# Supplementary material for: Histone methyltransferase DOT1L controls state‐specific identity during B cell differentiation
Source: PubMed Central journal article supplement — EMBO Rep. 2021 Jan 7;22(2):e51184. doi: 10.15252/embr.202051184 (PMC7857439; doi:10.15252/embr.202051184), 2021-01-07
Supplement: EMBR-22-e51184-s001.pdf [file EMBR-22-e51184-s001.pdf]

Appendix for  
**Histone methyltransferase DOT1L controls state-specific identity during B cell  
differentiation**

**Table of contents**

[Appendix Figure S1: Deletion of exon 2 of \*Dot1L\* renders \*Dot1L\* mRNA out of frame.....2](#)  
[Appendix Table S1: Expression of genes involved in class switch recombination.....3](#)  
[Appendix Table S2: Expression of unfold protein response genes \(UPR\).....6](#)  
[Appendix Table S3: Surface markers for identification of specific cellular population.....8](#)  
[Appendix Table S4: Antibodies used for Flowcytometry.....10](#)

Appendix Figure S1

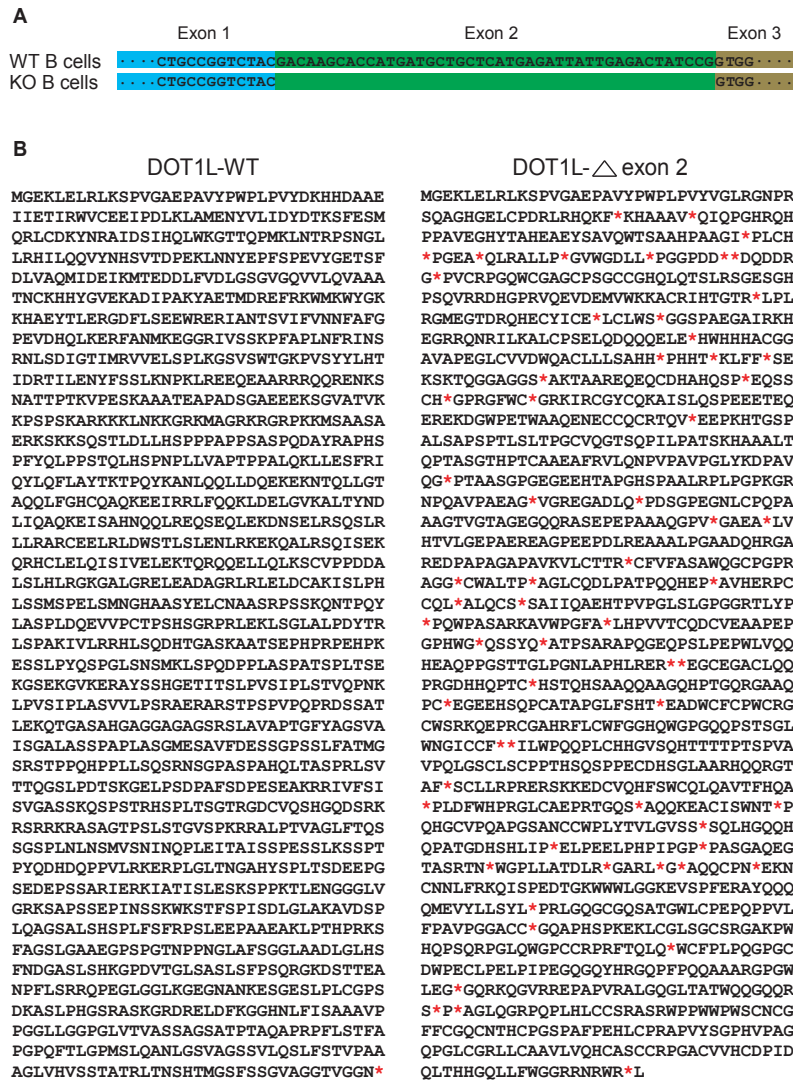

**Appendix Figure S1:** Deletion of exon 2 of *Dot1L* renders *Dot1L* mRNA out of frame  
 A. Nucleotide alignment of exon 1, 2 and 3 of *Dot1L* cDNA from WT and KO (Δ exon 2) B cells after sanger sequencing confirming the deletion of exon 2 only in KO B cells.  
 B. Sequence analysis showing the comparison of the predicted WT and KO (Δ exon 2) DOT1L amino acids sequence. Deletion of exon2 in the *Dot1L* locus renders the mRNA out of frame and generates multiple translational stop codons indicated as red \*.

Figure S1

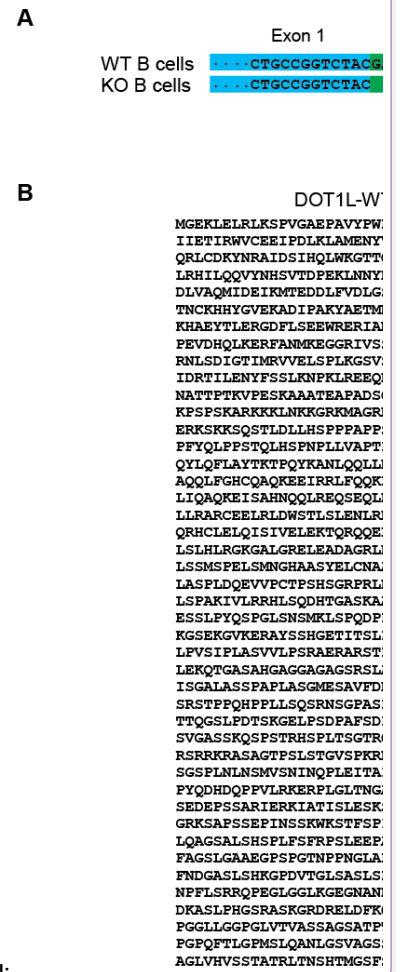

Deleted:

Deleted:

**Appendix Table S1: Expression of genes involved in class switch recombination**

**Naïve B cells**

| Symbol   | Ensemble_id         | log <sub>2</sub> FC (KO/WT) | log <sub>2</sub> CPM | FDR         | Class |
|----------|---------------------|-----------------------------|----------------------|-------------|-------|
| CTNBL1   | ENSMUSG00000027649  | 0.661849364                 | 4.844862022          | 0.189896181 | A     |
| EEF1A1   | ENSMUSG00000037742  | -0.174526281                | 13.16458476          | 0.764831378 | A     |
| HSP90AA1 | ENSMUSG00000021270  | -0.530959468                | 11.4179635           | 0.299894055 | A     |
| PSME3    | ENSMUSG00000078652  | -0.400599605                | 7.714615982          | 0.451841033 | A     |
| PTBP2    | ENSMUSG00000028134  | -0.890118169                | 5.593583267          | 0.060313941 | A     |
| RPA1     | ENSMUSG00000000751  | -0.326733222                | 7.362567372          | 0.547324522 | A     |
| RPA2     | ENSMUSG00000028884  | 0.2608199                   | 4.808214698          | 0.644726864 | A     |
| RPA3     | ENSMUSG00000012483  | -0.397669234                | 3.669005634          | 0.473559965 | A     |
| SUPT5    | ENSMUSG00000003435  | 0.764849393                 | 7.59261189           | 0.115216802 | A     |
| SUPT6    | ENSMUSG00000002052  | -0.091982611                | 7.773279241          | 0.88441725  | A     |
| TRIM28   | ENSMUSG00000005566  | 0.631414171                 | 7.395883757          | 0.206965223 | A     |
| AICDA    | ENSMUSG00000040627  | -1.61042881                 | 1.850138724          | 0.001242527 | B     |
| APEX1    | ENSMUSG000000035960 | 0.120220523                 | 5.111705157          | 0.845601487 | C     |
| APEX2    | ENSMUSG00000025269  | 0.047067076                 | 3.763216722          | 0.949601854 | C     |
| UNG      | ENSMUSG00000029591  | 0.681089396                 | 2.353264122          | 0.217622869 | C     |
| XRCC1    | ENSMUSG000000051768 | 1.146594878                 | 4.541622034          | 0.011550465 | C     |
| APLF     | ENSMUSG000000030051 | -0.070137337                | 3.737886699          | 0.919411043 | D     |
| ATM      | ENSMUSG000000034218 | -1.205121639                | 7.483761354          | 0.006413404 | D     |
| ATR      | ENSMUSG000000032409 | -0.992839783                | 7.01376052           | 0.03039051  | D     |
| DCLRE1C  | ENSMUSG000000026648 | -0.650030604                | 6.003666243          | 0.19446862  | D     |
| LIG4     | ENSMUSG000000049717 | -0.63617797                 | 4.01840124           | 0.220205066 | D     |
| MRE11A   | ENSMUSG000000031928 | -0.374788374                | 6.116788349          | 0.487077043 | D     |
| NBN      | ENSMUSG000000028224 | -0.045430665                | 5.141282934          | 0.947781725 | D     |
| NHEJ1    | ENSMUSG000000026162 | 0.287475475                 | 2.360830853          | 0.635039048 | D     |
| PARP1    | ENSMUSG000000026496 | 0.571416079                 | 8.427280071          | 0.259640764 | D     |
| RAD50    | ENSMUSG000000020380 | -0.456552873                | 6.415821884          | 0.384185034 | D     |
| RBBP8    | ENSMUSG000000041238 | -0.522310826                | 5.561061803          | 0.313786464 | D     |
| REV1     | ENSMUSG000000026082 | -0.699093739                | 6.264200353          | 0.156925509 | D     |
| RNF168   | ENSMUSG000000014074 | -0.372092987                | 5.193855258          | 0.493881344 | D     |
| RNF8     | ENSMUSG000000090083 | 0.524741284                 | 1.99050762           | 0.369231933 | D     |
| TRP53BP1 | ENSMUSG000000043909 | -0.206619763                | 6.77524595           | 0.717948751 | D     |
| XRCC4    | ENSMUSG000000021615 | -0.712466082                | 4.099075643          | 0.158256773 | D     |
| XRCC5    | ENSMUSG000000026187 | -0.39396788                 | 5.633866498          | 0.464884287 | D     |
| XRCC6    | ENSMUSG000000022471 | -0.273083246                | 5.306721424          | 0.625669741 | D     |
| PAXIP1   | ENSMUSG000000002221 | 0.021043119                 | 5.552817787          | 0.977335657 | E     |
| SUPT16   | ENSMUSG000000035726 | -0.399475881                | 7.765231816          | 0.453277416 | E     |
| EXO1     | ENSMUSG000000039748 | -0.455101475                | 2.55712726           | 0.426552421 | F     |
| MLH1     | ENSMUSG000000032498 | -0.323144879                | 5.585486464          | 0.555716473 | F     |
| MLH3     | ENSMUSG000000021245 | -0.30484102                 | 5.052779783          | 0.582435728 | F     |
| MSH2     | ENSMUSG000000024151 | -0.425656654                | 6.32387961           | 0.421159665 | F     |

|      |                    |              |             |             |   |
|------|--------------------|--------------|-------------|-------------|---|
| MSH6 | ENSMUSG00000005370 | -0.509792695 | 6.574525741 | 0.324118383 | F |
| PMS2 | ENSMUSG00000079109 | -0.456257072 | 5.386377497 | 0.3872161   | F |

**Activated B cells (LPS + IL-4)-Day 02**

| Symbol   | Ensemble_id        | log <sub>2</sub> FC (KO/WT) | log <sub>2</sub> CPM | FDR         | Class |
|----------|--------------------|-----------------------------|----------------------|-------------|-------|
| CTNBL1   | ENSMUSG00000027649 | 0.677913243                 | 5.215708768          | 0.118811505 | A     |
| EEF1A1   | ENSMUSG00000037742 | 0.118076202                 | 13.19986242          | 0.837414095 | A     |
| HSP90AA1 | ENSMUSG00000021270 | -0.614728021                | 10.96346561          | 0.158174295 | A     |
| PSME3    | ENSMUSG00000078652 | -0.656685702                | 9.142011854          | 0.125631513 | A     |
| PTBP2    | ENSMUSG00000028134 | -1.072236538                | 4.726680452          | 0.005587082 | A     |
| RPA1     | ENSMUSG00000000751 | -0.085469936                | 8.339982325          | 0.886323864 | A     |
| RPA2     | ENSMUSG00000028884 | 0.231653731                 | 6.131983366          | 0.663396493 | A     |
| RPA3     | ENSMUSG00000012483 | -0.326843123                | 5.29015353           | 0.515892032 | A     |
| SUPT5    | ENSMUSG00000003435 | 0.211307831                 | 7.136742005          | 0.692269073 | A     |
| SUPT6    | ENSMUSG00000002052 | -0.077610994                | 7.862986093          | 0.896741849 | A     |
| TRIM28   | ENSMUSG00000005566 | 0.346109402                 | 7.919127797          | 0.4784557   | A     |
| AICDA    | ENSMUSG00000040627 | 0.954584455                 | 6.814722885          | 0.014082198 | B     |
| APEX1    | ENSMUSG00000035960 | -0.692828122                | 7.150801072          | 0.101896663 | C     |
| APEX2    | ENSMUSG00000025269 | 0.134840896                 | 4.216411079          | 0.822621993 | C     |
| UNG      | ENSMUSG00000029591 | -0.050257175                | 4.345680507          | 0.937764186 | C     |
| XRCC1    | ENSMUSG00000051768 | 0.904021461                 | 4.555980706          | 0.025863784 | C     |
| APLF     | ENSMUSG00000030051 | -0.439055278                | 3.792558324          | 0.371955021 | D     |
| ATM      | ENSMUSG00000034218 | -0.749218082                | 8.452664049          | 0.069587542 | D     |
| ATR      | ENSMUSG00000032409 | -0.786769379                | 7.158037227          | 0.054677362 | D     |
| DCLRE1C  | ENSMUSG00000026648 | -0.094081745                | 5.251548568          | 0.877564055 | D     |
| LIG4     | ENSMUSG00000049717 | 0.197928752                 | 4.325799261          | 0.723861417 | D     |
| MRE11A   | ENSMUSG00000031928 | -0.445323835                | 6.915668205          | 0.338852861 | D     |
| NBN      | ENSMUSG00000028224 | -0.905979559                | 6.305135196          | 0.021994601 | D     |
| NHEJ1    | ENSMUSG00000026162 | 0.108537751                 | 1.621487162          | 0.908962133 | D     |
| PARP1    | ENSMUSG00000026496 | 0.254821015                 | 8.123321404          | 0.623231792 | D     |
| RAD50    | ENSMUSG00000020380 | -0.479517371                | 7.257454883          | 0.297591834 | D     |
| RBBP8    | ENSMUSG00000041238 | -0.496598397                | 6.525845417          | 0.279897202 | D     |
| REV1     | ENSMUSG00000026082 | -0.354185572                | 5.980878063          | 0.470095156 | D     |
| RNF168   | ENSMUSG00000014074 | -0.344188853                | 6.282446279          | 0.483800687 | D     |
| RNF8     | ENSMUSG00000090083 | 0.270150984                 | 1.191524039          | 0.714284863 | D     |
| TRP53BP1 | ENSMUSG00000043909 | -0.326913139                | 6.489515086          | 0.510604111 | D     |
| XRCC4    | ENSMUSG00000021615 | -0.610396518                | 4.28122986           | 0.179179985 | D     |
| XRCC5    | ENSMUSG00000026187 | -0.556048809                | 6.402687408          | 0.213750919 | D     |
| XRCC6    | ENSMUSG00000022471 | -0.25567987                 | 6.741484047          | 0.622992519 | D     |
| PAXIP1   | ENSMUSG00000002221 | -0.280738058                | 6.492274743          | 0.583241585 | E     |
| SUPT16   | ENSMUSG00000035726 | -0.586101643                | 9.378448083          | 0.183251245 | E     |
| EXO1     | ENSMUSG00000039748 | -0.498682259                | 6.259496778          | 0.276790004 | F     |
| MLH1     | ENSMUSG00000032498 | -0.353504751                | 5.700896853          | 0.472342445 | F     |
| MLH3     | ENSMUSG00000021245 | -0.379627331                | 5.427832586          | 0.435181677 | F     |

|      |                    |              |             |             |   |
|------|--------------------|--------------|-------------|-------------|---|
| MSH2 | ENSMUSG00000024151 | -0.417706636 | 6.834268696 | 0.377474928 | F |
| MSH6 | ENSMUSG00000005370 | -0.172815004 | 8.102291743 | 0.75473192  | F |
| PMS2 | ENSMUSG00000079109 | -0.367174199 | 5.861778313 | 0.449367716 | F |

**Class code for Appendix Table S1**

|   |                                                             |
|---|-------------------------------------------------------------|
| A | AID-binding factors                                         |
| B | B cell-specific factors                                     |
| C | Base excision repair factors                                |
| D | DNA damage sensors, adaptors and effectors                  |
| E | Factors involved in chromatin modification or transcription |
| F | Mismatch repair factors                                     |

**Appendix Table S2: Expression of unfold protein response genes (UPR)**

**Activated B cells (LPS + IL-4)-Day 02**

| Symbol   | Ensemble_id        | log <sub>2</sub> FC (KO/WT) | log <sub>2</sub> CPM | FDR         | Direction       |
|----------|--------------------|-----------------------------|----------------------|-------------|-----------------|
| KDELR3   | ENSMUSG00000010830 | 3.247117583                 | 0.39792167           | 1.83E-08    | up in KO        |
| XBP1     | ENSMUSG00000020484 | 1.03759429                  | 9.30853137           | 0.00609591  | up in KO        |
| PDIA6    | ENSMUSG00000020571 | 0.951207615                 | 9.46863521           | 0.01393015  | up in KO        |
| PDIA5    | ENSMUSG00000022844 | 3.901776327                 | 0.62301879           | 8.47E-11    | up in KO        |
| VEGFA    | ENSMUSG00000023951 | 1.136257563                 | 3.11570159           | 0.00516219  | up in KO        |
| BAG3     | ENSMUSG00000030847 | 1.847088707                 | 2.06419502           | 0.00000632  | up in KO        |
| HERPUD1  | ENSMUSG00000031770 | 1.144244776                 | 7.09910264           | 0.00206591  | up in KO        |
| HYOU1    | ENSMUSG00000032115 | 0.85715382                  | 8.92763372           | 0.03148537  | up in KO        |
| DNAJA4   | ENSMUSG00000032285 | 1.057850732                 | 1.9718521            | 0.01561533  | up in KO        |
| CCL2     | ENSMUSG00000035385 | 2.934101708                 | 1.61962897           | 6.26E-11    | up in KO        |
| WFS1     | ENSMUSG00000039474 | 1.336826324                 | 2.65899779           | 0.00086907  | up in KO        |
| WIPI1    | ENSMUSG00000041895 | 2.199136612                 | 1.45291297           | 0.000000986 | up in KO        |
| TUBB2A   | ENSMUSG00000058672 | 2.476153534                 | 3.14923086           | 1.16E-10    | up in KO        |
| DKC1     | ENSMUSG00000031403 | -0.856039022                | 8.74443954           | 0.031792    | down in KO      |
| DDX10    | ENSMUSG00000053289 | -0.921486708                | 7.2663858            | 0.01868136  | down in KO      |
| NPM1     | ENSMUSG00000057113 | -0.88066088                 | 11.945197            | 0.02585723  | down in KO      |
| NHP2     | ENSMUSG00000001056 | -0.028926224                | 5.64937506           | 0.9633208   | Non-Significant |
| CALR     | ENSMUSG00000003814 | 0.640919807                 | 11.3107756           | 0.13732202  | Non-Significant |
| MTHFD2   | ENSMUSG00000005667 | -0.376428105                | 7.05367961           | 0.43294744  | Non-Significant |
| ZBTB17   | ENSMUSG00000006215 | 0.654043106                 | 2.98780737           | 0.16324985  | Non-Significant |
| KIF5B    | ENSMUSG00000006740 | -0.442567322                | 9.05603109           | 0.34013182  | Non-Significant |
| KHSRP    | ENSMUSG00000007670 | -0.064356792                | 7.16553214           | 0.91639477  | Non-Significant |
| ATP6V0D1 | ENSMUSG00000013160 | 0.468000462                 | 6.1611161            | 0.31327407  | Non-Significant |
| DNAJB9   | ENSMUSG00000014905 | 0.608446416                 | 5.76991144           | 0.16874318  | Non-Significant |
| NOLC1    | ENSMUSG00000015176 | -0.235331285                | 8.22680434           | 0.65225346  | Non-Significant |
| MTREX    | ENSMUSG00000016018 | -0.514887933                | 8.20057275           | 0.25582648  | Non-Significant |
| EXOSC10  | ENSMUSG00000017264 | 0.05253682                  | 6.97139113           | 0.93264449  | Non-Significant |
| HSP90B1  | ENSMUSG00000020048 | 0.597122279                 | 12.4162054           | 0.17314147  | Non-Significant |
| DDIT4    | ENSMUSG00000020108 | 0.354197815                 | 4.01326533           | 0.48530959  | Non-Significant |
| SLC1A4   | ENSMUSG00000020142 | -0.632750017                | 3.74354912           | 0.16112025  | Non-Significant |
| CNOT2    | ENSMUSG00000020166 | -0.525502584                | 7.67036848           | 0.24393267  | Non-Significant |
| NFYB     | ENSMUSG00000020248 | -0.392831482                | 6.21230641           | 0.41272589  | Non-Significant |
| CNOT6    | ENSMUSG00000020362 | -0.472739445                | 8.85747084           | 0.30419924  | Non-Significant |
| ERN1     | ENSMUSG00000020715 | 0.382983027                 | 4.7705642            | 0.43294744  | Non-Significant |
| GOSR2    | ENSMUSG00000020946 | 0.163536436                 | 6.94619011           | 0.76949994  | Non-Significant |
| EIF2S1   | ENSMUSG00000021116 | -0.55843651                 | 8.70661028           | 0.20878331  | Non-Significant |

|          |                    |              |            |            |                 |
|----------|--------------------|--------------|------------|------------|-----------------|
| EXOC2    | ENSMUSG00000021357 | 0.020790923  | 6.11428414 | 0.97389129 | Non-Significant |
| SSR1     | ENSMUSG00000021427 | 0.182069966  | 8.73075464 | 0.73738069 | Non-Significant |
| SLC30A5  | ENSMUSG00000021629 | -0.002353719 | 7.6277146  | 0.99893208 | Non-Significant |
| SPCS1    | ENSMUSG00000021917 | 0.430567447  | 6.37774546 | 0.36047835 | Non-Significant |
| DCP1A    | ENSMUSG00000021962 | -0.132826106 | 6.61470896 | 0.81731943 | Non-Significant |
| DNAJC3   | ENSMUSG00000022136 | 0.442166613  | 8.27017333 | 0.34109297 | Non-Significant |
| YWHAZ    | ENSMUSG00000022285 | -0.292011751 | 9.89279435 | 0.56386111 | Non-Significant |
| PARN     | ENSMUSG00000022685 | -0.370776993 | 6.06184373 | 0.44413064 | Non-Significant |
| EIF4A2   | ENSMUSG00000022884 | -0.635303013 | 9.59613937 | 0.1417821  | Non-Significant |
| NFYA     | ENSMUSG00000023994 | -0.160247581 | 7.09378967 | 0.77444963 | Non-Significant |
| HSPA9    | ENSMUSG00000024359 | -0.711158269 | 10.4573733 | 0.08947966 | Non-Significant |
| DCP2     | ENSMUSG00000024472 | -0.574950282 | 7.79587212 | 0.19445067 | Non-Significant |
| CXXC1    | ENSMUSG00000024560 | 0.437788433  | 4.56258015 | 0.36482014 | Non-Significant |
| RPS14    | ENSMUSG00000024608 | 0.477037638  | 7.99876594 | 0.29968984 | Non-Significant |
| PSAT1    | ENSMUSG00000024640 | -0.170530418 | 8.12683625 | 0.75757803 | Non-Significant |
| BANF1    | ENSMUSG00000024844 | -0.076959969 | 6.51637887 | 0.89759146 | Non-Significant |
| YIF1A    | ENSMUSG00000024875 | 0.542860942  | 3.550164   | 0.2561741  | Non-Significant |
| ALDH18A1 | ENSMUSG00000025007 | 0.022074927  | 6.55597643 | 0.97232232 | Non-Significant |
| PAIP1    | ENSMUSG00000025451 | -0.414463655 | 6.52254889 | 0.38181343 | Non-Significant |
| EIF4A3   | ENSMUSG00000025580 | -0.111935652 | 6.85339701 | 0.84779748 | Non-Significant |
| SEC11A   | ENSMUSG00000025724 | 0.129703257  | 6.72624007 | 0.82261828 | Non-Significant |
| NABP1    | ENSMUSG00000026107 | 0.301884329  | 8.78377559 | 0.54888531 | Non-Significant |
| ATF3     | ENSMUSG00000026628 | -0.657082275 | 3.75806901 | 0.14724832 | Non-Significant |
| ATF6     | ENSMUSG00000026663 | 0.723604325  | 7.77162234 | 0.08329224 | Non-Significant |
| HSPA5    | ENSMUSG00000026864 | 0.277023574  | 11.4682889 | 0.58657887 | Non-Significant |
| NOP56    | ENSMUSG00000027405 | -0.622425813 | 8.97053921 | 0.15217163 | Non-Significant |
| ARFGAP1  | ENSMUSG00000027575 | 0.461319817  | 5.20734177 | 0.32567207 | Non-Significant |
| EXOSC9   | ENSMUSG00000027714 | -0.610526631 | 7.02190683 | 0.16413854 | Non-Significant |
| SERP1    | ENSMUSG00000027808 | 0.04881001   | 9.74865417 | 0.938097   | Non-Significant |
| CKS1B    | ENSMUSG00000028044 | 0.340787504  | 5.14027586 | 0.49448602 | Non-Significant |
| EIF4E    | ENSMUSG00000028156 | -0.646757811 | 8.24391436 | 0.13373266 | Non-Significant |
| SDAD1    | ENSMUSG00000029415 | -0.687503513 | 7.84846055 | 0.10488967 | Non-Significant |
| ASNS     | ENSMUSG00000029752 | -0.352332894 | 5.9389813  | 0.47262392 | Non-Significant |
| EDEM1    | ENSMUSG00000030104 | 0.572043872  | 9.06583419 | 0.19664737 | Non-Significant |
| POP4     | ENSMUSG00000030423 | -0.2709673   | 5.92597386 | 0.60162631 | Non-Significant |
| FUS      | ENSMUSG00000030795 | -0.557100558 | 9.01081264 | 0.20978702 | Non-Significant |
| EIF4EBP1 | ENSMUSG00000031490 | -0.065109499 | 2.9019814  | 0.9211792  | Non-Significant |
| EIF2AK3  | ENSMUSG00000031668 | 0.605649583  | 6.42413256 | 0.16937163 | Non-Significant |
| LSM4     | ENSMUSG00000031848 | 0.699261889  | 3.91721633 | 0.11531525 | Non-Significant |
| DCTN1    | ENSMUSG00000031865 | 0.811114588  | 4.46975819 | 0.05312949 | Non-Significant |

|        |                    |              |            |            |                 |
|--------|--------------------|--------------|------------|------------|-----------------|
| IMP3   | ENSMUSG00000032288 | -0.220902058 | 5.51887997 | 0.68064647 | Non-Significant |
| SRPRB  | ENSMUSG00000032553 | 0.554859259  | 5.03450475 | 0.22281873 | Non-Significant |
| TTC37  | ENSMUSG00000033991 | -0.44205628  | 7.25455596 | 0.34260545 | Non-Significant |
| EXOSC4 | ENSMUSG00000034259 | -0.261666266 | 3.33624482 | 0.63514811 | Non-Significant |
| EXOSC1 | ENSMUSG00000034321 | -0.487820476 | 5.5553005  | 0.29302611 | Non-Significant |
| IFIT1  | ENSMUSG00000034459 | 0.269165982  | 6.75833284 | 0.60226522 | Non-Significant |
| XPOT   | ENSMUSG00000034667 | -0.560374835 | 7.68366963 | 0.20771094 | Non-Significant |
| EEF2   | ENSMUSG00000034994 | 0.635954596  | 10.3151564 | 0.14115106 | Non-Significant |
| SEC31A | ENSMUSG00000035325 | 0.274511299  | 7.54897371 | 0.59266302 | Non-Significant |
| EDC4   | ENSMUSG00000036270 | 0.417423631  | 5.44706871 | 0.3819     | Non-Significant |
| NOP14  | ENSMUSG00000036693 | -0.730254354 | 7.55589168 | 0.07958366 | Non-Significant |
| LSM1   | ENSMUSG00000037296 | -0.502338694 | 4.5221849  | 0.28240154 | Non-Significant |
| CNOT4  | ENSMUSG00000038784 | -0.289815795 | 6.13311631 | 0.57200415 | Non-Significant |
| EXOSC2 | ENSMUSG00000039356 | -0.464524349 | 6.73300796 | 0.31492337 | Non-Significant |
| SLC7A5 | ENSMUSG00000040010 | 0.052585748  | 7.59889524 | 0.93255506 | Non-Significant |
| TSPYL2 | ENSMUSG00000041096 | 0.230518768  | 5.32355542 | 0.66772108 | Non-Significant |
| RRP9   | ENSMUSG00000041506 | -0.082439465 | 4.14844772 | 0.88693274 | Non-Significant |
| ATF4   | ENSMUSG00000042406 | -0.301950636 | 8.11586806 | 0.5490964  | Non-Significant |
| SHC1   | ENSMUSG00000042626 | 0.304587565  | 6.35193561 | 0.54797967 | Non-Significant |
| PREB   | ENSMUSG00000045302 | 0.448752886  | 6.50645462 | 0.33591596 | Non-Significant |
| EIF4G1 | ENSMUSG00000045983 | -0.083044203 | 9.88284657 | 0.88842741 | Non-Significant |
| SPCS3  | ENSMUSG00000054408 | -0.034390162 | 8.59293086 | 0.95705613 | Non-Significant |
| CEBPG  | ENSMUSG00000056216 | -0.364379967 | 6.2185668  | 0.45371819 | Non-Significant |
| CEBPB  | ENSMUSG00000056501 | 1.063842288  | 0.68535308 | 0.05501577 | Non-Significant |
| TATDN2 | ENSMUSG00000056952 | -0.255414018 | 6.72409655 | 0.62334152 | Non-Significant |
| EIF4A1 | ENSMUSG00000059796 | -0.405080996 | 10.1553163 | 0.39027245 | Non-Significant |
| EXOSC5 | ENSMUSG00000061286 | 0.688530882  | 2.00450195 | 0.18241079 | Non-Significant |



**Appendix Table S3: Surface markers for identification of specific cellular population**

**Bone Marrow**

|                  |                                                                                             |
|------------------|---------------------------------------------------------------------------------------------|
| B cells          | CD19 <sup>+</sup> B220 <sup>+</sup>                                                         |
| Immature B cells | CD19 <sup>+</sup> B220 <sup>low</sup> IgM <sup>+</sup>                                      |
| Mature B cells   | CD19 <sup>+</sup> B220 <sup>high</sup> IgM <sup>+</sup>                                     |
| Pro B cells      | CD19 <sup>+</sup> B220 <sup>low</sup> IgM <sup>-</sup> c-Kit <sup>+</sup> CD25 <sup>-</sup> |
| Pre-B cells      | CD19 <sup>+</sup> B220 <sup>low</sup> IgM <sup>-</sup> c-Kit <sup>-</sup> CD25 <sup>+</sup> |

**Spleen**

|                          |                                                                                                        |
|--------------------------|--------------------------------------------------------------------------------------------------------|
| B cells                  | CD19 <sup>+</sup> B220 <sup>+</sup>                                                                    |
| B1-a cells               | CD19 <sup>+</sup> B220 <sup>low</sup>                                                                  |
| T1 cells                 | CD19 <sup>+</sup> B220 <sup>+</sup> CD23 <sup>-/low</sup> CD21/35 <sup>-/low</sup> IgM <sup>high</sup> |
| T2 cells                 | CD19 <sup>+</sup> B220 <sup>+</sup> CD23 <sup>high</sup> CD21/35 <sup>-/low</sup> IgM <sup>high</sup>  |
| Marginal Zone progenitor | CD19 <sup>+</sup> B220 <sup>+</sup> CD23 <sup>high</sup> CD21/35 <sup>high</sup> IgM <sup>high</sup>   |
| Marginal Zone B cells    | CD19 <sup>+</sup> B220 <sup>+</sup> CD23 <sup>-/low</sup> CD21/35 <sup>high</sup> IgM <sup>high</sup>  |
| Follicular B cells       | CD19 <sup>+</sup> B220 <sup>+</sup> CD23 <sup>high</sup> CD21/35 <sup>low</sup> IgM <sup>-/low</sup>   |
| Follicular B-I cells     | B220 <sup>+</sup> CD93 <sup>-/low</sup> CD21/35 <sup>low</sup> IgM <sup>low</sup> IgD <sup>high</sup>  |
| Follicular B-II cells    | B220 <sup>+</sup> CD93 <sup>-</sup> CD21/35 <sup>low</sup> IgM <sup>high</sup> IgD <sup>high</sup>     |
| Germinal center B cells  | CD19 <sup>+</sup> B220 <sup>+</sup> PNA/GL7 <sup>high</sup> CD95 <sup>high</sup>                       |
| Plasma cells             | CD19 <sup>+</sup> B220 <sup>+</sup> IgD <sup>-</sup> CD138 <sup>+</sup>                                |
| T cells                  | CD3 <sup>+</sup> CD19 <sup>-</sup>                                                                     |

**Peyer's patches**

|                         |                                                                                  |
|-------------------------|----------------------------------------------------------------------------------|
| Germinal center B cells | CD19 <sup>+</sup> B220 <sup>+</sup> PNA/GL7 <sup>high</sup> CD95 <sup>high</sup> |
|-------------------------|----------------------------------------------------------------------------------|

**Appendix Table S4: Antibodies used for flowcytometry**

**Bone Marrow**

| Antibodies   | Fluorophore  | Clone     | Dilution | Vendor        |
|--------------|--------------|-----------|----------|---------------|
| CD19         | APC-H7       | 1D3       | 1:200    | BD Pharmingen |
| CD19         | PerCpCy5,5   | 1D3       | 1:200    | BD Pharmingen |
| CD45R (B220) | Pacific Blue | RA3-6B2   | 1:200    | BD Pharmingen |
| IgM          | PECy7        | 11/41     | 1:200    | eBioscience   |
| CD117 (cKit) | APC          | 2B8       | 1:200    | eBioscience   |
| CD117 (cKit) | BV605        | 2B8       | 1:100    | BD Bioscience |
| CD25         | PE           | PC61      | 1:200    | Biolegend     |
| IgD          | FITC         | 11-26c.2a | 1:200    | BD Pharmingen |
| DAPI         |              |           | 1:20     | Sigma-Aldrich |
| PI           |              |           | 1:20     | Sigma-Aldrich |
| Annexin V    | APC          |           | 1:20     | Biolegend     |

**Spleen**

| Antibodies        | Fluorophore | Clone     | Dilution | Vendor        |
|-------------------|-------------|-----------|----------|---------------|
| GL-7              | FITC        | GL7       | 1:200    | BD Pharmingen |
| Peanut Agglutinin | FITC        |           | 1:400    | Vector        |
| CD23              | BV421       | B3B4      | 1:200    | Biolegend     |
| CD19              | PerCpCy5,5  | 1D3       | 1:200    | BD Pharmingen |
| CD19              | APC-H7      | 1D3       | 1:200    | BD Pharmingen |
| CD19              | A780        | 1D3       | 1:200    | eBioscience   |
| CD95              | Biotin      | 15A7      | 1:100    | eBioscience   |
| CD95              | PE          | Jo2       | 1:200    | BD Pharmingen |
| CD21/35           | APC         | 7E9       | 1:200    | Biolegend     |
| CD93              | BV650       | AA4.1     | 1:200    | BD Pharmingen |
| IgM               | BV785       | 11/41     | 1:200    | BD Pharmingen |
| IgD               | BV650       | 11-26c.2a | 1:200    | Biolegend     |
| IgD               | PE          | 11-26C    | 1:800    | eBioscience   |
| IgD               | AF-488      | 11-26c2a  | 1:200    | eBioscience   |
| CD3               | FITC        | 17A2      | 1:200    | Biolegend     |
| CD3               | AF488       | 145-2C11  | 1:200    | eBioscience   |
| CD45R (B220)      | V500        | RA3-6B2   | 1:200    | BD Pharmingen |
| CD45R (B220)      | PB          | RA3-6B2   | 1:200    | BD Pharmingen |
| CD45R (B220)      | APC         | RA3-6B2   | 1:200    | BD Pharmingen |
| CD45R (B220)      | BV510       | RA3-6B2   | 1:200    | Biolegend     |
| CD138             | PE          | 281-2     | 1:200    | BD Pharmingen |

|              |       |       |        |               |
|--------------|-------|-------|--------|---------------|
| CD138        | BV605 | 281-2 | 1:200  | Biolegend     |
| Streptavidin | BV605 |       | 1:400  | BD Pharmingen |
| Zombie NIR   |       |       | 1:1000 | Biolegend     |
| 7AAD         |       |       | 1:500  | Biolegend     |
| PI           |       |       | 1:20   | Sigma-Aldrich |
| DAPI         |       |       | 1:20   | Sigma-Aldrich |
| Annexin V    | APC   |       | 1:20   | Biolegend     |

#### **Peyer's Patches**

| Antibodies        | Fluorophore  | Clone      | Dilution | Vendor           |
|-------------------|--------------|------------|----------|------------------|
| CD45R (B220)      | Pacific Blue | RA3-6B2    | 1:200    | BD Pharmingen    |
| CD19              | PerCpCy5,5   | 1D3        | 1:200    | BD Pharmingen    |
| IgM               | APC          | Polyclonal | 1:200    | Southern Biotech |
| Peanut Agglutinin | FITC         |            | 1:400    | Vector           |
| CD95              | PE           | Jo2        | 1:200    | BD Pharmingen    |
| DAPI              |              |            | 1:20     | Sigma-Aldrich    |

#### **Class switch recombination (*In vitro*)**

| Antibodies | Fluorophore | Clone      | Dilution | Vendor           |
|------------|-------------|------------|----------|------------------|
| CD19       | PerCpCy5,5  | 1D3        | 1:400    | BD Pharmingen    |
| IgG1       | PE          | 15H6       | 1:800    | Southern Biotech |
| IgM        | APC         | Polyclonal | 1:1000   | Southern Biotech |
| IgG3       | PE          | Polyclonal | 1:800    | Southern Biotech |
| DAPI       |             |            | 1:20     | Sigma-Aldrich    |

#### **Plasma cells (*In vitro*)**

| Antibodies      | Fluorophore | Clone     | Dilution | Vendor        |
|-----------------|-------------|-----------|----------|---------------|
| CD138           | BV605       | 281-2     | 1:200    | Biolegend     |
| CD45R (B220)    | BV510       | RA3-6B2   | 1:200    | Biolegend     |
| IgD             | BV650       | 11-26c.2a | 1:200    | Biolegend     |
| Sca1            | PeCy7       | D7        | 1:200    | Biolegend     |
| CD3e            | APC         | 145-2C11  | 1:200    | BD Pharmingen |
| Ter119          | APC         | TER-119   | 1:200    | BD Pharmingen |
| Blimp1*         | PE          | SE7       | 1:200    | Biolegend     |
| Zombie NIR      |             |           | 1:1000   | Biolegend     |
| * Intracellular |             |           |          |               |

#### **Cleaved Caspase-3 (*In vitro*)**

| Antibodies | Fluorophore | Clone | Dilution | Vendor |
|------------|-------------|-------|----------|--------|
|------------|-------------|-------|----------|--------|

|                   |            |     |        |                |
|-------------------|------------|-----|--------|----------------|
| CD19              | PerCpCy5,5 | 1D3 | 1:400  | BD Pharmingen  |
| Cleaved Caspse-3* | AF488      |     | 1:50   | Cell signaling |
| Zombie NIR        |            |     | 1:1000 | Biolegend      |
| * Intracellular   |            |     |        |                |
