# Supplementary material for: Histone methyltransferase DOT1L controls state‐specific identity during B cell differentiation
Source: PubMed Central journal article supplement — EMBO Rep. 2021 Jan 7;22(2):e51184. doi: 10.15252/embr.202051184 (PMC7857439; doi:10.15252/embr.202051184), 2021-01-07
Supplement: EMBR-22-e51184-s003.pdf [file EMBR-22-e51184-s003.pdf]

|                                                                                                                                                                                |
|--------------------------------------------------------------------------------------------------------------------------------------------------------------------------------|
| This file contains                                                                                                                                                             |
| Gene expression comparison between DOT1L KO and WT Activated B cells                                                                                                           |
| TMM normalized RNA-seq counts ( <i>Bach2</i> , <i>Prdm1</i> , <i>Sdc1</i> , <i>Myc</i> , <i>Ezh2</i> , <i>Cdkn1a</i> , <i>Irf4</i> )<br>from DOT1L KO and WT Activated B cells |
| Plasma Signature genes                                                                                                                                                         |
| Myc Target genes                                                                                                                                                               |

Activated B cells

Negative logFC indicates that a gene is down in DOT1L-KO

Postive logFC indicates that a gene is up in DOT1L-KO

Gene with FDR < 0.05 is considered significant

| ID                 | logFC      | logCPM     | PValue   | FDR      |
|--------------------|------------|------------|----------|----------|
| ENSMUSG00000028005 | 8.18461252 | 0.5136603  | 7.21E-18 | 1.14E-15 |
| ENSMUSG00000033542 | 6.39567164 | 1.99491419 | 4.02E-29 | 4.81E-26 |
| ENSMUSG00000044033 | 6.23879957 | 0.638926   | 1.29E-17 | 1.96E-15 |
| ENSMUSG00000099391 | 6.1845375  | 0.57877359 | 3.44E-17 | 4.76E-15 |
| ENSMUSG00000040254 | 6.14332033 | 2.8687399  | 5.52E-35 | 5.95E-31 |
| ENSMUSG00000020092 | 6.07810387 | 0.4924649  | 2.60E-16 | 3.12E-14 |
| ENSMUSG00000040964 | 5.95686134 | 0.39687424 | 2.84E-15 | 2.92E-13 |
| ENSMUSG00000064043 | 5.82191812 | 0.9842993  | 5.55E-20 | 1.33E-17 |
| ENSMUSG00000029279 | 5.38780549 | 3.0834202  | 2.29E-33 | 6.17E-30 |
| ENSMUSG00000027204 | 5.34805046 | 1.04860524 | 7.09E-19 | 1.34E-16 |
| ENSMUSG00000021806 | 5.28919223 | 1.85476332 | 5.46E-25 | 3.68E-22 |
| ENSMUSG00000029330 | 5.20822139 | 2.58974176 | 3.59E-29 | 4.81E-26 |
| ENSMUSG00000022438 | 5.20342863 | 1.52506333 | 3.96E-22 | 1.43E-19 |
| ENSMUSG00000074743 | 5.17031989 | 0.42244239 | 1.40E-14 | 1.22E-12 |
| ENSMUSG00000040616 | 5.12633639 | 0.39794657 | 1.54E-13 | 1.06E-11 |
| ENSMUSG00000054640 | 5.10886202 | 0.34339596 | 5.36E-14 | 4.16E-12 |
| ENSMUSG00000024669 | 5.05791966 | 0.8044948  | 2.60E-16 | 3.12E-14 |
| ENSMUSG00000036381 | 4.99333471 | 1.79446674 | 2.03E-22 | 8.11E-20 |
| ENSMUSG00000094025 | 4.86900809 | 0.13098736 | 2.79E-13 | 1.82E-11 |
| ENSMUSG00000025555 | 4.8328413  | 1.22246011 | 3.29E-18 | 5.62E-16 |
| ENSMUSG00000036334 | 4.75874751 | 2.47657691 | 2.75E-26 | 2.47E-23 |
| ENSMUSG00000024897 | 4.72906334 | 0.47229623 | 4.91E-15 | 4.74E-13 |
| ENSMUSG00000017002 | 4.6099768  | 4.32087207 | 9.10E-34 | 3.61E-30 |
| ENSMUSG00000000058 | 4.54883211 | 0.32446757 | 5.83E-13 | 3.61E-11 |
| ENSMUSG00000023328 | 4.51615929 | 0.92598616 | 5.06E-16 | 5.69E-14 |
| ENSMUSG00000021876 | 4.51220019 | 0.6416821  | 3.73E-14 | 3.05E-12 |
| ENSMUSG00000022861 | 4.47372983 | 0.25585565 | 3.76E-13 | 2.37E-11 |
| ENSMUSG00000004891 | 4.46415446 | 2.00203114 | 2.47E-22 | 9.17E-20 |
| ENSMUSG00000027072 | 4.4401419  | 0.82529545 | 2.09E-16 | 2.57E-14 |
| ENSMUSG00000066705 | 4.43093988 | 0.59427323 | 1.20E-13 | 8.49E-12 |
| ENSMUSG00000028037 | 4.40146151 | 5.4258615  | 1.01E-33 | 3.61E-30 |
| ENSMUSG00000073489 | 4.29385148 | 3.6619855  | 7.91E-29 | 8.53E-26 |
| ENSMUSG00000043940 | 4.28758633 | 2.91142319 | 5.78E-26 | 4.46E-23 |
| ENSMUSG00000052512 | 4.22654635 | 1.79858266 | 1.31E-19 | 2.81E-17 |
| ENSMUSG00000023959 | 4.18443945 | 0.60791443 | 7.48E-14 | 5.52E-12 |
| ENSMUSG00000030772 | 4.1780048  | 1.77868722 | 1.48E-20 | 3.80E-18 |
| ENSMUSG00000057182 | 4.14213019 | 1.87228866 | 1.73E-20 | 4.33E-18 |

|                    |            |            |          |          |
|--------------------|------------|------------|----------|----------|
| ENSMUSG00000045672 | 4.13782146 | 0.79195194 | 1.13E-14 | 1.02E-12 |
| ENSMUSG00000029810 | 4.11052179 | 7.22372121 | 7.24E-32 | 1.56E-28 |
| ENSMUSG00000066861 | 4.09967181 | 1.16783582 | 1.33E-15 | 1.42E-13 |
| ENSMUSG00000042759 | 4.09373576 | 2.43622695 | 5.14E-23 | 2.22E-20 |
| ENSMUSG00000048899 | 4.07791174 | 0.27033369 | 1.16E-11 | 5.44E-10 |
| ENSMUSG00000028184 | 4.07223579 | 5.23360913 | 8.44E-30 | 1.46E-26 |
| ENSMUSG00000032363 | 4.04240009 | 1.35521981 | 1.49E-17 | 2.17E-15 |
| ENSMUSG00000026883 | 4.04178263 | 1.93626036 | 6.12E-21 | 1.89E-18 |
| ENSMUSG00000026463 | 4.02563414 | 2.71671874 | 2.39E-23 | 1.07E-20 |
| ENSMUSG00000032718 | 4.02415207 | 0.70815033 | 6.51E-14 | 4.91E-12 |
| ENSMUSG00000059498 | 4.02110141 | 2.77101335 | 1.25E-23 | 6.75E-21 |
| ENSMUSG00000073226 | 4.01833416 | 0.85393706 | 2.59E-15 | 2.69E-13 |
| ENSMUSG00000039835 | 4.01303754 | 0.45126433 | 3.77E-13 | 2.37E-11 |
| ENSMUSG00000057135 | 4.00101367 | 1.23353004 | 1.98E-15 | 2.07E-13 |
| ENSMUSG00000000530 | 3.98640577 | 1.69457754 | 5.60E-18 | 9.29E-16 |
| ENSMUSG00000043391 | 3.96931851 | 2.30952378 | 7.03E-21 | 2.00E-18 |
| ENSMUSG00000026548 | 3.94673022 | 2.60167787 | 2.34E-22 | 9.03E-20 |
| ENSMUSG00000076613 | 3.93922511 | 6.79552903 | 9.48E-30 | 1.46E-26 |
| ENSMUSG00000022844 | 3.90177633 | 0.62301879 | 1.51E-12 | 8.47E-11 |
| ENSMUSG00000028207 | 3.90007228 | 2.44441419 | 1.32E-21 | 4.46E-19 |
| ENSMUSG00000045039 | 3.88763678 | 0.59962651 | 2.38E-12 | 1.27E-10 |
| ENSMUSG00000005672 | 3.88587237 | 3.1659211  | 3.93E-24 | 2.23E-21 |
| ENSMUSG00000061356 | 3.86882134 | 2.649526   | 7.43E-22 | 2.58E-19 |
| ENSMUSG00000041488 | 3.85678003 | 1.4634043  | 1.35E-16 | 1.71E-14 |
| ENSMUSG00000046152 | 3.85305586 | 0.61065108 | 8.12E-12 | 3.96E-10 |
| ENSMUSG00000025491 | 3.82960611 | 0.32454711 | 2.24E-11 | 1.00E-09 |
| ENSMUSG00000046058 | 3.82450841 | 0.89571258 | 7.28E-14 | 5.41E-12 |
| ENSMUSG00000020900 | 3.8156365  | 1.78291674 | 5.76E-18 | 9.42E-16 |
| ENSMUSG00000027071 | 3.78807146 | 1.96594835 | 3.38E-18 | 5.70E-16 |
| ENSMUSG00000038235 | 3.78632247 | 1.6871324  | 2.15E-17 | 3.05E-15 |
| ENSMUSG00000039943 | 3.75460621 | 2.77523472 | 3.03E-21 | 9.61E-19 |
| ENSMUSG00000062545 | 3.73890519 | 2.32922933 | 3.14E-19 | 6.27E-17 |
| ENSMUSG00000023367 | 3.72015829 | 5.7284357  | 1.32E-26 | 1.29E-23 |
| ENSMUSG00000022505 | 3.70611759 | 1.34060804 | 6.19E-15 | 5.75E-13 |
| ENSMUSG00000068220 | 3.70555481 | 5.14106396 | 5.41E-26 | 4.46E-23 |
| ENSMUSG00000053158 | 3.70545257 | 1.8765303  | 1.37E-17 | 2.05E-15 |
| ENSMUSG00000026833 | 3.69405541 | 1.59502008 | 1.34E-16 | 1.71E-14 |
| ENSMUSG00000038894 | 3.6869124  | 1.30145882 | 2.97E-15 | 3.03E-13 |
| ENSMUSG00000025492 | 3.65961547 | 4.72126294 | 5.29E-25 | 3.68E-22 |
| ENSMUSG00000026814 | 3.65481034 | 1.99942917 | 2.33E-17 | 3.27E-15 |
| ENSMUSG00000086291 | 3.65187384 | 0.38559469 | 3.09E-11 | 1.34E-09 |
| ENSMUSG00000047842 | 3.6507567  | 1.45832785 | 4.91E-16 | 5.57E-14 |
| ENSMUSG00000053025 | 3.65066058 | 0.3957093  | 1.08E-10 | 4.18E-09 |

|                    |            |            |          |          |
|--------------------|------------|------------|----------|----------|
| ENSMUSG00000022584 | 3.64807138 | 4.41995192 | 1.81E-24 | 1.09E-21 |
| ENSMUSG00000001247 | 3.64545126 | 0.75721645 | 2.34E-12 | 1.26E-10 |
| ENSMUSG00000028859 | 3.63522776 | 1.67565176 | 6.97E-17 | 9.39E-15 |
| ENSMUSG00000020121 | 3.62507245 | 0.75444357 | 7.10E-12 | 3.51E-10 |
| ENSMUSG00000015968 | 3.61757012 | 2.07801308 | 2.68E-18 | 4.67E-16 |
| ENSMUSG00000073490 | 3.60040761 | 5.09501066 | 7.36E-25 | 4.67E-22 |
| ENSMUSG00000095079 | 3.58834816 | 3.70633768 | 2.27E-23 | 1.06E-20 |
| ENSMUSG00000047747 | 3.56568911 | 0.49463571 | 1.97E-11 | 8.99E-10 |
| ENSMUSG00000022469 | 3.56001238 | 1.29164717 | 1.12E-14 | 1.02E-12 |
| ENSMUSG00000049191 | 3.55871676 | 1.31718231 | 2.90E-14 | 2.40E-12 |
| ENSMUSG00000018398 | 3.53665669 | 3.00854865 | 1.46E-20 | 3.80E-18 |
| ENSMUSG00000026932 | 3.53400011 | 1.38753926 | 1.83E-14 | 1.57E-12 |
| ENSMUSG00000040152 | 3.52960622 | 3.78210063 | 1.55E-22 | 6.44E-20 |
| ENSMUSG00000022440 | 3.52521721 | 2.38085935 | 1.60E-18 | 2.87E-16 |
| ENSMUSG00000024659 | 3.52359333 | 2.29243146 | 1.48E-18 | 2.71E-16 |
| ENSMUSG00000029304 | 3.51158373 | 3.36147914 | 6.39E-21 | 1.91E-18 |
| ENSMUSG00000002324 | 3.49814787 | 0.93112107 | 1.92E-12 | 1.06E-10 |
| ENSMUSG00000048388 | 3.49698765 | 0.77877842 | 3.81E-12 | 1.98E-10 |
| ENSMUSG00000058297 | 3.49219253 | 1.12696285 | 1.16E-13 | 8.30E-12 |
| ENSMUSG00000024664 | 3.49167324 | 2.91434131 | 1.07E-19 | 2.41E-17 |
| ENSMUSG00000026012 | 3.48699573 | 4.98867021 | 1.69E-23 | 8.68E-21 |
| ENSMUSG00000027073 | 3.48131455 | 1.90654021 | 8.54E-17 | 1.12E-14 |
| ENSMUSG00000038963 | 3.45089658 | 5.15170632 | 1.81E-23 | 8.87E-21 |
| ENSMUSG00000043895 | 3.43707271 | 2.44943359 | 7.42E-18 | 1.16E-15 |
| ENSMUSG00000038463 | 3.42607606 | 3.03658825 | 1.45E-19 | 3.06E-17 |
| ENSMUSG00000027848 | 3.42390161 | 1.11347514 | 1.29E-12 | 7.39E-11 |
| ENSMUSG00000048440 | 3.40421377 | 3.68709442 | 6.78E-21 | 1.98E-18 |
| ENSMUSG00000062960 | 3.37170762 | 1.5282985  | 1.18E-14 | 1.05E-12 |
| ENSMUSG00000020886 | 3.37092013 | 0.9225341  | 2.81E-12 | 1.48E-10 |
| ENSMUSG00000017417 | 3.3600382  | 0.52986053 | 1.96E-10 | 6.99E-09 |
| ENSMUSG00000022010 | 3.35793681 | 3.64967201 | 1.79E-20 | 4.38E-18 |
| ENSMUSG00000049807 | 3.35667574 | 0.65819835 | 3.88E-11 | 1.65E-09 |
| ENSMUSG00000019852 | 3.35183418 | 0.77293419 | 1.64E-11 | 7.61E-10 |
| ENSMUSG00000026437 | 3.35163561 | 0.91478433 | 8.94E-12 | 4.32E-10 |
| ENSMUSG00000061411 | 3.34538199 | 1.31498425 | 3.02E-13 | 1.95E-11 |
| ENSMUSG00000041729 | 3.3393746  | 1.66921115 | 9.00E-15 | 8.30E-13 |
| ENSMUSG00000012428 | 3.33331277 | 3.13425237 | 4.54E-19 | 8.75E-17 |
| ENSMUSG00000052821 | 3.3247182  | 1.41516137 | 1.91E-13 | 1.30E-11 |
| ENSMUSG00000033470 | 3.3171353  | 1.3675806  | 1.78E-13 | 1.22E-11 |
| ENSMUSG00000076612 | 3.30765929 | 4.13271415 | 8.51E-21 | 2.35E-18 |
| ENSMUSG00000026475 | 3.30152764 | 1.77056708 | 5.54E-15 | 5.20E-13 |
| ENSMUSG00000032092 | 3.29961004 | 0.62111896 | 2.03E-10 | 7.18E-09 |
| ENSMUSG00000070942 | 3.29722894 | 0.57760456 | 4.99E-11 | 2.09E-09 |

|                    |            |            |          |          |
|--------------------|------------|------------|----------|----------|
| ENSMUSG00000033590 | 3.29296605 | 1.1944889  | 1.38E-12 | 7.82E-11 |
| ENSMUSG00000066952 | 3.28816697 | 1.03646698 | 2.09E-12 | 1.15E-10 |
| ENSMUSG00000030789 | 3.28439424 | 1.46303035 | 6.15E-14 | 4.67E-12 |
| ENSMUSG00000005883 | 3.27489916 | 0.58845592 | 1.80E-10 | 6.53E-09 |
| ENSMUSG00000034485 | 3.26429284 | 1.70504284 | 2.34E-14 | 1.97E-12 |
| ENSMUSG00000045790 | 3.26301744 | 0.41215102 | 3.46E-10 | 1.17E-08 |
| ENSMUSG00000040183 | 3.25532914 | 0.46135115 | 1.75E-09 | 4.96E-08 |
| ENSMUSG00000062995 | 3.25214278 | 2.05774361 | 9.99E-16 | 1.09E-13 |
| ENSMUSG00000010830 | 3.24711758 | 0.39792167 | 5.65E-10 | 1.83E-08 |
| ENSMUSG00000019944 | 3.23833891 | 2.27487593 | 1.75E-16 | 2.17E-14 |
| ENSMUSG00000030208 | 3.23185061 | 2.56563238 | 1.44E-17 | 2.13E-15 |
| ENSMUSG00000059901 | 3.23054943 | 0.89548388 | 1.58E-11 | 7.39E-10 |
| ENSMUSG00000039616 | 3.21750321 | 0.64729613 | 5.98E-11 | 2.42E-09 |
| ENSMUSG00000009654 | 3.2143486  | 1.55640182 | 5.61E-14 | 4.32E-12 |
| ENSMUSG00000032231 | 3.21389519 | 3.52621369 | 3.61E-19 | 7.08E-17 |
| ENSMUSG00000019970 | 3.21085877 | 1.70521283 | 4.68E-14 | 3.71E-12 |
| ENSMUSG00000026014 | 3.20896216 | 4.87060244 | 8.97E-21 | 2.42E-18 |
| ENSMUSG00000035105 | 3.2059457  | 2.36530784 | 3.57E-16 | 4.10E-14 |
| ENSMUSG00000037202 | 3.19326917 | 1.40694337 | 2.55E-13 | 1.70E-11 |
| ENSMUSG00000071714 | 3.19180806 | 3.78207251 | 1.56E-19 | 3.24E-17 |
| ENSMUSG00000055980 | 3.18497103 | 1.04192621 | 6.08E-11 | 2.45E-09 |
| ENSMUSG00000029913 | 3.17086535 | 1.76082762 | 2.48E-14 | 2.08E-12 |
| ENSMUSG00000050394 | 3.16506633 | 1.48187453 | 5.87E-13 | 3.61E-11 |
| ENSMUSG00000025151 | 3.15432494 | 4.55419816 | 6.31E-20 | 1.48E-17 |
| ENSMUSG00000028927 | 3.13958725 | 3.13072778 | 1.01E-17 | 1.56E-15 |
| ENSMUSG00000027611 | 3.13601811 | 0.33023745 | 4.36E-09 | 1.14E-07 |
| ENSMUSG00000005397 | 3.13582491 | 4.40351415 | 1.07E-19 | 2.41E-17 |
| ENSMUSG00000001663 | 3.1324478  | 0.87986801 | 7.37E-12 | 3.63E-10 |
| ENSMUSG00000025867 | 3.11704621 | 1.23327651 | 1.07E-11 | 5.08E-10 |
| ENSMUSG00000027175 | 3.11541109 | 2.10392407 | 4.92E-15 | 4.74E-13 |
| ENSMUSG00000006930 | 3.11331461 | 1.36751152 | 2.77E-13 | 1.82E-11 |
| ENSMUSG00000036036 | 3.10988916 | 1.18306508 | 9.47E-12 | 4.52E-10 |
| ENSMUSG00000030124 | 3.08860488 | 0.88873497 | 5.74E-11 | 2.36E-09 |
| ENSMUSG00000038507 | 3.08008189 | 5.01200635 | 1.29E-19 | 2.81E-17 |
| ENSMUSG00000021678 | 3.07895149 | 1.22034499 | 5.89E-12 | 2.97E-10 |
| ENSMUSG00000087598 | 3.05824421 | 1.93525864 | 1.92E-14 | 1.64E-12 |
| ENSMUSG00000037306 | 3.04627133 | 1.14236668 | 2.92E-11 | 1.28E-09 |
| ENSMUSG00000095918 | 3.0437154  | 0.20566632 | 3.04E-09 | 8.19E-08 |
| ENSMUSG00000052364 | 3.04228989 | 0.28075413 | 3.06E-08 | 6.63E-07 |
| ENSMUSG00000002602 | 3.04052188 | 3.95458222 | 2.67E-18 | 4.67E-16 |
| ENSMUSG00000033855 | 3.03660758 | 1.48069775 | 1.35E-12 | 7.67E-11 |
| ENSMUSG00000044345 | 3.02441406 | 1.8279231  | 6.14E-14 | 4.67E-12 |
| ENSMUSG00000036053 | 3.0180279  | 5.5995224  | 2.87E-19 | 5.84E-17 |

|                    |            |            |          |          |
|--------------------|------------|------------|----------|----------|
| ENSMUSG00000024140 | 3.01050136 | 2.16727377 | 4.67E-14 | 3.71E-12 |
| ENSMUSG00000022421 | 3.01018187 | 1.74420155 | 2.05E-13 | 1.38E-11 |
| ENSMUSG00000069920 | 3.00841895 | 0.82830109 | 1.50E-10 | 5.61E-09 |
| ENSMUSG00000047712 | 3.00423126 | 1.34409283 | 2.33E-12 | 1.26E-10 |
| ENSMUSG00000018906 | 3.00250337 | 0.448456   | 8.02E-10 | 2.46E-08 |
| ENSMUSG00000049985 | 2.99773003 | 1.45103436 | 3.07E-12 | 1.61E-10 |
| ENSMUSG00000020061 | 2.99402353 | 0.51366541 | 5.66E-09 | 1.43E-07 |
| ENSMUSG00000032194 | 2.98321166 | 0.69134911 | 5.59E-10 | 1.82E-08 |
| ENSMUSG00000074923 | 2.97458386 | 0.55496749 | 1.17E-09 | 3.44E-08 |
| ENSMUSG00000053965 | 2.97359593 | 1.6033002  | 9.43E-13 | 5.56E-11 |
| ENSMUSG00000026796 | 2.97281416 | 2.19611817 | 2.99E-14 | 2.46E-12 |
| ENSMUSG00000018930 | 2.9677659  | 1.97950755 | 5.32E-14 | 4.16E-12 |
| ENSMUSG00000032281 | 2.95382961 | 0.34258661 | 1.88E-08 | 4.26E-07 |
| ENSMUSG00000033906 | 2.95369616 | 0.71193342 | 2.44E-09 | 6.70E-08 |
| ENSMUSG00000035385 | 2.93410171 | 1.61962897 | 1.08E-12 | 6.26E-11 |
| ENSMUSG00000047250 | 2.93378267 | 2.54733352 | 1.31E-14 | 1.16E-12 |
| ENSMUSG00000026131 | 2.9163397  | 3.62854132 | 8.34E-17 | 1.11E-14 |
| ENSMUSG00000060063 | 2.90603883 | 2.46878974 | 2.19E-14 | 1.86E-12 |
| ENSMUSG00000038732 | 2.89529203 | 1.2234252  | 5.22E-11 | 2.16E-09 |
| ENSMUSG00000034714 | 2.89498486 | 0.98415019 | 1.59E-10 | 5.87E-09 |
| ENSMUSG00000028378 | 2.89319675 | 3.7615066  | 1.21E-16 | 1.57E-14 |
| ENSMUSG00000050953 | 2.88661725 | 0.71064188 | 1.32E-09 | 3.85E-08 |
| ENSMUSG00000021477 | 2.88620836 | 3.31894889 | 5.14E-16 | 5.71E-14 |
| ENSMUSG00000039735 | 2.88348498 | 3.15794451 | 1.13E-15 | 1.22E-13 |
| ENSMUSG00000021069 | 2.88096351 | 1.45726336 | 5.97E-12 | 3.00E-10 |
| ENSMUSG00000012350 | 2.87214668 | 0.49319551 | 7.06E-09 | 1.77E-07 |
| ENSMUSG00000049866 | 2.86761478 | 4.16421428 | 6.10E-17 | 8.33E-15 |
| ENSMUSG00000024899 | 2.8655612  | 2.07405595 | 6.24E-13 | 3.80E-11 |
| ENSMUSG00000000555 | 2.84909658 | 2.33398451 | 1.36E-13 | 9.48E-12 |
| ENSMUSG00000058325 | 2.84590522 | 0.95454204 | 4.84E-10 | 1.59E-08 |
| ENSMUSG00000033174 | 2.84062984 | 3.01873629 | 5.15E-15 | 4.89E-13 |
| ENSMUSG00000076615 | 2.83745858 | 6.6463899  | 6.45E-18 | 1.04E-15 |
| ENSMUSG00000054072 | 2.82874678 | 4.36110175 | 1.45E-16 | 1.81E-14 |
| ENSMUSG00000029153 | 2.82472055 | 1.43027585 | 2.24E-11 | 1.00E-09 |
| ENSMUSG00000069830 | 2.81234771 | 2.22775801 | 2.95E-13 | 1.91E-11 |
| ENSMUSG00000055172 | 2.80635504 | 0.91553319 | 5.58E-10 | 1.82E-08 |
| ENSMUSG00000030786 | 2.80577836 | 4.01693176 | 2.69E-16 | 3.18E-14 |
| ENSMUSG00000018339 | 2.80511248 | 0.74541052 | 2.00E-09 | 5.59E-08 |
| ENSMUSG00000010307 | 2.80132821 | 0.96379158 | 2.27E-10 | 7.96E-09 |
| ENSMUSG00000034271 | 2.79943091 | 1.12285051 | 3.25E-10 | 1.10E-08 |
| ENSMUSG00000033880 | 2.79453764 | 6.49621968 | 1.85E-17 | 2.66E-15 |
| ENSMUSG00000000903 | 2.78429008 | 3.06195821 | 1.39E-14 | 1.22E-12 |
| ENSMUSG00000050989 | 2.78366422 | 2.37934581 | 1.99E-13 | 1.34E-11 |

|                    |            |            |          |          |
|--------------------|------------|------------|----------|----------|
| ENSMUSG00000026073 | 2.76658026 | 4.58465915 | 3.17E-16 | 3.71E-14 |
| ENSMUSG00000039963 | 2.7652525  | 0.63797756 | 6.78E-09 | 1.71E-07 |
| ENSMUSG00000059327 | 2.75304626 | 0.46611462 | 8.69E-08 | 1.70E-06 |
| ENSMUSG00000026589 | 2.75009435 | 0.46528269 | 1.08E-07 | 2.08E-06 |
| ENSMUSG00000042453 | 2.74757882 | 1.33708273 | 5.88E-10 | 1.89E-08 |
| ENSMUSG00000024935 | 2.74722225 | 1.72194213 | 5.43E-12 | 2.76E-10 |
| ENSMUSG00000005533 | 2.74155653 | 0.79042742 | 5.16E-09 | 1.32E-07 |
| ENSMUSG00000034462 | 2.73965291 | 2.00199899 | 2.38E-12 | 1.27E-10 |
| ENSMUSG00000052270 | 2.73754547 | 2.53978585 | 7.67E-14 | 5.59E-12 |
| ENSMUSG00000042156 | 2.73191896 | 2.72698233 | 1.36E-13 | 9.48E-12 |
| ENSMUSG00000061186 | 2.72641095 | 4.12587002 | 1.42E-15 | 1.50E-13 |
| ENSMUSG00000094502 | 2.72375655 | 2.0000355  | 7.98E-12 | 3.91E-10 |
| ENSMUSG00000009092 | 2.72254667 | 3.63281621 | 3.58E-15 | 3.61E-13 |
| ENSMUSG00000033460 | 2.72089062 | 0.7788579  | 5.16E-09 | 1.32E-07 |
| ENSMUSG00000060716 | 2.71786056 | 0.55904432 | 8.60E-09 | 2.11E-07 |
| ENSMUSG00000024424 | 2.71754755 | 2.04045394 | 1.60E-12 | 8.94E-11 |
| ENSMUSG00000038740 | 2.71298809 | 2.2177338  | 1.27E-12 | 7.30E-11 |
| ENSMUSG00000024459 | 2.69392593 | 2.63174913 | 3.16E-13 | 2.03E-11 |
| ENSMUSG00000022836 | 2.69295975 | 1.47823062 | 6.96E-11 | 2.78E-09 |
| ENSMUSG00000029223 | 2.69216704 | 4.11750986 | 3.72E-15 | 3.68E-13 |
| ENSMUSG00000021200 | 2.6892607  | 3.01241192 | 3.97E-14 | 3.22E-12 |
| ENSMUSG00000027199 | 2.68902769 | 5.07883024 | 7.10E-16 | 7.81E-14 |
| ENSMUSG00000020828 | 2.68884684 | 2.18684334 | 2.31E-12 | 1.26E-10 |
| ENSMUSG00000033066 | 2.67606982 | 3.10309903 | 4.50E-14 | 3.62E-12 |
| ENSMUSG00000050708 | 2.66170253 | 7.44435532 | 3.30E-16 | 3.82E-14 |
| ENSMUSG00000041460 | 2.66123775 | 0.98633785 | 3.89E-09 | 1.03E-07 |
| ENSMUSG00000024968 | 2.6556788  | 0.9394132  | 1.08E-08 | 2.59E-07 |
| ENSMUSG00000027399 | 2.653934   | 4.37476798 | 3.63E-15 | 3.63E-13 |
| ENSMUSG00000017057 | 2.65087826 | 2.93746733 | 1.32E-13 | 9.28E-12 |
| ENSMUSG00000038502 | 2.64832349 | 1.04524328 | 1.98E-09 | 5.55E-08 |
| ENSMUSG00000068551 | 2.64134485 | 1.98379678 | 2.56E-11 | 1.13E-09 |
| ENSMUSG00000041444 | 2.63091622 | 1.46659557 | 1.59E-10 | 5.87E-09 |
| ENSMUSG00000025804 | 2.63038768 | 1.61571296 | 2.07E-11 | 9.44E-10 |
| ENSMUSG00000030579 | 2.62818958 | 1.78278757 | 5.90E-11 | 2.40E-09 |
| ENSMUSG00000027398 | 2.61863882 | 4.56949617 | 5.17E-15 | 4.89E-13 |
| ENSMUSG00000050578 | 2.61629762 | 1.19043111 | 2.97E-10 | 1.01E-08 |
| ENSMUSG00000038775 | 2.6142553  | 1.91885023 | 1.73E-11 | 8.01E-10 |
| ENSMUSG00000036611 | 2.61126018 | 0.8862236  | 1.14E-08 | 2.72E-07 |
| ENSMUSG00000020297 | 2.60836372 | 1.25674575 | 1.19E-09 | 3.50E-08 |
| ENSMUSG00000026576 | 2.60713861 | 3.66459543 | 5.22E-14 | 4.11E-12 |
| ENSMUSG00000039787 | 2.60021352 | 1.49806806 | 1.86E-10 | 6.70E-09 |
| ENSMUSG00000049988 | 2.59914945 | 1.36485649 | 5.12E-10 | 1.68E-08 |
| ENSMUSG00000032501 | 2.59688118 | 3.31388033 | 1.07E-13 | 7.67E-12 |

|                    |            |            |          |          |
|--------------------|------------|------------|----------|----------|
| ENSMUSG0000002190  | 2.59574634 | 1.60433002 | 2.31E-10 | 8.10E-09 |
| ENSMUSG00000035042 | 2.58691167 | 4.54776508 | 1.09E-14 | 9.98E-13 |
| ENSMUSG00000015474 | 2.58610594 | 0.59109789 | 4.17E-08 | 8.76E-07 |
| ENSMUSG00000026070 | 2.58236422 | 1.89816702 | 5.72E-11 | 2.36E-09 |
| ENSMUSG00000076666 | 2.57939858 | 3.15328323 | 3.57E-13 | 2.28E-11 |
| ENSMUSG00000042476 | 2.57707701 | 2.62464964 | 2.33E-12 | 1.26E-10 |
| ENSMUSG00000095923 | 2.57578179 | 0.71844362 | 1.62E-08 | 3.73E-07 |
| ENSMUSG00000020937 | 2.57418804 | 1.001718   | 8.69E-09 | 2.13E-07 |
| ENSMUSG00000028885 | 2.56273232 | 1.47968528 | 2.74E-10 | 9.48E-09 |
| ENSMUSG00000033287 | 2.55462067 | 1.92169829 | 3.01E-11 | 1.31E-09 |
| ENSMUSG00000006611 | 2.55365837 | 1.61791815 | 4.81E-10 | 1.59E-08 |
| ENSMUSG00000049001 | 2.55023762 | 2.06143869 | 3.29E-11 | 1.41E-09 |
| ENSMUSG00000022102 | 2.54692054 | 1.07364291 | 4.33E-09 | 1.14E-07 |
| ENSMUSG00000097471 | 2.54018989 | 0.95213774 | 9.12E-09 | 2.22E-07 |
| ENSMUSG00000022994 | 2.53839923 | 0.67635409 | 2.10E-08 | 4.72E-07 |
| ENSMUSG00000011148 | 2.53818114 | 2.31503888 | 2.75E-11 | 1.20E-09 |
| ENSMUSG00000024164 | 2.53711385 | 1.78815948 | 8.44E-11 | 3.31E-09 |
| ENSMUSG00000032262 | 2.53694108 | 0.48259369 | 2.25E-07 | 4.05E-06 |
| ENSMUSG00000037638 | 2.52705688 | 0.8360894  | 1.73E-08 | 3.97E-07 |
| ENSMUSG00000031444 | 2.52315065 | 0.88031291 | 5.84E-09 | 1.48E-07 |
| ENSMUSG00000040809 | 2.52275876 | 2.1835473  | 2.64E-11 | 1.16E-09 |
| ENSMUSG0000002006  | 2.52095799 | 1.32158538 | 3.04E-09 | 8.19E-08 |
| ENSMUSG00000041845 | 2.52028314 | 0.60464056 | 7.04E-08 | 1.41E-06 |
| ENSMUSG00000049103 | 2.5194121  | 0.65160684 | 1.25E-07 | 2.38E-06 |
| ENSMUSG00000029287 | 2.51829358 | 1.85606222 | 1.02E-10 | 3.98E-09 |
| ENSMUSG00000005803 | 2.51719928 | 0.98889678 | 1.36E-08 | 3.19E-07 |
| ENSMUSG00000022098 | 2.51690284 | 1.17019881 | 9.32E-09 | 2.25E-07 |
| ENSMUSG00000035829 | 2.51320257 | 0.92114103 | 1.53E-08 | 3.55E-07 |
| ENSMUSG00000028041 | 2.50927194 | 2.07949311 | 3.29E-11 | 1.41E-09 |
| ENSMUSG00000058715 | 2.50720479 | 3.41299484 | 3.78E-13 | 2.37E-11 |
| ENSMUSG00000027993 | 2.5024955  | 1.46446572 | 1.87E-09 | 5.28E-08 |
| ENSMUSG00000058099 | 2.49578554 | 3.39226345 | 7.93E-13 | 4.70E-11 |
| ENSMUSG00000095115 | 2.49549402 | 3.2741246  | 5.88E-13 | 3.61E-11 |
| ENSMUSG00000039831 | 2.49206905 | 1.78598631 | 6.71E-10 | 2.09E-08 |
| ENSMUSG00000037902 | 2.48493228 | 4.50982184 | 9.52E-14 | 6.89E-12 |
| ENSMUSG00000051439 | 2.47894092 | 0.57577187 | 1.06E-07 | 2.05E-06 |
| ENSMUSG00000021596 | 2.47860159 | 2.04256709 | 9.23E-11 | 3.61E-09 |
| ENSMUSG00000058672 | 2.47615353 | 3.14923086 | 2.11E-12 | 1.16E-10 |
| ENSMUSG00000078670 | 2.47545593 | 1.58240124 | 6.86E-10 | 2.12E-08 |
| ENSMUSG00000017144 | 2.47095189 | 1.80803338 | 1.68E-10 | 6.15E-09 |
| ENSMUSG00000039497 | 2.46609547 | 4.50153172 | 1.60E-13 | 1.10E-11 |
| ENSMUSG00000020176 | 2.46575558 | 0.84680217 | 6.22E-08 | 1.26E-06 |
| ENSMUSG00000021779 | 2.46533568 | 1.48632934 | 2.36E-09 | 6.52E-08 |



|                    |            |            |          |          |
|--------------------|------------|------------|----------|----------|
| ENSMUSG00000027995 | 2.46459273 | 3.56430398 | 7.52E-13 | 4.48E-11 |
| ENSMUSG00000094102 | 2.46363108 | 2.537497   | 1.93E-11 | 8.86E-10 |
| ENSMUSG00000071311 | 2.45367846 | 0.41436014 | 1.02E-06 | 1.61E-05 |
| ENSMUSG00000022332 | 2.45217998 | 1.68686196 | 2.02E-09 | 5.63E-08 |
| ENSMUSG00000046207 | 2.44931928 | 3.76451594 | 6.29E-13 | 3.81E-11 |
| ENSMUSG00000024544 | 2.44890512 | 1.48598699 | 8.84E-10 | 2.68E-08 |
| ENSMUSG00000039234 | 2.44772307 | 5.53680406 | 7.66E-14 | 5.59E-12 |
| ENSMUSG00000050538 | 2.44693492 | 1.81463333 | 6.03E-10 | 1.92E-08 |
| ENSMUSG00000005413 | 2.43683974 | 6.07419192 | 6.96E-14 | 5.21E-12 |
| ENSMUSG00000036206 | 2.43505866 | 0.89922291 | 8.54E-08 | 1.67E-06 |
| ENSMUSG00000003526 | 2.43390377 | 0.81050577 | 6.87E-08 | 1.38E-06 |
| ENSMUSG00000024885 | 2.4329281  | 3.6371537  | 1.06E-12 | 6.16E-11 |
| ENSMUSG00000041362 | 2.42934531 | 2.12230017 | 5.82E-11 | 2.38E-09 |
| ENSMUSG00000025993 | 2.42848426 | 0.74334091 | 5.24E-08 | 1.07E-06 |
| ENSMUSG00000030259 | 2.42777496 | 1.81846114 | 3.98E-10 | 1.34E-08 |
| ENSMUSG00000004359 | 2.42594031 | 1.91389789 | 1.34E-10 | 5.02E-09 |
| ENSMUSG00000053469 | 2.4180194  | 1.12348947 | 7.56E-09 | 1.88E-07 |
| ENSMUSG00000032841 | 2.41508959 | 1.65419798 | 1.68E-09 | 4.79E-08 |
| ENSMUSG00000048905 | 2.41354361 | 1.29267744 | 7.00E-09 | 1.76E-07 |
| ENSMUSG00000015243 | 2.41062929 | 3.11346087 | 3.73E-12 | 1.94E-10 |
| ENSMUSG00000003283 | 2.40753149 | 3.17608989 | 4.09E-12 | 2.10E-10 |
| ENSMUSG00000004032 | 2.39868926 | 1.9933529  | 2.80E-10 | 9.60E-09 |
| ENSMUSG00000044788 | 2.39722567 | 0.39530734 | 4.05E-07 | 6.95E-06 |
| ENSMUSG00000034586 | 2.39243232 | 2.27910424 | 8.22E-11 | 3.24E-09 |
| ENSMUSG00000030494 | 2.39100921 | 0.87168942 | 4.37E-08 | 9.13E-07 |
| ENSMUSG00000017754 | 2.39055631 | 4.32132047 | 9.54E-13 | 5.59E-11 |
| ENSMUSG00000026068 | 2.38988868 | 3.04685709 | 9.55E-12 | 4.54E-10 |
| ENSMUSG00000071723 | 2.38971878 | 1.53433186 | 2.54E-09 | 6.91E-08 |
| ENSMUSG00000068874 | 2.38744956 | 1.14238869 | 1.98E-08 | 4.45E-07 |
| ENSMUSG00000074417 | 2.38285943 | 0.80063795 | 1.06E-07 | 2.05E-06 |
| ENSMUSG00000063354 | 2.38194148 | 3.14228685 | 9.23E-12 | 4.42E-10 |
| ENSMUSG00000044072 | 2.37938106 | 1.80605486 | 7.42E-10 | 2.29E-08 |
| ENSMUSG00000020658 | 2.37840699 | 1.75850941 | 9.29E-10 | 2.78E-08 |
| ENSMUSG00000024538 | 2.37603433 | 1.59977818 | 4.20E-09 | 1.10E-07 |
| ENSMUSG00000022246 | 2.36970372 | 3.12661887 | 1.91E-11 | 8.80E-10 |
| ENSMUSG00000019539 | 2.36948676 | 0.74653322 | 2.07E-07 | 3.76E-06 |
| ENSMUSG00000030792 | 2.36353621 | 1.2235578  | 1.74E-08 | 3.97E-07 |
| ENSMUSG00000026317 | 2.36170361 | 1.68581301 | 1.47E-09 | 4.27E-08 |
| ENSMUSG00000020101 | 2.35946822 | 4.99966231 | 6.48E-13 | 3.91E-11 |
| ENSMUSG00000021589 | 2.35531153 | 1.24587413 | 1.41E-08 | 3.32E-07 |
| ENSMUSG00000079339 | 2.35455922 | 2.44873027 | 1.64E-10 | 6.01E-09 |
| ENSMUSG00000028354 | 2.35164657 | 1.74785582 | 3.86E-09 | 1.03E-07 |
| ENSMUSG00000038807 | 2.34977342 | 4.32884932 | 1.31E-12 | 7.50E-11 |

|                    |            |            |          |          |
|--------------------|------------|------------|----------|----------|
| ENSMUSG0000005800  | 2.34884306 | 2.6927455  | 3.66E-11 | 1.56E-09 |
| ENSMUSG00000068566 | 2.34702058 | 5.67835176 | 5.88E-13 | 3.61E-11 |
| ENSMUSG00000006179 | 2.34577316 | 1.42349958 | 1.49E-08 | 3.48E-07 |
| ENSMUSG00000041115 | 2.34302012 | 2.00652304 | 8.44E-10 | 2.57E-08 |
| ENSMUSG00000034738 | 2.34140474 | 1.66247363 | 4.75E-09 | 1.23E-07 |
| ENSMUSG00000009376 | 2.3376239  | 2.07132562 | 5.80E-10 | 1.87E-08 |
| ENSMUSG00000068227 | 2.33647869 | 3.89938297 | 3.61E-12 | 1.89E-10 |
| ENSMUSG00000023349 | 2.33416903 | 3.47431786 | 8.60E-12 | 4.18E-10 |
| ENSMUSG00000060131 | 2.33393585 | 3.6381851  | 6.12E-12 | 3.06E-10 |
| ENSMUSG00000033213 | 2.33264421 | 1.24356851 | 2.68E-08 | 5.89E-07 |
| ENSMUSG00000059149 | 2.33250321 | 2.28684069 | 2.78E-10 | 9.58E-09 |
| ENSMUSG00000076548 | 2.33114798 | 2.3222282  | 3.52E-10 | 1.19E-08 |
| ENSMUSG00000076688 | 2.32660387 | 2.73401341 | 1.03E-10 | 4.00E-09 |
| ENSMUSG00000029468 | 2.32381685 | 2.60372278 | 1.28E-10 | 4.83E-09 |
| ENSMUSG00000029822 | 2.32305368 | 3.1805058  | 2.43E-11 | 1.08E-09 |
| ENSMUSG00000005986 | 2.3226799  | 1.38435327 | 1.29E-08 | 3.04E-07 |
| ENSMUSG00000033705 | 2.31885095 | 2.22195425 | 4.81E-10 | 1.59E-08 |
| ENSMUSG00000076441 | 2.31821933 | 6.60525362 | 6.60E-13 | 3.96E-11 |
| ENSMUSG00000039629 | 2.31116667 | 2.11654097 | 4.46E-10 | 1.49E-08 |
| ENSMUSG00000051579 | 2.30968736 | 2.07649309 | 6.33E-10 | 1.99E-08 |
| ENSMUSG00000055435 | 2.30697101 | 0.99112398 | 5.93E-08 | 1.20E-06 |
| ENSMUSG00000053216 | 2.30618574 | 0.4812258  | 1.32E-06 | 2.01E-05 |
| ENSMUSG00000018417 | 2.30565182 | 0.94164445 | 1.33E-07 | 2.50E-06 |
| ENSMUSG00000018920 | 2.30539179 | 0.94430121 | 3.68E-08 | 7.83E-07 |
| ENSMUSG00000051790 | 2.30532002 | 1.55436123 | 5.07E-09 | 1.30E-07 |
| ENSMUSG00000037239 | 2.30493079 | 1.85546948 | 1.76E-09 | 4.97E-08 |
| ENSMUSG00000015222 | 2.30364165 | 3.06685631 | 4.89E-11 | 2.05E-09 |
| ENSMUSG00000028064 | 2.30255501 | 2.41293772 | 3.29E-10 | 1.12E-08 |
| ENSMUSG00000036295 | 2.29932615 | 2.30232916 | 5.97E-10 | 1.90E-08 |
| ENSMUSG00000034171 | 2.29675363 | 2.64661517 | 1.91E-10 | 6.84E-09 |
| ENSMUSG00000049422 | 2.29181683 | 1.90176766 | 3.94E-09 | 1.04E-07 |
| ENSMUSG00000032802 | 2.28973189 | 2.56949122 | 1.52E-10 | 5.67E-09 |
| ENSMUSG00000021453 | 2.28387193 | 1.51306752 | 1.18E-08 | 2.81E-07 |
| ENSMUSG00000028278 | 2.28088435 | 2.52127714 | 2.90E-10 | 9.94E-09 |
| ENSMUSG00000070476 | 2.27846803 | 0.71869376 | 3.76E-07 | 6.54E-06 |
| ENSMUSG00000028494 | 2.27648255 | 3.58041646 | 2.20E-11 | 9.91E-10 |
| ENSMUSG00000038141 | 2.27604319 | 1.42859779 | 2.32E-08 | 5.14E-07 |
| ENSMUSG00000018341 | 2.26592424 | 0.67139221 | 9.41E-07 | 1.49E-05 |
| ENSMUSG00000026879 | 2.26295939 | 3.51804706 | 3.18E-11 | 1.37E-09 |
| ENSMUSG00000060044 | 2.26221012 | 4.78850333 | 6.27E-12 | 3.12E-10 |
| ENSMUSG00000051339 | 2.25267567 | 1.85666489 | 4.94E-09 | 1.27E-07 |
| ENSMUSG00000026836 | 2.25064164 | 2.0368823  | 2.55E-09 | 6.93E-08 |
| ENSMUSG00000019066 | 2.24862788 | 2.41719462 | 6.19E-10 | 1.95E-08 |

|                     |            |            |          |            |
|---------------------|------------|------------|----------|------------|
| ENSMUSG00000024679  | 2.2484053  | 3.27851821 | 5.10E-11 | 2.12E-09   |
| ENSMUSG00000029026  | 2.24772269 | 2.0979054  | 1.73E-09 | 4.92E-08   |
| ENSMUSG00000002997  | 2.24372921 | 2.65870331 | 2.46E-10 | 8.55E-09   |
| ENSMUSG000000051457 | 2.2368712  | 5.57974398 | 5.88E-12 | 2.97E-10   |
| ENSMUSG00000001348  | 2.23531025 | 1.9085289  | 4.62E-09 | 1.20E-07   |
| ENSMUSG000000053063 | 2.2320609  | 1.40049506 | 2.18E-08 | 4.89E-07   |
| ENSMUSG000000040711 | 2.2219338  | 0.98248352 | 1.64E-07 | 3.03E-06   |
| ENSMUSG000000028556 | 2.21958262 | 4.21607654 | 2.17E-11 | 9.82E-10   |
| ENSMUSG000000026177 | 2.2183602  | 2.02054955 | 2.18E-09 | 6.06E-08   |
| ENSMUSG000000045763 | 2.21738339 | 3.07653683 | 1.58E-10 | 5.86E-09   |
| ENSMUSG000000095642 | 2.21495893 | 4.22455104 | 2.30E-11 | 1.03E-09   |
| ENSMUSG000000049625 | 2.21476282 | 1.75240446 | 1.80E-08 | 4.11E-07   |
| ENSMUSG000000005640 | 2.21296407 | 0.36090909 | 2.47E-06 | 3.54E-05   |
| ENSMUSG000000038764 | 2.21154995 | 2.32510644 | 1.14E-09 | 3.37E-08   |
| ENSMUSG000000095429 | 2.20855835 | 3.97362344 | 4.01E-11 | 1.70E-09   |
| ENSMUSG000000074813 | 2.20777545 | 2.70064629 | 4.46E-10 | 1.49E-08   |
| ENSMUSG000000094051 | 2.20726776 | 3.02039644 | 1.77E-10 | 6.47E-09   |
| ENSMUSG000000056888 | 2.20670756 | 7.92147634 | 5.31E-12 | 2.71E-10   |
| ENSMUSG000000055305 | 2.20073246 | 0.51570409 | 2.00E-06 | 2.93E-05   |
| ENSMUSG000000038034 | 2.19979372 | 1.58781652 | 5.25E-08 | 1.07E-06   |
| ENSMUSG000000041895 | 2.19913661 | 1.45291297 | 4.78E-08 | 9.86E-07   |
| ENSMUSG000000068129 | 2.1966903  | 3.93863474 | 5.95E-11 | 2.41E-09   |
| ENSMUSG000000095442 | 2.19520443 | 2.73297675 | 6.58E-10 | 2.05E-08   |
| ENSMUSG000000033777 | 2.192755   | 1.23454497 | 3.08E-08 | 6.68E-07   |
| ENSMUSG000000060703 | 2.19144002 | 1.61792878 | 3.50E-08 | 7.51E-07   |
| ENSMUSG000000026411 | 2.19084345 | 2.49724661 | 1.49E-09 | 4.30E-08   |
| ENSMUSG000000029530 | 2.19006633 | 2.34602943 | 1.39E-09 | 4.04E-08   |
| ENSMUSG000000042155 | 2.1869803  | 1.66978286 | 1.91E-08 | 4.31E-07   |
| ENSMUSG000000035493 | 2.18529072 | 0.64333082 | 1.12E-06 | 1.74E-05   |
| ENSMUSG000000024066 | 2.18132962 | 4.2781373  | 4.71E-11 | 1.99E-09   |
| ENSMUSG000000029322 | 2.18000731 | 8.00183415 | 9.06E-12 | 4.36E-10   |
| ENSMUSG000000034413 | 2.17642189 | 1.50612252 | 1.81E-08 | 4.13E-07   |
| ENSMUSG000000030410 | 2.16695365 | 0.27099402 | 9.40E-06 | 0.00011978 |
| ENSMUSG000000006800 | 2.16511327 | 2.26765502 | 3.79E-09 | 1.01E-07   |
| ENSMUSG000000026981 | 2.163906   | 2.82942508 | 7.76E-10 | 2.38E-08   |
| ENSMUSG000000094509 | 2.16290021 | 2.52479297 | 1.65E-09 | 4.71E-08   |
| ENSMUSG000000034613 | 2.15939696 | 2.76436265 | 8.97E-10 | 2.71E-08   |
| ENSMUSG000000040265 | 2.1564134  | 1.47494635 | 8.40E-08 | 1.65E-06   |
| ENSMUSG000000034947 | 2.15536115 | 2.12908764 | 3.99E-09 | 1.05E-07   |
| ENSMUSG000000062488 | 2.15370686 | 1.06089638 | 4.00E-07 | 6.89E-06   |
| ENSMUSG000000049037 | 2.15272403 | 2.18085058 | 3.14E-09 | 8.42E-08   |
| ENSMUSG000000094796 | 2.14864466 | 2.86984074 | 9.29E-10 | 2.78E-08   |
| ENSMUSG000000096499 | 2.14661139 | 4.02200881 | 1.05E-10 | 4.07E-09   |

|                    |            |            |          |            |
|--------------------|------------|------------|----------|------------|
| ENSMUSG00000048534 | 2.14520003 | 3.87971695 | 1.22E-10 | 4.65E-09   |
| ENSMUSG00000096805 | 2.14470559 | 4.11289904 | 1.09E-10 | 4.20E-09   |
| ENSMUSG00000022148 | 2.14455816 | 3.47118376 | 2.36E-10 | 8.23E-09   |
| ENSMUSG00000042331 | 2.14127537 | 4.48742329 | 7.67E-11 | 3.04E-09   |
| ENSMUSG00000024621 | 2.14033281 | 1.28715329 | 1.28E-07 | 2.43E-06   |
| ENSMUSG00000028597 | 2.13602987 | 1.40470519 | 8.52E-08 | 1.67E-06   |
| ENSMUSG00000042272 | 2.13569168 | 2.32230196 | 7.75E-09 | 1.93E-07   |
| ENSMUSG00000015143 | 2.13331038 | 2.52827471 | 2.51E-09 | 6.88E-08   |
| ENSMUSG00000044534 | 2.13101268 | 1.9886855  | 2.28E-08 | 5.07E-07   |
| ENSMUSG00000022297 | 2.12890145 | 2.62169609 | 1.50E-09 | 4.30E-08   |
| ENSMUSG00000020032 | 2.1274207  | 1.8026727  | 2.53E-08 | 5.57E-07   |
| ENSMUSG00000003484 | 2.12675922 | 3.30347239 | 5.86E-10 | 1.89E-08   |
| ENSMUSG00000025351 | 2.12615592 | 0.64259315 | 1.64E-06 | 2.44E-05   |
| ENSMUSG00000092060 | 2.12406868 | 3.75907715 | 2.12E-10 | 7.45E-09   |
| ENSMUSG00000076535 | 2.1225192  | 4.77431588 | 8.09E-11 | 3.20E-09   |
| ENSMUSG00000074896 | 2.12233731 | 3.31322051 | 6.05E-10 | 1.92E-08   |
| ENSMUSG00000033581 | 2.12147781 | 0.5657425  | 1.35E-06 | 2.04E-05   |
| ENSMUSG00000062345 | 2.12138659 | 3.66058201 | 1.95E-10 | 6.95E-09   |
| ENSMUSG00000076540 | 2.12058346 | 3.97116448 | 1.99E-10 | 7.06E-09   |
| ENSMUSG00000002289 | 2.11991141 | 1.31300956 | 1.51E-07 | 2.81E-06   |
| ENSMUSG00000003380 | 2.11229333 | 1.33096936 | 2.30E-07 | 4.11E-06   |
| ENSMUSG00000076695 | 2.1104385  | 5.21304448 | 6.82E-11 | 2.73E-09   |
| ENSMUSG00000030342 | 2.10873764 | 5.30611583 | 7.30E-11 | 2.91E-09   |
| ENSMUSG00000021708 | 2.10634154 | 1.57450706 | 9.55E-08 | 1.85E-06   |
| ENSMUSG00000040209 | 2.10542398 | 2.97525643 | 1.89E-09 | 5.33E-08   |
| ENSMUSG00000043953 | 2.10386967 | 2.39273638 | 3.87E-09 | 1.03E-07   |
| ENSMUSG00000019558 | 2.10305958 | 1.09738521 | 8.50E-07 | 1.37E-05   |
| ENSMUSG00000027636 | 2.10122391 | 1.07493928 | 4.00E-07 | 6.89E-06   |
| ENSMUSG00000094561 | 2.09884385 | 6.06488148 | 5.81E-11 | 2.38E-09   |
| ENSMUSG00000025810 | 2.09595799 | 0.81839665 | 1.36E-06 | 2.06E-05   |
| ENSMUSG00000052271 | 2.09575675 | 4.35354188 | 1.84E-10 | 6.65E-09   |
| ENSMUSG00000041420 | 2.08803854 | 1.48564579 | 1.39E-07 | 2.60E-06   |
| ENSMUSG00000035158 | 2.08737697 | 1.27554329 | 1.47E-07 | 2.73E-06   |
| ENSMUSG00000015305 | 2.08153515 | 1.93080947 | 3.03E-08 | 6.58E-07   |
| ENSMUSG00000022126 | 2.07930804 | 4.84451895 | 1.64E-10 | 6.01E-09   |
| ENSMUSG00000036622 | 2.07887178 | 3.75067337 | 6.52E-10 | 2.04E-08   |
| ENSMUSG00000097101 | 2.07413343 | 0.38882821 | 1.54E-05 | 0.00018781 |
| ENSMUSG00000021281 | 2.06966984 | 2.27051572 | 9.91E-09 | 2.39E-07   |
| ENSMUSG00000032661 | 2.06937286 | 5.76813045 | 1.27E-10 | 4.81E-09   |
| ENSMUSG00000025780 | 2.06883915 | 2.23592164 | 1.50E-08 | 3.49E-07   |
| ENSMUSG00000033083 | 2.06839417 | 3.81723838 | 5.95E-10 | 1.90E-08   |
| ENSMUSG00000036362 | 2.06645419 | 2.92908092 | 2.64E-09 | 7.15E-08   |
| ENSMUSG00000003573 | 2.06456451 | 0.77346693 | 3.18E-06 | 4.46E-05   |

|                    |            |            |          |            |
|--------------------|------------|------------|----------|------------|
| ENSMUSG00000024617 | 2.06408189 | 2.20981412 | 1.96E-08 | 4.43E-07   |
| ENSMUSG00000032690 | 2.06256941 | 6.27214983 | 1.15E-10 | 4.41E-09   |
| ENSMUSG00000055733 | 2.05903878 | 1.50474989 | 1.27E-07 | 2.41E-06   |
| ENSMUSG00000076541 | 2.05513961 | 1.39583911 | 1.64E-07 | 3.03E-06   |
| ENSMUSG00000042842 | 2.05286609 | 6.70350482 | 1.28E-10 | 4.83E-09   |
| ENSMUSG00000029392 | 2.04456158 | 1.61404077 | 1.26E-07 | 2.39E-06   |
| ENSMUSG00000026011 | 2.04219106 | 3.7436656  | 9.15E-10 | 2.76E-08   |
| ENSMUSG00000022468 | 2.04197414 | 3.80940685 | 8.50E-10 | 2.58E-08   |
| ENSMUSG00000000957 | 2.04173478 | 1.82566398 | 4.06E-08 | 8.58E-07   |
| ENSMUSG00000068747 | 2.04123143 | 1.63572431 | 1.16E-07 | 2.22E-06   |
| ENSMUSG00000020439 | 2.03550111 | 1.4908855  | 2.57E-07 | 4.56E-06   |
| ENSMUSG00000096580 | 2.03198392 | 1.45297801 | 2.24E-07 | 4.03E-06   |
| ENSMUSG00000049307 | 2.0282949  | 2.77385214 | 9.29E-09 | 2.25E-07   |
| ENSMUSG00000020057 | 2.02769633 | 1.23612333 | 6.50E-07 | 1.07E-05   |
| ENSMUSG00000063146 | 2.02729204 | 2.4596176  | 1.28E-08 | 3.02E-07   |
| ENSMUSG00000076934 | 2.02614248 | 8.22618418 | 1.82E-10 | 6.58E-09   |
| ENSMUSG00000095200 | 2.02528812 | 3.9293147  | 1.05E-09 | 3.13E-08   |
| ENSMUSG00000036019 | 2.02324706 | 1.67532111 | 1.88E-07 | 3.44E-06   |
| ENSMUSG00000050737 | 2.02267628 | 1.62974314 | 1.16E-07 | 2.22E-06   |
| ENSMUSG00000017493 | 2.02060578 | 0.63573407 | 8.15E-06 | 0.00010488 |
| ENSMUSG00000029379 | 2.01911645 | 4.37657272 | 6.11E-10 | 1.93E-08   |
| ENSMUSG00000026358 | 2.01852622 | 2.71040852 | 1.00E-08 | 2.41E-07   |
| ENSMUSG00000045658 | 2.01427673 | 1.12299555 | 8.50E-07 | 1.37E-05   |
| ENSMUSG00000034993 | 2.01333256 | 2.96017688 | 4.79E-09 | 1.24E-07   |
| ENSMUSG00000032691 | 2.00586838 | 1.19638237 | 4.25E-07 | 7.23E-06   |
| ENSMUSG00000037995 | 2.00463333 | 0.83339228 | 3.11E-06 | 4.38E-05   |
| ENSMUSG00000026700 | 2.00239897 | 2.82564979 | 8.41E-09 | 2.08E-07   |
| ENSMUSG00000061175 | 1.99847479 | 1.3575747  | 2.06E-07 | 3.75E-06   |
| ENSMUSG00000021108 | 1.99501176 | 1.4018177  | 5.19E-07 | 8.68E-06   |
| ENSMUSG00000000552 | 1.99407761 | 2.12888931 | 7.82E-08 | 1.55E-06   |
| ENSMUSG00000000982 | 1.99306851 | 4.13174478 | 1.42E-09 | 4.13E-08   |
| ENSMUSG00000032122 | 1.99271635 | 5.67395645 | 5.77E-10 | 1.87E-08   |
| ENSMUSG00000020641 | 1.99226069 | 5.27572175 | 6.51E-10 | 2.04E-08   |
| ENSMUSG00000059248 | 1.99209546 | 5.92855543 | 4.73E-10 | 1.57E-08   |
| ENSMUSG00000056124 | 1.99157911 | 0.90772646 | 2.16E-06 | 3.15E-05   |
| ENSMUSG00000026764 | 1.98909545 | 2.81946853 | 9.82E-09 | 2.37E-07   |
| ENSMUSG00000007987 | 1.98605955 | 2.49859773 | 2.88E-08 | 6.29E-07   |
| ENSMUSG00000030256 | 1.98330148 | 6.14233936 | 5.23E-10 | 1.71E-08   |
| ENSMUSG00000036353 | 1.9802126  | 2.2855928  | 6.08E-08 | 1.23E-06   |
| ENSMUSG00000020279 | 1.97950975 | 4.74793122 | 1.11E-09 | 3.28E-08   |
| ENSMUSG00000034361 | 1.97710914 | 3.12758998 | 8.57E-09 | 2.11E-07   |
| ENSMUSG00000035936 | 1.97551692 | 1.30344097 | 8.47E-07 | 1.37E-05   |
| ENSMUSG00000030144 | 1.97426708 | 3.64237461 | 2.74E-09 | 7.40E-08   |

|                    |            |            |          |            |
|--------------------|------------|------------|----------|------------|
| ENSMUSG0000000753  | 1.97268625 | 2.20646614 | 7.39E-08 | 1.48E-06   |
| ENSMUSG00000052776 | 1.96996155 | 4.62234253 | 1.50E-09 | 4.30E-08   |
| ENSMUSG00000028926 | 1.96567146 | 2.34277867 | 2.86E-08 | 6.25E-07   |
| ENSMUSG00000028082 | 1.96433548 | 3.51144815 | 4.56E-09 | 1.19E-07   |
| ENSMUSG00000025092 | 1.96401774 | 2.79017967 | 1.84E-08 | 4.19E-07   |
| ENSMUSG0000002250  | 1.96367978 | 2.40203819 | 3.62E-08 | 7.75E-07   |
| ENSMUSG00000096410 | 1.96335019 | 5.43667658 | 1.02E-09 | 3.04E-08   |
| ENSMUSG00000066677 | 1.96258904 | 4.23647466 | 3.16E-09 | 8.47E-08   |
| ENSMUSG00000035273 | 1.96164956 | 5.37941593 | 1.16E-09 | 3.40E-08   |
| ENSMUSG00000029602 | 1.95960827 | 2.83662449 | 1.91E-08 | 4.31E-07   |
| ENSMUSG00000021703 | 1.95670863 | 6.32909008 | 8.29E-10 | 2.53E-08   |
| ENSMUSG00000019990 | 1.95507805 | 2.29837603 | 7.81E-08 | 1.55E-06   |
| ENSMUSG00000005447 | 1.95294801 | 1.69511202 | 5.38E-07 | 8.97E-06   |
| ENSMUSG00000035547 | 1.95178943 | 2.52489714 | 3.72E-08 | 7.91E-07   |
| ENSMUSG00000038545 | 1.94753271 | 1.792859   | 2.74E-07 | 4.86E-06   |
| ENSMUSG00000022305 | 1.9404644  | 1.39320942 | 1.20E-06 | 1.85E-05   |
| ENSMUSG00000101581 | 1.94031619 | 2.14067848 | 1.32E-07 | 2.48E-06   |
| ENSMUSG00000022528 | 1.93893912 | 1.29214987 | 4.40E-07 | 7.48E-06   |
| ENSMUSG00000046245 | 1.93594242 | 0.68138627 | 6.55E-06 | 8.61E-05   |
| ENSMUSG00000066755 | 1.93342018 | 0.55731619 | 2.42E-05 | 0.00028248 |
| ENSMUSG00000025498 | 1.92908411 | 5.96984556 | 1.49E-09 | 4.30E-08   |
| ENSMUSG00000026179 | 1.92822161 | 3.56577522 | 8.65E-09 | 2.12E-07   |
| ENSMUSG00000020901 | 1.92461547 | 4.1711911  | 4.64E-09 | 1.20E-07   |
| ENSMUSG00000073802 | 1.91713027 | 2.59234815 | 5.41E-08 | 1.10E-06   |
| ENSMUSG00000021822 | 1.91670087 | 1.23856989 | 1.11E-06 | 1.72E-05   |
| ENSMUSG00000035711 | 1.91617051 | 1.6331585  | 9.04E-07 | 1.45E-05   |
| ENSMUSG00000040552 | 1.91126782 | 1.78286866 | 4.07E-07 | 6.97E-06   |
| ENSMUSG00000029759 | 1.91125943 | 4.14966848 | 5.30E-09 | 1.35E-07   |
| ENSMUSG00000032298 | 1.91121889 | 3.44094424 | 1.25E-08 | 2.96E-07   |
| ENSMUSG00000020205 | 1.90806265 | 1.89158486 | 3.45E-07 | 6.06E-06   |
| ENSMUSG00000025433 | 1.90805212 | 2.82592221 | 5.12E-08 | 1.05E-06   |
| ENSMUSG00000035713 | 1.90769204 | 1.04674529 | 4.12E-06 | 5.63E-05   |
| ENSMUSG00000025473 | 1.90524635 | 2.632519   | 5.06E-08 | 1.04E-06   |
| ENSMUSG00000025743 | 1.90436502 | 4.36918399 | 5.10E-09 | 1.31E-07   |
| ENSMUSG00000021591 | 1.90364003 | 5.91899461 | 2.37E-09 | 6.53E-08   |
| ENSMUSG00000046841 | 1.90188578 | 6.34201615 | 2.23E-09 | 6.19E-08   |
| ENSMUSG00000023132 | 1.9006048  | 1.27505912 | 2.92E-06 | 4.14E-05   |
| ENSMUSG00000004730 | 1.90043603 | 5.99431899 | 2.53E-09 | 6.91E-08   |
| ENSMUSG00000030064 | 1.89698498 | 1.81113542 | 4.49E-07 | 7.60E-06   |
| ENSMUSG00000076940 | 1.89649695 | 6.26793912 | 2.52E-09 | 6.90E-08   |
| ENSMUSG00000079445 | 1.89287934 | 3.65923757 | 1.42E-08 | 3.32E-07   |
| ENSMUSG00000036502 | 1.89201357 | 1.13790886 | 3.30E-06 | 4.61E-05   |
| ENSMUSG00000030142 | 1.88436309 | 4.25162834 | 7.87E-09 | 1.95E-07   |

|                    |            |            |          |            |
|--------------------|------------|------------|----------|------------|
| ENSMUSG0000003363  | 1.88409293 | 3.42112159 | 2.35E-08 | 5.20E-07   |
| ENSMUSG0000004508  | 1.88298814 | 2.65504351 | 8.00E-08 | 1.58E-06   |
| ENSMUSG00000076562 | 1.88279955 | 3.71726703 | 1.54E-08 | 3.57E-07   |
| ENSMUSG00000041736 | 1.87991121 | 2.36169213 | 1.36E-07 | 2.55E-06   |
| ENSMUSG00000094164 | 1.87983187 | 3.08644727 | 3.20E-08 | 6.91E-07   |
| ENSMUSG00000024529 | 1.87914961 | 0.62736261 | 9.76E-06 | 0.00012416 |
| ENSMUSG00000082088 | 1.87615648 | 0.96422619 | 1.03E-05 | 0.00013068 |
| ENSMUSG00000094694 | 1.87472461 | 5.25773061 | 5.37E-09 | 1.36E-07   |
| ENSMUSG00000035776 | 1.87316532 | 4.99714813 | 6.44E-09 | 1.62E-07   |
| ENSMUSG00000046329 | 1.87257424 | 3.00500773 | 4.71E-08 | 9.74E-07   |
| ENSMUSG00000038352 | 1.86626496 | 4.90783216 | 7.57E-09 | 1.88E-07   |
| ENSMUSG00000032561 | 1.86242986 | 2.53974778 | 6.95E-08 | 1.39E-06   |
| ENSMUSG00000031216 | 1.86111881 | 1.28686572 | 3.31E-06 | 4.62E-05   |
| ENSMUSG00000059316 | 1.86108947 | 2.67593218 | 9.17E-08 | 1.78E-06   |
| ENSMUSG00000025044 | 1.85911681 | 2.45853939 | 8.80E-08 | 1.72E-06   |
| ENSMUSG00000020573 | 1.85774036 | 6.82680402 | 4.58E-09 | 1.19E-07   |
| ENSMUSG00000032207 | 1.85681189 | 1.25819487 | 2.36E-06 | 3.41E-05   |
| ENSMUSG00000076598 | 1.85202923 | 3.55752785 | 3.10E-08 | 6.69E-07   |
| ENSMUSG00000029380 | 1.85062908 | 1.90948953 | 4.55E-07 | 7.68E-06   |
| ENSMUSG00000030847 | 1.84708871 | 2.06419502 | 3.62E-07 | 6.32E-06   |
| ENSMUSG00000022132 | 1.84657112 | 1.17989379 | 4.66E-06 | 6.32E-05   |
| ENSMUSG00000024913 | 1.84298127 | 1.02642527 | 1.09E-05 | 0.00013651 |
| ENSMUSG00000044037 | 1.84110489 | 1.87422311 | 8.44E-07 | 1.36E-05   |
| ENSMUSG00000078816 | 1.84007092 | 0.97290685 | 1.53E-05 | 0.00018619 |
| ENSMUSG00000028476 | 1.8399059  | 1.56468158 | 1.26E-06 | 1.93E-05   |
| ENSMUSG0000002885  | 1.83982747 | 5.47615839 | 8.88E-09 | 2.17E-07   |
| ENSMUSG00000056529 | 1.83654227 | 1.33028008 | 3.16E-06 | 4.44E-05   |
| ENSMUSG00000039007 | 1.83474997 | 1.00772086 | 1.58E-05 | 0.00019164 |
| ENSMUSG00000073494 | 1.8347371  | 0.5350884  | 4.19E-05 | 0.00046046 |
| ENSMUSG00000022180 | 1.82897285 | 0.84579364 | 1.40E-05 | 0.00017308 |
| ENSMUSG00000070780 | 1.82890663 | 2.726205   | 1.21E-07 | 2.32E-06   |
| ENSMUSG00000031803 | 1.82727472 | 0.91958732 | 1.88E-05 | 0.00022409 |
| ENSMUSG00000095565 | 1.82460116 | 3.49884252 | 4.55E-08 | 9.46E-07   |
| ENSMUSG00000079017 | 1.82425785 | 6.08734608 | 9.31E-09 | 2.25E-07   |
| ENSMUSG00000040009 | 1.82306433 | 0.53063608 | 6.04E-05 | 0.00063502 |
| ENSMUSG00000022799 | 1.82177506 | 3.59598102 | 4.78E-08 | 9.86E-07   |
| ENSMUSG00000039236 | 1.82151054 | 4.33159109 | 2.19E-08 | 4.89E-07   |
| ENSMUSG00000026811 | 1.81813966 | 2.24440826 | 4.03E-07 | 6.94E-06   |
| ENSMUSG00000029275 | 1.81599873 | 1.76187762 | 1.66E-06 | 2.47E-05   |
| ENSMUSG00000020085 | 1.81520002 | 1.57348545 | 1.55E-06 | 2.31E-05   |
| ENSMUSG00000046794 | 1.81322694 | 1.92543225 | 9.07E-07 | 1.45E-05   |
| ENSMUSG00000024677 | 1.81234644 | 6.08206393 | 1.14E-08 | 2.72E-07   |
| ENSMUSG00000050315 | 1.81090023 | 0.74552187 | 2.85E-05 | 0.0003275  |

|                    |            |            |          |            |
|--------------------|------------|------------|----------|------------|
| ENSMUSG00000013236 | 1.81071877 | 2.50774733 | 2.23E-07 | 4.03E-06   |
| ENSMUSG00000076668 | 1.81016656 | 1.39559719 | 4.17E-06 | 5.69E-05   |
| ENSMUSG00000002985 | 1.80892098 | 1.94911798 | 1.16E-06 | 1.80E-05   |
| ENSMUSG00000046718 | 1.80623633 | 6.24383244 | 1.25E-08 | 2.96E-07   |
| ENSMUSG00000036606 | 1.80533752 | 4.6352891  | 2.48E-08 | 5.48E-07   |
| ENSMUSG00000054619 | 1.80472933 | 2.2609627  | 5.00E-07 | 8.39E-06   |
| ENSMUSG00000030793 | 1.80152273 | 4.27193839 | 3.41E-08 | 7.32E-07   |
| ENSMUSG00000016756 | 1.79806712 | 5.94627285 | 1.51E-08 | 3.51E-07   |
| ENSMUSG00000056413 | 1.79797352 | 4.06983586 | 4.18E-08 | 8.76E-07   |
| ENSMUSG00000009687 | 1.79392461 | 6.31131465 | 1.54E-08 | 3.56E-07   |
| ENSMUSG00000018507 | 1.79349749 | 6.00132544 | 1.62E-08 | 3.73E-07   |
| ENSMUSG00000032333 | 1.79161495 | 3.47382006 | 8.70E-08 | 1.70E-06   |
| ENSMUSG00000022892 | 1.79142548 | 3.987754   | 4.93E-08 | 1.01E-06   |
| ENSMUSG00000044162 | 1.79137888 | 3.2949956  | 1.32E-07 | 2.48E-06   |
| ENSMUSG00000030474 | 1.7905276  | 0.93678646 | 1.20E-05 | 0.00014941 |
| ENSMUSG00000052609 | 1.78945982 | 2.63374836 | 2.24E-07 | 4.03E-06   |
| ENSMUSG00000054065 | 1.78891924 | 2.65191257 | 3.54E-07 | 6.20E-06   |
| ENSMUSG00000023913 | 1.78720926 | 3.63604909 | 6.56E-08 | 1.32E-06   |
| ENSMUSG00000095285 | 1.78684398 | 3.94484782 | 4.61E-08 | 9.59E-07   |
| ENSMUSG00000029207 | 1.7861948  | 1.71061531 | 2.98E-06 | 4.21E-05   |
| ENSMUSG00000095612 | 1.78573202 | 5.46330088 | 2.30E-08 | 5.11E-07   |
| ENSMUSG00000024777 | 1.78425937 | 2.40341547 | 5.31E-07 | 8.87E-06   |
| ENSMUSG00000022895 | 1.78335527 | 4.41986149 | 3.64E-08 | 7.77E-07   |
| ENSMUSG00000096150 | 1.78203887 | 4.21453387 | 4.42E-08 | 9.22E-07   |
| ENSMUSG00000095351 | 1.78095933 | 4.87822213 | 3.23E-08 | 6.95E-07   |
| ENSMUSG00000019055 | 1.77932248 | 2.38482745 | 4.99E-07 | 8.39E-06   |
| ENSMUSG00000013033 | 1.77835584 | 3.05524722 | 1.57E-07 | 2.92E-06   |
| ENSMUSG00000049577 | 1.77718483 | 1.61482816 | 4.52E-06 | 6.14E-05   |
| ENSMUSG00000021687 | 1.77646884 | 2.38850228 | 5.31E-07 | 8.87E-06   |
| ENSMUSG00000095583 | 1.77549282 | 4.5158485  | 4.13E-08 | 8.71E-07   |
| ENSMUSG00000031379 | 1.77195656 | 2.05217257 | 1.72E-06 | 2.55E-05   |
| ENSMUSG00000096459 | 1.77040075 | 6.26180734 | 2.32E-08 | 5.14E-07   |
| ENSMUSG00000029816 | 1.76775039 | 3.08193807 | 1.61E-07 | 2.98E-06   |
| ENSMUSG00000061666 | 1.7677139  | 2.25267862 | 9.33E-07 | 1.48E-05   |
| ENSMUSG00000072966 | 1.76766351 | 3.44824289 | 1.25E-07 | 2.38E-06   |
| ENSMUSG00000076545 | 1.76553405 | 4.70553365 | 4.21E-08 | 8.82E-07   |
| ENSMUSG00000022838 | 1.76497528 | 5.0255979  | 3.88E-08 | 8.22E-07   |
| ENSMUSG00000023050 | 1.76470556 | 2.600129   | 3.94E-07 | 6.83E-06   |
| ENSMUSG00000041000 | 1.76394573 | 1.88942058 | 1.97E-06 | 2.89E-05   |
| ENSMUSG00000094194 | 1.76329268 | 4.92554431 | 4.13E-08 | 8.71E-07   |
| ENSMUSG00000059089 | 1.76255144 | 2.03399051 | 1.20E-06 | 1.85E-05   |
| ENSMUSG00000047281 | 1.76162415 | 2.35294981 | 9.58E-07 | 1.51E-05   |
| ENSMUSG00000020601 | 1.76157106 | 5.11332463 | 3.85E-08 | 8.18E-07   |



|                    |            |            |            |            |
|--------------------|------------|------------|------------|------------|
| ENSMUSG00000027078 | 1.76103703 | 4.682192   | 4.88E-08   | 1.00E-06   |
| ENSMUSG00000067377 | 1.75748879 | 2.39386798 | 7.77E-07   | 1.26E-05   |
| ENSMUSG00000041954 | 1.7573269  | 0.63044128 | 0.000138   | 0.00132163 |
| ENSMUSG00000023495 | 1.75547469 | 0.91552354 | 4.28E-05   | 0.00046886 |
| ENSMUSG00000079293 | 1.75442917 | 1.52754746 | 3.57E-06   | 4.94E-05   |
| ENSMUSG00000072623 | 1.7516615  | 1.97040509 | 1.14E-06   | 1.77E-05   |
| ENSMUSG00000018774 | 1.75162385 | 3.05444777 | 2.54E-07   | 4.53E-06   |
| ENSMUSG00000040322 | 1.75110492 | 3.92122696 | 9.86E-08   | 1.91E-06   |
| ENSMUSG00000023079 | 1.74978109 | 2.78856223 | 4.00E-07   | 6.89E-06   |
| ENSMUSG00000095197 | 1.74905679 | 1.98649562 | 1.84E-06   | 2.70E-05   |
| ENSMUSG00000029650 | 1.74890669 | 2.82528311 | 2.84E-07   | 5.02E-06   |
| ENSMUSG00000056592 | 1.748454   | 2.57826476 | 5.86E-07   | 9.74E-06   |
| ENSMUSG00000058427 | 1.74831672 | 4.06558762 | 7.69E-08   | 1.53E-06   |
| ENSMUSG00000075602 | 1.74650755 | 10.1780251 | 2.78E-08   | 6.08E-07   |
| ENSMUSG00000058163 | 1.74604325 | 3.7396302  | 1.20E-07   | 2.31E-06   |
| ENSMUSG00000034616 | 1.74237086 | 2.59308136 | 6.19E-07   | 1.03E-05   |
| ENSMUSG00000064373 | 1.74229882 | 4.34939527 | 8.15E-08   | 1.61E-06   |
| ENSMUSG00000051236 | 1.74026832 | 2.57497391 | 7.34E-07   | 1.20E-05   |
| ENSMUSG00000050957 | 1.74020078 | 2.42743409 | 9.25E-07   | 1.47E-05   |
| ENSMUSG00000041688 | 1.73770352 | 2.02879799 | 1.30E-06   | 1.98E-05   |
| ENSMUSG00000079227 | 1.73723484 | 4.75214939 | 6.65E-08   | 1.34E-06   |
| ENSMUSG00000030774 | 1.73698567 | 2.55231852 | 7.39E-07   | 1.20E-05   |
| ENSMUSG00000030060 | 1.73585245 | 3.26718488 | 2.26E-07   | 4.06E-06   |
| ENSMUSG00000052928 | 1.73573675 | 1.25234184 | 1.55E-05   | 0.00018811 |
| ENSMUSG00000045551 | 1.73426246 | 2.70329798 | 4.42E-07   | 7.49E-06   |
| ENSMUSG00000031995 | 1.7323234  | 3.87049153 | 1.27E-07   | 2.41E-06   |
| ENSMUSG00000031239 | 1.7307723  | 3.29540127 | 2.56E-07   | 4.55E-06   |
| ENSMUSG00000054342 | 1.73044643 | 2.7154897  | 5.74E-07   | 9.55E-06   |
| ENSMUSG00000042249 | 1.72892156 | 2.45044252 | 1.09E-06   | 1.71E-05   |
| ENSMUSG0000003032  | 1.72784544 | 0.53293496 | 0.00014458 | 0.00137369 |
| ENSMUSG00000007891 | 1.72675466 | 6.56648984 | 4.67E-08   | 9.69E-07   |
| ENSMUSG00000027173 | 1.72544247 | 0.90876836 | 4.60E-05   | 0.00049786 |
| ENSMUSG00000031596 | 1.7248646  | 3.05007774 | 2.54E-07   | 4.53E-06   |
| ENSMUSG00000025268 | 1.72328218 | 1.22581397 | 1.44E-05   | 0.00017672 |
| ENSMUSG00000047371 | 1.72028336 | 1.13131733 | 3.04E-05   | 0.00034782 |
| ENSMUSG00000030917 | 1.71997788 | 0.86132936 | 3.98E-05   | 0.00044246 |
| ENSMUSG00000029860 | 1.71915709 | 2.27425408 | 1.69E-06   | 2.51E-05   |
| ENSMUSG00000056220 | 1.71905093 | 2.98335085 | 4.23E-07   | 7.20E-06   |
| ENSMUSG00000029053 | 1.71820182 | 1.85936823 | 2.03E-06   | 2.97E-05   |
| ENSMUSG00000021485 | 1.71742205 | 1.48704605 | 1.04E-05   | 0.00013138 |
| ENSMUSG00000017631 | 1.71589327 | 5.33748011 | 7.55E-08   | 1.51E-06   |
| ENSMUSG00000032769 | 1.71368329 | 2.09666277 | 3.17E-06   | 4.46E-05   |
| ENSMUSG00000039959 | 1.71309931 | 4.34434819 | 1.27E-07   | 2.41E-06   |

|                    |            |            |            |            |
|--------------------|------------|------------|------------|------------|
| ENSMUSG00000020882 | 1.71283352 | 1.03452408 | 2.61E-05   | 0.00030308 |
| ENSMUSG00000093955 | 1.70894759 | 2.84969572 | 6.46E-07   | 1.06E-05   |
| ENSMUSG00000076543 | 1.70724755 | 3.11895358 | 4.07E-07   | 6.97E-06   |
| ENSMUSG00000096672 | 1.70239087 | 2.09066676 | 3.97E-06   | 5.45E-05   |
| ENSMUSG00000022793 | 1.70102624 | 2.1546648  | 3.42E-06   | 4.76E-05   |
| ENSMUSG00000001020 | 1.69861351 | 2.15997274 | 2.60E-06   | 3.72E-05   |
| ENSMUSG00000095210 | 1.69772051 | 4.30076872 | 1.63E-07   | 3.01E-06   |
| ENSMUSG00000070390 | 1.69529137 | 1.40465565 | 1.05E-05   | 0.00013258 |
| ENSMUSG00000032418 | 1.69177259 | 2.34157181 | 1.69E-06   | 2.51E-05   |
| ENSMUSG00000045827 | 1.69115429 | 6.78455984 | 8.22E-08   | 1.62E-06   |
| ENSMUSG00000096210 | 1.69098822 | 4.16562431 | 1.87E-07   | 3.43E-06   |
| ENSMUSG00000069833 | 1.68775006 | 5.03792105 | 1.30E-07   | 2.45E-06   |
| ENSMUSG00000029925 | 1.68755776 | 4.42488834 | 2.13E-07   | 3.85E-06   |
| ENSMUSG00000057914 | 1.68726556 | 0.69436025 | 0.00016336 | 0.00152918 |
| ENSMUSG00000038151 | 1.68168595 | 6.96884721 | 9.24E-08   | 1.80E-06   |
| ENSMUSG00000031832 | 1.67988619 | 1.86465494 | 7.52E-06   | 9.77E-05   |
| ENSMUSG00000040026 | 1.67981062 | 1.61256639 | 4.87E-06   | 6.55E-05   |
| ENSMUSG00000076536 | 1.67885854 | 2.64378488 | 1.10E-06   | 1.71E-05   |
| ENSMUSG00000079362 | 1.67787411 | 5.34244845 | 1.43E-07   | 2.68E-06   |
| ENSMUSG00000033644 | 1.67784436 | 3.04069765 | 6.43E-07   | 1.06E-05   |
| ENSMUSG00000035722 | 1.67703661 | 4.2861471  | 2.31E-07   | 4.14E-06   |
| ENSMUSG00000021375 | 1.67508095 | 2.88612225 | 8.04E-07   | 1.30E-05   |
| ENSMUSG00000094930 | 1.67481982 | 4.07155249 | 2.92E-07   | 5.17E-06   |
| ENSMUSG00000039976 | 1.6740756  | 1.77079839 | 7.32E-06   | 9.54E-05   |
| ENSMUSG00000038936 | 1.67377656 | 3.77160989 | 3.71E-07   | 6.47E-06   |
| ENSMUSG00000040584 | 1.671396   | 2.70469808 | 9.60E-07   | 1.51E-05   |
| ENSMUSG00000076552 | 1.67136814 | 2.8116385  | 1.05E-06   | 1.64E-05   |
| ENSMUSG00000051314 | 1.67048939 | 2.41717614 | 2.87E-06   | 4.08E-05   |
| ENSMUSG00000020785 | 1.66992103 | 1.33952153 | 2.74E-05   | 0.00031613 |
| ENSMUSG00000024300 | 1.66990887 | 2.9723308  | 9.62E-07   | 1.51E-05   |
| ENSMUSG00000095519 | 1.6694591  | 2.89981137 | 9.16E-07   | 1.46E-05   |
| ENSMUSG00000057606 | 1.6691674  | 1.20406273 | 3.25E-05   | 0.00036887 |
| ENSMUSG00000050335 | 1.66431966 | 3.11342094 | 9.30E-07   | 1.48E-05   |
| ENSMUSG00000019122 | 1.66373463 | 1.25592159 | 1.67E-05   | 0.00020021 |
| ENSMUSG00000022657 | 1.66314558 | 4.2597278  | 3.41E-07   | 5.99E-06   |
| ENSMUSG00000048163 | 1.66185768 | 5.70874101 | 1.57E-07   | 2.92E-06   |
| ENSMUSG00000076586 | 1.66162329 | 5.12258713 | 1.98E-07   | 3.62E-06   |
| ENSMUSG00000020841 | 1.66160969 | 4.85122648 | 2.04E-07   | 3.72E-06   |
| ENSMUSG00000030589 | 1.65943569 | 2.04215991 | 8.02E-06   | 0.00010337 |
| ENSMUSG00000041779 | 1.65868147 | 5.70291377 | 1.65E-07   | 3.03E-06   |
| ENSMUSG00000076655 | 1.65635606 | 3.78206128 | 4.22E-07   | 7.20E-06   |
| ENSMUSG00000003123 | 1.65496686 | 2.04760104 | 4.93E-06   | 6.62E-05   |
| ENSMUSG00000022479 | 1.65496197 | 0.63982194 | 0.00017261 | 0.00160439 |

|                    |            |            |            |            |
|--------------------|------------|------------|------------|------------|
| ENSMUSG00000026335 | 1.65111546 | 1.79183295 | 1.04E-05   | 0.00013138 |
| ENSMUSG00000076709 | 1.64903725 | 2.16235524 | 5.05E-06   | 6.75E-05   |
| ENSMUSG00000039304 | 1.64508498 | 3.48041964 | 6.34E-07   | 1.05E-05   |
| ENSMUSG00000028456 | 1.64468617 | 1.99092293 | 5.59E-06   | 7.43E-05   |
| ENSMUSG00000073755 | 1.64434567 | 1.40685794 | 1.96E-05   | 0.00023384 |
| ENSMUSG00000054752 | 1.64348512 | 2.43372005 | 2.51E-06   | 3.59E-05   |
| ENSMUSG00000000037 | 1.64024639 | 1.58523395 | 1.52E-05   | 0.00018514 |
| ENSMUSG00000046688 | 1.63901194 | 3.27994181 | 9.19E-07   | 1.46E-05   |
| ENSMUSG00000042632 | 1.6380925  | 1.98012677 | 5.87E-06   | 7.80E-05   |
| ENSMUSG00000094951 | 1.6367047  | 5.0522781  | 2.98E-07   | 5.25E-06   |
| ENSMUSG00000095889 | 1.63540251 | 2.55905925 | 2.22E-06   | 3.22E-05   |
| ENSMUSG00000022540 | 1.63471616 | 2.94719338 | 1.43E-06   | 2.16E-05   |
| ENSMUSG00000045659 | 1.63395229 | 0.62246147 | 0.00023989 | 0.00213977 |
| ENSMUSG00000041836 | 1.63349494 | 4.25904219 | 4.59E-07   | 7.75E-06   |
| ENSMUSG00000025938 | 1.63217447 | 2.45610387 | 3.06E-06   | 4.31E-05   |
| ENSMUSG00000096464 | 1.62771033 | 4.80658441 | 3.74E-07   | 6.52E-06   |
| ENSMUSG00000101389 | 1.62676611 | 1.64260086 | 1.34E-05   | 0.00016615 |
| ENSMUSG00000001473 | 1.62626075 | 3.88065794 | 6.46E-07   | 1.06E-05   |
| ENSMUSG00000058755 | 1.62588459 | 2.66207815 | 2.33E-06   | 3.37E-05   |
| ENSMUSG00000035239 | 1.6256287  | 1.74331793 | 1.05E-05   | 0.00013279 |
| ENSMUSG00000078452 | 1.62545635 | 1.27644788 | 4.61E-05   | 0.00049914 |
| ENSMUSG00000001750 | 1.62385799 | 4.89200653 | 3.99E-07   | 6.89E-06   |
| ENSMUSG00000003346 | 1.62350605 | 1.77265018 | 1.54E-05   | 0.00018735 |
| ENSMUSG00000048120 | 1.62199564 | 4.94761927 | 3.90E-07   | 6.78E-06   |
| ENSMUSG00000040212 | 1.62128775 | 4.19151936 | 6.28E-07   | 1.04E-05   |
| ENSMUSG00000044469 | 1.62075233 | 1.88794525 | 1.30E-05   | 0.0001612  |
| ENSMUSG00000006445 | 1.61885465 | 1.52589595 | 3.56E-05   | 0.00040054 |
| ENSMUSG00000030516 | 1.61857067 | 0.74664664 | 0.00017183 | 0.00160294 |
| ENSMUSG00000030255 | 1.61844063 | 1.1075378  | 8.39E-05   | 0.00085047 |
| ENSMUSG00000031373 | 1.61824508 | 2.59147551 | 3.56E-06   | 4.94E-05   |
| ENSMUSG00000061046 | 1.61755884 | 1.251066   | 5.55E-05   | 0.00058804 |
| ENSMUSG00000027776 | 1.61654211 | 2.84507878 | 2.30E-06   | 3.33E-05   |
| ENSMUSG00000042826 | 1.61579584 | 2.05177631 | 8.42E-06   | 0.00010798 |
| ENSMUSG00000041757 | 1.61502122 | 1.1617825  | 5.06E-05   | 0.00054261 |
| ENSMUSG00000076533 | 1.61431498 | 1.84507279 | 1.03E-05   | 0.00013017 |
| ENSMUSG00000068245 | 1.61382503 | 3.44415628 | 1.06E-06   | 1.65E-05   |
| ENSMUSG00000015027 | 1.61195479 | 5.29089392 | 4.19E-07   | 7.16E-06   |
| ENSMUSG00000025854 | 1.61105996 | 1.60865572 | 2.06E-05   | 0.00024398 |
| ENSMUSG00000042616 | 1.61089074 | 1.33752346 | 4.07E-05   | 0.00045233 |
| ENSMUSG00000032204 | 1.61035144 | 1.39364488 | 3.81E-05   | 0.00042575 |
| ENSMUSG00000026778 | 1.60864686 | 2.6171149  | 3.60E-06   | 4.98E-05   |
| ENSMUSG00000029101 | 1.60688683 | 2.10365035 | 7.77E-06   | 0.00010062 |
| ENSMUSG00000018381 | 1.60356734 | 3.40510656 | 1.43E-06   | 2.16E-05   |

|                    |            |            |            |            |
|--------------------|------------|------------|------------|------------|
| ENSMUSG00000079037 | 1.59880636 | 2.5083305  | 5.17E-06   | 6.91E-05   |
| ENSMUSG00000024030 | 1.59811404 | 4.49846648 | 7.18E-07   | 1.17E-05   |
| ENSMUSG00000044447 | 1.59729628 | 1.85340306 | 1.28E-05   | 0.00015916 |
| ENSMUSG00000033147 | 1.59533381 | 1.73900782 | 2.01E-05   | 0.00023896 |
| ENSMUSG00000020020 | 1.59431692 | 0.88705416 | 0.00021388 | 0.00193496 |
| ENSMUSG00000030217 | 1.59365929 | 0.56964552 | 0.00022853 | 0.00205198 |
| ENSMUSG00000029119 | 1.59348693 | 3.73883037 | 1.21E-06   | 1.86E-05   |
| ENSMUSG00000095633 | 1.59034848 | 2.51497316 | 4.19E-06   | 5.72E-05   |
| ENSMUSG00000049723 | 1.58975617 | 2.1276781  | 1.07E-05   | 0.00013521 |
| ENSMUSG00000024087 | 1.58974711 | 1.24973857 | 5.83E-05   | 0.00061584 |
| ENSMUSG00000033735 | 1.58572097 | 1.80664468 | 2.42E-05   | 0.00028248 |
| ENSMUSG00000029561 | 1.58571618 | 6.61170824 | 4.64E-07   | 7.82E-06   |
| ENSMUSG00000026715 | 1.58425728 | 1.05188424 | 0.00013364 | 0.00128332 |
| ENSMUSG00000040093 | 1.58344345 | 3.91403952 | 1.26E-06   | 1.92E-05   |
| ENSMUSG00000035004 | 1.58223375 | 1.84284952 | 8.20E-06   | 0.00010535 |
| ENSMUSG00000032487 | 1.58190294 | 4.97513847 | 7.16E-07   | 1.17E-05   |
| ENSMUSG00000016382 | 1.57980919 | 3.28416549 | 1.69E-06   | 2.50E-05   |
| ENSMUSG00000026519 | 1.57961293 | 3.86386738 | 1.53E-06   | 2.29E-05   |
| ENSMUSG00000031391 | 1.57793161 | 2.47366958 | 7.16E-06   | 9.36E-05   |
| ENSMUSG00000051517 | 1.57786998 | 2.95727997 | 2.97E-06   | 4.21E-05   |
| ENSMUSG00000076571 | 1.57529278 | 1.30418041 | 5.73E-05   | 0.00060567 |
| ENSMUSG00000022257 | 1.57478863 | 2.5087041  | 6.37E-06   | 8.40E-05   |
| ENSMUSG00000020432 | 1.57304524 | 2.8900261  | 3.67E-06   | 5.07E-05   |
| ENSMUSG00000027200 | 1.57244938 | 5.87924058 | 6.47E-07   | 1.06E-05   |
| ENSMUSG00000024672 | 1.57213257 | 3.12862579 | 3.46E-06   | 4.81E-05   |
| ENSMUSG00000029713 | 1.57211559 | 4.88971211 | 9.04E-07   | 1.45E-05   |
| ENSMUSG00000034855 | 1.57179127 | 3.17782499 | 2.66E-06   | 3.80E-05   |
| ENSMUSG00000057897 | 1.57149022 | 0.87009963 | 0.00012729 | 0.00122998 |
| ENSMUSG00000060591 | 1.57059808 | 2.98896653 | 4.06E-06   | 5.57E-05   |
| ENSMUSG0000006378  | 1.56974053 | 3.08695072 | 3.31E-06   | 4.62E-05   |
| ENSMUSG00000049804 | 1.56964807 | 4.54160919 | 1.02E-06   | 1.60E-05   |
| ENSMUSG00000035513 | 1.56902572 | 0.97729191 | 9.70E-05   | 0.00096761 |
| ENSMUSG00000020395 | 1.56867153 | 2.82394917 | 4.49E-06   | 6.11E-05   |
| ENSMUSG00000022564 | 1.56657981 | 3.6638996  | 1.94E-06   | 2.84E-05   |
| ENSMUSG00000020592 | 1.56493988 | 2.93079807 | 3.94E-06   | 5.42E-05   |
| ENSMUSG00000033307 | 1.56386165 | 3.83512901 | 1.81E-06   | 2.67E-05   |
| ENSMUSG00000094117 | 1.56383679 | 4.11715052 | 1.54E-06   | 2.31E-05   |
| ENSMUSG00000060147 | 1.5636585  | 3.42520935 | 2.35E-06   | 3.39E-05   |
| ENSMUSG00000001418 | 1.56062139 | 5.44233066 | 8.42E-07   | 1.36E-05   |
| ENSMUSG00000024095 | 1.55893683 | 4.05271993 | 1.48E-06   | 2.22E-05   |
| ENSMUSG00000026921 | 1.55882528 | 1.1576214  | 0.0001384  | 0.00132432 |
| ENSMUSG00000027227 | 1.55834363 | 4.48049509 | 1.37E-06   | 2.07E-05   |
| ENSMUSG00000034457 | 1.55801752 | 1.02048537 | 9.38E-05   | 0.00094019 |

|                     |            |            |            |            |
|---------------------|------------|------------|------------|------------|
| ENSMUSG0000000386   | 1.55792966 | 5.91543958 | 7.83E-07   | 1.27E-05   |
| ENSMUSG00000004110  | 1.55760493 | 5.58509813 | 8.05E-07   | 1.30E-05   |
| ENSMUSG000000095682 | 1.55572944 | 2.56202621 | 6.84E-06   | 8.98E-05   |
| ENSMUSG000000046410 | 1.5532102  | 4.19387431 | 1.61E-06   | 2.40E-05   |
| ENSMUSG000000094006 | 1.55189605 | 4.54893787 | 1.30E-06   | 1.98E-05   |
| ENSMUSG000000093896 | 1.55079098 | 3.70001006 | 2.17E-06   | 3.16E-05   |
| ENSMUSG000000045136 | 1.54795271 | 2.72780947 | 7.56E-06   | 9.81E-05   |
| ENSMUSG000000095130 | 1.54563242 | 5.21737167 | 1.13E-06   | 1.76E-05   |
| ENSMUSG000000028434 | 1.54524479 | 0.49123984 | 0.00062712 | 0.0050356  |
| ENSMUSG000000048521 | 1.54517157 | 1.05056514 | 0.00013926 | 0.00133022 |
| ENSMUSG000000003541 | 1.54377925 | 1.10231664 | 0.00010806 | 0.00105846 |
| ENSMUSG000000072244 | 1.54316032 | 2.62096705 | 5.92E-06   | 7.85E-05   |
| ENSMUSG000000000791 | 1.54169327 | 3.67217736 | 2.81E-06   | 4.00E-05   |
| ENSMUSG000000022018 | 1.54071815 | 1.17447386 | 8.15E-05   | 0.00082729 |
| ENSMUSG000000024253 | 1.54001175 | 0.59608747 | 0.00079166 | 0.00615516 |
| ENSMUSG000000068735 | 1.53769645 | 4.58971371 | 1.71E-06   | 2.53E-05   |
| ENSMUSG000000013698 | 1.53677856 | 5.48040305 | 1.21E-06   | 1.86E-05   |
| ENSMUSG000000053297 | 1.53579935 | 0.71389059 | 0.00027329 | 0.00241969 |
| ENSMUSG000000028789 | 1.53501285 | 0.80682127 | 0.00030548 | 0.00268044 |
| ENSMUSG000000002379 | 1.5335447  | 2.2229801  | 2.06E-05   | 0.00024398 |
| ENSMUSG000000022747 | 1.5324564  | 6.32629469 | 1.11E-06   | 1.73E-05   |
| ENSMUSG000000027298 | 1.53223034 | 1.67635798 | 4.18E-05   | 0.00046032 |
| ENSMUSG000000094689 | 1.53131783 | 4.01238716 | 2.40E-06   | 3.45E-05   |
| ENSMUSG000000044229 | 1.53108956 | 1.41440231 | 4.96E-05   | 0.00053378 |
| ENSMUSG000000063568 | 1.53060621 | 1.42584406 | 7.44E-05   | 0.00076258 |
| ENSMUSG000000034634 | 1.5278669  | 6.05665606 | 1.23E-06   | 1.89E-05   |
| ENSMUSG000000025579 | 1.52759591 | 3.90214546 | 2.85E-06   | 4.06E-05   |
| ENSMUSG000000020422 | 1.52707866 | 4.3066372  | 2.14E-06   | 3.12E-05   |
| ENSMUSG000000042129 | 1.5264915  | 6.49366887 | 1.19E-06   | 1.84E-05   |
| ENSMUSG000000032666 | 1.52571122 | 2.60836986 | 1.16E-05   | 0.00014497 |
| ENSMUSG000000028565 | 1.52557181 | 0.6342716  | 0.00069127 | 0.00547333 |
| ENSMUSG000000076549 | 1.52478952 | 4.16089819 | 2.39E-06   | 3.44E-05   |
| ENSMUSG000000081534 | 1.52440166 | 5.94256399 | 1.33E-06   | 2.02E-05   |
| ENSMUSG000000030844 | 1.52402513 | 4.62327758 | 1.97E-06   | 2.89E-05   |
| ENSMUSG000000008855 | 1.52359052 | 3.15621166 | 6.04E-06   | 7.98E-05   |
| ENSMUSG000000076547 | 1.52334443 | 2.80220245 | 6.91E-06   | 9.07E-05   |
| ENSMUSG000000062593 | 1.5229003  | 5.44709908 | 1.48E-06   | 2.22E-05   |
| ENSMUSG000000056476 | 1.52192731 | 2.41093016 | 1.42E-05   | 0.00017522 |
| ENSMUSG000000032245 | 1.52093971 | 4.03238851 | 2.90E-06   | 4.11E-05   |
| ENSMUSG000000027737 | 1.51790087 | 4.45201024 | 2.13E-06   | 3.12E-05   |
| ENSMUSG000000041189 | 1.51662149 | 2.31915114 | 1.72E-05   | 0.00020688 |
| ENSMUSG000000094134 | 1.51639001 | 1.20223472 | 0.0001005  | 0.00099797 |
| ENSMUSG000000019872 | 1.5155935  | 2.74345866 | 9.85E-06   | 0.00012508 |

|                    |            |            |            |            |
|--------------------|------------|------------|------------|------------|
| ENSMUSG00000060314 | 1.51304405 | 1.57051038 | 4.09E-05   | 0.00045323 |
| ENSMUSG00000015568 | 1.51232359 | 2.11253626 | 1.77E-05   | 0.00021188 |
| ENSMUSG00000005580 | 1.51225706 | 1.01370802 | 0.00018975 | 0.00175047 |
| ENSMUSG00000073405 | 1.51032512 | 2.02111118 | 3.04E-05   | 0.00034782 |
| ENSMUSG00000076939 | 1.50950571 | 4.76339518 | 2.46E-06   | 3.53E-05   |
| ENSMUSG00000039747 | 1.50781    | 3.79304093 | 4.10E-06   | 5.61E-05   |
| ENSMUSG00000041351 | 1.50732377 | 0.76151296 | 0.00033071 | 0.00287379 |
| ENSMUSG00000035671 | 1.50398603 | 2.20982382 | 1.99E-05   | 0.0002362  |
| ENSMUSG00000068335 | 1.50333975 | 3.12212266 | 7.12E-06   | 9.33E-05   |
| ENSMUSG00000003546 | 1.50327859 | 0.64216094 | 0.00057752 | 0.00467568 |
| ENSMUSG00000030530 | 1.50204278 | 3.03378176 | 8.34E-06   | 0.00010704 |
| ENSMUSG00000030122 | 1.50191088 | 3.46798793 | 6.03E-06   | 7.97E-05   |
| ENSMUSG00000015437 | 1.50184868 | 2.0875265  | 2.35E-05   | 0.0002747  |
| ENSMUSG00000071713 | 1.4995963  | 6.61487203 | 1.75E-06   | 2.59E-05   |
| ENSMUSG00000040594 | 1.49360507 | 1.36480411 | 9.46E-05   | 0.00094676 |
| ENSMUSG00000037235 | 1.49355683 | 4.4454018  | 3.46E-06   | 4.81E-05   |
| ENSMUSG00000033577 | 1.49352129 | 2.26875209 | 2.14E-05   | 0.00025249 |
| ENSMUSG00000026944 | 1.49215882 | 3.78088993 | 4.90E-06   | 6.59E-05   |
| ENSMUSG00000095761 | 1.49113991 | 2.14919149 | 2.52E-05   | 0.00029296 |
| ENSMUSG00000069516 | 1.48944099 | 3.9060982  | 3.95E-06   | 5.43E-05   |
| ENSMUSG00000033255 | 1.48936085 | 1.75489672 | 5.73E-05   | 0.00060567 |
| ENSMUSG00000020099 | 1.48924066 | 0.88594213 | 0.00020554 | 0.00187012 |
| ENSMUSG00000052151 | 1.48814319 | 2.09618756 | 4.12E-05   | 0.00045515 |
| ENSMUSG00000030605 | 1.48522458 | 1.84198395 | 7.55E-05   | 0.00077137 |
| ENSMUSG00000030824 | 1.48308802 | 6.2963222  | 2.36E-06   | 3.41E-05   |
| ENSMUSG00000047409 | 1.48262843 | 2.18738571 | 2.60E-05   | 0.00030224 |
| ENSMUSG00000032420 | 1.47885812 | 2.44803467 | 1.98E-05   | 0.00023541 |
| ENSMUSG00000022995 | 1.47669933 | 0.96815265 | 0.00032073 | 0.00279611 |
| ENSMUSG00000020027 | 1.47530479 | 5.60603343 | 2.99E-06   | 4.22E-05   |
| ENSMUSG00000029009 | 1.47472709 | 4.10021475 | 5.09E-06   | 6.80E-05   |
| ENSMUSG00000096715 | 1.47374685 | 4.42104341 | 4.73E-06   | 6.40E-05   |
| ENSMUSG00000026360 | 1.47285496 | 3.18651319 | 1.13E-05   | 0.00014095 |
| ENSMUSG00000036764 | 1.46923753 | 1.955886   | 6.26E-05   | 0.00065587 |
| ENSMUSG00000032344 | 1.46883657 | 2.41255865 | 2.87E-05   | 0.00033032 |
| ENSMUSG00000028042 | 1.46871095 | 2.93651644 | 1.34E-05   | 0.00016615 |
| ENSMUSG00000029370 | 1.4673593  | 1.79040813 | 6.33E-05   | 0.00066186 |
| ENSMUSG00000096833 | 1.46673938 | 4.58129096 | 4.83E-06   | 6.51E-05   |
| ENSMUSG00000048911 | 1.4650829  | 5.80815746 | 3.26E-06   | 4.57E-05   |
| ENSMUSG00000074604 | 1.46503914 | 3.38813501 | 8.89E-06   | 0.00011343 |
| ENSMUSG00000032583 | 1.46432877 | 1.36600423 | 0.00011329 | 0.00110865 |
| ENSMUSG00000055541 | 1.46382893 | 1.98919468 | 4.11E-05   | 0.00045428 |
| ENSMUSG00000059708 | 1.46257604 | 4.75244956 | 4.60E-06   | 6.25E-05   |
| ENSMUSG00000024177 | 1.46256709 | 1.38237566 | 0.0001912  | 0.00176079 |

|                    |            |            |            |            |
|--------------------|------------|------------|------------|------------|
| ENSMUSG00000095127 | 1.46256546 | 5.81856628 | 3.40E-06   | 4.74E-05   |
| ENSMUSG00000076534 | 1.46218665 | 4.52765905 | 5.33E-06   | 7.10E-05   |
| ENSMUSG00000020282 | 1.46214355 | 0.96894198 | 0.00035606 | 0.0030596  |
| ENSMUSG00000026536 | 1.46160715 | 2.90918411 | 1.52E-05   | 0.00018514 |
| ENSMUSG00000044551 | 1.46073146 | 1.0167405  | 0.00038451 | 0.00327271 |
| ENSMUSG00000026566 | 1.46070129 | 3.33631072 | 1.10E-05   | 0.00013839 |
| ENSMUSG00000026853 | 1.45951536 | 3.86403467 | 7.90E-06   | 0.00010206 |
| ENSMUSG00000021725 | 1.45926774 | 4.92055768 | 4.74E-06   | 6.41E-05   |
| ENSMUSG00000024084 | 1.45858916 | 0.9192445  | 0.00070444 | 0.00555314 |
| ENSMUSG00000020102 | 1.4569789  | 2.32748348 | 3.38E-05   | 0.00038191 |
| ENSMUSG00000062753 | 1.45579106 | 1.8609513  | 7.77E-05   | 0.00079346 |
| ENSMUSG00000002279 | 1.45534639 | 2.39284211 | 2.97E-05   | 0.00034075 |
| ENSMUSG00000094940 | 1.455322   | 1.87256609 | 5.20E-05   | 0.00055569 |
| ENSMUSG00000059714 | 1.45402411 | 2.3593006  | 3.36E-05   | 0.00038048 |
| ENSMUSG00000043587 | 1.45232043 | 2.04114326 | 5.95E-05   | 0.00062595 |
| ENSMUSG00000048232 | 1.45080826 | 1.34764709 | 0.00018068 | 0.00167393 |
| ENSMUSG00000044703 | 1.45065653 | 3.48833926 | 1.09E-05   | 0.00013747 |
| ENSMUSG00000045374 | 1.44904314 | 3.9175568  | 7.81E-06   | 0.000101   |
| ENSMUSG00000038648 | 1.44902106 | 5.04496729 | 4.95E-06   | 6.64E-05   |
| ENSMUSG00000096844 | 1.44467647 | 3.19863832 | 1.51E-05   | 0.00018464 |
| ENSMUSG00000025227 | 1.44418263 | 0.87266761 | 0.00068243 | 0.00542322 |
| ENSMUSG00000017314 | 1.44402303 | 1.15775945 | 0.00038125 | 0.0032501  |
| ENSMUSG00000004113 | 1.44367273 | 1.70807017 | 0.00011446 | 0.00111807 |
| ENSMUSG00000044468 | 1.44110399 | 7.74100873 | 3.94E-06   | 5.42E-05   |
| ENSMUSG00000061086 | 1.44030186 | 2.15603989 | 4.76E-05   | 0.00051435 |
| ENSMUSG00000034981 | 1.43951814 | 2.85330401 | 2.22E-05   | 0.00026096 |
| ENSMUSG00000001281 | 1.43949095 | 3.33487564 | 1.48E-05   | 0.00018151 |
| ENSMUSG00000020230 | 1.43932431 | 1.6340024  | 0.0001467  | 0.00139135 |
| ENSMUSG00000019139 | 1.43564056 | 4.40018064 | 7.93E-06   | 0.00010223 |
| ENSMUSG00000099398 | 1.43397289 | 1.42065397 | 0.00022885 | 0.00205319 |
| ENSMUSG00000096498 | 1.43337947 | 3.16511799 | 1.79E-05   | 0.00021434 |
| ENSMUSG00000026389 | 1.43308004 | 1.81665334 | 0.00010445 | 0.00103056 |
| ENSMUSG00000020163 | 1.43077168 | 2.03789995 | 7.93E-05   | 0.00080794 |
| ENSMUSG00000024665 | 1.42896968 | 4.41789127 | 8.78E-06   | 0.00011234 |
| ENSMUSG00000085148 | 1.42887852 | 2.83769874 | 2.43E-05   | 0.00028309 |
| ENSMUSG00000036620 | 1.42777528 | 2.46634834 | 4.19E-05   | 0.00046046 |
| ENSMUSG00000057137 | 1.42622771 | 3.08523433 | 2.14E-05   | 0.00025249 |
| ENSMUSG00000027669 | 1.42579922 | 4.95616652 | 7.40E-06   | 9.64E-05   |
| ENSMUSG00000038058 | 1.42540544 | 1.35772074 | 0.00018595 | 0.00171976 |
| ENSMUSG00000030681 | 1.42488552 | 3.60284551 | 1.37E-05   | 0.00016928 |
| ENSMUSG00000026922 | 1.42464291 | 1.95673215 | 0.00010356 | 0.00102269 |
| ENSMUSG00000021900 | 1.42175303 | 3.35679082 | 1.66E-05   | 0.00020021 |
| ENSMUSG00000053580 | 1.42161971 | 4.48319705 | 8.65E-06   | 0.00011079 |

|                    |            |            |            |            |
|--------------------|------------|------------|------------|------------|
| ENSMUSG00000071649 | 1.42005104 | 2.36754977 | 5.48E-05   | 0.00058321 |
| ENSMUSG00000069763 | 1.41901757 | 0.81569837 | 0.00048551 | 0.0040275  |
| ENSMUSG00000048852 | 1.41836153 | 2.29158227 | 5.84E-05   | 0.00061637 |
| ENSMUSG00000023272 | 1.41658985 | 6.91167206 | 5.95E-06   | 7.88E-05   |
| ENSMUSG00000034216 | 1.41550798 | 2.57908212 | 4.33E-05   | 0.00047285 |
| ENSMUSG00000009563 | 1.41444496 | 3.52438589 | 1.66E-05   | 0.00020021 |
| ENSMUSG00000054277 | 1.41376934 | 3.93419612 | 1.27E-05   | 0.00015845 |
| ENSMUSG00000026490 | 1.41356361 | 3.32217396 | 1.94E-05   | 0.00023159 |
| ENSMUSG00000024220 | 1.40935855 | 0.74856147 | 0.00084796 | 0.00650848 |
| ENSMUSG00000067149 | 1.40884998 | 6.94948267 | 6.54E-06   | 8.61E-05   |
| ENSMUSG00000037613 | 1.40818289 | 2.17358849 | 8.57E-05   | 0.00086682 |
| ENSMUSG00000037049 | 1.40816879 | 3.84241149 | 1.47E-05   | 0.00018006 |
| ENSMUSG00000032845 | 1.40785922 | 2.83073717 | 3.22E-05   | 0.00036602 |
| ENSMUSG00000003355 | 1.40721856 | 1.92663445 | 0.00011482 | 0.00112055 |
| ENSMUSG00000035637 | 1.4023331  | 2.73609811 | 4.15E-05   | 0.00045806 |
| ENSMUSG00000095416 | 1.40130265 | 2.83157578 | 3.22E-05   | 0.00036602 |
| ENSMUSG00000041355 | 1.40057471 | 7.01961206 | 7.48E-06   | 9.74E-05   |
| ENSMUSG00000033594 | 1.39992844 | 0.57544377 | 0.00126942 | 0.0093189  |
| ENSMUSG00000032109 | 1.39964868 | 1.55196359 | 0.00023765 | 0.00212503 |
| ENSMUSG00000022108 | 1.39958014 | 8.01546816 | 7.22E-06   | 9.43E-05   |
| ENSMUSG00000029166 | 1.39657637 | 0.82505166 | 0.00088387 | 0.00676006 |
| ENSMUSG00000029864 | 1.39423219 | 2.12717252 | 8.95E-05   | 0.00090241 |
| ENSMUSG00000002944 | 1.39371267 | 8.87334082 | 7.68E-06   | 9.95E-05   |
| ENSMUSG00000031712 | 1.39332188 | 1.26300194 | 0.00033805 | 0.00292581 |
| ENSMUSG00000023805 | 1.3932926  | 3.14002107 | 2.84E-05   | 0.0003275  |
| ENSMUSG00000039450 | 1.38479435 | 1.69100927 | 0.00023349 | 0.00209129 |
| ENSMUSG00000048330 | 1.38436608 | 1.18683544 | 0.00039739 | 0.00336642 |
| ENSMUSG00000021696 | 1.38412616 | 0.5799591  | 0.00174276 | 0.01231577 |
| ENSMUSG00000057863 | 1.38276455 | 1.46541731 | 0.00035544 | 0.00305667 |
| ENSMUSG00000028527 | 1.38051715 | 1.41967699 | 0.00039222 | 0.00333307 |
| ENSMUSG00000074570 | 1.38008886 | 0.97016266 | 0.00082292 | 0.00635247 |
| ENSMUSG00000076665 | 1.38000672 | 3.22536484 | 3.10E-05   | 0.00035292 |
| ENSMUSG00000026821 | 1.37945319 | 4.6675137  | 1.55E-05   | 0.00018821 |
| ENSMUSG00000030720 | 1.37940759 | 3.34934535 | 3.01E-05   | 0.00034449 |
| ENSMUSG00000094652 | 1.37898756 | 4.6242204  | 1.52E-05   | 0.00018514 |
| ENSMUSG00000032373 | 1.37830123 | 3.38650864 | 3.26E-05   | 0.0003693  |
| ENSMUSG00000036565 | 1.37818557 | 3.45350584 | 3.16E-05   | 0.00035982 |
| ENSMUSG00000036863 | 1.37795803 | 2.17226369 | 9.75E-05   | 0.00097135 |
| ENSMUSG00000060675 | 1.37775098 | 4.22598313 | 1.85E-05   | 0.00022122 |
| ENSMUSG00000001665 | 1.37755209 | 3.06629189 | 3.67E-05   | 0.00041095 |
| ENSMUSG00000030588 | 1.37661748 | 2.70642128 | 5.92E-05   | 0.00062299 |
| ENSMUSG00000056629 | 1.37559883 | 3.44346856 | 3.17E-05   | 0.00036047 |
| ENSMUSG00000032177 | 1.37536663 | 2.55407738 | 6.54E-05   | 0.00067788 |



|                    |            |            |            |            |
|--------------------|------------|------------|------------|------------|
| ENSMUSG00000014778 | 1.37106476 | 2.54477709 | 6.76E-05   | 0.0006978  |
| ENSMUSG00000030107 | 1.37003888 | 5.47120398 | 1.35E-05   | 0.00016729 |
| ENSMUSG00000024190 | 1.3694186  | 2.46775841 | 6.09E-05   | 0.00063909 |
| ENSMUSG00000023067 | 1.36931587 | 5.98376799 | 1.28E-05   | 0.00015916 |
| ENSMUSG00000029338 | 1.3691134  | 2.98220989 | 4.23E-05   | 0.00046393 |
| ENSMUSG00000034438 | 1.36636808 | 2.7775411  | 5.18E-05   | 0.00055412 |
| ENSMUSG00000035778 | 1.36578724 | 7.30705707 | 1.21E-05   | 0.0001502  |
| ENSMUSG00000049670 | 1.36511984 | 0.67255956 | 0.00202613 | 0.01389054 |
| ENSMUSG00000020868 | 1.36316367 | 2.03878946 | 0.0002187  | 0.00197176 |
| ENSMUSG00000051817 | 1.36218377 | 2.13550179 | 0.00016119 | 0.00151027 |
| ENSMUSG00000039934 | 1.36131879 | 4.38334915 | 2.19E-05   | 0.00025728 |
| ENSMUSG00000026126 | 1.35876482 | 2.86328933 | 6.21E-05   | 0.00065173 |
| ENSMUSG00000043832 | 1.35852415 | 1.09382421 | 0.0003646  | 0.00312297 |
| ENSMUSG00000027533 | 1.35787892 | 6.00094223 | 1.51E-05   | 0.00018514 |
| ENSMUSG00000030826 | 1.35720411 | 4.58049092 | 2.16E-05   | 0.00025461 |
| ENSMUSG00000061143 | 1.35627712 | 2.25913678 | 0.00012129 | 0.00117626 |
| ENSMUSG00000076538 | 1.35613724 | 5.6752735  | 1.62E-05   | 0.00019579 |
| ENSMUSG00000063450 | 1.35559512 | 3.24235906 | 4.20E-05   | 0.00046169 |
| ENSMUSG00000028412 | 1.3542195  | 5.57017423 | 1.66E-05   | 0.00020021 |
| ENSMUSG00000058135 | 1.3540345  | 4.68698548 | 2.14E-05   | 0.00025293 |
| ENSMUSG00000089715 | 1.35354892 | 4.52805084 | 2.23E-05   | 0.00026107 |
| ENSMUSG00000085396 | 1.35148444 | 0.72835291 | 0.00201948 | 0.01386255 |
| ENSMUSG00000032182 | 1.3471351  | 2.67501003 | 8.46E-05   | 0.00085702 |
| ENSMUSG00000076564 | 1.34548693 | 5.72635937 | 1.83E-05   | 0.00021913 |
| ENSMUSG00000032549 | 1.34518821 | 0.94066118 | 0.00081315 | 0.00629502 |
| ENSMUSG00000027171 | 1.34370254 | 4.15097805 | 2.97E-05   | 0.00034069 |
| ENSMUSG00000094062 | 1.34309644 | 3.43151585 | 4.29E-05   | 0.00046962 |
| ENSMUSG00000030284 | 1.34143629 | 2.47758181 | 0.00010095 | 0.0010001  |
| ENSMUSG00000029545 | 1.34018732 | 2.32571046 | 0.00014247 | 0.00135848 |
| ENSMUSG00000036533 | 1.33943715 | 2.9648307  | 6.86E-05   | 0.0007068  |
| ENSMUSG00000039474 | 1.33682632 | 2.65899779 | 8.60E-05   | 0.00086907 |
| ENSMUSG00000023036 | 1.33587182 | 3.69338604 | 4.32E-05   | 0.00047222 |
| ENSMUSG00000094124 | 1.33506917 | 3.02947827 | 6.57E-05   | 0.00068095 |
| ENSMUSG00000094546 | 1.33370109 | 7.07272146 | 1.90E-05   | 0.00022688 |
| ENSMUSG00000041959 | 1.33004919 | 5.30841347 | 2.45E-05   | 0.00028519 |
| ENSMUSG00000056091 | 1.32944012 | 3.99631745 | 3.87E-05   | 0.00043157 |
| ENSMUSG00000024187 | 1.32925312 | 2.35319018 | 0.0001604  | 0.0015041  |
| ENSMUSG00000039953 | 1.32900319 | 3.13653659 | 6.52E-05   | 0.00067721 |
| ENSMUSG00000057948 | 1.3281541  | 3.93277802 | 4.10E-05   | 0.00045367 |
| ENSMUSG00000075122 | 1.32769595 | 4.78405586 | 2.93E-05   | 0.00033697 |
| ENSMUSG00000036599 | 1.32752034 | 2.44254061 | 0.00011921 | 0.00115813 |
| ENSMUSG00000034854 | 1.32598694 | 2.85444106 | 9.32E-05   | 0.00093517 |
| ENSMUSG00000029616 | 1.32518878 | 6.92866606 | 2.18E-05   | 0.00025673 |

|                    |            |            |            |            |
|--------------------|------------|------------|------------|------------|
| ENSMUSG00000060216 | 1.32435747 | 3.93004853 | 4.49E-05   | 0.00048749 |
| ENSMUSG00000018648 | 1.3240028  | 1.59385983 | 0.00033713 | 0.00292017 |
| ENSMUSG00000060376 | 1.32231267 | 1.11496129 | 0.00123574 | 0.00908398 |
| ENSMUSG00000013089 | 1.32160019 | 4.32752727 | 3.76E-05   | 0.00042058 |
| ENSMUSG00000039286 | 1.32060856 | 3.90800296 | 4.05E-05   | 0.00045059 |
| ENSMUSG00000028076 | 1.32010352 | 3.08566915 | 7.49E-05   | 0.00076636 |
| ENSMUSG00000048376 | 1.31992046 | 1.3874863  | 0.00052016 | 0.00426571 |
| ENSMUSG00000041025 | 1.31935499 | 0.87088549 | 0.00118096 | 0.00873491 |
| ENSMUSG00000003873 | 1.31909272 | 4.75074723 | 3.43E-05   | 0.00038642 |
| ENSMUSG00000030083 | 1.31878459 | 0.76615168 | 0.00231091 | 0.01552703 |
| ENSMUSG00000062661 | 1.31803414 | 2.85164323 | 9.32E-05   | 0.00093517 |
| ENSMUSG00000057058 | 1.3166002  | 1.20482026 | 0.00057588 | 0.00466589 |
| ENSMUSG00000019088 | 1.31574652 | 2.57300217 | 0.00011398 | 0.00111437 |
| ENSMUSG00000041857 | 1.31526356 | 1.73223184 | 0.00038409 | 0.00327174 |
| ENSMUSG00000059070 | 1.31523168 | 6.4951065  | 2.61E-05   | 0.00030244 |
| ENSMUSG00000096020 | 1.3136904  | 3.72595835 | 5.54E-05   | 0.00058795 |
| ENSMUSG00000093838 | 1.31257833 | 3.9005948  | 4.94E-05   | 0.00053237 |
| ENSMUSG00000030257 | 1.31221071 | 1.27937437 | 0.00053879 | 0.00439511 |
| ENSMUSG00000026153 | 1.31133424 | 2.12058766 | 0.00021256 | 0.00192467 |
| ENSMUSG00000033955 | 1.31118024 | 3.42913531 | 7.20E-05   | 0.00073949 |
| ENSMUSG00000024737 | 1.3110357  | 6.71191788 | 2.69E-05   | 0.0003117  |
| ENSMUSG00000000631 | 1.31027872 | 4.29238459 | 4.40E-05   | 0.00047903 |
| ENSMUSG00000043017 | 1.30987327 | 4.47380233 | 4.13E-05   | 0.00045547 |
| ENSMUSG00000015363 | 1.30897064 | 4.10442102 | 4.95E-05   | 0.00053237 |
| ENSMUSG00000026712 | 1.30884134 | 1.32734957 | 0.00093948 | 0.0071448  |
| ENSMUSG00000058756 | 1.30761292 | 0.96888989 | 0.00175284 | 0.0123789  |
| ENSMUSG00000033488 | 1.30646028 | 2.44006034 | 0.00017202 | 0.00160333 |
| ENSMUSG00000055994 | 1.30640203 | 3.62203859 | 5.86E-05   | 0.00061814 |
| ENSMUSG00000020689 | 1.30627145 | 5.08095227 | 3.64E-05   | 0.00040828 |
| ENSMUSG00000054364 | 1.30587704 | 3.55770218 | 6.60E-05   | 0.00068341 |
| ENSMUSG00000029185 | 1.30535278 | 2.16273782 | 0.00023957 | 0.0021387  |
| ENSMUSG00000051998 | 1.30366071 | 6.09944844 | 3.09E-05   | 0.00035225 |
| ENSMUSG00000024353 | 1.30341808 | 7.84265919 | 2.82E-05   | 0.00032516 |
| ENSMUSG00000044734 | 1.30293561 | 4.8291269  | 4.10E-05   | 0.00045367 |
| ENSMUSG00000063268 | 1.3020551  | 4.39938403 | 4.74E-05   | 0.00051205 |
| ENSMUSG00000076587 | 1.30124906 | 3.54620963 | 7.27E-05   | 0.00074592 |
| ENSMUSG00000022817 | 1.30068884 | 3.13486727 | 9.24E-05   | 0.00092988 |
| ENSMUSG00000068264 | 1.30068567 | 1.35204958 | 0.00094485 | 0.00717195 |
| ENSMUSG00000035478 | 1.30040045 | 3.76433749 | 6.78E-05   | 0.00069952 |
| ENSMUSG00000024958 | 1.2999534  | 0.83558961 | 0.00200653 | 0.0137912  |
| ENSMUSG00000001666 | 1.29952475 | 3.43364722 | 8.00E-05   | 0.00081377 |
| ENSMUSG00000085415 | 1.29950062 | 2.23100662 | 0.00017222 | 0.00160381 |
| ENSMUSG00000023277 | 1.29873556 | 3.68064546 | 6.66E-05   | 0.00068822 |

|                    |            |            |            |            |
|--------------------|------------|------------|------------|------------|
| ENSMUSG00000008540 | 1.29766089 | 1.37168808 | 0.00070121 | 0.00553883 |
| ENSMUSG00000027947 | 1.29738723 | 3.78134579 | 6.45E-05   | 0.00067291 |
| ENSMUSG00000029001 | 1.29691968 | 1.40069603 | 0.00064145 | 0.00513924 |
| ENSMUSG00000031532 | 1.29629229 | 4.33428283 | 5.10E-05   | 0.00054622 |
| ENSMUSG00000027447 | 1.29622757 | 4.4883067  | 4.87E-05   | 0.00052525 |
| ENSMUSG00000068115 | 1.29543271 | 0.77977039 | 0.00230044 | 0.0154663  |
| ENSMUSG00000052160 | 1.29482697 | 6.01215985 | 3.59E-05   | 0.00040345 |
| ENSMUSG00000038895 | 1.29429188 | 0.97790563 | 0.00120906 | 0.00893049 |
| ENSMUSG00000096515 | 1.29417135 | 5.13448173 | 4.25E-05   | 0.00046525 |
| ENSMUSG00000032012 | 1.2928757  | 2.66770677 | 0.00015442 | 0.00145307 |
| ENSMUSG00000025815 | 1.29214585 | 2.10512644 | 0.00025489 | 0.00226609 |
| ENSMUSG00000035246 | 1.28977018 | 2.00808748 | 0.00030854 | 0.00270508 |
| ENSMUSG00000028671 | 1.28916703 | 2.35225485 | 0.00020123 | 0.00184057 |
| ENSMUSG0000002227  | 1.28909989 | 4.57106467 | 5.17E-05   | 0.00055332 |
| ENSMUSG00000095677 | 1.28857982 | 1.4432797  | 0.00087764 | 0.00671712 |
| ENSMUSG0000003644  | 1.28838825 | 5.91759626 | 3.93E-05   | 0.00043848 |
| ENSMUSG00000076633 | 1.28811136 | 2.19670895 | 0.00024902 | 0.00221572 |
| ENSMUSG0000001249  | 1.28588307 | 0.87826289 | 0.00199648 | 0.01373086 |
| ENSMUSG00000026223 | 1.28525076 | 4.13462145 | 6.52E-05   | 0.00067721 |
| ENSMUSG00000027712 | 1.28509018 | 5.30249275 | 4.50E-05   | 0.00048828 |
| ENSMUSG00000042106 | 1.28446406 | 2.54798012 | 0.00019689 | 0.00181015 |
| ENSMUSG00000019461 | 1.28372496 | 2.58022883 | 0.00015754 | 0.00147993 |
| ENSMUSG00000076617 | 1.2814629  | 13.22186   | 3.63E-05   | 0.00040747 |
| ENSMUSG00000095571 | 1.28087052 | 5.6561642  | 4.45E-05   | 0.00048333 |
| ENSMUSG00000024661 | 1.28075316 | 10.1786483 | 3.69E-05   | 0.00041364 |
| ENSMUSG00000000958 | 1.27987316 | 3.08293641 | 0.00012886 | 0.00124296 |
| ENSMUSG00000054452 | 1.27900834 | 5.08470352 | 5.27E-05   | 0.00056242 |
| ENSMUSG00000078853 | 1.27567261 | 6.57795464 | 4.38E-05   | 0.00047718 |
| ENSMUSG00000019832 | 1.27538809 | 2.80021344 | 0.00017254 | 0.00160439 |
| ENSMUSG00000026956 | 1.27536727 | 3.67011536 | 9.27E-05   | 0.00093133 |
| ENSMUSG00000033065 | 1.27444735 | 2.78056273 | 0.00019006 | 0.00175176 |
| ENSMUSG00000034765 | 1.27316397 | 3.46656805 | 9.71E-05   | 0.00096761 |
| ENSMUSG00000032741 | 1.27300934 | 2.80211272 | 0.00017077 | 0.00159448 |
| ENSMUSG00000074219 | 1.27266379 | 0.6382983  | 0.00410064 | 0.02524045 |
| ENSMUSG00000020638 | 1.2701148  | 5.33718439 | 5.39E-05   | 0.00057458 |
| ENSMUSG00000051000 | 1.26881441 | 3.54303827 | 0.00011528 | 0.00112403 |
| ENSMUSG00000028807 | 1.26879298 | 1.65408687 | 0.00061021 | 0.00491449 |
| ENSMUSG0000001995  | 1.26870563 | 2.49265001 | 0.00020567 | 0.00187012 |
| ENSMUSG00000024769 | 1.26816545 | 1.51634843 | 0.00089744 | 0.00685412 |
| ENSMUSG00000005823 | 1.2679204  | 4.54088997 | 6.83E-05   | 0.00070395 |
| ENSMUSG00000037295 | 1.26780936 | 2.87703392 | 0.00017387 | 0.00161358 |
| ENSMUSG00000076609 | 1.26752439 | 11.2072169 | 4.39E-05   | 0.00047871 |
| ENSMUSG00000071648 | 1.26650879 | 0.89088493 | 0.00255944 | 0.01697477 |

|                    |            |            |            |            |
|--------------------|------------|------------|------------|------------|
| ENSMUSG00000044350 | 1.26617831 | 4.75878098 | 6.51E-05   | 0.00067689 |
| ENSMUSG00000067370 | 1.26523787 | 1.26393752 | 0.00113669 | 0.0084364  |
| ENSMUSG00000051435 | 1.2650212  | 1.99966669 | 0.00043932 | 0.00366974 |
| ENSMUSG00000052062 | 1.26471078 | 3.00628173 | 0.00018433 | 0.00170625 |
| ENSMUSG00000036181 | 1.26423324 | 1.7776579  | 0.00036377 | 0.00311836 |
| ENSMUSG00000018585 | 1.26367105 | 3.03348979 | 0.00014937 | 0.00141055 |
| ENSMUSG00000009035 | 1.26245803 | 5.00775209 | 6.50E-05   | 0.00067689 |
| ENSMUSG00000039899 | 1.26146218 | 6.69301278 | 5.21E-05   | 0.00055657 |
| ENSMUSG00000035441 | 1.25743165 | 1.82516091 | 0.00052468 | 0.00429622 |
| ENSMUSG00000047721 | 1.25688104 | 1.65683236 | 0.00078452 | 0.00610847 |
| ENSMUSG00000040276 | 1.25661981 | 2.23626493 | 0.00040033 | 0.00338813 |
| ENSMUSG00000038618 | 1.25625011 | 1.06552001 | 0.00195646 | 0.01351596 |
| ENSMUSG00000019564 | 1.2559692  | 6.60854046 | 5.63E-05   | 0.00059691 |
| ENSMUSG00000015944 | 1.25562916 | 3.00440203 | 0.00014371 | 0.00136702 |
| ENSMUSG00000045382 | 1.25400972 | 5.8281629  | 6.31E-05   | 0.00066036 |
| ENSMUSG00000027422 | 1.25291921 | 8.05304949 | 5.53E-05   | 0.00058716 |
| ENSMUSG00000022656 | 1.25152505 | 0.91325924 | 0.00252514 | 0.01678858 |
| ENSMUSG00000095630 | 1.25130725 | 5.14779984 | 7.49E-05   | 0.00076636 |
| ENSMUSG00000034853 | 1.25081187 | 3.00559169 | 0.00017614 | 0.00163329 |
| ENSMUSG00000047146 | 1.25060592 | 2.56015008 | 0.00023573 | 0.00210967 |
| ENSMUSG00000096461 | 1.24889945 | 2.21284327 | 0.00039689 | 0.0033648  |
| ENSMUSG00000009739 | 1.24807624 | 3.23734062 | 0.00014273 | 0.00135971 |
| ENSMUSG00000029311 | 1.24802537 | 4.31756419 | 9.87E-05   | 0.00098217 |
| ENSMUSG00000029470 | 1.24580851 | 4.1579845  | 0.00010759 | 0.0010557  |
| ENSMUSG00000004709 | 1.24507895 | 0.86772492 | 0.00226844 | 0.01527021 |
| ENSMUSG00000038828 | 1.24366322 | 5.24881688 | 7.89E-05   | 0.00080521 |
| ENSMUSG00000021242 | 1.24316529 | 7.23495182 | 6.49E-05   | 0.00067618 |
| ENSMUSG00000053898 | 1.24256977 | 4.35639125 | 0.00010223 | 0.00101046 |
| ENSMUSG00000042726 | 1.24185716 | 6.37144732 | 6.95E-05   | 0.00071563 |
| ENSMUSG00000034974 | 1.24154933 | 1.86383934 | 0.00067186 | 0.00534316 |
| ENSMUSG00000064105 | 1.24133732 | 1.74566271 | 0.00069277 | 0.0054812  |
| ENSMUSG00000034265 | 1.24064976 | 2.1061566  | 0.0004709  | 0.0039153  |
| ENSMUSG00000038208 | 1.23992647 | 1.10450531 | 0.00217318 | 0.01472556 |
| ENSMUSG00000035561 | 1.23964995 | 2.58874994 | 0.00026974 | 0.00239018 |
| ENSMUSG00000096670 | 1.23880635 | 2.35791726 | 0.00032902 | 0.00286376 |
| ENSMUSG00000019975 | 1.23822922 | 2.68500531 | 0.00028548 | 0.00251727 |
| ENSMUSG00000001025 | 1.23633916 | 4.01030895 | 0.00012812 | 0.00123689 |
| ENSMUSG00000020238 | 1.23576073 | 3.78985394 | 0.00013901 | 0.00132894 |
| ENSMUSG00000070283 | 1.23370134 | 1.5499557  | 0.00099021 | 0.00748067 |
| ENSMUSG00000002007 | 1.23368556 | 4.14170735 | 0.00011902 | 0.00115731 |
| ENSMUSG00000040767 | 1.23090354 | 3.95039633 | 0.00014375 | 0.00136702 |
| ENSMUSG00000078771 | 1.22767815 | 5.33641244 | 9.48E-05   | 0.0009477  |
| ENSMUSG00000021928 | 1.22748643 | 3.01804585 | 0.00024526 | 0.00218401 |

|                    |            |            |            |            |
|--------------------|------------|------------|------------|------------|
| ENSMUSG00000055401 | 1.22724207 | 2.65782076 | 0.00031899 | 0.00278544 |
| ENSMUSG00000037649 | 1.22652699 | 6.57325355 | 8.39E-05   | 0.00085047 |
| ENSMUSG00000029802 | 1.22464199 | 4.17129784 | 0.00013494 | 0.00129468 |
| ENSMUSG00000074227 | 1.22442419 | 2.19135628 | 0.00056394 | 0.00458292 |
| ENSMUSG00000006362 | 1.22204067 | 3.17013381 | 0.00022649 | 0.00203542 |
| ENSMUSG00000004267 | 1.22183679 | 2.45000883 | 0.00042164 | 0.00353576 |
| ENSMUSG00000001156 | 1.22032605 | 3.88767256 | 0.00015225 | 0.0014352  |
| ENSMUSG00000011008 | 1.2196013  | 4.38555153 | 0.00013334 | 0.00128162 |
| ENSMUSG00000034795 | 1.21891939 | 1.52673964 | 0.00129109 | 0.00944577 |
| ENSMUSG00000022436 | 1.21800692 | 4.11903688 | 0.00015241 | 0.00143542 |
| ENSMUSG00000076570 | 1.217518   | 1.80729118 | 0.00112283 | 0.00835074 |
| ENSMUSG00000039246 | 1.21543294 | 0.73516338 | 0.00303587 | 0.01959614 |
| ENSMUSG00000096638 | 1.21510145 | 2.58842214 | 0.00034491 | 0.00297319 |
| ENSMUSG00000017830 | 1.215007   | 6.20544324 | 9.96E-05   | 0.00098962 |
| ENSMUSG00000028573 | 1.21424308 | 2.22663887 | 0.00051062 | 0.00420021 |
| ENSMUSG00000024327 | 1.2140019  | 0.98929325 | 0.00315229 | 0.0202181  |
| ENSMUSG00000021939 | 1.21326307 | 7.07932479 | 9.63E-05   | 0.00096204 |
| ENSMUSG00000034101 | 1.2127147  | 2.51588233 | 0.00042057 | 0.00352948 |
| ENSMUSG00000029674 | 1.21207942 | 3.47760738 | 0.00021823 | 0.001971   |
| ENSMUSG00000063445 | 1.21196569 | 4.3304952  | 0.00014796 | 0.00140087 |
| ENSMUSG00000031897 | 1.21185013 | 3.52860968 | 0.00021886 | 0.00197176 |
| ENSMUSG00000045679 | 1.21103392 | 6.06379202 | 0.00010627 | 0.00104372 |
| ENSMUSG00000040813 | 1.2106026  | 2.57759249 | 0.00041682 | 0.00350348 |
| ENSMUSG00000076596 | 1.21050779 | 3.81671824 | 0.00019307 | 0.00177646 |
| ENSMUSG00000024807 | 1.20933972 | 7.1454154  | 0.00010099 | 0.0010001  |
| ENSMUSG00000055681 | 1.2081386  | 4.60962189 | 0.00014768 | 0.00139947 |
| ENSMUSG00000030432 | 1.20776053 | 6.58110863 | 0.00010769 | 0.0010557  |
| ENSMUSG00000054932 | 1.20732002 | 1.59833786 | 0.00152844 | 0.01095925 |
| ENSMUSG00000032754 | 1.2069983  | 1.42284021 | 0.00128072 | 0.00939542 |
| ENSMUSG00000026193 | 1.20655228 | 2.40123313 | 0.00042884 | 0.00358776 |
| ENSMUSG00000025912 | 1.205914   | 5.63350689 | 0.00011849 | 0.00115324 |
| ENSMUSG00000022885 | 1.20498059 | 8.90148491 | 0.00010203 | 0.00100941 |
| ENSMUSG00000021190 | 1.20497142 | 7.69877322 | 0.00010496 | 0.00103464 |
| ENSMUSG00000037938 | 1.2041237  | 1.19736673 | 0.00155536 | 0.01111531 |
| ENSMUSG00000002332 | 1.20410853 | 3.7649151  | 0.00020205 | 0.00184493 |
| ENSMUSG00000047878 | 1.20386057 | 1.85742944 | 0.0008416  | 0.00647345 |
| ENSMUSG00000100287 | 1.20180151 | 0.95825003 | 0.00197999 | 0.01362617 |
| ENSMUSG00000037366 | 1.20065834 | 2.79956457 | 0.00037861 | 0.00323416 |
| ENSMUSG00000024910 | 1.20062114 | 0.77081119 | 0.00339871 | 0.02149659 |
| ENSMUSG00000040997 | 1.19976345 | 3.7522929  | 0.00020357 | 0.00185574 |
| ENSMUSG00000019188 | 1.19920337 | 7.00036037 | 0.00011613 | 0.00113125 |
| ENSMUSG00000037731 | 1.19839636 | 5.98851456 | 0.00012562 | 0.00121495 |
| ENSMUSG00000032010 | 1.19705115 | 1.86678586 | 0.0010518  | 0.00787681 |

|                    |            |            |            |            |
|--------------------|------------|------------|------------|------------|
| ENSMUSG00000039031 | 1.19598369 | 4.0254705  | 0.00020141 | 0.00184067 |
| ENSMUSG00000078429 | 1.19581658 | 5.52777043 | 0.00013744 | 0.00131748 |
| ENSMUSG00000026880 | 1.19521672 | 3.20745548 | 0.00032062 | 0.00279611 |
| ENSMUSG00000041827 | 1.19510062 | 6.67332153 | 0.00012411 | 0.00120252 |
| ENSMUSG00000034708 | 1.19484883 | 7.53496969 | 0.00012007 | 0.00116542 |
| ENSMUSG00000074916 | 1.19297692 | 1.94361678 | 0.00080411 | 0.00623404 |
| ENSMUSG00000007379 | 1.19252746 | 1.93170809 | 0.00074667 | 0.00585181 |
| ENSMUSG00000032374 | 1.19227665 | 3.10220793 | 0.00033378 | 0.00289578 |
| ENSMUSG00000040466 | 1.19101544 | 1.35011807 | 0.00248959 | 0.01656243 |
| ENSMUSG00000039652 | 1.19042103 | 2.27413382 | 0.00062495 | 0.00502197 |
| ENSMUSG00000028757 | 1.18760195 | 7.58852141 | 0.00013121 | 0.00126339 |
| ENSMUSG00000094088 | 1.18758002 | 4.78319573 | 0.00017273 | 0.00160439 |
| ENSMUSG00000038604 | 1.18656729 | 3.0777785  | 0.00038921 | 0.00331015 |
| ENSMUSG00000029455 | 1.18525738 | 4.26866264 | 0.00020899 | 0.0018971  |
| ENSMUSG00000033436 | 1.18428178 | 5.47151392 | 0.00015855 | 0.00148807 |
| ENSMUSG00000030086 | 1.18412161 | 1.36692297 | 0.00205915 | 0.01404545 |
| ENSMUSG00000032198 | 1.18404843 | 2.08498616 | 0.00069043 | 0.00547071 |
| ENSMUSG00000036073 | 1.18370025 | 1.6529578  | 0.00129686 | 0.00948155 |
| ENSMUSG00000019433 | 1.18221514 | 2.39769579 | 0.00059196 | 0.0047782  |
| ENSMUSG00000059013 | 1.18067742 | 2.88508963 | 0.00043746 | 0.00365704 |
| ENSMUSG00000032724 | 1.1804261  | 2.61284412 | 0.00051942 | 0.00426288 |
| ENSMUSG00000022594 | 1.17932805 | 5.00180966 | 0.00018823 | 0.00173943 |
| ENSMUSG00000025408 | 1.17852093 | 3.00679661 | 0.00042662 | 0.00357195 |
| ENSMUSG00000051483 | 1.17806388 | 2.67112637 | 0.00058866 | 0.00475873 |
| ENSMUSG00000027514 | 1.17753761 | 7.16824729 | 0.00015106 | 0.0014252  |
| ENSMUSG00000031227 | 1.17700292 | 2.38149065 | 0.00073284 | 0.00575596 |
| ENSMUSG00000044952 | 1.17654345 | 1.2401607  | 0.00312038 | 0.02005375 |
| ENSMUSG00000024044 | 1.17548538 | 2.40605887 | 0.00066575 | 0.00530243 |
| ENSMUSG00000031556 | 1.17449847 | 4.54480293 | 0.00021846 | 0.00197147 |
| ENSMUSG00000022475 | 1.17341195 | 4.04618737 | 0.00026957 | 0.00239018 |
| ENSMUSG00000097993 | 1.17104356 | 1.60482863 | 0.00166287 | 0.01179765 |
| ENSMUSG00000040327 | 1.17069671 | 1.83275275 | 0.00140101 | 0.0101467  |
| ENSMUSG00000031129 | 1.17044796 | 1.63184962 | 0.00152679 | 0.0109547  |
| ENSMUSG00000025702 | 1.17036922 | 3.39807979 | 0.00037878 | 0.00323416 |
| ENSMUSG00000095753 | 1.17017452 | 4.70122094 | 0.00021812 | 0.001971   |
| ENSMUSG00000047123 | 1.16992847 | 5.23443754 | 0.00019852 | 0.00182352 |
| ENSMUSG00000021796 | 1.16884267 | 1.38895427 | 0.00224038 | 0.01510016 |
| ENSMUSG00000068417 | 1.16844822 | 2.01663373 | 0.00094197 | 0.00715868 |
| ENSMUSG00000026860 | 1.16823747 | 2.71036505 | 0.00065358 | 0.00521704 |
| ENSMUSG00000094787 | 1.16793615 | 3.32834087 | 0.00036794 | 0.00314912 |
| ENSMUSG00000096336 | 1.16782609 | 7.64920582 | 0.00016766 | 0.00156675 |
| ENSMUSG00000040811 | 1.16708348 | 2.64648533 | 0.00050389 | 0.00416078 |
| ENSMUSG00000095794 | 1.16645574 | 5.52629889 | 0.00020089 | 0.00183903 |

|                    |            |            |            |            |
|--------------------|------------|------------|------------|------------|
| ENSMUSG00000072825 | 1.16366083 | 2.43954682 | 0.00082667 | 0.0063768  |
| ENSMUSG00000020219 | 1.16354358 | 1.91214345 | 0.00160308 | 0.01141852 |
| ENSMUSG00000020668 | 1.16341768 | 2.47973351 | 0.00075722 | 0.00591731 |
| ENSMUSG00000054708 | 1.16147166 | 0.72595839 | 0.00398405 | 0.02464948 |
| ENSMUSG00000000782 | 1.16114585 | 2.04393397 | 0.00101154 | 0.00761759 |
| ENSMUSG00000031880 | 1.16102383 | 2.79679212 | 0.00055129 | 0.00448689 |
| ENSMUSG00000036661 | 1.16007572 | 4.92846608 | 0.00023875 | 0.00213316 |
| ENSMUSG00000024339 | 1.15993376 | 5.66228702 | 0.00021042 | 0.00190685 |
| ENSMUSG00000040462 | 1.15938025 | 6.16547392 | 0.00020242 | 0.0018468  |
| ENSMUSG00000094198 | 1.15910937 | 2.99947479 | 0.00047255 | 0.00392296 |
| ENSMUSG00000004263 | 1.15876342 | 3.16843667 | 0.00046011 | 0.00383449 |
| ENSMUSG00000048897 | 1.15871828 | 3.63965492 | 0.00037256 | 0.0031861  |
| ENSMUSG00000022265 | 1.15861063 | 3.40876983 | 0.0004046  | 0.00341183 |
| ENSMUSG00000074064 | 1.15814279 | 1.74677463 | 0.00151501 | 0.01087743 |
| ENSMUSG00000024781 | 1.15775029 | 6.17575788 | 0.00020558 | 0.00187012 |
| ENSMUSG00000003072 | 1.15581868 | 4.20849398 | 0.00031199 | 0.00273088 |
| ENSMUSG00000023809 | 1.15355941 | 2.81774232 | 0.00060622 | 0.00488963 |
| ENSMUSG00000067878 | 1.15256273 | 3.11127832 | 0.00051023 | 0.00420021 |
| ENSMUSG00000019487 | 1.15229761 | 2.77020136 | 0.00059114 | 0.00477517 |
| ENSMUSG00000041361 | 1.15076679 | 2.14614326 | 0.00115654 | 0.008566   |
| ENSMUSG00000030207 | 1.15018922 | 4.17034503 | 0.00031721 | 0.00277208 |
| ENSMUSG00000031662 | 1.14922756 | 5.03629818 | 0.00026959 | 0.00239018 |
| ENSMUSG00000030035 | 1.14919334 | 2.11980418 | 0.00108538 | 0.00809457 |
| ENSMUSG00000047810 | 1.14918365 | 4.30486615 | 0.00031575 | 0.00276158 |
| ENSMUSG00000004552 | 1.14911016 | 2.59582382 | 0.00065265 | 0.00521704 |
| ENSMUSG00000034041 | 1.14792376 | 2.92470727 | 0.00068487 | 0.00543462 |
| ENSMUSG00000028843 | 1.14745364 | 6.99264118 | 0.00022179 | 0.00199645 |
| ENSMUSG00000031842 | 1.1471406  | 1.08000199 | 0.00416308 | 0.02556755 |
| ENSMUSG00000038349 | 1.14662593 | 1.03408165 | 0.00342373 | 0.0216168  |
| ENSMUSG00000021759 | 1.14654025 | 4.89349468 | 0.00028444 | 0.00251018 |
| ENSMUSG00000021701 | 1.14625779 | 4.10939624 | 0.00033988 | 0.0029393  |
| ENSMUSG00000039168 | 1.14573989 | 4.54702478 | 0.0003036  | 0.00266618 |
| ENSMUSG00000031770 | 1.14424478 | 7.09910264 | 0.00023046 | 0.00206591 |
| ENSMUSG00000076555 | 1.14340751 | 3.7887783  | 0.0004107  | 0.00345743 |
| ENSMUSG00000056204 | 1.14277119 | 4.34613468 | 0.00034424 | 0.0029722  |
| ENSMUSG00000046731 | 1.14245041 | 1.23846206 | 0.00457035 | 0.02747307 |
| ENSMUSG00000047264 | 1.14187243 | 1.42216289 | 0.00315345 | 0.0202181  |
| ENSMUSG00000048832 | 1.14154382 | 3.14303125 | 0.00055347 | 0.00450123 |
| ENSMUSG00000040328 | 1.13999342 | 2.31993815 | 0.00099546 | 0.00751097 |
| ENSMUSG00000039621 | 1.13913359 | 5.68352142 | 0.00026942 | 0.00239018 |
| ENSMUSG00000034487 | 1.13893025 | 2.685173   | 0.00077275 | 0.00602991 |
| ENSMUSG00000076501 | 1.13852016 | 5.2962292  | 0.00028069 | 0.00247908 |
| ENSMUSG00000040618 | 1.13796677 | 4.75345723 | 0.00032628 | 0.00284217 |

|                    |            |            |            |            |
|--------------------|------------|------------|------------|------------|
| ENSMUSG00000027459 | 1.13788053 | 1.02404562 | 0.00478762 | 0.02856084 |
| ENSMUSG00000087305 | 1.13728644 | 1.84417512 | 0.00172924 | 0.01225037 |
| ENSMUSG00000032375 | 1.13715886 | 1.85281458 | 0.00185009 | 0.01294541 |
| ENSMUSG00000023951 | 1.13625756 | 3.11570159 | 0.0006448  | 0.00516219 |
| ENSMUSG00000033107 | 1.13478954 | 1.52076941 | 0.00299497 | 0.01939808 |
| ENSMUSG00000024970 | 1.13359874 | 1.67325365 | 0.00224693 | 0.01513483 |
| ENSMUSG00000076523 | 1.13322182 | 5.34206846 | 0.00029537 | 0.00259807 |
| ENSMUSG00000091649 | 1.13298116 | 5.39331982 | 0.00030134 | 0.00264841 |
| ENSMUSG00000039911 | 1.13281374 | 2.9664788  | 0.00075048 | 0.00586889 |
| ENSMUSG00000027330 | 1.1321573  | 6.34677133 | 0.00027965 | 0.00247189 |
| ENSMUSG00000030084 | 1.12988188 | 4.86513616 | 0.00034189 | 0.00295425 |
| ENSMUSG00000029919 | 1.12901251 | 6.3228273  | 0.0002907  | 0.00256122 |
| ENSMUSG00000078922 | 1.12820376 | 2.16865791 | 0.0012288  | 0.00906384 |
| ENSMUSG00000055652 | 1.12711612 | 3.51855781 | 0.00056809 | 0.00461312 |
| ENSMUSG00000001751 | 1.12532953 | 2.35738949 | 0.00123298 | 0.00908225 |
| ENSMUSG00000048612 | 1.12470879 | 5.91678045 | 0.0003109  | 0.00272359 |
| ENSMUSG00000028048 | 1.1237179  | 5.66490257 | 0.00033066 | 0.00287379 |
| ENSMUSG00000097657 | 1.12283117 | 1.00520576 | 0.00597985 | 0.03431108 |
| ENSMUSG00000045752 | 1.12185851 | 3.16873008 | 0.00074842 | 0.00586125 |
| ENSMUSG00000076526 | 1.12164434 | 3.92461823 | 0.00046189 | 0.00384633 |
| ENSMUSG00000028581 | 1.12101882 | 8.91666877 | 0.00029271 | 0.00257676 |
| ENSMUSG00000022428 | 1.12081394 | 2.37964876 | 0.00136561 | 0.00992367 |
| ENSMUSG00000022419 | 1.12048045 | 0.85723119 | 0.00469716 | 0.02810999 |
| ENSMUSG00000036120 | 1.12015456 | 3.72146687 | 0.00053516 | 0.00437537 |
| ENSMUSG00000031530 | 1.11966016 | 5.53019915 | 0.00034462 | 0.00297314 |
| ENSMUSG00000038312 | 1.11924493 | 5.38470337 | 0.00035751 | 0.00306957 |
| ENSMUSG00000029723 | 1.11807095 | 3.82622378 | 0.00054272 | 0.00442377 |
| ENSMUSG00000038181 | 1.11667453 | 4.06177966 | 0.00049454 | 0.00409609 |
| ENSMUSG00000016344 | 1.11636983 | 3.02251209 | 0.00081855 | 0.00633141 |
| ENSMUSG00000025218 | 1.11619745 | 2.48425158 | 0.00123444 | 0.00908398 |
| ENSMUSG00000096422 | 1.11563485 | 5.86028357 | 0.00035069 | 0.00301827 |
| ENSMUSG00000001942 | 1.11505667 | 3.97140953 | 0.00052414 | 0.00429511 |
| ENSMUSG00000047342 | 1.11437877 | 1.65137098 | 0.00262571 | 0.01731847 |
| ENSMUSG00000066800 | 1.11262438 | 5.07760968 | 0.00040068 | 0.00338813 |
| ENSMUSG00000030465 | 1.1124792  | 4.43446936 | 0.00046593 | 0.003877   |
| ENSMUSG00000055200 | 1.11125803 | 1.63151528 | 0.00266057 | 0.01748419 |
| ENSMUSG00000034792 | 1.11015412 | 4.29630073 | 0.00051636 | 0.00424103 |
| ENSMUSG00000031355 | 1.1088523  | 2.83813932 | 0.00094504 | 0.00717195 |
| ENSMUSG00000037204 | 1.1085917  | 1.9701738  | 0.00219037 | 0.01481867 |
| ENSMUSG00000076733 | 1.10848309 | 0.71651726 | 0.00934479 | 0.0489433  |
| ENSMUSG00000084796 | 1.10752536 | 0.66447164 | 0.01461694 | 0.06862389 |
| ENSMUSG00000094075 | 1.10673647 | 5.2001319  | 0.00042465 | 0.00355823 |
| ENSMUSG00000020178 | 1.10631914 | 2.07968838 | 0.00166665 | 0.01181669 |



|                    |            |            |            |            |
|--------------------|------------|------------|------------|------------|
| ENSMUSG00000038387 | 1.10553839 | 1.77695302 | 0.00268767 | 0.01760866 |
| ENSMUSG00000028347 | 1.10345102 | 1.62854916 | 0.0019424  | 0.01343607 |
| ENSMUSG00000042622 | 1.10249341 | 1.10123475 | 0.0061722  | 0.03522855 |
| ENSMUSG00000028062 | 1.10159954 | 2.79564562 | 0.00114178 | 0.00846832 |
| ENSMUSG00000015837 | 1.10048379 | 6.84866455 | 0.00039588 | 0.00335887 |
| ENSMUSG00000045639 | 1.10035395 | 2.55186669 | 0.00141406 | 0.01022064 |
| ENSMUSG00000024399 | 1.09993993 | 2.59073052 | 0.00134969 | 0.00984463 |
| ENSMUSG00000004846 | 1.09928216 | 3.51600686 | 0.00076851 | 0.00600118 |
| ENSMUSG00000053977 | 1.09824365 | 2.57504477 | 0.00103166 | 0.0077583  |
| ENSMUSG00000005881 | 1.09721376 | 4.88664771 | 0.00051165 | 0.00420552 |
| ENSMUSG00000003970 | 1.09639332 | 7.61507857 | 0.0004048  | 0.00341183 |
| ENSMUSG00000013707 | 1.09626073 | 2.78708425 | 0.00128362 | 0.00941028 |
| ENSMUSG00000092274 | 1.09491421 | 7.0753152  | 0.00041948 | 0.00352308 |
| ENSMUSG00000035697 | 1.09462634 | 5.92210934 | 0.00045124 | 0.00376349 |
| ENSMUSG00000022558 | 1.09254195 | 3.5408445  | 0.00081302 | 0.00629502 |
| ENSMUSG00000021665 | 1.09215901 | 6.69472294 | 0.00044089 | 0.00367997 |
| ENSMUSG00000006301 | 1.09116386 | 3.9826549  | 0.00068465 | 0.00543462 |
| ENSMUSG00000039782 | 1.09100728 | 4.05934946 | 0.00064569 | 0.00516549 |
| ENSMUSG00000025169 | 1.09086366 | 2.26393501 | 0.00189611 | 0.01319202 |
| ENSMUSG00000028362 | 1.09013965 | 4.92061573 | 0.00053833 | 0.00439465 |
| ENSMUSG00000037966 | 1.09012394 | 2.01053652 | 0.00259897 | 0.0171732  |
| ENSMUSG00000024334 | 1.08924026 | 3.72515399 | 0.00079784 | 0.00618989 |
| ENSMUSG00000096490 | 1.08613241 | 5.31000855 | 0.00052688 | 0.00431099 |
| ENSMUSG00000034902 | 1.08608976 | 5.80007222 | 0.00050468 | 0.00416409 |
| ENSMUSG00000020346 | 1.08594331 | 6.08428882 | 0.00049316 | 0.00408782 |
| ENSMUSG00000032737 | 1.08591395 | 3.21822376 | 0.00102984 | 0.00775004 |
| ENSMUSG00000018909 | 1.08459977 | 3.74325986 | 0.00081995 | 0.00633405 |
| ENSMUSG00000038486 | 1.08389683 | 2.35480849 | 0.00185226 | 0.01294541 |
| ENSMUSG00000033124 | 1.08379363 | 3.01545738 | 0.00107667 | 0.00805185 |
| ENSMUSG00000003299 | 1.08198524 | 3.62752347 | 0.00089057 | 0.00680643 |
| ENSMUSG00000024818 | 1.08181665 | 4.1935396  | 0.00070352 | 0.00554992 |
| ENSMUSG00000013858 | 1.08163297 | 4.03610766 | 0.00073603 | 0.00577265 |
| ENSMUSG00000076937 | 1.08127646 | 8.93423822 | 0.00047198 | 0.00392128 |
| ENSMUSG00000055053 | 1.08042348 | 2.13849835 | 0.00207495 | 0.01412642 |
| ENSMUSG00000030427 | 1.08005243 | 0.98805472 | 0.00668045 | 0.03748282 |
| ENSMUSG00000030852 | 1.07929289 | 1.35221117 | 0.00505724 | 0.02985072 |
| ENSMUSG00000026728 | 1.07836947 | 8.03734943 | 0.00049548 | 0.00410069 |
| ENSMUSG00000020808 | 1.07749236 | 3.31825384 | 0.00104052 | 0.00780863 |
| ENSMUSG00000019823 | 1.07667063 | 4.67357929 | 0.00066452 | 0.00529652 |
| ENSMUSG00000056938 | 1.0754669  | 2.26338593 | 0.00221932 | 0.01496755 |
| ENSMUSG00000031342 | 1.07534746 | 0.93041175 | 0.00780971 | 0.04251381 |
| ENSMUSG00000031563 | 1.07482363 | 1.92077865 | 0.00287168 | 0.0186668  |
| ENSMUSG00000041912 | 1.07410363 | 3.46056937 | 0.00100255 | 0.00755524 |

|                    |            |            |            |            |
|--------------------|------------|------------|------------|------------|
| ENSMUSG00000066363 | 1.0739575  | 4.59859583 | 0.00071021 | 0.0055864  |
| ENSMUSG00000031378 | 1.07393836 | 4.67683308 | 0.00068896 | 0.00546307 |
| ENSMUSG00000020260 | 1.07360662 | 2.79169315 | 0.00144175 | 0.01039293 |
| ENSMUSG00000037499 | 1.07272249 | 1.28054906 | 0.00537452 | 0.03146514 |
| ENSMUSG00000042613 | 1.07229104 | 5.12726119 | 0.00063713 | 0.00511219 |
| ENSMUSG00000089832 | 1.07125579 | 2.45893683 | 0.00180934 | 0.01270304 |
| ENSMUSG00000018427 | 1.07090072 | 2.57961187 | 0.0017542  | 0.01238044 |
| ENSMUSG00000041598 | 1.06975767 | 0.63366152 | 0.01164936 | 0.05783917 |
| ENSMUSG00000032641 | 1.06872795 | 1.71576251 | 0.00342196 | 0.0216168  |
| ENSMUSG00000033684 | 1.06671721 | 3.40856446 | 0.00113484 | 0.00843428 |
| ENSMUSG00000037221 | 1.06600175 | 1.84136382 | 0.00367606 | 0.02300788 |
| ENSMUSG00000095589 | 1.06542354 | 4.27157802 | 0.00082801 | 0.00638225 |
| ENSMUSG00000069792 | 1.06516579 | 1.85610599 | 0.00334974 | 0.02122417 |
| ENSMUSG00000033021 | 1.06447095 | 4.21504336 | 0.00085494 | 0.0065574  |
| ENSMUSG00000086316 | 1.06411353 | 1.69102811 | 0.00371927 | 0.02323792 |
| ENSMUSG00000056501 | 1.06384229 | 0.68535308 | 0.01093013 | 0.05501577 |
| ENSMUSG00000029598 | 1.06383874 | 4.14984468 | 0.00086943 | 0.00665906 |
| ENSMUSG00000028028 | 1.05963815 | 1.93474291 | 0.00267381 | 0.01753915 |
| ENSMUSG00000053334 | 1.05887081 | 1.93867117 | 0.00304443 | 0.01962413 |
| ENSMUSG00000043740 | 1.05875221 | 1.54047387 | 0.00513787 | 0.03021087 |
| ENSMUSG00000005125 | 1.05850783 | 1.73935897 | 0.00413597 | 0.02544341 |
| ENSMUSG00000049047 | 1.05846398 | 5.0773724  | 0.00074971 | 0.0058671  |
| ENSMUSG00000032285 | 1.05785073 | 1.9718521  | 0.0023255  | 0.01561533 |
| ENSMUSG00000094420 | 1.05782254 | 7.33898658 | 0.00064063 | 0.00513644 |
| ENSMUSG00000040483 | 1.05775033 | 5.76094384 | 0.0006962  | 0.00550426 |
| ENSMUSG00000059810 | 1.05769496 | 1.80530694 | 0.00349058 | 0.02197458 |
| ENSMUSG00000034731 | 1.05745287 | 2.71425116 | 0.00151247 | 0.0108664  |
| ENSMUSG00000018509 | 1.05735044 | 1.00586238 | 0.0081366  | 0.04382277 |
| ENSMUSG00000036199 | 1.05573124 | 3.62730496 | 0.00116938 | 0.00865518 |
| ENSMUSG00000034748 | 1.05413723 | 1.11802324 | 0.00744598 | 0.04096806 |
| ENSMUSG00000032180 | 1.05391577 | 2.66245711 | 0.00187152 | 0.01305467 |
| ENSMUSG00000026797 | 1.05122619 | 2.48094987 | 0.00236209 | 0.0158118  |
| ENSMUSG00000038967 | 1.05057423 | 1.07244452 | 0.01012621 | 0.05207238 |
| ENSMUSG00000079419 | 1.04909621 | 7.56187216 | 0.00070514 | 0.00555457 |
| ENSMUSG00000039137 | 1.04850924 | 1.48292269 | 0.00543304 | 0.0317045  |
| ENSMUSG00000037849 | 1.04849471 | 6.51777578 | 0.00073563 | 0.00577265 |
| ENSMUSG00000071042 | 1.04747999 | 8.72744296 | 0.0007016  | 0.00553883 |
| ENSMUSG00000076563 | 1.04700905 | 5.67523938 | 0.00079586 | 0.0061834  |
| ENSMUSG00000028952 | 1.04681312 | 1.9788046  | 0.00338523 | 0.02142393 |
| ENSMUSG00000024856 | 1.04675969 | 4.10137145 | 0.00108406 | 0.00809028 |
| ENSMUSG00000069743 | 1.04625769 | 1.27592276 | 0.00580944 | 0.03350212 |
| ENSMUSG00000006589 | 1.04551354 | 4.02705183 | 0.00113569 | 0.00843475 |
| ENSMUSG00000005057 | 1.04463421 | 0.75925875 | 0.01762876 | 0.07927794 |

|                    |            |            |            |            |
|--------------------|------------|------------|------------|------------|
| ENSMUSG00000010045 | 1.04380985 | 2.43554545 | 0.00264747 | 0.01741932 |
| ENSMUSG00000028634 | 1.04353342 | 6.47731224 | 0.00077974 | 0.00608004 |
| ENSMUSG00000026641 | 1.04248208 | 3.99657423 | 0.00115458 | 0.00855742 |
| ENSMUSG00000039891 | 1.04188895 | 2.76759611 | 0.00203754 | 0.01393015 |
| ENSMUSG00000022272 | 1.03967289 | 1.96806491 | 0.00357684 | 0.02242593 |
| ENSMUSG00000026209 | 1.03763183 | 3.87183232 | 0.00128953 | 0.00944079 |
| ENSMUSG00000020484 | 1.03759429 | 9.30853137 | 0.00078234 | 0.00609591 |
| ENSMUSG00000011831 | 1.03755022 | 4.63227395 | 0.00104164 | 0.00781155 |
| ENSMUSG00000076556 | 1.03728012 | 4.89810296 | 0.00099598 | 0.00751097 |
| ENSMUSG00000029923 | 1.03482574 | 2.58060429 | 0.0026805  | 0.01757231 |
| ENSMUSG00000056665 | 1.0345178  | 2.13360294 | 0.00382513 | 0.02381649 |
| ENSMUSG00000022614 | 1.03443085 | 3.89265131 | 0.00136163 | 0.00990234 |
| ENSMUSG00000032353 | 1.03440743 | 4.60258475 | 0.00110087 | 0.00819873 |
| ENSMUSG00000008090 | 1.03387772 | 0.76250714 | 0.01275009 | 0.06199803 |
| ENSMUSG00000022750 | 1.03253829 | 3.38602652 | 0.00163083 | 0.01160848 |
| ENSMUSG00000023345 | 1.03205006 | 3.07259041 | 0.00191906 | 0.01330877 |
| ENSMUSG00000038886 | 1.0303624  | 5.52975835 | 0.00097854 | 0.00741048 |
| ENSMUSG00000089672 | 1.02974388 | 5.07288611 | 0.00103775 | 0.00779326 |
| ENSMUSG00000073430 | 1.02934315 | 1.48657023 | 0.00499776 | 0.02958061 |
| ENSMUSG00000030055 | 1.02855907 | 5.64937648 | 0.00098949 | 0.00748067 |
| ENSMUSG00000003882 | 1.02814527 | 2.01863203 | 0.00288895 | 0.01875646 |
| ENSMUSG00000035372 | 1.02766998 | 2.2770352  | 0.00300127 | 0.0194272  |
| ENSMUSG00000027163 | 1.02605449 | 2.61918317 | 0.0024335  | 0.01623936 |
| ENSMUSG00000042814 | 1.02496099 | 1.19726748 | 0.00817015 | 0.04396551 |
| ENSMUSG00000016256 | 1.02413981 | 7.91751124 | 0.00092981 | 0.00708624 |
| ENSMUSG00000060803 | 1.02320141 | 5.14507261 | 0.00111016 | 0.00826221 |
| ENSMUSG00000027805 | 1.02319173 | 3.08072453 | 0.0020318  | 0.01391173 |
| ENSMUSG00000047037 | 1.02310212 | 1.33223043 | 0.00662739 | 0.03730157 |
| ENSMUSG00000026657 | 1.02277352 | 1.03503472 | 0.01038692 | 0.05308651 |
| ENSMUSG00000044199 | 1.02174661 | 3.38984555 | 0.00180367 | 0.0126715  |
| ENSMUSG00000016028 | 1.02139142 | 1.25420181 | 0.00924389 | 0.04860367 |
| ENSMUSG00000085795 | 1.02105011 | 2.6185699  | 0.00252878 | 0.01680243 |
| ENSMUSG00000029994 | 1.02067606 | 4.5055481  | 0.00125386 | 0.00921093 |
| ENSMUSG00000027890 | 1.0205434  | 3.25414901 | 0.00177161 | 0.01248692 |
| ENSMUSG00000097908 | 1.01828159 | 3.80269819 | 0.001603   | 0.01141852 |
| ENSMUSG00000050002 | 1.01710147 | 4.088436   | 0.00147478 | 0.01061682 |
| ENSMUSG00000026347 | 1.01615928 | 1.8861253  | 0.0048361  | 0.02876586 |
| ENSMUSG00000002014 | 1.01557964 | 6.40597385 | 0.00108018 | 0.00806697 |
| ENSMUSG00000020235 | 1.01542842 | 3.97156457 | 0.00155437 | 0.01111531 |
| ENSMUSG00000032383 | 1.01464042 | 7.9381614  | 0.00103545 | 0.00778135 |
| ENSMUSG00000044456 | 1.01409426 | 3.44183482 | 0.00191344 | 0.01327832 |
| ENSMUSG00000060166 | 1.0126732  | 2.35455084 | 0.00303646 | 0.01959614 |
| ENSMUSG00000029094 | 1.01237989 | 1.70616602 | 0.00598889 | 0.03433504 |

|                    |            |            |            |            |
|--------------------|------------|------------|------------|------------|
| ENSMUSG00000024160 | 1.01226141 | 2.89988915 | 0.00248942 | 0.01656243 |
| ENSMUSG00000066621 | 1.01096323 | 3.1127061  | 0.00233848 | 0.0156732  |
| ENSMUSG00000024835 | 1.01036788 | 5.84666727 | 0.00119499 | 0.00883263 |
| ENSMUSG00000021880 | 1.00733718 | 4.86029536 | 0.00138972 | 0.01007849 |
| ENSMUSG00000030761 | 1.00732728 | 3.99377947 | 0.00165616 | 0.01175774 |
| ENSMUSG00000094322 | 1.00715639 | 3.34021377 | 0.0020253  | 0.01389054 |
| ENSMUSG00000041199 | 1.0065594  | 1.09297942 | 0.01012621 | 0.05207238 |
| ENSMUSG00000033313 | 1.00558421 | 1.25652359 | 0.01085117 | 0.05473294 |
| ENSMUSG00000094749 | 1.00544823 | 4.74797306 | 0.00142188 | 0.01027033 |
| ENSMUSG00000021213 | 1.00543505 | 1.3255552  | 0.00908472 | 0.04783673 |
| ENSMUSG00000027956 | 1.00515564 | 0.73730644 | 0.01762876 | 0.07927794 |
| ENSMUSG00000002393 | 1.00487113 | 0.96567549 | 0.01252834 | 0.06118912 |
| ENSMUSG00000015092 | 1.00436892 | 3.76172793 | 0.00185708 | 0.01297071 |
| ENSMUSG00000051615 | 1.00408562 | 2.920259   | 0.00254495 | 0.01688904 |
| ENSMUSG00000057411 | 1.00362976 | 1.45086887 | 0.00709495 | 0.03934834 |
| ENSMUSG00000095007 | 1.00347856 | 4.50697948 | 0.0015403  | 0.01103395 |
| ENSMUSG00000010358 | 1.00301643 | 5.58367723 | 0.00131665 | 0.00961973 |
| ENSMUSG00000025503 | 1.001801   | 5.51604687 | 0.00135017 | 0.00984463 |
| ENSMUSG00000074811 | 1.00091871 | 1.5386848  | 0.00813781 | 0.04382277 |
| ENSMUSG00000074283 | 1.00079467 | 1.47863483 | 0.00793119 | 0.04303299 |
| ENSMUSG00000037326 | 1.00070441 | 1.56628563 | 0.007995   | 0.04328217 |
| ENSMUSG00000029428 | 0.99885958 | 2.11320156 | 0.00478839 | 0.02856084 |
| ENSMUSG00000018932 | 0.99707574 | 5.94338914 | 0.00135894 | 0.00990186 |
| ENSMUSG00000026782 | 0.99682242 | 4.86531273 | 0.00154091 | 0.01103395 |
| ENSMUSG00000054499 | 0.99621681 | 1.81736122 | 0.0058529  | 0.03369869 |
| ENSMUSG00000061758 | 0.99490254 | 3.80796503 | 0.00208837 | 0.01420879 |
| ENSMUSG00000038593 | 0.99433445 | 1.5212713  | 0.00880094 | 0.04668437 |
| ENSMUSG00000020167 | 0.99312479 | 4.34157386 | 0.00179143 | 0.01260656 |
| ENSMUSG00000095335 | 0.99295911 | 3.8577195  | 0.00205091 | 0.01400695 |
| ENSMUSG00000029469 | 0.99294448 | 1.28530767 | 0.00885343 | 0.04691667 |
| ENSMUSG00000061981 | 0.99280763 | 2.92616428 | 0.00289775 | 0.01880222 |
| ENSMUSG00000059674 | 0.9913754  | 0.55079639 | 0.02899443 | 0.11541077 |
| ENSMUSG00000044156 | 0.99114418 | 2.81047745 | 0.00298875 | 0.01936942 |
| ENSMUSG00000056116 | 0.99076555 | 6.91226868 | 0.00138581 | 0.01005694 |
| ENSMUSG00000027082 | 0.99066306 | 2.97777152 | 0.0030958  | 0.01991949 |
| ENSMUSG00000024812 | 0.99054343 | 4.50692003 | 0.00177689 | 0.01251597 |
| ENSMUSG00000045932 | 0.99042043 | 6.34187129 | 0.00142555 | 0.01028995 |
| ENSMUSG00000076550 | 0.99039356 | 3.02660507 | 0.00266385 | 0.01749507 |
| ENSMUSG00000003233 | 0.98971422 | 2.19747167 | 0.00522808 | 0.03070787 |
| ENSMUSG00000051335 | 0.98823367 | 1.70764262 | 0.00680886 | 0.03812398 |
| ENSMUSG00000039716 | 0.98814956 | 0.83577994 | 0.01774976 | 0.07958366 |
| ENSMUSG00000036676 | 0.98727177 | 3.69366584 | 0.00218036 | 0.01476021 |
| ENSMUSG00000061111 | 0.98703198 | 2.75441315 | 0.00369966 | 0.02314218 |

|                    |            |            |            |            |
|--------------------|------------|------------|------------|------------|
| ENSMUSG00000062157 | 0.98530523 | 1.27804036 | 0.01060028 | 0.05379453 |
| ENSMUSG00000073176 | 0.98511119 | 1.24488489 | 0.01085117 | 0.05473294 |
| ENSMUSG00000033685 | 0.98436614 | 7.94858438 | 0.00144739 | 0.01042662 |
| ENSMUSG00000043372 | 0.98405734 | 0.97811996 | 0.01503091 | 0.07010957 |
| ENSMUSG00000003345 | 0.98208331 | 3.10694704 | 0.00305263 | 0.01965349 |
| ENSMUSG00000028392 | 0.9808373  | 0.75901931 | 0.01762876 | 0.07927794 |
| ENSMUSG00000021136 | 0.98067365 | 1.1741323  | 0.01282556 | 0.06225468 |
| ENSMUSG00000022565 | 0.98051599 | 4.06855213 | 0.00207102 | 0.01410859 |
| ENSMUSG00000034744 | 0.98045538 | 2.99867849 | 0.00325201 | 0.02072673 |
| ENSMUSG00000003518 | 0.97960103 | 4.43161921 | 0.00202795 | 0.01389418 |
| ENSMUSG00000034471 | 0.9776761  | 1.87827197 | 0.00702697 | 0.03904112 |
| ENSMUSG00000026955 | 0.97456494 | 3.17278674 | 0.00318609 | 0.02039097 |
| ENSMUSG00000036106 | 0.97438995 | 3.94640693 | 0.00239943 | 0.01605179 |
| ENSMUSG00000037325 | 0.97391268 | 3.01208409 | 0.00331764 | 0.02109784 |
| ENSMUSG00000017747 | 0.97335149 | 2.1855975  | 0.00556672 | 0.03234455 |
| ENSMUSG00000035890 | 0.9733065  | 2.64203949 | 0.00418944 | 0.02569904 |
| ENSMUSG00000029998 | 0.97224418 | 5.15206568 | 0.00192293 | 0.01332702 |
| ENSMUSG00000043311 | 0.97193352 | 2.76572079 | 0.00394429 | 0.02444554 |
| ENSMUSG00000070284 | 0.97165811 | 4.76195293 | 0.00205391 | 0.01401861 |
| ENSMUSG00000044309 | 0.97158098 | 3.54319383 | 0.00270494 | 0.01770027 |
| ENSMUSG00000022620 | 0.97148235 | 2.69831618 | 0.00428952 | 0.02622344 |
| ENSMUSG00000039910 | 0.97146074 | 5.55987461 | 0.00185138 | 0.01294541 |
| ENSMUSG00000020186 | 0.97145711 | 2.33345056 | 0.00556525 | 0.03234455 |
| ENSMUSG00000045594 | 0.97123909 | 5.12858825 | 0.00195985 | 0.01353076 |
| ENSMUSG00000082292 | 0.96970179 | 5.39150114 | 0.00190773 | 0.01325575 |
| ENSMUSG00000056737 | 0.96938669 | 6.14870215 | 0.0018164  | 0.01274433 |
| ENSMUSG00000028980 | 0.96932227 | 3.77967189 | 0.00264741 | 0.01741932 |
| ENSMUSG00000070699 | 0.96916699 | 2.2231434  | 0.00540599 | 0.03158599 |
| ENSMUSG00000040033 | 0.96846462 | 7.63699868 | 0.00173009 | 0.01225037 |
| ENSMUSG00000031303 | 0.96823673 | 2.80720278 | 0.00394007 | 0.02443339 |
| ENSMUSG00000002820 | 0.96786117 | 2.55700544 | 0.00428633 | 0.02621884 |
| ENSMUSG00000001082 | 0.967114   | 3.28745477 | 0.00313936 | 0.02016346 |
| ENSMUSG00000024862 | 0.96665053 | 1.89370887 | 0.00738488 | 0.04071049 |
| ENSMUSG00000025792 | 0.96655078 | 2.31418197 | 0.00523407 | 0.03072629 |
| ENSMUSG00000024772 | 0.96653551 | 5.88819306 | 0.00191207 | 0.01327735 |
| ENSMUSG00000041936 | 0.96634384 | 2.43694951 | 0.00510975 | 0.03009479 |
| ENSMUSG00000036686 | 0.96612676 | 2.67660443 | 0.00454363 | 0.02732763 |
| ENSMUSG00000032648 | 0.96605355 | 1.3247389  | 0.01013055 | 0.05207238 |
| ENSMUSG00000056498 | 0.96554005 | 6.58422168 | 0.00184722 | 0.01293536 |
| ENSMUSG00000032842 | 0.96496938 | 1.20810821 | 0.01753252 | 0.07900988 |
| ENSMUSG00000021185 | 0.96467345 | 5.69388258 | 0.00197315 | 0.01359646 |
| ENSMUSG00000034858 | 0.96411078 | 5.14405619 | 0.00209223 | 0.01422611 |
| ENSMUSG00000028466 | 0.96409757 | 4.40132817 | 0.00243964 | 0.0162703  |

|                    |            |            |            |            |
|--------------------|------------|------------|------------|------------|
| ENSMUSG0000001911  | 0.96409639 | 1.71974786 | 0.00772001 | 0.04211054 |
| ENSMUSG00000053559 | 0.96388411 | 2.02833176 | 0.0064112  | 0.03627408 |
| ENSMUSG00000039886 | 0.96378609 | 2.46871136 | 0.00477212 | 0.0284953  |
| ENSMUSG00000032596 | 0.96311146 | 6.14022136 | 0.00193576 | 0.01340735 |
| ENSMUSG00000071074 | 0.96206168 | 3.41373131 | 0.00319806 | 0.0204433  |
| ENSMUSG00000076522 | 0.95933916 | 6.10397737 | 0.00200916 | 0.0138005  |
| ENSMUSG00000066357 | 0.9583011  | 5.43453842 | 0.00217388 | 0.01472556 |
| ENSMUSG00000022853 | 0.95690769 | 3.38611703 | 0.00332858 | 0.0211398  |
| ENSMUSG00000028795 | 0.95627608 | 2.39658116 | 0.00508363 | 0.02997621 |
| ENSMUSG00000095204 | 0.95493784 | 2.51263408 | 0.0056638  | 0.03285553 |
| ENSMUSG00000040627 | 0.95458446 | 6.81472289 | 0.00206584 | 0.0140822  |
| ENSMUSG00000033128 | 0.95453756 | 3.6247801  | 0.00332668 | 0.0211398  |
| ENSMUSG00000065037 | 0.95406705 | 1.28369643 | 0.01085117 | 0.05473294 |
| ENSMUSG00000014856 | 0.95391295 | 3.6126148  | 0.00321389 | 0.02052021 |
| ENSMUSG00000037410 | 0.95290813 | 2.36383072 | 0.00618151 | 0.03523332 |
| ENSMUSG00000031708 | 0.95268998 | 5.39287552 | 0.00233197 | 0.01564899 |
| ENSMUSG00000018008 | 0.95214755 | 6.30912729 | 0.00216669 | 0.0146953  |
| ENSMUSG00000023991 | 0.95212005 | 2.64221174 | 0.00485389 | 0.02885575 |
| ENSMUSG00000020571 | 0.95120762 | 9.46863521 | 0.00203837 | 0.01393015 |
| ENSMUSG00000032175 | 0.95108104 | 5.33857185 | 0.0023499  | 0.01573997 |
| ENSMUSG00000019082 | 0.95033129 | 3.85986222 | 0.00319718 | 0.0204433  |
| ENSMUSG00000058709 | 0.95003791 | 3.32292818 | 0.00374016 | 0.0233306  |
| ENSMUSG00000017756 | 0.94972348 | 3.47690642 | 0.00351312 | 0.0220649  |
| ENSMUSG00000026197 | 0.94875261 | 2.20681187 | 0.00729966 | 0.0402874  |
| ENSMUSG00000029007 | 0.94755581 | 3.90325769 | 0.00310842 | 0.0199888  |
| ENSMUSG00000029364 | 0.94739571 | 4.58383149 | 0.00273322 | 0.01786365 |
| ENSMUSG00000055538 | 0.94623893 | 3.07508428 | 0.00426706 | 0.02612604 |
| ENSMUSG00000019822 | 0.94574985 | 2.52624643 | 0.0060149  | 0.03446584 |
| ENSMUSG00000063455 | 0.94512653 | 2.33840586 | 0.00636224 | 0.03603489 |
| ENSMUSG00000067212 | 0.94413265 | 6.45675706 | 0.0023344  | 0.01565555 |
| ENSMUSG00000001542 | 0.94231088 | 7.62402592 | 0.00228694 | 0.01538512 |
| ENSMUSG00000007872 | 0.94211011 | 1.7859846  | 0.01049804 | 0.05342656 |
| ENSMUSG00000076532 | 0.94161346 | 4.81969296 | 0.00275625 | 0.01799239 |
| ENSMUSG00000004934 | 0.94071014 | 3.17468285 | 0.00430441 | 0.02626978 |
| ENSMUSG00000071715 | 0.94066399 | 5.18617283 | 0.0026913  | 0.01762171 |
| ENSMUSG00000020225 | 0.94032526 | 5.48711681 | 0.00258647 | 0.01713301 |
| ENSMUSG00000047238 | 0.94027646 | 1.41545458 | 0.01143507 | 0.05710074 |
| ENSMUSG00000089942 | 0.93928203 | 1.86239011 | 0.00892165 | 0.04718542 |
| ENSMUSG00000093861 | 0.93848986 | 6.83383942 | 0.00242287 | 0.01617844 |
| ENSMUSG00000029638 | 0.93847655 | 1.54110306 | 0.0121661  | 0.05985093 |
| ENSMUSG00000030539 | 0.93646592 | 5.41611849 | 0.00275025 | 0.01796407 |
| ENSMUSG00000037370 | 0.93629131 | 4.70956692 | 0.00296594 | 0.01923316 |
| ENSMUSG00000035206 | 0.9360642  | 1.47048042 | 0.01359252 | 0.06483047 |

|                    |            |            |            |            |
|--------------------|------------|------------|------------|------------|
| ENSMUSG00000028850 | 0.93541451 | 1.52676583 | 0.01270207 | 0.0618416  |
| ENSMUSG00000063439 | 0.93384042 | 1.13825284 | 0.01802521 | 0.08045692 |
| ENSMUSG00000024942 | 0.93300524 | 4.89630323 | 0.00304015 | 0.01960824 |
| ENSMUSG00000094319 | 0.93288076 | 0.94015225 | 0.01438199 | 0.06775894 |
| ENSMUSG00000029103 | 0.93242194 | 4.93883804 | 0.00301239 | 0.01947579 |
| ENSMUSG00000032265 | 0.9319391  | 4.02359605 | 0.00353306 | 0.02216435 |
| ENSMUSG00000032657 | 0.9310012  | 1.30301138 | 0.01915124 | 0.08471164 |
| ENSMUSG00000024773 | 0.93032182 | 3.3708744  | 0.00447867 | 0.02702847 |
| ENSMUSG00000037606 | 0.92964653 | 3.32671053 | 0.0044205  | 0.02676625 |
| ENSMUSG00000031286 | 0.92955822 | 1.41080245 | 0.01314947 | 0.06333357 |
| ENSMUSG00000033060 | 0.92889461 | 4.35394708 | 0.0034936  | 0.02198075 |
| ENSMUSG00000075010 | 0.92860796 | 5.81632272 | 0.00285725 | 0.01859542 |
| ENSMUSG00000096074 | 0.92837113 | 1.20121994 | 0.01282556 | 0.06225468 |
| ENSMUSG00000020941 | 0.92827756 | 3.60320817 | 0.00439222 | 0.02668613 |
| ENSMUSG00000006057 | 0.92654362 | 5.13702075 | 0.00314119 | 0.02016346 |
| ENSMUSG00000030653 | 0.92626741 | 5.33580348 | 0.00304891 | 0.01964127 |
| ENSMUSG00000031813 | 0.92617299 | 2.76804468 | 0.00618961 | 0.03526083 |
| ENSMUSG00000025076 | 0.92428454 | 4.13056916 | 0.0037406  | 0.0233306  |
| ENSMUSG00000001794 | 0.92386686 | 6.6297616  | 0.00286241 | 0.01861775 |
| ENSMUSG00000010110 | 0.9234817  | 5.82891084 | 0.00300311 | 0.01942743 |
| ENSMUSG00000038217 | 0.92320531 | 2.16466405 | 0.00796621 | 0.04314799 |
| ENSMUSG00000006519 | 0.92219921 | 4.94228644 | 0.00334972 | 0.02122417 |
| ENSMUSG00000056666 | 0.9214314  | 2.25188253 | 0.00832662 | 0.04456291 |
| ENSMUSG00000071547 | 0.92063181 | 2.70981602 | 0.0069767  | 0.03884187 |
| ENSMUSG00000029135 | 0.92048612 | 1.42514163 | 0.01053531 | 0.05358235 |
| ENSMUSG00000086784 | 0.91994235 | 2.15110886 | 0.00896014 | 0.04734253 |
| ENSMUSG00000063802 | 0.91984066 | 2.05263377 | 0.00959946 | 0.05005831 |
| ENSMUSG00000067336 | 0.91947082 | 3.08857343 | 0.00512237 | 0.03013616 |
| ENSMUSG00000030680 | 0.91916162 | 1.72893396 | 0.01054076 | 0.05358235 |
| ENSMUSG00000095737 | 0.91890583 | 2.20805309 | 0.00759548 | 0.0416419  |
| ENSMUSG00000074272 | 0.91856893 | 4.91973281 | 0.00348158 | 0.02193072 |
| ENSMUSG00000006517 | 0.91779298 | 3.04510494 | 0.00568577 | 0.03294753 |
| ENSMUSG00000038351 | 0.91611561 | 1.52085164 | 0.01340761 | 0.06409028 |
| ENSMUSG00000037344 | 0.91594813 | 2.07395214 | 0.01026684 | 0.05262486 |
| ENSMUSG00000093894 | 0.914779   | 4.18830023 | 0.00395207 | 0.02447967 |
| ENSMUSG00000014599 | 0.91426927 | 2.96001432 | 0.00578201 | 0.03342934 |
| ENSMUSG00000017697 | 0.91409253 | 4.02940383 | 0.00435287 | 0.02652052 |
| ENSMUSG00000002105 | 0.91374922 | 2.07027072 | 0.00986027 | 0.05104806 |
| ENSMUSG00000024357 | 0.91327729 | 3.98800925 | 0.00430169 | 0.02626806 |
| ENSMUSG00000067071 | 0.91279912 | 2.11796759 | 0.00932532 | 0.04888877 |
| ENSMUSG00000031988 | 0.91198587 | 3.91737945 | 0.00441569 | 0.02676422 |
| ENSMUSG00000020231 | 0.91188016 | 3.03047065 | 0.00558101 | 0.03241011 |
| ENSMUSG00000021306 | 0.91128983 | 3.54592627 | 0.00487421 | 0.02896061 |

|                    |            |            |            |            |
|--------------------|------------|------------|------------|------------|
| ENSMUSG00000018599 | 0.91118552 | 2.31394606 | 0.00928883 | 0.04876863 |
| ENSMUSG00000032855 | 0.91070924 | 4.26082659 | 0.00409635 | 0.02522847 |
| ENSMUSG00000036390 | 0.91044403 | 2.35385592 | 0.00808395 | 0.043676   |
| ENSMUSG00000060671 | 0.91011076 | 7.04812212 | 0.00324883 | 0.02071872 |
| ENSMUSG00000020806 | 0.90995661 | 2.77532033 | 0.00655212 | 0.03696679 |
| ENSMUSG00000042675 | 0.90925694 | 3.13317701 | 0.00579802 | 0.0334721  |
| ENSMUSG00000035517 | 0.90893271 | 4.61866773 | 0.00392822 | 0.02437395 |
| ENSMUSG00000022474 | 0.90872741 | 4.01510428 | 0.00461315 | 0.02771487 |
| ENSMUSG00000028057 | 0.9086372  | 4.20707086 | 0.00426874 | 0.02612604 |
| ENSMUSG00000024036 | 0.90852566 | 1.85022921 | 0.01219868 | 0.05988347 |
| ENSMUSG00000016194 | 0.90832361 | 2.54592492 | 0.00715212 | 0.03955308 |
| ENSMUSG00000037846 | 0.90765931 | 0.81131513 | 0.02220338 | 0.09497868 |
| ENSMUSG00000037089 | 0.90725127 | 4.07162675 | 0.0046561  | 0.0278952  |
| ENSMUSG00000034108 | 0.90628533 | 2.37486591 | 0.00906896 | 0.04782378 |
| ENSMUSG00000026102 | 0.90508181 | 4.91480505 | 0.00399153 | 0.02465332 |
| ENSMUSG00000021614 | 0.90468706 | 1.46877065 | 0.01228427 | 0.06023105 |
| ENSMUSG00000031517 | 0.9043223  | 3.63369945 | 0.00537097 | 0.03146147 |
| ENSMUSG00000008384 | 0.90423495 | 1.80940705 | 0.01434894 | 0.06767191 |
| ENSMUSG00000049686 | 0.90404928 | 1.44961644 | 0.01957516 | 0.08614365 |
| ENSMUSG00000051768 | 0.90402146 | 4.55598071 | 0.00422109 | 0.02586378 |
| ENSMUSG00000053644 | 0.9038021  | 4.18927647 | 0.00451481 | 0.02721504 |
| ENSMUSG00000014867 | 0.90376914 | 7.9318281  | 0.00340743 | 0.02153908 |
| ENSMUSG00000078921 | 0.90301271 | 4.18504245 | 0.00446183 | 0.02697105 |
| ENSMUSG00000031441 | 0.90190464 | 3.96017279 | 0.00475848 | 0.02842959 |
| ENSMUSG00000022174 | 0.90156701 | 5.36954288 | 0.00389856 | 0.02421777 |
| ENSMUSG00000005089 | 0.90133118 | 3.38189465 | 0.00567653 | 0.03291168 |
| ENSMUSG00000024299 | 0.8983471  | 3.22980445 | 0.00645226 | 0.03646814 |
| ENSMUSG00000030269 | 0.89777247 | 6.95178072 | 0.00371007 | 0.02319383 |
| ENSMUSG00000028756 | 0.89738963 | 2.87422696 | 0.00714616 | 0.03954036 |
| ENSMUSG00000041649 | 0.89738683 | 3.47645231 | 0.00576711 | 0.03336507 |
| ENSMUSG00000030541 | 0.89636986 | 4.40226508 | 0.0047477  | 0.02838094 |
| ENSMUSG00000037419 | 0.89627372 | 3.99063077 | 0.00492122 | 0.0292077  |
| ENSMUSG00000030120 | 0.89584061 | 4.79701817 | 0.0043968  | 0.02668613 |
| ENSMUSG00000036555 | 0.89533009 | 2.83504358 | 0.00698688 | 0.03887852 |
| ENSMUSG00000025736 | 0.895225   | 3.3151031  | 0.00635761 | 0.03602756 |
| ENSMUSG00000032299 | 0.89480468 | 3.44077485 | 0.00587137 | 0.033787   |
| ENSMUSG00000025324 | 0.89474174 | 5.36693893 | 0.0041732  | 0.02561399 |
| ENSMUSG00000018931 | 0.89395217 | 3.62324845 | 0.00554588 | 0.03229308 |
| ENSMUSG00000024960 | 0.89314152 | 2.99150986 | 0.00709217 | 0.03934834 |
| ENSMUSG00000041773 | 0.89279485 | 3.97330098 | 0.00522618 | 0.03070787 |
| ENSMUSG00000061306 | 0.89253087 | 5.17941115 | 0.00434621 | 0.02649494 |
| ENSMUSG00000070327 | 0.89223382 | 9.45904282 | 0.00377011 | 0.02348748 |
| ENSMUSG00000034659 | 0.89192035 | 4.32537377 | 0.00503297 | 0.02974005 |



|                    |            |            |            |            |
|--------------------|------------|------------|------------|------------|
| ENSMUSG00000046432 | 0.89191726 | 4.57879197 | 0.00482081 | 0.02869282 |
| ENSMUSG00000030930 | 0.89174611 | 3.69806111 | 0.00576003 | 0.03334203 |
| ENSMUSG00000033589 | 0.89136197 | 4.77168622 | 0.00465298 | 0.02789201 |
| ENSMUSG00000091549 | 0.88911162 | 5.53220922 | 0.00431829 | 0.02633959 |
| ENSMUSG00000020766 | 0.88909796 | 2.68753957 | 0.00854632 | 0.04546795 |
| ENSMUSG00000033033 | 0.88843652 | 1.83540031 | 0.01533057 | 0.07104633 |
| ENSMUSG00000039745 | 0.88842738 | 4.0519157  | 0.00547144 | 0.03187684 |
| ENSMUSG00000025931 | 0.88810744 | 2.08551481 | 0.01264455 | 0.06164504 |
| ENSMUSG00000009828 | 0.88745673 | 2.83899098 | 0.00761819 | 0.04170281 |
| ENSMUSG00000038213 | 0.88671141 | 5.06354349 | 0.00464933 | 0.02788565 |
| ENSMUSG00000033355 | 0.88641659 | 5.30417593 | 0.00447885 | 0.02702847 |
| ENSMUSG00000038079 | 0.88635604 | 2.39314009 | 0.00847634 | 0.04516248 |
| ENSMUSG00000027953 | 0.88634074 | 4.22067601 | 0.00540687 | 0.03158599 |
| ENSMUSG00000040345 | 0.88633014 | 4.08425535 | 0.00546282 | 0.03184383 |
| ENSMUSG00000019302 | 0.88591018 | 7.04758131 | 0.00415996 | 0.02556755 |
| ENSMUSG00000003452 | 0.88502009 | 3.49635055 | 0.00603023 | 0.03453533 |
| ENSMUSG00000032392 | 0.88501607 | 0.99548226 | 0.03229138 | 0.12537558 |
| ENSMUSG00000020100 | 0.88462493 | 5.87557325 | 0.00441745 | 0.02676422 |
| ENSMUSG00000028967 | 0.88408445 | 2.37990229 | 0.0104796  | 0.0533579  |
| ENSMUSG00000024201 | 0.88322613 | 3.0431534  | 0.00730478 | 0.04029397 |
| ENSMUSG00000063457 | 0.88321215 | 6.41590838 | 0.00439737 | 0.02668613 |
| ENSMUSG00000018574 | 0.88279095 | 5.85513701 | 0.00452985 | 0.02726001 |
| ENSMUSG00000036473 | 0.88276006 | 3.79279853 | 0.00583001 | 0.03358486 |
| ENSMUSG00000040511 | 0.88269017 | 4.82111029 | 0.00498364 | 0.02951323 |
| ENSMUSG00000024870 | 0.88254925 | 5.12549431 | 0.00482116 | 0.02869282 |
| ENSMUSG00000016496 | 0.88140623 | 6.39020377 | 0.00443902 | 0.02684822 |
| ENSMUSG00000015335 | 0.88119285 | 1.81396468 | 0.0159457  | 0.07339242 |
| ENSMUSG00000059534 | 0.88101999 | 3.5645486  | 0.0068915  | 0.03846398 |
| ENSMUSG00000055805 | 0.88056935 | 7.07075743 | 0.00438449 | 0.026668   |
| ENSMUSG00000035559 | 0.8804042  | 2.48319014 | 0.01005904 | 0.05182832 |
| ENSMUSG00000031387 | 0.88026614 | 3.85300996 | 0.00616524 | 0.035215   |
| ENSMUSG00000025509 | 0.87981995 | 3.79038002 | 0.00626909 | 0.03560629 |
| ENSMUSG00000046157 | 0.87945796 | 6.0687354  | 0.00463542 | 0.02781769 |
| ENSMUSG00000027035 | 0.87858127 | 4.16890959 | 0.00582    | 0.03354509 |
| ENSMUSG00000009894 | 0.87788349 | 3.6232425  | 0.00681899 | 0.03814108 |
| ENSMUSG00000045867 | 0.87778035 | 2.00964434 | 0.01416227 | 0.06692635 |
| ENSMUSG00000024012 | 0.87766493 | 5.14780202 | 0.00508406 | 0.02997621 |
| ENSMUSG00000020818 | 0.87679604 | 4.26537882 | 0.00579124 | 0.03345085 |
| ENSMUSG00000028833 | 0.87600163 | 3.30579935 | 0.00756764 | 0.04155265 |
| ENSMUSG00000059278 | 0.87552257 | 2.52605332 | 0.01033759 | 0.05289324 |
| ENSMUSG00000071537 | 0.87529933 | 0.93905067 | 0.03496873 | 0.13268407 |
| ENSMUSG00000035692 | 0.87509274 | 5.39139807 | 0.00504223 | 0.02977845 |
| ENSMUSG00000064254 | 0.87430748 | 2.76058087 | 0.01010852 | 0.05203357 |

|                    |            |            |            |            |
|--------------------|------------|------------|------------|------------|
| ENSMUSG00000038534 | 0.87363271 | 3.05097353 | 0.00829034 | 0.04445701 |
| ENSMUSG00000052087 | 0.87265914 | 2.63655822 | 0.01003727 | 0.0517409  |
| ENSMUSG00000031706 | 0.87247263 | 2.10193204 | 0.01456542 | 0.06847145 |
| ENSMUSG00000025158 | 0.87143949 | 2.64198661 | 0.01031916 | 0.05284037 |
| ENSMUSG00000020262 | 0.8710389  | 1.3793456  | 0.02298813 | 0.09767691 |
| ENSMUSG00000022453 | 0.87041902 | 2.70632621 | 0.01043107 | 0.05323649 |
| ENSMUSG00000028068 | 0.8699604  | 4.64429831 | 0.00580335 | 0.03348491 |
| ENSMUSG00000025510 | 0.86952123 | 1.91590766 | 0.01542118 | 0.07143559 |
| ENSMUSG00000000149 | 0.86880136 | 3.84051021 | 0.00689456 | 0.03846398 |
| ENSMUSG00000049858 | 0.86855794 | 3.56674945 | 0.00738784 | 0.04071049 |
| ENSMUSG00000024338 | 0.86809382 | 7.42949947 | 0.00493167 | 0.02925366 |
| ENSMUSG00000006736 | 0.86745534 | 6.58395674 | 0.00508847 | 0.02998583 |
| ENSMUSG00000022175 | 0.86660636 | 5.72210406 | 0.00537966 | 0.03147818 |
| ENSMUSG00000039485 | 0.86655053 | 3.06751272 | 0.00829704 | 0.04447083 |
| ENSMUSG00000046572 | 0.86591661 | 4.00612199 | 0.00661062 | 0.03722658 |
| ENSMUSG00000041268 | 0.86565499 | 2.01038006 | 0.01340098 | 0.06408788 |
| ENSMUSG00000004952 | 0.86531852 | 4.10936243 | 0.00673122 | 0.03774804 |
| ENSMUSG00000034786 | 0.86456804 | 2.16093341 | 0.01465898 | 0.06879132 |
| ENSMUSG00000006360 | 0.86397357 | 1.15457636 | 0.0327512  | 0.12645504 |
| ENSMUSG00000025533 | 0.86300346 | 3.30467297 | 0.00846266 | 0.04511187 |
| ENSMUSG00000027605 | 0.86254748 | 3.20343461 | 0.00931634 | 0.04886546 |
| ENSMUSG00000035311 | 0.8621303  | 7.08424927 | 0.005269   | 0.03089772 |
| ENSMUSG00000021279 | 0.86211155 | 3.75049932 | 0.00725189 | 0.0400637  |
| ENSMUSG00000034757 | 0.86170543 | 3.70962025 | 0.00771395 | 0.04210289 |
| ENSMUSG00000019768 | 0.86135118 | 0.89088176 | 0.02915478 | 0.11593108 |
| ENSMUSG00000021728 | 0.86134312 | 5.38654729 | 0.00575018 | 0.03330287 |
| ENSMUSG00000042377 | 0.85975    | 0.81002926 | 0.04821516 | 0.16595988 |
| ENSMUSG00000024953 | 0.85922078 | 3.62588135 | 0.00793301 | 0.04303299 |
| ENSMUSG00000026342 | 0.85897149 | 3.57753412 | 0.00771142 | 0.04210289 |
| ENSMUSG00000058486 | 0.85856071 | 3.64165896 | 0.00790303 | 0.04291352 |
| ENSMUSG00000042178 | 0.85846614 | 2.7085955  | 0.01081279 | 0.05467736 |
| ENSMUSG00000057789 | 0.85842454 | 5.48888546 | 0.00591161 | 0.03400042 |
| ENSMUSG00000032115 | 0.85715382 | 8.92763372 | 0.00538381 | 0.03148537 |
| ENSMUSG00000062075 | 0.85634685 | 3.61954937 | 0.00842244 | 0.0449864  |
| ENSMUSG00000041762 | 0.85631491 | 4.93120556 | 0.00631683 | 0.03583412 |
| ENSMUSG00000038650 | 0.85458501 | 4.92101004 | 0.00645001 | 0.03646814 |
| ENSMUSG00000029624 | 0.85438915 | 3.50423338 | 0.00844681 | 0.04504965 |
| ENSMUSG00000028517 | 0.85392017 | 1.44563567 | 0.02220098 | 0.09497868 |
| ENSMUSG00000053835 | 0.85379306 | 5.32578275 | 0.00620186 | 0.03530808 |
| ENSMUSG00000021493 | 0.85340323 | 2.45757813 | 0.01308014 | 0.06305598 |
| ENSMUSG00000047669 | 0.85254964 | 1.51228677 | 0.01997847 | 0.08743826 |
| ENSMUSG00000055322 | 0.85207627 | 2.41780009 | 0.0128019  | 0.06221528 |
| ENSMUSG00000069874 | 0.85138751 | 6.08225335 | 0.00605336 | 0.03464938 |

|                    |            |            |            |            |
|--------------------|------------|------------|------------|------------|
| ENSMUSG00000020538 | 0.85090174 | 4.24831773 | 0.0074585  | 0.04100173 |
| ENSMUSG00000024937 | 0.84994364 | 5.16523303 | 0.0066077  | 0.03722658 |
| ENSMUSG00000044857 | 0.84977963 | 2.50958625 | 0.01411667 | 0.06679869 |
| ENSMUSG00000040699 | 0.8496511  | 6.44570108 | 0.00610204 | 0.03490949 |
| ENSMUSG00000034412 | 0.84954836 | 2.60211754 | 0.01337911 | 0.06408788 |
| ENSMUSG00000020277 | 0.84930171 | 4.67251791 | 0.00711621 | 0.03943533 |
| ENSMUSG00000031138 | 0.84911778 | 1.96220681 | 0.01732779 | 0.07821805 |
| ENSMUSG00000039461 | 0.84879806 | 3.22426445 | 0.0097337  | 0.05062953 |
| ENSMUSG00000035673 | 0.84873094 | 4.26631686 | 0.00739896 | 0.04075096 |
| ENSMUSG00000075706 | 0.84811212 | 5.10225138 | 0.00675819 | 0.03787959 |
| ENSMUSG00000068923 | 0.84767352 | 3.72031622 | 0.00801668 | 0.04337775 |
| ENSMUSG00000095488 | 0.8458967  | 5.15085189 | 0.00682269 | 0.03814198 |
| ENSMUSG00000039623 | 0.84565956 | 2.28036302 | 0.01552442 | 0.07175967 |
| ENSMUSG00000034509 | 0.84448049 | 3.4615542  | 0.00963162 | 0.05020171 |
| ENSMUSG00000050732 | 0.84445893 | 5.00726843 | 0.00709686 | 0.03934834 |
| ENSMUSG00000017765 | 0.84415198 | 3.21310295 | 0.00993544 | 0.05138789 |
| ENSMUSG00000019039 | 0.84406971 | 3.54737602 | 0.00938191 | 0.04911384 |
| ENSMUSG00000038007 | 0.84304291 | 1.89345264 | 0.01946168 | 0.08573315 |
| ENSMUSG00000020423 | 0.84298769 | 7.12576058 | 0.00634363 | 0.03596724 |
| ENSMUSG00000042500 | 0.84262191 | 2.87043536 | 0.010843   | 0.05473294 |
| ENSMUSG00000024610 | 0.84184634 | 11.2549524 | 0.00620445 | 0.03530808 |
| ENSMUSG00000094356 | 0.84170743 | 4.40371792 | 0.007823   | 0.04256004 |
| ENSMUSG00000042210 | 0.84141705 | 2.59176945 | 0.01317892 | 0.06341878 |
| ENSMUSG00000074364 | 0.8406848  | 3.23109327 | 0.00991846 | 0.05132469 |
| ENSMUSG00000024887 | 0.84056266 | 4.62606964 | 0.00761802 | 0.04170281 |
| ENSMUSG00000096054 | 0.84055066 | 4.24053577 | 0.00806954 | 0.04362002 |
| ENSMUSG00000027134 | 0.83984596 | 1.84410349 | 0.02114851 | 0.09140903 |
| ENSMUSG00000093661 | 0.83984411 | 4.49360552 | 0.00782609 | 0.04256004 |
| ENSMUSG00000053730 | 0.83965733 | 3.60299118 | 0.00940089 | 0.04916547 |
| ENSMUSG00000028893 | 0.83924468 | 4.55284368 | 0.00777258 | 0.04235449 |
| ENSMUSG00000020605 | 0.83872599 | 2.75875599 | 0.01262816 | 0.06159297 |
| ENSMUSG00000040472 | 0.83872492 | 3.06275658 | 0.01065892 | 0.05404125 |
| ENSMUSG00000018819 | 0.83821626 | 7.24993713 | 0.00663198 | 0.0373079  |
| ENSMUSG00000033434 | 0.83804092 | 1.14560489 | 0.03575615 | 0.13505027 |
| ENSMUSG00000064065 | 0.83784747 | 2.9187424  | 0.01111009 | 0.05571142 |
| ENSMUSG00000038055 | 0.83646686 | 3.59094435 | 0.00969225 | 0.05046897 |
| ENSMUSG00000044453 | 0.83517419 | 1.16037306 | 0.02998685 | 0.11858385 |
| ENSMUSG00000037148 | 0.8344403  | 3.81036976 | 0.00950575 | 0.04964163 |
| ENSMUSG00000048277 | 0.83443863 | 7.8200933  | 0.00681276 | 0.03812602 |
| ENSMUSG00000026556 | 0.83414242 | 2.34468434 | 0.01702386 | 0.07713667 |
| ENSMUSG00000032783 | 0.83300107 | 3.53400186 | 0.01009717 | 0.05199995 |
| ENSMUSG00000024197 | 0.83135467 | 3.48867195 | 0.01024827 | 0.05257721 |
| ENSMUSG00000051537 | 0.83116866 | 0.72025449 | 0.05017089 | 0.1704609  |

|                    |            |            |            |            |
|--------------------|------------|------------|------------|------------|
| ENSMUSG00000036959 | 0.8306604  | 3.16456147 | 0.01160278 | 0.05771421 |
| ENSMUSG00000040158 | 0.82881346 | 1.79807268 | 0.02124812 | 0.09172925 |
| ENSMUSG00000006219 | 0.82864327 | 1.1129747  | 0.0268734  | 0.10907139 |
| ENSMUSG00000031903 | 0.82841477 | 3.04641917 | 0.01228749 | 0.06023105 |
| ENSMUSG00000026856 | 0.82825168 | 3.31676503 | 0.01163219 | 0.05780715 |
| ENSMUSG00000033697 | 0.82715384 | 1.13772771 | 0.03575615 | 0.13505027 |
| ENSMUSG00000029385 | 0.82668723 | 5.2883793  | 0.00805293 | 0.04355205 |
| ENSMUSG00000020400 | 0.82661839 | 4.95430757 | 0.00839684 | 0.04489417 |
| ENSMUSG00000014837 | 0.8265921  | 2.58482096 | 0.01460663 | 0.06860536 |
| ENSMUSG00000096188 | 0.82656396 | 4.05198901 | 0.00927088 | 0.04869808 |
| ENSMUSG00000047875 | 0.82652876 | 2.44689011 | 0.01588754 | 0.07321846 |
| ENSMUSG00000024965 | 0.82613947 | 6.22045152 | 0.00768801 | 0.04204233 |
| ENSMUSG00000028101 | 0.82589044 | 3.51658199 | 0.01087383 | 0.05482161 |
| ENSMUSG00000074785 | 0.82545996 | 7.4278001  | 0.0074597  | 0.04100173 |
| ENSMUSG00000049881 | 0.82539671 | 3.31007263 | 0.01219992 | 0.05988347 |
| ENSMUSG00000045980 | 0.82413754 | 1.76315898 | 0.02418751 | 0.10102175 |
| ENSMUSG00000072235 | 0.82333739 | 5.12779287 | 0.00852019 | 0.04535132 |
| ENSMUSG00000035769 | 0.82333187 | 2.99347321 | 0.01289471 | 0.06246924 |
| ENSMUSG00000005514 | 0.82309648 | 4.19294536 | 0.00978247 | 0.05074273 |
| ENSMUSG00000032515 | 0.82223622 | 4.1091406  | 0.00975106 | 0.05067733 |
| ENSMUSG00000023055 | 0.82215133 | 2.70900966 | 0.0152974  | 0.07092313 |
| ENSMUSG00000029299 | 0.8221226  | 2.6752544  | 0.01455558 | 0.06845504 |
| ENSMUSG00000019810 | 0.82140721 | 5.34327153 | 0.00844349 | 0.04504965 |
| ENSMUSG00000094433 | 0.82098901 | 5.94677843 | 0.00813956 | 0.04382277 |
| ENSMUSG00000031149 | 0.81989559 | 4.2164162  | 0.00995619 | 0.05146849 |
| ENSMUSG00000003199 | 0.8195566  | 3.00961254 | 0.0137025  | 0.06529728 |
| ENSMUSG00000019960 | 0.81943594 | 4.09072123 | 0.01018605 | 0.05230782 |
| ENSMUSG00000042747 | 0.81941639 | 5.25091518 | 0.00874723 | 0.04644514 |
| ENSMUSG00000042870 | 0.81923467 | 2.05177681 | 0.02062255 | 0.08971098 |
| ENSMUSG00000021606 | 0.81907222 | 3.72382727 | 0.01100353 | 0.05526927 |
| ENSMUSG00000022519 | 0.81876439 | 3.35205393 | 0.0120197  | 0.05930435 |
| ENSMUSG00000038366 | 0.81847493 | 6.41899998 | 0.00820573 | 0.04413497 |
| ENSMUSG00000041298 | 0.81761656 | 2.48423194 | 0.01507351 | 0.07020557 |
| ENSMUSG00000022671 | 0.81759343 | 1.6628138  | 0.0262568  | 0.10701184 |
| ENSMUSG00000037855 | 0.81748851 | 3.98954526 | 0.01046251 | 0.05332122 |
| ENSMUSG00000028988 | 0.81667167 | 1.08711648 | 0.0421534  | 0.15117468 |
| ENSMUSG00000021288 | 0.81628836 | 5.48022201 | 0.00881634 | 0.04674305 |
| ENSMUSG00000006476 | 0.81613247 | 3.02094935 | 0.01413016 | 0.06683315 |
| ENSMUSG00000029605 | 0.8159642  | 3.51718157 | 0.01217492 | 0.05985093 |
| ENSMUSG00000017664 | 0.81593565 | 3.91174836 | 0.01082732 | 0.054715   |
| ENSMUSG00000002489 | 0.81498957 | 2.87116048 | 0.01527477 | 0.07084865 |
| ENSMUSG00000017167 | 0.81493175 | 2.17988126 | 0.02198922 | 0.09439956 |
| ENSMUSG00000042570 | 0.81420462 | 2.55208161 | 0.01700374 | 0.07707791 |

|                    |            |            |            |            |
|--------------------|------------|------------|------------|------------|
| ENSMUSG0000005267  | 0.81391744 | 3.59820239 | 0.01189925 | 0.05880911 |
| ENSMUSG00000020747 | 0.81384109 | 3.04399944 | 0.01443192 | 0.06793269 |
| ENSMUSG00000025144 | 0.81298063 | 3.56870923 | 0.01246662 | 0.0609429  |
| ENSMUSG00000060586 | 0.81252155 | 9.90007712 | 0.00825054 | 0.04430966 |
| ENSMUSG00000004207 | 0.81233724 | 8.72619953 | 0.0083149  | 0.0445444  |
| ENSMUSG00000040061 | 0.81212671 | 4.530056   | 0.01026731 | 0.05262486 |
| ENSMUSG00000020895 | 0.81191998 | 1.54982626 | 0.0295465  | 0.11710011 |
| ENSMUSG00000031865 | 0.81111459 | 4.46975819 | 0.01040026 | 0.05312949 |
| ENSMUSG00000026930 | 0.81083253 | 1.78826413 | 0.0254967  | 0.10490514 |
| ENSMUSG00000020873 | 0.81060022 | 6.81665371 | 0.00871899 | 0.046318   |
| ENSMUSG00000038264 | 0.81002856 | 5.35249894 | 0.00930614 | 0.0488357  |
| ENSMUSG00000003379 | 0.80965351 | 7.34641719 | 0.00869254 | 0.04620028 |
| ENSMUSG00000006299 | 0.80953557 | 5.10124847 | 0.00977084 | 0.0507068  |
| ENSMUSG00000022414 | 0.80913733 | 2.67261981 | 0.01678598 | 0.07621897 |
| ENSMUSG00000023341 | 0.80907307 | 4.47070192 | 0.01036897 | 0.0530199  |
| ENSMUSG00000036908 | 0.80904359 | 6.99977239 | 0.00879946 | 0.04668437 |
| ENSMUSG00000096326 | 0.80753402 | 4.05342853 | 0.01143709 | 0.05710074 |
| ENSMUSG00000055202 | 0.80704065 | 1.68978609 | 0.02876694 | 0.11476977 |
| ENSMUSG00000002963 | 0.80653368 | 3.79271053 | 0.01216795 | 0.05985093 |
| ENSMUSG00000046330 | 0.80641743 | 7.43632088 | 0.00895908 | 0.04734253 |
| ENSMUSG00000048930 | 0.8062128  | 2.71469694 | 0.01678444 | 0.07621897 |
| ENSMUSG00000059142 | 0.8052482  | 4.16621184 | 0.01128243 | 0.05640691 |
| ENSMUSG00000024055 | 0.8042532  | 1.81234449 | 0.02435565 | 0.10148813 |
| ENSMUSG00000034175 | 0.80256314 | 1.50006592 | 0.03454139 | 0.13166997 |
| ENSMUSG00000020307 | 0.80241629 | 4.95157696 | 0.01045985 | 0.05332122 |
| ENSMUSG00000086236 | 0.80213292 | 2.32673469 | 0.01970444 | 0.0864846  |
| ENSMUSG00000059895 | 0.80145734 | 5.65069761 | 0.00998157 | 0.05155231 |
| ENSMUSG00000096452 | 0.80122723 | 1.33850005 | 0.03671917 | 0.13746639 |
| ENSMUSG00000036114 | 0.80060381 | 2.06899832 | 0.02318656 | 0.09821047 |
| ENSMUSG00000030553 | 0.80050882 | 1.2522781  | 0.04761356 | 0.16447664 |
| ENSMUSG00000073491 | 0.800497   | 6.14155507 | 0.00976303 | 0.0507068  |
| ENSMUSG00000052384 | 0.79934601 | 6.09341173 | 0.00996057 | 0.05146849 |
| ENSMUSG00000026895 | 0.79689031 | 4.0008695  | 0.01286226 | 0.06234005 |
| ENSMUSG00000024050 | 0.79633451 | 4.17568453 | 0.01247862 | 0.06097391 |
| ENSMUSG00000024952 | 0.79594267 | 3.7748157  | 0.01324261 | 0.06364352 |
| ENSMUSG00000093906 | 0.79589842 | 2.00382327 | 0.02427486 | 0.10126889 |
| ENSMUSG00000013833 | 0.79573071 | 2.07370473 | 0.02318656 | 0.09821047 |
| ENSMUSG00000027907 | 0.79554104 | 5.85102234 | 0.01040948 | 0.05315145 |
| ENSMUSG00000045252 | 0.79525975 | 2.13137162 | 0.02480434 | 0.10299961 |
| ENSMUSG00000015478 | 0.79468085 | 3.6321724  | 0.01380605 | 0.06561674 |
| ENSMUSG00000024516 | 0.79459412 | 8.3444863  | 0.00985091 | 0.05102411 |
| ENSMUSG00000027381 | 0.7937191  | 6.89855141 | 0.01016523 | 0.05222574 |
| ENSMUSG00000026471 | 0.79347839 | 3.0253387  | 0.01584449 | 0.07305128 |

|                    |            |            |            |            |
|--------------------|------------|------------|------------|------------|
| ENSMUSG00000024194 | 0.79315343 | 3.84501639 | 0.0135279  | 0.064608   |
| ENSMUSG00000006315 | 0.7926459  | 4.98578192 | 0.01155285 | 0.05754589 |
| ENSMUSG00000017760 | 0.79166618 | 6.46012383 | 0.01054356 | 0.05358235 |
| ENSMUSG00000032359 | 0.79129474 | 7.80824276 | 0.01022872 | 0.0525019  |
| ENSMUSG00000026520 | 0.79107052 | 4.19420981 | 0.01303227 | 0.06293776 |
| ENSMUSG00000031875 | 0.79043255 | 2.71281723 | 0.01880978 | 0.08356048 |
| ENSMUSG00000022508 | 0.79008272 | 3.51805097 | 0.01488273 | 0.06958754 |
| ENSMUSG00000074247 | 0.79004277 | 4.06025246 | 0.01343814 | 0.06420775 |
| ENSMUSG00000058569 | 0.78939409 | 6.50903154 | 0.01073793 | 0.05433969 |
| ENSMUSG00000025512 | 0.78854028 | 4.83471062 | 0.01207393 | 0.05953601 |
| ENSMUSG00000010057 | 0.78835647 | 3.02133518 | 0.01723688 | 0.07790549 |
| ENSMUSG00000002871 | 0.78684689 | 2.38721709 | 0.02190488 | 0.09414996 |
| ENSMUSG00000053460 | 0.78681727 | 3.31664213 | 0.01524222 | 0.07072808 |
| ENSMUSG00000003549 | 0.78627786 | 2.0034938  | 0.02697574 | 0.10944558 |
| ENSMUSG00000096649 | 0.78511224 | 1.36694221 | 0.03047868 | 0.1199132  |
| ENSMUSG00000024963 | 0.78323676 | 0.73559299 | 0.05909183 | 0.18954381 |
| ENSMUSG00000020097 | 0.7827692  | 8.22605729 | 0.01100285 | 0.05526927 |
| ENSMUSG00000024941 | 0.7826095  | 4.12493762 | 0.01374059 | 0.06540494 |
| ENSMUSG00000062997 | 0.78221215 | 6.25127878 | 0.01167271 | 0.05792846 |
| ENSMUSG00000051403 | 0.78171134 | 2.11717456 | 0.02575854 | 0.10557966 |
| ENSMUSG00000024858 | 0.78057491 | 8.34835504 | 0.01121602 | 0.05617908 |
| ENSMUSG00000004054 | 0.7796608  | 2.41848791 | 0.02331656 | 0.09856962 |
| ENSMUSG00000047767 | 0.77913516 | 2.71296066 | 0.02083214 | 0.09051322 |
| ENSMUSG00000025534 | 0.77908205 | 6.89698525 | 0.01163784 | 0.05780858 |
| ENSMUSG00000022575 | 0.77900426 | 4.3129748  | 0.01415927 | 0.06692635 |
| ENSMUSG00000076576 | 0.77733667 | 6.10644111 | 0.0121304  | 0.05975981 |
| ENSMUSG00000030946 | 0.77700992 | 2.64032911 | 0.02178265 | 0.09369928 |
| ENSMUSG00000021990 | 0.77681939 | 5.10716572 | 0.01275145 | 0.06199803 |
| ENSMUSG00000091144 | 0.77676514 | 4.69857394 | 0.01340117 | 0.06408788 |
| ENSMUSG00000027198 | 0.7758875  | 4.91506403 | 0.01336611 | 0.06407728 |
| ENSMUSG00000031570 | 0.77585668 | 4.51603189 | 0.01379329 | 0.06558504 |
| ENSMUSG00000013846 | 0.7745205  | 6.06615432 | 0.012449   | 0.06091199 |
| ENSMUSG00000049922 | 0.77448037 | 4.70790782 | 0.01400845 | 0.06637668 |
| ENSMUSG00000021756 | 0.77358179 | 5.91691306 | 0.01260159 | 0.06149117 |
| ENSMUSG00000032436 | 0.77284418 | 3.92176672 | 0.01605595 | 0.07378467 |
| ENSMUSG00000034105 | 0.77265827 | 1.75310033 | 0.03877407 | 0.1424439  |
| ENSMUSG00000051169 | 0.77193265 | 1.42988986 | 0.04069891 | 0.14772703 |
| ENSMUSG00000070003 | 0.77123026 | 0.84044385 | 0.06562718 | 0.20357165 |
| ENSMUSG00000000682 | 0.77063253 | 9.17447579 | 0.01221622 | 0.05993618 |
| ENSMUSG00000036845 | 0.77048258 | 3.12786013 | 0.01907058 | 0.08445878 |
| ENSMUSG00000022372 | 0.76990343 | 6.39060662 | 0.01283837 | 0.06225913 |
| ENSMUSG00000032300 | 0.76967557 | 6.21368328 | 0.01293406 | 0.06263175 |
| ENSMUSG00000019370 | 0.76951835 | 7.00833113 | 0.01266398 | 0.06168397 |

|                    |            |            |            |            |
|--------------------|------------|------------|------------|------------|
| ENSMUSG0000002111  | 0.7694607  | 3.68664781 | 0.01738876 | 0.07846039 |
| ENSMUSG00000033721 | 0.76936589 | 3.92727074 | 0.01605829 | 0.07378467 |
| ENSMUSG00000000532 | 0.76852068 | 3.98014405 | 0.01591292 | 0.0732728  |
| ENSMUSG00000036646 | 0.76704566 | 6.85483646 | 0.0129969  | 0.06279504 |
| ENSMUSG00000024830 | 0.76699071 | 3.9223942  | 0.01630538 | 0.07460214 |
| ENSMUSG00000000078 | 0.76678642 | 6.03365036 | 0.01335235 | 0.06405328 |
| ENSMUSG00000026639 | 0.76675089 | 1.25179936 | 0.04939769 | 0.16875896 |
| ENSMUSG00000030062 | 0.76640966 | 8.87900742 | 0.01271215 | 0.06186276 |
| ENSMUSG00000020823 | 0.76559232 | 4.51939001 | 0.015208   | 0.07059969 |
| ENSMUSG00000017721 | 0.76504679 | 5.65703987 | 0.01392878 | 0.06610229 |
| ENSMUSG00000022433 | 0.76480957 | 4.03996462 | 0.01616181 | 0.07413399 |
| ENSMUSG00000002968 | 0.76462534 | 2.9188457  | 0.02211728 | 0.09476074 |
| ENSMUSG00000076594 | 0.76444396 | 3.39301548 | 0.01973209 | 0.08657073 |
| ENSMUSG00000027438 | 0.7641871  | 1.13792133 | 0.05083207 | 0.17194888 |
| ENSMUSG00000019838 | 0.76386405 | 4.02807083 | 0.01662939 | 0.07573112 |
| ENSMUSG00000013646 | 0.76247849 | 3.23715708 | 0.01996256 | 0.08743826 |
| ENSMUSG00000039952 | 0.76227303 | 3.99250154 | 0.01712738 | 0.07749729 |
| ENSMUSG00000007570 | 0.76219478 | 1.33268686 | 0.04620943 | 0.16116511 |
| ENSMUSG00000034371 | 0.7618418  | 1.69012995 | 0.04062819 | 0.14761939 |
| ENSMUSG00000043592 | 0.76170908 | 2.15801649 | 0.02787481 | 0.11187269 |
| ENSMUSG00000035919 | 0.76164195 | 4.18503089 | 0.01639727 | 0.07489543 |
| ENSMUSG00000037946 | 0.76128745 | 4.68617408 | 0.01547549 | 0.07165638 |
| ENSMUSG00000024349 | 0.76084811 | 7.52885712 | 0.01355886 | 0.06469854 |
| ENSMUSG00000023990 | 0.7606718  | 2.73428038 | 0.02393099 | 0.10030766 |
| ENSMUSG00000089682 | 0.75975553 | 4.74755546 | 0.01551305 | 0.07175967 |
| ENSMUSG00000038587 | 0.75937219 | 4.04388226 | 0.01726417 | 0.07799616 |
| ENSMUSG00000018669 | 0.75798068 | 4.46540255 | 0.01651786 | 0.0752868  |
| ENSMUSG00000019982 | 0.75735106 | 4.46052203 | 0.01675406 | 0.07613811 |
| ENSMUSG00000004947 | 0.75647029 | 2.59103688 | 0.02593578 | 0.10602407 |
| ENSMUSG00000027642 | 0.75644158 | 8.5750623  | 0.01393272 | 0.06610229 |
| ENSMUSG00000040482 | 0.75626961 | 2.32313468 | 0.03008679 | 0.11881151 |
| ENSMUSG00000058886 | 0.75610212 | 2.56080279 | 0.02746358 | 0.11088255 |
| ENSMUSG00000078440 | 0.75589835 | 2.23278812 | 0.02813408 | 0.11270353 |
| ENSMUSG00000028613 | 0.75578252 | 5.37650607 | 0.01519618 | 0.07058505 |
| ENSMUSG00000020778 | 0.75564912 | 2.9774821  | 0.02375885 | 0.099928   |
| ENSMUSG00000080268 | 0.75535497 | 3.72889486 | 0.01904113 | 0.08436299 |
| ENSMUSG00000020381 | 0.75491939 | 1.50573619 | 0.05095939 | 0.17222166 |
| ENSMUSG00000024462 | 0.75485474 | 4.65667524 | 0.01655576 | 0.07542767 |
| ENSMUSG00000045826 | 0.75412877 | 4.79804681 | 0.01649522 | 0.07521542 |
| ENSMUSG00000076731 | 0.75389007 | 4.99561922 | 0.0159078  | 0.0732728  |
| ENSMUSG00000042363 | 0.75368192 | 3.50011574 | 0.01962182 | 0.08619214 |
| ENSMUSG00000031146 | 0.75315977 | 6.01578793 | 0.0151983  | 0.07058505 |
| ENSMUSG00000026480 | 0.7531181  | 6.0693909  | 0.01513814 | 0.07039658 |

|                    |            |            |            |            |
|--------------------|------------|------------|------------|------------|
| ENSMUSG0000003623  | 0.75308447 | 4.96294054 | 0.01610765 | 0.07394162 |
| ENSMUSG0000003458  | 0.75302447 | 6.6452507  | 0.01480045 | 0.06936466 |
| ENSMUSG00000033949 | 0.75230059 | 2.14995151 | 0.03297677 | 0.1271439  |
| ENSMUSG00000029386 | 0.75106064 | 0.99903009 | 0.06543    | 0.20328353 |
| ENSMUSG00000094491 | 0.75081185 | 2.47895544 | 0.03218606 | 0.12503404 |
| ENSMUSG00000025578 | 0.75047843 | 1.03044283 | 0.05731495 | 0.18558753 |
| ENSMUSG00000038271 | 0.75031474 | 3.26133274 | 0.02217559 | 0.09497284 |
| ENSMUSG00000073421 | 0.74885104 | 9.83869888 | 0.01481447 | 0.06940017 |
| ENSMUSG00000041801 | 0.74878544 | 2.91738966 | 0.02549124 | 0.10490514 |
| ENSMUSG00000007721 | 0.74826526 | 1.39858227 | 0.05606787 | 0.18333412 |
| ENSMUSG00000032041 | 0.74797816 | 4.36309459 | 0.01775578 | 0.07958366 |
| ENSMUSG00000038520 | 0.7479668  | 2.94922777 | 0.02552712 | 0.10499025 |
| ENSMUSG00000028458 | 0.74692133 | 1.95290917 | 0.03373182 | 0.12926936 |
| ENSMUSG00000027222 | 0.74679773 | 2.01148764 | 0.03821296 | 0.14127138 |
| ENSMUSG00000049288 | 0.74604449 | 1.33630475 | 0.04463164 | 0.15713601 |
| ENSMUSG00000046822 | 0.74552962 | 1.71115129 | 0.04608163 | 0.16090254 |
| ENSMUSG00000028465 | 0.74529454 | 7.64596833 | 0.01552121 | 0.07175967 |
| ENSMUSG00000018340 | 0.74517149 | 6.72338343 | 0.01583682 | 0.07304718 |
| ENSMUSG00000084314 | 0.74484211 | 0.96104829 | 0.06846311 | 0.20814947 |
| ENSMUSG00000020712 | 0.74383217 | 1.32987386 | 0.05390766 | 0.1788189  |
| ENSMUSG00000017400 | 0.74377254 | 3.31496285 | 0.02347548 | 0.09900648 |
| ENSMUSG00000024180 | 0.74367423 | 2.48895694 | 0.02984361 | 0.11806069 |
| ENSMUSG00000012296 | 0.74341543 | 2.92326676 | 0.02549124 | 0.10490514 |
| ENSMUSG00000058881 | 0.74326713 | 2.72474367 | 0.02641679 | 0.1075014  |
| ENSMUSG00000031266 | 0.74317352 | 3.58787453 | 0.02094139 | 0.0908797  |
| ENSMUSG00000022559 | 0.74317337 | 2.50081579 | 0.03168241 | 0.12356714 |
| ENSMUSG00000024236 | 0.74296887 | 4.63346752 | 0.01790933 | 0.08010545 |
| ENSMUSG00000031823 | 0.74248428 | 4.05794867 | 0.019633   | 0.08620613 |
| ENSMUSG00000032733 | 0.74219356 | 2.4522779  | 0.03059004 | 0.12021976 |
| ENSMUSG00000041164 | 0.74204839 | 5.90073232 | 0.01674636 | 0.07613811 |
| ENSMUSG00000024038 | 0.74144028 | 4.19170007 | 0.01990441 | 0.08722029 |
| ENSMUSG00000028803 | 0.74112924 | 4.1368512  | 0.0196176  | 0.08619214 |
| ENSMUSG00000022231 | 0.74046433 | 0.73107853 | 0.08034886 | 0.2314322  |
| ENSMUSG00000073434 | 0.73849196 | 3.37955617 | 0.02281793 | 0.09703018 |
| ENSMUSG00000095771 | 0.73812318 | 6.72559982 | 0.01681979 | 0.07634033 |
| ENSMUSG00000074406 | 0.73786374 | 0.6914629  | 0.09922792 | 0.26511467 |
| ENSMUSG00000060538 | 0.73753112 | 2.91688274 | 0.02748087 | 0.11091081 |
| ENSMUSG00000020496 | 0.7374128  | 6.14494939 | 0.01729815 | 0.07811694 |
| ENSMUSG00000038286 | 0.73721479 | 2.77314595 | 0.02765466 | 0.11132061 |
| ENSMUSG00000029401 | 0.73720411 | 5.84035939 | 0.01761962 | 0.07927794 |
| ENSMUSG00000063904 | 0.73683733 | 5.73121982 | 0.01769579 | 0.07954621 |
| ENSMUSG00000022550 | 0.73632509 | 1.51493189 | 0.05636402 | 0.18407083 |
| ENSMUSG00000029403 | 0.7359201  | 1.53958724 | 0.04478633 | 0.15757774 |



|                    |            |            |            |            |
|--------------------|------------|------------|------------|------------|
| ENSMUSG00000015127 | 0.73559087 | 4.59163359 | 0.01932395 | 0.08526572 |
| ENSMUSG00000028480 | 0.73517003 | 5.94034941 | 0.01773767 | 0.07958366 |
| ENSMUSG00000030682 | 0.73468957 | 5.37117125 | 0.01841344 | 0.08205392 |
| ENSMUSG00000010607 | 0.7346772  | 0.9632558  | 0.07485105 | 0.22088169 |
| ENSMUSG00000040713 | 0.73453837 | 4.8180336  | 0.01918964 | 0.08477715 |
| ENSMUSG00000004929 | 0.73431543 | 3.72489761 | 0.02336149 | 0.09871878 |
| ENSMUSG00000039427 | 0.7342156  | 3.73620233 | 0.02252997 | 0.09595704 |
| ENSMUSG00000057672 | 0.73379864 | 5.32787955 | 0.01865466 | 0.08302595 |
| ENSMUSG00000037103 | 0.73366266 | 4.01196225 | 0.02118112 | 0.0915133  |
| ENSMUSG00000022210 | 0.73364945 | 4.3043898  | 0.02047402 | 0.08917278 |
| ENSMUSG00000094872 | 0.73328553 | 5.95281372 | 0.01791957 | 0.08011802 |
| ENSMUSG00000006333 | 0.73321319 | 8.05009996 | 0.01721306 | 0.07783046 |
| ENSMUSG00000038059 | 0.7327242  | 3.78377454 | 0.0220725  | 0.09464408 |
| ENSMUSG00000019820 | 0.73229579 | 4.85145157 | 0.0190896  | 0.0845083  |
| ENSMUSG00000024219 | 0.73186399 | 2.52721645 | 0.03090736 | 0.12115774 |
| ENSMUSG00000038150 | 0.73178045 | 3.62684501 | 0.02320368 | 0.09822804 |
| ENSMUSG00000028670 | 0.7312516  | 3.34543909 | 0.02504797 | 0.1038114  |
| ENSMUSG00000059734 | 0.73101737 | 4.55865156 | 0.02096306 | 0.09089891 |
| ENSMUSG00000023939 | 0.73062275 | 1.71305549 | 0.04200967 | 0.15088051 |
| ENSMUSG00000030802 | 0.73061985 | 4.84137235 | 0.01997459 | 0.08743826 |
| ENSMUSG00000094335 | 0.7303543  | 6.8847265  | 0.01786654 | 0.07998038 |
| ENSMUSG00000026482 | 0.73002897 | 3.1273361  | 0.02706138 | 0.10975174 |
| ENSMUSG00000026158 | 0.7296681  | 5.24871943 | 0.01917173 | 0.08475981 |
| ENSMUSG00000079523 | 0.7294595  | 6.88921764 | 0.01808408 | 0.08068625 |
| ENSMUSG00000063856 | 0.72932921 | 5.88647288 | 0.01884693 | 0.08367446 |
| ENSMUSG00000092486 | 0.72925894 | 3.36771964 | 0.02434136 | 0.10146781 |
| ENSMUSG00000002731 | 0.72911994 | 2.41320332 | 0.03138657 | 0.12267952 |
| ENSMUSG00000025130 | 0.72869865 | 9.18794405 | 0.01773454 | 0.07958366 |
| ENSMUSG00000002778 | 0.7286784  | 5.93919707 | 0.01876907 | 0.08343184 |
| ENSMUSG00000029346 | 0.72865055 | 2.18590977 | 0.03829479 | 0.1414769  |
| ENSMUSG00000025790 | 0.72856176 | 4.72529404 | 0.02042056 | 0.08897587 |
| ENSMUSG00000024065 | 0.72746801 | 4.03485308 | 0.02237761 | 0.09557488 |
| ENSMUSG00000052302 | 0.72746157 | 4.90600163 | 0.02032602 | 0.08870734 |
| ENSMUSG00000024525 | 0.72712631 | 2.98499156 | 0.02839879 | 0.11355305 |
| ENSMUSG00000070394 | 0.72688076 | 4.24118089 | 0.02202818 | 0.09449161 |
| ENSMUSG00000060791 | 0.72637556 | 5.87957545 | 0.01917785 | 0.08475981 |
| ENSMUSG00000006720 | 0.72617053 | 1.12224399 | 0.06787492 | 0.2070358  |
| ENSMUSG00000025730 | 0.72586191 | 2.70950227 | 0.03111451 | 0.12179268 |
| ENSMUSG00000096145 | 0.72551949 | 2.32351606 | 0.03815704 | 0.14115106 |
| ENSMUSG00000007036 | 0.72536106 | 2.64904446 | 0.03191286 | 0.1241516  |
| ENSMUSG00000024137 | 0.72526322 | 2.38254206 | 0.03867728 | 0.14230496 |
| ENSMUSG00000049516 | 0.72522654 | 6.70436888 | 0.01881351 | 0.08356048 |
| ENSMUSG00000022570 | 0.7251393  | 3.7380097  | 0.02420331 | 0.1010486  |

|                    |            |            |            |            |
|--------------------|------------|------------|------------|------------|
| ENSMUSG00000031787 | 0.72507514 | 2.61790517 | 0.032669   | 0.12627329 |
| ENSMUSG00000097715 | 0.72504705 | 1.47109553 | 0.05629822 | 0.18397278 |
| ENSMUSG00000052534 | 0.72470984 | 1.26240376 | 0.05361809 | 0.17813232 |
| ENSMUSG00000026663 | 0.72360433 | 7.77162234 | 0.01872994 | 0.08329224 |
| ENSMUSG00000095497 | 0.72356863 | 3.48656858 | 0.02524701 | 0.10443564 |
| ENSMUSG00000025381 | 0.72315215 | 4.91774838 | 0.02104404 | 0.09110356 |
| ENSMUSG00000010047 | 0.72301188 | 1.30526628 | 0.06479537 | 0.20206863 |
| ENSMUSG00000002372 | 0.7228323  | 4.80344917 | 0.02121383 | 0.09161792 |
| ENSMUSG00000028672 | 0.72260675 | 4.33405273 | 0.02246657 | 0.09576263 |
| ENSMUSG00000086513 | 0.7225786  | 1.29163627 | 0.0478744  | 0.16517178 |
| ENSMUSG00000064030 | 0.72214259 | 3.72341586 | 0.02484308 | 0.10312078 |
| ENSMUSG00000096472 | 0.72169158 | 3.3229056  | 0.02685601 | 0.10904188 |
| ENSMUSG00000023206 | 0.72156649 | 3.69324762 | 0.02446073 | 0.10184731 |
| ENSMUSG00000034868 | 0.72154693 | 5.02274915 | 0.02108774 | 0.09121949 |
| ENSMUSG00000063897 | 0.72083885 | 1.30443947 | 0.06973086 | 0.21033782 |
| ENSMUSG00000026426 | 0.72062648 | 4.65034594 | 0.02194057 | 0.09426576 |
| ENSMUSG00000004667 | 0.72025418 | 3.91052104 | 0.02549148 | 0.10490514 |
| ENSMUSG00000039483 | 0.72022108 | 2.57507604 | 0.03329611 | 0.1281085  |
| ENSMUSG00000035027 | 0.71966088 | 4.06948982 | 0.02366294 | 0.09960231 |
| ENSMUSG00000028822 | 0.71953464 | 5.3989766  | 0.02095521 | 0.09089891 |
| ENSMUSG00000028164 | 0.71921714 | 5.22263996 | 0.02112191 | 0.09133065 |
| ENSMUSG00000067714 | 0.71906243 | 0.99635945 | 0.08124659 | 0.23296018 |
| ENSMUSG00000028969 | 0.71873429 | 3.40569399 | 0.02710328 | 0.10988035 |
| ENSMUSG00000006095 | 0.71842692 | 4.3626887  | 0.02316129 | 0.09818056 |
| ENSMUSG00000039637 | 0.71778656 | 5.27403359 | 0.02135046 | 0.09203441 |
| ENSMUSG00000022193 | 0.71775173 | 4.86445683 | 0.02227642 | 0.09521558 |
| ENSMUSG00000044937 | 0.71729718 | 2.56281558 | 0.03262066 | 0.12613164 |
| ENSMUSG00000028158 | 0.71700533 | 2.71091411 | 0.0344583  | 0.1314747  |
| ENSMUSG00000028439 | 0.7168347  | 2.39059223 | 0.03653629 | 0.13714145 |
| ENSMUSG00000000290 | 0.71496468 | 6.40867291 | 0.02072527 | 0.09008519 |
| ENSMUSG00000020964 | 0.71420054 | 8.11878027 | 0.02022841 | 0.08835285 |
| ENSMUSG00000042492 | 0.71412593 | 5.24854653 | 0.02208751 | 0.09467078 |
| ENSMUSG00000036529 | 0.7140891  | 5.32993617 | 0.02195153 | 0.0942753  |
| ENSMUSG00000090946 | 0.71345204 | 6.23912143 | 0.021077   | 0.09120961 |
| ENSMUSG00000024845 | 0.71340903 | 5.70366814 | 0.02162294 | 0.0930494  |
| ENSMUSG00000032462 | 0.7133107  | 3.02594811 | 0.0289806  | 0.11540873 |
| ENSMUSG00000046574 | 0.71249578 | 2.15342238 | 0.04258961 | 0.15223279 |
| ENSMUSG00000028737 | 0.71114845 | 2.83926533 | 0.03229723 | 0.12537558 |
| ENSMUSG00000031879 | 0.71114823 | 3.02947477 | 0.03235899 | 0.12556037 |
| ENSMUSG00000047881 | 0.71105733 | 2.99826345 | 0.03245636 | 0.12563151 |
| ENSMUSG00000028641 | 0.71093702 | 2.66989588 | 0.03447156 | 0.1314747  |
| ENSMUSG00000036553 | 0.71056251 | 2.1320332  | 0.04552354 | 0.15954691 |
| ENSMUSG00000036985 | 0.71028506 | 4.37885683 | 0.02494523 | 0.10350494 |

|                     |            |            |            |            |
|---------------------|------------|------------|------------|------------|
| ENSMUSG00000024851  | 0.7101042  | 4.60871769 | 0.02409959 | 0.10073254 |
| ENSMUSG00000003402  | 0.70977368 | 5.70091972 | 0.02239515 | 0.09557488 |
| ENSMUSG000000050556 | 0.70966651 | 1.39455827 | 0.06914806 | 0.20952308 |
| ENSMUSG000000051427 | 0.70965673 | 2.28360687 | 0.04108737 | 0.14863677 |
| ENSMUSG000000057375 | 0.70958328 | 5.13218749 | 0.0231355  | 0.09810981 |
| ENSMUSG00000005686  | 0.70901327 | 1.90719131 | 0.04268293 | 0.15251582 |
| ENSMUSG000000037375 | 0.70876901 | 1.29577243 | 0.05796612 | 0.1866547  |
| ENSMUSG000000031202 | 0.70863456 | 2.23803417 | 0.03980826 | 0.1454242  |
| ENSMUSG000000017188 | 0.70849257 | 4.11052979 | 0.02637899 | 0.10738809 |
| ENSMUSG00000002981  | 0.70808706 | 6.66349249 | 0.02184094 | 0.09391257 |
| ENSMUSG000000020396 | 0.707241   | 4.3183305  | 0.02548172 | 0.10490514 |
| ENSMUSG000000021676 | 0.70706021 | 3.60145656 | 0.02822671 | 0.11299067 |
| ENSMUSG000000078546 | 0.70698367 | 2.4097454  | 0.0383433  | 0.14160758 |
| ENSMUSG000000024158 | 0.70678115 | 2.56077496 | 0.0370223  | 0.13814827 |
| ENSMUSG000000025791 | 0.70665846 | 4.86736238 | 0.02405784 | 0.10059704 |
| ENSMUSG000000042810 | 0.70558619 | 2.74147504 | 0.03767962 | 0.13992323 |
| ENSMUSG000000005442 | 0.70554283 | 4.71089671 | 0.02515387 | 0.1041326  |
| ENSMUSG000000032593 | 0.70500019 | 1.77436856 | 0.04789045 | 0.16517178 |
| ENSMUSG000000054874 | 0.70477168 | 3.99660636 | 0.02713898 | 0.10990531 |
| ENSMUSG000000059713 | 0.70474905 | 4.35027263 | 0.02597347 | 0.1060977  |
| ENSMUSG000000031782 | 0.70466656 | 4.04816954 | 0.02714001 | 0.10990531 |
| ENSMUSG000000036966 | 0.70451586 | 3.75705026 | 0.02905879 | 0.11559202 |
| ENSMUSG000000037321 | 0.70387449 | 7.77135182 | 0.02219158 | 0.09497868 |
| ENSMUSG000000031822 | 0.70361638 | 4.19122855 | 0.02648416 | 0.10769424 |
| ENSMUSG000000023952 | 0.70341211 | 5.34909512 | 0.02391197 | 0.10030766 |
| ENSMUSG000000048264 | 0.70285358 | 3.77070819 | 0.02784492 | 0.11179434 |
| ENSMUSG000000026307 | 0.70161013 | 4.11174052 | 0.0272814  | 0.11039497 |
| ENSMUSG000000027009 | 0.70145884 | 7.56433243 | 0.02264955 | 0.09642824 |
| ENSMUSG000000055675 | 0.70125166 | 3.7681155  | 0.02784492 | 0.11179434 |
| ENSMUSG000000025058 | 0.70122452 | 5.15494773 | 0.0246672  | 0.10250908 |
| ENSMUSG000000079677 | 0.70110822 | 3.44583471 | 0.03070056 | 0.12048851 |
| ENSMUSG000000022900 | 0.70102022 | 2.12674682 | 0.04050686 | 0.14732747 |
| ENSMUSG000000034341 | 0.70086912 | 5.36886991 | 0.02448285 | 0.10189666 |
| ENSMUSG000000036594 | 0.70046773 | 10.7972663 | 0.02250355 | 0.09588236 |
| ENSMUSG000000038375 | 0.70033719 | 4.71283182 | 0.0257744  | 0.10560454 |
| ENSMUSG000000050856 | 0.69996373 | 5.00630546 | 0.02548555 | 0.10490514 |
| ENSMUSG000000031848 | 0.69926189 | 3.91721633 | 0.02894644 | 0.11531525 |
| ENSMUSG000000029136 | 0.69924317 | 2.09229947 | 0.046375   | 0.16169027 |
| ENSMUSG000000021809 | 0.69905645 | 2.57433882 | 0.03849821 | 0.14198518 |
| ENSMUSG000000036986 | 0.69898718 | 7.7467202  | 0.02312691 | 0.09810981 |
| ENSMUSG000000042558 | 0.69886675 | 3.01695038 | 0.03634804 | 0.13648232 |
| ENSMUSG000000038241 | 0.69759001 | 5.10767051 | 0.02541513 | 0.10488967 |
| ENSMUSG000000050721 | 0.69726263 | 6.76751645 | 0.02387358 | 0.10029323 |

|                    |            |            |            |            |
|--------------------|------------|------------|------------|------------|
| ENSMUSG00000023094 | 0.69692322 | 2.44630911 | 0.04254795 | 0.15217163 |
| ENSMUSG00000022841 | 0.69626709 | 7.3968627  | 0.02378568 | 0.10000184 |
| ENSMUSG00000021484 | 0.69522671 | 6.89005209 | 0.02423988 | 0.10116211 |
| ENSMUSG00000023904 | 0.69516622 | 1.83446458 | 0.05388285 | 0.1788189  |
| ENSMUSG00000040570 | 0.69509151 | 3.34856451 | 0.03146083 | 0.1228807  |
| ENSMUSG00000056214 | 0.69386385 | 2.40703059 | 0.0430256  | 0.15338448 |
| ENSMUSG00000029551 | 0.69360001 | 1.86987276 | 0.05114901 | 0.17269598 |
| ENSMUSG00000037679 | 0.69318649 | 5.25359939 | 0.02643757 | 0.10754535 |
| ENSMUSG00000030790 | 0.69202729 | 3.2585811  | 0.03438444 | 0.13127884 |
| ENSMUSG00000024792 | 0.69139791 | 1.97048867 | 0.05030698 | 0.17063717 |
| ENSMUSG00000033857 | 0.69069758 | 1.4459939  | 0.07121124 | 0.21309275 |
| ENSMUSG00000011832 | 0.69036504 | 2.61488863 | 0.04101844 | 0.14848702 |
| ENSMUSG00000059555 | 0.69009127 | 4.11972257 | 0.0296748  | 0.11743596 |
| ENSMUSG00000050930 | 0.68914067 | 2.09012073 | 0.04316355 | 0.1537238  |
| ENSMUSG00000061286 | 0.68853088 | 2.00450195 | 0.05566163 | 0.18241079 |
| ENSMUSG00000018899 | 0.68829165 | 6.20384451 | 0.02607169 | 0.10645033 |
| ENSMUSG00000022769 | 0.68803578 | 6.71877849 | 0.02582592 | 0.10573529 |
| ENSMUSG00000042182 | 0.68769849 | 1.1470679  | 0.0651331  | 0.20271151 |
| ENSMUSG00000028337 | 0.68748008 | 7.94108795 | 0.02541183 | 0.10488967 |
| ENSMUSG00000028073 | 0.68737271 | 2.46500216 | 0.04341153 | 0.15439602 |
| ENSMUSG00000014444 | 0.68709807 | 5.3690352  | 0.02731204 | 0.11041356 |
| ENSMUSG00000036534 | 0.68708636 | 3.27418196 | 0.03492693 | 0.13268407 |
| ENSMUSG00000047777 | 0.68544698 | 3.3956544  | 0.03483149 | 0.13240141 |
| ENSMUSG00000056290 | 0.68542815 | 4.16231852 | 0.03010671 | 0.11883996 |
| ENSMUSG00000038991 | 0.68421539 | 7.28928126 | 0.02633021 | 0.10723    |
| ENSMUSG00000033938 | 0.68372367 | 3.27458514 | 0.03909148 | 0.14336876 |
| ENSMUSG00000022568 | 0.68251537 | 3.97037725 | 0.03329823 | 0.1281085  |
| ENSMUSG00000002064 | 0.68238828 | 4.63118553 | 0.03006752 | 0.11881151 |
| ENSMUSG00000036372 | 0.68188705 | 5.89343627 | 0.02790083 | 0.11193545 |
| ENSMUSG00000029029 | 0.68155085 | 2.99174692 | 0.04241693 | 0.15186725 |
| ENSMUSG00000079491 | 0.68125536 | 4.45436319 | 0.03114449 | 0.12186581 |
| ENSMUSG00000045394 | 0.68124221 | 2.07189408 | 0.04189091 | 0.15058385 |
| ENSMUSG00000019689 | 0.68095367 | 1.61440636 | 0.06793782 | 0.2071364  |
| ENSMUSG00000032089 | 0.68041795 | 6.53935407 | 0.0275862  | 0.11116949 |
| ENSMUSG00000028744 | 0.68026851 | 2.34866899 | 0.0498824  | 0.16974813 |
| ENSMUSG00000076525 | 0.68000975 | 2.17469187 | 0.05354668 | 0.17800474 |
| ENSMUSG00000015095 | 0.67999058 | 4.11486293 | 0.03308442 | 0.12746782 |
| ENSMUSG00000019659 | 0.67991427 | 3.65101538 | 0.03576628 | 0.13505027 |
| ENSMUSG00000020744 | 0.67988447 | 6.89823639 | 0.02746185 | 0.11088255 |
| ENSMUSG00000050075 | 0.67941661 | 6.3386597  | 0.02792767 | 0.11200148 |
| ENSMUSG00000089901 | 0.679095   | 1.0392717  | 0.09441917 | 0.25764583 |
| ENSMUSG00000031521 | 0.67909089 | 3.50133748 | 0.03608858 | 0.13593408 |
| ENSMUSG00000022946 | 0.67864795 | 3.64525237 | 0.03447797 | 0.1314747  |

|                    |            |            |            |            |
|--------------------|------------|------------|------------|------------|
| ENSMUSG00000037573 | 0.67814572 | 3.13461077 | 0.03909936 | 0.14336876 |
| ENSMUSG00000027649 | 0.67791324 | 5.21570877 | 0.03008849 | 0.11881151 |
| ENSMUSG00000037816 | 0.67747262 | 3.01841407 | 0.03941769 | 0.14433967 |
| ENSMUSG00000097403 | 0.67690894 | 0.9347177  | 0.0893022  | 0.24775788 |
| ENSMUSG00000002058 | 0.67685518 | 3.01040599 | 0.04092913 | 0.14821348 |
| ENSMUSG00000027580 | 0.67655001 | 8.1948146  | 0.02773107 | 0.11151099 |
| ENSMUSG00000098557 | 0.67615829 | 6.558602   | 0.02837483 | 0.11349933 |
| ENSMUSG00000025429 | 0.67598218 | 0.84269182 | 0.09973448 | 0.26585318 |
| ENSMUSG00000046598 | 0.6755469  | 4.37255786 | 0.03300951 | 0.12722465 |
| ENSMUSG00000042303 | 0.67497759 | 2.56256524 | 0.04738884 | 0.16395292 |
| ENSMUSG00000025823 | 0.67444126 | 9.76996281 | 0.02802082 | 0.11229155 |
| ENSMUSG00000075701 | 0.67431615 | 6.71381941 | 0.0288976  | 0.11516324 |
| ENSMUSG00000016933 | 0.67401843 | 4.48949068 | 0.03209043 | 0.12470745 |
| ENSMUSG00000037949 | 0.67390805 | 4.51190311 | 0.03255974 | 0.12598645 |
| ENSMUSG00000026858 | 0.67350702 | 2.93076504 | 0.04185504 | 0.15050508 |
| ENSMUSG00000021234 | 0.67342992 | 1.04425749 | 0.08387971 | 0.23854399 |
| ENSMUSG00000028830 | 0.6731773  | 4.97585653 | 0.03147563 | 0.12289399 |
| ENSMUSG00000001029 | 0.67315914 | 3.80425417 | 0.03690021 | 0.137979   |
| ENSMUSG00000022125 | 0.67176825 | 6.82774879 | 0.02936776 | 0.11652019 |
| ENSMUSG00000034247 | 0.67160049 | 5.34007324 | 0.03098686 | 0.12138113 |
| ENSMUSG00000039254 | 0.6706088  | 3.60047787 | 0.0385416  | 0.14209402 |
| ENSMUSG00000036928 | 0.6705958  | 2.15614527 | 0.04787675 | 0.16517178 |
| ENSMUSG00000026390 | 0.67013274 | 0.75726219 | 0.06912932 | 0.20952308 |
| ENSMUSG00000026873 | 0.67009772 | 5.20750904 | 0.03176452 | 0.12363548 |
| ENSMUSG00000076569 | 0.66990203 | 5.88192666 | 0.03061398 | 0.12027001 |
| ENSMUSG00000001729 | 0.66982877 | 5.98676834 | 0.03065383 | 0.1203827  |
| ENSMUSG00000013787 | 0.6689901  | 5.44973612 | 0.03164567 | 0.12346847 |
| ENSMUSG00000014294 | 0.66881001 | 3.67103919 | 0.03857901 | 0.14209402 |
| ENSMUSG00000024867 | 0.66861215 | 2.26930165 | 0.05716075 | 0.18533207 |
| ENSMUSG00000016526 | 0.66860158 | 2.45223449 | 0.04943912 | 0.16875896 |
| ENSMUSG00000025793 | 0.66739231 | 4.07604564 | 0.03672484 | 0.13746639 |
| ENSMUSG00000001120 | 0.66666316 | 2.27926278 | 0.05489713 | 0.18060119 |
| ENSMUSG00000028962 | 0.66665149 | 3.76765608 | 0.03859611 | 0.14210326 |
| ENSMUSG00000026972 | 0.6665671  | 3.78350076 | 0.03786006 | 0.14036452 |
| ENSMUSG00000098318 | 0.66603181 | 2.77621029 | 0.0478943  | 0.16517178 |
| ENSMUSG00000020261 | 0.66526026 | 3.77609922 | 0.03839028 | 0.14168404 |
| ENSMUSG00000031504 | 0.66514365 | 2.05616186 | 0.06117147 | 0.19413571 |
| ENSMUSG00000010362 | 0.66493226 | 2.6944826  | 0.0481715  | 0.16586252 |
| ENSMUSG00000050552 | 0.66485073 | 2.22270627 | 0.05957804 | 0.19070633 |
| ENSMUSG00000094902 | 0.66468652 | 2.71827415 | 0.04541712 | 0.15922569 |
| ENSMUSG00000029449 | 0.6643651  | 5.58785854 | 0.03245614 | 0.12563151 |
| ENSMUSG00000004610 | 0.66415409 | 4.14196154 | 0.03696836 | 0.13799473 |
| ENSMUSG00000047139 | 0.66348373 | 8.96096809 | 0.03070312 | 0.12048851 |

|                    |            |            |            |            |
|--------------------|------------|------------|------------|------------|
| ENSMUSG00000026433 | 0.66337931 | 4.02567773 | 0.03718154 | 0.13850284 |
| ENSMUSG00000097755 | 0.66325973 | 2.44492001 | 0.05031771 | 0.17063717 |
| ENSMUSG00000039377 | 0.66238012 | 0.76246297 | 0.12166692 | 0.30217782 |
| ENSMUSG00000039308 | 0.66226428 | 4.34962677 | 0.0361123  | 0.13597593 |
| ENSMUSG00000076652 | 0.6619461  | 5.21282654 | 0.03334503 | 0.12823817 |
| ENSMUSG00000042275 | 0.66188776 | 3.17666499 | 0.04340161 | 0.15439602 |
| ENSMUSG00000017639 | 0.66167147 | 2.23562648 | 0.05038575 | 0.17070686 |
| ENSMUSG00000000594 | 0.66134372 | 6.72811683 | 0.03206476 | 0.12465262 |
| ENSMUSG00000069633 | 0.66113727 | 1.01316924 | 0.09193652 | 0.2531776  |
| ENSMUSG00000062638 | 0.66097144 | 2.13975411 | 0.0596693  | 0.19071538 |
| ENSMUSG00000004460 | 0.66096423 | 8.4824796  | 0.03145046 | 0.1228807  |
| ENSMUSG00000068580 | 0.65967331 | 3.22636595 | 0.04528289 | 0.1588956  |
| ENSMUSG00000047557 | 0.65905459 | 2.75849638 | 0.0492777  | 0.16859478 |
| ENSMUSG00000009076 | 0.65889122 | 2.07911845 | 0.06840648 | 0.20809463 |
| ENSMUSG00000098274 | 0.65886338 | 5.18377581 | 0.03482574 | 0.13240141 |
| ENSMUSG00000054404 | 0.65884022 | 6.99721742 | 0.03242647 | 0.12563151 |
| ENSMUSG00000035781 | 0.65872379 | 4.31570874 | 0.03714023 | 0.13839676 |
| ENSMUSG00000047921 | 0.65827819 | 3.3861752  | 0.04360826 | 0.15487371 |
| ENSMUSG00000070000 | 0.65780883 | 4.68013936 | 0.03631993 | 0.13647182 |
| ENSMUSG00000003581 | 0.65770525 | 3.3004556  | 0.04386395 | 0.15544819 |
| ENSMUSG00000095700 | 0.65758658 | 4.39614027 | 0.0362432  | 0.13623099 |
| ENSMUSG00000040952 | 0.65747951 | 7.38534083 | 0.03273443 | 0.12643555 |
| ENSMUSG00000030400 | 0.65738026 | 3.85984867 | 0.0398259  | 0.14543938 |
| ENSMUSG00000068328 | 0.65545157 | 5.94468993 | 0.03437342 | 0.13127884 |
| ENSMUSG00000078695 | 0.65507157 | 3.35388005 | 0.04382871 | 0.15537435 |
| ENSMUSG00000024018 | 0.65436857 | 3.45347256 | 0.04415326 | 0.15599781 |
| ENSMUSG00000006215 | 0.65404311 | 2.98780737 | 0.04707966 | 0.16324985 |
| ENSMUSG00000030695 | 0.6537399  | 8.27338167 | 0.03341652 | 0.12833465 |
| ENSMUSG00000029547 | 0.65310988 | 3.87311648 | 0.04238389 | 0.15179934 |
| ENSMUSG00000069893 | 0.65305667 | 3.94806817 | 0.04068398 | 0.14772259 |
| ENSMUSG00000026047 | 0.65230729 | 4.22510129 | 0.03995792 | 0.1457241  |
| ENSMUSG00000000823 | 0.65229078 | 5.10965234 | 0.03677858 | 0.13757205 |
| ENSMUSG00000022856 | 0.65118984 | 2.80626073 | 0.05096062 | 0.17222166 |
| ENSMUSG00000020776 | 0.65114947 | 3.43499637 | 0.04397686 | 0.15560886 |
| ENSMUSG00000043289 | 0.65101105 | 0.88048481 | 0.09856082 | 0.2645296  |
| ENSMUSG00000087150 | 0.65094164 | 2.60408357 | 0.05098091 | 0.17223626 |
| ENSMUSG00000024121 | 0.64995278 | 5.79722047 | 0.036201   | 0.13616728 |
| ENSMUSG00000032120 | 0.64992405 | 2.68208887 | 0.05630864 | 0.18397278 |
| ENSMUSG00000025575 | 0.64971652 | 4.87859953 | 0.03806739 | 0.14092643 |
| ENSMUSG00000022912 | 0.6495204  | 3.56548754 | 0.044595   | 0.15710961 |
| ENSMUSG00000041354 | 0.64923956 | 3.23652014 | 0.04689757 | 0.16290199 |
| ENSMUSG00000018167 | 0.64901122 | 3.40237526 | 0.04645924 | 0.16193162 |
| ENSMUSG00000041037 | 0.6485125  | 4.79162938 | 0.03837835 | 0.14168404 |

|                    |            |            |            |            |
|--------------------|------------|------------|------------|------------|
| ENSMUSG00000025277 | 0.64816147 | 3.38017744 | 0.0467962  | 0.16268542 |
| ENSMUSG00000029465 | 0.64783788 | 7.09956842 | 0.03551035 | 0.13427196 |
| ENSMUSG00000049086 | 0.64770429 | 1.30956701 | 0.08606319 | 0.24245178 |
| ENSMUSG00000032594 | 0.64750458 | 5.94573597 | 0.03662376 | 0.13731706 |
| ENSMUSG00000041161 | 0.64674073 | 1.42249793 | 0.10172002 | 0.26938819 |
| ENSMUSG00000033379 | 0.64645832 | 5.5716755  | 0.0375879  | 0.13963069 |
| ENSMUSG00000007038 | 0.64623829 | 4.50267306 | 0.04044589 | 0.14724832 |
| ENSMUSG00000026509 | 0.64428798 | 5.6521279  | 0.03780538 | 0.14029359 |
| ENSMUSG00000037706 | 0.64427641 | 6.3963745  | 0.03696407 | 0.13799473 |
| ENSMUSG00000024847 | 0.64399219 | 3.63581892 | 0.04700297 | 0.16308881 |
| ENSMUSG00000028460 | 0.643966   | 1.30804344 | 0.10196525 | 0.26972713 |
| ENSMUSG00000018861 | 0.64266189 | 1.65263026 | 0.08528771 | 0.2411305  |
| ENSMUSG00000024561 | 0.64235464 | 5.53135681 | 0.03876663 | 0.1424439  |
| ENSMUSG00000019054 | 0.64222011 | 4.59636148 | 0.04131138 | 0.14924687 |
| ENSMUSG00000040365 | 0.64184635 | 4.13511858 | 0.04311958 | 0.15361794 |
| ENSMUSG00000003814 | 0.64091981 | 11.3107756 | 0.03664807 | 0.13732202 |
| ENSMUSG00000001105 | 0.64048392 | 4.24371989 | 0.04297946 | 0.1533721  |
| ENSMUSG00000024354 | 0.63934479 | 1.45314493 | 0.0734816  | 0.21799877 |
| ENSMUSG00000043439 | 0.63929924 | 2.90945926 | 0.0556464  | 0.18241079 |
| ENSMUSG00000035382 | 0.63920059 | 4.69552963 | 0.04236106 | 0.15179934 |
| ENSMUSG00000022500 | 0.63884899 | 5.07544342 | 0.04089089 | 0.14821348 |
| ENSMUSG00000032606 | 0.63872248 | 3.29791579 | 0.05037203 | 0.17070686 |
| ENSMUSG00000029033 | 0.63872044 | 3.2232377  | 0.05173898 | 0.17376303 |
| ENSMUSG00000097906 | 0.63830458 | 1.24809675 | 0.09698896 | 0.26141689 |
| ENSMUSG00000002103 | 0.63827289 | 2.98280396 | 0.05430446 | 0.17941768 |
| ENSMUSG00000055041 | 0.63779596 | 2.20607607 | 0.07030826 | 0.21137559 |
| ENSMUSG00000002763 | 0.6376952  | 2.89449682 | 0.0571567  | 0.18533207 |
| ENSMUSG00000068290 | 0.63706217 | 4.41235095 | 0.04361568 | 0.15487371 |
| ENSMUSG00000005142 | 0.63697869 | 6.27576498 | 0.039283   | 0.14394424 |
| ENSMUSG00000024381 | 0.63685619 | 5.95347869 | 0.03969561 | 0.14514896 |
| ENSMUSG00000004788 | 0.63680229 | 4.89515048 | 0.0423759  | 0.15179934 |
| ENSMUSG00000079553 | 0.63676573 | 3.93776793 | 0.04732371 | 0.16388531 |
| ENSMUSG00000042046 | 0.63597744 | 3.8142431  | 0.04660565 | 0.1623283  |
| ENSMUSG00000034994 | 0.6359546  | 10.3151564 | 0.03816733 | 0.14115106 |
| ENSMUSG00000028684 | 0.63568958 | 3.67991685 | 0.04925241 | 0.16856171 |
| ENSMUSG00000076589 | 0.63564729 | 1.75950414 | 0.09216308 | 0.25334863 |
| ENSMUSG00000039763 | 0.63562116 | 1.44862655 | 0.08085968 | 0.2322717  |
| ENSMUSG00000013076 | 0.63426215 | 1.81600515 | 0.07608447 | 0.22306197 |
| ENSMUSG00000034035 | 0.63413502 | 2.23156704 | 0.06593525 | 0.20397181 |
| ENSMUSG00000035585 | 0.63410463 | 1.50869821 | 0.09633503 | 0.26025491 |
| ENSMUSG00000001424 | 0.63390846 | 7.68704237 | 0.03928166 | 0.14394424 |
| ENSMUSG00000021482 | 0.63382731 | 3.2611814  | 0.05299089 | 0.17659263 |
| ENSMUSG00000016495 | 0.63361632 | 5.86534177 | 0.04077294 | 0.14794595 |

|                    |            |            |            |            |
|--------------------|------------|------------|------------|------------|
| ENSMUSG00000023707 | 0.63353345 | 2.27637316 | 0.0657353  | 0.20376244 |
| ENSMUSG00000028917 | 0.63343812 | 3.24880648 | 0.05125391 | 0.17288776 |
| ENSMUSG00000024579 | 0.63312685 | 2.31598979 | 0.06939579 | 0.20989911 |
| ENSMUSG00000026820 | 0.6313876  | 2.18007419 | 0.07656987 | 0.22404193 |
| ENSMUSG00000031156 | 0.63132943 | 3.83463736 | 0.04884597 | 0.1674364  |
| ENSMUSG00000054723 | 0.63043035 | 2.37363462 | 0.06518124 | 0.20280278 |
| ENSMUSG00000032562 | 0.62986011 | 7.7299777  | 0.04054771 | 0.14742632 |
| ENSMUSG00000031166 | 0.62980351 | 4.42116571 | 0.04571324 | 0.15995183 |
| ENSMUSG00000020198 | 0.62978715 | 6.34496411 | 0.04150069 | 0.14971174 |
| ENSMUSG00000038000 | 0.62953166 | 3.95868687 | 0.04809189 | 0.16569422 |
| ENSMUSG00000030082 | 0.62940465 | 8.40378772 | 0.04044418 | 0.14724832 |
| ENSMUSG00000002812 | 0.62916416 | 6.33489462 | 0.04169438 | 0.15017775 |
| ENSMUSG00000019470 | 0.6284681  | 4.81254919 | 0.04504019 | 0.15826438 |
| ENSMUSG00000097709 | 0.62816839 | 1.45207344 | 0.09457265 | 0.25780371 |
| ENSMUSG00000035849 | 0.62815334 | 3.69177137 | 0.05010975 | 0.17030681 |
| ENSMUSG00000041439 | 0.62768732 | 4.20645913 | 0.04738267 | 0.16395292 |
| ENSMUSG00000025188 | 0.62712165 | 3.08132313 | 0.05779581 | 0.18637397 |
| ENSMUSG00000022761 | 0.62712016 | 4.80361019 | 0.04558259 | 0.15959828 |
| ENSMUSG00000027951 | 0.62593123 | 7.83132638 | 0.04171419 | 0.15019895 |
| ENSMUSG00000036748 | 0.62580098 | 4.03589807 | 0.04975245 | 0.16946632 |
| ENSMUSG00000039774 | 0.6251846  | 3.52672412 | 0.05307921 | 0.17677771 |
| ENSMUSG00000046658 | 0.62467894 | 1.11343881 | 0.10456715 | 0.27462676 |
| ENSMUSG00000035674 | 0.62401816 | 4.74994151 | 0.04732262 | 0.16388531 |
| ENSMUSG00000032932 | 0.62374697 | 6.64788034 | 0.04302423 | 0.15338448 |
| ENSMUSG00000028923 | 0.62372405 | 4.99398444 | 0.04608939 | 0.16090254 |
| ENSMUSG00000021094 | 0.62359383 | 3.76004109 | 0.05116582 | 0.17269864 |
| ENSMUSG00000033233 | 0.6232978  | 1.46311723 | 0.08875313 | 0.2467424  |
| ENSMUSG00000008318 | 0.62274404 | 3.42565359 | 0.05437034 | 0.17958031 |
| ENSMUSG00000004565 | 0.62249933 | 4.08669944 | 0.05058353 | 0.17132311 |
| ENSMUSG00000034889 | 0.62225313 | 3.6271657  | 0.05284602 | 0.17632781 |
| ENSMUSG00000001128 | 0.62222736 | 5.37240751 | 0.04588373 | 0.16039226 |
| ENSMUSG00000003531 | 0.62176081 | 2.48073124 | 0.06923796 | 0.20973658 |
| ENSMUSG00000021313 | 0.62175772 | 4.59881135 | 0.04829788 | 0.16613124 |
| ENSMUSG00000003559 | 0.62146013 | 4.11178318 | 0.05038069 | 0.17070686 |
| ENSMUSG00000022015 | 0.62142796 | 2.13117988 | 0.08042096 | 0.23151619 |
| ENSMUSG00000002668 | 0.62121892 | 4.04415839 | 0.05205102 | 0.17449317 |
| ENSMUSG00000036775 | 0.62089708 | 3.76593396 | 0.05118715 | 0.17271658 |
| ENSMUSG00000034006 | 0.62076786 | 1.80189423 | 0.08891839 | 0.24688361 |
| ENSMUSG00000002307 | 0.62063556 | 5.68156766 | 0.04557088 | 0.15959828 |
| ENSMUSG00000040824 | 0.62051786 | 5.57000518 | 0.04586894 | 0.16039226 |
| ENSMUSG00000029560 | 0.62051678 | 4.86427966 | 0.04780917 | 0.16508936 |
| ENSMUSG00000036561 | 0.62033324 | 3.31148024 | 0.05646941 | 0.18407083 |
| ENSMUSG00000059842 | 0.62023747 | 1.46739125 | 0.11285554 | 0.28791913 |



|                    |            |            |            |            |
|--------------------|------------|------------|------------|------------|
| ENSMUSG00000023143 | 0.62014774 | 2.93998611 | 0.06336759 | 0.19910187 |
| ENSMUSG00000018395 | 0.62005297 | 3.06595221 | 0.06134026 | 0.19445067 |
| ENSMUSG00000029413 | 0.61997026 | 4.0851412  | 0.05153073 | 0.17333356 |
| ENSMUSG00000003444 | 0.61995312 | 2.80502069 | 0.06674385 | 0.20507955 |
| ENSMUSG00000039501 | 0.61987305 | 6.46992998 | 0.04462305 | 0.15713601 |
| ENSMUSG00000028538 | 0.61968383 | 2.2742746  | 0.07673305 | 0.2243126  |
| ENSMUSG00000026966 | 0.61934756 | 3.99044993 | 0.0515539  | 0.17335744 |
| ENSMUSG00000036333 | 0.61931392 | 6.87543371 | 0.04439877 | 0.15652725 |
| ENSMUSG00000033088 | 0.61895936 | 3.64437987 | 0.05466107 | 0.18018931 |
| ENSMUSG00000047090 | 0.61864137 | 2.5397742  | 0.06649522 | 0.20488128 |
| ENSMUSG00000051735 | 0.61835918 | 3.76642822 | 0.05398242 | 0.17895678 |
| ENSMUSG00000002257 | 0.61790388 | 4.26537052 | 0.051504   | 0.17329769 |
| ENSMUSG00000022452 | 0.61780437 | 4.41924923 | 0.05071327 | 0.1716634  |
| ENSMUSG00000032187 | 0.61750012 | 6.92960244 | 0.04506529 | 0.15830102 |
| ENSMUSG00000016757 | 0.61717497 | 4.98924185 | 0.04840422 | 0.16618629 |
| ENSMUSG00000041220 | 0.61699802 | 4.65901398 | 0.05005203 | 0.17016429 |
| ENSMUSG00000019738 | 0.61670723 | 2.42808511 | 0.07095858 | 0.21268607 |
| ENSMUSG00000045103 | 0.61668181 | 1.70728279 | 0.08175892 | 0.23411426 |
| ENSMUSG00000015217 | 0.61648148 | 5.16260902 | 0.048079   | 0.16569422 |
| ENSMUSG00000022561 | 0.61606968 | 3.29782576 | 0.05944239 | 0.19038241 |
| ENSMUSG00000029456 | 0.61537881 | 1.33892402 | 0.11849308 | 0.29723874 |
| ENSMUSG00000006398 | 0.61530617 | 6.59166966 | 0.04614839 | 0.16105638 |
| ENSMUSG00000072294 | 0.61528548 | 1.35318071 | 0.10381925 | 0.27329249 |
| ENSMUSG00000039382 | 0.61524718 | 2.68977774 | 0.06755863 | 0.20644722 |
| ENSMUSG00000042642 | 0.61503552 | 3.56202391 | 0.05746341 | 0.18570136 |
| ENSMUSG00000032370 | 0.61491372 | 4.85142748 | 0.04960982 | 0.16919428 |
| ENSMUSG00000027496 | 0.61482196 | 6.34628497 | 0.04663326 | 0.1623283  |
| ENSMUSG00000042524 | 0.61478498 | 5.29587122 | 0.04832864 | 0.16613124 |
| ENSMUSG00000032575 | 0.61471272 | 8.78816883 | 0.04522239 | 0.15880112 |
| ENSMUSG0000002345  | 0.61457767 | 2.51515963 | 0.07611907 | 0.22306197 |
| ENSMUSG00000036882 | 0.61439592 | 2.27268173 | 0.0797641  | 0.23048661 |
| ENSMUSG00000087582 | 0.61436946 | 2.78199092 | 0.06320763 | 0.19890021 |
| ENSMUSG00000027490 | 0.6141674  | 4.14915387 | 0.05389417 | 0.1788189  |
| ENSMUSG00000000282 | 0.61388104 | 3.0059021  | 0.06465299 | 0.20174128 |
| ENSMUSG00000075705 | 0.612868   | 3.92416347 | 0.05571704 | 0.18246356 |
| ENSMUSG00000047959 | 0.61249424 | 2.80159752 | 0.06674385 | 0.20507955 |
| ENSMUSG00000028931 | 0.61197531 | 5.34934006 | 0.04945088 | 0.16875896 |
| ENSMUSG00000032261 | 0.61181311 | 2.78776367 | 0.06682856 | 0.20526322 |
| ENSMUSG00000038564 | 0.61091293 | 3.44126448 | 0.05916727 | 0.18970206 |
| ENSMUSG00000025868 | 0.60992068 | 3.69699085 | 0.05737656 | 0.18558753 |
| ENSMUSG00000028454 | 0.60938696 | 3.91791145 | 0.05647599 | 0.18407083 |
| ENSMUSG00000013822 | 0.60933528 | 4.76785839 | 0.05246132 | 0.17547856 |
| ENSMUSG00000026421 | 0.60871125 | 6.39946549 | 0.04866678 | 0.16692828 |

|                    |            |            |            |            |
|--------------------|------------|------------|------------|------------|
| ENSMUSG00000020133 | 0.60869992 | 2.92732313 | 0.0693715  | 0.20989911 |
| ENSMUSG00000014905 | 0.60844642 | 5.76991144 | 0.04933673 | 0.16874318 |
| ENSMUSG00000020287 | 0.60798839 | 3.37107533 | 0.06104304 | 0.19389932 |
| ENSMUSG00000020520 | 0.60794662 | 3.35437323 | 0.06353389 | 0.19946127 |
| ENSMUSG00000035203 | 0.60704713 | 5.03221354 | 0.05224204 | 0.1750709  |
| ENSMUSG00000096594 | 0.60587757 | 4.92231038 | 0.05293338 | 0.17652604 |
| ENSMUSG00000000959 | 0.60579686 | 5.15684144 | 0.0523111  | 0.17519344 |
| ENSMUSG00000031668 | 0.60564958 | 6.42413256 | 0.04969324 | 0.16937163 |
| ENSMUSG00000022221 | 0.60552084 | 5.31567147 | 0.05176621 | 0.17380039 |
| ENSMUSG00000025648 | 0.60479704 | 2.33200234 | 0.08028033 | 0.23129658 |
| ENSMUSG00000000378 | 0.60461617 | 4.65439088 | 0.05482357 | 0.18041422 |
| ENSMUSG00000044244 | 0.60360035 | 1.56708835 | 0.09719067 | 0.26182966 |
| ENSMUSG00000034449 | 0.60325838 | 3.57281819 | 0.06201041 | 0.19633596 |
| ENSMUSG00000032294 | 0.60298333 | 9.12002547 | 0.0494192  | 0.16875896 |
| ENSMUSG00000058818 | 0.60193843 | 3.20705928 | 0.065636   | 0.20357165 |
| ENSMUSG00000035270 | 0.60180224 | 1.79771236 | 0.090943   | 0.25131211 |
| ENSMUSG00000095863 | 0.60175046 | 0.83957742 | 0.13536762 | 0.32097723 |
| ENSMUSG00000059851 | 0.60164585 | 3.54856736 | 0.06264458 | 0.19765944 |
| ENSMUSG00000019971 | 0.6016088  | 5.19813826 | 0.05336173 | 0.17749934 |
| ENSMUSG00000052248 | 0.60145797 | 2.07896444 | 0.08837048 | 0.2459322  |
| ENSMUSG00000022442 | 0.60117854 | 2.12493404 | 0.0823089  | 0.23542307 |
| ENSMUSG00000021065 | 0.6010421  | 6.45603369 | 0.0514094  | 0.17314147 |
| ENSMUSG00000004994 | 0.60081454 | 2.33860019 | 0.0816343  | 0.23394746 |
| ENSMUSG00000032380 | 0.59892189 | 3.42530542 | 0.06495197 | 0.20233037 |
| ENSMUSG00000042462 | 0.59877998 | 3.45486213 | 0.0665832  | 0.20503518 |
| ENSMUSG00000027309 | 0.59871099 | 3.4935031  | 0.06287091 | 0.19818763 |
| ENSMUSG00000073436 | 0.59855682 | 3.94296398 | 0.06033879 | 0.1922285  |
| ENSMUSG00000076674 | 0.59821281 | 3.52816767 | 0.06217994 | 0.19664737 |
| ENSMUSG00000061119 | 0.59811489 | 5.51295193 | 0.05411746 | 0.17917999 |
| ENSMUSG00000021947 | 0.59799723 | 3.15440817 | 0.07126297 | 0.21317611 |
| ENSMUSG00000002320 | 0.59736021 | 5.6302385  | 0.05420365 | 0.17924937 |
| ENSMUSG00000026202 | 0.59734109 | 6.6705036  | 0.05281936 | 0.17629341 |
| ENSMUSG00000020048 | 0.59712228 | 12.4162054 | 0.05139429 | 0.17314147 |
| ENSMUSG00000026489 | 0.59596516 | 3.86015916 | 0.06402347 | 0.20047302 |
| ENSMUSG00000034863 | 0.59592669 | 1.59267151 | 0.10813547 | 0.28065774 |
| ENSMUSG00000040848 | 0.59557839 | 6.84083244 | 0.05319329 | 0.17704829 |
| ENSMUSG00000030611 | 0.59548877 | 2.89896874 | 0.07521008 | 0.22154206 |
| ENSMUSG00000055447 | 0.5946384  | 8.6013206  | 0.05269044 | 0.17608108 |
| ENSMUSG00000026269 | 0.59453618 | 3.90036587 | 0.0633932  | 0.19910187 |
| ENSMUSG00000038578 | 0.59391925 | 5.66832514 | 0.05542246 | 0.18188551 |
| ENSMUSG00000008398 | 0.59334683 | 5.47378341 | 0.05579948 | 0.18267808 |
| ENSMUSG00000006281 | 0.59324894 | 5.33731236 | 0.05638265 | 0.18407083 |
| ENSMUSG00000040659 | 0.59321409 | 5.22711997 | 0.05702846 | 0.18507218 |

|                    |            |            |            |            |
|--------------------|------------|------------|------------|------------|
| ENSMUSG00000032312 | 0.59313228 | 6.87330018 | 0.0542931  | 0.17941768 |
| ENSMUSG00000036644 | 0.59296905 | 4.61697319 | 0.0586046  | 0.18831705 |
| ENSMUSG00000021978 | 0.59282455 | 5.26980326 | 0.0569202  | 0.18493827 |
| ENSMUSG00000045441 | 0.59270337 | 0.69957259 | 0.14949193 | 0.34133411 |
| ENSMUSG00000011256 | 0.59248167 | 7.25724794 | 0.05419709 | 0.17924937 |
| ENSMUSG00000038497 | 0.59240372 | 2.73874773 | 0.07969952 | 0.23048528 |
| ENSMUSG00000063952 | 0.59235374 | 4.47069389 | 0.05994507 | 0.19127321 |
| ENSMUSG00000042312 | 0.59212718 | 4.113229   | 0.06240023 | 0.19716497 |
| ENSMUSG00000035227 | 0.59207555 | 7.97824077 | 0.05395141 | 0.17890899 |
| ENSMUSG00000062031 | 0.59198417 | 1.8425671  | 0.10413414 | 0.27383141 |
| ENSMUSG00000028334 | 0.59185501 | 5.81482411 | 0.05631437 | 0.18397278 |
| ENSMUSG00000006418 | 0.59185293 | 6.76247671 | 0.0548082  | 0.18041422 |
| ENSMUSG00000021957 | 0.5908803  | 7.05594049 | 0.05503802 | 0.1808672  |
| ENSMUSG00000011382 | 0.59034351 | 3.66704294 | 0.06667619 | 0.20507955 |
| ENSMUSG00000076512 | 0.58957481 | 1.68179108 | 0.10746138 | 0.27991872 |
| ENSMUSG00000031812 | 0.58933236 | 5.3418989  | 0.05830898 | 0.18753476 |
| ENSMUSG00000018474 | 0.58892205 | 6.94037151 | 0.05583236 | 0.18273024 |
| ENSMUSG00000025145 | 0.58865037 | 2.40925334 | 0.08772602 | 0.24477036 |
| ENSMUSG00000039814 | 0.58864911 | 1.81741385 | 0.10500365 | 0.27526405 |
| ENSMUSG00000099375 | 0.58855246 | 2.47578612 | 0.08596014 | 0.24232866 |
| ENSMUSG00000062908 | 0.58792725 | 6.31795623 | 0.05693574 | 0.18493827 |
| ENSMUSG00000042121 | 0.5876845  | 4.62058122 | 0.06108768 | 0.19398398 |
| ENSMUSG00000046562 | 0.58740386 | 4.74888133 | 0.06111668 | 0.19401891 |
| ENSMUSG00000002546 | 0.58678226 | 5.57758858 | 0.05882022 | 0.18878489 |
| ENSMUSG00000042569 | 0.58676932 | 3.73729281 | 0.06817351 | 0.20771094 |
| ENSMUSG00000038831 | 0.58663816 | 3.3681248  | 0.07041937 | 0.21152659 |
| ENSMUSG00000028973 | 0.58644578 | 3.70391627 | 0.07057058 | 0.21180995 |
| ENSMUSG00000043964 | 0.58641847 | 4.45258877 | 0.062547   | 0.19745516 |
| ENSMUSG00000022498 | 0.58627283 | 6.4902674  | 0.05741177 | 0.18564573 |
| ENSMUSG00000043885 | 0.58561265 | 5.29506444 | 0.05942249 | 0.19037794 |
| ENSMUSG00000056698 | 0.58553132 | 3.03879078 | 0.07596397 | 0.22303169 |
| ENSMUSG00000030741 | 0.58470218 | 3.28559932 | 0.07421996 | 0.21964547 |
| ENSMUSG00000030315 | 0.58438601 | 3.86302532 | 0.0680624  | 0.20745758 |
| ENSMUSG00000030835 | 0.58437569 | 6.92044166 | 0.05789464 | 0.18653593 |
| ENSMUSG00000015013 | 0.58422916 | 4.22141237 | 0.06609782 | 0.20406494 |
| ENSMUSG00000023908 | 0.58361362 | 2.38922196 | 0.0945448  | 0.25780371 |
| ENSMUSG00000023051 | 0.58305212 | 4.43780147 | 0.06559744 | 0.20357165 |
| ENSMUSG00000040712 | 0.58294263 | 3.78279949 | 0.0702775  | 0.21134204 |
| ENSMUSG00000027952 | 0.58224859 | 3.76047983 | 0.07101954 | 0.21276974 |
| ENSMUSG00000039316 | 0.58222369 | 7.13701834 | 0.05857365 | 0.18827368 |
| ENSMUSG00000073411 | 0.5820788  | 8.96813581 | 0.05781567 | 0.18637397 |
| ENSMUSG00000022560 | 0.58178559 | 2.17886211 | 0.1029443  | 0.27167191 |
| ENSMUSG00000047098 | 0.58153181 | 4.17911148 | 0.06788563 | 0.2070358  |

|                    |            |            |            |            |
|--------------------|------------|------------|------------|------------|
| ENSMUSG00000073633 | 0.58140084 | 0.88745023 | 0.14914309 | 0.34109297 |
| ENSMUSG00000041308 | 0.58110809 | 2.3809073  | 0.08369981 | 0.23828374 |
| ENSMUSG00000033253 | 0.58088097 | 4.38931944 | 0.06561976 | 0.20357165 |
| ENSMUSG00000038070 | 0.58068601 | 4.55422805 | 0.06455861 | 0.20156342 |
| ENSMUSG00000038976 | 0.58060302 | 4.27273342 | 0.06608671 | 0.20406494 |
| ENSMUSG00000029599 | 0.58049156 | 5.51294153 | 0.06182249 | 0.19585599 |
| ENSMUSG00000045211 | 0.57956816 | 2.36714816 | 0.09647289 | 0.26035125 |
| ENSMUSG00000007603 | 0.57954178 | 2.58029433 | 0.09202043 | 0.25326485 |
| ENSMUSG00000060860 | 0.5793944  | 6.53797974 | 0.06039436 | 0.19233925 |
| ENSMUSG00000043987 | 0.57929786 | 3.70797071 | 0.07157993 | 0.21375092 |
| ENSMUSG00000040054 | 0.57778829 | 7.53703581 | 0.06013726 | 0.19169974 |
| ENSMUSG00000031805 | 0.57750723 | 4.31342689 | 0.06749224 | 0.2063028  |
| ENSMUSG00000094087 | 0.57696624 | 1.73881928 | 0.11710197 | 0.29491536 |
| ENSMUSG00000034254 | 0.57689024 | 4.17518584 | 0.06981571 | 0.21036396 |
| ENSMUSG00000018661 | 0.57684764 | 4.03175069 | 0.07045656 | 0.21152659 |
| ENSMUSG00000020472 | 0.57614394 | 4.5123086  | 0.06713792 | 0.20574461 |
| ENSMUSG00000059323 | 0.57552776 | 5.45820464 | 0.0643946  | 0.20116783 |
| ENSMUSG00000028032 | 0.57548734 | 4.09754783 | 0.06978753 | 0.21033782 |
| ENSMUSG00000022791 | 0.57511373 | 3.20899357 | 0.0817386  | 0.23411426 |
| ENSMUSG00000053128 | 0.57504449 | 4.89020788 | 0.06602393 | 0.20402268 |
| ENSMUSG00000032898 | 0.57485139 | 4.31045863 | 0.06887381 | 0.20902771 |
| ENSMUSG00000001229 | 0.57474679 | 4.80222397 | 0.06672974 | 0.20507955 |
| ENSMUSG00000030688 | 0.57427746 | 1.18019127 | 0.15468238 | 0.34890081 |
| ENSMUSG00000018677 | 0.57420687 | 4.11719699 | 0.07121534 | 0.21309275 |
| ENSMUSG00000031862 | 0.57417706 | 5.61882177 | 0.06451701 | 0.20149186 |
| ENSMUSG00000041939 | 0.57401944 | 1.76113828 | 0.12440513 | 0.30567468 |
| ENSMUSG00000052040 | 0.5739352  | 6.2276884  | 0.06318111 | 0.19887481 |
| ENSMUSG00000023175 | 0.57377158 | 7.04224644 | 0.06244692 | 0.1972547  |
| ENSMUSG00000040687 | 0.5731887  | 6.18777726 | 0.0636231  | 0.1996251  |
| ENSMUSG00000030161 | 0.57284415 | 4.78273883 | 0.06737294 | 0.20608903 |
| ENSMUSG00000021286 | 0.57269916 | 1.92872822 | 0.11279962 | 0.28786902 |
| ENSMUSG00000021819 | 0.57246258 | 4.52534543 | 0.06940841 | 0.20989911 |
| ENSMUSG00000030839 | 0.57228304 | 2.58355159 | 0.09325737 | 0.25563994 |
| ENSMUSG00000030104 | 0.57204387 | 9.06583419 | 0.0621682  | 0.19664737 |
| ENSMUSG00000036046 | 0.57203654 | 5.35755231 | 0.06586042 | 0.20392655 |
| ENSMUSG00000024854 | 0.57200807 | 4.0811695  | 0.07245072 | 0.21526301 |
| ENSMUSG00000027332 | 0.57077763 | 5.46052119 | 0.06645481 | 0.20487383 |
| ENSMUSG00000068036 | 0.5707626  | 3.11499772 | 0.07826017 | 0.22760456 |
| ENSMUSG00000075600 | 0.57036482 | 0.87515495 | 0.17091365 | 0.37189928 |
| ENSMUSG00000041481 | 0.57017919 | 7.13587228 | 0.06387016 | 0.20017643 |
| ENSMUSG00000041740 | 0.57014033 | 7.24671467 | 0.06388193 | 0.20017643 |
| ENSMUSG00000036526 | 0.56974388 | 5.69084319 | 0.06652541 | 0.20491573 |
| ENSMUSG00000027502 | 0.56940917 | 5.28626968 | 0.06770271 | 0.20682889 |

|                    |            |            |            |            |
|--------------------|------------|------------|------------|------------|
| ENSMUSG00000039982 | 0.56927679 | 4.08351987 | 0.07239059 | 0.21523576 |
| ENSMUSG00000033335 | 0.56915447 | 6.25452366 | 0.06541618 | 0.20328353 |
| ENSMUSG00000003762 | 0.56858361 | 2.46830271 | 0.09816908 | 0.26374074 |
| ENSMUSG00000035064 | 0.5683606  | 3.64933704 | 0.07684447 | 0.22445579 |
| ENSMUSG00000031887 | 0.56808996 | 2.429627   | 0.09639711 | 0.26027702 |
| ENSMUSG00000004937 | 0.56776541 | 4.66993953 | 0.07025081 | 0.21132072 |
| ENSMUSG00000001054 | 0.56772663 | 3.90071314 | 0.07525493 | 0.22161365 |
| ENSMUSG00000067274 | 0.56755096 | 9.08117256 | 0.06428463 | 0.2009407  |
| ENSMUSG00000062785 | 0.56706025 | 1.32259746 | 0.15352258 | 0.34693786 |
| ENSMUSG00000020232 | 0.56700481 | 2.78495419 | 0.09515076 | 0.25869282 |
| ENSMUSG00000072919 | 0.56598296 | 2.65780788 | 0.09368477 | 0.25635538 |
| ENSMUSG00000013539 | 0.56510547 | 3.18289327 | 0.08562736 | 0.24166591 |
| ENSMUSG00000017707 | 0.56490826 | 10.852119  | 0.0652771  | 0.20304247 |
| ENSMUSG00000028602 | 0.56489789 | 6.80707069 | 0.06671499 | 0.20507955 |
| ENSMUSG00000047547 | 0.56468003 | 4.00235381 | 0.07567284 | 0.22254046 |
| ENSMUSG00000022906 | 0.56442957 | 8.14363272 | 0.06598716 | 0.20401534 |
| ENSMUSG00000027394 | 0.56401611 | 2.66905999 | 0.09604666 | 0.26017764 |
| ENSMUSG00000030533 | 0.56369039 | 3.93077095 | 0.07975724 | 0.23048661 |
| ENSMUSG00000046792 | 0.56364489 | 1.23913308 | 0.13587163 | 0.32174785 |
| ENSMUSG00000030830 | 0.56321862 | 8.55277986 | 0.06644045 | 0.20487383 |
| ENSMUSG00000019428 | 0.5630546  | 4.99461559 | 0.07184957 | 0.2142178  |
| ENSMUSG00000021384 | 0.56238439 | 1.82081335 | 0.11820932 | 0.29666496 |
| ENSMUSG00000026270 | 0.56211029 | 2.32851858 | 0.10322185 | 0.27216246 |
| ENSMUSG00000059970 | 0.56208405 | 1.36486575 | 0.14500522 | 0.33506242 |
| ENSMUSG00000027950 | 0.56201657 | 1.30948982 | 0.12007724 | 0.29960967 |
| ENSMUSG00000001482 | 0.56200942 | 4.5798293  | 0.07420855 | 0.21964547 |
| ENSMUSG00000075419 | 0.56183987 | 3.33862729 | 0.08382782 | 0.23846792 |
| ENSMUSG00000066877 | 0.56161165 | 2.38916673 | 0.10083628 | 0.26763928 |
| ENSMUSG00000073600 | 0.56129728 | 1.64510517 | 0.13038004 | 0.31447514 |
| ENSMUSG00000079450 | 0.56128647 | 1.7622575  | 0.12066497 | 0.30072821 |
| ENSMUSG00000038421 | 0.56045096 | 4.60895882 | 0.07410991 | 0.21950048 |
| ENSMUSG00000045438 | 0.55935521 | 3.64441171 | 0.08177934 | 0.23411426 |
| ENSMUSG00000047675 | 0.55919798 | 8.12269564 | 0.0686461  | 0.20864699 |
| ENSMUSG00000021013 | 0.55851107 | 1.89347076 | 0.10958163 | 0.28298091 |
| ENSMUSG00000005951 | 0.55838972 | 1.56794518 | 0.12818185 | 0.31126168 |
| ENSMUSG00000027551 | 0.5581856  | 2.67197653 | 0.10176479 | 0.26944059 |
| ENSMUSG00000049608 | 0.55789311 | 4.30576723 | 0.07800788 | 0.22699324 |
| ENSMUSG00000026547 | 0.5578367  | 7.67030731 | 0.06948318 | 0.21004402 |
| ENSMUSG00000037217 | 0.55776806 | 2.03427688 | 0.10823952 | 0.28086019 |
| ENSMUSG00000008348 | 0.55775855 | 6.3414406  | 0.07088093 | 0.21262306 |
| ENSMUSG00000072082 | 0.5571663  | 6.16016333 | 0.07154379 | 0.21371974 |
| ENSMUSG00000035845 | 0.55680259 | 4.12302022 | 0.08040049 | 0.23151619 |
| ENSMUSG00000020476 | 0.55651279 | 6.09929712 | 0.07202301 | 0.21449768 |

|                    |            |            |            |            |
|--------------------|------------|------------|------------|------------|
| ENSMUSG00000043602 | 0.55638631 | 1.89858068 | 0.11917892 | 0.29826536 |
| ENSMUSG00000043323 | 0.55587701 | 1.97734978 | 0.11592022 | 0.29324035 |
| ENSMUSG00000031818 | 0.55575658 | 6.7249911  | 0.07145394 | 0.21356965 |
| ENSMUSG00000052934 | 0.55560565 | 2.02863222 | 0.12097393 | 0.30108075 |
| ENSMUSG00000023505 | 0.55557093 | 6.64218514 | 0.0715263  | 0.21371974 |
| ENSMUSG00000032553 | 0.55485926 | 5.03450475 | 0.07580437 | 0.22281873 |
| ENSMUSG00000058586 | 0.55481605 | 4.43554348 | 0.0790862  | 0.22926493 |
| ENSMUSG00000002031 | 0.55449713 | 4.01726788 | 0.08247506 | 0.23573047 |
| ENSMUSG00000030397 | 0.55448054 | 2.47488365 | 0.10285365 | 0.27159005 |
| ENSMUSG00000060519 | 0.55415385 | 6.770043   | 0.07210662 | 0.21450973 |
| ENSMUSG00000059518 | 0.5536458  | 2.25475505 | 0.11578794 | 0.29311202 |
| ENSMUSG00000040857 | 0.55299941 | 0.82767304 | 0.20138236 | 0.41121735 |
| ENSMUSG00000038642 | 0.55273418 | 8.57707197 | 0.0716359  | 0.21381719 |
| ENSMUSG00000011877 | 0.5524318  | 3.8840988  | 0.08433992 | 0.23947386 |
| ENSMUSG00000005107 | 0.55153422 | 2.90987175 | 0.0970594  | 0.26154137 |
| ENSMUSG00000050846 | 0.55147757 | 2.80702404 | 0.10065234 | 0.26734849 |
| ENSMUSG00000029577 | 0.5513701  | 5.37348267 | 0.07642854 | 0.223908   |
| ENSMUSG00000024079 | 0.55109408 | 8.01282327 | 0.0726118  | 0.21565564 |
| ENSMUSG00000038836 | 0.55095288 | 2.13173068 | 0.10864758 | 0.28145921 |
| ENSMUSG00000005043 | 0.55074302 | 2.49160511 | 0.1119842  | 0.28650952 |
| ENSMUSG00000035891 | 0.55070966 | 5.5256271  | 0.07607869 | 0.22306197 |
| ENSMUSG00000055745 | 0.55062236 | 3.60344924 | 0.0872463  | 0.24399441 |
| ENSMUSG00000049932 | 0.55046649 | 4.20258874 | 0.08365658 | 0.23822355 |
| ENSMUSG00000074738 | 0.55045021 | 1.20773569 | 0.17368874 | 0.37579354 |
| ENSMUSG00000020289 | 0.5502962  | 3.91919483 | 0.08407701 | 0.23904205 |
| ENSMUSG00000025422 | 0.55005804 | 3.55795803 | 0.08768073 | 0.24470729 |
| ENSMUSG00000021504 | 0.55002984 | 2.61178012 | 0.09949588 | 0.26547767 |
| ENSMUSG00000052456 | 0.54999787 | 5.02952093 | 0.07862094 | 0.22840737 |
| ENSMUSG00000020455 | 0.54998698 | 4.49334145 | 0.08080717 | 0.23225601 |
| ENSMUSG00000031807 | 0.54986556 | 3.6233209  | 0.09009566 | 0.24938183 |
| ENSMUSG00000001036 | 0.54985116 | 1.44277501 | 0.14367054 | 0.33304883 |
| ENSMUSG00000049760 | 0.54908022 | 3.96698277 | 0.08510535 | 0.24094936 |
| ENSMUSG00000020329 | 0.54832221 | 2.36476956 | 0.11650874 | 0.2939018  |
| ENSMUSG00000062006 | 0.54831309 | 7.8235485  | 0.0743173  | 0.21987318 |
| ENSMUSG00000020536 | 0.54809131 | 3.57548782 | 0.09145134 | 0.25218189 |
| ENSMUSG00000045257 | 0.54803634 | 1.48639347 | 0.13342224 | 0.31821601 |
| ENSMUSG00000047417 | 0.54772253 | 3.84988042 | 0.08795412 | 0.24520181 |
| ENSMUSG00000028857 | 0.54766913 | 3.92811408 | 0.08599701 | 0.24232866 |
| ENSMUSG00000024013 | 0.5471483  | 5.66833952 | 0.07792677 | 0.22687966 |
| ENSMUSG00000041571 | 0.5470241  | 6.2382973  | 0.0766083  | 0.2240694  |
| ENSMUSG00000049401 | 0.54685418 | 6.093995   | 0.07705457 | 0.22482587 |
| ENSMUSG00000042700 | 0.5462926  | 5.83071523 | 0.07763596 | 0.22633851 |
| ENSMUSG00000001517 | 0.54609816 | 6.03690255 | 0.07740575 | 0.22577332 |

|                    |            |            |            |            |
|--------------------|------------|------------|------------|------------|
| ENSMUSG0000006019  | 0.54593786 | 1.8346441  | 0.12880594 | 0.31186423 |
| ENSMUSG00000024423 | 0.54565158 | 6.03473661 | 0.07742116 | 0.22577332 |
| ENSMUSG00000036636 | 0.5454488  | 4.96607695 | 0.08083415 | 0.23227166 |
| ENSMUSG00000032306 | 0.54486601 | 4.4036494  | 0.08447559 | 0.23973284 |
| ENSMUSG00000026810 | 0.54460746 | 4.34553544 | 0.08542829 | 0.24135734 |
| ENSMUSG0000002308  | 0.54439189 | 3.26072801 | 0.09603367 | 0.26017764 |
| ENSMUSG00000040415 | 0.54407955 | 4.13342198 | 0.08702669 | 0.24363859 |
| ENSMUSG00000030987 | 0.54395237 | 5.39899927 | 0.0802759  | 0.23129658 |
| ENSMUSG00000005949 | 0.54391353 | 3.98003872 | 0.08731217 | 0.24399441 |
| ENSMUSG00000025138 | 0.54373482 | 4.5660187  | 0.08412061 | 0.2390528  |
| ENSMUSG00000038712 | 0.54372119 | 4.18482793 | 0.08669348 | 0.24334594 |
| ENSMUSG00000021486 | 0.5435668  | 6.5919559  | 0.07796654 | 0.22693419 |
| ENSMUSG00000029060 | 0.54330637 | 1.37249231 | 0.16764491 | 0.36745584 |
| ENSMUSG00000024875 | 0.54286094 | 3.550164   | 0.09357101 | 0.2561741  |
| ENSMUSG00000045665 | 0.5425644  | 3.73915135 | 0.09275843 | 0.25470036 |
| ENSMUSG00000036613 | 0.54222082 | 3.55201329 | 0.09206562 | 0.25326485 |
| ENSMUSG00000031012 | 0.5420518  | 2.77421343 | 0.10313424 | 0.27200218 |
| ENSMUSG00000021884 | 0.54197107 | 3.05753515 | 0.09673011 | 0.26084958 |
| ENSMUSG00000022639 | 0.54118136 | 3.62558031 | 0.09131033 | 0.25209693 |
| ENSMUSG00000032330 | 0.54061777 | 6.53071915 | 0.07954944 | 0.23011296 |
| ENSMUSG00000023873 | 0.54010605 | 1.43766579 | 0.1524556  | 0.34561303 |
| ENSMUSG00000022831 | 0.5397362  | 8.19063693 | 0.07869526 | 0.22850019 |
| ENSMUSG00000034255 | 0.53966472 | 4.18798202 | 0.08938452 | 0.24785874 |
| ENSMUSG00000032763 | 0.53963946 | 3.42235324 | 0.10014776 | 0.26641213 |
| ENSMUSG00000027378 | 0.53933278 | 2.35084324 | 0.12479041 | 0.30628842 |
| ENSMUSG00000029461 | 0.53875182 | 4.7629346  | 0.08474086 | 0.24016964 |
| ENSMUSG00000019969 | 0.53805793 | 6.51535563 | 0.08098691 | 0.23251483 |
| ENSMUSG00000028518 | 0.53794458 | 1.6247301  | 0.14216245 | 0.33069023 |
| ENSMUSG00000053411 | 0.53781088 | 4.69524894 | 0.08669751 | 0.24334594 |
| ENSMUSG00000025410 | 0.53772611 | 5.65344852 | 0.08315322 | 0.23710321 |
| ENSMUSG00000028467 | 0.53706587 | 3.98735787 | 0.09360916 | 0.2562135  |
| ENSMUSG00000044948 | 0.53700261 | 4.25753895 | 0.09019927 | 0.24960455 |
| ENSMUSG00000051864 | 0.53636926 | 4.10662053 | 0.09208563 | 0.25326485 |
| ENSMUSG00000008393 | 0.53558469 | 4.91322065 | 0.08659648 | 0.24325514 |
| ENSMUSG00000070639 | 0.53554519 | 2.96787619 | 0.10683892 | 0.27870124 |
| ENSMUSG00000087543 | 0.53438428 | 1.39014919 | 0.14834556 | 0.33994019 |
| ENSMUSG00000020736 | 0.53423112 | 3.93354086 | 0.09531723 | 0.25891712 |
| ENSMUSG00000067586 | 0.53419619 | 5.99571609 | 0.0841321  | 0.2390528  |
| ENSMUSG00000046879 | 0.53409099 | 8.28747474 | 0.08174874 | 0.23411426 |
| ENSMUSG00000031851 | 0.53389254 | 3.12906438 | 0.10479702 | 0.27503797 |
| ENSMUSG00000040339 | 0.53374265 | 4.79550377 | 0.0881814  | 0.24554079 |
| ENSMUSG00000039754 | 0.53366393 | 2.12930459 | 0.12943838 | 0.3128336  |
| ENSMUSG00000041241 | 0.53357677 | 3.07567789 | 0.10493352 | 0.27526224 |

|                    |            |            |            |            |
|--------------------|------------|------------|------------|------------|
| ENSMUSG00000053964 | 0.53354953 | 1.56766974 | 0.16312209 | 0.36113912 |
| ENSMUSG00000047045 | 0.53330922 | 6.0391014  | 0.0846102  | 0.23992543 |
| ENSMUSG00000035107 | 0.53291435 | 3.84308973 | 0.09455874 | 0.25780371 |
| ENSMUSG00000017837 | 0.5328711  | 4.09586686 | 0.09446887 | 0.25771624 |
| ENSMUSG00000051950 | 0.5321561  | 3.05096217 | 0.11009093 | 0.28368474 |
| ENSMUSG00000076672 | 0.53200577 | 6.23745858 | 0.08467255 | 0.24003911 |
| ENSMUSG00000017299 | 0.5316414  | 3.63695152 | 0.09876342 | 0.26468333 |
| ENSMUSG00000046269 | 0.53161945 | 1.20411769 | 0.17765764 | 0.38020627 |
| ENSMUSG00000027822 | 0.53147458 | 5.80638519 | 0.08581132 | 0.2420584  |
| ENSMUSG00000023010 | 0.53139567 | 7.43237892 | 0.08383085 | 0.23846792 |
| ENSMUSG00000057342 | 0.5313542  | 2.89056991 | 0.11297079 | 0.28808817 |
| ENSMUSG00000038302 | 0.53133573 | 2.60717097 | 0.11615686 | 0.293426   |
| ENSMUSG00000029022 | 0.53129445 | 4.13835873 | 0.09516269 | 0.25869282 |
| ENSMUSG00000033610 | 0.53025604 | 3.11820265 | 0.10611127 | 0.27713826 |
| ENSMUSG00000044583 | 0.52989949 | 8.26768211 | 0.0841473  | 0.2390528  |
| ENSMUSG00000020553 | 0.52989857 | 3.90244589 | 0.09623003 | 0.26021681 |
| ENSMUSG00000000915 | 0.52989356 | 5.63266578 | 0.08801569 | 0.2452613  |
| ENSMUSG00000049488 | 0.52950662 | 3.84729678 | 0.09616683 | 0.26021681 |
| ENSMUSG00000030890 | 0.52933691 | 5.84821294 | 0.0874229  | 0.24405088 |
| ENSMUSG00000031168 | 0.52886129 | 5.3876428  | 0.08920298 | 0.2475463  |
| ENSMUSG00000024900 | 0.52880907 | 5.55640769 | 0.0881843  | 0.24554079 |
| ENSMUSG00000041035 | 0.52879983 | 3.59966717 | 0.10313584 | 0.27200218 |
| ENSMUSG00000094797 | 0.52848332 | 6.20067163 | 0.08706511 | 0.24368289 |
| ENSMUSG00000036427 | 0.52822065 | 8.20466643 | 0.08528073 | 0.2411305  |
| ENSMUSG00000097567 | 0.52818661 | 2.60487826 | 0.119594   | 0.298888   |
| ENSMUSG00000024308 | 0.52817112 | 8.4477576  | 0.08514341 | 0.24099385 |
| ENSMUSG00000026285 | 0.52759277 | 1.33261147 | 0.18168836 | 0.3851636  |
| ENSMUSG00000034308 | 0.52746086 | 2.26995247 | 0.12536825 | 0.30684775 |
| ENSMUSG00000063383 | 0.52740545 | 2.06369167 | 0.13321494 | 0.31791357 |
| ENSMUSG00000025068 | 0.5273804  | 5.67347366 | 0.0889894  | 0.24701715 |
| ENSMUSG00000024393 | 0.52720116 | 7.03065951 | 0.08679746 | 0.24347856 |
| ENSMUSG00000033739 | 0.52708864 | 1.6234791  | 0.15278934 | 0.34594271 |
| ENSMUSG00000030745 | 0.52647417 | 7.94558986 | 0.08642556 | 0.24315516 |
| ENSMUSG00000028088 | 0.52643011 | 2.02358453 | 0.13594715 | 0.32178535 |
| ENSMUSG00000039914 | 0.52631522 | 3.0314598  | 0.11103153 | 0.28515456 |
| ENSMUSG00000025574 | 0.52603036 | 4.6022954  | 0.09477517 | 0.25802965 |
| ENSMUSG00000005069 | 0.52570978 | 4.14763048 | 0.09886428 | 0.2648168  |
| ENSMUSG00000075289 | 0.52538697 | 1.91120863 | 0.1413344  | 0.32954952 |
| ENSMUSG00000025006 | 0.52522453 | 1.57874359 | 0.16929097 | 0.36971119 |
| ENSMUSG00000040296 | 0.5251997  | 7.42651699 | 0.08739046 | 0.24405088 |
| ENSMUSG00000034987 | 0.52472417 | 4.17478834 | 0.09890121 | 0.26484993 |
| ENSMUSG00000045107 | 0.52456826 | 1.36941825 | 0.16764491 | 0.36745584 |
| ENSMUSG00000002658 | 0.52449373 | 5.6577504  | 0.09100276 | 0.25131211 |



|                    |            |            |            |            |
|--------------------|------------|------------|------------|------------|
| ENSMUSG00000025737 | 0.52339275 | 3.34819967 | 0.11146377 | 0.28585618 |
| ENSMUSG00000002205 | 0.52332706 | 4.93116467 | 0.0943468  | 0.2575787  |
| ENSMUSG00000003849 | 0.52288294 | 4.2234105  | 0.09812882 | 0.26369827 |
| ENSMUSG00000038023 | 0.52257807 | 5.7069927  | 0.09180113 | 0.25299856 |
| ENSMUSG00000023020 | 0.52234575 | 2.76958713 | 0.12343207 | 0.30471829 |
| ENSMUSG00000083307 | 0.5222315  | 1.61896459 | 0.16097942 | 0.35793856 |
| ENSMUSG00000028266 | 0.52219147 | 4.30488159 | 0.09811571 | 0.26369827 |
| ENSMUSG00000059772 | 0.52207234 | 2.35160225 | 0.13530364 | 0.32097087 |
| ENSMUSG00000024944 | 0.52186145 | 2.78590807 | 0.11957817 | 0.298888   |
| ENSMUSG00000024889 | 0.52170765 | 3.37092993 | 0.11228744 | 0.28713019 |
| ENSMUSG00000029312 | 0.52156148 | 2.45637389 | 0.13054776 | 0.31474881 |
| ENSMUSG00000022636 | 0.52148127 | 6.77937247 | 0.09033639 | 0.24991985 |
| ENSMUSG00000073684 | 0.52136545 | 3.17846552 | 0.11124496 | 0.28556668 |
| ENSMUSG00000050628 | 0.52115078 | 4.84304554 | 0.09618615 | 0.26021681 |
| ENSMUSG00000017221 | 0.52104318 | 6.18543577 | 0.09193037 | 0.2531776  |
| ENSMUSG00000033728 | 0.52027051 | 3.41911278 | 0.11001525 | 0.28367657 |
| ENSMUSG00000076531 | 0.52009913 | 1.68348702 | 0.15121823 | 0.34374733 |
| ENSMUSG00000007041 | 0.519459   | 7.80254879 | 0.09075612 | 0.2509523  |
| ENSMUSG00000020777 | 0.51908643 | 5.25657969 | 0.0952874  | 0.2589013  |
| ENSMUSG00000029499 | 0.51887438 | 1.05340868 | 0.20906857 | 0.41992838 |
| ENSMUSG00000020827 | 0.51821423 | 5.13415899 | 0.09634065 | 0.26025491 |
| ENSMUSG00000017404 | 0.51807128 | 7.36195944 | 0.09207214 | 0.25326485 |
| ENSMUSG00000030323 | 0.51800005 | 3.04603249 | 0.1165593  | 0.29396058 |
| ENSMUSG00000004394 | 0.51788544 | 4.855169   | 0.098031   | 0.26369826 |
| ENSMUSG00000021417 | 0.51777255 | 5.5068873  | 0.09534946 | 0.25893945 |
| ENSMUSG00000037408 | 0.51719251 | 3.38793743 | 0.11150962 | 0.28590579 |
| ENSMUSG00000025484 | 0.51692335 | 3.29854993 | 0.11182132 | 0.28629655 |
| ENSMUSG00000023882 | 0.5168868  | 3.45572014 | 0.10899688 | 0.28201112 |
| ENSMUSG00000053317 | 0.5167094  | 5.62519629 | 0.09560882 | 0.25937799 |
| ENSMUSG00000030407 | 0.51660374 | 3.42211578 | 0.11348082 | 0.28889924 |
| ENSMUSG00000026857 | 0.51656812 | 2.22946605 | 0.1422573  | 0.33083949 |
| ENSMUSG00000024594 | 0.51651663 | 5.15320997 | 0.09733016 | 0.26207451 |
| ENSMUSG00000062683 | 0.51602838 | 3.64171842 | 0.11243041 | 0.28731032 |
| ENSMUSG00000014470 | 0.51568631 | 1.37646174 | 0.19279171 | 0.39974347 |
| ENSMUSG00000047731 | 0.51561397 | 4.91272433 | 0.09929508 | 0.26511467 |
| ENSMUSG00000035235 | 0.51538394 | 2.20548965 | 0.1334392  | 0.31821601 |
| ENSMUSG00000097415 | 0.51519342 | 6.12964749 | 0.09506018 | 0.25862977 |
| ENSMUSG00000027435 | 0.51518681 | 6.15118814 | 0.0956312  | 0.25937799 |
| ENSMUSG00000069255 | 0.51486632 | 3.22566302 | 0.11529581 | 0.29234658 |
| ENSMUSG00000031007 | 0.51424047 | 7.26448776 | 0.09430514 | 0.25753016 |
| ENSMUSG00000024588 | 0.51385521 | 4.75740368 | 0.10065148 | 0.26734849 |
| ENSMUSG00000029098 | 0.51357321 | 5.64429396 | 0.09754894 | 0.26253252 |
| ENSMUSG00000002395 | 0.51309914 | 3.54688487 | 0.1120307  | 0.2865605  |

|                     |            |            |            |            |
|---------------------|------------|------------|------------|------------|
| ENSMUSG00000010609  | 0.51279275 | 3.78474551 | 0.11008738 | 0.28368474 |
| ENSMUSG00000002845  | 0.51266021 | 5.86704781 | 0.0974944  | 0.26245123 |
| ENSMUSG000000020190 | 0.51247096 | 6.79779106 | 0.09617325 | 0.26021681 |
| ENSMUSG000000038037 | 0.51246329 | 2.96683441 | 0.12221484 | 0.30298042 |
| ENSMUSG00000003062  | 0.51217823 | 4.88857058 | 0.10156889 | 0.26905402 |
| ENSMUSG00000002984  | 0.51160992 | 4.59189003 | 0.10550025 | 0.27607733 |
| ENSMUSG00000015575  | 0.51149745 | 5.5827272  | 0.09913548 | 0.26508233 |
| ENSMUSG000000030319 | 0.511415   | 2.58931168 | 0.13137345 | 0.31558957 |
| ENSMUSG000000078920 | 0.51122886 | 7.52399044 | 0.09601319 | 0.26017764 |
| ENSMUSG000000028975 | 0.51098365 | 2.62953574 | 0.13097592 | 0.31492337 |
| ENSMUSG00000017764  | 0.5105078  | 3.38394595 | 0.11835135 | 0.2969523  |
| ENSMUSG000000047423 | 0.51045597 | 2.31078167 | 0.14559198 | 0.33598628 |
| ENSMUSG000000032590 | 0.51013677 | 5.03252111 | 0.10289053 | 0.27162093 |
| ENSMUSG000000029722 | 0.5097953  | 4.16264905 | 0.10889838 | 0.28189153 |
| ENSMUSG000000038178 | 0.50960487 | 5.12413054 | 0.10184739 | 0.26959308 |
| ENSMUSG00000016253  | 0.50954951 | 5.08824892 | 0.10296023 | 0.27167191 |
| ENSMUSG000000030894 | 0.50927893 | 6.39220007 | 0.09873089 | 0.26468333 |
| ENSMUSG000000031072 | 0.50860279 | 3.20277271 | 0.11996419 | 0.29944355 |
| ENSMUSG00000017670  | 0.50849301 | 4.76299394 | 0.10498034 | 0.27526405 |
| ENSMUSG000000020111 | 0.50828413 | 4.83529315 | 0.10502049 | 0.27526405 |
| ENSMUSG000000070002 | 0.50799955 | 3.51731876 | 0.11603876 | 0.29338421 |
| ENSMUSG000000033365 | 0.5078824  | 4.23884217 | 0.10974886 | 0.28320931 |
| ENSMUSG00000012848  | 0.50783901 | 8.10227101 | 0.09808787 | 0.26369827 |
| ENSMUSG000000030805 | 0.50754318 | 4.77757472 | 0.10637342 | 0.27762125 |
| ENSMUSG000000023830 | 0.50704389 | 6.61475508 | 0.09974663 | 0.26585318 |
| ENSMUSG000000032667 | 0.50699701 | 5.84564053 | 0.10121722 | 0.26851821 |
| ENSMUSG000000056515 | 0.50682172 | 4.41828673 | 0.10781141 | 0.28023874 |
| ENSMUSG000000025362 | 0.50678326 | 6.45523928 | 0.1007494  | 0.26747452 |
| ENSMUSG000000029703 | 0.5066093  | 4.15876925 | 0.11026513 | 0.2838623  |
| ENSMUSG000000023030 | 0.50653536 | 4.44697694 | 0.10790652 | 0.28026588 |
| ENSMUSG000000031749 | 0.50634612 | 4.19107629 | 0.11032518 | 0.28394911 |
| ENSMUSG000000005802 | 0.5062422  | 7.27410529 | 0.09950489 | 0.26547767 |
| ENSMUSG000000020471 | 0.50623646 | 4.68537734 | 0.10800066 | 0.28044283 |
| ENSMUSG000000035877 | 0.50554664 | 4.13910857 | 0.10883595 | 0.28184557 |
| ENSMUSG000000021176 | 0.50500846 | 1.91209815 | 0.16631368 | 0.3657327  |
| ENSMUSG000000020935 | 0.50483331 | 2.92079712 | 0.13080166 | 0.31492337 |
| ENSMUSG00000015488  | 0.50470681 | 4.32689211 | 0.11159035 | 0.28598166 |
| ENSMUSG000000037406 | 0.50466085 | 0.92958364 | 0.22734217 | 0.44181978 |
| ENSMUSG000000076508 | 0.50453331 | 5.68473468 | 0.10355486 | 0.27277371 |
| ENSMUSG00000018983  | 0.50426285 | 5.85977382 | 0.10339332 | 0.27248131 |
| ENSMUSG000000043059 | 0.50380475 | 3.05850054 | 0.12865398 | 0.31186423 |
| ENSMUSG000000037772 | 0.50338729 | 3.3335199  | 0.1232997  | 0.3045497  |
| ENSMUSG000000008036 | 0.5031365  | 5.03989451 | 0.10762194 | 0.28002618 |

|                    |            |            |            |            |
|--------------------|------------|------------|------------|------------|
| ENSMUSG00000026198 | 0.50307097 | 1.94708606 | 0.15964181 | 0.35584483 |
| ENSMUSG00000027244 | 0.50289085 | 4.76980049 | 0.10811554 | 0.28065774 |
| ENSMUSG00000040097 | 0.50285916 | 3.15578919 | 0.12866327 | 0.31186423 |
| ENSMUSG00000078945 | 0.50274307 | 4.25313581 | 0.11000095 | 0.28367657 |
| ENSMUSG00000071256 | 0.50272824 | 2.92744534 | 0.13312527 | 0.31783429 |
| ENSMUSG00000036835 | 0.5019584  | 4.17834925 | 0.11423591 | 0.29027334 |
| ENSMUSG00000022385 | 0.50193788 | 5.08515703 | 0.10756685 | 0.28002618 |
| ENSMUSG00000030982 | 0.50110355 | 5.97486321 | 0.10520472 | 0.27550455 |
| ENSMUSG00000047617 | 0.50093921 | 2.15107012 | 0.14808873 | 0.33953376 |
| ENSMUSG00000001910 | 0.50091626 | 6.1739279  | 0.10506183 | 0.27526405 |
| ENSMUSG00000022214 | 0.50028058 | 6.0824224  | 0.10549392 | 0.27607733 |
| ENSMUSG00000024312 | 0.49993719 | 4.62662493 | 0.11319352 | 0.28837206 |
| ENSMUSG00000076514 | 0.49896971 | 5.35705961 | 0.10838685 | 0.28103963 |
| ENSMUSG00000073616 | 0.49800579 | 4.29831891 | 0.11608591 | 0.29338421 |
| ENSMUSG00000044167 | 0.49773276 | 7.56075507 | 0.10503883 | 0.27526405 |
| ENSMUSG00000074682 | 0.49772445 | 2.67723705 | 0.13246062 | 0.3170822  |
| ENSMUSG00000076680 | 0.49766334 | 5.03924308 | 0.10912684 | 0.28227965 |
| ENSMUSG00000030595 | 0.4975881  | 3.01787008 | 0.13835989 | 0.32507037 |
| ENSMUSG00000025228 | 0.49694875 | 6.88924561 | 0.1065728  | 0.2780743  |
| ENSMUSG00000071654 | 0.49667428 | 2.23476282 | 0.15686098 | 0.35155772 |
| ENSMUSG00000031834 | 0.49638802 | 3.0001242  | 0.14108542 | 0.32917895 |
| ENSMUSG00000079363 | 0.49614269 | 7.35454621 | 0.10634602 | 0.27761693 |
| ENSMUSG00000063077 | 0.49604929 | 5.32621335 | 0.11003515 | 0.28367657 |
| ENSMUSG00000020263 | 0.49575082 | 3.25947444 | 0.12661837 | 0.30934314 |
| ENSMUSG00000025577 | 0.49535345 | 3.08622019 | 0.13322064 | 0.31791357 |
| ENSMUSG00000020802 | 0.49517422 | 4.62396602 | 0.11667398 | 0.29417914 |
| ENSMUSG00000070427 | 0.49503808 | 1.42328289 | 0.17145247 | 0.37254553 |
| ENSMUSG00000006127 | 0.49438185 | 5.26202427 | 0.11230667 | 0.28713019 |
| ENSMUSG00000041654 | 0.49421684 | 4.04281303 | 0.12092693 | 0.30103324 |
| ENSMUSG00000056121 | 0.494078   | 3.05784127 | 0.13249877 | 0.31710314 |
| ENSMUSG00000022517 | 0.49391532 | 5.21738827 | 0.11270248 | 0.28776423 |
| ENSMUSG00000039477 | 0.49389058 | 2.39600675 | 0.15038389 | 0.34264524 |
| ENSMUSG00000053565 | 0.49300167 | 6.38448136 | 0.1102281  | 0.28383976 |
| ENSMUSG00000021611 | 0.49272025 | 1.04114715 | 0.24032091 | 0.45726162 |
| ENSMUSG00000020415 | 0.49228112 | 4.37056869 | 0.11887055 | 0.29770089 |
| ENSMUSG00000090841 | 0.49213141 | 7.13920189 | 0.1096646  | 0.28311422 |
| ENSMUSG00000021948 | 0.49168478 | 7.84133106 | 0.10925777 | 0.2824151  |
| ENSMUSG00000006024 | 0.49165436 | 6.17221055 | 0.11164238 | 0.28604216 |
| ENSMUSG00000036273 | 0.4916464  | 7.47640097 | 0.10939869 | 0.28264386 |
| ENSMUSG00000079222 | 0.49159908 | 1.08116896 | 0.20375844 | 0.41354402 |
| ENSMUSG00000025132 | 0.49158064 | 8.01340677 | 0.10931325 | 0.28249078 |
| ENSMUSG00000042903 | 0.49154691 | 3.2578726  | 0.13144381 | 0.31562845 |
| ENSMUSG00000094345 | 0.4915336  | 4.11223621 | 0.12182202 | 0.30242371 |

|                    |            |            |            |            |
|--------------------|------------|------------|------------|------------|
| ENSMUSG00000014786 | 0.49094195 | 2.3320132  | 0.14604086 | 0.33659    |
| ENSMUSG00000052369 | 0.49044513 | 3.70406879 | 0.12753222 | 0.31034329 |
| ENSMUSG00000078681 | 0.4904257  | 2.79852895 | 0.14744224 | 0.33844553 |
| ENSMUSG00000035198 | 0.49024477 | 4.56177009 | 0.12056189 | 0.30054079 |
| ENSMUSG00000019173 | 0.48985699 | 6.07516509 | 0.11300391 | 0.28809319 |
| ENSMUSG00000020585 | 0.48957553 | 7.03591689 | 0.11140691 | 0.28577832 |
| ENSMUSG00000038252 | 0.48929545 | 8.00944891 | 0.11086176 | 0.28485424 |
| ENSMUSG00000062866 | 0.48915277 | 3.03727757 | 0.13791953 | 0.3244599  |
| ENSMUSG00000032860 | 0.48893057 | 0.97351661 | 0.22082112 | 0.43352174 |
| ENSMUSG00000024925 | 0.48859484 | 1.33898856 | 0.19690699 | 0.40517952 |
| ENSMUSG00000033720 | 0.48852496 | 2.20664586 | 0.14900665 | 0.34087562 |
| ENSMUSG00000031792 | 0.488515   | 4.14001513 | 0.12345179 | 0.30471829 |
| ENSMUSG00000062115 | 0.48826642 | 2.74484204 | 0.1437886  | 0.33325086 |
| ENSMUSG00000020707 | 0.48768985 | 3.36687932 | 0.13506961 | 0.32083495 |
| ENSMUSG00000019338 | 0.48763078 | 4.25427783 | 0.12193941 | 0.30250623 |
| ENSMUSG00000024301 | 0.48759143 | 2.11624237 | 0.16556285 | 0.36482014 |
| ENSMUSG00000002608 | 0.48667598 | 4.73140922 | 0.12138462 | 0.30174426 |
| ENSMUSG00000020109 | 0.48662173 | 4.35120528 | 0.12419869 | 0.30566959 |
| ENSMUSG00000042831 | 0.48648057 | 1.83523702 | 0.18950979 | 0.39483355 |
| ENSMUSG00000020780 | 0.48628692 | 6.18137526 | 0.11553433 | 0.29274488 |
| ENSMUSG00000071203 | 0.48596838 | 3.66808421 | 0.13082618 | 0.31492337 |
| ENSMUSG00000044252 | 0.48574957 | 2.94731631 | 0.14331383 | 0.33243629 |
| ENSMUSG00000035521 | 0.48552399 | 3.5546487  | 0.13516662 | 0.32097011 |
| ENSMUSG00000029073 | 0.48459983 | 4.31208906 | 0.12496956 | 0.30635865 |
| ENSMUSG00000034793 | 0.48457654 | 3.21514337 | 0.1407873  | 0.32876793 |
| ENSMUSG00000029554 | 0.48451803 | 4.140145   | 0.12786553 | 0.31077347 |
| ENSMUSG00000025192 | 0.48437465 | 4.68432706 | 0.1221076  | 0.30278417 |
| ENSMUSG00000053929 | 0.48413606 | 4.0520253  | 0.12965361 | 0.31315521 |
| ENSMUSG00000045410 | 0.48410971 | 4.31557389 | 0.12585766 | 0.30769643 |
| ENSMUSG00000030560 | 0.4839976  | 8.46069006 | 0.11446632 | 0.29062041 |
| ENSMUSG00000060002 | 0.48375418 | 4.37136589 | 0.12557486 | 0.30707467 |
| ENSMUSG00000004849 | 0.48373757 | 5.11156481 | 0.12089095 | 0.30101317 |
| ENSMUSG00000040433 | 0.4835983  | 6.37722922 | 0.11670052 | 0.29417914 |
| ENSMUSG00000060639 | 0.4831772  | 2.23204186 | 0.15686098 | 0.35155772 |
| ENSMUSG00000031816 | 0.48311903 | 3.33122669 | 0.13902745 | 0.32591934 |
| ENSMUSG00000023963 | 0.48307539 | 1.68759117 | 0.17858089 | 0.38132006 |
| ENSMUSG00000028910 | 0.48277224 | 4.00242798 | 0.13174164 | 0.31602683 |
| ENSMUSG00000032558 | 0.48262917 | 3.12155539 | 0.14264885 | 0.3313507  |
| ENSMUSG00000079111 | 0.48202838 | 6.39750495 | 0.11808776 | 0.29656693 |
| ENSMUSG00000031951 | 0.48192284 | 1.73516027 | 0.18145543 | 0.38483554 |
| ENSMUSG00000033960 | 0.48189129 | 3.18846171 | 0.14023223 | 0.32782665 |
| ENSMUSG00000042712 | 0.48155944 | 5.2082701  | 0.12163127 | 0.30215887 |
| ENSMUSG00000037552 | 0.48132684 | 3.73095275 | 0.13363072 | 0.31835229 |

|                    |            |            |            |            |
|--------------------|------------|------------|------------|------------|
| ENSMUSG00000079499 | 0.48088353 | 4.10575145 | 0.12876087 | 0.31186423 |
| ENSMUSG00000031996 | 0.48078245 | 6.10368112 | 0.11956491 | 0.298888   |
| ENSMUSG00000021820 | 0.48070601 | 4.24814093 | 0.12795404 | 0.31091851 |
| ENSMUSG00000028743 | 0.48064899 | 0.79767554 | 0.27640267 | 0.49645676 |
| ENSMUSG00000064267 | 0.48052405 | 7.4989261  | 0.11780817 | 0.29607161 |
| ENSMUSG00000052298 | 0.48031117 | 8.05855811 | 0.11741417 | 0.29535676 |
| ENSMUSG00000020921 | 0.47977505 | 1.91532166 | 0.18374873 | 0.38755062 |
| ENSMUSG00000078763 | 0.47919458 | 3.28266158 | 0.13391556 | 0.31872555 |
| ENSMUSG00000023032 | 0.47898224 | 2.73196165 | 0.14618401 | 0.33668677 |
| ENSMUSG00000028468 | 0.47882124 | 5.38260515 | 0.12349532 | 0.30475367 |
| ENSMUSG00000029478 | 0.47873552 | 3.7970429  | 0.13580988 | 0.32174291 |
| ENSMUSG00000027207 | 0.47812442 | 5.65466402 | 0.12295649 | 0.3041199  |
| ENSMUSG00000003228 | 0.47798699 | 3.3448193  | 0.14018598 | 0.32778959 |
| ENSMUSG00000041642 | 0.47780188 | 5.3789683  | 0.12423605 | 0.30567227 |
| ENSMUSG00000023044 | 0.47751525 | 1.68217024 | 0.19682873 | 0.40517952 |
| ENSMUSG00000024143 | 0.47715958 | 5.90414288 | 0.12273236 | 0.30363518 |
| ENSMUSG00000028959 | 0.4770949  | 3.79953553 | 0.13711986 | 0.32356686 |
| ENSMUSG00000024608 | 0.47703764 | 7.99876594 | 0.12016496 | 0.29968984 |
| ENSMUSG00000030657 | 0.47643278 | 3.85355839 | 0.13720352 | 0.32362264 |
| ENSMUSG00000002957 | 0.47635366 | 5.83889389 | 0.1240642  | 0.30552828 |
| ENSMUSG00000034156 | 0.47600027 | 3.47906728 | 0.13990771 | 0.32740155 |
| ENSMUSG00000028854 | 0.47586922 | 4.09917616 | 0.13520013 | 0.32097011 |
| ENSMUSG00000020752 | 0.47579358 | 4.74170799 | 0.12887924 | 0.31197165 |
| ENSMUSG00000032815 | 0.4754682  | 5.13338797 | 0.12705785 | 0.30999816 |
| ENSMUSG00000037921 | 0.4753016  | 5.68839857 | 0.12412061 | 0.30559741 |
| ENSMUSG00000042423 | 0.47522128 | 5.19922712 | 0.12736356 | 0.31034329 |
| ENSMUSG00000096727 | 0.47488236 | 6.35565755 | 0.12381943 | 0.30527405 |
| ENSMUSG00000046949 | 0.47459432 | 3.73383114 | 0.13750405 | 0.32385741 |
| ENSMUSG00000005625 | 0.47458324 | 6.29376996 | 0.12431499 | 0.30567468 |
| ENSMUSG00000030811 | 0.47457347 | 3.26242657 | 0.14810523 | 0.33953376 |
| ENSMUSG00000024208 | 0.47412871 | 3.42465167 | 0.14508529 | 0.33512917 |
| ENSMUSG00000025373 | 0.4740265  | 3.76120841 | 0.13744032 | 0.32382706 |
| ENSMUSG00000040414 | 0.47401423 | 2.85165749 | 0.15556832 | 0.34980167 |
| ENSMUSG00000079557 | 0.47399226 | 3.79411163 | 0.13823681 | 0.32499363 |
| ENSMUSG00000042333 | 0.4739154  | 3.0256711  | 0.15550267 | 0.34972697 |
| ENSMUSG00000022957 | 0.47366069 | 5.36831875 | 0.12757343 | 0.31034329 |
| ENSMUSG00000039740 | 0.47360605 | 5.95174186 | 0.1254451  | 0.30689653 |
| ENSMUSG00000019471 | 0.47336613 | 6.47769318 | 0.12490951 | 0.30628842 |
| ENSMUSG00000030727 | 0.47304955 | 3.06700637 | 0.15492117 | 0.34907435 |
| ENSMUSG00000032740 | 0.47300786 | 5.64259659 | 0.12663766 | 0.30934314 |
| ENSMUSG00000027698 | 0.47234403 | 5.00938695 | 0.12965348 | 0.31315521 |
| ENSMUSG00000032315 | 0.47231467 | 1.67078517 | 0.21977889 | 0.4323414  |
| ENSMUSG00000000738 | 0.47220972 | 4.51705477 | 0.13435769 | 0.31970727 |

|                    |            |            |            |            |
|--------------------|------------|------------|------------|------------|
| ENSMUSG00000031622 | 0.47204264 | 5.58337641 | 0.12854075 | 0.31185287 |
| ENSMUSG00000030822 | 0.47196488 | 5.04845071 | 0.13061507 | 0.31481381 |
| ENSMUSG00000072437 | 0.4717903  | 3.0158039  | 0.15434323 | 0.34845317 |
| ENSMUSG00000002280 | 0.47158037 | 3.45284688 | 0.14957333 | 0.34144766 |
| ENSMUSG00000071379 | 0.47152974 | 1.94435975 | 0.18364161 | 0.38747626 |
| ENSMUSG00000039201 | 0.47152332 | 2.99374736 | 0.15512039 | 0.34925299 |
| ENSMUSG00000041126 | 0.47143254 | 3.36568619 | 0.14807671 | 0.33953376 |
| ENSMUSG00000033059 | 0.47079752 | 6.1862541  | 0.1274832  | 0.31034329 |
| ENSMUSG00000034880 | 0.4706089  | 1.70336307 | 0.20287641 | 0.41264037 |
| ENSMUSG00000056185 | 0.47049296 | 1.35828475 | 0.22961316 | 0.44367466 |
| ENSMUSG00000026649 | 0.47042006 | 0.57817008 | 0.29042899 | 0.51291497 |
| ENSMUSG00000027187 | 0.47038337 | 6.70392694 | 0.12664595 | 0.30934314 |
| ENSMUSG00000034055 | 0.47035732 | 4.64972907 | 0.1329419  | 0.31767016 |
| ENSMUSG00000035242 | 0.4700091  | 6.15473576 | 0.12854099 | 0.31185287 |
| ENSMUSG00000079834 | 0.46969103 | 2.96215791 | 0.14361715 | 0.33299664 |
| ENSMUSG00000060601 | 0.46942932 | 2.61557881 | 0.17333287 | 0.37527036 |
| ENSMUSG00000028708 | 0.46922872 | 5.06421587 | 0.13290391 | 0.31767016 |
| ENSMUSG00000030538 | 0.46881861 | 5.08007033 | 0.13305715 | 0.31780472 |
| ENSMUSG00000016487 | 0.46853386 | 5.07078414 | 0.13228221 | 0.31680029 |
| ENSMUSG00000037280 | 0.46844326 | 4.09212573 | 0.13845484 | 0.32515179 |
| ENSMUSG00000031428 | 0.46842879 | 7.72545984 | 0.12697915 | 0.30987626 |
| ENSMUSG00000034194 | 0.46814986 | 3.05684143 | 0.15266528 | 0.34579759 |
| ENSMUSG00000013160 | 0.46800046 | 6.1611161  | 0.12982398 | 0.31327407 |
| ENSMUSG00000022106 | 0.467936   | 6.00620155 | 0.12998521 | 0.31359294 |
| ENSMUSG00000025178 | 0.46781943 | 4.81298501 | 0.13585203 | 0.32174785 |
| ENSMUSG00000059326 | 0.46765465 | 2.13227047 | 0.17855303 | 0.38132006 |
| ENSMUSG00000040220 | 0.46763187 | 2.32815116 | 0.18231576 | 0.38596254 |
| ENSMUSG00000031398 | 0.46650254 | 2.61611641 | 0.17333287 | 0.37527036 |
| ENSMUSG00000024212 | 0.46627737 | 4.36932612 | 0.14091907 | 0.32893318 |
| ENSMUSG00000022587 | 0.46604981 | 9.85260026 | 0.12809232 | 0.31118441 |
| ENSMUSG00000066440 | 0.46577302 | 5.85617723 | 0.13208809 | 0.31647145 |
| ENSMUSG00000038072 | 0.46575117 | 3.96517085 | 0.14251424 | 0.33121746 |
| ENSMUSG00000043019 | 0.46570018 | 7.1095243  | 0.12966714 | 0.31315521 |
| ENSMUSG00000054400 | 0.46567084 | 2.97169075 | 0.15833538 | 0.35403042 |
| ENSMUSG00000097412 | 0.46490088 | 2.92309501 | 0.1650398  | 0.36420491 |
| ENSMUSG00000054843 | 0.46444801 | 3.38567591 | 0.14846719 | 0.34008546 |
| ENSMUSG00000031969 | 0.46407358 | 2.8226914  | 0.1629918  | 0.36107304 |
| ENSMUSG00000039065 | 0.46336491 | 2.95469008 | 0.16525348 | 0.36442572 |
| ENSMUSG00000071657 | 0.46326124 | 4.26525176 | 0.14312118 | 0.33210469 |
| ENSMUSG00000090213 | 0.4629056  | 5.0570344  | 0.13796526 | 0.32449669 |
| ENSMUSG00000024413 | 0.46229045 | 5.58571871 | 0.1357655  | 0.32170844 |
| ENSMUSG00000025746 | 0.46225898 | 4.93540138 | 0.13753491 | 0.32385741 |
| ENSMUSG00000028970 | 0.46220677 | 6.93251401 | 0.13289174 | 0.31767016 |

|                    |            |            |            |            |
|--------------------|------------|------------|------------|------------|
| ENSMUSG0000003068  | 0.46205527 | 4.965041   | 0.14005421 | 0.32755251 |
| ENSMUSG00000061751 | 0.46180501 | 3.0578944  | 0.16143149 | 0.3587958  |
| ENSMUSG00000041528 | 0.4614541  | 4.56000598 | 0.1429432  | 0.33193357 |
| ENSMUSG00000027575 | 0.46131982 | 5.20734177 | 0.13870672 | 0.32567207 |
| ENSMUSG00000020153 | 0.46129277 | 2.10964913 | 0.20206194 | 0.41176039 |
| ENSMUSG00000002825 | 0.46104517 | 2.4567605  | 0.18006348 | 0.38302375 |
| ENSMUSG00000061689 | 0.46060258 | 3.05672807 | 0.16934789 | 0.3697606  |
| ENSMUSG00000035790 | 0.4605863  | 3.54121774 | 0.15483988 | 0.34903706 |
| ENSMUSG00000017801 | 0.46026343 | 5.66743866 | 0.1375433  | 0.32385741 |
| ENSMUSG00000024392 | 0.46025713 | 5.88130636 | 0.13726195 | 0.32366593 |
| ENSMUSG00000035168 | 0.46017792 | 3.62822181 | 0.15302537 | 0.34613992 |
| ENSMUSG00000026664 | 0.45990755 | 5.08886217 | 0.13970451 | 0.32708933 |
| ENSMUSG00000012114 | 0.45981203 | 4.88122857 | 0.14133592 | 0.32954952 |
| ENSMUSG00000001173 | 0.45916113 | 4.73632486 | 0.14266147 | 0.3313507  |
| ENSMUSG00000019362 | 0.45871563 | 4.36544485 | 0.14717426 | 0.33804626 |
| ENSMUSG00000025477 | 0.45863923 | 3.05373838 | 0.16361698 | 0.36178911 |
| ENSMUSG00000030921 | 0.45799976 | 9.08781846 | 0.1348897  | 0.32061946 |
| ENSMUSG00000053398 | 0.45790635 | 6.32304258 | 0.13818323 | 0.3249385  |
| ENSMUSG00000041594 | 0.45775412 | 3.78632304 | 0.15190821 | 0.34509757 |
| ENSMUSG00000024782 | 0.4575501  | 5.64513621 | 0.13973957 | 0.3271004  |
| ENSMUSG00000040652 | 0.45740593 | 4.25285913 | 0.14932306 | 0.34109297 |
| ENSMUSG00000037997 | 0.45731798 | 5.80252421 | 0.13951655 | 0.32679115 |
| ENSMUSG00000039069 | 0.45688862 | 3.16990271 | 0.16660265 | 0.3662134  |
| ENSMUSG00000036902 | 0.45683985 | 5.03258006 | 0.1421214  | 0.33066605 |
| ENSMUSG00000050188 | 0.45662135 | 2.73224254 | 0.17500613 | 0.37790671 |
| ENSMUSG00000019087 | 0.45636547 | 7.44942371 | 0.13734192 | 0.32366593 |
| ENSMUSG00000034243 | 0.45631411 | 6.52488584 | 0.13835822 | 0.32507037 |
| ENSMUSG00000063576 | 0.45605141 | 5.04219414 | 0.14416851 | 0.3337727  |
| ENSMUSG00000061731 | 0.45543926 | 3.40285755 | 0.15986167 | 0.35618766 |
| ENSMUSG00000028779 | 0.45535062 | 3.6068396  | 0.15639885 | 0.35108351 |
| ENSMUSG00000023104 | 0.45514584 | 5.86287395 | 0.14142477 | 0.32961417 |
| ENSMUSG00000028049 | 0.45479554 | 4.25052942 | 0.15162588 | 0.34452876 |
| ENSMUSG00000003308 | 0.45443792 | 4.64529191 | 0.14925808 | 0.34109297 |
| ENSMUSG00000051989 | 0.45432027 | 3.41396192 | 0.15907344 | 0.35494474 |
| ENSMUSG00000028599 | 0.45384627 | 6.49563883 | 0.14072621 | 0.32869914 |
| ENSMUSG00000033192 | 0.4537712  | 2.32254938 | 0.17647068 | 0.37888647 |
| ENSMUSG00000037752 | 0.45364636 | 2.21316357 | 0.18697557 | 0.3919037  |
| ENSMUSG00000024309 | 0.4532419  | 4.36268376 | 0.15281969 | 0.34594271 |
| ENSMUSG00000038633 | 0.45297547 | 6.78476699 | 0.14100618 | 0.32906527 |
| ENSMUSG00000033416 | 0.45245    | 4.64243215 | 0.14994356 | 0.34207559 |
| ENSMUSG00000035642 | 0.45228855 | 2.10525949 | 0.19474871 | 0.40248565 |
| ENSMUSG00000002996 | 0.45225204 | 5.12758864 | 0.14624351 | 0.33668677 |
| ENSMUSG00000031505 | 0.45158466 | 3.4185264  | 0.16974391 | 0.37032537 |

|                    |            |            |            |            |
|--------------------|------------|------------|------------|------------|
| ENSMUSG00000032892 | 0.4510667  | 3.58378373 | 0.16709891 | 0.36693841 |
| ENSMUSG00000040820 | 0.45063549 | 3.59952328 | 0.16014163 | 0.35658246 |
| ENSMUSG00000009863 | 0.44986233 | 6.25729471 | 0.1451382  | 0.33512917 |
| ENSMUSG00000063646 | 0.44927249 | 2.56375141 | 0.18828016 | 0.39371984 |
| ENSMUSG00000024052 | 0.4490496  | 5.70496553 | 0.14695867 | 0.3377669  |
| ENSMUSG00000052712 | 0.44898974 | 5.78514819 | 0.14708054 | 0.33790298 |
| ENSMUSG00000032316 | 0.44883648 | 5.51274622 | 0.14858689 | 0.34013182 |
| ENSMUSG00000024446 | 0.44879627 | 2.11528265 | 0.19704127 | 0.4052819  |
| ENSMUSG00000045302 | 0.44875289 | 6.50645462 | 0.14553036 | 0.33591596 |
| ENSMUSG00000052125 | 0.44873014 | 2.47001813 | 0.18540154 | 0.39015058 |
| ENSMUSG00000059981 | 0.44855893 | 5.89120255 | 0.14725976 | 0.33817062 |
| ENSMUSG00000019179 | 0.44845922 | 7.39034288 | 0.14451619 | 0.33436227 |
| ENSMUSG00000001034 | 0.44844854 | 2.99319428 | 0.17515078 | 0.3779109  |
| ENSMUSG00000026854 | 0.44826804 | 2.71748804 | 0.18559771 | 0.39022922 |
| ENSMUSG00000025858 | 0.44819558 | 4.94268433 | 0.15207166 | 0.34532339 |
| ENSMUSG00000031458 | 0.44764728 | 2.02798091 | 0.21898055 | 0.43190821 |
| ENSMUSG00000032508 | 0.4475784  | 5.64180079 | 0.14867317 | 0.34025709 |
| ENSMUSG00000045231 | 0.44716442 | 1.92684742 | 0.20771494 | 0.41828652 |
| ENSMUSG00000032127 | 0.44716182 | 5.46936915 | 0.14987083 | 0.34198202 |
| ENSMUSG00000067825 | 0.44678619 | 1.95373014 | 0.21292588 | 0.42451335 |
| ENSMUSG00000036067 | 0.44677943 | 5.03627771 | 0.15308273 | 0.34616148 |
| ENSMUSG00000036002 | 0.44655023 | 3.24579195 | 0.17007014 | 0.37084227 |
| ENSMUSG00000026849 | 0.44633017 | 4.77350386 | 0.15502857 | 0.34917045 |
| ENSMUSG00000022205 | 0.44546812 | 8.74714789 | 0.14602264 | 0.33659    |
| ENSMUSG00000096780 | 0.44545175 | 1.67986521 | 0.21977889 | 0.4323414  |
| ENSMUSG00000016206 | 0.44545109 | 5.35984448 | 0.15203182 | 0.34530563 |
| ENSMUSG00000039834 | 0.4446281  | 4.36216959 | 0.16047754 | 0.35696984 |
| ENSMUSG00000095687 | 0.44453748 | 1.39874148 | 0.25880637 | 0.47806918 |
| ENSMUSG00000038838 | 0.44440733 | 2.9866934  | 0.18142996 | 0.38483554 |
| ENSMUSG00000053175 | 0.44435455 | 4.06337333 | 0.16350797 | 0.3616964  |
| ENSMUSG00000009291 | 0.44429773 | 4.648511   | 0.15659834 | 0.35138504 |
| ENSMUSG00000001576 | 0.44429594 | 6.37850135 | 0.14975837 | 0.34179773 |
| ENSMUSG00000028211 | 0.4442084  | 7.12776562 | 0.14817548 | 0.33962261 |
| ENSMUSG00000073987 | 0.44387518 | 3.16698797 | 0.17411408 | 0.37655906 |
| ENSMUSG00000030966 | 0.44355037 | 5.60135569 | 0.15235273 | 0.34547404 |
| ENSMUSG00000025521 | 0.44333198 | 4.48441181 | 0.15951632 | 0.35571215 |
| ENSMUSG00000050199 | 0.44332063 | 2.27058093 | 0.19714741 | 0.4054229  |
| ENSMUSG00000026111 | 0.44303089 | 4.96915516 | 0.1552953  | 0.34949977 |
| ENSMUSG00000005161 | 0.44220253 | 5.98450785 | 0.15304109 | 0.34613992 |
| ENSMUSG00000022136 | 0.44216661 | 8.27017333 | 0.14923808 | 0.34109297 |
| ENSMUSG00000036052 | 0.44185572 | 3.12784212 | 0.17746031 | 0.37993488 |
| ENSMUSG00000055762 | 0.44174684 | 7.19022463 | 0.15094831 | 0.34351225 |
| ENSMUSG00000029076 | 0.44169975 | 7.31889403 | 0.15055601 | 0.3428925  |



|                    |            |            |            |            |
|--------------------|------------|------------|------------|------------|
| ENSMUSG00000026965 | 0.44156238 | 5.5913787  | 0.15478993 | 0.34899741 |
| ENSMUSG00000048677 | 0.44143699 | 3.29152888 | 0.17624355 | 0.37875855 |
| ENSMUSG00000004626 | 0.44121133 | 5.83569763 | 0.1540401  | 0.34803445 |
| ENSMUSG00000008690 | 0.44113023 | 6.67610105 | 0.15229018 | 0.34547404 |
| ENSMUSG00000034126 | 0.4411005  | 4.60947839 | 0.159956   | 0.3563242  |
| ENSMUSG00000024646 | 0.44071846 | 5.59219436 | 0.15498433 | 0.34914372 |
| ENSMUSG00000025731 | 0.44069121 | 2.34725946 | 0.19619506 | 0.40432073 |
| ENSMUSG00000063316 | 0.44060361 | 6.8823198  | 0.15233531 | 0.34547404 |
| ENSMUSG00000027006 | 0.44056432 | 7.67719491 | 0.15106617 | 0.34366592 |
| ENSMUSG00000024521 | 0.44053155 | 6.5603989  | 0.15251504 | 0.34567512 |
| ENSMUSG00000037525 | 0.44036298 | 1.49228728 | 0.24491616 | 0.46263371 |
| ENSMUSG00000028461 | 0.44025019 | 3.30522534 | 0.18440468 | 0.38870603 |
| ENSMUSG00000028677 | 0.44019053 | 4.97831157 | 0.16004126 | 0.35644052 |
| ENSMUSG00000028070 | 0.44015853 | 3.93266952 | 0.17069363 | 0.37157046 |
| ENSMUSG00000036672 | 0.43998511 | 3.66570097 | 0.17135709 | 0.37254553 |
| ENSMUSG00000045165 | 0.43989267 | 4.80920228 | 0.15902538 | 0.35494474 |
| ENSMUSG00000031328 | 0.43976393 | 8.9947782  | 0.15113722 | 0.34370809 |
| ENSMUSG00000056367 | 0.4390672  | 2.30464284 | 0.20739635 | 0.41789279 |
| ENSMUSG00000028937 | 0.43881887 | 4.20047055 | 0.16714724 | 0.36696168 |
| ENSMUSG00000020196 | 0.43874635 | 5.74353159 | 0.15672343 | 0.35144634 |
| ENSMUSG00000009293 | 0.43808656 | 4.96147708 | 0.16153813 | 0.35888642 |
| ENSMUSG00000024560 | 0.43778843 | 4.56258015 | 0.16553837 | 0.36482014 |
| ENSMUSG00000097194 | 0.43774992 | 3.82895603 | 0.17106748 | 0.37208385 |
| ENSMUSG00000040940 | 0.43708836 | 6.44340589 | 0.15650929 | 0.35125832 |
| ENSMUSG00000043923 | 0.43706645 | 2.95289218 | 0.18678144 | 0.39163612 |
| ENSMUSG00000024426 | 0.43687292 | 2.25228464 | 0.20631719 | 0.41665255 |
| ENSMUSG00000025545 | 0.43639496 | 3.78168034 | 0.17236713 | 0.37385501 |
| ENSMUSG00000024797 | 0.43635661 | 3.36153611 | 0.18307457 | 0.38676308 |
| ENSMUSG00000070420 | 0.43605818 | 2.38557731 | 0.19975084 | 0.40901045 |
| ENSMUSG00000045268 | 0.43595017 | 2.17286748 | 0.20565207 | 0.41594745 |
| ENSMUSG00000025140 | 0.43581017 | 3.02799428 | 0.18126273 | 0.38477585 |
| ENSMUSG00000054263 | 0.43567262 | 5.01489855 | 0.16193657 | 0.35932593 |
| ENSMUSG00000040272 | 0.43561149 | 1.86816448 | 0.23013347 | 0.44428201 |
| ENSMUSG00000078570 | 0.4352843  | 1.40836573 | 0.2626638  | 0.48170884 |
| ENSMUSG00000030095 | 0.4352318  | 4.7820811  | 0.16502868 | 0.36420491 |
| ENSMUSG00000002068 | 0.43516776 | 6.62811276 | 0.15761402 | 0.35292973 |
| ENSMUSG00000042628 | 0.43505673 | 4.28180216 | 0.1675663  | 0.36743289 |
| ENSMUSG00000068922 | 0.4350069  | 4.26466185 | 0.16951375 | 0.37004783 |
| ENSMUSG00000026698 | 0.43499555 | 4.44626045 | 0.16656348 | 0.36620196 |
| ENSMUSG00000001472 | 0.43478198 | 7.35644339 | 0.15701855 | 0.3518155  |
| ENSMUSG00000037993 | 0.43429833 | 5.1858074  | 0.16399442 | 0.36225231 |
| ENSMUSG00000021003 | 0.43421171 | 3.23505253 | 0.18266305 | 0.3862428  |
| ENSMUSG00000031709 | 0.43371746 | 4.96261567 | 0.16365728 | 0.36180403 |

|                    |            |            |            |            |
|--------------------|------------|------------|------------|------------|
| ENSMUSG00000028479 | 0.43304986 | 4.58541432 | 0.16690384 | 0.36672597 |
| ENSMUSG00000021338 | 0.43303167 | 3.82518904 | 0.17174524 | 0.37295623 |
| ENSMUSG00000003269 | 0.43282059 | 4.23945644 | 0.17151086 | 0.37259732 |
| ENSMUSG00000045362 | 0.43193091 | 5.00563049 | 0.16578179 | 0.36500424 |
| ENSMUSG00000005873 | 0.43152806 | 6.01960011 | 0.16306637 | 0.36113583 |
| ENSMUSG00000093674 | 0.43134252 | 6.78383158 | 0.16161934 | 0.35888642 |
| ENSMUSG00000003865 | 0.43128768 | 3.71990915 | 0.17907062 | 0.3819     |
| ENSMUSG00000042682 | 0.43119817 | 6.02244969 | 0.16291536 | 0.36097785 |
| ENSMUSG00000025409 | 0.43119728 | 3.29828905 | 0.18868463 | 0.39431002 |
| ENSMUSG00000021917 | 0.43056745 | 6.37774546 | 0.16257305 | 0.36047835 |
| ENSMUSG00000037916 | 0.43033695 | 5.14955208 | 0.16852713 | 0.36856551 |
| ENSMUSG00000013495 | 0.43030159 | 4.04141349 | 0.17645096 | 0.37888647 |
| ENSMUSG00000042073 | 0.43025631 | 2.19603286 | 0.22194877 | 0.43486475 |
| ENSMUSG00000068114 | 0.42905599 | 5.13086016 | 0.16927459 | 0.36971119 |
| ENSMUSG00000030214 | 0.42830229 | 6.24897338 | 0.16509479 | 0.36423532 |
| ENSMUSG00000032431 | 0.42825381 | 3.83758512 | 0.18090233 | 0.38443278 |
| ENSMUSG00000026893 | 0.42771385 | 4.58517651 | 0.17141281 | 0.37254553 |
| ENSMUSG00000030527 | 0.4274046  | 3.45417616 | 0.18637658 | 0.39125659 |
| ENSMUSG00000050144 | 0.42644046 | 4.99420585 | 0.17226142 | 0.37370089 |
| ENSMUSG00000037415 | 0.42584487 | 5.8155795  | 0.16863906 | 0.36873552 |
| ENSMUSG00000022420 | 0.42565375 | 1.48265673 | 0.26758926 | 0.48654233 |
| ENSMUSG00000022365 | 0.4256459  | 7.13407629 | 0.16597223 | 0.36527439 |
| ENSMUSG00000030123 | 0.42537081 | 5.61880737 | 0.170084   | 0.37084227 |
| ENSMUSG00000034403 | 0.42508448 | 4.03959516 | 0.18203781 | 0.38552548 |
| ENSMUSG00000007029 | 0.424407   | 7.46317467 | 0.16702242 | 0.36691174 |
| ENSMUSG00000027984 | 0.42434398 | 4.66045485 | 0.17740608 | 0.37993488 |
| ENSMUSG00000028849 | 0.42415013 | 4.2079539  | 0.18071794 | 0.38423941 |
| ENSMUSG00000047003 | 0.42376342 | 3.09146602 | 0.19563696 | 0.40362522 |
| ENSMUSG00000024410 | 0.42365354 | 5.20344903 | 0.17352949 | 0.37554526 |
| ENSMUSG00000006676 | 0.42308099 | 6.16680187 | 0.17058507 | 0.37140912 |
| ENSMUSG00000046798 | 0.42265752 | 2.215519   | 0.22115329 | 0.43377902 |
| ENSMUSG00000018740 | 0.42262503 | 1.52415841 | 0.2721482  | 0.49209359 |
| ENSMUSG00000028124 | 0.42246551 | 6.26991168 | 0.17050182 | 0.37137782 |
| ENSMUSG00000036752 | 0.42190484 | 7.7230343  | 0.16927488 | 0.36971119 |
| ENSMUSG00000029148 | 0.42184462 | 6.11856407 | 0.17185223 | 0.37303833 |
| ENSMUSG00000020844 | 0.42109137 | 3.52828022 | 0.19220977 | 0.39866162 |
| ENSMUSG00000026958 | 0.42097688 | 3.79614385 | 0.19159441 | 0.39766362 |
| ENSMUSG0000002803  | 0.42087797 | 2.78829635 | 0.20185336 | 0.41160995 |
| ENSMUSG00000033940 | 0.42083602 | 6.06666491 | 0.17291947 | 0.37475153 |
| ENSMUSG00000026288 | 0.42027446 | 8.12553769 | 0.17054792 | 0.37140321 |
| ENSMUSG00000030282 | 0.42012632 | 5.6289266  | 0.17476528 | 0.37761346 |
| ENSMUSG00000031304 | 0.4198351  | 6.71079815 | 0.17271246 | 0.37452868 |
| ENSMUSG00000052142 | 0.41972883 | 6.61309132 | 0.1729154  | 0.37475153 |

|                    |            |            |            |            |
|--------------------|------------|------------|------------|------------|
| ENSMUSG00000039771 | 0.4190712  | 4.32385709 | 0.18546932 | 0.39018751 |
| ENSMUSG00000015745 | 0.4183064  | 4.18119732 | 0.18888495 | 0.39444913 |
| ENSMUSG00000036968 | 0.41829598 | 4.61521569 | 0.18183918 | 0.38533183 |
| ENSMUSG00000033487 | 0.41802192 | 7.41037783 | 0.17322883 | 0.37519576 |
| ENSMUSG00000074863 | 0.41788621 | 1.64608099 | 0.2495505  | 0.4674252  |
| ENSMUSG00000051586 | 0.41750677 | 3.11376301 | 0.19781388 | 0.40625723 |
| ENSMUSG00000036270 | 0.41742363 | 5.44706871 | 0.17904388 | 0.3819     |
| ENSMUSG00000014748 | 0.41722033 | 5.94778301 | 0.17719689 | 0.37976603 |
| ENSMUSG00000039164 | 0.41719825 | 2.75016828 | 0.21395771 | 0.42601919 |
| ENSMUSG00000069793 | 0.41719412 | 5.65561414 | 0.17794889 | 0.3806031  |
| ENSMUSG00000030842 | 0.41715464 | 4.76587926 | 0.18452707 | 0.38888801 |
| ENSMUSG00000039852 | 0.41710415 | 6.25517751 | 0.1760816  | 0.37868784 |
| ENSMUSG00000027293 | 0.41697883 | 5.87591022 | 0.17769284 | 0.38020627 |
| ENSMUSG00000022555 | 0.41679028 | 2.7618077  | 0.21855593 | 0.43143093 |
| ENSMUSG00000023259 | 0.41656599 | 1.38427077 | 0.28821338 | 0.51019256 |
| ENSMUSG00000031551 | 0.41642554 | 4.04741648 | 0.18957772 | 0.39483355 |
| ENSMUSG00000035757 | 0.41635202 | 3.2847281  | 0.20423861 | 0.41400549 |
| ENSMUSG00000038811 | 0.41615251 | 4.42331598 | 0.18722242 | 0.39211923 |
| ENSMUSG00000037022 | 0.41575708 | 2.15648754 | 0.22824765 | 0.44237105 |
| ENSMUSG00000032867 | 0.41544301 | 4.97320574 | 0.18372054 | 0.38755062 |
| ENSMUSG00000029993 | 0.41538974 | 4.90676708 | 0.18288985 | 0.38659284 |
| ENSMUSG00000061232 | 0.41510488 | 9.60827424 | 0.17518251 | 0.3779109  |
| ENSMUSG00000076580 | 0.41497896 | 5.33553059 | 0.1806809  | 0.38423642 |
| ENSMUSG00000021556 | 0.41491623 | 4.37243102 | 0.18612665 | 0.39103638 |
| ENSMUSG00000046027 | 0.41435548 | 5.49073582 | 0.18151911 | 0.38488047 |
| ENSMUSG00000044678 | 0.41410283 | 2.50203346 | 0.21334818 | 0.4251195  |
| ENSMUSG00000020893 | 0.41396075 | 3.39387702 | 0.20635982 | 0.4166606  |
| ENSMUSG00000020644 | 0.41328848 | 4.33268118 | 0.1885382  | 0.3941066  |
| ENSMUSG00000020564 | 0.41275218 | 5.14345011 | 0.184771   | 0.38924995 |
| ENSMUSG00000034422 | 0.4125993  | 9.22064552 | 0.17782132 | 0.38040569 |
| ENSMUSG00000042677 | 0.41253197 | 4.57752272 | 0.18953921 | 0.39483355 |
| ENSMUSG00000017009 | 0.41246498 | 7.32090905 | 0.17936942 | 0.38227665 |
| ENSMUSG00000012117 | 0.41235559 | 5.76047742 | 0.1832091  | 0.3868125  |
| ENSMUSG00000022075 | 0.41229558 | 6.4154342  | 0.18109575 | 0.3846635  |
| ENSMUSG00000039853 | 0.41211176 | 3.7347179  | 0.19797974 | 0.40649182 |
| ENSMUSG00000041263 | 0.41209015 | 3.1849594  | 0.21124665 | 0.42304251 |
| ENSMUSG00000035215 | 0.41189298 | 3.24193551 | 0.21584249 | 0.42829374 |
| ENSMUSG00000025077 | 0.41137438 | 3.42414443 | 0.20563039 | 0.41594745 |
| ENSMUSG00000030322 | 0.41136132 | 5.37324675 | 0.18506922 | 0.38972592 |
| ENSMUSG00000028545 | 0.41132053 | 4.22337919 | 0.1941965  | 0.40157527 |
| ENSMUSG00000041765 | 0.41098044 | 4.29345608 | 0.19329679 | 0.40025203 |
| ENSMUSG00000042380 | 0.41072093 | 2.78342851 | 0.2231313  | 0.43638881 |
| ENSMUSG00000026792 | 0.41022285 | 2.04253085 | 0.25001887 | 0.46776605 |

|                    |            |            |            |            |
|--------------------|------------|------------|------------|------------|
| ENSMUSG00000036989 | 0.41004945 | 2.1127069  | 0.25439986 | 0.47300829 |
| ENSMUSG00000001642 | 0.40985732 | 6.84308832 | 0.18290028 | 0.38659284 |
| ENSMUSG00000027639 | 0.40931607 | 8.98726045 | 0.18139591 | 0.38483554 |
| ENSMUSG00000058290 | 0.40922393 | 5.98450611 | 0.18579044 | 0.39040611 |
| ENSMUSG00000035278 | 0.40910155 | 4.03662264 | 0.20163892 | 0.41136476 |
| ENSMUSG00000024911 | 0.40866824 | 3.7063705  | 0.20692346 | 0.4174079  |
| ENSMUSG00000071652 | 0.4083016  | 5.17644857 | 0.19056286 | 0.39611957 |
| ENSMUSG00000041084 | 0.40764886 | 7.57693579 | 0.18422031 | 0.38839333 |
| ENSMUSG00000008140 | 0.40732983 | 3.96498844 | 0.20375481 | 0.41354402 |
| ENSMUSG00000001521 | 0.40664895 | 4.50372666 | 0.19844437 | 0.40706701 |
| ENSMUSG00000028648 | 0.40649091 | 3.89780815 | 0.20139236 | 0.41121735 |
| ENSMUSG00000048965 | 0.4063527  | 2.60277441 | 0.23149335 | 0.44554214 |
| ENSMUSG00000031821 | 0.40604482 | 3.92406034 | 0.2061081  | 0.41662038 |
| ENSMUSG00000029622 | 0.40596849 | 6.03182793 | 0.18928866 | 0.39475709 |
| ENSMUSG00000031967 | 0.4058516  | 5.89928686 | 0.18958161 | 0.39483355 |
| ENSMUSG00000021203 | 0.40560775 | 3.29125149 | 0.2109062  | 0.42251764 |
| ENSMUSG00000070738 | 0.40527435 | 7.63785447 | 0.18665601 | 0.39163612 |
| ENSMUSG00000045795 | 0.40519572 | 3.87247869 | 0.20414731 | 0.41389822 |
| ENSMUSG00000076583 | 0.4049042  | 5.92638511 | 0.18950118 | 0.39483355 |
| ENSMUSG00000027439 | 0.40466141 | 4.64547914 | 0.19594792 | 0.40414813 |
| ENSMUSG00000034116 | 0.40451257 | 7.26036562 | 0.18803981 | 0.39343886 |
| ENSMUSG00000078580 | 0.40451132 | 0.96324132 | 0.32554654 | 0.55017927 |
| ENSMUSG00000036292 | 0.40449485 | 2.71004831 | 0.2271803  | 0.44173726 |
| ENSMUSG00000058076 | 0.40447133 | 5.78388274 | 0.19160425 | 0.39766362 |
| ENSMUSG00000048310 | 0.40446309 | 4.01121047 | 0.20626309 | 0.41665255 |
| ENSMUSG00000048578 | 0.40442251 | 8.78275748 | 0.18677236 | 0.39163612 |
| ENSMUSG00000040859 | 0.40435067 | 4.99016351 | 0.19514304 | 0.40300111 |
| ENSMUSG00000004567 | 0.40388791 | 4.13488239 | 0.20488953 | 0.41493496 |
| ENSMUSG00000037710 | 0.40354762 | 5.44785412 | 0.19415329 | 0.40157527 |
| ENSMUSG00000031066 | 0.40326322 | 4.97062363 | 0.19619903 | 0.40432073 |
| ENSMUSG00000016528 | 0.40294987 | 6.97124333 | 0.19013976 | 0.39561396 |
| ENSMUSG00000031513 | 0.4024795  | 3.41952577 | 0.21200438 | 0.4232897  |
| ENSMUSG00000020654 | 0.40246516 | 3.60085453 | 0.21508475 | 0.42747997 |
| ENSMUSG00000002660 | 0.40217204 | 3.19137496 | 0.22631427 | 0.44042713 |
| ENSMUSG00000032540 | 0.40195323 | 3.93103529 | 0.20370483 | 0.41354402 |
| ENSMUSG00000037890 | 0.40192237 | 2.03213598 | 0.25001887 | 0.46776605 |
| ENSMUSG00000024570 | 0.40126448 | 3.46390145 | 0.21719884 | 0.42969589 |
| ENSMUSG00000066036 | 0.40108003 | 7.49266995 | 0.19118242 | 0.39709383 |
| ENSMUSG00000026203 | 0.40096879 | 3.23291638 | 0.22221534 | 0.43514984 |
| ENSMUSG00000024074 | 0.40095271 | 3.13437433 | 0.21778043 | 0.43042123 |
| ENSMUSG00000024325 | 0.40069071 | 2.28216098 | 0.25618181 | 0.47523402 |
| ENSMUSG00000032121 | 0.40056915 | 1.72309558 | 0.25718864 | 0.47618063 |
| ENSMUSG00000024414 | 0.40033301 | 4.26917151 | 0.20799308 | 0.41854776 |

|                    |            |            |            |            |
|--------------------|------------|------------|------------|------------|
| ENSMUSG00000062007 | 0.4003168  | 3.96703104 | 0.20948938 | 0.42023193 |
| ENSMUSG00000024921 | 0.40008707 | 5.55564958 | 0.19627939 | 0.40440904 |
| ENSMUSG00000020009 | 0.39976373 | 4.94486162 | 0.20020312 | 0.40952018 |
| ENSMUSG00000021646 | 0.39971108 | 3.60131484 | 0.2159549  | 0.42836854 |
| ENSMUSG00000043091 | 0.39933558 | 6.20872207 | 0.19555017 | 0.40353135 |
| ENSMUSG00000040688 | 0.39931668 | 5.04111315 | 0.20198626 | 0.41168396 |
| ENSMUSG00000020253 | 0.39896108 | 4.69837735 | 0.20447933 | 0.41441555 |
| ENSMUSG00000034330 | 0.39890994 | 8.20342813 | 0.19315264 | 0.4001072  |
| ENSMUSG00000029621 | 0.39882915 | 5.98313098 | 0.19690852 | 0.40517952 |
| ENSMUSG00000025647 | 0.39862461 | 8.89518608 | 0.19307497 | 0.40005765 |
| ENSMUSG00000040721 | 0.39862244 | 1.93133774 | 0.26951879 | 0.48860716 |
| ENSMUSG00000028393 | 0.39856896 | 2.61335705 | 0.24715341 | 0.4654737  |
| ENSMUSG00000027654 | 0.39807805 | 3.83699936 | 0.21524763 | 0.4277189  |
| ENSMUSG00000021879 | 0.39806179 | 1.64243142 | 0.26468377 | 0.48380069 |
| ENSMUSG00000049502 | 0.3974632  | 8.03698301 | 0.19479853 | 0.40251146 |
| ENSMUSG00000032114 | 0.3973085  | 2.52213522 | 0.24961487 | 0.4674252  |
| ENSMUSG00000040007 | 0.39690107 | 4.4697395  | 0.20868388 | 0.41946917 |
| ENSMUSG00000089872 | 0.39677329 | 3.31530066 | 0.22191163 | 0.43486475 |
| ENSMUSG00000013997 | 0.39659985 | 4.48380661 | 0.20627883 | 0.41665255 |
| ENSMUSG00000085037 | 0.39642484 | 2.14868513 | 0.24444466 | 0.4620705  |
| ENSMUSG00000036639 | 0.39618466 | 3.49620035 | 0.2235094  | 0.43689059 |
| ENSMUSG00000014633 | 0.39587743 | 3.53440773 | 0.22206848 | 0.43494124 |
| ENSMUSG00000039158 | 0.39565477 | 7.23917856 | 0.19778948 | 0.40625723 |
| ENSMUSG00000078484 | 0.395301   | 2.35074597 | 0.26179476 | 0.48119903 |
| ENSMUSG00000028961 | 0.39512152 | 6.62388838 | 0.19957929 | 0.40887467 |
| ENSMUSG00000020185 | 0.39482481 | 4.28771039 | 0.2116635  | 0.4232897  |
| ENSMUSG00000003234 | 0.39471437 | 5.7584707  | 0.20258661 | 0.41239201 |
| ENSMUSG00000004266 | 0.39439136 | 7.95601452 | 0.19850372 | 0.40706701 |
| ENSMUSG00000041977 | 0.39435249 | 4.91503799 | 0.20623411 | 0.41665255 |
| ENSMUSG00000024824 | 0.39419211 | 4.8580593  | 0.20886419 | 0.41967419 |
| ENSMUSG00000073609 | 0.39413458 | 3.85324168 | 0.21476958 | 0.4272413  |
| ENSMUSG00000036825 | 0.3939426  | 3.98634792 | 0.21622449 | 0.4285877  |
| ENSMUSG00000037523 | 0.39377363 | 5.45444375 | 0.2047229  | 0.4147533  |
| ENSMUSG00000078974 | 0.39325072 | 6.07270068 | 0.20277107 | 0.41253819 |
| ENSMUSG00000026637 | 0.39308921 | 3.30761666 | 0.2281227  | 0.44237105 |
| ENSMUSG00000001166 | 0.39308753 | 3.23225371 | 0.23105117 | 0.44510924 |
| ENSMUSG00000046556 | 0.3926784  | 3.21419766 | 0.22928215 | 0.44351187 |
| ENSMUSG00000042349 | 0.39233863 | 5.59451177 | 0.20572312 | 0.41599815 |
| ENSMUSG00000022477 | 0.39194004 | 7.65564351 | 0.20157365 | 0.41136476 |
| ENSMUSG00000029557 | 0.39180941 | 1.58016798 | 0.31404229 | 0.53844548 |
| ENSMUSG00000037020 | 0.39135653 | 4.27280606 | 0.21508775 | 0.42747997 |
| ENSMUSG00000036398 | 0.39134722 | 5.62958072 | 0.20738501 | 0.41789279 |
| ENSMUSG00000009566 | 0.39066233 | 3.62309338 | 0.22793209 | 0.4421694  |

|                    |            |            |            |            |
|--------------------|------------|------------|------------|------------|
| ENSMUSG00000026110 | 0.39048788 | 6.76151214 | 0.20394125 | 0.41363597 |
| ENSMUSG00000028848 | 0.39029695 | 3.08485301 | 0.2360878  | 0.45154685 |
| ENSMUSG00000031506 | 0.39000721 | 6.74122081 | 0.20501108 | 0.41502524 |
| ENSMUSG00000011884 | 0.38998732 | 5.47783483 | 0.20924374 | 0.42012372 |
| ENSMUSG00000063382 | 0.38992816 | 2.36232139 | 0.26958574 | 0.48860716 |
| ENSMUSG00000046947 | 0.38948737 | 3.29735338 | 0.22967289 | 0.44371057 |
| ENSMUSG00000027566 | 0.38906752 | 7.25632694 | 0.20541254 | 0.41575992 |
| ENSMUSG00000035212 | 0.38881406 | 5.00783439 | 0.21256934 | 0.42388087 |
| ENSMUSG00000063065 | 0.3883576  | 4.30787107 | 0.21999036 | 0.43259956 |
| ENSMUSG00000025612 | 0.38834641 | 4.58532703 | 0.21555499 | 0.428093   |
| ENSMUSG00000035954 | 0.3875082  | 1.63536416 | 0.2737182  | 0.49354026 |
| ENSMUSG00000050106 | 0.38742798 | 3.88692965 | 0.22498125 | 0.43886133 |
| ENSMUSG00000002102 | 0.38735079 | 7.14330742 | 0.20775847 | 0.41828652 |
| ENSMUSG00000031659 | 0.38704421 | 6.61047518 | 0.20854157 | 0.41933849 |
| ENSMUSG00000034401 | 0.38699704 | 4.34326302 | 0.21935749 | 0.43192533 |
| ENSMUSG00000025278 | 0.38644768 | 6.23668228 | 0.21022664 | 0.42162621 |
| ENSMUSG00000033068 | 0.386328   | 4.62266638 | 0.22049395 | 0.43311599 |
| ENSMUSG00000064284 | 0.38580781 | 2.47536004 | 0.27519742 | 0.4951237  |
| ENSMUSG00000038893 | 0.38573976 | 2.68699862 | 0.25088612 | 0.46881925 |
| ENSMUSG00000036992 | 0.38559204 | 4.63158581 | 0.21936712 | 0.43192533 |
| ENSMUSG00000029426 | 0.38525422 | 4.94513948 | 0.21715985 | 0.42969589 |
| ENSMUSG00000038861 | 0.38509577 | 6.26527828 | 0.21202259 | 0.4232897  |
| ENSMUSG00000087642 | 0.38456397 | 3.67751461 | 0.23616145 | 0.45154685 |
| ENSMUSG00000017307 | 0.38444186 | 1.90397296 | 0.28814273 | 0.51015124 |
| ENSMUSG00000030643 | 0.3842228  | 3.98867657 | 0.23038522 | 0.4444158  |
| ENSMUSG00000020821 | 0.38418374 | 5.0784657  | 0.21821707 | 0.43084087 |
| ENSMUSG00000047115 | 0.38412993 | 2.23330108 | 0.2613783  | 0.48079817 |
| ENSMUSG00000020788 | 0.38410196 | 6.78331725 | 0.21219742 | 0.42337409 |
| ENSMUSG00000040591 | 0.38400285 | 2.71237502 | 0.25314047 | 0.47131678 |
| ENSMUSG00000038695 | 0.38382624 | 2.06689743 | 0.30157833 | 0.52480567 |
| ENSMUSG00000025153 | 0.38371967 | 7.10702288 | 0.2119774  | 0.4232897  |
| ENSMUSG00000022504 | 0.38371432 | 7.42716107 | 0.21140366 | 0.4231212  |
| ENSMUSG00000025507 | 0.3834035  | 4.09751921 | 0.22828217 | 0.44237105 |
| ENSMUSG0000003992  | 0.38335344 | 3.59716605 | 0.23571822 | 0.45102649 |
| ENSMUSG00000040385 | 0.38322396 | 8.48091417 | 0.21111542 | 0.42285823 |
| ENSMUSG00000020715 | 0.38298303 | 4.7705642  | 0.22030143 | 0.43294744 |
| ENSMUSG00000033902 | 0.38273201 | 4.4062463  | 0.22470575 | 0.43861569 |
| ENSMUSG00000038170 | 0.38271187 | 5.96494424 | 0.21504758 | 0.42747997 |
| ENSMUSG00000013622 | 0.38269132 | 4.66289502 | 0.22347149 | 0.43689059 |
| ENSMUSG00000047613 | 0.38268293 | 2.81859526 | 0.25995866 | 0.47929461 |
| ENSMUSG00000000743 | 0.38246566 | 5.24359801 | 0.21929051 | 0.43192533 |
| ENSMUSG00000031700 | 0.3823755  | 2.88825508 | 0.2573576  | 0.47637219 |
| ENSMUSG00000056724 | 0.38236961 | 3.88143809 | 0.2343153  | 0.44889965 |

|                    |            |            |            |            |
|--------------------|------------|------------|------------|------------|
| ENSMUSG0000004270  | 0.38208672 | 6.05360658 | 0.21624126 | 0.4285877  |
| ENSMUSG00000027466 | 0.38204417 | 4.92568986 | 0.22267436 | 0.4358113  |
| ENSMUSG00000039844 | 0.38199981 | 7.62093001 | 0.21323619 | 0.42497488 |
| ENSMUSG00000025204 | 0.38185624 | 5.0950528  | 0.22105131 | 0.43365787 |
| ENSMUSG00000041881 | 0.38114189 | 3.4125031  | 0.24848049 | 0.46695136 |
| ENSMUSG00000030058 | 0.38068432 | 7.48228342 | 0.21501768 | 0.42747997 |
| ENSMUSG00000033055 | 0.38037288 | 3.49803322 | 0.24386301 | 0.46153364 |
| ENSMUSG00000040188 | 0.38017734 | 5.93457735 | 0.21903802 | 0.43190821 |
| ENSMUSG00000029145 | 0.38001366 | 4.72083861 | 0.22698076 | 0.44143561 |
| ENSMUSG00000048755 | 0.37995787 | 3.36034564 | 0.24891926 | 0.46716764 |
| ENSMUSG00000036853 | 0.37995687 | 2.55861929 | 0.26059685 | 0.48019292 |
| ENSMUSG00000035208 | 0.37993607 | 6.7955176  | 0.2163703  | 0.42876466 |
| ENSMUSG00000019214 | 0.37955722 | 3.17426855 | 0.25313408 | 0.47131678 |
| ENSMUSG00000003812 | 0.37948327 | 4.95280123 | 0.22533759 | 0.43911105 |
| ENSMUSG00000045128 | 0.37902197 | 7.24997685 | 0.21765331 | 0.43027924 |
| ENSMUSG00000025757 | 0.37899259 | 4.74419199 | 0.22551836 | 0.43922117 |
| ENSMUSG00000032743 | 0.37866722 | 3.3000718  | 0.2471969  | 0.4654743  |
| ENSMUSG00000057219 | 0.37857857 | 2.60333205 | 0.26823288 | 0.48720456 |
| ENSMUSG00000030532 | 0.37854821 | 0.54881296 | 0.41307049 | 0.62828662 |
| ENSMUSG00000024947 | 0.37842518 | 4.70381803 | 0.22893989 | 0.44308826 |
| ENSMUSG00000029592 | 0.37840727 | 3.53850277 | 0.24508202 | 0.4627651  |
| ENSMUSG00000029798 | 0.37836788 | 7.4496819  | 0.21751604 | 0.43008672 |
| ENSMUSG00000030298 | 0.37829469 | 6.69055377 | 0.2193298  | 0.43192533 |
| ENSMUSG00000039936 | 0.37790439 | 6.99897806 | 0.21911942 | 0.43192533 |
| ENSMUSG00000034932 | 0.37731955 | 3.839899   | 0.242263   | 0.45955395 |
| ENSMUSG00000046805 | 0.37695265 | 8.03429105 | 0.21861069 | 0.43146004 |
| ENSMUSG00000038644 | 0.37686447 | 4.24852631 | 0.23553821 | 0.45076203 |
| ENSMUSG00000041891 | 0.37657162 | 7.67471957 | 0.2195761  | 0.43217898 |
| ENSMUSG00000037563 | 0.37649482 | 7.9236452  | 0.21964332 | 0.43223239 |
| ENSMUSG00000025485 | 0.37631325 | 5.08741864 | 0.2286313  | 0.44272938 |
| ENSMUSG00000049339 | 0.37622101 | 5.25718318 | 0.22757522 | 0.44187453 |
| ENSMUSG00000032890 | 0.37595644 | 2.60139613 | 0.28180205 | 0.50278208 |
| ENSMUSG00000036918 | 0.37589141 | 5.00865672 | 0.2294552  | 0.44367134 |
| ENSMUSG00000023909 | 0.37547198 | 1.10788117 | 0.34857583 | 0.57233055 |
| ENSMUSG00000055228 | 0.37497277 | 3.25276665 | 0.24291395 | 0.46038384 |
| ENSMUSG00000056310 | 0.37436036 | 4.59006236 | 0.23606457 | 0.45154685 |
| ENSMUSG00000036632 | 0.37420993 | 5.57609035 | 0.22721779 | 0.44173726 |
| ENSMUSG00000029458 | 0.37409383 | 5.59220433 | 0.22771594 | 0.44190907 |
| ENSMUSG00000029771 | 0.37400983 | 6.58345907 | 0.22467023 | 0.43861569 |
| ENSMUSG00000039738 | 0.37386685 | 5.8056395  | 0.22649646 | 0.44065269 |
| ENSMUSG00000020610 | 0.37386668 | 3.93567134 | 0.24402449 | 0.46163131 |
| ENSMUSG00000039195 | 0.37369697 | 1.97824955 | 0.29919191 | 0.52174735 |
| ENSMUSG00000078606 | 0.37365151 | 4.06754487 | 0.2345182  | 0.44920857 |

|                    |            |            |            |            |
|--------------------|------------|------------|------------|------------|
| ENSMUSG00000036315 | 0.37359838 | 4.85640053 | 0.23327959 | 0.44794998 |
| ENSMUSG00000021248 | 0.37350181 | 7.99557489 | 0.22312578 | 0.43638881 |
| ENSMUSG00000036864 | 0.37345665 | 1.85351623 | 0.31130625 | 0.53585421 |
| ENSMUSG00000007817 | 0.37341986 | 5.82193384 | 0.22753863 | 0.44187453 |
| ENSMUSG00000052684 | 0.37327528 | 3.86861357 | 0.24251758 | 0.45979423 |
| ENSMUSG00000024816 | 0.37291857 | 4.90542777 | 0.2340157  | 0.44856475 |
| ENSMUSG00000075467 | 0.37274834 | 3.77041845 | 0.24867438 | 0.46695136 |
| ENSMUSG00000071647 | 0.37269374 | 4.74263824 | 0.23497196 | 0.44975818 |
| ENSMUSG00000029204 | 0.37268929 | 5.17438546 | 0.23163354 | 0.44566209 |
| ENSMUSG00000034707 | 0.37258664 | 7.52025973 | 0.22476799 | 0.43863517 |
| ENSMUSG00000028645 | 0.37224964 | 3.94428541 | 0.24544754 | 0.46323175 |
| ENSMUSG00000069744 | 0.37207636 | 5.9924831  | 0.22923445 | 0.44349916 |
| ENSMUSG00000061898 | 0.37206046 | 3.89117997 | 0.24464183 | 0.46227746 |
| ENSMUSG00000031059 | 0.37200134 | 5.95801143 | 0.2289211  | 0.44308826 |
| ENSMUSG00000024799 | 0.37197169 | 2.18429248 | 0.28476189 | 0.50618118 |
| ENSMUSG00000051498 | 0.37186633 | 3.60650431 | 0.24966331 | 0.4674252  |
| ENSMUSG00000028630 | 0.37182853 | 3.13616644 | 0.25799001 | 0.4769697  |
| ENSMUSG00000041958 | 0.37176971 | 5.18982096 | 0.23325841 | 0.44794998 |
| ENSMUSG00000046031 | 0.37162336 | 1.16379723 | 0.36682836 | 0.58884743 |
| ENSMUSG00000058979 | 0.37045977 | 3.59629624 | 0.25258286 | 0.47076626 |
| ENSMUSG00000019261 | 0.37021757 | 1.05742362 | 0.37302372 | 0.59472025 |
| ENSMUSG00000031539 | 0.3695049  | 4.15414028 | 0.24415874 | 0.46176917 |
| ENSMUSG00000033020 | 0.36940137 | 2.72886938 | 0.27635791 | 0.49645676 |
| ENSMUSG00000074802 | 0.36932081 | 5.31807072 | 0.23424686 | 0.44884829 |
| ENSMUSG00000076518 | 0.36899464 | 3.64919963 | 0.24839755 | 0.46695136 |
| ENSMUSG00000003680 | 0.3687492  | 4.82092158 | 0.23823115 | 0.45431636 |
| ENSMUSG00000017386 | 0.36826306 | 2.94773868 | 0.27455353 | 0.49448602 |
| ENSMUSG00000029627 | 0.36801352 | 2.44974206 | 0.29216452 | 0.5142191  |
| ENSMUSG00000044712 | 0.36794268 | 2.6819401  | 0.2791909  | 0.4999659  |
| ENSMUSG00000018707 | 0.3678611  | 7.51921924 | 0.23052991 | 0.44449036 |
| ENSMUSG00000027075 | 0.36774645 | 3.18210502 | 0.26235426 | 0.48148882 |
| ENSMUSG00000037260 | 0.36703471 | 4.7662532  | 0.24058673 | 0.45749379 |
| ENSMUSG00000029512 | 0.36648971 | 4.02567794 | 0.24974195 | 0.46749126 |
| ENSMUSG00000022090 | 0.36615529 | 3.48101962 | 0.26214955 | 0.48144719 |
| ENSMUSG00000034557 | 0.36573143 | 1.04060544 | 0.32947735 | 0.55464628 |
| ENSMUSG00000089855 | 0.36529952 | 5.27929598 | 0.24263475 | 0.45993551 |
| ENSMUSG00000030590 | 0.36525079 | 2.52327907 | 0.28117287 | 0.50218089 |
| ENSMUSG00000073838 | 0.36522506 | 4.91426387 | 0.24425951 | 0.46181149 |
| ENSMUSG00000004500 | 0.36512623 | 4.02196867 | 0.25151321 | 0.46982824 |
| ENSMUSG00000031065 | 0.36494164 | 5.8674612  | 0.23829506 | 0.45434475 |
| ENSMUSG00000043262 | 0.36461099 | 4.32052558 | 0.24606028 | 0.46398218 |
| ENSMUSG00000090137 | 0.36425564 | 0.59231526 | 0.42584193 | 0.63955617 |
| ENSMUSG00000024487 | 0.36424091 | 5.86031988 | 0.23834897 | 0.4543672  |



|                    |            |            |            |            |
|--------------------|------------|------------|------------|------------|
| ENSMUSG00000071711 | 0.36364999 | 2.00461078 | 0.30717872 | 0.53112318 |
| ENSMUSG00000060012 | 0.36358782 | 3.45812168 | 0.26359175 | 0.48277403 |
| ENSMUSG00000003166 | 0.36332293 | 5.5418339  | 0.24153553 | 0.45890049 |
| ENSMUSG00000087679 | 0.3627512  | 3.92187856 | 0.25677795 | 0.47575778 |
| ENSMUSG00000031402 | 0.36247861 | 6.07066632 | 0.24033372 | 0.45726162 |
| ENSMUSG00000044060 | 0.36206501 | 3.36728482 | 0.26481044 | 0.4838556  |
| ENSMUSG00000026171 | 0.36200148 | 4.27563833 | 0.25193212 | 0.47028492 |
| ENSMUSG00000044390 | 0.36178643 | 1.26823789 | 0.34898132 | 0.57253042 |
| ENSMUSG00000026942 | 0.36138118 | 4.79540399 | 0.24962663 | 0.4674252  |
| ENSMUSG00000024826 | 0.36136769 | 6.18461811 | 0.24173516 | 0.459      |
| ENSMUSG00000032965 | 0.36135214 | 3.36639003 | 0.26986346 | 0.48886403 |
| ENSMUSG00000000708 | 0.36091745 | 5.54711369 | 0.24379652 | 0.46148879 |
| ENSMUSG00000040356 | 0.36055864 | 4.96032109 | 0.24982171 | 0.4675594  |
| ENSMUSG00000021552 | 0.36054537 | 3.21543077 | 0.26857817 | 0.48743638 |
| ENSMUSG00000003178 | 0.36028687 | 3.32979238 | 0.26615786 | 0.48539207 |
| ENSMUSG00000025759 | 0.35999664 | 4.07873656 | 0.25425109 | 0.4728132  |
| ENSMUSG00000022802 | 0.35983702 | 2.20687869 | 0.29174188 | 0.5139919  |
| ENSMUSG00000095595 | 0.35974548 | 4.8218342  | 0.24903578 | 0.46724664 |
| ENSMUSG00000033540 | 0.35923723 | 3.97803365 | 0.26071102 | 0.48019292 |
| ENSMUSG00000076577 | 0.35870335 | 4.91660628 | 0.2506034  | 0.4684533  |
| ENSMUSG00000025034 | 0.35863939 | 3.12374821 | 0.2741796  | 0.49402721 |
| ENSMUSG00000032116 | 0.35861376 | 9.32409031 | 0.24133847 | 0.45860688 |
| ENSMUSG00000020393 | 0.35808334 | 4.01153438 | 0.25944592 | 0.47859472 |
| ENSMUSG00000037622 | 0.35754817 | 3.07298246 | 0.28619615 | 0.50778862 |
| ENSMUSG00000031753 | 0.35741926 | 5.7263843  | 0.24867445 | 0.46695136 |
| ENSMUSG00000019210 | 0.35690493 | 6.05454099 | 0.24819895 | 0.46679063 |
| ENSMUSG00000000194 | 0.35677765 | 5.66550895 | 0.24920465 | 0.46736194 |
| ENSMUSG00000026425 | 0.35672344 | 6.49644872 | 0.24675885 | 0.46489298 |
| ENSMUSG00000037628 | 0.35644781 | 4.21314235 | 0.25852027 | 0.47770435 |
| ENSMUSG00000024892 | 0.35633399 | 1.67278985 | 0.35920953 | 0.5813771  |
| ENSMUSG00000022515 | 0.35622114 | 3.427644   | 0.27461503 | 0.49448602 |
| ENSMUSG00000032123 | 0.35529032 | 4.76547773 | 0.25685888 | 0.47575778 |
| ENSMUSG00000041645 | 0.35523142 | 7.87936229 | 0.24675834 | 0.46489298 |
| ENSMUSG00000030881 | 0.35512316 | 4.74755163 | 0.25750653 | 0.47647203 |
| ENSMUSG00000006335 | 0.35478182 | 2.89877585 | 0.28533815 | 0.50693354 |
| ENSMUSG00000033423 | 0.35449982 | 3.89107412 | 0.26862708 | 0.48744311 |
| ENSMUSG00000027248 | 0.35446789 | 11.0414834 | 0.24649357 | 0.46463672 |
| ENSMUSG00000023307 | 0.35439278 | 6.51554835 | 0.2496351  | 0.4674252  |
| ENSMUSG00000020108 | 0.35419782 | 4.01326533 | 0.26592121 | 0.48530959 |
| ENSMUSG00000028847 | 0.35414274 | 5.27055063 | 0.25567037 | 0.47479752 |
| ENSMUSG00000007892 | 0.35376155 | 6.39527611 | 0.25208189 | 0.47037834 |
| ENSMUSG00000024369 | 0.35351079 | 4.16079582 | 0.2666006  | 0.48569517 |
| ENSMUSG00000020834 | 0.35333396 | 2.54271489 | 0.30537661 | 0.52887137 |

|                    |            |            |            |            |
|--------------------|------------|------------|------------|------------|
| ENSMUSG00000052423 | 0.35302701 | 3.87522671 | 0.26980809 | 0.48884584 |
| ENSMUSG00000056228 | 0.35280144 | 4.04526238 | 0.2677506  | 0.48659964 |
| ENSMUSG00000039615 | 0.35243848 | 4.32670272 | 0.26822445 | 0.48720456 |
| ENSMUSG00000041684 | 0.35243312 | 4.07634302 | 0.26456582 | 0.48380069 |
| ENSMUSG00000039307 | 0.3518036  | 2.77160625 | 0.29250073 | 0.51448832 |
| ENSMUSG00000032184 | 0.3517907  | 1.0581026  | 0.40595156 | 0.62334923 |
| ENSMUSG00000024169 | 0.35098604 | 5.8358972  | 0.25662446 | 0.47558655 |
| ENSMUSG00000041187 | 0.35097352 | 6.01372594 | 0.25621389 | 0.47523402 |
| ENSMUSG00000026819 | 0.35048658 | 3.72241328 | 0.27781858 | 0.49800458 |
| ENSMUSG00000046806 | 0.35044957 | 2.61651351 | 0.30304777 | 0.52651316 |
| ENSMUSG00000039244 | 0.35039155 | 4.10623194 | 0.27301937 | 0.49275999 |
| ENSMUSG00000042744 | 0.35037716 | 4.97293543 | 0.26076557 | 0.48020763 |
| ENSMUSG00000031360 | 0.34947674 | 5.98223685 | 0.25772104 | 0.47671761 |
| ENSMUSG00000032324 | 0.34936091 | 5.1937296  | 0.26129505 | 0.48078945 |
| ENSMUSG00000040548 | 0.34913007 | 4.65878248 | 0.26672451 | 0.48570705 |
| ENSMUSG00000040234 | 0.34889127 | 4.21306257 | 0.2709159  | 0.490441   |
| ENSMUSG00000001524 | 0.34866308 | 3.69875455 | 0.281751   | 0.50278208 |
| ENSMUSG00000030314 | 0.34823871 | 3.47545317 | 0.2907507  | 0.51316785 |
| ENSMUSG00000045092 | 0.34816592 | 6.25597464 | 0.25893119 | 0.47821783 |
| ENSMUSG00000030220 | 0.34808792 | 9.89428908 | 0.25527341 | 0.474142   |
| ENSMUSG00000030670 | 0.34806254 | 1.56340764 | 0.32879167 | 0.55375439 |
| ENSMUSG00000025289 | 0.34778439 | 6.16785949 | 0.25980995 | 0.47910234 |
| ENSMUSG00000036057 | 0.34767888 | 4.71584532 | 0.26955885 | 0.48860716 |
| ENSMUSG00000002010 | 0.34732599 | 6.53735014 | 0.25966691 | 0.47892046 |
| ENSMUSG00000025384 | 0.34639548 | 1.21783053 | 0.39674808 | 0.61528185 |
| ENSMUSG00000005566 | 0.3461094  | 7.9191278  | 0.25914872 | 0.4784557  |
| ENSMUSG00000026727 | 0.34585335 | 5.66297721 | 0.26385484 | 0.4829857  |
| ENSMUSG00000039205 | 0.34578991 | 4.49459286 | 0.27411741 | 0.49402721 |
| ENSMUSG00000028419 | 0.34568338 | 5.68867466 | 0.26405556 | 0.48313118 |
| ENSMUSG00000026483 | 0.34567319 | 6.46993447 | 0.26165487 | 0.48102389 |
| ENSMUSG00000052752 | 0.34552394 | 6.65281326 | 0.26184851 | 0.4812158  |
| ENSMUSG00000069892 | 0.34550293 | 6.65755904 | 0.26087093 | 0.48031964 |
| ENSMUSG00000039294 | 0.34514611 | 6.60163036 | 0.2622595  | 0.48147852 |
| ENSMUSG00000026504 | 0.34507265 | 4.25702221 | 0.27546729 | 0.49535423 |
| ENSMUSG00000078317 | 0.34497408 | 1.27998166 | 0.35737941 | 0.57954579 |
| ENSMUSG00000002015 | 0.34477319 | 7.30630125 | 0.26149612 | 0.48085391 |
| ENSMUSG00000003421 | 0.3447102  | 3.71105446 | 0.28600178 | 0.50765731 |
| ENSMUSG00000057596 | 0.3444059  | 7.56619574 | 0.26130443 | 0.48078945 |
| ENSMUSG00000020340 | 0.34439002 | 8.74529782 | 0.26071305 | 0.48019292 |
| ENSMUSG00000024063 | 0.34412161 | 5.78521251 | 0.2665199  | 0.48569517 |
| ENSMUSG00000020311 | 0.34399938 | 5.60082777 | 0.26606879 | 0.48533251 |
| ENSMUSG00000073902 | 0.34328719 | 8.64746948 | 0.26215085 | 0.48144719 |
| ENSMUSG00000060600 | 0.34319246 | 1.33778869 | 0.39291303 | 0.61275114 |

|                    |            |            |            |            |
|--------------------|------------|------------|------------|------------|
| ENSMUSG00000074358 | 0.34281834 | 0.99028539 | 0.43694368 | 0.64901466 |
| ENSMUSG00000039849 | 0.34278718 | 4.27200959 | 0.27953008 | 0.50040711 |
| ENSMUSG00000057841 | 0.34237374 | 9.4078797  | 0.2633214  | 0.48252472 |
| ENSMUSG00000042523 | 0.34193326 | 2.24035452 | 0.31476955 | 0.5394906  |
| ENSMUSG00000022551 | 0.34189694 | 6.17803798 | 0.26850358 | 0.48738304 |
| ENSMUSG00000073557 | 0.34157559 | 3.82630038 | 0.28418376 | 0.50546555 |
| ENSMUSG00000022553 | 0.34136577 | 4.73066293 | 0.27696135 | 0.4971754  |
| ENSMUSG00000084899 | 0.34110469 | 2.69363714 | 0.30597115 | 0.52954467 |
| ENSMUSG00000038429 | 0.34107411 | 6.83596011 | 0.26775614 | 0.48659964 |
| ENSMUSG00000028044 | 0.3407875  | 5.14027586 | 0.27461766 | 0.49448602 |
| ENSMUSG00000014606 | 0.34072253 | 5.94349078 | 0.27028649 | 0.48944259 |
| ENSMUSG00000021916 | 0.34042465 | 4.28857289 | 0.28080918 | 0.50194699 |
| ENSMUSG00000039850 | 0.33994273 | 1.85516646 | 0.35212583 | 0.57532874 |
| ENSMUSG00000063286 | 0.3397908  | 8.19370685 | 0.26727857 | 0.4863054  |
| ENSMUSG00000022951 | 0.33977429 | 3.19805641 | 0.30481946 | 0.52853791 |
| ENSMUSG00000059363 | 0.33897958 | 3.08956365 | 0.30970533 | 0.53380107 |
| ENSMUSG00000029924 | 0.33887223 | 4.32730106 | 0.28110682 | 0.5021461  |
| ENSMUSG00000015542 | 0.33872958 | 1.72344879 | 0.39349439 | 0.61309072 |
| ENSMUSG00000070808 | 0.33860372 | 4.02531382 | 0.29065947 | 0.51309081 |
| ENSMUSG00000054414 | 0.33834143 | 6.08456969 | 0.27267959 | 0.49242354 |
| ENSMUSG00000032046 | 0.33829636 | 5.23011539 | 0.27698976 | 0.4971754  |
| ENSMUSG00000064120 | 0.33820131 | 2.43705682 | 0.32493035 | 0.54974097 |
| ENSMUSG00000034781 | 0.3381492  | 3.12587709 | 0.30285534 | 0.52626361 |
| ENSMUSG00000037570 | 0.33771841 | 3.15451537 | 0.31160785 | 0.53620218 |
| ENSMUSG00000047284 | 0.33757111 | 4.55436673 | 0.28504929 | 0.5065038  |
| ENSMUSG00000022131 | 0.33739345 | 3.27498204 | 0.29728438 | 0.51942884 |
| ENSMUSG00000045435 | 0.33711923 | 3.32252416 | 0.29935427 | 0.52194606 |
| ENSMUSG00000025538 | 0.33679225 | 3.7664256  | 0.29273402 | 0.51481468 |
| ENSMUSG00000053617 | 0.33665112 | 4.19216028 | 0.28782042 | 0.50974798 |
| ENSMUSG0000002486  | 0.33614703 | 3.51129194 | 0.30254625 | 0.52598078 |
| ENSMUSG00000035878 | 0.33611122 | 1.11995635 | 0.40115499 | 0.61932633 |
| ENSMUSG00000020029 | 0.33601461 | 7.23342716 | 0.27368308 | 0.49354026 |
| ENSMUSG00000034639 | 0.33595522 | 1.31678022 | 0.38892699 | 0.60957343 |
| ENSMUSG00000015750 | 0.33585853 | 5.33815497 | 0.28041243 | 0.5013209  |
| ENSMUSG00000027331 | 0.33533459 | 6.02571762 | 0.27758753 | 0.49767314 |
| ENSMUSG00000053581 | 0.33531399 | 4.66677916 | 0.28486387 | 0.50625774 |
| ENSMUSG00000067341 | 0.33499471 | 6.58221378 | 0.27623349 | 0.49640093 |
| ENSMUSG00000018040 | 0.33478316 | 5.73618759 | 0.28024224 | 0.5011828  |
| ENSMUSG00000002325 | 0.33444477 | 6.76655142 | 0.27675367 | 0.49692167 |
| ENSMUSG00000028700 | 0.3343574  | 4.77107471 | 0.28602799 | 0.50765731 |
| ENSMUSG00000031310 | 0.33348434 | 5.40134063 | 0.2827115  | 0.50401071 |
| ENSMUSG00000027742 | 0.33338586 | 5.61066691 | 0.28151082 | 0.50261799 |
| ENSMUSG00000030337 | 0.3332984  | 4.01980776 | 0.29202528 | 0.51421331 |

|                    |            |            |            |            |
|--------------------|------------|------------|------------|------------|
| ENSMUSG00000028657 | 0.33319544 | 6.40208964 | 0.27935939 | 0.50018458 |
| ENSMUSG00000024927 | 0.3331783  | 5.03038086 | 0.28714375 | 0.50896748 |
| ENSMUSG00000042535 | 0.33300768 | 5.81328796 | 0.28205504 | 0.5030899  |
| ENSMUSG00000022043 | 0.33291084 | 6.25584296 | 0.28011224 | 0.5010334  |
| ENSMUSG00000037992 | 0.33243638 | 3.23233188 | 0.3204712  | 0.54530228 |
| ENSMUSG00000042724 | 0.33233943 | 2.55790026 | 0.32645093 | 0.55118943 |
| ENSMUSG00000029156 | 0.33231719 | 3.788542   | 0.29677469 | 0.51870636 |
| ENSMUSG00000028102 | 0.33223777 | 4.04945223 | 0.29541818 | 0.51725762 |
| ENSMUSG00000042817 | 0.33200261 | 5.56355323 | 0.28389629 | 0.50512483 |
| ENSMUSG00000054021 | 0.33168186 | 1.20552317 | 0.3756462  | 0.59699164 |
| ENSMUSG00000020781 | 0.33166763 | 3.35571975 | 0.31821274 | 0.54317299 |
| ENSMUSG00000030733 | 0.33159362 | 4.50243865 | 0.29413991 | 0.51589203 |
| ENSMUSG00000061887 | 0.33145691 | 4.5787007  | 0.29122932 | 0.5138444  |
| ENSMUSG00000023243 | 0.33144817 | 3.49922406 | 0.30667032 | 0.53032917 |
| ENSMUSG00000086605 | 0.33144279 | 2.46653079 | 0.33672    | 0.56097459 |
| ENSMUSG00000039917 | 0.33138655 | 3.52583772 | 0.30738272 | 0.53136408 |
| ENSMUSG00000005225 | 0.33057016 | 4.82137037 | 0.28984562 | 0.51215717 |
| ENSMUSG00000022186 | 0.33030094 | 7.94315227 | 0.28127701 | 0.5022837  |
| ENSMUSG00000042082 | 0.33017133 | 5.4689122  | 0.28710955 | 0.50896748 |
| ENSMUSG00000030447 | 0.33009883 | 6.47570724 | 0.28368023 | 0.50506977 |
| ENSMUSG00000015461 | 0.32972118 | 4.64274199 | 0.29513825 | 0.51701931 |
| ENSMUSG00000009555 | 0.32895893 | 5.93972189 | 0.2875739  | 0.50956242 |
| ENSMUSG00000024675 | 0.32885013 | 8.31503224 | 0.28300318 | 0.50428298 |
| ENSMUSG00000028470 | 0.32867357 | 2.10352739 | 0.35136754 | 0.57483597 |
| ENSMUSG00000039328 | 0.32860778 | 1.54199259 | 0.38983982 | 0.61042715 |
| ENSMUSG00000021133 | 0.3282922  | 5.22324768 | 0.2914912  | 0.51390128 |
| ENSMUSG00000001098 | 0.32825299 | 5.29131194 | 0.29146928 | 0.51390128 |
| ENSMUSG00000028698 | 0.32807113 | 3.08997192 | 0.31639598 | 0.54098846 |
| ENSMUSG00000025871 | 0.32795379 | 6.15245563 | 0.28777906 | 0.50974798 |
| ENSMUSG00000019254 | 0.32779968 | 4.94244786 | 0.29498247 | 0.51683038 |
| ENSMUSG00000034959 | 0.32765685 | 4.96874629 | 0.29394366 | 0.51589203 |
| ENSMUSG00000038843 | 0.32695251 | 5.15906877 | 0.29284867 | 0.51487029 |
| ENSMUSG00000069520 | 0.3267781  | 4.78205497 | 0.29677255 | 0.51870636 |
| ENSMUSG00000029175 | 0.32667155 | 2.87177688 | 0.3313137  | 0.55650982 |
| ENSMUSG00000034135 | 0.32664835 | 5.48443422 | 0.29290887 | 0.51487029 |
| ENSMUSG00000018286 | 0.32634383 | 6.05448545 | 0.29138816 | 0.51390128 |
| ENSMUSG00000025025 | 0.32599192 | 2.86810908 | 0.3313137  | 0.55650982 |
| ENSMUSG00000028692 | 0.32515912 | 7.53628397 | 0.28937284 | 0.51148939 |
| ENSMUSG00000009640 | 0.32508708 | 3.46902474 | 0.32053701 | 0.54530228 |
| ENSMUSG00000027327 | 0.32505326 | 2.77221366 | 0.33583298 | 0.56008281 |
| ENSMUSG00000033102 | 0.32502777 | 4.12672936 | 0.30370457 | 0.52731445 |
| ENSMUSG00000033916 | 0.32480938 | 5.8092297  | 0.29430339 | 0.51589203 |
| ENSMUSG00000018199 | 0.32400277 | 2.80206607 | 0.32469646 | 0.54953381 |

|                    |            |            |            |            |
|--------------------|------------|------------|------------|------------|
| ENSMUSG00000040479 | 0.32376814 | 5.19031122 | 0.29914489 | 0.52174735 |
| ENSMUSG00000037190 | 0.3234482  | 2.98136744 | 0.33155617 | 0.55652855 |
| ENSMUSG00000063236 | 0.32340278 | 3.03158679 | 0.33459922 | 0.55936421 |
| ENSMUSG00000000881 | 0.323402   | 4.99349205 | 0.29958047 | 0.52216863 |
| ENSMUSG00000035443 | 0.32283295 | 4.79333809 | 0.30272319 | 0.52611876 |
| ENSMUSG00000028199 | 0.32236524 | 2.35709567 | 0.35161992 | 0.57498087 |
| ENSMUSG00000045576 | 0.32232335 | 2.89508036 | 0.33224678 | 0.55687742 |
| ENSMUSG00000055839 | 0.32215823 | 3.65610224 | 0.31903644 | 0.54403683 |
| ENSMUSG00000053044 | 0.32212184 | 1.32888017 | 0.35515124 | 0.57775698 |
| ENSMUSG00000051238 | 0.32173345 | 2.1829397  | 0.36189428 | 0.58391051 |
| ENSMUSG00000071650 | 0.32118392 | 8.66812866 | 0.29424689 | 0.51589203 |
| ENSMUSG00000094724 | 0.32114774 | 1.3562168  | 0.42067813 | 0.63514811 |
| ENSMUSG00000013593 | 0.3209503  | 6.88531355 | 0.29675817 | 0.51870636 |
| ENSMUSG00000062691 | 0.32017302 | 3.07179616 | 0.3348609  | 0.55943299 |
| ENSMUSG00000029516 | 0.32016154 | 5.32525084 | 0.30320869 | 0.52670788 |
| ENSMUSG00000018761 | 0.31999004 | 5.15926504 | 0.30538594 | 0.52887137 |
| ENSMUSG00000040528 | 0.31993507 | 4.90729738 | 0.30553428 | 0.52895836 |
| ENSMUSG00000065979 | 0.31989049 | 4.03850767 | 0.31426784 | 0.53871632 |
| ENSMUSG00000031703 | 0.31985029 | 6.57574145 | 0.29856209 | 0.52115467 |
| ENSMUSG00000060802 | 0.31932978 | 11.0743195 | 0.29635552 | 0.51861002 |
| ENSMUSG00000090210 | 0.3188737  | 1.73890362 | 0.39657141 | 0.61526686 |
| ENSMUSG00000032497 | 0.31866698 | 4.55387132 | 0.31168619 | 0.53625141 |
| ENSMUSG00000028618 | 0.31817809 | 6.53556502 | 0.30120677 | 0.52449763 |
| ENSMUSG00000052146 | 0.31758441 | 6.84503012 | 0.3022281  | 0.52561791 |
| ENSMUSG00000043384 | 0.31722974 | 5.57071244 | 0.30537365 | 0.52887137 |
| ENSMUSG00000025260 | 0.31690569 | 4.70284187 | 0.31337987 | 0.53796379 |
| ENSMUSG00000032038 | 0.31690331 | 3.59351906 | 0.32505246 | 0.54982381 |
| ENSMUSG00000025486 | 0.31686781 | 1.0232791  | 0.44649291 | 0.65688671 |
| ENSMUSG00000063931 | 0.31676035 | 4.04428173 | 0.32207248 | 0.5467433  |
| ENSMUSG00000032952 | 0.31672651 | 5.04893067 | 0.3093618  | 0.53344382 |
| ENSMUSG00000039183 | 0.31659504 | 4.83019662 | 0.31532124 | 0.54017859 |
| ENSMUSG00000068739 | 0.31658921 | 6.77146848 | 0.3038465  | 0.52739106 |
| ENSMUSG00000031516 | 0.31578803 | 4.31341883 | 0.31700061 | 0.54185046 |
| ENSMUSG00000064326 | 0.31566285 | 2.77355428 | 0.36065061 | 0.58274741 |
| ENSMUSG00000075256 | 0.3155938  | 2.30697017 | 0.35620381 | 0.57851354 |
| ENSMUSG00000020775 | 0.3154701  | 4.30749749 | 0.32011281 | 0.54518265 |
| ENSMUSG00000098332 | 0.31545469 | 1.74917421 | 0.38750486 | 0.60827546 |
| ENSMUSG00000046417 | 0.31544965 | 1.96313411 | 0.38823851 | 0.60873677 |
| ENSMUSG00000006526 | 0.31543068 | 3.68501425 | 0.32865232 | 0.55360616 |
| ENSMUSG00000024130 | 0.31538403 | 4.88260447 | 0.31405658 | 0.53844548 |
| ENSMUSG00000024007 | 0.3152608  | 5.43757088 | 0.31148425 | 0.53607503 |
| ENSMUSG00000079197 | 0.31517182 | 8.12412644 | 0.30380396 | 0.52739106 |
| ENSMUSG00000022848 | 0.31515403 | 2.57058569 | 0.36002054 | 0.58225278 |

|                    |            |            |            |            |
|--------------------|------------|------------|------------|------------|
| ENSMUSG0000001123  | 0.3149724  | 8.7064561  | 0.30362772 | 0.52726592 |
| ENSMUSG00000085882 | 0.31466507 | 1.79895292 | 0.38478349 | 0.60612112 |
| ENSMUSG00000015291 | 0.31460092 | 7.40527477 | 0.3052197  | 0.52887137 |
| ENSMUSG00000022364 | 0.31449375 | 5.77461861 | 0.30870622 | 0.53282457 |
| ENSMUSG00000070336 | 0.3144675  | 1.26598591 | 0.3968235  | 0.61529038 |
| ENSMUSG00000031639 | 0.31444998 | 2.87483619 | 0.33428715 | 0.55916746 |
| ENSMUSG00000046876 | 0.31443853 | 5.291754   | 0.31065879 | 0.53507581 |
| ENSMUSG00000019505 | 0.31383643 | 7.71630439 | 0.3062502  | 0.52977256 |
| ENSMUSG00000030677 | 0.31377408 | 6.26746839 | 0.30932994 | 0.53344382 |
| ENSMUSG00000026004 | 0.31346761 | 3.93694315 | 0.32120986 | 0.54596152 |
| ENSMUSG00000030823 | 0.31326344 | 1.95760207 | 0.37262277 | 0.59434462 |
| ENSMUSG00000042203 | 0.31307149 | 4.47918697 | 0.32122829 | 0.54596152 |
| ENSMUSG00000097750 | 0.31274654 | 0.88035333 | 0.43912875 | 0.65024023 |
| ENSMUSG00000020576 | 0.31265184 | 6.53199947 | 0.30967958 | 0.53380107 |
| ENSMUSG00000028551 | 0.31263595 | 3.74090062 | 0.33531974 | 0.55950612 |
| ENSMUSG00000014859 | 0.31245713 | 6.33990591 | 0.31130493 | 0.53585421 |
| ENSMUSG00000006567 | 0.31211845 | 0.7812445  | 0.51469173 | 0.71039702 |
| ENSMUSG00000029570 | 0.31184343 | 2.63452401 | 0.3776331  | 0.59923415 |
| ENSMUSG00000023791 | 0.31171491 | 3.92923097 | 0.32602092 | 0.55080834 |
| ENSMUSG00000001143 | 0.31168285 | 4.48822053 | 0.32209386 | 0.5467433  |
| ENSMUSG00000001829 | 0.31154844 | 4.83075488 | 0.32089461 | 0.54556637 |
| ENSMUSG00000016664 | 0.31148586 | 6.00548598 | 0.31327124 | 0.53789127 |
| ENSMUSG00000046541 | 0.31146022 | 3.14966503 | 0.35325592 | 0.57624164 |
| ENSMUSG00000049680 | 0.31085942 | 4.0644105  | 0.33239366 | 0.55698498 |
| ENSMUSG00000098112 | 0.31066055 | 5.8761877  | 0.31547725 | 0.54030327 |
| ENSMUSG00000025981 | 0.31050978 | 4.43726729 | 0.32038508 | 0.54530228 |
| ENSMUSG00000030008 | 0.31020566 | 3.61874454 | 0.34216571 | 0.56585109 |
| ENSMUSG00000025283 | 0.31015746 | 5.52092775 | 0.31615572 | 0.54078025 |
| ENSMUSG00000027074 | 0.31002345 | 7.65907162 | 0.31210158 | 0.53662364 |
| ENSMUSG00000068663 | 0.30996506 | 5.13923946 | 0.31991241 | 0.54492741 |
| ENSMUSG00000023072 | 0.30967458 | 3.93699596 | 0.33457797 | 0.55936421 |
| ENSMUSG00000022443 | 0.30957002 | 8.06275888 | 0.31250532 | 0.53699096 |
| ENSMUSG00000035181 | 0.30945794 | 5.09149975 | 0.32018793 | 0.54522448 |
| ENSMUSG00000021356 | 0.3093973  | 9.01156765 | 0.31200944 | 0.53662364 |
| ENSMUSG00000015340 | 0.30912466 | 9.72279865 | 0.31221627 | 0.53673525 |
| ENSMUSG00000014932 | 0.3090954  | 2.56213926 | 0.3381175  | 0.56234717 |
| ENSMUSG00000045005 | 0.30863215 | 2.94715824 | 0.34950455 | 0.57264887 |
| ENSMUSG00000031858 | 0.30850934 | 5.98963593 | 0.31772557 | 0.54265957 |
| ENSMUSG00000003200 | 0.30838854 | 4.11841895 | 0.33657754 | 0.56090309 |
| ENSMUSG00000016427 | 0.30804276 | 4.54759339 | 0.32756323 | 0.55272131 |
| ENSMUSG00000039354 | 0.30800497 | 5.06495334 | 0.32359469 | 0.54842764 |
| ENSMUSG00000047379 | 0.3077795  | 2.18136812 | 0.37523666 | 0.59678326 |
| ENSMUSG00000031161 | 0.30775907 | 4.74831256 | 0.32828481 | 0.55333283 |

|                    |            |            |            |            |
|--------------------|------------|------------|------------|------------|
| ENSMUSG00000032322 | 0.30748963 | 3.96890048 | 0.33757379 | 0.56170279 |
| ENSMUSG00000001741 | 0.30735105 | 7.09601208 | 0.31709372 | 0.54192372 |
| ENSMUSG00000075704 | 0.30717451 | 3.3864426  | 0.34872455 | 0.57233055 |
| ENSMUSG00000025142 | 0.30707721 | 3.6575277  | 0.34484602 | 0.56868628 |
| ENSMUSG00000011306 | 0.30698641 | 5.02120586 | 0.3258463  | 0.55059958 |
| ENSMUSG00000022179 | 0.30681331 | 1.8386707  | 0.41097257 | 0.62668667 |
| ENSMUSG00000097204 | 0.30645582 | 0.89039569 | 0.44926789 | 0.65917074 |
| ENSMUSG00000025037 | 0.30640084 | 4.18495554 | 0.33178058 | 0.55652855 |
| ENSMUSG00000034110 | 0.30633774 | 3.14509703 | 0.35202059 | 0.57526747 |
| ENSMUSG00000068329 | 0.30630348 | 5.54570308 | 0.32429478 | 0.5490964  |
| ENSMUSG00000029177 | 0.30606555 | 6.26017284 | 0.32088709 | 0.54556637 |
| ENSMUSG00000051391 | 0.30605028 | 7.64904362 | 0.31832838 | 0.54317299 |
| ENSMUSG00000021871 | 0.30599068 | 6.43611945 | 0.32075452 | 0.54556637 |
| ENSMUSG00000033326 | 0.30562799 | 6.23645102 | 0.32196179 | 0.54671337 |
| ENSMUSG00000003500 | 0.30538026 | 4.54246948 | 0.33502967 | 0.55945494 |
| ENSMUSG00000028391 | 0.30528067 | 1.1262663  | 0.42427484 | 0.63830635 |
| ENSMUSG00000044864 | 0.30513155 | 3.93610728 | 0.33852641 | 0.56250674 |
| ENSMUSG00000018001 | 0.30481072 | 3.0399889  | 0.3579848  | 0.57983673 |
| ENSMUSG00000000275 | 0.30478353 | 7.9619003  | 0.31991131 | 0.54492741 |
| ENSMUSG00000042626 | 0.30458757 | 6.35193561 | 0.32312711 | 0.54797967 |
| ENSMUSG00000006442 | 0.30449002 | 6.47100326 | 0.32349376 | 0.54842764 |
| ENSMUSG00000037815 | 0.30430838 | 5.81701787 | 0.32541493 | 0.55004304 |
| ENSMUSG00000057963 | 0.30414188 | 2.99917673 | 0.36473242 | 0.58653062 |
| ENSMUSG00000073982 | 0.30385297 | 5.27704208 | 0.32972281 | 0.55485256 |
| ENSMUSG00000039662 | 0.30365487 | 5.45654677 | 0.32798032 | 0.55314336 |
| ENSMUSG00000015149 | 0.30362011 | 4.55556801 | 0.33511383 | 0.55950612 |
| ENSMUSG00000001289 | 0.30338132 | 5.86031244 | 0.32722209 | 0.55223208 |
| ENSMUSG00000045216 | 0.30315115 | 5.03770153 | 0.33241425 | 0.55698498 |
| ENSMUSG00000033769 | 0.30285432 | 4.06448352 | 0.33962493 | 0.56372407 |
| ENSMUSG00000025377 | 0.30284642 | 2.6864976  | 0.37647188 | 0.59785289 |
| ENSMUSG00000031021 | 0.30205838 | 4.8190096  | 0.33381521 | 0.55865585 |
| ENSMUSG00000003423 | 0.30191285 | 3.09995955 | 0.36874556 | 0.59056801 |
| ENSMUSG00000026107 | 0.30188433 | 8.78377559 | 0.32396652 | 0.54888531 |
| ENSMUSG00000030577 | 0.30169949 | 9.07645855 | 0.32428781 | 0.5490964  |
| ENSMUSG00000018559 | 0.30144659 | 6.1347056  | 0.32952696 | 0.55464628 |
| ENSMUSG00000053134 | 0.30140807 | 4.08300314 | 0.34492164 | 0.56868628 |
| ENSMUSG00000024163 | 0.3012588  | 5.52735614 | 0.33220255 | 0.55687742 |
| ENSMUSG00000019791 | 0.30116436 | 3.23963468 | 0.35980058 | 0.58198433 |
| ENSMUSG00000045917 | 0.30105648 | 3.75344528 | 0.3476762  | 0.57154576 |
| ENSMUSG00000039770 | 0.30093402 | 4.21139788 | 0.34091296 | 0.56455856 |
| ENSMUSG00000066057 | 0.30083794 | 1.16170637 | 0.49014727 | 0.69114856 |
| ENSMUSG00000031783 | 0.30078314 | 5.47750302 | 0.3333483  | 0.55820312 |
| ENSMUSG00000034022 | 0.30074441 | 5.98685508 | 0.33097966 | 0.5563743  |

|                    |            |            |            |            |
|--------------------|------------|------------|------------|------------|
| ENSMUSG00000026924 | 0.30066993 | 7.30564366 | 0.32719991 | 0.55223208 |
| ENSMUSG00000021495 | 0.30050747 | 3.84059371 | 0.35138341 | 0.57483597 |
| ENSMUSG00000019979 | 0.30049403 | 6.75119799 | 0.32802588 | 0.55314336 |
| ENSMUSG00000022744 | 0.30049166 | 9.09900398 | 0.3261214  | 0.5508918  |
| ENSMUSG00000033099 | 0.30012752 | 3.85105518 | 0.35447152 | 0.57726077 |
| ENSMUSG00000029466 | 0.30008784 | 5.51212913 | 0.33382588 | 0.55865585 |
| ENSMUSG00000031399 | 0.29926445 | 3.15781415 | 0.36840778 | 0.5903283  |
| ENSMUSG00000051124 | 0.29907593 | 5.69650737 | 0.33361607 | 0.55854516 |
| ENSMUSG00000028673 | 0.29903521 | 5.54040275 | 0.33561168 | 0.55982    |
| ENSMUSG00000000278 | 0.29865473 | 6.82484685 | 0.33160093 | 0.55652855 |
| ENSMUSG00000022544 | 0.29851011 | 2.96781497 | 0.36950259 | 0.59137962 |
| ENSMUSG00000032604 | 0.29833432 | 7.30226103 | 0.33113874 | 0.5564906  |
| ENSMUSG00000003808 | 0.29824471 | 5.9146051  | 0.33531489 | 0.55950612 |
| ENSMUSG00000027828 | 0.29810217 | 9.74029112 | 0.32975242 | 0.55485256 |
| ENSMUSG00000045282 | 0.29764186 | 0.882206   | 0.50272585 | 0.70115005 |
| ENSMUSG00000015869 | 0.29760067 | 5.10165407 | 0.34017641 | 0.56420523 |
| ENSMUSG00000047030 | 0.297569   | 4.6883458  | 0.34449873 | 0.56831488 |
| ENSMUSG00000001065 | 0.29738408 | 3.01961059 | 0.37791047 | 0.59932154 |
| ENSMUSG00000058301 | 0.29733014 | 5.78902974 | 0.33785565 | 0.56203708 |
| ENSMUSG00000069808 | 0.29719448 | 3.24966762 | 0.36210229 | 0.58391051 |
| ENSMUSG00000031728 | 0.29704903 | 2.35397847 | 0.40361159 | 0.62150359 |
| ENSMUSG00000024622 | 0.29695824 | 5.56126499 | 0.33851046 | 0.56250674 |
| ENSMUSG00000000876 | 0.29691731 | 3.21309953 | 0.36809343 | 0.59013135 |
| ENSMUSG00000033703 | 0.29670944 | 2.18975072 | 0.40259962 | 0.6204994  |
| ENSMUSG00000055943 | 0.2964197  | 6.30494158 | 0.33605506 | 0.5602996  |
| ENSMUSG00000005779 | 0.29611502 | 7.66886431 | 0.33444953 | 0.55935231 |
| ENSMUSG00000050786 | 0.29584273 | 2.19411554 | 0.39109505 | 0.61137642 |
| ENSMUSG00000041346 | 0.29577834 | 3.60734559 | 0.36104003 | 0.58302721 |
| ENSMUSG00000040312 | 0.29545308 | 2.47875043 | 0.38740832 | 0.6082343  |
| ENSMUSG00000036944 | 0.29542205 | 3.93880699 | 0.35382908 | 0.57669803 |
| ENSMUSG00000043773 | 0.29542169 | 3.45807611 | 0.35716907 | 0.57937895 |
| ENSMUSG00000026946 | 0.29519468 | 5.68965568 | 0.34024615 | 0.56423412 |
| ENSMUSG00000039395 | 0.29468594 | 5.93109298 | 0.34037756 | 0.56435327 |
| ENSMUSG00000076677 | 0.29460892 | 6.00980944 | 0.33922005 | 0.56315466 |
| ENSMUSG00000009549 | 0.29410847 | 5.88135256 | 0.34111879 | 0.56464653 |
| ENSMUSG00000030707 | 0.29402782 | 8.20027666 | 0.33734371 | 0.56160326 |
| ENSMUSG00000023048 | 0.29399925 | 5.27805142 | 0.34504513 | 0.5687812  |
| ENSMUSG00000048799 | 0.2938286  | 6.10614999 | 0.34057136 | 0.56442625 |
| ENSMUSG00000025474 | 0.2934463  | 5.271652   | 0.34562632 | 0.56939112 |
| ENSMUSG00000045822 | 0.29333442 | 2.70700456 | 0.375102   | 0.59678326 |
| ENSMUSG00000006850 | 0.29211398 | 2.4517084  | 0.41266659 | 0.6281807  |
| ENSMUSG00000032557 | 0.29203186 | 6.05596227 | 0.3439449  | 0.56776034 |
| ENSMUSG00000061479 | 0.2919826  | 5.13380367 | 0.34938329 | 0.57260629 |



|                    |            |            |            |            |
|--------------------|------------|------------|------------|------------|
| ENSMUSG00000020477 | 0.29197651 | 3.71341714 | 0.36859211 | 0.59053593 |
| ENSMUSG00000000441 | 0.29183521 | 6.91538959 | 0.34243378 | 0.56616397 |
| ENSMUSG00000042213 | 0.29182524 | 2.70517293 | 0.39279029 | 0.61264831 |
| ENSMUSG00000020869 | 0.29169285 | 8.07171514 | 0.3411872  | 0.56466586 |
| ENSMUSG00000019923 | 0.29166968 | 7.50810389 | 0.34161638 | 0.56511597 |
| ENSMUSG00000020372 | 0.29138049 | 9.95049939 | 0.34081038 | 0.56454669 |
| ENSMUSG00000029313 | 0.29098176 | 7.23266886 | 0.34290552 | 0.56655326 |
| ENSMUSG00000070953 | 0.29009163 | 4.05750079 | 0.36024747 | 0.58247522 |
| ENSMUSG00000070822 | 0.28987459 | 1.54090398 | 0.45110806 | 0.66079182 |
| ENSMUSG00000038274 | 0.28949441 | 5.22749441 | 0.35407748 | 0.57680326 |
| ENSMUSG00000057530 | 0.28946197 | 4.21751357 | 0.36038182 | 0.58247522 |
| ENSMUSG00000031090 | 0.28936483 | 2.7260197  | 0.40742387 | 0.62395419 |
| ENSMUSG00000032633 | 0.28915495 | 5.22775961 | 0.35375817 | 0.57669803 |
| ENSMUSG00000017774 | 0.28853161 | 6.60654368 | 0.34917092 | 0.57254306 |
| ENSMUSG00000018449 | 0.28803783 | 4.04613802 | 0.36701391 | 0.58891694 |
| ENSMUSG00000032119 | 0.28778537 | 4.15544612 | 0.36564074 | 0.58755323 |
| ENSMUSG00000024597 | 0.28757187 | 6.62854632 | 0.34959853 | 0.57264887 |
| ENSMUSG00000056941 | 0.28751306 | 4.54964102 | 0.35941918 | 0.58147497 |
| ENSMUSG00000024906 | 0.28745799 | 2.63348751 | 0.41556851 | 0.6302195  |
| ENSMUSG00000037548 | 0.28732339 | 7.95146822 | 0.34861081 | 0.57233055 |
| ENSMUSG00000079685 | 0.28728972 | 5.5229841  | 0.35246824 | 0.57556292 |
| ENSMUSG00000037405 | 0.28717878 | 6.42134432 | 0.35168526 | 0.57498087 |
| ENSMUSG00000002580 | 0.28705581 | 5.50750632 | 0.35512831 | 0.57775698 |
| ENSMUSG00000008668 | 0.28701488 | 8.38798287 | 0.34887457 | 0.57246856 |
| ENSMUSG00000068742 | 0.28696503 | 3.35525335 | 0.38349364 | 0.60479605 |
| ENSMUSG00000029171 | 0.28648358 | 5.2776703  | 0.35665257 | 0.5788023  |
| ENSMUSG00000028189 | 0.2863764  | 3.65151081 | 0.3719269  | 0.59358587 |
| ENSMUSG00000024350 | 0.28612562 | 5.17219965 | 0.35735576 | 0.57954579 |
| ENSMUSG00000022177 | 0.28593523 | 4.17180502 | 0.3705863  | 0.59244981 |
| ENSMUSG00000048787 | 0.28469023 | 3.08375285 | 0.38596237 | 0.60687924 |
| ENSMUSG00000033530 | 0.28468502 | 4.56738761 | 0.36598077 | 0.58783685 |
| ENSMUSG00000020717 | 0.2844663  | 6.35276461 | 0.35588815 | 0.57848057 |
| ENSMUSG00000034066 | 0.28420985 | 2.61268123 | 0.38944782 | 0.61017075 |
| ENSMUSG00000011837 | 0.28420402 | 3.11930091 | 0.39720708 | 0.61570808 |
| ENSMUSG00000022439 | 0.28414381 | 7.22989248 | 0.35495713 | 0.57761546 |
| ENSMUSG00000034088 | 0.28408973 | 9.52021613 | 0.35306534 | 0.57624164 |
| ENSMUSG00000024613 | 0.28407477 | 6.4819739  | 0.35714358 | 0.57937895 |
| ENSMUSG00000023118 | 0.28402212 | 6.31299645 | 0.3576379  | 0.57973159 |
| ENSMUSG00000032239 | 0.28390574 | 4.47896145 | 0.36696074 | 0.58891694 |
| ENSMUSG00000072889 | 0.28376898 | 4.96122984 | 0.363073   | 0.58473405 |
| ENSMUSG00000027637 | 0.2837008  | 6.76055948 | 0.35625988 | 0.57851354 |
| ENSMUSG00000038467 | 0.28352447 | 7.16313676 | 0.35602518 | 0.57848057 |
| ENSMUSG00000021910 | 0.2834861  | 7.12798334 | 0.3560206  | 0.57848057 |

|                    |            |            |            |            |
|--------------------|------------|------------|------------|------------|
| ENSMUSG00000051344 | 0.2832155  | 6.12169238 | 0.35791321 | 0.57983673 |
| ENSMUSG00000073481 | 0.2829853  | 5.54699305 | 0.36225742 | 0.58391156 |
| ENSMUSG00000048154 | 0.28282184 | 5.51762533 | 0.36133504 | 0.58324159 |
| ENSMUSG00000028221 | 0.28274716 | 4.56441096 | 0.36628197 | 0.58823302 |
| ENSMUSG00000038503 | 0.28205872 | 5.84586182 | 0.36223949 | 0.58391156 |
| ENSMUSG00000032218 | 0.28164287 | 6.10309167 | 0.36207717 | 0.58391051 |
| ENSMUSG00000021298 | 0.28157698 | 6.0938553  | 0.36203515 | 0.58391051 |
| ENSMUSG00000038543 | 0.28129504 | 4.31438756 | 0.37449351 | 0.5962702  |
| ENSMUSG00000027247 | 0.28101472 | 5.92731746 | 0.36366079 | 0.58524369 |
| ENSMUSG00000025354 | 0.2808658  | 6.27195469 | 0.36237988 | 0.58396663 |
| ENSMUSG00000041926 | 0.2808106  | 5.66888024 | 0.36543601 | 0.58731177 |
| ENSMUSG00000036026 | 0.28078299 | 3.69954032 | 0.38647151 | 0.60718368 |
| ENSMUSG00000028108 | 0.28069886 | 0.87817228 | 0.53392486 | 0.72546293 |
| ENSMUSG00000081453 | 0.28050245 | 1.27187036 | 0.46985724 | 0.67613297 |
| ENSMUSG00000070972 | 0.28009025 | 4.16453583 | 0.37527405 | 0.59678326 |
| ENSMUSG00000015312 | 0.27988227 | 4.42012884 | 0.37399958 | 0.59574764 |
| ENSMUSG00000039163 | 0.27984861 | 3.01717989 | 0.39369478 | 0.61309072 |
| ENSMUSG00000011114 | 0.27956498 | 6.26961128 | 0.3648712  | 0.58657887 |
| ENSMUSG00000036478 | 0.27885492 | 7.82759559 | 0.36272094 | 0.58442889 |
| ENSMUSG00000027628 | 0.27884538 | 4.75306716 | 0.37524434 | 0.59678326 |
| ENSMUSG00000011267 | 0.27884274 | 2.23160637 | 0.43955786 | 0.65049746 |
| ENSMUSG00000036368 | 0.27839022 | 2.19198545 | 0.43082618 | 0.64420819 |
| ENSMUSG00000030816 | 0.27824374 | 5.43167033 | 0.37161153 | 0.59352173 |
| ENSMUSG00000061028 | 0.27779517 | 3.52555781 | 0.39360076 | 0.61309072 |
| ENSMUSG00000045691 | 0.27770302 | 2.94459788 | 0.40798081 | 0.62398323 |
| ENSMUSG00000021886 | 0.27769617 | 5.53971432 | 0.37005106 | 0.59199386 |
| ENSMUSG00000070737 | 0.27768632 | 1.03707742 | 0.48227225 | 0.68534066 |
| ENSMUSG00000041697 | 0.27746969 | 5.69723874 | 0.371317   | 0.59322705 |
| ENSMUSG00000049739 | 0.27743539 | 5.78342976 | 0.3701699  | 0.59200834 |
| ENSMUSG00000068798 | 0.27704889 | 7.94005226 | 0.3658588  | 0.58772849 |
| ENSMUSG00000026864 | 0.27702357 | 11.4682889 | 0.36482267 | 0.58657887 |
| ENSMUSG00000001588 | 0.27639131 | 6.42571517 | 0.37010922 | 0.59199909 |
| ENSMUSG00000002768 | 0.27584222 | 4.11962956 | 0.39041175 | 0.61074145 |
| ENSMUSG00000063019 | 0.27572034 | 2.6007316  | 0.4252462  | 0.6390545  |
| ENSMUSG00000034926 | 0.27552123 | 5.66550752 | 0.37534573 | 0.59678326 |
| ENSMUSG00000078349 | 0.27547841 | 1.64612396 | 0.46142954 | 0.6690046  |
| ENSMUSG00000026409 | 0.275392   | 3.02794856 | 0.39632371 | 0.61526686 |
| ENSMUSG00000025008 | 0.27529344 | 3.49346464 | 0.39464538 | 0.61406435 |
| ENSMUSG00000029233 | 0.27523571 | 4.54354538 | 0.38035096 | 0.60162631 |
| ENSMUSG00000025453 | 0.27517326 | 5.12634455 | 0.37575003 | 0.59703673 |
| ENSMUSG00000020183 | 0.27506663 | 4.56864722 | 0.38235322 | 0.60374152 |
| ENSMUSG00000033161 | 0.27477136 | 8.34198084 | 0.36972619 | 0.59156191 |
| ENSMUSG00000057788 | 0.27459364 | 4.4632503  | 0.38525708 | 0.60635046 |

|                    |            |            |            |            |
|--------------------|------------|------------|------------|------------|
| ENSMUSG00000041203 | 0.27453043 | 5.64442927 | 0.37566629 | 0.59699164 |
| ENSMUSG00000035325 | 0.2745113  | 7.54897371 | 0.37085405 | 0.59266302 |
| ENSMUSG00000006731 | 0.27420447 | 5.19778942 | 0.37999671 | 0.60139191 |
| ENSMUSG00000005054 | 0.27414431 | 5.25849556 | 0.37947957 | 0.6007498  |
| ENSMUSG00000028999 | 0.27397046 | 5.18370604 | 0.37852668 | 0.59994588 |
| ENSMUSG00000025417 | 0.27361518 | 5.54913147 | 0.37785837 | 0.59932154 |
| ENSMUSG00000029291 | 0.27344978 | 4.19850025 | 0.38619672 | 0.60695903 |
| ENSMUSG00000058997 | 0.27322293 | 5.42185203 | 0.37871883 | 0.60007403 |
| ENSMUSG00000036833 | 0.27296251 | 4.62304361 | 0.38564622 | 0.60668254 |
| ENSMUSG00000029404 | 0.2726789  | 3.64188    | 0.40037235 | 0.6187895  |
| ENSMUSG00000055850 | 0.27235529 | 5.71897205 | 0.3791506  | 0.60033457 |
| ENSMUSG00000039887 | 0.27199451 | 3.0809853  | 0.41296104 | 0.62828662 |
| ENSMUSG00000047719 | 0.2719611  | 4.66276548 | 0.38742224 | 0.6082343  |
| ENSMUSG00000068744 | 0.27188037 | 4.86729485 | 0.38502564 | 0.6062369  |
| ENSMUSG00000055707 | 0.27180389 | 2.54972306 | 0.42070317 | 0.63514811 |
| ENSMUSG00000044533 | 0.27167349 | 4.58139418 | 0.38825033 | 0.60873677 |
| ENSMUSG00000056612 | 0.27159628 | 5.39360231 | 0.38356789 | 0.6048247  |
| ENSMUSG00000004317 | 0.2714818  | 6.42411387 | 0.37752038 | 0.59914345 |
| ENSMUSG00000019578 | 0.27121183 | 3.40735186 | 0.41158819 | 0.62720683 |
| ENSMUSG00000032782 | 0.27088346 | 4.12668214 | 0.39609012 | 0.61504029 |
| ENSMUSG00000004462 | 0.27053057 | 4.73270985 | 0.38756975 | 0.60828878 |
| ENSMUSG00000029345 | 0.27049552 | 4.66469456 | 0.39112444 | 0.61137642 |
| ENSMUSG00000038871 | 0.2703692  | 3.82693433 | 0.39676094 | 0.61528185 |
| ENSMUSG00000038880 | 0.27028798 | 3.70912736 | 0.40755642 | 0.62397636 |
| ENSMUSG00000090083 | 0.27015098 | 1.19152404 | 0.51968463 | 0.71428486 |
| ENSMUSG00000041323 | 0.27009472 | 1.00470704 | 0.50107527 | 0.70001428 |
| ENSMUSG00000078153 | 0.26959104 | 2.90428075 | 0.41139814 | 0.62714757 |
| ENSMUSG00000024914 | 0.2695644  | 4.34165891 | 0.39739116 | 0.6159049  |
| ENSMUSG00000034459 | 0.26916598 | 6.75833284 | 0.3809953  | 0.60226522 |
| ENSMUSG00000051285 | 0.2687136  | 6.86325013 | 0.38149145 | 0.60269613 |
| ENSMUSG00000054720 | 0.26847221 | 5.99731502 | 0.38444051 | 0.60584634 |
| ENSMUSG00000038611 | 0.26803498 | 6.30433396 | 0.38519396 | 0.60635046 |
| ENSMUSG00000038406 | 0.26796448 | 4.26421917 | 0.40014265 | 0.61867746 |
| ENSMUSG00000065990 | 0.2679276  | 4.82673188 | 0.39447723 | 0.61394752 |
| ENSMUSG00000030231 | 0.2678656  | 4.31725658 | 0.39918884 | 0.61795118 |
| ENSMUSG00000049411 | 0.26785583 | 3.38765995 | 0.40651898 | 0.62386519 |
| ENSMUSG00000021786 | 0.26766231 | 4.05033931 | 0.39709647 | 0.61562513 |
| ENSMUSG00000027076 | 0.26735949 | 3.07048878 | 0.43872191 | 0.6499931  |
| ENSMUSG00000052296 | 0.26675104 | 6.9400568  | 0.38572352 | 0.60671564 |
| ENSMUSG00000023186 | 0.26674094 | 5.80261842 | 0.38764256 | 0.60830401 |
| ENSMUSG00000024767 | 0.2666284  | 5.59014733 | 0.39106788 | 0.61137642 |
| ENSMUSG00000025779 | 0.26653034 | 3.66252281 | 0.40894034 | 0.62476106 |
| ENSMUSG00000038780 | 0.26638946 | 3.66880807 | 0.40978592 | 0.62576202 |

|                    |            |            |            |            |
|--------------------|------------|------------|------------|------------|
| ENSMUSG00000040560 | 0.26637989 | 5.27193434 | 0.39130539 | 0.61157063 |
| ENSMUSG00000033444 | 0.26612471 | 6.67485799 | 0.38692054 | 0.60762357 |
| ENSMUSG00000029559 | 0.26611767 | 3.990168   | 0.4079381  | 0.62398323 |
| ENSMUSG00000056917 | 0.265508   | 5.07096042 | 0.39563479 | 0.61477314 |
| ENSMUSG00000049421 | 0.26546788 | 5.67710593 | 0.39049168 | 0.61074145 |
| ENSMUSG00000087060 | 0.26506336 | 1.37380676 | 0.52161293 | 0.71582608 |
| ENSMUSG00000059182 | 0.26503435 | 5.60173156 | 0.39195307 | 0.61205066 |
| ENSMUSG00000022307 | 0.26466834 | 5.83725564 | 0.39172135 | 0.61196096 |
| ENSMUSG00000049751 | 0.26409533 | 6.38922771 | 0.39183961 | 0.61203404 |
| ENSMUSG00000043263 | 0.26388306 | 7.87319999 | 0.38895352 | 0.60957343 |
| ENSMUSG00000092417 | 0.26373452 | 3.21582872 | 0.43290562 | 0.64570597 |
| ENSMUSG00000028964 | 0.26360865 | 5.87075078 | 0.39551703 | 0.61467872 |
| ENSMUSG00000026979 | 0.26341949 | 7.58766578 | 0.39044436 | 0.61074145 |
| ENSMUSG00000032295 | 0.26323216 | 4.55254297 | 0.40520026 | 0.62281637 |
| ENSMUSG00000020034 | 0.26277206 | 4.49411506 | 0.40404317 | 0.62165809 |
| ENSMUSG00000046169 | 0.26222117 | 2.68445113 | 0.42323759 | 0.6374735  |
| ENSMUSG00000039202 | 0.26212677 | 6.27193728 | 0.39500782 | 0.61406435 |
| ENSMUSG00000031367 | 0.26206871 | 4.88279122 | 0.39988704 | 0.61860522 |
| ENSMUSG00000051378 | 0.26204774 | 5.26748292 | 0.40095283 | 0.61911158 |
| ENSMUSG00000056069 | 0.26196135 | 3.4278523  | 0.41331628 | 0.62852847 |
| ENSMUSG00000035245 | 0.2619566  | 4.80976132 | 0.40131947 | 0.61941165 |
| ENSMUSG00000052566 | 0.2618141  | 2.41393009 | 0.4573383  | 0.66689564 |
| ENSMUSG00000020267 | 0.26178787 | 7.15953568 | 0.39404152 | 0.61353505 |
| ENSMUSG00000023456 | 0.26146507 | 7.3821207  | 0.39468979 | 0.61406435 |
| ENSMUSG00000019947 | 0.2614606  | 4.29515218 | 0.41078276 | 0.62666308 |
| ENSMUSG00000030867 | 0.26127866 | 6.09852465 | 0.39787384 | 0.61647578 |
| ENSMUSG00000002017 | 0.2610666  | 7.14414862 | 0.39520082 | 0.61427582 |
| ENSMUSG00000035578 | 0.26096465 | 2.53575818 | 0.43822451 | 0.64968561 |
| ENSMUSG00000022391 | 0.26080544 | 7.30288521 | 0.39580887 | 0.61495503 |
| ENSMUSG00000025583 | 0.26061407 | 4.67980076 | 0.40796733 | 0.62398323 |
| ENSMUSG00000006471 | 0.26045414 | 5.20343877 | 0.40374408 | 0.62153509 |
| ENSMUSG00000005897 | 0.26016625 | 3.68102014 | 0.41398363 | 0.62905446 |
| ENSMUSG00000032977 | 0.2597706  | 4.10183904 | 0.4165042  | 0.63143289 |
| ENSMUSG00000001924 | 0.25945875 | 9.24155637 | 0.39641994 | 0.61526686 |
| ENSMUSG00000044700 | 0.25934029 | 3.34553507 | 0.43377804 | 0.64647075 |
| ENSMUSG00000040751 | 0.25923447 | 6.8599457  | 0.39903116 | 0.61795118 |
| ENSMUSG00000024101 | 0.25886082 | 3.63641154 | 0.42940877 | 0.6428018  |
| ENSMUSG00000060279 | 0.25856498 | 5.17877088 | 0.40856156 | 0.62434816 |
| ENSMUSG00000018999 | 0.25842821 | 5.95719593 | 0.40254521 | 0.6204994  |
| ENSMUSG00000065353 | 0.25838098 | 2.30561268 | 0.46240524 | 0.66978886 |
| ENSMUSG00000028436 | 0.25831314 | 6.07673302 | 0.40293919 | 0.62084529 |
| ENSMUSG00000022696 | 0.25828909 | 1.59063846 | 0.46732251 | 0.67374411 |
| ENSMUSG00000034850 | 0.25779298 | 6.47943177 | 0.402514   | 0.6204994  |

|                    |            |            |            |            |
|--------------------|------------|------------|------------|------------|
| ENSMUSG00000097574 | 0.25729137 | 1.28252373 | 0.49681821 | 0.69571323 |
| ENSMUSG00000031627 | 0.25689516 | 6.42972337 | 0.40421506 | 0.62183384 |
| ENSMUSG00000043419 | 0.25657278 | 2.80429738 | 0.43196122 | 0.6452791  |
| ENSMUSG00000046722 | 0.25629096 | 6.75165723 | 0.40484495 | 0.62253642 |
| ENSMUSG00000036352 | 0.25608465 | 5.23624453 | 0.41224299 | 0.62773629 |
| ENSMUSG00000073664 | 0.25605758 | 4.49092118 | 0.41111829 | 0.62682025 |
| ENSMUSG00000051154 | 0.25594677 | 6.02863941 | 0.40696083 | 0.62395419 |
| ENSMUSG00000036980 | 0.25579325 | 5.27355622 | 0.41160861 | 0.62720683 |
| ENSMUSG00000039783 | 0.25528388 | 6.41357029 | 0.40710217 | 0.62395419 |
| ENSMUSG00000028071 | 0.25518499 | 2.99717826 | 0.43975676 | 0.65049746 |
| ENSMUSG00000017119 | 0.25506057 | 6.58785809 | 0.40693504 | 0.62395419 |
| ENSMUSG00000026496 | 0.25482102 | 8.1233214  | 0.4057017  | 0.62323179 |
| ENSMUSG00000004451 | 0.25470413 | 4.34121722 | 0.41911753 | 0.63453088 |
| ENSMUSG00000027692 | 0.25468185 | 3.78528101 | 0.41887118 | 0.63424695 |
| ENSMUSG00000037395 | 0.25448865 | 2.65822398 | 0.44351515 | 0.65401042 |
| ENSMUSG00000019877 | 0.25426745 | 7.35107041 | 0.40710489 | 0.62395419 |
| ENSMUSG00000029767 | 0.25388486 | 8.18524368 | 0.40713151 | 0.62395419 |
| ENSMUSG00000002603 | 0.25378139 | 5.0449257  | 0.41628558 | 0.63121818 |
| ENSMUSG00000022488 | 0.25374169 | 9.0085069  | 0.40695845 | 0.62395419 |
| ENSMUSG00000026123 | 0.25366378 | 5.40272375 | 0.41398116 | 0.62905446 |
| ENSMUSG00000032812 | 0.25348722 | 5.37522135 | 0.41546724 | 0.63015453 |
| ENSMUSG00000002343 | 0.25322621 | 2.30700114 | 0.48844761 | 0.68981392 |
| ENSMUSG00000048307 | 0.25278854 | 4.77066004 | 0.41996117 | 0.63514811 |
| ENSMUSG00000031833 | 0.25239168 | 4.64999324 | 0.42417536 | 0.63830635 |
| ENSMUSG00000020986 | 0.25224566 | 6.36759298 | 0.41270959 | 0.6281807  |
| ENSMUSG00000035754 | 0.25158382 | 4.56845123 | 0.42786711 | 0.64165191 |
| ENSMUSG00000022898 | 0.25152324 | 5.70352188 | 0.41691097 | 0.63163359 |
| ENSMUSG00000078348 | 0.25151581 | 2.34198903 | 0.48408277 | 0.68634611 |
| ENSMUSG00000001999 | 0.25133449 | 4.80070416 | 0.42284601 | 0.6372235  |
| ENSMUSG00000002396 | 0.25089387 | 2.33812885 | 0.47225416 | 0.67813433 |
| ENSMUSG00000037341 | 0.25079442 | 6.25729882 | 0.41539556 | 0.63015453 |
| ENSMUSG00000063015 | 0.25049084 | 7.86329605 | 0.41367897 | 0.62883588 |
| ENSMUSG00000096687 | 0.2504311  | 3.20484822 | 0.43804068 | 0.64959169 |
| ENSMUSG00000053897 | 0.25039944 | 4.64635135 | 0.42363024 | 0.63769243 |
| ENSMUSG00000031907 | 0.25006395 | 3.14213386 | 0.44674766 | 0.65708222 |
| ENSMUSG00000000056 | 0.24952252 | 4.41747673 | 0.43110865 | 0.64445185 |
| ENSMUSG00000040697 | 0.24894554 | 4.85133259 | 0.42627142 | 0.6399709  |
| ENSMUSG00000047193 | 0.24871505 | 4.94465578 | 0.42324835 | 0.6374735  |
| ENSMUSG00000021240 | 0.24865599 | 2.58510081 | 0.47335707 | 0.67890447 |
| ENSMUSG00000048416 | 0.24862299 | 1.35472084 | 0.54152241 | 0.73015474 |
| ENSMUSG00000033917 | 0.24861505 | 5.49384549 | 0.42339617 | 0.63752829 |
| ENSMUSG00000031143 | 0.248464   | 0.94688377 | 0.58746228 | 0.76468971 |
| ENSMUSG00000025027 | 0.24833262 | 5.44036472 | 0.42472557 | 0.63871712 |

|                    |            |            |            |            |
|--------------------|------------|------------|------------|------------|
| ENSMUSG00000033318 | 0.24808998 | 4.6697426  | 0.43282543 | 0.64569933 |
| ENSMUSG00000011158 | 0.24803902 | 4.69789594 | 0.43016945 | 0.64375001 |
| ENSMUSG00000056602 | 0.24799773 | 3.56422828 | 0.43830251 | 0.64971192 |
| ENSMUSG00000018428 | 0.24754475 | 4.91498254 | 0.43034067 | 0.64375001 |
| ENSMUSG00000021494 | 0.2473971  | 5.76945965 | 0.42485811 | 0.63882736 |
| ENSMUSG00000066152 | 0.24737146 | 6.0916691  | 0.42267073 | 0.6372235  |
| ENSMUSG00000033885 | 0.24702858 | 7.52638197 | 0.42047359 | 0.63514811 |
| ENSMUSG00000014077 | 0.24696062 | 7.12549755 | 0.42116636 | 0.63565347 |
| ENSMUSG00000039470 | 0.24686239 | 4.23487429 | 0.43119883 | 0.64445483 |
| ENSMUSG00000050947 | 0.2468375  | 1.66875484 | 0.52909297 | 0.72133231 |
| ENSMUSG00000063535 | 0.24657936 | 1.33576642 | 0.56230512 | 0.74632596 |
| ENSMUSG00000049305 | 0.24654596 | 4.24246585 | 0.44027011 | 0.65092855 |
| ENSMUSG00000026553 | 0.24632343 | 9.29535276 | 0.42066435 | 0.63514811 |
| ENSMUSG00000074212 | 0.24615301 | 3.75478365 | 0.43224777 | 0.64542494 |
| ENSMUSG00000018166 | 0.24614196 | 3.64336699 | 0.43746436 | 0.64918528 |
| ENSMUSG00000063145 | 0.2456303  | 2.41621228 | 0.45920624 | 0.66763551 |
| ENSMUSG00000020770 | 0.24562119 | 3.64711206 | 0.44775067 | 0.65819836 |
| ENSMUSG00000024014 | 0.2455467  | 8.01050146 | 0.42283505 | 0.6372235  |
| ENSMUSG00000019916 | 0.24550383 | 4.76708995 | 0.43333178 | 0.64614914 |
| ENSMUSG00000020211 | 0.24536175 | 4.4947958  | 0.43992054 | 0.65059012 |
| ENSMUSG00000036751 | 0.24501166 | 6.88317639 | 0.42596904 | 0.63960597 |
| ENSMUSG00000041064 | 0.24491095 | 4.73800114 | 0.43675808 | 0.64901466 |
| ENSMUSG00000033526 | 0.244871   | 4.90134735 | 0.43446062 | 0.64704333 |
| ENSMUSG00000034032 | 0.24465769 | 4.92432941 | 0.43613962 | 0.64855622 |
| ENSMUSG00000001285 | 0.24465096 | 4.40351042 | 0.43873329 | 0.6499931  |
| ENSMUSG00000001323 | 0.2441133  | 3.08755364 | 0.4599539  | 0.66794276 |
| ENSMUSG00000037544 | 0.24398865 | 6.56547195 | 0.42807931 | 0.64166304 |
| ENSMUSG00000073700 | 0.2435019  | 3.91549337 | 0.44490075 | 0.65510145 |
| ENSMUSG00000034673 | 0.24325083 | 4.35173943 | 0.44115498 | 0.65147826 |
| ENSMUSG00000025371 | 0.24310893 | 3.62264705 | 0.46130922 | 0.66894436 |
| ENSMUSG00000048865 | 0.24301579 | 1.90157058 | 0.49675572 | 0.69571323 |
| ENSMUSG00000026632 | 0.24288236 | 2.52372155 | 0.46665948 | 0.67341841 |
| ENSMUSG00000025873 | 0.2427621  | 6.66833372 | 0.43002011 | 0.6436276  |
| ENSMUSG00000031827 | 0.24263225 | 5.43902411 | 0.43632651 | 0.64865524 |
| ENSMUSG00000061536 | 0.24237952 | 3.30102663 | 0.45991302 | 0.66794276 |
| ENSMUSG00000025499 | 0.2420076  | 4.04062795 | 0.45528442 | 0.66500165 |
| ENSMUSG00000074886 | 0.24185169 | 6.53372223 | 0.43262524 | 0.64561468 |
| ENSMUSG00000022760 | 0.24149839 | 1.83472611 | 0.53190268 | 0.72386142 |
| ENSMUSG00000022899 | 0.24134119 | 4.23557783 | 0.44118562 | 0.65147826 |
| ENSMUSG00000049517 | 0.24126992 | 7.35357703 | 0.43215175 | 0.64538491 |
| ENSMUSG00000022095 | 0.24118104 | 3.8582299  | 0.45029849 | 0.66005423 |
| ENSMUSG00000038803 | 0.24106934 | 5.57737462 | 0.43738184 | 0.64918528 |
| ENSMUSG00000020792 | 0.24090756 | 4.35298099 | 0.44806141 | 0.65847564 |

|                    |            |            |            |            |
|--------------------|------------|------------|------------|------------|
| ENSMUSG00000020265 | 0.24074189 | 6.51874783 | 0.43456038 | 0.64710013 |
| ENSMUSG00000034118 | 0.24072994 | 6.59003428 | 0.43438952 | 0.64704333 |
| ENSMUSG00000040532 | 0.24069339 | 3.07572726 | 0.47905015 | 0.68289184 |
| ENSMUSG00000014075 | 0.24061701 | 2.60394177 | 0.50160883 | 0.700352   |
| ENSMUSG00000030036 | 0.240495   | 5.70996743 | 0.43893925 | 0.65020891 |
| ENSMUSG00000000538 | 0.24033724 | 3.38138458 | 0.46318397 | 0.670352   |
| ENSMUSG00000032598 | 0.24033618 | 1.72175024 | 0.53996468 | 0.72917895 |
| ENSMUSG00000038324 | 0.23998084 | 6.78333131 | 0.43533744 | 0.64754193 |
| ENSMUSG00000070305 | 0.23992768 | 3.55971646 | 0.45935704 | 0.66770539 |
| ENSMUSG00000024150 | 0.23980066 | 5.37333273 | 0.44043204 | 0.6510787  |
| ENSMUSG00000022552 | 0.23965813 | 4.49357054 | 0.44885959 | 0.6589561  |
| ENSMUSG00000021814 | 0.23964    | 6.82139966 | 0.43590858 | 0.64830204 |
| ENSMUSG00000026525 | 0.23949802 | 2.635654   | 0.46836902 | 0.67444139 |
| ENSMUSG00000024181 | 0.23940431 | 4.19900962 | 0.45480467 | 0.66485205 |
| ENSMUSG00000074480 | 0.23935087 | 2.55587923 | 0.49920957 | 0.69788385 |
| ENSMUSG00000054428 | 0.23931865 | 5.05384104 | 0.44290269 | 0.65329813 |
| ENSMUSG00000033220 | 0.23928443 | 8.35657686 | 0.43471594 | 0.64713104 |
| ENSMUSG00000073471 | 0.23908865 | 1.07748204 | 0.52662326 | 0.71923825 |
| ENSMUSG00000027997 | 0.23856395 | 3.05030484 | 0.47188335 | 0.67772354 |
| ENSMUSG00000046756 | 0.23849298 | 6.10956009 | 0.44066004 | 0.65114796 |
| ENSMUSG00000007458 | 0.23815629 | 8.66395868 | 0.43652072 | 0.64885124 |
| ENSMUSG00000068391 | 0.238108   | 3.82812493 | 0.46420609 | 0.67149544 |
| ENSMUSG00000091537 | 0.2380889  | 6.71069114 | 0.43903284 | 0.65024023 |
| ENSMUSG00000054808 | 0.2375239  | 7.20982974 | 0.43955921 | 0.65049746 |
| ENSMUSG00000033159 | 0.23729303 | 5.56296983 | 0.44491497 | 0.65510145 |
| ENSMUSG00000029535 | 0.23705891 | 4.1085119  | 0.45699159 | 0.66651302 |
| ENSMUSG00000002661 | 0.23702164 | 1.49860452 | 0.5503187  | 0.73688135 |
| ENSMUSG00000021458 | 0.23624511 | 3.05739113 | 0.47429168 | 0.67920324 |
| ENSMUSG00000074754 | 0.23562727 | 2.23610345 | 0.51080724 | 0.7074587  |
| ENSMUSG00000062526 | 0.23562095 | 3.94564828 | 0.45978738 | 0.66794276 |
| ENSMUSG00000022472 | 0.23560018 | 6.23403164 | 0.44511913 | 0.65522314 |
| ENSMUSG00000048997 | 0.23515077 | 1.64082884 | 0.56054968 | 0.74482107 |
| ENSMUSG00000040701 | 0.23406442 | 4.83870674 | 0.45745577 | 0.66689564 |
| ENSMUSG00000042992 | 0.23390379 | 2.93238177 | 0.48690315 | 0.68889577 |
| ENSMUSG00000031916 | 0.23370891 | 4.76079597 | 0.45689872 | 0.66646772 |
| ENSMUSG00000003527 | 0.23338032 | 3.96812404 | 0.4703589  | 0.67650447 |
| ENSMUSG00000071552 | 0.23288506 | 2.87360739 | 0.49615139 | 0.69541156 |
| ENSMUSG00000031487 | 0.23284405 | 2.36765548 | 0.49350449 | 0.69322172 |
| ENSMUSG00000007908 | 0.23279906 | 1.75828905 | 0.51383096 | 0.70958548 |
| ENSMUSG00000017195 | 0.23271161 | 0.98527261 | 0.5642929  | 0.7480436  |
| ENSMUSG00000023330 | 0.23245591 | 3.97586833 | 0.469029   | 0.67530157 |
| ENSMUSG00000023967 | 0.23226117 | 4.44850691 | 0.46512691 | 0.67228637 |
| ENSMUSG00000040888 | 0.23220506 | 3.57647858 | 0.48086696 | 0.68464571 |

|                    |            |            |            |            |
|--------------------|------------|------------|------------|------------|
| ENSMUSG00000068206 | 0.23197819 | 3.35383005 | 0.4750574  | 0.67989635 |
| ENSMUSG00000034574 | 0.23185814 | 4.06852498 | 0.46461944 | 0.6719131  |
| ENSMUSG00000085586 | 0.23178929 | 0.99511143 | 0.56832347 | 0.75089442 |
| ENSMUSG00000025212 | 0.23172205 | 3.52276133 | 0.47687652 | 0.68141465 |
| ENSMUSG00000028884 | 0.23165373 | 6.13198337 | 0.45362442 | 0.66339649 |
| ENSMUSG00000002346 | 0.2315873  | 1.85121334 | 0.55435696 | 0.73950834 |
| ENSMUSG00000001687 | 0.23151991 | 6.43460219 | 0.45209406 | 0.66178666 |
| ENSMUSG00000034121 | 0.23147189 | 3.06159306 | 0.48283588 | 0.68568917 |
| ENSMUSG00000021285 | 0.23147051 | 4.24823685 | 0.4665     | 0.67327837 |
| ENSMUSG00000033762 | 0.23100037 | 3.89305404 | 0.47401164 | 0.67908773 |
| ENSMUSG00000026927 | 0.23096228 | 6.06015701 | 0.45497832 | 0.66487071 |
| ENSMUSG00000032171 | 0.23095965 | 4.30433658 | 0.46912639 | 0.67535162 |
| ENSMUSG00000038690 | 0.23090205 | 4.58780184 | 0.46781334 | 0.67400121 |
| ENSMUSG00000054312 | 0.23075253 | 4.43052017 | 0.4718204  | 0.67772354 |
| ENSMUSG00000060938 | 0.23073861 | 8.43599429 | 0.45127801 | 0.66095098 |
| ENSMUSG00000018567 | 0.23068991 | 7.82844759 | 0.45164047 | 0.66121244 |
| ENSMUSG00000036537 | 0.23052648 | 1.35695607 | 0.59329884 | 0.7686089  |
| ENSMUSG00000041096 | 0.23051877 | 5.32355542 | 0.45942975 | 0.66772108 |
| ENSMUSG00000059883 | 0.23042279 | 3.58691674 | 0.47902986 | 0.68289184 |
| ENSMUSG00000025651 | 0.23007705 | 6.55289515 | 0.45599862 | 0.66558803 |
| ENSMUSG00000031934 | 0.22948558 | 5.08171544 | 0.46213185 | 0.66948279 |
| ENSMUSG00000064210 | 0.22920642 | 5.86623155 | 0.45853004 | 0.66718361 |
| ENSMUSG00000042608 | 0.22836827 | 4.820627   | 0.46812031 | 0.67435338 |
| ENSMUSG00000039367 | 0.22827241 | 8.14488296 | 0.45616555 | 0.66558803 |
| ENSMUSG00000007564 | 0.22797495 | 7.45110625 | 0.45770936 | 0.66692849 |
| ENSMUSG00000014243 | 0.22792331 | 1.85902705 | 0.53927075 | 0.72875886 |
| ENSMUSG00000010663 | 0.22753036 | 6.09393638 | 0.46171124 | 0.66916579 |
| ENSMUSG00000024507 | 0.22749362 | 5.66231627 | 0.46320454 | 0.670352   |
| ENSMUSG00000022074 | 0.22739574 | 5.16077628 | 0.4650016  | 0.67223161 |
| ENSMUSG00000025935 | 0.22721208 | 8.22880552 | 0.45803422 | 0.66695125 |
| ENSMUSG00000006390 | 0.2271987  | 6.39695115 | 0.46132597 | 0.66894436 |
| ENSMUSG00000057738 | 0.22717352 | 7.91629526 | 0.45843941 | 0.66718361 |
| ENSMUSG00000030654 | 0.22716408 | 8.96165618 | 0.45777762 | 0.66693783 |
| ENSMUSG00000036138 | 0.22713335 | 3.63235094 | 0.48622168 | 0.68811215 |
| ENSMUSG00000031993 | 0.22705606 | 6.05972168 | 0.46198697 | 0.66940459 |
| ENSMUSG00000029146 | 0.22695932 | 5.95081637 | 0.46322915 | 0.670352   |
| ENSMUSG00000008035 | 0.22694827 | 3.2429435  | 0.49086723 | 0.69143727 |
| ENSMUSG00000016534 | 0.22693262 | 7.87307087 | 0.45878618 | 0.66741537 |
| ENSMUSG00000028643 | 0.22688069 | 3.06908867 | 0.50125281 | 0.70001428 |
| ENSMUSG00000039568 | 0.22674269 | 3.49487573 | 0.48534708 | 0.68747485 |
| ENSMUSG00000044496 | 0.22671873 | 4.27876566 | 0.47880462 | 0.68289184 |
| ENSMUSG00000038605 | 0.22646978 | 2.5816799  | 0.50562631 | 0.70375247 |
| ENSMUSG00000022621 | 0.22627915 | 2.80022035 | 0.49596733 | 0.69524394 |



|                    |            |            |            |            |
|--------------------|------------|------------|------------|------------|
| ENSMUSG00000033429 | 0.22618442 | 2.56809534 | 0.52524598 | 0.71858811 |
| ENSMUSG00000033039 | 0.22586672 | 4.69570275 | 0.47091027 | 0.67692567 |
| ENSMUSG00000073678 | 0.22556198 | 5.37594322 | 0.46605433 | 0.67290282 |
| ENSMUSG00000074825 | 0.22553682 | 4.81010882 | 0.47298591 | 0.67873563 |
| ENSMUSG00000024142 | 0.2253274  | 4.90162347 | 0.47288815 | 0.67873563 |
| ENSMUSG00000028797 | 0.2252655  | 5.72997135 | 0.46768696 | 0.67390916 |
| ENSMUSG00000026003 | 0.22517504 | 6.9783553  | 0.46360175 | 0.67071121 |
| ENSMUSG00000025374 | 0.2251417  | 4.74242725 | 0.4747557  | 0.67955475 |
| ENSMUSG00000020519 | 0.22503699 | 2.06143348 | 0.55578991 | 0.7406869  |
| ENSMUSG00000017390 | 0.22482297 | 2.29272274 | 0.52614536 | 0.71907812 |
| ENSMUSG00000028567 | 0.22473325 | 4.81018851 | 0.47432118 | 0.67920324 |
| ENSMUSG00000002833 | 0.22456625 | 4.82979681 | 0.47825217 | 0.68258899 |
| ENSMUSG00000087385 | 0.22426397 | 1.34708893 | 0.53817744 | 0.72797388 |
| ENSMUSG00000021501 | 0.22416614 | 4.03130233 | 0.48161878 | 0.68515686 |
| ENSMUSG00000031681 | 0.22413823 | 2.34126648 | 0.52447385 | 0.7181481  |
| ENSMUSG00000021115 | 0.22405913 | 6.72613643 | 0.46633826 | 0.67313502 |
| ENSMUSG00000034709 | 0.22350149 | 5.60520931 | 0.47056145 | 0.67660462 |
| ENSMUSG00000024218 | 0.22329123 | 4.99959961 | 0.47539011 | 0.68026723 |
| ENSMUSG00000072621 | 0.2232448  | 4.31154951 | 0.47853203 | 0.68269473 |
| ENSMUSG00000025137 | 0.22312381 | 4.77025285 | 0.48076053 | 0.68464483 |
| ENSMUSG00000008167 | 0.22278606 | 1.47807646 | 0.56968362 | 0.75167848 |
| ENSMUSG00000032688 | 0.22257713 | 7.72776831 | 0.46750699 | 0.67390916 |
| ENSMUSG00000079442 | 0.22245307 | 5.83711006 | 0.47322687 | 0.67884687 |
| ENSMUSG00000070462 | 0.22233339 | 4.59475003 | 0.47803176 | 0.68252277 |
| ENSMUSG00000030747 | 0.22219988 | 0.96343278 | 0.62378641 | 0.78872304 |
| ENSMUSG00000067365 | 0.22191418 | 5.42190765 | 0.47407962 | 0.67908773 |
| ENSMUSG00000030814 | 0.22188915 | 3.72613058 | 0.49217593 | 0.69244948 |
| ENSMUSG00000020448 | 0.22166276 | 5.29533239 | 0.47642516 | 0.68099409 |
| ENSMUSG00000032786 | 0.22164109 | 4.65685514 | 0.48166072 | 0.68515686 |
| ENSMUSG00000031776 | 0.22150837 | 5.77255548 | 0.47438606 | 0.67920595 |
| ENSMUSG00000079455 | 0.22149744 | 1.13378669 | 0.56610551 | 0.7489174  |
| ENSMUSG00000037824 | 0.22141432 | 4.38998888 | 0.48191982 | 0.68515686 |
| ENSMUSG00000032478 | 0.22122627 | 4.28535077 | 0.48790356 | 0.68940671 |
| ENSMUSG00000026842 | 0.2211812  | 5.19659601 | 0.47750836 | 0.68204637 |
| ENSMUSG00000015971 | 0.2209843  | 4.86333585 | 0.4816342  | 0.68515686 |
| ENSMUSG00000021275 | 0.22094747 | 4.04850887 | 0.49034424 | 0.69114856 |
| ENSMUSG00000021226 | 0.22092032 | 1.76469619 | 0.57418735 | 0.75575185 |
| ENSMUSG00000016637 | 0.22089167 | 3.86802449 | 0.48983298 | 0.69107486 |
| ENSMUSG00000022684 | 0.22053156 | 5.69492827 | 0.4764559  | 0.68099409 |
| ENSMUSG00000038085 | 0.22035993 | 2.047931   | 0.53620379 | 0.72686346 |
| ENSMUSG00000024948 | 0.22024413 | 6.2818909  | 0.47577254 | 0.68064647 |
| ENSMUSG00000035596 | 0.21981037 | 4.98423323 | 0.48265155 | 0.68566912 |
| ENSMUSG00000024048 | 0.21952073 | 6.33148048 | 0.47678656 | 0.6813764  |

|                    |            |            |            |            |
|--------------------|------------|------------|------------|------------|
| ENSMUSG00000052428 | 0.21913078 | 5.99503621 | 0.47793952 | 0.68252277 |
| ENSMUSG00000031974 | 0.21882116 | 4.70775    | 0.48542685 | 0.68747485 |
| ENSMUSG00000070565 | 0.21881296 | 3.2486834  | 0.49956203 | 0.69828606 |
| ENSMUSG00000027194 | 0.21876739 | 5.03475948 | 0.48291999 | 0.68568917 |
| ENSMUSG00000071451 | 0.21839209 | 2.79316994 | 0.52319425 | 0.71691573 |
| ENSMUSG00000038342 | 0.21835058 | 6.64792802 | 0.477987   | 0.68252277 |
| ENSMUSG00000029165 | 0.21827648 | 3.23368189 | 0.50995202 | 0.70703556 |
| ENSMUSG00000081137 | 0.2180845  | 1.44216346 | 0.56066863 | 0.74488734 |
| ENSMUSG00000040128 | 0.21807843 | 4.30604332 | 0.487581   | 0.6892489  |
| ENSMUSG00000007216 | 0.21795792 | 1.75045181 | 0.56928984 | 0.75161871 |
| ENSMUSG00000031979 | 0.21792633 | 4.97637008 | 0.48834241 | 0.68981392 |
| ENSMUSG00000046519 | 0.21746874 | 5.78363846 | 0.48187715 | 0.68515686 |
| ENSMUSG00000026280 | 0.21736965 | 5.07607284 | 0.48715133 | 0.68907012 |
| ENSMUSG00000035048 | 0.21718044 | 2.85622413 | 0.52852595 | 0.72094032 |
| ENSMUSG00000020700 | 0.21713092 | 5.93880201 | 0.48289333 | 0.68568917 |
| ENSMUSG00000087259 | 0.21708449 | 1.90082399 | 0.55108071 | 0.73699733 |
| ENSMUSG00000025495 | 0.21673427 | 3.91854811 | 0.50513265 | 0.70342853 |
| ENSMUSG00000013465 | 0.21648237 | 5.9393367  | 0.48440298 | 0.68661958 |
| ENSMUSG00000005683 | 0.21642964 | 8.70814821 | 0.4795221  | 0.68329057 |
| ENSMUSG00000027429 | 0.21640791 | 7.37664075 | 0.48053716 | 0.68446872 |
| ENSMUSG00000039055 | 0.21623769 | 4.64556462 | 0.49313607 | 0.69309715 |
| ENSMUSG00000035310 | 0.21622127 | 5.83188537 | 0.48372955 | 0.68620619 |
| ENSMUSG00000039210 | 0.21611138 | 5.05053791 | 0.48949194 | 0.69074602 |
| ENSMUSG00000031983 | 0.21608697 | 2.61453403 | 0.52536765 | 0.71858811 |
| ENSMUSG00000028991 | 0.21596204 | 5.9588266  | 0.48466905 | 0.68681617 |
| ENSMUSG00000037936 | 0.21528581 | 4.76555145 | 0.4946379  | 0.69401186 |
| ENSMUSG00000017210 | 0.21514187 | 5.53956263 | 0.4893973  | 0.69070285 |
| ENSMUSG00000039512 | 0.21492095 | 4.29675393 | 0.49852607 | 0.69738036 |
| ENSMUSG00000083086 | 0.2149182  | 1.41471618 | 0.60509749 | 0.77627544 |
| ENSMUSG00000006717 | 0.21481299 | 3.41892767 | 0.51474799 | 0.71039702 |
| ENSMUSG00000005417 | 0.21449346 | 6.1845481  | 0.48766405 | 0.6892489  |
| ENSMUSG00000068250 | 0.21423493 | 2.15928832 | 0.53581609 | 0.72676307 |
| ENSMUSG00000018169 | 0.21379568 | 3.73688925 | 0.51109601 | 0.7074587  |
| ENSMUSG00000043487 | 0.21364266 | 1.89992725 | 0.55108071 | 0.73699733 |
| ENSMUSG00000045973 | 0.21346195 | 6.10762029 | 0.48891866 | 0.69020799 |
| ENSMUSG00000040747 | 0.21330792 | 8.87935428 | 0.48562974 | 0.68763538 |
| ENSMUSG00000022822 | 0.21326576 | 5.34383976 | 0.49264486 | 0.69280496 |
| ENSMUSG00000025332 | 0.21320098 | 7.20743753 | 0.48816722 | 0.68968888 |
| ENSMUSG00000032849 | 0.21307471 | 5.69132123 | 0.4918828  | 0.69226907 |
| ENSMUSG00000062783 | 0.2129064  | 5.6165983  | 0.49069609 | 0.69143727 |
| ENSMUSG00000018820 | 0.21259272 | 4.0159561  | 0.51002095 | 0.70704023 |
| ENSMUSG00000020740 | 0.21241649 | 5.84898645 | 0.49268557 | 0.69280496 |
| ENSMUSG00000001445 | 0.21228536 | 5.67417521 | 0.49422133 | 0.69378844 |

|                    |            |            |            |            |
|--------------------|------------|------------|------------|------------|
| ENSMUSG00000030602 | 0.2120269  | 4.64817941 | 0.50324797 | 0.70143804 |
| ENSMUSG00000035007 | 0.21157231 | 4.00978493 | 0.50881199 | 0.70599954 |
| ENSMUSG00000076591 | 0.21139901 | 3.37240807 | 0.50715199 | 0.70487525 |
| ENSMUSG00000011096 | 0.21133383 | 2.22005561 | 0.56338482 | 0.74711533 |
| ENSMUSG00000003435 | 0.21130783 | 7.13674201 | 0.49191932 | 0.69226907 |
| ENSMUSG00000002496 | 0.2112936  | 5.6707835  | 0.4963425  | 0.69549864 |
| ENSMUSG00000071655 | 0.21127854 | 5.33441374 | 0.49842969 | 0.69733599 |
| ENSMUSG00000037617 | 0.21084653 | 2.67716533 | 0.54288845 | 0.73131094 |
| ENSMUSG00000046550 | 0.21066329 | 1.04011907 | 0.54676299 | 0.73410011 |
| ENSMUSG00000012126 | 0.21057972 | 1.85928834 | 0.59276217 | 0.76812632 |
| ENSMUSG00000020737 | 0.21055563 | 6.7236791  | 0.49387074 | 0.69347683 |
| ENSMUSG00000039515 | 0.21033488 | 6.90155998 | 0.49440487 | 0.69386545 |
| ENSMUSG00000007777 | 0.21029057 | 3.15725908 | 0.52654894 | 0.71922783 |
| ENSMUSG00000044968 | 0.21028018 | 2.37382178 | 0.53512668 | 0.72616158 |
| ENSMUSG00000026112 | 0.21025368 | 7.86444137 | 0.49240121 | 0.69267606 |
| ENSMUSG00000037112 | 0.21018398 | 4.1981084  | 0.50658637 | 0.704634   |
| ENSMUSG00000097287 | 0.21002691 | 2.34738472 | 0.54237115 | 0.73084225 |
| ENSMUSG00000000326 | 0.20998777 | 3.83709185 | 0.51943589 | 0.71422405 |
| ENSMUSG00000031060 | 0.20977028 | 5.98543685 | 0.49812134 | 0.69708545 |
| ENSMUSG00000040269 | 0.20956108 | 3.73628936 | 0.51669903 | 0.71208721 |
| ENSMUSG00000003206 | 0.20947072 | 5.50860738 | 0.50094234 | 0.70001428 |
| ENSMUSG00000037243 | 0.20939037 | 3.74150959 | 0.52303698 | 0.71679131 |
| ENSMUSG00000043154 | 0.20922793 | 2.70166704 | 0.52843545 | 0.72094032 |
| ENSMUSG00000090150 | 0.20909435 | 4.54009396 | 0.50528218 | 0.7035459  |
| ENSMUSG00000053483 | 0.20909215 | 4.22750663 | 0.51098968 | 0.7074587  |
| ENSMUSG00000032527 | 0.20886138 | 4.06000059 | 0.5105893  | 0.70743177 |
| ENSMUSG00000037098 | 0.2086018  | 2.01121817 | 0.57515826 | 0.75602586 |
| ENSMUSG00000015016 | 0.20842229 | 2.43838629 | 0.57636401 | 0.75695564 |
| ENSMUSG00000026594 | 0.20804507 | 7.16505741 | 0.49780158 | 0.69681882 |
| ENSMUSG00000022204 | 0.20782616 | 5.5371017  | 0.50434761 | 0.7025087  |
| ENSMUSG00000051736 | 0.20765726 | 1.27290267 | 0.54544897 | 0.73288354 |
| ENSMUSG00000029298 | 0.20742007 | 7.35403    | 0.49876369 | 0.69744134 |
| ENSMUSG00000004661 | 0.20689209 | 5.31566411 | 0.50617862 | 0.70424851 |
| ENSMUSG00000032059 | 0.20667764 | 4.83861481 | 0.50942107 | 0.70666283 |
| ENSMUSG00000044475 | 0.2065493  | 3.81287173 | 0.52262958 | 0.71641507 |
| ENSMUSG00000037761 | 0.20642383 | 3.18237412 | 0.54003415 | 0.72917895 |
| ENSMUSG00000033400 | 0.206318   | 4.6794361  | 0.51014913 | 0.70712702 |
| ENSMUSG00000043831 | 0.20515312 | 2.69530208 | 0.5369852  | 0.72721944 |
| ENSMUSG00000029467 | 0.20502663 | 9.53384342 | 0.50260257 | 0.70108216 |
| ENSMUSG00000026816 | 0.20501918 | 5.22728098 | 0.51260333 | 0.70874062 |
| ENSMUSG00000038280 | 0.20497141 | 5.81076099 | 0.50707037 | 0.70487525 |
| ENSMUSG00000039041 | 0.20482994 | 4.94210772 | 0.51553876 | 0.71112433 |
| ENSMUSG00000032042 | 0.2048193  | 8.04300711 | 0.50376461 | 0.70197668 |

|                    |            |            |             |            |
|--------------------|------------|------------|-------------|------------|
| ENSMUSG00000038102 | 0.20476168 | 5.86237639 | 0.50745381  | 0.70502214 |
| ENSMUSG00000006307 | 0.20465178 | 6.22248874 | 0.50741605  | 0.70502214 |
| ENSMUSG00000020440 | 0.20462879 | 4.40083083 | 0.52186361  | 0.7159111  |
| ENSMUSG00000026585 | 0.20440359 | 4.17759052 | 0.51610161  | 0.71175882 |
| ENSMUSG00000026656 | 0.20385811 | 7.42608408 | 0.50626888  | 0.70428322 |
| ENSMUSG00000047459 | 0.20373837 | 5.74778809 | 0.51076309  | 0.7074587  |
| ENSMUSG00000024644 | 0.20355262 | 5.88651521 | 0.51086893  | 0.7074587  |
| ENSMUSG00000032422 | 0.20339494 | 4.81329278 | 0.51343121  | 0.70927284 |
| ENSMUSG00000020733 | 0.20312469 | 4.42761278 | 0.5224172   | 0.71635153 |
| ENSMUSG00000049624 | 0.20289852 | 3.65061345 | 0.53093244  | 0.72320013 |
| ENSMUSG00000031835 | 0.2028249  | 6.63187643 | 0.5098866   | 0.70703556 |
| ENSMUSG00000004056 | 0.20263771 | 5.79390965 | 0.51367858  | 0.70946591 |
| ENSMUSG00000034807 | 0.202298   | 6.73123599 | 0.511111005 | 0.7074587  |
| ENSMUSG00000066306 | 0.20226672 | 6.65403978 | 0.51139155  | 0.70766668 |
| ENSMUSG00000038733 | 0.20217698 | 9.45134027 | 0.50851246  | 0.7058564  |
| ENSMUSG00000045482 | 0.20216861 | 6.65784448 | 0.5110623   | 0.7074587  |
| ENSMUSG00000021009 | 0.20209803 | 2.57964887 | 0.55154643  | 0.73724612 |
| ENSMUSG00000024258 | 0.20207203 | 4.83205591 | 0.51991112  | 0.71439026 |
| ENSMUSG00000023007 | 0.20204853 | 1.87164994 | 0.6176805   | 0.78496222 |
| ENSMUSG00000050605 | 0.20171246 | 3.18380256 | 0.54104554  | 0.72969424 |
| ENSMUSG00000039047 | 0.20119195 | 5.66990479 | 0.51635939  | 0.71198308 |
| ENSMUSG0000002083  | 0.20115136 | 0.84872409 | 0.7122628   | 0.846112   |
| ENSMUSG00000057363 | 0.20106346 | 5.15098946 | 0.51892365  | 0.7139235  |
| ENSMUSG00000049600 | 0.20071977 | 2.41627602 | 0.57162525  | 0.75368709 |
| ENSMUSG00000005982 | 0.20067904 | 5.37617868 | 0.51889437  | 0.7139235  |
| ENSMUSG00000037526 | 0.20054949 | 3.21385523 | 0.5418116   | 0.73045334 |
| ENSMUSG00000051007 | 0.20032935 | 3.84620116 | 0.53660676  | 0.72689012 |
| ENSMUSG00000022516 | 0.20025221 | 4.318874   | 0.52623929  | 0.71907812 |
| ENSMUSG00000043290 | 0.20018276 | 1.05981243 | 0.61378433  | 0.78267118 |
| ENSMUSG00000049106 | 0.19986039 | 5.33799589 | 0.52086392  | 0.71508549 |
| ENSMUSG00000082588 | 0.19977989 | 2.07185533 | 0.57737558  | 0.75747181 |
| ENSMUSG00000030271 | 0.1996236  | 2.76614206 | 0.56574274  | 0.748887   |
| ENSMUSG00000084786 | 0.1995806  | 6.28503116 | 0.51785955  | 0.71323083 |
| ENSMUSG00000022394 | 0.19946599 | 6.03963492 | 0.51950793  | 0.71422405 |
| ENSMUSG00000005615 | 0.19931287 | 5.67569808 | 0.51944476  | 0.71422405 |
| ENSMUSG00000030435 | 0.19904399 | 7.71780528 | 0.51652647  | 0.71208721 |
| ENSMUSG00000024962 | 0.1987138  | 2.38768374 | 0.57785968  | 0.75783033 |
| ENSMUSG00000034591 | 0.1982638  | 3.78442436 | 0.5300475   | 0.72217716 |
| ENSMUSG00000051390 | 0.19804248 | 3.40682626 | 0.55013754  | 0.73688135 |
| ENSMUSG00000049717 | 0.19792875 | 4.32579926 | 0.53195517  | 0.72386142 |
| ENSMUSG00000020515 | 0.19787523 | 6.3313249  | 0.52123065  | 0.71540681 |
| ENSMUSG00000020897 | 0.19780428 | 6.66243629 | 0.52070666  | 0.71507506 |
| ENSMUSG00000061533 | 0.1976654  | 5.38823827 | 0.52449318  | 0.7181481  |

|                    |            |            |            |            |
|--------------------|------------|------------|------------|------------|
| ENSMUSG00000020444 | 0.19765459 | 4.03395495 | 0.53738866 | 0.72746746 |
| ENSMUSG00000029507 | 0.19731747 | 4.54196897 | 0.5364009  | 0.72686346 |
| ENSMUSG00000027010 | 0.19729591 | 6.06814389 | 0.52331707 | 0.71699292 |
| ENSMUSG00000028760 | 0.19719288 | 7.28113444 | 0.52073148 | 0.71507506 |
| ENSMUSG00000021287 | 0.19719244 | 2.4920905  | 0.57647114 | 0.75695564 |
| ENSMUSG00000029071 | 0.19697021 | 3.90494332 | 0.54782992 | 0.73480006 |
| ENSMUSG00000017288 | 0.19695723 | 5.75651822 | 0.52499707 | 0.71839007 |
| ENSMUSG00000030279 | 0.19691829 | 6.40612325 | 0.52236849 | 0.71635153 |
| ENSMUSG00000039145 | 0.19682395 | 5.65765389 | 0.52468539 | 0.71832008 |
| ENSMUSG00000031913 | 0.19644088 | 5.79275343 | 0.52589069 | 0.71896618 |
| ENSMUSG00000035944 | 0.19638646 | 2.97226335 | 0.56097434 | 0.74520169 |
| ENSMUSG00000029319 | 0.19637492 | 4.80968703 | 0.53151318 | 0.72380832 |
| ENSMUSG00000019826 | 0.19623579 | 4.16674308 | 0.53661673 | 0.72689012 |
| ENSMUSG00000056899 | 0.19613465 | 2.18041945 | 0.58672218 | 0.76443211 |
| ENSMUSG00000005886 | 0.19589944 | 6.19307689 | 0.52496355 | 0.71839007 |
| ENSMUSG00000097141 | 0.19578167 | 1.10783092 | 0.6240872  | 0.78872304 |
| ENSMUSG00000030522 | 0.19572579 | 3.00656614 | 0.55195737 | 0.73749253 |
| ENSMUSG00000022556 | 0.19561469 | 4.41010526 | 0.54081506 | 0.72965502 |
| ENSMUSG00000042308 | 0.19543027 | 4.68583845 | 0.53459343 | 0.72580329 |
| ENSMUSG00000033396 | 0.19542367 | 5.58359763 | 0.52853804 | 0.72094032 |
| ENSMUSG00000022967 | 0.19524637 | 6.72046379 | 0.52531425 | 0.71858811 |
| ENSMUSG00000061288 | 0.19488624 | 6.85987557 | 0.52617698 | 0.71907812 |
| ENSMUSG00000050973 | 0.19488048 | 3.29407648 | 0.5557087  | 0.74067021 |
| ENSMUSG00000030815 | 0.19451209 | 5.20735177 | 0.53377683 | 0.72542525 |
| ENSMUSG00000035078 | 0.19429418 | 5.58503672 | 0.53123358 | 0.72351894 |
| ENSMUSG00000054484 | 0.1934399  | 4.57917375 | 0.53642472 | 0.72686346 |
| ENSMUSG00000041130 | 0.19343291 | 4.34319655 | 0.54330097 | 0.73154671 |
| ENSMUSG00000045671 | 0.19340596 | 3.83762556 | 0.54467895 | 0.73239623 |
| ENSMUSG00000014349 | 0.19318466 | 7.39645813 | 0.52898436 | 0.72133231 |
| ENSMUSG00000072893 | 0.19310096 | 2.03461606 | 0.59960688 | 0.77337167 |
| ENSMUSG00000052783 | 0.19272321 | 1.53497175 | 0.60902505 | 0.77888289 |
| ENSMUSG00000021610 | 0.1924729  | 7.89849027 | 0.52993282 | 0.72211215 |
| ENSMUSG00000019579 | 0.1921646  | 5.45560289 | 0.53750701 | 0.72746746 |
| ENSMUSG00000051674 | 0.1920661  | 3.29683449 | 0.55753164 | 0.74199941 |
| ENSMUSG00000005150 | 0.19186743 | 3.07325909 | 0.57729044 | 0.75747181 |
| ENSMUSG00000072582 | 0.19179747 | 4.94183694 | 0.54002383 | 0.72917895 |
| ENSMUSG00000039678 | 0.19179141 | 5.18895721 | 0.53935642 | 0.72878331 |
| ENSMUSG00000028995 | 0.19171272 | 6.18910588 | 0.53399331 | 0.72546293 |
| ENSMUSG00000052656 | 0.19164831 | 4.09509085 | 0.54601414 | 0.73327727 |
| ENSMUSG00000026790 | 0.19124203 | 7.27203113 | 0.5333958  | 0.72518158 |
| ENSMUSG00000070733 | 0.19111737 | 6.98108462 | 0.53352911 | 0.72527138 |
| ENSMUSG00000029390 | 0.19101351 | 8.94162942 | 0.53234883 | 0.72421468 |
| ENSMUSG00000031864 | 0.19097022 | 5.7036022  | 0.53757309 | 0.72746746 |

|                    |            |            |            |            |
|--------------------|------------|------------|------------|------------|
| ENSMUSG0000002210  | 0.1909183  | 3.20245929 | 0.56901031 | 0.75145517 |
| ENSMUSG00000012123 | 0.19089893 | 1.02606248 | 0.67046164 | 0.82068767 |
| ENSMUSG00000023353 | 0.19067497 | 3.06225499 | 0.58345583 | 0.76201861 |
| ENSMUSG00000056050 | 0.19063992 | 7.3181253  | 0.53447612 | 0.72580329 |
| ENSMUSG00000027510 | 0.19039199 | 3.66252247 | 0.56741602 | 0.75006305 |
| ENSMUSG00000022263 | 0.19031057 | 3.706493   | 0.54546272 | 0.73288354 |
| ENSMUSG00000094094 | 0.19025019 | 2.62284684 | 0.57536204 | 0.75602586 |
| ENSMUSG00000037740 | 0.18995528 | 4.41439378 | 0.5526006  | 0.73787471 |
| ENSMUSG00000021866 | 0.18966042 | 2.88803595 | 0.60623663 | 0.7771821  |
| ENSMUSG00000028703 | 0.18954698 | 4.53990104 | 0.54876247 | 0.73568554 |
| ENSMUSG00000015790 | 0.18912862 | 4.54620372 | 0.54929667 | 0.7360711  |
| ENSMUSG00000098178 | 0.18890864 | 11.8695321 | 0.53645274 | 0.72686346 |
| ENSMUSG00000021038 | 0.18882041 | 5.89003975 | 0.54226763 | 0.73079407 |
| ENSMUSG00000050357 | 0.18878995 | 3.36986926 | 0.58171601 | 0.76066757 |
| ENSMUSG00000021951 | 0.18840324 | 3.87847623 | 0.56129911 | 0.74544946 |
| ENSMUSG00000070426 | 0.18823623 | 5.04969911 | 0.54751489 | 0.7346523  |
| ENSMUSG00000035840 | 0.18810394 | 5.50272155 | 0.54266716 | 0.73114976 |
| ENSMUSG00000018171 | 0.18796968 | 7.34184561 | 0.54002325 | 0.72917895 |
| ENSMUSG00000063488 | 0.18755875 | 2.12987398 | 0.59073053 | 0.76716376 |
| ENSMUSG00000034300 | 0.1875412  | 6.16804393 | 0.54298901 | 0.73131094 |
| ENSMUSG00000042289 | 0.18717096 | 1.63744833 | 0.60746835 | 0.77802482 |
| ENSMUSG00000023015 | 0.1869495  | 7.00632681 | 0.54299023 | 0.73131094 |
| ENSMUSG00000025465 | 0.18693949 | 4.60833525 | 0.55526163 | 0.74034884 |
| ENSMUSG00000052763 | 0.18691167 | 3.5476908  | 0.56802616 | 0.75068556 |
| ENSMUSG00000027002 | 0.1868151  | 2.12188523 | 0.58887197 | 0.76570921 |
| ENSMUSG00000025159 | 0.18673834 | 5.9022136  | 0.54652664 | 0.73387415 |
| ENSMUSG00000025239 | 0.1866352  | 7.21066755 | 0.543294   | 0.73154671 |
| ENSMUSG00000089989 | 0.1865049  | 3.4107968  | 0.56543351 | 0.74863536 |
| ENSMUSG00000022969 | 0.18645425 | 5.05867956 | 0.55056443 | 0.73694624 |
| ENSMUSG00000016554 | 0.18642346 | 7.48110684 | 0.54399295 | 0.73196093 |
| ENSMUSG00000007610 | 0.18636915 | 2.918046   | 0.58392833 | 0.76226644 |
| ENSMUSG00000035621 | 0.18616209 | 4.44266534 | 0.55664313 | 0.74110899 |
| ENSMUSG00000014601 | 0.18584255 | 5.17604113 | 0.5529325  | 0.73815599 |
| ENSMUSG00000045975 | 0.1856696  | 3.04501195 | 0.57106388 | 0.75313108 |
| ENSMUSG00000014769 | 0.18561224 | 7.61886585 | 0.5451463  | 0.73265923 |
| ENSMUSG00000026478 | 0.18558522 | 6.21456258 | 0.54774402 | 0.73477691 |
| ENSMUSG00000068457 | 0.18542525 | 4.97657232 | 0.53435291 | 0.72575086 |
| ENSMUSG00000022914 | 0.18532323 | 4.98860859 | 0.55265338 | 0.73787471 |
| ENSMUSG00000029407 | 0.18516779 | 7.82640941 | 0.5455396  | 0.73288354 |
| ENSMUSG00000003662 | 0.18465946 | 5.12520654 | 0.55564229 | 0.74067021 |
| ENSMUSG00000069208 | 0.18432991 | 3.33714815 | 0.57495358 | 0.75602586 |
| ENSMUSG00000028343 | 0.1843046  | 7.78611401 | 0.54739736 | 0.73458601 |
| ENSMUSG00000026925 | 0.18415686 | 4.17100205 | 0.56189626 | 0.7458751  |

|                    |            |            |            |            |
|--------------------|------------|------------|------------|------------|
| ENSMUSG00000027465 | 0.18415256 | 5.99995004 | 0.55156729 | 0.73724612 |
| ENSMUSG00000037885 | 0.18370548 | 5.24784588 | 0.55646603 | 0.74110899 |
| ENSMUSG00000027883 | 0.18343843 | 4.54082332 | 0.56050773 | 0.74482107 |
| ENSMUSG00000052429 | 0.18329803 | 7.22034765 | 0.55123826 | 0.73699733 |
| ENSMUSG00000028960 | 0.1831148  | 6.78896879 | 0.55164965 | 0.73726482 |
| ENSMUSG00000100078 | 0.18286084 | 3.1940098  | 0.57646535 | 0.75695564 |
| ENSMUSG00000015702 | 0.18223768 | 1.47551421 | 0.64297653 | 0.80158258 |
| ENSMUSG00000021427 | 0.18206997 | 8.73075464 | 0.55180473 | 0.73738069 |
| ENSMUSG00000039737 | 0.18182633 | 3.73194361 | 0.58033551 | 0.75987593 |
| ENSMUSG00000037944 | 0.18180447 | 5.52754916 | 0.55950895 | 0.7438965  |
| ENSMUSG00000040913 | 0.1816621  | 2.21963881 | 0.59382701 | 0.76895179 |
| ENSMUSG00000024742 | 0.18153839 | 6.75766603 | 0.55535215 | 0.74037799 |
| ENSMUSG00000034773 | 0.18102585 | 3.87080425 | 0.5783616  | 0.75811979 |
| ENSMUSG00000036955 | 0.18085943 | 4.84771918 | 0.56289621 | 0.74692664 |
| ENSMUSG00000070461 | 0.18041147 | 2.421912   | 0.59999412 | 0.77340863 |
| ENSMUSG00000034789 | 0.18032264 | 4.31004879 | 0.575227   | 0.75602586 |
| ENSMUSG00000028229 | 0.18007853 | 1.89937183 | 0.60778945 | 0.77831307 |
| ENSMUSG00000032020 | 0.17978841 | 4.33573794 | 0.56705889 | 0.74968285 |
| ENSMUSG00000030768 | 0.17966414 | 2.3182201  | 0.63248147 | 0.79467321 |
| ENSMUSG00000040710 | 0.17945443 | 7.0628963  | 0.55840105 | 0.74269819 |
| ENSMUSG00000097534 | 0.17890561 | 2.61958566 | 0.59744915 | 0.77132666 |
| ENSMUSG00000041775 | 0.17858245 | 2.79286817 | 0.59424341 | 0.76913981 |
| ENSMUSG00000022557 | 0.17855974 | 5.77725859 | 0.56606885 | 0.7489174  |
| ENSMUSG00000071661 | 0.17843347 | 1.45322041 | 0.66514757 | 0.8167788  |
| ENSMUSG00000074930 | 0.17839421 | 2.65858938 | 0.60653814 | 0.7773334  |
| ENSMUSG00000026080 | 0.17776957 | 5.13424349 | 0.56988108 | 0.75184702 |
| ENSMUSG00000021767 | 0.17734574 | 4.21025436 | 0.57643862 | 0.75695564 |
| ENSMUSG00000038615 | 0.17710176 | 6.72317996 | 0.56517442 | 0.74848834 |
| ENSMUSG00000000409 | 0.17709535 | 3.13531677 | 0.60199931 | 0.77455811 |
| ENSMUSG00000047789 | 0.17694744 | 4.63147939 | 0.57259663 | 0.75465517 |
| ENSMUSG00000014959 | 0.17684952 | 7.05964499 | 0.56495814 | 0.74848834 |
| ENSMUSG00000028015 | 0.17666469 | 5.86020529 | 0.56668226 | 0.74936867 |
| ENSMUSG00000034595 | 0.17660333 | 6.96180593 | 0.56576247 | 0.748887   |
| ENSMUSG00000028837 | 0.17657153 | 6.90763936 | 0.56609055 | 0.7489174  |
| ENSMUSG00000036086 | 0.17631953 | 4.6452032  | 0.57489158 | 0.75602586 |
| ENSMUSG00000039148 | 0.17550049 | 5.55681914 | 0.57410775 | 0.75575185 |
| ENSMUSG00000021420 | 0.17538135 | 3.50871794 | 0.59677238 | 0.77096314 |
| ENSMUSG00000054455 | 0.17528125 | 5.01043529 | 0.57549445 | 0.75610772 |
| ENSMUSG00000000740 | 0.17518679 | 7.81873299 | 0.56782186 | 0.75050754 |
| ENSMUSG00000071477 | 0.17506708 | 3.54350053 | 0.59184983 | 0.76758973 |
| ENSMUSG00000057554 | 0.1747026  | 6.05941286 | 0.57120379 | 0.75322348 |
| ENSMUSG00000013662 | 0.17458841 | 8.25645495 | 0.56842181 | 0.75093236 |
| ENSMUSG00000059689 | 0.17447773 | 3.11425191 | 0.60536947 | 0.77653198 |

|                    |            |            |            |            |
|--------------------|------------|------------|------------|------------|
| ENSMUSG00000026404 | 0.17440878 | 3.60173992 | 0.58841823 | 0.76555569 |
| ENSMUSG00000028958 | 0.1741463  | 0.64734687 | 0.71907586 | 0.84906538 |
| ENSMUSG00000042625 | 0.17379614 | 6.13606017 | 0.57431785 | 0.75575884 |
| ENSMUSG00000048027 | 0.17346545 | 1.78168486 | 0.65945646 | 0.81275183 |
| ENSMUSG00000066640 | 0.17340521 | 3.25925399 | 0.60747116 | 0.77802482 |
| ENSMUSG00000025224 | 0.17322656 | 7.1495666  | 0.5726394  | 0.75465517 |
| ENSMUSG00000037363 | 0.1731895  | 1.38017336 | 0.62425715 | 0.78872304 |
| ENSMUSG00000032425 | 0.17299157 | 3.56652883 | 0.59234202 | 0.76772574 |
| ENSMUSG00000025969 | 0.17279429 | 5.94687494 | 0.57506372 | 0.75602586 |
| ENSMUSG00000029708 | 0.17271605 | 4.24803542 | 0.58620162 | 0.76398826 |
| ENSMUSG00000028796 | 0.172287   | 5.29152619 | 0.58275875 | 0.76149113 |
| ENSMUSG00000031101 | 0.17215083 | 7.98461245 | 0.57424246 | 0.75575185 |
| ENSMUSG00000005469 | 0.17178733 | 5.53255675 | 0.58077428 | 0.76016891 |
| ENSMUSG00000055413 | 0.17156878 | 4.86757048 | 0.58606578 | 0.76394699 |
| ENSMUSG00000030990 | 0.17144171 | 5.0608427  | 0.58430576 | 0.76257452 |
| ENSMUSG00000063524 | 0.17101668 | 7.55676924 | 0.57779787 | 0.75783033 |
| ENSMUSG00000030126 | 0.17099672 | 4.73931141 | 0.586386   | 0.76408732 |
| ENSMUSG00000052102 | 0.17081809 | 6.58533965 | 0.57918966 | 0.75883627 |
| ENSMUSG00000022678 | 0.17033108 | 6.63245401 | 0.58046744 | 0.7599564  |
| ENSMUSG00000079563 | 0.17025526 | 1.52785181 | 0.70356795 | 0.84022461 |
| ENSMUSG00000052155 | 0.17021042 | 2.55308181 | 0.63071021 | 0.79374243 |
| ENSMUSG00000004637 | 0.17011566 | 2.8867773  | 0.61682612 | 0.78462657 |
| ENSMUSG00000030744 | 0.17006815 | 10.0248547 | 0.57806285 | 0.75791244 |
| ENSMUSG00000021411 | 0.16982167 | 3.55844917 | 0.60287535 | 0.77499199 |
| ENSMUSG00000000827 | 0.16902073 | 5.28089457 | 0.58871582 | 0.76564651 |
| ENSMUSG00000074582 | 0.16893293 | 6.56708681 | 0.58303234 | 0.76174227 |
| ENSMUSG00000020149 | 0.16891574 | 7.96183027 | 0.5812899  | 0.76036285 |
| ENSMUSG00000020474 | 0.16873725 | 4.29384211 | 0.60136935 | 0.77425586 |
| ENSMUSG00000015289 | 0.16860198 | 3.98544718 | 0.60233165 | 0.77466243 |
| ENSMUSG00000028894 | 0.16851632 | 5.86112708 | 0.58561419 | 0.76363523 |
| ENSMUSG00000071054 | 0.16843927 | 6.50374423 | 0.58505652 | 0.76339418 |
| ENSMUSG00000038301 | 0.16838527 | 5.19605047 | 0.58748649 | 0.76468971 |
| ENSMUSG00000039997 | 0.16819098 | 8.45704147 | 0.58251259 | 0.76143222 |
| ENSMUSG00000005973 | 0.16818709 | 4.81004499 | 0.59131521 | 0.76717315 |
| ENSMUSG00000038845 | 0.16818619 | 5.69383719 | 0.58890877 | 0.76570921 |
| ENSMUSG00000025156 | 0.16783297 | 5.41848928 | 0.59205746 | 0.76770605 |
| ENSMUSG00000024789 | 0.16782231 | 7.52687874 | 0.58389921 | 0.76226644 |
| ENSMUSG00000032519 | 0.1676052  | 2.89783493 | 0.6285024  | 0.79171634 |
| ENSMUSG00000026385 | 0.16747958 | 6.33285628 | 0.58739016 | 0.76468971 |
| ENSMUSG00000060992 | 0.16738219 | 7.68470986 | 0.58521696 | 0.76339418 |
| ENSMUSG00000049960 | 0.16737134 | 5.05248573 | 0.59530815 | 0.7699452  |
| ENSMUSG00000091562 | 0.16723363 | 3.60134332 | 0.60725708 | 0.77793542 |
| ENSMUSG00000024132 | 0.16708616 | 4.00136229 | 0.60151342 | 0.77425647 |



|                    |            |            |            |            |
|--------------------|------------|------------|------------|------------|
| ENSMUSG00000030591 | 0.16690622 | 8.00379224 | 0.58603529 | 0.76394699 |
| ENSMUSG00000022503 | 0.16666862 | 6.23036609 | 0.59050704 | 0.76704745 |
| ENSMUSG00000052085 | 0.16658308 | 7.72735542 | 0.58679512 | 0.76443211 |
| ENSMUSG00000022837 | 0.16607068 | 5.4414399  | 0.59141442 | 0.76720956 |
| ENSMUSG00000079562 | 0.16587702 | 5.74644254 | 0.59365692 | 0.76882385 |
| ENSMUSG00000031820 | 0.16577796 | 4.8750811  | 0.60116406 | 0.77408397 |
| ENSMUSG00000000902 | 0.16570127 | 6.14992162 | 0.59238185 | 0.76772574 |
| ENSMUSG00000034429 | 0.16564438 | 1.82148984 | 0.68918977 | 0.83255545 |
| ENSMUSG00000032479 | 0.16563791 | 7.394487   | 0.58933301 | 0.76587253 |
| ENSMUSG00000046861 | 0.16559375 | 4.67114629 | 0.59932112 | 0.77328057 |
| ENSMUSG00000045237 | 0.1655724  | 3.11093398 | 0.62268009 | 0.78821501 |
| ENSMUSG00000053604 | 0.16551962 | 6.53316226 | 0.59113952 | 0.76716376 |
| ENSMUSG00000031684 | 0.16524609 | 5.05686218 | 0.5957084  | 0.77018575 |
| ENSMUSG00000025888 | 0.16522552 | 6.79035363 | 0.5908288  | 0.76716376 |
| ENSMUSG00000039640 | 0.16495129 | 5.29545497 | 0.60079714 | 0.77398116 |
| ENSMUSG00000001918 | 0.16485998 | 7.51453774 | 0.59123684 | 0.76716376 |
| ENSMUSG00000031938 | 0.16475747 | 3.5155491  | 0.61210031 | 0.78107795 |
| ENSMUSG00000027284 | 0.1646941  | 5.15597215 | 0.5968408  | 0.77096314 |
| ENSMUSG00000034908 | 0.16464292 | 6.36761737 | 0.594256   | 0.76913981 |
| ENSMUSG00000068040 | 0.16446212 | 6.62192265 | 0.59362351 | 0.76882385 |
| ENSMUSG00000023973 | 0.16439491 | 5.3130991  | 0.59971325 | 0.77340863 |
| ENSMUSG00000070319 | 0.1643728  | 6.68868065 | 0.59410395 | 0.76913981 |
| ENSMUSG00000019986 | 0.16434521 | 4.03174921 | 0.60481568 | 0.77609225 |
| ENSMUSG00000024193 | 0.1642425  | 2.0990992  | 0.66531468 | 0.81679799 |
| ENSMUSG00000049709 | 0.16414536 | 2.77979486 | 0.62346901 | 0.78864486 |
| ENSMUSG00000052395 | 0.16404522 | 4.29010147 | 0.60461116 | 0.7759736  |
| ENSMUSG00000002625 | 0.16399775 | 5.14156974 | 0.60017714 | 0.77350591 |
| ENSMUSG00000028944 | 0.16371524 | 4.41790769 | 0.60279631 | 0.77498276 |
| ENSMUSG00000029804 | 0.16359169 | 5.53419682 | 0.59707132 | 0.77105847 |
| ENSMUSG00000020946 | 0.16353644 | 6.94619011 | 0.59467846 | 0.76949994 |
| ENSMUSG00000049091 | 0.16323613 | 5.63690827 | 0.59941299 | 0.7732992  |
| ENSMUSG00000028550 | 0.1629991  | 3.18871571 | 0.61556577 | 0.78392315 |
| ENSMUSG00000025035 | 0.16294323 | 3.11752033 | 0.61538113 | 0.78392315 |
| ENSMUSG00000031672 | 0.16283774 | 7.77058942 | 0.59550177 | 0.77001092 |
| ENSMUSG00000036391 | 0.16275161 | 6.69685887 | 0.59615388 | 0.77057695 |
| ENSMUSG00000029432 | 0.16273223 | 4.44005557 | 0.60450433 | 0.7759736  |
| ENSMUSG00000050428 | 0.16266175 | 2.44877557 | 0.66039702 | 0.8133533  |
| ENSMUSG00000041638 | 0.16242686 | 5.48437245 | 0.6037881  | 0.77547987 |
| ENSMUSG00000039414 | 0.16235508 | 5.68975634 | 0.59993985 | 0.77340863 |
| ENSMUSG00000018750 | 0.16134467 | 4.49653419 | 0.60691966 | 0.77768794 |
| ENSMUSG00000037536 | 0.16123623 | 4.20345719 | 0.61551967 | 0.78392315 |
| ENSMUSG00000019295 | 0.16111261 | 4.68283511 | 0.60851235 | 0.77871095 |
| ENSMUSG00000014313 | 0.16098805 | 6.13353125 | 0.6025529  | 0.77485458 |

|                    |            |            |            |            |
|--------------------|------------|------------|------------|------------|
| ENSMUSG00000055720 | 0.16054639 | 5.13154695 | 0.60876779 | 0.77885298 |
| ENSMUSG00000038256 | 0.16021836 | 5.06886275 | 0.60951688 | 0.77897962 |
| ENSMUSG00000022771 | 0.16013377 | 6.10838954 | 0.60457316 | 0.7759736  |
| ENSMUSG00000036879 | 0.16011703 | 5.5329363  | 0.60488273 | 0.77609225 |
| ENSMUSG00000022130 | 0.15991078 | 4.80690827 | 0.61039054 | 0.77940596 |
| ENSMUSG00000040297 | 0.15982046 | 7.29961695 | 0.60207357 | 0.77455811 |
| ENSMUSG00000035047 | 0.15961095 | 5.50592602 | 0.60908006 | 0.77888289 |
| ENSMUSG00000029649 | 0.1593644  | 7.40411961 | 0.60364751 | 0.77542999 |
| ENSMUSG00000040018 | 0.15900548 | 5.9938107  | 0.60710451 | 0.77783236 |
| ENSMUSG00000025372 | 0.15855925 | 1.75208839 | 0.69713596 | 0.83647886 |
| ENSMUSG00000004945 | 0.15800385 | 4.65758932 | 0.6177564  | 0.78496222 |
| ENSMUSG00000025572 | 0.15783409 | 3.93577216 | 0.62963155 | 0.79284758 |
| ENSMUSG00000057132 | 0.15769861 | 4.3094063  | 0.62106065 | 0.78738749 |
| ENSMUSG00000029344 | 0.15769592 | 3.98834853 | 0.6272046  | 0.7908751  |
| ENSMUSG00000003208 | 0.15754019 | 2.57061664 | 0.67211206 | 0.82186829 |
| ENSMUSG00000020978 | 0.15727275 | 7.59857587 | 0.60836476 | 0.77864287 |
| ENSMUSG00000053702 | 0.15725038 | 2.46382922 | 0.63702201 | 0.79712757 |
| ENSMUSG00000042302 | 0.15693871 | 2.55166885 | 0.64406234 | 0.80197365 |
| ENSMUSG00000046079 | 0.15673468 | 5.3934185  | 0.61430018 | 0.78277362 |
| ENSMUSG00000078202 | 0.15672144 | 1.01528481 | 0.67046164 | 0.82068767 |
| ENSMUSG00000030345 | 0.15630303 | 1.0138962  | 0.67361378 | 0.82267849 |
| ENSMUSG00000025357 | 0.15605763 | 5.91954923 | 0.61317274 | 0.78199102 |
| ENSMUSG00000023971 | 0.15595201 | 3.35211494 | 0.6442304  | 0.80197365 |
| ENSMUSG00000001632 | 0.1559321  | 5.65482759 | 0.61616297 | 0.78413274 |
| ENSMUSG00000024387 | 0.15590591 | 6.44261441 | 0.61391285 | 0.78270312 |
| ENSMUSG00000014426 | 0.15559702 | 4.668701   | 0.62138166 | 0.78766566 |
| ENSMUSG00000009569 | 0.15558502 | 5.48706362 | 0.61616662 | 0.78413274 |
| ENSMUSG00000022416 | 0.15555373 | 3.21352031 | 0.63628377 | 0.7963886  |
| ENSMUSG00000061589 | 0.15550934 | 5.74045643 | 0.61741476 | 0.78496222 |
| ENSMUSG00000029726 | 0.15544444 | 4.87767271 | 0.62340295 | 0.78864486 |
| ENSMUSG00000006058 | 0.15538468 | 5.74457088 | 0.61684233 | 0.78462657 |
| ENSMUSG00000009108 | 0.15525721 | 1.24928468 | 0.68317089 | 0.82882463 |
| ENSMUSG00000040006 | 0.15477016 | 4.80134645 | 0.6223714  | 0.78821501 |
| ENSMUSG00000019802 | 0.15388046 | 7.61071495 | 0.61569839 | 0.78399946 |
| ENSMUSG00000027255 | 0.15380875 | 6.59238065 | 0.61779636 | 0.78496222 |
| ENSMUSG00000057409 | 0.15363429 | 5.34076428 | 0.61995865 | 0.78680564 |
| ENSMUSG00000039473 | 0.15350338 | 7.01581388 | 0.61713058 | 0.78489635 |
| ENSMUSG00000003528 | 0.15337861 | 5.09508986 | 0.62484791 | 0.78912897 |
| ENSMUSG00000039656 | 0.15337745 | 4.1448656  | 0.63559446 | 0.79580526 |
| ENSMUSG00000035133 | 0.15336781 | 5.8284554  | 0.61878777 | 0.7858918  |
| ENSMUSG00000021575 | 0.15320186 | 3.29613657 | 0.64763238 | 0.80499345 |
| ENSMUSG00000059439 | 0.15310307 | 3.7321595  | 0.63179442 | 0.79427268 |
| ENSMUSG00000036246 | 0.15300302 | 6.11817971 | 0.62096759 | 0.78738749 |

|                    |            |            |            |            |
|--------------------|------------|------------|------------|------------|
| ENSMUSG00000020918 | 0.15297572 | 5.67649079 | 0.62324793 | 0.78864486 |
| ENSMUSG00000000486 | 0.15270929 | 5.78300827 | 0.6237949  | 0.78872304 |
| ENSMUSG00000021697 | 0.1522862  | 3.83465883 | 0.63834137 | 0.79813024 |
| ENSMUSG00000042292 | 0.15221115 | 4.11266646 | 0.63265684 | 0.79477217 |
| ENSMUSG00000026456 | 0.15186603 | 4.98616501 | 0.62853569 | 0.79171634 |
| ENSMUSG00000031534 | 0.15186188 | 3.00672858 | 0.63476792 | 0.7955994  |
| ENSMUSG00000021468 | 0.15184758 | 5.84833875 | 0.62351503 | 0.78864486 |
| ENSMUSG00000069678 | 0.15184557 | 2.33144779 | 0.68089353 | 0.82796432 |
| ENSMUSG00000040263 | 0.15179508 | 5.14114541 | 0.62988612 | 0.79286899 |
| ENSMUSG00000061518 | 0.15169878 | 5.70877454 | 0.62658201 | 0.79039836 |
| ENSMUSG00000002983 | 0.15152497 | 4.25865334 | 0.64075482 | 0.80022003 |
| ENSMUSG00000022389 | 0.15122438 | 4.95864383 | 0.62984603 | 0.79286899 |
| ENSMUSG00000039989 | 0.15102918 | 4.60206371 | 0.63167579 | 0.79427268 |
| ENSMUSG00000074129 | 0.15102686 | 9.03752954 | 0.621749   | 0.7877684  |
| ENSMUSG00000022956 | 0.15099614 | 7.24056588 | 0.6233464  | 0.78864486 |
| ENSMUSG00000039703 | 0.15098468 | 7.5094276  | 0.62266595 | 0.78821501 |
| ENSMUSG00000027809 | 0.15089382 | 5.65680924 | 0.62685132 | 0.79063914 |
| ENSMUSG00000025245 | 0.15082453 | 5.3305075  | 0.62708362 | 0.79083964 |
| ENSMUSG00000046691 | 0.15078513 | 7.06712787 | 0.62393791 | 0.78872304 |
| ENSMUSG00000035885 | 0.15077046 | 6.19827218 | 0.62560806 | 0.78971758 |
| ENSMUSG00000030091 | 0.15068614 | 8.43784841 | 0.62273578 | 0.78821501 |
| ENSMUSG00000020437 | 0.15066091 | 7.38530406 | 0.62401667 | 0.78872304 |
| ENSMUSG00000027452 | 0.15028918 | 4.11527629 | 0.63356155 | 0.79515627 |
| ENSMUSG00000024787 | 0.15009093 | 2.90424159 | 0.67135533 | 0.82131547 |
| ENSMUSG00000032402 | 0.15008975 | 4.34872895 | 0.6338086  | 0.79515627 |
| ENSMUSG00000031960 | 0.15001649 | 7.82864696 | 0.62485595 | 0.78912897 |
| ENSMUSG00000035069 | 0.14969296 | 4.33321517 | 0.63802883 | 0.79801704 |
| ENSMUSG00000041650 | 0.14963715 | 4.98959705 | 0.63202614 | 0.79442051 |
| ENSMUSG00000023961 | 0.14941968 | 1.7786731  | 0.66144943 | 0.8140916  |
| ENSMUSG00000071644 | 0.14930298 | 10.4713912 | 0.62523985 | 0.78943761 |
| ENSMUSG00000026249 | 0.14905977 | 3.89189186 | 0.63540968 | 0.79580392 |
| ENSMUSG00000029715 | 0.14901714 | 2.02543165 | 0.72435626 | 0.85287236 |
| ENSMUSG00000044030 | 0.14898298 | 2.16446744 | 0.67922037 | 0.82690364 |
| ENSMUSG00000022571 | 0.14865117 | 3.7133015  | 0.6506108  | 0.8066437  |
| ENSMUSG00000030374 | 0.14845364 | 5.52541344 | 0.6350047  | 0.79572479 |
| ENSMUSG00000015804 | 0.14794925 | 5.18428617 | 0.63567012 | 0.79580526 |
| ENSMUSG00000030986 | 0.14763085 | 4.42820371 | 0.64101842 | 0.80031711 |
| ENSMUSG00000039686 | 0.14750487 | 3.63253032 | 0.6636746  | 0.81530252 |
| ENSMUSG00000005621 | 0.14731695 | 6.46170156 | 0.63276101 | 0.79477217 |
| ENSMUSG00000002897 | 0.14715577 | 6.32067999 | 0.63407235 | 0.7951897  |
| ENSMUSG00000035051 | 0.14709837 | 6.30838138 | 0.63278185 | 0.79477217 |
| ENSMUSG00000066839 | 0.14697135 | 3.99912246 | 0.65894027 | 0.81230131 |
| ENSMUSG00000055553 | 0.14679247 | 4.47774163 | 0.64844161 | 0.80525038 |

|                    |            |            |            |            |
|--------------------|------------|------------|------------|------------|
| ENSMUSG00000021040 | 0.14679033 | 5.07595125 | 0.63829081 | 0.79813024 |
| ENSMUSG00000075415 | 0.1466629  | 8.63110779 | 0.63179093 | 0.79427268 |
| ENSMUSG00000039230 | 0.14650503 | 6.52679566 | 0.6346721  | 0.7955994  |
| ENSMUSG00000039220 | 0.14646699 | 6.33793196 | 0.635408   | 0.79580392 |
| ENSMUSG00000062647 | 0.14629707 | 5.44600751 | 0.64033386 | 0.80006492 |
| ENSMUSG00000038524 | 0.14621197 | 1.78096854 | 0.70256858 | 0.83985354 |
| ENSMUSG00000049728 | 0.14606444 | 2.38950297 | 0.69111767 | 0.83335668 |
| ENSMUSG00000020458 | 0.14602432 | 7.08374066 | 0.6341759  | 0.79522709 |
| ENSMUSG00000044627 | 0.14568067 | 7.12046017 | 0.63566225 | 0.79580526 |
| ENSMUSG00000005936 | 0.14553476 | 7.29362289 | 0.63544766 | 0.79580392 |
| ENSMUSG00000073437 | 0.14549202 | 3.53912533 | 0.65669976 | 0.81095201 |
| ENSMUSG00000022489 | 0.14522824 | 3.89613149 | 0.65687678 | 0.81095201 |
| ENSMUSG00000052751 | 0.14519281 | 2.97619979 | 0.65651035 | 0.81095201 |
| ENSMUSG00000054150 | 0.14515222 | 5.15556961 | 0.64226902 | 0.80099794 |
| ENSMUSG00000040506 | 0.14478138 | 5.73961811 | 0.64065203 | 0.80018432 |
| ENSMUSG00000024182 | 0.14458926 | 5.77832678 | 0.64198098 | 0.80091658 |
| ENSMUSG00000025494 | 0.14443956 | 2.06788621 | 0.71361186 | 0.84644245 |
| ENSMUSG00000030979 | 0.1442252  | 3.7134628  | 0.65683867 | 0.81095201 |
| ENSMUSG00000037278 | 0.14393207 | 6.0429578  | 0.64245026 | 0.80103868 |
| ENSMUSG00000021877 | 0.14390081 | 7.56226268 | 0.63870321 | 0.79839752 |
| ENSMUSG00000002550 | 0.14362266 | 4.72115497 | 0.65105202 | 0.80691242 |
| ENSMUSG00000020321 | 0.14353035 | 8.17927034 | 0.63942662 | 0.79911654 |
| ENSMUSG00000006010 | 0.14352811 | 5.89632155 | 0.64185029 | 0.80085999 |
| ENSMUSG00000025950 | 0.14335079 | 4.21600799 | 0.64802019 | 0.80516297 |
| ENSMUSG00000030468 | 0.14328061 | 7.09923998 | 0.64105519 | 0.80031711 |
| ENSMUSG00000057177 | 0.14327772 | 6.13505424 | 0.64424126 | 0.80197365 |
| ENSMUSG00000063275 | 0.14323285 | 1.37024914 | 0.70527194 | 0.8412402  |
| ENSMUSG00000051256 | 0.14321554 | 5.02342287 | 0.64763753 | 0.80499345 |
| ENSMUSG00000059995 | 0.14301385 | 6.07338076 | 0.64408208 | 0.80197365 |
| ENSMUSG00000020250 | 0.14291561 | 8.34628567 | 0.64060357 | 0.80018432 |
| ENSMUSG00000004798 | 0.14271528 | 4.93569887 | 0.64815225 | 0.80516921 |
| ENSMUSG00000003348 | 0.14270549 | 6.36401343 | 0.64411683 | 0.80197365 |
| ENSMUSG00000059355 | 0.14259168 | 4.41621188 | 0.65282342 | 0.80845748 |
| ENSMUSG00000036339 | 0.1423578  | 4.92154108 | 0.64748329 | 0.80498729 |
| ENSMUSG00000004285 | 0.14225772 | 4.90556559 | 0.65304002 | 0.80854002 |
| ENSMUSG00000053094 | 0.1421793  | 7.00618774 | 0.64358909 | 0.80197365 |
| ENSMUSG00000020801 | 0.1419272  | 1.9838907  | 0.72002947 | 0.85000524 |
| ENSMUSG00000037351 | 0.14177639 | 5.57838193 | 0.64988032 | 0.80624904 |
| ENSMUSG00000062234 | 0.14118574 | 7.12843345 | 0.64597314 | 0.803573   |
| ENSMUSG00000023861 | 0.14098913 | 5.90258526 | 0.64873362 | 0.80542751 |
| ENSMUSG00000059866 | 0.14077111 | 3.89830586 | 0.668413   | 0.81932801 |
| ENSMUSG00000060450 | 0.14077084 | 6.46655619 | 0.64729799 | 0.8048497  |
| ENSMUSG00000037805 | 0.14055    | 7.81420899 | 0.64684378 | 0.80456325 |

|                    |            |            |            |            |
|--------------------|------------|------------|------------|------------|
| ENSMUSG00000020483 | 0.1405347  | 6.00236273 | 0.64970047 | 0.80624904 |
| ENSMUSG00000034751 | 0.14050203 | 4.40524211 | 0.65034735 | 0.80644253 |
| ENSMUSG00000014498 | 0.14047517 | 7.00681058 | 0.6478031  | 0.80510644 |
| ENSMUSG00000029587 | 0.14046296 | 4.57840377 | 0.65676067 | 0.81095201 |
| ENSMUSG00000033819 | 0.14045529 | 1.52747769 | 0.75558633 | 0.87212277 |
| ENSMUSG00000022329 | 0.14018343 | 4.20178223 | 0.65772439 | 0.81145176 |
| ENSMUSG00000038384 | 0.14016615 | 4.26150393 | 0.66578429 | 0.8171639  |
| ENSMUSG00000029416 | 0.14008458 | 4.86450409 | 0.65613317 | 0.81069432 |
| ENSMUSG00000058454 | 0.13997684 | 5.13799827 | 0.65579814 | 0.81037322 |
| ENSMUSG00000020514 | 0.13974782 | 4.42030357 | 0.66125233 | 0.81394192 |
| ENSMUSG00000028914 | 0.13938362 | 4.42343991 | 0.6619367  | 0.81431957 |
| ENSMUSG0000003039  | 0.13918164 | 5.76427032 | 0.65356167 | 0.80890728 |
| ENSMUSG00000024422 | 0.13882074 | 5.81867168 | 0.65549696 | 0.81009388 |
| ENSMUSG00000021901 | 0.13879064 | 6.22934147 | 0.65392875 | 0.80908302 |
| ENSMUSG00000044783 | 0.13835924 | 8.51650067 | 0.65122137 | 0.80702956 |
| ENSMUSG00000030301 | 0.13825827 | 3.71490037 | 0.66878952 | 0.81932801 |
| ENSMUSG00000009621 | 0.13820084 | 6.8593728  | 0.65356161 | 0.80890728 |
| ENSMUSG00000020228 | 0.13769588 | 5.62842872 | 0.65701852 | 0.81095201 |
| ENSMUSG00000033096 | 0.13761281 | 5.97430882 | 0.65635847 | 0.8108798  |
| ENSMUSG00000002524 | 0.1371791  | 6.21652591 | 0.65798498 | 0.8116804  |
| ENSMUSG00000005481 | 0.13713897 | 7.73108616 | 0.6549845  | 0.8099035  |
| ENSMUSG00000024660 | 0.13710321 | 7.48338603 | 0.65530458 | 0.81001571 |
| ENSMUSG00000030286 | 0.13704634 | 6.44967347 | 0.65695407 | 0.81095201 |
| ENSMUSG00000015314 | 0.13704631 | 8.39714118 | 0.6542933  | 0.80933255 |
| ENSMUSG00000036180 | 0.13656816 | 6.01307908 | 0.65981256 | 0.81307233 |
| ENSMUSG00000092341 | 0.1363962  | 9.30693096 | 0.65534211 | 0.81001571 |
| ENSMUSG00000004996 | 0.13629036 | 3.667285   | 0.67701374 | 0.82514876 |
| ENSMUSG00000063714 | 0.13627602 | 0.90603466 | 0.80117625 | 0.89737066 |
| ENSMUSG00000066026 | 0.13626915 | 3.41529077 | 0.68006198 | 0.82736782 |
| ENSMUSG00000021114 | 0.13624787 | 6.21093853 | 0.65855681 | 0.81201425 |
| ENSMUSG00000025825 | 0.13584063 | 4.38393949 | 0.67232789 | 0.82200151 |
| ENSMUSG00000026201 | 0.13565267 | 4.79350971 | 0.66800096 | 0.81907019 |
| ENSMUSG00000051853 | 0.13563813 | 7.33985229 | 0.65869598 | 0.812093   |
| ENSMUSG00000015846 | 0.13560976 | 4.19315521 | 0.67260417 | 0.82219036 |
| ENSMUSG00000058626 | 0.13546366 | 0.62999572 | 0.90332859 | 0.95364616 |
| ENSMUSG00000001211 | 0.13531893 | 5.41666056 | 0.66530478 | 0.81679799 |
| ENSMUSG00000033458 | 0.13514516 | 3.07422641 | 0.68614612 | 0.83046889 |
| ENSMUSG00000006498 | 0.13484333 | 8.19866831 | 0.6600181  | 0.81307233 |
| ENSMUSG00000025269 | 0.1348409  | 4.21641108 | 0.67349124 | 0.82262199 |
| ENSMUSG00000006289 | 0.1346085  | 5.23393177 | 0.66673654 | 0.81779877 |
| ENSMUSG00000026199 | 0.13457796 | 4.09947504 | 0.67567203 | 0.8241655  |
| ENSMUSG00000002699 | 0.13455554 | 6.38493039 | 0.66325644 | 0.81530252 |
| ENSMUSG00000028678 | 0.13448632 | 6.5793092  | 0.66288101 | 0.81520228 |

|                    |            |            |            |            |
|--------------------|------------|------------|------------|------------|
| ENSMUSG00000066829 | 0.13448101 | 3.66229949 | 0.68297959 | 0.82882463 |
| ENSMUSG00000027933 | 0.1343949  | 6.5995841  | 0.66301635 | 0.81527575 |
| ENSMUSG00000079487 | 0.13423152 | 6.90558287 | 0.66260709 | 0.81505131 |
| ENSMUSG00000031785 | 0.13419237 | 1.30742842 | 0.78170527 | 0.88671643 |
| ENSMUSG00000057229 | 0.13401515 | 4.2629917  | 0.6748125  | 0.82360706 |
| ENSMUSG00000037940 | 0.13396042 | 4.95658525 | 0.66611837 | 0.81731943 |
| ENSMUSG00000037553 | 0.13347958 | 5.23228625 | 0.67073178 | 0.82083378 |
| ENSMUSG00000031029 | 0.13333437 | 8.27478342 | 0.66345704 | 0.81530252 |
| ENSMUSG00000079003 | 0.13328132 | 4.45224    | 0.67875211 | 0.82652018 |
| ENSMUSG00000022335 | 0.13311959 | 2.72695487 | 0.7026305  | 0.83985354 |
| ENSMUSG00000036880 | 0.13300086 | 3.50053611 | 0.69716914 | 0.83647886 |
| ENSMUSG00000020022 | 0.13295206 | 5.09724354 | 0.67285396 | 0.82227802 |
| ENSMUSG00000078584 | 0.13234206 | 4.9638002  | 0.67328856 | 0.82261828 |
| ENSMUSG00000079057 | 0.13227424 | 3.93179273 | 0.68088642 | 0.82796432 |
| ENSMUSG00000033900 | 0.13206292 | 2.35770441 | 0.71606554 | 0.84808541 |
| ENSMUSG00000031591 | 0.13159326 | 6.43509151 | 0.66881904 | 0.81932801 |
| ENSMUSG00000040451 | 0.13143897 | 4.46367064 | 0.67404758 | 0.82292869 |
| ENSMUSG00000000384 | 0.13142581 | 5.74829873 | 0.67341192 | 0.82261828 |
| ENSMUSG00000037466 | 0.13121929 | 3.90671126 | 0.68549987 | 0.83022476 |
| ENSMUSG00000057594 | 0.13120616 | 3.06111781 | 0.69351382 | 0.83460027 |
| ENSMUSG00000028447 | 0.13094903 | 3.44680759 | 0.70093721 | 0.83867297 |
| ENSMUSG00000020451 | 0.13071221 | 5.27852027 | 0.676922   | 0.8251302  |
| ENSMUSG00000022999 | 0.13048761 | 3.56548265 | 0.695355   | 0.83513847 |
| ENSMUSG00000028656 | 0.13038041 | 9.03936603 | 0.66996798 | 0.82053972 |
| ENSMUSG00000029142 | 0.13028821 | 5.39794313 | 0.67510358 | 0.82384486 |
| ENSMUSG00000018293 | 0.13002803 | 9.24959603 | 0.67073324 | 0.82083378 |
| ENSMUSG00000036894 | 0.12991136 | 4.37448073 | 0.6819759  | 0.82829053 |
| ENSMUSG00000040435 | 0.12974499 | 3.77654865 | 0.68740026 | 0.83139654 |
| ENSMUSG00000025724 | 0.12970326 | 6.72624007 | 0.67339226 | 0.82261828 |
| ENSMUSG00000092607 | 0.12969877 | 4.17801095 | 0.68708743 | 0.83113301 |
| ENSMUSG00000100975 | 0.12953206 | 2.07007027 | 0.71361186 | 0.84644245 |
| ENSMUSG00000005465 | 0.12948852 | 4.27981331 | 0.68633265 | 0.83049947 |
| ENSMUSG00000031755 | 0.12944059 | 2.47948903 | 0.72314427 | 0.8523922  |
| ENSMUSG00000027865 | 0.1292205  | 5.57147646 | 0.67661199 | 0.82503207 |
| ENSMUSG00000028104 | 0.12916212 | 3.12792572 | 0.69691858 | 0.83645742 |
| ENSMUSG00000055897 | 0.12912883 | 3.22715706 | 0.69815182 | 0.83707733 |
| ENSMUSG00000041841 | 0.12901597 | 7.33573721 | 0.67483235 | 0.82360706 |
| ENSMUSG00000035152 | 0.12882518 | 8.29763579 | 0.67392863 | 0.82287663 |
| ENSMUSG00000010025 | 0.12871948 | 5.7390201  | 0.67811007 | 0.8261115  |
| ENSMUSG00000033373 | 0.12864591 | 3.44771643 | 0.70093721 | 0.83867297 |
| ENSMUSG00000039191 | 0.12858519 | 7.51459033 | 0.67469715 | 0.82360706 |
| ENSMUSG00000068523 | 0.1283113  | 5.31195605 | 0.6799293  | 0.82729974 |
| ENSMUSG00000012405 | 0.12829208 | 6.74886966 | 0.67784509 | 0.82606064 |

|                    |            |            |            |            |
|--------------------|------------|------------|------------|------------|
| ENSMUSG00000024170 | 0.12826784 | 3.76176256 | 0.7018259  | 0.83935794 |
| ENSMUSG00000067567 | 0.12797843 | 4.08468348 | 0.69156881 | 0.83351479 |
| ENSMUSG00000015112 | 0.12785001 | 4.86361593 | 0.68385654 | 0.82927122 |
| ENSMUSG00000029524 | 0.12762391 | 2.06958744 | 0.73395694 | 0.85892476 |
| ENSMUSG00000007833 | 0.12756865 | 2.32428324 | 0.77155621 | 0.88196547 |
| ENSMUSG00000032258 | 0.12749865 | 3.92361192 | 0.68955393 | 0.83262193 |
| ENSMUSG00000042328 | 0.12737556 | 4.00951802 | 0.69124402 | 0.83335668 |
| ENSMUSG00000003037 | 0.12713168 | 6.89096007 | 0.67961863 | 0.82720172 |
| ENSMUSG00000052632 | 0.12698907 | 2.02376805 | 0.74399995 | 0.86457925 |
| ENSMUSG00000071078 | 0.12683321 | 4.15102439 | 0.69505927 | 0.83506229 |
| ENSMUSG00000039396 | 0.12676239 | 4.58018822 | 0.68564371 | 0.83022476 |
| ENSMUSG00000041319 | 0.12671589 | 3.5996463  | 0.70879669 | 0.84357835 |
| ENSMUSG00000018841 | 0.12652497 | 4.27512578 | 0.6939173  | 0.83471324 |
| ENSMUSG00000025155 | 0.12626089 | 5.46677785 | 0.68661003 | 0.8306487  |
| ENSMUSG00000031545 | 0.12623608 | 7.0520302  | 0.68148732 | 0.82816228 |
| ENSMUSG00000022982 | 0.12595159 | 7.37595478 | 0.68183902 | 0.82822167 |
| ENSMUSG00000019494 | 0.12588194 | 6.65188991 | 0.68320931 | 0.82882463 |
| ENSMUSG00000031232 | 0.12576042 | 8.1400245  | 0.68115561 | 0.82796432 |
| ENSMUSG00000037470 | 0.12575339 | 8.44104712 | 0.68116422 | 0.82796432 |
| ENSMUSG00000028793 | 0.1257203  | 8.05015914 | 0.68163653 | 0.82816228 |
| ENSMUSG00000037257 | 0.1256425  | 5.23287923 | 0.68758379 | 0.83145365 |
| ENSMUSG00000026730 | 0.12563686 | 2.70357834 | 0.72279373 | 0.85224225 |
| ENSMUSG00000021238 | 0.12548999 | 3.21351347 | 0.70423131 | 0.84064982 |
| ENSMUSG00000028383 | 0.12537743 | 5.57472415 | 0.68580827 | 0.83023759 |
| ENSMUSG00000022463 | 0.12535086 | 6.94040726 | 0.68403245 | 0.82939126 |
| ENSMUSG00000037012 | 0.12529033 | 5.93044824 | 0.68648314 | 0.83058838 |
| ENSMUSG00000043683 | 0.12528392 | 6.29007749 | 0.68524976 | 0.83022476 |
| ENSMUSG00000030276 | 0.12523733 | 1.59821968 | 0.7414134  | 0.86268905 |
| ENSMUSG00000027963 | 0.12519634 | 3.92186909 | 0.69967073 | 0.83780248 |
| ENSMUSG00000001403 | 0.12481079 | 6.62901814 | 0.68541749 | 0.83022476 |
| ENSMUSG00000020936 | 0.12461219 | 7.68036375 | 0.68465962 | 0.83001462 |
| ENSMUSG00000006463 | 0.12446576 | 3.57019339 | 0.70346525 | 0.84022461 |
| ENSMUSG00000035268 | 0.12420057 | 5.3716945  | 0.69160704 | 0.83351479 |
| ENSMUSG00000002741 | 0.12416487 | 6.99792337 | 0.6862275  | 0.83046889 |
| ENSMUSG00000033446 | 0.12368586 | 3.63855234 | 0.69688668 | 0.83645742 |
| ENSMUSG00000024026 | 0.1236229  | 5.86181652 | 0.68995071 | 0.83282517 |
| ENSMUSG00000020212 | 0.12358194 | 4.11917183 | 0.69817171 | 0.83707733 |
| ENSMUSG00000032612 | 0.12341684 | 7.64121151 | 0.68745947 | 0.83139654 |
| ENSMUSG00000059791 | 0.12335634 | 4.3633545  | 0.69897377 | 0.8374141  |
| ENSMUSG00000029578 | 0.12318981 | 5.65371915 | 0.69237676 | 0.83397643 |
| ENSMUSG00000021257 | 0.12315251 | 2.60749656 | 0.74363258 | 0.86424547 |
| ENSMUSG00000061544 | 0.12294083 | 3.00151673 | 0.69144881 | 0.83351039 |
| ENSMUSG00000032202 | 0.12292436 | 4.82943545 | 0.69422278 | 0.83475024 |

|                    |            |            |            |            |
|--------------------|------------|------------|------------|------------|
| ENSMUSG00000054199 | 0.12264057 | 5.66668467 | 0.6930751  | 0.83422377 |
| ENSMUSG00000009905 | 0.12260875 | 3.9170203  | 0.6988033  | 0.8374141  |
| ENSMUSG00000031633 | 0.12248738 | 7.17064183 | 0.69037172 | 0.83294737 |
| ENSMUSG00000024571 | 0.12231388 | 6.24253356 | 0.6931236  | 0.83422377 |
| ENSMUSG00000034522 | 0.12220624 | 3.04665881 | 0.71862522 | 0.84892688 |
| ENSMUSG00000091780 | 0.12218497 | 1.67672435 | 0.77792904 | 0.88502867 |
| ENSMUSG00000079020 | 0.12194796 | 2.96457522 | 0.72343992 | 0.8525381  |
| ENSMUSG00000019731 | 0.12175523 | 7.11872989 | 0.69196929 | 0.83373651 |
| ENSMUSG00000031158 | 0.1217545  | 3.54303467 | 0.7255032  | 0.8529024  |
| ENSMUSG00000044770 | 0.12170225 | 2.10705537 | 0.72193437 | 0.85160143 |
| ENSMUSG00000024639 | 0.12168932 | 5.64426621 | 0.69467276 | 0.83502433 |
| ENSMUSG00000005674 | 0.1216831  | 4.8111997  | 0.7011305  | 0.83875344 |
| ENSMUSG00000029434 | 0.12159262 | 6.09285556 | 0.69425769 | 0.83475024 |
| ENSMUSG00000049439 | 0.12157621 | 5.51304085 | 0.69533082 | 0.83513847 |
| ENSMUSG00000024425 | 0.12147219 | 6.62184545 | 0.69292191 | 0.83422377 |
| ENSMUSG00000028826 | 0.12127791 | 5.53670941 | 0.69628184 | 0.8360654  |
| ENSMUSG00000031422 | 0.12124907 | 8.48686173 | 0.69202295 | 0.83373651 |
| ENSMUSG00000071037 | 0.12116676 | 1.24433668 | 0.77419743 | 0.88312601 |
| ENSMUSG00000026427 | 0.12111914 | 5.77551187 | 0.69652257 | 0.83626134 |
| ENSMUSG00000031666 | 0.12096782 | 6.49566968 | 0.69437973 | 0.8348039  |
| ENSMUSG00000001248 | 0.12090452 | 5.73073597 | 0.69834001 | 0.83713858 |
| ENSMUSG00000024069 | 0.12067711 | 4.14583602 | 0.70815327 | 0.84299866 |
| ENSMUSG00000025208 | 0.12027404 | 4.04575913 | 0.7130395  | 0.84629298 |
| ENSMUSG00000018858 | 0.12011754 | 4.24185227 | 0.71278697 | 0.84617951 |
| ENSMUSG00000025508 | 0.12011061 | 6.25786678 | 0.69918531 | 0.8374141  |
| ENSMUSG00000040592 | 0.12007866 | 9.29270249 | 0.69476903 | 0.83502433 |
| ENSMUSG00000031584 | 0.12006178 | 4.87840516 | 0.69992248 | 0.83782965 |
| ENSMUSG00000025505 | 0.11997014 | 2.97741145 | 0.7264707  | 0.85321934 |
| ENSMUSG00000002342 | 0.11965397 | 4.2775869  | 0.71093767 | 0.84524235 |
| ENSMUSG00000021271 | 0.11958494 | 3.3374944  | 0.71887984 | 0.84892688 |
| ENSMUSG00000022350 | 0.1194999  | 7.04273544 | 0.69733344 | 0.83658292 |
| ENSMUSG00000019977 | 0.119484   | 6.72563262 | 0.69802072 | 0.83707733 |
| ENSMUSG00000031176 | 0.11947215 | 5.56869987 | 0.69983823 | 0.83782965 |
| ENSMUSG00000074922 | 0.11941572 | 2.79079942 | 0.73746131 | 0.86125003 |
| ENSMUSG00000018572 | 0.11937094 | 5.67851221 | 0.70233888 | 0.83978517 |
| ENSMUSG00000059824 | 0.11925264 | 2.06164951 | 0.75045115 | 0.86879927 |
| ENSMUSG00000014551 | 0.11900368 | 4.84171906 | 0.70618342 | 0.84186182 |
| ENSMUSG00000052056 | 0.11896644 | 6.67844331 | 0.69919107 | 0.8374141  |
| ENSMUSG00000035392 | 0.11896088 | 4.16649289 | 0.71642727 | 0.8481852  |
| ENSMUSG00000051675 | 0.11837671 | 3.83959657 | 0.71688088 | 0.84842443 |
| ENSMUSG00000043931 | 0.11837588 | 5.04158187 | 0.7035394  | 0.84022461 |
| ENSMUSG00000037742 | 0.1180762  | 13.1998624 | 0.69909231 | 0.8374141  |
| ENSMUSG00000004677 | 0.11799072 | 6.38016391 | 0.70270758 | 0.83985354 |



|                    |            |            |            |            |
|--------------------|------------|------------|------------|------------|
| ENSMUSG00000027455 | 0.11789471 | 5.79432946 | 0.70599839 | 0.84173429 |
| ENSMUSG00000024248 | 0.11756223 | 6.76082086 | 0.70297405 | 0.83998583 |
| ENSMUSG00000004530 | 0.11750598 | 6.27698101 | 0.70490744 | 0.84089843 |
| ENSMUSG00000000374 | 0.11735505 | 6.41203    | 0.70364136 | 0.84022461 |
| ENSMUSG00000042670 | 0.11716692 | 4.39759815 | 0.70588422 | 0.84173429 |
| ENSMUSG00000024096 | 0.11646635 | 5.98899444 | 0.70693731 | 0.84238038 |
| ENSMUSG00000000028 | 0.11633974 | 6.63150277 | 0.70580711 | 0.84173429 |
| ENSMUSG00000010376 | 0.11604693 | 6.77828462 | 0.706321   | 0.84193276 |
| ENSMUSG00000095041 | 0.116006   | 6.48452509 | 0.70798154 | 0.84298033 |
| ENSMUSG00000042502 | 0.11599915 | 6.73933584 | 0.70700898 | 0.84238038 |
| ENSMUSG00000028718 | 0.11599107 | 6.41788611 | 0.70598742 | 0.84173429 |
| ENSMUSG00000032320 | 0.11577313 | 5.41786463 | 0.7095162  | 0.84424834 |
| ENSMUSG00000020087 | 0.11544295 | 3.8200564  | 0.73036497 | 0.85654819 |
| ENSMUSG00000033216 | 0.11517685 | 4.34375415 | 0.72291114 | 0.8522875  |
| ENSMUSG00000068267 | 0.11513251 | 5.21843295 | 0.71555598 | 0.84803477 |
| ENSMUSG00000028107 | 0.11502368 | 5.2712648  | 0.71502026 | 0.84771092 |
| ENSMUSG00000063808 | 0.11474627 | 4.44518748 | 0.71842246 | 0.84892688 |
| ENSMUSG00000027219 | 0.11465626 | 5.95347072 | 0.71019917 | 0.84487456 |
| ENSMUSG00000090319 | 0.11381965 | 2.14950005 | 0.76356987 | 0.87664617 |
| ENSMUSG00000034893 | 0.11381824 | 6.22051861 | 0.71217861 | 0.8461093  |
| ENSMUSG00000022723 | 0.11374917 | 5.04235895 | 0.71550711 | 0.84803477 |
| ENSMUSG00000015087 | 0.11336481 | 6.16411675 | 0.71446407 | 0.8472378  |
| ENSMUSG00000038990 | 0.11327143 | 5.36151896 | 0.71770572 | 0.8487486  |
| ENSMUSG00000031971 | 0.11301141 | 2.58236211 | 0.73996342 | 0.8622113  |
| ENSMUSG00000000711 | 0.11294263 | 6.6167056  | 0.71371488 | 0.84644245 |
| ENSMUSG00000027523 | 0.11285217 | 8.34870373 | 0.71266773 | 0.8461311  |
| ENSMUSG00000039840 | 0.1128315  | 5.48801279 | 0.71599499 | 0.84808541 |
| ENSMUSG00000026189 | 0.11281305 | 3.5087806  | 0.73389789 | 0.85892476 |
| ENSMUSG00000021497 | 0.11255764 | 4.37070838 | 0.7241494  | 0.85281502 |
| ENSMUSG00000020888 | 0.11253098 | 3.12122603 | 0.74981865 | 0.86825344 |
| ENSMUSG00000025139 | 0.11249541 | 6.26192082 | 0.71562993 | 0.84803477 |
| ENSMUSG00000027613 | 0.11240328 | 5.68801004 | 0.72055788 | 0.85031631 |
| ENSMUSG00000074918 | 0.11206789 | 4.22946889 | 0.72360212 | 0.85259837 |
| ENSMUSG00000024687 | 0.11174506 | 7.0333799  | 0.71611069 | 0.84808541 |
| ENSMUSG00000026353 | 0.11162346 | 7.29457258 | 0.71612725 | 0.84808541 |
| ENSMUSG00000032280 | 0.11146443 | 4.75665857 | 0.72391235 | 0.85265789 |
| ENSMUSG00000028453 | 0.11127833 | 4.62632182 | 0.72585181 | 0.85299089 |
| ENSMUSG00000000605 | 0.11123176 | 6.09783291 | 0.71868289 | 0.84892688 |
| ENSMUSG00000039159 | 0.11113896 | 4.76785519 | 0.72435042 | 0.85287236 |
| ENSMUSG00000025369 | 0.11101837 | 6.90528727 | 0.71829645 | 0.84892688 |
| ENSMUSG00000039671 | 0.111012   | 6.72369099 | 0.71844148 | 0.84892688 |
| ENSMUSG00000026213 | 0.11079236 | 4.59453806 | 0.72944924 | 0.85587864 |
| ENSMUSG00000000134 | 0.11078392 | 5.00476854 | 0.72531983 | 0.8529024  |

|                    |            |            |            |            |
|--------------------|------------|------------|------------|------------|
| ENSMUSG00000018974 | 0.11051174 | 5.53571313 | 0.72484969 | 0.8529024  |
| ENSMUSG00000078521 | 0.11030297 | 4.30131986 | 0.73203544 | 0.85760675 |
| ENSMUSG00000055240 | 0.11026004 | 5.61314224 | 0.72224239 | 0.85187158 |
| ENSMUSG00000035399 | 0.10996232 | 4.92076126 | 0.72514169 | 0.8529024  |
| ENSMUSG00000044709 | 0.10956805 | 4.65674511 | 0.72960902 | 0.85597298 |
| ENSMUSG00000059890 | 0.10956202 | 7.65610562 | 0.72068723 | 0.85031631 |
| ENSMUSG00000026277 | 0.10954334 | 5.74182796 | 0.72542559 | 0.8529024  |
| ENSMUSG00000055862 | 0.10939411 | 1.1310516  | 0.85931833 | 0.9309932  |
| ENSMUSG00000037251 | 0.10890778 | 3.73181411 | 0.73921415 | 0.86200869 |
| ENSMUSG00000031953 | 0.10888529 | 2.8006814  | 0.76206704 | 0.8754599  |
| ENSMUSG00000041949 | 0.10876768 | 3.61286545 | 0.74426052 | 0.86461136 |
| ENSMUSG00000004815 | 0.10857344 | 4.47582882 | 0.73227598 | 0.85779537 |
| ENSMUSG00000085399 | 0.10855502 | 2.19145664 | 0.76909166 | 0.88009946 |
| ENSMUSG00000026162 | 0.10853775 | 1.62148716 | 0.8204702  | 0.90896213 |
| ENSMUSG00000031691 | 0.10847893 | 6.87057707 | 0.72483422 | 0.8529024  |
| ENSMUSG00000030225 | 0.10847146 | 4.80926339 | 0.73193137 | 0.85760675 |
| ENSMUSG00000026457 | 0.10841061 | 6.45152208 | 0.72564721 | 0.8529024  |
| ENSMUSG00000060733 | 0.10778217 | 6.64846196 | 0.72644329 | 0.85321934 |
| ENSMUSG00000005087 | 0.10765577 | 9.81873243 | 0.72471713 | 0.8529024  |
| ENSMUSG00000037075 | 0.10763759 | 5.95643905 | 0.72639863 | 0.85321934 |
| ENSMUSG00000005354 | 0.10755349 | 5.83476716 | 0.7305482  | 0.85660887 |
| ENSMUSG00000059291 | 0.10754673 | 8.65659304 | 0.7255172  | 0.8529024  |
| ENSMUSG00000028437 | 0.1074109  | 5.60230991 | 0.72971914 | 0.85600905 |
| ENSMUSG00000039361 | 0.10737991 | 7.74974682 | 0.7258807  | 0.85299089 |
| ENSMUSG00000025366 | 0.10733406 | 7.15634727 | 0.72738976 | 0.85411271 |
| ENSMUSG00000038773 | 0.10727385 | 6.93717608 | 0.72713791 | 0.85390996 |
| ENSMUSG00000030603 | 0.10712427 | 7.36650114 | 0.72759589 | 0.85426174 |
| ENSMUSG00000038518 | 0.10708579 | 5.6695316  | 0.72936413 | 0.8558719  |
| ENSMUSG00000025816 | 0.10691168 | 4.66848384 | 0.73471896 | 0.85936449 |
| ENSMUSG00000029097 | 0.10690579 | 3.06540999 | 0.76064142 | 0.87514746 |
| ENSMUSG00000036099 | 0.10689674 | 4.64990967 | 0.73561636 | 0.85993353 |
| ENSMUSG00000030156 | 0.10633355 | 7.78940616 | 0.72841538 | 0.85494466 |
| ENSMUSG00000018659 | 0.10587354 | 4.98878664 | 0.73826233 | 0.86162565 |
| ENSMUSG00000038393 | 0.10585683 | 6.7159581  | 0.73079315 | 0.85680292 |
| ENSMUSG00000032869 | 0.10582637 | 4.97197142 | 0.7379521  | 0.86162565 |
| ENSMUSG00000018900 | 0.10568109 | 3.52009638 | 0.74325477 | 0.86424547 |
| ENSMUSG00000034892 | 0.10555091 | 6.31067957 | 0.73326756 | 0.85849439 |
| ENSMUSG00000031483 | 0.10554947 | 5.53669776 | 0.73456523 | 0.85936449 |
| ENSMUSG00000026923 | 0.10540959 | 4.9685756  | 0.73929061 | 0.86200869 |
| ENSMUSG00000005483 | 0.10536986 | 6.02592058 | 0.73387284 | 0.85892476 |
| ENSMUSG00000020898 | 0.10533064 | 5.90416384 | 0.73471613 | 0.85936449 |
| ENSMUSG00000048833 | 0.10526733 | 6.57067141 | 0.73254245 | 0.85801431 |
| ENSMUSG00000050567 | 0.10513025 | 4.74633757 | 0.7382149  | 0.86162565 |

|                    |            |            |            |            |
|--------------------|------------|------------|------------|------------|
| ENSMUSG00000022721 | 0.10509272 | 6.07397338 | 0.73535428 | 0.85972035 |
| ENSMUSG00000035828 | 0.10492943 | 3.82938298 | 0.74909431 | 0.86781933 |
| ENSMUSG00000073155 | 0.10483577 | 4.1573399  | 0.74660987 | 0.8664917  |
| ENSMUSG00000029020 | 0.10476977 | 6.16284318 | 0.73518167 | 0.85965123 |
| ENSMUSG00000049299 | 0.10446866 | 5.24004321 | 0.73869387 | 0.86184947 |
| ENSMUSG00000030630 | 0.10445528 | 3.2543166  | 0.76231775 | 0.87558149 |
| ENSMUSG00000028582 | 0.10429608 | 5.62562059 | 0.73816432 | 0.86162565 |
| ENSMUSG00000044617 | 0.10377553 | 3.95147541 | 0.74727279 | 0.86707443 |
| ENSMUSG00000036854 | 0.10372987 | 1.96287197 | 0.77406513 | 0.88312601 |
| ENSMUSG00000024831 | 0.10348174 | 2.94834094 | 0.77281356 | 0.88246733 |
| ENSMUSG00000031781 | 0.10341875 | 4.92565188 | 0.74426811 | 0.86461136 |
| ENSMUSG00000030613 | 0.10322495 | 3.71237105 | 0.75461846 | 0.87136546 |
| ENSMUSG00000039958 | 0.10313972 | 3.24210044 | 0.74352739 | 0.86424547 |
| ENSMUSG00000062729 | 0.10310161 | 4.29218327 | 0.74701444 | 0.86686793 |
| ENSMUSG00000047898 | 0.10304897 | 1.33956649 | 0.81761057 | 0.90718848 |
| ENSMUSG00000020903 | 0.10296767 | 4.6023205  | 0.74654767 | 0.8664917  |
| ENSMUSG00000029575 | 0.1028147  | 3.62730375 | 0.76024984 | 0.87497698 |
| ENSMUSG00000043415 | 0.10272736 | 3.1146756  | 0.74918806 | 0.86781933 |
| ENSMUSG00000039176 | 0.10231337 | 5.95853255 | 0.74208085 | 0.86327938 |
| ENSMUSG00000056692 | 0.10223698 | 6.88511492 | 0.74020101 | 0.86225448 |
| ENSMUSG00000031617 | 0.10162011 | 5.74441197 | 0.7417047  | 0.86293489 |
| ENSMUSG00000003779 | 0.10149079 | 7.70567087 | 0.74079319 | 0.86252578 |
| ENSMUSG00000002635 | 0.10137909 | 3.33487518 | 0.76641577 | 0.87888427 |
| ENSMUSG00000054381 | 0.10118686 | 2.47261631 | 0.79289626 | 0.89263944 |
| ENSMUSG00000022681 | 0.10118116 | 5.28553858 | 0.74621763 | 0.86631617 |
| ENSMUSG00000058239 | 0.10117294 | 5.40498878 | 0.74779559 | 0.86715681 |
| ENSMUSG00000017652 | 0.10107296 | 6.61472582 | 0.74355126 | 0.86424547 |
| ENSMUSG00000025745 | 0.10078235 | 7.49057732 | 0.74279309 | 0.86392156 |
| ENSMUSG00000041915 | 0.10062813 | 6.62317448 | 0.74358517 | 0.86424547 |
| ENSMUSG00000006392 | 0.10037561 | 5.6737351  | 0.74749196 | 0.86714213 |
| ENSMUSG00000074829 | 0.10030891 | 4.17012793 | 0.74911335 | 0.86781933 |
| ENSMUSG00000040621 | 0.09993665 | 2.38604399 | 0.78095586 | 0.88664972 |
| ENSMUSG00000021457 | 0.09991125 | 8.71512447 | 0.74414144 | 0.86461136 |
| ENSMUSG00000025821 | 0.09982747 | 4.06060351 | 0.76450899 | 0.87744412 |
| ENSMUSG00000000276 | 0.09979137 | 4.85320215 | 0.74970007 | 0.86820935 |
| ENSMUSG00000029580 | 0.09959155 | 11.114526  | 0.74449934 | 0.86478682 |
| ENSMUSG00000047824 | 0.09939345 | 5.64479225 | 0.7499849  | 0.86835272 |
| ENSMUSG00000048218 | 0.09937065 | 5.91766327 | 0.74780862 | 0.86715681 |
| ENSMUSG00000079418 | 0.09887025 | 5.02318008 | 0.75160973 | 0.86958044 |
| ENSMUSG00000028459 | 0.09871437 | 6.6856475  | 0.74875336 | 0.86781933 |
| ENSMUSG00000078866 | 0.09847261 | 3.04164673 | 0.75747685 | 0.87299672 |
| ENSMUSG00000032526 | 0.09825808 | 3.74321835 | 0.76582719 | 0.87848956 |
| ENSMUSG00000037509 | 0.09785722 | 1.65054341 | 0.84837336 | 0.92477601 |

|                     |            |            |            |            |
|---------------------|------------|------------|------------|------------|
| ENSMUSG00000037965  | 0.0978383  | 7.79516627 | 0.74949407 | 0.86806402 |
| ENSMUSG00000040524  | 0.09770135 | 5.46533365 | 0.75408413 | 0.87091164 |
| ENSMUSG00000052926  | 0.09751882 | 4.69986805 | 0.76100193 | 0.87527047 |
| ENSMUSG00000029314  | 0.09744498 | 2.97103817 | 0.77661646 | 0.88423954 |
| ENSMUSG00000004100  | 0.0974202  | 4.15215095 | 0.76880111 | 0.88009946 |
| ENSMUSG00000023942  | 0.09737001 | 4.66409094 | 0.76505437 | 0.8778832  |
| ENSMUSG00000002814  | 0.09695885 | 4.65606288 | 0.76115416 | 0.87527047 |
| ENSMUSG00000001062  | 0.09693688 | 2.56071959 | 0.8036108  | 0.89869739 |
| ENSMUSG00000022742  | 0.0968146  | 9.18456936 | 0.75159153 | 0.86958044 |
| ENSMUSG00000061461  | 0.09670857 | 3.96974965 | 0.76611624 | 0.87872767 |
| ENSMUSG00000006273  | 0.09664959 | 7.56441395 | 0.75278217 | 0.87019004 |
| ENSMUSG00000013150  | 0.0965111  | 1.21956266 | 0.86688695 | 0.93419695 |
| ENSMUSG00000033669  | 0.09650613 | 3.62104131 | 0.77234371 | 0.88214569 |
| ENSMUSG00000028680  | 0.09644125 | 4.19978992 | 0.76707173 | 0.87935596 |
| ENSMUSG00000037337  | 0.09611888 | 7.2996759  | 0.75489315 | 0.87141594 |
| ENSMUSG00000028223  | 0.09597902 | 4.67655821 | 0.75966445 | 0.87458326 |
| ENSMUSG00000005682  | 0.09589149 | 5.31202443 | 0.75899944 | 0.87398527 |
| ENSMUSG00000037001  | 0.09576959 | 4.65958717 | 0.76202441 | 0.8754599  |
| ENSMUSG00000001100  | 0.09561891 | 5.83898957 | 0.75867698 | 0.87379605 |
| ENSMUSG000000054520 | 0.09533132 | 5.24498886 | 0.76183654 | 0.87540173 |
| ENSMUSG00000028772  | 0.09513124 | 5.69630541 | 0.76054869 | 0.87513413 |
| ENSMUSG00000007035  | 0.09510413 | 1.30198936 | 0.84311947 | 0.92138228 |
| ENSMUSG00000028798  | 0.09506749 | 7.32669619 | 0.75764087 | 0.87309245 |
| ENSMUSG00000023892  | 0.09467082 | 4.72517234 | 0.76168483 | 0.87532068 |
| ENSMUSG00000029394  | 0.09452589 | 4.64887301 | 0.76820026 | 0.88008835 |
| ENSMUSG00000047515  | 0.09447499 | 1.33954837 | 0.81761057 | 0.90718848 |
| ENSMUSG00000020883  | 0.09428269 | 4.86117105 | 0.76312415 | 0.87622773 |
| ENSMUSG00000026399  | 0.09413527 | 6.15255734 | 0.75976899 | 0.87461024 |
| ENSMUSG00000020692  | 0.09384525 | 3.6315764  | 0.79423242 | 0.89377047 |
| ENSMUSG00000039715  | 0.09353609 | 1.06411508 | 0.85376696 | 0.92753676 |
| ENSMUSG00000021179  | 0.0932552  | 4.18556703 | 0.77420932 | 0.88312601 |
| ENSMUSG00000035505  | 0.09324286 | 3.52312726 | 0.7791297  | 0.88583391 |
| ENSMUSG00000019432  | 0.09309267 | 7.55088228 | 0.76213071 | 0.8754599  |
| ENSMUSG00000029992  | 0.09298845 | 7.87797166 | 0.76148242 | 0.87532068 |
| ENSMUSG00000034071  | 0.09211492 | 1.395403   | 0.8233507  | 0.9106681  |
| ENSMUSG00000031930  | 0.09193328 | 5.61563773 | 0.76977054 | 0.88048425 |
| ENSMUSG00000020546  | 0.09139671 | 3.67932441 | 0.77478481 | 0.8833153  |
| ENSMUSG00000026024  | 0.09131339 | 5.66443338 | 0.76879583 | 0.88009946 |
| ENSMUSG00000025956  | 0.09085204 | 3.51789452 | 0.78569195 | 0.8884009  |
| ENSMUSG00000031295  | 0.09082448 | 5.06935868 | 0.77243874 | 0.88214569 |
| ENSMUSG00000039531  | 0.09079028 | 6.06233548 | 0.76840437 | 0.88009946 |
| ENSMUSG00000070544  | 0.09056711 | 9.4513975  | 0.76703394 | 0.87935596 |
| ENSMUSG00000059409  | 0.0905445  | 6.45710287 | 0.77026435 | 0.88094943 |

|                    |            |            |            |            |
|--------------------|------------|------------|------------|------------|
| ENSMUSG00000033862 | 0.09033703 | 2.99470738 | 0.81026284 | 0.90288131 |
| ENSMUSG00000036214 | 0.090164   | 2.04697998 | 0.78567706 | 0.8884009  |
| ENSMUSG00000010277 | 0.08995646 | 8.55277611 | 0.76886398 | 0.88009946 |
| ENSMUSG00000058173 | 0.08981302 | 2.62310964 | 0.81195516 | 0.90390466 |
| ENSMUSG00000006763 | 0.08963337 | 4.80504514 | 0.77733557 | 0.88463348 |
| ENSMUSG00000028405 | 0.08952207 | 5.98575095 | 0.77307418 | 0.88267147 |
| ENSMUSG00000055670 | 0.0894425  | 6.58512531 | 0.77130644 | 0.88178431 |
| ENSMUSG00000031447 | 0.08934498 | 7.66357079 | 0.77107132 | 0.88169156 |
| ENSMUSG00000037300 | 0.08902833 | 6.07901699 | 0.77432836 | 0.88316838 |
| ENSMUSG00000061983 | 0.0890152  | 8.20433753 | 0.77173727 | 0.88198545 |
| ENSMUSG00000017499 | 0.08895222 | 7.0679724  | 0.77229897 | 0.88214569 |
| ENSMUSG00000068130 | 0.0889262  | 2.0795337  | 0.77197716 | 0.88209717 |
| ENSMUSG00000026848 | 0.08881216 | 5.95428552 | 0.7747749  | 0.8833153  |
| ENSMUSG00000068101 | 0.08846118 | 2.67233866 | 0.83028826 | 0.91468266 |
| ENSMUSG00000026991 | 0.08835083 | 4.71140961 | 0.78124496 | 0.88664972 |
| ENSMUSG00000032518 | 0.08814078 | 9.68671145 | 0.77322213 | 0.88274692 |
| ENSMUSG00000042207 | 0.08813687 | 4.91437342 | 0.77637563 | 0.88420195 |
| ENSMUSG00000026766 | 0.08781314 | 6.92606309 | 0.77499854 | 0.88346556 |
| ENSMUSG00000036327 | 0.08748828 | 4.28940037 | 0.78486645 | 0.8882018  |
| ENSMUSG00000003746 | 0.08731552 | 9.32581034 | 0.77517075 | 0.8834751  |
| ENSMUSG00000030347 | 0.08727976 | 5.75141482 | 0.77877801 | 0.88552742 |
| ENSMUSG00000021235 | 0.0870339  | 3.50894988 | 0.80608654 | 0.90018325 |
| ENSMUSG00000026773 | 0.08692456 | 5.86769465 | 0.77934217 | 0.88586414 |
| ENSMUSG00000020708 | 0.08691058 | 7.19974668 | 0.7778917  | 0.88502867 |
| ENSMUSG00000025162 | 0.08633051 | 6.88181216 | 0.77948304 | 0.88586414 |
| ENSMUSG00000041168 | 0.08628612 | 5.91028906 | 0.78327515 | 0.88755272 |
| ENSMUSG00000042496 | 0.08622363 | 3.50039825 | 0.79739455 | 0.89492503 |
| ENSMUSG00000037134 | 0.08619191 | 5.43889767 | 0.78210129 | 0.88687234 |
| ENSMUSG00000030168 | 0.08616483 | 7.67590441 | 0.77877504 | 0.88552742 |
| ENSMUSG00000021266 | 0.08607426 | 6.03772296 | 0.78231838 | 0.88693274 |
| ENSMUSG00000047694 | 0.08595819 | 6.01430608 | 0.78066772 | 0.88664972 |
| ENSMUSG00000033809 | 0.08576858 | 4.13392938 | 0.79495444 | 0.89420972 |
| ENSMUSG00000050705 | 0.08573979 | 4.15178588 | 0.79270439 | 0.89260981 |
| ENSMUSG00000003868 | 0.08563718 | 5.3227035  | 0.78870561 | 0.89024506 |
| ENSMUSG00000034848 | 0.08553079 | 4.53194978 | 0.78788538 | 0.88965899 |
| ENSMUSG00000032440 | 0.08513469 | 7.26355652 | 0.78161052 | 0.88671643 |
| ENSMUSG00000032599 | 0.08507155 | 3.48472165 | 0.79578446 | 0.89462453 |
| ENSMUSG00000020220 | 0.08506081 | 6.38367597 | 0.78218127 | 0.88687234 |
| ENSMUSG00000001419 | 0.08498727 | 6.27435413 | 0.78408535 | 0.8879335  |
| ENSMUSG00000035929 | 0.08498224 | 6.78022669 | 0.78320514 | 0.88755272 |
| ENSMUSG00000015355 | 0.08482749 | 7.67057675 | 0.78208614 | 0.88687234 |
| ENSMUSG00000029048 | 0.08478499 | 7.29098269 | 0.78248128 | 0.88693274 |
| ENSMUSG00000089917 | 0.08477742 | 3.83854435 | 0.80300533 | 0.89833226 |

|                    |            |            |            |            |
|--------------------|------------|------------|------------|------------|
| ENSMUSG00000034614 | 0.08430709 | 3.33982707 | 0.80786684 | 0.90158708 |
| ENSMUSG00000036528 | 0.08426806 | 4.83295815 | 0.79021067 | 0.89113043 |
| ENSMUSG00000026254 | 0.08424245 | 6.6283077  | 0.78508341 | 0.8882018  |
| ENSMUSG00000039908 | 0.08417215 | 2.0637716  | 0.8257531  | 0.91201571 |
| ENSMUSG00000059923 | 0.08379423 | 7.92973347 | 0.78476136 | 0.8882018  |
| ENSMUSG00000052214 | 0.08360247 | 5.37760322 | 0.79088926 | 0.89149679 |
| ENSMUSG00000044197 | 0.08348161 | 1.25144501 | 0.8703698  | 0.93635814 |
| ENSMUSG00000044991 | 0.08284237 | 1.96745024 | 0.83509657 | 0.91723854 |
| ENSMUSG00000003360 | 0.08282926 | 6.36997052 | 0.78989876 | 0.89097112 |
| ENSMUSG00000022507 | 0.082579   | 6.26390748 | 0.78865447 | 0.89024506 |
| ENSMUSG00000005262 | 0.08254371 | 6.55521033 | 0.78895217 | 0.89033698 |
| ENSMUSG00000027582 | 0.08249095 | 4.31685702 | 0.80130325 | 0.8974197  |
| ENSMUSG00000026670 | 0.08242456 | 6.27399473 | 0.78959788 | 0.89093049 |
| ENSMUSG00000074151 | 0.08216203 | 7.74653717 | 0.78883492 | 0.89029783 |
| ENSMUSG00000062352 | 0.08202089 | 5.25370568 | 0.79374172 | 0.89340473 |
| ENSMUSG00000042901 | 0.08180285 | 7.51785141 | 0.78964333 | 0.89093049 |
| ENSMUSG00000040761 | 0.08170904 | 5.86115738 | 0.79251999 | 0.89249536 |
| ENSMUSG00000028559 | 0.08170111 | 7.44965957 | 0.7899272  | 0.89097112 |
| ENSMUSG00000035297 | 0.08163483 | 6.83191988 | 0.79104474 | 0.89155946 |
| ENSMUSG00000024191 | 0.0815172  | 4.3692891  | 0.80009983 | 0.89672381 |
| ENSMUSG00000011658 | 0.08146977 | 2.53752274 | 0.82931337 | 0.91379538 |
| ENSMUSG00000040945 | 0.08146798 | 7.36144439 | 0.79165243 | 0.89182696 |
| ENSMUSG00000024764 | 0.08146376 | 6.8912054  | 0.79167563 | 0.89182696 |
| ENSMUSG00000021222 | 0.08134405 | 3.36412399 | 0.81077785 | 0.90324672 |
| ENSMUSG00000035376 | 0.08134005 | 4.75996409 | 0.79648243 | 0.89480847 |
| ENSMUSG00000024766 | 0.08107849 | 4.54553476 | 0.79494788 | 0.89420972 |
| ENSMUSG00000030330 | 0.08085506 | 4.37565629 | 0.80097047 | 0.89723336 |
| ENSMUSG00000023938 | 0.08070038 | 2.25576302 | 0.86222884 | 0.93147859 |
| ENSMUSG00000041515 | 0.08054881 | 8.06423925 | 0.79287484 | 0.89263944 |
| ENSMUSG00000027882 | 0.08030537 | 5.03941437 | 0.79551974 | 0.89462453 |
| ENSMUSG00000030685 | 0.08023454 | 2.20933763 | 0.82344688 | 0.91066834 |
| ENSMUSG00000043243 | 0.0801081  | 5.51419758 | 0.7983083  | 0.8952742  |
| ENSMUSG00000029623 | 0.08004639 | 6.55042978 | 0.79604014 | 0.89462453 |
| ENSMUSG00000024603 | 0.07973605 | 6.20060562 | 0.79589303 | 0.89462453 |
| ENSMUSG00000030275 | 0.0795913  | 9.10048005 | 0.79459516 | 0.89403114 |
| ENSMUSG00000023074 | 0.07953433 | 3.8995374  | 0.81101224 | 0.90341453 |
| ENSMUSG00000030157 | 0.07936383 | 6.49874964 | 0.79621678 | 0.89469644 |
| ENSMUSG00000026672 | 0.07934564 | 4.82640065 | 0.8004609  | 0.8967557  |
| ENSMUSG00000001175 | 0.07933656 | 9.60002541 | 0.7952764  | 0.89447858 |
| ENSMUSG00000036678 | 0.0792218  | 5.77089684 | 0.80042923 | 0.8967557  |
| ENSMUSG00000021147 | 0.07919963 | 6.14241202 | 0.79716396 | 0.89492503 |
| ENSMUSG00000006998 | 0.07912568 | 8.88189511 | 0.79606982 | 0.89462453 |
| ENSMUSG00000026843 | 0.07900763 | 4.87012042 | 0.80240625 | 0.89809538 |

|                    |            |            |            |            |
|--------------------|------------|------------|------------|------------|
| ENSMUSG00000020387 | 0.07899922 | 7.22519326 | 0.7976813  | 0.89492503 |
| ENSMUSG00000015714 | 0.07889725 | 7.61630585 | 0.7971265  | 0.89492503 |
| ENSMUSG00000038943 | 0.0788608  | 8.18840101 | 0.79681548 | 0.89492503 |
| ENSMUSG00000048546 | 0.07880655 | 5.60387447 | 0.80149758 | 0.89743054 |
| ENSMUSG00000002028 | 0.07854864 | 7.4531631  | 0.79774273 | 0.89492503 |
| ENSMUSG00000096433 | 0.07845515 | 4.41104806 | 0.79791321 | 0.89501727 |
| ENSMUSG00000029363 | 0.07776264 | 6.5355461  | 0.80164581 | 0.89743054 |
| ENSMUSG00000012519 | 0.07770611 | 5.91660039 | 0.80156995 | 0.89743054 |
| ENSMUSG00000024666 | 0.07741964 | 4.26011584 | 0.81140223 | 0.90356894 |
| ENSMUSG00000019843 | 0.07721024 | 5.89497832 | 0.80343089 | 0.89858937 |
| ENSMUSG00000029474 | 0.07716418 | 5.62964524 | 0.8047623  | 0.89955044 |
| ENSMUSG00000022312 | 0.07712393 | 8.15701215 | 0.80141187 | 0.89743054 |
| ENSMUSG00000001844 | 0.07710279 | 3.74484008 | 0.82154454 | 0.90938484 |
| ENSMUSG00000010392 | 0.0768033  | 5.84444799 | 0.80425911 | 0.89932914 |
| ENSMUSG00000013973 | 0.07666665 | 4.59367231 | 0.81192171 | 0.90390466 |
| ENSMUSG00000062116 | 0.07665252 | 4.34969559 | 0.81421057 | 0.90561718 |
| ENSMUSG00000025232 | 0.07657656 | 5.45205026 | 0.80690193 | 0.90069665 |
| ENSMUSG00000049882 | 0.07655458 | 4.29220434 | 0.81133827 | 0.90356894 |
| ENSMUSG00000009406 | 0.0759869  | 4.79477247 | 0.80970158 | 0.90270049 |
| ENSMUSG00000055932 | 0.0758118  | 5.87671554 | 0.80803957 | 0.90159325 |
| ENSMUSG00000025147 | 0.07564641 | 3.42268887 | 0.82584877 | 0.91202797 |
| ENSMUSG00000024098 | 0.07542812 | 7.07768032 | 0.80603886 | 0.90018325 |
| ENSMUSG00000036615 | 0.07542634 | 3.07796624 | 0.83074679 | 0.91500086 |
| ENSMUSG00000024146 | 0.07529659 | 4.72675375 | 0.80988609 | 0.90271955 |
| ENSMUSG00000072620 | 0.07514805 | 8.23121953 | 0.80619156 | 0.90018325 |
| ENSMUSG00000062646 | 0.07483812 | 4.65192054 | 0.81253467 | 0.90444002 |
| ENSMUSG00000031641 | 0.07462603 | 3.32567703 | 0.81464216 | 0.90568459 |
| ENSMUSG00000044068 | 0.07459373 | 3.7662521  | 0.81817758 | 0.90755267 |
| ENSMUSG00000048076 | 0.07446039 | 8.30806335 | 0.80814127 | 0.90161344 |
| ENSMUSG00000033386 | 0.07414647 | 4.09068229 | 0.81859078 | 0.90774954 |
| ENSMUSG00000079511 | 0.07411711 | 1.37013308 | 0.87979248 | 0.94071645 |
| ENSMUSG00000031948 | 0.07409468 | 8.13742001 | 0.80922548 | 0.90247079 |
| ENSMUSG00000074733 | 0.07407255 | 4.83737602 | 0.81167599 | 0.90378048 |
| ENSMUSG00000004895 | 0.07372419 | 4.95432612 | 0.81759626 | 0.90718848 |
| ENSMUSG00000030751 | 0.07370107 | 8.58213971 | 0.80968282 | 0.90270049 |
| ENSMUSG00000045248 | 0.07364842 | 3.00203778 | 0.83194898 | 0.91541831 |
| ENSMUSG00000020485 | 0.07352734 | 5.33583385 | 0.8148832  | 0.90585512 |
| ENSMUSG00000036860 | 0.07337365 | 2.92658871 | 0.84539432 | 0.92302646 |
| ENSMUSG00000038717 | 0.07279031 | 4.21681539 | 0.82873869 | 0.91362891 |
| ENSMUSG00000027291 | 0.07275092 | 6.08977184 | 0.81464582 | 0.90568459 |
| ENSMUSG00000041815 | 0.07272822 | 7.23088463 | 0.81336915 | 0.90482494 |
| ENSMUSG00000029310 | 0.07265442 | 4.84588726 | 0.82159646 | 0.90938484 |
| ENSMUSG00000046006 | 0.07242135 | 3.05742097 | 0.82849495 | 0.91354699 |

|                    |            |            |            |            |
|--------------------|------------|------------|------------|------------|
| ENSMUSG00000078619 | 0.07239974 | 6.45646734 | 0.81518425 | 0.90600298 |
| ENSMUSG00000034566 | 0.07218116 | 7.19661183 | 0.8146201  | 0.90568459 |
| ENSMUSG00000041774 | 0.07207953 | 2.3317322  | 0.8693916  | 0.93577393 |
| ENSMUSG00000026799 | 0.07178717 | 3.82995928 | 0.8314477  | 0.91524806 |
| ENSMUSG00000021120 | 0.07164212 | 4.11445604 | 0.82642712 | 0.91247979 |
| ENSMUSG00000003099 | 0.07162655 | 6.63734046 | 0.81734402 | 0.90718848 |
| ENSMUSG00000030659 | 0.07161058 | 5.25251763 | 0.81857534 | 0.90774954 |
| ENSMUSG00000076676 | 0.0715268  | 1.08239228 | 0.92730228 | 0.96419555 |
| ENSMUSG00000013275 | 0.0711853  | 4.60725821 | 0.82525139 | 0.911794   |
| ENSMUSG00000049643 | 0.07103698 | 3.89854872 | 0.83886221 | 0.91896486 |
| ENSMUSG00000028059 | 0.07102019 | 6.52649776 | 0.81860759 | 0.90774954 |
| ENSMUSG00000026239 | 0.07074322 | 4.16465211 | 0.82729612 | 0.91296093 |
| ENSMUSG00000047153 | 0.07072311 | 5.37392477 | 0.82101714 | 0.90928856 |
| ENSMUSG00000001783 | 0.07069966 | 8.05055517 | 0.81776513 | 0.90718848 |
| ENSMUSG00000052906 | 0.07040946 | 4.75254795 | 0.82414997 | 0.91108491 |
| ENSMUSG00000027007 | 0.07019905 | 5.95646471 | 0.82109162 | 0.90928856 |
| ENSMUSG00000074794 | 0.06982254 | 5.5382334  | 0.82160019 | 0.90938484 |
| ENSMUSG00000022964 | 0.06978222 | 6.1328537  | 0.82137824 | 0.90938484 |
| ENSMUSG00000037791 | 0.06977604 | 5.92759752 | 0.82289175 | 0.91044061 |
| ENSMUSG00000001018 | 0.06974124 | 4.90701533 | 0.82325913 | 0.91066022 |
| ENSMUSG00000060036 | 0.06955975 | 10.0720885 | 0.82007413 | 0.90872168 |
| ENSMUSG00000024790 | 0.06946306 | 2.65598501 | 0.8545815  | 0.92807723 |
| ENSMUSG00000028452 | 0.06938978 | 9.42769465 | 0.82054399 | 0.90896213 |
| ENSMUSG00000010054 | 0.0689444  | 4.58176921 | 0.8292199  | 0.91379538 |
| ENSMUSG00000006464 | 0.06890088 | 1.42404339 | 0.91218416 | 0.95755807 |
| ENSMUSG00000032750 | 0.06881321 | 1.23417731 | 0.86922956 | 0.93577393 |
| ENSMUSG00000001962 | 0.06869726 | 5.43652006 | 0.82737084 | 0.91296093 |
| ENSMUSG00000003575 | 0.06851957 | 2.74373697 | 0.86229143 | 0.93147859 |
| ENSMUSG00000045503 | 0.06850827 | 4.77600327 | 0.83201455 | 0.91541831 |
| ENSMUSG00000035824 | 0.06827146 | 3.40914876 | 0.84012639 | 0.9194311  |
| ENSMUSG00000027371 | 0.0682304  | 1.77443565 | 0.85971462 | 0.93119469 |
| ENSMUSG00000033712 | 0.06815005 | 6.03433839 | 0.82774083 | 0.9130889  |
| ENSMUSG00000000148 | 0.06774163 | 3.61806288 | 0.84693721 | 0.92390978 |
| ENSMUSG00000028974 | 0.067624   | 5.03367194 | 0.83149288 | 0.91524806 |
| ENSMUSG00000018347 | 0.06738335 | 3.75436966 | 0.83521076 | 0.91723854 |
| ENSMUSG00000018541 | 0.06737073 | 4.98308429 | 0.83086266 | 0.91503502 |
| ENSMUSG00000020956 | 0.06731154 | 3.25659921 | 0.84935323 | 0.92504132 |
| ENSMUSG00000034320 | 0.06729061 | 5.64698493 | 0.82759414 | 0.91302048 |
| ENSMUSG00000023249 | 0.06728419 | 3.54920653 | 0.83988318 | 0.9194311  |
| ENSMUSG00000032788 | 0.06706857 | 5.27360672 | 0.83288483 | 0.9157657  |
| ENSMUSG00000024431 | 0.06701683 | 7.16737359 | 0.82698702 | 0.91296093 |
| ENSMUSG00000067148 | 0.0669096  | 5.42147257 | 0.8333535  | 0.91618759 |
| ENSMUSG00000021400 | 0.06676565 | 5.50033582 | 0.83152637 | 0.91524806 |



|                    |            |            |            |            |
|--------------------|------------|------------|------------|------------|
| ENSMUSG00000034940 | 0.0667632  | 6.18232531 | 0.8290584  | 0.91379454 |
| ENSMUSG00000078684 | 0.06651556 | 4.47921313 | 0.83683107 | 0.91776531 |
| ENSMUSG00000060090 | 0.0665133  | 6.70353978 | 0.82845535 | 0.91354699 |
| ENSMUSG00000050621 | 0.06643337 | 7.53110709 | 0.82904495 | 0.91379454 |
| ENSMUSG00000021807 | 0.06638931 | 7.541656   | 0.82858634 | 0.91355435 |
| ENSMUSG00000015377 | 0.06635463 | 2.2636547  | 0.88013485 | 0.94081009 |
| ENSMUSG00000039157 | 0.06613588 | 3.94368884 | 0.843609   | 0.92182384 |
| ENSMUSG00000044600 | 0.06606269 | 5.98971255 | 0.83145161 | 0.91524806 |
| ENSMUSG00000029625 | 0.06568289 | 4.89763702 | 0.83831888 | 0.91892974 |
| ENSMUSG00000024740 | 0.0654182  | 9.49946237 | 0.83068008 | 0.91500086 |
| ENSMUSG00000020790 | 0.06540857 | 7.59714315 | 0.83105803 | 0.91515672 |
| ENSMUSG00000025487 | 0.06521811 | 7.10835569 | 0.83267209 | 0.91562515 |
| ENSMUSG00000019992 | 0.06515507 | 5.29091823 | 0.83465821 | 0.91706917 |
| ENSMUSG00000070691 | 0.06512699 | 6.13078393 | 0.83452654 | 0.91706917 |
| ENSMUSG00000025794 | 0.06487832 | 9.29505512 | 0.83214444 | 0.91541831 |
| ENSMUSG00000034342 | 0.06485046 | 7.35521744 | 0.83232804 | 0.91552615 |
| ENSMUSG00000053436 | 0.06474371 | 6.3271847  | 0.83470446 | 0.91706917 |
| ENSMUSG00000017615 | 0.06462501 | 5.91909102 | 0.83583929 | 0.91723854 |
| ENSMUSG00000040822 | 0.0644639  | 5.05104424 | 0.83930201 | 0.91916654 |
| ENSMUSG00000002835 | 0.06417714 | 6.52308357 | 0.83673846 | 0.91775707 |
| ENSMUSG00000046836 | 0.06406584 | 6.37492743 | 0.83539688 | 0.91723854 |
| ENSMUSG00000039166 | 0.06396957 | 2.75674828 | 0.86409312 | 0.93248207 |
| ENSMUSG00000041483 | 0.06382542 | 6.64539137 | 0.83539974 | 0.91723854 |
| ENSMUSG00000062328 | 0.06373707 | 7.89097583 | 0.83576947 | 0.91723854 |
| ENSMUSG00000006585 | 0.06366423 | 4.49610966 | 0.84664508 | 0.9237374  |
| ENSMUSG00000079179 | 0.06364077 | 3.70878012 | 0.85618243 | 0.92925501 |
| ENSMUSG00000055725 | 0.06328658 | 1.98970467 | 0.87795488 | 0.94010239 |
| ENSMUSG00000022787 | 0.06326518 | 3.56113872 | 0.84838225 | 0.92477601 |
| ENSMUSG00000017715 | 0.06310256 | 4.59328183 | 0.84878192 | 0.92494586 |
| ENSMUSG00000050945 | 0.06299872 | 2.50902168 | 0.86933525 | 0.93577393 |
| ENSMUSG00000039981 | 0.0628631  | 5.74576007 | 0.83884114 | 0.91896486 |
| ENSMUSG00000050410 | 0.06246253 | 5.29785547 | 0.84435754 | 0.92249831 |
| ENSMUSG00000021671 | 0.06232139 | 5.28595455 | 0.84267737 | 0.9211792  |
| ENSMUSG00000010095 | 0.06231353 | 7.13479222 | 0.83999933 | 0.9194311  |
| ENSMUSG00000028886 | 0.06225007 | 6.73116686 | 0.84001726 | 0.9194311  |
| ENSMUSG00000006728 | 0.06210135 | 7.76411492 | 0.8400459  | 0.9194311  |
| ENSMUSG00000037750 | 0.06194146 | 4.19855293 | 0.84966557 | 0.92506749 |
| ENSMUSG00000046897 | 0.06191443 | 6.44018604 | 0.84143655 | 0.92047594 |
| ENSMUSG00000040725 | 0.06189854 | 8.21714926 | 0.84008226 | 0.9194311  |
| ENSMUSG00000097154 | 0.06173398 | 1.98430327 | 0.85742686 | 0.92962605 |
| ENSMUSG00000031723 | 0.06154101 | 3.18426225 | 0.86035032 | 0.93139517 |
| ENSMUSG00000022354 | 0.06134455 | 5.96460209 | 0.84453553 | 0.92249831 |
| ENSMUSG00000032047 | 0.06126865 | 7.06197292 | 0.84226456 | 0.92100801 |

|                    |            |            |            |            |
|--------------------|------------|------------|------------|------------|
| ENSMUSG00000024442 | 0.06106424 | 4.63504627 | 0.85255634 | 0.92697281 |
| ENSMUSG00000073702 | 0.06087373 | 8.63859538 | 0.842618   | 0.9211792  |
| ENSMUSG00000028629 | 0.06077269 | 4.92776866 | 0.84648951 | 0.92366113 |
| ENSMUSG00000036450 | 0.06074432 | 6.27494733 | 0.84457219 | 0.92249831 |
| ENSMUSG00000022807 | 0.06074189 | 5.08093754 | 0.84697441 | 0.92390978 |
| ENSMUSG00000057230 | 0.06069218 | 4.20628375 | 0.85040728 | 0.92578156 |
| ENSMUSG00000044367 | 0.06025605 | 2.56232681 | 0.8874353  | 0.94491531 |
| ENSMUSG00000018425 | 0.06023886 | 6.79549923 | 0.84465396 | 0.92249831 |
| ENSMUSG00000021192 | 0.06004043 | 6.02591548 | 0.84629103 | 0.92366113 |
| ENSMUSG00000003464 | 0.05996968 | 5.89290104 | 0.84786947 | 0.92453973 |
| ENSMUSG00000024319 | 0.05995947 | 5.5540112  | 0.8495179  | 0.92504132 |
| ENSMUSG00000001755 | 0.05987006 | 3.6820159  | 0.85986987 | 0.93119469 |
| ENSMUSG00000086841 | 0.0597995  | 4.72140653 | 0.85271546 | 0.92697281 |
| ENSMUSG00000005410 | 0.059168   | 8.10725831 | 0.84732731 | 0.92410778 |
| ENSMUSG00000087266 | 0.05915728 | 1.06355145 | 0.92730228 | 0.96419555 |
| ENSMUSG00000028525 | 0.05912075 | 6.19831304 | 0.847909   | 0.92453973 |
| ENSMUSG00000027160 | 0.05881359 | 4.40352304 | 0.85692292 | 0.92940825 |
| ENSMUSG00000005299 | 0.05861792 | 5.80215994 | 0.85262508 | 0.92697281 |
| ENSMUSG00000066643 | 0.05847166 | 3.89680129 | 0.86163455 | 0.93147859 |
| ENSMUSG00000037210 | 0.05838576 | 5.53070771 | 0.85174505 | 0.92658314 |
| ENSMUSG00000029528 | 0.05830406 | 5.93593802 | 0.85225649 | 0.92695249 |
| ENSMUSG00000048175 | 0.05829693 | 4.73164327 | 0.85375237 | 0.92753676 |
| ENSMUSG00000045969 | 0.05801299 | 5.63442262 | 0.85338707 | 0.92734041 |
| ENSMUSG00000034931 | 0.05790899 | 6.721056   | 0.85156276 | 0.92648275 |
| ENSMUSG00000025217 | 0.05789325 | 4.13352027 | 0.85751176 | 0.92962605 |
| ENSMUSG00000022757 | 0.0577446  | 6.20996075 | 0.85247527 | 0.92697281 |
| ENSMUSG00000026311 | 0.05738765 | 4.84194824 | 0.85701369 | 0.92940825 |
| ENSMUSG00000020755 | 0.05667682 | 5.9693994  | 0.85640171 | 0.92939882 |
| ENSMUSG00000021585 | 0.05664869 | 6.79116493 | 0.85391181 | 0.92753676 |
| ENSMUSG00000039178 | 0.05657624 | 3.14466338 | 0.86644893 | 0.93400492 |
| ENSMUSG00000045598 | 0.05657604 | 3.78144339 | 0.86888572 | 0.93569638 |
| ENSMUSG00000054676 | 0.05652267 | 4.3347417  | 0.8629248  | 0.93177069 |
| ENSMUSG00000078994 | 0.05648789 | 4.51403356 | 0.85303687 | 0.92705327 |
| ENSMUSG00000020513 | 0.05634471 | 4.20743262 | 0.86000409 | 0.93124652 |
| ENSMUSG00000037364 | 0.05601132 | 7.61978188 | 0.85577506 | 0.92899922 |
| ENSMUSG00000020184 | 0.0556541  | 7.38749529 | 0.85618303 | 0.92925501 |
| ENSMUSG00000034165 | 0.05565169 | 5.23700062 | 0.86299385 | 0.93177069 |
| ENSMUSG00000082536 | 0.05554188 | 2.73405724 | 0.8744953  | 0.93864411 |
| ENSMUSG00000028245 | 0.05546713 | 6.76481874 | 0.85697275 | 0.92940825 |
| ENSMUSG00000026289 | 0.05544258 | 5.20363239 | 0.86057321 | 0.93139517 |
| ENSMUSG00000062944 | 0.05535826 | 3.039524   | 0.87698757 | 0.93963577 |
| ENSMUSG00000061132 | 0.05531463 | 8.38130883 | 0.85680238 | 0.92940825 |
| ENSMUSG00000044250 | 0.05529976 | 4.53477079 | 0.86676783 | 0.93416193 |

|                    |            |            |            |            |
|--------------------|------------|------------|------------|------------|
| ENSMUSG00000044502 | 0.05500113 | 3.45557607 | 0.88333478 | 0.94260595 |
| ENSMUSG00000020456 | 0.0546821  | 7.80228167 | 0.85887946 | 0.93077641 |
| ENSMUSG00000020091 | 0.05413036 | 6.32150864 | 0.86178757 | 0.93147859 |
| ENSMUSG00000028800 | 0.05389784 | 7.50671798 | 0.86093815 | 0.93141623 |
| ENSMUSG00000003153 | 0.05368255 | 5.296883   | 0.86449861 | 0.93255506 |
| ENSMUSG00000090086 | 0.0533191  | 4.42091924 | 0.87054216 | 0.93635814 |
| ENSMUSG00000034432 | 0.05328561 | 6.18133107 | 0.86410302 | 0.93248207 |
| ENSMUSG00000035299 | 0.05327838 | 4.11198221 | 0.87537826 | 0.93893765 |
| ENSMUSG00000029190 | 0.05275408 | 5.57738676 | 0.86551169 | 0.93308788 |
| ENSMUSG00000032846 | 0.05275327 | 2.87423225 | 0.87398697 | 0.93847212 |
| ENSMUSG00000054509 | 0.05271722 | 6.62327753 | 0.86390904 | 0.93247874 |
| ENSMUSG00000040010 | 0.05258575 | 7.59889524 | 0.8644902  | 0.93255506 |
| ENSMUSG00000017264 | 0.05253682 | 6.97139113 | 0.86489779 | 0.93264449 |
| ENSMUSG00000027889 | 0.05238791 | 5.4087214  | 0.86996734 | 0.93611333 |
| ENSMUSG00000026627 | 0.05234209 | 3.65742088 | 0.88452385 | 0.94349211 |
| ENSMUSG00000042351 | 0.05193676 | 4.17974828 | 0.87606735 | 0.9389447  |
| ENSMUSG00000021408 | 0.05175658 | 6.17679344 | 0.86765147 | 0.93492549 |
| ENSMUSG00000026222 | 0.05137465 | 8.98658686 | 0.86658362 | 0.93405675 |
| ENSMUSG00000025231 | 0.05113365 | 4.7656206  | 0.87493495 | 0.93883567 |
| ENSMUSG00000024213 | 0.05081816 | 4.9258463  | 0.87574798 | 0.9389447  |
| ENSMUSG00000062963 | 0.05064348 | 6.07057774 | 0.87156336 | 0.93717612 |
| ENSMUSG00000026032 | 0.0506006  | 5.16000973 | 0.87536439 | 0.93893765 |
| ENSMUSG00000022604 | 0.05049501 | 4.91745134 | 0.8720787  | 0.93763676 |
| ENSMUSG00000021124 | 0.05018303 | 5.74415561 | 0.87252777 | 0.9377935  |
| ENSMUSG00000032485 | 0.04997319 | 5.48202883 | 0.87611317 | 0.9389447  |
| ENSMUSG00000067288 | 0.04996029 | 6.75647646 | 0.8725105  | 0.9377935  |
| ENSMUSG00000017132 | 0.04979002 | 6.21948623 | 0.87306639 | 0.938097   |
| ENSMUSG00000026933 | 0.04955868 | 5.21498753 | 0.87609239 | 0.9389447  |
| ENSMUSG00000026575 | 0.04948338 | 3.14574156 | 0.88538728 | 0.94394101 |
| ENSMUSG00000029106 | 0.04912298 | 7.10199882 | 0.87333843 | 0.93817364 |
| ENSMUSG00000074649 | 0.04907704 | 3.72540516 | 0.89604264 | 0.95042036 |
| ENSMUSG00000005374 | 0.04899699 | 6.10063657 | 0.87502261 | 0.93883632 |
| ENSMUSG00000027808 | 0.04881001 | 9.74865417 | 0.87311569 | 0.938097   |
| ENSMUSG00000000732 | 0.04879431 | 3.08511863 | 0.8805537  | 0.94111904 |
| ENSMUSG00000028152 | 0.04844792 | 4.69882782 | 0.87850506 | 0.9403274  |
| ENSMUSG00000062604 | 0.04810925 | 6.17384637 | 0.87616248 | 0.9389447  |
| ENSMUSG00000030313 | 0.04808454 | 5.89028868 | 0.87616844 | 0.9389447  |
| ENSMUSG00000020246 | 0.04797033 | 5.42657328 | 0.87812049 | 0.94010239 |
| ENSMUSG00000041870 | 0.04796263 | 7.28705444 | 0.8767768  | 0.93950328 |
| ENSMUSG00000021577 | 0.04785345 | 8.25620125 | 0.87607918 | 0.9389447  |
| ENSMUSG00000034602 | 0.04765703 | 6.69432209 | 0.87721398 | 0.93967786 |
| ENSMUSG00000035953 | 0.04757989 | 6.01851071 | 0.87887881 | 0.94035412 |
| ENSMUSG00000029482 | 0.04749147 | 4.32339563 | 0.88741975 | 0.94491531 |

|                    |            |            |            |            |
|--------------------|------------|------------|------------|------------|
| ENSMUSG00000024006 | 0.04724166 | 7.10479304 | 0.87786156 | 0.94010239 |
| ENSMUSG00000037270 | 0.0468726  | 7.70083439 | 0.87804071 | 0.94010239 |
| ENSMUSG00000039994 | 0.0468428  | 5.59121223 | 0.88317961 | 0.94260595 |
| ENSMUSG00000017716 | 0.046557   | 7.23361939 | 0.87986539 | 0.94071645 |
| ENSMUSG00000009073 | 0.0463592  | 6.46191642 | 0.88147469 | 0.94173931 |
| ENSMUSG00000038379 | 0.04633991 | 6.03653248 | 0.88144775 | 0.94173931 |
| ENSMUSG00000030934 | 0.04591809 | 7.43934555 | 0.88165802 | 0.94173931 |
| ENSMUSG00000038776 | 0.04578475 | 4.06001515 | 0.88625454 | 0.94449738 |
| ENSMUSG00000048490 | 0.04564034 | 4.36070278 | 0.88618197 | 0.94449738 |
| ENSMUSG00000001525 | 0.04557489 | 10.1117803 | 0.88157719 | 0.94173931 |
| ENSMUSG00000021036 | 0.04551119 | 6.32301077 | 0.88293281 | 0.94255931 |
| ENSMUSG00000051978 | 0.04543447 | 2.28180558 | 0.91538505 | 0.95905158 |
| ENSMUSG00000028214 | 0.04531642 | 4.6357762  | 0.8877319  | 0.94506634 |
| ENSMUSG00000021140 | 0.04524338 | 4.80168121 | 0.88546989 | 0.94394101 |
| ENSMUSG00000021290 | 0.04518029 | 6.28567995 | 0.88477663 | 0.94359959 |
| ENSMUSG00000029714 | 0.04503091 | 3.79538157 | 0.90082018 | 0.95327354 |
| ENSMUSG00000022184 | 0.0449212  | 4.39550557 | 0.8889072  | 0.94564222 |
| ENSMUSG00000009090 | 0.04486972 | 6.27034802 | 0.88648299 | 0.94460776 |
| ENSMUSG00000015937 | 0.04434784 | 7.00916114 | 0.88622475 | 0.94449738 |
| ENSMUSG00000016833 | 0.04416114 | 5.27509732 | 0.88861063 | 0.94553115 |
| ENSMUSG00000015839 | 0.04414455 | 6.15859509 | 0.88688532 | 0.94467071 |
| ENSMUSG00000034575 | 0.0440068  | 4.89599208 | 0.89166308 | 0.94764139 |
| ENSMUSG00000035545 | 0.04398937 | 6.02721833 | 0.88886637 | 0.94564222 |
| ENSMUSG00000038884 | 0.04333495 | 4.80054465 | 0.89387969 | 0.9489662  |
| ENSMUSG00000028745 | 0.04318047 | 8.10115123 | 0.88832824 | 0.94549267 |
| ENSMUSG00000030714 | 0.04300578 | 3.22763265 | 0.91816846 | 0.96045251 |
| ENSMUSG00000025157 | 0.04295716 | 5.16808803 | 0.89346149 | 0.9486156  |
| ENSMUSG00000027610 | 0.04290354 | 3.98421365 | 0.90734982 | 0.95532678 |
| ENSMUSG00000024260 | 0.04279938 | 6.20107352 | 0.89085506 | 0.9471538  |
| ENSMUSG00000057667 | 0.04257699 | 2.83910095 | 0.89451201 | 0.94928669 |
| ENSMUSG00000032959 | 0.04256193 | 6.88137265 | 0.89125081 | 0.94738775 |
| ENSMUSG00000040430 | 0.04235913 | 3.11215334 | 0.90215834 | 0.95343743 |
| ENSMUSG00000030878 | 0.0423008  | 4.34465277 | 0.89755629 | 0.95131757 |
| ENSMUSG00000024513 | 0.04223405 | 6.90615565 | 0.89112607 | 0.94734853 |
| ENSMUSG00000054469 | 0.04214202 | 5.3172758  | 0.89210839 | 0.948019   |
| ENSMUSG00000048458 | 0.04209044 | 3.33919376 | 0.90742428 | 0.95532678 |
| ENSMUSG00000038042 | 0.04199846 | 2.49729239 | 0.91147745 | 0.95718891 |
| ENSMUSG00000036503 | 0.04195411 | 5.71166359 | 0.89235336 | 0.9480489  |
| ENSMUSG00000059540 | 0.04179199 | 2.48302767 | 0.92574833 | 0.96419555 |
| ENSMUSG00000029463 | 0.04177945 | 4.07628961 | 0.90268175 | 0.95351088 |
| ENSMUSG00000029922 | 0.04173564 | 5.68810871 | 0.89471068 | 0.94928768 |
| ENSMUSG00000031388 | 0.04158723 | 4.34087791 | 0.90583967 | 0.95470826 |
| ENSMUSG00000040613 | 0.04155146 | 5.81651997 | 0.89397673 | 0.94897579 |

|                    |            |            |            |            |
|--------------------|------------|------------|------------|------------|
| ENSMUSG00000031634 | 0.0414092  | 5.81821536 | 0.89427168 | 0.94919545 |
| ENSMUSG00000029402 | 0.04140208 | 2.40835728 | 0.93747799 | 0.96948242 |
| ENSMUSG00000028191 | 0.04139792 | 6.06624488 | 0.89460273 | 0.94928669 |
| ENSMUSG00000019132 | 0.04131818 | 8.90354588 | 0.89248244 | 0.9480489  |
| ENSMUSG00000022940 | 0.04115949 | 3.19698091 | 0.90766674 | 0.95532678 |
| ENSMUSG00000046711 | 0.04111035 | 3.6174119  | 0.91599796 | 0.9592787  |
| ENSMUSG00000021592 | 0.0410491  | 3.7087425  | 0.90157519 | 0.95338983 |
| ENSMUSG00000048707 | 0.04073253 | 3.21209244 | 0.91737141 | 0.95998645 |
| ENSMUSG00000025173 | 0.04046048 | 5.48894018 | 0.8979191  | 0.95147485 |
| ENSMUSG00000056144 | 0.04032293 | 6.40952497 | 0.89564119 | 0.950088   |
| ENSMUSG00000049916 | 0.03985463 | 3.13773996 | 0.93239131 | 0.96691104 |
| ENSMUSG00000002329 | 0.0394217  | 4.90188461 | 0.90180335 | 0.95343601 |
| ENSMUSG00000029063 | 0.03933861 | 7.03969185 | 0.89902899 | 0.95255734 |
| ENSMUSG00000047084 | 0.03929874 | 4.10340943 | 0.90449512 | 0.95422377 |
| ENSMUSG00000024725 | 0.03925574 | 5.5884064  | 0.90106884 | 0.95327354 |
| ENSMUSG00000020993 | 0.03913645 | 5.48748798 | 0.89913501 | 0.95257608 |
| ENSMUSG00000026812 | 0.03911804 | 6.03092968 | 0.90034366 | 0.95327354 |
| ENSMUSG00000022751 | 0.03885068 | 4.90964574 | 0.90417593 | 0.95407371 |
| ENSMUSG00000021123 | 0.03871908 | 4.53446059 | 0.90407364 | 0.95407371 |
| ENSMUSG00000022105 | 0.03871443 | 7.38296119 | 0.89932516 | 0.95268394 |
| ENSMUSG00000029111 | 0.03860221 | 5.32377723 | 0.90497582 | 0.95445078 |
| ENSMUSG00000024833 | 0.03859295 | 6.15392049 | 0.90258936 | 0.95351088 |
| ENSMUSG00000047539 | 0.03853888 | 5.24169698 | 0.90197131 | 0.95343743 |
| ENSMUSG00000022185 | 0.03838557 | 7.92632433 | 0.90076235 | 0.95327354 |
| ENSMUSG00000032806 | 0.03837115 | 3.88940001 | 0.91279198 | 0.95782317 |
| ENSMUSG00000036975 | 0.03831253 | 3.12829581 | 0.92246284 | 0.96281836 |
| ENSMUSG00000022668 | 0.03809345 | 3.49165666 | 0.90889946 | 0.95597111 |
| ENSMUSG00000022973 | 0.03808478 | 4.95062725 | 0.90252576 | 0.95351088 |
| ENSMUSG00000030754 | 0.03805924 | 8.46950304 | 0.9010513  | 0.95327354 |
| ENSMUSG00000030612 | 0.0380069  | 4.71548502 | 0.91041579 | 0.95691266 |
| ENSMUSG00000024382 | 0.03785596 | 5.99846228 | 0.90387181 | 0.95403285 |
| ENSMUSG00000074141 | 0.03778731 | 7.52300812 | 0.90301129 | 0.95351088 |
| ENSMUSG00000008683 | 0.03778662 | 9.45802703 | 0.90178302 | 0.95343601 |
| ENSMUSG00000035632 | 0.03749994 | 6.01473016 | 0.90531383 | 0.95452721 |
| ENSMUSG00000015697 | 0.0373733  | 7.80249576 | 0.9031407  | 0.95354115 |
| ENSMUSG00000024778 | 0.03732408 | 4.33394701 | 0.90551845 | 0.95464962 |
| ENSMUSG00000025203 | 0.03731037 | 9.38821798 | 0.90292727 | 0.95351088 |
| ENSMUSG00000062202 | 0.03720685 | 4.70963884 | 0.90822059 | 0.95553667 |
| ENSMUSG00000032513 | 0.03720536 | 3.31692234 | 0.93145282 | 0.96640247 |
| ENSMUSG00000028411 | 0.03713124 | 3.88698037 | 0.91265745 | 0.95782317 |
| ENSMUSG00000045327 | 0.0369374  | 1.54753215 | 0.91917156 | 0.96086063 |
| ENSMUSG00000036568 | 0.0368585  | 4.80017946 | 0.90671284 | 0.95506849 |
| ENSMUSG00000030172 | 0.03679988 | 4.78849929 | 0.90855046 | 0.95570946 |

|                    |            |            |            |            |
|--------------------|------------|------------|------------|------------|
| ENSMUSG00000011427 | 0.03667039 | 4.81645041 | 0.90784531 | 0.95536653 |
| ENSMUSG00000051510 | 0.03658482 | 5.01074644 | 0.91121111 | 0.9570707  |
| ENSMUSG00000020089 | 0.03626765 | 7.8448123  | 0.90610559 | 0.95482715 |
| ENSMUSG00000048920 | 0.03622228 | 5.05528486 | 0.91087829 | 0.95705613 |
| ENSMUSG00000030034 | 0.03617444 | 1.12255436 | 0.96448995 | 0.98355174 |
| ENSMUSG00000029550 | 0.03607347 | 5.11822135 | 0.9092882  | 0.95610023 |
| ENSMUSG00000000223 | 0.03569185 | 1.36355683 | 0.93923436 | 0.96999649 |
| ENSMUSG00000022876 | 0.03551069 | 8.9477418  | 0.90763194 | 0.95532678 |
| ENSMUSG00000031819 | 0.03490518 | 4.4348648  | 0.91823677 | 0.96045251 |
| ENSMUSG00000031608 | 0.03488109 | 5.95578367 | 0.91108477 | 0.95705613 |
| ENSMUSG00000021196 | 0.03485585 | 6.69428353 | 0.91127614 | 0.9570707  |
| ENSMUSG00000043881 | 0.03481926 | 4.62837833 | 0.90953546 | 0.95626698 |
| ENSMUSG00000020630 | 0.03469547 | 3.70272816 | 0.9273587  | 0.96419555 |
| ENSMUSG00000090330 | 0.03462782 | 2.70084283 | 0.93543516 | 0.96876335 |
| ENSMUSG00000066647 | 0.03458718 | 2.11059082 | 0.94327815 | 0.9716111  |
| ENSMUSG00000067916 | 0.0344915  | 2.27789752 | 0.88174875 | 0.94174294 |
| ENSMUSG00000006395 | 0.03445977 | 1.08181582 | 0.96379271 | 0.98339867 |
| ENSMUSG00000028161 | 0.03441405 | 7.00656192 | 0.91105754 | 0.95705613 |
| ENSMUSG00000038398 | 0.03416375 | 4.58932525 | 0.92087487 | 0.96190572 |
| ENSMUSG00000022089 | 0.0340585  | 4.96318447 | 0.916771   | 0.95966399 |
| ENSMUSG00000053293 | 0.03386486 | 6.25648662 | 0.91407028 | 0.95856344 |
| ENSMUSG00000058407 | 0.03339798 | 6.71642938 | 0.91351926 | 0.95824136 |
| ENSMUSG00000005575 | 0.03323672 | 6.37534928 | 0.91603947 | 0.9592787  |
| ENSMUSG00000024896 | 0.03323398 | 6.05925353 | 0.91520524 | 0.95905158 |
| ENSMUSG00000069755 | 0.03319948 | 1.46778069 | 0.91550606 | 0.95905158 |
| ENSMUSG00000021236 | 0.03296762 | 6.0106187  | 0.91622502 | 0.9592787  |
| ENSMUSG00000028646 | 0.03282895 | 6.84895695 | 0.91496214 | 0.95905158 |
| ENSMUSG00000085208 | 0.03278845 | 6.95571451 | 0.91556343 | 0.95905158 |
| ENSMUSG00000035678 | 0.03255503 | 1.69529373 | 0.95086185 | 0.97602268 |
| ENSMUSG00000059743 | 0.03229272 | 6.55349905 | 0.91821059 | 0.96045251 |
| ENSMUSG00000053329 | 0.03228061 | 3.15719068 | 0.94283804 | 0.97148532 |
| ENSMUSG00000060181 | 0.03227536 | 4.73694978 | 0.91985809 | 0.96121605 |
| ENSMUSG00000022545 | 0.03226495 | 4.43814739 | 0.92217884 | 0.96270828 |
| ENSMUSG00000025241 | 0.03222288 | 4.65433686 | 0.92377221 | 0.9633208  |
| ENSMUSG00000044715 | 0.03197393 | 4.26312163 | 0.92329756 | 0.96320556 |
| ENSMUSG00000052837 | 0.0319493  | 0.80095734 | 1          | 1          |
| ENSMUSG00000021143 | 0.03153828 | 4.73317969 | 0.92696122 | 0.96419555 |
| ENSMUSG00000027544 | 0.0314956  | 3.62972582 | 0.93060384 | 0.96589334 |
| ENSMUSG00000032637 | 0.03147632 | 7.60334139 | 0.91886942 | 0.96068998 |
| ENSMUSG00000015247 | 0.03126368 | 5.40920243 | 0.92028376 | 0.96147452 |
| ENSMUSG00000027109 | 0.0311524  | 8.01651027 | 0.91890923 | 0.96068998 |
| ENSMUSG00000059482 | 0.0310346  | 3.77574363 | 0.92466486 | 0.96371516 |
| ENSMUSG00000031392 | 0.03103126 | 7.06034992 | 0.92026938 | 0.96147452 |

|                    |            |            |            |            |
|--------------------|------------|------------|------------|------------|
| ENSMUSG00000033272 | 0.03074012 | 6.6564859  | 0.92169532 | 0.96248135 |
| ENSMUSG00000070501 | 0.03061425 | 4.95840236 | 0.91954966 | 0.96098687 |
| ENSMUSG00000000439 | 0.03044638 | 4.18807264 | 0.92871679 | 0.96482277 |
| ENSMUSG00000053286 | 0.03009908 | 6.02307616 | 0.92293104 | 0.96293424 |
| ENSMUSG00000073415 | 0.03005963 | 0.68992971 | 1          | 1          |
| ENSMUSG00000023170 | 0.02999082 | 4.38480903 | 0.93348552 | 0.96758054 |
| ENSMUSG00000027775 | 0.02982971 | 6.99133182 | 0.92287076 | 0.96293424 |
| ENSMUSG00000071076 | 0.02968132 | 4.97630467 | 0.92588285 | 0.96419555 |
| ENSMUSG00000046020 | 0.02956688 | 6.36016687 | 0.92427803 | 0.96350066 |
| ENSMUSG00000064141 | 0.02911807 | 1.44338909 | 0.97113194 | 0.98659321 |
| ENSMUSG00000025645 | 0.02887075 | 2.61642881 | 0.959127   | 0.9804471  |
| ENSMUSG00000024165 | 0.02879346 | 6.63964754 | 0.9262278  | 0.96419555 |
| ENSMUSG00000034190 | 0.02871169 | 5.62814627 | 0.92758688 | 0.96424686 |
| ENSMUSG00000071662 | 0.02859206 | 7.11150426 | 0.92634777 | 0.96419555 |
| ENSMUSG00000026511 | 0.02842697 | 6.89913099 | 0.92666863 | 0.96419555 |
| ENSMUSG00000067713 | 0.02832593 | 5.41989865 | 0.9300899  | 0.96573171 |
| ENSMUSG00000021686 | 0.02823428 | 6.87650111 | 0.92713186 | 0.96419555 |
| ENSMUSG00000041143 | 0.02772479 | 4.81522641 | 0.93478252 | 0.96845948 |
| ENSMUSG00000054836 | 0.02761906 | 2.60150516 | 0.95867763 | 0.9803698  |
| ENSMUSG00000020319 | 0.0275294  | 2.50079124 | 0.92690307 | 0.96419555 |
| ENSMUSG00000024869 | 0.02744149 | 1.78631494 | 1          | 1          |
| ENSMUSG00000037151 | 0.02702912 | 3.00708081 | 0.94735621 | 0.9743447  |
| ENSMUSG00000046324 | 0.02671367 | 6.95899959 | 0.93084791 | 0.96596072 |
| ENSMUSG00000075271 | 0.02657645 | 2.49044794 | 0.94091862 | 0.97071333 |
| ENSMUSG00000000916 | 0.02650114 | 3.40811473 | 0.95164364 | 0.9765463  |
| ENSMUSG00000027706 | 0.02647878 | 6.76236664 | 0.93174745 | 0.96661515 |
| ENSMUSG00000047242 | 0.02638228 | 5.38814772 | 0.93220777 | 0.96681367 |
| ENSMUSG00000031889 | 0.02631999 | 4.61762068 | 0.9365776  | 0.96929489 |
| ENSMUSG00000021262 | 0.02585654 | 5.07268075 | 0.93766715 | 0.96951022 |
| ENSMUSG00000026779 | 0.02567458 | 5.35951855 | 0.93476516 | 0.96845948 |
| ENSMUSG00000055128 | 0.02550724 | 3.02353773 | 0.94793861 | 0.97442905 |
| ENSMUSG00000048327 | 0.02546223 | 7.18540913 | 0.93420527 | 0.96823351 |
| ENSMUSG00000021476 | 0.02537703 | 3.24000843 | 0.95491958 | 0.97851091 |
| ENSMUSG00000024037 | 0.02535796 | 4.34462696 | 0.94437166 | 0.97232232 |
| ENSMUSG00000055067 | 0.0253005  | 3.16955841 | 0.94341059 | 0.9716111  |
| ENSMUSG00000045193 | 0.02528748 | 3.35255441 | 0.94981858 | 0.97545584 |
| ENSMUSG00000021007 | 0.0252669  | 2.48159406 | 0.92604043 | 0.96419555 |
| ENSMUSG00000041375 | 0.02502507 | 4.04446499 | 0.94751046 | 0.9743447  |
| ENSMUSG00000018412 | 0.02499492 | 6.55273408 | 0.93579118 | 0.96885292 |
| ENSMUSG00000024683 | 0.02493503 | 5.41856088 | 0.93904729 | 0.96999649 |
| ENSMUSG00000021893 | 0.02492477 | 7.27119126 | 0.93520767 | 0.96862078 |
| ENSMUSG00000014763 | 0.0249026  | 5.36616767 | 0.93801181 | 0.96969671 |
| ENSMUSG00000027746 | 0.02481263 | 6.44883623 | 0.93598394 | 0.96886646 |

|                    |            |            |            |            |
|--------------------|------------|------------|------------|------------|
| ENSMUSG00000036792 | 0.02460463 | 5.06678773 | 0.93697101 | 0.96942294 |
| ENSMUSG00000037313 | 0.02454646 | 7.62948534 | 0.93675717 | 0.96938771 |
| ENSMUSG00000021182 | 0.02449656 | 5.01447872 | 0.9418696  | 0.97115644 |
| ENSMUSG00000038900 | 0.02426714 | 9.36297574 | 0.93689564 | 0.96942294 |
| ENSMUSG00000024735 | 0.02419533 | 7.87885459 | 0.93768468 | 0.96951022 |
| ENSMUSG00000072568 | 0.0241791  | 3.39114464 | 0.94304848 | 0.97151651 |
| ENSMUSG00000026200 | 0.02397478 | 3.01824536 | 0.93745909 | 0.96948242 |
| ENSMUSG00000031077 | 0.02395807 | 3.70434621 | 0.94727474 | 0.9743447  |
| ENSMUSG00000061032 | 0.02385472 | 7.27202049 | 0.93934758 | 0.97001459 |
| ENSMUSG00000024667 | 0.02376339 | 3.03266305 | 0.948225   | 0.97442905 |
| ENSMUSG00000007415 | 0.02373139 | 6.02614367 | 0.93895754 | 0.96999649 |
| ENSMUSG00000037443 | 0.0237072  | 4.64926542 | 0.94782811 | 0.97442905 |
| ENSMUSG00000030443 | 0.02350011 | 2.82325429 | 0.94072398 | 0.97069825 |
| ENSMUSG00000045962 | 0.02336497 | 9.92443176 | 0.93904237 | 0.96999649 |
| ENSMUSG00000022390 | 0.02304674 | 5.88909994 | 0.94236218 | 0.97127341 |
| ENSMUSG00000006169 | 0.02301425 | 6.91241405 | 0.94086399 | 0.97071333 |
| ENSMUSG00000016493 | 0.02296771 | 0.88714392 | 0.87991532 | 0.94071645 |
| ENSMUSG00000039105 | 0.02250654 | 5.31660034 | 0.94412585 | 0.97225489 |
| ENSMUSG00000021996 | 0.02248826 | 7.0701234  | 0.94188847 | 0.97115644 |
| ENSMUSG00000062070 | 0.02210059 | 8.21534867 | 0.94282641 | 0.97148532 |
| ENSMUSG00000025007 | 0.02207493 | 6.55597643 | 0.94435552 | 0.97232232 |
| ENSMUSG00000016940 | 0.02198259 | 3.36490732 | 0.95858776 | 0.9803698  |
| ENSMUSG00000020628 | 0.02180386 | 5.17269297 | 0.94732143 | 0.9743447  |
| ENSMUSG00000024085 | 0.02126029 | 7.33627102 | 0.94479821 | 0.97257578 |
| ENSMUSG00000028873 | 0.02124358 | 6.15371492 | 0.9474556  | 0.9743447  |
| ENSMUSG00000021357 | 0.02079092 | 6.11428414 | 0.94643738 | 0.97389129 |
| ENSMUSG00000032308 | 0.02075482 | 3.64718333 | 0.95196723 | 0.9767854  |
| ENSMUSG00000001366 | 0.02069919 | 4.34881113 | 0.95307901 | 0.97746115 |
| ENSMUSG00000037119 | 0.02057974 | 7.34862312 | 0.94656417 | 0.97392882 |
| ENSMUSG00000038692 | 0.02054462 | 1.07987032 | 0.92730228 | 0.96419555 |
| ENSMUSG00000021451 | 0.02049024 | 6.73495364 | 0.94795735 | 0.97442905 |
| ENSMUSG00000014668 | 0.02031312 | 6.49226712 | 0.94817635 | 0.97442905 |
| ENSMUSG00000020482 | 0.02019803 | 6.66289185 | 0.94808484 | 0.97442905 |
| ENSMUSG00000026383 | 0.020172   | 2.80879286 | 0.96407385 | 0.98349229 |
| ENSMUSG00000039660 | 0.02007241 | 3.95196261 | 0.9664836  | 0.98418044 |
| ENSMUSG00000015290 | 0.01994843 | 5.05215782 | 0.95444661 | 0.97821253 |
| ENSMUSG00000029125 | 0.01988739 | 4.66493293 | 0.95252781 | 0.9770817  |
| ENSMUSG00000022022 | 0.01952552 | 3.15601063 | 0.95241299 | 0.97707147 |
| ENSMUSG00000039206 | 0.01946305 | 3.28504004 | 0.96497735 | 0.98358372 |
| ENSMUSG00000001089 | 0.01945151 | 5.12849824 | 0.95006088 | 0.97545584 |
| ENSMUSG00000032437 | 0.01927851 | 9.17490647 | 0.94981725 | 0.97545584 |
| ENSMUSG00000079547 | 0.01902175 | 5.94448794 | 0.95330876 | 0.97760381 |
| ENSMUSG00000032556 | 0.01859511 | 2.5320863  | 0.98558599 | 0.99330123 |



|                    |            |            |            |            |
|--------------------|------------|------------|------------|------------|
| ENSMUSG00000087260 | 0.01837175 | 5.74928577 | 0.95409713 | 0.97794729 |
| ENSMUSG00000005505 | 0.01830546 | 5.24434534 | 0.95563709 | 0.97851091 |
| ENSMUSG00000003033 | 0.01811402 | 6.31221311 | 0.95577449 | 0.97851091 |
| ENSMUSG00000024754 | 0.01788727 | 3.78587599 | 0.95626727 | 0.97851091 |
| ENSMUSG00000044477 | 0.01751012 | 4.17656788 | 0.96163189 | 0.98221617 |
| ENSMUSG00000025421 | 0.01742965 | 4.7066206  | 0.96061477 | 0.98145234 |
| ENSMUSG00000020721 | 0.0173208  | 6.55039624 | 0.955418   | 0.97851091 |
| ENSMUSG00000032254 | 0.01731227 | 7.48733916 | 0.95538942 | 0.97851091 |
| ENSMUSG00000025728 | 0.01671992 | 6.11842839 | 0.95900442 | 0.9804471  |
| ENSMUSG00000026181 | 0.01656748 | 5.57535466 | 0.96113158 | 0.98179813 |
| ENSMUSG00000079505 | 0.01645221 | 3.11251149 | 0.97061963 | 0.98616564 |
| ENSMUSG00000030101 | 0.01627878 | 4.78847448 | 0.96244222 | 0.98267155 |
| ENSMUSG00000035199 | 0.01627048 | 6.62525474 | 0.9587333  | 0.9803698  |
| ENSMUSG00000031628 | 0.01622121 | 5.92604279 | 0.95917256 | 0.9804471  |
| ENSMUSG00000036402 | 0.01566063 | 4.76549182 | 0.96275486 | 0.98285034 |
| ENSMUSG00000023988 | 0.01562541 | 5.56107718 | 0.96434835 | 0.98350034 |
| ENSMUSG00000090394 | 0.01554628 | 5.78566915 | 0.96036808 | 0.98129708 |
| ENSMUSG00000028936 | 0.01542186 | 8.40184359 | 0.96013903 | 0.98116702 |
| ENSMUSG00000032009 | 0.01469262 | 5.4187865  | 0.96279961 | 0.98285034 |
| ENSMUSG00000025223 | 0.01437434 | 6.2593546  | 0.96487753 | 0.98358372 |
| ENSMUSG00000039828 | 0.01433325 | 4.78619081 | 0.96639452 | 0.98418044 |
| ENSMUSG00000095981 | 0.01431948 | 4.99811337 | 0.96313106 | 0.98300258 |
| ENSMUSG00000041258 | 0.01429232 | 5.231019   | 0.96550588 | 0.98393644 |
| ENSMUSG00000018442 | 0.01398782 | 6.09706262 | 0.96480255 | 0.98358372 |
| ENSMUSG00000004264 | 0.01380577 | 7.24370548 | 0.96582547 | 0.98407614 |
| ENSMUSG00000006050 | 0.01376919 | 5.72755887 | 0.96653288 | 0.98418044 |
| ENSMUSG00000042997 | 0.01358974 | 4.34927278 | 0.97016489 | 0.98598229 |
| ENSMUSG00000020593 | 0.01345302 | 3.21738424 | 0.97254807 | 0.98703918 |
| ENSMUSG00000054434 | 0.01345    | 2.14788343 | 1          | 1          |
| ENSMUSG00000031778 | 0.01335154 | 1.10575243 | 1          | 1          |
| ENSMUSG00000018565 | 0.01313806 | 5.70163392 | 0.96907323 | 0.98598229 |
| ENSMUSG00000033792 | 0.01275883 | 4.67143197 | 0.96745033 | 0.98470829 |
| ENSMUSG00000070871 | 0.01264647 | 4.49730941 | 0.96485175 | 0.98358372 |
| ENSMUSG00000025781 | 0.01261593 | 8.38007333 | 0.96732096 | 0.98470829 |
| ENSMUSG00000020803 | 0.0122413  | 5.793177   | 0.96988398 | 0.98598229 |
| ENSMUSG00000025193 | 0.01222372 | 3.95584315 | 0.97775112 | 0.98960526 |
| ENSMUSG00000038708 | 0.01209868 | 6.6056514  | 0.96917169 | 0.98598229 |
| ENSMUSG00000021891 | 0.01209529 | 5.69619833 | 0.96975167 | 0.98598229 |
| ENSMUSG00000079260 | 0.01192253 | 5.03919792 | 0.97257774 | 0.98703918 |
| ENSMUSG00000035173 | 0.01173164 | 5.18449598 | 0.96990015 | 0.98598229 |
| ENSMUSG00000029034 | 0.01163274 | 5.98074646 | 0.97245557 | 0.98703918 |
| ENSMUSG00000056962 | 0.01150039 | 5.60190107 | 0.97396816 | 0.98770667 |
| ENSMUSG00000038612 | 0.0114677  | 9.20996861 | 0.9701227  | 0.98598229 |

|                    |            |            |            |            |
|--------------------|------------|------------|------------|------------|
| ENSMUSG00000028455 | 0.01143962 | 5.97196775 | 0.97322386 | 0.98732324 |
| ENSMUSG00000051037 | 0.01125769 | 2.84803125 | 0.9766037  | 0.98880645 |
| ENSMUSG00000037519 | 0.01123035 | 6.14479183 | 0.9725717  | 0.98703918 |
| ENSMUSG00000073139 | 0.01110943 | 5.41406025 | 0.97366327 | 0.98767611 |
| ENSMUSG00000029472 | 0.01071031 | 8.64122244 | 0.97241795 | 0.98703918 |
| ENSMUSG00000071454 | 0.01070127 | 3.60643411 | 0.98589606 | 0.99345011 |
| ENSMUSG00000042851 | 0.01069695 | 3.2938848  | 0.97394152 | 0.98770667 |
| ENSMUSG00000057130 | 0.01048677 | 4.60083117 | 0.98015647 | 0.99016463 |
| ENSMUSG00000032565 | 0.01044921 | 3.40140771 | 0.98383797 | 0.99239628 |
| ENSMUSG00000021361 | 0.01031321 | 5.83811621 | 0.97586239 | 0.98863713 |
| ENSMUSG00000010205 | 0.01002299 | 6.63901084 | 0.97607031 | 0.98868741 |
| ENSMUSG00000040350 | 0.00960831 | 3.67770772 | 0.97984535 | 0.99012858 |
| ENSMUSG00000020493 | 0.00957951 | 7.00655317 | 0.97527823 | 0.98847748 |
| ENSMUSG00000056201 | 0.00946181 | 10.2401339 | 0.97540336 | 0.9885114  |
| ENSMUSG00000016319 | 0.0094607  | 9.00146269 | 0.97558361 | 0.98860116 |
| ENSMUSG00000031549 | 0.00942462 | 3.04686846 | 0.98975104 | 0.99603165 |
| ENSMUSG00000026466 | 0.0091027  | 7.9708898  | 0.97649255 | 0.98880645 |
| ENSMUSG00000030922 | 0.00869831 | 2.18295459 | 0.98198826 | 0.99136505 |
| ENSMUSG00000004268 | 0.00862259 | 7.0868754  | 0.97856885 | 0.98970772 |
| ENSMUSG00000075040 | 0.00861306 | 3.73805753 | 0.99354596 | 0.99817399 |
| ENSMUSG00000090626 | 0.00850497 | 4.28761342 | 0.98221437 | 0.99140769 |
| ENSMUSG00000022680 | 0.00850289 | 6.58784335 | 0.97899826 | 0.98977352 |
| ENSMUSG00000031105 | 0.00838384 | 3.01536991 | 0.97907632 | 0.98977352 |
| ENSMUSG00000036817 | 0.00829306 | 4.86725317 | 0.9818555  | 0.99136505 |
| ENSMUSG00000013663 | 0.00801478 | 8.2466611  | 0.97912684 | 0.98977352 |
| ENSMUSG00000021339 | 0.00789296 | 4.83428372 | 0.98422187 | 0.99269067 |
| ENSMUSG00000002617 | 0.00788198 | 3.58162532 | 0.97850335 | 0.98970772 |
| ENSMUSG00000015942 | 0.00785958 | 2.0657578  | 1          | 1          |
| ENSMUSG00000042787 | 0.00780148 | 4.32025383 | 0.98260436 | 0.99146897 |
| ENSMUSG00000062421 | 0.00767148 | 4.67968795 | 0.98379629 | 0.99239628 |
| ENSMUSG00000022641 | 0.00759812 | 6.69421536 | 0.98004832 | 0.99014812 |
| ENSMUSG00000032053 | 0.00726277 | 9.68184921 | 0.98113249 | 0.99087215 |
| ENSMUSG00000029064 | 0.00702654 | 8.53736524 | 0.98197198 | 0.99136505 |
| ENSMUSG00000037487 | 0.00669134 | 8.79147025 | 0.9826155  | 0.99146897 |
| ENSMUSG00000027593 | 0.00640404 | 6.86500082 | 0.98508365 | 0.99318831 |
| ENSMUSG00000006373 | 0.00624908 | 6.36989293 | 0.9844348  | 0.99281257 |
| ENSMUSG00000028879 | 0.00611529 | 5.82646492 | 0.98558124 | 0.99330123 |
| ENSMUSG00000037426 | 0.00609082 | 6.0593654  | 0.9856562  | 0.99330123 |
| ENSMUSG00000019998 | 0.00600253 | 6.7002805  | 0.98497025 | 0.99316682 |
| ENSMUSG00000033985 | 0.00599563 | 3.1537982  | 1          | 1          |
| ENSMUSG00000028706 | 0.00567717 | 4.34278908 | 0.99143999 | 0.99717485 |
| ENSMUSG00000028689 | 0.0053827  | 3.89241891 | 0.99418375 | 0.99865851 |
| ENSMUSG00000029333 | 0.00532874 | 2.6159612  | 1          | 1          |

|                    |            |            |            |            |
|--------------------|------------|------------|------------|------------|
| ENSMUSG00000048109 | 0.00521181 | 5.70630305 | 0.98867426 | 0.99531957 |
| ENSMUSG00000072494 | 0.0049846  | 2.66153624 | 1          | 1          |
| ENSMUSG00000023723 | 0.00482792 | 5.60403374 | 0.99028648 | 0.99629158 |
| ENSMUSG00000031109 | 0.0048216  | 4.36296581 | 0.9915551  | 0.99717485 |
| ENSMUSG00000034274 | 0.0047875  | 5.95731864 | 0.98958688 | 0.9959594  |
| ENSMUSG00000030102 | 0.00477035 | 7.85753073 | 0.98778789 | 0.99461294 |
| ENSMUSG00000024758 | 0.00443258 | 7.91920754 | 0.98863103 | 0.99531957 |
| ENSMUSG00000041625 | 0.00388329 | 2.6891585  | 1          | 1          |
| ENSMUSG00000006276 | 0.00368711 | 5.64684696 | 0.99350214 | 0.99817399 |
| ENSMUSG00000040048 | 0.0035637  | 5.55605928 | 0.99430605 | 0.99865851 |
| ENSMUSG00000025195 | 0.00334716 | 2.11140463 | 1          | 1          |
| ENSMUSG00000027845 | 0.00327335 | 5.54380008 | 0.99318917 | 0.9980015  |
| ENSMUSG00000033047 | 0.0032341  | 8.18895968 | 0.99201836 | 0.99730325 |
| ENSMUSG00000021643 | 0.00298279 | 1.26729541 | 1          | 1          |
| ENSMUSG00000029387 | 0.00265503 | 5.54311588 | 0.99534146 | 0.99932617 |
| ENSMUSG00000082163 | 0.00263868 | 1.9308522  | 0.97871139 | 0.98972464 |
| ENSMUSG00000026078 | 0.00257707 | 5.50338179 | 0.99637592 | 0.99983459 |
| ENSMUSG00000050148 | 0.00240472 | 4.92510918 | 0.9965335  | 0.99983459 |
| ENSMUSG00000038346 | 0.00209017 | 6.13781377 | 0.99618026 | 0.99983459 |
| ENSMUSG00000020134 | 0.00207642 | 6.72605607 | 0.99503772 | 0.99911423 |
| ENSMUSG00000020390 | 0.00201178 | 6.70663669 | 0.99482531 | 0.99899396 |
| ENSMUSG00000038685 | 0.0019716  | 6.447588   | 0.99677501 | 0.99983459 |
| ENSMUSG00000001127 | 0.00192771 | 6.41844716 | 0.99672294 | 0.99983459 |
| ENSMUSG00000039697 | 0.00173918 | 5.82489523 | 0.99598238 | 0.99983459 |
| ENSMUSG00000028159 | 0.00147605 | 6.25515856 | 0.99687433 | 0.99984122 |
| ENSMUSG00000023977 | 0.0014394  | 7.11061481 | 0.99676655 | 0.99983459 |
| ENSMUSG00000028619 | 0.00135932 | 4.43528643 | 1          | 1          |
| ENSMUSG00000050954 | 0.00092815 | 3.79067194 | 1          | 1          |
| ENSMUSG00000008682 | 0.00052261 | 9.26857977 | 0.99884573 | 1          |
| ENSMUSG00000025544 | 0.00042837 | 8.32192144 | 0.9988844  | 1          |
| ENSMUSG00000075254 | 0.00031436 | 7.40217433 | 0.99958927 | 1          |
| ENSMUSG00000057982 | 0.00028319 | 5.19194923 | 1          | 1          |
| ENSMUSG00000058594 | 0.00011755 | 5.85816335 | 1          | 1          |
| ENSMUSG00000016503 | -7.56E-05  | 4.7441013  | 1          | 1          |
| ENSMUSG00000024127 | -0.000152  | 5.20113843 | 1          | 1          |
| ENSMUSG00000057143 | -0.0001727 | 6.90129215 | 1          | 1          |
| ENSMUSG00000037447 | -0.0004921 | 5.18981498 | 0.99788301 | 1          |
| ENSMUSG00000061477 | -0.0005973 | 8.99190884 | 0.99854417 | 1          |
| ENSMUSG00000027475 | -0.0006341 | 6.01373559 | 1          | 1          |
| ENSMUSG00000059554 | -0.0009021 | 1.71087536 | 1          | 1          |
| ENSMUSG00000021178 | -0.0010135 | 8.16440386 | 0.99749912 | 1          |
| ENSMUSG00000061455 | -0.0010529 | 4.80726375 | 1          | 1          |
| ENSMUSG00000020537 | -0.0014518 | 5.97073007 | 0.99605675 | 0.99983459 |

|                    |            |            |            |            |
|--------------------|------------|------------|------------|------------|
| ENSMUSG00000019863 | -0.0019938 | 5.2089302  | 0.99649687 | 0.99983459 |
| ENSMUSG00000066151 | -0.0023481 | 6.61341197 | 0.99423982 | 0.99865851 |
| ENSMUSG00000021629 | -0.0023537 | 7.6277146  | 0.99467106 | 0.99893208 |
| ENSMUSG00000055480 | -0.0029133 | 2.70489388 | 1          | 1          |
| ENSMUSG00000072694 | -0.0030708 | 3.04640612 | 1          | 1          |
| ENSMUSG00000015889 | -0.0030713 | 7.06552642 | 0.99258414 | 0.99776541 |
| ENSMUSG00000006288 | -0.0033792 | 4.83480913 | 0.99148114 | 0.99717485 |
| ENSMUSG00000031198 | -0.0034696 | 6.24867747 | 0.99295275 | 0.99789804 |
| ENSMUSG00000031839 | -0.0035435 | 5.65766196 | 0.99203189 | 0.99730325 |
| ENSMUSG00000025017 | -0.0035495 | 6.48409539 | 0.99162677 | 0.99717485 |
| ENSMUSG00000002767 | -0.0036066 | 4.23583154 | 0.99078023 | 0.99669534 |
| ENSMUSG00000029614 | -0.0038402 | 9.47181828 | 0.98999419 | 0.99618339 |
| ENSMUSG00000028030 | -0.0044367 | 4.67256847 | 0.99647754 | 0.99983459 |
| ENSMUSG00000020227 | -0.0044963 | 5.0292025  | 0.99187979 | 0.99730325 |
| ENSMUSG00000027778 | -0.004736  | 5.19025416 | 0.99276044 | 0.99784962 |
| ENSMUSG00000022031 | -0.0049    | 6.69670506 | 0.98767174 | 0.99458886 |
| ENSMUSG00000037685 | -0.0051422 | 5.65616238 | 0.99009009 | 0.99618693 |
| ENSMUSG00000002948 | -0.0052338 | 5.48310923 | 0.98709128 | 0.99419001 |
| ENSMUSG00000008604 | -0.005355  | 6.31447638 | 0.9867029  | 0.99395927 |
| ENSMUSG00000042185 | -0.0054909 | 5.70712445 | 0.98660772 | 0.99395927 |
| ENSMUSG00000028811 | -0.0055487 | 7.00056026 | 0.98554538 | 0.99330123 |
| ENSMUSG00000000131 | -0.0056767 | 7.55186055 | 0.98552841 | 0.99330123 |
| ENSMUSG00000030748 | -0.0057372 | 8.38513004 | 0.98496416 | 0.99316682 |
| ENSMUSG00000060950 | -0.0057488 | 3.25796334 | 0.98215235 | 0.99140769 |
| ENSMUSG00000015747 | -0.0057776 | 4.94818303 | 0.98905626 | 0.99551826 |
| ENSMUSG00000090258 | -0.0058881 | 3.05529153 | 0.97964235 | 0.99010901 |
| ENSMUSG00000025257 | -0.0061289 | 1.46356384 | 1          | 1          |
| ENSMUSG00000026803 | -0.0062942 | 5.62369138 | 0.98677003 | 0.99395927 |
| ENSMUSG00000038623 | -0.0065179 | 4.57137652 | 0.98884328 | 0.9953968  |
| ENSMUSG00000074221 | -0.0067496 | 5.10099719 | 0.98633683 | 0.9938014  |
| ENSMUSG00000028099 | -0.0071874 | 6.31151798 | 0.98191593 | 0.99136505 |
| ENSMUSG00000046380 | -0.0074823 | 2.72094524 | 0.98724911 | 0.99425611 |
| ENSMUSG00000022216 | -0.0077036 | 8.0698427  | 0.98003885 | 0.99014812 |
| ENSMUSG00000002844 | -0.0080074 | 5.61860536 | 0.98075418 | 0.99058285 |
| ENSMUSG00000021748 | -0.0080521 | 7.09745121 | 0.97977806 | 0.99012858 |
| ENSMUSG00000022476 | -0.0082395 | 4.322477   | 0.97393915 | 0.98770667 |
| ENSMUSG00000002455 | -0.0084152 | 6.88333983 | 0.97851242 | 0.98970772 |
| ENSMUSG00000040040 | -0.0084743 | 3.61404769 | 0.99299368 | 0.99789804 |
| ENSMUSG00000027519 | -0.0086985 | 5.88821466 | 0.97906999 | 0.98977352 |
| ENSMUSG00000044201 | -0.0088306 | 5.28750141 | 0.9794296  | 0.98998677 |
| ENSMUSG00000029038 | -0.0090453 | 6.26317165 | 0.97738639 | 0.98940531 |
| ENSMUSG00000024042 | -0.0090571 | 6.4938414  | 0.97714549 | 0.98925432 |
| ENSMUSG00000047514 | -0.0091713 | 6.01384084 | 0.97860287 | 0.98970772 |

|                    |            |            |            |            |
|--------------------|------------|------------|------------|------------|
| ENSMUSG00000020843 | -0.009489  | 4.53973338 | 0.9778592  | 0.98960526 |
| ENSMUSG00000042202 | -0.0095326 | 5.89143825 | 0.97784724 | 0.98960526 |
| ENSMUSG00000021188 | -0.0096845 | 6.71143601 | 0.97661141 | 0.98880645 |
| ENSMUSG00000028271 | -0.0097528 | 6.30987885 | 0.97581544 | 0.98863713 |
| ENSMUSG00000028992 | -0.0098198 | 2.95343618 | 0.97816556 | 0.98970772 |
| ENSMUSG00000052593 | -0.0098588 | 7.56363876 | 0.97508674 | 0.98837629 |
| ENSMUSG00000070939 | -0.0100056 | 4.91876121 | 0.97645934 | 0.98880645 |
| ENSMUSG00000043336 | -0.010045  | 5.65768632 | 0.97816938 | 0.98970772 |
| ENSMUSG00000042350 | -0.0101512 | 6.55441984 | 0.97493154 | 0.98837629 |
| ENSMUSG00000020056 | -0.0104762 | 4.67699488 | 0.97589413 | 0.98863713 |
| ENSMUSG00000049489 | -0.0105218 | 3.0987762  | 0.97031062 | 0.98603748 |
| ENSMUSG00000018401 | -0.010596  | 7.43655238 | 0.97281363 | 0.98718567 |
| ENSMUSG00000032489 | -0.0107445 | 2.248402   | 0.98273478 | 0.99146897 |
| ENSMUSG00000027425 | -0.0107473 | 5.47601147 | 0.97296886 | 0.98720032 |
| ENSMUSG00000016541 | -0.0107549 | 7.3426866  | 0.97255959 | 0.98703918 |
| ENSMUSG00000034593 | -0.010826  | 7.91251842 | 0.97237345 | 0.98703918 |
| ENSMUSG00000058444 | -0.01085   | 4.34183756 | 0.97858994 | 0.98970772 |
| ENSMUSG00000029502 | -0.0109436 | 6.59256773 | 0.97246424 | 0.98703918 |
| ENSMUSG00000028277 | -0.0111162 | 7.14782636 | 0.97191814 | 0.98703918 |
| ENSMUSG00000027303 | -0.0111446 | 6.61977826 | 0.97191462 | 0.98703918 |
| ENSMUSG00000066892 | -0.0112262 | 3.29400583 | 0.98260592 | 0.99146897 |
| ENSMUSG00000031629 | -0.0119052 | 3.73409762 | 0.9741215  | 0.98776927 |
| ENSMUSG00000059811 | -0.012128  | 6.93077009 | 0.96964049 | 0.98598229 |
| ENSMUSG00000023021 | -0.012227  | 6.20483853 | 0.96966586 | 0.98598229 |
| ENSMUSG00000038412 | -0.0123072 | 5.0934098  | 0.97009954 | 0.98598229 |
| ENSMUSG00000019297 | -0.0124916 | 6.24605092 | 0.96794084 | 0.98502162 |
| ENSMUSG00000039801 | -0.0125112 | 4.93295961 | 0.97301115 | 0.98720032 |
| ENSMUSG00000006920 | -0.0126086 | 5.09498384 | 0.96911316 | 0.98598229 |
| ENSMUSG00000022234 | -0.0126112 | 9.30535295 | 0.96710106 | 0.98463159 |
| ENSMUSG00000062931 | -0.0132173 | 3.30142864 | 0.98272564 | 0.99146897 |
| ENSMUSG00000039018 | -0.0132317 | 3.54112496 | 0.97052754 | 0.98616499 |
| ENSMUSG00000049323 | -0.0132623 | 7.36577169 | 0.96625527 | 0.98418044 |
| ENSMUSG00000083161 | -0.0132832 | 5.09016206 | 0.96965459 | 0.98598229 |
| ENSMUSG00000035601 | -0.0133657 | 3.20184091 | 0.96308901 | 0.98300258 |
| ENSMUSG00000036291 | -0.0135228 | 5.27784928 | 0.96982442 | 0.98598229 |
| ENSMUSG00000053716 | -0.0135546 | 4.37896162 | 0.96656667 | 0.98418044 |
| ENSMUSG00000020948 | -0.013692  | 4.67922618 | 0.97251741 | 0.98703918 |
| ENSMUSG00000047215 | -0.0137303 | 9.93228412 | 0.96424925 | 0.98349229 |
| ENSMUSG00000038500 | -0.0137331 | 4.41480882 | 0.96739807 | 0.98470829 |
| ENSMUSG00000030697 | -0.0140942 | 6.79375482 | 0.96340768 | 0.98309883 |
| ENSMUSG00000028709 | -0.0146465 | 4.11947196 | 0.97507848 | 0.98837629 |
| ENSMUSG00000089862 | -0.0148172 | 4.48924085 | 0.96510464 | 0.98362049 |
| ENSMUSG00000014177 | -0.0152866 | 4.99821219 | 0.96417535 | 0.98349229 |

|                    |            |            |            |            |
|--------------------|------------|------------|------------|------------|
| ENSMUSG00000036257 | -0.0153141 | 6.65946019 | 0.96173883 | 0.98223236 |
| ENSMUSG00000037656 | -0.0153382 | 3.6440975  | 0.96561825 | 0.98395797 |
| ENSMUSG00000002319 | -0.0154974 | 5.73523021 | 0.95811183 | 0.98001309 |
| ENSMUSG00000027363 | -0.0157217 | 7.18241799 | 0.96014981 | 0.98116702 |
| ENSMUSG00000032643 | -0.0157978 | 3.21632515 | 0.96335843 | 0.98309883 |
| ENSMUSG00000019806 | -0.0159751 | 3.34482946 | 0.95803405 | 0.98001309 |
| ENSMUSG00000002326 | -0.0162258 | 5.40275976 | 0.96070205 | 0.98145234 |
| ENSMUSG00000022014 | -0.0164665 | 5.72729215 | 0.95998357 | 0.98116702 |
| ENSMUSG00000066233 | -0.0166611 | 1.74920781 | 0.97612712 | 0.98868741 |
| ENSMUSG00000021144 | -0.0166759 | 5.40621903 | 0.95680304 | 0.97895294 |
| ENSMUSG00000024118 | -0.0171505 | 3.28516198 | 0.95628028 | 0.97851091 |
| ENSMUSG00000061360 | -0.0174167 | 6.29122451 | 0.95556118 | 0.97851091 |
| ENSMUSG00000051786 | -0.0174751 | 5.26996314 | 0.95595554 | 0.97851091 |
| ENSMUSG00000027079 | -0.0175857 | 5.65277972 | 0.95577209 | 0.97851091 |
| ENSMUSG00000034473 | -0.0176449 | 3.92606257 | 0.96597929 | 0.98413988 |
| ENSMUSG00000059447 | -0.017795  | 6.68645612 | 0.95501257 | 0.97851091 |
| ENSMUSG00000024926 | -0.0180516 | 4.96294951 | 0.95613764 | 0.97851091 |
| ENSMUSG00000048758 | -0.0181257 | 1.88644502 | 0.93432775 | 0.96825405 |
| ENSMUSG00000042644 | -0.0181638 | 5.18430749 | 0.95362817 | 0.97783837 |
| ENSMUSG00000038179 | -0.0181707 | 6.02320023 | 0.95487111 | 0.97851091 |
| ENSMUSG00000056167 | -0.018222  | 6.4232812  | 0.95395145 | 0.97792021 |
| ENSMUSG00000026754 | -0.0183407 | 5.37173442 | 0.95603967 | 0.97851091 |
| ENSMUSG00000005534 | -0.0183826 | 4.80097278 | 0.95883784 | 0.98038374 |
| ENSMUSG00000027131 | -0.0184962 | 5.4862914  | 0.95398002 | 0.97792021 |
| ENSMUSG00000026113 | -0.0185967 | 3.04923463 | 0.96934324 | 0.98598229 |
| ENSMUSG00000073427 | -0.0186032 | 1.75887556 | 1          | 1          |
| ENSMUSG00000028420 | -0.0190049 | 2.90955297 | 0.96632521 | 0.98418044 |
| ENSMUSG00000043445 | -0.0190939 | 2.40300391 | 0.92172911 | 0.96248135 |
| ENSMUSG00000091512 | -0.0191004 | 4.46816207 | 0.95303898 | 0.97746115 |
| ENSMUSG00000026176 | -0.0192639 | 5.45801821 | 0.95061383 | 0.97586097 |
| ENSMUSG00000038542 | -0.0192728 | 5.44138831 | 0.9516045  | 0.9765463  |
| ENSMUSG00000015605 | -0.019273  | 4.21847879 | 0.94872856 | 0.97476074 |
| ENSMUSG00000015659 | -0.0193135 | 2.73548386 | 0.96227173 | 0.98259051 |
| ENSMUSG00000023018 | -0.019364  | 5.29845968 | 0.94995638 | 0.97545584 |
| ENSMUSG00000037072 | -0.0194    | 7.73825867 | 0.94999428 | 0.97545584 |
| ENSMUSG00000028096 | -0.0195069 | 5.56807152 | 0.95012872 | 0.97545584 |
| ENSMUSG00000031337 | -0.0195136 | 3.57220926 | 0.96397429 | 0.98349089 |
| ENSMUSG00000001847 | -0.0195989 | 8.12294923 | 0.94922497 | 0.97517787 |
| ENSMUSG00000066900 | -0.0199458 | 6.38562995 | 0.94858857 | 0.97470978 |
| ENSMUSG00000030956 | -0.0200653 | 4.85431437 | 0.94967525 | 0.97545584 |
| ENSMUSG00000029366 | -0.0202902 | 7.474016   | 0.94792718 | 0.97442905 |
| ENSMUSG00000026526 | -0.0207509 | 7.25537644 | 0.94641642 | 0.97389129 |
| ENSMUSG00000032399 | -0.020754  | 11.4612306 | 0.94583817 | 0.97355338 |

|                    |            |            |            |            |
|--------------------|------------|------------|------------|------------|
| ENSMUSG00000024056 | -0.0214794 | 6.29326289 | 0.9459648  | 0.9735908  |
| ENSMUSG00000036275 | -0.0215231 | 7.05900415 | 0.94471157 | 0.97257578 |
| ENSMUSG00000029036 | -0.0217505 | 5.91461725 | 0.94253564 | 0.97135936 |
| ENSMUSG00000040084 | -0.0219787 | 7.93669517 | 0.94302598 | 0.97151651 |
| ENSMUSG00000085823 | -0.0220429 | 2.94348839 | 0.95622024 | 0.97851091 |
| ENSMUSG00000030780 | -0.0221944 | 3.21040701 | 0.93568857 | 0.96885292 |
| ENSMUSG00000042211 | -0.0222158 | 6.71201189 | 0.94335092 | 0.9716111  |
| ENSMUSG00000025225 | -0.0222769 | 6.01053817 | 0.9414681  | 0.9710944  |
| ENSMUSG00000002846 | -0.0224447 | 4.14731262 | 0.95111175 | 0.97619217 |
| ENSMUSG00000001415 | -0.0228298 | 6.63799412 | 0.9406061  | 0.97069825 |
| ENSMUSG00000029004 | -0.0228779 | 7.90093747 | 0.94109802 | 0.97080554 |
| ENSMUSG00000022094 | -0.0230594 | 6.04392521 | 0.94179895 | 0.97115644 |
| ENSMUSG00000017843 | -0.0231517 | 7.29470972 | 0.94051314 | 0.97069825 |
| ENSMUSG00000020115 | -0.0233553 | 7.04982771 | 0.94032207 | 0.97069825 |
| ENSMUSG00000002870 | -0.0234378 | 7.42167257 | 0.93915469 | 0.96999649 |
| ENSMUSG00000045868 | -0.0234919 | 3.28187602 | 0.96497735 | 0.98358372 |
| ENSMUSG00000032601 | -0.0236659 | 6.10161946 | 0.94049104 | 0.97069825 |
| ENSMUSG00000032777 | -0.0237423 | 6.58096196 | 0.93862557 | 0.96999649 |
| ENSMUSG00000059325 | -0.0237473 | 2.06088095 | 0.98048733 | 0.99040608 |
| ENSMUSG00000003161 | -0.0238162 | 7.13925213 | 0.93880961 | 0.96999649 |
| ENSMUSG00000003813 | -0.0239123 | 4.87692353 | 0.93943178 | 0.97001459 |
| ENSMUSG00000054611 | -0.0242527 | 7.67167989 | 0.93737603 | 0.96948242 |
| ENSMUSG00000032602 | -0.0242816 | 4.69181219 | 0.94213681 | 0.97122678 |
| ENSMUSG00000003316 | -0.0244101 | 7.32942701 | 0.93714359 | 0.96948104 |
| ENSMUSG00000032615 | -0.0245965 | 3.08627304 | 0.93024543 | 0.9657948  |
| ENSMUSG00000040669 | -0.0246273 | 3.2843611  | 0.9388213  | 0.96999649 |
| ENSMUSG00000019518 | -0.0246488 | 4.04694932 | 0.93720696 | 0.96948104 |
| ENSMUSG00000028066 | -0.024815  | 4.52370805 | 0.93625296 | 0.96905192 |
| ENSMUSG00000043505 | -0.0248308 | 4.95033489 | 0.93828214 | 0.969849   |
| ENSMUSG00000027573 | -0.0249826 | 6.25396892 | 0.93592325 | 0.96886646 |
| ENSMUSG00000037773 | -0.025049  | 4.18461435 | 0.93804489 | 0.96969671 |
| ENSMUSG00000039089 | -0.0252213 | 4.77219651 | 0.94235877 | 0.97127341 |
| ENSMUSG00000029763 | -0.0252489 | 7.05974616 | 0.93520567 | 0.96862078 |
| ENSMUSG00000027784 | -0.0254975 | 4.73533517 | 0.94039583 | 0.97069825 |
| ENSMUSG00000004099 | -0.0256147 | 8.48487416 | 0.93331709 | 0.96758054 |
| ENSMUSG00000030451 | -0.0259046 | 6.78071277 | 0.93440466 | 0.96825405 |
| ENSMUSG00000031838 | -0.0260404 | 7.90072799 | 0.93212302 | 0.96681367 |
| ENSMUSG00000007476 | -0.0261206 | 2.11081623 | 0.96207228 | 0.98247987 |
| ENSMUSG00000055024 | -0.0261796 | 7.7086453  | 0.93256174 | 0.96699479 |
| ENSMUSG00000023980 | -0.0262514 | 4.21672832 | 0.93003868 | 0.96573171 |
| ENSMUSG00000027351 | -0.0262906 | 5.434421   | 0.93570338 | 0.96885292 |
| ENSMUSG00000022387 | -0.0263651 | 5.31675048 | 0.93340309 | 0.96758054 |
| ENSMUSG00000024429 | -0.026446  | 4.90992298 | 0.93131281 | 0.96635017 |

|                    |            |            |            |            |
|--------------------|------------|------------|------------|------------|
| ENSMUSG00000033970 | -0.0264596 | 5.59902018 | 0.93295432 | 0.96730885 |
| ENSMUSG00000030868 | -0.0266525 | 6.42822541 | 0.93217562 | 0.96681367 |
| ENSMUSG00000042298 | -0.0266797 | 4.02442986 | 0.94691925 | 0.97420122 |
| ENSMUSG00000026988 | -0.0268265 | 2.43383779 | 0.95395066 | 0.97792021 |
| ENSMUSG00000061650 | -0.0268852 | 3.49334059 | 0.93919397 | 0.96999649 |
| ENSMUSG00000050565 | -0.0272612 | 7.59286967 | 0.92973066 | 0.96554463 |
| ENSMUSG00000048445 | -0.0274451 | 0.76693615 | 0.9559728  | 0.97851091 |
| ENSMUSG00000003810 | -0.0276403 | 5.63700038 | 0.92876718 | 0.96482277 |
| ENSMUSG00000035093 | -0.0279073 | 6.94886562 | 0.92866644 | 0.96482277 |
| ENSMUSG00000078813 | -0.0281113 | 2.58806618 | 0.91700912 | 0.95974381 |
| ENSMUSG00000047434 | -0.0282349 | 4.85543092 | 0.92871494 | 0.96482277 |
| ENSMUSG00000033623 | -0.0282967 | 5.30280176 | 0.92946212 | 0.96545169 |
| ENSMUSG00000028688 | -0.0283405 | 5.01991691 | 0.92668015 | 0.96419555 |
| ENSMUSG00000031393 | -0.0287366 | 6.20808012 | 0.92749527 | 0.96424457 |
| ENSMUSG00000099413 | -0.0287884 | 4.80386821 | 0.93034153 | 0.9657948  |
| ENSMUSG00000086324 | -0.0287902 | 4.79074939 | 0.92607839 | 0.96419555 |
| ENSMUSG00000001056 | -0.0289262 | 5.64937506 | 0.92376793 | 0.9633208  |
| ENSMUSG00000033790 | -0.0289726 | 5.80775053 | 0.92798828 | 0.96457114 |
| ENSMUSG00000053510 | -0.0290113 | 8.77215549 | 0.92470922 | 0.96371516 |
| ENSMUSG00000038160 | -0.0290145 | 5.73612667 | 0.9270213  | 0.96419555 |
| ENSMUSG00000034345 | -0.0290701 | 5.58676103 | 0.92593458 | 0.96419555 |
| ENSMUSG00000033671 | -0.0293161 | 7.23097329 | 0.92517757 | 0.96397246 |
| ENSMUSG00000016831 | -0.0294867 | 7.49367161 | 0.92392684 | 0.9633208  |
| ENSMUSG00000009030 | -0.0295509 | 5.96439935 | 0.92565306 | 0.96419555 |
| ENSMUSG00000002204 | -0.02967   | 7.15393658 | 0.92266374 | 0.96293424 |
| ENSMUSG00000031557 | -0.0296907 | 8.87644151 | 0.92288778 | 0.96293424 |
| ENSMUSG00000041453 | -0.0298369 | 4.14092041 | 0.92639914 | 0.96419555 |
| ENSMUSG00000014554 | -0.0300092 | 3.71813691 | 0.92823826 | 0.96473799 |
| ENSMUSG00000072763 | -0.030298  | 2.99670708 | 0.95769658 | 0.97977421 |
| ENSMUSG00000020386 | -0.0304723 | 5.78280201 | 0.92345904 | 0.96320556 |
| ENSMUSG00000083844 | -0.0304945 | 3.45322511 | 0.92969756 | 0.96554463 |
| ENSMUSG00000007613 | -0.0306029 | 5.74090925 | 0.92502    | 0.9639014  |
| ENSMUSG00000026172 | -0.0307942 | 4.24116974 | 0.92208656 | 0.96270515 |
| ENSMUSG00000021959 | -0.0310189 | 4.85041423 | 0.92387251 | 0.9633208  |
| ENSMUSG00000037907 | -0.0311476 | 0.78972857 | 0.9136348  | 0.95824136 |
| ENSMUSG00000022223 | -0.0312687 | 4.10047944 | 0.91925066 | 0.96086063 |
| ENSMUSG00000014195 | -0.0314117 | 8.90322271 | 0.91841424 | 0.96054497 |
| ENSMUSG00000032077 | -0.0314764 | 5.1234894  | 0.92054849 | 0.96165794 |
| ENSMUSG00000048878 | -0.0314999 | 4.39864304 | 0.92178296 | 0.96248135 |
| ENSMUSG00000031921 | -0.0317337 | 5.66894617 | 0.91941583 | 0.96094013 |
| ENSMUSG00000076435 | -0.0321555 | 5.4855214  | 0.91851915 | 0.96056154 |
| ENSMUSG00000031400 | -0.0325937 | 6.527389   | 0.9161497  | 0.9592787  |
| ENSMUSG00000030145 | -0.0326751 | 3.1241958  | 0.94165743 | 0.97115644 |



|                    |            |            |            |            |
|--------------------|------------|------------|------------|------------|
| ENSMUSG00000032405 | -0.0330111 | 5.84089544 | 0.91702524 | 0.95974381 |
| ENSMUSG00000041890 | -0.0331087 | 5.8430718  | 0.91514892 | 0.95905158 |
| ENSMUSG00000028691 | -0.0333633 | 10.1138954 | 0.91318776 | 0.95814524 |
| ENSMUSG00000021773 | -0.0334905 | 0.56576937 | 0.90068209 | 0.95327354 |
| ENSMUSG00000032579 | -0.0335518 | 3.82545852 | 0.91498238 | 0.95905158 |
| ENSMUSG00000028295 | -0.0335728 | 3.82501784 | 0.92720894 | 0.96419555 |
| ENSMUSG00000059456 | -0.0336472 | 7.5183461  | 0.9127713  | 0.95782317 |
| ENSMUSG00000026721 | -0.0336938 | 7.27374506 | 0.91351255 | 0.95824136 |
| ENSMUSG00000046862 | -0.0337589 | 5.21702265 | 0.91619775 | 0.9592787  |
| ENSMUSG00000034612 | -0.0338225 | 5.2748956  | 0.91648032 | 0.95945284 |
| ENSMUSG00000050323 | -0.0343676 | 3.13097117 | 0.92246284 | 0.96281836 |
| ENSMUSG00000054408 | -0.0343902 | 8.59293086 | 0.91092152 | 0.95705613 |
| ENSMUSG00000031987 | -0.0344985 | 4.44386988 | 0.91746258 | 0.95998645 |
| ENSMUSG00000020741 | -0.0347526 | 6.82484601 | 0.90963258 | 0.95627586 |
| ENSMUSG00000031577 | -0.0347953 | 4.59106365 | 0.91411966 | 0.95856344 |
| ENSMUSG00000035595 | -0.0348381 | 2.49065146 | 0.92604043 | 0.96419555 |
| ENSMUSG00000019942 | -0.0350388 | 7.7473358  | 0.90925668 | 0.95610023 |
| ENSMUSG00000004561 | -0.0350947 | 3.66323918 | 0.91871277 | 0.96067085 |
| ENSMUSG00000056832 | -0.0352291 | 1.62776877 | 0.97431905 | 0.98787671 |
| ENSMUSG00000019842 | -0.0354069 | 4.37476668 | 0.91214338 | 0.95755807 |
| ENSMUSG00000060798 | -0.0354519 | 2.73643138 | 0.9247519  | 0.96371516 |
| ENSMUSG00000039768 | -0.0355366 | 6.60402683 | 0.90723907 | 0.95532678 |
| ENSMUSG00000028085 | -0.0356266 | 3.96833096 | 0.9118227  | 0.95745823 |
| ENSMUSG00000009681 | -0.0356421 | 3.70367308 | 0.91434731 | 0.95870893 |
| ENSMUSG00000036721 | -0.0358331 | 3.42101266 | 0.92836168 | 0.96477329 |
| ENSMUSG00000090019 | -0.0358867 | 4.91926099 | 0.91088617 | 0.95705613 |
| ENSMUSG00000029634 | -0.0359868 | 5.81224142 | 0.90903424 | 0.95601963 |
| ENSMUSG00000048497 | -0.0360487 | 4.22563771 | 0.9121009  | 0.95755807 |
| ENSMUSG00000030798 | -0.0360895 | 6.8325877  | 0.90621809 | 0.95482715 |
| ENSMUSG00000060098 | -0.0362275 | 5.67164364 | 0.90568425 | 0.95470826 |
| ENSMUSG00000029104 | -0.0362836 | 7.11988959 | 0.90650989 | 0.9550033  |
| ENSMUSG00000036435 | -0.0363328 | 6.02682103 | 0.90798088 | 0.95537768 |
| ENSMUSG00000032480 | -0.036336  | 6.21236155 | 0.9057954  | 0.95470826 |
| ENSMUSG00000016481 | -0.0363552 | 6.86513286 | 0.90656239 | 0.9550033  |
| ENSMUSG00000039990 | -0.0364171 | 6.27717328 | 0.90730649 | 0.95532678 |
| ENSMUSG00000021180 | -0.0365975 | 3.57693423 | 0.92099575 | 0.96193881 |
| ENSMUSG00000028367 | -0.0367462 | 8.34447655 | 0.90459935 | 0.95424038 |
| ENSMUSG00000018678 | -0.0371624 | 3.99525849 | 0.90788169 | 0.95536653 |
| ENSMUSG00000037017 | -0.0373978 | 4.60816429 | 0.9071784  | 0.95532678 |
| ENSMUSG00000029003 | -0.0374077 | 4.1228683  | 0.91063046 | 0.95704501 |
| ENSMUSG00000027411 | -0.0374983 | 6.15085304 | 0.90282014 | 0.95351088 |
| ENSMUSG00000027430 | -0.0376956 | 3.4723089  | 0.90759822 | 0.95532678 |
| ENSMUSG00000097354 | -0.0378895 | 2.08800659 | 0.92345565 | 0.96320556 |

|                    |            |            |            |            |
|--------------------|------------|------------|------------|------------|
| ENSMUSG00000005103 | -0.0380515 | 8.43422567 | 0.90116947 | 0.95327354 |
| ENSMUSG00000000976 | -0.0380533 | 5.14247638 | 0.90408999 | 0.95407371 |
| ENSMUSG00000033808 | -0.0380942 | 6.49283108 | 0.90302361 | 0.95351088 |
| ENSMUSG00000057101 | -0.0381096 | 5.09505988 | 0.90509123 | 0.95447915 |
| ENSMUSG00000038383 | -0.0381855 | 5.81274276 | 0.90344132 | 0.95367181 |
| ENSMUSG00000028478 | -0.0382202 | 6.83005481 | 0.90093832 | 0.95327354 |
| ENSMUSG00000039130 | -0.0382453 | 5.36131787 | 0.90236769 | 0.95351088 |
| ENSMUSG00000022407 | -0.0382774 | 6.42563642 | 0.90074587 | 0.95327354 |
| ENSMUSG00000028766 | -0.0383036 | 6.57289972 | 0.90084016 | 0.95327354 |
| ENSMUSG00000037971 | -0.0383825 | 2.57803885 | 0.93041935 | 0.9657948  |
| ENSMUSG00000019854 | -0.0384432 | 6.23433182 | 0.90158286 | 0.95338983 |
| ENSMUSG00000026832 | -0.0386185 | 7.05707041 | 0.90044335 | 0.95327354 |
| ENSMUSG00000063698 | -0.0388074 | 1.74417835 | 0.95242723 | 0.97707147 |
| ENSMUSG00000032586 | -0.039135  | 4.85172163 | 0.90129609 | 0.95327354 |
| ENSMUSG00000036469 | -0.0391682 | 5.72934272 | 0.90208223 | 0.95343743 |
| ENSMUSG00000026017 | -0.0392864 | 3.15859519 | 0.92402584 | 0.96333089 |
| ENSMUSG00000003948 | -0.0393495 | 4.98011252 | 0.90252031 | 0.95351088 |
| ENSMUSG00000031546 | -0.0394799 | 5.42059754 | 0.89957248 | 0.95285234 |
| ENSMUSG00000025271 | -0.039766  | 3.21543733 | 0.90856207 | 0.95570946 |
| ENSMUSG00000010936 | -0.0400598 | 5.85716302 | 0.89675804 | 0.95071164 |
| ENSMUSG00000024104 | -0.0400602 | 7.26618696 | 0.89666573 | 0.95070723 |
| ENSMUSG00000055319 | -0.040094  | 7.52013751 | 0.89643246 | 0.95055336 |
| ENSMUSG00000035704 | -0.0400992 | 6.2850301  | 0.89759424 | 0.95131757 |
| ENSMUSG00000039264 | -0.0402932 | 5.30233826 | 0.89625121 | 0.95052496 |
| ENSMUSG00000025340 | -0.0403338 | 5.02014125 | 0.89992631 | 0.9531335  |
| ENSMUSG00000025393 | -0.0404749 | 10.7807448 | 0.89462172 | 0.94928669 |
| ENSMUSG00000026500 | -0.0405321 | 4.04795842 | 0.90618961 | 0.95482715 |
| ENSMUSG00000027243 | -0.0406242 | 3.55234417 | 0.90524948 | 0.95452721 |
| ENSMUSG00000044308 | -0.0406365 | 7.28021022 | 0.89563433 | 0.950088   |
| ENSMUSG00000047749 | -0.0407125 | 3.12595952 | 0.91269444 | 0.95782317 |
| ENSMUSG00000073968 | -0.0412618 | 3.24294775 | 0.91030166 | 0.95688596 |
| ENSMUSG00000041538 | -0.0414832 | 8.09574284 | 0.89259017 | 0.9480489  |
| ENSMUSG00000008305 | -0.0415407 | 2.99590261 | 0.91550999 | 0.95905158 |
| ENSMUSG00000028998 | -0.0415463 | 5.92749626 | 0.89317427 | 0.94848433 |
| ENSMUSG00000075502 | -0.0415652 | 2.96291073 | 0.93512465 | 0.96862078 |
| ENSMUSG00000027699 | -0.0418159 | 7.09529326 | 0.892664   | 0.9480489  |
| ENSMUSG00000053477 | -0.0422267 | 7.94802581 | 0.8907763  | 0.9471538  |
| ENSMUSG00000018965 | -0.0422305 | 7.83093455 | 0.89078605 | 0.9471538  |
| ENSMUSG00000042572 | -0.0422948 | 7.43525956 | 0.89084532 | 0.9471538  |
| ENSMUSG00000037787 | -0.0423391 | 3.91678685 | 0.89166517 | 0.94764139 |
| ENSMUSG00000020389 | -0.042481  | 3.44171134 | 0.91359241 | 0.95824136 |
| ENSMUSG00000034297 | -0.042519  | 8.53068067 | 0.89002692 | 0.94664665 |
| ENSMUSG00000042709 | -0.0425944 | 4.90736663 | 0.89257838 | 0.9480489  |

|                    |            |            |            |            |
|--------------------|------------|------------|------------|------------|
| ENSMUSG00000078765 | -0.0430504 | 3.90220366 | 0.89631754 | 0.95052496 |
| ENSMUSG00000000884 | -0.0434361 | 1.98639183 | 0.89789885 | 0.95147485 |
| ENSMUSG00000004393 | -0.0436733 | 6.20607302 | 0.88703037 | 0.94467071 |
| ENSMUSG00000022228 | -0.0438389 | 6.12575107 | 0.8884797  | 0.94553115 |
| ENSMUSG00000062981 | -0.0439943 | 6.50705289 | 0.88689451 | 0.94467071 |
| ENSMUSG00000048285 | -0.0440136 | 2.77436392 | 0.90206184 | 0.95343743 |
| ENSMUSG00000004837 | -0.044085  | 7.86537308 | 0.88529181 | 0.9439378  |
| ENSMUSG00000102059 | -0.0441199 | 2.55431927 | 0.91513762 | 0.95905158 |
| ENSMUSG00000010721 | -0.0442882 | 1.85910577 | 0.95554036 | 0.97851091 |
| ENSMUSG00000069895 | -0.0442885 | 5.51353968 | 0.88791727 | 0.94514853 |
| ENSMUSG00000035293 | -0.0444631 | 6.19368329 | 0.88775241 | 0.94506634 |
| ENSMUSG00000074405 | -0.0445631 | 1.91544734 | 0.89263868 | 0.9480489  |
| ENSMUSG00000040658 | -0.0445788 | 3.80842289 | 0.88958395 | 0.94626883 |
| ENSMUSG00000046605 | -0.044714  | 2.76058013 | 0.88862743 | 0.94553115 |
| ENSMUSG00000066406 | -0.0447519 | 7.79056425 | 0.88450134 | 0.94349211 |
| ENSMUSG00000066456 | -0.0449895 | 6.42998902 | 0.88488712 | 0.94359959 |
| ENSMUSG00000042489 | -0.0452064 | 7.3248973  | 0.88325588 | 0.94260595 |
| ENSMUSG00000024696 | -0.0452364 | 8.09989231 | 0.88273725 | 0.94251866 |
| ENSMUSG00000037353 | -0.0453384 | 4.89585538 | 0.88658892 | 0.94460776 |
| ENSMUSG00000018796 | -0.0454311 | 5.20085921 | 0.8866209  | 0.94460776 |
| ENSMUSG00000023089 | -0.0454577 | 5.4026751  | 0.88480782 | 0.94359959 |
| ENSMUSG00000038539 | -0.0455627 | 3.82979946 | 0.89710351 | 0.9509844  |
| ENSMUSG00000039456 | -0.0457483 | 6.83029501 | 0.88295012 | 0.94255931 |
| ENSMUSG00000024989 | -0.0457803 | 7.17161699 | 0.88214491 | 0.94197947 |
| ENSMUSG00000045322 | -0.0458222 | 4.99979073 | 0.88334345 | 0.94260595 |
| ENSMUSG00000026851 | -0.0461384 | 5.46972594 | 0.88187478 | 0.94178427 |
| ENSMUSG00000027340 | -0.0462443 | 6.71572352 | 0.88155111 | 0.94173931 |
| ENSMUSG00000025428 | -0.0464682 | 9.94078015 | 0.87916499 | 0.94046142 |
| ENSMUSG00000079808 | -0.046582  | 2.02950067 | 0.9006034  | 0.95327354 |
| ENSMUSG00000054715 | -0.0466451 | 4.76772102 | 0.88426917 | 0.94349211 |
| ENSMUSG00000005198 | -0.0467016 | 9.12022407 | 0.87872479 | 0.94035412 |
| ENSMUSG00000002910 | -0.0467516 | 1.9247106  | 0.89324989 | 0.94848433 |
| ENSMUSG00000053877 | -0.0468218 | 7.75349914 | 0.87883458 | 0.94035412 |
| ENSMUSG00000038957 | -0.0469566 | 5.7869584  | 0.8801774  | 0.94081009 |
| ENSMUSG00000029918 | -0.0470348 | 3.7739061  | 0.88701633 | 0.94467071 |
| ENSMUSG00000032026 | -0.0470566 | 6.35802905 | 0.87885282 | 0.94035412 |
| ENSMUSG00000036777 | -0.0471805 | 6.18867728 | 0.87932794 | 0.94046142 |
| ENSMUSG00000056429 | -0.0476169 | 7.77202552 | 0.87722194 | 0.93967786 |
| ENSMUSG00000066979 | -0.0482076 | 7.04750507 | 0.87531907 | 0.93893765 |
| ENSMUSG00000034075 | -0.0484595 | 7.4334967  | 0.87471754 | 0.93878921 |
| ENSMUSG00000070883 | -0.0485728 | 1.73924144 | 0.9044138  | 0.95422377 |
| ENSMUSG00000020653 | -0.048662  | 2.61613873 | 0.90481169 | 0.95437102 |
| ENSMUSG00000015536 | -0.0486699 | 4.68437086 | 0.88110434 | 0.94161423 |

|                    |            |            |            |            |
|--------------------|------------|------------|------------|------------|
| ENSMUSG00000036323 | -0.0486933 | 8.64318784 | 0.87380757 | 0.93837292 |
| ENSMUSG00000032577 | -0.0487692 | 5.48494505 | 0.875657   | 0.9389447  |
| ENSMUSG00000029480 | -0.0488548 | 4.92829861 | 0.87491758 | 0.93883567 |
| ENSMUSG00000043866 | -0.0488773 | 5.88267045 | 0.87427516 | 0.93859466 |
| ENSMUSG00000016510 | -0.0488829 | 3.65603583 | 0.88452385 | 0.94349211 |
| ENSMUSG00000074140 | -0.0489646 | 1.40013429 | 0.94068983 | 0.97069825 |
| ENSMUSG00000042404 | -0.0492382 | 5.88687119 | 0.87344801 | 0.93817364 |
| ENSMUSG00000074884 | -0.0494251 | 5.60448216 | 0.87408208 | 0.9384808  |
| ENSMUSG00000027088 | -0.0494303 | 4.92565295 | 0.87959219 | 0.94065075 |
| ENSMUSG00000025358 | -0.0494864 | 6.83025146 | 0.87257233 | 0.9377935  |
| ENSMUSG00000022617 | -0.0495378 | 4.71792213 | 0.87784265 | 0.94010239 |
| ENSMUSG00000084846 | -0.0496805 | 1.27586958 | 0.96788332 | 0.98502162 |
| ENSMUSG00000071528 | -0.0496888 | 5.61344143 | 0.87439998 | 0.93863521 |
| ENSMUSG00000021993 | -0.0499665 | 5.4880723  | 0.87380632 | 0.93837292 |
| ENSMUSG00000034723 | -0.0500656 | 4.60686342 | 0.87924777 | 0.94046142 |
| ENSMUSG00000028542 | -0.0502511 | 0.87042698 | 0.91752414 | 0.95998645 |
| ENSMUSG00000029591 | -0.0502572 | 4.34568051 | 0.87228418 | 0.93776419 |
| ENSMUSG00000032870 | -0.0504655 | 8.45637065 | 0.86924414 | 0.93577393 |
| ENSMUSG00000025646 | -0.0505675 | 4.50661897 | 0.87579104 | 0.9389447  |
| ENSMUSG00000038970 | -0.0507855 | 6.01197624 | 0.87066166 | 0.93639328 |
| ENSMUSG00000078435 | -0.0508615 | 2.06872953 | 0.94211016 | 0.97122678 |
| ENSMUSG00000021868 | -0.0509937 | 5.81215852 | 0.86819581 | 0.93514019 |
| ENSMUSG00000042167 | -0.051037  | 6.79089785 | 0.86951452 | 0.93581283 |
| ENSMUSG00000041431 | -0.0510994 | 7.70217154 | 0.86797837 | 0.93509278 |
| ENSMUSG00000030647 | -0.0517646 | 4.68523265 | 0.8733849  | 0.93817364 |
| ENSMUSG00000052917 | -0.0518566 | 5.67979378 | 0.86938327 | 0.93577393 |
| ENSMUSG00000030327 | -0.0519286 | 5.15820797 | 0.87019916 | 0.93626936 |
| ENSMUSG00000032329 | -0.0522669 | 5.57488957 | 0.86806565 | 0.93509339 |
| ENSMUSG00000062110 | -0.0523065 | 4.47809587 | 0.86886333 | 0.93569638 |
| ENSMUSG00000052459 | -0.0523847 | 7.74537347 | 0.86467118 | 0.93264449 |
| ENSMUSG00000025872 | -0.0524772 | 5.9899437  | 0.86492745 | 0.93264449 |
| ENSMUSG00000051518 | -0.0525629 | 4.08333351 | 0.86773639 | 0.93492549 |
| ENSMUSG00000042694 | -0.0525692 | 4.14319591 | 0.87302776 | 0.938097   |
| ENSMUSG00000034290 | -0.0529828 | 7.3162942  | 0.86346878 | 0.93216155 |
| ENSMUSG00000078812 | -0.0530476 | 9.52207969 | 0.86217829 | 0.93147859 |
| ENSMUSG00000029152 | -0.0530752 | 7.88744567 | 0.86285601 | 0.93177069 |
| ENSMUSG00000033751 | -0.0532832 | 3.31346245 | 0.85479152 | 0.92815983 |
| ENSMUSG00000029388 | -0.0533081 | 6.43233896 | 0.86269032 | 0.93172282 |
| ENSMUSG00000025041 | -0.0533269 | 6.12987065 | 0.86352874 | 0.93216155 |
| ENSMUSG00000038619 | -0.0534788 | 7.00291899 | 0.86213796 | 0.93147859 |
| ENSMUSG00000020640 | -0.0536276 | 8.57076516 | 0.86119287 | 0.93147859 |
| ENSMUSG00000038909 | -0.0537436 | 7.40625415 | 0.86129836 | 0.93147859 |
| ENSMUSG00000052833 | -0.0539234 | 7.88721339 | 0.86050373 | 0.93139517 |

|                    |            |            |            |            |
|--------------------|------------|------------|------------|------------|
| ENSMUSG00000057531 | -0.0540534 | 4.75442634 | 0.86172083 | 0.93147859 |
| ENSMUSG00000026240 | -0.0541387 | 4.93820633 | 0.86259302 | 0.93171105 |
| ENSMUSG00000023764 | -0.0541744 | 4.8772655  | 0.86417153 | 0.93248207 |
| ENSMUSG00000029439 | -0.0541937 | 5.16402964 | 0.86195293 | 0.93147859 |
| ENSMUSG00000020288 | -0.0542045 | 6.32087666 | 0.86152294 | 0.93147859 |
| ENSMUSG00000028878 | -0.0545869 | 4.97302624 | 0.86204904 | 0.93147859 |
| ENSMUSG00000050608 | -0.0546367 | 6.38045555 | 0.85983656 | 0.93119469 |
| ENSMUSG00000021754 | -0.0546762 | 6.88844107 | 0.85933849 | 0.9309932  |
| ENSMUSG00000032458 | -0.0547095 | 8.75220671 | 0.85827408 | 0.93021384 |
| ENSMUSG00000022255 | -0.0548996 | 9.92289558 | 0.85755934 | 0.92962605 |
| ENSMUSG00000035139 | -0.0549714 | 5.23666786 | 0.86136967 | 0.93147859 |
| ENSMUSG00000014418 | -0.055094  | 5.83889066 | 0.86042652 | 0.93139517 |
| ENSMUSG00000057778 | -0.0551738 | 2.62771099 | 0.87910731 | 0.94046142 |
| ENSMUSG00000022194 | -0.0553903 | 4.11617358 | 0.86084067 | 0.93141623 |
| ENSMUSG00000039599 | -0.055463  | 3.93261841 | 0.86492595 | 0.93264449 |
| ENSMUSG00000048756 | -0.0555194 | 4.94315798 | 0.86074802 | 0.93141623 |
| ENSMUSG00000069020 | -0.0556136 | 3.94980745 | 0.86090436 | 0.93141623 |
| ENSMUSG00000026608 | -0.05575   | 4.63373258 | 0.86028188 | 0.93139517 |
| ENSMUSG00000096795 | -0.0558536 | 4.26329035 | 0.86968776 | 0.93590588 |
| ENSMUSG00000054519 | -0.0559737 | 3.27451868 | 0.87728827 | 0.93967786 |
| ENSMUSG00000018809 | -0.0560347 | 3.87454235 | 0.8653974  | 0.93305795 |
| ENSMUSG00000026135 | -0.0562015 | 5.5265222  | 0.85650016 | 0.92940825 |
| ENSMUSG00000025316 | -0.056591  | 3.3887801  | 0.86195764 | 0.93147859 |
| ENSMUSG00000032578 | -0.0566505 | 6.41509789 | 0.85383271 | 0.92753676 |
| ENSMUSG00000063849 | -0.0571323 | 4.45503819 | 0.85683687 | 0.92940825 |
| ENSMUSG00000019794 | -0.0573428 | 5.6679177  | 0.85418649 | 0.92774168 |
| ENSMUSG00000020156 | -0.0574528 | 5.02048597 | 0.85279092 | 0.92697281 |
| ENSMUSG00000028416 | -0.0576128 | 6.96115991 | 0.85156686 | 0.92648275 |
| ENSMUSG00000034928 | -0.0578059 | 5.26438752 | 0.85249426 | 0.92697281 |
| ENSMUSG00000038145 | -0.0579556 | 4.25184808 | 0.85962284 | 0.93119469 |
| ENSMUSG00000023262 | -0.0582714 | 3.09052502 | 0.85119666 | 0.92636036 |
| ENSMUSG00000036078 | -0.0586344 | 5.07154994 | 0.84895863 | 0.92504132 |
| ENSMUSG00000031165 | -0.0587204 | 6.49159457 | 0.84845455 | 0.92477601 |
| ENSMUSG00000022808 | -0.0588565 | 6.65111323 | 0.84920108 | 0.92504132 |
| ENSMUSG00000025880 | -0.0588576 | 2.93121659 | 0.87841357 | 0.94032281 |
| ENSMUSG00000022779 | -0.0589047 | 5.76264995 | 0.84937915 | 0.92504132 |
| ENSMUSG00000095325 | -0.0591364 | 4.66753474 | 0.85503004 | 0.92828389 |
| ENSMUSG00000041124 | -0.0592668 | 5.42008787 | 0.85135519 | 0.92643939 |
| ENSMUSG00000031389 | -0.0592879 | 5.66663435 | 0.84869189 | 0.92494122 |
| ENSMUSG00000067787 | -0.0593282 | 3.55571707 | 0.85482969 | 0.92815983 |
| ENSMUSG00000026134 | -0.0597955 | 5.84982253 | 0.84798057 | 0.92453973 |
| ENSMUSG00000032435 | -0.0598739 | 6.09007334 | 0.84708507 | 0.92393703 |
| ENSMUSG00000021224 | -0.0601391 | 4.36220188 | 0.85295675 | 0.92705327 |

|                    |            |            |            |            |
|--------------------|------------|------------|------------|------------|
| ENSMUSG00000022864 | -0.0603716 | 5.3171164  | 0.84955575 | 0.92504132 |
| ENSMUSG00000039345 | -0.0607757 | 1.66239458 | 0.84938839 | 0.92504132 |
| ENSMUSG00000032290 | -0.0608504 | 6.09265526 | 0.84465181 | 0.92249831 |
| ENSMUSG00000078786 | -0.0609243 | 2.83483484 | 0.85900877 | 0.93082301 |
| ENSMUSG00000040043 | -0.0610819 | 5.3624915  | 0.84491996 | 0.92269538 |
| ENSMUSG00000048234 | -0.0611195 | 4.29623191 | 0.85056626 | 0.92586116 |
| ENSMUSG00000029030 | -0.0612714 | 4.97017972 | 0.84646815 | 0.92366113 |
| ENSMUSG00000021975 | -0.0613611 | 6.19854798 | 0.84295247 | 0.92138228 |
| ENSMUSG00000029594 | -0.0613907 | 4.78559211 | 0.84202295 | 0.92083719 |
| ENSMUSG00000026781 | -0.0614214 | 5.3803579  | 0.84587981 | 0.92346304 |
| ENSMUSG00000010755 | -0.0615511 | 6.59790593 | 0.84153881 | 0.92049443 |
| ENSMUSG00000062761 | -0.0615524 | 4.77145878 | 0.84641833 | 0.92366113 |
| ENSMUSG00000060477 | -0.0621337 | 4.58820407 | 0.8451447  | 0.92284735 |
| ENSMUSG00000056749 | -0.0623822 | 7.29497741 | 0.83885649 | 0.91896486 |
| ENSMUSG00000015711 | -0.0626928 | 4.26571013 | 0.84304164 | 0.92138228 |
| ENSMUSG00000029613 | -0.0627835 | 6.88785042 | 0.83865498 | 0.91896486 |
| ENSMUSG00000022881 | -0.0632148 | 6.51145734 | 0.83827963 | 0.91892974 |
| ENSMUSG00000038696 | -0.0634364 | 5.70050162 | 0.83867943 | 0.91896486 |
| ENSMUSG00000026027 | -0.063452  | 4.42310035 | 0.85093002 | 0.92616364 |
| ENSMUSG00000027834 | -0.063517  | 5.25007278 | 0.84056797 | 0.91980569 |
| ENSMUSG00000063235 | -0.0635311 | 4.06589267 | 0.8407898  | 0.91986336 |
| ENSMUSG00000031751 | -0.0635883 | 7.1131364  | 0.83620828 | 0.91736216 |
| ENSMUSG00000026622 | -0.0636534 | 7.1423192  | 0.83596097 | 0.91723854 |
| ENSMUSG00000039523 | -0.0637056 | 4.87448874 | 0.83864917 | 0.91896486 |
| ENSMUSG00000032336 | -0.0638235 | 7.584115   | 0.83555326 | 0.91723854 |
| ENSMUSG00000027944 | -0.0640643 | 6.05931574 | 0.83635515 | 0.91742996 |
| ENSMUSG00000019849 | -0.0640968 | 6.8686027  | 0.83483569 | 0.91706917 |
| ENSMUSG00000020088 | -0.0641343 | 7.57373621 | 0.83455968 | 0.91706917 |
| ENSMUSG00000029632 | -0.0641442 | 7.16187406 | 0.83482967 | 0.91706917 |
| ENSMUSG00000078789 | -0.0641606 | 3.39288606 | 0.83807761 | 0.91892974 |
| ENSMUSG00000050891 | -0.0642419 | 3.49874249 | 0.85693663 | 0.92940825 |
| ENSMUSG00000022353 | -0.0643113 | 4.825506   | 0.83913165 | 0.9190733  |
| ENSMUSG00000007670 | -0.0643568 | 7.16553214 | 0.8337119  | 0.91639477 |
| ENSMUSG00000031986 | -0.0646075 | 4.13074536 | 0.83789974 | 0.91884389 |
| ENSMUSG00000020143 | -0.0649979 | 9.11454108 | 0.83181878 | 0.91541831 |
| ENSMUSG00000019763 | -0.0650408 | 5.38346623 | 0.83566031 | 0.91723854 |
| ENSMUSG00000031490 | -0.0651095 | 2.9019814  | 0.84263962 | 0.9211792  |
| ENSMUSG00000020491 | -0.065273  | 3.0952071  | 0.8519727  | 0.92673731 |
| ENSMUSG00000004069 | -0.065297  | 6.24412254 | 0.83247431 | 0.91552615 |
| ENSMUSG00000052533 | -0.0653684 | 6.7016943  | 0.83156532 | 0.91524806 |
| ENSMUSG00000028955 | -0.0656112 | 6.37436696 | 0.83249716 | 0.91552615 |
| ENSMUSG00000023075 | -0.0656402 | 6.71724033 | 0.83214301 | 0.91541831 |
| ENSMUSG00000038888 | -0.0661181 | 2.9381819  | 0.85776995 | 0.92976089 |

|                    |            |            |            |            |
|--------------------|------------|------------|------------|------------|
| ENSMUSG00000051351 | -0.0662674 | 4.05842991 | 0.8401404  | 0.9194311  |
| ENSMUSG00000046791 | -0.066389  | 4.15720328 | 0.83592361 | 0.91723854 |
| ENSMUSG00000032536 | -0.0664086 | 5.56726513 | 0.83012918 | 0.91460084 |
| ENSMUSG00000001983 | -0.066493  | 3.7401045  | 0.84618296 | 0.92366113 |
| ENSMUSG00000003190 | -0.0668827 | 1.96232074 | 0.81330465 | 0.90482494 |
| ENSMUSG00000003438 | -0.0670711 | 5.06693149 | 0.82731072 | 0.91296093 |
| ENSMUSG00000005609 | -0.0672174 | 6.56494527 | 0.82801639 | 0.91329945 |
| ENSMUSG00000010453 | -0.0672609 | 5.87025744 | 0.82834644 | 0.91354699 |
| ENSMUSG00000022244 | -0.0675    | 2.45355565 | 0.84947516 | 0.92504132 |
| ENSMUSG00000034278 | -0.0676265 | 2.49224352 | 0.82402301 | 0.91103795 |
| ENSMUSG00000042460 | -0.0676741 | 6.7589986  | 0.82724008 | 0.91296093 |
| ENSMUSG00000028906 | -0.0676996 | 6.57707379 | 0.82623655 | 0.91236278 |
| ENSMUSG00000030722 | -0.067799  | 6.01842969 | 0.82723939 | 0.91296093 |
| ENSMUSG00000032185 | -0.0678075 | 6.18294806 | 0.82502587 | 0.91167938 |
| ENSMUSG00000021072 | -0.0680795 | 7.04109157 | 0.82537156 | 0.911794   |
| ENSMUSG00000003184 | -0.0680826 | 5.12399842 | 0.82568084 | 0.91201571 |
| ENSMUSG00000068854 | -0.0682371 | 2.3431294  | 0.87051359 | 0.93635814 |
| ENSMUSG00000038485 | -0.0683462 | 5.54006595 | 0.82757354 | 0.91302048 |
| ENSMUSG00000037913 | -0.0684746 | 4.0407377  | 0.83816021 | 0.91892974 |
| ENSMUSG00000022386 | -0.0687089 | 3.5772424  | 0.83601053 | 0.91723854 |
| ENSMUSG00000021583 | -0.0688769 | 8.51964575 | 0.82220338 | 0.90995907 |
| ENSMUSG00000027339 | -0.0694185 | 8.28844075 | 0.82084012 | 0.90919678 |
| ENSMUSG00000031767 | -0.0694703 | 3.25577451 | 0.84079128 | 0.91986336 |
| ENSMUSG00000038982 | -0.0696165 | 3.03040136 | 0.83559443 | 0.91723854 |
| ENSMUSG00000035495 | -0.0698593 | 5.79341631 | 0.82288897 | 0.91044061 |
| ENSMUSG00000038812 | -0.0699032 | 4.90950383 | 0.82361232 | 0.91067726 |
| ENSMUSG00000033952 | -0.0704661 | 7.09069578 | 0.81952788 | 0.9082097  |
| ENSMUSG00000074211 | -0.0704774 | 3.82913926 | 0.82538326 | 0.911794   |
| ENSMUSG00000045948 | -0.0708756 | 3.67902434 | 0.82042939 | 0.90896213 |
| ENSMUSG00000020522 | -0.070923  | 6.52810616 | 0.81912619 | 0.90813784 |
| ENSMUSG00000028443 | -0.0709431 | 3.70708501 | 0.82351981 | 0.91066834 |
| ENSMUSG00000024335 | -0.0709928 | 8.63912242 | 0.81664272 | 0.9066895  |
| ENSMUSG00000015522 | -0.071279  | 6.69801148 | 0.81766212 | 0.90718848 |
| ENSMUSG00000018168 | -0.0713851 | 8.40300002 | 0.81585513 | 0.9062816  |
| ENSMUSG00000007880 | -0.0715277 | 7.72632671 | 0.8156314  | 0.90628137 |
| ENSMUSG00000063882 | -0.0715716 | 7.34414422 | 0.81577089 | 0.90628137 |
| ENSMUSG00000041153 | -0.0718079 | 5.70067801 | 0.81908514 | 0.90813784 |
| ENSMUSG00000024969 | -0.0718145 | 5.98982891 | 0.81618109 | 0.90645694 |
| ENSMUSG00000027012 | -0.0719005 | 7.00699455 | 0.81560221 | 0.90628137 |
| ENSMUSG00000075245 | -0.0720589 | 1.27090767 | 0.87149006 | 0.93717612 |
| ENSMUSG00000036712 | -0.072108  | 8.08606767 | 0.81424928 | 0.90561718 |
| ENSMUSG00000028086 | -0.0721816 | 6.713916   | 0.81516287 | 0.90600298 |
| ENSMUSG00000062101 | -0.0722593 | 2.93119798 | 0.85735722 | 0.92962605 |

|                    |            |            |            |            |
|--------------------|------------|------------|------------|------------|
| ENSMUSG0000000579  | -0.0723782 | 4.05997103 | 0.8250244  | 0.91167938 |
| ENSMUSG00000025135 | -0.0724837 | 3.29857184 | 0.81951943 | 0.9082097  |
| ENSMUSG00000098134 | -0.0725441 | 3.87151227 | 0.82460316 | 0.91139905 |
| ENSMUSG00000060038 | -0.0726333 | 4.82058084 | 0.81607746 | 0.90643519 |
| ENSMUSG00000071757 | -0.0726567 | 3.4901615  | 0.83349162 | 0.91624604 |
| ENSMUSG00000034906 | -0.0727497 | 6.96753028 | 0.81307289 | 0.90477536 |
| ENSMUSG00000034501 | -0.0730161 | 3.5169492  | 0.82927198 | 0.91379538 |
| ENSMUSG00000020273 | -0.0734599 | 5.53371064 | 0.81639038 | 0.90659571 |
| ENSMUSG00000030007 | -0.0735774 | 8.90225844 | 0.80982804 | 0.90271955 |
| ENSMUSG00000031732 | -0.0736208 | 5.76633863 | 0.8133455  | 0.90482494 |
| ENSMUSG00000036054 | -0.0738931 | 5.38323684 | 0.8126038  | 0.90444002 |
| ENSMUSG00000057924 | -0.074056  | 1.46907379 | 0.91550606 | 0.95905158 |
| ENSMUSG00000019710 | -0.0741362 | 6.20341537 | 0.81021589 | 0.90288131 |
| ENSMUSG00000031103 | -0.0743247 | 6.86261113 | 0.80945781 | 0.90261534 |
| ENSMUSG00000018765 | -0.074551  | 5.86418497 | 0.80924448 | 0.90247079 |
| ENSMUSG00000038365 | -0.0751175 | 2.67163476 | 0.81776514 | 0.90718848 |
| ENSMUSG00000026154 | -0.0755516 | 3.09561103 | 0.82303974 | 0.91051094 |
| ENSMUSG00000020743 | -0.0755558 | 5.96216669 | 0.80700389 | 0.90071724 |
| ENSMUSG00000025066 | -0.0756464 | 6.91232689 | 0.8060527  | 0.90018325 |
| ENSMUSG00000015120 | -0.0757722 | 8.26202749 | 0.80461368 | 0.89954104 |
| ENSMUSG00000025352 | -0.0761931 | 3.78731353 | 0.81461853 | 0.90568459 |
| ENSMUSG00000020910 | -0.0762193 | 4.93349077 | 0.81062659 | 0.90317152 |
| ENSMUSG00000037373 | -0.0762626 | 5.90076586 | 0.80479067 | 0.89955044 |
| ENSMUSG00000061979 | -0.0763282 | 3.56442554 | 0.80581913 | 0.90018325 |
| ENSMUSG00000038506 | -0.0764247 | 4.25070913 | 0.81028239 | 0.90288131 |
| ENSMUSG00000024566 | -0.076428  | 5.94778872 | 0.80530951 | 0.89994381 |
| ENSMUSG00000029730 | -0.0764957 | 8.10123263 | 0.8026331  | 0.89816242 |
| ENSMUSG00000024844 | -0.07696   | 6.51637887 | 0.80187279 | 0.89759146 |
| ENSMUSG00000039577 | -0.0769645 | 0.69256398 | 0.81760269 | 0.90718848 |
| ENSMUSG00000022972 | -0.0771228 | 3.91166115 | 0.80670519 | 0.9006635  |
| ENSMUSG00000031079 | -0.0773055 | 1.1312168  | 0.93071209 | 0.96591273 |
| ENSMUSG00000014245 | -0.077429  | 3.24273434 | 0.81273928 | 0.90449746 |
| ENSMUSG00000003809 | -0.0775103 | 4.84645389 | 0.80507158 | 0.89977115 |
| ENSMUSG00000030592 | -0.0776037 | 1.82144382 | 0.81927705 | 0.9082097  |
| ENSMUSG00000002052 | -0.077611  | 7.86298609 | 0.80021189 | 0.89674185 |
| ENSMUSG00000047187 | -0.0776732 | 6.15293037 | 0.80253914 | 0.8981509  |
| ENSMUSG00000030357 | -0.0779837 | 7.11574556 | 0.79882368 | 0.89547968 |
| ENSMUSG00000023393 | -0.078178  | 4.0722441  | 0.8061344  | 0.90018325 |
| ENSMUSG00000053841 | -0.0782542 | 7.06457179 | 0.79862498 | 0.8954431  |
| ENSMUSG00000026755 | -0.0783959 | 7.74845289 | 0.79852152 | 0.8954202  |
| ENSMUSG00000032221 | -0.0784815 | 5.36324848 | 0.80028223 | 0.89674185 |
| ENSMUSG00000040105 | -0.0788047 | 3.88190711 | 0.80870787 | 0.90205892 |
| ENSMUSG00000097164 | -0.0788259 | 4.15252101 | 0.81647418 | 0.90659571 |



|                    |            |            |            |            |
|--------------------|------------|------------|------------|------------|
| ENSMUSG00000035941 | -0.078861  | 7.93638435 | 0.79730001 | 0.89492503 |
| ENSMUSG00000031901 | -0.0788829 | 4.03718744 | 0.80686403 | 0.90069665 |
| ENSMUSG00000039005 | -0.079062  | 4.96060689 | 0.80461544 | 0.89954104 |
| ENSMUSG00000020929 | -0.0791237 | 7.93886243 | 0.79600556 | 0.89462453 |
| ENSMUSG00000051671 | -0.0792241 | 2.72516913 | 0.82439898 | 0.91126677 |
| ENSMUSG00000036893 | -0.0794278 | 5.85956143 | 0.79767899 | 0.89492503 |
| ENSMUSG00000018547 | -0.0797581 | 6.47991553 | 0.79574502 | 0.89462453 |
| ENSMUSG00000039384 | -0.0797943 | 5.14760557 | 0.79800352 | 0.89502547 |
| ENSMUSG00000005981 | -0.0801154 | 7.30364186 | 0.79407281 | 0.89368411 |
| ENSMUSG00000000085 | -0.0804234 | 4.02687259 | 0.80553014 | 0.90009709 |
| ENSMUSG00000025857 | -0.0804306 | 4.41060593 | 0.79769856 | 0.89492503 |
| ENSMUSG00000044876 | -0.0806092 | 2.4826213  | 0.80851487 | 0.90193694 |
| ENSMUSG00000042348 | -0.0810727 | 3.16435702 | 0.82146563 | 0.90938484 |
| ENSMUSG00000078517 | -0.0811871 | 5.92913137 | 0.79223574 | 0.89226843 |
| ENSMUSG00000037287 | -0.0812223 | 5.75834361 | 0.79462987 | 0.89403114 |
| ENSMUSG00000090272 | -0.0812479 | 8.42932203 | 0.79111021 | 0.89155946 |
| ENSMUSG00000031148 | -0.0813266 | 6.52857321 | 0.79204482 | 0.89214657 |
| ENSMUSG00000021550 | -0.0813387 | 4.8681257  | 0.7972358  | 0.89492503 |
| ENSMUSG00000027469 | -0.0816329 | 8.4652606  | 0.789831   | 0.89097112 |
| ENSMUSG00000029066 | -0.0817881 | 5.83473508 | 0.79167836 | 0.89182696 |
| ENSMUSG00000021496 | -0.0817952 | 2.72823646 | 0.79980448 | 0.89648597 |
| ENSMUSG00000071350 | -0.0819378 | 5.93859031 | 0.7930869  | 0.89276087 |
| ENSMUSG00000037933 | -0.0822308 | 5.50641595 | 0.79047866 | 0.89113043 |
| ENSMUSG00000049482 | -0.0823661 | 3.29873798 | 0.78541707 | 0.88839288 |
| ENSMUSG00000041506 | -0.0824395 | 4.14844772 | 0.78247043 | 0.88693274 |
| ENSMUSG00000005804 | -0.0825154 | 5.73481015 | 0.79156425 | 0.89182696 |
| ENSMUSG00000050240 | -0.082521  | 2.14060924 | 0.81569914 | 0.90628137 |
| ENSMUSG00000063047 | -0.0826998 | 3.50584288 | 0.80608654 | 0.90018325 |
| ENSMUSG00000027215 | -0.082807  | 6.68997428 | 0.78729035 | 0.8891525  |
| ENSMUSG00000068749 | -0.0828172 | 7.68833098 | 0.78710982 | 0.88909524 |
| ENSMUSG00000038425 | -0.0829159 | 4.0101021  | 0.80335755 | 0.89858937 |
| ENSMUSG00000045983 | -0.0830442 | 9.88284657 | 0.78585952 | 0.88842741 |
| ENSMUSG00000027495 | -0.0833302 | 2.99946002 | 0.81131033 | 0.90356894 |
| ENSMUSG00000021661 | -0.0835272 | 4.25095378 | 0.79713279 | 0.89492503 |
| ENSMUSG00000029198 | -0.083585  | 6.29894407 | 0.78616407 | 0.88851199 |
| ENSMUSG00000062825 | -0.0836408 | 10.5303674 | 0.78430624 | 0.88803316 |
| ENSMUSG00000041341 | -0.083649  | 6.79388656 | 0.7863265  | 0.88854181 |
| ENSMUSG00000020271 | -0.0839254 | 6.46852361 | 0.78618151 | 0.88851199 |
| ENSMUSG00000016252 | -0.0839284 | 5.86371622 | 0.78559767 | 0.8884009  |
| ENSMUSG00000030884 | -0.0840637 | 8.30619535 | 0.78382945 | 0.88790092 |
| ENSMUSG00000076614 | -0.0841168 | 6.92269843 | 0.78410523 | 0.8879335  |
| ENSMUSG00000034560 | -0.0841657 | 7.64497683 | 0.78438638 | 0.88803316 |
| ENSMUSG00000024277 | -0.0842227 | 7.64989956 | 0.78366535 | 0.88781797 |

|                    |            |            |            |            |
|--------------------|------------|------------|------------|------------|
| ENSMUSG00000023088 | -0.0842817 | 6.64500827 | 0.78444027 | 0.88803316 |
| ENSMUSG00000068732 | -0.0843577 | 5.61290388 | 0.78814945 | 0.88980356 |
| ENSMUSG00000025036 | -0.0845948 | 4.11027346 | 0.79647027 | 0.89480847 |
| ENSMUSG00000018736 | -0.0846028 | 5.51263703 | 0.78575369 | 0.8884009  |
| ENSMUSG00000021044 | -0.0847623 | 3.35072283 | 0.78502952 | 0.8882018  |
| ENSMUSG00000021650 | -0.0847808 | 5.82341629 | 0.78524228 | 0.88828834 |
| ENSMUSG00000047866 | -0.0848613 | 5.90134669 | 0.78497285 | 0.8882018  |
| ENSMUSG00000050395 | -0.084984  | 1.16970788 | 0.86445759 | 0.93255506 |
| ENSMUSG00000028322 | -0.0849891 | 5.70191774 | 0.78470466 | 0.8882018  |
| ENSMUSG00000019795 | -0.0851825 | 5.75190886 | 0.7840701  | 0.8879335  |
| ENSMUSG00000031985 | -0.0853594 | 6.85582572 | 0.78117309 | 0.88664972 |
| ENSMUSG00000000751 | -0.0854699 | 8.33998233 | 0.78021814 | 0.88632386 |
| ENSMUSG00000061607 | -0.0854808 | 7.01048059 | 0.78124007 | 0.88664972 |
| ENSMUSG00000027540 | -0.0858091 | 6.08754888 | 0.78112304 | 0.88664972 |
| ENSMUSG00000040928 | -0.0858845 | 6.59980319 | 0.78123044 | 0.88664972 |
| ENSMUSG00000030724 | -0.0859971 | 9.6259584  | 0.77843885 | 0.88532847 |
| ENSMUSG00000022359 | -0.0860529 | 4.77224082 | 0.78637269 | 0.88854181 |
| ENSMUSG00000038718 | -0.0860721 | 2.97637603 | 0.81936627 | 0.9082097  |
| ENSMUSG00000023921 | -0.086138  | 5.46448399 | 0.78367389 | 0.88781797 |
| ENSMUSG00000028126 | -0.0861669 | 5.79098312 | 0.78145847 | 0.88671643 |
| ENSMUSG00000019868 | -0.0861767 | 5.30952866 | 0.78304277 | 0.88747591 |
| ENSMUSG00000048550 | -0.0863759 | 2.69522768 | 0.80795763 | 0.90159325 |
| ENSMUSG00000039795 | -0.0866817 | 4.1121825  | 0.78732541 | 0.8891525  |
| ENSMUSG00000032504 | -0.0867844 | 7.77072954 | 0.77747187 | 0.88469523 |
| ENSMUSG00000042050 | -0.0867966 | 3.1647383  | 0.8030344  | 0.89833226 |
| ENSMUSG00000004707 | -0.0868251 | 7.64072673 | 0.77720109 | 0.88457378 |
| ENSMUSG00000090812 | -0.0868866 | 1.64216456 | 0.82288791 | 0.91044061 |
| ENSMUSG00000010914 | -0.0869265 | 5.05603936 | 0.78099807 | 0.88664972 |
| ENSMUSG00000047766 | -0.0869413 | 2.88431773 | 0.79672984 | 0.89492503 |
| ENSMUSG00000033282 | -0.0870817 | 4.29674557 | 0.79048161 | 0.89113043 |
| ENSMUSG00000053333 | -0.0871071 | 4.73395159 | 0.78210225 | 0.88687234 |
| ENSMUSG00000045328 | -0.087199  | 8.20674488 | 0.7761578  | 0.88420195 |
| ENSMUSG00000090262 | -0.0873928 | 3.9729474  | 0.7879389  | 0.88965899 |
| ENSMUSG00000021302 | -0.0874616 | 5.6360423  | 0.78015812 | 0.88632386 |
| ENSMUSG00000074579 | -0.0875334 | 1.68649725 | 0.90125907 | 0.95327354 |
| ENSMUSG00000051695 | -0.0877044 | 7.64102495 | 0.77465843 | 0.8833153  |
| ENSMUSG00000042015 | -0.0877521 | 4.0364635  | 0.78645751 | 0.88854456 |
| ENSMUSG00000083798 | -0.0879141 | 1.05281346 | 0.92730228 | 0.96419555 |
| ENSMUSG00000041720 | -0.0881193 | 7.53191648 | 0.77406747 | 0.88312601 |
| ENSMUSG00000053950 | -0.0884558 | 5.39025917 | 0.77686606 | 0.88437914 |
| ENSMUSG00000040521 | -0.0887481 | 3.95235964 | 0.77933436 | 0.88586414 |
| ENSMUSG00000023827 | -0.0887999 | 3.76357555 | 0.78069993 | 0.88664972 |
| ENSMUSG00000016946 | -0.0888654 | 5.43567184 | 0.77568555 | 0.88387499 |

|                    |            |            |            |            |
|--------------------|------------|------------|------------|------------|
| ENSMUSG00000034109 | -0.0888843 | 5.26216768 | 0.77646443 | 0.88420195 |
| ENSMUSG00000060261 | -0.0889132 | 6.81616473 | 0.77245008 | 0.88214569 |
| ENSMUSG00000059552 | -0.0889528 | 7.23863088 | 0.77165164 | 0.88198106 |
| ENSMUSG00000028954 | -0.0890646 | 6.798486   | 0.7722103  | 0.88214569 |
| ENSMUSG00000038902 | -0.089117  | 5.91290663 | 0.77367417 | 0.88307292 |
| ENSMUSG00000056131 | -0.0891842 | 4.85658047 | 0.77666144 | 0.88423954 |
| ENSMUSG00000006527 | -0.0893342 | 6.22273086 | 0.77352273 | 0.88299662 |
| ENSMUSG00000055371 | -0.0895547 | 5.77552236 | 0.7738422  | 0.88308088 |
| ENSMUSG00000060636 | -0.0897701 | 7.90054709 | 0.76966335 | 0.88045503 |
| ENSMUSG00000032580 | -0.0898405 | 8.03052274 | 0.76950172 | 0.88045503 |
| ENSMUSG00000021368 | -0.0899197 | 3.43839841 | 0.78168596 | 0.88671643 |
| ENSMUSG00000020832 | -0.0900552 | 4.5659974  | 0.77375334 | 0.88307292 |
| ENSMUSG00000031453 | -0.0900562 | 6.95047879 | 0.76960102 | 0.88045503 |
| ENSMUSG00000028398 | -0.0902029 | 4.76889295 | 0.77516054 | 0.8834751  |
| ENSMUSG00000041623 | -0.0902561 | 3.92971161 | 0.78171487 | 0.88671643 |
| ENSMUSG00000028433 | -0.0903086 | 6.82122693 | 0.76894518 | 0.88009946 |
| ENSMUSG00000005470 | -0.0904541 | 6.76123549 | 0.76881089 | 0.88009946 |
| ENSMUSG00000018362 | -0.0904755 | 8.57601659 | 0.7676008  | 0.87968193 |
| ENSMUSG00000021973 | -0.0907807 | 6.46754866 | 0.76895256 | 0.88009946 |
| ENSMUSG00000097119 | -0.0911954 | 4.1931407  | 0.7755913  | 0.883861   |
| ENSMUSG00000027562 | -0.0912244 | 6.44693945 | 0.76718624 | 0.87939375 |
| ENSMUSG00000022971 | -0.0912445 | 4.84781041 | 0.77199861 | 0.88209717 |
| ENSMUSG00000021785 | -0.0917391 | 5.72859433 | 0.76910769 | 0.88009946 |
| ENSMUSG00000022960 | -0.0919244 | 5.79900986 | 0.76794683 | 0.87989148 |
| ENSMUSG00000040410 | -0.0919538 | 4.17069916 | 0.77700469 | 0.88444359 |
| ENSMUSG00000062054 | -0.0921113 | 4.67945338 | 0.77034061 | 0.88094943 |
| ENSMUSG00000042271 | -0.0921416 | 3.35548785 | 0.78595823 | 0.88844587 |
| ENSMUSG00000034801 | -0.0923668 | 5.69674766 | 0.76751116 | 0.87967269 |
| ENSMUSG00000039901 | -0.0925324 | 4.16425721 | 0.77589082 | 0.88401549 |
| ENSMUSG00000034173 | -0.0926348 | 1.6449838  | 0.79876427 | 0.89547968 |
| ENSMUSG00000029438 | -0.0927277 | 4.62991052 | 0.76844585 | 0.88009946 |
| ENSMUSG00000013629 | -0.0928302 | 7.16812424 | 0.76167962 | 0.87532068 |
| ENSMUSG00000027428 | -0.0928329 | 3.24236304 | 0.78683308 | 0.88887575 |
| ENSMUSG00000040354 | -0.0929212 | 7.32817146 | 0.76162661 | 0.87532068 |
| ENSMUSG00000029414 | -0.0933505 | 7.34267016 | 0.76150802 | 0.87532068 |
| ENSMUSG00000016619 | -0.0933865 | 7.4909515  | 0.76086962 | 0.87527047 |
| ENSMUSG00000034663 | -0.0935494 | 7.21190362 | 0.76111938 | 0.87527047 |
| ENSMUSG00000038855 | -0.0936211 | 5.17894614 | 0.76429971 | 0.87729729 |
| ENSMUSG00000039232 | -0.0936903 | 4.17984939 | 0.77810769 | 0.88504517 |
| ENSMUSG00000031796 | -0.0938831 | 5.06946102 | 0.76521029 | 0.87794903 |
| ENSMUSG00000049775 | -0.093946  | 9.6723891  | 0.75870187 | 0.87379605 |
| ENSMUSG00000030556 | -0.0939845 | 3.62033736 | 0.77966159 | 0.88597162 |
| ENSMUSG00000026648 | -0.0940817 | 5.25154857 | 0.76469487 | 0.87756406 |

|                    |            |            |            |            |
|--------------------|------------|------------|------------|------------|
| ENSMUSG0000006304  | -0.094127  | 9.30601541 | 0.7583446  | 0.87362335 |
| ENSMUSG00000031652 | -0.0941975 | 6.88883863 | 0.76008926 | 0.87488553 |
| ENSMUSG00000055817 | -0.0943851 | 4.22499976 | 0.76666855 | 0.87908067 |
| ENSMUSG00000019996 | -0.0947697 | 4.36880629 | 0.76375725 | 0.87676795 |
| ENSMUSG00000026603 | -0.094954  | 4.91627285 | 0.7603873  | 0.87504179 |
| ENSMUSG00000026605 | -0.0950912 | 7.55288199 | 0.75708015 | 0.87284687 |
| ENSMUSG00000004070 | -0.0953392 | 6.10394426 | 0.75745002 | 0.87299672 |
| ENSMUSG00000020864 | -0.0953471 | 6.55696214 | 0.75696462 | 0.87284687 |
| ENSMUSG00000036249 | -0.0953911 | 5.3942404  | 0.7610368  | 0.87527047 |
| ENSMUSG00000026687 | -0.0955322 | 6.46255476 | 0.75675198 | 0.87272093 |
| ENSMUSG00000066441 | -0.0957188 | 6.62027428 | 0.75606872 | 0.87248292 |
| ENSMUSG00000021156 | -0.0957201 | 6.38793083 | 0.75666812 | 0.87271754 |
| ENSMUSG00000044636 | -0.0958815 | 1.8216283  | 0.79774799 | 0.89492503 |
| ENSMUSG00000035164 | -0.0960963 | 5.91578324 | 0.75830295 | 0.87362335 |
| ENSMUSG00000040359 | -0.0961365 | 6.28516682 | 0.75622198 | 0.87248292 |
| ENSMUSG00000046671 | -0.0962552 | 5.27124513 | 0.75710401 | 0.87284687 |
| ENSMUSG00000022749 | -0.0962631 | 5.07675264 | 0.76132377 | 0.87532068 |
| ENSMUSG00000040247 | -0.0963241 | 5.01046936 | 0.75413324 | 0.87091164 |
| ENSMUSG00000035770 | -0.0964258 | 6.58006211 | 0.75476861 | 0.87136546 |
| ENSMUSG00000023923 | -0.096599  | 5.84850949 | 0.7561684  | 0.87248292 |
| ENSMUSG00000032410 | -0.0966709 | 7.06414613 | 0.75411156 | 0.87091164 |
| ENSMUSG00000054091 | -0.0966938 | 5.20348492 | 0.75632028 | 0.87250298 |
| ENSMUSG00000028251 | -0.0967186 | 4.73779379 | 0.762664   | 0.87579263 |
| ENSMUSG00000000171 | -0.0967888 | 7.19444316 | 0.7526093  | 0.87008348 |
| ENSMUSG00000033773 | -0.0968204 | 5.22736525 | 0.75738228 | 0.87299672 |
| ENSMUSG00000041961 | -0.0968414 | 3.09530062 | 0.77475483 | 0.8833153  |
| ENSMUSG00000019818 | -0.0968942 | 8.70462107 | 0.75174771 | 0.86964678 |
| ENSMUSG00000084803 | -0.0969641 | 1.1279541  | 0.86193651 | 0.93147859 |
| ENSMUSG00000031221 | -0.0969651 | 6.39195665 | 0.75326589 | 0.87047351 |
| ENSMUSG00000024145 | -0.0969709 | 4.29949356 | 0.76527456 | 0.87794903 |
| ENSMUSG00000026395 | -0.0971278 | 10.0621666 | 0.75076652 | 0.8689778  |
| ENSMUSG00000040363 | -0.0973363 | 6.39814165 | 0.75213432 | 0.8698141  |
| ENSMUSG00000075000 | -0.0975496 | 4.58949724 | 0.75873759 | 0.87379605 |
| ENSMUSG00000027598 | -0.0977257 | 7.45763824 | 0.7506125  | 0.86889279 |
| ENSMUSG00000062519 | -0.0978392 | 3.6990716  | 0.77131596 | 0.88178431 |
| ENSMUSG00000049588 | -0.0982105 | 3.81061354 | 0.75802538 | 0.87344221 |
| ENSMUSG00000032712 | -0.0982566 | 7.82304443 | 0.74920234 | 0.86781933 |
| ENSMUSG00000026248 | -0.0984189 | 4.87256673 | 0.75323757 | 0.87047351 |
| ENSMUSG00000038462 | -0.098808  | 6.95403491 | 0.74780975 | 0.86715681 |
| ENSMUSG00000056145 | -0.098931  | 5.56376214 | 0.75225823 | 0.86986412 |
| ENSMUSG00000029617 | -0.0990012 | 7.0946339  | 0.74782626 | 0.86715681 |
| ENSMUSG00000022948 | -0.0991045 | 2.11493104 | 0.77645235 | 0.88420195 |
| ENSMUSG00000043542 | -0.0991511 | 1.67568543 | 0.80271601 | 0.89816242 |

|                    |            |            |            |            |
|--------------------|------------|------------|------------|------------|
| ENSMUSG00000026499 | -0.0991867 | 6.45139552 | 0.74836076 | 0.86759002 |
| ENSMUSG00000003235 | -0.0993627 | 7.04364017 | 0.7458456  | 0.86597749 |
| ENSMUSG00000027300 | -0.0993787 | 4.05022601 | 0.75326955 | 0.87047351 |
| ENSMUSG00000015668 | -0.0994918 | 5.56308712 | 0.7489426  | 0.86781933 |
| ENSMUSG00000043284 | -0.0996677 | 3.92400449 | 0.74806888 | 0.86734489 |
| ENSMUSG00000033502 | -0.1001036 | 5.05959622 | 0.75157272 | 0.86958044 |
| ENSMUSG00000003752 | -0.1002017 | 2.50631667 | 0.76859538 | 0.88009946 |
| ENSMUSG00000048012 | -0.1004047 | 2.67625832 | 0.76780162 | 0.87981858 |
| ENSMUSG00000031171 | -0.1008846 | 4.86232734 | 0.74556222 | 0.86574168 |
| ENSMUSG00000004665 | -0.1009131 | 5.88974343 | 0.7435056  | 0.86424547 |
| ENSMUSG00000030610 | -0.101095  | 2.78101481 | 0.75906399 | 0.87398527 |
| ENSMUSG00000031167 | -0.1012342 | 8.64208217 | 0.74072757 | 0.86252578 |
| ENSMUSG00000026355 | -0.1014064 | 9.26775424 | 0.74022575 | 0.86225448 |
| ENSMUSG00000028138 | -0.1014298 | 7.03685035 | 0.74114853 | 0.86268905 |
| ENSMUSG00000026087 | -0.1015095 | 6.01017021 | 0.74231402 | 0.86345749 |
| ENSMUSG00000096632 | -0.1015113 | 3.38877465 | 0.75113513 | 0.86931114 |
| ENSMUSG00000021794 | -0.1020794 | 7.86875332 | 0.73930994 | 0.86200869 |
| ENSMUSG00000038175 | -0.1021534 | 3.95632763 | 0.75347308 | 0.87061541 |
| ENSMUSG00000008822 | -0.1021557 | 1.03234449 | 0.78001745 | 0.88628261 |
| ENSMUSG00000022801 | -0.1022733 | 6.17862188 | 0.74134932 | 0.86268905 |
| ENSMUSG00000029427 | -0.1025665 | 5.98469817 | 0.73983791 | 0.86218661 |
| ENSMUSG00000030245 | -0.1026964 | 6.16595521 | 0.7397693  | 0.86218661 |
| ENSMUSG00000027286 | -0.1027897 | 4.75729125 | 0.7473817  | 0.8671075  |
| ENSMUSG00000003429 | -0.1030916 | 9.90621593 | 0.73590086 | 0.86009338 |
| ENSMUSG00000033323 | -0.1031241 | 5.04392698 | 0.74101768 | 0.86268905 |
| ENSMUSG00000030965 | -0.1033688 | 5.64360778 | 0.74024035 | 0.86225448 |
| ENSMUSG00000058240 | -0.103465  | 4.91692332 | 0.74313896 | 0.86423062 |
| ENSMUSG00000027884 | -0.1034831 | 5.9842061  | 0.73878072 | 0.86185756 |
| ENSMUSG00000057367 | -0.1035487 | 7.27933238 | 0.7365424  | 0.86050922 |
| ENSMUSG00000026872 | -0.1037026 | 6.93778715 | 0.73658759 | 0.86050922 |
| ENSMUSG00000042605 | -0.1037801 | 4.49010019 | 0.74488137 | 0.86513739 |
| ENSMUSG00000053838 | -0.1037876 | 5.96081734 | 0.73690854 | 0.86073195 |
| ENSMUSG00000072915 | -0.1039488 | 3.01934489 | 0.75356882 | 0.87063275 |
| ENSMUSG00000038533 | -0.104222  | 5.44262276 | 0.73975128 | 0.86218661 |
| ENSMUSG00000020652 | -0.1043706 | 4.9177807  | 0.73986229 | 0.86218661 |
| ENSMUSG00000062232 | -0.1045378 | 3.55742258 | 0.75619244 | 0.87248292 |
| ENSMUSG00000024993 | -0.1045582 | 5.07234003 | 0.74129962 | 0.86268905 |
| ENSMUSG00000025353 | -0.104597  | 5.93814984 | 0.73521544 | 0.85965123 |
| ENSMUSG00000016308 | -0.1046143 | 5.94261141 | 0.7363271  | 0.86039309 |
| ENSMUSG00000027879 | -0.104663  | 6.62747273 | 0.73473114 | 0.85936449 |
| ENSMUSG00000005078 | -0.1047364 | 4.16980347 | 0.74911335 | 0.86781933 |
| ENSMUSG00000021823 | -0.1049198 | 4.2788566  | 0.7449837  | 0.86516307 |
| ENSMUSG00000021982 | -0.1049749 | 4.17742654 | 0.74125187 | 0.86268905 |

|                    |            |            |            |            |
|--------------------|------------|------------|------------|------------|
| ENSMUSG00000028821 | -0.1049944 | 5.88347555 | 0.73423307 | 0.85915467 |
| ENSMUSG00000020038 | -0.1051155 | 4.86124329 | 0.73927886 | 0.86200869 |
| ENSMUSG00000031555 | -0.1051434 | 6.84401331 | 0.73300669 | 0.85837161 |
| ENSMUSG00000034620 | -0.105201  | 4.81155195 | 0.73922927 | 0.86200869 |
| ENSMUSG00000041560 | -0.1052251 | 6.37420869 | 0.73175875 | 0.85756209 |
| ENSMUSG00000008435 | -0.105262  | 4.18759553 | 0.73847914 | 0.86169217 |
| ENSMUSG00000008958 | -0.1054683 | 4.12103912 | 0.73591261 | 0.86009338 |
| ENSMUSG00000053119 | -0.1054727 | 6.0354241  | 0.73327076 | 0.85849439 |
| ENSMUSG00000030752 | -0.1055912 | 3.52613823 | 0.73693788 | 0.86073195 |
| ENSMUSG00000030555 | -0.1057307 | 1.26403082 | 0.83905554 | 0.9190733  |
| ENSMUSG00000034210 | -0.1058735 | 6.62000285 | 0.73158349 | 0.85744989 |
| ENSMUSG00000019796 | -0.105898  | 3.41137039 | 0.75473619 | 0.87136546 |
| ENSMUSG00000029199 | -0.1061113 | 5.37245469 | 0.73380902 | 0.85892476 |
| ENSMUSG00000060336 | -0.106232  | 2.57323259 | 0.77948487 | 0.88586414 |
| ENSMUSG00000032757 | -0.1062782 | 4.64300563 | 0.73803599 | 0.86162565 |
| ENSMUSG00000048351 | -0.1063596 | 4.18902172 | 0.73847914 | 0.86169217 |
| ENSMUSG00000027618 | -0.106949  | 5.1472984  | 0.73195824 | 0.85760675 |
| ENSMUSG00000021218 | -0.1070113 | 9.83628547 | 0.72638352 | 0.85321934 |
| ENSMUSG00000090015 | -0.1070636 | 3.34475867 | 0.75241327 | 0.86995011 |
| ENSMUSG00000036223 | -0.1072159 | 4.34957049 | 0.73632862 | 0.86039309 |
| ENSMUSG00000031004 | -0.1073581 | 10.4978683 | 0.72540738 | 0.8529024  |
| ENSMUSG00000046442 | -0.1073896 | 3.69950835 | 0.74645202 | 0.8664917  |
| ENSMUSG00000029047 | -0.107477  | 2.17319838 | 0.74896461 | 0.86781933 |
| ENSMUSG00000027498 | -0.1075923 | 5.64512208 | 0.72807455 | 0.85470909 |
| ENSMUSG00000035620 | -0.1077915 | 4.27076029 | 0.73939824 | 0.86201844 |
| ENSMUSG00000009927 | -0.1078058 | 9.47677615 | 0.72446226 | 0.8529024  |
| ENSMUSG00000052488 | -0.1080146 | 6.17810752 | 0.72535268 | 0.8529024  |
| ENSMUSG00000031371 | -0.1080951 | 4.96714482 | 0.72982086 | 0.85603526 |
| ENSMUSG00000038416 | -0.1090268 | 6.85338359 | 0.72342564 | 0.8525381  |
| ENSMUSG00000004789 | -0.1090363 | 7.96424491 | 0.72179377 | 0.85152871 |
| ENSMUSG00000047603 | -0.1091617 | 2.38870563 | 0.76622396 | 0.87875776 |
| ENSMUSG00000021576 | -0.1091789 | 6.24053334 | 0.72393691 | 0.85265789 |
| ENSMUSG00000004455 | -0.1096023 | 8.23055816 | 0.7205896  | 0.85031631 |
| ENSMUSG00000091264 | -0.1096326 | 4.60124122 | 0.73129777 | 0.85720817 |
| ENSMUSG00000020272 | -0.1096831 | 5.24218256 | 0.7237942  | 0.85265789 |
| ENSMUSG00000059495 | -0.1101268 | 5.45354141 | 0.7263211  | 0.85321934 |
| ENSMUSG00000028603 | -0.1102948 | 6.36778061 | 0.72063484 | 0.85031631 |
| ENSMUSG00000035329 | -0.1103144 | 5.6207088  | 0.72466356 | 0.8529024  |
| ENSMUSG00000017146 | -0.110379  | 7.15511408 | 0.71978719 | 0.84981225 |
| ENSMUSG00000041225 | -0.1105905 | 5.5325637  | 0.72364919 | 0.85259837 |
| ENSMUSG00000020120 | -0.1108419 | 7.54188788 | 0.71840668 | 0.84892688 |
| ENSMUSG00000043257 | -0.1108772 | 3.00250642 | 0.74052271 | 0.86240466 |
| ENSMUSG00000017405 | -0.1109067 | 2.67195388 | 0.75405236 | 0.87091164 |

|                    |            |            |            |            |
|--------------------|------------|------------|------------|------------|
| ENSMUSG00000020697 | -0.1109239 | 6.70574525 | 0.71878013 | 0.84892688 |
| ENSMUSG00000032328 | -0.1110604 | 7.21900451 | 0.71831364 | 0.84892688 |
| ENSMUSG00000003154 | -0.1112365 | 4.44753812 | 0.72259585 | 0.85210209 |
| ENSMUSG00000035354 | -0.111258  | 6.80750502 | 0.71807669 | 0.84892688 |
| ENSMUSG00000031511 | -0.1112951 | 5.52692755 | 0.72054373 | 0.85031631 |
| ENSMUSG00000028932 | -0.1113115 | 7.83419955 | 0.71648945 | 0.8481852  |
| ENSMUSG00000045854 | -0.1116051 | 3.90014921 | 0.72813542 | 0.85470909 |
| ENSMUSG00000025786 | -0.1116826 | 7.01005886 | 0.71620121 | 0.84808541 |
| ENSMUSG00000028874 | -0.1117676 | 1.55449036 | 0.76241454 | 0.8755994  |
| ENSMUSG00000015994 | -0.1118316 | 6.26698967 | 0.71754108 | 0.84866618 |
| ENSMUSG00000028127 | -0.1118453 | 5.93680561 | 0.71884567 | 0.84892688 |
| ENSMUSG00000097636 | -0.1118689 | 2.73346876 | 0.75202597 | 0.86978207 |
| ENSMUSG00000022526 | -0.1118735 | 4.45126786 | 0.72315803 | 0.8523922  |
| ENSMUSG00000025580 | -0.1119357 | 6.85339701 | 0.71517189 | 0.84779748 |
| ENSMUSG00000014547 | -0.1120906 | 4.13914186 | 0.72513711 | 0.8529024  |
| ENSMUSG00000021171 | -0.1121429 | 6.2761781  | 0.71735467 | 0.84866618 |
| ENSMUSG00000056493 | -0.1124598 | 5.60939369 | 0.71613636 | 0.84808541 |
| ENSMUSG00000048668 | -0.1124872 | 5.13535375 | 0.71660484 | 0.84819082 |
| ENSMUSG00000021594 | -0.1125214 | 1.11764625 | 0.79032088 | 0.89113043 |
| ENSMUSG00000097145 | -0.1126102 | 3.41570281 | 0.74052923 | 0.86240466 |
| ENSMUSG00000025016 | -0.1131718 | 9.00272556 | 0.71161683 | 0.84553503 |
| ENSMUSG00000028622 | -0.1134415 | 6.24797585 | 0.71236377 | 0.846112   |
| ENSMUSG00000034177 | -0.1135749 | 1.82858213 | 0.79774799 | 0.89492503 |
| ENSMUSG00000029028 | -0.1137282 | 6.00648746 | 0.71241626 | 0.846112   |
| ENSMUSG00000058900 | -0.1137802 | 4.11753963 | 0.7310356  | 0.85699401 |
| ENSMUSG00000068917 | -0.1138778 | 5.72150397 | 0.71264957 | 0.8461311  |
| ENSMUSG00000033557 | -0.1139441 | 6.70525727 | 0.71152279 | 0.84551644 |
| ENSMUSG00000024346 | -0.1139825 | 5.48348238 | 0.71368548 | 0.84644245 |
| ENSMUSG00000027341 | -0.1139922 | 5.01999316 | 0.71725584 | 0.84866618 |
| ENSMUSG00000030718 | -0.1143833 | 5.31381691 | 0.71315822 | 0.84634074 |
| ENSMUSG00000017176 | -0.1143933 | 5.14526933 | 0.7129757  | 0.84629298 |
| ENSMUSG00000035572 | -0.1144072 | 5.7057726  | 0.71329151 | 0.84640578 |
| ENSMUSG00000073000 | -0.1144678 | 1.35625715 | 0.73041702 | 0.85654819 |
| ENSMUSG00000056234 | -0.1145092 | 4.98257563 | 0.71652144 | 0.8481852  |
| ENSMUSG00000045751 | -0.1146878 | 6.47887318 | 0.71061346 | 0.84512009 |
| ENSMUSG00000060152 | -0.1147327 | 5.20017355 | 0.71132287 | 0.84537204 |
| ENSMUSG00000015776 | -0.1148155 | 5.63421442 | 0.710778   | 0.84519021 |
| ENSMUSG00000020807 | -0.1148409 | 4.12188506 | 0.72235284 | 0.85190868 |
| ENSMUSG00000025907 | -0.1150737 | 6.22643599 | 0.71113537 | 0.84524235 |
| ENSMUSG00000032386 | -0.1151038 | 6.06645188 | 0.71036489 | 0.84497849 |
| ENSMUSG00000034636 | -0.1151911 | 6.90355305 | 0.70863918 | 0.84348399 |
| ENSMUSG00000003437 | -0.1154667 | 6.52374502 | 0.70752255 | 0.84259607 |
| ENSMUSG00000024454 | -0.1156484 | 6.92475904 | 0.70672741 | 0.84223101 |

|                    |            |            |            |            |
|--------------------|------------|------------|------------|------------|
| ENSMUSG00000027999 | -0.1157785 | 3.6080731  | 0.71721402 | 0.84866618 |
| ENSMUSG00000047388 | -0.1159049 | 5.20734612 | 0.70943272 | 0.84424216 |
| ENSMUSG00000005510 | -0.1159205 | 6.05301123 | 0.70758067 | 0.84259607 |
| ENSMUSG00000039810 | -0.1162241 | 3.81253151 | 0.71755419 | 0.84866618 |
| ENSMUSG00000079426 | -0.1165121 | 7.38210819 | 0.70433229 | 0.8406773  |
| ENSMUSG00000033478 | -0.1166015 | 4.60948472 | 0.71250214 | 0.84612081 |
| ENSMUSG00000036850 | -0.1167565 | 4.0599143  | 0.71568662 | 0.84803477 |
| ENSMUSG00000030534 | -0.1168004 | 5.14632864 | 0.70741169 | 0.84259607 |
| ENSMUSG00000075028 | -0.1168685 | 2.85403876 | 0.72562219 | 0.8529024  |
| ENSMUSG00000064337 | -0.1169417 | 8.47420409 | 0.70252593 | 0.83985354 |
| ENSMUSG00000039357 | -0.1173581 | 3.53743759 | 0.71831384 | 0.84892688 |
| ENSMUSG00000034263 | -0.1174632 | 6.31679486 | 0.70357954 | 0.84022461 |
| ENSMUSG00000038290 | -0.1175852 | 5.83600961 | 0.70477152 | 0.84084533 |
| ENSMUSG00000090100 | -0.1176254 | 3.30333064 | 0.72893185 | 0.85545773 |
| ENSMUSG00000030614 | -0.117659  | 4.59495495 | 0.70977403 | 0.84446195 |
| ENSMUSG00000021254 | -0.1177798 | 4.36476965 | 0.7071538  | 0.84245985 |
| ENSMUSG00000028081 | -0.1181671 | 10.2184941 | 0.69902751 | 0.8374141  |
| ENSMUSG00000029640 | -0.1182957 | 5.98802546 | 0.70293373 | 0.83998583 |
| ENSMUSG00000035248 | -0.1183368 | 6.91193154 | 0.70094209 | 0.83867297 |
| ENSMUSG00000000244 | -0.1183916 | 5.13588933 | 0.70478495 | 0.84084533 |
| ENSMUSG00000033031 | -0.118431  | 7.51986633 | 0.6999265  | 0.83782965 |
| ENSMUSG00000024019 | -0.1186378 | 2.61667446 | 0.73298917 | 0.85837161 |
| ENSMUSG00000026305 | -0.1186514 | 7.27995516 | 0.69910374 | 0.8374141  |
| ENSMUSG00000022451 | -0.118805  | 5.96117501 | 0.7013224  | 0.8388488  |
| ENSMUSG00000014453 | -0.1188293 | 5.51989517 | 0.70233407 | 0.83978517 |
| ENSMUSG00000074735 | -0.1191368 | 3.0261217  | 0.73518419 | 0.85965123 |
| ENSMUSG00000024083 | -0.1192772 | 6.12692184 | 0.70020739 | 0.83807286 |
| ENSMUSG00000060681 | -0.1196157 | 4.74099137 | 0.70473812 | 0.84084533 |
| ENSMUSG00000019715 | -0.1196201 | 6.25649777 | 0.69815685 | 0.83707733 |
| ENSMUSG00000042487 | -0.1198851 | 5.7701255  | 0.69821129 | 0.83707733 |
| ENSMUSG00000021902 | -0.1200875 | 4.17036026 | 0.70380063 | 0.84032175 |
| ENSMUSG00000060073 | -0.1206063 | 8.24425277 | 0.693917   | 0.83471324 |
| ENSMUSG00000025532 | -0.1207642 | 5.20859292 | 0.69866408 | 0.8374141  |
| ENSMUSG00000051341 | -0.120811  | 5.39470951 | 0.7011649  | 0.83875344 |
| ENSMUSG00000020349 | -0.1209257 | 8.72324382 | 0.69285842 | 0.83422377 |
| ENSMUSG00000010406 | -0.1209942 | 3.55023739 | 0.70671241 | 0.84223101 |
| ENSMUSG00000020739 | -0.1210195 | 7.29895175 | 0.69306911 | 0.83422377 |
| ENSMUSG00000018287 | -0.1213811 | 5.05282713 | 0.69526763 | 0.83513847 |
| ENSMUSG00000035401 | -0.1214081 | 6.03589685 | 0.6950004  | 0.83506229 |
| ENSMUSG00000025402 | -0.121425  | 3.00285236 | 0.71107764 | 0.84524235 |
| ENSMUSG00000054823 | -0.1215718 | 7.56705308 | 0.69214116 | 0.83378578 |
| ENSMUSG00000026869 | -0.1216263 | 6.7496896  | 0.69305288 | 0.83422377 |
| ENSMUSG00000032112 | -0.1217481 | 5.16710408 | 0.69493564 | 0.83506229 |



|                    |            |            |            |            |
|--------------------|------------|------------|------------|------------|
| ENSMUSG00000060862 | -0.1217858 | 4.63871121 | 0.69701544 | 0.83647886 |
| ENSMUSG00000038122 | -0.1218871 | 3.51660556 | 0.71456486 | 0.84726415 |
| ENSMUSG00000040596 | -0.1220024 | 5.85303265 | 0.69418672 | 0.83475024 |
| ENSMUSG00000027940 | -0.122056  | 8.48478407 | 0.69000862 | 0.83282517 |
| ENSMUSG00000038762 | -0.1222996 | 7.59903454 | 0.68963085 | 0.83262193 |
| ENSMUSG00000055069 | -0.1223382 | 2.71909191 | 0.72549785 | 0.8529024  |
| ENSMUSG00000070493 | -0.1223921 | 6.65415196 | 0.69119566 | 0.83335668 |
| ENSMUSG00000055991 | -0.1224989 | 3.5361097  | 0.70396702 | 0.84042736 |
| ENSMUSG00000079477 | -0.122554  | 8.0819249  | 0.68906042 | 0.83249245 |
| ENSMUSG00000061436 | -0.1225765 | 6.59340924 | 0.69121222 | 0.83335668 |
| ENSMUSG00000048732 | -0.1226054 | 4.2377298  | 0.7035328  | 0.84022461 |
| ENSMUSG00000035232 | -0.1226846 | 6.50819776 | 0.69113586 | 0.83335668 |
| ENSMUSG00000004446 | -0.1226972 | 6.58201272 | 0.69003087 | 0.83282517 |
| ENSMUSG00000021022 | -0.1227683 | 5.71149577 | 0.6937448  | 0.83469195 |
| ENSMUSG00000026701 | -0.1228205 | 6.69161811 | 0.68962073 | 0.83262193 |
| ENSMUSG00000038482 | -0.1236466 | 7.988183   | 0.68623037 | 0.83046889 |
| ENSMUSG00000031711 | -0.1238183 | 5.9020744  | 0.6890174  | 0.83249245 |
| ENSMUSG00000028788 | -0.1238577 | 9.2223897  | 0.68559175 | 0.83022476 |
| ENSMUSG00000050627 | -0.1239198 | 6.06900878 | 0.68892483 | 0.83249245 |
| ENSMUSG00000025584 | -0.1239277 | 5.00781841 | 0.69401943 | 0.83474297 |
| ENSMUSG00000071253 | -0.1239569 | 5.26061964 | 0.69304902 | 0.83422377 |
| ENSMUSG00000009995 | -0.1240795 | 5.57381112 | 0.68950413 | 0.83262193 |
| ENSMUSG00000021033 | -0.1244541 | 3.04208337 | 0.69945731 | 0.83763994 |
| ENSMUSG00000031774 | -0.1244557 | 5.64808437 | 0.68812821 | 0.83184654 |
| ENSMUSG00000000339 | -0.1245104 | 5.4755118  | 0.68811094 | 0.83184654 |
| ENSMUSG00000021681 | -0.124652  | 6.80557713 | 0.6853376  | 0.83022476 |
| ENSMUSG00000024527 | -0.1247355 | 6.60949977 | 0.68477746 | 0.83001462 |
| ENSMUSG00000047126 | -0.124775  | 11.1545331 | 0.68303925 | 0.82882463 |
| ENSMUSG00000035284 | -0.1249205 | 5.60942333 | 0.69027152 | 0.83292918 |
| ENSMUSG00000049287 | -0.1252456 | 2.87659012 | 0.70809715 | 0.84299866 |
| ENSMUSG00000087687 | -0.1252863 | 3.55882351 | 0.69479537 | 0.83502433 |
| ENSMUSG00000032058 | -0.125448  | 6.81240447 | 0.6836591  | 0.82918113 |
| ENSMUSG00000077450 | -0.1254517 | 5.49262465 | 0.68572072 | 0.8302248  |
| ENSMUSG00000051721 | -0.1255359 | 2.93127299 | 0.71876834 | 0.84892688 |
| ENSMUSG00000040124 | -0.1255418 | 3.01681256 | 0.71338317 | 0.8464214  |
| ENSMUSG00000014402 | -0.125624  | 5.80196856 | 0.68532631 | 0.83022476 |
| ENSMUSG00000026975 | -0.1256848 | 4.59001708 | 0.6901515  | 0.83287755 |
| ENSMUSG00000022404 | -0.1258249 | 6.16958844 | 0.68370536 | 0.82918113 |
| ENSMUSG00000033157 | -0.1259326 | 4.18290439 | 0.69742756 | 0.83660275 |
| ENSMUSG00000078942 | -0.1259896 | 2.5661306  | 0.71064067 | 0.84512009 |
| ENSMUSG00000043067 | -0.1260197 | 6.34995645 | 0.68308408 | 0.82882463 |
| ENSMUSG00000035151 | -0.1261004 | 5.15092223 | 0.68945613 | 0.83262193 |
| ENSMUSG00000006021 | -0.1261329 | 3.48328147 | 0.69365492 | 0.83467693 |

|                    |            |            |            |            |
|--------------------|------------|------------|------------|------------|
| ENSMUSG0000006705  | -0.1261492 | 5.62558007 | 0.68472658 | 0.83001462 |
| ENSMUSG00000027111 | -0.1262732 | 4.86534951 | 0.68860826 | 0.83231915 |
| ENSMUSG00000041781 | -0.1263061 | 7.94889736 | 0.68041671 | 0.82770601 |
| ENSMUSG00000031478 | -0.1264404 | 2.10237139 | 0.75658845 | 0.87271754 |
| ENSMUSG00000024654 | -0.1266231 | 5.07011454 | 0.68532373 | 0.83022476 |
| ENSMUSG00000037111 | -0.1266832 | 6.64681684 | 0.68132026 | 0.82805789 |
| ENSMUSG00000021102 | -0.1270696 | 4.40782535 | 0.68885427 | 0.83249245 |
| ENSMUSG00000055204 | -0.1270722 | 8.53494982 | 0.67822698 | 0.82616059 |
| ENSMUSG00000029433 | -0.1271004 | 5.7786948  | 0.6811665  | 0.82796432 |
| ENSMUSG00000035024 | -0.1271902 | 6.67126311 | 0.67987727 | 0.82729974 |
| ENSMUSG00000024271 | -0.1271922 | 7.40845467 | 0.67852844 | 0.82639308 |
| ENSMUSG00000021518 | -0.1272815 | 6.5925361  | 0.67938177 | 0.82700677 |
| ENSMUSG00000029462 | -0.1272861 | 5.82204572 | 0.68161778 | 0.82816228 |
| ENSMUSG00000020716 | -0.1273335 | 5.5948229  | 0.68313921 | 0.82882463 |
| ENSMUSG00000009112 | -0.1276997 | 6.18616115 | 0.67890331 | 0.82661097 |
| ENSMUSG00000024780 | -0.1280351 | 5.3818188  | 0.68175865 | 0.82821734 |
| ENSMUSG00000064128 | -0.1280494 | 5.77376635 | 0.68094514 | 0.82796432 |
| ENSMUSG00000020070 | -0.1280792 | 4.64269443 | 0.68546868 | 0.83022476 |
| ENSMUSG00000019373 | -0.1284826 | 7.07767181 | 0.67602441 | 0.82450206 |
| ENSMUSG00000074030 | -0.128483  | 4.87329652 | 0.6832577  | 0.82882463 |
| ENSMUSG00000006715 | -0.1291942 | 6.39342909 | 0.67522245 | 0.82389669 |
| ENSMUSG00000063663 | -0.1292401 | 5.87410238 | 0.67791512 | 0.82606064 |
| ENSMUSG00000026000 | -0.1293112 | 3.83350055 | 0.68231207 | 0.82851631 |
| ENSMUSG00000021385 | -0.1295088 | 4.97056093 | 0.68053526 | 0.82775685 |
| ENSMUSG00000062822 | -0.1295181 | 5.82359763 | 0.67678935 | 0.8251302  |
| ENSMUSG00000041219 | -0.1295192 | 7.90444218 | 0.67279204 | 0.82227802 |
| ENSMUSG00000014550 | -0.1296261 | 5.81912839 | 0.67556772 | 0.8241655  |
| ENSMUSG00000073409 | -0.1297971 | 7.860656   | 0.6719278  | 0.82173615 |
| ENSMUSG00000097073 | -0.1298618 | 1.49600653 | 0.75202341 | 0.86978207 |
| ENSMUSG00000015165 | -0.1302748 | 8.98374446 | 0.67018751 | 0.82063155 |
| ENSMUSG00000001150 | -0.1305239 | 6.45636776 | 0.67153816 | 0.82139819 |
| ENSMUSG00000030291 | -0.1305603 | 4.7658754  | 0.67978847 | 0.82729974 |
| ENSMUSG00000095253 | -0.1306437 | 3.92709072 | 0.69044107 | 0.83294737 |
| ENSMUSG00000001964 | -0.1312665 | 6.04936835 | 0.67157528 | 0.82139819 |
| ENSMUSG00000035439 | -0.1314805 | 3.72095241 | 0.68239341 | 0.82852179 |
| ENSMUSG00000028911 | -0.1315898 | 5.72357532 | 0.67003642 | 0.82053972 |
| ENSMUSG00000037434 | -0.1317271 | 4.08928438 | 0.68295875 | 0.82882463 |
| ENSMUSG00000037318 | -0.1318109 | 6.55639937 | 0.66859807 | 0.81932801 |
| ENSMUSG00000031386 | -0.1319738 | 8.48371877 | 0.66635977 | 0.81742962 |
| ENSMUSG00000069844 | -0.1322767 | 5.57713858 | 0.67101305 | 0.82108302 |
| ENSMUSG00000060301 | -0.1323416 | 4.66450092 | 0.67807017 | 0.8261115  |
| ENSMUSG00000029681 | -0.1325782 | 3.43524156 | 0.67691923 | 0.8251302  |
| ENSMUSG00000021962 | -0.1328261 | 6.61470896 | 0.66607735 | 0.81731943 |

|                    |            |            |            |            |
|--------------------|------------|------------|------------|------------|
| ENSMUSG00000022270 | -0.1328689 | 5.58809707 | 0.6702772  | 0.8206482  |
| ENSMUSG00000024853 | -0.133053  | 8.35947559 | 0.66371563 | 0.81530252 |
| ENSMUSG00000020366 | -0.1332431 | 6.35025059 | 0.66633007 | 0.81742962 |
| ENSMUSG00000031425 | -0.1333576 | 1.47206877 | 0.77636569 | 0.88420195 |
| ENSMUSG00000057835 | -0.1334713 | 2.76322191 | 0.71100377 | 0.84524235 |
| ENSMUSG00000049657 | -0.133622  | 5.10077486 | 0.66819014 | 0.81920901 |
| ENSMUSG00000030469 | -0.133778  | 4.43689363 | 0.67616725 | 0.82458302 |
| ENSMUSG00000026554 | -0.1338739 | 6.61996101 | 0.66333027 | 0.81530252 |
| ENSMUSG00000032705 | -0.1338988 | 4.36776122 | 0.67290463 | 0.82227802 |
| ENSMUSG00000047867 | -0.1345934 | 8.67898523 | 0.66014482 | 0.81313555 |
| ENSMUSG00000032398 | -0.1346763 | 4.72953617 | 0.6685226  | 0.81932801 |
| ENSMUSG00000031950 | -0.1348952 | 5.78327923 | 0.66366716 | 0.81530252 |
| ENSMUSG00000028614 | -0.1349129 | 7.18113275 | 0.66074267 | 0.81350028 |
| ENSMUSG00000061882 | -0.134946  | 1.27727763 | 0.7780151  | 0.88503321 |
| ENSMUSG00000034430 | -0.1349614 | 4.43753386 | 0.66881553 | 0.81932801 |
| ENSMUSG00000031231 | -0.1351169 | 7.0502244  | 0.65998498 | 0.81307233 |
| ENSMUSG00000071014 | -0.1355384 | 5.06869182 | 0.66572232 | 0.8171639  |
| ENSMUSG00000027939 | -0.135636  | 2.2440649  | 0.69609615 | 0.83593552 |
| ENSMUSG00000022412 | -0.1358076 | 5.97450492 | 0.66066296 | 0.81349502 |
| ENSMUSG00000004328 | -0.1360539 | 1.39560873 | 0.70754047 | 0.84259607 |
| ENSMUSG00000030691 | -0.1361777 | 8.29540233 | 0.656722   | 0.81095201 |
| ENSMUSG00000007411 | -0.1362944 | 6.49661413 | 0.65822744 | 0.81179377 |
| ENSMUSG00000020128 | -0.1364438 | 6.93322877 | 0.6576511  | 0.81145176 |
| ENSMUSG00000071632 | -0.1365586 | 3.70054928 | 0.67237345 | 0.82200151 |
| ENSMUSG00000068394 | -0.1365948 | 5.27850121 | 0.66052211 | 0.81341446 |
| ENSMUSG00000030509 | -0.1368647 | 4.6325598  | 0.66681588 | 0.81780308 |
| ENSMUSG00000037957 | -0.1369864 | 4.10786297 | 0.66851158 | 0.81932801 |
| ENSMUSG00000024269 | -0.1370418 | 4.45707622 | 0.66584006 | 0.8171639  |
| ENSMUSG00000030203 | -0.1372218 | 5.25442597 | 0.66157186 | 0.81414937 |
| ENSMUSG00000064181 | -0.1376752 | 3.64312537 | 0.66000775 | 0.81307233 |
| ENSMUSG00000032096 | -0.1377376 | 9.09126704 | 0.65260476 | 0.80827952 |
| ENSMUSG00000001518 | -0.137785  | 3.6604795  | 0.66346875 | 0.81530252 |
| ENSMUSG00000046364 | -0.1378054 | 8.76651165 | 0.65248094 | 0.80821898 |
| ENSMUSG00000045757 | -0.1381334 | 3.06714674 | 0.67564582 | 0.8241655  |
| ENSMUSG00000027678 | -0.1383429 | 8.0336097  | 0.6515956  | 0.80731374 |
| ENSMUSG00000063511 | -0.1384902 | 7.37873267 | 0.6516004  | 0.80731374 |
| ENSMUSG00000064215 | -0.1386067 | 4.88967713 | 0.6553586  | 0.81001571 |
| ENSMUSG00000000934 | -0.1387136 | 3.29127057 | 0.66190555 | 0.81431957 |
| ENSMUSG00000026469 | -0.1388551 | 6.05818093 | 0.6550425  | 0.8099035  |
| ENSMUSG00000034343 | -0.1391567 | 6.03580945 | 0.65295466 | 0.80852717 |
| ENSMUSG00000042148 | -0.1391678 | 4.1059519  | 0.65850472 | 0.81201425 |
| ENSMUSG00000098923 | -0.1393903 | 4.65472942 | 0.65926298 | 0.81260624 |
| ENSMUSG00000056019 | -0.139619  | 4.55893759 | 0.66282278 | 0.81520228 |

|                    |            |            |            |            |
|--------------------|------------|------------|------------|------------|
| ENSMUSG00000022536 | -0.139637  | 8.06940193 | 0.64843066 | 0.80525038 |
| ENSMUSG00000033909 | -0.1397564 | 5.91396727 | 0.64976879 | 0.80624904 |
| ENSMUSG00000036769 | -0.1399259 | 5.17641935 | 0.65729843 | 0.81120465 |
| ENSMUSG00000074748 | -0.1400726 | 7.20990185 | 0.64859186 | 0.80534423 |
| ENSMUSG00000030861 | -0.1402692 | 4.42181732 | 0.65807755 | 0.81170174 |
| ENSMUSG00000058388 | -0.1407166 | 6.19169531 | 0.64932297 | 0.80606641 |
| ENSMUSG00000054920 | -0.1410103 | 5.25010061 | 0.65073636 | 0.80670662 |
| ENSMUSG00000069049 | -0.1410889 | 6.62273523 | 0.65386111 | 0.80908302 |
| ENSMUSG00000029196 | -0.1412603 | 5.36601759 | 0.65004486 | 0.80624904 |
| ENSMUSG00000005583 | -0.141419  | 9.07193626 | 0.64396567 | 0.80197365 |
| ENSMUSG00000037262 | -0.1414365 | 5.1653801  | 0.65089571 | 0.80681142 |
| ENSMUSG00000072704 | -0.1416411 | 4.91424771 | 0.65453194 | 0.80945784 |
| ENSMUSG00000024791 | -0.1416748 | 6.20587442 | 0.64596571 | 0.803573   |
| ENSMUSG00000043716 | -0.14198   | 10.8286034 | 0.64219823 | 0.80099794 |
| ENSMUSG00000030557 | -0.1419821 | 7.19796642 | 0.64414762 | 0.80197365 |
| ENSMUSG00000022514 | -0.1420129 | 4.75662155 | 0.65382685 | 0.80908302 |
| ENSMUSG00000025290 | -0.142031  | 10.1130528 | 0.64219507 | 0.80099794 |
| ENSMUSG00000046962 | -0.1420419 | 4.38584326 | 0.64995965 | 0.80624904 |
| ENSMUSG00000022863 | -0.1421585 | 3.24724815 | 0.66917185 | 0.81966711 |
| ENSMUSG00000036299 | -0.1421958 | 5.44438813 | 0.64718354 | 0.80480019 |
| ENSMUSG00000083902 | -0.1424112 | 1.15482746 | 0.79604826 | 0.89462453 |
| ENSMUSG00000027673 | -0.1428194 | 6.61771537 | 0.64303514 | 0.80158258 |
| ENSMUSG00000037725 | -0.1429627 | 5.90429929 | 0.64460758 | 0.80233704 |
| ENSMUSG00000010911 | -0.1429804 | 4.87625981 | 0.64833868 | 0.80525038 |
| ENSMUSG00000040795 | -0.1429892 | 3.82475986 | 0.65234487 | 0.80814326 |
| ENSMUSG00000042389 | -0.1430178 | 3.6724182  | 0.65403811 | 0.8091255  |
| ENSMUSG00000026430 | -0.1430377 | 6.56419122 | 0.64239049 | 0.80103868 |
| ENSMUSG00000027655 | -0.1431612 | 4.56580272 | 0.64805166 | 0.80516297 |
| ENSMUSG00000058291 | -0.1431913 | 6.33314341 | 0.64353228 | 0.80197365 |
| ENSMUSG00000028563 | -0.1433621 | 3.48998181 | 0.66738359 | 0.81840626 |
| ENSMUSG00000044795 | -0.1434043 | 4.00220181 | 0.65006819 | 0.80624904 |
| ENSMUSG00000078941 | -0.1434776 | 5.39637325 | 0.64489858 | 0.80260661 |
| ENSMUSG00000050213 | -0.1434857 | 5.58038792 | 0.64379654 | 0.80197365 |
| ENSMUSG00000020962 | -0.1435993 | 6.44272794 | 0.64186136 | 0.80085999 |
| ENSMUSG00000032652 | -0.1438011 | 2.86101294 | 0.67384892 | 0.82287247 |
| ENSMUSG00000024750 | -0.1438265 | 6.89007239 | 0.64058484 | 0.80018432 |
| ENSMUSG00000022820 | -0.1440223 | 3.90499287 | 0.65435557 | 0.80933255 |
| ENSMUSG00000026229 | -0.1440732 | 8.60182456 | 0.63791113 | 0.79796237 |
| ENSMUSG00000048439 | -0.1444496 | 4.5049975  | 0.64807257 | 0.80516297 |
| ENSMUSG00000008429 | -0.1447406 | 4.81491929 | 0.64506659 | 0.80272307 |
| ENSMUSG00000046032 | -0.144874  | 5.67554592 | 0.64084998 | 0.80024621 |
| ENSMUSG00000023953 | -0.1448907 | 6.18953571 | 0.63849211 | 0.79822616 |
| ENSMUSG00000022462 | -0.1450926 | 8.05549963 | 0.6359117  | 0.79601529 |

|                    |            |            |            |            |
|--------------------|------------|------------|------------|------------|
| ENSMUSG00000027811 | -0.145128  | 4.42008436 | 0.65037376 | 0.80644253 |
| ENSMUSG00000054792 | -0.1455034 | 4.59704236 | 0.64367311 | 0.80197365 |
| ENSMUSG00000063801 | -0.145576  | 5.55201648 | 0.63930884 | 0.79906195 |
| ENSMUSG00000030801 | -0.1456244 | 4.63934234 | 0.64163695 | 0.80085999 |
| ENSMUSG00000021376 | -0.1456413 | 1.0996267  | 0.79032088 | 0.89113043 |
| ENSMUSG00000036810 | -0.1458035 | 5.60343929 | 0.6401604  | 0.79994087 |
| ENSMUSG00000033114 | -0.145989  | 3.53871666 | 0.66372384 | 0.81530252 |
| ENSMUSG00000040174 | -0.1460589 | 3.91610706 | 0.6459706  | 0.803573   |
| ENSMUSG00000021177 | -0.1461118 | 5.34843646 | 0.63696423 | 0.79712757 |
| ENSMUSG00000026600 | -0.1461692 | 6.79812147 | 0.63523776 | 0.79580392 |
| ENSMUSG00000024246 | -0.1463045 | 3.16674541 | 0.66101329 | 0.81374056 |
| ENSMUSG00000032264 | -0.146311  | 6.59912569 | 0.63473751 | 0.7955994  |
| ENSMUSG00000027406 | -0.1464818 | 6.83909496 | 0.63362287 | 0.79515627 |
| ENSMUSG00000011958 | -0.146807  | 7.05978161 | 0.63287321 | 0.79477217 |
| ENSMUSG00000036438 | -0.1468279 | 8.22176392 | 0.63176587 | 0.79427268 |
| ENSMUSG00000057156 | -0.1470118 | 3.6395818  | 0.65346909 | 0.80890728 |
| ENSMUSG00000029017 | -0.1471407 | 6.61595413 | 0.63300243 | 0.79477217 |
| ENSMUSG00000074629 | -0.1471439 | 1.59767819 | 0.71755733 | 0.84866618 |
| ENSMUSG00000005774 | -0.1473694 | 6.11474801 | 0.63318059 | 0.79490332 |
| ENSMUSG00000045098 | -0.147397  | 6.09260121 | 0.63396945 | 0.79515627 |
| ENSMUSG00000038250 | -0.1475592 | 7.2139467  | 0.63121377 | 0.79400551 |
| ENSMUSG00000005871 | -0.1476089 | 6.75186062 | 0.63205935 | 0.79442051 |
| ENSMUSG00000047804 | -0.1478549 | 6.25610862 | 0.63247104 | 0.79467321 |
| ENSMUSG00000058230 | -0.148003  | 5.65113747 | 0.63377652 | 0.79515627 |
| ENSMUSG00000035967 | -0.1481003 | 6.27070475 | 0.63218911 | 0.79449101 |
| ENSMUSG00000049659 | -0.1481621 | 7.61584958 | 0.62930501 | 0.79252893 |
| ENSMUSG00000000127 | -0.1482048 | 0.98216143 | 0.73814205 | 0.86162565 |
| ENSMUSG00000018923 | -0.1483119 | 4.01324383 | 0.63814487 | 0.79806961 |
| ENSMUSG00000007338 | -0.1484963 | 5.96023947 | 0.63097759 | 0.79389073 |
| ENSMUSG00000030652 | -0.1490592 | 3.28972272 | 0.63787986 | 0.79796237 |
| ENSMUSG00000056531 | -0.1495306 | 4.39870281 | 0.64184794 | 0.80085999 |
| ENSMUSG00000029826 | -0.1496766 | 8.65838012 | 0.62492224 | 0.78912897 |
| ENSMUSG00000001376 | -0.149743  | 6.20986846 | 0.62828411 | 0.79170552 |
| ENSMUSG00000019984 | -0.1498181 | 6.32918449 | 0.62767885 | 0.79114527 |
| ENSMUSG00000035725 | -0.1501324 | 5.65076587 | 0.62987407 | 0.79286899 |
| ENSMUSG00000020495 | -0.1501601 | 5.66279335 | 0.62769278 | 0.79114527 |
| ENSMUSG00000051469 | -0.1501781 | 6.41703372 | 0.62658713 | 0.79039836 |
| ENSMUSG00000020412 | -0.1504079 | 6.14360419 | 0.62546121 | 0.78962464 |
| ENSMUSG00000074576 | -0.1504524 | 2.40099042 | 0.66468803 | 0.81630745 |
| ENSMUSG00000046675 | -0.1506333 | 5.03535156 | 0.63159736 | 0.79427268 |
| ENSMUSG00000028898 | -0.1506524 | 4.68917828 | 0.63081387 | 0.79378025 |
| ENSMUSG00000078622 | -0.151244  | 7.21631833 | 0.62273663 | 0.78821501 |
| ENSMUSG00000026273 | -0.1512757 | 4.33153549 | 0.63397196 | 0.79515627 |

|                    |            |            |            |            |
|--------------------|------------|------------|------------|------------|
| ENSMUSG00000026048 | -0.1513279 | 5.03888613 | 0.62994265 | 0.79286899 |
| ENSMUSG00000021972 | -0.151398  | 5.16445078 | 0.62784791 | 0.79124831 |
| ENSMUSG00000031729 | -0.1514722 | 6.77513019 | 0.62258727 | 0.78821501 |
| ENSMUSG00000034269 | -0.1517689 | 8.35502809 | 0.62020212 | 0.78692651 |
| ENSMUSG00000024997 | -0.1520224 | 7.71539554 | 0.62001802 | 0.78680564 |
| ENSMUSG00000034152 | -0.1520489 | 6.69330151 | 0.62103504 | 0.78738749 |
| ENSMUSG00000043411 | -0.1521166 | 7.23015413 | 0.62033218 | 0.78692651 |
| ENSMUSG00000070697 | -0.152367  | 7.0434437  | 0.61988666 | 0.78680564 |
| ENSMUSG00000061313 | -0.1525167 | 5.37074329 | 0.62438136 | 0.78872304 |
| ENSMUSG00000017286 | -0.1526563 | 6.31261233 | 0.62064314 | 0.78713579 |
| ENSMUSG00000035765 | -0.1529839 | 5.22557266 | 0.62325784 | 0.78864486 |
| ENSMUSG00000046185 | -0.1529954 | 5.07601755 | 0.62432056 | 0.78872304 |
| ENSMUSG00000034187 | -0.1532852 | 6.25367683 | 0.61887969 | 0.78591599 |
| ENSMUSG00000050088 | -0.1533211 | 4.13295512 | 0.63337813 | 0.79505875 |
| ENSMUSG00000004221 | -0.1533969 | 5.96539254 | 0.62026983 | 0.78692651 |
| ENSMUSG00000051506 | -0.1534429 | 9.03617216 | 0.6159125  | 0.78413274 |
| ENSMUSG00000015316 | -0.1537217 | 4.35607158 | 0.62852784 | 0.79171634 |
| ENSMUSG00000038594 | -0.153768  | 3.52168892 | 0.64710399 | 0.80479408 |
| ENSMUSG00000033382 | -0.1538413 | 7.33257472 | 0.61684571 | 0.78462657 |
| ENSMUSG00000048581 | -0.1538915 | 1.90001132 | 0.70458917 | 0.84084533 |
| ENSMUSG00000022812 | -0.1539079 | 6.44309132 | 0.61782809 | 0.78496222 |
| ENSMUSG00000061613 | -0.1539975 | 6.85718126 | 0.61595467 | 0.78413274 |
| ENSMUSG00000040731 | -0.1542756 | 8.23896182 | 0.61422709 | 0.78277298 |
| ENSMUSG00000037935 | -0.1543045 | 6.56643002 | 0.61611493 | 0.78413274 |
| ENSMUSG00000042042 | -0.1544121 | 4.9150447  | 0.6261796  | 0.79034654 |
| ENSMUSG00000042472 | -0.1544554 | 5.78597364 | 0.61807437 | 0.78507821 |
| ENSMUSG00000061759 | -0.1545458 | 5.86157448 | 0.61784952 | 0.78496222 |
| ENSMUSG00000057469 | -0.154693  | 5.55898081 | 0.61791027 | 0.78496222 |
| ENSMUSG00000012076 | -0.1547822 | 4.86180037 | 0.62254769 | 0.78821501 |
| ENSMUSG00000017686 | -0.1549157 | 6.64913459 | 0.61538443 | 0.78392315 |
| ENSMUSG00000046603 | -0.1549535 | 3.58161094 | 0.63383466 | 0.79515627 |
| ENSMUSG00000086859 | -0.154957  | 2.32181772 | 0.66379415 | 0.81530252 |
| ENSMUSG00000035266 | -0.1550186 | 5.44928728 | 0.61757    | 0.78496222 |
| ENSMUSG00000020459 | -0.1550755 | 5.89635389 | 0.61761318 | 0.78496222 |
| ENSMUSG00000079469 | -0.1551295 | 4.67790107 | 0.62187244 | 0.7877684  |
| ENSMUSG00000089844 | -0.1551815 | 5.51451273 | 0.61721503 | 0.78491119 |
| ENSMUSG00000043733 | -0.1551815 | 7.3278018  | 0.61299918 | 0.78194737 |
| ENSMUSG00000038816 | -0.1551837 | 5.07301081 | 0.62061049 | 0.78713579 |
| ENSMUSG00000041879 | -0.1552336 | 7.65870726 | 0.61257007 | 0.78149245 |
| ENSMUSG00000022722 | -0.1554591 | 2.8451756  | 0.64973724 | 0.80624904 |
| ENSMUSG00000024981 | -0.1555219 | 9.06029864 | 0.61121205 | 0.78022144 |
| ENSMUSG00000000399 | -0.155577  | 6.94761201 | 0.61252393 | 0.78149245 |
| ENSMUSG00000050043 | -0.1556207 | 6.37117342 | 0.61402712 | 0.78270312 |

|                    |            |            |            |            |
|--------------------|------------|------------|------------|------------|
| ENSMUSG0000001151  | -0.1556247 | 6.0410324  | 0.61411165 | 0.78271835 |
| ENSMUSG00000041498 | -0.1558601 | 6.39234695 | 0.61317842 | 0.78199102 |
| ENSMUSG00000020430 | -0.15631   | 7.49253431 | 0.60994417 | 0.77922089 |
| ENSMUSG00000030678 | -0.1563841 | 6.65384778 | 0.6104928  | 0.77940596 |
| ENSMUSG00000024474 | -0.1565489 | 8.0257714  | 0.60941639 | 0.7789435  |
| ENSMUSG00000097994 | -0.1567684 | 1.99516368 | 0.68204932 | 0.82829053 |
| ENSMUSG00000017776 | -0.1569113 | 7.00190911 | 0.61006695 | 0.77922089 |
| ENSMUSG00000003135 | -0.1570558 | 5.96243665 | 0.61186029 | 0.78095648 |
| ENSMUSG00000024404 | -0.157138  | 7.22263937 | 0.60899106 | 0.77888289 |
| ENSMUSG00000038848 | -0.1571673 | 7.01797979 | 0.6089172  | 0.77888289 |
| ENSMUSG00000043279 | -0.1572474 | 6.84387572 | 0.6093178  | 0.77891253 |
| ENSMUSG00000028078 | -0.1572565 | 3.4328617  | 0.62646121 | 0.79039836 |
| ENSMUSG00000039804 | -0.1573011 | 5.87296257 | 0.61022099 | 0.77932533 |
| ENSMUSG00000029863 | -0.1574328 | 6.91268718 | 0.60874383 | 0.77885298 |
| ENSMUSG00000052915 | -0.1575173 | 7.06879795 | 0.6082481  | 0.77864287 |
| ENSMUSG00000038702 | -0.1575683 | 1.76676853 | 0.6574405  | 0.81128715 |
| ENSMUSG00000051166 | -0.1577045 | 4.32861498 | 0.62183879 | 0.7877684  |
| ENSMUSG00000032525 | -0.1578585 | 8.52234563 | 0.60614824 | 0.77716117 |
| ENSMUSG00000024581 | -0.1579033 | 4.75282975 | 0.61631118 | 0.78422416 |
| ENSMUSG00000024436 | -0.158011  | 5.96460015 | 0.60791274 | 0.77831307 |
| ENSMUSG00000021572 | -0.158042  | 3.55247599 | 0.62725841 | 0.7908751  |
| ENSMUSG00000019927 | -0.1580971 | 4.53217398 | 0.61968802 | 0.78673872 |
| ENSMUSG00000032840 | -0.1582856 | 4.14306882 | 0.61401419 | 0.78270312 |
| ENSMUSG00000060032 | -0.1586339 | 2.87590115 | 0.63506811 | 0.79572479 |
| ENSMUSG00000034587 | -0.1586859 | 2.15242919 | 0.661679   | 0.8141883  |
| ENSMUSG00000042508 | -0.1586894 | 6.08285381 | 0.60838695 | 0.77864287 |
| ENSMUSG00000021619 | -0.1590908 | 3.01849284 | 0.63759126 | 0.79774732 |
| ENSMUSG00000027709 | -0.1592851 | 5.16211475 | 0.61050094 | 0.77940596 |
| ENSMUSG00000002365 | -0.1593789 | 6.58349603 | 0.60458308 | 0.7759736  |
| ENSMUSG00000050312 | -0.1594332 | 4.98517562 | 0.61203889 | 0.78107795 |
| ENSMUSG00000059273 | -0.1594408 | 6.22613862 | 0.60464634 | 0.7759736  |
| ENSMUSG00000061778 | -0.1595534 | 5.30938402 | 0.60960986 | 0.77900613 |
| ENSMUSG00000028430 | -0.1597957 | 6.2229873  | 0.60315106 | 0.7751273  |
| ENSMUSG00000029440 | -0.1597992 | 4.05571984 | 0.60599994 | 0.77706342 |
| ENSMUSG00000042063 | -0.1600003 | 5.3156467  | 0.60924924 | 0.77891253 |
| ENSMUSG00000071369 | -0.160128  | 6.42422923 | 0.60383016 | 0.77547987 |
| ENSMUSG00000009145 | -0.1601719 | 1.59560634 | 0.64399882 | 0.80197365 |
| ENSMUSG00000031467 | -0.1602387 | 6.24851207 | 0.60413025 | 0.77577287 |
| ENSMUSG00000023994 | -0.1602476 | 7.09378967 | 0.6017353  | 0.77444963 |
| ENSMUSG00000047248 | -0.1602835 | 6.9883596  | 0.60218803 | 0.7745701  |
| ENSMUSG00000028792 | -0.160376  | 8.29199207 | 0.60025691 | 0.77350591 |
| ENSMUSG00000097245 | -0.1604165 | 1.43925884 | 0.68814011 | 0.83184654 |
| ENSMUSG00000037759 | -0.1604471 | 0.93248936 | 0.69172203 | 0.83356022 |

|                    |            |            |            |            |
|--------------------|------------|------------|------------|------------|
| ENSMUSG00000014039 | -0.1604921 | 4.72214791 | 0.60984273 | 0.77921137 |
| ENSMUSG00000008763 | -0.160606  | 7.32405153 | 0.60115837 | 0.77408397 |
| ENSMUSG00000042557 | -0.1607677 | 7.41493942 | 0.60059718 | 0.773816   |
| ENSMUSG00000097352 | -0.1607926 | 5.4643106  | 0.6065709  | 0.7773334  |
| ENSMUSG00000028329 | -0.1609702 | 3.54824105 | 0.61974642 | 0.78673872 |
| ENSMUSG00000032252 | -0.160973  | 5.54795304 | 0.60569541 | 0.77685767 |
| ENSMUSG00000078908 | -0.1610666 | 5.62630775 | 0.60305279 | 0.7751273  |
| ENSMUSG00000040213 | -0.1610773 | 4.96350769 | 0.60582325 | 0.77692924 |
| ENSMUSG00000038774 | -0.1610991 | 7.57279061 | 0.59980366 | 0.77340863 |
| ENSMUSG00000026436 | -0.1611945 | 6.85153205 | 0.60088663 | 0.774004   |
| ENSMUSG00000097295 | -0.1612025 | 1.28567119 | 0.69089351 | 0.83335668 |
| ENSMUSG00000053390 | -0.1618152 | 5.00551712 | 0.60633293 | 0.77721316 |
| ENSMUSG00000024902 | -0.1623287 | 5.10720622 | 0.60148081 | 0.77425647 |
| ENSMUSG00000009585 | -0.1625075 | 9.0521599  | 0.59523981 | 0.7699452  |
| ENSMUSG00000080866 | -0.1625522 | 0.86132297 | 0.6785711  | 0.82639308 |
| ENSMUSG00000027346 | -0.1626536 | 7.12850366 | 0.59709841 | 0.77105847 |
| ENSMUSG00000032434 | -0.1627539 | 6.82978182 | 0.59656049 | 0.77082534 |
| ENSMUSG00000048922 | -0.1630977 | 6.71137834 | 0.59593963 | 0.77039235 |
| ENSMUSG00000028653 | -0.1632999 | 4.71934395 | 0.60319624 | 0.7751273  |
| ENSMUSG00000033306 | -0.1633299 | 5.94650668 | 0.59887658 | 0.77305762 |
| ENSMUSG00000038658 | -0.1634869 | 6.45879064 | 0.59631466 | 0.77069239 |
| ENSMUSG00000031537 | -0.1637024 | 6.62006459 | 0.5942575  | 0.76913981 |
| ENSMUSG00000032178 | -0.1637823 | 7.45843202 | 0.59318591 | 0.76858307 |
| ENSMUSG00000059586 | -0.1638222 | 5.31562414 | 0.59947898 | 0.7732992  |
| ENSMUSG00000037242 | -0.1638582 | 9.4357199  | 0.5920819  | 0.76770605 |
| ENSMUSG00000025040 | -0.164392  | 5.34761228 | 0.59920108 | 0.7732182  |
| ENSMUSG00000029186 | -0.1644144 | 4.87714831 | 0.60103216 | 0.77408397 |
| ENSMUSG00000043207 | -0.1644418 | 7.40675109 | 0.59224025 | 0.76772574 |
| ENSMUSG00000020917 | -0.1645092 | 8.23608326 | 0.59087969 | 0.76716376 |
| ENSMUSG00000026142 | -0.1645327 | 4.73663576 | 0.60028477 | 0.77350591 |
| ENSMUSG00000064068 | -0.1645329 | 4.60265564 | 0.59895443 | 0.77305762 |
| ENSMUSG00000051185 | -0.1645945 | 3.88899932 | 0.60931993 | 0.77891253 |
| ENSMUSG00000006412 | -0.1647874 | 5.15426222 | 0.59490751 | 0.76970397 |
| ENSMUSG00000027080 | -0.1647944 | 5.44461107 | 0.5968816  | 0.77096314 |
| ENSMUSG00000030079 | -0.16481   | 6.89579397 | 0.59114068 | 0.76716376 |
| ENSMUSG00000062040 | -0.1650562 | 4.10027488 | 0.60359197 | 0.77542999 |
| ENSMUSG00000020180 | -0.1654281 | 7.37177424 | 0.58959783 | 0.76605097 |
| ENSMUSG00000020107 | -0.165479  | 5.12744837 | 0.59543149 | 0.77001092 |
| ENSMUSG00000025279 | -0.1655345 | 4.98918463 | 0.59733943 | 0.77127735 |
| ENSMUSG00000024966 | -0.1657862 | 8.69536046 | 0.58786684 | 0.76500012 |
| ENSMUSG00000021327 | -0.1658851 | 6.02559076 | 0.59109424 | 0.76716376 |
| ENSMUSG00000019528 | -0.1660009 | 5.67239451 | 0.5933484  | 0.7686089  |
| ENSMUSG00000020326 | -0.1660566 | 9.50323539 | 0.58720582 | 0.76468971 |



|                    |            |            |            |            |
|--------------------|------------|------------|------------|------------|
| ENSMUSG00000047419 | -0.1662665 | 1.60570424 | 0.67115379 | 0.82116207 |
| ENSMUSG00000026039 | -0.1663401 | 6.42542959 | 0.59029128 | 0.76685956 |
| ENSMUSG00000025198 | -0.1664464 | 6.01320087 | 0.5910333  | 0.76716376 |
| ENSMUSG00000027942 | -0.1664929 | 6.50634769 | 0.58915945 | 0.76575816 |
| ENSMUSG00000036941 | -0.1665579 | 4.29688177 | 0.6026504  | 0.77488755 |
| ENSMUSG00000002881 | -0.1666397 | 7.65586737 | 0.58692726 | 0.76443211 |
| ENSMUSG00000025413 | -0.1667029 | 5.78724354 | 0.58938948 | 0.76587253 |
| ENSMUSG00000078676 | -0.1668772 | 6.72774603 | 0.58693415 | 0.76443211 |
| ENSMUSG00000008730 | -0.1672455 | 7.93603272 | 0.58531362 | 0.76342793 |
| ENSMUSG00000097333 | -0.1672628 | 5.07740838 | 0.59446398 | 0.76931472 |
| ENSMUSG00000075486 | -0.1675495 | 4.73328746 | 0.59500496 | 0.7697377  |
| ENSMUSG00000041132 | -0.1678977 | 4.00599601 | 0.60359353 | 0.77542999 |
| ENSMUSG00000005718 | -0.1682697 | 2.81655023 | 0.6100269  | 0.77922089 |
| ENSMUSG00000020973 | -0.1683293 | 5.33133595 | 0.58758655 | 0.76472765 |
| ENSMUSG00000097616 | -0.168557  | 1.15109525 | 0.6968269  | 0.83645742 |
| ENSMUSG00000029234 | -0.1687265 | 6.07949637 | 0.58556846 | 0.76363523 |
| ENSMUSG00000062203 | -0.1688855 | 9.17569484 | 0.58094102 | 0.76020725 |
| ENSMUSG00000030059 | -0.1689226 | 6.80451583 | 0.58333773 | 0.76195664 |
| ENSMUSG00000018042 | -0.1691044 | 5.9195992  | 0.58313098 | 0.76177887 |
| ENSMUSG00000044786 | -0.1694927 | 5.59839366 | 0.58521519 | 0.76339418 |
| ENSMUSG00000068921 | -0.1698695 | 6.27347903 | 0.58130907 | 0.76036285 |
| ENSMUSG00000028607 | -0.1702035 | 4.19293187 | 0.58843575 | 0.76555569 |
| ENSMUSG00000026618 | -0.1702481 | 7.30718922 | 0.57918302 | 0.75883627 |
| ENSMUSG00000026705 | -0.1702896 | 5.74743248 | 0.5825961  | 0.76144907 |
| ENSMUSG00000030204 | -0.1703205 | 7.09240483 | 0.57899077 | 0.75883627 |
| ENSMUSG00000089810 | -0.1704141 | 2.51109667 | 0.63508933 | 0.79572479 |
| ENSMUSG00000062397 | -0.1704608 | 7.93875527 | 0.57818565 | 0.75798129 |
| ENSMUSG00000026155 | -0.170501  | 5.75631049 | 0.58246775 | 0.76143222 |
| ENSMUSG00000024640 | -0.1705304 | 8.12683625 | 0.5775268  | 0.75757803 |
| ENSMUSG00000094114 | -0.1706559 | 1.92167338 | 0.64989867 | 0.80624904 |
| ENSMUSG00000041278 | -0.1707324 | 5.82918791 | 0.58084123 | 0.76016891 |
| ENSMUSG00000024073 | -0.1708788 | 8.54673949 | 0.5768899  | 0.75738747 |
| ENSMUSG00000069631 | -0.1708867 | 5.05227045 | 0.58359914 | 0.76211348 |
| ENSMUSG00000041040 | -0.1709922 | 5.67772968 | 0.58153929 | 0.76052871 |
| ENSMUSG00000020974 | -0.1711516 | 6.0596913  | 0.57959327 | 0.75918059 |
| ENSMUSG00000002055 | -0.1711539 | 7.01904079 | 0.57736582 | 0.75747181 |
| ENSMUSG00000038046 | -0.1713045 | 3.80765876 | 0.58898292 | 0.7657133  |
| ENSMUSG00000044792 | -0.1713142 | 4.14189941 | 0.59230272 | 0.76772574 |
| ENSMUSG00000025235 | -0.1713196 | 3.08475268 | 0.60789519 | 0.77831307 |
| ENSMUSG00000079610 | -0.1714326 | 2.15844661 | 0.62858636 | 0.79171634 |
| ENSMUSG00000026447 | -0.1715322 | 5.18448432 | 0.58080504 | 0.76016891 |
| ENSMUSG00000057691 | -0.1717199 | 4.98957736 | 0.58228031 | 0.76131314 |
| ENSMUSG00000020300 | -0.1717215 | 6.02679019 | 0.57950787 | 0.75916095 |

|                    |            |            |            |            |
|--------------------|------------|------------|------------|------------|
| ENSMUSG0000004040  | -0.1717743 | 7.42295348 | 0.57517048 | 0.75602586 |
| ENSMUSG00000033016 | -0.1718612 | 6.3041929  | 0.5771225  | 0.75747181 |
| ENSMUSG00000005102 | -0.1718883 | 5.80746117 | 0.57918566 | 0.75883627 |
| ENSMUSG00000021830 | -0.1721043 | 6.74439991 | 0.57649079 | 0.75695564 |
| ENSMUSG00000022400 | -0.1725939 | 6.44613256 | 0.5753147  | 0.75602586 |
| ENSMUSG00000020859 | -0.1726699 | 7.43783122 | 0.57391277 | 0.75575185 |
| ENSMUSG00000005656 | -0.172701  | 6.86927218 | 0.5746894  | 0.75602586 |
| ENSMUSG00000028882 | -0.1727873 | 6.6186636  | 0.57407426 | 0.75575185 |
| ENSMUSG00000005370 | -0.172815  | 8.10229174 | 0.57276762 | 0.75473192 |
| ENSMUSG00000029068 | -0.1728667 | 7.44409048 | 0.57303134 | 0.75498717 |
| ENSMUSG00000028861 | -0.172991  | 6.41247515 | 0.57422134 | 0.75575185 |
| ENSMUSG00000006456 | -0.1730827 | 5.51333118 | 0.57503505 | 0.75602586 |
| ENSMUSG00000068966 | -0.1733673 | 4.32291419 | 0.58623913 | 0.76398826 |
| ENSMUSG00000036104 | -0.1733859 | 6.64648009 | 0.57362366 | 0.75549067 |
| ENSMUSG00000013878 | -0.1735763 | 4.67907098 | 0.5827695  | 0.76149113 |
| ENSMUSG00000058267 | -0.1741309 | 5.76216159 | 0.57330412 | 0.75525429 |
| ENSMUSG00000061787 | -0.1741762 | 8.79312662 | 0.56902661 | 0.75145517 |
| ENSMUSG00000039983 | -0.1742589 | 3.66738083 | 0.58728554 | 0.76468971 |
| ENSMUSG00000055065 | -0.1743814 | 8.78776927 | 0.56875987 | 0.75128693 |
| ENSMUSG00000036552 | -0.1744333 | 3.9282797  | 0.58871855 | 0.76564651 |
| ENSMUSG00000021706 | -0.1744999 | 5.6763738  | 0.57513806 | 0.75602586 |
| ENSMUSG00000019845 | -0.1745146 | 4.51986634 | 0.58015482 | 0.75973158 |
| ENSMUSG00000031431 | -0.1745831 | 3.35883609 | 0.60210688 | 0.77455811 |
| ENSMUSG00000027852 | -0.1746393 | 7.68820336 | 0.5691161  | 0.75148132 |
| ENSMUSG00000020063 | -0.1748138 | 6.30558833 | 0.57172335 | 0.75372428 |
| ENSMUSG00000018076 | -0.1752819 | 5.80358397 | 0.57092794 | 0.7530439  |
| ENSMUSG00000022450 | -0.1753912 | 5.21446431 | 0.57355666 | 0.75549067 |
| ENSMUSG00000045538 | -0.1754204 | 3.64046345 | 0.58605565 | 0.76394699 |
| ENSMUSG00000025921 | -0.1755472 | 3.33751888 | 0.59640869 | 0.77072154 |
| ENSMUSG00000034292 | -0.175896  | 3.84569104 | 0.57714952 | 0.75747181 |
| ENSMUSG00000044629 | -0.1759105 | 2.7887678  | 0.61551814 | 0.78392315 |
| ENSMUSG00000034379 | -0.176268  | 3.88823603 | 0.58367046 | 0.76211433 |
| ENSMUSG00000074749 | -0.1764401 | 3.50259626 | 0.58910499 | 0.76575816 |
| ENSMUSG00000035086 | -0.1765117 | 7.34898629 | 0.56499468 | 0.74848834 |
| ENSMUSG00000047888 | -0.1765117 | 6.78724802 | 0.56675595 | 0.74937422 |
| ENSMUSG00000051034 | -0.1766026 | 2.86083058 | 0.60181073 | 0.77445429 |
| ENSMUSG00000032382 | -0.1766292 | 7.11832545 | 0.56504041 | 0.74848834 |
| ENSMUSG00000073647 | -0.1766864 | 1.36778452 | 0.62142613 | 0.78766566 |
| ENSMUSG00000056673 | -0.1766897 | 5.84404377 | 0.57972483 | 0.7592607  |
| ENSMUSG00000089417 | -0.1766978 | 2.57212526 | 0.6345513  | 0.7955994  |
| ENSMUSG00000031349 | -0.1767553 | 5.6194156  | 0.56966222 | 0.75167848 |
| ENSMUSG00000090553 | -0.1768575 | 7.23800601 | 0.56481697 | 0.74848834 |
| ENSMUSG00000025436 | -0.1769392 | 2.12504526 | 0.62172609 | 0.7877684  |

|                    |            |            |            |            |
|--------------------|------------|------------|------------|------------|
| ENSMUSG00000022842 | -0.1769568 | 3.62709388 | 0.5706626  | 0.752786   |
| ENSMUSG00000001855 | -0.1770518 | 6.9830162  | 0.56418272 | 0.74798949 |
| ENSMUSG00000005378 | -0.1771249 | 4.40906142 | 0.57211943 | 0.75415425 |
| ENSMUSG00000038279 | -0.1771555 | 6.94595769 | 0.56330076 | 0.74711533 |
| ENSMUSG00000025404 | -0.1774361 | 6.07081355 | 0.56620211 | 0.7489174  |
| ENSMUSG00000033760 | -0.1774726 | 3.95542073 | 0.58117195 | 0.76036285 |
| ENSMUSG00000056076 | -0.1774768 | 9.03410267 | 0.56168452 | 0.74579571 |
| ENSMUSG00000045176 | -0.1775944 | 1.71894147 | 0.62632232 | 0.79039836 |
| ENSMUSG00000007589 | -0.17773   | 4.82493707 | 0.56943855 | 0.75167848 |
| ENSMUSG00000027312 | -0.1778038 | 5.62214966 | 0.56655592 | 0.74929348 |
| ENSMUSG00000066042 | -0.1779859 | 3.57817831 | 0.58858181 | 0.76564651 |
| ENSMUSG00000027287 | -0.178096  | 6.12943482 | 0.56510601 | 0.74848834 |
| ENSMUSG00000035529 | -0.1781503 | 6.42039939 | 0.56331881 | 0.74711533 |
| ENSMUSG00000042229 | -0.1784856 | 5.55716259 | 0.56597179 | 0.7489174  |
| ENSMUSG00000057649 | -0.1786568 | 5.64445733 | 0.56329171 | 0.74711533 |
| ENSMUSG00000028414 | -0.1789428 | 4.56638055 | 0.56950781 | 0.75167848 |
| ENSMUSG00000001700 | -0.1789502 | 7.39089457 | 0.55977223 | 0.74406308 |
| ENSMUSG00000028385 | -0.1791267 | 6.23506006 | 0.5617673  | 0.74579571 |
| ENSMUSG00000048118 | -0.1791621 | 6.54401137 | 0.56108458 | 0.74525632 |
| ENSMUSG00000026788 | -0.179492  | 5.10701792 | 0.5644781  | 0.74819713 |
| ENSMUSG00000005362 | -0.1799195 | 5.49393608 | 0.56371633 | 0.74746303 |
| ENSMUSG00000030583 | -0.1801261 | 3.14124136 | 0.57735134 | 0.75747181 |
| ENSMUSG00000018372 | -0.1802295 | 5.38222016 | 0.56328554 | 0.74711533 |
| ENSMUSG00000030689 | -0.1803358 | 5.59819082 | 0.55868958 | 0.74299031 |
| ENSMUSG00000057110 | -0.1805727 | 7.81714525 | 0.55591618 | 0.74076363 |
| ENSMUSG00000035901 | -0.1806034 | 6.46270341 | 0.55788521 | 0.74237834 |
| ENSMUSG00000020783 | -0.180618  | 6.64010496 | 0.55736057 | 0.74195486 |
| ENSMUSG00000022855 | -0.1807137 | 7.07393749 | 0.55665642 | 0.74110899 |
| ENSMUSG00000041530 | -0.1808819 | 6.83369889 | 0.55655462 | 0.74110899 |
| ENSMUSG00000037669 | -0.1810878 | 5.7515973  | 0.55883539 | 0.74309258 |
| ENSMUSG00000026473 | -0.1813537 | 5.59801143 | 0.5581479  | 0.74254465 |
| ENSMUSG00000073542 | -0.1819701 | 5.65042019 | 0.55747785 | 0.74199941 |
| ENSMUSG00000046865 | -0.1820204 | 6.13666016 | 0.55367653 | 0.73887485 |
| ENSMUSG00000035202 | -0.1820818 | 11.7166963 | 0.55121746 | 0.73699733 |
| ENSMUSG00000031010 | -0.1824394 | 8.90275931 | 0.55124448 | 0.73699733 |
| ENSMUSG00000000346 | -0.1828131 | 8.47812952 | 0.55040609 | 0.73688135 |
| ENSMUSG00000041028 | -0.182821  | 8.20186836 | 0.55060576 | 0.73694624 |
| ENSMUSG00000029276 | -0.1829331 | 5.29097223 | 0.55797178 | 0.74240194 |
| ENSMUSG00000027936 | -0.1830458 | 6.09435459 | 0.5520252  | 0.73749253 |
| ENSMUSG00000021635 | -0.1832837 | 6.26326206 | 0.55326255 | 0.73850518 |
| ENSMUSG00000027981 | -0.1833067 | 4.50427848 | 0.56613728 | 0.7489174  |
| ENSMUSG00000033004 | -0.1833581 | 8.40896751 | 0.54954947 | 0.73628295 |
| ENSMUSG00000099876 | -0.1834761 | 1.26963735 | 0.84178807 | 0.92067369 |

|                    |            |            |            |            |
|--------------------|------------|------------|------------|------------|
| ENSMUSG00000018770 | -0.183565  | 8.12968862 | 0.54898449 | 0.7358917  |
| ENSMUSG00000020528 | -0.1835742 | 5.6884072  | 0.5536261  | 0.73887485 |
| ENSMUSG00000028293 | -0.1835873 | 4.90452806 | 0.55838236 | 0.74269819 |
| ENSMUSG00000024642 | -0.1837608 | 6.92883934 | 0.55021233 | 0.73688135 |
| ENSMUSG00000048970 | -0.1837746 | 4.42079791 | 0.56525866 | 0.74849575 |
| ENSMUSG00000066043 | -0.1837886 | 4.29353067 | 0.55966764 | 0.74401576 |
| ENSMUSG00000034800 | -0.1838742 | 3.13045593 | 0.58421863 | 0.7625531  |
| ENSMUSG00000021076 | -0.1838809 | 6.7413356  | 0.55035784 | 0.73688135 |
| ENSMUSG00000021481 | -0.1839738 | 5.10348083 | 0.55476164 | 0.73986514 |
| ENSMUSG00000000759 | -0.1840003 | 6.27132138 | 0.55065957 | 0.73694624 |
| ENSMUSG00000070520 | -0.1842337 | 4.13143586 | 0.55999456 | 0.74426686 |
| ENSMUSG00000035397 | -0.1844291 | 4.47781279 | 0.55638651 | 0.74110899 |
| ENSMUSG00000055717 | -0.1845429 | 3.86872246 | 0.56825247 | 0.75089261 |
| ENSMUSG00000019866 | -0.1846041 | 5.86397411 | 0.55095581 | 0.73699733 |
| ENSMUSG00000022707 | -0.1846232 | 4.3718599  | 0.56272899 | 0.74679664 |
| ENSMUSG00000021764 | -0.1846747 | 5.95995412 | 0.55028384 | 0.73688135 |
| ENSMUSG00000036281 | -0.1847838 | 5.43336721 | 0.54932309 | 0.7360711  |
| ENSMUSG00000034601 | -0.1851589 | 5.0630325  | 0.55452966 | 0.73964724 |
| ENSMUSG00000062619 | -0.1852994 | 1.14939601 | 0.66357785 | 0.81530252 |
| ENSMUSG00000046679 | -0.1854627 | 3.98428599 | 0.56518366 | 0.74848834 |
| ENSMUSG00000029610 | -0.1856872 | 5.18004577 | 0.54820572 | 0.73512192 |
| ENSMUSG00000042055 | -0.1857511 | 6.12043112 | 0.54718328 | 0.7343901  |
| ENSMUSG00000034311 | -0.1859078 | 7.51651212 | 0.54449845 | 0.73233615 |
| ENSMUSG00000026915 | -0.1859543 | 7.73409897 | 0.54435248 | 0.73223115 |
| ENSMUSG00000029501 | -0.1861921 | 7.29445399 | 0.54427033 | 0.73221198 |
| ENSMUSG00000015357 | -0.1862278 | 6.16329097 | 0.54700411 | 0.73433242 |
| ENSMUSG00000020894 | -0.1862351 | 5.54428408 | 0.54715836 | 0.7343901  |
| ENSMUSG00000026339 | -0.1862508 | 5.73427493 | 0.54789756 | 0.73480006 |
| ENSMUSG00000039298 | -0.1863603 | 6.32912618 | 0.54590023 | 0.73321561 |
| ENSMUSG00000026260 | -0.1863614 | 6.96154227 | 0.54393588 | 0.73196093 |
| ENSMUSG00000020523 | -0.1866566 | 6.19341194 | 0.54558504 | 0.73288354 |
| ENSMUSG00000027998 | -0.1867078 | 6.78698658 | 0.54357967 | 0.73174939 |
| ENSMUSG00000027329 | -0.1868534 | 1.50010336 | 0.62422712 | 0.78872304 |
| ENSMUSG00000041629 | -0.1874996 | 3.986185   | 0.5565147  | 0.74110899 |
| ENSMUSG00000054939 | -0.1875414 | 1.60794895 | 0.62656942 | 0.79039836 |
| ENSMUSG00000043998 | -0.1878737 | 7.31971171 | 0.54050476 | 0.72939114 |
| ENSMUSG00000001228 | -0.1879867 | 8.14790725 | 0.5390755  | 0.72858632 |
| ENSMUSG00000022016 | -0.1880973 | 7.11841923 | 0.5409488  | 0.72965502 |
| ENSMUSG00000048000 | -0.1881519 | 7.26020682 | 0.54007086 | 0.72917895 |
| ENSMUSG00000029705 | -0.188421  | 5.97977203 | 0.5419563  | 0.73046579 |
| ENSMUSG00000020114 | -0.1885157 | 8.2343015  | 0.53827365 | 0.72797388 |
| ENSMUSG00000030604 | -0.1885316 | 2.87533525 | 0.58520667 | 0.76339418 |
| ENSMUSG00000018322 | -0.1885472 | 5.97350508 | 0.54137626 | 0.73004897 |

|                    |            |            |            |            |
|--------------------|------------|------------|------------|------------|
| ENSMUSG00000046295 | -0.1888316 | 3.60426891 | 0.55220677 | 0.73755237 |
| ENSMUSG00000040943 | -0.1891272 | 6.20182704 | 0.54012254 | 0.72917895 |
| ENSMUSG00000068479 | -0.1891617 | 5.52115432 | 0.54490881 | 0.73252264 |
| ENSMUSG00000038949 | -0.1893141 | 4.9862329  | 0.54465116 | 0.73239623 |
| ENSMUSG00000026718 | -0.1894812 | 4.82174453 | 0.54761401 | 0.73469389 |
| ENSMUSG00000022437 | -0.189725  | 6.92911384 | 0.53667463 | 0.72689012 |
| ENSMUSG00000021423 | -0.189864  | 7.61891218 | 0.5358395  | 0.72676307 |
| ENSMUSG00000029505 | -0.1898709 | 7.89679127 | 0.53563699 | 0.7266712  |
| ENSMUSG00000028702 | -0.1898732 | 6.6448739  | 0.53709961 | 0.72728305 |
| ENSMUSG00000039001 | -0.1898952 | 6.95269328 | 0.53622427 | 0.72686346 |
| ENSMUSG00000036197 | -0.1900802 | 6.1064879  | 0.53886668 | 0.72848572 |
| ENSMUSG00000030424 | -0.1902225 | 1.79004296 | 0.6218012  | 0.7877684  |
| ENSMUSG00000021987 | -0.1902926 | 6.52141998 | 0.53738089 | 0.72746746 |
| ENSMUSG00000039270 | -0.1904168 | 4.01203635 | 0.55422543 | 0.73942435 |
| ENSMUSG00000051147 | -0.1904719 | 4.15910042 | 0.55120784 | 0.73699733 |
| ENSMUSG00000026889 | -0.1906298 | 5.46306962 | 0.54039249 | 0.72936078 |
| ENSMUSG00000037754 | -0.1906859 | 7.59587272 | 0.53400638 | 0.72546293 |
| ENSMUSG00000029397 | -0.1907856 | 5.44704081 | 0.54055026 | 0.72939114 |
| ENSMUSG00000043858 | -0.1908692 | 6.72249635 | 0.5337206  | 0.72542525 |
| ENSMUSG00000057666 | -0.1908858 | 1.88179624 | 0.58134196 | 0.76036285 |
| ENSMUSG00000028318 | -0.1913362 | 5.58887417 | 0.53621928 | 0.72686346 |
| ENSMUSG00000058298 | -0.1913608 | 5.08049296 | 0.53978858 | 0.72917895 |
| ENSMUSG00000021466 | -0.1914885 | 5.74524425 | 0.5364175  | 0.72686346 |
| ENSMUSG00000024340 | -0.1914928 | 2.06346357 | 0.59118663 | 0.76716376 |
| ENSMUSG00000024099 | -0.1918256 | 6.77442379 | 0.53304793 | 0.7248816  |
| ENSMUSG00000031583 | -0.1918575 | 6.1989024  | 0.53504421 | 0.72614104 |
| ENSMUSG00000021432 | -0.1918751 | 4.3474059  | 0.54513292 | 0.73265923 |
| ENSMUSG00000041935 | -0.1919699 | 6.77645519 | 0.53310794 | 0.7248816  |
| ENSMUSG00000020952 | -0.1920762 | 7.11821707 | 0.53202203 | 0.72386142 |
| ENSMUSG00000046179 | -0.1921049 | 6.25401442 | 0.5328292  | 0.72477676 |
| ENSMUSG00000020850 | -0.1921131 | 9.82370904 | 0.52978682 | 0.72206171 |
| ENSMUSG00000006782 | -0.1921479 | 6.69992477 | 0.53172887 | 0.72386142 |
| ENSMUSG00000026279 | -0.1922276 | 3.89343732 | 0.54020495 | 0.72919892 |
| ENSMUSG00000020647 | -0.1923224 | 5.87297766 | 0.53470177 | 0.725859   |
| ENSMUSG00000041229 | -0.1924085 | 6.85922857 | 0.53177626 | 0.72386142 |
| ENSMUSG00000031381 | -0.1925587 | 5.82077856 | 0.53417505 | 0.72560067 |
| ENSMUSG00000025733 | -0.192756  | 4.14295214 | 0.53784103 | 0.72764744 |
| ENSMUSG00000020023 | -0.1928833 | 4.72158141 | 0.53877913 | 0.72845964 |
| ENSMUSG00000058093 | -0.1932873 | 5.19115126 | 0.53828484 | 0.72797388 |
| ENSMUSG00000058600 | -0.193299  | 9.32014441 | 0.52738251 | 0.7200928  |
| ENSMUSG00000014504 | -0.1933002 | 6.51058307 | 0.53028453 | 0.72240884 |
| ENSMUSG00000000826 | -0.1933403 | 7.48828767 | 0.528519   | 0.72094032 |
| ENSMUSG00000079480 | -0.1935545 | 3.95835022 | 0.54401584 | 0.73196093 |

|                    |            |            |            |            |
|--------------------|------------|------------|------------|------------|
| ENSMUSG00000015126 | -0.1939125 | 3.51938805 | 0.541887   | 0.73046367 |
| ENSMUSG00000017781 | -0.1939994 | 8.29526396 | 0.52642712 | 0.71917217 |
| ENSMUSG00000033624 | -0.1941162 | 5.64928509 | 0.53190482 | 0.72386142 |
| ENSMUSG00000032217 | -0.1943773 | 6.25272729 | 0.52879775 | 0.72120335 |
| ENSMUSG00000045404 | -0.1943867 | 1.33069141 | 0.64171146 | 0.80085999 |
| ENSMUSG00000056919 | -0.1944674 | 5.58694825 | 0.53158117 | 0.72380951 |
| ENSMUSG00000030002 | -0.1945585 | 7.91665791 | 0.52567696 | 0.7187651  |
| ENSMUSG00000063229 | -0.1947012 | 9.26791213 | 0.52420748 | 0.71793922 |
| ENSMUSG00000049940 | -0.1948401 | 6.22360092 | 0.52769555 | 0.72042902 |
| ENSMUSG00000017802 | -0.1948815 | 6.14273506 | 0.52780025 | 0.72043751 |
| ENSMUSG00000032305 | -0.1953021 | 4.2857805  | 0.53893352 | 0.72848572 |
| ENSMUSG00000029147 | -0.1957899 | 8.013952   | 0.52245037 | 0.71635153 |
| ENSMUSG00000067847 | -0.1958479 | 1.56836914 | 0.54365506 | 0.73174939 |
| ENSMUSG00000032309 | -0.1960174 | 5.28874316 | 0.52936182 | 0.72160762 |
| ENSMUSG00000028636 | -0.1960538 | 3.58984798 | 0.54362047 | 0.73174939 |
| ENSMUSG00000032939 | -0.1960863 | 7.46674392 | 0.52255772 | 0.71640764 |
| ENSMUSG00000054426 | -0.1961644 | 2.95143177 | 0.55643248 | 0.74110899 |
| ENSMUSG00000032560 | -0.1963051 | 8.2985047  | 0.52168308 | 0.71582608 |
| ENSMUSG00000020330 | -0.1963534 | 7.99381569 | 0.52173525 | 0.71582608 |
| ENSMUSG00000031529 | -0.1965347 | 5.58221426 | 0.5264415  | 0.71917217 |
| ENSMUSG00000031133 | -0.1972955 | 8.97743186 | 0.51914041 | 0.71399186 |
| ENSMUSG00000041540 | -0.1973733 | 1.7476615  | 0.63294888 | 0.79477217 |
| ENSMUSG00000028759 | -0.1973904 | 7.72659284 | 0.5196089  | 0.71427181 |
| ENSMUSG00000030263 | -0.1975058 | 6.60754683 | 0.52079002 | 0.71507506 |
| ENSMUSG00000060550 | -0.1975112 | 7.99659207 | 0.5189891  | 0.7139235  |
| ENSMUSG00000059183 | -0.1976788 | 4.72887443 | 0.52909024 | 0.72133231 |
| ENSMUSG00000025220 | -0.1977026 | 8.18590322 | 0.51877086 | 0.7139235  |
| ENSMUSG00000012422 | -0.1978778 | 7.09490166 | 0.51996005 | 0.71439026 |
| ENSMUSG00000038417 | -0.1980007 | 5.72378441 | 0.52350654 | 0.7171614  |
| ENSMUSG00000069184 | -0.198071  | 2.22592107 | 0.59900496 | 0.77305762 |
| ENSMUSG00000027597 | -0.1981176 | 6.69753223 | 0.51852328 | 0.7139235  |
| ENSMUSG00000037894 | -0.1981226 | 6.23833067 | 0.52042906 | 0.71485251 |
| ENSMUSG00000052707 | -0.1981326 | 7.79486381 | 0.51819907 | 0.71360731 |
| ENSMUSG00000042520 | -0.1984695 | 8.82779496 | 0.51658055 | 0.71208721 |
| ENSMUSG00000033184 | -0.1985493 | 7.8997155  | 0.51724144 | 0.71265258 |
| ENSMUSG00000072109 | -0.1985593 | 4.80227158 | 0.52545101 | 0.71858811 |
| ENSMUSG00000037847 | -0.1989719 | 3.26546258 | 0.54921685 | 0.7360711  |
| ENSMUSG00000022711 | -0.1989984 | 6.02486874 | 0.51881479 | 0.7139235  |
| ENSMUSG00000053754 | -0.1990632 | 7.84642711 | 0.51613074 | 0.71175882 |
| ENSMUSG00000029513 | -0.1990888 | 4.5437804  | 0.52595784 | 0.71896684 |
| ENSMUSG00000062270 | -0.1991304 | 8.68980527 | 0.51530469 | 0.71098334 |
| ENSMUSG00000019734 | -0.1993231 | 1.38233754 | 0.62425715 | 0.78872304 |
| ENSMUSG00000022339 | -0.1993513 | 4.8497957  | 0.52500298 | 0.71839007 |

|                    |            |            |            |            |
|--------------------|------------|------------|------------|------------|
| ENSMUSG00000071266 | -0.1997372 | 3.2282713  | 0.55382772 | 0.73898517 |
| ENSMUSG00000052337 | -0.1997791 | 8.36312934 | 0.51409252 | 0.70976491 |
| ENSMUSG00000021391 | -0.2000014 | 4.15178838 | 0.53292773 | 0.72481935 |
| ENSMUSG00000087396 | -0.2001889 | 2.63427053 | 0.55523755 | 0.74034884 |
| ENSMUSG00000020923 | -0.2003751 | 7.70565814 | 0.5129972  | 0.7090697  |
| ENSMUSG00000042790 | -0.200468  | 5.21280267 | 0.52037296 | 0.71485251 |
| ENSMUSG00000009079 | -0.20062   | 8.66141847 | 0.51205908 | 0.70840861 |
| ENSMUSG00000033126 | -0.2007419 | 2.8230715  | 0.5509023  | 0.73699733 |
| ENSMUSG00000026798 | -0.2008475 | 2.87950085 | 0.52728578 | 0.7200519  |
| ENSMUSG00000032011 | -0.2009143 | 3.59895142 | 0.52790219 | 0.72043751 |
| ENSMUSG00000026708 | -0.2010242 | 5.41425085 | 0.51866032 | 0.7139235  |
| ENSMUSG00000068959 | -0.2011191 | 2.82524493 | 0.55216062 | 0.73755237 |
| ENSMUSG00000031358 | -0.2011706 | 6.34902158 | 0.51439418 | 0.71009048 |
| ENSMUSG00000027067 | -0.2014564 | 9.70649897 | 0.50994698 | 0.70703556 |
| ENSMUSG00000032267 | -0.201548  | 5.40147488 | 0.51756921 | 0.712922   |
| ENSMUSG00000071645 | -0.2021236 | 5.30337931 | 0.51310727 | 0.70910956 |
| ENSMUSG00000028089 | -0.2025188 | 5.6935112  | 0.5122042  | 0.70846695 |
| ENSMUSG00000062867 | -0.2026093 | 8.13121804 | 0.50810833 | 0.70565876 |
| ENSMUSG00000028649 | -0.2026691 | 8.35457244 | 0.50829189 | 0.70573191 |
| ENSMUSG00000038965 | -0.2026781 | 7.55539006 | 0.50867023 | 0.70589368 |
| ENSMUSG00000050697 | -0.2027695 | 6.63274929 | 0.51038919 | 0.70736885 |
| ENSMUSG00000004843 | -0.2029309 | 5.52285934 | 0.51393052 | 0.70963211 |
| ENSMUSG00000021965 | -0.202959  | 5.60288952 | 0.51322331 | 0.70910956 |
| ENSMUSG00000028060 | -0.2029795 | 6.75676932 | 0.50934399 | 0.7066468  |
| ENSMUSG00000020526 | -0.2030122 | 4.1461454  | 0.5190245  | 0.7139235  |
| ENSMUSG00000001380 | -0.2034035 | 7.41473133 | 0.50708618 | 0.70487525 |
| ENSMUSG00000079038 | -0.2034831 | 3.17411306 | 0.54837111 | 0.73525227 |
| ENSMUSG00000021578 | -0.2035093 | 6.77120548 | 0.50845045 | 0.7058564  |
| ENSMUSG00000050079 | -0.2035186 | 5.76504504 | 0.51178149 | 0.70811542 |
| ENSMUSG00000020441 | -0.2037101 | 3.31494668 | 0.52490099 | 0.71839007 |
| ENSMUSG00000030515 | -0.2038432 | 4.31139994 | 0.52098031 | 0.71515423 |
| ENSMUSG00000040720 | -0.2039758 | 7.95825788 | 0.50581525 | 0.7039246  |
| ENSMUSG00000023572 | -0.2040685 | 5.06351863 | 0.51347302 | 0.70927284 |
| ENSMUSG00000058440 | -0.2041539 | 5.79050379 | 0.50801861 | 0.70562503 |
| ENSMUSG00000027366 | -0.2042126 | 7.8900775  | 0.50547275 | 0.70372038 |
| ENSMUSG00000001138 | -0.2045346 | 4.01291272 | 0.51871448 | 0.7139235  |
| ENSMUSG00000028617 | -0.2046077 | 4.96329836 | 0.51248381 | 0.70872345 |
| ENSMUSG00000035629 | -0.2047716 | 5.74152349 | 0.50824329 | 0.70573191 |
| ENSMUSG00000006191 | -0.2048493 | 5.13723042 | 0.51223264 | 0.70846695 |
| ENSMUSG00000028687 | -0.2048525 | 2.22187778 | 0.53563322 | 0.7266712  |
| ENSMUSG00000042541 | -0.2048583 | 6.42768893 | 0.50598166 | 0.70406532 |
| ENSMUSG00000026750 | -0.2054825 | 7.99879699 | 0.50236078 | 0.70083553 |
| ENSMUSG00000059975 | -0.2054991 | 3.59817223 | 0.52790219 | 0.72043751 |

|                    |            |            |            |            |
|--------------------|------------|------------|------------|------------|
| ENSMUSG00000045210 | -0.2055999 | 7.60737973 | 0.5029713  | 0.70123367 |
| ENSMUSG00000045205 | -0.2056023 | 5.60162708 | 0.508591   | 0.70587456 |
| ENSMUSG00000026036 | -0.2056265 | 5.22821886 | 0.50788113 | 0.70552493 |
| ENSMUSG00000022139 | -0.2058145 | 5.75833707 | 0.50694485 | 0.70487525 |
| ENSMUSG00000027087 | -0.2058219 | 5.78083579 | 0.50713743 | 0.70487525 |
| ENSMUSG00000089993 | -0.2059435 | 1.97508987 | 0.55246342 | 0.73780378 |
| ENSMUSG00000022682 | -0.2061239 | 7.46264041 | 0.50181252 | 0.700352   |
| ENSMUSG00000101013 | -0.2061732 | 3.05883403 | 0.54093164 | 0.72965502 |
| ENSMUSG00000026926 | -0.2062422 | 7.64471547 | 0.50118583 | 0.70001428 |
| ENSMUSG00000032126 | -0.2064046 | 5.71082916 | 0.50421571 | 0.70242374 |
| ENSMUSG00000039231 | -0.2065066 | 7.08498144 | 0.50123705 | 0.70001428 |
| ENSMUSG00000063245 | -0.206733  | 0.97441641 | 0.6310489  | 0.79389073 |
| ENSMUSG00000020224 | -0.2067439 | 5.45755042 | 0.50408061 | 0.70232626 |
| ENSMUSG00000039016 | -0.2069495 | 4.84636202 | 0.50733426 | 0.70502214 |
| ENSMUSG00000039128 | -0.2069552 | 6.91018316 | 0.5007928  | 0.6999157  |
| ENSMUSG00000037085 | -0.2071172 | 3.54042007 | 0.51742127 | 0.71280927 |
| ENSMUSG00000027937 | -0.2071693 | 6.10193464 | 0.50291712 | 0.70123367 |
| ENSMUSG00000037174 | -0.2073128 | 6.00137625 | 0.50181936 | 0.700352   |
| ENSMUSG00000021906 | -0.207454  | 3.97464188 | 0.5166679  | 0.71208721 |
| ENSMUSG00000054309 | -0.2074658 | 7.63069878 | 0.49872668 | 0.69744134 |
| ENSMUSG00000000804 | -0.2076941 | 6.29222609 | 0.50168465 | 0.700352   |
| ENSMUSG00000037339 | -0.2078702 | 4.16628291 | 0.51287248 | 0.70898819 |
| ENSMUSG00000040274 | -0.2080638 | 4.5861001  | 0.51061281 | 0.70743177 |
| ENSMUSG00000003382 | -0.2081753 | 6.89291552 | 0.49798876 | 0.69699036 |
| ENSMUSG00000039680 | -0.2082229 | 4.23657436 | 0.51063139 | 0.70743177 |
| ENSMUSG00000049354 | -0.2085108 | 7.90221638 | 0.49623979 | 0.69544508 |
| ENSMUSG00000015671 | -0.2085303 | 8.53492188 | 0.49575985 | 0.69504345 |
| ENSMUSG00000035469 | -0.2085533 | 6.28184508 | 0.49890864 | 0.69755359 |
| ENSMUSG00000073639 | -0.208565  | 6.5034535  | 0.4987057  | 0.69744134 |
| ENSMUSG00000041477 | -0.2086342 | 3.17022983 | 0.52244465 | 0.71635153 |
| ENSMUSG00000018921 | -0.2086945 | 5.60418281 | 0.49823882 | 0.69715939 |
| ENSMUSG00000038914 | -0.2088058 | 7.1015192  | 0.49643224 | 0.69553401 |
| ENSMUSG00000032366 | -0.2089128 | 5.15619996 | 0.50195507 | 0.70045076 |
| ENSMUSG00000010048 | -0.2090994 | 4.60564121 | 0.50114878 | 0.70001428 |
| ENSMUSG00000038215 | -0.2092802 | 4.04681825 | 0.5155308  | 0.71112433 |
| ENSMUSG00000056579 | -0.2096079 | 7.51565737 | 0.49489334 | 0.69418962 |
| ENSMUSG00000043061 | -0.2099149 | 4.88136257 | 0.50278128 | 0.70115005 |
| ENSMUSG00000027176 | -0.2099683 | 6.79583315 | 0.49513139 | 0.69443321 |
| ENSMUSG00000021905 | -0.2100368 | 4.60594616 | 0.50319877 | 0.70143804 |
| ENSMUSG00000022664 | -0.2100686 | 4.72215044 | 0.50560682 | 0.70375247 |
| ENSMUSG00000046201 | -0.2102074 | 7.23043013 | 0.49369403 | 0.69331898 |
| ENSMUSG00000024400 | -0.2106376 | 7.07479249 | 0.49292335 | 0.6929586  |
| ENSMUSG00000021371 | -0.2107764 | 5.648508   | 0.49656724 | 0.69554242 |



|                    |            |            |            |            |
|--------------------|------------|------------|------------|------------|
| ENSMUSG00000039086 | -0.2108138 | 2.78014151 | 0.52982885 | 0.72206171 |
| ENSMUSG00000041417 | -0.2108688 | 6.76513689 | 0.49343464 | 0.69322172 |
| ENSMUSG00000039262 | -0.2110304 | 7.0564525  | 0.49179746 | 0.69226907 |
| ENSMUSG00000030243 | -0.2111652 | 6.39139814 | 0.49356049 | 0.69322172 |
| ENSMUSG00000021366 | -0.2112724 | 6.6355267  | 0.49255952 | 0.69280496 |
| ENSMUSG00000030870 | -0.2113849 | 7.23120644 | 0.49117671 | 0.69156352 |
| ENSMUSG00000051397 | -0.2114259 | 1.60009181 | 0.59991781 | 0.77340863 |
| ENSMUSG00000040396 | -0.2115548 | 6.12356685 | 0.49410498 | 0.69371541 |
| ENSMUSG00000055491 | -0.2117515 | 6.81459237 | 0.4902091  | 0.69114856 |
| ENSMUSG00000025917 | -0.2117548 | 7.3196848  | 0.49029002 | 0.69114856 |
| ENSMUSG00000097284 | -0.2118467 | 0.96420035 | 0.62745244 | 0.79102725 |
| ENSMUSG00000073468 | -0.2119191 | 4.60677835 | 0.50178096 | 0.700352   |
| ENSMUSG00000089756 | -0.2121566 | 1.09750265 | 0.6240872  | 0.78872304 |
| ENSMUSG00000022554 | -0.21217   | 3.6677914  | 0.50229627 | 0.70083553 |
| ENSMUSG00000096883 | -0.2122478 | 2.04986204 | 0.53620379 | 0.72686346 |
| ENSMUSG00000052253 | -0.2123939 | 5.50841868 | 0.49321472 | 0.69309715 |
| ENSMUSG00000097177 | -0.2125708 | 1.66499281 | 0.59152964 | 0.76726673 |
| ENSMUSG00000000340 | -0.2126118 | 5.77067856 | 0.49204752 | 0.69235915 |
| ENSMUSG00000052419 | -0.2126402 | 5.72904506 | 0.4927776  | 0.69284402 |
| ENSMUSG00000005501 | -0.2127278 | 5.25012452 | 0.49526576 | 0.69453134 |
| ENSMUSG00000026775 | -0.2128103 | 8.40210003 | 0.48721277 | 0.68907012 |
| ENSMUSG00000050921 | -0.2128574 | 6.47534903 | 0.49051476 | 0.69128479 |
| ENSMUSG00000038212 | -0.2129148 | 6.45276351 | 0.49026334 | 0.69114856 |
| ENSMUSG00000026309 | -0.2129774 | 6.21061622 | 0.48985314 | 0.69107486 |
| ENSMUSG00000051346 | -0.2129879 | 4.25667902 | 0.497727   | 0.69681882 |
| ENSMUSG00000009647 | -0.2131919 | 3.97562839 | 0.50365569 | 0.7019156  |
| ENSMUSG00000032067 | -0.2132486 | 5.00156177 | 0.49557086 | 0.69486883 |
| ENSMUSG00000085741 | -0.2133328 | 1.70884453 | 0.56174047 | 0.74579571 |
| ENSMUSG00000021520 | -0.2134101 | 6.57435033 | 0.48838902 | 0.68981392 |
| ENSMUSG00000085786 | -0.2134725 | 5.32384377 | 0.49454939 | 0.69397796 |
| ENSMUSG00000038489 | -0.2138187 | 1.40710099 | 0.57801075 | 0.75791244 |
| ENSMUSG00000039463 | -0.2139375 | 5.08260593 | 0.49109634 | 0.69156352 |
| ENSMUSG00000034285 | -0.2142709 | 4.31242038 | 0.49654436 | 0.69554242 |
| ENSMUSG00000071415 | -0.2145373 | 10.4590136 | 0.48277427 | 0.68568917 |
| ENSMUSG00000062861 | -0.2145727 | 2.64868016 | 0.52548088 | 0.71858811 |
| ENSMUSG00000057133 | -0.2145826 | 5.86603381 | 0.48868692 | 0.69006091 |
| ENSMUSG00000027397 | -0.2145848 | 7.01038118 | 0.48491932 | 0.68708054 |
| ENSMUSG00000025893 | -0.2146221 | 1.47046411 | 0.56968362 | 0.75167848 |
| ENSMUSG00000020525 | -0.2148891 | 5.25094761 | 0.49028501 | 0.69114856 |
| ENSMUSG00000078671 | -0.2148895 | 7.43199324 | 0.48395854 | 0.68628846 |
| ENSMUSG00000021772 | -0.214927  | 3.24023211 | 0.51980554 | 0.71436001 |
| ENSMUSG00000033871 | -0.2149696 | 0.89368191 | 0.575084   | 0.75602586 |
| ENSMUSG00000054280 | -0.2152836 | 7.0145976  | 0.48397846 | 0.68628846 |

|                    |            |            |            |            |
|--------------------|------------|------------|------------|------------|
| ENSMUSG00000032078 | -0.2152858 | 6.60634544 | 0.48367264 | 0.68620619 |
| ENSMUSG00000043140 | -0.2153448 | 4.65285906 | 0.49122557 | 0.69156352 |
| ENSMUSG00000029016 | -0.2154485 | 4.55093022 | 0.49035401 | 0.69114856 |
| ENSMUSG00000095832 | -0.2156141 | 4.73690316 | 0.49075531 | 0.69143727 |
| ENSMUSG00000037331 | -0.2156815 | 8.88777441 | 0.48078777 | 0.68464483 |
| ENSMUSG00000032035 | -0.2157727 | 7.72365998 | 0.48165847 | 0.68515686 |
| ENSMUSG00000029571 | -0.216002  | 6.49056012 | 0.48381081 | 0.68623119 |
| ENSMUSG00000036442 | -0.2162769 | 4.30157684 | 0.49352478 | 0.69322172 |
| ENSMUSG00000040195 | -0.2163587 | 6.14434235 | 0.48358154 | 0.68618794 |
| ENSMUSG00000042198 | -0.2165459 | 3.16200819 | 0.51316337 | 0.70910956 |
| ENSMUSG00000028832 | -0.2165573 | 8.04165769 | 0.47947534 | 0.68329057 |
| ENSMUSG00000051890 | -0.2166256 | 3.4481544  | 0.50993102 | 0.70703556 |
| ENSMUSG00000030177 | -0.2166795 | 5.21771483 | 0.48764363 | 0.6892489  |
| ENSMUSG00000028986 | -0.216817  | 4.51034034 | 0.4932079  | 0.69309715 |
| ENSMUSG00000031731 | -0.2169317 | 8.06887385 | 0.47902661 | 0.68289184 |
| ENSMUSG00000030498 | -0.217005  | 2.6788119  | 0.52270571 | 0.71642836 |
| ENSMUSG00000027843 | -0.2171348 | 6.72150308 | 0.48091536 | 0.68464571 |
| ENSMUSG00000035798 | -0.2172674 | 5.35446129 | 0.48582388 | 0.68775706 |
| ENSMUSG00000069237 | -0.2173249 | 5.09748756 | 0.48721807 | 0.68907012 |
| ENSMUSG00000034252 | -0.217371  | 8.0141499  | 0.47828253 | 0.68258899 |
| ENSMUSG00000014850 | -0.2174387 | 6.01388537 | 0.48178912 | 0.68515686 |
| ENSMUSG00000020623 | -0.2175125 | 2.38213042 | 0.53858006 | 0.72828181 |
| ENSMUSG00000097431 | -0.2176482 | 3.22225079 | 0.50687362 | 0.70487525 |
| ENSMUSG00000063172 | -0.2178437 | 3.33445041 | 0.51121414 | 0.70751197 |
| ENSMUSG00000020590 | -0.2179181 | 5.99724727 | 0.48197329 | 0.68515686 |
| ENSMUSG00000028521 | -0.2179829 | 5.16397689 | 0.48510102 | 0.68724769 |
| ENSMUSG00000024891 | -0.218016  | 1.54178277 | 0.53774921 | 0.72761449 |
| ENSMUSG00000020064 | -0.2180179 | 6.99493642 | 0.47842383 | 0.68263066 |
| ENSMUSG00000044894 | -0.2182788 | 3.75301817 | 0.49087943 | 0.69143727 |
| ENSMUSG00000066149 | -0.2183948 | 5.4975626  | 0.48186742 | 0.68515686 |
| ENSMUSG00000075033 | -0.2184158 | 6.30837066 | 0.47890039 | 0.68289184 |
| ENSMUSG00000030706 | -0.2184888 | 4.96083034 | 0.48229323 | 0.68534066 |
| ENSMUSG00000040389 | -0.21867   | 4.29423399 | 0.49474944 | 0.69407804 |
| ENSMUSG00000030105 | -0.2187007 | 8.15072054 | 0.4754427  | 0.68026723 |
| ENSMUSG00000024587 | -0.2188136 | 8.59575603 | 0.47460941 | 0.67943554 |
| ENSMUSG00000039704 | -0.2188897 | 5.37217139 | 0.48346167 | 0.68618723 |
| ENSMUSG00000049504 | -0.2189005 | 5.19867158 | 0.48236677 | 0.68535483 |
| ENSMUSG00000036898 | -0.2189417 | 4.77639903 | 0.48755524 | 0.6892489  |
| ENSMUSG00000022109 | -0.2191552 | 5.69298304 | 0.47833132 | 0.68258899 |
| ENSMUSG00000019437 | -0.21927   | 2.6043013  | 0.52385161 | 0.71754296 |
| ENSMUSG00000027274 | -0.2193381 | 4.86221826 | 0.4843715  | 0.68661958 |
| ENSMUSG00000043535 | -0.2195551 | 8.02865521 | 0.47397156 | 0.67908773 |
| ENSMUSG00000006818 | -0.2195887 | 6.37843054 | 0.47607967 | 0.68072702 |

|                    |            |            |            |            |
|--------------------|------------|------------|------------|------------|
| ENSMUSG00000044147 | -0.2196852 | 8.25047082 | 0.47325397 | 0.67884687 |
| ENSMUSG00000041995 | -0.2198443 | 4.18885317 | 0.48875048 | 0.69006091 |
| ENSMUSG00000034327 | -0.2198604 | 6.09728895 | 0.47702282 | 0.6815334  |
| ENSMUSG00000031696 | -0.2199692 | 8.51157477 | 0.47261712 | 0.67847485 |
| ENSMUSG00000027259 | -0.2200503 | 4.54079867 | 0.48754893 | 0.6892489  |
| ENSMUSG00000020460 | -0.2201588 | 9.61562531 | 0.47157857 | 0.67770567 |
| ENSMUSG00000025010 | -0.2202451 | 4.66553835 | 0.48299939 | 0.68571162 |
| ENSMUSG00000034390 | -0.2203149 | 5.84435202 | 0.47591529 | 0.68067248 |
| ENSMUSG00000022833 | -0.2204417 | 4.62459085 | 0.48358942 | 0.68618794 |
| ENSMUSG00000040374 | -0.2205482 | 5.10720883 | 0.48032021 | 0.68425008 |
| ENSMUSG00000025280 | -0.2208101 | 6.12542358 | 0.47408459 | 0.67908773 |
| ENSMUSG00000032288 | -0.2209021 | 5.51887997 | 0.47583399 | 0.68064647 |
| ENSMUSG00000021810 | -0.2210829 | 6.80780618 | 0.47190524 | 0.67772354 |
| ENSMUSG00000003848 | -0.2211111 | 5.37125709 | 0.47367627 | 0.67908773 |
| ENSMUSG00000024548 | -0.2213287 | 4.88486461 | 0.48100043 | 0.68467643 |
| ENSMUSG00000029729 | -0.2215006 | 6.07141896 | 0.47411457 | 0.67908773 |
| ENSMUSG00000048280 | -0.2217439 | 4.50123106 | 0.484498   | 0.68666401 |
| ENSMUSG00000040738 | -0.22184   | 7.20649035 | 0.47036633 | 0.67650447 |
| ENSMUSG00000008450 | -0.2220807 | 5.61424379 | 0.4732404  | 0.67884687 |
| ENSMUSG00000029249 | -0.2221875 | 6.29074049 | 0.47176245 | 0.67772354 |
| ENSMUSG00000074797 | -0.2222299 | 5.99482107 | 0.47179928 | 0.67772354 |
| ENSMUSG00000037058 | -0.2222356 | 6.81541979 | 0.47026863 | 0.67650447 |
| ENSMUSG00000020003 | -0.2223278 | 5.10797459 | 0.47598158 | 0.68067701 |
| ENSMUSG00000028121 | -0.2224741 | 7.90079988 | 0.46759663 | 0.67390916 |
| ENSMUSG00000007646 | -0.2227545 | 4.35639243 | 0.48225383 | 0.68534066 |
| ENSMUSG00000028953 | -0.2230328 | 7.34172119 | 0.46694115 | 0.6736792  |
| ENSMUSG00000032381 | -0.2231429 | 6.75232918 | 0.46825137 | 0.67444139 |
| ENSMUSG00000008301 | -0.2231619 | 5.7885929  | 0.47068453 | 0.67669137 |
| ENSMUSG00000026683 | -0.2234967 | 6.99366104 | 0.46731957 | 0.67374411 |
| ENSMUSG00000024533 | -0.2235893 | 4.00722679 | 0.47862492 | 0.68273692 |
| ENSMUSG00000006134 | -0.2236532 | 6.85733311 | 0.46706984 | 0.6736792  |
| ENSMUSG00000051412 | -0.2238372 | 5.08844609 | 0.47408476 | 0.67908773 |
| ENSMUSG00000038084 | -0.2240195 | 7.26373945 | 0.46564587 | 0.67258043 |
| ENSMUSG00000069565 | -0.2240583 | 6.10585303 | 0.46716913 | 0.67370312 |
| ENSMUSG00000024776 | -0.2240994 | 5.01608617 | 0.47347788 | 0.67898743 |
| ENSMUSG00000035847 | -0.2242893 | 5.8014342  | 0.46932328 | 0.67554488 |
| ENSMUSG00000022110 | -0.2243688 | 6.92672013 | 0.46570457 | 0.67258043 |
| ENSMUSG00000021067 | -0.2246044 | 6.97398981 | 0.46502669 | 0.67223161 |
| ENSMUSG00000027180 | -0.2248797 | 6.35926372 | 0.46611499 | 0.67290282 |
| ENSMUSG00000048429 | -0.2249906 | 6.43532596 | 0.46530491 | 0.67245352 |
| ENSMUSG00000054051 | -0.2252609 | 5.54501739 | 0.46831235 | 0.67444139 |
| ENSMUSG00000054894 | -0.2254037 | 2.76056193 | 0.51501643 | 0.71067654 |
| ENSMUSG00000005899 | -0.2255128 | 6.35681657 | 0.4634688  | 0.67060882 |

|                    |            |            |            |            |
|--------------------|------------|------------|------------|------------|
| ENSMUSG00000033983 | -0.2256654 | 4.51386726 | 0.47017685 | 0.67650262 |
| ENSMUSG00000033430 | -0.2256982 | 4.85873783 | 0.47235476 | 0.67818849 |
| ENSMUSG00000041777 | -0.2257438 | 4.49267458 | 0.4729876  | 0.67873563 |
| ENSMUSG00000034621 | -0.2257818 | 6.78869354 | 0.46316675 | 0.670352   |
| ENSMUSG00000022295 | -0.2261766 | 6.93686211 | 0.4620158  | 0.66940459 |
| ENSMUSG00000062510 | -0.2262721 | 5.05684848 | 0.4676576  | 0.67390916 |
| ENSMUSG00000038369 | -0.2266414 | 6.5744549  | 0.46172688 | 0.66916579 |
| ENSMUSG00000020368 | -0.2266971 | 10.7541102 | 0.45832396 | 0.66718361 |
| ENSMUSG00000039000 | -0.2267175 | 6.90624921 | 0.46092497 | 0.66863262 |
| ENSMUSG00000029110 | -0.2267726 | 7.99543198 | 0.45924705 | 0.66763551 |
| ENSMUSG00000027710 | -0.2268505 | 6.75721385 | 0.46062153 | 0.66839461 |
| ENSMUSG00000029263 | -0.2271667 | 4.674956   | 0.47108739 | 0.67709002 |
| ENSMUSG00000037795 | -0.2272225 | 6.92626267 | 0.46015607 | 0.66814637 |
| ENSMUSG00000032396 | -0.2274178 | 4.98549554 | 0.46447437 | 0.6717934  |
| ENSMUSG00000062580 | -0.2274791 | 6.54625966 | 0.45960052 | 0.66787927 |
| ENSMUSG00000021598 | -0.2276495 | 4.88978304 | 0.46551554 | 0.67248755 |
| ENSMUSG00000022992 | -0.2277426 | 6.16203078 | 0.46023573 | 0.66817207 |
| ENSMUSG00000044982 | -0.2277863 | 2.48945261 | 0.51698836 | 0.7123949  |
| ENSMUSG00000003721 | -0.2278112 | 4.76455754 | 0.46971507 | 0.67601859 |
| ENSMUSG00000041215 | -0.2279896 | 5.99567129 | 0.46041201 | 0.66824806 |
| ENSMUSG00000031154 | -0.2280223 | 6.62538208 | 0.45848905 | 0.66718361 |
| ENSMUSG00000020572 | -0.2281159 | 8.7681523  | 0.45615045 | 0.66558803 |
| ENSMUSG00000019189 | -0.2281267 | 6.96088279 | 0.45762498 | 0.66689564 |
| ENSMUSG00000004768 | -0.2283097 | 3.97742185 | 0.47360864 | 0.67908464 |
| ENSMUSG00000022901 | -0.2283968 | 6.56718186 | 0.45905914 | 0.66763551 |
| ENSMUSG00000035949 | -0.2284852 | 6.34668103 | 0.458565   | 0.66718361 |
| ENSMUSG00000094410 | -0.2285363 | 8.26288832 | 0.45562068 | 0.66532341 |
| ENSMUSG00000052798 | -0.2286982 | 7.19787467 | 0.45626926 | 0.66563956 |
| ENSMUSG00000022003 | -0.2287194 | 3.45070594 | 0.48584322 | 0.68775706 |
| ENSMUSG00000043572 | -0.2288607 | 3.17309043 | 0.47829031 | 0.68258899 |
| ENSMUSG00000021710 | -0.2289386 | 4.99737833 | 0.46272878 | 0.6700775  |
| ENSMUSG00000022945 | -0.2292158 | 5.40708432 | 0.45922816 | 0.66763551 |
| ENSMUSG00000034042 | -0.2294326 | 6.62266791 | 0.45617221 | 0.66558803 |
| ENSMUSG00000044573 | -0.2296904 | 6.3165817  | 0.4557681  | 0.6653585  |
| ENSMUSG00000028098 | -0.2297461 | 6.9153771  | 0.45515012 | 0.66492574 |
| ENSMUSG00000019837 | -0.2299742 | 5.91604993 | 0.4576098  | 0.66689564 |
| ENSMUSG00000016552 | -0.2299971 | 4.85904748 | 0.46038274 | 0.66824806 |
| ENSMUSG00000094441 | -0.2301243 | 3.2263728  | 0.494392   | 0.69386545 |
| ENSMUSG00000034951 | -0.2301632 | 4.12946887 | 0.46705575 | 0.6736792  |
| ENSMUSG00000009733 | -0.2301838 | 3.00565462 | 0.4833978  | 0.6861869  |
| ENSMUSG00000028920 | -0.2302198 | 5.58909639 | 0.45741785 | 0.66689564 |
| ENSMUSG00000028863 | -0.2302698 | 4.7753906  | 0.46074494 | 0.66846138 |
| ENSMUSG00000039193 | -0.2304079 | 4.18895999 | 0.47043783 | 0.67651708 |

|                    |            |            |            |            |
|--------------------|------------|------------|------------|------------|
| ENSMUSG00000058558 | -0.2304328 | 10.0309606 | 0.45106373 | 0.66079182 |
| ENSMUSG00000074088 | -0.230435  | 7.02026919 | 0.4527498  | 0.66238689 |
| ENSMUSG00000071793 | -0.2305869 | 3.40828704 | 0.4795833  | 0.68329057 |
| ENSMUSG00000001416 | -0.230617  | 9.35152748 | 0.45081884 | 0.66072715 |
| ENSMUSG00000055116 | -0.2307055 | 3.87328121 | 0.47408342 | 0.67908773 |
| ENSMUSG00000027668 | -0.2308605 | 6.11095426 | 0.45500239 | 0.66487071 |
| ENSMUSG00000046034 | -0.2309427 | 6.579021   | 0.45266668 | 0.66238689 |
| ENSMUSG00000042705 | -0.2312414 | 4.53475637 | 0.46250557 | 0.66984422 |
| ENSMUSG00000026088 | -0.2313883 | 5.15444769 | 0.45973186 | 0.66794276 |
| ENSMUSG00000041859 | -0.2315459 | 8.63655035 | 0.44916005 | 0.65917074 |
| ENSMUSG00000073910 | -0.2316946 | 4.24316512 | 0.46541414 | 0.67248755 |
| ENSMUSG00000035772 | -0.2317292 | 6.29946946 | 0.45235798 | 0.66208313 |
| ENSMUSG00000041231 | -0.2319743 | 5.005652   | 0.45993527 | 0.66794276 |
| ENSMUSG00000027130 | -0.2320774 | 6.60228468 | 0.45138887 | 0.66102357 |
| ENSMUSG00000058761 | -0.2321269 | 5.44277122 | 0.45487044 | 0.66485807 |
| ENSMUSG00000019864 | -0.2322181 | 5.25753042 | 0.45516337 | 0.66492574 |
| ENSMUSG00000017478 | -0.2322815 | 6.22963815 | 0.4502399  | 0.66005423 |
| ENSMUSG00000021716 | -0.2326307 | 4.58247904 | 0.46160845 | 0.66916579 |
| ENSMUSG00000046062 | -0.2327604 | 8.53764286 | 0.44714295 | 0.65757393 |
| ENSMUSG00000025287 | -0.2328155 | 6.16856557 | 0.45100923 | 0.66079182 |
| ENSMUSG00000029012 | -0.2328317 | 5.54197464 | 0.45414105 | 0.66406197 |
| ENSMUSG00000074867 | -0.2328377 | 3.85005335 | 0.47634245 | 0.68099409 |
| ENSMUSG00000024785 | -0.233047  | 5.85664963 | 0.44940453 | 0.65928152 |
| ENSMUSG00000035011 | -0.233187  | 4.72523645 | 0.45573997 | 0.6653585  |
| ENSMUSG00000029174 | -0.2332093 | 6.58565167 | 0.44842964 | 0.65874747 |
| ENSMUSG00000006906 | -0.2333799 | 5.09185008 | 0.45533866 | 0.66500165 |
| ENSMUSG00000020409 | -0.2335142 | 6.44043639 | 0.44864512 | 0.65888978 |
| ENSMUSG00000024222 | -0.233662  | 6.07643987 | 0.44881213 | 0.6589561  |
| ENSMUSG00000039536 | -0.2337057 | 5.85775322 | 0.44971287 | 0.65946473 |
| ENSMUSG00000020718 | -0.2338748 | 3.68902086 | 0.46709007 | 0.6736792  |
| ENSMUSG00000022191 | -0.233931  | 6.41075799 | 0.44730235 | 0.65771865 |
| ENSMUSG00000028945 | -0.2339729 | 6.04582888 | 0.44889179 | 0.6589561  |
| ENSMUSG00000027854 | -0.2343257 | 5.16155296 | 0.45308847 | 0.66279247 |
| ENSMUSG00000040877 | -0.2343571 | 1.62239963 | 0.5375209  | 0.72746746 |
| ENSMUSG00000057506 | -0.2349274 | 5.73105521 | 0.44840787 | 0.65874747 |
| ENSMUSG00000024457 | -0.2349412 | 6.76291683 | 0.44481618 | 0.65510145 |
| ENSMUSG00000048796 | -0.2350055 | 3.9701475  | 0.4631565  | 0.670352   |
| ENSMUSG00000018196 | -0.2350143 | 5.09699904 | 0.45147994 | 0.66106716 |
| ENSMUSG00000033628 | -0.235036  | 5.81018288 | 0.44757154 | 0.65802474 |
| ENSMUSG00000057191 | -0.2351252 | 4.54888291 | 0.45440437 | 0.66435693 |
| ENSMUSG00000050890 | -0.2352855 | 5.55748942 | 0.44893829 | 0.6589561  |
| ENSMUSG00000081920 | -0.2352881 | 1.6862057  | 0.53458804 | 0.72580329 |
| ENSMUSG00000015176 | -0.2353313 | 8.22680434 | 0.44189204 | 0.65225346 |

|                    |            |            |            |            |
|--------------------|------------|------------|------------|------------|
| ENSMUSG00000060475 | -0.2353407 | 7.41529209 | 0.44324815 | 0.65371828 |
| ENSMUSG00000026470 | -0.2353562 | 5.13521649 | 0.44970698 | 0.65946473 |
| ENSMUSG00000056394 | -0.2354377 | 7.78039106 | 0.44212264 | 0.65250452 |
| ENSMUSG00000027263 | -0.2356199 | 6.33422539 | 0.44485189 | 0.65510145 |
| ENSMUSG00000036875 | -0.2356337 | 5.84409048 | 0.44597828 | 0.65621909 |
| ENSMUSG00000035126 | -0.2357423 | 2.39888289 | 0.50440698 | 0.7025087  |
| ENSMUSG00000022361 | -0.2357762 | 6.79632518 | 0.44362818 | 0.65401042 |
| ENSMUSG00000008892 | -0.235874  | 7.24185308 | 0.44251273 | 0.65295584 |
| ENSMUSG00000024370 | -0.2358826 | 6.97750388 | 0.44284956 | 0.65329813 |
| ENSMUSG00000033883 | -0.2360645 | 4.26611318 | 0.45852645 | 0.66718361 |
| ENSMUSG00000040549 | -0.2360657 | 8.8158632  | 0.4406211  | 0.65114796 |
| ENSMUSG00000026510 | -0.2365315 | 3.86885073 | 0.45801206 | 0.66695125 |
| ENSMUSG00000042506 | -0.236563  | 7.12095777 | 0.44090547 | 0.65142137 |
| ENSMUSG00000000600 | -0.2367512 | 6.28122453 | 0.44374563 | 0.65408391 |
| ENSMUSG00000022024 | -0.2375688 | 6.92891067 | 0.43972458 | 0.65049746 |
| ENSMUSG00000026584 | -0.2376371 | 5.78811814 | 0.44254954 | 0.65295584 |
| ENSMUSG00000060739 | -0.2376702 | 8.0213853  | 0.43791703 | 0.64949763 |
| ENSMUSG00000070934 | -0.2377344 | 6.15862409 | 0.44105278 | 0.65146831 |
| ENSMUSG00000046010 | -0.237799  | 4.48105633 | 0.44826978 | 0.65869209 |
| ENSMUSG00000050668 | -0.2378798 | 4.63634285 | 0.44949205 | 0.65932022 |
| ENSMUSG00000026035 | -0.2379229 | 5.48504096 | 0.44422298 | 0.65452938 |
| ENSMUSG00000062762 | -0.2380232 | 7.11884454 | 0.4386248  | 0.6499931  |
| ENSMUSG00000056209 | -0.2381303 | 5.8756765  | 0.43970871 | 0.65049746 |
| ENSMUSG00000028901 | -0.2381828 | 5.23933729 | 0.44360241 | 0.65401042 |
| ENSMUSG00000024002 | -0.2382675 | 7.32927271 | 0.43746564 | 0.64918528 |
| ENSMUSG00000037029 | -0.2383576 | 6.1664486  | 0.43979757 | 0.65049746 |
| ENSMUSG00000042369 | -0.2386353 | 5.61411029 | 0.4413246  | 0.65150893 |
| ENSMUSG00000020649 | -0.2386965 | 9.50246933 | 0.43517942 | 0.6474855  |
| ENSMUSG00000042408 | -0.2389234 | 4.78222498 | 0.44788253 | 0.65830246 |
| ENSMUSG00000038013 | -0.2390114 | 5.59079373 | 0.4406231  | 0.65114796 |
| ENSMUSG00000008475 | -0.2392901 | 8.14990244 | 0.43484351 | 0.64716428 |
| ENSMUSG00000060126 | -0.2394781 | 10.7302792 | 0.43341898 | 0.64614914 |
| ENSMUSG00000028016 | -0.2395446 | 5.34670836 | 0.44132722 | 0.65150893 |
| ENSMUSG00000054893 | -0.2398716 | 3.31958    | 0.4660623  | 0.67290282 |
| ENSMUSG00000030788 | -0.2399132 | 5.31602406 | 0.44026871 | 0.65092855 |
| ENSMUSG00000059336 | -0.2399716 | 4.6815671  | 0.44395701 | 0.65422689 |
| ENSMUSG00000009907 | -0.240033  | 7.34486606 | 0.43446223 | 0.64704333 |
| ENSMUSG00000038368 | -0.2401141 | 6.5790497  | 0.43525633 | 0.64751059 |
| ENSMUSG00000031902 | -0.2401456 | 8.63738838 | 0.43284129 | 0.64569933 |
| ENSMUSG00000027306 | -0.2405498 | 7.85780237 | 0.43266146 | 0.64561468 |
| ENSMUSG00000025764 | -0.2407379 | 5.52347367 | 0.43820593 | 0.64968561 |
| ENSMUSG00000078651 | -0.240883  | 2.79653613 | 0.46545677 | 0.67248755 |
| ENSMUSG00000034083 | -0.2409402 | 5.17366478 | 0.43954897 | 0.65049746 |

|                    |            |            |            |            |
|--------------------|------------|------------|------------|------------|
| ENSMUSG00000069089 | -0.241     | 5.70066008 | 0.43708791 | 0.64901466 |
| ENSMUSG00000025154 | -0.2410532 | 7.23245616 | 0.43229825 | 0.64542494 |
| ENSMUSG00000020076 | -0.2411629 | 6.84649988 | 0.4334424  | 0.64614914 |
| ENSMUSG00000062901 | -0.2411818 | 5.70957981 | 0.43772533 | 0.64930261 |
| ENSMUSG00000036430 | -0.2412065 | 2.46145638 | 0.48637241 | 0.68823515 |
| ENSMUSG00000037361 | -0.2413001 | 6.85480582 | 0.43261393 | 0.64561468 |
| ENSMUSG00000063889 | -0.2415114 | 4.6437789  | 0.44379933 | 0.65408391 |
| ENSMUSG00000028729 | -0.2417325 | 6.97631743 | 0.43072636 | 0.64414825 |
| ENSMUSG00000073705 | -0.2422546 | 2.94608668 | 0.45793024 | 0.66695125 |
| ENSMUSG00000061207 | -0.2427245 | 3.41834598 | 0.45109592 | 0.66079182 |
| ENSMUSG00000028890 | -0.2427861 | 5.55620005 | 0.43324639 | 0.64612489 |
| ENSMUSG00000029050 | -0.2427964 | 4.1894915  | 0.44864871 | 0.65888978 |
| ENSMUSG00000054737 | -0.2428071 | 4.46555374 | 0.44672005 | 0.65708222 |
| ENSMUSG00000024949 | -0.2430244 | 8.61812468 | 0.42721471 | 0.64111932 |
| ENSMUSG00000002748 | -0.2432006 | 8.88721478 | 0.42678001 | 0.64064527 |
| ENSMUSG00000024978 | -0.243209  | 4.08815292 | 0.43914128 | 0.65024023 |
| ENSMUSG00000029454 | -0.2432829 | 5.97316516 | 0.43141404 | 0.64464029 |
| ENSMUSG00000024795 | -0.2432992 | 7.76833247 | 0.42765518 | 0.64151252 |
| ENSMUSG00000036940 | -0.2433721 | 7.12130942 | 0.42818923 | 0.64168881 |
| ENSMUSG00000056305 | -0.2433809 | 7.11322702 | 0.42806255 | 0.64166304 |
| ENSMUSG00000027164 | -0.2436684 | 6.6970499  | 0.42850098 | 0.64206677 |
| ENSMUSG00000021666 | -0.243818  | 6.22302346 | 0.42916013 | 0.6427865  |
| ENSMUSG00000006932 | -0.2438195 | 8.2939198  | 0.42587656 | 0.63955617 |
| ENSMUSG00000027472 | -0.2438939 | 5.38731685 | 0.43168593 | 0.64495719 |
| ENSMUSG00000002679 | -0.244074  | 4.76775158 | 0.43719683 | 0.64905432 |
| ENSMUSG00000029283 | -0.2440926 | 6.58826769 | 0.42780906 | 0.64165191 |
| ENSMUSG00000031843 | -0.2441222 | 5.90969637 | 0.43024499 | 0.64375001 |
| ENSMUSG00000044906 | -0.2441964 | 5.3048049  | 0.43372699 | 0.64647075 |
| ENSMUSG00000023965 | -0.2443928 | 4.73650382 | 0.43763237 | 0.64930051 |
| ENSMUSG00000010067 | -0.2444452 | 4.40764514 | 0.43414129 | 0.64683333 |
| ENSMUSG00000020696 | -0.2444754 | 4.52807665 | 0.43710993 | 0.64901466 |
| ENSMUSG00000021958 | -0.2445385 | 4.80064313 | 0.43389615 | 0.64655743 |
| ENSMUSG00000095567 | -0.2445649 | 7.64146803 | 0.42449751 | 0.6384632  |
| ENSMUSG00000028651 | -0.2446409 | 4.99921865 | 0.43204444 | 0.64531403 |
| ENSMUSG00000031446 | -0.2447661 | 5.62187096 | 0.42939373 | 0.6428018  |
| ENSMUSG00000040112 | -0.2448121 | 4.93161731 | 0.43266481 | 0.64561468 |
| ENSMUSG00000027509 | -0.2450062 | 6.4091517  | 0.42573288 | 0.63953178 |
| ENSMUSG00000022151 | -0.2450138 | 4.77217401 | 0.43472226 | 0.64713104 |
| ENSMUSG00000024732 | -0.2450906 | 5.19690381 | 0.42811254 | 0.64166304 |
| ENSMUSG00000005907 | -0.2452882 | 4.54606543 | 0.43476116 | 0.64713104 |
| ENSMUSG00000051212 | -0.2453473 | 6.44175858 | 0.42574171 | 0.63953178 |
| ENSMUSG00000091896 | -0.2455791 | 8.38068306 | 0.42277058 | 0.6372235  |
| ENSMUSG00000029534 | -0.245718  | 6.83894493 | 0.42434797 | 0.63832731 |

|                    |            |            |            |            |
|--------------------|------------|------------|------------|------------|
| ENSMUSG0000004535  | -0.2458319 | 7.86925768 | 0.42272863 | 0.6372235  |
| ENSMUSG00000039050 | -0.2460479 | 4.88119331 | 0.43063724 | 0.64410429 |
| ENSMUSG00000066150 | -0.2460826 | 7.38340394 | 0.42278838 | 0.6372235  |
| ENSMUSG00000027170 | -0.2460923 | 7.79290975 | 0.42207819 | 0.63668921 |
| ENSMUSG00000056820 | -0.2463422 | 6.54041716 | 0.42347193 | 0.6375431  |
| ENSMUSG00000032411 | -0.2467768 | 4.02241406 | 0.43853737 | 0.64997072 |
| ENSMUSG00000042548 | -0.2470722 | 7.52418653 | 0.42042556 | 0.63514811 |
| ENSMUSG00000050107 | -0.2471228 | 5.59676531 | 0.42539498 | 0.63918901 |
| ENSMUSG00000022889 | -0.2472424 | 6.22399426 | 0.42296928 | 0.63727257 |
| ENSMUSG00000015950 | -0.2472688 | 7.7540506  | 0.41971614 | 0.63499142 |
| ENSMUSG00000015214 | -0.2472703 | 6.57762273 | 0.42232511 | 0.63697258 |
| ENSMUSG00000030729 | -0.2473528 | 5.97616597 | 0.42406621 | 0.63825959 |
| ENSMUSG00000058748 | -0.2475138 | 4.51780413 | 0.43691891 | 0.64901466 |
| ENSMUSG00000036819 | -0.2476016 | 4.94462316 | 0.42801454 | 0.64166304 |
| ENSMUSG00000037416 | -0.2479436 | 7.32235818 | 0.41970565 | 0.63499142 |
| ENSMUSG00000038371 | -0.2481367 | 4.74736116 | 0.43098932 | 0.64436279 |
| ENSMUSG00000025078 | -0.2481458 | 4.75582392 | 0.42909091 | 0.6427721  |
| ENSMUSG00000026319 | -0.248186  | 6.24983058 | 0.42152398 | 0.63603115 |
| ENSMUSG00000041840 | -0.2482478 | 5.16917905 | 0.42511835 | 0.6389514  |
| ENSMUSG00000037355 | -0.2483406 | 5.11461521 | 0.42718905 | 0.64111932 |
| ENSMUSG00000060227 | -0.2484635 | 4.79866964 | 0.42936812 | 0.6428018  |
| ENSMUSG00000078453 | -0.2484682 | 6.68935332 | 0.41938709 | 0.63476076 |
| ENSMUSG00000019773 | -0.2485236 | 6.32293178 | 0.41995874 | 0.63514811 |
| ENSMUSG00000020492 | -0.2486443 | 5.99677199 | 0.42121473 | 0.63565347 |
| ENSMUSG00000066442 | -0.2486897 | 1.42668088 | 0.51262767 | 0.70874062 |
| ENSMUSG00000008206 | -0.2488888 | 4.50029654 | 0.42871108 | 0.64229234 |
| ENSMUSG00000048486 | -0.248919  | 3.71589891 | 0.43511321 | 0.64747631 |
| ENSMUSG00000020171 | -0.249083  | 6.07158205 | 0.420241   | 0.63514811 |
| ENSMUSG00000031878 | -0.2491166 | 6.13427728 | 0.42058621 | 0.63514811 |
| ENSMUSG00000067931 | -0.2491236 | 3.12740556 | 0.45788738 | 0.66695125 |
| ENSMUSG00000075470 | -0.249211  | 6.34735826 | 0.41918276 | 0.63454055 |
| ENSMUSG00000036501 | -0.2492145 | 5.72518445 | 0.42171478 | 0.63623003 |
| ENSMUSG00000028029 | -0.249342  | 6.49230405 | 0.41778677 | 0.63278266 |
| ENSMUSG00000055866 | -0.249465  | 3.47433153 | 0.43923991 | 0.65029698 |
| ENSMUSG00000010517 | -0.2495051 | 6.89628818 | 0.41698243 | 0.63165312 |
| ENSMUSG00000029221 | -0.24953   | 6.06296635 | 0.41948229 | 0.63481575 |
| ENSMUSG00000025102 | -0.2495473 | 2.68083654 | 0.46063694 | 0.66839461 |
| ENSMUSG00000071866 | -0.2496219 | 9.91335286 | 0.41430844 | 0.62945931 |
| ENSMUSG00000021771 | -0.2496706 | 8.69864038 | 0.41472651 | 0.62982829 |
| ENSMUSG00000042390 | -0.2497238 | 5.51084559 | 0.42044524 | 0.63514811 |
| ENSMUSG00000026393 | -0.2498324 | 7.89817997 | 0.41517877 | 0.63007147 |
| ENSMUSG00000037601 | -0.2500033 | 7.24438182 | 0.41508683 | 0.6300206  |
| ENSMUSG00000027404 | -0.2502027 | 6.54719907 | 0.41540928 | 0.63015453 |



|                    |            |            |            |            |
|--------------------|------------|------------|------------|------------|
| ENSMUSG0000005882  | -0.2503975 | 5.34419782 | 0.42013441 | 0.63514811 |
| ENSMUSG00000026274 | -0.2504956 | 5.0884516  | 0.42061188 | 0.63514811 |
| ENSMUSG00000083012 | -0.2505068 | 3.73448278 | 0.4362531  | 0.64863552 |
| ENSMUSG00000022706 | -0.2506897 | 5.8864529  | 0.41670566 | 0.63156134 |
| ENSMUSG00000057181 | -0.2506907 | 4.88709767 | 0.42500031 | 0.63886302 |
| ENSMUSG00000079508 | -0.2508389 | 4.505479   | 0.42754508 | 0.64143657 |
| ENSMUSG00000052557 | -0.2510662 | 2.87694844 | 0.45342525 | 0.66319516 |
| ENSMUSG00000026753 | -0.2514239 | 7.18018605 | 0.41340435 | 0.62852847 |
| ENSMUSG00000015341 | -0.2515663 | 6.27078088 | 0.41446053 | 0.629513   |
| ENSMUSG00000027304 | -0.2515761 | 6.9770146  | 0.41303145 | 0.62828662 |
| ENSMUSG00000063870 | -0.2515927 | 9.45377018 | 0.41076551 | 0.62666308 |
| ENSMUSG00000059939 | -0.2517769 | 5.68170407 | 0.41504741 | 0.6300206  |
| ENSMUSG00000030316 | -0.252104  | 4.75547772 | 0.4203977  | 0.63514811 |
| ENSMUSG00000020375 | -0.2523551 | 5.28804966 | 0.41654429 | 0.63143289 |
| ENSMUSG00000037070 | -0.2527782 | 5.77606338 | 0.41294574 | 0.62828662 |
| ENSMUSG00000041264 | -0.2530204 | 6.64267641 | 0.41076352 | 0.62666308 |
| ENSMUSG00000037503 | -0.2531815 | 8.05328584 | 0.40857056 | 0.62434816 |
| ENSMUSG00000041236 | -0.2531903 | 6.69347584 | 0.41084709 | 0.62667256 |
| ENSMUSG00000020694 | -0.253222  | 6.8533704  | 0.41042703 | 0.62638623 |
| ENSMUSG00000066595 | -0.2532246 | 5.83992643 | 0.41336158 | 0.62852847 |
| ENSMUSG00000053470 | -0.2533395 | 6.38479569 | 0.41172081 | 0.62720683 |
| ENSMUSG00000074671 | -0.2533543 | 4.55005425 | 0.42090677 | 0.63536654 |
| ENSMUSG00000056536 | -0.2533657 | 6.33334026 | 0.41192257 | 0.62742557 |
| ENSMUSG00000002129 | -0.2537276 | 8.08076754 | 0.40744486 | 0.62395419 |
| ENSMUSG00000032040 | -0.2538147 | 5.72000876 | 0.41168765 | 0.62720683 |
| ENSMUSG00000026563 | -0.253918  | 5.39923051 | 0.41372316 | 0.62883588 |
| ENSMUSG00000028639 | -0.2540633 | 9.6032842  | 0.4060691  | 0.62344094 |
| ENSMUSG00000027195 | -0.2541099 | 7.26079187 | 0.40813708 | 0.62398323 |
| ENSMUSG00000040667 | -0.2542607 | 7.97060272 | 0.40677914 | 0.62395419 |
| ENSMUSG00000030663 | -0.254523  | 6.58366441 | 0.40810479 | 0.62398323 |
| ENSMUSG00000026516 | -0.2546115 | 7.35676482 | 0.40689703 | 0.62395419 |
| ENSMUSG00000059475 | -0.2547298 | 5.71377867 | 0.41213485 | 0.62766025 |
| ENSMUSG00000028291 | -0.254776  | 6.04115259 | 0.41019756 | 0.62612463 |
| ENSMUSG00000004748 | -0.2548063 | 2.15137696 | 0.44448915 | 0.6548321  |
| ENSMUSG00000028249 | -0.2548155 | 6.98121088 | 0.40731822 | 0.62395419 |
| ENSMUSG00000049744 | -0.2548758 | 6.46693235 | 0.40840107 | 0.62426607 |
| ENSMUSG00000020705 | -0.2550073 | 7.95934706 | 0.40537277 | 0.62299252 |
| ENSMUSG00000029201 | -0.2550989 | 5.47917873 | 0.41144928 | 0.62714757 |
| ENSMUSG00000038039 | -0.2552472 | 6.41329641 | 0.40815817 | 0.62398323 |
| ENSMUSG00000056952 | -0.255414  | 6.72409655 | 0.40588874 | 0.62334152 |
| ENSMUSG00000022529 | -0.255445  | 6.40146565 | 0.40744432 | 0.62395419 |
| ENSMUSG00000041702 | -0.2554577 | 5.014481   | 0.41445287 | 0.629513   |
| ENSMUSG00000070709 | -0.2556303 | 2.91742212 | 0.44995009 | 0.65972288 |

|                    |            |            |            |            |
|--------------------|------------|------------|------------|------------|
| ENSMUSG00000030056 | -0.2556616 | 6.74125873 | 0.40548818 | 0.62299252 |
| ENSMUSG00000022471 | -0.2556799 | 6.74148405 | 0.40546991 | 0.62299252 |
| ENSMUSG00000029775 | -0.2558819 | 5.90029002 | 0.40760938 | 0.62397636 |
| ENSMUSG00000047067 | -0.2559501 | 1.37211659 | 0.54482201 | 0.73249727 |
| ENSMUSG00000021241 | -0.2561594 | 4.76613964 | 0.41479945 | 0.62985036 |
| ENSMUSG00000022370 | -0.2561651 | 6.193476   | 0.40634817 | 0.62369181 |
| ENSMUSG00000045409 | -0.2561864 | 5.89913127 | 0.40728983 | 0.62395419 |
| ENSMUSG00000022635 | -0.2562065 | 5.69330798 | 0.40812504 | 0.62398323 |
| ENSMUSG00000032463 | -0.2564145 | 4.50228507 | 0.41797296 | 0.63297577 |
| ENSMUSG00000026028 | -0.2564828 | 7.0397425  | 0.4038623  | 0.62153509 |
| ENSMUSG00000030879 | -0.2565428 | 5.37627014 | 0.40769078 | 0.62397636 |
| ENSMUSG00000032350 | -0.2565776 | 6.58114396 | 0.40476471 | 0.6225018  |
| ENSMUSG00000027281 | -0.256624  | 5.00522508 | 0.41279636 | 0.62822409 |
| ENSMUSG00000025470 | -0.2568318 | 3.61476732 | 0.42340297 | 0.63752829 |
| ENSMUSG00000051557 | -0.2570062 | 3.55323031 | 0.42000178 | 0.63514811 |
| ENSMUSG00000021945 | -0.2570138 | 6.89675464 | 0.40384266 | 0.62153509 |
| ENSMUSG00000040446 | -0.2570294 | 5.16386647 | 0.40997701 | 0.62589218 |
| ENSMUSG00000072964 | -0.2571019 | 6.28597773 | 0.40498886 | 0.62266893 |
| ENSMUSG00000040663 | -0.2571263 | 4.11591788 | 0.41486586 | 0.62986251 |
| ENSMUSG00000067768 | -0.2571508 | 2.94904687 | 0.45924055 | 0.66763551 |
| ENSMUSG00000099689 | -0.2573759 | 2.85743098 | 0.44924623 | 0.65917074 |
| ENSMUSG00000062794 | -0.2573832 | 4.53637393 | 0.41532326 | 0.63015453 |
| ENSMUSG00000037814 | -0.2574213 | 5.11881984 | 0.40956743 | 0.62551695 |
| ENSMUSG00000018882 | -0.2574841 | 6.61132574 | 0.40243949 | 0.6204994  |
| ENSMUSG00000022314 | -0.2575722 | 8.93736814 | 0.40001209 | 0.61863335 |
| ENSMUSG00000031320 | -0.2577476 | 11.1062383 | 0.39913471 | 0.61795118 |
| ENSMUSG00000050174 | -0.2579367 | 1.44807392 | 0.49111807 | 0.69156352 |
| ENSMUSG00000025190 | -0.2579409 | 6.85189621 | 0.4006347  | 0.61906356 |
| ENSMUSG00000033713 | -0.2581702 | 5.15714778 | 0.40742796 | 0.62395419 |
| ENSMUSG00000059436 | -0.2582316 | 6.37970488 | 0.40152059 | 0.61963338 |
| ENSMUSG00000034211 | -0.2583679 | 5.18232824 | 0.40580453 | 0.62330096 |
| ENSMUSG00000032193 | -0.2584474 | 5.97402749 | 0.40196797 | 0.62023502 |
| ENSMUSG00000030403 | -0.2585235 | 6.46595032 | 0.40039995 | 0.6187895  |
| ENSMUSG00000049755 | -0.2588361 | 4.88121078 | 0.40767664 | 0.62397636 |
| ENSMUSG00000063550 | -0.2588522 | 7.71139796 | 0.39859328 | 0.61750179 |
| ENSMUSG00000074862 | -0.2591339 | 2.30713048 | 0.45270273 | 0.66238689 |
| ENSMUSG00000055239 | -0.2593233 | 6.35481533 | 0.4002539  | 0.61874111 |
| ENSMUSG00000074519 | -0.2593803 | 3.2839283  | 0.43657869 | 0.64885124 |
| ENSMUSG00000019256 | -0.259604  | 5.23342662 | 0.40509373 | 0.62274138 |
| ENSMUSG00000076432 | -0.2599718 | 8.34330604 | 0.39607277 | 0.61504029 |
| ENSMUSG00000022890 | -0.2600523 | 7.59498871 | 0.39659385 | 0.61526686 |
| ENSMUSG00000019761 | -0.2600759 | 1.42656233 | 0.53478355 | 0.72587864 |
| ENSMUSG00000032251 | -0.260107  | 1.77985782 | 0.4817664  | 0.68515686 |

|                    |            |            |            |            |
|--------------------|------------|------------|------------|------------|
| ENSMUSG00000031669 | -0.2604313 | 5.15604651 | 0.4036546  | 0.62150359 |
| ENSMUSG00000039263 | -0.2607346 | 4.90772461 | 0.40073712 | 0.61908336 |
| ENSMUSG00000028173 | -0.2607894 | 4.32194367 | 0.410914   | 0.62668599 |
| ENSMUSG00000061118 | -0.2610076 | 3.67294334 | 0.41674615 | 0.63156134 |
| ENSMUSG00000052738 | -0.261012  | 6.53859072 | 0.39609188 | 0.61504029 |
| ENSMUSG00000052310 | -0.2612127 | 6.34891155 | 0.39651516 | 0.61526686 |
| ENSMUSG00000029389 | -0.2612417 | 4.79693409 | 0.40229627 | 0.6204994  |
| ENSMUSG00000060771 | -0.2612897 | 1.72831029 | 0.48789676 | 0.68940671 |
| ENSMUSG00000022070 | -0.261445  | 5.95359859 | 0.39756822 | 0.61609077 |
| ENSMUSG00000031701 | -0.2615215 | 8.48302462 | 0.39310409 | 0.61287184 |
| ENSMUSG00000034259 | -0.2616663 | 3.33624482 | 0.42036725 | 0.63514811 |
| ENSMUSG00000025979 | -0.2617969 | 5.75143111 | 0.39916694 | 0.61795118 |
| ENSMUSG00000031311 | -0.2618013 | 9.12997525 | 0.39214445 | 0.61226085 |
| ENSMUSG00000012609 | -0.2618456 | 4.77336099 | 0.40231835 | 0.6204994  |
| ENSMUSG00000041921 | -0.2618934 | 4.71337478 | 0.40277808 | 0.62068574 |
| ENSMUSG00000004071 | -0.2619444 | 5.15855473 | 0.39933003 | 0.61802167 |
| ENSMUSG00000039458 | -0.2619984 | 5.46837813 | 0.39900366 | 0.61795118 |
| ENSMUSG00000031540 | -0.2621789 | 7.89270814 | 0.39241276 | 0.61245141 |
| ENSMUSG00000027133 | -0.2622082 | 6.15273789 | 0.39487153 | 0.61406435 |
| ENSMUSG00000029128 | -0.2622296 | 5.21262451 | 0.39993653 | 0.61860522 |
| ENSMUSG00000039318 | -0.26236   | 6.60361107 | 0.39364388 | 0.61309072 |
| ENSMUSG00000030641 | -0.262527  | 6.44794841 | 0.39494205 | 0.61406435 |
| ENSMUSG00000049792 | -0.2625375 | 4.65877428 | 0.40015535 | 0.61867746 |
| ENSMUSG00000086965 | -0.2625815 | 1.36337768 | 0.44509964 | 0.65522314 |
| ENSMUSG00000030493 | -0.2625961 | 4.82165922 | 0.3996202  | 0.61838201 |
| ENSMUSG00000041920 | -0.2626    | 6.06943673 | 0.39478152 | 0.61406435 |
| ENSMUSG00000021000 | -0.2626206 | 7.80265299 | 0.39172538 | 0.61196096 |
| ENSMUSG00000007656 | -0.2628634 | 6.91065762 | 0.39243687 | 0.61245141 |
| ENSMUSG00000039048 | -0.2629152 | 5.87472615 | 0.39420394 | 0.61369428 |
| ENSMUSG00000036550 | -0.2630512 | 9.37005277 | 0.38995447 | 0.61043243 |
| ENSMUSG00000030446 | -0.2630801 | 2.16504522 | 0.47915361 | 0.68294906 |
| ENSMUSG00000045078 | -0.2631325 | 6.2915579  | 0.39303986 | 0.6128603  |
| ENSMUSG00000035142 | -0.2633731 | 4.0499801  | 0.40918781 | 0.62502568 |
| ENSMUSG00000025571 | -0.2634502 | 5.29885721 | 0.39643575 | 0.61526686 |
| ENSMUSG00000044881 | -0.2635585 | 2.88489894 | 0.43123016 | 0.64445483 |
| ENSMUSG00000054626 | -0.2635589 | 0.73906211 | 0.6190178  | 0.78599882 |
| ENSMUSG00000070814 | -0.2638089 | 2.96204802 | 0.42923383 | 0.6428018  |
| ENSMUSG00000024240 | -0.2638915 | 5.93474466 | 0.39336249 | 0.61309072 |
| ENSMUSG00000028409 | -0.2638919 | 7.70451195 | 0.38952403 | 0.61020149 |
| ENSMUSG00000041733 | -0.2638982 | 5.10039613 | 0.39601824 | 0.61504029 |
| ENSMUSG00000038372 | -0.2642212 | 5.56670658 | 0.3942576  | 0.61369428 |
| ENSMUSG00000067369 | -0.2642484 | 5.51079702 | 0.394968   | 0.61406435 |
| ENSMUSG00000027634 | -0.2645904 | 5.9377776  | 0.39159915 | 0.61194105 |

|                    |            |            |            |            |
|--------------------|------------|------------|------------|------------|
| ENSMUSG00000041718 | -0.2645904 | 4.61847183 | 0.40208225 | 0.6203226  |
| ENSMUSG00000074890 | -0.2646052 | 3.47772106 | 0.41251565 | 0.6280628  |
| ENSMUSG00000026634 | -0.2647194 | 6.60763198 | 0.38989449 | 0.61042715 |
| ENSMUSG00000040818 | -0.2647925 | 5.86727038 | 0.39262356 | 0.61252695 |
| ENSMUSG00000054770 | -0.2648294 | 4.24813889 | 0.40258184 | 0.6204994  |
| ENSMUSG00000022772 | -0.2649701 | 6.35133864 | 0.39020098 | 0.61072967 |
| ENSMUSG00000004085 | -0.2650058 | 5.69638256 | 0.3926554  | 0.61252695 |
| ENSMUSG00000017421 | -0.265103  | 8.4488685  | 0.38665257 | 0.60737965 |
| ENSMUSG00000034235 | -0.2651286 | 4.37845482 | 0.40093627 | 0.61911158 |
| ENSMUSG00000031799 | -0.265161  | 9.01317849 | 0.38627059 | 0.60695903 |
| ENSMUSG00000028149 | -0.2651791 | 7.34146847 | 0.38769227 | 0.60830401 |
| ENSMUSG00000066838 | -0.2653718 | 2.59244039 | 0.44572089 | 0.65592987 |
| ENSMUSG00000020077 | -0.265432  | 7.02859971 | 0.38778748 | 0.60833036 |
| ENSMUSG00000036890 | -0.2655432 | 4.40048608 | 0.39969783 | 0.6184134  |
| ENSMUSG00000024235 | -0.2656267 | 6.34596013 | 0.38914383 | 0.60978307 |
| ENSMUSG00000040771 | -0.2657828 | 5.48053391 | 0.39188567 | 0.61203404 |
| ENSMUSG00000038538 | -0.2660806 | 6.6467538  | 0.3878783  | 0.60833036 |
| ENSMUSG00000027487 | -0.2661887 | 4.00290973 | 0.40079638 | 0.61908336 |
| ENSMUSG00000024273 | -0.2663136 | 3.74452429 | 0.40624766 | 0.6236263  |
| ENSMUSG00000031016 | -0.266388  | 5.2118691  | 0.39265568 | 0.61252695 |
| ENSMUSG00000003731 | -0.2666289 | 7.61110652 | 0.3846641  | 0.60610462 |
| ENSMUSG00000023452 | -0.2668466 | 3.62632249 | 0.40673278 | 0.62395419 |
| ENSMUSG00000045730 | -0.2670168 | 2.05672814 | 0.46124745 | 0.66894436 |
| ENSMUSG00000044148 | -0.2673032 | 6.29855689 | 0.38615505 | 0.60695903 |
| ENSMUSG00000000563 | -0.2673613 | 8.34931861 | 0.38271691 | 0.60401276 |
| ENSMUSG00000021051 | -0.2674149 | 6.63373971 | 0.38536781 | 0.60642149 |
| ENSMUSG00000025047 | -0.2675978 | 7.27195891 | 0.38294001 | 0.60409964 |
| ENSMUSG00000029672 | -0.2676673 | 6.60143695 | 0.38471681 | 0.60610462 |
| ENSMUSG00000062376 | -0.267672  | 3.85852147 | 0.40346093 | 0.62142918 |
| ENSMUSG00000038002 | -0.2677894 | 6.12818672 | 0.38546391 | 0.60648421 |
| ENSMUSG00000054604 | -0.2679026 | 7.47348357 | 0.38286497 | 0.60409964 |
| ENSMUSG00000035247 | -0.2679771 | 8.81768852 | 0.38141213 | 0.60265911 |
| ENSMUSG00000032301 | -0.2680784 | 8.56739153 | 0.38130656 | 0.60258059 |
| ENSMUSG00000050619 | -0.2681221 | 5.85028251 | 0.38682778 | 0.60756639 |
| ENSMUSG00000038014 | -0.2685786 | 8.46930306 | 0.38040779 | 0.60162631 |
| ENSMUSG00000031485 | -0.2686341 | 5.64331952 | 0.38526644 | 0.60635046 |
| ENSMUSG00000015133 | -0.2687638 | 5.09694796 | 0.38627224 | 0.60695903 |
| ENSMUSG00000024251 | -0.2688556 | 6.48225422 | 0.38266763 | 0.60401276 |
| ENSMUSG00000028710 | -0.2692174 | 5.0327765  | 0.39045179 | 0.61074145 |
| ENSMUSG00000039233 | -0.269222  | 6.13033512 | 0.38347365 | 0.60479605 |
| ENSMUSG00000029250 | -0.2693232 | 8.49307944 | 0.3791616  | 0.60033457 |
| ENSMUSG00000028842 | -0.2693383 | 4.98484019 | 0.3898929  | 0.61042715 |
| ENSMUSG00000031145 | -0.2694496 | 2.50423799 | 0.44105806 | 0.65146831 |

|                    |            |            |            |            |
|--------------------|------------|------------|------------|------------|
| ENSMUSG00000057322 | -0.269682  | 7.39936081 | 0.37911447 | 0.60033457 |
| ENSMUSG00000022718 | -0.2697551 | 7.20832847 | 0.37957974 | 0.60082019 |
| ENSMUSG00000027900 | -0.269962  | 4.94849925 | 0.39027296 | 0.61074145 |
| ENSMUSG00000010097 | -0.2700292 | 8.20686236 | 0.3780741  | 0.59949289 |
| ENSMUSG00000073791 | -0.2700303 | 2.89722954 | 0.40998724 | 0.62589218 |
| ENSMUSG00000030216 | -0.2700733 | 7.52344499 | 0.37851846 | 0.59994588 |
| ENSMUSG00000072946 | -0.2703542 | 5.6958429  | 0.38291028 | 0.60409964 |
| ENSMUSG00000023947 | -0.2706043 | 6.08769936 | 0.38042376 | 0.60162631 |
| ENSMUSG00000038010 | -0.2707677 | 2.19521162 | 0.44524711 | 0.65532207 |
| ENSMUSG00000014355 | -0.2707823 | 8.81730175 | 0.37639411 | 0.59785289 |
| ENSMUSG00000003031 | -0.2709568 | 5.71831559 | 0.38194545 | 0.60323663 |
| ENSMUSG00000030423 | -0.2709673 | 5.92597386 | 0.38034146 | 0.60162631 |
| ENSMUSG00000100201 | -0.2711349 | 1.0589514  | 0.46474223 | 0.67200057 |
| ENSMUSG00000026571 | -0.2714758 | 4.07082626 | 0.3936993  | 0.61309072 |
| ENSMUSG00000030882 | -0.2717972 | 2.4253517  | 0.42728202 | 0.64113111 |
| ENSMUSG00000031754 | -0.2718754 | 6.73210124 | 0.37736487 | 0.59900637 |
| ENSMUSG00000030309 | -0.2719701 | 2.8909125  | 0.42498063 | 0.63886302 |
| ENSMUSG00000030047 | -0.2721642 | 6.6189101  | 0.3761583  | 0.5975974  |
| ENSMUSG00000030980 | -0.2722142 | 7.13952373 | 0.37530337 | 0.59678326 |
| ENSMUSG00000038679 | -0.2722292 | 2.55615385 | 0.42422338 | 0.63830635 |
| ENSMUSG00000032727 | -0.2724245 | 4.89425497 | 0.38435232 | 0.60579588 |
| ENSMUSG00000004096 | -0.2724719 | 7.19313621 | 0.37479965 | 0.59666954 |
| ENSMUSG00000070034 | -0.2725675 | 7.81488661 | 0.37394767 | 0.59574764 |
| ENSMUSG00000029192 | -0.2725769 | 6.92971363 | 0.37512161 | 0.59678326 |
| ENSMUSG00000021792 | -0.2727419 | 4.92823333 | 0.38245881 | 0.60378214 |
| ENSMUSG00000061079 | -0.2727873 | 5.71655385 | 0.37894837 | 0.60033457 |
| ENSMUSG00000058546 | -0.2728265 | 8.55085216 | 0.37283272 | 0.59450364 |
| ENSMUSG00000031536 | -0.2729721 | 5.10305995 | 0.38184918 | 0.60317292 |
| ENSMUSG00000022160 | -0.2730543 | 5.54079474 | 0.37859024 | 0.59995844 |
| ENSMUSG00000020464 | -0.2730652 | 7.18590675 | 0.37432721 | 0.59609342 |
| ENSMUSG00000037152 | -0.2731939 | 4.68600758 | 0.38400323 | 0.60533414 |
| ENSMUSG00000028809 | -0.2732189 | 8.54925039 | 0.37214042 | 0.59383876 |
| ENSMUSG00000040463 | -0.2732939 | 9.20977987 | 0.37157589 | 0.59352173 |
| ENSMUSG00000064145 | -0.2733227 | 5.63217549 | 0.37787282 | 0.59932154 |
| ENSMUSG00000015202 | -0.2734929 | 1.88390348 | 0.45762162 | 0.66689564 |
| ENSMUSG00000060904 | -0.2735205 | 7.07435718 | 0.37329225 | 0.59497246 |
| ENSMUSG00000036376 | -0.2735457 | 4.09807524 | 0.38786859 | 0.60833036 |
| ENSMUSG00000030335 | -0.2736968 | 5.97551208 | 0.37516565 | 0.59678326 |
| ENSMUSG00000004771 | -0.273976  | 5.89419398 | 0.37648544 | 0.59785289 |
| ENSMUSG00000024798 | -0.2744593 | 3.84986649 | 0.39663717 | 0.61526686 |
| ENSMUSG00000022974 | -0.2745128 | 6.20550207 | 0.37407908 | 0.59578627 |
| ENSMUSG00000037818 | -0.2745929 | 3.69339414 | 0.39487212 | 0.61406435 |
| ENSMUSG00000023944 | -0.2746487 | 12.3093746 | 0.36888595 | 0.59056801 |

|                    |            |            |            |            |
|--------------------|------------|------------|------------|------------|
| ENSMUSG00000041303 | -0.2747398 | 6.15784783 | 0.37391626 | 0.59574764 |
| ENSMUSG00000051413 | -0.2748161 | 7.20156378 | 0.370714   | 0.59252702 |
| ENSMUSG00000087141 | -0.2748291 | 4.67584076 | 0.38123251 | 0.60255187 |
| ENSMUSG00000030166 | -0.2749944 | 3.77032672 | 0.39220847 | 0.61227217 |
| ENSMUSG00000033319 | -0.2755793 | 6.38990179 | 0.37184423 | 0.59358587 |
| ENSMUSG00000021621 | -0.2756093 | 5.6735809  | 0.37360546 | 0.59538367 |
| ENSMUSG00000002416 | -0.2758219 | 4.55488676 | 0.38038382 | 0.60162631 |
| ENSMUSG00000033961 | -0.2759051 | 3.26046608 | 0.38978896 | 0.61042715 |
| ENSMUSG00000027671 | -0.2761333 | 7.16042288 | 0.36825642 | 0.59017346 |
| ENSMUSG00000024908 | -0.2763352 | 8.12970253 | 0.36719449 | 0.58891694 |
| ENSMUSG00000026604 | -0.2764636 | 1.30714468 | 0.47745377 | 0.68204637 |
| ENSMUSG00000079317 | -0.2764814 | 3.57379806 | 0.40081973 | 0.61908336 |
| ENSMUSG00000027650 | -0.2767051 | 5.93542425 | 0.37035778 | 0.59222099 |
| ENSMUSG00000097867 | -0.2768147 | 1.25621597 | 0.48929312 | 0.6906462  |
| ENSMUSG00000024829 | -0.2768771 | 5.18934605 | 0.37318219 | 0.59488496 |
| ENSMUSG00000026867 | -0.2768982 | 7.68482786 | 0.36656526 | 0.58856372 |
| ENSMUSG00000091183 | -0.2771297 | 2.62918697 | 0.43698914 | 0.64901466 |
| ENSMUSG00000032456 | -0.2772032 | 2.67536339 | 0.40120676 | 0.61932633 |
| ENSMUSG00000022996 | -0.2772443 | 4.16319413 | 0.3782605  | 0.59970026 |
| ENSMUSG00000021510 | -0.2773936 | 5.23292805 | 0.37542449 | 0.59678326 |
| ENSMUSG00000056904 | -0.277447  | 1.23962938 | 0.48545261 | 0.68747485 |
| ENSMUSG00000023147 | -0.2776667 | 4.03067993 | 0.38049722 | 0.60163426 |
| ENSMUSG00000021252 | -0.2776949 | 6.09762544 | 0.36799499 | 0.59010527 |
| ENSMUSG00000027651 | -0.2778024 | 6.73238554 | 0.36659704 | 0.58856372 |
| ENSMUSG00000020914 | -0.277936  | 11.0365853 | 0.36331224 | 0.58494464 |
| ENSMUSG00000033918 | -0.2780641 | 6.15400156 | 0.36719933 | 0.58891694 |
| ENSMUSG00000055917 | -0.2784168 | 5.24303568 | 0.37231735 | 0.59403319 |
| ENSMUSG00000039428 | -0.2784295 | 5.82560469 | 0.36881165 | 0.59056801 |
| ENSMUSG00000020079 | -0.2786206 | 5.82779842 | 0.36713523 | 0.58891694 |
| ENSMUSG00000028696 | -0.2787106 | 5.13846517 | 0.37171915 | 0.59358587 |
| ENSMUSG00000020454 | -0.2788917 | 7.66563199 | 0.36305764 | 0.58473405 |
| ENSMUSG00000074994 | -0.2789958 | 5.77167161 | 0.36821767 | 0.59017346 |
| ENSMUSG00000030871 | -0.2790025 | 3.09042732 | 0.38849066 | 0.60902504 |
| ENSMUSG00000030094 | -0.2790822 | 3.92827664 | 0.37702388 | 0.59861978 |
| ENSMUSG00000038722 | -0.2793751 | 6.89665893 | 0.3632691  | 0.58494464 |
| ENSMUSG00000028344 | -0.2797441 | 4.73262437 | 0.37244888 | 0.59415514 |
| ENSMUSG00000021737 | -0.2797804 | 7.6537784  | 0.36170894 | 0.58375774 |
| ENSMUSG00000078995 | -0.2797841 | 4.17118482 | 0.38493421 | 0.60618144 |
| ENSMUSG00000030760 | -0.2799765 | 3.73228975 | 0.3849289  | 0.60618144 |
| ENSMUSG00000018160 | -0.2804678 | 7.87203894 | 0.36029615 | 0.58247522 |
| ENSMUSG00000001786 | -0.2805327 | 4.73101785 | 0.36957428 | 0.59140659 |
| ENSMUSG00000053192 | -0.2806983 | 3.92819893 | 0.38054036 | 0.60163426 |
| ENSMUSG00000002221 | -0.2807381 | 6.49227474 | 0.36130904 | 0.58324159 |

|                    |            |            |            |            |
|--------------------|------------|------------|------------|------------|
| ENSMUSG00000034973 | -0.2808771 | 6.19952117 | 0.36302354 | 0.58473405 |
| ENSMUSG00000030536 | -0.2808853 | 9.76380092 | 0.35846092 | 0.58051398 |
| ENSMUSG00000036822 | -0.2811589 | 6.9625915  | 0.36042815 | 0.58247522 |
| ENSMUSG00000043004 | -0.2812925 | 5.74603874 | 0.36390376 | 0.58554731 |
| ENSMUSG00000022325 | -0.2814787 | 6.16993949 | 0.36090797 | 0.58297405 |
| ENSMUSG00000037722 | -0.28159   | 5.79125347 | 0.36353589 | 0.58513    |
| ENSMUSG00000031660 | -0.2819508 | 7.0578928  | 0.35871662 | 0.58084084 |
| ENSMUSG00000042305 | -0.2820023 | 6.74935667 | 0.35913187 | 0.58133865 |
| ENSMUSG00000031196 | -0.2820079 | 2.1185844  | 0.43766371 | 0.64930051 |
| ENSMUSG00000030846 | -0.2820464 | 7.57329418 | 0.35798896 | 0.57983673 |
| ENSMUSG00000029521 | -0.282111  | 5.28515792 | 0.36446623 | 0.58627743 |
| ENSMUSG00000050555 | -0.2822906 | 4.81823394 | 0.36718823 | 0.58891694 |
| ENSMUSG00000031488 | -0.2824403 | 3.57549226 | 0.37541668 | 0.59678326 |
| ENSMUSG00000034329 | -0.2826828 | 6.62906826 | 0.35894792 | 0.58112812 |
| ENSMUSG00000052299 | -0.2829022 | 7.66328134 | 0.35639565 | 0.57851354 |
| ENSMUSG00000015656 | -0.2829088 | 11.1999975 | 0.35475256 | 0.57745556 |
| ENSMUSG00000054942 | -0.2834217 | 5.50108465 | 0.36195697 | 0.58391051 |
| ENSMUSG0000001383  | -0.283541  | 7.33239368 | 0.35566676 | 0.57834081 |
| ENSMUSG00000034163 | -0.2836217 | 7.14984811 | 0.35612131 | 0.57851354 |
| ENSMUSG00000026439 | -0.2837669 | 6.70596096 | 0.3563864  | 0.57851354 |
| ENSMUSG00000041782 | -0.2840443 | 5.54310341 | 0.35765526 | 0.57973159 |
| ENSMUSG00000074282 | -0.2842002 | 2.72877537 | 0.39922718 | 0.61795118 |
| ENSMUSG00000021037 | -0.2842359 | 7.92609098 | 0.35352413 | 0.57658867 |
| ENSMUSG00000042396 | -0.284412  | 6.77847185 | 0.35533981 | 0.57797655 |
| ENSMUSG00000001016 | -0.2846932 | 7.65245876 | 0.35316767 | 0.57624164 |
| ENSMUSG00000054517 | -0.2847286 | 4.01463692 | 0.37180387 | 0.59358587 |
| ENSMUSG00000057278 | -0.2847726 | 6.43823487 | 0.35480532 | 0.57745556 |
| ENSMUSG00000048058 | -0.2848685 | 2.30947063 | 0.4039056  | 0.62153509 |
| ENSMUSG00000079435 | -0.2849807 | 8.55078819 | 0.35195814 | 0.57525258 |
| ENSMUSG00000032570 | -0.285012  | 7.12434518 | 0.35373246 | 0.57669803 |
| ENSMUSG00000095193 | -0.2850374 | 3.80803353 | 0.37902859 | 0.60033457 |
| ENSMUSG00000040405 | -0.2851367 | 1.44915547 | 0.49779342 | 0.69681882 |
| ENSMUSG00000062743 | -0.2855492 | 3.53178067 | 0.38237709 | 0.60374152 |
| ENSMUSG00000086825 | -0.2855544 | 3.06200417 | 0.39359349 | 0.61309072 |
| ENSMUSG00000021488 | -0.2859146 | 8.55573806 | 0.3505157  | 0.57376462 |
| ENSMUSG00000042729 | -0.2861562 | 5.63865236 | 0.3541107  | 0.57680326 |
| ENSMUSG00000020922 | -0.2862947 | 6.342719   | 0.35241346 | 0.57556062 |
| ENSMUSG00000071659 | -0.2863162 | 9.03664134 | 0.34953031 | 0.57264887 |
| ENSMUSG00000023286 | -0.2863369 | 5.82964468 | 0.35413709 | 0.57680326 |
| ENSMUSG00000029518 | -0.2865078 | 8.07272182 | 0.34970359 | 0.57264887 |
| ENSMUSG00000097318 | -0.2865696 | 1.1423848  | 0.48606798 | 0.68798491 |
| ENSMUSG00000033392 | -0.2865908 | 6.27948974 | 0.35314078 | 0.57624164 |
| ENSMUSG00000017428 | -0.2866335 | 7.96574211 | 0.34962738 | 0.57264887 |

|                    |            |            |            |            |
|--------------------|------------|------------|------------|------------|
| ENSMUSG00000062169 | -0.2866402 | 5.46217148 | 0.35589274 | 0.57848057 |
| ENSMUSG00000073008 | -0.286654  | 6.14401409 | 0.35399009 | 0.57680326 |
| ENSMUSG00000022035 | -0.2866549 | 6.66333529 | 0.35167238 | 0.57498087 |
| ENSMUSG00000078515 | -0.2866564 | 6.45185635 | 0.35216478 | 0.57532874 |
| ENSMUSG00000031429 | -0.2869926 | 5.08386378 | 0.35748193 | 0.57962489 |
| ENSMUSG00000029486 | -0.2871352 | 5.86862447 | 0.35383463 | 0.57669803 |
| ENSMUSG00000066571 | -0.287175  | 4.95901527 | 0.35779957 | 0.57979123 |
| ENSMUSG00000045294 | -0.2873519 | 7.44631528 | 0.34905025 | 0.57253042 |
| ENSMUSG00000061273 | -0.2874693 | 6.40970198 | 0.35118486 | 0.57468551 |
| ENSMUSG00000025968 | -0.2874784 | 7.79522484 | 0.34852768 | 0.57233055 |
| ENSMUSG00000026980 | -0.2875071 | 7.30880559 | 0.34918544 | 0.57254306 |
| ENSMUSG00000041632 | -0.2876987 | 5.60258577 | 0.35188956 | 0.57522768 |
| ENSMUSG00000042599 | -0.2877136 | 6.08932876 | 0.35222186 | 0.57533482 |
| ENSMUSG00000057637 | -0.2880085 | 6.97762709 | 0.34873739 | 0.57233055 |
| ENSMUSG00000021752 | -0.2881493 | 3.7333146  | 0.37127393 | 0.59322705 |
| ENSMUSG00000022401 | -0.2881535 | 4.90803317 | 0.35642099 | 0.57851354 |
| ENSMUSG00000037652 | -0.2881895 | 6.65949786 | 0.34927759 | 0.57260629 |
| ENSMUSG00000002458 | -0.2882483 | 6.26320987 | 0.34934304 | 0.57260629 |
| ENSMUSG00000067194 | -0.2882944 | 7.62913558 | 0.34740096 | 0.57126745 |
| ENSMUSG00000021048 | -0.2883033 | 7.51619024 | 0.34701819 | 0.57089918 |
| ENSMUSG00000035683 | -0.2884511 | 6.14170344 | 0.34972788 | 0.57264887 |
| ENSMUSG00000026694 | -0.2884703 | 5.04365502 | 0.35278008 | 0.57597842 |
| ENSMUSG00000031357 | -0.2887444 | 5.40030429 | 0.35385857 | 0.57669803 |
| ENSMUSG00000029642 | -0.2887785 | 6.58274163 | 0.34786367 | 0.57168921 |
| ENSMUSG00000024712 | -0.2889063 | 5.98764306 | 0.34986103 | 0.57277993 |
| ENSMUSG00000072774 | -0.2890362 | 4.13019619 | 0.36467065 | 0.58651877 |
| ENSMUSG00000040599 | -0.2890759 | 7.02733689 | 0.3469658  | 0.57089918 |
| ENSMUSG00000027667 | -0.2891615 | 5.7954422  | 0.35100935 | 0.57448548 |
| ENSMUSG00000024283 | -0.2891986 | 7.79559531 | 0.34578918 | 0.5695724  |
| ENSMUSG00000020283 | -0.2892926 | 4.84873362 | 0.35771525 | 0.5797417  |
| ENSMUSG00000096401 | -0.2893886 | 1.86739675 | 0.43702261 | 0.64901466 |
| ENSMUSG00000029647 | -0.2895971 | 7.14905958 | 0.34597097 | 0.56969781 |
| ENSMUSG00000096986 | -0.2896906 | 2.09828192 | 0.40318169 | 0.62113019 |
| ENSMUSG00000038784 | -0.2898158 | 6.13311631 | 0.34811417 | 0.57200415 |
| ENSMUSG00000021824 | -0.2898458 | 6.80734388 | 0.3461543  | 0.56991267 |
| ENSMUSG00000028382 | -0.290452  | 9.58728627 | 0.3424599  | 0.56616397 |
| ENSMUSG00000068284 | -0.2904695 | 7.00972529 | 0.34493481 | 0.56868628 |
| ENSMUSG00000041769 | -0.290587  | 5.92542023 | 0.34735041 | 0.57126745 |
| ENSMUSG00000057396 | -0.2908241 | 3.23719128 | 0.37737846 | 0.59900637 |
| ENSMUSG00000063888 | -0.2908689 | 7.77569515 | 0.34251754 | 0.56617246 |
| ENSMUSG00000038670 | -0.2909732 | 1.04847512 | 0.43031828 | 0.64375001 |
| ENSMUSG00000071302 | -0.2913411 | 4.59980657 | 0.35567102 | 0.57834081 |
| ENSMUSG00000039701 | -0.2915814 | 4.05756848 | 0.36091328 | 0.58297405 |



|                    |            |            |            |            |
|--------------------|------------|------------|------------|------------|
| ENSMUSG00000059119 | -0.2916913 | 7.61220725 | 0.34150891 | 0.56511156 |
| ENSMUSG00000043015 | -0.2919006 | 5.70281199 | 0.34635233 | 0.57006464 |
| ENSMUSG00000049553 | -0.2919048 | 7.47253868 | 0.34112316 | 0.56464653 |
| ENSMUSG00000048047 | -0.2919077 | 6.9117623  | 0.34297131 | 0.56657515 |
| ENSMUSG00000044694 | -0.2920034 | 4.33700126 | 0.35592493 | 0.57848057 |
| ENSMUSG00000022285 | -0.2920118 | 9.89279435 | 0.33975978 | 0.56386111 |
| ENSMUSG00000042688 | -0.2920584 | 8.18620998 | 0.34042266 | 0.56435327 |
| ENSMUSG00000057522 | -0.2921271 | 7.41713831 | 0.34108928 | 0.56464653 |
| ENSMUSG00000045160 | -0.2921598 | 4.57677396 | 0.35164363 | 0.57498087 |
| ENSMUSG00000022377 | -0.2922094 | 6.02172321 | 0.34470277 | 0.5685645  |
| ENSMUSG00000035365 | -0.2922133 | 5.80058008 | 0.34536753 | 0.56913867 |
| ENSMUSG00000049969 | -0.2922338 | 6.43222263 | 0.34315374 | 0.5667029  |
| ENSMUSG00000029217 | -0.2923566 | 6.04990222 | 0.34423913 | 0.56814734 |
| ENSMUSG00000040843 | -0.2923995 | 5.79655376 | 0.34517121 | 0.56890207 |
| ENSMUSG00000030763 | -0.2924483 | 4.33552498 | 0.35282951 | 0.57597842 |
| ENSMUSG00000050271 | -0.2926359 | 5.45756257 | 0.34304301 | 0.5666068  |
| ENSMUSG00000036461 | -0.2928253 | 8.41275828 | 0.33915127 | 0.56315466 |
| ENSMUSG00000047036 | -0.2931151 | 6.89825583 | 0.34054751 | 0.56442625 |
| ENSMUSG00000032044 | -0.2932704 | 4.89516245 | 0.34622558 | 0.56994301 |
| ENSMUSG00000050592 | -0.2935529 | 3.65535214 | 0.35460905 | 0.57731039 |
| ENSMUSG00000045251 | -0.2935672 | 1.98062237 | 0.39350442 | 0.61309072 |
| ENSMUSG00000031730 | -0.2935754 | 3.99054156 | 0.35633523 | 0.57851354 |
| ENSMUSG00000090862 | -0.2937241 | 8.95270079 | 0.33722166 | 0.5615501  |
| ENSMUSG00000051232 | -0.2938287 | 5.41497851 | 0.34395199 | 0.56776034 |
| ENSMUSG00000021103 | -0.293844  | 4.78854585 | 0.34748423 | 0.57131727 |
| ENSMUSG00000021890 | -0.2939395 | 7.25205986 | 0.33842039 | 0.56250674 |
| ENSMUSG00000039067 | -0.2939852 | 7.74202236 | 0.33740982 | 0.56160326 |
| ENSMUSG00000101892 | -0.2942642 | 3.76790204 | 0.3571344  | 0.57937895 |
| ENSMUSG00000049550 | -0.2942782 | 6.8688069  | 0.33845368 | 0.56250674 |
| ENSMUSG00000038705 | -0.2944559 | 5.7507132  | 0.34069166 | 0.56450513 |
| ENSMUSG00000030876 | -0.294586  | 5.92321547 | 0.34085344 | 0.56454669 |
| ENSMUSG00000038954 | -0.2947048 | 3.58383334 | 0.36412637 | 0.58581811 |
| ENSMUSG00000022897 | -0.2947092 | 7.34865542 | 0.33721805 | 0.5615501  |
| ENSMUSG00000078970 | -0.2949689 | 5.30375374 | 0.34284987 | 0.56654811 |
| ENSMUSG00000025959 | -0.2950235 | 5.31140052 | 0.3435848  | 0.56732789 |
| ENSMUSG00000035000 | -0.2953183 | 6.70335126 | 0.33754142 | 0.56170279 |
| ENSMUSG00000022702 | -0.295366  | 4.2107343  | 0.34907154 | 0.57253042 |
| ENSMUSG00000037214 | -0.2956001 | 2.83331606 | 0.37190817 | 0.59358587 |
| ENSMUSG00000001998 | -0.2956015 | 5.44202651 | 0.34175207 | 0.56525372 |
| ENSMUSG00000043190 | -0.2957218 | 3.57589037 | 0.36229157 | 0.58391156 |
| ENSMUSG00000020612 | -0.2957613 | 8.34662748 | 0.33423972 | 0.55916746 |
| ENSMUSG00000032412 | -0.2958136 | 7.88321407 | 0.33461225 | 0.55936421 |
| ENSMUSG00000056770 | -0.2959037 | 6.674664   | 0.33616575 | 0.56031089 |

|                    |            |            |            |            |
|--------------------|------------|------------|------------|------------|
| ENSMUSG00000072762 | -0.2959661 | 4.02264011 | 0.35325793 | 0.57624164 |
| ENSMUSG00000052331 | -0.296216  | 7.14091201 | 0.33501591 | 0.55945494 |
| ENSMUSG00000021608 | -0.2962798 | 6.63890482 | 0.33524844 | 0.55950612 |
| ENSMUSG00000032966 | -0.296364  | 7.77167027 | 0.33365615 | 0.55854516 |
| ENSMUSG00000001674 | -0.296422  | 6.93420865 | 0.33479904 | 0.5594163  |
| ENSMUSG00000033653 | -0.2967545 | 5.25511868 | 0.34072366 | 0.56450513 |
| ENSMUSG00000029178 | -0.2968326 | 4.33249115 | 0.34864023 | 0.57233055 |
| ENSMUSG00000025237 | -0.2970206 | 4.49851961 | 0.34561449 | 0.56939112 |
| ENSMUSG00000035437 | -0.2970583 | 6.60898828 | 0.33498669 | 0.55945494 |
| ENSMUSG00000069045 | -0.2971753 | 6.8119255  | 0.33834583 | 0.56250674 |
| ENSMUSG00000026192 | -0.2973228 | 8.15842937 | 0.33169885 | 0.55652855 |
| ENSMUSG00000008200 | -0.2974787 | 8.11603808 | 0.33167005 | 0.55652855 |
| ENSMUSG00000036009 | -0.2976383 | 3.24358231 | 0.36095306 | 0.58297405 |
| ENSMUSG00000020687 | -0.2976613 | 8.47934035 | 0.33120719 | 0.55650982 |
| ENSMUSG00000002733 | -0.2977203 | 6.13848312 | 0.33476847 | 0.5594163  |
| ENSMUSG00000040918 | -0.2981476 | 5.12870713 | 0.33879087 | 0.56277276 |
| ENSMUSG00000030880 | -0.2982447 | 5.19378317 | 0.3358731  | 0.56008281 |
| ENSMUSG00000029772 | -0.2983517 | 6.47534429 | 0.33274942 | 0.55745995 |
| ENSMUSG00000020876 | -0.2984303 | 4.62588515 | 0.33922966 | 0.56315466 |
| ENSMUSG00000048100 | -0.2985514 | 4.46137021 | 0.34873038 | 0.57233055 |
| ENSMUSG00000028397 | -0.2988458 | 5.98336483 | 0.33422411 | 0.55916746 |
| ENSMUSG00000035049 | -0.2989228 | 5.76525165 | 0.33178061 | 0.55652855 |
| ENSMUSG00000021711 | -0.2989273 | 6.4222587  | 0.33217052 | 0.55687742 |
| ENSMUSG00000032263 | -0.2990965 | 3.27477282 | 0.35943177 | 0.58147497 |
| ENSMUSG00000030929 | -0.2991828 | 5.49248723 | 0.33614472 | 0.56031089 |
| ENSMUSG00000017778 | -0.299344  | 4.49467546 | 0.33917518 | 0.56315466 |
| ENSMUSG00000034354 | -0.299727  | 7.15448261 | 0.32893749 | 0.553827   |
| ENSMUSG00000029910 | -0.3001458 | 7.51802925 | 0.32806982 | 0.55314336 |
| ENSMUSG00000042111 | -0.3005688 | 5.37110164 | 0.33196985 | 0.55667281 |
| ENSMUSG00000045100 | -0.3006908 | 1.96885156 | 0.39088085 | 0.61126147 |
| ENSMUSG00000001909 | -0.3009126 | 5.98662624 | 0.32856218 | 0.55354079 |
| ENSMUSG00000030609 | -0.3010463 | 6.48048219 | 0.32789314 | 0.55310489 |
| ENSMUSG00000015342 | -0.3010512 | 4.45895648 | 0.33982268 | 0.56387872 |
| ENSMUSG00000062210 | -0.3013402 | 6.44081338 | 0.32841954 | 0.55338692 |
| ENSMUSG00000012640 | -0.3014357 | 5.61971818 | 0.3313566  | 0.55650982 |
| ENSMUSG00000021039 | -0.3016519 | 7.65471872 | 0.32532687 | 0.55001551 |
| ENSMUSG00000037266 | -0.3016902 | 8.25577359 | 0.32480244 | 0.54961078 |
| ENSMUSG00000003226 | -0.3019149 | 9.6620044  | 0.32378899 | 0.54867072 |
| ENSMUSG00000042406 | -0.3019506 | 8.11586806 | 0.32426592 | 0.5490964  |
| ENSMUSG00000027326 | -0.3020316 | 7.70983955 | 0.32508146 | 0.54982381 |
| ENSMUSG00000082286 | -0.3020723 | 2.04424859 | 0.38599636 | 0.60687924 |
| ENSMUSG00000041570 | -0.3024591 | 5.88885703 | 0.32840698 | 0.55338692 |
| ENSMUSG00000034312 | -0.3024603 | 6.06280062 | 0.32629166 | 0.55100677 |

|                    |            |            |            |            |
|--------------------|------------|------------|------------|------------|
| ENSMUSG00000097061 | -0.3029326 | 2.64067873 | 0.3727884  | 0.59450364 |
| ENSMUSG00000024983 | -0.3030311 | 5.00817697 | 0.33092257 | 0.5563743  |
| ENSMUSG00000074220 | -0.3031419 | 3.04515529 | 0.35930572 | 0.5814455  |
| ENSMUSG00000027652 | -0.3033127 | 7.2058235  | 0.32351187 | 0.54842764 |
| ENSMUSG00000027774 | -0.3033913 | 7.35109733 | 0.32301031 | 0.54786776 |
| ENSMUSG00000024580 | -0.3035168 | 6.35614617 | 0.3246585  | 0.54953381 |
| ENSMUSG00000019303 | -0.3035271 | 3.78594296 | 0.33835908 | 0.56250674 |
| ENSMUSG00000033596 | -0.3035409 | 8.30719004 | 0.32180349 | 0.54671337 |
| ENSMUSG00000085566 | -0.3037331 | 2.78521048 | 0.36537261 | 0.58729739 |
| ENSMUSG00000022426 | -0.3037528 | 5.99874803 | 0.32470599 | 0.54953381 |
| ENSMUSG00000027288 | -0.3037682 | 9.45470513 | 0.3208059  | 0.54556637 |
| ENSMUSG00000022867 | -0.3039504 | 7.5396944  | 0.32194614 | 0.54671337 |
| ENSMUSG00000097290 | -0.3042254 | 3.76018404 | 0.34642018 | 0.57008931 |
| ENSMUSG00000031508 | -0.3043247 | 5.31270527 | 0.32626357 | 0.55100677 |
| ENSMUSG00000028495 | -0.3043907 | 9.32461068 | 0.31980234 | 0.54492741 |
| ENSMUSG00000026577 | -0.3048874 | 5.54288223 | 0.32513227 | 0.54982381 |
| ENSMUSG00000052406 | -0.3051436 | 6.40357618 | 0.32136091 | 0.54610086 |
| ENSMUSG00000078566 | -0.3051904 | 3.83838694 | 0.3443441  | 0.56823363 |
| ENSMUSG00000012535 | -0.305295  | 8.17606819 | 0.31909027 | 0.5440426  |
| ENSMUSG00000028331 | -0.3055231 | 2.69391925 | 0.35459305 | 0.57731039 |
| ENSMUSG00000052997 | -0.3055268 | 8.3551588  | 0.31853169 | 0.54334795 |
| ENSMUSG00000049764 | -0.3055498 | 7.94302998 | 0.31891813 | 0.5439211  |
| ENSMUSG00000001630 | -0.3056689 | 4.17203389 | 0.33685009 | 0.56110462 |
| ENSMUSG00000020659 | -0.3058344 | 5.54309391 | 0.32410141 | 0.54902758 |
| ENSMUSG00000029552 | -0.3058509 | 5.96291391 | 0.32182443 | 0.54671337 |
| ENSMUSG00000059897 | -0.306217  | 4.4775703  | 0.33146031 | 0.55652855 |
| ENSMUSG00000025437 | -0.3065259 | 6.51068529 | 0.31982274 | 0.54492741 |
| ENSMUSG00000023460 | -0.3065416 | 4.36732166 | 0.33289434 | 0.55761612 |
| ENSMUSG00000022978 | -0.3068999 | 4.54155765 | 0.32820909 | 0.55329167 |
| ENSMUSG00000026429 | -0.307083  | 4.38305247 | 0.3301233  | 0.55524161 |
| ENSMUSG00000037461 | -0.3070988 | 7.19561459 | 0.31719497 | 0.541925   |
| ENSMUSG00000047368 | -0.3072751 | 5.96181866 | 0.32036755 | 0.54530228 |
| ENSMUSG00000042444 | -0.3072957 | 6.92870675 | 0.31783677 | 0.54276353 |
| ENSMUSG00000075327 | -0.3073105 | 4.38414493 | 0.32778476 | 0.55300859 |
| ENSMUSG00000004880 | -0.307348  | 8.48833151 | 0.31557752 | 0.54030829 |
| ENSMUSG00000054293 | -0.3073985 | 3.60814167 | 0.3444186  | 0.56826961 |
| ENSMUSG00000032905 | -0.3074599 | 5.36183332 | 0.323573   | 0.54842764 |
| ENSMUSG00000039100 | -0.3075262 | 6.74093124 | 0.31769217 | 0.54265957 |
| ENSMUSG00000054008 | -0.3076889 | 5.087502   | 0.32236787 | 0.54712231 |
| ENSMUSG00000029191 | -0.3077417 | 7.78260115 | 0.31549422 | 0.54030327 |
| ENSMUSG00000031292 | -0.3078311 | 2.43946687 | 0.37778972 | 0.59932154 |
| ENSMUSG00000061859 | -0.3078704 | 4.20307533 | 0.33520394 | 0.55950612 |
| ENSMUSG00000014956 | -0.3079043 | 8.26012543 | 0.31503351 | 0.5398572  |

|                    |            |            |            |            |
|--------------------|------------|------------|------------|------------|
| ENSMUSG00000033793 | -0.3079093 | 6.72907053 | 0.31718025 | 0.541925   |
| ENSMUSG00000020170 | -0.3081354 | 5.41450558 | 0.32197484 | 0.54671337 |
| ENSMUSG00000032555 | -0.3082673 | 8.78376917 | 0.31402049 | 0.53844548 |
| ENSMUSG00000020661 | -0.3085881 | 6.13320702 | 0.31691221 | 0.54178524 |
| ENSMUSG00000026150 | -0.3088412 | 6.4908662  | 0.31623866 | 0.54080522 |
| ENSMUSG00000036983 | -0.3088716 | 4.22935256 | 0.33184475 | 0.55654957 |
| ENSMUSG00000024542 | -0.3089233 | 8.08832103 | 0.31357535 | 0.53821368 |
| ENSMUSG00000020954 | -0.3089518 | 6.7749777  | 0.31559736 | 0.54030829 |
| ENSMUSG00000029603 | -0.3090084 | 3.04568103 | 0.33992781 | 0.56396639 |
| ENSMUSG00000031207 | -0.3091856 | 10.5104262 | 0.3120252  | 0.53662364 |
| ENSMUSG00000022911 | -0.3093605 | 4.19065394 | 0.33093718 | 0.5563743  |
| ENSMUSG00000056383 | -0.3093975 | 4.54435732 | 0.32708191 | 0.55216833 |
| ENSMUSG00000027177 | -0.3094714 | 7.31240866 | 0.31363307 | 0.53822709 |
| ENSMUSG00000026174 | -0.3097768 | 7.65312653 | 0.31257088 | 0.53700245 |
| ENSMUSG00000026127 | -0.3098923 | 6.80595854 | 0.31328775 | 0.53789127 |
| ENSMUSG00000099681 | -0.3099511 | 2.97203809 | 0.36571541 | 0.58758566 |
| ENSMUSG00000053801 | -0.3100185 | 5.45185168 | 0.31527766 | 0.54017859 |
| ENSMUSG00000000355 | -0.3101238 | 6.02868832 | 0.31597606 | 0.54061333 |
| ENSMUSG00000037514 | -0.3105362 | 5.78505841 | 0.31572689 | 0.54032458 |
| ENSMUSG00000054115 | -0.3107253 | 4.89712036 | 0.31941858 | 0.54451628 |
| ENSMUSG00000053253 | -0.3107801 | 5.02561626 | 0.3194795  | 0.54453404 |
| ENSMUSG00000057335 | -0.310784  | 6.57459059 | 0.31292444 | 0.53743863 |
| ENSMUSG00000039046 | -0.3108107 | 6.18810276 | 0.31376125 | 0.53836138 |
| ENSMUSG00000038930 | -0.3108527 | 3.80166453 | 0.33176494 | 0.55652855 |
| ENSMUSG00000007659 | -0.3109163 | 5.69779846 | 0.31381406 | 0.53836635 |
| ENSMUSG00000075284 | -0.3112876 | 7.9014276  | 0.30983224 | 0.53391353 |
| ENSMUSG00000028426 | -0.3114047 | 8.47714053 | 0.30930801 | 0.53344382 |
| ENSMUSG00000034543 | -0.3114479 | 7.21293215 | 0.31042074 | 0.53475675 |
| ENSMUSG00000064339 | -0.3114649 | 10.1582511 | 0.30855265 | 0.53273004 |
| ENSMUSG00000029780 | -0.3115811 | 6.36714226 | 0.3125144  | 0.53699096 |
| ENSMUSG00000064351 | -0.3116176 | 12.6839557 | 0.30806761 | 0.53197776 |
| ENSMUSG00000020257 | -0.3118924 | 8.0092521  | 0.30896297 | 0.53318081 |
| ENSMUSG00000036097 | -0.3121208 | 7.50860702 | 0.30924313 | 0.53344382 |
| ENSMUSG00000079478 | -0.3122434 | 2.25639996 | 0.36338188 | 0.58496943 |
| ENSMUSG00000024811 | -0.3125883 | 8.53751025 | 0.30750675 | 0.53136408 |
| ENSMUSG00000025236 | -0.3128347 | 5.91409906 | 0.31070519 | 0.53507581 |
| ENSMUSG00000036403 | -0.3131299 | 5.93031126 | 0.31095663 | 0.53542333 |
| ENSMUSG00000057388 | -0.3135272 | 6.37875196 | 0.30863253 | 0.53278265 |
| ENSMUSG00000021624 | -0.3135512 | 8.61438681 | 0.30594223 | 0.52954467 |
| ENSMUSG00000052962 | -0.3137098 | 5.89628757 | 0.31032283 | 0.5346735  |
| ENSMUSG00000078877 | -0.3143215 | 2.05121703 | 0.40349102 | 0.62142918 |
| ENSMUSG00000032913 | -0.3147294 | 4.86684645 | 0.31573662 | 0.54032458 |
| ENSMUSG00000029176 | -0.3147298 | 6.84878686 | 0.30616916 | 0.52971735 |

|                    |            |            |            |            |
|--------------------|------------|------------|------------|------------|
| ENSMUSG0000006673  | -0.3147783 | 7.42788729 | 0.30492554 | 0.5285738  |
| ENSMUSG0000002147  | -0.3150306 | 6.65261763 | 0.30549536 | 0.52895836 |
| ENSMUSG00000038683 | -0.3152272 | 6.52418559 | 0.30609689 | 0.52967729 |
| ENSMUSG00000069539 | -0.3152633 | 6.40628756 | 0.30660568 | 0.53030243 |
| ENSMUSG00000024589 | -0.315486  | 4.18662908 | 0.32053192 | 0.54530228 |
| ENSMUSG00000031667 | -0.3155002 | 3.93171158 | 0.32287393 | 0.54783849 |
| ENSMUSG00000039275 | -0.3156316 | 6.90337117 | 0.30411125 | 0.52776564 |
| ENSMUSG00000020549 | -0.3160716 | 6.11507097 | 0.30485031 | 0.52853791 |
| ENSMUSG00000039449 | -0.3163123 | 6.56156703 | 0.30426461 | 0.52794684 |
| ENSMUSG00000033904 | -0.3163149 | 6.51009596 | 0.30464292 | 0.52838684 |
| ENSMUSG00000044702 | -0.3165223 | 4.90274372 | 0.31243904 | 0.53699096 |
| ENSMUSG00000087107 | -0.316534  | 8.79233741 | 0.3011954  | 0.52449763 |
| ENSMUSG00000046982 | -0.3165885 | 4.01118636 | 0.31831946 | 0.54317299 |
| ENSMUSG00000020621 | -0.3166863 | 3.73290537 | 0.33000393 | 0.55518913 |
| ENSMUSG00000087452 | -0.3167447 | 1.6267563  | 0.38370789 | 0.60495701 |
| ENSMUSG00000026767 | -0.3167461 | 6.26711131 | 0.30466519 | 0.52838684 |
| ENSMUSG00000035759 | -0.3169351 | 2.37507173 | 0.36942567 | 0.59134429 |
| ENSMUSG00000093459 | -0.3170221 | 1.33375103 | 0.41681576 | 0.63157808 |
| ENSMUSG00000064302 | -0.3170301 | 7.53829841 | 0.30145853 | 0.52468186 |
| ENSMUSG00000009013 | -0.3170548 | 7.96703269 | 0.30097353 | 0.52426079 |
| ENSMUSG00000028609 | -0.3170985 | 6.90427785 | 0.30239972 | 0.5258108  |
| ENSMUSG00000033972 | -0.3171034 | 3.6583358  | 0.33013809 | 0.55524161 |
| ENSMUSG00000041147 | -0.3171937 | 6.27442867 | 0.30438046 | 0.52806288 |
| ENSMUSG00000033545 | -0.3172347 | 3.59866577 | 0.32294346 | 0.54784053 |
| ENSMUSG00000039182 | -0.3173447 | 3.85446557 | 0.32289146 | 0.54783849 |
| ENSMUSG00000059920 | -0.3175225 | 5.87683359 | 0.30496905 | 0.5285738  |
| ENSMUSG00000046591 | -0.3177587 | 6.68078602 | 0.30175946 | 0.52503614 |
| ENSMUSG00000020847 | -0.3178557 | 1.4980008  | 0.36212848 | 0.58391051 |
| ENSMUSG00000036932 | -0.3182617 | 6.49240213 | 0.30129291 | 0.5245338  |
| ENSMUSG00000021277 | -0.3182961 | 6.27666803 | 0.30132482 | 0.5245338  |
| ENSMUSG00000027835 | -0.3187301 | 6.21016351 | 0.30210774 | 0.52555733 |
| ENSMUSG00000020402 | -0.3189664 | 7.91276105 | 0.2980298  | 0.520394   |
| ENSMUSG00000031327 | -0.3190051 | 2.90714097 | 0.33662507 | 0.56090309 |
| ENSMUSG00000043962 | -0.3190536 | 8.52889413 | 0.29743324 | 0.51960475 |
| ENSMUSG00000024614 | -0.3192629 | 6.89061738 | 0.29960477 | 0.52216863 |
| ENSMUSG00000022159 | -0.3193072 | 4.07957754 | 0.31850858 | 0.54334795 |
| ENSMUSG00000053012 | -0.3195159 | 6.21939947 | 0.30092386 | 0.52425896 |
| ENSMUSG00000042032 | -0.3196748 | 6.23092874 | 0.30007259 | 0.52286036 |
| ENSMUSG00000035614 | -0.3203345 | 6.46927554 | 0.29904575 | 0.52174557 |
| ENSMUSG00000010142 | -0.3203443 | 8.99842738 | 0.29536135 | 0.51724209 |
| ENSMUSG00000031758 | -0.3204903 | 3.74883832 | 0.31820626 | 0.54317299 |
| ENSMUSG00000024843 | -0.3206408 | 4.62424481 | 0.30756441 | 0.53136408 |
| ENSMUSG00000020256 | -0.3206497 | 2.19513896 | 0.36884025 | 0.59056801 |

|                    |            |            |            |            |
|--------------------|------------|------------|------------|------------|
| ENSMUSG00000021113 | -0.3206666 | 4.73824866 | 0.30756114 | 0.53136408 |
| ENSMUSG00000041353 | -0.3208069 | 4.38771426 | 0.30901151 | 0.53318081 |
| ENSMUSG00000031575 | -0.3209909 | 6.81863414 | 0.29653403 | 0.51865535 |
| ENSMUSG00000058638 | -0.3212822 | 6.63374479 | 0.29659733 | 0.51865535 |
| ENSMUSG00000057572 | -0.3213941 | 5.97829861 | 0.29855026 | 0.52115467 |
| ENSMUSG00000059423 | -0.3214202 | 4.54071489 | 0.30783907 | 0.53175341 |
| ENSMUSG00000074071 | -0.3215067 | 5.55140183 | 0.29962718 | 0.52216863 |
| ENSMUSG00000024082 | -0.3215586 | 4.95858429 | 0.30265105 | 0.52607816 |
| ENSMUSG00000026914 | -0.3215724 | 7.95899601 | 0.2942034  | 0.51589203 |
| ENSMUSG00000022360 | -0.321613  | 8.63067818 | 0.29369077 | 0.51582432 |
| ENSMUSG00000029815 | -0.3216536 | 3.98318959 | 0.31287775 | 0.53743863 |
| ENSMUSG00000026374 | -0.3217975 | 7.74101426 | 0.29408811 | 0.51589203 |
| ENSMUSG00000022369 | -0.3219019 | 6.29896775 | 0.29660122 | 0.51865535 |
| ENSMUSG00000001833 | -0.3220321 | 8.53456079 | 0.29318405 | 0.51518606 |
| ENSMUSG00000034024 | -0.3222079 | 9.70099131 | 0.29225231 | 0.5142191  |
| ENSMUSG00000023235 | -0.3223624 | 1.35475452 | 0.40461249 | 0.62235645 |
| ENSMUSG00000041712 | -0.3223756 | 6.9373833  | 0.29417577 | 0.51589203 |
| ENSMUSG00000025967 | -0.3224604 | 9.9833456  | 0.29182274 | 0.51405038 |
| ENSMUSG00000020577 | -0.3226912 | 5.48915148 | 0.29786381 | 0.5201884  |
| ENSMUSG00000029270 | -0.3228888 | 6.52103551 | 0.29482663 | 0.51664127 |
| ENSMUSG00000079641 | -0.3229529 | 8.65557796 | 0.29164624 | 0.51390736 |
| ENSMUSG00000037958 | -0.3232325 | 5.79634871 | 0.29623997 | 0.51852813 |
| ENSMUSG00000033845 | -0.3232639 | 6.64567116 | 0.29362173 | 0.51578705 |
| ENSMUSG00000021244 | -0.3232732 | 7.39772586 | 0.29222679 | 0.5142191  |
| ENSMUSG00000036061 | -0.3234473 | 3.29570026 | 0.32041923 | 0.54530228 |
| ENSMUSG00000024067 | -0.3237954 | 5.86601279 | 0.29521117 | 0.51706306 |
| ENSMUSG00000037730 | -0.3238753 | 5.70129953 | 0.29638294 | 0.51861002 |
| ENSMUSG00000032547 | -0.3240366 | 2.47319026 | 0.34729555 | 0.57126745 |
| ENSMUSG00000038437 | -0.3240374 | 6.26328348 | 0.29306    | 0.51505199 |
| ENSMUSG00000049904 | -0.3241141 | 1.44982296 | 0.40791677 | 0.62398323 |
| ENSMUSG00000027739 | -0.3242165 | 4.207179   | 0.30745287 | 0.53136408 |
| ENSMUSG00000057234 | -0.3242342 | 2.71278124 | 0.33552789 | 0.55976683 |
| ENSMUSG00000074513 | -0.3242785 | 5.95461528 | 0.29422968 | 0.51589203 |
| ENSMUSG00000045466 | -0.3245265 | 3.40618419 | 0.31617391 | 0.54078025 |
| ENSMUSG00000067424 | -0.3245325 | 2.76298214 | 0.32885399 | 0.55377287 |
| ENSMUSG00000029790 | -0.3246818 | 4.01086982 | 0.30534166 | 0.52887137 |
| ENSMUSG00000025742 | -0.3246861 | 7.34912665 | 0.29048041 | 0.51291497 |
| ENSMUSG00000027478 | -0.3246989 | 3.46747852 | 0.31208736 | 0.53662364 |
| ENSMUSG00000031924 | -0.3249367 | 8.3470366  | 0.28883457 | 0.51070536 |
| ENSMUSG00000041837 | -0.3249424 | 4.7053422  | 0.29910157 | 0.52174735 |
| ENSMUSG00000031157 | -0.3249638 | 5.93157753 | 0.29205828 | 0.51421331 |
| ENSMUSG00000032228 | -0.325018  | 7.63709388 | 0.28946079 | 0.51156099 |
| ENSMUSG00000033222 | -0.3251559 | 6.66756376 | 0.2905123  | 0.51291497 |

|                    |            |            |            |            |
|--------------------|------------|------------|------------|------------|
| ENSMUSG00000027663 | -0.3252127 | 5.99572696 | 0.29290638 | 0.51487029 |
| ENSMUSG00000041426 | -0.3255531 | 4.99072297 | 0.29750351 | 0.51964332 |
| ENSMUSG00000069495 | -0.3256146 | 6.33666574 | 0.29132106 | 0.51390128 |
| ENSMUSG00000087213 | -0.3257752 | 2.37894677 | 0.34843144 | 0.57233055 |
| ENSMUSG00000027184 | -0.3257955 | 10.2711327 | 0.28684005 | 0.50859636 |
| ENSMUSG00000056708 | -0.3259196 | 5.86837844 | 0.29161303 | 0.51390736 |
| ENSMUSG00000021930 | -0.3264389 | 4.41194645 | 0.30224005 | 0.52561791 |
| ENSMUSG00000027245 | -0.3264616 | 2.69149065 | 0.33787893 | 0.56203708 |
| ENSMUSG00000074925 | -0.3265837 | 3.67396159 | 0.31405991 | 0.53844548 |
| ENSMUSG00000074093 | -0.3266095 | 1.44631855 | 0.38591033 | 0.60687924 |
| ENSMUSG00000030983 | -0.3266148 | 7.01182046 | 0.2877159  | 0.50973029 |
| ENSMUSG00000012483 | -0.3268431 | 5.29015353 | 0.29396608 | 0.51589203 |
| ENSMUSG00000034484 | -0.3268457 | 9.23875389 | 0.28558539 | 0.50722568 |
| ENSMUSG00000044730 | -0.3268719 | 4.51060056 | 0.29710603 | 0.51920133 |
| ENSMUSG00000043909 | -0.3269131 | 6.48951509 | 0.28864967 | 0.51060411 |
| ENSMUSG00000042446 | -0.3269831 | 6.70047932 | 0.28829691 | 0.5102401  |
| ENSMUSG00000057069 | -0.3271355 | 8.23499319 | 0.28576715 | 0.50736136 |
| ENSMUSG00000074340 | -0.3273193 | 1.29362336 | 0.40895663 | 0.62476106 |
| ENSMUSG00000021540 | -0.3273259 | 5.51924205 | 0.29190111 | 0.51410445 |
| ENSMUSG00000047832 | -0.3275974 | 6.45459504 | 0.28659299 | 0.50832547 |
| ENSMUSG00000030528 | -0.3276064 | 7.13020482 | 0.28633692 | 0.50795482 |
| ENSMUSG00000031309 | -0.3276916 | 6.53609243 | 0.28788596 | 0.50978033 |
| ENSMUSG00000080717 | -0.3276967 | 2.67014873 | 0.33860434 | 0.56254955 |
| ENSMUSG00000019790 | -0.3277816 | 5.92139668 | 0.28873893 | 0.51061997 |
| ENSMUSG00000033781 | -0.3278005 | 4.0517671  | 0.30359486 | 0.52726592 |
| ENSMUSG00000061904 | -0.328002  | 9.08642923 | 0.28389851 | 0.50512483 |
| ENSMUSG00000027272 | -0.3281166 | 6.91771778 | 0.28616507 | 0.50778862 |
| ENSMUSG00000028175 | -0.3284608 | 5.53609258 | 0.29116772 | 0.51381979 |
| ENSMUSG00000063362 | -0.3284717 | 5.75670866 | 0.28910257 | 0.51109542 |
| ENSMUSG00000027282 | -0.3286378 | 7.8225483  | 0.28389339 | 0.50512483 |
| ENSMUSG00000001157 | -0.328674  | 5.40843514 | 0.29050798 | 0.51291497 |
| ENSMUSG00000030960 | -0.3288131 | 4.9706508  | 0.29335951 | 0.51541038 |
| ENSMUSG00000032314 | -0.3289349 | 7.14008992 | 0.28446522 | 0.50588273 |
| ENSMUSG00000028799 | -0.3290217 | 4.38198482 | 0.29428342 | 0.51589203 |
| ENSMUSG00000074165 | -0.3292432 | 4.73784856 | 0.29622968 | 0.51852813 |
| ENSMUSG00000007815 | -0.3294589 | 8.96843593 | 0.28183119 | 0.50278208 |
| ENSMUSG00000033417 | -0.3295495 | 6.77973804 | 0.28416357 | 0.50546555 |
| ENSMUSG00000034538 | -0.3295611 | 2.5104525  | 0.34161624 | 0.56511597 |
| ENSMUSG00000025209 | -0.3296606 | 5.04182592 | 0.28856385 | 0.51056153 |
| ENSMUSG00000070372 | -0.329805  | 8.35890675 | 0.2817992  | 0.50278208 |
| ENSMUSG00000022961 | -0.3302593 | 9.90200596 | 0.28039859 | 0.5013209  |
| ENSMUSG00000068299 | -0.3306583 | 2.74752878 | 0.33101794 | 0.5563743  |
| ENSMUSG00000030766 | -0.3309817 | 6.33774896 | 0.28300451 | 0.50428298 |

|                    |            |            |            |            |
|--------------------|------------|------------|------------|------------|
| ENSMUSG00000031683 | -0.3310564 | 6.35659044 | 0.28262793 | 0.50394504 |
| ENSMUSG00000028080 | -0.3313793 | 7.10316843 | 0.28108648 | 0.5021461  |
| ENSMUSG00000025240 | -0.331632  | 6.93049177 | 0.28095572 | 0.50204901 |
| ENSMUSG00000058690 | -0.3316552 | 6.08736611 | 0.28366379 | 0.50506977 |
| ENSMUSG00000030615 | -0.3320087 | 4.71228462 | 0.29006333 | 0.51245789 |
| ENSMUSG00000076437 | -0.3320484 | 5.47791331 | 0.28389167 | 0.50512483 |
| ENSMUSG00000002297 | -0.3322328 | 7.47478194 | 0.27904717 | 0.49979151 |
| ENSMUSG00000024483 | -0.3323931 | 8.19432003 | 0.27812919 | 0.49831286 |
| ENSMUSG00000024352 | -0.3323935 | 3.51187637 | 0.29467764 | 0.51646411 |
| ENSMUSG00000074909 | -0.3324176 | 5.59979648 | 0.28477385 | 0.50618118 |
| ENSMUSG00000010751 | -0.3324889 | 4.31400035 | 0.29211388 | 0.5142191  |
| ENSMUSG00000032673 | -0.3325511 | 4.18228639 | 0.29392562 | 0.51589203 |
| ENSMUSG00000029833 | -0.3326728 | 6.58968011 | 0.27995957 | 0.5009265  |
| ENSMUSG00000027985 | -0.3328277 | 4.248638   | 0.29386329 | 0.51589203 |
| ENSMUSG00000019952 | -0.3329144 | 5.03302972 | 0.28559665 | 0.50722568 |
| ENSMUSG00000034189 | -0.3329683 | 4.68329008 | 0.28833486 | 0.5102401  |
| ENSMUSG00000031362 | -0.3331035 | 1.19320859 | 0.42299676 | 0.63727257 |
| ENSMUSG00000058729 | -0.3335747 | 5.40422274 | 0.28282859 | 0.50413611 |
| ENSMUSG00000032563 | -0.3337458 | 6.75276552 | 0.27794763 | 0.49815311 |
| ENSMUSG00000003660 | -0.3338213 | 8.72169056 | 0.27557797 | 0.49547063 |
| ENSMUSG00000049076 | -0.3338757 | 7.02614002 | 0.2775677  | 0.49767314 |
| ENSMUSG00000041491 | -0.3339071 | 4.23334682 | 0.29149982 | 0.51390128 |
| ENSMUSG00000036931 | -0.3339863 | 4.94712366 | 0.2825002  | 0.50380058 |
| ENSMUSG00000071646 | -0.3344797 | 8.47259663 | 0.27477639 | 0.49460667 |
| ENSMUSG00000028234 | -0.3345525 | 9.7882336  | 0.27415921 | 0.49402721 |
| ENSMUSG00000022521 | -0.3347109 | 6.65783192 | 0.27713354 | 0.49718984 |
| ENSMUSG00000020453 | -0.3347614 | 4.79232609 | 0.28354618 | 0.50499786 |
| ENSMUSG00000019907 | -0.3347844 | 6.93931229 | 0.27633077 | 0.49645676 |
| ENSMUSG00000033111 | -0.3349358 | 5.09794145 | 0.28335627 | 0.50482636 |
| ENSMUSG00000032477 | -0.3352159 | 7.04799866 | 0.27511346 | 0.4951237  |
| ENSMUSG00000089768 | -0.3352259 | 1.69161695 | 0.36887166 | 0.59056801 |
| ENSMUSG00000024604 | -0.3353801 | 6.69629788 | 0.27545748 | 0.49535423 |
| ENSMUSG00000021555 | -0.3354537 | 6.23208487 | 0.27712412 | 0.49718984 |
| ENSMUSG00000032384 | -0.3354775 | 6.65917187 | 0.2758643  | 0.4958201  |
| ENSMUSG00000041406 | -0.3357356 | 5.67256717 | 0.27890241 | 0.49961521 |
| ENSMUSG00000016257 | -0.3357661 | 6.85632322 | 0.27433793 | 0.4942299  |
| ENSMUSG00000030199 | -0.3357754 | 6.6145895  | 0.27520136 | 0.4951237  |
| ENSMUSG00000006699 | -0.3359289 | 9.86060011 | 0.2722444  | 0.49210252 |
| ENSMUSG00000097743 | -0.335993  | 3.46856108 | 0.29875218 | 0.52140209 |
| ENSMUSG00000027715 | -0.3362028 | 8.80357353 | 0.27221094 | 0.49210252 |
| ENSMUSG00000032582 | -0.3363902 | 7.74816637 | 0.27282733 | 0.49257825 |
| ENSMUSG00000022434 | -0.3367211 | 5.09402699 | 0.28009398 | 0.5010334  |
| ENSMUSG00000026276 | -0.3370136 | 8.56705875 | 0.27121798 | 0.49074073 |



|                    |            |            |            |            |
|--------------------|------------|------------|------------|------------|
| ENSMUSG00000035569 | -0.3370314 | 6.92356815 | 0.27269598 | 0.49242354 |
| ENSMUSG00000047554 | -0.3371392 | 6.52945847 | 0.27372629 | 0.49354026 |
| ENSMUSG00000070282 | -0.337305  | 1.95671759 | 0.33307834 | 0.55783768 |
| ENSMUSG00000058331 | -0.3375382 | 2.45938386 | 0.33477636 | 0.5594163  |
| ENSMUSG00000024174 | -0.338069  | 4.56049861 | 0.28183584 | 0.50278208 |
| ENSMUSG00000024217 | -0.3380913 | 5.63282191 | 0.27477479 | 0.49460667 |
| ENSMUSG00000039187 | -0.338455  | 6.25995666 | 0.27259146 | 0.49239971 |
| ENSMUSG00000024590 | -0.3384742 | 8.26435464 | 0.26919566 | 0.48831051 |
| ENSMUSG00000040236 | -0.3386052 | 4.51586972 | 0.27960039 | 0.50044989 |
| ENSMUSG00000037896 | -0.3387249 | 6.37217863 | 0.27193982 | 0.49188175 |
| ENSMUSG00000026749 | -0.3388462 | 5.08221619 | 0.27572881 | 0.4956592  |
| ENSMUSG00000021395 | -0.3390486 | 6.51216162 | 0.27112979 | 0.49066347 |
| ENSMUSG00000024480 | -0.3391014 | 4.23680885 | 0.28738187 | 0.50930584 |
| ENSMUSG00000052713 | -0.3391581 | 6.42014566 | 0.27098856 | 0.4904902  |
| ENSMUSG00000071180 | -0.3391957 | 6.17848148 | 0.27201525 | 0.49193568 |
| ENSMUSG00000026021 | -0.3394362 | 7.08705152 | 0.26952187 | 0.48860716 |
| ENSMUSG00000022051 | -0.3394948 | 5.03158593 | 0.27703329 | 0.4971754  |
| ENSMUSG00000026219 | -0.3398448 | 9.20787681 | 0.26694793 | 0.48586776 |
| ENSMUSG00000028438 | -0.3399591 | 4.62885242 | 0.27803627 | 0.49822917 |
| ENSMUSG00000020720 | -0.339983  | 7.96225019 | 0.26747926 | 0.48650639 |
| ENSMUSG00000025439 | -0.3400248 | 7.19627725 | 0.2682781  | 0.48720456 |
| ENSMUSG00000039826 | -0.3401548 | 5.20683755 | 0.27359984 | 0.49354026 |
| ENSMUSG00000021670 | -0.3402835 | 8.57313612 | 0.26654115 | 0.48569517 |
| ENSMUSG00000003778 | -0.340393  | 7.59470227 | 0.26710727 | 0.48607574 |
| ENSMUSG00000020392 | -0.3404551 | 6.68628989 | 0.26830672 | 0.48720456 |
| ENSMUSG00000034453 | -0.3404934 | 6.69290129 | 0.26843266 | 0.48733633 |
| ENSMUSG00000018326 | -0.3407708 | 8.67624676 | 0.2658242  | 0.48527028 |
| ENSMUSG00000022201 | -0.3408015 | 7.70917426 | 0.26667295 | 0.48569517 |
| ENSMUSG00000027522 | -0.3409499 | 5.87764349 | 0.27018388 | 0.48936227 |
| ENSMUSG00000028982 | -0.3411198 | 3.80421939 | 0.28095936 | 0.50204901 |
| ENSMUSG00000028868 | -0.3411538 | 7.59875358 | 0.2660267  | 0.48533251 |
| ENSMUSG00000033732 | -0.341185  | 9.5200896  | 0.26486886 | 0.48388036 |
| ENSMUSG00000020982 | -0.3412629 | 7.55895524 | 0.26619146 | 0.48539207 |
| ENSMUSG00000046567 | -0.3416607 | 3.66304578 | 0.28665996 | 0.50836064 |
| ENSMUSG00000021134 | -0.3416744 | 8.51836942 | 0.26457925 | 0.48380069 |
| ENSMUSG00000028140 | -0.3416826 | 6.32948933 | 0.2675757  | 0.48654233 |
| ENSMUSG00000022538 | -0.3417176 | 6.6073787  | 0.26666858 | 0.48569517 |
| ENSMUSG00000029538 | -0.3418715 | 5.87359024 | 0.2683149  | 0.48720456 |
| ENSMUSG00000072640 | -0.3420485 | 3.43851    | 0.28868261 | 0.51060411 |
| ENSMUSG00000022013 | -0.3421979 | 4.54702104 | 0.27755223 | 0.49767314 |
| ENSMUSG00000035666 | -0.3422802 | 6.50411749 | 0.26624756 | 0.48541229 |
| ENSMUSG00000027030 | -0.3422951 | 4.34451306 | 0.27750543 | 0.49767314 |
| ENSMUSG00000020849 | -0.3424748 | 9.65002034 | 0.26304669 | 0.4821852  |

|                    |            |            |            |            |
|--------------------|------------|------------|------------|------------|
| ENSMUSG0000009741  | -0.3426271 | 6.73153159 | 0.2653865  | 0.48466181 |
| ENSMUSG00000025261 | -0.3426354 | 9.8207609  | 0.26281324 | 0.48183917 |
| ENSMUSG00000074865 | -0.3430345 | 1.98649428 | 0.37061076 | 0.59244981 |
| ENSMUSG00000027479 | -0.3430798 | 8.54521694 | 0.26269748 | 0.48170884 |
| ENSMUSG00000019988 | -0.3430955 | 6.31795408 | 0.26597002 | 0.48531653 |
| ENSMUSG00000039156 | -0.3432301 | 5.26391879 | 0.270319   | 0.48944259 |
| ENSMUSG00000022358 | -0.3432505 | 2.59726316 | 0.32534764 | 0.55001551 |
| ENSMUSG00000043241 | -0.3434196 | 7.18034875 | 0.26374274 | 0.48288654 |
| ENSMUSG00000027680 | -0.3435034 | 7.320147   | 0.26341309 | 0.48261073 |
| ENSMUSG00000022351 | -0.343528  | 7.36432313 | 0.26310338 | 0.48220714 |
| ENSMUSG00000034023 | -0.3436639 | 6.85401724 | 0.26388648 | 0.4829857  |
| ENSMUSG00000022673 | -0.3441252 | 8.97648271 | 0.26102172 | 0.48051523 |
| ENSMUSG00000014074 | -0.3441889 | 6.28244628 | 0.26469066 | 0.48380069 |
| ENSMUSG00000030365 | -0.3442658 | 4.93872296 | 0.27233523 | 0.4921725  |
| ENSMUSG00000033538 | -0.3443472 | 5.98183807 | 0.26585468 | 0.48527028 |
| ENSMUSG00000037343 | -0.344363  | 7.23114163 | 0.262304   | 0.48147852 |
| ENSMUSG00000053768 | -0.3445632 | 6.85128439 | 0.26243698 | 0.48154719 |
| ENSMUSG00000019920 | -0.3446265 | 6.80233157 | 0.26261685 | 0.48170884 |
| ENSMUSG00000028268 | -0.3446337 | 8.34752235 | 0.26064202 | 0.48019292 |
| ENSMUSG00000061371 | -0.344739  | 3.1577545  | 0.2988536  | 0.5214947  |
| ENSMUSG00000034154 | -0.3450122 | 6.71621489 | 0.26221942 | 0.48147852 |
| ENSMUSG00000015759 | -0.3451944 | 6.74790624 | 0.2619386  | 0.48129934 |
| ENSMUSG00000062797 | -0.3453208 | 4.78261474 | 0.2694055  | 0.48860716 |
| ENSMUSG00000043090 | -0.3455163 | 5.60924114 | 0.26527871 | 0.48454702 |
| ENSMUSG00000024135 | -0.3455169 | 5.9819318  | 0.26347872 | 0.48264897 |
| ENSMUSG00000030649 | -0.3457261 | 5.09969567 | 0.26480608 | 0.4838556  |
| ENSMUSG00000042473 | -0.3457985 | 4.60008609 | 0.27249636 | 0.4923104  |
| ENSMUSG00000039253 | -0.3458522 | 3.95985235 | 0.27657281 | 0.49667963 |
| ENSMUSG00000041997 | -0.3458604 | 7.90853942 | 0.25941051 | 0.47859472 |
| ENSMUSG00000000295 | -0.3459205 | 4.27471386 | 0.27181708 | 0.49174222 |
| ENSMUSG00000035992 | -0.3460769 | 6.30276298 | 0.262153   | 0.48144719 |
| ENSMUSG00000029430 | -0.3463226 | 9.17270488 | 0.2578615  | 0.47681386 |
| ENSMUSG00000039725 | -0.3464103 | 3.21898679 | 0.27992345 | 0.5009265  |
| ENSMUSG00000020664 | -0.3466232 | 7.55624728 | 0.25875676 | 0.47805942 |
| ENSMUSG00000028851 | -0.3467294 | 7.28104459 | 0.25832966 | 0.47743394 |
| ENSMUSG00000022048 | -0.346736  | 4.69102173 | 0.26884027 | 0.4877479  |
| ENSMUSG00000024427 | -0.3467734 | 1.60719712 | 0.34257933 | 0.56618781 |
| ENSMUSG00000026740 | -0.3472256 | 5.39549536 | 0.26394538 | 0.48301153 |
| ENSMUSG00000028896 | -0.3472452 | 6.91302566 | 0.2582413  | 0.47735246 |
| ENSMUSG00000048279 | -0.347366  | 6.74696397 | 0.2594381  | 0.47859472 |
| ENSMUSG00000095403 | -0.3475173 | 4.82458962 | 0.26763902 | 0.48655077 |
| ENSMUSG00000008226 | -0.3476329 | 3.26943536 | 0.29157389 | 0.51390736 |
| ENSMUSG00000028381 | -0.3477083 | 8.49872124 | 0.25646573 | 0.4754558  |

|                    |            |            |            |            |
|--------------------|------------|------------|------------|------------|
| ENSMUSG00000032897 | -0.3477438 | 5.52620636 | 0.26139834 | 0.48079817 |
| ENSMUSG00000032946 | -0.347852  | 5.29485574 | 0.26247537 | 0.48154719 |
| ENSMUSG00000027379 | -0.3479187 | 7.64910631 | 0.25689332 | 0.47575778 |
| ENSMUSG00000026917 | -0.3479947 | 7.02044048 | 0.25720996 | 0.47618063 |
| ENSMUSG00000030096 | -0.348017  | 6.77394065 | 0.25754409 | 0.47647203 |
| ENSMUSG00000019978 | -0.3483499 | 7.23564389 | 0.25655144 | 0.47553296 |
| ENSMUSG00000030869 | -0.3485724 | 6.11358234 | 0.25924657 | 0.47850612 |
| ENSMUSG00000090673 | -0.3487331 | 4.61287694 | 0.2668229  | 0.48580417 |
| ENSMUSG00000034160 | -0.3489168 | 8.68637997 | 0.25465094 | 0.47323035 |
| ENSMUSG00000063810 | -0.3489919 | 5.58829376 | 0.26115442 | 0.48067746 |
| ENSMUSG00000021770 | -0.3489936 | 4.90562692 | 0.2646397  | 0.48380069 |
| ENSMUSG00000055835 | -0.3490493 | 4.08590526 | 0.2734404  | 0.49343729 |
| ENSMUSG00000027751 | -0.34918   | 6.60965003 | 0.25687345 | 0.47575778 |
| ENSMUSG00000051306 | -0.3493753 | 5.09425188 | 0.26151782 | 0.48085391 |
| ENSMUSG00000038446 | -0.3494231 | 6.92865876 | 0.25585133 | 0.47504333 |
| ENSMUSG00000021365 | -0.3497339 | 7.3784602  | 0.25451018 | 0.47305219 |
| ENSMUSG00000024077 | -0.3497838 | 6.60239594 | 0.25594714 | 0.47504333 |
| ENSMUSG00000036873 | -0.3500378 | 4.36924246 | 0.26690355 | 0.48586776 |
| ENSMUSG00000026659 | -0.3506421 | 5.22498993 | 0.26033311 | 0.47988301 |
| ENSMUSG00000029504 | -0.3507546 | 5.62237583 | 0.2563038  | 0.47531903 |
| ENSMUSG00000028899 | -0.3507812 | 5.80929051 | 0.25619158 | 0.47523402 |
| ENSMUSG00000066613 | -0.350924  | 4.18397647 | 0.27288222 | 0.4925949  |
| ENSMUSG00000022962 | -0.3513266 | 7.97891302 | 0.25150393 | 0.46982824 |
| ENSMUSG00000032551 | -0.3514422 | 4.02432673 | 0.26744531 | 0.48650639 |
| ENSMUSG00000021707 | -0.35176   | 7.14429851 | 0.25220026 | 0.47037834 |
| ENSMUSG00000028106 | -0.3521854 | 6.83304432 | 0.25216762 | 0.47037834 |
| ENSMUSG00000029752 | -0.3523329 | 5.9389813  | 0.25410548 | 0.47262392 |
| ENSMUSG00000021694 | -0.3525339 | 4.36822243 | 0.26434838 | 0.48358488 |
| ENSMUSG00000019804 | -0.3525462 | 6.79786341 | 0.25161091 | 0.46992935 |
| ENSMUSG00000063787 | -0.3525556 | 5.35497107 | 0.25636642 | 0.47535342 |
| ENSMUSG00000041974 | -0.3527092 | 5.45154726 | 0.25597893 | 0.47504333 |
| ENSMUSG00000022672 | -0.3527383 | 6.44138281 | 0.25310451 | 0.47131678 |
| ENSMUSG00000021068 | -0.3532108 | 7.21184103 | 0.2501508  | 0.46787225 |
| ENSMUSG00000026918 | -0.3532388 | 5.04138682 | 0.25595361 | 0.47504333 |
| ENSMUSG00000026696 | -0.35337   | 4.74527604 | 0.26036679 | 0.47988301 |
| ENSMUSG00000028484 | -0.3534789 | 8.30785645 | 0.24871742 | 0.46695136 |
| ENSMUSG00000032498 | -0.3535048 | 5.70089685 | 0.25383636 | 0.47234245 |
| ENSMUSG00000049470 | -0.3536434 | 7.53169667 | 0.24928282 | 0.46736194 |
| ENSMUSG00000098090 | -0.3537404 | 4.3588137  | 0.2636714  | 0.4828379  |
| ENSMUSG00000028309 | -0.353822  | 7.74243918 | 0.2486737  | 0.46695136 |
| ENSMUSG00000014301 | -0.3539108 | 2.50105682 | 0.28474684 | 0.50618118 |
| ENSMUSG00000025602 | -0.3539422 | 3.217425   | 0.28569323 | 0.50731365 |
| ENSMUSG00000059263 | -0.3539527 | 7.78435619 | 0.2486017  | 0.46695136 |

|                    |            |            |            |            |
|--------------------|------------|------------|------------|------------|
| ENSMUSG00000058835 | -0.3541179 | 7.20293584 | 0.24904801 | 0.46724664 |
| ENSMUSG00000026082 | -0.3541856 | 5.98087806 | 0.25178687 | 0.47009516 |
| ENSMUSG00000079800 | -0.3542239 | 2.74873676 | 0.29248383 | 0.51448832 |
| ENSMUSG00000032640 | -0.3542571 | 5.73305186 | 0.25214348 | 0.47037834 |
| ENSMUSG00000047909 | -0.3543047 | 5.38748872 | 0.25349797 | 0.47190093 |
| ENSMUSG00000034729 | -0.354445  | 5.50897096 | 0.25272133 | 0.47088579 |
| ENSMUSG00000019951 | -0.3545242 | 6.72020181 | 0.24949886 | 0.4674252  |
| ENSMUSG00000024645 | -0.3548725 | 5.36705815 | 0.25369356 | 0.47218352 |
| ENSMUSG00000020719 | -0.3549399 | 10.871091  | 0.24591019 | 0.46378025 |
| ENSMUSG00000005610 | -0.3550403 | 11.5797985 | 0.24570066 | 0.46354722 |
| ENSMUSG00000021326 | -0.3551258 | 7.20991683 | 0.24743635 | 0.46576254 |
| ENSMUSG00000042215 | -0.3551604 | 3.41979598 | 0.26969551 | 0.48872398 |
| ENSMUSG00000071281 | -0.3551667 | 4.74301279 | 0.25908738 | 0.47842436 |
| ENSMUSG00000025747 | -0.355307  | 7.03376091 | 0.24757521 | 0.46594259 |
| ENSMUSG00000056851 | -0.3555368 | 9.56871963 | 0.24532773 | 0.46308668 |
| ENSMUSG00000019897 | -0.3559678 | 5.67856801 | 0.25033175 | 0.46802663 |
| ENSMUSG00000032342 | -0.3560392 | 4.78597431 | 0.25516652 | 0.4740251  |
| ENSMUSG00000033658 | -0.3561311 | 6.35552773 | 0.24801258 | 0.46660286 |
| ENSMUSG00000020527 | -0.3563203 | 4.88914375 | 0.25247335 | 0.47072486 |
| ENSMUSG00000062190 | -0.3564683 | 5.51622295 | 0.25085926 | 0.46881925 |
| ENSMUSG00000032388 | -0.3568261 | 6.13529542 | 0.24780471 | 0.46629314 |
| ENSMUSG00000031297 | -0.3569581 | 5.45171488 | 0.24917263 | 0.46736194 |
| ENSMUSG00000020589 | -0.356976  | 5.15046747 | 0.25386654 | 0.47234245 |
| ENSMUSG00000027752 | -0.357112  | 6.76312354 | 0.24559661 | 0.463432   |
| ENSMUSG00000067235 | -0.3574062 | 4.90487458 | 0.25273433 | 0.47088579 |
| ENSMUSG00000026743 | -0.3574966 | 6.49838623 | 0.24582488 | 0.46370045 |
| ENSMUSG00000071337 | -0.3576002 | 6.87996608 | 0.24502633 | 0.46276076 |
| ENSMUSG00000051278 | -0.357619  | 5.61697014 | 0.24876723 | 0.46696359 |
| ENSMUSG00000001134 | -0.3577427 | 4.17687767 | 0.25777617 | 0.47673782 |
| ENSMUSG00000038664 | -0.3579103 | 7.98342278 | 0.24319678 | 0.46075792 |
| ENSMUSG00000046753 | -0.3579318 | 5.41152425 | 0.24965096 | 0.4674252  |
| ENSMUSG00000032199 | -0.3583238 | 7.09060025 | 0.24343171 | 0.46108007 |
| ENSMUSG00000028690 | -0.3583345 | 4.55205356 | 0.25470256 | 0.47324474 |
| ENSMUSG00000033237 | -0.3584814 | 6.79636679 | 0.24399485 | 0.46163131 |
| ENSMUSG00000074158 | -0.3585522 | 2.02255192 | 0.33998185 | 0.56396928 |
| ENSMUSG00000078919 | -0.3585692 | 3.40178965 | 0.2723744  | 0.4921725  |
| ENSMUSG00000072772 | -0.3588983 | 1.77756838 | 0.31827452 | 0.54317299 |
| ENSMUSG00000000420 | -0.3589003 | 7.97707162 | 0.24181835 | 0.459      |
| ENSMUSG00000003038 | -0.3596374 | 8.06667322 | 0.24061078 | 0.45749379 |
| ENSMUSG00000031134 | -0.3596565 | 7.04044773 | 0.2417779  | 0.459      |
| ENSMUSG00000096965 | -0.3596903 | 1.71839775 | 0.31575718 | 0.54032458 |
| ENSMUSG00000090164 | -0.359821  | 6.95753618 | 0.24184329 | 0.459      |
| ENSMUSG00000036513 | -0.3598959 | 4.95120171 | 0.24868766 | 0.46695136 |

|                    |            |            |            |            |
|--------------------|------------|------------|------------|------------|
| ENSMUSG00000067928 | -0.3599466 | 4.00247242 | 0.26644407 | 0.48568844 |
| ENSMUSG00000041966 | -0.3599651 | 5.4337488  | 0.24680484 | 0.46489841 |
| ENSMUSG00000017677 | -0.3601885 | 7.54135055 | 0.24062545 | 0.45749379 |
| ENSMUSG00000082064 | -0.3603442 | 1.87624417 | 0.30806559 | 0.53197776 |
| ENSMUSG00000022000 | -0.3603531 | 6.6583438  | 0.24161689 | 0.4589742  |
| ENSMUSG00000085622 | -0.3606629 | 2.87495905 | 0.27379691 | 0.49358507 |
| ENSMUSG00000009630 | -0.3607081 | 6.31555632 | 0.24190292 | 0.45903239 |
| ENSMUSG00000029536 | -0.3607851 | 4.94283506 | 0.24808728 | 0.466662   |
| ENSMUSG00000072872 | -0.3607872 | 5.90355856 | 0.24404303 | 0.46163131 |
| ENSMUSG00000026196 | -0.3608575 | 6.09897989 | 0.24244712 | 0.45974147 |
| ENSMUSG00000029253 | -0.3611372 | 6.67844332 | 0.24090826 | 0.45794134 |
| ENSMUSG00000036241 | -0.3611426 | 6.0910225  | 0.24231614 | 0.45957391 |
| ENSMUSG00000034525 | -0.3615516 | 6.82370643 | 0.23979644 | 0.456481   |
| ENSMUSG00000026709 | -0.3615548 | 5.92219568 | 0.24213875 | 0.45939906 |
| ENSMUSG00000020152 | -0.3618001 | 10.1457607 | 0.2370435  | 0.45275897 |
| ENSMUSG00000020189 | -0.3618181 | 7.24502426 | 0.23900987 | 0.45545206 |
| ENSMUSG00000047714 | -0.361839  | 6.51754104 | 0.24037937 | 0.45726779 |
| ENSMUSG00000091931 | -0.3621423 | 3.46158515 | 0.26558018 | 0.48493339 |
| ENSMUSG00000031264 | -0.3625258 | 8.18964299 | 0.23692367 | 0.45261024 |
| ENSMUSG00000021712 | -0.3625358 | 5.30532498 | 0.24460409 | 0.46227746 |
| ENSMUSG00000030264 | -0.3627217 | 6.99517986 | 0.23823804 | 0.45431636 |
| ENSMUSG00000048371 | -0.362726  | 4.29132111 | 0.24826928 | 0.46684149 |
| ENSMUSG00000029464 | -0.3631046 | 4.94204633 | 0.24378736 | 0.46148879 |
| ENSMUSG00000040407 | -0.3632245 | 6.72394815 | 0.23801265 | 0.45404714 |
| ENSMUSG00000037062 | -0.3634549 | 7.73134949 | 0.23619954 | 0.45154685 |
| ENSMUSG00000005687 | -0.3637861 | 6.4592746  | 0.23753861 | 0.45346368 |
| ENSMUSG00000028990 | -0.3638629 | 5.85694876 | 0.23924012 | 0.45566328 |
| ENSMUSG00000043183 | -0.3638951 | 5.47928467 | 0.24094577 | 0.45794134 |
| ENSMUSG00000040785 | -0.3638974 | 6.04496662 | 0.23909948 | 0.45547585 |
| ENSMUSG00000040370 | -0.3639459 | 3.89270773 | 0.25754313 | 0.47647203 |
| ENSMUSG00000031353 | -0.3643564 | 9.51769061 | 0.23391547 | 0.44845234 |
| ENSMUSG00000056216 | -0.36438   | 6.2185668  | 0.237714   | 0.45371819 |
| ENSMUSG00000033294 | -0.3647896 | 6.10153243 | 0.23630612 | 0.4515905  |
| ENSMUSG00000075376 | -0.36501   | 6.55445482 | 0.23626837 | 0.4515905  |
| ENSMUSG00000064363 | -0.3650497 | 10.5713588 | 0.23279218 | 0.4472729  |
| ENSMUSG00000042029 | -0.3651046 | 8.11208606 | 0.23372507 | 0.44832642 |
| ENSMUSG00000078185 | -0.3651445 | 3.90473675 | 0.25240915 | 0.47068654 |
| ENSMUSG00000037007 | -0.3653711 | 4.54476189 | 0.24674921 | 0.46489298 |
| ENSMUSG00000054814 | -0.3658493 | 4.85153333 | 0.24295724 | 0.46038497 |
| ENSMUSG00000061474 | -0.3658833 | 4.18950529 | 0.24639428 | 0.46453076 |
| ENSMUSG00000023932 | -0.366029  | 7.71085533 | 0.23280256 | 0.4472729  |
| ENSMUSG00000090958 | -0.3660438 | 3.27218726 | 0.25257327 | 0.47076626 |
| ENSMUSG00000063895 | -0.3661285 | 6.90747964 | 0.23391062 | 0.44845234 |

|                    |            |            |            |            |
|--------------------|------------|------------|------------|------------|
| ENSMUSG00000018583 | -0.3662847 | 9.00124545 | 0.23152988 | 0.44554214 |
| ENSMUSG00000051234 | -0.3664116 | 6.14787397 | 0.23470139 | 0.44936772 |
| ENSMUSG00000001052 | -0.3667294 | 6.83295873 | 0.23311388 | 0.44779125 |
| ENSMUSG00000100033 | -0.3671666 | 1.34290168 | 0.33736331 | 0.56160326 |
| ENSMUSG00000079109 | -0.3671742 | 5.86177831 | 0.23469682 | 0.44936772 |
| ENSMUSG00000052949 | -0.3673282 | 4.76558997 | 0.23796092 | 0.45402877 |
| ENSMUSG00000024122 | -0.3673321 | 7.57413468 | 0.23144853 | 0.44554214 |
| ENSMUSG00000030655 | -0.3674087 | 8.72378146 | 0.23040882 | 0.4444158  |
| ENSMUSG00000024668 | -0.367442  | 6.17831629 | 0.23378532 | 0.44836224 |
| ENSMUSG00000022280 | -0.367507  | 5.27207549 | 0.23778363 | 0.45377078 |
| ENSMUSG00000020677 | -0.36758   | 7.38278919 | 0.2313922  | 0.4455157  |
| ENSMUSG00000038525 | -0.3676706 | 6.29072719 | 0.23340394 | 0.44810897 |
| ENSMUSG00000000628 | -0.3676855 | 6.46001231 | 0.23205901 | 0.44640107 |
| ENSMUSG00000034867 | -0.368046  | 5.76470756 | 0.23359879 | 0.44829845 |
| ENSMUSG00000022034 | -0.3681422 | 6.50321939 | 0.23260108 | 0.44712479 |
| ENSMUSG00000015932 | -0.3681926 | 6.42126822 | 0.2322257  | 0.44656241 |
| ENSMUSG00000040586 | -0.3682076 | 5.47260529 | 0.23614037 | 0.45154685 |
| ENSMUSG00000100199 | -0.3682264 | 1.07217078 | 0.36037663 | 0.58247522 |
| ENSMUSG00000027630 | -0.3682586 | 7.52905665 | 0.23033889 | 0.4444158  |
| ENSMUSG00000022021 | -0.3683216 | 6.36249539 | 0.23230079 | 0.44662716 |
| ENSMUSG00000066148 | -0.3683617 | 6.85294661 | 0.2308026  | 0.44477756 |
| ENSMUSG00000059669 | -0.3685182 | 5.59140703 | 0.23472629 | 0.44936772 |
| ENSMUSG00000024456 | -0.3687778 | 7.85193785 | 0.2291705  | 0.443455   |
| ENSMUSG00000021738 | -0.3688002 | 5.72422359 | 0.23369911 | 0.44832642 |
| ENSMUSG00000032349 | -0.3691167 | 6.88683083 | 0.23009753 | 0.44428201 |
| ENSMUSG00000038806 | -0.3692604 | 6.18960937 | 0.23105726 | 0.44510924 |
| ENSMUSG00000022141 | -0.3692745 | 8.12498792 | 0.22854127 | 0.44271404 |
| ENSMUSG00000041328 | -0.3694246 | 7.7884109  | 0.22859613 | 0.44272938 |
| ENSMUSG00000020361 | -0.3694378 | 9.7466076  | 0.22738724 | 0.44182774 |
| ENSMUSG00000041313 | -0.3695589 | 7.74262125 | 0.22816683 | 0.44237105 |
| ENSMUSG00000015733 | -0.3696314 | 8.50741396 | 0.2277136  | 0.44190907 |
| ENSMUSG00000021831 | -0.3697805 | 7.3923558  | 0.22850497 | 0.44271404 |
| ENSMUSG00000023110 | -0.3699199 | 7.69956688 | 0.22767836 | 0.44190907 |
| ENSMUSG00000028889 | -0.369922  | 5.76960403 | 0.23116575 | 0.4452387  |
| ENSMUSG00000060397 | -0.3699716 | 1.60387247 | 0.34595869 | 0.56969781 |
| ENSMUSG00000039509 | -0.3702298 | 6.96588498 | 0.22826594 | 0.44237105 |
| ENSMUSG00000019726 | -0.3702925 | 7.688122   | 0.22780043 | 0.4419935  |
| ENSMUSG00000027550 | -0.3705546 | 5.65594978 | 0.23264934 | 0.44713785 |
| ENSMUSG00000049038 | -0.3707657 | 3.73935063 | 0.25016241 | 0.46787225 |
| ENSMUSG00000022685 | -0.370777  | 6.06184373 | 0.22993151 | 0.44413064 |
| ENSMUSG00000031935 | -0.3707804 | 6.43975812 | 0.22874586 | 0.4428717  |
| ENSMUSG00000021660 | -0.3710422 | 9.03481447 | 0.22555702 | 0.43922117 |
| ENSMUSG00000030978 | -0.3712719 | 9.69975008 | 0.22510101 | 0.43886133 |

|                    |            |            |            |            |
|--------------------|------------|------------|------------|------------|
| ENSMUSG00000023004 | -0.3715965 | 8.16782063 | 0.22516875 | 0.43886133 |
| ENSMUSG00000026617 | -0.3717926 | 5.21137105 | 0.23136675 | 0.4455157  |
| ENSMUSG00000042323 | -0.3718862 | 8.23018938 | 0.22508724 | 0.43886133 |
| ENSMUSG00000020385 | -0.3719489 | 6.48280509 | 0.22752521 | 0.44187453 |
| ENSMUSG00000039842 | -0.3720005 | 5.70652693 | 0.22935182 | 0.44356707 |
| ENSMUSG00000060441 | -0.3720086 | 4.27737375 | 0.24176257 | 0.459      |
| ENSMUSG00000004364 | -0.3721243 | 8.33717408 | 0.22471733 | 0.43861569 |
| ENSMUSG00000020018 | -0.3722664 | 6.54700586 | 0.22662468 | 0.44082261 |
| ENSMUSG00000014980 | -0.3723381 | 4.30308998 | 0.23859429 | 0.45475447 |
| ENSMUSG00000040423 | -0.3724839 | 7.41245458 | 0.2251661  | 0.43886133 |
| ENSMUSG00000084159 | -0.3725804 | 4.85137535 | 0.23416201 | 0.44876544 |
| ENSMUSG00000042208 | -0.3726718 | 5.61176473 | 0.23012073 | 0.44428201 |
| ENSMUSG00000052139 | -0.3728098 | 5.35513307 | 0.23050056 | 0.44449036 |
| ENSMUSG00000029776 | -0.3730265 | 6.07025214 | 0.22733735 | 0.44181978 |
| ENSMUSG00000038028 | -0.3730435 | 5.06193996 | 0.23077775 | 0.44477756 |
| ENSMUSG00000025049 | -0.3737717 | 5.29995567 | 0.2295703  | 0.44367134 |
| ENSMUSG00000005813 | -0.3738216 | 6.77433074 | 0.22428484 | 0.43824746 |
| ENSMUSG00000030386 | -0.3738928 | 3.65099083 | 0.24926359 | 0.46736194 |
| ENSMUSG00000018405 | -0.3739235 | 3.66526563 | 0.24345233 | 0.46108007 |
| ENSMUSG00000030704 | -0.3740191 | 6.67049833 | 0.22459479 | 0.43861569 |
| ENSMUSG00000053870 | -0.3740307 | 5.15077651 | 0.23039845 | 0.4444158  |
| ENSMUSG00000060288 | -0.3740921 | 6.34303887 | 0.22470324 | 0.43861569 |
| ENSMUSG00000036707 | -0.3744594 | 7.87194681 | 0.22202809 | 0.43494114 |
| ENSMUSG00000047843 | -0.3747069 | 2.93263339 | 0.2545112  | 0.47305219 |
| ENSMUSG00000058706 | -0.3747209 | 6.14238882 | 0.22504606 | 0.43886133 |
| ENSMUSG00000022466 | -0.3748422 | 5.53733861 | 0.22633969 | 0.44042713 |
| ENSMUSG00000060657 | -0.3749629 | 8.18910952 | 0.22128318 | 0.43395486 |
| ENSMUSG00000027635 | -0.3755548 | 5.76656388 | 0.22458392 | 0.43861569 |
| ENSMUSG00000073147 | -0.3758411 | 3.15313392 | 0.2539141  | 0.47234942 |
| ENSMUSG00000027368 | -0.3759951 | 4.4225302  | 0.22804291 | 0.4423048  |
| ENSMUSG00000035161 | -0.3761153 | 6.56008899 | 0.22260064 | 0.43574611 |
| ENSMUSG00000027357 | -0.3761686 | 5.0122913  | 0.22956176 | 0.44367134 |
| ENSMUSG00000020457 | -0.3761725 | 7.5123875  | 0.22034814 | 0.43294744 |
| ENSMUSG00000036572 | -0.3762749 | 6.09110135 | 0.22317465 | 0.43639445 |
| ENSMUSG00000023150 | -0.3763193 | 9.34306095 | 0.21900038 | 0.43190821 |
| ENSMUSG00000005667 | -0.3764281 | 7.05367961 | 0.22031132 | 0.43294744 |
| ENSMUSG00000003923 | -0.3768824 | 6.93394205 | 0.22030884 | 0.43294744 |
| ENSMUSG00000025184 | -0.3769888 | 5.39666764 | 0.22541238 | 0.43917744 |
| ENSMUSG00000028212 | -0.3770087 | 6.41964037 | 0.22157458 | 0.43444732 |
| ENSMUSG00000061894 | -0.3770984 | 3.71583748 | 0.23904476 | 0.45545206 |
| ENSMUSG00000063052 | -0.3773243 | 6.51199417 | 0.22080627 | 0.43352174 |
| ENSMUSG00000026275 | -0.3774402 | 6.98954214 | 0.21948858 | 0.43208558 |
| ENSMUSG00000094942 | -0.3775611 | 3.23584113 | 0.25174566 | 0.47009516 |

|                    |            |            |            |            |
|--------------------|------------|------------|------------|------------|
| ENSMUSG00000030850 | -0.3779922 | 5.94735935 | 0.22176838 | 0.43466926 |
| ENSMUSG00000026029 | -0.3779968 | 8.50303466 | 0.2173218  | 0.42978146 |
| ENSMUSG00000031918 | -0.3780908 | 6.90114585 | 0.21893945 | 0.43190821 |
| ENSMUSG00000056211 | -0.3784004 | 7.14250497 | 0.21816556 | 0.43081805 |
| ENSMUSG00000025403 | -0.378417  | 6.80065913 | 0.21780496 | 0.43042123 |
| ENSMUSG00000000673 | -0.3784469 | 2.84233264 | 0.24947698 | 0.4674252  |
| ENSMUSG00000001891 | -0.3784625 | 6.60331416 | 0.21931107 | 0.43192533 |
| ENSMUSG00000034640 | -0.3786371 | 7.99245882 | 0.21704544 | 0.42962886 |
| ENSMUSG00000056153 | -0.3787023 | 4.92395007 | 0.22553809 | 0.43922117 |
| ENSMUSG00000028557 | -0.3793159 | 5.1750313  | 0.22384968 | 0.43747643 |
| ENSMUSG00000061559 | -0.3796155 | 6.3507016  | 0.21794429 | 0.43053878 |
| ENSMUSG00000021245 | -0.3796273 | 5.42783259 | 0.22227195 | 0.43518168 |
| ENSMUSG00000065954 | -0.3796314 | 7.39835092 | 0.21618125 | 0.4285877  |
| ENSMUSG00000020745 | -0.379645  | 8.59476433 | 0.21532455 | 0.42779291 |
| ENSMUSG00000022789 | -0.3800734 | 7.48083213 | 0.21581818 | 0.42829374 |
| ENSMUSG00000079737 | -0.3801626 | 3.31430934 | 0.24483882 | 0.46256865 |
| ENSMUSG00000038827 | -0.3801888 | 6.25062207 | 0.21801187 | 0.43059341 |
| ENSMUSG00000027589 | -0.3802162 | 4.74244469 | 0.22604258 | 0.44008723 |
| ENSMUSG00000022814 | -0.3802506 | 6.98669301 | 0.21597179 | 0.42836854 |
| ENSMUSG00000027660 | -0.3802997 | 7.87696149 | 0.21506722 | 0.42747997 |
| ENSMUSG00000038323 | -0.3803425 | 4.26460977 | 0.23077504 | 0.44477756 |
| ENSMUSG00000029169 | -0.3805685 | 9.40848337 | 0.21384754 | 0.42587846 |
| ENSMUSG00000033933 | -0.3807252 | 5.23348849 | 0.22101698 | 0.43365787 |
| ENSMUSG00000055296 | -0.3807976 | 6.38121152 | 0.21681855 | 0.42932891 |
| ENSMUSG00000039285 | -0.3808161 | 6.26247609 | 0.21727397 | 0.42976568 |
| ENSMUSG00000034681 | -0.3808222 | 6.0334647  | 0.21678186 | 0.42932891 |
| ENSMUSG00000028284 | -0.3808866 | 7.47543057 | 0.21472101 | 0.42722351 |
| ENSMUSG00000034007 | -0.3809473 | 4.70158842 | 0.22616171 | 0.44023969 |
| ENSMUSG00000042410 | -0.3810399 | 7.99533839 | 0.21407241 | 0.42609023 |
| ENSMUSG00000024537 | -0.3816609 | 5.33804095 | 0.21886869 | 0.4318902  |
| ENSMUSG00000022283 | -0.3818294 | 11.5785116 | 0.21194934 | 0.4232897  |
| ENSMUSG00000030287 | -0.3818699 | 5.15905832 | 0.22071842 | 0.43347796 |
| ENSMUSG00000073096 | -0.3818792 | 3.22911524 | 0.24012951 | 0.45703435 |
| ENSMUSG00000025795 | -0.3820571 | 5.32196053 | 0.21922966 | 0.43192533 |
| ENSMUSG00000038569 | -0.3821914 | 1.75737893 | 0.29649933 | 0.51865535 |
| ENSMUSG00000092558 | -0.3823134 | 5.40073589 | 0.2179082  | 0.43053878 |
| ENSMUSG00000003119 | -0.3824245 | 7.40393997 | 0.21297734 | 0.42453745 |
| ENSMUSG00000044165 | -0.3824256 | 1.01281169 | 0.3681207  | 0.59013135 |
| ENSMUSG00000032235 | -0.3824717 | 5.71491328 | 0.21711901 | 0.42969562 |
| ENSMUSG00000038622 | -0.382696  | 4.84314503 | 0.22095865 | 0.43365787 |
| ENSMUSG00000054302 | -0.3827783 | 5.7357585  | 0.21652068 | 0.42898383 |
| ENSMUSG00000040253 | -0.3827982 | 7.85545178 | 0.2121028  | 0.42334195 |
| ENSMUSG00000032051 | -0.3829424 | 3.17683103 | 0.23729556 | 0.45316014 |



|                    |            |            |            |            |
|--------------------|------------|------------|------------|------------|
| ENSMUSG00000014767 | -0.3830188 | 5.85421259 | 0.21585465 | 0.42829374 |
| ENSMUSG00000029229 | -0.383041  | 5.05884671 | 0.220368   | 0.43294744 |
| ENSMUSG00000033499 | -0.3830423 | 7.91053271 | 0.2116694  | 0.4232897  |
| ENSMUSG00000069729 | -0.3830568 | 5.4487977  | 0.21601572 | 0.42837689 |
| ENSMUSG00000062198 | -0.3831366 | 4.42405261 | 0.22509895 | 0.43886133 |
| ENSMUSG00000038240 | -0.3836033 | 3.66619989 | 0.23362735 | 0.44829845 |
| ENSMUSG00000070730 | -0.3837129 | 5.36668456 | 0.21582366 | 0.42829374 |
| ENSMUSG00000006641 | -0.3838255 | 3.60557618 | 0.22743257 | 0.44183622 |
| ENSMUSG00000032293 | -0.3838255 | 8.09371898 | 0.21074199 | 0.42230076 |
| ENSMUSG00000040661 | -0.3839091 | 6.70988614 | 0.21219377 | 0.42337409 |
| ENSMUSG00000025607 | -0.3839169 | 6.6965485  | 0.21252609 | 0.42387302 |
| ENSMUSG00000064370 | -0.3839704 | 12.2990594 | 0.20937693 | 0.42020092 |
| ENSMUSG00000024982 | -0.3840936 | 6.75109591 | 0.21192276 | 0.4232897  |
| ENSMUSG00000069662 | -0.384284  | 6.78584292 | 0.21196977 | 0.4232897  |
| ENSMUSG00000031590 | -0.3843677 | 6.03786077 | 0.21371784 | 0.42577742 |
| ENSMUSG00000019943 | -0.384386  | 7.32431265 | 0.2107527  | 0.42230076 |
| ENSMUSG00000037458 | -0.3844825 | 8.9109493  | 0.20939909 | 0.42020092 |
| ENSMUSG00000068039 | -0.3845087 | 10.3599847 | 0.20891027 | 0.41968858 |
| ENSMUSG00000001767 | -0.3845361 | 6.57559312 | 0.21203737 | 0.4232897  |
| ENSMUSG00000027569 | -0.3847372 | 4.96909941 | 0.2168541  | 0.42932891 |
| ENSMUSG00000024259 | -0.3847442 | 6.61630099 | 0.21202555 | 0.4232897  |
| ENSMUSG00000020359 | -0.3848373 | 4.09271828 | 0.22272878 | 0.43583872 |
| ENSMUSG00000085793 | -0.3853009 | 4.61230632 | 0.22100243 | 0.43365787 |
| ENSMUSG00000035842 | -0.3853461 | 5.04321319 | 0.2156725  | 0.4282475  |
| ENSMUSG00000024298 | -0.3853717 | 6.89333272 | 0.21043401 | 0.42188518 |
| ENSMUSG00000013701 | -0.3855287 | 6.20342554 | 0.21137982 | 0.4231212  |
| ENSMUSG00000025920 | -0.3856807 | 6.2178386  | 0.21149538 | 0.42322623 |
| ENSMUSG00000044950 | -0.3859938 | 5.42442303 | 0.21401774 | 0.42606004 |
| ENSMUSG00000075700 | -0.3863446 | 8.30123678 | 0.2074974  | 0.4180183  |
| ENSMUSG00000038546 | -0.3864986 | 6.78953028 | 0.20919006 | 0.42009415 |
| ENSMUSG00000022020 | -0.3865143 | 6.20183182 | 0.21075878 | 0.42230076 |
| ENSMUSG00000027893 | -0.386657  | 7.54972076 | 0.20778569 | 0.41828652 |
| ENSMUSG00000004865 | -0.3869506 | 7.55180625 | 0.20733842 | 0.41789279 |
| ENSMUSG00000025782 | -0.3870318 | 5.46256223 | 0.21179284 | 0.4232897  |
| ENSMUSG00000040029 | -0.3870738 | 6.80751118 | 0.2085007  | 0.41933849 |
| ENSMUSG00000026626 | -0.3872269 | 7.12891562 | 0.20769465 | 0.41828652 |
| ENSMUSG00000004896 | -0.3872764 | 4.19614752 | 0.21990956 | 0.43251954 |
| ENSMUSG00000018209 | -0.3873485 | 8.43714174 | 0.20625056 | 0.41665255 |
| ENSMUSG00000020840 | -0.3874542 | 7.27310584 | 0.20709006 | 0.4175406  |
| ENSMUSG00000030452 | -0.3875115 | 6.47570196 | 0.20868537 | 0.41946917 |
| ENSMUSG00000006423 | -0.3875402 | 6.85445725 | 0.20788405 | 0.41840641 |
| ENSMUSG00000028933 | -0.3875795 | 4.94257362 | 0.21545144 | 0.42796616 |
| ENSMUSG00000057193 | -0.3876786 | 6.30072406 | 0.20851512 | 0.41933849 |

|                    |            |            |            |            |
|--------------------|------------|------------|------------|------------|
| ENSMUSG00000031365 | -0.3878347 | 5.94937218 | 0.20949248 | 0.42023193 |
| ENSMUSG00000037720 | -0.388268  | 6.81524557 | 0.2071054  | 0.4175406  |
| ENSMUSG00000061755 | -0.3885603 | 7.39321586 | 0.20594973 | 0.41637832 |
| ENSMUSG00000028568 | -0.3890342 | 5.95039669 | 0.20872325 | 0.41946917 |
| ENSMUSG00000074166 | -0.3891452 | 2.80801782 | 0.2528525  | 0.47102459 |
| ENSMUSG00000070923 | -0.3895708 | 6.3054944  | 0.20691538 | 0.4174079  |
| ENSMUSG00000026970 | -0.3895957 | 7.16158821 | 0.20488445 | 0.41493496 |
| ENSMUSG00000007850 | -0.3896827 | 9.67199236 | 0.2030012  | 0.4126809  |
| ENSMUSG00000031605 | -0.3900697 | 4.79629307 | 0.21199803 | 0.4232897  |
| ENSMUSG00000020074 | -0.3901342 | 8.43425039 | 0.20301114 | 0.4126809  |
| ENSMUSG00000067150 | -0.3903267 | 7.20499778 | 0.2038225  | 0.41355066 |
| ENSMUSG00000027424 | -0.3903418 | 4.41312854 | 0.21384006 | 0.42587846 |
| ENSMUSG00000060373 | -0.3906693 | 9.58662959 | 0.20187361 | 0.41160995 |
| ENSMUSG00000001441 | -0.3909726 | 6.84298819 | 0.20390386 | 0.41363597 |
| ENSMUSG00000048170 | -0.3909922 | 7.25998394 | 0.20291687 | 0.41264484 |
| ENSMUSG00000007080 | -0.3911646 | 7.70296293 | 0.20228023 | 0.41212733 |
| ENSMUSG00000063018 | -0.3911792 | 1.63220666 | 0.2737182  | 0.49354026 |
| ENSMUSG00000079457 | -0.3912022 | 2.84618772 | 0.2374517  | 0.45337804 |
| ENSMUSG00000022008 | -0.391259  | 6.6658853  | 0.20400223 | 0.41368184 |
| ENSMUSG00000006941 | -0.3912885 | 5.2893057  | 0.2083086  | 0.41910447 |
| ENSMUSG00000001436 | -0.3913653 | 4.13343436 | 0.21138695 | 0.4231212  |
| ENSMUSG00000096910 | -0.3916752 | 2.65571856 | 0.25024204 | 0.46794003 |
| ENSMUSG00000038910 | -0.3918244 | 5.8239034  | 0.20554415 | 0.41594745 |
| ENSMUSG00000039108 | -0.3918921 | 4.79588888 | 0.21028873 | 0.42167231 |
| ENSMUSG00000008373 | -0.3918976 | 7.02428713 | 0.20191769 | 0.41162199 |
| ENSMUSG00000022811 | -0.3920452 | 6.98176107 | 0.20247125 | 0.41228284 |
| ENSMUSG00000028552 | -0.3922175 | 8.13929503 | 0.2008471  | 0.41037044 |
| ENSMUSG00000033411 | -0.3922541 | 6.76160136 | 0.20267558 | 0.41246526 |
| ENSMUSG00000020248 | -0.3928315 | 6.21230641 | 0.20307155 | 0.41272589 |
| ENSMUSG00000026667 | -0.3928574 | 8.67323986 | 0.19980002 | 0.40901045 |
| ENSMUSG00000092260 | -0.3929117 | 1.99892118 | 0.28347444 | 0.50495347 |
| ENSMUSG00000021963 | -0.3929258 | 5.17385827 | 0.20682396 | 0.4174079  |
| ENSMUSG00000074102 | -0.3929995 | 6.18374377 | 0.20260134 | 0.41239201 |
| ENSMUSG00000050912 | -0.3930621 | 10.2528421 | 0.19902642 | 0.40804199 |
| ENSMUSG00000026558 | -0.3936611 | 6.11949959 | 0.20160234 | 0.41136476 |
| ENSMUSG00000024231 | -0.3937907 | 7.21576712 | 0.2000588  | 0.40933856 |
| ENSMUSG00000038876 | -0.394085  | 5.77414492 | 0.20316435 | 0.41283669 |
| ENSMUSG00000028741 | -0.3942357 | 6.56882398 | 0.19980221 | 0.40901045 |
| ENSMUSG00000018995 | -0.3946553 | 4.666562   | 0.20939118 | 0.42020092 |
| ENSMUSG00000043510 | -0.394739  | 3.64256114 | 0.21936021 | 0.43192533 |
| ENSMUSG00000037197 | -0.3948646 | 7.76924925 | 0.19800645 | 0.40649182 |
| ENSMUSG00000003198 | -0.3951226 | 4.1256612  | 0.21681959 | 0.42932891 |
| ENSMUSG00000027167 | -0.3952576 | 4.94688338 | 0.20681766 | 0.4174079  |

|                    |            |            |            |            |
|--------------------|------------|------------|------------|------------|
| ENSMUSG00000028496 | -0.3953738 | 6.26693723 | 0.20007637 | 0.40933856 |
| ENSMUSG00000086502 | -0.3955344 | 3.62933984 | 0.22169623 | 0.43460682 |
| ENSMUSG00000024270 | -0.3958978 | 7.01124256 | 0.19774835 | 0.40625723 |
| ENSMUSG00000059878 | -0.3959394 | 5.62937974 | 0.20152644 | 0.41136476 |
| ENSMUSG00000030213 | -0.3959598 | 6.72299085 | 0.19816111 | 0.4066185  |
| ENSMUSG00000040520 | -0.3963589 | 6.66041573 | 0.19818127 | 0.4066185  |
| ENSMUSG00000020130 | -0.3963769 | 7.05424623 | 0.19728472 | 0.40562792 |
| ENSMUSG00000040111 | -0.396417  | 4.82817672 | 0.20495749 | 0.41499466 |
| ENSMUSG00000098702 | -0.3964981 | 2.59065742 | 0.24366347 | 0.46139891 |
| ENSMUSG00000099515 | -0.3965366 | 6.05509479 | 0.19959798 | 0.40887467 |
| ENSMUSG00000039789 | -0.3965605 | 5.69094809 | 0.20076341 | 0.41027716 |
| ENSMUSG00000018651 | -0.39663   | 4.89926794 | 0.20378087 | 0.41354402 |
| ENSMUSG00000017858 | -0.3970161 | 5.63369106 | 0.20001751 | 0.40933856 |
| ENSMUSG00000090000 | -0.3973453 | 5.02262121 | 0.20358312 | 0.41345394 |
| ENSMUSG00000072761 | -0.3973699 | 3.02965445 | 0.23671964 | 0.45230059 |
| ENSMUSG00000029144 | -0.3973896 | 6.15849431 | 0.1977238  | 0.40625723 |
| ENSMUSG00000050350 | -0.3975284 | 4.84280711 | 0.20464995 | 0.41468339 |
| ENSMUSG00000020955 | -0.397534  | 4.02041923 | 0.21231461 | 0.42352955 |
| ENSMUSG00000037234 | -0.3977837 | 6.31677038 | 0.19747062 | 0.40593275 |
| ENSMUSG00000005312 | -0.3978873 | 7.56200871 | 0.19474434 | 0.40248565 |
| ENSMUSG00000016477 | -0.3980179 | 6.25002081 | 0.19699511 | 0.40526426 |
| ENSMUSG00000027641 | -0.3980744 | 7.4569508  | 0.19488065 | 0.402604   |
| ENSMUSG00000032468 | -0.3980834 | 6.32872849 | 0.19691634 | 0.40517952 |
| ENSMUSG00000028655 | -0.3982037 | 4.45233056 | 0.20340086 | 0.41323943 |
| ENSMUSG00000028483 | -0.3982109 | 4.69472178 | 0.20565948 | 0.41594745 |
| ENSMUSG00000083863 | -0.3982467 | 0.68708541 | 0.36114295 | 0.58310609 |
| ENSMUSG00000030061 | -0.3984684 | 6.95505072 | 0.19514761 | 0.40300111 |
| ENSMUSG00000045817 | -0.3990988 | 6.20063047 | 0.19596833 | 0.40414813 |
| ENSMUSG00000060935 | -0.3991053 | 5.67926589 | 0.1980824  | 0.40657036 |
| ENSMUSG00000024054 | -0.3993864 | 9.15691897 | 0.19223298 | 0.39866162 |
| ENSMUSG00000008859 | -0.3994269 | 5.26822333 | 0.19926598 | 0.40837786 |
| ENSMUSG00000025937 | -0.3994829 | 6.0081304  | 0.19600285 | 0.40414813 |
| ENSMUSG00000040746 | -0.3994861 | 5.14586749 | 0.19962214 | 0.40887467 |
| ENSMUSG00000051220 | -0.3999188 | 6.90330034 | 0.19356993 | 0.40074066 |
| ENSMUSG00000044348 | -0.3999583 | 6.74665353 | 0.19370943 | 0.40079864 |
| ENSMUSG00000035762 | -0.4002122 | 4.95145079 | 0.2006747  | 0.41027716 |
| ENSMUSG00000055923 | -0.4002332 | 4.78824304 | 0.20074619 | 0.41027716 |
| ENSMUSG00000092416 | -0.4004522 | 4.86498978 | 0.20121602 | 0.41104632 |
| ENSMUSG00000031314 | -0.4006188 | 8.04578839 | 0.19148376 | 0.3975948  |
| ENSMUSG00000034168 | -0.400649  | 2.8730977  | 0.22956823 | 0.44367134 |
| ENSMUSG00000064367 | -0.4006814 | 11.2409345 | 0.19035171 | 0.39582585 |
| ENSMUSG00000026878 | -0.4007366 | 7.79761286 | 0.19149735 | 0.3975948  |
| ENSMUSG00000047180 | -0.4007587 | 5.54058886 | 0.19661122 | 0.40489228 |

|                    |            |            |            |            |
|--------------------|------------|------------|------------|------------|
| ENSMUSG00000020521 | -0.4009661 | 5.80283725 | 0.1954834  | 0.40353135 |
| ENSMUSG00000017831 | -0.4010623 | 6.55380763 | 0.19307885 | 0.40005765 |
| ENSMUSG00000020397 | -0.4013879 | 5.47990175 | 0.19662656 | 0.40489228 |
| ENSMUSG00000016921 | -0.4015448 | 8.8174731  | 0.18990205 | 0.39532203 |
| ENSMUSG00000022338 | -0.4015921 | 6.19400285 | 0.19309162 | 0.40005765 |
| ENSMUSG00000079084 | -0.4016638 | 5.57341664 | 0.19615031 | 0.40432073 |
| ENSMUSG00000024072 | -0.402103  | 5.75291444 | 0.19469697 | 0.40248565 |
| ENSMUSG00000058655 | -0.4022179 | 9.67548018 | 0.18885534 | 0.39444913 |
| ENSMUSG00000027374 | -0.402342  | 5.34290956 | 0.19419421 | 0.40157527 |
| ENSMUSG00000048271 | -0.4024291 | 7.21558481 | 0.19029604 | 0.39578639 |
| ENSMUSG00000030779 | -0.4024683 | 8.25534229 | 0.18928074 | 0.39475709 |
| ENSMUSG00000029676 | -0.4024767 | 5.79469319 | 0.19370837 | 0.40079864 |
| ENSMUSG00000058013 | -0.4026777 | 8.25485445 | 0.18894175 | 0.39447242 |
| ENSMUSG00000029651 | -0.4027195 | 1.49133468 | 0.24848987 | 0.46695136 |
| ENSMUSG00000028069 | -0.4027278 | 6.13109657 | 0.19111335 | 0.39702685 |
| ENSMUSG00000028902 | -0.4027848 | 7.67954228 | 0.18919191 | 0.39470799 |
| ENSMUSG00000073725 | -0.4031602 | 6.025212   | 0.19220567 | 0.39866162 |
| ENSMUSG00000005204 | -0.4034379 | 7.09458014 | 0.18912189 | 0.39463825 |
| ENSMUSG00000045427 | -0.4034418 | 7.32747079 | 0.1890125  | 0.39448631 |
| ENSMUSG00000022322 | -0.4035118 | 7.1714241  | 0.18933591 | 0.39477928 |
| ENSMUSG00000031631 | -0.4035525 | 5.6601618  | 0.19324686 | 0.40022548 |
| ENSMUSG00000021981 | -0.40362   | 6.55306363 | 0.19023152 | 0.39572854 |
| ENSMUSG00000046985 | -0.4038981 | 6.21496115 | 0.19088657 | 0.39670857 |
| ENSMUSG00000031826 | -0.4040311 | 6.28604315 | 0.18963941 | 0.39487765 |
| ENSMUSG00000075266 | -0.4044244 | 3.46304326 | 0.21182424 | 0.4232897  |
| ENSMUSG00000021474 | -0.4045733 | 7.68294099 | 0.18721315 | 0.39211923 |
| ENSMUSG00000059796 | -0.405081  | 10.1553163 | 0.18565446 | 0.39027245 |
| ENSMUSG00000032018 | -0.4051888 | 6.4182325  | 0.18896926 | 0.39447242 |
| ENSMUSG00000079845 | -0.4056396 | 2.44392361 | 0.24426676 | 0.46181149 |
| ENSMUSG00000025395 | -0.4058816 | 7.06789071 | 0.18669359 | 0.39163612 |
| ENSMUSG00000025878 | -0.4061199 | 6.43053496 | 0.18769835 | 0.39295128 |
| ENSMUSG00000020024 | -0.4061388 | 6.95605241 | 0.18673274 | 0.39163612 |
| ENSMUSG00000039530 | -0.4061696 | 4.72952332 | 0.19520347 | 0.40303929 |
| ENSMUSG00000057551 | -0.4062286 | 5.24524531 | 0.19175091 | 0.39789143 |
| ENSMUSG00000034674 | -0.4063712 | 6.44521823 | 0.1866769  | 0.39163612 |
| ENSMUSG00000022100 | -0.4065079 | 7.71259536 | 0.18526418 | 0.39000726 |
| ENSMUSG00000046138 | -0.4065514 | 5.86297462 | 0.18947534 | 0.39483355 |
| ENSMUSG00000022124 | -0.4066085 | 6.25410378 | 0.18773043 | 0.39295128 |
| ENSMUSG00000069910 | -0.4068631 | 6.14665926 | 0.18724231 | 0.39211923 |
| ENSMUSG00000037275 | -0.4070318 | 7.3291926  | 0.18483745 | 0.38931387 |
| ENSMUSG00000038187 | -0.4072498 | 5.68059148 | 0.18870864 | 0.39431002 |
| ENSMUSG00000022337 | -0.4073053 | 6.5899577  | 0.18632989 | 0.39123472 |
| ENSMUSG00000026034 | -0.4077193 | 7.72808624 | 0.18406339 | 0.38813837 |

|                    |            |            |            |            |
|--------------------|------------|------------|------------|------------|
| ENSMUSG00000039218 | -0.4079503 | 10.4857122 | 0.18251819 | 0.38614625 |
| ENSMUSG00000021012 | -0.4083889 | 7.71771133 | 0.18321942 | 0.3868125  |
| ENSMUSG00000021096 | -0.408557  | 6.11138614 | 0.18558367 | 0.39022922 |
| ENSMUSG00000022724 | -0.4086241 | 7.58953309 | 0.18312181 | 0.38676308 |
| ENSMUSG00000023008 | -0.4086956 | 7.19227631 | 0.18326168 | 0.38682599 |
| ENSMUSG00000043131 | -0.4088024 | 9.14161973 | 0.18197482 | 0.38546778 |
| ENSMUSG00000012443 | -0.4090219 | 9.02930543 | 0.18177546 | 0.38527252 |
| ENSMUSG00000027365 | -0.4091807 | 7.73054964 | 0.18254096 | 0.38614625 |
| ENSMUSG00000005698 | -0.409751  | 8.39483321 | 0.18126651 | 0.38477585 |
| ENSMUSG00000028719 | -0.4098568 | 7.23140292 | 0.18237381 | 0.38600965 |
| ENSMUSG00000066258 | -0.409904  | 6.13752847 | 0.18476876 | 0.38924995 |
| ENSMUSG00000045414 | -0.4099538 | 2.91846454 | 0.22302596 | 0.43634106 |
| ENSMUSG00000062590 | -0.409961  | 1.69530286 | 0.23978588 | 0.456481   |
| ENSMUSG00000040302 | -0.4099803 | 4.09639884 | 0.19851311 | 0.40706701 |
| ENSMUSG00000021027 | -0.4099812 | 7.25078975 | 0.18225601 | 0.3859118  |
| ENSMUSG00000053080 | -0.4101221 | 3.80119682 | 0.19925337 | 0.40837786 |
| ENSMUSG00000029213 | -0.4102969 | 6.28981821 | 0.18356449 | 0.38738932 |
| ENSMUSG00000042426 | -0.4105278 | 6.57266726 | 0.18261364 | 0.38621405 |
| ENSMUSG00000063406 | -0.4106352 | 7.70342527 | 0.18095148 | 0.38443278 |
| ENSMUSG00000044224 | -0.4107159 | 6.5020171  | 0.18254577 | 0.38614625 |
| ENSMUSG00000028218 | -0.4110831 | 4.55929352 | 0.19106413 | 0.39700107 |
| ENSMUSG00000072663 | -0.4111197 | 2.02015117 | 0.25926477 | 0.47850612 |
| ENSMUSG00000046573 | -0.4111746 | 3.62717383 | 0.20235384 | 0.41219943 |
| ENSMUSG00000052681 | -0.411213  | 8.77024655 | 0.17957773 | 0.38249382 |
| ENSMUSG00000025925 | -0.4112201 | 5.22248235 | 0.18625005 | 0.39114324 |
| ENSMUSG00000021193 | -0.4113289 | 8.40780064 | 0.17951349 | 0.38243253 |
| ENSMUSG00000026977 | -0.4115372 | 7.07988313 | 0.18085046 | 0.38443278 |
| ENSMUSG00000038119 | -0.4115758 | 4.26764283 | 0.1936141  | 0.40075518 |
| ENSMUSG00000029202 | -0.4116523 | 8.86439368 | 0.17907379 | 0.3819     |
| ENSMUSG00000023919 | -0.4116546 | 5.42875515 | 0.1855663  | 0.39022922 |
| ENSMUSG00000037013 | -0.4124895 | 6.30411004 | 0.18092977 | 0.38443278 |
| ENSMUSG00000027531 | -0.4125663 | 7.07532402 | 0.17949517 | 0.38243253 |
| ENSMUSG00000031023 | -0.4126205 | 4.46465903 | 0.1887678  | 0.39435721 |
| ENSMUSG00000021918 | -0.4126423 | 4.55561168 | 0.18837849 | 0.39384909 |
| ENSMUSG00000051396 | -0.4128046 | 7.27288134 | 0.1789496  | 0.3819     |
| ENSMUSG00000097944 | -0.4129295 | 0.89091897 | 0.30971748 | 0.53380107 |
| ENSMUSG00000015880 | -0.4129395 | 7.9141167  | 0.17836162 | 0.38118344 |
| ENSMUSG00000091337 | -0.4131146 | 5.63116847 | 0.1829925  | 0.38671197 |
| ENSMUSG00000028243 | -0.413179  | 5.17031218 | 0.18541559 | 0.39015058 |
| ENSMUSG00000027166 | -0.4132524 | 3.46009417 | 0.20074773 | 0.41027716 |
| ENSMUSG00000030629 | -0.4133481 | 6.13079319 | 0.18129137 | 0.38477585 |
| ENSMUSG00000030346 | -0.4142425 | 5.99810755 | 0.18007515 | 0.38302375 |
| ENSMUSG00000048874 | -0.4142437 | 7.67703625 | 0.17718545 | 0.37976603 |

|                    |            |            |            |            |
|--------------------|------------|------------|------------|------------|
| ENSMUSG00000025451 | -0.4144637 | 6.52254889 | 0.17886883 | 0.38181343 |
| ENSMUSG00000073628 | -0.4145027 | 2.29945405 | 0.23018555 | 0.44430303 |
| ENSMUSG00000020516 | -0.4145206 | 7.09342394 | 0.17754062 | 0.38003136 |
| ENSMUSG00000037926 | -0.4145987 | 7.1193968  | 0.17743522 | 0.37993488 |
| ENSMUSG00000022052 | -0.4146532 | 7.6435349  | 0.1768175  | 0.37933383 |
| ENSMUSG00000063281 | -0.4147314 | 6.08105316 | 0.17976999 | 0.38271022 |
| ENSMUSG00000071533 | -0.4147358 | 7.06407059 | 0.17737872 | 0.37993488 |
| ENSMUSG00000019774 | -0.4150473 | 4.12932692 | 0.19302209 | 0.40005765 |
| ENSMUSG00000022965 | -0.4150477 | 7.22861075 | 0.17661258 | 0.37902289 |
| ENSMUSG00000028345 | -0.4151445 | 6.93289797 | 0.17728487 | 0.37986092 |
| ENSMUSG00000047879 | -0.4151661 | 7.51535943 | 0.17647093 | 0.37888647 |
| ENSMUSG00000020462 | -0.4152069 | 4.46904434 | 0.18681159 | 0.39163612 |
| ENSMUSG00000014592 | -0.4152274 | 3.47803307 | 0.20241406 | 0.41224423 |
| ENSMUSG00000079316 | -0.4153329 | 4.70810837 | 0.18572246 | 0.3903393  |
| ENSMUSG00000004233 | -0.4154718 | 4.13287264 | 0.18992763 | 0.39532203 |
| ENSMUSG00000025722 | -0.4155183 | 4.94594009 | 0.18195145 | 0.38546778 |
| ENSMUSG00000039879 | -0.415526  | 5.89008637 | 0.17922968 | 0.38205432 |
| ENSMUSG00000005233 | -0.4155328 | 6.28545851 | 0.17819635 | 0.38098125 |
| ENSMUSG00000021832 | -0.4155596 | 8.26836367 | 0.17529533 | 0.37792578 |
| ENSMUSG00000055302 | -0.4156198 | 8.51673173 | 0.17507466 | 0.3779109  |
| ENSMUSG00000031095 | -0.4156515 | 7.43052777 | 0.17606481 | 0.37868784 |
| ENSMUSG00000029203 | -0.4158373 | 6.72529442 | 0.17682782 | 0.37933383 |
| ENSMUSG00000024943 | -0.4158551 | 7.27414354 | 0.17597533 | 0.37863488 |
| ENSMUSG00000035933 | -0.41588   | 5.81243236 | 0.17908645 | 0.3819     |
| ENSMUSG00000021811 | -0.416027  | 7.62882553 | 0.17535655 | 0.37792578 |
| ENSMUSG00000060679 | -0.416203  | 5.47803567 | 0.17994948 | 0.3829075  |
| ENSMUSG00000026669 | -0.4162151 | 7.18819467 | 0.17536541 | 0.37792578 |
| ENSMUSG00000021500 | -0.4165773 | 8.34430555 | 0.17413761 | 0.37655906 |
| ENSMUSG00000030045 | -0.4169091 | 5.93498002 | 0.17701761 | 0.37966545 |
| ENSMUSG00000029131 | -0.4169189 | 6.75074777 | 0.17564595 | 0.37837914 |
| ENSMUSG00000027599 | -0.4169869 | 6.59336119 | 0.1759274  | 0.37860727 |
| ENSMUSG00000053600 | -0.4170816 | 5.41765802 | 0.17983519 | 0.38273983 |
| ENSMUSG00000021519 | -0.4171847 | 5.29917838 | 0.17975765 | 0.38271022 |
| ENSMUSG00000006005 | -0.4173001 | 9.76353061 | 0.17288735 | 0.37475153 |
| ENSMUSG00000024151 | -0.4177066 | 6.8342687  | 0.17466616 | 0.37747493 |
| ENSMUSG00000056608 | -0.4177711 | 6.78040723 | 0.17496195 | 0.37788697 |
| ENSMUSG00000061130 | -0.4178838 | 6.21556074 | 0.17583394 | 0.37858095 |
| ENSMUSG00000036023 | -0.4181355 | 6.33988025 | 0.17490317 | 0.3778357  |
| ENSMUSG00000025809 | -0.4186204 | 8.4520458  | 0.17203751 | 0.37336538 |
| ENSMUSG00000022677 | -0.4192395 | 5.13106298 | 0.17831856 | 0.38116697 |
| ENSMUSG00000059588 | -0.4192476 | 3.6690262  | 0.19056642 | 0.39611957 |
| ENSMUSG00000029735 | -0.4195473 | 3.16227711 | 0.20178781 | 0.41159064 |
| ENSMUSG00000020021 | -0.4197569 | 4.0262642  | 0.18527515 | 0.39000726 |

|                    |            |            |            |            |
|--------------------|------------|------------|------------|------------|
| ENSMUSG00000054226 | -0.4199539 | 5.53162681 | 0.17584496 | 0.37858095 |
| ENSMUSG00000026987 | -0.4201139 | 6.2247376  | 0.17371391 | 0.37579354 |
| ENSMUSG00000029254 | -0.4204357 | 5.93312192 | 0.17448304 | 0.37715475 |
| ENSMUSG00000048222 | -0.4204781 | 4.50529765 | 0.18146223 | 0.38483554 |
| ENSMUSG00000040021 | -0.4205462 | 7.23283326 | 0.17114479 | 0.37217692 |
| ENSMUSG00000021111 | -0.4207396 | 9.08552416 | 0.16958372 | 0.37012564 |
| ENSMUSG00000066415 | -0.4207491 | 7.44596785 | 0.17081711 | 0.37176421 |
| ENSMUSG00000027206 | -0.4209018 | 8.15177498 | 0.16991854 | 0.37063139 |
| ENSMUSG00000044066 | -0.4212834 | 6.29006701 | 0.17182867 | 0.37303833 |
| ENSMUSG00000048249 | -0.421408  | 5.62722885 | 0.17515373 | 0.3779109  |
| ENSMUSG00000064345 | -0.4214831 | 10.855955  | 0.16845494 | 0.36855713 |
| ENSMUSG00000029405 | -0.4216651 | 8.39165419 | 0.16895658 | 0.36928005 |
| ENSMUSG00000026578 | -0.4219708 | 3.70197571 | 0.18619435 | 0.39110243 |
| ENSMUSG00000019809 | -0.4219878 | 5.23309374 | 0.17544731 | 0.37802672 |
| ENSMUSG00000055884 | -0.4220054 | 6.27061839 | 0.17145081 | 0.37254553 |
| ENSMUSG00000032872 | -0.4221582 | 7.17316757 | 0.1696732  | 0.37024601 |
| ENSMUSG00000042719 | -0.4223258 | 7.69574438 | 0.16875915 | 0.36892331 |
| ENSMUSG00000033701 | -0.4226498 | 4.58818554 | 0.17854    | 0.38132006 |
| ENSMUSG00000058192 | -0.4228552 | 3.33822067 | 0.19555404 | 0.40353135 |
| ENSMUSG00000026095 | -0.4228917 | 4.83677405 | 0.17655588 | 0.37897663 |
| ENSMUSG00000029657 | -0.4230111 | 8.89159947 | 0.16730821 | 0.36716559 |
| ENSMUSG00000030924 | -0.4231231 | 3.46665238 | 0.18813001 | 0.39348216 |
| ENSMUSG00000020309 | -0.4232218 | 2.60158963 | 0.20701032 | 0.41750502 |
| ENSMUSG00000037465 | -0.4232392 | 3.47329169 | 0.18996279 | 0.39532203 |
| ENSMUSG00000036188 | -0.4234378 | 4.9476669  | 0.17577636 | 0.37858095 |
| ENSMUSG00000028330 | -0.4235449 | 7.86628337 | 0.16738188 | 0.36717783 |
| ENSMUSG00000025971 | -0.4236608 | 4.5670086  | 0.17816167 | 0.38098125 |
| ENSMUSG00000032698 | -0.4237851 | 7.12110229 | 0.16787999 | 0.36780296 |
| ENSMUSG00000053553 | -0.4240923 | 3.33850209 | 0.1872602  | 0.39211923 |
| ENSMUSG00000028013 | -0.4241551 | 4.98891907 | 0.17434358 | 0.37692886 |
| ENSMUSG00000079988 | -0.4242494 | 0.92023143 | 0.34786949 | 0.57168921 |
| ENSMUSG00000015748 | -0.4242802 | 6.78904382 | 0.16790993 | 0.36780296 |
| ENSMUSG00000040842 | -0.4243392 | 6.35939431 | 0.16805653 | 0.36794973 |
| ENSMUSG00000022323 | -0.4243408 | 4.14759345 | 0.17978579 | 0.38271022 |
| ENSMUSG00000054693 | -0.4243637 | 7.84506942 | 0.16673195 | 0.36642294 |
| ENSMUSG00000029782 | -0.4245182 | 6.85001509 | 0.16776048 | 0.36763442 |
| ENSMUSG00000005364 | -0.4245194 | 4.69864103 | 0.17610842 | 0.37868784 |
| ENSMUSG00000002728 | -0.4245447 | 6.62049826 | 0.16810908 | 0.36794973 |
| ENSMUSG00000021929 | -0.42497   | 8.29886481 | 0.16576689 | 0.36500424 |
| ENSMUSG00000038225 | -0.4251882 | 5.28980203 | 0.17213382 | 0.37349922 |
| ENSMUSG00000034192 | -0.425481  | 6.56834708 | 0.16710261 | 0.36693841 |
| ENSMUSG00000061950 | -0.4256457 | 6.06320368 | 0.16808994 | 0.36794973 |
| ENSMUSG00000024878 | -0.4257162 | 5.43191086 | 0.17041825 | 0.37127078 |

|                    |            |            |            |            |
|--------------------|------------|------------|------------|------------|
| ENSMUSG00000037646 | -0.425843  | 7.08081428 | 0.16631613 | 0.3657327  |
| ENSMUSG00000025337 | -0.4259767 | 6.14244126 | 0.16747862 | 0.36731533 |
| ENSMUSG00000094936 | -0.4259949 | 3.26876369 | 0.19658692 | 0.40489228 |
| ENSMUSG00000087370 | -0.4260129 | 6.00519966 | 0.16830658 | 0.36830726 |
| ENSMUSG00000025133 | -0.4260881 | 7.72637701 | 0.16496604 | 0.36420491 |
| ENSMUSG00000044026 | -0.4263514 | 4.36986994 | 0.17714564 | 0.37976603 |
| ENSMUSG00000026662 | -0.4264059 | 6.85344021 | 0.16567254 | 0.36491273 |
| ENSMUSG00000031200 | -0.4264743 | 3.68348243 | 0.18312428 | 0.38676308 |
| ENSMUSG00000038374 | -0.426494  | 6.71534703 | 0.16563106 | 0.36489587 |
| ENSMUSG00000020657 | -0.4265339 | 4.95796947 | 0.17167924 | 0.372888   |
| ENSMUSG00000038759 | -0.4265443 | 8.85710257 | 0.16386667 | 0.36205113 |
| ENSMUSG00000003824 | -0.4265647 | 4.78852999 | 0.17300218 | 0.37485543 |
| ENSMUSG00000018068 | -0.4268399 | 7.250162   | 0.16489437 | 0.36416565 |
| ENSMUSG00000047534 | -0.4270873 | 6.48176755 | 0.16629901 | 0.3657327  |
| ENSMUSG00000028577 | -0.4272984 | 8.27512419 | 0.16349736 | 0.3616964  |
| ENSMUSG00000009772 | -0.4273611 | 3.661981   | 0.17921777 | 0.38205432 |
| ENSMUSG00000031262 | -0.4276101 | 6.29975452 | 0.16590617 | 0.36520354 |
| ENSMUSG00000018143 | -0.4278158 | 3.94265922 | 0.17589097 | 0.37860443 |
| ENSMUSG00000020899 | -0.4283773 | 7.17743529 | 0.16308712 | 0.36113583 |
| ENSMUSG00000040331 | -0.4284273 | 7.04451015 | 0.16349725 | 0.3616964  |
| ENSMUSG00000044408 | -0.4284335 | 6.23336035 | 0.16504724 | 0.36420491 |
| ENSMUSG00000063800 | -0.428579  | 6.91596372 | 0.16346415 | 0.3616964  |
| ENSMUSG00000050332 | -0.4286797 | 4.39440618 | 0.17614726 | 0.37868784 |
| ENSMUSG00000040383 | -0.4288484 | 8.08549724 | 0.16203403 | 0.35946822 |
| ENSMUSG00000025199 | -0.4294168 | 7.48048254 | 0.16210515 | 0.35955202 |
| ENSMUSG00000037972 | -0.4295472 | 6.98651351 | 0.16260359 | 0.36047835 |
| ENSMUSG00000025982 | -0.429707  | 10.0396768 | 0.16046022 | 0.35696984 |
| ENSMUSG00000030738 | -0.4300197 | 9.68180357 | 0.16017637 | 0.35658246 |
| ENSMUSG00000060743 | -0.4300356 | 8.00902419 | 0.16080865 | 0.35763261 |
| ENSMUSG00000023156 | -0.4300509 | 4.9062504  | 0.16852401 | 0.36856551 |
| ENSMUSG00000038069 | -0.4300716 | 4.35740964 | 0.17519389 | 0.3779109  |
| ENSMUSG00000033009 | -0.43048   | 5.54265005 | 0.16513528 | 0.36425012 |
| ENSMUSG00000027104 | -0.4307676 | 6.84709307 | 0.1616219  | 0.35888642 |
| ENSMUSG00000040177 | -0.4308173 | 3.93755842 | 0.17720537 | 0.37976603 |
| ENSMUSG00000036977 | -0.430856  | 4.72056159 | 0.17023621 | 0.3710991  |
| ENSMUSG00000025086 | -0.4308915 | 4.89809265 | 0.1679397  | 0.36780296 |
| ENSMUSG00000044847 | -0.4310527 | 3.74757833 | 0.17525085 | 0.3779109  |
| ENSMUSG00000027858 | -0.4312091 | 3.33557132 | 0.1872602  | 0.39211923 |
| ENSMUSG00000001280 | -0.4315818 | 8.23123854 | 0.15932134 | 0.35542436 |
| ENSMUSG00000064341 | -0.4316175 | 11.8810983 | 0.15840234 | 0.35410673 |
| ENSMUSG00000041408 | -0.4318231 | 8.39194615 | 0.15904064 | 0.35494474 |
| ENSMUSG00000059060 | -0.4319216 | 2.67911729 | 0.20034037 | 0.40972322 |
| ENSMUSG00000020305 | -0.4320237 | 4.71988084 | 0.16909916 | 0.36951678 |



|                    |            |            |            |            |
|--------------------|------------|------------|------------|------------|
| ENSMUSG00000018548 | -0.4322416 | 7.30308062 | 0.15948371 | 0.35571215 |
| ENSMUSG00000061315 | -0.4323488 | 8.94775694 | 0.15813932 | 0.35366538 |
| ENSMUSG00000021276 | -0.4323492 | 6.03270254 | 0.16156257 | 0.35888642 |
| ENSMUSG00000053769 | -0.4324373 | 1.52311257 | 0.23960003 | 0.45626818 |
| ENSMUSG00000034206 | -0.4325132 | 6.89380739 | 0.15982156 | 0.35617188 |
| ENSMUSG00000001017 | -0.4327079 | 7.54593579 | 0.158741   | 0.35471674 |
| ENSMUSG00000051727 | -0.4330969 | 5.03905842 | 0.16528248 | 0.36442572 |
| ENSMUSG00000034820 | -0.4333866 | 7.49273019 | 0.15808134 | 0.35361151 |
| ENSMUSG00000022770 | -0.4335621 | 6.79688468 | 0.15894502 | 0.35494474 |
| ENSMUSG00000040675 | -0.4337416 | 7.01684452 | 0.15808245 | 0.35361151 |
| ENSMUSG00000020530 | -0.4339647 | 7.62474972 | 0.15750306 | 0.35275452 |
| ENSMUSG00000046873 | -0.4342537 | 5.50282733 | 0.16287143 | 0.36095468 |
| ENSMUSG00000049672 | -0.434629  | 4.90126742 | 0.1636144  | 0.36178911 |
| ENSMUSG00000079215 | -0.4350983 | 6.15495399 | 0.1586851  | 0.35466532 |
| ENSMUSG00000033014 | -0.4351942 | 6.9883942  | 0.15721775 | 0.35218866 |
| ENSMUSG00000021127 | -0.4352336 | 7.91226396 | 0.15613104 | 0.35062831 |
| ENSMUSG00000030268 | -0.4355894 | 5.98548539 | 0.15800545 | 0.35358597 |
| ENSMUSG00000028580 | -0.4356345 | 6.81212205 | 0.15670835 | 0.35144634 |
| ENSMUSG00000074698 | -0.4359342 | 7.77803488 | 0.15550164 | 0.34972697 |
| ENSMUSG00000027620 | -0.4363091 | 9.17662933 | 0.15437268 | 0.34845317 |
| ENSMUSG00000024695 | -0.4363126 | 8.25466587 | 0.15474647 | 0.34897239 |
| ENSMUSG00000071226 | -0.436438  | 4.03190109 | 0.17038802 | 0.37127078 |
| ENSMUSG00000046111 | -0.4365515 | 7.40413116 | 0.15535426 | 0.34953899 |
| ENSMUSG00000016498 | -0.4367518 | 2.95274009 | 0.18807282 | 0.39343886 |
| ENSMUSG00000029173 | -0.4367977 | 5.29191878 | 0.16021336 | 0.35658246 |
| ENSMUSG00000026974 | -0.436836  | 6.1244184  | 0.15671502 | 0.35144634 |
| ENSMUSG00000040167 | -0.4368564 | 5.26097059 | 0.16023726 | 0.35658246 |
| ENSMUSG00000022403 | -0.4373898 | 8.58837552 | 0.1535034  | 0.34693786 |
| ENSMUSG00000056763 | -0.4374093 | 5.54789383 | 0.15882266 | 0.35482568 |
| ENSMUSG00000054733 | -0.4375289 | 3.41384713 | 0.17617553 | 0.37868784 |
| ENSMUSG00000036781 | -0.4376968 | 7.17744954 | 0.15438699 | 0.34845317 |
| ENSMUSG00000033405 | -0.4379307 | 3.42637669 | 0.17341414 | 0.37537094 |
| ENSMUSG00000064061 | -0.4379597 | 6.20685416 | 0.15631031 | 0.35095781 |
| ENSMUSG00000027014 | -0.4381507 | 6.93710729 | 0.15434273 | 0.34845317 |
| ENSMUSG00000041763 | -0.438641  | 8.31068786 | 0.15260873 | 0.34574642 |
| ENSMUSG00000018501 | -0.4387559 | 8.42444849 | 0.15236225 | 0.34547404 |
| ENSMUSG00000038697 | -0.4388623 | 5.81958299 | 0.15530442 | 0.34949977 |
| ENSMUSG00000000001 | -0.4389882 | 8.46239279 | 0.15220202 | 0.34547404 |
| ENSMUSG00000030051 | -0.4390553 | 3.79255832 | 0.17097376 | 0.37195502 |
| ENSMUSG00000029701 | -0.4391511 | 7.23195109 | 0.15283336 | 0.34594271 |
| ENSMUSG00000038116 | -0.439349  | 6.0349785  | 0.15512999 | 0.34925299 |
| ENSMUSG00000022092 | -0.439368  | 6.92605298 | 0.15327711 | 0.34652837 |
| ENSMUSG00000005371 | -0.4396211 | 7.60311842 | 0.15229183 | 0.34547404 |

|                    |            |            |            |            |
|--------------------|------------|------------|------------|------------|
| ENSMUSG00000058355 | -0.4396312 | 9.48261645 | 0.15117543 | 0.3437225  |
| ENSMUSG00000022913 | -0.4398176 | 5.60053396 | 0.15561373 | 0.34983082 |
| ENSMUSG00000026887 | -0.4398183 | 4.84445551 | 0.15962331 | 0.35584483 |
| ENSMUSG00000071252 | -0.4398986 | 2.43352495 | 0.20278792 | 0.41253819 |
| ENSMUSG00000090115 | -0.4400763 | 3.56971881 | 0.17525338 | 0.3779109  |
| ENSMUSG00000056999 | -0.4401618 | 8.49811786 | 0.15095554 | 0.34351225 |
| ENSMUSG00000089847 | -0.4406171 | 3.07744124 | 0.17634703 | 0.37888647 |
| ENSMUSG00000011752 | -0.4406959 | 8.54543319 | 0.15044854 | 0.34272012 |
| ENSMUSG00000024601 | -0.4412134 | 6.16901048 | 0.15288974 | 0.34594271 |
| ENSMUSG00000032567 | -0.4412737 | 4.2183835  | 0.16262307 | 0.36047835 |
| ENSMUSG00000035530 | -0.4412785 | 8.3320724  | 0.1500465  | 0.34216567 |
| ENSMUSG00000028247 | -0.4413637 | 3.80960058 | 0.16618558 | 0.3656693  |
| ENSMUSG00000040151 | -0.4414885 | 4.88623369 | 0.15771518 | 0.35308294 |
| ENSMUSG00000029422 | -0.4417512 | 7.47293798 | 0.15031889 | 0.34260545 |
| ENSMUSG00000052748 | -0.4419505 | 5.53661782 | 0.15488706 | 0.34907044 |
| ENSMUSG00000033991 | -0.4420563 | 7.25455596 | 0.15033466 | 0.34260545 |
| ENSMUSG00000017291 | -0.4422855 | 7.04239527 | 0.15060687 | 0.34293591 |
| ENSMUSG00000039087 | -0.4424988 | 4.70078385 | 0.1568709  | 0.35155772 |
| ENSMUSG00000006740 | -0.4425673 | 9.05603109 | 0.14858147 | 0.34013182 |
| ENSMUSG00000097885 | -0.4425914 | 1.00883922 | 0.27540079 | 0.49535423 |
| ENSMUSG00000021713 | -0.4428422 | 5.94954569 | 0.15230549 | 0.34547404 |
| ENSMUSG00000099083 | -0.4429859 | 6.31578387 | 0.15108681 | 0.34366592 |
| ENSMUSG00000030189 | -0.4430185 | 7.49056004 | 0.14886784 | 0.34063035 |
| ENSMUSG00000032834 | -0.4431045 | 6.10031121 | 0.1507169  | 0.343114   |
| ENSMUSG00000030726 | -0.443448  | 6.8488606  | 0.14938125 | 0.34115362 |
| ENSMUSG00000095120 | -0.4440278 | 1.71459503 | 0.2321647  | 0.44652472 |
| ENSMUSG00000021428 | -0.4440824 | 6.70453443 | 0.14929486 | 0.34109297 |
| ENSMUSG00000024477 | -0.4446652 | 5.97138426 | 0.15030716 | 0.34260545 |
| ENSMUSG00000019850 | -0.4451383 | 7.83835507 | 0.14681892 | 0.33758961 |
| ENSMUSG00000031928 | -0.4453238 | 6.91566821 | 0.14765111 | 0.33885286 |
| ENSMUSG00000029127 | -0.4455951 | 1.82160992 | 0.20688475 | 0.4174079  |
| ENSMUSG00000079555 | -0.4456618 | 6.49234071 | 0.14850356 | 0.34008546 |
| ENSMUSG00000037572 | -0.4458942 | 7.75669246 | 0.14627078 | 0.33668677 |
| ENSMUSG00000029062 | -0.4460802 | 7.400689   | 0.14630139 | 0.33668677 |
| ENSMUSG00000031904 | -0.4465106 | 6.70491843 | 0.14687458 | 0.33764558 |
| ENSMUSG00000054387 | -0.4467426 | 8.71919143 | 0.14497341 | 0.3350607  |
| ENSMUSG00000053091 | -0.4468774 | 3.7882556  | 0.1619226  | 0.35932593 |
| ENSMUSG00000031479 | -0.4474824 | 6.4158256  | 0.14654353 | 0.33710014 |
| ENSMUSG00000028282 | -0.4475745 | 7.74623626 | 0.14490931 | 0.33498435 |
| ENSMUSG00000007827 | -0.4477209 | 5.51751462 | 0.14927872 | 0.34109297 |
| ENSMUSG00000024759 | -0.4485589 | 7.91216279 | 0.14385214 | 0.33327555 |
| ENSMUSG00000029569 | -0.448635  | 7.33141584 | 0.14433909 | 0.33402419 |
| ENSMUSG00000063179 | -0.4487483 | 3.47125325 | 0.16734249 | 0.36716611 |

|                    |            |            |            |            |
|--------------------|------------|------------|------------|------------|
| ENSMUSG00000069206 | -0.4488027 | 3.97186769 | 0.16163866 | 0.35888642 |
| ENSMUSG00000006599 | -0.4488131 | 7.48565553 | 0.14388635 | 0.33327555 |
| ENSMUSG00000060121 | -0.4489616 | 5.2521479  | 0.14919453 | 0.34109297 |
| ENSMUSG00000049327 | -0.4492558 | 6.97588638 | 0.14389197 | 0.33327555 |
| ENSMUSG00000033450 | -0.4492697 | 6.48465525 | 0.14487332 | 0.33497296 |
| ENSMUSG00000024120 | -0.4493018 | 8.00832209 | 0.14301437 | 0.33198603 |
| ENSMUSG00000021967 | -0.4494005 | 3.61608996 | 0.16111857 | 0.35817412 |
| ENSMUSG00000018986 | -0.4497134 | 4.23205058 | 0.15430464 | 0.34845317 |
| ENSMUSG00000021715 | -0.4498462 | 5.38015822 | 0.14776508 | 0.33904226 |
| ENSMUSG00000020611 | -0.450031  | 7.88099707 | 0.14254268 | 0.33121746 |
| ENSMUSG00000040225 | -0.4500617 | 9.42766134 | 0.14174886 | 0.33015545 |
| ENSMUSG00000067851 | -0.4502517 | 8.46667819 | 0.14199812 | 0.33056066 |
| ENSMUSG00000078495 | -0.450679  | 5.26505087 | 0.1484742  | 0.34008546 |
| ENSMUSG00000090733 | -0.4511538 | 8.46462161 | 0.14112182 | 0.32919266 |
| ENSMUSG00000003604 | -0.4511672 | 5.25033592 | 0.1461315  | 0.33668677 |
| ENSMUSG00000031600 | -0.4511695 | 5.56019991 | 0.14661021 | 0.33718159 |
| ENSMUSG00000002428 | -0.451217  | 6.59814494 | 0.14314008 | 0.33210469 |
| ENSMUSG00000038844 | -0.4516134 | 5.46391187 | 0.14579972 | 0.33617792 |
| ENSMUSG00000024974 | -0.4516172 | 8.51120379 | 0.14072737 | 0.32869914 |
| ENSMUSG00000028145 | -0.4518385 | 2.71257366 | 0.17647874 | 0.37888647 |
| ENSMUSG00000039929 | -0.4520824 | 6.30603692 | 0.14230016 | 0.33086782 |
| ENSMUSG00000029500 | -0.4521788 | 6.38949539 | 0.14237552 | 0.33097167 |
| ENSMUSG00000071660 | -0.4522082 | 6.93279114 | 0.14160038 | 0.32995214 |
| ENSMUSG00000030662 | -0.4524309 | 9.70854265 | 0.13957819 | 0.32686454 |
| ENSMUSG00000048410 | -0.4525657 | 5.56172649 | 0.14469227 | 0.33462608 |
| ENSMUSG00000051224 | -0.4527104 | 3.90179699 | 0.15602448 | 0.35047616 |
| ENSMUSG00000044966 | -0.4527169 | 3.44793976 | 0.16374002 | 0.36191275 |
| ENSMUSG00000022313 | -0.4531039 | 4.76036198 | 0.14780886 | 0.33907057 |
| ENSMUSG00000078773 | -0.4531348 | 5.1238668  | 0.14621646 | 0.33668677 |
| ENSMUSG00000037991 | -0.4532116 | 5.0545335  | 0.14576034 | 0.336159   |
| ENSMUSG00000041415 | -0.4532407 | 7.50566368 | 0.1399972  | 0.32749019 |
| ENSMUSG00000028274 | -0.4533241 | 5.91106766 | 0.14302736 | 0.33198603 |
| ENSMUSG00000052031 | -0.4533424 | 4.16692011 | 0.15288909 | 0.34594271 |
| ENSMUSG00000056014 | -0.4534818 | 3.93814042 | 0.1558774  | 0.35027752 |
| ENSMUSG00000028608 | -0.4535855 | 4.82593207 | 0.14565137 | 0.33605142 |
| ENSMUSG00000007812 | -0.4540191 | 6.20832529 | 0.14165331 | 0.33000417 |
| ENSMUSG00000022241 | -0.4540467 | 7.64577392 | 0.13905368 | 0.32591934 |
| ENSMUSG00000074873 | -0.4540759 | 2.38189732 | 0.18780985 | 0.39304122 |
| ENSMUSG00000000776 | -0.4542342 | 4.79711804 | 0.14462613 | 0.33454487 |
| ENSMUSG00000034377 | -0.4543112 | 6.36414458 | 0.14062539 | 0.3286033  |
| ENSMUSG00000038738 | -0.4546014 | 2.52885314 | 0.17316911 | 0.37514175 |
| ENSMUSG00000042650 | -0.4546437 | 7.3926617  | 0.13881512 | 0.32569099 |
| ENSMUSG00000032279 | -0.4546589 | 7.37960259 | 0.13876698 | 0.32567207 |

|                    |            |            |            |            |
|--------------------|------------|------------|------------|------------|
| ENSMUSG00000021911 | -0.4546887 | 7.02424802 | 0.13944071 | 0.32668447 |
| ENSMUSG00000095432 | -0.4547909 | 5.12073088 | 0.14515842 | 0.33512917 |
| ENSMUSG00000040044 | -0.4548493 | 7.35490749 | 0.13891443 | 0.3258054  |
| ENSMUSG00000014353 | -0.4549854 | 4.78387619 | 0.14704857 | 0.33790151 |
| ENSMUSG00000025103 | -0.4557233 | 6.27504184 | 0.13992895 | 0.32740155 |
| ENSMUSG00000023284 | -0.4558457 | 3.79817042 | 0.15603079 | 0.35047616 |
| ENSMUSG00000024583 | -0.4561245 | 7.73629379 | 0.13733985 | 0.32366593 |
| ENSMUSG00000043008 | -0.4565627 | 5.35392438 | 0.14201479 | 0.33056066 |
| ENSMUSG00000038582 | -0.4571751 | 6.24658879 | 0.138416   | 0.32513136 |
| ENSMUSG00000059288 | -0.4571836 | 4.56430063 | 0.14642945 | 0.33690957 |
| ENSMUSG00000015757 | -0.4572078 | 7.0680721  | 0.13719888 | 0.32362264 |
| ENSMUSG00000031657 | -0.4572139 | 7.66120066 | 0.13640211 | 0.32243761 |
| ENSMUSG00000011254 | -0.4573346 | 5.26239379 | 0.14057713 | 0.32856171 |
| ENSMUSG00000034064 | -0.4573786 | 6.31773423 | 0.1382753  | 0.32501327 |
| ENSMUSG00000075595 | -0.4574377 | 4.80773329 | 0.14350814 | 0.33281544 |
| ENSMUSG00000081400 | -0.4580394 | 1.43957485 | 0.21469523 | 0.42722351 |
| ENSMUSG00000037531 | -0.4580437 | 5.66539582 | 0.13940323 | 0.32666764 |
| ENSMUSG00000025860 | -0.4581659 | 8.06988267 | 0.13540127 | 0.32098643 |
| ENSMUSG00000048701 | -0.4585362 | 6.7378459  | 0.13631275 | 0.32229702 |
| ENSMUSG00000026455 | -0.4587031 | 6.07955785 | 0.13761882 | 0.32396449 |
| ENSMUSG00000022427 | -0.4587282 | 7.43573714 | 0.13530541 | 0.32097087 |
| ENSMUSG00000032998 | -0.4588861 | 6.57676027 | 0.13651287 | 0.3226287  |
| ENSMUSG00000002477 | -0.4589336 | 7.31535508 | 0.13524557 | 0.32097011 |
| ENSMUSG00000027454 | -0.4595016 | 4.7300877  | 0.14207604 | 0.33063186 |
| ENSMUSG00000066880 | -0.4596625 | 4.24342759 | 0.14733218 | 0.33826491 |
| ENSMUSG00000084957 | -0.4598971 | 5.41526269 | 0.13901703 | 0.32591934 |
| ENSMUSG00000021731 | -0.4601439 | 6.18585161 | 0.13624651 | 0.32221105 |
| ENSMUSG00000023755 | -0.4601496 | 3.37037827 | 0.15779304 | 0.35318393 |
| ENSMUSG00000044340 | -0.4601897 | 5.70558098 | 0.13776627 | 0.32424082 |
| ENSMUSG00000027115 | -0.4601999 | 5.97980607 | 0.13692867 | 0.32333717 |
| ENSMUSG00000026245 | -0.4602912 | 7.84694349 | 0.13364065 | 0.31835229 |
| ENSMUSG00000040123 | -0.460672  | 5.94394942 | 0.13693257 | 0.32333717 |
| ENSMUSG00000071669 | -0.4609328 | 5.50361088 | 0.13696417 | 0.32334098 |
| ENSMUSG00000040028 | -0.4611429 | 7.7940553  | 0.13292543 | 0.31767016 |
| ENSMUSG00000046434 | -0.4615688 | 10.3782764 | 0.13167823 | 0.31598088 |
| ENSMUSG00000026049 | -0.4617346 | 5.78911111 | 0.13612052 | 0.32208715 |
| ENSMUSG00000031976 | -0.4617671 | 7.03016966 | 0.13312847 | 0.31783429 |
| ENSMUSG00000022064 | -0.4620269 | 4.63701559 | 0.14139799 | 0.32961417 |
| ENSMUSG00000096199 | -0.4620353 | 3.28620504 | 0.15586443 | 0.35027752 |
| ENSMUSG00000078861 | -0.4621153 | 1.229484   | 0.2473062  | 0.46559882 |
| ENSMUSG00000035171 | -0.4621367 | 6.11075917 | 0.13476208 | 0.32045739 |
| ENSMUSG00000039117 | -0.4622212 | 5.38215301 | 0.13672946 | 0.32299902 |
| ENSMUSG00000036768 | -0.4622719 | 7.85750998 | 0.13206948 | 0.31647145 |

|                    |            |            |            |            |
|--------------------|------------|------------|------------|------------|
| ENSMUSG00000040899 | -0.4623432 | 3.69825974 | 0.15128017 | 0.34381567 |
| ENSMUSG00000027305 | -0.4624622 | 5.18180456 | 0.13788057 | 0.32443904 |
| ENSMUSG00000041135 | -0.4625475 | 5.25294953 | 0.13729539 | 0.32366593 |
| ENSMUSG00000028549 | -0.4626159 | 3.784482   | 0.14998593 | 0.3420999  |
| ENSMUSG00000002949 | -0.4626837 | 6.06693042 | 0.13372221 | 0.31847623 |
| ENSMUSG00000024817 | -0.4628915 | 6.61085665 | 0.13299544 | 0.31772769 |
| ENSMUSG00000036112 | -0.4629329 | 8.67742646 | 0.13097452 | 0.31492337 |
| ENSMUSG00000040242 | -0.4629637 | 7.40950297 | 0.1317853  | 0.31602683 |
| ENSMUSG00000028256 | -0.4629887 | 4.50455433 | 0.14189061 | 0.33041424 |
| ENSMUSG00000015755 | -0.4630754 | 7.7323561  | 0.13147283 | 0.31562845 |
| ENSMUSG00000033364 | -0.4630759 | 6.80342073 | 0.13253849 | 0.31712782 |
| ENSMUSG00000056267 | -0.4631636 | 3.48984814 | 0.15261062 | 0.34574642 |
| ENSMUSG00000026083 | -0.4634074 | 8.60592758 | 0.13063722 | 0.31481381 |
| ENSMUSG00000026104 | -0.4637336 | 7.78521957 | 0.13092223 | 0.31492337 |
| ENSMUSG00000090641 | -0.4638735 | 2.65235145 | 0.17039093 | 0.37127078 |
| ENSMUSG00000028273 | -0.4639498 | 5.93960181 | 0.13346541 | 0.31821601 |
| ENSMUSG00000028948 | -0.4643944 | 7.07647959 | 0.13078283 | 0.31492337 |
| ENSMUSG00000039356 | -0.4645243 | 6.73300796 | 0.13100392 | 0.31492337 |
| ENSMUSG00000024068 | -0.464652  | 6.25805332 | 0.13231347 | 0.31680029 |
| ENSMUSG00000001440 | -0.464729  | 10.5284479 | 0.12904894 | 0.31217221 |
| ENSMUSG00000024293 | -0.4650621 | 6.85121446 | 0.13112496 | 0.31507387 |
| ENSMUSG00000029265 | -0.4650682 | 6.92601957 | 0.1307383  | 0.31492337 |
| ENSMUSG00000021282 | -0.4652433 | 9.7294624  | 0.12878605 | 0.31186423 |
| ENSMUSG00000027323 | -0.4652788 | 6.86932092 | 0.13055187 | 0.31474881 |
| ENSMUSG00000021532 | -0.4652831 | 5.21494439 | 0.13488628 | 0.32061946 |
| ENSMUSG00000035378 | -0.4655629 | 4.30482988 | 0.14091735 | 0.32893318 |
| ENSMUSG00000028217 | -0.4659406 | 5.27882317 | 0.13473051 | 0.32045298 |
| ENSMUSG00000004591 | -0.4660207 | 7.02549467 | 0.12982375 | 0.31327407 |
| ENSMUSG00000057246 | -0.4662166 | 1.1121312  | 0.25201101 | 0.47035077 |
| ENSMUSG00000079427 | -0.4662376 | 2.9292644  | 0.15905585 | 0.35494474 |
| ENSMUSG00000037674 | -0.4664972 | 8.17581432 | 0.12836757 | 0.31157234 |
| ENSMUSG00000041133 | -0.4666529 | 8.92077809 | 0.12781199 | 0.31071338 |
| ENSMUSG00000028018 | -0.4668026 | 5.56954014 | 0.13230077 | 0.31680029 |
| ENSMUSG00000021537 | -0.4668998 | 6.92026524 | 0.12930967 | 0.31259256 |
| ENSMUSG00000029670 | -0.4670074 | 5.32340804 | 0.13261192 | 0.31723313 |
| ENSMUSG00000029179 | -0.4670294 | 4.83935924 | 0.13534575 | 0.32097723 |
| ENSMUSG00000055184 | -0.4670727 | 4.77360114 | 0.13572154 | 0.32167497 |
| ENSMUSG00000014771 | -0.4670957 | 5.11126601 | 0.13353055 | 0.31830093 |
| ENSMUSG00000017376 | -0.4671475 | 5.53565575 | 0.13202857 | 0.31646945 |
| ENSMUSG00000056342 | -0.4672007 | 8.67896522 | 0.12756392 | 0.31034329 |
| ENSMUSG00000029446 | -0.4673283 | 4.40519307 | 0.13616426 | 0.32208715 |
| ENSMUSG00000038344 | -0.4675502 | 5.16536999 | 0.13389165 | 0.31872555 |
| ENSMUSG00000038056 | -0.4675875 | 6.75347634 | 0.1291162  | 0.31226487 |

|                    |            |            |            |            |
|--------------------|------------|------------|------------|------------|
| ENSMUSG00000027905 | -0.4677843 | 6.89855472 | 0.12860373 | 0.31186423 |
| ENSMUSG00000072847 | -0.4678067 | 2.95741029 | 0.16167565 | 0.35889465 |
| ENSMUSG00000055436 | -0.4678238 | 8.35826825 | 0.12710582 | 0.31004505 |
| ENSMUSG00000037533 | -0.4678526 | 7.80055603 | 0.12749721 | 0.31034329 |
| ENSMUSG00000028300 | -0.4681392 | 5.21194959 | 0.13333096 | 0.31810644 |
| ENSMUSG00000045273 | -0.4683118 | 4.83106902 | 0.13497398 | 0.32071894 |
| ENSMUSG00000019143 | -0.4683613 | 5.59714441 | 0.13098596 | 0.31492337 |
| ENSMUSG00000029471 | -0.4686539 | 4.77422449 | 0.13360741 | 0.31835229 |
| ENSMUSG00000025134 | -0.4686737 | 6.90799733 | 0.12740499 | 0.31034329 |
| ENSMUSG00000087174 | -0.4692192 | 4.19362476 | 0.13709332 | 0.32356686 |
| ENSMUSG00000046223 | -0.469296  | 1.93135919 | 0.18114008 | 0.38468189 |
| ENSMUSG00000089911 | -0.4693095 | 6.71301895 | 0.1275157  | 0.31034329 |
| ENSMUSG00000009628 | -0.4693949 | 3.82227403 | 0.14433831 | 0.33402419 |
| ENSMUSG00000037369 | -0.4696889 | 6.72545831 | 0.12689221 | 0.30980431 |
| ENSMUSG00000037851 | -0.4697261 | 8.63219707 | 0.12543648 | 0.30689653 |
| ENSMUSG00000035351 | -0.4697436 | 5.96660823 | 0.12872024 | 0.31186423 |
| ENSMUSG00000049800 | -0.4697831 | 5.10303047 | 0.13166146 | 0.31598088 |
| ENSMUSG00000047221 | -0.4698778 | 4.73552857 | 0.13385173 | 0.31871429 |
| ENSMUSG00000068015 | -0.4701834 | 5.08160694 | 0.13139811 | 0.31558957 |
| ENSMUSG00000032097 | -0.4702167 | 9.89588158 | 0.12472517 | 0.30624686 |
| ENSMUSG00000042447 | -0.4702872 | 6.34352779 | 0.12762033 | 0.31038737 |
| ENSMUSG00000039197 | -0.4704812 | 6.05464761 | 0.1275414  | 0.31034329 |
| ENSMUSG00000041440 | -0.4706322 | 3.41530665 | 0.14574272 | 0.336159   |
| ENSMUSG00000021024 | -0.4707434 | 8.49665065 | 0.12472306 | 0.30624686 |
| ENSMUSG00000034333 | -0.4708066 | 5.775136   | 0.12860245 | 0.31186423 |
| ENSMUSG00000048007 | -0.4708536 | 2.92604039 | 0.15905585 | 0.35494474 |
| ENSMUSG00000029027 | -0.4708622 | 3.86943523 | 0.13883545 | 0.32569099 |
| ENSMUSG00000027324 | -0.4708641 | 4.07631618 | 0.13667235 | 0.32293484 |
| ENSMUSG00000019878 | -0.4709041 | 4.78835853 | 0.13279983 | 0.3176122  |
| ENSMUSG00000015806 | -0.4710226 | 6.11294995 | 0.12718327 | 0.3100937  |
| ENSMUSG00000030016 | -0.4711197 | 8.14650358 | 0.12469149 | 0.30624686 |
| ENSMUSG00000035125 | -0.4712584 | 5.12122041 | 0.13097184 | 0.31492337 |
| ENSMUSG00000022781 | -0.4714333 | 8.73009678 | 0.12406179 | 0.30552828 |
| ENSMUSG00000040351 | -0.4719861 | 6.86925174 | 0.12521239 | 0.30672833 |
| ENSMUSG00000097277 | -0.4720289 | 1.71843203 | 0.17860234 | 0.38132006 |
| ENSMUSG00000017861 | -0.4720306 | 6.45581959 | 0.1248689  | 0.30628842 |
| ENSMUSG00000001158 | -0.4721286 | 5.73099563 | 0.12736077 | 0.31034329 |
| ENSMUSG00000027185 | -0.4721643 | 7.11803634 | 0.1244071  | 0.30567468 |
| ENSMUSG00000020362 | -0.4727394 | 8.85747084 | 0.12301677 | 0.30419924 |
| ENSMUSG00000033075 | -0.4728124 | 6.98412547 | 0.12428249 | 0.30567468 |
| ENSMUSG00000037486 | -0.4729155 | 7.44194055 | 0.1237912  | 0.30527405 |
| ENSMUSG00000020629 | -0.4729924 | 5.88818386 | 0.1263339  | 0.30879075 |
| ENSMUSG00000030254 | -0.4730419 | 6.33281557 | 0.12531525 | 0.30678766 |

|                    |            |            |            |            |
|--------------------|------------|------------|------------|------------|
| ENSMUSG00000032512 | -0.4733651 | 6.32243545 | 0.12482596 | 0.30628842 |
| ENSMUSG00000021607 | -0.4733715 | 5.55360066 | 0.12713693 | 0.31005079 |
| ENSMUSG00000024045 | -0.473449  | 7.59085928 | 0.12308345 | 0.3042246  |
| ENSMUSG00000038005 | -0.4734741 | 6.7453806  | 0.12420662 | 0.30566959 |
| ENSMUSG00000022300 | -0.4735471 | 7.129796   | 0.12361295 | 0.30497417 |
| ENSMUSG00000027959 | -0.4735574 | 5.65206455 | 0.12688046 | 0.30980431 |
| ENSMUSG00000035575 | -0.473811  | 7.79982769 | 0.12267478 | 0.30356237 |
| ENSMUSG00000038206 | -0.4739723 | 4.71718281 | 0.13107402 | 0.31502166 |
| ENSMUSG00000036309 | -0.474078  | 7.62293402 | 0.12266382 | 0.30356237 |
| ENSMUSG00000021733 | -0.4741244 | 8.025617   | 0.12234758 | 0.30323979 |
| ENSMUSG00000093904 | -0.4742125 | 7.36471086 | 0.12264138 | 0.30356237 |
| ENSMUSG00000026333 | -0.4743872 | 4.21344263 | 0.13441019 | 0.31976164 |
| ENSMUSG00000016409 | -0.4745014 | 5.92908356 | 0.12523413 | 0.30672833 |
| ENSMUSG00000027555 | -0.4745223 | 6.81822025 | 0.1232546  | 0.30450803 |
| ENSMUSG00000025085 | -0.4745937 | 9.23947967 | 0.12140842 | 0.30174426 |
| ENSMUSG00000021258 | -0.4746995 | 6.68820267 | 0.12317048 | 0.30436996 |
| ENSMUSG00000027679 | -0.4747798 | 4.99771995 | 0.12830002 | 0.31147848 |
| ENSMUSG00000022023 | -0.4748301 | 6.23061436 | 0.1240359  | 0.30552828 |
| ENSMUSG00000040782 | -0.4754229 | 6.59295569 | 0.12307852 | 0.3042246  |
| ENSMUSG00000038095 | -0.4756543 | 8.487099   | 0.1208818  | 0.30101317 |
| ENSMUSG00000026349 | -0.4759425 | 6.93119539 | 0.12192131 | 0.30250623 |
| ENSMUSG00000025903 | -0.4760636 | 6.8184617  | 0.12199172 | 0.30256641 |
| ENSMUSG00000035623 | -0.4763096 | 6.8476293  | 0.12185915 | 0.30244629 |
| ENSMUSG00000052446 | -0.4763473 | 6.06335369 | 0.12345273 | 0.30471829 |
| ENSMUSG00000034480 | -0.4766248 | 5.55073544 | 0.12522883 | 0.30672833 |
| ENSMUSG00000027665 | -0.4767629 | 7.19489109 | 0.12108696 | 0.30129251 |
| ENSMUSG00000021413 | -0.4768439 | 8.07336382 | 0.12016051 | 0.29968984 |
| ENSMUSG00000030127 | -0.4770595 | 5.20003714 | 0.12403054 | 0.30552828 |
| ENSMUSG00000034445 | -0.477128  | 5.13643386 | 0.12484908 | 0.30628842 |
| ENSMUSG00000025613 | -0.4771406 | 10.0810515 | 0.11925774 | 0.29832416 |
| ENSMUSG00000058064 | -0.4772884 | 1.83223639 | 0.20352935 | 0.41342259 |
| ENSMUSG00000036087 | -0.4773909 | 6.73545338 | 0.12115367 | 0.30138896 |
| ENSMUSG00000036022 | -0.4774057 | 5.23556162 | 0.12529796 | 0.30678766 |
| ENSMUSG00000048696 | -0.4775718 | 2.15371675 | 0.16386977 | 0.36205113 |
| ENSMUSG00000031756 | -0.4778469 | 5.51277574 | 0.12368513 | 0.30508243 |
| ENSMUSG00000037474 | -0.4783331 | 7.50438086 | 0.11940926 | 0.29863391 |
| ENSMUSG00000024991 | -0.4784776 | 10.5003084 | 0.1181611  | 0.29665973 |
| ENSMUSG00000041716 | -0.4786382 | 2.75470325 | 0.15444382 | 0.34850852 |
| ENSMUSG00000074781 | -0.4789652 | 7.97683475 | 0.11859394 | 0.29735342 |
| ENSMUSG00000024592 | -0.4793712 | 4.50271913 | 0.12973025 | 0.31318804 |
| ENSMUSG00000042043 | -0.4795126 | 5.91871596 | 0.12128955 | 0.30158785 |
| ENSMUSG00000038126 | -0.4795126 | 6.19209358 | 0.12051105 | 0.30048349 |
| ENSMUSG00000020380 | -0.4795174 | 7.25745488 | 0.11879522 | 0.29759183 |

|                    |            |            |            |            |
|--------------------|------------|------------|------------|------------|
| ENSMUSG00000031585 | -0.4797255 | 6.49746674 | 0.11973238 | 0.29906995 |
| ENSMUSG00000035958 | -0.4800146 | 5.9400112  | 0.12119084 | 0.30141191 |
| ENSMUSG00000027829 | -0.4800443 | 7.51660623 | 0.11817973 | 0.29665973 |
| ENSMUSG00000025986 | -0.4800653 | 5.82885553 | 0.12088888 | 0.30101317 |
| ENSMUSG00000028668 | -0.4800697 | 8.48075508 | 0.11740009 | 0.29535676 |
| ENSMUSG00000053985 | -0.4804977 | 1.05500152 | 0.23361317 | 0.44829845 |
| ENSMUSG00000035021 | -0.4805242 | 9.03112073 | 0.11690041 | 0.29447653 |
| ENSMUSG00000044221 | -0.4805247 | 7.29786338 | 0.11799156 | 0.29646341 |
| ENSMUSG00000028540 | -0.4806595 | 3.92432098 | 0.12815965 | 0.31126168 |
| ENSMUSG00000034883 | -0.4807431 | 4.09513098 | 0.13185216 | 0.31611688 |
| ENSMUSG00000041685 | -0.4808895 | 4.85225505 | 0.1250347  | 0.30644869 |
| ENSMUSG00000079509 | -0.4813412 | 6.85227333 | 0.11805247 | 0.29654737 |
| ENSMUSG00000040481 | -0.4813512 | 7.90015156 | 0.11681697 | 0.29440389 |
| ENSMUSG00000037286 | -0.4814357 | 7.85237688 | 0.11687089 | 0.29447096 |
| ENSMUSG00000024241 | -0.481447  | 6.42886163 | 0.11856881 | 0.29735342 |
| ENSMUSG00000054648 | -0.4816664 | 5.75330331 | 0.1199829  | 0.29944355 |
| ENSMUSG00000028413 | -0.4818214 | 8.79277571 | 0.11599986 | 0.29337301 |
| ENSMUSG00000051355 | -0.4822028 | 4.65037161 | 0.12437272 | 0.30567468 |
| ENSMUSG00000061838 | -0.4823532 | 6.71603332 | 0.11730639 | 0.29522337 |
| ENSMUSG00000025817 | -0.4824    | 7.24310792 | 0.11649466 | 0.2939018  |
| ENSMUSG00000040774 | -0.4825525 | 6.04284785 | 0.11898225 | 0.29791144 |
| ENSMUSG00000004897 | -0.4826874 | 8.65699317 | 0.11529333 | 0.29234658 |
| ENSMUSG00000041852 | -0.483038  | 7.19407246 | 0.11611532 | 0.2933898  |
| ENSMUSG00000029056 | -0.4830958 | 4.9045029  | 0.12087214 | 0.30101317 |
| ENSMUSG00000031197 | -0.4831441 | 7.12064669 | 0.11629626 | 0.29363077 |
| ENSMUSG00000003847 | -0.4833534 | 6.96760367 | 0.1164164  | 0.29380634 |
| ENSMUSG00000059486 | -0.4834655 | 6.16114189 | 0.11778673 | 0.29607161 |
| ENSMUSG00000032621 | -0.4836843 | 6.96434244 | 0.11590556 | 0.29324035 |
| ENSMUSG00000028869 | -0.4837894 | 7.24240553 | 0.11539587 | 0.2925315  |
| ENSMUSG00000021557 | -0.4840502 | 5.98169964 | 0.11779479 | 0.29607161 |
| ENSMUSG00000049606 | -0.4840616 | 6.17213503 | 0.11723675 | 0.29511698 |
| ENSMUSG00000028576 | -0.4843583 | 3.85740754 | 0.13177107 | 0.31602683 |
| ENSMUSG00000021018 | -0.484526  | 5.22427355 | 0.11879941 | 0.29759183 |
| ENSMUSG00000073563 | -0.484559  | 6.56876967 | 0.11607646 | 0.29338421 |
| ENSMUSG00000040550 | -0.4848115 | 7.15386319 | 0.11490394 | 0.29152784 |
| ENSMUSG00000020580 | -0.4849209 | 8.17312361 | 0.11401712 | 0.2899073  |
| ENSMUSG00000032400 | -0.4852117 | 6.85062172 | 0.11491885 | 0.29152784 |
| ENSMUSG00000022200 | -0.4853894 | 7.10592007 | 0.11453626 | 0.29069405 |
| ENSMUSG00000067430 | -0.4855759 | 3.45350742 | 0.13499103 | 0.32071894 |
| ENSMUSG00000042660 | -0.4856821 | 5.261007   | 0.11721868 | 0.29511698 |
| ENSMUSG00000039585 | -0.4859811 | 5.23719335 | 0.11921507 | 0.29828662 |
| ENSMUSG00000019732 | -0.4860569 | 1.03490643 | 0.24511445 | 0.4627651  |
| ENSMUSG00000073775 | -0.4861369 | 5.20172243 | 0.1186323  | 0.29738046 |



|                    |            |            |            |            |
|--------------------|------------|------------|------------|------------|
| ENSMUSG00000028693 | -0.4861457 | 8.97007147 | 0.11271477 | 0.28776423 |
| ENSMUSG00000037104 | -0.4861511 | 2.73606756 | 0.14514868 | 0.33512917 |
| ENSMUSG00000038544 | -0.4862396 | 6.14171237 | 0.11551767 | 0.29274488 |
| ENSMUSG00000073792 | -0.4865193 | 4.96660914 | 0.11967544 | 0.29902222 |
| ENSMUSG00000047735 | -0.4866648 | 8.68872499 | 0.11253061 | 0.28743014 |
| ENSMUSG00000062627 | -0.487088  | 6.5938842  | 0.11403809 | 0.2899073  |
| ENSMUSG00000006732 | -0.4871355 | 5.17911189 | 0.11631961 | 0.29363077 |
| ENSMUSG00000020124 | -0.4871402 | 8.15609009 | 0.11237149 | 0.28722781 |
| ENSMUSG00000002797 | -0.4875964 | 3.9840995  | 0.12491251 | 0.30628842 |
| ENSMUSG00000034321 | -0.4878205 | 5.5553005  | 0.11572684 | 0.29302611 |
| ENSMUSG00000023066 | -0.4879669 | 5.68511867 | 0.11586508 | 0.29323845 |
| ENSMUSG00000025246 | -0.4882473 | 7.65948424 | 0.1118848  | 0.28639109 |
| ENSMUSG00000038495 | -0.4885698 | 6.01745368 | 0.1137464  | 0.2894387  |
| ENSMUSG00000064037 | -0.4888279 | 6.03247673 | 0.11362912 | 0.2892085  |
| ENSMUSG00000051223 | -0.4889661 | 9.76812532 | 0.11046284 | 0.28411542 |
| ENSMUSG00000031068 | -0.4889818 | 7.39360678 | 0.11159225 | 0.28598166 |
| ENSMUSG00000072501 | -0.4890502 | 7.17000278 | 0.11178326 | 0.28626708 |
| ENSMUSG00000074476 | -0.4891753 | 4.40823217 | 0.11975    | 0.29906995 |
| ENSMUSG00000014873 | -0.4896715 | 5.76144533 | 0.11308996 | 0.28817632 |
| ENSMUSG00000063358 | -0.4896784 | 8.76886109 | 0.11023006 | 0.28383976 |
| ENSMUSG00000033352 | -0.4897093 | 7.07513022 | 0.11139468 | 0.28577832 |
| ENSMUSG00000055760 | -0.4898733 | 5.6085498  | 0.11400946 | 0.2899073  |
| ENSMUSG00000040204 | -0.4898836 | 9.04226783 | 0.10996208 | 0.28367657 |
| ENSMUSG00000026707 | -0.490355  | 3.76370065 | 0.12692158 | 0.30980588 |
| ENSMUSG00000003131 | -0.490644  | 7.58898097 | 0.11017151 | 0.28382456 |
| ENSMUSG00000024855 | -0.4907536 | 5.11091821 | 0.11447357 | 0.29062041 |
| ENSMUSG00000029209 | -0.4912169 | 4.06243971 | 0.12160387 | 0.30215887 |
| ENSMUSG00000071359 | -0.491773  | 5.59535988 | 0.11305864 | 0.28816459 |
| ENSMUSG00000029840 | -0.4918542 | 8.94409069 | 0.10860036 | 0.28145789 |
| ENSMUSG00000027203 | -0.4919409 | 8.08115886 | 0.10885449 | 0.28184557 |
| ENSMUSG00000041658 | -0.4919454 | 3.25348002 | 0.12901101 | 0.31217221 |
| ENSMUSG00000026960 | -0.4922135 | 5.51624853 | 0.11297523 | 0.28808817 |
| ENSMUSG00000097039 | -0.4922294 | 3.88721009 | 0.12242579 | 0.30333842 |
| ENSMUSG00000034903 | -0.4923902 | 5.80813153 | 0.11171843 | 0.28616902 |
| ENSMUSG00000026341 | -0.4924864 | 10.2218168 | 0.10786643 | 0.28023874 |
| ENSMUSG00000021932 | -0.4929033 | 6.17632061 | 0.11046884 | 0.28411542 |
| ENSMUSG00000033863 | -0.4930675 | 1.21250468 | 0.19781683 | 0.40625723 |
| ENSMUSG00000023940 | -0.4931214 | 6.57337754 | 0.10968576 | 0.28311422 |
| ENSMUSG00000021815 | -0.4934464 | 1.67939272 | 0.17858089 | 0.38132006 |
| ENSMUSG00000036208 | -0.493506  | 5.6417084  | 0.11130278 | 0.28564713 |
| ENSMUSG00000058793 | -0.4935255 | 7.14569991 | 0.10846651 | 0.28117857 |
| ENSMUSG00000015002 | -0.4943587 | 7.62793813 | 0.10752531 | 0.28001763 |
| ENSMUSG00000020132 | -0.4944599 | 6.39795153 | 0.10896654 | 0.28200027 |

|                    |            |            |            |            |
|--------------------|------------|------------|------------|------------|
| ENSMUSG00000033105 | -0.4947077 | 5.91819706 | 0.10915664 | 0.28228903 |
| ENSMUSG00000019813 | -0.4950453 | 4.77207705 | 0.11426713 | 0.29028426 |
| ENSMUSG00000049090 | -0.4951325 | 4.98040124 | 0.11280921 | 0.28786902 |
| ENSMUSG00000020919 | -0.4953774 | 5.61998116 | 0.10950356 | 0.28284705 |
| ENSMUSG00000000365 | -0.4955437 | 1.55382325 | 0.20141414 | 0.41121735 |
| ENSMUSG00000004018 | -0.4955578 | 5.09561345 | 0.11248611 | 0.28738456 |
| ENSMUSG00000033285 | -0.4960358 | 7.67200957 | 0.1062843  | 0.27752297 |
| ENSMUSG00000031949 | -0.4965728 | 3.75625255 | 0.11876908 | 0.29759183 |
| ENSMUSG00000041238 | -0.4965984 | 6.52584542 | 0.10742655 | 0.2798972  |
| ENSMUSG00000036698 | -0.4970529 | 7.26481101 | 0.10588311 | 0.2766764  |
| ENSMUSG00000021374 | -0.4972213 | 8.90834441 | 0.10483324 | 0.27506609 |
| ENSMUSG00000034248 | -0.4972537 | 6.00784804 | 0.10761311 | 0.28002618 |
| ENSMUSG00000037149 | -0.4976011 | 8.76253485 | 0.1045894  | 0.27462676 |
| ENSMUSG00000028033 | -0.497764  | 5.02659518 | 0.11066789 | 0.28454855 |
| ENSMUSG00000025266 | -0.4977769 | 6.98280878 | 0.10573296 | 0.276418   |
| ENSMUSG00000047260 | -0.4978731 | 5.53796763 | 0.10829435 | 0.28093487 |
| ENSMUSG00000030671 | -0.4985651 | 6.79770183 | 0.10558383 | 0.27616202 |
| ENSMUSG00000039967 | -0.498609  | 6.91900572 | 0.10543073 | 0.27602938 |
| ENSMUSG00000039748 | -0.4986823 | 6.25949678 | 0.10595226 | 0.27679    |
| ENSMUSG00000095990 | -0.4987704 | 2.07155487 | 0.16534931 | 0.36449857 |
| ENSMUSG00000004980 | -0.4999347 | 11.2375583 | 0.10256376 | 0.27109584 |
| ENSMUSG00000032030 | -0.5000128 | 7.06236128 | 0.10421947 | 0.27393364 |
| ENSMUSG00000023915 | -0.5000855 | 3.30648123 | 0.12257366 | 0.30352109 |
| ENSMUSG00000020706 | -0.5005623 | 8.50962991 | 0.10256593 | 0.27109584 |
| ENSMUSG00000029141 | -0.5007884 | 6.01646353 | 0.10516526 | 0.27546811 |
| ENSMUSG00000038174 | -0.5008377 | 5.30150989 | 0.10787009 | 0.28023874 |
| ENSMUSG00000025758 | -0.5008542 | 7.13163726 | 0.1034772  | 0.27263574 |
| ENSMUSG00000047757 | -0.5009826 | 5.30151678 | 0.10763936 | 0.28002618 |
| ENSMUSG00000021431 | -0.5010946 | 5.18156741 | 0.10782624 | 0.28023874 |
| ENSMUSG00000053536 | -0.5012503 | 6.46617297 | 0.1040333  | 0.27363295 |
| ENSMUSG00000038766 | -0.5014491 | 8.3690942  | 0.10209313 | 0.26997848 |
| ENSMUSG00000094870 | -0.5017787 | 6.80282345 | 0.10335008 | 0.27243395 |
| ENSMUSG00000026356 | -0.5019233 | 8.02204358 | 0.10197306 | 0.26972713 |
| ENSMUSG00000022858 | -0.5023104 | 8.46470954 | 0.10150085 | 0.26898551 |
| ENSMUSG00000037296 | -0.5023387 | 4.5221849  | 0.10922634 | 0.28240154 |
| ENSMUSG00000068134 | -0.5024204 | 5.28138878 | 0.10688992 | 0.27876685 |
| ENSMUSG00000041058 | -0.502555  | 5.57467169 | 0.10561501 | 0.27617659 |
| ENSMUSG00000019797 | -0.5027022 | 3.71278151 | 0.11566729 | 0.29301279 |
| ENSMUSG00000040648 | -0.5028749 | 7.35122959 | 0.10194256 | 0.26972713 |
| ENSMUSG00000075511 | -0.5032888 | 2.72674166 | 0.13875962 | 0.32567207 |
| ENSMUSG00000018848 | -0.5034891 | 8.31401696 | 0.10073814 | 0.26747452 |
| ENSMUSG00000042364 | -0.5034893 | 4.23924116 | 0.11107197 | 0.28519051 |
| ENSMUSG00000016984 | -0.5036197 | 5.88752227 | 0.10390764 | 0.27343582 |

|                    |            |            |            |            |
|--------------------|------------|------------|------------|------------|
| ENSMUSG00000062373 | -0.5038325 | 4.3697804  | 0.11042396 | 0.28411542 |
| ENSMUSG00000073538 | -0.5040349 | 2.56190789 | 0.13084689 | 0.31492337 |
| ENSMUSG00000068882 | -0.5041948 | 9.14867709 | 0.1000048  | 0.26621864 |
| ENSMUSG00000027395 | -0.5043517 | 6.94128891 | 0.10103679 | 0.26810549 |
| ENSMUSG00000004319 | -0.5044959 | 7.88549647 | 0.1003667  | 0.26691848 |
| ENSMUSG00000078502 | -0.504548  | 3.83056409 | 0.11756351 | 0.29566346 |
| ENSMUSG00000036432 | -0.5045646 | 6.59341926 | 0.1014468  | 0.26896731 |
| ENSMUSG00000028621 | -0.5045882 | 3.29264549 | 0.1191082  | 0.29815756 |
| ENSMUSG00000026097 | -0.5046163 | 4.78904142 | 0.10834245 | 0.28099206 |
| ENSMUSG00000028572 | -0.5046233 | 6.80650064 | 0.10133556 | 0.26876603 |
| ENSMUSG00000018481 | -0.5051241 | 7.55194442 | 0.10015159 | 0.26641213 |
| ENSMUSG00000041975 | -0.5052052 | 3.40541498 | 0.11988881 | 0.29934728 |
| ENSMUSG00000003955 | -0.5052692 | 5.32141645 | 0.10382783 | 0.27329249 |
| ENSMUSG00000054405 | -0.5054252 | 7.54852703 | 0.09986012 | 0.26601464 |
| ENSMUSG00000000561 | -0.5055277 | 7.60712282 | 0.09974195 | 0.26585318 |
| ENSMUSG00000029777 | -0.5056877 | 8.62035979 | 0.09910703 | 0.26507196 |
| ENSMUSG00000023068 | -0.5059873 | 7.98064662 | 0.09928993 | 0.26511467 |
| ENSMUSG00000068154 | -0.506111  | 3.86486168 | 0.11569441 | 0.29301279 |
| ENSMUSG00000026999 | -0.5061959 | 5.22323217 | 0.10422382 | 0.27393364 |
| ENSMUSG00000037400 | -0.5064537 | 8.03418488 | 0.09898857 | 0.26495229 |
| ENSMUSG00000030180 | -0.5067941 | 7.70734343 | 0.09897319 | 0.26495229 |
| ENSMUSG00000025616 | -0.5068484 | 7.29347526 | 0.09920327 | 0.26511467 |
| ENSMUSG00000015023 | -0.506992  | 6.63474805 | 0.0997689  | 0.26585318 |
| ENSMUSG00000020532 | -0.5070729 | 7.60396877 | 0.09876537 | 0.26468333 |
| ENSMUSG00000036499 | -0.5071401 | 6.52302328 | 0.10003298 | 0.26622795 |
| ENSMUSG00000078784 | -0.5071988 | 5.80737994 | 0.10151809 | 0.26898551 |
| ENSMUSG00000057337 | -0.5073388 | 7.09726264 | 0.09907628 | 0.26505548 |
| ENSMUSG00000049225 | -0.5074651 | 3.32451861 | 0.12244363 | 0.30333842 |
| ENSMUSG00000061374 | -0.50757   | 5.23257446 | 0.10260167 | 0.27112384 |
| ENSMUSG00000029208 | -0.5078818 | 6.11420572 | 0.10046947 | 0.26712593 |
| ENSMUSG00000062929 | -0.5080842 | 4.47973469 | 0.10765843 | 0.28002618 |
| ENSMUSG00000037640 | -0.5080878 | 5.13274231 | 0.1040323  | 0.27363295 |
| ENSMUSG00000029089 | -0.5081563 | 3.78593767 | 0.11339899 | 0.28882729 |
| ENSMUSG00000026568 | -0.5083926 | 4.50329104 | 0.10578193 | 0.27647899 |
| ENSMUSG00000058446 | -0.5088428 | 6.40191038 | 0.0992791  | 0.26511467 |
| ENSMUSG00000031107 | -0.5090311 | 4.80540975 | 0.10380225 | 0.27329249 |
| ENSMUSG00000029920 | -0.5091651 | 6.82080891 | 0.09831422 | 0.26399915 |
| ENSMUSG00000046707 | -0.5092961 | 6.38534371 | 0.0986201  | 0.26462283 |
| ENSMUSG00000044807 | -0.5095342 | 2.78672135 | 0.12968761 | 0.31315521 |
| ENSMUSG00000025785 | -0.5101224 | 5.61045062 | 0.09906753 | 0.26505548 |
| ENSMUSG00000079108 | -0.510205  | 5.71892108 | 0.09987883 | 0.26601464 |
| ENSMUSG00000052407 | -0.5103019 | 2.62979491 | 0.13522148 | 0.32097011 |
| ENSMUSG00000028035 | -0.5103756 | 4.36213575 | 0.10742716 | 0.2798972  |

|                    |            |            |            |            |
|--------------------|------------|------------|------------|------------|
| ENSMUSG00000026313 | -0.5104437 | 3.87821205 | 0.10777929 | 0.28023874 |
| ENSMUSG00000046785 | -0.5104713 | 6.36844558 | 0.09811064 | 0.26369827 |
| ENSMUSG00000033707 | -0.5105742 | 1.31525345 | 0.16722765 | 0.3670635  |
| ENSMUSG00000037826 | -0.5105908 | 5.72149204 | 0.09992619 | 0.26607508 |
| ENSMUSG00000053113 | -0.510624  | 3.14094946 | 0.11399086 | 0.2899073  |
| ENSMUSG00000050017 | -0.5106403 | 7.21783155 | 0.09671862 | 0.26084958 |
| ENSMUSG00000042772 | -0.5106413 | 8.13983385 | 0.09609325 | 0.26021681 |
| ENSMUSG00000064262 | -0.5108739 | 7.79675638 | 0.09614776 | 0.26021681 |
| ENSMUSG00000011960 | -0.5108825 | 7.63337724 | 0.09632532 | 0.26025491 |
| ENSMUSG00000025531 | -0.5109901 | 6.19056635 | 0.09840688 | 0.26418216 |
| ENSMUSG00000099881 | -0.5110065 | 2.87097337 | 0.12876684 | 0.31186423 |
| ENSMUSG00000040429 | -0.5111125 | 2.58662653 | 0.12902938 | 0.31217221 |
| ENSMUSG00000038024 | -0.5114208 | 5.87854933 | 0.09871276 | 0.26468333 |
| ENSMUSG00000026737 | -0.5118184 | 6.17760102 | 0.09758405 | 0.26256146 |
| ENSMUSG00000052676 | -0.5125242 | 3.66355528 | 0.11408754 | 0.28996465 |
| ENSMUSG00000032244 | -0.5128409 | 7.35451014 | 0.09526768 | 0.2589013  |
| ENSMUSG00000037808 | -0.5133182 | 6.31865009 | 0.0963735  | 0.26027702 |
| ENSMUSG00000025869 | -0.5133771 | 6.48982784 | 0.09548953 | 0.25918615 |
| ENSMUSG00000070732 | -0.5135476 | 2.53383318 | 0.14401508 | 0.33348906 |
| ENSMUSG00000026896 | -0.5136837 | 7.82795638 | 0.09438852 | 0.25762738 |
| ENSMUSG00000029247 | -0.5137498 | 9.12274483 | 0.09375124 | 0.25647219 |
| ENSMUSG00000022752 | -0.5137961 | 8.56730114 | 0.09393889 | 0.25679012 |
| ENSMUSG00000024976 | -0.5139791 | 6.47680263 | 0.09566924 | 0.25941592 |
| ENSMUSG00000028187 | -0.5140115 | 6.12280524 | 0.09645507 | 0.26035125 |
| ENSMUSG00000039634 | -0.5140846 | 3.22404284 | 0.11618866 | 0.29343758 |
| ENSMUSG00000026643 | -0.5141949 | 6.21673138 | 0.09596557 | 0.26015404 |
| ENSMUSG00000015189 | -0.5144096 | 6.12435592 | 0.09628427 | 0.26025491 |
| ENSMUSG00000027770 | -0.5144775 | 7.62459872 | 0.09407404 | 0.25696416 |
| ENSMUSG00000030725 | -0.5145344 | 2.49477237 | 0.12918841 | 0.31236947 |
| ENSMUSG00000026615 | -0.5146019 | 9.63006258 | 0.09309273 | 0.25538337 |
| ENSMUSG00000020290 | -0.5146227 | 9.79029398 | 0.09308101 | 0.25538337 |
| ENSMUSG00000016018 | -0.5148879 | 8.20057275 | 0.09339659 | 0.25582648 |
| ENSMUSG00000047466 | -0.5155039 | 5.33214444 | 0.0972745  | 0.26199007 |
| ENSMUSG00000058503 | -0.5155247 | 5.51922754 | 0.09686137 | 0.26113825 |
| ENSMUSG00000027347 | -0.5159957 | 6.33750043 | 0.094881   | 0.25825259 |
| ENSMUSG00000015749 | -0.5161082 | 8.67730399 | 0.09236297 | 0.25370408 |
| ENSMUSG00000028423 | -0.5161087 | 7.77132746 | 0.09277291 | 0.25470036 |
| ENSMUSG00000024238 | -0.5164749 | 6.1053603  | 0.09466388 | 0.25792224 |
| ENSMUSG00000022019 | -0.5171118 | 4.71296056 | 0.09927973 | 0.26511467 |
| ENSMUSG00000063894 | -0.5171342 | 5.66420946 | 0.09546873 | 0.25918615 |
| ENSMUSG00000028312 | -0.5173098 | 9.3088186  | 0.09148068 | 0.25218189 |
| ENSMUSG00000021938 | -0.5173456 | 6.47127461 | 0.09335312 | 0.25582498 |
| ENSMUSG00000063049 | -0.5174034 | 4.11855691 | 0.10462957 | 0.27466536 |

|                    |            |            |            |            |
|--------------------|------------|------------|------------|------------|
| ENSMUSG00000041846 | -0.5174887 | 7.97668893 | 0.09189088 | 0.2531776  |
| ENSMUSG00000052033 | -0.5175845 | 5.78248473 | 0.09472112 | 0.25794762 |
| ENSMUSG00000046516 | -0.5176322 | 4.56169812 | 0.09828334 | 0.26398194 |
| ENSMUSG00000032002 | -0.5182586 | 7.06951506 | 0.09221033 | 0.25341392 |
| ENSMUSG00000022601 | -0.5185443 | 6.88240749 | 0.09216244 | 0.25334863 |
| ENSMUSG00000041079 | -0.5191077 | 4.39112902 | 0.09946944 | 0.26547767 |
| ENSMUSG00000019782 | -0.5193796 | 6.32650245 | 0.09236076 | 0.25370408 |
| ENSMUSG00000032393 | -0.519652  | 7.89004715 | 0.09057945 | 0.25052802 |
| ENSMUSG00000035898 | -0.5198179 | 6.94294291 | 0.09140201 | 0.25215638 |
| ENSMUSG00000034303 | -0.5202104 | 4.31398885 | 0.10050993 | 0.26716762 |
| ENSMUSG00000060149 | -0.5203379 | 4.59106263 | 0.09872564 | 0.26468333 |
| ENSMUSG00000079658 | -0.5204687 | 6.96412773 | 0.09086803 | 0.25119735 |
| ENSMUSG00000005968 | -0.5206584 | 1.93768422 | 0.13593067 | 0.32178535 |
| ENSMUSG00000038025 | -0.5207165 | 5.13947289 | 0.0939729  | 0.25681798 |
| ENSMUSG00000025059 | -0.5207192 | 5.56828445 | 0.09342401 | 0.2558366  |
| ENSMUSG00000036109 | -0.521069  | 5.56848259 | 0.09321837 | 0.25559798 |
| ENSMUSG00000042978 | -0.5211547 | 4.60107718 | 0.09509517 | 0.25863967 |
| ENSMUSG00000085438 | -0.5214075 | 8.17676423 | 0.08935293 | 0.24783488 |
| ENSMUSG00000022701 | -0.5216257 | 3.5722354  | 0.10727404 | 0.27963337 |
| ENSMUSG00000031562 | -0.5218238 | 4.63298662 | 0.09620784 | 0.26021681 |
| ENSMUSG00000021243 | -0.5221722 | 6.13507908 | 0.09098581 | 0.25131211 |
| ENSMUSG00000034544 | -0.5228352 | 5.00548809 | 0.09387328 | 0.25667582 |
| ENSMUSG00000069769 | -0.5228928 | 6.56326443 | 0.08970298 | 0.24848624 |
| ENSMUSG00000031245 | -0.522896  | 6.51814489 | 0.08993071 | 0.2490531  |
| ENSMUSG00000026655 | -0.5228979 | 8.25931062 | 0.08840633 | 0.24596847 |
| ENSMUSG00000040250 | -0.5229507 | 6.72696997 | 0.08958641 | 0.24829089 |
| ENSMUSG00000051316 | -0.5229754 | 5.0310748  | 0.0938573  | 0.25667582 |
| ENSMUSG00000078616 | -0.5229771 | 3.62852126 | 0.10716688 | 0.27942156 |
| ENSMUSG00000049658 | -0.5233351 | 7.69000237 | 0.08849232 | 0.24614423 |
| ENSMUSG00000019808 | -0.5237473 | 2.95720862 | 0.11195217 | 0.28649555 |
| ENSMUSG00000028820 | -0.5240129 | 9.89612505 | 0.08725388 | 0.24399441 |
| ENSMUSG00000029823 | -0.5245531 | 8.56023778 | 0.08727492 | 0.24399441 |
| ENSMUSG00000026596 | -0.5250971 | 6.26970332 | 0.08890318 | 0.24688361 |
| ENSMUSG00000039480 | -0.5251966 | 5.36552613 | 0.09137694 | 0.25215638 |
| ENSMUSG00000020166 | -0.5255026 | 7.67036848 | 0.08717698 | 0.24393267 |
| ENSMUSG00000007050 | -0.5255176 | 5.62048854 | 0.08947833 | 0.24805509 |
| ENSMUSG00000031155 | -0.5256445 | 7.6922466  | 0.08691719 | 0.24347856 |
| ENSMUSG00000078713 | -0.5257226 | 6.36346018 | 0.08824031 | 0.24563334 |
| ENSMUSG00000098905 | -0.5257235 | 4.4817953  | 0.0955124  | 0.25918615 |
| ENSMUSG00000029686 | -0.5257372 | 7.97934599 | 0.08684851 | 0.24347856 |
| ENSMUSG00000028394 | -0.5263804 | 6.32189583 | 0.08805923 | 0.24531924 |
| ENSMUSG00000040749 | -0.5264928 | 4.15130063 | 0.09660385 | 0.26063945 |
| ENSMUSG00000021273 | -0.5265891 | 6.25701108 | 0.08797161 | 0.24520181 |

|                    |            |            |            |            |
|--------------------|------------|------------|------------|------------|
| ENSMUSG00000022195 | -0.5266101 | 5.84046808 | 0.08886385 | 0.24685928 |
| ENSMUSG00000035356 | -0.5266294 | 6.33414542 | 0.0877508  | 0.24477617 |
| ENSMUSG00000079144 | -0.5267249 | 4.5665151  | 0.09470729 | 0.25794762 |
| ENSMUSG00000030304 | -0.52678   | 7.4669031  | 0.0865498  | 0.24325073 |
| ENSMUSG00000021131 | -0.5267844 | 7.19154268 | 0.08671907 | 0.24334594 |
| ENSMUSG00000028292 | -0.5269288 | 6.29394078 | 0.08785371 | 0.24499986 |
| ENSMUSG00000056537 | -0.5273937 | 8.41399073 | 0.08567262 | 0.24173038 |
| ENSMUSG00000011179 | -0.5274005 | 8.80929707 | 0.0854285  | 0.24135734 |
| ENSMUSG00000025609 | -0.5275782 | 7.09824302 | 0.08647073 | 0.24315516 |
| ENSMUSG00000033257 | -0.5277662 | 6.51664177 | 0.08688911 | 0.24347856 |
| ENSMUSG00000085028 | -0.5278607 | 3.03841081 | 0.10058398 | 0.26729857 |
| ENSMUSG00000060427 | -0.5278626 | 4.49998173 | 0.09296854 | 0.25517249 |
| ENSMUSG00000004642 | -0.5279193 | 8.0541879  | 0.08549152 | 0.24140889 |
| ENSMUSG00000027001 | -0.5281867 | 2.92690419 | 0.11085645 | 0.28485424 |
| ENSMUSG00000042507 | -0.5282889 | 5.98000175 | 0.08738533 | 0.24405088 |
| ENSMUSG00000020463 | -0.5294743 | 8.45068522 | 0.08444027 | 0.23969569 |
| ENSMUSG00000031982 | -0.5297563 | 2.68359587 | 0.11098189 | 0.28509497 |
| ENSMUSG00000042594 | -0.5298059 | 6.26686552 | 0.08598897 | 0.24232866 |
| ENSMUSG00000038608 | -0.5298732 | 10.5321567 | 0.08373344 | 0.23831654 |
| ENSMUSG00000046351 | -0.5299604 | 6.1911007  | 0.08643297 | 0.24315516 |
| ENSMUSG00000031984 | -0.5299907 | 5.9051051  | 0.08657637 | 0.24325514 |
| ENSMUSG00000021023 | -0.5301825 | 4.90180484 | 0.09000946 | 0.24920718 |
| ENSMUSG00000031568 | -0.5302845 | 5.87837242 | 0.08649325 | 0.24315516 |
| ENSMUSG00000034157 | -0.5304571 | 5.7067866  | 0.08646831 | 0.24315516 |
| ENSMUSG00000069094 | -0.5309964 | 5.88621163 | 0.08625949 | 0.24294133 |
| ENSMUSG00000098374 | -0.5311924 | 2.10257226 | 0.12554989 | 0.30707467 |
| ENSMUSG00000034518 | -0.5316383 | 6.00234861 | 0.08547101 | 0.24140889 |
| ENSMUSG00000027122 | -0.5317112 | 5.57673248 | 0.08664694 | 0.24333349 |
| ENSMUSG00000039068 | -0.5317982 | 7.60718134 | 0.08348083 | 0.23779585 |
| ENSMUSG00000068184 | -0.5320838 | 3.99765986 | 0.093125   | 0.25540693 |
| ENSMUSG00000090035 | -0.5325889 | 4.77189633 | 0.08967963 | 0.24848539 |
| ENSMUSG00000020069 | -0.5327504 | 5.78580206 | 0.08529829 | 0.2411305  |
| ENSMUSG00000026281 | -0.5328529 | 6.30324795 | 0.08418289 | 0.23909094 |
| ENSMUSG00000028053 | -0.5330514 | 7.09725772 | 0.08325103 | 0.23731935 |
| ENSMUSG00000027583 | -0.5331663 | 2.27980573 | 0.12435776 | 0.30567468 |
| ENSMUSG00000037857 | -0.5335111 | 7.65910936 | 0.08250672 | 0.23575848 |
| ENSMUSG00000066735 | -0.5336319 | 6.05331777 | 0.08456204 | 0.23985192 |
| ENSMUSG00000066568 | -0.5340722 | 7.98014129 | 0.08193707 | 0.23450355 |
| ENSMUSG00000049300 | -0.5341325 | 4.74132701 | 0.08883354 | 0.24683866 |
| ENSMUSG00000063884 | -0.5344265 | 7.61242179 | 0.08202528 | 0.2346937  |
| ENSMUSG00000063694 | -0.5345318 | 6.95864394 | 0.08237876 | 0.23551764 |
| ENSMUSG00000022765 | -0.5347182 | 6.75802927 | 0.08267861 | 0.23599949 |
| ENSMUSG00000056268 | -0.5350477 | 6.90202084 | 0.08232385 | 0.23542307 |

|                    |            |            |            |            |
|--------------------|------------|------------|------------|------------|
| ENSMUSG00000051705 | -0.535628  | 3.3607479  | 0.09965438 | 0.26581075 |
| ENSMUSG00000035234 | -0.5356498 | 4.89184018 | 0.08730823 | 0.24399441 |
| ENSMUSG00000033454 | -0.5357285 | 6.43991769 | 0.08254197 | 0.23579673 |
| ENSMUSG00000027823 | -0.5357414 | 8.06513013 | 0.08100503 | 0.23251483 |
| ENSMUSG00000024493 | -0.5359944 | 8.33114245 | 0.08066911 | 0.23198285 |
| ENSMUSG00000057236 | -0.5365891 | 9.36699823 | 0.08006372 | 0.23116656 |
| ENSMUSG00000028165 | -0.5366018 | 6.0214343  | 0.08280064 | 0.23628528 |
| ENSMUSG00000027384 | -0.5367944 | 3.96239455 | 0.09199303 | 0.25326485 |
| ENSMUSG00000047044 | -0.5368692 | 5.67015605 | 0.08346219 | 0.23779585 |
| ENSMUSG00000046139 | -0.5371082 | 6.88447513 | 0.08102906 | 0.23252192 |
| ENSMUSG00000054099 | -0.5374361 | 4.43421731 | 0.08867788 | 0.24659677 |
| ENSMUSG00000030967 | -0.5380017 | 5.72615793 | 0.0826648  | 0.23599949 |
| ENSMUSG00000023106 | -0.5381882 | 7.27102237 | 0.08009391 | 0.23119184 |
| ENSMUSG00000033054 | -0.5384075 | 7.08514548 | 0.08024912 | 0.23129658 |
| ENSMUSG00000005893 | -0.5384196 | 7.11053052 | 0.08014641 | 0.2312196  |
| ENSMUSG00000034442 | -0.5384402 | 5.33456248 | 0.08348434 | 0.23779585 |
| ENSMUSG00000026238 | -0.538454  | 9.35804369 | 0.07896627 | 0.22904042 |
| ENSMUSG00000021546 | -0.5385907 | 10.4201243 | 0.07879767 | 0.22871439 |
| ENSMUSG00000044791 | -0.5387908 | 8.16035051 | 0.0792802  | 0.22958047 |
| ENSMUSG00000039242 | -0.5390005 | 6.29720495 | 0.08074478 | 0.23213856 |
| ENSMUSG00000028514 | -0.5391365 | 7.96608371 | 0.0791424  | 0.22930302 |
| ENSMUSG00000090112 | -0.5392866 | 6.44587    | 0.0805052  | 0.23163502 |
| ENSMUSG00000068823 | -0.5395295 | 9.93065295 | 0.07834341 | 0.2277852  |
| ENSMUSG00000028840 | -0.539683  | 2.94912778 | 0.09466397 | 0.25792224 |
| ENSMUSG00000022336 | -0.5396888 | 9.30936985 | 0.07837342 | 0.22781103 |
| ENSMUSG00000020315 | -0.5399221 | 7.3927625  | 0.07900376 | 0.22908753 |
| ENSMUSG00000008496 | -0.5401131 | 7.3451475  | 0.07881145 | 0.22871439 |
| ENSMUSG00000017550 | -0.5403541 | 7.64260799 | 0.07869221 | 0.22850019 |
| ENSMUSG00000045996 | -0.5404988 | 4.72522535 | 0.08492601 | 0.24050474 |
| ENSMUSG00000004043 | -0.5407778 | 5.90523004 | 0.08012768 | 0.2312196  |
| ENSMUSG00000050944 | -0.5409888 | 1.16853283 | 0.15468238 | 0.34890081 |
| ENSMUSG00000074238 | -0.5412535 | 5.81745581 | 0.08025154 | 0.23129658 |
| ENSMUSG00000020812 | -0.5415855 | 4.07719454 | 0.08595625 | 0.24232866 |
| ENSMUSG00000041747 | -0.5417929 | 7.22400438 | 0.07812845 | 0.22728276 |
| ENSMUSG00000030512 | -0.5420703 | 7.30028311 | 0.07792055 | 0.22687966 |
| ENSMUSG00000100214 | -0.5423531 | 1.54990778 | 0.14626761 | 0.33668677 |
| ENSMUSG00000045071 | -0.5424509 | 3.69265908 | 0.09139148 | 0.25215638 |
| ENSMUSG00000019948 | -0.5424907 | 4.61818277 | 0.08453614 | 0.23984154 |
| ENSMUSG00000049184 | -0.5434717 | 1.79128734 | 0.12175447 | 0.30232562 |
| ENSMUSG00000018733 | -0.5437406 | 4.17167292 | 0.0869218  | 0.24347856 |
| ENSMUSG00000090290 | -0.5437717 | 4.61858269 | 0.0826123  | 0.23593513 |
| ENSMUSG00000079043 | -0.5437819 | 4.3295447  | 0.08692132 | 0.24347856 |
| ENSMUSG00000026492 | -0.5439738 | 4.43766002 | 0.08478496 | 0.24019267 |

|                    |            |            |            |            |
|--------------------|------------|------------|------------|------------|
| ENSMUSG00000020413 | -0.5439973 | 6.50746146 | 0.07777174 | 0.22661185 |
| ENSMUSG00000042699 | -0.544128  | 10.2543983 | 0.07580879 | 0.22281873 |
| ENSMUSG00000062175 | -0.5441611 | 3.19657192 | 0.09148141 | 0.25218189 |
| ENSMUSG00000052760 | -0.5444505 | 7.09564711 | 0.07676404 | 0.22434237 |
| ENSMUSG00000026159 | -0.5444665 | 7.53948186 | 0.07647769 | 0.22393034 |
| ENSMUSG00000030619 | -0.5448746 | 7.33282702 | 0.07647528 | 0.22393034 |
| ENSMUSG00000025024 | -0.5450752 | 6.78595223 | 0.07689623 | 0.22448537 |
| ENSMUSG00000022253 | -0.5455989 | 4.81612063 | 0.08115632 | 0.23276324 |
| ENSMUSG00000030138 | -0.5458715 | 8.16992818 | 0.07533704 | 0.22172332 |
| ENSMUSG00000029290 | -0.5459744 | 5.28132897 | 0.07948657 | 0.2299928  |
| ENSMUSG00000027810 | -0.5461492 | 7.92428638 | 0.07537442 | 0.22172332 |
| ENSMUSG00000029787 | -0.5461853 | 6.62367018 | 0.07657813 | 0.22404193 |
| ENSMUSG00000038080 | -0.5462633 | 5.10062987 | 0.07988195 | 0.23070351 |
| ENSMUSG00000006678 | -0.5464309 | 8.00236447 | 0.07519841 | 0.22154206 |
| ENSMUSG00000044827 | -0.5470257 | 6.64587311 | 0.07610057 | 0.22306197 |
| ENSMUSG00000054702 | -0.5471871 | 6.60277597 | 0.07601584 | 0.22306197 |
| ENSMUSG00000021843 | -0.5472291 | 7.4862687  | 0.07505403 | 0.22126371 |
| ENSMUSG00000032215 | -0.5472517 | 6.59679901 | 0.07585706 | 0.22289987 |
| ENSMUSG00000073771 | -0.5474797 | 4.72898003 | 0.08087725 | 0.2322717  |
| ENSMUSG00000022748 | -0.5474917 | 4.59895317 | 0.08105505 | 0.23253461 |
| ENSMUSG00000031256 | -0.5475022 | 7.39858651 | 0.07488348 | 0.22088169 |
| ENSMUSG00000049950 | -0.5480579 | 4.11048943 | 0.08284196 | 0.23634066 |
| ENSMUSG00000031861 | -0.5483395 | 3.63430771 | 0.08700272 | 0.24363473 |
| ENSMUSG00000021461 | -0.5490311 | 4.6293653  | 0.08017097 | 0.23122859 |
| ENSMUSG00000000088 | -0.5491961 | 7.68908365 | 0.0738412  | 0.21876471 |
| ENSMUSG00000091474 | -0.5492353 | 5.36212263 | 0.07781033 | 0.22666304 |
| ENSMUSG00000022828 | -0.5493082 | 6.25475909 | 0.07528202 | 0.2216329  |
| ENSMUSG00000033964 | -0.5493502 | 5.5515252  | 0.07703302 | 0.22482385 |
| ENSMUSG00000050192 | -0.5495018 | 5.31099259 | 0.07767793 | 0.22639967 |
| ENSMUSG00000057406 | -0.5495822 | 8.47918779 | 0.07327545 | 0.21744701 |
| ENSMUSG00000048827 | -0.5500603 | 3.44376242 | 0.08530349 | 0.2411305  |
| ENSMUSG00000033706 | -0.5501437 | 6.08962751 | 0.07458122 | 0.22035175 |
| ENSMUSG00000020268 | -0.5502042 | 2.63314542 | 0.10276307 | 0.27141733 |
| ENSMUSG00000031697 | -0.5502449 | 7.0913697  | 0.07374988 | 0.21861426 |
| ENSMUSG00000037845 | -0.5507585 | 3.59072791 | 0.08741816 | 0.24405088 |
| ENSMUSG00000027957 | -0.5508091 | 6.78881735 | 0.07380247 | 0.21871003 |
| ENSMUSG00000022111 | -0.5508471 | 6.91443061 | 0.07370923 | 0.21855384 |
| ENSMUSG00000049232 | -0.5508907 | 5.64135474 | 0.07604581 | 0.22306197 |
| ENSMUSG00000084350 | -0.5510003 | 1.87847559 | 0.1225579  | 0.30352109 |
| ENSMUSG00000027242 | -0.5510058 | 6.85278714 | 0.07363256 | 0.21838656 |
| ENSMUSG00000032469 | -0.5511032 | 5.9526761  | 0.07488058 | 0.22088169 |
| ENSMUSG00000025234 | -0.5515214 | 8.19105512 | 0.07241788 | 0.21525755 |
| ENSMUSG00000057147 | -0.5518393 | 5.86151539 | 0.07474441 | 0.22071297 |



|                    |            |            |            |            |
|--------------------|------------|------------|------------|------------|
| ENSMUSG00000033752 | -0.5518751 | 2.68446232 | 0.09407358 | 0.25696416 |
| ENSMUSG00000034266 | -0.5519914 | 5.50485483 | 0.07443562 | 0.22004213 |
| ENSMUSG00000059208 | -0.5521379 | 9.24872014 | 0.07175391 | 0.21409399 |
| ENSMUSG00000046441 | -0.5529607 | 4.54333967 | 0.07916313 | 0.22930302 |
| ENSMUSG00000067942 | -0.5530199 | 5.65486219 | 0.0749644  | 0.22105991 |
| ENSMUSG00000057421 | -0.553166  | 7.16216202 | 0.07208729 | 0.21450973 |
| ENSMUSG00000031922 | -0.5532635 | 6.58960943 | 0.07281011 | 0.21618508 |
| ENSMUSG00000042228 | -0.5536602 | 7.0716722  | 0.07207468 | 0.21450973 |
| ENSMUSG00000039682 | -0.5539742 | 6.73751922 | 0.07192647 | 0.21435977 |
| ENSMUSG00000046668 | -0.5544241 | 1.57647575 | 0.12386804 | 0.30532411 |
| ENSMUSG00000042606 | -0.5546815 | 6.46107526 | 0.07178775 | 0.21409399 |
| ENSMUSG00000032803 | -0.5547054 | 9.69080423 | 0.07037564 | 0.21151919 |
| ENSMUSG00000029227 | -0.5549799 | 7.13916382 | 0.07129715 | 0.21321922 |
| ENSMUSG00000022033 | -0.5551816 | 5.97592309 | 0.0728738  | 0.21631463 |
| ENSMUSG00000035696 | -0.5551977 | 6.25071946 | 0.07233245 | 0.2151222  |
| ENSMUSG00000042138 | -0.5553836 | 4.16273607 | 0.08048263 | 0.23163188 |
| ENSMUSG00000028790 | -0.5554756 | 8.80002292 | 0.07017574 | 0.2112717  |
| ENSMUSG00000096740 | -0.5558667 | 4.44522638 | 0.07849037 | 0.2280895  |
| ENSMUSG00000055334 | -0.5559848 | 4.2361473  | 0.07913946 | 0.22930302 |
| ENSMUSG00000019841 | -0.556045  | 7.03750043 | 0.07102847 | 0.21276974 |
| ENSMUSG00000026187 | -0.5560488 | 6.40268741 | 0.07159387 | 0.21375092 |
| ENSMUSG00000005506 | -0.5564175 | 8.82779017 | 0.06969273 | 0.21033782 |
| ENSMUSG00000020671 | -0.5564273 | 7.6583563  | 0.07020877 | 0.21127481 |
| ENSMUSG00000044452 | -0.5565222 | 5.93464962 | 0.07193694 | 0.21435977 |
| ENSMUSG00000033356 | -0.5567604 | 4.70531345 | 0.075901   | 0.22295501 |
| ENSMUSG00000043162 | -0.5568306 | 2.98924614 | 0.09337232 | 0.25582498 |
| ENSMUSG00000030795 | -0.5571006 | 9.01081264 | 0.06929352 | 0.20978702 |
| ENSMUSG00000064340 | -0.5576204 | 2.50342173 | 0.10447778 | 0.27453421 |
| ENSMUSG00000035597 | -0.5578418 | 6.66848714 | 0.07042686 | 0.21152659 |
| ENSMUSG00000028431 | -0.5578542 | 7.1830041  | 0.06974117 | 0.21033782 |
| ENSMUSG00000085334 | -0.5580722 | 3.53933503 | 0.08518894 | 0.24105943 |
| ENSMUSG00000038121 | -0.558102  | 5.98478814 | 0.07139156 | 0.21344237 |
| ENSMUSG00000031433 | -0.5581789 | 4.89821993 | 0.07452193 | 0.2202369  |
| ENSMUSG00000004936 | -0.5583027 | 6.84364249 | 0.06968485 | 0.21033782 |
| ENSMUSG00000039219 | -0.5583336 | 7.0927707  | 0.06977075 | 0.21033782 |
| ENSMUSG00000021116 | -0.5584365 | 8.70661028 | 0.06872967 | 0.20878331 |
| ENSMUSG00000020680 | -0.5586234 | 7.81269589 | 0.06898994 | 0.2091807  |
| ENSMUSG00000032000 | -0.5586353 | 8.09304584 | 0.06884355 | 0.2090115  |
| ENSMUSG00000035851 | -0.5586449 | 7.87015178 | 0.06899627 | 0.2091807  |
| ENSMUSG00000050229 | -0.5588708 | 6.68460032 | 0.06986135 | 0.21044269 |
| ENSMUSG00000007739 | -0.5590339 | 9.79029332 | 0.06822257 | 0.20771094 |
| ENSMUSG00000037315 | -0.5590944 | 5.93665357 | 0.0709611  | 0.21268607 |
| ENSMUSG00000034724 | -0.5591472 | 7.85646633 | 0.06877587 | 0.20886481 |

|                    |            |            |            |            |
|--------------------|------------|------------|------------|------------|
| ENSMUSG00000022142 | -0.5592686 | 7.86098171 | 0.06867284 | 0.20866945 |
| ENSMUSG00000021311 | -0.5600959 | 6.47090747 | 0.06949528 | 0.21004402 |
| ENSMUSG00000036737 | -0.5603411 | 6.82028543 | 0.06888766 | 0.20902771 |
| ENSMUSG00000034667 | -0.5603748 | 7.68366963 | 0.06820389 | 0.20771094 |
| ENSMUSG00000020137 | -0.5607614 | 4.37242288 | 0.0765189  | 0.22399019 |
| ENSMUSG00000057440 | -0.561324  | 4.78001605 | 0.07437464 | 0.21998248 |
| ENSMUSG00000022661 | -0.5616702 | 4.30102313 | 0.07688181 | 0.22448537 |
| ENSMUSG00000024556 | -0.5620731 | 7.03263075 | 0.06777382 | 0.20697026 |
| ENSMUSG00000040325 | -0.5621949 | 7.59845463 | 0.06740933 | 0.20610781 |
| ENSMUSG0000002413  | -0.5624116 | 6.63659031 | 0.06820008 | 0.20771094 |
| ENSMUSG00000032212 | -0.5631779 | 7.83218699 | 0.06674923 | 0.20507955 |
| ENSMUSG00000035476 | -0.5633743 | 5.18062127 | 0.07108618 | 0.21288347 |
| ENSMUSG00000047213 | -0.5635106 | 7.21914589 | 0.06702481 | 0.20551479 |
| ENSMUSG00000021840 | -0.5635968 | 8.19435593 | 0.06638952 | 0.20480965 |
| ENSMUSG00000037608 | -0.5636897 | 9.32992387 | 0.06604622 | 0.20402268 |
| ENSMUSG00000021645 | -0.5638977 | 5.90340879 | 0.06831167 | 0.20786485 |
| ENSMUSG00000015672 | -0.5641394 | 5.54300169 | 0.06935968 | 0.20989911 |
| ENSMUSG00000031601 | -0.5642249 | 6.9839388  | 0.06697492 | 0.20549082 |
| ENSMUSG00000047446 | -0.5644633 | 5.0500057  | 0.07073087 | 0.21223198 |
| ENSMUSG00000035062 | -0.5644648 | 3.32509237 | 0.08562255 | 0.24166591 |
| ENSMUSG00000040620 | -0.5648001 | 7.11868558 | 0.06639601 | 0.20480965 |
| ENSMUSG00000024383 | -0.5648151 | 6.46473378 | 0.06728254 | 0.20601218 |
| ENSMUSG00000041471 | -0.5648169 | 4.72927433 | 0.07209074 | 0.21450973 |
| ENSMUSG00000078762 | -0.5653564 | 2.9129114  | 0.08479354 | 0.24019267 |
| ENSMUSG00000020594 | -0.5654296 | 9.02172039 | 0.06529715 | 0.20304628 |
| ENSMUSG00000051235 | -0.5656487 | 6.14162595 | 0.06738408 | 0.20608903 |
| ENSMUSG00000028907 | -0.5656607 | 6.43242156 | 0.06674974 | 0.20507955 |
| ENSMUSG00000023087 | -0.5656717 | 4.07491506 | 0.07417298 | 0.21962695 |
| ENSMUSG00000064127 | -0.5659912 | 7.25761232 | 0.06586021 | 0.20392655 |
| ENSMUSG00000053931 | -0.5660374 | 6.16982381 | 0.06694234 | 0.20549082 |
| ENSMUSG00000037475 | -0.5661694 | 7.99870294 | 0.06534477 | 0.20313578 |
| ENSMUSG00000027162 | -0.5662531 | 7.01250766 | 0.06591308 | 0.20396172 |
| ENSMUSG00000029238 | -0.5662715 | 5.73542195 | 0.06782701 | 0.20703269 |
| ENSMUSG00000032481 | -0.5662852 | 8.60910396 | 0.06496765 | 0.20233037 |
| ENSMUSG00000027132 | -0.5666575 | 5.09203386 | 0.06967107 | 0.21033782 |
| ENSMUSG00000021816 | -0.5671304 | 7.66665942 | 0.06498516 | 0.20233037 |
| ENSMUSG00000022774 | -0.5672794 | 6.63156609 | 0.06566693 | 0.20360902 |
| ENSMUSG00000036285 | -0.5673463 | 5.76842254 | 0.06700011 | 0.2054975  |
| ENSMUSG00000020255 | -0.5677001 | 7.20403718 | 0.06498662 | 0.20233037 |
| ENSMUSG00000026096 | -0.5680355 | 3.91728499 | 0.07591717 | 0.22295501 |
| ENSMUSG00000059474 | -0.5680463 | 6.39941573 | 0.06586389 | 0.20392655 |
| ENSMUSG00000050812 | -0.5680709 | 8.49552681 | 0.06419819 | 0.20078641 |
| ENSMUSG00000046667 | -0.5681931 | 3.72307511 | 0.07679006 | 0.22435763 |

|                     |            |            |            |            |
|---------------------|------------|------------|------------|------------|
| ENSMUSG00000001467  | -0.5686447 | 8.28695535 | 0.0639938  | 0.20043831 |
| ENSMUSG00000000568  | -0.568949  | 9.16814822 | 0.06360188 | 0.1996166  |
| ENSMUSG000000032459 | -0.5691108 | 5.39668203 | 0.06722321 | 0.20588898 |
| ENSMUSG000000029475 | -0.5696116 | 7.03142799 | 0.06417736 | 0.20078641 |
| ENSMUSG000000019917 | -0.5696708 | 2.97864122 | 0.0863437  | 0.24305154 |
| ENSMUSG000000034349 | -0.5698892 | 9.65217169 | 0.06309111 | 0.19864951 |
| ENSMUSG00000001785  | -0.5699173 | 7.49109445 | 0.06381657 | 0.2001157  |
| ENSMUSG000000027433 | -0.5699857 | 8.63597715 | 0.06326568 | 0.19902482 |
| ENSMUSG000000057858 | -0.5702426 | 5.21630544 | 0.06734186 | 0.20607679 |
| ENSMUSG000000050965 | -0.5702692 | 6.3414244  | 0.06468082 | 0.20176974 |
| ENSMUSG000000035455 | -0.5707101 | 7.59781309 | 0.06339287 | 0.19910187 |
| ENSMUSG000000021936 | -0.571133  | 5.75302713 | 0.06557927 | 0.20357165 |
| ENSMUSG000000038172 | -0.5719114 | 6.2770027  | 0.06417414 | 0.20078641 |
| ENSMUSG000000024576 | -0.5721145 | 9.05334634 | 0.06218171 | 0.19664737 |
| ENSMUSG000000017999 | -0.5722263 | 6.90454172 | 0.06294749 | 0.1983466  |
| ENSMUSG000000020078 | -0.5722391 | 6.76151019 | 0.06335836 | 0.19910187 |
| ENSMUSG000000029916 | -0.5724581 | 5.12862453 | 0.0661629  | 0.20420742 |
| ENSMUSG000000073676 | -0.5725731 | 8.34818429 | 0.06213987 | 0.19664737 |
| ENSMUSG000000074024 | -0.5726168 | 1.90641547 | 0.10865307 | 0.28145921 |
| ENSMUSG000000067873 | -0.5728901 | 7.15713563 | 0.06264836 | 0.19765944 |
| ENSMUSG000000033439 | -0.5730107 | 4.45372117 | 0.07008401 | 0.21105445 |
| ENSMUSG000000035649 | -0.57322   | 6.14937598 | 0.06389163 | 0.20017643 |
| ENSMUSG000000038628 | -0.5732555 | 5.6422133  | 0.06458921 | 0.2016006  |
| ENSMUSG000000075229 | -0.5732677 | 5.56418586 | 0.06485869 | 0.2022076  |
| ENSMUSG000000032475 | -0.5736691 | 5.23340101 | 0.06597852 | 0.20401534 |
| ENSMUSG00000000168  | -0.573914  | 6.52027535 | 0.06275088 | 0.19792499 |
| ENSMUSG000000039033 | -0.5741122 | 4.41155459 | 0.06826332 | 0.20777637 |
| ENSMUSG000000021998 | -0.5742063 | 10.5311049 | 0.06102605 | 0.19389932 |
| ENSMUSG000000038332 | -0.5742118 | 4.92599197 | 0.06647823 | 0.20488128 |
| ENSMUSG000000073016 | -0.5743861 | 4.35532702 | 0.06976938 | 0.21033782 |
| ENSMUSG000000010290 | -0.5745277 | 5.51595484 | 0.06434089 | 0.20105827 |
| ENSMUSG000000042579 | -0.5746682 | 2.23603575 | 0.09506754 | 0.25862977 |
| ENSMUSG000000024472 | -0.5749503 | 7.79587212 | 0.06134284 | 0.19445067 |
| ENSMUSG00000000787  | -0.5751544 | 10.4346261 | 0.06061396 | 0.19282033 |
| ENSMUSG000000028675 | -0.5751965 | 7.04091175 | 0.06179709 | 0.19583305 |
| ENSMUSG000000049164 | -0.5752577 | 5.95070555 | 0.06337827 | 0.19910187 |
| ENSMUSG000000038671 | -0.5755063 | 6.1474944  | 0.06253406 | 0.19745516 |
| ENSMUSG000000037108 | -0.5761196 | 4.57865923 | 0.06717218 | 0.20579112 |
| ENSMUSG000000033554 | -0.5762386 | 5.49385464 | 0.06340095 | 0.19910187 |
| ENSMUSG000000025019 | -0.5763296 | 4.10861051 | 0.07045145 | 0.21152659 |
| ENSMUSG000000027342 | -0.5764346 | 8.43110333 | 0.06040922 | 0.19233925 |
| ENSMUSG000000034111 | -0.5765336 | 8.91959547 | 0.06022242 | 0.19191446 |
| ENSMUSG000000020376 | -0.5766729 | 5.46621126 | 0.06368926 | 0.19977457 |

|                    |            |            |            |            |
|--------------------|------------|------------|------------|------------|
| ENSMUSG00000040760 | -0.5770215 | 7.13895028 | 0.06091576 | 0.19366586 |
| ENSMUSG00000040282 | -0.5780491 | 3.83014754 | 0.06927689 | 0.20978702 |
| ENSMUSG00000030188 | -0.5782273 | 4.35590783 | 0.06712216 | 0.20574461 |
| ENSMUSG00000054435 | -0.5782637 | 9.9785788  | 0.05929419 | 0.19002333 |
| ENSMUSG00000020925 | -0.5783585 | 6.13295869 | 0.06128619 | 0.19444256 |
| ENSMUSG00000055660 | -0.57847   | 5.5119546  | 0.06295813 | 0.1983466  |
| ENSMUSG00000045519 | -0.5788157 | 3.51965803 | 0.07441418 | 0.22003909 |
| ENSMUSG00000014232 | -0.5788244 | 4.33077454 | 0.06665099 | 0.20507955 |
| ENSMUSG00000085492 | -0.5788298 | 3.25225223 | 0.07610283 | 0.22306197 |
| ENSMUSG00000037788 | -0.578898  | 4.19688829 | 0.06843473 | 0.20812187 |
| ENSMUSG00000025364 | -0.5794993 | 9.8727371  | 0.05874399 | 0.18865253 |
| ENSMUSG00000063200 | -0.5795314 | 7.30103154 | 0.05963382 | 0.19071538 |
| ENSMUSG00000029911 | -0.579694  | 6.32668684 | 0.06052339 | 0.19264589 |
| ENSMUSG00000023026 | -0.5797076 | 7.06349008 | 0.05963958 | 0.19071538 |
| ENSMUSG00000097180 | -0.5797368 | 4.32236448 | 0.06604629 | 0.20402268 |
| ENSMUSG00000033486 | -0.5797752 | 1.88029937 | 0.1045327  | 0.2746116  |
| ENSMUSG00000058318 | -0.5797908 | 5.26443964 | 0.06277824 | 0.19795337 |
| ENSMUSG00000047649 | -0.5797938 | 4.41565892 | 0.06420315 | 0.20078641 |
| ENSMUSG00000061458 | -0.5799696 | 6.87863899 | 0.05972463 | 0.19083569 |
| ENSMUSG00000026786 | -0.5804453 | 6.86299202 | 0.05959973 | 0.19071538 |
| ENSMUSG00000024290 | -0.5807012 | 8.31334641 | 0.0586237  | 0.18832232 |
| ENSMUSG00000064289 | -0.581417  | 6.89138478 | 0.05917635 | 0.18970206 |
| ENSMUSG00000026502 | -0.5815305 | 6.41860351 | 0.05966314 | 0.19071538 |
| ENSMUSG00000001569 | -0.5819563 | 6.64892019 | 0.05907623 | 0.18954381 |
| ENSMUSG00000068105 | -0.582004  | 8.16111785 | 0.05804888 | 0.18686542 |
| ENSMUSG00000025525 | -0.5820773 | 5.24677345 | 0.06188426 | 0.19599407 |
| ENSMUSG00000045316 | -0.5822223 | 1.58794044 | 0.11069002 | 0.28454855 |
| ENSMUSG00000024515 | -0.5822381 | 5.45641915 | 0.06093363 | 0.19366586 |
| ENSMUSG00000090110 | -0.5824215 | 2.56713284 | 0.08146309 | 0.23351885 |
| ENSMUSG00000054178 | -0.5825054 | 3.75968298 | 0.07095235 | 0.21268607 |
| ENSMUSG00000059820 | -0.5826633 | 6.06685535 | 0.05975261 | 0.19086852 |
| ENSMUSG00000011257 | -0.5828781 | 7.63925735 | 0.05781342 | 0.18637397 |
| ENSMUSG00000031352 | -0.5834324 | 6.40995901 | 0.05879867 | 0.18877191 |
| ENSMUSG00000027387 | -0.5834371 | 4.22739304 | 0.06499188 | 0.20233037 |
| ENSMUSG00000031347 | -0.5834682 | 5.692982   | 0.06001445 | 0.19142142 |
| ENSMUSG00000096954 | -0.5835673 | 4.09026464 | 0.06588948 | 0.20394723 |
| ENSMUSG00000071456 | -0.5836239 | 5.02810967 | 0.0613353  | 0.19445067 |
| ENSMUSG00000041396 | -0.5837404 | 3.47669785 | 0.07117018 | 0.21307586 |
| ENSMUSG00000028114 | -0.5843312 | 5.54267679 | 0.05995025 | 0.19127321 |
| ENSMUSG00000028248 | -0.5843383 | 7.50906686 | 0.05733001 | 0.18558753 |
| ENSMUSG00000035367 | -0.5848092 | 3.99692949 | 0.06778737 | 0.20697026 |
| ENSMUSG00000034158 | -0.5848279 | 6.73581061 | 0.05775933 | 0.18637397 |
| ENSMUSG00000029447 | -0.5848797 | 9.29144997 | 0.05653745 | 0.18414372 |

|                    |            |            |            |            |
|--------------------|------------|------------|------------|------------|
| ENSMUSG00000021189 | -0.5852363 | 6.29274284 | 0.05830288 | 0.18753476 |
| ENSMUSG00000061136 | -0.5852606 | 8.9209984  | 0.05648093 | 0.18407083 |
| ENSMUSG00000025262 | -0.5854335 | 3.82806266 | 0.06786292 | 0.2070358  |
| ENSMUSG00000035726 | -0.5861016 | 9.37844808 | 0.05602553 | 0.18325125 |
| ENSMUSG00000074305 | -0.5861263 | 5.03518006 | 0.06056704 | 0.19272792 |
| ENSMUSG00000039988 | -0.5863587 | 6.65459316 | 0.05737481 | 0.18558753 |
| ENSMUSG00000031959 | -0.5863989 | 7.03967027 | 0.05674267 | 0.18465999 |
| ENSMUSG00000024841 | -0.5864249 | 6.69234329 | 0.05701591 | 0.18507218 |
| ENSMUSG00000021969 | -0.586433  | 6.63468541 | 0.05730535 | 0.18558753 |
| ENSMUSG00000030750 | -0.5865038 | 6.35340368 | 0.05734923 | 0.18558753 |
| ENSMUSG00000038975 | -0.5867581 | 7.19871244 | 0.0565341  | 0.18414372 |
| ENSMUSG00000030888 | -0.5868251 | 6.6154839  | 0.05699202 | 0.18506532 |
| ENSMUSG00000090935 | -0.5868529 | 6.27335865 | 0.05761419 | 0.18602138 |
| ENSMUSG00000031609 | -0.5873984 | 4.39662458 | 0.06308987 | 0.19864951 |
| ENSMUSG00000036006 | -0.5874949 | 5.88927993 | 0.05776184 | 0.18637397 |
| ENSMUSG00000099481 | -0.5875243 | 3.6242134  | 0.06697888 | 0.20549082 |
| ENSMUSG00000033813 | -0.5878576 | 8.01194609 | 0.05568401 | 0.18241079 |
| ENSMUSG00000027427 | -0.587876  | 6.42493636 | 0.05690316 | 0.18493827 |
| ENSMUSG00000078862 | -0.5883526 | 1.97878768 | 0.09880708 | 0.26472932 |
| ENSMUSG00000068856 | -0.5887993 | 5.49244497 | 0.05794852 | 0.18665378 |
| ENSMUSG00000017679 | -0.5888804 | 7.44658856 | 0.05554414 | 0.18217396 |
| ENSMUSG00000034203 | -0.5893091 | 5.50640359 | 0.0572754  | 0.18558753 |
| ENSMUSG00000025939 | -0.5894169 | 5.60144963 | 0.05782709 | 0.18637397 |
| ENSMUSG00000000581 | -0.5898144 | 6.01590436 | 0.0567105  | 0.18465159 |
| ENSMUSG00000017561 | -0.5901597 | 7.32875312 | 0.0550319  | 0.1808672  |
| ENSMUSG00000024539 | -0.5909018 | 6.80499914 | 0.0552152  | 0.18131568 |
| ENSMUSG00000095123 | -0.591374  | 3.02368137 | 0.07178819 | 0.21409399 |
| ENSMUSG00000022952 | -0.5918694 | 5.72807623 | 0.05646408 | 0.18407083 |
| ENSMUSG00000030042 | -0.5920906 | 6.50813354 | 0.05506185 | 0.1808672  |
| ENSMUSG00000023027 | -0.5924545 | 6.84346978 | 0.05444864 | 0.17972884 |
| ENSMUSG00000051977 | -0.5935143 | 4.63792816 | 0.05978276 | 0.19090827 |
| ENSMUSG00000043168 | -0.5935698 | 1.56850063 | 0.11448029 | 0.29062041 |
| ENSMUSG00000041297 | -0.5935733 | 7.14166518 | 0.0538534  | 0.17880389 |
| ENSMUSG00000021028 | -0.5936269 | 4.50430636 | 0.05985097 | 0.19106953 |
| ENSMUSG00000028136 | -0.5936931 | 7.38867207 | 0.05361438 | 0.17813232 |
| ENSMUSG00000036580 | -0.5939067 | 5.04878727 | 0.05680436 | 0.18473409 |
| ENSMUSG00000020358 | -0.5941289 | 10.1677425 | 0.05266153 | 0.17603903 |
| ENSMUSG00000031482 | -0.5942139 | 5.86373877 | 0.05505767 | 0.1808672  |
| ENSMUSG00000085385 | -0.5945065 | 5.84579638 | 0.05459928 | 0.18006073 |
| ENSMUSG00000063410 | -0.594546  | 7.38298921 | 0.05322914 | 0.17711294 |
| ENSMUSG00000032571 | -0.5945722 | 5.86980711 | 0.05467168 | 0.18018931 |
| ENSMUSG00000030224 | -0.5947567 | 8.63658041 | 0.05265979 | 0.17603903 |
| ENSMUSG00000057561 | -0.594927  | 8.03513435 | 0.05278616 | 0.17623713 |

|                    |            |            |            |            |
|--------------------|------------|------------|------------|------------|
| ENSMUSG00000028647 | -0.5952728 | 4.74047154 | 0.05751831 | 0.18582307 |
| ENSMUSG00000053137 | -0.5953048 | 2.97988208 | 0.06969571 | 0.21033782 |
| ENSMUSG00000040034 | -0.5956632 | 6.08789809 | 0.05402065 | 0.1790285  |
| ENSMUSG00000025862 | -0.5956824 | 8.54403692 | 0.0523713  | 0.1753406  |
| ENSMUSG00000035764 | -0.5963334 | 5.92905177 | 0.05413283 | 0.17917999 |
| ENSMUSG00000067722 | -0.5963339 | 4.55428668 | 0.05743362 | 0.18566071 |
| ENSMUSG00000066637 | -0.5963409 | 3.00198857 | 0.07201945 | 0.21449768 |
| ENSMUSG00000043872 | -0.5963979 | 5.57508421 | 0.05476892 | 0.18034737 |
| ENSMUSG00000057134 | -0.5966299 | 5.11265018 | 0.05568104 | 0.18241079 |
| ENSMUSG00000038047 | -0.596785  | 7.42404267 | 0.05240481 | 0.17534393 |
| ENSMUSG00000038268 | -0.5972517 | 4.83987332 | 0.0568837  | 0.18493633 |
| ENSMUSG00000087497 | -0.5976842 | 1.64973454 | 0.10269281 | 0.27129821 |
| ENSMUSG00000024188 | -0.5978964 | 7.21134375 | 0.0520404  | 0.17449317 |
| ENSMUSG00000024234 | -0.5979402 | 6.22482447 | 0.05306766 | 0.17677771 |
| ENSMUSG00000025200 | -0.5982433 | 5.20203123 | 0.05447185 | 0.17975044 |
| ENSMUSG00000029655 | -0.598368  | 7.41113096 | 0.05179827 | 0.1738539  |
| ENSMUSG00000018377 | -0.5985737 | 6.05231913 | 0.05295454 | 0.17652604 |
| ENSMUSG00000047635 | -0.5986335 | 3.75831046 | 0.0608663  | 0.19356595 |
| ENSMUSG00000037216 | -0.5988243 | 2.30498835 | 0.08056866 | 0.23175578 |
| ENSMUSG00000053774 | -0.5988859 | 7.07564754 | 0.05181941 | 0.17387074 |
| ENSMUSG00000062937 | -0.5989467 | 7.74963647 | 0.05129051 | 0.17290305 |
| ENSMUSG00000018697 | -0.598951  | 6.56280023 | 0.05205346 | 0.17449317 |
| ENSMUSG00000009535 | -0.5989642 | 6.40384392 | 0.05230078 | 0.17519344 |
| ENSMUSG00000036155 | -0.5989823 | 5.44056703 | 0.05407314 | 0.17914737 |
| ENSMUSG00000020691 | -0.5990334 | 5.27180897 | 0.0541887  | 0.17924937 |
| ENSMUSG00000027423 | -0.5991132 | 10.1353554 | 0.05073841 | 0.17168592 |
| ENSMUSG00000031954 | -0.59987   | 7.41181825 | 0.05114112 | 0.17269598 |
| ENSMUSG00000018800 | -0.5999434 | 4.56353964 | 0.05717728 | 0.18533207 |
| ENSMUSG00000042854 | -0.6003656 | 2.26043851 | 0.0797641  | 0.23048661 |
| ENSMUSG00000075528 | -0.6004117 | 1.38149163 | 0.10558329 | 0.27616202 |
| ENSMUSG00000026283 | -0.6004266 | 6.31157015 | 0.05173111 | 0.17376303 |
| ENSMUSG00000078899 | -0.6008692 | 5.77205184 | 0.05274291 | 0.1761976  |
| ENSMUSG00000058704 | -0.6010862 | 6.31407337 | 0.05168542 | 0.17369137 |
| ENSMUSG00000043065 | -0.6016498 | 4.30604067 | 0.05674733 | 0.18465999 |
| ENSMUSG00000024491 | -0.6017128 | 7.8851222  | 0.05024327 | 0.17059931 |
| ENSMUSG00000031201 | -0.6019453 | 6.38934424 | 0.05128386 | 0.17290305 |
| ENSMUSG00000027018 | -0.6020362 | 7.76872848 | 0.05019217 | 0.17047947 |
| ENSMUSG00000049878 | -0.6021462 | 6.36980949 | 0.05130934 | 0.17291247 |
| ENSMUSG00000042742 | -0.602764  | 5.26890806 | 0.05316881 | 0.17702143 |
| ENSMUSG00000027189 | -0.6032447 | 7.65776439 | 0.04975112 | 0.16946632 |
| ENSMUSG00000032407 | -0.603293  | 8.6546067  | 0.04939695 | 0.16875896 |
| ENSMUSG00000058402 | -0.6033167 | 2.88412332 | 0.06967999 | 0.21033782 |
| ENSMUSG00000028587 | -0.6034057 | 6.15811504 | 0.05087632 | 0.17204461 |

|                    |            |            |            |            |
|--------------------|------------|------------|------------|------------|
| ENSMUSG00000024360 | -0.6035219 | 9.45653441 | 0.04914385 | 0.16824359 |
| ENSMUSG00000021870 | -0.6042258 | 7.69007835 | 0.04939897 | 0.16875896 |
| ENSMUSG00000078427 | -0.6042578 | 7.5351935  | 0.04946803 | 0.16876406 |
| ENSMUSG00000018654 | -0.6044683 | 9.39495177 | 0.04880089 | 0.16733507 |
| ENSMUSG00000041671 | -0.6045116 | 4.1427416  | 0.0567925  | 0.18473409 |
| ENSMUSG00000026723 | -0.6045806 | 4.15920381 | 0.05711439 | 0.1852953  |
| ENSMUSG00000028228 | -0.6047993 | 6.61690015 | 0.05000671 | 0.17011745 |
| ENSMUSG00000044098 | -0.6050936 | 6.84359899 | 0.04967848 | 0.16937163 |
| ENSMUSG00000035900 | -0.6060905 | 4.89569507 | 0.05148366 | 0.17329769 |
| ENSMUSG00000027285 | -0.6062853 | 5.98651322 | 0.05030966 | 0.17063717 |
| ENSMUSG00000039478 | -0.6069074 | 2.90734737 | 0.06686661 | 0.20532162 |
| ENSMUSG00000034317 | -0.6077684 | 6.90890149 | 0.04863522 | 0.16692621 |
| ENSMUSG00000025766 | -0.6078377 | 4.00390637 | 0.05647168 | 0.18407083 |
| ENSMUSG00000026074 | -0.6078843 | 7.03214361 | 0.04832782 | 0.16613124 |
| ENSMUSG00000002109 | -0.608791  | 4.6588303  | 0.05240024 | 0.17534393 |
| ENSMUSG00000067995 | -0.6088057 | 6.04668197 | 0.04910207 | 0.16815394 |
| ENSMUSG00000020544 | -0.6088389 | 4.07306486 | 0.05476981 | 0.18034737 |
| ENSMUSG00000024498 | -0.6090719 | 8.31907539 | 0.04734287 | 0.16389906 |
| ENSMUSG00000047141 | -0.6092954 | 4.70433477 | 0.05293963 | 0.17652604 |
| ENSMUSG00000086725 | -0.6095074 | 2.001417   | 0.08633361 | 0.24305154 |
| ENSMUSG00000041459 | -0.6095527 | 9.69722382 | 0.04690381 | 0.16290199 |
| ENSMUSG00000048661 | -0.6100717 | 5.1075294  | 0.05071584 | 0.1716634  |
| ENSMUSG00000061244 | -0.6103674 | 7.19731632 | 0.04746571 | 0.16411358 |
| ENSMUSG00000037876 | -0.6103834 | 7.74933826 | 0.04712548 | 0.16330571 |
| ENSMUSG00000021615 | -0.6103965 | 4.28122986 | 0.05410981 | 0.17917999 |
| ENSMUSG00000027714 | -0.6105266 | 7.02190683 | 0.04748815 | 0.16413854 |
| ENSMUSG00000050310 | -0.6106352 | 6.16684169 | 0.04834909 | 0.16613124 |
| ENSMUSG00000079184 | -0.6111133 | 6.82568244 | 0.04743307 | 0.16405331 |
| ENSMUSG00000033632 | -0.6112222 | 4.2161642  | 0.05340969 | 0.17760411 |
| ENSMUSG00000091811 | -0.611989  | 1.84598079 | 0.0794331  | 0.22989977 |
| ENSMUSG00000002222 | -0.6128287 | 7.22015921 | 0.04651725 | 0.16208143 |
| ENSMUSG00000021460 | -0.612947  | 6.71321793 | 0.04670086 | 0.16251114 |
| ENSMUSG00000016181 | -0.6131456 | 5.82716332 | 0.04761648 | 0.16447664 |
| ENSMUSG00000001627 | -0.6132799 | 6.63030535 | 0.04689425 | 0.16290199 |
| ENSMUSG00000072980 | -0.6133696 | 4.94442635 | 0.04988235 | 0.16974813 |
| ENSMUSG00000079190 | -0.6134125 | 2.12087677 | 0.07888859 | 0.22887666 |
| ENSMUSG00000060708 | -0.6145892 | 3.28021016 | 0.05945919 | 0.19038241 |
| ENSMUSG00000021270 | -0.614728  | 10.9634656 | 0.04498522 | 0.1581743  |
| ENSMUSG00000097536 | -0.614979  | 1.51663374 | 0.10146133 | 0.26896731 |
| ENSMUSG00000034021 | -0.6154292 | 7.78388961 | 0.0453078  | 0.1588956  |
| ENSMUSG00000022456 | -0.6155935 | 2.92696132 | 0.06421665 | 0.20078641 |
| ENSMUSG00000031299 | -0.6155967 | 7.56300383 | 0.04528685 | 0.1588956  |
| ENSMUSG00000041112 | -0.6157041 | 8.12917019 | 0.04503918 | 0.15826438 |

|                    |            |            |            |            |
|--------------------|------------|------------|------------|------------|
| ENSMUSG00000031533 | -0.615991  | 4.97072712 | 0.04866098 | 0.16692828 |
| ENSMUSG00000021264 | -0.6165918 | 6.97885645 | 0.04530823 | 0.1588956  |
| ENSMUSG00000078903 | -0.6166669 | 3.33865066 | 0.05760856 | 0.18602138 |
| ENSMUSG00000026491 | -0.6171886 | 8.75493135 | 0.04440067 | 0.15652725 |
| ENSMUSG00000099697 | -0.617262  | 2.19739306 | 0.07466047 | 0.22052548 |
| ENSMUSG00000091625 | -0.6173223 | 5.72348346 | 0.04661899 | 0.1623283  |
| ENSMUSG00000038822 | -0.6173962 | 5.03132319 | 0.0483709  | 0.16613124 |
| ENSMUSG00000028683 | -0.6174972 | 6.21059258 | 0.04569434 | 0.15993762 |
| ENSMUSG00000024078 | -0.6178657 | 5.96479266 | 0.04580516 | 0.16022149 |
| ENSMUSG00000006494 | -0.6179685 | 5.34807265 | 0.04712605 | 0.16330571 |
| ENSMUSG00000027677 | -0.6180299 | 7.30444715 | 0.04465209 | 0.15715669 |
| ENSMUSG00000028410 | -0.6180688 | 8.73802126 | 0.04409274 | 0.15584926 |
| ENSMUSG00000010608 | -0.6182488 | 9.06660459 | 0.04396323 | 0.15560886 |
| ENSMUSG00000018446 | -0.6182522 | 8.80837804 | 0.04399587 | 0.15560886 |
| ENSMUSG00000049409 | -0.6184514 | 1.75494777 | 0.0829121  | 0.23647819 |
| ENSMUSG00000022768 | -0.6186392 | 2.1903533  | 0.06894734 | 0.20914996 |
| ENSMUSG00000025050 | -0.6188396 | 5.44580424 | 0.04676466 | 0.16262822 |
| ENSMUSG00000024081 | -0.618913  | 8.03114894 | 0.04399344 | 0.15560886 |
| ENSMUSG00000015501 | -0.6189723 | 3.72988374 | 0.05476858 | 0.18034737 |
| ENSMUSG00000040025 | -0.6191008 | 7.42568341 | 0.04418577 | 0.15602467 |
| ENSMUSG00000019961 | -0.6191239 | 9.03993042 | 0.04367263 | 0.15497389 |
| ENSMUSG00000041360 | -0.6194262 | 7.72374125 | 0.04389773 | 0.15551681 |
| ENSMUSG00000032624 | -0.619526  | 8.19165735 | 0.04373404 | 0.15514075 |
| ENSMUSG00000008333 | -0.6199241 | 7.03093636 | 0.0441637  | 0.15599781 |
| ENSMUSG00000038299 | -0.6202713 | 7.75003951 | 0.04364817 | 0.15493808 |
| ENSMUSG00000029326 | -0.6208199 | 4.23776704 | 0.04837278 | 0.16613124 |
| ENSMUSG00000021892 | -0.6208211 | 7.45904563 | 0.04354532 | 0.15472578 |
| ENSMUSG00000037905 | -0.6212104 | 6.22995478 | 0.04430555 | 0.1563964  |
| ENSMUSG00000034826 | -0.6212133 | 6.71320317 | 0.0439477  | 0.15560886 |
| ENSMUSG00000045767 | -0.6212417 | 6.95451396 | 0.04378676 | 0.15527669 |
| ENSMUSG00000028232 | -0.6212533 | 5.95468891 | 0.04486341 | 0.15779747 |
| ENSMUSG00000071855 | -0.6218153 | 3.47631103 | 0.05546006 | 0.18195353 |
| ENSMUSG00000027601 | -0.622108  | 6.23960722 | 0.04404965 | 0.155748   |
| ENSMUSG00000036591 | -0.6221706 | 5.9609432  | 0.04433432 | 0.15641872 |
| ENSMUSG00000042133 | -0.6222365 | 8.29587572 | 0.04281815 | 0.15289764 |
| ENSMUSG00000031333 | -0.6222484 | 7.20328495 | 0.04329337 | 0.1540844  |
| ENSMUSG00000027405 | -0.6224258 | 8.97053921 | 0.04255839 | 0.15217163 |
| ENSMUSG00000020280 | -0.6227737 | 6.77914746 | 0.04342388 | 0.15439602 |
| ENSMUSG00000024505 | -0.6231524 | 3.30141795 | 0.05589435 | 0.18287763 |
| ENSMUSG00000100370 | -0.6233916 | 4.23042375 | 0.04943761 | 0.16875896 |
| ENSMUSG00000016559 | -0.6236222 | 9.49432064 | 0.04209952 | 0.15113223 |
| ENSMUSG00000040681 | -0.6239116 | 8.66781113 | 0.04215305 | 0.15117468 |
| ENSMUSG00000040865 | -0.6239513 | 6.80094311 | 0.04299769 | 0.15338448 |



|                    |            |            |            |            |
|--------------------|------------|------------|------------|------------|
| ENSMUSG00000022710 | -0.6240356 | 9.28014479 | 0.04201541 | 0.15088051 |
| ENSMUSG00000057842 | -0.6247442 | 4.51127017 | 0.048073   | 0.16569422 |
| ENSMUSG00000046404 | -0.6247865 | 5.57261543 | 0.04434088 | 0.15641872 |
| ENSMUSG00000029406 | -0.6251033 | 4.43785164 | 0.04674425 | 0.16260967 |
| ENSMUSG00000035150 | -0.625531  | 9.60733104 | 0.0414469  | 0.14968261 |
| ENSMUSG00000045690 | -0.6257514 | 4.7204763  | 0.04603557 | 0.1608188  |
| ENSMUSG00000036202 | -0.6257724 | 8.4403535  | 0.04162236 | 0.14996844 |
| ENSMUSG00000036093 | -0.6257752 | 7.4352816  | 0.04198277 | 0.15086378 |
| ENSMUSG00000066324 | -0.6258776 | 7.11732126 | 0.04214882 | 0.15117468 |
| ENSMUSG00000020328 | -0.6262472 | 6.52910329 | 0.04247786 | 0.1520213  |
| ENSMUSG00000031578 | -0.6266204 | 7.98719346 | 0.04145975 | 0.14968261 |
| ENSMUSG00000031642 | -0.626765  | 3.13488254 | 0.05644829 | 0.18407083 |
| ENSMUSG00000040264 | -0.6271284 | 7.37735103 | 0.04157288 | 0.14984023 |
| ENSMUSG00000078779 | -0.6271574 | 2.40508382 | 0.06730991 | 0.20603749 |
| ENSMUSG00000097503 | -0.6277186 | 1.0373095  | 0.12766493 | 0.31042583 |
| ENSMUSG00000026361 | -0.6277979 | 7.14217736 | 0.0415106  | 0.14971174 |
| ENSMUSG00000032397 | -0.6283124 | 8.00343089 | 0.0409192  | 0.14821348 |
| ENSMUSG00000059839 | -0.628447  | 3.34820634 | 0.05536348 | 0.18174728 |
| ENSMUSG00000046909 | -0.629199  | 3.46778591 | 0.05150123 | 0.17329769 |
| ENSMUSG00000085172 | -0.6294135 | 0.70095357 | 0.13615279 | 0.32208715 |
| ENSMUSG00000079104 | -0.6295882 | 6.66559713 | 0.04127881 | 0.14917918 |
| ENSMUSG00000022704 | -0.6295928 | 6.10834429 | 0.04174676 | 0.1502159  |
| ENSMUSG00000021668 | -0.6296691 | 5.70781347 | 0.04248815 | 0.1520213  |
| ENSMUSG00000027361 | -0.630124  | 6.53915354 | 0.04118898 | 0.14895439 |
| ENSMUSG00000069114 | -0.6305778 | 3.33325152 | 0.05424898 | 0.17934426 |
| ENSMUSG00000019792 | -0.631035  | 5.19636636 | 0.04305358 | 0.1534335  |
| ENSMUSG00000026875 | -0.6310598 | 6.88045835 | 0.04034443 | 0.14698456 |
| ENSMUSG00000056671 | -0.6312545 | 1.53993131 | 0.08692437 | 0.24347856 |
| ENSMUSG00000070031 | -0.6312905 | 8.38162169 | 0.03986456 | 0.1454973  |
| ENSMUSG00000058392 | -0.6313922 | 7.31770805 | 0.04012569 | 0.14623707 |
| ENSMUSG00000034832 | -0.6320085 | 5.67286923 | 0.04152335 | 0.14971174 |
| ENSMUSG00000041607 | -0.6320906 | 4.95685615 | 0.04296956 | 0.1533721  |
| ENSMUSG00000062906 | -0.6323839 | 3.41397095 | 0.04984487 | 0.16972753 |
| ENSMUSG00000027615 | -0.6324385 | 6.56067022 | 0.04047969 | 0.14727833 |
| ENSMUSG00000066551 | -0.6326846 | 7.65305435 | 0.03970377 | 0.14514896 |
| ENSMUSG00000020142 | -0.63275   | 3.74354912 | 0.04618163 | 0.16112025 |
| ENSMUSG00000025898 | -0.6328224 | 6.32746369 | 0.04065885 | 0.14768103 |
| ENSMUSG00000030417 | -0.6329421 | 6.22845538 | 0.04061203 | 0.14761042 |
| ENSMUSG00000045038 | -0.6332083 | 4.74330758 | 0.04347727 | 0.15453488 |
| ENSMUSG00000004127 | -0.6334112 | 5.03962849 | 0.04226366 | 0.15151972 |
| ENSMUSG00000027881 | -0.6334531 | 7.97983782 | 0.03929728 | 0.14394764 |
| ENSMUSG00000044442 | -0.6337509 | 4.01129629 | 0.04591987 | 0.16046657 |
| ENSMUSG00000055900 | -0.6338021 | 4.9200082  | 0.04280939 | 0.15289764 |

|                    |            |            |            |            |
|--------------------|------------|------------|------------|------------|
| ENSMUSG00000020656 | -0.633936  | 1.90443663 | 0.07668576 | 0.22423514 |
| ENSMUSG00000028560 | -0.6345028 | 8.84089759 | 0.03878109 | 0.1424439  |
| ENSMUSG00000024384 | -0.6349085 | 7.60089074 | 0.03901709 | 0.14321316 |
| ENSMUSG00000022884 | -0.635303  | 9.59613937 | 0.03843    | 0.1417821  |
| ENSMUSG00000042590 | -0.6356405 | 7.09694738 | 0.03906182 | 0.14332858 |
| ENSMUSG00000022292 | -0.6361138 | 5.49337058 | 0.04092871 | 0.14821348 |
| ENSMUSG00000020420 | -0.6361413 | 3.71330697 | 0.04825796 | 0.16605418 |
| ENSMUSG00000031917 | -0.6363072 | 7.1317592  | 0.03877402 | 0.1424439  |
| ENSMUSG00000026646 | -0.6363383 | 4.9564969  | 0.0417335  | 0.1502159  |
| ENSMUSG00000027901 | -0.6364363 | 3.53387482 | 0.0481367  | 0.16579566 |
| ENSMUSG00000074578 | -0.6366718 | 6.69354615 | 0.03888876 | 0.14279073 |
| ENSMUSG00000003929 | -0.637161  | 5.05666489 | 0.04151472 | 0.14971174 |
| ENSMUSG00000002718 | -0.6371938 | 9.2858381  | 0.03789405 | 0.1403811  |
| ENSMUSG00000078578 | -0.6380009 | 8.67221507 | 0.03775289 | 0.14014706 |
| ENSMUSG00000027367 | -0.638272  | 7.97765662 | 0.03784844 | 0.14036452 |
| ENSMUSG00000021549 | -0.6383475 | 6.67574827 | 0.03864929 | 0.14225048 |
| ENSMUSG00000030759 | -0.6386821 | 8.78479489 | 0.03753746 | 0.13949136 |
| ENSMUSG00000053560 | -0.6388236 | 1.26947848 | 0.07245964 | 0.21526301 |
| ENSMUSG00000022983 | -0.6390984 | 6.29099374 | 0.03855667 | 0.14209402 |
| ENSMUSG00000032376 | -0.6398533 | 6.13247203 | 0.03871068 | 0.14237925 |
| ENSMUSG00000022119 | -0.6406216 | 7.4388746  | 0.03737665 | 0.13915755 |
| ENSMUSG00000038481 | -0.6410946 | 6.37529844 | 0.03806673 | 0.14092643 |
| ENSMUSG00000074746 | -0.6411266 | 7.0998392  | 0.03743759 | 0.13926421 |
| ENSMUSG00000029684 | -0.6411888 | 4.55970556 | 0.04177364 | 0.1502625  |
| ENSMUSG00000027782 | -0.6416631 | 8.31355958 | 0.03677557 | 0.13757205 |
| ENSMUSG00000063785 | -0.6422632 | 7.26243901 | 0.03694173 | 0.13799473 |
| ENSMUSG00000027108 | -0.642449  | 7.7535462  | 0.03670269 | 0.13746639 |
| ENSMUSG00000018363 | -0.642973  | 5.5936008  | 0.03858042 | 0.14209402 |
| ENSMUSG00000021025 | -0.6433226 | 7.08700848 | 0.03663401 | 0.13731706 |
| ENSMUSG00000050600 | -0.643426  | 3.40908234 | 0.04698918 | 0.16308881 |
| ENSMUSG00000021639 | -0.6438438 | 5.62607877 | 0.03825976 | 0.14139591 |
| ENSMUSG00000033228 | -0.6439056 | 8.77605873 | 0.0360099  | 0.13573254 |
| ENSMUSG00000066232 | -0.6440344 | 9.2458388  | 0.03590961 | 0.13541923 |
| ENSMUSG00000025899 | -0.6446121 | 5.98442563 | 0.03743168 | 0.13926421 |
| ENSMUSG00000020015 | -0.6447869 | 6.20505391 | 0.03713222 | 0.13839676 |
| ENSMUSG00000062014 | -0.6460382 | 8.04285608 | 0.03559023 | 0.13452681 |
| ENSMUSG00000069727 | -0.6465016 | 2.02594793 | 0.07021596 | 0.21127481 |
| ENSMUSG00000028156 | -0.6467578 | 8.24391436 | 0.03531812 | 0.13373266 |
| ENSMUSG00000048039 | -0.6473155 | 7.78527411 | 0.03529457 | 0.13369043 |
| ENSMUSG00000033931 | -0.647499  | 6.22284403 | 0.0362193  | 0.13618862 |
| ENSMUSG00000025558 | -0.6478653 | 5.12431678 | 0.03788974 | 0.1403811  |
| ENSMUSG00000097705 | -0.6482679 | 2.55671814 | 0.05815644 | 0.1871558  |
| ENSMUSG00000039841 | -0.6483124 | 6.53734259 | 0.03584275 | 0.1352443  |

|                    |            |            |            |            |
|--------------------|------------|------------|------------|------------|
| ENSMUSG00000020608 | -0.6483306 | 7.97230685 | 0.03497967 | 0.13268407 |
| ENSMUSG00000044150 | -0.6487465 | 5.2997456  | 0.03748732 | 0.13940113 |
| ENSMUSG00000090266 | -0.6492431 | 4.97910114 | 0.03809287 | 0.14097238 |
| ENSMUSG00000049957 | -0.6495913 | 5.44240884 | 0.03633958 | 0.13648232 |
| ENSMUSG00000042197 | -0.649828  | 6.58944372 | 0.0352942  | 0.13369043 |
| ENSMUSG00000022905 | -0.649997  | 7.45638751 | 0.03472658 | 0.13214234 |
| ENSMUSG00000058587 | -0.650364  | 7.11166878 | 0.03471806 | 0.13214234 |
| ENSMUSG00000096006 | -0.6503691 | 0.83204306 | 0.11343214 | 0.28884351 |
| ENSMUSG00000040455 | -0.6505192 | 6.15834284 | 0.03549893 | 0.13427196 |
| ENSMUSG00000026388 | -0.6505679 | 1.69413091 | 0.0753729  | 0.22172332 |
| ENSMUSG00000028578 | -0.6506068 | 4.17889676 | 0.03976729 | 0.14532378 |
| ENSMUSG00000054717 | -0.6506729 | 9.53241287 | 0.03400902 | 0.13028536 |
| ENSMUSG00000071172 | -0.6506813 | 8.88592126 | 0.03407869 | 0.13041325 |
| ENSMUSG00000037860 | -0.6507425 | 6.5424354  | 0.03508112 | 0.13297532 |
| ENSMUSG00000089774 | -0.6513955 | 4.14845088 | 0.03970599 | 0.14514896 |
| ENSMUSG00000020817 | -0.6515714 | 6.76303649 | 0.03467798 | 0.1320506  |
| ENSMUSG00000033826 | -0.6516782 | 3.67850053 | 0.04319426 | 0.15378239 |
| ENSMUSG00000031246 | -0.6523576 | 6.98871932 | 0.03432385 | 0.13116526 |
| ENSMUSG00000053453 | -0.6523895 | 6.51186624 | 0.03459942 | 0.13184456 |
| ENSMUSG00000026806 | -0.6524304 | 5.39845729 | 0.03581101 | 0.13517185 |
| ENSMUSG00000017929 | -0.6526117 | 5.82364641 | 0.03499588 | 0.13269888 |
| ENSMUSG00000034617 | -0.6526699 | 5.93391004 | 0.03496269 | 0.13268407 |
| ENSMUSG00000063273 | -0.6528221 | 9.07620029 | 0.03349913 | 0.12851461 |
| ENSMUSG00000028233 | -0.6529001 | 7.25795468 | 0.03402289 | 0.13029218 |
| ENSMUSG00000021215 | -0.6533427 | 6.91124191 | 0.03403561 | 0.13029466 |
| ENSMUSG00000026005 | -0.653468  | 6.65132339 | 0.0342186  | 0.13085583 |
| ENSMUSG00000024091 | -0.6536276 | 7.42123616 | 0.03373161 | 0.12926936 |
| ENSMUSG00000062949 | -0.6537399 | 6.4749339  | 0.03439009 | 0.13127884 |
| ENSMUSG00000018666 | -0.6538954 | 7.32342858 | 0.03367001 | 0.12912424 |
| ENSMUSG00000022533 | -0.6541053 | 8.80190583 | 0.03318905 | 0.12777962 |
| ENSMUSG00000021704 | -0.6541132 | 5.02631263 | 0.03616537 | 0.1360807  |
| ENSMUSG00000059994 | -0.6541659 | 5.83835915 | 0.03463418 | 0.13193041 |
| ENSMUSG00000022827 | -0.6542173 | 5.05947992 | 0.0360668  | 0.13589951 |
| ENSMUSG00000085887 | -0.6543065 | 3.61212946 | 0.04081805 | 0.14805981 |
| ENSMUSG00000041438 | -0.654448  | 7.70530403 | 0.03335572 | 0.12823817 |
| ENSMUSG00000025978 | -0.6546657 | 1.53594462 | 0.07481834 | 0.22087079 |
| ENSMUSG00000021699 | -0.6554018 | 1.72074223 | 0.07507955 | 0.22127845 |
| ENSMUSG00000031604 | -0.6559714 | 7.33294362 | 0.03314318 | 0.1276486  |
| ENSMUSG00000070583 | -0.6561892 | 2.63312402 | 0.0502941  | 0.17063717 |
| ENSMUSG00000078652 | -0.6566857 | 9.14201185 | 0.03244723 | 0.12563151 |
| ENSMUSG00000053332 | -0.6570607 | 8.65501793 | 0.03243486 | 0.12563151 |
| ENSMUSG00000026628 | -0.6570823 | 3.75806901 | 0.04045779 | 0.14724832 |
| ENSMUSG00000020258 | -0.6571048 | 1.93987979 | 0.05842312 | 0.18784584 |

|                    |            |            |            |            |
|--------------------|------------|------------|------------|------------|
| ENSMUSG00000031527 | -0.6581942 | 7.64959258 | 0.03242163 | 0.12563151 |
| ENSMUSG00000028333 | -0.6592718 | 9.71953854 | 0.03171379 | 0.12360009 |
| ENSMUSG00000078700 | -0.6593898 | 3.57446716 | 0.04010337 | 0.14620513 |
| ENSMUSG00000027086 | -0.6596157 | 5.30665152 | 0.03420266 | 0.13084125 |
| ENSMUSG00000044155 | -0.6598909 | 6.17883347 | 0.03288451 | 0.12683352 |
| ENSMUSG00000087153 | -0.6602168 | 4.94082306 | 0.03494181 | 0.13268407 |
| ENSMUSG00000031015 | -0.6607705 | 9.84500057 | 0.03132107 | 0.1225123  |
| ENSMUSG00000020846 | -0.6621034 | 6.96254572 | 0.03173633 | 0.12363548 |
| ENSMUSG00000086629 | -0.6624768 | 1.60685355 | 0.06584992 | 0.20392655 |
| ENSMUSG00000040268 | -0.6624774 | 4.95076483 | 0.03430694 | 0.13114714 |
| ENSMUSG00000023832 | -0.6626096 | 5.93453329 | 0.03236812 | 0.12556037 |
| ENSMUSG00000066037 | -0.6633762 | 7.68432039 | 0.0310628  | 0.12163444 |
| ENSMUSG00000065226 | -0.6639337 | 2.14236747 | 0.06227376 | 0.19688075 |
| ENSMUSG00000024317 | -0.6640713 | 5.58024298 | 0.03271372 | 0.12640084 |
| ENSMUSG00000072258 | -0.6641232 | 4.46797371 | 0.03545213 | 0.13419295 |
| ENSMUSG00000030019 | -0.6642544 | 5.27921019 | 0.03281366 | 0.12665086 |
| ENSMUSG00000047407 | -0.6648572 | 6.02315239 | 0.03175776 | 0.12363548 |
| ENSMUSG00000033106 | -0.6653185 | 5.8257068  | 0.03195948 | 0.12428813 |
| ENSMUSG00000000317 | -0.6657369 | 2.27628751 | 0.05381764 | 0.1787402  |
| ENSMUSG00000017548 | -0.6659714 | 9.07959625 | 0.03011943 | 0.11884667 |
| ENSMUSG00000021952 | -0.6661108 | 7.70120275 | 0.030395   | 0.11962761 |
| ENSMUSG00000020650 | -0.6661562 | 6.70645689 | 0.03088653 | 0.12112013 |
| ENSMUSG00000003418 | -0.6661911 | 6.85328016 | 0.03077431 | 0.12072395 |
| ENSMUSG00000022422 | -0.6668234 | 4.36159752 | 0.03475188 | 0.13219197 |
| ENSMUSG00000040929 | -0.6670412 | 3.94494989 | 0.03738311 | 0.13915755 |
| ENSMUSG00000026761 | -0.667338  | 6.34570232 | 0.03092527 | 0.12118391 |
| ENSMUSG00000022674 | -0.6680107 | 6.61474491 | 0.03052605 | 0.12005578 |
| ENSMUSG00000006154 | -0.668299  | 0.55375752 | 0.06554447 | 0.20357165 |
| ENSMUSG00000006262 | -0.6685469 | 6.8291927  | 0.03022714 | 0.11909734 |
| ENSMUSG00000016529 | -0.6691485 | 4.63335602 | 0.0334728  | 0.12850504 |
| ENSMUSG00000067367 | -0.6698609 | 7.14762663 | 0.02961399 | 0.11728142 |
| ENSMUSG00000022378 | -0.6703382 | 8.33804318 | 0.02919245 | 0.11599535 |
| ENSMUSG00000025323 | -0.6708975 | 5.15962093 | 0.03158679 | 0.12328337 |
| ENSMUSG00000025940 | -0.6723763 | 5.94813536 | 0.03008365 | 0.11881151 |
| ENSMUSG00000030057 | -0.6724805 | 9.70074263 | 0.02847962 | 0.11379185 |
| ENSMUSG00000057329 | -0.6728172 | 6.27932465 | 0.02958945 | 0.11722727 |
| ENSMUSG00000079036 | -0.6729173 | 6.23331776 | 0.02951225 | 0.11705043 |
| ENSMUSG00000031278 | -0.6730357 | 7.32062701 | 0.02887809 | 0.11516324 |
| ENSMUSG00000039096 | -0.6736044 | 3.42136649 | 0.03704886 | 0.13819956 |
| ENSMUSG00000026866 | -0.6739288 | 6.41465094 | 0.02926911 | 0.11617154 |
| ENSMUSG00000027722 | -0.6745394 | 6.18458442 | 0.02924739 | 0.11612806 |
| ENSMUSG00000099966 | -0.6746691 | 3.10638824 | 0.04083721 | 0.14807951 |
| ENSMUSG00000027968 | -0.6751152 | 6.55481535 | 0.02875947 | 0.11476977 |

|                    |            |            |            |            |
|--------------------|------------|------------|------------|------------|
| ENSMUSG00000029629 | -0.6752983 | 6.59559344 | 0.02875635 | 0.11476977 |
| ENSMUSG00000051329 | -0.675631  | 8.15737496 | 0.02798811 | 0.11220216 |
| ENSMUSG00000030232 | -0.6762169 | 8.48963311 | 0.02776585 | 0.11160155 |
| ENSMUSG00000071072 | -0.67685   | 9.05031507 | 0.02754425 | 0.11108345 |
| ENSMUSG00000092222 | -0.6770296 | 2.02191791 | 0.05440339 | 0.17963446 |
| ENSMUSG00000050244 | -0.6771866 | 8.65425911 | 0.02752086 | 0.11103067 |
| ENSMUSG00000031153 | -0.6776051 | 5.41572376 | 0.02919187 | 0.11599535 |
| ENSMUSG00000074497 | -0.6778252 | 2.25228436 | 0.0445171  | 0.15688641 |
| ENSMUSG00000000861 | -0.6778253 | 7.59939084 | 0.02761793 | 0.11125579 |
| ENSMUSG00000053347 | -0.6780973 | 4.25015848 | 0.03339992 | 0.1283166  |
| ENSMUSG00000049313 | -0.6784292 | 7.17805711 | 0.02764656 | 0.11132061 |
| ENSMUSG00000048174 | -0.6791016 | 2.63075217 | 0.04554559 | 0.15957233 |
| ENSMUSG00000074136 | -0.6794222 | 2.17681057 | 0.04909889 | 0.16815394 |
| ENSMUSG00000053907 | -0.6803911 | 9.29115588 | 0.02672416 | 0.10862923 |
| ENSMUSG00000054027 | -0.6807664 | 5.1454349  | 0.02889706 | 0.11516324 |
| ENSMUSG00000063253 | -0.6810835 | 5.12414161 | 0.02921895 | 0.11605789 |
| ENSMUSG00000024528 | -0.68145   | 5.08845291 | 0.02875859 | 0.11476977 |
| ENSMUSG00000040022 | -0.6815848 | 3.86993182 | 0.03285755 | 0.12677489 |
| ENSMUSG00000039756 | -0.6816153 | 7.75779477 | 0.02673973 | 0.10863079 |
| ENSMUSG00000031931 | -0.6816411 | 5.51018781 | 0.02842576 | 0.11361876 |
| ENSMUSG00000086503 | -0.6818762 | 8.72098868 | 0.02624876 | 0.10701184 |
| ENSMUSG00000031229 | -0.6823702 | 9.17907545 | 0.02631346 | 0.10720223 |
| ENSMUSG00000036225 | -0.6826581 | 3.24590582 | 0.03550532 | 0.13427196 |
| ENSMUSG00000070605 | -0.6826614 | 4.08965478 | 0.03176872 | 0.12363548 |
| ENSMUSG00000027193 | -0.6833743 | 8.97730708 | 0.02610986 | 0.10653376 |
| ENSMUSG00000079083 | -0.6834362 | 3.91972984 | 0.03349512 | 0.12851461 |
| ENSMUSG00000047989 | -0.6838684 | 5.84291114 | 0.02734966 | 0.11050532 |
| ENSMUSG00000021595 | -0.684331  | 9.06488353 | 0.02587022 | 0.10587644 |
| ENSMUSG00000057894 | -0.6844043 | 5.49214831 | 0.02777868 | 0.11161153 |
| ENSMUSG00000020547 | -0.6846051 | 7.26021196 | 0.02622523 | 0.10696401 |
| ENSMUSG00000036840 | -0.684661  | 3.34138703 | 0.03657682 | 0.13724579 |
| ENSMUSG00000028771 | -0.6864069 | 5.66539661 | 0.02711816 | 0.10989938 |
| ENSMUSG00000028633 | -0.6865067 | 7.76432558 | 0.02564435 | 0.10535186 |
| ENSMUSG00000022248 | -0.6869192 | 5.48484419 | 0.02724454 | 0.11028719 |
| ENSMUSG00000047022 | -0.6873338 | 2.14528619 | 0.05004518 | 0.17016429 |
| ENSMUSG00000029415 | -0.6875035 | 7.84846055 | 0.02541097 | 0.10488967 |
| ENSMUSG00000021693 | -0.6875717 | 6.67612366 | 0.02594883 | 0.10603721 |
| ENSMUSG00000018433 | -0.6885141 | 7.82795316 | 0.02521024 | 0.10432356 |
| ENSMUSG00000037697 | -0.6886921 | 5.08867502 | 0.02755969 | 0.11111042 |
| ENSMUSG00000039968 | -0.688805  | 6.33662133 | 0.02588769 | 0.10590776 |
| ENSMUSG00000066798 | -0.6888295 | 5.57151304 | 0.02674469 | 0.10863079 |
| ENSMUSG00000024276 | -0.6888753 | 6.834757   | 0.02558452 | 0.10514613 |
| ENSMUSG00000019861 | -0.6889099 | 6.07444997 | 0.02607954 | 0.10645033 |

|                    |            |            |            |            |
|--------------------|------------|------------|------------|------------|
| ENSMUSG00000024999 | -0.6892047 | 7.10928131 | 0.02533111 | 0.10470321 |
| ENSMUSG00000033543 | -0.6898391 | 6.19970988 | 0.02580789 | 0.10570159 |
| ENSMUSG00000097195 | -0.6900117 | 6.48801749 | 0.02549541 | 0.10490514 |
| ENSMUSG00000040139 | -0.6900564 | 2.28014394 | 0.04108737 | 0.14863677 |
| ENSMUSG00000053684 | -0.6903894 | 3.69167287 | 0.03137375 | 0.12267385 |
| ENSMUSG00000043467 | -0.6905877 | 4.01740814 | 0.03017874 | 0.11895012 |
| ENSMUSG00000089857 | -0.6906938 | 3.19307186 | 0.03616089 | 0.1360807  |
| ENSMUSG00000043702 | -0.6908148 | 6.1276086  | 0.02567886 | 0.10542572 |
| ENSMUSG00000030471 | -0.6913677 | 6.00223838 | 0.02571688 | 0.10544898 |
| ENSMUSG00000048379 | -0.6914089 | 6.94913003 | 0.02496205 | 0.1035349  |
| ENSMUSG00000022663 | -0.6918984 | 6.63140883 | 0.02504347 | 0.1038114  |
| ENSMUSG00000042514 | -0.6920563 | 4.18994724 | 0.02954646 | 0.11710011 |
| ENSMUSG00000034653 | -0.6921177 | 6.42493562 | 0.02515444 | 0.1041326  |
| ENSMUSG00000072969 | -0.6921383 | 4.09780851 | 0.02963028 | 0.11730286 |
| ENSMUSG00000091957 | -0.6922946 | 0.8299639  | 0.09097435 | 0.25131211 |
| ENSMUSG00000021597 | -0.6924297 | 5.86443042 | 0.02558437 | 0.10514613 |
| ENSMUSG00000075703 | -0.692625  | 6.75775261 | 0.02479115 | 0.1029845  |
| ENSMUSG00000020949 | -0.692795  | 7.39174472 | 0.02451038 | 0.10189666 |
| ENSMUSG00000035960 | -0.6928281 | 7.15080107 | 0.02449448 | 0.10189666 |
| ENSMUSG00000033943 | -0.6928888 | 8.01682815 | 0.02430125 | 0.10133979 |
| ENSMUSG00000020075 | -0.693342  | 10.1459354 | 0.02392054 | 0.10030766 |
| ENSMUSG00000052137 | -0.6941277 | 4.39714679 | 0.02819467 | 0.1129043  |
| ENSMUSG00000042595 | -0.6942395 | 4.76884562 | 0.02731671 | 0.11041356 |
| ENSMUSG00000097042 | -0.694469  | 3.17184287 | 0.03338887 | 0.1283166  |
| ENSMUSG00000027508 | -0.6946746 | 6.597839   | 0.02450425 | 0.10189666 |
| ENSMUSG00000021418 | -0.6948586 | 4.39713641 | 0.02837211 | 0.11349933 |
| ENSMUSG00000026094 | -0.6949368 | 8.00464636 | 0.02388694 | 0.10030766 |
| ENSMUSG00000001305 | -0.6964533 | 6.38870658 | 0.02414487 | 0.10088271 |
| ENSMUSG00000056260 | -0.696473  | 5.62550117 | 0.02509942 | 0.10398467 |
| ENSMUSG00000030031 | -0.6967257 | 5.32889325 | 0.02544533 | 0.10490514 |
| ENSMUSG00000024286 | -0.6967858 | 6.73697609 | 0.0239814  | 0.10039418 |
| ENSMUSG00000021149 | -0.6972422 | 8.47590655 | 0.02331705 | 0.09856962 |
| ENSMUSG00000036779 | -0.6977506 | 6.63311499 | 0.02379506 | 0.10000231 |
| ENSMUSG00000035868 | -0.6978577 | 3.81514591 | 0.03017218 | 0.11895012 |
| ENSMUSG00000027091 | -0.6985558 | 7.84474291 | 0.02320892 | 0.09822804 |
| ENSMUSG00000052539 | -0.6985884 | 3.62165546 | 0.03017609 | 0.11895012 |
| ENSMUSG00000039221 | -0.6992316 | 6.54162734 | 0.02362889 | 0.09953671 |
| ENSMUSG00000029836 | -0.6995397 | 8.31594938 | 0.02288447 | 0.0972748  |
| ENSMUSG00000044763 | -0.6995991 | 6.09683487 | 0.02393283 | 0.10030766 |
| ENSMUSG00000044934 | -0.6997939 | 5.7901043  | 0.02405519 | 0.10059704 |
| ENSMUSG00000044018 | -0.7001012 | 6.29887033 | 0.02358054 | 0.0994107  |
| ENSMUSG00000027353 | -0.7002415 | 5.4734649  | 0.02439351 | 0.10160663 |
| ENSMUSG00000009575 | -0.7010249 | 9.54611269 | 0.02246487 | 0.09576263 |

|                    |            |            |            |            |
|--------------------|------------|------------|------------|------------|
| ENSMUSG00000038388 | -0.7016013 | 7.3130992  | 0.02275707 | 0.09680956 |
| ENSMUSG00000040990 | -0.7016589 | 6.60113766 | 0.02312146 | 0.09810981 |
| ENSMUSG00000026675 | -0.7022224 | 5.71530731 | 0.02362504 | 0.09953671 |
| ENSMUSG00000049321 | -0.7025477 | 1.51697668 | 0.0545801  | 0.18005254 |
| ENSMUSG00000044465 | -0.7025684 | 2.39523345 | 0.03591422 | 0.13541923 |
| ENSMUSG00000025995 | -0.7026884 | 7.92504513 | 0.02238737 | 0.09557488 |
| ENSMUSG00000021175 | -0.7027381 | 5.59649207 | 0.02364498 | 0.09956557 |
| ENSMUSG00000038335 | -0.7028198 | 8.41255025 | 0.02224678 | 0.0951266  |
| ENSMUSG00000021112 | -0.7034278 | 5.44412322 | 0.02392869 | 0.10030766 |
| ENSMUSG00000024800 | -0.7034343 | 5.71198327 | 0.02346672 | 0.09900648 |
| ENSMUSG00000038214 | -0.703507  | 5.1099732  | 0.024014   | 0.10049166 |
| ENSMUSG00000021514 | -0.7035152 | 4.53964405 | 0.02571084 | 0.10544898 |
| ENSMUSG00000051495 | -0.7036127 | 5.27328759 | 0.02395108 | 0.10034515 |
| ENSMUSG00000098234 | -0.704162  | 5.68969183 | 0.02346443 | 0.09900648 |
| ENSMUSG00000037580 | -0.7042452 | 3.28201308 | 0.03028582 | 0.11928499 |
| ENSMUSG00000036282 | -0.7043382 | 6.0109129  | 0.0231255  | 0.09810981 |
| ENSMUSG00000096916 | -0.7051217 | 5.63982173 | 0.02337282 | 0.09872796 |
| ENSMUSG00000028977 | -0.7058684 | 1.92835185 | 0.03750463 | 0.13941742 |
| ENSMUSG00000022849 | -0.706329  | 3.75351509 | 0.02766906 | 0.111337   |
| ENSMUSG00000031370 | -0.7071102 | 5.76535873 | 0.02268872 | 0.09655688 |
| ENSMUSG00000097052 | -0.7072171 | 3.72890224 | 0.02731116 | 0.11041356 |
| ENSMUSG00000039753 | -0.7081677 | 5.97222709 | 0.02239593 | 0.09557488 |
| ENSMUSG00000029267 | -0.7082866 | 7.40540164 | 0.02149659 | 0.09261655 |
| ENSMUSG00000025326 | -0.7084746 | 7.83375922 | 0.02135294 | 0.09203441 |
| ENSMUSG00000074500 | -0.7086753 | 0.71645671 | 0.08878337 | 0.24676286 |
| ENSMUSG00000033799 | -0.7090425 | 7.72404309 | 0.02126849 | 0.09175881 |
| ENSMUSG00000007617 | -0.7097645 | 4.8424531  | 0.02370091 | 0.09972323 |
| ENSMUSG00000095362 | -0.7101215 | 1.67791261 | 0.05504711 | 0.1808672  |
| ENSMUSG00000058799 | -0.7104855 | 10.1921907 | 0.02068516 | 0.08994709 |
| ENSMUSG00000026064 | -0.7108121 | 7.4929671  | 0.0210217  | 0.09106136 |
| ENSMUSG00000024359 | -0.7111583 | 10.4573733 | 0.02055277 | 0.08947966 |
| ENSMUSG00000090659 | -0.7113168 | 2.64923529 | 0.03496886 | 0.13268407 |
| ENSMUSG00000032249 | -0.7117939 | 8.58206839 | 0.02058763 | 0.08959525 |
| ENSMUSG00000047583 | -0.7119505 | 2.48620323 | 0.0369618  | 0.13799473 |
| ENSMUSG00000027349 | -0.7120753 | 6.74344055 | 0.02100704 | 0.09105302 |
| ENSMUSG00000021692 | -0.7124542 | 5.167482   | 0.02245053 | 0.09576263 |
| ENSMUSG00000038291 | -0.7129254 | 5.79536899 | 0.02153811 | 0.09275838 |
| ENSMUSG00000058006 | -0.7131911 | 8.23411565 | 0.02039888 | 0.08892362 |
| ENSMUSG00000023845 | -0.7135188 | 8.10932717 | 0.02040032 | 0.08892362 |
| ENSMUSG00000008193 | -0.7155135 | 7.0817931  | 0.02025578 | 0.08843656 |
| ENSMUSG00000022247 | -0.7163932 | 7.52667821 | 0.02002324 | 0.08759861 |
| ENSMUSG00000038459 | -0.7167906 | 4.47571052 | 0.0231104  | 0.09810981 |
| ENSMUSG00000020994 | -0.7179845 | 8.09965648 | 0.01958738 | 0.08614614 |

|                    |            |            |            |            |
|--------------------|------------|------------|------------|------------|
| ENSMUSG0000001774  | -0.7184407 | 7.89987636 | 0.01957883 | 0.08614365 |
| ENSMUSG00000050471 | -0.7185028 | 5.42758849 | 0.02091509 | 0.09083703 |
| ENSMUSG00000064138 | -0.7186697 | 6.41709494 | 0.02014045 | 0.08806607 |
| ENSMUSG00000038736 | -0.71902   | 6.91200592 | 0.01980459 | 0.08685346 |
| ENSMUSG00000031592 | -0.7190469 | 7.66365433 | 0.01956209 | 0.0861403  |
| ENSMUSG00000030201 | -0.7194619 | 6.16809402 | 0.02014691 | 0.08806607 |
| ENSMUSG00000079614 | -0.7197635 | 7.51087485 | 0.01944404 | 0.08572547 |
| ENSMUSG00000040464 | -0.7208696 | 5.20596586 | 0.02094177 | 0.0908797  |
| ENSMUSG00000027787 | -0.7210879 | 7.42722379 | 0.01927047 | 0.08509941 |
| ENSMUSG00000038550 | -0.7213579 | 1.87279973 | 0.04124714 | 0.1491147  |
| ENSMUSG00000028252 | -0.7213744 | 6.15915893 | 0.01982746 | 0.08691843 |
| ENSMUSG00000089937 | -0.7215664 | 0.82163861 | 0.07937933 | 0.22980582 |
| ENSMUSG00000028403 | -0.7216457 | 6.41011317 | 0.01960904 | 0.08619214 |
| ENSMUSG00000062078 | -0.7217389 | 7.36839505 | 0.01914365 | 0.08471164 |
| ENSMUSG00000033629 | -0.7221664 | 7.55316623 | 0.0190273  | 0.08433639 |
| ENSMUSG00000087590 | -0.7225872 | 3.17038194 | 0.02773298 | 0.11151099 |
| ENSMUSG00000001707 | -0.7229402 | 6.47725918 | 0.01931896 | 0.08526572 |
| ENSMUSG00000026019 | -0.7230444 | 7.14031347 | 0.01898467 | 0.08421665 |
| ENSMUSG00000101225 | -0.7249606 | 1.36528446 | 0.06235618 | 0.19708355 |
| ENSMUSG00000024805 | -0.7262585 | 5.76500287 | 0.01936165 | 0.08539714 |
| ENSMUSG00000078768 | -0.7268779 | 3.19242175 | 0.02568188 | 0.10542572 |
| ENSMUSG00000083563 | -0.7271231 | 3.89159931 | 0.02340326 | 0.09881783 |
| ENSMUSG00000005846 | -0.7277703 | 9.09732477 | 0.01788642 | 0.08003617 |
| ENSMUSG00000086015 | -0.7282184 | 1.11371    | 0.0600447  | 0.19146127 |
| ENSMUSG00000028093 | -0.7283799 | 3.53303673 | 0.02397977 | 0.10039418 |
| ENSMUSG00000026377 | -0.728525  | 7.83500275 | 0.01794315 | 0.0801902  |
| ENSMUSG00000024070 | -0.7296999 | 7.05621144 | 0.01799811 | 0.08036918 |
| ENSMUSG00000036693 | -0.7302544 | 7.55589168 | 0.01773098 | 0.07958366 |
| ENSMUSG00000063108 | -0.7316864 | 6.89063996 | 0.01776507 | 0.07959225 |
| ENSMUSG00000021548 | -0.7326654 | 6.43179173 | 0.0178444  | 0.07991447 |
| ENSMUSG00000036160 | -0.7342023 | 5.86493904 | 0.01774293 | 0.07958366 |
| ENSMUSG00000030660 | -0.7348208 | 6.62851156 | 0.01745435 | 0.0786905  |
| ENSMUSG00000022009 | -0.7349651 | 6.01742476 | 0.01772133 | 0.07958366 |
| ENSMUSG00000031226 | -0.7352677 | 6.90590356 | 0.01713219 | 0.07749729 |
| ENSMUSG00000030067 | -0.7361432 | 8.28934265 | 0.01670696 | 0.07602018 |
| ENSMUSG00000045464 | -0.73622   | 2.382878   | 0.03170133 | 0.12359621 |
| ENSMUSG00000018239 | -0.7362261 | 5.22809251 | 0.01825604 | 0.08138615 |
| ENSMUSG00000045896 | -0.7362785 | 6.73869051 | 0.01708577 | 0.07738467 |
| ENSMUSG00000042079 | -0.7373871 | 9.26022895 | 0.01642552 | 0.07499271 |
| ENSMUSG00000063480 | -0.7378447 | 8.05500307 | 0.01649511 | 0.07521542 |
| ENSMUSG00000079065 | -0.7379896 | 4.24706995 | 0.02015459 | 0.08806607 |
| ENSMUSG00000024242 | -0.7393194 | 2.65694886 | 0.02900252 | 0.11541077 |
| ENSMUSG00000045411 | -0.7393331 | 6.36629741 | 0.01674727 | 0.07613811 |



|                    |            |            |            |            |
|--------------------|------------|------------|------------|------------|
| ENSMUSG00000033166 | -0.7395998 | 7.89546551 | 0.01627845 | 0.07451051 |
| ENSMUSG00000086370 | -0.7398369 | 4.44855782 | 0.01889943 | 0.08387304 |
| ENSMUSG00000024097 | -0.7403638 | 8.43516997 | 0.01607634 | 0.07383614 |
| ENSMUSG00000031715 | -0.7405089 | 9.12173205 | 0.01600037 | 0.07358122 |
| ENSMUSG00000030521 | -0.7405573 | 7.47228424 | 0.01623668 | 0.07438247 |
| ENSMUSG00000035236 | -0.7407178 | 5.14990188 | 0.01798271 | 0.08033368 |
| ENSMUSG00000034875 | -0.7411114 | 5.19311803 | 0.01759736 | 0.07926896 |
| ENSMUSG00000032745 | -0.7417379 | 7.88852602 | 0.01599899 | 0.07358122 |
| ENSMUSG00000050029 | -0.7420525 | 6.87747527 | 0.01621661 | 0.0743221  |
| ENSMUSG00000046808 | -0.7420597 | 4.73668987 | 0.01821922 | 0.0812556  |
| ENSMUSG00000062939 | -0.7420619 | 5.79778132 | 0.01695506 | 0.07688958 |
| ENSMUSG00000046096 | -0.7420684 | 4.61757668 | 0.01861261 | 0.08287301 |
| ENSMUSG00000038866 | -0.7423235 | 6.87740091 | 0.0161709  | 0.07414412 |
| ENSMUSG00000089788 | -0.7425079 | 5.92187517 | 0.0166721  | 0.07589359 |
| ENSMUSG00000028530 | -0.7427831 | 9.01001547 | 0.01568605 | 0.07238269 |
| ENSMUSG00000023852 | -0.7430906 | 8.67847034 | 0.01567839 | 0.07237833 |
| ENSMUSG00000072653 | -0.7442771 | 2.98000863 | 0.02571668 | 0.10544898 |
| ENSMUSG00000013736 | -0.744574  | 7.81936316 | 0.01559583 | 0.07205886 |
| ENSMUSG00000047632 | -0.7450403 | 0.77457895 | 0.07985705 | 0.23069339 |
| ENSMUSG00000064090 | -0.7466285 | 4.89076739 | 0.0174282  | 0.07860547 |
| ENSMUSG00000048720 | -0.7469169 | 3.2984002  | 0.02200032 | 0.09440966 |
| ENSMUSG00000026037 | -0.7486674 | 7.88403165 | 0.0150457  | 0.07014823 |
| ENSMUSG00000026434 | -0.7490233 | 9.96861381 | 0.01478596 | 0.06932685 |
| ENSMUSG00000034218 | -0.7492181 | 8.45266405 | 0.01488673 | 0.06958754 |
| ENSMUSG00000025104 | -0.7492394 | 1.50284208 | 0.05275798 | 0.1761976  |
| ENSMUSG00000046311 | -0.7492647 | 7.21660471 | 0.01513806 | 0.07039658 |
| ENSMUSG00000063334 | -0.749498  | 7.21046511 | 0.01506721 | 0.07020557 |
| ENSMUSG00000032220 | -0.7498209 | 6.65353712 | 0.01517272 | 0.070527   |
| ENSMUSG00000005732 | -0.7503901 | 8.24202239 | 0.01472523 | 0.06907217 |
| ENSMUSG00000071068 | -0.7506927 | 6.83941166 | 0.01498512 | 0.06997843 |
| ENSMUSG00000044949 | -0.7510229 | 1.67609456 | 0.03691297 | 0.137979   |
| ENSMUSG00000027506 | -0.751229  | 5.83871965 | 0.01552432 | 0.07175967 |
| ENSMUSG00000040459 | -0.7512625 | 7.01638483 | 0.01488628 | 0.06958754 |
| ENSMUSG00000027201 | -0.752194  | 6.78637655 | 0.01485911 | 0.06957908 |
| ENSMUSG00000025060 | -0.7522593 | 6.71276334 | 0.01488509 | 0.06958754 |
| ENSMUSG00000025962 | -0.7524195 | 6.46122567 | 0.01499242 | 0.06997843 |
| ENSMUSG00000027099 | -0.7526414 | 6.20711874 | 0.0150931  | 0.07024772 |
| ENSMUSG00000070407 | -0.7526507 | 1.56935691 | 0.03950653 | 0.14461588 |
| ENSMUSG00000040565 | -0.7531333 | 8.27996226 | 0.01438515 | 0.06775894 |
| ENSMUSG00000021714 | -0.7573221 | 4.6615996  | 0.01625061 | 0.07441466 |
| ENSMUSG00000004356 | -0.7573948 | 8.33181365 | 0.01383965 | 0.06571855 |
| ENSMUSG00000064357 | -0.7578815 | 1.3497552  | 0.0371156  | 0.13839676 |
| ENSMUSG00000022607 | -0.7580153 | 4.72445566 | 0.01611302 | 0.07394162 |

|                    |            |            |            |            |
|--------------------|------------|------------|------------|------------|
| ENSMUSG00000053799 | -0.7592706 | 5.97317588 | 0.01435141 | 0.06767191 |
| ENSMUSG00000001027 | -0.7595582 | 5.62644806 | 0.01450074 | 0.06822687 |
| ENSMUSG00000075581 | -0.7598792 | 0.89721369 | 0.05163809 | 0.1735864  |
| ENSMUSG00000052812 | -0.7603439 | 6.22144147 | 0.014106   | 0.06677749 |
| ENSMUSG00000098148 | -0.7605845 | 3.42146316 | 0.01845803 | 0.08221865 |
| ENSMUSG00000028522 | -0.7607517 | 7.66945407 | 0.01354571 | 0.06466441 |
| ENSMUSG00000018415 | -0.7607564 | 5.69869422 | 0.01433542 | 0.06765566 |
| ENSMUSG00000025949 | -0.7609471 | 6.88194299 | 0.01374329 | 0.06540494 |
| ENSMUSG00000030505 | -0.7623217 | 6.46672336 | 0.0136766  | 0.06520269 |
| ENSMUSG00000026031 | -0.7623543 | 8.20014501 | 0.01324941 | 0.06364437 |
| ENSMUSG00000087177 | -0.762434  | 1.39597985 | 0.04697974 | 0.16308881 |
| ENSMUSG00000019777 | -0.7632797 | 7.60235434 | 0.01324333 | 0.06364352 |
| ENSMUSG00000055531 | -0.764167  | 7.95566154 | 0.01307447 | 0.06305598 |
| ENSMUSG00000037138 | -0.7646891 | 6.56533935 | 0.01336924 | 0.06407728 |
| ENSMUSG00000023169 | -0.7647402 | 8.21765694 | 0.01295562 | 0.06267987 |
| ENSMUSG00000052794 | -0.7651407 | 4.25250383 | 0.01561065 | 0.07209646 |
| ENSMUSG00000030942 | -0.7653803 | 7.26049214 | 0.01305439 | 0.06301634 |
| ENSMUSG00000037643 | -0.7655737 | 6.30819218 | 0.01339621 | 0.06408788 |
| ENSMUSG00000026495 | -0.7656402 | 3.20230151 | 0.02035049 | 0.08877817 |
| ENSMUSG00000032534 | -0.7666036 | 5.4588506  | 0.01376741 | 0.06549084 |
| ENSMUSG00000020738 | -0.7667922 | 8.94465889 | 0.01265814 | 0.0616834  |
| ENSMUSG00000023883 | -0.7668591 | 6.94943088 | 0.01297658 | 0.06272496 |
| ENSMUSG00000058470 | -0.7671699 | 5.4295099  | 0.01399815 | 0.06637668 |
| ENSMUSG00000026784 | -0.7680558 | 4.56717804 | 0.0149961  | 0.06997843 |
| ENSMUSG00000036916 | -0.7680777 | 6.42236436 | 0.01306614 | 0.06304485 |
| ENSMUSG00000074656 | -0.7686233 | 8.75724222 | 0.01246424 | 0.0609429  |
| ENSMUSG00000033186 | -0.7687389 | 5.25248603 | 0.01373023 | 0.06540055 |
| ENSMUSG00000041235 | -0.7694892 | 6.14323785 | 0.0129502  | 0.06267987 |
| ENSMUSG00000038535 | -0.7696574 | 6.30333059 | 0.01296467 | 0.06269553 |
| ENSMUSG00000101599 | -0.7705112 | 2.71090739 | 0.02102585 | 0.09106136 |
| ENSMUSG00000020988 | -0.7706011 | 5.41940367 | 0.01333474 | 0.06399725 |
| ENSMUSG00000032423 | -0.7709445 | 9.20403138 | 0.01217665 | 0.05985093 |
| ENSMUSG00000045624 | -0.7715664 | 7.37880528 | 0.0123417  | 0.06044181 |
| ENSMUSG00000020863 | -0.7715937 | 8.18898893 | 0.0121927  | 0.05988347 |
| ENSMUSG00000031174 | -0.7729912 | 3.33575113 | 0.01871335 | 0.0832528  |
| ENSMUSG00000097589 | -0.7736912 | 2.7761679  | 0.02127198 | 0.09175881 |
| ENSMUSG00000057541 | -0.7737806 | 7.05916624 | 0.01215048 | 0.05983142 |
| ENSMUSG00000042505 | -0.7740035 | 2.81482851 | 0.01945481 | 0.08573315 |
| ENSMUSG00000016087 | -0.7749683 | 7.44022506 | 0.01192857 | 0.05892704 |
| ENSMUSG00000059005 | -0.7755129 | 9.11026626 | 0.01168033 | 0.05793243 |
| ENSMUSG00000040102 | -0.7760284 | 4.82729052 | 0.01332994 | 0.06399725 |
| ENSMUSG00000038510 | -0.7763152 | 7.02064377 | 0.01189614 | 0.05880911 |
| ENSMUSG00000034761 | -0.7769581 | 4.85225257 | 0.01319855 | 0.06348491 |

|                    |            |            |            |            |
|--------------------|------------|------------|------------|------------|
| ENSMUSG00000097188 | -0.7773618 | 7.40640206 | 0.01170246 | 0.05796936 |
| ENSMUSG00000097772 | -0.7773721 | 4.21935763 | 0.01402354 | 0.06641629 |
| ENSMUSG00000031242 | -0.7784006 | 5.71849512 | 0.01230039 | 0.06026689 |
| ENSMUSG00000021569 | -0.7785934 | 6.60224105 | 0.01177594 | 0.0583066  |
| ENSMUSG00000050379 | -0.7787411 | 7.56068025 | 0.01151815 | 0.05747882 |
| ENSMUSG00000019699 | -0.7791816 | 5.50639477 | 0.01239476 | 0.0606741  |
| ENSMUSG00000024294 | -0.7803732 | 6.67613394 | 0.01157376 | 0.05759643 |
| ENSMUSG00000048495 | -0.7812198 | 4.09102827 | 0.01428154 | 0.06743086 |
| ENSMUSG00000027236 | -0.7813354 | 6.56316764 | 0.01155293 | 0.05754589 |
| ENSMUSG00000025980 | -0.7814504 | 10.6973726 | 0.01100363 | 0.05526927 |
| ENSMUSG00000063317 | -0.783138  | 5.96811772 | 0.01157291 | 0.05759643 |
| ENSMUSG00000008976 | -0.7832068 | 7.60919945 | 0.01104442 | 0.05544836 |
| ENSMUSG00000042105 | -0.7833702 | 5.75879997 | 0.01169608 | 0.05796441 |
| ENSMUSG00000030421 | -0.7836328 | 6.38128228 | 0.01134257 | 0.05668131 |
| ENSMUSG00000101609 | -0.7840173 | 2.85340311 | 0.01899648 | 0.08423439 |
| ENSMUSG00000032403 | -0.7844885 | 1.74934964 | 0.03054822 | 0.12009916 |
| ENSMUSG00000051730 | -0.7845745 | 3.83592915 | 0.01421302 | 0.06713675 |
| ENSMUSG00000034647 | -0.7846178 | 6.44868905 | 0.01122865 | 0.05621621 |
| ENSMUSG00000028669 | -0.7851739 | 6.18390989 | 0.01123434 | 0.05621862 |
| ENSMUSG00000022800 | -0.7854965 | 7.18281865 | 0.01091798 | 0.05499274 |
| ENSMUSG00000029328 | -0.7855561 | 8.48967336 | 0.01069515 | 0.05414861 |
| ENSMUSG00000050855 | -0.7856902 | 3.62605383 | 0.0149963  | 0.06997843 |
| ENSMUSG00000037236 | -0.7859998 | 8.7892812  | 0.01063778 | 0.05395948 |
| ENSMUSG00000047710 | -0.7862339 | 6.63571173 | 0.01093275 | 0.05501577 |
| ENSMUSG00000036934 | -0.7867158 | 4.22528162 | 0.01282733 | 0.06225468 |
| ENSMUSG00000032409 | -0.7867694 | 7.15803723 | 0.0108148  | 0.05467736 |
| ENSMUSG00000089824 | -0.7870302 | 5.39715796 | 0.01154034 | 0.05753628 |
| ENSMUSG00000074182 | -0.7880643 | 5.66461355 | 0.01123967 | 0.05621922 |
| ENSMUSG00000022637 | -0.7884008 | 5.17858598 | 0.01168426 | 0.05793243 |
| ENSMUSG00000045102 | -0.7892306 | 0.87187501 | 0.04902354 | 0.16799169 |
| ENSMUSG00000021669 | -0.7894705 | 6.6014285  | 0.0106936  | 0.05414861 |
| ENSMUSG00000051022 | -0.7902333 | 1.95371756 | 0.02162274 | 0.0930494  |
| ENSMUSG00000038563 | -0.7902883 | 7.00817778 | 0.01045093 | 0.05331257 |
| ENSMUSG00000066278 | -0.7907423 | 3.45068806 | 0.01460552 | 0.06860536 |
| ENSMUSG00000025626 | -0.7913103 | 7.59031686 | 0.01028173 | 0.05267374 |
| ENSMUSG00000030393 | -0.7936498 | 4.04179949 | 0.01283979 | 0.06225913 |
| ENSMUSG00000031644 | -0.7936854 | 5.81383571 | 0.01067454 | 0.05409505 |
| ENSMUSG00000018846 | -0.7943058 | 7.48339138 | 0.01000973 | 0.05163054 |
| ENSMUSG00000022299 | -0.7950987 | 5.66812295 | 0.01057216 | 0.0536811  |
| ENSMUSG00000097230 | -0.7958825 | 1.43290148 | 0.03786354 | 0.14036452 |
| ENSMUSG00000045140 | -0.7964829 | 4.40754875 | 0.01182534 | 0.05852429 |
| ENSMUSG00000069135 | -0.7965344 | 6.57907059 | 0.01000026 | 0.05162414 |
| ENSMUSG00000059834 | -0.7977363 | 5.0032131  | 0.01090765 | 0.05496638 |

|                    |            |            |            |            |
|--------------------|------------|------------|------------|------------|
| ENSMUSG00000034998 | -0.7986115 | 6.54768054 | 0.00984181 | 0.05101734 |
| ENSMUSG00000053205 | -0.7987134 | 3.90042412 | 0.01258673 | 0.06144648 |
| ENSMUSG00000027534 | -0.7992429 | 3.25925165 | 0.01507753 | 0.07020557 |
| ENSMUSG00000022237 | -0.7997827 | 6.44812554 | 0.00973717 | 0.05062953 |
| ENSMUSG00000031671 | -0.7998045 | 4.36464236 | 0.01152647 | 0.05749373 |
| ENSMUSG00000031432 | -0.799886  | 7.1559721  | 0.00955545 | 0.04987706 |
| ENSMUSG00000047412 | -0.8006134 | 6.23768328 | 0.00977012 | 0.0507068  |
| ENSMUSG00000042225 | -0.8024508 | 6.07723659 | 0.009661   | 0.05033056 |
| ENSMUSG00000029635 | -0.8028263 | 6.5579544  | 0.00944198 | 0.04933251 |
| ENSMUSG00000046999 | -0.8037274 | 5.22020982 | 0.01001108 | 0.05163054 |
| ENSMUSG00000029817 | -0.8042397 | 7.69204772 | 0.00907764 | 0.04782863 |
| ENSMUSG00000028188 | -0.8053237 | 1.22425938 | 0.03261456 | 0.12613164 |
| ENSMUSG00000052749 | -0.8059151 | 4.38527723 | 0.0110953  | 0.05567786 |
| ENSMUSG00000074527 | -0.8063391 | 1.05079554 | 0.03661789 | 0.13731706 |
| ENSMUSG00000032883 | -0.8063415 | 6.29096056 | 0.00923669 | 0.04858948 |
| ENSMUSG00000037253 | -0.8064372 | 6.94670856 | 0.00903919 | 0.04769011 |
| ENSMUSG00000071796 | -0.8082324 | 4.20004365 | 0.01113825 | 0.05581548 |
| ENSMUSG00000031939 | -0.8086582 | 6.80954634 | 0.00888452 | 0.04703516 |
| ENSMUSG00000027552 | -0.8093036 | 4.47438602 | 0.0104722  | 0.0533454  |
| ENSMUSG00000064368 | -0.8093956 | 6.22729701 | 0.00901533 | 0.04758751 |
| ENSMUSG00000054237 | -0.8096348 | 5.16915228 | 0.00959283 | 0.05004792 |
| ENSMUSG00000086429 | -0.8097192 | 3.27866015 | 0.01316882 | 0.06339848 |
| ENSMUSG00000095315 | -0.8106904 | 1.18050833 | 0.03988224 | 0.1454973  |
| ENSMUSG00000005540 | -0.8110657 | 8.824977   | 0.00840391 | 0.04490969 |
| ENSMUSG00000040321 | -0.8115533 | 5.35716484 | 0.00933606 | 0.0489213  |
| ENSMUSG00000046994 | -0.8123246 | 5.68175496 | 0.00896818 | 0.04736183 |
| ENSMUSG00000049871 | -0.8126209 | 4.24805637 | 0.01057295 | 0.0536811  |
| ENSMUSG00000028163 | -0.8127091 | 9.35158448 | 0.00824749 | 0.04430966 |
| ENSMUSG00000028034 | -0.8134175 | 8.64318017 | 0.00823493 | 0.04426992 |
| ENSMUSG00000031885 | -0.8138416 | 7.94618374 | 0.0082661  | 0.04434904 |
| ENSMUSG00000020561 | -0.8147356 | 6.5208219  | 0.00848829 | 0.04520381 |
| ENSMUSG00000026771 | -0.8148666 | 4.64927036 | 0.00972012 | 0.05058963 |
| ENSMUSG00000097048 | -0.8148866 | 3.45026576 | 0.01201901 | 0.05930435 |
| ENSMUSG00000018189 | -0.8151818 | 6.88171758 | 0.00834421 | 0.04463491 |
| ENSMUSG00000024403 | -0.8160091 | 0.99536145 | 0.03961335 | 0.1449577  |
| ENSMUSG00000050796 | -0.8160684 | 2.51706401 | 0.01635577 | 0.07473755 |
| ENSMUSG00000028180 | -0.8163366 | 7.74551881 | 0.00809076 | 0.04369094 |
| ENSMUSG00000021636 | -0.8165974 | 2.39737439 | 0.01631502 | 0.0746146  |
| ENSMUSG00000024401 | -0.8172586 | 4.76956175 | 0.00939513 | 0.04915919 |
| ENSMUSG00000021690 | -0.817578  | 4.67319318 | 0.00942671 | 0.0492766  |
| ENSMUSG00000010554 | -0.81881   | 7.37274878 | 0.00795765 | 0.04312324 |
| ENSMUSG00000034424 | -0.8198662 | 6.34198186 | 0.00811056 | 0.04375403 |
| ENSMUSG00000042354 | -0.8199112 | 8.48141048 | 0.00775373 | 0.04227312 |

|                    |            |            |            |            |
|--------------------|------------|------------|------------|------------|
| ENSMUSG00000029014 | -0.820664  | 8.26958305 | 0.0077147  | 0.04210289 |
| ENSMUSG00000032113 | -0.8222461 | 6.37189545 | 0.0079436  | 0.04306878 |
| ENSMUSG00000084806 | -0.8224989 | 1.16271003 | 0.04704672 | 0.1631881  |
| ENSMUSG00000058661 | -0.8227901 | 3.27399501 | 0.01212945 | 0.05975981 |
| ENSMUSG00000020534 | -0.8230182 | 7.17855745 | 0.0076397  | 0.04179935 |
| ENSMUSG00000027559 | -0.8249695 | 1.17460409 | 0.03988224 | 0.1454973  |
| ENSMUSG00000025264 | -0.8258683 | 5.95592667 | 0.00779752 | 0.04246893 |
| ENSMUSG00000025001 | -0.8259011 | 8.95203459 | 0.00729985 | 0.0402874  |
| ENSMUSG00000026739 | -0.8269162 | 6.7811678  | 0.00748455 | 0.04111735 |
| ENSMUSG00000048895 | -0.8273536 | 4.37505785 | 0.00890419 | 0.04711616 |
| ENSMUSG00000036371 | -0.8280107 | 9.64554052 | 0.007122   | 0.03944717 |
| ENSMUSG00000015882 | -0.8283877 | 4.14446629 | 0.00926306 | 0.0486807  |
| ENSMUSG00000086290 | -0.8304603 | 5.16270803 | 0.00786072 | 0.04272679 |
| ENSMUSG00000093930 | -0.8305488 | 8.3441544  | 0.0070122  | 0.03897914 |
| ENSMUSG00000041390 | -0.8316476 | 5.34072711 | 0.00770723 | 0.04210289 |
| ENSMUSG00000037316 | -0.8318555 | 5.52114383 | 0.00757311 | 0.04156153 |
| ENSMUSG00000101970 | -0.8322203 | 4.003575   | 0.00915058 | 0.04816003 |
| ENSMUSG00000040413 | -0.8330067 | 4.35413344 | 0.0084381  | 0.04504774 |
| ENSMUSG00000019857 | -0.8338563 | 5.98392036 | 0.00723405 | 0.03998567 |
| ENSMUSG00000038646 | -0.8344771 | 5.17371869 | 0.00761692 | 0.04170281 |
| ENSMUSG00000032415 | -0.8345126 | 3.0838613  | 0.01098079 | 0.05523174 |
| ENSMUSG00000000184 | -0.8346581 | 10.4985987 | 0.00666084 | 0.03741171 |
| ENSMUSG00000014496 | -0.834776  | 6.67154364 | 0.00696176 | 0.03877875 |
| ENSMUSG00000025026 | -0.8348456 | 6.37782214 | 0.00699598 | 0.03890903 |
| ENSMUSG00000021079 | -0.834976  | 5.08153207 | 0.00757976 | 0.04157689 |
| ENSMUSG00000036990 | -0.8355455 | 8.55537936 | 0.00666931 | 0.03743981 |
| ENSMUSG00000005034 | -0.8360392 | 6.44009078 | 0.00693163 | 0.03863211 |
| ENSMUSG00000040850 | -0.8371917 | 7.79335254 | 0.00663566 | 0.03730917 |
| ENSMUSG00000027708 | -0.83778   | 6.31450641 | 0.00687359 | 0.03838674 |
| ENSMUSG00000056459 | -0.8379703 | 4.25698794 | 0.00826244 | 0.04434904 |
| ENSMUSG00000044501 | -0.8381978 | 4.0165699  | 0.0086428  | 0.04595854 |
| ENSMUSG00000016520 | -0.8401178 | 4.19245857 | 0.00810672 | 0.04375403 |
| ENSMUSG00000038400 | -0.8404088 | 5.03937526 | 0.00714328 | 0.03954036 |
| ENSMUSG00000037376 | -0.8404671 | 6.83249221 | 0.00654505 | 0.0369538  |
| ENSMUSG00000063320 | -0.8406912 | 2.50394811 | 0.01339725 | 0.06408788 |
| ENSMUSG00000020794 | -0.8407533 | 6.79182522 | 0.00656539 | 0.03701053 |
| ENSMUSG00000032103 | -0.8408441 | 5.66457973 | 0.00693186 | 0.03863211 |
| ENSMUSG00000009470 | -0.8415139 | 9.10170458 | 0.00627006 | 0.03560629 |
| ENSMUSG00000039410 | -0.8419546 | 2.64381141 | 0.01400903 | 0.06637668 |
| ENSMUSG00000051098 | -0.8423005 | 2.12750997 | 0.0164667  | 0.07514889 |
| ENSMUSG00000097519 | -0.842307  | 1.2812725  | 0.02591046 | 0.10596073 |
| ENSMUSG00000093594 | -0.8423462 | 2.88115464 | 0.01188014 | 0.05876855 |
| ENSMUSG00000053656 | -0.8428138 | 3.59395342 | 0.00907875 | 0.04782863 |

|                    |            |            |            |            |
|--------------------|------------|------------|------------|------------|
| ENSMUSG00000047945 | -0.8430753 | 6.73464767 | 0.0064104  | 0.03627408 |
| ENSMUSG00000028270 | -0.8432032 | 9.42866217 | 0.00615704 | 0.03518682 |
| ENSMUSG00000026623 | -0.8441411 | 8.54409423 | 0.00613734 | 0.03509284 |
| ENSMUSG00000060510 | -0.8456842 | 6.73200326 | 0.00625848 | 0.03559675 |
| ENSMUSG00000029687 | -0.8463966 | 9.01841027 | 0.00598153 | 0.03431108 |
| ENSMUSG00000033847 | -0.8489559 | 2.7532883  | 0.01111232 | 0.05571142 |
| ENSMUSG00000004568 | -0.8495257 | 4.66709479 | 0.00687057 | 0.03838674 |
| ENSMUSG00000009207 | -0.8506298 | 5.68002573 | 0.00626814 | 0.03560629 |
| ENSMUSG00000020679 | -0.8512664 | 1.89465146 | 0.0163481  | 0.07473417 |
| ENSMUSG00000073125 | -0.8521548 | 1.70543139 | 0.02536533 | 0.10480449 |
| ENSMUSG00000030753 | -0.8556066 | 7.49590233 | 0.00556486 | 0.03234455 |
| ENSMUSG00000031403 | -0.856039  | 8.74443954 | 0.00545098 | 0.031792   |
| ENSMUSG00000025630 | -0.8570536 | 8.17129042 | 0.00543038 | 0.0317045  |
| ENSMUSG00000047454 | -0.8593795 | 6.2441704  | 0.00555966 | 0.03234455 |
| ENSMUSG00000025591 | -0.8608604 | 5.85975494 | 0.0056147  | 0.03258822 |
| ENSMUSG00000071267 | -0.861024  | 4.53172255 | 0.0065542  | 0.03696679 |
| ENSMUSG00000097392 | -0.8613612 | 3.91730349 | 0.0070392  | 0.03908897 |
| ENSMUSG00000060548 | -0.8627319 | 0.83243969 | 0.03036361 | 0.11954769 |
| ENSMUSG00000022686 | -0.8653505 | 6.38140159 | 0.00525221 | 0.03081603 |
| ENSMUSG00000043252 | -0.8653943 | 4.81417401 | 0.00593492 | 0.03409811 |
| ENSMUSG00000020275 | -0.8655186 | 7.03798284 | 0.00511496 | 0.03010902 |
| ENSMUSG00000042195 | -0.8655743 | 4.2948989  | 0.00617741 | 0.03522855 |
| ENSMUSG00000024287 | -0.8675418 | 7.10585316 | 0.00500233 | 0.02959138 |
| ENSMUSG00000075232 | -0.867679  | 6.98944575 | 0.00500657 | 0.02960023 |
| ENSMUSG00000053819 | -0.8712684 | 8.10590523 | 0.00472252 | 0.02824606 |
| ENSMUSG00000020570 | -0.8713606 | 8.90316736 | 0.00468128 | 0.02803052 |
| ENSMUSG00000093726 | -0.8720493 | 2.86084978 | 0.00886366 | 0.04694777 |
| ENSMUSG00000062248 | -0.872994  | 6.53889789 | 0.00482024 | 0.02869282 |
| ENSMUSG00000050714 | -0.8743593 | 4.44965096 | 0.00578442 | 0.03342934 |
| ENSMUSG00000022797 | -0.8744476 | 9.81437992 | 0.00451157 | 0.0272107  |
| ENSMUSG00000027763 | -0.8756357 | 9.04887373 | 0.00447552 | 0.02702847 |
| ENSMUSG00000022634 | -0.8757209 | 4.22571775 | 0.00593236 | 0.03409811 |
| ENSMUSG00000026484 | -0.8764668 | 6.71141264 | 0.00463293 | 0.02781769 |
| ENSMUSG00000022346 | -0.8780247 | 6.62302138 | 0.00452477 | 0.02725983 |
| ENSMUSG00000052144 | -0.8794574 | 7.81280043 | 0.00436855 | 0.026586   |
| ENSMUSG00000073627 | -0.8802492 | 1.66246694 | 0.01691948 | 0.07676049 |
| ENSMUSG00000057113 | -0.8806609 | 11.945197  | 0.00421763 | 0.02585723 |
| ENSMUSG00000017485 | -0.8829483 | 8.99181499 | 0.00416326 | 0.02556755 |
| ENSMUSG00000073131 | -0.883013  | 6.232594   | 0.00441769 | 0.02676422 |
| ENSMUSG00000041992 | -0.8839291 | 5.96849959 | 0.00443717 | 0.02684822 |
| ENSMUSG00000041849 | -0.8850484 | 4.84795687 | 0.0049367  | 0.02926739 |
| ENSMUSG00000026020 | -0.8852028 | 9.32824378 | 0.00405806 | 0.02503552 |
| ENSMUSG00000026827 | -0.8855248 | 5.86606918 | 0.00439357 | 0.02668613 |

|                    |            |            |            |            |
|--------------------|------------|------------|------------|------------|
| ENSMUSG00000032307 | -0.8855446 | 6.0659438  | 0.00436669 | 0.026586   |
| ENSMUSG00000024691 | -0.8858297 | 8.96996433 | 0.00404229 | 0.02495253 |
| ENSMUSG00000064360 | -0.8858891 | 1.76421881 | 0.01312839 | 0.06326029 |
| ENSMUSG00000053178 | -0.8868606 | 0.90378611 | 0.02528746 | 0.10456286 |
| ENSMUSG00000094483 | -0.8872093 | 8.88680968 | 0.00398945 | 0.02465332 |
| ENSMUSG00000063972 | -0.888386  | 3.16889001 | 0.00665089 | 0.03737527 |
| ENSMUSG00000042474 | -0.889678  | 5.67846893 | 0.00429389 | 0.02623529 |
| ENSMUSG00000019814 | -0.8898969 | 7.05589712 | 0.00399076 | 0.02465332 |
| ENSMUSG00000042320 | -0.8899567 | 2.58692864 | 0.00787958 | 0.04280774 |
| ENSMUSG00000028676 | -0.8902992 | 8.74474177 | 0.00387029 | 0.024056   |
| ENSMUSG00000015396 | -0.8907325 | 9.70387949 | 0.00382937 | 0.02382914 |
| ENSMUSG00000044149 | -0.8913851 | 6.16763449 | 0.00407746 | 0.02512645 |
| ENSMUSG00000043929 | -0.8928855 | 4.03695092 | 0.00528578 | 0.03097925 |
| ENSMUSG00000040651 | -0.8932091 | 6.40284911 | 0.00396973 | 0.02457493 |
| ENSMUSG00000054079 | -0.8932248 | 7.1022523  | 0.00386353 | 0.02402789 |
| ENSMUSG00000061024 | -0.8939593 | 6.38418912 | 0.00392101 | 0.02434321 |
| ENSMUSG00000027863 | -0.8947838 | 4.22056759 | 0.00498058 | 0.02951128 |
| ENSMUSG00000087368 | -0.8968294 | 2.03775013 | 0.01162593 | 0.05780267 |
| ENSMUSG00000057497 | -0.8972842 | 6.88400372 | 0.00373141 | 0.02330027 |
| ENSMUSG00000014226 | -0.8980131 | 8.4791812  | 0.00358648 | 0.02247336 |
| ENSMUSG00000040723 | -0.8981268 | 6.21899413 | 0.00376489 | 0.02346855 |
| ENSMUSG00000086877 | -0.8989123 | 1.31282381 | 0.01713193 | 0.07749729 |
| ENSMUSG00000071291 | -0.9007754 | 2.82099917 | 0.00680254 | 0.03810834 |
| ENSMUSG00000021709 | -0.9029515 | 7.96074786 | 0.00343673 | 0.02168618 |
| ENSMUSG00000026103 | -0.9048289 | 8.6974868  | 0.00333836 | 0.0211869  |
| ENSMUSG00000041057 | -0.9054291 | 8.80013309 | 0.00331215 | 0.02108514 |
| ENSMUSG00000028224 | -0.9059796 | 6.3051352  | 0.00349784 | 0.0219946  |
| ENSMUSG00000026116 | -0.9063836 | 7.85575739 | 0.00331806 | 0.02109784 |
| ENSMUSG00000073236 | -0.9069161 | 2.46658419 | 0.00832168 | 0.04455861 |
| ENSMUSG00000025314 | -0.9083145 | 6.11220483 | 0.00345546 | 0.02177886 |
| ENSMUSG00000018379 | -0.9091884 | 10.1720315 | 0.00316137 | 0.02025682 |
| ENSMUSG00000022792 | -0.9093594 | 5.67817205 | 0.00350447 | 0.02202342 |
| ENSMUSG00000021470 | -0.9094043 | 9.09232672 | 0.00317347 | 0.02032225 |
| ENSMUSG00000097375 | -0.9095923 | 1.53353223 | 0.01382329 | 0.06566976 |
| ENSMUSG00000028010 | -0.9107481 | 5.91913101 | 0.00337067 | 0.02134427 |
| ENSMUSG00000093565 | -0.9115519 | 2.8508921  | 0.00617504 | 0.03522855 |
| ENSMUSG00000055148 | -0.9116365 | 4.24520208 | 0.0040751  | 0.0251263  |
| ENSMUSG00000026770 | -0.912697  | 6.6906339  | 0.00320563 | 0.02047958 |
| ENSMUSG00000034610 | -0.9159564 | 7.70581593 | 0.003023   | 0.01953267 |
| ENSMUSG00000014030 | -0.9169622 | 5.41058716 | 0.00322733 | 0.02059381 |
| ENSMUSG00000086000 | -0.9208355 | 0.69692097 | 0.02321859 | 0.09823039 |
| ENSMUSG00000053289 | -0.9214867 | 7.2663858  | 0.00287566 | 0.01868136 |
| ENSMUSG00000029246 | -0.9238994 | 7.76013523 | 0.00277318 | 0.01808097 |

|                    |            |            |            |            |
|--------------------|------------|------------|------------|------------|
| ENSMUSG00000021392 | -0.9241936 | 7.71752833 | 0.00277034 | 0.01807338 |
| ENSMUSG00000025423 | -0.9253251 | 6.47275085 | 0.00284963 | 0.01855699 |
| ENSMUSG00000024673 | -0.9260827 | 10.2126402 | 0.00265164 | 0.01743612 |
| ENSMUSG00000058258 | -0.9283797 | 9.06750301 | 0.00260458 | 0.01718959 |
| ENSMUSG00000061665 | -0.9288685 | 7.79826439 | 0.0026344  | 0.01735455 |
| ENSMUSG00000032902 | -0.9345541 | 7.71304729 | 0.00248028 | 0.01652093 |
| ENSMUSG00000021774 | -0.940055  | 6.67565089 | 0.00240943 | 0.01610868 |
| ENSMUSG00000027806 | -0.9413863 | 5.26513182 | 0.00262948 | 0.01733273 |
| ENSMUSG00000019883 | -0.9415272 | 5.4132258  | 0.00259806 | 0.0171732  |
| ENSMUSG00000035834 | -0.9420389 | 5.25820521 | 0.00259069 | 0.01715039 |
| ENSMUSG00000028261 | -0.9426855 | 6.13511568 | 0.00241814 | 0.01615691 |
| ENSMUSG00000012429 | -0.9441295 | 3.81146252 | 0.00333992 | 0.0211869  |
| ENSMUSG00000052397 | -0.9452335 | 7.48338087 | 0.0022191  | 0.01496755 |
| ENSMUSG00000052889 | -0.9459838 | 7.45257587 | 0.00221157 | 0.01493396 |
| ENSMUSG00000101279 | -0.9468229 | 1.88598119 | 0.00813512 | 0.04382277 |
| ENSMUSG00000018476 | -0.9471218 | 3.21111129 | 0.00345364 | 0.02177886 |
| ENSMUSG00000033767 | -0.947189  | 7.00771133 | 0.00220946 | 0.0149291  |
| ENSMUSG00000025958 | -0.9487414 | 7.6680396  | 0.00213994 | 0.01454133 |
| ENSMUSG00000097493 | -0.9503383 | 1.35064396 | 0.01033929 | 0.05289324 |
| ENSMUSG00000021895 | -0.9508035 | 4.61351561 | 0.00260051 | 0.0171732  |
| ENSMUSG00000039630 | -0.9569474 | 8.20258703 | 0.00194043 | 0.01343105 |
| ENSMUSG00000031925 | -0.9572921 | 4.4432019  | 0.0025662  | 0.01700915 |
| ENSMUSG00000034120 | -0.9585387 | 9.26152008 | 0.00188536 | 0.01314266 |
| ENSMUSG00000042097 | -0.9596403 | 3.95681819 | 0.00271714 | 0.01776934 |
| ENSMUSG00000032216 | -0.9602629 | 7.3466278  | 0.00190499 | 0.01324524 |
| ENSMUSG00000052477 | -0.9606523 | 5.89683942 | 0.00203707 | 0.01393015 |
| ENSMUSG00000046546 | -0.960766  | 4.32992739 | 0.00245626 | 0.01637101 |
| ENSMUSG00000023927 | -0.9624898 | 6.23183651 | 0.00195074 | 0.01348513 |
| ENSMUSG00000032253 | -0.9628131 | 9.9861918  | 0.00179473 | 0.01261695 |
| ENSMUSG00000024378 | -0.9633192 | 7.42622181 | 0.00183952 | 0.0128898  |
| ENSMUSG00000085241 | -0.9636234 | 5.84370025 | 0.00197528 | 0.01360244 |
| ENSMUSG00000071748 | -0.965063  | 6.27606921 | 0.00188758 | 0.01314968 |
| ENSMUSG00000023025 | -0.965105  | 8.50764258 | 0.00176931 | 0.01247887 |
| ENSMUSG00000055044 | -0.9666122 | 4.60444274 | 0.00215512 | 0.0146353  |
| ENSMUSG00000022708 | -0.9679991 | 4.75002044 | 0.00216442 | 0.01468915 |
| ENSMUSG00000070056 | -0.9722998 | 5.34314489 | 0.00186883 | 0.01304429 |
| ENSMUSG00000024975 | -0.9726294 | 5.66098272 | 0.00183905 | 0.0128898  |
| ENSMUSG00000054766 | -0.9742117 | 9.73921322 | 0.00158591 | 0.0113186  |
| ENSMUSG00000048031 | -0.9745999 | 7.25355689 | 0.0016338  | 0.01162196 |
| ENSMUSG00000044768 | -0.9800533 | 5.95693681 | 0.0016387  | 0.01164913 |
| ENSMUSG00000090523 | -0.9808115 | 6.55249721 | 0.00156099 | 0.01114816 |
| ENSMUSG00000032449 | -0.9817956 | 6.15955709 | 0.00159408 | 0.01136944 |
| ENSMUSG00000033953 | -0.9877143 | 7.60083114 | 0.001406   | 0.01017602 |



|                    |            |            |            |            |
|--------------------|------------|------------|------------|------------|
| ENSMUSG00000030265 | -0.9926745 | 6.27067733 | 0.00139626 | 0.01011912 |
| ENSMUSG00000036167 | -0.9958828 | 7.48234687 | 0.00128559 | 0.00941834 |
| ENSMUSG00000026234 | -0.9965755 | 12.6240366 | 0.00123154 | 0.00907789 |
| ENSMUSG00000075054 | -0.9976362 | 4.17991637 | 0.00174002 | 0.01230448 |
| ENSMUSG00000030103 | -0.9981974 | 5.69161965 | 0.00136024 | 0.00990234 |
| ENSMUSG00000021054 | -0.9994314 | 5.64254167 | 0.00136176 | 0.00990234 |
| ENSMUSG00000031093 | -0.999516  | 8.11224325 | 0.00122273 | 0.00902528 |
| ENSMUSG00000085156 | -1.0015955 | 5.16716839 | 0.0013825  | 0.01003964 |
| ENSMUSG00000020648 | -1.0028225 | 4.72806661 | 0.00150033 | 0.01078634 |
| ENSMUSG00000000811 | -1.0073146 | 3.92690184 | 0.00164958 | 0.01171878 |
| ENSMUSG00000098183 | -1.0085423 | 0.7223186  | 0.01438872 | 0.06775894 |
| ENSMUSG00000097729 | -1.0105756 | 2.61504296 | 0.00284269 | 0.01852301 |
| ENSMUSG00000051444 | -1.0115064 | 3.47036799 | 0.00189211 | 0.01317271 |
| ENSMUSG00000055612 | -1.0135867 | 7.27404292 | 0.00105997 | 0.00793251 |
| ENSMUSG00000100455 | -1.0137643 | 2.10430992 | 0.00452734 | 0.02726001 |
| ENSMUSG00000097769 | -1.0168419 | 6.04689724 | 0.00107938 | 0.00806653 |
| ENSMUSG00000024726 | -1.0170649 | 5.87781844 | 0.00109858 | 0.00818731 |
| ENSMUSG00000022698 | -1.0172416 | 8.854144   | 0.00099058 | 0.00748067 |
| ENSMUSG00000037868 | -1.0182864 | 2.76343141 | 0.00219413 | 0.01483479 |
| ENSMUSG00000038127 | -1.0199637 | 9.22245034 | 0.00095767 | 0.00726268 |
| ENSMUSG00000090252 | -1.0217539 | 1.4686421  | 0.00631536 | 0.03583412 |
| ENSMUSG00000037172 | -1.0229641 | 5.68527504 | 0.00105055 | 0.00787289 |
| ENSMUSG00000020116 | -1.0241584 | 7.65251984 | 0.00093443 | 0.00711643 |
| ENSMUSG00000038205 | -1.0242414 | 3.98948467 | 0.00134965 | 0.00984463 |
| ENSMUSG00000034833 | -1.0287175 | 3.78712085 | 0.00142897 | 0.01030768 |
| ENSMUSG00000038147 | -1.0300994 | 5.65427427 | 0.00097278 | 0.00737207 |
| ENSMUSG00000063757 | -1.034352  | 0.67677453 | 0.01202145 | 0.05930435 |
| ENSMUSG00000019873 | -1.0345958 | 7.01822228 | 0.00084467 | 0.00649245 |
| ENSMUSG00000050914 | -1.0346485 | 1.32748987 | 0.00651251 | 0.03678934 |
| ENSMUSG00000047880 | -1.0347665 | 7.47542201 | 0.00082856 | 0.00638225 |
| ENSMUSG00000079659 | -1.035349  | 6.49207111 | 0.0008606  | 0.00659608 |
| ENSMUSG00000035095 | -1.0360973 | 5.50527832 | 0.00092227 | 0.00703876 |
| ENSMUSG00000006310 | -1.0368289 | 6.87484155 | 0.00081902 | 0.00633141 |
| ENSMUSG00000002107 | -1.037374  | 8.00414165 | 0.00079737 | 0.00618989 |
| ENSMUSG00000093470 | -1.0394493 | 7.51836232 | 0.00079056 | 0.00615105 |
| ENSMUSG00000025894 | -1.0426457 | 5.54856498 | 0.00084713 | 0.00650672 |
| ENSMUSG00000097571 | -1.0443831 | 1.511288   | 0.00480305 | 0.02863247 |
| ENSMUSG00000057093 | -1.0480439 | 1.18064609 | 0.00742022 | 0.04084722 |
| ENSMUSG00000042638 | -1.0487542 | 2.30113581 | 0.00253199 | 0.01681342 |
| ENSMUSG00000056687 | -1.0496058 | 1.1158967  | 0.0059485  | 0.03415796 |
| ENSMUSG00000053641 | -1.0527272 | 8.73015764 | 0.00066131 | 0.00527479 |
| ENSMUSG00000098188 | -1.0547661 | 4.19615124 | 0.0009355  | 0.0071196  |
| ENSMUSG00000024986 | -1.0587405 | 4.1589031  | 0.00092981 | 0.00708624 |

|                    |            |            |            |            |
|--------------------|------------|------------|------------|------------|
| ENSMUSG00000093483 | -1.060266  | 1.36785396 | 0.00491453 | 0.02918408 |
| ENSMUSG00000062585 | -1.0608189 | 5.93081645 | 0.00066759 | 0.00531312 |
| ENSMUSG00000037071 | -1.0621343 | 9.74545658 | 0.00058689 | 0.00474793 |
| ENSMUSG00000101335 | -1.0656986 | 0.98160245 | 0.00984487 | 0.05101734 |
| ENSMUSG00000094614 | -1.0657707 | 1.58381687 | 0.00365187 | 0.02286977 |
| ENSMUSG00000027011 | -1.0680276 | 6.06249926 | 0.00060722 | 0.00489407 |
| ENSMUSG00000100658 | -1.069522  | 2.41614939 | 0.00173526 | 0.01227892 |
| ENSMUSG00000039987 | -1.0695477 | 6.82915672 | 0.00057002 | 0.00462537 |
| ENSMUSG00000028134 | -1.0722365 | 4.72668045 | 0.00071082 | 0.00558708 |
| ENSMUSG00000007836 | -1.0729368 | 7.42750284 | 0.00053565 | 0.0043761  |
| ENSMUSG00000027804 | -1.0756516 | 8.29883834 | 0.00050834 | 0.00419105 |
| ENSMUSG00000025915 | -1.080259  | 7.07171377 | 0.00049898 | 0.00412455 |
| ENSMUSG00000017418 | -1.0819659 | 4.8545724  | 0.00061209 | 0.00492594 |
| ENSMUSG00000029814 | -1.0840391 | 3.30904603 | 0.00098383 | 0.00744537 |
| ENSMUSG00000092118 | -1.0908891 | 2.11818327 | 0.00196404 | 0.01355101 |
| ENSMUSG00000048924 | -1.0910842 | 2.63109414 | 0.00123501 | 0.00908398 |
| ENSMUSG00000015961 | -1.0945703 | 7.76598553 | 0.00041127 | 0.00345954 |
| ENSMUSG00000030872 | -1.0987042 | 6.87576444 | 0.0004009  | 0.00338813 |
| ENSMUSG00000046230 | -1.0990595 | 6.99241477 | 0.00040154 | 0.00339095 |
| ENSMUSG00000018334 | -1.0991691 | 3.33502065 | 0.00070609 | 0.00555798 |
| ENSMUSG00000090103 | -1.1014358 | 4.32022096 | 0.00054896 | 0.0044713  |
| ENSMUSG00000092203 | -1.1027581 | 6.20666185 | 0.00039441 | 0.00334906 |
| ENSMUSG00000026098 | -1.10964   | 5.35842687 | 0.00040497 | 0.00341183 |
| ENSMUSG00000037110 | -1.111537  | 6.89366674 | 0.00034543 | 0.0029753  |
| ENSMUSG00000032413 | -1.1131254 | 7.32773062 | 0.0003341  | 0.00289621 |
| ENSMUSG00000073062 | -1.1161741 | 3.41798502 | 0.00065355 | 0.00521704 |
| ENSMUSG00000053541 | -1.1167457 | 5.69306842 | 0.00035954 | 0.00308459 |
| ENSMUSG00000039633 | -1.1240637 | 3.74343    | 0.00050946 | 0.00419707 |
| ENSMUSG00000073492 | -1.1277558 | 1.30133027 | 0.00330661 | 0.02106231 |
| ENSMUSG00000043421 | -1.132985  | 3.19462566 | 0.00057193 | 0.0046374  |
| ENSMUSG00000056130 | -1.1377243 | 4.66137155 | 0.00033123 | 0.00287595 |
| ENSMUSG00000071103 | -1.1384276 | 1.89376875 | 0.00149484 | 0.01075405 |
| ENSMUSG00000057098 | -1.1498234 | 6.21492791 | 0.00022546 | 0.0020278  |
| ENSMUSG00000044641 | -1.1548467 | 1.62124315 | 0.00179209 | 0.01260656 |
| ENSMUSG00000000838 | -1.1554443 | 7.07960241 | 0.00020051 | 0.00183712 |
| ENSMUSG00000032776 | -1.1598297 | 2.85288923 | 0.00062058 | 0.00499057 |
| ENSMUSG00000097207 | -1.1616163 | 1.10610027 | 0.0026718  | 0.01753662 |
| ENSMUSG00000041831 | -1.1646517 | 4.45599123 | 0.00024389 | 0.00217362 |
| ENSMUSG00000027878 | -1.1713283 | 6.67597597 | 0.00016592 | 0.00155185 |
| ENSMUSG00000037822 | -1.1769796 | 4.8012939  | 0.00020771 | 0.00188703 |
| ENSMUSG00000024563 | -1.1776688 | 6.48199177 | 0.00015744 | 0.00147993 |
| ENSMUSG00000021377 | -1.1793922 | 9.10276878 | 0.00014129 | 0.00134834 |
| ENSMUSG00000019876 | -1.1821077 | 6.51388081 | 0.00014822 | 0.00140215 |

|                    |            |            |            |            |
|--------------------|------------|------------|------------|------------|
| ENSMUSG00000039942 | -1.182611  | 4.34630969 | 0.00021039 | 0.00190685 |
| ENSMUSG00000073374 | -1.1882595 | 1.50919639 | 0.00140848 | 0.01018718 |
| ENSMUSG00000039985 | -1.1897422 | 6.83852121 | 0.00013204 | 0.00127024 |
| ENSMUSG00000020634 | -1.1930046 | 6.3945086  | 0.00013009 | 0.00125368 |
| ENSMUSG00000031258 | -1.1972614 | 4.17395917 | 0.0001895  | 0.00174966 |
| ENSMUSG00000064356 | -1.1974255 | 5.92787628 | 0.00012518 | 0.00121178 |
| ENSMUSG00000075297 | -1.2079883 | 0.80895596 | 0.00259469 | 0.01716631 |
| ENSMUSG00000055560 | -1.2088562 | 1.26166945 | 0.00155288 | 0.01111234 |
| ENSMUSG00000036452 | -1.2166911 | 5.49313844 | 0.00010548 | 0.00103786 |
| ENSMUSG00000064354 | -1.2186399 | 0.65221876 | 0.00351973 | 0.02209359 |
| ENSMUSG00000055723 | -1.2188026 | 6.89712474 | 9.06E-05   | 0.00091235 |
| ENSMUSG00000029084 | -1.2209984 | 5.57097072 | 0.00010073 | 0.00099931 |
| ENSMUSG00000031112 | -1.2282288 | 5.80452171 | 8.86E-05   | 0.00089447 |
| ENSMUSG00000051451 | -1.2329013 | 6.02956479 | 7.99E-05   | 0.00081376 |
| ENSMUSG00000032369 | -1.235102  | 5.67400375 | 8.11E-05   | 0.00082471 |
| ENSMUSG00000073643 | -1.2374198 | 4.75583799 | 9.43E-05   | 0.00094373 |
| ENSMUSG00000043671 | -1.2512368 | 5.13196669 | 7.20E-05   | 0.00073949 |
| ENSMUSG00000032050 | -1.2553398 | 7.74744577 | 5.40E-05   | 0.00057523 |
| ENSMUSG00000042708 | -1.2640827 | 1.27498813 | 0.00083713 | 0.00644365 |
| ENSMUSG00000047648 | -1.2663714 | 4.88291725 | 6.48E-05   | 0.00067599 |
| ENSMUSG00000021109 | -1.2687577 | 7.37076048 | 4.59E-05   | 0.00049774 |
| ENSMUSG00000032352 | -1.2870355 | 4.04798843 | 6.33E-05   | 0.00066158 |
| ENSMUSG00000071708 | -1.2907133 | 7.48954416 | 3.40E-05   | 0.00038323 |
| ENSMUSG00000097151 | -1.2911851 | 0.97585913 | 0.00196838 | 0.01357222 |
| ENSMUSG00000100967 | -1.2943545 | 2.02651507 | 0.00027616 | 0.0024431  |
| ENSMUSG00000095105 | -1.2965115 | 2.27097717 | 0.00019948 | 0.00183076 |
| ENSMUSG00000026384 | -1.2969041 | 6.3169604  | 3.37E-05   | 0.00038048 |
| ENSMUSG00000036943 | -1.3020853 | 8.38480894 | 2.83E-05   | 0.00032605 |
| ENSMUSG00000025932 | -1.3042522 | 1.47463489 | 0.00037993 | 0.00324139 |
| ENSMUSG00000021775 | -1.3090691 | 4.64583821 | 3.95E-05   | 0.00043963 |
| ENSMUSG00000030431 | -1.3199832 | 1.30381078 | 0.00049912 | 0.00412455 |
| ENSMUSG00000096768 | -1.323263  | 1.82094702 | 0.00019966 | 0.0018309  |
| ENSMUSG00000079470 | -1.3263644 | 6.22331079 | 2.26E-05   | 0.00026423 |
| ENSMUSG00000022120 | -1.3361995 | 5.52875078 | 2.15E-05   | 0.00025346 |
| ENSMUSG00000038570 | -1.3446653 | 4.4576587  | 2.68E-05   | 0.00031055 |
| ENSMUSG00000048621 | -1.3555749 | 1.85316851 | 0.00014921 | 0.00141022 |
| ENSMUSG00000014907 | -1.3742619 | 6.12154923 | 1.18E-05   | 0.00014704 |
| ENSMUSG00000089726 | -1.3833833 | 6.09671317 | 1.02E-05   | 0.00012956 |
| ENSMUSG00000047798 | -1.3834943 | 2.70760895 | 5.00E-05   | 0.00053711 |
| ENSMUSG00000043991 | -1.3918163 | 6.44864745 | 8.85E-06   | 0.00011314 |
| ENSMUSG00000032656 | -1.3967072 | 1.94584413 | 0.00010603 | 0.00104233 |
| ENSMUSG00000037922 | -1.3997653 | 7.74199996 | 7.25E-06   | 9.47E-05   |
| ENSMUSG00000026581 | -1.4145116 | 7.31443116 | 6.00E-06   | 7.94E-05   |

|                    |            |            |            |            |
|--------------------|------------|------------|------------|------------|
| ENSMUSG00000020642 | -1.4160404 | 4.19708221 | 1.12E-05   | 0.00014088 |
| ENSMUSG00000057315 | -1.4212008 | 3.49861585 | 1.59E-05   | 0.00019205 |
| ENSMUSG00000015597 | -1.4253903 | 6.37541155 | 5.52E-06   | 7.35E-05   |
| ENSMUSG00000099065 | -1.4259215 | 8.95892791 | 4.79E-06   | 6.46E-05   |
| ENSMUSG00000054321 | -1.4357549 | 5.94186155 | 4.97E-06   | 6.66E-05   |
| ENSMUSG00000071064 | -1.4472564 | 3.64606959 | 9.48E-06   | 0.00012068 |
| ENSMUSG00000099974 | -1.4596128 | 5.49947098 | 3.86E-06   | 5.32E-05   |
| ENSMUSG00000015766 | -1.4718913 | 4.38053756 | 4.64E-06   | 6.29E-05   |
| ENSMUSG00000028332 | -1.473396  | 1.30780626 | 0.00014563 | 0.00138246 |
| ENSMUSG00000051590 | -1.5095601 | 1.3411208  | 0.0001054  | 0.00103786 |
| ENSMUSG00000098496 | -1.5326945 | 1.26764938 | 9.02E-05   | 0.00090949 |
| ENSMUSG00000037999 | -1.5366357 | 7.59291607 | 9.38E-07   | 1.48E-05   |
| ENSMUSG00000044867 | -1.5425329 | 4.85140213 | 1.40E-06   | 2.12E-05   |
| ENSMUSG00000052013 | -1.5649895 | 6.33988567 | 6.79E-07   | 1.11E-05   |
| ENSMUSG00000028179 | -1.5703142 | 3.74850216 | 1.56E-06   | 2.34E-05   |
| ENSMUSG00000089929 | -1.5765175 | 4.74083253 | 8.84E-07   | 1.42E-05   |
| ENSMUSG00000063659 | -1.6088322 | 7.03938335 | 3.08E-07   | 5.41E-06   |
| ENSMUSG00000032028 | -1.6137406 | 3.52829783 | 1.12E-06   | 1.74E-05   |
| ENSMUSG00000038418 | -1.677747  | 3.79134804 | 2.95E-07   | 5.20E-06   |
| ENSMUSG00000091509 | -1.6858985 | 1.94629374 | 2.55E-06   | 3.65E-05   |
| ENSMUSG00000084854 | -1.7727231 | 0.88283868 | 1.62E-05   | 0.00019532 |
| ENSMUSG00000028341 | -1.7910078 | 2.1665613  | 5.00E-07   | 8.39E-06   |
| ENSMUSG00000050549 | -1.8244723 | 3.76807524 | 3.02E-08   | 6.58E-07   |
| ENSMUSG00000028701 | -1.8281869 | 3.05807615 | 6.53E-08   | 1.32E-06   |
| ENSMUSG00000097418 | -1.8407989 | 5.43614321 | 8.55E-09   | 2.11E-07   |
| ENSMUSG00000040270 | -1.9559858 | 7.00112812 | 7.43E-10   | 2.29E-08   |
| ENSMUSG00000053846 | -1.9787055 | 2.52766398 | 1.31E-08   | 3.08E-07   |
| ENSMUSG00000055320 | -2.0030424 | 1.50461313 | 2.11E-07   | 3.82E-06   |
| ENSMUSG00000099757 | -2.0049453 | 4.3715521  | 9.83E-10   | 2.94E-08   |
| ENSMUSG00000024402 | -2.0252925 | 3.18047007 | 1.97E-09   | 5.54E-08   |
| ENSMUSG00000026357 | -2.0480556 | 2.237342   | 2.24E-08   | 4.99E-07   |
| ENSMUSG00000097451 | -2.0674636 | 1.42315823 | 1.99E-07   | 3.63E-06   |
| ENSMUSG00000031779 | -2.2646877 | 7.68511026 | 1.62E-12   | 9.03E-11   |
| ENSMUSG00000019891 | -2.3618253 | 3.40527582 | 4.01E-12   | 2.07E-10   |
| ENSMUSG00000004698 | -2.3777463 | 5.81486954 | 2.73E-13   | 1.81E-11   |
| ENSMUSG00000040856 | -2.3886858 | 1.62488249 | 2.69E-10   | 9.33E-09   |
| ENSMUSG00000026616 | -2.5699951 | 5.78425645 | 4.86E-15   | 4.74E-13   |
| ENSMUSG00000094924 | -2.683529  | 1.72651763 | 1.51E-11   | 7.07E-10   |
| ENSMUSG00000044337 | -3.3173822 | 2.87865832 | 1.22E-18   | 2.27E-16   |
| ENSMUSG00000000617 | -3.3965154 | 3.69482858 | 2.73E-21   | 8.92E-19   |

Activated B cells

TMM normalized RNA-seq counts for selected genes

| ID                 | KO1        | KO2         | KO3         | WT1         | WT2         | WT3         | mgc_symbol | FDR         |
|--------------------|------------|-------------|-------------|-------------|-------------|-------------|------------|-------------|
| ENSMUSG00000020592 | 6.99867486 | 10.3522085  | 15.67906325 | 4.643876153 | 3.897033692 | 2.659788762 | Sdc1       | 5.42E-05    |
| ENSMUSG00000022346 | 59.6637032 | 62.41952937 | 85.99987553 | 126.9326148 | 125.5092279 | 130.2346569 | Myc        | 0.027259834 |
| ENSMUSG00000023067 | 85.0338996 | 89.12700219 | 98.68838175 | 44.25340805 | 35.50630697 | 25.83794798 | Cdkn1a     | 0.000159158 |
| ENSMUSG00000029687 | 417.995856 | 387.0745889 | 306.8311505 | 556.9919692 | 695.4040121 | 746.6407025 | Ezh2       | 0.034311075 |
| ENSMUSG00000038151 | 185.639851 | 211.3933227 | 175.1184748 | 38.97213713 | 89.26062884 | 49.87103929 | Prdm1      | 1.80E-06    |
| ENSMUSG00000040270 | 58.5264185 | 44.83915162 | 54.08635987 | 198.411885  | 225.4093773 | 186.945153  | Bach2      | 2.29E-08    |
| ENSMUSG00000021356 | 528.224985 | 652.8016924 | 532.2337056 | 384.5311567 | 553.1932112 | 444.754678  | Irf4       | 0.536623641 |

|    | EntrezID | Symbol   |
|----|----------|----------|
| 1  | 11416    | Slc33a1  |
| 2  | 11486    | Ada      |
| 3  | 11534    | Adk      |
| 4  | 11658    | Alcam    |
| 5  | 11773    | Ap2m1    |
| 6  | 11843    | Arf4     |
| 7  | 11852    | Rhob     |
| 8  | 11975    | Atp6v0a1 |
| 9  | 12041    | Bckdk    |
| 10 | 12068    | Bet1     |
| 11 | 12091    | Glb1     |
| 12 | 12142    | Prdm1    |
| 13 | 12282    | Hyou1    |
| 14 | 12317    | Calr     |
| 15 | 12321    | Calu     |
| 16 | 12337    | Capn5    |
| 17 | 12487    | Cd28     |
| 18 | 12495    | Entpd1   |
| 19 | 12892    | Cpox     |
| 20 | 13034    | Ctse     |
| 21 | 13200    | Ddost    |
| 22 | 13478    | Dpagt1   |
| 23 | 14127    | Fcer1g   |
| 24 | 14227    | Fkbp2    |
| 25 | 14281    | Fos      |
| 26 | 14343    | Fut1     |
| 27 | 14583    | Gfpt1    |
| 28 | 14828    | Hspa5    |
| 29 | 14950    | H13      |
| 30 | 14958    | H1f0     |
| 31 | 14977    | Slc39a7  |
| 32 | 15483    | Hsd11b1  |
| 33 | 16364    | Irf4     |
| 34 | 16430    | Stt3a    |
| 35 | 16534    | Kcnn4    |
| 36 | 17025    | Alad     |
| 37 | 17064    | Cd93     |
| 38 | 17067    | Ly6c1    |
| 39 | 17075    | Epcam    |
| 40 | 17254    | Slc3a2   |
| 41 | 17341    | Bhlha15  |
| 42 | 17684    | Cited2   |

|    | EntrezID | Symbol     |
|----|----------|------------|
| 43 | 17748    | Mt1        |
| 44 | 17750    | Mt2        |
| 45 | 17768    | Mthfd2     |
| 46 | 17872    | Ppp1r15a   |
| 47 | 18220    | Nucb1      |
| 48 | 18453    | P4hb       |
| 49 | 18605    | Enpp1      |
| 50 | 18669    | Abcb1b     |
| 51 | 19011    | Endou      |
| 52 | 19074    | Prg2       |
| 53 | 19324    | Rab1       |
| 54 | 19699    | Reln       |
| 55 | 19870    | Snord73a   |
| 56 | 20014    | Rpn2       |
| 57 | 20104    | Rps6       |
| 58 | 20333    | Sec22b     |
| 59 | 20338    | Sel1l      |
| 60 | 20363    | Sepp1      |
| 61 | 20440    | St6gal1    |
| 62 | 20498    | Slc12a4    |
| 63 | 20539    | Slc7a5     |
| 64 | 20568    | Slpi       |
| 65 | 20733    | Spint2     |
| 66 | 20818    | Srprb      |
| 67 | 20832    | Ssr4       |
| 68 | 20932    | Surf4      |
| 69 | 20969    | Sdc1       |
| 70 | 21935    | Tnfrsf17   |
| 71 | 21969    | Top1       |
| 72 | 22021    | Tpst1      |
| 73 | 22027    | Hsp90b1    |
| 74 | 22187    | Ubb        |
| 75 | 22190    | Ubc        |
| 76 | 22381    | Wbp5       |
| 77 | 22433    | Xbp1       |
| 78 | 24067    | Srp54a     |
| 79 | 26363    | Btd        |
| 80 | 27053    | Asns       |
| 81 | 27267    | Cars       |
| 82 | 27362    | Dnajb9     |
| 83 | 28075    | Desi1      |
| 84 | 28106    | D17Wsu104e |

|     | EntrezID | Symbol    |
|-----|----------|-----------|
| 85  | 50708    | Hist1h1c  |
| 86  | 50798    | Gne       |
| 87  | 52639    | Wipi1     |
| 88  | 53381    | Prdx4     |
| 89  | 53415    | Htatip2   |
| 90  | 53421    | Sec61a1   |
| 91  | 53618    | Fut8      |
| 92  | 54405    | Ndufa1    |
| 93  | 54637    | Praf2     |
| 94  | 55978    | Ift20     |
| 95  | 56041    | Uso1      |
| 96  | 56228    | Ube2j1    |
| 97  | 56298    | Atl2      |
| 98  | 56334    | Tmed2     |
| 99  | 56397    | Morf4l2   |
| 100 | 56454    | Aldh18a1  |
| 101 | 56463    | Snd1      |
| 102 | 56530    | Cnpy2     |
| 103 | 56737    | Alg2      |
| 104 | 56752    | Aldh9a1   |
| 105 | 56844    | Tssc4     |
| 106 | 57444    | Isg20     |
| 107 | 58203    | Zbp1      |
| 108 | 58226    | Cacna1h   |
| 109 | 59042    | Cope      |
| 110 | 59052    | Mettl9    |
| 111 | 60599    | Trp53inp1 |
| 112 | 64136    | Sdf2l1    |
| 113 | 64209    | Herpud1   |
| 114 | 64294    | Itn2c     |
| 115 | 64453    | Zfp280b   |
| 116 | 65963    | Tmem176b  |
| 117 | 66058    | Tmem176a  |
| 118 | 66059    | Krtcap2   |
| 119 | 66111    | Tmed3     |
| 120 | 66120    | Fkbp11    |
| 121 | 66155    | Ufc1      |
| 122 | 66212    | Sec61b    |
| 123 | 66214    | Rgcc      |
| 124 | 66251    | Arfgap3   |
| 125 | 66256    | Ssr2      |
| 126 | 66286    | Sec11c    |



|     | EntrezID | Symbol   |
|-----|----------|----------|
| 127 | 66480    | Rpl15    |
| 128 | 66616    | Snx9     |
| 129 | 66624    | Spcs2    |
| 130 | 66663    | Uba5     |
| 131 | 66753    | Erlec1   |
| 132 | 66913    | Kdelr2   |
| 133 | 66967    | Edem3    |
| 134 | 67041    | Oxct1    |
| 135 | 67075    | Magt1    |
| 136 | 67154    | Mtdh     |
| 137 | 67180    | Yipf5    |
| 138 | 67369    | Qpct1    |
| 139 | 67398    | Srpr     |
| 140 | 67422    | Dhdds    |
| 141 | 67437    | Ssr3     |
| 142 | 67458    | Ergic1   |
| 143 | 67510    | Tvp23b   |
| 144 | 67511    | Tmed9    |
| 145 | 67812    | Ubxn4    |
| 146 | 67819    | Derl1    |
| 147 | 67838    | Dnajib11 |
| 148 | 67840    | Mrp63    |
| 149 | 67846    | Tmem39a  |
| 150 | 67887    | Tmem66   |
| 151 | 67941    | Rps27l   |
| 152 | 67976    | Trabd    |
| 153 | 68038    | Chid1    |
| 154 | 68137    | Kdelr1   |
| 155 | 68192    | Leprotl1 |
| 156 | 68323    | Nudt22   |
| 157 | 68520    | Zfyve21  |
| 158 | 68526    | Gpr155   |
| 159 | 68796    | Tmem214  |
| 160 | 69019    | Spcs1    |
| 161 | 69038    | Tmem258  |
| 162 | 69288    | Rhobtb1  |
| 163 | 69550    | Bst2     |
| 164 | 69608    | Sec24d   |
| 165 | 69806    | Slc39a11 |
| 166 | 69816    | Mzb1     |
| 167 | 70223    | Nars     |
| 168 | 70361    | Lman1    |

|     | EntrezID | Symbol        |
|-----|----------|---------------|
| 169 | 70377    | Derl3         |
| 170 | 71667    | Tmem248       |
| 171 | 71853    | Pdia6         |
| 172 | 71910    | Ppapdc1b      |
| 173 | 72007    | Fndc3b        |
| 174 | 72027    | Slc39a4       |
| 175 | 72278    | Ccpg1         |
| 176 | 72774    | Neil1         |
| 177 | 73137    | Prrc1         |
| 178 | 73242    | Atat1         |
| 179 | 73690    | Glipr1        |
| 180 | 74048    | 4632428N05Rik |
| 181 | 74211    | 1700017B05Rik |
| 182 | 74241    | Chpf          |
| 183 | 74325    | Cltb          |
| 184 | 74551    | Pck2          |
| 185 | 74558    | Gvin1         |
| 186 | 74645    | Fam46c        |
| 187 | 74766    | Yipf2         |
| 188 | 74840    | Manf          |
| 189 | 75345    | Slamf7        |
| 190 | 76299    | Erp44         |
| 191 | 76485    | Glt8d1        |
| 192 | 76486    | Ly6k          |
| 193 | 76687    | Spcs3         |
| 194 | 76737    | Creld2        |
| 195 | 76969    | Chst1         |
| 196 | 77371    | Sec24a        |
| 197 | 77929    | Yipf6         |
| 198 | 78943    | Ern1          |
| 199 | 80795    | Selk          |
| 200 | 81500    | Sil1          |
| 201 | 94181    | Nans          |
| 202 | 94275    | Maged1        |
| 203 | 98238    | Lrrc59        |
| 204 | 100434   | Slc44a1       |
| 205 | 103963   | Rpn1          |
| 206 | 104368   | Snora70       |
| 207 | 104370   | Snora68       |
| 208 | 104433   | Snora62       |
| 209 | 104444   | Rexo2         |
| 210 | 104479   | Ccdc117       |

|     | EntrezID | Symbol    |
|-----|----------|-----------|
| 211 | 105245   | Txndc5    |
| 212 | 105670   | Rcbtb2    |
| 213 | 106200   | Txndc11   |
| 214 | 106389   | Eaf2      |
| 215 | 107271   | Yars      |
| 216 | 107503   | Atf5      |
| 217 | 107513   | Ssr1      |
| 218 | 108148   | Galnt2    |
| 219 | 108687   | Edem2     |
| 220 | 109815   | Vimp      |
| 221 | 110172   | Slc35b1   |
| 222 | 110611   | Hdlbp     |
| 223 | 110920   | Hspa13    |
| 224 | 110954   | Rpl10     |
| 225 | 111241   | Hmga1-rs1 |
| 226 | 114679   | Selm      |
| 227 | 140740   | Sec63     |
| 228 | 170829   | Tram2     |
| 229 | 170834   | Oosp1     |
| 230 | 170930   | Sumo2     |
| 231 | 192193   | Edem1     |
| 232 | 192657   | Ell2      |
| 233 | 193813   | Mcf2      |
| 234 | 208647   | Creb3l2   |
| 235 | 209027   | Pycr1     |
| 236 | 211770   | Trib1     |
| 237 | 213233   | Tapbpl    |
| 238 | 214048   | Larp1b    |
| 239 | 214572   | Prmt7     |
| 240 | 216197   | Ckap4     |
| 241 | 216440   | Os9       |
| 242 | 216443   | Mars      |
| 243 | 217310   | Hid1      |
| 244 | 217430   | Pq1c3     |
| 245 | 217664   | Mgat2     |
| 246 | 218335   | Clptm1l   |
| 247 | 218442   | Serinc5   |
| 248 | 223453   | Dap       |
| 249 | 223693   | Tmem184b  |
| 250 | 223864   | Rapgef3   |
| 251 | 226499   | BC003331  |
| 252 | 226744   | Cnst      |

|     | EntrezID  | Symbol        |
|-----|-----------|---------------|
| 253 | 227326    | Gpr55         |
| 254 | 227619    | Man1b1        |
| 255 | 231207    | Cpeb2         |
| 256 | 233744    | Spon1         |
| 257 | 235431    | Coro2b        |
| 258 | 235493    | Fam214a       |
| 259 | 238393    | Serpina3f     |
| 260 | 242362    | Manea         |
| 261 | 266793    | Snord87       |
| 262 | 268449    | Rpl23a        |
| 263 | 269523    | Vcp           |
| 264 | 269823    | Pon3          |
| 265 | 269951    | Idh2          |
| 266 | 319448    | Fndc3a        |
| 267 | 319939    | Tns3          |
| 268 | 320299    | Iqcb1         |
| 269 | 320560    | Dennd5b       |
| 270 | 321022    | Cdv3          |
| 271 | 330260    | Pon2          |
| 272 | 381308    | Mnda          |
| 273 | 433375    | Creg1         |
| 274 | 546643    | I830127L07Rik |
| 275 | 100037258 | Dnajc3        |
| 276 | 100041546 | Ly6c2         |
| 277 | 100042740 | Rpl31-ps9     |
| 278 | 100043314 | Tigit         |
| 279 | 100043636 | AI662270      |
| 280 | 100043872 | Rpl17-ps9     |
| 281 | 100101806 | Srp54c        |
| 282 | 100216532 | Snord2        |
| 283 | 100216534 | Snord96a      |
| 284 | 100216540 | Snord95       |
| 285 | 100217424 | Snord38a      |
| 286 | 100217426 | Snord49b      |
| 287 | 100217430 | Snord66       |
| 288 | 100217441 | Snord23       |
| 289 | 100217452 | Snord110      |
| 290 | 100217453 | Snord16a      |
| 291 | 100217454 | Snord37       |
| 292 | 100217464 | Snora41       |
| 293 | 100302498 | Snora21       |
| 294 | 100302499 | Snora3        |

|     | EntrezID  | Symbol        |
|-----|-----------|---------------|
| 295 | 100302565 | Snord68       |
| 296 | 100302593 | Snord14d      |
| 297 | 100302594 | Snord14e      |
| 298 | 100302601 | Snord83b      |
| 299 | 100303740 | Snora75       |
| 300 | 100303746 | Snora20       |
| 301 | 100504166 | 4933421O10Rik |

## HALLMARK\_MYC\_TARGETS\_V1

|    | A subgroup of genes regulated by MYC - version 1 (v1). |
|----|--------------------------------------------------------|
| 1  | ABCE1                                                  |
| 2  | ACP1                                                   |
| 3  | AIMP2                                                  |
| 4  | AP3S1                                                  |
| 5  | APEX1                                                  |
| 6  | BUB3                                                   |
| 7  | C1QBP                                                  |
| 8  | CAD                                                    |
| 9  | CANX                                                   |
| 10 | CBX3                                                   |
| 11 | CCNA2                                                  |
| 12 | CCT2                                                   |
| 13 | CCT3                                                   |
| 14 | CCT4                                                   |
| 15 | CCT5                                                   |
| 16 | CCT7                                                   |
| 17 | CDC20                                                  |
| 18 | CDC45                                                  |
| 19 | CDK2                                                   |
| 20 | CDK4                                                   |
| 21 | CLNS1A                                                 |
| 22 | CNBP                                                   |
| 23 | COPS5                                                  |
| 24 | COX5A                                                  |
| 25 | CSTF2                                                  |
| 26 | CTPS                                                   |
| 27 | CUL1                                                   |
| 28 | CYC1                                                   |
| 29 | DDX18                                                  |
| 30 | DDX21                                                  |
| 31 | DEK                                                    |
| 32 | DHX15                                                  |
| 33 | DUT                                                    |
| 34 | EEF1B2                                                 |
| 35 | EIF1AX                                                 |
| 36 | EIF2S1                                                 |
| 37 | EIF2S2                                                 |
| 38 | EIF3B                                                  |
| 39 | EIF3D                                                  |
| 40 | EIF3J                                                  |
| 41 | EIF4A1                                                 |

|    | A subgroup of genes regulated by MYC - version 1 (v1). |
|----|--------------------------------------------------------|
| 42 | EIF4E                                                  |
| 43 | EIF4G2                                                 |
| 44 | EIF4H                                                  |
| 45 | EPRS                                                   |
| 46 | ERH                                                    |
| 47 | ETF1                                                   |
| 48 | EXOSC7                                                 |
| 49 | FAM120A                                                |
| 50 | FBL                                                    |
| 51 | G3BP1                                                  |
| 52 | GLO1                                                   |
| 53 | GNB2L1                                                 |
| 54 | GNL3                                                   |
| 55 | GOT2                                                   |
| 56 | GSPT1                                                  |
| 57 | H2AFZ                                                  |
| 58 | HDAC2                                                  |
| 59 | HDDC2                                                  |
| 60 | HDGF                                                   |
| 61 | HNRNPA1                                                |
| 62 | HNRNPA2B1                                              |
| 63 | HNRNPA3                                                |
| 64 | HNRNPC                                                 |
| 65 | HNRNPD                                                 |
| 66 | HNRNPR                                                 |
| 67 | HNRNPU                                                 |
| 68 | HPRT1                                                  |
| 69 | HSP90AB1                                               |
| 70 | HSPD1                                                  |
| 71 | HSPE1                                                  |
| 72 | IARS                                                   |
| 73 | IFRD1                                                  |
| 74 | ILF2                                                   |
| 75 | IMPDH2                                                 |
| 76 | KARS                                                   |
| 77 | KPNA2                                                  |
| 78 | KPNB1                                                  |
| 79 | LDHA                                                   |
| 80 | LSM2                                                   |
| 81 | LSM7                                                   |
| 82 | MAD2L1                                                 |
| 83 | MCM2                                                   |

|     | A subgroup of genes regulated by MYC - version 1 (v1). |
|-----|--------------------------------------------------------|
| 84  | MCM4                                                   |
| 85  | MCM5                                                   |
| 86  | MCM6                                                   |
| 87  | MCM7                                                   |
| 88  | MRPL23                                                 |
| 89  | MRPL9                                                  |
| 90  | MRPS18B                                                |
| 91  | MYC                                                    |
| 92  | NAP1L1                                                 |
| 93  | NCBP1                                                  |
| 94  | NCBP2                                                  |
| 95  | NDUFAB1                                                |
| 96  | NHP2                                                   |
| 97  | NME1                                                   |
| 98  | NOLC1                                                  |
| 99  | NOP16                                                  |
| 100 | NOP56                                                  |
| 101 | NPM1                                                   |
| 102 | ODC1                                                   |
| 103 | ORC2                                                   |
| 104 | PA2G4                                                  |
| 105 | PABPC1                                                 |
| 106 | PABPC4                                                 |
| 107 | PCBP1                                                  |
| 108 | PCNA                                                   |
| 109 | PGK1                                                   |
| 110 | PHB                                                    |
| 111 | PHB2                                                   |
| 112 | POLD2                                                  |
| 113 | POLE3                                                  |
| 114 | PPIA                                                   |
| 115 | PPM1G                                                  |
| 116 | PRDX3                                                  |
| 117 | PRDX4                                                  |
| 118 | PRPF31                                                 |
| 119 | PRPS2                                                  |
| 120 | PSMA1                                                  |
| 121 | PSMA2                                                  |
| 122 | PSMA4                                                  |
| 123 | PSMA6                                                  |
| 124 | PSMA7                                                  |
| 125 | PSMB2                                                  |



|     | A subgroup of genes regulated by MYC - version 1 (v1). |
|-----|--------------------------------------------------------|
| 126 | PSMB3                                                  |
| 127 | PSMC4                                                  |
| 128 | PSMC6                                                  |
| 129 | PSMD1                                                  |
| 130 | PSMD14                                                 |
| 131 | PSMD3                                                  |
| 132 | PSMD7                                                  |
| 133 | PSMD8                                                  |
| 134 | PTGES3                                                 |
| 135 | PWP1                                                   |
| 136 | RAD23B                                                 |
| 137 | RAN                                                    |
| 138 | RANBP1                                                 |
| 139 | RFC4                                                   |
| 140 | RNPS1                                                  |
| 141 | RPL14                                                  |
| 142 | RPL18                                                  |
| 143 | RPL22                                                  |
| 144 | RPL34                                                  |
| 145 | RPL6                                                   |
| 146 | RPLP0                                                  |
| 147 | RPS10                                                  |
| 148 | RPS2                                                   |
| 149 | RPS3                                                   |
| 150 | RPS5                                                   |
| 151 | RPS6                                                   |
| 152 | RRM1                                                   |
| 153 | RRP9                                                   |
| 154 | RSL1D1                                                 |
| 155 | RUVBL2                                                 |
| 156 | SERBP1                                                 |
| 157 | SET                                                    |
| 158 | SF3A1                                                  |
| 159 | SF3B3                                                  |
| 160 | SLC25A3                                                |
| 161 | SMARCC1                                                |
| 162 | SNRPA                                                  |
| 163 | SNRPA1                                                 |
| 164 | SNRPB2                                                 |
| 165 | SNRPD1                                                 |
| 166 | SNRPD2                                                 |
| 167 | SNRPD3                                                 |

|     | A subgroup of genes regulated by MYC - version 1 (v1). |
|-----|--------------------------------------------------------|
| 168 | SNRPG                                                  |
| 169 | SRM                                                    |
| 170 | SRPK1                                                  |
| 171 | SRSF1                                                  |
| 172 | SRSF2                                                  |
| 173 | SRSF3                                                  |
| 174 | SRSF7                                                  |
| 175 | SSB                                                    |
| 176 | SSBP1                                                  |
| 177 | STARD7                                                 |
| 178 | SYNCRIP                                                |
| 179 | TARDBP                                                 |
| 180 | TCP1                                                   |
| 181 | TFDP1                                                  |
| 182 | TOMM70A                                                |
| 183 | TRA2B                                                  |
| 184 | TRIM28                                                 |
| 185 | TUFM                                                   |
| 186 | TXNL4A                                                 |
| 187 | TYMS                                                   |
| 188 | U2AF1                                                  |
| 189 | UBA2                                                   |
| 190 | UBE2E1                                                 |
| 191 | UBE2L3                                                 |
| 192 | USP1                                                   |
| 193 | VBP1                                                   |
| 194 | VDAC1                                                  |
| 195 | VDAC3                                                  |
| 196 | XPO1                                                   |
| 197 | XPOT                                                   |
| 198 | XRCC6                                                  |
| 199 | YWHAE                                                  |
| 200 | YWHAQ                                                  |
