# Supplementary material for: Histone methyltransferase DOT1L controls state‐specific identity during B cell differentiation
Source: PubMed Central journal article supplement — EMBO Rep. 2021 Jan 7;22(2):e51184. doi: 10.15252/embr.202051184 (PMC7857439; doi:10.15252/embr.202051184), 2021-01-07
Supplement: EMBR-22-e51184-s004.pdf [file EMBR-22-e51184-s004.pdf]

|                                                                                                                             |
|-----------------------------------------------------------------------------------------------------------------------------|
| This file contains                                                                                                          |
| Gene expression comparison between DOT1L KO and WT Naive B cells                                                            |
| Gene expression comparison between DOT1L KO and WT Activated B cells                                                        |
| TMM normalized H3K79me2 from Naive and Activated WT B cells                                                                 |
| TMM normalized RNA-seq counts ( <i>Bach2, Prdm1, Sdc1, Myc, Ezh2, Cdkn1a, Irf4</i> ) from DOT1L KO and WT Activated B cells |
| Transcript per million values for <i>Dot1L and Ezh2</i> from different B cells populations<br>GSE60927                      |

Naïve B cells

Negative logFC indicates that a gene is down in DOT1L-KO

Postive logFC indicates that a gene is up in DOT1L-KO

Gene with FDR < 0.05 is considered significant

| ID                 | logFC      | logCPM     | PValue   | FDR      |
|--------------------|------------|------------|----------|----------|
| ENSMUSG00000069919 | 4.71644648 | 5.57521104 | 2.14E-28 | 2.46E-24 |
| ENSMUSG00000039032 | -6.1155893 | 2.3320352  | 4.99E-28 | 2.87E-24 |
| ENSMUSG00000028763 | 5.01133544 | 3.45759549 | 2.32E-26 | 8.89E-23 |
| ENSMUSG00000015890 | 6.61682559 | 2.30823739 | 9.91E-26 | 2.85E-22 |
| ENSMUSG00000004951 | 4.11289878 | 5.21713714 | 1.17E-23 | 2.70E-20 |
| ENSMUSG00000057863 | 4.40127236 | 3.05359199 | 2.59E-21 | 4.97E-18 |
| ENSMUSG00000026580 | 3.99917797 | 3.6098501  | 2.51E-20 | 4.12E-17 |
| ENSMUSG00000028184 | 3.76500647 | 4.40650625 | 1.09E-19 | 1.57E-16 |
| ENSMUSG00000045672 | 3.57155344 | 4.7321881  | 9.63E-19 | 1.23E-15 |
| ENSMUSG00000044337 | -3.5538636 | 4.17556909 | 2.23E-18 | 2.56E-15 |
| ENSMUSG00000049001 | 3.64360764 | 4.21896208 | 2.79E-18 | 2.92E-15 |
| ENSMUSG00000018924 | 4.29563299 | 2.62557089 | 3.62E-18 | 3.47E-15 |
| ENSMUSG00000001930 | 3.76062758 | 3.36112344 | 4.91E-18 | 4.34E-15 |
| ENSMUSG00000069917 | 3.43700716 | 5.23792084 | 7.42E-18 | 6.09E-15 |
| ENSMUSG00000030589 | 3.39595059 | 5.36748416 | 1.03E-17 | 7.91E-15 |
| ENSMUSG00000040249 | 3.38106157 | 5.61481046 | 1.11E-17 | 7.97E-15 |
| ENSMUSG00000073418 | 4.02044411 | 2.78601945 | 2.27E-17 | 1.53E-14 |
| ENSMUSG00000039578 | 3.76603123 | 2.72116427 | 2.73E-17 | 1.74E-14 |
| ENSMUSG00000000731 | 3.72532866 | 3.1705447  | 4.38E-17 | 2.65E-14 |
| ENSMUSG00000020282 | 3.31751186 | 4.87359178 | 7.41E-17 | 3.93E-14 |
| ENSMUSG00000026928 | 3.95750195 | 2.10658455 | 7.46E-17 | 3.93E-14 |
| ENSMUSG00000026796 | 3.79917885 | 2.38169031 | 7.52E-17 | 3.93E-14 |
| ENSMUSG00000059479 | 4.10886114 | 1.93406122 | 1.18E-16 | 5.88E-14 |
| ENSMUSG00000044288 | 5.34327381 | 1.12170875 | 2.96E-16 | 1.42E-13 |
| ENSMUSG00000024011 | 3.65334477 | 2.41691167 | 3.15E-16 | 1.45E-13 |
| ENSMUSG00000049988 | 3.51081412 | 3.07636315 | 4.93E-16 | 2.18E-13 |
| ENSMUSG00000101964 | -3.5322677 | 2.49969762 | 6.84E-16 | 2.91E-13 |
| ENSMUSG00000040907 | 3.17786991 | 4.52304173 | 8.73E-16 | 3.59E-13 |
| ENSMUSG00000031722 | 3.18690156 | 4.17931762 | 9.14E-16 | 3.62E-13 |
| ENSMUSG00000029581 | 3.67701968 | 2.09615045 | 1.06E-15 | 4.08E-13 |
| ENSMUSG00000053158 | 3.12534085 | 5.13340931 | 1.24E-15 | 4.60E-13 |
| ENSMUSG00000036896 | 3.12960427 | 4.91113812 | 1.55E-15 | 5.57E-13 |
| ENSMUSG00000037032 | 3.7874023  | 2.06529781 | 1.93E-15 | 6.57E-13 |
| ENSMUSG00000053963 | 3.42236623 | 2.94024091 | 1.98E-15 | 6.57E-13 |
| ENSMUSG00000028037 | 3.41004295 | 3.04247899 | 2.00E-15 | 6.57E-13 |
| ENSMUSG00000040616 | 3.24250097 | 3.24994839 | 2.29E-15 | 7.15E-13 |
| ENSMUSG00000025932 | -3.5058283 | 2.30087668 | 2.30E-15 | 7.15E-13 |

|                    |            |            |          |          |
|--------------------|------------|------------|----------|----------|
| ENSMUSG00000042766 | 3.45370369 | 2.68730304 | 2.80E-15 | 8.46E-13 |
| ENSMUSG00000070880 | -3.2512233 | 3.25922093 | 3.28E-15 | 9.66E-13 |
| ENSMUSG00000020828 | 3.13894267 | 3.76296797 | 8.50E-15 | 2.44E-12 |
| ENSMUSG00000064147 | 3.5709636  | 1.7116075  | 2.31E-14 | 6.47E-12 |
| ENSMUSG00000001552 | 3.21092023 | 2.94282972 | 2.66E-14 | 7.17E-12 |
| ENSMUSG00000006356 | 3.58959807 | 1.97496805 | 2.68E-14 | 7.17E-12 |
| ENSMUSG00000030068 | -3.2040547 | 2.83981032 | 3.08E-14 | 8.04E-12 |
| ENSMUSG00000001247 | 3.5783477  | 2.04456806 | 5.24E-14 | 1.34E-11 |
| ENSMUSG00000037855 | 3.33055059 | 2.42760528 | 5.45E-14 | 1.36E-11 |
| ENSMUSG00000002083 | 3.65464319 | 1.55097544 | 5.96E-14 | 1.46E-11 |
| ENSMUSG00000060376 | 2.98526331 | 3.44528402 | 9.90E-14 | 2.37E-11 |
| ENSMUSG00000028859 | 2.82666314 | 6.84974233 | 1.01E-13 | 2.37E-11 |
| ENSMUSG00000027322 | 3.17103539 | 2.72488501 | 1.03E-13 | 2.37E-11 |
| ENSMUSG00000001288 | 3.12853515 | 2.86108966 | 1.23E-13 | 2.77E-11 |
| ENSMUSG00000014846 | 4.11742246 | 1.46354755 | 1.30E-13 | 2.86E-11 |
| ENSMUSG00000063382 | 2.88031357 | 4.46560575 | 1.63E-13 | 3.54E-11 |
| ENSMUSG00000030339 | 3.38761057 | 2.09543156 | 1.79E-13 | 3.80E-11 |
| ENSMUSG00000025227 | 4.86701958 | 0.69793322 | 1.90E-13 | 3.96E-11 |
| ENSMUSG00000020219 | 3.29311967 | 2.21426631 | 2.10E-13 | 4.32E-11 |
| ENSMUSG00000034881 | 3.32543137 | 1.91603708 | 3.27E-13 | 6.60E-11 |
| ENSMUSG00000029860 | 2.77067468 | 5.90534188 | 3.39E-13 | 6.72E-11 |
| ENSMUSG00000017002 | 2.79966494 | 4.80912876 | 4.80E-13 | 9.35E-11 |
| ENSMUSG00000024955 | 3.07507344 | 2.55236388 | 5.18E-13 | 9.92E-11 |
| ENSMUSG00000019539 | 3.07333123 | 2.69984886 | 5.36E-13 | 1.01E-10 |
| ENSMUSG00000024913 | 3.00868031 | 2.84844542 | 5.49E-13 | 1.02E-10 |
| ENSMUSG00000029797 | 4.38232897 | 0.89928585 | 6.53E-13 | 1.19E-10 |
| ENSMUSG00000066952 | 3.15718872 | 2.58501267 | 8.21E-13 | 1.48E-10 |
| ENSMUSG00000095120 | -3.2408411 | 1.80220932 | 9.09E-13 | 1.61E-10 |
| ENSMUSG00000033170 | 4.82731081 | 0.68919424 | 1.14E-12 | 1.98E-10 |
| ENSMUSG00000006930 | 2.95006808 | 2.72165769 | 1.30E-12 | 2.23E-10 |
| ENSMUSG00000025504 | 5.09896268 | 0.44390207 | 1.54E-12 | 2.60E-10 |
| ENSMUSG00000035478 | 2.70915612 | 4.17400018 | 1.78E-12 | 2.97E-10 |
| ENSMUSG00000030747 | 3.78377087 | 1.2418528  | 2.01E-12 | 3.30E-10 |
| ENSMUSG00000045094 | 2.81735607 | 3.38101056 | 2.05E-12 | 3.32E-10 |
| ENSMUSG00000002379 | 3.00287078 | 2.37712139 | 2.08E-12 | 3.32E-10 |
| ENSMUSG00000015846 | 2.75372595 | 3.94269213 | 2.21E-12 | 3.48E-10 |
| ENSMUSG00000049804 | 2.79247153 | 3.73915792 | 2.62E-12 | 4.07E-10 |
| ENSMUSG00000040767 | 2.68649401 | 4.76270419 | 3.34E-12 | 5.12E-10 |
| ENSMUSG00000030410 | 2.86542618 | 2.76477549 | 3.39E-12 | 5.13E-10 |
| ENSMUSG00000033508 | 3.32226452 | 1.92645098 | 3.53E-12 | 5.27E-10 |
| ENSMUSG00000017737 | 2.72344653 | 4.30424882 | 4.23E-12 | 6.19E-10 |
| ENSMUSG00000031897 | 2.65639061 | 4.47162077 | 4.25E-12 | 6.19E-10 |
| ENSMUSG00000101609 | -2.658093  | 4.63065896 | 4.94E-12 | 7.10E-10 |

|                    |            |            |          |          |
|--------------------|------------|------------|----------|----------|
| ENSMUSG00000033542 | 3.04167659 | 2.32184581 | 5.35E-12 | 7.59E-10 |
| ENSMUSG00000021453 | 2.97956039 | 2.43331082 | 6.21E-12 | 8.71E-10 |
| ENSMUSG00000002985 | 2.58202803 | 6.84684812 | 6.47E-12 | 8.96E-10 |
| ENSMUSG00000035711 | 2.59815408 | 5.56803815 | 6.85E-12 | 9.37E-10 |
| ENSMUSG00000032186 | -3.3004203 | 1.13734333 | 8.67E-12 | 1.17E-09 |
| ENSMUSG00000032231 | 2.55717624 | 6.52255538 | 9.89E-12 | 1.32E-09 |
| ENSMUSG00000049130 | 2.81042839 | 2.79957099 | 1.03E-11 | 1.36E-09 |
| ENSMUSG00000001507 | 2.98464364 | 2.06168052 | 1.12E-11 | 1.46E-09 |
| ENSMUSG00000046961 | -3.1912731 | 1.73562759 | 1.15E-11 | 1.48E-09 |
| ENSMUSG00000086564 | 2.71785916 | 3.49807599 | 1.37E-11 | 1.76E-09 |
| ENSMUSG00000026193 | 2.52795299 | 7.66833959 | 1.49E-11 | 1.88E-09 |
| ENSMUSG00000090665 | 2.75837801 | 3.20300355 | 1.61E-11 | 2.02E-09 |
| ENSMUSG00000025330 | 3.14310462 | 2.07021358 | 1.65E-11 | 2.04E-09 |
| ENSMUSG00000031444 | 3.32012378 | 1.6917425  | 1.91E-11 | 2.34E-09 |
| ENSMUSG00000036905 | 2.5276434  | 5.71233114 | 2.28E-11 | 2.76E-09 |
| ENSMUSG00000026579 | 2.66094709 | 3.93725238 | 2.32E-11 | 2.77E-09 |
| ENSMUSG00000034041 | 2.55137472 | 4.68487884 | 2.47E-11 | 2.93E-09 |
| ENSMUSG00000001227 | 4.12722892 | 0.66612797 | 2.60E-11 | 3.05E-09 |
| ENSMUSG00000037185 | 2.67946027 | 2.93973894 | 2.67E-11 | 3.10E-09 |
| ENSMUSG00000017754 | 2.5409987  | 4.80805871 | 3.21E-11 | 3.69E-09 |
| ENSMUSG00000003344 | 2.65838145 | 3.15314566 | 3.50E-11 | 3.98E-09 |
| ENSMUSG00000036168 | 3.65026042 | 1.01438858 | 3.64E-11 | 4.07E-09 |
| ENSMUSG00000001270 | 3.35536188 | 1.45086578 | 3.65E-11 | 4.07E-09 |
| ENSMUSG00000042759 | 2.51850172 | 4.81799636 | 4.33E-11 | 4.79E-09 |
| ENSMUSG00000050708 | 2.45423517 | 7.58040415 | 4.76E-11 | 5.21E-09 |
| ENSMUSG00000007872 | 2.60079628 | 3.24247919 | 5.59E-11 | 6.06E-09 |
| ENSMUSG00000036606 | 2.47102352 | 5.63608213 | 5.81E-11 | 6.24E-09 |
| ENSMUSG00000006517 | 2.78183821 | 2.30103584 | 5.91E-11 | 6.29E-09 |
| ENSMUSG00000039781 | 3.38083103 | 0.81123858 | 5.97E-11 | 6.30E-09 |
| ENSMUSG00000029713 | 2.44874358 | 6.21191448 | 6.04E-11 | 6.32E-09 |
| ENSMUSG00000024451 | 2.64750045 | 3.133823   | 6.38E-11 | 6.61E-09 |
| ENSMUSG00000027864 | 3.46045776 | 1.04580469 | 6.66E-11 | 6.83E-09 |
| ENSMUSG00000034220 | 3.95473154 | 0.77016316 | 7.15E-11 | 7.23E-09 |
| ENSMUSG00000007721 | 2.94443583 | 1.73582789 | 7.17E-11 | 7.23E-09 |
| ENSMUSG00000049577 | 2.709822   | 2.69545855 | 7.45E-11 | 7.45E-09 |
| ENSMUSG00000051000 | 2.70323926 | 2.96365923 | 8.04E-11 | 7.97E-09 |
| ENSMUSG00000003072 | 2.47214924 | 4.47521367 | 9.02E-11 | 8.86E-09 |
| ENSMUSG00000047281 | 2.48356962 | 4.19394081 | 1.08E-10 | 1.05E-08 |
| ENSMUSG00000029287 | 2.57711856 | 3.49390732 | 1.10E-10 | 1.06E-08 |
| ENSMUSG00000021069 | 2.45412024 | 5.00910566 | 1.11E-10 | 1.06E-08 |
| ENSMUSG00000052212 | 2.54941083 | 3.36025374 | 1.15E-10 | 1.09E-08 |
| ENSMUSG00000060591 | 2.48900063 | 4.01139007 | 1.18E-10 | 1.12E-08 |
| ENSMUSG00000022817 | 2.48483459 | 4.17527679 | 1.27E-10 | 1.18E-08 |



|                    |            |            |          |          |
|--------------------|------------|------------|----------|----------|
| ENSMUSG00000020886 | 2.6976803  | 2.69232909 | 1.44E-10 | 1.33E-08 |
| ENSMUSG00000036887 | 2.42578968 | 5.270904   | 1.45E-10 | 1.33E-08 |
| ENSMUSG00000025492 | 2.40930945 | 5.43942174 | 1.50E-10 | 1.37E-08 |
| ENSMUSG00000028456 | 2.7124062  | 2.63320701 | 1.54E-10 | 1.38E-08 |
| ENSMUSG00000052837 | 2.43585036 | 4.9711636  | 1.54E-10 | 1.38E-08 |
| ENSMUSG00000030341 | 2.46971    | 4.25331265 | 1.56E-10 | 1.38E-08 |
| ENSMUSG00000030122 | 2.43482011 | 4.81930791 | 1.56E-10 | 1.38E-08 |
| ENSMUSG00000037326 | 2.57450481 | 3.00423154 | 1.63E-10 | 1.43E-08 |
| ENSMUSG00000007207 | 2.88844971 | 1.64890288 | 1.71E-10 | 1.49E-08 |
| ENSMUSG00000037638 | 2.73654492 | 2.20997875 | 1.76E-10 | 1.52E-08 |
| ENSMUSG00000028041 | 2.57709883 | 3.14492211 | 1.77E-10 | 1.52E-08 |
| ENSMUSG00000025161 | 2.60249454 | 2.82778722 | 1.93E-10 | 1.64E-08 |
| ENSMUSG00000006014 | 2.75144022 | 2.94666718 | 2.16E-10 | 1.83E-08 |
| ENSMUSG00000031028 | 2.65591379 | 2.71836612 | 2.24E-10 | 1.87E-08 |
| ENSMUSG00000031824 | 2.45364324 | 3.97087263 | 2.25E-10 | 1.87E-08 |
| ENSMUSG00000022122 | 4.57042329 | 0.51016686 | 2.35E-10 | 1.95E-08 |
| ENSMUSG00000006589 | 2.51099359 | 3.12819034 | 2.41E-10 | 1.98E-08 |
| ENSMUSG00000033307 | 2.6849019  | 2.39597161 | 2.59E-10 | 2.11E-08 |
| ENSMUSG00000022892 | 2.38867709 | 4.99123982 | 2.86E-10 | 2.32E-08 |
| ENSMUSG00000036067 | 2.50011186 | 3.4321653  | 3.02E-10 | 2.43E-08 |
| ENSMUSG00000034394 | 2.69779638 | 2.26436452 | 3.23E-10 | 2.58E-08 |
| ENSMUSG00000033788 | 2.68944023 | 2.13205082 | 3.33E-10 | 2.64E-08 |
| ENSMUSG00000020167 | 2.35367148 | 5.28403509 | 4.09E-10 | 3.22E-08 |
| ENSMUSG00000025877 | 2.47880799 | 3.425882   | 4.13E-10 | 3.23E-08 |
| ENSMUSG00000020163 | 2.77152482 | 1.63388872 | 4.45E-10 | 3.46E-08 |
| ENSMUSG00000047721 | 2.77694742 | 1.89240455 | 4.74E-10 | 3.66E-08 |
| ENSMUSG00000064043 | 2.57383166 | 2.59182046 | 4.85E-10 | 3.72E-08 |
| ENSMUSG00000038872 | 2.93456255 | 1.71799294 | 5.06E-10 | 3.85E-08 |
| ENSMUSG00000004933 | 2.42637974 | 3.51722776 | 5.52E-10 | 4.17E-08 |
| ENSMUSG00000051790 | 3.61779656 | 0.91086969 | 6.07E-10 | 4.56E-08 |
| ENSMUSG00000053646 | 2.92698229 | 1.27759202 | 7.25E-10 | 5.36E-08 |
| ENSMUSG00000070803 | 4.05770042 | 0.3713418  | 7.28E-10 | 5.36E-08 |
| ENSMUSG00000041757 | 2.52609503 | 2.79852858 | 7.31E-10 | 5.36E-08 |
| ENSMUSG00000035890 | 2.45291208 | 2.80582577 | 7.31E-10 | 5.36E-08 |
| ENSMUSG00000049562 | 2.85485429 | 1.57116422 | 7.51E-10 | 5.47E-08 |
| ENSMUSG00000043157 | 2.9168699  | 1.3208634  | 8.31E-10 | 6.01E-08 |
| ENSMUSG00000038502 | 2.55329925 | 2.19920694 | 8.60E-10 | 6.18E-08 |
| ENSMUSG00000038775 | 2.48596148 | 2.9986314  | 9.44E-10 | 6.74E-08 |
| ENSMUSG00000024164 | 2.28646433 | 5.58869393 | 1.02E-09 | 7.23E-08 |
| ENSMUSG00000000552 | 2.39005587 | 3.55629776 | 1.04E-09 | 7.32E-08 |
| ENSMUSG00000030579 | 2.26637977 | 6.45468929 | 1.09E-09 | 7.67E-08 |
| ENSMUSG00000037992 | 2.29530184 | 5.09038797 | 1.12E-09 | 7.80E-08 |
| ENSMUSG00000029304 | 2.39302049 | 3.36460504 | 1.18E-09 | 8.14E-08 |

|                    |            |            |          |          |
|--------------------|------------|------------|----------|----------|
| ENSMUSG00000040405 | -2.854991  | 1.38680116 | 1.18E-09 | 8.14E-08 |
| ENSMUSG00000038517 | 2.60514121 | 2.20171469 | 1.21E-09 | 8.30E-08 |
| ENSMUSG00000001128 | 2.26799005 | 5.91355265 | 1.25E-09 | 8.48E-08 |
| ENSMUSG00000030681 | 2.30751713 | 4.41044309 | 1.26E-09 | 8.52E-08 |
| ENSMUSG00000037221 | 2.44993752 | 2.60716566 | 1.48E-09 | 9.86E-08 |
| ENSMUSG00000017309 | 2.70198531 | 1.70217758 | 1.48E-09 | 9.86E-08 |
| ENSMUSG00000044017 | 3.03399546 | 1.26777609 | 1.57E-09 | 1.05E-07 |
| ENSMUSG00000020238 | 2.27096758 | 4.81147764 | 1.59E-09 | 1.05E-07 |
| ENSMUSG00000074063 | 2.62472724 | 2.17744383 | 1.61E-09 | 1.06E-07 |
| ENSMUSG00000019139 | 2.2936124  | 4.25520359 | 1.69E-09 | 1.11E-07 |
| ENSMUSG00000030717 | 2.51562715 | 2.06113051 | 1.77E-09 | 1.15E-07 |
| ENSMUSG00000039943 | 2.54947348 | 2.5135899  | 1.86E-09 | 1.20E-07 |
| ENSMUSG00000030409 | 2.45784796 | 2.76070848 | 1.98E-09 | 1.27E-07 |
| ENSMUSG00000020681 | 2.23947907 | 5.3922136  | 1.98E-09 | 1.27E-07 |
| ENSMUSG00000021200 | 2.35065565 | 3.47495102 | 2.05E-09 | 1.30E-07 |
| ENSMUSG00000003363 | 2.23639547 | 5.45147221 | 2.18E-09 | 1.38E-07 |
| ENSMUSG00000020279 | 2.20729295 | 8.79558185 | 2.32E-09 | 1.46E-07 |
| ENSMUSG00000019312 | 2.59477951 | 2.1285537  | 2.36E-09 | 1.48E-07 |
| ENSMUSG00000014725 | -2.6324094 | 1.65904902 | 2.52E-09 | 1.57E-07 |
| ENSMUSG00000052062 | 2.33647842 | 3.74523055 | 2.65E-09 | 1.64E-07 |
| ENSMUSG00000046480 | 2.75532324 | 1.32745771 | 2.83E-09 | 1.74E-07 |
| ENSMUSG00000002108 | 2.3859857  | 2.8172452  | 3.05E-09 | 1.86E-07 |
| ENSMUSG00000060716 | 3.47139908 | 0.72989213 | 3.26E-09 | 1.98E-07 |
| ENSMUSG00000063457 | 2.18575041 | 7.72336725 | 3.30E-09 | 2.00E-07 |
| ENSMUSG00000025701 | 2.59883044 | 2.11472472 | 3.41E-09 | 2.05E-07 |
| ENSMUSG00000078817 | 2.45426775 | 2.40231747 | 3.65E-09 | 2.18E-07 |
| ENSMUSG00000042190 | 2.42756719 | 2.44702374 | 3.67E-09 | 2.19E-07 |
| ENSMUSG00000058755 | 2.22313434 | 4.72873195 | 3.82E-09 | 2.26E-07 |
| ENSMUSG00000048163 | 2.18895179 | 5.97304104 | 3.98E-09 | 2.34E-07 |
| ENSMUSG00000022818 | 2.9334969  | 0.98450209 | 4.10E-09 | 2.39E-07 |
| ENSMUSG00000061411 | 2.50984367 | 2.35554702 | 4.11E-09 | 2.39E-07 |
| ENSMUSG00000025473 | 2.24920744 | 4.18369297 | 4.11E-09 | 2.39E-07 |
| ENSMUSG00000033880 | 2.19402673 | 5.45411558 | 4.22E-09 | 2.44E-07 |
| ENSMUSG00000006800 | 2.25678527 | 3.82385053 | 4.44E-09 | 2.55E-07 |
| ENSMUSG00000001025 | 2.20290235 | 4.99329853 | 4.49E-09 | 2.57E-07 |
| ENSMUSG00000028833 | 2.25279116 | 3.74429527 | 4.52E-09 | 2.57E-07 |
| ENSMUSG00000041736 | 2.25751331 | 3.47607488 | 4.54E-09 | 2.57E-07 |
| ENSMUSG00000051184 | 2.78767914 | 1.25221673 | 4.87E-09 | 2.75E-07 |
| ENSMUSG00000035863 | 2.77726623 | 1.46134809 | 4.93E-09 | 2.77E-07 |
| ENSMUSG00000019158 | 3.03496951 | 0.90723984 | 4.98E-09 | 2.78E-07 |
| ENSMUSG00000013707 | 2.22485252 | 4.13570312 | 5.01E-09 | 2.78E-07 |
| ENSMUSG00000035206 | 2.26900441 | 3.55667814 | 5.05E-09 | 2.79E-07 |
| ENSMUSG00000000489 | 2.80368053 | 1.29697237 | 5.28E-09 | 2.90E-07 |

|                     |            |            |          |          |
|---------------------|------------|------------|----------|----------|
| ENSMUSG00000018417  | 2.85920717 | 1.60233452 | 5.41E-09 | 2.96E-07 |
| ENSMUSG00000000530  | 2.32292391 | 2.94225968 | 5.69E-09 | 3.09E-07 |
| ENSMUSG000000031502 | 3.04440778 | 0.66622836 | 5.74E-09 | 3.09E-07 |
| ENSMUSG000000032890 | 2.25714812 | 3.69258055 | 5.76E-09 | 3.09E-07 |
| ENSMUSG000000025151 | 2.26606343 | 3.63407994 | 5.76E-09 | 3.09E-07 |
| ENSMUSG000000024053 | 2.1732953  | 5.51025852 | 5.95E-09 | 3.18E-07 |
| ENSMUSG000000014686 | 2.45535676 | 2.25582557 | 6.05E-09 | 3.22E-07 |
| ENSMUSG000000046207 | 2.39846691 | 2.24179062 | 6.28E-09 | 3.33E-07 |
| ENSMUSG000000034271 | 2.82691317 | 1.23293971 | 6.31E-09 | 3.33E-07 |
| ENSMUSG000000056413 | 2.21095033 | 4.10670908 | 6.37E-09 | 3.34E-07 |
| ENSMUSG000000058297 | 2.75743718 | 1.09912731 | 6.47E-09 | 3.38E-07 |
| ENSMUSG000000024885 | 2.20797055 | 4.10320742 | 6.75E-09 | 3.51E-07 |
| ENSMUSG000000060063 | 2.16734449 | 5.17015526 | 6.93E-09 | 3.59E-07 |
| ENSMUSG000000035493 | 2.14193091 | 6.48602164 | 6.96E-09 | 3.59E-07 |
| ENSMUSG000000034009 | -2.4638671 | 2.13484532 | 7.27E-09 | 3.72E-07 |
| ENSMUSG000000026814 | 2.64367942 | 1.7264855  | 7.28E-09 | 3.72E-07 |
| ENSMUSG000000044092 | 2.68669536 | 1.47173515 | 7.36E-09 | 3.74E-07 |
| ENSMUSG000000063193 | 2.22997755 | 4.00694716 | 7.48E-09 | 3.79E-07 |
| ENSMUSG000000040964 | 2.55706978 | 1.64338174 | 7.71E-09 | 3.89E-07 |
| ENSMUSG000000048142 | 2.64741745 | 1.53709364 | 8.19E-09 | 4.11E-07 |
| ENSMUSG000000025743 | 2.12866784 | 6.25489056 | 9.08E-09 | 4.54E-07 |
| ENSMUSG000000004267 | 2.9164514  | 1.02198448 | 9.16E-09 | 4.56E-07 |
| ENSMUSG000000003352 | 2.69861609 | 1.48575254 | 9.69E-09 | 4.80E-07 |
| ENSMUSG000000025555 | 2.80105261 | 1.06770111 | 9.92E-09 | 4.89E-07 |
| ENSMUSG000000081723 | 2.51547795 | 2.26496038 | 1.02E-08 | 4.99E-07 |
| ENSMUSG000000018378 | 2.38858109 | 2.41682701 | 1.06E-08 | 5.20E-07 |
| ENSMUSG000000038740 | 2.34206625 | 2.83685862 | 1.10E-08 | 5.35E-07 |
| ENSMUSG000000037995 | 2.21144807 | 3.61580932 | 1.11E-08 | 5.37E-07 |
| ENSMUSG000000034926 | 2.15815822 | 4.2570301  | 1.20E-08 | 5.77E-07 |
| ENSMUSG000000002043 | 2.57384114 | 1.71599909 | 1.46E-08 | 7.03E-07 |
| ENSMUSG000000033855 | 3.62976567 | 0.28316403 | 1.50E-08 | 7.19E-07 |
| ENSMUSG000000026883 | 2.3162882  | 2.18977622 | 1.53E-08 | 7.30E-07 |
| ENSMUSG000000030084 | 2.21247449 | 3.36136874 | 1.55E-08 | 7.33E-07 |
| ENSMUSG000000025511 | 2.43791576 | 2.12261772 | 1.55E-08 | 7.33E-07 |
| ENSMUSG000000003541 | 2.23521614 | 2.78965508 | 1.62E-08 | 7.62E-07 |
| ENSMUSG000000045039 | 2.60484549 | 1.51873224 | 1.63E-08 | 7.62E-07 |
| ENSMUSG000000041609 | 2.49525895 | 1.65466726 | 1.67E-08 | 7.77E-07 |
| ENSMUSG000000031906 | 2.25314818 | 2.64310454 | 1.67E-08 | 7.77E-07 |
| ENSMUSG000000041420 | 2.19353889 | 3.18998573 | 1.72E-08 | 7.98E-07 |
| ENSMUSG000000003873 | 2.12725816 | 4.40082902 | 1.74E-08 | 8.06E-07 |
| ENSMUSG000000056665 | 2.20093179 | 3.31221599 | 1.88E-08 | 8.65E-07 |
| ENSMUSG000000028671 | 2.40083287 | 1.75953303 | 2.04E-08 | 9.32E-07 |
| ENSMUSG000000092060 | 2.26193771 | 2.70264212 | 2.04E-08 | 9.32E-07 |

|                    |            |            |          |          |
|--------------------|------------|------------|----------|----------|
| ENSMUSG00000026180 | 2.1199979  | 4.6384646  | 2.07E-08 | 9.41E-07 |
| ENSMUSG00000071649 | 2.12415289 | 3.89007232 | 2.12E-08 | 9.58E-07 |
| ENSMUSG00000024399 | 2.05883683 | 6.98155806 | 2.24E-08 | 1.01E-06 |
| ENSMUSG00000022708 | -2.0605367 | 6.68239837 | 2.29E-08 | 1.03E-06 |
| ENSMUSG00000004667 | 2.11314706 | 4.15840792 | 2.35E-08 | 1.05E-06 |
| ENSMUSG00000055809 | 2.88621007 | 1.09785698 | 2.60E-08 | 1.16E-06 |
| ENSMUSG00000038486 | 2.44007387 | 1.99009454 | 2.64E-08 | 1.17E-06 |
| ENSMUSG00000084796 | 2.20764247 | 2.3963981  | 2.65E-08 | 1.17E-06 |
| ENSMUSG00000053216 | 2.34186271 | 2.60564759 | 2.65E-08 | 1.17E-06 |
| ENSMUSG00000035640 | 2.58495282 | 1.49009364 | 2.78E-08 | 1.22E-06 |
| ENSMUSG00000037679 | 2.11737943 | 4.11733458 | 2.79E-08 | 1.22E-06 |
| ENSMUSG00000024621 | 2.04006499 | 8.09670911 | 2.83E-08 | 1.23E-06 |
| ENSMUSG00000047712 | 2.25378958 | 2.54719    | 2.86E-08 | 1.24E-06 |
| ENSMUSG00000006235 | 2.40385522 | 2.16867108 | 2.90E-08 | 1.25E-06 |
| ENSMUSG00000052336 | 2.0798705  | 4.69503858 | 3.06E-08 | 1.32E-06 |
| ENSMUSG00000024670 | 2.19998238 | 2.98137459 | 3.21E-08 | 1.38E-06 |
| ENSMUSG00000038738 | 2.1010035  | 4.26288508 | 3.26E-08 | 1.39E-06 |
| ENSMUSG00000004952 | 2.08110397 | 4.54188824 | 3.45E-08 | 1.47E-06 |
| ENSMUSG00000034714 | 2.25658308 | 2.4737208  | 3.48E-08 | 1.48E-06 |
| ENSMUSG00000031565 | 3.05055261 | 0.47213758 | 3.57E-08 | 1.51E-06 |
| ENSMUSG00000003346 | 2.1287909  | 3.22657786 | 3.83E-08 | 1.61E-06 |
| ENSMUSG00000045502 | 2.04404301 | 5.4228046  | 4.05E-08 | 1.70E-06 |
| ENSMUSG00000028064 | 2.06414101 | 4.60771945 | 4.22E-08 | 1.76E-06 |
| ENSMUSG00000045752 | 2.19517487 | 2.6053102  | 4.24E-08 | 1.76E-06 |
| ENSMUSG00000062545 | 2.24835947 | 2.37307501 | 4.31E-08 | 1.79E-06 |
| ENSMUSG00000032012 | 2.148221   | 2.74768507 | 4.33E-08 | 1.79E-06 |
| ENSMUSG00000025491 | 2.27221446 | 2.44000067 | 4.36E-08 | 1.80E-06 |
| ENSMUSG00000030790 | 2.20240515 | 2.65379563 | 4.49E-08 | 1.84E-06 |
| ENSMUSG00000052584 | 2.86790285 | 0.64909467 | 4.52E-08 | 1.85E-06 |
| ENSMUSG00000000555 | 2.20716898 | 2.82169659 | 4.57E-08 | 1.86E-06 |
| ENSMUSG00000015599 | 2.29741162 | 2.21533146 | 4.78E-08 | 1.94E-06 |
| ENSMUSG00000032661 | 2.04903258 | 4.75895727 | 4.82E-08 | 1.95E-06 |
| ENSMUSG00000006519 | 2.01857701 | 5.75243851 | 4.99E-08 | 2.01E-06 |
| ENSMUSG00000030313 | -2.0018764 | 7.27795978 | 5.10E-08 | 2.05E-06 |
| ENSMUSG00000023963 | -2.0334615 | 4.97183495 | 5.12E-08 | 2.05E-06 |
| ENSMUSG00000031832 | 2.1102459  | 3.1765516  | 5.39E-08 | 2.15E-06 |
| ENSMUSG00000051817 | 2.41782443 | 1.54547667 | 5.49E-08 | 2.18E-06 |
| ENSMUSG00000031303 | 2.05025583 | 4.72943338 | 5.50E-08 | 2.18E-06 |
| ENSMUSG00000011148 | 2.1059264  | 3.1036514  | 5.61E-08 | 2.22E-06 |
| ENSMUSG00000068335 | 2.03471592 | 4.61284114 | 5.63E-08 | 2.22E-06 |
| ENSMUSG00000024066 | 2.01611169 | 5.49773286 | 5.75E-08 | 2.26E-06 |
| ENSMUSG00000022561 | 2.12056762 | 3.30220598 | 5.90E-08 | 2.31E-06 |
| ENSMUSG00000046456 | 2.63525887 | 0.59001273 | 6.19E-08 | 2.41E-06 |

|                    |            |            |          |          |
|--------------------|------------|------------|----------|----------|
| ENSMUSG00000047507 | 2.76163566 | 0.91196927 | 6.53E-08 | 2.54E-06 |
| ENSMUSG00000090223 | 2.26240844 | 2.1300955  | 6.71E-08 | 2.60E-06 |
| ENSMUSG00000017639 | 2.04155893 | 4.24981931 | 6.83E-08 | 2.63E-06 |
| ENSMUSG00000086784 | 2.1742784  | 2.5773055  | 7.13E-08 | 2.74E-06 |
| ENSMUSG00000059070 | 1.97719282 | 7.08062178 | 7.15E-08 | 2.74E-06 |
| ENSMUSG00000045252 | 2.14657544 | 2.95196259 | 7.21E-08 | 2.75E-06 |
| ENSMUSG00000003380 | 2.04736289 | 3.85772765 | 7.25E-08 | 2.76E-06 |
| ENSMUSG00000059901 | 2.34010386 | 1.88911968 | 7.39E-08 | 2.80E-06 |
| ENSMUSG00000064246 | 2.55057683 | 1.38559564 | 7.44E-08 | 2.81E-06 |
| ENSMUSG00000029436 | 2.72410317 | 0.93142399 | 7.77E-08 | 2.93E-06 |
| ENSMUSG00000063254 | -2.1877822 | 2.33391193 | 8.28E-08 | 3.11E-06 |
| ENSMUSG00000055485 | 2.4587804  | 1.36025843 | 8.33E-08 | 3.12E-06 |
| ENSMUSG00000022559 | 2.03329142 | 3.69109499 | 8.99E-08 | 3.36E-06 |
| ENSMUSG00000037211 | 2.05908999 | 3.15423993 | 9.12E-08 | 3.39E-06 |
| ENSMUSG00000000982 | 1.97503527 | 5.65567209 | 9.20E-08 | 3.41E-06 |
| ENSMUSG00000022574 | 2.59333667 | 1.19100017 | 9.36E-08 | 3.46E-06 |
| ENSMUSG00000057411 | 2.09046863 | 3.065868   | 1.02E-07 | 3.74E-06 |
| ENSMUSG00000061286 | 2.16363651 | 2.42854999 | 1.03E-07 | 3.77E-06 |
| ENSMUSG00000029810 | 1.98961356 | 4.42736056 | 1.04E-07 | 3.82E-06 |
| ENSMUSG00000034748 | 2.17883344 | 2.19280885 | 1.06E-07 | 3.88E-06 |
| ENSMUSG00000002393 | 2.13437595 | 2.57356788 | 1.13E-07 | 4.10E-06 |
| ENSMUSG00000038034 | 2.11707577 | 2.66340511 | 1.13E-07 | 4.11E-06 |
| ENSMUSG00000001870 | 2.99172848 | 0.6300133  | 1.16E-07 | 4.21E-06 |
| ENSMUSG00000037960 | 2.22545705 | 2.06727857 | 1.20E-07 | 4.33E-06 |
| ENSMUSG00000026458 | 2.02799379 | 3.57236686 | 1.22E-07 | 4.38E-06 |
| ENSMUSG00000058317 | -2.5094331 | 0.98459288 | 1.23E-07 | 4.39E-06 |
| ENSMUSG00000020865 | 1.97811765 | 4.76513219 | 1.24E-07 | 4.43E-06 |
| ENSMUSG00000032109 | 2.214245   | 2.22243054 | 1.27E-07 | 4.53E-06 |
| ENSMUSG00000022568 | 1.96221855 | 5.13445073 | 1.28E-07 | 4.53E-06 |
| ENSMUSG00000024897 | 2.16115344 | 2.36149899 | 1.33E-07 | 4.71E-06 |
| ENSMUSG00000074406 | 2.2194137  | 1.80963491 | 1.35E-07 | 4.77E-06 |
| ENSMUSG00000018774 | 1.95334678 | 5.36287766 | 1.38E-07 | 4.84E-06 |
| ENSMUSG00000016028 | 2.33655772 | 1.74698529 | 1.39E-07 | 4.85E-06 |
| ENSMUSG00000066682 | 2.0092019  | 3.70548497 | 1.53E-07 | 5.34E-06 |
| ENSMUSG00000068220 | 1.99244043 | 3.76215939 | 1.56E-07 | 5.45E-06 |
| ENSMUSG00000051439 | 1.98673205 | 3.83851249 | 1.58E-07 | 5.47E-06 |
| ENSMUSG00000003378 | 2.27300217 | 1.66439123 | 1.58E-07 | 5.48E-06 |
| ENSMUSG00000030259 | 2.53368212 | 1.06967474 | 1.61E-07 | 5.54E-06 |
| ENSMUSG00000015143 | 1.9382538  | 5.58692244 | 1.62E-07 | 5.57E-06 |
| ENSMUSG00000022103 | 2.00899419 | 3.62820884 | 1.62E-07 | 5.57E-06 |
| ENSMUSG00000018930 | 1.94021015 | 5.42780661 | 1.65E-07 | 5.64E-06 |
| ENSMUSG00000044328 | 2.512207   | 0.75404547 | 1.68E-07 | 5.74E-06 |
| ENSMUSG00000030340 | 2.52158702 | 1.26335678 | 1.71E-07 | 5.81E-06 |

|                     |            |            |          |          |
|---------------------|------------|------------|----------|----------|
| ENSMUSG00000005533  | 2.1495078  | 2.57385406 | 1.76E-07 | 5.97E-06 |
| ENSMUSG00000005413  | 1.91388279 | 7.02227713 | 1.79E-07 | 6.07E-06 |
| ENSMUSG000000030727 | 1.93869029 | 5.15702383 | 1.84E-07 | 6.19E-06 |
| ENSMUSG000000040327 | 2.01713015 | 3.47158089 | 1.84E-07 | 6.19E-06 |
| ENSMUSG000000048440 | 1.96141078 | 4.12549967 | 2.04E-07 | 6.84E-06 |
| ENSMUSG00000004931  | 2.23819842 | 1.84695849 | 2.14E-07 | 7.16E-06 |
| ENSMUSG000000032754 | 1.94615731 | 4.40695023 | 2.15E-07 | 7.16E-06 |
| ENSMUSG000000038451 | 2.37159468 | 1.57357297 | 2.19E-07 | 7.28E-06 |
| ENSMUSG000000031274 | 2.31906964 | 1.38946429 | 2.25E-07 | 7.44E-06 |
| ENSMUSG000000022534 | 1.95593722 | 3.93625614 | 2.29E-07 | 7.55E-06 |
| ENSMUSG00000002250  | 2.00834255 | 3.19720689 | 2.31E-07 | 7.61E-06 |
| ENSMUSG000000035459 | 1.97089107 | 3.80309873 | 2.32E-07 | 7.63E-06 |
| ENSMUSG000000021360 | 1.97011889 | 4.04671594 | 2.44E-07 | 8.00E-06 |
| ENSMUSG000000050556 | 2.07941997 | 2.16234438 | 2.51E-07 | 8.21E-06 |
| ENSMUSG000000026170 | 1.89441629 | 6.16006103 | 2.59E-07 | 8.41E-06 |
| ENSMUSG000000039208 | 2.0454397  | 2.91462755 | 2.59E-07 | 8.41E-06 |
| ENSMUSG000000029490 | 2.21067496 | 1.57943172 | 2.67E-07 | 8.65E-06 |
| ENSMUSG000000023991 | 1.91396112 | 4.69062717 | 2.70E-07 | 8.70E-06 |
| ENSMUSG000000070369 | 1.89024775 | 6.03648331 | 2.74E-07 | 8.81E-06 |
| ENSMUSG000000076441 | 1.90538221 | 5.19647424 | 2.75E-07 | 8.81E-06 |
| ENSMUSG000000004612 | 1.98801716 | 3.34479766 | 2.75E-07 | 8.81E-06 |
| ENSMUSG000000034771 | 2.50730353 | 1.03954306 | 2.79E-07 | 8.87E-06 |
| ENSMUSG000000040520 | -1.8843586 | 6.50422744 | 2.79E-07 | 8.87E-06 |
| ENSMUSG000000037902 | 1.87943418 | 7.28584545 | 2.81E-07 | 8.87E-06 |
| ENSMUSG000000033460 | 2.71258267 | 0.6863688  | 2.81E-07 | 8.87E-06 |
| ENSMUSG000000030474 | 1.92854021 | 4.25225436 | 2.81E-07 | 8.87E-06 |
| ENSMUSG000000004054 | 1.92269646 | 4.2344826  | 2.82E-07 | 8.89E-06 |
| ENSMUSG000000004609 | 2.02029914 | 3.22602498 | 2.86E-07 | 9.00E-06 |
| ENSMUSG000000050272 | 2.25608651 | 1.61274503 | 3.08E-07 | 9.65E-06 |
| ENSMUSG000000003970 | 1.86851789 | 8.14795087 | 3.12E-07 | 9.71E-06 |
| ENSMUSG000000043017 | 2.14961142 | 1.51225509 | 3.12E-07 | 9.71E-06 |
| ENSMUSG000000026117 | 2.0557375  | 2.19443472 | 3.16E-07 | 9.81E-06 |
| ENSMUSG000000039713 | 2.31326084 | 1.58384757 | 3.17E-07 | 9.81E-06 |
| ENSMUSG000000030432 | 1.87171447 | 6.73439308 | 3.20E-07 | 9.87E-06 |
| ENSMUSG000000030272 | 2.28176563 | 1.97584658 | 3.20E-07 | 9.87E-06 |
| ENSMUSG000000036565 | 1.88286442 | 5.44892109 | 3.53E-07 | 1.08E-05 |
| ENSMUSG000000005397 | 1.86885106 | 6.58182894 | 3.55E-07 | 1.09E-05 |
| ENSMUSG000000048779 | 2.42406636 | 1.18457847 | 3.68E-07 | 1.12E-05 |
| ENSMUSG000000029547 | 1.89795708 | 4.69824398 | 3.70E-07 | 1.13E-05 |
| ENSMUSG000000054342 | 1.96051139 | 3.5348041  | 3.71E-07 | 1.13E-05 |
| ENSMUSG000000035697 | 1.85497757 | 8.69484912 | 3.73E-07 | 1.13E-05 |
| ENSMUSG000000072244 | 2.25152054 | 1.84609634 | 3.95E-07 | 1.20E-05 |
| ENSMUSG000000079334 | 2.07249105 | 1.97764386 | 4.02E-07 | 1.21E-05 |

|                    |            |            |          |          |
|--------------------|------------|------------|----------|----------|
| ENSMUSG00000019990 | 2.3373685  | 1.21119986 | 4.03E-07 | 1.21E-05 |
| ENSMUSG00000022436 | 1.87358668 | 5.40759765 | 4.07E-07 | 1.22E-05 |
| ENSMUSG00000045980 | 1.97130112 | 3.16075516 | 4.12E-07 | 1.23E-05 |
| ENSMUSG00000013236 | 1.95238692 | 3.35386692 | 4.15E-07 | 1.24E-05 |
| ENSMUSG00000029602 | 1.92755907 | 3.69181845 | 4.16E-07 | 1.24E-05 |
| ENSMUSG00000031286 | 2.4835749  | 1.15553616 | 4.17E-07 | 1.24E-05 |
| ENSMUSG00000086503 | -1.8450575 | 9.6529629  | 4.24E-07 | 1.26E-05 |
| ENSMUSG00000063802 | 2.08573443 | 2.0317031  | 4.30E-07 | 1.27E-05 |
| ENSMUSG00000030083 | 1.92483512 | 3.63210206 | 4.33E-07 | 1.28E-05 |
| ENSMUSG00000031584 | 1.87106294 | 5.37887541 | 4.41E-07 | 1.30E-05 |
| ENSMUSG00000007892 | 1.84769311 | 6.69419915 | 4.51E-07 | 1.32E-05 |
| ENSMUSG00000093803 | 2.0736823  | 1.92417147 | 4.60E-07 | 1.35E-05 |
| ENSMUSG00000035164 | -1.8576731 | 5.50932236 | 4.82E-07 | 1.41E-05 |
| ENSMUSG00000097649 | -2.4497351 | 0.91359054 | 4.88E-07 | 1.42E-05 |
| ENSMUSG00000037820 | 1.87084213 | 4.77292942 | 4.89E-07 | 1.42E-05 |
| ENSMUSG00000019082 | 1.88914126 | 4.13772114 | 4.90E-07 | 1.42E-05 |
| ENSMUSG00000038235 | 2.04677038 | 2.38199757 | 4.91E-07 | 1.42E-05 |
| ENSMUSG00000053687 | 2.4056806  | 1.12843103 | 4.94E-07 | 1.42E-05 |
| ENSMUSG00000046574 | 1.87932626 | 4.22275526 | 5.05E-07 | 1.45E-05 |
| ENSMUSG00000032011 | 1.87111819 | 4.53841215 | 5.09E-07 | 1.46E-05 |
| ENSMUSG00000027134 | 1.95265667 | 3.03450977 | 5.10E-07 | 1.46E-05 |
| ENSMUSG00000032841 | 1.98721121 | 3.01891621 | 5.18E-07 | 1.48E-05 |
| ENSMUSG00000022102 | 2.04588042 | 2.32944197 | 5.29E-07 | 1.51E-05 |
| ENSMUSG00000079419 | 1.84222331 | 5.78122522 | 5.30E-07 | 1.51E-05 |
| ENSMUSG00000039953 | 2.00958791 | 2.69260571 | 5.34E-07 | 1.51E-05 |
| ENSMUSG00000023019 | 2.49421326 | 1.05303698 | 5.37E-07 | 1.52E-05 |
| ENSMUSG00000022420 | 2.12942883 | 2.05584495 | 5.42E-07 | 1.53E-05 |
| ENSMUSG00000023495 | 2.23818648 | 1.43673898 | 5.46E-07 | 1.53E-05 |
| ENSMUSG00000028927 | 1.85251238 | 5.21264766 | 5.55E-07 | 1.55E-05 |
| ENSMUSG00000015474 | 1.97349684 | 2.77721202 | 5.56E-07 | 1.56E-05 |
| ENSMUSG00000021806 | 2.19749169 | 1.68834688 | 5.71E-07 | 1.59E-05 |
| ENSMUSG00000024985 | 2.04836411 | 2.27760871 | 5.73E-07 | 1.59E-05 |
| ENSMUSG00000050022 | 1.89690928 | 3.86479421 | 5.83E-07 | 1.62E-05 |
| ENSMUSG00000033697 | 1.94917513 | 3.32439309 | 5.86E-07 | 1.62E-05 |
| ENSMUSG00000026249 | -2.0121499 | 2.65802282 | 5.86E-07 | 1.62E-05 |
| ENSMUSG00000063889 | -1.8397831 | 5.41534005 | 6.14E-07 | 1.69E-05 |
| ENSMUSG00000029570 | 1.86498722 | 4.26301385 | 6.18E-07 | 1.70E-05 |
| ENSMUSG00000060166 | 1.88230883 | 3.6731214  | 6.48E-07 | 1.78E-05 |
| ENSMUSG00000022793 | 1.98580739 | 2.5573348  | 6.52E-07 | 1.79E-05 |
| ENSMUSG00000001053 | 2.03164272 | 2.0826156  | 6.76E-07 | 1.84E-05 |
| ENSMUSG00000022861 | 2.23976659 | 1.42534326 | 6.77E-07 | 1.84E-05 |
| ENSMUSG00000020709 | 1.96194424 | 2.77786459 | 6.80E-07 | 1.85E-05 |
| ENSMUSG00000031626 | -2.0450224 | 2.05221915 | 7.01E-07 | 1.90E-05 |

|                    |            |            |          |          |
|--------------------|------------|------------|----------|----------|
| ENSMUSG00000004263 | 1.85003059 | 4.35665496 | 7.19E-07 | 1.94E-05 |
| ENSMUSG00000039377 | 2.1606573  | 1.19053715 | 7.50E-07 | 2.02E-05 |
| ENSMUSG00000002489 | 1.91355925 | 3.31711721 | 7.59E-07 | 2.04E-05 |
| ENSMUSG00000066894 | 2.17499666 | 1.75408253 | 7.60E-07 | 2.04E-05 |
| ENSMUSG00000026177 | 1.83715612 | 4.9179344  | 7.82E-07 | 2.10E-05 |
| ENSMUSG00000030352 | 2.14315491 | 1.3961469  | 7.90E-07 | 2.11E-05 |
| ENSMUSG00000026223 | 1.836959   | 4.77080532 | 7.93E-07 | 2.11E-05 |
| ENSMUSG00000024327 | 2.57931175 | 0.7868234  | 7.97E-07 | 2.12E-05 |
| ENSMUSG00000038260 | 2.08352609 | 2.00763545 | 8.04E-07 | 2.13E-05 |
| ENSMUSG00000069830 | 2.06524409 | 1.98454889 | 8.34E-07 | 2.21E-05 |
| ENSMUSG00000041488 | 1.98609565 | 2.59347283 | 8.39E-07 | 2.22E-05 |
| ENSMUSG00000029223 | 2.81053988 | 0.30982997 | 8.43E-07 | 2.22E-05 |
| ENSMUSG00000030108 | 2.79696733 | 0.31323829 | 8.43E-07 | 2.22E-05 |
| ENSMUSG00000007908 | -2.5575395 | 0.40968631 | 8.86E-07 | 2.33E-05 |
| ENSMUSG00000022584 | 1.82170527 | 4.95376529 | 9.00E-07 | 2.36E-05 |
| ENSMUSG00000070003 | 2.11331862 | 1.81456335 | 9.02E-07 | 2.36E-05 |
| ENSMUSG00000000204 | 1.83052419 | 4.88612414 | 9.06E-07 | 2.36E-05 |
| ENSMUSG00000049422 | 1.91349628 | 2.74445596 | 9.07E-07 | 2.36E-05 |
| ENSMUSG00000040209 | 2.40680431 | 1.18583916 | 9.12E-07 | 2.37E-05 |
| ENSMUSG00000019433 | 2.05234535 | 2.1908558  | 9.17E-07 | 2.37E-05 |
| ENSMUSG00000049625 | 1.8190922  | 4.79744805 | 9.57E-07 | 2.47E-05 |
| ENSMUSG00000054065 | 1.84061965 | 4.08662641 | 9.62E-07 | 2.48E-05 |
| ENSMUSG00000015305 | 1.83295155 | 4.37090205 | 9.64E-07 | 2.48E-05 |
| ENSMUSG00000030786 | 1.79462369 | 6.24156779 | 9.65E-07 | 2.48E-05 |
| ENSMUSG00000034974 | 1.91745026 | 2.83346805 | 1.02E-06 | 2.60E-05 |
| ENSMUSG00000030737 | 1.88210969 | 3.46935119 | 1.02E-06 | 2.60E-05 |
| ENSMUSG00000092341 | -1.7765375 | 12.2293205 | 1.04E-06 | 2.65E-05 |
| ENSMUSG00000030109 | 2.7903129  | 0.29430121 | 1.04E-06 | 2.65E-05 |
| ENSMUSG00000063146 | 1.91046185 | 3.07500516 | 1.07E-06 | 2.72E-05 |
| ENSMUSG00000024773 | 1.79992261 | 5.21711476 | 1.09E-06 | 2.76E-05 |
| ENSMUSG00000030413 | 1.83171883 | 3.98539003 | 1.11E-06 | 2.81E-05 |
| ENSMUSG00000014470 | 1.86091686 | 3.57484162 | 1.12E-06 | 2.83E-05 |
| ENSMUSG00000010021 | 2.10806019 | 1.62438291 | 1.14E-06 | 2.86E-05 |
| ENSMUSG00000026932 | 2.08428985 | 1.87991215 | 1.14E-06 | 2.86E-05 |
| ENSMUSG00000074622 | 1.86040089 | 3.73693343 | 1.14E-06 | 2.87E-05 |
| ENSMUSG00000020178 | 1.98395753 | 2.51893446 | 1.15E-06 | 2.87E-05 |
| ENSMUSG00000017969 | 2.15351049 | 1.46481694 | 1.16E-06 | 2.88E-05 |
| ENSMUSG00000036686 | 1.84417279 | 3.66981848 | 1.16E-06 | 2.88E-05 |
| ENSMUSG00000026815 | 2.13484981 | 1.8059516  | 1.20E-06 | 2.99E-05 |
| ENSMUSG00000026791 | 2.1462254  | 1.47428795 | 1.22E-06 | 3.01E-05 |
| ENSMUSG00000024300 | 1.77591351 | 6.24925444 | 1.23E-06 | 3.04E-05 |
| ENSMUSG00000030720 | 1.79172879 | 5.00126833 | 1.25E-06 | 3.09E-05 |
| ENSMUSG00000095105 | -1.7868978 | 5.27222057 | 1.26E-06 | 3.11E-05 |



|                     |            |            |          |          |
|---------------------|------------|------------|----------|----------|
| ENSMUSG00000078763  | 1.80835731 | 4.53862716 | 1.28E-06 | 3.13E-05 |
| ENSMUSG00000002602  | 1.76690734 | 6.88800595 | 1.31E-06 | 3.20E-05 |
| ENSMUSG00000001473  | 2.04203617 | 1.87223914 | 1.34E-06 | 3.27E-05 |
| ENSMUSG000000021281 | 1.77523555 | 5.73800045 | 1.35E-06 | 3.31E-05 |
| ENSMUSG000000031441 | 1.87030712 | 3.28779298 | 1.38E-06 | 3.35E-05 |
| ENSMUSG000000023367 | 1.88798334 | 3.0118391  | 1.38E-06 | 3.36E-05 |
| ENSMUSG000000037348 | 2.09213552 | 1.99184409 | 1.39E-06 | 3.36E-05 |
| ENSMUSG000000095079 | 1.75941861 | 7.50481677 | 1.40E-06 | 3.40E-05 |
| ENSMUSG000000020424 | 1.96078246 | 1.80390341 | 1.42E-06 | 3.43E-05 |
| ENSMUSG000000050919 | 2.12164736 | 1.37386857 | 1.45E-06 | 3.48E-05 |
| ENSMUSG000000096833 | -1.7796178 | 5.06789416 | 1.45E-06 | 3.50E-05 |
| ENSMUSG000000047810 | 1.78040835 | 4.94102145 | 1.53E-06 | 3.67E-05 |
| ENSMUSG000000036622 | 1.77440615 | 5.23890049 | 1.53E-06 | 3.67E-05 |
| ENSMUSG000000024856 | 1.774492   | 4.9787419  | 1.54E-06 | 3.67E-05 |
| ENSMUSG000000013833 | 1.89467321 | 2.80803612 | 1.55E-06 | 3.69E-05 |
| ENSMUSG000000021384 | 1.83030472 | 3.72477813 | 1.55E-06 | 3.69E-05 |
| ENSMUSG000000007950 | 2.017749   | 1.49985601 | 1.56E-06 | 3.70E-05 |
| ENSMUSG000000050989 | 1.8519348  | 3.45909858 | 1.63E-06 | 3.85E-05 |
| ENSMUSG000000007570 | 1.89357082 | 2.24945782 | 1.63E-06 | 3.85E-05 |
| ENSMUSG000000071724 | 2.26406131 | 0.97438846 | 1.64E-06 | 3.85E-05 |
| ENSMUSG000000022180 | 1.88891912 | 2.9317253  | 1.64E-06 | 3.85E-05 |
| ENSMUSG000000029330 | 2.21003967 | 1.16081392 | 1.69E-06 | 3.98E-05 |
| ENSMUSG000000051403 | 1.79174354 | 4.05723022 | 1.76E-06 | 4.12E-05 |
| ENSMUSG000000022211 | 2.11622504 | 1.42448615 | 1.76E-06 | 4.13E-05 |
| ENSMUSG000000037570 | 1.79870694 | 3.94317746 | 1.77E-06 | 4.13E-05 |
| ENSMUSG000000049999 | 2.30775299 | 0.82619744 | 1.78E-06 | 4.15E-05 |
| ENSMUSG000000023009 | 2.29883492 | 1.04457379 | 1.85E-06 | 4.30E-05 |
| ENSMUSG000000048078 | 1.83535866 | 3.61200483 | 1.85E-06 | 4.30E-05 |
| ENSMUSG000000036199 | 1.79014416 | 3.81318814 | 1.88E-06 | 4.36E-05 |
| ENSMUSG000000001751 | 1.78853147 | 3.78879407 | 1.91E-06 | 4.42E-05 |
| ENSMUSG000000025171 | 2.10763782 | 1.32431824 | 1.92E-06 | 4.44E-05 |
| ENSMUSG000000053541 | -1.7324731 | 7.10780644 | 1.97E-06 | 4.55E-05 |
| ENSMUSG000000055322 | 1.8490038  | 3.31126843 | 1.98E-06 | 4.56E-05 |
| ENSMUSG000000026981 | 1.87887406 | 2.88349589 | 1.99E-06 | 4.57E-05 |
| ENSMUSG000000074661 | -1.9207466 | 2.31032071 | 2.00E-06 | 4.59E-05 |
| ENSMUSG000000055782 | 1.86321027 | 3.22340864 | 2.02E-06 | 4.61E-05 |
| ENSMUSG000000047250 | 1.77584323 | 4.2727783  | 2.09E-06 | 4.77E-05 |
| ENSMUSG000000028460 | 1.82827119 | 3.39013367 | 2.13E-06 | 4.84E-05 |
| ENSMUSG000000020766 | 2.19287921 | 1.31152195 | 2.15E-06 | 4.89E-05 |
| ENSMUSG000000062753 | 1.85739701 | 2.73944161 | 2.16E-06 | 4.90E-05 |
| ENSMUSG000000044811 | 1.79550564 | 3.77934326 | 2.18E-06 | 4.93E-05 |
| ENSMUSG000000062683 | 1.80556546 | 3.34231065 | 2.18E-06 | 4.93E-05 |
| ENSMUSG000000055053 | 1.83338789 | 3.36955733 | 2.20E-06 | 4.95E-05 |

|                    |            |            |          |          |
|--------------------|------------|------------|----------|----------|
| ENSMUSG00000026833 | 1.84244727 | 2.8478796  | 2.26E-06 | 5.07E-05 |
| ENSMUSG00000075705 | 1.74211422 | 5.1638098  | 2.30E-06 | 5.16E-05 |
| ENSMUSG00000024953 | 1.74847058 | 4.79110267 | 2.32E-06 | 5.19E-05 |
| ENSMUSG00000015947 | 1.80489739 | 3.33042308 | 2.37E-06 | 5.28E-05 |
| ENSMUSG00000046822 | 1.82457663 | 2.96065528 | 2.37E-06 | 5.28E-05 |
| ENSMUSG00000045664 | 1.93269897 | 1.92669111 | 2.38E-06 | 5.31E-05 |
| ENSMUSG00000009292 | 1.73123673 | 5.70951577 | 2.41E-06 | 5.35E-05 |
| ENSMUSG00000086712 | 1.85462746 | 2.90074758 | 2.42E-06 | 5.37E-05 |
| ENSMUSG00000034652 | 1.72885303 | 5.62105455 | 2.43E-06 | 5.37E-05 |
| ENSMUSG00000076594 | -1.7918399 | 3.57836828 | 2.47E-06 | 5.46E-05 |
| ENSMUSG00000020235 | 1.75584864 | 4.50546379 | 2.48E-06 | 5.47E-05 |
| ENSMUSG00000024910 | 1.79005704 | 3.37135496 | 2.48E-06 | 5.47E-05 |
| ENSMUSG00000005580 | 1.96694588 | 1.89553487 | 2.51E-06 | 5.52E-05 |
| ENSMUSG00000067714 | 1.98427351 | 1.69184703 | 2.56E-06 | 5.62E-05 |
| ENSMUSG00000048897 | 1.73319112 | 5.10665343 | 2.58E-06 | 5.65E-05 |
| ENSMUSG00000030124 | 2.07514482 | 1.53824656 | 2.59E-06 | 5.65E-05 |
| ENSMUSG00000040466 | 1.75722849 | 4.38586065 | 2.59E-06 | 5.65E-05 |
| ENSMUSG00000096632 | -1.7974239 | 3.36427203 | 2.60E-06 | 5.65E-05 |
| ENSMUSG00000020092 | 2.32275987 | 0.89525907 | 2.73E-06 | 5.93E-05 |
| ENSMUSG00000076591 | -1.8105636 | 3.2377079  | 2.74E-06 | 5.94E-05 |
| ENSMUSG00000076569 | -1.7131307 | 6.03425108 | 2.81E-06 | 6.08E-05 |
| ENSMUSG00000097230 | -1.8814677 | 2.29534845 | 2.92E-06 | 6.31E-05 |
| ENSMUSG00000021614 | 1.85532352 | 2.76216792 | 2.94E-06 | 6.35E-05 |
| ENSMUSG00000076525 | -1.8564155 | 2.49172872 | 2.97E-06 | 6.40E-05 |
| ENSMUSG00000053318 | 1.79318198 | 3.1836159  | 3.01E-06 | 6.46E-05 |
| ENSMUSG00000036820 | 1.8727162  | 2.54611704 | 3.01E-06 | 6.46E-05 |
| ENSMUSG00000029545 | 1.81925206 | 2.75556307 | 3.04E-06 | 6.51E-05 |
| ENSMUSG00000057948 | 1.70513332 | 5.85352919 | 3.05E-06 | 6.52E-05 |
| ENSMUSG00000049823 | 1.97185782 | 1.68136867 | 3.06E-06 | 6.52E-05 |
| ENSMUSG00000032232 | 2.57563103 | 0.34775985 | 3.10E-06 | 6.59E-05 |
| ENSMUSG00000029723 | 1.70765512 | 5.62206608 | 3.12E-06 | 6.60E-05 |
| ENSMUSG00000034361 | 2.01486137 | 1.93503528 | 3.12E-06 | 6.60E-05 |
| ENSMUSG00000032333 | 1.72806112 | 4.87999053 | 3.12E-06 | 6.60E-05 |
| ENSMUSG00000027222 | 1.79810565 | 2.73999079 | 3.14E-06 | 6.64E-05 |
| ENSMUSG00000048807 | 2.22678411 | 1.11339851 | 3.18E-06 | 6.70E-05 |
| ENSMUSG00000026435 | 1.76592865 | 3.57202162 | 3.23E-06 | 6.79E-05 |
| ENSMUSG00000022218 | 1.99654578 | 1.91924153 | 3.29E-06 | 6.92E-05 |
| ENSMUSG00000031375 | 2.21880016 | 1.03403763 | 3.33E-06 | 6.97E-05 |
| ENSMUSG00000037306 | 1.88046337 | 2.42887535 | 3.35E-06 | 7.02E-05 |
| ENSMUSG00000044199 | 1.72516271 | 4.2943014  | 3.39E-06 | 7.08E-05 |
| ENSMUSG00000041939 | 2.08274945 | 1.4074527  | 3.44E-06 | 7.17E-05 |
| ENSMUSG00000024958 | 1.83367375 | 2.84338424 | 3.46E-06 | 7.21E-05 |
| ENSMUSG00000020153 | 1.85040996 | 2.79737423 | 3.48E-06 | 7.24E-05 |

|                    |            |            |          |            |
|--------------------|------------|------------|----------|------------|
| ENSMUSG00000024187 | 1.72944095 | 4.40818627 | 3.52E-06 | 7.31E-05   |
| ENSMUSG00000022414 | 1.78528047 | 3.24909766 | 3.53E-06 | 7.32E-05   |
| ENSMUSG00000025579 | 1.72701526 | 4.31110408 | 3.55E-06 | 7.34E-05   |
| ENSMUSG00000020538 | 1.71206209 | 4.82759265 | 3.58E-06 | 7.38E-05   |
| ENSMUSG00000045287 | 2.03293335 | 1.34027307 | 3.60E-06 | 7.43E-05   |
| ENSMUSG00000032691 | 1.75655154 | 4.00574323 | 3.63E-06 | 7.46E-05   |
| ENSMUSG00000037349 | 2.25912849 | 0.87514301 | 3.66E-06 | 7.52E-05   |
| ENSMUSG00000039621 | 1.6862911  | 6.72327761 | 3.68E-06 | 7.54E-05   |
| ENSMUSG00000037692 | 1.76218588 | 3.5727964  | 3.78E-06 | 7.74E-05   |
| ENSMUSG00000039759 | 1.83696873 | 2.63050726 | 3.80E-06 | 7.77E-05   |
| ENSMUSG00000047423 | 1.73223332 | 3.76390701 | 3.82E-06 | 7.78E-05   |
| ENSMUSG00000067149 | -1.6776852 | 8.38704364 | 3.83E-06 | 7.80E-05   |
| ENSMUSG00000037979 | 2.281195   | 0.90650438 | 3.84E-06 | 7.80E-05   |
| ENSMUSG00000015363 | 1.70515428 | 4.8280769  | 3.87E-06 | 7.84E-05   |
| ENSMUSG00000036473 | 1.8225224  | 2.82250056 | 3.88E-06 | 7.85E-05   |
| ENSMUSG00000026271 | 1.74161441 | 3.89510417 | 3.89E-06 | 7.85E-05   |
| ENSMUSG00000024941 | 1.70561554 | 4.683539   | 3.96E-06 | 7.99E-05   |
| ENSMUSG00000013033 | 1.74099446 | 3.75471677 | 3.97E-06 | 7.99E-05   |
| ENSMUSG00000000791 | 1.97860667 | 1.61185721 | 4.18E-06 | 8.41E-05   |
| ENSMUSG00000044345 | 1.74096566 | 3.70429625 | 4.20E-06 | 8.42E-05   |
| ENSMUSG00000086593 | 2.49779073 | 0.55435941 | 4.26E-06 | 8.53E-05   |
| ENSMUSG00000022421 | 2.07161811 | 1.52330566 | 4.31E-06 | 8.62E-05   |
| ENSMUSG00000025792 | 1.91765678 | 1.88582983 | 4.39E-06 | 8.76E-05   |
| ENSMUSG00000033434 | 1.76675009 | 3.14585021 | 4.40E-06 | 8.76E-05   |
| ENSMUSG00000050931 | 1.88296216 | 2.34638777 | 4.45E-06 | 8.85E-05   |
| ENSMUSG00000080316 | 2.16907923 | 0.93219787 | 4.61E-06 | 9.16E-05   |
| ENSMUSG00000029600 | 2.07264623 | 1.09768939 | 4.65E-06 | 9.21E-05   |
| ENSMUSG00000009418 | 1.7102045  | 4.4109311  | 4.73E-06 | 9.35E-05   |
| ENSMUSG00000015968 | 1.72729424 | 4.25352259 | 4.84E-06 | 9.56E-05   |
| ENSMUSG00000042558 | 1.7377543  | 3.52376732 | 4.88E-06 | 9.62E-05   |
| ENSMUSG00000027333 | 1.77161116 | 3.24792955 | 5.04E-06 | 9.93E-05   |
| ENSMUSG00000030852 | 2.36001775 | 0.5597268  | 5.08E-06 | 9.99E-05   |
| ENSMUSG00000056724 | 1.67541936 | 5.20305981 | 5.19E-06 | 0.00010173 |
| ENSMUSG00000017417 | 2.17559325 | 1.08971097 | 5.28E-06 | 0.00010342 |
| ENSMUSG00000032487 | 1.66582057 | 5.67317249 | 5.35E-06 | 0.00010444 |
| ENSMUSG00000024730 | 2.06971736 | 1.40720545 | 5.35E-06 | 0.00010444 |
| ENSMUSG00000066861 | 2.30747459 | 0.60675192 | 5.37E-06 | 0.00010449 |
| ENSMUSG00000014599 | 1.6899863  | 4.45871606 | 5.37E-06 | 0.00010449 |
| ENSMUSG00000056071 | 1.65602754 | 6.91543675 | 5.47E-06 | 0.00010608 |
| ENSMUSG00000035637 | 1.75557471 | 3.10213211 | 5.47E-06 | 0.00010608 |
| ENSMUSG00000101013 | -1.6817162 | 4.67857186 | 5.49E-06 | 0.00010626 |
| ENSMUSG00000023908 | 1.77393901 | 2.84573758 | 5.53E-06 | 0.00010655 |
| ENSMUSG00000030792 | 1.92703323 | 1.85427008 | 5.53E-06 | 0.00010655 |

|                    |            |            |          |            |
|--------------------|------------|------------|----------|------------|
| ENSMUSG0000003123  | 1.69336848 | 4.1131649  | 5.53E-06 | 0.00010655 |
| ENSMUSG00000028062 | 1.6939077  | 4.01430173 | 5.54E-06 | 0.00010658 |
| ENSMUSG00000018585 | 1.71434204 | 3.6703922  | 5.58E-06 | 0.00010716 |
| ENSMUSG00000032583 | 1.75733821 | 2.64587246 | 5.65E-06 | 0.00010824 |
| ENSMUSG00000025981 | -1.6551824 | 6.09392469 | 5.71E-06 | 0.00010915 |
| ENSMUSG00000022540 | 1.66085782 | 5.31886026 | 5.93E-06 | 0.00011317 |
| ENSMUSG00000001729 | 1.65327115 | 5.73680465 | 5.98E-06 | 0.00011398 |
| ENSMUSG00000001082 | 1.73344377 | 3.41495988 | 6.04E-06 | 0.00011491 |
| ENSMUSG00000035722 | 1.64584774 | 6.66930807 | 6.07E-06 | 0.00011526 |
| ENSMUSG00000024617 | 1.85545175 | 2.60325535 | 6.12E-06 | 0.00011618 |
| ENSMUSG00000020101 | 1.64860287 | 6.23247378 | 6.17E-06 | 0.00011691 |
| ENSMUSG00000059498 | 1.65683354 | 5.3117001  | 6.28E-06 | 0.0001187  |
| ENSMUSG00000017144 | 1.70457501 | 3.5656825  | 6.30E-06 | 0.00011889 |
| ENSMUSG00000021957 | 1.64245842 | 6.63137803 | 6.32E-06 | 0.00011906 |
| ENSMUSG00000049295 | 1.9436964  | 1.83427479 | 6.38E-06 | 0.00012011 |
| ENSMUSG00000079164 | 2.41285203 | 0.41903181 | 6.52E-06 | 0.00012254 |
| ENSMUSG00000055926 | 1.8277454  | 2.54727561 | 6.59E-06 | 0.00012354 |
| ENSMUSG00000022586 | 2.13394566 | 1.01606166 | 6.66E-06 | 0.00012466 |
| ENSMUSG00000019487 | 1.70580022 | 3.19845077 | 6.78E-06 | 0.00012665 |
| ENSMUSG00000020277 | 1.66141121 | 4.74994295 | 6.80E-06 | 0.00012682 |
| ENSMUSG00000041164 | 1.63545279 | 6.99633211 | 6.81E-06 | 0.00012683 |
| ENSMUSG00000022565 | 1.64206335 | 5.96536274 | 6.82E-06 | 0.00012683 |
| ENSMUSG00000029314 | -1.6861042 | 3.98467885 | 6.89E-06 | 0.00012791 |
| ENSMUSG00000074811 | 1.8704709  | 1.85257895 | 6.97E-06 | 0.00012928 |
| ENSMUSG00000024334 | 1.63294568 | 6.70152373 | 7.03E-06 | 0.00013006 |
| ENSMUSG00000035314 | 2.11638383 | 0.91491245 | 7.04E-06 | 0.00013018 |
| ENSMUSG00000025503 | 1.63453488 | 6.36184173 | 7.13E-06 | 0.00013159 |
| ENSMUSG00000017466 | 1.68928502 | 3.88431131 | 7.14E-06 | 0.00013159 |
| ENSMUSG00000030970 | 1.96624685 | 1.55285986 | 7.19E-06 | 0.0001322  |
| ENSMUSG00000003526 | 1.97189628 | 1.35673475 | 7.21E-06 | 0.00013228 |
| ENSMUSG00000073412 | 1.68843928 | 3.72881851 | 7.22E-06 | 0.00013228 |
| ENSMUSG00000062661 | 2.44280252 | 0.35621192 | 7.46E-06 | 0.00013661 |
| ENSMUSG00000028670 | 1.65731613 | 4.51062168 | 7.59E-06 | 0.00013869 |
| ENSMUSG00000072825 | 1.72226018 | 2.88537134 | 7.78E-06 | 0.00014194 |
| ENSMUSG00000001020 | 1.64140065 | 5.1001588  | 7.79E-06 | 0.00014194 |
| ENSMUSG00000034634 | 1.61936148 | 7.94405086 | 7.91E-06 | 0.00014382 |
| ENSMUSG00000048621 | -1.6198349 | 7.78764899 | 8.00E-06 | 0.00014494 |
| ENSMUSG00000030223 | 1.66845551 | 4.13201993 | 8.01E-06 | 0.00014494 |
| ENSMUSG00000046230 | -1.6210806 | 7.29711998 | 8.01E-06 | 0.00014494 |
| ENSMUSG00000037344 | 1.72059387 | 3.33310943 | 8.02E-06 | 0.00014494 |
| ENSMUSG00000001911 | 1.78194511 | 2.23989352 | 8.11E-06 | 0.00014628 |
| ENSMUSG00000029162 | 1.79373914 | 2.05769522 | 8.14E-06 | 0.0001467  |
| ENSMUSG00000035671 | 1.7056219  | 3.17999387 | 8.17E-06 | 0.00014701 |

|                    |            |            |          |            |
|--------------------|------------|------------|----------|------------|
| ENSMUSG00000033819 | 1.75900595 | 2.66471523 | 8.29E-06 | 0.00014882 |
| ENSMUSG00000024769 | 1.73350044 | 2.84044022 | 8.32E-06 | 0.00014923 |
| ENSMUSG00000005800 | 1.74080106 | 3.00439287 | 8.36E-06 | 0.00014956 |
| ENSMUSG00000019891 | -1.8920103 | 1.63716222 | 8.37E-06 | 0.00014956 |
| ENSMUSG00000052776 | 1.67869586 | 3.70344995 | 8.38E-06 | 0.00014962 |
| ENSMUSG00000073423 | 1.96087277 | 1.72963561 | 8.50E-06 | 0.0001515  |
| ENSMUSG00000025163 | 1.69179593 | 3.58344332 | 8.54E-06 | 0.00015202 |
| ENSMUSG00000063455 | 2.69250088 | 0.26534758 | 8.60E-06 | 0.00015275 |
| ENSMUSG00000019659 | 1.64606296 | 4.43722367 | 8.62E-06 | 0.00015295 |
| ENSMUSG00000059326 | 1.65728588 | 4.10579665 | 8.81E-06 | 0.00015609 |
| ENSMUSG00000015335 | 1.84459408 | 2.0996245  | 8.84E-06 | 0.00015634 |
| ENSMUSG00000025573 | 1.94596566 | 1.09359522 | 8.98E-06 | 0.00015862 |
| ENSMUSG00000021279 | 1.65007658 | 4.37430297 | 9.00E-06 | 0.00015874 |
| ENSMUSG00000028776 | 1.91745596 | 1.98332909 | 9.20E-06 | 0.00016192 |
| ENSMUSG00000063897 | 1.79579677 | 2.03219007 | 9.28E-06 | 0.00016316 |
| ENSMUSG00000017418 | -1.6118129 | 6.33403161 | 9.46E-06 | 0.00016586 |
| ENSMUSG00000030742 | 1.66956437 | 3.61608021 | 9.47E-06 | 0.00016586 |
| ENSMUSG00000029053 | 1.6779182  | 3.35226361 | 9.57E-06 | 0.00016737 |
| ENSMUSG00000001768 | 1.73327511 | 2.71403371 | 9.58E-06 | 0.00016737 |
| ENSMUSG00000028108 | 1.78706526 | 2.50642348 | 9.69E-06 | 0.00016895 |
| ENSMUSG00000031787 | 1.7265311  | 2.78853668 | 9.70E-06 | 0.000169   |
| ENSMUSG00000027947 | 1.61384433 | 5.77248662 | 9.85E-06 | 0.00017134 |
| ENSMUSG00000000627 | 2.16788196 | 0.71609225 | 9.90E-06 | 0.00017193 |
| ENSMUSG00000071714 | 1.69790303 | 3.22812193 | 9.98E-06 | 0.00017301 |
| ENSMUSG00000063268 | 1.61711244 | 5.13860141 | 1.02E-05 | 0.00017692 |
| ENSMUSG00000032193 | 1.60878165 | 5.75394749 | 1.03E-05 | 0.00017756 |
| ENSMUSG00000003134 | 1.64337888 | 4.19323202 | 1.05E-05 | 0.00018163 |
| ENSMUSG00000040717 | 2.01152322 | 1.16327513 | 1.06E-05 | 0.00018226 |
| ENSMUSG00000039199 | 2.22786964 | 0.84326574 | 1.06E-05 | 0.00018234 |
| ENSMUSG00000006731 | 1.59551604 | 7.79581477 | 1.07E-05 | 0.00018429 |
| ENSMUSG00000040390 | 1.81212296 | 1.82472811 | 1.11E-05 | 0.00019088 |
| ENSMUSG00000041115 | 1.78247447 | 2.3917048  | 1.11E-05 | 0.00019096 |
| ENSMUSG00000076518 | -1.6596718 | 3.73608011 | 1.12E-05 | 0.00019221 |
| ENSMUSG00000047417 | 1.61318318 | 5.03000502 | 1.13E-05 | 0.00019224 |
| ENSMUSG00000068747 | 1.62069138 | 4.81437938 | 1.13E-05 | 0.00019259 |
| ENSMUSG00000038387 | 1.64187047 | 3.76575966 | 1.15E-05 | 0.00019557 |
| ENSMUSG00000068551 | 1.67507052 | 3.20442904 | 1.16E-05 | 0.00019769 |
| ENSMUSG00000039735 | 2.13956418 | 1.07760033 | 1.17E-05 | 0.00019854 |
| ENSMUSG00000021699 | -1.6141972 | 4.82127005 | 1.19E-05 | 0.00020158 |
| ENSMUSG00000018677 | 1.63934629 | 4.0513194  | 1.20E-05 | 0.00020246 |
| ENSMUSG00000033735 | 1.88687988 | 1.78870934 | 1.20E-05 | 0.00020294 |
| ENSMUSG00000003644 | 1.59264795 | 6.13020175 | 1.21E-05 | 0.00020411 |
| ENSMUSG00000025498 | 1.59318451 | 6.12761531 | 1.22E-05 | 0.00020516 |

|                    |            |            |          |            |
|--------------------|------------|------------|----------|------------|
| ENSMUSG00000028937 | 1.68169992 | 2.84745705 | 1.24E-05 | 0.00020891 |
| ENSMUSG00000023079 | 1.75059189 | 2.51844586 | 1.24E-05 | 0.00020891 |
| ENSMUSG00000025225 | 1.58340353 | 7.38006463 | 1.25E-05 | 0.00021022 |
| ENSMUSG00000039109 | 1.59273402 | 5.82405783 | 1.26E-05 | 0.00021033 |
| ENSMUSG00000004610 | 1.64809716 | 3.58013181 | 1.26E-05 | 0.00021051 |
| ENSMUSG00000033128 | 1.60488389 | 4.95348195 | 1.28E-05 | 0.00021387 |
| ENSMUSG00000026638 | 2.31423868 | 0.96713285 | 1.29E-05 | 0.00021527 |
| ENSMUSG00000071540 | 2.16924887 | 1.00856712 | 1.30E-05 | 0.00021702 |
| ENSMUSG00000020057 | 1.75568935 | 2.29569582 | 1.31E-05 | 0.00021808 |
| ENSMUSG00000022564 | 1.58659768 | 6.173749   | 1.32E-05 | 0.00021991 |
| ENSMUSG00000040659 | 1.59643949 | 4.95655464 | 1.37E-05 | 0.00022655 |
| ENSMUSG00000035673 | 1.58643164 | 5.64955949 | 1.37E-05 | 0.00022682 |
| ENSMUSG00000027533 | 1.68836459 | 3.05862843 | 1.37E-05 | 0.00022702 |
| ENSMUSG00000034471 | 1.87501651 | 1.37144553 | 1.38E-05 | 0.00022818 |
| ENSMUSG00000041797 | 1.61438438 | 4.11481548 | 1.39E-05 | 0.00022886 |
| ENSMUSG00000055041 | 1.91434956 | 1.52245593 | 1.40E-05 | 0.00023028 |
| ENSMUSG00000051537 | 1.83881067 | 1.81733576 | 1.41E-05 | 0.00023114 |
| ENSMUSG00000056124 | 1.84779274 | 1.78319607 | 1.41E-05 | 0.00023114 |
| ENSMUSG00000041695 | 1.67562088 | 3.12569498 | 1.41E-05 | 0.00023122 |
| ENSMUSG00000024965 | 1.57506584 | 6.68792629 | 1.43E-05 | 0.00023375 |
| ENSMUSG00000026014 | 1.69605326 | 2.99376492 | 1.43E-05 | 0.00023375 |
| ENSMUSG00000074227 | 1.62157169 | 3.9947844  | 1.43E-05 | 0.00023378 |
| ENSMUSG00000027398 | 1.57134427 | 7.9549089  | 1.44E-05 | 0.00023505 |
| ENSMUSG00000068227 | 1.59378262 | 4.95498511 | 1.44E-05 | 0.0002351  |
| ENSMUSG00000015092 | 1.61324324 | 4.16524525 | 1.45E-05 | 0.00023538 |
| ENSMUSG00000070348 | 1.65548953 | 3.34517269 | 1.46E-05 | 0.00023687 |
| ENSMUSG00000023277 | 1.5923092  | 4.79804757 | 1.46E-05 | 0.00023715 |
| ENSMUSG00000011267 | 1.69582768 | 2.55532545 | 1.50E-05 | 0.00024357 |
| ENSMUSG00000003299 | 1.6206807  | 3.743201   | 1.51E-05 | 0.00024458 |
| ENSMUSG00000028864 | 1.97270146 | 1.17764478 | 1.52E-05 | 0.00024458 |
| ENSMUSG00000020432 | 1.58799006 | 4.98860268 | 1.52E-05 | 0.00024458 |
| ENSMUSG00000079138 | -1.7828871 | 1.77557413 | 1.52E-05 | 0.00024487 |
| ENSMUSG00000060216 | 1.57339832 | 6.12337807 | 1.53E-05 | 0.00024536 |
| ENSMUSG00000060429 | 1.92183746 | 1.61588861 | 1.53E-05 | 0.00024597 |
| ENSMUSG00000076580 | -1.5851806 | 5.36118767 | 1.53E-05 | 0.00024597 |
| ENSMUSG00000059714 | 1.63603316 | 3.51602059 | 1.54E-05 | 0.00024601 |
| ENSMUSG00000027068 | 1.77839248 | 2.36273222 | 1.54E-05 | 0.00024601 |
| ENSMUSG00000026073 | 1.73872172 | 2.46835573 | 1.60E-05 | 0.00025483 |
| ENSMUSG00000031765 | 2.37718804 | 0.65428133 | 1.60E-05 | 0.00025483 |
| ENSMUSG00000028838 | 1.63893673 | 2.91651653 | 1.61E-05 | 0.00025666 |
| ENSMUSG00000006179 | 1.7607107  | 2.17884242 | 1.67E-05 | 0.00026545 |
| ENSMUSG00000036256 | 1.81761854 | 1.63578399 | 1.67E-05 | 0.00026545 |
| ENSMUSG00000022791 | 1.57397191 | 5.34332211 | 1.68E-05 | 0.00026574 |

|                    |            |            |          |            |
|--------------------|------------|------------|----------|------------|
| ENSMUSG00000026483 | 1.57071567 | 5.74628264 | 1.68E-05 | 0.00026604 |
| ENSMUSG00000031391 | 1.57713964 | 5.37502487 | 1.69E-05 | 0.00026657 |
| ENSMUSG00000006333 | 1.55585771 | 8.90078255 | 1.69E-05 | 0.00026722 |
| ENSMUSG00000069516 | 1.55480229 | 9.51700875 | 1.71E-05 | 0.00026862 |
| ENSMUSG00000070476 | 2.01602505 | 1.19806411 | 1.71E-05 | 0.00026862 |
| ENSMUSG00000061046 | 1.79707508 | 2.00637613 | 1.72E-05 | 0.00027093 |
| ENSMUSG00000021375 | 1.60668983 | 3.93311176 | 1.74E-05 | 0.00027277 |
| ENSMUSG00000031808 | 1.74115338 | 1.91945744 | 1.75E-05 | 0.00027405 |
| ENSMUSG00000032548 | 2.49492836 | 0.38741389 | 1.75E-05 | 0.00027405 |
| ENSMUSG00000074277 | 1.67607986 | 2.47354527 | 1.77E-05 | 0.0002761  |
| ENSMUSG00000052302 | 1.85253141 | 1.82024217 | 1.77E-05 | 0.00027662 |
| ENSMUSG00000040026 | 2.61229529 | 0.42655671 | 1.78E-05 | 0.00027839 |
| ENSMUSG00000026938 | 1.56542693 | 5.71035635 | 1.80E-05 | 0.00027977 |
| ENSMUSG00000022272 | 1.62949706 | 3.63617397 | 1.81E-05 | 0.00028094 |
| ENSMUSG00000019055 | 1.60440937 | 3.63158132 | 1.85E-05 | 0.00028742 |
| ENSMUSG00000020782 | 1.72098749 | 2.25879808 | 1.85E-05 | 0.00028742 |
| ENSMUSG00000044037 | 1.5925985  | 4.28958632 | 1.87E-05 | 0.00029038 |
| ENSMUSG00000029821 | 2.13825136 | 0.7544695  | 1.90E-05 | 0.00029422 |
| ENSMUSG00000023045 | 2.15667381 | 0.78384569 | 1.91E-05 | 0.00029517 |
| ENSMUSG00000025509 | 1.56263798 | 5.22729802 | 1.92E-05 | 0.00029557 |
| ENSMUSG00000022651 | 1.64597292 | 3.42816873 | 1.92E-05 | 0.00029557 |
| ENSMUSG00000027994 | 1.75865184 | 1.81001404 | 1.92E-05 | 0.00029557 |
| ENSMUSG00000045636 | 1.604604   | 3.83531505 | 1.93E-05 | 0.00029631 |
| ENSMUSG00000024220 | 1.72229093 | 2.27408337 | 1.96E-05 | 0.00030005 |
| ENSMUSG00000001229 | 1.56115923 | 5.23867019 | 1.97E-05 | 0.00030163 |
| ENSMUSG00000058099 | 1.54804444 | 6.49605255 | 2.00E-05 | 0.00030676 |
| ENSMUSG00000042333 | 1.58248568 | 4.3519055  | 2.02E-05 | 0.00030879 |
| ENSMUSG00000051177 | 1.77382095 | 1.90442592 | 2.02E-05 | 0.00030879 |
| ENSMUSG00000029478 | 1.56177403 | 5.09358649 | 2.03E-05 | 0.00030879 |
| ENSMUSG00000024679 | 1.67148521 | 2.64308473 | 2.03E-05 | 0.00030886 |
| ENSMUSG00000092609 | 2.25433232 | 0.28790372 | 2.03E-05 | 0.00030896 |
| ENSMUSG00000020747 | 1.56886766 | 4.72972503 | 2.06E-05 | 0.00031219 |
| ENSMUSG00000093674 | 1.54339615 | 6.68565254 | 2.11E-05 | 0.00032065 |
| ENSMUSG00000044339 | 1.82063748 | 1.26181874 | 2.13E-05 | 0.00032222 |
| ENSMUSG00000004508 | 1.59517396 | 3.87678729 | 2.13E-05 | 0.00032222 |
| ENSMUSG00000063506 | 2.30730532 | 0.49390784 | 2.16E-05 | 0.00032649 |
| ENSMUSG00000061353 | 2.21147019 | 0.49086175 | 2.16E-05 | 0.00032649 |
| ENSMUSG00000022199 | 2.31527864 | 0.54697355 | 2.18E-05 | 0.00032873 |
| ENSMUSG00000056531 | -1.6924456 | 2.22066169 | 2.19E-05 | 0.00032991 |
| ENSMUSG00000024312 | 1.59556218 | 3.64238256 | 2.20E-05 | 0.0003311  |
| ENSMUSG00000067878 | 2.25316404 | 0.67712012 | 2.21E-05 | 0.00033183 |
| ENSMUSG00000030530 | 1.56752197 | 4.8391752  | 2.22E-05 | 0.00033237 |
| ENSMUSG00000022371 | 1.57156711 | 4.42031797 | 2.22E-05 | 0.00033237 |

|                    |            |            |          |            |
|--------------------|------------|------------|----------|------------|
| ENSMUSG00000044103 | 1.67958195 | 2.83086719 | 2.23E-05 | 0.00033279 |
| ENSMUSG00000026131 | 1.61200206 | 3.84745746 | 2.24E-05 | 0.00033405 |
| ENSMUSG00000032554 | 1.64018666 | 2.9976322  | 2.25E-05 | 0.00033483 |
| ENSMUSG00000055839 | 1.60805776 | 3.22619201 | 2.25E-05 | 0.00033483 |
| ENSMUSG00000021109 | -1.5339241 | 7.34625896 | 2.28E-05 | 0.00033903 |
| ENSMUSG00000031813 | 1.61555037 | 3.03936002 | 2.28E-05 | 0.00033903 |
| ENSMUSG00000064109 | 1.71699361 | 1.95161807 | 2.30E-05 | 0.00034072 |
| ENSMUSG00000037936 | 1.55780299 | 4.75921227 | 2.30E-05 | 0.00034072 |
| ENSMUSG00000025145 | 1.56850621 | 4.29494278 | 2.32E-05 | 0.00034241 |
| ENSMUSG0000002968  | 1.62663833 | 3.00335286 | 2.32E-05 | 0.00034241 |
| ENSMUSG00000050335 | 1.54754298 | 5.2786947  | 2.36E-05 | 0.00034776 |
| ENSMUSG00000038545 | 1.68011467 | 2.21552731 | 2.36E-05 | 0.00034841 |
| ENSMUSG00000029119 | 1.55075421 | 4.89614932 | 2.38E-05 | 0.00035041 |
| ENSMUSG00000023143 | 1.58718543 | 3.51793312 | 2.44E-05 | 0.00035818 |
| ENSMUSG00000066684 | 1.60414941 | 3.61200967 | 2.44E-05 | 0.00035818 |
| ENSMUSG00000036959 | 1.58120529 | 3.65118698 | 2.45E-05 | 0.00035887 |
| ENSMUSG00000024393 | 1.52650336 | 7.60426345 | 2.47E-05 | 0.00036105 |
| ENSMUSG00000020877 | 1.87866768 | 1.03420428 | 2.49E-05 | 0.00036438 |
| ENSMUSG00000028458 | 1.55114862 | 4.39538375 | 2.56E-05 | 0.00037384 |
| ENSMUSG00000033857 | 1.67566612 | 2.27217766 | 2.59E-05 | 0.00037748 |
| ENSMUSG00000048232 | 1.67062437 | 2.48058293 | 2.59E-05 | 0.00037802 |
| ENSMUSG00000022114 | 1.60088568 | 3.27887614 | 2.60E-05 | 0.00037831 |
| ENSMUSG00000035513 | 1.75604422 | 2.11248096 | 2.62E-05 | 0.00038032 |
| ENSMUSG00000034216 | 1.54706921 | 4.58104188 | 2.62E-05 | 0.00038072 |
| ENSMUSG00000095788 | 1.58901921 | 3.49147035 | 2.72E-05 | 0.00039389 |
| ENSMUSG0000002984  | 1.58312229 | 3.61176105 | 2.85E-05 | 0.00041188 |
| ENSMUSG00000029561 | 1.52602629 | 5.653177   | 2.85E-05 | 0.00041188 |
| ENSMUSG00000031706 | 1.56988536 | 3.94256359 | 2.86E-05 | 0.00041368 |
| ENSMUSG00000024140 | 1.86256628 | 0.94039153 | 2.89E-05 | 0.00041625 |
| ENSMUSG00000041954 | 1.61707139 | 2.86796931 | 2.96E-05 | 0.00042601 |
| ENSMUSG00000004846 | 1.53628224 | 4.7507494  | 2.98E-05 | 0.0004287  |
| ENSMUSG00000016283 | 2.03178346 | 0.75695808 | 2.99E-05 | 0.00042886 |
| ENSMUSG00000013974 | 1.57955097 | 3.48964073 | 2.99E-05 | 0.00042886 |
| ENSMUSG00000022550 | 1.66152815 | 2.39400815 | 2.99E-05 | 0.00042886 |
| ENSMUSG00000034957 | 1.65962372 | 2.30368428 | 3.00E-05 | 0.00042886 |
| ENSMUSG00000015850 | 2.10062487 | 0.72110307 | 3.01E-05 | 0.00043004 |
| ENSMUSG00000026939 | 1.95065376 | 1.1556137  | 3.04E-05 | 0.00043413 |
| ENSMUSG00000010045 | 1.61137313 | 2.84465946 | 3.11E-05 | 0.00044346 |
| ENSMUSG00000040850 | -1.5069827 | 7.06404113 | 3.15E-05 | 0.00044886 |
| ENSMUSG00000036599 | 1.60660093 | 2.87464201 | 3.17E-05 | 0.00045119 |
| ENSMUSG00000039899 | 1.51827325 | 5.56297841 | 3.23E-05 | 0.00045835 |
| ENSMUSG00000063810 | -1.5513379 | 3.95782713 | 3.24E-05 | 0.00045913 |
| ENSMUSG00000019261 | 1.71855714 | 1.94787162 | 3.24E-05 | 0.00045913 |



|                    |            |            |          |            |
|--------------------|------------|------------|----------|------------|
| ENSMUSG00000037239 | 1.84601787 | 1.4606836  | 3.28E-05 | 0.00046343 |
| ENSMUSG00000059013 | 1.51232452 | 5.66537251 | 3.28E-05 | 0.00046343 |
| ENSMUSG00000026179 | 1.70172682 | 2.23373328 | 3.28E-05 | 0.00046346 |
| ENSMUSG00000043940 | 1.55946902 | 4.10683337 | 3.31E-05 | 0.00046649 |
| ENSMUSG00000068874 | 1.6995412  | 2.1055253  | 3.34E-05 | 0.00047012 |
| ENSMUSG00000003345 | 1.52405139 | 4.9038344  | 3.35E-05 | 0.00047197 |
| ENSMUSG00000079481 | 1.61233348 | 3.18043136 | 3.37E-05 | 0.00047291 |
| ENSMUSG00000043391 | 1.74393318 | 1.85369125 | 3.38E-05 | 0.00047506 |
| ENSMUSG00000050552 | 1.56551098 | 3.54340578 | 3.41E-05 | 0.00047752 |
| ENSMUSG00000022614 | 1.53332652 | 4.36959384 | 3.42E-05 | 0.00047838 |
| ENSMUSG00000062997 | 1.50455502 | 6.25804688 | 3.44E-05 | 0.0004811  |
| ENSMUSG00000095497 | -1.554285  | 3.80571944 | 3.47E-05 | 0.00048409 |
| ENSMUSG00000031805 | 1.50437914 | 5.78168535 | 3.52E-05 | 0.00049011 |
| ENSMUSG00000069515 | 1.71956646 | 2.02008271 | 3.52E-05 | 0.00049011 |
| ENSMUSG00000031216 | 1.63128034 | 2.81473614 | 3.54E-05 | 0.00049264 |
| ENSMUSG00000015854 | 1.51505077 | 5.19947802 | 3.55E-05 | 0.00049329 |
| ENSMUSG00000044447 | 1.52912482 | 4.40713927 | 3.63E-05 | 0.00050443 |
| ENSMUSG00000030680 | 1.61852317 | 2.460533   | 3.67E-05 | 0.0005088  |
| ENSMUSG00000034640 | -1.4934154 | 7.18731673 | 3.67E-05 | 0.0005089  |
| ENSMUSG00000044162 | 2.24314424 | 0.45213344 | 3.69E-05 | 0.0005094  |
| ENSMUSG00000022912 | 1.66716849 | 2.37786837 | 3.69E-05 | 0.0005094  |
| ENSMUSG00000029725 | 2.13621829 | 0.41086601 | 3.71E-05 | 0.00051156 |
| ENSMUSG00000047371 | 1.79475793 | 1.41220094 | 3.71E-05 | 0.00051156 |
| ENSMUSG00000028051 | 2.33335946 | 0.34441962 | 3.73E-05 | 0.00051347 |
| ENSMUSG00000027200 | 1.5242992  | 4.60650947 | 3.73E-05 | 0.00051347 |
| ENSMUSG00000030120 | 1.51100708 | 4.89165724 | 3.77E-05 | 0.00051791 |
| ENSMUSG00000032657 | 1.52712627 | 4.11469459 | 3.78E-05 | 0.00051845 |
| ENSMUSG00000032718 | 1.87476963 | 0.90227495 | 3.78E-05 | 0.00051845 |
| ENSMUSG00000062157 | 1.59212815 | 3.28724188 | 3.79E-05 | 0.00051861 |
| ENSMUSG00000076615 | 1.5078808  | 5.45586951 | 3.82E-05 | 0.0005228  |
| ENSMUSG00000034708 | 1.49056681 | 6.70373012 | 3.90E-05 | 0.00053179 |
| ENSMUSG00000054640 | 1.58822331 | 3.00238997 | 3.95E-05 | 0.00053864 |
| ENSMUSG00000051682 | 1.50440891 | 5.15267447 | 3.96E-05 | 0.00053969 |
| ENSMUSG00000095028 | 1.63381081 | 2.53685371 | 3.98E-05 | 0.00054107 |
| ENSMUSG00000025153 | 1.4901064  | 6.12318486 | 4.11E-05 | 0.00055871 |
| ENSMUSG00000020400 | 1.48878925 | 5.68273785 | 4.18E-05 | 0.00056744 |
| ENSMUSG00000024862 | 1.52712126 | 3.76999788 | 4.19E-05 | 0.00056753 |
| ENSMUSG00000076498 | 1.56851565 | 3.01022806 | 4.20E-05 | 0.00056882 |
| ENSMUSG00000025218 | 1.54432091 | 3.27109042 | 4.30E-05 | 0.00058117 |
| ENSMUSG00000040813 | 1.5315116  | 3.36483248 | 4.41E-05 | 0.00059519 |
| ENSMUSG00000034557 | 1.53477357 | 3.68463662 | 4.41E-05 | 0.00059519 |
| ENSMUSG00000054855 | 2.20544757 | 0.39323356 | 4.46E-05 | 0.00060143 |
| ENSMUSG00000022838 | -1.6221819 | 2.34859257 | 4.50E-05 | 0.00060506 |

|                    |            |            |          |            |
|--------------------|------------|------------|----------|------------|
| ENSMUSG00000032690 | 1.48009036 | 6.33306517 | 4.50E-05 | 0.00060527 |
| ENSMUSG00000089855 | 1.50816144 | 3.90082243 | 4.51E-05 | 0.00060527 |
| ENSMUSG00000033777 | 1.4991745  | 4.92110748 | 4.51E-05 | 0.00060527 |
| ENSMUSG00000002944 | -1.4761985 | 7.02403634 | 4.52E-05 | 0.00060532 |
| ENSMUSG00000055013 | 1.61014148 | 2.75974097 | 4.64E-05 | 0.00062102 |
| ENSMUSG00000039264 | 1.47601461 | 6.38599261 | 4.66E-05 | 0.00062259 |
| ENSMUSG00000076583 | -1.4814134 | 5.77186839 | 4.69E-05 | 0.00062596 |
| ENSMUSG00000034947 | 1.53202087 | 3.79156744 | 4.69E-05 | 0.00062596 |
| ENSMUSG00000071074 | 1.49777827 | 4.51578008 | 4.71E-05 | 0.00062768 |
| ENSMUSG00000034889 | 1.51358066 | 4.06885121 | 4.73E-05 | 0.00062992 |
| ENSMUSG00000040811 | 1.51745047 | 3.91894699 | 4.75E-05 | 0.00063184 |
| ENSMUSG00000024663 | 1.51218547 | 4.18899836 | 4.79E-05 | 0.00063526 |
| ENSMUSG00000021483 | 1.71605794 | 1.56899045 | 4.80E-05 | 0.00063619 |
| ENSMUSG00000031828 | 1.71436184 | 1.45074574 | 4.80E-05 | 0.00063619 |
| ENSMUSG00000008035 | 1.52484051 | 3.85134993 | 4.87E-05 | 0.00064481 |
| ENSMUSG00000025384 | 1.58316845 | 2.45914843 | 4.89E-05 | 0.00064605 |
| ENSMUSG00000050357 | 1.47815824 | 5.44887544 | 4.90E-05 | 0.00064608 |
| ENSMUSG00000005125 | 1.4948893  | 4.4526852  | 5.05E-05 | 0.00066586 |
| ENSMUSG00000039616 | 1.75328613 | 1.79109439 | 5.06E-05 | 0.00066637 |
| ENSMUSG00000029060 | 1.53146254 | 3.55257933 | 5.07E-05 | 0.00066637 |
| ENSMUSG00000037217 | 1.85157156 | 0.84441456 | 5.08E-05 | 0.00066726 |
| ENSMUSG00000042745 | 1.82212553 | 1.22588618 | 5.10E-05 | 0.00066865 |
| ENSMUSG00000030671 | -1.4694145 | 6.02956276 | 5.15E-05 | 0.00067472 |
| ENSMUSG00000042570 | 1.51460372 | 3.73184356 | 5.16E-05 | 0.00067472 |
| ENSMUSG00000026822 | 1.68433232 | 2.26992566 | 5.17E-05 | 0.00067472 |
| ENSMUSG00000029482 | 1.4973792  | 4.35283773 | 5.17E-05 | 0.00067472 |
| ENSMUSG00000050075 | -1.4619553 | 7.76288563 | 5.18E-05 | 0.00067568 |
| ENSMUSG00000054452 | 1.46472488 | 6.27496477 | 5.34E-05 | 0.00069537 |
| ENSMUSG00000001281 | 1.45885681 | 7.53862983 | 5.37E-05 | 0.00069939 |
| ENSMUSG00000069114 | -1.4675797 | 5.79924153 | 5.38E-05 | 0.00069939 |
| ENSMUSG00000090252 | -1.6877094 | 1.84068827 | 5.39E-05 | 0.00070064 |
| ENSMUSG00000057286 | 1.67476494 | 1.63523303 | 5.40E-05 | 0.00070064 |
| ENSMUSG00000033871 | 1.67673355 | 2.02532423 | 5.43E-05 | 0.00070356 |
| ENSMUSG00000031807 | 1.49255223 | 4.38506026 | 5.47E-05 | 0.00070746 |
| ENSMUSG00000035027 | 1.48330928 | 4.64511136 | 5.47E-05 | 0.00070774 |
| ENSMUSG00000013858 | 1.46857161 | 5.36119158 | 5.50E-05 | 0.00071027 |
| ENSMUSG00000009035 | 1.4792567  | 4.66344273 | 5.54E-05 | 0.00071535 |
| ENSMUSG00000061577 | 1.54199024 | 2.7805787  | 5.73E-05 | 0.00073844 |
| ENSMUSG00000076512 | -1.7474203 | 1.56272667 | 6.00E-05 | 0.00077278 |
| ENSMUSG00000039623 | 1.48593122 | 4.10100566 | 6.04E-05 | 0.00077698 |
| ENSMUSG00000017664 | 1.46640627 | 5.01905597 | 6.21E-05 | 0.0007981  |
| ENSMUSG00000020396 | 1.5960389  | 2.13038878 | 6.24E-05 | 0.00080113 |
| ENSMUSG00000009076 | 1.55902908 | 2.56967716 | 6.26E-05 | 0.0008024  |

|                    |            |            |          |            |
|--------------------|------------|------------|----------|------------|
| ENSMUSG00000023353 | 1.50179575 | 3.57915917 | 6.27E-05 | 0.0008024  |
| ENSMUSG00000020307 | 1.48517612 | 3.91764655 | 6.37E-05 | 0.00081408 |
| ENSMUSG00000039236 | 1.49425438 | 3.895282   | 6.42E-05 | 0.00081955 |
| ENSMUSG00000028874 | 1.44618759 | 6.54520534 | 6.58E-05 | 0.00083928 |
| ENSMUSG00000059108 | 1.55544385 | 2.8678505  | 6.67E-05 | 0.00085053 |
| ENSMUSG00000038644 | 1.44810894 | 5.5765201  | 6.69E-05 | 0.00085073 |
| ENSMUSG00000062127 | 1.65712187 | 1.87451005 | 6.69E-05 | 0.00085073 |
| ENSMUSG00000039115 | 1.47002171 | 4.47498705 | 6.70E-05 | 0.00085106 |
| ENSMUSG00000030588 | 1.58951523 | 2.36440605 | 6.72E-05 | 0.00085293 |
| ENSMUSG00000029648 | 1.64611929 | 1.93064202 | 6.77E-05 | 0.00085863 |
| ENSMUSG00000006611 | 1.47673314 | 4.16233468 | 6.84E-05 | 0.0008655  |
| ENSMUSG00000029915 | 1.72868199 | 1.53686685 | 6.85E-05 | 0.00086662 |
| ENSMUSG00000052512 | 1.62404823 | 2.3331233  | 6.93E-05 | 0.00087497 |
| ENSMUSG00000030336 | 1.55283747 | 2.73662539 | 6.96E-05 | 0.00087787 |
| ENSMUSG00000024330 | 1.63343875 | 2.1210098  | 7.05E-05 | 0.00088892 |
| ENSMUSG00000038256 | 1.43993715 | 6.3618132  | 7.12E-05 | 0.000895   |
| ENSMUSG00000026384 | -1.4416722 | 5.93981602 | 7.12E-05 | 0.000895   |
| ENSMUSG00000027583 | 1.51945229 | 3.33438234 | 7.30E-05 | 0.00091726 |
| ENSMUSG00000003546 | 1.51172695 | 3.02203443 | 7.33E-05 | 0.00091976 |
| ENSMUSG00000052539 | -1.4854297 | 3.72864438 | 7.34E-05 | 0.0009198  |
| ENSMUSG00000048930 | 1.48981274 | 3.51198065 | 7.38E-05 | 0.00092374 |
| ENSMUSG00000073489 | 1.46591431 | 4.42827503 | 7.40E-05 | 0.00092556 |
| ENSMUSG00000005803 | 1.51875355 | 3.1139434  | 7.41E-05 | 0.00092556 |
| ENSMUSG00000032496 | 1.54596956 | 2.92517241 | 7.42E-05 | 0.00092617 |
| ENSMUSG00000038507 | 1.47901773 | 3.89288339 | 7.49E-05 | 0.00093431 |
| ENSMUSG00000054206 | 2.06480272 | 0.40872018 | 7.55E-05 | 0.00094085 |
| ENSMUSG00000058427 | 1.46946579 | 4.19704962 | 7.64E-05 | 0.00095049 |
| ENSMUSG00000020329 | 1.49754995 | 3.31551395 | 7.69E-05 | 0.00095614 |
| ENSMUSG00000032340 | 1.8667525  | 1.2010238  | 7.71E-05 | 0.00095691 |
| ENSMUSG00000078780 | 1.52140221 | 3.0466038  | 7.77E-05 | 0.00096306 |
| ENSMUSG00000041199 | 1.71142361 | 1.41332436 | 7.77E-05 | 0.00096306 |
| ENSMUSG00000002699 | 1.43499128 | 5.77976018 | 7.79E-05 | 0.00096387 |
| ENSMUSG00000020953 | 1.51376363 | 3.15917502 | 7.83E-05 | 0.00096824 |
| ENSMUSG00000038357 | 2.04163651 | 0.61216898 | 7.86E-05 | 0.00097105 |
| ENSMUSG00000005824 | 1.59798009 | 2.0633675  | 7.93E-05 | 0.00097778 |
| ENSMUSG00000018428 | 1.80254093 | 1.18317376 | 7.94E-05 | 0.00097827 |
| ENSMUSG00000030553 | 1.8965636  | 0.76671902 | 8.00E-05 | 0.00098428 |
| ENSMUSG00000058672 | 1.49414191 | 3.58234682 | 8.02E-05 | 0.00098548 |
| ENSMUSG00000024960 | 1.47031301 | 3.90661866 | 8.02E-05 | 0.00098548 |
| ENSMUSG00000079339 | 1.45598491 | 4.42997422 | 8.10E-05 | 0.00099374 |
| ENSMUSG00000032591 | 2.03610892 | 0.54838793 | 8.14E-05 | 0.0009971  |
| ENSMUSG00000000838 | -1.4255601 | 6.40076114 | 8.22E-05 | 0.00100596 |
| ENSMUSG00000014778 | 1.43554399 | 5.08552787 | 8.26E-05 | 0.00101017 |

|                    |            |            |            |            |
|--------------------|------------|------------|------------|------------|
| ENSMUSG0000003199  | 1.44551804 | 4.43113754 | 8.31E-05   | 0.00101502 |
| ENSMUSG00000040857 | 1.50985832 | 3.24601414 | 8.34E-05   | 0.00101774 |
| ENSMUSG00000025574 | 1.45045878 | 4.65291466 | 8.40E-05   | 0.00102348 |
| ENSMUSG00000027510 | 1.43079312 | 5.30716655 | 8.41E-05   | 0.00102374 |
| ENSMUSG00000044857 | 1.44721665 | 4.48405171 | 8.42E-05   | 0.00102403 |
| ENSMUSG00000099398 | -1.6229796 | 1.27140186 | 8.46E-05   | 0.00102824 |
| ENSMUSG00000054874 | 1.42711709 | 5.9029768  | 8.47E-05   | 0.00102824 |
| ENSMUSG00000060131 | 1.44876595 | 4.69147708 | 8.49E-05   | 0.00102925 |
| ENSMUSG00000050921 | -1.4164199 | 8.50872002 | 8.52E-05   | 0.00103101 |
| ENSMUSG00000020592 | 1.48968256 | 3.56659689 | 8.52E-05   | 0.00103101 |
| ENSMUSG00000033955 | 1.45818754 | 4.12021482 | 8.89E-05   | 0.00107471 |
| ENSMUSG00000064030 | 1.44979805 | 4.15847423 | 8.97E-05   | 0.00108303 |
| ENSMUSG00000058715 | 1.42383431 | 5.62011573 | 8.98E-05   | 0.00108303 |
| ENSMUSG00000040722 | 1.67446946 | 1.59389928 | 9.01E-05   | 0.00108586 |
| ENSMUSG00000101585 | 1.66207517 | 1.49514549 | 9.22E-05   | 0.00110922 |
| ENSMUSG00000030208 | 1.87592556 | 0.76005236 | 9.24E-05   | 0.00111106 |
| ENSMUSG00000038274 | 1.41388394 | 6.49046535 | 9.33E-05   | 0.00111936 |
| ENSMUSG00000028680 | 1.43463661 | 4.89752193 | 9.33E-05   | 0.00111936 |
| ENSMUSG00000055733 | 1.57474581 | 2.36173905 | 9.34E-05   | 0.00111936 |
| ENSMUSG00000037966 | 1.46752929 | 3.59504938 | 9.53E-05   | 0.00114135 |
| ENSMUSG00000052616 | -1.4826029 | 3.23012014 | 9.70E-05   | 0.00116051 |
| ENSMUSG00000093445 | 1.55784503 | 2.03795461 | 9.79E-05   | 0.00116929 |
| ENSMUSG00000033318 | 1.50990809 | 2.90456482 | 9.87E-05   | 0.00117818 |
| ENSMUSG00000025429 | 1.54447135 | 2.53553495 | 9.88E-05   | 0.00117856 |
| ENSMUSG00000023031 | 1.66513477 | 1.91417294 | 0.00010043 | 0.00119625 |
| ENSMUSG00000089715 | 1.42639904 | 4.63089342 | 0.00010159 | 0.00120885 |
| ENSMUSG00000026764 | 1.87052321 | 0.78100096 | 0.00010256 | 0.0012181  |
| ENSMUSG00000074570 | 1.58287849 | 1.95047144 | 0.00010258 | 0.0012181  |
| ENSMUSG00000024137 | 1.42726085 | 4.47306779 | 0.00010326 | 0.00122493 |
| ENSMUSG00000029009 | 1.42931689 | 4.48799803 | 0.00010347 | 0.00122551 |
| ENSMUSG00000096210 | 1.51864199 | 2.78896176 | 0.00010352 | 0.00122551 |
| ENSMUSG00000002111 | 1.41423068 | 5.30721012 | 0.00010413 | 0.0012314  |
| ENSMUSG00000025044 | 1.48765693 | 2.97905323 | 0.00010497 | 0.00124014 |
| ENSMUSG00000020882 | 1.55872222 | 2.34759981 | 0.00010539 | 0.00124253 |
| ENSMUSG00000040627 | -1.6104288 | 1.85013872 | 0.00010539 | 0.00124253 |
| ENSMUSG00000029716 | 1.67320031 | 1.69733867 | 0.00010642 | 0.00125334 |
| ENSMUSG00000042817 | 1.42482784 | 4.68667242 | 0.00010671 | 0.00125545 |
| ENSMUSG00000034738 | 1.68139245 | 1.19321662 | 0.00010704 | 0.00125806 |
| ENSMUSG00000061111 | 1.43527112 | 4.08117139 | 0.0001084  | 0.00127142 |
| ENSMUSG00000001014 | 2.03595115 | 0.58285238 | 0.00010846 | 0.00127142 |
| ENSMUSG00000061462 | 2.00444136 | 0.37233734 | 0.00010851 | 0.00127142 |
| ENSMUSG00000031494 | 1.42168737 | 4.29244382 | 0.00010986 | 0.00128598 |
| ENSMUSG00000036553 | 1.4504718  | 3.63367372 | 0.00011058 | 0.00129314 |

|                    |            |            |            |            |
|--------------------|------------|------------|------------|------------|
| ENSMUSG00000067203 | 1.41777373 | 4.53176622 | 0.00011074 | 0.00129352 |
| ENSMUSG00000038473 | 1.74823342 | 1.40558386 | 0.00011084 | 0.00129352 |
| ENSMUSG00000006360 | 1.40916744 | 5.25797443 | 0.00011097 | 0.00129366 |
| ENSMUSG00000022037 | 1.73632497 | 0.71716079 | 0.00011136 | 0.00129625 |
| ENSMUSG00000094062 | 1.44857718 | 3.71295648 | 0.00011141 | 0.00129625 |
| ENSMUSG00000034108 | 1.51903175 | 2.47072884 | 0.00011268 | 0.00130964 |
| ENSMUSG00000074677 | 1.44808298 | 3.63182778 | 0.00011301 | 0.00131222 |
| ENSMUSG00000036611 | 1.83786481 | 0.8252007  | 0.00011322 | 0.00131254 |
| ENSMUSG00000007039 | 1.83140307 | 0.54514838 | 0.00011327 | 0.00131254 |
| ENSMUSG00000041354 | 1.396609   | 6.0151199  | 0.00011446 | 0.00132494 |
| ENSMUSG00000046245 | 1.41806485 | 4.77128426 | 0.00011513 | 0.0013314  |
| ENSMUSG00000018927 | 1.40561325 | 5.36004978 | 0.00011609 | 0.0013409  |
| ENSMUSG00000034254 | 1.40756403 | 4.98455971 | 0.00011626 | 0.0013409  |
| ENSMUSG00000055172 | 1.92652085 | 0.6537353  | 0.0001163  | 0.0013409  |
| ENSMUSG00000048758 | 1.58472251 | 2.1202674  | 0.00011681 | 0.00134362 |
| ENSMUSG00000041827 | 1.40571679 | 4.97579041 | 0.00011681 | 0.00134362 |
| ENSMUSG00000002324 | 1.57084867 | 2.33416364 | 0.00011689 | 0.00134362 |
| ENSMUSG00000066357 | 1.40229976 | 5.32220121 | 0.00011758 | 0.0013502  |
| ENSMUSG00000040940 | 1.38554282 | 9.02930156 | 0.00011882 | 0.00136307 |
| ENSMUSG00000006411 | 1.73599421 | 1.19181601 | 0.00011945 | 0.00136765 |
| ENSMUSG00000074863 | -1.6941968 | 1.12486272 | 0.00011945 | 0.00136765 |
| ENSMUSG00000000149 | 1.40872952 | 4.63119861 | 0.00012043 | 0.0013775  |
| ENSMUSG00000021322 | 1.53572167 | 2.56544154 | 0.00012127 | 0.00138569 |
| ENSMUSG00000026785 | 1.91040642 | 0.6288886  | 0.00012164 | 0.00138858 |
| ENSMUSG00000052934 | 1.45384012 | 3.30409009 | 0.00012206 | 0.00139189 |
| ENSMUSG00000014791 | 1.50376864 | 2.71905791 | 0.00012231 | 0.00139345 |
| ENSMUSG00000025268 | 1.81631209 | 0.74169692 | 0.00012347 | 0.00140518 |
| ENSMUSG00000002343 | 1.59129442 | 1.85270639 | 0.00012468 | 0.00141762 |
| ENSMUSG00000026860 | 1.40973743 | 4.36897283 | 0.0001256  | 0.00142661 |
| ENSMUSG00000096188 | 1.43921686 | 3.54768623 | 0.00012763 | 0.00144832 |
| ENSMUSG00000008318 | 1.40247088 | 4.77282797 | 0.00012897 | 0.00146202 |
| ENSMUSG00000026548 | 1.43034512 | 3.88112508 | 0.00012956 | 0.0014673  |
| ENSMUSG00000097993 | 1.49887778 | 2.62576328 | 0.00013033 | 0.00147457 |
| ENSMUSG00000070304 | 1.54534095 | 2.18056374 | 0.00013201 | 0.00149211 |
| ENSMUSG00000078201 | 1.61700944 | 1.47493136 | 0.00013271 | 0.00149851 |
| ENSMUSG00000020937 | 1.68401604 | 1.18601288 | 0.00013333 | 0.0015041  |
| ENSMUSG00000076490 | 1.51806558 | 2.40815129 | 0.0001338  | 0.0015079  |
| ENSMUSG00000089774 | -1.3964948 | 5.0381753  | 0.00013466 | 0.00151609 |
| ENSMUSG00000093906 | -1.5933796 | 1.74735186 | 0.00013559 | 0.00152509 |
| ENSMUSG00000024299 | 1.38521246 | 5.7365305  | 0.00013589 | 0.00152696 |
| ENSMUSG00000076677 | -1.388706  | 5.37196324 | 0.00013839 | 0.00155355 |
| ENSMUSG00000073405 | 1.51851837 | 2.43981332 | 0.00013907 | 0.00155957 |
| ENSMUSG00000028063 | 1.53132144 | 2.7454865  | 0.00013997 | 0.00156614 |

|                    |            |            |            |            |
|--------------------|------------|------------|------------|------------|
| ENSMUSG00000040712 | 1.38104668 | 5.75229453 | 0.00014006 | 0.00156614 |
| ENSMUSG00000025912 | -1.4541617 | 3.11858476 | 0.00014019 | 0.00156614 |
| ENSMUSG00000028649 | -1.3693624 | 11.5108157 | 0.0001402  | 0.00156614 |
| ENSMUSG00000074158 | -1.66716   | 1.23464815 | 0.00014101 | 0.00157372 |
| ENSMUSG00000002820 | 1.41108863 | 3.79213759 | 0.00014175 | 0.0015796  |
| ENSMUSG00000064023 | 1.58268537 | 1.80467522 | 0.00014181 | 0.0015796  |
| ENSMUSG00000074743 | 1.4188191  | 3.59631491 | 0.00014258 | 0.00158654 |
| ENSMUSG00000031865 | 1.38500418 | 5.29957039 | 0.00014282 | 0.00158768 |
| ENSMUSG00000080268 | 1.40343029 | 4.27489264 | 0.00014301 | 0.00158832 |
| ENSMUSG00000051457 | 1.38213262 | 5.58001663 | 0.00014329 | 0.00158992 |
| ENSMUSG00000024206 | 1.50971333 | 2.39202843 | 0.00014346 | 0.0015902  |
| ENSMUSG00000040724 | 1.60230125 | 1.92654328 | 0.00014381 | 0.00159256 |
| ENSMUSG00000004698 | -1.3784139 | 5.59647185 | 0.00014587 | 0.00161384 |
| ENSMUSG00000034855 | 1.45401451 | 2.65567248 | 0.00014658 | 0.00162009 |
| ENSMUSG00000092572 | 1.4266341  | 3.57116672 | 0.00014803 | 0.00163249 |
| ENSMUSG00000045136 | 1.43475137 | 2.91620458 | 0.00014804 | 0.00163249 |
| ENSMUSG00000079499 | 1.41595357 | 3.80500027 | 0.00014822 | 0.00163249 |
| ENSMUSG00000046321 | 1.65530179 | 1.50303336 | 0.00014827 | 0.00163249 |
| ENSMUSG00000019039 | 1.38509854 | 4.9015693  | 0.00014957 | 0.0016453  |
| ENSMUSG00000079017 | 1.38395648 | 5.08234695 | 0.00015264 | 0.00167744 |
| ENSMUSG00000002963 | 1.3786771  | 5.12068292 | 0.0001531  | 0.00168089 |
| ENSMUSG00000055401 | 1.43116892 | 3.19880091 | 0.00015412 | 0.00169044 |
| ENSMUSG00000033020 | 1.52619267 | 1.75170668 | 0.0001553  | 0.00170179 |
| ENSMUSG00000079489 | -1.5825318 | 1.5696378  | 0.00015589 | 0.00170664 |
| ENSMUSG00000096954 | -1.3783225 | 5.13764922 | 0.0001566  | 0.00171276 |
| ENSMUSG00000032842 | 1.50709774 | 2.8050315  | 0.00015736 | 0.00171941 |
| ENSMUSG00000071226 | -1.3699959 | 5.66047381 | 0.00016    | 0.00174524 |
| ENSMUSG00000028393 | 1.40801701 | 3.94117208 | 0.00016003 | 0.00174524 |
| ENSMUSG00000015354 | 1.59275343 | 1.71882691 | 0.00016032 | 0.00174675 |
| ENSMUSG00000094614 | -1.468998  | 2.35478316 | 0.00016305 | 0.00177484 |
| ENSMUSG00000024212 | 1.38252376 | 4.44007708 | 0.00016369 | 0.00178018 |
| ENSMUSG00000036718 | 1.62586782 | 1.78446561 | 0.0001643  | 0.00178337 |
| ENSMUSG00000043587 | 1.60404368 | 1.78567273 | 0.0001643  | 0.00178337 |
| ENSMUSG00000041754 | 1.66377905 | 1.53836236 | 0.00016456 | 0.00178457 |
| ENSMUSG00000078783 | 1.46322982 | 2.69261101 | 0.00016493 | 0.00178686 |
| ENSMUSG00000035585 | 1.50669425 | 2.26038519 | 0.00016583 | 0.00179492 |
| ENSMUSG00000051043 | 1.81305926 | 0.59221402 | 0.00016662 | 0.00180081 |
| ENSMUSG00000038895 | 1.44573792 | 2.57026241 | 0.00016669 | 0.00180081 |
| ENSMUSG00000033705 | 1.42187873 | 3.81375608 | 0.00016697 | 0.00180218 |
| ENSMUSG00000063856 | 1.35787842 | 6.99014551 | 0.0001678  | 0.00180943 |
| ENSMUSG00000006154 | -1.4098754 | 3.880663   | 0.00016799 | 0.00180974 |
| ENSMUSG00000074735 | -1.411891  | 3.52442601 | 0.00016857 | 0.00181434 |
| ENSMUSG00000059895 | 1.35647289 | 6.81464219 | 0.00017106 | 0.0018394  |

|                    |            |            |            |            |
|--------------------|------------|------------|------------|------------|
| ENSMUSG00000033209 | 1.3930256  | 4.26136372 | 0.00017138 | 0.0018411  |
| ENSMUSG00000015568 | 1.43489145 | 3.29952038 | 0.00017221 | 0.00184827 |
| ENSMUSG00000024677 | 1.35593233 | 7.16875087 | 0.00017237 | 0.0018483  |
| ENSMUSG00000049191 | 1.42812496 | 3.12378778 | 0.0001732  | 0.00185543 |
| ENSMUSG00000070604 | 1.71313582 | 0.97055817 | 0.0001735  | 0.00185691 |
| ENSMUSG00000035992 | -1.3585738 | 6.05143201 | 0.00017376 | 0.00185804 |
| ENSMUSG00000036206 | 1.86627281 | 0.66252743 | 0.00017422 | 0.00186122 |
| ENSMUSG00000020941 | 1.36281204 | 5.45623689 | 0.00017465 | 0.00186408 |
| ENSMUSG00000020205 | 1.3697459  | 4.74507679 | 0.00017882 | 0.00190676 |
| ENSMUSG00000026094 | -1.3458885 | 10.4365387 | 0.00018109 | 0.0019292  |
| ENSMUSG00000028917 | 1.38501385 | 4.27913074 | 0.00018183 | 0.00193529 |
| ENSMUSG00000033365 | 1.3636971  | 5.15050718 | 0.00018223 | 0.0019363  |
| ENSMUSG00000028843 | 1.34712189 | 7.71703888 | 0.00018226 | 0.0019363  |
| ENSMUSG00000017830 | 1.36426053 | 5.03580303 | 0.0001838  | 0.00195073 |
| ENSMUSG00000031842 | 1.48870402 | 2.10253371 | 0.00018415 | 0.00195073 |
| ENSMUSG00000049686 | 1.49976947 | 2.50221859 | 0.00018425 | 0.00195073 |
| ENSMUSG00000084792 | -1.5554929 | 1.74900977 | 0.0001843  | 0.00195073 |
| ENSMUSG00000043953 | 1.36486706 | 5.06938096 | 0.00018482 | 0.0019545  |
| ENSMUSG00000037904 | 1.71043335 | 1.19937503 | 0.0001889  | 0.00199572 |
| ENSMUSG00000017493 | 1.44190872 | 3.03660045 | 0.00019021 | 0.0020078  |
| ENSMUSG00000074141 | 1.35729137 | 5.34895088 | 0.00019106 | 0.00201487 |
| ENSMUSG00000005043 | 1.36151256 | 5.01588053 | 0.00019424 | 0.00204657 |
| ENSMUSG00000078122 | 1.48555703 | 2.6932847  | 0.00019455 | 0.00204796 |
| ENSMUSG00000005514 | 1.37438019 | 4.39990122 | 0.00019524 | 0.00205283 |
| ENSMUSG00000031903 | 1.35867683 | 5.02985831 | 0.00019537 | 0.00205283 |
| ENSMUSG00000042272 | 1.49640646 | 2.12795018 | 0.00019648 | 0.00206166 |
| ENSMUSG00000024914 | 1.35709279 | 4.90112611 | 0.00019657 | 0.00206166 |
| ENSMUSG00000023571 | 1.50342628 | 2.34976323 | 0.00019808 | 0.00207555 |
| ENSMUSG00000007603 | 1.38487864 | 3.9763807  | 0.00019834 | 0.00207646 |
| ENSMUSG00000037499 | 1.61908251 | 1.82243716 | 0.00019953 | 0.00208701 |
| ENSMUSG00000037031 | -1.4104829 | 2.91761922 | 0.0002006  | 0.0020963  |
| ENSMUSG00000002227 | 1.36690364 | 4.51640675 | 0.00020147 | 0.00210027 |
| ENSMUSG00000025324 | 1.44280187 | 2.82005513 | 0.00020152 | 0.00210027 |
| ENSMUSG00000056629 | 1.39951008 | 3.24795498 | 0.00020153 | 0.00210027 |
| ENSMUSG00000022324 | 1.82932413 | 0.66757217 | 0.00020237 | 0.00210711 |
| ENSMUSG00000007891 | 1.33747152 | 7.83840273 | 0.0002031  | 0.0021128  |
| ENSMUSG00000059534 | 1.42549831 | 2.97523504 | 0.00020494 | 0.00213    |
| ENSMUSG00000005442 | 1.33981141 | 6.62681995 | 0.00020583 | 0.00213731 |
| ENSMUSG00000024959 | 1.56622149 | 1.4002508  | 0.00020789 | 0.00215676 |
| ENSMUSG00000029468 | 1.377318   | 4.01280336 | 0.00020928 | 0.00216923 |
| ENSMUSG00000026922 | 1.3936481  | 3.39720526 | 0.00020987 | 0.00217342 |
| ENSMUSG00000023990 | 1.36259866 | 4.48583969 | 0.00021066 | 0.0021796  |
| ENSMUSG00000073664 | -1.3385989 | 6.25932123 | 0.00021236 | 0.00219521 |

|                    |            |            |            |            |
|--------------------|------------|------------|------------|------------|
| ENSMUSG00000030064 | 1.35534397 | 4.75612968 | 0.00021326 | 0.00220253 |
| ENSMUSG00000028654 | 1.46250303 | 2.36344799 | 0.00021389 | 0.00220569 |
| ENSMUSG00000046908 | 1.77867361 | 0.80893889 | 0.00021395 | 0.00220569 |
| ENSMUSG00000048277 | 1.3364736  | 6.42643349 | 0.00021454 | 0.00220813 |
| ENSMUSG00000023795 | 1.7241436  | 1.05485304 | 0.00021457 | 0.00220813 |
| ENSMUSG00000040867 | 1.72436112 | 1.29912064 | 0.00021498 | 0.0022104  |
| ENSMUSG00000044534 | -1.3986709 | 3.32401328 | 0.00021722 | 0.00223099 |
| ENSMUSG00000027360 | 1.38879709 | 4.10609424 | 0.00021737 | 0.00223099 |
| ENSMUSG00000042303 | 1.4439677  | 2.61215117 | 0.00021825 | 0.00223644 |
| ENSMUSG00000035004 | 1.34034478 | 5.69721601 | 0.00021829 | 0.00223644 |
| ENSMUSG00000047181 | 1.46445061 | 2.64926628 | 0.00021886 | 0.00224025 |
| ENSMUSG00000025362 | 1.33288098 | 6.48648186 | 0.0002193  | 0.0022427  |
| ENSMUSG00000021108 | 1.36233114 | 4.23330591 | 0.00022019 | 0.00224989 |
| ENSMUSG00000024339 | 1.33579203 | 5.94844614 | 0.0002234  | 0.00227765 |
| ENSMUSG00000095115 | 1.38561139 | 3.72443009 | 0.00022349 | 0.00227765 |
| ENSMUSG00000053560 | 1.3458555  | 5.26575722 | 0.0002235  | 0.00227765 |
| ENSMUSG00000037606 | 1.34343575 | 5.09467199 | 0.00022411 | 0.00228179 |
| ENSMUSG00000019944 | 1.55497982 | 1.93772049 | 0.00022463 | 0.00228507 |
| ENSMUSG00000027602 | 1.43580909 | 2.52542378 | 0.00022684 | 0.00230552 |
| ENSMUSG00000067586 | -1.3321061 | 6.24794153 | 0.00022766 | 0.00231178 |
| ENSMUSG00000022408 | 1.9626228  | 0.54980624 | 0.00022854 | 0.00231748 |
| ENSMUSG00000038807 | 1.34483013 | 5.1458936  | 0.00022867 | 0.00231748 |
| ENSMUSG00000038351 | 1.43060027 | 2.76383375 | 0.00022902 | 0.00231748 |
| ENSMUSG00000020133 | 1.38744763 | 3.42197461 | 0.00022918 | 0.00231748 |
| ENSMUSG00000022788 | 1.39695636 | 3.43373233 | 0.00022923 | 0.00231748 |
| ENSMUSG00000028327 | 1.54934639 | 1.8163173  | 0.0002301  | 0.00232422 |
| ENSMUSG00000022193 | 1.36180121 | 3.84030917 | 0.00023058 | 0.00232701 |
| ENSMUSG00000022148 | 1.3296251  | 6.46903521 | 0.00023172 | 0.00233655 |
| ENSMUSG00000023022 | 1.40436794 | 3.28170153 | 0.00023475 | 0.00236386 |
| ENSMUSG00000007833 | 1.37317209 | 3.88172854 | 0.00023484 | 0.00236386 |
| ENSMUSG00000070000 | 1.33103738 | 5.81920822 | 0.00023614 | 0.00237483 |
| ENSMUSG00000012296 | 1.38214779 | 3.42353897 | 0.00024362 | 0.00244788 |
| ENSMUSG00000030125 | 1.61551241 | 1.65101111 | 0.00024541 | 0.00246379 |
| ENSMUSG00000031377 | 1.7318995  | 1.15684048 | 0.00024574 | 0.0024649  |
| ENSMUSG00000029093 | 1.44084111 | 2.73879487 | 0.00024726 | 0.00247802 |
| ENSMUSG00000020260 | 1.35624082 | 3.97747653 | 0.00025102 | 0.0025135  |
| ENSMUSG00000003420 | 1.34042698 | 4.48108424 | 0.0002592  | 0.00259314 |
| ENSMUSG00000067924 | 1.96940208 | 0.44761915 | 0.00026081 | 0.00260698 |
| ENSMUSG00000034664 | 1.58897503 | 1.24944099 | 0.00026142 | 0.00261082 |
| ENSMUSG00000062488 | 1.42511486 | 2.50003874 | 0.00026565 | 0.0026507  |
| ENSMUSG00000025500 | 1.39244807 | 3.00239285 | 0.0002666  | 0.00265786 |
| ENSMUSG00000035559 | 1.41153159 | 2.65858008 | 0.00026863 | 0.00267582 |
| ENSMUSG00000052688 | 1.42702514 | 2.59386147 | 0.00026982 | 0.00268533 |



|                    |            |            |            |            |
|--------------------|------------|------------|------------|------------|
| ENSMUSG0000006344  | 1.4353086  | 2.44260194 | 0.00027287 | 0.00270976 |
| ENSMUSG00000024927 | 1.31511614 | 6.12501744 | 0.00027294 | 0.00270976 |
| ENSMUSG00000073628 | -1.3629381 | 3.48252508 | 0.00027298 | 0.00270976 |
| ENSMUSG00000069727 | -1.5752411 | 1.41050969 | 0.00027673 | 0.00274462 |
| ENSMUSG00000044496 | 1.32882172 | 4.71733483 | 0.00027772 | 0.00275205 |
| ENSMUSG00000050965 | -1.3221412 | 5.2012359  | 0.00027963 | 0.0027686  |
| ENSMUSG00000037089 | 1.33471389 | 4.49124437 | 0.00028098 | 0.00277954 |
| ENSMUSG00000045374 | 1.31842659 | 5.4449567  | 0.00028184 | 0.00278566 |
| ENSMUSG00000063439 | 1.4035285  | 2.53281516 | 0.00028337 | 0.00279836 |
| ENSMUSG00000023067 | 1.33332411 | 4.45887923 | 0.0002838  | 0.00280022 |
| ENSMUSG00000074867 | -1.4838397 | 1.76551102 | 0.00028506 | 0.00281028 |
| ENSMUSG00000063652 | 1.69192595 | 0.92643534 | 0.00028565 | 0.0028137  |
| ENSMUSG00000098292 | 1.71700319 | 0.51078554 | 0.00028697 | 0.00282428 |
| ENSMUSG00000058325 | 1.49199001 | 2.11061708 | 0.00028767 | 0.00282866 |
| ENSMUSG00000025855 | 1.78450182 | 1.05184384 | 0.00028829 | 0.00283235 |
| ENSMUSG00000019122 | 1.32991193 | 4.66169485 | 0.00028982 | 0.00284495 |
| ENSMUSG00000079293 | 1.32728686 | 4.9818796  | 0.00029057 | 0.0028499  |
| ENSMUSG00000028962 | 1.3202259  | 4.8666864  | 0.00029594 | 0.00290013 |
| ENSMUSG00000057342 | 1.34193041 | 3.82278604 | 0.0002985  | 0.0029227  |
| ENSMUSG00000048031 | -1.3069693 | 6.10646794 | 0.00030067 | 0.0029414  |
| ENSMUSG00000037649 | 1.30041215 | 7.45552576 | 0.00030125 | 0.00294289 |
| ENSMUSG00000063931 | 1.33425973 | 3.97297729 | 0.00030133 | 0.00294289 |
| ENSMUSG00000026875 | 1.3042401  | 6.62820073 | 0.00030208 | 0.0029477  |
| ENSMUSG00000034616 | 1.33929985 | 3.9150553  | 0.00030437 | 0.00296756 |
| ENSMUSG00000034175 | 1.57900786 | 1.26060276 | 0.00030507 | 0.00297186 |
| ENSMUSG00000026641 | 1.3053506  | 5.69970435 | 0.00030655 | 0.00298203 |
| ENSMUSG00000034659 | 1.32985791 | 4.21326132 | 0.00030671 | 0.00298203 |
| ENSMUSG00000003200 | 1.31310287 | 5.06198017 | 0.00030689 | 0.00298203 |
| ENSMUSG00000038068 | 1.3856079  | 3.05258025 | 0.0003099  | 0.00300865 |
| ENSMUSG00000095737 | -1.5142951 | 1.60758066 | 0.00031098 | 0.00301661 |
| ENSMUSG00000024098 | -1.3105558 | 5.26757326 | 0.00031211 | 0.00302343 |
| ENSMUSG00000030200 | 1.56823638 | 1.59928254 | 0.00031221 | 0.00302343 |
| ENSMUSG00000020536 | 1.3154335  | 4.79671387 | 0.00031373 | 0.00303561 |
| ENSMUSG00000076612 | -1.3428867 | 3.91695767 | 0.00031948 | 0.00308864 |
| ENSMUSG00000067297 | 1.6539367  | 1.15259168 | 0.00032233 | 0.00311359 |
| ENSMUSG00000027624 | 1.68785235 | 0.98525105 | 0.0003238  | 0.00312521 |
| ENSMUSG00000024942 | 1.29517348 | 6.3900381  | 0.00032864 | 0.00316806 |
| ENSMUSG00000024970 | 1.40399601 | 2.55101276 | 0.0003288  | 0.00316806 |
| ENSMUSG00000029469 | 1.50707968 | 1.75061314 | 0.00033074 | 0.00318412 |
| ENSMUSG00000002763 | 1.31997402 | 4.25036277 | 0.00033264 | 0.00319977 |
| ENSMUSG00000025158 | 1.34217296 | 3.46599057 | 0.00033369 | 0.00320241 |
| ENSMUSG00000022760 | 1.456852   | 2.08470364 | 0.00033384 | 0.00320241 |
| ENSMUSG00000022994 | 1.35076464 | 3.68762868 | 0.00033389 | 0.00320241 |

|                    |            |            |            |            |
|--------------------|------------|------------|------------|------------|
| ENSMUSG00000030605 | 1.39524023 | 2.36029683 | 0.00033426 | 0.00320241 |
| ENSMUSG00000030342 | 1.30844036 | 5.27791782 | 0.00033431 | 0.00320241 |
| ENSMUSG00000039483 | 1.34486115 | 3.67903454 | 0.00033467 | 0.00320319 |
| ENSMUSG00000040414 | 1.32388662 | 4.16526331 | 0.00033726 | 0.00322334 |
| ENSMUSG00000093470 | -1.2882255 | 8.40160244 | 0.00033734 | 0.00322334 |
| ENSMUSG00000034936 | 1.45668528 | 2.30109377 | 0.00033772 | 0.00322431 |
| ENSMUSG00000020211 | 1.31845603 | 4.34477247 | 0.00033807 | 0.00322502 |
| ENSMUSG00000034586 | 1.50359457 | 1.60685456 | 0.00033861 | 0.00322744 |
| ENSMUSG00000029598 | 1.31269727 | 4.75813433 | 0.00034119 | 0.00324935 |
| ENSMUSG00000038534 | 1.31083215 | 4.66323277 | 0.00034294 | 0.00326335 |
| ENSMUSG00000094797 | -1.2940221 | 6.09923491 | 0.00034494 | 0.00327715 |
| ENSMUSG00000006215 | 1.33509514 | 3.71605472 | 0.00034496 | 0.00327715 |
| ENSMUSG00000043832 | 1.30729959 | 4.80202435 | 0.00034684 | 0.00329221 |
| ENSMUSG00000032050 | -1.2875296 | 6.64770493 | 0.0003542  | 0.00335936 |
| ENSMUSG00000020620 | 1.48269797 | 1.89587276 | 0.0003566  | 0.00337931 |
| ENSMUSG00000030035 | 1.32641408 | 3.73281003 | 0.00035692 | 0.00337954 |
| ENSMUSG00000074024 | -1.3521496 | 2.99913925 | 0.00035866 | 0.0033911  |
| ENSMUSG00000034171 | 1.29200334 | 5.80940494 | 0.00035873 | 0.0033911  |
| ENSMUSG00000017756 | 1.30261126 | 5.07985596 | 0.00036172 | 0.00341661 |
| ENSMUSG00000033554 | -1.2896267 | 5.87275378 | 0.00036372 | 0.00343268 |
| ENSMUSG00000071267 | -1.3058373 | 4.55949069 | 0.00036743 | 0.00346485 |
| ENSMUSG00000027315 | 1.69013013 | 0.6936088  | 0.00036981 | 0.00348443 |
| ENSMUSG00000040212 | 1.29355966 | 5.20787914 | 0.00037122 | 0.00349477 |
| ENSMUSG00000043939 | 1.51237066 | 1.99294827 | 0.00037171 | 0.0034966  |
| ENSMUSG00000022844 | 1.59704793 | 1.18073785 | 0.00037705 | 0.00354385 |
| ENSMUSG00000001750 | 1.28120499 | 6.33117832 | 0.00038031 | 0.00356883 |
| ENSMUSG00000036362 | 1.32404059 | 3.8270565  | 0.00038032 | 0.00356883 |
| ENSMUSG00000049103 | 1.286959   | 5.74633489 | 0.00038093 | 0.00357157 |
| ENSMUSG00000095630 | -1.2948719 | 5.07700903 | 0.0003826  | 0.00358437 |
| ENSMUSG00000032776 | -1.29169   | 5.22549116 | 0.0003853  | 0.00360479 |
| ENSMUSG00000000318 | 1.40419615 | 2.19222378 | 0.00038541 | 0.00360479 |
| ENSMUSG00000041153 | -1.2829706 | 5.93902035 | 0.00038601 | 0.00360749 |
| ENSMUSG00000002372 | 1.28881444 | 5.27096013 | 0.00038644 | 0.00360857 |
| ENSMUSG00000045551 | 1.35353174 | 3.11074311 | 0.00038759 | 0.00361639 |
| ENSMUSG00000055681 | 1.29392083 | 4.9445945  | 0.00039002 | 0.00363608 |
| ENSMUSG00000024613 | 1.27928887 | 6.25807746 | 0.00039186 | 0.00364588 |
| ENSMUSG00000028019 | 1.61967875 | 0.87866706 | 0.00039202 | 0.00364588 |
| ENSMUSG00000016382 | 1.45257749 | 2.02411106 | 0.00039202 | 0.00364588 |
| ENSMUSG00000030595 | 1.33183998 | 3.60830988 | 0.00039374 | 0.00365889 |
| ENSMUSG00000038976 | 1.27806786 | 6.40929516 | 0.00039517 | 0.00366925 |
| ENSMUSG00000073940 | 1.28150274 | 6.16637384 | 0.00039589 | 0.00367289 |
| ENSMUSG00000046711 | 1.38437486 | 2.54858001 | 0.00039847 | 0.00369191 |
| ENSMUSG00000062960 | 1.8608754  | 0.54370047 | 0.00039858 | 0.00369191 |

|                    |            |            |            |            |
|--------------------|------------|------------|------------|------------|
| ENSMUSG00000079455 | -1.3027611 | 4.18430116 | 0.00040122 | 0.00371041 |
| ENSMUSG00000050394 | 1.37617147 | 2.75974337 | 0.00040127 | 0.00371041 |
| ENSMUSG00000054385 | -1.342781  | 3.47769349 | 0.00040154 | 0.00371041 |
| ENSMUSG00000049307 | 1.44777759 | 2.04019707 | 0.00040227 | 0.0037141  |
| ENSMUSG00000026315 | 1.5474308  | 1.53783693 | 0.00040266 | 0.00371472 |
| ENSMUSG00000064493 | -1.4615225 | 1.6377313  | 0.00040355 | 0.00372    |
| ENSMUSG00000034201 | 1.68048388 | 0.97404417 | 0.00041187 | 0.00378999 |
| ENSMUSG00000006019 | 1.31581001 | 3.91872908 | 0.00041191 | 0.00378999 |
| ENSMUSG00000034641 | 1.30238147 | 4.41245793 | 0.00041214 | 0.00378999 |
| ENSMUSG00000045659 | 1.42789186 | 2.22214456 | 0.00041277 | 0.0037928  |
| ENSMUSG00000097418 | -1.4104334 | 2.0977287  | 0.00041471 | 0.00380755 |
| ENSMUSG00000019823 | 1.27098193 | 6.86839215 | 0.00041637 | 0.00381979 |
| ENSMUSG00000032120 | 1.30890572 | 3.81265611 | 0.00041808 | 0.00383244 |
| ENSMUSG00000020230 | 1.33490316 | 3.28560786 | 0.00042278 | 0.00387243 |
| ENSMUSG00000045658 | 1.31361987 | 3.83201213 | 0.00042592 | 0.00389801 |
| ENSMUSG00000025409 | 1.28283947 | 5.1381878  | 0.0004276  | 0.00391031 |
| ENSMUSG00000044456 | 1.26701756 | 6.83161067 | 0.00043199 | 0.00394732 |
| ENSMUSG00000072966 | 1.28828638 | 4.55412059 | 0.00043337 | 0.00395676 |
| ENSMUSG00000094924 | -1.264441  | 7.90510154 | 0.00043388 | 0.00395833 |
| ENSMUSG00000025533 | 1.33970711 | 3.07356014 | 0.00044166 | 0.00402608 |
| ENSMUSG00000031432 | -1.2745872 | 5.36718739 | 0.00044302 | 0.00403531 |
| ENSMUSG00000041638 | 1.27100018 | 5.88060513 | 0.00044509 | 0.00405089 |
| ENSMUSG00000039850 | 1.30397824 | 3.96008637 | 0.00044658 | 0.00406129 |
| ENSMUSG00000029622 | 1.26265512 | 6.99284363 | 0.0004512  | 0.0041     |
| ENSMUSG00000003469 | 1.59955193 | 1.2719682  | 0.00045175 | 0.00410182 |
| ENSMUSG00000005718 | 1.39725913 | 2.10874636 | 0.00045425 | 0.00412122 |
| ENSMUSG00000055296 | -1.2601118 | 7.6172941  | 0.00045499 | 0.00412472 |
| ENSMUSG00000056608 | -1.2599806 | 7.51681963 | 0.000457   | 0.00413968 |
| ENSMUSG00000005883 | 1.47060131 | 1.83012031 | 0.00045824 | 0.00414757 |
| ENSMUSG00000042210 | 1.43640072 | 1.92486917 | 0.00045892 | 0.0041505  |
| ENSMUSG00000028850 | 1.36451619 | 2.30070352 | 0.00046855 | 0.00423429 |
| ENSMUSG00000026858 | 1.33184103 | 3.11130812 | 0.00047377 | 0.00427804 |
| ENSMUSG00000029817 | -1.2562616 | 7.4439123  | 0.0004758  | 0.004293   |
| ENSMUSG00000043439 | 1.44529901 | 1.63509366 | 0.00047705 | 0.00430096 |
| ENSMUSG00000031834 | 1.30824097 | 3.54315399 | 0.00047793 | 0.00430547 |
| ENSMUSG00000068264 | 1.34663963 | 2.71069676 | 0.00049249 | 0.00443316 |
| ENSMUSG00000059089 | 1.29822288 | 3.92085067 | 0.00049297 | 0.00443407 |
| ENSMUSG00000030789 | 1.26285892 | 5.42677812 | 0.00049406 | 0.00444034 |
| ENSMUSG00000022610 | 1.26157319 | 5.47943701 | 0.00049701 | 0.00446089 |
| ENSMUSG00000025137 | 1.26247988 | 5.30344066 | 0.00049712 | 0.00446089 |
| ENSMUSG00000028042 | 1.26706663 | 5.09734587 | 0.0004979  | 0.00446437 |
| ENSMUSG00000045326 | 1.39825088 | 2.29655153 | 0.0005027  | 0.0045039  |
| ENSMUSG00000037661 | 1.62158007 | 1.0752487  | 0.00050444 | 0.00451435 |

|                    |            |            |            |            |
|--------------------|------------|------------|------------|------------|
| ENSMUSG00000027115 | -1.291949  | 3.8446218  | 0.00050465 | 0.00451435 |
| ENSMUSG00000053101 | 1.27385582 | 4.50220401 | 0.00050578 | 0.00452096 |
| ENSMUSG00000038056 | -1.2477109 | 8.87649406 | 0.0005071  | 0.00452777 |
| ENSMUSG00000032571 | -1.2502084 | 7.27345869 | 0.00050733 | 0.00452777 |
| ENSMUSG00000094433 | -1.2613132 | 5.43064637 | 0.0005092  | 0.00454005 |
| ENSMUSG00000033751 | 1.32255383 | 2.75758867 | 0.0005095  | 0.00454005 |
| ENSMUSG00000034101 | 1.42809978 | 1.81284615 | 0.00051183 | 0.00455732 |
| ENSMUSG00000056054 | 1.26450303 | 5.48560539 | 0.00051294 | 0.00456361 |
| ENSMUSG00000029560 | 1.25240849 | 6.21146309 | 0.00051341 | 0.00456427 |
| ENSMUSG00000042377 | 1.42262587 | 1.9472648  | 0.00051478 | 0.00457294 |
| ENSMUSG00000095889 | -1.3622789 | 2.69312881 | 0.00051918 | 0.0046085  |
| ENSMUSG00000032977 | 1.2761639  | 4.02703476 | 0.00052155 | 0.00462512 |
| ENSMUSG00000042156 | 1.33340518 | 3.02919858 | 0.00052186 | 0.00462512 |
| ENSMUSG00000062075 | 1.31871334 | 2.97091913 | 0.00052235 | 0.00462592 |
| ENSMUSG00000079056 | 1.6569994  | 0.7056498  | 0.00052518 | 0.00464739 |
| ENSMUSG00000074361 | 1.46835175 | 1.8250278  | 0.00052563 | 0.00464775 |
| ENSMUSG00000067274 | 1.24302353 | 9.0402878  | 0.00053074 | 0.00468939 |
| ENSMUSG00000026821 | 1.25395033 | 5.67630907 | 0.00053132 | 0.00469086 |
| ENSMUSG00000028028 | 1.3243263  | 3.22955539 | 0.00053255 | 0.00469805 |
| ENSMUSG00000024847 | 1.26216111 | 4.80168058 | 0.00053295 | 0.00469805 |
| ENSMUSG00000062742 | 1.59040224 | 0.62694771 | 0.00053457 | 0.00470872 |
| ENSMUSG00000038520 | 1.26400821 | 4.82854077 | 0.00053654 | 0.00472247 |
| ENSMUSG00000049482 | 1.28946193 | 3.6511529  | 0.00053784 | 0.00473026 |
| ENSMUSG00000033088 | 1.27462951 | 4.35631367 | 0.00054061 | 0.00475104 |
| ENSMUSG00000034786 | 1.25979776 | 5.00697523 | 0.00054244 | 0.00476343 |
| ENSMUSG00000003206 | 1.28661512 | 3.68184948 | 0.00054374 | 0.00477123 |
| ENSMUSG00000043629 | -1.4862029 | 1.4421588  | 0.00054492 | 0.00477466 |
| ENSMUSG00000032093 | 1.28560789 | 3.76163659 | 0.00054541 | 0.00477466 |
| ENSMUSG00000022843 | 1.37403341 | 2.49871549 | 0.00054575 | 0.00477466 |
| ENSMUSG00000040522 | 1.29501577 | 3.65785756 | 0.00054579 | 0.00477466 |
| ENSMUSG00000027490 | 1.32170851 | 3.12018372 | 0.00055018 | 0.00480937 |
| ENSMUSG00000047115 | 1.6007692  | 1.11570582 | 0.00055165 | 0.00481625 |
| ENSMUSG00000005699 | 1.44595158 | 1.56319894 | 0.00055181 | 0.00481625 |
| ENSMUSG00000002825 | 1.35119427 | 2.59588509 | 0.00055258 | 0.00481938 |
| ENSMUSG00000046314 | 1.47307227 | 1.61999051 | 0.00055799 | 0.00486044 |
| ENSMUSG00000059851 | 1.2582768  | 4.88691115 | 0.00055814 | 0.00486044 |
| ENSMUSG00000026836 | 1.49484898 | 1.21799842 | 0.0005625  | 0.00489475 |
| ENSMUSG00000024535 | 1.63663619 | 1.05968488 | 0.00056406 | 0.00490455 |
| ENSMUSG00000021876 | 1.42815821 | 2.00015688 | 0.00056535 | 0.0049121  |
| ENSMUSG00000024669 | 1.330867   | 2.95711717 | 0.00056873 | 0.00493771 |
| ENSMUSG00000027326 | -1.2547977 | 4.92773106 | 0.00057033 | 0.00494788 |
| ENSMUSG00000042642 | 1.26179993 | 4.69653754 | 0.00057081 | 0.00494834 |
| ENSMUSG00000039062 | 1.30036211 | 3.30805603 | 0.00057154 | 0.00495093 |

|                    |            |            |            |            |
|--------------------|------------|------------|------------|------------|
| ENSMUSG00000041571 | 1.24530875 | 5.73645397 | 0.00057294 | 0.00495926 |
| ENSMUSG00000042659 | 1.2773999  | 3.63515899 | 0.00057499 | 0.00497325 |
| ENSMUSG00000034462 | 1.59203766 | 0.85042916 | 0.00057617 | 0.00497979 |
| ENSMUSG00000075184 | -1.4355819 | 1.81075522 | 0.00057737 | 0.00498636 |
| ENSMUSG00000070873 | 1.35267693 | 2.51104644 | 0.00057931 | 0.00499941 |
| ENSMUSG00000042632 | 1.35478464 | 2.21790433 | 0.00058024 | 0.00500365 |
| ENSMUSG00000032299 | 1.26058335 | 4.3624759  | 0.00058569 | 0.00504687 |
| ENSMUSG00000066026 | 1.46667334 | 1.80354357 | 0.0005881  | 0.00506378 |
| ENSMUSG00000090103 | -1.2856964 | 3.60862856 | 0.00059047 | 0.00508045 |
| ENSMUSG0000003421  | 1.26854168 | 4.10094526 | 0.00059153 | 0.00508409 |
| ENSMUSG00000026321 | 1.44076448 | 1.85690455 | 0.00059178 | 0.00508409 |
| ENSMUSG00000047793 | 1.35728733 | 2.79426983 | 0.00059383 | 0.00509436 |
| ENSMUSG00000070056 | -1.2450772 | 5.30703665 | 0.00059386 | 0.00509436 |
| ENSMUSG00000073490 | 1.25515253 | 4.87522736 | 0.00059808 | 0.00512505 |
| ENSMUSG00000030826 | 1.25451042 | 4.77111688 | 0.00059833 | 0.00512505 |
| ENSMUSG00000096326 | -1.2744831 | 3.70492681 | 0.00060177 | 0.00515069 |
| ENSMUSG00000012126 | 1.29680473 | 3.17714574 | 0.00060239 | 0.00515083 |
| ENSMUSG00000059734 | 1.262582   | 4.26566782 | 0.00060269 | 0.00515083 |
| ENSMUSG00000036620 | 1.31893294 | 2.81248575 | 0.00060885 | 0.00519966 |
| ENSMUSG00000022504 | 1.22978798 | 8.40630801 | 0.00060951 | 0.00520139 |
| ENSMUSG00000023845 | -1.2298108 | 8.11957852 | 0.0006119  | 0.00521795 |
| ENSMUSG00000031875 | 1.27040639 | 3.76110722 | 0.00061842 | 0.0052696  |
| ENSMUSG00000023800 | 1.3572406  | 2.26176868 | 0.00062479 | 0.00531613 |
| ENSMUSG00000026576 | 1.24495942 | 4.99451616 | 0.0006248  | 0.00531613 |
| ENSMUSG0000002660  | 1.32592145 | 2.72760349 | 0.00062916 | 0.00534922 |
| ENSMUSG00000020471 | 1.2846412  | 3.24669381 | 0.00063214 | 0.00536916 |
| ENSMUSG00000053044 | 1.2675485  | 3.62717784 | 0.00063244 | 0.00536916 |
| ENSMUSG0000006299  | 1.2352221  | 5.69689673 | 0.00063369 | 0.00537583 |
| ENSMUSG00000031848 | 1.26406582 | 3.83036448 | 0.00063476 | 0.00538092 |
| ENSMUSG00000028959 | 1.25106464 | 4.55913798 | 0.00063769 | 0.00540182 |
| ENSMUSG00000034613 | 1.26212892 | 4.28434222 | 0.00064966 | 0.00549916 |
| ENSMUSG00000050373 | 1.77357868 | 0.43006288 | 0.00065128 | 0.00550879 |
| ENSMUSG00000028476 | 1.47101382 | 1.60247866 | 0.00065279 | 0.00551479 |
| ENSMUSG00000089417 | -1.2443069 | 4.77807391 | 0.00065295 | 0.00551479 |
| ENSMUSG00000041707 | 1.36735274 | 2.10043145 | 0.00065468 | 0.00552536 |
| ENSMUSG00000041075 | 1.46267326 | 1.66260293 | 0.00065548 | 0.00552802 |
| ENSMUSG00000032312 | 1.22255088 | 8.08228828 | 0.0006564  | 0.00553172 |
| ENSMUSG00000031596 | 1.51556307 | 1.36582874 | 0.00065802 | 0.00554132 |
| ENSMUSG00000028677 | 1.2311601  | 5.60932169 | 0.00065909 | 0.00554626 |
| ENSMUSG00000025422 | 1.23953861 | 4.91956    | 0.00065976 | 0.00554789 |
| ENSMUSG00000019461 | 1.30373425 | 2.93762673 | 0.00066153 | 0.00555865 |
| ENSMUSG00000024737 | 1.25017755 | 4.52228087 | 0.00066386 | 0.00557423 |
| ENSMUSG00000078348 | 1.38368583 | 1.9771375  | 0.00066516 | 0.00557884 |

|                    |            |            |            |            |
|--------------------|------------|------------|------------|------------|
| ENSMUSG00000040152 | 1.24643106 | 4.59379913 | 0.00066538 | 0.00557884 |
| ENSMUSG00000000142 | 1.47003953 | 1.2602336  | 0.00067091 | 0.0056211  |
| ENSMUSG00000059555 | 1.2292846  | 5.56969355 | 0.00067238 | 0.00562931 |
| ENSMUSG00000040624 | 1.48387681 | 1.32813228 | 0.00067572 | 0.00565314 |
| ENSMUSG00000032515 | 1.22433281 | 6.38889703 | 0.0006775  | 0.00566392 |
| ENSMUSG00000041361 | -1.3818213 | 2.00008708 | 0.00067966 | 0.00567778 |
| ENSMUSG00000070420 | 1.27758929 | 3.40222078 | 0.00068125 | 0.00568693 |
| ENSMUSG00000000409 | 1.22811576 | 5.74518806 | 0.0006835  | 0.00570012 |
| ENSMUSG00000026389 | 1.31097852 | 2.90756738 | 0.00068382 | 0.00570012 |
| ENSMUSG00000028975 | 1.28908416 | 3.14019301 | 0.00068654 | 0.00571868 |
| ENSMUSG00000054404 | 1.21998169 | 7.34347734 | 0.00068734 | 0.00571911 |
| ENSMUSG00000011877 | 1.24415504 | 4.27680816 | 0.00068759 | 0.00571911 |
| ENSMUSG00000068923 | 1.24265893 | 4.56771612 | 0.00069479 | 0.00577482 |
| ENSMUSG00000094936 | -1.2594309 | 3.71861978 | 0.00070116 | 0.0058236  |
| ENSMUSG00000033099 | 1.25958436 | 3.62266849 | 0.00070535 | 0.00585019 |
| ENSMUSG00000026987 | -1.2154511 | 8.10408394 | 0.00070576 | 0.00585019 |
| ENSMUSG00000024401 | 1.23022562 | 5.24243913 | 0.00070589 | 0.00585019 |
| ENSMUSG00000067001 | 1.34663189 | 2.5071206  | 0.00070979 | 0.00587828 |
| ENSMUSG00000033306 | -1.2183996 | 6.57167818 | 0.00071209 | 0.00589305 |
| ENSMUSG00000031838 | 1.21398028 | 7.9138792  | 0.00071466 | 0.0059101  |
| ENSMUSG00000074064 | 1.26491791 | 3.61416407 | 0.00071526 | 0.00591077 |
| ENSMUSG00000029059 | 1.42509421 | 1.30737165 | 0.00071875 | 0.00593535 |
| ENSMUSG00000020736 | 1.2309805  | 4.70630454 | 0.00071997 | 0.00594114 |
| ENSMUSG00000051079 | -1.3558909 | 1.94803914 | 0.00072205 | 0.00595406 |
| ENSMUSG00000031785 | 1.48471094 | 1.42572222 | 0.00072277 | 0.00595571 |
| ENSMUSG00000027253 | 1.41067161 | 1.89001114 | 0.00072345 | 0.0059571  |
| ENSMUSG00000029551 | 1.44578699 | 1.67535604 | 0.00072499 | 0.00596544 |
| ENSMUSG00000019470 | 1.22018138 | 5.74923931 | 0.00072886 | 0.00599069 |
| ENSMUSG00000026556 | 1.2810233  | 2.93205177 | 0.00072946 | 0.00599069 |
| ENSMUSG00000004633 | 1.34122976 | 2.53094393 | 0.00072962 | 0.00599069 |
| ENSMUSG00000094787 | -1.3006003 | 2.86570291 | 0.00073185 | 0.00600472 |
| ENSMUSG00000025746 | 1.61612015 | 0.70291713 | 0.00073417 | 0.00601949 |
| ENSMUSG00000094075 | -1.2277594 | 4.94355389 | 0.00073577 | 0.00602829 |
| ENSMUSG00000038637 | 1.34160159 | 2.22060685 | 0.00074265 | 0.00608033 |
| ENSMUSG00000024397 | 1.2547156  | 3.84307715 | 0.00074354 | 0.00608329 |
| ENSMUSG00000048997 | 1.28310634 | 3.06433485 | 0.00074482 | 0.00608937 |
| ENSMUSG00000071379 | 1.24709176 | 3.88408796 | 0.0007578  | 0.00619113 |
| ENSMUSG00000051149 | -1.4301312 | 1.19533518 | 0.00076598 | 0.00624993 |
| ENSMUSG00000035203 | 1.21134158 | 6.41569701 | 0.00076609 | 0.00624993 |
| ENSMUSG00000074247 | 1.23042319 | 4.54828113 | 0.00076895 | 0.00626886 |
| ENSMUSG00000089727 | 1.35049525 | 2.16076488 | 0.00077221 | 0.00629095 |
| ENSMUSG00000084408 | -1.2824609 | 2.87974996 | 0.00078068 | 0.00635549 |
| ENSMUSG00000070699 | 1.33324866 | 2.37521925 | 0.00078374 | 0.00637585 |

|                    |            |            |            |            |
|--------------------|------------|------------|------------|------------|
| ENSMUSG00000027993 | 1.47369024 | 1.54089006 | 0.00078544 | 0.00638516 |
| ENSMUSG00000064247 | 1.42429627 | 1.42237574 | 0.00078896 | 0.00640929 |
| ENSMUSG00000034218 | -1.2051216 | 7.48376135 | 0.00079003 | 0.0064134  |
| ENSMUSG00000030533 | 1.21864557 | 5.14567927 | 0.00079586 | 0.00645615 |
| ENSMUSG00000022602 | 1.39650943 | 1.74434933 | 0.00079694 | 0.00646041 |
| ENSMUSG00000026365 | 1.29891471 | 2.86216333 | 0.00080146 | 0.00649241 |
| ENSMUSG00000034349 | -1.2024559 | 7.92782024 | 0.00080469 | 0.00651401 |
| ENSMUSG00000040809 | 1.21752614 | 4.8492714  | 0.00080549 | 0.0065159  |
| ENSMUSG00000032737 | 1.2260328  | 4.7625577  | 0.00080619 | 0.00651699 |
| ENSMUSG00000028173 | -1.2192934 | 4.86775756 | 0.00080947 | 0.00653891 |
| ENSMUSG00000034255 | 1.20581073 | 5.97216926 | 0.00082882 | 0.00669049 |
| ENSMUSG00000019832 | 1.24070422 | 3.89578936 | 0.00083186 | 0.00671033 |
| ENSMUSG00000030946 | 1.41500901 | 1.46680756 | 0.00083395 | 0.0067225  |
| ENSMUSG00000021125 | 1.4094849  | 1.71044855 | 0.00083723 | 0.00674419 |
| ENSMUSG00000099757 | -1.1997131 | 7.25661888 | 0.00083794 | 0.00674453 |
| ENSMUSG00000040415 | 1.21065595 | 5.46771358 | 0.00083845 | 0.00674453 |
| ENSMUSG00000029715 | 1.35406851 | 1.89392852 | 0.00084064 | 0.00675747 |
| ENSMUSG00000014361 | 1.21467293 | 5.06967686 | 0.00084154 | 0.00675992 |
| ENSMUSG00000018169 | 1.21172473 | 5.1969808  | 0.00084778 | 0.00680536 |
| ENSMUSG00000028035 | -1.1963934 | 8.41865612 | 0.00084904 | 0.00681068 |
| ENSMUSG00000039450 | 1.38495511 | 1.74542986 | 0.00085581 | 0.00686017 |
| ENSMUSG00000037646 | -1.195678  | 8.04420256 | 0.00085779 | 0.00687126 |
| ENSMUSG00000054178 | -1.2367005 | 3.79484564 | 0.00085971 | 0.00687766 |
| ENSMUSG00000030144 | 1.25888782 | 3.52708206 | 0.00085978 | 0.00687766 |
| ENSMUSG00000042249 | 1.20089388 | 6.24631509 | 0.0008642  | 0.0069082  |
| ENSMUSG00000030148 | 1.25801034 | 3.10413464 | 0.00086488 | 0.00690881 |
| ENSMUSG00000018593 | 1.65053789 | 0.6160905  | 0.00087836 | 0.00701161 |
| ENSMUSG00000046794 | 1.2654432  | 3.20453546 | 0.00087922 | 0.00701232 |
| ENSMUSG00000024989 | -1.3037136 | 2.40474246 | 0.00087967 | 0.00701232 |
| ENSMUSG00000037410 | 1.2130853  | 4.9690972  | 0.00088034 | 0.00701281 |
| ENSMUSG00000037605 | 1.36714116 | 1.98571172 | 0.00088348 | 0.00703297 |
| ENSMUSG00000026768 | 1.56525453 | 0.92768864 | 0.00088481 | 0.00703871 |
| ENSMUSG00000032724 | 1.26570353 | 3.10019565 | 0.00089016 | 0.0070763  |
| ENSMUSG00000087233 | -1.3210798 | 2.00090994 | 0.00089258 | 0.00709064 |
| ENSMUSG00000029404 | 1.24208205 | 3.37765413 | 0.00090019 | 0.00714622 |
| ENSMUSG00000036502 | 1.89337716 | 0.37040668 | 0.00090549 | 0.00718334 |
| ENSMUSG00000054072 | 1.27494203 | 2.79119469 | 0.00090997 | 0.00721389 |
| ENSMUSG00000024906 | 1.24729909 | 3.42737326 | 0.00091128 | 0.0072148  |
| ENSMUSG00000001627 | -1.1923613 | 6.78829416 | 0.00091134 | 0.0072148  |
| ENSMUSG00000037071 | -1.1872239 | 10.7088609 | 0.00091573 | 0.00724452 |
| ENSMUSG00000029484 | 1.35666562 | 2.06721448 | 0.00092289 | 0.00728731 |
| ENSMUSG00000037270 | -1.1873731 | 8.74019463 | 0.0009229  | 0.00728731 |
| ENSMUSG00000032609 | 1.60559098 | 0.65469004 | 0.00092304 | 0.00728731 |

|                    |            |            |            |            |
|--------------------|------------|------------|------------|------------|
| ENSMUSG00000025494 | 1.20999289 | 4.49148331 | 0.00092731 | 0.00731603 |
| ENSMUSG00000034902 | 1.19397153 | 5.87921036 | 0.00093519 | 0.0073731  |
| ENSMUSG00000041831 | 1.38991641 | 1.62642557 | 0.00093596 | 0.00737334 |
| ENSMUSG00000037103 | 1.20037313 | 5.04381447 | 0.00093692 | 0.00737334 |
| ENSMUSG00000029687 | -1.1953776 | 5.78860366 | 0.00093714 | 0.00737334 |
| ENSMUSG00000031398 | 1.23848515 | 3.58479415 | 0.00094284 | 0.00740993 |
| ENSMUSG00000028497 | 1.22877466 | 3.96398515 | 0.00094308 | 0.00740993 |
| ENSMUSG00000026317 | 1.21543873 | 4.24350341 | 0.00094397 | 0.00741182 |
| ENSMUSG00000096916 | -1.206756  | 4.63833011 | 0.0009465  | 0.00742666 |
| ENSMUSG00000079038 | -1.2233203 | 3.85882721 | 0.00095043 | 0.00744878 |
| ENSMUSG00000019841 | -1.1868975 | 7.1824214  | 0.00095062 | 0.00744878 |
| ENSMUSG00000014496 | -1.1920344 | 5.81573939 | 0.00095755 | 0.00749798 |
| ENSMUSG00000024044 | 1.24462268 | 3.36765797 | 0.00096086 | 0.00751878 |
| ENSMUSG00000040618 | 1.19465861 | 5.46265603 | 0.00096254 | 0.00752684 |
| ENSMUSG00000002289 | 1.42999368 | 1.43355319 | 0.00096469 | 0.00753845 |
| ENSMUSG00000037325 | 1.39181517 | 1.82409689 | 0.00096603 | 0.0075438  |
| ENSMUSG00000094094 | -1.3135351 | 2.08323485 | 0.00096802 | 0.00755427 |
| ENSMUSG00000026879 | 1.1885841  | 6.24218113 | 0.00096967 | 0.00756199 |
| ENSMUSG00000029925 | 1.23898669 | 3.66482117 | 0.00097366 | 0.00758796 |
| ENSMUSG00000078350 | 1.49369362 | 1.28196822 | 0.00098614 | 0.00767997 |
| ENSMUSG00000014444 | 1.18816827 | 6.05809122 | 0.00098851 | 0.00769325 |
| ENSMUSG00000027995 | 1.19032489 | 5.65508977 | 0.00099056 | 0.00769867 |
| ENSMUSG00000044708 | 1.19844107 | 5.08219769 | 0.00099078 | 0.00769867 |
| ENSMUSG00000027805 | 1.35783208 | 1.90648218 | 0.00099122 | 0.00769867 |
| ENSMUSG00000026566 | 1.26854655 | 2.89251875 | 0.00099336 | 0.0077101  |
| ENSMUSG00000035042 | 1.20539632 | 4.2400051  | 0.00099515 | 0.00771879 |
| ENSMUSG00000014786 | 1.30619201 | 2.18609301 | 0.0010025  | 0.00777056 |
| ENSMUSG00000023348 | 1.37831343 | 1.47746336 | 0.0010132  | 0.00784818 |
| ENSMUSG00000035458 | 1.65326369 | 0.60274522 | 0.00101515 | 0.00785796 |
| ENSMUSG00000099515 | -1.1808019 | 6.91349941 | 0.00101583 | 0.00785796 |
| ENSMUSG00000031490 | 1.27582916 | 2.58009636 | 0.00101918 | 0.00787863 |
| ENSMUSG00000024818 | 1.18605833 | 5.37974013 | 0.00103772 | 0.00801401 |
| ENSMUSG00000032827 | 1.36842407 | 1.88988328 | 0.00103809 | 0.00801401 |
| ENSMUSG00000026944 | 1.1853614  | 5.67058342 | 0.00105237 | 0.00811877 |
| ENSMUSG00000026895 | 1.22442281 | 3.36449625 | 0.00106413 | 0.00820166 |
| ENSMUSG00000047123 | 1.1866932  | 4.85966919 | 0.00106478 | 0.00820166 |
| ENSMUSG00000025034 | 1.19328926 | 4.74309298 | 0.00106596 | 0.00820166 |
| ENSMUSG00000027952 | 1.20469013 | 3.842358   | 0.00106597 | 0.00820166 |
| ENSMUSG00000060601 | 1.18351686 | 5.35315574 | 0.00106859 | 0.00821637 |
| ENSMUSG00000055692 | 1.51322717 | 1.17984464 | 0.00107105 | 0.00822422 |
| ENSMUSG00000021213 | 1.44415553 | 1.17670689 | 0.00107105 | 0.00822422 |
| ENSMUSG00000024219 | 1.19698072 | 4.49103099 | 0.00107201 | 0.00822488 |
| ENSMUSG00000092417 | 1.2075091  | 4.07100742 | 0.00107256 | 0.00822488 |



|                    |            |            |            |            |
|--------------------|------------|------------|------------|------------|
| ENSMUSG00000018381 | 1.18330693 | 5.11766986 | 0.00108275 | 0.00829747 |
| ENSMUSG00000029553 | 1.43879652 | 1.28315776 | 0.00108401 | 0.00829987 |
| ENSMUSG00000027447 | 1.174746   | 6.68984688 | 0.00108451 | 0.00829987 |
| ENSMUSG00000028848 | 1.22184274 | 3.06029052 | 0.001089   | 0.00832872 |
| ENSMUSG00000024160 | 1.19593938 | 4.41968721 | 0.00109038 | 0.0083337  |
| ENSMUSG00000039967 | -1.1699117 | 8.17845785 | 0.00109855 | 0.0083906  |
| ENSMUSG00000020053 | 1.20834797 | 3.95409024 | 0.00110643 | 0.00844517 |
| ENSMUSG00000020253 | 1.17648522 | 5.76644963 | 0.00110942 | 0.00845899 |
| ENSMUSG00000071652 | 1.19991212 | 4.01659872 | 0.00110971 | 0.00845899 |
| ENSMUSG00000000440 | 1.27152931 | 2.62258555 | 0.00111663 | 0.00850608 |
| ENSMUSG00000028556 | 1.23156181 | 3.55454779 | 0.00111868 | 0.00851211 |
| ENSMUSG00000032294 | 1.16856614 | 7.62221922 | 0.0011189  | 0.00851211 |
| ENSMUSG00000005802 | -1.1808038 | 5.26885662 | 0.00112307 | 0.00853815 |
| ENSMUSG00000033147 | 1.32136044 | 2.18535512 | 0.00112922 | 0.00857923 |
| ENSMUSG00000022057 | 1.19036201 | 4.5237424  | 0.00113787 | 0.00863925 |
| ENSMUSG00000026158 | 1.17611081 | 5.65146296 | 0.00114454 | 0.00868414 |
| ENSMUSG00000025188 | 1.18326484 | 4.97191072 | 0.0011471  | 0.00869784 |
| ENSMUSG00000002781 | 1.42105976 | 1.50367001 | 0.0011517  | 0.00872692 |
| ENSMUSG00000022177 | 1.22440707 | 3.22723449 | 0.00116328 | 0.00880888 |
| ENSMUSG00000046572 | 1.25053349 | 2.90674372 | 0.00117007 | 0.00885451 |
| ENSMUSG00000070283 | 1.30528957 | 2.17336279 | 0.00117483 | 0.00888462 |
| ENSMUSG00000033488 | 1.25259736 | 2.91521196 | 0.00117914 | 0.0089114  |
| ENSMUSG00000037509 | 1.29951928 | 2.23304645 | 0.00118819 | 0.00897387 |
| ENSMUSG00000038630 | 1.46816369 | 1.35225838 | 0.00119613 | 0.00902793 |
| ENSMUSG00000031779 | 1.5562977  | 0.96454267 | 0.00119839 | 0.00903576 |
| ENSMUSG00000050106 | 1.17621934 | 5.03638096 | 0.0011994  | 0.00903576 |
| ENSMUSG00000097357 | -1.3189009 | 1.79599014 | 0.00119953 | 0.00903576 |
| ENSMUSG00000073492 | -1.1993866 | 3.76487572 | 0.00120231 | 0.00905076 |
| ENSMUSG00000059588 | -1.179464  | 4.76475048 | 0.00121371 | 0.00913011 |
| ENSMUSG00000032643 | 1.27949695 | 2.30719933 | 0.00121444 | 0.00913011 |
| ENSMUSG00000026616 | -1.1577356 | 11.1021643 | 0.0012156  | 0.00913291 |
| ENSMUSG00000030695 | 1.15922142 | 7.63398454 | 0.00122077 | 0.00916576 |
| ENSMUSG00000028549 | -1.238251  | 2.90223348 | 0.00122681 | 0.00920507 |
| ENSMUSG00000031266 | -1.1597319 | 7.29578336 | 0.00122924 | 0.00921731 |
| ENSMUSG00000027806 | -1.1638227 | 6.04800468 | 0.00123775 | 0.00927031 |
| ENSMUSG00000030793 | 1.18948486 | 4.02541972 | 0.00123792 | 0.00927031 |
| ENSMUSG00000068922 | 1.2274524  | 2.99800589 | 0.00123888 | 0.00927146 |
| ENSMUSG00000041598 | 1.23382466 | 2.96732    | 0.00124188 | 0.00928785 |
| ENSMUSG00000034111 | -1.1575405 | 7.65015022 | 0.00124685 | 0.00931895 |
| ENSMUSG00000000386 | 1.16591312 | 5.53809735 | 0.00125573 | 0.00937925 |
| ENSMUSG00000031712 | 1.30439758 | 2.07179755 | 0.00126269 | 0.00942507 |
| ENSMUSG00000024036 | 1.18469559 | 4.19605127 | 0.00126561 | 0.00944076 |
| ENSMUSG00000027466 | 1.15957814 | 6.32383723 | 0.00126644 | 0.00944083 |

|                    |            |            |            |            |
|--------------------|------------|------------|------------|------------|
| ENSMUSG00000024892 | 1.32379715 | 1.67803855 | 0.00126882 | 0.00945239 |
| ENSMUSG00000029714 | 1.16100991 | 6.10426775 | 0.00127199 | 0.00946656 |
| ENSMUSG00000030655 | -1.1530972 | 10.1147044 | 0.00127318 | 0.00946656 |
| ENSMUSG00000029703 | 1.17865162 | 4.42546085 | 0.00127319 | 0.00946656 |
| ENSMUSG00000023033 | 1.43911578 | 1.32792544 | 0.00127909 | 0.00949917 |
| ENSMUSG00000040220 | 1.39542045 | 1.24667648 | 0.00127923 | 0.00949917 |
| ENSMUSG00000008855 | 1.17569803 | 4.59043699 | 0.0012933  | 0.0095975  |
| ENSMUSG00000034854 | 1.22141334 | 2.94193781 | 0.00129418 | 0.00959778 |
| ENSMUSG00000034371 | 1.33560612 | 1.62010888 | 0.00129573 | 0.00960314 |
| ENSMUSG00000045826 | 1.16189914 | 5.53402772 | 0.00129769 | 0.00961141 |
| ENSMUSG00000051811 | 1.64700749 | 0.55083524 | 0.00130086 | 0.00962873 |
| ENSMUSG00000085334 | -1.1685077 | 4.88791136 | 0.00130328 | 0.00964043 |
| ENSMUSG00000085396 | 1.41560874 | 1.44294338 | 0.00130426 | 0.00964148 |
| ENSMUSG00000031078 | 1.4132509  | 1.36404787 | 0.00130765 | 0.00965577 |
| ENSMUSG00000033065 | 1.2330747  | 2.91618305 | 0.00130788 | 0.00965577 |
| ENSMUSG00000039153 | 1.26096803 | 2.33915385 | 0.00131678 | 0.00971528 |
| ENSMUSG00000034353 | 1.39061248 | 1.4749692  | 0.00133065 | 0.00981129 |
| ENSMUSG00000062115 | 1.1976061  | 3.66505703 | 0.00133414 | 0.00983075 |
| ENSMUSG00000039640 | 1.18895399 | 3.68731001 | 0.00133626 | 0.00983776 |
| ENSMUSG00000089929 | -1.1966812 | 3.56571846 | 0.00133681 | 0.00983776 |
| ENSMUSG00000022235 | 1.45061634 | 1.2919053  | 0.00134043 | 0.00985811 |
| ENSMUSG00000044024 | 1.27178616 | 2.19696357 | 0.00135273 | 0.00994219 |
| ENSMUSG00000022474 | 1.21617124 | 2.95386413 | 0.00135392 | 0.00994464 |
| ENSMUSG00000002210 | 1.18143629 | 4.14854551 | 0.00135775 | 0.00996054 |
| ENSMUSG00000024795 | -1.159535  | 5.3678078  | 0.00135782 | 0.00996054 |
| ENSMUSG00000100009 | 1.34573679 | 1.87717132 | 0.00135995 | 0.00996978 |
| ENSMUSG00000026820 | 1.25930161 | 2.15383226 | 0.00136088 | 0.00997023 |
| ENSMUSG00000096929 | -1.2273892 | 2.62622543 | 0.00136391 | 0.00998605 |
| ENSMUSG00000026589 | 1.24190971 | 2.69644328 | 0.00136804 | 0.01000604 |
| ENSMUSG00000025810 | 1.19364799 | 3.77278604 | 0.00136838 | 0.01000604 |
| ENSMUSG00000004929 | 1.31167707 | 1.90385415 | 0.00137923 | 0.01007899 |
| ENSMUSG00000020275 | -1.1464298 | 7.88889897 | 0.00138062 | 0.0100827  |
| ENSMUSG00000009687 | 1.14846519 | 7.02717994 | 0.00138153 | 0.01008301 |
| ENSMUSG00000022309 | 1.51719269 | 0.97526904 | 0.00138268 | 0.01008498 |
| ENSMUSG00000059316 | 1.1791006  | 3.99869217 | 0.00139621 | 0.01017721 |
| ENSMUSG00000022438 | 1.19592585 | 3.60462939 | 0.00139984 | 0.01019719 |
| ENSMUSG00000016757 | 1.18445121 | 3.91481017 | 0.00140534 | 0.01023079 |
| ENSMUSG00000030187 | 1.16940672 | 4.37346818 | 0.00140677 | 0.01023388 |
| ENSMUSG00000076676 | -1.3295013 | 1.48795001 | 0.00140823 | 0.01023388 |
| ENSMUSG00000052942 | 1.38308347 | 1.24597852 | 0.00140844 | 0.01023388 |
| ENSMUSG00000021709 | -1.1434414 | 8.4020401  | 0.00140981 | 0.01023741 |
| ENSMUSG00000029022 | 1.15843178 | 4.99126397 | 0.00142001 | 0.01030493 |
| ENSMUSG00000021819 | 1.14812221 | 6.10802527 | 0.00144321 | 0.01046671 |

|                    |            |            |            |            |
|--------------------|------------|------------|------------|------------|
| ENSMUSG00000073434 | 1.18701192 | 3.83033218 | 0.00144521 | 0.01046839 |
| ENSMUSG00000062007 | 1.16638646 | 4.44269504 | 0.00144527 | 0.01046839 |
| ENSMUSG00000084899 | -1.2018328 | 3.23723736 | 0.00145021 | 0.01049706 |
| ENSMUSG00000024201 | 1.16086159 | 4.80557441 | 0.00145105 | 0.01049706 |
| ENSMUSG00000003308 | 1.15995413 | 4.72395106 | 0.00145531 | 0.01052125 |
| ENSMUSG00000032812 | 1.1412226  | 7.38442319 | 0.00146169 | 0.01056075 |
| ENSMUSG00000040356 | 1.14384219 | 6.27351865 | 0.00147416 | 0.0106398  |
| ENSMUSG00000028952 | 1.18359934 | 3.54131504 | 0.00147449 | 0.0106398  |
| ENSMUSG00000006301 | 1.21053438 | 3.30236867 | 0.00148022 | 0.01067354 |
| ENSMUSG00000059518 | 1.27277922 | 2.11436194 | 0.00148102 | 0.01067354 |
| ENSMUSG00000004934 | 1.17315835 | 3.79686661 | 0.00150659 | 0.01085102 |
| ENSMUSG00000046410 | 1.18509669 | 3.51986954 | 0.00151228 | 0.01088519 |
| ENSMUSG00000033233 | 1.27497297 | 1.69703142 | 0.00151467 | 0.01089414 |
| ENSMUSG00000080866 | 1.51670018 | 0.68630666 | 0.00151637 | 0.01089414 |
| ENSMUSG00000038037 | 1.47419447 | 0.69825912 | 0.00151637 | 0.01089414 |
| ENSMUSG00000030427 | 1.15559835 | 5.15037686 | 0.00151893 | 0.01090577 |
| ENSMUSG00000009566 | 1.201706   | 3.15360521 | 0.00152834 | 0.01096643 |
| ENSMUSG00000039987 | -1.1375073 | 6.9566715  | 0.00153216 | 0.01098701 |
| ENSMUSG00000042473 | -1.1499998 | 5.08465056 | 0.00153873 | 0.01102721 |
| ENSMUSG00000020520 | 1.14363506 | 5.42272478 | 0.00154342 | 0.01105394 |
| ENSMUSG00000025993 | 1.13487104 | 7.66762251 | 0.0015491  | 0.01108771 |
| ENSMUSG00000005763 | 1.18233264 | 3.5328991  | 0.00156345 | 0.01117838 |
| ENSMUSG00000036902 | 1.26408345 | 2.10491183 | 0.00156371 | 0.01117838 |
| ENSMUSG00000031613 | 1.15575082 | 4.53290347 | 0.00156468 | 0.01117838 |
| ENSMUSG00000044813 | 1.55691602 | 0.56566274 | 0.00156814 | 0.01119615 |
| ENSMUSG00000031229 | -1.1311763 | 9.01343742 | 0.00157421 | 0.01123247 |
| ENSMUSG00000026209 | 1.15153199 | 4.43628729 | 0.00158182 | 0.01127977 |
| ENSMUSG00000039521 | 1.43416887 | 1.01579639 | 0.00158682 | 0.01130145 |
| ENSMUSG00000073755 | 1.43258703 | 1.00480706 | 0.00158682 | 0.01130145 |
| ENSMUSG0000002833  | 1.14404507 | 5.14144247 | 0.00159705 | 0.01136721 |
| ENSMUSG00000003868 | 1.15508646 | 4.22302512 | 0.00160374 | 0.01140777 |
| ENSMUSG00000031925 | -1.1347189 | 6.25689276 | 0.00161145 | 0.01145556 |
| ENSMUSG00000037202 | 1.18777479 | 3.28644433 | 0.00161782 | 0.01149368 |
| ENSMUSG00000056529 | 1.17490225 | 4.05614925 | 0.00161979 | 0.01149928 |
| ENSMUSG00000062031 | 1.16190417 | 4.1324943  | 0.00162125 | 0.01149928 |
| ENSMUSG00000033938 | 1.16139493 | 4.04130987 | 0.0016216  | 0.01149928 |
| ENSMUSG00000018507 | 1.1322859  | 6.4347819  | 0.00162538 | 0.01151898 |
| ENSMUSG00000051768 | 1.14659488 | 4.54162203 | 0.00163083 | 0.01155047 |
| ENSMUSG00000020476 | 1.13010187 | 7.05121379 | 0.00163264 | 0.01155614 |
| ENSMUSG00000004319 | -1.1297298 | 7.20988311 | 0.00163395 | 0.01155832 |
| ENSMUSG00000090582 | -1.169701  | 3.69777844 | 0.00163593 | 0.01156523 |
| ENSMUSG00000015745 | 1.13318218 | 5.84293761 | 0.00165429 | 0.01168779 |
| ENSMUSG00000060244 | 1.26016419 | 1.96855721 | 0.00166002 | 0.0117211  |

|                    |            |            |            |            |
|--------------------|------------|------------|------------|------------|
| ENSMUSG00000067653 | 1.22290797 | 2.32022731 | 0.00166751 | 0.01176674 |
| ENSMUSG00000025138 | 1.13132189 | 6.14122292 | 0.00166997 | 0.01177691 |
| ENSMUSG00000074417 | 1.18961015 | 3.35770563 | 0.00167265 | 0.0117885  |
| ENSMUSG00000025142 | 1.14883303 | 4.7505735  | 0.0016738  | 0.0117894  |
| ENSMUSG00000035370 | 1.36976747 | 1.52921071 | 0.00167829 | 0.01181381 |
| ENSMUSG00000019647 | 1.47082385 | 0.65156015 | 0.00168138 | 0.01182828 |
| ENSMUSG00000039936 | 1.12423289 | 8.00389123 | 0.00169498 | 0.01191667 |
| ENSMUSG00000097838 | -1.3537453 | 1.17368762 | 0.00170746 | 0.0119971  |
| ENSMUSG00000024424 | 1.5379826  | 0.81840823 | 0.00171399 | 0.01202825 |
| ENSMUSG00000029814 | -1.4485081 | 0.78774973 | 0.00171399 | 0.01202825 |
| ENSMUSG00000025144 | 1.18967252 | 3.05006259 | 0.00172813 | 0.01212009 |
| ENSMUSG00000037622 | 1.13918561 | 4.44666065 | 0.00173211 | 0.01214064 |
| ENSMUSG00000005986 | 1.1810072  | 3.24314857 | 0.00174026 | 0.01219028 |
| ENSMUSG00000014856 | 1.16182645 | 3.58730977 | 0.00174517 | 0.01221726 |
| ENSMUSG00000040345 | 1.12465783 | 6.42276011 | 0.00175476 | 0.01227693 |
| ENSMUSG00000022659 | -1.217793  | 2.48944496 | 0.00176265 | 0.01232461 |
| ENSMUSG00000034303 | -1.1485532 | 4.21560606 | 0.00176894 | 0.01236104 |
| ENSMUSG00000042106 | 1.39951185 | 1.25942591 | 0.00177338 | 0.01237707 |
| ENSMUSG00000028885 | 1.37285652 | 1.26634606 | 0.00177338 | 0.01237707 |
| ENSMUSG00000011837 | 1.19947719 | 2.92346431 | 0.00178325 | 0.01243837 |
| ENSMUSG00000020297 | 1.17881997 | 3.24380885 | 0.00178487 | 0.01244212 |
| ENSMUSG00000056204 | 1.16388867 | 3.54673849 | 0.0018041  | 0.01256854 |
| ENSMUSG00000047193 | -1.1406472 | 4.46186144 | 0.00180787 | 0.01258722 |
| ENSMUSG00000008845 | 1.12633272 | 5.49566729 | 0.00182092 | 0.01267037 |
| ENSMUSG00000039831 | 1.36642669 | 1.4188455  | 0.00182693 | 0.01270452 |
| ENSMUSG00000018920 | 1.21012754 | 2.95572735 | 0.00183063 | 0.01272252 |
| ENSMUSG00000076577 | -1.1436628 | 4.51374328 | 0.00183356 | 0.01273521 |
| ENSMUSG00000025823 | -1.1143019 | 8.51972709 | 0.00185036 | 0.01284415 |
| ENSMUSG00000050666 | 1.25104903 | 2.11619572 | 0.00185774 | 0.01288756 |
| ENSMUSG00000047098 | 1.12210077 | 5.7132951  | 0.00186018 | 0.01289597 |
| ENSMUSG00000073002 | 1.23844089 | 2.33042329 | 0.00186209 | 0.01289597 |
| ENSMUSG00000029599 | 1.12132097 | 5.83957423 | 0.00186232 | 0.01289597 |
| ENSMUSG00000033066 | 1.16549946 | 3.75599002 | 0.00186571 | 0.01291167 |
| ENSMUSG00000077167 | -1.2943784 | 1.52698166 | 0.00186798 | 0.01291964 |
| ENSMUSG00000037224 | 1.29234441 | 1.95549572 | 0.00187026 | 0.01292218 |
| ENSMUSG00000061981 | 1.14893252 | 4.08912602 | 0.00187257 | 0.01292218 |
| ENSMUSG00000002803 | 1.15798314 | 3.3785233  | 0.0018727  | 0.01292218 |
| ENSMUSG00000028988 | 1.46424509 | 0.60571791 | 0.00187285 | 0.01292218 |
| ENSMUSG00000035713 | 1.17390711 | 3.20248526 | 0.00187885 | 0.01295586 |
| ENSMUSG00000074994 | -1.1200294 | 5.83677766 | 0.00188241 | 0.01297142 |
| ENSMUSG00000009092 | 1.30517426 | 1.46595209 | 0.00188337 | 0.01297142 |
| ENSMUSG00000032322 | 1.11942831 | 5.70336521 | 0.00189273 | 0.01302537 |
| ENSMUSG00000042462 | 1.2737628  | 1.58928741 | 0.00189347 | 0.01302537 |

|                    |            |            |            |            |
|--------------------|------------|------------|------------|------------|
| ENSMUSG00000034892 | 1.11476409 | 7.03694504 | 0.00189647 | 0.01303822 |
| ENSMUSG00000032245 | 1.1654069  | 3.70267359 | 0.00190227 | 0.01307027 |
| ENSMUSG00000005447 | 1.15541077 | 3.65125339 | 0.00190554 | 0.01308491 |
| ENSMUSG00000024371 | 1.62543785 | 0.2427995  | 0.00190681 | 0.01308583 |
| ENSMUSG00000036918 | 1.11365522 | 6.84087243 | 0.00190878 | 0.01309152 |
| ENSMUSG00000044952 | 1.20938485 | 2.72920747 | 0.00191764 | 0.01314444 |
| ENSMUSG00000033538 | -1.1216958 | 5.218229   | 0.00192251 | 0.01316998 |
| ENSMUSG00000034994 | 1.10868838 | 10.4209348 | 0.00192762 | 0.01319712 |
| ENSMUSG00000032131 | 1.20162646 | 2.90769493 | 0.00194955 | 0.01333932 |
| ENSMUSG00000029657 | -1.1070908 | 11.2908323 | 0.0019542  | 0.01336318 |
| ENSMUSG00000095429 | 1.16037448 | 3.62520866 | 0.00195652 | 0.01337113 |
| ENSMUSG00000047141 | -1.1172997 | 5.53957723 | 0.00197404 | 0.0134828  |
| ENSMUSG00000038535 | -1.1106838 | 6.57523046 | 0.00198611 | 0.01355718 |
| ENSMUSG00000094335 | -1.1110331 | 6.64197262 | 0.00198827 | 0.01356215 |
| ENSMUSG00000038147 | -1.1078704 | 7.43234088 | 0.00198979 | 0.01356215 |
| ENSMUSG00000038055 | 1.16788519 | 3.24419446 | 0.00199037 | 0.01356215 |
| ENSMUSG00000032198 | 1.18979699 | 2.98855829 | 0.00199228 | 0.01356279 |
| ENSMUSG00000025132 | 1.10641002 | 8.20375564 | 0.00199283 | 0.01356279 |
| ENSMUSG00000055480 | -1.3584176 | 1.09665968 | 0.00200007 | 0.01360087 |
| ENSMUSG00000001034 | 1.13580949 | 4.18469857 | 0.00200079 | 0.01360087 |
| ENSMUSG00000018974 | 1.11505111 | 5.56273714 | 0.00201012 | 0.01365625 |
| ENSMUSG00000029507 | 1.12986419 | 4.10729613 | 0.00201166 | 0.01365859 |
| ENSMUSG00000032446 | 1.21329123 | 2.69393535 | 0.00201465 | 0.01366326 |
| ENSMUSG00000061028 | 1.12296109 | 4.74337199 | 0.00201472 | 0.01366326 |
| ENSMUSG00000102051 | 1.26618428 | 2.06102518 | 0.00201707 | 0.01367113 |
| ENSMUSG00000026573 | 1.24225887 | 2.22542394 | 0.00202087 | 0.01368801 |
| ENSMUSG00000028958 | 1.20805899 | 2.51645521 | 0.00202194 | 0.01368801 |
| ENSMUSG00000047648 | -1.1140825 | 5.4486762  | 0.00203454 | 0.01376315 |
| ENSMUSG00000005057 | 1.34800341 | 1.19161561 | 0.00203544 | 0.01376315 |
| ENSMUSG00000041189 | 1.13141666 | 4.42326949 | 0.00203782 | 0.01377118 |
| ENSMUSG00000041688 | 1.23067977 | 2.39339019 | 0.00204986 | 0.01384435 |
| ENSMUSG00000000628 | 1.13426469 | 4.07792886 | 0.00206391 | 0.01393111 |
| ENSMUSG00000011096 | 1.18961449 | 2.34753513 | 0.00207252 | 0.01398099 |
| ENSMUSG00000028931 | 1.11032536 | 5.69226495 | 0.00207435 | 0.01398242 |
| ENSMUSG00000037993 | 1.10873169 | 5.76786989 | 0.00207516 | 0.01398242 |
| ENSMUSG00000036057 | 1.11486484 | 5.31979908 | 0.00207994 | 0.01400349 |
| ENSMUSG00000023274 | 1.12665707 | 4.42035467 | 0.00208073 | 0.01400349 |
| ENSMUSG00000052456 | 1.11898252 | 4.69160455 | 0.00208306 | 0.01401098 |
| ENSMUSG00000042265 | 1.12827651 | 4.52153961 | 0.00209734 | 0.01409878 |
| ENSMUSG00000027579 | 1.1920623  | 2.58123994 | 0.00210848 | 0.01416539 |
| ENSMUSG00000033355 | 1.12438396 | 4.46822508 | 0.00212035 | 0.01423684 |
| ENSMUSG00000034793 | 1.13227937 | 4.05242746 | 0.00212389 | 0.01425228 |
| ENSMUSG00000023939 | 1.27742421 | 1.75553828 | 0.00212979 | 0.0142835  |

|                    |            |            |            |            |
|--------------------|------------|------------|------------|------------|
| ENSMUSG00000072972 | -1.3380535 | 1.03039371 | 0.00213585 | 0.01430903 |
| ENSMUSG00000084918 | 1.38729617 | 1.23523502 | 0.00213733 | 0.01430903 |
| ENSMUSG00000027459 | 1.30785018 | 1.2483228  | 0.00213733 | 0.01430903 |
| ENSMUSG00000071661 | 1.30699086 | 1.51919491 | 0.00215238 | 0.01440141 |
| ENSMUSG00000047921 | 1.12492852 | 4.43038257 | 0.0021688  | 0.01449938 |
| ENSMUSG00000026197 | 1.13359585 | 3.8204495  | 0.00216955 | 0.01449938 |
| ENSMUSG00000023007 | 1.15092423 | 3.26351921 | 0.00217606 | 0.01453447 |
| ENSMUSG00000032253 | -1.0958004 | 8.86629687 | 0.00218558 | 0.01458956 |
| ENSMUSG00000031523 | 1.36512986 | 1.42825431 | 0.00219096 | 0.014617   |
| ENSMUSG00000056342 | -1.094524  | 8.67087629 | 0.00221438 | 0.01476465 |
| ENSMUSG00000024325 | 1.12463995 | 4.12196522 | 0.00221637 | 0.01476935 |
| ENSMUSG00000003190 | 1.16886171 | 2.85315046 | 0.00222449 | 0.01480707 |
| ENSMUSG00000002409 | 1.17468731 | 2.67227396 | 0.0022246  | 0.01480707 |
| ENSMUSG00000028392 | 1.24579331 | 1.83241332 | 0.00223634 | 0.01487654 |
| ENSMUSG00000071715 | 1.09619711 | 6.65005108 | 0.00224774 | 0.01494374 |
| ENSMUSG00000058975 | 1.42830783 | 1.00345023 | 0.00225047 | 0.01495324 |
| ENSMUSG00000026536 | 1.28325754 | 1.73529734 | 0.00225649 | 0.0149846  |
| ENSMUSG00000028082 | 1.18819861 | 2.87717865 | 0.00226332 | 0.01502125 |
| ENSMUSG00000061186 | 1.39388935 | 1.19184278 | 0.00227936 | 0.01511902 |
| ENSMUSG00000047246 | -1.2639124 | 1.72806337 | 0.00230026 | 0.01524882 |
| ENSMUSG00000035236 | -1.0949946 | 6.37780728 | 0.00230713 | 0.01528069 |
| ENSMUSG00000015461 | 1.10406413 | 5.11412259 | 0.00230772 | 0.01528069 |
| ENSMUSG00000015095 | 1.09949035 | 5.47832214 | 0.00231665 | 0.01532718 |
| ENSMUSG00000021606 | 1.15740901 | 2.86637647 | 0.00231741 | 0.01532718 |
| ENSMUSG00000032528 | 1.17778175 | 2.67996631 | 0.00231904 | 0.0153291  |
| ENSMUSG00000031879 | 1.13738367 | 3.24138271 | 0.00232138 | 0.01532956 |
| ENSMUSG00000030325 | 1.16380687 | 2.98244685 | 0.00232177 | 0.01532956 |
| ENSMUSG00000015396 | -1.0879634 | 10.2786862 | 0.00233265 | 0.01539256 |
| ENSMUSG00000057069 | -1.0880978 | 8.50539879 | 0.0023518  | 0.01550998 |
| ENSMUSG00000020190 | 1.08873512 | 7.59534996 | 0.00235532 | 0.01552432 |
| ENSMUSG00000040097 | 1.14255943 | 3.36013496 | 0.00235798 | 0.01552832 |
| ENSMUSG00000006675 | 1.43778736 | 0.498129   | 0.00235863 | 0.01552832 |
| ENSMUSG00000028542 | 1.15098429 | 3.33042756 | 0.00237885 | 0.01565249 |
| ENSMUSG00000033685 | 1.0865525  | 8.63482843 | 0.00238061 | 0.01565507 |
| ENSMUSG00000026930 | 1.13690678 | 3.38687138 | 0.00239152 | 0.01571783 |
| ENSMUSG00000023915 | 1.10367061 | 4.82486    | 0.0024034  | 0.01578687 |
| ENSMUSG00000014859 | 1.0908475  | 6.0740327  | 0.00242002 | 0.015887   |
| ENSMUSG00000025104 | -1.2272552 | 1.82553582 | 0.00242425 | 0.01590565 |
| ENSMUSG00000022594 | 1.08847468 | 6.47683098 | 0.00242576 | 0.01590651 |
| ENSMUSG00000024963 | 1.19947914 | 2.1939125  | 0.00243316 | 0.01594537 |
| ENSMUSG00000042688 | -1.0866815 | 6.93873336 | 0.00243526 | 0.01594537 |
| ENSMUSG00000008140 | 1.11225883 | 4.43176091 | 0.00243729 | 0.01594537 |
| ENSMUSG00000042810 | 1.10797381 | 4.63772557 | 0.00243862 | 0.01594537 |

|                    |            |            |            |            |
|--------------------|------------|------------|------------|------------|
| ENSMUSG00000049037 | 1.10570779 | 4.63956415 | 0.00243862 | 0.01594537 |
| ENSMUSG00000052087 | 1.09183241 | 5.78926623 | 0.00244285 | 0.0159639  |
| ENSMUSG00000032076 | 1.11499684 | 4.37324304 | 0.00244843 | 0.01599067 |
| ENSMUSG00000025068 | 1.10657822 | 4.60794446 | 0.00244972 | 0.01599067 |
| ENSMUSG00000022560 | 1.1576196  | 2.63809822 | 0.00245122 | 0.01599134 |
| ENSMUSG00000027030 | 1.19204086 | 2.3973215  | 0.00245938 | 0.01603548 |
| ENSMUSG00000034880 | 1.24475372 | 1.48862684 | 0.0024628  | 0.01604869 |
| ENSMUSG00000049866 | 1.0941815  | 5.31094156 | 0.0024689  | 0.01607932 |
| ENSMUSG00000000326 | 1.123692   | 3.90007795 | 0.00247057 | 0.01608106 |
| ENSMUSG00000032598 | 1.11850463 | 3.73267151 | 0.00247504 | 0.01610109 |
| ENSMUSG00000026520 | 1.1225327  | 3.94292016 | 0.0024858  | 0.0161619  |
| ENSMUSG00000027201 | -1.0923847 | 5.42550751 | 0.00248968 | 0.01617801 |
| ENSMUSG00000025648 | 1.0968351  | 5.06641076 | 0.00249331 | 0.01619243 |
| ENSMUSG00000079553 | 1.23282827 | 2.02969297 | 0.00249962 | 0.01622424 |
| ENSMUSG00000058881 | 1.11114258 | 4.48306134 | 0.00250274 | 0.01623532 |
| ENSMUSG00000012848 | 1.0807108  | 8.51884128 | 0.00250918 | 0.01625346 |
| ENSMUSG00000013787 | 1.08602609 | 6.20855999 | 0.00250951 | 0.01625346 |
| ENSMUSG00000052821 | 1.3553519  | 1.18464886 | 0.00250978 | 0.01625346 |
| ENSMUSG00000021775 | -1.0866552 | 6.13014985 | 0.00251352 | 0.01626531 |
| ENSMUSG00000074405 | 1.16670251 | 2.82778137 | 0.00251444 | 0.01626531 |
| ENSMUSG00000030741 | 1.10126199 | 4.74502518 | 0.00252502 | 0.01632456 |
| ENSMUSG00000007613 | -1.0847397 | 6.31778349 | 0.00253047 | 0.0163506  |
| ENSMUSG00000037643 | -1.0917967 | 5.24587819 | 0.00253965 | 0.0164007  |
| ENSMUSG00000085795 | 1.11012592 | 4.25821447 | 0.00255436 | 0.01648648 |
| ENSMUSG00000055560 | -1.2214309 | 1.80958612 | 0.00256146 | 0.01652297 |
| ENSMUSG00000041161 | 1.1815732  | 2.29476021 | 0.00256505 | 0.01653686 |
| ENSMUSG00000017837 | 1.10626121 | 4.27391562 | 0.00257183 | 0.01656323 |
| ENSMUSG00000051586 | 1.11714866 | 3.97972559 | 0.00257202 | 0.01656323 |
| ENSMUSG00000095771 | -1.0844603 | 6.11867292 | 0.00258062 | 0.0166093  |
| ENSMUSG00000082088 | 1.18636721 | 1.59739364 | 0.00258938 | 0.01665636 |
| ENSMUSG00000000958 | 1.12038928 | 3.90247057 | 0.00260028 | 0.01671713 |
| ENSMUSG00000034194 | 1.16372718 | 2.68342627 | 0.00260898 | 0.01676368 |
| ENSMUSG00000050428 | 1.14521625 | 2.76959678 | 0.00261837 | 0.01681463 |
| ENSMUSG00000057265 | -1.3340579 | 0.82669441 | 0.00262745 | 0.01686352 |
| ENSMUSG00000041633 | 1.21267786 | 1.89842714 | 0.002638   | 0.01692177 |
| ENSMUSG00000051735 | 1.09243447 | 4.9190286  | 0.0026499  | 0.01698861 |
| ENSMUSG00000034412 | 1.10560732 | 3.64199621 | 0.00265317 | 0.01700009 |
| ENSMUSG00000004837 | 1.07521607 | 7.74907833 | 0.00265741 | 0.0170178  |
| ENSMUSG00000055994 | 1.12066563 | 3.64843189 | 0.0026637  | 0.01704858 |
| ENSMUSG00000058886 | 1.11643698 | 3.47297515 | 0.0026707  | 0.01707898 |
| ENSMUSG00000047656 | 1.41227342 | 0.89628981 | 0.00267142 | 0.01707898 |
| ENSMUSG00000048498 | 1.10984448 | 3.96791045 | 0.00267804 | 0.01711178 |
| ENSMUSG00000022475 | 1.07758072 | 6.29849997 | 0.00269653 | 0.01722037 |

|                    |            |            |            |            |
|--------------------|------------|------------|------------|------------|
| ENSMUSG00000024812 | 1.1283209  | 3.71470055 | 0.00270104 | 0.01723953 |
| ENSMUSG00000029082 | 1.18059762 | 2.67364184 | 0.00270498 | 0.01725511 |
| ENSMUSG00000051343 | 1.21439175 | 1.82281762 | 0.00270949 | 0.01727432 |
| ENSMUSG00000025737 | 1.09680563 | 4.07135312 | 0.00271991 | 0.01733112 |
| ENSMUSG00000090124 | 1.20775141 | 2.21741593 | 0.00273441 | 0.01741385 |
| ENSMUSG00000034509 | 1.09881032 | 4.02522716 | 0.00274727 | 0.01748608 |
| ENSMUSG00000040688 | 1.10044669 | 4.13222064 | 0.00275372 | 0.01751744 |
| ENSMUSG00000070868 | 1.22121508 | 1.98968206 | 0.00276168 | 0.0175523  |
| ENSMUSG00000037204 | 1.09584022 | 3.85551302 | 0.00276226 | 0.0175523  |
| ENSMUSG00000009563 | 1.09781117 | 4.04579015 | 0.00277079 | 0.01759679 |
| ENSMUSG00000076672 | -1.0779656 | 5.82825919 | 0.00277376 | 0.01760597 |
| ENSMUSG00000039834 | 1.07846106 | 5.58544854 | 0.00278363 | 0.01765885 |
| ENSMUSG00000020196 | 1.07535193 | 6.25741037 | 0.00279402 | 0.01771498 |
| ENSMUSG00000034853 | 1.11814867 | 3.49361392 | 0.00281493 | 0.01783773 |
| ENSMUSG00000022799 | 1.08743126 | 4.8692171  | 0.00284142 | 0.01798422 |
| ENSMUSG00000036534 | 1.0954897  | 4.20746817 | 0.00284213 | 0.01798422 |
| ENSMUSG00000048755 | 1.11256685 | 3.51659314 | 0.00284274 | 0.01798422 |
| ENSMUSG00000037475 | -1.0677304 | 7.59748712 | 0.00285394 | 0.01804515 |
| ENSMUSG00000038208 | 1.19375265 | 2.07939732 | 0.00285839 | 0.01806331 |
| ENSMUSG00000029994 | 1.07991944 | 5.17089443 | 0.00286023 | 0.018065   |
| ENSMUSG00000031592 | -1.06703   | 7.76727919 | 0.00286793 | 0.01810372 |
| ENSMUSG00000007036 | 1.09142289 | 4.50769405 | 0.00288319 | 0.01819004 |
| ENSMUSG00000031239 | 1.11700536 | 3.27974819 | 0.00290086 | 0.0182915  |
| ENSMUSG00000039615 | 1.07965629 | 4.9409402  | 0.00292244 | 0.01841746 |
| ENSMUSG00000001910 | 1.06962939 | 5.90740992 | 0.00292855 | 0.01844584 |
| ENSMUSG00000040945 | 1.06562356 | 6.82733892 | 0.00294463 | 0.01853698 |
| ENSMUSG00000019970 | 1.06566019 | 6.75298896 | 0.00295372 | 0.01858402 |
| ENSMUSG00000022181 | 1.08215165 | 4.77499579 | 0.00295714 | 0.01859533 |
| ENSMUSG00000017057 | 1.09744966 | 4.02879372 | 0.00296533 | 0.01863669 |
| ENSMUSG00000076508 | -1.0736396 | 5.42453277 | 0.00297045 | 0.01865621 |
| ENSMUSG00000089832 | 1.08828547 | 4.18605248 | 0.00297169 | 0.01865621 |
| ENSMUSG00000037405 | 1.06723365 | 6.14634334 | 0.00298    | 0.0186982  |
| ENSMUSG00000055745 | 1.08918389 | 4.23294999 | 0.00298595 | 0.01872103 |
| ENSMUSG00000094872 | -1.0702821 | 5.75602075 | 0.0029869  | 0.01872103 |
| ENSMUSG00000043740 | 1.0866316  | 4.5459721  | 0.00298856 | 0.01872127 |
| ENSMUSG00000023259 | 1.14217949 | 2.34301395 | 0.00301485 | 0.01887333 |
| ENSMUSG00000063065 | 1.07222064 | 5.19910347 | 0.00301612 | 0.01887333 |
| ENSMUSG00000027297 | 1.10243188 | 3.68527125 | 0.00303403 | 0.01897504 |
| ENSMUSG00000024193 | 1.06409686 | 6.32415765 | 0.00303584 | 0.01897605 |
| ENSMUSG00000094322 | -1.1320832 | 3.11623609 | 0.00304265 | 0.01900497 |
| ENSMUSG00000017765 | 1.10908648 | 3.52983146 | 0.00304377 | 0.01900497 |
| ENSMUSG00000067370 | 1.19945303 | 1.41042608 | 0.00305507 | 0.01906035 |
| ENSMUSG00000071716 | 1.18505775 | 2.24258615 | 0.00305596 | 0.01906035 |



|                    |            |            |            |            |
|--------------------|------------|------------|------------|------------|
| ENSMUSG00000040462 | 1.06214258 | 6.62635526 | 0.00306874 | 0.01912846 |
| ENSMUSG00000026854 | 1.11021843 | 3.49481502 | 0.00307021 | 0.01912846 |
| ENSMUSG00000054893 | -1.1036823 | 3.60198112 | 0.00307274 | 0.01913388 |
| ENSMUSG00000034993 | 1.09225491 | 4.01593765 | 0.00308564 | 0.0192038  |
| ENSMUSG00000030688 | 1.0921648  | 3.7361171  | 0.0030879  | 0.01920745 |
| ENSMUSG00000085667 | 1.55150265 | 0.4271758  | 0.00310892 | 0.01932775 |
| ENSMUSG00000037416 | -1.0558904 | 8.89769195 | 0.00313025 | 0.01944983 |
| ENSMUSG00000029720 | 1.15037154 | 2.56608147 | 0.00313782 | 0.01948632 |
| ENSMUSG00000031995 | 1.07534817 | 4.57607836 | 0.00314604 | 0.01952682 |
| ENSMUSG00000024186 | 1.27981363 | 1.01989847 | 0.00315211 | 0.01954828 |
| ENSMUSG00000030257 | -1.0965848 | 3.37041599 | 0.00315353 | 0.01954828 |
| ENSMUSG00000078485 | 1.10164805 | 3.51385711 | 0.00315459 | 0.01954828 |
| ENSMUSG00000037762 | 1.11994385 | 3.00510354 | 0.00316799 | 0.01962072 |
| ENSMUSG00000022557 | 1.06940284 | 4.8111222  | 0.00318483 | 0.01970706 |
| ENSMUSG00000055884 | -1.0634422 | 5.59764254 | 0.00318572 | 0.01970706 |
| ENSMUSG00000053347 | -1.0654817 | 5.29114312 | 0.00318776 | 0.01970706 |
| ENSMUSG00000035561 | 1.1079975  | 2.83744664 | 0.00318879 | 0.01970706 |
| ENSMUSG00000045007 | 1.22118151 | 1.52275406 | 0.00319849 | 0.01975641 |
| ENSMUSG00000042275 | 1.11582014 | 2.94706559 | 0.00320391 | 0.01977925 |
| ENSMUSG00000006442 | 1.09589792 | 3.36438279 | 0.00320867 | 0.01979798 |
| ENSMUSG00000024664 | 1.3281601  | 1.3053722  | 0.003218   | 0.0198449  |
| ENSMUSG00000041506 | 1.10715744 | 3.06553183 | 0.00322996 | 0.01989844 |
| ENSMUSG00000019066 | 1.10291474 | 3.3832969  | 0.00323014 | 0.01989844 |
| ENSMUSG00000002395 | 1.0611002  | 5.57748466 | 0.0032335  | 0.01990845 |
| ENSMUSG00000017390 | 1.12225056 | 2.99506397 | 0.00325378 | 0.02002257 |
| ENSMUSG00000021838 | 1.38404973 | 1.07665981 | 0.00325605 | 0.02002585 |
| ENSMUSG00000001062 | 1.07663882 | 4.38880157 | 0.00326481 | 0.02006896 |
| ENSMUSG00000021728 | 1.06146131 | 5.54717729 | 0.00327277 | 0.02010717 |
| ENSMUSG00000024050 | 1.07470476 | 4.40245754 | 0.00327771 | 0.02012677 |
| ENSMUSG00000026991 | 1.10208345 | 3.20269456 | 0.00328208 | 0.02013464 |
| ENSMUSG00000024544 | 1.24663117 | 1.80057219 | 0.0032825  | 0.02013464 |
| ENSMUSG00000042784 | 1.29214743 | 1.11335944 | 0.00328845 | 0.02016037 |
| ENSMUSG00000031708 | 1.05708908 | 5.79521832 | 0.003293   | 0.02017754 |
| ENSMUSG00000040929 | -1.0594263 | 5.40724508 | 0.00331299 | 0.02028918 |
| ENSMUSG00000046169 | -1.0599138 | 5.309139   | 0.00332687 | 0.02036335 |
| ENSMUSG00000025742 | -1.0522504 | 6.84821959 | 0.00333167 | 0.02037561 |
| ENSMUSG00000039234 | 1.10169241 | 3.5556825  | 0.00333242 | 0.02037561 |
| ENSMUSG00000033174 | 1.12434709 | 2.97694901 | 0.00333596 | 0.02038642 |
| ENSMUSG00000019362 | 1.06382704 | 4.88339072 | 0.00333888 | 0.02039341 |
| ENSMUSG00000035161 | -1.0520136 | 6.76863371 | 0.00334872 | 0.02043791 |
| ENSMUSG00000052305 | 1.05018604 | 7.68287324 | 0.00335002 | 0.02043791 |
| ENSMUSG00000022453 | 1.0739158  | 4.58433569 | 0.0033515  | 0.02043791 |
| ENSMUSG00000017747 | 1.10627262 | 3.27528604 | 0.00335583 | 0.02045348 |

|                    |            |            |            |            |
|--------------------|------------|------------|------------|------------|
| ENSMUSG00000037369 | -1.0498385 | 7.39976989 | 0.00335873 | 0.02046032 |
| ENSMUSG00000032915 | 1.05407231 | 6.11900036 | 0.00336535 | 0.02048976 |
| ENSMUSG00000028613 | 1.21919494 | 2.07698118 | 0.00338576 | 0.0206031  |
| ENSMUSG00000061306 | 1.05292498 | 5.85264067 | 0.00342777 | 0.02084772 |
| ENSMUSG00000052572 | 1.43640108 | 0.93400935 | 0.00343543 | 0.02087525 |
| ENSMUSG00000076538 | -1.0577106 | 5.248472   | 0.00343762 | 0.02087525 |
| ENSMUSG00000038838 | 1.07497198 | 4.08531562 | 0.00343774 | 0.02087525 |
| ENSMUSG00000028066 | 1.09559351 | 3.28183724 | 0.00344227 | 0.02088672 |
| ENSMUSG00000039137 | 1.07203341 | 4.45655145 | 0.00344327 | 0.02088672 |
| ENSMUSG00000026070 | 1.07589199 | 4.20331415 | 0.00345459 | 0.02094439 |
| ENSMUSG00000030089 | 1.17993348 | 2.16544051 | 0.00346031 | 0.020968   |
| ENSMUSG00000002804 | 1.19651414 | 1.54129205 | 0.0034742  | 0.02104108 |
| ENSMUSG00000035062 | -1.1252299 | 2.64027262 | 0.0034831  | 0.02108387 |
| ENSMUSG00000066621 | 1.05320269 | 5.58629245 | 0.00351561 | 0.02126945 |
| ENSMUSG00000040860 | 1.25765476 | 1.60978042 | 0.00355123 | 0.02147337 |
| ENSMUSG00000031486 | 1.37533041 | 0.3877817  | 0.00355305 | 0.02147337 |
| ENSMUSG00000029135 | 1.05014811 | 5.92488576 | 0.00355994 | 0.02150369 |
| ENSMUSG00000018669 | 1.0604189  | 4.74787474 | 0.00356659 | 0.02153256 |
| ENSMUSG00000026594 | -1.0408078 | 9.25640529 | 0.00356898 | 0.02153563 |
| ENSMUSG00000020935 | 1.1433142  | 2.28388687 | 0.00357099 | 0.02153646 |
| ENSMUSG00000038213 | 1.05361037 | 5.0818548  | 0.00359979 | 0.02169881 |
| ENSMUSG00000060224 | 1.27178691 | 1.38903219 | 0.00360721 | 0.02173214 |
| ENSMUSG00000026098 | -1.0637365 | 4.47169943 | 0.00361432 | 0.02175401 |
| ENSMUSG00000036908 | 1.03978903 | 8.5264652  | 0.00361463 | 0.02175401 |
| ENSMUSG00000040701 | 1.04443272 | 6.14688175 | 0.00363342 | 0.02185567 |
| ENSMUSG00000026270 | 1.10249701 | 2.96332513 | 0.00363591 | 0.02185917 |
| ENSMUSG00000000782 | 1.04948484 | 5.55524918 | 0.00364396 | 0.0218921  |
| ENSMUSG00000024101 | 1.06331999 | 4.21517349 | 0.0036467  | 0.0218921  |
| ENSMUSG00000038828 | 1.05284562 | 5.01580231 | 0.00364854 | 0.0218921  |
| ENSMUSG00000021356 | -1.0378373 | 10.3494061 | 0.003649   | 0.0218921  |
| ENSMUSG00000003484 | 1.0426729  | 6.40700281 | 0.00365482 | 0.02191556 |
| ENSMUSG00000053113 | 1.05025994 | 5.25356229 | 0.00365738 | 0.02191946 |
| ENSMUSG00000030842 | 1.05632147 | 4.6330922  | 0.003669   | 0.02197768 |
| ENSMUSG00000036966 | 1.05694223 | 4.77370874 | 0.00368412 | 0.02205674 |
| ENSMUSG00000031227 | 1.15795417 | 2.00071896 | 0.00369386 | 0.02210353 |
| ENSMUSG00000000290 | 1.03798951 | 7.78829225 | 0.00370191 | 0.02214018 |
| ENSMUSG00000021573 | 1.19514134 | 2.00941629 | 0.00370595 | 0.02215285 |
| ENSMUSG00000010358 | 1.04581242 | 5.5412726  | 0.00370873 | 0.02215665 |
| ENSMUSG00000058470 | -1.0388633 | 7.16770381 | 0.00371044 | 0.02215665 |
| ENSMUSG00000030365 | -1.0377276 | 7.3288718  | 0.00373551 | 0.02229476 |
| ENSMUSG00000036353 | 1.17882751 | 2.05497037 | 0.00374101 | 0.02231599 |
| ENSMUSG00000024074 | 1.06687561 | 4.04089146 | 0.00375776 | 0.0224043  |
| ENSMUSG00000027708 | -1.0424937 | 5.75345476 | 0.00377957 | 0.02252262 |

|                    |            |            |            |            |
|--------------------|------------|------------|------------|------------|
| ENSMUSG00000024830 | 1.04966727 | 4.79342054 | 0.00379636 | 0.02261098 |
| ENSMUSG00000024869 | 1.06652833 | 3.8749208  | 0.00380089 | 0.0226262  |
| ENSMUSG00000030708 | 1.50568067 | 0.53249433 | 0.00380365 | 0.02263095 |
| ENSMUSG00000039959 | 1.03955402 | 6.08418014 | 0.00382483 | 0.02274514 |
| ENSMUSG00000030774 | 1.06124045 | 4.13692272 | 0.00383042 | 0.0227608  |
| ENSMUSG00000026956 | 1.06102114 | 4.20768953 | 0.00383234 | 0.0227608  |
| ENSMUSG00000018566 | 1.25358255 | 1.61718108 | 0.0038334  | 0.0227608  |
| ENSMUSG00000027978 | 1.09185969 | 3.45463239 | 0.00384062 | 0.02278224 |
| ENSMUSG00000070002 | 1.05943799 | 4.21942883 | 0.00384097 | 0.02278224 |
| ENSMUSG00000076709 | -1.1348065 | 2.15462905 | 0.00384594 | 0.02279993 |
| ENSMUSG00000089788 | -1.0372046 | 6.2315209  | 0.00386449 | 0.02287632 |
| ENSMUSG00000052477 | -1.0410123 | 5.60284622 | 0.00386529 | 0.02287632 |
| ENSMUSG00000027737 | 1.34429408 | 0.94645117 | 0.00386839 | 0.02287632 |
| ENSMUSG00000037876 | -1.0316251 | 9.08793638 | 0.00387041 | 0.02287632 |
| ENSMUSG00000045282 | 1.10274367 | 2.9792409  | 0.00387132 | 0.02287632 |
| ENSMUSG00000004937 | 1.0485866  | 4.66579597 | 0.00387276 | 0.02287632 |
| ENSMUSG00000041130 | 1.04567613 | 5.02295952 | 0.00387466 | 0.02287632 |
| ENSMUSG00000041718 | -1.0627955 | 3.88026894 | 0.00387475 | 0.02287632 |
| ENSMUSG00000028766 | -1.1895372 | 1.67889177 | 0.00390898 | 0.02306661 |
| ENSMUSG00000030156 | -1.0300117 | 9.37855144 | 0.00392096 | 0.02311963 |
| ENSMUSG00000062524 | 1.09401954 | 3.45283605 | 0.00392199 | 0.02311963 |
| ENSMUSG00000010307 | 1.08014858 | 3.21058555 | 0.00393119 | 0.02315671 |
| ENSMUSG00000005881 | 1.04162211 | 5.17031059 | 0.00393231 | 0.02315671 |
| ENSMUSG00000009376 | 1.14449985 | 2.04170707 | 0.00393748 | 0.02317526 |
| ENSMUSG00000024792 | 1.11498809 | 2.53293677 | 0.00394188 | 0.0231893  |
| ENSMUSG00000037525 | 1.1603361  | 2.04930241 | 0.00394772 | 0.02321177 |
| ENSMUSG00000071547 | 1.41736737 | 0.63604667 | 0.00395537 | 0.02324489 |
| ENSMUSG00000057530 | 1.04100017 | 5.18036939 | 0.00397633 | 0.02335612 |
| ENSMUSG00000079003 | 1.04363902 | 4.78385903 | 0.0039892  | 0.02341976 |
| ENSMUSG00000048279 | -1.0314999 | 6.67849466 | 0.00400176 | 0.02348148 |
| ENSMUSG00000054321 | -1.0418229 | 5.04739839 | 0.00400807 | 0.02350654 |
| ENSMUSG00000023904 | 1.07942253 | 3.32846549 | 0.00401131 | 0.02351354 |
| ENSMUSG00000074916 | 1.20100169 | 1.87199198 | 0.00404741 | 0.02371304 |
| ENSMUSG00000001065 | 1.04248362 | 4.66649343 | 0.00405739 | 0.02375941 |
| ENSMUSG00000078349 | -1.0514656 | 4.26646745 | 0.00407309 | 0.02383919 |
| ENSMUSG00000026547 | 1.02830042 | 7.22954258 | 0.00407533 | 0.02384015 |
| ENSMUSG00000084806 | -1.1040962 | 2.7116402  | 0.00407939 | 0.0238518  |
| ENSMUSG00000002103 | 1.04018452 | 5.0943155  | 0.00409124 | 0.02390892 |
| ENSMUSG00000031821 | 1.25228949 | 1.19280628 | 0.00410658 | 0.02398132 |
| ENSMUSG00000000378 | 1.03010531 | 6.2873728  | 0.00410781 | 0.02398132 |
| ENSMUSG00000026994 | 1.10271998 | 3.00393469 | 0.00411881 | 0.02402555 |
| ENSMUSG00000018008 | 1.02691085 | 7.09042487 | 0.00411956 | 0.02402555 |
| ENSMUSG00000028849 | 1.04293643 | 4.72042277 | 0.00412687 | 0.02405599 |

|                    |            |            |            |            |
|--------------------|------------|------------|------------|------------|
| ENSMUSG00000026688 | 1.09155786 | 3.02399479 | 0.00413099 | 0.0240678  |
| ENSMUSG00000007029 | 1.02459044 | 8.02482371 | 0.00414434 | 0.02413332 |
| ENSMUSG00000064427 | -1.2286989 | 1.20084102 | 0.0041489  | 0.02414765 |
| ENSMUSG00000029822 | 1.14515232 | 2.34381888 | 0.00415483 | 0.02416995 |
| ENSMUSG00000057406 | -1.0275712 | 6.53782793 | 0.00416622 | 0.02422393 |
| ENSMUSG00000022558 | 1.03500114 | 5.42550582 | 0.00420817 | 0.02445548 |
| ENSMUSG00000037847 | -1.0698139 | 3.35108219 | 0.00421913 | 0.02450678 |
| ENSMUSG00000091509 | -1.2007203 | 1.31254383 | 0.00424195 | 0.0246269  |
| ENSMUSG00000023132 | 1.06608586 | 3.57843752 | 0.00424594 | 0.02463762 |
| ENSMUSG00000038406 | 1.03500578 | 5.15507698 | 0.00425175 | 0.02465086 |
| ENSMUSG00000030400 | 1.0380742  | 4.59396977 | 0.00425252 | 0.02465086 |
| ENSMUSG00000029101 | 1.08011237 | 3.29372965 | 0.00428181 | 0.02480195 |
| ENSMUSG00000005338 | 1.32630317 | 0.91681367 | 0.0042829  | 0.02480195 |
| ENSMUSG00000038650 | 1.02804263 | 5.61342062 | 0.00430193 | 0.02489965 |
| ENSMUSG00000046447 | 1.19960768 | 1.4349524  | 0.00430543 | 0.02490734 |
| ENSMUSG00000076680 | -1.0429246 | 4.62965314 | 0.00431368 | 0.02494254 |
| ENSMUSG00000028073 | 1.04056906 | 4.46779988 | 0.00432032 | 0.02495696 |
| ENSMUSG00000023051 | 1.04535536 | 4.36609142 | 0.00432052 | 0.02495696 |
| ENSMUSG00000006335 | 1.0769632  | 3.17917605 | 0.00432888 | 0.0249927  |
| ENSMUSG00000003402 | 1.03236512 | 5.01248044 | 0.00434566 | 0.02507699 |
| ENSMUSG00000030214 | 1.01989264 | 7.65539119 | 0.00435332 | 0.0251086  |
| ENSMUSG00000017221 | 1.02564441 | 5.55834517 | 0.00439911 | 0.02535995 |
| ENSMUSG00000022090 | 1.0353845  | 4.74803986 | 0.0044033  | 0.02537138 |
| ENSMUSG00000024835 | 1.01963105 | 6.83124337 | 0.00442933 | 0.02550859 |
| ENSMUSG00000074896 | 1.03629447 | 4.52562314 | 0.00443614 | 0.02553504 |
| ENSMUSG00000028494 | 1.02650983 | 4.725115   | 0.00447139 | 0.02572502 |
| ENSMUSG00000025019 | -1.0211301 | 6.07938391 | 0.00447505 | 0.02573323 |
| ENSMUSG00000020901 | 1.0255172  | 5.48752482 | 0.00449178 | 0.0258165  |
| ENSMUSG00000042349 | 1.02361854 | 5.74186816 | 0.00450295 | 0.02586778 |
| ENSMUSG00000094902 | -1.125137  | 2.26272565 | 0.0045143  | 0.02592    |
| ENSMUSG00000062593 | 1.02554241 | 5.57201063 | 0.00452707 | 0.02598038 |
| ENSMUSG00000024851 | 1.01809533 | 6.43426138 | 0.00453229 | 0.02599737 |
| ENSMUSG00000032745 | -1.0134314 | 8.16519744 | 0.00456794 | 0.02617576 |
| ENSMUSG00000026068 | 1.05050519 | 3.99406992 | 0.00456795 | 0.02617576 |
| ENSMUSG00000024309 | 1.0378394  | 4.02767964 | 0.00457764 | 0.02621824 |
| ENSMUSG00000019738 | 1.13740077 | 1.96944452 | 0.00461009 | 0.02639092 |
| ENSMUSG00000032783 | 1.34833299 | 0.72532337 | 0.00462118 | 0.02644126 |
| ENSMUSG00000038664 | -1.0110747 | 8.76302385 | 0.00463219 | 0.02649108 |
| ENSMUSG00000030031 | -1.0310289 | 4.59369774 | 0.00463963 | 0.02652042 |
| ENSMUSG00000046330 | 1.01072227 | 8.09083553 | 0.0046598  | 0.02662149 |
| ENSMUSG00000041202 | 1.2067525  | 1.42989408 | 0.00466254 | 0.02662149 |
| ENSMUSG00000022570 | 1.04085097 | 3.84718996 | 0.00466426 | 0.02662149 |
| ENSMUSG00000002668 | 1.01391603 | 6.62349229 | 0.00466932 | 0.02663262 |

|                    |            |            |            |            |
|--------------------|------------|------------|------------|------------|
| ENSMUSG00000076514 | -1.0233302 | 5.17670553 | 0.00467232 | 0.02663262 |
| ENSMUSG00000074358 | 1.13532676 | 2.12755163 | 0.00467316 | 0.02663262 |
| ENSMUSG00000020781 | 1.04661933 | 3.58142722 | 0.0046758  | 0.02663444 |
| ENSMUSG00000024073 | -1.0094488 | 9.1407539  | 0.00468621 | 0.02668053 |
| ENSMUSG00000072596 | 1.09374447 | 2.81645199 | 0.00470233 | 0.02675788 |
| ENSMUSG00000038059 | 1.08411713 | 2.82616035 | 0.00470445 | 0.02675788 |
| ENSMUSG00000002319 | 1.02578801 | 4.57078713 | 0.00472219 | 0.02684547 |
| ENSMUSG00000076731 | -1.0332007 | 4.41033341 | 0.00473762 | 0.0269199  |
| ENSMUSG00000024560 | 1.01705747 | 5.48673494 | 0.00474508 | 0.02694894 |
| ENSMUSG00000037938 | 1.11767068 | 2.36486382 | 0.00475154 | 0.02697233 |
| ENSMUSG00000078861 | -1.1640858 | 1.57933041 | 0.00475559 | 0.02698201 |
| ENSMUSG00000071037 | -1.1034819 | 2.41514448 | 0.00477147 | 0.02705873 |
| ENSMUSG00000047284 | 1.01343669 | 6.04690311 | 0.0047926  | 0.0271521  |
| ENSMUSG00000045128 | 1.00775786 | 8.10532908 | 0.00479266 | 0.0271521  |
| ENSMUSG00000003226 | -1.0064577 | 8.89106973 | 0.00481637 | 0.027273   |
| ENSMUSG00000008540 | 1.05197493 | 3.43056955 | 0.00483443 | 0.02736179 |
| ENSMUSG00000022385 | 1.16269475 | 1.82977264 | 0.00483686 | 0.02736204 |
| ENSMUSG00000026269 | 1.01331653 | 5.74910465 | 0.00484822 | 0.02741285 |
| ENSMUSG00000098496 | -1.0431671 | 3.61381255 | 0.00486448 | 0.02749122 |
| ENSMUSG00000022556 | 1.01367799 | 5.39856286 | 0.004867   | 0.02749199 |
| ENSMUSG00000027669 | 1.09087157 | 2.89883451 | 0.00487034 | 0.02749734 |
| ENSMUSG00000036748 | 1.03015175 | 4.3437262  | 0.00488509 | 0.02756706 |
| ENSMUSG00000051497 | 1.07270922 | 3.10327442 | 0.00489971 | 0.02762746 |
| ENSMUSG00000035692 | 1.03615677 | 3.91773167 | 0.0049006  | 0.02762746 |
| ENSMUSG00000039656 | 1.01270177 | 5.50311276 | 0.00490514 | 0.02763953 |
| ENSMUSG00000000693 | 1.23054894 | 1.14121956 | 0.00492149 | 0.02771804 |
| ENSMUSG00000035158 | 1.11962118 | 2.1825298  | 0.00492869 | 0.02772386 |
| ENSMUSG00000068036 | 1.06403281 | 3.34346089 | 0.00492897 | 0.02772386 |
| ENSMUSG00000024772 | 1.00838103 | 6.34765605 | 0.00492976 | 0.02772386 |
| ENSMUSG00000028807 | 1.11930646 | 2.29742238 | 0.00495024 | 0.02782545 |
| ENSMUSG00000015533 | 1.24581347 | 1.20112072 | 0.00495937 | 0.02786314 |
| ENSMUSG00000046269 | 1.26220769 | 1.21015451 | 0.00497066 | 0.02791291 |
| ENSMUSG00000038587 | -1.0200151 | 4.86296339 | 0.00497442 | 0.02791737 |
| ENSMUSG00000068735 | 1.00480874 | 7.03523504 | 0.00497631 | 0.02791737 |
| ENSMUSG00000051839 | -1.0054989 | 7.09887888 | 0.00498448 | 0.02794957 |
| ENSMUSG00000048251 | 1.07731918 | 2.76846961 | 0.00500836 | 0.02806978 |
| ENSMUSG00000047675 | 1.00239708 | 8.08042961 | 0.00501707 | 0.02810486 |
| ENSMUSG00000043592 | 1.04744237 | 3.54673829 | 0.00504552 | 0.02825047 |
| ENSMUSG00000050856 | 1.0255108  | 3.9650167  | 0.00505148 | 0.02825327 |
| ENSMUSG00000029605 | 1.02945265 | 4.0676046  | 0.00505224 | 0.02825327 |
| ENSMUSG00000057789 | 1.01537851 | 4.878418   | 0.00505339 | 0.02825327 |
| ENSMUSG00000004730 | 1.00364834 | 6.94178118 | 0.00506544 | 0.02830685 |
| ENSMUSG00000063663 | -1.0046344 | 6.55716429 | 0.0050682  | 0.02830854 |

|                    |            |            |            |            |
|--------------------|------------|------------|------------|------------|
| ENSMUSG00000047415 | 1.15575176 | 1.58138866 | 0.00509386 | 0.02843806 |
| ENSMUSG00000026942 | 1.00650632 | 5.88801798 | 0.00511223 | 0.02852671 |
| ENSMUSG00000021559 | 1.20524144 | 1.67547703 | 0.00511751 | 0.02854236 |
| ENSMUSG00000031827 | 1.00194485 | 6.85407986 | 0.00512331 | 0.0285507  |
| ENSMUSG00000028047 | 1.15910666 | 1.71295103 | 0.00512397 | 0.0285507  |
| ENSMUSG00000053656 | -1.1279853 | 2.02267238 | 0.00516645 | 0.02877341 |
| ENSMUSG00000058756 | 1.10036659 | 2.36850227 | 0.00517958 | 0.02880559 |
| ENSMUSG00000021611 | 1.10034746 | 2.3804109  | 0.00517971 | 0.02880559 |
| ENSMUSG00000044072 | 1.09449591 | 2.5635184  | 0.00517974 | 0.02880559 |
| ENSMUSG00000022433 | 1.01220818 | 4.88714668 | 0.00521243 | 0.02897332 |
| ENSMUSG00000038181 | 1.02214728 | 4.21586693 | 0.00524258 | 0.02912686 |
| ENSMUSG00000043323 | 1.04134293 | 3.54032344 | 0.00524573 | 0.02913028 |
| ENSMUSG00000000631 | 1.00146246 | 6.12302761 | 0.0052527  | 0.02915492 |
| ENSMUSG00000090015 | -1.0399629 | 3.20820825 | 0.00528491 | 0.02931952 |
| ENSMUSG00000052684 | 0.99522131 | 9.27941075 | 0.0052924  | 0.02934691 |
| ENSMUSG00000041268 | 1.08214495 | 3.03153948 | 0.00530995 | 0.02943001 |
| ENSMUSG00000022797 | -0.9946964 | 8.55371447 | 0.00534219 | 0.02959447 |
| ENSMUSG00000062949 | -0.9981586 | 6.52356796 | 0.00535683 | 0.02966127 |
| ENSMUSG00000036114 | 1.07452387 | 2.67630111 | 0.00536122 | 0.02967126 |
| ENSMUSG00000010047 | 1.27210135 | 1.06497358 | 0.0054025  | 0.02987395 |
| ENSMUSG00000019428 | 0.99852737 | 6.25089819 | 0.00540304 | 0.02987395 |
| ENSMUSG00000064120 | 1.02250933 | 4.05319002 | 0.00541031 | 0.02989979 |
| ENSMUSG00000071176 | 1.11166604 | 2.2294055  | 0.0054239  | 0.02995439 |
| ENSMUSG00000034105 | 1.09563949 | 2.21850506 | 0.00542541 | 0.02995439 |
| ENSMUSG00000029638 | -1.0443347 | 3.11887824 | 0.00543294 | 0.02998156 |
| ENSMUSG00000069755 | -1.2248431 | 1.19244592 | 0.00544471 | 0.0300321  |
| ENSMUSG00000030802 | 1.01644922 | 4.38239525 | 0.00545504 | 0.03007465 |
| ENSMUSG00000005947 | 1.16253674 | 1.92328353 | 0.00545858 | 0.03007975 |
| ENSMUSG00000054708 | 1.1834877  | 1.47182547 | 0.00547138 | 0.03012458 |
| ENSMUSG00000047821 | 1.10973016 | 1.52892351 | 0.00547307 | 0.03012458 |
| ENSMUSG00000031217 | 1.13159887 | 1.60830922 | 0.00547458 | 0.03012458 |
| ENSMUSG00000034006 | 1.01935422 | 4.30433844 | 0.00547754 | 0.0301265  |
| ENSMUSG00000058006 | -0.9908395 | 8.34429996 | 0.00551872 | 0.03033846 |
| ENSMUSG00000032409 | -0.9928398 | 7.01376052 | 0.00553084 | 0.03039051 |
| ENSMUSG00000020689 | 0.99511227 | 6.38680723 | 0.00556091 | 0.03054117 |
| ENSMUSG00000015961 | -0.9926848 | 6.70922358 | 0.00557339 | 0.03058186 |
| ENSMUSG00000029674 | 1.01917168 | 4.01405754 | 0.00557364 | 0.03058186 |
| ENSMUSG00000051212 | -0.9899408 | 8.08524028 | 0.00557759 | 0.03058894 |
| ENSMUSG00000037999 | -0.9903468 | 7.74081153 | 0.00558222 | 0.03059973 |
| ENSMUSG00000086938 | 1.05172168 | 3.08965332 | 0.00558812 | 0.03061747 |
| ENSMUSG00000026596 | -0.9907182 | 7.00842976 | 0.00562178 | 0.03078721 |
| ENSMUSG00000048234 | 1.00652029 | 4.82925436 | 0.00565371 | 0.03094731 |
| ENSMUSG00000059323 | 0.99317658 | 6.03722719 | 0.00566697 | 0.03100514 |

|                    |            |            |            |            |
|--------------------|------------|------------|------------|------------|
| ENSMUSG00000028854 | 0.99986068 | 5.09667131 | 0.00567012 | 0.03100763 |
| ENSMUSG00000000903 | 1.00231649 | 4.8177689  | 0.00570461 | 0.03117057 |
| ENSMUSG00000020010 | 1.14888317 | 2.15337846 | 0.00570534 | 0.03117057 |
| ENSMUSG00000025875 | 1.11183636 | 2.05663542 | 0.00573694 | 0.03132834 |
| ENSMUSG00000071654 | 1.06067441 | 2.64793752 | 0.00575819 | 0.03142945 |
| ENSMUSG00000005672 | 1.03863766 | 3.30976792 | 0.00577158 | 0.03148757 |
| ENSMUSG00000033762 | 1.1486448  | 1.89871095 | 0.0057841  | 0.0315409  |
| ENSMUSG00000029780 | -0.9891057 | 6.50193974 | 0.00579231 | 0.03157068 |
| ENSMUSG00000045665 | 1.01829385 | 3.50029877 | 0.00579869 | 0.03159051 |
| ENSMUSG00000032344 | 1.04235157 | 3.21720596 | 0.00581702 | 0.031671   |
| ENSMUSG00000008763 | -0.9881538 | 6.4880968  | 0.00581898 | 0.031671   |
| ENSMUSG00000024030 | 0.9899927  | 6.01058169 | 0.00583267 | 0.03173052 |
| ENSMUSG00000042345 | 1.14202591 | 1.68975168 | 0.00584943 | 0.03180663 |
| ENSMUSG00000043311 | 1.03667781 | 3.07921847 | 0.00589322 | 0.03202958 |
| ENSMUSG00000001666 | 1.13215038 | 1.51750867 | 0.00589729 | 0.03203657 |
| ENSMUSG00000018509 | 1.28375743 | 0.67922564 | 0.00590671 | 0.03207259 |
| ENSMUSG00000028965 | 1.28287101 | 0.7741474  | 0.00593703 | 0.03220043 |
| ENSMUSG00000044134 | 1.25103928 | 0.77693948 | 0.00593703 | 0.03220043 |
| ENSMUSG00000034928 | 0.98581222 | 6.59767648 | 0.00593866 | 0.03220043 |
| ENSMUSG00000065226 | -1.1706853 | 1.1620694  | 0.00595381 | 0.03226736 |
| ENSMUSG00000020827 | 0.9851702  | 6.33100151 | 0.00600446 | 0.03252649 |
| ENSMUSG00000020346 | 0.98357001 | 6.68013108 | 0.00604016 | 0.03270451 |
| ENSMUSG00000018334 | 1.0117893  | 3.78486108 | 0.00604469 | 0.03271361 |
| ENSMUSG00000038658 | -0.9832109 | 6.4769809  | 0.00607515 | 0.03286299 |
| ENSMUSG00000034297 | -0.9782491 | 9.68470982 | 0.0060949  | 0.03295433 |
| ENSMUSG00000027163 | 1.06827122 | 2.42933709 | 0.00609785 | 0.03295477 |
| ENSMUSG00000002345 | 1.01928545 | 3.68946079 | 0.00611432 | 0.03302825 |
| ENSMUSG00000057706 | 1.07663642 | 2.39659796 | 0.00611793 | 0.0330322  |
| ENSMUSG00000020287 | 1.00315414 | 4.47023833 | 0.00613554 | 0.03311177 |
| ENSMUSG00000018363 | -0.9814351 | 6.5363912  | 0.00615308 | 0.03319085 |
| ENSMUSG00000028341 | -1.0249356 | 3.30098569 | 0.00617188 | 0.0332766  |
| ENSMUSG00000101389 | 1.02511414 | 3.2730207  | 0.00620328 | 0.03343022 |
| ENSMUSG00000075600 | 1.08847732 | 2.20016772 | 0.00625594 | 0.03369824 |
| ENSMUSG00000036526 | 0.97742288 | 7.22216131 | 0.00626157 | 0.03371275 |
| ENSMUSG00000060279 | 0.98741937 | 5.2250052  | 0.00627429 | 0.03376545 |
| ENSMUSG00000039148 | 0.97995511 | 6.21152989 | 0.00628006 | 0.03378068 |
| ENSMUSG00000085786 | -0.9860926 | 5.2281368  | 0.0063012  | 0.03386655 |
| ENSMUSG00000078440 | 1.0540299  | 2.48462326 | 0.00630192 | 0.03386655 |
| ENSMUSG00000036916 | -0.9816142 | 5.75227685 | 0.00631978 | 0.03394667 |
| ENSMUSG00000034021 | -0.9765309 | 7.11239851 | 0.0063347  | 0.0340109  |
| ENSMUSG00000032295 | 0.98483475 | 5.44977423 | 0.00634175 | 0.0340289  |
| ENSMUSG00000044229 | 0.9996122  | 4.15584358 | 0.00634434 | 0.0340289  |
| ENSMUSG00000039477 | 0.99743414 | 4.07035456 | 0.00634693 | 0.0340289  |

|                    |            |            |            |            |
|--------------------|------------|------------|------------|------------|
| ENSMUSG00000027423 | -0.9732018 | 9.6537755  | 0.00635857 | 0.03407542 |
| ENSMUSG00000036073 | 1.00604218 | 3.84445839 | 0.00638567 | 0.03419683 |
| ENSMUSG00000037493 | 1.14652011 | 1.43925927 | 0.00638718 | 0.03419683 |
| ENSMUSG00000036381 | 1.1330602  | 1.9708854  | 0.00642169 | 0.03436561 |
| ENSMUSG00000078435 | -1.0252668 | 3.00312328 | 0.00642901 | 0.03437737 |
| ENSMUSG00000025575 | 0.97924065 | 5.76180445 | 0.00642987 | 0.03437737 |
| ENSMUSG00000004383 | 1.19908046 | 1.31687576 | 0.00645609 | 0.03450152 |
| ENSMUSG00000056938 | 1.02074094 | 3.15301613 | 0.00646276 | 0.03452112 |
| ENSMUSG00000029554 | 1.00690426 | 3.75551963 | 0.00647801 | 0.03458647 |
| ENSMUSG00000018821 | 1.17640634 | 1.25209592 | 0.00649156 | 0.03464275 |
| ENSMUSG00000041362 | 1.03712579 | 2.93696988 | 0.00651264 | 0.03473909 |
| ENSMUSG00000033278 | 1.03815662 | 3.09850042 | 0.00652115 | 0.03476836 |
| ENSMUSG00000026972 | 0.97801056 | 5.76047199 | 0.00653302 | 0.03481549 |
| ENSMUSG00000031662 | 0.9807268  | 4.96293124 | 0.0065614  | 0.03493154 |
| ENSMUSG00000020063 | -0.9728282 | 6.86377534 | 0.00656256 | 0.03493154 |
| ENSMUSG00000046718 | 0.98739729 | 4.5955224  | 0.00656391 | 0.03493154 |
| ENSMUSG00000070424 | 1.19962778 | 1.07337907 | 0.00657461 | 0.03497232 |
| ENSMUSG00000092416 | -0.9848572 | 4.85035855 | 0.00658983 | 0.03503703 |
| ENSMUSG00000038150 | 0.98995909 | 4.5694089  | 0.00659311 | 0.0350383  |
| ENSMUSG00000066150 | -0.9807287 | 5.15520403 | 0.00660596 | 0.03509034 |
| ENSMUSG00000025804 | 0.98925092 | 4.87846311 | 0.00660976 | 0.03509431 |
| ENSMUSG00000043572 | 1.07938653 | 2.1247419  | 0.00663105 | 0.0351911  |
| ENSMUSG00000042363 | 1.07253152 | 2.60001066 | 0.00666178 | 0.03530347 |
| ENSMUSG00000023938 | 1.03574317 | 2.79888395 | 0.00666776 | 0.03530347 |
| ENSMUSG00000005371 | -0.9690875 | 7.78617592 | 0.00666906 | 0.03530347 |
| ENSMUSG00000061578 | 1.32401708 | 0.81403492 | 0.00666912 | 0.03530347 |
| ENSMUSG00000058833 | 1.24323292 | 0.83561483 | 0.00666912 | 0.03530347 |
| ENSMUSG00000059810 | 0.98230671 | 5.02461025 | 0.00667065 | 0.03530347 |
| ENSMUSG00000031016 | -1.0629775 | 2.3356719  | 0.00668226 | 0.03534863 |
| ENSMUSG00000033943 | -0.9672012 | 8.73882646 | 0.00671205 | 0.03548988 |
| ENSMUSG00000030159 | 1.08004007 | 2.29466639 | 0.00675507 | 0.03569572 |
| ENSMUSG00000050812 | -0.9677146 | 7.61311346 | 0.00675719 | 0.03569572 |
| ENSMUSG00000071072 | -0.9673253 | 7.79588565 | 0.00678193 | 0.03580997 |
| ENSMUSG00000032180 | 1.09046398 | 1.96586607 | 0.00679653 | 0.03587058 |
| ENSMUSG00000042284 | 1.11665093 | 1.94720257 | 0.00681184 | 0.03593489 |
| ENSMUSG00000034987 | 1.02794404 | 3.10417935 | 0.00685076 | 0.03612364 |
| ENSMUSG00000017485 | -0.9642019 | 8.94997275 | 0.00687521 | 0.03623593 |
| ENSMUSG00000028973 | 1.01922424 | 3.27471628 | 0.0069457  | 0.03659064 |
| ENSMUSG00000057335 | -0.9653242 | 6.96638361 | 0.00696311 | 0.03666556 |
| ENSMUSG00000061740 | 1.02701442 | 2.69863855 | 0.00701644 | 0.03692946 |
| ENSMUSG00000042419 | 1.16306302 | 1.31262704 | 0.00702054 | 0.03693416 |
| ENSMUSG00000032562 | 0.9616152  | 8.52458074 | 0.00703328 | 0.03698425 |
| ENSMUSG00000040407 | -0.962872  | 7.47726546 | 0.00703795 | 0.03699189 |



|                    |            |            |            |            |
|--------------------|------------|------------|------------|------------|
| ENSMUSG00000041440 | -1.0198906 | 3.07623685 | 0.00704794 | 0.03702744 |
| ENSMUSG00000030816 | 0.96613814 | 6.12550349 | 0.00705796 | 0.03706314 |
| ENSMUSG00000079555 | -0.9712298 | 5.3919756  | 0.00706465 | 0.03708132 |
| ENSMUSG00000052151 | 1.10155046 | 1.7206381  | 0.00707675 | 0.03712788 |
| ENSMUSG00000053574 | -1.1409507 | 1.19396916 | 0.0070848  | 0.03715074 |
| ENSMUSG00000040565 | -0.9616998 | 7.7533457  | 0.00708757 | 0.03715074 |
| ENSMUSG00000003283 | 0.96211377 | 7.27742158 | 0.0071011  | 0.03720472 |
| ENSMUSG00000048442 | 1.20990019 | 1.21323612 | 0.00710691 | 0.03721821 |
| ENSMUSG00000043991 | -0.9644193 | 6.31307397 | 0.00712518 | 0.03729245 |
| ENSMUSG00000038880 | 1.00069692 | 3.44911781 | 0.00712758 | 0.03729245 |
| ENSMUSG00000020605 | 0.99652601 | 3.60172791 | 0.00715065 | 0.03739616 |
| ENSMUSG00000035385 | 1.20270427 | 1.15334152 | 0.00717529 | 0.03750792 |
| ENSMUSG00000053329 | 0.98703379 | 3.86517912 | 0.00718384 | 0.03753554 |
| ENSMUSG00000039754 | 1.02139751 | 2.73535335 | 0.00719034 | 0.03755247 |
| ENSMUSG00000038244 | 1.22604171 | 1.12478841 | 0.00719875 | 0.03757929 |
| ENSMUSG00000067071 | 0.99108855 | 3.71027446 | 0.00721722 | 0.03765861 |
| ENSMUSG00000044749 | 1.03509157 | 3.09077743 | 0.00722212 | 0.03766709 |
| ENSMUSG00000028053 | -0.9581601 | 8.72242861 | 0.00723065 | 0.0376945  |
| ENSMUSG00000052605 | 1.18026826 | 1.07402627 | 0.00724662 | 0.03776062 |
| ENSMUSG00000029029 | 0.98867441 | 3.45724948 | 0.00725663 | 0.03779562 |
| ENSMUSG00000029166 | 1.06922025 | 2.34566173 | 0.00727331 | 0.03786534 |
| ENSMUSG00000062906 | 0.96194238 | 6.10197009 | 0.0072848  | 0.037908   |
| ENSMUSG00000044468 | -0.9585379 | 7.33853565 | 0.00730916 | 0.03801756 |
| ENSMUSG00000073982 | 0.96080199 | 6.13097185 | 0.00734756 | 0.03820002 |
| ENSMUSG00000030036 | 0.9688339  | 5.07811646 | 0.00735285 | 0.03821024 |
| ENSMUSG00000023243 | -0.9682069 | 5.36195132 | 0.00736725 | 0.03826775 |
| ENSMUSG00000024446 | 1.02546172 | 2.88415437 | 0.00738405 | 0.03831663 |
| ENSMUSG00000026856 | 0.99579619 | 3.4653894  | 0.00738625 | 0.03831663 |
| ENSMUSG00000048612 | -0.9577518 | 7.15998771 | 0.00738666 | 0.03831663 |
| ENSMUSG00000059811 | -0.9618159 | 5.95679701 | 0.00740783 | 0.03840913 |
| ENSMUSG00000087179 | 1.19397716 | 0.87134406 | 0.00742249 | 0.03846776 |
| ENSMUSG00000033826 | -0.9659564 | 4.99618805 | 0.00748252 | 0.03876138 |
| ENSMUSG00000024925 | 1.09613162 | 1.75435921 | 0.00749396 | 0.03880317 |
| ENSMUSG00000026049 | -0.9790023 | 4.25400675 | 0.00750961 | 0.03885208 |
| ENSMUSG00000025979 | -0.9594613 | 6.05879879 | 0.0075171  | 0.03885208 |
| ENSMUSG00000038070 | 1.01828224 | 3.12949761 | 0.00751773 | 0.03885208 |
| ENSMUSG00000078903 | -0.9909718 | 3.3828121  | 0.00751972 | 0.03885208 |
| ENSMUSG00000031922 | -0.9573666 | 6.52916135 | 0.0075203  | 0.03885208 |
| ENSMUSG00000036120 | 0.9729598  | 4.29358428 | 0.00752904 | 0.03887977 |
| ENSMUSG00000038538 | -0.9544539 | 7.55087292 | 0.00753398 | 0.03888777 |
| ENSMUSG00000030660 | -0.9544936 | 6.82837437 | 0.00762786 | 0.03932779 |
| ENSMUSG00000034610 | -0.9516487 | 8.7966047  | 0.00762871 | 0.03932779 |
| ENSMUSG00000031862 | 0.95666574 | 6.18939769 | 0.00762949 | 0.03932779 |

|                    |            |            |            |            |
|--------------------|------------|------------|------------|------------|
| ENSMUSG00000028961 | 0.95809921 | 5.89539018 | 0.00763958 | 0.03936217 |
| ENSMUSG00000006057 | 0.98115256 | 3.7386228  | 0.00765422 | 0.03941992 |
| ENSMUSG00000036644 | 0.96072039 | 5.57181313 | 0.00767292 | 0.03949853 |
| ENSMUSG00000056917 | 0.95128156 | 7.91413825 | 0.0076863  | 0.03954969 |
| ENSMUSG00000039787 | 1.13994314 | 1.61119947 | 0.00771631 | 0.03967757 |
| ENSMUSG00000029063 | 0.95253747 | 7.0672017  | 0.00772008 | 0.03967757 |
| ENSMUSG00000042608 | 0.96011314 | 5.27939396 | 0.00772151 | 0.03967757 |
| ENSMUSG00000026519 | 0.95644527 | 5.89802517 | 0.0077561  | 0.0398132  |
| ENSMUSG00000038618 | 1.07047868 | 2.25726806 | 0.00775728 | 0.0398132  |
| ENSMUSG00000057098 | -0.9501371 | 8.1824588  | 0.00775829 | 0.0398132  |
| ENSMUSG00000040711 | 1.18952921 | 1.20584023 | 0.00776569 | 0.03983339 |
| ENSMUSG00000035171 | -0.9534616 | 6.45913778 | 0.00777903 | 0.03987624 |
| ENSMUSG00000024054 | -0.9491856 | 8.87940004 | 0.00778098 | 0.03987624 |
| ENSMUSG00000050310 | -0.9505721 | 7.42932214 | 0.00779045 | 0.03990694 |
| ENSMUSG00000023905 | 1.03866984 | 2.53957923 | 0.00780305 | 0.03995123 |
| ENSMUSG00000013663 | -0.9489678 | 8.66597711 | 0.00780604 | 0.03995123 |
| ENSMUSG00000059834 | -0.9619635 | 5.05796763 | 0.00781179 | 0.03996287 |
| ENSMUSG00000039178 | -1.1072281 | 1.49723367 | 0.00784264 | 0.04010283 |
| ENSMUSG00000024180 | 0.95971571 | 5.13243512 | 0.00784762 | 0.04011047 |
| ENSMUSG00000030745 | 0.94943226 | 7.79247199 | 0.0078528  | 0.0401191  |
| ENSMUSG00000024570 | 0.98019329 | 3.75605493 | 0.00786571 | 0.04016718 |
| ENSMUSG00000073062 | -0.9945288 | 3.21068979 | 0.00787644 | 0.04020411 |
| ENSMUSG00000027285 | -0.9573649 | 5.37327165 | 0.00789372 | 0.04027442 |
| ENSMUSG00000039427 | 0.97157092 | 4.20296905 | 0.00790189 | 0.04028698 |
| ENSMUSG00000025510 | 0.99679462 | 3.04402102 | 0.00790319 | 0.04028698 |
| ENSMUSG00000024190 | 0.94645046 | 9.98426394 | 0.00792544 | 0.04038251 |
| ENSMUSG00000000673 | 0.95498748 | 5.69152362 | 0.00793062 | 0.04039099 |
| ENSMUSG00000034757 | 0.96296637 | 4.79340576 | 0.00793442 | 0.04039247 |
| ENSMUSG00000032177 | 0.96425709 | 4.70413895 | 0.00795539 | 0.04048126 |
| ENSMUSG00000017721 | 0.95464292 | 5.46451589 | 0.00800972 | 0.04073972 |
| ENSMUSG00000002307 | 0.95271615 | 5.65128392 | 0.00805977 | 0.04097616 |
| ENSMUSG00000025793 | 0.95523129 | 4.90830927 | 0.00807497 | 0.04103526 |
| ENSMUSG00000039497 | 0.96474462 | 4.62623105 | 0.00808069 | 0.0410462  |
| ENSMUSG00000063904 | 0.9520213  | 5.46178115 | 0.00809013 | 0.04107599 |
| ENSMUSG00000049305 | 0.96350393 | 4.37387283 | 0.00810287 | 0.04112253 |
| ENSMUSG00000036106 | 0.95985676 | 4.69466852 | 0.00811376 | 0.04115052 |
| ENSMUSG00000018861 | 1.01915593 | 2.75864078 | 0.00811803 | 0.04115052 |
| ENSMUSG00000033054 | -0.9509063 | 5.83494729 | 0.00811913 | 0.04115052 |
| ENSMUSG00000003423 | 0.98465598 | 3.52720231 | 0.00813877 | 0.0412319  |
| ENSMUSG00000039158 | 0.94260047 | 8.67038608 | 0.00820469 | 0.04153442 |
| ENSMUSG00000036241 | -0.9458144 | 6.82511809 | 0.00820571 | 0.04153442 |
| ENSMUSG00000030167 | 1.11478316 | 1.61352023 | 0.00822511 | 0.04161427 |
| ENSMUSG00000039007 | 1.00612925 | 3.07708039 | 0.00823085 | 0.04162498 |

|                    |            |            |            |            |
|--------------------|------------|------------|------------|------------|
| ENSMUSG00000049643 | 0.97013506 | 3.90137057 | 0.0082387  | 0.04164636 |
| ENSMUSG00000021282 | -0.941592  | 9.3272689  | 0.0082616  | 0.04174378 |
| ENSMUSG00000054737 | -0.9502714 | 5.47572153 | 0.00828366 | 0.04183687 |
| ENSMUSG00000002983 | 0.94972971 | 5.59096111 | 0.00828991 | 0.04185005 |
| ENSMUSG00000000901 | 1.1854347  | 1.28593684 | 0.00829986 | 0.04188187 |
| ENSMUSG00000032513 | 1.00743928 | 2.96445215 | 0.00830539 | 0.04189137 |
| ENSMUSG00000096490 | -0.954948  | 5.03983446 | 0.00833235 | 0.04200894 |
| ENSMUSG00000095416 | -1.0341576 | 2.4214201  | 0.00833674 | 0.04201262 |
| ENSMUSG00000034266 | 1.00951924 | 2.76092184 | 0.0083612  | 0.04211741 |
| ENSMUSG00000074794 | -0.9409751 | 8.05812348 | 0.00837163 | 0.0421515  |
| ENSMUSG00000015597 | -0.9395456 | 9.06168481 | 0.00840734 | 0.04231278 |
| ENSMUSG00000079065 | -0.9529962 | 4.85547482 | 0.00844306 | 0.04247394 |
| ENSMUSG00000030541 | 0.96671803 | 4.0920159  | 0.00848939 | 0.04268832 |
| ENSMUSG00000053644 | 0.99338311 | 3.19782826 | 0.00850051 | 0.04272554 |
| ENSMUSG00000021678 | 1.00922071 | 2.60754798 | 0.00851319 | 0.04277059 |
| ENSMUSG00000051314 | 0.96821393 | 3.78587139 | 0.00855681 | 0.04297096 |
| ENSMUSG00000058301 | 0.94198645 | 6.22813312 | 0.00856676 | 0.04300215 |
| ENSMUSG00000014905 | -0.9393547 | 7.19682603 | 0.00858517 | 0.04307574 |
| ENSMUSG00000032688 | -0.9364924 | 9.2566247  | 0.00861613 | 0.04321222 |
| ENSMUSG00000092500 | 1.10794304 | 1.68416792 | 0.00862139 | 0.04321973 |
| ENSMUSG00000014294 | 0.97273473 | 3.57188206 | 0.0086258  | 0.04322298 |
| ENSMUSG00000031840 | 1.01633062 | 2.44804145 | 0.00864423 | 0.04329646 |
| ENSMUSG00000035936 | 1.15127701 | 1.40618287 | 0.00870134 | 0.04356352 |
| ENSMUSG00000030203 | -0.9395256 | 6.50324516 | 0.00872369 | 0.04365641 |
| ENSMUSG00000020021 | -0.9430941 | 5.54105228 | 0.00879093 | 0.04397377 |
| ENSMUSG00000092528 | 1.24735701 | 1.04809824 | 0.00880092 | 0.04400459 |
| ENSMUSG00000039753 | -0.9358846 | 7.29699202 | 0.00880476 | 0.04400465 |
| ENSMUSG00000025790 | 1.04705534 | 2.13614269 | 0.00881493 | 0.04403632 |
| ENSMUSG00000035958 | -0.9425636 | 5.49477229 | 0.00883402 | 0.04410845 |
| ENSMUSG00000021597 | -0.9477928 | 5.02239532 | 0.00883704 | 0.04410845 |
| ENSMUSG00000033964 | -0.9412128 | 5.68887762 | 0.00884507 | 0.04412937 |
| ENSMUSG00000095488 | -0.9479639 | 4.84951371 | 0.0088512  | 0.0441408  |
| ENSMUSG00000041995 | -0.9929947 | 2.90126514 | 0.00893777 | 0.0445532  |
| ENSMUSG00000025377 | 0.95812167 | 3.90003577 | 0.00897754 | 0.04473203 |
| ENSMUSG00000025980 | -0.9304871 | 9.63633818 | 0.00903481 | 0.04499792 |
| ENSMUSG00000075232 | -0.9373931 | 5.71173765 | 0.00911566 | 0.0453809  |
| ENSMUSG00000056749 | 0.9441865  | 4.99387456 | 0.00912593 | 0.04541235 |
| ENSMUSG00000024298 | -0.9312912 | 7.26648179 | 0.00913826 | 0.04545404 |
| ENSMUSG00000030733 | 0.93493813 | 5.9061018  | 0.00916694 | 0.04557696 |
| ENSMUSG00000031097 | 1.15144979 | 0.88632255 | 0.00917283 | 0.04558654 |
| ENSMUSG00000093896 | -0.9773996 | 3.2306315  | 0.00917713 | 0.04558819 |
| ENSMUSG00000023118 | 0.93227829 | 6.46509564 | 0.00920487 | 0.04570628 |
| ENSMUSG00000078919 | -0.9433494 | 4.78172752 | 0.00921992 | 0.0457612  |

|                    |            |            |            |            |
|--------------------|------------|------------|------------|------------|
| ENSMUSG00000022141 | -0.9277614 | 8.82513695 | 0.00926057 | 0.04593113 |
| ENSMUSG00000062931 | -1.0081172 | 2.5412972  | 0.00926215 | 0.04593113 |
| ENSMUSG00000026568 | -0.9503183 | 4.25121513 | 0.00929853 | 0.04609166 |
| ENSMUSG00000021477 | 0.9388678  | 5.25818583 | 0.00931852 | 0.04617088 |
| ENSMUSG00000029624 | 0.94920404 | 4.26986825 | 0.0093625  | 0.0463688  |
| ENSMUSG00000097207 | -1.1922911 | 0.73456334 | 0.00938319 | 0.04643121 |
| ENSMUSG00000032714 | 1.18458295 | 0.80165749 | 0.00938319 | 0.04643121 |
| ENSMUSG00000018167 | 0.93761381 | 4.85272559 | 0.00939515 | 0.04647043 |
| ENSMUSG00000035448 | 0.93949146 | 5.01833632 | 0.00940689 | 0.04650848 |
| ENSMUSG00000068457 | -0.9417755 | 5.03014515 | 0.00942533 | 0.04657959 |
| ENSMUSG00000010609 | 0.93770955 | 5.12069558 | 0.00943068 | 0.04658604 |
| ENSMUSG00000020085 | 1.09319556 | 1.76608412 | 0.00946583 | 0.04673957 |
| ENSMUSG00000043432 | 0.96603001 | 3.51401142 | 0.00947861 | 0.04678257 |
| ENSMUSG00000020806 | 0.93746273 | 5.025721   | 0.00950237 | 0.04686258 |
| ENSMUSG00000036529 | 0.92810338 | 6.67753593 | 0.00950297 | 0.04686258 |
| ENSMUSG00000017670 | 0.9316336  | 5.76857199 | 0.00952085 | 0.04693062 |
| ENSMUSG00000028454 | 0.9389742  | 4.89021235 | 0.00959056 | 0.04725394 |
| ENSMUSG00000076555 | -0.9517235 | 3.96212546 | 0.00960471 | 0.04730338 |
| ENSMUSG00000032175 | 0.92765798 | 6.27056466 | 0.00962568 | 0.04738639 |
| ENSMUSG00000020716 | -0.9275555 | 6.15542021 | 0.00964122 | 0.04744254 |
| ENSMUSG00000016344 | 0.9344476  | 4.9997288  | 0.00967021 | 0.04756484 |
| ENSMUSG00000056429 | -0.9221609 | 8.97755133 | 0.00967997 | 0.04759251 |
| ENSMUSG00000002910 | 0.94558277 | 4.21376306 | 0.00968906 | 0.04761684 |
| ENSMUSG00000021112 | -0.931966  | 5.290116   | 0.00976035 | 0.04794666 |
| ENSMUSG00000025001 | -0.9348592 | 4.95326489 | 0.00978363 | 0.04804051 |
| ENSMUSG00000030147 | 1.10367462 | 1.50060809 | 0.00978992 | 0.04805084 |
| ENSMUSG00000037816 | 0.97586249 | 3.33908308 | 0.00980005 | 0.04807257 |
| ENSMUSG00000022175 | 0.92334772 | 6.84171165 | 0.00980271 | 0.04807257 |
| ENSMUSG00000028743 | 0.98365691 | 2.50343198 | 0.00982547 | 0.04816368 |
| ENSMUSG00000022265 | 0.93531931 | 4.89607567 | 0.00983963 | 0.04821252 |
| ENSMUSG00000035954 | 0.98505489 | 3.17451676 | 0.00984909 | 0.0482383  |
| ENSMUSG00000060149 | -0.9417295 | 4.25788743 | 0.0099102  | 0.04851695 |
| ENSMUSG00000028957 | -0.9549396 | 3.3926878  | 0.00992226 | 0.04854247 |
| ENSMUSG00000000282 | 0.93142076 | 5.06846449 | 0.00992386 | 0.04854247 |
| ENSMUSG00000026923 | 0.94193942 | 4.44833585 | 0.01001959 | 0.04897896 |
| ENSMUSG00000041481 | 0.91873238 | 7.85887788 | 0.01002162 | 0.04897896 |
| ENSMUSG00000039968 | -0.9201661 | 7.03742434 | 0.01003595 | 0.04902816 |
| ENSMUSG00000031586 | 0.96473458 | 3.32097866 | 0.01008337 | 0.0492389  |
| ENSMUSG00000022119 | -0.91879   | 7.21146665 | 0.01010422 | 0.04931973 |
| ENSMUSG00000020580 | -0.9176148 | 7.69864265 | 0.01013655 | 0.04945654 |
| ENSMUSG00000021288 | 0.92553882 | 5.41538664 | 0.0101521  | 0.04951143 |
| ENSMUSG00000026646 | -1.0019587 | 2.56313161 | 0.01019952 | 0.04972159 |
| ENSMUSG00000022443 | 0.91467024 | 9.25086917 | 0.01026635 | 0.05002615 |

|                    |            |            |            |            |
|--------------------|------------|------------|------------|------------|
| ENSMUSG00000036295 | 1.22123411 | 1.13210019 | 0.01029948 | 0.05015112 |
| ENSMUSG00000034403 | 0.92185918 | 5.33237296 | 0.01030805 | 0.05015112 |
| ENSMUSG00000028655 | 1.14569487 | 0.85339154 | 0.01030869 | 0.05015112 |
| ENSMUSG00000061311 | -1.1177908 | 1.32709285 | 0.01031123 | 0.05015112 |
| ENSMUSG00000040479 | 0.91649916 | 6.95361279 | 0.01031631 | 0.05015112 |
| ENSMUSG00000037253 | -0.9186324 | 6.37597597 | 0.0103211  | 0.05015112 |
| ENSMUSG00000040699 | 0.91507675 | 7.80994673 | 0.01032254 | 0.05015112 |
| ENSMUSG00000019054 | 0.92362805 | 5.20394799 | 0.01036257 | 0.05030423 |
| ENSMUSG00000058569 | 0.92141547 | 5.57756415 | 0.0103628  | 0.05030423 |
| ENSMUSG00000033033 | 0.92901474 | 4.85448662 | 0.01039671 | 0.05044753 |
| ENSMUSG00000053063 | 0.92156175 | 5.84834011 | 0.01045617 | 0.05071463 |
| ENSMUSG00000038894 | 0.93217261 | 4.45699604 | 0.01047165 | 0.05076827 |
| ENSMUSG00000031196 | -1.1211264 | 1.02606825 | 0.01048499 | 0.05079328 |
| ENSMUSG00000032867 | 0.92894182 | 4.56827503 | 0.01048853 | 0.05079328 |
| ENSMUSG00000034792 | 0.96070865 | 2.98297582 | 0.01049203 | 0.05079328 |
| ENSMUSG00000022533 | -0.9136952 | 7.36173439 | 0.01049448 | 0.05079328 |
| ENSMUSG00000055184 | -1.1225448 | 0.74417514 | 0.0105108  | 0.05085085 |
| ENSMUSG00000048865 | -0.9544067 | 3.34132196 | 0.01056488 | 0.05109098 |
| ENSMUSG00000031639 | -0.9258756 | 4.75187908 | 0.01057661 | 0.0511262  |
| ENSMUSG00000092035 | 1.0465222  | 1.8995302  | 0.01060487 | 0.05124125 |
| ENSMUSG00000050232 | 1.04124947 | 1.78496892 | 0.01061575 | 0.0512723  |
| ENSMUSG00000020776 | 0.93014382 | 4.42067892 | 0.0106502  | 0.05141709 |
| ENSMUSG00000094749 | -0.9260434 | 4.80638763 | 0.01070096 | 0.05164044 |
| ENSMUSG00000025626 | -0.9152107 | 6.0574984  | 0.0107205  | 0.05171303 |
| ENSMUSG00000025862 | -0.9092713 | 8.63994159 | 0.01074833 | 0.05182554 |
| ENSMUSG00000017400 | 0.92435565 | 4.81291847 | 0.0107638  | 0.05186862 |
| ENSMUSG00000038375 | -0.9101291 | 7.59979339 | 0.01076629 | 0.05186862 |
| ENSMUSG00000031246 | -0.9120999 | 6.71573776 | 0.01077475 | 0.05188761 |
| ENSMUSG00000024392 | 0.91264173 | 6.48018391 | 0.01081086 | 0.05203972 |
| ENSMUSG00000042613 | 0.90996753 | 7.24243881 | 0.01084179 | 0.05216674 |
| ENSMUSG00000056501 | 0.95047381 | 3.46053942 | 0.01085152 | 0.05218208 |
| ENSMUSG00000045087 | 1.10397134 | 1.22250279 | 0.01085405 | 0.05218208 |
| ENSMUSG00000028599 | 0.91014777 | 6.76965276 | 0.01090515 | 0.05240581 |
| ENSMUSG00000095981 | -0.936782  | 4.18878524 | 0.01094846 | 0.05259197 |
| ENSMUSG00000050914 | -0.9785207 | 2.69297944 | 0.01095777 | 0.05259806 |
| ENSMUSG00000041528 | 0.90906255 | 7.06373577 | 0.01096191 | 0.05259806 |
| ENSMUSG00000042770 | 0.93845166 | 3.89315992 | 0.01096346 | 0.05259806 |
| ENSMUSG00000040276 | 0.93297244 | 4.02461815 | 0.01097514 | 0.05263214 |
| ENSMUSG00000042726 | 0.91057199 | 6.47993421 | 0.01099332 | 0.05269733 |
| ENSMUSG00000034022 | 0.90964904 | 6.47777574 | 0.01101662 | 0.05278703 |
| ENSMUSG00000030201 | -0.908987  | 6.56769497 | 0.01104652 | 0.05289302 |
| ENSMUSG00000026712 | 0.90818137 | 7.03274749 | 0.01105487 | 0.05289302 |
| ENSMUSG00000054676 | 0.91640969 | 5.20473494 | 0.01105543 | 0.05289302 |

|                    |            |            |            |            |
|--------------------|------------|------------|------------|------------|
| ENSMUSG00000031093 | -0.9055498 | 8.79004715 | 0.01105715 | 0.05289302 |
| ENSMUSG00000026643 | -0.9114063 | 6.0018364  | 0.01108634 | 0.0530106  |
| ENSMUSG00000003549 | 0.97557639 | 2.9127377  | 0.01111965 | 0.05314774 |
| ENSMUSG00000021185 | 0.91516287 | 5.15552516 | 0.01114829 | 0.05325315 |
| ENSMUSG00000031504 | 0.9905511  | 2.45958707 | 0.01115096 | 0.05325315 |
| ENSMUSG00000049878 | -0.9059331 | 7.22918964 | 0.01119054 | 0.05341994 |
| ENSMUSG00000042105 | -0.9060007 | 7.15925284 | 0.01120322 | 0.05345827 |
| ENSMUSG00000020921 | 1.05614368 | 1.65498997 | 0.01125285 | 0.05363777 |
| ENSMUSG00000022040 | 1.03061494 | 1.64089593 | 0.01125285 | 0.05363777 |
| ENSMUSG00000040997 | 0.92765336 | 4.38884928 | 0.01125483 | 0.05363777 |
| ENSMUSG00000079470 | -0.9147703 | 5.072389   | 0.0112637  | 0.05365777 |
| ENSMUSG00000020399 | 0.93241073 | 3.83750739 | 0.01128062 | 0.05371612 |
| ENSMUSG00000039660 | 0.93632895 | 3.45440977 | 0.0113126  | 0.05382745 |
| ENSMUSG00000041000 | 1.11914376 | 1.4783805  | 0.01131337 | 0.05382745 |
| ENSMUSG00000030142 | 0.92228791 | 4.74387405 | 0.01131805 | 0.05382745 |
| ENSMUSG00000027985 | 0.93499759 | 3.7722288  | 0.01134363 | 0.05391135 |
| ENSMUSG00000025372 | 0.9702642  | 2.57409202 | 0.01134507 | 0.05391135 |
| ENSMUSG00000035754 | 0.92553112 | 4.03031245 | 0.01136186 | 0.05396882 |
| ENSMUSG00000045519 | -0.9409135 | 3.46642615 | 0.01138823 | 0.05405149 |
| ENSMUSG00000002871 | 0.92183381 | 4.42308771 | 0.01138867 | 0.05405149 |
| ENSMUSG00000071103 | -0.9242654 | 4.17589811 | 0.01139743 | 0.05407075 |
| ENSMUSG00000094483 | -0.9013779 | 8.43104215 | 0.01145464 | 0.05428562 |
| ENSMUSG00000028799 | 0.92427336 | 4.27716769 | 0.01145975 | 0.05428562 |
| ENSMUSG00000097589 | -0.9342656 | 3.68223782 | 0.01146346 | 0.05428562 |
| ENSMUSG00000020482 | -0.9017817 | 7.99151749 | 0.01146896 | 0.05428562 |
| ENSMUSG00000020642 | -0.9036812 | 6.80032588 | 0.01147045 | 0.05428562 |
| ENSMUSG00000037172 | -0.9090945 | 5.50854176 | 0.01147105 | 0.05428562 |
| ENSMUSG00000043932 | 0.98156618 | 2.54152989 | 0.01150472 | 0.05442255 |
| ENSMUSG00000031791 | 1.09799447 | 1.08020425 | 0.01151486 | 0.05444811 |
| ENSMUSG00000028779 | 0.92061059 | 4.18290531 | 0.01153376 | 0.05450537 |
| ENSMUSG00000032666 | 0.96694869 | 2.60637354 | 0.01153646 | 0.05450537 |
| ENSMUSG00000030583 | 0.93202402 | 4.02257382 | 0.01155398 | 0.05456571 |
| ENSMUSG00000044309 | 0.92118195 | 4.53197805 | 0.01156395 | 0.0545904  |
| ENSMUSG00000051978 | 0.96100879 | 2.82878744 | 0.01159074 | 0.0546944  |
| ENSMUSG00000076563 | -0.9108759 | 5.24546763 | 0.01160968 | 0.05476129 |
| ENSMUSG00000049092 | -0.9674187 | 2.7535437  | 0.01161521 | 0.0547649  |
| ENSMUSG00000031292 | -1.025791  | 1.6853672  | 0.01162182 | 0.05477362 |
| ENSMUSG00000061589 | 0.90625212 | 5.68726134 | 0.01171185 | 0.05517531 |
| ENSMUSG00000066877 | 0.9278608  | 4.17040644 | 0.01172901 | 0.05523351 |
| ENSMUSG00000020654 | 0.92263584 | 4.1302401  | 0.01173772 | 0.05525188 |
| ENSMUSG00000060771 | -0.9283627 | 3.66166131 | 0.01176282 | 0.0553294  |
| ENSMUSG00000029290 | -0.9097143 | 5.02001526 | 0.01176382 | 0.0553294  |
| ENSMUSG00000093459 | -1.018685  | 1.75925893 | 0.01178464 | 0.0553852  |

|                    |            |            |            |            |
|--------------------|------------|------------|------------|------------|
| ENSMUSG00000039849 | 0.90337572 | 6.0238544  | 0.01178532 | 0.0553852  |
| ENSMUSG00000072762 | -0.9274559 | 3.90239437 | 0.01179543 | 0.05541008 |
| ENSMUSG00000049401 | 0.90389561 | 5.79164613 | 0.01181025 | 0.05545701 |
| ENSMUSG00000025245 | -0.9107014 | 4.75885758 | 0.0118175  | 0.05546844 |
| ENSMUSG00000003573 | 1.05225989 | 1.53790369 | 0.0118308  | 0.05550817 |
| ENSMUSG00000024854 | 0.90391736 | 5.57603077 | 0.01184758 | 0.05556422 |
| ENSMUSG00000090100 | -0.9361889 | 3.42276929 | 0.01186042 | 0.05560178 |
| ENSMUSG00000053977 | 0.91501761 | 4.65489039 | 0.01188184 | 0.05567322 |
| ENSMUSG00000046442 | -0.9441756 | 3.19918639 | 0.01188535 | 0.05567322 |
| ENSMUSG00000051169 | 1.13557995 | 1.00438502 | 0.01190156 | 0.05570884 |
| ENSMUSG00000028756 | 0.9085122  | 4.96733101 | 0.01190265 | 0.05570884 |
| ENSMUSG00000035000 | -0.8969548 | 7.50621579 | 0.01196446 | 0.05595562 |
| ENSMUSG00000040913 | 0.93065328 | 3.90904868 | 0.01196511 | 0.05595562 |
| ENSMUSG00000029455 | 0.8975111  | 6.94335017 | 0.01199818 | 0.05608746 |
| ENSMUSG00000024301 | 1.13991743 | 0.9671025  | 0.01204032 | 0.05626158 |
| ENSMUSG00000027613 | 0.90893466 | 4.70243071 | 0.01204549 | 0.05626287 |
| ENSMUSG00000025736 | 0.91699924 | 4.20512587 | 0.01205557 | 0.05628708 |
| ENSMUSG00000068580 | 0.92280896 | 3.81841324 | 0.01208431 | 0.05639835 |
| ENSMUSG00000053641 | -0.8937118 | 9.09739952 | 0.01211618 | 0.05652416 |
| ENSMUSG00000028211 | -0.8943788 | 8.05523361 | 0.01213828 | 0.05657456 |
| ENSMUSG00000101970 | -0.8993682 | 5.98063268 | 0.01213895 | 0.05657456 |
| ENSMUSG00000042292 | 0.90017967 | 5.89724651 | 0.01214175 | 0.05657456 |
| ENSMUSG00000039630 | -0.8946479 | 7.38511145 | 0.01219141 | 0.05678291 |
| ENSMUSG00000026811 | 0.94766298 | 3.11553195 | 0.01220254 | 0.0568026  |
| ENSMUSG00000030824 | 0.89737807 | 6.28803212 | 0.0122067  | 0.0568026  |
| ENSMUSG00000039183 | 0.91028019 | 4.59244114 | 0.01221046 | 0.0568026  |
| ENSMUSG00000030107 | 0.91120186 | 4.34809831 | 0.01222718 | 0.05685736 |
| ENSMUSG00000071711 | 0.97007002 | 2.61632316 | 0.01224249 | 0.05690553 |
| ENSMUSG00000020283 | -0.9072646 | 4.82794941 | 0.01224878 | 0.05691176 |
| ENSMUSG00000030034 | 0.9693739  | 2.35259399 | 0.01229246 | 0.05704477 |
| ENSMUSG00000040297 | -0.8932427 | 7.63030201 | 0.01229293 | 0.05704477 |
| ENSMUSG00000020590 | -0.8957002 | 6.52803964 | 0.0122941  | 0.05704477 |
| ENSMUSG00000099697 | -0.9270826 | 3.48969491 | 0.01229726 | 0.05704477 |
| ENSMUSG00000040537 | 1.0359375  | 1.92156083 | 0.01232085 | 0.05712657 |
| ENSMUSG00000024338 | 0.89379974 | 7.09299198 | 0.01232483 | 0.05712657 |
| ENSMUSG00000033313 | 1.00954789 | 2.01364588 | 0.01233712 | 0.05716048 |
| ENSMUSG00000022223 | 0.94094771 | 3.36103446 | 0.01234612 | 0.05717914 |
| ENSMUSG00000027236 | -0.9039666 | 4.97504062 | 0.01237991 | 0.05731255 |
| ENSMUSG00000047888 | -0.890991  | 8.28632675 | 0.01242972 | 0.05748793 |
| ENSMUSG00000048376 | 1.00097351 | 2.09403403 | 0.0124328  | 0.05748793 |
| ENSMUSG00000068130 | -0.9989617 | 2.06473303 | 0.0124328  | 0.05748793 |
| ENSMUSG00000005823 | 0.89636899 | 5.71394458 | 0.01247466 | 0.05765831 |
| ENSMUSG00000020232 | 0.90979352 | 4.49271674 | 0.01248679 | 0.0576835  |

|                    |            |            |            |            |
|--------------------|------------|------------|------------|------------|
| ENSMUSG00000020061 | 1.22588439 | 0.88057278 | 0.01249015 | 0.0576835  |
| ENSMUSG00000029577 | 0.89384468 | 6.25540272 | 0.01252477 | 0.05782016 |
| ENSMUSG00000005364 | -0.9059711 | 4.66972719 | 0.01253285 | 0.05783423 |
| ENSMUSG00000057219 | 0.91673136 | 3.90002716 | 0.01254158 | 0.05785132 |
| ENSMUSG00000021843 | -0.890122  | 7.77084992 | 0.01257843 | 0.05799165 |
| ENSMUSG00000007987 | 0.94997999 | 2.7343249  | 0.01258209 | 0.05799165 |
| ENSMUSG00000063286 | -0.8885315 | 9.33270316 | 0.01260201 | 0.05803738 |
| ENSMUSG00000059713 | 0.91601211 | 4.02495991 | 0.01260211 | 0.05803738 |
| ENSMUSG00000034647 | -0.890611  | 7.19208488 | 0.01261278 | 0.05806326 |
| ENSMUSG00000030314 | 0.91896347 | 3.88824292 | 0.01262235 | 0.05808403 |
| ENSMUSG00000022837 | -0.9040553 | 4.6832528  | 0.0126338  | 0.05809189 |
| ENSMUSG00000026649 | 1.18527621 | 1.05409632 | 0.01264403 | 0.05809189 |
| ENSMUSG00000043487 | 1.17225626 | 1.05129254 | 0.01264403 | 0.05809189 |
| ENSMUSG00000033454 | -0.8918017 | 6.66729405 | 0.01264427 | 0.05809189 |
| ENSMUSG00000037857 | -0.8884964 | 8.26408454 | 0.01269215 | 0.05828854 |
| ENSMUSG00000031823 | 0.90509694 | 4.44227424 | 0.01274902 | 0.05852635 |
| ENSMUSG00000048534 | 0.89955063 | 5.22898806 | 0.01275785 | 0.0585292  |
| ENSMUSG00000060950 | 0.97519923 | 2.2113924  | 0.01275982 | 0.0585292  |
| ENSMUSG00000032038 | 0.90532929 | 4.54121291 | 0.01278991 | 0.05864381 |
| ENSMUSG00000027551 | 0.97186252 | 2.59347002 | 0.01279817 | 0.05865828 |
| ENSMUSG00000068267 | 0.89763361 | 5.20026304 | 0.0128967  | 0.05908633 |
| ENSMUSG00000049339 | 0.89040561 | 6.09808408 | 0.01291192 | 0.05913248 |
| ENSMUSG00000020547 | -0.8945658 | 5.28372234 | 0.01293806 | 0.05922857 |
| ENSMUSG00000078879 | -1.1062416 | 0.75002758 | 0.01299733 | 0.05947622 |
| ENSMUSG00000073838 | 0.90705007 | 3.99021419 | 0.01303119 | 0.05960743 |
| ENSMUSG00000038594 | -0.8990503 | 4.75888557 | 0.01304094 | 0.05962833 |
| ENSMUSG00000009207 | -0.9021894 | 4.5324026  | 0.01304652 | 0.05963013 |
| ENSMUSG00000017291 | -0.8846962 | 8.18183086 | 0.01306684 | 0.05969926 |
| ENSMUSG00000034252 | -0.8854244 | 7.60462846 | 0.01307437 | 0.05970993 |
| ENSMUSG00000034761 | -0.8880873 | 6.43490784 | 0.01308518 | 0.05973558 |
| ENSMUSG00000030055 | 0.88647774 | 6.5937994  | 0.01314798 | 0.05999844 |
| ENSMUSG00000072770 | 0.93557643 | 2.98669682 | 0.01316271 | 0.06004179 |
| ENSMUSG00000004565 | 0.89603211 | 4.99153407 | 0.01319096 | 0.06014681 |
| ENSMUSG00000025630 | -0.8871053 | 6.34218145 | 0.0132072  | 0.06017741 |
| ENSMUSG00000017548 | -0.8841081 | 7.60746764 | 0.01320814 | 0.06017741 |
| ENSMUSG00000028134 | -0.8901182 | 5.59358327 | 0.01324336 | 0.06031394 |
| ENSMUSG00000051378 | 0.95555385 | 2.83152636 | 0.0133204  | 0.06064078 |
| ENSMUSG00000038695 | 0.91294847 | 3.96694865 | 0.01337767 | 0.0608774  |
| ENSMUSG00000005465 | 0.88481063 | 6.3524606  | 0.01341801 | 0.06103683 |
| ENSMUSG00000053907 | -0.8804141 | 8.93495999 | 0.01345064 | 0.06116102 |
| ENSMUSG00000026491 | -0.8808063 | 8.04478598 | 0.01348401 | 0.06127468 |
| ENSMUSG00000078484 | 0.89844006 | 4.56848731 | 0.01348629 | 0.06127468 |
| ENSMUSG00000024659 | 0.88970554 | 5.4744412  | 0.0134976  | 0.0613018  |



|                    |            |            |            |            |
|--------------------|------------|------------|------------|------------|
| ENSMUSG00000028465 | 0.87969572 | 8.88715398 | 0.01353406 | 0.06144312 |
| ENSMUSG00000035781 | 0.88867251 | 5.37166787 | 0.01355764 | 0.06152587 |
| ENSMUSG00000033487 | -0.8808885 | 7.3020202  | 0.01357528 | 0.06156098 |
| ENSMUSG00000014226 | -0.8810392 | 7.54150322 | 0.01357608 | 0.06156098 |
| ENSMUSG00000081665 | 0.95276346 | 2.65421831 | 0.01358479 | 0.06157619 |
| ENSMUSG00000046841 | 0.88928892 | 5.26260159 | 0.01363162 | 0.06176406 |
| ENSMUSG00000060703 | 0.9242838  | 3.44481998 | 0.01366827 | 0.06190574 |
| ENSMUSG00000027776 | 0.89279264 | 4.85416847 | 0.01372846 | 0.06215384 |
| ENSMUSG00000020841 | 0.91672826 | 3.98271285 | 0.01375036 | 0.06221258 |
| ENSMUSG00000023942 | 0.89772887 | 4.30408658 | 0.01375226 | 0.06221258 |
| ENSMUSG00000029823 | -0.8775828 | 8.59863924 | 0.01376268 | 0.06223525 |
| ENSMUSG00000051615 | 0.92311836 | 3.34263242 | 0.01378245 | 0.06227815 |
| ENSMUSG00000030016 | -0.8776473 | 8.37467746 | 0.013783   | 0.06227815 |
| ENSMUSG00000026475 | 1.09386757 | 0.8424772  | 0.01407861 | 0.06358885 |
| ENSMUSG00000053774 | -0.876186  | 7.33010451 | 0.01408684 | 0.06360105 |
| ENSMUSG00000026484 | -0.87771   | 6.56107995 | 0.01414215 | 0.06382566 |
| ENSMUSG00000039286 | 0.93862379 | 2.94469559 | 0.01419077 | 0.06401139 |
| ENSMUSG00000063524 | 0.87607837 | 6.75664823 | 0.01419444 | 0.06401139 |
| ENSMUSG00000038665 | 1.08926697 | 1.44787122 | 0.01420405 | 0.06402965 |
| ENSMUSG00000037049 | 0.8948623  | 4.11896262 | 0.01423052 | 0.06411949 |
| ENSMUSG00000046138 | -0.8767012 | 6.47232456 | 0.01423514 | 0.06411949 |
| ENSMUSG00000034164 | 0.91484561 | 3.46694958 | 0.01425136 | 0.06416739 |
| ENSMUSG00000096594 | -0.8910474 | 4.74622091 | 0.01428249 | 0.06428241 |
| ENSMUSG00000032519 | 0.88879179 | 4.60885091 | 0.01429088 | 0.06428484 |
| ENSMUSG00000067916 | -1.1049969 | 0.77002747 | 0.01429422 | 0.06428484 |
| ENSMUSG00000089672 | 0.87968706 | 6.16581979 | 0.01430012 | 0.06428624 |
| ENSMUSG00000020868 | 0.92673809 | 2.84448014 | 0.01440153 | 0.06471682 |
| ENSMUSG00000005142 | 0.87196044 | 8.15431895 | 0.01441518 | 0.06475284 |
| ENSMUSG00000054693 | -0.8721991 | 7.77563084 | 0.01444772 | 0.06487367 |
| ENSMUSG00000053702 | -0.8881134 | 4.75838627 | 0.01446737 | 0.06493654 |
| ENSMUSG00000051517 | 0.97478698 | 2.26791669 | 0.01447855 | 0.06496131 |
| ENSMUSG00000054808 | 0.87326961 | 6.9398213  | 0.01448539 | 0.06496668 |
| ENSMUSG00000021262 | 0.87267602 | 7.07762449 | 0.01450359 | 0.06502249 |
| ENSMUSG00000068959 | -0.8936865 | 4.15013059 | 0.01450915 | 0.06502249 |
| ENSMUSG00000053040 | 1.03086706 | 1.41075742 | 0.01453906 | 0.06513113 |
| ENSMUSG00000054280 | -0.8714045 | 7.63103578 | 0.01455123 | 0.06516027 |
| ENSMUSG00000074909 | -0.8752895 | 6.13988825 | 0.01455909 | 0.06516606 |
| ENSMUSG00000086429 | -0.9093587 | 3.33491512 | 0.01456386 | 0.06516606 |
| ENSMUSG00000024070 | -0.8723658 | 6.88520556 | 0.0145842  | 0.06523166 |
| ENSMUSG00000079852 | 1.04684658 | 1.96048756 | 0.01461307 | 0.06533538 |
| ENSMUSG00000040472 | 0.88018545 | 5.05773031 | 0.01463042 | 0.06538749 |
| ENSMUSG00000028923 | 0.87716483 | 5.56512317 | 0.01463808 | 0.06539631 |
| ENSMUSG00000023066 | -0.8761695 | 5.70575711 | 0.01467515 | 0.06553644 |

|                    |            |            |            |            |
|--------------------|------------|------------|------------|------------|
| ENSMUSG00000030284 | 0.93756065 | 2.53647144 | 0.0147093  | 0.06564362 |
| ENSMUSG00000004207 | 0.86825639 | 10.2122278 | 0.01471057 | 0.06564362 |
| ENSMUSG00000031820 | 0.88165855 | 4.84187575 | 0.01474934 | 0.0657911  |
| ENSMUSG00000066363 | 0.8868333  | 4.24227314 | 0.01478065 | 0.0659052  |
| ENSMUSG00000029267 | -0.8719466 | 6.48014114 | 0.01479393 | 0.06593882 |
| ENSMUSG00000058290 | 0.92924924 | 3.0984989  | 0.01483107 | 0.06607874 |
| ENSMUSG00000027272 | -0.8690537 | 7.24592109 | 0.01488405 | 0.06628572 |
| ENSMUSG00000021027 | -0.8686796 | 7.42560724 | 0.01488906 | 0.06628572 |
| ENSMUSG00000028980 | 0.89295888 | 4.25987791 | 0.01490725 | 0.066341   |
| ENSMUSG00000034731 | 0.93207204 | 2.97969616 | 0.01495732 | 0.06653714 |
| ENSMUSG00000003527 | 0.88586139 | 4.29973493 | 0.0149629  | 0.06653714 |
| ENSMUSG00000058135 | 0.89558125 | 3.79706757 | 0.01498484 | 0.06660897 |
| ENSMUSG00000039982 | 0.89160872 | 4.23368548 | 0.01500675 | 0.06668053 |
| ENSMUSG00000025326 | -0.8682704 | 7.15274902 | 0.0150177  | 0.06670343 |
| ENSMUSG00000040774 | -0.8699793 | 6.28660339 | 0.01507843 | 0.06690659 |
| ENSMUSG00000020300 | -0.8680461 | 6.92704712 | 0.01508069 | 0.06690659 |
| ENSMUSG00000026429 | -0.9046922 | 3.52741065 | 0.0150809  | 0.06690659 |
| ENSMUSG00000071655 | 0.87312796 | 5.51993112 | 0.01508921 | 0.06691762 |
| ENSMUSG00000003208 | 0.91440404 | 2.73280141 | 0.01511173 | 0.06699164 |
| ENSMUSG00000074682 | 0.9869136  | 1.91271441 | 0.01514441 | 0.06711062 |
| ENSMUSG00000035284 | -0.8671025 | 6.87602465 | 0.01516985 | 0.06717312 |
| ENSMUSG00000032803 | -0.8654136 | 8.13829176 | 0.0151702  | 0.06717312 |
| ENSMUSG00000028825 | 0.87444856 | 5.39749694 | 0.01519764 | 0.0672687  |
| ENSMUSG00000066613 | -0.8903649 | 3.88046996 | 0.01524403 | 0.06744808 |
| ENSMUSG00000053137 | 0.86651738 | 6.83665254 | 0.0152505  | 0.06745075 |
| ENSMUSG00000042104 | -1.006156  | 1.51953853 | 0.01525776 | 0.06745688 |
| ENSMUSG00000030814 | 0.90584792 | 3.30423704 | 0.01531635 | 0.06768172 |
| ENSMUSG00000044030 | 0.90057403 | 3.35881607 | 0.01532039 | 0.06768172 |
| ENSMUSG00000006476 | 0.89209519 | 3.84075852 | 0.01536216 | 0.06784018 |
| ENSMUSG00000006678 | -0.8724206 | 5.36014205 | 0.01539147 | 0.06794353 |
| ENSMUSG00000058587 | -0.8630203 | 8.21132543 | 0.01544043 | 0.0681335  |
| ENSMUSG00000002058 | 0.87203914 | 4.98600137 | 0.01551671 | 0.06844382 |
| ENSMUSG00000079853 | -1.1607291 | 0.35951727 | 0.0155533  | 0.06857888 |
| ENSMUSG00000041147 | -0.8772233 | 4.7180446  | 0.01556257 | 0.06859345 |
| ENSMUSG00000024610 | 0.86049634 | 12.7095917 | 0.01557303 | 0.06861326 |
| ENSMUSG00000038797 | 0.98787002 | 1.87731606 | 0.01558076 | 0.06862099 |
| ENSMUSG00000031488 | 0.87459171 | 4.83620916 | 0.01565129 | 0.06890523 |
| ENSMUSG00000044250 | 0.87560856 | 4.67202063 | 0.01566463 | 0.06893754 |
| ENSMUSG00000038174 | -0.8698898 | 5.34058733 | 0.0156764  | 0.06896298 |
| ENSMUSG00000031174 | -0.9173792 | 2.96934659 | 0.01568989 | 0.06899592 |
| ENSMUSG00000031644 | -0.8714357 | 4.90131919 | 0.01582878 | 0.06957716 |
| ENSMUSG00000041936 | 0.90654147 | 3.36553703 | 0.01583699 | 0.06957716 |
| ENSMUSG00000003068 | 0.86421597 | 6.05436764 | 0.01584023 | 0.06957716 |

|                    |            |            |            |            |
|--------------------|------------|------------|------------|------------|
| ENSMUSG00000081534 | 0.86631322 | 5.67669988 | 0.01586174 | 0.06963264 |
| ENSMUSG00000021952 | -0.8636811 | 6.1969234  | 0.01586702 | 0.06963264 |
| ENSMUSG00000073147 | -0.867123  | 5.34726359 | 0.01587103 | 0.06963264 |
| ENSMUSG00000030000 | 0.89313294 | 3.85036303 | 0.0158786  | 0.06963926 |
| ENSMUSG00000042492 | 0.86750146 | 5.43229311 | 0.01588546 | 0.06964279 |
| ENSMUSG00000036093 | -0.8615277 | 6.74746915 | 0.01591761 | 0.06975711 |
| ENSMUSG00000034317 | -0.8603853 | 6.99868727 | 0.01597561 | 0.06998462 |
| ENSMUSG00000025314 | -0.85743   | 8.85757657 | 0.01604212 | 0.07024192 |
| ENSMUSG00000017718 | 0.93958642 | 2.55089234 | 0.01604657 | 0.07024192 |
| ENSMUSG00000036555 | 0.87714032 | 4.41809195 | 0.0160528  | 0.07024247 |
| ENSMUSG00000079242 | -1.0270621 | 1.31928228 | 0.01608052 | 0.07033697 |
| ENSMUSG00000036639 | 0.97183384 | 1.74422964 | 0.01613965 | 0.07053351 |
| ENSMUSG00000045598 | 0.8977315  | 3.33861052 | 0.01614325 | 0.07053351 |
| ENSMUSG00000071713 | 0.8632038  | 5.97701295 | 0.01614386 | 0.07053351 |
| ENSMUSG00000032596 | 0.85739607 | 7.8316348  | 0.01616234 | 0.07058212 |
| ENSMUSG00000021374 | -0.8567619 | 8.39468787 | 0.01616832 | 0.07058212 |
| ENSMUSG00000032462 | 0.88047372 | 4.30183255 | 0.01617341 | 0.07058212 |
| ENSMUSG00000076536 | -0.8982592 | 3.42104284 | 0.01626879 | 0.07097145 |
| ENSMUSG00000043929 | -0.8764029 | 4.31363026 | 0.01628746 | 0.07102591 |
| ENSMUSG00000059842 | 0.92417055 | 2.77969586 | 0.01632773 | 0.07117453 |
| ENSMUSG00000037580 | -0.8731061 | 4.42383741 | 0.01634784 | 0.07123518 |
| ENSMUSG00000053819 | -0.8559219 | 7.65318207 | 0.01636379 | 0.07127764 |
| ENSMUSG00000064326 | 1.01643189 | 1.43293729 | 0.01642656 | 0.07152396 |
| ENSMUSG00000067212 | 0.85524721 | 7.53949307 | 0.01647243 | 0.07169654 |
| ENSMUSG00000039470 | 1.03336105 | 1.30565057 | 0.01652894 | 0.07191527 |
| ENSMUSG00000030682 | 0.86119659 | 5.513982   | 0.01656644 | 0.07205118 |
| ENSMUSG00000030029 | 0.96270575 | 2.06723083 | 0.01660756 | 0.07217772 |
| ENSMUSG00000027829 | -0.852659  | 9.11140457 | 0.01661339 | 0.07217772 |
| ENSMUSG00000040263 | 0.86682066 | 4.55990745 | 0.01662015 | 0.07217772 |
| ENSMUSG00000030149 | 0.87603055 | 4.27956803 | 0.01662066 | 0.07217772 |
| ENSMUSG00000073125 | -0.8973146 | 3.17804261 | 0.01662699 | 0.07217796 |
| ENSMUSG00000024136 | 0.90829262 | 2.58889381 | 0.01663942 | 0.07217896 |
| ENSMUSG00000042677 | 0.86199436 | 5.51094615 | 0.01663978 | 0.07217896 |
| ENSMUSG00000056579 | -0.8535907 | 7.66738026 | 0.0166545  | 0.07221557 |
| ENSMUSG00000036202 | -0.8533521 | 7.51742948 | 0.01671292 | 0.07244157 |
| ENSMUSG00000003581 | 0.86762392 | 4.42377417 | 0.01673406 | 0.07250586 |
| ENSMUSG00000072844 | -0.9032994 | 3.10042316 | 0.01675712 | 0.07253555 |
| ENSMUSG00000018921 | 0.86672996 | 4.51506839 | 0.01675818 | 0.07253555 |
| ENSMUSG00000022126 | 0.98589898 | 2.32700358 | 0.01676581 | 0.07253555 |
| ENSMUSG00000015222 | 1.06377834 | 1.27554623 | 0.01676616 | 0.07253555 |
| ENSMUSG00000021549 | -0.8536624 | 7.08021066 | 0.01678119 | 0.0725733  |
| ENSMUSG00000086920 | -1.1124352 | 0.82081324 | 0.01679707 | 0.0725983  |
| ENSMUSG00000078813 | 0.88842628 | 3.25933069 | 0.01679961 | 0.0725983  |

|                    |            |            |            |            |
|--------------------|------------|------------|------------|------------|
| ENSMUSG00000021486 | 0.85657131 | 5.80134831 | 0.01681229 | 0.07262582 |
| ENSMUSG00000035173 | -0.8554407 | 6.19032396 | 0.01687104 | 0.07283887 |
| ENSMUSG00000020032 | 0.92260176 | 2.27924667 | 0.01687552 | 0.07283887 |
| ENSMUSG00000018661 | 0.85889096 | 5.35876833 | 0.01688062 | 0.07283887 |
| ENSMUSG00000028842 | -0.8544064 | 6.31462191 | 0.01692058 | 0.0729839  |
| ENSMUSG00000059005 | -0.8504921 | 8.58388149 | 0.01692833 | 0.07298993 |
| ENSMUSG00000046985 | -0.8529052 | 6.83317028 | 0.01694413 | 0.07303065 |
| ENSMUSG00000013089 | 0.88402286 | 3.32735319 | 0.0169579  | 0.0730626  |
| ENSMUSG00000069792 | 0.86110874 | 5.04582884 | 0.01697524 | 0.07310993 |
| ENSMUSG00000030699 | 0.95209238 | 1.83496493 | 0.01698219 | 0.07311245 |
| ENSMUSG00000044453 | 0.88752361 | 3.21499873 | 0.01701311 | 0.07321815 |
| ENSMUSG00000039384 | 0.87493573 | 3.86682177 | 0.01702727 | 0.07325169 |
| ENSMUSG00000024787 | 0.88827142 | 3.50944791 | 0.01704879 | 0.07325872 |
| ENSMUSG00000028101 | 0.85969398 | 5.04767825 | 0.01705029 | 0.07325872 |
| ENSMUSG00000075376 | -0.8511747 | 7.27331537 | 0.01705226 | 0.07325872 |
| ENSMUSG00000039908 | 0.8657852  | 4.80465819 | 0.0170544  | 0.07325872 |
| ENSMUSG00000041774 | 1.13307774 | 0.84308113 | 0.01710093 | 0.07342934 |
| ENSMUSG00000025027 | 0.86255894 | 4.88909688 | 0.0171069  | 0.07342934 |
| ENSMUSG00000040952 | 0.84964342 | 7.77225203 | 0.017123   | 0.07347102 |
| ENSMUSG00000067851 | -0.8485524 | 8.63844522 | 0.01717073 | 0.0736377  |
| ENSMUSG00000025971 | -0.8822148 | 3.61892938 | 0.01717466 | 0.0736377  |
| ENSMUSG00000027099 | -0.8632706 | 4.7162231  | 0.01718643 | 0.07366071 |
| ENSMUSG00000098176 | 0.96776984 | 1.87770735 | 0.01719817 | 0.07368355 |
| ENSMUSG00000046731 | 0.91155954 | 2.62800072 | 0.01721895 | 0.0737451  |
| ENSMUSG00000032475 | -0.8544273 | 5.75366123 | 0.01726699 | 0.07392331 |
| ENSMUSG00000041460 | 0.92944847 | 2.39465258 | 0.01731856 | 0.07411647 |
| ENSMUSG00000036989 | 0.88444621 | 3.82460601 | 0.01732637 | 0.07412229 |
| ENSMUSG00000023973 | 0.85194269 | 5.97317861 | 0.01735146 | 0.07418513 |
| ENSMUSG00000024197 | 0.87399807 | 3.99014013 | 0.01735396 | 0.07418513 |
| ENSMUSG00000038893 | 0.8558898  | 5.36677172 | 0.01741921 | 0.07443638 |
| ENSMUSG00000099974 | -0.9226326 | 2.36704857 | 0.01745231 | 0.07455009 |
| ENSMUSG00000060044 | 0.85822902 | 5.05049294 | 0.01745961 | 0.07455355 |
| ENSMUSG00000030446 | -0.8978371 | 2.98655642 | 0.01750863 | 0.07473512 |
| ENSMUSG00000015501 | -0.8464354 | 7.78552746 | 0.01754154 | 0.07484781 |
| ENSMUSG00000024349 | 0.84711823 | 7.07006912 | 0.01757396 | 0.07495834 |
| ENSMUSG00000047747 | 0.93389934 | 2.42275893 | 0.01758504 | 0.07497776 |
| ENSMUSG00000073427 | -0.9344541 | 2.01845969 | 0.01759301 | 0.07498391 |
| ENSMUSG00000053175 | 0.85691283 | 4.42911451 | 0.01760442 | 0.07500473 |
| ENSMUSG00000032484 | 0.89619005 | 3.2201077  | 0.01762752 | 0.07507533 |
| ENSMUSG00000029705 | -0.8468145 | 6.91417714 | 0.01768732 | 0.07528606 |
| ENSMUSG00000027981 | -0.8626585 | 4.36915896 | 0.01769297 | 0.07528606 |
| ENSMUSG00000020954 | -0.848112  | 6.47347645 | 0.01769665 | 0.07528606 |
| ENSMUSG00000023805 | 0.87191042 | 3.97976784 | 0.01772581 | 0.07538223 |

|                    |            |            |            |            |
|--------------------|------------|------------|------------|------------|
| ENSMUSG00000028926 | 0.92436326 | 2.81263897 | 0.01774169 | 0.07542188 |
| ENSMUSG00000029402 | 0.9832611  | 1.75706105 | 0.01775648 | 0.07545684 |
| ENSMUSG00000049871 | -0.850067  | 5.64231383 | 0.01778339 | 0.07554327 |
| ENSMUSG00000036391 | -0.8486251 | 6.10615598 | 0.01779173 | 0.07555075 |
| ENSMUSG00000052748 | -0.8487693 | 6.09014005 | 0.01780317 | 0.07557143 |
| ENSMUSG00000000617 | 0.89969956 | 2.91284848 | 0.01781026 | 0.0755736  |
| ENSMUSG00000015478 | 0.86661156 | 3.87706216 | 0.01781824 | 0.07557957 |
| ENSMUSG00000034163 | -0.8449373 | 7.19942771 | 0.01785651 | 0.07571398 |
| ENSMUSG00000076526 | -0.8743164 | 3.74365189 | 0.01787785 | 0.075771   |
| ENSMUSG00000076928 | 0.87212511 | 3.73289714 | 0.01788719 | 0.075771   |
| ENSMUSG00000036309 | -0.8454371 | 6.97270572 | 0.01789489 | 0.075771   |
| ENSMUSG00000040549 | -0.845042  | 7.13375321 | 0.01789633 | 0.075771   |
| ENSMUSG00000001418 | 0.84723135 | 6.16345038 | 0.01790369 | 0.07577428 |
| ENSMUSG00000040631 | 1.02503453 | 0.94691293 | 0.01792164 | 0.07582234 |
| ENSMUSG00000003233 | 0.87557318 | 3.63461763 | 0.01793753 | 0.07586163 |
| ENSMUSG00000005150 | 0.87204732 | 3.59168423 | 0.01795953 | 0.07592675 |
| ENSMUSG00000063317 | -0.8504934 | 5.44226246 | 0.01799968 | 0.07606848 |
| ENSMUSG00000026103 | -0.8424204 | 7.89299666 | 0.01807229 | 0.07634728 |
| ENSMUSG00000031010 | -0.8416216 | 8.3524756  | 0.01811905 | 0.07651669 |
| ENSMUSG00000047126 | -0.8408839 | 9.40765378 | 0.01813209 | 0.07654366 |
| ENSMUSG00000037818 | -0.869826  | 3.81146525 | 0.01816203 | 0.07663312 |
| ENSMUSG00000024943 | -0.8438016 | 6.77472995 | 0.0181708  | 0.07663312 |
| ENSMUSG00000024937 | 0.84576223 | 6.33526695 | 0.01817328 | 0.07663312 |
| ENSMUSG00000021504 | 0.86397377 | 3.9737886  | 0.01825037 | 0.07692998 |
| ENSMUSG00000049807 | 0.89720342 | 3.14437997 | 0.0183147  | 0.07717284 |
| ENSMUSG00000004451 | 0.86274524 | 3.98330847 | 0.01833907 | 0.07724721 |
| ENSMUSG00000027367 | -0.8411069 | 7.14701054 | 0.01841893 | 0.07753146 |
| ENSMUSG00000033960 | 0.94821504 | 1.63388271 | 0.01842005 | 0.07753146 |
| ENSMUSG00000020024 | -0.846581  | 5.591845   | 0.01842997 | 0.0775349  |
| ENSMUSG00000029207 | 1.01887883 | 1.24877295 | 0.01843435 | 0.0775349  |
| ENSMUSG00000052736 | 1.02643211 | 1.45559636 | 0.01844454 | 0.07754935 |
| ENSMUSG00000031833 | 0.8417594  | 6.58177868 | 0.01847505 | 0.07760662 |
| ENSMUSG00000022016 | -0.8408334 | 7.04331315 | 0.01847515 | 0.07760662 |
| ENSMUSG00000020474 | 0.84518904 | 5.68532849 | 0.01847841 | 0.07760662 |
| ENSMUSG00000037940 | -0.8427644 | 6.20446398 | 0.01851798 | 0.07773012 |
| ENSMUSG00000069045 | -0.8409042 | 7.20631943 | 0.01852134 | 0.07773012 |
| ENSMUSG00000022948 | 0.88754825 | 3.18396595 | 0.01853505 | 0.07775929 |
| ENSMUSG00000010048 | 0.8701616  | 3.84079146 | 0.01856931 | 0.07785612 |
| ENSMUSG00000029413 | 0.84477811 | 5.8330231  | 0.01857168 | 0.07785612 |
| ENSMUSG00000020189 | -0.8393528 | 7.26514672 | 0.01861476 | 0.07796294 |
| ENSMUSG00000021929 | -0.841125  | 6.60428626 | 0.01861758 | 0.07796294 |
| ENSMUSG00000056145 | -0.8400443 | 6.9287728  | 0.01862759 | 0.07796294 |
| ENSMUSG00000034917 | 0.92819339 | 2.30125679 | 0.01862778 | 0.07796294 |

|                    |            |            |            |            |
|--------------------|------------|------------|------------|------------|
| ENSMUSG00000053929 | 0.84590449 | 5.20686862 | 0.01863107 | 0.07796294 |
| ENSMUSG00000031004 | -0.8370809 | 8.77274924 | 0.01870963 | 0.07825093 |
| ENSMUSG00000030629 | -0.8409177 | 6.3680153  | 0.01871885 | 0.07825093 |
| ENSMUSG00000038242 | 1.14998046 | 1.10319603 | 0.01872073 | 0.07825093 |
| ENSMUSG00000015619 | 0.99427695 | 1.34839178 | 0.01872712 | 0.07825093 |
| ENSMUSG00000034973 | -0.8381101 | 6.92255074 | 0.01887349 | 0.07883384 |
| ENSMUSG00000038172 | -0.8390588 | 6.48453517 | 0.0188932  | 0.07887812 |
| ENSMUSG00000042298 | -0.8605264 | 3.95227888 | 0.01890027 | 0.07887812 |
| ENSMUSG00000031988 | 0.8531312  | 4.36276869 | 0.01891724 | 0.07887812 |
| ENSMUSG00000063019 | 0.87541361 | 3.28507456 | 0.01891747 | 0.07887812 |
| ENSMUSG00000030231 | 0.86147601 | 4.26703498 | 0.0189184  | 0.07887812 |
| ENSMUSG00000020802 | 0.8446862  | 5.24601452 | 0.01903304 | 0.07932372 |
| ENSMUSG00000038047 | -0.8404014 | 5.9444045  | 0.01903907 | 0.07932372 |
| ENSMUSG00000046862 | -0.8402001 | 5.9389369  | 0.01906556 | 0.07940529 |
| ENSMUSG00000003500 | 0.85263723 | 4.64662042 | 0.01908784 | 0.07946931 |
| ENSMUSG00000049044 | -0.8398665 | 5.85108028 | 0.0190981  | 0.07948323 |
| ENSMUSG00000026784 | -0.8945113 | 2.58848002 | 0.01914567 | 0.07965235 |
| ENSMUSG00000049600 | 0.94751171 | 1.87140508 | 0.01916183 | 0.07967107 |
| ENSMUSG00000049516 | -0.835158  | 7.44059317 | 0.01916403 | 0.07967107 |
| ENSMUSG00000024383 | -0.8352996 | 7.20006771 | 0.01920361 | 0.07980676 |
| ENSMUSG00000038000 | 0.84599885 | 4.821064   | 0.01922148 | 0.07984837 |
| ENSMUSG00000040321 | -0.8542211 | 4.21778555 | 0.01922752 | 0.07984837 |
| ENSMUSG00000057058 | 0.86140928 | 3.99802995 | 0.01924778 | 0.07990365 |
| ENSMUSG00000022672 | -0.8345702 | 7.21995642 | 0.01929697 | 0.08007896 |
| ENSMUSG00000015468 | 1.1100379  | 0.80615538 | 0.01936951 | 0.08035098 |
| ENSMUSG00000042460 | -0.8351555 | 6.72442311 | 0.01938666 | 0.08036216 |
| ENSMUSG00000033021 | 0.85282612 | 4.35521824 | 0.01938947 | 0.08036216 |
| ENSMUSG00000028672 | 0.84936637 | 4.72482775 | 0.01939992 | 0.08036216 |
| ENSMUSG00000061878 | 1.07315665 | 0.952804   | 0.01940017 | 0.08036216 |
| ENSMUSG00000031887 | 0.87834725 | 3.34130791 | 0.01946506 | 0.08060191 |
| ENSMUSG00000001755 | 0.86141023 | 3.71667921 | 0.01947278 | 0.08060484 |
| ENSMUSG00000024423 | -0.8343373 | 6.63057366 | 0.01949728 | 0.08067719 |
| ENSMUSG00000070544 | -0.8321528 | 7.69821264 | 0.01955848 | 0.08090131 |
| ENSMUSG00000030323 | 0.91534838 | 2.28630145 | 0.01957642 | 0.08094638 |
| ENSMUSG00000034724 | -0.8314022 | 8.05412315 | 0.0195999  | 0.08101433 |
| ENSMUSG00000044279 | 0.95170689 | 1.84078864 | 0.01961347 | 0.08104128 |
| ENSMUSG00000051390 | 0.85328458 | 4.12251595 | 0.01966249 | 0.08117568 |
| ENSMUSG00000025758 | -0.8440461 | 4.85222846 | 0.01966479 | 0.08117568 |
| ENSMUSG00000040502 | 0.95167901 | 1.96024773 | 0.01966718 | 0.08117568 |
| ENSMUSG00000030590 | 0.84761972 | 4.61942612 | 0.01967934 | 0.0811967  |
| ENSMUSG00000031458 | 1.03771831 | 1.15212631 | 0.01970379 | 0.08126839 |
| ENSMUSG00000031347 | -0.8380239 | 5.51359357 | 0.01971484 | 0.08128481 |
| ENSMUSG00000006095 | 0.85282444 | 4.01118304 | 0.01972287 | 0.08128875 |

|                    |            |            |            |            |
|--------------------|------------|------------|------------|------------|
| ENSMUSG00000089683 | -0.9096283 | 2.34069808 | 0.01976823 | 0.08143213 |
| ENSMUSG00000020387 | 0.83245277 | 6.73779826 | 0.01977182 | 0.08143213 |
| ENSMUSG00000022671 | 1.10348438 | 0.78221022 | 0.01977938 | 0.08143408 |
| ENSMUSG00000002297 | -0.8424519 | 4.97286639 | 0.01978824 | 0.0814414  |
| ENSMUSG00000025949 | -0.8299582 | 7.83187787 | 0.01983566 | 0.08160734 |
| ENSMUSG00000033799 | -0.829246  | 8.18561164 | 0.01988026 | 0.08176155 |
| ENSMUSG00000028555 | 1.00877454 | 1.59266289 | 0.01988901 | 0.08176832 |
| ENSMUSG00000061979 | 0.87471649 | 3.22283595 | 0.01992532 | 0.08188831 |
| ENSMUSG00000042675 | 0.83242047 | 6.1478628  | 0.01996549 | 0.08202405 |
| ENSMUSG00000027665 | -0.8292776 | 7.6125312  | 0.01999289 | 0.08210727 |
| ENSMUSG00000004709 | 0.84740115 | 4.69740593 | 0.02000887 | 0.08214355 |
| ENSMUSG00000022463 | 0.829471   | 7.28467884 | 0.02002852 | 0.08219486 |
| ENSMUSG00000060935 | -0.8453274 | 4.53856578 | 0.02003717 | 0.08220101 |
| ENSMUSG00000022667 | 0.95794956 | 1.67963008 | 0.02005486 | 0.08221966 |
| ENSMUSG00000037295 | 0.84508435 | 4.48426678 | 0.02005602 | 0.08221966 |
| ENSMUSG00000021143 | 0.83630504 | 5.50755384 | 0.02006778 | 0.08223856 |
| ENSMUSG00000022858 | -0.8284937 | 7.68495469 | 0.0200913  | 0.08230561 |
| ENSMUSG00000030180 | -0.8274324 | 8.4695289  | 0.0201192  | 0.08239053 |
| ENSMUSG00000035476 | -0.8330706 | 5.84164856 | 0.02013602 | 0.08243003 |
| ENSMUSG00000076939 | -0.8372843 | 5.23000155 | 0.02015001 | 0.08243207 |
| ENSMUSG00000050188 | 0.88378875 | 2.91431606 | 0.02015086 | 0.08243207 |
| ENSMUSG00000038079 | 0.96696009 | 1.58468315 | 0.02016702 | 0.08246221 |
| ENSMUSG00000031505 | 0.86938254 | 3.58284119 | 0.02017257 | 0.08246221 |
| ENSMUSG00000071648 | 0.97964824 | 1.33928106 | 0.02020525 | 0.08256644 |
| ENSMUSG00000037706 | 0.82869967 | 6.95055161 | 0.02021436 | 0.0825743  |
| ENSMUSG00000056268 | -0.8279818 | 7.40038798 | 0.02022378 | 0.08258344 |
| ENSMUSG00000027379 | -0.8572695 | 3.71171901 | 0.02026471 | 0.08269426 |
| ENSMUSG00000044791 | -0.8260149 | 9.20929038 | 0.02026531 | 0.08269426 |
| ENSMUSG00000069135 | -0.8301487 | 6.29614985 | 0.0202906  | 0.08274784 |
| ENSMUSG00000085241 | -0.8546413 | 3.72641757 | 0.02029284 | 0.08274784 |
| ENSMUSG00000047767 | 0.83087256 | 5.93085034 | 0.02030095 | 0.08275158 |
| ENSMUSG00000040865 | -0.826706  | 7.80178848 | 0.02031213 | 0.08276777 |
| ENSMUSG00000097352 | -0.8295322 | 6.28478642 | 0.02035619 | 0.08291792 |
| ENSMUSG00000021493 | 0.84681109 | 4.07843593 | 0.02042462 | 0.08316719 |
| ENSMUSG00000042870 | 0.91190701 | 2.52632978 | 0.02048608 | 0.08338792 |
| ENSMUSG00000087582 | -0.9105101 | 2.42891039 | 0.02051812 | 0.08348878 |
| ENSMUSG00000035126 | -0.866415  | 2.95974818 | 0.02066177 | 0.08401689 |
| ENSMUSG00000029370 | -0.8989185 | 2.29676013 | 0.02066253 | 0.08401689 |
| ENSMUSG00000033760 | -0.8318486 | 5.38868389 | 0.02068516 | 0.08406269 |
| ENSMUSG00000025484 | 0.84943755 | 3.88320641 | 0.02070131 | 0.08406269 |
| ENSMUSG00000030465 | -0.8325312 | 5.29515607 | 0.02070361 | 0.08406269 |
| ENSMUSG00000036432 | -0.8283789 | 6.0287361  | 0.02070597 | 0.08406269 |
| ENSMUSG00000023971 | 0.85759423 | 3.53687433 | 0.02071036 | 0.08406269 |

|                    |            |            |            |            |
|--------------------|------------|------------|------------|------------|
| ENSMUSG00000025261 | -0.8226412 | 9.87927705 | 0.02073215 | 0.08412143 |
| ENSMUSG00000036591 | -0.8342498 | 4.87238018 | 0.02078762 | 0.08431677 |
| ENSMUSG00000030104 | -0.8223396 | 8.00994427 | 0.0209481  | 0.08493772 |
| ENSMUSG00000025246 | -0.8239988 | 6.87996996 | 0.02096353 | 0.08497029 |
| ENSMUSG00000008348 | 0.82137274 | 8.98830296 | 0.02097457 | 0.08498418 |
| ENSMUSG00000028175 | -0.8868335 | 2.59021968 | 0.02098174 | 0.08498418 |
| ENSMUSG00000026864 | -0.8206    | 10.4572497 | 0.02103051 | 0.08515173 |
| ENSMUSG00000059743 | 0.83837253 | 4.39876949 | 0.02104253 | 0.08515262 |
| ENSMUSG00000018341 | 0.89380513 | 2.28895141 | 0.02104856 | 0.08515262 |
| ENSMUSG00000100691 | 1.07152647 | 0.83193351 | 0.02106037 | 0.08515262 |
| ENSMUSG00000023909 | 1.06649459 | 0.8286898  | 0.02106037 | 0.08515262 |
| ENSMUSG00000010205 | 0.82621531 | 5.90804868 | 0.0211354  | 0.08542596 |
| ENSMUSG00000068329 | 0.82801277 | 5.41991824 | 0.0211736  | 0.08549969 |
| ENSMUSG00000055546 | 0.96381384 | 1.91846146 | 0.02117686 | 0.08549969 |
| ENSMUSG00000097284 | -0.9176436 | 1.89886943 | 0.02117686 | 0.08549969 |
| ENSMUSG00000063273 | -0.82158   | 7.46193278 | 0.02118618 | 0.08549969 |
| ENSMUSG00000054364 | 0.82181562 | 7.47156289 | 0.02119083 | 0.08549969 |
| ENSMUSG00000027630 | -0.820945  | 7.82904473 | 0.02120344 | 0.08550399 |
| ENSMUSG00000027087 | -0.8245824 | 6.11380009 | 0.02120929 | 0.08550399 |
| ENSMUSG00000026153 | 1.0412274  | 1.05302113 | 0.02121421 | 0.08550399 |
| ENSMUSG00000029781 | 1.00355103 | 1.26558164 | 0.02125396 | 0.08563145 |
| ENSMUSG00000040370 | -0.8388062 | 4.40167762 | 0.02126074 | 0.08563145 |
| ENSMUSG00000047412 | -0.8220354 | 6.94943479 | 0.02128929 | 0.08571643 |
| ENSMUSG00000054648 | -0.8215922 | 6.99441964 | 0.02131953 | 0.08580813 |
| ENSMUSG00000024870 | 0.82656597 | 5.590878   | 0.02132842 | 0.08581384 |
| ENSMUSG00000052131 | 1.03167949 | 1.35143879 | 0.02142923 | 0.08618928 |
| ENSMUSG00000037236 | -0.8185924 | 8.44137365 | 0.02148456 | 0.08638159 |
| ENSMUSG00000033792 | -0.8251488 | 5.53940557 | 0.021544   | 0.08656885 |
| ENSMUSG00000043535 | -0.8180262 | 8.55582153 | 0.02154619 | 0.08656885 |
| ENSMUSG00000041168 | 0.82548325 | 5.5505982  | 0.02158158 | 0.08668073 |
| ENSMUSG00000037098 | 0.86736448 | 3.07736468 | 0.02160339 | 0.08673802 |
| ENSMUSG00000026915 | -0.8178377 | 7.99822529 | 0.02166993 | 0.0869748  |
| ENSMUSG00000072763 | -0.8729025 | 2.81052268 | 0.02175664 | 0.08729235 |
| ENSMUSG00000026080 | 0.8182823  | 6.88572658 | 0.02180578 | 0.08745897 |
| ENSMUSG00000017299 | 0.83995909 | 4.11218255 | 0.02187515 | 0.08770663 |
| ENSMUSG00000032376 | -0.8186704 | 6.53833201 | 0.02194004 | 0.0879361  |
| ENSMUSG00000038250 | -0.8173899 | 7.05218577 | 0.02195549 | 0.08796737 |
| ENSMUSG00000025651 | 0.8198106  | 5.95905464 | 0.02198706 | 0.08806317 |
| ENSMUSG00000028397 | -0.8181215 | 6.58075977 | 0.02204272 | 0.08825535 |
| ENSMUSG00000022092 | -0.8171485 | 6.837557   | 0.02209268 | 0.08842457 |
| ENSMUSG00000015882 | -0.8309138 | 4.63863244 | 0.02211989 | 0.08850266 |
| ENSMUSG00000012519 | 0.98017869 | 1.54743654 | 0.02216196 | 0.08864012 |
| ENSMUSG00000027620 | -0.8135198 | 9.56646297 | 0.02218745 | 0.08868221 |



|                    |            |            |            |            |
|--------------------|------------|------------|------------|------------|
| ENSMUSG00000030798 | 0.81364517 | 9.30306908 | 0.02218791 | 0.08868221 |
| ENSMUSG00000024012 | 0.82326342 | 5.19633846 | 0.02220253 | 0.08870978 |
| ENSMUSG00000051864 | 0.82638517 | 4.8803142  | 0.02223078 | 0.08879181 |
| ENSMUSG00000027962 | 0.81402596 | 8.29745344 | 0.02223908 | 0.08879411 |
| ENSMUSG00000026034 | -0.8128568 | 10.3357928 | 0.02226029 | 0.08884794 |
| ENSMUSG00000020289 | 0.82619865 | 5.13927112 | 0.02232073 | 0.08905822 |
| ENSMUSG00000096461 | -0.9469269 | 1.6505684  | 0.02233362 | 0.08907873 |
| ENSMUSG00000037808 | -0.8152979 | 6.84115256 | 0.0223768  | 0.08922    |
| ENSMUSG00000042670 | -0.840538  | 3.81731221 | 0.02239587 | 0.08926509 |
| ENSMUSG00000054426 | -0.8384206 | 3.78528091 | 0.02246114 | 0.08947077 |
| ENSMUSG00000096740 | -0.8688338 | 2.9458751  | 0.02246304 | 0.08947077 |
| ENSMUSG00000034206 | -0.8300905 | 4.51790081 | 0.02248163 | 0.08951378 |
| ENSMUSG00000060509 | 0.89889677 | 2.48778208 | 0.0225229  | 0.08964708 |
| ENSMUSG00000020109 | 0.82564254 | 4.67231601 | 0.02254446 | 0.08970181 |
| ENSMUSG00000040738 | -0.8149651 | 6.52202824 | 0.02260159 | 0.089898   |
| ENSMUSG00000061371 | -0.8442472 | 3.58827419 | 0.02264152 | 0.09002569 |
| ENSMUSG00000033004 | -0.8103697 | 9.70575817 | 0.02268898 | 0.0901832  |
| ENSMUSG00000095687 | 0.97073204 | 1.71728528 | 0.02271732 | 0.09026463 |
| ENSMUSG00000022200 | -0.8135126 | 6.6942485  | 0.02274455 | 0.09034162 |
| ENSMUSG00000018470 | 1.08726152 | 0.56695244 | 0.02276993 | 0.09041117 |
| ENSMUSG00000021668 | -0.8207788 | 5.11011896 | 0.02281345 | 0.09051818 |
| ENSMUSG00000037826 | -0.8144078 | 6.29093812 | 0.02281992 | 0.09051818 |
| ENSMUSG00000022637 | -0.8115418 | 7.31001931 | 0.0228205  | 0.09051818 |
| ENSMUSG00000047264 | 0.88612017 | 2.32298954 | 0.02285013 | 0.09060444 |
| ENSMUSG00000081920 | -0.9517702 | 1.48507408 | 0.02286583 | 0.09063544 |
| ENSMUSG00000036086 | -0.8382872 | 3.80730383 | 0.02288244 | 0.09067001 |
| ENSMUSG00000024542 | -0.8106379 | 7.11355249 | 0.02304353 | 0.09127509 |
| ENSMUSG00000022554 | 0.85844689 | 2.95692168 | 0.02305103 | 0.09127509 |
| ENSMUSG00000025982 | -0.8076411 | 10.5068218 | 0.02311587 | 0.09149928 |
| ENSMUSG00000039263 | 0.81744414 | 5.34669986 | 0.02312799 | 0.09149928 |
| ENSMUSG00000064368 | -0.8174705 | 5.330438   | 0.02313153 | 0.09149928 |
| ENSMUSG00000003847 | -0.8079715 | 8.63272584 | 0.02317069 | 0.09162265 |
| ENSMUSG00000020362 | -0.8087545 | 7.80205945 | 0.02318705 | 0.09165581 |
| ENSMUSG00000021485 | 1.06015288 | 1.06277598 | 0.02319989 | 0.09167505 |
| ENSMUSG00000018040 | 0.81488153 | 5.19094432 | 0.02331635 | 0.09210359 |
| ENSMUSG00000032436 | 0.8140623  | 5.54206736 | 0.0233384  | 0.09215901 |
| ENSMUSG00000057963 | 0.8273504  | 4.22108841 | 0.02339429 | 0.09234399 |
| ENSMUSG00000040651 | -0.8080086 | 7.27426483 | 0.02340131 | 0.09234399 |
| ENSMUSG00000048379 | -0.8081353 | 7.15306654 | 0.02346505 | 0.09253214 |
| ENSMUSG00000023827 | 0.8416221  | 3.80192179 | 0.02346972 | 0.09253214 |
| ENSMUSG00000071647 | 0.81226888 | 5.88642446 | 0.02347314 | 0.09253214 |
| ENSMUSG00000086370 | -0.8100902 | 6.36318868 | 0.02348573 | 0.09255003 |
| ENSMUSG00000039069 | 0.82816837 | 4.02304474 | 0.02350149 | 0.0925804  |

|                    |            |            |            |            |
|--------------------|------------|------------|------------|------------|
| ENSMUSG00000059278 | 0.88412891 | 2.16627558 | 0.02352324 | 0.09263434 |
| ENSMUSG00000039116 | 1.01443436 | 0.93498044 | 0.0235512  | 0.09271268 |
| ENSMUSG00000026004 | -0.813216  | 5.49334322 | 0.02362134 | 0.09295698 |
| ENSMUSG00000002280 | 0.82387188 | 4.26195849 | 0.02363696 | 0.09298661 |
| ENSMUSG00000050846 | 0.86188729 | 2.79083702 | 0.02368938 | 0.09316095 |
| ENSMUSG00000033577 | 0.85134178 | 3.20365518 | 0.02372583 | 0.09327238 |
| ENSMUSG00000038604 | 0.81833155 | 4.5522059  | 0.02375357 | 0.09334951 |
| ENSMUSG00000004187 | 0.88292964 | 2.27715912 | 0.02377413 | 0.09339838 |
| ENSMUSG00000064373 | 0.80655791 | 6.96984714 | 0.02383926 | 0.09362225 |
| ENSMUSG00000027695 | 0.9683815  | 1.22421552 | 0.02388372 | 0.09376482 |
| ENSMUSG00000048832 | 0.82861911 | 3.96999115 | 0.02389765 | 0.09378748 |
| ENSMUSG00000090266 | -0.8092779 | 5.93162002 | 0.02391658 | 0.09382972 |
| ENSMUSG00000062866 | 0.84426673 | 3.42916199 | 0.02399167 | 0.09409222 |
| ENSMUSG00000053730 | 0.84326353 | 3.17217578 | 0.02400166 | 0.09409927 |
| ENSMUSG00000004788 | 0.81812925 | 4.5380805  | 0.02407372 | 0.09431454 |
| ENSMUSG00000048100 | -0.8138858 | 4.99690006 | 0.02407819 | 0.09431454 |
| ENSMUSG00000071477 | 0.82279761 | 4.44179435 | 0.02408118 | 0.09431454 |
| ENSMUSG00000039232 | 0.84655593 | 3.50586038 | 0.02416287 | 0.09460224 |
| ENSMUSG00000027765 | 1.07077059 | 0.98253108 | 0.02421299 | 0.09476618 |
| ENSMUSG00000079491 | 0.80673078 | 6.12413015 | 0.02422706 | 0.094789   |
| ENSMUSG00000025609 | -0.8036443 | 7.04544429 | 0.02426569 | 0.09490782 |
| ENSMUSG00000042380 | 0.8414221  | 3.15962666 | 0.02427768 | 0.09492244 |
| ENSMUSG00000012428 | 0.91212872 | 2.20496049 | 0.02428662 | 0.09492507 |
| ENSMUSG00000075704 | 0.81880923 | 4.49057667 | 0.02437802 | 0.09524994 |
| ENSMUSG00000027834 | -0.810592  | 5.23590068 | 0.02442046 | 0.09538336 |
| ENSMUSG00000004043 | 0.81334215 | 5.00979541 | 0.02444771 | 0.09545734 |
| ENSMUSG00000052296 | 0.8016621  | 7.52333732 | 0.02445681 | 0.09546046 |
| ENSMUSG00000032590 | 0.80424619 | 6.24461083 | 0.02451096 | 0.09563934 |
| ENSMUSG00000025907 | -0.8014841 | 7.3580022  | 0.02453667 | 0.09570716 |
| ENSMUSG00000015542 | 0.84789887 | 2.99066681 | 0.02455429 | 0.09573835 |
| ENSMUSG00000045639 | 0.83377086 | 3.54106586 | 0.02456132 | 0.09573835 |
| ENSMUSG00000001348 | 0.80273467 | 6.49674994 | 0.02459687 | 0.09584441 |
| ENSMUSG00000033253 | 0.80468678 | 6.1061134  | 0.02472219 | 0.09628677 |
| ENSMUSG00000034165 | 0.80450891 | 6.0552759  | 0.02472715 | 0.09628677 |
| ENSMUSG00000041439 | 0.81283497 | 4.81466718 | 0.02474234 | 0.09631331 |
| ENSMUSG00000101029 | 0.98921718 | 0.97213348 | 0.02475873 | 0.09633674 |
| ENSMUSG00000035198 | 0.83418117 | 3.5499065  | 0.02476512 | 0.09633674 |
| ENSMUSG00000039637 | 0.80303419 | 6.46847959 | 0.02479145 | 0.09640653 |
| ENSMUSG00000025499 | 0.83200326 | 3.41155838 | 0.02480449 | 0.09642463 |
| ENSMUSG00000076531 | -0.9593404 | 1.30446106 | 0.02488027 | 0.09668651 |
| ENSMUSG00000006262 | -0.8034827 | 5.84616011 | 0.02491259 | 0.09677937 |
| ENSMUSG00000070780 | 0.93409715 | 1.94677155 | 0.02499818 | 0.09707908 |
| ENSMUSG00000028410 | -0.7966166 | 10.4940227 | 0.02504016 | 0.09720927 |

|                    |            |            |            |            |
|--------------------|------------|------------|------------|------------|
| ENSMUSG00000027763 | -0.79688   | 9.14743389 | 0.02505588 | 0.09723747 |
| ENSMUSG00000037916 | 0.80625432 | 5.21060269 | 0.02514386 | 0.09754595 |
| ENSMUSG00000027784 | -0.8069456 | 5.04677073 | 0.02518634 | 0.09767779 |
| ENSMUSG00000053334 | 0.85487456 | 2.83583108 | 0.02520878 | 0.09773184 |
| ENSMUSG00000039201 | 0.81233053 | 4.20408489 | 0.02526725 | 0.09786675 |
| ENSMUSG00000024899 | 1.07157569 | 0.84652681 | 0.02526912 | 0.09786675 |
| ENSMUSG00000030917 | 1.02606223 | 0.84787409 | 0.02526912 | 0.09786675 |
| ENSMUSG00000024369 | 0.82868548 | 3.42517926 | 0.02537457 | 0.09819171 |
| ENSMUSG00000097119 | -0.822571  | 3.92359696 | 0.02538021 | 0.09819171 |
| ENSMUSG00000041225 | -0.7997846 | 6.07847975 | 0.02538207 | 0.09819171 |
| ENSMUSG00000041353 | -0.8180026 | 3.97060761 | 0.02538719 | 0.09819171 |
| ENSMUSG00000042699 | -0.7949113 | 9.35276507 | 0.02540165 | 0.0982146  |
| ENSMUSG00000016526 | 0.83231572 | 3.58258966 | 0.02545939 | 0.09840474 |
| ENSMUSG00000019822 | 0.81498161 | 4.19323489 | 0.0254896  | 0.09844901 |
| ENSMUSG00000024947 | 0.80868599 | 4.62154601 | 0.02549647 | 0.09844901 |
| ENSMUSG00000042524 | 0.79587977 | 7.59342555 | 0.02549654 | 0.09844901 |
| ENSMUSG00000027823 | -0.7983857 | 6.32002843 | 0.02556722 | 0.09865771 |
| ENSMUSG00000060336 | -0.8426986 | 3.02697421 | 0.02556775 | 0.09865771 |
| ENSMUSG00000020315 | -0.7935814 | 8.74996913 | 0.0256889  | 0.09909193 |
| ENSMUSG00000026873 | 0.81355602 | 4.15525638 | 0.02569972 | 0.09910041 |
| ENSMUSG00000004591 | -0.7951727 | 7.15518826 | 0.0257409  | 0.0992083  |
| ENSMUSG00000025858 | 0.81011254 | 4.54191172 | 0.02574496 | 0.0992083  |
| ENSMUSG00000011960 | -0.7945893 | 7.38027575 | 0.02577142 | 0.09927697 |
| ENSMUSG00000059897 | -0.8155945 | 3.96867376 | 0.02580206 | 0.09933904 |
| ENSMUSG00000052429 | 0.79910071 | 5.53695223 | 0.02581511 | 0.09933904 |
| ENSMUSG00000024797 | 0.8103106  | 4.30763737 | 0.02582802 | 0.09933904 |
| ENSMUSG00000025351 | 1.01730692 | 0.7012547  | 0.02583153 | 0.09933904 |
| ENSMUSG00000062939 | -0.7980838 | 6.02751927 | 0.02583588 | 0.09933904 |
| ENSMUSG00000011884 | 0.7994348  | 5.76301897 | 0.02583939 | 0.09933904 |
| ENSMUSG00000022021 | -0.818958  | 3.94259659 | 0.02585052 | 0.09934863 |
| ENSMUSG00000052609 | 0.80638397 | 4.76922866 | 0.02592332 | 0.09959511 |
| ENSMUSG00000040760 | -0.7949962 | 6.75397532 | 0.02594251 | 0.09963552 |
| ENSMUSG00000024293 | -0.7937237 | 7.33750691 | 0.0259653  | 0.09968976 |
| ENSMUSG00000031433 | -0.8024536 | 5.0547877  | 0.02604342 | 0.0999563  |
| ENSMUSG00000028538 | 0.82995607 | 3.37876202 | 0.02605724 | 0.09997597 |
| ENSMUSG00000061755 | -0.7921222 | 7.9655267  | 0.02608748 | 0.1000586  |
| ENSMUSG00000097636 | -0.7934401 | 6.77161459 | 0.02613856 | 0.10022108 |
| ENSMUSG00000026064 | -0.7916534 | 8.10057124 | 0.02615966 | 0.10025966 |
| ENSMUSG00000024290 | -0.791385  | 8.30104947 | 0.02617519 | 0.10025966 |
| ENSMUSG00000034487 | 0.89597431 | 1.99227788 | 0.02619652 | 0.10025966 |
| ENSMUSG00000056537 | -0.7919466 | 7.57745868 | 0.0262     | 0.10025966 |
| ENSMUSG00000021061 | 0.79602372 | 6.12672674 | 0.02620271 | 0.10025966 |
| ENSMUSG00000042595 | -0.8035925 | 4.86964428 | 0.02620927 | 0.10025966 |

|                    |            |            |            |            |
|--------------------|------------|------------|------------|------------|
| ENSMUSG00000020288 | -0.7932468 | 7.12884886 | 0.02620968 | 0.10025966 |
| ENSMUSG00000020437 | 0.79112602 | 8.10606429 | 0.02625559 | 0.10040188 |
| ENSMUSG00000033545 | 0.80757724 | 4.52109245 | 0.02629693 | 0.10052652 |
| ENSMUSG00000020284 | 0.87812696 | 2.24760921 | 0.02634295 | 0.10066894 |
| ENSMUSG00000002812 | 0.79131172 | 7.41051525 | 0.02635279 | 0.1006731  |
| ENSMUSG00000044150 | -0.7978696 | 5.42667138 | 0.02640254 | 0.10082962 |
| ENSMUSG00000049086 | 0.88546914 | 2.31217481 | 0.02646857 | 0.10104824 |
| ENSMUSG00000065990 | 0.80465373 | 4.56654775 | 0.0265286  | 0.10124379 |
| ENSMUSG00000040918 | -0.8271179 | 3.20339453 | 0.02655434 | 0.10130839 |
| ENSMUSG00000085054 | -0.9938864 | 0.82011718 | 0.02657717 | 0.10136183 |
| ENSMUSG00000031880 | 0.79703886 | 4.98775153 | 0.02667611 | 0.10170544 |
| ENSMUSG00000027502 | 0.79190007 | 6.13445479 | 0.02673253 | 0.10186288 |
| ENSMUSG00000079316 | -0.8064786 | 4.25854472 | 0.02673513 | 0.10186288 |
| ENSMUSG00000025371 | 0.81777629 | 3.35478414 | 0.02674997 | 0.10188565 |
| ENSMUSG00000004562 | 0.96425803 | 1.32791558 | 0.02680224 | 0.10205093 |
| ENSMUSG00000058402 | -0.8027834 | 4.5959297  | 0.02683059 | 0.10212506 |
| ENSMUSG00000033382 | -0.7884865 | 7.5753541  | 0.02687154 | 0.10222732 |
| ENSMUSG00000039206 | 0.80908235 | 4.21103286 | 0.02687525 | 0.10222732 |
| ENSMUSG00000043467 | -0.793449  | 5.60172003 | 0.02692535 | 0.10237368 |
| ENSMUSG00000025939 | -0.7938752 | 5.63347597 | 0.02693154 | 0.10237368 |
| ENSMUSG00000027399 | 0.94442701 | 1.52663609 | 0.02697026 | 0.10248699 |
| ENSMUSG00000028430 | 0.7958033  | 5.36079446 | 0.02699524 | 0.10251879 |
| ENSMUSG00000071252 | -0.890562  | 1.88737914 | 0.02699647 | 0.10251879 |
| ENSMUSG00000032902 | -0.7897408 | 6.30851681 | 0.02717755 | 0.10317236 |
| ENSMUSG00000035168 | 0.8642021  | 2.58489389 | 0.02726143 | 0.10345664 |
| ENSMUSG00000005625 | 0.7898631  | 6.03163417 | 0.02730949 | 0.10360481 |
| ENSMUSG00000042271 | -0.8172781 | 3.53634463 | 0.02731857 | 0.10360505 |
| ENSMUSG00000051727 | 0.81681249 | 3.93924601 | 0.02733099 | 0.10361797 |
| ENSMUSG00000029655 | -0.7855805 | 7.67834342 | 0.0274134  | 0.10384411 |
| ENSMUSG00000010663 | 0.81351965 | 3.79148927 | 0.02741576 | 0.10384411 |
| ENSMUSG00000003929 | -0.795548  | 5.03543784 | 0.02742446 | 0.10384411 |
| ENSMUSG00000026097 | -0.7978437 | 4.93373327 | 0.02742677 | 0.10384411 |
| ENSMUSG00000095753 | -0.8042836 | 4.3300979  | 0.02748405 | 0.10402671 |
| ENSMUSG00000032845 | -0.8161459 | 3.55775817 | 0.02760202 | 0.10443883 |
| ENSMUSG00000089844 | -0.7918635 | 5.41082943 | 0.02763389 | 0.10452504 |
| ENSMUSG00000026965 | 0.78690964 | 6.34989417 | 0.02767129 | 0.10463208 |
| ENSMUSG00000023048 | 0.78718598 | 6.36204732 | 0.02768523 | 0.10465033 |
| ENSMUSG00000034459 | 0.82125999 | 3.30092661 | 0.02770114 | 0.10467605 |
| ENSMUSG00000056267 | -0.8020508 | 4.14482561 | 0.02772955 | 0.10474901 |
| ENSMUSG00000028581 | 0.78197671 | 9.57921428 | 0.02784031 | 0.1051317  |
| ENSMUSG00000078185 | -0.8119884 | 3.74307206 | 0.02784915 | 0.1051317  |
| ENSMUSG00000003033 | 0.78433206 | 6.82360244 | 0.02795087 | 0.10547511 |
| ENSMUSG00000096515 | -0.796763  | 4.65659553 | 0.02796505 | 0.10547511 |

|                    |            |            |            |            |
|--------------------|------------|------------|------------|------------|
| ENSMUSG00000033216 | 0.80093053 | 4.08285994 | 0.02796765 | 0.10547511 |
| ENSMUSG00000027580 | 0.78122885 | 9.58176869 | 0.02799508 | 0.10554393 |
| ENSMUSG00000049658 | -0.7822765 | 7.7513555  | 0.02803046 | 0.10559446 |
| ENSMUSG00000040482 | 0.80568262 | 4.01646808 | 0.02803489 | 0.10559446 |
| ENSMUSG00000035547 | 0.80306266 | 4.23529175 | 0.02803604 | 0.10559446 |
| ENSMUSG00000056592 | 0.83638958 | 3.01135237 | 0.02805392 | 0.10562718 |
| ENSMUSG00000020608 | -0.7819108 | 7.90110758 | 0.02807903 | 0.1056871  |
| ENSMUSG00000024483 | -0.7805433 | 8.78518056 | 0.02819581 | 0.10609191 |
| ENSMUSG00000001029 | 0.78800939 | 5.39192756 | 0.02831996 | 0.10652419 |
| ENSMUSG00000057672 | 0.78208096 | 7.19139538 | 0.0283386  | 0.10652818 |
| ENSMUSG00000036097 | -0.7807971 | 7.62343652 | 0.02835399 | 0.10652818 |
| ENSMUSG00000013698 | 0.78468689 | 6.05976185 | 0.02836433 | 0.10652818 |
| ENSMUSG00000021495 | 0.78305785 | 6.34626993 | 0.02836433 | 0.10652818 |
| ENSMUSG00000015944 | 0.81864228 | 3.37997912 | 0.02836736 | 0.10652818 |
| ENSMUSG00000027889 | 0.79371995 | 4.64011113 | 0.02837732 | 0.1065308  |
| ENSMUSG00000000275 | -0.7797127 | 8.41911163 | 0.02841529 | 0.10663851 |
| ENSMUSG00000024013 | 0.77996741 | 7.18595807 | 0.02863011 | 0.10740964 |
| ENSMUSG00000038058 | 0.78541211 | 5.56436599 | 0.02870854 | 0.10762474 |
| ENSMUSG00000046733 | 0.85921265 | 2.11909503 | 0.0287116  | 0.10762474 |
| ENSMUSG00000022546 | 0.98480798 | 0.8098511  | 0.02872032 | 0.10762474 |
| ENSMUSG00000097705 | -0.7843892 | 5.58722027 | 0.02872607 | 0.10762474 |
| ENSMUSG00000044867 | -0.8097872 | 3.53097297 | 0.02875282 | 0.10762474 |
| ENSMUSG00000002105 | 0.81921862 | 3.35084348 | 0.02875523 | 0.10762474 |
| ENSMUSG00000058486 | 0.78716822 | 5.13560641 | 0.0287607  | 0.10762474 |
| ENSMUSG00000002658 | 0.78632658 | 5.26515805 | 0.02876325 | 0.10762474 |
| ENSMUSG00000031709 | 0.78730678 | 5.34391702 | 0.02877171 | 0.10762474 |
| ENSMUSG00000019214 | 0.90864573 | 1.89868396 | 0.02880642 | 0.10771953 |
| ENSMUSG00000029313 | -0.7778092 | 7.98255082 | 0.02886098 | 0.10788846 |
| ENSMUSG00000028245 | -0.7779669 | 7.72297365 | 0.02888887 | 0.10795759 |
| ENSMUSG00000064367 | -0.7762103 | 11.1851671 | 0.02892815 | 0.10806925 |
| ENSMUSG00000019432 | 0.7771319  | 8.05575387 | 0.02897481 | 0.1082084  |
| ENSMUSG00000082064 | -0.8935498 | 1.81569612 | 0.02899554 | 0.10825065 |
| ENSMUSG00000037486 | -0.7776764 | 7.53480148 | 0.02900571 | 0.10825347 |
| ENSMUSG00000054387 | -0.7761946 | 9.29970447 | 0.02901806 | 0.10826439 |
| ENSMUSG00000034032 | 0.7879785  | 5.04793082 | 0.02902992 | 0.10827352 |
| ENSMUSG00000021939 | 0.77611131 | 9.14296482 | 0.02906109 | 0.1083546  |
| ENSMUSG00000015452 | 0.94846993 | 1.24169105 | 0.02908949 | 0.10838207 |
| ENSMUSG0000002608  | 0.78322975 | 5.60868325 | 0.02909092 | 0.10838207 |
| ENSMUSG00000031583 | -0.7790709 | 6.62643313 | 0.02909674 | 0.10838207 |
| ENSMUSG00000028559 | -0.776754  | 7.79995859 | 0.02913541 | 0.10849093 |
| ENSMUSG00000019726 | -0.7755705 | 8.36032985 | 0.02924345 | 0.10885798 |
| ENSMUSG00000020231 | 0.8203962  | 3.47640294 | 0.02926889 | 0.1089174  |
| ENSMUSG00000053205 | -0.8265871 | 2.76747782 | 0.02931399 | 0.10904994 |

|                    |            |            |            |            |
|--------------------|------------|------------|------------|------------|
| ENSMUSG0000000325  | 0.94639014 | 1.15925168 | 0.02932446 | 0.10905358 |
| ENSMUSG00000024429 | 0.78346822 | 5.15804128 | 0.029346   | 0.1090984  |
| ENSMUSG00000082101 | -0.7906668 | 4.69173386 | 0.02937625 | 0.10917554 |
| ENSMUSG00000032307 | -0.7815057 | 5.62637762 | 0.02939607 | 0.10921391 |
| ENSMUSG00000022428 | 0.86690862 | 1.9238441  | 0.02944538 | 0.10934112 |
| ENSMUSG00000028552 | -0.7750243 | 8.00692063 | 0.02944933 | 0.10934112 |
| ENSMUSG00000030805 | 0.77999239 | 5.8105207  | 0.02948927 | 0.10945402 |
| ENSMUSG00000040824 | 0.7856467  | 4.44090696 | 0.02955753 | 0.10967198 |
| ENSMUSG00000021936 | -0.7804278 | 5.61175329 | 0.02958838 | 0.10975103 |
| ENSMUSG00000024691 | -0.7735949 | 8.89935256 | 0.02961015 | 0.10979635 |
| ENSMUSG00000038936 | 0.83043218 | 2.74222617 | 0.02969053 | 0.11005171 |
| ENSMUSG00000032485 | 0.78077545 | 5.3980002  | 0.02969898 | 0.11005171 |
| ENSMUSG00000021713 | -0.7833164 | 5.12691184 | 0.02970774 | 0.11005171 |
| ENSMUSG00000026966 | 0.79681717 | 3.92652229 | 0.02977661 | 0.1102713  |
| ENSMUSG00000064356 | 0.77861547 | 5.88407088 | 0.02982504 | 0.11041509 |
| ENSMUSG00000038910 | -0.7738785 | 7.18905947 | 0.02988982 | 0.11061927 |
| ENSMUSG00000040325 | -0.7746131 | 6.64149398 | 0.03000586 | 0.11094052 |
| ENSMUSG00000089838 | -0.8371132 | 2.4038558  | 0.03000856 | 0.11094052 |
| ENSMUSG00000022551 | 0.77778576 | 5.49754677 | 0.03001011 | 0.11094052 |
| ENSMUSG00000063406 | -0.7745193 | 6.67430593 | 0.03001523 | 0.11094052 |
| ENSMUSG00000047454 | -0.7852675 | 4.83583538 | 0.03004352 | 0.11100942 |
| ENSMUSG00000042148 | 0.80992769 | 3.22271613 | 0.03008291 | 0.11111921 |
| ENSMUSG00000024241 | -0.7745346 | 6.45064763 | 0.0301096  | 0.11118211 |
| ENSMUSG00000002768 | 0.78726504 | 4.28449138 | 0.03014136 | 0.11126362 |
| ENSMUSG00000029033 | 0.80310944 | 3.76126049 | 0.0302215  | 0.1115024  |
| ENSMUSG00000076674 | -0.8206604 | 3.15031449 | 0.03023133 | 0.1115024  |
| ENSMUSG00000028312 | -0.7738771 | 6.60065351 | 0.03023514 | 0.1115024  |
| ENSMUSG00000039221 | -0.7751152 | 6.19690541 | 0.03024564 | 0.11150532 |
| ENSMUSG00000071064 | -0.7965824 | 3.52872785 | 0.03025965 | 0.1115212  |
| ENSMUSG00000020395 | 0.78118302 | 5.10665023 | 0.03028495 | 0.11157868 |
| ENSMUSG00000033632 | -0.7804892 | 5.08164441 | 0.03035057 | 0.11178462 |
| ENSMUSG00000060301 | -0.7761351 | 5.80937036 | 0.0303607  | 0.11178613 |
| ENSMUSG00000029726 | 0.77560694 | 5.89419077 | 0.03042698 | 0.1119943  |
| ENSMUSG00000042289 | 0.84762354 | 2.44720079 | 0.03045584 | 0.11206461 |
| ENSMUSG00000037110 | -0.7743859 | 5.92231058 | 0.03048257 | 0.1121271  |
| ENSMUSG00000035840 | -0.7769876 | 5.4966973  | 0.03052095 | 0.11223234 |
| ENSMUSG00000043102 | 0.9541348  | 0.93611284 | 0.03061165 | 0.11249391 |
| ENSMUSG00000024891 | 0.93361647 | 0.94266487 | 0.03061165 | 0.11249391 |
| ENSMUSG00000064127 | -0.7711935 | 6.82536262 | 0.0306234  | 0.11250112 |
| ENSMUSG00000033972 | -0.7908376 | 3.84736576 | 0.0306581  | 0.11259261 |
| ENSMUSG00000025925 | -0.7776069 | 5.32830126 | 0.03072052 | 0.1127858  |
| ENSMUSG00000021025 | 0.76953388 | 7.40702658 | 0.03079106 | 0.11300871 |
| ENSMUSG00000004359 | 0.77596797 | 5.58729328 | 0.03084771 | 0.11318048 |

|                    |            |            |            |            |
|--------------------|------------|------------|------------|------------|
| ENSMUSG00000025058 | -0.772582  | 5.94079646 | 0.03088643 | 0.11328639 |
| ENSMUSG00000076613 | 0.7774215  | 5.4357836  | 0.03089806 | 0.11329288 |
| ENSMUSG00000026509 | 0.77300146 | 5.81322677 | 0.03091924 | 0.11333439 |
| ENSMUSG00000037752 | 0.86091179 | 1.91743187 | 0.03095765 | 0.11343902 |
| ENSMUSG00000079677 | 0.80393031 | 2.89726698 | 0.030971   | 0.11345178 |
| ENSMUSG00000062743 | -0.78917   | 3.80077805 | 0.03103187 | 0.11363851 |
| ENSMUSG00000039219 | -0.7673963 | 7.96993183 | 0.03106173 | 0.11368294 |
| ENSMUSG00000021242 | 0.76867279 | 7.04417194 | 0.03107018 | 0.11368294 |
| ENSMUSG00000024608 | 0.76677895 | 8.50829164 | 0.03107367 | 0.11368294 |
| ENSMUSG00000031878 | -0.7701534 | 6.33915935 | 0.03113753 | 0.11388034 |
| ENSMUSG00000048280 | -0.7812861 | 4.62307425 | 0.03115042 | 0.11389126 |
| ENSMUSG00000046785 | -0.7685677 | 6.63582727 | 0.03130329 | 0.11441376 |
| ENSMUSG00000029580 | 0.76485972 | 10.8742509 | 0.03133025 | 0.11447591 |
| ENSMUSG00000046111 | -0.7673749 | 7.04029813 | 0.03134476 | 0.11449254 |
| ENSMUSG00000040423 | -0.7660368 | 7.96679758 | 0.03137181 | 0.11455493 |
| ENSMUSG00000028068 | 0.95368028 | 1.36137523 | 0.03138741 | 0.11457551 |
| ENSMUSG00000091474 | -0.7743597 | 5.2568161  | 0.03141089 | 0.11462483 |
| ENSMUSG00000022905 | -0.7664189 | 7.46479896 | 0.03144997 | 0.11473101 |
| ENSMUSG00000099065 | -0.7646079 | 9.48774256 | 0.03146041 | 0.11473268 |
| ENSMUSG00000029345 | 0.77411244 | 5.17438012 | 0.03147991 | 0.11476737 |
| ENSMUSG00000006395 | 0.81138199 | 3.19498199 | 0.03151098 | 0.11484422 |
| ENSMUSG00000020949 | -0.7691473 | 6.17755062 | 0.03152526 | 0.11485986 |
| ENSMUSG00000064254 | 0.80255773 | 3.21258714 | 0.03157555 | 0.11500665 |
| ENSMUSG00000029417 | 0.81654536 | 2.918102   | 0.03162171 | 0.11507529 |
| ENSMUSG00000003198 | -0.7849063 | 4.24947639 | 0.03162988 | 0.11507529 |
| ENSMUSG00000029185 | 0.79330833 | 3.84766932 | 0.03163788 | 0.11507529 |
| ENSMUSG00000022575 | 0.76824935 | 6.13187109 | 0.03164265 | 0.11507529 |
| ENSMUSG00000038291 | -0.7683903 | 6.13916505 | 0.03164445 | 0.11507529 |
| ENSMUSG00000003435 | 0.76484939 | 7.59261189 | 0.03169564 | 0.1152168  |
| ENSMUSG00000021900 | 0.78798572 | 3.62978725 | 0.03170341 | 0.1152168  |
| ENSMUSG00000009555 | 0.76681104 | 6.50200855 | 0.03172671 | 0.11524896 |
| ENSMUSG00000033953 | -0.7661826 | 6.87617557 | 0.03173232 | 0.11524896 |
| ENSMUSG00000052544 | -0.8578335 | 1.95033571 | 0.03175674 | 0.11528791 |
| ENSMUSG00000063364 | -0.8978921 | 1.25703152 | 0.0317631  | 0.11528791 |
| ENSMUSG00000008384 | 0.77739467 | 4.80430658 | 0.03180143 | 0.11539062 |
| ENSMUSG00000022503 | 0.76974493 | 5.76955063 | 0.03187455 | 0.11559581 |
| ENSMUSG00000026039 | -0.8089467 | 3.09793996 | 0.0318781  | 0.11559581 |
| ENSMUSG00000073791 | -0.8514821 | 2.10841062 | 0.03191669 | 0.11569927 |
| ENSMUSG00000027215 | 0.76470873 | 7.08389104 | 0.03196501 | 0.11583789 |
| ENSMUSG00000026623 | -0.7628437 | 8.27842637 | 0.03200227 | 0.11593635 |
| ENSMUSG00000076576 | -0.7702465 | 5.55284268 | 0.03201454 | 0.11594426 |
| ENSMUSG00000017404 | 0.76305987 | 7.70817941 | 0.03203727 | 0.11599006 |
| ENSMUSG00000024525 | 0.87171089 | 1.92802258 | 0.03206126 | 0.11604036 |

|                    |            |            |            |            |
|--------------------|------------|------------|------------|------------|
| ENSMUSG00000029787 | -0.7637279 | 7.15725608 | 0.03212478 | 0.11623366 |
| ENSMUSG00000015942 | 0.79078014 | 3.66793205 | 0.03218543 | 0.11641647 |
| ENSMUSG00000033192 | 0.76969013 | 5.4923412  | 0.03220337 | 0.11644471 |
| ENSMUSG00000040648 | -0.7635778 | 6.91974745 | 0.03222872 | 0.11649973 |
| ENSMUSG00000063698 | -0.8025785 | 3.14194535 | 0.03228296 | 0.11660105 |
| ENSMUSG00000018379 | -0.7613243 | 8.61302141 | 0.03228948 | 0.11660105 |
| ENSMUSG00000022201 | -0.7625586 | 7.35607226 | 0.03229628 | 0.11660105 |
| ENSMUSG00000031314 | -0.7619213 | 7.8714896  | 0.03229732 | 0.11660105 |
| ENSMUSG00000018599 | 0.8157558  | 2.81464485 | 0.03234168 | 0.11669006 |
| ENSMUSG00000087452 | -0.8000005 | 3.15973831 | 0.03234228 | 0.11669006 |
| ENSMUSG00000029312 | 0.83682727 | 2.35427743 | 0.03238003 | 0.1167896  |
| ENSMUSG00000000823 | 0.76867216 | 5.58333003 | 0.03245333 | 0.11701728 |
| ENSMUSG00000057497 | -0.7711862 | 4.99320097 | 0.03251412 | 0.11719968 |
| ENSMUSG00000042197 | -0.7628562 | 6.64619034 | 0.03255714 | 0.11729784 |
| ENSMUSG00000072761 | -0.8098437 | 2.86021178 | 0.03256224 | 0.11729784 |
| ENSMUSG00000019173 | 0.76304237 | 6.38217476 | 0.03257196 | 0.11729784 |
| ENSMUSG00000028563 | -0.7979915 | 3.2375514  | 0.03262116 | 0.1174271  |
| ENSMUSG00000026718 | -0.7731663 | 4.84048788 | 0.03262829 | 0.1174271  |
| ENSMUSG00000030096 | 0.76194411 | 6.95636649 | 0.03265086 | 0.11747156 |
| ENSMUSG00000061689 | 0.76641613 | 5.65192892 | 0.03267711 | 0.11749181 |
| ENSMUSG00000003882 | 0.7767347  | 4.7216563  | 0.03268548 | 0.11749181 |
| ENSMUSG00000031158 | 0.78576227 | 3.80730114 | 0.03268715 | 0.11749181 |
| ENSMUSG00000023707 | 0.79574112 | 3.51845555 | 0.03272757 | 0.11760031 |
| ENSMUSG00000033124 | 0.78265263 | 4.0897031  | 0.03280002 | 0.11782383 |
| ENSMUSG00000002257 | 0.76989268 | 4.89696889 | 0.03287929 | 0.11807166 |
| ENSMUSG00000032066 | 0.90544087 | 1.56557997 | 0.03298819 | 0.11842575 |
| ENSMUSG00000073494 | 0.84630958 | 2.42542155 | 0.03304242 | 0.11852293 |
| ENSMUSG00000008822 | 0.86954575 | 1.89640379 | 0.03304343 | 0.11852293 |
| ENSMUSG00000058748 | -0.7948746 | 3.43138336 | 0.03304619 | 0.11852293 |
| ENSMUSG00000080717 | -0.8330736 | 2.18451777 | 0.03312031 | 0.11875171 |
| ENSMUSG00000026361 | -0.7607201 | 6.53751889 | 0.0331433  | 0.11879709 |
| ENSMUSG00000074874 | 0.90485047 | 1.44004503 | 0.03322111 | 0.11903884 |
| ENSMUSG00000045932 | 0.76282316 | 5.60660887 | 0.03339637 | 0.11962955 |
| ENSMUSG00000041328 | -0.7566208 | 8.27712931 | 0.03342486 | 0.1196943  |
| ENSMUSG00000036845 | 0.77733761 | 3.75388232 | 0.03346402 | 0.11979723 |
| ENSMUSG00000022052 | -0.7581754 | 7.04585136 | 0.03347704 | 0.11980654 |
| ENSMUSG00000004100 | 0.78593986 | 3.87376338 | 0.03350459 | 0.1198678  |
| ENSMUSG00000027175 | 0.87975276 | 1.87960971 | 0.03355818 | 0.11998691 |
| ENSMUSG00000021830 | -0.7564627 | 7.79840027 | 0.03356172 | 0.11998691 |
| ENSMUSG00000056260 | -0.7607716 | 5.90087113 | 0.0335692  | 0.11998691 |
| ENSMUSG00000038774 | -0.7572056 | 7.1935541  | 0.0335814  | 0.11999324 |
| ENSMUSG00000048120 | 0.76070994 | 6.03845052 | 0.03363829 | 0.12015914 |
| ENSMUSG00000033684 | 0.78166126 | 3.82605128 | 0.03367489 | 0.12025251 |



|                    |            |            |            |            |
|--------------------|------------|------------|------------|------------|
| ENSMUSG00000024238 | -0.7579136 | 6.53035178 | 0.03373535 | 0.120431   |
| ENSMUSG00000066232 | -0.7559919 | 7.60710229 | 0.03375174 | 0.12045211 |
| ENSMUSG00000037286 | -0.755719  | 7.32804468 | 0.03387976 | 0.12087146 |
| ENSMUSG00000029422 | -0.7544675 | 8.03253762 | 0.03396589 | 0.12114115 |
| ENSMUSG00000061244 | -0.7571821 | 6.41357539 | 0.03400119 | 0.12122943 |
| ENSMUSG00000055762 | 0.75614373 | 6.52432716 | 0.03404463 | 0.1213158  |
| ENSMUSG00000031095 | -0.7574301 | 6.30118623 | 0.03404652 | 0.1213158  |
| ENSMUSG00000024831 | 0.79679238 | 3.38056155 | 0.03411833 | 0.12151619 |
| ENSMUSG00000055435 | 0.7691407  | 4.54585722 | 0.0341239  | 0.12151619 |
| ENSMUSG00000076522 | -0.7603124 | 5.7415744  | 0.03417032 | 0.1216438  |
| ENSMUSG00000058818 | 0.75556484 | 6.59414767 | 0.03420501 | 0.1217086  |
| ENSMUSG00000037058 | -0.753613  | 7.91505407 | 0.0342097  | 0.1217086  |
| ENSMUSG00000026335 | 0.94514064 | 1.27789361 | 0.0342281  | 0.1217364  |
| ENSMUSG00000094870 | -0.7560494 | 6.47864482 | 0.03429807 | 0.12194753 |
| ENSMUSG00000019370 | 0.75536391 | 6.28918375 | 0.03436685 | 0.1221114  |
| ENSMUSG00000031816 | 0.78283212 | 3.71710482 | 0.03437326 | 0.1221114  |
| ENSMUSG00000085156 | -0.7604366 | 5.38411528 | 0.03437603 | 0.1221114  |
| ENSMUSG00000036840 | -0.7701659 | 4.37231661 | 0.03443462 | 0.12228172 |
| ENSMUSG00000032030 | -0.7560181 | 6.18450713 | 0.03446132 | 0.12233874 |
| ENSMUSG00000028796 | 0.75554807 | 6.03464393 | 0.03450288 | 0.12244849 |
| ENSMUSG00000028076 | -0.7545439 | 6.35838431 | 0.03461239 | 0.12279922 |
| ENSMUSG00000082286 | 0.75683129 | 5.39119425 | 0.03475528 | 0.12326809 |
| ENSMUSG00000025645 | 0.82463925 | 2.64738027 | 0.03479413 | 0.12336146 |
| ENSMUSG00000055116 | -0.758176  | 5.34544299 | 0.03480753 | 0.12336146 |
| ENSMUSG00000025964 | 0.80186118 | 3.19021877 | 0.0348138  | 0.12336146 |
| ENSMUSG00000089688 | -0.8560684 | 1.90914332 | 0.03485085 | 0.12345471 |
| ENSMUSG00000000804 | -0.7517313 | 7.13109444 | 0.03489334 | 0.12356714 |
| ENSMUSG00000015880 | -0.771507  | 4.22819636 | 0.03492989 | 0.12365849 |
| ENSMUSG00000027281 | -0.762186  | 4.89072561 | 0.03498846 | 0.12381857 |
| ENSMUSG00000025451 | -0.7539468 | 6.22429816 | 0.03499665 | 0.12381857 |
| ENSMUSG00000027365 | -0.7505316 | 7.53227816 | 0.03500923 | 0.12382494 |
| ENSMUSG00000020108 | 0.75811335 | 4.90297591 | 0.03508121 | 0.12404138 |
| ENSMUSG00000039771 | 0.77119186 | 3.82286402 | 0.03509876 | 0.12406528 |
| ENSMUSG00000031543 | 0.75638351 | 5.61987861 | 0.03511602 | 0.12408812 |
| ENSMUSG00000004665 | 0.7498462  | 7.60094808 | 0.03515005 | 0.12417019 |
| ENSMUSG00000026411 | 0.78834449 | 2.98560332 | 0.03518597 | 0.12425266 |
| ENSMUSG00000020794 | -0.7545699 | 5.81523769 | 0.035198   | 0.12425266 |
| ENSMUSG00000071256 | 0.80277104 | 2.84530645 | 0.0352075  | 0.12425266 |
| ENSMUSG00000007030 | 0.88334825 | 1.31857934 | 0.03521663 | 0.12425266 |
| ENSMUSG00000006498 | 0.74978668 | 7.48391786 | 0.03523548 | 0.124281   |
| ENSMUSG00000023456 | 0.75443969 | 5.57943612 | 0.03527066 | 0.12433646 |
| ENSMUSG00000022132 | 0.83765534 | 2.10616423 | 0.03528365 | 0.12433646 |
| ENSMUSG00000016493 | -0.8190953 | 2.08077298 | 0.03528365 | 0.12433646 |

|                    |            |            |            |            |
|--------------------|------------|------------|------------|------------|
| ENSMUSG00000067336 | 0.78857877 | 3.65549295 | 0.03530926 | 0.12437702 |
| ENSMUSG00000004947 | 0.77080715 | 3.94118803 | 0.0353168  | 0.12437702 |
| ENSMUSG00000028857 | 0.76129529 | 4.47478304 | 0.03537793 | 0.12455416 |
| ENSMUSG00000021313 | -0.7930803 | 2.75343601 | 0.0353964  | 0.12458103 |
| ENSMUSG00000025395 | -0.7603096 | 4.9202402  | 0.03542838 | 0.12465542 |
| ENSMUSG00000002028 | -0.7473423 | 9.06139004 | 0.03548145 | 0.12480393 |
| ENSMUSG00000020741 | 0.75284543 | 5.79533533 | 0.03553407 | 0.12488957 |
| ENSMUSG00000036864 | 0.78958759 | 2.8568068  | 0.03554626 | 0.12488957 |
| ENSMUSG00000037151 | 0.77275973 | 3.69798415 | 0.03555989 | 0.12488957 |
| ENSMUSG00000028630 | 0.7552058  | 5.45416551 | 0.03556489 | 0.12488957 |
| ENSMUSG00000055240 | -0.7592939 | 4.70177342 | 0.03556974 | 0.12488957 |
| ENSMUSG00000097151 | -0.809518  | 2.44825371 | 0.03557098 | 0.12488957 |
| ENSMUSG00000020462 | -0.7695374 | 4.10210849 | 0.03560081 | 0.12495611 |
| ENSMUSG00000021028 | -0.7632867 | 4.43594594 | 0.03564076 | 0.12504413 |
| ENSMUSG00000097375 | -0.7946813 | 2.90253959 | 0.03564764 | 0.12504413 |
| ENSMUSG00000027900 | -0.7537794 | 5.48782322 | 0.03567522 | 0.12510271 |
| ENSMUSG00000030630 | 0.83891603 | 2.06263912 | 0.03570966 | 0.12518529 |
| ENSMUSG00000026426 | 0.75125708 | 6.03535115 | 0.03572596 | 0.12520425 |
| ENSMUSG00000006850 | 0.76759294 | 3.92018656 | 0.03574034 | 0.12521646 |
| ENSMUSG00000038608 | -0.7459335 | 9.91380826 | 0.03576407 | 0.12526142 |
| ENSMUSG00000032417 | 0.8722464  | 1.52935087 | 0.0358202  | 0.12541979 |
| ENSMUSG00000017760 | 0.74682192 | 7.73977478 | 0.0358568  | 0.12549713 |
| ENSMUSG00000030729 | -0.7560666 | 5.12414098 | 0.03586412 | 0.12549713 |
| ENSMUSG00000031939 | -0.7507446 | 6.03171167 | 0.03589055 | 0.12553195 |
| ENSMUSG00000095041 | 0.74611196 | 8.6299937  | 0.03590086 | 0.12553195 |
| ENSMUSG00000023262 | 0.79796878 | 2.671013   | 0.03590683 | 0.12553195 |
| ENSMUSG00000024952 | 0.75774503 | 4.57223526 | 0.03593484 | 0.12559165 |
| ENSMUSG00000025103 | -0.7493685 | 6.35464203 | 0.03598275 | 0.12572087 |
| ENSMUSG00000070867 | 0.91717909 | 1.28434104 | 0.03602737 | 0.12583852 |
| ENSMUSG00000055228 | -0.7852133 | 3.1678465  | 0.03604872 | 0.12585042 |
| ENSMUSG00000049760 | 0.76636797 | 3.92293504 | 0.03605267 | 0.12585042 |
| ENSMUSG00000014907 | -0.7754272 | 3.40935387 | 0.03613314 | 0.12606725 |
| ENSMUSG00000004626 | 0.74718783 | 6.9130013  | 0.03613672 | 0.12606725 |
| ENSMUSG00000035914 | 0.92389444 | 1.34750116 | 0.03617955 | 0.12617838 |
| ENSMUSG00000050241 | 0.8934485  | 1.75897574 | 0.03632087 | 0.12658141 |
| ENSMUSG00000000384 | 0.75346713 | 5.10819996 | 0.03632467 | 0.12658141 |
| ENSMUSG00000055531 | -0.7451829 | 7.50738489 | 0.03633032 | 0.12658141 |
| ENSMUSG00000064128 | -0.7532305 | 5.13650332 | 0.03633936 | 0.12658141 |
| ENSMUSG00000033671 | -0.7444748 | 8.07757918 | 0.03635017 | 0.12658141 |
| ENSMUSG00000029202 | -0.7441848 | 8.24645666 | 0.03640331 | 0.12672807 |
| ENSMUSG00000001774 | -0.7456274 | 7.39497617 | 0.03643523 | 0.12680077 |
| ENSMUSG00000047534 | -0.7809057 | 3.06928426 | 0.0364621  | 0.1268559  |
| ENSMUSG00000032423 | -0.7444905 | 7.51967554 | 0.03652643 | 0.12704123 |

|                    |            |            |            |            |
|--------------------|------------|------------|------------|------------|
| ENSMUSG00000068328 | 0.74590902 | 6.44093732 | 0.03660142 | 0.12726356 |
| ENSMUSG00000034327 | -0.7520078 | 5.22297051 | 0.03661607 | 0.12727601 |
| ENSMUSG00000026761 | -0.7480809 | 5.95898453 | 0.03664596 | 0.12734138 |
| ENSMUSG00000020128 | -0.7445906 | 7.0672195  | 0.03667081 | 0.12738922 |
| ENSMUSG00000026707 | -0.7584115 | 4.53024246 | 0.03670319 | 0.1274632  |
| ENSMUSG00000026853 | 0.75113682 | 5.06044452 | 0.03672322 | 0.12749423 |
| ENSMUSG00000026021 | -0.745532  | 6.55289984 | 0.03673623 | 0.12749789 |
| ENSMUSG00000033862 | 0.75741655 | 4.32140308 | 0.03674646 | 0.12749789 |
| ENSMUSG00000035868 | -0.7666706 | 3.84805736 | 0.03677991 | 0.12755878 |
| ENSMUSG00000074746 | -0.7448868 | 6.71614595 | 0.0367862  | 0.12755878 |
| ENSMUSG00000025995 | -0.7457533 | 6.31883553 | 0.03688184 | 0.12785185 |
| ENSMUSG00000027712 | 0.74701104 | 5.98047699 | 0.03689713 | 0.12786629 |
| ENSMUSG00000042178 | 0.77847626 | 3.30009164 | 0.03692646 | 0.12790621 |
| ENSMUSG00000039678 | 0.74602841 | 5.89110392 | 0.0369309  | 0.12790621 |
| ENSMUSG00000072494 | 0.82568967 | 2.19785054 | 0.03696859 | 0.12799818 |
| ENSMUSG00000026126 | 0.76439917 | 4.52632153 | 0.03700984 | 0.12810242 |
| ENSMUSG00000007739 | -0.7412195 | 8.74113556 | 0.03708582 | 0.12831391 |
| ENSMUSG00000052056 | 0.74290287 | 7.1462367  | 0.03709327 | 0.12831391 |
| ENSMUSG00000026020 | -0.7434081 | 6.83389061 | 0.03711785 | 0.1283603  |
| ENSMUSG00000028514 | -0.7409429 | 8.47549891 | 0.03715942 | 0.12846542 |
| ENSMUSG00000035828 | 0.7502331  | 5.16696711 | 0.03718041 | 0.12849935 |
| ENSMUSG00000031951 | 0.81819542 | 2.48486724 | 0.03724087 | 0.12863096 |
| ENSMUSG00000051969 | 0.81133622 | 2.48545832 | 0.03724087 | 0.12863096 |
| ENSMUSG00000028207 | 0.77384189 | 3.88973634 | 0.03729613 | 0.12878312 |
| ENSMUSG00000022634 | -0.7762832 | 3.26301128 | 0.03739971 | 0.129102   |
| ENSMUSG00000020124 | -0.7406949 | 7.55105338 | 0.03747415 | 0.12932015 |
| ENSMUSG00000026950 | -0.8423449 | 1.61500019 | 0.03752024 | 0.12944032 |
| ENSMUSG00000079020 | 0.75935258 | 4.21177835 | 0.03756288 | 0.12954853 |
| ENSMUSG00000035399 | -0.7455053 | 5.69716686 | 0.03758779 | 0.12954881 |
| ENSMUSG00000030283 | 0.80194134 | 2.37624981 | 0.03759405 | 0.12954881 |
| ENSMUSG00000046873 | -0.748098  | 5.14663751 | 0.03759677 | 0.12954881 |
| ENSMUSG00000097536 | -0.7976595 | 2.45421872 | 0.03765689 | 0.12971709 |
| ENSMUSG00000041406 | -0.7726993 | 3.42673473 | 0.03769553 | 0.1298113  |
| ENSMUSG00000022710 | -0.7383813 | 9.00206804 | 0.037749   | 0.1299565  |
| ENSMUSG00000031333 | -0.741362  | 6.49413218 | 0.0378568  | 0.13017865 |
| ENSMUSG00000020821 | 0.74454461 | 5.50971792 | 0.03786129 | 0.13017865 |
| ENSMUSG00000028187 | -0.7462952 | 5.27636713 | 0.0378653  | 0.13017865 |
| ENSMUSG00000016554 | 0.7398801  | 6.7836232  | 0.0378728  | 0.13017865 |
| ENSMUSG00000027035 | 0.75127431 | 4.91569114 | 0.03787764 | 0.13017865 |
| ENSMUSG00000033237 | -0.7397918 | 7.07372583 | 0.03788148 | 0.13017865 |
| ENSMUSG00000056612 | 0.76430184 | 3.47426452 | 0.03792328 | 0.13028337 |
| ENSMUSG00000020785 | 0.82764735 | 2.44072769 | 0.0380751  | 0.13076584 |
| ENSMUSG00000022205 | -0.7378445 | 7.88700083 | 0.03809171 | 0.1307838  |

|                    |            |            |            |            |
|--------------------|------------|------------|------------|------------|
| ENSMUSG0000003813  | 0.74261408 | 5.75537373 | 0.0382298  | 0.13117524 |
| ENSMUSG00000031601 | -0.739907  | 6.433706   | 0.03824571 | 0.13117524 |
| ENSMUSG00000025366 | 0.73682337 | 8.27294449 | 0.03824739 | 0.13117524 |
| ENSMUSG00000073008 | -0.7376418 | 7.55542639 | 0.03825509 | 0.13117524 |
| ENSMUSG00000034160 | -0.7362037 | 9.3322856  | 0.03826277 | 0.13117524 |
| ENSMUSG00000026857 | 0.86884902 | 1.71561932 | 0.03831851 | 0.13129593 |
| ENSMUSG00000033543 | -0.7408849 | 5.98165447 | 0.03832082 | 0.13129593 |
| ENSMUSG00000028676 | -0.7369599 | 7.8954311  | 0.03833476 | 0.13130453 |
| ENSMUSG00000027167 | -0.7725578 | 3.25235696 | 0.03840566 | 0.13149279 |
| ENSMUSG00000051510 | 0.74495029 | 5.46177428 | 0.0384126  | 0.13149279 |
| ENSMUSG00000049744 | -0.7364025 | 7.5070809  | 0.03857021 | 0.13199303 |
| ENSMUSG00000015016 | 0.77075564 | 3.29208537 | 0.03865257 | 0.1322355  |
| ENSMUSG00000005871 | -0.7355045 | 7.86593653 | 0.03867867 | 0.13228543 |
| ENSMUSG00000029145 | 0.75019743 | 4.32881781 | 0.03870084 | 0.13232188 |
| ENSMUSG00000030967 | -0.7376603 | 6.5056597  | 0.03876732 | 0.13248337 |
| ENSMUSG00000079509 | -0.7366391 | 6.96051768 | 0.03877501 | 0.13248337 |
| ENSMUSG00000033364 | -0.7379655 | 6.38827748 | 0.03878374 | 0.13248337 |
| ENSMUSG00000019471 | 0.73826306 | 6.09597953 | 0.03879417 | 0.13248337 |
| ENSMUSG00000034248 | -0.7343608 | 8.89837255 | 0.03880684 | 0.13248726 |
| ENSMUSG00000019505 | 0.73422057 | 8.78734252 | 0.03882718 | 0.13251734 |
| ENSMUSG00000075706 | 0.74107966 | 5.5230844  | 0.03888721 | 0.13268285 |
| ENSMUSG00000023345 | 0.86062314 | 1.51858189 | 0.03895441 | 0.13287267 |
| ENSMUSG00000066839 | 0.77059529 | 3.45940617 | 0.03904183 | 0.13309711 |
| ENSMUSG00000038304 | 0.82803199 | 2.1223036  | 0.03904336 | 0.13309711 |
| ENSMUSG00000037458 | -0.7340891 | 7.97949011 | 0.03907176 | 0.13315442 |
| ENSMUSG00000028483 | -0.7422423 | 5.17652906 | 0.0391022  | 0.13317072 |
| ENSMUSG00000041264 | -0.7358553 | 6.91593758 | 0.03911034 | 0.13317072 |
| ENSMUSG00000037020 | 0.78978954 | 2.92901362 | 0.0391113  | 0.13317072 |
| ENSMUSG00000009575 | -0.7343453 | 7.53429927 | 0.03914161 | 0.13323448 |
| ENSMUSG00000060600 | 0.75540404 | 4.17599443 | 0.03919824 | 0.13338774 |
| ENSMUSG00000024767 | 0.74178091 | 5.19452032 | 0.03921808 | 0.13341575 |
| ENSMUSG00000030271 | 0.78883219 | 2.72738103 | 0.03923637 | 0.1334293  |
| ENSMUSG00000034007 | -0.7383008 | 5.73179778 | 0.03924528 | 0.1334293  |
| ENSMUSG00000078789 | 0.76317462 | 3.40278818 | 0.03931808 | 0.13363731 |
| ENSMUSG00000028684 | 0.74123605 | 5.24987168 | 0.03935006 | 0.13370647 |
| ENSMUSG00000057409 | -0.7411184 | 5.25008225 | 0.03946472 | 0.13399337 |
| ENSMUSG00000026721 | -0.7326207 | 7.86689362 | 0.03947517 | 0.13399337 |
| ENSMUSG00000024747 | 0.96361107 | 0.9794217  | 0.03947755 | 0.13399337 |
| ENSMUSG00000002603 | 0.73440359 | 6.47914647 | 0.03948259 | 0.13399337 |
| ENSMUSG00000032551 | -0.7577776 | 3.67172121 | 0.03949278 | 0.13399337 |
| ENSMUSG00000044350 | 0.74734591 | 4.76410862 | 0.03952881 | 0.13407602 |
| ENSMUSG00000014353 | -0.7354708 | 6.13688138 | 0.03962091 | 0.13434879 |
| ENSMUSG00000034593 | -0.7316734 | 7.94477706 | 0.03967771 | 0.13447981 |

|                    |            |            |            |            |
|--------------------|------------|------------|------------|------------|
| ENSMUSG00000031119 | 0.90920249 | 1.20455474 | 0.03968295 | 0.13447981 |
| ENSMUSG00000021392 | -0.7340347 | 6.62152513 | 0.03971103 | 0.13452092 |
| ENSMUSG00000036833 | 0.73459218 | 6.55863207 | 0.03971849 | 0.13452092 |
| ENSMUSG00000052566 | 0.80936801 | 2.53116162 | 0.0397869  | 0.13471293 |
| ENSMUSG00000020770 | 0.74895968 | 4.44149586 | 0.03981081 | 0.1347542  |
| ENSMUSG00000029004 | -0.7301065 | 8.96879118 | 0.03991843 | 0.13507869 |
| ENSMUSG00000055862 | 0.79053894 | 2.77430053 | 0.03993333 | 0.13508934 |
| ENSMUSG00000100370 | -0.7382262 | 5.15683024 | 0.04006109 | 0.13548169 |
| ENSMUSG00000057230 | -0.7404758 | 4.69726858 | 0.04009519 | 0.13555712 |
| ENSMUSG00000041881 | 0.76253264 | 3.6528514  | 0.04012337 | 0.13561251 |
| ENSMUSG00000022456 | 0.98439508 | 0.64481848 | 0.04016605 | 0.13567696 |
| ENSMUSG00000039063 | 0.97960276 | 0.63608581 | 0.04016605 | 0.13567696 |
| ENSMUSG00000093861 | -0.7331564 | 6.4387013  | 0.04022216 | 0.13582547 |
| ENSMUSG00000049164 | -0.7328634 | 6.26338899 | 0.04023364 | 0.13582547 |
| ENSMUSG00000053565 | 0.73175327 | 6.42587    | 0.04027174 | 0.13591416 |
| ENSMUSG00000022961 | -0.728316  | 10.3195283 | 0.04028758 | 0.1359277  |
| ENSMUSG00000074796 | 0.77401667 | 2.77001608 | 0.04031197 | 0.13594267 |
| ENSMUSG00000025969 | -0.7588392 | 3.65591751 | 0.04031566 | 0.13594267 |
| ENSMUSG00000039187 | -0.7518852 | 3.978589   | 0.04033533 | 0.13596908 |
| ENSMUSG00000079523 | 0.72901553 | 7.91484903 | 0.0403735  | 0.13605786 |
| ENSMUSG00000093594 | -0.7621647 | 3.44498499 | 0.04042695 | 0.13619806 |
| ENSMUSG00000024750 | -0.7289006 | 7.93900161 | 0.04044512 | 0.13621935 |
| ENSMUSG00000032293 | -0.7292124 | 7.60681029 | 0.04047433 | 0.13623068 |
| ENSMUSG00000032410 | -0.7294412 | 7.34304616 | 0.04048397 | 0.13623068 |
| ENSMUSG00000006782 | 0.72893401 | 7.64173051 | 0.04048404 | 0.13623068 |
| ENSMUSG00000022305 | 0.95936504 | 0.89322305 | 0.04056645 | 0.13645824 |
| ENSMUSG00000042447 | -0.7334914 | 5.6792474  | 0.0405754  | 0.13645824 |
| ENSMUSG00000025870 | 0.81258078 | 2.2161666  | 0.04061917 | 0.1365632  |
| ENSMUSG00000034245 | 0.77700974 | 3.00487958 | 0.04063037 | 0.1365632  |
| ENSMUSG00000032802 | 0.88087693 | 1.47422764 | 0.04065854 | 0.13661792 |
| ENSMUSG00000045322 | 0.73043141 | 6.63979593 | 0.04069856 | 0.13671244 |
| ENSMUSG00000027660 | -0.7281776 | 7.6080944  | 0.04073949 | 0.13680995 |
| ENSMUSG00000046805 | 0.72684591 | 8.98330029 | 0.04082401 | 0.13705375 |
| ENSMUSG00000040481 | -0.7266712 | 8.79115725 | 0.04087657 | 0.13719012 |
| ENSMUSG00000049858 | 0.74411973 | 4.23135822 | 0.04092928 | 0.13732693 |
| ENSMUSG00000076552 | -0.8005921 | 2.30114328 | 0.04098243 | 0.13746515 |
| ENSMUSG00000022800 | -0.7289902 | 6.7279723  | 0.04100335 | 0.13749518 |
| ENSMUSG00000039205 | 0.72996851 | 6.35580182 | 0.04101682 | 0.13750026 |
| ENSMUSG00000044258 | 0.77408063 | 2.7746869  | 0.04104981 | 0.13757073 |
| ENSMUSG00000039634 | -0.7617276 | 3.47170456 | 0.04108135 | 0.13763629 |
| ENSMUSG00000060510 | -0.7298674 | 6.10288044 | 0.04116088 | 0.13782555 |
| ENSMUSG00000050271 | 0.75053445 | 4.18939273 | 0.04116182 | 0.13782555 |
| ENSMUSG00000020198 | 0.72719973 | 7.06890513 | 0.04122661 | 0.13798517 |

|                    |            |            |            |            |
|--------------------|------------|------------|------------|------------|
| ENSMUSG00000024776 | -0.7339982 | 5.1883262  | 0.0412335  | 0.13798517 |
| ENSMUSG00000046432 | 0.73597368 | 5.04581016 | 0.04127263 | 0.13807592 |
| ENSMUSG00000022914 | -0.724972  | 9.19803103 | 0.04129219 | 0.13810115 |
| ENSMUSG00000042599 | -0.7249072 | 8.87628143 | 0.04135466 | 0.13821889 |
| ENSMUSG00000004677 | 0.7269448  | 7.15082418 | 0.04135577 | 0.13821889 |
| ENSMUSG00000098188 | 0.73461606 | 5.30310777 | 0.04136346 | 0.13821889 |
| ENSMUSG00000047735 | -0.7245219 | 9.48100509 | 0.04139266 | 0.13826575 |
| ENSMUSG00000085287 | -0.8356012 | 1.58521718 | 0.04140154 | 0.13826575 |
| ENSMUSG00000033166 | -0.7299497 | 5.89830416 | 0.04142126 | 0.13829144 |
| ENSMUSG00000040123 | -0.7258436 | 7.41432897 | 0.04145655 | 0.13836907 |
| ENSMUSG00000040451 | -0.7259794 | 7.29873932 | 0.04150693 | 0.13849699 |
| ENSMUSG00000068284 | -0.7247616 | 8.07907651 | 0.04154926 | 0.13858779 |
| ENSMUSG00000035621 | 0.73020806 | 5.84624267 | 0.04155825 | 0.13858779 |
| ENSMUSG00000030707 | 0.72305646 | 8.89333341 | 0.04188243 | 0.13962835 |
| ENSMUSG00000072774 | -0.7402844 | 4.35486503 | 0.04196232 | 0.13985414 |
| ENSMUSG00000052889 | -0.7227515 | 8.56038706 | 0.0420051  | 0.13995036 |
| ENSMUSG00000029238 | -0.726551  | 6.14850595 | 0.04201635 | 0.13995036 |
| ENSMUSG00000021676 | 0.73412703 | 5.07959875 | 0.04203086 | 0.13995036 |
| ENSMUSG00000026749 | 0.78754439 | 2.50920842 | 0.0420399  | 0.13995036 |
| ENSMUSG00000002332 | 0.74072097 | 4.41523778 | 0.04205353 | 0.13995523 |
| ENSMUSG00000019802 | -0.7241346 | 7.10989762 | 0.04206708 | 0.13995981 |
| ENSMUSG00000029592 | 0.74004516 | 4.11876352 | 0.04209287 | 0.14000508 |
| ENSMUSG00000036882 | 0.79404243 | 2.27154725 | 0.04212736 | 0.14007414 |
| ENSMUSG00000004356 | -0.7247762 | 6.61310727 | 0.04214386 | 0.14007414 |
| ENSMUSG00000045205 | -0.7319528 | 5.04559446 | 0.04215019 | 0.14007414 |
| ENSMUSG00000094006 | -0.7451023 | 4.02074528 | 0.04220475 | 0.14015518 |
| ENSMUSG00000025410 | 0.72752249 | 5.82237105 | 0.04221064 | 0.14015518 |
| ENSMUSG00000028403 | -0.7265273 | 5.96359407 | 0.04223088 | 0.14015518 |
| ENSMUSG00000045996 | -0.7453194 | 3.83029374 | 0.04224533 | 0.14015518 |
| ENSMUSG00000089942 | 0.73075029 | 5.11248996 | 0.04224989 | 0.14015518 |
| ENSMUSG00000052271 | 0.77106589 | 2.59773776 | 0.04225295 | 0.14015518 |
| ENSMUSG00000038279 | 0.7296955  | 5.09898423 | 0.0422614  | 0.14015518 |
| ENSMUSG00000025323 | -0.7249082 | 6.45624407 | 0.04227212 | 0.14015518 |
| ENSMUSG00000035597 | -0.7231399 | 7.31529977 | 0.04229218 | 0.14017552 |
| ENSMUSG00000037922 | -0.7211948 | 9.68141316 | 0.0423123  | 0.14017552 |
| ENSMUSG00000094420 | -0.7237973 | 7.00162279 | 0.04231484 | 0.14017552 |
| ENSMUSG00000040990 | -0.7218687 | 8.12932364 | 0.04236425 | 0.14029879 |
| ENSMUSG00000022257 | 0.78869801 | 2.54899658 | 0.04238518 | 0.14032306 |
| ENSMUSG00000031715 | -0.7220404 | 7.87754023 | 0.042396   | 0.14032306 |
| ENSMUSG00000091896 | -0.7220242 | 7.82455926 | 0.04241126 | 0.14033317 |
| ENSMUSG00000022100 | -0.7216815 | 8.03975827 | 0.04242885 | 0.14035098 |
| ENSMUSG00000040389 | -0.7303671 | 5.06027551 | 0.04245018 | 0.14038112 |
| ENSMUSG00000035278 | 0.73838655 | 4.32195925 | 0.04247126 | 0.1404092  |

|                    |            |            |            |            |
|--------------------|------------|------------|------------|------------|
| ENSMUSG00000056383 | -0.7307334 | 5.0550977  | 0.0424831  | 0.1404092  |
| ENSMUSG00000020719 | -0.7201399 | 12.2543991 | 0.04250709 | 0.14044813 |
| ENSMUSG00000035834 | -0.7388653 | 4.32884994 | 0.04256761 | 0.14057304 |
| ENSMUSG00000022099 | 0.73852108 | 4.41297817 | 0.04256936 | 0.14057304 |
| ENSMUSG00000042514 | -0.7301637 | 5.16952282 | 0.04264976 | 0.14079811 |
| ENSMUSG00000052160 | 0.72100067 | 7.78112727 | 0.04267986 | 0.14085701 |
| ENSMUSG00000036180 | 0.72433277 | 6.09273271 | 0.04270051 | 0.14088473 |
| ENSMUSG00000044934 | -0.7283607 | 5.2550634  | 0.04272466 | 0.14092394 |
| ENSMUSG00000043964 | 0.72703261 | 5.20252255 | 0.04277132 | 0.14103737 |
| ENSMUSG00000040247 | 0.72134771 | 7.05697919 | 0.04287661 | 0.14132162 |
| ENSMUSG00000025780 | -0.7373057 | 4.01583583 | 0.04288211 | 0.14132162 |
| ENSMUSG00000030616 | 0.79230567 | 2.36403848 | 0.04291806 | 0.14139957 |
| ENSMUSG00000039345 | 0.80550942 | 2.17026596 | 0.04296452 | 0.14149251 |
| ENSMUSG00000036550 | -0.7191215 | 8.98496543 | 0.04297089 | 0.14149251 |
| ENSMUSG00000096020 | -0.7603898 | 3.23466976 | 0.04302445 | 0.14162831 |
| ENSMUSG00000026614 | 1.03414709 | 0.46700131 | 0.04306095 | 0.14170786 |
| ENSMUSG00000027091 | -0.7210446 | 6.84344278 | 0.04314911 | 0.14192205 |
| ENSMUSG00000049907 | 0.97223102 | 0.91155409 | 0.04315072 | 0.14192205 |
| ENSMUSG00000051354 | 0.81764497 | 1.86015896 | 0.04319702 | 0.14196275 |
| ENSMUSG00000020792 | 0.72967245 | 4.8976369  | 0.04321008 | 0.14196275 |
| ENSMUSG00000044098 | -0.7208983 | 6.80116609 | 0.04321292 | 0.14196275 |
| ENSMUSG00000020290 | -0.7187634 | 8.27859297 | 0.04321599 | 0.14196275 |
| ENSMUSG00000006638 | 0.75939024 | 2.81083997 | 0.04322485 | 0.14196275 |
| ENSMUSG00000023960 | 0.87449381 | 1.50942164 | 0.04326683 | 0.14201948 |
| ENSMUSG00000086629 | -0.819061  | 1.47349131 | 0.04326683 | 0.14201948 |
| ENSMUSG00000015126 | 0.75230616 | 3.32084254 | 0.04329888 | 0.14208409 |
| ENSMUSG00000031378 | 0.72145007 | 6.26089131 | 0.04338777 | 0.14233515 |
| ENSMUSG00000036769 | -0.720354  | 6.49326727 | 0.04355561 | 0.142845   |
| ENSMUSG00000029528 | 0.72263978 | 5.85202226 | 0.04358064 | 0.14288634 |
| ENSMUSG00000000600 | -0.7196933 | 6.59238146 | 0.04364832 | 0.14306742 |
| ENSMUSG00000097772 | -0.7345532 | 4.14360394 | 0.04368294 | 0.14314007 |
| ENSMUSG00000016256 | 0.71739766 | 7.59084809 | 0.04370949 | 0.14318625 |
| ENSMUSG00000020687 | -0.7183369 | 7.15605718 | 0.0437338  | 0.14322509 |
| ENSMUSG00000025102 | 0.78171445 | 2.5489183  | 0.04375685 | 0.14325976 |
| ENSMUSG00000072082 | 0.75170492 | 3.3402579  | 0.04377038 | 0.14326325 |
| ENSMUSG00000029594 | 0.74148522 | 3.87515166 | 0.04380324 | 0.14329166 |
| ENSMUSG00000097188 | -0.7181657 | 7.03268586 | 0.04380399 | 0.14329166 |
| ENSMUSG00000032094 | 0.74055018 | 3.79821253 | 0.04393701 | 0.14365015 |
| ENSMUSG00000028044 | 0.79795685 | 2.0571191  | 0.04393858 | 0.14365015 |
| ENSMUSG00000017386 | 0.72124489 | 5.38203162 | 0.04405368 | 0.1439855  |
| ENSMUSG00000020166 | -0.7163544 | 7.73979823 | 0.04407124 | 0.14400195 |
| ENSMUSG00000101279 | -0.7879068 | 2.1488729  | 0.04411511 | 0.14410436 |
| ENSMUSG00000018559 | 0.71912026 | 5.97619837 | 0.04414655 | 0.14413306 |

|                    |            |            |            |            |
|--------------------|------------|------------|------------|------------|
| ENSMUSG00000036641 | 0.87374981 | 1.12499292 | 0.04414898 | 0.14413306 |
| ENSMUSG00000053128 | 0.74463016 | 3.74434163 | 0.04416827 | 0.14415511 |
| ENSMUSG00000025507 | 0.74744165 | 3.30759684 | 0.04418988 | 0.14418468 |
| ENSMUSG00000007812 | -0.718287  | 6.37814871 | 0.04423718 | 0.1442656  |
| ENSMUSG00000035614 | -0.7181133 | 6.44985843 | 0.04423978 | 0.1442656  |
| ENSMUSG00000035275 | 0.94828397 | 1.02393784 | 0.04427927 | 0.14435343 |
| ENSMUSG00000037465 | 0.72312178 | 5.27736185 | 0.04433045 | 0.1444596  |
| ENSMUSG00000004530 | 0.7216913  | 5.53501747 | 0.04433697 | 0.1444596  |
| ENSMUSG00000083282 | 0.83259639 | 1.72172263 | 0.04439431 | 0.14460545 |
| ENSMUSG00000037795 | -0.7145439 | 7.76244533 | 0.04455251 | 0.14501302 |
| ENSMUSG00000042348 | -0.7534857 | 3.00665628 | 0.04455727 | 0.14501302 |
| ENSMUSG00000026655 | -0.7137343 | 8.9820669  | 0.04455728 | 0.14501302 |
| ENSMUSG00000022698 | -0.7155945 | 6.93244833 | 0.04468449 | 0.14538583 |
| ENSMUSG00000028034 | -0.7146226 | 7.38514558 | 0.04471887 | 0.14545653 |
| ENSMUSG00000053470 | -0.7143351 | 7.39919204 | 0.04479529 | 0.14562833 |
| ENSMUSG00000028282 | -0.7159174 | 6.61291489 | 0.04479702 | 0.14562833 |
| ENSMUSG00000038095 | -0.713117  | 8.44490294 | 0.04481945 | 0.14566005 |
| ENSMUSG00000021945 | -0.7132922 | 8.06897362 | 0.04486413 | 0.14576404 |
| ENSMUSG00000066415 | -0.7131403 | 7.98815085 | 0.04493066 | 0.14593895 |
| ENSMUSG00000020733 | 0.71947585 | 5.19004612 | 0.04499621 | 0.14609326 |
| ENSMUSG00000026775 | -0.7131352 | 7.74483926 | 0.04501494 | 0.14609326 |
| ENSMUSG00000074165 | -0.7227398 | 4.73281916 | 0.0450163  | 0.14609326 |
| ENSMUSG00000024673 | -0.7112275 | 10.8161829 | 0.04514498 | 0.14646954 |
| ENSMUSG00000031633 | 0.71830973 | 5.640256   | 0.04516606 | 0.14649657 |
| ENSMUSG00000097769 | -0.748313  | 3.32008456 | 0.04520351 | 0.14657668 |
| ENSMUSG00000038366 | 0.71310956 | 7.00524901 | 0.04526211 | 0.1467253  |
| ENSMUSG00000030397 | 0.74309322 | 3.41538499 | 0.04529252 | 0.14674821 |
| ENSMUSG00000056228 | 0.73024982 | 4.17185414 | 0.04529471 | 0.14674821 |
| ENSMUSG00000038384 | 0.71964307 | 5.40731329 | 0.04541691 | 0.14708779 |
| ENSMUSG00000078995 | -0.7293342 | 4.17274622 | 0.04542511 | 0.14708779 |
| ENSMUSG00000041408 | -0.7111498 | 7.91493006 | 0.04554493 | 0.14743424 |
| ENSMUSG00000035762 | -0.7181858 | 5.40044903 | 0.04559052 | 0.14754026 |
| ENSMUSG00000021054 | -0.7157167 | 5.84692556 | 0.04560665 | 0.14755092 |
| ENSMUSG00000028331 | 0.73194573 | 4.03647483 | 0.0457186  | 0.14787149 |
| ENSMUSG00000013646 | 0.72608642 | 4.25763618 | 0.04575201 | 0.1479292  |
| ENSMUSG00000023249 | 0.71299426 | 6.29366817 | 0.04576218 | 0.1479292  |
| ENSMUSG00000020888 | 0.73113863 | 4.17132856 | 0.04577543 | 0.14793042 |
| ENSMUSG00000035293 | -0.7188959 | 5.09200105 | 0.04580954 | 0.14799907 |
| ENSMUSG00000006423 | -0.7135031 | 6.14848924 | 0.04584935 | 0.14807214 |
| ENSMUSG00000057177 | 0.7122623  | 6.46034577 | 0.04585792 | 0.14807214 |
| ENSMUSG00000095794 | -0.718943  | 5.22072463 | 0.04588481 | 0.14811736 |
| ENSMUSG00000034744 | 0.7496218  | 3.43839149 | 0.04594429 | 0.14826773 |
| ENSMUSG00000052751 | 0.75796968 | 2.48491828 | 0.04596364 | 0.14828854 |



|                    |            |            |            |            |
|--------------------|------------|------------|------------|------------|
| ENSMUSG0000002835  | 0.74280714 | 3.55092546 | 0.04604222 | 0.14850036 |
| ENSMUSG00000074519 | -0.7332126 | 3.6903527  | 0.04610584 | 0.14866385 |
| ENSMUSG00000030714 | 0.72900481 | 3.77002847 | 0.04613256 | 0.1487083  |
| ENSMUSG00000025355 | 0.85379625 | 1.67338891 | 0.04618639 | 0.14884008 |
| ENSMUSG00000016206 | 0.71131699 | 6.50750072 | 0.04620882 | 0.14887061 |
| ENSMUSG00000025178 | 0.71742587 | 5.19088296 | 0.04631852 | 0.14918222 |
| ENSMUSG00000071078 | 0.73063988 | 3.62692174 | 0.04633493 | 0.14919329 |
| ENSMUSG00000024269 | -0.7228366 | 4.51527118 | 0.0463809  | 0.14924596 |
| ENSMUSG00000028467 | 0.7119471  | 5.93911939 | 0.04640224 | 0.14924596 |
| ENSMUSG00000035048 | 0.74034054 | 3.26704465 | 0.04641085 | 0.14924596 |
| ENSMUSG00000029276 | -0.728531  | 4.00158714 | 0.04641598 | 0.14924596 |
| ENSMUSG00000052488 | 0.71313426 | 5.84692142 | 0.04641621 | 0.14924596 |
| ENSMUSG00000030604 | -0.7582627 | 2.82961963 | 0.04657742 | 0.14972244 |
| ENSMUSG00000050855 | -0.7343459 | 3.57013231 | 0.04663173 | 0.14985512 |
| ENSMUSG00000005360 | 0.7644725  | 2.60556231 | 0.04672387 | 0.15006807 |
| ENSMUSG00000097417 | -0.7748362 | 2.32844788 | 0.04672411 | 0.15006807 |
| ENSMUSG00000029735 | -0.7276354 | 3.75963423 | 0.04677772 | 0.15008369 |
| ENSMUSG00000024712 | -0.709228  | 6.67252556 | 0.0467816  | 0.15008369 |
| ENSMUSG00000030161 | 0.72020043 | 4.73131302 | 0.04678296 | 0.15008369 |
| ENSMUSG00000032002 | -0.7117412 | 5.85170289 | 0.04678653 | 0.15008369 |
| ENSMUSG00000026037 | -0.7108622 | 6.11325254 | 0.04679425 | 0.15008369 |
| ENSMUSG00000026219 | -0.7061081 | 9.12720665 | 0.04682521 | 0.15014107 |
| ENSMUSG00000045629 | 0.7528971  | 3.03880686 | 0.04684289 | 0.15015587 |
| ENSMUSG00000018398 | 0.72971974 | 4.07053818 | 0.04689731 | 0.15026367 |
| ENSMUSG00000041570 | -0.7093238 | 6.4193672  | 0.04690266 | 0.15026367 |
| ENSMUSG00000018481 | -0.7082777 | 6.76818931 | 0.04698185 | 0.15044445 |
| ENSMUSG00000090935 | -0.7109108 | 5.94149494 | 0.04698526 | 0.15044445 |
| ENSMUSG00000004266 | 0.70531693 | 9.33218258 | 0.04702108 | 0.15051723 |
| ENSMUSG00000022337 | -0.7116843 | 5.69417546 | 0.04704784 | 0.15056093 |
| ENSMUSG00000037572 | -0.7102372 | 5.9331602  | 0.04707323 | 0.15060028 |
| ENSMUSG00000037487 | -0.705821  | 8.12656691 | 0.04708697 | 0.15060231 |
| ENSMUSG00000015316 | 0.71252691 | 5.81929063 | 0.04712778 | 0.15066087 |
| ENSMUSG00000053398 | 0.72336343 | 4.03782568 | 0.04713149 | 0.15066087 |
| ENSMUSG00000045328 | -0.7130954 | 5.26412009 | 0.04732843 | 0.15124836 |
| ENSMUSG00000055493 | 0.82758811 | 1.77304479 | 0.0473449  | 0.15125893 |
| ENSMUSG00000021669 | -0.7062839 | 7.13545841 | 0.04735922 | 0.15126265 |
| ENSMUSG00000024181 | 0.72828443 | 3.70895167 | 0.04738871 | 0.15131477 |
| ENSMUSG00000001630 | -0.7163415 | 4.75542917 | 0.04747733 | 0.15155565 |
| ENSMUSG00000039452 | 0.73485737 | 3.40204491 | 0.04754257 | 0.15172179 |
| ENSMUSG00000054277 | 0.74141497 | 3.27377242 | 0.04756316 | 0.15174356 |
| ENSMUSG00000026407 | 0.86042027 | 1.15787851 | 0.0475758  | 0.15174356 |
| ENSMUSG00000032547 | -0.7995352 | 1.71784438 | 0.04759041 | 0.15174805 |
| ENSMUSG00000036427 | 0.70393965 | 8.26233349 | 0.04763657 | 0.15185312 |

|                    |            |            |            |            |
|--------------------|------------|------------|------------|------------|
| ENSMUSG00000022120 | -0.7261103 | 4.04542195 | 0.04775446 | 0.15218671 |
| ENSMUSG00000021969 | -0.7049019 | 7.11226809 | 0.04778234 | 0.15223337 |
| ENSMUSG00000027959 | -0.7199975 | 4.30448791 | 0.04781304 | 0.15226267 |
| ENSMUSG00000040289 | 0.85978731 | 0.75966065 | 0.04781803 | 0.15226267 |
| ENSMUSG00000035649 | -0.7036872 | 7.81618969 | 0.04784872 | 0.1523182  |
| ENSMUSG00000095704 | 0.88925561 | 1.31422753 | 0.04795431 | 0.15256678 |
| ENSMUSG00000015437 | 0.80046203 | 1.33940903 | 0.04795431 | 0.15256678 |
| ENSMUSG00000025572 | 0.70811539 | 5.68754259 | 0.04796663 | 0.15256678 |
| ENSMUSG00000048827 | -0.7598113 | 2.03042333 | 0.04798171 | 0.15257256 |
| ENSMUSG00000033411 | -0.7059757 | 6.31307113 | 0.04805788 | 0.1527725  |
| ENSMUSG00000033319 | -0.7045987 | 6.76822698 | 0.04808073 | 0.15280288 |
| ENSMUSG00000037234 | -0.704659  | 6.5539547  | 0.04819154 | 0.15307597 |
| ENSMUSG00000021707 | -0.7261669 | 3.8289693  | 0.0481933  | 0.15307597 |
| ENSMUSG00000020823 | 0.70902054 | 5.36683461 | 0.04826462 | 0.1532233  |
| ENSMUSG00000050052 | 0.84329146 | 1.76539502 | 0.04826634 | 0.1532233  |
| ENSMUSG00000014850 | -0.7067899 | 5.86863934 | 0.04831272 | 0.15332818 |
| ENSMUSG00000091575 | 0.78519184 | 2.57476238 | 0.04833885 | 0.15336878 |
| ENSMUSG00000017550 | -0.7109747 | 5.06293541 | 0.04835225 | 0.15336896 |
| ENSMUSG00000097320 | 0.84195176 | 1.60087612 | 0.04840757 | 0.15350207 |
| ENSMUSG00000024294 | -0.7058353 | 5.85120723 | 0.04843974 | 0.15356171 |
| ENSMUSG00000031162 | 0.74043966 | 3.27248045 | 0.04849256 | 0.15364362 |
| ENSMUSG00000046329 | 0.71701299 | 4.29779583 | 0.04850398 | 0.15364362 |
| ENSMUSG00000018819 | 0.70063217 | 9.03911969 | 0.04852679 | 0.15364362 |
| ENSMUSG00000038007 | 0.82436198 | 1.41153162 | 0.04852871 | 0.15364362 |
| ENSMUSG00000035242 | 0.70318603 | 7.00642634 | 0.0485324  | 0.15364362 |
| ENSMUSG00000008730 | -0.7005204 | 8.72923128 | 0.0486237  | 0.15389025 |
| ENSMUSG00000030178 | 0.7852697  | 2.38566899 | 0.04867101 | 0.1539318  |
| ENSMUSG00000029270 | -0.7028774 | 6.73895732 | 0.04868208 | 0.1539318  |
| ENSMUSG00000036022 | -0.7145111 | 4.59684965 | 0.04868389 | 0.1539318  |
| ENSMUSG00000050721 | 0.70204192 | 7.04167997 | 0.04869039 | 0.1539318  |
| ENSMUSG00000000148 | 0.7178078  | 4.43540491 | 0.0487124  | 0.15395905 |
| ENSMUSG00000020599 | 0.93765398 | 0.86799633 | 0.04885603 | 0.15430399 |
| ENSMUSG00000038168 | 0.86684947 | 1.36343277 | 0.04885655 | 0.15430399 |
| ENSMUSG00000024038 | 0.71727411 | 4.27334299 | 0.04886181 | 0.15430399 |
| ENSMUSG00000051483 | 0.73089473 | 3.47054231 | 0.04891667 | 0.1544348  |
| ENSMUSG00000032741 | 0.70885272 | 5.2341026  | 0.04896384 | 0.15454128 |
| ENSMUSG00000022391 | 0.70221105 | 6.29337333 | 0.04898089 | 0.15455265 |
| ENSMUSG00000022752 | -0.7011942 | 7.02712778 | 0.04902844 | 0.15466024 |
| ENSMUSG00000087177 | -0.7197504 | 3.87311209 | 0.04905695 | 0.15467038 |
| ENSMUSG00000025888 | -0.7020091 | 6.60313807 | 0.04905857 | 0.15467038 |
| ENSMUSG00000020561 | -0.7050588 | 5.68998652 | 0.04911518 | 0.15480642 |
| ENSMUSG00000071266 | -0.7388165 | 3.09656843 | 0.04913225 | 0.15481775 |
| ENSMUSG00000029254 | -0.6996739 | 7.69025239 | 0.04916645 | 0.15488307 |

|                    |            |            |            |            |
|--------------------|------------|------------|------------|------------|
| ENSMUSG0000009894  | 0.72476176 | 3.7359794  | 0.04920062 | 0.15491504 |
| ENSMUSG00000031060 | 0.70388175 | 5.79618175 | 0.04922472 | 0.15491504 |
| ENSMUSG00000005583 | -0.698511  | 9.06296007 | 0.04923639 | 0.15491504 |
| ENSMUSG00000055805 | 0.69853936 | 8.71354811 | 0.04925416 | 0.15491504 |
| ENSMUSG00000059263 | -0.6997467 | 7.44855744 | 0.04925466 | 0.15491504 |
| ENSMUSG00000049881 | 0.82904579 | 1.85041747 | 0.04927093 | 0.15491504 |
| ENSMUSG00000026798 | 0.78418919 | 1.86173463 | 0.04927093 | 0.15491504 |
| ENSMUSG00000027286 | -0.7047317 | 5.62902789 | 0.04940941 | 0.15530796 |
| ENSMUSG00000022360 | -0.7007239 | 6.72583114 | 0.04943757 | 0.15535399 |
| ENSMUSG00000038497 | 0.73252505 | 3.403794   | 0.04947418 | 0.15542653 |
| ENSMUSG00000004567 | 0.70412217 | 5.60760445 | 0.0495601  | 0.15561978 |
| ENSMUSG00000098090 | -0.7423234 | 2.7584351  | 0.04956277 | 0.15561978 |
| ENSMUSG00000051316 | -0.7025778 | 5.9488284  | 0.04957821 | 0.15562446 |
| ENSMUSG00000020464 | -0.7012366 | 6.26594067 | 0.04959134 | 0.15562446 |
| ENSMUSG00000024431 | -0.6976536 | 8.3058617  | 0.04967569 | 0.15584662 |
| ENSMUSG00000020611 | -0.6976009 | 8.06425615 | 0.04974369 | 0.1560174  |
| ENSMUSG00000066551 | -0.7002921 | 6.41502954 | 0.04976509 | 0.15604021 |
| ENSMUSG00000003762 | 0.72406969 | 3.66989381 | 0.04977812 | 0.15604021 |
| ENSMUSG00000028964 | 0.7049646  | 5.21216093 | 0.04981237 | 0.15610503 |
| ENSMUSG00000032328 | -0.6984704 | 7.09243281 | 0.04984323 | 0.15613333 |
| ENSMUSG00000079104 | -0.701823  | 5.95610243 | 0.04984857 | 0.15613333 |
| ENSMUSG00000028080 | -0.6980331 | 7.17467001 | 0.0498929  | 0.1562296  |
| ENSMUSG00000063358 | -0.6968578 | 8.31745445 | 0.0499144  | 0.15625437 |
| ENSMUSG00000021706 | -0.7006979 | 5.86513763 | 0.04996886 | 0.15638226 |
| ENSMUSG00000019872 | 0.70014575 | 6.44804191 | 0.0499939  | 0.15641803 |
| ENSMUSG00000037321 | 0.6970275  | 7.81214968 | 0.05002621 | 0.15647653 |
| ENSMUSG00000076614 | -0.8487418 | 1.48683033 | 0.05018423 | 0.15687911 |
| ENSMUSG00000029070 | 0.80807509 | 1.84015337 | 0.05019664 | 0.15687911 |
| ENSMUSG00000038372 | -0.7348994 | 3.0970617  | 0.0502021  | 0.15687911 |
| ENSMUSG00000022621 | 0.79960439 | 1.72568329 | 0.05021365 | 0.15687911 |
| ENSMUSG00000028795 | 0.75776201 | 2.58863071 | 0.05022315 | 0.15687911 |
| ENSMUSG00000048874 | -0.6960532 | 7.98442352 | 0.05026476 | 0.15692551 |
| ENSMUSG00000026082 | -0.6990937 | 6.26420035 | 0.05026531 | 0.15692551 |
| ENSMUSG00000054203 | 0.75127559 | 2.68687912 | 0.05031734 | 0.15704529 |
| ENSMUSG00000034875 | -0.7119689 | 4.43489181 | 0.05038233 | 0.15719695 |
| ENSMUSG00000025437 | -0.6974021 | 6.76992883 | 0.05039328 | 0.15719695 |
| ENSMUSG00000022237 | 0.71642591 | 4.37225627 | 0.05041424 | 0.15721409 |
| ENSMUSG00000037720 | -0.6994924 | 6.2845977  | 0.05042613 | 0.15721409 |
| ENSMUSG00000028582 | 0.69900849 | 6.21424709 | 0.05045816 | 0.15727131 |
| ENSMUSG00000027259 | -0.704945  | 4.83494592 | 0.0505323  | 0.15745969 |
| ENSMUSG00000000738 | 0.69974821 | 5.84244752 | 0.05057176 | 0.15753994 |
| ENSMUSG00000027808 | -0.6939864 | 9.68247017 | 0.05063393 | 0.15766726 |
| ENSMUSG00000027109 | -0.694703  | 8.28095697 | 0.05064006 | 0.15766726 |

|                    |            |            |            |            |
|--------------------|------------|------------|------------|------------|
| ENSMUSG00000025759 | -0.7061865 | 4.59637116 | 0.0507137  | 0.15785377 |
| ENSMUSG00000025508 | 0.69674271 | 6.51991805 | 0.0507571  | 0.15794608 |
| ENSMUSG00000022452 | 0.71084689 | 4.20472544 | 0.05078898 | 0.15800253 |
| ENSMUSG00000021615 | -0.7124661 | 4.09907564 | 0.05088447 | 0.15825677 |
| ENSMUSG00000019877 | -0.6943863 | 7.63490009 | 0.05090333 | 0.1582726  |
| ENSMUSG00000022863 | -0.7435476 | 2.70593466 | 0.05099677 | 0.15851551 |
| ENSMUSG00000057842 | -0.7029413 | 5.02774566 | 0.05100904 | 0.15851551 |
| ENSMUSG00000041237 | 0.75604477 | 2.80193644 | 0.05103424 | 0.15855098 |
| ENSMUSG00000022105 | -0.6937665 | 7.74968067 | 0.05108096 | 0.15861367 |
| ENSMUSG00000005540 | 0.6924953  | 10.147157  | 0.05108985 | 0.15861367 |
| ENSMUSG00000031979 | 0.70188506 | 5.17788552 | 0.05109582 | 0.15861367 |
| ENSMUSG00000022010 | 0.69389545 | 7.21739885 | 0.05113144 | 0.15866214 |
| ENSMUSG00000070808 | 0.70109547 | 5.22009695 | 0.05113904 | 0.15866214 |
| ENSMUSG00000040661 | -0.6956327 | 6.44975949 | 0.05119289 | 0.15878636 |
| ENSMUSG00000000743 | 0.69733915 | 5.96743404 | 0.05127785 | 0.15900697 |
| ENSMUSG00000028560 | -0.6944296 | 6.91801386 | 0.05132449 | 0.15908357 |
| ENSMUSG00000033436 | 0.69852405 | 5.81737186 | 0.05133023 | 0.15908357 |
| ENSMUSG00000036636 | 0.69743892 | 5.94566238 | 0.05143761 | 0.15934885 |
| ENSMUSG00000021044 | 0.72224968 | 3.57497678 | 0.05144523 | 0.15934885 |
| ENSMUSG00000085498 | -0.8953107 | 0.62548198 | 0.05145741 | 0.15934885 |
| ENSMUSG00000038332 | -0.692302  | 7.63586369 | 0.05161896 | 0.15980607 |
| ENSMUSG00000084771 | -0.8187218 | 1.50887014 | 0.051739   | 0.16006697 |
| ENSMUSG00000024790 | 0.8062471  | 1.54621665 | 0.051739   | 0.16006697 |
| ENSMUSG00000037190 | 0.74313504 | 2.78086359 | 0.05176429 | 0.16006697 |
| ENSMUSG00000034480 | -0.6962063 | 5.64084923 | 0.05177385 | 0.16006697 |
| ENSMUSG00000027435 | -0.6965279 | 5.68112722 | 0.05178638 | 0.16006697 |
| ENSMUSG00000032267 | -0.697493  | 5.36534987 | 0.05178678 | 0.16006697 |
| ENSMUSG00000037552 | 0.69420382 | 6.32073434 | 0.05181613 | 0.16008743 |
| ENSMUSG00000002279 | 0.73229181 | 3.34788258 | 0.05182126 | 0.16008743 |
| ENSMUSG00000091183 | -0.8207231 | 1.23243806 | 0.05189441 | 0.16027035 |
| ENSMUSG00000026176 | 0.69317002 | 6.48767162 | 0.0519977  | 0.16054623 |
| ENSMUSG00000056220 | 0.72313881 | 3.35518628 | 0.05203584 | 0.1605594  |
| ENSMUSG00000090258 | -0.7225769 | 3.34459207 | 0.05203584 | 0.1605594  |
| ENSMUSG00000051220 | -0.7088062 | 4.23936578 | 0.05205617 | 0.1605594  |
| ENSMUSG00000030748 | 0.69086517 | 7.74957087 | 0.05205784 | 0.1605594  |
| ENSMUSG00000015605 | 0.69899526 | 5.0402116  | 0.05220051 | 0.16091924 |
| ENSMUSG00000026958 | 0.69793215 | 5.15161194 | 0.05220251 | 0.16091924 |
| ENSMUSG00000020775 | 0.70352763 | 4.31739653 | 0.05224308 | 0.16099187 |
| ENSMUSG00000039841 | -0.69214   | 6.66612027 | 0.05225408 | 0.16099187 |
| ENSMUSG00000063576 | 0.69762959 | 5.17271243 | 0.05229359 | 0.16107042 |
| ENSMUSG00000039244 | 0.70555883 | 4.04229279 | 0.05231296 | 0.16108692 |
| ENSMUSG00000020577 | -0.6909322 | 7.073731   | 0.05233301 | 0.16110551 |
| ENSMUSG00000041346 | 0.71211099 | 3.63339762 | 0.05240134 | 0.16127268 |

|                    |            |            |            |            |
|--------------------|------------|------------|------------|------------|
| ENSMUSG00000055900 | -0.7072537 | 4.23400514 | 0.05245814 | 0.16140426 |
| ENSMUSG00000044937 | -0.770602  | 1.55465711 | 0.05248125 | 0.16143214 |
| ENSMUSG00000036990 | -0.6891973 | 7.87331036 | 0.05255566 | 0.16159349 |
| ENSMUSG00000040785 | -0.6907723 | 6.76042356 | 0.05256181 | 0.16159349 |
| ENSMUSG00000022571 | 0.7362537  | 2.65826403 | 0.0525886  | 0.16163261 |
| ENSMUSG00000050229 | -0.6906074 | 6.81627549 | 0.05261799 | 0.16164676 |
| ENSMUSG00000035273 | 0.69329759 | 6.06475928 | 0.05262133 | 0.16164676 |
| ENSMUSG00000027514 | 0.69257322 | 5.95412383 | 0.05263863 | 0.16165671 |
| ENSMUSG00000055553 | 0.6979878  | 4.93269858 | 0.05276619 | 0.16200518 |
| ENSMUSG00000056763 | -0.6914659 | 6.11930863 | 0.05285976 | 0.16224911 |
| ENSMUSG00000035329 | -0.6911477 | 6.25400238 | 0.05288397 | 0.16228008 |
| ENSMUSG00000030867 | 0.75038476 | 2.60722383 | 0.05310228 | 0.1629065  |
| ENSMUSG00000028274 | -0.6946579 | 5.343879   | 0.05314152 | 0.16298341 |
| ENSMUSG00000029920 | -0.690297  | 6.24481683 | 0.05324417 | 0.16325467 |
| ENSMUSG00000034673 | 0.69183237 | 5.66936745 | 0.05330569 | 0.1633997  |
| ENSMUSG00000079800 | -0.7136814 | 3.42252094 | 0.05332676 | 0.1634207  |
| ENSMUSG00000007646 | -0.7199265 | 3.54151343 | 0.05336822 | 0.16350418 |
| ENSMUSG00000020918 | 0.69109023 | 5.66830995 | 0.05340917 | 0.16358604 |
| ENSMUSG00000038240 | -0.7197955 | 3.18667637 | 0.05349556 | 0.16377669 |
| ENSMUSG00000021144 | 0.6963557  | 4.84355684 | 0.05349991 | 0.16377669 |
| ENSMUSG00000024056 | -0.703297  | 4.12420162 | 0.05355164 | 0.1638914  |
| ENSMUSG00000069208 | -0.733124  | 2.75549316 | 0.05372617 | 0.16438178 |
| ENSMUSG00000028300 | -0.693002  | 5.18935394 | 0.05390932 | 0.16485036 |
| ENSMUSG00000023150 | -0.6843722 | 9.44589294 | 0.05391795 | 0.16485036 |
| ENSMUSG00000041841 | 0.68555232 | 7.57602554 | 0.05392235 | 0.16485036 |
| ENSMUSG00000030291 | -0.7031595 | 4.31825031 | 0.0539542  | 0.16490388 |
| ENSMUSG00000079685 | -0.7444168 | 2.56231042 | 0.05401165 | 0.1650356  |
| ENSMUSG00000028256 | -0.7046082 | 3.97104433 | 0.05404945 | 0.16508198 |
| ENSMUSG00000028645 | 0.69231595 | 4.92248785 | 0.05406425 | 0.16508198 |
| ENSMUSG00000028347 | 0.80228254 | 1.70480389 | 0.05408428 | 0.16508198 |
| ENSMUSG00000068129 | 0.7738407  | 1.71992617 | 0.05408428 | 0.16508198 |
| ENSMUSG00000029840 | -0.6839393 | 8.45308004 | 0.05424342 | 0.16552378 |
| ENSMUSG00000022336 | -0.6837023 | 8.47207318 | 0.05431213 | 0.16568946 |
| ENSMUSG00000021182 | 0.68625096 | 6.82709069 | 0.05435229 | 0.16576799 |
| ENSMUSG00000028568 | -0.6892616 | 5.53148399 | 0.05440509 | 0.16588503 |
| ENSMUSG00000029071 | 0.69068243 | 5.27194977 | 0.05452392 | 0.1661579  |
| ENSMUSG00000084350 | -0.8045764 | 1.33244257 | 0.05453125 | 0.1661579  |
| ENSMUSG00000028557 | -0.6908124 | 5.26792705 | 0.05453795 | 0.1661579  |
| ENSMUSG00000043858 | 0.6942089  | 4.77692445 | 0.05457133 | 0.16621553 |
| ENSMUSG00000006567 | 0.7911193  | 1.96456163 | 0.05461888 | 0.16631377 |
| ENSMUSG00000031622 | 0.68600052 | 6.09314814 | 0.05463252 | 0.16631377 |
| ENSMUSG00000037674 | -0.6828528 | 8.19067947 | 0.05467359 | 0.16636426 |
| ENSMUSG00000007038 | 0.68400872 | 7.12736357 | 0.05468635 | 0.16636426 |

|                    |            |            |            |            |
|--------------------|------------|------------|------------|------------|
| ENSMUSG00000051341 | -0.6907592 | 5.19935226 | 0.05470329 | 0.16636426 |
| ENSMUSG00000078816 | 0.73264408 | 3.09591513 | 0.05470699 | 0.16636426 |
| ENSMUSG00000024402 | 0.69042182 | 5.2370677  | 0.05475772 | 0.16644627 |
| ENSMUSG00000042354 | -0.6853384 | 6.42967179 | 0.05476292 | 0.16644627 |
| ENSMUSG00000038811 | 0.6870067  | 5.82111538 | 0.05483382 | 0.1666177  |
| ENSMUSG00000022515 | 0.69061829 | 5.10612853 | 0.05485426 | 0.16663575 |
| ENSMUSG00000039157 | 0.6842555  | 6.55877491 | 0.05495197 | 0.16688847 |
| ENSMUSG00000042225 | -0.6925514 | 4.83470932 | 0.05506084 | 0.16714659 |
| ENSMUSG00000020156 | 0.68617223 | 5.96151953 | 0.05506604 | 0.16714659 |
| ENSMUSG00000047789 | -0.6843894 | 6.22680458 | 0.05519413 | 0.16739991 |
| ENSMUSG00000029229 | -0.6880135 | 5.46327279 | 0.05521151 | 0.16739991 |
| ENSMUSG00000020644 | 0.6893486  | 5.37092892 | 0.0552135  | 0.16739991 |
| ENSMUSG00000046994 | -0.6860352 | 5.79184419 | 0.05521368 | 0.16739991 |
| ENSMUSG00000026667 | -0.6810935 | 8.46247562 | 0.05522231 | 0.16739991 |
| ENSMUSG00000014773 | 0.7311468  | 2.82945446 | 0.05523997 | 0.16740929 |
| ENSMUSG00000034601 | -0.6891656 | 5.06802106 | 0.05530281 | 0.16755557 |
| ENSMUSG00000026110 | -0.6815704 | 7.39457808 | 0.05541071 | 0.16783824 |
| ENSMUSG00000020397 | -0.6849827 | 5.95026738 | 0.05544371 | 0.16789395 |
| ENSMUSG00000025962 | -0.6879078 | 5.23159033 | 0.05549386 | 0.16800156 |
| ENSMUSG00000023892 | -0.6911573 | 4.84056404 | 0.0555693  | 0.16818567 |
| ENSMUSG00000040721 | 0.7051999  | 3.9423649  | 0.05559249 | 0.16821153 |
| ENSMUSG00000036879 | -0.6848698 | 5.80498853 | 0.05565804 | 0.16836558 |
| ENSMUSG00000036835 | 0.68778533 | 4.98647387 | 0.0558119  | 0.16878657 |
| ENSMUSG00000010362 | 0.69749595 | 4.00576283 | 0.05599887 | 0.16924147 |
| ENSMUSG00000011658 | 0.70018793 | 4.14385506 | 0.05600288 | 0.16924147 |
| ENSMUSG00000073538 | -0.694446  | 4.42904279 | 0.05600648 | 0.16924147 |
| ENSMUSG00000079418 | -0.686541  | 5.16432778 | 0.05605505 | 0.16934371 |
| ENSMUSG00000036026 | 0.70168179 | 3.93572085 | 0.056132   | 0.16953161 |
| ENSMUSG00000020594 | -0.6781652 | 8.84620379 | 0.05618734 | 0.16964706 |
| ENSMUSG00000069892 | -0.6784946 | 8.16979484 | 0.05619974 | 0.16964706 |
| ENSMUSG00000040189 | 0.77001454 | 2.19805584 | 0.05626407 | 0.16979667 |
| ENSMUSG00000051285 | -0.6794512 | 7.11347536 | 0.0563416  | 0.16996737 |
| ENSMUSG00000021690 | -0.6846784 | 5.40074528 | 0.05635021 | 0.16996737 |
| ENSMUSG00000000915 | 0.6787979  | 7.3085527  | 0.05641715 | 0.17008963 |
| ENSMUSG00000048661 | -0.6833488 | 5.72322302 | 0.05642172 | 0.17008963 |
| ENSMUSG00000054079 | -0.6833126 | 5.71808253 | 0.05643513 | 0.17008963 |
| ENSMUSG00000056536 | -0.6806772 | 6.24583333 | 0.05650686 | 0.17022998 |
| ENSMUSG00000010406 | 0.70788087 | 3.50289396 | 0.05651132 | 0.17022998 |
| ENSMUSG00000078851 | -0.6932869 | 4.30291449 | 0.05653415 | 0.17025413 |
| ENSMUSG00000024163 | 0.67877913 | 7.37202351 | 0.05655799 | 0.17028134 |
| ENSMUSG00000046982 | 0.69023826 | 4.64181568 | 0.05659472 | 0.1703473  |
| ENSMUSG00000042302 | -0.7219201 | 2.91421168 | 0.0566524  | 0.17047627 |
| ENSMUSG00000100150 | -0.7258264 | 2.68082223 | 0.05669514 | 0.17049474 |

|                    |            |            |            |            |
|--------------------|------------|------------|------------|------------|
| ENSMUSG00000019818 | -0.6770011 | 8.42522294 | 0.05670338 | 0.17049474 |
| ENSMUSG00000039985 | -0.6816812 | 5.97950138 | 0.05670954 | 0.17049474 |
| ENSMUSG00000070639 | 0.76049909 | 2.36319952 | 0.05671787 | 0.17049474 |
| ENSMUSG00000044678 | 0.72042465 | 3.28351648 | 0.05677855 | 0.17063254 |
| ENSMUSG00000011008 | -0.6839601 | 5.22878605 | 0.0568194  | 0.17071065 |
| ENSMUSG00000020385 | -0.6769692 | 7.83166034 | 0.05691232 | 0.17091829 |
| ENSMUSG00000020496 | 0.67989778 | 6.21637954 | 0.05693275 | 0.17091829 |
| ENSMUSG00000003812 | 0.68283091 | 5.63691329 | 0.05693311 | 0.17091829 |
| ENSMUSG00000064061 | -0.6863503 | 4.92482474 | 0.05701388 | 0.17111607 |
| ENSMUSG00000021179 | 0.69345558 | 4.43544691 | 0.05707558 | 0.17125654 |
| ENSMUSG00000010057 | 0.69419837 | 4.08780905 | 0.05723541 | 0.17169129 |
| ENSMUSG00000096727 | 0.67847183 | 6.32490308 | 0.0572666  | 0.17174002 |
| ENSMUSG00000047547 | 0.70488032 | 3.67656908 | 0.05728579 | 0.17175278 |
| ENSMUSG00000038127 | -0.6751178 | 8.58885389 | 0.05734377 | 0.17188178 |
| ENSMUSG00000062101 | -0.7165527 | 2.91490364 | 0.05746822 | 0.1722099  |
| ENSMUSG00000030753 | -0.6779627 | 6.33642583 | 0.05750047 | 0.17226165 |
| ENSMUSG00000066798 | -0.6812011 | 5.55529022 | 0.05755179 | 0.17231751 |
| ENSMUSG00000020015 | -0.6759254 | 7.27678036 | 0.05755341 | 0.17231751 |
| ENSMUSG00000022884 | -0.6739293 | 10.3532234 | 0.05756409 | 0.17231751 |
| ENSMUSG00000048731 | 0.77968264 | 1.92943923 | 0.05767807 | 0.17256881 |
| ENSMUSG00000021066 | -0.762902  | 1.90577349 | 0.05767807 | 0.17256881 |
| ENSMUSG00000092222 | -0.6883145 | 4.39993136 | 0.05769991 | 0.17258924 |
| ENSMUSG00000040351 | -0.6764622 | 6.62593493 | 0.05773336 | 0.17264438 |
| ENSMUSG00000047407 | -0.6743714 | 7.9600644  | 0.05777648 | 0.17272838 |
| ENSMUSG00000074342 | -0.688566  | 4.21894103 | 0.05781089 | 0.17278633 |
| ENSMUSG00000012114 | 0.67934599 | 5.65104599 | 0.05785166 | 0.17286322 |
| ENSMUSG00000029167 | 0.70905107 | 3.26369675 | 0.05788052 | 0.17290451 |
| ENSMUSG00000024360 | -0.674708  | 7.372113   | 0.05791426 | 0.17296037 |
| ENSMUSG00000022761 | 0.6789714  | 5.5686764  | 0.05798099 | 0.17311468 |
| ENSMUSG00000007670 | 0.67575094 | 6.45167678 | 0.05809776 | 0.17341828 |
| ENSMUSG00000045362 | -0.685016  | 4.74496454 | 0.05813885 | 0.17345953 |
| ENSMUSG00000020048 | -0.6723638 | 10.2956936 | 0.05815205 | 0.17345953 |
| ENSMUSG00000028420 | 0.7321886  | 2.5181726  | 0.05815685 | 0.17345953 |
| ENSMUSG00000039801 | -0.6780572 | 5.56522625 | 0.05827564 | 0.17375623 |
| ENSMUSG00000040225 | -0.672146  | 9.42430053 | 0.05828656 | 0.17375623 |
| ENSMUSG00000021693 | -0.6763167 | 6.1388805  | 0.05837347 | 0.17393464 |
| ENSMUSG00000038323 | -0.6974006 | 3.70281174 | 0.05839855 | 0.17393464 |
| ENSMUSG00000024644 | 0.67841817 | 5.63467309 | 0.05840549 | 0.17393464 |
| ENSMUSG00000038690 | 0.69599864 | 3.80326574 | 0.05840694 | 0.17393464 |
| ENSMUSG00000096351 | 0.76819604 | 2.24800253 | 0.05843935 | 0.17398464 |
| ENSMUSG00000054945 | -0.8598947 | 0.68475113 | 0.058454   | 0.17398464 |
| ENSMUSG00000017146 | -0.681767  | 5.03460033 | 0.05847212 | 0.17399353 |
| ENSMUSG00000030254 | -0.6846888 | 4.62260518 | 0.05850179 | 0.17403067 |

|                    |            |            |            |            |
|--------------------|------------|------------|------------|------------|
| ENSMUSG00000032103 | -0.6800386 | 5.27402302 | 0.05851488 | 0.17403067 |
| ENSMUSG00000089857 | -0.6918807 | 4.11342651 | 0.05856398 | 0.17413165 |
| ENSMUSG00000046792 | 0.73809234 | 2.09353844 | 0.05859933 | 0.17418208 |
| ENSMUSG00000030689 | 0.68220444 | 4.79719516 | 0.05861125 | 0.17418208 |
| ENSMUSG00000038615 | 0.67337466 | 6.97160682 | 0.05865408 | 0.17426431 |
| ENSMUSG00000027968 | -0.6780919 | 5.50356642 | 0.05867004 | 0.1742667  |
| ENSMUSG00000028521 | -0.6880258 | 4.29914684 | 0.05869607 | 0.17429896 |
| ENSMUSG00000038546 | -0.6737939 | 6.68350458 | 0.05871355 | 0.17430585 |
| ENSMUSG00000070284 | 0.69742186 | 3.60436929 | 0.05874741 | 0.17436134 |
| ENSMUSG00000024130 | 0.67417886 | 6.6049706  | 0.05876827 | 0.17437823 |
| ENSMUSG00000041319 | 0.70197972 | 3.47665061 | 0.0587989  | 0.17442408 |
| ENSMUSG00000027018 | -0.6766906 | 5.69250204 | 0.05890411 | 0.17469112 |
| ENSMUSG00000024858 | 0.67055367 | 9.01945087 | 0.05892094 | 0.17469595 |
| ENSMUSG00000020817 | -0.6719931 | 7.25611758 | 0.05898647 | 0.17484515 |
| ENSMUSG00000090110 | -0.7264485 | 2.62803662 | 0.05904013 | 0.17495908 |
| ENSMUSG00000029442 | -0.8097354 | 1.17075747 | 0.05908036 | 0.17499624 |
| ENSMUSG00000037351 | 0.67530417 | 5.95449629 | 0.05908312 | 0.17499624 |
| ENSMUSG00000029406 | -0.6802886 | 4.67199418 | 0.05910069 | 0.17500319 |
| ENSMUSG00000060519 | 0.67453217 | 5.93747852 | 0.05913908 | 0.17507179 |
| ENSMUSG00000052270 | 0.76882154 | 2.00161841 | 0.05920888 | 0.17518818 |
| ENSMUSG00000062785 | 0.74340252 | 2.00178002 | 0.05920888 | 0.17518818 |
| ENSMUSG00000036528 | 0.67748482 | 5.29599254 | 0.05922917 | 0.17520312 |
| ENSMUSG00000029681 | 0.68116328 | 4.63254461 | 0.05928417 | 0.17532069 |
| ENSMUSG00000027804 | -0.6724042 | 6.67645757 | 0.05933099 | 0.17537995 |
| ENSMUSG00000057788 | 0.68717259 | 4.11004602 | 0.05933472 | 0.17537995 |
| ENSMUSG00000041846 | -0.6703993 | 7.69579357 | 0.05939295 | 0.17550692 |
| ENSMUSG00000024799 | 0.7796367  | 1.81169804 | 0.05944766 | 0.17562344 |
| ENSMUSG00000031902 | -0.6689896 | 8.81544357 | 0.05959308 | 0.17600782 |
| ENSMUSG00000026740 | -0.6765993 | 5.25148001 | 0.05960949 | 0.17601107 |
| ENSMUSG00000032228 | -0.6698622 | 7.54695479 | 0.05966174 | 0.17612011 |
| ENSMUSG00000074283 | 0.81380222 | 1.51289192 | 0.05976878 | 0.1763908  |
| ENSMUSG00000031077 | 0.70119313 | 3.43046012 | 0.05988493 | 0.17652886 |
| ENSMUSG00000073430 | 0.77476265 | 1.89911505 | 0.05989486 | 0.17652886 |
| ENSMUSG00000028212 | -0.6981815 | 3.69244335 | 0.0599139  | 0.17652886 |
| ENSMUSG00000031818 | 0.67086577 | 6.41998956 | 0.05991927 | 0.17652886 |
| ENSMUSG00000058192 | -0.6898064 | 4.02143852 | 0.05993196 | 0.17652886 |
| ENSMUSG00000021911 | -0.6704424 | 6.80879567 | 0.05995146 | 0.17652886 |
| ENSMUSG00000090141 | -0.8496667 | 0.98033287 | 0.05995244 | 0.17652886 |
| ENSMUSG00000071708 | -0.6709606 | 6.50886199 | 0.05996119 | 0.17652886 |
| ENSMUSG00000051977 | -0.6740693 | 5.53720244 | 0.05996139 | 0.17652886 |
| ENSMUSG00000028251 | -0.6891649 | 3.849982   | 0.05996914 | 0.17652886 |
| ENSMUSG00000032712 | -0.6684914 | 7.65151367 | 0.06010153 | 0.17685054 |
| ENSMUSG00000047875 | 0.77903906 | 1.76704543 | 0.06010918 | 0.17685054 |



|                    |            |            |            |            |
|--------------------|------------|------------|------------|------------|
| ENSMUSG00000021770 | -0.6737344 | 5.5998389  | 0.06012886 | 0.17686317 |
| ENSMUSG00000030165 | 0.71996713 | 2.73584435 | 0.06016872 | 0.17693513 |
| ENSMUSG00000025898 | -0.6714931 | 6.12192568 | 0.06019399 | 0.17696418 |
| ENSMUSG00000043252 | -0.6701817 | 6.55161798 | 0.06022298 | 0.17700414 |
| ENSMUSG00000036270 | 0.67107584 | 6.12362778 | 0.06027807 | 0.17705811 |
| ENSMUSG00000048410 | -0.6708052 | 6.16535349 | 0.06028588 | 0.17705811 |
| ENSMUSG00000023074 | -0.6867172 | 4.03863713 | 0.06028755 | 0.17705811 |
| ENSMUSG00000038725 | -0.681905  | 4.76919615 | 0.06034543 | 0.17716097 |
| ENSMUSG00000029776 | -0.6723337 | 5.75857679 | 0.0603534  | 0.17716097 |
| ENSMUSG00000047757 | -0.6988963 | 3.3937522  | 0.06036887 | 0.17716114 |
| ENSMUSG00000038622 | -0.6852987 | 4.01605109 | 0.06049362 | 0.1774819  |
| ENSMUSG00000020895 | 0.81003146 | 1.4577638  | 0.06056315 | 0.17760548 |
| ENSMUSG00000031245 | -0.6749626 | 5.28468835 | 0.06056664 | 0.17760548 |
| ENSMUSG00000058799 | -0.6659477 | 9.05620524 | 0.06070696 | 0.17794038 |
| ENSMUSG00000022789 | -0.667588  | 7.14111678 | 0.0607118  | 0.17794038 |
| ENSMUSG00000014956 | -0.6664106 | 8.05259636 | 0.06076607 | 0.17805404 |
| ENSMUSG00000020572 | -0.6673048 | 7.09427762 | 0.06084758 | 0.17821294 |
| ENSMUSG00000052331 | -0.6657528 | 8.57601399 | 0.06085131 | 0.17821294 |
| ENSMUSG00000036860 | 0.73951079 | 2.14594335 | 0.06093974 | 0.17842645 |
| ENSMUSG00000055660 | -0.6777502 | 4.58867386 | 0.06102815 | 0.17863982 |
| ENSMUSG00000001157 | -0.6712582 | 5.57362833 | 0.06116467 | 0.17899387 |
| ENSMUSG00000061665 | -0.6649267 | 8.12846703 | 0.06129498 | 0.17932955 |
| ENSMUSG00000024283 | -0.6652293 | 7.81491029 | 0.06132022 | 0.17935776 |
| ENSMUSG00000067942 | -0.6709841 | 5.40546149 | 0.06146871 | 0.17974632 |
| ENSMUSG00000047631 | 0.75845482 | 1.32141214 | 0.06157159 | 0.18000137 |
| ENSMUSG00000031201 | -0.6702638 | 5.49376449 | 0.06162733 | 0.18011851 |
| ENSMUSG00000042508 | -0.6646904 | 7.27183557 | 0.06175692 | 0.1804514  |
| ENSMUSG00000041247 | 0.69794612 | 3.65681609 | 0.06177312 | 0.18045287 |
| ENSMUSG00000055917 | -0.6730973 | 4.91543412 | 0.06185194 | 0.18063048 |
| ENSMUSG00000029684 | -0.6695924 | 5.43037057 | 0.06186535 | 0.18063048 |
| ENSMUSG00000025867 | 0.71377563 | 2.41642937 | 0.06188761 | 0.18064959 |
| ENSMUSG00000057315 | -0.6791881 | 4.30581585 | 0.0620347  | 0.18098865 |
| ENSMUSG00000007817 | 0.66672248 | 6.36650871 | 0.06203526 | 0.18098865 |
| ENSMUSG00000041297 | -0.6627095 | 8.10647065 | 0.06217554 | 0.18135188 |
| ENSMUSG00000047139 | -0.6614866 | 10.2226601 | 0.06230222 | 0.18167528 |
| ENSMUSG00000079298 | 0.78991896 | 1.63503457 | 0.06235837 | 0.18177715 |
| ENSMUSG00000058230 | -0.6680569 | 5.41691274 | 0.06236878 | 0.18177715 |
| ENSMUSG00000041444 | 0.77416433 | 1.80152755 | 0.06248382 | 0.1820663  |
| ENSMUSG00000033712 | 0.66495374 | 6.19302914 | 0.06259384 | 0.18234064 |
| ENSMUSG00000075467 | 0.68495919 | 3.41891958 | 0.0628308  | 0.18298454 |
| ENSMUSG00000035247 | -0.6604109 | 8.87302417 | 0.0628741  | 0.18306428 |
| ENSMUSG00000014837 | 0.70055696 | 2.98308809 | 0.06291897 | 0.18314588 |
| ENSMUSG00000101335 | -0.7875519 | 0.99605955 | 0.06294488 | 0.18314588 |

|                    |            |            |            |            |
|--------------------|------------|------------|------------|------------|
| ENSMUSG00000024472 | -0.6621608 | 6.94172529 | 0.06294992 | 0.18314588 |
| ENSMUSG00000030059 | -0.6616436 | 7.1966119  | 0.06300952 | 0.18327289 |
| ENSMUSG00000022020 | -0.6676426 | 5.37006225 | 0.06312751 | 0.18356964 |
| ENSMUSG00000094942 | -0.7536086 | 1.74754859 | 0.06326163 | 0.18391309 |
| ENSMUSG00000058291 | -0.6622739 | 6.60333668 | 0.06330859 | 0.18394989 |
| ENSMUSG00000025049 | -0.6698598 | 4.7886266  | 0.06331389 | 0.18394989 |
| ENSMUSG00000022765 | -0.6603585 | 7.66638007 | 0.06332229 | 0.18394989 |
| ENSMUSG00000079184 | -0.6628266 | 6.25149564 | 0.06336785 | 0.18403573 |
| ENSMUSG00000042323 | -0.6596969 | 7.88248029 | 0.0634347  | 0.1841404  |
| ENSMUSG00000063450 | 0.67121198 | 5.12403625 | 0.06343593 | 0.1841404  |
| ENSMUSG00000035151 | -0.6653671 | 5.47212083 | 0.06359364 | 0.18455159 |
| ENSMUSG00000101599 | -0.6817459 | 3.41923592 | 0.06362002 | 0.18456518 |
| ENSMUSG00000049606 | -0.6607582 | 6.76653274 | 0.06364383 | 0.18456518 |
| ENSMUSG00000070390 | 0.70593068 | 3.25267347 | 0.06364649 | 0.18456518 |
| ENSMUSG00000033014 | -0.6595928 | 7.45394574 | 0.0636638  | 0.18456883 |
| ENSMUSG00000020463 | -0.6583009 | 7.91395336 | 0.06400717 | 0.18551752 |
| ENSMUSG00000071350 | -0.6607    | 6.38963007 | 0.06403235 | 0.1855437  |
| ENSMUSG00000076562 | -0.6890052 | 3.47295973 | 0.06415601 | 0.18585517 |
| ENSMUSG00000035851 | -0.6572635 | 8.43225662 | 0.06424175 | 0.18605667 |
| ENSMUSG00000048249 | -0.6577607 | 7.64973545 | 0.06430253 | 0.18617567 |
| ENSMUSG00000038822 | -0.6627167 | 5.58365082 | 0.06431523 | 0.18617567 |
| ENSMUSG00000003575 | 0.67890305 | 3.95521437 | 0.06436114 | 0.18625137 |
| ENSMUSG00000026473 | 0.65837942 | 7.15879916 | 0.06437379 | 0.18625137 |
| ENSMUSG00000019813 | -0.6715608 | 4.26093333 | 0.06450414 | 0.18654689 |
| ENSMUSG00000023104 | 0.66108673 | 5.76073111 | 0.06450839 | 0.18654689 |
| ENSMUSG00000054520 | 0.65816784 | 6.88098661 | 0.06452709 | 0.18655221 |
| ENSMUSG00000020390 | -0.6575184 | 7.43640821 | 0.06454268 | 0.18655221 |
| ENSMUSG00000053483 | 0.66368771 | 5.11930683 | 0.06456913 | 0.1865584  |
| ENSMUSG00000090641 | -0.6755439 | 4.1647033  | 0.06458931 | 0.1865584  |
| ENSMUSG00000026502 | -0.6641203 | 5.2242935  | 0.06459351 | 0.1865584  |
| ENSMUSG00000016253 | 0.66377707 | 5.202149   | 0.06473286 | 0.18691391 |
| ENSMUSG00000078784 | -0.6682736 | 4.7020311  | 0.06476503 | 0.18691478 |
| ENSMUSG00000027346 | -0.6559585 | 8.3381392  | 0.0647775  | 0.18691478 |
| ENSMUSG00000033446 | -0.6638978 | 5.22186117 | 0.06479712 | 0.18691478 |
| ENSMUSG00000056737 | 0.65746574 | 6.89259792 | 0.06479821 | 0.18691478 |
| ENSMUSG00000036109 | -0.6735093 | 4.21487784 | 0.06491037 | 0.18719135 |
| ENSMUSG00000052812 | -0.6575656 | 6.718077   | 0.06494811 | 0.18725322 |
| ENSMUSG00000033055 | 0.673234   | 4.04565373 | 0.0649721  | 0.18727539 |
| ENSMUSG00000030641 | -0.697199  | 2.95824706 | 0.06499441 | 0.18729273 |
| ENSMUSG00000026728 | 0.65539638 | 8.05218168 | 0.06512495 | 0.18762188 |
| ENSMUSG00000027957 | -0.6596423 | 5.81139555 | 0.06518748 | 0.18775495 |
| ENSMUSG00000032171 | 0.68773035 | 3.40116307 | 0.06530851 | 0.1880103  |
| ENSMUSG00000053716 | 0.66702004 | 4.48766402 | 0.06532384 | 0.1880103  |

|                    |            |            |            |            |
|--------------------|------------|------------|------------|------------|
| ENSMUSG00000025485 | 0.6582122  | 6.09829509 | 0.0653252  | 0.1880103  |
| ENSMUSG00000037652 | -0.6551099 | 7.50895239 | 0.0653811  | 0.18801155 |
| ENSMUSG00000018678 | 0.66552376 | 4.77278867 | 0.06538188 | 0.18801155 |
| ENSMUSG00000020477 | 0.68751839 | 3.2465143  | 0.06538814 | 0.18801155 |
| ENSMUSG00000097295 | -0.6657809 | 4.48679421 | 0.06540167 | 0.18801155 |
| ENSMUSG00000016756 | -0.6541161 | 8.88118671 | 0.06540741 | 0.18801155 |
| ENSMUSG00000094356 | -0.6696684 | 4.54453829 | 0.06542488 | 0.18801474 |
| ENSMUSG00000029169 | -0.6541718 | 8.50263556 | 0.06547814 | 0.18811994 |
| ENSMUSG00000030847 | 0.66974833 | 4.31613755 | 0.06549422 | 0.18811994 |
| ENSMUSG00000013629 | 0.66060322 | 5.42853721 | 0.0655349  | 0.18818977 |
| ENSMUSG00000033105 | 0.66420364 | 4.94064445 | 0.06561589 | 0.18837529 |
| ENSMUSG00000070709 | -0.669523  | 4.20142191 | 0.06563763 | 0.18839064 |
| ENSMUSG00000027680 | -0.6554326 | 7.0959141  | 0.06565715 | 0.18839963 |
| ENSMUSG00000060538 | 0.67586502 | 3.98381878 | 0.06567794 | 0.18841226 |
| ENSMUSG00000032384 | -0.6558318 | 6.52607766 | 0.06580477 | 0.18871471 |
| ENSMUSG00000024845 | 0.65683529 | 6.35585277 | 0.06581621 | 0.18871471 |
| ENSMUSG00000054312 | 0.67329005 | 3.93199503 | 0.06588802 | 0.1888735  |
| ENSMUSG00000042129 | 0.65473408 | 7.10248911 | 0.06597804 | 0.18906374 |
| ENSMUSG00000035898 | -0.6581032 | 5.77143929 | 0.06598728 | 0.18906374 |
| ENSMUSG00000028977 | 0.67836093 | 3.7144877  | 0.06611661 | 0.18938711 |
| ENSMUSG00000027649 | 0.66184936 | 4.84486202 | 0.06631085 | 0.18989618 |
| ENSMUSG00000026989 | 0.80081443 | 1.2150231  | 0.06636322 | 0.18995275 |
| ENSMUSG00000031068 | -0.6568326 | 5.83527051 | 0.06636366 | 0.18995275 |
| ENSMUSG00000064138 | -0.655445  | 6.10628509 | 0.06647499 | 0.19022406 |
| ENSMUSG00000052760 | -0.6523239 | 7.58198295 | 0.0665448  | 0.19037641 |
| ENSMUSG00000025730 | 0.67135512 | 3.90444417 | 0.06657304 | 0.19040984 |
| ENSMUSG00000004264 | 0.65454383 | 6.29444245 | 0.0666036  | 0.19042002 |
| ENSMUSG00000041997 | -0.6520223 | 7.79538083 | 0.06660974 | 0.19042002 |
| ENSMUSG00000020745 | -0.6513768 | 8.44875653 | 0.06664643 | 0.19047755 |
| ENSMUSG00000024491 | -0.6524783 | 7.32631887 | 0.06667524 | 0.19051253 |
| ENSMUSG00000053559 | 0.66210244 | 3.72784707 | 0.06676641 | 0.19072561 |
| ENSMUSG00000031198 | -0.6579186 | 5.45370023 | 0.06679329 | 0.19075498 |
| ENSMUSG00000021893 | -0.6520776 | 7.3148322  | 0.06681516 | 0.19077005 |
| ENSMUSG00000056515 | 0.66102784 | 4.9824054  | 0.06690529 | 0.19097997 |
| ENSMUSG00000037075 | -0.6532626 | 6.47873698 | 0.06694305 | 0.19104031 |
| ENSMUSG00000003721 | -0.6578395 | 5.30684836 | 0.06699189 | 0.19113224 |
| ENSMUSG00000061666 | 0.73399636 | 2.04786282 | 0.06714253 | 0.19151449 |
| ENSMUSG00000035372 | 0.6985324  | 2.78762737 | 0.06724668 | 0.19176398 |
| ENSMUSG00000059486 | -0.6512274 | 7.0878226  | 0.0673028  | 0.1918764  |
| ENSMUSG00000024286 | -0.6520169 | 6.65332503 | 0.06732147 | 0.19188204 |
| ENSMUSG00000029557 | 0.78467717 | 1.00363738 | 0.06735158 | 0.19192029 |
| ENSMUSG00000037400 | -0.6499054 | 7.82285802 | 0.067445   | 0.19213884 |
| ENSMUSG00000051329 | -0.6500682 | 7.58996808 | 0.06752668 | 0.19232387 |

|                    |            |            |            |            |
|--------------------|------------|------------|------------|------------|
| ENSMUSG00000052291 | -0.7408606 | 1.8872218  | 0.06756052 | 0.1923726  |
| ENSMUSG00000042167 | -0.6518648 | 6.27616053 | 0.06767564 | 0.19265266 |
| ENSMUSG00000004285 | 0.65527755 | 5.22978899 | 0.06787136 | 0.193162   |
| ENSMUSG00000051278 | -0.6669396 | 4.19478531 | 0.06789906 | 0.193193   |
| ENSMUSG00000021514 | -0.6556332 | 5.22916759 | 0.06791752 | 0.19319769 |
| ENSMUSG00000067847 | 0.77098225 | 1.41134699 | 0.06795208 | 0.19324818 |
| ENSMUSG00000037761 | 0.66327833 | 3.960593   | 0.06800897 | 0.19335601 |
| ENSMUSG00000021087 | 0.78286284 | 1.63501919 | 0.06803544 | 0.19335601 |
| ENSMUSG00000097994 | -0.6804529 | 3.12579096 | 0.06804046 | 0.19335601 |
| ENSMUSG00000023393 | 0.66482849 | 4.32112132 | 0.06810156 | 0.1934818  |
| ENSMUSG00000027835 | -0.6515636 | 6.01118906 | 0.0681872  | 0.19367725 |
| ENSMUSG00000021866 | 0.66538161 | 4.29208651 | 0.06823272 | 0.19375867 |
| ENSMUSG00000045751 | -0.661923  | 4.44361437 | 0.06825054 | 0.19376142 |
| ENSMUSG00000038178 | 0.65001264 | 6.59077873 | 0.0683045  | 0.193834   |
| ENSMUSG00000069744 | 0.65501084 | 5.06916549 | 0.06830984 | 0.193834   |
| ENSMUSG00000019927 | -0.651173  | 6.08555683 | 0.0684316  | 0.1941316  |
| ENSMUSG00000038344 | -0.6534019 | 5.43518233 | 0.06847384 | 0.1942035  |
| ENSMUSG00000031731 | -0.6477183 | 7.56790022 | 0.06850332 | 0.19423919 |
| ENSMUSG00000024122 | -0.6475029 | 7.61857574 | 0.06857063 | 0.19432074 |
| ENSMUSG00000017713 | 0.78661991 | 1.4537579  | 0.0685771  | 0.19432074 |
| ENSMUSG00000020744 | 0.65137636 | 5.80204962 | 0.0685828  | 0.19432074 |
| ENSMUSG00000026648 | -0.6500306 | 6.00366624 | 0.06865191 | 0.19446862 |
| ENSMUSG00000033720 | 0.67211865 | 3.82954567 | 0.06868438 | 0.19451269 |
| ENSMUSG00000094930 | -0.6697207 | 3.85396844 | 0.06875458 | 0.19466351 |
| ENSMUSG00000042535 | 0.64949763 | 6.13022637 | 0.06877381 | 0.19467003 |
| ENSMUSG00000039089 | -0.6489661 | 6.54948263 | 0.06880336 | 0.19470571 |
| ENSMUSG00000031714 | 0.7609689  | 1.78797627 | 0.06900027 | 0.1952149  |
| ENSMUSG00000083798 | -0.7664511 | 1.68101926 | 0.06907106 | 0.19524823 |
| ENSMUSG00000022425 | 0.84257595 | 1.08148774 | 0.06907166 | 0.19524823 |
| ENSMUSG00000101678 | -0.7927812 | 1.04333417 | 0.06907166 | 0.19524823 |
| ENSMUSG00000047368 | -0.6473554 | 6.8575874  | 0.06908241 | 0.19524823 |
| ENSMUSG00000041241 | 0.67177597 | 3.60932922 | 0.06911338 | 0.19524823 |
| ENSMUSG00000026357 | -0.6653768 | 3.79492576 | 0.06911397 | 0.19524823 |
| ENSMUSG00000066324 | -0.649691  | 5.90856264 | 0.06917985 | 0.19538633 |
| ENSMUSG00000056476 | 0.72323427 | 2.44334114 | 0.06929588 | 0.19564631 |
| ENSMUSG00000029524 | 0.68850953 | 2.74918839 | 0.06932155 | 0.19564631 |
| ENSMUSG00000031381 | -0.6522395 | 5.19211788 | 0.06932296 | 0.19564631 |
| ENSMUSG00000026753 | -0.6477781 | 6.48360549 | 0.06936215 | 0.19570888 |
| ENSMUSG00000027111 | -0.6517146 | 5.22406506 | 0.06939232 | 0.19574593 |
| ENSMUSG00000048310 | 0.6553609  | 4.83188097 | 0.06941173 | 0.19575266 |
| ENSMUSG00000002679 | -0.6591678 | 4.55786645 | 0.06943556 | 0.19577182 |
| ENSMUSG00000030471 | -0.6487355 | 6.04761642 | 0.06946358 | 0.19580279 |
| ENSMUSG00000021488 | -0.6440614 | 9.20956535 | 0.06954748 | 0.19599124 |

|                    |            |            |            |            |
|--------------------|------------|------------|------------|------------|
| ENSMUSG00000030213 | -0.6443333 | 8.31130121 | 0.06961255 | 0.19607945 |
| ENSMUSG00000000787 | -0.6437527 | 9.81076952 | 0.0696129  | 0.19607945 |
| ENSMUSG00000021714 | -0.7326189 | 1.98987254 | 0.0696474  | 0.19612857 |
| ENSMUSG00000028049 | 0.64979471 | 5.2487715  | 0.0697418  | 0.19634631 |
| ENSMUSG00000030287 | -0.6445655 | 7.6006726  | 0.06977199 | 0.19636272 |
| ENSMUSG00000022544 | 0.67715136 | 3.31235488 | 0.06978179 | 0.19636272 |
| ENSMUSG00000037685 | -0.6439752 | 7.91456962 | 0.06990296 | 0.19665553 |
| ENSMUSG00000039041 | 0.65460431 | 4.72658191 | 0.06994628 | 0.19672927 |
| ENSMUSG00000030042 | -0.647046  | 6.19691762 | 0.07001208 | 0.19680246 |
| ENSMUSG00000024811 | -0.6433384 | 8.54190167 | 0.07002016 | 0.19680246 |
| ENSMUSG00000027699 | -0.6632472 | 3.92753222 | 0.07002367 | 0.19680246 |
| ENSMUSG00000003746 | -0.6429718 | 8.95574871 | 0.07007758 | 0.19690583 |
| ENSMUSG00000035310 | -0.650644  | 5.24642462 | 0.07016458 | 0.19699071 |
| ENSMUSG00000030127 | 0.65623288 | 4.57253943 | 0.07016707 | 0.19699071 |
| ENSMUSG00000043183 | -0.6505533 | 5.22376663 | 0.07017183 | 0.19699071 |
| ENSMUSG00000043445 | 0.72639611 | 1.65791424 | 0.07017633 | 0.19699071 |
| ENSMUSG00000021215 | -0.6479944 | 5.78435755 | 0.07023915 | 0.19711889 |
| ENSMUSG00000031617 | -0.6490604 | 5.547381   | 0.07026242 | 0.19713609 |
| ENSMUSG00000061479 | 0.66249612 | 3.8739878  | 0.07031348 | 0.19723121 |
| ENSMUSG00000028693 | -0.6450592 | 6.55999325 | 0.07039389 | 0.19740856 |
| ENSMUSG00000041028 | -0.6427557 | 7.9725293  | 0.0704395  | 0.1974883  |
| ENSMUSG00000097457 | 0.8880558  | 0.81752276 | 0.07051165 | 0.19764238 |
| ENSMUSG00000040274 | -0.6651765 | 3.6558649  | 0.07055612 | 0.19771881 |
| ENSMUSG00000054836 | 0.71546882 | 2.15893943 | 0.07059464 | 0.19777854 |
| ENSMUSG00000017715 | 0.65199684 | 5.21648253 | 0.07063347 | 0.1978391  |
| ENSMUSG00000083086 | -0.6879255 | 2.81888739 | 0.07066242 | 0.197872   |
| ENSMUSG00000028840 | 0.68002009 | 3.12263451 | 0.07069013 | 0.19790136 |
| ENSMUSG00000030555 | -0.7443948 | 1.54348199 | 0.07084565 | 0.19828846 |
| ENSMUSG00000037316 | -0.651489  | 4.86189213 | 0.07088726 | 0.19834493 |
| ENSMUSG00000024462 | 0.64367168 | 6.77660094 | 0.07090033 | 0.19834493 |
| ENSMUSG00000028188 | -0.6847799 | 2.71749729 | 0.07094525 | 0.19838241 |
| ENSMUSG00000045103 | 0.75808608 | 1.7952513  | 0.07094825 | 0.19838241 |
| ENSMUSG00000024817 | -0.6429079 | 6.97555921 | 0.07097053 | 0.19839647 |
| ENSMUSG00000022369 | -0.6520269 | 4.80191311 | 0.07103461 | 0.19852732 |
| ENSMUSG00000024824 | 0.64482493 | 5.86032894 | 0.07106556 | 0.19856554 |
| ENSMUSG00000034329 | -0.6867006 | 2.84558436 | 0.07108294 | 0.19856582 |
| ENSMUSG00000005610 | -0.6401252 | 10.5788229 | 0.07113452 | 0.19861582 |
| ENSMUSG00000061904 | -0.6403779 | 9.34422068 | 0.07113539 | 0.19861582 |
| ENSMUSG00000017679 | -0.6410409 | 8.09343049 | 0.07116483 | 0.19864976 |
| ENSMUSG00000067825 | 0.65983113 | 3.67181199 | 0.07123496 | 0.19879724 |
| ENSMUSG00000038732 | 0.79292828 | 1.21147726 | 0.07133203 | 0.19897276 |
| ENSMUSG00000068039 | -0.6402029 | 8.79853082 | 0.0713473  | 0.19897276 |
| ENSMUSG00000027132 | -0.6594401 | 4.100681   | 0.07135198 | 0.19897276 |

|                    |            |            |            |            |
|--------------------|------------|------------|------------|------------|
| ENSMUSG00000031370 | -0.6442686 | 5.90948986 | 0.07136969 | 0.19897276 |
| ENSMUSG00000032570 | -0.6413705 | 7.32180375 | 0.0713844  | 0.19897276 |
| ENSMUSG00000047446 | -0.6423997 | 6.51899888 | 0.0716073  | 0.19954568 |
| ENSMUSG00000018474 | 0.63946792 | 8.48553231 | 0.07165184 | 0.1996214  |
| ENSMUSG00000068798 | -0.6410676 | 6.9183879  | 0.07178899 | 0.19989283 |
| ENSMUSG00000082436 | -0.7334638 | 1.33965339 | 0.07179939 | 0.19989283 |
| ENSMUSG00000008167 | 0.75552209 | 1.85106518 | 0.07180144 | 0.19989283 |
| ENSMUSG00000003153 | 0.64115274 | 6.92008378 | 0.07188779 | 0.20008477 |
| ENSMUSG00000031112 | -0.6422296 | 6.22743991 | 0.07196083 | 0.2002396  |
| ENSMUSG00000072847 | -0.6550624 | 3.99408674 | 0.07199562 | 0.20028792 |
| ENSMUSG00000067599 | 0.72354747 | 2.06752331 | 0.07205703 | 0.20041025 |
| ENSMUSG00000040044 | -0.6409495 | 6.49812619 | 0.07215954 | 0.2006468  |
| ENSMUSG00000025403 | 0.64584271 | 5.02153575 | 0.07222061 | 0.20076806 |
| ENSMUSG00000029629 | -0.6401233 | 6.76133997 | 0.07230454 | 0.20095277 |
| ENSMUSG00000081208 | 0.87925261 | 0.92646952 | 0.07233393 | 0.20098588 |
| ENSMUSG00000002413 | -0.6402393 | 6.56859988 | 0.0723742  | 0.20104915 |
| ENSMUSG00000073563 | -0.6391905 | 7.28032415 | 0.07239503 | 0.20105842 |
| ENSMUSG00000087141 | -0.6484757 | 4.53934362 | 0.07246159 | 0.20119468 |
| ENSMUSG00000006307 | 0.63954842 | 6.95926959 | 0.07252513 | 0.20132247 |
| ENSMUSG00000049421 | -0.6417776 | 6.01349679 | 0.07261805 | 0.20150619 |
| ENSMUSG00000079845 | -0.6785692 | 2.70091152 | 0.0726361  | 0.20150619 |
| ENSMUSG00000027715 | -0.6430678 | 5.69669063 | 0.0726439  | 0.20150619 |
| ENSMUSG00000044367 | 0.72471749 | 1.70381694 | 0.07280051 | 0.20189187 |
| ENSMUSG00000050555 | -0.646806  | 5.0085113  | 0.07289586 | 0.20210755 |
| ENSMUSG00000028572 | -0.6417362 | 5.73199476 | 0.07293711 | 0.20217315 |
| ENSMUSG00000031600 | -0.6408984 | 5.79715663 | 0.07312237 | 0.2026378  |
| ENSMUSG00000056211 | -0.6374954 | 7.00612169 | 0.07315501 | 0.20265122 |
| ENSMUSG00000035769 | 0.78534604 | 0.98288122 | 0.07316247 | 0.20265122 |
| ENSMUSG00000006676 | 0.63704747 | 7.22733573 | 0.07329187 | 0.20296073 |
| ENSMUSG00000025893 | -0.7303872 | 1.81467729 | 0.0733192  | 0.20298753 |
| ENSMUSG00000034071 | -0.7259677 | 1.93570504 | 0.07336118 | 0.20300055 |
| ENSMUSG00000041035 | 0.67362505 | 2.94222374 | 0.07339251 | 0.20300055 |
| ENSMUSG00000010936 | 0.64094677 | 5.66473975 | 0.07340603 | 0.20300055 |
| ENSMUSG00000076556 | -0.648989  | 4.60030146 | 0.07341577 | 0.20300055 |
| ENSMUSG00000043019 | -0.6379049 | 6.62564771 | 0.07343482 | 0.20300055 |
| ENSMUSG00000028820 | -0.6351336 | 9.51477498 | 0.07344724 | 0.20300055 |
| ENSMUSG00000005233 | -0.6702991 | 3.14642209 | 0.07344752 | 0.20300055 |
| ENSMUSG00000043059 | 0.65018552 | 4.49667139 | 0.07350303 | 0.20310512 |
| ENSMUSG00000001056 | 0.65586892 | 3.72213467 | 0.07356629 | 0.20323107 |
| ENSMUSG00000067430 | -0.6655321 | 3.15562193 | 0.07360258 | 0.20327058 |
| ENSMUSG00000073792 | -0.6635625 | 3.50102622 | 0.07362028 | 0.20327058 |
| ENSMUSG00000068134 | -0.6413849 | 5.45511681 | 0.07363364 | 0.20327058 |
| ENSMUSG00000096844 | -0.6895211 | 2.64280195 | 0.07375871 | 0.20356695 |

|                    |            |            |            |            |
|--------------------|------------|------------|------------|------------|
| ENSMUSG00000032508 | 0.63867994 | 5.82710284 | 0.07378144 | 0.2035735  |
| ENSMUSG00000038510 | -0.6463844 | 4.69454871 | 0.0737965  | 0.2035735  |
| ENSMUSG00000074282 | 0.67045242 | 3.27202122 | 0.07382529 | 0.20360406 |
| ENSMUSG00000056069 | 0.63877149 | 5.93404877 | 0.07398605 | 0.20396776 |
| ENSMUSG00000078671 | -0.6340954 | 8.89078734 | 0.0740043  | 0.20396776 |
| ENSMUSG00000053684 | 0.67089601 | 3.23815762 | 0.0740104  | 0.20396776 |
| ENSMUSG00000032353 | 0.64619159 | 4.67969645 | 0.07404659 | 0.2040186  |
| ENSMUSG00000038271 | 0.64334328 | 5.17070038 | 0.07409044 | 0.20409049 |
| ENSMUSG00000067288 | 0.63583847 | 6.93327249 | 0.07413284 | 0.20414843 |
| ENSMUSG00000038179 | -0.6427271 | 4.95072118 | 0.074147   | 0.20414843 |
| ENSMUSG00000019132 | -0.6336059 | 9.17243976 | 0.07418504 | 0.20420427 |
| ENSMUSG00000058558 | -0.6332846 | 9.73610621 | 0.07425604 | 0.20435078 |
| ENSMUSG00000030539 | 0.63707086 | 6.21719948 | 0.07430547 | 0.20443785 |
| ENSMUSG00000019971 | 0.65778679 | 4.04578697 | 0.07438661 | 0.20458112 |
| ENSMUSG00000079043 | -0.6628256 | 3.59429904 | 0.07439313 | 0.20458112 |
| ENSMUSG00000036461 | -0.6326535 | 8.79406358 | 0.07469912 | 0.20532551 |
| ENSMUSG00000042308 | 0.64403327 | 4.87160299 | 0.07469955 | 0.20532551 |
| ENSMUSG00000071369 | -0.634115  | 6.97791179 | 0.07479426 | 0.20549694 |
| ENSMUSG00000028033 | -0.6474551 | 4.30128175 | 0.07479767 | 0.20549694 |
| ENSMUSG00000045962 | -0.6315988 | 9.69242593 | 0.07501982 | 0.20605803 |
| ENSMUSG00000027342 | -0.6336929 | 6.94363292 | 0.0750385  | 0.2060601  |
| ENSMUSG00000038543 | -0.6406447 | 5.02891633 | 0.07512828 | 0.20625737 |
| ENSMUSG00000066677 | 0.64128625 | 5.88209161 | 0.07517094 | 0.2063252  |
| ENSMUSG00000025234 | -0.6320126 | 7.90864398 | 0.07527303 | 0.20655611 |
| ENSMUSG00000027770 | -0.6332339 | 6.88236246 | 0.07529675 | 0.20657188 |
| ENSMUSG00000034833 | -0.6337551 | 6.5676382  | 0.07538668 | 0.20676084 |
| ENSMUSG00000059674 | 0.86586219 | 0.71531922 | 0.07540525 | 0.20676084 |
| ENSMUSG00000054892 | 0.66605364 | 3.38122964 | 0.07541959 | 0.20676084 |
| ENSMUSG00000024359 | -0.6312589 | 8.4770544  | 0.07544983 | 0.20679441 |
| ENSMUSG00000087679 | 0.64421125 | 4.32950307 | 0.07549809 | 0.20682265 |
| ENSMUSG00000016529 | -0.6884591 | 2.69419299 | 0.07550708 | 0.20682265 |
| ENSMUSG00000053600 | -0.6383272 | 5.30323638 | 0.07551619 | 0.20682265 |
| ENSMUSG00000029911 | -0.6372745 | 5.47801952 | 0.07553727 | 0.20682265 |
| ENSMUSG00000051223 | -0.6308376 | 8.6298986  | 0.07557141 | 0.20682265 |
| ENSMUSG00000047879 | -0.6359204 | 5.73460441 | 0.07558473 | 0.20682265 |
| ENSMUSG00000021171 | -0.6319743 | 7.26549961 | 0.07560455 | 0.20682265 |
| ENSMUSG00000027011 | -0.6429186 | 4.72997388 | 0.07561038 | 0.20682265 |
| ENSMUSG00000096422 | -0.6376246 | 5.47811881 | 0.07562206 | 0.20682265 |
| ENSMUSG00000025060 | -0.6317643 | 7.18814103 | 0.07566536 | 0.20689183 |
| ENSMUSG00000008690 | 0.63301546 | 6.4842423  | 0.07572405 | 0.20696522 |
| ENSMUSG00000005566 | 0.63141417 | 7.39588376 | 0.0757339  | 0.20696522 |
| ENSMUSG00000026628 | 0.63079074 | 7.982771   | 0.07575672 | 0.20696522 |
| ENSMUSG00000061751 | 0.70603137 | 1.76004037 | 0.07576422 | 0.20696522 |

|                    |            |            |            |            |
|--------------------|------------|------------|------------|------------|
| ENSMUSG00000026482 | 0.64004711 | 4.95131848 | 0.07579335 | 0.20699562 |
| ENSMUSG00000022811 | -0.6314782 | 7.30694499 | 0.07583805 | 0.20706849 |
| ENSMUSG00000032786 | 0.64910481 | 4.09612747 | 0.07588849 | 0.20715174 |
| ENSMUSG00000026510 | -0.6393618 | 4.80582784 | 0.07592216 | 0.20715174 |
| ENSMUSG00000022323 | -0.6503851 | 4.00461165 | 0.0759226  | 0.20715174 |
| ENSMUSG00000046675 | -0.641351  | 4.77183797 | 0.07595346 | 0.20718675 |
| ENSMUSG00000026896 | 0.64219519 | 4.74674797 | 0.07608121 | 0.20748601 |
| ENSMUSG00000026234 | -0.629076  | 9.95762382 | 0.07616163 | 0.20765605 |
| ENSMUSG00000006005 | -0.6291299 | 9.34283542 | 0.07621015 | 0.20773906 |
| ENSMUSG00000058690 | -0.6313422 | 6.81125618 | 0.07624246 | 0.20777789 |
| ENSMUSG00000039686 | 0.63483305 | 5.84667448 | 0.07630532 | 0.20787889 |
| ENSMUSG00000022674 | -0.6405582 | 4.81562096 | 0.07632323 | 0.20787889 |
| ENSMUSG00000001665 | 0.88146928 | 0.75507934 | 0.07633378 | 0.20787889 |
| ENSMUSG00000061536 | 0.65135892 | 4.01066757 | 0.07638349 | 0.207965   |
| ENSMUSG00000048707 | 0.66492417 | 3.09400794 | 0.07640906 | 0.20798535 |
| ENSMUSG00000031851 | 0.65867353 | 3.20658178 | 0.07643979 | 0.20801973 |
| ENSMUSG00000028698 | -0.6788752 | 2.53380762 | 0.07655934 | 0.20829578 |
| ENSMUSG00000054428 | 0.63824516 | 5.01950993 | 0.07665326 | 0.20846894 |
| ENSMUSG00000063800 | -0.6337157 | 5.66239248 | 0.07669227 | 0.20846894 |
| ENSMUSG00000030610 | 0.64888751 | 3.72636337 | 0.07670691 | 0.20846894 |
| ENSMUSG00000078866 | -0.6572711 | 3.37365473 | 0.07671251 | 0.20846894 |
| ENSMUSG00000001833 | -0.6292635 | 7.52083    | 0.07671367 | 0.20846894 |
| ENSMUSG00000036246 | 0.62907349 | 7.72995148 | 0.07673436 | 0.20847589 |
| ENSMUSG00000026782 | 0.66453867 | 3.28506506 | 0.07683615 | 0.20865585 |
| ENSMUSG00000037730 | -0.6311844 | 6.33555966 | 0.07683691 | 0.20865585 |
| ENSMUSG00000020634 | -0.634409  | 5.62450808 | 0.07689925 | 0.20877583 |
| ENSMUSG00000036282 | -0.6329408 | 5.66876504 | 0.0769436  | 0.2088469  |
| ENSMUSG00000022601 | -0.6296327 | 6.87569705 | 0.07698498 | 0.2089099  |
| ENSMUSG00000030835 | 0.63246703 | 5.52194892 | 0.07718354 | 0.20939928 |
| ENSMUSG00000057924 | -0.7526957 | 1.01890862 | 0.07730439 | 0.20967767 |
| ENSMUSG00000014932 | 0.75795393 | 1.57153978 | 0.07734755 | 0.20969728 |
| ENSMUSG00000013465 | 0.62873277 | 6.69187918 | 0.0773486  | 0.20969728 |
| ENSMUSG00000098234 | -0.6413603 | 4.41145988 | 0.07736635 | 0.20969728 |
| ENSMUSG00000024276 | -0.6296563 | 6.37895504 | 0.07744024 | 0.20984807 |
| ENSMUSG00000049314 | -0.730727  | 1.71842976 | 0.07749634 | 0.20995061 |
| ENSMUSG00000031278 | -0.6303746 | 6.06424814 | 0.07751775 | 0.20995913 |
| ENSMUSG00000015749 | -0.6279138 | 7.25025988 | 0.07753982 | 0.20996943 |
| ENSMUSG00000020311 | -0.632596  | 5.4942956  | 0.07757611 | 0.21001824 |
| ENSMUSG00000024962 | 0.68219112 | 2.35169982 | 0.07763738 | 0.21012455 |
| ENSMUSG00000002767 | 0.65833254 | 3.3999408  | 0.07765194 | 0.21012455 |
| ENSMUSG00000045092 | -0.625942  | 9.01196301 | 0.07776835 | 0.210338   |
| ENSMUSG00000009470 | -0.6262972 | 8.25204931 | 0.07777802 | 0.210338   |
| ENSMUSG00000027242 | -0.6347485 | 5.07301833 | 0.07779871 | 0.210338   |



|                    |            |            |            |            |
|--------------------|------------|------------|------------|------------|
| ENSMUSG00000063445 | 0.65652242 | 3.50980388 | 0.07780402 | 0.210338   |
| ENSMUSG00000059423 | -0.6390922 | 4.3527514  | 0.07795226 | 0.21068921 |
| ENSMUSG00000004364 | -0.6262278 | 7.87491495 | 0.07797343 | 0.21069688 |
| ENSMUSG00000074825 | 0.63727939 | 4.26096857 | 0.07811499 | 0.21099816 |
| ENSMUSG00000051695 | 0.62666602 | 6.92404781 | 0.07812163 | 0.21099816 |
| ENSMUSG00000057541 | -0.6332107 | 5.11810528 | 0.07824188 | 0.21127329 |
| ENSMUSG00000018166 | 0.67135343 | 3.10927847 | 0.07827356 | 0.21130921 |
| ENSMUSG00000027439 | -0.6333166 | 5.10171895 | 0.07830242 | 0.21133748 |
| ENSMUSG00000057113 | -0.6244958 | 9.36948921 | 0.07838648 | 0.21151469 |
| ENSMUSG00000024911 | 0.63852548 | 4.36785441 | 0.07843269 | 0.21158971 |
| ENSMUSG00000047749 | -0.6654503 | 2.91062507 | 0.07846164 | 0.21161815 |
| ENSMUSG00000021180 | -0.628888  | 5.91465051 | 0.07858758 | 0.21190809 |
| ENSMUSG00000076652 | -0.6365548 | 4.84130584 | 0.07865329 | 0.21203554 |
| ENSMUSG00000027300 | 0.66217624 | 3.4345151  | 0.07878549 | 0.21234215 |
| ENSMUSG00000042444 | -0.6248453 | 7.38457819 | 0.07885064 | 0.2124679  |
| ENSMUSG00000030298 | 0.62826732 | 5.84933809 | 0.07890576 | 0.21256662 |
| ENSMUSG00000029246 | -0.6304142 | 5.44731362 | 0.07898833 | 0.21273918 |
| ENSMUSG00000023328 | 0.68680335 | 2.5582185  | 0.07906197 | 0.21288764 |
| ENSMUSG00000010608 | -0.6228582 | 8.677694   | 0.07927637 | 0.21341497 |
| ENSMUSG00000018572 | 0.62679878 | 5.93875619 | 0.07929568 | 0.21341695 |
| ENSMUSG00000056459 | -0.6365564 | 4.38063256 | 0.07932704 | 0.2134514  |
| ENSMUSG00000020149 | -0.6242627 | 7.07107454 | 0.07937238 | 0.21351063 |
| ENSMUSG00000079084 | -0.6264346 | 6.09378795 | 0.07938621 | 0.21351063 |
| ENSMUSG00000027636 | 0.67841463 | 2.27791313 | 0.079417   | 0.21354348 |
| ENSMUSG00000016018 | -0.6237769 | 7.01600611 | 0.07967343 | 0.21410811 |
| ENSMUSG00000075254 | -0.6230534 | 7.41691428 | 0.07968362 | 0.21410811 |
| ENSMUSG00000052248 | 0.69937941 | 2.04490253 | 0.07969234 | 0.21410811 |
| ENSMUSG00000026914 | -0.6250718 | 6.32803706 | 0.07970149 | 0.21410811 |
| ENSMUSG00000092415 | -0.6923585 | 2.17246898 | 0.07979833 | 0.21431643 |
| ENSMUSG00000021520 | -0.628799  | 5.3345175  | 0.07981632 | 0.21431643 |
| ENSMUSG00000038593 | 0.65535662 | 3.67333564 | 0.07986327 | 0.2143924  |
| ENSMUSG00000079457 | -0.6400633 | 3.84705485 | 0.07992324 | 0.21450331 |
| ENSMUSG00000002718 | -0.6222838 | 7.64509623 | 0.07996865 | 0.21457507 |
| ENSMUSG00000026096 | -0.6392086 | 4.12888495 | 0.08007002 | 0.21478337 |
| ENSMUSG00000051339 | 0.73769212 | 1.61966073 | 0.08011565 | 0.21478337 |
| ENSMUSG00000051034 | -0.7129682 | 1.60512225 | 0.08011565 | 0.21478337 |
| ENSMUSG00000021188 | -0.6223314 | 7.22477166 | 0.08012218 | 0.21478337 |
| ENSMUSG00000061887 | 0.63447346 | 4.45229765 | 0.0801397  | 0.21478337 |
| ENSMUSG00000025860 | -0.6219081 | 7.52009161 | 0.08018112 | 0.2148443  |
| ENSMUSG00000003585 | 0.66643376 | 2.99491932 | 0.08027557 | 0.21501779 |
| ENSMUSG00000027130 | -0.6208557 | 8.56242373 | 0.08028329 | 0.21501779 |
| ENSMUSG00000037364 | 0.62158821 | 7.53235814 | 0.08035322 | 0.21515497 |
| ENSMUSG00000038886 | 0.6219283  | 7.24840986 | 0.08047417 | 0.21542863 |

|                    |            |            |            |            |
|--------------------|------------|------------|------------|------------|
| ENSMUSG00000021250 | 0.61977577 | 10.9945447 | 0.08049657 | 0.21543844 |
| ENSMUSG00000056014 | -0.6431088 | 3.77422835 | 0.08056859 | 0.215581   |
| ENSMUSG00000018846 | -0.621636  | 7.02067965 | 0.0807097  | 0.2159083  |
| ENSMUSG00000024614 | -0.6218116 | 6.80816593 | 0.08079864 | 0.21609595 |
| ENSMUSG00000072501 | -0.6202946 | 7.69767338 | 0.08085806 | 0.21619851 |
| ENSMUSG00000020863 | -0.6201716 | 7.82121199 | 0.08089258 | 0.21619851 |
| ENSMUSG00000039988 | -0.6229763 | 6.26144612 | 0.08089342 | 0.21619851 |
| ENSMUSG00000039428 | -0.6242012 | 5.74031779 | 0.08098625 | 0.21639632 |
| ENSMUSG00000022516 | 0.63238773 | 4.31815736 | 0.08101502 | 0.21642289 |
| ENSMUSG00000057147 | -0.6278895 | 5.00115986 | 0.08106328 | 0.21650149 |
| ENSMUSG00000062762 | -0.622855  | 6.11814792 | 0.08108597 | 0.21650908 |
| ENSMUSG00000015002 | -0.6203761 | 7.19908635 | 0.08111425 | 0.21650908 |
| ENSMUSG00000092618 | 0.87504236 | 0.83404296 | 0.08112263 | 0.21650908 |
| ENSMUSG00000035473 | 0.71185573 | 1.70908393 | 0.08117117 | 0.21658834 |
| ENSMUSG00000047842 | 0.63640473 | 3.69390623 | 0.08121239 | 0.21664804 |
| ENSMUSG00000024236 | 0.62416909 | 5.89662941 | 0.08125051 | 0.21669944 |
| ENSMUSG00000062937 | -0.625608  | 5.32028349 | 0.08129802 | 0.21677586 |
| ENSMUSG00000019809 | -0.6292968 | 4.76226201 | 0.081341   | 0.21684017 |
| ENSMUSG00000045071 | -0.63488   | 4.17429104 | 0.081394   | 0.21691917 |
| ENSMUSG00000033813 | -0.6201768 | 7.02614196 | 0.08140838 | 0.21691917 |
| ENSMUSG00000090112 | -0.6204544 | 6.72042432 | 0.08146484 | 0.2170193  |
| ENSMUSG00000050332 | -0.6310141 | 4.56801677 | 0.08149438 | 0.21704771 |
| ENSMUSG00000039704 | -0.6278476 | 4.76010852 | 0.08158921 | 0.21724993 |
| ENSMUSG00000042590 | -0.6261407 | 5.04330503 | 0.08167258 | 0.21742157 |
| ENSMUSG00000029591 | 0.6810894  | 2.35326412 | 0.08176713 | 0.21762287 |
| ENSMUSG00000038005 | -0.6246085 | 5.31247355 | 0.08182367 | 0.21772293 |
| ENSMUSG00000034932 | 0.64765814 | 3.07091597 | 0.08194744 | 0.21800181 |
| ENSMUSG00000051550 | 0.6707633  | 2.5000587  | 0.08203017 | 0.21817141 |
| ENSMUSG00000030304 | -0.6191428 | 6.83169468 | 0.08206375 | 0.21821022 |
| ENSMUSG00000054434 | 0.66941517 | 2.7214006  | 0.08211381 | 0.21829284 |
| ENSMUSG00000020069 | -0.6199573 | 6.42082997 | 0.08222605 | 0.21854067 |
| ENSMUSG00000032314 | -0.62166   | 5.77299491 | 0.08236578 | 0.21886144 |
| ENSMUSG00000012640 | -0.6185648 | 6.76886407 | 0.08240519 | 0.21891311 |
| ENSMUSG00000029559 | 0.63595538 | 4.1212273  | 0.08242331 | 0.21891311 |
| ENSMUSG00000022034 | -0.6417744 | 3.699711   | 0.08247136 | 0.21899014 |
| ENSMUSG00000020272 | 0.61671913 | 7.78871525 | 0.08258047 | 0.21918641 |
| ENSMUSG00000001525 | 0.61613444 | 8.39389484 | 0.08258913 | 0.21918641 |
| ENSMUSG00000049728 | 0.70109297 | 2.16146773 | 0.08263482 | 0.21918641 |
| ENSMUSG00000030067 | -0.6159785 | 8.63665155 | 0.08264926 | 0.21918641 |
| ENSMUSG00000058729 | -0.6280355 | 4.59158573 | 0.08266808 | 0.21918641 |
| ENSMUSG00000023094 | 0.66266435 | 2.67404346 | 0.08269321 | 0.21918641 |
| ENSMUSG00000049932 | 0.64313215 | 3.49636105 | 0.08269782 | 0.21918641 |
| ENSMUSG00000031200 | -0.6428461 | 3.48568859 | 0.08269782 | 0.21918641 |

|                    |            |            |            |            |
|--------------------|------------|------------|------------|------------|
| ENSMUSG00000036053 | 0.64276481 | 3.73376386 | 0.08275541 | 0.21928849 |
| ENSMUSG00000048550 | -0.637572  | 3.68179508 | 0.0828517  | 0.21949303 |
| ENSMUSG00000007617 | -0.6313447 | 4.2788967  | 0.08288089 | 0.21951978 |
| ENSMUSG00000049717 | -0.636178  | 4.01840124 | 0.0831699  | 0.22020507 |
| ENSMUSG00000036875 | 0.6330652  | 4.27493539 | 0.08318848 | 0.22020507 |
| ENSMUSG00000026029 | -0.616016  | 7.28553801 | 0.0831971  | 0.22020507 |
| ENSMUSG00000024807 | 0.61565254 | 7.3500119  | 0.0832335  | 0.22022868 |
| ENSMUSG00000042647 | 0.72638405 | 1.49443907 | 0.08324433 | 0.22022868 |
| ENSMUSG00000040570 | -0.651568  | 2.73477074 | 0.08340036 | 0.22055197 |
| ENSMUSG00000055652 | 0.63833058 | 3.74457494 | 0.08340491 | 0.22055197 |
| ENSMUSG00000021470 | -0.6176577 | 6.23012782 | 0.08343054 | 0.22056901 |
| ENSMUSG00000047221 | -0.6331453 | 3.80766331 | 0.0835513  | 0.22083747 |
| ENSMUSG00000063550 | -0.6154602 | 7.09492748 | 0.08363905 | 0.22096967 |
| ENSMUSG00000026571 | -0.6210009 | 5.206684   | 0.08364792 | 0.22096967 |
| ENSMUSG00000026319 | -0.6151617 | 7.21728853 | 0.08366695 | 0.22096967 |
| ENSMUSG00000032411 | -0.617075  | 6.27529202 | 0.08367821 | 0.22096967 |
| ENSMUSG00000029364 | 0.62043278 | 5.22650838 | 0.08371815 | 0.22102439 |
| ENSMUSG00000097048 | -0.6214219 | 5.2183885  | 0.08391991 | 0.22150618 |
| ENSMUSG00000058355 | -0.6137849 | 7.86118614 | 0.08405002 | 0.22172454 |
| ENSMUSG00000063200 | -0.6156424 | 6.63961201 | 0.08406888 | 0.22172454 |
| ENSMUSG00000040521 | 0.64979302 | 3.0159834  | 0.08407278 | 0.22172454 |
| ENSMUSG00000040022 | -0.6199087 | 5.2193137  | 0.08408075 | 0.22172454 |
| ENSMUSG00000029470 | 0.61813528 | 5.89659681 | 0.08409909 | 0.22172454 |
| ENSMUSG00000026395 | -0.612222  | 11.6093686 | 0.08419191 | 0.22191837 |
| ENSMUSG00000040158 | 0.63289246 | 3.52613843 | 0.08429392 | 0.22210132 |
| ENSMUSG00000040250 | -0.6156758 | 6.41499465 | 0.08429996 | 0.22210132 |
| ENSMUSG00000025868 | 0.62494137 | 4.22321933 | 0.0846576  | 0.22294397 |
| ENSMUSG00000029647 | -0.6121175 | 8.349966   | 0.08468118 | 0.22294397 |
| ENSMUSG00000048027 | 0.66060131 | 2.51029657 | 0.08470981 | 0.22294397 |
| ENSMUSG00000049488 | -0.6490589 | 3.17095072 | 0.08474584 | 0.22294397 |
| ENSMUSG00000021494 | 0.61416068 | 6.33090566 | 0.08474917 | 0.22294397 |
| ENSMUSG00000025262 | -0.621526  | 4.71402278 | 0.08475096 | 0.22294397 |
| ENSMUSG00000057133 | -0.6125072 | 7.52791987 | 0.08475556 | 0.22294397 |
| ENSMUSG00000051098 | -0.637377  | 3.26420935 | 0.08479468 | 0.22299586 |
| ENSMUSG00000024726 | -0.6344629 | 3.64177873 | 0.08482125 | 0.2230147  |
| ENSMUSG00000021377 | -0.6120467 | 7.89341426 | 0.08490284 | 0.22317816 |
| ENSMUSG00000000486 | 0.61240894 | 7.20886434 | 0.0849975  | 0.22332932 |
| ENSMUSG00000024381 | 0.61208881 | 7.4548231  | 0.0849992  | 0.22332932 |
| ENSMUSG00000094546 | -0.6134149 | 6.49567955 | 0.08502553 | 0.22334744 |
| ENSMUSG00000030704 | -0.6135125 | 6.68323793 | 0.08508634 | 0.22345613 |
| ENSMUSG00000028757 | 0.61361511 | 6.2989847  | 0.08519243 | 0.22368365 |
| ENSMUSG00000020780 | 0.6151389  | 5.86351798 | 0.08524122 | 0.22371822 |
| ENSMUSG00000024170 | 0.6277207  | 4.15018963 | 0.08524452 | 0.22371822 |

|                    |            |            |            |            |
|--------------------|------------|------------|------------|------------|
| ENSMUSG0000001444  | 0.65128296 | 3.05199602 | 0.08532367 | 0.22387483 |
| ENSMUSG00000032413 | -0.6119015 | 7.01859662 | 0.08550567 | 0.2242829  |
| ENSMUSG00000031242 | -0.6195779 | 4.92906231 | 0.08551822 | 0.2242829  |
| ENSMUSG00000045038 | -0.6134114 | 6.0521775  | 0.08568862 | 0.22467854 |
| ENSMUSG00000028703 | 0.62410902 | 4.20571582 | 0.08571998 | 0.22470949 |
| ENSMUSG00000032560 | -0.6104169 | 7.65221678 | 0.08579619 | 0.22485801 |
| ENSMUSG00000028710 | -0.6253428 | 4.25938247 | 0.08582762 | 0.2248891  |
| ENSMUSG00000068882 | -0.6101863 | 7.83487849 | 0.08588314 | 0.2249833  |
| ENSMUSG00000063895 | -0.6130706 | 6.16832738 | 0.08592061 | 0.22503018 |
| ENSMUSG00000040151 | -0.6276404 | 3.95869491 | 0.08594058 | 0.22503119 |
| ENSMUSG00000021820 | 0.61941972 | 4.76189418 | 0.08599642 | 0.22512613 |
| ENSMUSG00000027634 | -0.6124745 | 6.30472656 | 0.08603962 | 0.22518794 |
| ENSMUSG00000055200 | 0.62099942 | 4.2022976  | 0.08610967 | 0.22531997 |
| ENSMUSG00000036561 | 0.61961507 | 4.84730149 | 0.08615004 | 0.2253743  |
| ENSMUSG00000024759 | -0.6097956 | 7.55004727 | 0.08618748 | 0.22542094 |
| ENSMUSG00000020422 | 0.61665521 | 5.43039257 | 0.08624151 | 0.22551096 |
| ENSMUSG00000026455 | -0.6127138 | 5.8889079  | 0.08631536 | 0.22565273 |
| ENSMUSG00000005846 | -0.610355  | 7.01204995 | 0.08634237 | 0.22565715 |
| ENSMUSG00000021596 | 0.66825884 | 2.82712336 | 0.08635631 | 0.22565715 |
| ENSMUSG00000022394 | 0.61517787 | 5.28977646 | 0.08651809 | 0.2260285  |
| ENSMUSG00000046806 | 0.63578107 | 3.57302212 | 0.08664237 | 0.22627127 |
| ENSMUSG00000025436 | 0.70276939 | 1.8340356  | 0.08665038 | 0.22627127 |
| ENSMUSG00000025950 | 0.61708365 | 5.11570681 | 0.08668068 | 0.22629899 |
| ENSMUSG00000041729 | 0.89893491 | 0.66280366 | 0.08678545 | 0.22643365 |
| ENSMUSG00000037373 | 0.61102047 | 6.25006923 | 0.08679851 | 0.22643365 |
| ENSMUSG00000041417 | -0.6085039 | 7.58349974 | 0.08680381 | 0.22643365 |
| ENSMUSG00000040021 | -0.6090531 | 7.16738809 | 0.08682348 | 0.22643365 |
| ENSMUSG00000026893 | 0.64241176 | 3.5091976  | 0.08683075 | 0.22643365 |
| ENSMUSG00000000732 | 0.60740676 | 9.00828773 | 0.08688643 | 0.22652743 |
| ENSMUSG00000041187 | 0.60811073 | 7.41846718 | 0.08693676 | 0.22660728 |
| ENSMUSG00000036452 | -0.6090133 | 7.01278561 | 0.08695665 | 0.22660773 |
| ENSMUSG00000036676 | 0.65519041 | 2.91638307 | 0.08704921 | 0.22675858 |
| ENSMUSG00000021218 | -0.6069515 | 9.40721098 | 0.08707124 | 0.22675858 |
| ENSMUSG00000055204 | -0.6074041 | 8.33823967 | 0.08707372 | 0.22675858 |
| ENSMUSG00000055723 | -0.6096355 | 6.6429907  | 0.08710015 | 0.22677604 |
| ENSMUSG00000065353 | 0.73939589 | 1.06416742 | 0.08719051 | 0.22694619 |
| ENSMUSG00000033257 | -0.6091512 | 6.57679617 | 0.08720499 | 0.22694619 |
| ENSMUSG00000006281 | 0.6095235  | 6.74430789 | 0.08723163 | 0.22696414 |
| ENSMUSG00000027550 | -0.6128554 | 5.34372468 | 0.08726555 | 0.22700101 |
| ENSMUSG00000023050 | 0.66302777 | 2.50767655 | 0.08728832 | 0.22700888 |
| ENSMUSG00000027937 | -0.6110135 | 5.82794592 | 0.08742305 | 0.22730784 |
| ENSMUSG00000025766 | -0.6230236 | 4.09239511 | 0.08747409 | 0.2273464  |
| ENSMUSG00000041390 | -0.6144124 | 5.06922614 | 0.08747744 | 0.2273464  |

|                    |            |            |            |            |
|--------------------|------------|------------|------------|------------|
| ENSMUSG00000021552 | 0.65436484 | 2.54113835 | 0.08753186 | 0.22743643 |
| ENSMUSG00000022247 | -0.611312  | 5.74912843 | 0.08756106 | 0.22746087 |
| ENSMUSG00000015377 | 0.61769618 | 4.70799598 | 0.08759508 | 0.22749783 |
| ENSMUSG00000079645 | -0.7026827 | 1.68351548 | 0.08774771 | 0.22777315 |
| ENSMUSG00000043987 | 0.62006864 | 4.51091474 | 0.08775401 | 0.22777315 |
| ENSMUSG00000037772 | 0.63648848 | 3.13702506 | 0.08776053 | 0.22777315 |
| ENSMUSG00000024231 | -0.6112757 | 5.59800719 | 0.08792204 | 0.22814082 |
| ENSMUSG00000031309 | -0.6064229 | 7.44867694 | 0.08794457 | 0.22814777 |
| ENSMUSG00000050107 | -0.6394409 | 3.27140218 | 0.0879678  | 0.22815656 |
| ENSMUSG00000025577 | 0.65963485 | 2.01065747 | 0.08803463 | 0.22827839 |
| ENSMUSG00000084957 | -0.6138688 | 4.95896201 | 0.08818456 | 0.22861559 |
| ENSMUSG00000030670 | -0.635425  | 2.9453591  | 0.08834019 | 0.22896742 |
| ENSMUSG00000079658 | -0.6110849 | 5.44066265 | 0.08839399 | 0.22905522 |
| ENSMUSG00000029480 | 0.61497374 | 4.61447336 | 0.08847996 | 0.22922632 |
| ENSMUSG00000033863 | -0.6418926 | 2.83106962 | 0.08855541 | 0.22937008 |
| ENSMUSG00000022543 | 0.79274584 | 0.84474434 | 0.08861341 | 0.22939297 |
| ENSMUSG00000028381 | -0.604638  | 8.10157509 | 0.08862708 | 0.22939297 |
| ENSMUSG00000022521 | -0.6047592 | 7.73973972 | 0.08863611 | 0.22939297 |
| ENSMUSG00000067148 | 0.61298865 | 4.88450746 | 0.08865993 | 0.22939297 |
| ENSMUSG00000012443 | -0.6106897 | 5.52476623 | 0.08866403 | 0.22939297 |
| ENSMUSG00000019878 | -0.6239808 | 3.93213183 | 0.08872907 | 0.22948275 |
| ENSMUSG00000020650 | -0.6130585 | 4.89738917 | 0.08873865 | 0.22948275 |
| ENSMUSG00000026028 | -0.6044101 | 7.90718808 | 0.08878039 | 0.22953904 |
| ENSMUSG00000025290 | -0.6031715 | 10.291676  | 0.08892974 | 0.22987348 |
| ENSMUSG00000048924 | -0.6139914 | 4.7338103  | 0.08898569 | 0.22991862 |
| ENSMUSG00000028933 | -0.6257427 | 3.6252029  | 0.08898721 | 0.22991862 |
| ENSMUSG00000028439 | 0.63651143 | 3.31911589 | 0.08902955 | 0.22992636 |
| ENSMUSG00000020009 | 0.60504729 | 7.10620992 | 0.08903021 | 0.22992636 |
| ENSMUSG00000054814 | -0.6190425 | 4.26693286 | 0.08908547 | 0.2300174  |
| ENSMUSG00000020330 | -0.6204666 | 4.27067727 | 0.08911548 | 0.23004322 |
| ENSMUSG00000025978 | -0.6225251 | 3.91683652 | 0.08914142 | 0.23005851 |
| ENSMUSG00000030830 | 0.60320545 | 8.71968    | 0.0891776  | 0.23008033 |
| ENSMUSG00000023020 | 0.63566019 | 3.22120206 | 0.0891899  | 0.23008033 |
| ENSMUSG00000042195 | -0.7030022 | 1.59237669 | 0.08925313 | 0.23014267 |
| ENSMUSG00000026771 | -0.6090852 | 5.45714767 | 0.08925473 | 0.23014267 |
| ENSMUSG00000052676 | -0.611937  | 4.68326597 | 0.08927414 | 0.23014267 |
| ENSMUSG00000070733 | -0.6035251 | 7.65462659 | 0.08931381 | 0.23019332 |
| ENSMUSG00000052446 | -0.6080996 | 5.69035929 | 0.089387   | 0.23033032 |
| ENSMUSG00000020778 | 0.63823747 | 3.25989716 | 0.08943366 | 0.23039891 |
| ENSMUSG00000070031 | -0.6035182 | 7.53479573 | 0.08949701 | 0.23051046 |
| ENSMUSG00000050732 | 0.60562721 | 6.22414526 | 0.0895668  | 0.23063851 |
| ENSMUSG00000000861 | -0.6026302 | 8.09916712 | 0.08963397 | 0.23072127 |
| ENSMUSG00000005893 | -0.603073  | 7.59930225 | 0.08963908 | 0.23072127 |

|                    |            |            |            |            |
|--------------------|------------|------------|------------|------------|
| ENSMUSG00000028343 | -0.6045336 | 6.66697348 | 0.08967545 | 0.23076323 |
| ENSMUSG00000025733 | 0.61442183 | 4.56182156 | 0.08978146 | 0.2309843  |
| ENSMUSG00000000959 | 0.60711916 | 5.43904692 | 0.08983296 | 0.23101844 |
| ENSMUSG00000027288 | -0.6019206 | 8.65790496 | 0.0898466  | 0.23101844 |
| ENSMUSG00000029007 | 0.61723141 | 4.26533444 | 0.08986929 | 0.23101844 |
| ENSMUSG00000012405 | 0.60461147 | 6.44958572 | 0.08987512 | 0.23101844 |
| ENSMUSG00000017405 | 0.61796318 | 4.3402886  | 0.08991814 | 0.23107736 |
| ENSMUSG00000028573 | 0.68374818 | 1.72959019 | 0.0900837  | 0.23145107 |
| ENSMUSG00000040455 | -0.6041244 | 6.23877881 | 0.09037168 | 0.23213911 |
| ENSMUSG00000020640 | -0.6005116 | 9.19178537 | 0.09046683 | 0.23232868 |
| ENSMUSG00000036613 | 0.62791564 | 3.43664326 | 0.09048777 | 0.23232868 |
| ENSMUSG00000053253 | -0.6080687 | 5.07090061 | 0.09050612 | 0.23232868 |
| ENSMUSG00000030095 | 0.60490442 | 5.60722245 | 0.09064418 | 0.23263114 |
| ENSMUSG00000021257 | 0.62528173 | 3.71792578 | 0.09071532 | 0.23276173 |
| ENSMUSG00000020472 | 0.60965502 | 4.73547824 | 0.09076173 | 0.23282886 |
| ENSMUSG00000041935 | -0.6005842 | 7.67901688 | 0.0908853  | 0.23307433 |
| ENSMUSG00000031487 | 0.66281351 | 2.16364366 | 0.09089798 | 0.23307433 |
| ENSMUSG00000029438 | -0.6027743 | 6.29783858 | 0.09096756 | 0.23320074 |
| ENSMUSG00000031362 | -0.6682077 | 2.17095786 | 0.09101558 | 0.2332718  |
| ENSMUSG00000029686 | -0.6004478 | 7.61177763 | 0.09109146 | 0.23337547 |
| ENSMUSG00000038481 | -0.6006131 | 7.38327988 | 0.09109663 | 0.23337547 |
| ENSMUSG00000027677 | -0.6002516 | 7.58990083 | 0.09113026 | 0.23340961 |
| ENSMUSG00000061136 | -0.6000665 | 7.51376212 | 0.0913354  | 0.23388291 |
| ENSMUSG00000038954 | -0.6261632 | 3.31571324 | 0.09139589 | 0.23398568 |
| ENSMUSG00000032913 | -0.6014833 | 6.4267687  | 0.09154005 | 0.23430258 |
| ENSMUSG00000094724 | -0.6873348 | 1.5734022  | 0.09159095 | 0.23438067 |
| ENSMUSG00000050244 | -0.5994443 | 7.33911021 | 0.0917408  | 0.23467696 |
| ENSMUSG00000028334 | 0.61018998 | 4.54790207 | 0.09174756 | 0.23467696 |
| ENSMUSG00000033126 | 0.67837937 | 1.99304937 | 0.09178394 | 0.23471778 |
| ENSMUSG00000020273 | -0.6009553 | 6.37873013 | 0.09184301 | 0.23481659 |
| ENSMUSG00000031967 | 0.605982   | 5.27182565 | 0.0919289  | 0.23498392 |
| ENSMUSG00000038533 | -0.6042993 | 5.48938432 | 0.09197917 | 0.23506014 |
| ENSMUSG00000001998 | -0.6021798 | 5.86312462 | 0.09200138 | 0.23506421 |
| ENSMUSG00000005034 | -0.5991493 | 7.17864154 | 0.09202166 | 0.23506421 |
| ENSMUSG00000040435 | 0.59743982 | 9.07651688 | 0.09213625 | 0.23530465 |
| ENSMUSG00000030061 | -0.60197   | 5.96821638 | 0.09217066 | 0.23534023 |
| ENSMUSG00000032525 | -0.5973963 | 8.5975206  | 0.09225121 | 0.23549359 |
| ENSMUSG00000041135 | -0.6030916 | 5.64040046 | 0.09230341 | 0.23557454 |
| ENSMUSG00000072969 | -0.6046142 | 5.17611992 | 0.09246163 | 0.23578536 |
| ENSMUSG00000025607 | -0.5992705 | 6.7049107  | 0.09247946 | 0.23578536 |
| ENSMUSG00000062210 | -0.598967  | 6.80687157 | 0.09249068 | 0.23578536 |
| ENSMUSG00000048732 | -0.6088596 | 4.47729208 | 0.09251061 | 0.23578536 |
| ENSMUSG00000022270 | -0.5981879 | 7.27950735 | 0.09254675 | 0.23578536 |

|                    |            |            |            |            |
|--------------------|------------|------------|------------|------------|
| ENSMUSG00000078566 | -0.6240839 | 3.56234026 | 0.09255079 | 0.23578536 |
| ENSMUSG00000074656 | -0.5989488 | 6.77845101 | 0.09256252 | 0.23578536 |
| ENSMUSG00000004642 | -0.5986191 | 6.95380102 | 0.09256872 | 0.23578536 |
| ENSMUSG00000044465 | 0.60861659 | 4.7320029  | 0.09257063 | 0.23578536 |
| ENSMUSG00000026434 | -0.5976223 | 7.6222267  | 0.09260068 | 0.23580966 |
| ENSMUSG00000024169 | 0.59752136 | 7.67248629 | 0.09267256 | 0.23594045 |
| ENSMUSG00000028910 | 0.62500897 | 3.47155577 | 0.0928359  | 0.23630396 |
| ENSMUSG00000049969 | -0.5986061 | 6.69654553 | 0.09286288 | 0.23632031 |
| ENSMUSG00000061533 | -0.6044794 | 5.10999451 | 0.09288783 | 0.23633147 |
| ENSMUSG00000068479 | -0.6031534 | 5.31657983 | 0.0929202  | 0.23636152 |
| ENSMUSG00000021413 | -0.5964014 | 8.21162429 | 0.09295469 | 0.23639695 |
| ENSMUSG00000089716 | -0.7039619 | 1.33604213 | 0.0929778  | 0.23640341 |
| ENSMUSG00000026605 | -0.6076426 | 4.77429034 | 0.09305315 | 0.236526   |
| ENSMUSG00000074925 | -0.6125616 | 3.98010068 | 0.09306717 | 0.236526   |
| ENSMUSG00000054293 | -0.6024603 | 5.23334408 | 0.09314944 | 0.23664201 |
| ENSMUSG00000097793 | -0.728609  | 0.87020401 | 0.09318787 | 0.23664201 |
| ENSMUSG00000025899 | -0.6020189 | 5.45617557 | 0.09320013 | 0.23664201 |
| ENSMUSG00000026816 | 0.60589866 | 4.65620808 | 0.0932111  | 0.23664201 |
| ENSMUSG00000036078 | 0.60641523 | 4.56890432 | 0.09321575 | 0.23664201 |
| ENSMUSG00000021703 | -0.5988966 | 6.22618788 | 0.09323799 | 0.23664621 |
| ENSMUSG00000027433 | -0.5958221 | 8.11752427 | 0.09328714 | 0.23671868 |
| ENSMUSG00000023882 | -0.6460246 | 2.6399205  | 0.0933145  | 0.23673586 |
| ENSMUSG00000042446 | -0.5977995 | 6.43137446 | 0.09341175 | 0.23693029 |
| ENSMUSG00000022747 | -0.5993621 | 5.96587989 | 0.09346722 | 0.23701868 |
| ENSMUSG00000037149 | -0.5974312 | 6.59382058 | 0.09353675 | 0.23713055 |
| ENSMUSG00000034342 | -0.5955494 | 7.65178584 | 0.09357112 | 0.23713055 |
| ENSMUSG00000022339 | -0.6033355 | 5.09446317 | 0.09357322 | 0.23713055 |
| ENSMUSG00000036980 | 0.60189021 | 5.0595032  | 0.09372006 | 0.23741157 |
| ENSMUSG00000017774 | 0.59475933 | 8.29558045 | 0.09372542 | 0.23741157 |
| ENSMUSG00000051518 | 0.63749073 | 2.80510114 | 0.09388733 | 0.23776931 |
| ENSMUSG00000014075 | 0.64793634 | 2.85065803 | 0.09406726 | 0.23816033 |
| ENSMUSG00000026500 | -0.6053272 | 4.51170412 | 0.09408317 | 0.23816033 |
| ENSMUSG00000055302 | -0.5946701 | 7.8843737  | 0.09413201 | 0.23823149 |
| ENSMUSG00000040322 | 0.61525772 | 4.01651354 | 0.09419993 | 0.23835092 |
| ENSMUSG00000003379 | 0.59350559 | 9.13228435 | 0.09422539 | 0.23836286 |
| ENSMUSG00000025757 | -0.600289  | 5.7270018  | 0.09428364 | 0.23842222 |
| ENSMUSG00000073684 | 0.60538733 | 4.33850343 | 0.09429034 | 0.23842222 |
| ENSMUSG00000040795 | 0.6124407  | 4.07183666 | 0.09436927 | 0.23856934 |
| ENSMUSG00000025155 | 0.60213622 | 5.07460169 | 0.09451393 | 0.2388825  |
| ENSMUSG00000036986 | 0.59377347 | 7.70288054 | 0.09466342 | 0.2391915  |
| ENSMUSG00000032582 | -0.5934709 | 7.93983    | 0.0946778  | 0.2391915  |
| ENSMUSG00000032998 | -0.5949429 | 6.73392632 | 0.09470504 | 0.23920775 |
| ENSMUSG00000031090 | 0.60926307 | 4.20139224 | 0.09474256 | 0.23924995 |

|                    |            |            |            |            |
|--------------------|------------|------------|------------|------------|
| ENSMUSG00000023913 | 0.5982808  | 5.75474136 | 0.09486009 | 0.23949411 |
| ENSMUSG00000031402 | -0.5948716 | 6.3824185  | 0.09511327 | 0.24008059 |
| ENSMUSG00000061175 | 0.61962546 | 3.51951854 | 0.09516246 | 0.24015202 |
| ENSMUSG00000062078 | -0.593103  | 7.35535901 | 0.09521794 | 0.2402393  |
| ENSMUSG00000033417 | -0.5937811 | 6.85249423 | 0.09528033 | 0.24034395 |
| ENSMUSG00000032097 | -0.5914374 | 9.80058949 | 0.09531303 | 0.2403737  |
| ENSMUSG00000045438 | 0.61801581 | 3.28435265 | 0.09533788 | 0.24038361 |
| ENSMUSG00000020076 | -0.5936158 | 6.8151995  | 0.09542647 | 0.24055423 |
| ENSMUSG00000032051 | -0.677865  | 1.90792741 | 0.09545459 | 0.24057236 |
| ENSMUSG00000087370 | -0.594985  | 5.95199334 | 0.0956225  | 0.24088776 |
| ENSMUSG00000000708 | -0.5941663 | 6.30843323 | 0.09563266 | 0.24088776 |
| ENSMUSG00000061273 | -0.6006931 | 4.99779564 | 0.0956426  | 0.24088776 |
| ENSMUSG00000025583 | 0.60002119 | 5.01760274 | 0.09571063 | 0.24100629 |
| ENSMUSG00000057234 | -0.635743  | 2.61096143 | 0.09578856 | 0.24111923 |
| ENSMUSG00000078439 | 0.65791305 | 2.03876537 | 0.09581742 | 0.24111923 |
| ENSMUSG00000024875 | 0.62894303 | 3.10996894 | 0.09581841 | 0.24111923 |
| ENSMUSG00000011382 | 0.61793752 | 3.50603563 | 0.09585288 | 0.24115318 |
| ENSMUSG00000029250 | -0.5918038 | 7.49259643 | 0.09590113 | 0.24120168 |
| ENSMUSG00000026810 | 0.59956746 | 4.98411421 | 0.09593816 | 0.24120168 |
| ENSMUSG00000044308 | -0.5917078 | 7.33088882 | 0.09594378 | 0.24120168 |
| ENSMUSG00000037148 | 0.63606929 | 2.69508903 | 0.09596024 | 0.24120168 |
| ENSMUSG00000098912 | 0.7762433  | 1.37742796 | 0.09597708 | 0.24120168 |
| ENSMUSG00000030754 | -0.591226  | 7.71304625 | 0.09606684 | 0.2413745  |
| ENSMUSG00000029036 | 0.59781834 | 5.12572742 | 0.09613756 | 0.2414994  |
| ENSMUSG00000028382 | -0.5894562 | 9.40155411 | 0.09648856 | 0.24232815 |
| ENSMUSG00000075040 | 0.60489495 | 4.22370123 | 0.09658294 | 0.24235661 |
| ENSMUSG00000040877 | 0.67585837 | 1.5668783  | 0.09658462 | 0.24235661 |
| ENSMUSG00000064267 | 0.58958015 | 8.56743007 | 0.09659099 | 0.24235661 |
| ENSMUSG00000001632 | 0.59248638 | 6.36171817 | 0.09659132 | 0.24235661 |
| ENSMUSG00000037773 | 0.60288801 | 4.50301643 | 0.0966053  | 0.24235661 |
| ENSMUSG00000056673 | -0.5939248 | 6.32188267 | 0.09663351 | 0.24237447 |
| ENSMUSG00000090673 | -0.5952803 | 5.32225806 | 0.09666949 | 0.24241182 |
| ENSMUSG00000046351 | -0.5965452 | 5.21029413 | 0.09672265 | 0.24249223 |
| ENSMUSG00000085741 | 0.64069566 | 2.44096453 | 0.09679039 | 0.24260913 |
| ENSMUSG00000002102 | 0.5923656  | 6.14550431 | 0.09691757 | 0.24287496 |
| ENSMUSG00000021572 | -0.6093115 | 3.76493859 | 0.09697112 | 0.2429562  |
| ENSMUSG00000030759 | -0.5890432 | 8.09007643 | 0.09705628 | 0.24311658 |
| ENSMUSG00000057367 | -0.5898027 | 7.2438701  | 0.09714004 | 0.24327336 |
| ENSMUSG00000038623 | -0.5891149 | 7.6157305  | 0.09725033 | 0.24349652 |
| ENSMUSG00000031262 | -0.6287724 | 2.76660647 | 0.09734745 | 0.24368661 |
| ENSMUSG00000031754 | -0.5940197 | 5.55499125 | 0.09743335 | 0.24384855 |
| ENSMUSG00000045210 | -0.5887184 | 7.60070495 | 0.097521   | 0.24395927 |
| ENSMUSG00000058626 | 0.56140603 | 2.92248159 | 0.09752307 | 0.24395927 |



|                    |            |            |            |            |
|--------------------|------------|------------|------------|------------|
| ENSMUSG00000041632 | 0.61060207 | 3.73405072 | 0.09754914 | 0.24395927 |
| ENSMUSG00000068823 | -0.5875835 | 9.31935015 | 0.09756248 | 0.24395927 |
| ENSMUSG00000035047 | 0.59072536 | 6.25330845 | 0.09758581 | 0.24396453 |
| ENSMUSG00000016984 | -0.5962083 | 5.05848946 | 0.0976861  | 0.24416215 |
| ENSMUSG00000079737 | -0.6070151 | 3.97751275 | 0.09776377 | 0.24430316 |
| ENSMUSG00000031527 | -0.5904555 | 6.33508697 | 0.09779171 | 0.24431987 |
| ENSMUSG00000034800 | -0.6154455 | 3.23369725 | 0.09784684 | 0.24440447 |
| ENSMUSG00000056116 | 0.58903883 | 6.82775038 | 0.0979403  | 0.24458477 |
| ENSMUSG00000040204 | -0.6036403 | 4.29671778 | 0.09798129 | 0.24463399 |
| ENSMUSG00000004849 | 0.60685628 | 3.56530804 | 0.09808405 | 0.24482675 |
| ENSMUSG00000016496 | -0.5874206 | 7.74726502 | 0.09810109 | 0.24482675 |
| ENSMUSG00000024639 | -0.5927011 | 5.38108929 | 0.09816774 | 0.24493992 |
| ENSMUSG00000093894 | -0.6075007 | 3.8146736  | 0.09822581 | 0.24501716 |
| ENSMUSG00000029910 | -0.5951161 | 5.03508155 | 0.09824133 | 0.24501716 |
| ENSMUSG00000002524 | 0.58897972 | 6.38378631 | 0.09830122 | 0.24510531 |
| ENSMUSG00000022022 | -0.6325974 | 2.45129217 | 0.09831932 | 0.24510531 |
| ENSMUSG00000019907 | -0.5873579 | 7.51251374 | 0.09835087 | 0.24513081 |
| ENSMUSG00000001436 | 0.63553438 | 2.59138412 | 0.0984256  | 0.24523573 |
| ENSMUSG00000019179 | 0.58868659 | 6.47896253 | 0.09843564 | 0.24523573 |
| ENSMUSG00000037533 | -0.5861182 | 8.61196328 | 0.0985312  | 0.24541082 |
| ENSMUSG00000027778 | -0.5933897 | 5.11772293 | 0.09854862 | 0.24541082 |
| ENSMUSG00000024270 | -0.5929711 | 5.24825883 | 0.09867213 | 0.24555026 |
| ENSMUSG00000009013 | -0.587339  | 7.27715925 | 0.09869935 | 0.24555026 |
| ENSMUSG00000031328 | 0.58542726 | 9.97321227 | 0.09870555 | 0.24555026 |
| ENSMUSG00000030685 | 0.61640651 | 3.21498175 | 0.09872739 | 0.24555026 |
| ENSMUSG00000046753 | -0.5935286 | 5.12896138 | 0.09873516 | 0.24555026 |
| ENSMUSG00000021537 | -0.5905209 | 5.71279134 | 0.09874376 | 0.24555026 |
| ENSMUSG00000029512 | 0.59514157 | 4.97675573 | 0.09875414 | 0.24555026 |
| ENSMUSG00000020246 | -0.5913091 | 5.58302409 | 0.09881073 | 0.24558864 |
| ENSMUSG00000025208 | 0.60707246 | 3.69094625 | 0.09881231 | 0.24558864 |
| ENSMUSG00000029128 | -0.5975442 | 4.46427511 | 0.09884531 | 0.24561755 |
| ENSMUSG00000051007 | 0.59492618 | 4.90698191 | 0.09892073 | 0.24575183 |
| ENSMUSG00000045624 | -0.5900045 | 5.85610532 | 0.09895138 | 0.24577486 |
| ENSMUSG00000075703 | -0.5920985 | 5.29030127 | 0.09909296 | 0.24596559 |
| ENSMUSG00000032220 | -0.5859445 | 7.60132951 | 0.0990996  | 0.24596559 |
| ENSMUSG00000018076 | -0.5871179 | 6.51820121 | 0.09910934 | 0.24596559 |
| ENSMUSG00000032594 | 0.58614184 | 7.33935302 | 0.09911376 | 0.24596559 |
| ENSMUSG00000056418 | 0.72253554 | 1.47051952 | 0.09913596 | 0.24596759 |
| ENSMUSG00000001424 | 0.58746825 | 6.38037263 | 0.09934393 | 0.24623699 |
| ENSMUSG00000027351 | 0.60456821 | 4.06648025 | 0.09934641 | 0.24623699 |
| ENSMUSG00000029722 | 0.601855   | 4.06629722 | 0.09934641 | 0.24623699 |
| ENSMUSG00000095193 | -0.6762896 | 1.58302366 | 0.09935165 | 0.24623699 |
| ENSMUSG00000056367 | -0.6721898 | 1.57919095 | 0.09935165 | 0.24623699 |

|                    |            |            |            |            |
|--------------------|------------|------------|------------|------------|
| ENSMUSG00000039480 | -0.5903323 | 5.48959761 | 0.0994274  | 0.24635983 |
| ENSMUSG00000024142 | 0.59151989 | 5.09135266 | 0.09944407 | 0.24635983 |
| ENSMUSG00000025156 | 0.59128793 | 5.00972352 | 0.09949332 | 0.24642874 |
| ENSMUSG00000042138 | -0.5937798 | 4.94872717 | 0.09955661 | 0.24653236 |
| ENSMUSG00000020692 | 0.61980215 | 3.374258   | 0.09958037 | 0.24653808 |
| ENSMUSG00000046031 | 0.61997476 | 3.09593208 | 0.09967583 | 0.2467007  |
| ENSMUSG00000022422 | -0.6634386 | 1.89220189 | 0.09968898 | 0.2467007  |
| ENSMUSG00000039662 | 0.58762591 | 5.95298763 | 0.0997125  | 0.24670582 |
| ENSMUSG00000032561 | 0.63088241 | 2.68119257 | 0.09979092 | 0.2468118  |
| ENSMUSG00000024158 | 0.60036326 | 4.15796779 | 0.09979828 | 0.2468118  |
| ENSMUSG00000030516 | 0.65669242 | 2.32548198 | 0.09982252 | 0.24681864 |
| ENSMUSG00000040007 | 0.5877446  | 5.71060852 | 0.09986527 | 0.24687123 |
| ENSMUSG00000053898 | 0.5900372  | 5.29090087 | 0.09990459 | 0.24691535 |
| ENSMUSG00000095130 | -0.5974153 | 4.4783614  | 0.09999755 | 0.24709197 |
| ENSMUSG00000035382 | 0.58807164 | 5.66921145 | 0.10002103 | 0.24709687 |
| ENSMUSG00000073131 | -0.5922413 | 4.94773609 | 0.10013625 | 0.24732836 |
| ENSMUSG00000003848 | 0.59266162 | 4.62213807 | 0.10024167 | 0.24753555 |
| ENSMUSG00000041921 | -0.5872156 | 5.84323091 | 0.1002906  | 0.24760319 |
| ENSMUSG00000027357 | -0.6127093 | 3.28178591 | 0.10048081 | 0.24801952 |
| ENSMUSG00000054619 | 0.60152188 | 3.87556301 | 0.10057429 | 0.24819697 |
| ENSMUSG00000019857 | -0.592354  | 4.77061563 | 0.10073396 | 0.24853764 |
| ENSMUSG00000024287 | -0.5850866 | 6.29864235 | 0.1008561  | 0.24872599 |
| ENSMUSG00000027953 | 0.58516848 | 6.19782748 | 0.10087496 | 0.24872599 |
| ENSMUSG00000027104 | -0.5843513 | 6.5394998  | 0.10087521 | 0.24872599 |
| ENSMUSG00000063108 | -0.5842709 | 6.64730359 | 0.10091453 | 0.24876957 |
| ENSMUSG00000023852 | -0.5821285 | 8.25085765 | 0.1009724  | 0.24883166 |
| ENSMUSG00000079037 | 0.60351332 | 3.99608712 | 0.10098301 | 0.24883166 |
| ENSMUSG00000062929 | -0.5923544 | 4.7117365  | 0.10114505 | 0.24917753 |
| ENSMUSG00000043542 | 0.7540557  | 0.89133853 | 0.10130007 | 0.24941931 |
| ENSMUSG00000030846 | -0.5823215 | 7.47167739 | 0.10130095 | 0.24941931 |
| ENSMUSG00000090553 | -0.5859143 | 5.72709335 | 0.10130829 | 0.24941931 |
| ENSMUSG00000025531 | -0.585346  | 5.91187323 | 0.10134856 | 0.24946504 |
| ENSMUSG00000030451 | -0.5813073 | 8.26562582 | 0.10139024 | 0.24951419 |
| ENSMUSG00000039395 | -0.6104126 | 3.24016259 | 0.10142436 | 0.24952444 |
| ENSMUSG00000021731 | -0.5895954 | 5.10259112 | 0.10143782 | 0.24952444 |
| ENSMUSG00000027378 | 0.78308327 | 0.98277752 | 0.10154025 | 0.24965525 |
| ENSMUSG00000070732 | -0.7068679 | 0.96349816 | 0.10154025 | 0.24965525 |
| ENSMUSG00000026532 | -0.5832809 | 6.79681278 | 0.10155615 | 0.24965525 |
| ENSMUSG00000007850 | -0.5804659 | 9.72034375 | 0.10158194 | 0.24966526 |
| ENSMUSG00000024259 | -0.5848497 | 5.8515501  | 0.10177595 | 0.25008862 |
| ENSMUSG00000020788 | 0.58036942 | 8.84108316 | 0.1018229  | 0.25015051 |
| ENSMUSG00000047731 | 0.58410639 | 5.97653941 | 0.10185363 | 0.25017255 |
| ENSMUSG00000027347 | -0.5806888 | 8.07243122 | 0.10188904 | 0.2501817  |

|                    |            |            |            |            |
|--------------------|------------|------------|------------|------------|
| ENSMUSG00000046591 | -0.6059821 | 3.44521102 | 0.10190089 | 0.2501817  |
| ENSMUSG00000097471 | 0.6825163  | 1.60924085 | 0.10203303 | 0.25045264 |
| ENSMUSG00000027810 | -0.5823318 | 6.5603303  | 0.10206036 | 0.25046624 |
| ENSMUSG00000003038 | -0.5822682 | 6.49717296 | 0.1022062  | 0.25077061 |
| ENSMUSG00000021023 | -0.596445  | 3.89688903 | 0.10228444 | 0.25090902 |
| ENSMUSG00000026083 | -0.5806041 | 7.39566417 | 0.10234267 | 0.25097932 |
| ENSMUSG00000027327 | 0.61561673 | 3.22999002 | 0.10236714 | 0.25097932 |
| ENSMUSG00000028468 | 0.58366782 | 6.02566484 | 0.1023786  | 0.25097932 |
| ENSMUSG00000038876 | -0.5815435 | 6.67435549 | 0.10255136 | 0.25133832 |
| ENSMUSG00000005354 | 0.58353607 | 5.70039505 | 0.10256877 | 0.25133832 |
| ENSMUSG00000033255 | 0.64416607 | 2.58603074 | 0.10261066 | 0.25134148 |
| ENSMUSG00000031353 | -0.5802031 | 7.34345111 | 0.1026138  | 0.25134148 |
| ENSMUSG00000037355 | -0.5824179 | 5.83281564 | 0.10264013 | 0.25135242 |
| ENSMUSG00000035354 | -0.5798974 | 7.37849079 | 0.10271532 | 0.25148298 |
| ENSMUSG00000063952 | 0.58334103 | 5.92219069 | 0.1028968  | 0.25187366 |
| ENSMUSG00000002222 | -0.5796094 | 7.33822391 | 0.10293641 | 0.25191697 |
| ENSMUSG00000052656 | -0.5856479 | 5.15935928 | 0.10303255 | 0.2519963  |
| ENSMUSG00000001098 | 0.58171112 | 6.20259127 | 0.10303374 | 0.2519963  |
| ENSMUSG00000052142 | 0.57863713 | 8.04056909 | 0.10303784 | 0.2519963  |
| ENSMUSG00000070394 | 0.60197849 | 3.59980352 | 0.10305651 | 0.2519963  |
| ENSMUSG00000020120 | -0.5781565 | 8.84697136 | 0.10309613 | 0.25202682 |
| ENSMUSG00000058013 | -0.5798102 | 7.03598758 | 0.10313399 | 0.25202682 |
| ENSMUSG00000057229 | 0.58043479 | 6.6997333  | 0.10313477 | 0.25202682 |
| ENSMUSG00000075700 | -0.5783447 | 8.04338994 | 0.10331042 | 0.25235307 |
| ENSMUSG00000026393 | -0.5788965 | 7.45586049 | 0.10331219 | 0.25235307 |
| ENSMUSG00000001280 | -0.5778032 | 8.3935732  | 0.10345039 | 0.25263697 |
| ENSMUSG00000026307 | 0.59298176 | 4.34519805 | 0.10354207 | 0.25280717 |
| ENSMUSG00000032549 | 0.59935631 | 3.85081501 | 0.10361821 | 0.25290572 |
| ENSMUSG00000041459 | -0.5772909 | 8.68349646 | 0.10367991 | 0.25290572 |
| ENSMUSG00000051444 | -0.6444529 | 2.07319246 | 0.10369014 | 0.25290572 |
| ENSMUSG00000028252 | -0.5848432 | 5.12947784 | 0.10371877 | 0.25290572 |
| ENSMUSG00000053754 | -0.5771884 | 8.61446921 | 0.10372685 | 0.25290572 |
| ENSMUSG00000037129 | 0.65779603 | 2.0694627  | 0.10373826 | 0.25290572 |
| ENSMUSG00000032449 | -0.5788328 | 6.84054232 | 0.10375681 | 0.25290572 |
| ENSMUSG00000029616 | 0.57817279 | 7.19937443 | 0.10375845 | 0.25290572 |
| ENSMUSG00000060803 | 0.59358511 | 4.05469495 | 0.10406122 | 0.25358993 |
| ENSMUSG00000069094 | -0.5765977 | 8.47761065 | 0.10417318 | 0.25380897 |
| ENSMUSG00000025616 | -0.5778024 | 7.03950178 | 0.10426617 | 0.2539817  |
| ENSMUSG00000008036 | 0.59221729 | 4.32735773 | 0.10448801 | 0.25446816 |
| ENSMUSG00000033335 | 0.57662533 | 7.30962608 | 0.10467957 | 0.25488068 |
| ENSMUSG00000032263 | -0.6031496 | 3.33362668 | 0.10470525 | 0.25488921 |
| ENSMUSG00000066037 | -0.5769231 | 7.09565394 | 0.10474351 | 0.25492837 |
| ENSMUSG00000051579 | 0.63462162 | 2.31765303 | 0.10491041 | 0.25528051 |

|                    |            |            |            |            |
|--------------------|------------|------------|------------|------------|
| ENSMUSG00000064340 | -0.6739501 | 1.34118636 | 0.10520383 | 0.25594033 |
| ENSMUSG00000022111 | -0.5805505 | 5.54433025 | 0.10531196 | 0.25614917 |
| ENSMUSG00000078974 | -0.5834736 | 4.96990246 | 0.10539518 | 0.25629734 |
| ENSMUSG00000020859 | -0.5743197 | 8.39824462 | 0.10553643 | 0.25649291 |
| ENSMUSG00000076549 | -0.5949813 | 3.95862961 | 0.10554058 | 0.25649291 |
| ENSMUSG00000084381 | -0.7101052 | 1.01996413 | 0.10556485 | 0.25649291 |
| ENSMUSG00000050199 | 0.69417231 | 1.05452388 | 0.10556485 | 0.25649291 |
| ENSMUSG00000046598 | 0.62674375 | 2.55986554 | 0.10561061 | 0.25654128 |
| ENSMUSG00000034269 | -0.5741799 | 8.31377889 | 0.10563271 | 0.25654128 |
| ENSMUSG00000024816 | 0.58143256 | 5.08835805 | 0.10565171 | 0.25654128 |
| ENSMUSG00000044876 | 0.61135286 | 2.85707281 | 0.10569553 | 0.25659347 |
| ENSMUSG00000036880 | 0.58957707 | 4.41229264 | 0.10583986 | 0.25688961 |
| ENSMUSG00000093565 | -0.6504452 | 1.99868545 | 0.10597717 | 0.25716858 |
| ENSMUSG00000036698 | -0.5736173 | 8.1354983  | 0.10600148 | 0.25717328 |
| ENSMUSG00000021592 | -0.5838067 | 4.72138205 | 0.10616184 | 0.25750665 |
| ENSMUSG00000026349 | -0.5735673 | 7.89639337 | 0.10618369 | 0.25750665 |
| ENSMUSG00000039285 | -0.5746581 | 6.81602859 | 0.10635166 | 0.25783098 |
| ENSMUSG00000043881 | -0.5802826 | 5.1954398  | 0.10638068 | 0.25783098 |
| ENSMUSG00000033658 | -0.5764608 | 5.99354214 | 0.10638472 | 0.25783098 |
| ENSMUSG00000001524 | 0.61188123 | 3.07326672 | 0.10690401 | 0.25903492 |
| ENSMUSG00000033392 | -0.5762318 | 5.71994166 | 0.10694778 | 0.25908636 |
| ENSMUSG00000041415 | -0.5722771 | 7.54880688 | 0.10715316 | 0.2595292  |
| ENSMUSG00000036792 | -0.5754241 | 5.93856688 | 0.10721131 | 0.25961535 |
| ENSMUSG00000026496 | 0.57141608 | 8.42728007 | 0.10726262 | 0.25964076 |
| ENSMUSG00000036501 | -0.5728685 | 6.93967627 | 0.10726699 | 0.25964076 |
| ENSMUSG00000024974 | -0.5720783 | 7.5404871  | 0.1073697  | 0.25983467 |
| ENSMUSG00000029771 | 0.57192397 | 7.46323631 | 0.10742213 | 0.25989021 |
| ENSMUSG00000038418 | 0.57106979 | 8.67671343 | 0.10745551 | 0.25989021 |
| ENSMUSG00000024317 | -0.5791059 | 4.95353005 | 0.10746047 | 0.25989021 |
| ENSMUSG00000038759 | -0.5720559 | 7.11430877 | 0.10769738 | 0.26040838 |
| ENSMUSG00000038121 | -0.5763403 | 5.4348005  | 0.10784901 | 0.26072017 |
| ENSMUSG00000022841 | 0.57156324 | 6.97471073 | 0.10800551 | 0.26099762 |
| ENSMUSG00000019791 | -0.5980491 | 3.36475289 | 0.10802467 | 0.26099762 |
| ENSMUSG00000042814 | -0.6747666 | 1.45913466 | 0.1080319  | 0.26099762 |
| ENSMUSG00000031513 | 0.58024723 | 4.64331431 | 0.10806007 | 0.26101083 |
| ENSMUSG00000020866 | 0.69887598 | 1.45552595 | 0.10815829 | 0.26119319 |
| ENSMUSG00000039474 | 0.65029976 | 2.00221807 | 0.10819035 | 0.26121572 |
| ENSMUSG00000048047 | -0.5724478 | 6.48300162 | 0.10832212 | 0.26147896 |
| ENSMUSG00000028345 | -0.5729055 | 6.20388266 | 0.10835281 | 0.26149813 |
| ENSMUSG00000006736 | 0.57452699 | 5.76521334 | 0.10852046 | 0.26184776 |
| ENSMUSG00000029447 | -0.5706804 | 7.31595613 | 0.10855402 | 0.26187376 |
| ENSMUSG00000022035 | -0.5747144 | 5.65721616 | 0.10863482 | 0.26201369 |
| ENSMUSG00000028081 | -0.5686279 | 9.92465452 | 0.10868939 | 0.2620228  |

|                     |            |            |            |            |
|---------------------|------------|------------|------------|------------|
| ENSMUSG00000018287  | 0.5789747  | 4.7563736  | 0.10870304 | 0.2620228  |
| ENSMUSG00000003119  | -0.5694134 | 7.89571874 | 0.10870698 | 0.2620228  |
| ENSMUSG000000031803 | 0.67791879 | 1.27367241 | 0.10882206 | 0.26219064 |
| ENSMUSG000000034653 | -0.5720623 | 6.19713521 | 0.10882223 | 0.26219064 |
| ENSMUSG000000035572 | -0.5738711 | 5.59865407 | 0.10890498 | 0.26233237 |
| ENSMUSG000000039990 | -0.5710367 | 6.53505753 | 0.10893536 | 0.26233237 |
| ENSMUSG000000031226 | -0.5745732 | 5.41902573 | 0.10896688 | 0.26233237 |
| ENSMUSG000000048271 | -0.5686625 | 8.33167406 | 0.10898753 | 0.26233237 |
| ENSMUSG000000067928 | -0.5920947 | 3.47401492 | 0.10899516 | 0.26233237 |
| ENSMUSG000000045302 | 0.57086932 | 6.60916061 | 0.10901933 | 0.26233562 |
| ENSMUSG000000094509 | 0.6364037  | 1.83461259 | 0.10908508 | 0.2624389  |
| ENSMUSG000000030611 | 0.62077697 | 2.47699604 | 0.10912755 | 0.26248612 |
| ENSMUSG000000005378 | 0.5790758  | 4.47856589 | 0.10920615 | 0.26256785 |
| ENSMUSG000000074649 | 0.58708536 | 3.56594805 | 0.10920721 | 0.26256785 |
| ENSMUSG000000021051 | -0.5703352 | 6.63786913 | 0.10926619 | 0.26265472 |
| ENSMUSG000000003131 | -0.570385  | 6.56147409 | 0.1093693  | 0.26284761 |
| ENSMUSG000000025731 | 0.60805098 | 2.84287967 | 0.10946345 | 0.26298435 |
| ENSMUSG000000042203 | 0.5801575  | 4.5484964  | 0.10948741 | 0.26298435 |
| ENSMUSG000000020170 | -0.5710183 | 6.07142139 | 0.10951429 | 0.26298435 |
| ENSMUSG000000004771 | -0.5725935 | 5.66332753 | 0.10951771 | 0.26298435 |
| ENSMUSG000000024645 | -0.5824402 | 4.30691089 | 0.10957988 | 0.26307869 |
| ENSMUSG000000013822 | 0.58462829 | 4.03786751 | 0.10962126 | 0.26312307 |
| ENSMUSG000000022419 | 0.6126619  | 2.62377179 | 0.10967701 | 0.26320192 |
| ENSMUSG000000034781 | 0.58580251 | 3.93785109 | 0.10980134 | 0.26344529 |
| ENSMUSG000000046311 | -0.5679952 | 7.54164985 | 0.10987411 | 0.26356487 |
| ENSMUSG000000028577 | -0.569075  | 6.78877925 | 0.10992295 | 0.26362702 |
| ENSMUSG000000049800 | -0.5693778 | 6.4673768  | 0.10995524 | 0.2636293  |
| ENSMUSG000000005686 | 0.57438434 | 5.30634196 | 0.10996977 | 0.2636293  |
| ENSMUSG000000022960 | -0.570784  | 5.92884581 | 0.11004536 | 0.26373801 |
| ENSMUSG000000087424 | -0.715214  | 0.87178099 | 0.110061   | 0.26373801 |
| ENSMUSG000000046556 | 0.57872227 | 4.24640815 | 0.11008969 | 0.26375176 |
| ENSMUSG000000055943 | -0.5723602 | 5.4725527  | 0.11015031 | 0.26384201 |
| ENSMUSG000000032997 | 0.61905071 | 2.54953475 | 0.11021876 | 0.26395096 |
| ENSMUSG000000029516 | 0.59161377 | 3.71701781 | 0.11024545 | 0.26395988 |
| ENSMUSG000000024777 | 0.57699966 | 4.3380027  | 0.11029777 | 0.26403016 |
| ENSMUSG000000007216 | 0.66491382 | 1.62339545 | 0.11032337 | 0.26403645 |
| ENSMUSG000000057666 | 0.63630144 | 2.28087686 | 0.11043381 | 0.26421544 |
| ENSMUSG000000023919 | -0.5734375 | 5.15036747 | 0.11044412 | 0.26421544 |
| ENSMUSG000000038524 | 0.58231125 | 3.92452224 | 0.11053045 | 0.26436694 |
| ENSMUSG000000049892 | 0.57329409 | 4.60842571 | 0.11057007 | 0.26437751 |
| ENSMUSG000000000876 | 0.5895091  | 3.48805343 | 0.11058292 | 0.26437751 |
| ENSMUSG000000015149 | 0.57217443 | 5.36029504 | 0.11060387 | 0.26437751 |
| ENSMUSG000000042198 | -0.5804269 | 4.09812136 | 0.11074559 | 0.26466124 |

|                    |            |            |            |            |
|--------------------|------------|------------|------------|------------|
| ENSMUSG00000060657 | -0.5657439 | 8.2774781  | 0.11085307 | 0.26486302 |
| ENSMUSG00000051412 | -0.5886203 | 3.5316661  | 0.11096881 | 0.26506888 |
| ENSMUSG00000027162 | -0.5670928 | 6.89155183 | 0.11098534 | 0.26506888 |
| ENSMUSG00000022378 | -0.5653716 | 8.28741304 | 0.11109273 | 0.26527023 |
| ENSMUSG00000093904 | -0.5684055 | 6.09835249 | 0.11112974 | 0.2653035  |
| ENSMUSG00000049470 | -0.5649468 | 8.8475756  | 0.1111636  | 0.26531421 |
| ENSMUSG00000041697 | 0.57103881 | 5.29929845 | 0.11118039 | 0.26531421 |
| ENSMUSG00000022635 | -0.5710606 | 5.31296839 | 0.11127589 | 0.265487   |
| ENSMUSG00000039952 | 0.57674175 | 4.59559774 | 0.11144455 | 0.26583421 |
| ENSMUSG00000033589 | 0.5803929  | 3.95242353 | 0.11149947 | 0.26591004 |
| ENSMUSG00000027176 | -0.5692959 | 5.57372381 | 0.11153777 | 0.26594621 |
| ENSMUSG00000024583 | -0.5691181 | 5.7667612  | 0.11162113 | 0.26608977 |
| ENSMUSG00000056735 | -0.5871967 | 3.54368002 | 0.11166847 | 0.26614744 |
| ENSMUSG00000068854 | -0.5830081 | 3.99036239 | 0.11170742 | 0.26618507 |
| ENSMUSG00000030207 | 0.5719908  | 5.05541629 | 0.11187519 | 0.26652959 |
| ENSMUSG00000041143 | 0.5727737  | 4.66604834 | 0.11193464 | 0.26661598 |
| ENSMUSG00000033991 | -0.5668996 | 6.11640081 | 0.11216422 | 0.26703828 |
| ENSMUSG00000048264 | 0.60706992 | 3.19792787 | 0.11217897 | 0.26703828 |
| ENSMUSG00000035021 | -0.5633641 | 8.89699752 | 0.11218311 | 0.26703828 |
| ENSMUSG00000051022 | -0.5942919 | 3.39959344 | 0.11220486 | 0.26703828 |
| ENSMUSG00000073411 | 0.56277985 | 10.3825587 | 0.11227962 | 0.26716089 |
| ENSMUSG00000006373 | -0.5682511 | 5.54057168 | 0.11248954 | 0.26760497 |
| ENSMUSG00000071281 | -0.5773453 | 4.23660604 | 0.11259957 | 0.2678113  |
| ENSMUSG00000022552 | 0.56593958 | 6.13825091 | 0.11273864 | 0.26803231 |
| ENSMUSG00000079110 | -0.6678424 | 1.17716446 | 0.112759   | 0.26803231 |
| ENSMUSG00000052917 | -0.5638019 | 7.17706877 | 0.11278459 | 0.26803231 |
| ENSMUSG00000043162 | -0.6055926 | 2.88667313 | 0.11278576 | 0.26803231 |
| ENSMUSG00000046096 | -0.5716142 | 4.87485063 | 0.11295377 | 0.2683761  |
| ENSMUSG00000020349 | -0.5626307 | 7.97118853 | 0.11299022 | 0.26840722 |
| ENSMUSG00000025024 | -0.5649943 | 6.38356313 | 0.11303248 | 0.26844954 |
| ENSMUSG00000029486 | -0.5756063 | 4.37994475 | 0.11305474 | 0.26844954 |
| ENSMUSG00000097431 | -0.5900168 | 3.09090592 | 0.11315424 | 0.26863032 |
| ENSMUSG00000061983 | 0.56199691 | 8.04505083 | 0.113351   | 0.26903063 |
| ENSMUSG00000028719 | -0.5650632 | 6.11919254 | 0.11336967 | 0.26903063 |
| ENSMUSG00000054717 | -0.5626481 | 7.14726769 | 0.1135231  | 0.26933912 |
| ENSMUSG00000055170 | 0.58950859 | 3.1649138  | 0.11355443 | 0.26935786 |
| ENSMUSG00000048285 | -0.5913213 | 3.24925772 | 0.11362123 | 0.2694607  |
| ENSMUSG00000020914 | -0.5630548 | 6.8459348  | 0.11368864 | 0.26956496 |
| ENSMUSG00000071359 | -0.5663177 | 5.59097545 | 0.11372484 | 0.26959519 |
| ENSMUSG00000027782 | -0.5612123 | 8.25957833 | 0.1137739  | 0.26965586 |
| ENSMUSG00000052144 | -0.5622254 | 7.03396947 | 0.11399557 | 0.27012555 |
| ENSMUSG00000027177 | -0.5618589 | 7.03304064 | 0.11406604 | 0.27023684 |
| ENSMUSG00000059474 | -0.5626115 | 6.65994766 | 0.1141051  | 0.27027368 |

|                    |            |            |            |            |
|--------------------|------------|------------|------------|------------|
| ENSMUSG00000085438 | -0.5604339 | 8.1852932  | 0.11427001 | 0.27057613 |
| ENSMUSG00000058709 | 0.5720579  | 4.62250106 | 0.11427987 | 0.27057613 |
| ENSMUSG00000028576 | -0.6089936 | 2.43680863 | 0.11432507 | 0.2706274  |
| ENSMUSG00000049657 | 0.5688299  | 4.83197393 | 0.11443739 | 0.27083752 |
| ENSMUSG00000038866 | -0.5610396 | 7.36613151 | 0.11446961 | 0.270858   |
| ENSMUSG00000096638 | 0.62796238 | 2.418991   | 0.11449645 | 0.27086576 |
| ENSMUSG00000071302 | -0.5699952 | 4.7830167  | 0.1146197  | 0.27107502 |
| ENSMUSG00000011179 | -0.5600232 | 8.0467976  | 0.11463207 | 0.27107502 |
| ENSMUSG00000028718 | -0.5861412 | 3.41242164 | 0.11466273 | 0.27109175 |
| ENSMUSG00000015668 | -0.5718004 | 4.35505235 | 0.11470904 | 0.27114547 |
| ENSMUSG00000030882 | -0.5707294 | 4.17780081 | 0.11475031 | 0.27118726 |
| ENSMUSG00000078429 | 0.56104182 | 6.79398721 | 0.11478222 | 0.27120036 |
| ENSMUSG00000040928 | -0.5615438 | 6.61956947 | 0.1148093  | 0.27120036 |
| ENSMUSG00000017686 | -0.5620428 | 6.32522674 | 0.1148454  | 0.27120036 |
| ENSMUSG00000022620 | 0.57332771 | 4.03127055 | 0.11485023 | 0.27120036 |
| ENSMUSG00000031320 | -0.5585926 | 10.9112754 | 0.11494041 | 0.27135756 |
| ENSMUSG00000020671 | -0.5600216 | 7.39458514 | 0.11503338 | 0.27152129 |
| ENSMUSG00000066640 | 0.57737115 | 4.05893059 | 0.11508558 | 0.27156364 |
| ENSMUSG00000033220 | 0.55868204 | 9.00293005 | 0.11509937 | 0.27156364 |
| ENSMUSG00000064065 | -0.5623108 | 5.87139916 | 0.1151222  | 0.27156364 |
| ENSMUSG00000031668 | -0.559682  | 7.24651875 | 0.11527183 | 0.27186084 |
| ENSMUSG00000024976 | -0.5612441 | 6.45118168 | 0.11530795 | 0.27189023 |
| ENSMUSG00000047036 | -0.5597314 | 6.81208724 | 0.1155808  | 0.27247573 |
| ENSMUSG00000074480 | 0.61456324 | 2.14428125 | 0.11560367 | 0.27247573 |
| ENSMUSG00000096336 | -0.5595424 | 7.13248468 | 0.11570205 | 0.27265172 |
| ENSMUSG00000068290 | 0.56315431 | 5.48102876 | 0.11605641 | 0.2734307  |
| ENSMUSG00000036478 | -0.5568212 | 10.4951892 | 0.11611533 | 0.27351347 |
| ENSMUSG00000033808 | -0.5589173 | 6.8540801  | 0.11624411 | 0.27376071 |
| ENSMUSG00000030154 | 0.59700873 | 3.194109   | 0.11632046 | 0.27388442 |
| ENSMUSG00000032555 | -0.5578409 | 7.41696541 | 0.11635537 | 0.27390995 |
| ENSMUSG00000004980 | -0.5563899 | 10.509393  | 0.11639849 | 0.27390995 |
| ENSMUSG00000002396 | 0.57001651 | 4.47659834 | 0.11643209 | 0.27390995 |
| ENSMUSG00000028788 | -0.5566183 | 9.23042265 | 0.11643408 | 0.27390995 |
| ENSMUSG00000031403 | -0.5594273 | 6.52518511 | 0.11645045 | 0.27390995 |
| ENSMUSG00000032238 | 0.65068295 | 2.05589596 | 0.11652895 | 0.27403852 |
| ENSMUSG00000067194 | -0.5611733 | 5.76778021 | 0.11660629 | 0.2741643  |
| ENSMUSG00000027787 | -0.5598454 | 6.05143496 | 0.1166567  | 0.27422675 |
| ENSMUSG00000032501 | 0.55921609 | 6.30237842 | 0.11673272 | 0.27434933 |
| ENSMUSG00000098055 | 0.68121955 | 1.200123   | 0.11677722 | 0.27439782 |
| ENSMUSG00000075229 | -0.5847024 | 3.23043323 | 0.11681149 | 0.27442225 |
| ENSMUSG00000042992 | 0.59411842 | 2.96299118 | 0.11698079 | 0.27474871 |
| ENSMUSG00000003444 | 0.6002495  | 2.63837582 | 0.11699825 | 0.27474871 |
| ENSMUSG00000024146 | -0.5638137 | 5.04955834 | 0.11706549 | 0.27485046 |

|                    |            |            |            |            |
|--------------------|------------|------------|------------|------------|
| ENSMUSG00000034157 | -0.5600193 | 5.71892688 | 0.11709341 | 0.27485985 |
| ENSMUSG00000020900 | 0.57465438 | 4.03211597 | 0.11716308 | 0.27496726 |
| ENSMUSG00000026399 | -0.5551704 | 9.83920732 | 0.1172595  | 0.27513194 |
| ENSMUSG00000015342 | -0.5675106 | 4.60009283 | 0.11728112 | 0.27513194 |
| ENSMUSG00000038400 | 0.63906248 | 1.48401625 | 0.11745091 | 0.27542868 |
| ENSMUSG00000039853 | 0.56708683 | 4.49831602 | 0.11745554 | 0.27542868 |
| ENSMUSG00000022338 | -0.5634164 | 4.94291673 | 0.11757751 | 0.27565846 |
| ENSMUSG00000095123 | -0.5648924 | 4.33851783 | 0.1177527  | 0.27596688 |
| ENSMUSG00000034438 | 0.56625638 | 4.88711601 | 0.11775707 | 0.27596688 |
| ENSMUSG00000049225 | -0.5642389 | 4.82342515 | 0.11783241 | 0.27608716 |
| ENSMUSG00000003438 | 0.57235631 | 3.78975475 | 0.11788447 | 0.27615285 |
| ENSMUSG00000031918 | -0.5567575 | 6.58583667 | 0.1179443  | 0.27620081 |
| ENSMUSG00000028633 | -0.5620473 | 5.09429065 | 0.11795301 | 0.27620081 |
| ENSMUSG00000040710 | -0.554874  | 7.71440162 | 0.11810603 | 0.27639774 |
| ENSMUSG00000019814 | -0.5578663 | 5.99390925 | 0.11811214 | 0.27639774 |
| ENSMUSG00000046541 | 0.57131939 | 3.87085321 | 0.11812217 | 0.27639774 |
| ENSMUSG00000002732 | -0.6474652 | 1.39153402 | 0.11814804 | 0.27639774 |
| ENSMUSG00000001794 | 0.55542801 | 7.07079214 | 0.11815733 | 0.27639774 |
| ENSMUSG00000030435 | 0.55495956 | 7.47002458 | 0.11824071 | 0.27653651 |
| ENSMUSG00000039768 | 0.55795309 | 5.99813731 | 0.11843261 | 0.27687844 |
| ENSMUSG00000024780 | -0.5585876 | 5.61149278 | 0.11843509 | 0.27687844 |
| ENSMUSG00000036672 | 0.57734247 | 3.63826634 | 0.11850375 | 0.27698264 |
| ENSMUSG00000026918 | 0.55991131 | 5.34139218 | 0.11856254 | 0.27702828 |
| ENSMUSG00000020948 | -0.5600875 | 5.2466338  | 0.11857148 | 0.27702828 |
| ENSMUSG00000071172 | -0.5535831 | 8.47279484 | 0.11861925 | 0.27708358 |
| ENSMUSG00000022299 | -0.5666998 | 4.49938026 | 0.11868671 | 0.27718482 |
| ENSMUSG00000005362 | -0.5559599 | 6.19804853 | 0.11883403 | 0.2774725  |
| ENSMUSG00000045817 | -0.5532455 | 8.57902725 | 0.11887547 | 0.27750619 |
| ENSMUSG00000035107 | 0.68085886 | 1.33490404 | 0.11889674 | 0.27750619 |
| ENSMUSG00000035674 | 0.55914441 | 4.85446124 | 0.11917191 | 0.27809199 |
| ENSMUSG00000056493 | 0.55516447 | 6.50931618 | 0.11921957 | 0.27813411 |
| ENSMUSG00000020116 | -0.5637462 | 4.63040589 | 0.11923835 | 0.27813411 |
| ENSMUSG00000019883 | -0.5663298 | 4.28956286 | 0.11947247 | 0.27862365 |
| ENSMUSG00000070372 | -0.5527623 | 7.73969312 | 0.11954909 | 0.27873741 |
| ENSMUSG00000053390 | -0.5584694 | 5.3710123  | 0.11956974 | 0.27873741 |
| ENSMUSG00000031904 | -0.5565343 | 5.67622272 | 0.11977217 | 0.27914153 |
| ENSMUSG00000063047 | -0.5774347 | 3.3670709  | 0.11979166 | 0.27914153 |
| ENSMUSG00000066829 | -0.5662811 | 4.16166948 | 0.1198221  | 0.27915104 |
| ENSMUSG00000003923 | -0.5535882 | 6.84688487 | 0.11984455 | 0.27915104 |
| ENSMUSG00000034192 | -0.5609201 | 4.88477725 | 0.1198686  | 0.27915104 |
| ENSMUSG00000039981 | -0.5533758 | 6.48110231 | 0.12002849 | 0.27946679 |
| ENSMUSG00000028480 | 0.55784723 | 5.48492334 | 0.12009733 | 0.27957043 |
| ENSMUSG00000021302 | -0.5543242 | 6.10578286 | 0.12038431 | 0.28018174 |



|                    |            |            |            |            |
|--------------------|------------|------------|------------|------------|
| ENSMUSG00000019920 | -0.5521432 | 7.00478383 | 0.1204532  | 0.28028532 |
| ENSMUSG00000031799 | -0.5506131 | 8.53578226 | 0.12063884 | 0.28066049 |
| ENSMUSG00000022142 | -0.5527994 | 6.41347577 | 0.12081043 | 0.28100281 |
| ENSMUSG00000018995 | -0.5674228 | 4.06003155 | 0.12084738 | 0.2810319  |
| ENSMUSG00000079317 | -0.5651056 | 3.9403901  | 0.12092449 | 0.28107556 |
| ENSMUSG00000057894 | -0.5544181 | 5.71700469 | 0.12094817 | 0.28107556 |
| ENSMUSG00000025779 | -0.6019186 | 2.33574154 | 0.12095235 | 0.28107556 |
| ENSMUSG00000020546 | -0.567798  | 3.7684399  | 0.12097514 | 0.28107556 |
| ENSMUSG00000035397 | 0.55808107 | 4.78805942 | 0.12100045 | 0.28107556 |
| ENSMUSG00000030602 | 0.55688212 | 5.22080109 | 0.12101287 | 0.28107556 |
| ENSMUSG00000024077 | -0.5516581 | 6.67395805 | 0.12114979 | 0.28133313 |
| ENSMUSG00000035967 | -0.5509463 | 7.08115203 | 0.12117271 | 0.28133313 |
| ENSMUSG00000038429 | 0.5521632  | 6.30582183 | 0.1213701  | 0.2817156  |
| ENSMUSG00000071337 | -0.5504298 | 7.16381447 | 0.12140317 | 0.2817156  |
| ENSMUSG00000037447 | 0.55347475 | 5.72035663 | 0.12142565 | 0.2817156  |
| ENSMUSG00000015759 | -0.5551462 | 5.46847319 | 0.12145382 | 0.2817156  |
| ENSMUSG00000026977 | -0.5498211 | 7.65353704 | 0.12146114 | 0.2817156  |
| ENSMUSG00000004056 | 0.55174015 | 6.25927358 | 0.12148449 | 0.2817156  |
| ENSMUSG00000096795 | -0.5606051 | 4.21465499 | 0.12166194 | 0.28206855 |
| ENSMUSG00000051235 | -0.572457  | 3.3082965  | 0.12168577 | 0.28206855 |
| ENSMUSG00000031792 | 0.55708931 | 4.87916246 | 0.12175015 | 0.28216089 |
| ENSMUSG00000055024 | -0.5486047 | 8.62869206 | 0.12186565 | 0.28237163 |
| ENSMUSG00000003531 | 0.61072757 | 2.15069142 | 0.12194227 | 0.2824353  |
| ENSMUSG00000048012 | -0.6004727 | 2.13423659 | 0.12194227 | 0.2824353  |
| ENSMUSG00000045896 | -0.5518846 | 6.13989266 | 0.12200196 | 0.28247347 |
| ENSMUSG00000094993 | -0.6785729 | 1.06119361 | 0.1220079  | 0.28247347 |
| ENSMUSG00000036499 | -0.5512445 | 6.10676731 | 0.12209562 | 0.28261964 |
| ENSMUSG00000079562 | 0.55118125 | 5.94134816 | 0.12231489 | 0.2830702  |
| ENSMUSG00000030795 | -0.5476847 | 8.8497972  | 0.12238783 | 0.283182   |
| ENSMUSG00000030822 | 0.54943771 | 6.79554538 | 0.12241761 | 0.28319388 |
| ENSMUSG00000096982 | -0.6329108 | 1.94761832 | 0.12245366 | 0.28322029 |
| ENSMUSG00000073902 | -0.5472659 | 9.43971432 | 0.12259626 | 0.28346336 |
| ENSMUSG00000027198 | 0.55600031 | 4.91465658 | 0.12260807 | 0.28346336 |
| ENSMUSG00000018900 | -0.5588953 | 4.3627339  | 0.1227094  | 0.28363428 |
| ENSMUSG00000030779 | -0.5476397 | 8.05874465 | 0.12275504 | 0.28363428 |
| ENSMUSG00000016528 | 0.54869562 | 7.03154201 | 0.12275603 | 0.28363428 |
| ENSMUSG00000045410 | 0.58100694 | 2.90904896 | 0.12282393 | 0.28368756 |
| ENSMUSG00000023068 | -0.5496433 | 6.54705486 | 0.12283815 | 0.28368756 |
| ENSMUSG00000030374 | 0.5500247  | 6.22287193 | 0.12285313 | 0.28368756 |
| ENSMUSG00000031669 | -0.5697638 | 3.64926003 | 0.12295574 | 0.28383324 |
| ENSMUSG00000016498 | 0.55887477 | 4.79724502 | 0.12298848 | 0.28383324 |
| ENSMUSG00000017652 | 0.54930697 | 6.57476824 | 0.12300441 | 0.28383324 |
| ENSMUSG00000021510 | -0.553996  | 5.08888155 | 0.12301498 | 0.28383324 |

|                    |            |            |            |            |
|--------------------|------------|------------|------------|------------|
| ENSMUSG00000045691 | 0.56730039 | 3.64976292 | 0.12308327 | 0.28393381 |
| ENSMUSG00000033629 | -0.5513771 | 5.74075947 | 0.12313002 | 0.28398467 |
| ENSMUSG00000030683 | 0.70230993 | 1.29382265 | 0.1233119  | 0.28434709 |
| ENSMUSG00000029676 | -0.5516264 | 5.56859372 | 0.12334596 | 0.28436859 |
| ENSMUSG00000060126 | -0.5457945 | 11.2195895 | 0.12342101 | 0.28448457 |
| ENSMUSG00000019689 | 0.60986632 | 1.73461148 | 0.12346025 | 0.28451795 |
| ENSMUSG00000032182 | 0.56672551 | 3.75493556 | 0.12349986 | 0.2845522  |
| ENSMUSG00000021785 | -0.5497604 | 5.97852856 | 0.12357842 | 0.28466585 |
| ENSMUSG00000027108 | -0.5503814 | 5.85364582 | 0.12359872 | 0.28466585 |
| ENSMUSG00000022184 | -0.5562018 | 4.65162687 | 0.12369583 | 0.28483245 |
| ENSMUSG00000031563 | 0.58572751 | 2.60198216 | 0.12382383 | 0.28507009 |
| ENSMUSG00000039770 | -0.5478746 | 6.53275172 | 0.12386712 | 0.28511264 |
| ENSMUSG00000057236 | -0.5458032 | 8.39680886 | 0.12392065 | 0.28512484 |
| ENSMUSG00000032407 | -0.5463998 | 7.58133141 | 0.12392203 | 0.28512484 |
| ENSMUSG00000032114 | 0.56074059 | 4.37233568 | 0.12408244 | 0.28542507 |
| ENSMUSG00000026767 | -0.5537193 | 4.87674515 | 0.12412186 | 0.28542507 |
| ENSMUSG00000027534 | -0.5800027 | 3.03963171 | 0.12412701 | 0.28542507 |
| ENSMUSG00000059447 | -0.5478731 | 6.23493852 | 0.12421221 | 0.28556387 |
| ENSMUSG00000036390 | -0.5486167 | 6.2131236  | 0.12424409 | 0.28558005 |
| ENSMUSG00000003360 | 0.54696223 | 6.68576457 | 0.12431433 | 0.2856315  |
| ENSMUSG00000031399 | 0.55967191 | 4.19459799 | 0.12431829 | 0.2856315  |
| ENSMUSG00000024008 | 0.65104726 | 1.67535303 | 0.12434102 | 0.2856315  |
| ENSMUSG00000022897 | -0.5454526 | 7.87756741 | 0.12437758 | 0.28565839 |
| ENSMUSG00000024589 | -0.5501715 | 5.58018447 | 0.12443824 | 0.28565906 |
| ENSMUSG00000039756 | -0.5467439 | 6.72064289 | 0.12444983 | 0.28565906 |
| ENSMUSG00000069539 | -0.5476955 | 6.34358366 | 0.12445521 | 0.28565906 |
| ENSMUSG00000041471 | -0.5519659 | 5.06149418 | 0.12447727 | 0.28565906 |
| ENSMUSG00000078495 | -0.5539201 | 4.65063137 | 0.12451867 | 0.28569702 |
| ENSMUSG00000021003 | 0.57477873 | 3.26874433 | 0.12456692 | 0.28570382 |
| ENSMUSG00000097042 | -0.5524405 | 4.92187056 | 0.12457134 | 0.28570382 |
| ENSMUSG00000024427 | 0.71742119 | 0.85363944 | 0.12482336 | 0.28619722 |
| ENSMUSG00000059839 | -0.5607205 | 4.19254156 | 0.12483626 | 0.28619722 |
| ENSMUSG00000021870 | -0.545525  | 7.11085942 | 0.12487827 | 0.28623643 |
| ENSMUSG00000031969 | 0.57739397 | 3.00793016 | 0.12495002 | 0.2863438  |
| ENSMUSG00000079362 | 0.55854462 | 4.51348898 | 0.12509822 | 0.28662628 |
| ENSMUSG00000053293 | 0.54777614 | 5.91445368 | 0.12517013 | 0.28672281 |
| ENSMUSG00000027582 | 0.54790928 | 5.79989227 | 0.12519024 | 0.28672281 |
| ENSMUSG00000050619 | -0.546067  | 6.40864661 | 0.12535992 | 0.28705424 |
| ENSMUSG00000035011 | 0.54880428 | 5.60373477 | 0.12545605 | 0.28718105 |
| ENSMUSG00000031703 | -0.5463236 | 6.26161008 | 0.12547328 | 0.28718105 |
| ENSMUSG00000053411 | 0.54414265 | 7.61896753 | 0.12549025 | 0.28718105 |
| ENSMUSG00000030498 | -0.6770986 | 1.10837426 | 0.1255399  | 0.28723749 |
| ENSMUSG00000100392 | 0.61334029 | 2.17721882 | 0.12567054 | 0.28747917 |

|                    |            |            |            |            |
|--------------------|------------|------------|------------|------------|
| ENSMUSG00000072109 | -0.5480325 | 5.60716483 | 0.12569783 | 0.28748439 |
| ENSMUSG00000049588 | -0.5515908 | 4.90813905 | 0.12575698 | 0.28756246 |
| ENSMUSG00000035365 | -0.6004274 | 2.25832382 | 0.12619821 | 0.288514   |
| ENSMUSG00000031357 | -0.5474308 | 5.55167694 | 0.12623572 | 0.28854236 |
| ENSMUSG00000029815 | -0.5685199 | 3.22646904 | 0.1262922  | 0.28861407 |
| ENSMUSG00000041926 | 0.54719568 | 5.59300389 | 0.12638168 | 0.28876011 |
| ENSMUSG00000006740 | -0.5423311 | 8.12963113 | 0.12640634 | 0.28876011 |
| ENSMUSG00000040899 | 0.54286714 | 7.37305088 | 0.12656261 | 0.28905965 |
| ENSMUSG00000022351 | 0.54980884 | 4.97159803 | 0.12674041 | 0.28940822 |
| ENSMUSG00000027569 | 0.54810942 | 5.22978861 | 0.12682443 | 0.28954257 |
| ENSMUSG00000056290 | 0.55090513 | 5.0737206  | 0.1268557  | 0.28955006 |
| ENSMUSG00000043671 | -0.5490485 | 4.80322199 | 0.12687809 | 0.28955006 |
| ENSMUSG00000059495 | -0.5448298 | 5.94646525 | 0.12691984 | 0.28956553 |
| ENSMUSG00000024948 | 0.5411639  | 8.77944265 | 0.12694369 | 0.28956553 |
| ENSMUSG00000020440 | 0.549289   | 4.98400546 | 0.12696044 | 0.28956553 |
| ENSMUSG00000024095 | 0.56608506 | 3.73043824 | 0.1269858  | 0.28956591 |
| ENSMUSG00000035125 | -0.5504517 | 4.70151477 | 0.12709035 | 0.28974683 |
| ENSMUSG00000022476 | 0.56088058 | 3.23966612 | 0.12729457 | 0.29015489 |
| ENSMUSG00000027189 | -0.5411247 | 7.89608221 | 0.12737981 | 0.29026088 |
| ENSMUSG00000015672 | -0.5562093 | 4.35322904 | 0.12739157 | 0.29026088 |
| ENSMUSG00000099083 | -0.5413031 | 7.40829116 | 0.12745252 | 0.29034219 |
| ENSMUSG00000069495 | -0.5418167 | 7.05506369 | 0.12758333 | 0.29050333 |
| ENSMUSG00000025544 | -0.5409842 | 7.68576945 | 0.12760496 | 0.29050333 |
| ENSMUSG00000003228 | 0.55228963 | 4.69967384 | 0.12760913 | 0.29050333 |
| ENSMUSG00000031389 | 0.54009769 | 8.89139276 | 0.12764722 | 0.29050333 |
| ENSMUSG00000031783 | 0.55031245 | 4.75199214 | 0.12765935 | 0.29050333 |
| ENSMUSG00000034424 | -0.5648339 | 3.31389081 | 0.12767489 | 0.29050333 |
| ENSMUSG00000021149 | -0.5416505 | 7.0530823  | 0.1277002  | 0.29050343 |
| ENSMUSG00000032320 | -0.5480282 | 5.10667002 | 0.12774921 | 0.29055742 |
| ENSMUSG00000037740 | 0.55697542 | 3.72894471 | 0.12784939 | 0.29072773 |
| ENSMUSG00000000568 | -0.5403553 | 7.83850156 | 0.1278956  | 0.29077531 |
| ENSMUSG00000028614 | -0.5525126 | 4.43865965 | 0.1279907  | 0.29093396 |
| ENSMUSG00000021361 | 0.54460118 | 5.78697785 | 0.12802219 | 0.29094802 |
| ENSMUSG00000060708 | -0.573205  | 3.02053032 | 0.12820739 | 0.29131131 |
| ENSMUSG00000040446 | -0.5504317 | 4.62209459 | 0.12842331 | 0.29174425 |
| ENSMUSG00000043510 | -0.5587785 | 3.6180242  | 0.12852209 | 0.29191098 |
| ENSMUSG00000028378 | 0.63863939 | 1.42620176 | 0.12858841 | 0.29198545 |
| ENSMUSG00000001211 | 0.54241579 | 6.18242204 | 0.12860569 | 0.29198545 |
| ENSMUSG00000062203 | -0.5399517 | 7.22178972 | 0.12868771 | 0.29211399 |
| ENSMUSG00000013662 | -0.5403203 | 6.97197891 | 0.12874238 | 0.29218039 |
| ENSMUSG00000060427 | -0.5433813 | 5.43633274 | 0.12892006 | 0.29252589 |
| ENSMUSG00000090164 | -0.5420657 | 6.31379607 | 0.12905483 | 0.29277388 |
| ENSMUSG00000000355 | -0.5451656 | 5.1730039  | 0.12910434 | 0.29282842 |

|                    |            |            |            |            |
|--------------------|------------|------------|------------|------------|
| ENSMUSG00000052752 | 0.53948363 | 6.97541082 | 0.12914944 | 0.29287292 |
| ENSMUSG00000019861 | -0.5404096 | 6.56186291 | 0.12919623 | 0.29292124 |
| ENSMUSG00000035620 | -0.5448086 | 5.16827626 | 0.12922628 | 0.2929316  |
| ENSMUSG00000030452 | -0.5424427 | 5.73014298 | 0.1293089  | 0.29306108 |
| ENSMUSG00000021244 | -0.5384992 | 7.48125022 | 0.12937987 | 0.29316411 |
| ENSMUSG00000031467 | -0.5541174 | 3.94331508 | 0.1294971  | 0.29337192 |
| ENSMUSG00000041650 | -0.5477192 | 4.56997208 | 0.12961742 | 0.29358665 |
| ENSMUSG00000047777 | 0.55522185 | 3.99610901 | 0.12965733 | 0.2936192  |
| ENSMUSG00000033386 | 0.56883892 | 3.22814869 | 0.1297373  | 0.29374242 |
| ENSMUSG00000021127 | -0.5368556 | 9.91716539 | 0.12976369 | 0.29374431 |
| ENSMUSG00000031697 | -0.546476  | 4.65147903 | 0.12986223 | 0.29384203 |
| ENSMUSG00000091780 | 0.63563207 | 1.35691524 | 0.12987719 | 0.29384203 |
| ENSMUSG00000001741 | 0.53701737 | 8.36008341 | 0.12991854 | 0.29384203 |
| ENSMUSG00000060288 | -0.5493596 | 4.5003994  | 0.12992013 | 0.29384203 |
| ENSMUSG00000027287 | -0.5401512 | 6.12280988 | 0.12993467 | 0.29384203 |
| ENSMUSG00000026778 | 0.54844887 | 4.49968347 | 0.13001452 | 0.29396478 |
| ENSMUSG00000090019 | 0.54233284 | 5.36966715 | 0.1302829  | 0.29451365 |
| ENSMUSG00000018574 | 0.54017261 | 5.80989583 | 0.13036906 | 0.29465049 |
| ENSMUSG00000020225 | -0.5418479 | 5.38345157 | 0.13048539 | 0.29479296 |
| ENSMUSG00000024966 | -0.5367782 | 8.31610964 | 0.13050896 | 0.29479296 |
| ENSMUSG00000005161 | 0.53848508 | 6.60484214 | 0.13050904 | 0.29479296 |
| ENSMUSG00000023967 | 0.54951262 | 4.09048726 | 0.13063935 | 0.29502935 |
| ENSMUSG00000006471 | 0.53873995 | 6.26138686 | 0.13074396 | 0.2951435  |
| ENSMUSG00000020629 | -0.5419298 | 5.39539591 | 0.13076543 | 0.2951435  |
| ENSMUSG00000039886 | 0.56699251 | 2.91536554 | 0.13079223 | 0.2951435  |
| ENSMUSG00000031585 | -0.5414137 | 5.46916156 | 0.1307926  | 0.2951435  |
| ENSMUSG00000037260 | 0.5438368  | 5.17646446 | 0.13083539 | 0.2951601  |
| ENSMUSG00000028156 | -0.5386138 | 6.3786135  | 0.13085132 | 0.2951601  |
| ENSMUSG00000043716 | -0.5351416 | 10.3694799 | 0.1309484  | 0.29532114 |
| ENSMUSG0000002205  | 0.53880219 | 5.8977443  | 0.13105547 | 0.2954799  |
| ENSMUSG00000032187 | 0.53716228 | 6.84787785 | 0.13107021 | 0.2954799  |
| ENSMUSG00000078570 | 0.66567944 | 1.06920989 | 0.1310977  | 0.29548393 |
| ENSMUSG00000097180 | -0.560194  | 3.29507357 | 0.13117617 | 0.29560283 |
| ENSMUSG00000037613 | 0.65342662 | 1.27994166 | 0.13128062 | 0.29578023 |
| ENSMUSG00000030823 | 0.60854948 | 2.22730245 | 0.13130704 | 0.29578177 |
| ENSMUSG00000069049 | -0.5383363 | 6.63025747 | 0.13139465 | 0.29589333 |
| ENSMUSG00000032577 | 0.54153982 | 5.19496823 | 0.13140804 | 0.29589333 |
| ENSMUSG00000079563 | 0.54489393 | 4.47043747 | 0.1316695  | 0.29637701 |
| ENSMUSG00000026150 | -0.5368515 | 6.49767959 | 0.13167442 | 0.29637701 |
| ENSMUSG00000027076 | 0.59902351 | 2.01000428 | 0.13174257 | 0.29647237 |
| ENSMUSG00000097715 | -0.5455813 | 4.2755603  | 0.13181624 | 0.2965801  |
| ENSMUSG00000066278 | -0.5409396 | 5.04049522 | 0.13184323 | 0.29658276 |
| ENSMUSG00000023940 | -0.5580626 | 3.35001499 | 0.13198868 | 0.29684108 |

|                    |            |            |            |            |
|--------------------|------------|------------|------------|------------|
| ENSMUSG00000022064 | -0.5449746 | 4.54555399 | 0.13200971 | 0.29684108 |
| ENSMUSG00000016559 | -0.5336207 | 9.83252392 | 0.13208551 | 0.29695343 |
| ENSMUSG00000026017 | -0.5470095 | 4.1480441  | 0.13214265 | 0.2970107  |
| ENSMUSG00000060073 | -0.5354733 | 6.87608993 | 0.13216266 | 0.2970107  |
| ENSMUSG00000036898 | -0.5411251 | 5.13060394 | 0.13221038 | 0.29701747 |
| ENSMUSG00000027722 | -0.5397265 | 5.47134395 | 0.13221735 | 0.29701747 |
| ENSMUSG00000059248 | 0.53651756 | 6.33161416 | 0.13229594 | 0.29713595 |
| ENSMUSG00000040820 | 0.54005233 | 5.39780394 | 0.13253977 | 0.29762545 |
| ENSMUSG00000024576 | -0.5329914 | 8.25385978 | 0.1329963  | 0.29859227 |
| ENSMUSG00000024889 | 0.54239966 | 4.25453895 | 0.13304437 | 0.29861892 |
| ENSMUSG00000028136 | -0.5346123 | 6.67251523 | 0.13306012 | 0.29861892 |
| ENSMUSG00000072694 | 0.55736505 | 3.462994   | 0.13324945 | 0.29898544 |
| ENSMUSG00000046808 | -0.53315   | 7.32725581 | 0.13338112 | 0.29922248 |
| ENSMUSG00000006728 | 0.53512737 | 6.17659267 | 0.13343155 | 0.29927719 |
| ENSMUSG00000020988 | -0.5508174 | 3.78084702 | 0.13346641 | 0.29929698 |
| ENSMUSG00000028229 | -0.5763342 | 2.37767237 | 0.13352381 | 0.2993673  |
| ENSMUSG00000047554 | -0.5378895 | 5.28390363 | 0.13371755 | 0.29971044 |
| ENSMUSG00000017861 | 0.55758535 | 3.55060446 | 0.133729   | 0.29971044 |
| ENSMUSG00000047213 | -0.53232   | 7.48043382 | 0.13384134 | 0.29989406 |
| ENSMUSG00000067365 | -0.5382684 | 5.22531149 | 0.13389018 | 0.29989406 |
| ENSMUSG00000021270 | -0.5309595 | 11.4179635 | 0.13389795 | 0.29989406 |
| ENSMUSG00000026019 | -0.5377296 | 5.32122131 | 0.13391653 | 0.29989406 |
| ENSMUSG00000030060 | -0.5364757 | 5.56414262 | 0.13397835 | 0.29989406 |
| ENSMUSG00000042404 | 0.53209746 | 7.58841514 | 0.13401899 | 0.29989406 |
| ENSMUSG00000022285 | -0.5310724 | 9.46101228 | 0.13402173 | 0.29989406 |
| ENSMUSG00000030619 | -0.5338231 | 6.41340667 | 0.13404466 | 0.29989406 |
| ENSMUSG00000041836 | 0.53885991 | 5.2302049  | 0.13404573 | 0.29989406 |
| ENSMUSG00000030357 | 0.5313175  | 6.87429032 | 0.13416119 | 0.30008692 |
| ENSMUSG00000029767 | -0.5324545 | 7.11031977 | 0.13418644 | 0.30008692 |
| ENSMUSG00000003348 | 0.53183923 | 6.96584611 | 0.13422304 | 0.30008692 |
| ENSMUSG00000032405 | -0.5329387 | 6.68760144 | 0.13423636 | 0.30008692 |
| ENSMUSG00000032782 | 0.54448089 | 4.34900896 | 0.13431863 | 0.30021246 |
| ENSMUSG00000040713 | 0.53405342 | 6.22794245 | 0.13443353 | 0.30036807 |
| ENSMUSG00000039100 | -0.5317538 | 7.25743552 | 0.13449044 | 0.30036807 |
| ENSMUSG00000050379 | -0.530972  | 8.14508298 | 0.13449626 | 0.30036807 |
| ENSMUSG00000064339 | -0.530227  | 10.3316987 | 0.13450124 | 0.30036807 |
| ENSMUSG00000036977 | -0.5509262 | 3.82658816 | 0.13451891 | 0.30036807 |
| ENSMUSG00000025825 | 0.54117901 | 4.72657589 | 0.13466284 | 0.30063106 |
| ENSMUSG00000024563 | -0.5329582 | 6.44900914 | 0.13471985 | 0.30069994 |
| ENSMUSG00000060860 | 0.53498737 | 5.3978714  | 0.13480635 | 0.30080394 |
| ENSMUSG00000020532 | -0.532788  | 6.26131039 | 0.13481878 | 0.30080394 |
| ENSMUSG00000030264 | -0.5330469 | 6.24991808 | 0.13487959 | 0.3008812  |
| ENSMUSG00000030057 | -0.5299945 | 8.8703594  | 0.13492252 | 0.30089716 |

|                    |            |            |            |            |
|--------------------|------------|------------|------------|------------|
| ENSMUSG00000021484 | 0.53210597 | 6.57756401 | 0.13493909 | 0.30089716 |
| ENSMUSG00000022770 | -0.5312496 | 7.14337956 | 0.13497831 | 0.30091373 |
| ENSMUSG00000024871 | 0.61410495 | 1.74209446 | 0.1350116  | 0.30091373 |
| ENSMUSG00000019373 | -0.5333024 | 5.99754629 | 0.13502505 | 0.30091373 |
| ENSMUSG00000033161 | 0.5302542  | 7.8501346  | 0.13512641 | 0.30108123 |
| ENSMUSG00000043241 | -0.530875  | 7.16033372 | 0.13524334 | 0.30128337 |
| ENSMUSG00000004500 | 0.56116643 | 2.73960996 | 0.13527527 | 0.3012961  |
| ENSMUSG00000022641 | -0.5309465 | 7.04832479 | 0.1353309  | 0.30136163 |
| ENSMUSG00000001156 | 0.53216149 | 6.4072969  | 0.1353681  | 0.30138607 |
| ENSMUSG00000022772 | -0.5328284 | 6.02836474 | 0.13553166 | 0.30164351 |
| ENSMUSG00000026683 | -0.5504949 | 3.84555281 | 0.13553621 | 0.30164351 |
| ENSMUSG00000024387 | 0.53261687 | 5.90029916 | 0.13563485 | 0.30180461 |
| ENSMUSG00000041303 | -0.5352265 | 5.21786902 | 0.13570686 | 0.30190641 |
| ENSMUSG00000027652 | -0.5294619 | 7.83580727 | 0.13576102 | 0.30196844 |
| ENSMUSG00000031197 | -0.5318364 | 6.09521293 | 0.13606611 | 0.30258851 |
| ENSMUSG00000041607 | 0.53118384 | 6.47526166 | 0.13610795 | 0.30262299 |
| ENSMUSG00000094051 | 0.58633377 | 2.28631119 | 0.13630105 | 0.3029411  |
| ENSMUSG00000022831 | 0.52829733 | 8.28347969 | 0.13630725 | 0.3029411  |
| ENSMUSG00000028217 | -0.5335884 | 5.62209395 | 0.13633008 | 0.3029411  |
| ENSMUSG00000021635 | -0.5323328 | 5.84706411 | 0.13636835 | 0.30296757 |
| ENSMUSG00000002107 | -0.5282333 | 8.36034708 | 0.1363969  | 0.30297243 |
| ENSMUSG00000079641 | -0.5281341 | 8.48077951 | 0.13647037 | 0.30302336 |
| ENSMUSG00000015839 | -0.5294259 | 6.84596219 | 0.13647255 | 0.30302336 |
| ENSMUSG00000071748 | -0.5351957 | 5.067853   | 0.13656143 | 0.30316216 |
| ENSMUSG00000028261 | -0.5382833 | 4.41075632 | 0.13663079 | 0.30325756 |
| ENSMUSG00000040584 | -0.5425649 | 4.13787102 | 0.13670652 | 0.30336707 |
| ENSMUSG00000025935 | -0.5282635 | 7.71983603 | 0.13676585 | 0.30344016 |
| ENSMUSG00000021624 | -0.5273904 | 8.6776334  | 0.13685408 | 0.3035773  |
| ENSMUSG00000022895 | 0.52858385 | 7.08661035 | 0.13704205 | 0.30390067 |
| ENSMUSG00000017677 | -0.5274943 | 7.94827281 | 0.13705272 | 0.30390067 |
| ENSMUSG00000040302 | -0.5346889 | 4.99414734 | 0.1370959  | 0.30393778 |
| ENSMUSG00000043602 | 0.57826729 | 2.40731666 | 0.13713561 | 0.30396719 |
| ENSMUSG00000029428 | 0.5369044  | 4.68149518 | 0.13719194 | 0.30403342 |
| ENSMUSG00000057561 | -0.5304958 | 5.97812252 | 0.13729982 | 0.30421385 |
| ENSMUSG00000085793 | -0.5366768 | 4.76730008 | 0.13747211 | 0.30453689 |
| ENSMUSG00000026696 | -0.531946  | 5.43260049 | 0.13753696 | 0.30462184 |
| ENSMUSG00000005312 | -0.5273905 | 7.61518116 | 0.13758829 | 0.30467683 |
| ENSMUSG00000023452 | 0.54306032 | 4.04543767 | 0.13762795 | 0.3047032  |
| ENSMUSG00000024085 | -0.5269502 | 7.685871   | 0.13765322 | 0.3047032  |
| ENSMUSG00000029410 | 0.70521228 | 0.72775383 | 0.13774801 | 0.30485133 |
| ENSMUSG00000084846 | -0.5602937 | 2.75137942 | 0.13777318 | 0.30485133 |
| ENSMUSG00000035232 | -0.533669  | 5.05330425 | 0.1378044  | 0.30486174 |
| ENSMUSG00000040782 | -0.5284383 | 6.52930192 | 0.13783302 | 0.30486637 |

|                    |            |            |            |            |
|--------------------|------------|------------|------------|------------|
| ENSMUSG00000057246 | -0.544045  | 3.8656174  | 0.13788297 | 0.30491818 |
| ENSMUSG00000039994 | 0.54461248 | 4.09974001 | 0.13793913 | 0.3049837  |
| ENSMUSG00000039515 | 0.52720603 | 6.9350385  | 0.1381172  | 0.30531869 |
| ENSMUSG00000028057 | 0.53590604 | 4.55898241 | 0.13820241 | 0.30544609 |
| ENSMUSG00000035517 | 0.53103271 | 5.60915571 | 0.13822797 | 0.30544609 |
| ENSMUSG00000032009 | -0.5271292 | 6.86782329 | 0.1383495  | 0.30565588 |
| ENSMUSG00000041958 | 0.53000269 | 5.62625672 | 0.13837661 | 0.30565702 |
| ENSMUSG00000026708 | -0.5404924 | 4.07938769 | 0.13842209 | 0.30568447 |
| ENSMUSG00000041763 | -0.5264366 | 7.25651267 | 0.13844222 | 0.30568447 |
| ENSMUSG00000051451 | -0.5281803 | 6.13533183 | 0.13853243 | 0.3058249  |
| ENSMUSG00000053477 | -0.5259347 | 7.35779329 | 0.13866815 | 0.30603356 |
| ENSMUSG00000004748 | 0.60811884 | 1.14116899 | 0.13868019 | 0.30603356 |
| ENSMUSG00000015937 | 0.52597493 | 7.16867003 | 0.13877383 | 0.30618143 |
| ENSMUSG00000060475 | -0.5257182 | 7.38758709 | 0.13889072 | 0.30637603 |
| ENSMUSG00000021831 | -0.5285306 | 5.91104758 | 0.13891534 | 0.30637603 |
| ENSMUSG00000040943 | -0.5263717 | 6.5715838  | 0.13895789 | 0.30641107 |
| ENSMUSG00000027751 | -0.5254722 | 7.24391126 | 0.13912107 | 0.30667222 |
| ENSMUSG00000071528 | -0.5358637 | 4.46173934 | 0.13915442 | 0.30667222 |
| ENSMUSG00000020982 | -0.5254276 | 7.27240288 | 0.13915636 | 0.30667222 |
| ENSMUSG00000044629 | -0.5455667 | 3.45299651 | 0.13927358 | 0.30682033 |
| ENSMUSG00000046722 | 0.52448632 | 7.95780161 | 0.13927694 | 0.30682033 |
| ENSMUSG00000046791 | 0.54157356 | 3.05196842 | 0.13932049 | 0.30685744 |
| ENSMUSG00000035441 | 0.55898229 | 3.20810894 | 0.13936214 | 0.30689039 |
| ENSMUSG00000075256 | -0.5679043 | 2.51344295 | 0.13952311 | 0.30718601 |
| ENSMUSG00000058093 | -0.5315124 | 5.0081317  | 0.13974475 | 0.30761507 |
| ENSMUSG00000028249 | -0.5239662 | 7.84502343 | 0.13982467 | 0.30770842 |
| ENSMUSG00000074733 | -0.5270545 | 5.90760125 | 0.13984069 | 0.30770842 |
| ENSMUSG00000054027 | -0.5298467 | 5.16426269 | 0.13987625 | 0.30772775 |
| ENSMUSG00000053870 | -0.5297714 | 5.25715729 | 0.14004355 | 0.30799922 |
| ENSMUSG00000057137 | 0.54770346 | 3.74966356 | 0.14005323 | 0.30799922 |
| ENSMUSG00000027193 | -0.5236909 | 7.83457222 | 0.1401271  | 0.30810273 |
| ENSMUSG00000041895 | 0.57932973 | 2.43747934 | 0.14023865 | 0.30827098 |
| ENSMUSG00000037343 | -0.5255047 | 6.32927001 | 0.14025726 | 0.30827098 |
| ENSMUSG00000034663 | -0.5228913 | 8.42005639 | 0.14034282 | 0.30840007 |
| ENSMUSG00000020530 | -0.5232069 | 7.62900385 | 0.14055239 | 0.30877211 |
| ENSMUSG00000062014 | -0.52346   | 7.34093945 | 0.1405773  | 0.30877211 |
| ENSMUSG00000029203 | -0.5264004 | 5.90293236 | 0.14059271 | 0.30877211 |
| ENSMUSG00000096917 | -0.6298588 | 1.22156998 | 0.14071562 | 0.30894843 |
| ENSMUSG00000078580 | 0.5746255  | 2.42038466 | 0.14075363 | 0.30894843 |
| ENSMUSG00000024208 | 0.57226277 | 2.42154737 | 0.14075363 | 0.30894843 |
| ENSMUSG00000019876 | -0.5262177 | 5.71077207 | 0.14097504 | 0.30936042 |
| ENSMUSG00000023349 | 0.53575127 | 4.4398843  | 0.14099515 | 0.30936042 |
| ENSMUSG00000020305 | -0.5315198 | 4.75837159 | 0.14103844 | 0.30939635 |

|                    |            |            |            |            |
|--------------------|------------|------------|------------|------------|
| ENSMUSG00000030678 | 0.52309936 | 6.72095264 | 0.14122266 | 0.30973947 |
| ENSMUSG00000021832 | -0.5237254 | 6.59132261 | 0.14129395 | 0.30973947 |
| ENSMUSG00000031732 | -0.5249586 | 5.98023793 | 0.14129732 | 0.30973947 |
| ENSMUSG00000024037 | 0.5363577  | 4.2471571  | 0.14130263 | 0.30973947 |
| ENSMUSG00000041229 | -0.5229192 | 7.01712045 | 0.1413312  | 0.30974302 |
| ENSMUSG00000079442 | 0.52847912 | 4.99494365 | 0.14137881 | 0.3097883  |
| ENSMUSG00000038733 | -0.5211582 | 8.74545975 | 0.14152816 | 0.31005646 |
| ENSMUSG00000033352 | -0.523584  | 6.39841571 | 0.14155781 | 0.31006231 |
| ENSMUSG00000085028 | 0.53061246 | 4.65083483 | 0.14169012 | 0.31029299 |
| ENSMUSG00000031479 | -0.5247644 | 5.85837605 | 0.14174973 | 0.3103644  |
| ENSMUSG00000026480 | 0.52183861 | 7.66039276 | 0.14180708 | 0.31043084 |
| ENSMUSG00000030177 | -0.5277889 | 5.1339139  | 0.14186455 | 0.31049753 |
| ENSMUSG00000022901 | -0.5228075 | 6.44974498 | 0.14190353 | 0.31050062 |
| ENSMUSG00000016409 | -0.5257076 | 5.62093392 | 0.14191999 | 0.31050062 |
| ENSMUSG00000036002 | 0.52999047 | 4.92330862 | 0.14204981 | 0.3107255  |
| ENSMUSG00000020630 | 0.53792102 | 3.634534   | 0.14216777 | 0.31085883 |
| ENSMUSG00000002550 | 0.52451158 | 5.66321828 | 0.14218025 | 0.31085883 |
| ENSMUSG00000034158 | -0.523848  | 5.91545131 | 0.14219189 | 0.31085883 |
| ENSMUSG00000095589 | -0.5418373 | 3.59538231 | 0.14234556 | 0.3111034  |
| ENSMUSG00000042133 | -0.5217226 | 6.9663847  | 0.14235788 | 0.3111034  |
| ENSMUSG00000018189 | -0.5269813 | 5.14275702 | 0.14261406 | 0.31160399 |
| ENSMUSG00000030105 | -0.5217224 | 6.62967019 | 0.14267913 | 0.31168692 |
| ENSMUSG00000021557 | -0.5222284 | 6.36161833 | 0.14271762 | 0.31171178 |
| ENSMUSG00000044149 | -0.5304349 | 4.60145372 | 0.14277657 | 0.31178129 |
| ENSMUSG00000021886 | -0.5229428 | 5.86029521 | 0.14294177 | 0.31208275 |
| ENSMUSG00000086008 | -0.5940455 | 1.66120363 | 0.14304897 | 0.31225748 |
| ENSMUSG00000098021 | 0.55557576 | 0.98133665 | 0.14315214 | 0.31242337 |
| ENSMUSG00000019820 | -0.5203626 | 6.82927964 | 0.1431919  | 0.31245082 |
| ENSMUSG00000020601 | 0.52158594 | 6.54146677 | 0.14335213 | 0.31272529 |
| ENSMUSG00000079427 | -0.534239  | 3.56139009 | 0.1433721  | 0.31272529 |
| ENSMUSG00000031901 | 0.53579728 | 4.02999394 | 0.14355278 | 0.31305998 |
| ENSMUSG00000096670 | 0.61483708 | 1.86092813 | 0.14368651 | 0.31328303 |
| ENSMUSG00000004535 | -0.518388  | 8.56278703 | 0.14375992 | 0.31328303 |
| ENSMUSG00000054894 | -0.5610882 | 2.66705935 | 0.14375994 | 0.31328303 |
| ENSMUSG00000038967 | 0.55590732 | 2.91227231 | 0.14377375 | 0.31328303 |
| ENSMUSG00000035933 | -0.5217929 | 5.89005116 | 0.14381486 | 0.31328303 |
| ENSMUSG00000025050 | -0.5273544 | 4.6504993  | 0.14381858 | 0.31328303 |
| ENSMUSG00000033728 | 0.54414572 | 3.46645605 | 0.144047   | 0.31372116 |
| ENSMUSG00000089682 | 0.53035574 | 4.26652592 | 0.14413142 | 0.31378646 |
| ENSMUSG00000040842 | 0.52129981 | 5.9508223  | 0.1441625  | 0.31378646 |
| ENSMUSG00000030423 | -0.5256815 | 4.83080582 | 0.1442129  | 0.31378646 |
| ENSMUSG00000041238 | -0.5223108 | 5.5610618  | 0.14423826 | 0.31378646 |
| ENSMUSG00000049922 | 0.51990384 | 5.84929056 | 0.14425368 | 0.31378646 |



|                    |            |            |            |            |
|--------------------|------------|------------|------------|------------|
| ENSMUSG00000040188 | 0.52097702 | 6.09700228 | 0.1442593  | 0.31378646 |
| ENSMUSG00000043090 | -0.5204842 | 6.22521485 | 0.14426807 | 0.31378646 |
| ENSMUSG00000026116 | -0.5182109 | 7.57939643 | 0.14429586 | 0.31378754 |
| ENSMUSG00000031555 | -0.5216957 | 5.77632096 | 0.14439212 | 0.31393746 |
| ENSMUSG00000000001 | -0.5181351 | 7.67254009 | 0.14446726 | 0.31398305 |
| ENSMUSG00000035623 | -0.5183042 | 7.42081772 | 0.14446771 | 0.31398305 |
| ENSMUSG00000031696 | -0.5181262 | 7.34734696 | 0.14465188 | 0.31432389 |
| ENSMUSG00000028228 | -0.5194461 | 6.3737983  | 0.14484963 | 0.3146941  |
| ENSMUSG00000090946 | 0.52077267 | 6.01508407 | 0.14490712 | 0.31475951 |
| ENSMUSG00000028291 | -0.520853  | 5.84308314 | 0.14518279 | 0.31521878 |
| ENSMUSG00000025016 | -0.5166975 | 8.19851587 | 0.14519627 | 0.31521878 |
| ENSMUSG00000034243 | -0.5174361 | 7.1179047  | 0.14520082 | 0.31521878 |
| ENSMUSG00000030327 | -0.5192595 | 6.17240552 | 0.14534636 | 0.31547516 |
| ENSMUSG00000098148 | -0.5297062 | 4.01242797 | 0.14538747 | 0.31550481 |
| ENSMUSG00000001829 | 0.53367997 | 3.8516439  | 0.14550879 | 0.3156261  |
| ENSMUSG00000039783 | -0.5165708 | 7.83219033 | 0.14551811 | 0.3156261  |
| ENSMUSG00000052428 | -0.5228049 | 5.06755887 | 0.14552574 | 0.3156261  |
| ENSMUSG00000025423 | -0.5198197 | 5.81687792 | 0.14562442 | 0.31578056 |
| ENSMUSG00000058076 | 0.52260753 | 5.14981583 | 0.1456667  | 0.31581265 |
| ENSMUSG00000032199 | -0.517662  | 6.70598189 | 0.14570057 | 0.31582222 |
| ENSMUSG00000078619 | 0.51689105 | 7.10018302 | 0.14572606 | 0.31582222 |
| ENSMUSG00000095315 | -0.5913376 | 1.56865047 | 0.14580299 | 0.31592939 |
| ENSMUSG00000097392 | -0.5273154 | 4.34097229 | 0.14589617 | 0.3160717  |
| ENSMUSG00000024055 | 0.53004367 | 4.70451486 | 0.14596849 | 0.31616879 |
| ENSMUSG00000028030 | -0.5214315 | 5.28358794 | 0.14602636 | 0.31623455 |
| ENSMUSG00000074305 | -0.5187411 | 5.71839    | 0.14608272 | 0.31623928 |
| ENSMUSG00000061882 | -0.539896  | 3.17796575 | 0.14608357 | 0.31623928 |
| ENSMUSG00000030643 | -0.518267  | 6.11681648 | 0.14614135 | 0.3163048  |
| ENSMUSG00000039328 | 0.52386124 | 5.05020466 | 0.14628987 | 0.31656666 |
| ENSMUSG00000087497 | -0.5894679 | 1.8632482  | 0.14633171 | 0.3165976  |
| ENSMUSG00000024068 | -0.5189823 | 5.88245718 | 0.14639914 | 0.31666222 |
| ENSMUSG00000074129 | 0.51460785 | 9.33645136 | 0.14644385 | 0.31666222 |
| ENSMUSG00000039585 | -0.5166738 | 6.30355028 | 0.14646677 | 0.31666222 |
| ENSMUSG00000039501 | 0.51640613 | 6.80088838 | 0.14647177 | 0.31666222 |
| ENSMUSG00000035064 | 0.52812405 | 4.44565175 | 0.14654063 | 0.31675152 |
| ENSMUSG00000028107 | 0.51977088 | 5.49917754 | 0.14674642 | 0.3171367  |
| ENSMUSG00000049091 | 0.52648723 | 4.14433458 | 0.1467983  | 0.31718919 |
| ENSMUSG00000027330 | 0.51571739 | 6.94617366 | 0.14698846 | 0.31750555 |
| ENSMUSG00000039737 | 0.53369697 | 3.62721112 | 0.14699996 | 0.31750555 |
| ENSMUSG00000021639 | -0.5209281 | 5.15691233 | 0.14708254 | 0.31759487 |
| ENSMUSG00000019897 | -0.5174126 | 5.8678211  | 0.14710602 | 0.31759487 |
| ENSMUSG00000021807 | -0.5164657 | 6.43254696 | 0.1471242  | 0.31759487 |
| ENSMUSG00000059475 | -0.5178749 | 5.81834177 | 0.14718328 | 0.31766275 |

|                    |            |            |            |            |
|--------------------|------------|------------|------------|------------|
| ENSMUSG00000028609 | -0.5189274 | 5.5787829  | 0.14722259 | 0.31768794 |
| ENSMUSG00000029918 | -0.548495  | 3.00779061 | 0.14725131 | 0.31769028 |
| ENSMUSG00000024908 | -0.5142092 | 7.76202264 | 0.14731448 | 0.31776693 |
| ENSMUSG00000027361 | -0.5174279 | 5.83909536 | 0.14751463 | 0.31813895 |
| ENSMUSG00000024347 | 0.60149655 | 1.42935924 | 0.14766641 | 0.31830202 |
| ENSMUSG00000011306 | 0.5204567  | 5.14470543 | 0.1476886  | 0.31830202 |
| ENSMUSG00000044060 | -0.5235456 | 4.38260927 | 0.14769067 | 0.31830202 |
| ENSMUSG00000040061 | 0.51413463 | 7.4220133  | 0.147701   | 0.31830202 |
| ENSMUSG00000040128 | -0.5135556 | 7.87798177 | 0.14776989 | 0.3183908  |
| ENSMUSG00000041966 | -0.5171739 | 5.72438338 | 0.14787936 | 0.31856696 |
| ENSMUSG00000022110 | -0.5168222 | 5.88160901 | 0.14794632 | 0.31865147 |
| ENSMUSG00000087543 | 0.57003813 | 2.50514282 | 0.14797558 | 0.31865398 |
| ENSMUSG00000096498 | 0.56112571 | 2.44565282 | 0.14800292 | 0.31865398 |
| ENSMUSG00000020738 | -0.5139461 | 7.33654981 | 0.14807151 | 0.31874196 |
| ENSMUSG00000022051 | -0.514364  | 6.79165795 | 0.14816349 | 0.31888023 |
| ENSMUSG00000098112 | 0.51369643 | 7.19790749 | 0.14821327 | 0.31892174 |
| ENSMUSG00000023927 | -0.5129683 | 7.92552175 | 0.14823827 | 0.31892174 |
| ENSMUSG00000026792 | 0.53377531 | 3.66317254 | 0.14831943 | 0.31903664 |
| ENSMUSG00000027556 | 0.52058543 | 5.0821161  | 0.14853008 | 0.31942998 |
| ENSMUSG00000063480 | -0.5147109 | 6.36809606 | 0.14861195 | 0.31953753 |
| ENSMUSG00000028675 | -0.5126763 | 7.73904711 | 0.14863568 | 0.31953753 |
| ENSMUSG00000063894 | -0.5169193 | 5.28949161 | 0.14868226 | 0.31957788 |
| ENSMUSG00000048521 | 0.57916755 | 2.31217644 | 0.14872424 | 0.31960837 |
| ENSMUSG00000028232 | -0.5166775 | 5.50035135 | 0.1489504  | 0.31997495 |
| ENSMUSG00000027951 | 0.51210514 | 7.7858584  | 0.14897062 | 0.31997495 |
| ENSMUSG00000041064 | 0.60628806 | 1.87736307 | 0.14897834 | 0.31997495 |
| ENSMUSG00000068566 | 0.51278462 | 7.25301884 | 0.14929055 | 0.32055862 |
| ENSMUSG00000024695 | -0.5116436 | 7.93318832 | 0.14932009 | 0.32055862 |
| ENSMUSG00000076609 | -0.5106621 | 11.1372151 | 0.14933374 | 0.32055862 |
| ENSMUSG00000023926 | -0.5159151 | 5.88500342 | 0.1494243  | 0.32063481 |
| ENSMUSG00000062006 | 0.51124059 | 8.18474877 | 0.14942503 | 0.32063481 |
| ENSMUSG00000031133 | -0.5111097 | 8.41598558 | 0.14950286 | 0.32070912 |
| ENSMUSG00000028032 | 0.52616273 | 4.22204974 | 0.14951546 | 0.32070912 |
| ENSMUSG00000045917 | 0.52248708 | 4.58716929 | 0.14964456 | 0.32089762 |
| ENSMUSG00000029221 | -0.5123652 | 6.84448477 | 0.14965917 | 0.32089762 |
| ENSMUSG00000090841 | 0.51143522 | 7.30322713 | 0.14970786 | 0.32094215 |
| ENSMUSG00000006362 | 0.5208512  | 4.90317102 | 0.14981942 | 0.32100404 |
| ENSMUSG00000038299 | -0.5133606 | 6.24085871 | 0.14989361 | 0.32100404 |
| ENSMUSG00000037341 | -0.5122276 | 6.72617693 | 0.14990817 | 0.32100404 |
| ENSMUSG00000051224 | -0.5234843 | 4.39612607 | 0.14995252 | 0.32100404 |
| ENSMUSG00000032481 | -0.5120317 | 6.86707422 | 0.14998018 | 0.32100404 |
| ENSMUSG00000038268 | -0.5220068 | 4.56323513 | 0.14998475 | 0.32100404 |
| ENSMUSG00000061032 | 0.51141489 | 7.0498914  | 0.15000545 | 0.32100404 |

|                    |            |            |            |            |
|--------------------|------------|------------|------------|------------|
| ENSMUSG00000074221 | -0.5154518 | 5.43724673 | 0.15000553 | 0.32100404 |
| ENSMUSG00000033467 | 0.64686458 | 1.34845955 | 0.15001598 | 0.32100404 |
| ENSMUSG00000039410 | 0.52943254 | 1.38584097 | 0.15001598 | 0.32100404 |
| ENSMUSG00000019792 | -0.5291499 | 3.89028369 | 0.15009766 | 0.32111905 |
| ENSMUSG00000036853 | -0.524041  | 4.32129463 | 0.15014913 | 0.32113781 |
| ENSMUSG00000039361 | -0.5101521 | 8.52373217 | 0.15017288 | 0.32113781 |
| ENSMUSG00000029253 | -0.5154945 | 5.42165444 | 0.15019025 | 0.32113781 |
| ENSMUSG00000034127 | -0.5393838 | 3.37792538 | 0.15034628 | 0.32130034 |
| ENSMUSG00000043008 | -0.5105757 | 7.47527849 | 0.1504012  | 0.32130034 |
| ENSMUSG00000028578 | -0.5253645 | 3.86243164 | 0.15040381 | 0.32130034 |
| ENSMUSG00000029310 | 0.5217893  | 4.46839438 | 0.15040441 | 0.32130034 |
| ENSMUSG00000022095 | 0.51672937 | 5.21267717 | 0.15040602 | 0.32130034 |
| ENSMUSG00000019979 | -0.5126196 | 6.18424676 | 0.15045108 | 0.32133688 |
| ENSMUSG00000031400 | 0.51239066 | 6.23515808 | 0.15048385 | 0.32134717 |
| ENSMUSG00000040586 | -0.5151143 | 5.40178893 | 0.15051999 | 0.32136465 |
| ENSMUSG00000061132 | -0.5096568 | 8.49109556 | 0.1505755  | 0.32139236 |
| ENSMUSG00000050714 | -0.5267526 | 3.79879508 | 0.15058888 | 0.32139236 |
| ENSMUSG00000032028 | -0.5112641 | 6.6425358  | 0.15080553 | 0.32176044 |
| ENSMUSG00000025613 | -0.5095024 | 8.43602037 | 0.15082607 | 0.32176044 |
| ENSMUSG00000025815 | -0.5437519 | 2.52327943 | 0.15084533 | 0.32176044 |
| ENSMUSG00000071533 | -0.5110399 | 6.75363186 | 0.15093367 | 0.32183213 |
| ENSMUSG00000038241 | 0.512576   | 6.22310373 | 0.15093493 | 0.32183213 |
| ENSMUSG00000021418 | -0.5506472 | 2.46743058 | 0.15098019 | 0.32186894 |
| ENSMUSG00000020516 | -0.5109139 | 6.64640681 | 0.15106945 | 0.3219995  |
| ENSMUSG00000037553 | 0.51012507 | 6.97601607 | 0.15116977 | 0.32215359 |
| ENSMUSG00000073542 | -0.5173302 | 4.68109015 | 0.15130714 | 0.32235124 |
| ENSMUSG00000072915 | -0.528933  | 3.38144471 | 0.1513186  | 0.32235124 |
| ENSMUSG00000015950 | 0.50884795 | 8.30034815 | 0.15135293 | 0.32236463 |
| ENSMUSG00000027809 | -0.5132497 | 5.51447855 | 0.15167885 | 0.32298335 |
| ENSMUSG00000028540 | 0.52559647 | 3.83813211 | 0.15169962 | 0.32298335 |
| ENSMUSG00000028822 | 0.51100014 | 6.08446374 | 0.15175599 | 0.32304353 |
| ENSMUSG00000010554 | -0.5112366 | 6.09963242 | 0.1519351  | 0.32336493 |
| ENSMUSG00000037814 | -0.5176156 | 4.7325769  | 0.15230771 | 0.32409794 |
| ENSMUSG00000023980 | 0.51148991 | 5.40507138 | 0.15236178 | 0.32411838 |
| ENSMUSG00000005370 | -0.5097927 | 6.57452574 | 0.15237371 | 0.32411838 |
| ENSMUSG00000022951 | 0.53539056 | 3.27633871 | 0.15240253 | 0.32411971 |
| ENSMUSG00000028945 | -0.5117344 | 5.63537064 | 0.15258497 | 0.3244205  |
| ENSMUSG00000033703 | 0.52860037 | 3.45890115 | 0.15264863 | 0.3244205  |
| ENSMUSG00000031079 | -0.6177909 | 1.12480316 | 0.15267655 | 0.3244205  |
| ENSMUSG00000070501 | -0.5105204 | 5.96580315 | 0.15268215 | 0.3244205  |
| ENSMUSG00000039298 | -0.5087198 | 6.76229602 | 0.15268507 | 0.3244205  |
| ENSMUSG00000021764 | -0.5136741 | 5.13406694 | 0.15273048 | 0.324457   |
| ENSMUSG00000024072 | -0.5102597 | 6.03930792 | 0.1527644  | 0.32445824 |

|                    |            |            |            |            |
|--------------------|------------|------------|------------|------------|
| ENSMUSG00000021546 | -0.506554  | 9.61619915 | 0.15278751 | 0.32445824 |
| ENSMUSG00000047694 | -0.5109005 | 5.73356996 | 0.15282849 | 0.32448531 |
| ENSMUSG00000036188 | -0.5153623 | 4.71948363 | 0.15289705 | 0.3245309  |
| ENSMUSG00000043336 | -0.5065497 | 9.17663206 | 0.15290792 | 0.3245309  |
| ENSMUSG00000032349 | -0.5085414 | 6.93283367 | 0.15294847 | 0.3245309  |
| ENSMUSG00000025199 | -0.5073431 | 7.55027293 | 0.15300245 | 0.3245309  |
| ENSMUSG00000020593 | 0.51750399 | 4.4830737  | 0.15301254 | 0.3245309  |
| ENSMUSG00000049409 | 0.760103   | 0.38121841 | 0.15303069 | 0.3245309  |
| ENSMUSG00000072294 | -0.5661647 | 1.98804103 | 0.15304759 | 0.3245309  |
| ENSMUSG00000073468 | -0.5097864 | 5.86606757 | 0.15315611 | 0.32465389 |
| ENSMUSG00000022801 | -0.5077322 | 6.92640333 | 0.15316208 | 0.32465389 |
| ENSMUSG00000022255 | -0.5067059 | 7.92319858 | 0.1532565  | 0.32479415 |
| ENSMUSG00000049659 | -0.5066426 | 7.74687807 | 0.15342294 | 0.32498113 |
| ENSMUSG00000015189 | -0.5097308 | 5.91983068 | 0.15342813 | 0.32498113 |
| ENSMUSG00000015757 | -0.5074367 | 6.99990604 | 0.15342954 | 0.32498113 |
| ENSMUSG00000029089 | -0.528143  | 3.47749063 | 0.1537928  | 0.32569054 |
| ENSMUSG00000041236 | -0.5069713 | 6.95240912 | 0.15386613 | 0.32578581 |
| ENSMUSG00000062397 | -0.5063576 | 7.53906373 | 0.15392109 | 0.32584216 |
| ENSMUSG00000028896 | 0.51563483 | 4.40906535 | 0.15402795 | 0.32600834 |
| ENSMUSG00000005225 | 0.5253844  | 3.73806997 | 0.15415321 | 0.32621339 |
| ENSMUSG00000049493 | 0.68609166 | 0.77115012 | 0.15421915 | 0.32629286 |
| ENSMUSG00000033059 | 0.50702021 | 6.40073436 | 0.15427845 | 0.32633629 |
| ENSMUSG00000019782 | -0.5134914 | 4.93576282 | 0.15430565 | 0.32633629 |
| ENSMUSG00000016308 | -0.511536  | 5.18733005 | 0.1543268  | 0.32633629 |
| ENSMUSG00000035778 | -0.5055656 | 7.78512442 | 0.15435323 | 0.32633629 |
| ENSMUSG00000064284 | 0.54763985 | 2.39955335 | 0.15440641 | 0.32638869 |
| ENSMUSG00000054823 | -0.5048992 | 8.38710673 | 0.1544607  | 0.32641809 |
| ENSMUSG00000076533 | -0.6047103 | 1.53800749 | 0.15447711 | 0.32641809 |
| ENSMUSG00000012422 | -0.5084629 | 5.9118606  | 0.15454053 | 0.32648538 |
| ENSMUSG00000029449 | 0.50502101 | 6.67425103 | 0.15456576 | 0.32648538 |
| ENSMUSG00000021948 | 0.5046463  | 8.50361238 | 0.15464381 | 0.32659022 |
| ENSMUSG00000056055 | -0.5558534 | 1.42096815 | 0.15480342 | 0.32686725 |
| ENSMUSG00000068744 | 0.6023783  | 1.34096861 | 0.15513393 | 0.3274221  |
| ENSMUSG00000053289 | -0.5068249 | 6.25852045 | 0.15513495 | 0.3274221  |
| ENSMUSG00000031422 | -0.5049835 | 7.25019378 | 0.15515165 | 0.3274221  |
| ENSMUSG00000028798 | 0.50564888 | 6.68908709 | 0.15531045 | 0.32766401 |
| ENSMUSG00000033906 | 0.60447595 | 1.63129735 | 0.15532329 | 0.32766401 |
| ENSMUSG00000045216 | 0.50704439 | 5.81515355 | 0.15551132 | 0.32800048 |
| ENSMUSG00000033114 | -0.5156676 | 4.14236065 | 0.15599308 | 0.32895624 |
| ENSMUSG00000020361 | -0.5030902 | 8.27679473 | 0.15606882 | 0.32899947 |
| ENSMUSG00000027901 | -0.5040662 | 7.06022151 | 0.15609454 | 0.32899947 |
| ENSMUSG00000032815 | 0.51091512 | 4.68126565 | 0.15612434 | 0.32899947 |
| ENSMUSG00000024340 | -0.516827  | 4.00088303 | 0.15612806 | 0.32899947 |

|                    |            |            |            |            |
|--------------------|------------|------------|------------|------------|
| ENSMUSG00000032872 | -0.5047149 | 6.66717063 | 0.15621804 | 0.32912874 |
| ENSMUSG00000035437 | -0.5045129 | 6.65830219 | 0.15634883 | 0.32915437 |
| ENSMUSG00000049517 | 0.5031116  | 7.54169749 | 0.15637826 | 0.32915437 |
| ENSMUSG00000017421 | -0.5029267 | 7.76520983 | 0.15640372 | 0.32915437 |
| ENSMUSG00000037062 | -0.5029786 | 7.74063078 | 0.15641458 | 0.32915437 |
| ENSMUSG00000050947 | 0.54003236 | 2.82755425 | 0.15642064 | 0.32915437 |
| ENSMUSG00000040888 | 0.53399956 | 2.96978627 | 0.15642262 | 0.32915437 |
| ENSMUSG00000018143 | 0.5058144  | 6.0995279  | 0.15643065 | 0.32915437 |
| ENSMUSG00000008668 | 0.50228791 | 8.52567062 | 0.15649016 | 0.32921932 |
| ENSMUSG00000040720 | -0.5029547 | 7.63109154 | 0.15653603 | 0.32924077 |
| ENSMUSG00000026436 | -0.5024596 | 7.9502835  | 0.15662536 | 0.32924077 |
| ENSMUSG00000074340 | -0.5323382 | 3.17188227 | 0.15663405 | 0.32924077 |
| ENSMUSG00000070871 | -0.5140837 | 4.02124666 | 0.15663618 | 0.32924077 |
| ENSMUSG00000058761 | -0.5056955 | 5.92764416 | 0.15664356 | 0.32924077 |
| ENSMUSG00000071291 | -0.5393919 | 2.98625164 | 0.15667842 | 0.32925383 |
| ENSMUSG00000029179 | -0.5086644 | 4.88044897 | 0.15676579 | 0.32937722 |
| ENSMUSG00000022940 | -0.5177671 | 3.82780999 | 0.15687601 | 0.32954856 |
| ENSMUSG00000024571 | 0.5048523  | 6.16413455 | 0.15705328 | 0.32986068 |
| ENSMUSG00000047824 | 0.50538547 | 5.54074565 | 0.15751064 | 0.33070272 |
| ENSMUSG00000078695 | 0.51847531 | 3.78310675 | 0.15751174 | 0.33070272 |
| ENSMUSG00000041025 | 0.55184374 | 2.72521096 | 0.15764523 | 0.33090178 |
| ENSMUSG00000062627 | -0.5020491 | 7.09446809 | 0.15766412 | 0.33090178 |
| ENSMUSG00000022723 | -0.5081978 | 4.88480175 | 0.15771656 | 0.33095142 |
| ENSMUSG00000046667 | -0.5163436 | 4.3231669  | 0.15785965 | 0.33119121 |
| ENSMUSG00000029177 | -0.50481   | 5.66519135 | 0.1578886  | 0.33119151 |
| ENSMUSG00000070691 | 0.50248463 | 6.37218904 | 0.15796768 | 0.33129694 |
| ENSMUSG00000055491 | 0.50324543 | 6.17389196 | 0.1580634  | 0.33138779 |
| ENSMUSG00000025464 | 0.60453291 | 1.26423582 | 0.15806866 | 0.33138779 |
| ENSMUSG00000025525 | -0.5177437 | 3.93979442 | 0.15816664 | 0.33153275 |
| ENSMUSG00000020224 | 0.50770455 | 4.49631768 | 0.15829491 | 0.33174111 |
| ENSMUSG00000057110 | -0.5000458 | 8.43902723 | 0.15839603 | 0.33185143 |
| ENSMUSG00000002546 | 0.5030434  | 6.15990108 | 0.15840529 | 0.33185143 |
| ENSMUSG00000023004 | 0.50282212 | 5.93288366 | 0.15878193 | 0.33257635 |
| ENSMUSG00000024975 | -0.4999753 | 7.7886618  | 0.15883735 | 0.33257635 |
| ENSMUSG00000034247 | 0.50111477 | 6.75811224 | 0.15883812 | 0.33257635 |
| ENSMUSG00000001248 | 0.49975987 | 7.97195371 | 0.15887101 | 0.33258464 |
| ENSMUSG00000078994 | -0.5061742 | 4.77148741 | 0.159029   | 0.33271108 |
| ENSMUSG00000028793 | 0.50107089 | 6.71657194 | 0.15903378 | 0.33271108 |
| ENSMUSG00000029012 | -0.5055296 | 5.3117588  | 0.1590361  | 0.33271108 |
| ENSMUSG00000045193 | 0.50484502 | 5.61058387 | 0.15904718 | 0.33271108 |
| ENSMUSG00000040234 | 0.51084596 | 4.65780104 | 0.15912639 | 0.33281096 |
| ENSMUSG00000040312 | 0.54316036 | 2.29120876 | 0.15915283 | 0.33281096 |
| ENSMUSG00000020309 | -0.5370573 | 2.51763976 | 0.15919621 | 0.33284111 |

|                    |            |            |            |            |
|--------------------|------------|------------|------------|------------|
| ENSMUSG0000001763  | 0.50674125 | 5.07216412 | 0.15926174 | 0.33290895 |
| ENSMUSG00000039254 | 0.51362295 | 4.04719493 | 0.15928658 | 0.33290895 |
| ENSMUSG00000018923 | 0.51046701 | 4.41291527 | 0.159526   | 0.33334873 |
| ENSMUSG00000027893 | -0.4998042 | 7.03796229 | 0.15961499 | 0.33347407 |
| ENSMUSG00000020042 | 0.62619012 | 1.4327168  | 0.15979264 | 0.33371146 |
| ENSMUSG00000057551 | -0.501601  | 6.13007977 | 0.15980468 | 0.33371146 |
| ENSMUSG00000045427 | -0.498697  | 7.92380937 | 0.15981571 | 0.33371146 |
| ENSMUSG00000022508 | 0.49997199 | 6.96238236 | 0.15985151 | 0.33372559 |
| ENSMUSG00000086316 | 0.5806456  | 1.97526551 | 0.16002651 | 0.33403028 |
| ENSMUSG00000038845 | 0.51074455 | 4.29206707 | 0.16017029 | 0.33426969 |
| ENSMUSG00000034401 | -0.506407  | 4.68020256 | 0.16031076 | 0.33447841 |
| ENSMUSG00000027936 | 0.49885663 | 6.95511554 | 0.16033907 | 0.33447841 |
| ENSMUSG00000009927 | -0.4974636 | 9.20120896 | 0.16035759 | 0.33447841 |
| ENSMUSG00000021811 | -0.4990609 | 7.00464226 | 0.16041446 | 0.33453632 |
| ENSMUSG00000058331 | -0.5376986 | 2.80658111 | 0.16052084 | 0.33469746 |
| ENSMUSG00000001588 | 0.49728107 | 8.74808992 | 0.16059579 | 0.334793   |
| ENSMUSG00000032386 | -0.5005312 | 6.0685169  | 0.16068592 | 0.33492014 |
| ENSMUSG00000020647 | -0.4990467 | 6.59002747 | 0.16074392 | 0.33498031 |
| ENSMUSG00000022792 | -0.5121888 | 4.04233487 | 0.16082562 | 0.33503026 |
| ENSMUSG00000031557 | -0.4969114 | 9.06933316 | 0.16085266 | 0.33503026 |
| ENSMUSG00000042410 | -0.4982968 | 7.05991089 | 0.16086491 | 0.33503026 |
| ENSMUSG00000089917 | 0.50089758 | 5.87258228 | 0.16088447 | 0.33503026 |
| ENSMUSG00000033228 | -0.4967213 | 8.70793468 | 0.16110779 | 0.33539417 |
| ENSMUSG00000095197 | 0.59278376 | 1.57901067 | 0.16111758 | 0.33539417 |
| ENSMUSG00000041483 | -0.4997954 | 6.03353407 | 0.16118956 | 0.33547113 |
| ENSMUSG00000047022 | -0.5387523 | 2.55429388 | 0.16121292 | 0.33547113 |
| ENSMUSG00000037608 | -0.4964417 | 8.62764705 | 0.16137519 | 0.33574802 |
| ENSMUSG00000074166 | -0.5266613 | 2.95159838 | 0.16147782 | 0.33590076 |
| ENSMUSG00000039242 | -0.5001087 | 5.80668832 | 0.16152405 | 0.33593612 |
| ENSMUSG00000061143 | 0.51937995 | 3.51867326 | 0.16164381 | 0.33612439 |
| ENSMUSG00000029333 | -0.495938  | 8.77920197 | 0.16175182 | 0.33628815 |
| ENSMUSG00000025278 | 0.50138057 | 5.63230159 | 0.16179594 | 0.33631905 |
| ENSMUSG00000036932 | -0.5013105 | 5.37390753 | 0.16183376 | 0.33633684 |
| ENSMUSG00000030447 | 0.4986163  | 6.41741517 | 0.16193106 | 0.33647822 |
| ENSMUSG00000052681 | -0.4954046 | 8.72846236 | 0.1621887  | 0.33695267 |
| ENSMUSG00000023951 | 0.53941371 | 2.97598277 | 0.16222215 | 0.33696127 |
| ENSMUSG00000095567 | 0.49646858 | 7.03097052 | 0.16229505 | 0.33705178 |
| ENSMUSG00000079108 | -0.501085  | 5.20050897 | 0.16242302 | 0.33725661 |
| ENSMUSG00000020525 | -0.5002947 | 5.52452206 | 0.16256102 | 0.3374822  |
| ENSMUSG00000019790 | -0.4993447 | 5.52296352 | 0.16261656 | 0.33753653 |
| ENSMUSG00000034868 | 0.49581368 | 7.18811179 | 0.16274874 | 0.3377018  |
| ENSMUSG00000029084 | -0.4949704 | 8.35847216 | 0.16275493 | 0.3377018  |
| ENSMUSG00000045394 | 0.52221357 | 2.8346007  | 0.16280059 | 0.33773557 |

|                    |            |            |            |            |
|--------------------|------------|------------|------------|------------|
| ENSMUSG00000044224 | -0.4992635 | 5.66927887 | 0.16287946 | 0.33783822 |
| ENSMUSG00000062901 | -0.4946135 | 8.62057634 | 0.16290907 | 0.33783867 |
| ENSMUSG00000009145 | 0.53245655 | 2.86804945 | 0.162961   | 0.3378394  |
| ENSMUSG00000022359 | -0.5094796 | 4.15570559 | 0.1629682  | 0.3378394  |
| ENSMUSG00000041272 | 0.59091119 | 1.63213108 | 0.16302329 | 0.33789266 |
| ENSMUSG00000078768 | -0.5243891 | 3.12485685 | 0.16306737 | 0.33789824 |
| ENSMUSG00000020262 | 0.65408235 | 1.12867017 | 0.16308477 | 0.33789824 |
| ENSMUSG00000003309 | 0.53216259 | 2.76130864 | 0.16313034 | 0.33793174 |
| ENSMUSG00000030929 | -0.5086082 | 4.23670305 | 0.16336967 | 0.33830718 |
| ENSMUSG00000039629 | 0.58519428 | 1.89868883 | 0.16337044 | 0.33830718 |
| ENSMUSG00000026074 | -0.4945438 | 7.43729469 | 0.16358817 | 0.33865894 |
| ENSMUSG00000030839 | 0.53069927 | 2.85541299 | 0.16359923 | 0.33865894 |
| ENSMUSG00000094410 | -0.4936104 | 8.73939414 | 0.16371577 | 0.33883917 |
| ENSMUSG00000079083 | -0.5014695 | 4.8518602  | 0.16377449 | 0.33889969 |
| ENSMUSG00000021022 | -0.4994378 | 5.11572523 | 0.16383068 | 0.33895494 |
| ENSMUSG00000041438 | -0.4990476 | 5.31753894 | 0.16412671 | 0.33944611 |
| ENSMUSG00000018286 | 0.49791616 | 5.43028143 | 0.16414453 | 0.33944611 |
| ENSMUSG00000054408 | -0.4943398 | 7.14219882 | 0.16415667 | 0.33944611 |
| ENSMUSG00000002996 | -0.4940193 | 7.10573249 | 0.16428075 | 0.33964158 |
| ENSMUSG00000037697 | -0.4950951 | 6.2323883  | 0.16449619 | 0.34002584 |
| ENSMUSG00000061458 | -0.497865  | 5.47318206 | 0.16458058 | 0.34013911 |
| ENSMUSG00000030224 | -0.4940219 | 7.01919013 | 0.16466601 | 0.3402545  |
| ENSMUSG00000062604 | -0.4943188 | 6.50499876 | 0.16492523 | 0.34072889 |
| ENSMUSG00000024384 | -0.4930084 | 7.30851918 | 0.16502857 | 0.34088112 |
| ENSMUSG00000058407 | -0.4954559 | 5.9537115  | 0.16507972 | 0.3409255  |
| ENSMUSG00000022089 | 0.49673527 | 5.68923012 | 0.16511871 | 0.34094478 |
| ENSMUSG00000024078 | -0.502106  | 4.52598295 | 0.16528691 | 0.34119565 |
| ENSMUSG00000021190 | 0.49260755 | 7.44752201 | 0.16534388 | 0.34119565 |
| ENSMUSG00000034187 | -0.4931337 | 6.91009923 | 0.16535451 | 0.34119565 |
| ENSMUSG00000035142 | -0.527136  | 2.74237175 | 0.16535893 | 0.34119565 |
| ENSMUSG00000020521 | -0.4982505 | 5.01789756 | 0.16588681 | 0.34222343 |
| ENSMUSG00000040033 | 0.49147888 | 7.79176897 | 0.16605288 | 0.34246797 |
| ENSMUSG00000082588 | -0.560305  | 1.9058537  | 0.16606494 | 0.34246797 |
| ENSMUSG00000041426 | -0.5005627 | 4.41733489 | 0.16612897 | 0.34253858 |
| ENSMUSG00000021013 | 0.60442301 | 1.63052602 | 0.16626489 | 0.34275734 |
| ENSMUSG00000027086 | -0.4973887 | 5.05953998 | 0.16629572 | 0.34275942 |
| ENSMUSG00000024007 | 0.50563504 | 4.10984254 | 0.16634652 | 0.34276919 |
| ENSMUSG00000021930 | -0.511111  | 3.42266318 | 0.16636009 | 0.34276919 |
| ENSMUSG00000028550 | -0.5044056 | 3.9054845  | 0.16645534 | 0.34284722 |
| ENSMUSG00000028426 | -0.4917312 | 7.03703132 | 0.16645762 | 0.34284722 |
| ENSMUSG00000068732 | -0.4926459 | 6.48875365 | 0.16654771 | 0.34296829 |
| ENSMUSG00000064141 | -0.5541962 | 1.68759585 | 0.16657607 | 0.34296829 |
| ENSMUSG00000027164 | -0.4919686 | 6.66833516 | 0.16673442 | 0.34320077 |

|                    |            |            |            |            |
|--------------------|------------|------------|------------|------------|
| ENSMUSG00000014606 | 0.4925461  | 6.30395103 | 0.1667487  | 0.34320077 |
| ENSMUSG00000034341 | 0.49182488 | 6.70591179 | 0.16681036 | 0.34320574 |
| ENSMUSG00000014355 | -0.4903047 | 7.97055253 | 0.16688046 | 0.34320574 |
| ENSMUSG00000042505 | -0.5313758 | 2.44693461 | 0.16688275 | 0.34320574 |
| ENSMUSG00000030528 | -0.497642  | 4.8740714  | 0.16688502 | 0.34320574 |
| ENSMUSG00000029864 | 0.52281251 | 2.75776725 | 0.1669004  | 0.34320574 |
| ENSMUSG00000066571 | -0.4936834 | 5.74221317 | 0.16703995 | 0.34343126 |
| ENSMUSG00000020220 | -0.4897059 | 8.1197283  | 0.16724838 | 0.34379831 |
| ENSMUSG00000027305 | -0.5023777 | 4.25163868 | 0.16728004 | 0.3438019  |
| ENSMUSG0000003099  | 0.4917468  | 6.0404457  | 0.16734044 | 0.34386457 |
| ENSMUSG00000073700 | 0.49503566 | 4.97335197 | 0.16747182 | 0.34398228 |
| ENSMUSG00000039536 | -0.490906  | 6.80002239 | 0.1675015  | 0.34398228 |
| ENSMUSG00000021395 | -0.4907417 | 7.00387333 | 0.16754147 | 0.34398228 |
| ENSMUSG00000017210 | 0.49418    | 5.61129911 | 0.16754238 | 0.34398228 |
| ENSMUSG00000037134 | -0.4948501 | 5.4478689  | 0.16754735 | 0.34398228 |
| ENSMUSG00000090272 | -0.4886832 | 9.27278295 | 0.16778952 | 0.34441796 |
| ENSMUSG00000025578 | 0.52796906 | 2.52179306 | 0.1679585  | 0.34470326 |
| ENSMUSG00000079036 | -0.491987  | 5.89740266 | 0.16800465 | 0.34473642 |
| ENSMUSG00000038252 | 0.49163545 | 6.07497335 | 0.16814699 | 0.34491079 |
| ENSMUSG00000097195 | -0.4935418 | 5.46550543 | 0.16814964 | 0.34491079 |
| ENSMUSG00000015289 | 0.51322588 | 3.03796714 | 0.16821923 | 0.34499198 |
| ENSMUSG00000058586 | 0.50963421 | 3.74257443 | 0.16873008 | 0.34597793 |
| ENSMUSG00000054051 | -0.4900009 | 6.31995917 | 0.16880136 | 0.34606236 |
| ENSMUSG00000076618 | -0.5401586 | 2.49800067 | 0.16883249 | 0.34606446 |
| ENSMUSG00000034390 | 0.48947742 | 6.62544652 | 0.16889745 | 0.34613588 |
| ENSMUSG00000022517 | 0.4887923  | 6.90191409 | 0.16907565 | 0.34643931 |
| ENSMUSG00000073600 | -0.5348327 | 2.07960495 | 0.16912243 | 0.3464667  |
| ENSMUSG00000021240 | 0.50146764 | 3.76908002 | 0.16914929 | 0.3464667  |
| ENSMUSG00000035270 | -0.5073638 | 3.49133508 | 0.1693428  | 0.34679424 |
| ENSMUSG00000051786 | 0.48930391 | 6.4669828  | 0.16941485 | 0.34679424 |
| ENSMUSG00000004655 | 0.48853748 | 6.86719773 | 0.16942731 | 0.34679424 |
| ENSMUSG00000002033 | 0.49990241 | 4.13327583 | 0.16943144 | 0.34679424 |
| ENSMUSG00000028385 | -0.487316  | 7.97715477 | 0.16946005 | 0.34679424 |
| ENSMUSG00000020460 | -0.4867778 | 9.08587149 | 0.16951461 | 0.34680347 |
| ENSMUSG00000038122 | -0.5120831 | 3.08261118 | 0.16954425 | 0.34680347 |
| ENSMUSG00000022750 | 0.50682863 | 3.80873246 | 0.1695646  | 0.34680347 |
| ENSMUSG00000059273 | 0.48950448 | 6.43139631 | 0.16958524 | 0.34680347 |
| ENSMUSG00000057572 | -0.4944817 | 4.86560214 | 0.16974623 | 0.34704877 |
| ENSMUSG00000001482 | 0.50011367 | 4.20029346 | 0.16976557 | 0.34704877 |
| ENSMUSG00000020074 | -0.4872546 | 7.52734394 | 0.16987642 | 0.34712029 |
| ENSMUSG00000003184 | 0.48905049 | 6.22934484 | 0.16990081 | 0.34712029 |
| ENSMUSG00000031129 | 0.50071991 | 4.58065308 | 0.16990308 | 0.34712029 |
| ENSMUSG00000041992 | -0.4964113 | 4.64168228 | 0.16992135 | 0.34712029 |



|                    |            |            |            |            |
|--------------------|------------|------------|------------|------------|
| ENSMUSG00000021712 | -0.4919066 | 5.14271947 | 0.16997825 | 0.34717484 |
| ENSMUSG00000048677 | 0.49637181 | 4.49367927 | 0.17011362 | 0.34734218 |
| ENSMUSG00000037926 | -0.4863089 | 8.36609444 | 0.17012062 | 0.34734218 |
| ENSMUSG00000038039 | -0.4887309 | 6.10429115 | 0.17038399 | 0.34781815 |
| ENSMUSG00000036087 | -0.4874834 | 6.73720277 | 0.17051877 | 0.3479934  |
| ENSMUSG00000043702 | -0.4944851 | 4.79149894 | 0.17053039 | 0.3479934  |
| ENSMUSG00000055069 | -0.5006889 | 4.31538529 | 0.17088981 | 0.34866495 |
| ENSMUSG00000023953 | -0.4933625 | 4.74897657 | 0.17095045 | 0.34872678 |
| ENSMUSG00000010517 | -0.4881673 | 6.18630309 | 0.1710078  | 0.34878189 |
| ENSMUSG00000027552 | -0.5007659 | 3.91237923 | 0.17104255 | 0.34879087 |
| ENSMUSG00000022507 | -0.486927  | 6.66082166 | 0.17115645 | 0.34896123 |
| ENSMUSG00000034320 | -0.4882353 | 5.72711061 | 0.17126132 | 0.3490063  |
| ENSMUSG00000036854 | 0.57035424 | 1.74944992 | 0.171266   | 0.3490063  |
| ENSMUSG00000064289 | -0.4856899 | 7.4802559  | 0.17126964 | 0.3490063  |
| ENSMUSG00000014601 | 0.48879486 | 5.76936645 | 0.17140079 | 0.34921164 |
| ENSMUSG00000024052 | -0.4861388 | 6.6738098  | 0.17153219 | 0.34937353 |
| ENSMUSG00000041625 | 0.55181053 | 2.09649836 | 0.17154104 | 0.34937353 |
| ENSMUSG00000038206 | -0.4938992 | 4.68897673 | 0.17160339 | 0.34943407 |
| ENSMUSG00000009090 | 0.48601756 | 6.855168   | 0.17163156 | 0.34943407 |
| ENSMUSG00000025894 | -0.4955976 | 4.54791789 | 0.17173206 | 0.34952654 |
| ENSMUSG00000041840 | -0.5049329 | 3.41116471 | 0.17175805 | 0.34952654 |
| ENSMUSG00000075470 | -0.4891081 | 5.52242687 | 0.1717682  | 0.34952654 |
| ENSMUSG00000029826 | -0.4843374 | 8.56318377 | 0.17182152 | 0.34957316 |
| ENSMUSG00000035530 | -0.4842535 | 8.66931154 | 0.17186532 | 0.34960039 |
| ENSMUSG00000073910 | 0.50506283 | 3.51002684 | 0.17215848 | 0.35013477 |
| ENSMUSG00000016503 | 0.49542344 | 4.30600148 | 0.17225822 | 0.35027565 |
| ENSMUSG00000073643 | -0.4899784 | 5.20572828 | 0.17230465 | 0.35029185 |
| ENSMUSG00000002728 | -0.4934059 | 4.61851438 | 0.17232714 | 0.35029185 |
| ENSMUSG00000075595 | -0.484522  | 7.16770469 | 0.17247337 | 0.35052712 |
| ENSMUSG00000046865 | 0.49210193 | 4.80132163 | 0.1725208  | 0.35056154 |
| ENSMUSG00000028522 | -0.4839027 | 7.67295909 | 0.1726459  | 0.35075372 |
| ENSMUSG00000020280 | -0.488983  | 5.2300621  | 0.17273884 | 0.35075802 |
| ENSMUSG00000023010 | 0.48367711 | 7.96654263 | 0.1727528  | 0.35075802 |
| ENSMUSG00000023341 | 0.49822471 | 4.16156108 | 0.17275413 | 0.35075802 |
| ENSMUSG00000029001 | 0.59618962 | 1.72377102 | 0.17277006 | 0.35075802 |
| ENSMUSG00000022781 | -0.4831909 | 8.55440385 | 0.17285667 | 0.35086083 |
| ENSMUSG00000026663 | -0.4838274 | 7.52765149 | 0.17288175 | 0.35086083 |
| ENSMUSG00000030217 | 0.51140083 | 3.29145982 | 0.17294612 | 0.3509145  |
| ENSMUSG00000030659 | -0.4884529 | 5.34132842 | 0.17299887 | 0.3509145  |
| ENSMUSG00000059540 | 0.50044545 | 3.81198589 | 0.17299978 | 0.3509145  |
| ENSMUSG00000026849 | 0.4912165  | 4.67262156 | 0.17332428 | 0.35147641 |
| ENSMUSG00000035401 | -0.4847162 | 6.31577081 | 0.1733406  | 0.35147641 |
| ENSMUSG00000034120 | -0.4825205 | 8.70312831 | 0.17336853 | 0.35147641 |

|                    |            |            |            |            |
|--------------------|------------|------------|------------|------------|
| ENSMUSG00000021226 | 0.51239871 | 2.91856519 | 0.17357922 | 0.35184149 |
| ENSMUSG00000039887 | -0.5185671 | 2.78729686 | 0.17379906 | 0.35216372 |
| ENSMUSG00000038080 | -0.4871272 | 5.42829897 | 0.17379946 | 0.35216372 |
| ENSMUSG00000021290 | -0.4872352 | 5.46352344 | 0.17392914 | 0.35236437 |
| ENSMUSG00000039270 | -0.4956142 | 4.02827827 | 0.17396782 | 0.35238064 |
| ENSMUSG00000018770 | -0.4839467 | 6.53880451 | 0.1740203  | 0.35242483 |
| ENSMUSG00000046550 | 0.64317118 | 1.12243703 | 0.1741233  | 0.35257132 |
| ENSMUSG00000074886 | 0.48158061 | 8.38346469 | 0.17429717 | 0.35267202 |
| ENSMUSG00000024422 | 0.48339737 | 6.43709076 | 0.17431764 | 0.35267202 |
| ENSMUSG00000069206 | -0.4935809 | 4.23546937 | 0.17435989 | 0.35267202 |
| ENSMUSG00000099689 | -0.510238  | 3.37102425 | 0.17437823 | 0.35267202 |
| ENSMUSG00000034484 | -0.4812148 | 9.15725029 | 0.17438115 | 0.35267202 |
| ENSMUSG00000046056 | 0.61753479 | 1.39847803 | 0.17438452 | 0.35267202 |
| ENSMUSG00000062797 | -0.4980895 | 3.99824646 | 0.1743878  | 0.35267202 |
| ENSMUSG00000039782 | -0.4877671 | 5.11086663 | 0.17445602 | 0.35274793 |
| ENSMUSG00000042202 | -0.4845428 | 6.0965054  | 0.17460949 | 0.35299615 |
| ENSMUSG00000000134 | 0.48540509 | 5.88193297 | 0.17487357 | 0.35346786 |
| ENSMUSG00000085887 | -0.4872106 | 4.68378183 | 0.17499434 | 0.35356202 |
| ENSMUSG00000019088 | 0.4953345  | 4.38339006 | 0.17502529 | 0.35356202 |
| ENSMUSG00000070605 | -0.5034676 | 3.4931571  | 0.1750293  | 0.35356202 |
| ENSMUSG00000044197 | 0.49465021 | 4.20623951 | 0.17504319 | 0.35356202 |
| ENSMUSG00000037235 | 0.48242568 | 6.26588364 | 0.17513812 | 0.35369161 |
| ENSMUSG00000020171 | -0.483902  | 5.97568282 | 0.17525168 | 0.35385879 |
| ENSMUSG00000068739 | 0.48265918 | 6.33341292 | 0.17531865 | 0.35393184 |
| ENSMUSG00000034951 | 0.49772996 | 3.99532382 | 0.17542239 | 0.3540406  |
| ENSMUSG00000036291 | -0.4841878 | 5.69407225 | 0.17543412 | 0.3540406  |
| ENSMUSG00000004317 | -0.4858289 | 5.21998905 | 0.17551175 | 0.35413507 |
| ENSMUSG00000035215 | 0.5459706  | 1.86278083 | 0.17564185 | 0.35433539 |
| ENSMUSG00000002416 | -0.493895  | 4.09928182 | 0.1757027  | 0.35438813 |
| ENSMUSG00000057440 | -0.510153  | 2.90151745 | 0.17572965 | 0.35438813 |
| ENSMUSG00000001376 | -0.4849724 | 5.33552277 | 0.17586492 | 0.35455004 |
| ENSMUSG00000052299 | -0.4807905 | 7.18128006 | 0.17587163 | 0.35455004 |
| ENSMUSG00000002007 | 0.4807947  | 7.03221383 | 0.17593017 | 0.35460586 |
| ENSMUSG00000045248 | 0.50096556 | 3.37153364 | 0.17596268 | 0.35460923 |
| ENSMUSG00000031749 | 0.48925581 | 4.44505058 | 0.17609546 | 0.3548146  |
| ENSMUSG00000061838 | -0.4838466 | 5.59926367 | 0.17617536 | 0.35491338 |
| ENSMUSG00000045435 | -0.4940808 | 3.96644979 | 0.17620791 | 0.35491676 |
| ENSMUSG00000097131 | 0.59115494 | 0.98633606 | 0.17630941 | 0.35505897 |
| ENSMUSG00000087138 | 0.61303303 | 1.18755309 | 0.17641545 | 0.35517251 |
| ENSMUSG00000022009 | -0.4866994 | 4.94697884 | 0.17642758 | 0.35517251 |
| ENSMUSG00000022221 | 0.48326264 | 5.55711345 | 0.1764762  | 0.35519761 |
| ENSMUSG00000025220 | -0.4789782 | 8.73801217 | 0.17650185 | 0.35519761 |
| ENSMUSG00000097290 | -0.4838174 | 5.30054387 | 0.17665232 | 0.3554382  |

|                    |            |            |            |            |
|--------------------|------------|------------|------------|------------|
| ENSMUSG00000024498 | -0.479909  | 7.0877641  | 0.17678334 | 0.35563957 |
| ENSMUSG00000042423 | 0.48049593 | 6.60365577 | 0.17686084 | 0.35571358 |
| ENSMUSG00000042207 | -0.4805394 | 6.54406398 | 0.17690081 | 0.35571358 |
| ENSMUSG00000050565 | -0.4795156 | 7.24902889 | 0.17691297 | 0.35571358 |
| ENSMUSG00000046691 | 0.479355   | 6.97705342 | 0.17708653 | 0.3560003  |
| ENSMUSG00000025041 | -0.4814139 | 6.09107046 | 0.17722395 | 0.35621425 |
| ENSMUSG00000052146 | 0.47926672 | 7.04561398 | 0.1773163  | 0.35633756 |
| ENSMUSG00000021175 | -0.4936068 | 3.84781343 | 0.17784372 | 0.35733501 |
| ENSMUSG00000024132 | 0.49030957 | 3.98349573 | 0.17789642 | 0.35737842 |
| ENSMUSG00000038564 | 0.48224263 | 5.63657237 | 0.17794306 | 0.35740965 |
| ENSMUSG00000029186 | -0.4882706 | 4.26450476 | 0.17798833 | 0.35743813 |
| ENSMUSG00000052033 | -0.4948398 | 3.88611617 | 0.17802215 | 0.3574436  |
| ENSMUSG00000061414 | 0.53535684 | 1.99316812 | 0.17805885 | 0.35745485 |
| ENSMUSG00000025007 | 0.48208636 | 5.12627069 | 0.17813107 | 0.3575374  |
| ENSMUSG00000022159 | -0.4850164 | 4.7645387  | 0.17818663 | 0.35758647 |
| ENSMUSG00000052707 | -0.4772289 | 8.09698776 | 0.17827855 | 0.35770146 |
| ENSMUSG00000060227 | -0.4877522 | 4.36025608 | 0.17830756 | 0.35770146 |
| ENSMUSG00000044694 | -0.4810034 | 5.49526719 | 0.17836552 | 0.35770146 |
| ENSMUSG00000006191 | -0.4848192 | 4.80341881 | 0.1783684  | 0.35770146 |
| ENSMUSG00000002881 | -0.4783804 | 6.94315844 | 0.17840875 | 0.35771997 |
| ENSMUSG00000006010 | -0.4811316 | 5.66477274 | 0.17844639 | 0.35773305 |
| ENSMUSG00000028706 | -0.483543  | 4.79157805 | 0.17892472 | 0.35858505 |
| ENSMUSG00000007564 | 0.47713737 | 7.28841422 | 0.17896391 | 0.35858505 |
| ENSMUSG00000019777 | -0.4787727 | 6.44950633 | 0.17896498 | 0.35858505 |
| ENSMUSG00000026878 | -0.4770965 | 7.36451224 | 0.17903151 | 0.35860408 |
| ENSMUSG00000039910 | 0.48144365 | 5.35710809 | 0.17903687 | 0.35860408 |
| ENSMUSG00000025085 | -0.4756318 | 9.96662568 | 0.17925413 | 0.3589767  |
| ENSMUSG00000017478 | 0.47930687 | 6.03668262 | 0.17950275 | 0.35941197 |
| ENSMUSG00000032468 | -0.4778174 | 6.33182612 | 0.17954249 | 0.35942893 |
| ENSMUSG00000034156 | 0.51703181 | 2.84598834 | 0.17969423 | 0.35967006 |
| ENSMUSG00000031429 | -0.4850951 | 4.64263661 | 0.17977655 | 0.35977219 |
| ENSMUSG00000015214 | -0.4775703 | 6.43307635 | 0.17981178 | 0.35978004 |
| ENSMUSG00000033596 | -0.4771888 | 6.72583942 | 0.17990735 | 0.35990863 |
| ENSMUSG00000020255 | -0.4767221 | 6.84705979 | 0.1800144  | 0.36006012 |
| ENSMUSG00000094441 | -0.5047081 | 3.0163037  | 0.18004988 | 0.36006843 |
| ENSMUSG00000060675 | 0.48621908 | 4.51732096 | 0.180174   | 0.36025397 |
| ENSMUSG00000032244 | -0.4768365 | 6.48621136 | 0.18035574 | 0.36055464 |
| ENSMUSG00000025958 | -0.4752208 | 7.72459682 | 0.18044305 | 0.36062265 |
| ENSMUSG00000004843 | -0.4787099 | 5.76659581 | 0.18047587 | 0.36062265 |
| ENSMUSG00000038766 | -0.4745971 | 8.68540104 | 0.18048702 | 0.36062265 |
| ENSMUSG00000023952 | 0.47554624 | 7.32794806 | 0.18051524 | 0.36062265 |
| ENSMUSG00000084808 | -0.5555736 | 1.27878065 | 0.18055914 | 0.36064767 |
| ENSMUSG00000039789 | -0.4769537 | 6.36132001 | 0.18066038 | 0.36078719 |

|                    |            |            |            |            |
|--------------------|------------|------------|------------|------------|
| ENSMUSG00000063884 | -0.4765083 | 6.50859801 | 0.18079963 | 0.36100257 |
| ENSMUSG00000034311 | -0.4883158 | 4.20852903 | 0.18098545 | 0.36131083 |
| ENSMUSG00000021877 | -0.4753426 | 7.07434239 | 0.1810517  | 0.36138033 |
| ENSMUSG00000061510 | -0.5461196 | 0.87117571 | 0.18157812 | 0.36231036 |
| ENSMUSG00000036661 | 0.47486018 | 6.87677186 | 0.18158068 | 0.36231036 |
| ENSMUSG00000032397 | -0.4806562 | 4.93679155 | 0.18168292 | 0.36239877 |
| ENSMUSG00000025816 | -0.483545  | 4.03237168 | 0.18168805 | 0.36239877 |
| ENSMUSG00000041180 | 0.67773167 | 0.63688293 | 0.18174623 | 0.36245193 |
| ENSMUSG00000019256 | -0.4825871 | 4.36613261 | 0.18178868 | 0.3624737  |
| ENSMUSG00000047613 | 0.50069065 | 3.13431472 | 0.18187973 | 0.36259235 |
| ENSMUSG00000063236 | 0.49659398 | 3.27978936 | 0.18195868 | 0.36266379 |
| ENSMUSG00000031170 | 0.49726916 | 3.59646095 | 0.18200995 | 0.36266379 |
| ENSMUSG00000053897 | 0.51574883 | 2.83557354 | 0.18203588 | 0.36266379 |
| ENSMUSG00000029505 | -0.472989  | 8.30256369 | 0.18204177 | 0.36266379 |
| ENSMUSG00000058318 | -0.4740103 | 6.8988752  | 0.18232274 | 0.36316061 |
| ENSMUSG00000017561 | -0.4725921 | 8.05393809 | 0.18264841 | 0.36374626 |
| ENSMUSG00000028165 | -0.4747485 | 6.232979   | 0.18268404 | 0.36375421 |
| ENSMUSG00000024091 | -0.4742275 | 6.5737762  | 0.18277366 | 0.36380337 |
| ENSMUSG00000017776 | -0.4730785 | 7.27654816 | 0.1827774  | 0.36380337 |
| ENSMUSG00000043505 | 0.47768988 | 5.58023602 | 0.18280368 | 0.36380337 |
| ENSMUSG00000039068 | -0.4728961 | 7.31595714 | 0.1829217  | 0.36397524 |
| ENSMUSG00000070319 | 0.47451946 | 5.99950481 | 0.18295418 | 0.36397687 |
| ENSMUSG00000069020 | 0.48969029 | 4.04173483 | 0.1830192  | 0.36402559 |
| ENSMUSG00000037731 | 0.47234922 | 7.95768359 | 0.18304201 | 0.36402559 |
| ENSMUSG00000086877 | -0.5582879 | 1.14463501 | 0.18325955 | 0.36439518 |
| ENSMUSG00000097177 | -0.5472448 | 1.03979121 | 0.18368019 | 0.36516841 |
| ENSMUSG00000034278 | 0.51227533 | 2.61434456 | 0.18389761 | 0.36553745 |
| ENSMUSG00000018820 | 0.47559823 | 5.75292526 | 0.18393128 | 0.36554117 |
| ENSMUSG00000024426 | 0.50292266 | 3.03527966 | 0.18401119 | 0.36563675 |
| ENSMUSG00000034259 | 0.5098508  | 2.47974141 | 0.18410799 | 0.36576588 |
| ENSMUSG00000039396 | -0.4933842 | 3.27871665 | 0.18418803 | 0.36585431 |
| ENSMUSG00000071657 | 0.47767145 | 5.06855506 | 0.18421616 | 0.36585431 |
| ENSMUSG00000063972 | -0.541897  | 1.65848131 | 0.18426355 | 0.36588522 |
| ENSMUSG00000030960 | -0.4865173 | 3.93636661 | 0.18431321 | 0.36592062 |
| ENSMUSG00000042650 | -0.4711699 | 7.3587774  | 0.1845185  | 0.36620311 |
| ENSMUSG00000027248 | -0.4701571 | 9.06812509 | 0.18451922 | 0.36620311 |
| ENSMUSG00000056666 | 0.55534518 | 1.83576166 | 0.18461757 | 0.366328   |
| ENSMUSG00000020152 | -0.4698332 | 9.62786832 | 0.18464588 | 0.366328   |
| ENSMUSG00000018340 | 0.47022886 | 8.12815324 | 0.18474515 | 0.36643482 |
| ENSMUSG00000024579 | 0.56305347 | 1.59666523 | 0.18476348 | 0.36643482 |
| ENSMUSG00000042043 | -0.4754067 | 5.43800538 | 0.18491658 | 0.36655444 |
| ENSMUSG00000056602 | -0.4723502 | 5.98001439 | 0.18493287 | 0.36655444 |
| ENSMUSG00000024425 | -0.4718534 | 6.48517057 | 0.1849504  | 0.36655444 |

|                     |            |            |            |            |
|---------------------|------------|------------|------------|------------|
| ENSMUSG00000028284  | -0.4710216 | 7.03149028 | 0.18495135 | 0.36655444 |
| ENSMUSG00000002204  | 0.46984837 | 8.11548879 | 0.18510326 | 0.36679228 |
| ENSMUSG000000041642 | 0.46980651 | 8.32802069 | 0.18518456 | 0.36689013 |
| ENSMUSG000000022070 | -0.4886723 | 3.2259984  | 0.18531008 | 0.36707555 |
| ENSMUSG000000053799 | -0.4711488 | 6.66250611 | 0.1853723  | 0.36709291 |
| ENSMUSG000000037822 | -0.469974  | 7.47984392 | 0.18538272 | 0.36709291 |
| ENSMUSG000000036138 | 0.47536487 | 5.27237699 | 0.18550371 | 0.36726923 |
| ENSMUSG000000020898 | 0.47595868 | 5.22374438 | 0.18555078 | 0.36729916 |
| ENSMUSG000000064370 | -0.4684701 | 12.4221674 | 0.18567221 | 0.36736807 |
| ENSMUSG000000033904 | -0.4744155 | 5.19045119 | 0.18572367 | 0.36736807 |
| ENSMUSG000000073016 | -0.4766297 | 4.90083499 | 0.18575157 | 0.36736807 |
| ENSMUSG000000032480 | 0.47084123 | 6.63120405 | 0.18577203 | 0.36736807 |
| ENSMUSG000000075555 | 0.60071798 | 1.11692347 | 0.18582161 | 0.36736807 |
| ENSMUSG000000069763 | 0.55647568 | 1.13028146 | 0.18582161 | 0.36736807 |
| ENSMUSG000000089726 | -0.4732672 | 5.47868207 | 0.18582918 | 0.36736807 |
| ENSMUSG000000024539 | -0.4716643 | 6.12745518 | 0.18584126 | 0.36736807 |
| ENSMUSG000000047880 | -0.4686469 | 8.95969003 | 0.18593132 | 0.3674829  |
| ENSMUSG000000041685 | -0.4703961 | 6.5319043  | 0.18601921 | 0.3675457  |
| ENSMUSG000000038379 | -0.5180186 | 2.25367876 | 0.18602704 | 0.3675457  |
| ENSMUSG000000025228 | 0.4694809  | 7.02555551 | 0.18625485 | 0.36793255 |
| ENSMUSG000000090035 | -0.4743965 | 5.11540515 | 0.18640604 | 0.36805326 |
| ENSMUSG000000074419 | 0.51106845 | 2.44800814 | 0.18642461 | 0.36805326 |
| ENSMUSG000000079659 | -0.4705292 | 6.31611468 | 0.18643952 | 0.36805326 |
| ENSMUSG000000024049 | 0.59653441 | 1.3681326  | 0.18647234 | 0.36805326 |
| ENSMUSG000000039648 | 0.52535916 | 2.22492006 | 0.18647605 | 0.36805326 |
| ENSMUSG000000022136 | -0.4691866 | 7.14006429 | 0.18651687 | 0.36807064 |
| ENSMUSG000000002458 | 0.46955473 | 6.65342417 | 0.18666905 | 0.3683077  |
| ENSMUSG000000054414 | -0.470903  | 5.95543542 | 0.18671235 | 0.36832991 |
| ENSMUSG000000021540 | -0.4697392 | 6.35462986 | 0.1869941  | 0.36877766 |
| ENSMUSG000000018733 | -0.4836211 | 3.95877249 | 0.18700464 | 0.36877766 |
| ENSMUSG000000002844 | 0.47293956 | 5.45982247 | 0.1870926  | 0.36877766 |
| ENSMUSG000000034903 | -0.4688989 | 6.96713579 | 0.18709695 | 0.36877766 |
| ENSMUSG000000042831 | 0.48642103 | 3.78881223 | 0.18711916 | 0.36877766 |
| ENSMUSG000000026341 | -0.4670871 | 10.0442602 | 0.18714962 | 0.36877766 |
| ENSMUSG000000028277 | -0.4689276 | 6.88269547 | 0.18716389 | 0.36877766 |
| ENSMUSG000000027282 | -0.4698085 | 6.32414919 | 0.18722926 | 0.36884325 |
| ENSMUSG000000025821 | 0.48212229 | 3.97250651 | 0.18727515 | 0.36887044 |
| ENSMUSG000000021024 | -0.4690131 | 6.58160466 | 0.18743779 | 0.36912752 |
| ENSMUSG000000090083 | 0.52474128 | 1.99050762 | 0.18752293 | 0.36923193 |
| ENSMUSG000000039218 | -0.4665136 | 10.6906942 | 0.18757778 | 0.36927669 |
| ENSMUSG000000099881 | -0.4731455 | 5.07936536 | 0.18772885 | 0.36951082 |
| ENSMUSG000000054702 | -0.468911  | 6.42574834 | 0.18802576 | 0.37003186 |
| ENSMUSG000000022139 | -0.4692682 | 5.95237075 | 0.18828779 | 0.37048411 |

|                    |            |            |            |            |
|--------------------|------------|------------|------------|------------|
| ENSMUSG00000025374 | 0.4745586  | 4.61113041 | 0.18839939 | 0.37064026 |
| ENSMUSG00000023186 | 0.47098107 | 5.50509414 | 0.18851823 | 0.370802   |
| ENSMUSG00000042029 | -0.4719249 | 5.20893029 | 0.18854612 | 0.370802   |
| ENSMUSG00000022686 | -0.4657741 | 8.84963901 | 0.18862073 | 0.37083504 |
| ENSMUSG00000044703 | 0.49371063 | 3.10320639 | 0.18862744 | 0.37083504 |
| ENSMUSG00000036572 | -0.4684274 | 6.11498921 | 0.18869743 | 0.37085564 |
| ENSMUSG00000028691 | -0.4664983 | 7.50237536 | 0.18872504 | 0.37085564 |
| ENSMUSG00000030172 | -0.477478  | 4.40576935 | 0.18873471 | 0.37085564 |
| ENSMUSG00000020623 | -0.4785687 | 4.12503746 | 0.1888119  | 0.37086234 |
| ENSMUSG00000027479 | -0.4662297 | 7.64692895 | 0.18883709 | 0.37086234 |
| ENSMUSG00000095633 | -0.5138811 | 2.4074366  | 0.18886699 | 0.37086234 |
| ENSMUSG00000032123 | 0.47898719 | 3.90381473 | 0.18887743 | 0.37086234 |
| ENSMUSG00000032185 | 0.47054128 | 5.48752303 | 0.18889943 | 0.37086234 |
| ENSMUSG00000037965 | -0.4653961 | 8.31246763 | 0.18917866 | 0.37130338 |
| ENSMUSG00000028700 | 0.47204706 | 5.02111371 | 0.18919498 | 0.37130338 |
| ENSMUSG00000028647 | -0.4841471 | 3.54078495 | 0.18922099 | 0.37130338 |
| ENSMUSG00000030870 | -0.4673322 | 6.73199425 | 0.18931779 | 0.37142994 |
| ENSMUSG00000067424 | -0.4943123 | 2.97968976 | 0.18947224 | 0.37166385 |
| ENSMUSG00000001707 | -0.4771738 | 4.42871704 | 0.18950168 | 0.37166385 |
| ENSMUSG00000031365 | -0.4679015 | 6.05227577 | 0.1895529  | 0.37166895 |
| ENSMUSG00000033031 | -0.4807551 | 3.81515484 | 0.18958782 | 0.37166895 |
| ENSMUSG00000030393 | -0.5329651 | 1.4419164  | 0.18967471 | 0.37166895 |
| ENSMUSG00000016427 | 0.48382015 | 3.92820945 | 0.18968836 | 0.37166895 |
| ENSMUSG00000028893 | 0.48087434 | 3.92966108 | 0.18968836 | 0.37166895 |
| ENSMUSG00000038267 | 0.49409321 | 3.50734932 | 0.18972278 | 0.37166895 |
| ENSMUSG00000028466 | 0.4721219  | 4.9334427  | 0.18973061 | 0.37166895 |
| ENSMUSG00000051910 | -0.4770517 | 4.29317422 | 0.18996814 | 0.37207084 |
| ENSMUSG00000056698 | 0.47594211 | 4.26690544 | 0.19007248 | 0.37215387 |
| ENSMUSG00000033282 | -0.4866324 | 3.51209537 | 0.19007528 | 0.37215387 |
| ENSMUSG00000077222 | -0.604934  | 0.83343225 | 0.19011973 | 0.37217749 |
| ENSMUSG00000040006 | -0.4699429 | 5.1297529  | 0.19015892 | 0.37219084 |
| ENSMUSG00000027422 | 0.46556697 | 7.06321263 | 0.19033645 | 0.37230626 |
| ENSMUSG00000020493 | -0.4841203 | 3.49416079 | 0.1903393  | 0.37230626 |
| ENSMUSG00000014767 | -0.4683874 | 5.56558127 | 0.19037437 | 0.37230626 |
| ENSMUSG00000038578 | -0.4653687 | 6.91345751 | 0.19040133 | 0.37230626 |
| ENSMUSG00000021327 | -0.4653385 | 6.90354997 | 0.19040561 | 0.37230626 |
| ENSMUSG00000024999 | -0.4682217 | 5.65670643 | 0.19041222 | 0.37230626 |
| ENSMUSG00000028708 | 0.46686549 | 6.08690239 | 0.19050349 | 0.37237829 |
| ENSMUSG00000027344 | 0.58676634 | 1.13816948 | 0.19051385 | 0.37237829 |
| ENSMUSG00000038736 | -0.4737044 | 4.63822901 | 0.19057873 | 0.37244177 |
| ENSMUSG00000030761 | 0.47113026 | 5.00053399 | 0.19062379 | 0.37246651 |
| ENSMUSG00000025240 | -0.4662238 | 6.27523203 | 0.1906747  | 0.37250267 |
| ENSMUSG00000031953 | -0.4840033 | 3.42400004 | 0.19081053 | 0.37270468 |

|                    |            |            |            |            |
|--------------------|------------|------------|------------|------------|
| ENSMUSG0000002948  | 0.46665838 | 6.03476661 | 0.19085421 | 0.37272666 |
| ENSMUSG00000027742 | -0.4688091 | 5.34381909 | 0.19091224 | 0.37277666 |
| ENSMUSG00000032469 | -0.4707638 | 5.03480492 | 0.19106326 | 0.37300818 |
| ENSMUSG00000045251 | 0.48749365 | 3.70724328 | 0.19116161 | 0.37313681 |
| ENSMUSG00000000916 | 0.47959455 | 3.63987571 | 0.19129361 | 0.37324858 |
| ENSMUSG00000044807 | -0.482662  | 3.34979801 | 0.19132953 | 0.37324858 |
| ENSMUSG00000000581 | -0.4731084 | 4.50239901 | 0.19135485 | 0.37324858 |
| ENSMUSG00000031609 | -0.4761419 | 4.03854405 | 0.19137008 | 0.37324858 |
| ENSMUSG00000073725 | -0.4635155 | 7.75980381 | 0.19139921 | 0.37324858 |
| ENSMUSG00000030691 | -0.4627844 | 9.1484005  | 0.19141369 | 0.37324858 |
| ENSMUSG00000008333 | -0.4675966 | 5.60484749 | 0.19148573 | 0.37332573 |
| ENSMUSG00000024597 | 0.4701098  | 5.23796292 | 0.19162403 | 0.373532   |
| ENSMUSG00000051998 | -0.4631592 | 7.84849076 | 0.19167255 | 0.37356323 |
| ENSMUSG00000067873 | -0.4643421 | 6.72842066 | 0.19171999 | 0.37359235 |
| ENSMUSG00000024048 | 0.4647627  | 6.25218967 | 0.19180828 | 0.37370105 |
| ENSMUSG00000094164 | 0.51256303 | 2.33589423 | 0.19203379 | 0.37406152 |
| ENSMUSG00000003528 | 0.47275843 | 4.3142895  | 0.19205838 | 0.37406152 |
| ENSMUSG00000028293 | -0.4696441 | 4.79698531 | 0.19220484 | 0.37428335 |
| ENSMUSG00000030557 | -0.4634735 | 6.60667329 | 0.19248373 | 0.37473585 |
| ENSMUSG00000062794 | -0.5103521 | 2.20644197 | 0.19250241 | 0.37473585 |
| ENSMUSG00000039164 | 0.47773967 | 3.57751842 | 0.19269559 | 0.3750484  |
| ENSMUSG00000002496 | 0.46454529 | 6.15153546 | 0.19276703 | 0.37507095 |
| ENSMUSG00000078427 | -0.4642186 | 6.34539769 | 0.19279303 | 0.37507095 |
| ENSMUSG00000018899 | 0.46152616 | 8.1439162  | 0.19280507 | 0.37507095 |
| ENSMUSG00000022881 | -0.4719402 | 4.35268671 | 0.19284575 | 0.37508661 |
| ENSMUSG00000028086 | -0.4641118 | 5.93420157 | 0.19323974 | 0.37578935 |
| ENSMUSG00000024112 | 0.55942754 | 1.47757428 | 0.19347379 | 0.37618085 |
| ENSMUSG00000094652 | -0.4782998 | 3.9001832  | 0.19353673 | 0.37623958 |
| ENSMUSG00000022769 | 0.47213143 | 4.01451026 | 0.19359809 | 0.37629524 |
| ENSMUSG00000028071 | 0.46690759 | 5.18121527 | 0.19389156 | 0.37680193 |
| ENSMUSG00000024878 | -0.4782494 | 3.9824959  | 0.19405151 | 0.37700283 |
| ENSMUSG00000016940 | 0.46773407 | 4.86979661 | 0.19407809 | 0.37700283 |
| ENSMUSG00000040365 | 0.46666866 | 5.20676331 | 0.19410911 | 0.37700283 |
| ENSMUSG00000001285 | 0.47247748 | 4.43046391 | 0.19412612 | 0.37700283 |
| ENSMUSG00000018501 | -0.459983  | 8.67416912 | 0.19421791 | 0.37711737 |
| ENSMUSG00000051107 | 0.5371948  | 1.80492806 | 0.19430252 | 0.37721794 |
| ENSMUSG00000057132 | -0.4625512 | 5.98621468 | 0.19448435 | 0.37750719 |
| ENSMUSG00000020070 | -0.4629254 | 5.85185934 | 0.19454365 | 0.37750843 |
| ENSMUSG00000033590 | 0.60083821 | 0.66476813 | 0.19455067 | 0.37750843 |
| ENSMUSG00000057093 | -0.5069793 | 2.2888609  | 0.19485842 | 0.37804178 |
| ENSMUSG00000091562 | -0.4820639 | 3.30429422 | 0.19492233 | 0.37810196 |
| ENSMUSG00000091931 | -0.4862148 | 3.11946221 | 0.19495677 | 0.37810495 |
| ENSMUSG00000089872 | 0.47693309 | 3.95366199 | 0.19500382 | 0.3781324  |

|                    |            |            |            |            |
|--------------------|------------|------------|------------|------------|
| ENSMUSG00000058454 | 0.46584678 | 4.77769084 | 0.19517299 | 0.3783966  |
| ENSMUSG00000074364 | 0.47557985 | 3.39280648 | 0.1952574  | 0.37849642 |
| ENSMUSG00000032096 | -0.459158  | 8.02967942 | 0.19540993 | 0.378671   |
| ENSMUSG00000018209 | -0.4586984 | 8.92565386 | 0.19541335 | 0.378671   |
| ENSMUSG00000030521 | -0.4623265 | 5.83283898 | 0.19562931 | 0.37899006 |
| ENSMUSG00000027195 | -0.4624017 | 5.70629253 | 0.19564885 | 0.37899006 |
| ENSMUSG00000007827 | -0.4640537 | 5.20635681 | 0.1956769  | 0.37899006 |
| ENSMUSG00000031072 | 0.4688153  | 4.35433345 | 0.19576068 | 0.37908845 |
| ENSMUSG00000030157 | -0.4593984 | 6.94313377 | 0.19599354 | 0.37947112 |
| ENSMUSG00000025931 | 0.49552991 | 2.80733866 | 0.19603026 | 0.37947112 |
| ENSMUSG00000038722 | -0.4609452 | 6.16433332 | 0.19605733 | 0.37947112 |
| ENSMUSG00000002808 | 0.56000131 | 1.54491884 | 0.19611935 | 0.37952725 |
| ENSMUSG00000031983 | 0.47973934 | 3.3934204  | 0.19631354 | 0.37980827 |
| ENSMUSG00000033423 | 0.47799702 | 3.8574843  | 0.19633064 | 0.37980827 |
| ENSMUSG00000021273 | 0.4652897  | 4.89399979 | 0.19647747 | 0.38002835 |
| ENSMUSG00000062729 | 0.45984464 | 6.52746966 | 0.19654312 | 0.38008665 |
| ENSMUSG00000026887 | -0.4745745 | 3.67780593 | 0.19657374 | 0.38008665 |
| ENSMUSG00000045868 | -0.4887194 | 3.13863634 | 0.19662279 | 0.38011756 |
| ENSMUSG00000020993 | -0.4618557 | 5.49453918 | 0.19670109 | 0.38020497 |
| ENSMUSG00000023018 | 0.46262841 | 5.32618428 | 0.19678229 | 0.38029798 |
| ENSMUSG00000026626 | -0.4576965 | 7.66163534 | 0.19708617 | 0.38081803 |
| ENSMUSG00000053965 | 0.54781116 | 1.34802563 | 0.19711764 | 0.38081803 |
| ENSMUSG00000028969 | 0.46493604 | 4.55429332 | 0.19717779 | 0.38087022 |
| ENSMUSG00000021733 | -0.4572366 | 7.9439315  | 0.19724877 | 0.38091696 |
| ENSMUSG00000029471 | 0.46239103 | 5.48090791 | 0.19727575 | 0.38091696 |
| ENSMUSG00000021692 | -0.4722892 | 4.11821849 | 0.1973014  | 0.38091696 |
| ENSMUSG00000032633 | 0.45943867 | 6.17556004 | 0.19737835 | 0.38100153 |
| ENSMUSG00000001134 | -0.4756338 | 3.52775593 | 0.19744112 | 0.3810587  |
| ENSMUSG00000078812 | 0.45686311 | 7.762234   | 0.19769095 | 0.38147684 |
| ENSMUSG00000054770 | -0.461061  | 5.25272872 | 0.19774776 | 0.38152241 |
| ENSMUSG00000039531 | -0.4579107 | 6.45398896 | 0.19804928 | 0.38204001 |
| ENSMUSG00000038780 | 0.46481004 | 4.84890709 | 0.19823122 | 0.38227546 |
| ENSMUSG00000002617 | -0.4790045 | 2.97381553 | 0.19823784 | 0.38227546 |
| ENSMUSG00000098702 | -0.493156  | 2.67009622 | 0.19841436 | 0.38252646 |
| ENSMUSG00000039844 | 0.45614242 | 7.79525641 | 0.19843456 | 0.38252646 |
| ENSMUSG00000053510 | -0.4554832 | 8.6837866  | 0.19862189 | 0.38282338 |
| ENSMUSG00000049960 | 0.46627823 | 4.59177648 | 0.19867122 | 0.38284249 |
| ENSMUSG00000022974 | -0.4567641 | 6.81307921 | 0.19869841 | 0.38284249 |
| ENSMUSG00000040747 | -0.4550584 | 9.55923014 | 0.19881263 | 0.38299836 |
| ENSMUSG00000066735 | -0.4630082 | 4.98195119 | 0.19914514 | 0.38340428 |
| ENSMUSG00000032763 | 0.46548741 | 4.44181255 | 0.19914925 | 0.38340428 |
| ENSMUSG00000028248 | -0.4549975 | 8.39157764 | 0.19915585 | 0.38340428 |
| ENSMUSG00000021431 | -0.4592542 | 5.59938365 | 0.19915676 | 0.38340428 |



|                    |            |            |            |            |
|--------------------|------------|------------|------------|------------|
| ENSMUSG00000032010 | 0.65273163 | 0.80992767 | 0.19928364 | 0.38354743 |
| ENSMUSG00000018446 | -0.4577172 | 6.2007144  | 0.19929785 | 0.38354743 |
| ENSMUSG00000020534 | -0.4819942 | 2.92357725 | 0.1993442  | 0.3835724  |
| ENSMUSG00000029397 | -0.4563764 | 6.61099085 | 0.19953161 | 0.38386877 |
| ENSMUSG00000003458 | 0.45587777 | 6.86705897 | 0.1996936  | 0.38411612 |
| ENSMUSG00000020380 | -0.4565529 | 6.41582188 | 0.19976285 | 0.38418503 |
| ENSMUSG00000027274 | -0.465118  | 4.44678867 | 0.19982054 | 0.3842317  |
| ENSMUSG00000070565 | 0.52429861 | 2.00474544 | 0.19998081 | 0.38447557 |
| ENSMUSG00000039530 | -0.462202  | 4.67330979 | 0.2000625  | 0.38451502 |
| ENSMUSG00000026889 | -0.457847  | 5.7345112  | 0.20009357 | 0.38451502 |
| ENSMUSG00000018372 | -0.4578977 | 5.72335664 | 0.20010168 | 0.38451502 |
| ENSMUSG00000021916 | -0.4637755 | 4.46424911 | 0.20027198 | 0.38477794 |
| ENSMUSG00000050705 | 0.46698313 | 4.15092742 | 0.20043523 | 0.38499456 |
| ENSMUSG00000098905 | -0.4626878 | 4.37718768 | 0.20045472 | 0.38499456 |
| ENSMUSG00000039747 | 0.45628336 | 6.11986116 | 0.2004852  | 0.38499456 |
| ENSMUSG00000052423 | 0.45747168 | 5.89564898 | 0.2005268  | 0.38501012 |
| ENSMUSG00000090000 | -0.4635351 | 4.2612961  | 0.20056939 | 0.38502757 |
| ENSMUSG00000072889 | -0.4628218 | 4.53203127 | 0.20065627 | 0.38513003 |
| ENSMUSG00000000056 | -0.4555265 | 6.62188725 | 0.20087775 | 0.38549078 |
| ENSMUSG00000035941 | -0.4535212 | 7.87990848 | 0.20096034 | 0.38558489 |
| ENSMUSG00000030869 | -0.4605055 | 4.96180811 | 0.20108732 | 0.38576415 |
| ENSMUSG00000036890 | -0.4591868 | 5.01555321 | 0.2012015  | 0.38591878 |
| ENSMUSG00000060636 | -0.4530692 | 7.83436385 | 0.20150378 | 0.38643408 |
| ENSMUSG00000032855 | 0.45494478 | 6.71800176 | 0.20157197 | 0.38650038 |
| ENSMUSG00000048970 | -0.4615682 | 4.65557664 | 0.20165063 | 0.38658672 |
| ENSMUSG00000021311 | -0.4551378 | 6.04925752 | 0.20172245 | 0.38665992 |
| ENSMUSG00000030386 | -0.4681891 | 3.90337491 | 0.20180566 | 0.38675492 |
| ENSMUSG00000030662 | -0.4531096 | 7.35196133 | 0.20187894 | 0.38676564 |
| ENSMUSG00000038335 | -0.4539559 | 6.61739304 | 0.20192553 | 0.38676564 |
| ENSMUSG00000037012 | 0.45500616 | 6.1173874  | 0.20192874 | 0.38676564 |
| ENSMUSG00000039382 | 0.46039031 | 4.4784185  | 0.20194583 | 0.38676564 |
| ENSMUSG00000029405 | -0.4523372 | 8.01102405 | 0.20205454 | 0.38690937 |
| ENSMUSG00000021072 | -0.4538542 | 6.50045959 | 0.20230715 | 0.38718441 |
| ENSMUSG00000044408 | -0.456519  | 5.40149382 | 0.20232557 | 0.38718441 |
| ENSMUSG00000039156 | -0.4561677 | 5.61501468 | 0.20233088 | 0.38718441 |
| ENSMUSG00000032308 | 0.45660763 | 5.49109478 | 0.20233291 | 0.38718441 |
| ENSMUSG00000079109 | -0.4562571 | 5.3863775  | 0.20238315 | 0.3872161  |
| ENSMUSG00000040139 | -0.4725767 | 3.23211164 | 0.20245052 | 0.38727573 |
| ENSMUSG00000030265 | -0.4526344 | 7.02741261 | 0.20250019 | 0.38727573 |
| ENSMUSG00000024065 | 0.4581244  | 5.06620191 | 0.20255604 | 0.38727573 |
| ENSMUSG00000022124 | -0.452508  | 7.04118467 | 0.20256907 | 0.38727573 |
| ENSMUSG00000056310 | 0.45814076 | 4.82318471 | 0.20258277 | 0.38727573 |
| ENSMUSG00000090659 | -0.4849223 | 2.59170511 | 0.20287559 | 0.38777102 |

|                    |            |            |            |            |
|--------------------|------------|------------|------------|------------|
| ENSMUSG00000021868 | 0.45995339 | 4.6816287  | 0.20303524 | 0.38801165 |
| ENSMUSG00000002428 | -0.4520421 | 6.85012926 | 0.20338939 | 0.38858909 |
| ENSMUSG00000078578 | -0.4511857 | 7.90278979 | 0.20340501 | 0.38858909 |
| ENSMUSG00000045211 | 0.47363973 | 3.50389196 | 0.20383247 | 0.38934102 |
| ENSMUSG00000031954 | -0.4529094 | 6.15951384 | 0.20425354 | 0.39008049 |
| ENSMUSG00000033083 | 0.46790157 | 3.68031352 | 0.20455073 | 0.39058315 |
| ENSMUSG00000055538 | 0.45473692 | 5.35976517 | 0.20498762 | 0.39135237 |
| ENSMUSG00000070822 | 0.47507085 | 3.30651685 | 0.20516127 | 0.39161886 |
| ENSMUSG00000004393 | 0.45520786 | 4.92177197 | 0.20527388 | 0.39171513 |
| ENSMUSG00000018666 | -0.4510274 | 6.51820861 | 0.20527985 | 0.39171513 |
| ENSMUSG00000026358 | 0.45002139 | 7.15351962 | 0.20535777 | 0.39179877 |
| ENSMUSG00000026999 | -0.4670946 | 3.80198919 | 0.20590065 | 0.39276933 |
| ENSMUSG00000017307 | 0.47329451 | 3.34725868 | 0.20601991 | 0.39293161 |
| ENSMUSG00000095335 | -0.4718149 | 3.51697399 | 0.20606069 | 0.39294419 |
| ENSMUSG00000066568 | -0.4485205 | 7.80269855 | 0.20611927 | 0.39299072 |
| ENSMUSG00000026739 | -0.4504448 | 6.1599237  | 0.20633237 | 0.39329303 |
| ENSMUSG00000028803 | 0.44998212 | 6.27574471 | 0.20634626 | 0.39329303 |
| ENSMUSG00000029833 | -0.4490946 | 6.84552243 | 0.20644015 | 0.3933513  |
| ENSMUSG00000026427 | 0.45331577 | 5.39253507 | 0.20644527 | 0.3933513  |
| ENSMUSG00000026657 | 0.45886729 | 4.31452152 | 0.20655829 | 0.39350141 |
| ENSMUSG00000051730 | -0.4662529 | 3.70034672 | 0.20674037 | 0.3937361  |
| ENSMUSG00000098178 | 0.44687868 | 10.3840814 | 0.20677655 | 0.3937361  |
| ENSMUSG00000034858 | -0.4482847 | 6.95170255 | 0.20678424 | 0.3937361  |
| ENSMUSG00000064215 | 0.45176054 | 5.78024992 | 0.20683057 | 0.39375909 |
| ENSMUSG00000090698 | -0.4580593 | 4.60976654 | 0.20694589 | 0.3939134  |
| ENSMUSG00000047945 | 0.44873621 | 6.92948913 | 0.20699349 | 0.39392621 |
| ENSMUSG00000036810 | -0.4525888 | 5.15624837 | 0.20702116 | 0.39392621 |
| ENSMUSG00000032892 | 0.54960942 | 1.29580857 | 0.20711524 | 0.39402898 |
| ENSMUSG00000047466 | -0.4508182 | 5.81974921 | 0.20717888 | 0.39402898 |
| ENSMUSG00000013736 | -0.4490648 | 6.38800727 | 0.20721049 | 0.39402898 |
| ENSMUSG00000090733 | -0.4466276 | 9.63250781 | 0.20723262 | 0.39402898 |
| ENSMUSG00000047030 | 0.45405863 | 4.80713556 | 0.20724656 | 0.39402898 |
| ENSMUSG00000032360 | -0.4884937 | 2.09794651 | 0.20740211 | 0.39423082 |
| ENSMUSG00000025169 | 0.48489938 | 2.41286593 | 0.20744764 | 0.39423082 |
| ENSMUSG00000032527 | 0.46280176 | 3.84515854 | 0.20748639 | 0.39423082 |
| ENSMUSG00000052713 | -0.4481886 | 6.75000805 | 0.2074899  | 0.39423082 |
| ENSMUSG00000047045 | 0.4489095  | 6.07501638 | 0.20762008 | 0.39441296 |
| ENSMUSG00000041057 | -0.4473981 | 7.08351647 | 0.20788246 | 0.39484614 |
| ENSMUSG00000037640 | -0.4532788 | 4.96072557 | 0.20794406 | 0.39488529 |
| ENSMUSG00000034595 | 0.44645082 | 7.67261273 | 0.20797177 | 0.39488529 |
| ENSMUSG00000003623 | -0.4497571 | 5.82866893 | 0.20802567 | 0.39492239 |
| ENSMUSG00000037119 | -0.4469819 | 6.9307328  | 0.20837861 | 0.39552711 |
| ENSMUSG00000098374 | -0.4622551 | 3.49994908 | 0.20854217 | 0.39577221 |

|                    |            |            |            |            |
|--------------------|------------|------------|------------|------------|
| ENSMUSG0000000934  | 0.49364219 | 2.27499741 | 0.20858322 | 0.39578477 |
| ENSMUSG00000008090 | 0.53558708 | 1.81621976 | 0.20872156 | 0.39587623 |
| ENSMUSG00000052783 | -0.5001458 | 1.79507524 | 0.20872156 | 0.39587623 |
| ENSMUSG00000020952 | -0.4483079 | 6.07890142 | 0.20873474 | 0.39587623 |
| ENSMUSG00000024308 | 0.44564593 | 7.78372057 | 0.20893693 | 0.39619433 |
| ENSMUSG00000039997 | -0.4449096 | 9.5179423  | 0.20897672 | 0.39620442 |
| ENSMUSG00000020718 | -0.4472901 | 6.10763825 | 0.20905339 | 0.39623442 |
| ENSMUSG00000046201 | -0.4454221 | 7.9571699  | 0.20906149 | 0.39623442 |
| ENSMUSG00000027469 | -0.4530992 | 4.88222587 | 0.20921854 | 0.39641253 |
| ENSMUSG00000029141 | -0.4481103 | 6.00897733 | 0.20928015 | 0.39641253 |
| ENSMUSG00000026356 | -0.4466617 | 6.5550334  | 0.2092911  | 0.39641253 |
| ENSMUSG00000027905 | -0.4485642 | 5.7648703  | 0.20930515 | 0.39641253 |
| ENSMUSG00000047044 | -0.45248   | 5.0461999  | 0.20932789 | 0.39641253 |
| ENSMUSG00000031521 | 0.47973852 | 2.9615032  | 0.20946243 | 0.39660198 |
| ENSMUSG00000001472 | 0.444819   | 8.08159836 | 0.20955566 | 0.39671315 |
| ENSMUSG00000022498 | -0.4465462 | 6.28430535 | 0.2096633  | 0.39681182 |
| ENSMUSG00000022477 | 0.44564054 | 6.91459557 | 0.20970405 | 0.39681182 |
| ENSMUSG00000044018 | -0.452984  | 4.81511508 | 0.20971133 | 0.39681182 |
| ENSMUSG00000085492 | -0.4727062 | 3.04398514 | 0.20997795 | 0.39710772 |
| ENSMUSG00000015747 | -0.4547412 | 4.61105773 | 0.2099952  | 0.39710772 |
| ENSMUSG00000027668 | -0.4492391 | 5.37692669 | 0.2100159  | 0.39710772 |
| ENSMUSG00000048911 | -0.469093  | 3.16733866 | 0.2100185  | 0.39710772 |
| ENSMUSG00000037262 | -0.450094  | 5.15025432 | 0.21004045 | 0.39710772 |
| ENSMUSG00000020412 | 0.44889292 | 5.68851951 | 0.21009531 | 0.39714613 |
| ENSMUSG00000020459 | -0.4480412 | 5.61312131 | 0.21016931 | 0.39720966 |
| ENSMUSG00000031843 | -0.4605009 | 3.86530423 | 0.21019803 | 0.39720966 |
| ENSMUSG00000029729 | -0.44732   | 5.69733273 | 0.2103273  | 0.39728998 |
| ENSMUSG00000074698 | -0.4446073 | 7.43758102 | 0.21036398 | 0.39728998 |
| ENSMUSG00000051675 | 0.48494022 | 2.71796804 | 0.21036786 | 0.39728998 |
| ENSMUSG00000023088 | 0.44569904 | 6.72411247 | 0.21037878 | 0.39728998 |
| ENSMUSG00000030965 | -0.4466887 | 5.98906049 | 0.21048885 | 0.39743254 |
| ENSMUSG00000044700 | 0.46284159 | 3.41896401 | 0.21054243 | 0.39745805 |
| ENSMUSG00000029247 | -0.4445984 | 7.24132405 | 0.21062154 | 0.39745805 |
| ENSMUSG00000020668 | 0.45758846 | 4.09669645 | 0.21063265 | 0.39745805 |
| ENSMUSG00000033439 | -0.4494243 | 5.03408954 | 0.21064067 | 0.39745805 |
| ENSMUSG00000020064 | -0.4436458 | 8.02725674 | 0.21079985 | 0.39769314 |
| ENSMUSG00000034949 | 0.64759861 | 0.85672097 | 0.21084292 | 0.39770911 |
| ENSMUSG00000024240 | -0.4442447 | 7.21816198 | 0.21096242 | 0.39786924 |
| ENSMUSG00000069808 | 0.52085166 | 1.78145247 | 0.21107708 | 0.39796323 |
| ENSMUSG00000020925 | -0.4501725 | 4.91408556 | 0.2110815  | 0.39796323 |
| ENSMUSG00000026159 | -0.4442563 | 6.89353899 | 0.21113069 | 0.3979907  |
| ENSMUSG00000036281 | 0.44655725 | 5.82333591 | 0.21158366 | 0.39876365 |
| ENSMUSG00000003808 | 0.44593788 | 5.61206454 | 0.21161011 | 0.39876365 |

|                    |            |            |            |            |
|--------------------|------------|------------|------------|------------|
| ENSMUSG00000050549 | -0.4629059 | 3.42755323 | 0.21182376 | 0.39910082 |
| ENSMUSG00000032258 | -0.4574885 | 3.53254828 | 0.21193368 | 0.39924249 |
| ENSMUSG00000076432 | -0.4428016 | 7.47439758 | 0.21217697 | 0.39957287 |
| ENSMUSG00000071014 | -0.4633343 | 3.09498382 | 0.2121853  | 0.39957287 |
| ENSMUSG00000033730 | 0.44737357 | 5.59583502 | 0.21221789 | 0.39957287 |
| ENSMUSG00000025968 | -0.4431576 | 7.0276254  | 0.21224811 | 0.39957287 |
| ENSMUSG00000002342 | 0.45274731 | 4.30844061 | 0.21236036 | 0.39971873 |
| ENSMUSG00000036943 | -0.4429541 | 6.9792656  | 0.21250538 | 0.39988366 |
| ENSMUSG00000020420 | -0.4513559 | 4.62889079 | 0.21252136 | 0.39988366 |
| ENSMUSG00000031578 | -0.4430921 | 6.90309954 | 0.21255234 | 0.39988366 |
| ENSMUSG00000025433 | -0.453947  | 4.0606914  | 0.21261636 | 0.39993865 |
| ENSMUSG00000029014 | -0.4433819 | 6.7007912  | 0.2127287  | 0.40008449 |
| ENSMUSG00000032834 | 0.4467325  | 5.17687756 | 0.21281019 | 0.40011952 |
| ENSMUSG00000040396 | -0.4448023 | 5.89162078 | 0.21282637 | 0.40011952 |
| ENSMUSG00000029173 | -0.4462502 | 5.22573956 | 0.21287737 | 0.40011952 |
| ENSMUSG00000033285 | -0.4429035 | 6.76604735 | 0.21292116 | 0.40011952 |
| ENSMUSG00000031885 | -0.442346  | 7.29084972 | 0.21292137 | 0.40011952 |
| ENSMUSG00000032336 | -0.4424136 | 6.83782373 | 0.21318911 | 0.40055718 |
| ENSMUSG00000052407 | -0.4509643 | 4.32674478 | 0.21328345 | 0.40061552 |
| ENSMUSG00000021716 | -0.4563271 | 3.70514898 | 0.21330469 | 0.40061552 |
| ENSMUSG00000031930 | 0.44307666 | 6.40052152 | 0.21332471 | 0.40061552 |
| ENSMUSG00000042790 | -0.4442444 | 5.75239523 | 0.21346124 | 0.40080642 |
| ENSMUSG00000097164 | -0.4523336 | 3.93066234 | 0.21360112 | 0.40100357 |
| ENSMUSG00000043263 | -0.44051   | 8.99469367 | 0.21364078 | 0.40101254 |
| ENSMUSG00000055413 | 0.44121335 | 7.52381807 | 0.21390472 | 0.40140236 |
| ENSMUSG00000099375 | 0.52242725 | 2.07352109 | 0.2139183  | 0.40140236 |
| ENSMUSG00000030337 | -0.4418608 | 6.37260576 | 0.2140026  | 0.40144294 |
| ENSMUSG00000054509 | -0.4406735 | 7.73159176 | 0.21400977 | 0.40144294 |
| ENSMUSG00000050144 | 0.44547029 | 5.0850351  | 0.21407449 | 0.40149882 |
| ENSMUSG00000040363 | 0.44165495 | 6.96863223 | 0.21414553 | 0.40154905 |
| ENSMUSG00000018548 | -0.4460325 | 5.11203875 | 0.21419195 | 0.40154905 |
| ENSMUSG00000086825 | -0.4404206 | 7.63692158 | 0.21420607 | 0.40154905 |
| ENSMUSG00000015112 | 0.53216513 | 1.45876423 | 0.21436081 | 0.40177361 |
| ENSMUSG00000022462 | -0.4396408 | 9.35348448 | 0.21441948 | 0.40181805 |
| ENSMUSG00000041058 | -0.4438349 | 5.45660716 | 0.21446296 | 0.40183403 |
| ENSMUSG00000063334 | -0.4422786 | 6.3468983  | 0.21457062 | 0.40197023 |
| ENSMUSG00000033809 | 0.47154025 | 2.94859885 | 0.21464755 | 0.40204881 |
| ENSMUSG00000032252 | -0.4472068 | 4.58224536 | 0.21480263 | 0.40227374 |
| ENSMUSG00000024188 | -0.4402165 | 7.29104877 | 0.21499378 | 0.40253069 |
| ENSMUSG00000014867 | 0.44053796 | 6.93050998 | 0.21505147 | 0.40253069 |
| ENSMUSG00000018042 | 0.44485382 | 5.26459879 | 0.21507927 | 0.40253069 |
| ENSMUSG00000041702 | -0.4425807 | 5.72995324 | 0.21508243 | 0.40253069 |
| ENSMUSG00000038141 | 0.57251961 | 0.8178455  | 0.21511492 | 0.40253069 |

|                    |            |            |            |            |
|--------------------|------------|------------|------------|------------|
| ENSMUSG00000024222 | 0.44413169 | 5.40651307 | 0.2152073  | 0.40263801 |
| ENSMUSG00000049709 | -0.4600084 | 3.33491444 | 0.2152995  | 0.40274495 |
| ENSMUSG00000002486 | 0.44903272 | 4.56663159 | 0.21540885 | 0.40288395 |
| ENSMUSG00000026202 | 0.43948535 | 6.99776303 | 0.21568765 | 0.40333977 |
| ENSMUSG00000059920 | -0.443377  | 5.38257828 | 0.21590638 | 0.40357386 |
| ENSMUSG00000039958 | -0.4519713 | 3.70931855 | 0.21591622 | 0.40357386 |
| ENSMUSG00000038412 | -0.4482011 | 4.70096627 | 0.21591816 | 0.40357386 |
| ENSMUSG00000020261 | 0.44410727 | 5.20142895 | 0.21602885 | 0.4037151  |
| ENSMUSG00000089862 | -0.4474005 | 4.46162034 | 0.21609797 | 0.40377863 |
| ENSMUSG00000053801 | 0.45243465 | 3.57626697 | 0.21618007 | 0.40383438 |
| ENSMUSG00000002147 | 0.43810201 | 8.47599769 | 0.21619806 | 0.40383438 |
| ENSMUSG00000021203 | -0.4506466 | 4.09053073 | 0.21626071 | 0.40388577 |
| ENSMUSG00000027368 | 0.43861704 | 7.52852867 | 0.21631945 | 0.40392983 |
| ENSMUSG00000074781 | -0.4400583 | 6.47779404 | 0.21645209 | 0.40411187 |
| ENSMUSG00000030276 | 0.45866489 | 3.70932773 | 0.21663196 | 0.40433113 |
| ENSMUSG00000036934 | -0.4497483 | 4.26514507 | 0.21663988 | 0.40433113 |
| ENSMUSG00000005501 | -0.4431967 | 5.16462416 | 0.21672098 | 0.40441683 |
| ENSMUSG00000007033 | 0.48036115 | 2.24652697 | 0.21683033 | 0.40455521 |
| ENSMUSG00000097333 | -0.4434691 | 5.32823934 | 0.21696299 | 0.40473703 |
| ENSMUSG00000068250 | -0.4664332 | 2.72646496 | 0.21713762 | 0.40492676 |
| ENSMUSG00000045176 | 0.46116685 | 3.32343053 | 0.21714975 | 0.40492676 |
| ENSMUSG00000024505 | -0.4689888 | 2.83227946 | 0.21723375 | 0.40492676 |
| ENSMUSG00000020441 | 0.45505945 | 3.58787273 | 0.21730265 | 0.40492676 |
| ENSMUSG00000040667 | -0.4383831 | 7.0487695  | 0.2173171  | 0.40492676 |
| ENSMUSG00000021458 | -0.4523462 | 3.64045246 | 0.21733084 | 0.40492676 |
| ENSMUSG00000032127 | 0.43896848 | 6.44569395 | 0.21735565 | 0.40492676 |
| ENSMUSG00000029407 | -0.4381275 | 7.1025559  | 0.21737836 | 0.40492676 |
| ENSMUSG00000021809 | 0.45852866 | 3.40571341 | 0.21738174 | 0.40492676 |
| ENSMUSG00000097277 | -0.4542009 | 3.34055171 | 0.21753846 | 0.40512269 |
| ENSMUSG00000076547 | -0.4693186 | 2.5335317  | 0.21755741 | 0.40512269 |
| ENSMUSG00000034751 | -0.4382123 | 6.49558156 | 0.21780848 | 0.40552453 |
| ENSMUSG00000060681 | -0.4433773 | 4.66463889 | 0.21791111 | 0.40564991 |
| ENSMUSG00000023044 | 0.47682925 | 2.99004555 | 0.21805785 | 0.40579912 |
| ENSMUSG00000058706 | -0.4372678 | 7.30512942 | 0.21809009 | 0.40579912 |
| ENSMUSG00000034473 | -0.4534887 | 3.51114852 | 0.21809717 | 0.40579912 |
| ENSMUSG00000025198 | -0.4398816 | 5.95691244 | 0.21823728 | 0.4059941  |
| ENSMUSG00000026843 | 0.45060373 | 4.20199588 | 0.21856266 | 0.40653362 |
| ENSMUSG00000027478 | -0.4572018 | 3.19782441 | 0.21870696 | 0.4067362  |
| ENSMUSG00000085622 | -0.4523919 | 3.86156416 | 0.21899588 | 0.40720764 |
| ENSMUSG00000023170 | 0.43883461 | 5.70189741 | 0.21903848 | 0.40722098 |
| ENSMUSG00000053553 | 0.5642496  | 1.28690981 | 0.21918123 | 0.40736784 |
| ENSMUSG00000015994 | -0.4385975 | 5.86632778 | 0.21918835 | 0.40736784 |
| ENSMUSG00000026005 | -0.4394207 | 5.73494054 | 0.21927122 | 0.40740941 |

|                    |            |            |            |            |
|--------------------|------------|------------|------------|------------|
| ENSMUSG00000025959 | -0.4375726 | 6.05929676 | 0.21931276 | 0.40740941 |
| ENSMUSG00000023307 | -0.4377739 | 6.13793292 | 0.21937445 | 0.40740941 |
| ENSMUSG00000027455 | 0.43995676 | 5.31552178 | 0.21937481 | 0.40740941 |
| ENSMUSG00000029298 | -0.4356023 | 7.6501241  | 0.21938793 | 0.40740941 |
| ENSMUSG00000030275 | -0.4348783 | 9.11382893 | 0.21944767 | 0.40745452 |
| ENSMUSG00000001036 | 0.47152089 | 2.45024785 | 0.21985454 | 0.40814405 |
| ENSMUSG00000022217 | 0.51660352 | 1.77535894 | 0.21992855 | 0.40821551 |
| ENSMUSG00000040818 | -0.4356133 | 7.123428   | 0.2200062  | 0.40829371 |
| ENSMUSG00000035944 | 0.4433713  | 4.42634123 | 0.22007974 | 0.40836427 |
| ENSMUSG00000005506 | -0.4345286 | 8.34038212 | 0.22013581 | 0.40840238 |
| ENSMUSG00000039217 | 0.4617725  | 3.45949432 | 0.22018053 | 0.40841942 |
| ENSMUSG00000041126 | 0.44787049 | 3.91105167 | 0.22037094 | 0.40867841 |
| ENSMUSG00000021357 | -0.4359295 | 6.52595104 | 0.22039126 | 0.40867841 |
| ENSMUSG00000035150 | -0.4344399 | 7.96104962 | 0.2204557  | 0.40873198 |
| ENSMUSG00000026027 | -0.4386164 | 5.52090357 | 0.22059742 | 0.40892878 |
| ENSMUSG00000063362 | -0.4409705 | 4.87668658 | 0.22073483 | 0.40911753 |
| ENSMUSG00000040339 | 0.43773297 | 5.70621108 | 0.22083337 | 0.40923016 |
| ENSMUSG00000005534 | -0.4354153 | 6.33684831 | 0.22086681 | 0.40923016 |
| ENSMUSG00000002661 | 0.50235148 | 1.6404466  | 0.22098217 | 0.4093247  |
| ENSMUSG00000039001 | 0.4344606  | 7.50485401 | 0.22098905 | 0.4093247  |
| ENSMUSG00000021243 | -0.4392108 | 5.23753353 | 0.22102567 | 0.40932658 |
| ENSMUSG00000012350 | 0.53049277 | 1.12937693 | 0.22111267 | 0.40935397 |
| ENSMUSG00000030878 | -0.439156  | 5.38941564 | 0.22114931 | 0.40935397 |
| ENSMUSG00000025940 | -0.4449333 | 4.30323298 | 0.22115339 | 0.40935397 |
| ENSMUSG00000057191 | 0.43490866 | 6.83062137 | 0.22118291 | 0.40935397 |
| ENSMUSG00000027667 | -0.4372549 | 5.59068378 | 0.22124522 | 0.40939342 |
| ENSMUSG00000078453 | -0.4376425 | 5.65707587 | 0.22129207 | 0.40939342 |
| ENSMUSG00000012535 | -0.4340667 | 7.42188644 | 0.22131107 | 0.40939342 |
| ENSMUSG00000033594 | 0.48929711 | 1.90174802 | 0.22146014 | 0.40956586 |
| ENSMUSG00000033068 | 0.43785769 | 5.30642561 | 0.22147554 | 0.40956586 |
| ENSMUSG00000097571 | -0.4859949 | 1.40455827 | 0.22151767 | 0.40957786 |
| ENSMUSG00000019254 | 0.43515717 | 6.44810584 | 0.22159515 | 0.40965523 |
| ENSMUSG00000043140 | 0.4423582  | 4.35604452 | 0.22180023 | 0.40996843 |
| ENSMUSG00000020956 | 0.49433214 | 2.28776081 | 0.22184013 | 0.40997625 |
| ENSMUSG00000027088 | -0.4381829 | 5.29124263 | 0.22197293 | 0.41009924 |
| ENSMUSG00000025316 | 0.43810061 | 5.07719175 | 0.22197803 | 0.41009924 |
| ENSMUSG00000006134 | -0.4341824 | 6.8191771  | 0.22208007 | 0.41014705 |
| ENSMUSG00000037336 | 0.44152246 | 4.46623183 | 0.22212934 | 0.41014705 |
| ENSMUSG00000022314 | -0.4327578 | 8.20714373 | 0.22213633 | 0.41014705 |
| ENSMUSG00000020664 | -0.4342846 | 6.62866744 | 0.22214663 | 0.41014705 |
| ENSMUSG00000001415 | 0.43382468 | 6.81556058 | 0.22221912 | 0.41021501 |
| ENSMUSG00000009640 | 0.44791071 | 3.77372665 | 0.22244649 | 0.41056879 |
| ENSMUSG00000094124 | -0.4598506 | 2.65474698 | 0.2227062  | 0.41098214 |

|                    |            |            |            |            |
|--------------------|------------|------------|------------|------------|
| ENSMUSG00000020694 | -0.4329553 | 6.92567712 | 0.22306751 | 0.41158283 |
| ENSMUSG00000021423 | -0.4317178 | 7.9886527  | 0.22336721 | 0.41206966 |
| ENSMUSG00000051498 | 0.44698359 | 3.87960154 | 0.22371203 | 0.4125078  |
| ENSMUSG00000028826 | -0.433494  | 6.06988615 | 0.22374023 | 0.4125078  |
| ENSMUSG00000049323 | -0.4314777 | 7.75167535 | 0.22374353 | 0.4125078  |
| ENSMUSG00000001785 | -0.4345269 | 5.74594672 | 0.22375642 | 0.4125078  |
| ENSMUSG00000038806 | -0.4325103 | 6.57285458 | 0.22378413 | 0.4125078  |
| ENSMUSG00000028409 | -0.4321975 | 6.95244891 | 0.2238989  | 0.41263969 |
| ENSMUSG00000097743 | -0.4395833 | 4.762788   | 0.22392748 | 0.41263969 |
| ENSMUSG00000030301 | 0.44264736 | 3.77036512 | 0.22402578 | 0.41275466 |
| ENSMUSG00000034636 | -0.4314751 | 7.32466015 | 0.2241702  | 0.41295456 |
| ENSMUSG00000032621 | -0.4326055 | 6.32018712 | 0.22421939 | 0.41297899 |
| ENSMUSG00000029552 | 0.43350503 | 5.94544896 | 0.22448272 | 0.41339777 |
| ENSMUSG00000047832 | 0.43626759 | 4.98065387 | 0.2245953  | 0.41348851 |
| ENSMUSG00000035919 | 0.43689395 | 5.13677689 | 0.22460393 | 0.41348851 |
| ENSMUSG00000042063 | -0.4364698 | 4.91417534 | 0.22464233 | 0.41349296 |
| ENSMUSG00000059689 | 0.45058724 | 3.20962585 | 0.22471647 | 0.41356321 |
| ENSMUSG00000024319 | 0.43334125 | 5.79325648 | 0.22492584 | 0.41388227 |
| ENSMUSG00000038489 | 0.48752907 | 1.69671212 | 0.22497038 | 0.41389798 |
| ENSMUSG00000035764 | -0.4363233 | 4.98108539 | 0.2250694  | 0.41401389 |
| ENSMUSG00000097101 | 0.51119865 | 1.11432393 | 0.22517552 | 0.41414282 |
| ENSMUSG00000030123 | 0.44062201 | 4.38082563 | 0.22531194 | 0.41426788 |
| ENSMUSG00000035311 | -0.4307052 | 6.90994445 | 0.2253156  | 0.41426788 |
| ENSMUSG00000032280 | 0.43025003 | 7.2987797  | 0.22547265 | 0.41449035 |
| ENSMUSG00000061731 | 0.45165874 | 3.49892656 | 0.22559777 | 0.41461688 |
| ENSMUSG00000023216 | -0.4335235 | 5.80315059 | 0.22561362 | 0.41461688 |
| ENSMUSG00000000088 | -0.4322808 | 6.10217368 | 0.22569926 | 0.41466505 |
| ENSMUSG00000018415 | -0.4333373 | 5.69513404 | 0.22571198 | 0.41466505 |
| ENSMUSG00000033793 | -0.4321158 | 5.99567179 | 0.22582661 | 0.41480935 |
| ENSMUSG00000049076 | -0.42998   | 7.19277671 | 0.22586543 | 0.41481437 |
| ENSMUSG00000020752 | 0.43181884 | 6.00396805 | 0.2261772  | 0.41532059 |
| ENSMUSG00000046404 | -0.4332576 | 5.38138203 | 0.22639762 | 0.41565894 |
| ENSMUSG00000031425 | -0.4554276 | 2.84768106 | 0.22644783 | 0.41568474 |
| ENSMUSG00000036430 | 0.47414459 | 2.093591   | 0.22656237 | 0.41582858 |
| ENSMUSG00000066755 | 0.53039288 | 1.53233815 | 0.22659941 | 0.41583018 |
| ENSMUSG00000031529 | -0.4306407 | 6.16909949 | 0.22675526 | 0.41600259 |
| ENSMUSG00000020453 | 0.43150935 | 5.59425661 | 0.22679812 | 0.41600259 |
| ENSMUSG00000044600 | -0.4300949 | 6.50979981 | 0.22680193 | 0.41600259 |
| ENSMUSG00000038827 | -0.4323255 | 5.46909799 | 0.22692299 | 0.41615091 |
| ENSMUSG00000038446 | -0.4294917 | 6.86978058 | 0.2269552  | 0.41615091 |
| ENSMUSG00000031352 | -0.4330148 | 5.33654205 | 0.2270171  | 0.41618204 |
| ENSMUSG00000015837 | 0.42873164 | 7.51091519 | 0.22704549 | 0.41618204 |
| ENSMUSG00000079215 | -0.4305863 | 6.22092846 | 0.2270808  | 0.41618204 |

|                    |            |            |            |            |
|--------------------|------------|------------|------------|------------|
| ENSMUSG00000042042 | -0.4311767 | 5.78358731 | 0.2271431  | 0.41622986 |
| ENSMUSG00000031931 | -0.4393388 | 4.34587707 | 0.22721061 | 0.41628721 |
| ENSMUSG00000024949 | -0.4276365 | 8.84444549 | 0.22726776 | 0.41632556 |
| ENSMUSG00000015312 | 0.43026304 | 6.12732876 | 0.22753212 | 0.41674343 |
| ENSMUSG00000024668 | -0.4298174 | 6.38186392 | 0.22764936 | 0.41689174 |
| ENSMUSG00000023961 | 0.45788547 | 3.13490944 | 0.22769335 | 0.41690587 |
| ENSMUSG00000020955 | -0.4405316 | 4.13888254 | 0.22774913 | 0.41694159 |
| ENSMUSG00000019948 | -0.4426292 | 3.99225133 | 0.22781107 | 0.41698857 |
| ENSMUSG00000024006 | -0.4273505 | 7.92870076 | 0.22793528 | 0.4171495  |
| ENSMUSG00000037337 | 0.4273566  | 7.72576496 | 0.22826021 | 0.41767767 |
| ENSMUSG00000053332 | -0.4269985 | 8.11266571 | 0.22835433 | 0.41776131 |
| ENSMUSG00000032324 | 0.44401228 | 3.80076378 | 0.22839853 | 0.41776131 |
| ENSMUSG00000040350 | 0.42718728 | 8.12493979 | 0.22842997 | 0.41776131 |
| ENSMUSG00000051396 | -0.42859   | 6.44424109 | 0.22845129 | 0.41776131 |
| ENSMUSG00000030091 | 0.42689465 | 8.02552725 | 0.22856063 | 0.41789478 |
| ENSMUSG00000040483 | 0.43266639 | 5.20972797 | 0.2287541  | 0.41818199 |
| ENSMUSG00000039682 | 0.43702713 | 4.53562195 | 0.22881007 | 0.41821183 |
| ENSMUSG00000035049 | 0.43674436 | 4.27485217 | 0.22884319 | 0.41821183 |
| ENSMUSG00000066880 | -0.4391655 | 3.85829679 | 0.22890893 | 0.41826548 |
| ENSMUSG00000018199 | -0.4469562 | 2.96908048 | 0.22901433 | 0.41839097 |
| ENSMUSG00000035845 | 0.4366414  | 4.29907738 | 0.2290504  | 0.41839097 |
| ENSMUSG00000025059 | -0.4420894 | 3.88527726 | 0.22911495 | 0.41839602 |
| ENSMUSG00000019943 | -0.4263169 | 7.7660614  | 0.22914989 | 0.41839602 |
| ENSMUSG00000032113 | -0.4575047 | 2.80683796 | 0.22916607 | 0.41839602 |
| ENSMUSG00000021772 | -0.4360585 | 4.24592104 | 0.22924129 | 0.41839602 |
| ENSMUSG00000043683 | 0.42998118 | 5.53937646 | 0.22927239 | 0.41839602 |
| ENSMUSG00000024900 | -0.4268061 | 6.80546114 | 0.22933222 | 0.41839602 |
| ENSMUSG00000037860 | -0.4267329 | 7.16343648 | 0.22933316 | 0.41839602 |
| ENSMUSG00000022889 | -0.43181   | 5.25693806 | 0.22938164 | 0.41839602 |
| ENSMUSG00000017376 | -0.4309745 | 5.15444875 | 0.22939558 | 0.41839602 |
| ENSMUSG00000020326 | -0.4269938 | 7.11665895 | 0.22942052 | 0.41839602 |
| ENSMUSG00000095432 | -0.4323882 | 5.04619643 | 0.22945354 | 0.41839602 |
| ENSMUSG00000066258 | -0.4258719 | 7.8063873  | 0.22973325 | 0.4188396  |
| ENSMUSG00000055436 | -0.4254179 | 8.42324826 | 0.22983162 | 0.4189525  |
| ENSMUSG00000074056 | -0.5167941 | 1.49064447 | 0.22995029 | 0.41910237 |
| ENSMUSG00000046364 | -0.4253539 | 8.47382442 | 0.23002768 | 0.41917694 |
| ENSMUSG00000005698 | -0.4253166 | 8.25851087 | 0.23014984 | 0.41933309 |
| ENSMUSG00000038611 | 0.42673414 | 6.68860325 | 0.23024316 | 0.41943663 |
| ENSMUSG00000033767 | -0.4249176 | 8.62031528 | 0.23029505 | 0.41946467 |
| ENSMUSG00000035521 | 0.43772244 | 4.32272559 | 0.23036839 | 0.41951188 |
| ENSMUSG00000042121 | 0.42660217 | 6.61307754 | 0.23039395 | 0.41951188 |
| ENSMUSG00000049882 | -0.4551027 | 2.77324894 | 0.23052792 | 0.41968934 |
| ENSMUSG00000054720 | 0.42770183 | 6.20925895 | 0.23068299 | 0.41982049 |



|                    |            |            |            |            |
|--------------------|------------|------------|------------|------------|
| ENSMUSG00000044768 | -0.4262825 | 6.37782927 | 0.2307093  | 0.41982049 |
| ENSMUSG00000049439 | -0.4338036 | 4.52178567 | 0.23070953 | 0.41982049 |
| ENSMUSG00000023912 | -0.4577963 | 2.28902823 | 0.23074691 | 0.41982205 |
| ENSMUSG00000032652 | -0.4276145 | 5.99595736 | 0.23080423 | 0.41985515 |
| ENSMUSG00000069237 | -0.4296782 | 5.470342   | 0.23083815 | 0.41985515 |
| ENSMUSG00000095403 | -0.4286865 | 5.27048555 | 0.23103528 | 0.42014721 |
| ENSMUSG00000047996 | 0.58597434 | 0.71798272 | 0.2311199  | 0.42023462 |
| ENSMUSG00000029275 | -0.438455  | 3.73517505 | 0.23124755 | 0.42040022 |
| ENSMUSG00000083083 | -0.491712  | 1.20245598 | 0.23134976 | 0.42051953 |
| ENSMUSG00000038119 | -0.430353  | 4.9375097  | 0.23155126 | 0.4207917  |
| ENSMUSG00000054939 | -0.4642704 | 2.0723564  | 0.23157271 | 0.4207917  |
| ENSMUSG00000064351 | -0.4232041 | 13.1202695 | 0.23164704 | 0.42086024 |
| ENSMUSG00000040195 | -0.4278668 | 5.54905431 | 0.23188617 | 0.42115967 |
| ENSMUSG00000038116 | -0.4259062 | 6.13309197 | 0.23191956 | 0.42115967 |
| ENSMUSG00000024151 | -0.4256567 | 6.32387961 | 0.23200709 | 0.42115967 |
| ENSMUSG00000081769 | 0.54186223 | 0.81152574 | 0.23203168 | 0.42115967 |
| ENSMUSG00000089756 | -0.5287077 | 0.78992333 | 0.23203168 | 0.42115967 |
| ENSMUSG00000090319 | -0.4911261 | 0.80321873 | 0.23203168 | 0.42115967 |
| ENSMUSG00000091144 | -0.4322373 | 4.41957044 | 0.23212635 | 0.42125897 |
| ENSMUSG00000008226 | -0.4353107 | 4.33783507 | 0.23218968 | 0.42125897 |
| ENSMUSG00000040029 | -0.4247729 | 6.74414674 | 0.23219633 | 0.42125897 |
| ENSMUSG00000032478 | 0.45721686 | 2.5358531  | 0.23237543 | 0.42151737 |
| ENSMUSG00000038762 | 0.42422723 | 6.74153199 | 0.23255986 | 0.42178536 |
| ENSMUSG00000036768 | -0.4351545 | 4.33208758 | 0.23273233 | 0.42203158 |
| ENSMUSG00000025279 | 0.42683979 | 5.74954046 | 0.23288012 | 0.42223297 |
| ENSMUSG00000016921 | -0.4225046 | 8.66556782 | 0.23295115 | 0.42229514 |
| ENSMUSG00000004085 | -0.4361405 | 3.91387236 | 0.23311136 | 0.42248796 |
| ENSMUSG00000024833 | 0.42843026 | 5.00042861 | 0.23313103 | 0.42248796 |
| ENSMUSG00000020492 | -0.4361472 | 3.94639706 | 0.23328319 | 0.42265703 |
| ENSMUSG00000021500 | -0.4225219 | 7.98439212 | 0.23329785 | 0.42265703 |
| ENSMUSG00000026433 | 0.43580855 | 3.86008969 | 0.23359298 | 0.423125   |
| ENSMUSG00000018171 | -0.4236992 | 6.60010903 | 0.23363955 | 0.42314268 |
| ENSMUSG00000036552 | -0.4283438 | 4.79084115 | 0.23369834 | 0.42318204 |
| ENSMUSG00000055670 | -0.4221814 | 7.49406996 | 0.23373491 | 0.42318204 |
| ENSMUSG00000055567 | 0.47545511 | 2.03289041 | 0.23387412 | 0.4233674  |
| ENSMUSG00000031701 | -0.4223216 | 7.56107564 | 0.23394871 | 0.42343574 |
| ENSMUSG00000058239 | 0.42433621 | 6.00459269 | 0.23401828 | 0.42349498 |
| ENSMUSG00000023995 | 0.43897864 | 3.81110518 | 0.2341562  | 0.42359979 |
| ENSMUSG00000027858 | -0.4301863 | 4.51092913 | 0.23415686 | 0.42359979 |
| ENSMUSG00000025938 | 0.45417528 | 3.15324226 | 0.23418675 | 0.42359979 |
| ENSMUSG00000049232 | -0.4242759 | 6.06166558 | 0.23428741 | 0.42371519 |
| ENSMUSG00000067768 | -0.4334878 | 4.02108614 | 0.23436023 | 0.42378022 |
| ENSMUSG00000056999 | -0.4225092 | 6.96659547 | 0.23462808 | 0.42417717 |

|                    |            |            |            |            |
|--------------------|------------|------------|------------|------------|
| ENSMUSG00000028955 | -0.4232238 | 6.29704714 | 0.23465355 | 0.42417717 |
| ENSMUSG00000028292 | -0.4278517 | 4.9407048  | 0.23476872 | 0.42431862 |
| ENSMUSG00000021906 | -0.4333162 | 4.02461488 | 0.23507701 | 0.42480903 |
| ENSMUSG00000028233 | -0.4221932 | 6.59645962 | 0.23540516 | 0.42533516 |
| ENSMUSG00000060373 | -0.4203984 | 8.55438359 | 0.23544465 | 0.42533966 |
| ENSMUSG00000040242 | -0.4210867 | 7.45992133 | 0.23549775 | 0.42536874 |
| ENSMUSG00000026615 | -0.4208192 | 7.61233652 | 0.2355373  | 0.42537334 |
| ENSMUSG00000002320 | 0.42481813 | 5.40802412 | 0.23560386 | 0.42542671 |
| ENSMUSG00000028737 | 0.43861752 | 3.76961002 | 0.23565493 | 0.42545208 |
| ENSMUSG00000047798 | 0.43379659 | 4.72147289 | 0.23591453 | 0.42585389 |
| ENSMUSG00000042903 | 0.42555746 | 5.0213305  | 0.23618946 | 0.42628322 |
| ENSMUSG00000039748 | -0.4551015 | 2.55712726 | 0.23637572 | 0.42655242 |
| ENSMUSG00000004328 | 0.53324143 | 1.33252928 | 0.23664166 | 0.42696528 |
| ENSMUSG00000042548 | -0.4198389 | 7.07593785 | 0.236986   | 0.42751947 |
| ENSMUSG00000067567 | -0.4344622 | 3.70253322 | 0.23719828 | 0.42783527 |
| ENSMUSG00000073627 | -0.469065  | 2.19727124 | 0.23727692 | 0.42790997 |
| ENSMUSG00000031176 | -0.4213113 | 6.06306296 | 0.23734508 | 0.42791717 |
| ENSMUSG00000059995 | 0.42029745 | 6.48845261 | 0.23735536 | 0.42791717 |
| ENSMUSG00000039989 | 0.42449927 | 5.43719955 | 0.23747277 | 0.42794773 |
| ENSMUSG00000040681 | -0.4190232 | 7.78553947 | 0.23747484 | 0.42794773 |
| ENSMUSG00000026213 | 0.42122547 | 6.31170372 | 0.237484   | 0.42794773 |
| ENSMUSG00000063229 | 0.41897035 | 7.39296779 | 0.2375506  | 0.42800065 |
| ENSMUSG00000054792 | 0.42253109 | 5.77928181 | 0.23760045 | 0.42802338 |
| ENSMUSG00000030403 | 0.41866574 | 7.7612654  | 0.23766874 | 0.42807931 |
| ENSMUSG00000046027 | 0.42313746 | 5.51586105 | 0.23810041 | 0.42878962 |
| ENSMUSG00000090862 | -0.4178086 | 8.8187583  | 0.23817773 | 0.42886169 |
| ENSMUSG00000064345 | -0.417309  | 10.7344847 | 0.23831171 | 0.42899056 |
| ENSMUSG00000007836 | -0.4202731 | 6.22540094 | 0.23833732 | 0.42899056 |
| ENSMUSG00000040040 | -0.4362271 | 3.32004447 | 0.23837342 | 0.42899056 |
| ENSMUSG00000010751 | -0.4365126 | 3.34810418 | 0.23841908 | 0.42899056 |
| ENSMUSG00000027575 | 0.42182673 | 5.55364758 | 0.2384359  | 0.42899056 |
| ENSMUSG00000035632 | 0.41926437 | 6.31476681 | 0.2386781  | 0.42935912 |
| ENSMUSG00000001445 | 0.42168286 | 5.21729798 | 0.23882804 | 0.42956162 |
| ENSMUSG00000015733 | -0.4174952 | 8.00230697 | 0.23887367 | 0.42957648 |
| ENSMUSG00000021012 | -0.4183051 | 6.99361895 | 0.23900827 | 0.42972766 |
| ENSMUSG00000018697 | -0.421264  | 5.53965364 | 0.23907873 | 0.42972766 |
| ENSMUSG00000074513 | -0.4209517 | 5.62976051 | 0.23909018 | 0.42972766 |
| ENSMUSG00000032116 | -0.4176177 | 7.65766797 | 0.23910728 | 0.42972766 |
| ENSMUSG00000038550 | -0.4260503 | 4.45516035 | 0.23919206 | 0.42981284 |
| ENSMUSG00000022803 | 0.65563327 | 0.23035139 | 0.2392521  | 0.42985353 |
| ENSMUSG00000003955 | -0.4326868 | 3.98280738 | 0.23930627 | 0.42988366 |
| ENSMUSG00000007041 | 0.41701534 | 7.72801347 | 0.23945577 | 0.43008501 |
| ENSMUSG00000028646 | -0.4182791 | 6.56451482 | 0.23949541 | 0.43008901 |

|                    |            |            |            |            |
|--------------------|------------|------------|------------|------------|
| ENSMUSG00000030653 | -0.4193061 | 6.07891787 | 0.23958344 | 0.43017989 |
| ENSMUSG00000052534 | 0.44171498 | 3.52936256 | 0.2397213  | 0.43029364 |
| ENSMUSG00000038187 | -0.4218017 | 5.20194026 | 0.23972166 | 0.43029364 |
| ENSMUSG00000021629 | -0.4172308 | 7.21098055 | 0.23988604 | 0.43052146 |
| ENSMUSG00000095007 | -0.428382  | 4.29078665 | 0.24019758 | 0.43101329 |
| ENSMUSG00000066637 | -0.4511794 | 2.66858951 | 0.24032181 | 0.4311689  |
| ENSMUSG00000008398 | 0.41978709 | 5.82350114 | 0.24055855 | 0.43152629 |
| ENSMUSG00000059669 | -0.4194655 | 5.56078338 | 0.24062592 | 0.43156701 |
| ENSMUSG00000024944 | 0.44215041 | 3.26074649 | 0.24065633 | 0.43156701 |
| ENSMUSG00000020707 | 0.43686367 | 3.5453707  | 0.24073056 | 0.43163278 |
| ENSMUSG00000021591 | 0.42849995 | 4.06743787 | 0.24078847 | 0.43166929 |
| ENSMUSG00000016087 | -0.416113  | 7.46180728 | 0.24103206 | 0.43203859 |
| ENSMUSG00000022024 | -0.4175993 | 6.2371517  | 0.2410983  | 0.43208996 |
| ENSMUSG00000036438 | -0.415452  | 7.76692749 | 0.24135921 | 0.43247372 |
| ENSMUSG00000022814 | -0.4208196 | 5.33141194 | 0.24138768 | 0.43247372 |
| ENSMUSG00000033039 | 0.4171312  | 6.28842737 | 0.24149587 | 0.43260014 |
| ENSMUSG00000022890 | -0.4176195 | 6.14885419 | 0.24156508 | 0.43265669 |
| ENSMUSG00000033400 | -0.4193881 | 5.25171474 | 0.24168392 | 0.43276565 |
| ENSMUSG00000026832 | -0.4147023 | 8.67764804 | 0.24170122 | 0.43276565 |
| ENSMUSG00000094689 | 0.43313297 | 3.30326653 | 0.24184996 | 0.43291046 |
| ENSMUSG00000069184 | -0.4811809 | 1.7667973  | 0.24185741 | 0.43291046 |
| ENSMUSG00000035678 | 0.41921502 | 3.00995834 | 0.24199024 | 0.43308078 |
| ENSMUSG00000022322 | -0.446889  | 2.76770075 | 0.24207957 | 0.4331732  |
| ENSMUSG00000076550 | -0.4511279 | 2.53366062 | 0.24214684 | 0.43322613 |
| ENSMUSG00000029131 | -0.4163629 | 6.3275161  | 0.24233265 | 0.43338897 |
| ENSMUSG00000026766 | -0.4183886 | 5.50865793 | 0.24233641 | 0.43338897 |
| ENSMUSG00000061207 | -0.420504  | 4.50852732 | 0.24235096 | 0.43338897 |
| ENSMUSG00000032422 | -0.4177661 | 5.65744809 | 0.24243356 | 0.43346925 |
| ENSMUSG00000034908 | 0.41460386 | 7.55313885 | 0.24255978 | 0.43362748 |
| ENSMUSG00000015748 | -0.4166003 | 6.22987921 | 0.2426656  | 0.43374919 |
| ENSMUSG00000000531 | 0.4330428  | 4.17483442 | 0.24274894 | 0.4338307  |
| ENSMUSG00000027879 | -0.4170759 | 5.82948225 | 0.24306669 | 0.43433105 |
| ENSMUSG00000057396 | -0.4380725 | 3.04412582 | 0.24336727 | 0.43480055 |
| ENSMUSG00000021235 | 0.42818054 | 3.70871086 | 0.24344974 | 0.43488031 |
| ENSMUSG00000050891 | -0.4359699 | 2.84701413 | 0.24364818 | 0.43501676 |
| ENSMUSG00000038342 | -0.4130864 | 8.20286187 | 0.24365636 | 0.43501676 |
| ENSMUSG00000001054 | 0.41885101 | 5.29051025 | 0.24366487 | 0.43501676 |
| ENSMUSG00000031161 | 0.42123709 | 4.61347909 | 0.24370133 | 0.43501676 |
| ENSMUSG00000048327 | -0.4273057 | 4.00398146 | 0.24371535 | 0.43501676 |
| ENSMUSG00000021981 | -0.4148227 | 6.52749992 | 0.24380398 | 0.4350785  |
| ENSMUSG00000031530 | 0.41654709 | 6.10334967 | 0.24382564 | 0.4350785  |
| ENSMUSG00000015750 | 0.41918016 | 5.11506339 | 0.24390077 | 0.43514501 |
| ENSMUSG00000022812 | -0.4142029 | 6.61125268 | 0.24411725 | 0.43546366 |

|                    |            |            |            |            |
|--------------------|------------|------------|------------|------------|
| ENSMUSG00000030956 | 0.41656072 | 5.51993594 | 0.24435409 | 0.43581851 |
| ENSMUSG00000022722 | 0.53349111 | 0.97439313 | 0.24461552 | 0.4362171  |
| ENSMUSG00000037072 | -0.4134786 | 6.88407461 | 0.24465454 | 0.43621901 |
| ENSMUSG00000036052 | 0.42151539 | 4.51491757 | 0.24494821 | 0.43663556 |
| ENSMUSG00000005674 | 0.41909538 | 4.50993334 | 0.24496413 | 0.43663556 |
| ENSMUSG00000074476 | 0.51523659 | 1.22443263 | 0.24509386 | 0.43673318 |
| ENSMUSG00000060586 | 0.41118387 | 10.9937134 | 0.2452014  | 0.43673318 |
| ENSMUSG00000047227 | -0.4635036 | 1.63005059 | 0.24520707 | 0.43673318 |
| ENSMUSG00000003849 | -0.4906968 | 1.58301214 | 0.24522539 | 0.43673318 |
| ENSMUSG00000048106 | 0.49746336 | 1.46468137 | 0.24524759 | 0.43673318 |
| ENSMUSG00000029510 | 0.44177177 | 2.84795435 | 0.24528486 | 0.43673318 |
| ENSMUSG00000049489 | 0.43924257 | 2.8480904  | 0.24528486 | 0.43673318 |
| ENSMUSG00000027843 | -0.4129832 | 6.50960616 | 0.24542147 | 0.43690875 |
| ENSMUSG00000059142 | -0.4176376 | 4.6508568  | 0.24551308 | 0.43694346 |
| ENSMUSG00000053453 | -0.4163238 | 5.40175612 | 0.24551699 | 0.43694346 |
| ENSMUSG00000034801 | -0.413603  | 6.27416599 | 0.24555651 | 0.43694615 |
| ENSMUSG00000024042 | -0.4113736 | 8.07974279 | 0.24569228 | 0.43708177 |
| ENSMUSG00000022900 | -0.4249866 | 3.55484463 | 0.24570878 | 0.43708177 |
| ENSMUSG00000096715 | -0.4215289 | 4.31582095 | 0.2461372  | 0.43777613 |
| ENSMUSG00000017707 | -0.4098345 | 11.2436527 | 0.24675138 | 0.4388006  |
| ENSMUSG00000029073 | 0.44696346 | 2.83426182 | 0.24695699 | 0.43909831 |
| ENSMUSG00000027323 | -0.4287044 | 3.48188584 | 0.24700719 | 0.43911965 |
| ENSMUSG00000054843 | 0.42578816 | 4.22275087 | 0.24714202 | 0.4392914  |
| ENSMUSG00000016833 | -0.42452   | 4.02952104 | 0.24729307 | 0.4394412  |
| ENSMUSG00000045538 | 0.44089973 | 2.74224975 | 0.24730275 | 0.4394412  |
| ENSMUSG00000026374 | -0.4107934 | 6.99513088 | 0.24753723 | 0.43978987 |
| ENSMUSG00000045414 | -0.4218881 | 3.9590898  | 0.24761599 | 0.43986181 |
| ENSMUSG00000000532 | 0.41520459 | 5.19094724 | 0.24771612 | 0.43997169 |
| ENSMUSG00000035798 | -0.4109778 | 6.52115009 | 0.24799924 | 0.4404065  |
| ENSMUSG00000021972 | -0.4114949 | 5.88752342 | 0.24830283 | 0.44087751 |
| ENSMUSG00000023832 | -0.4222713 | 3.93740548 | 0.24849906 | 0.44114054 |
| ENSMUSG00000021368 | 0.47377381 | 1.73536747 | 0.24854924 | 0.44114054 |
| ENSMUSG00000032563 | -0.4122517 | 5.71103571 | 0.24856609 | 0.44114054 |
| ENSMUSG00000022468 | -0.4459802 | 2.41504144 | 0.24860693 | 0.44114489 |
| ENSMUSG00000047714 | -0.4115235 | 6.05451338 | 0.248701   | 0.44124371 |
| ENSMUSG00000025350 | 0.48627361 | 1.61205191 | 0.24889383 | 0.44151767 |
| ENSMUSG00000023025 | -0.4091311 | 7.3728186  | 0.24900638 | 0.44164918 |
| ENSMUSG00000035351 | -0.4314748 | 3.03303389 | 0.24909163 | 0.44169247 |
| ENSMUSG00000047215 | -0.4079332 | 9.92905677 | 0.24910764 | 0.44169247 |
| ENSMUSG00000032121 | -0.4915999 | 1.36799252 | 0.24947515 | 0.44227588 |
| ENSMUSG00000026142 | -0.4144732 | 4.92720093 | 0.24951908 | 0.44228555 |
| ENSMUSG00000057531 | 0.42219455 | 3.88498575 | 0.24961312 | 0.44232924 |
| ENSMUSG00000021222 | 0.42747422 | 3.40206153 | 0.24962068 | 0.44232924 |

|                    |            |            |            |            |
|--------------------|------------|------------|------------|------------|
| ENSMUSG00000030782 | -0.4784606 | 1.27280517 | 0.24969421 | 0.44237054 |
| ENSMUSG00000027942 | -0.4088622 | 6.97858082 | 0.24972096 | 0.44237054 |
| ENSMUSG00000001228 | 0.41307499 | 5.09356399 | 0.24998026 | 0.44276164 |
| ENSMUSG00000025967 | -0.4072721 | 9.18884052 | 0.25004482 | 0.44280777 |
| ENSMUSG00000097059 | -0.4799155 | 0.97205629 | 0.25009589 | 0.44282998 |
| ENSMUSG00000006315 | 0.41840565 | 4.11283497 | 0.25042559 | 0.44334547 |
| ENSMUSG00000028070 | 0.41626146 | 4.28833189 | 0.25056085 | 0.44349693 |
| ENSMUSG00000027184 | -0.4068708 | 8.95679091 | 0.2505883  | 0.44349693 |
| ENSMUSG00000063253 | -0.4179968 | 4.44207729 | 0.25066605 | 0.44356624 |
| ENSMUSG00000060038 | 0.41550056 | 4.65017997 | 0.25080374 | 0.44374158 |
| ENSMUSG00000015355 | -0.4073785 | 7.44454248 | 0.25092059 | 0.44388    |
| ENSMUSG00000015133 | 0.40978342 | 5.82828597 | 0.25105899 | 0.44405648 |
| ENSMUSG00000024991 | -0.4063498 | 9.19145954 | 0.25110315 | 0.44406626 |
| ENSMUSG00000062647 | 0.41055168 | 5.50052631 | 0.25135017 | 0.44443034 |
| ENSMUSG00000006398 | 0.42999753 | 3.12543213 | 0.25138635 | 0.44443034 |
| ENSMUSG00000021704 | -0.4119249 | 4.83162913 | 0.25145793 | 0.44447316 |
| ENSMUSG00000041852 | -0.4065011 | 7.75629058 | 0.25152317 | 0.44447316 |
| ENSMUSG00000002885 | 0.40613338 | 8.98358299 | 0.25155873 | 0.44447316 |
| ENSMUSG00000027206 | -0.4081752 | 6.34815584 | 0.25156524 | 0.44447316 |
| ENSMUSG00000076655 | -0.4175478 | 4.30009896 | 0.25167459 | 0.44459804 |
| ENSMUSG00000059981 | 0.40730155 | 6.79096764 | 0.25181265 | 0.44477357 |
| ENSMUSG00000014592 | -0.4231956 | 3.51956761 | 0.25203932 | 0.44510554 |
| ENSMUSG00000069910 | -0.4216895 | 3.50885257 | 0.25212339 | 0.44518561 |
| ENSMUSG00000018160 | -0.4058642 | 7.77138003 | 0.25230637 | 0.44544029 |
| ENSMUSG00000021816 | -0.40611   | 7.24407302 | 0.25248161 | 0.44568123 |
| ENSMUSG00000026456 | 0.41130495 | 5.20029256 | 0.25259096 | 0.44580578 |
| ENSMUSG00000029103 | 0.41152849 | 5.06319154 | 0.25275991 | 0.44596982 |
| ENSMUSG00000041351 | -0.4856531 | 1.57813312 | 0.25276149 | 0.44596982 |
| ENSMUSG00000037280 | 0.40784794 | 6.04477516 | 0.25285951 | 0.44607428 |
| ENSMUSG00000001441 | -0.4065829 | 6.65164617 | 0.25290999 | 0.44609488 |
| ENSMUSG00000020721 | -0.4060107 | 6.87083191 | 0.25298818 | 0.44616433 |
| ENSMUSG00000021116 | -0.4067016 | 6.52459403 | 0.25309648 | 0.44628687 |
| ENSMUSG00000047719 | 0.41570375 | 3.94781748 | 0.25316034 | 0.446331   |
| ENSMUSG00000032673 | -0.4161394 | 4.1032104  | 0.25328031 | 0.44647402 |
| ENSMUSG00000058503 | -0.4098384 | 5.37310591 | 0.25338963 | 0.44658823 |
| ENSMUSG00000025903 | -0.4073337 | 5.95851129 | 0.25342279 | 0.44658823 |
| ENSMUSG00000024781 | 0.40623333 | 6.60544871 | 0.25355324 | 0.44674961 |
| ENSMUSG00000032393 | -0.4046823 | 7.9833616  | 0.2536277  | 0.44678007 |
| ENSMUSG00000028830 | 0.40798941 | 5.67466846 | 0.25364826 | 0.44678007 |
| ENSMUSG00000037104 | -0.4085845 | 5.4832121  | 0.25376859 | 0.44692355 |
| ENSMUSG00000022553 | 0.40573225 | 6.56550467 | 0.25381214 | 0.44693176 |
| ENSMUSG00000020715 | 0.41430862 | 4.75567558 | 0.25401098 | 0.44714841 |
| ENSMUSG00000028790 | -0.4042197 | 8.09890197 | 0.25401297 | 0.44714841 |

|                    |            |            |            |            |
|--------------------|------------|------------|------------|------------|
| ENSMUSG00000048495 | -0.4240198 | 3.62443654 | 0.25419714 | 0.44740409 |
| ENSMUSG00000052384 | 0.4046311  | 7.26978562 | 0.2542886  | 0.44749654 |
| ENSMUSG00000092118 | -0.4949948 | 1.23624738 | 0.25446506 | 0.44773853 |
| ENSMUSG00000036208 | -0.4092612 | 5.10758304 | 0.25452501 | 0.44777548 |
| ENSMUSG00000025591 | -0.4167021 | 3.94680396 | 0.25469264 | 0.44795385 |
| ENSMUSG00000027679 | -0.4141975 | 4.17280299 | 0.25470434 | 0.44795385 |
| ENSMUSG00000049411 | -0.4142053 | 3.98048946 | 0.25513332 | 0.44863968 |
| ENSMUSG00000033624 | -0.4057454 | 5.84602661 | 0.25523766 | 0.44871288 |
| ENSMUSG00000070461 | -0.4256196 | 3.14210746 | 0.25525302 | 0.44871288 |
| ENSMUSG00000029104 | -0.4033608 | 7.45735843 | 0.25530183 | 0.44873005 |
| ENSMUSG00000050192 | -0.4144079 | 4.01511524 | 0.25555419 | 0.44910493 |
| ENSMUSG00000001089 | 0.42567554 | 2.96714368 | 0.2556204  | 0.44915263 |
| ENSMUSG00000015697 | -0.4038082 | 6.95812484 | 0.25572133 | 0.44926131 |
| ENSMUSG00000038605 | 0.41712303 | 3.91929643 | 0.25579654 | 0.44928572 |
| ENSMUSG00000031728 | 0.4114717  | 4.48535993 | 0.25584657 | 0.44928572 |
| ENSMUSG00000044991 | 0.42681194 | 3.22408564 | 0.25585249 | 0.44928572 |
| ENSMUSG00000006699 | -0.4021195 | 9.52372203 | 0.25597426 | 0.44942452 |
| ENSMUSG00000020366 | -0.404255  | 6.38317053 | 0.25600972 | 0.44942452 |
| ENSMUSG00000030880 | 0.40860361 | 4.956412   | 0.25613786 | 0.44945986 |
| ENSMUSG00000026421 | 0.40518558 | 5.92378041 | 0.25614525 | 0.44945986 |
| ENSMUSG00000047090 | 0.41530043 | 4.23070238 | 0.25614715 | 0.44945986 |
| ENSMUSG00000032459 | -0.4192201 | 3.52119772 | 0.25622489 | 0.44952765 |
| ENSMUSG00000024800 | -0.4182598 | 3.6107438  | 0.25631511 | 0.44960913 |
| ENSMUSG00000037872 | 0.46154765 | 2.00650811 | 0.2563773  | 0.44960913 |
| ENSMUSG00000032905 | -0.4047923 | 6.02243052 | 0.25639753 | 0.44960913 |
| ENSMUSG00000021932 | -0.4125778 | 4.37366952 | 0.25642779 | 0.44960913 |
| ENSMUSG00000059586 | -0.4113654 | 4.46602867 | 0.25656501 | 0.44978112 |
| ENSMUSG00000037946 | 0.40227614 | 7.42476673 | 0.25664807 | 0.44985812 |
| ENSMUSG00000055371 | -0.4053866 | 5.55821054 | 0.25674067 | 0.44995182 |
| ENSMUSG00000036944 | -0.4043101 | 5.9694893  | 0.2568163  | 0.44995923 |
| ENSMUSG00000053886 | 0.50050284 | 1.54260161 | 0.25682319 | 0.44995923 |
| ENSMUSG00000026196 | -0.4177195 | 3.64391547 | 0.25693442 | 0.45008552 |
| ENSMUSG00000028106 | -0.4019918 | 7.55101471 | 0.25711874 | 0.45028605 |
| ENSMUSG00000031264 | -0.4014249 | 8.5543888  | 0.25714265 | 0.45028605 |
| ENSMUSG00000041671 | -0.4086645 | 4.68740868 | 0.25716641 | 0.45028605 |
| ENSMUSG00000066152 | 0.41410955 | 3.84568749 | 0.25744375 | 0.45070301 |
| ENSMUSG00000021607 | -0.413088  | 4.21194342 | 0.25764849 | 0.45099275 |
| ENSMUSG00000036197 | -0.4023023 | 6.67871738 | 0.25769394 | 0.45100363 |
| ENSMUSG00000059796 | -0.4007264 | 8.71383966 | 0.25785648 | 0.45121865 |
| ENSMUSG00000058600 | -0.4005406 | 9.3202491  | 0.2578953  | 0.45121865 |
| ENSMUSG00000030978 | -0.4016068 | 7.20709979 | 0.25805186 | 0.45142386 |
| ENSMUSG00000018377 | -0.4013614 | 7.26846619 | 0.25829158 | 0.45170696 |
| ENSMUSG00000044763 | -0.4057159 | 5.31923276 | 0.25829568 | 0.45170696 |

|                    |            |            |            |            |
|--------------------|------------|------------|------------|------------|
| ENSMUSG00000066306 | 0.40085858 | 7.82208145 | 0.25836756 | 0.45170696 |
| ENSMUSG00000039463 | 0.40388684 | 6.11917432 | 0.25837088 | 0.45170696 |
| ENSMUSG00000089911 | -0.4019824 | 6.58830803 | 0.2585432  | 0.45184103 |
| ENSMUSG00000095990 | -0.4553795 | 2.06230816 | 0.25855283 | 0.45184103 |
| ENSMUSG00000036323 | -0.4007207 | 7.49115449 | 0.25862477 | 0.45184103 |
| ENSMUSG00000001891 | -0.402379  | 6.2504815  | 0.25864366 | 0.45184103 |
| ENSMUSG00000078652 | -0.4005996 | 7.71461598 | 0.25864822 | 0.45184103 |
| ENSMUSG00000052557 | -0.4179275 | 3.19792587 | 0.25868341 | 0.45184103 |
| ENSMUSG00000032624 | -0.4000967 | 8.32846077 | 0.25878659 | 0.45195257 |
| ENSMUSG00000023206 | 0.42328189 | 3.47673558 | 0.25894658 | 0.45210111 |
| ENSMUSG00000063564 | 0.42461871 | 2.27883269 | 0.2589503  | 0.45210111 |
| ENSMUSG00000038525 | -0.4024567 | 6.09172242 | 0.25900718 | 0.45213174 |
| ENSMUSG00000034621 | -0.4005652 | 7.01523307 | 0.25928315 | 0.45254477 |
| ENSMUSG00000026134 | -0.4086335 | 4.22384611 | 0.25947781 | 0.45281577 |
| ENSMUSG00000048965 | 0.40707372 | 4.45492717 | 0.25954635 | 0.45286662 |
| ENSMUSG00000026797 | 0.44782659 | 2.4070774  | 0.25976861 | 0.45318564 |
| ENSMUSG00000095700 | -0.4142203 | 3.78141042 | 0.25990333 | 0.45327742 |
| ENSMUSG00000035726 | -0.3994759 | 7.76523182 | 0.25992518 | 0.45327742 |
| ENSMUSG00000091694 | -0.4053242 | 5.34250109 | 0.25993969 | 0.45327742 |
| ENSMUSG00000070632 | -0.4825847 | 1.13955473 | 0.25997895 | 0.45327742 |
| ENSMUSG00000019951 | -0.3998228 | 7.02285172 | 0.26018428 | 0.45356662 |
| ENSMUSG00000036752 | 0.40078834 | 6.08745758 | 0.2602497  | 0.45361188 |
| ENSMUSG00000021156 | -0.3992877 | 7.40457906 | 0.26039771 | 0.45380105 |
| ENSMUSG00000047342 | 0.49593548 | 1.09545596 | 0.26044152 | 0.45380859 |
| ENSMUSG00000025381 | 0.41640615 | 3.59449857 | 0.26057461 | 0.45397167 |
| ENSMUSG00000001518 | 0.40861367 | 4.23787485 | 0.26065357 | 0.45404043 |
| ENSMUSG00000035455 | -0.4085536 | 4.47416688 | 0.260931   | 0.45435038 |
| ENSMUSG00000025920 | 0.40911242 | 4.06766797 | 0.26093901 | 0.45435038 |
| ENSMUSG00000034055 | -0.4016086 | 5.715154   | 0.26095008 | 0.45435038 |
| ENSMUSG00000025354 | 0.39906963 | 6.80724307 | 0.26112736 | 0.45445984 |
| ENSMUSG00000097885 | -0.4257651 | 3.00853078 | 0.26113727 | 0.45445984 |
| ENSMUSG00000004455 | -0.3988141 | 7.34738801 | 0.26115956 | 0.45445984 |
| ENSMUSG00000028414 | -0.4087559 | 4.24237015 | 0.26118859 | 0.45445984 |
| ENSMUSG00000058979 | 0.40515231 | 4.79956618 | 0.26121063 | 0.45445984 |
| ENSMUSG00000020653 | -0.4012853 | 5.44562641 | 0.26128152 | 0.45447919 |
| ENSMUSG00000026656 | -0.3980222 | 8.09173329 | 0.26130082 | 0.45447919 |
| ENSMUSG00000036503 | -0.3992622 | 6.70870387 | 0.26144089 | 0.45465401 |
| ENSMUSG00000047669 | 0.49878669 | 1.47409513 | 0.26156987 | 0.45480951 |
| ENSMUSG00000084803 | -0.4158832 | 2.23520406 | 0.26165572 | 0.45482815 |
| ENSMUSG00000020372 | 0.39721895 | 9.95362077 | 0.26165973 | 0.45482815 |
| ENSMUSG00000022965 | 0.39868375 | 6.63964626 | 0.26185243 | 0.4550943  |
| ENSMUSG00000046080 | 0.43186882 | 3.06373628 | 0.26191702 | 0.45513774 |
| ENSMUSG00000052533 | 0.40004484 | 6.01960751 | 0.26205262 | 0.45530454 |

|                    |            |            |            |            |
|--------------------|------------|------------|------------|------------|
| ENSMUSG00000020111 | 0.40225121 | 5.29759778 | 0.26209585 | 0.45531084 |
| ENSMUSG00000050912 | -0.3969207 | 9.41944518 | 0.26220243 | 0.45542715 |
| ENSMUSG00000095442 | -0.4707431 | 1.98339702 | 0.26243763 | 0.45576682 |
| ENSMUSG00000054604 | -0.3973479 | 7.62255234 | 0.26254295 | 0.45580172 |
| ENSMUSG00000009293 | 0.40118485 | 5.09189018 | 0.26257679 | 0.45580172 |
| ENSMUSG00000042557 | -0.3972907 | 7.67824183 | 0.26258824 | 0.45580172 |
| ENSMUSG00000000563 | -0.398118  | 6.85999382 | 0.26261634 | 0.45580172 |
| ENSMUSG00000003031 | -0.3969778 | 7.78789902 | 0.26285026 | 0.45610673 |
| ENSMUSG00000096952 | 0.47892978 | 1.69195307 | 0.26287143 | 0.45610673 |
| ENSMUSG00000060098 | 0.40394644 | 4.86511918 | 0.26291982 | 0.45612184 |
| ENSMUSG00000060739 | -0.3968755 | 7.83413685 | 0.26302627 | 0.45616029 |
| ENSMUSG00000004895 | 0.4008163  | 5.22572034 | 0.26303635 | 0.45616029 |
| ENSMUSG00000029227 | -0.3975142 | 7.06494233 | 0.26306103 | 0.45616029 |
| ENSMUSG00000000740 | 0.39653116 | 8.06300588 | 0.26313331 | 0.4562168  |
| ENSMUSG00000032540 | 0.41712499 | 3.55775569 | 0.26317357 | 0.4562178  |
| ENSMUSG00000025986 | -0.3998141 | 5.66410879 | 0.26332466 | 0.45641089 |
| ENSMUSG00000002897 | 0.39645241 | 7.85073216 | 0.26345262 | 0.45651207 |
| ENSMUSG00000025040 | -0.4018046 | 5.16223279 | 0.26348183 | 0.45651207 |
| ENSMUSG00000036225 | 0.44917509 | 2.1264694  | 0.26353807 | 0.45651207 |
| ENSMUSG00000027854 | -0.3982    | 6.28700854 | 0.26355997 | 0.45651207 |
| ENSMUSG00000002748 | -0.3959675 | 8.58149343 | 0.26358161 | 0.45651207 |
| ENSMUSG00000049764 | -0.3997184 | 5.60721981 | 0.26363771 | 0.45654044 |
| ENSMUSG00000052763 | 0.40273983 | 4.7248992  | 0.26369358 | 0.45656842 |
| ENSMUSG00000041112 | -0.3962425 | 7.76213268 | 0.26374378 | 0.45658655 |
| ENSMUSG00000038485 | -0.3987203 | 5.86246486 | 0.26397396 | 0.45690117 |
| ENSMUSG00000000902 | 0.39767801 | 6.31426423 | 0.26400501 | 0.45690117 |
| ENSMUSG00000030861 | -0.4041432 | 4.57094823 | 0.26432887 | 0.4573928  |
| ENSMUSG00000048175 | 0.4075638  | 4.11792777 | 0.26455364 | 0.45771285 |
| ENSMUSG00000025781 | -0.3958489 | 7.37777113 | 0.26465038 | 0.45781131 |
| ENSMUSG00000020029 | -0.3972895 | 6.22008381 | 0.26491085 | 0.45814381 |
| ENSMUSG00000032400 | -0.4141007 | 3.63553197 | 0.26492231 | 0.45814381 |
| ENSMUSG00000073374 | -0.4224713 | 2.73027925 | 0.26526305 | 0.45866408 |
| ENSMUSG00000032477 | -0.4016264 | 4.79361684 | 0.26544659 | 0.45888163 |
| ENSMUSG00000028330 | -0.3960725 | 6.63712778 | 0.26546871 | 0.45888163 |
| ENSMUSG00000062822 | -0.395233  | 7.04583727 | 0.26555201 | 0.45895661 |
| ENSMUSG00000079511 | 0.40938698 | 3.71695382 | 0.26559416 | 0.45896044 |
| ENSMUSG00000076586 | -0.4061724 | 4.2838575  | 0.26572529 | 0.45911803 |
| ENSMUSG00000020114 | -0.3947982 | 7.26703959 | 0.26599625 | 0.45951712 |
| ENSMUSG00000024213 | 0.39913875 | 5.08716162 | 0.26616948 | 0.45974728 |
| ENSMUSG00000027180 | -0.3953666 | 6.42781033 | 0.26645013 | 0.4601629  |
| ENSMUSG00000072872 | -0.396225  | 6.16998055 | 0.26666276 | 0.46046093 |
| ENSMUSG00000021583 | -0.3940679 | 7.25269501 | 0.2668435  | 0.46070382 |
| ENSMUSG00000035297 | -0.3960291 | 5.96905037 | 0.26695578 | 0.46082846 |



|                    |            |            |            |            |
|--------------------|------------|------------|------------|------------|
| ENSMUSG00000043262 | -0.4027227 | 4.24703648 | 0.2670578  | 0.46090014 |
| ENSMUSG00000021840 | -0.3940414 | 7.16413464 | 0.2670775  | 0.46090014 |
| ENSMUSG00000041560 | 0.39354389 | 7.26979401 | 0.2672865  | 0.46116618 |
| ENSMUSG00000036009 | -0.4089837 | 3.30719791 | 0.2673119  | 0.46116618 |
| ENSMUSG00000068245 | 0.41223414 | 3.66912254 | 0.26739033 | 0.46122124 |
| ENSMUSG00000041355 | 0.39630923 | 5.46896643 | 0.26745428 | 0.46122124 |
| ENSMUSG00000029650 | 0.39847253 | 5.21854019 | 0.26746418 | 0.46122124 |
| ENSMUSG00000015027 | 0.39996599 | 4.54365335 | 0.26753964 | 0.46128216 |
| ENSMUSG00000094694 | -0.4006254 | 4.84719889 | 0.26763629 | 0.46137961 |
| ENSMUSG00000027598 | -0.3925123 | 7.93069516 | 0.26813883 | 0.46217662 |
| ENSMUSG00000022075 | 0.39320845 | 6.73602395 | 0.26844189 | 0.46262962 |
| ENSMUSG00000039701 | -0.3960505 | 5.52344859 | 0.26878111 | 0.46314478 |
| ENSMUSG00000064337 | -0.3914981 | 8.98658578 | 0.26888056 | 0.46324396 |
| ENSMUSG00000044617 | 0.39748678 | 5.10408525 | 0.26891926 | 0.46324396 |
| ENSMUSG00000040268 | -0.3929905 | 6.61117853 | 0.26901665 | 0.46334227 |
| ENSMUSG00000051185 | -0.4017738 | 4.10444747 | 0.26909335 | 0.46340495 |
| ENSMUSG00000087266 | -0.4207285 | 2.5059122  | 0.26922205 | 0.46349226 |
| ENSMUSG00000029475 | -0.3932691 | 6.16785693 | 0.26922469 | 0.46349226 |
| ENSMUSG00000016831 | -0.3919575 | 7.4260467  | 0.26928385 | 0.46352046 |
| ENSMUSG00000032615 | 0.41964932 | 2.90147065 | 0.26932172 | 0.46352046 |
| ENSMUSG00000022952 | -0.3930076 | 6.33961811 | 0.26942404 | 0.46362715 |
| ENSMUSG00000076619 | -0.4272492 | 2.48539804 | 0.26964619 | 0.46393997 |
| ENSMUSG00000027199 | 0.4145843  | 3.37239818 | 0.26984267 | 0.46420855 |
| ENSMUSG00000032601 | 0.39779997 | 4.92146794 | 0.27012237 | 0.46462018 |
| ENSMUSG00000026558 | -0.4229919 | 2.66944885 | 0.27024605 | 0.46476336 |
| ENSMUSG00000044501 | -0.4005104 | 4.31187347 | 0.27032886 | 0.46480449 |
| ENSMUSG00000044950 | -0.3939903 | 5.67428396 | 0.27035083 | 0.46480449 |
| ENSMUSG00000026187 | -0.3939679 | 5.6338665  | 0.27043769 | 0.46488429 |
| ENSMUSG00000039457 | -0.4078968 | 3.5534671  | 0.27060042 | 0.46509447 |
| ENSMUSG00000025237 | -0.392455  | 6.27375298 | 0.27065735 | 0.46512278 |
| ENSMUSG00000029291 | -0.3972125 | 4.41089984 | 0.27070469 | 0.4651346  |
| ENSMUSG00000029048 | -0.3916258 | 6.67810104 | 0.27079173 | 0.4652146  |
| ENSMUSG00000046295 | 0.45524622 | 2.17295657 | 0.27084704 | 0.46524009 |
| ENSMUSG00000014748 | 0.39265807 | 5.92483824 | 0.2709319  | 0.4653057  |
| ENSMUSG00000025264 | -0.3960216 | 4.92538581 | 0.27096619 | 0.4653057  |
| ENSMUSG00000032212 | -0.3901381 | 7.76366632 | 0.2711669  | 0.4655808  |
| ENSMUSG00000034863 | 0.41512576 | 3.17250243 | 0.27146502 | 0.46602305 |
| ENSMUSG00000020677 | -0.3909573 | 6.63829993 | 0.27151388 | 0.46603733 |
| ENSMUSG00000024081 | -0.3899413 | 7.42885371 | 0.2718008  | 0.46640587 |
| ENSMUSG00000027673 | -0.3930661 | 5.661264   | 0.27180974 | 0.46640587 |
| ENSMUSG00000024844 | 0.39265079 | 5.35411985 | 0.27190456 | 0.46649895 |
| ENSMUSG00000031782 | 0.39825375 | 4.47511628 | 0.27231125 | 0.46712697 |
| ENSMUSG00000037523 | 0.389078   | 6.46475904 | 0.27249109 | 0.46736573 |

|                    |            |            |            |            |
|--------------------|------------|------------|------------|------------|
| ENSMUSG00000029390 | -0.3891629 | 7.52840451 | 0.27262308 | 0.46752234 |
| ENSMUSG00000021711 | -0.3932343 | 5.31225113 | 0.27272473 | 0.46756345 |
| ENSMUSG00000062190 | -0.3994685 | 4.13905356 | 0.27273722 | 0.46756345 |
| ENSMUSG00000034723 | -0.3915286 | 5.86533801 | 0.27276908 | 0.46756345 |
| ENSMUSG00000033653 | -0.391332  | 5.74380153 | 0.27284675 | 0.46762686 |
| ENSMUSG00000047617 | 0.40059339 | 4.15186408 | 0.27324884 | 0.46824618 |
| ENSMUSG00000027884 | -0.3914354 | 5.54613759 | 0.27351815 | 0.46863783 |
| ENSMUSG00000022962 | 0.39006916 | 6.09879436 | 0.27356121 | 0.46864175 |
| ENSMUSG00000061356 | 0.41441541 | 3.00123156 | 0.27367311 | 0.4686939  |
| ENSMUSG00000054455 | 0.3927135  | 5.39222911 | 0.2736732  | 0.4686939  |
| ENSMUSG00000087396 | -0.4065235 | 3.12529452 | 0.27373541 | 0.4687306  |
| ENSMUSG00000024127 | -0.3913502 | 5.56346913 | 0.27378614 | 0.46874764 |
| ENSMUSG00000019578 | 0.39450556 | 4.96367456 | 0.27387447 | 0.46882904 |
| ENSMUSG00000018736 | -0.3895461 | 6.11289871 | 0.2740776  | 0.46892713 |
| ENSMUSG00000051427 | 0.41397569 | 3.39933029 | 0.27410704 | 0.46892713 |
| ENSMUSG00000028271 | -0.3909148 | 5.63872092 | 0.27414494 | 0.46892713 |
| ENSMUSG00000020917 | 0.3876011  | 7.87091618 | 0.27417285 | 0.46892713 |
| ENSMUSG00000025287 | -0.3912103 | 5.42481008 | 0.27418039 | 0.46892713 |
| ENSMUSG00000039308 | 0.39145105 | 5.56856675 | 0.27418717 | 0.46892713 |
| ENSMUSG00000028013 | -0.3961349 | 4.36451739 | 0.27421732 | 0.46892713 |
| ENSMUSG00000040102 | -0.3912181 | 5.5446378  | 0.2743262  | 0.46904354 |
| ENSMUSG00000020089 | -0.3992319 | 4.16049697 | 0.27442353 | 0.46907993 |
| ENSMUSG00000042625 | 0.38783024 | 7.47902008 | 0.2744291  | 0.46907993 |
| ENSMUSG00000021774 | -0.39056   | 5.68283343 | 0.27468291 | 0.46940171 |
| ENSMUSG00000038369 | -0.3878599 | 6.84596673 | 0.27469902 | 0.46940171 |
| ENSMUSG00000069565 | 0.39085967 | 5.40791525 | 0.27480661 | 0.46950239 |
| ENSMUSG00000048076 | 0.38735249 | 7.43388607 | 0.27483963 | 0.46950239 |
| ENSMUSG00000032215 | -0.3932101 | 5.07610802 | 0.27489363 | 0.46952486 |
| ENSMUSG00000078622 | -0.3878123 | 6.92110615 | 0.27503233 | 0.46969198 |
| ENSMUSG00000020893 | 0.38759366 | 7.25351405 | 0.27515218 | 0.46978811 |
| ENSMUSG00000047804 | -0.3876317 | 6.87419362 | 0.27517037 | 0.46978811 |
| ENSMUSG00000023965 | -0.390813  | 5.47349773 | 0.27524677 | 0.46980013 |
| ENSMUSG00000095565 | 0.42016235 | 2.70555503 | 0.27525915 | 0.46980013 |
| ENSMUSG00000038024 | -0.3883339 | 6.24762057 | 0.27532832 | 0.46984843 |
| ENSMUSG00000034135 | 0.38949119 | 5.60793179 | 0.27545512 | 0.46999505 |
| ENSMUSG00000026960 | -0.3950693 | 4.69699591 | 0.27554891 | 0.47008529 |
| ENSMUSG00000066175 | 0.51892393 | 0.81494003 | 0.27563466 | 0.47016181 |
| ENSMUSG00000040532 | 0.39668233 | 4.22608487 | 0.27568771 | 0.47018253 |
| ENSMUSG00000028447 | 0.39979688 | 3.65325134 | 0.27577342 | 0.47025894 |
| ENSMUSG00000039117 | -0.3888381 | 5.69242465 | 0.27614239 | 0.47081827 |
| ENSMUSG00000025223 | 0.38620458 | 7.44807286 | 0.27629238 | 0.47100414 |
| ENSMUSG00000039176 | 0.386869   | 6.81262419 | 0.27638197 | 0.471087   |
| ENSMUSG00000054920 | 0.39204506 | 5.06110305 | 0.27650388 | 0.47112234 |

|                    |            |            |            |            |
|--------------------|------------|------------|------------|------------|
| ENSMUSG00000025212 | 0.38878057 | 5.81980588 | 0.27650463 | 0.47112234 |
| ENSMUSG00000087128 | -0.4486065 | 1.55076653 | 0.27654627 | 0.47112234 |
| ENSMUSG00000030612 | 0.39667202 | 3.44681061 | 0.27656664 | 0.47112234 |
| ENSMUSG00000042660 | 0.39441531 | 4.2155833  | 0.27667448 | 0.47123621 |
| ENSMUSG00000097749 | -0.4644172 | 1.05649606 | 0.27679967 | 0.47137959 |
| ENSMUSG00000039031 | -0.39057   | 5.05994083 | 0.27703503 | 0.47171051 |
| ENSMUSG00000031109 | -0.3919768 | 4.62742157 | 0.2773398  | 0.47215951 |
| ENSMUSG00000019916 | -0.390051  | 5.73210338 | 0.27747    | 0.47231122 |
| ENSMUSG00000018196 | -0.3897555 | 5.15973348 | 0.27751445 | 0.47231693 |
| ENSMUSG00000028683 | -0.391965  | 4.61556258 | 0.27761076 | 0.47241091 |
| ENSMUSG00000033970 | -0.3914101 | 4.89587654 | 0.27770395 | 0.47249297 |
| ENSMUSG00000043257 | 0.39047239 | 4.86287438 | 0.2777546  | 0.47249297 |
| ENSMUSG00000006574 | 0.38437097 | 8.66927293 | 0.27778229 | 0.47249297 |
| ENSMUSG00000022019 | -0.3903222 | 4.8434161  | 0.27784809 | 0.47253496 |
| ENSMUSG00000058704 | -0.390079  | 4.8800213  | 0.27792959 | 0.47254346 |
| ENSMUSG00000051335 | -0.4063202 | 3.18456477 | 0.27798212 | 0.47254346 |
| ENSMUSG00000040093 | 0.38679583 | 5.9883218  | 0.27800605 | 0.47254346 |
| ENSMUSG00000040359 | -0.386057  | 6.42217219 | 0.27801753 | 0.47254346 |
| ENSMUSG00000026872 | 0.38581141 | 6.88637049 | 0.27806775 | 0.47254739 |
| ENSMUSG00000029030 | 0.38554922 | 6.60172584 | 0.27810205 | 0.47254739 |
| ENSMUSG00000024251 | -0.3855098 | 6.43147645 | 0.27838562 | 0.47295931 |
| ENSMUSG00000027544 | 0.38823469 | 5.57666523 | 0.27849699 | 0.4730786  |
| ENSMUSG00000026495 | -0.4061771 | 3.31466614 | 0.27856621 | 0.47312481 |
| ENSMUSG00000004994 | 0.40273002 | 3.66003405 | 0.27860651 | 0.47312481 |
| ENSMUSG00000040043 | -0.3871303 | 5.66171591 | 0.27881405 | 0.47336759 |
| ENSMUSG00000047462 | 0.43293473 | 2.28506885 | 0.27889525 | 0.47336759 |
| ENSMUSG00000027079 | -0.3868099 | 5.79628067 | 0.27890612 | 0.47336759 |
| ENSMUSG00000004018 | -0.3908233 | 4.44208509 | 0.2789142  | 0.47336759 |
| ENSMUSG00000076587 | -0.4043703 | 3.25106439 | 0.27908475 | 0.4734815  |
| ENSMUSG00000027353 | -0.4040177 | 3.14350289 | 0.27909685 | 0.4734815  |
| ENSMUSG00000030346 | -0.4084773 | 3.02937842 | 0.27910489 | 0.4734815  |
| ENSMUSG00000036278 | 0.48251827 | 0.97641083 | 0.27917775 | 0.47353523 |
| ENSMUSG00000025217 | -0.388431  | 4.97986604 | 0.27922915 | 0.47355253 |
| ENSMUSG00000012483 | -0.3976692 | 3.66900563 | 0.27927473 | 0.47355997 |
| ENSMUSG00000004996 | 0.39614745 | 4.10782972 | 0.27950629 | 0.4738576  |
| ENSMUSG00000019188 | 0.38494947 | 6.36830889 | 0.27956004 | 0.4738576  |
| ENSMUSG00000031506 | 0.38510259 | 6.20396426 | 0.27957393 | 0.4738576  |
| ENSMUSG00000031165 | 0.38349641 | 6.99750815 | 0.27995138 | 0.47442741 |
| ENSMUSG00000086236 | -0.426755  | 1.73924588 | 0.28004634 | 0.47449329 |
| ENSMUSG00000017286 | -0.3866651 | 5.55994244 | 0.28008567 | 0.47449329 |
| ENSMUSG00000059970 | 0.40750554 | 3.05507785 | 0.28011982 | 0.47449329 |
| ENSMUSG00000025872 | 0.38860808 | 4.65974543 | 0.28015537 | 0.47449329 |
| ENSMUSG00000029466 | 0.38667096 | 5.30946658 | 0.28021089 | 0.47451742 |

|                    |            |            |            |            |
|--------------------|------------|------------|------------|------------|
| ENSMUSG00000032115 | 0.38278134 | 7.4255963  | 0.28039958 | 0.47476699 |
| ENSMUSG00000070407 | -0.3968988 | 3.46729248 | 0.28058497 | 0.47493546 |
| ENSMUSG00000020541 | -0.4152788 | 2.71838616 | 0.28061109 | 0.47493546 |
| ENSMUSG00000065954 | -0.3825082 | 7.74329035 | 0.28062302 | 0.47493546 |
| ENSMUSG00000033450 | -0.382232  | 8.27364373 | 0.28069838 | 0.4749648  |
| ENSMUSG00000038002 | -0.3832058 | 6.9424804  | 0.28072299 | 0.4749648  |
| ENSMUSG00000030421 | -0.385252  | 5.60595918 | 0.28096061 | 0.47529686 |
| ENSMUSG00000026248 | 0.39756878 | 3.71227011 | 0.28121745 | 0.47560535 |
| ENSMUSG00000027709 | -0.3854767 | 5.38888291 | 0.28122571 | 0.47560535 |
| ENSMUSG00000000811 | -0.4071541 | 2.76276341 | 0.2813163  | 0.47568856 |
| ENSMUSG00000020649 | -0.3835183 | 6.59750929 | 0.28149044 | 0.47580018 |
| ENSMUSG00000050982 | -0.459902  | 1.82585822 | 0.28149665 | 0.47580018 |
| ENSMUSG00000034543 | -0.3826575 | 6.81997342 | 0.28150648 | 0.47580018 |
| ENSMUSG00000073155 | 0.38959584 | 4.75567638 | 0.28163322 | 0.4759444  |
| ENSMUSG00000036822 | -0.3823955 | 6.95688302 | 0.28171993 | 0.47595559 |
| ENSMUSG00000031960 | 0.38331562 | 6.24679849 | 0.28174291 | 0.47595559 |
| ENSMUSG00000020075 | -0.381198  | 8.38077688 | 0.28189279 | 0.47595559 |
| ENSMUSG00000002870 | 0.38391743 | 5.8563138  | 0.28192608 | 0.47595559 |
| ENSMUSG00000031781 | 0.38924237 | 4.71366789 | 0.28194088 | 0.47595559 |
| ENSMUSG00000037972 | -0.3809162 | 8.85872499 | 0.28195866 | 0.47595559 |
| ENSMUSG00000034154 | -0.381878  | 7.07725342 | 0.28197417 | 0.47595559 |
| ENSMUSG00000034429 | 0.40331637 | 3.04543216 | 0.2819763  | 0.47595559 |
| ENSMUSG00000059820 | -0.3847403 | 5.59329917 | 0.28201249 | 0.47595559 |
| ENSMUSG00000021275 | 0.39583239 | 3.92896395 | 0.28221737 | 0.47623146 |
| ENSMUSG00000033707 | 0.45792979 | 1.50347252 | 0.28249231 | 0.47662543 |
| ENSMUSG00000018932 | 0.383994   | 5.37650814 | 0.2827568  | 0.47689438 |
| ENSMUSG00000071645 | 0.3856022  | 5.40475784 | 0.28277547 | 0.47689438 |
| ENSMUSG00000068391 | 0.39123161 | 4.37217787 | 0.28284794 | 0.47689438 |
| ENSMUSG00000026743 | -0.3812262 | 7.08332669 | 0.28288532 | 0.47689438 |
| ENSMUSG00000050592 | 0.3849624  | 5.1891188  | 0.28289907 | 0.47689438 |
| ENSMUSG00000029191 | -0.3808605 | 7.57666865 | 0.28291944 | 0.47689438 |
| ENSMUSG00000078616 | -0.4015969 | 3.0597462  | 0.28295426 | 0.47689438 |
| ENSMUSG00000026867 | -0.380622  | 7.67427182 | 0.28300649 | 0.47689438 |
| ENSMUSG00000041945 | 0.46007768 | 1.62794341 | 0.2830251  | 0.47689438 |
| ENSMUSG00000022295 | -0.3825273 | 6.21078313 | 0.28310608 | 0.47696092 |
| ENSMUSG00000027404 | 0.38248268 | 5.93173042 | 0.2832574  | 0.47714592 |
| ENSMUSG00000030850 | -0.3821451 | 6.00304119 | 0.28386986 | 0.47810755 |
| ENSMUSG00000027306 | -0.3864802 | 4.86131146 | 0.28394742 | 0.47816813 |
| ENSMUSG00000020248 | -0.382649  | 5.89805753 | 0.28401332 | 0.47820904 |
| ENSMUSG00000029346 | 0.39781457 | 3.46960096 | 0.28414484 | 0.47836042 |
| ENSMUSG00000044533 | 0.38973549 | 4.48630939 | 0.28422908 | 0.47842078 |
| ENSMUSG00000040687 | 0.38020177 | 7.22927007 | 0.28426393 | 0.47842078 |
| ENSMUSG00000036112 | -0.3797466 | 7.58249479 | 0.28434295 | 0.47848371 |

|                    |            |            |            |            |
|--------------------|------------|------------|------------|------------|
| ENSMUSG00000022361 | -0.3804815 | 6.73266602 | 0.28450999 | 0.47869472 |
| ENSMUSG00000061315 | -0.3791332 | 8.22230575 | 0.28456614 | 0.47871913 |
| ENSMUSG00000026499 | -0.3801039 | 6.77791453 | 0.28494587 | 0.4792878  |
| ENSMUSG00000040550 | -0.3824676 | 5.4386532  | 0.28536919 | 0.47978834 |
| ENSMUSG00000015243 | -0.3784855 | 8.10554177 | 0.28538054 | 0.47978834 |
| ENSMUSG00000039046 | -0.3792244 | 7.07147984 | 0.28541875 | 0.47978834 |
| ENSMUSG00000038812 | 0.38412488 | 4.78756649 | 0.28543191 | 0.47978834 |
| ENSMUSG00000031590 | -0.3815846 | 5.79463594 | 0.28546386 | 0.47978834 |
| ENSMUSG00000059791 | 0.38056839 | 6.08572106 | 0.28553001 | 0.47978834 |
| ENSMUSG00000021067 | -0.3797757 | 6.63735223 | 0.28553563 | 0.47978834 |
| ENSMUSG00000074671 | 0.38552494 | 4.64897292 | 0.28570945 | 0.48001024 |
| ENSMUSG00000026779 | -0.4222328 | 2.1153658  | 0.28594707 | 0.48033926 |
| ENSMUSG00000017831 | -0.3802819 | 6.2136119  | 0.28603426 | 0.48039758 |
| ENSMUSG00000033106 | -0.3809981 | 5.75638407 | 0.28606537 | 0.48039758 |
| ENSMUSG00000087368 | -0.392204  | 3.57903779 | 0.2861868  | 0.48042259 |
| ENSMUSG00000041084 | -0.3805723 | 5.97761909 | 0.28620273 | 0.48042259 |
| ENSMUSG00000027009 | -0.377354  | 9.85680936 | 0.28621948 | 0.48042259 |
| ENSMUSG00000024014 | 0.37864977 | 7.27379136 | 0.2862881  | 0.48042259 |
| ENSMUSG00000040410 | -0.3831472 | 4.88875631 | 0.28628924 | 0.48042259 |
| ENSMUSG00000058163 | 0.41140138 | 2.89932757 | 0.28637993 | 0.48050274 |
| ENSMUSG00000059890 | -0.3780399 | 7.65433535 | 0.2864206  | 0.48050274 |
| ENSMUSG00000010142 | -0.3777867 | 7.57646274 | 0.2867913  | 0.48101028 |
| ENSMUSG00000020708 | 0.38001722 | 5.83105996 | 0.28680682 | 0.48101028 |
| ENSMUSG00000032298 | 0.37979636 | 5.9849288  | 0.28690085 | 0.48109777 |
| ENSMUSG00000045854 | -0.3957895 | 3.48603758 | 0.28698691 | 0.4811719  |
| ENSMUSG00000102059 | -0.4024854 | 2.63071568 | 0.28720533 | 0.48146788 |
| ENSMUSG00000037971 | -0.3900462 | 3.75758071 | 0.28749888 | 0.48178281 |
| ENSMUSG00000023055 | 0.38245048 | 4.94233858 | 0.28752822 | 0.48178281 |
| ENSMUSG00000019763 | -0.3789441 | 6.20231578 | 0.28754035 | 0.48178281 |
| ENSMUSG00000046798 | 0.48723603 | 1.29279337 | 0.28756084 | 0.48178281 |
| ENSMUSG00000040383 | -0.3771693 | 7.49395716 | 0.28764671 | 0.48185645 |
| ENSMUSG00000098332 | 0.42428518 | 2.06343739 | 0.28775591 | 0.48196914 |
| ENSMUSG00000033323 | 0.38090143 | 5.20328778 | 0.28807755 | 0.48243756 |
| ENSMUSG00000015522 | -0.3772523 | 6.89962317 | 0.28812306 | 0.4824435  |
| ENSMUSG00000071669 | 0.37956416 | 6.01258392 | 0.28819585 | 0.4824777  |
| ENSMUSG00000051590 | -0.3787708 | 5.8858766  | 0.28822743 | 0.4824777  |
| ENSMUSG00000055334 | -0.3933801 | 3.51476488 | 0.28834065 | 0.48259694 |
| ENSMUSG00000029730 | 0.37759278 | 6.27229847 | 0.28870039 | 0.4831287  |
| ENSMUSG00000025135 | 0.3954851  | 3.69277093 | 0.2888751  | 0.48335069 |
| ENSMUSG00000037124 | 0.43374628 | 1.82701035 | 0.28896273 | 0.48338522 |
| ENSMUSG00000022407 | 0.3808709  | 5.10417607 | 0.28897984 | 0.48338522 |
| ENSMUSG00000042328 | 0.38291733 | 4.71717881 | 0.2892024  | 0.48368712 |
| ENSMUSG00000030527 | 0.38548911 | 4.70860712 | 0.28937905 | 0.48391216 |

|                    |            |            |            |            |
|--------------------|------------|------------|------------|------------|
| ENSMUSG00000015659 | -0.398923  | 3.09451698 | 0.28946371 | 0.48396193 |
| ENSMUSG00000038861 | 0.3765145  | 6.6089432  | 0.28949302 | 0.48396193 |
| ENSMUSG00000059183 | -0.3822874 | 4.68520544 | 0.28960677 | 0.4840817  |
| ENSMUSG00000084866 | -0.4245269 | 1.99660683 | 0.28971537 | 0.48417517 |
| ENSMUSG00000041623 | 0.38162269 | 4.10050674 | 0.28974693 | 0.48417517 |
| ENSMUSG00000024235 | -0.3756251 | 6.93703873 | 0.29004724 | 0.48460654 |
| ENSMUSG00000005102 | -0.3767677 | 6.14531602 | 0.290106   | 0.48463427 |
| ENSMUSG00000063052 | -0.3791943 | 5.08408849 | 0.29016856 | 0.48466835 |
| ENSMUSG00000022685 | -0.3774212 | 5.74329534 | 0.29036923 | 0.48493306 |
| ENSMUSG00000026980 | -0.3768998 | 5.80918481 | 0.29056892 | 0.48511023 |
| ENSMUSG00000022091 | 0.44312305 | 1.20665123 | 0.29058196 | 0.48511023 |
| ENSMUSG00000002365 | -0.3753947 | 6.94850432 | 0.29061178 | 0.48511023 |
| ENSMUSG00000033294 | 0.38183029 | 4.5672078  | 0.29073437 | 0.48511023 |
| ENSMUSG00000037108 | -0.3810227 | 4.89365303 | 0.29074624 | 0.48511023 |
| ENSMUSG00000020087 | 0.38400762 | 3.83347574 | 0.29076258 | 0.48511023 |
| ENSMUSG00000034064 | -0.3770669 | 5.95640692 | 0.29077841 | 0.48511023 |
| ENSMUSG00000022013 | -0.3861188 | 3.51011616 | 0.29081293 | 0.48511023 |
| ENSMUSG00000029328 | -0.3738871 | 8.45853496 | 0.29108971 | 0.48550149 |
| ENSMUSG00000030924 | -0.3863406 | 3.59545457 | 0.29114135 | 0.48551716 |
| ENSMUSG00000062232 | -0.378809  | 4.79121773 | 0.29122959 | 0.48552682 |
| ENSMUSG00000021621 | -0.3770826 | 5.62084152 | 0.29123162 | 0.48552682 |
| ENSMUSG00000038312 | 0.37723628 | 5.56007994 | 0.29152553 | 0.4858141  |
| ENSMUSG00000009907 | -0.3742984 | 7.10927424 | 0.29161439 | 0.4858141  |
| ENSMUSG00000026048 | -0.3768246 | 5.72755975 | 0.29164848 | 0.4858141  |
| ENSMUSG00000031485 | -0.3753279 | 6.30904993 | 0.29165371 | 0.4858141  |
| ENSMUSG00000056144 | -0.3744844 | 7.10197095 | 0.29165451 | 0.4858141  |
| ENSMUSG00000096805 | 0.39208821 | 3.31604798 | 0.29165751 | 0.4858141  |
| ENSMUSG00000003269 | 0.37616094 | 5.73868679 | 0.29178658 | 0.48593472 |
| ENSMUSG00000062646 | -0.3747075 | 6.64211193 | 0.29181448 | 0.48593472 |
| ENSMUSG00000000317 | 0.44100127 | 1.47711865 | 0.29186365 | 0.48594621 |
| ENSMUSG00000025235 | -0.3875521 | 3.79195083 | 0.2920795  | 0.48623516 |
| ENSMUSG00000094502 | 0.46986394 | 1.13772547 | 0.29224209 | 0.48642078 |
| ENSMUSG00000022833 | -0.3914059 | 3.18325339 | 0.29228188 | 0.48642078 |
| ENSMUSG00000016495 | -0.3739045 | 6.99858409 | 0.29231794 | 0.48642078 |
| ENSMUSG00000057606 | 0.39322544 | 3.55595415 | 0.29270232 | 0.4869489  |
| ENSMUSG00000027227 | 0.38924719 | 3.72460413 | 0.29275143 | 0.4869489  |
| ENSMUSG00000018909 | 0.37350543 | 7.4079347  | 0.2927624  | 0.4869489  |
| ENSMUSG00000021982 | -0.379113  | 4.73384261 | 0.29281175 | 0.48696051 |
| ENSMUSG00000029501 | -0.3730451 | 7.55755215 | 0.29287612 | 0.4869971  |
| ENSMUSG00000031928 | -0.3747884 | 6.11678835 | 0.29300216 | 0.48707704 |
| ENSMUSG00000022704 | -0.3767304 | 5.34089342 | 0.29300894 | 0.48707704 |
| ENSMUSG00000034807 | 0.37322307 | 7.29404268 | 0.29311123 | 0.48717663 |
| ENSMUSG00000031629 | -0.4099323 | 2.0788073  | 0.29323049 | 0.48723481 |

|                    |            |            |            |            |
|--------------------|------------|------------|------------|------------|
| ENSMUSG00000024083 | -0.3746734 | 6.06449504 | 0.29323101 | 0.48723481 |
| ENSMUSG00000090213 | 0.37821316 | 5.00308304 | 0.2933437  | 0.48729097 |
| ENSMUSG00000026837 | 0.46152029 | 1.42685206 | 0.29334959 | 0.48729097 |
| ENSMUSG00000027203 | -0.3783647 | 5.08582749 | 0.29375047 | 0.48788638 |
| ENSMUSG00000022372 | -0.3717457 | 8.75511988 | 0.29384099 | 0.48790338 |
| ENSMUSG00000041740 | 0.372401   | 7.26256194 | 0.29386549 | 0.48790338 |
| ENSMUSG00000070315 | 0.39413526 | 3.45964002 | 0.29396925 | 0.48790338 |
| ENSMUSG00000037754 | -0.3718863 | 8.06315365 | 0.29401277 | 0.48790338 |
| ENSMUSG00000026348 | -0.4823988 | 1.06121771 | 0.29401537 | 0.48790338 |
| ENSMUSG00000037216 | 0.45058565 | 1.07965759 | 0.29401537 | 0.48790338 |
| ENSMUSG00000009863 | 0.3756813  | 5.40277124 | 0.29414164 | 0.48804246 |
| ENSMUSG00000039697 | -0.3738144 | 6.07753602 | 0.29444406 | 0.48847373 |
| ENSMUSG00000034544 | -0.3800746 | 4.46333592 | 0.29450173 | 0.48849889 |
| ENSMUSG00000047867 | -0.370824  | 10.0637548 | 0.29460251 | 0.48859556 |
| ENSMUSG00000039556 | 0.43066402 | 2.12101116 | 0.29486391 | 0.48895855 |
| ENSMUSG00000027828 | -0.3713384 | 7.53929099 | 0.29512333 | 0.48924787 |
| ENSMUSG00000024145 | -0.3976959 | 2.58733839 | 0.29512351 | 0.48924787 |
| ENSMUSG00000008683 | -0.3704276 | 9.72711209 | 0.2952075  | 0.48925438 |
| ENSMUSG00000038670 | -0.3988682 | 2.46238382 | 0.29521256 | 0.48925438 |
| ENSMUSG00000029569 | -0.371837  | 6.56132065 | 0.29558117 | 0.48979467 |
| ENSMUSG00000019806 | -0.3772432 | 4.36730283 | 0.29577568 | 0.49004633 |
| ENSMUSG00000029440 | 0.38714679 | 3.71480012 | 0.29622407 | 0.49071849 |
| ENSMUSG00000026869 | -0.3729432 | 6.01305218 | 0.29636766 | 0.49088563 |
| ENSMUSG00000059208 | -0.3699197 | 8.18935628 | 0.29644967 | 0.49088683 |
| ENSMUSG00000044221 | -0.3715904 | 6.41314478 | 0.29650405 | 0.49088683 |
| ENSMUSG00000031447 | 0.3700226  | 7.98402343 | 0.29652027 | 0.49088683 |
| ENSMUSG00000030884 | -0.3703438 | 7.42605214 | 0.2965392  | 0.49088683 |
| ENSMUSG00000026469 | -0.3706997 | 6.81514761 | 0.29663348 | 0.49097219 |
| ENSMUSG00000018654 | -0.3692948 | 9.48062305 | 0.29670983 | 0.49097627 |
| ENSMUSG00000020876 | 0.3738015  | 5.48555173 | 0.29675188 | 0.49097627 |
| ENSMUSG00000074093 | 0.39864051 | 2.54683879 | 0.29676409 | 0.49097627 |
| ENSMUSG00000029790 | -0.3861418 | 3.5035851  | 0.29689926 | 0.49112923 |
| ENSMUSG00000022364 | -0.380852  | 4.22002986 | 0.29698272 | 0.49116847 |
| ENSMUSG00000057858 | -0.3742316 | 5.26992259 | 0.29700844 | 0.49116847 |
| ENSMUSG00000022370 | -0.3755371 | 4.80370918 | 0.29719287 | 0.49122786 |
| ENSMUSG00000029752 | -0.3856019 | 3.87682505 | 0.29720152 | 0.49122786 |
| ENSMUSG00000022307 | -0.3710629 | 6.31950765 | 0.29720178 | 0.49122786 |
| ENSMUSG00000022403 | -0.3699679 | 7.71995135 | 0.29721529 | 0.49122786 |
| ENSMUSG00000022702 | 0.39065106 | 3.58138403 | 0.29731995 | 0.4913302  |
| ENSMUSG00000032637 | 0.36923876 | 8.24254707 | 0.29737006 | 0.49134236 |
| ENSMUSG00000041912 | 0.41823342 | 2.34065488 | 0.2976008  | 0.49165294 |
| ENSMUSG00000033949 | -0.3742477 | 4.35243681 | 0.29770357 | 0.49175206 |
| ENSMUSG00000067931 | -0.4036211 | 2.38359364 | 0.29792802 | 0.4920521  |

|                    |            |            |            |            |
|--------------------|------------|------------|------------|------------|
| ENSMUSG00000026457 | 0.36955993 | 7.14181129 | 0.29810198 | 0.49223488 |
| ENSMUSG00000024735 | 0.36931942 | 6.86795985 | 0.29812433 | 0.49223488 |
| ENSMUSG00000097154 | -0.3974227 | 2.2508373  | 0.29826944 | 0.49237509 |
| ENSMUSG00000044966 | -0.391063  | 2.81181364 | 0.29830401 | 0.49237509 |
| ENSMUSG00000031155 | 0.37080929 | 5.82395665 | 0.29833776 | 0.49237509 |
| ENSMUSG00000037366 | 0.42594218 | 1.85828065 | 0.29860512 | 0.49274561 |
| ENSMUSG00000014195 | -0.3678411 | 8.93600071 | 0.29882488 | 0.49303746 |
| ENSMUSG00000025076 | 0.37952029 | 4.06769243 | 0.29887848 | 0.49305513 |
| ENSMUSG00000034560 | -0.3679983 | 7.89531569 | 0.29918393 | 0.4934401  |
| ENSMUSG00000020576 | -0.3704425 | 5.80630451 | 0.29920891 | 0.4934401  |
| ENSMUSG00000075569 | -0.4500357 | 1.36967122 | 0.29924062 | 0.4934401  |
| ENSMUSG00000024561 | 0.37133704 | 5.54753828 | 0.29930003 | 0.49346728 |
| ENSMUSG00000014074 | -0.372093  | 5.19385526 | 0.29959414 | 0.49388134 |
| ENSMUSG00000076535 | -0.3805722 | 4.17421416 | 0.29966973 | 0.49393512 |
| ENSMUSG00000032607 | 0.40257307 | 2.0762521  | 0.2998304  | 0.49412142 |
| ENSMUSG00000052926 | 0.37533045 | 4.33565277 | 0.2999514  | 0.49412142 |
| ENSMUSG00000029617 | -0.3692414 | 6.2506833  | 0.3000108  | 0.49412142 |
| ENSMUSG00000030512 | -0.370868  | 5.44772061 | 0.30001319 | 0.49412142 |
| ENSMUSG00000005262 | -0.3688592 | 6.26898315 | 0.30003543 | 0.49412142 |
| ENSMUSG00000028328 | -0.3854878 | 3.5156862  | 0.30004067 | 0.49412142 |
| ENSMUSG00000031349 | -0.3741518 | 4.70805198 | 0.30021932 | 0.4943448  |
| ENSMUSG00000013593 | 0.36791428 | 6.57418792 | 0.30033675 | 0.49446733 |
| ENSMUSG00000036894 | 0.37795138 | 4.2568213  | 0.30059336 | 0.49481894 |
| ENSMUSG00000022074 | -0.4058433 | 1.95915119 | 0.30074833 | 0.49500316 |
| ENSMUSG00000024805 | -0.3750991 | 4.50211637 | 0.30080055 | 0.49501822 |
| ENSMUSG00000039725 | 0.37559995 | 3.28093613 | 0.30149801 | 0.49609499 |
| ENSMUSG00000031337 | -0.3714443 | 4.72456393 | 0.30176262 | 0.49645933 |
| ENSMUSG00000005469 | 0.36857175 | 5.6062542  | 0.30198766 | 0.49672418 |
| ENSMUSG00000008976 | -0.3668186 | 6.82690785 | 0.30201061 | 0.49672418 |
| ENSMUSG00000022867 | -0.3657983 | 7.81854014 | 0.30209429 | 0.49672418 |
| ENSMUSG00000047248 | -0.3661235 | 7.21212411 | 0.30212786 | 0.49672418 |
| ENSMUSG00000050628 | 0.37222857 | 4.77649354 | 0.30213967 | 0.49672418 |
| ENSMUSG00000032264 | -0.3673663 | 6.32080606 | 0.30237048 | 0.49703256 |
| ENSMUSG00000089824 | -0.3724959 | 4.79410746 | 0.30248839 | 0.49709845 |
| ENSMUSG00000036537 | 0.48487053 | 0.82792364 | 0.3025027  | 0.49709845 |
| ENSMUSG00000020641 | -0.3665956 | 6.86081385 | 0.3025403  | 0.49709845 |
| ENSMUSG00000031232 | -0.3665604 | 6.58601005 | 0.30259177 | 0.49711197 |
| ENSMUSG00000027219 | -0.3651634 | 8.15325695 | 0.30268458 | 0.49718879 |
| ENSMUSG00000096459 | -0.3691232 | 5.55765721 | 0.3027525  | 0.49718879 |
| ENSMUSG00000022210 | 0.38284244 | 3.31164288 | 0.30278271 | 0.49718879 |
| ENSMUSG00000050079 | -0.3685105 | 5.63025393 | 0.30281155 | 0.49718879 |
| ENSMUSG00000014498 | 0.36660088 | 6.71882913 | 0.30309305 | 0.49757993 |
| ENSMUSG00000030890 | 0.36640722 | 6.46491432 | 0.30316939 | 0.49763418 |



|                    |            |            |            |            |
|--------------------|------------|------------|------------|------------|
| ENSMUSG00000025352 | 0.36578144 | 6.64222277 | 0.30325302 | 0.49770039 |
| ENSMUSG00000030047 | 0.36461547 | 7.9549824  | 0.30339291 | 0.49785888 |
| ENSMUSG00000046573 | -0.3931435 | 2.94666649 | 0.30349555 | 0.49789336 |
| ENSMUSG00000056019 | -0.3774377 | 3.75387925 | 0.30350054 | 0.49789336 |
| ENSMUSG00000031012 | 0.39832032 | 3.09002752 | 0.30370873 | 0.49816379 |
| ENSMUSG00000019564 | 0.37125607 | 4.64140573 | 0.30385102 | 0.49832608 |
| ENSMUSG00000005410 | 0.36660003 | 5.79331241 | 0.30398703 | 0.49843047 |
| ENSMUSG00000034940 | -0.3649781 | 6.97095895 | 0.30403206 | 0.49843047 |
| ENSMUSG00000052632 | -0.3802495 | 3.36689546 | 0.30404475 | 0.49843047 |
| ENSMUSG00000042215 | 0.41501562 | 1.61314176 | 0.30427424 | 0.49873555 |
| ENSMUSG00000032602 | -0.3727249 | 4.20452453 | 0.30432251 | 0.49874355 |
| ENSMUSG00000006599 | -0.3658295 | 6.18775981 | 0.30439685 | 0.49879427 |
| ENSMUSG00000016356 | 0.48777975 | 1.11527413 | 0.30445361 | 0.49881616 |
| ENSMUSG00000031065 | 0.36547493 | 6.36488571 | 0.30450511 | 0.49882945 |
| ENSMUSG00000027882 | -0.3658624 | 6.18103319 | 0.30460676 | 0.49892486 |
| ENSMUSG00000020628 | 0.36703536 | 5.6629625  | 0.30477463 | 0.4991287  |
| ENSMUSG00000026447 | -0.363872  | 7.32424423 | 0.30487974 | 0.49917988 |
| ENSMUSG00000022439 | 0.36364416 | 7.64443529 | 0.30493382 | 0.49917988 |
| ENSMUSG00000071180 | -0.3667229 | 5.7851926  | 0.30493616 | 0.49917988 |
| ENSMUSG00000024758 | -0.3639611 | 7.24613358 | 0.30503319 | 0.49926763 |
| ENSMUSG00000020570 | -0.3636557 | 7.41208492 | 0.30521508 | 0.49949421 |
| ENSMUSG00000046949 | -0.3749381 | 4.2458415  | 0.30530212 | 0.49949801 |
| ENSMUSG00000078584 | -0.3716054 | 4.59552138 | 0.30530431 | 0.49949801 |
| ENSMUSG00000027001 | -0.4092356 | 2.15429478 | 0.30538251 | 0.49955485 |
| ENSMUSG00000025915 | -0.3640383 | 6.809002   | 0.30545903 | 0.49960892 |
| ENSMUSG00000040025 | -0.3645557 | 6.56866989 | 0.30563889 | 0.499832   |
| ENSMUSG00000042742 | -0.3652599 | 5.81803319 | 0.30576651 | 0.49985567 |
| ENSMUSG00000078853 | 0.36512848 | 5.73752266 | 0.30579989 | 0.49985567 |
| ENSMUSG00000060743 | -0.3625865 | 8.74775449 | 0.30582175 | 0.49985567 |
| ENSMUSG00000021037 | -0.3635369 | 7.6109719  | 0.30583819 | 0.49985567 |
| ENSMUSG00000020130 | -0.3644253 | 6.3820193  | 0.30587079 | 0.49985567 |
| ENSMUSG00000087406 | 0.49361986 | 0.90703204 | 0.30608707 | 0.50009892 |
| ENSMUSG00000000184 | 0.36270712 | 7.13973148 | 0.30613295 | 0.50009892 |
| ENSMUSG00000006526 | 0.37885332 | 3.67945425 | 0.30619579 | 0.50009892 |
| ENSMUSG00000034377 | -0.3634718 | 6.51116695 | 0.30622951 | 0.50009892 |
| ENSMUSG00000003662 | 0.3674011  | 5.12654963 | 0.30628589 | 0.50009892 |
| ENSMUSG00000011832 | 0.37844946 | 3.46035723 | 0.30630514 | 0.50009892 |
| ENSMUSG00000078970 | -0.3718976 | 4.1291818  | 0.30633015 | 0.50009892 |
| ENSMUSG00000037656 | -0.3714133 | 3.97261884 | 0.30643842 | 0.50009892 |
| ENSMUSG00000064181 | -0.3715243 | 4.39486862 | 0.30645281 | 0.50009892 |
| ENSMUSG00000020621 | -0.3741367 | 3.87614834 | 0.30650795 | 0.50009892 |
| ENSMUSG00000024120 | -0.3632582 | 6.82760332 | 0.30653274 | 0.50009892 |
| ENSMUSG00000020638 | 0.36567398 | 5.42173841 | 0.30657677 | 0.50009892 |

|                    |            |            |            |            |
|--------------------|------------|------------|------------|------------|
| ENSMUSG00000039193 | -0.3642724 | 6.14610099 | 0.30659273 | 0.50009892 |
| ENSMUSG00000032727 | -0.364675  | 6.14437428 | 0.30662873 | 0.50009892 |
| ENSMUSG00000016520 | -0.3682206 | 4.6934403  | 0.30670748 | 0.50015641 |
| ENSMUSG00000038844 | -0.3649827 | 5.56048444 | 0.3072229  | 0.5008687  |
| ENSMUSG00000027463 | 0.43086579 | 1.19529392 | 0.30723876 | 0.5008687  |
| ENSMUSG00000052139 | -0.366285  | 5.11629602 | 0.30729509 | 0.5008687  |
| ENSMUSG00000033159 | 0.36280072 | 6.68847628 | 0.30736182 | 0.5008687  |
| ENSMUSG00000097534 | -0.3878787 | 2.89921893 | 0.30736214 | 0.5008687  |
| ENSMUSG00000022358 | -0.3682423 | 4.74112202 | 0.30748754 | 0.50100202 |
| ENSMUSG00000027775 | -0.362715  | 6.67808672 | 0.30760804 | 0.50108386 |
| ENSMUSG00000041341 | -0.3624795 | 6.72070627 | 0.30763791 | 0.50108386 |
| ENSMUSG00000058388 | -0.3645134 | 5.65044691 | 0.30766854 | 0.50108386 |
| ENSMUSG00000031822 | 0.36535459 | 5.66837765 | 0.30782123 | 0.50125282 |
| ENSMUSG00000034789 | 0.36579295 | 5.22544496 | 0.30788605 | 0.50125282 |
| ENSMUSG00000000127 | 0.41239157 | 1.53411597 | 0.3079031  | 0.50125282 |
| ENSMUSG00000022682 | -0.3628613 | 6.29285876 | 0.30827419 | 0.50178587 |
| ENSMUSG00000060032 | 0.37587476 | 3.51709974 | 0.3083729  | 0.50187547 |
| ENSMUSG00000013539 | 0.37214071 | 4.22654559 | 0.30853236 | 0.50206391 |
| ENSMUSG00000040843 | -0.3647971 | 5.36749209 | 0.30862286 | 0.50214009 |
| ENSMUSG00000048787 | -0.3705843 | 4.04225237 | 0.30895175 | 0.50260407 |
| ENSMUSG00000027411 | 0.3613302  | 6.78590638 | 0.30907144 | 0.50269974 |
| ENSMUSG00000032757 | -0.3729758 | 3.82399513 | 0.30909802 | 0.50269974 |
| ENSMUSG00000000594 | 0.36035523 | 8.20766857 | 0.30917423 | 0.50270788 |
| ENSMUSG00000001018 | -0.3635257 | 5.54969889 | 0.30919049 | 0.50270788 |
| ENSMUSG00000076633 | 0.40788586 | 2.13568761 | 0.30931681 | 0.50283984 |
| ENSMUSG00000087153 | -0.3628599 | 5.53636324 | 0.30936655 | 0.50283984 |
| ENSMUSG00000028383 | -0.3663529 | 4.79456256 | 0.30940289 | 0.50283984 |
| ENSMUSG00000018362 | -0.3664738 | 4.77465764 | 0.30956099 | 0.50302567 |
| ENSMUSG00000049038 | -0.3721936 | 3.77201235 | 0.30966827 | 0.50306302 |
| ENSMUSG00000074754 | 0.40235915 | 1.8465957  | 0.30967151 | 0.50306302 |
| ENSMUSG00000032932 | -0.3649658 | 5.11089617 | 0.30992032 | 0.50339609 |
| ENSMUSG00000035248 | -0.3593008 | 8.38865428 | 0.31035701 | 0.50403417 |
| ENSMUSG00000028716 | 0.38035568 | 3.32159952 | 0.31058135 | 0.50432726 |
| ENSMUSG00000022822 | 0.36136078 | 6.18215065 | 0.310672   | 0.50439803 |
| ENSMUSG00000001383 | -0.3605863 | 6.62032827 | 0.3107127  | 0.50439803 |
| ENSMUSG00000029171 | 0.36567089 | 4.38852112 | 0.31081343 | 0.50449032 |
| ENSMUSG00000039456 | -0.3591154 | 7.84976049 | 0.31093393 | 0.50461465 |
| ENSMUSG00000052013 | -0.358453  | 9.3959536  | 0.31102153 | 0.50468555 |
| ENSMUSG00000023272 | 0.36388275 | 4.68637863 | 0.31145406 | 0.50517313 |
| ENSMUSG00000031540 | -0.3583355 | 8.84403346 | 0.31145488 | 0.50517313 |
| ENSMUSG00000096472 | 0.3672631  | 4.43821355 | 0.31147277 | 0.50517313 |
| ENSMUSG00000015357 | -0.3618539 | 5.66147555 | 0.31154866 | 0.50517313 |
| ENSMUSG00000055612 | -0.3670681 | 4.59745351 | 0.31158569 | 0.50517313 |

|                    |            |            |            |            |
|--------------------|------------|------------|------------|------------|
| ENSMUSG00000022253 | -0.3644744 | 4.59659347 | 0.31158569 | 0.50517313 |
| ENSMUSG00000020832 | 0.36380692 | 4.74302946 | 0.31169513 | 0.50521716 |
| ENSMUSG00000044551 | 0.41338674 | 2.20711037 | 0.31174779 | 0.50521716 |
| ENSMUSG00000069678 | 0.39069649 | 2.77729487 | 0.3118188  | 0.50521716 |
| ENSMUSG00000046947 | 0.36353303 | 4.78255833 | 0.31182447 | 0.50521716 |
| ENSMUSG00000010067 | 0.36138892 | 5.80792512 | 0.31185082 | 0.50521716 |
| ENSMUSG00000014551 | -0.3671814 | 4.33887088 | 0.31189662 | 0.50521716 |
| ENSMUSG00000097242 | -0.4148328 | 0.90736237 | 0.31196119 | 0.50521716 |
| ENSMUSG00000031758 | 0.36247478 | 5.48437553 | 0.31196445 | 0.50521716 |
| ENSMUSG00000035757 | 0.36314156 | 5.17570996 | 0.31204879 | 0.50527368 |
| ENSMUSG00000018565 | 0.36493755 | 4.54456318 | 0.31208727 | 0.50527368 |
| ENSMUSG00000026737 | -0.3581558 | 7.89662527 | 0.31218743 | 0.50536467 |
| ENSMUSG00000038646 | -0.3631902 | 5.07638095 | 0.31225731 | 0.50539734 |
| ENSMUSG00000030469 | -0.3726086 | 3.33427823 | 0.31230456 | 0.50539734 |
| ENSMUSG00000030811 | 0.37328687 | 3.6636047  | 0.31240256 | 0.50539734 |
| ENSMUSG00000030768 | 0.37632491 | 2.8444954  | 0.31240739 | 0.50539734 |
| ENSMUSG00000018412 | -0.3580238 | 7.91785072 | 0.31242745 | 0.50539734 |
| ENSMUSG00000041975 | -0.36606   | 4.45307145 | 0.31251978 | 0.50547557 |
| ENSMUSG00000047205 | 0.37908456 | 3.8858022  | 0.31263987 | 0.50559866 |
| ENSMUSG00000023988 | 0.3671191  | 3.95855248 | 0.31270283 | 0.50562935 |
| ENSMUSG00000028530 | -0.3570113 | 10.0460622 | 0.31293951 | 0.50594089 |
| ENSMUSG00000055239 | -0.3596292 | 5.96993423 | 0.31341551 | 0.50663919 |
| ENSMUSG00000097908 | 0.38987523 | 2.78253424 | 0.3135369  | 0.50676416 |
| ENSMUSG00000022280 | -0.3599325 | 5.68088536 | 0.31361653 | 0.5068216  |
| ENSMUSG00000032648 | 0.41724965 | 1.97179826 | 0.31396687 | 0.50731644 |
| ENSMUSG00000042772 | -0.3566141 | 8.30365577 | 0.31401543 | 0.5073236  |
| ENSMUSG00000036678 | 0.36147279 | 5.06044123 | 0.31409833 | 0.50738621 |
| ENSMUSG00000030243 | -0.3584996 | 6.00623317 | 0.31474694 | 0.50836252 |
| ENSMUSG00000057637 | -0.3561385 | 8.11546656 | 0.31479247 | 0.50836464 |
| ENSMUSG00000058638 | -0.3570761 | 6.88641919 | 0.3149096  | 0.50848235 |
| ENSMUSG00000019988 | -0.3601684 | 5.32200881 | 0.31502997 | 0.50860527 |
| ENSMUSG00000078771 | 0.36022886 | 5.52940437 | 0.31521672 | 0.50874876 |
| ENSMUSG00000046062 | -0.3558447 | 8.05706803 | 0.3152409  | 0.50874876 |
| ENSMUSG00000021253 | 0.40060261 | 2.62962142 | 0.31530044 | 0.50874876 |
| ENSMUSG00000027540 | 0.35726777 | 6.67098085 | 0.31530297 | 0.50874876 |
| ENSMUSG00000100017 | 0.45125673 | 1.63693991 | 0.31534014 | 0.50874876 |
| ENSMUSG00000019189 | -0.3554779 | 8.31873505 | 0.31549681 | 0.50893009 |
| ENSMUSG00000003178 | 0.36960712 | 3.53789021 | 0.31563201 | 0.50904556 |
| ENSMUSG00000059772 | 0.39555186 | 2.40378519 | 0.31565696 | 0.50904556 |
| ENSMUSG00000036104 | -0.3560538 | 7.09960635 | 0.31578943 | 0.50918723 |
| ENSMUSG00000026276 | -0.3559502 | 7.21428432 | 0.3158334  | 0.50918723 |
| ENSMUSG00000026171 | 0.3589006  | 5.09584492 | 0.31612867 | 0.50954131 |
| ENSMUSG00000060450 | -0.3564806 | 6.44253153 | 0.31615924 | 0.50954131 |

|                    |            |            |            |            |
|--------------------|------------|------------|------------|------------|
| ENSMUSG00000044734 | -0.3552569 | 7.68806346 | 0.31622358 | 0.50954131 |
| ENSMUSG00000061130 | -0.3565831 | 6.42382104 | 0.31629441 | 0.50954131 |
| ENSMUSG00000021771 | -0.3555155 | 7.38701391 | 0.31633953 | 0.50954131 |
| ENSMUSG00000015806 | -0.3608963 | 4.91741982 | 0.31634531 | 0.50954131 |
| ENSMUSG00000100201 | -0.3978474 | 2.28073418 | 0.31636332 | 0.50954131 |
| ENSMUSG00000029575 | 0.37228518 | 3.26434122 | 0.3164582  | 0.50962273 |
| ENSMUSG00000087624 | 0.44425593 | 1.34224784 | 0.31656314 | 0.50972031 |
| ENSMUSG00000028337 | 0.35632467 | 6.54061821 | 0.3166294  | 0.50975559 |
| ENSMUSG00000035505 | 0.39186404 | 2.68303649 | 0.31686211 | 0.50997354 |
| ENSMUSG00000067369 | -0.3569799 | 5.99813499 | 0.31687693 | 0.50997354 |
| ENSMUSG00000029152 | -0.3549658 | 7.60787164 | 0.31689787 | 0.50997354 |
| ENSMUSG00000040599 | -0.3573388 | 5.94317664 | 0.31713517 | 0.51022489 |
| ENSMUSG00000031683 | -0.3583348 | 5.42540683 | 0.31714283 | 0.51022489 |
| ENSMUSG00000099481 | -0.3623901 | 4.52505846 | 0.31723958 | 0.51030911 |
| ENSMUSG00000025474 | 0.36057746 | 4.98042316 | 0.31729083 | 0.51032015 |
| ENSMUSG00000038010 | -0.3986843 | 1.89815758 | 0.31735672 | 0.51035471 |
| ENSMUSG00000021111 | -0.3541962 | 8.26846722 | 0.31740942 | 0.51036806 |
| ENSMUSG00000030724 | 0.35350202 | 10.9108745 | 0.31755353 | 0.51052837 |
| ENSMUSG00000035929 | 0.35406396 | 8.25234065 | 0.31760227 | 0.51053533 |
| ENSMUSG00000029623 | 0.35815361 | 5.16729091 | 0.31779824 | 0.51077891 |
| ENSMUSG00000027170 | -0.3547951 | 6.90443575 | 0.31789372 | 0.51078978 |
| ENSMUSG00000019978 | -0.354328  | 7.24163641 | 0.31789387 | 0.51078978 |
| ENSMUSG00000026578 | -0.3670422 | 3.73258861 | 0.31802712 | 0.51093246 |
| ENSMUSG00000027384 | -0.369098  | 3.71148012 | 0.31821798 | 0.51116764 |
| ENSMUSG00000041235 | -0.353772  | 7.23576479 | 0.31838332 | 0.51136178 |
| ENSMUSG00000024981 | -0.353697  | 7.74625521 | 0.31851206 | 0.51149709 |
| ENSMUSG00000066406 | -0.3527439 | 9.78454169 | 0.3187239  | 0.51176578 |
| ENSMUSG00000089847 | -0.3816798 | 2.85684842 | 0.31895561 | 0.5120663  |
| ENSMUSG00000021715 | -0.3597954 | 4.74235492 | 0.31918202 | 0.51235824 |
| ENSMUSG00000042426 | -0.3559318 | 5.68600549 | 0.31936471 | 0.51257991 |
| ENSMUSG00000042155 | 0.41012622 | 1.79058505 | 0.31977574 | 0.51313111 |
| ENSMUSG00000027641 | -0.3542501 | 6.24215776 | 0.31979741 | 0.51313111 |
| ENSMUSG00000043207 | -0.3545982 | 6.01508994 | 0.31996798 | 0.51333313 |
| ENSMUSG00000023932 | -0.352798  | 7.50264839 | 0.32004924 | 0.51339186 |
| ENSMUSG00000001576 | 0.35747866 | 5.05623287 | 0.32038793 | 0.51370109 |
| ENSMUSG00000074873 | -0.362836  | 3.67129969 | 0.32049693 | 0.51370109 |
| ENSMUSG00000042396 | -0.3535098 | 6.49142789 | 0.32050395 | 0.51370109 |
| ENSMUSG00000002477 | -0.35707   | 5.04945796 | 0.32052007 | 0.51370109 |
| ENSMUSG00000038290 | -0.3529991 | 6.61957012 | 0.3205246  | 0.51370109 |
| ENSMUSG00000032705 | -0.3554334 | 5.47428112 | 0.3205278  | 0.51370109 |
| ENSMUSG00000050621 | -0.3516984 | 8.86321012 | 0.32056151 | 0.51370109 |
| ENSMUSG00000026489 | 0.35438693 | 5.9455719  | 0.32068538 | 0.51370109 |
| ENSMUSG00000051166 | -0.3551386 | 5.11203654 | 0.32070256 | 0.51370109 |

|                    |            |            |            |            |
|--------------------|------------|------------|------------|------------|
| ENSMUSG00000028270 | 0.35415846 | 5.81190701 | 0.32071816 | 0.51370109 |
| ENSMUSG00000045464 | -0.3751918 | 3.20769262 | 0.32079019 | 0.51370109 |
| ENSMUSG00000026842 | 0.35428602 | 6.14744573 | 0.32080689 | 0.51370109 |
| ENSMUSG00000042472 | -0.3548989 | 5.62639967 | 0.32085991 | 0.51370109 |
| ENSMUSG00000015671 | -0.3527064 | 6.85124678 | 0.32086767 | 0.51370109 |
| ENSMUSG00000015087 | 0.35396676 | 5.99133035 | 0.32092953 | 0.51372858 |
| ENSMUSG00000033356 | -0.3640921 | 3.52669865 | 0.32101417 | 0.51379252 |
| ENSMUSG00000021451 | 0.35165957 | 7.95540016 | 0.32115083 | 0.51393969 |
| ENSMUSG00000033623 | -0.3547758 | 5.4768369  | 0.32134876 | 0.51415486 |
| ENSMUSG00000059552 | 0.35202985 | 6.93709557 | 0.32137475 | 0.51415486 |
| ENSMUSG00000053768 | -0.3540153 | 5.96090091 | 0.32142912 | 0.5141703  |
| ENSMUSG00000030279 | -0.3528373 | 6.13565059 | 0.32161773 | 0.51434214 |
| ENSMUSG00000056121 | 0.36517849 | 3.86467653 | 0.32162604 | 0.51434214 |
| ENSMUSG00000027263 | -0.3519067 | 6.84410948 | 0.32177965 | 0.51444809 |
| ENSMUSG00000036403 | -0.3529798 | 6.14239791 | 0.3217818  | 0.51444809 |
| ENSMUSG00000040463 | 0.35105731 | 7.6674985  | 0.32190038 | 0.51454413 |
| ENSMUSG00000039478 | -0.360491  | 3.75360399 | 0.32193695 | 0.51454413 |
| ENSMUSG00000091264 | -0.362186  | 4.01143502 | 0.32197616 | 0.51454413 |
| ENSMUSG00000092558 | -0.3526582 | 6.13960406 | 0.32202707 | 0.51455396 |
| ENSMUSG00000023460 | -0.3561696 | 4.69711548 | 0.32216967 | 0.51471026 |
| ENSMUSG00000034083 | -0.3539765 | 5.50061871 | 0.32221506 | 0.51471124 |
| ENSMUSG00000030788 | -0.3530397 | 5.8252594  | 0.32226091 | 0.51471296 |
| ENSMUSG00000008373 | 0.35402363 | 5.37533459 | 0.3224873  | 0.51488197 |
| ENSMUSG00000003752 | 0.36184845 | 3.75191686 | 0.32250568 | 0.51488197 |
| ENSMUSG00000027610 | 0.36893923 | 3.23397142 | 0.32253298 | 0.51488197 |
| ENSMUSG00000033009 | -0.3546525 | 5.29053512 | 0.32254589 | 0.51488197 |
| ENSMUSG00000074826 | -0.4527762 | 1.09636174 | 0.32262054 | 0.51488887 |
| ENSMUSG00000029017 | -0.3527851 | 5.96226627 | 0.3226398  | 0.51488887 |
| ENSMUSG00000026632 | -0.3625959 | 3.31853131 | 0.32271685 | 0.51494034 |
| ENSMUSG00000035299 | -0.3562271 | 3.85057588 | 0.32298163 | 0.5152913  |
| ENSMUSG00000070427 | 0.38179539 | 2.79133207 | 0.32311797 | 0.51543729 |
| ENSMUSG00000034235 | -0.3599004 | 3.97534545 | 0.32316315 | 0.51543782 |
| ENSMUSG00000012123 | 0.39512194 | 2.21294147 | 0.32326938 | 0.51553572 |
| ENSMUSG00000033773 | -0.3551772 | 4.91175259 | 0.32343484 | 0.51572805 |
| ENSMUSG00000035227 | -0.3509688 | 6.72623309 | 0.32364061 | 0.51598458 |
| ENSMUSG00000024969 | 0.35043457 | 7.11300638 | 0.3237923  | 0.51615483 |
| ENSMUSG00000028017 | -0.4046159 | 1.70568983 | 0.32391749 | 0.51620184 |
| ENSMUSG00000100455 | -0.3793671 | 2.55069266 | 0.32394    | 0.51620184 |
| ENSMUSG00000073647 | 0.37814133 | 2.15543065 | 0.32397556 | 0.51620184 |
| ENSMUSG00000020368 | -0.3490697 | 9.20705572 | 0.32405064 | 0.51620184 |
| ENSMUSG00000025270 | -0.350034  | 7.3155913  | 0.32407145 | 0.51620184 |
| ENSMUSG00000026827 | -0.3504029 | 6.76022683 | 0.32410276 | 0.51620184 |
| ENSMUSG00000031021 | -0.3543042 | 4.98061697 | 0.32413614 | 0.51620184 |

|                    |            |            |            |            |
|--------------------|------------|------------|------------|------------|
| ENSMUSG00000029190 | -0.3505549 | 6.45625372 | 0.32426508 | 0.51633566 |
| ENSMUSG00000087174 | -0.3542454 | 4.96234611 | 0.32431322 | 0.51634078 |
| ENSMUSG00000076501 | -0.3548517 | 5.12753758 | 0.32437664 | 0.51634667 |
| ENSMUSG00000021737 | -0.3514657 | 6.08390343 | 0.3244319  | 0.51634667 |
| ENSMUSG00000001569 | -0.3516544 | 5.930624   | 0.32445167 | 0.51634667 |
| ENSMUSG00000027366 | -0.3492625 | 7.47461446 | 0.32455259 | 0.51638338 |
| ENSMUSG00000033075 | -0.3495595 | 7.2507776  | 0.32456778 | 0.51638338 |
| ENSMUSG00000026245 | -0.3507205 | 6.34171047 | 0.32460951 | 0.51638338 |
| ENSMUSG00000033060 | -0.4096461 | 1.15073347 | 0.32467885 | 0.51642221 |
| ENSMUSG00000026201 | 0.35160249 | 5.57070858 | 0.32486837 | 0.51663956 |
| ENSMUSG00000024143 | -0.3500076 | 6.65505489 | 0.32490538 | 0.51663956 |
| ENSMUSG00000017119 | -0.3488835 | 7.7046937  | 0.32507447 | 0.51683693 |
| ENSMUSG00000037791 | 0.34955913 | 6.84847079 | 0.32514983 | 0.51688526 |
| ENSMUSG00000025337 | -0.3495662 | 6.67740284 | 0.32529561 | 0.5170455  |
| ENSMUSG00000021555 | -0.3506993 | 6.00244457 | 0.32549164 | 0.51728555 |
| ENSMUSG00000021608 | 0.34845475 | 7.75809883 | 0.32557122 | 0.5173405  |
| ENSMUSG00000033184 | -0.3491547 | 6.88575703 | 0.32562776 | 0.51735882 |
| ENSMUSG00000028121 | 0.34886804 | 7.03940086 | 0.3257094  | 0.51736049 |
| ENSMUSG00000038280 | -0.3501309 | 6.01956318 | 0.32571882 | 0.51736049 |
| ENSMUSG00000076543 | -0.3751207 | 2.63113139 | 0.32594115 | 0.51757307 |
| ENSMUSG00000029456 | 0.37693815 | 2.96539107 | 0.32594271 | 0.51757307 |
| ENSMUSG00000089989 | 0.35384536 | 5.03960917 | 0.32600053 | 0.51759339 |
| ENSMUSG00000036779 | -0.3494027 | 6.39343257 | 0.32610365 | 0.51762415 |
| ENSMUSG00000028517 | 0.35458065 | 4.41304818 | 0.32615245 | 0.51762415 |
| ENSMUSG00000085971 | 0.45212416 | 1.6812697  | 0.326155   | 0.51762415 |
| ENSMUSG00000100213 | -0.386339  | 1.9254067  | 0.32646533 | 0.51794819 |
| ENSMUSG00000028869 | -0.3488167 | 6.52759425 | 0.32648978 | 0.51794819 |
| ENSMUSG00000038225 | -0.3499883 | 5.76385284 | 0.3265304  | 0.51794819 |
| ENSMUSG00000031996 | 0.34909099 | 6.53693334 | 0.3265645  | 0.51794819 |
| ENSMUSG00000095519 | -0.3825595 | 2.15533529 | 0.32658447 | 0.51794819 |
| ENSMUSG00000034110 | 0.36743032 | 3.26180362 | 0.32672128 | 0.51809368 |
| ENSMUSG00000064302 | -0.3479686 | 7.19432349 | 0.32682657 | 0.51818917 |
| ENSMUSG00000078546 | -0.393176  | 1.40818195 | 0.32698347 | 0.51824482 |
| ENSMUSG00000063694 | -0.3526989 | 5.0125827  | 0.32706547 | 0.51824482 |
| ENSMUSG00000023330 | -0.3780614 | 2.75168464 | 0.32711335 | 0.51824482 |
| ENSMUSG00000035575 | -0.3491401 | 6.36842522 | 0.32712136 | 0.51824482 |
| ENSMUSG00000041219 | -0.349403  | 5.90065451 | 0.32712857 | 0.51824482 |
| ENSMUSG00000020610 | -0.3524259 | 4.91202585 | 0.32713218 | 0.51824482 |
| ENSMUSG00000029777 | -0.3482698 | 6.82618021 | 0.32719056 | 0.51826587 |
| ENSMUSG00000022969 | 0.34866535 | 6.40459607 | 0.32740155 | 0.51852864 |
| ENSMUSG00000042644 | 0.34723896 | 7.66637188 | 0.32754067 | 0.51867751 |
| ENSMUSG00000008892 | -0.3494172 | 5.87438879 | 0.32762849 | 0.51874511 |
| ENSMUSG00000035885 | 0.34942948 | 5.65796265 | 0.3277494  | 0.51886509 |

|                    |            |            |            |            |
|--------------------|------------|------------|------------|------------|
| ENSMUSG00000075602 | 0.34638465 | 8.59100956 | 0.32792274 | 0.51906801 |
| ENSMUSG00000018425 | -0.346995  | 7.10925274 | 0.32819387 | 0.51939581 |
| ENSMUSG00000028863 | 0.35220851 | 5.06300027 | 0.32824084 | 0.51939581 |
| ENSMUSG00000032869 | 0.35072589 | 5.22162587 | 0.32826538 | 0.51939581 |
| ENSMUSG00000009030 | -0.3504876 | 5.15688107 | 0.32840148 | 0.51953964 |
| ENSMUSG00000075419 | 0.37849189 | 2.44163998 | 0.32877027 | 0.51995445 |
| ENSMUSG00000028394 | -0.3522532 | 4.85395649 | 0.32877299 | 0.51995445 |
| ENSMUSG00000021548 | -0.3524615 | 4.72591885 | 0.32879938 | 0.51995445 |
| ENSMUSG00000028322 | -0.3537273 | 4.59935287 | 0.32903948 | 0.52026256 |
| ENSMUSG00000021147 | -0.3470004 | 6.5396299  | 0.3291356  | 0.52029644 |
| ENSMUSG00000000365 | 0.49559486 | 0.97687522 | 0.32915143 | 0.52029644 |
| ENSMUSG00000022292 | -0.3474163 | 6.39004181 | 0.32926258 | 0.52040057 |
| ENSMUSG00000027531 | -0.3477652 | 6.17627832 | 0.32931119 | 0.52040584 |
| ENSMUSG00000097061 | -0.3672463 | 2.78037926 | 0.32937881 | 0.52044115 |
| ENSMUSG00000022529 | -0.3462058 | 7.04075901 | 0.3295005  | 0.52056188 |
| ENSMUSG00000097141 | 0.41144333 | 1.82381248 | 0.32959371 | 0.52056605 |
| ENSMUSG00000072980 | -0.3976429 | 1.81633898 | 0.32959371 | 0.52056605 |
| ENSMUSG00000048118 | -0.3454185 | 7.55814479 | 0.32995081 | 0.52105847 |
| ENSMUSG00000042453 | 0.37106263 | 3.25101899 | 0.33006685 | 0.52110264 |
| ENSMUSG00000025271 | -0.370205  | 2.49155664 | 0.33006945 | 0.52110264 |
| ENSMUSG00000028180 | -0.3466391 | 6.25230526 | 0.33035983 | 0.52142858 |
| ENSMUSG00000026072 | -0.3850334 | 1.98675295 | 0.33038528 | 0.52142858 |
| ENSMUSG00000055319 | -0.3461183 | 6.67544284 | 0.33041198 | 0.52142858 |
| ENSMUSG00000004936 | 0.34499581 | 7.43276984 | 0.3306068  | 0.5216644  |
| ENSMUSG00000022526 | 0.35519092 | 3.97318231 | 0.33083821 | 0.5219579  |
| ENSMUSG00000005198 | -0.3439655 | 9.42861465 | 0.33098578 | 0.52203719 |
| ENSMUSG00000005417 | 0.34487882 | 7.32736292 | 0.33102219 | 0.52203719 |
| ENSMUSG00000074930 | -0.3720886 | 2.6252808  | 0.33102472 | 0.52203719 |
| ENSMUSG00000020134 | -0.3448414 | 7.22753274 | 0.33108641 | 0.52206287 |
| ENSMUSG00000018168 | -0.3438127 | 9.67408044 | 0.33117062 | 0.52212402 |
| ENSMUSG00000050148 | 0.34863421 | 5.11955839 | 0.33133717 | 0.52224971 |
| ENSMUSG00000031691 | 0.34611954 | 6.23335348 | 0.3313412  | 0.52224971 |
| ENSMUSG00000060679 | -0.3481454 | 4.70046181 | 0.33156781 | 0.52247091 |
| ENSMUSG00000045382 | -0.3434637 | 10.2744176 | 0.33157245 | 0.52247091 |
| ENSMUSG00000086288 | -0.3742208 | 2.16107826 | 0.33175812 | 0.52267235 |
| ENSMUSG00000073421 | 0.34324541 | 11.0785643 | 0.33179122 | 0.52267235 |
| ENSMUSG00000039671 | -0.3443186 | 6.94133489 | 0.33191236 | 0.52279153 |
| ENSMUSG00000021687 | 0.38770559 | 1.65320418 | 0.3321583  | 0.52310724 |
| ENSMUSG00000043421 | -0.3500263 | 4.68847577 | 0.33228316 | 0.52323218 |
| ENSMUSG00000028243 | -0.3485472 | 4.88770761 | 0.33260187 | 0.52363923 |
| ENSMUSG00000039826 | 0.35016369 | 4.69370686 | 0.33271715 | 0.52363923 |
| ENSMUSG00000029828 | 0.43614002 | 1.32624684 | 0.33272387 | 0.52363923 |
| ENSMUSG00000053226 | 0.40043714 | 1.34546165 | 0.33272387 | 0.52363923 |

|                    |            |            |            |            |
|--------------------|------------|------------|------------|------------|
| ENSMUSG00000023087 | -0.3521563 | 3.43930086 | 0.33284994 | 0.52373267 |
| ENSMUSG00000038126 | -0.3452909 | 5.94126103 | 0.33287437 | 0.52373267 |
| ENSMUSG00000038084 | -0.3439314 | 6.85433119 | 0.33303872 | 0.52387873 |
| ENSMUSG00000074749 | -0.3504095 | 4.32750048 | 0.33305835 | 0.52387873 |
| ENSMUSG00000020376 | -0.343735  | 6.80331712 | 0.33316303 | 0.52397168 |
| ENSMUSG00000027739 | -0.3465075 | 5.36065185 | 0.33326426 | 0.52405918 |
| ENSMUSG00000015776 | 0.34742484 | 4.94651974 | 0.33341375 | 0.52422256 |
| ENSMUSG00000031730 | 0.36009609 | 3.75956944 | 0.33349461 | 0.52427798 |
| ENSMUSG00000040433 | -0.3443818 | 5.89910373 | 0.3335856  | 0.5243493  |
| ENSMUSG00000026463 | -0.3466279 | 5.44472039 | 0.33372696 | 0.52447449 |
| ENSMUSG00000048222 | -0.3487756 | 4.78809864 | 0.33375649 | 0.52447449 |
| ENSMUSG00000027605 | 0.35537028 | 4.34788801 | 0.33396519 | 0.52470959 |
| ENSMUSG00000062270 | -0.3420941 | 8.36826748 | 0.33403806 | 0.52470959 |
| ENSMUSG00000022768 | 0.4210251  | 1.39406875 | 0.33407669 | 0.52470959 |
| ENSMUSG00000044352 | -0.3704472 | 2.86235447 | 0.33411347 | 0.52470959 |
| ENSMUSG00000021264 | -0.3435943 | 6.57243944 | 0.33413434 | 0.52470959 |
| ENSMUSG00000015247 | -0.3463353 | 5.05838365 | 0.33477657 | 0.52564632 |
| ENSMUSG00000051397 | 0.37043415 | 2.98818752 | 0.33496384 | 0.52586852 |
| ENSMUSG00000041974 | -0.346171  | 5.1277746  | 0.33513178 | 0.52606034 |
| ENSMUSG00000063882 | -0.3419095 | 7.23746895 | 0.33550191 | 0.52656943 |
| ENSMUSG00000026637 | 0.34333196 | 5.82397779 | 0.33574954 | 0.52688613 |
| ENSMUSG00000042564 | 0.43886657 | 1.2619794  | 0.3358899  | 0.52703446 |
| ENSMUSG00000027865 | -0.345266  | 5.35926948 | 0.33594676 | 0.52705173 |
| ENSMUSG00000038085 | 0.36039688 | 3.67247345 | 0.33621248 | 0.52727555 |
| ENSMUSG00000003948 | -0.3471822 | 4.80300545 | 0.33621689 | 0.52727555 |
| ENSMUSG00000028982 | -0.3649193 | 2.14362103 | 0.33622704 | 0.52727555 |
| ENSMUSG00000047180 | 0.34057799 | 8.20149412 | 0.33627893 | 0.527285   |
| ENSMUSG00000070336 | -0.4478042 | 1.07252987 | 0.33643018 | 0.5274502  |
| ENSMUSG00000026604 | -0.343825  | 5.58081527 | 0.33655768 | 0.52757815 |
| ENSMUSG00000030245 | -0.3473408 | 4.5845971  | 0.3367398  | 0.52779166 |
| ENSMUSG00000030493 | 0.35569573 | 3.30810749 | 0.33683023 | 0.52786142 |
| ENSMUSG00000048154 | 0.34059037 | 7.84263218 | 0.33723121 | 0.52841524 |
| ENSMUSG00000021427 | -0.3404715 | 7.19305905 | 0.33727556 | 0.52841524 |
| ENSMUSG00000096672 | -0.4164883 | 1.56749195 | 0.33749435 | 0.52867195 |
| ENSMUSG00000000276 | -0.3427169 | 5.47151177 | 0.3375314  | 0.52867195 |
| ENSMUSG00000023032 | 0.35249729 | 4.33615268 | 0.33769036 | 0.52884887 |
| ENSMUSG00000055707 | 0.37062105 | 2.81396876 | 0.3378355  | 0.5289088  |
| ENSMUSG00000048490 | -0.3414391 | 5.71897734 | 0.33785435 | 0.5289088  |
| ENSMUSG00000027714 | -0.3432493 | 5.37953984 | 0.33790176 | 0.5289088  |
| ENSMUSG00000038803 | 0.34451076 | 5.13712476 | 0.33791268 | 0.5289088  |
| ENSMUSG00000025266 | -0.3407638 | 6.54081253 | 0.33796804 | 0.52892343 |
| ENSMUSG00000046434 | -0.3390953 | 8.79707737 | 0.33807287 | 0.52901546 |
| ENSMUSG00000000085 | -0.3445192 | 4.62099305 | 0.33829368 | 0.52928895 |



|                    |            |            |            |            |
|--------------------|------------|------------|------------|------------|
| ENSMUSG00000038663 | 0.39829498 | 1.62527562 | 0.33846015 | 0.52947647 |
| ENSMUSG00000037376 | -0.3416714 | 5.58159754 | 0.33850566 | 0.52947647 |
| ENSMUSG00000038205 | -0.3417243 | 5.7093431  | 0.33862227 | 0.52954787 |
| ENSMUSG00000025728 | 0.33998464 | 6.96309238 | 0.33866972 | 0.52954787 |
| ENSMUSG00000030615 | -0.3510639 | 3.71503393 | 0.33868951 | 0.52954787 |
| ENSMUSG00000025724 | -0.3406716 | 6.19066057 | 0.3389793  | 0.52989746 |
| ENSMUSG00000021665 | -0.3392131 | 7.34016796 | 0.3390053  | 0.52989746 |
| ENSMUSG00000026511 | -0.3414529 | 5.67599474 | 0.33923236 | 0.53018028 |
| ENSMUSG00000071415 | -0.3378966 | 10.3027567 | 0.33944877 | 0.53044639 |
| ENSMUSG00000094561 | 0.34207399 | 5.17848099 | 0.33954185 | 0.53051972 |
| ENSMUSG00000066442 | -0.3623288 | 2.71803761 | 0.33974944 | 0.53077193 |
| ENSMUSG00000031631 | -0.3405557 | 5.89331972 | 0.33979654 | 0.53077337 |
| ENSMUSG00000035725 | -0.3395303 | 6.24524261 | 0.34018248 | 0.53130402 |
| ENSMUSG00000018102 | -0.3543195 | 3.53261154 | 0.34047236 | 0.53168453 |
| ENSMUSG00000018765 | 0.33905359 | 6.18395202 | 0.34083074 | 0.53217188 |
| ENSMUSG00000019773 | -0.3470246 | 4.24053549 | 0.3409201  | 0.53223911 |
| ENSMUSG00000026229 | -0.3384818 | 6.60038762 | 0.34115215 | 0.53239647 |
| ENSMUSG00000029603 | 0.33907145 | 6.02984262 | 0.3411707  | 0.53239647 |
| ENSMUSG00000005374 | -0.3423972 | 4.93330357 | 0.34120494 | 0.53239647 |
| ENSMUSG00000024592 | -0.3442698 | 4.38287897 | 0.34123311 | 0.53239647 |
| ENSMUSG00000026492 | -0.349906  | 3.65033299 | 0.34125248 | 0.53239647 |
| ENSMUSG00000016552 | 0.34484079 | 4.69420889 | 0.34144579 | 0.53260614 |
| ENSMUSG00000024414 | 0.37345952 | 2.6101318  | 0.34152587 | 0.53260614 |
| ENSMUSG00000021759 | 0.36638758 | 2.611906   | 0.34152587 | 0.53260614 |
| ENSMUSG00000033721 | -0.3414918 | 4.92661358 | 0.34164368 | 0.53271728 |
| ENSMUSG00000076540 | 0.3524862  | 3.15769187 | 0.34168982 | 0.53271728 |
| ENSMUSG00000002778 | 0.33913146 | 5.7747298  | 0.34180811 | 0.53282943 |
| ENSMUSG00000039774 | 0.34279743 | 4.38110509 | 0.34227737 | 0.53327205 |
| ENSMUSG00000025147 | 0.34840803 | 4.16346081 | 0.34228308 | 0.53327205 |
| ENSMUSG00000032567 | -0.3440217 | 4.53511297 | 0.34230965 | 0.53327205 |
| ENSMUSG00000043131 | -0.3360611 | 9.19584499 | 0.34233356 | 0.53327205 |
| ENSMUSG00000041654 | 0.3676498  | 3.01253354 | 0.34234522 | 0.53327205 |
| ENSMUSG00000031431 | -0.3359649 | 9.35820427 | 0.34241435 | 0.53327205 |
| ENSMUSG00000041915 | -0.3376597 | 6.59261096 | 0.34247389 | 0.53327205 |
| ENSMUSG00000020257 | -0.3366375 | 7.64465607 | 0.34253684 | 0.53327205 |
| ENSMUSG00000020078 | -0.3379695 | 6.27473451 | 0.34254386 | 0.53327205 |
| ENSMUSG00000028687 | 0.36394514 | 2.69104135 | 0.34261529 | 0.53327205 |
| ENSMUSG00000012429 | -0.3504758 | 3.74959921 | 0.34263818 | 0.53327205 |
| ENSMUSG00000035376 | -0.3455273 | 4.08972091 | 0.34264875 | 0.53327205 |
| ENSMUSG00000060862 | 0.34075111 | 5.15878255 | 0.34297384 | 0.53370574 |
| ENSMUSG00000020648 | -0.3544095 | 3.44311421 | 0.343298   | 0.53413785 |
| ENSMUSG00000040459 | -0.336613  | 6.84685494 | 0.34334986 | 0.53414624 |
| ENSMUSG00000021660 | -0.3357116 | 8.0446738  | 0.34340348 | 0.53415737 |

|                    |            |            |            |            |
|--------------------|------------|------------|------------|------------|
| ENSMUSG00000021965 | -0.382675  | 1.93897275 | 0.34359047 | 0.53435793 |
| ENSMUSG00000045404 | 0.39914251 | 1.74271556 | 0.34362539 | 0.53435793 |
| ENSMUSG00000021619 | -0.3536046 | 3.01018211 | 0.34380672 | 0.53449733 |
| ENSMUSG00000023923 | 0.33624314 | 7.02095506 | 0.34383435 | 0.53449733 |
| ENSMUSG00000024993 | -0.3398878 | 5.00071531 | 0.34385453 | 0.53449733 |
| ENSMUSG00000078143 | -0.5048528 | 0.58078308 | 0.34401553 | 0.53467162 |
| ENSMUSG00000086324 | -0.3609669 | 3.03659632 | 0.34405967 | 0.53467162 |
| ENSMUSG00000028470 | 0.36428477 | 2.67178208 | 0.34411071 | 0.53467281 |
| ENSMUSG00000026925 | 0.33825296 | 5.62128794 | 0.34415347 | 0.53467281 |
| ENSMUSG00000036377 | 0.41028633 | 1.78102305 | 0.34429168 | 0.53481525 |
| ENSMUSG00000074269 | 0.45241451 | 0.93757734 | 0.34439689 | 0.53485528 |
| ENSMUSG00000074582 | -0.3355123 | 7.01868316 | 0.34444475 | 0.53485528 |
| ENSMUSG00000023075 | -0.3360058 | 6.84226376 | 0.34445703 | 0.53485528 |
| ENSMUSG00000026659 | -0.3419849 | 4.18381819 | 0.34450993 | 0.53486516 |
| ENSMUSG00000059883 | 0.33983774 | 4.90362089 | 0.3446446  | 0.53487852 |
| ENSMUSG00000001844 | 0.34424772 | 4.39622599 | 0.34467523 | 0.53487852 |
| ENSMUSG00000037548 | 0.33439792 | 9.24045347 | 0.34467953 | 0.53487852 |
| ENSMUSG00000002010 | 0.33550394 | 6.89067267 | 0.34470912 | 0.53487852 |
| ENSMUSG00000047514 | -0.3353143 | 7.18458096 | 0.34475119 | 0.53487852 |
| ENSMUSG00000001767 | -0.3368217 | 6.11535341 | 0.3448321  | 0.53493184 |
| ENSMUSG00000067995 | -0.3406994 | 4.60261427 | 0.34511978 | 0.53530587 |
| ENSMUSG00000030417 | -0.3398886 | 4.91539188 | 0.34531894 | 0.53554253 |
| ENSMUSG00000037470 | -0.3341727 | 7.98009625 | 0.34555187 | 0.53583148 |
| ENSMUSG00000090625 | 0.41632698 | 1.03014976 | 0.34570006 | 0.53598897 |
| ENSMUSG00000038718 | 0.34945788 | 3.08227092 | 0.34594511 | 0.53629657 |
| ENSMUSG00000044795 | -0.3439191 | 4.10015244 | 0.34615126 | 0.53649871 |
| ENSMUSG00000025505 | 0.34668117 | 3.76566724 | 0.34616885 | 0.53649871 |
| ENSMUSG00000030536 | -0.3329528 | 10.1758207 | 0.34654133 | 0.53700359 |
| ENSMUSG00000051154 | -0.3359385 | 5.56829328 | 0.34693399 | 0.53753958 |
| ENSMUSG00000018965 | -0.3336747 | 7.53022254 | 0.34705809 | 0.5376594  |
| ENSMUSG00000037313 | -0.3374503 | 5.10344349 | 0.347208   | 0.53778879 |
| ENSMUSG00000001542 | -0.3348802 | 6.18202137 | 0.34723518 | 0.53778879 |
| ENSMUSG00000058546 | -0.3327899 | 8.33642051 | 0.34738472 | 0.53794791 |
| ENSMUSG00000040282 | -0.3534465 | 3.22363674 | 0.34752471 | 0.5380922  |
| ENSMUSG00000046861 | 0.33474014 | 6.05522019 | 0.34757805 | 0.53810231 |
| ENSMUSG00000018848 | -0.3340759 | 6.45362324 | 0.34792095 | 0.538551   |
| ENSMUSG00000022018 | 0.35974331 | 3.00855392 | 0.34796157 | 0.538551   |
| ENSMUSG00000028643 | 0.35439778 | 3.16050713 | 0.34810044 | 0.53869339 |
| ENSMUSG00000025439 | -0.3346064 | 5.89034722 | 0.34870196 | 0.53948548 |
| ENSMUSG00000027860 | 0.44199813 | 1.24935797 | 0.3487498  | 0.53948548 |
| ENSMUSG00000027939 | -0.342251  | 3.57030816 | 0.34875307 | 0.53948548 |
| ENSMUSG00000082454 | -0.3883305 | 1.59419827 | 0.34882588 | 0.5395255  |
| ENSMUSG00000004394 | 0.33640983 | 5.12892746 | 0.3491498  | 0.53983446 |

|                    |            |            |            |            |
|--------------------|------------|------------|------------|------------|
| ENSMUSG00000027496 | 0.34669393 | 3.52277001 | 0.34925632 | 0.53983446 |
| ENSMUSG00000027746 | -0.3352581 | 5.56707075 | 0.3492767  | 0.53983446 |
| ENSMUSG00000022386 | 0.3452117  | 3.91819629 | 0.34931707 | 0.53983446 |
| ENSMUSG00000030515 | 0.34234144 | 3.91658923 | 0.34931707 | 0.53983446 |
| ENSMUSG00000034210 | -0.333174  | 6.33026888 | 0.34931961 | 0.53983446 |
| ENSMUSG00000038612 | -0.331036  | 10.1366952 | 0.34935437 | 0.53983446 |
| ENSMUSG00000020358 | -0.3314598 | 8.23510423 | 0.34940631 | 0.53984214 |
| ENSMUSG00000054381 | 0.34640147 | 3.55080186 | 0.34950878 | 0.53992789 |
| ENSMUSG00000090115 | -0.3497874 | 3.0264586  | 0.34960366 | 0.53998317 |
| ENSMUSG00000042851 | -0.334275  | 5.12159621 | 0.34968311 | 0.53998317 |
| ENSMUSG00000034292 | 0.34612842 | 3.67977742 | 0.34970972 | 0.53998317 |
| ENSMUSG00000021057 | -0.3668453 | 2.24943434 | 0.34973247 | 0.53998317 |
| ENSMUSG00000021120 | -0.342248  | 4.2447881  | 0.35012381 | 0.5405148  |
| ENSMUSG00000003778 | -0.3310396 | 7.7293474  | 0.35023781 | 0.54061819 |
| ENSMUSG00000030657 | 0.33691118 | 4.84076587 | 0.35052409 | 0.54098743 |
| ENSMUSG00000058794 | 0.33715482 | 4.63482779 | 0.35063801 | 0.54107114 |
| ENSMUSG00000005813 | -0.3332054 | 5.86321522 | 0.35067246 | 0.54107114 |
| ENSMUSG00000087305 | -0.3483467 | 3.16332026 | 0.35074004 | 0.54110277 |
| ENSMUSG00000023873 | 0.39713813 | 1.44877054 | 0.35092174 | 0.54131045 |
| ENSMUSG00000045795 | 0.33565502 | 4.92815421 | 0.35112293 | 0.54154811 |
| ENSMUSG00000021890 | -0.3317491 | 6.50183636 | 0.35122303 | 0.54162983 |
| ENSMUSG00000027706 | -0.3310503 | 6.96383178 | 0.35129239 | 0.54166412 |
| ENSMUSG00000028247 | -0.3559483 | 2.68522164 | 0.35141552 | 0.54171975 |
| ENSMUSG00000022749 | -0.3323799 | 5.74132284 | 0.35142272 | 0.54171975 |
| ENSMUSG00000051984 | 0.3981769  | 1.51575787 | 0.35151091 | 0.54177657 |
| ENSMUSG00000026516 | -0.3316461 | 6.26443601 | 0.35155385 | 0.54177657 |
| ENSMUSG00000028986 | -0.3386001 | 4.55030105 | 0.35195917 | 0.54228721 |
| ENSMUSG00000026353 | -0.3308417 | 6.82741837 | 0.35197955 | 0.54228721 |
| ENSMUSG00000008475 | -0.3293788 | 8.46484198 | 0.35224941 | 0.54257683 |
| ENSMUSG00000000538 | 0.3377622  | 4.77634938 | 0.35230374 | 0.54257683 |
| ENSMUSG00000006390 | 0.33163567 | 5.68729111 | 0.35230913 | 0.54257683 |
| ENSMUSG00000037601 | -0.3353645 | 5.00436181 | 0.35247951 | 0.54272861 |
| ENSMUSG00000037887 | 0.34527129 | 3.40131085 | 0.35250211 | 0.54272861 |
| ENSMUSG00000047242 | -0.3351016 | 4.65759542 | 0.3527025  | 0.54296441 |
| ENSMUSG00000027427 | -0.331745  | 5.73965005 | 0.35308052 | 0.54342185 |
| ENSMUSG00000061759 | -0.3311105 | 5.83438227 | 0.3530942  | 0.54342185 |
| ENSMUSG00000039000 | -0.3298971 | 6.67863647 | 0.35327841 | 0.54357862 |
| ENSMUSG00000020798 | 0.34947829 | 3.52081092 | 0.35329064 | 0.54357862 |
| ENSMUSG00000021569 | -0.3623991 | 2.45319216 | 0.3535202  | 0.54385904 |
| ENSMUSG00000027628 | 0.33470404 | 4.6319283  | 0.35393892 | 0.54443034 |
| ENSMUSG00000028309 | -0.3283127 | 7.91050083 | 0.35422384 | 0.54479569 |
| ENSMUSG00000073139 | -0.3326397 | 5.15642879 | 0.35503915 | 0.54587158 |
| ENSMUSG00000021917 | -0.3312449 | 5.4595132  | 0.35504364 | 0.54587158 |

|                    |            |            |            |            |
|--------------------|------------|------------|------------|------------|
| ENSMUSG00000033326 | 0.32838303 | 6.88406219 | 0.3550884  | 0.54587158 |
| ENSMUSG00000026988 | 0.35338536 | 3.0127628  | 0.35511333 | 0.54587158 |
| ENSMUSG00000053964 | 0.33693719 | 4.00708541 | 0.35519863 | 0.5459297  |
| ENSMUSG00000044201 | -0.3752472 | 1.9778827  | 0.35530656 | 0.54601198 |
| ENSMUSG00000021938 | -0.3295385 | 5.7309098  | 0.35534716 | 0.54601198 |
| ENSMUSG00000036819 | -0.3336333 | 4.85744463 | 0.35547956 | 0.54614242 |
| ENSMUSG00000043872 | -0.3335083 | 4.74453986 | 0.35569861 | 0.54640593 |
| ENSMUSG00000029465 | 0.32758648 | 7.25602509 | 0.35583379 | 0.54654055 |
| ENSMUSG00000022827 | -0.338623  | 3.82400812 | 0.35589274 | 0.54655806 |
| ENSMUSG00000044340 | -0.3305426 | 5.46363032 | 0.35596191 | 0.54659126 |
| ENSMUSG00000035139 | 0.33021969 | 5.74042132 | 0.35603385 | 0.5466287  |
| ENSMUSG00000038417 | -0.3293719 | 5.85132628 | 0.35609367 | 0.54664753 |
| ENSMUSG00000024622 | 0.32927349 | 5.75954281 | 0.35625641 | 0.54677613 |
| ENSMUSG00000037815 | 0.32895923 | 6.05631282 | 0.35627257 | 0.54677613 |
| ENSMUSG00000046157 | 0.3274864  | 6.82427604 | 0.35653979 | 0.54704037 |
| ENSMUSG00000085609 | -0.3708346 | 1.65802206 | 0.35653992 | 0.54704037 |
| ENSMUSG00000021824 | -0.328683  | 5.91209032 | 0.35666594 | 0.547128   |
| ENSMUSG00000020227 | -0.3279465 | 6.48985169 | 0.35669224 | 0.547128   |
| ENSMUSG00000022108 | 0.3262489  | 8.72059969 | 0.35676001 | 0.54715895 |
| ENSMUSG00000025795 | -0.3272497 | 6.90363712 | 0.35684594 | 0.54721773 |
| ENSMUSG00000078941 | -0.3468315 | 3.09253983 | 0.35690135 | 0.5472297  |
| ENSMUSG00000000751 | -0.3267332 | 7.36256737 | 0.35701702 | 0.54732452 |
| ENSMUSG00000044827 | -0.326308  | 7.96632428 | 0.35705842 | 0.54732452 |
| ENSMUSG00000034848 | -0.3376603 | 4.13509594 | 0.35717001 | 0.54742257 |
| ENSMUSG00000026709 | -0.330773  | 5.03189769 | 0.35732925 | 0.54759362 |
| ENSMUSG00000033688 | 0.34567177 | 3.25734171 | 0.35752799 | 0.54782515 |
| ENSMUSG00000039485 | 0.33812171 | 3.29304485 | 0.35764874 | 0.54793713 |
| ENSMUSG00000042502 | 0.32674596 | 6.61846838 | 0.35793728 | 0.54830611 |
| ENSMUSG00000021701 | 0.32503262 | 9.44965319 | 0.35820538 | 0.54864369 |
| ENSMUSG00000022885 | -0.3251555 | 8.86123467 | 0.35831182 | 0.5487336  |
| ENSMUSG00000022434 | -0.3316249 | 4.34247877 | 0.35847331 | 0.54879892 |
| ENSMUSG00000024742 | 0.33010093 | 4.96001579 | 0.3584825  | 0.54879892 |
| ENSMUSG00000021094 | 0.33391617 | 4.36894281 | 0.35853973 | 0.54879892 |
| ENSMUSG00000022707 | -0.3334226 | 4.56334737 | 0.35854544 | 0.54879892 |
| ENSMUSG00000097867 | 0.38195409 | 2.11411232 | 0.35866368 | 0.5489068  |
| ENSMUSG00000046658 | 0.36007794 | 2.81129545 | 0.35889034 | 0.54918058 |
| ENSMUSG00000034442 | -0.3347451 | 4.15846439 | 0.35924656 | 0.5496525  |
| ENSMUSG00000041040 | -0.3261943 | 6.30135733 | 0.35938091 | 0.54978488 |
| ENSMUSG00000040331 | -0.325835  | 6.54256578 | 0.35947619 | 0.54985746 |
| ENSMUSG00000005470 | -0.3340642 | 4.34830534 | 0.35964995 | 0.54995347 |
| ENSMUSG00000064341 | -0.3239119 | 11.3412612 | 0.35965426 | 0.54995347 |
| ENSMUSG00000018761 | 0.33100705 | 4.78991956 | 0.35968249 | 0.54995347 |
| ENSMUSG00000000295 | -0.33646   | 3.66855491 | 0.35974686 | 0.54997874 |

|                    |            |            |            |            |
|--------------------|------------|------------|------------|------------|
| ENSMUSG00000098274 | 0.32772635 | 5.06286947 | 0.35983706 | 0.55004349 |
| ENSMUSG00000019804 | -0.3257908 | 6.68680978 | 0.3600093  | 0.5502336  |
| ENSMUSG00000023809 | 0.34911553 | 2.69776688 | 0.36032078 | 0.55063644 |
| ENSMUSG00000037536 | 0.33343219 | 4.05213192 | 0.36041562 | 0.55070816 |
| ENSMUSG00000030751 | -0.3247144 | 6.95854457 | 0.36066674 | 0.55101862 |
| ENSMUSG00000031770 | 0.32404154 | 7.5223838  | 0.36074966 | 0.55107207 |
| ENSMUSG00000035469 | -0.3255948 | 6.04582789 | 0.36097845 | 0.5513483  |
| ENSMUSG00000038462 | -0.3256201 | 6.09040807 | 0.36110139 | 0.5514628  |
| ENSMUSG00000076469 | 0.42131345 | 1.00930185 | 0.36117609 | 0.55150361 |
| ENSMUSG00000038628 | -0.3302482 | 4.72778507 | 0.36146678 | 0.55187417 |
| ENSMUSG00000032383 | 0.32361644 | 7.23885109 | 0.36158962 | 0.5519884  |
| ENSMUSG00000022283 | -0.3224874 | 10.3649524 | 0.36186973 | 0.55223552 |
| ENSMUSG00000005656 | -0.3248735 | 6.18475565 | 0.36188851 | 0.55223552 |
| ENSMUSG00000002346 | 0.36101487 | 2.51522196 | 0.3619291  | 0.55223552 |
| ENSMUSG00000028102 | 0.33021832 | 4.27417889 | 0.36195831 | 0.55223552 |
| ENSMUSG00000025486 | 0.34853699 | 2.57538015 | 0.3619917  | 0.55223552 |
| ENSMUSG00000000420 | -0.3226694 | 8.39770865 | 0.36218245 | 0.55245319 |
| ENSMUSG00000001416 | -0.3228762 | 8.03070357 | 0.36243051 | 0.55275822 |
| ENSMUSG00000025364 | -0.3229087 | 7.5068909  | 0.36256872 | 0.5528235  |
| ENSMUSG00000033952 | -0.3323709 | 4.08370502 | 0.3625695  | 0.5528235  |
| ENSMUSG00000027593 | 0.32313652 | 6.6946578  | 0.36291176 | 0.55323163 |
| ENSMUSG00000045594 | 0.32719153 | 5.12150897 | 0.36293343 | 0.55323163 |
| ENSMUSG00000067150 | -0.3239092 | 6.30466921 | 0.36301027 | 0.55327539 |
| ENSMUSG00000054733 | 0.33441283 | 3.84034268 | 0.36338324 | 0.55364838 |
| ENSMUSG00000020537 | 0.32633328 | 4.95930074 | 0.36341063 | 0.55364838 |
| ENSMUSG00000042737 | 0.38372062 | 1.64982896 | 0.36347323 | 0.55364838 |
| ENSMUSG00000027243 | -0.3345754 | 3.62821837 | 0.36348296 | 0.55364838 |
| ENSMUSG00000012609 | -0.3276244 | 4.74162041 | 0.36351611 | 0.55364838 |
| ENSMUSG00000036992 | 0.3349403  | 3.50992082 | 0.36354398 | 0.55364838 |
| ENSMUSG00000031776 | 0.32402322 | 5.86140986 | 0.36363909 | 0.55371988 |
| ENSMUSG00000028455 | 0.32710727 | 4.86611409 | 0.36369381 | 0.55372985 |
| ENSMUSG00000023036 | 0.37805974 | 1.92842508 | 0.36382368 | 0.55385422 |
| ENSMUSG00000029144 | -0.3230544 | 6.38305465 | 0.36399256 | 0.55403793 |
| ENSMUSG00000078153 | -0.3275338 | 4.7141785  | 0.36408949 | 0.5541121  |
| ENSMUSG00000056770 | -0.3226235 | 6.45805651 | 0.36424548 | 0.55426353 |
| ENSMUSG00000033713 | -0.3229605 | 6.01225613 | 0.36428543 | 0.55426353 |
| ENSMUSG00000025173 | -0.3239538 | 5.64995698 | 0.36445445 | 0.55444731 |
| ENSMUSG00000029518 | 0.32268103 | 6.19275293 | 0.3647325  | 0.55466138 |
| ENSMUSG00000036398 | 0.32354537 | 5.76317074 | 0.36473506 | 0.55466138 |
| ENSMUSG00000021550 | 0.32843474 | 4.4714443  | 0.36473992 | 0.55466138 |
| ENSMUSG00000025878 | -0.3215716 | 7.18376131 | 0.36482373 | 0.55466822 |
| ENSMUSG00000038642 | 0.32056858 | 9.64814188 | 0.36484093 | 0.55466822 |
| ENSMUSG00000069844 | -0.3317473 | 3.90814736 | 0.36493647 | 0.55474011 |

|                    |            |            |            |            |
|--------------------|------------|------------|------------|------------|
| ENSMUSG00000039745 | 0.33571034 | 3.71436046 | 0.36525728 | 0.55515436 |
| ENSMUSG00000029670 | -0.3236562 | 5.62717486 | 0.36556123 | 0.55554289 |
| ENSMUSG00000096580 | -0.4605265 | 0.72938635 | 0.36565511 | 0.55561209 |
| ENSMUSG00000032498 | -0.3231449 | 5.58548646 | 0.36583074 | 0.55571647 |
| ENSMUSG00000035696 | -0.3207501 | 7.14065217 | 0.36592367 | 0.55571647 |
| ENSMUSG00000035266 | -0.3244588 | 5.01689369 | 0.36592374 | 0.55571647 |
| ENSMUSG00000073889 | 0.35222069 | 2.49719492 | 0.36601844 | 0.55571647 |
| ENSMUSG00000030347 | -0.3259159 | 4.89561386 | 0.36602979 | 0.55571647 |
| ENSMUSG00000050029 | -0.3212801 | 6.78802641 | 0.36603663 | 0.55571647 |
| ENSMUSG0000003779  | -0.3316888 | 4.09521816 | 0.36606221 | 0.55571647 |
| ENSMUSG00000031959 | -0.3250543 | 4.60244187 | 0.36653259 | 0.55635708 |
| ENSMUSG00000028362 | 0.37275654 | 2.10914032 | 0.36659837 | 0.55638345 |
| ENSMUSG00000037243 | 0.32527971 | 4.80331519 | 0.36668816 | 0.55644626 |
| ENSMUSG00000032611 | -0.4230796 | 1.09288021 | 0.36678971 | 0.5564939  |
| ENSMUSG00000047866 | -0.3208279 | 6.58838716 | 0.36683371 | 0.5564939  |
| ENSMUSG00000043015 | -0.3201779 | 6.95213087 | 0.36686479 | 0.5564939  |
| ENSMUSG00000024442 | 0.32335498 | 4.99482981 | 0.36714115 | 0.55677803 |
| ENSMUSG00000025956 | 0.3395516  | 2.83831986 | 0.36714897 | 0.55677803 |
| ENSMUSG00000074211 | 0.32887565 | 4.37093647 | 0.36721659 | 0.55680711 |
| ENSMUSG00000033379 | 0.32034962 | 6.71469453 | 0.36732164 | 0.55682358 |
| ENSMUSG00000031976 | -0.3225648 | 5.40097334 | 0.36736589 | 0.55682358 |
| ENSMUSG00000030556 | -0.334036  | 3.61682964 | 0.36737278 | 0.55682358 |
| ENSMUSG00000021476 | 0.33473528 | 3.57838595 | 0.36750097 | 0.55689118 |
| ENSMUSG00000049680 | 0.32711148 | 4.08405639 | 0.36751427 | 0.55689118 |
| ENSMUSG00000038028 | -0.3274549 | 4.26361801 | 0.36756552 | 0.55689543 |
| ENSMUSG00000004110 | -0.3187467 | 8.05005295 | 0.36785015 | 0.55713812 |
| ENSMUSG00000040511 | 0.32686194 | 4.73460058 | 0.3678701  | 0.55713812 |
| ENSMUSG00000022701 | -0.3269178 | 4.17493434 | 0.3678711  | 0.55713812 |
| ENSMUSG00000066838 | -0.3420431 | 2.52702534 | 0.36798234 | 0.55723317 |
| ENSMUSG00000021578 | -0.322035  | 5.62050461 | 0.36804922 | 0.55726103 |
| ENSMUSG00000026377 | -0.3222098 | 5.51661303 | 0.36823399 | 0.55746736 |
| ENSMUSG00000029110 | -0.3188994 | 7.57931616 | 0.36839282 | 0.55763438 |
| ENSMUSG00000031007 | -0.3201258 | 6.21215715 | 0.36847756 | 0.55768921 |
| ENSMUSG00000024277 | -0.3200887 | 6.15506803 | 0.36861321 | 0.55780245 |
| ENSMUSG00000034729 | -0.3238123 | 4.5602018  | 0.36869297 | 0.55780245 |
| ENSMUSG00000021365 | -0.3182615 | 8.45536778 | 0.36873341 | 0.55780245 |
| ENSMUSG00000029708 | 0.32217366 | 5.1892596  | 0.36874648 | 0.55780245 |
| ENSMUSG00000036777 | -0.3268667 | 4.32641919 | 0.36915507 | 0.55834704 |
| ENSMUSG00000042369 | -0.3224488 | 5.14612467 | 0.36939507 | 0.55863654 |
| ENSMUSG00000034343 | -0.3202726 | 5.87457851 | 0.36966962 | 0.5589782  |
| ENSMUSG00000069769 | -0.3186934 | 6.63141539 | 0.36979262 | 0.55909065 |
| ENSMUSG00000028015 | -0.3178283 | 7.42565864 | 0.36987897 | 0.55911173 |
| ENSMUSG00000034959 | 0.31803237 | 7.39757539 | 0.36990385 | 0.55911173 |

|                    |            |            |            |            |
|--------------------|------------|------------|------------|------------|
| ENSMUSG00000020115 | -0.3185529 | 6.62294234 | 0.36996042 | 0.55912372 |
| ENSMUSG00000019320 | 0.37024388 | 1.86275061 | 0.37002447 | 0.55914701 |
| ENSMUSG00000048218 | -0.3229543 | 4.79686021 | 0.3701525  | 0.55923542 |
| ENSMUSG00000027508 | -0.3174448 | 7.63762434 | 0.37018028 | 0.55923542 |
| ENSMUSG00000075054 | -0.3385189 | 3.150649   | 0.37036882 | 0.55944673 |
| ENSMUSG00000029283 | -0.3197555 | 5.72993603 | 0.37047849 | 0.55953886 |
| ENSMUSG00000011158 | 0.31946786 | 6.02673255 | 0.3706731  | 0.55968916 |
| ENSMUSG00000031858 | 0.31742344 | 7.55136563 | 0.37068725 | 0.55968916 |
| ENSMUSG00000040385 | 0.31698813 | 8.12795784 | 0.37073608 | 0.55968916 |
| ENSMUSG00000020448 | -0.321605  | 5.13542506 | 0.37077276 | 0.55968916 |
| ENSMUSG00000019854 | -0.3193268 | 5.75034542 | 0.37084807 | 0.55972934 |
| ENSMUSG00000029613 | -0.3173979 | 7.23323217 | 0.37106462 | 0.55998265 |
| ENSMUSG00000020340 | -0.3164839 | 9.06970596 | 0.37113139 | 0.56000989 |
| ENSMUSG00000020720 | -0.3185735 | 6.21338585 | 0.37141214 | 0.56035996 |
| ENSMUSG00000029111 | 0.32131593 | 4.88757325 | 0.3714709  | 0.56037507 |
| ENSMUSG00000010054 | 0.32129619 | 4.78166567 | 0.37164059 | 0.56055315 |
| ENSMUSG00000091625 | -0.3252616 | 3.97121277 | 0.37172374 | 0.56055315 |
| ENSMUSG00000029763 | -0.3181138 | 6.28722762 | 0.37173525 | 0.56055315 |
| ENSMUSG00000063849 | 0.3186763  | 6.01506757 | 0.37194425 | 0.56073768 |
| ENSMUSG00000017631 | 0.31792271 | 6.26521455 | 0.37195518 | 0.56073768 |
| ENSMUSG00000024096 | 0.31815773 | 6.18626734 | 0.37204942 | 0.5608062  |
| ENSMUSG00000032640 | -0.3169555 | 6.89044923 | 0.37227901 | 0.5610787  |
| ENSMUSG00000001517 | 0.32527852 | 4.0786492  | 0.37252915 | 0.56127025 |
| ENSMUSG00000027881 | -0.3156564 | 8.55455586 | 0.3725589  | 0.56127025 |
| ENSMUSG00000030225 | 0.32726858 | 4.06980354 | 0.37259514 | 0.56127025 |
| ENSMUSG00000026009 | 0.34688854 | 2.43139285 | 0.37263227 | 0.56127025 |
| ENSMUSG00000032067 | -0.3185742 | 5.48237973 | 0.37265024 | 0.56127025 |
| ENSMUSG00000037896 | -0.3164587 | 6.80241826 | 0.37292844 | 0.56146038 |
| ENSMUSG00000019864 | -0.3197448 | 5.19453503 | 0.37294255 | 0.56146038 |
| ENSMUSG00000033985 | -0.325775  | 4.1182171  | 0.37295778 | 0.56146038 |
| ENSMUSG00000043895 | 0.3450123  | 2.37233366 | 0.37300015 | 0.56146038 |
| ENSMUSG00000063172 | -0.3410697 | 2.93647939 | 0.37303861 | 0.56146038 |
| ENSMUSG00000036046 | 0.31592761 | 7.28938187 | 0.37310242 | 0.56146038 |
| ENSMUSG00000041231 | -0.3162382 | 6.83053574 | 0.37311839 | 0.56146038 |
| ENSMUSG00000027073 | 0.35358441 | 2.33038316 | 0.37319406 | 0.56150074 |
| ENSMUSG00000036181 | 0.31835637 | 5.42988472 | 0.37356032 | 0.56197826 |
| ENSMUSG00000052337 | -0.315169  | 7.3525139  | 0.37427419 | 0.56286589 |
| ENSMUSG00000024194 | 0.32304495 | 3.94096009 | 0.3743123  | 0.56286589 |
| ENSMUSG00000028688 | 0.32025815 | 4.7034334  | 0.37433515 | 0.56286589 |
| ENSMUSG00000025010 | 0.32040071 | 4.95882495 | 0.37439394 | 0.56286589 |
| ENSMUSG00000021238 | -0.3230388 | 3.82427849 | 0.37439518 | 0.56286589 |
| ENSMUSG00000020910 | -0.3203754 | 4.81274613 | 0.37476699 | 0.56335119 |
| ENSMUSG00000058900 | -0.3255485 | 3.86046895 | 0.37493879 | 0.56353575 |

|                    |            |            |            |            |
|--------------------|------------|------------|------------|------------|
| ENSMUSG00000039233 | -0.3154896 | 6.40006973 | 0.37506907 | 0.56360861 |
| ENSMUSG00000027293 | 0.31594362 | 6.07437333 | 0.37508533 | 0.56360861 |
| ENSMUSG00000054302 | -0.3165554 | 5.91579226 | 0.37515913 | 0.56361379 |
| ENSMUSG00000029311 | 0.31626655 | 5.90717117 | 0.37518684 | 0.56361379 |
| ENSMUSG00000050350 | -0.3148715 | 6.92384726 | 0.37534387 | 0.56376118 |
| ENSMUSG00000029635 | -0.3170704 | 5.21806019 | 0.37538304 | 0.56376118 |
| ENSMUSG00000026754 | -0.3165162 | 5.75136866 | 0.37548808 | 0.56384526 |
| ENSMUSG00000064145 | -0.3150322 | 6.57145293 | 0.37555615 | 0.56387381 |
| ENSMUSG00000062248 | -0.3257084 | 4.10634981 | 0.37585273 | 0.56424541 |
| ENSMUSG00000041263 | 0.32166125 | 4.50454781 | 0.37590489 | 0.56425002 |
| ENSMUSG00000030780 | 0.32014456 | 4.90010226 | 0.37595883 | 0.56425731 |
| ENSMUSG00000037531 | -0.3240002 | 3.99576066 | 0.37613173 | 0.56444311 |
| ENSMUSG00000042390 | -0.3152253 | 6.14486579 | 0.37641762 | 0.5647984  |
| ENSMUSG00000052593 | -0.3134946 | 7.43668888 | 0.37664532 | 0.56506629 |
| ENSMUSG00000022151 | -0.3187115 | 4.78047535 | 0.37684898 | 0.56529631 |
| ENSMUSG00000041859 | 0.31440119 | 6.12212895 | 0.37689699 | 0.56529631 |
| ENSMUSG00000002109 | -0.3141557 | 6.36434216 | 0.37704656 | 0.56544687 |
| ENSMUSG00000036940 | -0.3137024 | 6.86098978 | 0.37721881 | 0.56563139 |
| ENSMUSG00000026355 | -0.3133816 | 6.9657271  | 0.37758336 | 0.56608136 |
| ENSMUSG00000027615 | -0.3125395 | 7.83441511 | 0.37761739 | 0.56608136 |
| ENSMUSG00000038943 | -0.3177148 | 4.99549398 | 0.37775177 | 0.56620898 |
| ENSMUSG00000034024 | -0.3122521 | 8.51248761 | 0.3779205  | 0.56638803 |
| ENSMUSG00000002949 | 0.31581592 | 5.46062966 | 0.37798676 | 0.56641348 |
| ENSMUSG00000001995 | 0.31615553 | 5.15039078 | 0.37828808 | 0.56679112 |
| ENSMUSG00000030560 | -0.3116868 | 8.92468017 | 0.3784211  | 0.56686211 |
| ENSMUSG00000040464 | -0.3218971 | 3.99144539 | 0.37845937 | 0.56686211 |
| ENSMUSG00000022657 | 0.33093629 | 3.38844387 | 0.3784834  | 0.56686211 |
| ENSMUSG00000037242 | -0.3122977 | 7.41366041 | 0.37858621 | 0.56694223 |
| ENSMUSG00000087259 | 0.32243976 | 3.95357125 | 0.37891793 | 0.56735157 |
| ENSMUSG00000028059 | 0.3119633  | 7.50159594 | 0.37895827 | 0.56735157 |
| ENSMUSG00000022313 | -0.3211861 | 4.00604836 | 0.37908489 | 0.56746722 |
| ENSMUSG00000037085 | 0.32919867 | 3.37535342 | 0.37978325 | 0.5684386  |
| ENSMUSG00000025584 | -0.3166489 | 4.60775769 | 0.37999457 | 0.56866901 |
| ENSMUSG00000047067 | -0.3583744 | 1.79766123 | 0.38011719 | 0.56866901 |
| ENSMUSG00000095204 | -0.3559774 | 1.79702686 | 0.38011719 | 0.56866901 |
| ENSMUSG00000020661 | 0.31322863 | 6.07302378 | 0.38013507 | 0.56866901 |
| ENSMUSG00000038264 | -0.314048  | 5.40017624 | 0.38075436 | 0.56952132 |
| ENSMUSG00000022899 | -0.311758  | 6.26715583 | 0.38080403 | 0.56952151 |
| ENSMUSG00000038215 | -0.3187436 | 4.04171108 | 0.38090306 | 0.56959551 |
| ENSMUSG00000037851 | -0.3109561 | 6.90223512 | 0.38113528 | 0.56975195 |
| ENSMUSG00000021466 | -0.31977   | 3.95837519 | 0.38120039 | 0.56975195 |
| ENSMUSG00000083563 | -0.3200667 | 4.37984595 | 0.38121515 | 0.56975195 |
| ENSMUSG00000052369 | 0.3207012  | 3.82407229 | 0.3812999  | 0.56975195 |



|                    |            |            |            |            |
|--------------------|------------|------------|------------|------------|
| ENSMUSG00000023979 | 0.37885123 | 1.23075575 | 0.38132577 | 0.56975195 |
| ENSMUSG00000010097 | -0.3098201 | 8.95745048 | 0.38133647 | 0.56975195 |
| ENSMUSG00000049904 | 0.35419291 | 1.98726901 | 0.38135463 | 0.56975195 |
| ENSMUSG00000011256 | -0.3102502 | 7.28812029 | 0.38170324 | 0.57011196 |
| ENSMUSG00000021193 | -0.311534  | 6.34050581 | 0.3817276  | 0.57011196 |
| ENSMUSG00000029432 | 0.31755295 | 4.77652377 | 0.38174439 | 0.57011196 |
| ENSMUSG00000020962 | -0.3111348 | 6.23609389 | 0.38187656 | 0.57023526 |
| ENSMUSG00000020250 | -0.311763  | 5.91597805 | 0.3819505  | 0.57027159 |
| ENSMUSG00000038902 | -0.3105229 | 6.730048   | 0.38222808 | 0.57061192 |
| ENSMUSG0000002981  | 0.31027733 | 6.52008774 | 0.38260552 | 0.57110122 |
| ENSMUSG00000018068 | -0.3113737 | 5.94789366 | 0.38272577 | 0.57112402 |
| ENSMUSG00000032300 | 0.31293607 | 5.22791926 | 0.38276681 | 0.57112402 |
| ENSMUSG00000027245 | -0.325334  | 3.13217328 | 0.38276985 | 0.57112402 |
| ENSMUSG00000020359 | -0.3136098 | 4.16524747 | 0.38282209 | 0.57112784 |
| ENSMUSG00000026003 | -0.3106399 | 6.33375388 | 0.38287239 | 0.57112874 |
| ENSMUSG00000033186 | -0.313438  | 4.88273256 | 0.38301798 | 0.57127179 |
| ENSMUSG00000026222 | -0.308402  | 9.63623322 | 0.38331363 | 0.57157628 |
| ENSMUSG00000024672 | -0.3314323 | 2.60268693 | 0.38332158 | 0.57157628 |
| ENSMUSG00000031556 | 0.32059162 | 4.02113574 | 0.38347269 | 0.57170584 |
| ENSMUSG00000022855 | -0.3093595 | 7.06509872 | 0.38352238 | 0.57170584 |
| ENSMUSG00000095571 | -0.3153071 | 4.822697   | 0.38355767 | 0.57170584 |
| ENSMUSG00000031103 | -0.3085052 | 8.27740699 | 0.38365571 | 0.57177782 |
| ENSMUSG00000022427 | -0.310274  | 6.29514525 | 0.38371005 | 0.57178467 |
| ENSMUSG00000032350 | -0.3098695 | 6.34313457 | 0.3840842  | 0.57219924 |
| ENSMUSG00000029366 | -0.3092867 | 6.82791811 | 0.38409017 | 0.57219924 |
| ENSMUSG00000032580 | -0.3079776 | 9.00479422 | 0.38413758 | 0.57219924 |
| ENSMUSG00000006717 | -0.3204558 | 3.61147526 | 0.38419751 | 0.57221435 |
| ENSMUSG00000022663 | -0.3097225 | 6.27553796 | 0.38435874 | 0.57238032 |
| ENSMUSG00000059493 | 0.34386445 | 2.52120497 | 0.38445075 | 0.57244318 |
| ENSMUSG00000028413 | -0.3089295 | 6.71478228 | 0.38455528 | 0.57244537 |
| ENSMUSG00000015023 | -0.310579  | 5.78665846 | 0.38456788 | 0.57244537 |
| ENSMUSG00000020986 | -0.3114224 | 5.49547535 | 0.38460162 | 0.57244537 |
| ENSMUSG00000021987 | -0.3086403 | 6.9419049  | 0.38482873 | 0.57270221 |
| ENSMUSG00000052137 | -0.3131844 | 5.1555572  | 0.38487382 | 0.57270221 |
| ENSMUSG00000015202 | 0.31971742 | 3.86061191 | 0.38508585 | 0.57288929 |
| ENSMUSG00000059355 | 0.31451487 | 4.36153713 | 0.38509922 | 0.57288929 |
| ENSMUSG00000010911 | -0.3216188 | 3.38834847 | 0.38539196 | 0.57325059 |
| ENSMUSG00000094198 | 0.35113773 | 2.4390851  | 0.38570924 | 0.57361703 |
| ENSMUSG00000085566 | -0.3202757 | 3.43738048 | 0.3857708  | 0.57361703 |
| ENSMUSG00000076596 | -0.3264364 | 3.57460564 | 0.38578802 | 0.57361703 |
| ENSMUSG00000029433 | -0.3091777 | 5.87221874 | 0.38588118 | 0.57368134 |
| ENSMUSG00000079435 | -0.3069468 | 8.32422428 | 0.3861216  | 0.57389764 |
| ENSMUSG00000017428 | -0.3083706 | 6.59104576 | 0.38612652 | 0.57389764 |

|                    |            |            |            |            |
|--------------------|------------|------------|------------|------------|
| ENSMUSG00000073639 | -0.3089217 | 5.92955539 | 0.38647481 | 0.57434104 |
| ENSMUSG00000038717 | 0.3222133  | 3.38034174 | 0.38675858 | 0.57468845 |
| ENSMUSG00000086841 | 0.30985158 | 5.36177318 | 0.38707158 | 0.5750792  |
| ENSMUSG00000017858 | -0.3089437 | 5.61876461 | 0.3872301  | 0.57518502 |
| ENSMUSG00000099966 | -0.3215174 | 2.72025052 | 0.38724288 | 0.57518502 |
| ENSMUSG00000009828 | 0.32849519 | 2.80528756 | 0.38775768 | 0.57581331 |
| ENSMUSG00000052406 | 0.30723532 | 6.21256923 | 0.38776606 | 0.57581331 |
| ENSMUSG00000030881 | 0.31121702 | 4.83347341 | 0.38791729 | 0.57596349 |
| ENSMUSG00000062585 | -0.305782  | 8.06140576 | 0.38806389 | 0.57610673 |
| ENSMUSG00000085894 | 0.36023769 | 2.27892064 | 0.38816077 | 0.57611195 |
| ENSMUSG00000021241 | -0.3127328 | 4.57649149 | 0.38816765 | 0.57611195 |
| ENSMUSG00000020184 | -0.3061085 | 7.14841594 | 0.38839533 | 0.57633797 |
| ENSMUSG00000018395 | 0.32530622 | 2.5411574  | 0.3884202  | 0.57633797 |
| ENSMUSG00000021118 | -0.3962988 | 1.01352091 | 0.38853518 | 0.57643416 |
| ENSMUSG00000025066 | -0.3065166 | 6.40183568 | 0.38860093 | 0.5764573  |
| ENSMUSG00000021432 | -0.3103679 | 4.92434974 | 0.38867167 | 0.57648785 |
| ENSMUSG00000029149 | -0.3165443 | 3.01020468 | 0.38901503 | 0.57690231 |
| ENSMUSG00000009535 | -0.3074452 | 5.69521788 | 0.38905148 | 0.57690231 |
| ENSMUSG00000032965 | 0.3662241  | 2.05083526 | 0.38917208 | 0.57700672 |
| ENSMUSG00000027002 | 0.35716905 | 1.62583329 | 0.38938583 | 0.57717474 |
| ENSMUSG00000026388 | -0.3454917 | 1.60827526 | 0.38938583 | 0.57717474 |
| ENSMUSG00000020456 | 0.30484057 | 7.90254856 | 0.38961491 | 0.5773816  |
| ENSMUSG00000045268 | 0.31663824 | 3.64714185 | 0.38966177 | 0.5773816  |
| ENSMUSG00000021189 | -0.3062887 | 6.31764782 | 0.38967607 | 0.5773816  |
| ENSMUSG00000055541 | 0.31419745 | 4.57666219 | 0.38977978 | 0.57746083 |
| ENSMUSG00000028717 | -0.3096308 | 5.29521992 | 0.39002599 | 0.57770812 |
| ENSMUSG00000031207 | -0.3039373 | 10.71691   | 0.39004721 | 0.57770812 |
| ENSMUSG00000020923 | 0.30469515 | 7.42465935 | 0.39011276 | 0.57773077 |
| ENSMUSG00000024370 | -0.3060977 | 6.13703243 | 0.39023584 | 0.5777989  |
| ENSMUSG00000031221 | -0.305709  | 6.40217535 | 0.39028103 | 0.5777989  |
| ENSMUSG00000019302 | 0.30555809 | 6.99235456 | 0.39030956 | 0.5777989  |
| ENSMUSG00000037722 | -0.3121864 | 4.33279814 | 0.39044222 | 0.57792086 |
| ENSMUSG00000054435 | -0.3038722 | 8.91868529 | 0.3905519  | 0.57800877 |
| ENSMUSG00000074890 | -0.3198253 | 3.58939546 | 0.39066928 | 0.57810805 |
| ENSMUSG00000041769 | -0.306952  | 5.51307865 | 0.3908722  | 0.57827763 |
| ENSMUSG00000032316 | 0.30491301 | 6.61112945 | 0.39088448 | 0.57827763 |
| ENSMUSG00000015575 | -0.3049407 | 6.43462746 | 0.39112531 | 0.57855944 |
| ENSMUSG00000032743 | 0.3102782  | 4.69404341 | 0.39125922 | 0.57868306 |
| ENSMUSG00000020023 | -0.3070187 | 4.82739983 | 0.39141868 | 0.57884442 |
| ENSMUSG00000015869 | 0.30590252 | 5.58453151 | 0.39196701 | 0.57955513 |
| ENSMUSG00000029521 | -0.3123897 | 4.15683958 | 0.39200977 | 0.57955513 |
| ENSMUSG00000018841 | 0.30803433 | 5.0718512  | 0.39205052 | 0.57955513 |
| ENSMUSG00000007815 | -0.3028233 | 9.19186815 | 0.39210201 | 0.57955672 |

|                    |            |            |            |            |
|--------------------|------------|------------|------------|------------|
| ENSMUSG00000038482 | 0.30657135 | 5.28871883 | 0.39221674 | 0.57965176 |
| ENSMUSG00000038884 | 0.30764187 | 5.25477259 | 0.39235149 | 0.57976962 |
| ENSMUSG00000024182 | 0.30391587 | 6.54466252 | 0.39241623 | 0.57976962 |
| ENSMUSG00000039512 | 0.31651082 | 3.74617826 | 0.3924478  | 0.57976962 |
| ENSMUSG00000024516 | -0.3030704 | 7.41265929 | 0.39262363 | 0.57995485 |
| ENSMUSG00000044068 | -0.3057471 | 5.62955783 | 0.39269338 | 0.57998335 |
| ENSMUSG00000048000 | -0.3031719 | 7.05254543 | 0.39278896 | 0.58004998 |
| ENSMUSG00000085112 | 0.37598804 | 1.3960053  | 0.39301085 | 0.58022928 |
| ENSMUSG00000056209 | 0.30964276 | 4.14299541 | 0.39305583 | 0.58022928 |
| ENSMUSG00000010290 | -0.3083128 | 4.81720511 | 0.3930618  | 0.58022928 |
| ENSMUSG00000029414 | -0.3116786 | 4.34969285 | 0.39318076 | 0.58033036 |
| ENSMUSG00000037788 | -0.3046585 | 5.74918276 | 0.3933663  | 0.58052967 |
| ENSMUSG00000039168 | 0.30778637 | 4.71778197 | 0.39349999 | 0.58065242 |
| ENSMUSG00000028098 | -0.3034411 | 6.39587741 | 0.3940574  | 0.58140031 |
| ENSMUSG00000042082 | 0.30636345 | 5.12662523 | 0.39411799 | 0.58141508 |
| ENSMUSG00000096150 | 0.3125338  | 3.56037304 | 0.39445406 | 0.58183618 |
| ENSMUSG00000032575 | -0.3035265 | 6.23009109 | 0.39473674 | 0.58217845 |
| ENSMUSG00000025997 | 0.34442225 | 2.52934354 | 0.39488505 | 0.58232125 |
| ENSMUSG00000034518 | -0.3039267 | 5.62377147 | 0.39493488 | 0.58232125 |
| ENSMUSG00000053931 | -0.3017308 | 7.44690078 | 0.39503405 | 0.58239276 |
| ENSMUSG00000021245 | -0.304841  | 5.05277978 | 0.39511386 | 0.58243573 |
| ENSMUSG00000027933 | 0.3023636  | 6.36061254 | 0.39518859 | 0.58243661 |
| ENSMUSG00000024791 | -0.3188227 | 3.07173384 | 0.39523902 | 0.58243661 |
| ENSMUSG00000001017 | -0.3013426 | 7.59371202 | 0.39528047 | 0.58243661 |
| ENSMUSG00000026585 | -0.3203076 | 2.77594322 | 0.39531713 | 0.58243661 |
| ENSMUSG00000021131 | -0.3069244 | 4.80183629 | 0.39551448 | 0.58264211 |
| ENSMUSG00000096410 | -0.308918  | 4.5032347  | 0.39560766 | 0.58264211 |
| ENSMUSG00000003234 | 0.30325999 | 5.96514312 | 0.39560867 | 0.58264211 |
| ENSMUSG00000036167 | -0.3028422 | 5.86743176 | 0.39572803 | 0.58274323 |
| ENSMUSG00000032806 | 0.30996936 | 4.16965839 | 0.39594293 | 0.58298501 |
| ENSMUSG00000046962 | -0.3031215 | 5.3756474  | 0.39605934 | 0.58308173 |
| ENSMUSG00000084915 | -0.3263875 | 2.55658986 | 0.39623463 | 0.58326508 |
| ENSMUSG00000039220 | 0.30256834 | 6.08537197 | 0.39629257 | 0.58327569 |
| ENSMUSG00000046707 | -0.3032596 | 5.62224001 | 0.39640442 | 0.58336561 |
| ENSMUSG00000014030 | 0.30146925 | 6.62937494 | 0.39696254 | 0.58400683 |
| ENSMUSG00000021039 | -0.3007216 | 7.13181922 | 0.39703882 | 0.58400683 |
| ENSMUSG00000038065 | -0.3118005 | 3.6252297  | 0.39707894 | 0.58400683 |
| ENSMUSG00000048720 | -0.3138532 | 3.44070404 | 0.39708505 | 0.58400683 |
| ENSMUSG00000051671 | -0.3449539 | 1.94581751 | 0.39709416 | 0.58400683 |
| ENSMUSG00000042709 | 0.30534549 | 4.39063149 | 0.39718945 | 0.58407224 |
| ENSMUSG00000072653 | -0.3035327 | 3.566133   | 0.39740891 | 0.58432022 |
| ENSMUSG00000031428 | 0.30379263 | 5.13247382 | 0.39755714 | 0.5844634  |
| ENSMUSG00000021519 | -0.3018769 | 5.88003258 | 0.39776433 | 0.58469323 |

|                    |            |            |            |            |
|--------------------|------------|------------|------------|------------|
| ENSMUSG00000027566 | 0.30116632 | 6.13919499 | 0.39798621 | 0.58493116 |
| ENSMUSG00000021068 | -0.2996126 | 7.21000448 | 0.39802797 | 0.58493116 |
| ENSMUSG00000009621 | 0.29949238 | 7.20514457 | 0.39846373 | 0.58549668 |
| ENSMUSG00000003452 | 0.32680684 | 2.86109813 | 0.39859502 | 0.58561474 |
| ENSMUSG00000045165 | 0.30030219 | 6.32681012 | 0.39869666 | 0.58568921 |
| ENSMUSG00000002957 | 0.30100598 | 6.17455977 | 0.3989122  | 0.58586643 |
| ENSMUSG00000029632 | -0.3012086 | 5.79997599 | 0.39891923 | 0.58586643 |
| ENSMUSG00000008429 | -0.3012104 | 5.86791239 | 0.39897606 | 0.58587504 |
| ENSMUSG00000101452 | -0.387161  | 1.04481951 | 0.39913251 | 0.58602991 |
| ENSMUSG00000043419 | 0.32353878 | 2.76499419 | 0.39923101 | 0.58609968 |
| ENSMUSG00000052419 | -0.3029901 | 5.10373641 | 0.39935332 | 0.58620436 |
| ENSMUSG00000009741 | -0.29837   | 7.67171522 | 0.39980871 | 0.58673086 |
| ENSMUSG00000042046 | -0.3003991 | 5.48382597 | 0.39981408 | 0.58673086 |
| ENSMUSG00000041949 | 0.30759082 | 3.91703894 | 0.39990243 | 0.58674676 |
| ENSMUSG00000095362 | -0.3549322 | 1.4647665  | 0.39996807 | 0.58674676 |
| ENSMUSG00000028145 | -0.3330143 | 1.95171814 | 0.39998382 | 0.58674676 |
| ENSMUSG00000042228 | -0.2977876 | 9.1282552  | 0.40002909 | 0.58674676 |
| ENSMUSG00000027341 | -0.3015035 | 5.24189129 | 0.40010144 | 0.586748   |
| ENSMUSG00000023861 | -0.3005608 | 5.72159756 | 0.40013202 | 0.586748   |
| ENSMUSG00000028906 | -0.2976346 | 8.13202744 | 0.40061581 | 0.58734791 |
| ENSMUSG00000029217 | -0.2979819 | 7.52291944 | 0.40064332 | 0.58734791 |
| ENSMUSG00000019528 | -0.3003223 | 5.66187062 | 0.40078047 | 0.58747405 |
| ENSMUSG00000039633 | -0.3090276 | 3.18957731 | 0.40088221 | 0.58752292 |
| ENSMUSG00000038383 | -0.301982  | 4.94554497 | 0.40091603 | 0.58752292 |
| ENSMUSG00000034042 | -0.2978574 | 7.5240138  | 0.40098636 | 0.58755108 |
| ENSMUSG00000070044 | -0.3480101 | 1.21524637 | 0.40113548 | 0.58769466 |
| ENSMUSG00000049739 | 0.29764753 | 7.09922481 | 0.40120105 | 0.58771582 |
| ENSMUSG00000024097 | -0.2973671 | 7.84361716 | 0.40146542 | 0.58802816 |
| ENSMUSG00000026035 | -0.3026952 | 4.64548908 | 0.40152902 | 0.5880428  |
| ENSMUSG00000027692 | 0.30266032 | 5.10892515 | 0.40157772 | 0.5880428  |
| ENSMUSG00000041498 | -0.3161923 | 3.44183604 | 0.40173155 | 0.58813288 |
| ENSMUSG00000058298 | -0.3010167 | 5.10343541 | 0.40174157 | 0.58813288 |
| ENSMUSG00000022197 | 0.31097582 | 3.80148312 | 0.4021107  | 0.58853966 |
| ENSMUSG00000032840 | 0.30250897 | 4.57051949 | 0.40212184 | 0.58853966 |
| ENSMUSG00000006464 | 0.41016177 | 0.88077734 | 0.40228804 | 0.58870796 |
| ENSMUSG00000026946 | -0.2992636 | 5.70040296 | 0.40235833 | 0.58873587 |
| ENSMUSG00000028525 | -0.2964826 | 8.55919282 | 0.40241804 | 0.5887483  |
| ENSMUSG00000033530 | 0.30619019 | 4.02732401 | 0.4025792  | 0.58890912 |
| ENSMUSG00000015755 | -0.2963976 | 8.09819306 | 0.40271137 | 0.5890275  |
| ENSMUSG00000072772 | 0.32472233 | 3.01375426 | 0.40278293 | 0.58905723 |
| ENSMUSG00000008604 | 0.29862651 | 5.82423384 | 0.40289364 | 0.58907834 |
| ENSMUSG00000021113 | -0.3018672 | 4.7664403  | 0.40289986 | 0.58907834 |
| ENSMUSG00000027194 | -0.2973841 | 6.54390305 | 0.4030584  | 0.58923519 |

|                    |            |            |            |            |
|--------------------|------------|------------|------------|------------|
| ENSMUSG00000038569 | -0.304763  | 3.65691019 | 0.40325917 | 0.58945374 |
| ENSMUSG00000060441 | -0.2972622 | 5.82473377 | 0.40373795 | 0.59004547 |
| ENSMUSG00000036712 | -0.2956954 | 8.18523984 | 0.40376665 | 0.59004547 |
| ENSMUSG00000040663 | 0.29656092 | 6.79335873 | 0.40382992 | 0.59004988 |
| ENSMUSG00000054191 | 0.31198769 | 3.36575531 | 0.40387233 | 0.59004988 |
| ENSMUSG00000082163 | 0.39803028 | 0.79519843 | 0.40406346 | 0.59009732 |
| ENSMUSG00000060147 | 0.30213521 | 4.72396055 | 0.4041127  | 0.59009732 |
| ENSMUSG00000056131 | -0.3028009 | 4.10225722 | 0.40411278 | 0.59009732 |
| ENSMUSG00000050017 | -0.2972758 | 6.05410496 | 0.40415029 | 0.59009732 |
| ENSMUSG00000035900 | 0.29751822 | 5.99526157 | 0.40416148 | 0.59009732 |
| ENSMUSG00000046139 | -0.2964593 | 6.69782772 | 0.40430956 | 0.59023856 |
| ENSMUSG00000028333 | -0.295287  | 8.31964751 | 0.40439771 | 0.59029227 |
| ENSMUSG00000040620 | -0.2968698 | 6.07639948 | 0.40497914 | 0.59106081 |
| ENSMUSG00000021710 | -0.3010736 | 4.32583165 | 0.40505428 | 0.59106081 |
| ENSMUSG00000044982 | -0.3140645 | 2.92547434 | 0.4051263  | 0.59106081 |
| ENSMUSG00000019845 | -0.325133  | 2.29144385 | 0.4051299  | 0.59106081 |
| ENSMUSG00000020523 | -0.295838  | 6.73889059 | 0.4052283  | 0.59110643 |
| ENSMUSG00000021258 | -0.2964422 | 6.1368268  | 0.40526401 | 0.59110643 |
| ENSMUSG00000024099 | -0.2978212 | 5.53034792 | 0.40540684 | 0.59123974 |
| ENSMUSG00000040548 | 0.30332164 | 4.31103071 | 0.40554633 | 0.59136814 |
| ENSMUSG00000031971 | -0.3123585 | 3.1685574  | 0.40569965 | 0.59151668 |
| ENSMUSG00000030603 | 0.2955428  | 6.22595664 | 0.40575477 | 0.59152201 |
| ENSMUSG00000045671 | 0.31771854 | 3.21007766 | 0.40589688 | 0.5915982  |
| ENSMUSG00000027907 | 0.29547817 | 6.3897125  | 0.40594975 | 0.5915982  |
| ENSMUSG00000005873 | 0.29547782 | 6.65617234 | 0.40596143 | 0.5915982  |
| ENSMUSG00000035472 | -0.347639  | 2.14120875 | 0.4066681  | 0.5925529  |
| ENSMUSG00000020455 | 0.29497735 | 6.35211204 | 0.40680224 | 0.59264777 |
| ENSMUSG00000042622 | 0.29976792 | 4.84670436 | 0.40683633 | 0.59264777 |
| ENSMUSG00000057982 | -0.2997993 | 4.73433191 | 0.40699853 | 0.59277511 |
| ENSMUSG00000054484 | -0.2976471 | 5.09983122 | 0.40702688 | 0.59277511 |
| ENSMUSG00000071796 | -0.2990825 | 4.62828159 | 0.40719979 | 0.59295181 |
| ENSMUSG00000054237 | -0.2998535 | 4.39289891 | 0.40732111 | 0.59305334 |
| ENSMUSG00000042682 | -0.2950215 | 6.23327075 | 0.4074454  | 0.59315918 |
| ENSMUSG00000049723 | 0.373326   | 1.16901494 | 0.40753336 | 0.5932121  |
| ENSMUSG00000048895 | -0.3040258 | 3.74006994 | 0.40762894 | 0.59327611 |
| ENSMUSG00000070923 | -0.2965587 | 5.3741187  | 0.40777825 | 0.59341828 |
| ENSMUSG00000022300 | -0.2955032 | 5.77750853 | 0.40788294 | 0.5934955  |
| ENSMUSG00000023175 | 0.29414173 | 6.57424102 | 0.40798296 | 0.59356589 |
| ENSMUSG00000064354 | -0.3711505 | 1.29450467 | 0.40857131 | 0.59427101 |
| ENSMUSG00000089810 | -0.303664  | 3.28986977 | 0.40861649 | 0.59427101 |
| ENSMUSG00000008859 | -0.2957247 | 5.56976685 | 0.40862271 | 0.59427101 |
| ENSMUSG00000027597 | 0.29724646 | 4.40952351 | 0.40872907 | 0.5943505  |
| ENSMUSG00000028127 | -0.2962587 | 5.24913151 | 0.40880012 | 0.59437862 |

|                    |            |            |            |            |
|--------------------|------------|------------|------------|------------|
| ENSMUSG00000031819 | 0.3031114  | 4.02426965 | 0.40890827 | 0.59446067 |
| ENSMUSG00000027405 | -0.2926134 | 7.68273108 | 0.40910667 | 0.59454747 |
| ENSMUSG00000073678 | -0.2920923 | 8.52678364 | 0.40911371 | 0.59454747 |
| ENSMUSG00000024487 | -0.2974369 | 4.6769924  | 0.40914439 | 0.59454747 |
| ENSMUSG00000023169 | -0.2923372 | 7.95779943 | 0.40925652 | 0.59454747 |
| ENSMUSG00000026112 | -0.2929723 | 6.9401178  | 0.40927953 | 0.59454747 |
| ENSMUSG00000046836 | -0.292966  | 6.87558385 | 0.40933281 | 0.59454747 |
| ENSMUSG00000041079 | -0.3082904 | 3.34608191 | 0.40934444 | 0.59454747 |
| ENSMUSG00000037890 | 0.33657691 | 1.85804073 | 0.40939546 | 0.59454747 |
| ENSMUSG00000004071 | -0.2938437 | 5.89922792 | 0.40947724 | 0.59454747 |
| ENSMUSG00000039983 | 0.30232681 | 3.79954335 | 0.4094852  | 0.59454747 |
| ENSMUSG00000039901 | -0.2966859 | 4.85123744 | 0.40968999 | 0.59471356 |
| ENSMUSG00000007610 | 0.31227793 | 3.261411   | 0.40970306 | 0.59471356 |
| ENSMUSG00000047649 | 0.34142028 | 1.95051909 | 0.40975908 | 0.59471978 |
| ENSMUSG00000021884 | 0.31461589 | 3.03766455 | 0.40982515 | 0.59474058 |
| ENSMUSG00000026031 | -0.2921789 | 7.35847517 | 0.40990687 | 0.59478407 |
| ENSMUSG00000022661 | 0.29433771 | 6.12197615 | 0.41004884 | 0.59491498 |
| ENSMUSG00000046756 | 0.29338104 | 5.06254667 | 0.41022156 | 0.59508037 |
| ENSMUSG00000026155 | -0.2934052 | 5.88038615 | 0.41026637 | 0.59508037 |
| ENSMUSG00000061232 | 0.29090205 | 10.9361714 | 0.41062739 | 0.59548693 |
| ENSMUSG00000025465 | 0.29944721 | 4.58951771 | 0.41065027 | 0.59548693 |
| ENSMUSG00000044792 | -0.2945374 | 5.24377871 | 0.41100424 | 0.59587248 |
| ENSMUSG00000024135 | -0.2944506 | 5.32796301 | 0.41106771 | 0.59587248 |
| ENSMUSG00000014301 | 0.33619943 | 1.90236744 | 0.41107166 | 0.59587248 |
| ENSMUSG00000037426 | -0.2922787 | 6.37013967 | 0.41118792 | 0.5959409  |
| ENSMUSG00000000340 | -0.2964685 | 4.79549814 | 0.41122255 | 0.5959409  |
| ENSMUSG00000026471 | -0.2986551 | 3.95014353 | 0.41131548 | 0.59600043 |
| ENSMUSG00000025538 | 0.30883003 | 3.20722939 | 0.41143233 | 0.59609461 |
| ENSMUSG00000059878 | -0.2980979 | 4.54567886 | 0.41158014 | 0.59623361 |
| ENSMUSG00000024867 | -0.2990233 | 4.04315834 | 0.41211349 | 0.59690585 |
| ENSMUSG00000090394 | -0.290517  | 7.8633051  | 0.41214804 | 0.59690585 |
| ENSMUSG00000020519 | 0.32086619 | 2.80747803 | 0.41246337 | 0.59716481 |
| ENSMUSG00000044676 | 0.35887446 | 0.71452327 | 0.41247528 | 0.59716481 |
| ENSMUSG00000012117 | 0.29451437 | 5.01964349 | 0.41248269 | 0.59716481 |
| ENSMUSG00000027304 | -0.2911675 | 6.72957135 | 0.41255836 | 0.59719913 |
| ENSMUSG00000038365 | 0.30724359 | 3.28874351 | 0.41269723 | 0.59726181 |
| ENSMUSG00000041747 | -0.2922773 | 6.1303153  | 0.4127088  | 0.59726181 |
| ENSMUSG00000032221 | 0.30038682 | 3.907889   | 0.41280639 | 0.59726181 |
| ENSMUSG00000038633 | 0.29119552 | 6.78848342 | 0.41280949 | 0.59726181 |
| ENSMUSG00000000168 | -0.2938327 | 5.27558915 | 0.41288617 | 0.59726535 |
| ENSMUSG00000035095 | -0.2919128 | 5.84543947 | 0.41295551 | 0.59726535 |
| ENSMUSG00000005774 | 0.29087304 | 7.05479272 | 0.41296781 | 0.59726535 |
| ENSMUSG00000012076 | -0.2955309 | 4.40268547 | 0.41309918 | 0.59738019 |

|                    |            |            |            |            |
|--------------------|------------|------------|------------|------------|
| ENSMUSG00000025534 | 0.2907984  | 6.52920688 | 0.41315726 | 0.59738902 |
| ENSMUSG00000028496 | -0.2938137 | 5.23862168 | 0.41341685 | 0.59764583 |
| ENSMUSG00000062519 | -0.2924929 | 5.19346651 | 0.41343886 | 0.59764583 |
| ENSMUSG00000036775 | 0.30514348 | 3.4969394  | 0.41377027 | 0.59804969 |
| ENSMUSG00000022008 | -0.2906776 | 6.49918323 | 0.41389329 | 0.5981523  |
| ENSMUSG00000032047 | -0.291268  | 6.04870388 | 0.41408776 | 0.59835812 |
| ENSMUSG00000030538 | 0.29156579 | 5.38708988 | 0.4143525  | 0.59861642 |
| ENSMUSG00000042719 | -0.2902764 | 6.42970766 | 0.41437067 | 0.59861642 |
| ENSMUSG00000041133 | -0.2890092 | 8.21199695 | 0.41448543 | 0.59870696 |
| ENSMUSG00000033526 | -0.2928526 | 5.11730209 | 0.41463673 | 0.59871555 |
| ENSMUSG00000006276 | 0.29033487 | 6.46170296 | 0.41467424 | 0.59871555 |
| ENSMUSG00000022204 | 0.29116339 | 5.37938511 | 0.4148155  | 0.59871555 |
| ENSMUSG00000024474 | -0.2889985 | 7.85124697 | 0.41481948 | 0.59871555 |
| ENSMUSG00000054766 | -0.2890493 | 7.72507143 | 0.41483107 | 0.59871555 |
| ENSMUSG00000038160 | -0.2928785 | 5.31967918 | 0.41483491 | 0.59871555 |
| ENSMUSG00000039810 | 0.29138063 | 5.67045856 | 0.41490272 | 0.59871555 |
| ENSMUSG00000028461 | 0.29814519 | 4.03349098 | 0.41494258 | 0.59871555 |
| ENSMUSG00000057596 | -0.2894805 | 6.69726899 | 0.41500204 | 0.59871555 |
| ENSMUSG00000032656 | 0.324886   | 2.68308049 | 0.41501222 | 0.59871555 |
| ENSMUSG00000060012 | -0.2922842 | 5.20140537 | 0.41506717 | 0.59871967 |
| ENSMUSG00000039096 | 0.30804339 | 3.1402113  | 0.41524412 | 0.59889977 |
| ENSMUSG00000020193 | -0.3187667 | 2.12737623 | 0.41541748 | 0.59894614 |
| ENSMUSG00000030942 | -0.2903537 | 6.20061567 | 0.41542716 | 0.59894614 |
| ENSMUSG00000032437 | -0.2883132 | 8.28962469 | 0.41543258 | 0.59894614 |
| ENSMUSG00000034312 | 0.28862053 | 7.59114127 | 0.41571513 | 0.59923159 |
| ENSMUSG00000042705 | -0.2973021 | 3.98724869 | 0.41573483 | 0.59923159 |
| ENSMUSG00000049950 | -0.3071492 | 3.15883482 | 0.41585565 | 0.59931696 |
| ENSMUSG00000025204 | 0.29382631 | 4.24240783 | 0.41589834 | 0.59931696 |
| ENSMUSG00000090086 | -0.2963404 | 3.86909822 | 0.41597266 | 0.59934893 |
| ENSMUSG00000029621 | 0.29127108 | 5.23595658 | 0.41609019 | 0.59942728 |
| ENSMUSG00000037138 | -0.288282  | 7.36869775 | 0.41616479 | 0.59942728 |
| ENSMUSG00000067722 | -0.2975055 | 3.93094226 | 0.41622759 | 0.59942728 |
| ENSMUSG00000040034 | -0.3004324 | 3.73925651 | 0.41625141 | 0.59942728 |
| ENSMUSG00000041879 | -0.2886224 | 6.92785559 | 0.41630326 | 0.59942728 |
| ENSMUSG00000024515 | -0.2895334 | 5.9494738  | 0.41633992 | 0.59942728 |
| ENSMUSG00000087107 | -0.2885029 | 7.09753428 | 0.41654423 | 0.59964633 |
| ENSMUSG00000025192 | 0.29771798 | 4.16422236 | 0.41671189 | 0.59979015 |
| ENSMUSG00000057103 | 0.3515429  | 1.0263136  | 0.41676292 | 0.59979015 |
| ENSMUSG00000068015 | -0.288463  | 6.7131131  | 0.41683619 | 0.59979015 |
| ENSMUSG00000031358 | -0.2900592 | 5.67904034 | 0.41685285 | 0.59979015 |
| ENSMUSG00000024660 | 0.29275472 | 5.05526134 | 0.41702651 | 0.5999282  |
| ENSMUSG00000033499 | -0.2879209 | 7.13013825 | 0.41707047 | 0.5999282  |
| ENSMUSG00000031534 | -0.2952059 | 4.13384676 | 0.41712231 | 0.5999282  |

|                    |            |            |            |            |
|--------------------|------------|------------|------------|------------|
| ENSMUSG00000085037 | -0.3028268 | 3.55213877 | 0.41718314 | 0.5999282  |
| ENSMUSG00000020319 | -0.3433667 | 1.59558204 | 0.41720975 | 0.5999282  |
| ENSMUSG00000005609 | -0.2888729 | 6.27673628 | 0.41740072 | 0.60012774 |
| ENSMUSG00000078899 | -0.2908016 | 5.19563184 | 0.41746466 | 0.60014461 |
| ENSMUSG00000026603 | 0.32851442 | 2.30329704 | 0.41759837 | 0.60026176 |
| ENSMUSG00000047084 | 0.29513198 | 4.09641781 | 0.41792181 | 0.60065156 |
| ENSMUSG00000016477 | -0.2931106 | 4.58846509 | 0.41816438 | 0.60092505 |
| ENSMUSG00000037868 | 0.28657258 | 7.56333067 | 0.41881675 | 0.60178732 |
| ENSMUSG00000024887 | -0.2937755 | 4.08469969 | 0.41897795 | 0.60192575 |
| ENSMUSG00000042408 | -0.2878089 | 6.18192434 | 0.41906242 | 0.60192575 |
| ENSMUSG00000040269 | 0.31773728 | 2.19301667 | 0.41907019 | 0.60192575 |
| ENSMUSG00000016933 | 0.28846183 | 5.98570385 | 0.41927619 | 0.60214641 |
| ENSMUSG00000054099 | -0.297833  | 3.49443048 | 0.41939651 | 0.60224395 |
| ENSMUSG00000018326 | -0.2858486 | 8.0844175  | 0.41970317 | 0.60259261 |
| ENSMUSG00000029625 | 0.2902159  | 4.77140884 | 0.41974415 | 0.60259261 |
| ENSMUSG00000027371 | 0.33051503 | 2.31066936 | 0.41985762 | 0.60265497 |
| ENSMUSG00000034614 | 0.28813217 | 5.58186798 | 0.41989245 | 0.60265497 |
| ENSMUSG00000021748 | -0.2868526 | 6.49662756 | 0.42001466 | 0.60274911 |
| ENSMUSG00000040270 | -0.28547   | 8.07407569 | 0.4200629  | 0.60274911 |
| ENSMUSG00000033111 | -0.2917091 | 4.42483692 | 0.42016186 | 0.60281585 |
| ENSMUSG00000013275 | -0.2871044 | 5.80763817 | 0.42035505 | 0.60301776 |
| ENSMUSG00000042331 | -0.2892905 | 5.15453734 | 0.42052573 | 0.60318733 |
| ENSMUSG00000021947 | 0.30914284 | 2.58496485 | 0.42079336 | 0.60346201 |
| ENSMUSG00000099681 | -0.3092445 | 2.34091151 | 0.42082222 | 0.60346201 |
| ENSMUSG00000015127 | 0.28970163 | 5.19123649 | 0.42107873 | 0.60373501 |
| ENSMUSG00000074219 | 0.35251434 | 1.49560891 | 0.42111764 | 0.60373501 |
| ENSMUSG00000025512 | 0.29378946 | 4.43044018 | 0.4212357  | 0.60382895 |
| ENSMUSG00000029923 | 0.29677087 | 3.75804307 | 0.42138157 | 0.60384728 |
| ENSMUSG00000069874 | 0.28638369 | 6.01012343 | 0.4213822  | 0.60384728 |
| ENSMUSG00000008958 | 0.29008388 | 4.91574923 | 0.42146124 | 0.60384728 |
| ENSMUSG00000078773 | -0.3326715 | 1.88328515 | 0.42149112 | 0.60384728 |
| ENSMUSG00000026927 | 0.28532579 | 6.74196717 | 0.42154706 | 0.60384728 |
| ENSMUSG00000022721 | 0.28572184 | 6.55428089 | 0.42156367 | 0.60384728 |
| ENSMUSG00000017764 | 0.30107799 | 3.26130765 | 0.42171928 | 0.60396171 |
| ENSMUSG00000042978 | 0.28506182 | 6.93484884 | 0.42174864 | 0.60396171 |
| ENSMUSG00000031299 | -0.2851874 | 6.90308693 | 0.42192586 | 0.60398127 |
| ENSMUSG00000034667 | -0.286285  | 6.12750007 | 0.4219328  | 0.60398127 |
| ENSMUSG00000027340 | -0.2856053 | 6.09855186 | 0.42195446 | 0.60398127 |
| ENSMUSG00000024456 | -0.2842935 | 8.29465248 | 0.42197248 | 0.60398127 |
| ENSMUSG00000062376 | -0.2916225 | 3.86264991 | 0.42238564 | 0.60449737 |
| ENSMUSG00000005687 | -0.2851127 | 6.68899891 | 0.42248567 | 0.60456527 |
| ENSMUSG00000085184 | 0.34014634 | 1.55797597 | 0.42279759 | 0.6049363  |
| ENSMUSG00000024069 | 0.29538097 | 3.62013155 | 0.42315887 | 0.60537788 |



|                    |            |            |            |            |
|--------------------|------------|------------|------------|------------|
| ENSMUSG00000044702 | -0.2924222 | 3.77538239 | 0.42340144 | 0.605622   |
| ENSMUSG00000004032 | 0.31204088 | 2.45599009 | 0.42343489 | 0.605622   |
| ENSMUSG00000032217 | -0.283585  | 7.58477461 | 0.42365708 | 0.60586441 |
| ENSMUSG00000021428 | -0.2851617 | 6.11804047 | 0.42377348 | 0.60595548 |
| ENSMUSG00000062116 | -0.2879129 | 5.00789141 | 0.42391137 | 0.60605208 |
| ENSMUSG00000025647 | 0.28274017 | 10.2719653 | 0.42394648 | 0.60605208 |
| ENSMUSG00000035545 | 0.28368512 | 7.70849581 | 0.42403304 | 0.60607222 |
| ENSMUSG00000026333 | -0.2949119 | 3.90617074 | 0.42406601 | 0.60607222 |
| ENSMUSG00000025086 | -0.2871744 | 4.4714168  | 0.42417607 | 0.60615414 |
| ENSMUSG00000042807 | -0.3488618 | 1.12751618 | 0.42430305 | 0.60621671 |
| ENSMUSG00000049811 | 0.33085643 | 1.63338324 | 0.42432665 | 0.60621671 |
| ENSMUSG00000026360 | 0.28250903 | 9.74596715 | 0.42440833 | 0.60621671 |
| ENSMUSG00000031483 | 0.28570287 | 5.78243017 | 0.42445866 | 0.60621671 |
| ENSMUSG00000009630 | -0.2848754 | 6.05696911 | 0.42449143 | 0.60621671 |
| ENSMUSG00000020994 | -0.2831811 | 7.35099793 | 0.42460515 | 0.60621671 |
| ENSMUSG00000032534 | -0.2840049 | 6.37322647 | 0.42463336 | 0.60621671 |
| ENSMUSG00000094117 | -0.3017046 | 3.60828979 | 0.42466876 | 0.60621671 |
| ENSMUSG00000021266 | 0.28523062 | 5.60225313 | 0.42469449 | 0.60621671 |
| ENSMUSG00000066042 | 0.30781945 | 2.53181989 | 0.42497495 | 0.60654173 |
| ENSMUSG00000004561 | 0.28639475 | 5.18416815 | 0.42514138 | 0.60666523 |
| ENSMUSG00000028344 | -0.2855285 | 5.33550184 | 0.42516704 | 0.60666523 |
| ENSMUSG00000068523 | -0.285987  | 5.05742674 | 0.42573003 | 0.60731838 |
| ENSMUSG00000040084 | -0.288531  | 4.47633594 | 0.42573045 | 0.60731838 |
| ENSMUSG00000051469 | -0.2842879 | 5.88629431 | 0.42582523 | 0.60737822 |
| ENSMUSG00000063787 | -0.2897417 | 4.06545169 | 0.42607806 | 0.60766344 |
| ENSMUSG00000004127 | -0.2970225 | 3.54929595 | 0.42613434 | 0.60766832 |
| ENSMUSG00000026385 | 0.28610378 | 4.56909592 | 0.42619675 | 0.60768192 |
| ENSMUSG00000042854 | 0.36535101 | 1.21873976 | 0.42634784 | 0.60774658 |
| ENSMUSG00000086533 | 0.33685162 | 1.22810884 | 0.42634784 | 0.60774658 |
| ENSMUSG00000034118 | 0.28358209 | 5.77450597 | 0.42658085 | 0.60800333 |
| ENSMUSG00000026581 | -0.2810632 | 9.87782173 | 0.42677761 | 0.60818319 |
| ENSMUSG00000000579 | -0.2848488 | 5.27704055 | 0.42683103 | 0.60818319 |
| ENSMUSG00000021671 | -0.2858628 | 4.94744268 | 0.42686576 | 0.60818319 |
| ENSMUSG00000054942 | -0.2844063 | 5.28828482 | 0.42697379 | 0.6082617  |
| ENSMUSG00000038170 | 0.28327719 | 6.17746006 | 0.42704331 | 0.60828535 |
| ENSMUSG00000035642 | 0.31841977 | 2.25382533 | 0.42716335 | 0.60834843 |
| ENSMUSG00000021670 | -0.2817831 | 7.19105893 | 0.42719343 | 0.60834843 |
| ENSMUSG00000062783 | -0.2827466 | 5.96222531 | 0.42746207 | 0.60865558 |
| ENSMUSG00000055835 | -0.2860319 | 4.64957826 | 0.42782759 | 0.60891232 |
| ENSMUSG00000028648 | 0.30156797 | 2.90820187 | 0.42784203 | 0.60891232 |
| ENSMUSG00000040272 | 0.29119801 | 3.84505003 | 0.42784542 | 0.60891232 |
| ENSMUSG00000031812 | 0.28143924 | 7.22606106 | 0.42785427 | 0.60891232 |
| ENSMUSG00000007589 | -0.2819515 | 5.77182175 | 0.42916455 | 0.61070148 |

|                    |            |            |            |            |
|--------------------|------------|------------|------------|------------|
| ENSMUSG00000030056 | -0.2816517 | 6.38374443 | 0.42922322 | 0.61070936 |
| ENSMUSG00000060002 | -0.2949227 | 3.13644993 | 0.4296645  | 0.61126156 |
| ENSMUSG00000037361 | -0.281605  | 6.00719867 | 0.42983301 | 0.61142563 |
| ENSMUSG00000063410 | -0.2795637 | 7.99506639 | 0.43006529 | 0.61168035 |
| ENSMUSG00000027349 | -0.2826192 | 5.38870465 | 0.43028395 | 0.61181938 |
| ENSMUSG00000036983 | -0.2974862 | 3.30048409 | 0.43030919 | 0.61181938 |
| ENSMUSG00000027014 | -0.2809106 | 6.03915871 | 0.43033048 | 0.61181938 |
| ENSMUSG00000034430 | 0.28380013 | 5.03711605 | 0.43037595 | 0.61181938 |
| ENSMUSG00000029094 | 0.29985881 | 2.81472805 | 0.43044431 | 0.6118409  |
| ENSMUSG00000021276 | -0.292244  | 3.82429546 | 0.43052768 | 0.61187861 |
| ENSMUSG00000030282 | -0.2813453 | 5.61641858 | 0.43063032 | 0.61187861 |
| ENSMUSG00000042364 | 0.28582865 | 4.69977945 | 0.43064246 | 0.61187861 |
| ENSMUSG00000038286 | 0.29725299 | 2.99108591 | 0.43072772 | 0.61187861 |
| ENSMUSG00000025184 | -0.2808762 | 6.12167335 | 0.43073699 | 0.61187861 |
| ENSMUSG00000026600 | -0.2793754 | 7.36406224 | 0.43079699 | 0.61188823 |
| ENSMUSG00000031871 | 0.37468416 | 1.23481048 | 0.43089082 | 0.61194588 |
| ENSMUSG00000035356 | 0.27956853 | 7.42855712 | 0.43100341 | 0.61200368 |
| ENSMUSG00000042073 | 0.29236258 | 3.08505806 | 0.43104633 | 0.61200368 |
| ENSMUSG00000038963 | 0.28733155 | 3.47189959 | 0.43113856 | 0.61200368 |
| ENSMUSG00000047260 | -0.2851652 | 4.76924601 | 0.43114448 | 0.61200368 |
| ENSMUSG00000034906 | -0.2873188 | 4.00166163 | 0.43145897 | 0.61232062 |
| ENSMUSG00000071203 | 0.28167082 | 5.67199681 | 0.43147429 | 0.61232062 |
| ENSMUSG00000030921 | -0.2784429 | 8.12780984 | 0.43169095 | 0.61255246 |
| ENSMUSG00000008206 | -0.2794719 | 6.37704056 | 0.43177964 | 0.61260269 |
| ENSMUSG00000029176 | -0.2799088 | 6.04501989 | 0.43183778 | 0.61260956 |
| ENSMUSG00000030002 | -0.278141  | 8.67090862 | 0.43193683 | 0.61267447 |
| ENSMUSG00000028837 | 0.2813287  | 5.36778686 | 0.43228726 | 0.61304451 |
| ENSMUSG00000029467 | -0.2782941 | 7.71606984 | 0.43230438 | 0.61304451 |
| ENSMUSG00000026181 | 0.28015425 | 5.5162213  | 0.43262236 | 0.61341976 |
| ENSMUSG00000035790 | 0.28967096 | 3.11076577 | 0.43275342 | 0.61352991 |
| ENSMUSG00000021978 | 0.27953204 | 5.9058909  | 0.43294066 | 0.61371967 |
| ENSMUSG00000050240 | 0.30810453 | 1.93322174 | 0.43316996 | 0.61396901 |
| ENSMUSG00000004768 | 0.29374505 | 3.37047746 | 0.43353154 | 0.61440575 |
| ENSMUSG00000044477 | 0.28019877 | 5.26073519 | 0.43396228 | 0.61494039 |
| ENSMUSG00000014313 | -0.2792768 | 5.39949027 | 0.43451462 | 0.6156306  |
| ENSMUSG00000026283 | -0.2779968 | 6.3289018  | 0.43460956 | 0.6156306  |
| ENSMUSG00000020495 | -0.2806272 | 5.2535651  | 0.43464335 | 0.6156306  |
| ENSMUSG00000019338 | 0.28177159 | 5.12095331 | 0.43473689 | 0.6156306  |
| ENSMUSG00000022664 | -0.2794986 | 5.48335163 | 0.43474254 | 0.6156306  |
| ENSMUSG00000050471 | -0.2817799 | 4.8800998  | 0.4347707  | 0.6156306  |
| ENSMUSG00000004945 | 0.28522688 | 3.73296746 | 0.43528767 | 0.61628671 |
| ENSMUSG00000028873 | 0.29156558 | 3.43250105 | 0.43544962 | 0.61631997 |
| ENSMUSG00000026024 | -0.2791993 | 5.3826805  | 0.43547176 | 0.61631997 |

|                    |            |            |            |            |
|--------------------|------------|------------|------------|------------|
| ENSMUSG0000001909  | 0.27809242 | 6.05480918 | 0.43547201 | 0.61631997 |
| ENSMUSG00000027247 | 0.27756255 | 6.26834758 | 0.43585066 | 0.61674576 |
| ENSMUSG00000005087 | 0.27612768 | 7.78668713 | 0.43590428 | 0.61674576 |
| ENSMUSG00000051853 | 0.27618253 | 7.35766803 | 0.43593383 | 0.61674576 |
| ENSMUSG00000045576 | -0.2847703 | 4.05117214 | 0.43621281 | 0.61706451 |
| ENSMUSG00000019984 | -0.2769247 | 6.22494469 | 0.43639071 | 0.61724021 |
| ENSMUSG00000096687 | 0.29696488 | 3.11879216 | 0.43664222 | 0.61751997 |
| ENSMUSG00000021076 | -0.2769458 | 6.14450562 | 0.43676272 | 0.61761441 |
| ENSMUSG00000053841 | 0.27644017 | 6.45248286 | 0.43685178 | 0.61765425 |
| ENSMUSG00000027642 | 0.2756512  | 7.42804375 | 0.43689837 | 0.61765425 |
| ENSMUSG00000028018 | -0.281288  | 4.5623157  | 0.43710959 | 0.61787687 |
| ENSMUSG00000068105 | -0.2753427 | 7.99687889 | 0.43724605 | 0.61799377 |
| ENSMUSG00000046441 | -0.2849792 | 4.04460359 | 0.43742346 | 0.61816851 |
| ENSMUSG00000046324 | -0.2758465 | 6.72894909 | 0.43754595 | 0.61826561 |
| ENSMUSG00000034820 | -0.2748511 | 8.27370065 | 0.43763841 | 0.61827529 |
| ENSMUSG00000070934 | -0.2757263 | 6.62414827 | 0.43766038 | 0.61827529 |
| ENSMUSG00000070034 | -0.2747446 | 8.02667787 | 0.43779939 | 0.61833645 |
| ENSMUSG00000037466 | 0.28639519 | 3.6060276  | 0.43781126 | 0.61833645 |
| ENSMUSG00000029401 | -0.2776988 | 5.18812678 | 0.43807299 | 0.6186301  |
| ENSMUSG00000043384 | 0.27431254 | 8.24429733 | 0.43826828 | 0.61882986 |
| ENSMUSG00000021096 | -0.276075  | 6.23330484 | 0.43846457 | 0.6188503  |
| ENSMUSG00000051391 | 0.27518347 | 6.71297043 | 0.43848828 | 0.6188503  |
| ENSMUSG00000057778 | -0.2912773 | 3.16794216 | 0.43849473 | 0.6188503  |
| ENSMUSG00000026078 | 0.27731967 | 4.88592058 | 0.4384981  | 0.6188503  |
| ENSMUSG00000030613 | -0.2835298 | 3.18659765 | 0.43876531 | 0.61911912 |
| ENSMUSG00000032777 | 0.27568163 | 6.40623469 | 0.43884003 | 0.61911912 |
| ENSMUSG00000031105 | -0.3032375 | 2.47323375 | 0.43885016 | 0.61911912 |
| ENSMUSG00000031355 | -0.2862554 | 3.38434191 | 0.43894535 | 0.61917743 |
| ENSMUSG00000027395 | -0.2766124 | 5.40752149 | 0.43900881 | 0.61919096 |
| ENSMUSG00000079988 | -0.4220971 | 0.57893757 | 0.43913261 | 0.61922519 |
| ENSMUSG00000007080 | -0.277643  | 5.02394839 | 0.43914083 | 0.61922519 |
| ENSMUSG00000024826 | 0.2744407  | 6.58924797 | 0.43960826 | 0.61980829 |
| ENSMUSG00000046380 | 0.33836654 | 1.79698768 | 0.43971815 | 0.61988719 |
| ENSMUSG00000019518 | 0.27902626 | 4.51496387 | 0.43979949 | 0.61992583 |
| ENSMUSG00000020790 | -0.2734598 | 8.1369239  | 0.43994143 | 0.62004485 |
| ENSMUSG00000014504 | -0.2765925 | 5.46411432 | 0.43999181 | 0.62004485 |
| ENSMUSG00000090150 | -0.2788903 | 4.31651001 | 0.44012611 | 0.62015808 |
| ENSMUSG00000002733 | -0.2765158 | 5.38527643 | 0.44026098 | 0.62022043 |
| ENSMUSG00000079179 | -0.2756773 | 4.64190543 | 0.44035413 | 0.62022043 |
| ENSMUSG00000007659 | 0.28620195 | 3.81933504 | 0.44035439 | 0.62022043 |
| ENSMUSG00000042506 | -0.2740326 | 6.48469802 | 0.44041212 | 0.62022043 |
| ENSMUSG00000090173 | -0.2904028 | 2.75709686 | 0.44049396 | 0.62022043 |
| ENSMUSG00000030760 | 0.28559677 | 4.24978814 | 0.44049409 | 0.62022043 |

|                    |            |            |            |            |
|--------------------|------------|------------|------------|------------|
| ENSMUSG00000036707 | -0.2734364 | 7.54184807 | 0.44061285 | 0.62026506 |
| ENSMUSG00000062981 | -0.278825  | 4.77816801 | 0.44063371 | 0.62026506 |
| ENSMUSG00000042351 | 0.27369427 | 6.89862233 | 0.44084205 | 0.62041784 |
| ENSMUSG00000027498 | 0.27618459 | 5.03981981 | 0.44085019 | 0.62041784 |
| ENSMUSG00000085385 | 0.27649848 | 5.42774433 | 0.44117441 | 0.62079813 |
| ENSMUSG00000021963 | -0.2766874 | 5.06349951 | 0.44129609 | 0.62089334 |
| ENSMUSG00000030199 | 0.27527072 | 5.81567907 | 0.44159934 | 0.62124397 |
| ENSMUSG00000020564 | 0.27458025 | 6.09838055 | 0.441897   | 0.62158663 |
| ENSMUSG00000018651 | -0.2869694 | 3.28149555 | 0.4420774  | 0.62175168 |
| ENSMUSG00000005069 | 0.27751126 | 4.91648011 | 0.44212251 | 0.62175168 |
| ENSMUSG00000032402 | -0.2740005 | 5.78841993 | 0.44266685 | 0.62225613 |
| ENSMUSG00000030672 | 0.3100235  | 1.5096125  | 0.44271236 | 0.62225613 |
| ENSMUSG00000042211 | -0.2723002 | 7.18539116 | 0.44273331 | 0.62225613 |
| ENSMUSG00000023034 | 0.2714327  | 10.0114023 | 0.44273919 | 0.62225613 |
| ENSMUSG00000049300 | -0.2811671 | 3.97955581 | 0.44276241 | 0.62225613 |
| ENSMUSG00000022335 | 0.28765317 | 3.12206156 | 0.44280601 | 0.62225613 |
| ENSMUSG00000024493 | -0.2724021 | 6.713657   | 0.44311966 | 0.62260256 |
| ENSMUSG00000025369 | 0.27193969 | 7.46008814 | 0.44316087 | 0.62260256 |
| ENSMUSG00000035093 | -0.2720502 | 6.9636452  | 0.4433343  | 0.6227701  |
| ENSMUSG00000041645 | 0.2718654  | 7.13461922 | 0.44346448 | 0.62287686 |
| ENSMUSG00000026788 | -0.2733724 | 5.79760832 | 0.44362433 | 0.62302525 |
| ENSMUSG00000026799 | 0.28599842 | 3.34998935 | 0.44376845 | 0.6231287  |
| ENSMUSG00000043415 | -0.2734131 | 5.86769524 | 0.44380641 | 0.6231287  |
| ENSMUSG00000041712 | -0.273273  | 5.97482631 | 0.44396491 | 0.62327511 |
| ENSMUSG00000044348 | -0.2743141 | 5.4727051  | 0.44408559 | 0.6233684  |
| ENSMUSG00000047635 | 0.28147348 | 2.98791851 | 0.4441693  | 0.62340979 |
| ENSMUSG00000092260 | -0.293862  | 2.45748138 | 0.44442743 | 0.62369592 |
| ENSMUSG00000036371 | -0.2705542 | 8.17969038 | 0.44491576 | 0.62430501 |
| ENSMUSG00000045140 | -0.2807228 | 3.73148991 | 0.44514174 | 0.62454586 |
| ENSMUSG00000020840 | -0.2726453 | 5.77143835 | 0.44570657 | 0.62521211 |
| ENSMUSG00000003316 | -0.2701765 | 7.71980266 | 0.44572538 | 0.62521211 |
| ENSMUSG00000033845 | -0.2742197 | 5.210862   | 0.44590478 | 0.62538744 |
| ENSMUSG00000039307 | 0.28141929 | 3.73804419 | 0.44598521 | 0.62539916 |
| ENSMUSG00000056076 | 0.27011804 | 7.47117411 | 0.44602195 | 0.62539916 |
| ENSMUSG00000000561 | -0.2710771 | 6.30243348 | 0.44610033 | 0.62543277 |
| ENSMUSG00000038784 | -0.2709924 | 6.42273185 | 0.44621657 | 0.62551945 |
| ENSMUSG00000022471 | -0.2730832 | 5.30672142 | 0.44637821 | 0.62566974 |
| ENSMUSG00000021114 | -0.2717119 | 5.93888719 | 0.44649396 | 0.62575467 |
| ENSMUSG00000050157 | -0.2898519 | 2.72230611 | 0.44654768 | 0.62575467 |
| ENSMUSG00000048039 | -0.2703239 | 6.91300369 | 0.44676466 | 0.62579001 |
| ENSMUSG00000079547 | 0.26969411 | 7.60040831 | 0.44678907 | 0.62579001 |
| ENSMUSG0000002997  | 0.27484815 | 4.6254361  | 0.44685072 | 0.62579001 |
| ENSMUSG00000058624 | 0.27196282 | 5.98278377 | 0.44685089 | 0.62579001 |

|                    |            |            |            |            |
|--------------------|------------|------------|------------|------------|
| ENSMUSG00000027589 | -0.2705976 | 6.372616   | 0.44686893 | 0.62579001 |
| ENSMUSG00000027312 | -0.2711754 | 5.87925471 | 0.44689954 | 0.62579001 |
| ENSMUSG00000033628 | -0.2707106 | 6.33513993 | 0.44700844 | 0.62586626 |
| ENSMUSG00000033373 | 0.28457986 | 3.19929172 | 0.44709181 | 0.62590675 |
| ENSMUSG00000063235 | -0.2886534 | 2.56664149 | 0.44716969 | 0.62593954 |
| ENSMUSG00000069255 | 0.2797809  | 4.14577164 | 0.4473664  | 0.62613865 |
| ENSMUSG00000096433 | -0.2755506 | 4.15348962 | 0.44743804 | 0.62616269 |
| ENSMUSG00000001403 | 0.27971931 | 3.7720495  | 0.44784766 | 0.62656051 |
| ENSMUSG00000037563 | 0.26865288 | 8.40221866 | 0.44785276 | 0.62656051 |
| ENSMUSG00000022023 | -0.2711814 | 5.85805233 | 0.44794275 | 0.62656051 |
| ENSMUSG00000038836 | -0.288614  | 2.69110205 | 0.44802116 | 0.62656051 |
| ENSMUSG00000013878 | -0.2737467 | 4.69294922 | 0.44805017 | 0.62656051 |
| ENSMUSG00000032504 | -0.2688136 | 7.75261113 | 0.44807176 | 0.62656051 |
| ENSMUSG00000074785 | -0.2687635 | 7.94233377 | 0.44810387 | 0.62656051 |
| ENSMUSG00000059409 | 0.27024285 | 5.54782721 | 0.44830613 | 0.62676709 |
| ENSMUSG00000042626 | 0.26906539 | 6.83852911 | 0.44869833 | 0.62722584 |
| ENSMUSG00000020849 | -0.2684559 | 7.84473871 | 0.4487946  | 0.62722584 |
| ENSMUSG00000078945 | 0.27289809 | 5.07195658 | 0.44879796 | 0.62722584 |
| ENSMUSG00000026478 | 0.27095909 | 5.35390743 | 0.44904758 | 0.62749841 |
| ENSMUSG00000036975 | 0.28105735 | 2.90450322 | 0.44919633 | 0.62762997 |
| ENSMUSG00000016481 | -0.2685038 | 6.97319657 | 0.4494543  | 0.6279141  |
| ENSMUSG00000038871 | -0.270318  | 5.60174167 | 0.44956193 | 0.62798813 |
| ENSMUSG00000029627 | -0.2722978 | 4.9425012  | 0.44968562 | 0.6280846  |
| ENSMUSG00000021134 | -0.2671774 | 9.47177933 | 0.44993756 | 0.62828843 |
| ENSMUSG00000027555 | -0.3074561 | 1.97577712 | 0.44994088 | 0.62828843 |
| ENSMUSG00000044252 | 0.29854591 | 2.44217098 | 0.45016782 | 0.62852898 |
| ENSMUSG00000054021 | 0.31845138 | 2.03444813 | 0.45022384 | 0.62853086 |
| ENSMUSG00000032329 | -0.268536  | 6.30307141 | 0.45044589 | 0.62876449 |
| ENSMUSG00000094345 | 0.27968869 | 4.45434006 | 0.45067076 | 0.62900199 |
| ENSMUSG00000034538 | -0.2920135 | 2.92664125 | 0.45078841 | 0.62908981 |
| ENSMUSG00000097729 | -0.268598  | 5.41553766 | 0.45088753 | 0.62915176 |
| ENSMUSG00000020919 | 0.26845495 | 6.23567555 | 0.4509901  | 0.62921849 |
| ENSMUSG00000070583 | -0.2855383 | 3.35270057 | 0.45129341 | 0.62956447 |
| ENSMUSG00000072235 | 0.27046973 | 5.50229152 | 0.45134761 | 0.62956447 |
| ENSMUSG00000044452 | -0.2675111 | 6.3999339  | 0.45178042 | 0.62991547 |
| ENSMUSG00000019837 | -0.2717291 | 4.78456949 | 0.45182676 | 0.62991547 |
| ENSMUSG00000031024 | 0.27918277 | 3.50072876 | 0.45183787 | 0.62991547 |
| ENSMUSG00000024410 | -0.2677116 | 6.40234981 | 0.45187322 | 0.62991547 |
| ENSMUSG00000027562 | 0.26637283 | 8.19624296 | 0.45187324 | 0.62991547 |
| ENSMUSG00000026755 | -0.2663294 | 7.93608949 | 0.45212318 | 0.63018745 |
| ENSMUSG00000028551 | -0.2909971 | 2.95968418 | 0.45231839 | 0.63029071 |
| ENSMUSG00000035024 | -0.2679524 | 6.05745225 | 0.45234447 | 0.63029071 |
| ENSMUSG00000028692 | 0.26664962 | 7.17417509 | 0.45238441 | 0.63029071 |

|                    |            |            |            |            |
|--------------------|------------|------------|------------|------------|
| ENSMUSG00000020850 | -0.2656568 | 9.4454168  | 0.45259063 | 0.63029071 |
| ENSMUSG00000005683 | 0.26599791 | 7.83885926 | 0.45261791 | 0.63029071 |
| ENSMUSG00000032898 | 0.27048872 | 4.6056373  | 0.45264353 | 0.63029071 |
| ENSMUSG00000042700 | 0.2669652  | 6.63764857 | 0.45266446 | 0.63029071 |
| ENSMUSG00000038708 | -0.2663999 | 7.02846718 | 0.45267264 | 0.63029071 |
| ENSMUSG00000019303 | 0.32787608 | 1.3169749  | 0.45269075 | 0.63029071 |
| ENSMUSG00000039163 | -0.2881413 | 2.73937308 | 0.45314878 | 0.63085203 |
| ENSMUSG00000002064 | 0.26819486 | 5.7010885  | 0.45327288 | 0.63093269 |
| ENSMUSG00000029439 | 0.26845832 | 5.58318873 | 0.4533165  | 0.63093269 |
| ENSMUSG00000035069 | 0.27054922 | 4.57440527 | 0.45349435 | 0.63110382 |
| ENSMUSG00000043411 | -0.2652922 | 7.98342892 | 0.45377772 | 0.63142172 |
| ENSMUSG00000023089 | -0.2754364 | 4.03832946 | 0.45406478 | 0.6317447  |
| ENSMUSG00000019794 | -0.2672885 | 5.90206116 | 0.45412173 | 0.63174746 |
| ENSMUSG00000026781 | -0.2663228 | 6.18074374 | 0.45427081 | 0.63187839 |
| ENSMUSG00000043998 | -0.2670656 | 5.87870441 | 0.45437353 | 0.63194479 |
| ENSMUSG00000027331 | -0.2721472 | 3.90072535 | 0.45453331 | 0.63209054 |
| ENSMUSG00000042569 | 0.28044376 | 3.54551186 | 0.4548236  | 0.63241771 |
| ENSMUSG00000068115 | 0.31210515 | 1.95117162 | 0.45521816 | 0.63288979 |
| ENSMUSG00000100214 | 0.36883703 | 0.95860395 | 0.45528016 | 0.63289944 |
| ENSMUSG00000002017 | -0.2664536 | 5.75919112 | 0.45549881 | 0.63308215 |
| ENSMUSG00000024675 | 0.26459689 | 7.58118583 | 0.45558766 | 0.63308215 |
| ENSMUSG00000028459 | 0.2640639  | 8.76013448 | 0.45560887 | 0.63308215 |
| ENSMUSG00000021901 | 0.26541422 | 6.31660481 | 0.45563189 | 0.63308215 |
| ENSMUSG00000031667 | -0.2716167 | 4.43263275 | 0.45574514 | 0.63316296 |
| ENSMUSG00000053604 | 0.26609212 | 5.70958774 | 0.45588241 | 0.63327713 |
| ENSMUSG00000006024 | 0.26512594 | 6.57074291 | 0.4559949  | 0.63335686 |
| ENSMUSG00000026750 | -0.2654856 | 6.22508979 | 0.45616832 | 0.63347937 |
| ENSMUSG00000059975 | -0.2732256 | 4.27853545 | 0.45620381 | 0.63347937 |
| ENSMUSG00000029189 | -0.3470891 | 1.15773179 | 0.45624843 | 0.63347937 |
| ENSMUSG00000026439 | -0.2647981 | 6.65792834 | 0.45641855 | 0.63363903 |
| ENSMUSG00000028423 | -0.2636997 | 7.71634079 | 0.45673378 | 0.6340001  |
| ENSMUSG00000028016 | -0.266841  | 5.3761963  | 0.45704344 | 0.63435333 |
| ENSMUSG00000025817 | -0.2661599 | 5.46675662 | 0.45732766 | 0.63467119 |
| ENSMUSG00000020268 | -0.2967218 | 1.54294604 | 0.45744288 | 0.6346983  |
| ENSMUSG00000041815 | 0.26358358 | 7.01102282 | 0.45745763 | 0.6346983  |
| ENSMUSG00000021958 | 0.27352687 | 3.7738584  | 0.45756357 | 0.63476867 |
| ENSMUSG00000079614 | -0.2644084 | 6.27071035 | 0.45786137 | 0.63503905 |
| ENSMUSG00000097296 | -0.2638066 | 5.99723081 | 0.45788035 | 0.63503905 |
| ENSMUSG00000094114 | -0.2900519 | 1.94540894 | 0.45797312 | 0.63503905 |
| ENSMUSG00000028696 | -0.270144  | 4.16585895 | 0.45801912 | 0.63503905 |
| ENSMUSG00000100975 | -0.2919884 | 2.1404622  | 0.45806334 | 0.63503905 |
| ENSMUSG00000026162 | 0.28747548 | 2.36083085 | 0.45808993 | 0.63503905 |
| ENSMUSG00000030654 | -0.2626891 | 8.10866182 | 0.45824245 | 0.63517388 |

|                    |            |            |            |            |
|--------------------|------------|------------|------------|------------|
| ENSMUSG00000019961 | -0.2627133 | 7.9869992  | 0.45830849 | 0.63518882 |
| ENSMUSG00000034893 | -0.2635057 | 6.54307161 | 0.45836436 | 0.63518966 |
| ENSMUSG00000060733 | -0.265231  | 5.34730539 | 0.4589382  | 0.63582052 |
| ENSMUSG00000031295 | -0.2642416 | 5.47190684 | 0.45897394 | 0.63582052 |
| ENSMUSG00000025358 | 0.26359914 | 6.30694241 | 0.45898553 | 0.63582052 |
| ENSMUSG00000078651 | 0.28360192 | 3.15229456 | 0.45909323 | 0.63589308 |
| ENSMUSG00000030407 | 0.2829972  | 2.98443065 | 0.45931294 | 0.63612076 |
| ENSMUSG00000078786 | 0.28877013 | 2.82602787 | 0.4595327  | 0.6363317  |
| ENSMUSG00000021814 | 0.26285752 | 6.65849205 | 0.45958824 | 0.6363317  |
| ENSMUSG00000006288 | 0.26417533 | 5.78536763 | 0.4597238  | 0.6363317  |
| ENSMUSG00000063179 | -0.2733289 | 3.45235149 | 0.45973062 | 0.6363317  |
| ENSMUSG00000068206 | 0.26950283 | 4.21947471 | 0.45978466 | 0.6363317  |
| ENSMUSG00000026311 | -0.2634598 | 5.91323903 | 0.4597974  | 0.6363317  |
| ENSMUSG00000060904 | -0.2635919 | 5.94245157 | 0.45995244 | 0.63646964 |
| ENSMUSG00000020974 | -0.2758253 | 3.23883494 | 0.46014708 | 0.63666234 |
| ENSMUSG00000001366 | -0.2641032 | 5.62935199 | 0.46054321 | 0.63706897 |
| ENSMUSG00000023008 | -0.2620562 | 6.85928908 | 0.46055182 | 0.63706897 |
| ENSMUSG00000042507 | -0.2613458 | 7.57916321 | 0.46074859 | 0.63726447 |
| ENSMUSG00000028991 | 0.26288677 | 6.05794291 | 0.46124716 | 0.63776389 |
| ENSMUSG00000033885 | -0.2607681 | 8.58739204 | 0.46126648 | 0.63776389 |
| ENSMUSG00000027006 | -0.2616188 | 6.63059586 | 0.46127612 | 0.63776389 |
| ENSMUSG00000021767 | -0.2628296 | 5.57870835 | 0.46159297 | 0.63789175 |
| ENSMUSG00000029672 | -0.2619646 | 6.32934163 | 0.46159558 | 0.63789175 |
| ENSMUSG00000033883 | -0.2710996 | 3.78523404 | 0.46159659 | 0.63789175 |
| ENSMUSG00000050174 | 0.2940673  | 2.61875908 | 0.46160072 | 0.63789175 |
| ENSMUSG00000031657 | -0.2631298 | 5.35848859 | 0.46165288 | 0.63789175 |
| ENSMUSG00000026553 | -0.2604569 | 8.86071354 | 0.46170156 | 0.63789175 |
| ENSMUSG00000005575 | 0.26302418 | 5.3371163  | 0.46180175 | 0.6379025  |
| ENSMUSG00000024121 | 0.26137306 | 7.12793531 | 0.46182032 | 0.6379025  |
| ENSMUSG00000097354 | -0.2679179 | 3.66384032 | 0.46199551 | 0.63799401 |
| ENSMUSG00000019297 | 0.26446896 | 5.01031234 | 0.46199757 | 0.63799401 |
| ENSMUSG00000056692 | 0.26115433 | 6.83137111 | 0.46221147 | 0.63821271 |
| ENSMUSG00000041431 | -0.2731223 | 3.58256311 | 0.46227957 | 0.63823008 |
| ENSMUSG00000033096 | -0.2630009 | 5.40635968 | 0.46252465 | 0.63843658 |
| ENSMUSG00000024400 | -0.2611941 | 6.33960335 | 0.46258348 | 0.63843658 |
| ENSMUSG00000028587 | -0.2844924 | 2.82875766 | 0.46259576 | 0.63843658 |
| ENSMUSG00000007411 | -0.2609142 | 6.68077494 | 0.46268852 | 0.63848794 |
| ENSMUSG00000020697 | -0.2621756 | 5.683752   | 0.46281828 | 0.63855251 |
| ENSMUSG00000021482 | -0.2672469 | 4.47350841 | 0.46284641 | 0.63855251 |
| ENSMUSG00000020444 | 0.26959289 | 3.80756762 | 0.46313399 | 0.63882905 |
| ENSMUSG00000039804 | 0.2616056  | 5.88873459 | 0.46315801 | 0.63882905 |
| ENSMUSG00000030094 | 0.26384499 | 4.99881378 | 0.46345282 | 0.63915899 |
| ENSMUSG00000092607 | 0.26425531 | 4.68970442 | 0.46353254 | 0.63919225 |

|                    |            |            |            |            |
|--------------------|------------|------------|------------|------------|
| ENSMUSG00000020932 | -0.3042854 | 1.87169222 | 0.4637145  | 0.63936646 |
| ENSMUSG00000033540 | 0.26258311 | 5.54072635 | 0.46400841 | 0.63969497 |
| ENSMUSG00000036646 | 0.25960067 | 6.89111465 | 0.46420642 | 0.63989121 |
| ENSMUSG00000029265 | -0.2607523 | 6.11160748 | 0.46452822 | 0.64015981 |
| ENSMUSG00000043004 | -0.2595604 | 7.06019678 | 0.46458074 | 0.64015981 |
| ENSMUSG00000023505 | 0.26510606 | 4.32810945 | 0.46461459 | 0.64015981 |
| ENSMUSG00000022673 | -0.2597109 | 6.88616907 | 0.46462404 | 0.64015981 |
| ENSMUSG00000010721 | -0.3022528 | 1.48691211 | 0.46472759 | 0.64022575 |
| ENSMUSG00000021411 | 0.26039068 | 6.57802681 | 0.46491709 | 0.64036812 |
| ENSMUSG00000046605 | 0.27338448 | 3.7700119  | 0.46494235 | 0.64036812 |
| ENSMUSG00000028264 | 0.32157383 | 1.26608465 | 0.4652367  | 0.64069676 |
| ENSMUSG00000042729 | 0.26292912 | 4.74158985 | 0.46565718 | 0.64117365 |
| ENSMUSG00000038302 | -0.2689096 | 4.02784166 | 0.46569454 | 0.64117365 |
| ENSMUSG00000024782 | -0.2607611 | 5.73424925 | 0.46580923 | 0.64125475 |
| ENSMUSG00000028889 | -0.2614593 | 5.43821071 | 0.46612454 | 0.64156725 |
| ENSMUSG00000021892 | -0.2582396 | 7.68368501 | 0.46614786 | 0.64156725 |
| ENSMUSG00000017264 | 0.25881285 | 6.55513896 | 0.46656913 | 0.64207017 |
| ENSMUSG00000055932 | 0.25989029 | 5.76689972 | 0.46666163 | 0.6421206  |
| ENSMUSG00000019579 | 0.26554546 | 4.26339542 | 0.46674009 | 0.64215169 |
| ENSMUSG00000029924 | -0.2601829 | 5.31647178 | 0.46705844 | 0.64251278 |
| ENSMUSG00000034620 | -0.2669073 | 3.94455783 | 0.46767612 | 0.64320027 |
| ENSMUSG00000075701 | -0.2602806 | 5.40943238 | 0.46767641 | 0.64320027 |
| ENSMUSG00000091649 | -0.2606255 | 5.18953848 | 0.46772606 | 0.64320027 |
| ENSMUSG00000060121 | -0.2649365 | 4.15457964 | 0.46812138 | 0.6436669  |
| ENSMUSG00000031917 | -0.2600934 | 5.4275698  | 0.46823509 | 0.64374624 |
| ENSMUSG00000029866 | -0.2588334 | 6.12499389 | 0.468356   | 0.64383547 |
| ENSMUSG00000020088 | -0.2571243 | 7.07174046 | 0.46874382 | 0.64429155 |
| ENSMUSG00000028884 | 0.2608199  | 4.8082147  | 0.46914366 | 0.64472686 |
| ENSMUSG00000009569 | -0.2590729 | 5.23214649 | 0.4691727  | 0.64472686 |
| ENSMUSG00000026279 | 0.26357235 | 3.41512202 | 0.46924096 | 0.64474359 |
| ENSMUSG00000038949 | -0.2594992 | 5.24257635 | 0.46934156 | 0.64480473 |
| ENSMUSG00000020549 | 0.25941907 | 5.08959634 | 0.4694283  | 0.6448071  |
| ENSMUSG00000030677 | 0.26592373 | 3.72304628 | 0.46945547 | 0.6448071  |
| ENSMUSG00000001942 | -0.2603704 | 4.929837   | 0.46961911 | 0.6449548  |
| ENSMUSG00000014232 | -0.2637076 | 4.26004036 | 0.46970053 | 0.64498956 |
| ENSMUSG00000047419 | -0.2892339 | 1.83011316 | 0.46980018 | 0.6450418  |
| ENSMUSG00000022387 | 0.25711874 | 6.5178199  | 0.46998082 | 0.6450418  |
| ENSMUSG00000023883 | -0.2578804 | 5.86466464 | 0.46999474 | 0.6450418  |
| ENSMUSG00000031134 | -0.2570259 | 6.24202351 | 0.46999866 | 0.6450418  |
| ENSMUSG00000071660 | -0.2577895 | 6.1469669  | 0.47003223 | 0.6450418  |
| ENSMUSG00000004880 | -0.2558159 | 8.19130394 | 0.47007526 | 0.6450418  |
| ENSMUSG00000038349 | 0.2884468  | 2.64974246 | 0.47028734 | 0.64525578 |
| ENSMUSG00000052738 | -0.2576882 | 5.9112189  | 0.4705752  | 0.64544776 |



|                    |            |            |            |            |
|--------------------|------------|------------|------------|------------|
| ENSMUSG00000024174 | -0.2562483 | 6.43924042 | 0.47059227 | 0.64544776 |
| ENSMUSG00000040557 | 0.33444924 | 1.03566314 | 0.47064533 | 0.64544776 |
| ENSMUSG00000076532 | -0.2604138 | 4.80211792 | 0.47065186 | 0.64544776 |
| ENSMUSG00000028760 | 0.2555577  | 8.03254479 | 0.47076887 | 0.64553122 |
| ENSMUSG00000022971 | 0.25731384 | 5.52862709 | 0.47116364 | 0.64596048 |
| ENSMUSG00000023072 | -0.2600957 | 4.7964712  | 0.47120071 | 0.64596048 |
| ENSMUSG00000026670 | -0.2570693 | 5.99440813 | 0.47125051 | 0.64596048 |
| ENSMUSG00000028995 | -0.2560373 | 6.48286098 | 0.47143509 | 0.64606292 |
| ENSMUSG00000060671 | 0.25570637 | 6.77926716 | 0.47143765 | 0.64606292 |
| ENSMUSG00000018882 | 0.25784284 | 5.20238199 | 0.47172115 | 0.64633609 |
| ENSMUSG00000034501 | -0.2720295 | 3.25624503 | 0.47175738 | 0.64633609 |
| ENSMUSG00000087385 | -0.2863662 | 1.94088214 | 0.47180567 | 0.64633609 |
| ENSMUSG00000041278 | -0.2586331 | 5.03276193 | 0.47195379 | 0.64646196 |
| ENSMUSG00000070814 | -0.2709988 | 2.80272367 | 0.47214622 | 0.64664849 |
| ENSMUSG00000034998 | -0.2559227 | 6.09148234 | 0.47238824 | 0.6468974  |
| ENSMUSG00000030102 | -0.2543716 | 7.99573802 | 0.47249492 | 0.6468974  |
| ENSMUSG00000095583 | -0.2701073 | 3.40199386 | 0.47249679 | 0.6468974  |
| ENSMUSG00000024588 | -0.2551994 | 6.62269196 | 0.47291244 | 0.64735422 |
| ENSMUSG00000024642 | -0.255237  | 6.4850412  | 0.47294308 | 0.64735422 |
| ENSMUSG00000008305 | 0.26385788 | 3.52145887 | 0.47329601 | 0.64776017 |
| ENSMUSG00000036968 | -0.2569512 | 5.45465518 | 0.47354702 | 0.64802655 |
| ENSMUSG00000033102 | -0.2618037 | 3.65498654 | 0.4736133  | 0.6480401  |
| ENSMUSG00000006932 | -0.2536437 | 8.086494   | 0.47389973 | 0.64835484 |
| ENSMUSG00000039086 | -0.2625913 | 3.88496866 | 0.4742539  | 0.64876218 |
| ENSMUSG00000024234 | -0.2554211 | 5.74238806 | 0.47439439 | 0.64887714 |
| ENSMUSG00000028218 | -0.269961  | 2.4055434  | 0.47447571 | 0.64891116 |
| ENSMUSG00000020018 | -0.2575261 | 5.10872155 | 0.47453573 | 0.64891604 |
| ENSMUSG00000040731 | 0.25377204 | 6.99316476 | 0.47473788 | 0.64911525 |
| ENSMUSG00000030987 | 0.25434995 | 6.10336039 | 0.47484466 | 0.6491726  |
| ENSMUSG00000058661 | -0.2700208 | 3.08161676 | 0.47489277 | 0.6491726  |
| ENSMUSG00000055065 | -0.2526598 | 9.31564459 | 0.47500984 | 0.64924247 |
| ENSMUSG00000019774 | -0.2648996 | 3.94259906 | 0.47505684 | 0.64924247 |
| ENSMUSG00000038831 | -0.2569044 | 4.69345911 | 0.47526589 | 0.6493867  |
| ENSMUSG00000007656 | -0.2550316 | 5.77471366 | 0.47531665 | 0.6493867  |
| ENSMUSG00000042606 | 0.25709574 | 4.7776418  | 0.47535707 | 0.6493867  |
| ENSMUSG00000055720 | 0.25631934 | 5.23006966 | 0.47538835 | 0.6493867  |
| ENSMUSG00000074220 | -0.2660628 | 3.57555716 | 0.47547577 | 0.64942895 |
| ENSMUSG00000073415 | 0.35323845 | 1.04763488 | 0.47559421 | 0.64951353 |
| ENSMUSG00000101122 | -0.2630519 | 2.62818144 | 0.47576361 | 0.6496677  |
| ENSMUSG00000071659 | -0.2522721 | 9.00908965 | 0.47584071 | 0.6496958  |
| ENSMUSG00000037997 | -0.2540024 | 5.80976153 | 0.47594343 | 0.64975887 |
| ENSMUSG00000044066 | -0.2533652 | 6.50704563 | 0.47601647 | 0.64978142 |
| ENSMUSG00000029249 | -0.252797  | 7.06888572 | 0.47627468 | 0.64998615 |

|                    |            |            |            |            |
|--------------------|------------|------------|------------|------------|
| ENSMUSG00000053769 | 0.27885797 | 2.25987486 | 0.47629025 | 0.64998615 |
| ENSMUSG00000038467 | 0.25336309 | 6.46196812 | 0.47637621 | 0.64998615 |
| ENSMUSG00000072258 | -0.2592048 | 4.33410893 | 0.47639263 | 0.64998615 |
| ENSMUSG00000025092 | 0.26474536 | 3.89248056 | 0.47646278 | 0.65000471 |
| ENSMUSG00000047843 | 0.26962838 | 3.63387362 | 0.4766181  | 0.65013944 |
| ENSMUSG00000022774 | -0.2555433 | 5.25717917 | 0.47690918 | 0.65035789 |
| ENSMUSG00000020783 | -0.2534538 | 6.23319967 | 0.47693602 | 0.65035789 |
| ENSMUSG00000045973 | -0.2524561 | 7.00690313 | 0.47694798 | 0.65035789 |
| ENSMUSG00000032679 | 0.28351198 | 2.53337251 | 0.47701199 | 0.65036803 |
| ENSMUSG00000051721 | -0.2699781 | 3.11830061 | 0.47710719 | 0.65041359 |
| ENSMUSG00000026095 | -0.2577987 | 4.67229755 | 0.47715858 | 0.65041359 |
| ENSMUSG00000031537 | 0.25167754 | 8.58105761 | 0.47726526 | 0.65048187 |
| ENSMUSG00000014873 | 0.25352128 | 5.4978573  | 0.47775829 | 0.65107665 |
| ENSMUSG00000075028 | 0.25810156 | 4.76094953 | 0.47784351 | 0.65111559 |
| ENSMUSG00000079190 | -0.2748186 | 2.30199588 | 0.47794559 | 0.6511775  |
| ENSMUSG00000028048 | 0.25229152 | 6.2865936  | 0.47806671 | 0.65126533 |
| ENSMUSG00000001138 | 0.25720149 | 4.66263654 | 0.47822313 | 0.6513881  |
| ENSMUSG00000008843 | 0.25559486 | 4.66900394 | 0.47832394 | 0.6513881  |
| ENSMUSG00000057337 | -0.2508041 | 8.83019549 | 0.47837283 | 0.6513881  |
| ENSMUSG00000022528 | 0.25766213 | 4.75662294 | 0.47839782 | 0.6513881  |
| ENSMUSG00000050796 | 0.29565625 | 1.87243066 | 0.47847315 | 0.6513881  |
| ENSMUSG00000020386 | -0.2566438 | 4.48784996 | 0.47849684 | 0.6513881  |
| ENSMUSG00000020990 | -0.2674936 | 2.99413406 | 0.47878837 | 0.65170779 |
| ENSMUSG00000031156 | 0.25933836 | 4.07441225 | 0.47893043 | 0.65171957 |
| ENSMUSG00000078908 | 0.2531582  | 5.35830719 | 0.47895054 | 0.65171957 |
| ENSMUSG00000028792 | 0.25242297 | 6.04394209 | 0.47901907 | 0.65171957 |
| ENSMUSG00000032959 | 0.25219823 | 5.79629248 | 0.47902503 | 0.65171957 |
| ENSMUSG00000030505 | -0.2527619 | 5.72584888 | 0.47910999 | 0.65171957 |
| ENSMUSG00000079508 | -0.2899782 | 2.02416229 | 0.47915282 | 0.65171957 |
| ENSMUSG00000005299 | 0.25277718 | 5.82989014 | 0.4791939  | 0.65171957 |
| ENSMUSG00000026819 | 0.25891048 | 4.46496876 | 0.47940005 | 0.65192282 |
| ENSMUSG00000021686 | -0.2512337 | 6.69352768 | 0.47967309 | 0.65216233 |
| ENSMUSG00000026313 | 0.26592493 | 3.93190892 | 0.47968965 | 0.65216233 |
| ENSMUSG00000042708 | 0.2836473  | 2.80155128 | 0.48014916 | 0.65270986 |
| ENSMUSG00000021123 | -0.2529093 | 5.58633436 | 0.48030285 | 0.65281182 |
| ENSMUSG00000027599 | -0.2526269 | 5.66910637 | 0.48033774 | 0.65281182 |
| ENSMUSG00000064363 | -0.2493796 | 10.7469565 | 0.48053459 | 0.65300214 |
| ENSMUSG00000018433 | -0.2516409 | 5.92241019 | 0.48072518 | 0.65318391 |
| ENSMUSG00000079557 | 0.25293146 | 5.44615966 | 0.48123307 | 0.65378243 |
| ENSMUSG00000027523 | 0.24916063 | 8.71811132 | 0.48131434 | 0.65378243 |
| ENSMUSG00000021306 | -0.2511866 | 5.65634414 | 0.48143981 | 0.65378243 |
| ENSMUSG00000019996 | 0.25469755 | 4.80512999 | 0.48144219 | 0.65378243 |
| ENSMUSG00000049940 | -0.2528579 | 5.28158421 | 0.48145004 | 0.65378243 |

|                    |            |            |            |            |
|--------------------|------------|------------|------------|------------|
| ENSMUSG00000020847 | 0.27116813 | 2.81470334 | 0.48166835 | 0.65396272 |
| ENSMUSG00000034066 | -0.2760533 | 2.03007335 | 0.48169659 | 0.65396272 |
| ENSMUSG00000041375 | 0.25280996 | 5.72317489 | 0.48197079 | 0.6542577  |
| ENSMUSG00000056941 | 0.25208174 | 5.22242596 | 0.48219832 | 0.65448927 |
| ENSMUSG00000027465 | 0.24945802 | 6.6451457  | 0.48233736 | 0.65460071 |
| ENSMUSG00000020409 | -0.2494721 | 6.9631846  | 0.48240389 | 0.65461371 |
| ENSMUSG00000004221 | -0.2493186 | 6.5835444  | 0.48265559 | 0.65486833 |
| ENSMUSG00000003809 | -0.253094  | 4.93569231 | 0.48274943 | 0.65486833 |
| ENSMUSG00000021754 | -0.2483161 | 8.52224897 | 0.48282678 | 0.65486833 |
| ENSMUSG00000035891 | 0.24857328 | 7.6514244  | 0.48284836 | 0.65486833 |
| ENSMUSG00000021065 | -0.2518709 | 5.1702044  | 0.48287638 | 0.65486833 |
| ENSMUSG00000036825 | 0.26165176 | 3.63815518 | 0.4829626  | 0.65490799 |
| ENSMUSG00000042066 | 0.24971412 | 6.18378757 | 0.48311253 | 0.65503403 |
| ENSMUSG00000033157 | -0.2549187 | 3.96956459 | 0.48345523 | 0.65540198 |
| ENSMUSG00000038990 | 0.2485945  | 7.03038684 | 0.48349794 | 0.65540198 |
| ENSMUSG00000026723 | -0.2555992 | 3.31486369 | 0.48361477 | 0.65548306 |
| ENSMUSG00000034681 | 0.25361027 | 4.76806458 | 0.48383657 | 0.65570637 |
| ENSMUSG00000029387 | 0.25191146 | 4.75083566 | 0.48398376 | 0.65581329 |
| ENSMUSG00000040751 | 0.24819249 | 7.30652535 | 0.48402958 | 0.65581329 |
| ENSMUSG00000074576 | 0.27622434 | 2.19379791 | 0.48426598 | 0.65602332 |
| ENSMUSG00000061559 | -0.2506967 | 5.31404076 | 0.48429873 | 0.65602332 |
| ENSMUSG00000057278 | -0.2504732 | 5.54889786 | 0.4844106  | 0.65609755 |
| ENSMUSG00000063646 | 0.2504386  | 5.43061806 | 0.48449455 | 0.65613394 |
| ENSMUSG00000016541 | -0.248931  | 6.29247777 | 0.48460087 | 0.65620061 |
| ENSMUSG00000017314 | 0.29990915 | 1.65073893 | 0.48491272 | 0.65649076 |
| ENSMUSG00000086291 | 0.28387325 | 2.40706923 | 0.48493747 | 0.65649076 |
| ENSMUSG00000018547 | 0.2477561  | 6.83600673 | 0.48498995 | 0.65649076 |
| ENSMUSG00000004865 | -0.2475801 | 7.31794594 | 0.48508037 | 0.65649076 |
| ENSMUSG00000028811 | 0.24978853 | 5.40684098 | 0.4851007  | 0.65649076 |
| ENSMUSG00000019960 | 0.24875038 | 6.24379476 | 0.48518597 | 0.65652887 |
| ENSMUSG00000051256 | 0.25399752 | 3.8378069  | 0.48525794 | 0.65654896 |
| ENSMUSG00000044583 | -0.2476442 | 6.54422773 | 0.48548435 | 0.65672366 |
| ENSMUSG00000014769 | -0.2476957 | 6.89299235 | 0.48553415 | 0.65672366 |
| ENSMUSG00000031681 | 0.2624314  | 3.21681158 | 0.48555845 | 0.65672366 |
| ENSMUSG00000027363 | -0.2472622 | 6.99518395 | 0.48565513 | 0.65677715 |
| ENSMUSG00000018427 | -0.2562581 | 3.85035067 | 0.48573438 | 0.65680705 |
| ENSMUSG00000030322 | -0.2485465 | 6.14120872 | 0.48579481 | 0.65681149 |
| ENSMUSG00000030007 | -0.2470541 | 7.87693439 | 0.48608192 | 0.6571224  |
| ENSMUSG00000041779 | -0.2498367 | 4.98855675 | 0.48615373 | 0.65712641 |
| ENSMUSG00000037363 | 0.25546228 | 4.18148959 | 0.48619923 | 0.65712641 |
| ENSMUSG00000008193 | 0.24620454 | 8.95065309 | 0.4863174  | 0.65720885 |
| ENSMUSG00000021996 | -0.2480606 | 6.16502493 | 0.48648667 | 0.65736032 |
| ENSMUSG00000036054 | 0.24793544 | 6.25022778 | 0.48664797 | 0.657481   |

|                    |            |            |            |            |
|--------------------|------------|------------|------------|------------|
| ENSMUSG00000025722 | 0.25372208 | 4.43997142 | 0.48669037 | 0.657481   |
| ENSMUSG00000039461 | 0.25528138 | 3.98406493 | 0.48688409 | 0.65759515 |
| ENSMUSG00000020091 | 0.24706494 | 6.27522387 | 0.48688928 | 0.65759515 |
| ENSMUSG00000083844 | 0.25656388 | 3.31423272 | 0.48722899 | 0.65797665 |
| ENSMUSG00000066900 | 0.24723461 | 6.03729152 | 0.48736816 | 0.65808728 |
| ENSMUSG00000024853 | 0.24560163 | 8.25917966 | 0.48773877 | 0.65851035 |
| ENSMUSG00000034121 | 0.25532044 | 4.22193046 | 0.48786632 | 0.65860521 |
| ENSMUSG00000025078 | -0.2490124 | 5.11758417 | 0.48808288 | 0.65882019 |
| ENSMUSG00000031388 | 0.25234279 | 3.98958229 | 0.48824425 | 0.65896062 |
| ENSMUSG00000041360 | -0.2470075 | 6.09978122 | 0.48839561 | 0.65908753 |
| ENSMUSG00000019795 | -0.2469782 | 6.08600934 | 0.48864969 | 0.65935299 |
| ENSMUSG00000001918 | 0.24487551 | 7.86663732 | 0.48875999 | 0.65942442 |
| ENSMUSG00000038416 | -0.2468732 | 5.87508019 | 0.48916328 | 0.65989108 |
| ENSMUSG00000020801 | -0.2571982 | 2.29774996 | 0.48924902 | 0.6599293  |
| ENSMUSG00000049287 | 0.26238363 | 3.48234964 | 0.49002033 | 0.66089214 |
| ENSMUSG00000013973 | 0.24721424 | 5.16913146 | 0.49017954 | 0.66102931 |
| ENSMUSG00000038683 | -0.2455792 | 6.17854097 | 0.49029387 | 0.66110592 |
| ENSMUSG00000095612 | 0.24894212 | 4.8765474  | 0.49062371 | 0.66133762 |
| ENSMUSG00000039005 | -0.2478688 | 5.07092807 | 0.49063048 | 0.66133762 |
| ENSMUSG00000052102 | 0.24626715 | 5.82076556 | 0.4906383  | 0.66133762 |
| ENSMUSG00000069893 | -0.2453945 | 5.91120997 | 0.49072982 | 0.66134253 |
| ENSMUSG00000033478 | -0.2458255 | 5.84381173 | 0.49075701 | 0.66134253 |
| ENSMUSG00000037395 | 0.2570309  | 3.86797179 | 0.49090984 | 0.66147094 |
| ENSMUSG00000035629 | 0.24383394 | 7.920469   | 0.49114959 | 0.66171643 |
| ENSMUSG00000020393 | 0.25178537 | 4.40579041 | 0.49125491 | 0.66178076 |
| ENSMUSG00000021036 | -0.2445635 | 6.72076557 | 0.4914309  | 0.66194026 |
| ENSMUSG00000028407 | 0.30651778 | 1.00734581 | 0.49159475 | 0.66208338 |
| ENSMUSG00000057835 | -0.2690842 | 2.46650824 | 0.49188193 | 0.66236948 |
| ENSMUSG00000035378 | -0.2599797 | 2.78471642 | 0.49192242 | 0.66236948 |
| ENSMUSG00000018293 | 0.24300423 | 9.19784217 | 0.4919996  | 0.6623958  |
| ENSMUSG00000051351 | 0.2471052  | 3.97645467 | 0.49222833 | 0.66262615 |
| ENSMUSG00000061898 | -0.247239  | 4.54376455 | 0.49253827 | 0.66296202 |
| ENSMUSG00000034602 | -0.2432673 | 7.27085906 | 0.49259318 | 0.66296202 |
| ENSMUSG00000041096 | -0.2437801 | 6.78831864 | 0.49275774 | 0.66310585 |
| ENSMUSG00000026088 | -0.2472092 | 4.91381971 | 0.4929463  | 0.66328195 |
| ENSMUSG00000026504 | -0.2464186 | 5.03837066 | 0.4931987  | 0.66348346 |
| ENSMUSG00000030319 | 0.29592717 | 1.74406251 | 0.4932115  | 0.66348346 |
| ENSMUSG00000069895 | -0.2433839 | 6.33009025 | 0.49341406 | 0.66355949 |
| ENSMUSG00000036352 | 0.2444758  | 5.84445008 | 0.49344081 | 0.66355949 |
| ENSMUSG00000032261 | 0.27321731 | 2.32440329 | 0.49344119 | 0.66355949 |
| ENSMUSG00000039458 | -0.2434087 | 6.23024745 | 0.49391956 | 0.66412509 |
| ENSMUSG00000029430 | -0.242758  | 7.02225132 | 0.49418801 | 0.66437358 |
| ENSMUSG00000022353 | -0.2428632 | 6.62289276 | 0.49421997 | 0.66437358 |

|                    |            |            |            |            |
|--------------------|------------|------------|------------|------------|
| ENSMUSG00000029919 | 0.25513103 | 4.23164608 | 0.49443502 | 0.66458496 |
| ENSMUSG00000020132 | -0.2429599 | 6.49664263 | 0.49473059 | 0.66490449 |
| ENSMUSG00000018809 | -0.2497225 | 3.98250853 | 0.49494131 | 0.66510993 |
| ENSMUSG00000048878 | 0.24583688 | 5.18551535 | 0.49515075 | 0.6653136  |
| ENSMUSG00000031387 | 0.25427947 | 3.73038405 | 0.49525742 | 0.66537916 |
| ENSMUSG00000097519 | -0.3199717 | 0.75466334 | 0.49539472 | 0.66548583 |
| ENSMUSG00000001016 | -0.2425019 | 6.46640016 | 0.49549781 | 0.66554654 |
| ENSMUSG00000022639 | -0.2461807 | 4.64783502 | 0.49564193 | 0.66560242 |
| ENSMUSG00000071757 | 0.24370079 | 5.64472813 | 0.49570826 | 0.66560242 |
| ENSMUSG00000053178 | -0.2888264 | 1.45161415 | 0.49575147 | 0.66560242 |
| ENSMUSG00000021752 | -0.2464621 | 4.4786534  | 0.49577103 | 0.66560242 |
| ENSMUSG00000057329 | 0.24170277 | 7.28640889 | 0.49593175 | 0.66574045 |
| ENSMUSG00000100615 | -0.2663342 | 1.60451428 | 0.4960483  | 0.66581915 |
| ENSMUSG00000048371 | 0.24723015 | 4.19227712 | 0.49616529 | 0.66589843 |
| ENSMUSG00000005936 | -0.2412271 | 7.32553869 | 0.49654279 | 0.66632727 |
| ENSMUSG00000056216 | -0.2419252 | 6.11986614 | 0.49700081 | 0.66686405 |
| ENSMUSG00000029804 | -0.2409481 | 6.94309956 | 0.49721589 | 0.66707478 |
| ENSMUSG00000021993 | -0.2478859 | 4.31961463 | 0.49743431 | 0.66728992 |
| ENSMUSG00000018347 | 0.24466694 | 4.82923588 | 0.49755349 | 0.66736048 |
| ENSMUSG00000054199 | 0.2421231  | 6.05805533 | 0.49760302 | 0.66736048 |
| ENSMUSG00000036814 | 0.26974459 | 2.14802174 | 0.49767776 | 0.66738286 |
| ENSMUSG00000036737 | -0.241187  | 6.33928089 | 0.49788815 | 0.66753886 |
| ENSMUSG00000027601 | -0.2423179 | 5.76727959 | 0.49791024 | 0.66753886 |
| ENSMUSG00000029020 | 0.24134019 | 6.09529232 | 0.49812728 | 0.66775197 |
| ENSMUSG00000017188 | 0.24899139 | 3.77489573 | 0.49838039 | 0.66801337 |
| ENSMUSG00000037933 | 0.24192041 | 5.58665169 | 0.49844848 | 0.66802673 |
| ENSMUSG00000053080 | -0.2690356 | 2.71441194 | 0.49887319 | 0.66851799 |
| ENSMUSG00000056130 | 0.27073558 | 2.6473346  | 0.49900284 | 0.66861378 |
| ENSMUSG00000022555 | -0.2417563 | 4.99774783 | 0.49908443 | 0.66864517 |
| ENSMUSG00000040697 | 0.24244393 | 5.29038752 | 0.49928945 | 0.66884189 |
| ENSMUSG00000037503 | -0.2389515 | 8.50113598 | 0.49959752 | 0.66913119 |
| ENSMUSG00000027822 | -0.2456842 | 3.99677229 | 0.49962665 | 0.66913119 |
| ENSMUSG00000053012 | -0.2406956 | 5.88486117 | 0.49973764 | 0.66913119 |
| ENSMUSG00000038957 | -0.2407068 | 6.08045039 | 0.49973826 | 0.66913119 |
| ENSMUSG00000075289 | -0.2402214 | 5.51525795 | 0.49986754 | 0.66915159 |
| ENSMUSG00000020740 | 0.23941065 | 6.9087057  | 0.49989474 | 0.66915159 |
| ENSMUSG00000063488 | -0.2488522 | 3.49430373 | 0.49992813 | 0.66915159 |
| ENSMUSG00000027663 | -0.2448199 | 4.22648637 | 0.50014971 | 0.66937023 |
| ENSMUSG00000021786 | 0.25396836 | 3.64580761 | 0.50035173 | 0.66954575 |
| ENSMUSG00000048852 | 0.28971274 | 1.94500155 | 0.50039735 | 0.66954575 |
| ENSMUSG00000068040 | 0.24020312 | 6.08918483 | 0.50074478 | 0.66983219 |
| ENSMUSG00000031729 | -0.2386991 | 7.50566328 | 0.50077976 | 0.66983219 |
| ENSMUSG00000056050 | -0.2386367 | 7.4785191  | 0.50078624 | 0.66983219 |

|                    |            |            |            |            |
|--------------------|------------|------------|------------|------------|
| ENSMUSG00000029782 | -0.2398276 | 6.13273549 | 0.50094163 | 0.66996208 |
| ENSMUSG00000050002 | 0.24240604 | 4.87700769 | 0.50125826 | 0.67026114 |
| ENSMUSG00000029536 | -0.2456283 | 4.08449608 | 0.50128186 | 0.67026114 |
| ENSMUSG00000093483 | 0.2902774  | 1.22483687 | 0.50135675 | 0.6702833  |
| ENSMUSG00000023921 | -0.2415222 | 5.05653045 | 0.50160493 | 0.67053712 |
| ENSMUSG00000074578 | -0.2389892 | 6.36785286 | 0.50175775 | 0.67066342 |
| ENSMUSG00000021177 | 0.24420403 | 4.35874976 | 0.50210011 | 0.67104298 |
| ENSMUSG00000032279 | -0.2403699 | 5.52064171 | 0.50224996 | 0.67116523 |
| ENSMUSG00000063785 | -0.2385205 | 6.61073638 | 0.50247706 | 0.67120763 |
| ENSMUSG00000006021 | 0.25069884 | 3.88128097 | 0.50253551 | 0.67120763 |
| ENSMUSG00000006732 | 0.24928244 | 3.72263932 | 0.50253684 | 0.67120763 |
| ENSMUSG00000015340 | -0.2370628 | 9.65685126 | 0.50255467 | 0.67120763 |
| ENSMUSG00000001467 | 0.23869709 | 6.11664503 | 0.50257365 | 0.67120763 |
| ENSMUSG00000031392 | 0.23769563 | 7.51976973 | 0.50264938 | 0.67123079 |
| ENSMUSG00000036873 | -0.2440456 | 3.96662201 | 0.50280334 | 0.67134946 |
| ENSMUSG00000048578 | -0.2372719 | 8.15894314 | 0.50285506 | 0.67134946 |
| ENSMUSG00000063049 | -0.2420038 | 4.83697796 | 0.50313657 | 0.67164729 |
| ENSMUSG00000045107 | 0.27297123 | 2.21681232 | 0.50320419 | 0.67165957 |
| ENSMUSG00000038398 | 0.2400393  | 4.4772455  | 0.50327034 | 0.67166987 |
| ENSMUSG00000061787 | -0.2369625 | 8.21374547 | 0.50337528 | 0.67173193 |
| ENSMUSG00000028607 | 0.24653622 | 3.77471215 | 0.50346213 | 0.67176984 |
| ENSMUSG00000057181 | -0.2415801 | 4.61725503 | 0.50362258 | 0.67183286 |
| ENSMUSG00000028495 | -0.236477  | 9.16518726 | 0.5038191  | 0.67183286 |
| ENSMUSG00000050890 | -0.241645  | 4.73660973 | 0.50382206 | 0.67183286 |
| ENSMUSG00000074238 | -0.2398272 | 5.2201588  | 0.5038274  | 0.67183286 |
| ENSMUSG00000005481 | 0.23781948 | 6.34323461 | 0.50385318 | 0.67183286 |
| ENSMUSG00000046034 | 0.23823687 | 6.17756172 | 0.50386003 | 0.67183286 |
| ENSMUSG00000070738 | -0.2362233 | 9.39991167 | 0.50420227 | 0.67216237 |
| ENSMUSG00000095642 | 0.24993014 | 3.64123899 | 0.5042241  | 0.67216237 |
| ENSMUSG00000037111 | -0.2372683 | 6.66701837 | 0.50438746 | 0.67228003 |
| ENSMUSG00000001964 | -0.237829  | 6.11707761 | 0.50442934 | 0.67228003 |
| ENSMUSG00000026425 | 0.23838023 | 5.93080269 | 0.50464696 | 0.67249209 |
| ENSMUSG00000021236 | -0.2368951 | 6.99769142 | 0.50471926 | 0.67251048 |
| ENSMUSG00000041890 | 0.23671422 | 6.90093841 | 0.50491    | 0.67264152 |
| ENSMUSG00000049106 | 0.23748752 | 6.38382072 | 0.50493464 | 0.67264152 |
| ENSMUSG00000084159 | -0.2438305 | 4.07115124 | 0.50517581 | 0.67288481 |
| ENSMUSG00000028295 | -0.2494665 | 3.16564825 | 0.50575043 | 0.67357215 |
| ENSMUSG00000027811 | -0.2644557 | 2.12434478 | 0.50595163 | 0.67376205 |
| ENSMUSG00000071054 | 0.23589392 | 6.9682776  | 0.50640677 | 0.67429003 |
| ENSMUSG00000095285 | 0.24912115 | 3.14093428 | 0.50650619 | 0.6743443  |
| ENSMUSG00000044786 | 0.23481122 | 10.041841  | 0.50664687 | 0.67445348 |
| ENSMUSG00000039568 | 0.2374531  | 5.75083623 | 0.50683598 | 0.6746271  |
| ENSMUSG00000032579 | 0.2511315  | 3.44118591 | 0.50697995 | 0.67470292 |

|                    |            |            |            |            |
|--------------------|------------|------------|------------|------------|
| ENSMUSG00000054263 | -0.2449756 | 3.61435638 | 0.50701033 | 0.67470292 |
| ENSMUSG00000027430 | 0.24587752 | 3.46396181 | 0.50729974 | 0.6750099  |
| ENSMUSG00000071632 | 0.24021257 | 4.41939393 | 0.50738641 | 0.67504709 |
| ENSMUSG00000007458 | -0.2345856 | 8.34793441 | 0.50752218 | 0.67507935 |
| ENSMUSG00000030219 | -0.2576581 | 2.2300734  | 0.50756527 | 0.67507935 |
| ENSMUSG00000018476 | 0.23663235 | 6.29673896 | 0.50758685 | 0.67507935 |
| ENSMUSG00000029640 | -0.2350243 | 6.82832809 | 0.50772395 | 0.67518357 |
| ENSMUSG00000005267 | 0.24062577 | 4.69403117 | 0.50780805 | 0.6752173  |
| ENSMUSG00000003154 | 0.23554225 | 6.47022678 | 0.50794545 | 0.67532187 |
| ENSMUSG00000001440 | -0.2341652 | 8.98497709 | 0.5080656  | 0.6754035  |
| ENSMUSG00000042079 | -0.2341264 | 8.4317712  | 0.50833028 | 0.67567722 |
| ENSMUSG00000031138 | -0.2813942 | 1.42616244 | 0.50864349 | 0.67594734 |
| ENSMUSG00000014980 | -0.2476628 | 3.35980268 | 0.50865111 | 0.67594734 |
| ENSMUSG00000009772 | 0.23453004 | 6.43822097 | 0.5088088  | 0.67607874 |
| ENSMUSG00000038705 | -0.2349334 | 6.38757141 | 0.50893304 | 0.67616566 |
| ENSMUSG00000029338 | 0.23675129 | 5.49970743 | 0.50910052 | 0.67627528 |
| ENSMUSG00000027171 | -0.2409969 | 3.87024438 | 0.50918955 | 0.67627528 |
| ENSMUSG00000025889 | -0.2399575 | 4.65195962 | 0.50919205 | 0.67627528 |
| ENSMUSG00000024841 | -0.2361004 | 5.73828526 | 0.50933815 | 0.67639117 |
| ENSMUSG00000028618 | -0.234146  | 7.1385934  | 0.50946119 | 0.67647642 |
| ENSMUSG00000047146 | 0.25032098 | 3.4283024  | 0.50956113 | 0.67653098 |
| ENSMUSG00000028416 | -0.2352604 | 6.09248555 | 0.50964507 | 0.67656428 |
| ENSMUSG00000024378 | -0.2352778 | 5.8223173  | 0.50971976 | 0.6765853  |
| ENSMUSG00000006715 | -0.2409978 | 4.09925264 | 0.51032253 | 0.67730718 |
| ENSMUSG00000020964 | -0.2335276 | 7.08260493 | 0.5103839  | 0.67731042 |
| ENSMUSG00000022946 | 0.23541554 | 5.71519176 | 0.51135654 | 0.67852285 |
| ENSMUSG00000000171 | 0.234801   | 5.66842965 | 0.51143594 | 0.67854987 |
| ENSMUSG00000025917 | -0.2345772 | 5.76252991 | 0.51152451 | 0.67855456 |
| ENSMUSG00000026617 | -0.2397518 | 4.61123753 | 0.51168298 | 0.67855456 |
| ENSMUSG00000036155 | -0.2342544 | 5.75278467 | 0.51168936 | 0.67855456 |
| ENSMUSG00000039294 | -0.2322932 | 8.92434131 | 0.51170961 | 0.67855456 |
| ENSMUSG00000028879 | -0.2348412 | 5.44246572 | 0.51178116 | 0.67855456 |
| ENSMUSG00000034525 | -0.2324569 | 7.435548   | 0.51179365 | 0.67855456 |
| ENSMUSG00000003037 | 0.23262458 | 7.07999855 | 0.51186347 | 0.67856886 |
| ENSMUSG00000021271 | 0.23653413 | 4.99447721 | 0.51204359 | 0.67872937 |
| ENSMUSG00000048922 | -0.2479372 | 3.0571821  | 0.51225647 | 0.67893326 |
| ENSMUSG00000041515 | 0.23183275 | 8.30946588 | 0.51251488 | 0.67913813 |
| ENSMUSG00000048701 | -0.232816  | 6.47436415 | 0.51252921 | 0.67913813 |
| ENSMUSG00000037474 | -0.2407135 | 4.11055104 | 0.513354   | 0.68015263 |
| ENSMUSG00000048429 | -0.2334963 | 5.88566907 | 0.51357529 | 0.68032956 |
| ENSMUSG00000079445 | 0.23180753 | 5.08393107 | 0.51360591 | 0.68032956 |
| ENSMUSG00000087150 | -0.2447093 | 2.58549437 | 0.5139538  | 0.68057354 |
| ENSMUSG00000032586 | -0.2592779 | 2.2488534  | 0.51397741 | 0.68057354 |

|                    |            |            |            |            |
|--------------------|------------|------------|------------|------------|
| ENSMUSG00000022538 | -0.2323554 | 6.23848144 | 0.51398987 | 0.68057354 |
| ENSMUSG00000039840 | -0.2319441 | 6.23073992 | 0.51402692 | 0.68057354 |
| ENSMUSG00000028099 | 0.23255065 | 6.04794986 | 0.5141297  | 0.68063123 |
| ENSMUSG00000024382 | 0.23328608 | 5.68997609 | 0.51455745 | 0.68111905 |
| ENSMUSG00000022389 | -0.2316495 | 6.03475274 | 0.51477859 | 0.68133332 |
| ENSMUSG00000033222 | -0.2332647 | 5.37152998 | 0.51484078 | 0.68133718 |
| ENSMUSG00000051147 | -0.239055  | 4.15520653 | 0.51494943 | 0.68140251 |
| ENSMUSG00000035776 | -0.2393239 | 3.98079572 | 0.51505635 | 0.68144637 |
| ENSMUSG00000002015 | -0.2310453 | 7.4101893  | 0.51510113 | 0.68144637 |
| ENSMUSG00000031577 | 0.2352982  | 4.61421925 | 0.51543595 | 0.68181084 |
| ENSMUSG00000063015 | -0.2302759 | 7.92142948 | 0.5155314  | 0.68185864 |
| ENSMUSG00000053286 | -0.231587  | 6.35352963 | 0.51583896 | 0.68211282 |
| ENSMUSG00000020659 | -0.2338633 | 5.20153619 | 0.51589072 | 0.68211282 |
| ENSMUSG00000043284 | 0.23837307 | 3.61097755 | 0.5159016  | 0.68211282 |
| ENSMUSG00000027007 | -0.2310691 | 6.24746922 | 0.51620144 | 0.68239847 |
| ENSMUSG00000052214 | -0.2329159 | 5.45139739 | 0.5162666  | 0.68239847 |
| ENSMUSG00000024353 | -0.231434  | 6.26488856 | 0.51629574 | 0.68239847 |
| ENSMUSG00000029998 | 0.23189017 | 5.5693536  | 0.51646046 | 0.68241732 |
| ENSMUSG00000045969 | 0.23126706 | 5.96111117 | 0.51647995 | 0.68241732 |
| ENSMUSG00000035949 | -0.2308239 | 6.34876475 | 0.51653171 | 0.68241732 |
| ENSMUSG00000007050 | -0.2348998 | 4.27177762 | 0.51654747 | 0.68241732 |
| ENSMUSG00000040506 | 0.23099566 | 6.34680535 | 0.51668844 | 0.68244149 |
| ENSMUSG00000045503 | 0.23385037 | 4.97127495 | 0.51673731 | 0.68244149 |
| ENSMUSG00000050627 | -0.2297515 | 7.71088621 | 0.51674386 | 0.68244149 |
| ENSMUSG00000097579 | -0.2589766 | 2.11039441 | 0.51684331 | 0.68249441 |
| ENSMUSG00000003824 | -0.2543877 | 2.34782544 | 0.5169463  | 0.682552   |
| ENSMUSG00000015176 | 0.23035281 | 6.36155481 | 0.51723352 | 0.68285279 |
| ENSMUSG00000032058 | -0.2309543 | 5.92835015 | 0.51730917 | 0.68287425 |
| ENSMUSG00000085603 | -0.232784  | 4.74460494 | 0.51747421 | 0.68301366 |
| ENSMUSG00000024533 | -0.234111  | 4.61211291 | 0.51791061 | 0.6833372  |
| ENSMUSG00000057375 | -0.2307245 | 5.59793597 | 0.51793858 | 0.6833372  |
| ENSMUSG00000032053 | 0.22868283 | 9.21522969 | 0.51796028 | 0.6833372  |
| ENSMUSG00000069089 | -0.2324056 | 4.95485941 | 0.51799241 | 0.6833372  |
| ENSMUSG00000076435 | 0.22969288 | 6.74516843 | 0.51803793 | 0.6833372  |
| ENSMUSG00000006412 | 0.23315249 | 4.65165851 | 0.51807601 | 0.6833372  |
| ENSMUSG00000006304 | -0.2285903 | 8.88334358 | 0.51820188 | 0.68336385 |
| ENSMUSG00000021661 | -0.2334015 | 4.76824684 | 0.51821511 | 0.68336385 |
| ENSMUSG00000026273 | -0.2395004 | 3.70677555 | 0.51830167 | 0.6833996  |
| ENSMUSG00000023026 | -0.2290413 | 7.20225718 | 0.51839235 | 0.68344076 |
| ENSMUSG00000021585 | -0.2286132 | 7.63702182 | 0.51893114 | 0.6840327  |
| ENSMUSG00000029363 | 0.2322779  | 4.64229705 | 0.51896035 | 0.6840327  |
| ENSMUSG00000024667 | 0.26429834 | 2.11998316 | 0.51914028 | 0.68406952 |
| ENSMUSG00000022185 | 0.22816019 | 8.54029757 | 0.51915424 | 0.68406952 |



|                    |            |            |            |            |
|--------------------|------------|------------|------------|------------|
| ENSMUSG0000004040  | 0.22844469 | 7.54929857 | 0.51916681 | 0.68406952 |
| ENSMUSG0000008200  | -0.2278708 | 8.62720385 | 0.51954003 | 0.68448282 |
| ENSMUSG00000038214 | 0.24775443 | 3.11287984 | 0.51974011 | 0.6845792  |
| ENSMUSG00000019966 | 0.32467789 | 1.10393932 | 0.51980931 | 0.6845792  |
| ENSMUSG00000063320 | -0.2595699 | 1.8926627  | 0.51984377 | 0.6845792  |
| ENSMUSG00000032249 | -0.2280466 | 7.9813703  | 0.5198514  | 0.6845792  |
| ENSMUSG00000038909 | -0.228006  | 7.51055008 | 0.52018864 | 0.68485835 |
| ENSMUSG00000029097 | 0.24906242 | 2.79050967 | 0.52020361 | 0.68485835 |
| ENSMUSG00000020514 | 0.24137851 | 3.3612034  | 0.52024211 | 0.68485835 |
| ENSMUSG00000029464 | 0.23375383 | 4.37792414 | 0.52033617 | 0.68490374 |
| ENSMUSG00000025764 | -0.2293979 | 5.76632692 | 0.52055336 | 0.68511116 |
| ENSMUSG00000010914 | -0.2346509 | 3.89676023 | 0.52097941 | 0.6855934  |
| ENSMUSG00000030815 | 0.22841032 | 6.25977105 | 0.5212689  | 0.68589584 |
| ENSMUSG00000029034 | 0.22816332 | 5.49841256 | 0.52196998 | 0.68670647 |
| ENSMUSG00000027255 | 0.2275301  | 6.55140839 | 0.52200445 | 0.68670647 |
| ENSMUSG00000094491 | -0.2741955 | 1.82889387 | 0.52210024 | 0.68675389 |
| ENSMUSG00000037419 | -0.2303073 | 5.31705751 | 0.52227651 | 0.68690715 |
| ENSMUSG00000040374 | -0.2290123 | 4.9338488  | 0.52271654 | 0.68736252 |
| ENSMUSG00000039202 | -0.226709  | 6.99482026 | 0.52274234 | 0.68736252 |
| ENSMUSG00000031304 | 0.22614352 | 8.27422082 | 0.52297587 | 0.68759095 |
| ENSMUSG00000032301 | -0.226996  | 6.55250729 | 0.5235559  | 0.68827482 |
| ENSMUSG00000029028 | 0.2276428  | 5.78295271 | 0.52374672 | 0.68844694 |
| ENSMUSG00000003810 | 0.22829643 | 5.32906836 | 0.52406479 | 0.68878628 |
| ENSMUSG00000052563 | 0.2592145  | 2.33938882 | 0.52451696 | 0.68925785 |
| ENSMUSG00000020515 | -0.2265351 | 6.46988552 | 0.52454351 | 0.68925785 |
| ENSMUSG00000030894 | 0.22598416 | 6.92578801 | 0.52462236 | 0.68928266 |
| ENSMUSG00000025241 | -0.2257511 | 6.39806452 | 0.52477601 | 0.68940575 |
| ENSMUSG00000005804 | -0.2281718 | 5.34248333 | 0.52517591 | 0.68981166 |
| ENSMUSG00000023977 | -0.2250203 | 7.76542936 | 0.52520501 | 0.68981166 |
| ENSMUSG00000056234 | -0.2274802 | 5.54609097 | 0.52526588 | 0.68981278 |
| ENSMUSG00000031796 | -0.2299736 | 4.43758034 | 0.52538619 | 0.68989197 |
| ENSMUSG00000058446 | -0.2251141 | 7.37732708 | 0.52552777 | 0.68999906 |
| ENSMUSG00000063316 | 0.22530858 | 6.84051223 | 0.52570179 | 0.6901487  |
| ENSMUSG00000028992 | 0.24060498 | 2.74199509 | 0.52581759 | 0.6902219  |
| ENSMUSG00000019998 | -0.2252231 | 6.86762024 | 0.52591378 | 0.69026934 |
| ENSMUSG00000087231 | -0.2619246 | 1.48181413 | 0.52629957 | 0.69069683 |
| ENSMUSG00000032412 | -0.2246745 | 6.99227288 | 0.52637094 | 0.69071164 |
| ENSMUSG00000025289 | -0.2290941 | 3.93050072 | 0.5264759  | 0.69077051 |
| ENSMUSG00000026339 | -0.2248574 | 6.86029548 | 0.52663097 | 0.69089511 |
| ENSMUSG00000074918 | -0.2284788 | 4.65580845 | 0.52689567 | 0.69116349 |
| ENSMUSG00000045983 | 0.22378433 | 8.6687453  | 0.52709999 | 0.69123362 |
| ENSMUSG00000061079 | -0.2253724 | 6.17190713 | 0.52713315 | 0.69123362 |
| ENSMUSG00000018322 | 0.2247396  | 6.52825331 | 0.5271604  | 0.69123362 |

|                    |            |            |            |            |
|--------------------|------------|------------|------------|------------|
| ENSMUSG00000038500 | 0.22806872 | 4.82834437 | 0.52718966 | 0.69123362 |
| ENSMUSG00000028479 | 0.22917938 | 4.86285877 | 0.52738935 | 0.69138483 |
| ENSMUSG00000086111 | -0.2328708 | 3.591234   | 0.52742528 | 0.69138483 |
| ENSMUSG00000037913 | -0.2281557 | 4.19907108 | 0.52748596 | 0.69138553 |
| ENSMUSG00000021339 | -0.2280772 | 4.56115117 | 0.52785183 | 0.6917862  |
| ENSMUSG00000035007 | 0.22646562 | 4.75807874 | 0.52809583 | 0.69202708 |
| ENSMUSG00000021697 | 0.25777171 | 2.21035762 | 0.52821533 | 0.6920367  |
| ENSMUSG00000035953 | -0.2236221 | 7.44680259 | 0.52822358 | 0.6920367  |
| ENSMUSG00000044148 | -0.2248561 | 6.01695832 | 0.52855574 | 0.69226779 |
| ENSMUSG00000020612 | -0.2231186 | 8.27082233 | 0.52859906 | 0.69226779 |
| ENSMUSG00000004896 | 0.2256853  | 5.51792601 | 0.52860263 | 0.69226779 |
| ENSMUSG00000029415 | -0.2239315 | 6.59004148 | 0.52867012 | 0.69226779 |
| ENSMUSG00000024413 | -0.2241753 | 6.1832582  | 0.52872695 | 0.69226779 |
| ENSMUSG00000020585 | -0.2233345 | 7.23766181 | 0.52876131 | 0.69226779 |
| ENSMUSG00000097403 | 0.27046688 | 1.23543581 | 0.5289645  | 0.69245495 |
| ENSMUSG00000032883 | -0.2277664 | 4.92786286 | 0.52927912 | 0.69278791 |
| ENSMUSG00000054469 | -0.225249  | 5.20811967 | 0.52963569 | 0.69317572 |
| ENSMUSG00000050043 | -0.2242945 | 5.9932247  | 0.53003376 | 0.69361773 |
| ENSMUSG00000005951 | 0.25021737 | 2.7910703  | 0.53026748 | 0.69381962 |
| ENSMUSG00000041329 | 0.25004299 | 2.64290857 | 0.53030876 | 0.69381962 |
| ENSMUSG00000022248 | -0.2292447 | 4.28522559 | 0.53072215 | 0.69428146 |
| ENSMUSG00000021645 | -0.2278671 | 4.51066041 | 0.53094923 | 0.69449948 |
| ENSMUSG00000009733 | 0.24087101 | 3.28068216 | 0.53111531 | 0.69463187 |
| ENSMUSG00000043773 | -0.2327455 | 3.22309705 | 0.53117131 | 0.69463187 |
| ENSMUSG00000053877 | -0.2214634 | 8.51001131 | 0.53124766 | 0.69465269 |
| ENSMUSG00000029802 | -0.2272506 | 4.75934859 | 0.53134413 | 0.69469981 |
| ENSMUSG00000041684 | -0.2315765 | 3.69780392 | 0.53146107 | 0.69477368 |
| ENSMUSG00000033732 | -0.2213678 | 8.5646779  | 0.53171407 | 0.6949975  |
| ENSMUSG00000037266 | -0.2210863 | 9.43900908 | 0.5317532  | 0.6949975  |
| ENSMUSG00000071253 | -0.2259463 | 4.51281913 | 0.5318429  | 0.69503571 |
| ENSMUSG00000025130 | -0.2211642 | 8.33671686 | 0.5320627  | 0.69524392 |
| ENSMUSG00000078765 | 0.22569727 | 4.80475033 | 0.5321826  | 0.69532155 |
| ENSMUSG00000050014 | 0.32098007 | 0.91704622 | 0.53238414 | 0.69550581 |
| ENSMUSG00000031256 | -0.2219285 | 6.44723096 | 0.5324876  | 0.69553957 |
| ENSMUSG00000054400 | -0.227729  | 3.90501689 | 0.53253099 | 0.69553957 |
| ENSMUSG00000032435 | -0.222709  | 6.08582301 | 0.53269936 | 0.69560154 |
| ENSMUSG00000033669 | 0.22471542 | 4.79737875 | 0.53269947 | 0.69560154 |
| ENSMUSG00000072919 | -0.2308599 | 3.40244998 | 0.53289337 | 0.6957757  |
| ENSMUSG00000029408 | 0.28152661 | 1.5261974  | 0.5330366  | 0.69586253 |
| ENSMUSG00000034826 | -0.2233365 | 5.58196996 | 0.53308094 | 0.69586253 |
| ENSMUSG00000031938 | 0.23579365 | 3.63161432 | 0.53320365 | 0.69589542 |
| ENSMUSG00000030726 | -0.2219979 | 6.24615628 | 0.53331742 | 0.69589542 |
| ENSMUSG00000035181 | 0.22489732 | 5.2660073  | 0.53343367 | 0.69589542 |

|                    |            |            |            |            |
|--------------------|------------|------------|------------|------------|
| ENSMUSG00000057421 | -0.2210562 | 6.72222307 | 0.53344727 | 0.69589542 |
| ENSMUSG00000031684 | -0.2249424 | 4.81845811 | 0.53345355 | 0.69589542 |
| ENSMUSG00000026577 | -0.224339  | 4.92250685 | 0.53346938 | 0.69589542 |
| ENSMUSG00000021496 | 0.24189768 | 2.58495606 | 0.53364156 | 0.69604104 |
| ENSMUSG00000030315 | -0.2237949 | 5.0173683  | 0.533915   | 0.69631869 |
| ENSMUSG00000021124 | -0.2221727 | 5.71632465 | 0.53399145 | 0.69633938 |
| ENSMUSG00000040236 | 0.22213877 | 5.35657367 | 0.53437768 | 0.69676399 |
| ENSMUSG00000029461 | -0.2209127 | 6.27360225 | 0.53463223 | 0.69699013 |
| ENSMUSG00000032641 | 0.25786868 | 2.17535617 | 0.53467238 | 0.69699013 |
| ENSMUSG00000008435 | 0.22790926 | 4.00822397 | 0.53485605 | 0.69715051 |
| ENSMUSG00000022401 | -0.2225652 | 5.13708719 | 0.53501982 | 0.6972849  |
| ENSMUSG00000086894 | 0.26316791 | 1.61282116 | 0.53614965 | 0.69859466 |
| ENSMUSG00000020451 | 0.22029372 | 6.22555671 | 0.53618146 | 0.69859466 |
| ENSMUSG00000022450 | -0.2220257 | 5.38672385 | 0.53620711 | 0.69859466 |
| ENSMUSG00000036764 | 0.25954584 | 1.53741753 | 0.53633866 | 0.69868682 |
| ENSMUSG00000078515 | -0.2195976 | 6.67983107 | 0.53644493 | 0.69868682 |
| ENSMUSG00000036693 | -0.2201085 | 6.11868409 | 0.53646019 | 0.69868682 |
| ENSMUSG00000024754 | -0.2219426 | 4.45587636 | 0.53663078 | 0.69870054 |
| ENSMUSG00000035770 | -0.2197169 | 6.51645683 | 0.5367042  | 0.69870054 |
| ENSMUSG00000035439 | 0.22501361 | 4.24775986 | 0.53670815 | 0.69870054 |
| ENSMUSG00000020027 | 0.30417884 | 1.35823258 | 0.53671386 | 0.69870054 |
| ENSMUSG00000024480 | -0.2321377 | 2.91068782 | 0.53688787 | 0.69884793 |
| ENSMUSG00000028967 | 0.22368237 | 4.39166475 | 0.53697572 | 0.69888315 |
| ENSMUSG00000055923 | -0.22047   | 5.12986587 | 0.53742005 | 0.69938225 |
| ENSMUSG00000024548 | -0.2189764 | 6.33809345 | 0.53765885 | 0.69956083 |
| ENSMUSG00000066148 | -0.2200441 | 5.96259142 | 0.53768597 | 0.69956083 |
| ENSMUSG00000026880 | 0.21914933 | 6.57336667 | 0.53773985 | 0.69956083 |
| ENSMUSG00000005968 | -0.2495814 | 2.38853267 | 0.53792631 | 0.69972422 |
| ENSMUSG00000001120 | 0.25899026 | 1.90803593 | 0.53801822 | 0.69976459 |
| ENSMUSG00000014959 | -0.2187367 | 6.74262738 | 0.53835377 | 0.7000938  |
| ENSMUSG00000022329 | -0.2271888 | 3.44472326 | 0.53839314 | 0.7000938  |
| ENSMUSG00000060802 | -0.2173424 | 10.9792328 | 0.53860934 | 0.70029571 |
| ENSMUSG00000031532 | 0.2189363  | 6.47528078 | 0.53868655 | 0.70031689 |
| ENSMUSG00000040213 | -0.236831  | 2.98144499 | 0.53910622 | 0.70078322 |
| ENSMUSG00000025231 | 0.2198505  | 5.65096586 | 0.53920852 | 0.70083694 |
| ENSMUSG00000029234 | -0.2205937 | 5.01240538 | 0.53938287 | 0.7009843  |
| ENSMUSG00000051238 | -0.2440284 | 2.34525228 | 0.54007545 | 0.70180503 |
| ENSMUSG00000052949 | -0.2189394 | 4.89677092 | 0.54022386 | 0.7018744  |
| ENSMUSG00000028651 | 0.220378   | 4.67016851 | 0.54025095 | 0.7018744  |
| ENSMUSG00000020705 | -0.2168621 | 7.68533234 | 0.54046341 | 0.70207107 |
| ENSMUSG00000022231 | -0.2220917 | 4.08311316 | 0.54060771 | 0.70217916 |
| ENSMUSG00000019969 | 0.21722446 | 6.52148525 | 0.54082208 | 0.70232708 |
| ENSMUSG00000056687 | -0.230512  | 2.72331772 | 0.54089619 | 0.70232708 |

|                    |            |            |            |            |
|--------------------|------------|------------|------------|------------|
| ENSMUSG00000029642 | -0.2182475 | 6.14766356 | 0.54090488 | 0.70232708 |
| ENSMUSG00000002635 | 0.2220259  | 4.0315994  | 0.54105761 | 0.70244604 |
| ENSMUSG00000039354 | 0.21894692 | 5.47460902 | 0.54111939 | 0.70244691 |
| ENSMUSG00000024404 | -0.2167646 | 7.1535855  | 0.54118286 | 0.70244998 |
| ENSMUSG00000021298 | 0.21665498 | 7.17017387 | 0.54137075 | 0.70261441 |
| ENSMUSG00000042757 | 0.23621912 | 2.65663131 | 0.54144791 | 0.70261441 |
| ENSMUSG00000028437 | -0.2174138 | 6.40063228 | 0.54151711 | 0.70261441 |
| ENSMUSG00000004233 | -0.2210474 | 4.24959945 | 0.54155404 | 0.70261441 |
| ENSMUSG00000021115 | -0.2173273 | 5.92542695 | 0.5418597  | 0.70283402 |
| ENSMUSG00000029916 | -0.2216273 | 4.27752164 | 0.5418646  | 0.70283402 |
| ENSMUSG00000031568 | -0.222312  | 4.49732049 | 0.54191163 | 0.70283402 |
| ENSMUSG00000029454 | -0.2175149 | 6.12054958 | 0.54198666 | 0.70283402 |
| ENSMUSG00000032218 | 0.22417644 | 3.98774738 | 0.54204873 | 0.70283402 |
| ENSMUSG00000021598 | 0.22065211 | 4.47777131 | 0.54209724 | 0.70283402 |
| ENSMUSG00000097039 | -0.22595   | 3.64293555 | 0.5421513  | 0.70283402 |
| ENSMUSG00000027428 | -0.2257167 | 3.43619102 | 0.542214   | 0.70283603 |
| ENSMUSG00000048486 | -0.2307837 | 3.19426793 | 0.54228308 | 0.70284632 |
| ENSMUSG00000005510 | -0.2184325 | 5.47105771 | 0.54247447 | 0.7029469  |
| ENSMUSG00000030982 | 0.21680364 | 6.27514961 | 0.54249133 | 0.7029469  |
| ENSMUSG00000053094 | -0.2168794 | 6.21766073 | 0.54254414 | 0.7029469  |
| ENSMUSG00000026786 | -0.2157656 | 7.39306346 | 0.54265478 | 0.70301102 |
| ENSMUSG00000054115 | -0.2214531 | 3.66463992 | 0.54277206 | 0.7030837  |
| ENSMUSG00000020457 | -0.2163498 | 6.23391287 | 0.54313686 | 0.70347698 |
| ENSMUSG00000031711 | -0.2179566 | 5.41134057 | 0.54328008 | 0.7035832  |
| ENSMUSG00000046879 | -0.2157899 | 7.08671302 | 0.54362478 | 0.70395031 |
| ENSMUSG00000043067 | 0.2177305  | 5.50500984 | 0.54390461 | 0.70418234 |
| ENSMUSG00000057506 | -0.218064  | 5.24989129 | 0.54396009 | 0.70418234 |
| ENSMUSG00000024258 | 0.22379801 | 3.78308096 | 0.54399658 | 0.70418234 |
| ENSMUSG00000039934 | 0.21716589 | 5.8061447  | 0.54404901 | 0.70418234 |
| ENSMUSG00000020271 | -0.2158139 | 6.27059371 | 0.54442978 | 0.70459585 |
| ENSMUSG00000000605 | -0.2146442 | 6.82179036 | 0.54543113 | 0.70580255 |
| ENSMUSG00000031666 | -0.2144449 | 7.16699426 | 0.54548498 | 0.70580255 |
| ENSMUSG00000060798 | -0.2421577 | 1.92025248 | 0.54561318 | 0.70588897 |
| ENSMUSG00000029062 | -0.2137883 | 8.01761115 | 0.54603258 | 0.70635207 |
| ENSMUSG00000028191 | 0.21433695 | 6.80437878 | 0.54618462 | 0.70646924 |
| ENSMUSG00000015714 | -0.21369   | 7.79655259 | 0.5464576  | 0.70674281 |
| ENSMUSG00000005054 | -0.2199926 | 4.40314198 | 0.54668849 | 0.70696189 |
| ENSMUSG00000014177 | -0.2185061 | 4.72335678 | 0.54713353 | 0.70745781 |
| ENSMUSG00000057738 | 0.21303232 | 8.62712105 | 0.54731284 | 0.70749826 |
| ENSMUSG00000019768 | -0.2266794 | 3.04004258 | 0.54734557 | 0.70749826 |
| ENSMUSG00000027429 | -0.2144247 | 6.32564928 | 0.54734946 | 0.70749826 |
| ENSMUSG00000004070 | -0.2149204 | 5.84258045 | 0.54748224 | 0.70759033 |
| ENSMUSG00000036850 | 0.22531014 | 3.45846026 | 0.54764286 | 0.70771834 |

|                    |            |            |            |            |
|--------------------|------------|------------|------------|------------|
| ENSMUSG00000030309 | -0.2191704 | 3.9921993  | 0.54783385 | 0.70786811 |
| ENSMUSG00000039318 | -0.2134677 | 6.44058975 | 0.54790611 | 0.70786811 |
| ENSMUSG00000036257 | -0.2138604 | 6.3062671  | 0.54797657 | 0.70786811 |
| ENSMUSG00000021391 | -0.3171    | 0.69546855 | 0.54833808 | 0.70786811 |
| ENSMUSG00000034591 | -0.2150726 | 5.08823612 | 0.54835313 | 0.70786811 |
| ENSMUSG00000019863 | -0.2150435 | 5.22400945 | 0.54836823 | 0.70786811 |
| ENSMUSG00000022604 | -0.2150717 | 5.26544603 | 0.54839051 | 0.70786811 |
| ENSMUSG00000026240 | 0.21836806 | 4.45574515 | 0.54844064 | 0.70786811 |
| ENSMUSG00000028622 | -0.213962  | 5.80916307 | 0.54847264 | 0.70786811 |
| ENSMUSG00000027852 | -0.2128473 | 7.20786681 | 0.54849351 | 0.70786811 |
| ENSMUSG00000005973 | 0.22325089 | 3.526897   | 0.54858635 | 0.70786811 |
| ENSMUSG00000022787 | 0.226538   | 3.13848087 | 0.54860282 | 0.70786811 |
| ENSMUSG00000032434 | 0.21251752 | 7.63242096 | 0.54869812 | 0.70786811 |
| ENSMUSG00000030876 | -0.2167462 | 4.39795942 | 0.54871186 | 0.70786811 |
| ENSMUSG00000051674 | -0.2202523 | 3.76172356 | 0.54874284 | 0.70786811 |
| ENSMUSG00000026069 | 0.23005129 | 2.82188443 | 0.54874404 | 0.70786811 |
| ENSMUSG00000049792 | 0.21680092 | 4.3885658  | 0.54886341 | 0.70794265 |
| ENSMUSG00000042320 | -0.2413931 | 1.57790832 | 0.54912188 | 0.70819657 |
| ENSMUSG00000001158 | -0.2162079 | 4.74921598 | 0.54924815 | 0.70827995 |
| ENSMUSG00000022437 | 0.21323259 | 6.07650519 | 0.54987353 | 0.70885843 |
| ENSMUSG00000032042 | -0.212108  | 7.43883011 | 0.54987911 | 0.70885843 |
| ENSMUSG00000095832 | 0.21381358 | 5.93029628 | 0.54988174 | 0.70885843 |
| ENSMUSG00000073968 | -0.2178571 | 4.14742772 | 0.55004736 | 0.70898546 |
| ENSMUSG00000055760 | -0.2337614 | 2.92959704 | 0.55010364 | 0.70898546 |
| ENSMUSG00000023106 | -0.2133814 | 5.646851   | 0.55043274 | 0.70933009 |
| ENSMUSG00000033961 | -0.218335  | 3.6363833  | 0.55050633 | 0.70934539 |
| ENSMUSG00000019826 | 0.21470641 | 5.15133519 | 0.55095948 | 0.70984972 |
| ENSMUSG00000027998 | -0.2127857 | 6.00738759 | 0.55114642 | 0.71001099 |
| ENSMUSG00000026627 | 0.21438236 | 5.195998   | 0.55123173 | 0.71004132 |
| ENSMUSG00000078202 | 0.26266828 | 1.88307408 | 0.5513522  | 0.71007225 |
| ENSMUSG00000056305 | -0.2125651 | 6.23008724 | 0.55138759 | 0.71007225 |
| ENSMUSG00000030019 | 0.2138529  | 5.13483721 | 0.55144106 | 0.71007225 |
| ENSMUSG00000006494 | -0.2114116 | 6.27564387 | 0.55152514 | 0.71010097 |
| ENSMUSG00000029127 | 0.22543075 | 3.28364802 | 0.55206455 | 0.71071587 |
| ENSMUSG00000085175 | -0.2432332 | 0.86323596 | 0.5524873  | 0.71118047 |
| ENSMUSG00000025871 | -0.2118474 | 6.06913051 | 0.55259696 | 0.71124198 |
| ENSMUSG00000050088 | -0.2146609 | 4.53595788 | 0.55277438 | 0.71135973 |
| ENSMUSG00000051355 | -0.2220695 | 3.54164397 | 0.55281222 | 0.71135973 |
| ENSMUSG00000022377 | -0.2105923 | 6.90233543 | 0.55294964 | 0.71145692 |
| ENSMUSG00000040621 | 0.2530745  | 1.75780963 | 0.55315351 | 0.71163958 |
| ENSMUSG00000025602 | 0.23850501 | 2.80523727 | 0.55333888 | 0.71171874 |
| ENSMUSG00000037725 | -0.2275977 | 2.80375751 | 0.55333888 | 0.71171874 |
| ENSMUSG00000000194 | 0.21103446 | 6.225688   | 0.55365979 | 0.71205183 |

|                    |            |            |            |            |
|--------------------|------------|------------|------------|------------|
| ENSMUSG00000031634 | -0.2131923 | 5.05193779 | 0.55383985 | 0.71220373 |
| ENSMUSG00000030592 | 0.23523927 | 3.04078655 | 0.55482344 | 0.71336177 |
| ENSMUSG00000083161 | -0.2141436 | 3.66893805 | 0.55486451 | 0.71336177 |
| ENSMUSG00000071454 | 0.21851578 | 4.26152919 | 0.5550085  | 0.71346709 |
| ENSMUSG00000029208 | -0.2101447 | 5.94223665 | 0.55518738 | 0.71361724 |
| ENSMUSG00000049184 | -0.2554691 | 1.6061551  | 0.55526882 | 0.71364212 |
| ENSMUSG00000054519 | -0.216207  | 2.84400833 | 0.55549177 | 0.71382385 |
| ENSMUSG00000020321 | -0.2091345 | 7.40987577 | 0.55553442 | 0.71382385 |
| ENSMUSG00000030871 | 0.21177161 | 4.50779225 | 0.55606128 | 0.71430366 |
| ENSMUSG00000030934 | -0.2089818 | 6.99979385 | 0.55613448 | 0.71430366 |
| ENSMUSG00000032458 | -0.2086338 | 7.64618875 | 0.55618228 | 0.71430366 |
| ENSMUSG00000035666 | -0.2109899 | 5.49166026 | 0.55625616 | 0.71430366 |
| ENSMUSG00000027131 | -0.216046  | 4.39081908 | 0.55628044 | 0.71430366 |
| ENSMUSG00000032556 | 0.2169281  | 3.81000134 | 0.55628067 | 0.71430366 |
| ENSMUSG00000024683 | -0.2155464 | 4.43861431 | 0.55636953 | 0.71433797 |
| ENSMUSG00000022718 | -0.2095623 | 5.90592918 | 0.55682813 | 0.71484692 |
| ENSMUSG00000034116 | 0.20790082 | 8.04371735 | 0.55690609 | 0.71486717 |
| ENSMUSG00000043290 | -0.2329533 | 1.68390937 | 0.5570431  | 0.71496321 |
| ENSMUSG00000021000 | -0.207973  | 7.54838892 | 0.5572469  | 0.71511915 |
| ENSMUSG00000015804 | -0.2103849 | 5.05482588 | 0.557293   | 0.71511915 |
| ENSMUSG00000019699 | -0.2080879 | 7.21719765 | 0.55735124 | 0.71511915 |
| ENSMUSG00000022500 | 0.21249816 | 4.94730548 | 0.55770163 | 0.71548284 |
| ENSMUSG00000041540 | 0.23815291 | 1.44726877 | 0.55778659 | 0.71548284 |
| ENSMUSG00000024843 | 0.21019245 | 6.41583242 | 0.55782142 | 0.71548284 |
| ENSMUSG00000045409 | -0.207871  | 7.19655716 | 0.55789251 | 0.71549419 |
| ENSMUSG00000032946 | 0.20713359 | 8.20229514 | 0.55852545 | 0.71617936 |
| ENSMUSG00000050822 | 0.26035368 | 1.15333235 | 0.55855136 | 0.71617936 |
| ENSMUSG00000013160 | 0.20813701 | 6.3441115  | 0.55880847 | 0.71642911 |
| ENSMUSG00000034453 | -0.2077541 | 6.35149264 | 0.55928451 | 0.71693383 |
| ENSMUSG00000036160 | 0.20868507 | 5.57576663 | 0.55936879 | 0.71693383 |
| ENSMUSG00000020328 | -0.2167921 | 3.80107777 | 0.55938926 | 0.71693383 |
| ENSMUSG00000037007 | -0.2103201 | 4.6689928  | 0.55945196 | 0.71693425 |
| ENSMUSG00000034321 | -0.2132727 | 4.25163253 | 0.55957457 | 0.71694551 |
| ENSMUSG00000038388 | -0.2091933 | 5.43592437 | 0.55958548 | 0.71694551 |
| ENSMUSG00000033486 | -0.2392302 | 1.97835854 | 0.56012388 | 0.71755534 |
| ENSMUSG00000033769 | -0.2091739 | 5.15331216 | 0.56020976 | 0.71758537 |
| ENSMUSG00000039087 | -0.2070057 | 5.97537844 | 0.56045065 | 0.71781395 |
| ENSMUSG00000039680 | -0.2292172 | 2.94015155 | 0.56070349 | 0.71794875 |
| ENSMUSG00000035202 | -0.2057073 | 10.0539223 | 0.56073566 | 0.71794875 |
| ENSMUSG00000020883 | -0.2062987 | 6.95143547 | 0.56075662 | 0.71794875 |
| ENSMUSG00000043909 | -0.2066198 | 6.77524595 | 0.56080573 | 0.71794875 |
| ENSMUSG00000028634 | 0.21598449 | 3.96474496 | 0.56092218 | 0.71795286 |
| ENSMUSG00000027374 | 0.21097487 | 4.38554658 | 0.56093385 | 0.71795286 |

|                    |            |            |            |            |
|--------------------|------------|------------|------------|------------|
| ENSMUSG00000029050 | 0.20870891 | 5.41692467 | 0.56154009 | 0.71859096 |
| ENSMUSG00000031950 | -0.2067469 | 6.25872603 | 0.56155742 | 0.71859096 |
| ENSMUSG00000049775 | -0.2051109 | 10.6339332 | 0.56170541 | 0.71870032 |
| ENSMUSG00000095595 | -0.2095886 | 4.66965732 | 0.56184532 | 0.71879933 |
| ENSMUSG00000081400 | -0.3189208 | 0.92310079 | 0.56212486 | 0.71893499 |
| ENSMUSG00000023052 | 0.29392822 | 0.91020026 | 0.56212486 | 0.71893499 |
| ENSMUSG00000027774 | -0.2075952 | 5.70479145 | 0.56213899 | 0.71893499 |
| ENSMUSG00000025791 | 0.21215628 | 4.43770294 | 0.56222158 | 0.71896063 |
| ENSMUSG00000072620 | 0.20508638 | 7.84987042 | 0.56239312 | 0.71909999 |
| ENSMUSG00000039130 | 0.21010053 | 4.66957856 | 0.56245908 | 0.71910434 |
| ENSMUSG00000004099 | 0.2055461  | 6.90234264 | 0.56266098 | 0.71926971 |
| ENSMUSG00000098488 | 0.25914332 | 1.36345601 | 0.56276072 | 0.71926971 |
| ENSMUSG00000035392 | 0.20998847 | 4.95026114 | 0.56277615 | 0.71926971 |
| ENSMUSG00000013846 | 0.20476293 | 8.11407582 | 0.56299191 | 0.71946548 |
| ENSMUSG00000019143 | -0.2061661 | 6.08933582 | 0.56305965 | 0.71947206 |
| ENSMUSG00000029610 | 0.21639949 | 3.47077165 | 0.56335669 | 0.71977161 |
| ENSMUSG00000097574 | -0.2384471 | 2.0541664  | 0.56350562 | 0.71988187 |
| ENSMUSG00000033430 | -0.2092852 | 4.84836503 | 0.5635847  | 0.71990289 |
| ENSMUSG00000029513 | 0.20670275 | 5.6439533  | 0.56378337 | 0.72000891 |
| ENSMUSG00000020680 | -0.2045326 | 7.55617009 | 0.56379297 | 0.72000891 |
| ENSMUSG00000029016 | 0.20718369 | 5.47089102 | 0.56385717 | 0.7200109  |
| ENSMUSG00000022106 | -0.2078215 | 4.62349375 | 0.56398521 | 0.72009441 |
| ENSMUSG00000022174 | 0.20696701 | 5.89061142 | 0.56407628 | 0.7201307  |
| ENSMUSG00000026012 | 0.22158827 | 3.56614548 | 0.56473945 | 0.72089728 |
| ENSMUSG00000050945 | -0.2162102 | 3.35460669 | 0.56509806 | 0.72120905 |
| ENSMUSG00000004568 | 0.20378148 | 8.11431994 | 0.56510917 | 0.72120905 |
| ENSMUSG00000010025 | -0.2045882 | 6.54715205 | 0.56518166 | 0.72122149 |
| ENSMUSG00000044906 | -0.2075539 | 4.6446468  | 0.56535999 | 0.72123999 |
| ENSMUSG00000031101 | 0.20341646 | 8.36198022 | 0.5653773  | 0.72123999 |
| ENSMUSG00000016510 | 0.20925036 | 4.14983361 | 0.56538439 | 0.72123999 |
| ENSMUSG00000005682 | 0.20371313 | 7.09347056 | 0.56604612 | 0.72200401 |
| ENSMUSG00000034445 | 0.20350637 | 6.96104643 | 0.56619708 | 0.72211643 |
| ENSMUSG00000031672 | 0.20426164 | 5.9933336  | 0.56659444 | 0.72252645 |
| ENSMUSG00000027424 | 0.21452936 | 3.59514674 | 0.56664427 | 0.72252645 |
| ENSMUSG00000020375 | -0.2041399 | 6.08826519 | 0.56675995 | 0.72259379 |
| ENSMUSG00000025077 | 0.2225096  | 3.14747239 | 0.56705574 | 0.72289074 |
| ENSMUSG00000078676 | 0.20304005 | 6.95465973 | 0.56725135 | 0.72293472 |
| ENSMUSG00000058793 | -0.2025342 | 8.05987786 | 0.56728347 | 0.72293472 |
| ENSMUSG00000021018 | -0.2119115 | 4.09693795 | 0.56732643 | 0.72293472 |
| ENSMUSG00000040771 | -0.204758  | 5.73304839 | 0.56734181 | 0.72293472 |
| ENSMUSG00000059866 | 0.20680991 | 4.86124414 | 0.5676899  | 0.7232981  |
| ENSMUSG00000031698 | -0.218799  | 3.36592673 | 0.56787264 | 0.72345073 |
| ENSMUSG00000006720 | 0.23943682 | 2.40158667 | 0.56822313 | 0.72373683 |

|                    |            |            |            |            |
|--------------------|------------|------------|------------|------------|
| ENSMUSG00000056185 | 0.22523043 | 2.41112907 | 0.56822313 | 0.72373683 |
| ENSMUSG00000034333 | -0.2049306 | 5.14695035 | 0.56853097 | 0.72404869 |
| ENSMUSG00000030879 | 0.21125473 | 3.92671736 | 0.56866915 | 0.7240678  |
| ENSMUSG00000015702 | -0.2189019 | 2.1405214  | 0.56867196 | 0.7240678  |
| ENSMUSG00000021636 | -0.2100323 | 4.38970822 | 0.56887441 | 0.72418646 |
| ENSMUSG00000022842 | 0.24470918 | 1.58417857 | 0.56889114 | 0.72418646 |
| ENSMUSG00000030189 | 0.20516722 | 5.1622037  | 0.56904463 | 0.72421652 |
| ENSMUSG00000034832 | 0.20282115 | 6.75339766 | 0.56923309 | 0.72421652 |
| ENSMUSG00000031984 | -0.2068826 | 4.53215304 | 0.56923314 | 0.72421652 |
| ENSMUSG00000039842 | -0.2043689 | 4.53212916 | 0.56923314 | 0.72421652 |
| ENSMUSG00000020423 | 0.20121887 | 9.70372053 | 0.56926056 | 0.72421652 |
| ENSMUSG00000085208 | -0.2035126 | 5.86745465 | 0.56929277 | 0.72421652 |
| ENSMUSG00000021224 | 0.20529884 | 4.92895457 | 0.56956041 | 0.72440076 |
| ENSMUSG00000022003 | 0.20682853 | 4.25024963 | 0.56960686 | 0.72440076 |
| ENSMUSG00000036435 | -0.202246  | 6.085557   | 0.56962666 | 0.72440076 |
| ENSMUSG00000024118 | 0.22481774 | 2.90539976 | 0.56969275 | 0.72440467 |
| ENSMUSG00000045767 | -0.201794  | 6.78193622 | 0.56992598 | 0.72462108 |
| ENSMUSG00000068394 | -0.2033718 | 5.30227194 | 0.57007954 | 0.72473615 |
| ENSMUSG00000020732 | 0.21407927 | 3.7718194  | 0.57080112 | 0.72557324 |
| ENSMUSG00000040652 | 0.20498291 | 4.54170194 | 0.57129644 | 0.72612258 |
| ENSMUSG00000090210 | 0.21413728 | 2.56373902 | 0.57147697 | 0.72627172 |
| ENSMUSG00000067341 | -0.2004554 | 7.50016122 | 0.57165172 | 0.7264135  |
| ENSMUSG00000058444 | -0.2041762 | 4.5191846  | 0.5718991  | 0.72664753 |
| ENSMUSG00000030697 | 0.20067801 | 6.50376452 | 0.57233329 | 0.72711883 |
| ENSMUSG00000052298 | -0.199919  | 7.94302176 | 0.57246856 | 0.7272103  |
| ENSMUSG00000001100 | 0.20316906 | 4.77921485 | 0.5725739  | 0.72726375 |
| ENSMUSG00000025134 | -0.2017407 | 5.54723683 | 0.5727315  | 0.72738356 |
| ENSMUSG00000033790 | -0.2010891 | 5.79858906 | 0.57292393 | 0.72754757 |
| ENSMUSG00000086914 | -0.2565911 | 1.07567143 | 0.57301765 | 0.7275862  |
| ENSMUSG00000091405 | -0.2386066 | 1.9744998  | 0.57318027 | 0.7277123  |
| ENSMUSG00000062352 | -0.2038796 | 4.9171     | 0.57329516 | 0.72771341 |
| ENSMUSG00000055897 | -0.2012586 | 4.76813125 | 0.57340358 | 0.72771341 |
| ENSMUSG00000031146 | 0.20152436 | 5.31900283 | 0.57342313 | 0.72771341 |
| ENSMUSG00000059363 | 0.21521643 | 2.77403065 | 0.57343437 | 0.72771341 |
| ENSMUSG00000062054 | 0.20369841 | 4.59377802 | 0.57371751 | 0.72799235 |
| ENSMUSG00000055991 | 0.20832847 | 3.89435463 | 0.5738303  | 0.72805511 |
| ENSMUSG00000020415 | -0.201032  | 5.54113483 | 0.57399175 | 0.72812512 |
| ENSMUSG00000076570 | -0.2492636 | 1.49745847 | 0.57401216 | 0.72812512 |
| ENSMUSG00000060261 | 0.19979647 | 6.65762384 | 0.57412443 | 0.72817877 |
| ENSMUSG00000044442 | -0.2060443 | 3.85657632 | 0.57418115 | 0.72817877 |
| ENSMUSG00000043243 | -0.201051  | 5.45495116 | 0.57446559 | 0.72841873 |
| ENSMUSG00000021371 | -0.200161  | 5.88807313 | 0.5744971  | 0.72841873 |
| ENSMUSG00000036099 | -0.2025073 | 4.44658966 | 0.57458639 | 0.72845159 |



|                    |            |            |            |            |
|--------------------|------------|------------|------------|------------|
| ENSMUSG0000001166  | 0.20485882 | 4.46058515 | 0.5746791  | 0.72845747 |
| ENSMUSG00000029136 | 0.22496516 | 2.38395971 | 0.57472698 | 0.72845747 |
| ENSMUSG00000062590 | 0.21468257 | 2.77788572 | 0.57478907 | 0.72845747 |
| ENSMUSG00000026826 | -0.19904   | 6.57021778 | 0.57491362 | 0.72845747 |
| ENSMUSG00000095682 | -0.2314292 | 1.91024394 | 0.57492079 | 0.72845747 |
| ENSMUSG00000028953 | 0.20029586 | 5.75262712 | 0.57497126 | 0.72845747 |
| ENSMUSG00000051344 | -0.198475  | 7.77340931 | 0.57518    | 0.72861989 |
| ENSMUSG00000035246 | 0.21381675 | 3.15030319 | 0.57522623 | 0.72861989 |
| ENSMUSG00000038437 | 0.19850602 | 7.85275892 | 0.57528975 | 0.72862006 |
| ENSMUSG00000026281 | -0.2007365 | 5.59348652 | 0.57538793 | 0.72864811 |
| ENSMUSG00000058064 | 0.24523441 | 1.31803014 | 0.57543867 | 0.72864811 |
| ENSMUSG00000055044 | 0.2034519  | 4.26135027 | 0.57595957 | 0.72922737 |
| ENSMUSG00000024507 | 0.20157168 | 5.26552522 | 0.57616044 | 0.72940135 |
| ENSMUSG00000037526 | 0.20379503 | 4.08618207 | 0.57636428 | 0.72957905 |
| ENSMUSG00000026288 | 0.19762862 | 8.53830929 | 0.5765283  | 0.72962721 |
| ENSMUSG00000021248 | -0.1979398 | 7.26344978 | 0.57658402 | 0.72962721 |
| ENSMUSG00000040018 | 0.20083324 | 5.16621379 | 0.57665008 | 0.72962721 |
| ENSMUSG00000039523 | 0.2004286  | 5.15622382 | 0.57665621 | 0.72962721 |
| ENSMUSG00000015656 | -0.1972427 | 11.6883348 | 0.57675749 | 0.72967503 |
| ENSMUSG00000029192 | -0.1977749 | 7.66418226 | 0.57684037 | 0.72969957 |
| ENSMUSG00000070282 | -0.2148256 | 1.0991005  | 0.5771204  | 0.72997348 |
| ENSMUSG00000048109 | -0.198941  | 5.98986464 | 0.57732282 | 0.73014917 |
| ENSMUSG00000020143 | -0.1969742 | 9.79807651 | 0.57739408 | 0.73015896 |
| ENSMUSG00000042055 | -0.1981078 | 6.09604736 | 0.57752514 | 0.73017236 |
| ENSMUSG00000017132 | -0.1975237 | 7.44715861 | 0.57753172 | 0.73017236 |
| ENSMUSG00000027710 | -0.1987038 | 5.87359523 | 0.57770741 | 0.73029952 |
| ENSMUSG00000039929 | -0.1990031 | 5.50774644 | 0.57775936 | 0.73029952 |
| ENSMUSG00000020137 | -0.2066004 | 4.18145242 | 0.57797271 | 0.73048358 |
| ENSMUSG00000041977 | 0.1987813  | 5.89794001 | 0.5780761  | 0.73048358 |
| ENSMUSG00000040028 | -0.197773  | 6.89949656 | 0.57809562 | 0.73048358 |
| ENSMUSG00000086725 | -0.2061404 | 2.67128289 | 0.57817345 | 0.73050095 |
| ENSMUSG00000030966 | 0.19822108 | 5.8958767  | 0.57823647 | 0.73050095 |
| ENSMUSG00000024982 | -0.1995471 | 5.3687039  | 0.57831032 | 0.73051397 |
| ENSMUSG00000020737 | 0.1979566  | 6.41075505 | 0.57838157 | 0.7305237  |
| ENSMUSG00000025782 | -0.1998381 | 5.10635195 | 0.57865043 | 0.73078298 |
| ENSMUSG00000030138 | -0.1969308 | 7.3691823  | 0.57873194 | 0.73080563 |
| ENSMUSG00000022179 | 0.21194218 | 2.24872484 | 0.5791723  | 0.73124558 |
| ENSMUSG00000020413 | -0.1988891 | 5.37754603 | 0.57920757 | 0.73124558 |
| ENSMUSG00000021998 | -0.1957974 | 11.4694376 | 0.57954196 | 0.73151341 |
| ENSMUSG00000038671 | -0.1969909 | 6.69600074 | 0.57957426 | 0.73151341 |
| ENSMUSG00000065037 | 0.22584855 | 2.67405649 | 0.57961062 | 0.73151341 |
| ENSMUSG00000030979 | -0.1983004 | 5.41233107 | 0.57996029 | 0.73187436 |
| ENSMUSG00000029204 | 0.19646192 | 7.16726073 | 0.58011376 | 0.73198767 |

|                    |            |            |            |            |
|--------------------|------------|------------|------------|------------|
| ENSMUSG00000063281 | -0.1982845 | 5.62839762 | 0.58025002 | 0.73207924 |
| ENSMUSG00000027082 | -0.2111249 | 2.11914063 | 0.58060272 | 0.73244384 |
| ENSMUSG00000001786 | -0.1971909 | 5.69915188 | 0.58085042 | 0.73267591 |
| ENSMUSG00000039067 | 0.19680922 | 5.83264263 | 0.5809144  | 0.73267622 |
| ENSMUSG00000016664 | 0.19678516 | 6.05442456 | 0.58101157 | 0.73271837 |
| ENSMUSG00000078502 | -0.2060671 | 3.10938923 | 0.58125402 | 0.73294372 |
| ENSMUSG00000026727 | -0.196978  | 5.83594687 | 0.58144748 | 0.73310725 |
| ENSMUSG00000005907 | -0.1980011 | 4.91440453 | 0.58229069 | 0.73404977 |
| ENSMUSG00000101892 | 0.21795301 | 2.64284676 | 0.58234638 | 0.73404977 |
| ENSMUSG00000028617 | -0.2014445 | 4.39205277 | 0.58252339 | 0.73404977 |
| ENSMUSG00000030647 | 0.21812686 | 2.76754016 | 0.58265873 | 0.73404977 |
| ENSMUSG00000061758 | 0.19871986 | 4.99632888 | 0.58266407 | 0.73404977 |
| ENSMUSG00000028484 | -0.1949149 | 7.38058833 | 0.58270611 | 0.73404977 |
| ENSMUSG00000005899 | 0.19774236 | 5.29022377 | 0.58271176 | 0.73404977 |
| ENSMUSG00000032392 | 0.20676037 | 3.2941772  | 0.58272067 | 0.73404977 |
| ENSMUSG00000030649 | -0.1974405 | 4.68915962 | 0.58276974 | 0.73404977 |
| ENSMUSG00000045231 | 0.22177226 | 2.84445683 | 0.58283617 | 0.734053   |
| ENSMUSG00000031145 | 0.20301435 | 4.31546735 | 0.58328902 | 0.73454286 |
| ENSMUSG00000030986 | 0.19734997 | 4.60039215 | 0.58370063 | 0.73498069 |
| ENSMUSG00000079197 | 0.1941948  | 7.22180882 | 0.58378733 | 0.73500935 |
| ENSMUSG00000021918 | -0.2044871 | 3.59257082 | 0.58405408 | 0.73526466 |
| ENSMUSG00000024067 | -0.1988723 | 4.42329827 | 0.58432206 | 0.73552147 |
| ENSMUSG00000062861 | -0.1989967 | 3.98517236 | 0.58444319 | 0.73557314 |
| ENSMUSG00000090262 | -0.1998876 | 4.14706488 | 0.58457134 | 0.73557314 |
| ENSMUSG00000018001 | 0.20169978 | 4.23788548 | 0.58463508 | 0.73557314 |
| ENSMUSG00000038072 | 0.19649824 | 5.57357141 | 0.58464929 | 0.73557314 |
| ENSMUSG00000053581 | -0.1942782 | 6.94096599 | 0.58468306 | 0.73557314 |
| ENSMUSG00000048920 | 0.19637427 | 4.71838551 | 0.58476659 | 0.73559772 |
| ENSMUSG00000035759 | -0.2695156 | 1.11544736 | 0.58510366 | 0.7359412  |
| ENSMUSG00000028619 | -0.1957661 | 5.18386568 | 0.58540353 | 0.73623781 |
| ENSMUSG00000025470 | 0.19726303 | 4.24137429 | 0.58561974 | 0.73642916 |
| ENSMUSG00000027495 | -0.1964401 | 4.86668801 | 0.58613919 | 0.73697955 |
| ENSMUSG00000031877 | 0.19718601 | 4.61461797 | 0.58618565 | 0.73697955 |
| ENSMUSG00000003429 | -0.1920596 | 9.90252281 | 0.58698757 | 0.73790706 |
| ENSMUSG00000028907 | -0.1943487 | 5.50710008 | 0.58710964 | 0.7379798  |
| ENSMUSG00000021880 | 0.19297632 | 6.78080589 | 0.58747925 | 0.73836366 |
| ENSMUSG00000025612 | 0.19452106 | 5.76988898 | 0.58762909 | 0.73837947 |
| ENSMUSG00000046223 | 0.19362273 | 5.81664333 | 0.58763874 | 0.73837947 |
| ENSMUSG00000021461 | -0.1960634 | 4.805626   | 0.58768454 | 0.73837947 |
| ENSMUSG00000023147 | 0.20431193 | 3.6104327  | 0.58784544 | 0.73843629 |
| ENSMUSG00000028124 | -0.1946488 | 5.25053795 | 0.58794131 | 0.73843629 |
| ENSMUSG00000031107 | -0.2054355 | 3.51661211 | 0.58797789 | 0.73843629 |
| ENSMUSG00000021277 | 0.19236249 | 7.18176544 | 0.58798672 | 0.73843629 |

|                    |            |            |            |            |
|--------------------|------------|------------|------------|------------|
| ENSMUSG00000022828 | -0.194826  | 5.16861627 | 0.58808646 | 0.73848087 |
| ENSMUSG00000035824 | 0.19258287 | 6.65411098 | 0.58853517 | 0.73892901 |
| ENSMUSG00000075033 | -0.1922969 | 6.84418105 | 0.5885719  | 0.73892901 |
| ENSMUSG00000027324 | 0.20655291 | 3.08231636 | 0.58870304 | 0.7389509  |
| ENSMUSG00000026466 | -0.191485  | 8.08491447 | 0.58871791 | 0.7389509  |
| ENSMUSG00000022451 | -0.1929988 | 5.76503285 | 0.58887194 | 0.73906354 |
| ENSMUSG00000021975 | -0.1938743 | 5.46079648 | 0.5890563  | 0.73916915 |
| ENSMUSG00000049109 | 0.20357095 | 3.34844085 | 0.58914892 | 0.73916915 |
| ENSMUSG00000006445 | -0.2464704 | 1.39019445 | 0.589149   | 0.73916915 |
| ENSMUSG00000031604 | 0.19399953 | 5.3049483  | 0.58938039 | 0.73937876 |
| ENSMUSG00000037905 | 0.19316146 | 5.64922005 | 0.58947756 | 0.73941996 |
| ENSMUSG00000073436 | 0.19807368 | 4.22774025 | 0.58959143 | 0.7394542  |
| ENSMUSG00000020743 | 0.19130452 | 7.3304579  | 0.58963351 | 0.7394542  |
| ENSMUSG00000076666 | 0.20433073 | 2.76311824 | 0.59066199 | 0.74061904 |
| ENSMUSG00000028673 | 0.19095357 | 6.95724621 | 0.5906912  | 0.74061904 |
| ENSMUSG00000026174 | -0.1921233 | 5.75857778 | 0.5908793  | 0.7407183  |
| ENSMUSG00000017615 | -0.1922456 | 5.42851235 | 0.59092498 | 0.7407183  |
| ENSMUSG00000045273 | -0.2214695 | 2.03616961 | 0.59096368 | 0.7407183  |
| ENSMUSG00000041920 | -0.1908062 | 6.46759174 | 0.59116533 | 0.74089026 |
| ENSMUSG00000021738 | -0.1905539 | 6.92492763 | 0.59134204 | 0.74101349 |
| ENSMUSG00000057522 | -0.1902635 | 7.76322947 | 0.59139258 | 0.74101349 |
| ENSMUSG00000017697 | -0.2173409 | 1.76333788 | 0.59166118 | 0.7412189  |
| ENSMUSG00000034566 | -0.1907434 | 6.41192832 | 0.59172436 | 0.7412189  |
| ENSMUSG00000052031 | -0.1955027 | 4.29220815 | 0.59179529 | 0.7412189  |
| ENSMUSG00000013997 | 0.19221258 | 5.08825468 | 0.59181444 | 0.7412189  |
| ENSMUSG00000026664 | -0.1913245 | 5.91695839 | 0.59190735 | 0.7412545  |
| ENSMUSG00000061778 | -0.191756  | 5.26397508 | 0.59208081 | 0.74131468 |
| ENSMUSG00000041530 | -0.1898636 | 7.52743841 | 0.59223688 | 0.74131468 |
| ENSMUSG00000065147 | 0.24918645 | 1.48833577 | 0.59224832 | 0.74131468 |
| ENSMUSG00000061374 | -0.1937662 | 4.80299679 | 0.59225051 | 0.74131468 |
| ENSMUSG00000021905 | -0.1932978 | 4.69757007 | 0.59227786 | 0.74131468 |
| ENSMUSG00000026277 | 0.18963122 | 7.05881473 | 0.59262899 | 0.74167341 |
| ENSMUSG00000009905 | -0.1942336 | 4.48146784 | 0.59272306 | 0.74171039 |
| ENSMUSG00000000817 | 0.23346125 | 1.05735149 | 0.59293498 | 0.74188332 |
| ENSMUSG00000058655 | -0.1890767 | 8.97804252 | 0.59299034 | 0.74188332 |
| ENSMUSG00000057841 | 0.18890989 | 9.47272288 | 0.59310399 | 0.74194476 |
| ENSMUSG00000027244 | 0.19149577 | 5.52984455 | 0.59317055 | 0.74194728 |
| ENSMUSG00000048696 | 0.22759067 | 1.98654573 | 0.5933467  | 0.74202302 |
| ENSMUSG00000031536 | -0.1931425 | 4.92059739 | 0.59336021 | 0.74202302 |
| ENSMUSG00000035234 | -0.1937474 | 4.05305825 | 0.5934433  | 0.7420462  |
| ENSMUSG00000035765 | -0.1921886 | 5.09496273 | 0.59364553 | 0.74221833 |
| ENSMUSG00000038393 | -0.1885192 | 9.70660605 | 0.59392248 | 0.74241195 |
| ENSMUSG00000032425 | -0.1939192 | 4.31594895 | 0.59404499 | 0.74241195 |

|                    |            |            |            |            |
|--------------------|------------|------------|------------|------------|
| ENSMUSG00000039050 | -0.1905533 | 5.61124951 | 0.59404995 | 0.74241195 |
| ENSMUSG00000039231 | -0.190786  | 5.5811342  | 0.59405873 | 0.74241195 |
| ENSMUSG00000046546 | -0.188699  | 7.8914094  | 0.59419188 | 0.74246541 |
| ENSMUSG00000057134 | -0.1917791 | 4.92766292 | 0.59423069 | 0.74246541 |
| ENSMUSG00000049687 | -0.2082956 | 2.81526446 | 0.59438453 | 0.74257691 |
| ENSMUSG00000000682 | -0.1883438 | 8.90059721 | 0.59448913 | 0.74262688 |
| ENSMUSG00000020513 | -0.1952197 | 3.91965145 | 0.59480549 | 0.74294133 |
| ENSMUSG00000028580 | -0.1887568 | 7.06023978 | 0.59488567 | 0.74296076 |
| ENSMUSG00000039182 | -0.2083382 | 2.93224944 | 0.59496624 | 0.74298065 |
| ENSMUSG00000034379 | -0.192198  | 4.2184794  | 0.59512276 | 0.74309538 |
| ENSMUSG00000032952 | -0.1890814 | 5.98835472 | 0.59524057 | 0.74316177 |
| ENSMUSG00000040112 | -0.1924046 | 4.46711991 | 0.59533589 | 0.74320005 |
| ENSMUSG00000086360 | 0.21746238 | 1.42094387 | 0.59569159 | 0.7434335  |
| ENSMUSG00000036928 | -0.2111924 | 1.40492438 | 0.59569159 | 0.7434335  |
| ENSMUSG00000032309 | -0.1896264 | 5.68941468 | 0.59571692 | 0.7434335  |
| ENSMUSG00000024601 | -0.190054  | 5.3802883  | 0.59584073 | 0.7435073  |
| ENSMUSG00000040592 | 0.18729442 | 9.93164676 | 0.59622854 | 0.74391046 |
| ENSMUSG00000052906 | -0.1921857 | 4.17759817 | 0.5964211  | 0.74405893 |
| ENSMUSG00000035595 | 0.20063384 | 2.20557962 | 0.596477   | 0.74405893 |
| ENSMUSG00000076437 | 0.19906103 | 3.32149367 | 0.59658888 | 0.74411775 |
| ENSMUSG00000085148 | -0.1896448 | 4.63203793 | 0.59676173 | 0.74425258 |
| ENSMUSG00000032254 | -0.1905427 | 4.85832321 | 0.59694573 | 0.74440129 |
| ENSMUSG00000029550 | 0.18999726 | 5.33319043 | 0.5975125  | 0.74502725 |
| ENSMUSG00000064225 | 0.18979281 | 5.14802594 | 0.59796633 | 0.74544897 |
| ENSMUSG00000043962 | -0.1866195 | 7.9407859  | 0.59798042 | 0.74544897 |
| ENSMUSG00000039414 | -0.1876449 | 5.84694922 | 0.5988259  | 0.746422   |
| ENSMUSG00000093930 | 0.18724883 | 6.25668308 | 0.59898315 | 0.74650845 |
| ENSMUSG00000020100 | 0.18838295 | 5.73533073 | 0.59905301 | 0.74650845 |
| ENSMUSG00000002329 | 0.18731583 | 5.98629872 | 0.59910939 | 0.74650845 |
| ENSMUSG00000062070 | -0.1881217 | 5.89018624 | 0.59915502 | 0.74650845 |
| ENSMUSG00000001289 | 0.18619227 | 6.78618355 | 0.59960995 | 0.7469943  |
| ENSMUSG00000035529 | -0.1868222 | 6.21504443 | 0.59982646 | 0.74718305 |
| ENSMUSG00000052749 | -0.1857347 | 7.25865387 | 0.60045285 | 0.74783189 |
| ENSMUSG00000037315 | -0.190606  | 4.28293174 | 0.60047746 | 0.74783189 |
| ENSMUSG00000019873 | 0.18674654 | 6.38616427 | 0.60070331 | 0.74798585 |
| ENSMUSG00000034152 | -0.1860232 | 6.57668858 | 0.60077335 | 0.74798585 |
| ENSMUSG00000023156 | -0.1914037 | 3.74684051 | 0.60079629 | 0.74798585 |
| ENSMUSG00000021103 | -0.1954877 | 3.63933974 | 0.60119527 | 0.74836524 |
| ENSMUSG00000022668 | -0.1940182 | 3.1257156  | 0.60123123 | 0.74836524 |
| ENSMUSG00000097944 | -0.2084782 | 2.08415674 | 0.60138054 | 0.74847005 |
| ENSMUSG00000021725 | 0.18569485 | 6.63148755 | 0.60182492 | 0.74894202 |
| ENSMUSG00000021234 | -0.2222751 | 1.41635688 | 0.60203759 | 0.74912558 |
| ENSMUSG00000052459 | -0.185433  | 6.37493027 | 0.60228755 | 0.74929702 |

|                    |            |            |            |            |
|--------------------|------------|------------|------------|------------|
| ENSMUSG00000037514 | -0.1856506 | 6.40928607 | 0.60230574 | 0.74929702 |
| ENSMUSG00000031907 | 0.18958386 | 4.4451495  | 0.60240032 | 0.74933359 |
| ENSMUSG00000089993 | -0.2233888 | 1.71410425 | 0.60248086 | 0.74935268 |
| ENSMUSG00000032518 | 0.18381623 | 9.45303164 | 0.60313424 | 0.75008418 |
| ENSMUSG00000096401 | -0.2042023 | 2.28266755 | 0.60335908 | 0.75028263 |
| ENSMUSG00000010277 | -0.1834625 | 8.72409661 | 0.6040686  | 0.75101788 |
| ENSMUSG00000038544 | -0.1851932 | 5.71031042 | 0.60408102 | 0.75101788 |
| ENSMUSG00000025047 | 0.1847089  | 6.37645469 | 0.60417048 | 0.75104787 |
| ENSMUSG00000028629 | 0.19258101 | 3.90311206 | 0.60429542 | 0.75106157 |
| ENSMUSG00000025232 | 0.18420269 | 6.7387286  | 0.60431218 | 0.75106157 |
| ENSMUSG00000007035 | -0.1881041 | 2.93318936 | 0.60571769 | 0.75260249 |
| ENSMUSG00000071662 | -0.1845635 | 5.86867432 | 0.60573204 | 0.75260249 |
| ENSMUSG00000042487 | 0.18824323 | 4.48316563 | 0.60574843 | 0.75260249 |
| ENSMUSG00000031393 | -0.1829829 | 6.62843146 | 0.60599412 | 0.75275537 |
| ENSMUSG00000022802 | 0.22141274 | 1.64609478 | 0.60600245 | 0.75275537 |
| ENSMUSG00000029993 | 0.18707208 | 4.74219884 | 0.60669292 | 0.75353162 |
| ENSMUSG00000030990 | -0.18515   | 4.86443587 | 0.60689664 | 0.75365591 |
| ENSMUSG00000027752 | -0.1837032 | 5.8135839  | 0.60692412 | 0.75365591 |
| ENSMUSG00000030058 | 0.18221485 | 7.43652893 | 0.60732581 | 0.75407325 |
| ENSMUSG00000041775 | -0.1836579 | 5.51481276 | 0.60752451 | 0.754107   |
| ENSMUSG00000028234 | -0.1815755 | 9.54801543 | 0.60756201 | 0.754107   |
| ENSMUSG00000071866 | -0.1817183 | 8.55765494 | 0.6076057  | 0.754107   |
| ENSMUSG00000024217 | -0.1856525 | 4.55268821 | 0.6076154  | 0.754107   |
| ENSMUSG00000039449 | -0.1826808 | 6.47822971 | 0.60782375 | 0.75428415 |
| ENSMUSG00000023572 | -0.1826816 | 6.37623284 | 0.60814115 | 0.75459656 |
| ENSMUSG00000021385 | -0.1887302 | 4.04560348 | 0.60824033 | 0.75463817 |
| ENSMUSG00000050973 | 0.20117475 | 2.83670295 | 0.60845156 | 0.75481877 |
| ENSMUSG00000024556 | -0.1823468 | 6.34192072 | 0.60858765 | 0.75490612 |
| ENSMUSG00000021326 | -0.1823984 | 6.4444414  | 0.60879103 | 0.75501616 |
| ENSMUSG00000031916 | 0.18282076 | 5.23212986 | 0.60880773 | 0.75501616 |
| ENSMUSG00000079426 | -0.1817023 | 6.83740992 | 0.60909602 | 0.75526926 |
| ENSMUSG00000051346 | -0.1904785 | 3.02553046 | 0.60914322 | 0.75526926 |
| ENSMUSG00000003166 | 0.18240386 | 5.76728311 | 0.60956254 | 0.75570766 |
| ENSMUSG00000032077 | 0.18337344 | 4.89099462 | 0.60965697 | 0.75574321 |
| ENSMUSG00000028088 | -0.1836564 | 4.42005682 | 0.60973186 | 0.75575455 |
| ENSMUSG00000015488 | 0.18286533 | 5.58350707 | 0.61005021 | 0.75585899 |
| ENSMUSG00000031360 | -0.1809429 | 7.21445775 | 0.61012816 | 0.75585899 |
| ENSMUSG00000034290 | -0.1806026 | 7.84509698 | 0.61013168 | 0.75585899 |
| ENSMUSG00000007415 | -0.1837663 | 5.29547612 | 0.61017676 | 0.75585899 |
| ENSMUSG00000017802 | -0.18071   | 7.65809992 | 0.61017899 | 0.75585899 |
| ENSMUSG00000071068 | 0.18032063 | 7.95159584 | 0.61021065 | 0.75585899 |
| ENSMUSG00000025453 | -0.1812763 | 5.15886958 | 0.61031143 | 0.75589761 |
| ENSMUSG00000030522 | -0.1837138 | 3.58169311 | 0.61037334 | 0.75589761 |

|                    |            |            |            |            |
|--------------------|------------|------------|------------|------------|
| ENSMUSG00000045757 | 0.19067847 | 3.40833407 | 0.6108998  | 0.75643939 |
| ENSMUSG00000037296 | -0.1876065 | 4.02199849 | 0.61094243 | 0.75643939 |
| ENSMUSG00000074802 | -0.1980572 | 2.12428406 | 0.61130347 | 0.75677829 |
| ENSMUSG00000044894 | 0.19491116 | 2.96527577 | 0.61134782 | 0.75677829 |
| ENSMUSG00000025873 | 0.18080861 | 6.37335848 | 0.61158393 | 0.75692649 |
| ENSMUSG00000037029 | -0.1814455 | 5.74715028 | 0.61159924 | 0.75692649 |
| ENSMUSG00000001521 | 0.18998658 | 3.00322863 | 0.61184961 | 0.75715484 |
| ENSMUSG00000027637 | -0.1815782 | 5.60173484 | 0.61206676 | 0.75734202 |
| ENSMUSG00000030188 | -0.1858947 | 3.10432072 | 0.61220591 | 0.75743267 |
| ENSMUSG00000007880 | -0.179246  | 8.81522068 | 0.61230326 | 0.75747158 |
| ENSMUSG00000028565 | 0.21952493 | 1.75578704 | 0.61259213 | 0.757637   |
| ENSMUSG00000028060 | -0.1797749 | 6.94329248 | 0.61261356 | 0.757637   |
| ENSMUSG00000027075 | -0.1811869 | 5.74097259 | 0.6126347  | 0.757637   |
| ENSMUSG00000005982 | 0.18014021 | 6.44795301 | 0.61292168 | 0.75791036 |
| ENSMUSG00000020228 | -0.1803698 | 5.6390125  | 0.61329318 | 0.75828817 |
| ENSMUSG00000018858 | 0.18623274 | 3.62378956 | 0.61357098 | 0.75855006 |
| ENSMUSG00000041629 | 0.18283722 | 4.3428607  | 0.61435724 | 0.75944042 |
| ENSMUSG00000031591 | 0.17945472 | 6.62080342 | 0.61443159 | 0.75945066 |
| ENSMUSG00000021902 | -0.1830245 | 4.41277532 | 0.61474123 | 0.75975168 |
| ENSMUSG00000032078 | 0.17894518 | 6.38117624 | 0.61488997 | 0.75985381 |
| ENSMUSG00000021595 | -0.1782462 | 7.23848581 | 0.61543202 | 0.76044191 |
| ENSMUSG00000037957 | -0.1807148 | 4.68002353 | 0.61576511 | 0.7607717  |
| ENSMUSG00000025646 | 0.18377105 | 4.19672936 | 0.61585756 | 0.76079264 |
| ENSMUSG00000068299 | -0.1892889 | 2.78352718 | 0.61595891 | 0.76079264 |
| ENSMUSG00000004270 | 0.18155966 | 4.96159386 | 0.61598061 | 0.76079264 |
| ENSMUSG00000021102 | -0.1870019 | 4.04293326 | 0.61629467 | 0.76107184 |
| ENSMUSG00000029534 | -0.1862953 | 3.48141543 | 0.61633908 | 0.76107184 |
| ENSMUSG00000022849 | 0.18852557 | 3.76992382 | 0.61641821 | 0.76108779 |
| ENSMUSG00000026675 | -0.1825523 | 4.24560311 | 0.61680509 | 0.76148368 |
| ENSMUSG00000062169 | -0.1831402 | 4.52906286 | 0.61703235 | 0.76167574 |
| ENSMUSG00000040761 | 0.17899367 | 6.0121884  | 0.61709319 | 0.76167574 |
| ENSMUSG00000072568 | -0.1774397 | 6.43421337 | 0.61791093 | 0.76257413 |
| ENSMUSG00000029538 | 0.17898354 | 4.9556103  | 0.61798895 | 0.76257413 |
| ENSMUSG00000046032 | -0.1785941 | 5.45343566 | 0.61802006 | 0.76257413 |
| ENSMUSG00000074797 | 0.18095158 | 4.34368768 | 0.6180889  | 0.76257721 |
| ENSMUSG00000045100 | 0.19542423 | 2.28681287 | 0.6182516  | 0.76269608 |
| ENSMUSG00000028104 | -0.1803006 | 4.38585578 | 0.61846391 | 0.76287612 |
| ENSMUSG00000074748 | -0.1767302 | 7.16274081 | 0.61866254 | 0.76297819 |
| ENSMUSG00000041491 | 0.18394259 | 3.96222508 | 0.61869098 | 0.76297819 |
| ENSMUSG00000020485 | 0.17733287 | 5.78059717 | 0.61874578 | 0.76297819 |
| ENSMUSG00000047187 | -0.1777843 | 5.92138606 | 0.6188403  | 0.76298792 |
| ENSMUSG00000022312 | -0.1762681 | 7.8642413  | 0.61888641 | 0.76298792 |
| ENSMUSG00000018999 | -0.1775    | 6.01304358 | 0.61899994 | 0.76304604 |

|                    |            |            |            |            |
|--------------------|------------|------------|------------|------------|
| ENSMUSG00000019982 | -0.180432  | 4.3629595  | 0.61948657 | 0.76347707 |
| ENSMUSG00000025702 | -0.1783253 | 5.50590814 | 0.61950112 | 0.76347707 |
| ENSMUSG00000038324 | 0.1761563  | 7.31309997 | 0.61954886 | 0.76347707 |
| ENSMUSG00000040560 | -0.1774224 | 5.52092189 | 0.61983489 | 0.76371274 |
| ENSMUSG00000034177 | 0.19255693 | 2.66729649 | 0.61987298 | 0.76371274 |
| ENSMUSG00000027651 | -0.1767974 | 6.0963993  | 0.62029627 | 0.76401964 |
| ENSMUSG00000095200 | -0.1900699 | 3.03823149 | 0.62031684 | 0.76401964 |
| ENSMUSG00000051232 | -0.1804773 | 4.47714408 | 0.62032147 | 0.76401964 |
| ENSMUSG00000070493 | -0.1764668 | 6.54736423 | 0.62042165 | 0.76406116 |
| ENSMUSG00000049354 | -0.1752595 | 7.73393271 | 0.62078363 | 0.76442505 |
| ENSMUSG00000024654 | 0.17817913 | 5.10700191 | 0.6210957  | 0.7647274  |
| ENSMUSG00000037742 | -0.1745263 | 13.1645848 | 0.6213119  | 0.76483138 |
| ENSMUSG00000033557 | -0.1757704 | 6.43723226 | 0.62131322 | 0.76483138 |
| ENSMUSG00000035539 | 0.21641892 | 1.70821703 | 0.6215833  | 0.76508192 |
| ENSMUSG00000024926 | 0.17720233 | 5.38489671 | 0.62170602 | 0.76515104 |
| ENSMUSG00000074922 | 0.18712484 | 3.11641224 | 0.62180516 | 0.76519112 |
| ENSMUSG00000001783 | 0.17449101 | 7.77933082 | 0.62208488 | 0.76543947 |
| ENSMUSG00000027509 | 0.17572336 | 6.01104479 | 0.62219228 | 0.76543947 |
| ENSMUSG00000021007 | -0.2185995 | 1.00983376 | 0.62223575 | 0.76543947 |
| ENSMUSG00000026608 | -0.1761615 | 5.80705198 | 0.62227332 | 0.76543947 |
| ENSMUSG00000058835 | -0.1745411 | 7.59850677 | 0.62235704 | 0.76546054 |
| ENSMUSG00000027397 | -0.1741572 | 7.97088688 | 0.62267888 | 0.76573338 |
| ENSMUSG00000021823 | 0.17746948 | 5.28378067 | 0.6227121  | 0.76573338 |
| ENSMUSG00000041870 | 0.17414649 | 7.44308424 | 0.62321958 | 0.76627543 |
| ENSMUSG00000029836 | -0.1750055 | 6.5867867  | 0.62330914 | 0.76630359 |
| ENSMUSG00000027160 | -0.1856628 | 2.89823393 | 0.62369924 | 0.76665867 |
| ENSMUSG00000062234 | 0.17394534 | 7.51473336 | 0.62373135 | 0.76665867 |
| ENSMUSG00000001924 | 0.17322796 | 8.54006434 | 0.62429996 | 0.7672621  |
| ENSMUSG00000034522 | -0.1764936 | 4.66909688 | 0.62435578 | 0.7672621  |
| ENSMUSG00000040855 | 0.25514371 | 0.27953315 | 0.62443712 | 0.76728003 |
| ENSMUSG00000030609 | 0.17569716 | 5.09429078 | 0.62487075 | 0.76773078 |
| ENSMUSG00000052395 | 0.1781873  | 4.57630086 | 0.62523726 | 0.768099   |
| ENSMUSG00000020402 | -0.1739829 | 6.41443877 | 0.6254017  | 0.76821891 |
| ENSMUSG00000037885 | 0.17613298 | 4.88816205 | 0.62564984 | 0.76837778 |
| ENSMUSG00000001027 | -0.1751127 | 5.40237181 | 0.62566473 | 0.76837778 |
| ENSMUSG00000024764 | 0.17439073 | 5.89243313 | 0.62580833 | 0.76843606 |
| ENSMUSG00000020691 | -0.1760962 | 4.74344329 | 0.62590062 | 0.76843606 |
| ENSMUSG00000071076 | 0.17370056 | 6.67315992 | 0.62591273 | 0.76843606 |
| ENSMUSG00000022194 | 0.17540719 | 5.23372636 | 0.62604593 | 0.76848036 |
| ENSMUSG00000031835 | 0.1730346  | 7.00496394 | 0.62608252 | 0.76848036 |
| ENSMUSG00000053617 | 0.17316906 | 6.84834396 | 0.62633408 | 0.76867184 |
| ENSMUSG00000039740 | 0.17525411 | 5.04722502 | 0.62642398 | 0.76867184 |
| ENSMUSG00000041658 | -0.1779628 | 3.05967904 | 0.62643913 | 0.76867184 |

|                    |            |            |            |            |
|--------------------|------------|------------|------------|------------|
| ENSMUSG00000043154 | 0.19182081 | 2.38647431 | 0.62686397 | 0.76911105 |
| ENSMUSG00000074884 | -0.1724603 | 7.03974991 | 0.62693264 | 0.7691132  |
| ENSMUSG00000026790 | 0.17261125 | 6.74686076 | 0.62703406 | 0.76915553 |
| ENSMUSG00000045948 | -0.1839051 | 2.99112679 | 0.62726073 | 0.76934911 |
| ENSMUSG00000021518 | -0.1731666 | 6.1549707  | 0.62739994 | 0.76934911 |
| ENSMUSG00000025008 | 0.17746754 | 4.01900688 | 0.62743259 | 0.76934911 |
| ENSMUSG00000022228 | -0.1719193 | 7.58766846 | 0.62745958 | 0.76934911 |
| ENSMUSG00000022000 | -0.1718756 | 6.68012467 | 0.62845405 | 0.77048627 |
| ENSMUSG00000058258 | -0.1726638 | 5.75787108 | 0.62878937 | 0.77081516 |
| ENSMUSG00000003604 | -0.1800221 | 3.98637935 | 0.62895837 | 0.77094012 |
| ENSMUSG00000024486 | 0.23115002 | 0.90819284 | 0.62918268 | 0.77106988 |
| ENSMUSG00000023284 | -0.178471  | 4.23458368 | 0.62921507 | 0.77106988 |
| ENSMUSG00000073478 | -0.1841788 | 2.92224128 | 0.62926547 | 0.77106988 |
| ENSMUSG00000066892 | 0.17230217 | 6.19074009 | 0.62955    | 0.77133631 |
| ENSMUSG00000017716 | -0.176232  | 4.55736628 | 0.62984354 | 0.77161256 |
| ENSMUSG00000044155 | -0.1737177 | 4.78550558 | 0.6299513  | 0.77161256 |
| ENSMUSG00000019797 | 0.18583763 | 2.40152076 | 0.63000554 | 0.77161256 |
| ENSMUSG00000057101 | -0.1717287 | 6.09140584 | 0.63004398 | 0.77161256 |
| ENSMUSG00000086782 | 0.19456202 | 2.79892494 | 0.63030039 | 0.77179058 |
| ENSMUSG00000028894 | -0.1714968 | 6.01476967 | 0.63032361 | 0.77179058 |
| ENSMUSG00000038368 | -0.1755213 | 4.12044154 | 0.63056005 | 0.77193823 |
| ENSMUSG00000022876 | 0.17149118 | 6.40893148 | 0.63057851 | 0.77193823 |
| ENSMUSG00000030722 | -0.1720631 | 5.74196273 | 0.63076572 | 0.77206901 |
| ENSMUSG00000037805 | 0.17024862 | 7.66932684 | 0.63081968 | 0.77206901 |
| ENSMUSG00000041720 | -0.1701623 | 7.85685287 | 0.6309448  | 0.77213994 |
| ENSMUSG00000070305 | 0.17603368 | 4.07001422 | 0.63106135 | 0.77220036 |
| ENSMUSG00000024646 | 0.1717773  | 5.75852036 | 0.63121964 | 0.77224053 |
| ENSMUSG00000030888 | -0.1730701 | 5.36516441 | 0.63125961 | 0.77224053 |
| ENSMUSG00000038042 | 0.18357654 | 3.37722276 | 0.63129572 | 0.77224053 |
| ENSMUSG00000028438 | -0.1819137 | 2.75876882 | 0.63149688 | 0.7724044  |
| ENSMUSG00000040354 | 0.17085284 | 6.13876819 | 0.63160177 | 0.77241457 |
| ENSMUSG00000026200 | -0.1759341 | 3.95757746 | 0.63163958 | 0.77241457 |
| ENSMUSG00000046179 | 0.17419469 | 4.47292094 | 0.63209298 | 0.77286136 |
| ENSMUSG00000031482 | -0.1779788 | 3.99926782 | 0.63213941 | 0.77286136 |
| ENSMUSG00000032035 | -0.1691376 | 10.3353808 | 0.63225257 | 0.77286576 |
| ENSMUSG00000027078 | 0.17139873 | 5.46368375 | 0.63235674 | 0.77286576 |
| ENSMUSG00000039304 | 0.17859958 | 3.77013055 | 0.63239237 | 0.77286576 |
| ENSMUSG00000029146 | 0.17040915 | 6.07427458 | 0.63241195 | 0.77286576 |
| ENSMUSG00000038102 | -0.1701865 | 6.43348327 | 0.63252592 | 0.77292287 |
| ENSMUSG00000034285 | -0.1732749 | 4.26609848 | 0.63276385 | 0.77310613 |
| ENSMUSG00000021967 | -0.1847838 | 2.66919374 | 0.63281041 | 0.77310613 |
| ENSMUSG00000040429 | -0.1891139 | 2.5179756  | 0.63297608 | 0.77314419 |
| ENSMUSG00000020844 | 0.18903383 | 2.52614908 | 0.63297608 | 0.77314419 |



|                    |            |            |            |            |
|--------------------|------------|------------|------------|------------|
| ENSMUSG0000000976  | 0.17004571 | 6.28953437 | 0.63333816 | 0.77350426 |
| ENSMUSG0000002898  | 0.17241953 | 4.60464155 | 0.63344211 | 0.77354904 |
| ENSMUSG00000020739 | 0.17006705 | 5.86445249 | 0.63378171 | 0.77388153 |
| ENSMUSG00000008450 | -0.1790938 | 3.63512454 | 0.63391327 | 0.77391731 |
| ENSMUSG00000073676 | -0.1686997 | 8.41525496 | 0.63394566 | 0.77391731 |
| ENSMUSG00000021040 | -0.1795038 | 3.50497183 | 0.63420729 | 0.77415449 |
| ENSMUSG00000030263 | 0.16838198 | 7.62946833 | 0.63508409 | 0.77503314 |
| ENSMUSG00000025495 | 0.17280018 | 4.73763705 | 0.63512725 | 0.77503314 |
| ENSMUSG00000024150 | 0.1703679  | 5.25487943 | 0.63514494 | 0.77503314 |
| ENSMUSG00000047379 | 0.18475904 | 2.73441057 | 0.63523646 | 0.77503314 |
| ENSMUSG00000028332 | -0.1696226 | 6.15363155 | 0.63526422 | 0.77503314 |
| ENSMUSG00000067367 | -0.1717887 | 4.80221847 | 0.6354968  | 0.77523461 |
| ENSMUSG00000031934 | -0.170438  | 5.5771858  | 0.63573201 | 0.77539647 |
| ENSMUSG00000054309 | -0.1679572 | 7.40984911 | 0.6358289  | 0.77539647 |
| ENSMUSG00000044968 | -0.2029192 | 1.86319415 | 0.63583185 | 0.77539647 |
| ENSMUSG00000025747 | -0.1758428 | 3.95603546 | 0.63599449 | 0.77544254 |
| ENSMUSG00000022911 | -0.1704567 | 4.80424342 | 0.63600454 | 0.77544254 |
| ENSMUSG00000063714 | -0.1983712 | 1.68276485 | 0.63621757 | 0.77561999 |
| ENSMUSG00000032101 | -0.1843062 | 2.78227409 | 0.63630312 | 0.77564203 |
| ENSMUSG00000074182 | -0.1750982 | 4.1489061  | 0.63676885 | 0.77580134 |
| ENSMUSG00000022856 | 0.20972161 | 1.36944861 | 0.63682812 | 0.77580134 |
| ENSMUSG00000039159 | -0.1681951 | 6.27511197 | 0.63687833 | 0.77580134 |
| ENSMUSG00000025209 | 0.17111315 | 4.42271597 | 0.6369039  | 0.77580134 |
| ENSMUSG00000039473 | -0.1673426 | 7.08809264 | 0.6369291  | 0.77580134 |
| ENSMUSG00000000948 | -0.2110579 | 1.22607941 | 0.6370177  | 0.77580134 |
| ENSMUSG00000085704 | -0.2031    | 1.23497671 | 0.6370177  | 0.77580134 |
| ENSMUSG00000039191 | -0.1679049 | 6.20082756 | 0.63702642 | 0.77580134 |
| ENSMUSG00000029416 | 0.16730472 | 7.21425976 | 0.63715931 | 0.77580134 |
| ENSMUSG00000096768 | 0.22614591 | 2.09451066 | 0.6371868  | 0.77580134 |
| ENSMUSG00000022325 | -0.1797187 | 3.31251699 | 0.63721689 | 0.77580134 |
| ENSMUSG00000006585 | -0.1694076 | 5.30191174 | 0.63729411 | 0.77580134 |
| ENSMUSG00000020755 | 0.168471   | 5.8055027  | 0.63731119 | 0.77580134 |
| ENSMUSG00000028701 | -0.1728405 | 3.83493056 | 0.63762979 | 0.77610699 |
| ENSMUSG00000001173 | -0.1696854 | 4.48170513 | 0.63778624 | 0.77613065 |
| ENSMUSG00000017778 | 0.17308329 | 4.22322747 | 0.63783135 | 0.77613065 |
| ENSMUSG00000032698 | -0.1667829 | 7.74288886 | 0.63785178 | 0.77613065 |
| ENSMUSG00000030468 | 0.16630665 | 9.63920278 | 0.63805103 | 0.77629091 |
| ENSMUSG00000029038 | 0.16824524 | 5.71821108 | 0.63811918 | 0.77629167 |
| ENSMUSG00000025921 | -0.1731163 | 3.905714   | 0.63844334 | 0.77652701 |
| ENSMUSG00000028882 | 0.16772794 | 5.46596583 | 0.63847413 | 0.77652701 |
| ENSMUSG00000021708 | 0.17653337 | 3.88534129 | 0.63855416 | 0.77652701 |
| ENSMUSG00000032939 | -0.1679791 | 5.87690605 | 0.63865854 | 0.77652701 |
| ENSMUSG00000071042 | 0.16604045 | 9.0304839  | 0.63869171 | 0.77652701 |

|                    |            |            |            |            |
|--------------------|------------|------------|------------|------------|
| ENSMUSG00000028133 | 0.20127384 | 2.18100413 | 0.63871795 | 0.77652701 |
| ENSMUSG00000028433 | 0.16804214 | 5.77510355 | 0.6388438  | 0.77659787 |
| ENSMUSG00000031700 | 0.17172242 | 1.60677969 | 0.63902795 | 0.77673958 |
| ENSMUSG00000091811 | 0.17856743 | 3.25917957 | 0.6392169  | 0.7768871  |
| ENSMUSG00000026812 | -0.166406  | 6.57767    | 0.63941573 | 0.77701342 |
| ENSMUSG00000040725 | 0.16599254 | 7.77064093 | 0.63945602 | 0.77701342 |
| ENSMUSG00000069662 | 0.16655146 | 6.79850633 | 0.63957159 | 0.777026   |
| ENSMUSG00000016319 | 0.16607556 | 7.50346725 | 0.63962738 | 0.777026   |
| ENSMUSG00000025785 | 0.16877256 | 4.54762588 | 0.63966916 | 0.777026   |
| ENSMUSG00000076934 | 0.16623756 | 7.16389729 | 0.63982035 | 0.77712752 |
| ENSMUSG00000051557 | 0.18978082 | 2.55043022 | 0.63996589 | 0.77719869 |
| ENSMUSG00000096965 | -0.171712  | 3.1204786  | 0.64001417 | 0.77719869 |
| ENSMUSG00000025408 | 0.1681142  | 5.36301905 | 0.64010077 | 0.77722175 |
| ENSMUSG00000042208 | -0.1707051 | 4.10869443 | 0.64037453 | 0.77747204 |
| ENSMUSG00000026111 | -0.1683929 | 4.87696361 | 0.64044821 | 0.77747937 |
| ENSMUSG00000030216 | -0.1655225 | 7.07848259 | 0.64070395 | 0.7776734  |
| ENSMUSG00000026634 | -0.1656126 | 6.90848344 | 0.64080957 | 0.7776734  |
| ENSMUSG00000096910 | -0.1820726 | 2.37936442 | 0.64096863 | 0.7776734  |
| ENSMUSG00000038212 | -0.1659347 | 6.52882094 | 0.64099868 | 0.7776734  |
| ENSMUSG00000021400 | 0.16703163 | 5.38831955 | 0.64100762 | 0.7776734  |
| ENSMUSG00000100033 | -0.2270771 | 1.71048942 | 0.64107795 | 0.7776734  |
| ENSMUSG00000033416 | -0.1655463 | 6.84598217 | 0.64108162 | 0.7776734  |
| ENSMUSG00000090626 | 0.17256083 | 4.41054073 | 0.64135247 | 0.77791987 |
| ENSMUSG00000056851 | -0.1647564 | 9.01330013 | 0.64142187 | 0.77792197 |
| ENSMUSG00000046688 | 0.16728214 | 5.49981635 | 0.64156267 | 0.77793221 |
| ENSMUSG00000036632 | -0.1677519 | 4.97949099 | 0.64156567 | 0.77793221 |
| ENSMUSG00000057135 | 0.168582   | 4.71200417 | 0.64185732 | 0.7781981  |
| ENSMUSG00000029056 | 0.16627376 | 5.79299407 | 0.64192035 | 0.7781981  |
| ENSMUSG00000036006 | -0.1643223 | 8.90258098 | 0.64223384 | 0.77849604 |
| ENSMUSG00000052962 | -0.170531  | 4.04407508 | 0.64237525 | 0.77858535 |
| ENSMUSG00000030082 | 0.16489014 | 7.14283955 | 0.64246689 | 0.77861433 |
| ENSMUSG00000014763 | -0.1651301 | 6.30516615 | 0.64272606 | 0.77882284 |
| ENSMUSG00000003039 | 0.16500633 | 6.4280608  | 0.64277444 | 0.77882284 |
| ENSMUSG00000043091 | 0.16851757 | 4.60160993 | 0.64305005 | 0.77907466 |
| ENSMUSG00000028936 | -0.1640585 | 8.26238726 | 0.64312587 | 0.7790844  |
| ENSMUSG00000052997 | -0.1644704 | 7.1325639  | 0.64325183 | 0.77910319 |
| ENSMUSG00000021990 | -0.164792  | 6.34874363 | 0.64327694 | 0.77910319 |
| ENSMUSG00000030750 | -0.1659776 | 5.40714341 | 0.64345978 | 0.77921347 |
| ENSMUSG00000022412 | 0.16594603 | 5.70196613 | 0.64350356 | 0.77921347 |
| ENSMUSG00000003235 | 0.16444067 | 6.13969668 | 0.64370638 | 0.77937695 |
| ENSMUSG00000026851 | 0.16474655 | 5.96672239 | 0.64386589 | 0.77948799 |
| ENSMUSG00000020818 | 0.16911584 | 4.42523711 | 0.64405142 | 0.77963048 |
| ENSMUSG00000094840 | 0.19296246 | 2.9442288  | 0.64439291 | 0.77996173 |

|                    |            |            |            |            |
|--------------------|------------|------------|------------|------------|
| ENSMUSG00000068184 | -0.1883994 | 2.13514928 | 0.64448449 | 0.77999044 |
| ENSMUSG00000019734 | 0.1728508  | 3.58421784 | 0.64531505 | 0.78082728 |
| ENSMUSG00000037251 | 0.16879109 | 4.15112481 | 0.64538522 | 0.78082728 |
| ENSMUSG00000019977 | -0.1638983 | 6.17397453 | 0.64548474 | 0.78082728 |
| ENSMUSG00000037434 | -0.1651948 | 5.16236497 | 0.64551229 | 0.78082728 |
| ENSMUSG00000028223 | -0.1659615 | 4.73471012 | 0.64551558 | 0.78082728 |
| ENSMUSG00000033918 | -0.164409  | 5.24279205 | 0.64567699 | 0.7808992  |
| ENSMUSG00000047003 | 0.16957049 | 2.68624848 | 0.64571091 | 0.7808992  |
| ENSMUSG00000036781 | -0.1683791 | 4.2233843  | 0.6460293  | 0.78120206 |
| ENSMUSG00000025571 | -0.1622638 | 6.819659   | 0.64681191 | 0.78200794 |
| ENSMUSG00000013701 | -0.1667326 | 4.1924185  | 0.6468318  | 0.78200794 |
| ENSMUSG00000032381 | -0.1640778 | 5.4170556  | 0.64706264 | 0.78220476 |
| ENSMUSG00000048307 | 0.16611366 | 4.7396333  | 0.64727785 | 0.78238263 |
| ENSMUSG00000063535 | -0.1779621 | 2.64061919 | 0.64746839 | 0.78253067 |
| ENSMUSG00000030532 | 0.21942155 | 1.1461244  | 0.64764817 | 0.78266565 |
| ENSMUSG00000032565 | 0.16569161 | 4.30168451 | 0.64826843 | 0.78333287 |
| ENSMUSG00000026563 | -0.1636442 | 5.13913001 | 0.64855854 | 0.78360106 |
| ENSMUSG00000021928 | -0.1774964 | 2.64230298 | 0.64873616 | 0.78373329 |
| ENSMUSG00000016181 | -0.1633723 | 5.32135741 | 0.6489616  | 0.78386798 |
| ENSMUSG00000064210 | -0.1614865 | 6.77329287 | 0.64900811 | 0.78386798 |
| ENSMUSG00000029196 | 0.16289372 | 5.4546102  | 0.64905223 | 0.78386798 |
| ENSMUSG00000004096 | -0.1620789 | 6.60837285 | 0.6492335  | 0.78400453 |
| ENSMUSG00000045466 | -0.1627603 | 4.99768422 | 0.64951618 | 0.78426349 |
| ENSMUSG00000034274 | 0.16221437 | 5.71676413 | 0.64968238 | 0.78438178 |
| ENSMUSG00000001674 | -0.1624158 | 5.79583757 | 0.6499061  | 0.78456948 |
| ENSMUSG00000033016 | -0.1606368 | 7.20637079 | 0.65033825 | 0.78500873 |
| ENSMUSG00000066643 | -0.1907458 | 1.74219297 | 0.65043099 | 0.78502972 |
| ENSMUSG00000010110 | -0.1607827 | 6.82529174 | 0.65049222 | 0.78502972 |
| ENSMUSG00000044475 | 0.16544792 | 4.11987231 | 0.65063146 | 0.78511533 |
| ENSMUSG00000030983 | -0.1612057 | 6.11850064 | 0.65126628 | 0.78579888 |
| ENSMUSG00000042213 | -0.165979  | 1.6398968  | 0.6515409  | 0.78604771 |
| ENSMUSG00000096780 | 0.17347412 | 3.17729482 | 0.6517966  | 0.78627368 |
| ENSMUSG00000031986 | 0.16331846 | 4.58960291 | 0.65223697 | 0.78672235 |
| ENSMUSG00000020185 | -0.1905162 | 1.54963121 | 0.65278036 | 0.78725673 |
| ENSMUSG00000038046 | 0.1725313  | 2.44296462 | 0.65281698 | 0.78725673 |
| ENSMUSG00000007338 | 0.16187496 | 5.01965039 | 0.65307649 | 0.78745399 |
| ENSMUSG00000022125 | -0.1601854 | 5.95987367 | 0.65311756 | 0.78745399 |
| ENSMUSG00000023947 | 0.15934758 | 7.29017925 | 0.65318694 | 0.78745505 |
| ENSMUSG00000028911 | 0.16139612 | 5.63643631 | 0.65365478 | 0.78785042 |
| ENSMUSG00000021815 | -0.1708198 | 2.37256851 | 0.65365502 | 0.78785042 |
| ENSMUSG00000037617 | -0.1780258 | 2.66719832 | 0.65372051 | 0.78785042 |
| ENSMUSG00000087060 | -0.2156611 | 0.85989119 | 0.65413434 | 0.78826651 |
| ENSMUSG00000022751 | -0.1664232 | 3.6731864  | 0.6544     | 0.78834651 |

|                    |            |            |            |            |
|--------------------|------------|------------|------------|------------|
| ENSMUSG00000031608 | -0.1609083 | 5.2576911  | 0.65440166 | 0.78834651 |
| ENSMUSG00000017999 | 0.1598292  | 6.05334752 | 0.6544566  | 0.78834651 |
| ENSMUSG00000061650 | 0.17176013 | 2.62203203 | 0.65447555 | 0.78834651 |
| ENSMUSG00000039852 | 0.15870874 | 7.74341054 | 0.65454364 | 0.78834651 |
| ENSMUSG00000055717 | -0.1614879 | 5.09827742 | 0.65486143 | 0.78859971 |
| ENSMUSG00000029394 | 0.16311485 | 3.80358188 | 0.65489107 | 0.78859971 |
| ENSMUSG00000020899 | 0.16098182 | 5.36041982 | 0.65528286 | 0.78898884 |
| ENSMUSG00000039253 | -0.1626408 | 4.69028689 | 0.65593905 | 0.78969621 |
| ENSMUSG00000027863 | 0.15762901 | 7.84063689 | 0.65635156 | 0.79003242 |
| ENSMUSG00000022864 | -0.1616991 | 3.92131548 | 0.65635577 | 0.79003242 |
| ENSMUSG00000009406 | 0.16144035 | 4.71867047 | 0.65695422 | 0.79066996 |
| ENSMUSG00000040430 | -0.1583098 | 5.80874998 | 0.65704062 | 0.79069116 |
| ENSMUSG00000036580 | -0.1603855 | 4.27451899 | 0.65745246 | 0.79110395 |
| ENSMUSG00000036249 | -0.1585402 | 5.88901141 | 0.6577493  | 0.79130009 |
| ENSMUSG00000078920 | 0.1576179  | 6.34260316 | 0.6577623  | 0.79130009 |
| ENSMUSG00000019986 | -0.1621613 | 4.14930316 | 0.65790687 | 0.79130009 |
| ENSMUSG00000061455 | 0.15808917 | 6.30393704 | 0.65798404 | 0.79130009 |
| ENSMUSG00000028954 | 0.15707112 | 7.06221305 | 0.65800509 | 0.79130009 |
| ENSMUSG00000021756 | 0.15852163 | 6.10069681 | 0.65803502 | 0.79130009 |
| ENSMUSG00000022214 | 0.15714016 | 7.08428456 | 0.65809733 | 0.79130009 |
| ENSMUSG00000029502 | -0.1572299 | 6.70670363 | 0.65829358 | 0.79142705 |
| ENSMUSG00000001380 | 0.15772183 | 6.02770068 | 0.65834063 | 0.79142705 |
| ENSMUSG00000018442 | -0.1581167 | 5.55375673 | 0.65854324 | 0.79158784 |
| ENSMUSG00000035212 | 0.15803227 | 5.81544528 | 0.65884202 | 0.79186418 |
| ENSMUSG00000068917 | 0.15678372 | 6.89198169 | 0.65892424 | 0.7918802  |
| ENSMUSG00000032788 | -0.1571358 | 5.868405   | 0.65936139 | 0.79230741 |
| ENSMUSG00000041777 | -0.1589343 | 4.95196759 | 0.65943632 | 0.79230741 |
| ENSMUSG00000038128 | 0.20386955 | 2.13301553 | 0.6594865  | 0.79230741 |
| ENSMUSG00000019494 | 0.15777289 | 5.46513443 | 0.65961047 | 0.79237353 |
| ENSMUSG00000046010 | -0.1596275 | 4.47890569 | 0.65973345 | 0.79243846 |
| ENSMUSG00000024666 | 0.16533076 | 3.56569701 | 0.6598631  | 0.79251137 |
| ENSMUSG00000028114 | -0.157631  | 5.4871776  | 0.66000769 | 0.79260221 |
| ENSMUSG00000046562 | 0.15644184 | 5.88398401 | 0.66010794 | 0.7926398  |
| ENSMUSG00000000346 | -0.1554101 | 9.06035068 | 0.66037478 | 0.79287738 |
| ENSMUSG00000021048 | 0.1575367  | 5.55255074 | 0.66054    | 0.79291807 |
| ENSMUSG00000039018 | 0.16558927 | 3.45303257 | 0.66067182 | 0.79291807 |
| ENSMUSG00000034088 | -0.1554267 | 8.08423726 | 0.66071077 | 0.79291807 |
| ENSMUSG00000100199 | 0.18202021 | 2.06686132 | 0.66082586 | 0.79291807 |
| ENSMUSG00000062198 | -0.1631945 | 3.77717381 | 0.66085016 | 0.79291807 |
| ENSMUSG00000026806 | -0.1601992 | 4.58657268 | 0.66089196 | 0.79291807 |
| ENSMUSG00000048756 | -0.155836  | 6.46538654 | 0.66090876 | 0.79291807 |
| ENSMUSG00000087538 | -0.1781865 | 1.69172639 | 0.6609605  | 0.79291807 |
| ENSMUSG00000097415 | 0.1574242  | 5.73339668 | 0.66122288 | 0.79315006 |

|                    |            |            |            |            |
|--------------------|------------|------------|------------|------------|
| ENSMUSG00000074071 | 0.15581938 | 6.62837662 | 0.66144224 | 0.7933304  |
| ENSMUSG00000029209 | -0.1593062 | 4.32752591 | 0.66163408 | 0.79341849 |
| ENSMUSG00000032740 | 0.15993726 | 4.86920313 | 0.66165373 | 0.79341849 |
| ENSMUSG00000039275 | 0.15598757 | 5.97682988 | 0.66175651 | 0.79345053 |
| ENSMUSG00000020700 | 0.15507074 | 7.15878478 | 0.6618185  | 0.79345053 |
| ENSMUSG00000068742 | -0.1579883 | 4.29532058 | 0.66190501 | 0.79347149 |
| ENSMUSG00000028545 | 0.15906776 | 4.86043713 | 0.66222382 | 0.79377089 |
| ENSMUSG00000064037 | -0.1569928 | 5.38977252 | 0.66254071 | 0.79402092 |
| ENSMUSG00000025402 | 0.15435694 | 4.38662857 | 0.66257057 | 0.79402092 |
| ENSMUSG00000059708 | -0.1584463 | 4.13642787 | 0.6630711  | 0.79453792 |
| ENSMUSG00000016487 | 0.16155408 | 3.99525058 | 0.66315024 | 0.79454993 |
| ENSMUSG00000034211 | -0.157046  | 4.89777214 | 0.66322215 | 0.79455163 |
| ENSMUSG00000057193 | -0.1539514 | 8.70380665 | 0.66348472 | 0.79455163 |
| ENSMUSG00000030844 | -0.1580506 | 4.46544722 | 0.66351821 | 0.79455163 |
| ENSMUSG00000006906 | -0.1571612 | 4.31944778 | 0.66353815 | 0.79455163 |
| ENSMUSG00000024357 | 0.16208036 | 3.74319285 | 0.66355639 | 0.79455163 |
| ENSMUSG00000086013 | -0.1730865 | 2.81238099 | 0.66356639 | 0.79455163 |
| ENSMUSG00000069814 | -0.1726917 | 2.95394634 | 0.6639118  | 0.79488242 |
| ENSMUSG00000057363 | -0.1572059 | 3.93279812 | 0.66398989 | 0.79489313 |
| ENSMUSG00000002845 | -0.1561417 | 4.87522436 | 0.66419922 | 0.79506093 |
| ENSMUSG00000004446 | -0.1552714 | 5.89785039 | 0.66436956 | 0.79517202 |
| ENSMUSG00000058240 | -0.1560585 | 5.17963291 | 0.66447489 | 0.79517202 |
| ENSMUSG00000054008 | -0.1537535 | 6.93978971 | 0.66449956 | 0.79517202 |
| ENSMUSG00000024537 | -0.1596896 | 4.02341308 | 0.66464635 | 0.79517937 |
| ENSMUSG00000047539 | -0.1556209 | 5.56453391 | 0.66465008 | 0.79517937 |
| ENSMUSG00000026102 | 0.15815841 | 4.85391386 | 0.66471323 | 0.79517937 |
| ENSMUSG00000072893 | 0.15852593 | 3.40970548 | 0.66479865 | 0.7951988  |
| ENSMUSG00000005732 | -0.1555382 | 5.49989749 | 0.66499991 | 0.7952795  |
| ENSMUSG00000029322 | -0.1532012 | 8.38058534 | 0.66505711 | 0.7952795  |
| ENSMUSG00000029344 | 0.15723283 | 4.31164446 | 0.66507367 | 0.7952795  |
| ENSMUSG00000032044 | 0.15577521 | 4.86145576 | 0.66521047 | 0.79536035 |
| ENSMUSG00000029148 | -0.1532679 | 7.53532459 | 0.66542857 | 0.79553837 |
| ENSMUSG00000022680 | -0.1535883 | 6.44569897 | 0.66595221 | 0.7960816  |
| ENSMUSG00000029434 | 0.15401589 | 6.17389016 | 0.66616854 | 0.79625739 |
| ENSMUSG00000025162 | 0.15301133 | 7.12494515 | 0.66636787 | 0.79641284 |
| ENSMUSG00000014554 | 0.15452514 | 5.29717429 | 0.66644732 | 0.79642499 |
| ENSMUSG00000016946 | 0.15515613 | 4.7894875  | 0.66656796 | 0.79648635 |
| ENSMUSG00000046668 | -0.157017  | 4.59993451 | 0.66666441 | 0.79651881 |
| ENSMUSG00000038712 | 0.15412828 | 5.8855367  | 0.6668828  | 0.79669693 |
| ENSMUSG00000024902 | -0.1560634 | 3.88050327 | 0.66701224 | 0.79670206 |
| ENSMUSG00000039914 | 0.15654528 | 4.43640786 | 0.66702572 | 0.79670206 |
| ENSMUSG00000024997 | -0.1532054 | 6.36313182 | 0.66730526 | 0.79685623 |
| ENSMUSG00000027406 | -0.1527824 | 6.787031   | 0.66732044 | 0.79685623 |

|                    |            |            |            |            |
|--------------------|------------|------------|------------|------------|
| ENSMUSG00000028159 | -0.1528265 | 6.93561426 | 0.6673722  | 0.79685623 |
| ENSMUSG00000039197 | -0.1570924 | 4.05739516 | 0.6674839  | 0.79685623 |
| ENSMUSG00000041215 | -0.1536933 | 5.39226284 | 0.66750141 | 0.79685623 |
| ENSMUSG00000078606 | -0.1592211 | 3.68342987 | 0.66759681 | 0.79688736 |
| ENSMUSG00000044881 | 0.17278807 | 2.09542609 | 0.66790672 | 0.79717451 |
| ENSMUSG00000027332 | 0.15276882 | 6.28327345 | 0.66804487 | 0.79725662 |
| ENSMUSG00000032489 | 0.16426543 | 3.38923289 | 0.66842131 | 0.79762306 |
| ENSMUSG00000052712 | -0.1525807 | 6.06082168 | 0.66850233 | 0.79763694 |
| ENSMUSG00000003660 | -0.1514366 | 8.48049978 | 0.66867059 | 0.7977549  |
| ENSMUSG00000028096 | -0.154059  | 4.85296288 | 0.66896598 | 0.79802448 |
| ENSMUSG00000037197 | -0.1520119 | 6.71783571 | 0.66919246 | 0.79817069 |
| ENSMUSG00000042842 | 0.15764028 | 4.10738313 | 0.669266   | 0.79817069 |
| ENSMUSG00000031342 | -0.1692723 | 2.45462885 | 0.66929685 | 0.79817069 |
| ENSMUSG00000016194 | -0.1542592 | 3.66362585 | 0.66942275 | 0.79823802 |
| ENSMUSG00000020003 | -0.1555489 | 4.5925855  | 0.66951188 | 0.7982615  |
| ENSMUSG00000076688 | 0.17048261 | 2.1095735  | 0.6696323  | 0.79827283 |
| ENSMUSG00000018401 | -0.1514384 | 7.21797818 | 0.66968067 | 0.79827283 |
| ENSMUSG00000027329 | 0.16205062 | 1.94725696 | 0.66977186 | 0.79827283 |
| ENSMUSG00000066595 | -0.1532621 | 4.98382059 | 0.66985684 | 0.79827283 |
| ENSMUSG00000027522 | -0.151104  | 7.11184774 | 0.66988405 | 0.79827283 |
| ENSMUSG00000027309 | -0.1524936 | 5.32429702 | 0.66996371 | 0.79827283 |
| ENSMUSG00000036299 | -0.1529811 | 5.33134106 | 0.6700157  | 0.79827283 |
| ENSMUSG00000036285 | -0.1556268 | 4.64821278 | 0.67007695 | 0.79827283 |
| ENSMUSG00000021497 | -0.1548524 | 4.02926276 | 0.67033323 | 0.79849538 |
| ENSMUSG00000028851 | 0.15127601 | 6.09771822 | 0.6705767  | 0.79870264 |
| ENSMUSG00000053460 | 0.15618355 | 3.80282527 | 0.67087724 | 0.79896035 |
| ENSMUSG00000006418 | 0.15054903 | 7.26158906 | 0.67093208 | 0.79896035 |
| ENSMUSG00000100493 | 0.16180792 | 2.03950984 | 0.67150543 | 0.79956027 |
| ENSMUSG00000041849 | -0.1504418 | 7.53860825 | 0.67157588 | 0.79956134 |
| ENSMUSG00000029027 | -0.1528734 | 4.17783397 | 0.67173209 | 0.7995846  |
| ENSMUSG00000095325 | 0.15235044 | 5.20675973 | 0.67176948 | 0.7995846  |
| ENSMUSG00000024687 | -0.1503839 | 6.95129261 | 0.67190203 | 0.7995846  |
| ENSMUSG00000079469 | -0.1525266 | 4.4728843  | 0.67192081 | 0.7995846  |
| ENSMUSG00000024018 | -0.1551224 | 3.97027196 | 0.67194322 | 0.7995846  |
| ENSMUSG00000051413 | 0.1515151  | 5.83568727 | 0.67232265 | 0.79995331 |
| ENSMUSG00000018567 | -0.1494153 | 8.08814527 | 0.67310278 | 0.800712   |
| ENSMUSG00000001999 | 0.15347353 | 4.43306122 | 0.67314567 | 0.800712   |
| ENSMUSG00000028847 | 0.15209382 | 4.98701316 | 0.67317398 | 0.800712   |
| ENSMUSG00000028890 | -0.1516601 | 5.59177829 | 0.67323893 | 0.800712   |
| ENSMUSG00000079477 | 0.14933451 | 7.83588433 | 0.67335125 | 0.80076273 |
| ENSMUSG00000046519 | -0.1509416 | 5.66210006 | 0.67348183 | 0.80083517 |
| ENSMUSG00000030706 | -0.1538608 | 4.36819773 | 0.6737938  | 0.8010781  |
| ENSMUSG00000049751 | -0.1509071 | 5.72301654 | 0.6738255  | 0.8010781  |

|                    |            |            |            |            |
|--------------------|------------|------------|------------|------------|
| ENSMUSG00000085823 | 0.15691622 | 3.54573386 | 0.67423329 | 0.80148001 |
| ENSMUSG00000027654 | 0.18621915 | 1.66164454 | 0.67454977 | 0.80177331 |
| ENSMUSG00000039652 | -0.161971  | 2.12415533 | 0.67470602 | 0.80187611 |
| ENSMUSG00000038848 | -0.1494248 | 6.43546943 | 0.67512167 | 0.80228715 |
| ENSMUSG00000019843 | 0.14915363 | 6.37115359 | 0.67540645 | 0.8025426  |
| ENSMUSG00000036941 | 0.15139388 | 5.05751975 | 0.67551799 | 0.80259218 |
| ENSMUSG00000014426 | 0.14975754 | 5.44342547 | 0.67572523 | 0.80275543 |
| ENSMUSG00000042229 | -0.1503227 | 5.37347412 | 0.67604811 | 0.80295063 |
| ENSMUSG00000029458 | 0.14865061 | 6.31951906 | 0.67606028 | 0.80295063 |
| ENSMUSG00000014668 | -0.1484921 | 6.70528823 | 0.6761507  | 0.80295063 |
| ENSMUSG00000020894 | -0.1477939 | 7.99650738 | 0.67625219 | 0.80295063 |
| ENSMUSG00000073422 | 0.18460324 | 1.1410948  | 0.6762541  | 0.80295063 |
| ENSMUSG00000061544 | -0.1637717 | 2.42730899 | 0.67630865 | 0.80295063 |
| ENSMUSG00000037370 | -0.1488076 | 5.99001729 | 0.67639416 | 0.80296921 |
| ENSMUSG00000002055 | -0.1515897 | 4.60512468 | 0.67675111 | 0.80331    |
| ENSMUSG00000021910 | 0.14772869 | 8.01236867 | 0.67686765 | 0.80332524 |
| ENSMUSG00000020571 | 0.14763055 | 7.46339893 | 0.67690372 | 0.80332524 |
| ENSMUSG00000000278 | 0.14775646 | 6.94755176 | 0.67719802 | 0.80354006 |
| ENSMUSG00000024350 | -0.1501064 | 4.83940529 | 0.67722455 | 0.80354006 |
| ENSMUSG00000032415 | -0.1945298 | 1.55758825 | 0.67735817 | 0.80361567 |
| ENSMUSG00000014633 | 0.15743296 | 2.23077302 | 0.67752625 | 0.80373212 |
| ENSMUSG00000039509 | -0.1483836 | 5.73162153 | 0.67781595 | 0.80399281 |
| ENSMUSG00000035239 | 0.18384743 | 2.14343567 | 0.67800512 | 0.80410932 |
| ENSMUSG00000022681 | -0.1483472 | 5.49243672 | 0.67805408 | 0.80410932 |
| ENSMUSG00000027671 | -0.1482683 | 5.98438208 | 0.67825136 | 0.80418377 |
| ENSMUSG00000035208 | -0.14716   | 7.17807821 | 0.67827075 | 0.80418377 |
| ENSMUSG00000034189 | 0.14823442 | 5.7699479  | 0.67832674 | 0.80418377 |
| ENSMUSG00000025340 | -0.147856  | 5.43887815 | 0.67862449 | 0.80439621 |
| ENSMUSG00000039055 | 0.17629311 | 1.31421308 | 0.67864588 | 0.80439621 |
| ENSMUSG00000094951 | 0.15047754 | 4.03219444 | 0.67981769 | 0.80570207 |
| ENSMUSG00000025332 | 0.14663039 | 7.36760783 | 0.68004918 | 0.80582499 |
| ENSMUSG00000025809 | 0.14646295 | 7.16056499 | 0.68009315 | 0.80582499 |
| ENSMUSG00000030868 | -0.1465888 | 6.92860232 | 0.68019239 | 0.80582499 |
| ENSMUSG00000076589 | -0.2377859 | 0.98030378 | 0.68021185 | 0.80582499 |
| ENSMUSG00000001175 | -0.1457434 | 9.22103689 | 0.68027192 | 0.80582499 |
| ENSMUSG00000076665 | -0.15716   | 3.89717442 | 0.68052124 | 0.80591755 |
| ENSMUSG00000025428 | 0.14563752 | 8.73057233 | 0.6806005  | 0.80591755 |
| ENSMUSG00000027650 | -0.1469055 | 6.01869115 | 0.68060176 | 0.80591755 |
| ENSMUSG00000020454 | -0.1461732 | 7.06176589 | 0.68067796 | 0.80591755 |
| ENSMUSG00000079363 | -0.1459964 | 7.1699194  | 0.68070061 | 0.80591755 |
| ENSMUSG00000073400 | -0.147993  | 5.52485123 | 0.68092521 | 0.80610044 |
| ENSMUSG00000028771 | -0.1469407 | 5.42507372 | 0.68198437 | 0.80727117 |
| ENSMUSG00000029047 | 0.1533973  | 2.905002   | 0.68209046 | 0.80730746 |

|                    |            |            |            |            |
|--------------------|------------|------------|------------|------------|
| ENSMUSG00000028431 | -0.1456819 | 6.17400141 | 0.68215549 | 0.80730746 |
| ENSMUSG00000001700 | -0.1452059 | 7.46958646 | 0.68242442 | 0.80737812 |
| ENSMUSG00000028974 | 0.1467808  | 5.01935715 | 0.68254202 | 0.80737812 |
| ENSMUSG00000040669 | 0.14815019 | 4.82211618 | 0.68260788 | 0.80737812 |
| ENSMUSG00000032235 | -0.1457803 | 6.14626713 | 0.68266639 | 0.80737812 |
| ENSMUSG00000044948 | 0.14503621 | 6.54399031 | 0.68270533 | 0.80737812 |
| ENSMUSG00000033272 | 0.14605284 | 5.70502804 | 0.68285034 | 0.80737812 |
| ENSMUSG00000034059 | 0.14995188 | 4.4639183  | 0.68293274 | 0.80737812 |
| ENSMUSG00000039145 | 0.14524563 | 6.98511758 | 0.68297658 | 0.80737812 |
| ENSMUSG00000027890 | 0.16013113 | 2.5853717  | 0.68301592 | 0.80737812 |
| ENSMUSG00000033701 | -0.1509784 | 3.64523861 | 0.68302844 | 0.80737812 |
| ENSMUSG00000031756 | -0.1660078 | 2.80642865 | 0.68305366 | 0.80737812 |
| ENSMUSG00000006673 | -0.1449432 | 7.06887075 | 0.68305804 | 0.80737812 |
| ENSMUSG00000055817 | 0.14566349 | 6.18821276 | 0.68325466 | 0.80750965 |
| ENSMUSG00000037461 | -0.1450717 | 6.45816415 | 0.68330982 | 0.80750965 |
| ENSMUSG00000074272 | -0.1453359 | 6.57031703 | 0.6835546  | 0.80763135 |
| ENSMUSG00000046897 | 0.14434606 | 7.93826181 | 0.68356887 | 0.80763135 |
| ENSMUSG00000098022 | -0.218592  | 1.01035078 | 0.68362357 | 0.80763135 |
| ENSMUSG00000095253 | -0.1484047 | 4.19656975 | 0.68397496 | 0.80796344 |
| ENSMUSG00000033444 | -0.1442029 | 7.35460037 | 0.68438011 | 0.80835896 |
| ENSMUSG00000050957 | 0.15856422 | 2.76447006 | 0.68464831 | 0.80856505 |
| ENSMUSG00000076523 | -0.1481399 | 5.23777348 | 0.68469528 | 0.80856505 |
| ENSMUSG00000030738 | -0.1437242 | 8.38973471 | 0.68481594 | 0.80862447 |
| ENSMUSG00000062202 | 0.14558773 | 5.37024389 | 0.68506767 | 0.80883863 |
| ENSMUSG00000066647 | -0.1663939 | 2.47198626 | 0.68557288 | 0.80931643 |
| ENSMUSG00000048668 | 0.14653917 | 4.86093498 | 0.6856158  | 0.80931643 |
| ENSMUSG00000028163 | 0.14325228 | 8.29732016 | 0.68568358 | 0.80931643 |
| ENSMUSG00000056091 | 0.14658292 | 4.86118704 | 0.68600914 | 0.80961756 |
| ENSMUSG00000054715 | -0.1493061 | 3.85126442 | 0.68633477 | 0.80984224 |
| ENSMUSG00000004789 | -0.1432171 | 7.32302036 | 0.68634042 | 0.80984224 |
| ENSMUSG00000057649 | -0.1439694 | 6.19660936 | 0.68655803 | 0.81001586 |
| ENSMUSG00000017176 | 0.14590417 | 4.7939999  | 0.68668117 | 0.810078   |
| ENSMUSG00000022972 | 0.15918167 | 2.77535678 | 0.6867585  | 0.81008609 |
| ENSMUSG00000015971 | 0.14468851 | 5.17602541 | 0.68699388 | 0.81028059 |
| ENSMUSG00000020696 | -0.143882  | 5.50885246 | 0.68708383 | 0.81030354 |
| ENSMUSG00000009585 | 0.14239526 | 9.36912294 | 0.68717092 | 0.81032312 |
| ENSMUSG00000026087 | -0.1444691 | 5.36802281 | 0.68751483 | 0.8106455  |
| ENSMUSG00000071855 | 0.16016875 | 2.61179352 | 0.68775397 | 0.81078529 |
| ENSMUSG00000024104 | -0.1424454 | 7.64412836 | 0.68777445 | 0.81078529 |
| ENSMUSG00000020430 | 0.14269533 | 6.47802847 | 0.68807927 | 0.81106145 |
| ENSMUSG00000028398 | -0.1459214 | 4.3331562  | 0.68829959 | 0.81123796 |
| ENSMUSG00000044026 | 0.17534382 | 1.83259758 | 0.68841616 | 0.81129216 |
| ENSMUSG00000021891 | -0.1449583 | 4.81545308 | 0.68866526 | 0.81150253 |



|                    |            |            |            |            |
|--------------------|------------|------------|------------|------------|
| ENSMUSG00000019866 | -0.1418644 | 7.15908051 | 0.6893765  | 0.81225737 |
| ENSMUSG00000020186 | -0.1683696 | 2.28596944 | 0.68951956 | 0.81234266 |
| ENSMUSG00000017843 | -0.1417372 | 7.1001752  | 0.68974395 | 0.81244749 |
| ENSMUSG00000025277 | 0.14866254 | 3.52857927 | 0.6897499  | 0.81244749 |
| ENSMUSG00000018931 | 0.14359692 | 5.06208595 | 0.68999638 | 0.81265454 |
| ENSMUSG00000010095 | 0.14168315 | 7.08829112 | 0.69008293 | 0.81267322 |
| ENSMUSG00000097616 | -0.1922181 | 1.03992321 | 0.69023568 | 0.81274064 |
| ENSMUSG00000037278 | 0.15236162 | 2.68641779 | 0.69037033 | 0.81274064 |
| ENSMUSG00000039230 | 0.14300759 | 5.77207832 | 0.69041477 | 0.81274064 |
| ENSMUSG00000064357 | 0.17829041 | 1.49577638 | 0.69048418 | 0.81274064 |
| ENSMUSG00000028914 | 0.14233591 | 5.71389568 | 0.6904937  | 0.81274064 |
| ENSMUSG00000027944 | -0.1442174 | 4.96758448 | 0.69082679 | 0.81304945 |
| ENSMUSG00000031546 | -0.1445358 | 4.77986334 | 0.69098435 | 0.81307057 |
| ENSMUSG00000046516 | -0.143968  | 4.95756341 | 0.69103351 | 0.81307057 |
| ENSMUSG00000033502 | -0.142946  | 5.33931649 | 0.69105693 | 0.81307057 |
| ENSMUSG00000022967 | -0.140688  | 7.56377916 | 0.69118719 | 0.81309873 |
| ENSMUSG00000062825 | 0.14035887 | 9.75863936 | 0.69128688 | 0.81309873 |
| ENSMUSG00000028329 | -0.1459086 | 4.19279786 | 0.69129308 | 0.81309873 |
| ENSMUSG00000058997 | -0.1415797 | 5.58588677 | 0.69160217 | 0.81337906 |
| ENSMUSG00000027166 | -0.1506838 | 2.99726992 | 0.69173744 | 0.81345492 |
| ENSMUSG00000032398 | -0.1449723 | 4.55475458 | 0.69196459 | 0.81359308 |
| ENSMUSG00000025236 | -0.1411947 | 6.19026032 | 0.69199648 | 0.81359308 |
| ENSMUSG00000000399 | -0.1416238 | 5.79533093 | 0.69220346 | 0.8137532  |
| ENSMUSG00000038900 | -0.1399    | 9.51102301 | 0.69235875 | 0.81385253 |
| ENSMUSG00000035877 | -0.1455748 | 3.69432747 | 0.6927299  | 0.81420554 |
| ENSMUSG00000034190 | -0.1417459 | 5.56535326 | 0.69284266 | 0.81423328 |
| ENSMUSG00000032207 | 0.15020054 | 2.4405797  | 0.69289517 | 0.81423328 |
| ENSMUSG00000073609 | 0.14149878 | 5.55132688 | 0.69298832 | 0.8142595  |
| ENSMUSG00000028149 | -0.1396788 | 7.67094231 | 0.69352243 | 0.81474255 |
| ENSMUSG00000026036 | 0.14637096 | 3.57941912 | 0.69354118 | 0.81474255 |
| ENSMUSG00000064105 | 0.16707265 | 2.30302246 | 0.69379578 | 0.81495836 |
| ENSMUSG00000028797 | 0.13999989 | 6.7332191  | 0.69389028 | 0.81498608 |
| ENSMUSG00000072964 | 0.1421677  | 4.72253685 | 0.69398356 | 0.81501236 |
| ENSMUSG00000066979 | 0.14014699 | 5.67394351 | 0.69420955 | 0.81513336 |
| ENSMUSG00000073236 | -0.1983907 | 1.24592419 | 0.69422841 | 0.81513336 |
| ENSMUSG00000003464 | 0.1409077  | 5.45446398 | 0.69450127 | 0.81537045 |
| ENSMUSG00000063077 | 0.14177939 | 5.53578589 | 0.69466438 | 0.81547866 |
| ENSMUSG00000099876 | -0.2051139 | 1.41770849 | 0.69479997 | 0.81552614 |
| ENSMUSG00000091512 | 0.14354282 | 4.23344315 | 0.69484672 | 0.81552614 |
| ENSMUSG00000032375 | -0.1435832 | 3.52326699 | 0.69523843 | 0.81589142 |
| ENSMUSG00000030577 | 0.13840592 | 10.7355933 | 0.6952999  | 0.81589142 |
| ENSMUSG00000047153 | 0.13892829 | 7.45468641 | 0.69543039 | 0.81594265 |
| ENSMUSG00000073491 | -0.1385699 | 7.60916868 | 0.69548552 | 0.81594265 |

|                    |            |            |            |            |
|--------------------|------------|------------|------------|------------|
| ENSMUSG00000053950 | 0.14089269 | 5.42778038 | 0.69579862 | 0.81622667 |
| ENSMUSG00000034109 | -0.1407305 | 4.64338233 | 0.6959873  | 0.81630809 |
| ENSMUSG00000037921 | 0.14283911 | 5.2068384  | 0.69605188 | 0.81630809 |
| ENSMUSG00000049299 | -0.1417387 | 5.00617518 | 0.69608107 | 0.81630809 |
| ENSMUSG00000052310 | 0.13977979 | 5.6183152  | 0.69626634 | 0.81644207 |
| ENSMUSG00000037824 | -0.1389638 | 6.05859527 | 0.69732027 | 0.81749948 |
| ENSMUSG00000070705 | 0.1935096  | 1.3962114  | 0.69733828 | 0.81749948 |
| ENSMUSG00000026979 | 0.13755086 | 8.63411262 | 0.69738147 | 0.81749948 |
| ENSMUSG00000032369 | 0.15092768 | 3.20434732 | 0.6977882  | 0.81776615 |
| ENSMUSG00000032578 | -0.1471495 | 3.20652991 | 0.6977882  | 0.81776615 |
| ENSMUSG00000004460 | -0.1381444 | 7.01456228 | 0.69782237 | 0.81776615 |
| ENSMUSG00000097123 | -0.1617323 | 2.46365774 | 0.69795272 | 0.81783451 |
| ENSMUSG00000020846 | -0.1402964 | 4.57086575 | 0.698023   | 0.81783451 |
| ENSMUSG00000028010 | 0.14224646 | 3.69402407 | 0.69819047 | 0.81794736 |
| ENSMUSG00000029178 | -0.1380455 | 6.53938914 | 0.69827562 | 0.81796374 |
| ENSMUSG00000030008 | -0.150862  | 3.25140585 | 0.69851376 | 0.81810341 |
| ENSMUSG00000058392 | -0.1398467 | 4.7630866  | 0.69858962 | 0.81810341 |
| ENSMUSG00000032667 | 0.13856126 | 5.97212454 | 0.69860835 | 0.81810341 |
| ENSMUSG00000028405 | 0.13964899 | 5.30123776 | 0.69883766 | 0.81823588 |
| ENSMUSG00000020604 | 0.16078216 | 2.83560947 | 0.69886385 | 0.81823588 |
| ENSMUSG00000029571 | -0.1373399 | 6.82681843 | 0.6991298  | 0.8184639  |
| ENSMUSG00000026430 | -0.1367993 | 7.93271573 | 0.69930467 | 0.8184974  |
| ENSMUSG00000045098 | -0.1368328 | 7.34662579 | 0.69942789 | 0.8184974  |
| ENSMUSG00000011958 | -0.1373177 | 6.74702347 | 0.69943789 | 0.8184974  |
| ENSMUSG00000018800 | 0.14759578 | 3.5431289  | 0.69950321 | 0.8184974  |
| ENSMUSG00000030286 | -0.1379509 | 6.08058356 | 0.69959631 | 0.8184974  |
| ENSMUSG00000074862 | 0.15607418 | 2.99315554 | 0.69960594 | 0.8184974  |
| ENSMUSG00000010051 | 0.21744914 | 1.09172678 | 0.69965684 | 0.8184974  |
| ENSMUSG00000033706 | 0.13825206 | 5.04653529 | 0.69979926 | 0.81858069 |
| ENSMUSG00000023791 | -0.1415956 | 4.01781411 | 0.70018297 | 0.8189462  |
| ENSMUSG00000023021 | -0.1370442 | 6.17416583 | 0.70035445 | 0.81906342 |
| ENSMUSG00000030232 | -0.1368442 | 6.64562947 | 0.70051479 | 0.8191676  |
| ENSMUSG00000048439 | -0.1408636 | 3.22056479 | 0.70079802 | 0.81941545 |
| ENSMUSG00000041765 | 0.1384801  | 5.23017046 | 0.70091742 | 0.8194717  |
| ENSMUSG00000031167 | -0.1356215 | 7.53912209 | 0.70162817 | 0.82009523 |
| ENSMUSG00000011831 | -0.1365961 | 5.31452449 | 0.70166302 | 0.82009523 |
| ENSMUSG00000094102 | 0.1478056  | 1.811646   | 0.70166478 | 0.82009523 |
| ENSMUSG00000037683 | 0.16388557 | 1.69259791 | 0.70186793 | 0.82024928 |
| ENSMUSG00000031860 | 0.18043973 | 1.5671684  | 0.70207889 | 0.82041241 |
| ENSMUSG00000032112 | 0.13744265 | 5.17867823 | 0.70216311 | 0.82042742 |
| ENSMUSG00000030166 | 0.13968094 | 4.38590624 | 0.70224678 | 0.82044179 |
| ENSMUSG00000014418 | -0.1355803 | 6.87682774 | 0.70265401 | 0.82083414 |
| ENSMUSG00000042579 | 0.15774661 | 2.80033023 | 0.70288666 | 0.82102248 |

|                    |            |            |            |            |
|--------------------|------------|------------|------------|------------|
| ENSMUSG00000030424 | 0.16046854 | 2.35072736 | 0.70333991 | 0.82146843 |
| ENSMUSG00000015120 | -0.1346449 | 8.16566472 | 0.70375266 | 0.82186699 |
| ENSMUSG00000024002 | -0.13454   | 7.69704522 | 0.70393369 | 0.82191501 |
| ENSMUSG00000028164 | -0.1359626 | 5.59758937 | 0.70393678 | 0.82191501 |
| ENSMUSG00000032463 | -0.138087  | 4.64083703 | 0.70425509 | 0.82220316 |
| ENSMUSG00000022677 | -0.1365287 | 5.00570292 | 0.70465346 | 0.8225847  |
| ENSMUSG00000034203 | -0.1398547 | 3.32336447 | 0.7047999  | 0.82261032 |
| ENSMUSG00000032306 | 0.14372022 | 3.5745473  | 0.70481853 | 0.82261032 |
| ENSMUSG00000021252 | 0.13799446 | 4.61185742 | 0.70496512 | 0.82263086 |
| ENSMUSG00000031924 | -0.1347425 | 6.71490636 | 0.70497926 | 0.82263086 |
| ENSMUSG00000017781 | -0.1339903 | 8.17089255 | 0.70514887 | 0.82267038 |
| ENSMUSG00000076668 | 0.22931403 | 1.28118292 | 0.70515627 | 0.82267038 |
| ENSMUSG00000093838 | -0.1511138 | 3.20322801 | 0.70542345 | 0.82289858 |
| ENSMUSG00000020777 | 0.1357481  | 5.52838467 | 0.70563274 | 0.82305919 |
| ENSMUSG00000042747 | 0.13636772 | 4.58908232 | 0.70582467 | 0.82319953 |
| ENSMUSG00000031985 | -0.1340362 | 6.8639825  | 0.70610408 | 0.82344186 |
| ENSMUSG00000031618 | 0.15791416 | 2.70088162 | 0.70643982 | 0.82374983 |
| ENSMUSG00000037017 | -0.1384814 | 4.51599399 | 0.70681964 | 0.82410911 |
| ENSMUSG00000055447 | -0.1329489 | 8.75485719 | 0.70704775 | 0.82415137 |
| ENSMUSG00000031143 | 0.14290924 | 1.4603807  | 0.70708905 | 0.82415137 |
| ENSMUSG00000022536 | -0.1332029 | 7.75744442 | 0.7071617  | 0.82415137 |
| ENSMUSG00000027635 | -0.1380272 | 4.14667624 | 0.70717905 | 0.82415137 |
| ENSMUSG00000037013 | -0.1337335 | 6.29989634 | 0.70721436 | 0.82415137 |
| ENSMUSG00000070327 | 0.13285673 | 9.48360937 | 0.70732735 | 0.82419948 |
| ENSMUSG00000021420 | 0.13864598 | 3.68406209 | 0.70759475 | 0.82442749 |
| ENSMUSG00000031755 | -0.1343707 | 4.55456522 | 0.70778494 | 0.82456551 |
| ENSMUSG00000003418 | 0.13521054 | 5.70243679 | 0.70825324 | 0.82502746 |
| ENSMUSG00000028140 | -0.1341823 | 5.33212494 | 0.70861595 | 0.82536634 |
| ENSMUSG00000027506 | -0.1325248 | 6.93706611 | 0.70869742 | 0.8253776  |
| ENSMUSG00000045822 | 0.14922626 | 2.72073463 | 0.70951284 | 0.82622096 |
| ENSMUSG00000026698 | 0.13394199 | 4.81885435 | 0.70958673 | 0.82622096 |
| ENSMUSG00000003680 | 0.13378237 | 5.38036012 | 0.70963719 | 0.82622096 |
| ENSMUSG00000021417 | -0.1341237 | 4.97770896 | 0.70971525 | 0.82622816 |
| ENSMUSG00000015013 | 0.13873282 | 4.07120036 | 0.70985392 | 0.82630591 |
| ENSMUSG00000029701 | -0.1322925 | 6.79378637 | 0.70996479 | 0.82635128 |
| ENSMUSG00000020973 | -0.1413983 | 3.56815219 | 0.71023038 | 0.82657672 |
| ENSMUSG00000013495 | 0.13994258 | 4.23041744 | 0.71044612 | 0.82664587 |
| ENSMUSG00000035152 | -0.1314171 | 8.45973839 | 0.71044765 | 0.82664587 |
| ENSMUSG00000019842 | -0.1333692 | 5.2908202  | 0.71050554 | 0.82664587 |
| ENSMUSG00000031861 | 0.13297127 | 4.5719593  | 0.71069858 | 0.82672444 |
| ENSMUSG00000029385 | -0.13173   | 6.9910368  | 0.71071692 | 0.82672444 |
| ENSMUSG00000019731 | -0.1319295 | 6.9069053  | 0.7108077  | 0.82674639 |
| ENSMUSG00000058594 | -0.1319703 | 6.42234103 | 0.710969   | 0.82685033 |

|                    |            |            |            |            |
|--------------------|------------|------------|------------|------------|
| ENSMUSG00000028478 | 0.13153943 | 6.57549325 | 0.71106738 | 0.82688108 |
| ENSMUSG00000039599 | 0.13656889 | 4.29804168 | 0.71130989 | 0.82707942 |
| ENSMUSG00000038014 | -0.1309466 | 7.49550843 | 0.71166812 | 0.82737921 |
| ENSMUSG00000084314 | 0.16368882 | 1.49108469 | 0.71173593 | 0.82737921 |
| ENSMUSG00000003518 | 0.13341516 | 5.02195587 | 0.71178364 | 0.82737921 |
| ENSMUSG00000044715 | -0.1354145 | 4.37874284 | 0.71191228 | 0.82744506 |
| ENSMUSG00000020903 | -0.1341054 | 4.92489854 | 0.71208214 | 0.82755881 |
| ENSMUSG00000027878 | -0.1301708 | 8.97496104 | 0.71274345 | 0.82815864 |
| ENSMUSG00000066456 | 0.13518843 | 3.90855401 | 0.71275132 | 0.82815864 |
| ENSMUSG00000031153 | 0.13058162 | 7.58867993 | 0.7128144  | 0.82815864 |
| ENSMUSG00000052798 | -0.1314686 | 5.61861005 | 0.71309596 | 0.82840203 |
| ENSMUSG00000028367 | 0.13230476 | 5.55870527 | 0.71345653 | 0.82872273 |
| ENSMUSG00000031367 | -0.1317778 | 5.03386874 | 0.71354971 | 0.82872273 |
| ENSMUSG00000006763 | 0.13324949 | 4.78405578 | 0.71358831 | 0.82872273 |
| ENSMUSG00000090330 | 0.13656844 | 3.40970216 | 0.71372    | 0.82879194 |
| ENSMUSG00000029165 | 0.13739734 | 4.09202024 | 0.7138713  | 0.8288839  |
| ENSMUSG00000037174 | -0.1301366 | 7.002897   | 0.71395926 | 0.8289023  |
| ENSMUSG00000020652 | -0.1319664 | 4.88996123 | 0.71407036 | 0.82894757 |
| ENSMUSG00000060550 | 0.12924836 | 10.1871665 | 0.71464854 | 0.82947148 |
| ENSMUSG00000062761 | -0.1304871 | 5.53170445 | 0.71466598 | 0.82947148 |
| ENSMUSG00000029213 | -0.130239  | 6.3044236  | 0.71479294 | 0.82953507 |
| ENSMUSG00000040613 | 0.13023806 | 6.29064941 | 0.71504875 | 0.82968404 |
| ENSMUSG00000029772 | -0.1298892 | 6.55488184 | 0.71506566 | 0.82968404 |
| ENSMUSG00000029263 | -0.1317519 | 3.92132557 | 0.71542795 | 0.82998627 |
| ENSMUSG00000030930 | -0.1294166 | 7.27059786 | 0.71547055 | 0.82998627 |
| ENSMUSG00000027999 | -0.1420608 | 2.81659616 | 0.71576065 | 0.83023901 |
| ENSMUSG00000057388 | 0.13258031 | 4.57936782 | 0.71601942 | 0.83035135 |
| ENSMUSG00000041837 | -0.1317483 | 5.31218171 | 0.71604721 | 0.83035135 |
| ENSMUSG00000082536 | -0.148508  | 2.69837199 | 0.7161739  | 0.83035135 |
| ENSMUSG00000001143 | 0.12873042 | 5.90308581 | 0.71621697 | 0.83035135 |
| ENSMUSG00000059291 | 0.1286228  | 8.36383679 | 0.71621867 | 0.83035135 |
| ENSMUSG00000026974 | -0.1337837 | 4.12779021 | 0.71632952 | 0.83039611 |
| ENSMUSG00000027394 | -0.1485361 | 2.26456153 | 0.71654567 | 0.83056292 |
| ENSMUSG00000028419 | -0.1299475 | 5.76928062 | 0.716853   | 0.83083538 |
| ENSMUSG00000021871 | 0.12961368 | 6.13675758 | 0.71692805 | 0.83083859 |
| ENSMUSG00000075010 | 0.12996697 | 6.14849423 | 0.71701531 | 0.83085595 |
| ENSMUSG00000033940 | 0.12889499 | 6.42698575 | 0.71715876 | 0.83093275 |
| ENSMUSG00000030062 | 0.12844623 | 6.97921677 | 0.71722616 | 0.83093275 |
| ENSMUSG00000028999 | -0.1302481 | 5.17639457 | 0.71738069 | 0.83102802 |
| ENSMUSG00000061118 | -0.1411686 | 3.13507189 | 0.71782714 | 0.83125455 |
| ENSMUSG00000046417 | -0.1395958 | 3.352765   | 0.71782798 | 0.83125455 |
| ENSMUSG00000056888 | -0.1292456 | 5.56858309 | 0.71783204 | 0.83125455 |
| ENSMUSG00000033107 | -0.1457134 | 2.2758998  | 0.71788388 | 0.83125455 |

|                    |            |            |            |            |
|--------------------|------------|------------|------------|------------|
| ENSMUSG00000024789 | -0.1278735 | 8.14631494 | 0.71793781 | 0.83125455 |
| ENSMUSG00000030744 | 0.12722335 | 10.0685337 | 0.71887896 | 0.83226042 |
| ENSMUSG00000034300 | -0.1281995 | 6.10987208 | 0.71907838 | 0.83240745 |
| ENSMUSG00000056899 | -0.1545042 | 2.28348165 | 0.71920975 | 0.83247569 |
| ENSMUSG00000038991 | -0.1272154 | 7.36379202 | 0.71970715 | 0.83296755 |
| ENSMUSG00000036513 | -0.1315266 | 4.26036298 | 0.72028087 | 0.83354763 |
| ENSMUSG00000043831 | 0.14484763 | 2.84086094 | 0.72035748 | 0.83355236 |
| ENSMUSG00000032305 | 0.12866545 | 4.97836325 | 0.72065819 | 0.83381639 |
| ENSMUSG00000026672 | -0.1300754 | 4.40626683 | 0.72078794 | 0.83388259 |
| ENSMUSG00000025280 | -0.1274129 | 6.16437928 | 0.72103066 | 0.83400418 |
| ENSMUSG00000026470 | -0.1284229 | 4.82022545 | 0.72115307 | 0.83400418 |
| ENSMUSG00000003437 | -0.1267779 | 6.91861906 | 0.72120881 | 0.83400418 |
| ENSMUSG00000031508 | 0.1275824  | 6.07286032 | 0.72124683 | 0.83400418 |
| ENSMUSG00000043190 | -0.1299735 | 3.62491819 | 0.72125581 | 0.83400418 |
| ENSMUSG00000015932 | -0.1280892 | 5.01744812 | 0.72149277 | 0.83419427 |
| ENSMUSG00000025532 | -0.1288263 | 4.84206697 | 0.72166239 | 0.83430647 |
| ENSMUSG00000049550 | -0.1267742 | 6.08274556 | 0.72219866 | 0.834774   |
| ENSMUSG00000043153 | 0.16431158 | 1.23789751 | 0.72221205 | 0.834774   |
| ENSMUSG00000020843 | 0.13016512 | 3.85441546 | 0.72278171 | 0.83531678 |
| ENSMUSG00000027012 | -0.1259369 | 7.00823241 | 0.72290771 | 0.83531678 |
| ENSMUSG00000049624 | 0.13870761 | 3.25669029 | 0.72294412 | 0.83531678 |
| ENSMUSG00000045867 | 0.16874728 | 1.80586641 | 0.72297231 | 0.83531678 |
| ENSMUSG00000024045 | -0.1253591 | 8.25593533 | 0.72317259 | 0.83539751 |
| ENSMUSG00000096464 | 0.13196574 | 3.93755017 | 0.72318753 | 0.83539751 |
| ENSMUSG00000031386 | 0.12535275 | 7.74052939 | 0.72374543 | 0.83595797 |
| ENSMUSG00000033916 | 0.12599429 | 6.04657435 | 0.72399353 | 0.8360834  |
| ENSMUSG00000015766 | 0.13095417 | 3.50365461 | 0.72402755 | 0.8360834  |
| ENSMUSG00000032026 | 0.12771882 | 4.96742959 | 0.72407223 | 0.8360834  |
| ENSMUSG00000041037 | -0.1269115 | 5.46302463 | 0.72423766 | 0.83619043 |
| ENSMUSG00000048215 | -0.13924   | 2.13878541 | 0.72453503 | 0.83644976 |
| ENSMUSG00000020831 | -0.1568694 | 1.68244206 | 0.72480359 | 0.83667577 |
| ENSMUSG00000061950 | -0.1252298 | 6.57612542 | 0.72500267 | 0.83682154 |
| ENSMUSG00000031570 | 0.14416399 | 2.61789369 | 0.72517772 | 0.83693955 |
| ENSMUSG00000021468 | 0.12614116 | 5.70344514 | 0.72556645 | 0.83720283 |
| ENSMUSG00000015536 | -0.1285857 | 4.45294867 | 0.72565493 | 0.83720283 |
| ENSMUSG00000038888 | 0.14350832 | 2.3196538  | 0.72565981 | 0.83720283 |
| ENSMUSG00000031231 | -0.1255924 | 5.6286495  | 0.72569718 | 0.83720283 |
| ENSMUSG00000062691 | 0.14237297 | 2.62382593 | 0.72620806 | 0.83762272 |
| ENSMUSG00000032536 | 0.12592193 | 5.74851022 | 0.72624407 | 0.83762272 |
| ENSMUSG00000029326 | 0.13278267 | 2.99052879 | 0.72627974 | 0.83762272 |
| ENSMUSG00000030614 | 0.12998827 | 3.84445727 | 0.72643759 | 0.83772071 |
| ENSMUSG00000030126 | 0.12578514 | 5.4446242  | 0.7266794  | 0.83791551 |
| ENSMUSG00000026639 | 0.15506598 | 1.26981554 | 0.72733574 | 0.8385882  |

|                    |            |            |            |            |
|--------------------|------------|------------|------------|------------|
| ENSMUSG00000041733 | 0.12822177 | 4.5388118  | 0.72745944 | 0.8386467  |
| ENSMUSG00000034574 | 0.13048687 | 4.21219621 | 0.72766711 | 0.83880199 |
| ENSMUSG00000031641 | -0.1252747 | 2.93827804 | 0.72807152 | 0.83918401 |
| ENSMUSG00000022350 | -0.123444  | 6.59587946 | 0.72826144 | 0.83931876 |
| ENSMUSG00000096145 | 0.13444731 | 2.16356893 | 0.72876385 | 0.83981357 |
| ENSMUSG00000037408 | 0.12663159 | 4.4747199  | 0.729183   | 0.84013907 |
| ENSMUSG00000026618 | -0.1229711 | 6.61054958 | 0.72919248 | 0.84013907 |
| ENSMUSG00000045679 | 0.12515204 | 5.32712179 | 0.72935534 | 0.8402425  |
| ENSMUSG00000031539 | 0.12419217 | 5.82848808 | 0.7294677  | 0.84028773 |
| ENSMUSG00000022442 | 0.13114735 | 2.9549313  | 0.72971124 | 0.84048404 |
| ENSMUSG00000022983 | -0.1229994 | 6.21958199 | 0.72997774 | 0.84070676 |
| ENSMUSG00000089901 | 0.1821872  | 1.1023266  | 0.73030939 | 0.84092021 |
| ENSMUSG00000062638 | 0.16247305 | 1.08908369 | 0.73030939 | 0.84092021 |
| ENSMUSG00000028608 | -0.1242567 | 5.44828544 | 0.73055105 | 0.84111422 |
| ENSMUSG00000092591 | -0.1216159 | 3.05658098 | 0.73074882 | 0.84125766 |
| ENSMUSG00000052833 | -0.122654  | 6.42475251 | 0.73087385 | 0.84131733 |
| ENSMUSG00000015165 | -0.1215527 | 8.67947169 | 0.73126861 | 0.84168747 |
| ENSMUSG00000068663 | 0.12397298 | 5.29011284 | 0.73143059 | 0.84178961 |
| ENSMUSG00000038692 | 0.16643659 | 1.45520669 | 0.73158024 | 0.84187755 |
| ENSMUSG00000056952 | -0.1216903 | 7.21597205 | 0.73197742 | 0.84225029 |
| ENSMUSG00000031949 | -0.13022   | 3.55000103 | 0.73236232 | 0.84260883 |
| ENSMUSG00000033909 | 0.12226603 | 5.90506402 | 0.73273477 | 0.84295299 |
| ENSMUSG00000034709 | 0.12232467 | 6.09062893 | 0.73285872 | 0.8430112  |
| ENSMUSG00000015314 | -0.1208804 | 7.61390299 | 0.73296454 | 0.84304857 |
| ENSMUSG00000079834 | -0.1532506 | 1.10246125 | 0.73305855 | 0.84307234 |
| ENSMUSG00000020389 | -0.1246371 | 2.65988534 | 0.73321347 | 0.84316615 |
| ENSMUSG00000061894 | 0.12317849 | 5.17016989 | 0.73350284 | 0.84340774 |
| ENSMUSG00000025154 | 0.1250068  | 4.79334386 | 0.7335703  | 0.84340774 |
| ENSMUSG00000079414 | 0.13752161 | 1.46698342 | 0.73375189 | 0.84345564 |
| ENSMUSG00000005078 | -0.1251554 | 4.46061724 | 0.73375872 | 0.84345564 |
| ENSMUSG00000063659 | -0.1205862 | 7.42078849 | 0.73393924 | 0.8435788  |
| ENSMUSG00000025017 | 0.12068293 | 7.1896944  | 0.73403389 | 0.84360323 |
| ENSMUSG00000020183 | -0.1205092 | 6.84255193 | 0.73417024 | 0.84367559 |
| ENSMUSG00000055850 | 0.12111848 | 6.29612287 | 0.73426623 | 0.84370155 |
| ENSMUSG00000095127 | -0.1243784 | 5.1291873  | 0.7343933  | 0.84376321 |
| ENSMUSG00000000827 | 0.12176305 | 5.37940279 | 0.73457653 | 0.84388939 |
| ENSMUSG00000044712 | -0.1216084 | 3.59607188 | 0.73473842 | 0.84391403 |
| ENSMUSG00000032512 | -0.1207332 | 6.46820853 | 0.73474481 | 0.84391403 |
| ENSMUSG00000028126 | -0.1212187 | 5.87151388 | 0.73486358 | 0.84396397 |
| ENSMUSG00000009731 | -0.137699  | 1.87274554 | 0.73493513 | 0.84396397 |
| ENSMUSG00000005204 | -0.1204772 | 6.54343261 | 0.73509934 | 0.84406821 |
| ENSMUSG00000005483 | 0.11947122 | 10.6471783 | 0.73520518 | 0.84410543 |
| ENSMUSG00000020936 | 0.12008758 | 6.8467988  | 0.73531535 | 0.84413471 |

|                    |            |            |            |            |
|--------------------|------------|------------|------------|------------|
| ENSMUSG00000041396 | -0.1261098 | 4.00647386 | 0.73542962 | 0.84413471 |
| ENSMUSG00000038679 | -0.1201121 | 5.9378958  | 0.73545099 | 0.84413471 |
| ENSMUSG00000050930 | 0.13609842 | 2.19577697 | 0.73553507 | 0.84414693 |
| ENSMUSG00000028641 | 0.1693148  | 1.47969178 | 0.73588903 | 0.84446884 |
| ENSMUSG00000038503 | 0.12038066 | 5.27246816 | 0.73613986 | 0.84467236 |
| ENSMUSG00000036333 | -0.1192821 | 7.49418487 | 0.73637377 | 0.84485642 |
| ENSMUSG00000005983 | 0.17113385 | 1.32702085 | 0.73704058 | 0.84549709 |
| ENSMUSG00000026975 | 0.1210076  | 4.5184206  | 0.73707928 | 0.84549709 |
| ENSMUSG00000036568 | -0.1190706 | 6.99637384 | 0.73715863 | 0.84550374 |
| ENSMUSG00000055128 | -0.1279871 | 3.24763039 | 0.7373471  | 0.84560149 |
| ENSMUSG00000035960 | 0.12022052 | 5.11170516 | 0.73739098 | 0.84560149 |
| ENSMUSG00000022742 | -0.1197755 | 6.38310408 | 0.73753989 | 0.84568789 |
| ENSMUSG00000030752 | 0.12201354 | 3.00309379 | 0.73762716 | 0.84570359 |
| ENSMUSG00000009291 | 0.11965266 | 6.14408865 | 0.73790507 | 0.84589119 |
| ENSMUSG00000028089 | -0.1203842 | 5.58581741 | 0.73793796 | 0.84589119 |
| ENSMUSG00000035772 | 0.12265949 | 4.5260502  | 0.73844206 | 0.84638463 |
| ENSMUSG00000052253 | -0.11919   | 6.15708535 | 0.73865021 | 0.8465388  |
| ENSMUSG00000021408 | -0.1193561 | 5.88166635 | 0.73890814 | 0.84674998 |
| ENSMUSG00000047959 | -0.1200796 | 4.78797115 | 0.73909924 | 0.8468651  |
| ENSMUSG00000016257 | 0.11949807 | 5.11019019 | 0.73915594 | 0.8468651  |
| ENSMUSG00000028069 | 0.12088957 | 4.25917252 | 0.73928202 | 0.84692513 |
| ENSMUSG00000021681 | -0.1188563 | 6.01108271 | 0.73946358 | 0.84704871 |
| ENSMUSG00000039033 | -0.1213082 | 3.73351024 | 0.74008938 | 0.84764828 |
| ENSMUSG00000028443 | 0.14754792 | 2.01810401 | 0.74013447 | 0.84764828 |
| ENSMUSG00000087260 | -0.119546  | 5.07497225 | 0.74084102 | 0.84813038 |
| ENSMUSG00000027845 | -0.1197268 | 4.66667949 | 0.74088594 | 0.84813038 |
| ENSMUSG00000038816 | -0.1266402 | 3.1206221  | 0.74090031 | 0.84813038 |
| ENSMUSG00000006941 | -0.1196471 | 5.07428116 | 0.74092283 | 0.84813038 |
| ENSMUSG00000028745 | 0.11702482 | 8.09842499 | 0.74092434 | 0.84813038 |
| ENSMUSG00000020929 | 0.11734278 | 6.91456362 | 0.74146528 | 0.84866508 |
| ENSMUSG00000042305 | -0.1175571 | 6.07061409 | 0.74157894 | 0.84871066 |
| ENSMUSG00000042350 | -0.1169521 | 7.0625825  | 0.74177555 | 0.84885117 |
| ENSMUSG00000075486 | 0.11918479 | 4.34197099 | 0.74224878 | 0.84930815 |
| ENSMUSG00000050600 | -0.1162671 | 7.46986212 | 0.74280363 | 0.84985843 |
| ENSMUSG00000028878 | -0.1169482 | 5.24279457 | 0.74338145 | 0.85038668 |
| ENSMUSG00000093661 | 0.12122062 | 4.159075   | 0.74341329 | 0.85038668 |
| ENSMUSG00000030763 | -0.1236335 | 3.33277597 | 0.74369826 | 0.850628   |
| ENSMUSG00000039166 | -0.1187901 | 4.2363537  | 0.74408029 | 0.85098029 |
| ENSMUSG00000024457 | -0.1155795 | 7.82350052 | 0.74425328 | 0.85107512 |
| ENSMUSG00000074088 | 0.11659366 | 5.74014701 | 0.74431129 | 0.85107512 |
| ENSMUSG00000002031 | 0.12055472 | 4.44317101 | 0.74460308 | 0.85132409 |
| ENSMUSG00000027452 | -0.1154414 | 7.24180227 | 0.74496279 | 0.85165065 |
| ENSMUSG00000025133 | -0.1154681 | 6.97480865 | 0.74514942 | 0.8517793  |

|                    |            |            |            |            |
|--------------------|------------|------------|------------|------------|
| ENSMUSG00000035601 | -0.1244335 | 3.51011396 | 0.74531606 | 0.85188507 |
| ENSMUSG00000052794 | 0.11482396 | 5.17408429 | 0.74575257 | 0.85229925 |
| ENSMUSG00000030101 | 0.11709734 | 5.23391208 | 0.74583481 | 0.85230849 |
| ENSMUSG00000079487 | 0.11471499 | 8.32006157 | 0.74601659 | 0.8524228  |
| ENSMUSG00000026198 | 0.16799306 | 1.37460232 | 0.74608315 | 0.8524228  |
| ENSMUSG00000020212 | -0.1180397 | 3.89792792 | 0.7461989  | 0.85247032 |
| ENSMUSG00000032020 | 0.12180463 | 4.04561911 | 0.74634116 | 0.85248173 |
| ENSMUSG00000056708 | 0.11450871 | 8.50850611 | 0.74635721 | 0.85248173 |
| ENSMUSG00000060477 | 0.11498809 | 6.66743775 | 0.74669613 | 0.85278411 |
| ENSMUSG00000039210 | -0.1159949 | 4.83179603 | 0.74683067 | 0.85285303 |
| ENSMUSG00000032526 | -0.1164285 | 2.67445954 | 0.74723678 | 0.85309273 |
| ENSMUSG00000031149 | 0.11654476 | 4.10664766 | 0.74730426 | 0.85309273 |
| ENSMUSG00000040174 | -0.1139003 | 3.93440991 | 0.74733514 | 0.85309273 |
| ENSMUSG00000022404 | -0.1158426 | 5.31252056 | 0.74733743 | 0.85309273 |
| ENSMUSG00000000028 | 0.12181147 | 3.48158608 | 0.74751144 | 0.85314924 |
| ENSMUSG00000059436 | 0.11457213 | 6.32946458 | 0.74753538 | 0.85314924 |
| ENSMUSG00000001052 | -0.11419   | 6.97783741 | 0.7476294  | 0.85317184 |
| ENSMUSG00000048174 | -0.121835  | 3.74648612 | 0.74781862 | 0.85323081 |
| ENSMUSG00000024581 | 0.11584907 | 5.59134271 | 0.74784077 | 0.85323081 |
| ENSMUSG00000038773 | 0.11389839 | 8.10200883 | 0.74790375 | 0.85323081 |
| ENSMUSG00000062867 | 0.11395633 | 6.68394022 | 0.7480386  | 0.85329996 |
| ENSMUSG00000020483 | 0.11472433 | 5.73286644 | 0.74826659 | 0.85347533 |
| ENSMUSG00000025937 | -0.1173716 | 4.1883818  | 0.74844788 | 0.85359742 |
| ENSMUSG00000026926 | -0.114036  | 6.64379183 | 0.74852828 | 0.85360442 |
| ENSMUSG00000020527 | 0.12057524 | 3.60816416 | 0.74870927 | 0.85372612 |
| ENSMUSG00000027339 | -0.1132235 | 8.77085407 | 0.74901641 | 0.85399163 |
| ENSMUSG00000030330 | 0.11400401 | 6.30581928 | 0.74916449 | 0.85407576 |
| ENSMUSG00000062908 | 0.11459711 | 5.72675324 | 0.74930391 | 0.85414998 |
| ENSMUSG00000053333 | -0.1143941 | 4.86203505 | 0.74971104 | 0.85452934 |
| ENSMUSG00000033396 | -0.1133544 | 6.27152973 | 0.74981078 | 0.85455828 |
| ENSMUSG00000032399 | -0.1125847 | 11.0294471 | 0.75002981 | 0.8546309  |
| ENSMUSG00000024580 | -0.1140565 | 5.81742577 | 0.75007419 | 0.8546309  |
| ENSMUSG00000040229 | 0.14326699 | 2.37799152 | 0.75015679 | 0.8546309  |
| ENSMUSG00000039356 | 0.11454356 | 5.06550501 | 0.75017188 | 0.8546309  |
| ENSMUSG00000018541 | -0.1140018 | 5.24130791 | 0.75026296 | 0.85464996 |
| ENSMUSG00000026199 | 0.114257   | 5.76529212 | 0.75049487 | 0.8547542  |
| ENSMUSG00000046909 | 0.14980669 | 2.28868889 | 0.75050319 | 0.8547542  |
| ENSMUSG00000033739 | 0.16434876 | 1.22209625 | 0.75084401 | 0.85505765 |
| ENSMUSG00000036450 | -0.1128024 | 6.73152778 | 0.75102816 | 0.85509007 |
| ENSMUSG00000006920 | -0.1126672 | 6.97758402 | 0.75109525 | 0.85509007 |
| ENSMUSG00000021481 | 0.11420545 | 5.37974354 | 0.75109564 | 0.85509007 |
| ENSMUSG00000071451 | 0.12715053 | 2.38615366 | 0.75126302 | 0.85511384 |
| ENSMUSG00000021694 | -0.1159953 | 3.93043788 | 0.75135636 | 0.85511384 |



|                    |            |            |            |            |
|--------------------|------------|------------|------------|------------|
| ENSMUSG00000056394 | 0.11360577 | 5.43889415 | 0.75139026 | 0.85511384 |
| ENSMUSG00000016534 | -0.1123348 | 6.73854411 | 0.75141409 | 0.85511384 |
| ENSMUSG00000054405 | -0.1124351 | 6.89156435 | 0.75163095 | 0.85527596 |
| ENSMUSG00000048799 | -0.1122856 | 7.04866082 | 0.75174983 | 0.85532657 |
| ENSMUSG00000026773 | 0.11244478 | 6.52195873 | 0.7519128  | 0.85542732 |
| ENSMUSG00000043885 | 0.1189836  | 4.023611   | 0.75202073 | 0.85546544 |
| ENSMUSG00000001127 | -0.111716  | 7.42174912 | 0.75219238 | 0.85557603 |
| ENSMUSG00000022957 | 0.11350718 | 5.68970719 | 0.75239291 | 0.85571945 |
| ENSMUSG00000031166 | 0.11380624 | 5.49406475 | 0.75256752 | 0.85583336 |
| ENSMUSG00000078317 | 0.13670998 | 2.10177677 | 0.75265054 | 0.85584311 |
| ENSMUSG00000020265 | 0.11212149 | 6.27973699 | 0.7527796  | 0.85590519 |
| ENSMUSG00000092203 | 0.11781344 | 4.16612092 | 0.75296265 | 0.85602865 |
| ENSMUSG00000001105 | 0.11848382 | 4.0025401  | 0.75328749 | 0.8562892  |
| ENSMUSG00000027984 | -0.1137468 | 4.38710565 | 0.75343455 | 0.8562892  |
| ENSMUSG00000073096 | 0.11422284 | 4.97121519 | 0.75347583 | 0.8562892  |
| ENSMUSG00000029587 | 0.11215987 | 5.4800382  | 0.75350895 | 0.8562892  |
| ENSMUSG00000022808 | -0.1118928 | 5.98096369 | 0.75359328 | 0.8562892  |
| ENSMUSG00000003731 | -0.1117441 | 6.65992523 | 0.75368935 | 0.8562892  |
| ENSMUSG00000073771 | 0.11767421 | 3.74840233 | 0.75371327 | 0.8562892  |
| ENSMUSG00000031660 | -0.1115809 | 6.67580271 | 0.75384698 | 0.85635646 |
| ENSMUSG00000044147 | -0.111022  | 7.95712393 | 0.75408288 | 0.85647596 |
| ENSMUSG00000028960 | -0.111481  | 6.49828093 | 0.75411232 | 0.85647596 |
| ENSMUSG00000010755 | 0.11186216 | 5.52392466 | 0.7541757  | 0.85647596 |
| ENSMUSG00000025936 | -0.1100241 | 1.42509436 | 0.7545285  | 0.85679197 |
| ENSMUSG00000041842 | -0.1173756 | 4.06867005 | 0.75469477 | 0.85682427 |
| ENSMUSG00000022820 | -0.1196327 | 3.30559231 | 0.75470602 | 0.85682427 |
| ENSMUSG00000019923 | -0.1116091 | 5.57679692 | 0.75482124 | 0.85687045 |
| ENSMUSG00000019838 | 0.11181153 | 5.86165167 | 0.75496399 | 0.85694787 |
| ENSMUSG00000042680 | -0.1421569 | 1.59955922 | 0.75552865 | 0.85750413 |
| ENSMUSG00000005667 | 0.11195501 | 4.58296483 | 0.75565072 | 0.857558   |
| ENSMUSG00000036893 | -0.1108245 | 6.14720962 | 0.75572847 | 0.85756128 |
| ENSMUSG00000097353 | -0.1400646 | 2.22739075 | 0.75580281 | 0.85756128 |
| ENSMUSG00000040822 | 0.11268663 | 4.69220865 | 0.75596449 | 0.85766007 |
| ENSMUSG00000034587 | 0.15149347 | 1.44489507 | 0.75655335 | 0.85822153 |
| ENSMUSG00000068114 | 0.11074195 | 5.22123725 | 0.75661089 | 0.85822153 |
| ENSMUSG00000040528 | 0.11278437 | 4.78134784 | 0.75668336 | 0.85822153 |
| ENSMUSG00000042605 | -0.110913  | 4.90639139 | 0.75678859 | 0.85825448 |
| ENSMUSG00000042520 | -0.1096214 | 8.18923116 | 0.75686173 | 0.85825448 |
| ENSMUSG00000021666 | -0.1100501 | 6.05268597 | 0.75755974 | 0.85896125 |
| ENSMUSG00000096199 | 0.13291445 | 2.13575563 | 0.75783902 | 0.85919317 |
| ENSMUSG00000062963 | -0.1116047 | 4.96378563 | 0.75802843 | 0.85932315 |
| ENSMUSG00000036376 | -0.1127569 | 4.27592818 | 0.75832806 | 0.85952858 |
| ENSMUSG00000055675 | 0.10912845 | 7.14245123 | 0.75837694 | 0.85952858 |

|                    |            |            |            |            |
|--------------------|------------|------------|------------|------------|
| ENSMUSG00000024346 | -0.1152995 | 4.19950505 | 0.75843396 | 0.85952858 |
| ENSMUSG00000029175 | 0.11394781 | 4.12415915 | 0.75888328 | 0.85995301 |
| ENSMUSG00000003062 | 0.11461409 | 4.20487132 | 0.75906201 | 0.86004495 |
| ENSMUSG00000056025 | 0.13330684 | 1.62149749 | 0.75911406 | 0.86004495 |
| ENSMUSG00000031015 | 0.10831633 | 9.31025479 | 0.75943525 | 0.86032405 |
| ENSMUSG00000022426 | -0.1096376 | 5.85064335 | 0.75969196 | 0.86046506 |
| ENSMUSG00000042901 | -0.1088137 | 6.93103848 | 0.75970943 | 0.86046506 |
| ENSMUSG00000078762 | -0.1184916 | 3.2898778  | 0.7597927  | 0.86047459 |
| ENSMUSG00000026154 | -0.1191735 | 3.01977774 | 0.75997237 | 0.86054589 |
| ENSMUSG00000032557 | -0.1091848 | 5.82177795 | 0.76000539 | 0.86054589 |
| ENSMUSG00000041649 | 0.1164136  | 3.56143067 | 0.76021126 | 0.86067238 |
| ENSMUSG00000020897 | 0.11188552 | 3.60509844 | 0.76026684 | 0.86067238 |
| ENSMUSG00000002325 | 0.10779594 | 7.47754424 | 0.76115735 | 0.86159565 |
| ENSMUSG00000076431 | -0.1179955 | 3.44588386 | 0.76159521 | 0.8620064  |
| ENSMUSG00000031767 | -0.1126842 | 3.762159   | 0.7617227  | 0.86204099 |
| ENSMUSG00000057130 | -0.1152986 | 3.93206677 | 0.76177576 | 0.86204099 |
| ENSMUSG00000015290 | 0.11037493 | 4.54840529 | 0.76191138 | 0.86210959 |
| ENSMUSG00000046079 | 0.10917822 | 5.77123921 | 0.76213299 | 0.86227547 |
| ENSMUSG00000021959 | 0.10781984 | 6.50592824 | 0.76225957 | 0.8623338  |
| ENSMUSG00000031562 | 0.1207819  | 1.48947155 | 0.76243352 | 0.86244571 |
| ENSMUSG00000076621 | 0.10923034 | 1.6579681  | 0.76259665 | 0.86254535 |
| ENSMUSG00000093327 | 0.12574796 | 1.93272854 | 0.76275983 | 0.86264505 |
| ENSMUSG00000078517 | 0.10856997 | 5.82764734 | 0.7629159  | 0.86273668 |
| ENSMUSG00000024026 | -0.1082921 | 5.30746286 | 0.76392946 | 0.86379787 |
| ENSMUSG00000034563 | -0.1116055 | 3.10404884 | 0.76401939 | 0.86381459 |
| ENSMUSG00000037022 | 0.11272016 | 3.50151912 | 0.76411611 | 0.86383898 |
| ENSMUSG00000000339 | -0.1093481 | 4.60194568 | 0.76425945 | 0.8638892  |
| ENSMUSG00000024524 | 0.16402223 | 1.31361207 | 0.76431084 | 0.8638892  |
| ENSMUSG00000094796 | 0.11789832 | 2.79219876 | 0.76519156 | 0.86479963 |
| ENSMUSG00000028161 | -0.1058151 | 7.84586664 | 0.76534866 | 0.86489214 |
| ENSMUSG00000034075 | -0.1059994 | 7.09577217 | 0.76551609 | 0.86492311 |
| ENSMUSG00000074030 | -0.1083508 | 4.21803239 | 0.76552655 | 0.86492311 |
| ENSMUSG00000054517 | -0.1071198 | 6.34961052 | 0.76564291 | 0.86496956 |
| ENSMUSG00000020263 | 0.10744527 | 5.64460396 | 0.76627066 | 0.86559368 |
| ENSMUSG00000094087 | -0.1347885 | 1.12294041 | 0.76660161 | 0.86588244 |
| ENSMUSG00000022033 | -0.115666  | 3.06438002 | 0.76740639 | 0.86665781 |
| ENSMUSG00000020528 | -0.1060312 | 5.88742638 | 0.76745198 | 0.86665781 |
| ENSMUSG00000034617 | -0.1076079 | 4.83739052 | 0.76751427 | 0.86665781 |
| ENSMUSG00000099137 | -0.1365422 | 1.52845418 | 0.76803794 | 0.86710341 |
| ENSMUSG00000086859 | 0.11207016 | 3.07718741 | 0.76805976 | 0.86710341 |
| ENSMUSG00000025036 | -0.1066875 | 4.38762226 | 0.768169   | 0.86714158 |
| ENSMUSG00000038371 | 0.10966952 | 4.41329207 | 0.76859816 | 0.86754083 |
| ENSMUSG00000026203 | 0.10498503 | 5.80760839 | 0.76878759 | 0.86766945 |

|                    |            |            |            |            |
|--------------------|------------|------------|------------|------------|
| ENSMUSG00000085829 | -0.1462384 | 1.12871041 | 0.76896582 | 0.8677854  |
| ENSMUSG00000022964 | 0.10487331 | 6.02050635 | 0.76908917 | 0.8678394  |
| ENSMUSG00000096802 | -0.1679926 | 0.86930495 | 0.76945546 | 0.8681675  |
| ENSMUSG00000031148 | -0.1043727 | 6.41223546 | 0.76971096 | 0.86837055 |
| ENSMUSG00000010376 | 0.10430798 | 5.96214055 | 0.7698937  | 0.86849147 |
| ENSMUSG00000025421 | 0.10624603 | 4.35196216 | 0.77000646 | 0.86851107 |
| ENSMUSG00000025035 | 0.11954392 | 2.4186093  | 0.77006219 | 0.86851107 |
| ENSMUSG00000006050 | -0.1041794 | 6.21972238 | 0.77034028 | 0.86865741 |
| ENSMUSG00000064090 | -0.1050205 | 5.37141287 | 0.77034308 | 0.86865741 |
| ENSMUSG00000093955 | 0.11514661 | 2.22978942 | 0.77105776 | 0.86937802 |
| ENSMUSG00000027997 | 0.111909   | 3.71175503 | 0.77123156 | 0.86948082 |
| ENSMUSG00000014402 | -0.1040798 | 5.73243033 | 0.77134539 | 0.86948082 |
| ENSMUSG00000038776 | -0.1035507 | 6.5005918  | 0.77144658 | 0.86948082 |
| ENSMUSG00000034028 | 0.11313622 | 2.69061383 | 0.77145149 | 0.86948082 |
| ENSMUSG00000029775 | -0.1046057 | 5.16171103 | 0.77174735 | 0.869729   |
| ENSMUSG00000037318 | -0.1027195 | 7.73536274 | 0.772049   | 0.86998366 |
| ENSMUSG00000097906 | 0.11532246 | 0.93256086 | 0.77215602 | 0.87001897 |
| ENSMUSG00000057554 | -0.10247   | 7.36087643 | 0.77271735 | 0.8705661  |
| ENSMUSG00000018983 | 0.10277371 | 6.43142788 | 0.77280944 | 0.87056803 |
| ENSMUSG00000031628 | -0.1062457 | 4.41773546 | 0.77287053 | 0.87056803 |
| ENSMUSG00000021650 | 0.10369915 | 5.26334715 | 0.7730012  | 0.8706299  |
| ENSMUSG00000079610 | -0.1123249 | 2.84972051 | 0.77362741 | 0.87124899 |
| ENSMUSG00000073702 | -0.1018445 | 8.5021921  | 0.77370246 | 0.87124899 |
| ENSMUSG00000075122 | 0.11212641 | 2.70270432 | 0.77392507 | 0.8713846  |
| ENSMUSG00000030045 | -0.1041987 | 4.66637026 | 0.77404141 | 0.8713846  |
| ENSMUSG00000049672 | 0.10343594 | 4.96783624 | 0.77405029 | 0.8713846  |
| ENSMUSG00000025487 | 0.10287207 | 5.9592106  | 0.774188   | 0.87141143 |
| ENSMUSG00000022757 | 0.10427717 | 4.84023884 | 0.77422574 | 0.87141143 |
| ENSMUSG00000030980 | -0.102999  | 5.63643448 | 0.77471343 | 0.87168829 |
| ENSMUSG00000005897 | 0.10846164 | 4.10901167 | 0.77472268 | 0.87168829 |
| ENSMUSG00000020589 | -0.1014939 | 6.88588511 | 0.77472308 | 0.87168829 |
| ENSMUSG00000089736 | -0.1243705 | 0.91575106 | 0.77479375 | 0.87168829 |
| ENSMUSG00000073616 | 0.11152777 | 3.73712778 | 0.77492391 | 0.87168829 |
| ENSMUSG00000024079 | -0.1018402 | 6.19738985 | 0.77494473 | 0.87168829 |
| ENSMUSG00000023030 | 0.1049406  | 4.70135696 | 0.77504348 | 0.87168829 |
| ENSMUSG00000030204 | -0.1016718 | 6.79851047 | 0.77507838 | 0.87168829 |
| ENSMUSG00000047459 | 0.10228157 | 5.12174837 | 0.77536632 | 0.87192681 |
| ENSMUSG00000020717 | -0.1008185 | 8.30233634 | 0.77591497 | 0.87234561 |
| ENSMUSG00000046603 | -0.1041943 | 4.46160007 | 0.77593799 | 0.87234561 |
| ENSMUSG00000029201 | -0.1026104 | 5.34780556 | 0.7760119  | 0.87234561 |
| ENSMUSG00000006705 | -0.1026762 | 5.68531605 | 0.77604229 | 0.87234561 |
| ENSMUSG00000032178 | 0.10114298 | 6.83193108 | 0.77649783 | 0.87268903 |
| ENSMUSG00000022973 | -0.1006523 | 5.88871855 | 0.77649964 | 0.87268903 |

|                    |            |            |            |            |
|--------------------|------------|------------|------------|------------|
| ENSMUSG00000042389 | -0.1090586 | 2.25660836 | 0.77660556 | 0.87272274 |
| ENSMUSG00000044847 | 0.10774762 | 3.62846221 | 0.77681531 | 0.87287256 |
| ENSMUSG00000028669 | 0.10167937 | 5.2738297  | 0.77689075 | 0.87287256 |
| ENSMUSG00000086015 | 0.14139213 | 0.9450651  | 0.77737081 | 0.87331696 |
| ENSMUSG00000061436 | -0.1009573 | 5.39280942 | 0.77743823 | 0.87331696 |
| ENSMUSG00000027454 | -0.1214571 | 2.36547563 | 0.77775613 | 0.87358869 |
| ENSMUSG00000061518 | 0.10126719 | 5.04892843 | 0.77822177 | 0.87402631 |
| ENSMUSG00000000374 | 0.1000897  | 6.75545757 | 0.7783638  | 0.87406143 |
| ENSMUSG00000056919 | -0.1004074 | 5.92348503 | 0.77840512 | 0.87406143 |
| ENSMUSG00000020107 | -0.10076   | 5.48335666 | 0.7787631  | 0.87437799 |
| ENSMUSG00000025417 | 0.09980787 | 6.54528412 | 0.77920348 | 0.87478699 |
| ENSMUSG00000021178 | 0.09962612 | 6.46367717 | 0.7795743  | 0.87511783 |
| ENSMUSG00000039047 | 0.10101167 | 5.5472523  | 0.77966002 | 0.87512859 |
| ENSMUSG00000026254 | 0.0995392  | 6.43706228 | 0.77985012 | 0.87525651 |
| ENSMUSG00000062510 | 0.11898835 | 2.74428808 | 0.78026979 | 0.87562918 |
| ENSMUSG00000025558 | -0.0994083 | 5.84434772 | 0.78041964 | 0.87562918 |
| ENSMUSG00000007476 | -0.104463  | 3.47618952 | 0.78046765 | 0.87562918 |
| ENSMUSG00000006456 | 0.10062365 | 5.23226563 | 0.78050455 | 0.87562918 |
| ENSMUSG00000004815 | -0.099742  | 5.59521903 | 0.78056304 | 0.87562918 |
| ENSMUSG00000011752 | -0.0994041 | 6.254753   | 0.78066525 | 0.87565837 |
| ENSMUSG00000087687 | 0.10421603 | 3.81482994 | 0.78075621 | 0.87566334 |
| ENSMUSG00000061859 | -0.0999278 | 5.47760297 | 0.78082203 | 0.87566334 |
| ENSMUSG00000021962 | 0.09920933 | 6.44261941 | 0.78117072 | 0.87592995 |
| ENSMUSG00000028452 | -0.0985221 | 7.72865347 | 0.78121217 | 0.87592995 |
| ENSMUSG00000031310 | 0.09937102 | 6.08641246 | 0.78153095 | 0.87614311 |
| ENSMUSG00000078921 | -0.1060942 | 3.62067205 | 0.78155471 | 0.87614311 |
| ENSMUSG00000026000 | -0.0995546 | 4.85337613 | 0.78194242 | 0.87649226 |
| ENSMUSG00000049553 | 0.09885937 | 6.30783857 | 0.78226871 | 0.87662714 |
| ENSMUSG00000020392 | -0.0995674 | 5.82430801 | 0.78226926 | 0.87662714 |
| ENSMUSG00000039357 | 0.10122704 | 4.40849964 | 0.78241018 | 0.87662714 |
| ENSMUSG00000026584 | -0.0986863 | 6.16193693 | 0.78250357 | 0.87662714 |
| ENSMUSG00000057594 | -0.11173   | 2.98222586 | 0.78265662 | 0.87662714 |
| ENSMUSG00000021474 | -0.0986984 | 5.6549728  | 0.78267634 | 0.87662714 |
| ENSMUSG00000041258 | 0.09856684 | 6.57907504 | 0.7827417  | 0.87662714 |
| ENSMUSG00000052915 | -0.097855  | 7.63972852 | 0.78276677 | 0.87662714 |
| ENSMUSG00000032366 | -0.0985549 | 5.67764118 | 0.78280454 | 0.87662714 |
| ENSMUSG00000026933 | -0.0992869 | 5.4005783  | 0.78285717 | 0.87662714 |
| ENSMUSG00000097245 | -0.0984454 | 1.78609346 | 0.78300453 | 0.87662714 |
| ENSMUSG00000022216 | 0.09758027 | 7.59194216 | 0.78300504 | 0.87662714 |
| ENSMUSG00000029634 | -0.0983305 | 6.21416027 | 0.78305415 | 0.87662714 |
| ENSMUSG00000038914 | -0.0974882 | 7.41329037 | 0.78314709 | 0.87664581 |
| ENSMUSG00000090290 | 0.10410383 | 3.63030955 | 0.78324337 | 0.87666821 |
| ENSMUSG00000032403 | -0.1258379 | 1.44263992 | 0.78379675 | 0.87719146 |

|                    |            |            |            |            |
|--------------------|------------|------------|------------|------------|
| ENSMUSG00000054611 | -0.0970005 | 8.99263117 | 0.78392286 | 0.87719146 |
| ENSMUSG00000045316 | -0.1066759 | 2.30693565 | 0.78393979 | 0.87719146 |
| ENSMUSG00000033610 | -0.1057123 | 3.87732134 | 0.78427728 | 0.87743058 |
| ENSMUSG00000035683 | 0.12414385 | 2.20038548 | 0.78432328 | 0.87743058 |
| ENSMUSG00000040124 | 0.10504243 | 3.55010131 | 0.78443463 | 0.87743058 |
| ENSMUSG00000036372 | 0.0984161  | 5.36519432 | 0.78450087 | 0.87743058 |
| ENSMUSG00000019850 | -0.096641  | 9.09755217 | 0.78453514 | 0.87743058 |
| ENSMUSG00000021973 | -0.0973929 | 6.24229306 | 0.78494906 | 0.8778081  |
| ENSMUSG00000023286 | -0.0984961 | 5.26610587 | 0.78516861 | 0.87796821 |
| ENSMUSG00000014077 | -0.0968839 | 7.12008975 | 0.78542108 | 0.8781651  |
| ENSMUSG00000042572 | -0.0966152 | 7.4772415  | 0.78569628 | 0.87838736 |
| ENSMUSG00000041248 | -0.1015175 | 2.69765799 | 0.78591878 | 0.87850009 |
| ENSMUSG00000032041 | -0.0988156 | 4.40760209 | 0.78594998 | 0.87850009 |
| ENSMUSG00000037353 | 0.09773425 | 5.38064536 | 0.7861222  | 0.87856913 |
| ENSMUSG00000034575 | 0.10019994 | 4.46075703 | 0.7861646  | 0.87856913 |
| ENSMUSG00000038619 | -0.0962492 | 7.44328964 | 0.78635171 | 0.8786928  |
| ENSMUSG00000029156 | 0.10505928 | 3.77902122 | 0.78663924 | 0.87888717 |
| ENSMUSG00000026032 | 0.09864927 | 4.41313618 | 0.78667857 | 0.87888717 |
| ENSMUSG00000028189 | -0.100396  | 3.99969613 | 0.78678595 | 0.87892171 |
| ENSMUSG00000025857 | 0.10366931 | 3.7009987  | 0.78710301 | 0.87911573 |
| ENSMUSG00000085379 | -0.1245917 | 1.02102362 | 0.78711257 | 0.87911573 |
| ENSMUSG00000025239 | 0.095505   | 7.92557954 | 0.78758269 | 0.87955533 |
| ENSMUSG00000005779 | 0.09595576 | 6.33006551 | 0.78774147 | 0.87964719 |
| ENSMUSG00000031889 | -0.0971453 | 4.97170484 | 0.78800808 | 0.87979378 |
| ENSMUSG00000049957 | -0.097154  | 5.11172641 | 0.78803891 | 0.87979378 |
| ENSMUSG00000028656 | -0.0950828 | 9.24479428 | 0.78810235 | 0.87979378 |
| ENSMUSG00000034330 | 0.09503907 | 8.66975774 | 0.78821083 | 0.87982943 |
| ENSMUSG00000041781 | -0.0953258 | 7.47599113 | 0.78830697 | 0.87985131 |
| ENSMUSG00000020079 | 0.09853575 | 4.69803329 | 0.78866415 | 0.88011382 |
| ENSMUSG00000026309 | -0.0955068 | 6.27752103 | 0.7886953  | 0.88011382 |
| ENSMUSG00000014550 | -0.0959599 | 5.76020636 | 0.78892321 | 0.88025962 |
| ENSMUSG00000021501 | -0.0985957 | 4.01568176 | 0.78900691 | 0.88025962 |
| ENSMUSG00000028152 | 0.09933541 | 4.17902311 | 0.78905568 | 0.88025962 |
| ENSMUSG00000028678 | 0.10175236 | 2.81006496 | 0.78915287 | 0.8802826  |
| ENSMUSG00000025193 | 0.09932118 | 4.01959361 | 0.78932047 | 0.88038412 |
| ENSMUSG00000038843 | 0.09547595 | 6.72024226 | 0.78942856 | 0.88041926 |
| ENSMUSG00000038069 | -0.0967079 | 5.34857786 | 0.78959608 | 0.88052066 |
| ENSMUSG00000020978 | -0.0960514 | 4.9319669  | 0.78989292 | 0.8806929  |
| ENSMUSG00000049502 | 0.09454084 | 7.13135959 | 0.78990376 | 0.8806929  |
| ENSMUSG00000031327 | 0.10648943 | 3.68228875 | 0.79092452 | 0.88174545 |
| ENSMUSG00000072437 | -0.1000873 | 3.88723626 | 0.79108378 | 0.88183748 |
| ENSMUSG00000022488 | -0.0935447 | 9.72528366 | 0.79131544 | 0.88201018 |
| ENSMUSG00000095351 | -0.0981508 | 4.52341679 | 0.79166772 | 0.88231728 |

|                    |            |            |            |            |
|--------------------|------------|------------|------------|------------|
| ENSMUSG00000028318 | 0.09518955 | 4.66136244 | 0.79185457 | 0.88243997 |
| ENSMUSG00000020526 | 0.10382042 | 3.05112803 | 0.79201198 | 0.88252983 |
| ENSMUSG00000018986 | -0.1091378 | 2.66432624 | 0.79267295 | 0.88318072 |
| ENSMUSG00000034612 | 0.09759278 | 4.32204249 | 0.79285905 | 0.88318443 |
| ENSMUSG00000076940 | -0.0948769 | 5.67723011 | 0.79298451 | 0.88318443 |
| ENSMUSG00000051950 | 0.09870123 | 3.41304031 | 0.79299893 | 0.88318443 |
| ENSMUSG00000079111 | 0.09548328 | 4.67359869 | 0.79304782 | 0.88318443 |
| ENSMUSG00000041538 | -0.0927157 | 10.4574694 | 0.79306044 | 0.88318443 |
| ENSMUSG00000035367 | -0.097018  | 4.50864769 | 0.79321102 | 0.88326655 |
| ENSMUSG00000031671 | -0.096511  | 4.53472311 | 0.7934087  | 0.8834011  |
| ENSMUSG00000062526 | 0.09396711 | 5.95368332 | 0.79367143 | 0.88358668 |
| ENSMUSG00000025195 | -0.0955009 | 4.11759105 | 0.79383692 | 0.88358668 |
| ENSMUSG00000031533 | 0.09565395 | 3.79130523 | 0.79389891 | 0.88358668 |
| ENSMUSG00000029651 | -0.1419266 | 1.31912524 | 0.79400514 | 0.88358668 |
| ENSMUSG00000049676 | 0.14038498 | 1.526043   | 0.79401869 | 0.88358668 |
| ENSMUSG00000020706 | -0.0929641 | 6.99200146 | 0.794044   | 0.88358668 |
| ENSMUSG00000028603 | -0.0928334 | 6.83375584 | 0.79418904 | 0.88358668 |
| ENSMUSG00000005505 | -0.0959447 | 4.87126988 | 0.79422988 | 0.88358668 |
| ENSMUSG00000037275 | -0.0935585 | 5.48969417 | 0.79426718 | 0.88358668 |
| ENSMUSG00000053119 | -0.0928821 | 6.50124654 | 0.79442468 | 0.88367638 |
| ENSMUSG00000025477 | 0.09485918 | 4.44390995 | 0.79465006 | 0.88384155 |
| ENSMUSG0000002052  | -0.0919826 | 7.77327924 | 0.7952446  | 0.88441725 |
| ENSMUSG00000029299 | -0.0917457 | 6.67907543 | 0.79554915 | 0.88452444 |
| ENSMUSG00000054723 | 0.09840701 | 3.6764245  | 0.79560376 | 0.88452444 |
| ENSMUSG00000005611 | 0.1116089  | 1.53959545 | 0.79562934 | 0.88452444 |
| ENSMUSG00000031154 | -0.0918438 | 7.72004453 | 0.79564878 | 0.88452444 |
| ENSMUSG00000027425 | 0.09302384 | 5.29466048 | 0.79583725 | 0.88464841 |
| ENSMUSG00000042032 | -0.0920687 | 6.66414688 | 0.79594152 | 0.88467877 |
| ENSMUSG00000032089 | 0.09118181 | 8.98431543 | 0.79630251 | 0.88499443 |
| ENSMUSG00000026104 | -0.0915666 | 7.36258778 | 0.79643434 | 0.88502563 |
| ENSMUSG00000038151 | -0.0938014 | 4.00125942 | 0.79648458 | 0.88502563 |
| ENSMUSG00000075000 | 0.09381537 | 4.69748293 | 0.79657441 | 0.8850399  |
| ENSMUSG00000042694 | 0.09535081 | 4.23582189 | 0.7969092  | 0.88532631 |
| ENSMUSG00000034674 | -0.0920597 | 4.82347485 | 0.79707678 | 0.88542691 |
| ENSMUSG00000044783 | -0.0912364 | 7.36730958 | 0.7972075  | 0.88548655 |
| ENSMUSG00000015790 | 0.09223996 | 4.78353643 | 0.7972938  | 0.88549683 |
| ENSMUSG00000086706 | -0.0928191 | 4.29734435 | 0.79747156 | 0.88560869 |
| ENSMUSG00000045975 | 0.09606467 | 3.86011661 | 0.79761748 | 0.88568517 |
| ENSMUSG00000028821 | 0.0909974  | 6.88781897 | 0.79777023 | 0.88576923 |
| ENSMUSG00000032606 | 0.09906799 | 3.65108601 | 0.79844406 | 0.88643176 |
| ENSMUSG00000036469 | -0.0902225 | 8.50919882 | 0.79886392 | 0.88681224 |
| ENSMUSG00000078681 | -0.0943341 | 3.4059863  | 0.79910716 | 0.88695413 |
| ENSMUSG00000039917 | 0.09505985 | 4.42441203 | 0.79914606 | 0.88695413 |

|                    |            |            |            |            |
|--------------------|------------|------------|------------|------------|
| ENSMUSG00000045411 | -0.0902085 | 6.22622498 | 0.7995705  | 0.88729358 |
| ENSMUSG00000023027 | -0.091031  | 5.98011766 | 0.79960628 | 0.88729358 |
| ENSMUSG00000053835 | -0.0902981 | 6.5810428  | 0.79984533 | 0.8874607  |
| ENSMUSG00000061288 | 0.09016559 | 6.9781062  | 0.79991129 | 0.8874607  |
| ENSMUSG00000009739 | 0.09076623 | 6.04404138 | 0.80007698 | 0.88748316 |
| ENSMUSG00000051037 | -0.0955571 | 2.72297752 | 0.80008594 | 0.88748316 |
| ENSMUSG00000030922 | -0.1279301 | 1.11948703 | 0.80021924 | 0.88752951 |
| ENSMUSG00000019849 | -0.0909495 | 5.75640082 | 0.80028215 | 0.88752951 |
| ENSMUSG00000028902 | -0.0902985 | 6.31924277 | 0.80102319 | 0.88820395 |
| ENSMUSG00000033781 | -0.0903881 | 5.70668315 | 0.80104483 | 0.88820395 |
| ENSMUSG00000004661 | -0.0892191 | 7.0702683  | 0.80130305 | 0.88840457 |
| ENSMUSG00000037070 | 0.09100107 | 4.46812652 | 0.80144567 | 0.888477   |
| ENSMUSG00000031574 | 0.11958823 | 1.58213438 | 0.8018283  | 0.88881546 |
| ENSMUSG00000050567 | -0.0900134 | 5.98192378 | 0.80193686 | 0.88883614 |
| ENSMUSG00000023830 | -0.0893107 | 5.67450671 | 0.80201433 | 0.88883614 |
| ENSMUSG00000015291 | 0.08866807 | 8.8995902  | 0.80207893 | 0.88883614 |
| ENSMUSG00000069520 | -0.0902632 | 4.9045001  | 0.80234717 | 0.88898852 |
| ENSMUSG00000043065 | -0.0906201 | 5.29774506 | 0.80244641 | 0.88898852 |
| ENSMUSG00000030079 | 0.08953004 | 5.30004609 | 0.80244845 | 0.88898852 |
| ENSMUSG00000031516 | 0.09198055 | 4.63189622 | 0.80268938 | 0.88911735 |
| ENSMUSG00000035847 | -0.0890962 | 6.36028249 | 0.80273192 | 0.88911735 |
| ENSMUSG00000028644 | -0.0891019 | 6.69713861 | 0.80279678 | 0.88911735 |
| ENSMUSG00000000759 | -0.0888342 | 6.57038253 | 0.80309511 | 0.88936207 |
| ENSMUSG00000020038 | -0.0917447 | 4.50755127 | 0.80319503 | 0.88937968 |
| ENSMUSG00000044167 | -0.0882317 | 8.32329134 | 0.80331398 | 0.88937968 |
| ENSMUSG00000019087 | -0.0881601 | 8.35539596 | 0.80341227 | 0.88937968 |
| ENSMUSG00000022390 | 0.09004012 | 5.58958862 | 0.8034205  | 0.88937968 |
| ENSMUSG00000021895 | 0.08830409 | 8.01231809 | 0.8035843  | 0.88940773 |
| ENSMUSG00000044156 | 0.09021928 | 5.50722447 | 0.80360058 | 0.88940773 |
| ENSMUSG00000030145 | 0.112607   | 2.09011691 | 0.80392839 | 0.88968488 |
| ENSMUSG00000029500 | -0.0897004 | 5.31319621 | 0.80434919 | 0.89006488 |
| ENSMUSG00000090523 | -0.0886438 | 5.96806384 | 0.80483925 | 0.89052144 |
| ENSMUSG00000024403 | -0.1012031 | 2.09629768 | 0.80498863 | 0.89060099 |
| ENSMUSG00000032204 | 0.09442671 | 3.27870593 | 0.80535897 | 0.8909162  |
| ENSMUSG00000050605 | 0.09354599 | 3.83708118 | 0.80542854 | 0.8909162  |
| ENSMUSG00000029125 | -0.0922645 | 4.13912686 | 0.80552019 | 0.89093184 |
| ENSMUSG00000032288 | 0.08941617 | 4.74837862 | 0.80572353 | 0.8910699  |
| ENSMUSG0000006998  | 0.08711877 | 7.48990937 | 0.80580005 | 0.8910699  |
| ENSMUSG00000026239 | 0.09151554 | 4.03639181 | 0.80588512 | 0.89107825 |
| ENSMUSG00000057143 | -0.0872479 | 6.97130089 | 0.80603949 | 0.89116322 |
| ENSMUSG00000029403 | 0.13719498 | 1.16539883 | 0.80618326 | 0.89123644 |
| ENSMUSG00000036442 | 0.0891908  | 4.18336406 | 0.80679395 | 0.89177939 |
| ENSMUSG00000022684 | 0.08754165 | 6.19808016 | 0.80689022 | 0.89177939 |

|                    |            |            |            |            |
|--------------------|------------|------------|------------|------------|
| ENSMUSG00000067235 | -0.0865931 | 7.30173381 | 0.80708414 | 0.89177939 |
| ENSMUSG00000003135 | -0.0885977 | 5.30340433 | 0.80710354 | 0.89177939 |
| ENSMUSG00000053279 | 0.09017824 | 4.28044604 | 0.80712888 | 0.89177939 |
| ENSMUSG00000024566 | -0.0868007 | 6.46683222 | 0.80718806 | 0.89177939 |
| ENSMUSG00000044636 | -0.0954215 | 3.02325096 | 0.80721745 | 0.89177939 |
| ENSMUSG00000022472 | -0.0884435 | 5.26424568 | 0.80798756 | 0.89240318 |
| ENSMUSG00000028436 | 0.08618041 | 7.45253628 | 0.8080664  | 0.89240318 |
| ENSMUSG00000026554 | 0.08641274 | 7.07299309 | 0.80806652 | 0.89240318 |
| ENSMUSG00000081453 | -0.1417848 | 1.1931815  | 0.80809262 | 0.89240318 |
| ENSMUSG00000021576 | -0.0873442 | 5.79323433 | 0.80829299 | 0.89247189 |
| ENSMUSG00000045078 | -0.0862319 | 7.02444842 | 0.80837484 | 0.89247189 |
| ENSMUSG00000005981 | 0.08638144 | 6.6112383  | 0.80838776 | 0.89247189 |
| ENSMUSG00000031948 | 0.08608474 | 6.64563091 | 0.80853377 | 0.89254737 |
| ENSMUSG00000097287 | 0.1088946  | 2.26724046 | 0.8087912  | 0.8926994  |
| ENSMUSG00000025880 | 0.08808132 | 5.35252503 | 0.80882681 | 0.8926994  |
| ENSMUSG00000059119 | -0.0858048 | 7.18955751 | 0.80928444 | 0.89311872 |
| ENSMUSG00000032239 | -0.0874809 | 5.26354146 | 0.80937857 | 0.89313686 |
| ENSMUSG00000006527 | -0.0857167 | 5.99596042 | 0.81033882 | 0.89411065 |
| ENSMUSG00000070426 | -0.0872532 | 5.16663218 | 0.81054556 | 0.89418841 |
| ENSMUSG00000033405 | -0.0892494 | 4.27662127 | 0.81056488 | 0.89418841 |
| ENSMUSG00000027950 | -0.0943837 | 2.80942839 | 0.81091215 | 0.89448567 |
| ENSMUSG00000042185 | 0.08518319 | 6.88322488 | 0.81121699 | 0.89473607 |
| ENSMUSG00000059439 | 0.08824237 | 4.77116559 | 0.81149016 | 0.8949515  |
| ENSMUSG00000028948 | 0.08532029 | 6.09722856 | 0.81169265 | 0.89508893 |
| ENSMUSG00000022913 | -0.091306  | 3.45142504 | 0.81214298 | 0.89549963 |
| ENSMUSG00000091679 | -0.0775707 | 0.92265707 | 0.81266278 | 0.89598683 |
| ENSMUSG00000001983 | 0.08976461 | 3.33802108 | 0.81274876 | 0.89599568 |
| ENSMUSG00000074604 | -0.0835811 | 4.62372406 | 0.81299476 | 0.89618094 |
| ENSMUSG00000032497 | 0.08632722 | 4.77151542 | 0.81320672 | 0.8963255  |
| ENSMUSG00000050697 | -0.0842099 | 6.34213728 | 0.81332553 | 0.8963255  |
| ENSMUSG00000056167 | -0.0843488 | 6.19018365 | 0.81335984 | 0.8963255  |
| ENSMUSG00000042744 | 0.08460157 | 6.86043272 | 0.81346885 | 0.89635971 |
| ENSMUSG00000040723 | 0.08333956 | 8.14292774 | 0.81399412 | 0.89685253 |
| ENSMUSG00000032396 | -0.0854674 | 5.01645419 | 0.81455935 | 0.89738928 |
| ENSMUSG00000025159 | 0.0837541  | 6.67154049 | 0.81468491 | 0.8974416  |
| ENSMUSG00000047603 | 0.09355528 | 2.55272925 | 0.81519578 | 0.89780873 |
| ENSMUSG00000009112 | -0.0836583 | 6.07027692 | 0.81526158 | 0.89780873 |
| ENSMUSG00000035443 | -0.0892662 | 3.00971192 | 0.81532833 | 0.89780873 |
| ENSMUSG00000038696 | -0.0840685 | 5.57655305 | 0.81533061 | 0.89780873 |
| ENSMUSG00000047989 | -0.0836678 | 5.57836546 | 0.81578405 | 0.89815966 |
| ENSMUSG00000038145 | -0.0829514 | 5.60563546 | 0.81580557 | 0.89815966 |
| ENSMUSG00000060397 | 0.10893053 | 2.04295345 | 0.81592173 | 0.89820152 |
| ENSMUSG00000020573 | -0.0824835 | 7.21470561 | 0.81623366 | 0.89838447 |



|                    |            |            |            |            |
|--------------------|------------|------------|------------|------------|
| ENSMUSG00000049755 | -0.0835416 | 4.44264162 | 0.81624423 | 0.89838447 |
| ENSMUSG00000008496 | 0.08285293 | 7.05598026 | 0.81644236 | 0.8985165  |
| ENSMUSG00000031935 | -0.0832186 | 5.91452002 | 0.81658998 | 0.89859293 |
| ENSMUSG00000036275 | -0.0826065 | 6.51245612 | 0.81690164 | 0.89877347 |
| ENSMUSG00000073000 | -0.1149262 | 0.96371317 | 0.81691042 | 0.89877347 |
| ENSMUSG00000098318 | -0.0949476 | 1.50497596 | 0.81712738 | 0.89892186 |
| ENSMUSG00000026238 | 0.08189681 | 7.92379338 | 0.81723095 | 0.89892186 |
| ENSMUSG00000028729 | 0.08274236 | 5.57967344 | 0.81727989 | 0.89892186 |
| ENSMUSG00000028093 | -0.0842698 | 4.8467479  | 0.81753545 | 0.89906058 |
| ENSMUSG00000020803 | 0.08356926 | 4.96599767 | 0.81756244 | 0.89906058 |
| ENSMUSG00000026135 | 0.08319142 | 5.91038923 | 0.81769013 | 0.89911498 |
| ENSMUSG00000027074 | -0.0826416 | 5.5024975  | 0.81779764 | 0.89914719 |
| ENSMUSG00000022241 | -0.0829823 | 6.01489955 | 0.81793706 | 0.89921447 |
| ENSMUSG00000042628 | 0.08253704 | 5.41959906 | 0.81841142 | 0.899548   |
| ENSMUSG00000024271 | -0.0818287 | 6.61659202 | 0.81849425 | 0.899548   |
| ENSMUSG00000024218 | -0.0835982 | 4.34074138 | 0.81851973 | 0.899548   |
| ENSMUSG00000068966 | -0.0836004 | 4.51979096 | 0.81855347 | 0.899548   |
| ENSMUSG00000043931 | -0.0823358 | 6.01954413 | 0.81874648 | 0.89956351 |
| ENSMUSG00000045294 | 0.08174128 | 6.69445221 | 0.81882109 | 0.89956351 |
| ENSMUSG00000022807 | 0.08236186 | 5.47036788 | 0.81887095 | 0.89956351 |
| ENSMUSG00000041762 | 0.08287469 | 5.41433182 | 0.8188806  | 0.89956351 |
| ENSMUSG00000031029 | 0.08090846 | 8.58988233 | 0.81901326 | 0.89962326 |
| ENSMUSG00000002731 | 0.08364032 | 2.69326978 | 0.81930446 | 0.89985714 |
| ENSMUSG00000023723 | 0.08235938 | 4.88813786 | 0.81970564 | 0.90021174 |
| ENSMUSG00000042712 | 0.08169536 | 5.27573298 | 0.82039036 | 0.90087764 |
| ENSMUSG00000031575 | -0.0809694 | 5.85660391 | 0.8206913  | 0.90112203 |
| ENSMUSG00000025224 | -0.0804155 | 6.8929066  | 0.82091969 | 0.90125383 |
| ENSMUSG00000044949 | -0.0936454 | 1.01283798 | 0.82096814 | 0.90125383 |
| ENSMUSG00000029174 | 0.0804815  | 7.23738178 | 0.82104718 | 0.90125451 |
| ENSMUSG00000028800 | -0.0803213 | 7.10800746 | 0.82120393 | 0.90134051 |
| ENSMUSG00000028886 | -0.0804754 | 6.35915037 | 0.82138812 | 0.9014566  |
| ENSMUSG00000037544 | -0.0853889 | 4.30030929 | 0.82156682 | 0.90156665 |
| ENSMUSG00000041313 | -0.0800137 | 6.46528423 | 0.82200015 | 0.90191301 |
| ENSMUSG00000024986 | 0.08008935 | 6.93510945 | 0.82203937 | 0.90191301 |
| ENSMUSG00000051306 | -0.08086   | 5.48507901 | 0.82246981 | 0.90229914 |
| ENSMUSG00000004069 | 0.08028326 | 5.79878762 | 0.82263229 | 0.90238061 |
| ENSMUSG00000031987 | -0.0817597 | 4.64674033 | 0.82270107 | 0.90238061 |
| ENSMUSG00000021338 | 0.08072719 | 5.87319267 | 0.82286421 | 0.90247344 |
| ENSMUSG00000053192 | 0.08572237 | 3.54165276 | 0.82303848 | 0.90257846 |
| ENSMUSG00000044864 | 0.08300506 | 4.65811585 | 0.82328416 | 0.90276175 |
| ENSMUSG00000029578 | 0.07938464 | 6.84242342 | 0.82338773 | 0.9027892  |
| ENSMUSG00000062110 | -0.0821811 | 3.65347862 | 0.82354141 | 0.90280576 |
| ENSMUSG00000027475 | 0.0798809  | 6.24709064 | 0.82355991 | 0.90280576 |

|                    |            |            |            |            |
|--------------------|------------|------------|------------|------------|
| ENSMUSG00000030168 | -0.07937   | 7.12489704 | 0.82372933 | 0.90290538 |
| ENSMUSG00000028990 | -0.0813089 | 5.02839413 | 0.8238588  | 0.90296119 |
| ENSMUSG00000028932 | -0.0794271 | 6.36628901 | 0.82451949 | 0.90359916 |
| ENSMUSG00000042050 | 0.10722016 | 1.95511044 | 0.82465668 | 0.90366335 |
| ENSMUSG00000071456 | -0.0817757 | 4.32734607 | 0.82481035 | 0.90366838 |
| ENSMUSG00000040447 | -0.081453  | 5.11891043 | 0.8248185  | 0.90366838 |
| ENSMUSG00000090877 | 0.07810467 | 10.4238586 | 0.82502191 | 0.90368012 |
| ENSMUSG00000029463 | 0.08902113 | 2.63520483 | 0.82505298 | 0.90368012 |
| ENSMUSG00000036751 | 0.07911412 | 5.95617654 | 0.82506506 | 0.90368012 |
| ENSMUSG00000025203 | 0.07809393 | 7.64854732 | 0.82530612 | 0.90377778 |
| ENSMUSG00000034850 | -0.0784282 | 7.295626   | 0.82532073 | 0.90377778 |
| ENSMUSG00000038374 | -0.0797137 | 5.58504015 | 0.82539009 | 0.90377778 |
| ENSMUSG00000024477 | -0.0793579 | 4.96829532 | 0.8257366  | 0.90407108 |
| ENSMUSG00000045482 | 0.07839508 | 7.3171989  | 0.82612407 | 0.90440916 |
| ENSMUSG00000036615 | -0.085754  | 3.32239821 | 0.82645137 | 0.90468132 |
| ENSMUSG00000083307 | 0.08818778 | 1.98290871 | 0.82672203 | 0.9048327  |
| ENSMUSG00000037849 | -0.0778791 | 7.13442476 | 0.8267471  | 0.9048327  |
| ENSMUSG00000068921 | -0.0782506 | 5.8168018  | 0.82710951 | 0.90514317 |
| ENSMUSG00000038930 | 0.08138741 | 4.68998625 | 0.82739756 | 0.9053722  |
| ENSMUSG00000037210 | -0.0773172 | 6.58826059 | 0.82764329 | 0.90555488 |
| ENSMUSG00000021133 | 0.07712421 | 7.67252615 | 0.82783567 | 0.90567917 |
| ENSMUSG00000035878 | 0.10636195 | 1.35546761 | 0.82837305 | 0.90616764 |
| ENSMUSG00000032122 | 0.07663548 | 6.38207931 | 0.82843982 | 0.90616764 |
| ENSMUSG00000037935 | -0.0773052 | 6.60056769 | 0.82864429 | 0.90623589 |
| ENSMUSG00000072621 | -0.0766077 | 3.27122616 | 0.82865989 | 0.90623589 |
| ENSMUSG00000032370 | 0.07753907 | 5.3519361  | 0.82878488 | 0.90628636 |
| ENSMUSG00000028636 | -0.0789607 | 4.22678588 | 0.82932023 | 0.90677829 |
| ENSMUSG00000074629 | 0.08942033 | 1.61455393 | 0.82943476 | 0.90677829 |
| ENSMUSG00000042474 | 0.07612852 | 9.62552602 | 0.82948164 | 0.90677829 |
| ENSMUSG00000066440 | 0.07727988 | 6.38999325 | 0.82955029 | 0.90677829 |
| ENSMUSG00000010453 | 0.07664734 | 6.71429694 | 0.82966008 | 0.90678391 |
| ENSMUSG00000075284 | 0.07618339 | 8.20615707 | 0.82971319 | 0.90678391 |
| ENSMUSG00000021457 | 0.0758382  | 10.5226893 | 0.83005095 | 0.90706426 |
| ENSMUSG00000052125 | 0.09389636 | 3.05231887 | 0.83017688 | 0.90706426 |
| ENSMUSG00000000711 | 0.07605213 | 7.23369345 | 0.83020644 | 0.90706426 |
| ENSMUSG00000034765 | -0.0763282 | 5.91366701 | 0.83081505 | 0.90756043 |
| ENSMUSG00000031652 | -0.0761575 | 6.45215639 | 0.8308915  | 0.90756043 |
| ENSMUSG00000032059 | 0.07790584 | 4.72615455 | 0.83089743 | 0.90756043 |
| ENSMUSG00000063511 | 0.07576702 | 7.21035628 | 0.83104595 | 0.90760077 |
| ENSMUSG00000028702 | 0.08284153 | 3.60873027 | 0.83109228 | 0.90760077 |
| ENSMUSG00000034263 | -0.0772895 | 5.44678521 | 0.83134106 | 0.90778622 |
| ENSMUSG00000001687 | -0.0760962 | 6.66432903 | 0.83143273 | 0.90780008 |
| ENSMUSG00000024740 | 0.07528095 | 8.50582014 | 0.83155024 | 0.90780067 |

|                    |            |            |            |            |
|--------------------|------------|------------|------------|------------|
| ENSMUSG00000021009 | 0.08485635 | 3.29883084 | 0.83159122 | 0.90780067 |
| ENSMUSG00000090952 | -0.0840813 | 2.02351791 | 0.83167923 | 0.90781053 |
| ENSMUSG00000043061 | 0.07913363 | 4.57630734 | 0.83188114 | 0.90794471 |
| ENSMUSG00000050668 | -0.0776144 | 5.06458473 | 0.83222836 | 0.90819772 |
| ENSMUSG00000031974 | -0.0755013 | 6.73837405 | 0.83234623 | 0.90819772 |
| ENSMUSG00000028221 | 0.08165138 | 3.56350589 | 0.83234998 | 0.90819772 |
| ENSMUSG00000001419 | -0.0750206 | 8.00409466 | 0.83248149 | 0.90825501 |
| ENSMUSG00000066151 | 0.07533506 | 7.06683322 | 0.83262059 | 0.9082636  |
| ENSMUSG00000094194 | -0.0806636 | 3.83320413 | 0.8326474  | 0.9082636  |
| ENSMUSG00000038459 | -0.0782308 | 4.02108748 | 0.83281926 | 0.90836487 |
| ENSMUSG00000026347 | 0.07761392 | 4.43107842 | 0.83293974 | 0.90841009 |
| ENSMUSG00000033983 | -0.0779257 | 3.83934754 | 0.83321438 | 0.90862341 |
| ENSMUSG00000047604 | 0.07733798 | 4.43470357 | 0.83331676 | 0.90864885 |
| ENSMUSG00000036292 | -0.0810644 | 3.16511452 | 0.83356516 | 0.90882351 |
| ENSMUSG00000024242 | -0.0757858 | 4.78864644 | 0.83363506 | 0.90882351 |
| ENSMUSG00000027940 | 0.0742141  | 8.36625366 | 0.83403791 | 0.90917646 |
| ENSMUSG00000026107 | -0.074168  | 6.52362406 | 0.83429412 | 0.90936952 |
| ENSMUSG00000022191 | -0.07548   | 5.46155566 | 0.83441429 | 0.90941427 |
| ENSMUSG00000037958 | -0.075786  | 5.44829937 | 0.83458069 | 0.90950939 |
| ENSMUSG00000015711 | 0.07592862 | 4.60178622 | 0.83472972 | 0.90951687 |
| ENSMUSG00000039128 | -0.0750899 | 5.90012005 | 0.8347458  | 0.90951687 |
| ENSMUSG00000024191 | -0.0748847 | 5.20278134 | 0.83484534 | 0.90953912 |
| ENSMUSG00000037287 | -0.0743299 | 6.04531618 | 0.83521597 | 0.90980921 |
| ENSMUSG00000028861 | -0.0761053 | 5.05950222 | 0.83525155 | 0.90980921 |
| ENSMUSG00000048015 | -0.137189  | 1.14579439 | 0.83553533 | 0.90993897 |
| ENSMUSG00000060791 | 0.0737241  | 7.23870435 | 0.83560084 | 0.90993897 |
| ENSMUSG00000033847 | -0.114514  | 1.42733549 | 0.83560816 | 0.90993897 |
| ENSMUSG00000038421 | 0.07340863 | 8.24090664 | 0.83574763 | 0.91000464 |
| ENSMUSG00000031993 | -0.0739879 | 6.17192962 | 0.83608342 | 0.91027923 |
| ENSMUSG00000020334 | -0.0823057 | 2.83686308 | 0.83615819 | 0.91027923 |
| ENSMUSG00000010392 | 0.0742816  | 5.76277593 | 0.83634018 | 0.91032805 |
| ENSMUSG00000079808 | 0.08537222 | 2.07872654 | 0.83636142 | 0.91032805 |
| ENSMUSG00000035051 | 0.07347363 | 7.03738626 | 0.83649591 | 0.91038823 |
| ENSMUSG00000020669 | 0.09681837 | 1.68862928 | 0.83675874 | 0.91053437 |
| ENSMUSG00000026705 | -0.0737227 | 5.99509138 | 0.83683747 | 0.91053437 |
| ENSMUSG00000028214 | -0.072997  | 8.02968481 | 0.83686782 | 0.91053437 |
| ENSMUSG00000049321 | -0.0780318 | 2.23627427 | 0.83701152 | 0.91060411 |
| ENSMUSG00000019810 | 0.07434917 | 5.76764334 | 0.83709035 | 0.91060411 |
| ENSMUSG00000021577 | -0.0727664 | 8.15792354 | 0.83729947 | 0.91067223 |
| ENSMUSG00000048351 | 0.08019224 | 3.28031396 | 0.83731143 | 0.91067223 |
| ENSMUSG00000025580 | 0.07346504 | 6.07524788 | 0.83750731 | 0.91075752 |
| ENSMUSG00000027133 | 0.07338226 | 5.37295341 | 0.83758508 | 0.91075752 |
| ENSMUSG00000029388 | -0.0759215 | 4.7856364  | 0.83762753 | 0.91075752 |

|                    |            |            |            |            |
|--------------------|------------|------------|------------|------------|
| ENSMUSG00000029472 | 0.0726367  | 7.73399456 | 0.83788581 | 0.91095218 |
| ENSMUSG00000005882 | -0.0742087 | 5.20912902 | 0.83803295 | 0.91102599 |
| ENSMUSG00000049327 | 0.07290207 | 5.90728974 | 0.83836933 | 0.91117555 |
| ENSMUSG00000022489 | 0.07405232 | 5.57131859 | 0.8384924  | 0.91117555 |
| ENSMUSG00000009079 | -0.0720655 | 8.42182285 | 0.83855018 | 0.91117555 |
| ENSMUSG00000039108 | 0.07312697 | 5.24236272 | 0.838582   | 0.91117555 |
| ENSMUSG00000020034 | -0.0721903 | 7.79113402 | 0.8386103  | 0.91117555 |
| ENSMUSG00000061024 | 0.07756968 | 4.11581321 | 0.83872343 | 0.91117555 |
| ENSMUSG00000025025 | -0.0736434 | 4.38230325 | 0.83872541 | 0.91117555 |
| ENSMUSG00000029427 | -0.0726092 | 5.79567483 | 0.83927666 | 0.91157743 |
| ENSMUSG00000022131 | 0.08043443 | 3.29746746 | 0.83930473 | 0.91157743 |
| ENSMUSG00000037845 | -0.0740271 | 4.52125681 | 0.83936305 | 0.91157743 |
| ENSMUSG00000068417 | 0.08357395 | 2.25939312 | 0.83941253 | 0.91157743 |
| ENSMUSG00000040524 | 0.07373881 | 5.26160361 | 0.8396203  | 0.91171692 |
| ENSMUSG00000073437 | 0.07549441 | 4.09549454 | 0.84115108 | 0.91329288 |
| ENSMUSG00000004707 | -0.0709149 | 8.2291827  | 0.84152752 | 0.91361531 |
| ENSMUSG00000038301 | 0.07394789 | 4.81813692 | 0.84188092 | 0.91391266 |
| ENSMUSG00000026172 | -0.0764309 | 3.76693404 | 0.84204288 | 0.91400217 |
| ENSMUSG00000022898 | 0.07125056 | 5.52133502 | 0.84241534 | 0.91429764 |
| ENSMUSG00000022999 | -0.0701067 | 6.33539878 | 0.84247417 | 0.91429764 |
| ENSMUSG00000002814 | -0.072934  | 4.89358956 | 0.84265939 | 0.91441232 |
| ENSMUSG00000029098 | 0.07083841 | 6.94336557 | 0.84283888 | 0.91452076 |
| ENSMUSG00000036931 | -0.0700698 | 8.84500094 | 0.8429919  | 0.91460046 |
| ENSMUSG00000038352 | 0.07060705 | 6.41930057 | 0.84334776 | 0.9149002  |
| ENSMUSG00000065979 | 0.08322884 | 2.8058554  | 0.84354908 | 0.91503225 |
| ENSMUSG00000028899 | -0.0717448 | 5.23512927 | 0.84420755 | 0.91562786 |
| ENSMUSG00000035086 | -0.0696602 | 7.66791454 | 0.84438125 | 0.91562786 |
| ENSMUSG00000038013 | -0.0701603 | 6.35967075 | 0.84440071 | 0.91562786 |
| ENSMUSG00000028653 | -0.0709843 | 5.26983389 | 0.84441679 | 0.91562786 |
| ENSMUSG00000035569 | -0.0689257 | 8.01331939 | 0.84540662 | 0.91661162 |
| ENSMUSG00000050786 | 0.08267199 | 2.31899436 | 0.84548351 | 0.91661162 |
| ENSMUSG00000043923 | 0.07278068 | 4.00286114 | 0.84564632 | 0.91663193 |
| ENSMUSG00000091549 | 0.07311484 | 4.22406809 | 0.84576628 | 0.91663193 |
| ENSMUSG00000076617 | -0.0687045 | 12.6705553 | 0.84578729 | 0.91663193 |
| ENSMUSG00000017009 | -0.0693233 | 6.93762388 | 0.84582122 | 0.91663193 |
| ENSMUSG00000030766 | -0.0687491 | 7.89974291 | 0.84618738 | 0.91685679 |
| ENSMUSG00000022978 | 0.07463496 | 3.69174537 | 0.84618823 | 0.91685679 |
| ENSMUSG00000020657 | -0.0696732 | 4.83591176 | 0.84636376 | 0.91692994 |
| ENSMUSG00000063808 | 0.07250698 | 4.34758916 | 0.84641528 | 0.91692994 |
| ENSMUSG00000029076 | 0.06860306 | 7.60283713 | 0.84661883 | 0.91700507 |
| ENSMUSG00000024725 | 0.06912168 | 6.65483377 | 0.84666927 | 0.91700507 |
| ENSMUSG00000031371 | -0.0732675 | 3.96515702 | 0.84672395 | 0.91700507 |
| ENSMUSG00000026404 | 0.0725989  | 4.15262841 | 0.84703532 | 0.91721728 |

|                    |            |            |            |            |
|--------------------|------------|------------|------------|------------|
| ENSMUSG00000027963 | -0.0666367 | 1.99288855 | 0.84707948 | 0.91721728 |
| ENSMUSG00000038563 | 0.06957114 | 5.21452265 | 0.84758232 | 0.91741233 |
| ENSMUSG00000025260 | -0.0694959 | 4.58313869 | 0.84759153 | 0.91741233 |
| ENSMUSG00000037710 | 0.06746553 | 3.2231443  | 0.8477095  | 0.91741233 |
| ENSMUSG00000029233 | 0.06913479 | 5.5503101  | 0.84771166 | 0.91741233 |
| ENSMUSG00000008682 | 0.06794118 | 8.84273676 | 0.84782439 | 0.91741233 |
| ENSMUSG00000028944 | 0.07072281 | 4.89486938 | 0.84786043 | 0.91741233 |
| ENSMUSG00000042787 | 0.06668374 | 4.16158393 | 0.8478704  | 0.91741233 |
| ENSMUSG00000030269 | -0.0689964 | 5.83895993 | 0.84793386 | 0.91741233 |
| ENSMUSG00000037257 | 0.06877515 | 5.8764694  | 0.8479779  | 0.91741233 |
| ENSMUSG00000062175 | -0.068     | 4.84981296 | 0.8481847  | 0.91754971 |
| ENSMUSG00000029068 | -0.0674125 | 8.43596223 | 0.84895739 | 0.91814105 |
| ENSMUSG00000003865 | 0.07100725 | 4.40987835 | 0.84896431 | 0.91814105 |
| ENSMUSG00000061477 | -0.0673424 | 9.34854002 | 0.84902317 | 0.91814105 |
| ENSMUSG00000070737 | 0.07761072 | 2.35891483 | 0.84905084 | 0.91814105 |
| ENSMUSG00000017929 | 0.06711691 | 6.33431019 | 0.84966788 | 0.91872188 |
| ENSMUSG00000021556 | -0.0676019 | 5.55730755 | 0.85018824 | 0.91919806 |
| ENSMUSG00000031864 | -0.0689406 | 5.05851533 | 0.8504034  | 0.91931346 |
| ENSMUSG00000100658 | 0.06649573 | 7.42811965 | 0.85053023 | 0.91931346 |
| ENSMUSG00000070354 | 0.08041286 | 3.0730027  | 0.8505349  | 0.91931346 |
| ENSMUSG00000032040 | 0.06802658 | 5.10227147 | 0.85071162 | 0.91941104 |
| ENSMUSG00000042594 | 0.06663896 | 7.87649598 | 0.85090022 | 0.91941104 |
| ENSMUSG00000000439 | 0.06997082 | 4.54207594 | 0.85091597 | 0.91941104 |
| ENSMUSG00000030051 | -0.0701373 | 3.7378867  | 0.85094511 | 0.91941104 |
| ENSMUSG00000037573 | -0.0683472 | 5.36835821 | 0.85107187 | 0.91946157 |
| ENSMUSG00000033458 | -0.0658598 | 3.08445814 | 0.85138285 | 0.9197111  |
| ENSMUSG00000002625 | 0.0663493  | 7.13945715 | 0.85186276 | 0.9200939  |
| ENSMUSG00000024696 | -0.0665507 | 6.89279386 | 0.85189729 | 0.9200939  |
| ENSMUSG00000034308 | 0.08490796 | 2.22413939 | 0.85200991 | 0.92012908 |
| ENSMUSG00000041773 | 0.06806355 | 4.69305946 | 0.85214321 | 0.92018658 |
| ENSMUSG00000051124 | -0.0664882 | 6.71899859 | 0.85234327 | 0.92026657 |
| ENSMUSG00000022848 | -0.069009  | 3.56469225 | 0.8523774  | 0.92026657 |
| ENSMUSG00000024436 | -0.0678054 | 4.75728102 | 0.85249088 | 0.92030265 |
| ENSMUSG00000029389 | -0.0670625 | 5.46204953 | 0.85274298 | 0.92048836 |
| ENSMUSG00000061313 | -0.0661716 | 5.39660487 | 0.85284476 | 0.92051178 |
| ENSMUSG00000014039 | 0.06693562 | 5.47474156 | 0.85304674 | 0.9205665  |
| ENSMUSG00000038518 | -0.0657911 | 7.36967019 | 0.85305562 | 0.9205665  |
| ENSMUSG00000002068 | 0.06767289 | 4.16939946 | 0.85319603 | 0.9206316  |
| ENSMUSG00000029142 | -0.0665765 | 4.98124019 | 0.85328498 | 0.92064115 |
| ENSMUSG00000079057 | 0.06649828 | 5.36494341 | 0.85434936 | 0.92170304 |
| ENSMUSG00000025869 | -0.0671261 | 4.27346495 | 0.85502435 | 0.92234399 |
| ENSMUSG00000030443 | -0.0735601 | 1.62431965 | 0.85514068 | 0.92234399 |
| ENSMUSG00000087590 | 0.0764345  | 2.56132701 | 0.85518419 | 0.92234399 |

|                    |            |            |            |            |
|--------------------|------------|------------|------------|------------|
| ENSMUSG00000049608 | -0.0716152 | 2.92230986 | 0.85539611 | 0.922486   |
| ENSMUSG00000034449 | 0.06705409 | 5.06143979 | 0.85558679 | 0.92256962 |
| ENSMUSG00000024063 | 0.06431101 | 8.90476751 | 0.85569114 | 0.92256962 |
| ENSMUSG00000041961 | 0.07936725 | 2.42798674 | 0.85571442 | 0.92256962 |
| ENSMUSG00000020553 | 0.06758704 | 4.15329949 | 0.855934   | 0.92262621 |
| ENSMUSG00000027010 | 0.06562806 | 5.52374028 | 0.85596003 | 0.92262621 |
| ENSMUSG00000049115 | -0.090562  | 1.35954449 | 0.8560077  | 0.92262621 |
| ENSMUSG00000043168 | -0.0654212 | 4.88983957 | 0.85614477 | 0.92268743 |
| ENSMUSG00000054091 | 0.06669292 | 4.40847487 | 0.85643378 | 0.92291238 |
| ENSMUSG00000074212 | -0.0641782 | 4.68001265 | 0.8566548  | 0.92306402 |
| ENSMUSG00000029504 | 0.06557989 | 5.29507567 | 0.85675879 | 0.92308954 |
| ENSMUSG00000059994 | -0.0638851 | 8.69618632 | 0.85685679 | 0.9231036  |
| ENSMUSG00000019210 | -0.0647437 | 5.88509885 | 0.85693245 | 0.9231036  |
| ENSMUSG00000032846 | -0.0648669 | 5.16329486 | 0.85709171 | 0.92312521 |
| ENSMUSG00000020864 | -0.0644901 | 6.22396965 | 0.85719102 | 0.92312521 |
| ENSMUSG00000059288 | -0.0657346 | 4.75122243 | 0.85719343 | 0.92312521 |
| ENSMUSG00000042476 | 0.06611661 | 4.75145735 | 0.85728294 | 0.92313512 |
| ENSMUSG00000029474 | -0.0657996 | 5.10496334 | 0.85781688 | 0.92362355 |
| ENSMUSG00000051234 | -0.065591  | 4.75742606 | 0.85806545 | 0.9237403  |
| ENSMUSG00000076548 | -0.0815052 | 1.90872163 | 0.85808603 | 0.9237403  |
| ENSMUSG00000005615 | 0.06434607 | 5.7062939  | 0.85857837 | 0.92418376 |
| ENSMUSG00000022031 | 0.06358223 | 5.92014125 | 0.8589757  | 0.92452487 |
| ENSMUSG00000034168 | -0.0648454 | 4.13886454 | 0.85913109 | 0.92456764 |
| ENSMUSG00000024335 | -0.0627941 | 9.02454162 | 0.8591763  | 0.92456764 |
| ENSMUSG00000071644 | 0.06254029 | 9.51967536 | 0.85954108 | 0.9248736  |
| ENSMUSG00000025353 | 0.0646683  | 4.81852573 | 0.85966518 | 0.92491486 |
| ENSMUSG00000028970 | -0.059471  | 3.16630011 | 0.85974034 | 0.92491486 |
| ENSMUSG00000029446 | -0.0708474 | 3.26154045 | 0.85988208 | 0.92498077 |
| ENSMUSG00000022130 | -0.0646937 | 4.57872479 | 0.86013764 | 0.92505922 |
| ENSMUSG00000062580 | 0.06633629 | 4.44697802 | 0.86014359 | 0.92505922 |
| ENSMUSG00000002129 | 0.06249924 | 7.03263134 | 0.86019643 | 0.92505922 |
| ENSMUSG00000061461 | 0.06267641 | 4.41177453 | 0.86041486 | 0.92520756 |
| ENSMUSG00000043279 | -0.0622994 | 7.26702714 | 0.86069044 | 0.92537452 |
| ENSMUSG00000032342 | -0.0635727 | 4.69536136 | 0.86073113 | 0.92537452 |
| ENSMUSG00000042724 | -0.0628784 | 5.74264737 | 0.8608454  | 0.92540206 |
| ENSMUSG00000053838 | 0.06293419 | 6.29530642 | 0.86091776 | 0.92540206 |
| ENSMUSG00000046679 | -0.0641653 | 5.05343278 | 0.86128872 | 0.92564479 |
| ENSMUSG00000032440 | 0.06186279 | 8.56975529 | 0.86130462 | 0.92564479 |
| ENSMUSG00000024019 | -0.0639556 | 4.69855839 | 0.86156012 | 0.92575355 |
| ENSMUSG00000009681 | 0.06468812 | 4.53823973 | 0.8615669  | 0.92575355 |
| ENSMUSG00000022945 | 0.076995   | 3.19222548 | 0.86195897 | 0.92608826 |
| ENSMUSG00000018750 | -0.0616661 | 6.86312066 | 0.86215106 | 0.92620807 |
| ENSMUSG00000055067 | 0.06608066 | 3.73578482 | 0.86249816 | 0.92645505 |

|                    |            |            |            |            |
|--------------------|------------|------------|------------|------------|
| ENSMUSG00000073409 | -0.0612194 | 9.83062569 | 0.86254214 | 0.92645505 |
| ENSMUSG00000030255 | 0.08969337 | 2.33621957 | 0.86304324 | 0.92690217 |
| ENSMUSG00000037331 | 0.06121691 | 7.58104965 | 0.86315438 | 0.92690217 |
| ENSMUSG00000029106 | -0.0609312 | 8.43839172 | 0.86338371 | 0.92690217 |
| ENSMUSG00000019715 | -0.0617496 | 6.13567429 | 0.86340471 | 0.92690217 |
| ENSMUSG00000036985 | 0.06306692 | 5.28452284 | 0.86343797 | 0.92690217 |
| ENSMUSG00000073775 | 0.06587716 | 4.23190346 | 0.86344223 | 0.92690217 |
| ENSMUSG00000025026 | -0.0607906 | 8.88216855 | 0.86359232 | 0.92697672 |
| ENSMUSG00000024661 | -0.060527  | 10.2442287 | 0.86409122 | 0.9273274  |
| ENSMUSG00000024921 | -0.0607233 | 7.33345707 | 0.86415803 | 0.9273274  |
| ENSMUSG00000098134 | -0.0621957 | 4.61099831 | 0.86416104 | 0.9273274  |
| ENSMUSG00000022711 | 0.06185479 | 6.04159037 | 0.86432187 | 0.92741341 |
| ENSMUSG00000034639 | -0.0988861 | 1.46024295 | 0.86443591 | 0.9274492  |
| ENSMUSG00000046876 | 0.06246909 | 5.49882778 | 0.86458496 | 0.92752255 |
| ENSMUSG00000047909 | -0.0602703 | 6.48166904 | 0.86502249 | 0.92784225 |
| ENSMUSG00000028412 | 0.06177275 | 5.45123197 | 0.8650444  | 0.92784225 |
| ENSMUSG00000037001 | -0.0622933 | 4.98949803 | 0.86522467 | 0.92791443 |
| ENSMUSG00000044573 | 0.06295843 | 4.92947032 | 0.86527315 | 0.92791443 |
| ENSMUSG00000078490 | -0.0518687 | 2.18304583 | 0.86592939 | 0.92836834 |
| ENSMUSG00000005107 | 0.06900143 | 3.14547112 | 0.86609173 | 0.92836834 |
| ENSMUSG00000020490 | -0.061194  | 5.72973746 | 0.86611019 | 0.92836834 |
| ENSMUSG00000026113 | -0.0595614 | 5.23315224 | 0.86615602 | 0.92836834 |
| ENSMUSG00000045237 | 0.06457193 | 3.64468485 | 0.86628418 | 0.92836834 |
| ENSMUSG00000027883 | -0.0633946 | 4.0140195  | 0.86638094 | 0.92836834 |
| ENSMUSG00000024603 | -0.0603959 | 6.11071626 | 0.86638636 | 0.92836834 |
| ENSMUSG00000040749 | -0.0667536 | 1.99324332 | 0.86639766 | 0.92836834 |
| ENSMUSG00000020097 | 0.05971446 | 7.50805706 | 0.86642328 | 0.92836834 |
| ENSMUSG00000022724 | -0.0598893 | 6.22009543 | 0.86705528 | 0.92894861 |
| ENSMUSG00000021140 | -0.0595801 | 6.00626077 | 0.86712645 | 0.92894861 |
| ENSMUSG00000020458 | -0.05903   | 6.98641434 | 0.86790581 | 0.92969689 |
| ENSMUSG00000028759 | -0.0588735 | 7.96404767 | 0.86815589 | 0.92987812 |
| ENSMUSG00000018740 | 0.0793215  | 2.40775041 | 0.86855679 | 0.93017037 |
| ENSMUSG00000022514 | -0.0601116 | 4.50011033 | 0.86859058 | 0.93017037 |
| ENSMUSG00000037991 | 0.0936458  | 1.50072761 | 0.86882143 | 0.93033091 |
| ENSMUSG00000036955 | 0.06019877 | 5.05209917 | 0.86928969 | 0.93071236 |
| ENSMUSG00000034023 | -0.0618119 | 3.81148503 | 0.86941493 | 0.93071236 |
| ENSMUSG00000073987 | -0.0585716 | 3.36609391 | 0.86942056 | 0.93071236 |
| ENSMUSG00000034432 | 0.05904788 | 5.86483507 | 0.86959604 | 0.93081353 |
| ENSMUSG00000026490 | -0.0635898 | 2.72068932 | 0.86986065 | 0.93101008 |
| ENSMUSG00000037415 | 0.05840447 | 7.03077118 | 0.86998764 | 0.9310593  |
| ENSMUSG00000031921 | -0.0585155 | 6.04862943 | 0.87012958 | 0.93111884 |
| ENSMUSG00000031446 | -0.0581559 | 6.32261503 | 0.87020528 | 0.93111884 |
| ENSMUSG00000022636 | -0.0580599 | 5.42704471 | 0.87047643 | 0.93132228 |

|                    |            |            |            |            |
|--------------------|------------|------------|------------|------------|
| ENSMUSG00000022263 | 0.06147327 | 5.0919143  | 0.87065025 | 0.93138772 |
| ENSMUSG00000025200 | -0.0597411 | 4.9244683  | 0.87069965 | 0.93138772 |
| ENSMUSG00000025786 | 0.05849534 | 6.10633665 | 0.87088201 | 0.93149611 |
| ENSMUSG00000022346 | -0.0574558 | 8.77471614 | 0.87103567 | 0.93157378 |
| ENSMUSG00000057667 | -0.0630761 | 3.55052452 | 0.8711344  | 0.9315927  |
| ENSMUSG00000019710 | -0.0578098 | 6.89544378 | 0.871252   | 0.93163179 |
| ENSMUSG00000056656 | 0.0615397  | 3.56177564 | 0.87193095 | 0.93227107 |
| ENSMUSG00000028029 | -0.0581964 | 5.52760139 | 0.87222554 | 0.93249931 |
| ENSMUSG00000022043 | 0.05715267 | 6.98873229 | 0.87244756 | 0.93259859 |
| ENSMUSG00000026289 | -0.0572796 | 6.38119506 | 0.87254623 | 0.93259859 |
| ENSMUSG00000008301 | 0.05807103 | 4.75435609 | 0.87256179 | 0.93259859 |
| ENSMUSG00000043733 | -0.0569801 | 6.94964514 | 0.87273661 | 0.93269871 |
| ENSMUSG00000038970 | -0.0568644 | 6.8170888  | 0.87294396 | 0.93283358 |
| ENSMUSG00000045763 | -0.061614  | 2.07940689 | 0.87308727 | 0.9329     |
| ENSMUSG00000001642 | 0.05675428 | 6.14223308 | 0.87352936 | 0.93320602 |
| ENSMUSG00000006127 | 0.05699558 | 6.89745046 | 0.87353604 | 0.93320602 |
| ENSMUSG00000024528 | 0.05995802 | 4.2524393  | 0.87371524 | 0.93323316 |
| ENSMUSG00000039703 | 0.05664194 | 6.58722978 | 0.87380493 | 0.93323316 |
| ENSMUSG00000082292 | 0.05474156 | 3.50645269 | 0.873805   | 0.93323316 |
| ENSMUSG00000056201 | 0.05606518 | 9.45242371 | 0.87399134 | 0.93334545 |
| ENSMUSG00000026803 | -0.0569824 | 6.33780636 | 0.8742061  | 0.93342487 |
| ENSMUSG00000020807 | -0.0587048 | 4.52389705 | 0.87422812 | 0.93342487 |
| ENSMUSG00000022696 | 0.05772351 | 5.57521549 | 0.87456033 | 0.93361611 |
| ENSMUSG00000064068 | 0.05898956 | 4.68837378 | 0.87458529 | 0.93361611 |
| ENSMUSG00000032849 | -0.0562612 | 5.08718484 | 0.87467298 | 0.93361611 |
| ENSMUSG00000018707 | 0.05598382 | 8.6134378  | 0.8747321  | 0.93361611 |
| ENSMUSG00000029147 | 0.05579578 | 7.13379315 | 0.87524502 | 0.93407683 |
| ENSMUSG00000014547 | 0.06035031 | 4.32369269 | 0.8756964  | 0.93430462 |
| ENSMUSG00000024454 | 0.05579046 | 6.33120209 | 0.87574931 | 0.93430462 |
| ENSMUSG00000006641 | -0.0567947 | 3.4432157  | 0.87583565 | 0.93430462 |
| ENSMUSG00000076598 | -0.0716629 | 2.92674934 | 0.87587644 | 0.93430462 |
| ENSMUSG00000029003 | -0.0644934 | 3.25906088 | 0.87591481 | 0.93430462 |
| ENSMUSG00000040596 | -0.058319  | 3.95250744 | 0.87594614 | 0.93430462 |
| ENSMUSG00000031511 | -0.0557523 | 5.96636519 | 0.87616217 | 0.93444833 |
| ENSMUSG00000092274 | -0.0547758 | 9.73075292 | 0.87671839 | 0.93480605 |
| ENSMUSG00000041308 | 0.06542916 | 3.05666438 | 0.87673297 | 0.93480605 |
| ENSMUSG00000025139 | -0.0552592 | 6.28765486 | 0.87674155 | 0.93480605 |
| ENSMUSG00000071650 | -0.0549095 | 8.46259944 | 0.87687189 | 0.93485831 |
| ENSMUSG00000097052 | -0.0582179 | 2.50458766 | 0.87733726 | 0.93526772 |
| ENSMUSG00000032352 | -0.0628101 | 3.28010628 | 0.87777047 | 0.9356379  |
| ENSMUSG00000039195 | 0.07548598 | 2.5146679  | 0.87784731 | 0.9356379  |
| ENSMUSG00000061613 | 0.05468782 | 5.41610319 | 0.87819607 | 0.93592285 |
| ENSMUSG00000001150 | 0.05452801 | 6.76872206 | 0.87873638 | 0.93637127 |



|                    |            |            |            |            |
|--------------------|------------|------------|------------|------------|
| ENSMUSG00000039316 | 0.05455859 | 6.57973188 | 0.87877975 | 0.93637127 |
| ENSMUSG00000032119 | 0.05436692 | 5.06051687 | 0.87906702 | 0.93651104 |
| ENSMUSG00000040859 | 0.05437162 | 6.73033028 | 0.87914935 | 0.93651104 |
| ENSMUSG00000070462 | -0.0568415 | 4.26860857 | 0.87921345 | 0.93651104 |
| ENSMUSG00000031453 | -0.0537955 | 8.69303868 | 0.87923681 | 0.93651104 |
| ENSMUSG00000000131 | -0.0536838 | 7.57813832 | 0.87950214 | 0.93665383 |
| ENSMUSG00000060090 | -0.0538988 | 6.73399752 | 0.87956748 | 0.93665383 |
| ENSMUSG00000018405 | 0.05691443 | 4.76781139 | 0.87961532 | 0.93665383 |
| ENSMUSG00000037750 | 0.05944444 | 3.73098568 | 0.8797408  | 0.93669909 |
| ENSMUSG00000049504 | 0.05475385 | 5.60561363 | 0.87982663 | 0.93669909 |
| ENSMUSG00000059182 | -0.0541944 | 5.93225798 | 0.87994701 | 0.93669909 |
| ENSMUSG00000019868 | 0.05609159 | 4.91158173 | 0.87998377 | 0.93669909 |
| ENSMUSG00000032265 | -0.0539057 | 7.3324607  | 0.88028376 | 0.93684506 |
| ENSMUSG00000045160 | -0.0575471 | 3.73763627 | 0.88040056 | 0.93684506 |
| ENSMUSG00000028920 | -0.054557  | 5.41597349 | 0.88047138 | 0.93684506 |
| ENSMUSG00000006058 | 0.05454298 | 5.32683966 | 0.88060039 | 0.93684506 |
| ENSMUSG00000028621 | -0.0555561 | 3.49854905 | 0.88063503 | 0.93684506 |
| ENSMUSG00000029863 | -0.0534138 | 7.22666188 | 0.88091398 | 0.93684506 |
| ENSMUSG00000085415 | 0.0513349  | 2.71893774 | 0.88095448 | 0.93684506 |
| ENSMUSG00000061607 | -0.0531122 | 7.64689396 | 0.88096068 | 0.93684506 |
| ENSMUSG00000003545 | -0.0528732 | 9.88471082 | 0.88105956 | 0.93684506 |
| ENSMUSG00000024785 | 0.05506497 | 4.1324622  | 0.88109343 | 0.93684506 |
| ENSMUSG00000001323 | -0.0557133 | 3.81799574 | 0.88109627 | 0.93684506 |
| ENSMUSG00000018796 | 0.05396516 | 5.78933632 | 0.88117537 | 0.93684506 |
| ENSMUSG00000030256 | -0.0547081 | 4.29183718 | 0.88118041 | 0.93684506 |
| ENSMUSG00000097194 | -0.0577275 | 3.82104842 | 0.8813018  | 0.93688747 |
| ENSMUSG00000040675 | 0.05365022 | 5.70033777 | 0.88164615 | 0.93701326 |
| ENSMUSG00000051890 | 0.05979569 | 3.59830663 | 0.88166954 | 0.93701326 |
| ENSMUSG00000051705 | -0.0641664 | 2.38608007 | 0.88172732 | 0.93701326 |
| ENSMUSG00000017288 | -0.0539367 | 5.28073177 | 0.88174619 | 0.93701326 |
| ENSMUSG00000032558 | -0.055433  | 3.00212898 | 0.88221529 | 0.9374251  |
| ENSMUSG00000039367 | -0.0523458 | 8.18001391 | 0.882673   | 0.9377525  |
| ENSMUSG00000030801 | 0.05324713 | 5.1610092  | 0.88268656 | 0.9377525  |
| ENSMUSG00000038975 | -0.0529302 | 6.02277406 | 0.88328275 | 0.93829916 |
| ENSMUSG00000002797 | -0.0534634 | 4.46489995 | 0.8834977  | 0.93836715 |
| ENSMUSG00000036402 | -0.0552175 | 3.35319947 | 0.88357522 | 0.93836715 |
| ENSMUSG00000066149 | -0.05293   | 5.23585863 | 0.88359165 | 0.93836715 |
| ENSMUSG00000024273 | -0.0527528 | 3.24776374 | 0.88368614 | 0.9383808  |
| ENSMUSG00000000441 | -0.0518851 | 7.4788661  | 0.88381571 | 0.938383   |
| ENSMUSG00000000826 | -0.0518629 | 7.91559097 | 0.88385148 | 0.938383   |
| ENSMUSG00000066043 | -0.0527164 | 5.51650354 | 0.8842278  | 0.93869584 |
| ENSMUSG00000022195 | -0.0528428 | 5.10553915 | 0.88447707 | 0.93887376 |
| ENSMUSG00000048170 | -0.0516679 | 6.97236491 | 0.88463387 | 0.93889876 |

|                    |            |            |            |            |
|--------------------|------------|------------|------------|------------|
| ENSMUSG00000026275 | -0.0521384 | 5.96126389 | 0.88466398 | 0.93889876 |
| ENSMUSG00000077450 | -0.0512569 | 6.6658519  | 0.8850229  | 0.93919297 |
| ENSMUSG00000041132 | -0.0518903 | 6.03988581 | 0.88526381 | 0.9393619  |
| ENSMUSG00000040746 | 0.05112453 | 7.56883694 | 0.88553817 | 0.9395663  |
| ENSMUSG00000004637 | -0.0523868 | 3.04620575 | 0.88565106 | 0.93959934 |
| ENSMUSG00000032018 | -0.0511636 | 5.61320569 | 0.88638474 | 0.94029093 |
| ENSMUSG00000032750 | -0.0538648 | 4.36025681 | 0.88658047 | 0.94036086 |
| ENSMUSG00000002455 | 0.05072354 | 6.83741103 | 0.8868295  | 0.94036086 |
| ENSMUSG00000040253 | 0.0514627  | 5.87952209 | 0.88684463 | 0.94036086 |
| ENSMUSG00000036023 | -0.0509077 | 6.39852095 | 0.88697221 | 0.94036086 |
| ENSMUSG00000044502 | 0.05079453 | 3.4943637  | 0.88700229 | 0.94036086 |
| ENSMUSG00000037112 | -0.0505956 | 5.3536195  | 0.88701479 | 0.94036086 |
| ENSMUSG00000042439 | -0.0738716 | 1.74257146 | 0.88707309 | 0.94036086 |
| ENSMUSG00000021532 | -0.0522628 | 3.96262682 | 0.88710511 | 0.94036086 |
| ENSMUSG00000020022 | 0.05290895 | 3.40121988 | 0.88732187 | 0.94050391 |
| ENSMUSG00000027207 | 0.05446103 | 4.47425265 | 0.88780146 | 0.94083479 |
| ENSMUSG00000007777 | -0.0628922 | 2.2629814  | 0.88803657 | 0.94083479 |
| ENSMUSG00000028868 | 0.04992441 | 8.2756415  | 0.88804453 | 0.94083479 |
| ENSMUSG00000021366 | -0.04999   | 7.21903431 | 0.8881093  | 0.94083479 |
| ENSMUSG00000022617 | -0.0501051 | 6.96867526 | 0.88811331 | 0.94083479 |
| ENSMUSG00000013622 | 0.05248209 | 5.04893048 | 0.88819305 | 0.94083479 |
| ENSMUSG00000049313 | -0.0496978 | 9.5307077  | 0.88820697 | 0.94083479 |
| ENSMUSG00000062040 | -0.0539226 | 3.31427667 | 0.88850549 | 0.94106428 |
| ENSMUSG00000036273 | -0.0494347 | 10.0806439 | 0.8887313  | 0.94115029 |
| ENSMUSG00000026417 | 0.06514949 | 2.47830276 | 0.88878479 | 0.94115029 |
| ENSMUSG00000005949 | -0.0513871 | 4.95351475 | 0.8888658  | 0.94115029 |
| ENSMUSG00000028273 | -0.0501483 | 6.12858917 | 0.8889142  | 0.94115029 |
| ENSMUSG00000044641 | -0.0692858 | 1.41978617 | 0.88903666 | 0.94119325 |
| ENSMUSG00000057691 | -0.0503384 | 5.7125197  | 0.88917214 | 0.94125    |
| ENSMUSG00000020056 | -0.0508631 | 4.34991954 | 0.88960828 | 0.94162497 |
| ENSMUSG00000026917 | -0.0498522 | 6.21911325 | 0.88970144 | 0.94163687 |
| ENSMUSG00000021792 | -0.050049  | 5.5610377  | 0.8899183  | 0.94177958 |
| ENSMUSG00000032388 | -0.0494762 | 6.19601404 | 0.89000013 | 0.94177958 |
| ENSMUSG00000016619 | -0.0495606 | 6.40377504 | 0.89022107 | 0.94192665 |
| ENSMUSG00000021794 | -0.0488749 | 7.88484878 | 0.89039651 | 0.94202558 |
| ENSMUSG00000022906 | -0.0490455 | 6.91115899 | 0.89062289 | 0.94209879 |
| ENSMUSG00000030534 | -0.0493669 | 5.59353354 | 0.89071818 | 0.94209879 |
| ENSMUSG00000021286 | 0.10954806 | 0.99379158 | 0.89078584 | 0.94209879 |
| ENSMUSG00000019808 | 0.06085171 | 2.08122233 | 0.89079354 | 0.94209879 |
| ENSMUSG00000029798 | 0.04975067 | 6.06164713 | 0.89094684 | 0.94217423 |
| ENSMUSG00000024594 | 0.05082661 | 4.84743475 | 0.89108848 | 0.94223734 |
| ENSMUSG00000003382 | -0.0484626 | 7.17489422 | 0.89135176 | 0.94242904 |
| ENSMUSG00000063801 | 0.04972244 | 5.35697679 | 0.89146223 | 0.94245915 |

|                    |            |            |            |            |
|--------------------|------------|------------|------------|------------|
| ENSMUSG00000032553 | 0.0507855  | 4.47734959 | 0.89157858 | 0.94249547 |
| ENSMUSG00000052155 | -0.0503863 | 3.36003072 | 0.89193027 | 0.94278055 |
| ENSMUSG00000021646 | 0.05204969 | 3.56131715 | 0.89213129 | 0.94280413 |
| ENSMUSG00000033047 | 0.0481809  | 7.04083497 | 0.89218452 | 0.94280413 |
| ENSMUSG00000022416 | -0.0482948 | 6.99903125 | 0.89219863 | 0.94280413 |
| ENSMUSG00000066441 | -0.0496531 | 5.54035193 | 0.89235076 | 0.9428782  |
| ENSMUSG00000094235 | -0.0676342 | 1.4755772  | 0.8927136  | 0.94317489 |
| ENSMUSG00000025190 | -0.0499531 | 5.43042758 | 0.89281699 | 0.94319743 |
| ENSMUSG00000025545 | -0.0553864 | 3.14964552 | 0.89313407 | 0.94337666 |
| ENSMUSG00000024732 | 0.05095821 | 4.49961234 | 0.8932313  | 0.94337666 |
| ENSMUSG00000026669 | 0.05283347 | 3.57454925 | 0.89323285 | 0.94337666 |
| ENSMUSG00000054499 | 0.04581413 | 5.34401816 | 0.89345114 | 0.94352052 |
| ENSMUSG00000070939 | 0.04845025 | 5.81470824 | 0.8938265  | 0.94383021 |
| ENSMUSG00000023755 | -0.0491041 | 3.67861989 | 0.89406323 | 0.94399346 |
| ENSMUSG00000026409 | -0.0482373 | 4.51157547 | 0.89415335 | 0.94400191 |
| ENSMUSG00000026575 | -0.0677561 | 2.13005482 | 0.89433814 | 0.94411029 |
| ENSMUSG00000019947 | -0.0475349 | 5.99202425 | 0.89450811 | 0.94418072 |
| ENSMUSG00000049047 | 0.0485361  | 5.82036755 | 0.89456913 | 0.94418072 |
| ENSMUSG00000032966 | -0.0476237 | 5.97510218 | 0.89498032 | 0.94452798 |
| ENSMUSG00000020869 | -0.0474986 | 6.21791135 | 0.89506912 | 0.94453498 |
| ENSMUSG00000022014 | 0.04734185 | 6.37020548 | 0.8952207  | 0.94460822 |
| ENSMUSG00000023764 | 0.04822857 | 6.1223296  | 0.89555311 | 0.94486011 |
| ENSMUSG00000024082 | 0.04850763 | 4.14485671 | 0.89567996 | 0.94486011 |
| ENSMUSG00000044709 | 0.04845217 | 4.87736268 | 0.89578718 | 0.94486011 |
| ENSMUSG00000020544 | -0.0508669 | 3.30499636 | 0.89578821 | 0.94486011 |
| ENSMUSG00000059456 | 0.04621594 | 9.14073862 | 0.89613052 | 0.94511073 |
| ENSMUSG00000027284 | 0.04725128 | 5.52729409 | 0.89619025 | 0.94511073 |
| ENSMUSG00000042500 | 0.04912371 | 4.9884372  | 0.8965473  | 0.94540054 |
| ENSMUSG00000028268 | 0.0461985  | 6.73651257 | 0.89672469 | 0.9454928  |
| ENSMUSG00000037443 | 0.04928316 | 4.64594472 | 0.8967993  | 0.9454928  |
| ENSMUSG00000071646 | -0.0460262 | 8.23758352 | 0.89689706 | 0.94550768 |
| ENSMUSG00000041477 | 0.04931609 | 4.56902605 | 0.89699158 | 0.94550768 |
| ENSMUSG00000028689 | 0.04752612 | 4.56890146 | 0.89711901 | 0.94550768 |
| ENSMUSG00000068749 | -0.0473096 | 5.49283709 | 0.89717083 | 0.94550768 |
| ENSMUSG00000027291 | -0.045994  | 6.73615144 | 0.89722468 | 0.94550768 |
| ENSMUSG00000038023 | 0.04659821 | 5.91803977 | 0.89734219 | 0.94554483 |
| ENSMUSG00000011427 | -0.0478153 | 5.06987798 | 0.89749481 | 0.94561896 |
| ENSMUSG00000053134 | 0.05138931 | 4.03884139 | 0.89759437 | 0.94563718 |
| ENSMUSG00000026701 | 0.04607709 | 6.30839043 | 0.89779843 | 0.94576548 |
| ENSMUSG00000022992 | -0.0464158 | 5.93638124 | 0.89806873 | 0.94592346 |
| ENSMUSG00000025393 | -0.0453323 | 9.39071155 | 0.89811298 | 0.94592346 |
| ENSMUSG00000027303 | 0.04545273 | 6.67050675 | 0.89865358 | 0.94635057 |
| ENSMUSG00000076564 | -0.0440797 | 5.73660044 | 0.89868315 | 0.94635057 |

|                    |            |            |            |            |
|--------------------|------------|------------|------------|------------|
| ENSMUSG00000076695 | -0.0481802 | 4.42637009 | 0.89895361 | 0.94643375 |
| ENSMUSG00000086184 | -0.0758603 | 1.92148352 | 0.89900634 | 0.94643375 |
| ENSMUSG00000020812 | 0.05149866 | 3.66060332 | 0.89900915 | 0.94643375 |
| ENSMUSG00000100078 | 0.04656442 | 3.10668001 | 0.89910195 | 0.94644477 |
| ENSMUSG00000078942 | -0.0444157 | 4.79258238 | 0.89920183 | 0.94646324 |
| ENSMUSG00000062373 | -0.0449884 | 4.65039494 | 0.89956928 | 0.94676331 |
| ENSMUSG00000032000 | -0.0445411 | 8.80153244 | 0.89979321 | 0.94689809 |
| ENSMUSG00000027381 | 0.04511556 | 6.5805085  | 0.89986209 | 0.94689809 |
| ENSMUSG00000096499 | -0.0480392 | 3.24641647 | 0.89995554 | 0.94690974 |
| ENSMUSG00000051495 | -0.044808  | 6.64858268 | 0.9002374  | 0.94711961 |
| ENSMUSG00000061360 | -0.0463147 | 5.15533863 | 0.9003622  | 0.94716423 |
| ENSMUSG00000046671 | -0.0451861 | 5.56438487 | 0.90053972 | 0.94718579 |
| ENSMUSG00000031311 | -0.0443073 | 8.28353446 | 0.900608   | 0.94718579 |
| ENSMUSG00000033933 | -0.0457773 | 5.35952778 | 0.9006947  | 0.94718579 |
| ENSMUSG00000020102 | -0.046185  | 4.15273026 | 0.90081173 | 0.94718579 |
| ENSMUSG00000054150 | 0.04653641 | 4.97847213 | 0.90083595 | 0.94718579 |
| ENSMUSG00000030103 | 0.04432796 | 7.47278357 | 0.90087709 | 0.94718579 |
| ENSMUSG00000032420 | 0.05369252 | 3.26291635 | 0.9009671  | 0.94719379 |
| ENSMUSG00000034265 | 0.04780466 | 3.78141374 | 0.90122349 | 0.94733329 |
| ENSMUSG00000015217 | 0.05205121 | 3.49339261 | 0.90126462 | 0.94733329 |
| ENSMUSG00000075327 | 0.04526025 | 4.81978046 | 0.90179293 | 0.94778173 |
| ENSMUSG00000032897 | 0.04490843 | 5.50334308 | 0.90190495 | 0.94778173 |
| ENSMUSG00000028224 | -0.0454307 | 5.14128293 | 0.90193861 | 0.94778173 |
| ENSMUSG00000017499 | 0.04440888 | 4.57777766 | 0.90213182 | 0.94789768 |
| ENSMUSG00000034422 | -0.0435174 | 8.37648826 | 0.90224545 | 0.94789768 |
| ENSMUSG00000037300 | -0.0439244 | 6.17602042 | 0.9023365  | 0.94789768 |
| ENSMUSG00000026694 | -0.0473506 | 4.10978177 | 0.90240197 | 0.94789768 |
| ENSMUSG00000027519 | -0.0442539 | 6.00896393 | 0.90248731 | 0.94789768 |
| ENSMUSG00000048796 | 0.04439965 | 5.83943272 | 0.90260903 | 0.94789768 |
| ENSMUSG00000031826 | -0.0443513 | 5.60858498 | 0.9026526  | 0.94789768 |
| ENSMUSG00000022771 | 0.04377156 | 6.7716113  | 0.90271674 | 0.94789768 |
| ENSMUSG00000009647 | -0.0459336 | 3.88855077 | 0.90279111 | 0.94789768 |
| ENSMUSG00000046567 | 0.05136831 | 3.1657637  | 0.9031829  | 0.94822243 |
| ENSMUSG00000027080 | -0.0457397 | 4.60844012 | 0.90353561 | 0.9485061  |
| ENSMUSG00000078700 | -0.0524511 | 2.49791648 | 0.90364249 | 0.94853168 |
| ENSMUSG00000037894 | 0.04495778 | 4.90716686 | 0.90389405 | 0.94870911 |
| ENSMUSG00000069631 | -0.0425204 | 5.63026626 | 0.90409515 | 0.94875201 |
| ENSMUSG00000036817 | -0.0429331 | 6.24433108 | 0.9041     | 0.94875201 |
| ENSMUSG00000074140 | 0.04743637 | 3.05179663 | 0.90461129 | 0.9492019  |
| ENSMUSG00000024640 | 0.0443538  | 4.65513033 | 0.90484016 | 0.94927044 |
| ENSMUSG00000086290 | -0.0424595 | 5.42173615 | 0.90484177 | 0.94927044 |
| ENSMUSG00000040167 | -0.0431979 | 5.36108618 | 0.90504362 | 0.94939555 |
| ENSMUSG00000074829 | -0.0412603 | 4.92619871 | 0.90516942 | 0.94943615 |

|                    |            |            |            |            |
|--------------------|------------|------------|------------|------------|
| ENSMUSG00000032290 | -0.0436768 | 5.32922454 | 0.90530367 | 0.94943615 |
| ENSMUSG00000073481 | -0.0430407 | 6.31645304 | 0.90533011 | 0.94943615 |
| ENSMUSG00000014771 | -0.0462579 | 4.54206566 | 0.90557238 | 0.94960185 |
| ENSMUSG00000028567 | 0.04439414 | 4.5318422  | 0.90569519 | 0.94960185 |
| ENSMUSG00000030872 | -0.042007  | 8.5676152  | 0.90575362 | 0.94960185 |
| ENSMUSG00000025269 | 0.04706708 | 3.76321672 | 0.9059188  | 0.94960185 |
| ENSMUSG00000036061 | -0.0440842 | 3.56648287 | 0.90593745 | 0.94960185 |
| ENSMUSG00000066036 | -0.0417042 | 8.46869804 | 0.90598378 | 0.94960185 |
| ENSMUSG00000050608 | -0.0430547 | 5.41606992 | 0.90619365 | 0.94973523 |
| ENSMUSG00000022982 | 0.04218698 | 6.52441324 | 0.90627682 | 0.9497358  |
| ENSMUSG00000025357 | -0.0414944 | 8.56247452 | 0.90670701 | 0.95009572 |
| ENSMUSG00000029614 | 0.04141234 | 9.21430994 | 0.90683595 | 0.95009572 |
| ENSMUSG00000003161 | -0.0417688 | 7.11137273 | 0.90695716 | 0.95009572 |
| ENSMUSG00000053091 | 0.04215412 | 4.03483012 | 0.9070242  | 0.95009572 |
| ENSMUSG00000038855 | 0.04159811 | 6.91082931 | 0.90703353 | 0.95009572 |
| ENSMUSG00000042489 | -0.0429578 | 4.11135976 | 0.90722645 | 0.95021121 |
| ENSMUSG00000060036 | 0.04101464 | 9.71132744 | 0.90767865 | 0.95053431 |
| ENSMUSG00000007379 | -0.0471886 | 2.56863168 | 0.90792054 | 0.95053431 |
| ENSMUSG00000038697 | 0.0422241  | 5.39792151 | 0.90794317 | 0.95053431 |
| ENSMUSG00000042111 | -0.0433326 | 4.45202547 | 0.90798564 | 0.95053431 |
| ENSMUSG00000037214 | 0.04156323 | 2.77196223 | 0.90800154 | 0.95053431 |
| ENSMUSG00000031545 | -0.0416513 | 6.24073255 | 0.90806044 | 0.95053431 |
| ENSMUSG00000031753 | 0.04169959 | 5.79258351 | 0.90811378 | 0.95053431 |
| ENSMUSG00000027655 | 0.04314802 | 4.77982787 | 0.90834205 | 0.95064861 |
| ENSMUSG00000057156 | 0.04541684 | 3.60620782 | 0.90838837 | 0.95064861 |
| ENSMUSG00000040296 | -0.0407793 | 7.91769496 | 0.90860714 | 0.95079099 |
| ENSMUSG00000032046 | 0.04171356 | 5.88585309 | 0.90889095 | 0.95089712 |
| ENSMUSG00000029066 | -0.042416  | 4.06478989 | 0.90893468 | 0.95089712 |
| ENSMUSG00000060181 | -0.0431162 | 4.58349739 | 0.90902246 | 0.95089712 |
| ENSMUSG00000024590 | -0.0415226 | 5.741196   | 0.90903944 | 0.95089712 |
| ENSMUSG00000060938 | 0.04036807 | 8.5852071  | 0.90915391 | 0.95093032 |
| ENSMUSG00000032431 | 0.04514598 | 2.97150748 | 0.90947733 | 0.95118205 |
| ENSMUSG00000069729 | 0.04075539 | 6.49907788 | 0.90967343 | 0.95130059 |
| ENSMUSG00000027618 | 0.04221963 | 4.8786493  | 0.9098407  | 0.95138896 |
| ENSMUSG00000028132 | 0.05190747 | 2.60056385 | 0.91009769 | 0.95150798 |
| ENSMUSG00000035199 | -0.0403334 | 6.86468518 | 0.91013595 | 0.95150798 |
| ENSMUSG00000028138 | -0.0405678 | 6.25957229 | 0.91020285 | 0.95150798 |
| ENSMUSG00000052085 | -0.0395914 | 8.73098832 | 0.91095526 | 0.95220794 |
| ENSMUSG00000036721 | 0.05756351 | 2.38498146 | 0.91115577 | 0.95224435 |
| ENSMUSG00000039763 | 0.04274402 | 2.3918185  | 0.91115577 | 0.95224435 |
| ENSMUSG00000026622 | 0.04518794 | 3.29831134 | 0.91131483 | 0.952324   |
| ENSMUSG00000022365 | -0.03978   | 6.66583697 | 0.9114799  | 0.95238971 |
| ENSMUSG00000028832 | -0.0410628 | 5.20437155 | 0.91154342 | 0.95238971 |

|                    |            |            |            |            |
|--------------------|------------|------------|------------|------------|
| ENSMUSG00000067787 | 0.04183241 | 4.18608322 | 0.91174002 | 0.95250854 |
| ENSMUSG00000004552 | 0.03901063 | 7.52633068 | 0.9125084  | 0.95322465 |
| ENSMUSG00000006289 | -0.0392099 | 5.55755679 | 0.91284966 | 0.95349449 |
| ENSMUSG00000038582 | -0.0394057 | 5.84714589 | 0.91306997 | 0.95363795 |
| ENSMUSG00000073705 | 0.08364925 | 1.36376928 | 0.91330858 | 0.9538005  |
| ENSMUSG00000017801 | -0.0395312 | 5.74120171 | 0.91353405 | 0.9539493  |
| ENSMUSG00000038425 | 0.03942469 | 5.64615973 | 0.91376002 | 0.95408793 |
| ENSMUSG00000029759 | -0.0343431 | 2.66232033 | 0.91383281 | 0.95408793 |
| ENSMUSG00000032599 | -0.0382858 | 4.55879247 | 0.91433498 | 0.95449393 |
| ENSMUSG00000038982 | -0.0397027 | 3.47795291 | 0.91438774 | 0.95449393 |
| ENSMUSG00000034867 | 0.03898746 | 5.5325136  | 0.91460432 | 0.95462591 |
| ENSMUSG00000042997 | 0.03906905 | 5.59039586 | 0.91468028 | 0.95462591 |
| ENSMUSG00000036368 | 0.06689013 | 1.38545461 | 0.91483212 | 0.9546977  |
| ENSMUSG00000026280 | -0.038175  | 6.12995149 | 0.91524218 | 0.95503893 |
| ENSMUSG00000061723 | -0.0342811 | 1.40497497 | 0.91630259 | 0.95605866 |
| ENSMUSG00000020646 | -0.053443  | 2.48288739 | 0.9164725  | 0.95614915 |
| ENSMUSG00000001847 | 0.03714522 | 7.79938824 | 0.9166287  | 0.95622532 |
| ENSMUSG00000002846 | 0.0362326  | 3.85572846 | 0.91693816 | 0.95646135 |
| ENSMUSG00000021254 | 0.03805168 | 5.86036247 | 0.91709176 | 0.95653477 |
| ENSMUSG00000022545 | -0.0370051 | 5.11248792 | 0.91728843 | 0.95657527 |
| ENSMUSG00000031258 | 0.03801207 | 5.916859   | 0.91729701 | 0.95657527 |
| ENSMUSG00000051506 | 0.03663578 | 9.53600519 | 0.91762925 | 0.95667262 |
| ENSMUSG00000028901 | 0.03814384 | 5.57419819 | 0.91763862 | 0.95667262 |
| ENSMUSG00000071793 | 0.04077178 | 4.2116806  | 0.91764004 | 0.95667262 |
| ENSMUSG00000085227 | 0.05780976 | 1.89067204 | 0.91785018 | 0.95679664 |
| ENSMUSG00000049090 | 0.03761338 | 5.53759534 | 0.91792548 | 0.95679664 |
| ENSMUSG00000020484 | 0.03653342 | 7.30141558 | 0.91805735 | 0.95682604 |
| ENSMUSG00000021285 | -0.0369914 | 6.14887911 | 0.91812016 | 0.95682604 |
| ENSMUSG00000040048 | 0.0368261  | 5.35226606 | 0.91820858 | 0.95683014 |
| ENSMUSG00000031642 | 0.05442344 | 2.24375672 | 0.91829057 | 0.95683014 |
| ENSMUSG00000020258 | 0.03717866 | 2.75945858 | 0.91845277 | 0.95685175 |
| ENSMUSG00000063870 | -0.0362223 | 9.26299026 | 0.91850524 | 0.95685175 |
| ENSMUSG00000047037 | 0.04132956 | 2.52075012 | 0.91856103 | 0.95685175 |
| ENSMUSG00000000244 | 0.0364449  | 7.15412263 | 0.91892785 | 0.95714713 |
| ENSMUSG00000060579 | -0.0770374 | 0.82539368 | 0.91925148 | 0.95739746 |
| ENSMUSG00000029649 | 0.03614903 | 5.91356112 | 0.91933527 | 0.95739798 |
| ENSMUSG00000046185 | 0.03598315 | 5.24106256 | 0.91978077 | 0.95777516 |
| ENSMUSG00000041453 | 0.03707835 | 4.4081129  | 0.92032093 | 0.95820829 |
| ENSMUSG00000031913 | -0.0368157 | 6.0135652  | 0.92036343 | 0.95820829 |
| ENSMUSG00000022244 | 0.04882534 | 2.28631705 | 0.92068085 | 0.95845194 |
| ENSMUSG00000075415 | 0.03524525 | 8.34929928 | 0.92103015 | 0.95864275 |
| ENSMUSG00000096956 | 0.08385041 | 1.50047116 | 0.92106937 | 0.95864275 |
| ENSMUSG00000027067 | -0.0351597 | 8.30106353 | 0.92119424 | 0.95864275 |

|                    |            |            |            |            |
|--------------------|------------|------------|------------|------------|
| ENSMUSG00000079450 | -0.0623697 | 0.86296072 | 0.92123997 | 0.95864275 |
| ENSMUSG00000057322 | -0.0352808 | 7.35881526 | 0.9212859  | 0.95864275 |
| ENSMUSG00000031751 | 0.03516572 | 7.29025185 | 0.92136451 | 0.95864275 |
| ENSMUSG00000022186 | 0.03519007 | 6.52807663 | 0.92176278 | 0.95897033 |
| ENSMUSG00000024513 | -0.0346846 | 7.25541665 | 0.92252089 | 0.95967218 |
| ENSMUSG00000028078 | 0.03569836 | 5.1424044  | 0.92283121 | 0.95990813 |
| ENSMUSG00000038539 | 0.06068907 | 1.54999715 | 0.92294889 | 0.95994367 |
| ENSMUSG00000040111 | 0.03615984 | 5.44402311 | 0.92307708 | 0.95999015 |
| ENSMUSG00000037628 | -0.0519691 | 1.99035809 | 0.92319269 | 0.96002352 |
| ENSMUSG00000024246 | 0.04318833 | 3.22278669 | 0.92361146 | 0.96037211 |
| ENSMUSG00000037519 | 0.03421684 | 6.29560911 | 0.92439654 | 0.96101595 |
| ENSMUSG00000086502 | -0.0408766 | 2.86172468 | 0.92439786 | 0.96101595 |
| ENSMUSG00000092486 | 0.05425237 | 2.01755651 | 0.92453086 | 0.96106731 |
| ENSMUSG00000069833 | 0.03363112 | 9.18574384 | 0.92479737 | 0.96124349 |
| ENSMUSG00000026526 | -0.0338256 | 6.46841572 | 0.92486759 | 0.96124349 |
| ENSMUSG00000038025 | -0.0341636 | 5.80238554 | 0.92516493 | 0.96138342 |
| ENSMUSG00000079144 | -0.0384887 | 3.25237309 | 0.9251695  | 0.96138342 |
| ENSMUSG00000042097 | 0.04120816 | 2.88527728 | 0.92538686 | 0.96146752 |
| ENSMUSG00000026848 | 0.03362751 | 6.34805935 | 0.92541772 | 0.96146752 |
| ENSMUSG00000047434 | 0.03513105 | 4.56421704 | 0.9255811  | 0.96155036 |
| ENSMUSG00000025413 | -0.0338922 | 5.93199225 | 0.92583303 | 0.96165204 |
| ENSMUSG00000022048 | -0.0355173 | 4.6722208  | 0.92584629 | 0.96165204 |
| ENSMUSG00000014453 | 0.03290318 | 8.66416492 | 0.92603088 | 0.96175686 |
| ENSMUSG00000047710 | -0.0338459 | 5.33032117 | 0.9265737  | 0.96223368 |
| ENSMUSG00000005886 | 0.03313104 | 6.89670807 | 0.92676533 | 0.96234575 |
| ENSMUSG00000023994 | -0.0326324 | 7.34926406 | 0.92698403 | 0.9624622  |
| ENSMUSG00000038175 | -0.0325336 | 7.40939772 | 0.92704493 | 0.9624622  |
| ENSMUSG00000016252 | 0.03310998 | 5.50535025 | 0.9274369  | 0.96278219 |
| ENSMUSG00000029530 | 0.06406654 | 1.63864457 | 0.92754687 | 0.9628094  |
| ENSMUSG00000026662 | -0.0335429 | 5.12871425 | 0.92774061 | 0.96292355 |
| ENSMUSG00000040848 | -0.0322778 | 7.09193392 | 0.92810314 | 0.96318383 |
| ENSMUSG00000003559 | -0.0340635 | 4.84739009 | 0.92819799 | 0.96318383 |
| ENSMUSG00000025283 | 0.0319792  | 8.88552369 | 0.92824275 | 0.96318383 |
| ENSMUSG00000059824 | 0.04203361 | 3.14665476 | 0.92844401 | 0.96330571 |
| ENSMUSG00000070972 | -0.0398354 | 3.1489509  | 0.92863979 | 0.96341129 |
| ENSMUSG00000003032 | 0.03184522 | 8.37690637 | 0.9287134  | 0.96341129 |
| ENSMUSG00000050213 | -0.0325501 | 5.19755946 | 0.92917816 | 0.9637986  |
| ENSMUSG00000024248 | -0.031637  | 7.32327294 | 0.92930839 | 0.9637986  |
| ENSMUSG00000006169 | -0.0314898 | 7.29636653 | 0.92939606 | 0.9637986  |
| ENSMUSG00000038648 | 0.03666252 | 4.09498344 | 0.92949972 | 0.9637986  |
| ENSMUSG00000044566 | 0.06235536 | 1.68543841 | 0.92964486 | 0.9637986  |
| ENSMUSG00000053536 | 0.03154466 | 6.36828623 | 0.92964723 | 0.9637986  |
| ENSMUSG00000034354 | 0.03131629 | 7.9102246  | 0.9297102  | 0.9637986  |

|                    |            |            |            |            |
|--------------------|------------|------------|------------|------------|
| ENSMUSG00000024527 | 0.03181808 | 6.1551394  | 0.92975752 | 0.9637986  |
| ENSMUSG00000032733 | -0.0313656 | 3.89826951 | 0.9301174  | 0.96408472 |
| ENSMUSG00000032456 | -0.0293689 | 2.49634603 | 0.9310928  | 0.96489365 |
| ENSMUSG00000055150 | 0.05654172 | 1.71535183 | 0.93113988 | 0.96489365 |
| ENSMUSG00000035842 | -0.0324476 | 4.76793248 | 0.93114966 | 0.96489365 |
| ENSMUSG00000091337 | 0.0312485  | 5.68545066 | 0.93125242 | 0.96491316 |
| ENSMUSG00000029462 | 0.03204062 | 5.05111899 | 0.93175012 | 0.96529151 |
| ENSMUSG00000024604 | 0.03073765 | 6.73355518 | 0.93178552 | 0.96529151 |
| ENSMUSG00000024778 | 0.03435456 | 3.39345595 | 0.93193747 | 0.96536192 |
| ENSMUSG00000037339 | 0.03240658 | 5.34897231 | 0.9320813  | 0.96542391 |
| ENSMUSG00000042015 | -0.0303199 | 4.90025748 | 0.93233906 | 0.96560388 |
| ENSMUSG00000001123 | -0.0303816 | 7.02905178 | 0.93274648 | 0.96589635 |
| ENSMUSG00000096751 | -0.0219879 | 1.11298512 | 0.9327895  | 0.96589635 |
| ENSMUSG00000085399 | -0.0461198 | 1.77105699 | 0.93349448 | 0.9665337  |
| ENSMUSG00000023110 | -0.0307519 | 5.80571036 | 0.93363801 | 0.9665337  |
| ENSMUSG00000021196 | 0.03022477 | 6.37775077 | 0.93371793 | 0.9665337  |
| ENSMUSG00000039795 | 0.03241725 | 4.59804071 | 0.93374135 | 0.9665337  |
| ENSMUSG00000033931 | -0.0309674 | 4.88441466 | 0.93407868 | 0.96672566 |
| ENSMUSG00000036304 | -0.0351219 | 2.22934259 | 0.93409499 | 0.96672566 |
| ENSMUSG00000032330 | 0.03006828 | 5.35126705 | 0.93437701 | 0.96678278 |
| ENSMUSG00000048581 | 0.05785283 | 1.79651356 | 0.93439162 | 0.96678278 |
| ENSMUSG00000022109 | 0.03030338 | 5.06938797 | 0.93440249 | 0.96678278 |
| ENSMUSG00000029426 | 0.02954296 | 6.26180148 | 0.93469667 | 0.96700011 |
| ENSMUSG00000095761 | -0.0516989 | 1.17319275 | 0.9348318  | 0.96705288 |
| ENSMUSG00000000120 | -0.0563458 | 1.81482006 | 0.93526475 | 0.96741369 |
| ENSMUSG00000063888 | 0.02883485 | 6.33827601 | 0.93552343 | 0.96759419 |
| ENSMUSG00000059923 | -0.0287267 | 8.01265792 | 0.93569082 | 0.9676555  |
| ENSMUSG00000052040 | 0.02870869 | 7.82903661 | 0.93575107 | 0.9676555  |
| ENSMUSG00000028085 | -0.0299705 | 3.7845515  | 0.93610661 | 0.96793608 |
| ENSMUSG00000048833 | -0.0289927 | 6.18887102 | 0.93627843 | 0.96802667 |
| ENSMUSG00000044730 | 0.03014927 | 4.70326052 | 0.93650138 | 0.96814374 |
| ENSMUSG00000078684 | 0.03040784 | 4.82695014 | 0.93666192 | 0.96814374 |
| ENSMUSG00000023015 | -0.0290394 | 4.78022738 | 0.93666658 | 0.96814374 |
| ENSMUSG00000043866 | -0.0291742 | 5.89474464 | 0.93672855 | 0.96814374 |
| ENSMUSG00000031132 | 0.05302604 | 1.86007285 | 0.93694278 | 0.9682781  |
| ENSMUSG00000042312 | -0.0327812 | 3.93882128 | 0.93718944 | 0.96844594 |
| ENSMUSG00000070697 | -0.0286236 | 5.88508458 | 0.93728329 | 0.96845585 |
| ENSMUSG00000035245 | -0.0286663 | 4.97867186 | 0.93756273 | 0.96863335 |
| ENSMUSG00000074151 | 0.02814553 | 7.49874675 | 0.9376236  | 0.96863335 |
| ENSMUSG00000037375 | -0.0425157 | 1.88402958 | 0.93814505 | 0.9690212  |
| ENSMUSG00000054932 | -0.0331448 | 2.32377611 | 0.93816763 | 0.9690212  |
| ENSMUSG00000025521 | 0.02811814 | 3.83994992 | 0.93841015 | 0.96918461 |
| ENSMUSG00000034931 | -0.0276788 | 6.86495275 | 0.93886402 | 0.9694998  |



|                    |            |            |            |            |
|--------------------|------------|------------|------------|------------|
| ENSMUSG00000024766 | 0.03665931 | 3.18253195 | 0.93896108 | 0.9694998  |
| ENSMUSG00000031171 | 0.02794948 | 4.09746909 | 0.93896836 | 0.9694998  |
| ENSMUSG00000063383 | -0.0468285 | 1.26716506 | 0.93914151 | 0.96959149 |
| ENSMUSG00000022234 | 0.02688657 | 8.35780379 | 0.93925833 | 0.96962501 |
| ENSMUSG00000074102 | -0.0278158 | 5.61380243 | 0.93957442 | 0.96986422 |
| ENSMUSG00000039048 | 0.02740542 | 5.86105557 | 0.93983765 | 0.97004883 |
| ENSMUSG00000045005 | 0.02979768 | 4.51436038 | 0.9400004  | 0.9701297  |
| ENSMUSG00000073607 | -0.0574433 | 1.30921612 | 0.94026901 | 0.97024357 |
| ENSMUSG00000074497 | 0.02706694 | 6.50232072 | 0.9403445  | 0.97024357 |
| ENSMUSG00000095210 | 0.02853016 | 3.74340465 | 0.94036395 | 0.97024357 |
| ENSMUSG00000031605 | 0.02869862 | 4.61636204 | 0.94072478 | 0.97052875 |
| ENSMUSG00000051989 | 0.03016238 | 3.60930253 | 0.9410915  | 0.97081996 |
| ENSMUSG00000022779 | -0.0260492 | 6.74001757 | 0.94163538 | 0.97127675 |
| ENSMUSG00000026047 | -0.0293618 | 2.74875094 | 0.9417033  | 0.97127675 |
| ENSMUSG00000044770 | 0.02639365 | 6.49276498 | 0.94199578 | 0.97136215 |
| ENSMUSG00000070730 | -0.027388  | 4.67886728 | 0.94208034 | 0.97136215 |
| ENSMUSG00000079478 | -0.0367861 | 1.99428088 | 0.94218529 | 0.97136215 |
| ENSMUSG00000084790 | 0.02686554 | 1.99307249 | 0.94218529 | 0.97136215 |
| ENSMUSG00000050954 | 0.02694722 | 5.22931194 | 0.94220861 | 0.97136215 |
| ENSMUSG00000039262 | -0.0254612 | 7.49658788 | 0.94261653 | 0.97166817 |
| ENSMUSG00000027122 | -0.0264358 | 4.61269454 | 0.94267451 | 0.97166817 |
| ENSMUSG00000085586 | -0.027015  | 1.37935174 | 0.94291139 | 0.97173059 |
| ENSMUSG00000085844 | 0.0240531  | 2.78573207 | 0.94292928 | 0.97173059 |
| ENSMUSG00000019295 | -0.0280184 | 4.75099758 | 0.94306256 | 0.97173059 |
| ENSMUSG00000026342 | 0.0320063  | 3.28608468 | 0.9430732  | 0.97173059 |
| ENSMUSG00000008393 | 0.02590602 | 5.80261007 | 0.94321631 | 0.97179094 |
| ENSMUSG00000032870 | 0.02497499 | 8.99794849 | 0.94377718 | 0.9722777  |
| ENSMUSG00000001305 | -0.0271801 | 4.32761618 | 0.94385793 | 0.9722777  |
| ENSMUSG00000032126 | 0.02500358 | 6.77863376 | 0.94417077 | 0.97243852 |
| ENSMUSG00000046006 | 0.0253169  | 4.86893404 | 0.94423029 | 0.97243852 |
| ENSMUSG00000000078 | -0.0246503 | 10.7547878 | 0.94439188 | 0.97243852 |
| ENSMUSG00000040591 | 0.05358982 | 2.04781084 | 0.94449155 | 0.97243852 |
| ENSMUSG00000045690 | 0.0329569  | 2.48812357 | 0.94449731 | 0.97243852 |
| ENSMUSG00000039879 | 0.02505295 | 6.65276176 | 0.94462963 | 0.97243852 |
| ENSMUSG00000031659 | 0.02469503 | 8.64939655 | 0.94465447 | 0.97243852 |
| ENSMUSG00000053985 | 0.02332684 | 2.06359635 | 0.94480602 | 0.97243852 |
| ENSMUSG00000030335 | -0.0266821 | 4.35637487 | 0.94494113 | 0.97243852 |
| ENSMUSG00000028772 | -0.0256773 | 4.81828038 | 0.94495958 | 0.97243852 |
| ENSMUSG00000050410 | 0.02877334 | 3.33996303 | 0.94499464 | 0.97243852 |
| ENSMUSG00000026305 | -0.024488  | 7.76813861 | 0.94509318 | 0.97243852 |
| ENSMUSG00000041203 | -0.0252827 | 5.46847349 | 0.94517932 | 0.97243852 |
| ENSMUSG00000085882 | 0.03460808 | 2.51233283 | 0.9451984  | 0.97243852 |
| ENSMUSG00000004268 | -0.0250053 | 6.39431106 | 0.94529123 | 0.972447   |

|                    |            |            |            |            |
|--------------------|------------|------------|------------|------------|
| ENSMUSG00000028690 | 0.02623673 | 2.85539524 | 0.94559862 | 0.97251418 |
| ENSMUSG00000029319 | 0.02562124 | 5.54454383 | 0.94561903 | 0.97251418 |
| ENSMUSG00000018659 | -0.0249179 | 5.51776559 | 0.94568211 | 0.97251418 |
| ENSMUSG00000026866 | -0.0243365 | 6.32282325 | 0.94569495 | 0.97251418 |
| ENSMUSG00000030718 | -0.0262896 | 4.8713639  | 0.94599302 | 0.97265958 |
| ENSMUSG00000037152 | -0.03025   | 3.13371164 | 0.94600557 | 0.97265958 |
| ENSMUSG00000024260 | 0.02462328 | 5.97597633 | 0.9461883  | 0.97276045 |
| ENSMUSG00000006392 | 0.02529001 | 5.27108367 | 0.94652058 | 0.97293297 |
| ENSMUSG00000003992 | -0.025569  | 3.90486655 | 0.94652539 | 0.97293297 |
| ENSMUSG00000029198 | 0.02478436 | 5.26940803 | 0.9468232  | 0.97308409 |
| ENSMUSG00000021951 | 0.02802496 | 2.89146421 | 0.94684172 | 0.97308409 |
| ENSMUSG00000059325 | -0.0266675 | 4.18853075 | 0.94704796 | 0.97310883 |
| ENSMUSG00000086049 | 0.03958363 | 1.49880249 | 0.94711745 | 0.97310883 |
| ENSMUSG00000020522 | -0.0240051 | 5.95022475 | 0.94711976 | 0.97310883 |
| ENSMUSG00000041891 | -0.0243952 | 5.68821147 | 0.94722139 | 0.97312627 |
| ENSMUSG00000033917 | 0.02429157 | 5.23489867 | 0.94744591 | 0.9732022  |
| ENSMUSG00000021038 | -0.0243833 | 5.97646809 | 0.94746462 | 0.9732022  |
| ENSMUSG00000004897 | 0.02325234 | 7.0215267  | 0.94788685 | 0.97354891 |
| ENSMUSG00000087175 | -0.0262827 | 2.1599854  | 0.94831865 | 0.97390538 |
| ENSMUSG00000039942 | -0.0232068 | 5.50398844 | 0.94844014 | 0.97392492 |
| ENSMUSG00000076937 | 0.02284603 | 9.65648999 | 0.94850714 | 0.97392492 |
| ENSMUSG00000005621 | 0.02287834 | 7.94613055 | 0.94869676 | 0.97403262 |
| ENSMUSG00000038542 | 0.02352809 | 5.34685535 | 0.94880907 | 0.97406093 |
| ENSMUSG00000024587 | 0.02285409 | 7.13697133 | 0.9489018  | 0.97406914 |
| ENSMUSG00000031059 | -0.0237619 | 5.75901781 | 0.94904976 | 0.97413403 |
| ENSMUSG00000000776 | -0.025581  | 3.82998656 | 0.94924332 | 0.97414432 |
| ENSMUSG00000022466 | -0.024645  | 4.2499442  | 0.94924576 | 0.97414432 |
| ENSMUSG00000031627 | -0.0226876 | 7.77180096 | 0.94945809 | 0.97414432 |
| ENSMUSG00000038506 | 0.02486647 | 4.13115443 | 0.94950734 | 0.97414432 |
| ENSMUSG00000025373 | -0.0222637 | 5.44840819 | 0.9495991  | 0.97414432 |
| ENSMUSG00000079071 | 0.0422765  | 2.96985333 | 0.94963644 | 0.97414432 |
| ENSMUSG00000014349 | -0.0228571 | 7.077186   | 0.949653   | 0.97414432 |
| ENSMUSG00000024829 | -0.0238285 | 3.99726173 | 0.94974013 | 0.97414676 |
| ENSMUSG00000002580 | -0.0242694 | 5.18485496 | 0.94988565 | 0.97418965 |
| ENSMUSG00000032612 | 0.02238899 | 7.62638191 | 0.94999469 | 0.97418965 |
| ENSMUSG00000066233 | -0.0256121 | 2.65073145 | 0.95003619 | 0.97418965 |
| ENSMUSG00000083012 | 0.02342306 | 4.85296987 | 0.95026657 | 0.97433897 |
| ENSMUSG00000031157 | 0.02209962 | 6.33905095 | 0.95046323 | 0.97445369 |
| ENSMUSG00000004462 | -0.0217341 | 4.43474565 | 0.9515286  | 0.97545896 |
| ENSMUSG00000024978 | -0.0213318 | 3.73977249 | 0.95210019 | 0.97595788 |
| ENSMUSG00000060992 | -0.0215223 | 6.95561914 | 0.95259857 | 0.97638168 |
| ENSMUSG00000096054 | -0.0197997 | 5.22471191 | 0.95276887 | 0.97646917 |
| ENSMUSG00000032359 | 0.02094233 | 8.55672503 | 0.95307672 | 0.97663024 |

|                    |            |            |            |            |
|--------------------|------------|------------|------------|------------|
| ENSMUSG00000031478 | 0.03190474 | 2.74286142 | 0.95309595 | 0.97663024 |
| ENSMUSG00000031839 | -0.0216708 | 5.74905928 | 0.95334448 | 0.97679783 |
| ENSMUSG00000034707 | -0.0207054 | 8.32678793 | 0.95353037 | 0.97680598 |
| ENSMUSG00000041716 | -0.0415609 | 1.69563042 | 0.95356829 | 0.97680598 |
| ENSMUSG00000064262 | -0.0206172 | 9.03512315 | 0.95360737 | 0.97680598 |
| ENSMUSG00000053436 | -0.0204916 | 7.55250976 | 0.95410646 | 0.97723013 |
| ENSMUSG00000066800 | -0.020418  | 5.74620754 | 0.95428955 | 0.97733057 |
| ENSMUSG00000031723 | 0.02296775 | 3.12142078 | 0.95442773 | 0.97733566 |
| ENSMUSG00000002221 | 0.02104312 | 5.55281779 | 0.95446456 | 0.97733566 |
| ENSMUSG00000040264 | 0.02026668 | 6.38959604 | 0.95481087 | 0.97760319 |
| ENSMUSG00000015341 | -0.0206892 | 6.00631936 | 0.95502593 | 0.97773629 |
| ENSMUSG00000032382 | 0.02018451 | 6.86517573 | 0.95511609 | 0.97774151 |
| ENSMUSG00000006818 | -0.0206906 | 5.58555044 | 0.95526705 | 0.97780897 |
| ENSMUSG00000032202 | 0.02080059 | 4.64253538 | 0.95578445 | 0.97825147 |
| ENSMUSG00000036214 | 0.04011302 | 1.78760202 | 0.956086   | 0.97847298 |
| ENSMUSG00000042406 | -0.0193849 | 8.77107607 | 0.95644666 | 0.9787029  |
| ENSMUSG00000027187 | -0.0194975 | 7.50454314 | 0.95654134 | 0.9787029  |
| ENSMUSG00000024521 | 0.01934901 | 9.11125079 | 0.95656608 | 0.9787029  |
| ENSMUSG00000001151 | -0.0190819 | 5.93247238 | 0.95665156 | 0.97870325 |
| ENSMUSG00000028453 | -0.0199217 | 4.48531377 | 0.95676143 | 0.97872854 |
| ENSMUSG00000001962 | -0.0199016 | 6.135928   | 0.9569252  | 0.97876654 |
| ENSMUSG00000045730 | 0.01941338 | 7.005868   | 0.95701356 | 0.97876654 |
| ENSMUSG00000025794 | 0.01910806 | 8.74084987 | 0.95705402 | 0.97876654 |
| ENSMUSG00000053580 | 0.03233216 | 2.44795894 | 0.95717051 | 0.9787986  |
| ENSMUSG00000028266 | -0.0204562 | 4.78087046 | 0.95739115 | 0.97893713 |
| ENSMUSG00000070953 | 0.0226609  | 3.49902915 | 0.95768999 | 0.97912956 |
| ENSMUSG00000056153 | 0.02112223 | 4.70664169 | 0.9577497  | 0.97912956 |
| ENSMUSG00000029992 | 0.01938481 | 6.44530548 | 0.95793952 | 0.97921456 |
| ENSMUSG00000038346 | 0.01900402 | 6.75321668 | 0.95801713 | 0.97921456 |
| ENSMUSG00000041124 | -0.0198775 | 4.59153018 | 0.9580884  | 0.97921456 |
| ENSMUSG00000073888 | 0.03498675 | 1.87031154 | 0.95834337 | 0.97935287 |
| ENSMUSG00000028741 | 0.02129929 | 4.41527261 | 0.95840783 | 0.97935287 |
| ENSMUSG00000031023 | 0.02715662 | 2.92424612 | 0.95847932 | 0.97935287 |
| ENSMUSG00000031774 | 0.01895096 | 5.58806207 | 0.95888334 | 0.97960382 |
| ENSMUSG00000022744 | 0.01864836 | 5.85888858 | 0.95895741 | 0.97960382 |
| ENSMUSG00000031168 | 0.01976204 | 4.75257428 | 0.95905704 | 0.97960382 |
| ENSMUSG00000035495 | -0.0190387 | 5.67422461 | 0.95912359 | 0.97960382 |
| ENSMUSG00000079260 | 0.01934294 | 5.27729023 | 0.9591727  | 0.97960382 |
| ENSMUSG00000072704 | 0.02005187 | 4.30526253 | 0.95928138 | 0.97960382 |
| ENSMUSG00000040177 | -0.0228958 | 3.28809818 | 0.95932146 | 0.97960382 |
| ENSMUSG00000076545 | -0.0205007 | 4.31149196 | 0.95943338 | 0.97963108 |
| ENSMUSG00000019952 | -0.0195872 | 4.94713431 | 0.95982891 | 0.97992956 |
| ENSMUSG00000009995 | -0.0180034 | 7.08902602 | 0.9598962  | 0.97992956 |

|                    |            |            |            |            |
|--------------------|------------|------------|------------|------------|
| ENSMUSG00000025745 | -0.0180015 | 7.21710026 | 0.96017911 | 0.98013133 |
| ENSMUSG00000079480 | 0.0220635  | 3.3284842  | 0.96040897 | 0.98027891 |
| ENSMUSG00000037669 | 0.01788002 | 5.78901115 | 0.96061415 | 0.98031877 |
| ENSMUSG00000032380 | 0.02426202 | 2.57143763 | 0.96062667 | 0.98031877 |
| ENSMUSG00000039738 | 0.0181017  | 6.11813017 | 0.96070386 | 0.98031877 |
| ENSMUSG00000022678 | 0.01788142 | 6.10276161 | 0.96103178 | 0.98056634 |
| ENSMUSG00000020267 | 0.01785675 | 5.86585188 | 0.96130277 | 0.98075578 |
| ENSMUSG00000056820 | -0.0175163 | 6.48520903 | 0.96152065 | 0.98088056 |
| ENSMUSG00000021033 | -0.0194616 | 3.64380977 | 0.96159574 | 0.98088056 |
| ENSMUSG00000048546 | -0.0170199 | 7.75676647 | 0.96207178 | 0.98123423 |
| ENSMUSG00000021810 | -0.0176421 | 5.78422618 | 0.96211453 | 0.98123423 |
| ENSMUSG00000075528 | -0.0402019 | 0.9460312  | 0.96220368 | 0.98123423 |
| ENSMUSG00000072640 | -0.015824  | 4.09053278 | 0.9622839  | 0.98123423 |
| ENSMUSG00000086605 | -0.0179846 | 2.64569318 | 0.96244455 | 0.98126823 |
| ENSMUSG00000029064 | -0.0168024 | 8.05811791 | 0.96255216 | 0.98126823 |
| ENSMUSG00000020180 | -0.0177508 | 5.76103665 | 0.96257953 | 0.98126823 |
| ENSMUSG00000097412 | -0.0392911 | 2.03976458 | 0.9626587  | 0.98126823 |
| ENSMUSG00000002326 | -0.0178807 | 4.65638454 | 0.96281373 | 0.98131188 |
| ENSMUSG00000017195 | 0.02568782 | 2.04495796 | 0.96287227 | 0.98131188 |
| ENSMUSG00000026687 | -0.0172597 | 5.73680973 | 0.96302273 | 0.98137822 |
| ENSMUSG00000056498 | -0.0164309 | 6.02640398 | 0.9632465  | 0.98151924 |
| ENSMUSG00000026970 | -0.0164508 | 6.98663697 | 0.9633505  | 0.9815382  |
| ENSMUSG00000055725 | -0.0322027 | 0.98053884 | 0.963496   | 0.9815928  |
| ENSMUSG00000058440 | -0.01679   | 5.95441281 | 0.9636378  | 0.9815928  |
| ENSMUSG00000041298 | 0.02496529 | 3.7254024  | 0.96373266 | 0.9815928  |
| ENSMUSG00000060639 | -0.0440258 | 2.08876966 | 0.96390434 | 0.9815928  |
| ENSMUSG00000028278 | 0.02001917 | 2.70704194 | 0.96396925 | 0.9815928  |
| ENSMUSG00000032604 | -0.016338  | 7.05625884 | 0.96399956 | 0.9815928  |
| ENSMUSG00000061119 | 0.01611846 | 7.25061858 | 0.96400183 | 0.9815928  |
| ENSMUSG00000035901 | -0.0158147 | 7.34863875 | 0.96474619 | 0.98226194 |
| ENSMUSG00000037949 | -0.0168101 | 4.86398933 | 0.96507442 | 0.98226194 |
| ENSMUSG00000085531 | 0.05751537 | 1.06185361 | 0.96508561 | 0.98226194 |
| ENSMUSG00000097204 | -0.0200691 | 1.05428272 | 0.96508561 | 0.98226194 |
| ENSMUSG00000024855 | -0.0158002 | 6.61871001 | 0.96508624 | 0.98226194 |
| ENSMUSG00000009073 | -0.0159799 | 6.28002571 | 0.96525277 | 0.98234446 |
| ENSMUSG00000027639 | -0.015111  | 9.98781393 | 0.96595754 | 0.98297467 |
| ENSMUSG00000025404 | -0.0152847 | 6.88017452 | 0.96607327 | 0.98300513 |
| ENSMUSG00000061086 | 0.02638489 | 2.80723257 | 0.96621346 | 0.98300513 |
| ENSMUSG00000022354 | -0.0168281 | 5.01706267 | 0.96633414 | 0.98300513 |
| ENSMUSG00000022956 | 0.01517353 | 6.0298057  | 0.96634959 | 0.98300513 |
| ENSMUSG00000048058 | 0.01740725 | 4.43855424 | 0.966509   | 0.98300513 |
| ENSMUSG00000002014 | 0.01606212 | 5.82778711 | 0.96657456 | 0.98300513 |
| ENSMUSG00000020922 | 0.01598048 | 5.0200855  | 0.96658608 | 0.98300513 |

|                    |            |            |            |            |
|--------------------|------------|------------|------------|------------|
| ENSMUSG00000027678 | 0.01489876 | 8.3807416  | 0.96675947 | 0.98309449 |
| ENSMUSG00000041594 | -0.0177859 | 3.85785876 | 0.96686677 | 0.98311663 |
| ENSMUSG00000061474 | 0.01531993 | 3.28238774 | 0.96732979 | 0.98350044 |
| ENSMUSG00000097779 | 0.01231541 | 3.30270736 | 0.9677343  | 0.98382469 |
| ENSMUSG00000091537 | -0.0146523 | 5.93671951 | 0.96814143 | 0.98415155 |
| ENSMUSG00000035849 | 0.01935018 | 3.65579619 | 0.96833489 | 0.98426117 |
| ENSMUSG00000022853 | 0.02258774 | 3.33653639 | 0.96851396 | 0.98428733 |
| ENSMUSG00000028668 | -0.0143405 | 7.14797248 | 0.96853188 | 0.98428733 |
| ENSMUSG00000028657 | 0.01419198 | 7.46864224 | 0.9687431  | 0.98441495 |
| ENSMUSG00000036327 | 0.0190697  | 3.68388624 | 0.96887924 | 0.98443134 |
| ENSMUSG00000098557 | 0.01382442 | 9.08060663 | 0.96893051 | 0.98443134 |
| ENSMUSG00000003814 | -0.0136305 | 9.73569831 | 0.96940117 | 0.98452159 |
| ENSMUSG00000036223 | -0.023093  | 1.26540277 | 0.96940448 | 0.98452159 |
| ENSMUSG00000074646 | 0.00777181 | 1.26920735 | 0.96940448 | 0.98452159 |
| ENSMUSG00000039065 | 0.01580699 | 4.58062846 | 0.96943534 | 0.98452159 |
| ENSMUSG00000037944 | -0.0136268 | 8.99656776 | 0.96944758 | 0.98452159 |
| ENSMUSG00000052397 | -0.0135702 | 8.77369288 | 0.96957165 | 0.98456061 |
| ENSMUSG00000039016 | 0.01572731 | 3.74504319 | 0.97013424 | 0.98504488 |
| ENSMUSG00000028998 | -0.0143206 | 4.89282015 | 0.97024908 | 0.98507447 |
| ENSMUSG00000054226 | -0.0145297 | 4.84159858 | 0.97051929 | 0.98526179 |
| ENSMUSG00000059939 | 0.01330264 | 6.14041972 | 0.97068983 | 0.9853479  |
| ENSMUSG00000005103 | 0.01298233 | 8.33285442 | 0.97079446 | 0.98536709 |
| ENSMUSG00000019942 | -0.0153967 | 4.06160783 | 0.97112353 | 0.98561407 |
| ENSMUSG00000047583 | -0.0238563 | 2.43701288 | 0.97125015 | 0.98565555 |
| ENSMUSG00000035704 | 0.014166   | 4.30396799 | 0.97143726 | 0.98575841 |
| ENSMUSG00000029535 | 0.01479182 | 4.31906223 | 0.97172048 | 0.98595877 |
| ENSMUSG00000068856 | 0.01408265 | 4.32396713 | 0.97182524 | 0.98597804 |
| ENSMUSG00000051504 | 0.04042173 | 1.40291626 | 0.97205627 | 0.98607732 |
| ENSMUSG00000062944 | 0.02806688 | 2.48638068 | 0.97223222 | 0.98607732 |
| ENSMUSG00000098923 | -0.0138287 | 4.67487243 | 0.9722623  | 0.98607732 |
| ENSMUSG00000023968 | 0.04763714 | 1.43434339 | 0.97229614 | 0.98607732 |
| ENSMUSG00000038685 | -0.0125349 | 6.43843066 | 0.97235202 | 0.98607732 |
| ENSMUSG00000020946 | 0.01227184 | 7.05790932 | 0.97270074 | 0.98634395 |
| ENSMUSG00000034345 | 0.01295504 | 4.77557466 | 0.97316286 | 0.98672551 |
| ENSMUSG00000078713 | -0.0144748 | 4.18671012 | 0.97347378 | 0.9869537  |
| ENSMUSG00000048497 | -0.0159837 | 3.92607248 | 0.97357341 | 0.98696766 |
| ENSMUSG00000028158 | -0.0104615 | 1.51832389 | 0.97386553 | 0.98717675 |
| ENSMUSG00000035325 | 0.01188488 | 7.06608746 | 0.97398553 | 0.98721133 |
| ENSMUSG00000034795 | 0.03393905 | 1.55030217 | 0.97448455 | 0.98755935 |
| ENSMUSG00000027573 | -0.0120154 | 6.1902558  | 0.97450071 | 0.98755935 |
| ENSMUSG00000026127 | -0.0119162 | 6.16704757 | 0.97474143 | 0.98761421 |
| ENSMUSG00000070520 | -0.014364  | 3.99484811 | 0.97479954 | 0.98761421 |
| ENSMUSG00000019975 | -0.0223363 | 2.63585825 | 0.9748126  | 0.98761421 |

|                    |            |            |            |            |
|--------------------|------------|------------|------------|------------|
| ENSMUSG00000032285 | 0.01056663 | 5.31260081 | 0.97639441 | 0.98912962 |
| ENSMUSG00000025157 | 0.01225444 | 4.6361961  | 0.97655994 | 0.98918376 |
| ENSMUSG00000035235 | 0.03314784 | 1.6971064  | 0.97669091 | 0.98918376 |
| ENSMUSG00000026770 | -0.0175131 | 2.75330034 | 0.97670602 | 0.98918376 |
| ENSMUSG00000011257 | 0.0106708  | 6.15846205 | 0.97737753 | 0.98977665 |
| ENSMUSG0000002308  | 0.0235077  | 1.76104669 | 0.97765606 | 0.98997149 |
| ENSMUSG00000032479 | 0.0099355  | 7.30783235 | 0.97822447 | 0.99040452 |
| ENSMUSG00000097184 | 0.01191807 | 1.80554627 | 0.97825602 | 0.99040452 |
| ENSMUSG00000028709 | 0.01084763 | 5.21542385 | 0.97834755 | 0.99040996 |
| ENSMUSG00000011114 | 0.00949498 | 6.45686484 | 0.97857027 | 0.99046737 |
| ENSMUSG00000036533 | -0.0122602 | 4.23280258 | 0.97857659 | 0.99046737 |
| ENSMUSG00000016637 | -0.0117827 | 3.48764007 | 0.97867611 | 0.99048089 |
| ENSMUSG00000019437 | 0.0147172  | 3.51317053 | 0.97904194 | 0.9907639  |
| ENSMUSG00000026123 | -0.0093053 | 5.97049702 | 0.97936038 | 0.99080165 |
| ENSMUSG00000072946 | 0.01011441 | 5.51094159 | 0.97938313 | 0.99080165 |
| ENSMUSG00000030652 | 0.02700163 | 1.89704592 | 0.97949424 | 0.99080165 |
| ENSMUSG00000040054 | 0.0092349  | 8.50728205 | 0.97956685 | 0.99080165 |
| ENSMUSG00000031137 | -0.0195153 | 1.90628972 | 0.97962313 | 0.99080165 |
| ENSMUSG00000020873 | -0.0105233 | 5.4986075  | 0.97966645 | 0.99080165 |
| ENSMUSG00000024983 | -0.0097659 | 4.70505018 | 0.9796928  | 0.99080165 |
| ENSMUSG00000038495 | -0.0092791 | 6.70477265 | 0.9797688  | 0.99080165 |
| ENSMUSG00000046020 | -0.0088196 | 6.06903364 | 0.97996236 | 0.99088258 |
| ENSMUSG00000020491 | 0.01025023 | 4.33331161 | 0.98002123 | 0.99088258 |
| ENSMUSG00000002741 | 0.00886471 | 6.33285958 | 0.98022166 | 0.99099807 |
| ENSMUSG00000055866 | 0.01457801 | 4.03795283 | 0.98042875 | 0.99112026 |
| ENSMUSG00000026192 | 0.00870347 | 6.46814263 | 0.98066769 | 0.99127464 |
| ENSMUSG00000058267 | 0.00972447 | 4.53156725 | 0.98088719 | 0.99140933 |
| ENSMUSG00000018239 | 0.0111418  | 3.67511641 | 0.98121692 | 0.99154356 |
| ENSMUSG00000042496 | -0.0064232 | 4.1040027  | 0.98129917 | 0.99154356 |
| ENSMUSG00000036339 | -0.0088636 | 5.21158863 | 0.98140861 | 0.99154356 |
| ENSMUSG00000021610 | 0.00831305 | 7.3065249  | 0.98150214 | 0.99154356 |
| ENSMUSG00000041959 | -0.0089669 | 6.44253334 | 0.98152885 | 0.99154356 |
| ENSMUSG00000053317 | 0.01254467 | 4.12283906 | 0.98153755 | 0.99154356 |
| ENSMUSG00000024232 | -0.0086332 | 4.14602509 | 0.98182078 | 0.99174252 |
| ENSMUSG00000094088 | -0.0103591 | 4.15973755 | 0.98197164 | 0.99180775 |
| ENSMUSG00000060152 | -0.011158  | 4.66868397 | 0.98209734 | 0.99184756 |
| ENSMUSG00000020077 | -0.0077292 | 8.26769434 | 0.98253375 | 0.99217576 |
| ENSMUSG00000035268 | 0.00918777 | 5.39843101 | 0.98263665 | 0.99217576 |
| ENSMUSG00000057469 | -0.0092702 | 3.79465117 | 0.98268126 | 0.99217576 |
| ENSMUSG00000035596 | 0.00809376 | 6.62347458 | 0.9829727  | 0.99232544 |
| ENSMUSG00000030591 | -0.0079834 | 6.84111825 | 0.98307627 | 0.99232544 |
| ENSMUSG00000056962 | 0.00764429 | 6.25189089 | 0.9830906  | 0.99232544 |
| ENSMUSG00000034126 | 0.01195924 | 3.84183755 | 0.98321651 | 0.99232544 |

|                    |            |            |            |            |
|--------------------|------------|------------|------------|------------|
| ENSMUSG00000039105 | 0.00776432 | 5.4280415  | 0.98326114 | 0.99232544 |
| ENSMUSG00000033429 | 0.01530503 | 2.22604925 | 0.98346456 | 0.99239719 |
| ENSMUSG00000030220 | -0.0073595 | 9.80443866 | 0.98356755 | 0.99239719 |
| ENSMUSG00000038965 | 0.0074505  | 6.25343172 | 0.98359123 | 0.99239719 |
| ENSMUSG00000040105 | 0.01074781 | 3.90001853 | 0.98388074 | 0.99260217 |
| ENSMUSG00000078779 | 0.02083035 | 2.28353084 | 0.98411157 | 0.99274792 |
| ENSMUSG00000028411 | 0.01072928 | 4.37706911 | 0.98448254 | 0.99290959 |
| ENSMUSG00000022706 | -0.0082803 | 4.37915561 | 0.98450099 | 0.99290959 |
| ENSMUSG00000036315 | 0.00772161 | 5.04042365 | 0.98453097 | 0.99290959 |
| ENSMUSG00000027698 | -0.0072802 | 4.64453239 | 0.98473706 | 0.99303031 |
| ENSMUSG00000037787 | -0.0085868 | 4.01172868 | 0.985063   | 0.99327186 |
| ENSMUSG00000014245 | 0.01120279 | 3.43821177 | 0.98528543 | 0.99340901 |
| ENSMUSG00000026011 | -0.0067836 | 3.49889355 | 0.98589092 | 0.9939323  |
| ENSMUSG00000024896 | 0.00648261 | 5.31166157 | 0.9863026  | 0.99426014 |
| ENSMUSG00000028744 | 0.00989115 | 4.15172925 | 0.98641246 | 0.99428369 |
| ENSMUSG00000062421 | 0.00711172 | 5.06704649 | 0.98679176 | 0.99449973 |
| ENSMUSG00000040010 | -0.0065991 | 5.16727702 | 0.98687148 | 0.99449973 |
| ENSMUSG00000039828 | -0.006788  | 4.20297991 | 0.98688634 | 0.99449973 |
| ENSMUSG00000022607 | 0.00801647 | 4.76984251 | 0.98716824 | 0.9946489  |
| ENSMUSG00000011254 | 0.01049877 | 3.64983971 | 0.98726934 | 0.9946489  |
| ENSMUSG00000015889 | -0.0063494 | 6.48252941 | 0.98729395 | 0.9946489  |
| ENSMUSG00000055148 | 0.00559643 | 8.93496292 | 0.98750893 | 0.99477829 |
| ENSMUSG00000018583 | -0.0055856 | 7.63247202 | 0.98775207 | 0.99493604 |
| ENSMUSG00000026274 | 0.01346175 | 2.72729738 | 0.98816107 | 0.9952608  |
| ENSMUSG00000026924 | 0.00554951 | 7.59831172 | 0.98835797 | 0.9953719  |
| ENSMUSG00000018449 | -0.0073039 | 4.70509034 | 0.98855938 | 0.99548752 |
| ENSMUSG00000062328 | -0.0052039 | 8.47064739 | 0.98868225 | 0.99552404 |
| ENSMUSG00000022400 | 0.00521077 | 5.52481387 | 0.98891608 | 0.99567227 |
| ENSMUSG00000079505 | 0.00693871 | 4.49880754 | 0.98928624 | 0.99595772 |
| ENSMUSG00000031066 | 0.00530309 | 6.55129898 | 0.98957193 | 0.99603466 |
| ENSMUSG00000059336 | -0.0041707 | 5.71331051 | 0.98964042 | 0.99603466 |
| ENSMUSG00000031982 | 0.00393161 | 2.94331901 | 0.98973021 | 0.99603466 |
| ENSMUSG00000047881 | -0.0055827 | 5.23295928 | 0.98977153 | 0.99603466 |
| ENSMUSG00000027185 | 0.0051984  | 6.10153531 | 0.9897959  | 0.99603466 |
| ENSMUSG00000029199 | 0.006083   | 4.72799266 | 0.99036869 | 0.99639594 |
| ENSMUSG00000036594 | -0.0042606 | 11.8786403 | 0.99039288 | 0.99639594 |
| ENSMUSG00000030509 | -0.005866  | 4.64280539 | 0.99047366 | 0.99639594 |
| ENSMUSG00000004798 | -0.0044078 | 6.36985942 | 0.99050164 | 0.99639594 |
| ENSMUSG00000041220 | -0.0071599 | 3.09036259 | 0.99069853 | 0.99650679 |
| ENSMUSG00000001855 | 0.004734   | 6.55087104 | 0.99112513 | 0.99684866 |
| ENSMUSG00000072582 | -0.0072198 | 4.24021483 | 0.99148021 | 0.99702516 |
| ENSMUSG00000034035 | -0.001581  | 3.22155897 | 0.99149983 | 0.99702516 |
| ENSMUSG00000009549 | -0.0046777 | 5.89404014 | 0.99156082 | 0.99702516 |

|                    |            |            |            |            |
|--------------------|------------|------------|------------|------------|
| ENSMUSG0000006273  | 0.00386437 | 7.38060068 | 0.99190568 | 0.99728468 |
| ENSMUSG00000027387 | 0.00804956 | 3.40917921 | 0.99249837 | 0.99779332 |
| ENSMUSG00000028809 | -0.0032121 | 8.05495328 | 0.99276695 | 0.99797604 |
| ENSMUSG00000006463 | -0.0056474 | 3.55014649 | 0.9931886  | 0.9983126  |
| ENSMUSG00000025175 | -0.0073839 | 3.59216498 | 0.99336885 | 0.99840648 |
| ENSMUSG00000067713 | -0.0034015 | 6.16405902 | 0.993492   | 0.99844296 |
| ENSMUSG00000021460 | 0.00492442 | 4.79748788 | 0.99406219 | 0.99892865 |
| ENSMUSG00000000881 | 0.00586783 | 3.90450102 | 0.99464426 | 0.99942215 |
| ENSMUSG00000050312 | -0.0014773 | 4.58159107 | 0.99472717 | 0.99942215 |
| ENSMUSG00000091971 | 0.00213888 | 10.1214337 | 0.99513847 | 0.99958726 |
| ENSMUSG00000027487 | 0.00059721 | 4.0477864  | 0.99514682 | 0.99958726 |
| ENSMUSG00000021822 | -0.0045699 | 4.94796124 | 0.99517695 | 0.99958726 |
| ENSMUSG00000045827 | 0.0052453  | 4.10709549 | 0.99533444 | 0.99958726 |
| ENSMUSG00000024165 | -0.0031843 | 5.57654273 | 0.99539581 | 0.99958726 |
| ENSMUSG00000079227 | -0.0033328 | 4.13157972 | 0.99541325 | 0.99958726 |
| ENSMUSG00000032216 | 0.00200136 | 7.87776868 | 0.99554044 | 0.99962765 |
| ENSMUSG00000029922 | -0.0022177 | 7.16889306 | 0.9957449  | 0.99974562 |
| ENSMUSG00000023944 | 0.00177068 | 12.2500134 | 0.99597678 | 0.9998911  |
| ENSMUSG00000042541 | -0.0020929 | 5.76809308 | 0.99690713 | 1          |
| ENSMUSG00000076534 | 0.00436691 | 4.74650971 | 0.99739651 | 1          |
| ENSMUSG00000022587 | -0.0009885 | 10.8710837 | 0.99785091 | 1          |
| ENSMUSG00000022160 | 0.00131253 | 6.21903106 | 0.99793326 | 1          |
| ENSMUSG00000047388 | 0.00132312 | 5.09786506 | 0.99835392 | 1          |
| ENSMUSG00000030663 | 0.00120121 | 5.53188213 | 0.99854812 | 1          |
| ENSMUSG00000028639 | 0.00064345 | 7.88709985 | 0.99872297 | 1          |
| ENSMUSG00000021192 | -0.0008388 | 6.29820941 | 0.99876202 | 1          |
| ENSMUSG00000027472 | 0.00094331 | 5.67943007 | 0.99922929 | 1          |
| ENSMUSG00000044627 | -0.000944  | 5.8171873  | 0.99931794 | 1          |
| ENSMUSG00000026260 | -0.0010427 | 5.8840525  | 0.99938734 | 1          |
| ENSMUSG00000035133 | 0.00366115 | 4.76813595 | 0.99963479 | 1          |
| ENSMUSG00000073557 | 1.59E-05   | 5.11781688 | 0.99994961 | 1          |
| ENSMUSG00000019917 | 0.03566077 | 1.37991757 | 1          | 1          |
| ENSMUSG00000059482 | 0.00852345 | 2.97132492 | 1          | 1          |
| ENSMUSG00000059554 | 0.00023079 | 3.10064182 | 1          | 1          |
| ENSMUSG00000030345 | 0.02949574 | 1.30601143 | 1          | 1          |
| ENSMUSG00000078521 | -0.0152175 | 0.84539789 | 1          | 1          |
| ENSMUSG00000033902 | 0.00021442 | 4.47017271 | 1          | 1          |
| ENSMUSG00000021079 | 0.00679274 | 3.39981301 | 1          | 1          |
| ENSMUSG00000047557 | 0.02309582 | 0.9661468  | 1          | 1          |
| ENSMUSG00000087403 | 0.02174866 | 1.08273988 | 1          | 1          |
| ENSMUSG00000079222 | 0.01956202 | 1.94476091 | 1          | 1          |
| ENSMUSG00000038702 | 0.01817272 | 1.87733058 | 1          | 1          |
| ENSMUSG00000090881 | 0.01525147 | 1.27428676 | 1          | 1          |



|                    |            |            |   |   |
|--------------------|------------|------------|---|---|
| ENSMUSG00000038217 | 0.01465642 | 1.45295658 | 1 | 1 |
| ENSMUSG00000019992 | -0.0132536 | 1.91537088 | 1 | 1 |
| ENSMUSG00000014243 | 0.0126971  | 1.80032577 | 1 | 1 |
| ENSMUSG00000024352 | 0.01093087 | 1.76458166 | 1 | 1 |
| ENSMUSG00000094940 | -0.0104269 | 1.46606651 | 1 | 1 |
| ENSMUSG00000078716 | 0.01033284 | 1.94948987 | 1 | 1 |
| ENSMUSG00000097162 | 0.00957456 | 1.03675756 | 1 | 1 |
| ENSMUSG00000028199 | 0.0089707  | 2.02671972 | 1 | 1 |
| ENSMUSG00000026189 | -0.0083592 | 1.55033844 | 1 | 1 |
| ENSMUSG00000025006 | 0.00696087 | 2.4531275  | 1 | 1 |
| ENSMUSG00000026383 | -0.0046936 | 2.26236297 | 1 | 1 |
| ENSMUSG00000037703 | -0.0042237 | 0.98774273 | 1 | 1 |
| ENSMUSG00000050323 | 0.00261072 | 1.82706684 | 1 | 1 |
| ENSMUSG00000020140 | -0.0023052 | 1.16221884 | 1 | 1 |
| ENSMUSG00000069793 | 0.00194484 | 3.63628543 | 1 | 1 |
| ENSMUSG00000030316 | 0.00160557 | 3.62451303 | 1 | 1 |
| ENSMUSG00000022094 | 0.00151118 | 4.07374789 | 1 | 1 |
| ENSMUSG00000035078 | -0.0003747 | 4.93620362 | 1 | 1 |
| ENSMUSG00000084786 | 0.00034593 | 6.30396694 | 1 | 1 |
| ENSMUSG00000076541 | -0.0002893 | 1.07128761 | 1 | 1 |

Activated B cells

Negative logFC indicates that a gene is down in DOT1L-KO

Postive logFC indicates that a gene is up in DOT1L-KO

Gene with FDR < 0.05 is considered significant

| ID                 | logFC      | logCPM     | PValue   | FDR      |
|--------------------|------------|------------|----------|----------|
| ENSMUSG00000028005 | 8.18461252 | 0.5136603  | 7.21E-18 | 1.14E-15 |
| ENSMUSG00000033542 | 6.39567164 | 1.99491419 | 4.02E-29 | 4.81E-26 |
| ENSMUSG00000044033 | 6.23879957 | 0.638926   | 1.29E-17 | 1.96E-15 |
| ENSMUSG00000099391 | 6.1845375  | 0.57877359 | 3.44E-17 | 4.76E-15 |
| ENSMUSG00000040254 | 6.14332033 | 2.8687399  | 5.52E-35 | 5.95E-31 |
| ENSMUSG00000020092 | 6.07810387 | 0.4924649  | 2.60E-16 | 3.12E-14 |
| ENSMUSG00000040964 | 5.95686134 | 0.39687424 | 2.84E-15 | 2.92E-13 |
| ENSMUSG00000064043 | 5.82191812 | 0.9842993  | 5.55E-20 | 1.33E-17 |
| ENSMUSG00000029279 | 5.38780549 | 3.0834202  | 2.29E-33 | 6.17E-30 |
| ENSMUSG00000027204 | 5.34805046 | 1.04860524 | 7.09E-19 | 1.34E-16 |
| ENSMUSG00000021806 | 5.28919223 | 1.85476332 | 5.46E-25 | 3.68E-22 |
| ENSMUSG00000029330 | 5.20822139 | 2.58974176 | 3.59E-29 | 4.81E-26 |
| ENSMUSG00000022438 | 5.20342863 | 1.52506333 | 3.96E-22 | 1.43E-19 |
| ENSMUSG00000074743 | 5.17031989 | 0.42244239 | 1.40E-14 | 1.22E-12 |
| ENSMUSG00000040616 | 5.12633639 | 0.39794657 | 1.54E-13 | 1.06E-11 |
| ENSMUSG00000054640 | 5.10886202 | 0.34339596 | 5.36E-14 | 4.16E-12 |
| ENSMUSG00000024669 | 5.05791966 | 0.8044948  | 2.60E-16 | 3.12E-14 |
| ENSMUSG00000036381 | 4.99333471 | 1.79446674 | 2.03E-22 | 8.11E-20 |
| ENSMUSG00000094025 | 4.86900809 | 0.13098736 | 2.79E-13 | 1.82E-11 |
| ENSMUSG00000025555 | 4.8328413  | 1.22246011 | 3.29E-18 | 5.62E-16 |
| ENSMUSG00000036334 | 4.75874751 | 2.47657691 | 2.75E-26 | 2.47E-23 |
| ENSMUSG00000024897 | 4.72906334 | 0.47229623 | 4.91E-15 | 4.74E-13 |
| ENSMUSG00000017002 | 4.6099768  | 4.32087207 | 9.10E-34 | 3.61E-30 |
| ENSMUSG00000000058 | 4.54883211 | 0.32446757 | 5.83E-13 | 3.61E-11 |
| ENSMUSG00000023328 | 4.51615929 | 0.92598616 | 5.06E-16 | 5.69E-14 |
| ENSMUSG00000021876 | 4.51220019 | 0.6416821  | 3.73E-14 | 3.05E-12 |
| ENSMUSG00000022861 | 4.47372983 | 0.25585565 | 3.76E-13 | 2.37E-11 |
| ENSMUSG00000004891 | 4.46415446 | 2.00203114 | 2.47E-22 | 9.17E-20 |
| ENSMUSG00000027072 | 4.4401419  | 0.82529545 | 2.09E-16 | 2.57E-14 |
| ENSMUSG00000066705 | 4.43093988 | 0.59427323 | 1.20E-13 | 8.49E-12 |
| ENSMUSG00000028037 | 4.40146151 | 5.4258615  | 1.01E-33 | 3.61E-30 |
| ENSMUSG00000073489 | 4.29385148 | 3.6619855  | 7.91E-29 | 8.53E-26 |
| ENSMUSG00000043940 | 4.28758633 | 2.91142319 | 5.78E-26 | 4.46E-23 |
| ENSMUSG00000052512 | 4.22654635 | 1.79858266 | 1.31E-19 | 2.81E-17 |
| ENSMUSG00000023959 | 4.18443945 | 0.60791443 | 7.48E-14 | 5.52E-12 |
| ENSMUSG00000030772 | 4.1780048  | 1.77868722 | 1.48E-20 | 3.80E-18 |
| ENSMUSG00000057182 | 4.14213019 | 1.87228866 | 1.73E-20 | 4.33E-18 |

|                    |            |            |          |          |
|--------------------|------------|------------|----------|----------|
| ENSMUSG00000045672 | 4.13782146 | 0.79195194 | 1.13E-14 | 1.02E-12 |
| ENSMUSG00000029810 | 4.11052179 | 7.22372121 | 7.24E-32 | 1.56E-28 |
| ENSMUSG00000066861 | 4.09967181 | 1.16783582 | 1.33E-15 | 1.42E-13 |
| ENSMUSG00000042759 | 4.09373576 | 2.43622695 | 5.14E-23 | 2.22E-20 |
| ENSMUSG00000048899 | 4.07791174 | 0.27033369 | 1.16E-11 | 5.44E-10 |
| ENSMUSG00000028184 | 4.07223579 | 5.23360913 | 8.44E-30 | 1.46E-26 |
| ENSMUSG00000032363 | 4.04240009 | 1.35521981 | 1.49E-17 | 2.17E-15 |
| ENSMUSG00000026883 | 4.04178263 | 1.93626036 | 6.12E-21 | 1.89E-18 |
| ENSMUSG00000026463 | 4.02563414 | 2.71671874 | 2.39E-23 | 1.07E-20 |
| ENSMUSG00000032718 | 4.02415207 | 0.70815033 | 6.51E-14 | 4.91E-12 |
| ENSMUSG00000059498 | 4.02110141 | 2.77101335 | 1.25E-23 | 6.75E-21 |
| ENSMUSG00000073226 | 4.01833416 | 0.85393706 | 2.59E-15 | 2.69E-13 |
| ENSMUSG00000039835 | 4.01303754 | 0.45126433 | 3.77E-13 | 2.37E-11 |
| ENSMUSG00000057135 | 4.00101367 | 1.23353004 | 1.98E-15 | 2.07E-13 |
| ENSMUSG00000000530 | 3.98640577 | 1.69457754 | 5.60E-18 | 9.29E-16 |
| ENSMUSG00000043391 | 3.96931851 | 2.30952378 | 7.03E-21 | 2.00E-18 |
| ENSMUSG00000026548 | 3.94673022 | 2.60167787 | 2.34E-22 | 9.03E-20 |
| ENSMUSG00000076613 | 3.93922511 | 6.79552903 | 9.48E-30 | 1.46E-26 |
| ENSMUSG00000022844 | 3.90177633 | 0.62301879 | 1.51E-12 | 8.47E-11 |
| ENSMUSG00000028207 | 3.90007228 | 2.44441419 | 1.32E-21 | 4.46E-19 |
| ENSMUSG00000045039 | 3.88763678 | 0.59962651 | 2.38E-12 | 1.27E-10 |
| ENSMUSG00000005672 | 3.88587237 | 3.1659211  | 3.93E-24 | 2.23E-21 |
| ENSMUSG00000061356 | 3.86882134 | 2.649526   | 7.43E-22 | 2.58E-19 |
| ENSMUSG00000041488 | 3.85678003 | 1.4634043  | 1.35E-16 | 1.71E-14 |
| ENSMUSG00000046152 | 3.85305586 | 0.61065108 | 8.12E-12 | 3.96E-10 |
| ENSMUSG00000025491 | 3.82960611 | 0.32454711 | 2.24E-11 | 1.00E-09 |
| ENSMUSG00000046058 | 3.82450841 | 0.89571258 | 7.28E-14 | 5.41E-12 |
| ENSMUSG00000020900 | 3.8156365  | 1.78291674 | 5.76E-18 | 9.42E-16 |
| ENSMUSG00000027071 | 3.78807146 | 1.96594835 | 3.38E-18 | 5.70E-16 |
| ENSMUSG00000038235 | 3.78632247 | 1.6871324  | 2.15E-17 | 3.05E-15 |
| ENSMUSG00000039943 | 3.75460621 | 2.77523472 | 3.03E-21 | 9.61E-19 |
| ENSMUSG00000062545 | 3.73890519 | 2.32922933 | 3.14E-19 | 6.27E-17 |
| ENSMUSG00000023367 | 3.72015829 | 5.7284357  | 1.32E-26 | 1.29E-23 |
| ENSMUSG00000022505 | 3.70611759 | 1.34060804 | 6.19E-15 | 5.75E-13 |
| ENSMUSG00000068220 | 3.70555481 | 5.14106396 | 5.41E-26 | 4.46E-23 |
| ENSMUSG00000053158 | 3.70545257 | 1.8765303  | 1.37E-17 | 2.05E-15 |
| ENSMUSG00000026833 | 3.69405541 | 1.59502008 | 1.34E-16 | 1.71E-14 |
| ENSMUSG00000038894 | 3.6869124  | 1.30145882 | 2.97E-15 | 3.03E-13 |
| ENSMUSG00000025492 | 3.65961547 | 4.72126294 | 5.29E-25 | 3.68E-22 |
| ENSMUSG00000026814 | 3.65481034 | 1.99942917 | 2.33E-17 | 3.27E-15 |
| ENSMUSG00000086291 | 3.65187384 | 0.38559469 | 3.09E-11 | 1.34E-09 |
| ENSMUSG00000047842 | 3.6507567  | 1.45832785 | 4.91E-16 | 5.57E-14 |
| ENSMUSG00000053025 | 3.65066058 | 0.3957093  | 1.08E-10 | 4.18E-09 |

|                    |            |            |          |          |
|--------------------|------------|------------|----------|----------|
| ENSMUSG00000022584 | 3.64807138 | 4.41995192 | 1.81E-24 | 1.09E-21 |
| ENSMUSG00000001247 | 3.64545126 | 0.75721645 | 2.34E-12 | 1.26E-10 |
| ENSMUSG00000028859 | 3.63522776 | 1.67565176 | 6.97E-17 | 9.39E-15 |
| ENSMUSG00000020121 | 3.62507245 | 0.75444357 | 7.10E-12 | 3.51E-10 |
| ENSMUSG00000015968 | 3.61757012 | 2.07801308 | 2.68E-18 | 4.67E-16 |
| ENSMUSG00000073490 | 3.60040761 | 5.09501066 | 7.36E-25 | 4.67E-22 |
| ENSMUSG00000095079 | 3.58834816 | 3.70633768 | 2.27E-23 | 1.06E-20 |
| ENSMUSG00000047747 | 3.56568911 | 0.49463571 | 1.97E-11 | 8.99E-10 |
| ENSMUSG00000022469 | 3.56001238 | 1.29164717 | 1.12E-14 | 1.02E-12 |
| ENSMUSG00000049191 | 3.55871676 | 1.31718231 | 2.90E-14 | 2.40E-12 |
| ENSMUSG00000018398 | 3.53665669 | 3.00854865 | 1.46E-20 | 3.80E-18 |
| ENSMUSG00000026932 | 3.53400011 | 1.38753926 | 1.83E-14 | 1.57E-12 |
| ENSMUSG00000040152 | 3.52960622 | 3.78210063 | 1.55E-22 | 6.44E-20 |
| ENSMUSG00000022440 | 3.52521721 | 2.38085935 | 1.60E-18 | 2.87E-16 |
| ENSMUSG00000024659 | 3.52359333 | 2.29243146 | 1.48E-18 | 2.71E-16 |
| ENSMUSG00000029304 | 3.51158373 | 3.36147914 | 6.39E-21 | 1.91E-18 |
| ENSMUSG00000002324 | 3.49814787 | 0.93112107 | 1.92E-12 | 1.06E-10 |
| ENSMUSG00000048388 | 3.49698765 | 0.77877842 | 3.81E-12 | 1.98E-10 |
| ENSMUSG00000058297 | 3.49219253 | 1.12696285 | 1.16E-13 | 8.30E-12 |
| ENSMUSG00000024664 | 3.49167324 | 2.91434131 | 1.07E-19 | 2.41E-17 |
| ENSMUSG00000026012 | 3.48699573 | 4.98867021 | 1.69E-23 | 8.68E-21 |
| ENSMUSG00000027073 | 3.48131455 | 1.90654021 | 8.54E-17 | 1.12E-14 |
| ENSMUSG00000038963 | 3.45089658 | 5.15170632 | 1.81E-23 | 8.87E-21 |
| ENSMUSG00000043895 | 3.43707271 | 2.44943359 | 7.42E-18 | 1.16E-15 |
| ENSMUSG00000038463 | 3.42607606 | 3.03658825 | 1.45E-19 | 3.06E-17 |
| ENSMUSG00000027848 | 3.42390161 | 1.11347514 | 1.29E-12 | 7.39E-11 |
| ENSMUSG00000048440 | 3.40421377 | 3.68709442 | 6.78E-21 | 1.98E-18 |
| ENSMUSG00000062960 | 3.37170762 | 1.5282985  | 1.18E-14 | 1.05E-12 |
| ENSMUSG00000020886 | 3.37092013 | 0.9225341  | 2.81E-12 | 1.48E-10 |
| ENSMUSG00000017417 | 3.3600382  | 0.52986053 | 1.96E-10 | 6.99E-09 |
| ENSMUSG00000022010 | 3.35793681 | 3.64967201 | 1.79E-20 | 4.38E-18 |
| ENSMUSG00000049807 | 3.35667574 | 0.65819835 | 3.88E-11 | 1.65E-09 |
| ENSMUSG00000019852 | 3.35183418 | 0.77293419 | 1.64E-11 | 7.61E-10 |
| ENSMUSG00000026437 | 3.35163561 | 0.91478433 | 8.94E-12 | 4.32E-10 |
| ENSMUSG00000061411 | 3.34538199 | 1.31498425 | 3.02E-13 | 1.95E-11 |
| ENSMUSG00000041729 | 3.3393746  | 1.66921115 | 9.00E-15 | 8.30E-13 |
| ENSMUSG00000012428 | 3.33331277 | 3.13425237 | 4.54E-19 | 8.75E-17 |
| ENSMUSG00000052821 | 3.3247182  | 1.41516137 | 1.91E-13 | 1.30E-11 |
| ENSMUSG00000033470 | 3.3171353  | 1.3675806  | 1.78E-13 | 1.22E-11 |
| ENSMUSG00000076612 | 3.30765929 | 4.13271415 | 8.51E-21 | 2.35E-18 |
| ENSMUSG00000026475 | 3.30152764 | 1.77056708 | 5.54E-15 | 5.20E-13 |
| ENSMUSG00000032092 | 3.29961004 | 0.62111896 | 2.03E-10 | 7.18E-09 |
| ENSMUSG00000070942 | 3.29722894 | 0.57760456 | 4.99E-11 | 2.09E-09 |

|                    |            |            |          |          |
|--------------------|------------|------------|----------|----------|
| ENSMUSG00000033590 | 3.29296605 | 1.1944889  | 1.38E-12 | 7.82E-11 |
| ENSMUSG00000066952 | 3.28816697 | 1.03646698 | 2.09E-12 | 1.15E-10 |
| ENSMUSG00000030789 | 3.28439424 | 1.46303035 | 6.15E-14 | 4.67E-12 |
| ENSMUSG00000005883 | 3.27489916 | 0.58845592 | 1.80E-10 | 6.53E-09 |
| ENSMUSG00000034485 | 3.26429284 | 1.70504284 | 2.34E-14 | 1.97E-12 |
| ENSMUSG00000045790 | 3.26301744 | 0.41215102 | 3.46E-10 | 1.17E-08 |
| ENSMUSG00000040183 | 3.25532914 | 0.46135115 | 1.75E-09 | 4.96E-08 |
| ENSMUSG00000062995 | 3.25214278 | 2.05774361 | 9.99E-16 | 1.09E-13 |
| ENSMUSG00000010830 | 3.24711758 | 0.39792167 | 5.65E-10 | 1.83E-08 |
| ENSMUSG00000019944 | 3.23833891 | 2.27487593 | 1.75E-16 | 2.17E-14 |
| ENSMUSG00000030208 | 3.23185061 | 2.56563238 | 1.44E-17 | 2.13E-15 |
| ENSMUSG00000059901 | 3.23054943 | 0.89548388 | 1.58E-11 | 7.39E-10 |
| ENSMUSG00000039616 | 3.21750321 | 0.64729613 | 5.98E-11 | 2.42E-09 |
| ENSMUSG00000009654 | 3.2143486  | 1.55640182 | 5.61E-14 | 4.32E-12 |
| ENSMUSG00000032231 | 3.21389519 | 3.52621369 | 3.61E-19 | 7.08E-17 |
| ENSMUSG00000019970 | 3.21085877 | 1.70521283 | 4.68E-14 | 3.71E-12 |
| ENSMUSG00000026014 | 3.20896216 | 4.87060244 | 8.97E-21 | 2.42E-18 |
| ENSMUSG00000035105 | 3.2059457  | 2.36530784 | 3.57E-16 | 4.10E-14 |
| ENSMUSG00000037202 | 3.19326917 | 1.40694337 | 2.55E-13 | 1.70E-11 |
| ENSMUSG00000071714 | 3.19180806 | 3.78207251 | 1.56E-19 | 3.24E-17 |
| ENSMUSG00000055980 | 3.18497103 | 1.04192621 | 6.08E-11 | 2.45E-09 |
| ENSMUSG00000029913 | 3.17086535 | 1.76082762 | 2.48E-14 | 2.08E-12 |
| ENSMUSG00000050394 | 3.16506633 | 1.48187453 | 5.87E-13 | 3.61E-11 |
| ENSMUSG00000025151 | 3.15432494 | 4.55419816 | 6.31E-20 | 1.48E-17 |
| ENSMUSG00000028927 | 3.13958725 | 3.13072778 | 1.01E-17 | 1.56E-15 |
| ENSMUSG00000027611 | 3.13601811 | 0.33023745 | 4.36E-09 | 1.14E-07 |
| ENSMUSG00000005397 | 3.13582491 | 4.40351415 | 1.07E-19 | 2.41E-17 |
| ENSMUSG00000001663 | 3.1324478  | 0.87986801 | 7.37E-12 | 3.63E-10 |
| ENSMUSG00000025867 | 3.11704621 | 1.23327651 | 1.07E-11 | 5.08E-10 |
| ENSMUSG00000027175 | 3.11541109 | 2.10392407 | 4.92E-15 | 4.74E-13 |
| ENSMUSG00000006930 | 3.11331461 | 1.36751152 | 2.77E-13 | 1.82E-11 |
| ENSMUSG00000036036 | 3.10988916 | 1.18306508 | 9.47E-12 | 4.52E-10 |
| ENSMUSG00000030124 | 3.08860488 | 0.88873497 | 5.74E-11 | 2.36E-09 |
| ENSMUSG00000038507 | 3.08008189 | 5.01200635 | 1.29E-19 | 2.81E-17 |
| ENSMUSG00000021678 | 3.07895149 | 1.22034499 | 5.89E-12 | 2.97E-10 |
| ENSMUSG00000087598 | 3.05824421 | 1.93525864 | 1.92E-14 | 1.64E-12 |
| ENSMUSG00000037306 | 3.04627133 | 1.14236668 | 2.92E-11 | 1.28E-09 |
| ENSMUSG00000095918 | 3.0437154  | 0.20566632 | 3.04E-09 | 8.19E-08 |
| ENSMUSG00000052364 | 3.04228989 | 0.28075413 | 3.06E-08 | 6.63E-07 |
| ENSMUSG00000002602 | 3.04052188 | 3.95458222 | 2.67E-18 | 4.67E-16 |
| ENSMUSG00000033855 | 3.03660758 | 1.48069775 | 1.35E-12 | 7.67E-11 |
| ENSMUSG00000044345 | 3.02441406 | 1.8279231  | 6.14E-14 | 4.67E-12 |
| ENSMUSG00000036053 | 3.0180279  | 5.5995224  | 2.87E-19 | 5.84E-17 |

|                    |            |            |          |          |
|--------------------|------------|------------|----------|----------|
| ENSMUSG00000024140 | 3.01050136 | 2.16727377 | 4.67E-14 | 3.71E-12 |
| ENSMUSG00000022421 | 3.01018187 | 1.74420155 | 2.05E-13 | 1.38E-11 |
| ENSMUSG00000069920 | 3.00841895 | 0.82830109 | 1.50E-10 | 5.61E-09 |
| ENSMUSG00000047712 | 3.00423126 | 1.34409283 | 2.33E-12 | 1.26E-10 |
| ENSMUSG00000018906 | 3.00250337 | 0.448456   | 8.02E-10 | 2.46E-08 |
| ENSMUSG00000049985 | 2.99773003 | 1.45103436 | 3.07E-12 | 1.61E-10 |
| ENSMUSG00000020061 | 2.99402353 | 0.51366541 | 5.66E-09 | 1.43E-07 |
| ENSMUSG00000032194 | 2.98321166 | 0.69134911 | 5.59E-10 | 1.82E-08 |
| ENSMUSG00000074923 | 2.97458386 | 0.55496749 | 1.17E-09 | 3.44E-08 |
| ENSMUSG00000053965 | 2.97359593 | 1.6033002  | 9.43E-13 | 5.56E-11 |
| ENSMUSG00000026796 | 2.97281416 | 2.19611817 | 2.99E-14 | 2.46E-12 |
| ENSMUSG00000018930 | 2.9677659  | 1.97950755 | 5.32E-14 | 4.16E-12 |
| ENSMUSG00000032281 | 2.95382961 | 0.34258661 | 1.88E-08 | 4.26E-07 |
| ENSMUSG00000033906 | 2.95369616 | 0.71193342 | 2.44E-09 | 6.70E-08 |
| ENSMUSG00000035385 | 2.93410171 | 1.61962897 | 1.08E-12 | 6.26E-11 |
| ENSMUSG00000047250 | 2.93378267 | 2.54733352 | 1.31E-14 | 1.16E-12 |
| ENSMUSG00000026131 | 2.9163397  | 3.62854132 | 8.34E-17 | 1.11E-14 |
| ENSMUSG00000060063 | 2.90603883 | 2.46878974 | 2.19E-14 | 1.86E-12 |
| ENSMUSG00000038732 | 2.89529203 | 1.2234252  | 5.22E-11 | 2.16E-09 |
| ENSMUSG00000034714 | 2.89498486 | 0.98415019 | 1.59E-10 | 5.87E-09 |
| ENSMUSG00000028378 | 2.89319675 | 3.7615066  | 1.21E-16 | 1.57E-14 |
| ENSMUSG00000050953 | 2.88661725 | 0.71064188 | 1.32E-09 | 3.85E-08 |
| ENSMUSG00000021477 | 2.88620836 | 3.31894889 | 5.14E-16 | 5.71E-14 |
| ENSMUSG00000039735 | 2.88348498 | 3.15794451 | 1.13E-15 | 1.22E-13 |
| ENSMUSG00000021069 | 2.88096351 | 1.45726336 | 5.97E-12 | 3.00E-10 |
| ENSMUSG00000012350 | 2.87214668 | 0.49319551 | 7.06E-09 | 1.77E-07 |
| ENSMUSG00000049866 | 2.86761478 | 4.16421428 | 6.10E-17 | 8.33E-15 |
| ENSMUSG00000024899 | 2.8655612  | 2.07405595 | 6.24E-13 | 3.80E-11 |
| ENSMUSG00000000555 | 2.84909658 | 2.33398451 | 1.36E-13 | 9.48E-12 |
| ENSMUSG00000058325 | 2.84590522 | 0.95454204 | 4.84E-10 | 1.59E-08 |
| ENSMUSG00000033174 | 2.84062984 | 3.01873629 | 5.15E-15 | 4.89E-13 |
| ENSMUSG00000076615 | 2.83745858 | 6.6463899  | 6.45E-18 | 1.04E-15 |
| ENSMUSG00000054072 | 2.82874678 | 4.36110175 | 1.45E-16 | 1.81E-14 |
| ENSMUSG00000029153 | 2.82472055 | 1.43027585 | 2.24E-11 | 1.00E-09 |
| ENSMUSG00000069830 | 2.81234771 | 2.22775801 | 2.95E-13 | 1.91E-11 |
| ENSMUSG00000055172 | 2.80635504 | 0.91553319 | 5.58E-10 | 1.82E-08 |
| ENSMUSG00000030786 | 2.80577836 | 4.01693176 | 2.69E-16 | 3.18E-14 |
| ENSMUSG00000018339 | 2.80511248 | 0.74541052 | 2.00E-09 | 5.59E-08 |
| ENSMUSG00000010307 | 2.80132821 | 0.96379158 | 2.27E-10 | 7.96E-09 |
| ENSMUSG00000034271 | 2.79943091 | 1.12285051 | 3.25E-10 | 1.10E-08 |
| ENSMUSG00000033880 | 2.79453764 | 6.49621968 | 1.85E-17 | 2.66E-15 |
| ENSMUSG00000000903 | 2.78429008 | 3.06195821 | 1.39E-14 | 1.22E-12 |
| ENSMUSG00000050989 | 2.78366422 | 2.37934581 | 1.99E-13 | 1.34E-11 |

|                    |            |            |          |          |
|--------------------|------------|------------|----------|----------|
| ENSMUSG00000026073 | 2.76658026 | 4.58465915 | 3.17E-16 | 3.71E-14 |
| ENSMUSG00000039963 | 2.7652525  | 0.63797756 | 6.78E-09 | 1.71E-07 |
| ENSMUSG00000059327 | 2.75304626 | 0.46611462 | 8.69E-08 | 1.70E-06 |
| ENSMUSG00000026589 | 2.75009435 | 0.46528269 | 1.08E-07 | 2.08E-06 |
| ENSMUSG00000042453 | 2.74757882 | 1.33708273 | 5.88E-10 | 1.89E-08 |
| ENSMUSG00000024935 | 2.74722225 | 1.72194213 | 5.43E-12 | 2.76E-10 |
| ENSMUSG00000005533 | 2.74155653 | 0.79042742 | 5.16E-09 | 1.32E-07 |
| ENSMUSG00000034462 | 2.73965291 | 2.00199899 | 2.38E-12 | 1.27E-10 |
| ENSMUSG00000052270 | 2.73754547 | 2.53978585 | 7.67E-14 | 5.59E-12 |
| ENSMUSG00000042156 | 2.73191896 | 2.72698233 | 1.36E-13 | 9.48E-12 |
| ENSMUSG00000061186 | 2.72641095 | 4.12587002 | 1.42E-15 | 1.50E-13 |
| ENSMUSG00000094502 | 2.72375655 | 2.0000355  | 7.98E-12 | 3.91E-10 |
| ENSMUSG00000009092 | 2.72254667 | 3.63281621 | 3.58E-15 | 3.61E-13 |
| ENSMUSG00000033460 | 2.72089062 | 0.7788579  | 5.16E-09 | 1.32E-07 |
| ENSMUSG00000060716 | 2.71786056 | 0.55904432 | 8.60E-09 | 2.11E-07 |
| ENSMUSG00000024424 | 2.71754755 | 2.04045394 | 1.60E-12 | 8.94E-11 |
| ENSMUSG00000038740 | 2.71298809 | 2.2177338  | 1.27E-12 | 7.30E-11 |
| ENSMUSG00000024459 | 2.69392593 | 2.63174913 | 3.16E-13 | 2.03E-11 |
| ENSMUSG00000022836 | 2.69295975 | 1.47823062 | 6.96E-11 | 2.78E-09 |
| ENSMUSG00000029223 | 2.69216704 | 4.11750986 | 3.72E-15 | 3.68E-13 |
| ENSMUSG00000021200 | 2.6892607  | 3.01241192 | 3.97E-14 | 3.22E-12 |
| ENSMUSG00000027199 | 2.68902769 | 5.07883024 | 7.10E-16 | 7.81E-14 |
| ENSMUSG00000020828 | 2.68884684 | 2.18684334 | 2.31E-12 | 1.26E-10 |
| ENSMUSG00000033066 | 2.67606982 | 3.10309903 | 4.50E-14 | 3.62E-12 |
| ENSMUSG00000050708 | 2.66170253 | 7.44435532 | 3.30E-16 | 3.82E-14 |
| ENSMUSG00000041460 | 2.66123775 | 0.98633785 | 3.89E-09 | 1.03E-07 |
| ENSMUSG00000024968 | 2.6556788  | 0.9394132  | 1.08E-08 | 2.59E-07 |
| ENSMUSG00000027399 | 2.653934   | 4.37476798 | 3.63E-15 | 3.63E-13 |
| ENSMUSG00000017057 | 2.65087826 | 2.93746733 | 1.32E-13 | 9.28E-12 |
| ENSMUSG00000038502 | 2.64832349 | 1.04524328 | 1.98E-09 | 5.55E-08 |
| ENSMUSG00000068551 | 2.64134485 | 1.98379678 | 2.56E-11 | 1.13E-09 |
| ENSMUSG00000041444 | 2.63091622 | 1.46659557 | 1.59E-10 | 5.87E-09 |
| ENSMUSG00000025804 | 2.63038768 | 1.61571296 | 2.07E-11 | 9.44E-10 |
| ENSMUSG00000030579 | 2.62818958 | 1.78278757 | 5.90E-11 | 2.40E-09 |
| ENSMUSG00000027398 | 2.61863882 | 4.56949617 | 5.17E-15 | 4.89E-13 |
| ENSMUSG00000050578 | 2.61629762 | 1.19043111 | 2.97E-10 | 1.01E-08 |
| ENSMUSG00000038775 | 2.6142553  | 1.91885023 | 1.73E-11 | 8.01E-10 |
| ENSMUSG00000036611 | 2.61126018 | 0.8862236  | 1.14E-08 | 2.72E-07 |
| ENSMUSG00000020297 | 2.60836372 | 1.25674575 | 1.19E-09 | 3.50E-08 |
| ENSMUSG00000026576 | 2.60713861 | 3.66459543 | 5.22E-14 | 4.11E-12 |
| ENSMUSG00000039787 | 2.60021352 | 1.49806806 | 1.86E-10 | 6.70E-09 |
| ENSMUSG00000049988 | 2.59914945 | 1.36485649 | 5.12E-10 | 1.68E-08 |
| ENSMUSG00000032501 | 2.59688118 | 3.31388033 | 1.07E-13 | 7.67E-12 |

|                    |            |            |          |          |
|--------------------|------------|------------|----------|----------|
| ENSMUSG0000002190  | 2.59574634 | 1.60433002 | 2.31E-10 | 8.10E-09 |
| ENSMUSG00000035042 | 2.58691167 | 4.54776508 | 1.09E-14 | 9.98E-13 |
| ENSMUSG00000015474 | 2.58610594 | 0.59109789 | 4.17E-08 | 8.76E-07 |
| ENSMUSG00000026070 | 2.58236422 | 1.89816702 | 5.72E-11 | 2.36E-09 |
| ENSMUSG00000076666 | 2.57939858 | 3.15328323 | 3.57E-13 | 2.28E-11 |
| ENSMUSG00000042476 | 2.57707701 | 2.62464964 | 2.33E-12 | 1.26E-10 |
| ENSMUSG00000095923 | 2.57578179 | 0.71844362 | 1.62E-08 | 3.73E-07 |
| ENSMUSG00000020937 | 2.57418804 | 1.001718   | 8.69E-09 | 2.13E-07 |
| ENSMUSG00000028885 | 2.56273232 | 1.47968528 | 2.74E-10 | 9.48E-09 |
| ENSMUSG00000033287 | 2.55462067 | 1.92169829 | 3.01E-11 | 1.31E-09 |
| ENSMUSG00000006611 | 2.55365837 | 1.61791815 | 4.81E-10 | 1.59E-08 |
| ENSMUSG00000049001 | 2.55023762 | 2.06143869 | 3.29E-11 | 1.41E-09 |
| ENSMUSG00000022102 | 2.54692054 | 1.07364291 | 4.33E-09 | 1.14E-07 |
| ENSMUSG00000097471 | 2.54018989 | 0.95213774 | 9.12E-09 | 2.22E-07 |
| ENSMUSG00000022994 | 2.53839923 | 0.67635409 | 2.10E-08 | 4.72E-07 |
| ENSMUSG00000011148 | 2.53818114 | 2.31503888 | 2.75E-11 | 1.20E-09 |
| ENSMUSG00000024164 | 2.53711385 | 1.78815948 | 8.44E-11 | 3.31E-09 |
| ENSMUSG00000032262 | 2.53694108 | 0.48259369 | 2.25E-07 | 4.05E-06 |
| ENSMUSG00000037638 | 2.52705688 | 0.8360894  | 1.73E-08 | 3.97E-07 |
| ENSMUSG00000031444 | 2.52315065 | 0.88031291 | 5.84E-09 | 1.48E-07 |
| ENSMUSG00000040809 | 2.52275876 | 2.1835473  | 2.64E-11 | 1.16E-09 |
| ENSMUSG00000002006 | 2.52095799 | 1.32158538 | 3.04E-09 | 8.19E-08 |
| ENSMUSG00000041845 | 2.52028314 | 0.60464056 | 7.04E-08 | 1.41E-06 |
| ENSMUSG00000049103 | 2.5194121  | 0.65160684 | 1.25E-07 | 2.38E-06 |
| ENSMUSG00000029287 | 2.51829358 | 1.85606222 | 1.02E-10 | 3.98E-09 |
| ENSMUSG00000005803 | 2.51719928 | 0.98889678 | 1.36E-08 | 3.19E-07 |
| ENSMUSG00000022098 | 2.51690284 | 1.17019881 | 9.32E-09 | 2.25E-07 |
| ENSMUSG00000035829 | 2.51320257 | 0.92114103 | 1.53E-08 | 3.55E-07 |
| ENSMUSG00000028041 | 2.50927194 | 2.07949311 | 3.29E-11 | 1.41E-09 |
| ENSMUSG00000058715 | 2.50720479 | 3.41299484 | 3.78E-13 | 2.37E-11 |
| ENSMUSG00000027993 | 2.5024955  | 1.46446572 | 1.87E-09 | 5.28E-08 |
| ENSMUSG00000058099 | 2.49578554 | 3.39226345 | 7.93E-13 | 4.70E-11 |
| ENSMUSG00000095115 | 2.49549402 | 3.2741246  | 5.88E-13 | 3.61E-11 |
| ENSMUSG00000039831 | 2.49206905 | 1.78598631 | 6.71E-10 | 2.09E-08 |
| ENSMUSG00000037902 | 2.48493228 | 4.50982184 | 9.52E-14 | 6.89E-12 |
| ENSMUSG00000051439 | 2.47894092 | 0.57577187 | 1.06E-07 | 2.05E-06 |
| ENSMUSG00000021596 | 2.47860159 | 2.04256709 | 9.23E-11 | 3.61E-09 |
| ENSMUSG00000058672 | 2.47615353 | 3.14923086 | 2.11E-12 | 1.16E-10 |
| ENSMUSG00000078670 | 2.47545593 | 1.58240124 | 6.86E-10 | 2.12E-08 |
| ENSMUSG00000017144 | 2.47095189 | 1.80803338 | 1.68E-10 | 6.15E-09 |
| ENSMUSG00000039497 | 2.46609547 | 4.50153172 | 1.60E-13 | 1.10E-11 |
| ENSMUSG00000020176 | 2.46575558 | 0.84680217 | 6.22E-08 | 1.26E-06 |
| ENSMUSG00000021779 | 2.46533568 | 1.48632934 | 2.36E-09 | 6.52E-08 |



|                    |            |            |          |          |
|--------------------|------------|------------|----------|----------|
| ENSMUSG00000027995 | 2.46459273 | 3.56430398 | 7.52E-13 | 4.48E-11 |
| ENSMUSG00000094102 | 2.46363108 | 2.537497   | 1.93E-11 | 8.86E-10 |
| ENSMUSG00000071311 | 2.45367846 | 0.41436014 | 1.02E-06 | 1.61E-05 |
| ENSMUSG00000022332 | 2.45217998 | 1.68686196 | 2.02E-09 | 5.63E-08 |
| ENSMUSG00000046207 | 2.44931928 | 3.76451594 | 6.29E-13 | 3.81E-11 |
| ENSMUSG00000024544 | 2.44890512 | 1.48598699 | 8.84E-10 | 2.68E-08 |
| ENSMUSG00000039234 | 2.44772307 | 5.53680406 | 7.66E-14 | 5.59E-12 |
| ENSMUSG00000050538 | 2.44693492 | 1.81463333 | 6.03E-10 | 1.92E-08 |
| ENSMUSG00000005413 | 2.43683974 | 6.07419192 | 6.96E-14 | 5.21E-12 |
| ENSMUSG00000036206 | 2.43505866 | 0.89922291 | 8.54E-08 | 1.67E-06 |
| ENSMUSG00000003526 | 2.43390377 | 0.81050577 | 6.87E-08 | 1.38E-06 |
| ENSMUSG00000024885 | 2.4329281  | 3.6371537  | 1.06E-12 | 6.16E-11 |
| ENSMUSG00000041362 | 2.42934531 | 2.12230017 | 5.82E-11 | 2.38E-09 |
| ENSMUSG00000025993 | 2.42848426 | 0.74334091 | 5.24E-08 | 1.07E-06 |
| ENSMUSG00000030259 | 2.42777496 | 1.81846114 | 3.98E-10 | 1.34E-08 |
| ENSMUSG00000004359 | 2.42594031 | 1.91389789 | 1.34E-10 | 5.02E-09 |
| ENSMUSG00000053469 | 2.4180194  | 1.12348947 | 7.56E-09 | 1.88E-07 |
| ENSMUSG00000032841 | 2.41508959 | 1.65419798 | 1.68E-09 | 4.79E-08 |
| ENSMUSG00000048905 | 2.41354361 | 1.29267744 | 7.00E-09 | 1.76E-07 |
| ENSMUSG00000015243 | 2.41062929 | 3.11346087 | 3.73E-12 | 1.94E-10 |
| ENSMUSG00000003283 | 2.40753149 | 3.17608989 | 4.09E-12 | 2.10E-10 |
| ENSMUSG00000004032 | 2.39868926 | 1.9933529  | 2.80E-10 | 9.60E-09 |
| ENSMUSG00000044788 | 2.39722567 | 0.39530734 | 4.05E-07 | 6.95E-06 |
| ENSMUSG00000034586 | 2.39243232 | 2.27910424 | 8.22E-11 | 3.24E-09 |
| ENSMUSG00000030494 | 2.39100921 | 0.87168942 | 4.37E-08 | 9.13E-07 |
| ENSMUSG00000017754 | 2.39055631 | 4.32132047 | 9.54E-13 | 5.59E-11 |
| ENSMUSG00000026068 | 2.38988868 | 3.04685709 | 9.55E-12 | 4.54E-10 |
| ENSMUSG00000071723 | 2.38971878 | 1.53433186 | 2.54E-09 | 6.91E-08 |
| ENSMUSG00000068874 | 2.38744956 | 1.14238869 | 1.98E-08 | 4.45E-07 |
| ENSMUSG00000074417 | 2.38285943 | 0.80063795 | 1.06E-07 | 2.05E-06 |
| ENSMUSG00000063354 | 2.38194148 | 3.14228685 | 9.23E-12 | 4.42E-10 |
| ENSMUSG00000044072 | 2.37938106 | 1.80605486 | 7.42E-10 | 2.29E-08 |
| ENSMUSG00000020658 | 2.37840699 | 1.75850941 | 9.29E-10 | 2.78E-08 |
| ENSMUSG00000024538 | 2.37603433 | 1.59977818 | 4.20E-09 | 1.10E-07 |
| ENSMUSG00000022246 | 2.36970372 | 3.12661887 | 1.91E-11 | 8.80E-10 |
| ENSMUSG00000019539 | 2.36948676 | 0.74653322 | 2.07E-07 | 3.76E-06 |
| ENSMUSG00000030792 | 2.36353621 | 1.2235578  | 1.74E-08 | 3.97E-07 |
| ENSMUSG00000026317 | 2.36170361 | 1.68581301 | 1.47E-09 | 4.27E-08 |
| ENSMUSG00000020101 | 2.35946822 | 4.99966231 | 6.48E-13 | 3.91E-11 |
| ENSMUSG00000021589 | 2.35531153 | 1.24587413 | 1.41E-08 | 3.32E-07 |
| ENSMUSG00000079339 | 2.35455922 | 2.44873027 | 1.64E-10 | 6.01E-09 |
| ENSMUSG00000028354 | 2.35164657 | 1.74785582 | 3.86E-09 | 1.03E-07 |
| ENSMUSG00000038807 | 2.34977342 | 4.32884932 | 1.31E-12 | 7.50E-11 |

|                    |            |            |          |          |
|--------------------|------------|------------|----------|----------|
| ENSMUSG0000005800  | 2.34884306 | 2.6927455  | 3.66E-11 | 1.56E-09 |
| ENSMUSG00000068566 | 2.34702058 | 5.67835176 | 5.88E-13 | 3.61E-11 |
| ENSMUSG00000006179 | 2.34577316 | 1.42349958 | 1.49E-08 | 3.48E-07 |
| ENSMUSG00000041115 | 2.34302012 | 2.00652304 | 8.44E-10 | 2.57E-08 |
| ENSMUSG00000034738 | 2.34140474 | 1.66247363 | 4.75E-09 | 1.23E-07 |
| ENSMUSG00000009376 | 2.3376239  | 2.07132562 | 5.80E-10 | 1.87E-08 |
| ENSMUSG00000068227 | 2.33647869 | 3.89938297 | 3.61E-12 | 1.89E-10 |
| ENSMUSG00000023349 | 2.33416903 | 3.47431786 | 8.60E-12 | 4.18E-10 |
| ENSMUSG00000060131 | 2.33393585 | 3.6381851  | 6.12E-12 | 3.06E-10 |
| ENSMUSG00000033213 | 2.33264421 | 1.24356851 | 2.68E-08 | 5.89E-07 |
| ENSMUSG00000059149 | 2.33250321 | 2.28684069 | 2.78E-10 | 9.58E-09 |
| ENSMUSG00000076548 | 2.33114798 | 2.3222282  | 3.52E-10 | 1.19E-08 |
| ENSMUSG00000076688 | 2.32660387 | 2.73401341 | 1.03E-10 | 4.00E-09 |
| ENSMUSG00000029468 | 2.32381685 | 2.60372278 | 1.28E-10 | 4.83E-09 |
| ENSMUSG00000029822 | 2.32305368 | 3.1805058  | 2.43E-11 | 1.08E-09 |
| ENSMUSG00000005986 | 2.3226799  | 1.38435327 | 1.29E-08 | 3.04E-07 |
| ENSMUSG00000033705 | 2.31885095 | 2.22195425 | 4.81E-10 | 1.59E-08 |
| ENSMUSG00000076441 | 2.31821933 | 6.60525362 | 6.60E-13 | 3.96E-11 |
| ENSMUSG00000039629 | 2.31116667 | 2.11654097 | 4.46E-10 | 1.49E-08 |
| ENSMUSG00000051579 | 2.30968736 | 2.07649309 | 6.33E-10 | 1.99E-08 |
| ENSMUSG00000055435 | 2.30697101 | 0.99112398 | 5.93E-08 | 1.20E-06 |
| ENSMUSG00000053216 | 2.30618574 | 0.4812258  | 1.32E-06 | 2.01E-05 |
| ENSMUSG00000018417 | 2.30565182 | 0.94164445 | 1.33E-07 | 2.50E-06 |
| ENSMUSG00000018920 | 2.30539179 | 0.94430121 | 3.68E-08 | 7.83E-07 |
| ENSMUSG00000051790 | 2.30532002 | 1.55436123 | 5.07E-09 | 1.30E-07 |
| ENSMUSG00000037239 | 2.30493079 | 1.85546948 | 1.76E-09 | 4.97E-08 |
| ENSMUSG00000015222 | 2.30364165 | 3.06685631 | 4.89E-11 | 2.05E-09 |
| ENSMUSG00000028064 | 2.30255501 | 2.41293772 | 3.29E-10 | 1.12E-08 |
| ENSMUSG00000036295 | 2.29932615 | 2.30232916 | 5.97E-10 | 1.90E-08 |
| ENSMUSG00000034171 | 2.29675363 | 2.64661517 | 1.91E-10 | 6.84E-09 |
| ENSMUSG00000049422 | 2.29181683 | 1.90176766 | 3.94E-09 | 1.04E-07 |
| ENSMUSG00000032802 | 2.28973189 | 2.56949122 | 1.52E-10 | 5.67E-09 |
| ENSMUSG00000021453 | 2.28387193 | 1.51306752 | 1.18E-08 | 2.81E-07 |
| ENSMUSG00000028278 | 2.28088435 | 2.52127714 | 2.90E-10 | 9.94E-09 |
| ENSMUSG00000070476 | 2.27846803 | 0.71869376 | 3.76E-07 | 6.54E-06 |
| ENSMUSG00000028494 | 2.27648255 | 3.58041646 | 2.20E-11 | 9.91E-10 |
| ENSMUSG00000038141 | 2.27604319 | 1.42859779 | 2.32E-08 | 5.14E-07 |
| ENSMUSG00000018341 | 2.26592424 | 0.67139221 | 9.41E-07 | 1.49E-05 |
| ENSMUSG00000026879 | 2.26295939 | 3.51804706 | 3.18E-11 | 1.37E-09 |
| ENSMUSG00000060044 | 2.26221012 | 4.78850333 | 6.27E-12 | 3.12E-10 |
| ENSMUSG00000051339 | 2.25267567 | 1.85666489 | 4.94E-09 | 1.27E-07 |
| ENSMUSG00000026836 | 2.25064164 | 2.0368823  | 2.55E-09 | 6.93E-08 |
| ENSMUSG00000019066 | 2.24862788 | 2.41719462 | 6.19E-10 | 1.95E-08 |

|                    |            |            |          |            |
|--------------------|------------|------------|----------|------------|
| ENSMUSG00000024679 | 2.2484053  | 3.27851821 | 5.10E-11 | 2.12E-09   |
| ENSMUSG00000029026 | 2.24772269 | 2.0979054  | 1.73E-09 | 4.92E-08   |
| ENSMUSG00000002997 | 2.24372921 | 2.65870331 | 2.46E-10 | 8.55E-09   |
| ENSMUSG00000051457 | 2.2368712  | 5.57974398 | 5.88E-12 | 2.97E-10   |
| ENSMUSG00000001348 | 2.23531025 | 1.9085289  | 4.62E-09 | 1.20E-07   |
| ENSMUSG00000053063 | 2.2320609  | 1.40049506 | 2.18E-08 | 4.89E-07   |
| ENSMUSG00000040711 | 2.2219338  | 0.98248352 | 1.64E-07 | 3.03E-06   |
| ENSMUSG00000028556 | 2.21958262 | 4.21607654 | 2.17E-11 | 9.82E-10   |
| ENSMUSG00000026177 | 2.2183602  | 2.02054955 | 2.18E-09 | 6.06E-08   |
| ENSMUSG00000045763 | 2.21738339 | 3.07653683 | 1.58E-10 | 5.86E-09   |
| ENSMUSG00000095642 | 2.21495893 | 4.22455104 | 2.30E-11 | 1.03E-09   |
| ENSMUSG00000049625 | 2.21476282 | 1.75240446 | 1.80E-08 | 4.11E-07   |
| ENSMUSG00000005640 | 2.21296407 | 0.36090909 | 2.47E-06 | 3.54E-05   |
| ENSMUSG00000038764 | 2.21154995 | 2.32510644 | 1.14E-09 | 3.37E-08   |
| ENSMUSG00000095429 | 2.20855835 | 3.97362344 | 4.01E-11 | 1.70E-09   |
| ENSMUSG00000074813 | 2.20777545 | 2.70064629 | 4.46E-10 | 1.49E-08   |
| ENSMUSG00000094051 | 2.20726776 | 3.02039644 | 1.77E-10 | 6.47E-09   |
| ENSMUSG00000056888 | 2.20670756 | 7.92147634 | 5.31E-12 | 2.71E-10   |
| ENSMUSG00000055305 | 2.20073246 | 0.51570409 | 2.00E-06 | 2.93E-05   |
| ENSMUSG00000038034 | 2.19979372 | 1.58781652 | 5.25E-08 | 1.07E-06   |
| ENSMUSG00000041895 | 2.19913661 | 1.45291297 | 4.78E-08 | 9.86E-07   |
| ENSMUSG00000068129 | 2.1966903  | 3.93863474 | 5.95E-11 | 2.41E-09   |
| ENSMUSG00000095442 | 2.19520443 | 2.73297675 | 6.58E-10 | 2.05E-08   |
| ENSMUSG00000033777 | 2.192755   | 1.23454497 | 3.08E-08 | 6.68E-07   |
| ENSMUSG00000060703 | 2.19144002 | 1.61792878 | 3.50E-08 | 7.51E-07   |
| ENSMUSG00000026411 | 2.19084345 | 2.49724661 | 1.49E-09 | 4.30E-08   |
| ENSMUSG00000029530 | 2.19006633 | 2.34602943 | 1.39E-09 | 4.04E-08   |
| ENSMUSG00000042155 | 2.1869803  | 1.66978286 | 1.91E-08 | 4.31E-07   |
| ENSMUSG00000035493 | 2.18529072 | 0.64333082 | 1.12E-06 | 1.74E-05   |
| ENSMUSG00000024066 | 2.18132962 | 4.2781373  | 4.71E-11 | 1.99E-09   |
| ENSMUSG00000029322 | 2.18000731 | 8.00183415 | 9.06E-12 | 4.36E-10   |
| ENSMUSG00000034413 | 2.17642189 | 1.50612252 | 1.81E-08 | 4.13E-07   |
| ENSMUSG00000030410 | 2.16695365 | 0.27099402 | 9.40E-06 | 0.00011978 |
| ENSMUSG00000006800 | 2.16511327 | 2.26765502 | 3.79E-09 | 1.01E-07   |
| ENSMUSG00000026981 | 2.163906   | 2.82942508 | 7.76E-10 | 2.38E-08   |
| ENSMUSG00000094509 | 2.16290021 | 2.52479297 | 1.65E-09 | 4.71E-08   |
| ENSMUSG00000034613 | 2.15939696 | 2.76436265 | 8.97E-10 | 2.71E-08   |
| ENSMUSG00000040265 | 2.1564134  | 1.47494635 | 8.40E-08 | 1.65E-06   |
| ENSMUSG00000034947 | 2.15536115 | 2.12908764 | 3.99E-09 | 1.05E-07   |
| ENSMUSG00000062488 | 2.15370686 | 1.06089638 | 4.00E-07 | 6.89E-06   |
| ENSMUSG00000049037 | 2.15272403 | 2.18085058 | 3.14E-09 | 8.42E-08   |
| ENSMUSG00000094796 | 2.14864466 | 2.86984074 | 9.29E-10 | 2.78E-08   |
| ENSMUSG00000096499 | 2.14661139 | 4.02200881 | 1.05E-10 | 4.07E-09   |

|                    |            |            |          |            |
|--------------------|------------|------------|----------|------------|
| ENSMUSG00000048534 | 2.14520003 | 3.87971695 | 1.22E-10 | 4.65E-09   |
| ENSMUSG00000096805 | 2.14470559 | 4.11289904 | 1.09E-10 | 4.20E-09   |
| ENSMUSG00000022148 | 2.14455816 | 3.47118376 | 2.36E-10 | 8.23E-09   |
| ENSMUSG00000042331 | 2.14127537 | 4.48742329 | 7.67E-11 | 3.04E-09   |
| ENSMUSG00000024621 | 2.14033281 | 1.28715329 | 1.28E-07 | 2.43E-06   |
| ENSMUSG00000028597 | 2.13602987 | 1.40470519 | 8.52E-08 | 1.67E-06   |
| ENSMUSG00000042272 | 2.13569168 | 2.32230196 | 7.75E-09 | 1.93E-07   |
| ENSMUSG00000015143 | 2.13331038 | 2.52827471 | 2.51E-09 | 6.88E-08   |
| ENSMUSG00000044534 | 2.13101268 | 1.9886855  | 2.28E-08 | 5.07E-07   |
| ENSMUSG00000022297 | 2.12890145 | 2.62169609 | 1.50E-09 | 4.30E-08   |
| ENSMUSG00000020032 | 2.1274207  | 1.8026727  | 2.53E-08 | 5.57E-07   |
| ENSMUSG00000003484 | 2.12675922 | 3.30347239 | 5.86E-10 | 1.89E-08   |
| ENSMUSG00000025351 | 2.12615592 | 0.64259315 | 1.64E-06 | 2.44E-05   |
| ENSMUSG00000092060 | 2.12406868 | 3.75907715 | 2.12E-10 | 7.45E-09   |
| ENSMUSG00000076535 | 2.1225192  | 4.77431588 | 8.09E-11 | 3.20E-09   |
| ENSMUSG00000074896 | 2.12233731 | 3.31322051 | 6.05E-10 | 1.92E-08   |
| ENSMUSG00000033581 | 2.12147781 | 0.5657425  | 1.35E-06 | 2.04E-05   |
| ENSMUSG00000062345 | 2.12138659 | 3.66058201 | 1.95E-10 | 6.95E-09   |
| ENSMUSG00000076540 | 2.12058346 | 3.97116448 | 1.99E-10 | 7.06E-09   |
| ENSMUSG00000002289 | 2.11991141 | 1.31300956 | 1.51E-07 | 2.81E-06   |
| ENSMUSG00000003380 | 2.11229333 | 1.33096936 | 2.30E-07 | 4.11E-06   |
| ENSMUSG00000076695 | 2.1104385  | 5.21304448 | 6.82E-11 | 2.73E-09   |
| ENSMUSG00000030342 | 2.10873764 | 5.30611583 | 7.30E-11 | 2.91E-09   |
| ENSMUSG00000021708 | 2.10634154 | 1.57450706 | 9.55E-08 | 1.85E-06   |
| ENSMUSG00000040209 | 2.10542398 | 2.97525643 | 1.89E-09 | 5.33E-08   |
| ENSMUSG00000043953 | 2.10386967 | 2.39273638 | 3.87E-09 | 1.03E-07   |
| ENSMUSG00000019558 | 2.10305958 | 1.09738521 | 8.50E-07 | 1.37E-05   |
| ENSMUSG00000027636 | 2.10122391 | 1.07493928 | 4.00E-07 | 6.89E-06   |
| ENSMUSG00000094561 | 2.09884385 | 6.06488148 | 5.81E-11 | 2.38E-09   |
| ENSMUSG00000025810 | 2.09595799 | 0.81839665 | 1.36E-06 | 2.06E-05   |
| ENSMUSG00000052271 | 2.09575675 | 4.35354188 | 1.84E-10 | 6.65E-09   |
| ENSMUSG00000041420 | 2.08803854 | 1.48564579 | 1.39E-07 | 2.60E-06   |
| ENSMUSG00000035158 | 2.08737697 | 1.27554329 | 1.47E-07 | 2.73E-06   |
| ENSMUSG00000015305 | 2.08153515 | 1.93080947 | 3.03E-08 | 6.58E-07   |
| ENSMUSG00000022126 | 2.07930804 | 4.84451895 | 1.64E-10 | 6.01E-09   |
| ENSMUSG00000036622 | 2.07887178 | 3.75067337 | 6.52E-10 | 2.04E-08   |
| ENSMUSG00000097101 | 2.07413343 | 0.38882821 | 1.54E-05 | 0.00018781 |
| ENSMUSG00000021281 | 2.06966984 | 2.27051572 | 9.91E-09 | 2.39E-07   |
| ENSMUSG00000032661 | 2.06937286 | 5.76813045 | 1.27E-10 | 4.81E-09   |
| ENSMUSG00000025780 | 2.06883915 | 2.23592164 | 1.50E-08 | 3.49E-07   |
| ENSMUSG00000033083 | 2.06839417 | 3.81723838 | 5.95E-10 | 1.90E-08   |
| ENSMUSG00000036362 | 2.06645419 | 2.92908092 | 2.64E-09 | 7.15E-08   |
| ENSMUSG00000003573 | 2.06456451 | 0.77346693 | 3.18E-06 | 4.46E-05   |

|                    |            |            |          |            |
|--------------------|------------|------------|----------|------------|
| ENSMUSG00000024617 | 2.06408189 | 2.20981412 | 1.96E-08 | 4.43E-07   |
| ENSMUSG00000032690 | 2.06256941 | 6.27214983 | 1.15E-10 | 4.41E-09   |
| ENSMUSG00000055733 | 2.05903878 | 1.50474989 | 1.27E-07 | 2.41E-06   |
| ENSMUSG00000076541 | 2.05513961 | 1.39583911 | 1.64E-07 | 3.03E-06   |
| ENSMUSG00000042842 | 2.05286609 | 6.70350482 | 1.28E-10 | 4.83E-09   |
| ENSMUSG00000029392 | 2.04456158 | 1.61404077 | 1.26E-07 | 2.39E-06   |
| ENSMUSG00000026011 | 2.04219106 | 3.7436656  | 9.15E-10 | 2.76E-08   |
| ENSMUSG00000022468 | 2.04197414 | 3.80940685 | 8.50E-10 | 2.58E-08   |
| ENSMUSG00000000957 | 2.04173478 | 1.82566398 | 4.06E-08 | 8.58E-07   |
| ENSMUSG00000068747 | 2.04123143 | 1.63572431 | 1.16E-07 | 2.22E-06   |
| ENSMUSG00000020439 | 2.03550111 | 1.4908855  | 2.57E-07 | 4.56E-06   |
| ENSMUSG00000096580 | 2.03198392 | 1.45297801 | 2.24E-07 | 4.03E-06   |
| ENSMUSG00000049307 | 2.0282949  | 2.77385214 | 9.29E-09 | 2.25E-07   |
| ENSMUSG00000020057 | 2.02769633 | 1.23612333 | 6.50E-07 | 1.07E-05   |
| ENSMUSG00000063146 | 2.02729204 | 2.4596176  | 1.28E-08 | 3.02E-07   |
| ENSMUSG00000076934 | 2.02614248 | 8.22618418 | 1.82E-10 | 6.58E-09   |
| ENSMUSG00000095200 | 2.02528812 | 3.9293147  | 1.05E-09 | 3.13E-08   |
| ENSMUSG00000036019 | 2.02324706 | 1.67532111 | 1.88E-07 | 3.44E-06   |
| ENSMUSG00000050737 | 2.02267628 | 1.62974314 | 1.16E-07 | 2.22E-06   |
| ENSMUSG00000017493 | 2.02060578 | 0.63573407 | 8.15E-06 | 0.00010488 |
| ENSMUSG00000029379 | 2.01911645 | 4.37657272 | 6.11E-10 | 1.93E-08   |
| ENSMUSG00000026358 | 2.01852622 | 2.71040852 | 1.00E-08 | 2.41E-07   |
| ENSMUSG00000045658 | 2.01427673 | 1.12299555 | 8.50E-07 | 1.37E-05   |
| ENSMUSG00000034993 | 2.01333256 | 2.96017688 | 4.79E-09 | 1.24E-07   |
| ENSMUSG00000032691 | 2.00586838 | 1.19638237 | 4.25E-07 | 7.23E-06   |
| ENSMUSG00000037995 | 2.00463333 | 0.83339228 | 3.11E-06 | 4.38E-05   |
| ENSMUSG00000026700 | 2.00239897 | 2.82564979 | 8.41E-09 | 2.08E-07   |
| ENSMUSG00000061175 | 1.99847479 | 1.3575747  | 2.06E-07 | 3.75E-06   |
| ENSMUSG00000021108 | 1.99501176 | 1.4018177  | 5.19E-07 | 8.68E-06   |
| ENSMUSG00000000552 | 1.99407761 | 2.12888931 | 7.82E-08 | 1.55E-06   |
| ENSMUSG00000000982 | 1.99306851 | 4.13174478 | 1.42E-09 | 4.13E-08   |
| ENSMUSG00000032122 | 1.99271635 | 5.67395645 | 5.77E-10 | 1.87E-08   |
| ENSMUSG00000020641 | 1.99226069 | 5.27572175 | 6.51E-10 | 2.04E-08   |
| ENSMUSG00000059248 | 1.99209546 | 5.92855543 | 4.73E-10 | 1.57E-08   |
| ENSMUSG00000056124 | 1.99157911 | 0.90772646 | 2.16E-06 | 3.15E-05   |
| ENSMUSG00000026764 | 1.98909545 | 2.81946853 | 9.82E-09 | 2.37E-07   |
| ENSMUSG00000007987 | 1.98605955 | 2.49859773 | 2.88E-08 | 6.29E-07   |
| ENSMUSG00000030256 | 1.98330148 | 6.14233936 | 5.23E-10 | 1.71E-08   |
| ENSMUSG00000036353 | 1.9802126  | 2.2855928  | 6.08E-08 | 1.23E-06   |
| ENSMUSG00000020279 | 1.97950975 | 4.74793122 | 1.11E-09 | 3.28E-08   |
| ENSMUSG00000034361 | 1.97710914 | 3.12758998 | 8.57E-09 | 2.11E-07   |
| ENSMUSG00000035936 | 1.97551692 | 1.30344097 | 8.47E-07 | 1.37E-05   |
| ENSMUSG00000030144 | 1.97426708 | 3.64237461 | 2.74E-09 | 7.40E-08   |

|                    |            |            |          |            |
|--------------------|------------|------------|----------|------------|
| ENSMUSG0000000753  | 1.97268625 | 2.20646614 | 7.39E-08 | 1.48E-06   |
| ENSMUSG00000052776 | 1.96996155 | 4.62234253 | 1.50E-09 | 4.30E-08   |
| ENSMUSG00000028926 | 1.96567146 | 2.34277867 | 2.86E-08 | 6.25E-07   |
| ENSMUSG00000028082 | 1.96433548 | 3.51144815 | 4.56E-09 | 1.19E-07   |
| ENSMUSG00000025092 | 1.96401774 | 2.79017967 | 1.84E-08 | 4.19E-07   |
| ENSMUSG0000002250  | 1.96367978 | 2.40203819 | 3.62E-08 | 7.75E-07   |
| ENSMUSG00000096410 | 1.96335019 | 5.43667658 | 1.02E-09 | 3.04E-08   |
| ENSMUSG00000066677 | 1.96258904 | 4.23647466 | 3.16E-09 | 8.47E-08   |
| ENSMUSG00000035273 | 1.96164956 | 5.37941593 | 1.16E-09 | 3.40E-08   |
| ENSMUSG00000029602 | 1.95960827 | 2.83662449 | 1.91E-08 | 4.31E-07   |
| ENSMUSG00000021703 | 1.95670863 | 6.32909008 | 8.29E-10 | 2.53E-08   |
| ENSMUSG00000019990 | 1.95507805 | 2.29837603 | 7.81E-08 | 1.55E-06   |
| ENSMUSG00000005447 | 1.95294801 | 1.69511202 | 5.38E-07 | 8.97E-06   |
| ENSMUSG00000035547 | 1.95178943 | 2.52489714 | 3.72E-08 | 7.91E-07   |
| ENSMUSG00000038545 | 1.94753271 | 1.792859   | 2.74E-07 | 4.86E-06   |
| ENSMUSG00000022305 | 1.9404644  | 1.39320942 | 1.20E-06 | 1.85E-05   |
| ENSMUSG00000101581 | 1.94031619 | 2.14067848 | 1.32E-07 | 2.48E-06   |
| ENSMUSG00000022528 | 1.93893912 | 1.29214987 | 4.40E-07 | 7.48E-06   |
| ENSMUSG00000046245 | 1.93594242 | 0.68138627 | 6.55E-06 | 8.61E-05   |
| ENSMUSG00000066755 | 1.93342018 | 0.55731619 | 2.42E-05 | 0.00028248 |
| ENSMUSG00000025498 | 1.92908411 | 5.96984556 | 1.49E-09 | 4.30E-08   |
| ENSMUSG00000026179 | 1.92822161 | 3.56577522 | 8.65E-09 | 2.12E-07   |
| ENSMUSG00000020901 | 1.92461547 | 4.1711911  | 4.64E-09 | 1.20E-07   |
| ENSMUSG00000073802 | 1.91713027 | 2.59234815 | 5.41E-08 | 1.10E-06   |
| ENSMUSG00000021822 | 1.91670087 | 1.23856989 | 1.11E-06 | 1.72E-05   |
| ENSMUSG00000035711 | 1.91617051 | 1.6331585  | 9.04E-07 | 1.45E-05   |
| ENSMUSG00000040552 | 1.91126782 | 1.78286866 | 4.07E-07 | 6.97E-06   |
| ENSMUSG00000029759 | 1.91125943 | 4.14966848 | 5.30E-09 | 1.35E-07   |
| ENSMUSG00000032298 | 1.91121889 | 3.44094424 | 1.25E-08 | 2.96E-07   |
| ENSMUSG00000020205 | 1.90806265 | 1.89158486 | 3.45E-07 | 6.06E-06   |
| ENSMUSG00000025433 | 1.90805212 | 2.82592221 | 5.12E-08 | 1.05E-06   |
| ENSMUSG00000035713 | 1.90769204 | 1.04674529 | 4.12E-06 | 5.63E-05   |
| ENSMUSG00000025473 | 1.90524635 | 2.632519   | 5.06E-08 | 1.04E-06   |
| ENSMUSG00000025743 | 1.90436502 | 4.36918399 | 5.10E-09 | 1.31E-07   |
| ENSMUSG00000021591 | 1.90364003 | 5.91899461 | 2.37E-09 | 6.53E-08   |
| ENSMUSG00000046841 | 1.90188578 | 6.34201615 | 2.23E-09 | 6.19E-08   |
| ENSMUSG00000023132 | 1.9006048  | 1.27505912 | 2.92E-06 | 4.14E-05   |
| ENSMUSG00000004730 | 1.90043603 | 5.99431899 | 2.53E-09 | 6.91E-08   |
| ENSMUSG00000030064 | 1.89698498 | 1.81113542 | 4.49E-07 | 7.60E-06   |
| ENSMUSG00000076940 | 1.89649695 | 6.26793912 | 2.52E-09 | 6.90E-08   |
| ENSMUSG00000079445 | 1.89287934 | 3.65923757 | 1.42E-08 | 3.32E-07   |
| ENSMUSG00000036502 | 1.89201357 | 1.13790886 | 3.30E-06 | 4.61E-05   |
| ENSMUSG00000030142 | 1.88436309 | 4.25162834 | 7.87E-09 | 1.95E-07   |

|                    |            |            |          |            |
|--------------------|------------|------------|----------|------------|
| ENSMUSG0000003363  | 1.88409293 | 3.42112159 | 2.35E-08 | 5.20E-07   |
| ENSMUSG0000004508  | 1.88298814 | 2.65504351 | 8.00E-08 | 1.58E-06   |
| ENSMUSG00000076562 | 1.88279955 | 3.71726703 | 1.54E-08 | 3.57E-07   |
| ENSMUSG00000041736 | 1.87991121 | 2.36169213 | 1.36E-07 | 2.55E-06   |
| ENSMUSG00000094164 | 1.87983187 | 3.08644727 | 3.20E-08 | 6.91E-07   |
| ENSMUSG00000024529 | 1.87914961 | 0.62736261 | 9.76E-06 | 0.00012416 |
| ENSMUSG00000082088 | 1.87615648 | 0.96422619 | 1.03E-05 | 0.00013068 |
| ENSMUSG00000094694 | 1.87472461 | 5.25773061 | 5.37E-09 | 1.36E-07   |
| ENSMUSG00000035776 | 1.87316532 | 4.99714813 | 6.44E-09 | 1.62E-07   |
| ENSMUSG00000046329 | 1.87257424 | 3.00500773 | 4.71E-08 | 9.74E-07   |
| ENSMUSG00000038352 | 1.86626496 | 4.90783216 | 7.57E-09 | 1.88E-07   |
| ENSMUSG00000032561 | 1.86242986 | 2.53974778 | 6.95E-08 | 1.39E-06   |
| ENSMUSG00000031216 | 1.86111881 | 1.28686572 | 3.31E-06 | 4.62E-05   |
| ENSMUSG00000059316 | 1.86108947 | 2.67593218 | 9.17E-08 | 1.78E-06   |
| ENSMUSG00000025044 | 1.85911681 | 2.45853939 | 8.80E-08 | 1.72E-06   |
| ENSMUSG00000020573 | 1.85774036 | 6.82680402 | 4.58E-09 | 1.19E-07   |
| ENSMUSG00000032207 | 1.85681189 | 1.25819487 | 2.36E-06 | 3.41E-05   |
| ENSMUSG00000076598 | 1.85202923 | 3.55752785 | 3.10E-08 | 6.69E-07   |
| ENSMUSG00000029380 | 1.85062908 | 1.90948953 | 4.55E-07 | 7.68E-06   |
| ENSMUSG00000030847 | 1.84708871 | 2.06419502 | 3.62E-07 | 6.32E-06   |
| ENSMUSG00000022132 | 1.84657112 | 1.17989379 | 4.66E-06 | 6.32E-05   |
| ENSMUSG00000024913 | 1.84298127 | 1.02642527 | 1.09E-05 | 0.00013651 |
| ENSMUSG00000044037 | 1.84110489 | 1.87422311 | 8.44E-07 | 1.36E-05   |
| ENSMUSG00000078816 | 1.84007092 | 0.97290685 | 1.53E-05 | 0.00018619 |
| ENSMUSG00000028476 | 1.8399059  | 1.56468158 | 1.26E-06 | 1.93E-05   |
| ENSMUSG0000002885  | 1.83982747 | 5.47615839 | 8.88E-09 | 2.17E-07   |
| ENSMUSG00000056529 | 1.83654227 | 1.33028008 | 3.16E-06 | 4.44E-05   |
| ENSMUSG00000039007 | 1.83474997 | 1.00772086 | 1.58E-05 | 0.00019164 |
| ENSMUSG00000073494 | 1.8347371  | 0.5350884  | 4.19E-05 | 0.00046046 |
| ENSMUSG00000022180 | 1.82897285 | 0.84579364 | 1.40E-05 | 0.00017308 |
| ENSMUSG00000070780 | 1.82890663 | 2.726205   | 1.21E-07 | 2.32E-06   |
| ENSMUSG00000031803 | 1.82727472 | 0.91958732 | 1.88E-05 | 0.00022409 |
| ENSMUSG00000095565 | 1.82460116 | 3.49884252 | 4.55E-08 | 9.46E-07   |
| ENSMUSG00000079017 | 1.82425785 | 6.08734608 | 9.31E-09 | 2.25E-07   |
| ENSMUSG00000040009 | 1.82306433 | 0.53063608 | 6.04E-05 | 0.00063502 |
| ENSMUSG00000022799 | 1.82177506 | 3.59598102 | 4.78E-08 | 9.86E-07   |
| ENSMUSG00000039236 | 1.82151054 | 4.33159109 | 2.19E-08 | 4.89E-07   |
| ENSMUSG00000026811 | 1.81813966 | 2.24440826 | 4.03E-07 | 6.94E-06   |
| ENSMUSG00000029275 | 1.81599873 | 1.76187762 | 1.66E-06 | 2.47E-05   |
| ENSMUSG00000020085 | 1.81520002 | 1.57348545 | 1.55E-06 | 2.31E-05   |
| ENSMUSG00000046794 | 1.81322694 | 1.92543225 | 9.07E-07 | 1.45E-05   |
| ENSMUSG00000024677 | 1.81234644 | 6.08206393 | 1.14E-08 | 2.72E-07   |
| ENSMUSG00000050315 | 1.81090023 | 0.74552187 | 2.85E-05 | 0.0003275  |

|                    |            |            |          |            |
|--------------------|------------|------------|----------|------------|
| ENSMUSG00000013236 | 1.81071877 | 2.50774733 | 2.23E-07 | 4.03E-06   |
| ENSMUSG00000076668 | 1.81016656 | 1.39559719 | 4.17E-06 | 5.69E-05   |
| ENSMUSG00000002985 | 1.80892098 | 1.94911798 | 1.16E-06 | 1.80E-05   |
| ENSMUSG00000046718 | 1.80623633 | 6.24383244 | 1.25E-08 | 2.96E-07   |
| ENSMUSG00000036606 | 1.80533752 | 4.6352891  | 2.48E-08 | 5.48E-07   |
| ENSMUSG00000054619 | 1.80472933 | 2.2609627  | 5.00E-07 | 8.39E-06   |
| ENSMUSG00000030793 | 1.80152273 | 4.27193839 | 3.41E-08 | 7.32E-07   |
| ENSMUSG00000016756 | 1.79806712 | 5.94627285 | 1.51E-08 | 3.51E-07   |
| ENSMUSG00000056413 | 1.79797352 | 4.06983586 | 4.18E-08 | 8.76E-07   |
| ENSMUSG00000009687 | 1.79392461 | 6.31131465 | 1.54E-08 | 3.56E-07   |
| ENSMUSG00000018507 | 1.79349749 | 6.00132544 | 1.62E-08 | 3.73E-07   |
| ENSMUSG00000032333 | 1.79161495 | 3.47382006 | 8.70E-08 | 1.70E-06   |
| ENSMUSG00000022892 | 1.79142548 | 3.987754   | 4.93E-08 | 1.01E-06   |
| ENSMUSG00000044162 | 1.79137888 | 3.2949956  | 1.32E-07 | 2.48E-06   |
| ENSMUSG00000030474 | 1.7905276  | 0.93678646 | 1.20E-05 | 0.00014941 |
| ENSMUSG00000052609 | 1.78945982 | 2.63374836 | 2.24E-07 | 4.03E-06   |
| ENSMUSG00000054065 | 1.78891924 | 2.65191257 | 3.54E-07 | 6.20E-06   |
| ENSMUSG00000023913 | 1.78720926 | 3.63604909 | 6.56E-08 | 1.32E-06   |
| ENSMUSG00000095285 | 1.78684398 | 3.94484782 | 4.61E-08 | 9.59E-07   |
| ENSMUSG00000029207 | 1.7861948  | 1.71061531 | 2.98E-06 | 4.21E-05   |
| ENSMUSG00000095612 | 1.78573202 | 5.46330088 | 2.30E-08 | 5.11E-07   |
| ENSMUSG00000024777 | 1.78425937 | 2.40341547 | 5.31E-07 | 8.87E-06   |
| ENSMUSG00000022895 | 1.78335527 | 4.41986149 | 3.64E-08 | 7.77E-07   |
| ENSMUSG00000096150 | 1.78203887 | 4.21453387 | 4.42E-08 | 9.22E-07   |
| ENSMUSG00000095351 | 1.78095933 | 4.87822213 | 3.23E-08 | 6.95E-07   |
| ENSMUSG00000019055 | 1.77932248 | 2.38482745 | 4.99E-07 | 8.39E-06   |
| ENSMUSG00000013033 | 1.77835584 | 3.05524722 | 1.57E-07 | 2.92E-06   |
| ENSMUSG00000049577 | 1.77718483 | 1.61482816 | 4.52E-06 | 6.14E-05   |
| ENSMUSG00000021687 | 1.77646884 | 2.38850228 | 5.31E-07 | 8.87E-06   |
| ENSMUSG00000095583 | 1.77549282 | 4.5158485  | 4.13E-08 | 8.71E-07   |
| ENSMUSG00000031379 | 1.77195656 | 2.05217257 | 1.72E-06 | 2.55E-05   |
| ENSMUSG00000096459 | 1.77040075 | 6.26180734 | 2.32E-08 | 5.14E-07   |
| ENSMUSG00000029816 | 1.76775039 | 3.08193807 | 1.61E-07 | 2.98E-06   |
| ENSMUSG00000061666 | 1.7677139  | 2.25267862 | 9.33E-07 | 1.48E-05   |
| ENSMUSG00000072966 | 1.76766351 | 3.44824289 | 1.25E-07 | 2.38E-06   |
| ENSMUSG00000076545 | 1.76553405 | 4.70553365 | 4.21E-08 | 8.82E-07   |
| ENSMUSG00000022838 | 1.76497528 | 5.0255979  | 3.88E-08 | 8.22E-07   |
| ENSMUSG00000023050 | 1.76470556 | 2.600129   | 3.94E-07 | 6.83E-06   |
| ENSMUSG00000041000 | 1.76394573 | 1.88942058 | 1.97E-06 | 2.89E-05   |
| ENSMUSG00000094194 | 1.76329268 | 4.92554431 | 4.13E-08 | 8.71E-07   |
| ENSMUSG00000059089 | 1.76255144 | 2.03399051 | 1.20E-06 | 1.85E-05   |
| ENSMUSG00000047281 | 1.76162415 | 2.35294981 | 9.58E-07 | 1.51E-05   |
| ENSMUSG00000020601 | 1.76157106 | 5.11332463 | 3.85E-08 | 8.18E-07   |



|                    |            |            |            |            |
|--------------------|------------|------------|------------|------------|
| ENSMUSG00000027078 | 1.76103703 | 4.682192   | 4.88E-08   | 1.00E-06   |
| ENSMUSG00000067377 | 1.75748879 | 2.39386798 | 7.77E-07   | 1.26E-05   |
| ENSMUSG00000041954 | 1.7573269  | 0.63044128 | 0.000138   | 0.00132163 |
| ENSMUSG00000023495 | 1.75547469 | 0.91552354 | 4.28E-05   | 0.00046886 |
| ENSMUSG00000079293 | 1.75442917 | 1.52754746 | 3.57E-06   | 4.94E-05   |
| ENSMUSG00000072623 | 1.7516615  | 1.97040509 | 1.14E-06   | 1.77E-05   |
| ENSMUSG00000018774 | 1.75162385 | 3.05444777 | 2.54E-07   | 4.53E-06   |
| ENSMUSG00000040322 | 1.75110492 | 3.92122696 | 9.86E-08   | 1.91E-06   |
| ENSMUSG00000023079 | 1.74978109 | 2.78856223 | 4.00E-07   | 6.89E-06   |
| ENSMUSG00000095197 | 1.74905679 | 1.98649562 | 1.84E-06   | 2.70E-05   |
| ENSMUSG00000029650 | 1.74890669 | 2.82528311 | 2.84E-07   | 5.02E-06   |
| ENSMUSG00000056592 | 1.748454   | 2.57826476 | 5.86E-07   | 9.74E-06   |
| ENSMUSG00000058427 | 1.74831672 | 4.06558762 | 7.69E-08   | 1.53E-06   |
| ENSMUSG00000075602 | 1.74650755 | 10.1780251 | 2.78E-08   | 6.08E-07   |
| ENSMUSG00000058163 | 1.74604325 | 3.7396302  | 1.20E-07   | 2.31E-06   |
| ENSMUSG00000034616 | 1.74237086 | 2.59308136 | 6.19E-07   | 1.03E-05   |
| ENSMUSG00000064373 | 1.74229882 | 4.34939527 | 8.15E-08   | 1.61E-06   |
| ENSMUSG00000051236 | 1.74026832 | 2.57497391 | 7.34E-07   | 1.20E-05   |
| ENSMUSG00000050957 | 1.74020078 | 2.42743409 | 9.25E-07   | 1.47E-05   |
| ENSMUSG00000041688 | 1.73770352 | 2.02879799 | 1.30E-06   | 1.98E-05   |
| ENSMUSG00000079227 | 1.73723484 | 4.75214939 | 6.65E-08   | 1.34E-06   |
| ENSMUSG00000030774 | 1.73698567 | 2.55231852 | 7.39E-07   | 1.20E-05   |
| ENSMUSG00000030060 | 1.73585245 | 3.26718488 | 2.26E-07   | 4.06E-06   |
| ENSMUSG00000052928 | 1.73573675 | 1.25234184 | 1.55E-05   | 0.00018811 |
| ENSMUSG00000045551 | 1.73426246 | 2.70329798 | 4.42E-07   | 7.49E-06   |
| ENSMUSG00000031995 | 1.7323234  | 3.87049153 | 1.27E-07   | 2.41E-06   |
| ENSMUSG00000031239 | 1.7307723  | 3.29540127 | 2.56E-07   | 4.55E-06   |
| ENSMUSG00000054342 | 1.73044643 | 2.7154897  | 5.74E-07   | 9.55E-06   |
| ENSMUSG00000042249 | 1.72892156 | 2.45044252 | 1.09E-06   | 1.71E-05   |
| ENSMUSG0000003032  | 1.72784544 | 0.53293496 | 0.00014458 | 0.00137369 |
| ENSMUSG00000007891 | 1.72675466 | 6.56648984 | 4.67E-08   | 9.69E-07   |
| ENSMUSG00000027173 | 1.72544247 | 0.90876836 | 4.60E-05   | 0.00049786 |
| ENSMUSG00000031596 | 1.7248646  | 3.05007774 | 2.54E-07   | 4.53E-06   |
| ENSMUSG00000025268 | 1.72328218 | 1.22581397 | 1.44E-05   | 0.00017672 |
| ENSMUSG00000047371 | 1.72028336 | 1.13131733 | 3.04E-05   | 0.00034782 |
| ENSMUSG00000030917 | 1.71997788 | 0.86132936 | 3.98E-05   | 0.00044246 |
| ENSMUSG00000029860 | 1.71915709 | 2.27425408 | 1.69E-06   | 2.51E-05   |
| ENSMUSG00000056220 | 1.71905093 | 2.98335085 | 4.23E-07   | 7.20E-06   |
| ENSMUSG00000029053 | 1.71820182 | 1.85936823 | 2.03E-06   | 2.97E-05   |
| ENSMUSG00000021485 | 1.71742205 | 1.48704605 | 1.04E-05   | 0.00013138 |
| ENSMUSG00000017631 | 1.71589327 | 5.33748011 | 7.55E-08   | 1.51E-06   |
| ENSMUSG00000032769 | 1.71368329 | 2.09666277 | 3.17E-06   | 4.46E-05   |
| ENSMUSG00000039959 | 1.71309931 | 4.34434819 | 1.27E-07   | 2.41E-06   |

|                    |            |            |            |            |
|--------------------|------------|------------|------------|------------|
| ENSMUSG00000020882 | 1.71283352 | 1.03452408 | 2.61E-05   | 0.00030308 |
| ENSMUSG00000093955 | 1.70894759 | 2.84969572 | 6.46E-07   | 1.06E-05   |
| ENSMUSG00000076543 | 1.70724755 | 3.11895358 | 4.07E-07   | 6.97E-06   |
| ENSMUSG00000096672 | 1.70239087 | 2.09066676 | 3.97E-06   | 5.45E-05   |
| ENSMUSG00000022793 | 1.70102624 | 2.1546648  | 3.42E-06   | 4.76E-05   |
| ENSMUSG00000001020 | 1.69861351 | 2.15997274 | 2.60E-06   | 3.72E-05   |
| ENSMUSG00000095210 | 1.69772051 | 4.30076872 | 1.63E-07   | 3.01E-06   |
| ENSMUSG00000070390 | 1.69529137 | 1.40465565 | 1.05E-05   | 0.00013258 |
| ENSMUSG00000032418 | 1.69177259 | 2.34157181 | 1.69E-06   | 2.51E-05   |
| ENSMUSG00000045827 | 1.69115429 | 6.78455984 | 8.22E-08   | 1.62E-06   |
| ENSMUSG00000096210 | 1.69098822 | 4.16562431 | 1.87E-07   | 3.43E-06   |
| ENSMUSG00000069833 | 1.68775006 | 5.03792105 | 1.30E-07   | 2.45E-06   |
| ENSMUSG00000029925 | 1.68755776 | 4.42488834 | 2.13E-07   | 3.85E-06   |
| ENSMUSG00000057914 | 1.68726556 | 0.69436025 | 0.00016336 | 0.00152918 |
| ENSMUSG00000038151 | 1.68168595 | 6.96884721 | 9.24E-08   | 1.80E-06   |
| ENSMUSG00000031832 | 1.67988619 | 1.86465494 | 7.52E-06   | 9.77E-05   |
| ENSMUSG00000040026 | 1.67981062 | 1.61256639 | 4.87E-06   | 6.55E-05   |
| ENSMUSG00000076536 | 1.67885854 | 2.64378488 | 1.10E-06   | 1.71E-05   |
| ENSMUSG00000079362 | 1.67787411 | 5.34244845 | 1.43E-07   | 2.68E-06   |
| ENSMUSG00000033644 | 1.67784436 | 3.04069765 | 6.43E-07   | 1.06E-05   |
| ENSMUSG00000035722 | 1.67703661 | 4.2861471  | 2.31E-07   | 4.14E-06   |
| ENSMUSG00000021375 | 1.67508095 | 2.88612225 | 8.04E-07   | 1.30E-05   |
| ENSMUSG00000094930 | 1.67481982 | 4.07155249 | 2.92E-07   | 5.17E-06   |
| ENSMUSG00000039976 | 1.6740756  | 1.77079839 | 7.32E-06   | 9.54E-05   |
| ENSMUSG00000038936 | 1.67377656 | 3.77160989 | 3.71E-07   | 6.47E-06   |
| ENSMUSG00000040584 | 1.671396   | 2.70469808 | 9.60E-07   | 1.51E-05   |
| ENSMUSG00000076552 | 1.67136814 | 2.8116385  | 1.05E-06   | 1.64E-05   |
| ENSMUSG00000051314 | 1.67048939 | 2.41717614 | 2.87E-06   | 4.08E-05   |
| ENSMUSG00000020785 | 1.66992103 | 1.33952153 | 2.74E-05   | 0.00031613 |
| ENSMUSG00000024300 | 1.66990887 | 2.9723308  | 9.62E-07   | 1.51E-05   |
| ENSMUSG00000095519 | 1.6694591  | 2.89981137 | 9.16E-07   | 1.46E-05   |
| ENSMUSG00000057606 | 1.6691674  | 1.20406273 | 3.25E-05   | 0.00036887 |
| ENSMUSG00000050335 | 1.66431966 | 3.11342094 | 9.30E-07   | 1.48E-05   |
| ENSMUSG00000019122 | 1.66373463 | 1.25592159 | 1.67E-05   | 0.00020021 |
| ENSMUSG00000022657 | 1.66314558 | 4.2597278  | 3.41E-07   | 5.99E-06   |
| ENSMUSG00000048163 | 1.66185768 | 5.70874101 | 1.57E-07   | 2.92E-06   |
| ENSMUSG00000076586 | 1.66162329 | 5.12258713 | 1.98E-07   | 3.62E-06   |
| ENSMUSG00000020841 | 1.66160969 | 4.85122648 | 2.04E-07   | 3.72E-06   |
| ENSMUSG00000030589 | 1.65943569 | 2.04215991 | 8.02E-06   | 0.00010337 |
| ENSMUSG00000041779 | 1.65868147 | 5.70291377 | 1.65E-07   | 3.03E-06   |
| ENSMUSG00000076655 | 1.65635606 | 3.78206128 | 4.22E-07   | 7.20E-06   |
| ENSMUSG00000003123 | 1.65496686 | 2.04760104 | 4.93E-06   | 6.62E-05   |
| ENSMUSG00000022479 | 1.65496197 | 0.63982194 | 0.00017261 | 0.00160439 |

|                    |            |            |            |            |
|--------------------|------------|------------|------------|------------|
| ENSMUSG00000026335 | 1.65111546 | 1.79183295 | 1.04E-05   | 0.00013138 |
| ENSMUSG00000076709 | 1.64903725 | 2.16235524 | 5.05E-06   | 6.75E-05   |
| ENSMUSG00000039304 | 1.64508498 | 3.48041964 | 6.34E-07   | 1.05E-05   |
| ENSMUSG00000028456 | 1.64468617 | 1.99092293 | 5.59E-06   | 7.43E-05   |
| ENSMUSG00000073755 | 1.64434567 | 1.40685794 | 1.96E-05   | 0.00023384 |
| ENSMUSG00000054752 | 1.64348512 | 2.43372005 | 2.51E-06   | 3.59E-05   |
| ENSMUSG00000000037 | 1.64024639 | 1.58523395 | 1.52E-05   | 0.00018514 |
| ENSMUSG00000046688 | 1.63901194 | 3.27994181 | 9.19E-07   | 1.46E-05   |
| ENSMUSG00000042632 | 1.6380925  | 1.98012677 | 5.87E-06   | 7.80E-05   |
| ENSMUSG00000094951 | 1.6367047  | 5.0522781  | 2.98E-07   | 5.25E-06   |
| ENSMUSG00000095889 | 1.63540251 | 2.55905925 | 2.22E-06   | 3.22E-05   |
| ENSMUSG00000022540 | 1.63471616 | 2.94719338 | 1.43E-06   | 2.16E-05   |
| ENSMUSG00000045659 | 1.63395229 | 0.62246147 | 0.00023989 | 0.00213977 |
| ENSMUSG00000041836 | 1.63349494 | 4.25904219 | 4.59E-07   | 7.75E-06   |
| ENSMUSG00000025938 | 1.63217447 | 2.45610387 | 3.06E-06   | 4.31E-05   |
| ENSMUSG00000096464 | 1.62771033 | 4.80658441 | 3.74E-07   | 6.52E-06   |
| ENSMUSG00000101389 | 1.62676611 | 1.64260086 | 1.34E-05   | 0.00016615 |
| ENSMUSG00000001473 | 1.62626075 | 3.88065794 | 6.46E-07   | 1.06E-05   |
| ENSMUSG00000058755 | 1.62588459 | 2.66207815 | 2.33E-06   | 3.37E-05   |
| ENSMUSG00000035239 | 1.6256287  | 1.74331793 | 1.05E-05   | 0.00013279 |
| ENSMUSG00000078452 | 1.62545635 | 1.27644788 | 4.61E-05   | 0.00049914 |
| ENSMUSG00000001750 | 1.62385799 | 4.89200653 | 3.99E-07   | 6.89E-06   |
| ENSMUSG00000003346 | 1.62350605 | 1.77265018 | 1.54E-05   | 0.00018735 |
| ENSMUSG00000048120 | 1.62199564 | 4.94761927 | 3.90E-07   | 6.78E-06   |
| ENSMUSG00000040212 | 1.62128775 | 4.19151936 | 6.28E-07   | 1.04E-05   |
| ENSMUSG00000044469 | 1.62075233 | 1.88794525 | 1.30E-05   | 0.0001612  |
| ENSMUSG00000006445 | 1.61885465 | 1.52589595 | 3.56E-05   | 0.00040054 |
| ENSMUSG00000030516 | 1.61857067 | 0.74664664 | 0.00017183 | 0.00160294 |
| ENSMUSG00000030255 | 1.61844063 | 1.1075378  | 8.39E-05   | 0.00085047 |
| ENSMUSG00000031373 | 1.61824508 | 2.59147551 | 3.56E-06   | 4.94E-05   |
| ENSMUSG00000061046 | 1.61755884 | 1.251066   | 5.55E-05   | 0.00058804 |
| ENSMUSG00000027776 | 1.61654211 | 2.84507878 | 2.30E-06   | 3.33E-05   |
| ENSMUSG00000042826 | 1.61579584 | 2.05177631 | 8.42E-06   | 0.00010798 |
| ENSMUSG00000041757 | 1.61502122 | 1.1617825  | 5.06E-05   | 0.00054261 |
| ENSMUSG00000076533 | 1.61431498 | 1.84507279 | 1.03E-05   | 0.00013017 |
| ENSMUSG00000068245 | 1.61382503 | 3.44415628 | 1.06E-06   | 1.65E-05   |
| ENSMUSG00000015027 | 1.61195479 | 5.29089392 | 4.19E-07   | 7.16E-06   |
| ENSMUSG00000025854 | 1.61105996 | 1.60865572 | 2.06E-05   | 0.00024398 |
| ENSMUSG00000042616 | 1.61089074 | 1.33752346 | 4.07E-05   | 0.00045233 |
| ENSMUSG00000032204 | 1.61035144 | 1.39364488 | 3.81E-05   | 0.00042575 |
| ENSMUSG00000026778 | 1.60864686 | 2.6171149  | 3.60E-06   | 4.98E-05   |
| ENSMUSG00000029101 | 1.60688683 | 2.10365035 | 7.77E-06   | 0.00010062 |
| ENSMUSG00000018381 | 1.60356734 | 3.40510656 | 1.43E-06   | 2.16E-05   |

|                    |            |            |            |            |
|--------------------|------------|------------|------------|------------|
| ENSMUSG00000079037 | 1.59880636 | 2.5083305  | 5.17E-06   | 6.91E-05   |
| ENSMUSG00000024030 | 1.59811404 | 4.49846648 | 7.18E-07   | 1.17E-05   |
| ENSMUSG00000044447 | 1.59729628 | 1.85340306 | 1.28E-05   | 0.00015916 |
| ENSMUSG00000033147 | 1.59533381 | 1.73900782 | 2.01E-05   | 0.00023896 |
| ENSMUSG00000020020 | 1.59431692 | 0.88705416 | 0.00021388 | 0.00193496 |
| ENSMUSG00000030217 | 1.59365929 | 0.56964552 | 0.00022853 | 0.00205198 |
| ENSMUSG00000029119 | 1.59348693 | 3.73883037 | 1.21E-06   | 1.86E-05   |
| ENSMUSG00000095633 | 1.59034848 | 2.51497316 | 4.19E-06   | 5.72E-05   |
| ENSMUSG00000049723 | 1.58975617 | 2.1276781  | 1.07E-05   | 0.00013521 |
| ENSMUSG00000024087 | 1.58974711 | 1.24973857 | 5.83E-05   | 0.00061584 |
| ENSMUSG00000033735 | 1.58572097 | 1.80664468 | 2.42E-05   | 0.00028248 |
| ENSMUSG00000029561 | 1.58571618 | 6.61170824 | 4.64E-07   | 7.82E-06   |
| ENSMUSG00000026715 | 1.58425728 | 1.05188424 | 0.00013364 | 0.00128332 |
| ENSMUSG00000040093 | 1.58344345 | 3.91403952 | 1.26E-06   | 1.92E-05   |
| ENSMUSG00000035004 | 1.58223375 | 1.84284952 | 8.20E-06   | 0.00010535 |
| ENSMUSG00000032487 | 1.58190294 | 4.97513847 | 7.16E-07   | 1.17E-05   |
| ENSMUSG00000016382 | 1.57980919 | 3.28416549 | 1.69E-06   | 2.50E-05   |
| ENSMUSG00000026519 | 1.57961293 | 3.86386738 | 1.53E-06   | 2.29E-05   |
| ENSMUSG00000031391 | 1.57793161 | 2.47366958 | 7.16E-06   | 9.36E-05   |
| ENSMUSG00000051517 | 1.57786998 | 2.95727997 | 2.97E-06   | 4.21E-05   |
| ENSMUSG00000076571 | 1.57529278 | 1.30418041 | 5.73E-05   | 0.00060567 |
| ENSMUSG00000022257 | 1.57478863 | 2.5087041  | 6.37E-06   | 8.40E-05   |
| ENSMUSG00000020432 | 1.57304524 | 2.8900261  | 3.67E-06   | 5.07E-05   |
| ENSMUSG00000027200 | 1.57244938 | 5.87924058 | 6.47E-07   | 1.06E-05   |
| ENSMUSG00000024672 | 1.57213257 | 3.12862579 | 3.46E-06   | 4.81E-05   |
| ENSMUSG00000029713 | 1.57211559 | 4.88971211 | 9.04E-07   | 1.45E-05   |
| ENSMUSG00000034855 | 1.57179127 | 3.17782499 | 2.66E-06   | 3.80E-05   |
| ENSMUSG00000057897 | 1.57149022 | 0.87009963 | 0.00012729 | 0.00122998 |
| ENSMUSG00000060591 | 1.57059808 | 2.98896653 | 4.06E-06   | 5.57E-05   |
| ENSMUSG0000006378  | 1.56974053 | 3.08695072 | 3.31E-06   | 4.62E-05   |
| ENSMUSG00000049804 | 1.56964807 | 4.54160919 | 1.02E-06   | 1.60E-05   |
| ENSMUSG00000035513 | 1.56902572 | 0.97729191 | 9.70E-05   | 0.00096761 |
| ENSMUSG00000020395 | 1.56867153 | 2.82394917 | 4.49E-06   | 6.11E-05   |
| ENSMUSG00000022564 | 1.56657981 | 3.6638996  | 1.94E-06   | 2.84E-05   |
| ENSMUSG00000020592 | 1.56493988 | 2.93079807 | 3.94E-06   | 5.42E-05   |
| ENSMUSG00000033307 | 1.56386165 | 3.83512901 | 1.81E-06   | 2.67E-05   |
| ENSMUSG00000094117 | 1.56383679 | 4.11715052 | 1.54E-06   | 2.31E-05   |
| ENSMUSG00000060147 | 1.5636585  | 3.42520935 | 2.35E-06   | 3.39E-05   |
| ENSMUSG00000001418 | 1.56062139 | 5.44233066 | 8.42E-07   | 1.36E-05   |
| ENSMUSG00000024095 | 1.55893683 | 4.05271993 | 1.48E-06   | 2.22E-05   |
| ENSMUSG00000026921 | 1.55882528 | 1.1576214  | 0.0001384  | 0.00132432 |
| ENSMUSG00000027227 | 1.55834363 | 4.48049509 | 1.37E-06   | 2.07E-05   |
| ENSMUSG00000034457 | 1.55801752 | 1.02048537 | 9.38E-05   | 0.00094019 |

|                     |            |            |            |            |
|---------------------|------------|------------|------------|------------|
| ENSMUSG0000000386   | 1.55792966 | 5.91543958 | 7.83E-07   | 1.27E-05   |
| ENSMUSG00000004110  | 1.55760493 | 5.58509813 | 8.05E-07   | 1.30E-05   |
| ENSMUSG000000095682 | 1.55572944 | 2.56202621 | 6.84E-06   | 8.98E-05   |
| ENSMUSG000000046410 | 1.5532102  | 4.19387431 | 1.61E-06   | 2.40E-05   |
| ENSMUSG000000094006 | 1.55189605 | 4.54893787 | 1.30E-06   | 1.98E-05   |
| ENSMUSG000000093896 | 1.55079098 | 3.70001006 | 2.17E-06   | 3.16E-05   |
| ENSMUSG000000045136 | 1.54795271 | 2.72780947 | 7.56E-06   | 9.81E-05   |
| ENSMUSG000000095130 | 1.54563242 | 5.21737167 | 1.13E-06   | 1.76E-05   |
| ENSMUSG000000028434 | 1.54524479 | 0.49123984 | 0.00062712 | 0.0050356  |
| ENSMUSG000000048521 | 1.54517157 | 1.05056514 | 0.00013926 | 0.00133022 |
| ENSMUSG000000003541 | 1.54377925 | 1.10231664 | 0.00010806 | 0.00105846 |
| ENSMUSG000000072244 | 1.54316032 | 2.62096705 | 5.92E-06   | 7.85E-05   |
| ENSMUSG000000000791 | 1.54169327 | 3.67217736 | 2.81E-06   | 4.00E-05   |
| ENSMUSG000000022018 | 1.54071815 | 1.17447386 | 8.15E-05   | 0.00082729 |
| ENSMUSG000000024253 | 1.54001175 | 0.59608747 | 0.00079166 | 0.00615516 |
| ENSMUSG000000068735 | 1.53769645 | 4.58971371 | 1.71E-06   | 2.53E-05   |
| ENSMUSG000000013698 | 1.53677856 | 5.48040305 | 1.21E-06   | 1.86E-05   |
| ENSMUSG000000053297 | 1.53579935 | 0.71389059 | 0.00027329 | 0.00241969 |
| ENSMUSG000000028789 | 1.53501285 | 0.80682127 | 0.00030548 | 0.00268044 |
| ENSMUSG000000002379 | 1.5335447  | 2.2229801  | 2.06E-05   | 0.00024398 |
| ENSMUSG000000022747 | 1.5324564  | 6.32629469 | 1.11E-06   | 1.73E-05   |
| ENSMUSG000000027298 | 1.53223034 | 1.67635798 | 4.18E-05   | 0.00046032 |
| ENSMUSG000000094689 | 1.53131783 | 4.01238716 | 2.40E-06   | 3.45E-05   |
| ENSMUSG000000044229 | 1.53108956 | 1.41440231 | 4.96E-05   | 0.00053378 |
| ENSMUSG000000063568 | 1.53060621 | 1.42584406 | 7.44E-05   | 0.00076258 |
| ENSMUSG000000034634 | 1.5278669  | 6.05665606 | 1.23E-06   | 1.89E-05   |
| ENSMUSG000000025579 | 1.52759591 | 3.90214546 | 2.85E-06   | 4.06E-05   |
| ENSMUSG000000020422 | 1.52707866 | 4.3066372  | 2.14E-06   | 3.12E-05   |
| ENSMUSG000000042129 | 1.5264915  | 6.49366887 | 1.19E-06   | 1.84E-05   |
| ENSMUSG000000032666 | 1.52571122 | 2.60836986 | 1.16E-05   | 0.00014497 |
| ENSMUSG000000028565 | 1.52557181 | 0.6342716  | 0.00069127 | 0.00547333 |
| ENSMUSG000000076549 | 1.52478952 | 4.16089819 | 2.39E-06   | 3.44E-05   |
| ENSMUSG000000081534 | 1.52440166 | 5.94256399 | 1.33E-06   | 2.02E-05   |
| ENSMUSG000000030844 | 1.52402513 | 4.62327758 | 1.97E-06   | 2.89E-05   |
| ENSMUSG000000008855 | 1.52359052 | 3.15621166 | 6.04E-06   | 7.98E-05   |
| ENSMUSG000000076547 | 1.52334443 | 2.80220245 | 6.91E-06   | 9.07E-05   |
| ENSMUSG000000062593 | 1.5229003  | 5.44709908 | 1.48E-06   | 2.22E-05   |
| ENSMUSG000000056476 | 1.52192731 | 2.41093016 | 1.42E-05   | 0.00017522 |
| ENSMUSG000000032245 | 1.52093971 | 4.03238851 | 2.90E-06   | 4.11E-05   |
| ENSMUSG000000027737 | 1.51790087 | 4.45201024 | 2.13E-06   | 3.12E-05   |
| ENSMUSG000000041189 | 1.51662149 | 2.31915114 | 1.72E-05   | 0.00020688 |
| ENSMUSG000000094134 | 1.51639001 | 1.20223472 | 0.0001005  | 0.00099797 |
| ENSMUSG000000019872 | 1.5155935  | 2.74345866 | 9.85E-06   | 0.00012508 |

|                    |            |            |            |            |
|--------------------|------------|------------|------------|------------|
| ENSMUSG00000060314 | 1.51304405 | 1.57051038 | 4.09E-05   | 0.00045323 |
| ENSMUSG00000015568 | 1.51232359 | 2.11253626 | 1.77E-05   | 0.00021188 |
| ENSMUSG00000005580 | 1.51225706 | 1.01370802 | 0.00018975 | 0.00175047 |
| ENSMUSG00000073405 | 1.51032512 | 2.02111118 | 3.04E-05   | 0.00034782 |
| ENSMUSG00000076939 | 1.50950571 | 4.76339518 | 2.46E-06   | 3.53E-05   |
| ENSMUSG00000039747 | 1.50781    | 3.79304093 | 4.10E-06   | 5.61E-05   |
| ENSMUSG00000041351 | 1.50732377 | 0.76151296 | 0.00033071 | 0.00287379 |
| ENSMUSG00000035671 | 1.50398603 | 2.20982382 | 1.99E-05   | 0.0002362  |
| ENSMUSG00000068335 | 1.50333975 | 3.12212266 | 7.12E-06   | 9.33E-05   |
| ENSMUSG00000003546 | 1.50327859 | 0.64216094 | 0.00057752 | 0.00467568 |
| ENSMUSG00000030530 | 1.50204278 | 3.03378176 | 8.34E-06   | 0.00010704 |
| ENSMUSG00000030122 | 1.50191088 | 3.46798793 | 6.03E-06   | 7.97E-05   |
| ENSMUSG00000015437 | 1.50184868 | 2.0875265  | 2.35E-05   | 0.0002747  |
| ENSMUSG00000071713 | 1.4995963  | 6.61487203 | 1.75E-06   | 2.59E-05   |
| ENSMUSG00000040594 | 1.49360507 | 1.36480411 | 9.46E-05   | 0.00094676 |
| ENSMUSG00000037235 | 1.49355683 | 4.4454018  | 3.46E-06   | 4.81E-05   |
| ENSMUSG00000033577 | 1.49352129 | 2.26875209 | 2.14E-05   | 0.00025249 |
| ENSMUSG00000026944 | 1.49215882 | 3.78088993 | 4.90E-06   | 6.59E-05   |
| ENSMUSG00000095761 | 1.49113991 | 2.14919149 | 2.52E-05   | 0.00029296 |
| ENSMUSG00000069516 | 1.48944099 | 3.9060982  | 3.95E-06   | 5.43E-05   |
| ENSMUSG00000033255 | 1.48936085 | 1.75489672 | 5.73E-05   | 0.00060567 |
| ENSMUSG00000020099 | 1.48924066 | 0.88594213 | 0.00020554 | 0.00187012 |
| ENSMUSG00000052151 | 1.48814319 | 2.09618756 | 4.12E-05   | 0.00045515 |
| ENSMUSG00000030605 | 1.48522458 | 1.84198395 | 7.55E-05   | 0.00077137 |
| ENSMUSG00000030824 | 1.48308802 | 6.2963222  | 2.36E-06   | 3.41E-05   |
| ENSMUSG00000047409 | 1.48262843 | 2.18738571 | 2.60E-05   | 0.00030224 |
| ENSMUSG00000032420 | 1.47885812 | 2.44803467 | 1.98E-05   | 0.00023541 |
| ENSMUSG00000022995 | 1.47669933 | 0.96815265 | 0.00032073 | 0.00279611 |
| ENSMUSG00000020027 | 1.47530479 | 5.60603343 | 2.99E-06   | 4.22E-05   |
| ENSMUSG00000029009 | 1.47472709 | 4.10021475 | 5.09E-06   | 6.80E-05   |
| ENSMUSG00000096715 | 1.47374685 | 4.42104341 | 4.73E-06   | 6.40E-05   |
| ENSMUSG00000026360 | 1.47285496 | 3.18651319 | 1.13E-05   | 0.00014095 |
| ENSMUSG00000036764 | 1.46923753 | 1.955886   | 6.26E-05   | 0.00065587 |
| ENSMUSG00000032344 | 1.46883657 | 2.41255865 | 2.87E-05   | 0.00033032 |
| ENSMUSG00000028042 | 1.46871095 | 2.93651644 | 1.34E-05   | 0.00016615 |
| ENSMUSG00000029370 | 1.4673593  | 1.79040813 | 6.33E-05   | 0.00066186 |
| ENSMUSG00000096833 | 1.46673938 | 4.58129096 | 4.83E-06   | 6.51E-05   |
| ENSMUSG00000048911 | 1.4650829  | 5.80815746 | 3.26E-06   | 4.57E-05   |
| ENSMUSG00000074604 | 1.46503914 | 3.38813501 | 8.89E-06   | 0.00011343 |
| ENSMUSG00000032583 | 1.46432877 | 1.36600423 | 0.00011329 | 0.00110865 |
| ENSMUSG00000055541 | 1.46382893 | 1.98919468 | 4.11E-05   | 0.00045428 |
| ENSMUSG00000059708 | 1.46257604 | 4.75244956 | 4.60E-06   | 6.25E-05   |
| ENSMUSG00000024177 | 1.46256709 | 1.38237566 | 0.0001912  | 0.00176079 |

|                    |            |            |            |            |
|--------------------|------------|------------|------------|------------|
| ENSMUSG00000095127 | 1.46256546 | 5.81856628 | 3.40E-06   | 4.74E-05   |
| ENSMUSG00000076534 | 1.46218665 | 4.52765905 | 5.33E-06   | 7.10E-05   |
| ENSMUSG00000020282 | 1.46214355 | 0.96894198 | 0.00035606 | 0.0030596  |
| ENSMUSG00000026536 | 1.46160715 | 2.90918411 | 1.52E-05   | 0.00018514 |
| ENSMUSG00000044551 | 1.46073146 | 1.0167405  | 0.00038451 | 0.00327271 |
| ENSMUSG00000026566 | 1.46070129 | 3.33631072 | 1.10E-05   | 0.00013839 |
| ENSMUSG00000026853 | 1.45951536 | 3.86403467 | 7.90E-06   | 0.00010206 |
| ENSMUSG00000021725 | 1.45926774 | 4.92055768 | 4.74E-06   | 6.41E-05   |
| ENSMUSG00000024084 | 1.45858916 | 0.9192445  | 0.00070444 | 0.00555314 |
| ENSMUSG00000020102 | 1.4569789  | 2.32748348 | 3.38E-05   | 0.00038191 |
| ENSMUSG00000062753 | 1.45579106 | 1.8609513  | 7.77E-05   | 0.00079346 |
| ENSMUSG00000002279 | 1.45534639 | 2.39284211 | 2.97E-05   | 0.00034075 |
| ENSMUSG00000094940 | 1.455322   | 1.87256609 | 5.20E-05   | 0.00055569 |
| ENSMUSG00000059714 | 1.45402411 | 2.3593006  | 3.36E-05   | 0.00038048 |
| ENSMUSG00000043587 | 1.45232043 | 2.04114326 | 5.95E-05   | 0.00062595 |
| ENSMUSG00000048232 | 1.45080826 | 1.34764709 | 0.00018068 | 0.00167393 |
| ENSMUSG00000044703 | 1.45065653 | 3.48833926 | 1.09E-05   | 0.00013747 |
| ENSMUSG00000045374 | 1.44904314 | 3.9175568  | 7.81E-06   | 0.000101   |
| ENSMUSG00000038648 | 1.44902106 | 5.04496729 | 4.95E-06   | 6.64E-05   |
| ENSMUSG00000096844 | 1.44467647 | 3.19863832 | 1.51E-05   | 0.00018464 |
| ENSMUSG00000025227 | 1.44418263 | 0.87266761 | 0.00068243 | 0.00542322 |
| ENSMUSG00000017314 | 1.44402303 | 1.15775945 | 0.00038125 | 0.0032501  |
| ENSMUSG00000004113 | 1.44367273 | 1.70807017 | 0.00011446 | 0.00111807 |
| ENSMUSG00000044468 | 1.44110399 | 7.74100873 | 3.94E-06   | 5.42E-05   |
| ENSMUSG00000061086 | 1.44030186 | 2.15603989 | 4.76E-05   | 0.00051435 |
| ENSMUSG00000034981 | 1.43951814 | 2.85330401 | 2.22E-05   | 0.00026096 |
| ENSMUSG00000001281 | 1.43949095 | 3.33487564 | 1.48E-05   | 0.00018151 |
| ENSMUSG00000020230 | 1.43932431 | 1.6340024  | 0.0001467  | 0.00139135 |
| ENSMUSG00000019139 | 1.43564056 | 4.40018064 | 7.93E-06   | 0.00010223 |
| ENSMUSG00000099398 | 1.43397289 | 1.42065397 | 0.00022885 | 0.00205319 |
| ENSMUSG00000096498 | 1.43337947 | 3.16511799 | 1.79E-05   | 0.00021434 |
| ENSMUSG00000026389 | 1.43308004 | 1.81665334 | 0.00010445 | 0.00103056 |
| ENSMUSG00000020163 | 1.43077168 | 2.03789995 | 7.93E-05   | 0.00080794 |
| ENSMUSG00000024665 | 1.42896968 | 4.41789127 | 8.78E-06   | 0.00011234 |
| ENSMUSG00000085148 | 1.42887852 | 2.83769874 | 2.43E-05   | 0.00028309 |
| ENSMUSG00000036620 | 1.42777528 | 2.46634834 | 4.19E-05   | 0.00046046 |
| ENSMUSG00000057137 | 1.42622771 | 3.08523433 | 2.14E-05   | 0.00025249 |
| ENSMUSG00000027669 | 1.42579922 | 4.95616652 | 7.40E-06   | 9.64E-05   |
| ENSMUSG00000038058 | 1.42540544 | 1.35772074 | 0.00018595 | 0.00171976 |
| ENSMUSG00000030681 | 1.42488552 | 3.60284551 | 1.37E-05   | 0.00016928 |
| ENSMUSG00000026922 | 1.42464291 | 1.95673215 | 0.00010356 | 0.00102269 |
| ENSMUSG00000021900 | 1.42175303 | 3.35679082 | 1.66E-05   | 0.00020021 |
| ENSMUSG00000053580 | 1.42161971 | 4.48319705 | 8.65E-06   | 0.00011079 |

|                    |            |            |            |            |
|--------------------|------------|------------|------------|------------|
| ENSMUSG00000071649 | 1.42005104 | 2.36754977 | 5.48E-05   | 0.00058321 |
| ENSMUSG00000069763 | 1.41901757 | 0.81569837 | 0.00048551 | 0.0040275  |
| ENSMUSG00000048852 | 1.41836153 | 2.29158227 | 5.84E-05   | 0.00061637 |
| ENSMUSG00000023272 | 1.41658985 | 6.91167206 | 5.95E-06   | 7.88E-05   |
| ENSMUSG00000034216 | 1.41550798 | 2.57908212 | 4.33E-05   | 0.00047285 |
| ENSMUSG00000009563 | 1.41444496 | 3.52438589 | 1.66E-05   | 0.00020021 |
| ENSMUSG00000054277 | 1.41376934 | 3.93419612 | 1.27E-05   | 0.00015845 |
| ENSMUSG00000026490 | 1.41356361 | 3.32217396 | 1.94E-05   | 0.00023159 |
| ENSMUSG00000024220 | 1.40935855 | 0.74856147 | 0.00084796 | 0.00650848 |
| ENSMUSG00000067149 | 1.40884998 | 6.94948267 | 6.54E-06   | 8.61E-05   |
| ENSMUSG00000037613 | 1.40818289 | 2.17358849 | 8.57E-05   | 0.00086682 |
| ENSMUSG00000037049 | 1.40816879 | 3.84241149 | 1.47E-05   | 0.00018006 |
| ENSMUSG00000032845 | 1.40785922 | 2.83073717 | 3.22E-05   | 0.00036602 |
| ENSMUSG00000003355 | 1.40721856 | 1.92663445 | 0.00011482 | 0.00112055 |
| ENSMUSG00000035637 | 1.4023331  | 2.73609811 | 4.15E-05   | 0.00045806 |
| ENSMUSG00000095416 | 1.40130265 | 2.83157578 | 3.22E-05   | 0.00036602 |
| ENSMUSG00000041355 | 1.40057471 | 7.01961206 | 7.48E-06   | 9.74E-05   |
| ENSMUSG00000033594 | 1.39992844 | 0.57544377 | 0.00126942 | 0.0093189  |
| ENSMUSG00000032109 | 1.39964868 | 1.55196359 | 0.00023765 | 0.00212503 |
| ENSMUSG00000022108 | 1.39958014 | 8.01546816 | 7.22E-06   | 9.43E-05   |
| ENSMUSG00000029166 | 1.39657637 | 0.82505166 | 0.00088387 | 0.00676006 |
| ENSMUSG00000029864 | 1.39423219 | 2.12717252 | 8.95E-05   | 0.00090241 |
| ENSMUSG00000002944 | 1.39371267 | 8.87334082 | 7.68E-06   | 9.95E-05   |
| ENSMUSG00000031712 | 1.39332188 | 1.26300194 | 0.00033805 | 0.00292581 |
| ENSMUSG00000023805 | 1.3932926  | 3.14002107 | 2.84E-05   | 0.0003275  |
| ENSMUSG00000039450 | 1.38479435 | 1.69100927 | 0.00023349 | 0.00209129 |
| ENSMUSG00000048330 | 1.38436608 | 1.18683544 | 0.00039739 | 0.00336642 |
| ENSMUSG00000021696 | 1.38412616 | 0.5799591  | 0.00174276 | 0.01231577 |
| ENSMUSG00000057863 | 1.38276455 | 1.46541731 | 0.00035544 | 0.00305667 |
| ENSMUSG00000028527 | 1.38051715 | 1.41967699 | 0.00039222 | 0.00333307 |
| ENSMUSG00000074570 | 1.38008886 | 0.97016266 | 0.00082292 | 0.00635247 |
| ENSMUSG00000076665 | 1.38000672 | 3.22536484 | 3.10E-05   | 0.00035292 |
| ENSMUSG00000026821 | 1.37945319 | 4.6675137  | 1.55E-05   | 0.00018821 |
| ENSMUSG00000030720 | 1.37940759 | 3.34934535 | 3.01E-05   | 0.00034449 |
| ENSMUSG00000094652 | 1.37898756 | 4.6242204  | 1.52E-05   | 0.00018514 |
| ENSMUSG00000032373 | 1.37830123 | 3.38650864 | 3.26E-05   | 0.0003693  |
| ENSMUSG00000036565 | 1.37818557 | 3.45350584 | 3.16E-05   | 0.00035982 |
| ENSMUSG00000036863 | 1.37795803 | 2.17226369 | 9.75E-05   | 0.00097135 |
| ENSMUSG00000060675 | 1.37775098 | 4.22598313 | 1.85E-05   | 0.00022122 |
| ENSMUSG00000001665 | 1.37755209 | 3.06629189 | 3.67E-05   | 0.00041095 |
| ENSMUSG00000030588 | 1.37661748 | 2.70642128 | 5.92E-05   | 0.00062299 |
| ENSMUSG00000056629 | 1.37559883 | 3.44346856 | 3.17E-05   | 0.00036047 |
| ENSMUSG00000032177 | 1.37536663 | 2.55407738 | 6.54E-05   | 0.00067788 |



|                    |            |            |            |            |
|--------------------|------------|------------|------------|------------|
| ENSMUSG00000014778 | 1.37106476 | 2.54477709 | 6.76E-05   | 0.0006978  |
| ENSMUSG00000030107 | 1.37003888 | 5.47120398 | 1.35E-05   | 0.00016729 |
| ENSMUSG00000024190 | 1.3694186  | 2.46775841 | 6.09E-05   | 0.00063909 |
| ENSMUSG00000023067 | 1.36931587 | 5.98376799 | 1.28E-05   | 0.00015916 |
| ENSMUSG00000029338 | 1.3691134  | 2.98220989 | 4.23E-05   | 0.00046393 |
| ENSMUSG00000034438 | 1.36636808 | 2.7775411  | 5.18E-05   | 0.00055412 |
| ENSMUSG00000035778 | 1.36578724 | 7.30705707 | 1.21E-05   | 0.0001502  |
| ENSMUSG00000049670 | 1.36511984 | 0.67255956 | 0.00202613 | 0.01389054 |
| ENSMUSG00000020868 | 1.36316367 | 2.03878946 | 0.0002187  | 0.00197176 |
| ENSMUSG00000051817 | 1.36218377 | 2.13550179 | 0.00016119 | 0.00151027 |
| ENSMUSG00000039934 | 1.36131879 | 4.38334915 | 2.19E-05   | 0.00025728 |
| ENSMUSG00000026126 | 1.35876482 | 2.86328933 | 6.21E-05   | 0.00065173 |
| ENSMUSG00000043832 | 1.35852415 | 1.09382421 | 0.0003646  | 0.00312297 |
| ENSMUSG00000027533 | 1.35787892 | 6.00094223 | 1.51E-05   | 0.00018514 |
| ENSMUSG00000030826 | 1.35720411 | 4.58049092 | 2.16E-05   | 0.00025461 |
| ENSMUSG00000061143 | 1.35627712 | 2.25913678 | 0.00012129 | 0.00117626 |
| ENSMUSG00000076538 | 1.35613724 | 5.6752735  | 1.62E-05   | 0.00019579 |
| ENSMUSG00000063450 | 1.35559512 | 3.24235906 | 4.20E-05   | 0.00046169 |
| ENSMUSG00000028412 | 1.3542195  | 5.57017423 | 1.66E-05   | 0.00020021 |
| ENSMUSG00000058135 | 1.3540345  | 4.68698548 | 2.14E-05   | 0.00025293 |
| ENSMUSG00000089715 | 1.35354892 | 4.52805084 | 2.23E-05   | 0.00026107 |
| ENSMUSG00000085396 | 1.35148444 | 0.72835291 | 0.00201948 | 0.01386255 |
| ENSMUSG00000032182 | 1.3471351  | 2.67501003 | 8.46E-05   | 0.00085702 |
| ENSMUSG00000076564 | 1.34548693 | 5.72635937 | 1.83E-05   | 0.00021913 |
| ENSMUSG00000032549 | 1.34518821 | 0.94066118 | 0.00081315 | 0.00629502 |
| ENSMUSG00000027171 | 1.34370254 | 4.15097805 | 2.97E-05   | 0.00034069 |
| ENSMUSG00000094062 | 1.34309644 | 3.43151585 | 4.29E-05   | 0.00046962 |
| ENSMUSG00000030284 | 1.34143629 | 2.47758181 | 0.00010095 | 0.0010001  |
| ENSMUSG00000029545 | 1.34018732 | 2.32571046 | 0.00014247 | 0.00135848 |
| ENSMUSG00000036533 | 1.33943715 | 2.9648307  | 6.86E-05   | 0.0007068  |
| ENSMUSG00000039474 | 1.33682632 | 2.65899779 | 8.60E-05   | 0.00086907 |
| ENSMUSG00000023036 | 1.33587182 | 3.69338604 | 4.32E-05   | 0.00047222 |
| ENSMUSG00000094124 | 1.33506917 | 3.02947827 | 6.57E-05   | 0.00068095 |
| ENSMUSG00000094546 | 1.33370109 | 7.07272146 | 1.90E-05   | 0.00022688 |
| ENSMUSG00000041959 | 1.33004919 | 5.30841347 | 2.45E-05   | 0.00028519 |
| ENSMUSG00000056091 | 1.32944012 | 3.99631745 | 3.87E-05   | 0.00043157 |
| ENSMUSG00000024187 | 1.32925312 | 2.35319018 | 0.0001604  | 0.0015041  |
| ENSMUSG00000039953 | 1.32900319 | 3.13653659 | 6.52E-05   | 0.00067721 |
| ENSMUSG00000057948 | 1.3281541  | 3.93277802 | 4.10E-05   | 0.00045367 |
| ENSMUSG00000075122 | 1.32769595 | 4.78405586 | 2.93E-05   | 0.00033697 |
| ENSMUSG00000036599 | 1.32752034 | 2.44254061 | 0.00011921 | 0.00115813 |
| ENSMUSG00000034854 | 1.32598694 | 2.85444106 | 9.32E-05   | 0.00093517 |
| ENSMUSG00000029616 | 1.32518878 | 6.92866606 | 2.18E-05   | 0.00025673 |

|                    |            |            |            |            |
|--------------------|------------|------------|------------|------------|
| ENSMUSG00000060216 | 1.32435747 | 3.93004853 | 4.49E-05   | 0.00048749 |
| ENSMUSG00000018648 | 1.3240028  | 1.59385983 | 0.00033713 | 0.00292017 |
| ENSMUSG00000060376 | 1.32231267 | 1.11496129 | 0.00123574 | 0.00908398 |
| ENSMUSG00000013089 | 1.32160019 | 4.32752727 | 3.76E-05   | 0.00042058 |
| ENSMUSG00000039286 | 1.32060856 | 3.90800296 | 4.05E-05   | 0.00045059 |
| ENSMUSG00000028076 | 1.32010352 | 3.08566915 | 7.49E-05   | 0.00076636 |
| ENSMUSG00000048376 | 1.31992046 | 1.3874863  | 0.00052016 | 0.00426571 |
| ENSMUSG00000041025 | 1.31935499 | 0.87088549 | 0.00118096 | 0.00873491 |
| ENSMUSG00000003873 | 1.31909272 | 4.75074723 | 3.43E-05   | 0.00038642 |
| ENSMUSG00000030083 | 1.31878459 | 0.76615168 | 0.00231091 | 0.01552703 |
| ENSMUSG00000062661 | 1.31803414 | 2.85164323 | 9.32E-05   | 0.00093517 |
| ENSMUSG00000057058 | 1.3166002  | 1.20482026 | 0.00057588 | 0.00466589 |
| ENSMUSG00000019088 | 1.31574652 | 2.57300217 | 0.00011398 | 0.00111437 |
| ENSMUSG00000041857 | 1.31526356 | 1.73223184 | 0.00038409 | 0.00327174 |
| ENSMUSG00000059070 | 1.31523168 | 6.4951065  | 2.61E-05   | 0.00030244 |
| ENSMUSG00000096020 | 1.3136904  | 3.72595835 | 5.54E-05   | 0.00058795 |
| ENSMUSG00000093838 | 1.31257833 | 3.9005948  | 4.94E-05   | 0.00053237 |
| ENSMUSG00000030257 | 1.31221071 | 1.27937437 | 0.00053879 | 0.00439511 |
| ENSMUSG00000026153 | 1.31133424 | 2.12058766 | 0.00021256 | 0.00192467 |
| ENSMUSG00000033955 | 1.31118024 | 3.42913531 | 7.20E-05   | 0.00073949 |
| ENSMUSG00000024737 | 1.3110357  | 6.71191788 | 2.69E-05   | 0.0003117  |
| ENSMUSG00000000631 | 1.31027872 | 4.29238459 | 4.40E-05   | 0.00047903 |
| ENSMUSG00000043017 | 1.30987327 | 4.47380233 | 4.13E-05   | 0.00045547 |
| ENSMUSG00000015363 | 1.30897064 | 4.10442102 | 4.95E-05   | 0.00053237 |
| ENSMUSG00000026712 | 1.30884134 | 1.32734957 | 0.00093948 | 0.0071448  |
| ENSMUSG00000058756 | 1.30761292 | 0.96888989 | 0.00175284 | 0.0123789  |
| ENSMUSG00000033488 | 1.30646028 | 2.44006034 | 0.00017202 | 0.00160333 |
| ENSMUSG00000055994 | 1.30640203 | 3.62203859 | 5.86E-05   | 0.00061814 |
| ENSMUSG00000020689 | 1.30627145 | 5.08095227 | 3.64E-05   | 0.00040828 |
| ENSMUSG00000054364 | 1.30587704 | 3.55770218 | 6.60E-05   | 0.00068341 |
| ENSMUSG00000029185 | 1.30535278 | 2.16273782 | 0.00023957 | 0.0021387  |
| ENSMUSG00000051998 | 1.30366071 | 6.09944844 | 3.09E-05   | 0.00035225 |
| ENSMUSG00000024353 | 1.30341808 | 7.84265919 | 2.82E-05   | 0.00032516 |
| ENSMUSG00000044734 | 1.30293561 | 4.8291269  | 4.10E-05   | 0.00045367 |
| ENSMUSG00000063268 | 1.3020551  | 4.39938403 | 4.74E-05   | 0.00051205 |
| ENSMUSG00000076587 | 1.30124906 | 3.54620963 | 7.27E-05   | 0.00074592 |
| ENSMUSG00000022817 | 1.30068884 | 3.13486727 | 9.24E-05   | 0.00092988 |
| ENSMUSG00000068264 | 1.30068567 | 1.35204958 | 0.00094485 | 0.00717195 |
| ENSMUSG00000035478 | 1.30040045 | 3.76433749 | 6.78E-05   | 0.00069952 |
| ENSMUSG00000024958 | 1.2999534  | 0.83558961 | 0.00200653 | 0.0137912  |
| ENSMUSG00000001666 | 1.29952475 | 3.43364722 | 8.00E-05   | 0.00081377 |
| ENSMUSG00000085415 | 1.29950062 | 2.23100662 | 0.00017222 | 0.00160381 |
| ENSMUSG00000023277 | 1.29873556 | 3.68064546 | 6.66E-05   | 0.00068822 |

|                    |            |            |            |            |
|--------------------|------------|------------|------------|------------|
| ENSMUSG0000008540  | 1.29766089 | 1.37168808 | 0.00070121 | 0.00553883 |
| ENSMUSG00000027947 | 1.29738723 | 3.78134579 | 6.45E-05   | 0.00067291 |
| ENSMUSG00000029001 | 1.29691968 | 1.40069603 | 0.00064145 | 0.00513924 |
| ENSMUSG00000031532 | 1.29629229 | 4.33428283 | 5.10E-05   | 0.00054622 |
| ENSMUSG00000027447 | 1.29622757 | 4.4883067  | 4.87E-05   | 0.00052525 |
| ENSMUSG00000068115 | 1.29543271 | 0.77977039 | 0.00230044 | 0.0154663  |
| ENSMUSG00000052160 | 1.29482697 | 6.01215985 | 3.59E-05   | 0.00040345 |
| ENSMUSG00000038895 | 1.29429188 | 0.97790563 | 0.00120906 | 0.00893049 |
| ENSMUSG00000096515 | 1.29417135 | 5.13448173 | 4.25E-05   | 0.00046525 |
| ENSMUSG00000032012 | 1.2928757  | 2.66770677 | 0.00015442 | 0.00145307 |
| ENSMUSG00000025815 | 1.29214585 | 2.10512644 | 0.00025489 | 0.00226609 |
| ENSMUSG00000035246 | 1.28977018 | 2.00808748 | 0.00030854 | 0.00270508 |
| ENSMUSG00000028671 | 1.28916703 | 2.35225485 | 0.00020123 | 0.00184057 |
| ENSMUSG0000002227  | 1.28909989 | 4.57106467 | 5.17E-05   | 0.00055332 |
| ENSMUSG00000095677 | 1.28857982 | 1.4432797  | 0.00087764 | 0.00671712 |
| ENSMUSG0000003644  | 1.28838825 | 5.91759626 | 3.93E-05   | 0.00043848 |
| ENSMUSG00000076633 | 1.28811136 | 2.19670895 | 0.00024902 | 0.00221572 |
| ENSMUSG0000001249  | 1.28588307 | 0.87826289 | 0.00199648 | 0.01373086 |
| ENSMUSG00000026223 | 1.28525076 | 4.13462145 | 6.52E-05   | 0.00067721 |
| ENSMUSG00000027712 | 1.28509018 | 5.30249275 | 4.50E-05   | 0.00048828 |
| ENSMUSG00000042106 | 1.28446406 | 2.54798012 | 0.00019689 | 0.00181015 |
| ENSMUSG00000019461 | 1.28372496 | 2.58022883 | 0.00015754 | 0.00147993 |
| ENSMUSG00000076617 | 1.2814629  | 13.22186   | 3.63E-05   | 0.00040747 |
| ENSMUSG00000095571 | 1.28087052 | 5.6561642  | 4.45E-05   | 0.00048333 |
| ENSMUSG00000024661 | 1.28075316 | 10.1786483 | 3.69E-05   | 0.00041364 |
| ENSMUSG00000000958 | 1.27987316 | 3.08293641 | 0.00012886 | 0.00124296 |
| ENSMUSG00000054452 | 1.27900834 | 5.08470352 | 5.27E-05   | 0.00056242 |
| ENSMUSG00000078853 | 1.27567261 | 6.57795464 | 4.38E-05   | 0.00047718 |
| ENSMUSG00000019832 | 1.27538809 | 2.80021344 | 0.00017254 | 0.00160439 |
| ENSMUSG00000026956 | 1.27536727 | 3.67011536 | 9.27E-05   | 0.00093133 |
| ENSMUSG00000033065 | 1.27444735 | 2.78056273 | 0.00019006 | 0.00175176 |
| ENSMUSG00000034765 | 1.27316397 | 3.46656805 | 9.71E-05   | 0.00096761 |
| ENSMUSG00000032741 | 1.27300934 | 2.80211272 | 0.00017077 | 0.00159448 |
| ENSMUSG00000074219 | 1.27266379 | 0.6382983  | 0.00410064 | 0.02524045 |
| ENSMUSG00000020638 | 1.2701148  | 5.33718439 | 5.39E-05   | 0.00057458 |
| ENSMUSG00000051000 | 1.26881441 | 3.54303827 | 0.00011528 | 0.00112403 |
| ENSMUSG00000028807 | 1.26879298 | 1.65408687 | 0.00061021 | 0.00491449 |
| ENSMUSG00000001995 | 1.26870563 | 2.49265001 | 0.00020567 | 0.00187012 |
| ENSMUSG00000024769 | 1.26816545 | 1.51634843 | 0.00089744 | 0.00685412 |
| ENSMUSG00000005823 | 1.2679204  | 4.54088997 | 6.83E-05   | 0.00070395 |
| ENSMUSG00000037295 | 1.26780936 | 2.87703392 | 0.00017387 | 0.00161358 |
| ENSMUSG00000076609 | 1.26752439 | 11.2072169 | 4.39E-05   | 0.00047871 |
| ENSMUSG00000071648 | 1.26650879 | 0.89088493 | 0.00255944 | 0.01697477 |

|                    |            |            |            |            |
|--------------------|------------|------------|------------|------------|
| ENSMUSG00000044350 | 1.26617831 | 4.75878098 | 6.51E-05   | 0.00067689 |
| ENSMUSG00000067370 | 1.26523787 | 1.26393752 | 0.00113669 | 0.0084364  |
| ENSMUSG00000051435 | 1.2650212  | 1.99966669 | 0.00043932 | 0.00366974 |
| ENSMUSG00000052062 | 1.26471078 | 3.00628173 | 0.00018433 | 0.00170625 |
| ENSMUSG00000036181 | 1.26423324 | 1.7776579  | 0.00036377 | 0.00311836 |
| ENSMUSG00000018585 | 1.26367105 | 3.03348979 | 0.00014937 | 0.00141055 |
| ENSMUSG00000009035 | 1.26245803 | 5.00775209 | 6.50E-05   | 0.00067689 |
| ENSMUSG00000039899 | 1.26146218 | 6.69301278 | 5.21E-05   | 0.00055657 |
| ENSMUSG00000035441 | 1.25743165 | 1.82516091 | 0.00052468 | 0.00429622 |
| ENSMUSG00000047721 | 1.25688104 | 1.65683236 | 0.00078452 | 0.00610847 |
| ENSMUSG00000040276 | 1.25661981 | 2.23626493 | 0.00040033 | 0.00338813 |
| ENSMUSG00000038618 | 1.25625011 | 1.06552001 | 0.00195646 | 0.01351596 |
| ENSMUSG00000019564 | 1.2559692  | 6.60854046 | 5.63E-05   | 0.00059691 |
| ENSMUSG00000015944 | 1.25562916 | 3.00440203 | 0.00014371 | 0.00136702 |
| ENSMUSG00000045382 | 1.25400972 | 5.8281629  | 6.31E-05   | 0.00066036 |
| ENSMUSG00000027422 | 1.25291921 | 8.05304949 | 5.53E-05   | 0.00058716 |
| ENSMUSG00000022656 | 1.25152505 | 0.91325924 | 0.00252514 | 0.01678858 |
| ENSMUSG00000095630 | 1.25130725 | 5.14779984 | 7.49E-05   | 0.00076636 |
| ENSMUSG00000034853 | 1.25081187 | 3.00559169 | 0.00017614 | 0.00163329 |
| ENSMUSG00000047146 | 1.25060592 | 2.56015008 | 0.00023573 | 0.00210967 |
| ENSMUSG00000096461 | 1.24889945 | 2.21284327 | 0.00039689 | 0.0033648  |
| ENSMUSG00000009739 | 1.24807624 | 3.23734062 | 0.00014273 | 0.00135971 |
| ENSMUSG00000029311 | 1.24802537 | 4.31756419 | 9.87E-05   | 0.00098217 |
| ENSMUSG00000029470 | 1.24580851 | 4.1579845  | 0.00010759 | 0.0010557  |
| ENSMUSG00000004709 | 1.24507895 | 0.86772492 | 0.00226844 | 0.01527021 |
| ENSMUSG00000038828 | 1.24366322 | 5.24881688 | 7.89E-05   | 0.00080521 |
| ENSMUSG00000021242 | 1.24316529 | 7.23495182 | 6.49E-05   | 0.00067618 |
| ENSMUSG00000053898 | 1.24256977 | 4.35639125 | 0.00010223 | 0.00101046 |
| ENSMUSG00000042726 | 1.24185716 | 6.37144732 | 6.95E-05   | 0.00071563 |
| ENSMUSG00000034974 | 1.24154933 | 1.86383934 | 0.00067186 | 0.00534316 |
| ENSMUSG00000064105 | 1.24133732 | 1.74566271 | 0.00069277 | 0.0054812  |
| ENSMUSG00000034265 | 1.24064976 | 2.1061566  | 0.0004709  | 0.0039153  |
| ENSMUSG00000038208 | 1.23992647 | 1.10450531 | 0.00217318 | 0.01472556 |
| ENSMUSG00000035561 | 1.23964995 | 2.58874994 | 0.00026974 | 0.00239018 |
| ENSMUSG00000096670 | 1.23880635 | 2.35791726 | 0.00032902 | 0.00286376 |
| ENSMUSG00000019975 | 1.23822922 | 2.68500531 | 0.00028548 | 0.00251727 |
| ENSMUSG00000001025 | 1.23633916 | 4.01030895 | 0.00012812 | 0.00123689 |
| ENSMUSG00000020238 | 1.23576073 | 3.78985394 | 0.00013901 | 0.00132894 |
| ENSMUSG00000070283 | 1.23370134 | 1.5499557  | 0.00099021 | 0.00748067 |
| ENSMUSG00000002007 | 1.23368556 | 4.14170735 | 0.00011902 | 0.00115731 |
| ENSMUSG00000040767 | 1.23090354 | 3.95039633 | 0.00014375 | 0.00136702 |
| ENSMUSG00000078771 | 1.22767815 | 5.33641244 | 9.48E-05   | 0.0009477  |
| ENSMUSG00000021928 | 1.22748643 | 3.01804585 | 0.00024526 | 0.00218401 |

|                    |            |            |            |            |
|--------------------|------------|------------|------------|------------|
| ENSMUSG00000055401 | 1.22724207 | 2.65782076 | 0.00031899 | 0.00278544 |
| ENSMUSG00000037649 | 1.22652699 | 6.57325355 | 8.39E-05   | 0.00085047 |
| ENSMUSG00000029802 | 1.22464199 | 4.17129784 | 0.00013494 | 0.00129468 |
| ENSMUSG00000074227 | 1.22442419 | 2.19135628 | 0.00056394 | 0.00458292 |
| ENSMUSG00000006362 | 1.22204067 | 3.17013381 | 0.00022649 | 0.00203542 |
| ENSMUSG00000004267 | 1.22183679 | 2.45000883 | 0.00042164 | 0.00353576 |
| ENSMUSG00000001156 | 1.22032605 | 3.88767256 | 0.00015225 | 0.0014352  |
| ENSMUSG00000011008 | 1.2196013  | 4.38555153 | 0.00013334 | 0.00128162 |
| ENSMUSG00000034795 | 1.21891939 | 1.52673964 | 0.00129109 | 0.00944577 |
| ENSMUSG00000022436 | 1.21800692 | 4.11903688 | 0.00015241 | 0.00143542 |
| ENSMUSG00000076570 | 1.217518   | 1.80729118 | 0.00112283 | 0.00835074 |
| ENSMUSG00000039246 | 1.21543294 | 0.73516338 | 0.00303587 | 0.01959614 |
| ENSMUSG00000096638 | 1.21510145 | 2.58842214 | 0.00034491 | 0.00297319 |
| ENSMUSG00000017830 | 1.215007   | 6.20544324 | 9.96E-05   | 0.00098962 |
| ENSMUSG00000028573 | 1.21424308 | 2.22663887 | 0.00051062 | 0.00420021 |
| ENSMUSG00000024327 | 1.2140019  | 0.98929325 | 0.00315229 | 0.0202181  |
| ENSMUSG00000021939 | 1.21326307 | 7.07932479 | 9.63E-05   | 0.00096204 |
| ENSMUSG00000034101 | 1.2127147  | 2.51588233 | 0.00042057 | 0.00352948 |
| ENSMUSG00000029674 | 1.21207942 | 3.47760738 | 0.00021823 | 0.001971   |
| ENSMUSG00000063445 | 1.21196569 | 4.3304952  | 0.00014796 | 0.00140087 |
| ENSMUSG00000031897 | 1.21185013 | 3.52860968 | 0.00021886 | 0.00197176 |
| ENSMUSG00000045679 | 1.21103392 | 6.06379202 | 0.00010627 | 0.00104372 |
| ENSMUSG00000040813 | 1.2106026  | 2.57759249 | 0.00041682 | 0.00350348 |
| ENSMUSG00000076596 | 1.21050779 | 3.81671824 | 0.00019307 | 0.00177646 |
| ENSMUSG00000024807 | 1.20933972 | 7.1454154  | 0.00010099 | 0.0010001  |
| ENSMUSG00000055681 | 1.2081386  | 4.60962189 | 0.00014768 | 0.00139947 |
| ENSMUSG00000030432 | 1.20776053 | 6.58110863 | 0.00010769 | 0.0010557  |
| ENSMUSG00000054932 | 1.20732002 | 1.59833786 | 0.00152844 | 0.01095925 |
| ENSMUSG00000032754 | 1.2069983  | 1.42284021 | 0.00128072 | 0.00939542 |
| ENSMUSG00000026193 | 1.20655228 | 2.40123313 | 0.00042884 | 0.00358776 |
| ENSMUSG00000025912 | 1.205914   | 5.63350689 | 0.00011849 | 0.00115324 |
| ENSMUSG00000022885 | 1.20498059 | 8.90148491 | 0.00010203 | 0.00100941 |
| ENSMUSG00000021190 | 1.20497142 | 7.69877322 | 0.00010496 | 0.00103464 |
| ENSMUSG00000037938 | 1.2041237  | 1.19736673 | 0.00155536 | 0.01111531 |
| ENSMUSG00000002332 | 1.20410853 | 3.7649151  | 0.00020205 | 0.00184493 |
| ENSMUSG00000047878 | 1.20386057 | 1.85742944 | 0.0008416  | 0.00647345 |
| ENSMUSG00000100287 | 1.20180151 | 0.95825003 | 0.00197999 | 0.01362617 |
| ENSMUSG00000037366 | 1.20065834 | 2.79956457 | 0.00037861 | 0.00323416 |
| ENSMUSG00000024910 | 1.20062114 | 0.77081119 | 0.00339871 | 0.02149659 |
| ENSMUSG00000040997 | 1.19976345 | 3.7522929  | 0.00020357 | 0.00185574 |
| ENSMUSG00000019188 | 1.19920337 | 7.00036037 | 0.00011613 | 0.00113125 |
| ENSMUSG00000037731 | 1.19839636 | 5.98851456 | 0.00012562 | 0.00121495 |
| ENSMUSG00000032010 | 1.19705115 | 1.86678586 | 0.0010518  | 0.00787681 |

|                    |            |            |            |            |
|--------------------|------------|------------|------------|------------|
| ENSMUSG00000039031 | 1.19598369 | 4.0254705  | 0.00020141 | 0.00184067 |
| ENSMUSG00000078429 | 1.19581658 | 5.52777043 | 0.00013744 | 0.00131748 |
| ENSMUSG00000026880 | 1.19521672 | 3.20745548 | 0.00032062 | 0.00279611 |
| ENSMUSG00000041827 | 1.19510062 | 6.67332153 | 0.00012411 | 0.00120252 |
| ENSMUSG00000034708 | 1.19484883 | 7.53496969 | 0.00012007 | 0.00116542 |
| ENSMUSG00000074916 | 1.19297692 | 1.94361678 | 0.00080411 | 0.00623404 |
| ENSMUSG00000007379 | 1.19252746 | 1.93170809 | 0.00074667 | 0.00585181 |
| ENSMUSG00000032374 | 1.19227665 | 3.10220793 | 0.00033378 | 0.00289578 |
| ENSMUSG00000040466 | 1.19101544 | 1.35011807 | 0.00248959 | 0.01656243 |
| ENSMUSG00000039652 | 1.19042103 | 2.27413382 | 0.00062495 | 0.00502197 |
| ENSMUSG00000028757 | 1.18760195 | 7.58852141 | 0.00013121 | 0.00126339 |
| ENSMUSG00000094088 | 1.18758002 | 4.78319573 | 0.00017273 | 0.00160439 |
| ENSMUSG00000038604 | 1.18656729 | 3.0777785  | 0.00038921 | 0.00331015 |
| ENSMUSG00000029455 | 1.18525738 | 4.26866264 | 0.00020899 | 0.0018971  |
| ENSMUSG00000033436 | 1.18428178 | 5.47151392 | 0.00015855 | 0.00148807 |
| ENSMUSG00000030086 | 1.18412161 | 1.36692297 | 0.00205915 | 0.01404545 |
| ENSMUSG00000032198 | 1.18404843 | 2.08498616 | 0.00069043 | 0.00547071 |
| ENSMUSG00000036073 | 1.18370025 | 1.6529578  | 0.00129686 | 0.00948155 |
| ENSMUSG00000019433 | 1.18221514 | 2.39769579 | 0.00059196 | 0.0047782  |
| ENSMUSG00000059013 | 1.18067742 | 2.88508963 | 0.00043746 | 0.00365704 |
| ENSMUSG00000032724 | 1.1804261  | 2.61284412 | 0.00051942 | 0.00426288 |
| ENSMUSG00000022594 | 1.17932805 | 5.00180966 | 0.00018823 | 0.00173943 |
| ENSMUSG00000025408 | 1.17852093 | 3.00679661 | 0.00042662 | 0.00357195 |
| ENSMUSG00000051483 | 1.17806388 | 2.67112637 | 0.00058866 | 0.00475873 |
| ENSMUSG00000027514 | 1.17753761 | 7.16824729 | 0.00015106 | 0.0014252  |
| ENSMUSG00000031227 | 1.17700292 | 2.38149065 | 0.00073284 | 0.00575596 |
| ENSMUSG00000044952 | 1.17654345 | 1.2401607  | 0.00312038 | 0.02005375 |
| ENSMUSG00000024044 | 1.17548538 | 2.40605887 | 0.00066575 | 0.00530243 |
| ENSMUSG00000031556 | 1.17449847 | 4.54480293 | 0.00021846 | 0.00197147 |
| ENSMUSG00000022475 | 1.17341195 | 4.04618737 | 0.00026957 | 0.00239018 |
| ENSMUSG00000097993 | 1.17104356 | 1.60482863 | 0.00166287 | 0.01179765 |
| ENSMUSG00000040327 | 1.17069671 | 1.83275275 | 0.00140101 | 0.0101467  |
| ENSMUSG00000031129 | 1.17044796 | 1.63184962 | 0.00152679 | 0.0109547  |
| ENSMUSG00000025702 | 1.17036922 | 3.39807979 | 0.00037878 | 0.00323416 |
| ENSMUSG00000095753 | 1.17017452 | 4.70122094 | 0.00021812 | 0.001971   |
| ENSMUSG00000047123 | 1.16992847 | 5.23443754 | 0.00019852 | 0.00182352 |
| ENSMUSG00000021796 | 1.16884267 | 1.38895427 | 0.00224038 | 0.01510016 |
| ENSMUSG00000068417 | 1.16844822 | 2.01663373 | 0.00094197 | 0.00715868 |
| ENSMUSG00000026860 | 1.16823747 | 2.71036505 | 0.00065358 | 0.00521704 |
| ENSMUSG00000094787 | 1.16793615 | 3.32834087 | 0.00036794 | 0.00314912 |
| ENSMUSG00000096336 | 1.16782609 | 7.64920582 | 0.00016766 | 0.00156675 |
| ENSMUSG00000040811 | 1.16708348 | 2.64648533 | 0.00050389 | 0.00416078 |
| ENSMUSG00000095794 | 1.16645574 | 5.52629889 | 0.00020089 | 0.00183903 |

|                    |            |            |            |            |
|--------------------|------------|------------|------------|------------|
| ENSMUSG00000072825 | 1.16366083 | 2.43954682 | 0.00082667 | 0.0063768  |
| ENSMUSG00000020219 | 1.16354358 | 1.91214345 | 0.00160308 | 0.01141852 |
| ENSMUSG00000020668 | 1.16341768 | 2.47973351 | 0.00075722 | 0.00591731 |
| ENSMUSG00000054708 | 1.16147166 | 0.72595839 | 0.00398405 | 0.02464948 |
| ENSMUSG00000000782 | 1.16114585 | 2.04393397 | 0.00101154 | 0.00761759 |
| ENSMUSG00000031880 | 1.16102383 | 2.79679212 | 0.00055129 | 0.00448689 |
| ENSMUSG00000036661 | 1.16007572 | 4.92846608 | 0.00023875 | 0.00213316 |
| ENSMUSG00000024339 | 1.15993376 | 5.66228702 | 0.00021042 | 0.00190685 |
| ENSMUSG00000040462 | 1.15938025 | 6.16547392 | 0.00020242 | 0.0018468  |
| ENSMUSG00000094198 | 1.15910937 | 2.99947479 | 0.00047255 | 0.00392296 |
| ENSMUSG00000004263 | 1.15876342 | 3.16843667 | 0.00046011 | 0.00383449 |
| ENSMUSG00000048897 | 1.15871828 | 3.63965492 | 0.00037256 | 0.0031861  |
| ENSMUSG00000022265 | 1.15861063 | 3.40876983 | 0.0004046  | 0.00341183 |
| ENSMUSG00000074064 | 1.15814279 | 1.74677463 | 0.00151501 | 0.01087743 |
| ENSMUSG00000024781 | 1.15775029 | 6.17575788 | 0.00020558 | 0.00187012 |
| ENSMUSG00000003072 | 1.15581868 | 4.20849398 | 0.00031199 | 0.00273088 |
| ENSMUSG00000023809 | 1.15355941 | 2.81774232 | 0.00060622 | 0.00488963 |
| ENSMUSG00000067878 | 1.15256273 | 3.11127832 | 0.00051023 | 0.00420021 |
| ENSMUSG00000019487 | 1.15229761 | 2.77020136 | 0.00059114 | 0.00477517 |
| ENSMUSG00000041361 | 1.15076679 | 2.14614326 | 0.00115654 | 0.008566   |
| ENSMUSG00000030207 | 1.15018922 | 4.17034503 | 0.00031721 | 0.00277208 |
| ENSMUSG00000031662 | 1.14922756 | 5.03629818 | 0.00026959 | 0.00239018 |
| ENSMUSG00000030035 | 1.14919334 | 2.11980418 | 0.00108538 | 0.00809457 |
| ENSMUSG00000047810 | 1.14918365 | 4.30486615 | 0.00031575 | 0.00276158 |
| ENSMUSG00000004552 | 1.14911016 | 2.59582382 | 0.00065265 | 0.00521704 |
| ENSMUSG00000034041 | 1.14792376 | 2.92470727 | 0.00068487 | 0.00543462 |
| ENSMUSG00000028843 | 1.14745364 | 6.99264118 | 0.00022179 | 0.00199645 |
| ENSMUSG00000031842 | 1.1471406  | 1.08000199 | 0.00416308 | 0.02556755 |
| ENSMUSG00000038349 | 1.14662593 | 1.03408165 | 0.00342373 | 0.0216168  |
| ENSMUSG00000021759 | 1.14654025 | 4.89349468 | 0.00028444 | 0.00251018 |
| ENSMUSG00000021701 | 1.14625779 | 4.10939624 | 0.00033988 | 0.0029393  |
| ENSMUSG00000039168 | 1.14573989 | 4.54702478 | 0.0003036  | 0.00266618 |
| ENSMUSG00000031770 | 1.14424478 | 7.09910264 | 0.00023046 | 0.00206591 |
| ENSMUSG00000076555 | 1.14340751 | 3.7887783  | 0.0004107  | 0.00345743 |
| ENSMUSG00000056204 | 1.14277119 | 4.34613468 | 0.00034424 | 0.0029722  |
| ENSMUSG00000046731 | 1.14245041 | 1.23846206 | 0.00457035 | 0.02747307 |
| ENSMUSG00000047264 | 1.14187243 | 1.42216289 | 0.00315345 | 0.0202181  |
| ENSMUSG00000048832 | 1.14154382 | 3.14303125 | 0.00055347 | 0.00450123 |
| ENSMUSG00000040328 | 1.13999342 | 2.31993815 | 0.00099546 | 0.00751097 |
| ENSMUSG00000039621 | 1.13913359 | 5.68352142 | 0.00026942 | 0.00239018 |
| ENSMUSG00000034487 | 1.13893025 | 2.685173   | 0.00077275 | 0.00602991 |
| ENSMUSG00000076501 | 1.13852016 | 5.2962292  | 0.00028069 | 0.00247908 |
| ENSMUSG00000040618 | 1.13796677 | 4.75345723 | 0.00032628 | 0.00284217 |

|                    |            |            |            |            |
|--------------------|------------|------------|------------|------------|
| ENSMUSG00000027459 | 1.13788053 | 1.02404562 | 0.00478762 | 0.02856084 |
| ENSMUSG00000087305 | 1.13728644 | 1.84417512 | 0.00172924 | 0.01225037 |
| ENSMUSG00000032375 | 1.13715886 | 1.85281458 | 0.00185009 | 0.01294541 |
| ENSMUSG00000023951 | 1.13625756 | 3.11570159 | 0.0006448  | 0.00516219 |
| ENSMUSG00000033107 | 1.13478954 | 1.52076941 | 0.00299497 | 0.01939808 |
| ENSMUSG00000024970 | 1.13359874 | 1.67325365 | 0.00224693 | 0.01513483 |
| ENSMUSG00000076523 | 1.13322182 | 5.34206846 | 0.00029537 | 0.00259807 |
| ENSMUSG00000091649 | 1.13298116 | 5.39331982 | 0.00030134 | 0.00264841 |
| ENSMUSG00000039911 | 1.13281374 | 2.9664788  | 0.00075048 | 0.00586889 |
| ENSMUSG00000027330 | 1.1321573  | 6.34677133 | 0.00027965 | 0.00247189 |
| ENSMUSG00000030084 | 1.12988188 | 4.86513616 | 0.00034189 | 0.00295425 |
| ENSMUSG00000029919 | 1.12901251 | 6.3228273  | 0.0002907  | 0.00256122 |
| ENSMUSG00000078922 | 1.12820376 | 2.16865791 | 0.0012288  | 0.00906384 |
| ENSMUSG00000055652 | 1.12711612 | 3.51855781 | 0.00056809 | 0.00461312 |
| ENSMUSG00000001751 | 1.12532953 | 2.35738949 | 0.00123298 | 0.00908225 |
| ENSMUSG00000048612 | 1.12470879 | 5.91678045 | 0.0003109  | 0.00272359 |
| ENSMUSG00000028048 | 1.1237179  | 5.66490257 | 0.00033066 | 0.00287379 |
| ENSMUSG00000097657 | 1.12283117 | 1.00520576 | 0.00597985 | 0.03431108 |
| ENSMUSG00000045752 | 1.12185851 | 3.16873008 | 0.00074842 | 0.00586125 |
| ENSMUSG00000076526 | 1.12164434 | 3.92461823 | 0.00046189 | 0.00384633 |
| ENSMUSG00000028581 | 1.12101882 | 8.91666877 | 0.00029271 | 0.00257676 |
| ENSMUSG00000022428 | 1.12081394 | 2.37964876 | 0.00136561 | 0.00992367 |
| ENSMUSG00000022419 | 1.12048045 | 0.85723119 | 0.00469716 | 0.02810999 |
| ENSMUSG00000036120 | 1.12015456 | 3.72146687 | 0.00053516 | 0.00437537 |
| ENSMUSG00000031530 | 1.11966016 | 5.53019915 | 0.00034462 | 0.00297314 |
| ENSMUSG00000038312 | 1.11924493 | 5.38470337 | 0.00035751 | 0.00306957 |
| ENSMUSG00000029723 | 1.11807095 | 3.82622378 | 0.00054272 | 0.00442377 |
| ENSMUSG00000038181 | 1.11667453 | 4.06177966 | 0.00049454 | 0.00409609 |
| ENSMUSG00000016344 | 1.11636983 | 3.02251209 | 0.00081855 | 0.00633141 |
| ENSMUSG00000025218 | 1.11619745 | 2.48425158 | 0.00123444 | 0.00908398 |
| ENSMUSG00000096422 | 1.11563485 | 5.86028357 | 0.00035069 | 0.00301827 |
| ENSMUSG00000001942 | 1.11505667 | 3.97140953 | 0.00052414 | 0.00429511 |
| ENSMUSG00000047342 | 1.11437877 | 1.65137098 | 0.00262571 | 0.01731847 |
| ENSMUSG00000066800 | 1.11262438 | 5.07760968 | 0.00040068 | 0.00338813 |
| ENSMUSG00000030465 | 1.1124792  | 4.43446936 | 0.00046593 | 0.003877   |
| ENSMUSG00000055200 | 1.11125803 | 1.63151528 | 0.00266057 | 0.01748419 |
| ENSMUSG00000034792 | 1.11015412 | 4.29630073 | 0.00051636 | 0.00424103 |
| ENSMUSG00000031355 | 1.1088523  | 2.83813932 | 0.00094504 | 0.00717195 |
| ENSMUSG00000037204 | 1.1085917  | 1.9701738  | 0.00219037 | 0.01481867 |
| ENSMUSG00000076733 | 1.10848309 | 0.71651726 | 0.00934479 | 0.0489433  |
| ENSMUSG00000084796 | 1.10752536 | 0.66447164 | 0.01461694 | 0.06862389 |
| ENSMUSG00000094075 | 1.10673647 | 5.2001319  | 0.00042465 | 0.00355823 |
| ENSMUSG00000020178 | 1.10631914 | 2.07968838 | 0.00166665 | 0.01181669 |



|                    |            |            |            |            |
|--------------------|------------|------------|------------|------------|
| ENSMUSG00000038387 | 1.10553839 | 1.77695302 | 0.00268767 | 0.01760866 |
| ENSMUSG00000028347 | 1.10345102 | 1.62854916 | 0.0019424  | 0.01343607 |
| ENSMUSG00000042622 | 1.10249341 | 1.10123475 | 0.0061722  | 0.03522855 |
| ENSMUSG00000028062 | 1.10159954 | 2.79564562 | 0.00114178 | 0.00846832 |
| ENSMUSG00000015837 | 1.10048379 | 6.84866455 | 0.00039588 | 0.00335887 |
| ENSMUSG00000045639 | 1.10035395 | 2.55186669 | 0.00141406 | 0.01022064 |
| ENSMUSG00000024399 | 1.09993993 | 2.59073052 | 0.00134969 | 0.00984463 |
| ENSMUSG00000004846 | 1.09928216 | 3.51600686 | 0.00076851 | 0.00600118 |
| ENSMUSG00000053977 | 1.09824365 | 2.57504477 | 0.00103166 | 0.0077583  |
| ENSMUSG00000005881 | 1.09721376 | 4.88664771 | 0.00051165 | 0.00420552 |
| ENSMUSG00000003970 | 1.09639332 | 7.61507857 | 0.0004048  | 0.00341183 |
| ENSMUSG00000013707 | 1.09626073 | 2.78708425 | 0.00128362 | 0.00941028 |
| ENSMUSG00000092274 | 1.09491421 | 7.0753152  | 0.00041948 | 0.00352308 |
| ENSMUSG00000035697 | 1.09462634 | 5.92210934 | 0.00045124 | 0.00376349 |
| ENSMUSG00000022558 | 1.09254195 | 3.5408445  | 0.00081302 | 0.00629502 |
| ENSMUSG00000021665 | 1.09215901 | 6.69472294 | 0.00044089 | 0.00367997 |
| ENSMUSG00000006301 | 1.09116386 | 3.9826549  | 0.00068465 | 0.00543462 |
| ENSMUSG00000039782 | 1.09100728 | 4.05934946 | 0.00064569 | 0.00516549 |
| ENSMUSG00000025169 | 1.09086366 | 2.26393501 | 0.00189611 | 0.01319202 |
| ENSMUSG00000028362 | 1.09013965 | 4.92061573 | 0.00053833 | 0.00439465 |
| ENSMUSG00000037966 | 1.09012394 | 2.01053652 | 0.00259897 | 0.0171732  |
| ENSMUSG00000024334 | 1.08924026 | 3.72515399 | 0.00079784 | 0.00618989 |
| ENSMUSG00000096490 | 1.08613241 | 5.31000855 | 0.00052688 | 0.00431099 |
| ENSMUSG00000034902 | 1.08608976 | 5.80007222 | 0.00050468 | 0.00416409 |
| ENSMUSG00000020346 | 1.08594331 | 6.08428882 | 0.00049316 | 0.00408782 |
| ENSMUSG00000032737 | 1.08591395 | 3.21822376 | 0.00102984 | 0.00775004 |
| ENSMUSG00000018909 | 1.08459977 | 3.74325986 | 0.00081995 | 0.00633405 |
| ENSMUSG00000038486 | 1.08389683 | 2.35480849 | 0.00185226 | 0.01294541 |
| ENSMUSG00000033124 | 1.08379363 | 3.01545738 | 0.00107667 | 0.00805185 |
| ENSMUSG00000003299 | 1.08198524 | 3.62752347 | 0.00089057 | 0.00680643 |
| ENSMUSG00000024818 | 1.08181665 | 4.1935396  | 0.00070352 | 0.00554992 |
| ENSMUSG00000013858 | 1.08163297 | 4.03610766 | 0.00073603 | 0.00577265 |
| ENSMUSG00000076937 | 1.08127646 | 8.93423822 | 0.00047198 | 0.00392128 |
| ENSMUSG00000055053 | 1.08042348 | 2.13849835 | 0.00207495 | 0.01412642 |
| ENSMUSG00000030427 | 1.08005243 | 0.98805472 | 0.00668045 | 0.03748282 |
| ENSMUSG00000030852 | 1.07929289 | 1.35221117 | 0.00505724 | 0.02985072 |
| ENSMUSG00000026728 | 1.07836947 | 8.03734943 | 0.00049548 | 0.00410069 |
| ENSMUSG00000020808 | 1.07749236 | 3.31825384 | 0.00104052 | 0.00780863 |
| ENSMUSG00000019823 | 1.07667063 | 4.67357929 | 0.00066452 | 0.00529652 |
| ENSMUSG00000056938 | 1.0754669  | 2.26338593 | 0.00221932 | 0.01496755 |
| ENSMUSG00000031342 | 1.07534746 | 0.93041175 | 0.00780971 | 0.04251381 |
| ENSMUSG00000031563 | 1.07482363 | 1.92077865 | 0.00287168 | 0.0186668  |
| ENSMUSG00000041912 | 1.07410363 | 3.46056937 | 0.00100255 | 0.00755524 |

|                    |            |            |            |            |
|--------------------|------------|------------|------------|------------|
| ENSMUSG00000066363 | 1.0739575  | 4.59859583 | 0.00071021 | 0.0055864  |
| ENSMUSG00000031378 | 1.07393836 | 4.67683308 | 0.00068896 | 0.00546307 |
| ENSMUSG00000020260 | 1.07360662 | 2.79169315 | 0.00144175 | 0.01039293 |
| ENSMUSG00000037499 | 1.07272249 | 1.28054906 | 0.00537452 | 0.03146514 |
| ENSMUSG00000042613 | 1.07229104 | 5.12726119 | 0.00063713 | 0.00511219 |
| ENSMUSG00000089832 | 1.07125579 | 2.45893683 | 0.00180934 | 0.01270304 |
| ENSMUSG00000018427 | 1.07090072 | 2.57961187 | 0.0017542  | 0.01238044 |
| ENSMUSG00000041598 | 1.06975767 | 0.63366152 | 0.01164936 | 0.05783917 |
| ENSMUSG00000032641 | 1.06872795 | 1.71576251 | 0.00342196 | 0.0216168  |
| ENSMUSG00000033684 | 1.06671721 | 3.40856446 | 0.00113484 | 0.00843428 |
| ENSMUSG00000037221 | 1.06600175 | 1.84136382 | 0.00367606 | 0.02300788 |
| ENSMUSG00000095589 | 1.06542354 | 4.27157802 | 0.00082801 | 0.00638225 |
| ENSMUSG00000069792 | 1.06516579 | 1.85610599 | 0.00334974 | 0.02122417 |
| ENSMUSG00000033021 | 1.06447095 | 4.21504336 | 0.00085494 | 0.0065574  |
| ENSMUSG00000086316 | 1.06411353 | 1.69102811 | 0.00371927 | 0.02323792 |
| ENSMUSG00000056501 | 1.06384229 | 0.68535308 | 0.01093013 | 0.05501577 |
| ENSMUSG00000029598 | 1.06383874 | 4.14984468 | 0.00086943 | 0.00665906 |
| ENSMUSG00000028028 | 1.05963815 | 1.93474291 | 0.00267381 | 0.01753915 |
| ENSMUSG00000053334 | 1.05887081 | 1.93867117 | 0.00304443 | 0.01962413 |
| ENSMUSG00000043740 | 1.05875221 | 1.54047387 | 0.00513787 | 0.03021087 |
| ENSMUSG00000005125 | 1.05850783 | 1.73935897 | 0.00413597 | 0.02544341 |
| ENSMUSG00000049047 | 1.05846398 | 5.0773724  | 0.00074971 | 0.0058671  |
| ENSMUSG00000032285 | 1.05785073 | 1.9718521  | 0.0023255  | 0.01561533 |
| ENSMUSG00000094420 | 1.05782254 | 7.33898658 | 0.00064063 | 0.00513644 |
| ENSMUSG00000040483 | 1.05775033 | 5.76094384 | 0.0006962  | 0.00550426 |
| ENSMUSG00000059810 | 1.05769496 | 1.80530694 | 0.00349058 | 0.02197458 |
| ENSMUSG00000034731 | 1.05745287 | 2.71425116 | 0.00151247 | 0.0108664  |
| ENSMUSG00000018509 | 1.05735044 | 1.00586238 | 0.0081366  | 0.04382277 |
| ENSMUSG00000036199 | 1.05573124 | 3.62730496 | 0.00116938 | 0.00865518 |
| ENSMUSG00000034748 | 1.05413723 | 1.11802324 | 0.00744598 | 0.04096806 |
| ENSMUSG00000032180 | 1.05391577 | 2.66245711 | 0.00187152 | 0.01305467 |
| ENSMUSG00000026797 | 1.05122619 | 2.48094987 | 0.00236209 | 0.0158118  |
| ENSMUSG00000038967 | 1.05057423 | 1.07244452 | 0.01012621 | 0.05207238 |
| ENSMUSG00000079419 | 1.04909621 | 7.56187216 | 0.00070514 | 0.00555457 |
| ENSMUSG00000039137 | 1.04850924 | 1.48292269 | 0.00543304 | 0.0317045  |
| ENSMUSG00000037849 | 1.04849471 | 6.51777578 | 0.00073563 | 0.00577265 |
| ENSMUSG00000071042 | 1.04747999 | 8.72744296 | 0.0007016  | 0.00553883 |
| ENSMUSG00000076563 | 1.04700905 | 5.67523938 | 0.00079586 | 0.0061834  |
| ENSMUSG00000028952 | 1.04681312 | 1.9788046  | 0.00338523 | 0.02142393 |
| ENSMUSG00000024856 | 1.04675969 | 4.10137145 | 0.00108406 | 0.00809028 |
| ENSMUSG00000069743 | 1.04625769 | 1.27592276 | 0.00580944 | 0.03350212 |
| ENSMUSG00000006589 | 1.04551354 | 4.02705183 | 0.00113569 | 0.00843475 |
| ENSMUSG00000005057 | 1.04463421 | 0.75925875 | 0.01762876 | 0.07927794 |

|                    |            |            |            |            |
|--------------------|------------|------------|------------|------------|
| ENSMUSG00000010045 | 1.04380985 | 2.43554545 | 0.00264747 | 0.01741932 |
| ENSMUSG00000028634 | 1.04353342 | 6.47731224 | 0.00077974 | 0.00608004 |
| ENSMUSG00000026641 | 1.04248208 | 3.99657423 | 0.00115458 | 0.00855742 |
| ENSMUSG00000039891 | 1.04188895 | 2.76759611 | 0.00203754 | 0.01393015 |
| ENSMUSG00000022272 | 1.03967289 | 1.96806491 | 0.00357684 | 0.02242593 |
| ENSMUSG00000026209 | 1.03763183 | 3.87183232 | 0.00128953 | 0.00944079 |
| ENSMUSG00000020484 | 1.03759429 | 9.30853137 | 0.00078234 | 0.00609591 |
| ENSMUSG00000011831 | 1.03755022 | 4.63227395 | 0.00104164 | 0.00781155 |
| ENSMUSG00000076556 | 1.03728012 | 4.89810296 | 0.00099598 | 0.00751097 |
| ENSMUSG00000029923 | 1.03482574 | 2.58060429 | 0.0026805  | 0.01757231 |
| ENSMUSG00000056665 | 1.0345178  | 2.13360294 | 0.00382513 | 0.02381649 |
| ENSMUSG00000022614 | 1.03443085 | 3.89265131 | 0.00136163 | 0.00990234 |
| ENSMUSG00000032353 | 1.03440743 | 4.60258475 | 0.00110087 | 0.00819873 |
| ENSMUSG00000008090 | 1.03387772 | 0.76250714 | 0.01275009 | 0.06199803 |
| ENSMUSG00000022750 | 1.03253829 | 3.38602652 | 0.00163083 | 0.01160848 |
| ENSMUSG00000023345 | 1.03205006 | 3.07259041 | 0.00191906 | 0.01330877 |
| ENSMUSG00000038886 | 1.0303624  | 5.52975835 | 0.00097854 | 0.00741048 |
| ENSMUSG00000089672 | 1.02974388 | 5.07288611 | 0.00103775 | 0.00779326 |
| ENSMUSG00000073430 | 1.02934315 | 1.48657023 | 0.00499776 | 0.02958061 |
| ENSMUSG00000030055 | 1.02855907 | 5.64937648 | 0.00098949 | 0.00748067 |
| ENSMUSG00000003882 | 1.02814527 | 2.01863203 | 0.00288895 | 0.01875646 |
| ENSMUSG00000035372 | 1.02766998 | 2.2770352  | 0.00300127 | 0.0194272  |
| ENSMUSG00000027163 | 1.02605449 | 2.61918317 | 0.0024335  | 0.01623936 |
| ENSMUSG00000042814 | 1.02496099 | 1.19726748 | 0.00817015 | 0.04396551 |
| ENSMUSG00000016256 | 1.02413981 | 7.91751124 | 0.00092981 | 0.00708624 |
| ENSMUSG00000060803 | 1.02320141 | 5.14507261 | 0.00111016 | 0.00826221 |
| ENSMUSG00000027805 | 1.02319173 | 3.08072453 | 0.0020318  | 0.01391173 |
| ENSMUSG00000047037 | 1.02310212 | 1.33223043 | 0.00662739 | 0.03730157 |
| ENSMUSG00000026657 | 1.02277352 | 1.03503472 | 0.01038692 | 0.05308651 |
| ENSMUSG00000044199 | 1.02174661 | 3.38984555 | 0.00180367 | 0.0126715  |
| ENSMUSG00000016028 | 1.02139142 | 1.25420181 | 0.00924389 | 0.04860367 |
| ENSMUSG00000085795 | 1.02105011 | 2.6185699  | 0.00252878 | 0.01680243 |
| ENSMUSG00000029994 | 1.02067606 | 4.5055481  | 0.00125386 | 0.00921093 |
| ENSMUSG00000027890 | 1.0205434  | 3.25414901 | 0.00177161 | 0.01248692 |
| ENSMUSG00000097908 | 1.01828159 | 3.80269819 | 0.001603   | 0.01141852 |
| ENSMUSG00000050002 | 1.01710147 | 4.088436   | 0.00147478 | 0.01061682 |
| ENSMUSG00000026347 | 1.01615928 | 1.8861253  | 0.0048361  | 0.02876586 |
| ENSMUSG00000002014 | 1.01557964 | 6.40597385 | 0.00108018 | 0.00806697 |
| ENSMUSG00000020235 | 1.01542842 | 3.97156457 | 0.00155437 | 0.01111531 |
| ENSMUSG00000032383 | 1.01464042 | 7.9381614  | 0.00103545 | 0.00778135 |
| ENSMUSG00000044456 | 1.01409426 | 3.44183482 | 0.00191344 | 0.01327832 |
| ENSMUSG00000060166 | 1.0126732  | 2.35455084 | 0.00303646 | 0.01959614 |
| ENSMUSG00000029094 | 1.01237989 | 1.70616602 | 0.00598889 | 0.03433504 |

|                    |            |            |            |            |
|--------------------|------------|------------|------------|------------|
| ENSMUSG00000024160 | 1.01226141 | 2.89988915 | 0.00248942 | 0.01656243 |
| ENSMUSG00000066621 | 1.01096323 | 3.1127061  | 0.00233848 | 0.0156732  |
| ENSMUSG00000024835 | 1.01036788 | 5.84666727 | 0.00119499 | 0.00883263 |
| ENSMUSG00000021880 | 1.00733718 | 4.86029536 | 0.00138972 | 0.01007849 |
| ENSMUSG00000030761 | 1.00732728 | 3.99377947 | 0.00165616 | 0.01175774 |
| ENSMUSG00000094322 | 1.00715639 | 3.34021377 | 0.0020253  | 0.01389054 |
| ENSMUSG00000041199 | 1.0065594  | 1.09297942 | 0.01012621 | 0.05207238 |
| ENSMUSG00000033313 | 1.00558421 | 1.25652359 | 0.01085117 | 0.05473294 |
| ENSMUSG00000094749 | 1.00544823 | 4.74797306 | 0.00142188 | 0.01027033 |
| ENSMUSG00000021213 | 1.00543505 | 1.3255552  | 0.00908472 | 0.04783673 |
| ENSMUSG00000027956 | 1.00515564 | 0.73730644 | 0.01762876 | 0.07927794 |
| ENSMUSG00000002393 | 1.00487113 | 0.96567549 | 0.01252834 | 0.06118912 |
| ENSMUSG00000015092 | 1.00436892 | 3.76172793 | 0.00185708 | 0.01297071 |
| ENSMUSG00000051615 | 1.00408562 | 2.920259   | 0.00254495 | 0.01688904 |
| ENSMUSG00000057411 | 1.00362976 | 1.45086887 | 0.00709495 | 0.03934834 |
| ENSMUSG00000095007 | 1.00347856 | 4.50697948 | 0.0015403  | 0.01103395 |
| ENSMUSG00000010358 | 1.00301643 | 5.58367723 | 0.00131665 | 0.00961973 |
| ENSMUSG00000025503 | 1.001801   | 5.51604687 | 0.00135017 | 0.00984463 |
| ENSMUSG00000074811 | 1.00091871 | 1.5386848  | 0.00813781 | 0.04382277 |
| ENSMUSG00000074283 | 1.00079467 | 1.47863483 | 0.00793119 | 0.04303299 |
| ENSMUSG00000037326 | 1.00070441 | 1.56628563 | 0.007995   | 0.04328217 |
| ENSMUSG00000029428 | 0.99885958 | 2.11320156 | 0.00478839 | 0.02856084 |
| ENSMUSG00000018932 | 0.99707574 | 5.94338914 | 0.00135894 | 0.00990186 |
| ENSMUSG00000026782 | 0.99682242 | 4.86531273 | 0.00154091 | 0.01103395 |
| ENSMUSG00000054499 | 0.99621681 | 1.81736122 | 0.0058529  | 0.03369869 |
| ENSMUSG00000061758 | 0.99490254 | 3.80796503 | 0.00208837 | 0.01420879 |
| ENSMUSG00000038593 | 0.99433445 | 1.5212713  | 0.00880094 | 0.04668437 |
| ENSMUSG00000020167 | 0.99312479 | 4.34157386 | 0.00179143 | 0.01260656 |
| ENSMUSG00000095335 | 0.99295911 | 3.8577195  | 0.00205091 | 0.01400695 |
| ENSMUSG00000029469 | 0.99294448 | 1.28530767 | 0.00885343 | 0.04691667 |
| ENSMUSG00000061981 | 0.99280763 | 2.92616428 | 0.00289775 | 0.01880222 |
| ENSMUSG00000059674 | 0.9913754  | 0.55079639 | 0.02899443 | 0.11541077 |
| ENSMUSG00000044156 | 0.99114418 | 2.81047745 | 0.00298875 | 0.01936942 |
| ENSMUSG00000056116 | 0.99076555 | 6.91226868 | 0.00138581 | 0.01005694 |
| ENSMUSG00000027082 | 0.99066306 | 2.97777152 | 0.0030958  | 0.01991949 |
| ENSMUSG00000024812 | 0.99054343 | 4.50692003 | 0.00177689 | 0.01251597 |
| ENSMUSG00000045932 | 0.99042043 | 6.34187129 | 0.00142555 | 0.01028995 |
| ENSMUSG00000076550 | 0.99039356 | 3.02660507 | 0.00266385 | 0.01749507 |
| ENSMUSG00000003233 | 0.98971422 | 2.19747167 | 0.00522808 | 0.03070787 |
| ENSMUSG00000051335 | 0.98823367 | 1.70764262 | 0.00680886 | 0.03812398 |
| ENSMUSG00000039716 | 0.98814956 | 0.83577994 | 0.01774976 | 0.07958366 |
| ENSMUSG00000036676 | 0.98727177 | 3.69366584 | 0.00218036 | 0.01476021 |
| ENSMUSG00000061111 | 0.98703198 | 2.75441315 | 0.00369966 | 0.02314218 |

|                    |            |            |            |            |
|--------------------|------------|------------|------------|------------|
| ENSMUSG00000062157 | 0.98530523 | 1.27804036 | 0.01060028 | 0.05379453 |
| ENSMUSG00000073176 | 0.9851119  | 1.24488489 | 0.01085117 | 0.05473294 |
| ENSMUSG00000033685 | 0.98436614 | 7.94858438 | 0.00144739 | 0.01042662 |
| ENSMUSG00000043372 | 0.98405734 | 0.97811996 | 0.01503091 | 0.07010957 |
| ENSMUSG00000003345 | 0.98208331 | 3.10694704 | 0.00305263 | 0.01965349 |
| ENSMUSG00000028392 | 0.9808373  | 0.75901931 | 0.01762876 | 0.07927794 |
| ENSMUSG00000021136 | 0.98067365 | 1.1741323  | 0.01282556 | 0.06225468 |
| ENSMUSG00000022565 | 0.98051599 | 4.06855213 | 0.00207102 | 0.01410859 |
| ENSMUSG00000034744 | 0.98045538 | 2.99867849 | 0.00325201 | 0.02072673 |
| ENSMUSG00000003518 | 0.97960103 | 4.43161921 | 0.00202795 | 0.01389418 |
| ENSMUSG00000034471 | 0.9776761  | 1.87827197 | 0.00702697 | 0.03904112 |
| ENSMUSG00000026955 | 0.97456494 | 3.17278674 | 0.00318609 | 0.02039097 |
| ENSMUSG00000036106 | 0.97438995 | 3.94640693 | 0.00239943 | 0.01605179 |
| ENSMUSG00000037325 | 0.97391268 | 3.01208409 | 0.00331764 | 0.02109784 |
| ENSMUSG00000017747 | 0.97335149 | 2.1855975  | 0.00556672 | 0.03234455 |
| ENSMUSG00000035890 | 0.9733065  | 2.64203949 | 0.00418944 | 0.02569904 |
| ENSMUSG00000029998 | 0.97224418 | 5.15206568 | 0.00192293 | 0.01332702 |
| ENSMUSG00000043311 | 0.97193352 | 2.76572079 | 0.00394429 | 0.02444554 |
| ENSMUSG00000070284 | 0.97165811 | 4.76195293 | 0.00205391 | 0.01401861 |
| ENSMUSG00000044309 | 0.97158098 | 3.54319383 | 0.00270494 | 0.01770027 |
| ENSMUSG00000022620 | 0.97148235 | 2.69831618 | 0.00428952 | 0.02622344 |
| ENSMUSG00000039910 | 0.97146074 | 5.55987461 | 0.00185138 | 0.01294541 |
| ENSMUSG00000020186 | 0.97145711 | 2.33345056 | 0.00556525 | 0.03234455 |
| ENSMUSG00000045594 | 0.97123909 | 5.12858825 | 0.00195985 | 0.01353076 |
| ENSMUSG00000082292 | 0.96970179 | 5.39150114 | 0.00190773 | 0.01325575 |
| ENSMUSG00000056737 | 0.96938669 | 6.14870215 | 0.0018164  | 0.01274433 |
| ENSMUSG00000028980 | 0.96932227 | 3.77967189 | 0.00264741 | 0.01741932 |
| ENSMUSG00000070699 | 0.96916699 | 2.2231434  | 0.00540599 | 0.03158599 |
| ENSMUSG00000040033 | 0.96846462 | 7.63699868 | 0.00173009 | 0.01225037 |
| ENSMUSG00000031303 | 0.96823673 | 2.80720278 | 0.00394007 | 0.02443339 |
| ENSMUSG00000002820 | 0.96786117 | 2.55700544 | 0.00428633 | 0.02621884 |
| ENSMUSG00000001082 | 0.967114   | 3.28745477 | 0.00313936 | 0.02016346 |
| ENSMUSG00000024862 | 0.96665053 | 1.89370887 | 0.00738488 | 0.04071049 |
| ENSMUSG00000025792 | 0.96655078 | 2.31418197 | 0.00523407 | 0.03072629 |
| ENSMUSG00000024772 | 0.96653551 | 5.88819306 | 0.00191207 | 0.01327735 |
| ENSMUSG00000041936 | 0.96634384 | 2.43694951 | 0.00510975 | 0.03009479 |
| ENSMUSG00000036686 | 0.96612676 | 2.67660443 | 0.00454363 | 0.02732763 |
| ENSMUSG00000032648 | 0.96605355 | 1.3247389  | 0.01013055 | 0.05207238 |
| ENSMUSG00000056498 | 0.96554005 | 6.58422168 | 0.00184722 | 0.01293536 |
| ENSMUSG00000032842 | 0.96496938 | 1.20810821 | 0.01753252 | 0.07900988 |
| ENSMUSG00000021185 | 0.96467345 | 5.69388258 | 0.00197315 | 0.01359646 |
| ENSMUSG00000034858 | 0.96411078 | 5.14405619 | 0.00209223 | 0.01422611 |
| ENSMUSG00000028466 | 0.96409757 | 4.40132817 | 0.00243964 | 0.0162703  |

|                    |            |            |            |            |
|--------------------|------------|------------|------------|------------|
| ENSMUSG0000001911  | 0.96409639 | 1.71974786 | 0.00772001 | 0.04211054 |
| ENSMUSG00000053559 | 0.96388411 | 2.02833176 | 0.0064112  | 0.03627408 |
| ENSMUSG00000039886 | 0.96378609 | 2.46871136 | 0.00477212 | 0.0284953  |
| ENSMUSG00000032596 | 0.96311146 | 6.14022136 | 0.00193576 | 0.01340735 |
| ENSMUSG00000071074 | 0.96206168 | 3.41373131 | 0.00319806 | 0.0204433  |
| ENSMUSG00000076522 | 0.95933916 | 6.10397737 | 0.00200916 | 0.0138005  |
| ENSMUSG00000066357 | 0.9583011  | 5.43453842 | 0.00217388 | 0.01472556 |
| ENSMUSG00000022853 | 0.95690769 | 3.38611703 | 0.00332858 | 0.0211398  |
| ENSMUSG00000028795 | 0.95627608 | 2.39658116 | 0.00508363 | 0.02997621 |
| ENSMUSG00000095204 | 0.95493784 | 2.51263408 | 0.0056638  | 0.03285553 |
| ENSMUSG00000040627 | 0.95458446 | 6.81472289 | 0.00206584 | 0.0140822  |
| ENSMUSG00000033128 | 0.95453756 | 3.6247801  | 0.00332668 | 0.0211398  |
| ENSMUSG00000065037 | 0.95406705 | 1.28369643 | 0.01085117 | 0.05473294 |
| ENSMUSG00000014856 | 0.95391295 | 3.6126148  | 0.00321389 | 0.02052021 |
| ENSMUSG00000037410 | 0.95290813 | 2.36383072 | 0.00618151 | 0.03523332 |
| ENSMUSG00000031708 | 0.95268998 | 5.39287552 | 0.00233197 | 0.01564899 |
| ENSMUSG00000018008 | 0.95214755 | 6.30912729 | 0.00216669 | 0.0146953  |
| ENSMUSG00000023991 | 0.95212005 | 2.64221174 | 0.00485389 | 0.02885575 |
| ENSMUSG00000020571 | 0.95120762 | 9.46863521 | 0.00203837 | 0.01393015 |
| ENSMUSG00000032175 | 0.95108104 | 5.33857185 | 0.0023499  | 0.01573997 |
| ENSMUSG00000019082 | 0.95033129 | 3.85986222 | 0.00319718 | 0.0204433  |
| ENSMUSG00000058709 | 0.95003791 | 3.32292818 | 0.00374016 | 0.0233306  |
| ENSMUSG00000017756 | 0.94972348 | 3.47690642 | 0.00351312 | 0.0220649  |
| ENSMUSG00000026197 | 0.94875261 | 2.20681187 | 0.00729966 | 0.0402874  |
| ENSMUSG00000029007 | 0.94755581 | 3.90325769 | 0.00310842 | 0.0199888  |
| ENSMUSG00000029364 | 0.94739571 | 4.58383149 | 0.00273322 | 0.01786365 |
| ENSMUSG00000055538 | 0.94623893 | 3.07508428 | 0.00426706 | 0.02612604 |
| ENSMUSG00000019822 | 0.94574985 | 2.52624643 | 0.0060149  | 0.03446584 |
| ENSMUSG00000063455 | 0.94512653 | 2.33840586 | 0.00636224 | 0.03603489 |
| ENSMUSG00000067212 | 0.94413265 | 6.45675706 | 0.0023344  | 0.01565555 |
| ENSMUSG00000001542 | 0.94231088 | 7.62402592 | 0.00228694 | 0.01538512 |
| ENSMUSG00000007872 | 0.94211011 | 1.7859846  | 0.01049804 | 0.05342656 |
| ENSMUSG00000076532 | 0.94161346 | 4.81969296 | 0.00275625 | 0.01799239 |
| ENSMUSG00000004934 | 0.94071014 | 3.17468285 | 0.00430441 | 0.02626978 |
| ENSMUSG00000071715 | 0.94066399 | 5.18617283 | 0.0026913  | 0.01762171 |
| ENSMUSG00000020225 | 0.94032526 | 5.48711681 | 0.00258647 | 0.01713301 |
| ENSMUSG00000047238 | 0.94027646 | 1.41545458 | 0.01143507 | 0.05710074 |
| ENSMUSG00000089942 | 0.93928203 | 1.86239011 | 0.00892165 | 0.04718542 |
| ENSMUSG00000093861 | 0.93848986 | 6.83383942 | 0.00242287 | 0.01617844 |
| ENSMUSG00000029638 | 0.93847655 | 1.54110306 | 0.0121661  | 0.05985093 |
| ENSMUSG00000030539 | 0.93646592 | 5.41611849 | 0.00275025 | 0.01796407 |
| ENSMUSG00000037370 | 0.93629131 | 4.70956692 | 0.00296594 | 0.01923316 |
| ENSMUSG00000035206 | 0.9360642  | 1.47048042 | 0.01359252 | 0.06483047 |

|                    |            |            |            |            |
|--------------------|------------|------------|------------|------------|
| ENSMUSG00000028850 | 0.93541451 | 1.52676583 | 0.01270207 | 0.0618416  |
| ENSMUSG00000063439 | 0.93384042 | 1.13825284 | 0.01802521 | 0.08045692 |
| ENSMUSG00000024942 | 0.93300524 | 4.89630323 | 0.00304015 | 0.01960824 |
| ENSMUSG00000094319 | 0.93288076 | 0.94015225 | 0.01438199 | 0.06775894 |
| ENSMUSG00000029103 | 0.93242194 | 4.93883804 | 0.00301239 | 0.01947579 |
| ENSMUSG00000032265 | 0.9319391  | 4.02359605 | 0.00353306 | 0.02216435 |
| ENSMUSG00000032657 | 0.9310012  | 1.30301138 | 0.01915124 | 0.08471164 |
| ENSMUSG00000024773 | 0.93032182 | 3.3708744  | 0.00447867 | 0.02702847 |
| ENSMUSG00000037606 | 0.92964653 | 3.32671053 | 0.0044205  | 0.02676625 |
| ENSMUSG00000031286 | 0.92955822 | 1.41080245 | 0.01314947 | 0.06333357 |
| ENSMUSG00000033060 | 0.92889461 | 4.35394708 | 0.0034936  | 0.02198075 |
| ENSMUSG00000075010 | 0.92860796 | 5.81632272 | 0.00285725 | 0.01859542 |
| ENSMUSG00000096074 | 0.92837113 | 1.20121994 | 0.01282556 | 0.06225468 |
| ENSMUSG00000020941 | 0.92827756 | 3.60320817 | 0.00439222 | 0.02668613 |
| ENSMUSG00000006057 | 0.92654362 | 5.13702075 | 0.00314119 | 0.02016346 |
| ENSMUSG00000030653 | 0.92626741 | 5.33580348 | 0.00304891 | 0.01964127 |
| ENSMUSG00000031813 | 0.92617299 | 2.76804468 | 0.00618961 | 0.03526083 |
| ENSMUSG00000025076 | 0.92428454 | 4.13056916 | 0.0037406  | 0.0233306  |
| ENSMUSG00000001794 | 0.92386686 | 6.6297616  | 0.00286241 | 0.01861775 |
| ENSMUSG00000010110 | 0.9234817  | 5.82891084 | 0.00300311 | 0.01942743 |
| ENSMUSG00000038217 | 0.92320531 | 2.16466405 | 0.00796621 | 0.04314799 |
| ENSMUSG00000006519 | 0.92219921 | 4.94228644 | 0.00334972 | 0.02122417 |
| ENSMUSG00000056666 | 0.9214314  | 2.25188253 | 0.00832662 | 0.04456291 |
| ENSMUSG00000071547 | 0.92063181 | 2.70981602 | 0.0069767  | 0.03884187 |
| ENSMUSG00000029135 | 0.92048612 | 1.42514163 | 0.01053531 | 0.05358235 |
| ENSMUSG00000086784 | 0.91994235 | 2.15110886 | 0.00896014 | 0.04734253 |
| ENSMUSG00000063802 | 0.91984066 | 2.05263377 | 0.00959946 | 0.05005831 |
| ENSMUSG00000067336 | 0.91947082 | 3.08857343 | 0.00512237 | 0.03013616 |
| ENSMUSG00000030680 | 0.91916162 | 1.72893396 | 0.01054076 | 0.05358235 |
| ENSMUSG00000095737 | 0.91890583 | 2.20805309 | 0.00759548 | 0.0416419  |
| ENSMUSG00000074272 | 0.91856893 | 4.91973281 | 0.00348158 | 0.02193072 |
| ENSMUSG00000006517 | 0.91779298 | 3.04510494 | 0.00568577 | 0.03294753 |
| ENSMUSG00000038351 | 0.91611561 | 1.52085164 | 0.01340761 | 0.06409028 |
| ENSMUSG00000037344 | 0.91594813 | 2.07395214 | 0.01026684 | 0.05262486 |
| ENSMUSG00000093894 | 0.914779   | 4.18830023 | 0.00395207 | 0.02447967 |
| ENSMUSG00000014599 | 0.91426927 | 2.96001432 | 0.00578201 | 0.03342934 |
| ENSMUSG00000017697 | 0.91409253 | 4.02940383 | 0.00435287 | 0.02652052 |
| ENSMUSG00000002105 | 0.91374922 | 2.07027072 | 0.00986027 | 0.05104806 |
| ENSMUSG00000024357 | 0.91327729 | 3.98800925 | 0.00430169 | 0.02626806 |
| ENSMUSG00000067071 | 0.91279912 | 2.11796759 | 0.00932532 | 0.04888877 |
| ENSMUSG00000031988 | 0.91198587 | 3.91737945 | 0.00441569 | 0.02676422 |
| ENSMUSG00000020231 | 0.91188016 | 3.03047065 | 0.00558101 | 0.03241011 |
| ENSMUSG00000021306 | 0.91128983 | 3.54592627 | 0.00487421 | 0.02896061 |

|                    |            |            |            |            |
|--------------------|------------|------------|------------|------------|
| ENSMUSG00000018599 | 0.91118552 | 2.31394606 | 0.00928883 | 0.04876863 |
| ENSMUSG00000032855 | 0.91070924 | 4.26082659 | 0.00409635 | 0.02522847 |
| ENSMUSG00000036390 | 0.91044403 | 2.35385592 | 0.00808395 | 0.043676   |
| ENSMUSG00000060671 | 0.91011076 | 7.04812212 | 0.00324883 | 0.02071872 |
| ENSMUSG00000020806 | 0.90995661 | 2.77532033 | 0.00655212 | 0.03696679 |
| ENSMUSG00000042675 | 0.90925694 | 3.13317701 | 0.00579802 | 0.0334721  |
| ENSMUSG00000035517 | 0.90893271 | 4.61866773 | 0.00392822 | 0.02437395 |
| ENSMUSG00000022474 | 0.90872741 | 4.01510428 | 0.00461315 | 0.02771487 |
| ENSMUSG00000028057 | 0.9086372  | 4.20707086 | 0.00426874 | 0.02612604 |
| ENSMUSG00000024036 | 0.90852566 | 1.85022921 | 0.01219868 | 0.05988347 |
| ENSMUSG00000016194 | 0.90832361 | 2.54592492 | 0.00715212 | 0.03955308 |
| ENSMUSG00000037846 | 0.90765931 | 0.81131513 | 0.02220338 | 0.09497868 |
| ENSMUSG00000037089 | 0.90725127 | 4.07162675 | 0.0046561  | 0.0278952  |
| ENSMUSG00000034108 | 0.90628533 | 2.37486591 | 0.00906896 | 0.04782378 |
| ENSMUSG00000026102 | 0.90508181 | 4.91480505 | 0.00399153 | 0.02465332 |
| ENSMUSG00000021614 | 0.90468706 | 1.46877065 | 0.01228427 | 0.06023105 |
| ENSMUSG00000031517 | 0.9043223  | 3.63369945 | 0.00537097 | 0.03146147 |
| ENSMUSG00000008384 | 0.90423495 | 1.80940705 | 0.01434894 | 0.06767191 |
| ENSMUSG00000049686 | 0.90404928 | 1.44961644 | 0.01957516 | 0.08614365 |
| ENSMUSG00000051768 | 0.90402146 | 4.55598071 | 0.00422109 | 0.02586378 |
| ENSMUSG00000053644 | 0.9038021  | 4.18927647 | 0.00451481 | 0.02721504 |
| ENSMUSG00000014867 | 0.90376914 | 7.9318281  | 0.00340743 | 0.02153908 |
| ENSMUSG00000078921 | 0.90301271 | 4.18504245 | 0.00446183 | 0.02697105 |
| ENSMUSG00000031441 | 0.90190464 | 3.96017279 | 0.00475848 | 0.02842959 |
| ENSMUSG00000022174 | 0.90156701 | 5.36954288 | 0.00389856 | 0.02421777 |
| ENSMUSG00000005089 | 0.90133118 | 3.38189465 | 0.00567653 | 0.03291168 |
| ENSMUSG00000024299 | 0.8983471  | 3.22980445 | 0.00645226 | 0.03646814 |
| ENSMUSG00000030269 | 0.89777247 | 6.95178072 | 0.00371007 | 0.02319383 |
| ENSMUSG00000028756 | 0.89738963 | 2.87422696 | 0.00714616 | 0.03954036 |
| ENSMUSG00000041649 | 0.89738683 | 3.47645231 | 0.00576711 | 0.03336507 |
| ENSMUSG00000030541 | 0.89636986 | 4.40226508 | 0.0047477  | 0.02838094 |
| ENSMUSG00000037419 | 0.89627372 | 3.99063077 | 0.00492122 | 0.0292077  |
| ENSMUSG00000030120 | 0.89584061 | 4.79701817 | 0.0043968  | 0.02668613 |
| ENSMUSG00000036555 | 0.89533009 | 2.83504358 | 0.00698688 | 0.03887852 |
| ENSMUSG00000025736 | 0.895225   | 3.3151031  | 0.00635761 | 0.03602756 |
| ENSMUSG00000032299 | 0.89480468 | 3.44077485 | 0.00587137 | 0.033787   |
| ENSMUSG00000025324 | 0.89474174 | 5.36693893 | 0.0041732  | 0.02561399 |
| ENSMUSG00000018931 | 0.89395217 | 3.62324845 | 0.00554588 | 0.03229308 |
| ENSMUSG00000024960 | 0.89314152 | 2.99150986 | 0.00709217 | 0.03934834 |
| ENSMUSG00000041773 | 0.89279485 | 3.97330098 | 0.00522618 | 0.03070787 |
| ENSMUSG00000061306 | 0.89253087 | 5.17941115 | 0.00434621 | 0.02649494 |
| ENSMUSG00000070327 | 0.89223382 | 9.45904282 | 0.00377011 | 0.02348748 |
| ENSMUSG00000034659 | 0.89192035 | 4.32537377 | 0.00503297 | 0.02974005 |



|                    |            |            |            |            |
|--------------------|------------|------------|------------|------------|
| ENSMUSG00000046432 | 0.89191726 | 4.57879197 | 0.00482081 | 0.02869282 |
| ENSMUSG00000030930 | 0.89174611 | 3.69806111 | 0.00576003 | 0.03334203 |
| ENSMUSG00000033589 | 0.89136197 | 4.77168622 | 0.00465298 | 0.02789201 |
| ENSMUSG00000091549 | 0.88911162 | 5.53220922 | 0.00431829 | 0.02633959 |
| ENSMUSG00000020766 | 0.88909796 | 2.68753957 | 0.00854632 | 0.04546795 |
| ENSMUSG00000033033 | 0.88843652 | 1.83540031 | 0.01533057 | 0.07104633 |
| ENSMUSG00000039745 | 0.88842738 | 4.0519157  | 0.00547144 | 0.03187684 |
| ENSMUSG00000025931 | 0.88810744 | 2.08551481 | 0.01264455 | 0.06164504 |
| ENSMUSG00000009828 | 0.88745673 | 2.83899098 | 0.00761819 | 0.04170281 |
| ENSMUSG00000038213 | 0.88671141 | 5.06354349 | 0.00464933 | 0.02788565 |
| ENSMUSG00000033355 | 0.88641659 | 5.30417593 | 0.00447885 | 0.02702847 |
| ENSMUSG00000038079 | 0.88635604 | 2.39314009 | 0.00847634 | 0.04516248 |
| ENSMUSG00000027953 | 0.88634074 | 4.22067601 | 0.00540687 | 0.03158599 |
| ENSMUSG00000040345 | 0.88633014 | 4.08425535 | 0.00546282 | 0.03184383 |
| ENSMUSG00000019302 | 0.88591018 | 7.04758131 | 0.00415996 | 0.02556755 |
| ENSMUSG00000003452 | 0.88502009 | 3.49635055 | 0.00603023 | 0.03453533 |
| ENSMUSG00000032392 | 0.88501607 | 0.99548226 | 0.03229138 | 0.12537558 |
| ENSMUSG00000020100 | 0.88462493 | 5.87557325 | 0.00441745 | 0.02676422 |
| ENSMUSG00000028967 | 0.88408445 | 2.37990229 | 0.0104796  | 0.0533579  |
| ENSMUSG00000024201 | 0.88322613 | 3.0431534  | 0.00730478 | 0.04029397 |
| ENSMUSG00000063457 | 0.88321215 | 6.41590838 | 0.00439737 | 0.02668613 |
| ENSMUSG00000018574 | 0.88279095 | 5.85513701 | 0.00452985 | 0.02726001 |
| ENSMUSG00000036473 | 0.88276006 | 3.79279853 | 0.00583001 | 0.03358486 |
| ENSMUSG00000040511 | 0.88269017 | 4.82111029 | 0.00498364 | 0.02951323 |
| ENSMUSG00000024870 | 0.88254925 | 5.12549431 | 0.00482116 | 0.02869282 |
| ENSMUSG00000016496 | 0.88140623 | 6.39020377 | 0.00443902 | 0.02684822 |
| ENSMUSG00000015335 | 0.88119285 | 1.81396468 | 0.0159457  | 0.07339242 |
| ENSMUSG00000059534 | 0.88101999 | 3.5645486  | 0.0068915  | 0.03846398 |
| ENSMUSG00000055805 | 0.88056935 | 7.07075743 | 0.00438449 | 0.026668   |
| ENSMUSG00000035559 | 0.8804042  | 2.48319014 | 0.01005904 | 0.05182832 |
| ENSMUSG00000031387 | 0.88026614 | 3.85300996 | 0.00616524 | 0.035215   |
| ENSMUSG00000025509 | 0.87981995 | 3.79038002 | 0.00626909 | 0.03560629 |
| ENSMUSG00000046157 | 0.87945796 | 6.0687354  | 0.00463542 | 0.02781769 |
| ENSMUSG00000027035 | 0.87858127 | 4.16890959 | 0.00582    | 0.03354509 |
| ENSMUSG00000009894 | 0.87788349 | 3.6232425  | 0.00681899 | 0.03814108 |
| ENSMUSG00000045867 | 0.87778035 | 2.00964434 | 0.01416227 | 0.06692635 |
| ENSMUSG00000024012 | 0.87766493 | 5.14780202 | 0.00508406 | 0.02997621 |
| ENSMUSG00000020818 | 0.87679604 | 4.26537882 | 0.00579124 | 0.03345085 |
| ENSMUSG00000028833 | 0.87600163 | 3.30579935 | 0.00756764 | 0.04155265 |
| ENSMUSG00000059278 | 0.87552257 | 2.52605332 | 0.01033759 | 0.05289324 |
| ENSMUSG00000071537 | 0.87529933 | 0.93905067 | 0.03496873 | 0.13268407 |
| ENSMUSG00000035692 | 0.87509274 | 5.39139807 | 0.00504223 | 0.02977845 |
| ENSMUSG00000064254 | 0.87430748 | 2.76058087 | 0.01010852 | 0.05203357 |

|                    |            |            |            |            |
|--------------------|------------|------------|------------|------------|
| ENSMUSG00000038534 | 0.87363271 | 3.05097353 | 0.00829034 | 0.04445701 |
| ENSMUSG00000052087 | 0.87265914 | 2.63655822 | 0.01003727 | 0.0517409  |
| ENSMUSG00000031706 | 0.87247263 | 2.10193204 | 0.01456542 | 0.06847145 |
| ENSMUSG00000025158 | 0.87143949 | 2.64198661 | 0.01031916 | 0.05284037 |
| ENSMUSG00000020262 | 0.8710389  | 1.3793456  | 0.02298813 | 0.09767691 |
| ENSMUSG00000022453 | 0.87041902 | 2.70632621 | 0.01043107 | 0.05323649 |
| ENSMUSG00000028068 | 0.8699604  | 4.64429831 | 0.00580335 | 0.03348491 |
| ENSMUSG00000025510 | 0.86952123 | 1.91590766 | 0.01542118 | 0.07143559 |
| ENSMUSG00000000149 | 0.86880136 | 3.84051021 | 0.00689456 | 0.03846398 |
| ENSMUSG00000049858 | 0.86855794 | 3.56674945 | 0.00738784 | 0.04071049 |
| ENSMUSG00000024338 | 0.86809382 | 7.42949947 | 0.00493167 | 0.02925366 |
| ENSMUSG00000006736 | 0.86745534 | 6.58395674 | 0.00508847 | 0.02998583 |
| ENSMUSG00000022175 | 0.86660636 | 5.72210406 | 0.00537966 | 0.03147818 |
| ENSMUSG00000039485 | 0.86655053 | 3.06751272 | 0.00829704 | 0.04447083 |
| ENSMUSG00000046572 | 0.86591661 | 4.00612199 | 0.00661062 | 0.03722658 |
| ENSMUSG00000041268 | 0.86565499 | 2.01038006 | 0.01340098 | 0.06408788 |
| ENSMUSG00000004952 | 0.86531852 | 4.10936243 | 0.00673122 | 0.03774804 |
| ENSMUSG00000034786 | 0.86456804 | 2.16093341 | 0.01465898 | 0.06879132 |
| ENSMUSG00000006360 | 0.86397357 | 1.15457636 | 0.0327512  | 0.12645504 |
| ENSMUSG00000025533 | 0.86300346 | 3.30467297 | 0.00846266 | 0.04511187 |
| ENSMUSG00000027605 | 0.86254748 | 3.20343461 | 0.00931634 | 0.04886546 |
| ENSMUSG00000035311 | 0.8621303  | 7.08424927 | 0.005269   | 0.03089772 |
| ENSMUSG00000021279 | 0.86211155 | 3.75049932 | 0.00725189 | 0.0400637  |
| ENSMUSG00000034757 | 0.86170543 | 3.70962025 | 0.00771395 | 0.04210289 |
| ENSMUSG00000019768 | 0.86135118 | 0.89088176 | 0.02915478 | 0.11593108 |
| ENSMUSG00000021728 | 0.86134312 | 5.38654729 | 0.00575018 | 0.03330287 |
| ENSMUSG00000042377 | 0.85975    | 0.81002926 | 0.04821516 | 0.16595988 |
| ENSMUSG00000024953 | 0.85922078 | 3.62588135 | 0.00793301 | 0.04303299 |
| ENSMUSG00000026342 | 0.85897149 | 3.57753412 | 0.00771142 | 0.04210289 |
| ENSMUSG00000058486 | 0.85856071 | 3.64165896 | 0.00790303 | 0.04291352 |
| ENSMUSG00000042178 | 0.85846614 | 2.7085955  | 0.01081279 | 0.05467736 |
| ENSMUSG00000057789 | 0.85842454 | 5.48888546 | 0.00591161 | 0.03400042 |
| ENSMUSG00000032115 | 0.85715382 | 8.92763372 | 0.00538381 | 0.03148537 |
| ENSMUSG00000062075 | 0.85634685 | 3.61954937 | 0.00842244 | 0.0449864  |
| ENSMUSG00000041762 | 0.85631491 | 4.93120556 | 0.00631683 | 0.03583412 |
| ENSMUSG00000038650 | 0.85458501 | 4.92101004 | 0.00645001 | 0.03646814 |
| ENSMUSG00000029624 | 0.85438915 | 3.50423338 | 0.00844681 | 0.04504965 |
| ENSMUSG00000028517 | 0.85392017 | 1.44563567 | 0.02220098 | 0.09497868 |
| ENSMUSG00000053835 | 0.85379306 | 5.32578275 | 0.00620186 | 0.03530808 |
| ENSMUSG00000021493 | 0.85340323 | 2.45757813 | 0.01308014 | 0.06305598 |
| ENSMUSG00000047669 | 0.85254964 | 1.51228677 | 0.01997847 | 0.08743826 |
| ENSMUSG00000055322 | 0.85207627 | 2.41780009 | 0.0128019  | 0.06221528 |
| ENSMUSG00000069874 | 0.85138751 | 6.08225335 | 0.00605336 | 0.03464938 |

|                    |            |            |            |            |
|--------------------|------------|------------|------------|------------|
| ENSMUSG00000020538 | 0.85090174 | 4.24831773 | 0.0074585  | 0.04100173 |
| ENSMUSG00000024937 | 0.84994364 | 5.16523303 | 0.0066077  | 0.03722658 |
| ENSMUSG00000044857 | 0.84977963 | 2.50958625 | 0.01411667 | 0.06679869 |
| ENSMUSG00000040699 | 0.8496511  | 6.44570108 | 0.00610204 | 0.03490949 |
| ENSMUSG00000034412 | 0.84954836 | 2.60211754 | 0.01337911 | 0.06408788 |
| ENSMUSG00000020277 | 0.84930171 | 4.67251791 | 0.00711621 | 0.03943533 |
| ENSMUSG00000031138 | 0.84911778 | 1.96220681 | 0.01732779 | 0.07821805 |
| ENSMUSG00000039461 | 0.84879806 | 3.22426445 | 0.0097337  | 0.05062953 |
| ENSMUSG00000035673 | 0.84873094 | 4.26631686 | 0.00739896 | 0.04075096 |
| ENSMUSG00000075706 | 0.84811212 | 5.10225138 | 0.00675819 | 0.03787959 |
| ENSMUSG00000068923 | 0.84767352 | 3.72031622 | 0.00801668 | 0.04337775 |
| ENSMUSG00000095488 | 0.8458967  | 5.15085189 | 0.00682269 | 0.03814198 |
| ENSMUSG00000039623 | 0.84565956 | 2.28036302 | 0.01552442 | 0.07175967 |
| ENSMUSG00000034509 | 0.84448049 | 3.4615542  | 0.00963162 | 0.05020171 |
| ENSMUSG00000050732 | 0.84445893 | 5.00726843 | 0.00709686 | 0.03934834 |
| ENSMUSG00000017765 | 0.84415198 | 3.21310295 | 0.00993544 | 0.05138789 |
| ENSMUSG00000019039 | 0.84406971 | 3.54737602 | 0.00938191 | 0.04911384 |
| ENSMUSG00000038007 | 0.84304291 | 1.89345264 | 0.01946168 | 0.08573315 |
| ENSMUSG00000020423 | 0.84298769 | 7.12576058 | 0.00634363 | 0.03596724 |
| ENSMUSG00000042500 | 0.84262191 | 2.87043536 | 0.010843   | 0.05473294 |
| ENSMUSG00000024610 | 0.84184634 | 11.2549524 | 0.00620445 | 0.03530808 |
| ENSMUSG00000094356 | 0.84170743 | 4.40371792 | 0.007823   | 0.04256004 |
| ENSMUSG00000042210 | 0.84141705 | 2.59176945 | 0.01317892 | 0.06341878 |
| ENSMUSG00000074364 | 0.8406848  | 3.23109327 | 0.00991846 | 0.05132469 |
| ENSMUSG00000024887 | 0.84056266 | 4.62606964 | 0.00761802 | 0.04170281 |
| ENSMUSG00000096054 | 0.84055066 | 4.24053577 | 0.00806954 | 0.04362002 |
| ENSMUSG00000027134 | 0.83984596 | 1.84410349 | 0.02114851 | 0.09140903 |
| ENSMUSG00000093661 | 0.83984411 | 4.49360552 | 0.00782609 | 0.04256004 |
| ENSMUSG00000053730 | 0.83965733 | 3.60299118 | 0.00940089 | 0.04916547 |
| ENSMUSG00000028893 | 0.83924468 | 4.55284368 | 0.00777258 | 0.04235449 |
| ENSMUSG00000020605 | 0.83872599 | 2.75875599 | 0.01262816 | 0.06159297 |
| ENSMUSG00000040472 | 0.83872492 | 3.06275658 | 0.01065892 | 0.05404125 |
| ENSMUSG00000018819 | 0.83821626 | 7.24993713 | 0.00663198 | 0.0373079  |
| ENSMUSG00000033434 | 0.83804092 | 1.14560489 | 0.03575615 | 0.13505027 |
| ENSMUSG00000064065 | 0.83784747 | 2.9187424  | 0.01111009 | 0.05571142 |
| ENSMUSG00000038055 | 0.83646686 | 3.59094435 | 0.00969225 | 0.05046897 |
| ENSMUSG00000044453 | 0.83517419 | 1.16037306 | 0.02998685 | 0.11858385 |
| ENSMUSG00000037148 | 0.8344403  | 3.81036976 | 0.00950575 | 0.04964163 |
| ENSMUSG00000048277 | 0.83443863 | 7.8200933  | 0.00681276 | 0.03812602 |
| ENSMUSG00000026556 | 0.83414242 | 2.34468434 | 0.01702386 | 0.07713667 |
| ENSMUSG00000032783 | 0.83300107 | 3.53400186 | 0.01009717 | 0.05199995 |
| ENSMUSG00000024197 | 0.83135467 | 3.48867195 | 0.01024827 | 0.05257721 |
| ENSMUSG00000051537 | 0.83116866 | 0.72025449 | 0.05017089 | 0.1704609  |

|                    |            |            |            |            |
|--------------------|------------|------------|------------|------------|
| ENSMUSG00000036959 | 0.8306604  | 3.16456147 | 0.01160278 | 0.05771421 |
| ENSMUSG00000040158 | 0.82881346 | 1.79807268 | 0.02124812 | 0.09172925 |
| ENSMUSG00000006219 | 0.82864327 | 1.1129747  | 0.0268734  | 0.10907139 |
| ENSMUSG00000031903 | 0.82841477 | 3.04641917 | 0.01228749 | 0.06023105 |
| ENSMUSG00000026856 | 0.82825168 | 3.31676503 | 0.01163219 | 0.05780715 |
| ENSMUSG00000033697 | 0.82715384 | 1.13772771 | 0.03575615 | 0.13505027 |
| ENSMUSG00000029385 | 0.82668723 | 5.2883793  | 0.00805293 | 0.04355205 |
| ENSMUSG00000020400 | 0.82661839 | 4.95430757 | 0.00839684 | 0.04489417 |
| ENSMUSG00000014837 | 0.8265921  | 2.58482096 | 0.01460663 | 0.06860536 |
| ENSMUSG00000096188 | 0.82656396 | 4.05198901 | 0.00927088 | 0.04869808 |
| ENSMUSG00000047875 | 0.82652876 | 2.44689011 | 0.01588754 | 0.07321846 |
| ENSMUSG00000024965 | 0.82613947 | 6.22045152 | 0.00768801 | 0.04204233 |
| ENSMUSG00000028101 | 0.82589044 | 3.51658199 | 0.01087383 | 0.05482161 |
| ENSMUSG00000074785 | 0.82545996 | 7.4278001  | 0.0074597  | 0.04100173 |
| ENSMUSG00000049881 | 0.82539671 | 3.31007263 | 0.01219992 | 0.05988347 |
| ENSMUSG00000045980 | 0.82413754 | 1.76315898 | 0.02418751 | 0.10102175 |
| ENSMUSG00000072235 | 0.82333739 | 5.12779287 | 0.00852019 | 0.04535132 |
| ENSMUSG00000035769 | 0.82333187 | 2.99347321 | 0.01289471 | 0.06246924 |
| ENSMUSG00000005514 | 0.82309648 | 4.19294536 | 0.00978247 | 0.05074273 |
| ENSMUSG00000032515 | 0.82223622 | 4.1091406  | 0.00975106 | 0.05067733 |
| ENSMUSG00000023055 | 0.82215133 | 2.70900966 | 0.0152974  | 0.07092313 |
| ENSMUSG00000029299 | 0.8221226  | 2.6752544  | 0.01455558 | 0.06845504 |
| ENSMUSG00000019810 | 0.82140721 | 5.34327153 | 0.00844349 | 0.04504965 |
| ENSMUSG00000094433 | 0.82098901 | 5.94677843 | 0.00813956 | 0.04382277 |
| ENSMUSG00000031149 | 0.81989559 | 4.2164162  | 0.00995619 | 0.05146849 |
| ENSMUSG00000003199 | 0.8195566  | 3.00961254 | 0.0137025  | 0.06529728 |
| ENSMUSG00000019960 | 0.81943594 | 4.09072123 | 0.01018605 | 0.05230782 |
| ENSMUSG00000042747 | 0.81941639 | 5.25091518 | 0.00874723 | 0.04644514 |
| ENSMUSG00000042870 | 0.81923467 | 2.05177681 | 0.02062255 | 0.08971098 |
| ENSMUSG00000021606 | 0.81907222 | 3.72382727 | 0.01100353 | 0.05526927 |
| ENSMUSG00000022519 | 0.81876439 | 3.35205393 | 0.0120197  | 0.05930435 |
| ENSMUSG00000038366 | 0.81847493 | 6.41899998 | 0.00820573 | 0.04413497 |
| ENSMUSG00000041298 | 0.81761656 | 2.48423194 | 0.01507351 | 0.07020557 |
| ENSMUSG00000022671 | 0.81759343 | 1.6628138  | 0.0262568  | 0.10701184 |
| ENSMUSG00000037855 | 0.81748851 | 3.98954526 | 0.01046251 | 0.05332122 |
| ENSMUSG00000028988 | 0.81667167 | 1.08711648 | 0.0421534  | 0.15117468 |
| ENSMUSG00000021288 | 0.81628836 | 5.48022201 | 0.00881634 | 0.04674305 |
| ENSMUSG00000006476 | 0.81613247 | 3.02094935 | 0.01413016 | 0.06683315 |
| ENSMUSG00000029605 | 0.8159642  | 3.51718157 | 0.01217492 | 0.05985093 |
| ENSMUSG00000017664 | 0.81593565 | 3.91174836 | 0.01082732 | 0.054715   |
| ENSMUSG00000002489 | 0.81498957 | 2.87116048 | 0.01527477 | 0.07084865 |
| ENSMUSG00000017167 | 0.81493175 | 2.17988126 | 0.02198922 | 0.09439956 |
| ENSMUSG00000042570 | 0.81420462 | 2.55208161 | 0.01700374 | 0.07707791 |

|                    |            |            |            |            |
|--------------------|------------|------------|------------|------------|
| ENSMUSG0000005267  | 0.81391744 | 3.59820239 | 0.01189925 | 0.05880911 |
| ENSMUSG00000020747 | 0.81384109 | 3.04399944 | 0.01443192 | 0.06793269 |
| ENSMUSG00000025144 | 0.81298063 | 3.56870923 | 0.01246662 | 0.0609429  |
| ENSMUSG00000060586 | 0.81252155 | 9.90007712 | 0.00825054 | 0.04430966 |
| ENSMUSG00000004207 | 0.81233724 | 8.72619953 | 0.0083149  | 0.0445444  |
| ENSMUSG00000040061 | 0.81212671 | 4.530056   | 0.01026731 | 0.05262486 |
| ENSMUSG00000020895 | 0.81191998 | 1.54982626 | 0.0295465  | 0.11710011 |
| ENSMUSG00000031865 | 0.81111459 | 4.46975819 | 0.01040026 | 0.05312949 |
| ENSMUSG00000026930 | 0.81083253 | 1.78826413 | 0.0254967  | 0.10490514 |
| ENSMUSG00000020873 | 0.81060022 | 6.81665371 | 0.00871899 | 0.046318   |
| ENSMUSG00000038264 | 0.81002856 | 5.35249894 | 0.00930614 | 0.0488357  |
| ENSMUSG00000003379 | 0.80965351 | 7.34641719 | 0.00869254 | 0.04620028 |
| ENSMUSG00000006299 | 0.80953557 | 5.10124847 | 0.00977084 | 0.0507068  |
| ENSMUSG00000022414 | 0.80913733 | 2.67261981 | 0.01678598 | 0.07621897 |
| ENSMUSG00000023341 | 0.80907307 | 4.47070192 | 0.01036897 | 0.0530199  |
| ENSMUSG00000036908 | 0.80904359 | 6.99977239 | 0.00879946 | 0.04668437 |
| ENSMUSG00000096326 | 0.80753402 | 4.05342853 | 0.01143709 | 0.05710074 |
| ENSMUSG00000055202 | 0.80704065 | 1.68978609 | 0.02876694 | 0.11476977 |
| ENSMUSG00000002963 | 0.80653368 | 3.79271053 | 0.01216795 | 0.05985093 |
| ENSMUSG00000046330 | 0.80641743 | 7.43632088 | 0.00895908 | 0.04734253 |
| ENSMUSG00000048930 | 0.8062128  | 2.71469694 | 0.01678444 | 0.07621897 |
| ENSMUSG00000059142 | 0.8052482  | 4.16621184 | 0.01128243 | 0.05640691 |
| ENSMUSG00000024055 | 0.8042532  | 1.81234449 | 0.02435565 | 0.10148813 |
| ENSMUSG00000034175 | 0.80256314 | 1.50006592 | 0.03454139 | 0.13166997 |
| ENSMUSG00000020307 | 0.80241629 | 4.95157696 | 0.01045985 | 0.05332122 |
| ENSMUSG00000086236 | 0.80213292 | 2.32673469 | 0.01970444 | 0.0864846  |
| ENSMUSG00000059895 | 0.80145734 | 5.65069761 | 0.00998157 | 0.05155231 |
| ENSMUSG00000096452 | 0.80122723 | 1.33850005 | 0.03671917 | 0.13746639 |
| ENSMUSG00000036114 | 0.80060381 | 2.06899832 | 0.02318656 | 0.09821047 |
| ENSMUSG00000030553 | 0.80050882 | 1.2522781  | 0.04761356 | 0.16447664 |
| ENSMUSG00000073491 | 0.800497   | 6.14155507 | 0.00976303 | 0.0507068  |
| ENSMUSG00000052384 | 0.79934601 | 6.09341173 | 0.00996057 | 0.05146849 |
| ENSMUSG00000026895 | 0.79689031 | 4.0008695  | 0.01286226 | 0.06234005 |
| ENSMUSG00000024050 | 0.79633451 | 4.17568453 | 0.01247862 | 0.06097391 |
| ENSMUSG00000024952 | 0.79594267 | 3.7748157  | 0.01324261 | 0.06364352 |
| ENSMUSG00000093906 | 0.79589842 | 2.00382327 | 0.02427486 | 0.10126889 |
| ENSMUSG00000013833 | 0.79573071 | 2.07370473 | 0.02318656 | 0.09821047 |
| ENSMUSG00000027907 | 0.79554104 | 5.85102234 | 0.01040948 | 0.05315145 |
| ENSMUSG00000045252 | 0.79525975 | 2.13137162 | 0.02480434 | 0.10299961 |
| ENSMUSG00000015478 | 0.79468085 | 3.6321724  | 0.01380605 | 0.06561674 |
| ENSMUSG00000024516 | 0.79459412 | 8.3444863  | 0.00985091 | 0.05102411 |
| ENSMUSG00000027381 | 0.7937191  | 6.89855141 | 0.01016523 | 0.05222574 |
| ENSMUSG00000026471 | 0.79347839 | 3.0253387  | 0.01584449 | 0.07305128 |

|                    |            |            |            |            |
|--------------------|------------|------------|------------|------------|
| ENSMUSG00000024194 | 0.79315343 | 3.84501639 | 0.0135279  | 0.064608   |
| ENSMUSG00000006315 | 0.7926459  | 4.98578192 | 0.01155285 | 0.05754589 |
| ENSMUSG00000017760 | 0.79166618 | 6.46012383 | 0.01054356 | 0.05358235 |
| ENSMUSG00000032359 | 0.79129474 | 7.80824276 | 0.01022872 | 0.0525019  |
| ENSMUSG00000026520 | 0.79107052 | 4.19420981 | 0.01303227 | 0.06293776 |
| ENSMUSG00000031875 | 0.79043255 | 2.71281723 | 0.01880978 | 0.08356048 |
| ENSMUSG00000022508 | 0.79008272 | 3.51805097 | 0.01488273 | 0.06958754 |
| ENSMUSG00000074247 | 0.79004277 | 4.06025246 | 0.01343814 | 0.06420775 |
| ENSMUSG00000058569 | 0.78939409 | 6.50903154 | 0.01073793 | 0.05433969 |
| ENSMUSG00000025512 | 0.78854028 | 4.83471062 | 0.01207393 | 0.05953601 |
| ENSMUSG00000010057 | 0.78835647 | 3.02133518 | 0.01723688 | 0.07790549 |
| ENSMUSG00000002871 | 0.78684689 | 2.38721709 | 0.02190488 | 0.09414996 |
| ENSMUSG00000053460 | 0.78681727 | 3.31664213 | 0.01524222 | 0.07072808 |
| ENSMUSG00000003549 | 0.78627786 | 2.0034938  | 0.02697574 | 0.10944558 |
| ENSMUSG00000096649 | 0.78511224 | 1.36694221 | 0.03047868 | 0.1199132  |
| ENSMUSG00000024963 | 0.78323676 | 0.73559299 | 0.05909183 | 0.18954381 |
| ENSMUSG00000020097 | 0.7827692  | 8.22605729 | 0.01100285 | 0.05526927 |
| ENSMUSG00000024941 | 0.7826095  | 4.12493762 | 0.01374059 | 0.06540494 |
| ENSMUSG00000062997 | 0.78221215 | 6.25127878 | 0.01167271 | 0.05792846 |
| ENSMUSG00000051403 | 0.78171134 | 2.11717456 | 0.02575854 | 0.10557966 |
| ENSMUSG00000024858 | 0.78057491 | 8.34835504 | 0.01121602 | 0.05617908 |
| ENSMUSG00000004054 | 0.7796608  | 2.41848791 | 0.02331656 | 0.09856962 |
| ENSMUSG00000047767 | 0.77913516 | 2.71296066 | 0.02083214 | 0.09051322 |
| ENSMUSG00000025534 | 0.77908205 | 6.89698525 | 0.01163784 | 0.05780858 |
| ENSMUSG00000022575 | 0.77900426 | 4.3129748  | 0.01415927 | 0.06692635 |
| ENSMUSG00000076576 | 0.77733667 | 6.10644111 | 0.0121304  | 0.05975981 |
| ENSMUSG00000030946 | 0.77700992 | 2.64032911 | 0.02178265 | 0.09369928 |
| ENSMUSG00000021990 | 0.77681939 | 5.10716572 | 0.01275145 | 0.06199803 |
| ENSMUSG00000091144 | 0.77676514 | 4.69857394 | 0.01340117 | 0.06408788 |
| ENSMUSG00000027198 | 0.7758875  | 4.91506403 | 0.01336611 | 0.06407728 |
| ENSMUSG00000031570 | 0.77585668 | 4.51603189 | 0.01379329 | 0.06558504 |
| ENSMUSG00000013846 | 0.7745205  | 6.06615432 | 0.012449   | 0.06091199 |
| ENSMUSG00000049922 | 0.77448037 | 4.70790782 | 0.01400845 | 0.06637668 |
| ENSMUSG00000021756 | 0.77358179 | 5.91691306 | 0.01260159 | 0.06149117 |
| ENSMUSG00000032436 | 0.77284418 | 3.92176672 | 0.01605595 | 0.07378467 |
| ENSMUSG00000034105 | 0.77265827 | 1.75310033 | 0.03877407 | 0.1424439  |
| ENSMUSG00000051169 | 0.77193265 | 1.42988986 | 0.04069891 | 0.14772703 |
| ENSMUSG00000070003 | 0.77123026 | 0.84044385 | 0.06562718 | 0.20357165 |
| ENSMUSG00000000682 | 0.77063253 | 9.17447579 | 0.01221622 | 0.05993618 |
| ENSMUSG00000036845 | 0.77048258 | 3.12786013 | 0.01907058 | 0.08445878 |
| ENSMUSG00000022372 | 0.76990343 | 6.39060662 | 0.01283837 | 0.06225913 |
| ENSMUSG00000032300 | 0.76967557 | 6.21368328 | 0.01293406 | 0.06263175 |
| ENSMUSG00000019370 | 0.76951835 | 7.00833113 | 0.01266398 | 0.06168397 |

|                    |            |            |            |            |
|--------------------|------------|------------|------------|------------|
| ENSMUSG0000002111  | 0.7694607  | 3.68664781 | 0.01738876 | 0.07846039 |
| ENSMUSG00000033721 | 0.76936589 | 3.92727074 | 0.01605829 | 0.07378467 |
| ENSMUSG00000000532 | 0.76852068 | 3.98014405 | 0.01591292 | 0.0732728  |
| ENSMUSG00000036646 | 0.76704566 | 6.85483646 | 0.0129969  | 0.06279504 |
| ENSMUSG00000024830 | 0.76699071 | 3.9223942  | 0.01630538 | 0.07460214 |
| ENSMUSG00000000078 | 0.76678642 | 6.03365036 | 0.01335235 | 0.06405328 |
| ENSMUSG00000026639 | 0.76675089 | 1.25179936 | 0.04939769 | 0.16875896 |
| ENSMUSG00000030062 | 0.76640966 | 8.87900742 | 0.01271215 | 0.06186276 |
| ENSMUSG00000020823 | 0.76559232 | 4.51939001 | 0.015208   | 0.07059969 |
| ENSMUSG00000017721 | 0.76504679 | 5.65703987 | 0.01392878 | 0.06610229 |
| ENSMUSG00000022433 | 0.76480957 | 4.03996462 | 0.01616181 | 0.07413399 |
| ENSMUSG00000002968 | 0.76462534 | 2.9188457  | 0.02211728 | 0.09476074 |
| ENSMUSG00000076594 | 0.76444396 | 3.39301548 | 0.01973209 | 0.08657073 |
| ENSMUSG00000027438 | 0.7641871  | 1.13792133 | 0.05083207 | 0.17194888 |
| ENSMUSG00000019838 | 0.76386405 | 4.02807083 | 0.01662939 | 0.07573112 |
| ENSMUSG00000013646 | 0.76247849 | 3.23715708 | 0.01996256 | 0.08743826 |
| ENSMUSG00000039952 | 0.76227303 | 3.99250154 | 0.01712738 | 0.07749729 |
| ENSMUSG00000007570 | 0.76219478 | 1.33268686 | 0.04620943 | 0.16116511 |
| ENSMUSG00000034371 | 0.7618418  | 1.69012995 | 0.04062819 | 0.14761939 |
| ENSMUSG00000043592 | 0.76170908 | 2.15801649 | 0.02787481 | 0.11187269 |
| ENSMUSG00000035919 | 0.76164195 | 4.18503089 | 0.01639727 | 0.07489543 |
| ENSMUSG00000037946 | 0.76128745 | 4.68617408 | 0.01547549 | 0.07165638 |
| ENSMUSG00000024349 | 0.76084811 | 7.52885712 | 0.01355886 | 0.06469854 |
| ENSMUSG00000023990 | 0.7606718  | 2.73428038 | 0.02393099 | 0.10030766 |
| ENSMUSG00000089682 | 0.75975553 | 4.74755546 | 0.01551305 | 0.07175967 |
| ENSMUSG00000038587 | 0.75937219 | 4.04388226 | 0.01726417 | 0.07799616 |
| ENSMUSG00000018669 | 0.75798068 | 4.46540255 | 0.01651786 | 0.0752868  |
| ENSMUSG00000019982 | 0.75735106 | 4.46052203 | 0.01675406 | 0.07613811 |
| ENSMUSG00000004947 | 0.75647029 | 2.59103688 | 0.02593578 | 0.10602407 |
| ENSMUSG00000027642 | 0.75644158 | 8.5750623  | 0.01393272 | 0.06610229 |
| ENSMUSG00000040482 | 0.75626961 | 2.32313468 | 0.03008679 | 0.11881151 |
| ENSMUSG00000058886 | 0.75610212 | 2.56080279 | 0.02746358 | 0.11088255 |
| ENSMUSG00000078440 | 0.75589835 | 2.23278812 | 0.02813408 | 0.11270353 |
| ENSMUSG00000028613 | 0.75578252 | 5.37650607 | 0.01519618 | 0.07058505 |
| ENSMUSG00000020778 | 0.75564912 | 2.9774821  | 0.02375885 | 0.099928   |
| ENSMUSG00000080268 | 0.75535497 | 3.72889486 | 0.01904113 | 0.08436299 |
| ENSMUSG00000020381 | 0.75491939 | 1.50573619 | 0.05095939 | 0.17222166 |
| ENSMUSG00000024462 | 0.75485474 | 4.65667524 | 0.01655576 | 0.07542767 |
| ENSMUSG00000045826 | 0.75412877 | 4.79804681 | 0.01649522 | 0.07521542 |
| ENSMUSG00000076731 | 0.75389007 | 4.99561922 | 0.0159078  | 0.0732728  |
| ENSMUSG00000042363 | 0.75368192 | 3.50011574 | 0.01962182 | 0.08619214 |
| ENSMUSG00000031146 | 0.75315977 | 6.01578793 | 0.0151983  | 0.07058505 |
| ENSMUSG00000026480 | 0.7531181  | 6.0693909  | 0.01513814 | 0.07039658 |

|                    |            |            |            |            |
|--------------------|------------|------------|------------|------------|
| ENSMUSG0000003623  | 0.75308447 | 4.96294054 | 0.01610765 | 0.07394162 |
| ENSMUSG0000003458  | 0.75302447 | 6.6452507  | 0.01480045 | 0.06936466 |
| ENSMUSG00000033949 | 0.75230059 | 2.14995151 | 0.03297677 | 0.1271439  |
| ENSMUSG00000029386 | 0.75106064 | 0.99903009 | 0.06543    | 0.20328353 |
| ENSMUSG00000094491 | 0.75081185 | 2.47895544 | 0.03218606 | 0.12503404 |
| ENSMUSG00000025578 | 0.75047843 | 1.03044283 | 0.05731495 | 0.18558753 |
| ENSMUSG00000038271 | 0.75031474 | 3.26133274 | 0.02217559 | 0.09497284 |
| ENSMUSG00000073421 | 0.74885104 | 9.83869888 | 0.01481447 | 0.06940017 |
| ENSMUSG00000041801 | 0.74878544 | 2.91738966 | 0.02549124 | 0.10490514 |
| ENSMUSG00000007721 | 0.74826526 | 1.39858227 | 0.05606787 | 0.18333412 |
| ENSMUSG00000032041 | 0.74797816 | 4.36309459 | 0.01775578 | 0.07958366 |
| ENSMUSG00000038520 | 0.7479668  | 2.94922777 | 0.02552712 | 0.10499025 |
| ENSMUSG00000028458 | 0.74692133 | 1.95290917 | 0.03373182 | 0.12926936 |
| ENSMUSG00000027222 | 0.74679773 | 2.01148764 | 0.03821296 | 0.14127138 |
| ENSMUSG00000049288 | 0.74604449 | 1.33630475 | 0.04463164 | 0.15713601 |
| ENSMUSG00000046822 | 0.74552962 | 1.71115129 | 0.04608163 | 0.16090254 |
| ENSMUSG00000028465 | 0.74529454 | 7.64596833 | 0.01552121 | 0.07175967 |
| ENSMUSG00000018340 | 0.74517149 | 6.72338343 | 0.01583682 | 0.07304718 |
| ENSMUSG00000084314 | 0.74484211 | 0.96104829 | 0.06846311 | 0.20814947 |
| ENSMUSG00000020712 | 0.74383217 | 1.32987386 | 0.05390766 | 0.1788189  |
| ENSMUSG00000017400 | 0.74377254 | 3.31496285 | 0.02347548 | 0.09900648 |
| ENSMUSG00000024180 | 0.74367423 | 2.48895694 | 0.02984361 | 0.11806069 |
| ENSMUSG00000012296 | 0.74341543 | 2.92326676 | 0.02549124 | 0.10490514 |
| ENSMUSG00000058881 | 0.74326713 | 2.72474367 | 0.02641679 | 0.1075014  |
| ENSMUSG00000031266 | 0.74317352 | 3.58787453 | 0.02094139 | 0.0908797  |
| ENSMUSG00000022559 | 0.74317337 | 2.50081579 | 0.03168241 | 0.12356714 |
| ENSMUSG00000024236 | 0.74296887 | 4.63346752 | 0.01790933 | 0.08010545 |
| ENSMUSG00000031823 | 0.74248428 | 4.05794867 | 0.019633   | 0.08620613 |
| ENSMUSG00000032733 | 0.74219356 | 2.4522779  | 0.03059004 | 0.12021976 |
| ENSMUSG00000041164 | 0.74204839 | 5.90073232 | 0.01674636 | 0.07613811 |
| ENSMUSG00000024038 | 0.74144028 | 4.19170007 | 0.01990441 | 0.08722029 |
| ENSMUSG00000028803 | 0.74112924 | 4.1368512  | 0.0196176  | 0.08619214 |
| ENSMUSG00000022231 | 0.74046433 | 0.73107853 | 0.08034886 | 0.2314322  |
| ENSMUSG00000073434 | 0.73849196 | 3.37955617 | 0.02281793 | 0.09703018 |
| ENSMUSG00000095771 | 0.73812318 | 6.72559982 | 0.01681979 | 0.07634033 |
| ENSMUSG00000074406 | 0.73786374 | 0.6914629  | 0.09922792 | 0.26511467 |
| ENSMUSG00000060538 | 0.73753112 | 2.91688274 | 0.02748087 | 0.11091081 |
| ENSMUSG00000020496 | 0.7374128  | 6.14494939 | 0.01729815 | 0.07811694 |
| ENSMUSG00000038286 | 0.73721479 | 2.77314595 | 0.02765466 | 0.11132061 |
| ENSMUSG00000029401 | 0.73720411 | 5.84035939 | 0.01761962 | 0.07927794 |
| ENSMUSG00000063904 | 0.73683733 | 5.73121982 | 0.01769579 | 0.07954621 |
| ENSMUSG00000022550 | 0.73632509 | 1.51493189 | 0.05636402 | 0.18407083 |
| ENSMUSG00000029403 | 0.7359201  | 1.53958724 | 0.04478633 | 0.15757774 |



|                    |            |            |            |            |
|--------------------|------------|------------|------------|------------|
| ENSMUSG00000015127 | 0.73559087 | 4.59163359 | 0.01932395 | 0.08526572 |
| ENSMUSG00000028480 | 0.73517003 | 5.94034941 | 0.01773767 | 0.07958366 |
| ENSMUSG00000030682 | 0.73468957 | 5.37117125 | 0.01841344 | 0.08205392 |
| ENSMUSG00000010607 | 0.7346772  | 0.9632558  | 0.07485105 | 0.22088169 |
| ENSMUSG00000040713 | 0.73453837 | 4.8180336  | 0.01918964 | 0.08477715 |
| ENSMUSG00000004929 | 0.73431543 | 3.72489761 | 0.02336149 | 0.09871878 |
| ENSMUSG00000039427 | 0.7342156  | 3.73620233 | 0.02252997 | 0.09595704 |
| ENSMUSG00000057672 | 0.73379864 | 5.32787955 | 0.01865466 | 0.08302595 |
| ENSMUSG00000037103 | 0.73366266 | 4.01196225 | 0.02118112 | 0.0915133  |
| ENSMUSG00000022210 | 0.73364945 | 4.3043898  | 0.02047402 | 0.08917278 |
| ENSMUSG00000094872 | 0.73328553 | 5.95281372 | 0.01791957 | 0.08011802 |
| ENSMUSG00000006333 | 0.73321319 | 8.05009996 | 0.01721306 | 0.07783046 |
| ENSMUSG00000038059 | 0.7327242  | 3.78377454 | 0.0220725  | 0.09464408 |
| ENSMUSG00000019820 | 0.73229579 | 4.85145157 | 0.0190896  | 0.0845083  |
| ENSMUSG00000024219 | 0.73186399 | 2.52721645 | 0.03090736 | 0.12115774 |
| ENSMUSG00000038150 | 0.73178045 | 3.62684501 | 0.02320368 | 0.09822804 |
| ENSMUSG00000028670 | 0.7312516  | 3.34543909 | 0.02504797 | 0.1038114  |
| ENSMUSG00000059734 | 0.73101737 | 4.55865156 | 0.02096306 | 0.09089891 |
| ENSMUSG00000023939 | 0.73062275 | 1.71305549 | 0.04200967 | 0.15088051 |
| ENSMUSG00000030802 | 0.73061985 | 4.84137235 | 0.01997459 | 0.08743826 |
| ENSMUSG00000094335 | 0.7303543  | 6.8847265  | 0.01786654 | 0.07998038 |
| ENSMUSG00000026482 | 0.73002897 | 3.1273361  | 0.02706138 | 0.10975174 |
| ENSMUSG00000026158 | 0.7296681  | 5.24871943 | 0.01917173 | 0.08475981 |
| ENSMUSG00000079523 | 0.7294595  | 6.88921764 | 0.01808408 | 0.08068625 |
| ENSMUSG00000063856 | 0.72932921 | 5.88647288 | 0.01884693 | 0.08367446 |
| ENSMUSG00000092486 | 0.72925894 | 3.36771964 | 0.02434136 | 0.10146781 |
| ENSMUSG00000002731 | 0.72911994 | 2.41320332 | 0.03138657 | 0.12267952 |
| ENSMUSG00000025130 | 0.72869865 | 9.18794405 | 0.01773454 | 0.07958366 |
| ENSMUSG00000002778 | 0.7286784  | 5.93919707 | 0.01876907 | 0.08343184 |
| ENSMUSG00000029346 | 0.72865055 | 2.18590977 | 0.03829479 | 0.1414769  |
| ENSMUSG00000025790 | 0.72856176 | 4.72529404 | 0.02042056 | 0.08897587 |
| ENSMUSG00000024065 | 0.72746801 | 4.03485308 | 0.02237761 | 0.09557488 |
| ENSMUSG00000052302 | 0.72746157 | 4.90600163 | 0.02032602 | 0.08870734 |
| ENSMUSG00000024525 | 0.72712631 | 2.98499156 | 0.02839879 | 0.11355305 |
| ENSMUSG00000070394 | 0.72688076 | 4.24118089 | 0.02202818 | 0.09449161 |
| ENSMUSG00000060791 | 0.72637556 | 5.87957545 | 0.01917785 | 0.08475981 |
| ENSMUSG00000006720 | 0.72617053 | 1.12224399 | 0.06787492 | 0.2070358  |
| ENSMUSG00000025730 | 0.72586191 | 2.70950227 | 0.03111451 | 0.12179268 |
| ENSMUSG00000096145 | 0.72551949 | 2.32351606 | 0.03815704 | 0.14115106 |
| ENSMUSG00000007036 | 0.72536106 | 2.64904446 | 0.03191286 | 0.1241516  |
| ENSMUSG00000024137 | 0.72526322 | 2.38254206 | 0.03867728 | 0.14230496 |
| ENSMUSG00000049516 | 0.72522654 | 6.70436888 | 0.01881351 | 0.08356048 |
| ENSMUSG00000022570 | 0.7251393  | 3.7380097  | 0.02420331 | 0.1010486  |

|                    |            |            |            |            |
|--------------------|------------|------------|------------|------------|
| ENSMUSG00000031787 | 0.72507514 | 2.61790517 | 0.032669   | 0.12627329 |
| ENSMUSG00000097715 | 0.72504705 | 1.47109553 | 0.05629822 | 0.18397278 |
| ENSMUSG00000052534 | 0.72470984 | 1.26240376 | 0.05361809 | 0.17813232 |
| ENSMUSG00000026663 | 0.72360433 | 7.77162234 | 0.01872994 | 0.08329224 |
| ENSMUSG00000095497 | 0.72356863 | 3.48656858 | 0.02524701 | 0.10443564 |
| ENSMUSG00000025381 | 0.72315215 | 4.91774838 | 0.02104404 | 0.09110356 |
| ENSMUSG00000010047 | 0.72301188 | 1.30526628 | 0.06479537 | 0.20206863 |
| ENSMUSG00000002372 | 0.7228323  | 4.80344917 | 0.02121383 | 0.09161792 |
| ENSMUSG00000028672 | 0.72260675 | 4.33405273 | 0.02246657 | 0.09576263 |
| ENSMUSG00000086513 | 0.7225786  | 1.29163627 | 0.0478744  | 0.16517178 |
| ENSMUSG00000064030 | 0.72214259 | 3.72341586 | 0.02484308 | 0.10312078 |
| ENSMUSG00000096472 | 0.72169158 | 3.3229056  | 0.02685601 | 0.10904188 |
| ENSMUSG00000023206 | 0.72156649 | 3.69324762 | 0.02446073 | 0.10184731 |
| ENSMUSG00000034868 | 0.72154693 | 5.02274915 | 0.02108774 | 0.09121949 |
| ENSMUSG00000063897 | 0.72083885 | 1.30443947 | 0.06973086 | 0.21033782 |
| ENSMUSG00000026426 | 0.72062648 | 4.65034594 | 0.02194057 | 0.09426576 |
| ENSMUSG00000004667 | 0.72025418 | 3.91052104 | 0.02549148 | 0.10490514 |
| ENSMUSG00000039483 | 0.72022108 | 2.57507604 | 0.03329611 | 0.1281085  |
| ENSMUSG00000035027 | 0.71966088 | 4.06948982 | 0.02366294 | 0.09960231 |
| ENSMUSG00000028822 | 0.71953464 | 5.3989766  | 0.02095521 | 0.09089891 |
| ENSMUSG00000028164 | 0.71921714 | 5.22263996 | 0.02112191 | 0.09133065 |
| ENSMUSG00000067714 | 0.71906243 | 0.99635945 | 0.08124659 | 0.23296018 |
| ENSMUSG00000028969 | 0.71873429 | 3.40569399 | 0.02710328 | 0.10988035 |
| ENSMUSG00000006095 | 0.71842692 | 4.3626887  | 0.02316129 | 0.09818056 |
| ENSMUSG00000039637 | 0.71778656 | 5.27403359 | 0.02135046 | 0.09203441 |
| ENSMUSG00000022193 | 0.71775173 | 4.86445683 | 0.02227642 | 0.09521558 |
| ENSMUSG00000044937 | 0.71729718 | 2.56281558 | 0.03262066 | 0.12613164 |
| ENSMUSG00000028158 | 0.71700533 | 2.71091411 | 0.0344583  | 0.1314747  |
| ENSMUSG00000028439 | 0.7168347  | 2.39059223 | 0.03653629 | 0.13714145 |
| ENSMUSG00000000290 | 0.71496468 | 6.40867291 | 0.02072527 | 0.09008519 |
| ENSMUSG00000020964 | 0.71420054 | 8.11878027 | 0.02022841 | 0.08835285 |
| ENSMUSG00000042492 | 0.71412593 | 5.24854653 | 0.02208751 | 0.09467078 |
| ENSMUSG00000036529 | 0.7140891  | 5.32993617 | 0.02195153 | 0.0942753  |
| ENSMUSG00000090946 | 0.71345204 | 6.23912143 | 0.021077   | 0.09120961 |
| ENSMUSG00000024845 | 0.71340903 | 5.70366814 | 0.02162294 | 0.0930494  |
| ENSMUSG00000032462 | 0.7133107  | 3.02594811 | 0.0289806  | 0.11540873 |
| ENSMUSG00000046574 | 0.71249578 | 2.15342238 | 0.04258961 | 0.15223279 |
| ENSMUSG00000028737 | 0.71114845 | 2.83926533 | 0.03229723 | 0.12537558 |
| ENSMUSG00000031879 | 0.71114823 | 3.02947477 | 0.03235899 | 0.12556037 |
| ENSMUSG00000047881 | 0.71105733 | 2.99826345 | 0.03245636 | 0.12563151 |
| ENSMUSG00000028641 | 0.71093702 | 2.66989588 | 0.03447156 | 0.1314747  |
| ENSMUSG00000036553 | 0.71056251 | 2.1320332  | 0.04552354 | 0.15954691 |
| ENSMUSG00000036985 | 0.71028506 | 4.37885683 | 0.02494523 | 0.10350494 |

|                     |            |            |            |            |
|---------------------|------------|------------|------------|------------|
| ENSMUSG00000024851  | 0.7101042  | 4.60871769 | 0.02409959 | 0.10073254 |
| ENSMUSG00000003402  | 0.70977368 | 5.70091972 | 0.02239515 | 0.09557488 |
| ENSMUSG000000050556 | 0.70966651 | 1.39455827 | 0.06914806 | 0.20952308 |
| ENSMUSG000000051427 | 0.70965673 | 2.28360687 | 0.04108737 | 0.14863677 |
| ENSMUSG000000057375 | 0.70958328 | 5.13218749 | 0.0231355  | 0.09810981 |
| ENSMUSG00000005686  | 0.70901327 | 1.90719131 | 0.04268293 | 0.15251582 |
| ENSMUSG000000037375 | 0.70876901 | 1.29577243 | 0.05796612 | 0.1866547  |
| ENSMUSG000000031202 | 0.70863456 | 2.23803417 | 0.03980826 | 0.1454242  |
| ENSMUSG000000017188 | 0.70849257 | 4.11052979 | 0.02637899 | 0.10738809 |
| ENSMUSG00000002981  | 0.70808706 | 6.66349249 | 0.02184094 | 0.09391257 |
| ENSMUSG000000020396 | 0.707241   | 4.3183305  | 0.02548172 | 0.10490514 |
| ENSMUSG000000021676 | 0.70706021 | 3.60145656 | 0.02822671 | 0.11299067 |
| ENSMUSG000000078546 | 0.70698367 | 2.4097454  | 0.0383433  | 0.14160758 |
| ENSMUSG000000024158 | 0.70678115 | 2.56077496 | 0.0370223  | 0.13814827 |
| ENSMUSG000000025791 | 0.70665846 | 4.86736238 | 0.02405784 | 0.10059704 |
| ENSMUSG000000042810 | 0.70558619 | 2.74147504 | 0.03767962 | 0.13992323 |
| ENSMUSG000000005442 | 0.70554283 | 4.71089671 | 0.02515387 | 0.1041326  |
| ENSMUSG000000032593 | 0.70500019 | 1.77436856 | 0.04789045 | 0.16517178 |
| ENSMUSG000000054874 | 0.70477168 | 3.99660636 | 0.02713898 | 0.10990531 |
| ENSMUSG000000059713 | 0.70474905 | 4.35027263 | 0.02597347 | 0.1060977  |
| ENSMUSG000000031782 | 0.70466656 | 4.04816954 | 0.02714001 | 0.10990531 |
| ENSMUSG000000036966 | 0.70451586 | 3.75705026 | 0.02905879 | 0.11559202 |
| ENSMUSG000000037321 | 0.70387449 | 7.77135182 | 0.02219158 | 0.09497868 |
| ENSMUSG000000031822 | 0.70361638 | 4.19122855 | 0.02648416 | 0.10769424 |
| ENSMUSG000000023952 | 0.70341211 | 5.34909512 | 0.02391197 | 0.10030766 |
| ENSMUSG000000048264 | 0.70285358 | 3.77070819 | 0.02784492 | 0.11179434 |
| ENSMUSG000000026307 | 0.70161013 | 4.11174052 | 0.0272814  | 0.11039497 |
| ENSMUSG000000027009 | 0.70145884 | 7.56433243 | 0.02264955 | 0.09642824 |
| ENSMUSG000000055675 | 0.70125166 | 3.7681155  | 0.02784492 | 0.11179434 |
| ENSMUSG000000025058 | 0.70122452 | 5.15494773 | 0.0246672  | 0.10250908 |
| ENSMUSG000000079677 | 0.70110822 | 3.44583471 | 0.03070056 | 0.12048851 |
| ENSMUSG000000022900 | 0.70102022 | 2.12674682 | 0.04050686 | 0.14732747 |
| ENSMUSG000000034341 | 0.70086912 | 5.36886991 | 0.02448285 | 0.10189666 |
| ENSMUSG000000036594 | 0.70046773 | 10.7972663 | 0.02250355 | 0.09588236 |
| ENSMUSG000000038375 | 0.70033719 | 4.71283182 | 0.0257744  | 0.10560454 |
| ENSMUSG000000050856 | 0.69996373 | 5.00630546 | 0.02548555 | 0.10490514 |
| ENSMUSG000000031848 | 0.69926189 | 3.91721633 | 0.02894644 | 0.11531525 |
| ENSMUSG000000029136 | 0.69924317 | 2.09229947 | 0.046375   | 0.16169027 |
| ENSMUSG000000021809 | 0.69905645 | 2.57433882 | 0.03849821 | 0.14198518 |
| ENSMUSG000000036986 | 0.69898718 | 7.7467202  | 0.02312691 | 0.09810981 |
| ENSMUSG000000042558 | 0.69886675 | 3.01695038 | 0.03634804 | 0.13648232 |
| ENSMUSG000000038241 | 0.69759001 | 5.10767051 | 0.02541513 | 0.10488967 |
| ENSMUSG000000050721 | 0.69726263 | 6.76751645 | 0.02387358 | 0.10029323 |

|                    |            |            |            |            |
|--------------------|------------|------------|------------|------------|
| ENSMUSG00000023094 | 0.69692322 | 2.44630911 | 0.04254795 | 0.15217163 |
| ENSMUSG00000022841 | 0.69626709 | 7.3968627  | 0.02378568 | 0.10000184 |
| ENSMUSG00000021484 | 0.69522671 | 6.89005209 | 0.02423988 | 0.10116211 |
| ENSMUSG00000023904 | 0.69516622 | 1.83446458 | 0.05388285 | 0.1788189  |
| ENSMUSG00000040570 | 0.69509151 | 3.34856451 | 0.03146083 | 0.1228807  |
| ENSMUSG00000056214 | 0.69386385 | 2.40703059 | 0.0430256  | 0.15338448 |
| ENSMUSG00000029551 | 0.69360001 | 1.86987276 | 0.05114901 | 0.17269598 |
| ENSMUSG00000037679 | 0.69318649 | 5.25359939 | 0.02643757 | 0.10754535 |
| ENSMUSG00000030790 | 0.69202729 | 3.2585811  | 0.03438444 | 0.13127884 |
| ENSMUSG00000024792 | 0.69139791 | 1.97048867 | 0.05030698 | 0.17063717 |
| ENSMUSG00000033857 | 0.69069758 | 1.4459939  | 0.07121124 | 0.21309275 |
| ENSMUSG00000011832 | 0.69036504 | 2.61488863 | 0.04101844 | 0.14848702 |
| ENSMUSG00000059555 | 0.69009127 | 4.11972257 | 0.0296748  | 0.11743596 |
| ENSMUSG00000050930 | 0.68914067 | 2.09012073 | 0.04316355 | 0.1537238  |
| ENSMUSG00000061286 | 0.68853088 | 2.00450195 | 0.05566163 | 0.18241079 |
| ENSMUSG00000018899 | 0.68829165 | 6.20384451 | 0.02607169 | 0.10645033 |
| ENSMUSG00000022769 | 0.68803578 | 6.71877849 | 0.02582592 | 0.10573529 |
| ENSMUSG00000042182 | 0.68769849 | 1.1470679  | 0.0651331  | 0.20271151 |
| ENSMUSG00000028337 | 0.68748008 | 7.94108795 | 0.02541183 | 0.10488967 |
| ENSMUSG00000028073 | 0.68737271 | 2.46500216 | 0.04341153 | 0.15439602 |
| ENSMUSG00000014444 | 0.68709807 | 5.3690352  | 0.02731204 | 0.11041356 |
| ENSMUSG00000036534 | 0.68708636 | 3.27418196 | 0.03492693 | 0.13268407 |
| ENSMUSG00000047777 | 0.68544698 | 3.3956544  | 0.03483149 | 0.13240141 |
| ENSMUSG00000056290 | 0.68542815 | 4.16231852 | 0.03010671 | 0.11883996 |
| ENSMUSG00000038991 | 0.68421539 | 7.28928126 | 0.02633021 | 0.10723    |
| ENSMUSG00000033938 | 0.68372367 | 3.27458514 | 0.03909148 | 0.14336876 |
| ENSMUSG00000022568 | 0.68251537 | 3.97037725 | 0.03329823 | 0.1281085  |
| ENSMUSG00000002064 | 0.68238828 | 4.63118553 | 0.03006752 | 0.11881151 |
| ENSMUSG00000036372 | 0.68188705 | 5.89343627 | 0.02790083 | 0.11193545 |
| ENSMUSG00000029029 | 0.68155085 | 2.99174692 | 0.04241693 | 0.15186725 |
| ENSMUSG00000079491 | 0.68125536 | 4.45436319 | 0.03114449 | 0.12186581 |
| ENSMUSG00000045394 | 0.68124221 | 2.07189408 | 0.04189091 | 0.15058385 |
| ENSMUSG00000019689 | 0.68095367 | 1.61440636 | 0.06793782 | 0.2071364  |
| ENSMUSG00000032089 | 0.68041795 | 6.53935407 | 0.0275862  | 0.11116949 |
| ENSMUSG00000028744 | 0.68026851 | 2.34866899 | 0.0498824  | 0.16974813 |
| ENSMUSG00000076525 | 0.68000975 | 2.17469187 | 0.05354668 | 0.17800474 |
| ENSMUSG00000015095 | 0.67999058 | 4.11486293 | 0.03308442 | 0.12746782 |
| ENSMUSG00000019659 | 0.67991427 | 3.65101538 | 0.03576628 | 0.13505027 |
| ENSMUSG00000020744 | 0.67988447 | 6.89823639 | 0.02746185 | 0.11088255 |
| ENSMUSG00000050075 | 0.67941661 | 6.3386597  | 0.02792767 | 0.11200148 |
| ENSMUSG00000089901 | 0.679095   | 1.0392717  | 0.09441917 | 0.25764583 |
| ENSMUSG00000031521 | 0.67909089 | 3.50133748 | 0.03608858 | 0.13593408 |
| ENSMUSG00000022946 | 0.67864795 | 3.64525237 | 0.03447797 | 0.1314747  |

|                    |            |            |            |            |
|--------------------|------------|------------|------------|------------|
| ENSMUSG00000037573 | 0.67814572 | 3.13461077 | 0.03909936 | 0.14336876 |
| ENSMUSG00000027649 | 0.67791324 | 5.21570877 | 0.03008849 | 0.11881151 |
| ENSMUSG00000037816 | 0.67747262 | 3.01841407 | 0.03941769 | 0.14433967 |
| ENSMUSG00000097403 | 0.67690894 | 0.9347177  | 0.0893022  | 0.24775788 |
| ENSMUSG00000002058 | 0.67685518 | 3.01040599 | 0.04092913 | 0.14821348 |
| ENSMUSG00000027580 | 0.67655001 | 8.1948146  | 0.02773107 | 0.11151099 |
| ENSMUSG00000098557 | 0.67615829 | 6.558602   | 0.02837483 | 0.11349933 |
| ENSMUSG00000025429 | 0.67598218 | 0.84269182 | 0.09973448 | 0.26585318 |
| ENSMUSG00000046598 | 0.6755469  | 4.37255786 | 0.03300951 | 0.12722465 |
| ENSMUSG00000042303 | 0.67497759 | 2.56256524 | 0.04738884 | 0.16395292 |
| ENSMUSG00000025823 | 0.67444126 | 9.76996281 | 0.02802082 | 0.11229155 |
| ENSMUSG00000075701 | 0.67431615 | 6.71381941 | 0.0288976  | 0.11516324 |
| ENSMUSG00000016933 | 0.67401843 | 4.48949068 | 0.03209043 | 0.12470745 |
| ENSMUSG00000037949 | 0.67390805 | 4.51190311 | 0.03255974 | 0.12598645 |
| ENSMUSG00000026858 | 0.67350702 | 2.93076504 | 0.04185504 | 0.15050508 |
| ENSMUSG00000021234 | 0.67342992 | 1.04425749 | 0.08387971 | 0.23854399 |
| ENSMUSG00000028830 | 0.6731773  | 4.97585653 | 0.03147563 | 0.12289399 |
| ENSMUSG00000001029 | 0.67315914 | 3.80425417 | 0.03690021 | 0.137979   |
| ENSMUSG00000022125 | 0.67176825 | 6.82774879 | 0.02936776 | 0.11652019 |
| ENSMUSG00000034247 | 0.67160049 | 5.34007324 | 0.03098686 | 0.12138113 |
| ENSMUSG00000039254 | 0.6706088  | 3.60047787 | 0.0385416  | 0.14209402 |
| ENSMUSG00000036928 | 0.6705958  | 2.15614527 | 0.04787675 | 0.16517178 |
| ENSMUSG00000026390 | 0.67013274 | 0.75726219 | 0.06912932 | 0.20952308 |
| ENSMUSG00000026873 | 0.67009772 | 5.20750904 | 0.03176452 | 0.12363548 |
| ENSMUSG00000076569 | 0.66990203 | 5.88192666 | 0.03061398 | 0.12027001 |
| ENSMUSG00000001729 | 0.66982877 | 5.98676834 | 0.03065383 | 0.1203827  |
| ENSMUSG00000013787 | 0.6689901  | 5.44973612 | 0.03164567 | 0.12346847 |
| ENSMUSG00000014294 | 0.66881001 | 3.67103919 | 0.03857901 | 0.14209402 |
| ENSMUSG00000024867 | 0.66861215 | 2.26930165 | 0.05716075 | 0.18533207 |
| ENSMUSG00000016526 | 0.66860158 | 2.45223449 | 0.04943912 | 0.16875896 |
| ENSMUSG00000025793 | 0.66739231 | 4.07604564 | 0.03672484 | 0.13746639 |
| ENSMUSG00000001120 | 0.66666316 | 2.27926278 | 0.05489713 | 0.18060119 |
| ENSMUSG00000028962 | 0.66665149 | 3.76765608 | 0.03859611 | 0.14210326 |
| ENSMUSG00000026972 | 0.6665671  | 3.78350076 | 0.03786006 | 0.14036452 |
| ENSMUSG00000098318 | 0.66603181 | 2.77621029 | 0.0478943  | 0.16517178 |
| ENSMUSG00000020261 | 0.66526026 | 3.77609922 | 0.03839028 | 0.14168404 |
| ENSMUSG00000031504 | 0.66514365 | 2.05616186 | 0.06117147 | 0.19413571 |
| ENSMUSG00000010362 | 0.66493226 | 2.6944826  | 0.0481715  | 0.16586252 |
| ENSMUSG00000050552 | 0.66485073 | 2.22270627 | 0.05957804 | 0.19070633 |
| ENSMUSG00000094902 | 0.66468652 | 2.71827415 | 0.04541712 | 0.15922569 |
| ENSMUSG00000029449 | 0.6643651  | 5.58785854 | 0.03245614 | 0.12563151 |
| ENSMUSG00000004610 | 0.66415409 | 4.14196154 | 0.03696836 | 0.13799473 |
| ENSMUSG00000047139 | 0.66348373 | 8.96096809 | 0.03070312 | 0.12048851 |

|                    |            |            |            |            |
|--------------------|------------|------------|------------|------------|
| ENSMUSG00000026433 | 0.66337931 | 4.02567773 | 0.03718154 | 0.13850284 |
| ENSMUSG00000097755 | 0.66325973 | 2.44492001 | 0.05031771 | 0.17063717 |
| ENSMUSG00000039377 | 0.66238012 | 0.76246297 | 0.12166692 | 0.30217782 |
| ENSMUSG00000039308 | 0.66226428 | 4.34962677 | 0.0361123  | 0.13597593 |
| ENSMUSG00000076652 | 0.6619461  | 5.21282654 | 0.03334503 | 0.12823817 |
| ENSMUSG00000042275 | 0.66188776 | 3.17666499 | 0.04340161 | 0.15439602 |
| ENSMUSG00000017639 | 0.66167147 | 2.23562648 | 0.05038575 | 0.17070686 |
| ENSMUSG00000000594 | 0.66134372 | 6.72811683 | 0.03206476 | 0.12465262 |
| ENSMUSG00000069633 | 0.66113727 | 1.01316924 | 0.09193652 | 0.2531776  |
| ENSMUSG00000062638 | 0.66097144 | 2.13975411 | 0.0596693  | 0.19071538 |
| ENSMUSG00000004460 | 0.66096423 | 8.4824796  | 0.03145046 | 0.1228807  |
| ENSMUSG00000068580 | 0.65967331 | 3.22636595 | 0.04528289 | 0.1588956  |
| ENSMUSG00000047557 | 0.65905459 | 2.75849638 | 0.0492777  | 0.16859478 |
| ENSMUSG00000009076 | 0.65889122 | 2.07911845 | 0.06840648 | 0.20809463 |
| ENSMUSG00000098274 | 0.65886338 | 5.18377581 | 0.03482574 | 0.13240141 |
| ENSMUSG00000054404 | 0.65884022 | 6.99721742 | 0.03242647 | 0.12563151 |
| ENSMUSG00000035781 | 0.65872379 | 4.31570874 | 0.03714023 | 0.13839676 |
| ENSMUSG00000047921 | 0.65827819 | 3.3861752  | 0.04360826 | 0.15487371 |
| ENSMUSG00000070000 | 0.65780883 | 4.68013936 | 0.03631993 | 0.13647182 |
| ENSMUSG00000003581 | 0.65770525 | 3.3004556  | 0.04386395 | 0.15544819 |
| ENSMUSG00000095700 | 0.65758658 | 4.39614027 | 0.0362432  | 0.13623099 |
| ENSMUSG00000040952 | 0.65747951 | 7.38534083 | 0.03273443 | 0.12643555 |
| ENSMUSG00000030400 | 0.65738026 | 3.85984867 | 0.0398259  | 0.14543938 |
| ENSMUSG00000068328 | 0.65545157 | 5.94468993 | 0.03437342 | 0.13127884 |
| ENSMUSG00000078695 | 0.65507157 | 3.35388005 | 0.04382871 | 0.15537435 |
| ENSMUSG00000024018 | 0.65436857 | 3.45347256 | 0.04415326 | 0.15599781 |
| ENSMUSG00000006215 | 0.65404311 | 2.98780737 | 0.04707966 | 0.16324985 |
| ENSMUSG00000030695 | 0.6537399  | 8.27338167 | 0.03341652 | 0.12833465 |
| ENSMUSG00000029547 | 0.65310988 | 3.87311648 | 0.04238389 | 0.15179934 |
| ENSMUSG00000069893 | 0.65305667 | 3.94806817 | 0.04068398 | 0.14772259 |
| ENSMUSG00000026047 | 0.65230729 | 4.22510129 | 0.03995792 | 0.1457241  |
| ENSMUSG00000000823 | 0.65229078 | 5.10965234 | 0.03677858 | 0.13757205 |
| ENSMUSG00000022856 | 0.65118984 | 2.80626073 | 0.05096062 | 0.17222166 |
| ENSMUSG00000020776 | 0.65114947 | 3.43499637 | 0.04397686 | 0.15560886 |
| ENSMUSG00000043289 | 0.65101105 | 0.88048481 | 0.09856082 | 0.2645296  |
| ENSMUSG00000087150 | 0.65094164 | 2.60408357 | 0.05098091 | 0.17223626 |
| ENSMUSG00000024121 | 0.64995278 | 5.79722047 | 0.036201   | 0.13616728 |
| ENSMUSG00000032120 | 0.64992405 | 2.68208887 | 0.05630864 | 0.18397278 |
| ENSMUSG00000025575 | 0.64971652 | 4.87859953 | 0.03806739 | 0.14092643 |
| ENSMUSG00000022912 | 0.6495204  | 3.56548754 | 0.044595   | 0.15710961 |
| ENSMUSG00000041354 | 0.64923956 | 3.23652014 | 0.04689757 | 0.16290199 |
| ENSMUSG00000018167 | 0.64901122 | 3.40237526 | 0.04645924 | 0.16193162 |
| ENSMUSG00000041037 | 0.6485125  | 4.79162938 | 0.03837835 | 0.14168404 |

|                    |            |            |            |            |
|--------------------|------------|------------|------------|------------|
| ENSMUSG00000025277 | 0.64816147 | 3.38017744 | 0.0467962  | 0.16268542 |
| ENSMUSG00000029465 | 0.64783788 | 7.09956842 | 0.03551035 | 0.13427196 |
| ENSMUSG00000049086 | 0.64770429 | 1.30956701 | 0.08606319 | 0.24245178 |
| ENSMUSG00000032594 | 0.64750458 | 5.94573597 | 0.03662376 | 0.13731706 |
| ENSMUSG00000041161 | 0.64674073 | 1.42249793 | 0.10172002 | 0.26938819 |
| ENSMUSG00000033379 | 0.64645832 | 5.5716755  | 0.0375879  | 0.13963069 |
| ENSMUSG00000007038 | 0.64623829 | 4.50267306 | 0.04044589 | 0.14724832 |
| ENSMUSG00000026509 | 0.64428798 | 5.6521279  | 0.03780538 | 0.14029359 |
| ENSMUSG00000037706 | 0.64427641 | 6.3963745  | 0.03696407 | 0.13799473 |
| ENSMUSG00000024847 | 0.64399219 | 3.63581892 | 0.04700297 | 0.16308881 |
| ENSMUSG00000028460 | 0.643966   | 1.30804344 | 0.10196525 | 0.26972713 |
| ENSMUSG00000018861 | 0.64266189 | 1.65263026 | 0.08528771 | 0.2411305  |
| ENSMUSG00000024561 | 0.64235464 | 5.53135681 | 0.03876663 | 0.1424439  |
| ENSMUSG00000019054 | 0.64222011 | 4.59636148 | 0.04131138 | 0.14924687 |
| ENSMUSG00000040365 | 0.64184635 | 4.13511858 | 0.04311958 | 0.15361794 |
| ENSMUSG00000003814 | 0.64091981 | 11.3107756 | 0.03664807 | 0.13732202 |
| ENSMUSG00000001105 | 0.64048392 | 4.24371989 | 0.04297946 | 0.1533721  |
| ENSMUSG00000024354 | 0.63934479 | 1.45314493 | 0.0734816  | 0.21799877 |
| ENSMUSG00000043439 | 0.63929924 | 2.90945926 | 0.0556464  | 0.18241079 |
| ENSMUSG00000035382 | 0.63920059 | 4.69552963 | 0.04236106 | 0.15179934 |
| ENSMUSG00000022500 | 0.63884899 | 5.07544342 | 0.04089089 | 0.14821348 |
| ENSMUSG00000032606 | 0.63872248 | 3.29791579 | 0.05037203 | 0.17070686 |
| ENSMUSG00000029033 | 0.63872044 | 3.2232377  | 0.05173898 | 0.17376303 |
| ENSMUSG00000097906 | 0.63830458 | 1.24809675 | 0.09698896 | 0.26141689 |
| ENSMUSG00000002103 | 0.63827289 | 2.98280396 | 0.05430446 | 0.17941768 |
| ENSMUSG00000055041 | 0.63779596 | 2.20607607 | 0.07030826 | 0.21137559 |
| ENSMUSG00000002763 | 0.6376952  | 2.89449682 | 0.0571567  | 0.18533207 |
| ENSMUSG00000068290 | 0.63706217 | 4.41235095 | 0.04361568 | 0.15487371 |
| ENSMUSG00000005142 | 0.63697869 | 6.27576498 | 0.039283   | 0.14394424 |
| ENSMUSG00000024381 | 0.63685619 | 5.95347869 | 0.03969561 | 0.14514896 |
| ENSMUSG00000004788 | 0.63680229 | 4.89515048 | 0.0423759  | 0.15179934 |
| ENSMUSG00000079553 | 0.63676573 | 3.93776793 | 0.04732371 | 0.16388531 |
| ENSMUSG00000042046 | 0.63597744 | 3.8142431  | 0.04660565 | 0.1623283  |
| ENSMUSG00000034994 | 0.6359546  | 10.3151564 | 0.03816733 | 0.14115106 |
| ENSMUSG00000028684 | 0.63568958 | 3.67991685 | 0.04925241 | 0.16856171 |
| ENSMUSG00000076589 | 0.63564729 | 1.75950414 | 0.09216308 | 0.25334863 |
| ENSMUSG00000039763 | 0.63562116 | 1.44862655 | 0.08085968 | 0.2322717  |
| ENSMUSG00000013076 | 0.63426215 | 1.81600515 | 0.07608447 | 0.22306197 |
| ENSMUSG00000034035 | 0.63413502 | 2.23156704 | 0.06593525 | 0.20397181 |
| ENSMUSG00000035585 | 0.63410463 | 1.50869821 | 0.09633503 | 0.26025491 |
| ENSMUSG00000001424 | 0.63390846 | 7.68704237 | 0.03928166 | 0.14394424 |
| ENSMUSG00000021482 | 0.63382731 | 3.2611814  | 0.05299089 | 0.17659263 |
| ENSMUSG00000016495 | 0.63361632 | 5.86534177 | 0.04077294 | 0.14794595 |

|                    |            |            |            |            |
|--------------------|------------|------------|------------|------------|
| ENSMUSG00000023707 | 0.63353345 | 2.27637316 | 0.0657353  | 0.20376244 |
| ENSMUSG00000028917 | 0.63343812 | 3.24880648 | 0.05125391 | 0.17288776 |
| ENSMUSG00000024579 | 0.63312685 | 2.31598979 | 0.06939579 | 0.20989911 |
| ENSMUSG00000026820 | 0.6313876  | 2.18007419 | 0.07656987 | 0.22404193 |
| ENSMUSG00000031156 | 0.63132943 | 3.83463736 | 0.04884597 | 0.1674364  |
| ENSMUSG00000054723 | 0.63043035 | 2.37363462 | 0.06518124 | 0.20280278 |
| ENSMUSG00000032562 | 0.62986011 | 7.7299777  | 0.04054771 | 0.14742632 |
| ENSMUSG00000031166 | 0.62980351 | 4.42116571 | 0.04571324 | 0.15995183 |
| ENSMUSG00000020198 | 0.62978715 | 6.34496411 | 0.04150069 | 0.14971174 |
| ENSMUSG00000038000 | 0.62953166 | 3.95868687 | 0.04809189 | 0.16569422 |
| ENSMUSG00000030082 | 0.62940465 | 8.40378772 | 0.04044418 | 0.14724832 |
| ENSMUSG00000002812 | 0.62916416 | 6.33489462 | 0.04169438 | 0.15017775 |
| ENSMUSG00000019470 | 0.6284681  | 4.81254919 | 0.04504019 | 0.15826438 |
| ENSMUSG00000097709 | 0.62816839 | 1.45207344 | 0.09457265 | 0.25780371 |
| ENSMUSG00000035849 | 0.62815334 | 3.69177137 | 0.05010975 | 0.17030681 |
| ENSMUSG00000041439 | 0.62768732 | 4.20645913 | 0.04738267 | 0.16395292 |
| ENSMUSG00000025188 | 0.62712165 | 3.08132313 | 0.05779581 | 0.18637397 |
| ENSMUSG00000022761 | 0.62712016 | 4.80361019 | 0.04558259 | 0.15959828 |
| ENSMUSG00000027951 | 0.62593123 | 7.83132638 | 0.04171419 | 0.15019895 |
| ENSMUSG00000036748 | 0.62580098 | 4.03589807 | 0.04975245 | 0.16946632 |
| ENSMUSG00000039774 | 0.6251846  | 3.52672412 | 0.05307921 | 0.17677771 |
| ENSMUSG00000046658 | 0.62467894 | 1.11343881 | 0.10456715 | 0.27462676 |
| ENSMUSG00000035674 | 0.62401816 | 4.74994151 | 0.04732262 | 0.16388531 |
| ENSMUSG00000032932 | 0.62374697 | 6.64788034 | 0.04302423 | 0.15338448 |
| ENSMUSG00000028923 | 0.62372405 | 4.99398444 | 0.04608939 | 0.16090254 |
| ENSMUSG00000021094 | 0.62359383 | 3.76004109 | 0.05116582 | 0.17269864 |
| ENSMUSG00000033233 | 0.6232978  | 1.46311723 | 0.08875313 | 0.2467424  |
| ENSMUSG00000008318 | 0.62274404 | 3.42565359 | 0.05437034 | 0.17958031 |
| ENSMUSG00000004565 | 0.62249933 | 4.08669944 | 0.05058353 | 0.17132311 |
| ENSMUSG00000034889 | 0.62225313 | 3.6271657  | 0.05284602 | 0.17632781 |
| ENSMUSG00000001128 | 0.62222736 | 5.37240751 | 0.04588373 | 0.16039226 |
| ENSMUSG00000003531 | 0.62176081 | 2.48073124 | 0.06923796 | 0.20973658 |
| ENSMUSG00000021313 | 0.62175772 | 4.59881135 | 0.04829788 | 0.16613124 |
| ENSMUSG00000003559 | 0.62146013 | 4.11178318 | 0.05038069 | 0.17070686 |
| ENSMUSG00000022015 | 0.62142796 | 2.13117988 | 0.08042096 | 0.23151619 |
| ENSMUSG00000002668 | 0.62121892 | 4.04415839 | 0.05205102 | 0.17449317 |
| ENSMUSG00000036775 | 0.62089708 | 3.76593396 | 0.05118715 | 0.17271658 |
| ENSMUSG00000034006 | 0.62076786 | 1.80189423 | 0.08891839 | 0.24688361 |
| ENSMUSG00000002307 | 0.62063556 | 5.68156766 | 0.04557088 | 0.15959828 |
| ENSMUSG00000040824 | 0.62051786 | 5.57000518 | 0.04586894 | 0.16039226 |
| ENSMUSG00000029560 | 0.62051678 | 4.86427966 | 0.04780917 | 0.16508936 |
| ENSMUSG00000036561 | 0.62033324 | 3.31148024 | 0.05646941 | 0.18407083 |
| ENSMUSG00000059842 | 0.62023747 | 1.46739125 | 0.11285554 | 0.28791913 |



|                     |            |            |            |            |
|---------------------|------------|------------|------------|------------|
| ENSMUSG00000023143  | 0.62014774 | 2.93998611 | 0.06336759 | 0.19910187 |
| ENSMUSG00000018395  | 0.62005297 | 3.06595221 | 0.06134026 | 0.19445067 |
| ENSMUSG00000029413  | 0.61997026 | 4.0851412  | 0.05153073 | 0.17333356 |
| ENSMUSG00000003444  | 0.61995312 | 2.80502069 | 0.06674385 | 0.20507955 |
| ENSMUSG000000039501 | 0.61987305 | 6.46992998 | 0.04462305 | 0.15713601 |
| ENSMUSG00000028538  | 0.61968383 | 2.2742746  | 0.07673305 | 0.2243126  |
| ENSMUSG00000026966  | 0.61934756 | 3.99044993 | 0.0515539  | 0.17335744 |
| ENSMUSG00000036333  | 0.61931392 | 6.87543371 | 0.04439877 | 0.15652725 |
| ENSMUSG00000033088  | 0.61895936 | 3.64437987 | 0.05466107 | 0.18018931 |
| ENSMUSG00000047090  | 0.61864137 | 2.5397742  | 0.06649522 | 0.20488128 |
| ENSMUSG000000051735 | 0.61835918 | 3.76642822 | 0.05398242 | 0.17895678 |
| ENSMUSG00000002257  | 0.61790388 | 4.26537052 | 0.051504   | 0.17329769 |
| ENSMUSG00000022452  | 0.61780437 | 4.41924923 | 0.05071327 | 0.1716634  |
| ENSMUSG00000032187  | 0.61750012 | 6.92960244 | 0.04506529 | 0.15830102 |
| ENSMUSG00000016757  | 0.61717497 | 4.98924185 | 0.04840422 | 0.16618629 |
| ENSMUSG00000041220  | 0.61699802 | 4.65901398 | 0.05005203 | 0.17016429 |
| ENSMUSG00000019738  | 0.61670723 | 2.42808511 | 0.07095858 | 0.21268607 |
| ENSMUSG00000045103  | 0.61668181 | 1.70728279 | 0.08175892 | 0.23411426 |
| ENSMUSG00000015217  | 0.61648148 | 5.16260902 | 0.048079   | 0.16569422 |
| ENSMUSG00000022561  | 0.61606968 | 3.29782576 | 0.05944239 | 0.19038241 |
| ENSMUSG00000029456  | 0.61537881 | 1.33892402 | 0.11849308 | 0.29723874 |
| ENSMUSG00000006398  | 0.61530617 | 6.59166966 | 0.04614839 | 0.16105638 |
| ENSMUSG00000072294  | 0.61528548 | 1.35318071 | 0.10381925 | 0.27329249 |
| ENSMUSG00000039382  | 0.61524718 | 2.68977774 | 0.06755863 | 0.20644722 |
| ENSMUSG00000042642  | 0.61503552 | 3.56202391 | 0.05746341 | 0.18570136 |
| ENSMUSG00000032370  | 0.61491372 | 4.85142748 | 0.04960982 | 0.16919428 |
| ENSMUSG00000027496  | 0.61482196 | 6.34628497 | 0.04663326 | 0.1623283  |
| ENSMUSG00000042524  | 0.61478498 | 5.29587122 | 0.04832864 | 0.16613124 |
| ENSMUSG00000032575  | 0.61471272 | 8.78816883 | 0.04522239 | 0.15880112 |
| ENSMUSG00000002345  | 0.61457767 | 2.51515963 | 0.07611907 | 0.22306197 |
| ENSMUSG00000036882  | 0.61439592 | 2.27268173 | 0.0797641  | 0.23048661 |
| ENSMUSG00000087582  | 0.61436946 | 2.78199092 | 0.06320763 | 0.19890021 |
| ENSMUSG00000027490  | 0.6141674  | 4.14915387 | 0.05389417 | 0.1788189  |
| ENSMUSG00000000282  | 0.61388104 | 3.0059021  | 0.06465299 | 0.20174128 |
| ENSMUSG00000075705  | 0.612868   | 3.92416347 | 0.05571704 | 0.18246356 |
| ENSMUSG00000047959  | 0.61249424 | 2.80159752 | 0.06674385 | 0.20507955 |
| ENSMUSG00000028931  | 0.61197531 | 5.34934006 | 0.04945088 | 0.16875896 |
| ENSMUSG00000032261  | 0.61181311 | 2.78776367 | 0.06682856 | 0.20526322 |
| ENSMUSG00000038564  | 0.61091293 | 3.44126448 | 0.05916727 | 0.18970206 |
| ENSMUSG00000025868  | 0.60992068 | 3.69699085 | 0.05737656 | 0.18558753 |
| ENSMUSG00000028454  | 0.60938696 | 3.91791145 | 0.05647599 | 0.18407083 |
| ENSMUSG00000013822  | 0.60933528 | 4.76785839 | 0.05246132 | 0.17547856 |
| ENSMUSG00000026421  | 0.60871125 | 6.39946549 | 0.04866678 | 0.16692828 |

|                    |            |            |            |            |
|--------------------|------------|------------|------------|------------|
| ENSMUSG00000020133 | 0.60869992 | 2.92732313 | 0.0693715  | 0.20989911 |
| ENSMUSG00000014905 | 0.60844642 | 5.76991144 | 0.04933673 | 0.16874318 |
| ENSMUSG00000020287 | 0.60798839 | 3.37107533 | 0.06104304 | 0.19389932 |
| ENSMUSG00000020520 | 0.60794662 | 3.35437323 | 0.06353389 | 0.19946127 |
| ENSMUSG00000035203 | 0.60704713 | 5.03221354 | 0.05224204 | 0.1750709  |
| ENSMUSG00000096594 | 0.60587757 | 4.92231038 | 0.05293338 | 0.17652604 |
| ENSMUSG00000000959 | 0.60579686 | 5.15684144 | 0.0523111  | 0.17519344 |
| ENSMUSG00000031668 | 0.60564958 | 6.42413256 | 0.04969324 | 0.16937163 |
| ENSMUSG00000022221 | 0.60552084 | 5.31567147 | 0.05176621 | 0.17380039 |
| ENSMUSG00000025648 | 0.60479704 | 2.33200234 | 0.08028033 | 0.23129658 |
| ENSMUSG00000000378 | 0.60461617 | 4.65439088 | 0.05482357 | 0.18041422 |
| ENSMUSG00000044244 | 0.60360035 | 1.56708835 | 0.09719067 | 0.26182966 |
| ENSMUSG00000034449 | 0.60325838 | 3.57281819 | 0.06201041 | 0.19633596 |
| ENSMUSG00000032294 | 0.60298333 | 9.12002547 | 0.0494192  | 0.16875896 |
| ENSMUSG00000058818 | 0.60193843 | 3.20705928 | 0.065636   | 0.20357165 |
| ENSMUSG00000035270 | 0.60180224 | 1.79771236 | 0.090943   | 0.25131211 |
| ENSMUSG00000095863 | 0.60175046 | 0.83957742 | 0.13536762 | 0.32097723 |
| ENSMUSG00000059851 | 0.60164585 | 3.54856736 | 0.06264458 | 0.19765944 |
| ENSMUSG00000019971 | 0.6016088  | 5.19813826 | 0.05336173 | 0.17749934 |
| ENSMUSG00000052248 | 0.60145797 | 2.07896444 | 0.08837048 | 0.2459322  |
| ENSMUSG00000022442 | 0.60117854 | 2.12493404 | 0.0823089  | 0.23542307 |
| ENSMUSG00000021065 | 0.6010421  | 6.45603369 | 0.0514094  | 0.17314147 |
| ENSMUSG00000004994 | 0.60081454 | 2.33860019 | 0.0816343  | 0.23394746 |
| ENSMUSG00000032380 | 0.59892189 | 3.42530542 | 0.06495197 | 0.20233037 |
| ENSMUSG00000042462 | 0.59877998 | 3.45486213 | 0.0665832  | 0.20503518 |
| ENSMUSG00000027309 | 0.59871099 | 3.4935031  | 0.06287091 | 0.19818763 |
| ENSMUSG00000073436 | 0.59855682 | 3.94296398 | 0.06033879 | 0.1922285  |
| ENSMUSG00000076674 | 0.59821281 | 3.52816767 | 0.06217994 | 0.19664737 |
| ENSMUSG00000061119 | 0.59811489 | 5.51295193 | 0.05411746 | 0.17917999 |
| ENSMUSG00000021947 | 0.59799723 | 3.15440817 | 0.07126297 | 0.21317611 |
| ENSMUSG00000002320 | 0.59736021 | 5.6302385  | 0.05420365 | 0.17924937 |
| ENSMUSG00000026202 | 0.59734109 | 6.6705036  | 0.05281936 | 0.17629341 |
| ENSMUSG00000020048 | 0.59712228 | 12.4162054 | 0.05139429 | 0.17314147 |
| ENSMUSG00000026489 | 0.59596516 | 3.86015916 | 0.06402347 | 0.20047302 |
| ENSMUSG00000034863 | 0.59592669 | 1.59267151 | 0.10813547 | 0.28065774 |
| ENSMUSG00000040848 | 0.59557839 | 6.84083244 | 0.05319329 | 0.17704829 |
| ENSMUSG00000030611 | 0.59548877 | 2.89896874 | 0.07521008 | 0.22154206 |
| ENSMUSG00000055447 | 0.5946384  | 8.6013206  | 0.05269044 | 0.17608108 |
| ENSMUSG00000026269 | 0.59453618 | 3.90036587 | 0.0633932  | 0.19910187 |
| ENSMUSG00000038578 | 0.59391925 | 5.66832514 | 0.05542246 | 0.18188551 |
| ENSMUSG00000008398 | 0.59334683 | 5.47378341 | 0.05579948 | 0.18267808 |
| ENSMUSG00000006281 | 0.59324894 | 5.33731236 | 0.05638265 | 0.18407083 |
| ENSMUSG00000040659 | 0.59321409 | 5.22711997 | 0.05702846 | 0.18507218 |

|                    |            |            |            |            |
|--------------------|------------|------------|------------|------------|
| ENSMUSG00000032312 | 0.59313228 | 6.87330018 | 0.0542931  | 0.17941768 |
| ENSMUSG00000036644 | 0.59296905 | 4.61697319 | 0.0586046  | 0.18831705 |
| ENSMUSG00000021978 | 0.59282455 | 5.26980326 | 0.0569202  | 0.18493827 |
| ENSMUSG00000045441 | 0.59270337 | 0.69957259 | 0.14949193 | 0.34133411 |
| ENSMUSG00000011256 | 0.59248167 | 7.25724794 | 0.05419709 | 0.17924937 |
| ENSMUSG00000038497 | 0.59240372 | 2.73874773 | 0.07969952 | 0.23048528 |
| ENSMUSG00000063952 | 0.59235374 | 4.47069389 | 0.05994507 | 0.19127321 |
| ENSMUSG00000042312 | 0.59212718 | 4.113229   | 0.06240023 | 0.19716497 |
| ENSMUSG00000035227 | 0.59207555 | 7.97824077 | 0.05395141 | 0.17890899 |
| ENSMUSG00000062031 | 0.59198417 | 1.8425671  | 0.10413414 | 0.27383141 |
| ENSMUSG00000028334 | 0.59185501 | 5.81482411 | 0.05631437 | 0.18397278 |
| ENSMUSG00000006418 | 0.59185293 | 6.76247671 | 0.0548082  | 0.18041422 |
| ENSMUSG00000021957 | 0.5908803  | 7.05594049 | 0.05503802 | 0.1808672  |
| ENSMUSG00000011382 | 0.59034351 | 3.66704294 | 0.06667619 | 0.20507955 |
| ENSMUSG00000076512 | 0.58957481 | 1.68179108 | 0.10746138 | 0.27991872 |
| ENSMUSG00000031812 | 0.58933236 | 5.3418989  | 0.05830898 | 0.18753476 |
| ENSMUSG00000018474 | 0.58892205 | 6.94037151 | 0.05583236 | 0.18273024 |
| ENSMUSG00000025145 | 0.58865037 | 2.40925334 | 0.08772602 | 0.24477036 |
| ENSMUSG00000039814 | 0.58864911 | 1.81741385 | 0.10500365 | 0.27526405 |
| ENSMUSG00000099375 | 0.58855246 | 2.47578612 | 0.08596014 | 0.24232866 |
| ENSMUSG00000062908 | 0.58792725 | 6.31795623 | 0.05693574 | 0.18493827 |
| ENSMUSG00000042121 | 0.5876845  | 4.62058122 | 0.06108768 | 0.19398398 |
| ENSMUSG00000046562 | 0.58740386 | 4.74888133 | 0.06111668 | 0.19401891 |
| ENSMUSG00000002546 | 0.58678226 | 5.57758858 | 0.05882022 | 0.18878489 |
| ENSMUSG00000042569 | 0.58676932 | 3.73729281 | 0.06817351 | 0.20771094 |
| ENSMUSG00000038831 | 0.58663816 | 3.3681248  | 0.07041937 | 0.21152659 |
| ENSMUSG00000028973 | 0.58644578 | 3.70391627 | 0.07057058 | 0.21180995 |
| ENSMUSG00000043964 | 0.58641847 | 4.45258877 | 0.062547   | 0.19745516 |
| ENSMUSG00000022498 | 0.58627283 | 6.4902674  | 0.05741177 | 0.18564573 |
| ENSMUSG00000043885 | 0.58561265 | 5.29506444 | 0.05942249 | 0.19037794 |
| ENSMUSG00000056698 | 0.58553132 | 3.03879078 | 0.07596397 | 0.22303169 |
| ENSMUSG00000030741 | 0.58470218 | 3.28559932 | 0.07421996 | 0.21964547 |
| ENSMUSG00000030315 | 0.58438601 | 3.86302532 | 0.0680624  | 0.20745758 |
| ENSMUSG00000030835 | 0.58437569 | 6.92044166 | 0.05789464 | 0.18653593 |
| ENSMUSG00000015013 | 0.58422916 | 4.22141237 | 0.06609782 | 0.20406494 |
| ENSMUSG00000023908 | 0.58361362 | 2.38922196 | 0.0945448  | 0.25780371 |
| ENSMUSG00000023051 | 0.58305212 | 4.43780147 | 0.06559744 | 0.20357165 |
| ENSMUSG00000040712 | 0.58294263 | 3.78279949 | 0.0702775  | 0.21134204 |
| ENSMUSG00000027952 | 0.58224859 | 3.76047983 | 0.07101954 | 0.21276974 |
| ENSMUSG00000039316 | 0.58222369 | 7.13701834 | 0.05857365 | 0.18827368 |
| ENSMUSG00000073411 | 0.5820788  | 8.96813581 | 0.05781567 | 0.18637397 |
| ENSMUSG00000022560 | 0.58178559 | 2.17886211 | 0.1029443  | 0.27167191 |
| ENSMUSG00000047098 | 0.58153181 | 4.17911148 | 0.06788563 | 0.2070358  |

|                    |            |            |            |            |
|--------------------|------------|------------|------------|------------|
| ENSMUSG00000073633 | 0.58140084 | 0.88745023 | 0.14914309 | 0.34109297 |
| ENSMUSG00000041308 | 0.58110809 | 2.3809073  | 0.08369981 | 0.23828374 |
| ENSMUSG00000033253 | 0.58088097 | 4.38931944 | 0.06561976 | 0.20357165 |
| ENSMUSG00000038070 | 0.58068601 | 4.55422805 | 0.06455861 | 0.20156342 |
| ENSMUSG00000038976 | 0.58060302 | 4.27273342 | 0.06608671 | 0.20406494 |
| ENSMUSG00000029599 | 0.58049156 | 5.51294153 | 0.06182249 | 0.19585599 |
| ENSMUSG00000045211 | 0.57956816 | 2.36714816 | 0.09647289 | 0.26035125 |
| ENSMUSG00000007603 | 0.57954178 | 2.58029433 | 0.09202043 | 0.25326485 |
| ENSMUSG00000060860 | 0.5793944  | 6.53797974 | 0.06039436 | 0.19233925 |
| ENSMUSG00000043987 | 0.57929786 | 3.70797071 | 0.07157993 | 0.21375092 |
| ENSMUSG00000040054 | 0.57778829 | 7.53703581 | 0.06013726 | 0.19169974 |
| ENSMUSG00000031805 | 0.57750723 | 4.31342689 | 0.06749224 | 0.2063028  |
| ENSMUSG00000094087 | 0.57696624 | 1.73881928 | 0.11710197 | 0.29491536 |
| ENSMUSG00000034254 | 0.57689024 | 4.17518584 | 0.06981571 | 0.21036396 |
| ENSMUSG00000018661 | 0.57684764 | 4.03175069 | 0.07045656 | 0.21152659 |
| ENSMUSG00000020472 | 0.57614394 | 4.5123086  | 0.06713792 | 0.20574461 |
| ENSMUSG00000059323 | 0.57552776 | 5.45820464 | 0.0643946  | 0.20116783 |
| ENSMUSG00000028032 | 0.57548734 | 4.09754783 | 0.06978753 | 0.21033782 |
| ENSMUSG00000022791 | 0.57511373 | 3.20899357 | 0.0817386  | 0.23411426 |
| ENSMUSG00000053128 | 0.57504449 | 4.89020788 | 0.06602393 | 0.20402268 |
| ENSMUSG00000032898 | 0.57485139 | 4.31045863 | 0.06887381 | 0.20902771 |
| ENSMUSG00000001229 | 0.57474679 | 4.80222397 | 0.06672974 | 0.20507955 |
| ENSMUSG00000030688 | 0.57427746 | 1.18019127 | 0.15468238 | 0.34890081 |
| ENSMUSG00000018677 | 0.57420687 | 4.11719699 | 0.07121534 | 0.21309275 |
| ENSMUSG00000031862 | 0.57417706 | 5.61882177 | 0.06451701 | 0.20149186 |
| ENSMUSG00000041939 | 0.57401944 | 1.76113828 | 0.12440513 | 0.30567468 |
| ENSMUSG00000052040 | 0.5739352  | 6.2276884  | 0.06318111 | 0.19887481 |
| ENSMUSG00000023175 | 0.57377158 | 7.04224644 | 0.06244692 | 0.1972547  |
| ENSMUSG00000040687 | 0.5731887  | 6.18777726 | 0.0636231  | 0.1996251  |
| ENSMUSG00000030161 | 0.57284415 | 4.78273883 | 0.06737294 | 0.20608903 |
| ENSMUSG00000021286 | 0.57269916 | 1.92872822 | 0.11279962 | 0.28786902 |
| ENSMUSG00000021819 | 0.57246258 | 4.52534543 | 0.06940841 | 0.20989911 |
| ENSMUSG00000030839 | 0.57228304 | 2.58355159 | 0.09325737 | 0.25563994 |
| ENSMUSG00000030104 | 0.57204387 | 9.06583419 | 0.0621682  | 0.19664737 |
| ENSMUSG00000036046 | 0.57203654 | 5.35755231 | 0.06586042 | 0.20392655 |
| ENSMUSG00000024854 | 0.57200807 | 4.0811695  | 0.07245072 | 0.21526301 |
| ENSMUSG00000027332 | 0.57077763 | 5.46052119 | 0.06645481 | 0.20487383 |
| ENSMUSG00000068036 | 0.5707626  | 3.11499772 | 0.07826017 | 0.22760456 |
| ENSMUSG00000075600 | 0.57036482 | 0.87515495 | 0.17091365 | 0.37189928 |
| ENSMUSG00000041481 | 0.57017919 | 7.13587228 | 0.06387016 | 0.20017643 |
| ENSMUSG00000041740 | 0.57014033 | 7.24671467 | 0.06388193 | 0.20017643 |
| ENSMUSG00000036526 | 0.56974388 | 5.69084319 | 0.06652541 | 0.20491573 |
| ENSMUSG00000027502 | 0.56940917 | 5.28626968 | 0.06770271 | 0.20682889 |

|                    |            |            |            |            |
|--------------------|------------|------------|------------|------------|
| ENSMUSG00000039982 | 0.56927679 | 4.08351987 | 0.07239059 | 0.21523576 |
| ENSMUSG00000033335 | 0.56915447 | 6.25452366 | 0.06541618 | 0.20328353 |
| ENSMUSG00000003762 | 0.56858361 | 2.46830271 | 0.09816908 | 0.26374074 |
| ENSMUSG00000035064 | 0.5683606  | 3.64933704 | 0.07684447 | 0.22445579 |
| ENSMUSG00000031887 | 0.56808996 | 2.429627   | 0.09639711 | 0.26027702 |
| ENSMUSG00000004937 | 0.56776541 | 4.66993953 | 0.07025081 | 0.21132072 |
| ENSMUSG00000001054 | 0.56772663 | 3.90071314 | 0.07525493 | 0.22161365 |
| ENSMUSG00000067274 | 0.56755096 | 9.08117256 | 0.06428463 | 0.2009407  |
| ENSMUSG00000062785 | 0.56706025 | 1.32259746 | 0.15352258 | 0.34693786 |
| ENSMUSG00000020232 | 0.56700481 | 2.78495419 | 0.09515076 | 0.25869282 |
| ENSMUSG00000072919 | 0.56598296 | 2.65780788 | 0.09368477 | 0.25635538 |
| ENSMUSG00000013539 | 0.56510547 | 3.18289327 | 0.08562736 | 0.24166591 |
| ENSMUSG00000017707 | 0.56490826 | 10.852119  | 0.0652771  | 0.20304247 |
| ENSMUSG00000028602 | 0.56489789 | 6.80707069 | 0.06671499 | 0.20507955 |
| ENSMUSG00000047547 | 0.56468003 | 4.00235381 | 0.07567284 | 0.22254046 |
| ENSMUSG00000022906 | 0.56442957 | 8.14363272 | 0.06598716 | 0.20401534 |
| ENSMUSG00000027394 | 0.56401611 | 2.66905999 | 0.09604666 | 0.26017764 |
| ENSMUSG00000030533 | 0.56369039 | 3.93077095 | 0.07975724 | 0.23048661 |
| ENSMUSG00000046792 | 0.56364489 | 1.23913308 | 0.13587163 | 0.32174785 |
| ENSMUSG00000030830 | 0.56321862 | 8.55277986 | 0.06644045 | 0.20487383 |
| ENSMUSG00000019428 | 0.5630546  | 4.99461559 | 0.07184957 | 0.2142178  |
| ENSMUSG00000021384 | 0.56238439 | 1.82081335 | 0.11820932 | 0.29666496 |
| ENSMUSG00000026270 | 0.56211029 | 2.32851858 | 0.10322185 | 0.27216246 |
| ENSMUSG00000059970 | 0.56208405 | 1.36486575 | 0.14500522 | 0.33506242 |
| ENSMUSG00000027950 | 0.56201657 | 1.30948982 | 0.12007724 | 0.29960967 |
| ENSMUSG00000001482 | 0.56200942 | 4.5798293  | 0.07420855 | 0.21964547 |
| ENSMUSG00000075419 | 0.56183987 | 3.33862729 | 0.08382782 | 0.23846792 |
| ENSMUSG00000066877 | 0.56161165 | 2.38916673 | 0.10083628 | 0.26763928 |
| ENSMUSG00000073600 | 0.56129728 | 1.64510517 | 0.13038004 | 0.31447514 |
| ENSMUSG00000079450 | 0.56128647 | 1.7622575  | 0.12066497 | 0.30072821 |
| ENSMUSG00000038421 | 0.56045096 | 4.60895882 | 0.07410991 | 0.21950048 |
| ENSMUSG00000045438 | 0.55935521 | 3.64441171 | 0.08177934 | 0.23411426 |
| ENSMUSG00000047675 | 0.55919798 | 8.12269564 | 0.0686461  | 0.20864699 |
| ENSMUSG00000021013 | 0.55851107 | 1.89347076 | 0.10958163 | 0.28298091 |
| ENSMUSG00000005951 | 0.55838972 | 1.56794518 | 0.12818185 | 0.31126168 |
| ENSMUSG00000027551 | 0.5581856  | 2.67197653 | 0.10176479 | 0.26944059 |
| ENSMUSG00000049608 | 0.55789311 | 4.30576723 | 0.07800788 | 0.22699324 |
| ENSMUSG00000026547 | 0.5578367  | 7.67030731 | 0.06948318 | 0.21004402 |
| ENSMUSG00000037217 | 0.55776806 | 2.03427688 | 0.10823952 | 0.28086019 |
| ENSMUSG00000008348 | 0.55775855 | 6.3414406  | 0.07088093 | 0.21262306 |
| ENSMUSG00000072082 | 0.5571663  | 6.16016333 | 0.07154379 | 0.21371974 |
| ENSMUSG00000035845 | 0.55680259 | 4.12302022 | 0.08040049 | 0.23151619 |
| ENSMUSG00000020476 | 0.55651279 | 6.09929712 | 0.07202301 | 0.21449768 |

|                    |            |            |            |            |
|--------------------|------------|------------|------------|------------|
| ENSMUSG00000043602 | 0.55638631 | 1.89858068 | 0.11917892 | 0.29826536 |
| ENSMUSG00000043323 | 0.55587701 | 1.97734978 | 0.11592022 | 0.29324035 |
| ENSMUSG00000031818 | 0.55575658 | 6.7249911  | 0.07145394 | 0.21356965 |
| ENSMUSG00000052934 | 0.55560565 | 2.02863222 | 0.12097393 | 0.30108075 |
| ENSMUSG00000023505 | 0.55557093 | 6.64218514 | 0.0715263  | 0.21371974 |
| ENSMUSG00000032553 | 0.55485926 | 5.03450475 | 0.07580437 | 0.22281873 |
| ENSMUSG00000058586 | 0.55481605 | 4.43554348 | 0.0790862  | 0.22926493 |
| ENSMUSG00000002031 | 0.55449713 | 4.01726788 | 0.08247506 | 0.23573047 |
| ENSMUSG00000030397 | 0.55448054 | 2.47488365 | 0.10285365 | 0.27159005 |
| ENSMUSG00000060519 | 0.55415385 | 6.770043   | 0.07210662 | 0.21450973 |
| ENSMUSG00000059518 | 0.5536458  | 2.25475505 | 0.11578794 | 0.29311202 |
| ENSMUSG00000040857 | 0.55299941 | 0.82767304 | 0.20138236 | 0.41121735 |
| ENSMUSG00000038642 | 0.55273418 | 8.57707197 | 0.0716359  | 0.21381719 |
| ENSMUSG00000011877 | 0.5524318  | 3.8840988  | 0.08433992 | 0.23947386 |
| ENSMUSG00000005107 | 0.55153422 | 2.90987175 | 0.0970594  | 0.26154137 |
| ENSMUSG00000050846 | 0.55147757 | 2.80702404 | 0.10065234 | 0.26734849 |
| ENSMUSG00000029577 | 0.5513701  | 5.37348267 | 0.07642854 | 0.223908   |
| ENSMUSG00000024079 | 0.55109408 | 8.01282327 | 0.0726118  | 0.21565564 |
| ENSMUSG00000038836 | 0.55095288 | 2.13173068 | 0.10864758 | 0.28145921 |
| ENSMUSG00000005043 | 0.55074302 | 2.49160511 | 0.1119842  | 0.28650952 |
| ENSMUSG00000035891 | 0.55070966 | 5.5256271  | 0.07607869 | 0.22306197 |
| ENSMUSG00000055745 | 0.55062236 | 3.60344924 | 0.0872463  | 0.24399441 |
| ENSMUSG00000049932 | 0.55046649 | 4.20258874 | 0.08365658 | 0.23822355 |
| ENSMUSG00000074738 | 0.55045021 | 1.20773569 | 0.17368874 | 0.37579354 |
| ENSMUSG00000020289 | 0.5502962  | 3.91919483 | 0.08407701 | 0.23904205 |
| ENSMUSG00000025422 | 0.55005804 | 3.55795803 | 0.08768073 | 0.24470729 |
| ENSMUSG00000021504 | 0.55002984 | 2.61178012 | 0.09949588 | 0.26547767 |
| ENSMUSG00000052456 | 0.54999787 | 5.02952093 | 0.07862094 | 0.22840737 |
| ENSMUSG00000020455 | 0.54998698 | 4.49334145 | 0.08080717 | 0.23225601 |
| ENSMUSG00000031807 | 0.54986556 | 3.6233209  | 0.09009566 | 0.24938183 |
| ENSMUSG00000001036 | 0.54985116 | 1.44277501 | 0.14367054 | 0.33304883 |
| ENSMUSG00000049760 | 0.54908022 | 3.96698277 | 0.08510535 | 0.24094936 |
| ENSMUSG00000020329 | 0.54832221 | 2.36476956 | 0.11650874 | 0.2939018  |
| ENSMUSG00000062006 | 0.54831309 | 7.8235485  | 0.0743173  | 0.21987318 |
| ENSMUSG00000020536 | 0.54809131 | 3.57548782 | 0.09145134 | 0.25218189 |
| ENSMUSG00000045257 | 0.54803634 | 1.48639347 | 0.13342224 | 0.31821601 |
| ENSMUSG00000047417 | 0.54772253 | 3.84988042 | 0.08795412 | 0.24520181 |
| ENSMUSG00000028857 | 0.54766913 | 3.92811408 | 0.08599701 | 0.24232866 |
| ENSMUSG00000024013 | 0.5471483  | 5.66833952 | 0.07792677 | 0.22687966 |
| ENSMUSG00000041571 | 0.5470241  | 6.2382973  | 0.0766083  | 0.2240694  |
| ENSMUSG00000049401 | 0.54685418 | 6.093995   | 0.07705457 | 0.22482587 |
| ENSMUSG00000042700 | 0.5462926  | 5.83071523 | 0.07763596 | 0.22633851 |
| ENSMUSG00000001517 | 0.54609816 | 6.03690255 | 0.07740575 | 0.22577332 |

|                    |            |            |            |            |
|--------------------|------------|------------|------------|------------|
| ENSMUSG0000006019  | 0.54593786 | 1.8346441  | 0.12880594 | 0.31186423 |
| ENSMUSG00000024423 | 0.54565158 | 6.03473661 | 0.07742116 | 0.22577332 |
| ENSMUSG00000036636 | 0.5454488  | 4.96607695 | 0.08083415 | 0.23227166 |
| ENSMUSG00000032306 | 0.54486601 | 4.4036494  | 0.08447559 | 0.23973284 |
| ENSMUSG00000026810 | 0.54460746 | 4.34553544 | 0.08542829 | 0.24135734 |
| ENSMUSG0000002308  | 0.54439189 | 3.26072801 | 0.09603367 | 0.26017764 |
| ENSMUSG00000040415 | 0.54407955 | 4.13342198 | 0.08702669 | 0.24363859 |
| ENSMUSG00000030987 | 0.54395237 | 5.39899927 | 0.0802759  | 0.23129658 |
| ENSMUSG00000005949 | 0.54391353 | 3.98003872 | 0.08731217 | 0.24399441 |
| ENSMUSG00000025138 | 0.54373482 | 4.5660187  | 0.08412061 | 0.2390528  |
| ENSMUSG00000038712 | 0.54372119 | 4.18482793 | 0.08669348 | 0.24334594 |
| ENSMUSG00000021486 | 0.5435668  | 6.5919559  | 0.07796654 | 0.22693419 |
| ENSMUSG00000029060 | 0.54330637 | 1.37249231 | 0.16764491 | 0.36745584 |
| ENSMUSG00000024875 | 0.54286094 | 3.550164   | 0.09357101 | 0.2561741  |
| ENSMUSG00000045665 | 0.5425644  | 3.73915135 | 0.09275843 | 0.25470036 |
| ENSMUSG00000036613 | 0.54222082 | 3.55201329 | 0.09206562 | 0.25326485 |
| ENSMUSG00000031012 | 0.5420518  | 2.77421343 | 0.10313424 | 0.27200218 |
| ENSMUSG00000021884 | 0.54197107 | 3.05753515 | 0.09673011 | 0.26084958 |
| ENSMUSG00000022639 | 0.54118136 | 3.62558031 | 0.09131033 | 0.25209693 |
| ENSMUSG00000032330 | 0.54061777 | 6.53071915 | 0.07954944 | 0.23011296 |
| ENSMUSG00000023873 | 0.54010605 | 1.43766579 | 0.1524556  | 0.34561303 |
| ENSMUSG00000022831 | 0.5397362  | 8.19063693 | 0.07869526 | 0.22850019 |
| ENSMUSG00000034255 | 0.53966472 | 4.18798202 | 0.08938452 | 0.24785874 |
| ENSMUSG00000032763 | 0.53963946 | 3.42235324 | 0.10014776 | 0.26641213 |
| ENSMUSG00000027378 | 0.53933278 | 2.35084324 | 0.12479041 | 0.30628842 |
| ENSMUSG00000029461 | 0.53875182 | 4.7629346  | 0.08474086 | 0.24016964 |
| ENSMUSG00000019969 | 0.53805793 | 6.51535563 | 0.08098691 | 0.23251483 |
| ENSMUSG00000028518 | 0.53794458 | 1.6247301  | 0.14216245 | 0.33069023 |
| ENSMUSG00000053411 | 0.53781088 | 4.69524894 | 0.08669751 | 0.24334594 |
| ENSMUSG00000025410 | 0.53772611 | 5.65344852 | 0.08315322 | 0.23710321 |
| ENSMUSG00000028467 | 0.53706587 | 3.98735787 | 0.09360916 | 0.2562135  |
| ENSMUSG00000044948 | 0.53700261 | 4.25753895 | 0.09019927 | 0.24960455 |
| ENSMUSG00000051864 | 0.53636926 | 4.10662053 | 0.09208563 | 0.25326485 |
| ENSMUSG00000008393 | 0.53558469 | 4.91322065 | 0.08659648 | 0.24325514 |
| ENSMUSG00000070639 | 0.53554519 | 2.96787619 | 0.10683892 | 0.27870124 |
| ENSMUSG00000087543 | 0.53438428 | 1.39014919 | 0.14834556 | 0.33994019 |
| ENSMUSG00000020736 | 0.53423112 | 3.93354086 | 0.09531723 | 0.25891712 |
| ENSMUSG00000067586 | 0.53419619 | 5.99571609 | 0.0841321  | 0.2390528  |
| ENSMUSG00000046879 | 0.53409099 | 8.28747474 | 0.08174874 | 0.23411426 |
| ENSMUSG00000031851 | 0.53389254 | 3.12906438 | 0.10479702 | 0.27503797 |
| ENSMUSG00000040339 | 0.53374265 | 4.79550377 | 0.0881814  | 0.24554079 |
| ENSMUSG00000039754 | 0.53366393 | 2.12930459 | 0.12943838 | 0.3128336  |
| ENSMUSG00000041241 | 0.53357677 | 3.07567789 | 0.10493352 | 0.27526224 |

|                    |            |            |            |            |
|--------------------|------------|------------|------------|------------|
| ENSMUSG00000053964 | 0.53354953 | 1.56766974 | 0.16312209 | 0.36113912 |
| ENSMUSG00000047045 | 0.53330922 | 6.0391014  | 0.0846102  | 0.23992543 |
| ENSMUSG00000035107 | 0.53291435 | 3.84308973 | 0.09455874 | 0.25780371 |
| ENSMUSG00000017837 | 0.5328711  | 4.09586686 | 0.09446887 | 0.25771624 |
| ENSMUSG00000051950 | 0.5321561  | 3.05096217 | 0.11009093 | 0.28368474 |
| ENSMUSG00000076672 | 0.53200577 | 6.23745858 | 0.08467255 | 0.24003911 |
| ENSMUSG00000017299 | 0.5316414  | 3.63695152 | 0.09876342 | 0.26468333 |
| ENSMUSG00000046269 | 0.53161945 | 1.20411769 | 0.17765764 | 0.38020627 |
| ENSMUSG00000027822 | 0.53147458 | 5.80638519 | 0.08581132 | 0.2420584  |
| ENSMUSG00000023010 | 0.53139567 | 7.43237892 | 0.08383085 | 0.23846792 |
| ENSMUSG00000057342 | 0.5313542  | 2.89056991 | 0.11297079 | 0.28808817 |
| ENSMUSG00000038302 | 0.53133573 | 2.60717097 | 0.11615686 | 0.293426   |
| ENSMUSG00000029022 | 0.53129445 | 4.13835873 | 0.09516269 | 0.25869282 |
| ENSMUSG00000033610 | 0.53025604 | 3.11820265 | 0.10611127 | 0.27713826 |
| ENSMUSG00000044583 | 0.52989949 | 8.26768211 | 0.0841473  | 0.2390528  |
| ENSMUSG00000020553 | 0.52989857 | 3.90244589 | 0.09623003 | 0.26021681 |
| ENSMUSG00000000915 | 0.52989356 | 5.63266578 | 0.08801569 | 0.2452613  |
| ENSMUSG00000049488 | 0.52950662 | 3.84729678 | 0.09616683 | 0.26021681 |
| ENSMUSG00000030890 | 0.52933691 | 5.84821294 | 0.0874229  | 0.24405088 |
| ENSMUSG00000031168 | 0.52886129 | 5.3876428  | 0.08920298 | 0.2475463  |
| ENSMUSG00000024900 | 0.52880907 | 5.55640769 | 0.0881843  | 0.24554079 |
| ENSMUSG00000041035 | 0.52879983 | 3.59966717 | 0.10313584 | 0.27200218 |
| ENSMUSG00000094797 | 0.52848332 | 6.20067163 | 0.08706511 | 0.24368289 |
| ENSMUSG00000036427 | 0.52822065 | 8.20466643 | 0.08528073 | 0.2411305  |
| ENSMUSG00000097567 | 0.52818661 | 2.60487826 | 0.119594   | 0.298888   |
| ENSMUSG00000024308 | 0.52817112 | 8.4477576  | 0.08514341 | 0.24099385 |
| ENSMUSG00000026285 | 0.52759277 | 1.33261147 | 0.18168836 | 0.3851636  |
| ENSMUSG00000034308 | 0.52746086 | 2.26995247 | 0.12536825 | 0.30684775 |
| ENSMUSG00000063383 | 0.52740545 | 2.06369167 | 0.13321494 | 0.31791357 |
| ENSMUSG00000025068 | 0.5273804  | 5.67347366 | 0.0889894  | 0.24701715 |
| ENSMUSG00000024393 | 0.52720116 | 7.03065951 | 0.08679746 | 0.24347856 |
| ENSMUSG00000033739 | 0.52708864 | 1.6234791  | 0.15278934 | 0.34594271 |
| ENSMUSG00000030745 | 0.52647417 | 7.94558986 | 0.08642556 | 0.24315516 |
| ENSMUSG00000028088 | 0.52643011 | 2.02358453 | 0.13594715 | 0.32178535 |
| ENSMUSG00000039914 | 0.52631522 | 3.0314598  | 0.11103153 | 0.28515456 |
| ENSMUSG00000025574 | 0.52603036 | 4.6022954  | 0.09477517 | 0.25802965 |
| ENSMUSG00000005069 | 0.52570978 | 4.14763048 | 0.09886428 | 0.2648168  |
| ENSMUSG00000075289 | 0.52538697 | 1.91120863 | 0.1413344  | 0.32954952 |
| ENSMUSG00000025006 | 0.52522453 | 1.57874359 | 0.16929097 | 0.36971119 |
| ENSMUSG00000040296 | 0.5251997  | 7.42651699 | 0.08739046 | 0.24405088 |
| ENSMUSG00000034987 | 0.52472417 | 4.17478834 | 0.09890121 | 0.26484993 |
| ENSMUSG00000045107 | 0.52456826 | 1.36941825 | 0.16764491 | 0.36745584 |
| ENSMUSG00000002658 | 0.52449373 | 5.6577504  | 0.09100276 | 0.25131211 |



|                    |            |            |            |            |
|--------------------|------------|------------|------------|------------|
| ENSMUSG00000025737 | 0.52339275 | 3.34819967 | 0.11146377 | 0.28585618 |
| ENSMUSG0000002205  | 0.52332706 | 4.93116467 | 0.0943468  | 0.2575787  |
| ENSMUSG0000003849  | 0.52288294 | 4.2234105  | 0.09812882 | 0.26369827 |
| ENSMUSG00000038023 | 0.52257807 | 5.7069927  | 0.09180113 | 0.25299856 |
| ENSMUSG00000023020 | 0.52234575 | 2.76958713 | 0.12343207 | 0.30471829 |
| ENSMUSG00000083307 | 0.5222315  | 1.61896459 | 0.16097942 | 0.35793856 |
| ENSMUSG00000028266 | 0.52219147 | 4.30488159 | 0.09811571 | 0.26369827 |
| ENSMUSG00000059772 | 0.52207234 | 2.35160225 | 0.13530364 | 0.32097087 |
| ENSMUSG00000024944 | 0.52186145 | 2.78590807 | 0.11957817 | 0.298888   |
| ENSMUSG00000024889 | 0.52170765 | 3.37092993 | 0.11228744 | 0.28713019 |
| ENSMUSG00000029312 | 0.52156148 | 2.45637389 | 0.13054776 | 0.31474881 |
| ENSMUSG00000022636 | 0.52148127 | 6.77937247 | 0.09033639 | 0.24991985 |
| ENSMUSG00000073684 | 0.52136545 | 3.17846552 | 0.11124496 | 0.28556668 |
| ENSMUSG00000050628 | 0.52115078 | 4.84304554 | 0.09618615 | 0.26021681 |
| ENSMUSG00000017221 | 0.52104318 | 6.18543577 | 0.09193037 | 0.2531776  |
| ENSMUSG00000033728 | 0.52027051 | 3.41911278 | 0.11001525 | 0.28367657 |
| ENSMUSG00000076531 | 0.52009913 | 1.68348702 | 0.15121823 | 0.34374733 |
| ENSMUSG0000007041  | 0.519459   | 7.80254879 | 0.09075612 | 0.2509523  |
| ENSMUSG00000020777 | 0.51908643 | 5.25657969 | 0.0952874  | 0.2589013  |
| ENSMUSG00000029499 | 0.51887438 | 1.05340868 | 0.20906857 | 0.41992838 |
| ENSMUSG00000020827 | 0.51821423 | 5.13415899 | 0.09634065 | 0.26025491 |
| ENSMUSG00000017404 | 0.51807128 | 7.36195944 | 0.09207214 | 0.25326485 |
| ENSMUSG00000030323 | 0.51800005 | 3.04603249 | 0.1165593  | 0.29396058 |
| ENSMUSG00000004394 | 0.51788544 | 4.855169   | 0.098031   | 0.26369826 |
| ENSMUSG00000021417 | 0.51777255 | 5.5068873  | 0.09534946 | 0.25893945 |
| ENSMUSG00000037408 | 0.51719251 | 3.38793743 | 0.11150962 | 0.28590579 |
| ENSMUSG00000025484 | 0.51692335 | 3.29854993 | 0.11182132 | 0.28629655 |
| ENSMUSG00000023882 | 0.5168868  | 3.45572014 | 0.10899688 | 0.28201112 |
| ENSMUSG00000053317 | 0.5167094  | 5.62519629 | 0.09560882 | 0.25937799 |
| ENSMUSG00000030407 | 0.51660374 | 3.42211578 | 0.11348082 | 0.28889924 |
| ENSMUSG00000026857 | 0.51656812 | 2.22946605 | 0.1422573  | 0.33083949 |
| ENSMUSG00000024594 | 0.51651663 | 5.15320997 | 0.09733016 | 0.26207451 |
| ENSMUSG00000062683 | 0.51602838 | 3.64171842 | 0.11243041 | 0.28731032 |
| ENSMUSG00000014470 | 0.51568631 | 1.37646174 | 0.19279171 | 0.39974347 |
| ENSMUSG00000047731 | 0.51561397 | 4.91272433 | 0.09929508 | 0.26511467 |
| ENSMUSG00000035235 | 0.51538394 | 2.20548965 | 0.1334392  | 0.31821601 |
| ENSMUSG00000097415 | 0.51519342 | 6.12964749 | 0.09506018 | 0.25862977 |
| ENSMUSG00000027435 | 0.51518681 | 6.15118814 | 0.0956312  | 0.25937799 |
| ENSMUSG00000069255 | 0.51486632 | 3.22566302 | 0.11529581 | 0.29234658 |
| ENSMUSG00000031007 | 0.51424047 | 7.26448776 | 0.09430514 | 0.25753016 |
| ENSMUSG00000024588 | 0.51385521 | 4.75740368 | 0.10065148 | 0.26734849 |
| ENSMUSG00000029098 | 0.51357321 | 5.64429396 | 0.09754894 | 0.26253252 |
| ENSMUSG0000002395  | 0.51309914 | 3.54688487 | 0.1120307  | 0.2865605  |

|                     |            |            |            |            |
|---------------------|------------|------------|------------|------------|
| ENSMUSG00000010609  | 0.51279275 | 3.78474551 | 0.11008738 | 0.28368474 |
| ENSMUSG00000002845  | 0.51266021 | 5.86704781 | 0.0974944  | 0.26245123 |
| ENSMUSG000000020190 | 0.51247096 | 6.79779106 | 0.09617325 | 0.26021681 |
| ENSMUSG000000038037 | 0.51246329 | 2.96683441 | 0.12221484 | 0.30298042 |
| ENSMUSG00000003062  | 0.51217823 | 4.88857058 | 0.10156889 | 0.26905402 |
| ENSMUSG00000002984  | 0.51160992 | 4.59189003 | 0.10550025 | 0.27607733 |
| ENSMUSG00000015575  | 0.51149745 | 5.5827272  | 0.09913548 | 0.26508233 |
| ENSMUSG000000030319 | 0.511415   | 2.58931168 | 0.13137345 | 0.31558957 |
| ENSMUSG000000078920 | 0.51122886 | 7.52399044 | 0.09601319 | 0.26017764 |
| ENSMUSG000000028975 | 0.51098365 | 2.62953574 | 0.13097592 | 0.31492337 |
| ENSMUSG00000017764  | 0.5105078  | 3.38394595 | 0.11835135 | 0.2969523  |
| ENSMUSG000000047423 | 0.51045597 | 2.31078167 | 0.14559198 | 0.33598628 |
| ENSMUSG000000032590 | 0.51013677 | 5.03252111 | 0.10289053 | 0.27162093 |
| ENSMUSG000000029722 | 0.5097953  | 4.16264905 | 0.10889838 | 0.28189153 |
| ENSMUSG000000038178 | 0.50960487 | 5.12413054 | 0.10184739 | 0.26959308 |
| ENSMUSG00000016253  | 0.50954951 | 5.08824892 | 0.10296023 | 0.27167191 |
| ENSMUSG000000030894 | 0.50927893 | 6.39220007 | 0.09873089 | 0.26468333 |
| ENSMUSG000000031072 | 0.50860279 | 3.20277271 | 0.11996419 | 0.29944355 |
| ENSMUSG00000017670  | 0.50849301 | 4.76299394 | 0.10498034 | 0.27526405 |
| ENSMUSG000000020111 | 0.50828413 | 4.83529315 | 0.10502049 | 0.27526405 |
| ENSMUSG000000070002 | 0.50799955 | 3.51731876 | 0.11603876 | 0.29338421 |
| ENSMUSG000000033365 | 0.5078824  | 4.23884217 | 0.10974886 | 0.28320931 |
| ENSMUSG00000012848  | 0.50783901 | 8.10227101 | 0.09808787 | 0.26369827 |
| ENSMUSG000000030805 | 0.50754318 | 4.77757472 | 0.10637342 | 0.27762125 |
| ENSMUSG000000023830 | 0.50704389 | 6.61475508 | 0.09974663 | 0.26585318 |
| ENSMUSG000000032667 | 0.50699701 | 5.84564053 | 0.10121722 | 0.26851821 |
| ENSMUSG000000056515 | 0.50682172 | 4.41828673 | 0.10781141 | 0.28023874 |
| ENSMUSG000000025362 | 0.50678326 | 6.45523928 | 0.1007494  | 0.26747452 |
| ENSMUSG000000029703 | 0.5066093  | 4.15876925 | 0.11026513 | 0.2838623  |
| ENSMUSG000000023030 | 0.50653536 | 4.44697694 | 0.10790652 | 0.28026588 |
| ENSMUSG000000031749 | 0.50634612 | 4.19107629 | 0.11032518 | 0.28394911 |
| ENSMUSG000000005802 | 0.5062422  | 7.27410529 | 0.09950489 | 0.26547767 |
| ENSMUSG000000020471 | 0.50623646 | 4.68537734 | 0.10800066 | 0.28044283 |
| ENSMUSG000000035877 | 0.50554664 | 4.13910857 | 0.10883595 | 0.28184557 |
| ENSMUSG000000021176 | 0.50500846 | 1.91209815 | 0.16631368 | 0.3657327  |
| ENSMUSG000000020935 | 0.50483331 | 2.92079712 | 0.13080166 | 0.31492337 |
| ENSMUSG00000015488  | 0.50470681 | 4.32689211 | 0.11159035 | 0.28598166 |
| ENSMUSG000000037406 | 0.50466085 | 0.92958364 | 0.22734217 | 0.44181978 |
| ENSMUSG000000076508 | 0.50453331 | 5.68473468 | 0.10355486 | 0.27277371 |
| ENSMUSG00000018983  | 0.50426285 | 5.85977382 | 0.10339332 | 0.27248131 |
| ENSMUSG000000043059 | 0.50380475 | 3.05850054 | 0.12865398 | 0.31186423 |
| ENSMUSG000000037772 | 0.50338729 | 3.3335199  | 0.1232997  | 0.3045497  |
| ENSMUSG000000008036 | 0.5031365  | 5.03989451 | 0.10762194 | 0.28002618 |

|                    |            |            |            |            |
|--------------------|------------|------------|------------|------------|
| ENSMUSG00000026198 | 0.50307097 | 1.94708606 | 0.15964181 | 0.35584483 |
| ENSMUSG00000027244 | 0.50289085 | 4.76980049 | 0.10811554 | 0.28065774 |
| ENSMUSG00000040097 | 0.50285916 | 3.15578919 | 0.12866327 | 0.31186423 |
| ENSMUSG00000078945 | 0.50274307 | 4.25313581 | 0.11000095 | 0.28367657 |
| ENSMUSG00000071256 | 0.50272824 | 2.92744534 | 0.13312527 | 0.31783429 |
| ENSMUSG00000036835 | 0.5019584  | 4.17834925 | 0.11423591 | 0.29027334 |
| ENSMUSG00000022385 | 0.50193788 | 5.08515703 | 0.10756685 | 0.28002618 |
| ENSMUSG00000030982 | 0.50110355 | 5.97486321 | 0.10520472 | 0.27550455 |
| ENSMUSG00000047617 | 0.50093921 | 2.15107012 | 0.14808873 | 0.33953376 |
| ENSMUSG00000001910 | 0.50091626 | 6.1739279  | 0.10506183 | 0.27526405 |
| ENSMUSG00000022214 | 0.50028058 | 6.0824224  | 0.10549392 | 0.27607733 |
| ENSMUSG00000024312 | 0.49993719 | 4.62662493 | 0.11319352 | 0.28837206 |
| ENSMUSG00000076514 | 0.49896971 | 5.35705961 | 0.10838685 | 0.28103963 |
| ENSMUSG00000073616 | 0.49800579 | 4.29831891 | 0.11608591 | 0.29338421 |
| ENSMUSG00000044167 | 0.49773276 | 7.56075507 | 0.10503883 | 0.27526405 |
| ENSMUSG00000074682 | 0.49772445 | 2.67723705 | 0.13246062 | 0.3170822  |
| ENSMUSG00000076680 | 0.49766334 | 5.03924308 | 0.10912684 | 0.28227965 |
| ENSMUSG00000030595 | 0.4975881  | 3.01787008 | 0.13835989 | 0.32507037 |
| ENSMUSG00000025228 | 0.49694875 | 6.88924561 | 0.1065728  | 0.2780743  |
| ENSMUSG00000071654 | 0.49667428 | 2.23476282 | 0.15686098 | 0.35155772 |
| ENSMUSG00000031834 | 0.49638802 | 3.0001242  | 0.14108542 | 0.32917895 |
| ENSMUSG00000079363 | 0.49614269 | 7.35454621 | 0.10634602 | 0.27761693 |
| ENSMUSG00000063077 | 0.49604929 | 5.32621335 | 0.11003515 | 0.28367657 |
| ENSMUSG00000020263 | 0.49575082 | 3.25947444 | 0.12661837 | 0.30934314 |
| ENSMUSG00000025577 | 0.49535345 | 3.08622019 | 0.13322064 | 0.31791357 |
| ENSMUSG00000020802 | 0.49517422 | 4.62396602 | 0.11667398 | 0.29417914 |
| ENSMUSG00000070427 | 0.49503808 | 1.42328289 | 0.17145247 | 0.37254553 |
| ENSMUSG00000006127 | 0.49438185 | 5.26202427 | 0.11230667 | 0.28713019 |
| ENSMUSG00000041654 | 0.49421684 | 4.04281303 | 0.12092693 | 0.30103324 |
| ENSMUSG00000056121 | 0.494078   | 3.05784127 | 0.13249877 | 0.31710314 |
| ENSMUSG00000022517 | 0.49391532 | 5.21738827 | 0.11270248 | 0.28776423 |
| ENSMUSG00000039477 | 0.49389058 | 2.39600675 | 0.15038389 | 0.34264524 |
| ENSMUSG00000053565 | 0.49300167 | 6.38448136 | 0.1102281  | 0.28383976 |
| ENSMUSG00000021611 | 0.49272025 | 1.04114715 | 0.24032091 | 0.45726162 |
| ENSMUSG00000020415 | 0.49228112 | 4.37056869 | 0.11887055 | 0.29770089 |
| ENSMUSG00000090841 | 0.49213141 | 7.13920189 | 0.1096646  | 0.28311422 |
| ENSMUSG00000021948 | 0.49168478 | 7.84133106 | 0.10925777 | 0.2824151  |
| ENSMUSG00000006024 | 0.49165436 | 6.17221055 | 0.11164238 | 0.28604216 |
| ENSMUSG00000036273 | 0.4916464  | 7.47640097 | 0.10939869 | 0.28264386 |
| ENSMUSG00000079222 | 0.49159908 | 1.08116896 | 0.20375844 | 0.41354402 |
| ENSMUSG00000025132 | 0.49158064 | 8.01340677 | 0.10931325 | 0.28249078 |
| ENSMUSG00000042903 | 0.49154691 | 3.2578726  | 0.13144381 | 0.31562845 |
| ENSMUSG00000094345 | 0.4915336  | 4.11223621 | 0.12182202 | 0.30242371 |

|                    |            |            |            |            |
|--------------------|------------|------------|------------|------------|
| ENSMUSG00000014786 | 0.49094195 | 2.3320132  | 0.14604086 | 0.33659    |
| ENSMUSG00000052369 | 0.49044513 | 3.70406879 | 0.12753222 | 0.31034329 |
| ENSMUSG00000078681 | 0.4904257  | 2.79852895 | 0.14744224 | 0.33844553 |
| ENSMUSG00000035198 | 0.49024477 | 4.56177009 | 0.12056189 | 0.30054079 |
| ENSMUSG00000019173 | 0.48985699 | 6.07516509 | 0.11300391 | 0.28809319 |
| ENSMUSG00000020585 | 0.48957553 | 7.03591689 | 0.11140691 | 0.28577832 |
| ENSMUSG00000038252 | 0.48929545 | 8.00944891 | 0.11086176 | 0.28485424 |
| ENSMUSG00000062866 | 0.48915277 | 3.03727757 | 0.13791953 | 0.3244599  |
| ENSMUSG00000032860 | 0.48893057 | 0.97351661 | 0.22082112 | 0.43352174 |
| ENSMUSG00000024925 | 0.48859484 | 1.33898856 | 0.19690699 | 0.40517952 |
| ENSMUSG00000033720 | 0.48852496 | 2.20664586 | 0.14900665 | 0.34087562 |
| ENSMUSG00000031792 | 0.488515   | 4.14001513 | 0.12345179 | 0.30471829 |
| ENSMUSG00000062115 | 0.48826642 | 2.74484204 | 0.1437886  | 0.33325086 |
| ENSMUSG00000020707 | 0.48768985 | 3.36687932 | 0.13506961 | 0.32083495 |
| ENSMUSG00000019338 | 0.48763078 | 4.25427783 | 0.12193941 | 0.30250623 |
| ENSMUSG00000024301 | 0.48759143 | 2.11624237 | 0.16556285 | 0.36482014 |
| ENSMUSG00000002608 | 0.48667598 | 4.73140922 | 0.12138462 | 0.30174426 |
| ENSMUSG00000020109 | 0.48662173 | 4.35120528 | 0.12419869 | 0.30566959 |
| ENSMUSG00000042831 | 0.48648057 | 1.83523702 | 0.18950979 | 0.39483355 |
| ENSMUSG00000020780 | 0.48628692 | 6.18137526 | 0.11553433 | 0.29274488 |
| ENSMUSG00000071203 | 0.48596838 | 3.66808421 | 0.13082618 | 0.31492337 |
| ENSMUSG00000044252 | 0.48574957 | 2.94731631 | 0.14331383 | 0.33243629 |
| ENSMUSG00000035521 | 0.48552399 | 3.5546487  | 0.13516662 | 0.32097011 |
| ENSMUSG00000029073 | 0.48459983 | 4.31208906 | 0.12496956 | 0.30635865 |
| ENSMUSG00000034793 | 0.48457654 | 3.21514337 | 0.1407873  | 0.32876793 |
| ENSMUSG00000029554 | 0.48451803 | 4.140145   | 0.12786553 | 0.31077347 |
| ENSMUSG00000025192 | 0.48437465 | 4.68432706 | 0.1221076  | 0.30278417 |
| ENSMUSG00000053929 | 0.48413606 | 4.0520253  | 0.12965361 | 0.31315521 |
| ENSMUSG00000045410 | 0.48410971 | 4.31557389 | 0.12585766 | 0.30769643 |
| ENSMUSG00000030560 | 0.4839976  | 8.46069006 | 0.11446632 | 0.29062041 |
| ENSMUSG00000060002 | 0.48375418 | 4.37136589 | 0.12557486 | 0.30707467 |
| ENSMUSG00000004849 | 0.48373757 | 5.11156481 | 0.12089095 | 0.30101317 |
| ENSMUSG00000040433 | 0.4835983  | 6.37722922 | 0.11670052 | 0.29417914 |
| ENSMUSG00000060639 | 0.4831772  | 2.23204186 | 0.15686098 | 0.35155772 |
| ENSMUSG00000031816 | 0.48311903 | 3.33122669 | 0.13902745 | 0.32591934 |
| ENSMUSG00000023963 | 0.48307539 | 1.68759117 | 0.17858089 | 0.38132006 |
| ENSMUSG00000028910 | 0.48277224 | 4.00242798 | 0.13174164 | 0.31602683 |
| ENSMUSG00000032558 | 0.48262917 | 3.12155539 | 0.14264885 | 0.3313507  |
| ENSMUSG00000079111 | 0.48202838 | 6.39750495 | 0.11808776 | 0.29656693 |
| ENSMUSG00000031951 | 0.48192284 | 1.73516027 | 0.18145543 | 0.38483554 |
| ENSMUSG00000033960 | 0.48189129 | 3.18846171 | 0.14023223 | 0.32782665 |
| ENSMUSG00000042712 | 0.48155944 | 5.2082701  | 0.12163127 | 0.30215887 |
| ENSMUSG00000037552 | 0.48132684 | 3.73095275 | 0.13363072 | 0.31835229 |

|                    |            |            |            |            |
|--------------------|------------|------------|------------|------------|
| ENSMUSG00000079499 | 0.48088353 | 4.10575145 | 0.12876087 | 0.31186423 |
| ENSMUSG00000031996 | 0.48078245 | 6.10368112 | 0.11956491 | 0.298888   |
| ENSMUSG00000021820 | 0.48070601 | 4.24814093 | 0.12795404 | 0.31091851 |
| ENSMUSG00000028743 | 0.48064899 | 0.79767554 | 0.27640267 | 0.49645676 |
| ENSMUSG00000064267 | 0.48052405 | 7.4989261  | 0.11780817 | 0.29607161 |
| ENSMUSG00000052298 | 0.48031117 | 8.05855811 | 0.11741417 | 0.29535676 |
| ENSMUSG00000020921 | 0.47977505 | 1.91532166 | 0.18374873 | 0.38755062 |
| ENSMUSG00000078763 | 0.47919458 | 3.28266158 | 0.13391556 | 0.31872555 |
| ENSMUSG00000023032 | 0.47898224 | 2.73196165 | 0.14618401 | 0.33668677 |
| ENSMUSG00000028468 | 0.47882124 | 5.38260515 | 0.12349532 | 0.30475367 |
| ENSMUSG00000029478 | 0.47873552 | 3.7970429  | 0.13580988 | 0.32174291 |
| ENSMUSG00000027207 | 0.47812442 | 5.65466402 | 0.12295649 | 0.3041199  |
| ENSMUSG00000003228 | 0.47798699 | 3.3448193  | 0.14018598 | 0.32778959 |
| ENSMUSG00000041642 | 0.47780188 | 5.3789683  | 0.12423605 | 0.30567227 |
| ENSMUSG00000023044 | 0.47751525 | 1.68217024 | 0.19682873 | 0.40517952 |
| ENSMUSG00000024143 | 0.47715958 | 5.90414288 | 0.12273236 | 0.30363518 |
| ENSMUSG00000028959 | 0.4770949  | 3.79953553 | 0.13711986 | 0.32356686 |
| ENSMUSG00000024608 | 0.47703764 | 7.99876594 | 0.12016496 | 0.29968984 |
| ENSMUSG00000030657 | 0.47643278 | 3.85355839 | 0.13720352 | 0.32362264 |
| ENSMUSG00000002957 | 0.47635366 | 5.83889389 | 0.1240642  | 0.30552828 |
| ENSMUSG00000034156 | 0.47600027 | 3.47906728 | 0.13990771 | 0.32740155 |
| ENSMUSG00000028854 | 0.47586922 | 4.09917616 | 0.13520013 | 0.32097011 |
| ENSMUSG00000020752 | 0.47579358 | 4.74170799 | 0.12887924 | 0.31197165 |
| ENSMUSG00000032815 | 0.4754682  | 5.13338797 | 0.12705785 | 0.30999816 |
| ENSMUSG00000037921 | 0.4753016  | 5.68839857 | 0.12412061 | 0.30559741 |
| ENSMUSG00000042423 | 0.47522128 | 5.19922712 | 0.12736356 | 0.31034329 |
| ENSMUSG00000096727 | 0.47488236 | 6.35565755 | 0.12381943 | 0.30527405 |
| ENSMUSG00000046949 | 0.47459432 | 3.73383114 | 0.13750405 | 0.32385741 |
| ENSMUSG00000005625 | 0.47458324 | 6.29376996 | 0.12431499 | 0.30567468 |
| ENSMUSG00000030811 | 0.47457347 | 3.26242657 | 0.14810523 | 0.33953376 |
| ENSMUSG00000024208 | 0.47412871 | 3.42465167 | 0.14508529 | 0.33512917 |
| ENSMUSG00000025373 | 0.4740265  | 3.76120841 | 0.13744032 | 0.32382706 |
| ENSMUSG00000040414 | 0.47401423 | 2.85165749 | 0.15556832 | 0.34980167 |
| ENSMUSG00000079557 | 0.47399226 | 3.79411163 | 0.13823681 | 0.32499363 |
| ENSMUSG00000042333 | 0.4739154  | 3.0256711  | 0.15550267 | 0.34972697 |
| ENSMUSG00000022957 | 0.47366069 | 5.36831875 | 0.12757343 | 0.31034329 |
| ENSMUSG00000039740 | 0.47360605 | 5.95174186 | 0.1254451  | 0.30689653 |
| ENSMUSG00000019471 | 0.47336613 | 6.47769318 | 0.12490951 | 0.30628842 |
| ENSMUSG00000030727 | 0.47304955 | 3.06700637 | 0.15492117 | 0.34907435 |
| ENSMUSG00000032740 | 0.47300786 | 5.64259659 | 0.12663766 | 0.30934314 |
| ENSMUSG00000027698 | 0.47234403 | 5.00938695 | 0.12965348 | 0.31315521 |
| ENSMUSG00000032315 | 0.47231467 | 1.67078517 | 0.21977889 | 0.4323414  |
| ENSMUSG00000000738 | 0.47220972 | 4.51705477 | 0.13435769 | 0.31970727 |

|                    |            |            |            |            |
|--------------------|------------|------------|------------|------------|
| ENSMUSG00000031622 | 0.47204264 | 5.58337641 | 0.12854075 | 0.31185287 |
| ENSMUSG00000030822 | 0.47196488 | 5.04845071 | 0.13061507 | 0.31481381 |
| ENSMUSG00000072437 | 0.4717903  | 3.0158039  | 0.15434323 | 0.34845317 |
| ENSMUSG00000002280 | 0.47158037 | 3.45284688 | 0.14957333 | 0.34144766 |
| ENSMUSG00000071379 | 0.47152974 | 1.94435975 | 0.18364161 | 0.38747626 |
| ENSMUSG00000039201 | 0.47152332 | 2.99374736 | 0.15512039 | 0.34925299 |
| ENSMUSG00000041126 | 0.47143254 | 3.36568619 | 0.14807671 | 0.33953376 |
| ENSMUSG00000033059 | 0.47079752 | 6.1862541  | 0.1274832  | 0.31034329 |
| ENSMUSG00000034880 | 0.4706089  | 1.70336307 | 0.20287641 | 0.41264037 |
| ENSMUSG00000056185 | 0.47049296 | 1.35828475 | 0.22961316 | 0.44367466 |
| ENSMUSG00000026649 | 0.47042006 | 0.57817008 | 0.29042899 | 0.51291497 |
| ENSMUSG00000027187 | 0.47038337 | 6.70392694 | 0.12664595 | 0.30934314 |
| ENSMUSG00000034055 | 0.47035732 | 4.64972907 | 0.1329419  | 0.31767016 |
| ENSMUSG00000035242 | 0.4700091  | 6.15473576 | 0.12854099 | 0.31185287 |
| ENSMUSG00000079834 | 0.46969103 | 2.96215791 | 0.14361715 | 0.33299664 |
| ENSMUSG00000060601 | 0.46942932 | 2.61557881 | 0.17333287 | 0.37527036 |
| ENSMUSG00000028708 | 0.46922872 | 5.06421587 | 0.13290391 | 0.31767016 |
| ENSMUSG00000030538 | 0.46881861 | 5.08007033 | 0.13305715 | 0.31780472 |
| ENSMUSG00000016487 | 0.46853386 | 5.07078414 | 0.13228221 | 0.31680029 |
| ENSMUSG00000037280 | 0.46844326 | 4.09212573 | 0.13845484 | 0.32515179 |
| ENSMUSG00000031428 | 0.46842879 | 7.72545984 | 0.12697915 | 0.30987626 |
| ENSMUSG00000034194 | 0.46814986 | 3.05684143 | 0.15266528 | 0.34579759 |
| ENSMUSG00000013160 | 0.46800046 | 6.1611161  | 0.12982398 | 0.31327407 |
| ENSMUSG00000022106 | 0.467936   | 6.00620155 | 0.12998521 | 0.31359294 |
| ENSMUSG00000025178 | 0.46781943 | 4.81298501 | 0.13585203 | 0.32174785 |
| ENSMUSG00000059326 | 0.46765465 | 2.13227047 | 0.17855303 | 0.38132006 |
| ENSMUSG00000040220 | 0.46763187 | 2.32815116 | 0.18231576 | 0.38596254 |
| ENSMUSG00000031398 | 0.46650254 | 2.61611641 | 0.17333287 | 0.37527036 |
| ENSMUSG00000024212 | 0.46627737 | 4.36932612 | 0.14091907 | 0.32893318 |
| ENSMUSG00000022587 | 0.46604981 | 9.85260026 | 0.12809232 | 0.31118441 |
| ENSMUSG00000066440 | 0.46577302 | 5.85617723 | 0.13208809 | 0.31647145 |
| ENSMUSG00000038072 | 0.46575117 | 3.96517085 | 0.14251424 | 0.33121746 |
| ENSMUSG00000043019 | 0.46570018 | 7.1095243  | 0.12966714 | 0.31315521 |
| ENSMUSG00000054400 | 0.46567084 | 2.97169075 | 0.15833538 | 0.35403042 |
| ENSMUSG00000097412 | 0.46490088 | 2.92309501 | 0.1650398  | 0.36420491 |
| ENSMUSG00000054843 | 0.46444801 | 3.38567591 | 0.14846719 | 0.34008546 |
| ENSMUSG00000031969 | 0.46407358 | 2.8226914  | 0.1629918  | 0.36107304 |
| ENSMUSG00000039065 | 0.46336491 | 2.95469008 | 0.16525348 | 0.36442572 |
| ENSMUSG00000071657 | 0.46326124 | 4.26525176 | 0.14312118 | 0.33210469 |
| ENSMUSG00000090213 | 0.4629056  | 5.0570344  | 0.13796526 | 0.32449669 |
| ENSMUSG00000024413 | 0.46229045 | 5.58571871 | 0.1357655  | 0.32170844 |
| ENSMUSG00000025746 | 0.46225898 | 4.93540138 | 0.13753491 | 0.32385741 |
| ENSMUSG00000028970 | 0.46220677 | 6.93251401 | 0.13289174 | 0.31767016 |

|                    |            |            |            |            |
|--------------------|------------|------------|------------|------------|
| ENSMUSG0000003068  | 0.46205527 | 4.965041   | 0.14005421 | 0.32755251 |
| ENSMUSG00000061751 | 0.46180501 | 3.0578944  | 0.16143149 | 0.3587958  |
| ENSMUSG00000041528 | 0.4614541  | 4.56000598 | 0.1429432  | 0.33193357 |
| ENSMUSG00000027575 | 0.46131982 | 5.20734177 | 0.13870672 | 0.32567207 |
| ENSMUSG00000020153 | 0.46129277 | 2.10964913 | 0.20206194 | 0.41176039 |
| ENSMUSG00000002825 | 0.46104517 | 2.4567605  | 0.18006348 | 0.38302375 |
| ENSMUSG00000061689 | 0.46060258 | 3.05672807 | 0.16934789 | 0.3697606  |
| ENSMUSG00000035790 | 0.4605863  | 3.54121774 | 0.15483988 | 0.34903706 |
| ENSMUSG00000017801 | 0.46026343 | 5.66743866 | 0.1375433  | 0.32385741 |
| ENSMUSG00000024392 | 0.46025713 | 5.88130636 | 0.13726195 | 0.32366593 |
| ENSMUSG00000035168 | 0.46017792 | 3.62822181 | 0.15302537 | 0.34613992 |
| ENSMUSG00000026664 | 0.45990755 | 5.08886217 | 0.13970451 | 0.32708933 |
| ENSMUSG00000012114 | 0.45981203 | 4.88122857 | 0.14133592 | 0.32954952 |
| ENSMUSG00000001173 | 0.45916113 | 4.73632486 | 0.14266147 | 0.3313507  |
| ENSMUSG00000019362 | 0.45871563 | 4.36544485 | 0.14717426 | 0.33804626 |
| ENSMUSG00000025477 | 0.45863923 | 3.05373838 | 0.16361698 | 0.36178911 |
| ENSMUSG00000030921 | 0.45799976 | 9.08781846 | 0.1348897  | 0.32061946 |
| ENSMUSG00000053398 | 0.45790635 | 6.32304258 | 0.13818323 | 0.3249385  |
| ENSMUSG00000041594 | 0.45775412 | 3.78632304 | 0.15190821 | 0.34509757 |
| ENSMUSG00000024782 | 0.4575501  | 5.64513621 | 0.13973957 | 0.3271004  |
| ENSMUSG00000040652 | 0.45740593 | 4.25285913 | 0.14932306 | 0.34109297 |
| ENSMUSG00000037997 | 0.45731798 | 5.80252421 | 0.13951655 | 0.32679115 |
| ENSMUSG00000039069 | 0.45688862 | 3.16990271 | 0.16660265 | 0.3662134  |
| ENSMUSG00000036902 | 0.45683985 | 5.03258006 | 0.1421214  | 0.33066605 |
| ENSMUSG00000050188 | 0.45662135 | 2.73224254 | 0.17500613 | 0.37790671 |
| ENSMUSG00000019087 | 0.45636547 | 7.44942371 | 0.13734192 | 0.32366593 |
| ENSMUSG00000034243 | 0.45631411 | 6.52488584 | 0.13835822 | 0.32507037 |
| ENSMUSG00000063576 | 0.45605141 | 5.04219414 | 0.14416851 | 0.3337727  |
| ENSMUSG00000061731 | 0.45543926 | 3.40285755 | 0.15986167 | 0.35618766 |
| ENSMUSG00000028779 | 0.45535062 | 3.6068396  | 0.15639885 | 0.35108351 |
| ENSMUSG00000023104 | 0.45514584 | 5.86287395 | 0.14142477 | 0.32961417 |
| ENSMUSG00000028049 | 0.45479554 | 4.25052942 | 0.15162588 | 0.34452876 |
| ENSMUSG00000003308 | 0.45443792 | 4.64529191 | 0.14925808 | 0.34109297 |
| ENSMUSG00000051989 | 0.45432027 | 3.41396192 | 0.15907344 | 0.35494474 |
| ENSMUSG00000028599 | 0.45384627 | 6.49563883 | 0.14072621 | 0.32869914 |
| ENSMUSG00000033192 | 0.4537712  | 2.32254938 | 0.17647068 | 0.37888647 |
| ENSMUSG00000037752 | 0.45364636 | 2.21316357 | 0.18697557 | 0.3919037  |
| ENSMUSG00000024309 | 0.4532419  | 4.36268376 | 0.15281969 | 0.34594271 |
| ENSMUSG00000038633 | 0.45297547 | 6.78476699 | 0.14100618 | 0.32906527 |
| ENSMUSG00000033416 | 0.45245    | 4.64243215 | 0.14994356 | 0.34207559 |
| ENSMUSG00000035642 | 0.45228855 | 2.10525949 | 0.19474871 | 0.40248565 |
| ENSMUSG00000002996 | 0.45225204 | 5.12758864 | 0.14624351 | 0.33668677 |
| ENSMUSG00000031505 | 0.45158466 | 3.4185264  | 0.16974391 | 0.37032537 |

|                    |            |            |            |            |
|--------------------|------------|------------|------------|------------|
| ENSMUSG00000032892 | 0.4510667  | 3.58378373 | 0.16709891 | 0.36693841 |
| ENSMUSG00000040820 | 0.45063549 | 3.59952328 | 0.16014163 | 0.35658246 |
| ENSMUSG00000009863 | 0.44986233 | 6.25729471 | 0.1451382  | 0.33512917 |
| ENSMUSG00000063646 | 0.44927249 | 2.56375141 | 0.18828016 | 0.39371984 |
| ENSMUSG00000024052 | 0.4490496  | 5.70496553 | 0.14695867 | 0.3377669  |
| ENSMUSG00000052712 | 0.44898974 | 5.78514819 | 0.14708054 | 0.33790298 |
| ENSMUSG00000032316 | 0.44883648 | 5.51274622 | 0.14858689 | 0.34013182 |
| ENSMUSG00000024446 | 0.44879627 | 2.11528265 | 0.19704127 | 0.4052819  |
| ENSMUSG00000045302 | 0.44875289 | 6.50645462 | 0.14553036 | 0.33591596 |
| ENSMUSG00000052125 | 0.44873014 | 2.47001813 | 0.18540154 | 0.39015058 |
| ENSMUSG00000059981 | 0.44855893 | 5.89120255 | 0.14725976 | 0.33817062 |
| ENSMUSG00000019179 | 0.44845922 | 7.39034288 | 0.14451619 | 0.33436227 |
| ENSMUSG00000001034 | 0.44844854 | 2.99319428 | 0.17515078 | 0.3779109  |
| ENSMUSG00000026854 | 0.44826804 | 2.71748804 | 0.18559771 | 0.39022922 |
| ENSMUSG00000025858 | 0.44819558 | 4.94268433 | 0.15207166 | 0.34532339 |
| ENSMUSG00000031458 | 0.44764728 | 2.02798091 | 0.21898055 | 0.43190821 |
| ENSMUSG00000032508 | 0.4475784  | 5.64180079 | 0.14867317 | 0.34025709 |
| ENSMUSG00000045231 | 0.44716442 | 1.92684742 | 0.20771494 | 0.41828652 |
| ENSMUSG00000032127 | 0.44716182 | 5.46936915 | 0.14987083 | 0.34198202 |
| ENSMUSG00000067825 | 0.44678619 | 1.95373014 | 0.21292588 | 0.42451335 |
| ENSMUSG00000036067 | 0.44677943 | 5.03627771 | 0.15308273 | 0.34616148 |
| ENSMUSG00000036002 | 0.44655023 | 3.24579195 | 0.17007014 | 0.37084227 |
| ENSMUSG00000026849 | 0.44633017 | 4.77350386 | 0.15502857 | 0.34917045 |
| ENSMUSG00000022205 | 0.44546812 | 8.74714789 | 0.14602264 | 0.33659    |
| ENSMUSG00000096780 | 0.44545175 | 1.67986521 | 0.21977889 | 0.4323414  |
| ENSMUSG00000016206 | 0.44545109 | 5.35984448 | 0.15203182 | 0.34530563 |
| ENSMUSG00000039834 | 0.4446281  | 4.36216959 | 0.16047754 | 0.35696984 |
| ENSMUSG00000095687 | 0.44453748 | 1.39874148 | 0.25880637 | 0.47806918 |
| ENSMUSG00000038838 | 0.44440733 | 2.9866934  | 0.18142996 | 0.38483554 |
| ENSMUSG00000053175 | 0.44435455 | 4.06337333 | 0.16350797 | 0.3616964  |
| ENSMUSG00000009291 | 0.44429773 | 4.648511   | 0.15659834 | 0.35138504 |
| ENSMUSG00000001576 | 0.44429594 | 6.37850135 | 0.14975837 | 0.34179773 |
| ENSMUSG00000028211 | 0.4442084  | 7.12776562 | 0.14817548 | 0.33962261 |
| ENSMUSG00000073987 | 0.44387518 | 3.16698797 | 0.17411408 | 0.37655906 |
| ENSMUSG00000030966 | 0.44355037 | 5.60135569 | 0.15235273 | 0.34547404 |
| ENSMUSG00000025521 | 0.44333198 | 4.48441181 | 0.15951632 | 0.35571215 |
| ENSMUSG00000050199 | 0.44332063 | 2.27058093 | 0.19714741 | 0.4054229  |
| ENSMUSG00000026111 | 0.44303089 | 4.96915516 | 0.1552953  | 0.34949977 |
| ENSMUSG00000005161 | 0.44220253 | 5.98450785 | 0.15304109 | 0.34613992 |
| ENSMUSG00000022136 | 0.44216661 | 8.27017333 | 0.14923808 | 0.34109297 |
| ENSMUSG00000036052 | 0.44185572 | 3.12784212 | 0.17746031 | 0.37993488 |
| ENSMUSG00000055762 | 0.44174684 | 7.19022463 | 0.15094831 | 0.34351225 |
| ENSMUSG00000029076 | 0.44169975 | 7.31889403 | 0.15055601 | 0.3428925  |



|                    |            |            |            |            |
|--------------------|------------|------------|------------|------------|
| ENSMUSG00000026965 | 0.44156238 | 5.5913787  | 0.15478993 | 0.34899741 |
| ENSMUSG00000048677 | 0.44143699 | 3.29152888 | 0.17624355 | 0.37875855 |
| ENSMUSG00000004626 | 0.44121133 | 5.83569763 | 0.1540401  | 0.34803445 |
| ENSMUSG00000008690 | 0.44113023 | 6.67610105 | 0.15229018 | 0.34547404 |
| ENSMUSG00000034126 | 0.4411005  | 4.60947839 | 0.159956   | 0.3563242  |
| ENSMUSG00000024646 | 0.44071846 | 5.59219436 | 0.15498433 | 0.34914372 |
| ENSMUSG00000025731 | 0.44069121 | 2.34725946 | 0.19619506 | 0.40432073 |
| ENSMUSG00000063316 | 0.44060361 | 6.8823198  | 0.15233531 | 0.34547404 |
| ENSMUSG00000027006 | 0.44056432 | 7.67719491 | 0.15106617 | 0.34366592 |
| ENSMUSG00000024521 | 0.44053155 | 6.5603989  | 0.15251504 | 0.34567512 |
| ENSMUSG00000037525 | 0.44036298 | 1.49228728 | 0.24491616 | 0.46263371 |
| ENSMUSG00000028461 | 0.44025019 | 3.30522534 | 0.18440468 | 0.38870603 |
| ENSMUSG00000028677 | 0.44019053 | 4.97831157 | 0.16004126 | 0.35644052 |
| ENSMUSG00000028070 | 0.44015853 | 3.93266952 | 0.17069363 | 0.37157046 |
| ENSMUSG00000036672 | 0.43998511 | 3.66570097 | 0.17135709 | 0.37254553 |
| ENSMUSG00000045165 | 0.43989267 | 4.80920228 | 0.15902538 | 0.35494474 |
| ENSMUSG00000031328 | 0.43976393 | 8.9947782  | 0.15113722 | 0.34370809 |
| ENSMUSG00000056367 | 0.4390672  | 2.30464284 | 0.20739635 | 0.41789279 |
| ENSMUSG00000028937 | 0.43881887 | 4.20047055 | 0.16714724 | 0.36696168 |
| ENSMUSG00000020196 | 0.43874635 | 5.74353159 | 0.15672343 | 0.35144634 |
| ENSMUSG00000009293 | 0.43808656 | 4.96147708 | 0.16153813 | 0.35888642 |
| ENSMUSG00000024560 | 0.43778843 | 4.56258015 | 0.16553837 | 0.36482014 |
| ENSMUSG00000097194 | 0.43774992 | 3.82895603 | 0.17106748 | 0.37208385 |
| ENSMUSG00000040940 | 0.43708836 | 6.44340589 | 0.15650929 | 0.35125832 |
| ENSMUSG00000043923 | 0.43706645 | 2.95289218 | 0.18678144 | 0.39163612 |
| ENSMUSG00000024426 | 0.43687292 | 2.25228464 | 0.20631719 | 0.41665255 |
| ENSMUSG00000025545 | 0.43639496 | 3.78168034 | 0.17236713 | 0.37385501 |
| ENSMUSG00000024797 | 0.43635661 | 3.36153611 | 0.18307457 | 0.38676308 |
| ENSMUSG00000070420 | 0.43605818 | 2.38557731 | 0.19975084 | 0.40901045 |
| ENSMUSG00000045268 | 0.43595017 | 2.17286748 | 0.20565207 | 0.41594745 |
| ENSMUSG00000025140 | 0.43581017 | 3.02799428 | 0.18126273 | 0.38477585 |
| ENSMUSG00000054263 | 0.43567262 | 5.01489855 | 0.16193657 | 0.35932593 |
| ENSMUSG00000040272 | 0.43561149 | 1.86816448 | 0.23013347 | 0.44428201 |
| ENSMUSG00000078570 | 0.4352843  | 1.40836573 | 0.2626638  | 0.48170884 |
| ENSMUSG00000030095 | 0.4352318  | 4.7820811  | 0.16502868 | 0.36420491 |
| ENSMUSG00000002068 | 0.43516776 | 6.62811276 | 0.15761402 | 0.35292973 |
| ENSMUSG00000042628 | 0.43505673 | 4.28180216 | 0.1675663  | 0.36743289 |
| ENSMUSG00000068922 | 0.4350069  | 4.26466185 | 0.16951375 | 0.37004783 |
| ENSMUSG00000026698 | 0.43499555 | 4.44626045 | 0.16656348 | 0.36620196 |
| ENSMUSG00000001472 | 0.43478198 | 7.35644339 | 0.15701855 | 0.3518155  |
| ENSMUSG00000037993 | 0.43429833 | 5.1858074  | 0.16399442 | 0.36225231 |
| ENSMUSG00000021003 | 0.43421171 | 3.23505253 | 0.18266305 | 0.3862428  |
| ENSMUSG00000031709 | 0.43371746 | 4.96261567 | 0.16365728 | 0.36180403 |

|                    |            |            |            |            |
|--------------------|------------|------------|------------|------------|
| ENSMUSG00000028479 | 0.43304986 | 4.58541432 | 0.16690384 | 0.36672597 |
| ENSMUSG00000021338 | 0.43303167 | 3.82518904 | 0.17174524 | 0.37295623 |
| ENSMUSG00000003269 | 0.43282059 | 4.23945644 | 0.17151086 | 0.37259732 |
| ENSMUSG00000045362 | 0.43193091 | 5.00563049 | 0.16578179 | 0.36500424 |
| ENSMUSG00000005873 | 0.43152806 | 6.01960011 | 0.16306637 | 0.36113583 |
| ENSMUSG00000093674 | 0.43134252 | 6.78383158 | 0.16161934 | 0.35888642 |
| ENSMUSG00000003865 | 0.43128768 | 3.71990915 | 0.17907062 | 0.3819     |
| ENSMUSG00000042682 | 0.43119817 | 6.02244969 | 0.16291536 | 0.36097785 |
| ENSMUSG00000025409 | 0.43119728 | 3.29828905 | 0.18868463 | 0.39431002 |
| ENSMUSG00000021917 | 0.43056745 | 6.37774546 | 0.16257305 | 0.36047835 |
| ENSMUSG00000037916 | 0.43033695 | 5.14955208 | 0.16852713 | 0.36856551 |
| ENSMUSG00000013495 | 0.43030159 | 4.04141349 | 0.17645096 | 0.37888647 |
| ENSMUSG00000042073 | 0.43025631 | 2.19603286 | 0.22194877 | 0.43486475 |
| ENSMUSG00000068114 | 0.42905599 | 5.13086016 | 0.16927459 | 0.36971119 |
| ENSMUSG00000030214 | 0.42830229 | 6.24897338 | 0.16509479 | 0.36423532 |
| ENSMUSG00000032431 | 0.42825381 | 3.83758512 | 0.18090233 | 0.38443278 |
| ENSMUSG00000026893 | 0.42771385 | 4.58517651 | 0.17141281 | 0.37254553 |
| ENSMUSG00000030527 | 0.4274046  | 3.45417616 | 0.18637658 | 0.39125659 |
| ENSMUSG00000050144 | 0.42644046 | 4.99420585 | 0.17226142 | 0.37370089 |
| ENSMUSG00000037415 | 0.42584487 | 5.8155795  | 0.16863906 | 0.36873552 |
| ENSMUSG00000022420 | 0.42565375 | 1.48265673 | 0.26758926 | 0.48654233 |
| ENSMUSG00000022365 | 0.4256459  | 7.13407629 | 0.16597223 | 0.36527439 |
| ENSMUSG00000030123 | 0.42537081 | 5.61880737 | 0.170084   | 0.37084227 |
| ENSMUSG00000034403 | 0.42508448 | 4.03959516 | 0.18203781 | 0.38552548 |
| ENSMUSG00000007029 | 0.424407   | 7.46317467 | 0.16702242 | 0.36691174 |
| ENSMUSG00000027984 | 0.42434398 | 4.66045485 | 0.17740608 | 0.37993488 |
| ENSMUSG00000028849 | 0.42415013 | 4.2079539  | 0.18071794 | 0.38423941 |
| ENSMUSG00000047003 | 0.42376342 | 3.09146602 | 0.19563696 | 0.40362522 |
| ENSMUSG00000024410 | 0.42365354 | 5.20344903 | 0.17352949 | 0.37554526 |
| ENSMUSG00000006676 | 0.42308099 | 6.16680187 | 0.17058507 | 0.37140912 |
| ENSMUSG00000046798 | 0.42265752 | 2.215519   | 0.22115329 | 0.43377902 |
| ENSMUSG00000018740 | 0.42262503 | 1.52415841 | 0.2721482  | 0.49209359 |
| ENSMUSG00000028124 | 0.42246551 | 6.26991168 | 0.17050182 | 0.37137782 |
| ENSMUSG00000036752 | 0.42190484 | 7.7230343  | 0.16927488 | 0.36971119 |
| ENSMUSG00000029148 | 0.42184462 | 6.11856407 | 0.17185223 | 0.37303833 |
| ENSMUSG00000020844 | 0.42109137 | 3.52828022 | 0.19220977 | 0.39866162 |
| ENSMUSG00000026958 | 0.42097688 | 3.79614385 | 0.19159441 | 0.39766362 |
| ENSMUSG0000002803  | 0.42087797 | 2.78829635 | 0.20185336 | 0.41160995 |
| ENSMUSG00000033940 | 0.42083602 | 6.06666491 | 0.17291947 | 0.37475153 |
| ENSMUSG00000026288 | 0.42027446 | 8.12553769 | 0.17054792 | 0.37140321 |
| ENSMUSG00000030282 | 0.42012632 | 5.6289266  | 0.17476528 | 0.37761346 |
| ENSMUSG00000031304 | 0.4198351  | 6.71079815 | 0.17271246 | 0.37452868 |
| ENSMUSG00000052142 | 0.41972883 | 6.61309132 | 0.1729154  | 0.37475153 |

|                    |            |            |            |            |
|--------------------|------------|------------|------------|------------|
| ENSMUSG00000039771 | 0.4190712  | 4.32385709 | 0.18546932 | 0.39018751 |
| ENSMUSG00000015745 | 0.4183064  | 4.18119732 | 0.18888495 | 0.39444913 |
| ENSMUSG00000036968 | 0.41829598 | 4.61521569 | 0.18183918 | 0.38533183 |
| ENSMUSG00000033487 | 0.41802192 | 7.41037783 | 0.17322883 | 0.37519576 |
| ENSMUSG00000074863 | 0.41788621 | 1.64608099 | 0.2495505  | 0.4674252  |
| ENSMUSG00000051586 | 0.41750677 | 3.11376301 | 0.19781388 | 0.40625723 |
| ENSMUSG00000036270 | 0.41742363 | 5.44706871 | 0.17904388 | 0.3819     |
| ENSMUSG00000014748 | 0.41722033 | 5.94778301 | 0.17719689 | 0.37976603 |
| ENSMUSG00000039164 | 0.41719825 | 2.75016828 | 0.21395771 | 0.42601919 |
| ENSMUSG00000069793 | 0.41719412 | 5.65561414 | 0.17794889 | 0.3806031  |
| ENSMUSG00000030842 | 0.41715464 | 4.76587926 | 0.18452707 | 0.38888801 |
| ENSMUSG00000039852 | 0.41710415 | 6.25517751 | 0.1760816  | 0.37868784 |
| ENSMUSG00000027293 | 0.41697883 | 5.87591022 | 0.17769284 | 0.38020627 |
| ENSMUSG00000022555 | 0.41679028 | 2.7618077  | 0.21855593 | 0.43143093 |
| ENSMUSG00000023259 | 0.41656599 | 1.38427077 | 0.28821338 | 0.51019256 |
| ENSMUSG00000031551 | 0.41642554 | 4.04741648 | 0.18957772 | 0.39483355 |
| ENSMUSG00000035757 | 0.41635202 | 3.2847281  | 0.20423861 | 0.41400549 |
| ENSMUSG00000038811 | 0.41615251 | 4.42331598 | 0.18722242 | 0.39211923 |
| ENSMUSG00000037022 | 0.41575708 | 2.15648754 | 0.22824765 | 0.44237105 |
| ENSMUSG00000032867 | 0.41544301 | 4.97320574 | 0.18372054 | 0.38755062 |
| ENSMUSG00000029993 | 0.41538974 | 4.90676708 | 0.18288985 | 0.38659284 |
| ENSMUSG00000061232 | 0.41510488 | 9.60827424 | 0.17518251 | 0.3779109  |
| ENSMUSG00000076580 | 0.41497896 | 5.33553059 | 0.1806809  | 0.38423642 |
| ENSMUSG00000021556 | 0.41491623 | 4.37243102 | 0.18612665 | 0.39103638 |
| ENSMUSG00000046027 | 0.41435548 | 5.49073582 | 0.18151911 | 0.38488047 |
| ENSMUSG00000044678 | 0.41410283 | 2.50203346 | 0.21334818 | 0.4251195  |
| ENSMUSG00000020893 | 0.41396075 | 3.39387702 | 0.20635982 | 0.4166606  |
| ENSMUSG00000020644 | 0.41328848 | 4.33268118 | 0.1885382  | 0.3941066  |
| ENSMUSG00000020564 | 0.41275218 | 5.14345011 | 0.184771   | 0.38924995 |
| ENSMUSG00000034422 | 0.4125993  | 9.22064552 | 0.17782132 | 0.38040569 |
| ENSMUSG00000042677 | 0.41253197 | 4.57752272 | 0.18953921 | 0.39483355 |
| ENSMUSG00000017009 | 0.41246498 | 7.32090905 | 0.17936942 | 0.38227665 |
| ENSMUSG00000012117 | 0.41235559 | 5.76047742 | 0.1832091  | 0.3868125  |
| ENSMUSG00000022075 | 0.41229558 | 6.4154342  | 0.18109575 | 0.3846635  |
| ENSMUSG00000039853 | 0.41211176 | 3.7347179  | 0.19797974 | 0.40649182 |
| ENSMUSG00000041263 | 0.41209015 | 3.1849594  | 0.21124665 | 0.42304251 |
| ENSMUSG00000035215 | 0.41189298 | 3.24193551 | 0.21584249 | 0.42829374 |
| ENSMUSG00000025077 | 0.41137438 | 3.42414443 | 0.20563039 | 0.41594745 |
| ENSMUSG00000030322 | 0.41136132 | 5.37324675 | 0.18506922 | 0.38972592 |
| ENSMUSG00000028545 | 0.41132053 | 4.22337919 | 0.1941965  | 0.40157527 |
| ENSMUSG00000041765 | 0.41098044 | 4.29345608 | 0.19329679 | 0.40025203 |
| ENSMUSG00000042380 | 0.41072093 | 2.78342851 | 0.2231313  | 0.43638881 |
| ENSMUSG00000026792 | 0.41022285 | 2.04253085 | 0.25001887 | 0.46776605 |

|                    |            |            |            |            |
|--------------------|------------|------------|------------|------------|
| ENSMUSG00000036989 | 0.41004945 | 2.1127069  | 0.25439986 | 0.47300829 |
| ENSMUSG00000001642 | 0.40985732 | 6.84308832 | 0.18290028 | 0.38659284 |
| ENSMUSG00000027639 | 0.40931607 | 8.98726045 | 0.18139591 | 0.38483554 |
| ENSMUSG00000058290 | 0.40922393 | 5.98450611 | 0.18579044 | 0.39040611 |
| ENSMUSG00000035278 | 0.40910155 | 4.03662264 | 0.20163892 | 0.41136476 |
| ENSMUSG00000024911 | 0.40866824 | 3.7063705  | 0.20692346 | 0.4174079  |
| ENSMUSG00000071652 | 0.4083016  | 5.17644857 | 0.19056286 | 0.39611957 |
| ENSMUSG00000041084 | 0.40764886 | 7.57693579 | 0.18422031 | 0.38839333 |
| ENSMUSG00000008140 | 0.40732983 | 3.96498844 | 0.20375481 | 0.41354402 |
| ENSMUSG00000001521 | 0.40664895 | 4.50372666 | 0.19844437 | 0.40706701 |
| ENSMUSG00000028648 | 0.40649091 | 3.89780815 | 0.20139236 | 0.41121735 |
| ENSMUSG00000048965 | 0.4063527  | 2.60277441 | 0.23149335 | 0.44554214 |
| ENSMUSG00000031821 | 0.40604482 | 3.92406034 | 0.2061081  | 0.41662038 |
| ENSMUSG00000029622 | 0.40596849 | 6.03182793 | 0.18928866 | 0.39475709 |
| ENSMUSG00000031967 | 0.4058516  | 5.89928686 | 0.18958161 | 0.39483355 |
| ENSMUSG00000021203 | 0.40560775 | 3.29125149 | 0.2109062  | 0.42251764 |
| ENSMUSG00000070738 | 0.40527435 | 7.63785447 | 0.18665601 | 0.39163612 |
| ENSMUSG00000045795 | 0.40519572 | 3.87247869 | 0.20414731 | 0.41389822 |
| ENSMUSG00000076583 | 0.4049042  | 5.92638511 | 0.18950118 | 0.39483355 |
| ENSMUSG00000027439 | 0.40466141 | 4.64547914 | 0.19594792 | 0.40414813 |
| ENSMUSG00000034116 | 0.40451257 | 7.26036562 | 0.18803981 | 0.39343886 |
| ENSMUSG00000078580 | 0.40451132 | 0.96324132 | 0.32554654 | 0.55017927 |
| ENSMUSG00000036292 | 0.40449485 | 2.71004831 | 0.2271803  | 0.44173726 |
| ENSMUSG00000058076 | 0.40447133 | 5.78388274 | 0.19160425 | 0.39766362 |
| ENSMUSG00000048310 | 0.40446309 | 4.01121047 | 0.20626309 | 0.41665255 |
| ENSMUSG00000048578 | 0.40442251 | 8.78275748 | 0.18677236 | 0.39163612 |
| ENSMUSG00000040859 | 0.40435067 | 4.99016351 | 0.19514304 | 0.40300111 |
| ENSMUSG00000004567 | 0.40388791 | 4.13488239 | 0.20488953 | 0.41493496 |
| ENSMUSG00000037710 | 0.40354762 | 5.44785412 | 0.19415329 | 0.40157527 |
| ENSMUSG00000031066 | 0.40326322 | 4.97062363 | 0.19619903 | 0.40432073 |
| ENSMUSG00000016528 | 0.40294987 | 6.97124333 | 0.19013976 | 0.39561396 |
| ENSMUSG00000031513 | 0.4024795  | 3.41952577 | 0.21200438 | 0.4232897  |
| ENSMUSG00000020654 | 0.40246516 | 3.60085453 | 0.21508475 | 0.42747997 |
| ENSMUSG00000002660 | 0.40217204 | 3.19137496 | 0.22631427 | 0.44042713 |
| ENSMUSG00000032540 | 0.40195323 | 3.93103529 | 0.20370483 | 0.41354402 |
| ENSMUSG00000037890 | 0.40192237 | 2.03213598 | 0.25001887 | 0.46776605 |
| ENSMUSG00000024570 | 0.40126448 | 3.46390145 | 0.21719884 | 0.42969589 |
| ENSMUSG00000066036 | 0.40108003 | 7.49266995 | 0.19118242 | 0.39709383 |
| ENSMUSG00000026203 | 0.40096879 | 3.23291638 | 0.22221534 | 0.43514984 |
| ENSMUSG00000024074 | 0.40095271 | 3.13437433 | 0.21778043 | 0.43042123 |
| ENSMUSG00000024325 | 0.40069071 | 2.28216098 | 0.25618181 | 0.47523402 |
| ENSMUSG00000032121 | 0.40056915 | 1.72309558 | 0.25718864 | 0.47618063 |
| ENSMUSG00000024414 | 0.40033301 | 4.26917151 | 0.20799308 | 0.41854776 |

|                    |            |            |            |            |
|--------------------|------------|------------|------------|------------|
| ENSMUSG00000062007 | 0.4003168  | 3.96703104 | 0.20948938 | 0.42023193 |
| ENSMUSG00000024921 | 0.40008707 | 5.55564958 | 0.19627939 | 0.40440904 |
| ENSMUSG00000020009 | 0.39976373 | 4.94486162 | 0.20020312 | 0.40952018 |
| ENSMUSG00000021646 | 0.39971108 | 3.60131484 | 0.2159549  | 0.42836854 |
| ENSMUSG00000043091 | 0.39933558 | 6.20872207 | 0.19555017 | 0.40353135 |
| ENSMUSG00000040688 | 0.39931668 | 5.04111315 | 0.20198626 | 0.41168396 |
| ENSMUSG00000020253 | 0.39896108 | 4.69837735 | 0.20447933 | 0.41441555 |
| ENSMUSG00000034330 | 0.39890994 | 8.20342813 | 0.19315264 | 0.4001072  |
| ENSMUSG00000029621 | 0.39882915 | 5.98313098 | 0.19690852 | 0.40517952 |
| ENSMUSG00000025647 | 0.39862461 | 8.89518608 | 0.19307497 | 0.40005765 |
| ENSMUSG00000040721 | 0.39862244 | 1.93133774 | 0.26951879 | 0.48860716 |
| ENSMUSG00000028393 | 0.39856896 | 2.61335705 | 0.24715341 | 0.4654737  |
| ENSMUSG00000027654 | 0.39807805 | 3.83699936 | 0.21524763 | 0.4277189  |
| ENSMUSG00000021879 | 0.39806179 | 1.64243142 | 0.26468377 | 0.48380069 |
| ENSMUSG00000049502 | 0.3974632  | 8.03698301 | 0.19479853 | 0.40251146 |
| ENSMUSG00000032114 | 0.3973085  | 2.52213522 | 0.24961487 | 0.4674252  |
| ENSMUSG00000040007 | 0.39690107 | 4.4697395  | 0.20868388 | 0.41946917 |
| ENSMUSG00000089872 | 0.39677329 | 3.31530066 | 0.22191163 | 0.43486475 |
| ENSMUSG00000013997 | 0.39659985 | 4.48380661 | 0.20627883 | 0.41665255 |
| ENSMUSG00000085037 | 0.39642484 | 2.14868513 | 0.24444466 | 0.4620705  |
| ENSMUSG00000036639 | 0.39618466 | 3.49620035 | 0.2235094  | 0.43689059 |
| ENSMUSG00000014633 | 0.39587743 | 3.53440773 | 0.22206848 | 0.43494124 |
| ENSMUSG00000039158 | 0.39565477 | 7.23917856 | 0.19778948 | 0.40625723 |
| ENSMUSG00000078484 | 0.395301   | 2.35074597 | 0.26179476 | 0.48119903 |
| ENSMUSG00000028961 | 0.39512152 | 6.62388838 | 0.19957929 | 0.40887467 |
| ENSMUSG00000020185 | 0.39482481 | 4.28771039 | 0.2116635  | 0.4232897  |
| ENSMUSG00000003234 | 0.39471437 | 5.7584707  | 0.20258661 | 0.41239201 |
| ENSMUSG00000004266 | 0.39439136 | 7.95601452 | 0.19850372 | 0.40706701 |
| ENSMUSG00000041977 | 0.39435249 | 4.91503799 | 0.20623411 | 0.41665255 |
| ENSMUSG00000024824 | 0.39419211 | 4.8580593  | 0.20886419 | 0.41967419 |
| ENSMUSG00000073609 | 0.39413458 | 3.85324168 | 0.21476958 | 0.4272413  |
| ENSMUSG00000036825 | 0.3939426  | 3.98634792 | 0.21622449 | 0.4285877  |
| ENSMUSG00000037523 | 0.39377363 | 5.45444375 | 0.2047229  | 0.4147533  |
| ENSMUSG00000078974 | 0.39325072 | 6.07270068 | 0.20277107 | 0.41253819 |
| ENSMUSG00000026637 | 0.39308921 | 3.30761666 | 0.2281227  | 0.44237105 |
| ENSMUSG00000001166 | 0.39308753 | 3.23225371 | 0.23105117 | 0.44510924 |
| ENSMUSG00000046556 | 0.3926784  | 3.21419766 | 0.22928215 | 0.44351187 |
| ENSMUSG00000042349 | 0.39233863 | 5.59451177 | 0.20572312 | 0.41599815 |
| ENSMUSG00000022477 | 0.39194004 | 7.65564351 | 0.20157365 | 0.41136476 |
| ENSMUSG00000029557 | 0.39180941 | 1.58016798 | 0.31404229 | 0.53844548 |
| ENSMUSG00000037020 | 0.39135653 | 4.27280606 | 0.21508775 | 0.42747997 |
| ENSMUSG00000036398 | 0.39134722 | 5.62958072 | 0.20738501 | 0.41789279 |
| ENSMUSG00000009566 | 0.39066233 | 3.62309338 | 0.22793209 | 0.4421694  |

|                    |            |            |            |            |
|--------------------|------------|------------|------------|------------|
| ENSMUSG00000026110 | 0.39048788 | 6.76151214 | 0.20394125 | 0.41363597 |
| ENSMUSG00000028848 | 0.39029695 | 3.08485301 | 0.2360878  | 0.45154685 |
| ENSMUSG00000031506 | 0.39000721 | 6.74122081 | 0.20501108 | 0.41502524 |
| ENSMUSG00000011884 | 0.38998732 | 5.47783483 | 0.20924374 | 0.42012372 |
| ENSMUSG00000063382 | 0.38992816 | 2.36232139 | 0.26958574 | 0.48860716 |
| ENSMUSG00000046947 | 0.38948737 | 3.29735338 | 0.22967289 | 0.44371057 |
| ENSMUSG00000027566 | 0.38906752 | 7.25632694 | 0.20541254 | 0.41575992 |
| ENSMUSG00000035212 | 0.38881406 | 5.00783439 | 0.21256934 | 0.42388087 |
| ENSMUSG00000063065 | 0.3883576  | 4.30787107 | 0.21999036 | 0.43259956 |
| ENSMUSG00000025612 | 0.38834641 | 4.58532703 | 0.21555499 | 0.428093   |
| ENSMUSG00000035954 | 0.3875082  | 1.63536416 | 0.2737182  | 0.49354026 |
| ENSMUSG00000050106 | 0.38742798 | 3.88692965 | 0.22498125 | 0.43886133 |
| ENSMUSG00000002102 | 0.38735079 | 7.14330742 | 0.20775847 | 0.41828652 |
| ENSMUSG00000031659 | 0.38704421 | 6.61047518 | 0.20854157 | 0.41933849 |
| ENSMUSG00000034401 | 0.38699704 | 4.34326302 | 0.21935749 | 0.43192533 |
| ENSMUSG00000025278 | 0.38644768 | 6.23668228 | 0.21022664 | 0.42162621 |
| ENSMUSG00000033068 | 0.386328   | 4.62266638 | 0.22049395 | 0.43311599 |
| ENSMUSG00000064284 | 0.38580781 | 2.47536004 | 0.27519742 | 0.4951237  |
| ENSMUSG00000038893 | 0.38573976 | 2.68699862 | 0.25088612 | 0.46881925 |
| ENSMUSG00000036992 | 0.38559204 | 4.63158581 | 0.21936712 | 0.43192533 |
| ENSMUSG00000029426 | 0.38525422 | 4.94513948 | 0.21715985 | 0.42969589 |
| ENSMUSG00000038861 | 0.38509577 | 6.26527828 | 0.21202259 | 0.4232897  |
| ENSMUSG00000087642 | 0.38456397 | 3.67751461 | 0.23616145 | 0.45154685 |
| ENSMUSG00000017307 | 0.38444186 | 1.90397296 | 0.28814273 | 0.51015124 |
| ENSMUSG00000030643 | 0.3842228  | 3.98867657 | 0.23038522 | 0.4444158  |
| ENSMUSG00000020821 | 0.38418374 | 5.0784657  | 0.21821707 | 0.43084087 |
| ENSMUSG00000047115 | 0.38412993 | 2.23330108 | 0.2613783  | 0.48079817 |
| ENSMUSG00000020788 | 0.38410196 | 6.78331725 | 0.21219742 | 0.42337409 |
| ENSMUSG00000040591 | 0.38400285 | 2.71237502 | 0.25314047 | 0.47131678 |
| ENSMUSG00000038695 | 0.38382624 | 2.06689743 | 0.30157833 | 0.52480567 |
| ENSMUSG00000025153 | 0.38371967 | 7.10702288 | 0.2119774  | 0.4232897  |
| ENSMUSG00000022504 | 0.38371432 | 7.42716107 | 0.21140366 | 0.4231212  |
| ENSMUSG00000025507 | 0.3834035  | 4.09751921 | 0.22828217 | 0.44237105 |
| ENSMUSG0000003992  | 0.38335344 | 3.59716605 | 0.23571822 | 0.45102649 |
| ENSMUSG00000040385 | 0.38322396 | 8.48091417 | 0.21111542 | 0.42285823 |
| ENSMUSG00000020715 | 0.38298303 | 4.7705642  | 0.22030143 | 0.43294744 |
| ENSMUSG00000033902 | 0.38273201 | 4.4062463  | 0.22470575 | 0.43861569 |
| ENSMUSG00000038170 | 0.38271187 | 5.96494424 | 0.21504758 | 0.42747997 |
| ENSMUSG00000013622 | 0.38269132 | 4.66289502 | 0.22347149 | 0.43689059 |
| ENSMUSG00000047613 | 0.38268293 | 2.81859526 | 0.25995866 | 0.47929461 |
| ENSMUSG00000000743 | 0.38246566 | 5.24359801 | 0.21929051 | 0.43192533 |
| ENSMUSG00000031700 | 0.3823755  | 2.88825508 | 0.2573576  | 0.47637219 |
| ENSMUSG00000056724 | 0.38236961 | 3.88143809 | 0.2343153  | 0.44889965 |

|                    |            |            |            |            |
|--------------------|------------|------------|------------|------------|
| ENSMUSG0000004270  | 0.38208672 | 6.05360658 | 0.21624126 | 0.4285877  |
| ENSMUSG00000027466 | 0.38204417 | 4.92568986 | 0.22267436 | 0.4358113  |
| ENSMUSG00000039844 | 0.38199981 | 7.62093001 | 0.21323619 | 0.42497488 |
| ENSMUSG00000025204 | 0.38185624 | 5.0950528  | 0.22105131 | 0.43365787 |
| ENSMUSG00000041881 | 0.38114189 | 3.4125031  | 0.24848049 | 0.46695136 |
| ENSMUSG00000030058 | 0.38068432 | 7.48228342 | 0.21501768 | 0.42747997 |
| ENSMUSG00000033055 | 0.38037288 | 3.49803322 | 0.24386301 | 0.46153364 |
| ENSMUSG00000040188 | 0.38017734 | 5.93457735 | 0.21903802 | 0.43190821 |
| ENSMUSG00000029145 | 0.38001366 | 4.72083861 | 0.22698076 | 0.44143561 |
| ENSMUSG00000048755 | 0.37995787 | 3.36034564 | 0.24891926 | 0.46716764 |
| ENSMUSG00000036853 | 0.37995687 | 2.55861929 | 0.26059685 | 0.48019292 |
| ENSMUSG00000035208 | 0.37993607 | 6.7955176  | 0.2163703  | 0.42876466 |
| ENSMUSG00000019214 | 0.37955722 | 3.17426855 | 0.25313408 | 0.47131678 |
| ENSMUSG00000003812 | 0.37948327 | 4.95280123 | 0.22533759 | 0.43911105 |
| ENSMUSG00000045128 | 0.37902197 | 7.24997685 | 0.21765331 | 0.43027924 |
| ENSMUSG00000025757 | 0.37899259 | 4.74419199 | 0.22551836 | 0.43922117 |
| ENSMUSG00000032743 | 0.37866722 | 3.3000718  | 0.2471969  | 0.4654743  |
| ENSMUSG00000057219 | 0.37857857 | 2.60333205 | 0.26823288 | 0.48720456 |
| ENSMUSG00000030532 | 0.37854821 | 0.54881296 | 0.41307049 | 0.62828662 |
| ENSMUSG00000024947 | 0.37842518 | 4.70381803 | 0.22893989 | 0.44308826 |
| ENSMUSG00000029592 | 0.37840727 | 3.53850277 | 0.24508202 | 0.4627651  |
| ENSMUSG00000029798 | 0.37836788 | 7.4496819  | 0.21751604 | 0.43008672 |
| ENSMUSG00000030298 | 0.37829469 | 6.69055377 | 0.2193298  | 0.43192533 |
| ENSMUSG00000039936 | 0.37790439 | 6.99897806 | 0.21911942 | 0.43192533 |
| ENSMUSG00000034932 | 0.37731955 | 3.839899   | 0.242263   | 0.45955395 |
| ENSMUSG00000046805 | 0.37695265 | 8.03429105 | 0.21861069 | 0.43146004 |
| ENSMUSG00000038644 | 0.37686447 | 4.24852631 | 0.23553821 | 0.45076203 |
| ENSMUSG00000041891 | 0.37657162 | 7.67471957 | 0.2195761  | 0.43217898 |
| ENSMUSG00000037563 | 0.37649482 | 7.9236452  | 0.21964332 | 0.43223239 |
| ENSMUSG00000025485 | 0.37631325 | 5.08741864 | 0.2286313  | 0.44272938 |
| ENSMUSG00000049339 | 0.37622101 | 5.25718318 | 0.22757522 | 0.44187453 |
| ENSMUSG00000032890 | 0.37595644 | 2.60139613 | 0.28180205 | 0.50278208 |
| ENSMUSG00000036918 | 0.37589141 | 5.00865672 | 0.2294552  | 0.44367134 |
| ENSMUSG00000023909 | 0.37547198 | 1.10788117 | 0.34857583 | 0.57233055 |
| ENSMUSG00000055228 | 0.37497277 | 3.25276665 | 0.24291395 | 0.46038384 |
| ENSMUSG00000056310 | 0.37436036 | 4.59006236 | 0.23606457 | 0.45154685 |
| ENSMUSG00000036632 | 0.37420993 | 5.57609035 | 0.22721779 | 0.44173726 |
| ENSMUSG00000029458 | 0.37409383 | 5.59220433 | 0.22771594 | 0.44190907 |
| ENSMUSG00000029771 | 0.37400983 | 6.58345907 | 0.22467023 | 0.43861569 |
| ENSMUSG00000039738 | 0.37386685 | 5.8056395  | 0.22649646 | 0.44065269 |
| ENSMUSG00000020610 | 0.37386668 | 3.93567134 | 0.24402449 | 0.46163131 |
| ENSMUSG00000039195 | 0.37369697 | 1.97824955 | 0.29919191 | 0.52174735 |
| ENSMUSG00000078606 | 0.37365151 | 4.06754487 | 0.2345182  | 0.44920857 |

|                    |            |            |            |            |
|--------------------|------------|------------|------------|------------|
| ENSMUSG00000036315 | 0.37359838 | 4.85640053 | 0.23327959 | 0.44794998 |
| ENSMUSG00000021248 | 0.37350181 | 7.99557489 | 0.22312578 | 0.43638881 |
| ENSMUSG00000036864 | 0.37345665 | 1.85351623 | 0.31130625 | 0.53585421 |
| ENSMUSG00000007817 | 0.37341986 | 5.82193384 | 0.22753863 | 0.44187453 |
| ENSMUSG00000052684 | 0.37327528 | 3.86861357 | 0.24251758 | 0.45979423 |
| ENSMUSG00000024816 | 0.37291857 | 4.90542777 | 0.2340157  | 0.44856475 |
| ENSMUSG00000075467 | 0.37274834 | 3.77041845 | 0.24867438 | 0.46695136 |
| ENSMUSG00000071647 | 0.37269374 | 4.74263824 | 0.23497196 | 0.44975818 |
| ENSMUSG00000029204 | 0.37268929 | 5.17438546 | 0.23163354 | 0.44566209 |
| ENSMUSG00000034707 | 0.37258664 | 7.52025973 | 0.22476799 | 0.43863517 |
| ENSMUSG00000028645 | 0.37224964 | 3.94428541 | 0.24544754 | 0.46323175 |
| ENSMUSG00000069744 | 0.37207636 | 5.9924831  | 0.22923445 | 0.44349916 |
| ENSMUSG00000061898 | 0.37206046 | 3.89117997 | 0.24464183 | 0.46227746 |
| ENSMUSG00000031059 | 0.37200134 | 5.95801143 | 0.2289211  | 0.44308826 |
| ENSMUSG00000024799 | 0.37197169 | 2.18429248 | 0.28476189 | 0.50618118 |
| ENSMUSG00000051498 | 0.37186633 | 3.60650431 | 0.24966331 | 0.4674252  |
| ENSMUSG00000028630 | 0.37182853 | 3.13616644 | 0.25799001 | 0.4769697  |
| ENSMUSG00000041958 | 0.37176971 | 5.18982096 | 0.23325841 | 0.44794998 |
| ENSMUSG00000046031 | 0.37162336 | 1.16379723 | 0.36682836 | 0.58884743 |
| ENSMUSG00000058979 | 0.37045977 | 3.59629624 | 0.25258286 | 0.47076626 |
| ENSMUSG00000019261 | 0.37021757 | 1.05742362 | 0.37302372 | 0.59472025 |
| ENSMUSG00000031539 | 0.3695049  | 4.15414028 | 0.24415874 | 0.46176917 |
| ENSMUSG00000033020 | 0.36940137 | 2.72886938 | 0.27635791 | 0.49645676 |
| ENSMUSG00000074802 | 0.36932081 | 5.31807072 | 0.23424686 | 0.44884829 |
| ENSMUSG00000076518 | 0.36899464 | 3.64919963 | 0.24839755 | 0.46695136 |
| ENSMUSG00000003680 | 0.3687492  | 4.82092158 | 0.23823115 | 0.45431636 |
| ENSMUSG00000017386 | 0.36826306 | 2.94773868 | 0.27455353 | 0.49448602 |
| ENSMUSG00000029627 | 0.36801352 | 2.44974206 | 0.29216452 | 0.5142191  |
| ENSMUSG00000044712 | 0.36794268 | 2.6819401  | 0.2791909  | 0.4999659  |
| ENSMUSG00000018707 | 0.3678611  | 7.51921924 | 0.23052991 | 0.44449036 |
| ENSMUSG00000027075 | 0.36774645 | 3.18210502 | 0.26235426 | 0.48148882 |
| ENSMUSG00000037260 | 0.36703471 | 4.7662532  | 0.24058673 | 0.45749379 |
| ENSMUSG00000029512 | 0.36648971 | 4.02567794 | 0.24974195 | 0.46749126 |
| ENSMUSG00000022090 | 0.36615529 | 3.48101962 | 0.26214955 | 0.48144719 |
| ENSMUSG00000034557 | 0.36573143 | 1.04060544 | 0.32947735 | 0.55464628 |
| ENSMUSG00000089855 | 0.36529952 | 5.27929598 | 0.24263475 | 0.45993551 |
| ENSMUSG00000030590 | 0.36525079 | 2.52327907 | 0.28117287 | 0.50218089 |
| ENSMUSG00000073838 | 0.36522506 | 4.91426387 | 0.24425951 | 0.46181149 |
| ENSMUSG00000004500 | 0.36512623 | 4.02196867 | 0.25151321 | 0.46982824 |
| ENSMUSG00000031065 | 0.36494164 | 5.8674612  | 0.23829506 | 0.45434475 |
| ENSMUSG00000043262 | 0.36461099 | 4.32052558 | 0.24606028 | 0.46398218 |
| ENSMUSG00000090137 | 0.36425564 | 0.59231526 | 0.42584193 | 0.63955617 |
| ENSMUSG00000024487 | 0.36424091 | 5.86031988 | 0.23834897 | 0.4543672  |



|                    |            |            |            |            |
|--------------------|------------|------------|------------|------------|
| ENSMUSG00000071711 | 0.36364999 | 2.00461078 | 0.30717872 | 0.53112318 |
| ENSMUSG00000060012 | 0.36358782 | 3.45812168 | 0.26359175 | 0.48277403 |
| ENSMUSG00000003166 | 0.36332293 | 5.5418339  | 0.24153553 | 0.45890049 |
| ENSMUSG00000087679 | 0.3627512  | 3.92187856 | 0.25677795 | 0.47575778 |
| ENSMUSG00000031402 | 0.36247861 | 6.07066632 | 0.24033372 | 0.45726162 |
| ENSMUSG00000044060 | 0.36206501 | 3.36728482 | 0.26481044 | 0.4838556  |
| ENSMUSG00000026171 | 0.36200148 | 4.27563833 | 0.25193212 | 0.47028492 |
| ENSMUSG00000044390 | 0.36178643 | 1.26823789 | 0.34898132 | 0.57253042 |
| ENSMUSG00000026942 | 0.36138118 | 4.79540399 | 0.24962663 | 0.4674252  |
| ENSMUSG00000024826 | 0.36136769 | 6.18461811 | 0.24173516 | 0.459      |
| ENSMUSG00000032965 | 0.36135214 | 3.36639003 | 0.26986346 | 0.48886403 |
| ENSMUSG00000000708 | 0.36091745 | 5.54711369 | 0.24379652 | 0.46148879 |
| ENSMUSG00000040356 | 0.36055864 | 4.96032109 | 0.24982171 | 0.4675594  |
| ENSMUSG00000021552 | 0.36054537 | 3.21543077 | 0.26857817 | 0.48743638 |
| ENSMUSG00000003178 | 0.36028687 | 3.32979238 | 0.26615786 | 0.48539207 |
| ENSMUSG00000025759 | 0.35999664 | 4.07873656 | 0.25425109 | 0.4728132  |
| ENSMUSG00000022802 | 0.35983702 | 2.20687869 | 0.29174188 | 0.5139919  |
| ENSMUSG00000095595 | 0.35974548 | 4.8218342  | 0.24903578 | 0.46724664 |
| ENSMUSG00000033540 | 0.35923723 | 3.97803365 | 0.26071102 | 0.48019292 |
| ENSMUSG00000076577 | 0.35870335 | 4.91660628 | 0.2506034  | 0.4684533  |
| ENSMUSG00000025034 | 0.35863939 | 3.12374821 | 0.2741796  | 0.49402721 |
| ENSMUSG00000032116 | 0.35861376 | 9.32409031 | 0.24133847 | 0.45860688 |
| ENSMUSG00000020393 | 0.35808334 | 4.01153438 | 0.25944592 | 0.47859472 |
| ENSMUSG00000037622 | 0.35754817 | 3.07298246 | 0.28619615 | 0.50778862 |
| ENSMUSG00000031753 | 0.35741926 | 5.7263843  | 0.24867445 | 0.46695136 |
| ENSMUSG00000019210 | 0.35690493 | 6.05454099 | 0.24819895 | 0.46679063 |
| ENSMUSG00000000194 | 0.35677765 | 5.66550895 | 0.24920465 | 0.46736194 |
| ENSMUSG00000026425 | 0.35672344 | 6.49644872 | 0.24675885 | 0.46489298 |
| ENSMUSG00000037628 | 0.35644781 | 4.21314235 | 0.25852027 | 0.47770435 |
| ENSMUSG00000024892 | 0.35633399 | 1.67278985 | 0.35920953 | 0.5813771  |
| ENSMUSG00000022515 | 0.35622114 | 3.427644   | 0.27461503 | 0.49448602 |
| ENSMUSG00000032123 | 0.35529032 | 4.76547773 | 0.25685888 | 0.47575778 |
| ENSMUSG00000041645 | 0.35523142 | 7.87936229 | 0.24675834 | 0.46489298 |
| ENSMUSG00000030881 | 0.35512316 | 4.74755163 | 0.25750653 | 0.47647203 |
| ENSMUSG00000006335 | 0.35478182 | 2.89877585 | 0.28533815 | 0.50693354 |
| ENSMUSG00000033423 | 0.35449982 | 3.89107412 | 0.26862708 | 0.48744311 |
| ENSMUSG00000027248 | 0.35446789 | 11.0414834 | 0.24649357 | 0.46463672 |
| ENSMUSG00000023307 | 0.35439278 | 6.51554835 | 0.2496351  | 0.4674252  |
| ENSMUSG00000020108 | 0.35419782 | 4.01326533 | 0.26592121 | 0.48530959 |
| ENSMUSG00000028847 | 0.35414274 | 5.27055063 | 0.25567037 | 0.47479752 |
| ENSMUSG00000007892 | 0.35376155 | 6.39527611 | 0.25208189 | 0.47037834 |
| ENSMUSG00000024369 | 0.35351079 | 4.16079582 | 0.2666006  | 0.48569517 |
| ENSMUSG00000020834 | 0.35333396 | 2.54271489 | 0.30537661 | 0.52887137 |

|                    |            |            |            |            |
|--------------------|------------|------------|------------|------------|
| ENSMUSG00000052423 | 0.35302701 | 3.87522671 | 0.26980809 | 0.48884584 |
| ENSMUSG00000056228 | 0.35280144 | 4.04526238 | 0.2677506  | 0.48659964 |
| ENSMUSG00000039615 | 0.35243848 | 4.32670272 | 0.26822445 | 0.48720456 |
| ENSMUSG00000041684 | 0.35243312 | 4.07634302 | 0.26456582 | 0.48380069 |
| ENSMUSG00000039307 | 0.3518036  | 2.77160625 | 0.29250073 | 0.51448832 |
| ENSMUSG00000032184 | 0.3517907  | 1.0581026  | 0.40595156 | 0.62334923 |
| ENSMUSG00000024169 | 0.35098604 | 5.8358972  | 0.25662446 | 0.47558655 |
| ENSMUSG00000041187 | 0.35097352 | 6.01372594 | 0.25621389 | 0.47523402 |
| ENSMUSG00000026819 | 0.35048658 | 3.72241328 | 0.27781858 | 0.49800458 |
| ENSMUSG00000046806 | 0.35044957 | 2.61651351 | 0.30304777 | 0.52651316 |
| ENSMUSG00000039244 | 0.35039155 | 4.10623194 | 0.27301937 | 0.49275999 |
| ENSMUSG00000042744 | 0.35037716 | 4.97293543 | 0.26076557 | 0.48020763 |
| ENSMUSG00000031360 | 0.34947674 | 5.98223685 | 0.25772104 | 0.47671761 |
| ENSMUSG00000032324 | 0.34936091 | 5.1937296  | 0.26129505 | 0.48078945 |
| ENSMUSG00000040548 | 0.34913007 | 4.65878248 | 0.26672451 | 0.48570705 |
| ENSMUSG00000040234 | 0.34889127 | 4.21306257 | 0.2709159  | 0.490441   |
| ENSMUSG00000001524 | 0.34866308 | 3.69875455 | 0.281751   | 0.50278208 |
| ENSMUSG00000030314 | 0.34823871 | 3.47545317 | 0.2907507  | 0.51316785 |
| ENSMUSG00000045092 | 0.34816592 | 6.25597464 | 0.25893119 | 0.47821783 |
| ENSMUSG00000030220 | 0.34808792 | 9.89428908 | 0.25527341 | 0.474142   |
| ENSMUSG00000030670 | 0.34806254 | 1.56340764 | 0.32879167 | 0.55375439 |
| ENSMUSG00000025289 | 0.34778439 | 6.16785949 | 0.25980995 | 0.47910234 |
| ENSMUSG00000036057 | 0.34767888 | 4.71584532 | 0.26955885 | 0.48860716 |
| ENSMUSG00000002010 | 0.34732599 | 6.53735014 | 0.25966691 | 0.47892046 |
| ENSMUSG00000025384 | 0.34639548 | 1.21783053 | 0.39674808 | 0.61528185 |
| ENSMUSG00000005566 | 0.3461094  | 7.9191278  | 0.25914872 | 0.4784557  |
| ENSMUSG00000026727 | 0.34585335 | 5.66297721 | 0.26385484 | 0.4829857  |
| ENSMUSG00000039205 | 0.34578991 | 4.49459286 | 0.27411741 | 0.49402721 |
| ENSMUSG00000028419 | 0.34568338 | 5.68867466 | 0.26405556 | 0.48313118 |
| ENSMUSG00000026483 | 0.34567319 | 6.46993447 | 0.26165487 | 0.48102389 |
| ENSMUSG00000052752 | 0.34552394 | 6.65281326 | 0.26184851 | 0.4812158  |
| ENSMUSG00000069892 | 0.34550293 | 6.65755904 | 0.26087093 | 0.48031964 |
| ENSMUSG00000039294 | 0.34514611 | 6.60163036 | 0.2622595  | 0.48147852 |
| ENSMUSG00000026504 | 0.34507265 | 4.25702221 | 0.27546729 | 0.49535423 |
| ENSMUSG00000078317 | 0.34497408 | 1.27998166 | 0.35737941 | 0.57954579 |
| ENSMUSG00000002015 | 0.34477319 | 7.30630125 | 0.26149612 | 0.48085391 |
| ENSMUSG00000003421 | 0.3447102  | 3.71105446 | 0.28600178 | 0.50765731 |
| ENSMUSG00000057596 | 0.3444059  | 7.56619574 | 0.26130443 | 0.48078945 |
| ENSMUSG00000020340 | 0.34439002 | 8.74529782 | 0.26071305 | 0.48019292 |
| ENSMUSG00000024063 | 0.34412161 | 5.78521251 | 0.2665199  | 0.48569517 |
| ENSMUSG00000020311 | 0.34399938 | 5.60082777 | 0.26606879 | 0.48533251 |
| ENSMUSG00000073902 | 0.34328719 | 8.64746948 | 0.26215085 | 0.48144719 |
| ENSMUSG00000060600 | 0.34319246 | 1.33778869 | 0.39291303 | 0.61275114 |

|                    |            |            |            |            |
|--------------------|------------|------------|------------|------------|
| ENSMUSG00000074358 | 0.34281834 | 0.99028539 | 0.43694368 | 0.64901466 |
| ENSMUSG00000039849 | 0.34278718 | 4.27200959 | 0.27953008 | 0.50040711 |
| ENSMUSG00000057841 | 0.34237374 | 9.4078797  | 0.2633214  | 0.48252472 |
| ENSMUSG00000042523 | 0.34193326 | 2.24035452 | 0.31476955 | 0.5394906  |
| ENSMUSG00000022551 | 0.34189694 | 6.17803798 | 0.26850358 | 0.48738304 |
| ENSMUSG00000073557 | 0.34157559 | 3.82630038 | 0.28418376 | 0.50546555 |
| ENSMUSG00000022553 | 0.34136577 | 4.73066293 | 0.27696135 | 0.4971754  |
| ENSMUSG00000084899 | 0.34110469 | 2.69363714 | 0.30597115 | 0.52954467 |
| ENSMUSG00000038429 | 0.34107411 | 6.83596011 | 0.26775614 | 0.48659964 |
| ENSMUSG00000028044 | 0.3407875  | 5.14027586 | 0.27461766 | 0.49448602 |
| ENSMUSG00000014606 | 0.34072253 | 5.94349078 | 0.27028649 | 0.48944259 |
| ENSMUSG00000021916 | 0.34042465 | 4.28857289 | 0.28080918 | 0.50194699 |
| ENSMUSG00000039850 | 0.33994273 | 1.85516646 | 0.35212583 | 0.57532874 |
| ENSMUSG00000063286 | 0.3397908  | 8.19370685 | 0.26727857 | 0.4863054  |
| ENSMUSG00000022951 | 0.33977429 | 3.19805641 | 0.30481946 | 0.52853791 |
| ENSMUSG00000059363 | 0.33897958 | 3.08956365 | 0.30970533 | 0.53380107 |
| ENSMUSG00000029924 | 0.33887223 | 4.32730106 | 0.28110682 | 0.5021461  |
| ENSMUSG00000015542 | 0.33872958 | 1.72344879 | 0.39349439 | 0.61309072 |
| ENSMUSG00000070808 | 0.33860372 | 4.02531382 | 0.29065947 | 0.51309081 |
| ENSMUSG00000054414 | 0.33834143 | 6.08456969 | 0.27267959 | 0.49242354 |
| ENSMUSG00000032046 | 0.33829636 | 5.23011539 | 0.27698976 | 0.4971754  |
| ENSMUSG00000064120 | 0.33820131 | 2.43705682 | 0.32493035 | 0.54974097 |
| ENSMUSG00000034781 | 0.3381492  | 3.12587709 | 0.30285534 | 0.52626361 |
| ENSMUSG00000037570 | 0.33771841 | 3.15451537 | 0.31160785 | 0.53620218 |
| ENSMUSG00000047284 | 0.33757111 | 4.55436673 | 0.28504929 | 0.5065038  |
| ENSMUSG00000022131 | 0.33739345 | 3.27498204 | 0.29728438 | 0.51942884 |
| ENSMUSG00000045435 | 0.33711923 | 3.32252416 | 0.29935427 | 0.52194606 |
| ENSMUSG00000025538 | 0.33679225 | 3.7664256  | 0.29273402 | 0.51481468 |
| ENSMUSG00000053617 | 0.33665112 | 4.19216028 | 0.28782042 | 0.50974798 |
| ENSMUSG0000002486  | 0.33614703 | 3.51129194 | 0.30254625 | 0.52598078 |
| ENSMUSG00000035878 | 0.33611122 | 1.11995635 | 0.40115499 | 0.61932633 |
| ENSMUSG00000020029 | 0.33601461 | 7.23342716 | 0.27368308 | 0.49354026 |
| ENSMUSG00000034639 | 0.33595522 | 1.31678022 | 0.38892699 | 0.60957343 |
| ENSMUSG00000015750 | 0.33585853 | 5.33815497 | 0.28041243 | 0.5013209  |
| ENSMUSG00000027331 | 0.33533459 | 6.02571762 | 0.27758753 | 0.49767314 |
| ENSMUSG00000053581 | 0.33531399 | 4.66677916 | 0.28486387 | 0.50625774 |
| ENSMUSG00000067341 | 0.33499471 | 6.58221378 | 0.27623349 | 0.49640093 |
| ENSMUSG00000018040 | 0.33478316 | 5.73618759 | 0.28024224 | 0.5011828  |
| ENSMUSG00000002325 | 0.33444477 | 6.76655142 | 0.27675367 | 0.49692167 |
| ENSMUSG00000028700 | 0.3343574  | 4.77107471 | 0.28602799 | 0.50765731 |
| ENSMUSG00000031310 | 0.33348434 | 5.40134063 | 0.2827115  | 0.50401071 |
| ENSMUSG00000027742 | 0.33338586 | 5.61066691 | 0.28151082 | 0.50261799 |
| ENSMUSG00000030337 | 0.3332984  | 4.01980776 | 0.29202528 | 0.51421331 |

|                    |            |            |            |            |
|--------------------|------------|------------|------------|------------|
| ENSMUSG00000028657 | 0.33319544 | 6.40208964 | 0.27935939 | 0.50018458 |
| ENSMUSG00000024927 | 0.3331783  | 5.03038086 | 0.28714375 | 0.50896748 |
| ENSMUSG00000042535 | 0.33300768 | 5.81328796 | 0.28205504 | 0.5030899  |
| ENSMUSG00000022043 | 0.33291084 | 6.25584296 | 0.28011224 | 0.5010334  |
| ENSMUSG00000037992 | 0.33243638 | 3.23233188 | 0.3204712  | 0.54530228 |
| ENSMUSG00000042724 | 0.33233943 | 2.55790026 | 0.32645093 | 0.55118943 |
| ENSMUSG00000029156 | 0.33231719 | 3.788542   | 0.29677469 | 0.51870636 |
| ENSMUSG00000028102 | 0.33223777 | 4.04945223 | 0.29541818 | 0.51725762 |
| ENSMUSG00000042817 | 0.33200261 | 5.56355323 | 0.28389629 | 0.50512483 |
| ENSMUSG00000054021 | 0.33168186 | 1.20552317 | 0.3756462  | 0.59699164 |
| ENSMUSG00000020781 | 0.33166763 | 3.35571975 | 0.31821274 | 0.54317299 |
| ENSMUSG00000030733 | 0.33159362 | 4.50243865 | 0.29413991 | 0.51589203 |
| ENSMUSG00000061887 | 0.33145691 | 4.5787007  | 0.29122932 | 0.5138444  |
| ENSMUSG00000023243 | 0.33144817 | 3.49922406 | 0.30667032 | 0.53032917 |
| ENSMUSG00000086605 | 0.33144279 | 2.46653079 | 0.33672    | 0.56097459 |
| ENSMUSG00000039917 | 0.33138655 | 3.52583772 | 0.30738272 | 0.53136408 |
| ENSMUSG00000005225 | 0.33057016 | 4.82137037 | 0.28984562 | 0.51215717 |
| ENSMUSG00000022186 | 0.33030094 | 7.94315227 | 0.28127701 | 0.5022837  |
| ENSMUSG00000042082 | 0.33017133 | 5.4689122  | 0.28710955 | 0.50896748 |
| ENSMUSG00000030447 | 0.33009883 | 6.47570724 | 0.28368023 | 0.50506977 |
| ENSMUSG00000015461 | 0.32972118 | 4.64274199 | 0.29513825 | 0.51701931 |
| ENSMUSG00000009555 | 0.32895893 | 5.93972189 | 0.2875739  | 0.50956242 |
| ENSMUSG00000024675 | 0.32885013 | 8.31503224 | 0.28300318 | 0.50428298 |
| ENSMUSG00000028470 | 0.32867357 | 2.10352739 | 0.35136754 | 0.57483597 |
| ENSMUSG00000039328 | 0.32860778 | 1.54199259 | 0.38983982 | 0.61042715 |
| ENSMUSG00000021133 | 0.3282922  | 5.22324768 | 0.2914912  | 0.51390128 |
| ENSMUSG00000001098 | 0.32825299 | 5.29131194 | 0.29146928 | 0.51390128 |
| ENSMUSG00000028698 | 0.32807113 | 3.08997192 | 0.31639598 | 0.54098846 |
| ENSMUSG00000025871 | 0.32795379 | 6.15245563 | 0.28777906 | 0.50974798 |
| ENSMUSG00000019254 | 0.32779968 | 4.94244786 | 0.29498247 | 0.51683038 |
| ENSMUSG00000034959 | 0.32765685 | 4.96874629 | 0.29394366 | 0.51589203 |
| ENSMUSG00000038843 | 0.32695251 | 5.15906877 | 0.29284867 | 0.51487029 |
| ENSMUSG00000069520 | 0.3267781  | 4.78205497 | 0.29677255 | 0.51870636 |
| ENSMUSG00000029175 | 0.32667155 | 2.87177688 | 0.3313137  | 0.55650982 |
| ENSMUSG00000034135 | 0.32664835 | 5.48443422 | 0.29290887 | 0.51487029 |
| ENSMUSG00000018286 | 0.32634383 | 6.05448545 | 0.29138816 | 0.51390128 |
| ENSMUSG00000025025 | 0.32599192 | 2.86810908 | 0.3313137  | 0.55650982 |
| ENSMUSG00000028692 | 0.32515912 | 7.53628397 | 0.28937284 | 0.51148939 |
| ENSMUSG00000009640 | 0.32508708 | 3.46902474 | 0.32053701 | 0.54530228 |
| ENSMUSG00000027327 | 0.32505326 | 2.77221366 | 0.33583298 | 0.56008281 |
| ENSMUSG00000033102 | 0.32502777 | 4.12672936 | 0.30370457 | 0.52731445 |
| ENSMUSG00000033916 | 0.32480938 | 5.8092297  | 0.29430339 | 0.51589203 |
| ENSMUSG00000018199 | 0.32400277 | 2.80206607 | 0.32469646 | 0.54953381 |

|                    |            |            |            |            |
|--------------------|------------|------------|------------|------------|
| ENSMUSG00000040479 | 0.32376814 | 5.19031122 | 0.29914489 | 0.52174735 |
| ENSMUSG00000037190 | 0.3234482  | 2.98136744 | 0.33155617 | 0.55652855 |
| ENSMUSG00000063236 | 0.32340278 | 3.03158679 | 0.33459922 | 0.55936421 |
| ENSMUSG00000000881 | 0.323402   | 4.99349205 | 0.29958047 | 0.52216863 |
| ENSMUSG00000035443 | 0.32283295 | 4.79333809 | 0.30272319 | 0.52611876 |
| ENSMUSG00000028199 | 0.32236524 | 2.35709567 | 0.35161992 | 0.57498087 |
| ENSMUSG00000045576 | 0.32232335 | 2.89508036 | 0.33224678 | 0.55687742 |
| ENSMUSG00000055839 | 0.32215823 | 3.65610224 | 0.31903644 | 0.54403683 |
| ENSMUSG00000053044 | 0.32212184 | 1.32888017 | 0.35515124 | 0.57775698 |
| ENSMUSG00000051238 | 0.32173345 | 2.1829397  | 0.36189428 | 0.58391051 |
| ENSMUSG00000071650 | 0.32118392 | 8.66812866 | 0.29424689 | 0.51589203 |
| ENSMUSG00000094724 | 0.32114774 | 1.3562168  | 0.42067813 | 0.63514811 |
| ENSMUSG00000013593 | 0.3209503  | 6.88531355 | 0.29675817 | 0.51870636 |
| ENSMUSG00000062691 | 0.32017302 | 3.07179616 | 0.3348609  | 0.55943299 |
| ENSMUSG00000029516 | 0.32016154 | 5.32525084 | 0.30320869 | 0.52670788 |
| ENSMUSG00000018761 | 0.31999004 | 5.15926504 | 0.30538594 | 0.52887137 |
| ENSMUSG00000040528 | 0.31993507 | 4.90729738 | 0.30553428 | 0.52895836 |
| ENSMUSG00000065979 | 0.31989049 | 4.03850767 | 0.31426784 | 0.53871632 |
| ENSMUSG00000031703 | 0.31985029 | 6.57574145 | 0.29856209 | 0.52115467 |
| ENSMUSG00000060802 | 0.31932978 | 11.0743195 | 0.29635552 | 0.51861002 |
| ENSMUSG00000090210 | 0.3188737  | 1.73890362 | 0.39657141 | 0.61526686 |
| ENSMUSG00000032497 | 0.31866698 | 4.55387132 | 0.31168619 | 0.53625141 |
| ENSMUSG00000028618 | 0.31817809 | 6.53556502 | 0.30120677 | 0.52449763 |
| ENSMUSG00000052146 | 0.31758441 | 6.84503012 | 0.3022281  | 0.52561791 |
| ENSMUSG00000043384 | 0.31722974 | 5.57071244 | 0.30537365 | 0.52887137 |
| ENSMUSG00000025260 | 0.31690569 | 4.70284187 | 0.31337987 | 0.53796379 |
| ENSMUSG00000032038 | 0.31690331 | 3.59351906 | 0.32505246 | 0.54982381 |
| ENSMUSG00000025486 | 0.31686781 | 1.0232791  | 0.44649291 | 0.65688671 |
| ENSMUSG00000063931 | 0.31676035 | 4.04428173 | 0.32207248 | 0.5467433  |
| ENSMUSG00000032952 | 0.31672651 | 5.04893067 | 0.3093618  | 0.53344382 |
| ENSMUSG00000039183 | 0.31659504 | 4.83019662 | 0.31532124 | 0.54017859 |
| ENSMUSG00000068739 | 0.31658921 | 6.77146848 | 0.3038465  | 0.52739106 |
| ENSMUSG00000031516 | 0.31578803 | 4.31341883 | 0.31700061 | 0.54185046 |
| ENSMUSG00000064326 | 0.31566285 | 2.77355428 | 0.36065061 | 0.58274741 |
| ENSMUSG00000075256 | 0.3155938  | 2.30697017 | 0.35620381 | 0.57851354 |
| ENSMUSG00000020775 | 0.3154701  | 4.30749749 | 0.32011281 | 0.54518265 |
| ENSMUSG00000098332 | 0.31545469 | 1.74917421 | 0.38750486 | 0.60827546 |
| ENSMUSG00000046417 | 0.31544965 | 1.96313411 | 0.38823851 | 0.60873677 |
| ENSMUSG00000006526 | 0.31543068 | 3.68501425 | 0.32865232 | 0.55360616 |
| ENSMUSG00000024130 | 0.31538403 | 4.88260447 | 0.31405658 | 0.53844548 |
| ENSMUSG00000024007 | 0.3152608  | 5.43757088 | 0.31148425 | 0.53607503 |
| ENSMUSG00000079197 | 0.31517182 | 8.12412644 | 0.30380396 | 0.52739106 |
| ENSMUSG00000022848 | 0.31515403 | 2.57058569 | 0.36002054 | 0.58225278 |

|                    |            |            |            |            |
|--------------------|------------|------------|------------|------------|
| ENSMUSG0000001123  | 0.3149724  | 8.7064561  | 0.30362772 | 0.52726592 |
| ENSMUSG00000085882 | 0.31466507 | 1.79895292 | 0.38478349 | 0.60612112 |
| ENSMUSG00000015291 | 0.31460092 | 7.40527477 | 0.3052197  | 0.52887137 |
| ENSMUSG00000022364 | 0.31449375 | 5.77461861 | 0.30870622 | 0.53282457 |
| ENSMUSG00000070336 | 0.3144675  | 1.26598591 | 0.3968235  | 0.61529038 |
| ENSMUSG00000031639 | 0.31444998 | 2.87483619 | 0.33428715 | 0.55916746 |
| ENSMUSG00000046876 | 0.31443853 | 5.291754   | 0.31065879 | 0.53507581 |
| ENSMUSG00000019505 | 0.31383643 | 7.71630439 | 0.3062502  | 0.52977256 |
| ENSMUSG00000030677 | 0.31377408 | 6.26746839 | 0.30932994 | 0.53344382 |
| ENSMUSG00000026004 | 0.31346761 | 3.93694315 | 0.32120986 | 0.54596152 |
| ENSMUSG00000030823 | 0.31326344 | 1.95760207 | 0.37262277 | 0.59434462 |
| ENSMUSG00000042203 | 0.31307149 | 4.47918697 | 0.32122829 | 0.54596152 |
| ENSMUSG00000097750 | 0.31274654 | 0.88035333 | 0.43912875 | 0.65024023 |
| ENSMUSG00000020576 | 0.31265184 | 6.53199947 | 0.30967958 | 0.53380107 |
| ENSMUSG00000028551 | 0.31263595 | 3.74090062 | 0.33531974 | 0.55950612 |
| ENSMUSG00000014859 | 0.31245713 | 6.33990591 | 0.31130493 | 0.53585421 |
| ENSMUSG00000006567 | 0.31211845 | 0.7812445  | 0.51469173 | 0.71039702 |
| ENSMUSG00000029570 | 0.31184343 | 2.63452401 | 0.3776331  | 0.59923415 |
| ENSMUSG00000023791 | 0.31171491 | 3.92923097 | 0.32602092 | 0.55080834 |
| ENSMUSG00000001143 | 0.31168285 | 4.48822053 | 0.32209386 | 0.5467433  |
| ENSMUSG00000001829 | 0.31154844 | 4.83075488 | 0.32089461 | 0.54556637 |
| ENSMUSG00000016664 | 0.31148586 | 6.00548598 | 0.31327124 | 0.53789127 |
| ENSMUSG00000046541 | 0.31146022 | 3.14966503 | 0.35325592 | 0.57624164 |
| ENSMUSG00000049680 | 0.31085942 | 4.0644105  | 0.33239366 | 0.55698498 |
| ENSMUSG00000098112 | 0.31066055 | 5.8761877  | 0.31547725 | 0.54030327 |
| ENSMUSG00000025981 | 0.31050978 | 4.43726729 | 0.32038508 | 0.54530228 |
| ENSMUSG00000030008 | 0.31020566 | 3.61874454 | 0.34216571 | 0.56585109 |
| ENSMUSG00000025283 | 0.31015746 | 5.52092775 | 0.31615572 | 0.54078025 |
| ENSMUSG00000027074 | 0.31002345 | 7.65907162 | 0.31210158 | 0.53662364 |
| ENSMUSG00000068663 | 0.30996506 | 5.13923946 | 0.31991241 | 0.54492741 |
| ENSMUSG00000023072 | 0.30967458 | 3.93699596 | 0.33457797 | 0.55936421 |
| ENSMUSG00000022443 | 0.30957002 | 8.06275888 | 0.31250532 | 0.53699096 |
| ENSMUSG00000035181 | 0.30945794 | 5.09149975 | 0.32018793 | 0.54522448 |
| ENSMUSG00000021356 | 0.3093973  | 9.01156765 | 0.31200944 | 0.53662364 |
| ENSMUSG00000015340 | 0.30912466 | 9.72279865 | 0.31221627 | 0.53673525 |
| ENSMUSG00000014932 | 0.3090954  | 2.56213926 | 0.3381175  | 0.56234717 |
| ENSMUSG00000045005 | 0.30863215 | 2.94715824 | 0.34950455 | 0.57264887 |
| ENSMUSG00000031858 | 0.30850934 | 5.98963593 | 0.31772557 | 0.54265957 |
| ENSMUSG00000003200 | 0.30838854 | 4.11841895 | 0.33657754 | 0.56090309 |
| ENSMUSG00000016427 | 0.30804276 | 4.54759339 | 0.32756323 | 0.55272131 |
| ENSMUSG00000039354 | 0.30800497 | 5.06495334 | 0.32359469 | 0.54842764 |
| ENSMUSG00000047379 | 0.3077795  | 2.18136812 | 0.37523666 | 0.59678326 |
| ENSMUSG00000031161 | 0.30775907 | 4.74831256 | 0.32828481 | 0.55333283 |

|                    |            |            |            |            |
|--------------------|------------|------------|------------|------------|
| ENSMUSG00000032322 | 0.30748963 | 3.96890048 | 0.33757379 | 0.56170279 |
| ENSMUSG00000001741 | 0.30735105 | 7.09601208 | 0.31709372 | 0.54192372 |
| ENSMUSG00000075704 | 0.30717451 | 3.3864426  | 0.34872455 | 0.57233055 |
| ENSMUSG00000025142 | 0.30707721 | 3.6575277  | 0.34484602 | 0.56868628 |
| ENSMUSG00000011306 | 0.30698641 | 5.02120586 | 0.3258463  | 0.55059958 |
| ENSMUSG00000022179 | 0.30681331 | 1.8386707  | 0.41097257 | 0.62668667 |
| ENSMUSG00000097204 | 0.30645582 | 0.89039569 | 0.44926789 | 0.65917074 |
| ENSMUSG00000025037 | 0.30640084 | 4.18495554 | 0.33178058 | 0.55652855 |
| ENSMUSG00000034110 | 0.30633774 | 3.14509703 | 0.35202059 | 0.57526747 |
| ENSMUSG00000068329 | 0.30630348 | 5.54570308 | 0.32429478 | 0.5490964  |
| ENSMUSG00000029177 | 0.30606555 | 6.26017284 | 0.32088709 | 0.54556637 |
| ENSMUSG00000051391 | 0.30605028 | 7.64904362 | 0.31832838 | 0.54317299 |
| ENSMUSG00000021871 | 0.30599068 | 6.43611945 | 0.32075452 | 0.54556637 |
| ENSMUSG00000033326 | 0.30562799 | 6.23645102 | 0.32196179 | 0.54671337 |
| ENSMUSG00000003500 | 0.30538026 | 4.54246948 | 0.33502967 | 0.55945494 |
| ENSMUSG00000028391 | 0.30528067 | 1.1262663  | 0.42427484 | 0.63830635 |
| ENSMUSG00000044864 | 0.30513155 | 3.93610728 | 0.33852641 | 0.56250674 |
| ENSMUSG00000018001 | 0.30481072 | 3.0399889  | 0.3579848  | 0.57983673 |
| ENSMUSG00000000275 | 0.30478353 | 7.9619003  | 0.31991131 | 0.54492741 |
| ENSMUSG00000042626 | 0.30458757 | 6.35193561 | 0.32312711 | 0.54797967 |
| ENSMUSG00000006442 | 0.30449002 | 6.47100326 | 0.32349376 | 0.54842764 |
| ENSMUSG00000037815 | 0.30430838 | 5.81701787 | 0.32541493 | 0.55004304 |
| ENSMUSG00000057963 | 0.30414188 | 2.99917673 | 0.36473242 | 0.58653062 |
| ENSMUSG00000073982 | 0.30385297 | 5.27704208 | 0.32972281 | 0.55485256 |
| ENSMUSG00000039662 | 0.30365487 | 5.45654677 | 0.32798032 | 0.55314336 |
| ENSMUSG00000015149 | 0.30362011 | 4.55556801 | 0.33511383 | 0.55950612 |
| ENSMUSG00000001289 | 0.30338132 | 5.86031244 | 0.32722209 | 0.55223208 |
| ENSMUSG00000045216 | 0.30315115 | 5.03770153 | 0.33241425 | 0.55698498 |
| ENSMUSG00000033769 | 0.30285432 | 4.06448352 | 0.33962493 | 0.56372407 |
| ENSMUSG00000025377 | 0.30284642 | 2.6864976  | 0.37647188 | 0.59785289 |
| ENSMUSG00000031021 | 0.30205838 | 4.8190096  | 0.33381521 | 0.55865585 |
| ENSMUSG00000003423 | 0.30191285 | 3.09995955 | 0.36874556 | 0.59056801 |
| ENSMUSG00000026107 | 0.30188433 | 8.78377559 | 0.32396652 | 0.54888531 |
| ENSMUSG00000030577 | 0.30169949 | 9.07645855 | 0.32428781 | 0.5490964  |
| ENSMUSG00000018559 | 0.30144659 | 6.1347056  | 0.32952696 | 0.55464628 |
| ENSMUSG00000053134 | 0.30140807 | 4.08300314 | 0.34492164 | 0.56868628 |
| ENSMUSG00000024163 | 0.3012588  | 5.52735614 | 0.33220255 | 0.55687742 |
| ENSMUSG00000019791 | 0.30116436 | 3.23963468 | 0.35980058 | 0.58198433 |
| ENSMUSG00000045917 | 0.30105648 | 3.75344528 | 0.3476762  | 0.57154576 |
| ENSMUSG00000039770 | 0.30093402 | 4.21139788 | 0.34091296 | 0.56455856 |
| ENSMUSG00000066057 | 0.30083794 | 1.16170637 | 0.49014727 | 0.69114856 |
| ENSMUSG00000031783 | 0.30078314 | 5.47750302 | 0.3333483  | 0.55820312 |
| ENSMUSG00000034022 | 0.30074441 | 5.98685508 | 0.33097966 | 0.5563743  |

|                    |            |            |            |            |
|--------------------|------------|------------|------------|------------|
| ENSMUSG00000026924 | 0.30066993 | 7.30564366 | 0.32719991 | 0.55223208 |
| ENSMUSG00000021495 | 0.30050747 | 3.84059371 | 0.35138341 | 0.57483597 |
| ENSMUSG00000019979 | 0.30049403 | 6.75119799 | 0.32802588 | 0.55314336 |
| ENSMUSG00000022744 | 0.30049166 | 9.09900398 | 0.3261214  | 0.5508918  |
| ENSMUSG00000033099 | 0.30012752 | 3.85105518 | 0.35447152 | 0.57726077 |
| ENSMUSG00000029466 | 0.30008784 | 5.51212913 | 0.33382588 | 0.55865585 |
| ENSMUSG00000031399 | 0.29926445 | 3.15781415 | 0.36840778 | 0.5903283  |
| ENSMUSG00000051124 | 0.29907593 | 5.69650737 | 0.33361607 | 0.55854516 |
| ENSMUSG00000028673 | 0.29903521 | 5.54040275 | 0.33561168 | 0.55982    |
| ENSMUSG00000000278 | 0.29865473 | 6.82484685 | 0.33160093 | 0.55652855 |
| ENSMUSG00000022544 | 0.29851011 | 2.96781497 | 0.36950259 | 0.59137962 |
| ENSMUSG00000032604 | 0.29833432 | 7.30226103 | 0.33113874 | 0.5564906  |
| ENSMUSG00000003808 | 0.29824471 | 5.9146051  | 0.33531489 | 0.55950612 |
| ENSMUSG00000027828 | 0.29810217 | 9.74029112 | 0.32975242 | 0.55485256 |
| ENSMUSG00000045282 | 0.29764186 | 0.882206   | 0.50272585 | 0.70115005 |
| ENSMUSG00000015869 | 0.29760067 | 5.10165407 | 0.34017641 | 0.56420523 |
| ENSMUSG00000047030 | 0.297569   | 4.6883458  | 0.34449873 | 0.56831488 |
| ENSMUSG00000001065 | 0.29738408 | 3.01961059 | 0.37791047 | 0.59932154 |
| ENSMUSG00000058301 | 0.29733014 | 5.78902974 | 0.33785565 | 0.56203708 |
| ENSMUSG00000069808 | 0.29719448 | 3.24966762 | 0.36210229 | 0.58391051 |
| ENSMUSG00000031728 | 0.29704903 | 2.35397847 | 0.40361159 | 0.62150359 |
| ENSMUSG00000024622 | 0.29695824 | 5.56126499 | 0.33851046 | 0.56250674 |
| ENSMUSG00000000876 | 0.29691731 | 3.21309953 | 0.36809343 | 0.59013135 |
| ENSMUSG00000033703 | 0.29670944 | 2.18975072 | 0.40259962 | 0.6204994  |
| ENSMUSG00000055943 | 0.2964197  | 6.30494158 | 0.33605506 | 0.5602996  |
| ENSMUSG00000005779 | 0.29611502 | 7.66886431 | 0.33444953 | 0.55935231 |
| ENSMUSG00000050786 | 0.29584273 | 2.19411554 | 0.39109505 | 0.61137642 |
| ENSMUSG00000041346 | 0.29577834 | 3.60734559 | 0.36104003 | 0.58302721 |
| ENSMUSG00000040312 | 0.29545308 | 2.47875043 | 0.38740832 | 0.6082343  |
| ENSMUSG00000036944 | 0.29542205 | 3.93880699 | 0.35382908 | 0.57669803 |
| ENSMUSG00000043773 | 0.29542169 | 3.45807611 | 0.35716907 | 0.57937895 |
| ENSMUSG00000026946 | 0.29519468 | 5.68965568 | 0.34024615 | 0.56423412 |
| ENSMUSG00000039395 | 0.29468594 | 5.93109298 | 0.34037756 | 0.56435327 |
| ENSMUSG00000076677 | 0.29460892 | 6.00980944 | 0.33922005 | 0.56315466 |
| ENSMUSG00000009549 | 0.29410847 | 5.88135256 | 0.34111879 | 0.56464653 |
| ENSMUSG00000030707 | 0.29402782 | 8.20027666 | 0.33734371 | 0.56160326 |
| ENSMUSG00000023048 | 0.29399925 | 5.27805142 | 0.34504513 | 0.5687812  |
| ENSMUSG00000048799 | 0.2938286  | 6.10614999 | 0.34057136 | 0.56442625 |
| ENSMUSG00000025474 | 0.2934463  | 5.271652   | 0.34562632 | 0.56939112 |
| ENSMUSG00000045822 | 0.29333442 | 2.70700456 | 0.375102   | 0.59678326 |
| ENSMUSG00000006850 | 0.29211398 | 2.4517084  | 0.41266659 | 0.6281807  |
| ENSMUSG00000032557 | 0.29203186 | 6.05596227 | 0.3439449  | 0.56776034 |
| ENSMUSG00000061479 | 0.2919826  | 5.13380367 | 0.34938329 | 0.57260629 |



|                    |            |            |            |            |
|--------------------|------------|------------|------------|------------|
| ENSMUSG00000020477 | 0.29197651 | 3.71341714 | 0.36859211 | 0.59053593 |
| ENSMUSG00000000441 | 0.29183521 | 6.91538959 | 0.34243378 | 0.56616397 |
| ENSMUSG00000042213 | 0.29182524 | 2.70517293 | 0.39279029 | 0.61264831 |
| ENSMUSG00000020869 | 0.29169285 | 8.07171514 | 0.3411872  | 0.56466586 |
| ENSMUSG00000019923 | 0.29166968 | 7.50810389 | 0.34161638 | 0.56511597 |
| ENSMUSG00000020372 | 0.29138049 | 9.95049939 | 0.34081038 | 0.56454669 |
| ENSMUSG00000029313 | 0.29098176 | 7.23266886 | 0.34290552 | 0.56655326 |
| ENSMUSG00000070953 | 0.29009163 | 4.05750079 | 0.36024747 | 0.58247522 |
| ENSMUSG00000070822 | 0.28987459 | 1.54090398 | 0.45110806 | 0.66079182 |
| ENSMUSG00000038274 | 0.28949441 | 5.22749441 | 0.35407748 | 0.57680326 |
| ENSMUSG00000057530 | 0.28946197 | 4.21751357 | 0.36038182 | 0.58247522 |
| ENSMUSG00000031090 | 0.28936483 | 2.7260197  | 0.40742387 | 0.62395419 |
| ENSMUSG00000032633 | 0.28915495 | 5.22775961 | 0.35375817 | 0.57669803 |
| ENSMUSG00000017774 | 0.28853161 | 6.60654368 | 0.34917092 | 0.57254306 |
| ENSMUSG00000018449 | 0.28803783 | 4.04613802 | 0.36701391 | 0.58891694 |
| ENSMUSG00000032119 | 0.28778537 | 4.15544612 | 0.36564074 | 0.58755323 |
| ENSMUSG00000024597 | 0.28757187 | 6.62854632 | 0.34959853 | 0.57264887 |
| ENSMUSG00000056941 | 0.28751306 | 4.54964102 | 0.35941918 | 0.58147497 |
| ENSMUSG00000024906 | 0.28745799 | 2.63348751 | 0.41556851 | 0.6302195  |
| ENSMUSG00000037548 | 0.28732339 | 7.95146822 | 0.34861081 | 0.57233055 |
| ENSMUSG00000079685 | 0.28728972 | 5.5229841  | 0.35246824 | 0.57556292 |
| ENSMUSG00000037405 | 0.28717878 | 6.42134432 | 0.35168526 | 0.57498087 |
| ENSMUSG00000002580 | 0.28705581 | 5.50750632 | 0.35512831 | 0.57775698 |
| ENSMUSG00000008668 | 0.28701488 | 8.38798287 | 0.34887457 | 0.57246856 |
| ENSMUSG00000068742 | 0.28696503 | 3.35525335 | 0.38349364 | 0.60479605 |
| ENSMUSG00000029171 | 0.28648358 | 5.2776703  | 0.35665257 | 0.5788023  |
| ENSMUSG00000028189 | 0.2863764  | 3.65151081 | 0.3719269  | 0.59358587 |
| ENSMUSG00000024350 | 0.28612562 | 5.17219965 | 0.35735576 | 0.57954579 |
| ENSMUSG00000022177 | 0.28593523 | 4.17180502 | 0.3705863  | 0.59244981 |
| ENSMUSG00000048787 | 0.28469023 | 3.08375285 | 0.38596237 | 0.60687924 |
| ENSMUSG00000033530 | 0.28468502 | 4.56738761 | 0.36598077 | 0.58783685 |
| ENSMUSG00000020717 | 0.2844663  | 6.35276461 | 0.35588815 | 0.57848057 |
| ENSMUSG00000034066 | 0.28420985 | 2.61268123 | 0.38944782 | 0.61017075 |
| ENSMUSG00000011837 | 0.28420402 | 3.11930091 | 0.39720708 | 0.61570808 |
| ENSMUSG00000022439 | 0.28414381 | 7.22989248 | 0.35495713 | 0.57761546 |
| ENSMUSG00000034088 | 0.28408973 | 9.52021613 | 0.35306534 | 0.57624164 |
| ENSMUSG00000024613 | 0.28407477 | 6.4819739  | 0.35714358 | 0.57937895 |
| ENSMUSG00000023118 | 0.28402212 | 6.31299645 | 0.3576379  | 0.57973159 |
| ENSMUSG00000032239 | 0.28390574 | 4.47896145 | 0.36696074 | 0.58891694 |
| ENSMUSG00000072889 | 0.28376898 | 4.96122984 | 0.363073   | 0.58473405 |
| ENSMUSG00000027637 | 0.2837008  | 6.76055948 | 0.35625988 | 0.57851354 |
| ENSMUSG00000038467 | 0.28352447 | 7.16313676 | 0.35602518 | 0.57848057 |
| ENSMUSG00000021910 | 0.2834861  | 7.12798334 | 0.3560206  | 0.57848057 |

|                    |            |            |            |            |
|--------------------|------------|------------|------------|------------|
| ENSMUSG00000051344 | 0.2832155  | 6.12169238 | 0.35791321 | 0.57983673 |
| ENSMUSG00000073481 | 0.2829853  | 5.54699305 | 0.36225742 | 0.58391156 |
| ENSMUSG00000048154 | 0.28282184 | 5.51762533 | 0.36133504 | 0.58324159 |
| ENSMUSG00000028221 | 0.28274716 | 4.56441096 | 0.36628197 | 0.58823302 |
| ENSMUSG00000038503 | 0.28205872 | 5.84586182 | 0.36223949 | 0.58391156 |
| ENSMUSG00000032218 | 0.28164287 | 6.10309167 | 0.36207717 | 0.58391051 |
| ENSMUSG00000021298 | 0.28157698 | 6.0938553  | 0.36203515 | 0.58391051 |
| ENSMUSG00000038543 | 0.28129504 | 4.31438756 | 0.37449351 | 0.5962702  |
| ENSMUSG00000027247 | 0.28101472 | 5.92731746 | 0.36366079 | 0.58524369 |
| ENSMUSG00000025354 | 0.2808658  | 6.27195469 | 0.36237988 | 0.58396663 |
| ENSMUSG00000041926 | 0.2808106  | 5.66888024 | 0.36543601 | 0.58731177 |
| ENSMUSG00000036026 | 0.28078299 | 3.69954032 | 0.38647151 | 0.60718368 |
| ENSMUSG00000028108 | 0.28069886 | 0.87817228 | 0.53392486 | 0.72546293 |
| ENSMUSG00000081453 | 0.28050245 | 1.27187036 | 0.46985724 | 0.67613297 |
| ENSMUSG00000070972 | 0.28009025 | 4.16453583 | 0.37527405 | 0.59678326 |
| ENSMUSG00000015312 | 0.27988227 | 4.42012884 | 0.37399958 | 0.59574764 |
| ENSMUSG00000039163 | 0.27984861 | 3.01717989 | 0.39369478 | 0.61309072 |
| ENSMUSG00000011114 | 0.27956498 | 6.26961128 | 0.3648712  | 0.58657887 |
| ENSMUSG00000036478 | 0.27885492 | 7.82759559 | 0.36272094 | 0.58442889 |
| ENSMUSG00000027628 | 0.27884538 | 4.75306716 | 0.37524434 | 0.59678326 |
| ENSMUSG00000011267 | 0.27884274 | 2.23160637 | 0.43955786 | 0.65049746 |
| ENSMUSG00000036368 | 0.27839022 | 2.19198545 | 0.43082618 | 0.64420819 |
| ENSMUSG00000030816 | 0.27824374 | 5.43167033 | 0.37161153 | 0.59352173 |
| ENSMUSG00000061028 | 0.27779517 | 3.52555781 | 0.39360076 | 0.61309072 |
| ENSMUSG00000045691 | 0.27770302 | 2.94459788 | 0.40798081 | 0.62398323 |
| ENSMUSG00000021886 | 0.27769617 | 5.53971432 | 0.37005106 | 0.59199386 |
| ENSMUSG00000070737 | 0.27768632 | 1.03707742 | 0.48227225 | 0.68534066 |
| ENSMUSG00000041697 | 0.27746969 | 5.69723874 | 0.371317   | 0.59322705 |
| ENSMUSG00000049739 | 0.27743539 | 5.78342976 | 0.3701699  | 0.59200834 |
| ENSMUSG00000068798 | 0.27704889 | 7.94005226 | 0.3658588  | 0.58772849 |
| ENSMUSG00000026864 | 0.27702357 | 11.4682889 | 0.36482267 | 0.58657887 |
| ENSMUSG00000001588 | 0.27639131 | 6.42571517 | 0.37010922 | 0.59199909 |
| ENSMUSG00000002768 | 0.27584222 | 4.11962956 | 0.39041175 | 0.61074145 |
| ENSMUSG00000063019 | 0.27572034 | 2.6007316  | 0.4252462  | 0.6390545  |
| ENSMUSG00000034926 | 0.27552123 | 5.66550752 | 0.37534573 | 0.59678326 |
| ENSMUSG00000078349 | 0.27547841 | 1.64612396 | 0.46142954 | 0.6690046  |
| ENSMUSG00000026409 | 0.275392   | 3.02794856 | 0.39632371 | 0.61526686 |
| ENSMUSG00000025008 | 0.27529344 | 3.49346464 | 0.39464538 | 0.61406435 |
| ENSMUSG00000029233 | 0.27523571 | 4.54354538 | 0.38035096 | 0.60162631 |
| ENSMUSG00000025453 | 0.27517326 | 5.12634455 | 0.37575003 | 0.59703673 |
| ENSMUSG00000020183 | 0.27506663 | 4.56864722 | 0.38235322 | 0.60374152 |
| ENSMUSG00000033161 | 0.27477136 | 8.34198084 | 0.36972619 | 0.59156191 |
| ENSMUSG00000057788 | 0.27459364 | 4.4632503  | 0.38525708 | 0.60635046 |

|                    |            |            |            |            |
|--------------------|------------|------------|------------|------------|
| ENSMUSG00000041203 | 0.27453043 | 5.64442927 | 0.37566629 | 0.59699164 |
| ENSMUSG00000035325 | 0.2745113  | 7.54897371 | 0.37085405 | 0.59266302 |
| ENSMUSG00000006731 | 0.27420447 | 5.19778942 | 0.37999671 | 0.60139191 |
| ENSMUSG00000005054 | 0.27414431 | 5.25849556 | 0.37947957 | 0.6007498  |
| ENSMUSG00000028999 | 0.27397046 | 5.18370604 | 0.37852668 | 0.59994588 |
| ENSMUSG00000025417 | 0.27361518 | 5.54913147 | 0.37785837 | 0.59932154 |
| ENSMUSG00000029291 | 0.27344978 | 4.19850025 | 0.38619672 | 0.60695903 |
| ENSMUSG00000058997 | 0.27322293 | 5.42185203 | 0.37871883 | 0.60007403 |
| ENSMUSG00000036833 | 0.27296251 | 4.62304361 | 0.38564622 | 0.60668254 |
| ENSMUSG00000029404 | 0.2726789  | 3.64188    | 0.40037235 | 0.6187895  |
| ENSMUSG00000055850 | 0.27235529 | 5.71897205 | 0.3791506  | 0.60033457 |
| ENSMUSG00000039887 | 0.27199451 | 3.0809853  | 0.41296104 | 0.62828662 |
| ENSMUSG00000047719 | 0.2719611  | 4.66276548 | 0.38742224 | 0.6082343  |
| ENSMUSG00000068744 | 0.27188037 | 4.86729485 | 0.38502564 | 0.6062369  |
| ENSMUSG00000055707 | 0.27180389 | 2.54972306 | 0.42070317 | 0.63514811 |
| ENSMUSG00000044533 | 0.27167349 | 4.58139418 | 0.38825033 | 0.60873677 |
| ENSMUSG00000056612 | 0.27159628 | 5.39360231 | 0.38356789 | 0.6048247  |
| ENSMUSG00000004317 | 0.2714818  | 6.42411387 | 0.37752038 | 0.59914345 |
| ENSMUSG00000019578 | 0.27121183 | 3.40735186 | 0.41158819 | 0.62720683 |
| ENSMUSG00000032782 | 0.27088346 | 4.12668214 | 0.39609012 | 0.61504029 |
| ENSMUSG00000004462 | 0.27053057 | 4.73270985 | 0.38756975 | 0.60828878 |
| ENSMUSG00000029345 | 0.27049552 | 4.66469456 | 0.39112444 | 0.61137642 |
| ENSMUSG00000038871 | 0.2703692  | 3.82693433 | 0.39676094 | 0.61528185 |
| ENSMUSG00000038880 | 0.27028798 | 3.70912736 | 0.40755642 | 0.62397636 |
| ENSMUSG00000090083 | 0.27015098 | 1.19152404 | 0.51968463 | 0.71428486 |
| ENSMUSG00000041323 | 0.27009472 | 1.00470704 | 0.50107527 | 0.70001428 |
| ENSMUSG00000078153 | 0.26959104 | 2.90428075 | 0.41139814 | 0.62714757 |
| ENSMUSG00000024914 | 0.2695644  | 4.34165891 | 0.39739116 | 0.6159049  |
| ENSMUSG00000034459 | 0.26916598 | 6.75833284 | 0.3809953  | 0.60226522 |
| ENSMUSG00000051285 | 0.2687136  | 6.86325013 | 0.38149145 | 0.60269613 |
| ENSMUSG00000054720 | 0.26847221 | 5.99731502 | 0.38444051 | 0.60584634 |
| ENSMUSG00000038611 | 0.26803498 | 6.30433396 | 0.38519396 | 0.60635046 |
| ENSMUSG00000038406 | 0.26796448 | 4.26421917 | 0.40014265 | 0.61867746 |
| ENSMUSG00000065990 | 0.2679276  | 4.82673188 | 0.39447723 | 0.61394752 |
| ENSMUSG00000030231 | 0.2678656  | 4.31725658 | 0.39918884 | 0.61795118 |
| ENSMUSG00000049411 | 0.26785583 | 3.38765995 | 0.40651898 | 0.62386519 |
| ENSMUSG00000021786 | 0.26766231 | 4.05033931 | 0.39709647 | 0.61562513 |
| ENSMUSG00000027076 | 0.26735949 | 3.07048878 | 0.43872191 | 0.6499931  |
| ENSMUSG00000052296 | 0.26675104 | 6.9400568  | 0.38572352 | 0.60671564 |
| ENSMUSG00000023186 | 0.26674094 | 5.80261842 | 0.38764256 | 0.60830401 |
| ENSMUSG00000024767 | 0.2666284  | 5.59014733 | 0.39106788 | 0.61137642 |
| ENSMUSG00000025779 | 0.26653034 | 3.66252281 | 0.40894034 | 0.62476106 |
| ENSMUSG00000038780 | 0.26638946 | 3.66880807 | 0.40978592 | 0.62576202 |

|                    |            |            |            |            |
|--------------------|------------|------------|------------|------------|
| ENSMUSG00000040560 | 0.26637989 | 5.27193434 | 0.39130539 | 0.61157063 |
| ENSMUSG00000033444 | 0.26612471 | 6.67485799 | 0.38692054 | 0.60762357 |
| ENSMUSG00000029559 | 0.26611767 | 3.990168   | 0.4079381  | 0.62398323 |
| ENSMUSG00000056917 | 0.265508   | 5.07096042 | 0.39563479 | 0.61477314 |
| ENSMUSG00000049421 | 0.26546788 | 5.67710593 | 0.39049168 | 0.61074145 |
| ENSMUSG00000087060 | 0.26506336 | 1.37380676 | 0.52161293 | 0.71582608 |
| ENSMUSG00000059182 | 0.26503435 | 5.60173156 | 0.39195307 | 0.61205066 |
| ENSMUSG00000022307 | 0.26466834 | 5.83725564 | 0.39172135 | 0.61196096 |
| ENSMUSG00000049751 | 0.26409533 | 6.38922771 | 0.39183961 | 0.61203404 |
| ENSMUSG00000043263 | 0.26388306 | 7.87319999 | 0.38895352 | 0.60957343 |
| ENSMUSG00000092417 | 0.26373452 | 3.21582872 | 0.43290562 | 0.64570597 |
| ENSMUSG00000028964 | 0.26360865 | 5.87075078 | 0.39551703 | 0.61467872 |
| ENSMUSG00000026979 | 0.26341949 | 7.58766578 | 0.39044436 | 0.61074145 |
| ENSMUSG00000032295 | 0.26323216 | 4.55254297 | 0.40520026 | 0.62281637 |
| ENSMUSG00000020034 | 0.26277206 | 4.49411506 | 0.40404317 | 0.62165809 |
| ENSMUSG00000046169 | 0.26222117 | 2.68445113 | 0.42323759 | 0.6374735  |
| ENSMUSG00000039202 | 0.26212677 | 6.27193728 | 0.39500782 | 0.61406435 |
| ENSMUSG00000031367 | 0.26206871 | 4.88279122 | 0.39988704 | 0.61860522 |
| ENSMUSG00000051378 | 0.26204774 | 5.26748292 | 0.40095283 | 0.61911158 |
| ENSMUSG00000056069 | 0.26196135 | 3.4278523  | 0.41331628 | 0.62852847 |
| ENSMUSG00000035245 | 0.2619566  | 4.80976132 | 0.40131947 | 0.61941165 |
| ENSMUSG00000052566 | 0.2618141  | 2.41393009 | 0.4573383  | 0.66689564 |
| ENSMUSG00000020267 | 0.26178787 | 7.15953568 | 0.39404152 | 0.61353505 |
| ENSMUSG00000023456 | 0.26146507 | 7.3821207  | 0.39468979 | 0.61406435 |
| ENSMUSG00000019947 | 0.2614606  | 4.29515218 | 0.41078276 | 0.62666308 |
| ENSMUSG00000030867 | 0.26127866 | 6.09852465 | 0.39787384 | 0.61647578 |
| ENSMUSG00000002017 | 0.2610666  | 7.14414862 | 0.39520082 | 0.61427582 |
| ENSMUSG00000035578 | 0.26096465 | 2.53575818 | 0.43822451 | 0.64968561 |
| ENSMUSG00000022391 | 0.26080544 | 7.30288521 | 0.39580887 | 0.61495503 |
| ENSMUSG00000025583 | 0.26061407 | 4.67980076 | 0.40796733 | 0.62398323 |
| ENSMUSG00000006471 | 0.26045414 | 5.20343877 | 0.40374408 | 0.62153509 |
| ENSMUSG00000005897 | 0.26016625 | 3.68102014 | 0.41398363 | 0.62905446 |
| ENSMUSG00000032977 | 0.2597706  | 4.10183904 | 0.4165042  | 0.63143289 |
| ENSMUSG00000001924 | 0.25945875 | 9.24155637 | 0.39641994 | 0.61526686 |
| ENSMUSG00000044700 | 0.25934029 | 3.34553507 | 0.43377804 | 0.64647075 |
| ENSMUSG00000040751 | 0.25923447 | 6.8599457  | 0.39903116 | 0.61795118 |
| ENSMUSG00000024101 | 0.25886082 | 3.63641154 | 0.42940877 | 0.6428018  |
| ENSMUSG00000060279 | 0.25856498 | 5.17877088 | 0.40856156 | 0.62434816 |
| ENSMUSG00000018999 | 0.25842821 | 5.95719593 | 0.40254521 | 0.6204994  |
| ENSMUSG00000065353 | 0.25838098 | 2.30561268 | 0.46240524 | 0.66978886 |
| ENSMUSG00000028436 | 0.25831314 | 6.07673302 | 0.40293919 | 0.62084529 |
| ENSMUSG00000022696 | 0.25828909 | 1.59063846 | 0.46732251 | 0.67374411 |
| ENSMUSG00000034850 | 0.25779298 | 6.47943177 | 0.402514   | 0.6204994  |

|                    |            |            |            |            |
|--------------------|------------|------------|------------|------------|
| ENSMUSG00000097574 | 0.25729137 | 1.28252373 | 0.49681821 | 0.69571323 |
| ENSMUSG00000031627 | 0.25689516 | 6.42972337 | 0.40421506 | 0.62183384 |
| ENSMUSG00000043419 | 0.25657278 | 2.80429738 | 0.43196122 | 0.6452791  |
| ENSMUSG00000046722 | 0.25629096 | 6.75165723 | 0.40484495 | 0.62253642 |
| ENSMUSG00000036352 | 0.25608465 | 5.23624453 | 0.41224299 | 0.62773629 |
| ENSMUSG00000073664 | 0.25605758 | 4.49092118 | 0.41111829 | 0.62682025 |
| ENSMUSG00000051154 | 0.25594677 | 6.02863941 | 0.40696083 | 0.62395419 |
| ENSMUSG00000036980 | 0.25579325 | 5.27355622 | 0.41160861 | 0.62720683 |
| ENSMUSG00000039783 | 0.25528388 | 6.41357029 | 0.40710217 | 0.62395419 |
| ENSMUSG00000028071 | 0.25518499 | 2.99717826 | 0.43975676 | 0.65049746 |
| ENSMUSG00000017119 | 0.25506057 | 6.58785809 | 0.40693504 | 0.62395419 |
| ENSMUSG00000026496 | 0.25482102 | 8.1233214  | 0.4057017  | 0.62323179 |
| ENSMUSG00000004451 | 0.25470413 | 4.34121722 | 0.41911753 | 0.63453088 |
| ENSMUSG00000027692 | 0.25468185 | 3.78528101 | 0.41887118 | 0.63424695 |
| ENSMUSG00000037395 | 0.25448865 | 2.65822398 | 0.44351515 | 0.65401042 |
| ENSMUSG00000019877 | 0.25426745 | 7.35107041 | 0.40710489 | 0.62395419 |
| ENSMUSG00000029767 | 0.25388486 | 8.18524368 | 0.40713151 | 0.62395419 |
| ENSMUSG00000002603 | 0.25378139 | 5.0449257  | 0.41628558 | 0.63121818 |
| ENSMUSG00000022488 | 0.25374169 | 9.0085069  | 0.40695845 | 0.62395419 |
| ENSMUSG00000026123 | 0.25366378 | 5.40272375 | 0.41398116 | 0.62905446 |
| ENSMUSG00000032812 | 0.25348722 | 5.37522135 | 0.41546724 | 0.63015453 |
| ENSMUSG00000002343 | 0.25322621 | 2.30700114 | 0.48844761 | 0.68981392 |
| ENSMUSG00000048307 | 0.25278854 | 4.77066004 | 0.41996117 | 0.63514811 |
| ENSMUSG00000031833 | 0.25239168 | 4.64999324 | 0.42417536 | 0.63830635 |
| ENSMUSG00000020986 | 0.25224566 | 6.36759298 | 0.41270959 | 0.6281807  |
| ENSMUSG00000035754 | 0.25158382 | 4.56845123 | 0.42786711 | 0.64165191 |
| ENSMUSG00000022898 | 0.25152324 | 5.70352188 | 0.41691097 | 0.63163359 |
| ENSMUSG00000078348 | 0.25151581 | 2.34198903 | 0.48408277 | 0.68634611 |
| ENSMUSG00000001999 | 0.25133449 | 4.80070416 | 0.42284601 | 0.6372235  |
| ENSMUSG00000002396 | 0.25089387 | 2.33812885 | 0.47225416 | 0.67813433 |
| ENSMUSG00000037341 | 0.25079442 | 6.25729882 | 0.41539556 | 0.63015453 |
| ENSMUSG00000063015 | 0.25049084 | 7.86329605 | 0.41367897 | 0.62883588 |
| ENSMUSG00000096687 | 0.2504311  | 3.20484822 | 0.43804068 | 0.64959169 |
| ENSMUSG00000053897 | 0.25039944 | 4.64635135 | 0.42363024 | 0.63769243 |
| ENSMUSG00000031907 | 0.25006395 | 3.14213386 | 0.44674766 | 0.65708222 |
| ENSMUSG00000000056 | 0.24952252 | 4.41747673 | 0.43110865 | 0.64445185 |
| ENSMUSG00000040697 | 0.24894554 | 4.85133259 | 0.42627142 | 0.6399709  |
| ENSMUSG00000047193 | 0.24871505 | 4.94465578 | 0.42324835 | 0.6374735  |
| ENSMUSG00000021240 | 0.24865599 | 2.58510081 | 0.47335707 | 0.67890447 |
| ENSMUSG00000048416 | 0.24862299 | 1.35472084 | 0.54152241 | 0.73015474 |
| ENSMUSG00000033917 | 0.24861505 | 5.49384549 | 0.42339617 | 0.63752829 |
| ENSMUSG00000031143 | 0.248464   | 0.94688377 | 0.58746228 | 0.76468971 |
| ENSMUSG00000025027 | 0.24833262 | 5.44036472 | 0.42472557 | 0.63871712 |

|                    |            |            |            |            |
|--------------------|------------|------------|------------|------------|
| ENSMUSG00000033318 | 0.24808998 | 4.6697426  | 0.43282543 | 0.64569933 |
| ENSMUSG00000011158 | 0.24803902 | 4.69789594 | 0.43016945 | 0.64375001 |
| ENSMUSG00000056602 | 0.24799773 | 3.56422828 | 0.43830251 | 0.64971192 |
| ENSMUSG00000018428 | 0.24754475 | 4.91498254 | 0.43034067 | 0.64375001 |
| ENSMUSG00000021494 | 0.2473971  | 5.76945965 | 0.42485811 | 0.63882736 |
| ENSMUSG00000066152 | 0.24737146 | 6.0916691  | 0.42267073 | 0.6372235  |
| ENSMUSG00000033885 | 0.24702858 | 7.52638197 | 0.42047359 | 0.63514811 |
| ENSMUSG00000014077 | 0.24696062 | 7.12549755 | 0.42116636 | 0.63565347 |
| ENSMUSG00000039470 | 0.24686239 | 4.23487429 | 0.43119883 | 0.64445483 |
| ENSMUSG00000050947 | 0.2468375  | 1.66875484 | 0.52909297 | 0.72133231 |
| ENSMUSG00000063535 | 0.24657936 | 1.33576642 | 0.56230512 | 0.74632596 |
| ENSMUSG00000049305 | 0.24654596 | 4.24246585 | 0.44027011 | 0.65092855 |
| ENSMUSG00000026553 | 0.24632343 | 9.29535276 | 0.42066435 | 0.63514811 |
| ENSMUSG00000074212 | 0.24615301 | 3.75478365 | 0.43224777 | 0.64542494 |
| ENSMUSG00000018166 | 0.24614196 | 3.64336699 | 0.43746436 | 0.64918528 |
| ENSMUSG00000063145 | 0.2456303  | 2.41621228 | 0.45920624 | 0.66763551 |
| ENSMUSG00000020770 | 0.24562119 | 3.64711206 | 0.44775067 | 0.65819836 |
| ENSMUSG00000024014 | 0.2455467  | 8.01050146 | 0.42283505 | 0.6372235  |
| ENSMUSG00000019916 | 0.24550383 | 4.76708995 | 0.43333178 | 0.64614914 |
| ENSMUSG00000020211 | 0.24536175 | 4.4947958  | 0.43992054 | 0.65059012 |
| ENSMUSG00000036751 | 0.24501166 | 6.88317639 | 0.42596904 | 0.63960597 |
| ENSMUSG00000041064 | 0.24491095 | 4.73800114 | 0.43675808 | 0.64901466 |
| ENSMUSG00000033526 | 0.244871   | 4.90134735 | 0.43446062 | 0.64704333 |
| ENSMUSG00000034032 | 0.24465769 | 4.92432941 | 0.43613962 | 0.64855622 |
| ENSMUSG00000001285 | 0.24465096 | 4.40351042 | 0.43873329 | 0.6499931  |
| ENSMUSG00000001323 | 0.2441133  | 3.08755364 | 0.4599539  | 0.66794276 |
| ENSMUSG00000037544 | 0.24398865 | 6.56547195 | 0.42807931 | 0.64166304 |
| ENSMUSG00000073700 | 0.2435019  | 3.91549337 | 0.44490075 | 0.65510145 |
| ENSMUSG00000034673 | 0.24325083 | 4.35173943 | 0.44115498 | 0.65147826 |
| ENSMUSG00000025371 | 0.24310893 | 3.62264705 | 0.46130922 | 0.66894436 |
| ENSMUSG00000048865 | 0.24301579 | 1.90157058 | 0.49675572 | 0.69571323 |
| ENSMUSG00000026632 | 0.24288236 | 2.52372155 | 0.46665948 | 0.67341841 |
| ENSMUSG00000025873 | 0.2427621  | 6.66833372 | 0.43002011 | 0.6436276  |
| ENSMUSG00000031827 | 0.24263225 | 5.43902411 | 0.43632651 | 0.64865524 |
| ENSMUSG00000061536 | 0.24237952 | 3.30102663 | 0.45991302 | 0.66794276 |
| ENSMUSG00000025499 | 0.2420076  | 4.04062795 | 0.45528442 | 0.66500165 |
| ENSMUSG00000074886 | 0.24185169 | 6.53372223 | 0.43262524 | 0.64561468 |
| ENSMUSG00000022760 | 0.24149839 | 1.83472611 | 0.53190268 | 0.72386142 |
| ENSMUSG00000022899 | 0.24134119 | 4.23557783 | 0.44118562 | 0.65147826 |
| ENSMUSG00000049517 | 0.24126992 | 7.35357703 | 0.43215175 | 0.64538491 |
| ENSMUSG00000022095 | 0.24118104 | 3.8582299  | 0.45029849 | 0.66005423 |
| ENSMUSG00000038803 | 0.24106934 | 5.57737462 | 0.43738184 | 0.64918528 |
| ENSMUSG00000020792 | 0.24090756 | 4.35298099 | 0.44806141 | 0.65847564 |

|                    |            |            |            |            |
|--------------------|------------|------------|------------|------------|
| ENSMUSG00000020265 | 0.24074189 | 6.51874783 | 0.43456038 | 0.64710013 |
| ENSMUSG00000034118 | 0.24072994 | 6.59003428 | 0.43438952 | 0.64704333 |
| ENSMUSG00000040532 | 0.24069339 | 3.07572726 | 0.47905015 | 0.68289184 |
| ENSMUSG00000014075 | 0.24061701 | 2.60394177 | 0.50160883 | 0.700352   |
| ENSMUSG00000030036 | 0.240495   | 5.70996743 | 0.43893925 | 0.65020891 |
| ENSMUSG00000000538 | 0.24033724 | 3.38138458 | 0.46318397 | 0.670352   |
| ENSMUSG00000032598 | 0.24033618 | 1.72175024 | 0.53996468 | 0.72917895 |
| ENSMUSG00000038324 | 0.23998084 | 6.78333131 | 0.43533744 | 0.64754193 |
| ENSMUSG00000070305 | 0.23992768 | 3.55971646 | 0.45935704 | 0.66770539 |
| ENSMUSG00000024150 | 0.23980066 | 5.37333273 | 0.44043204 | 0.6510787  |
| ENSMUSG00000022552 | 0.23965813 | 4.49357054 | 0.44885959 | 0.6589561  |
| ENSMUSG00000021814 | 0.23964    | 6.82139966 | 0.43590858 | 0.64830204 |
| ENSMUSG00000026525 | 0.23949802 | 2.635654   | 0.46836902 | 0.67444139 |
| ENSMUSG00000024181 | 0.23940431 | 4.19900962 | 0.45480467 | 0.66485205 |
| ENSMUSG00000074480 | 0.23935087 | 2.55587923 | 0.49920957 | 0.69788385 |
| ENSMUSG00000054428 | 0.23931865 | 5.05384104 | 0.44290269 | 0.65329813 |
| ENSMUSG00000033220 | 0.23928443 | 8.35657686 | 0.43471594 | 0.64713104 |
| ENSMUSG00000073471 | 0.23908865 | 1.07748204 | 0.52662326 | 0.71923825 |
| ENSMUSG00000027997 | 0.23856395 | 3.05030484 | 0.47188335 | 0.67772354 |
| ENSMUSG00000046756 | 0.23849298 | 6.10956009 | 0.44066004 | 0.65114796 |
| ENSMUSG00000007458 | 0.23815629 | 8.66395868 | 0.43652072 | 0.64885124 |
| ENSMUSG00000068391 | 0.238108   | 3.82812493 | 0.46420609 | 0.67149544 |
| ENSMUSG00000091537 | 0.2380889  | 6.71069114 | 0.43903284 | 0.65024023 |
| ENSMUSG00000054808 | 0.2375239  | 7.20982974 | 0.43955921 | 0.65049746 |
| ENSMUSG00000033159 | 0.23729303 | 5.56296983 | 0.44491497 | 0.65510145 |
| ENSMUSG00000029535 | 0.23705891 | 4.1085119  | 0.45699159 | 0.66651302 |
| ENSMUSG00000002661 | 0.23702164 | 1.49860452 | 0.5503187  | 0.73688135 |
| ENSMUSG00000021458 | 0.23624511 | 3.05739113 | 0.47429168 | 0.67920324 |
| ENSMUSG00000074754 | 0.23562727 | 2.23610345 | 0.51080724 | 0.7074587  |
| ENSMUSG00000062526 | 0.23562095 | 3.94564828 | 0.45978738 | 0.66794276 |
| ENSMUSG00000022472 | 0.23560018 | 6.23403164 | 0.44511913 | 0.65522314 |
| ENSMUSG00000048997 | 0.23515077 | 1.64082884 | 0.56054968 | 0.74482107 |
| ENSMUSG00000040701 | 0.23406442 | 4.83870674 | 0.45745577 | 0.66689564 |
| ENSMUSG00000042992 | 0.23390379 | 2.93238177 | 0.48690315 | 0.68889577 |
| ENSMUSG00000031916 | 0.23370891 | 4.76079597 | 0.45689872 | 0.66646772 |
| ENSMUSG00000003527 | 0.23338032 | 3.96812404 | 0.4703589  | 0.67650447 |
| ENSMUSG00000071552 | 0.23288506 | 2.87360739 | 0.49615139 | 0.69541156 |
| ENSMUSG00000031487 | 0.23284405 | 2.36765548 | 0.49350449 | 0.69322172 |
| ENSMUSG00000007908 | 0.23279906 | 1.75828905 | 0.51383096 | 0.70958548 |
| ENSMUSG00000017195 | 0.23271161 | 0.98527261 | 0.5642929  | 0.7480436  |
| ENSMUSG00000023330 | 0.23245591 | 3.97586833 | 0.469029   | 0.67530157 |
| ENSMUSG00000023967 | 0.23226117 | 4.44850691 | 0.46512691 | 0.67228637 |
| ENSMUSG00000040888 | 0.23220506 | 3.57647858 | 0.48086696 | 0.68464571 |

|                    |            |            |            |            |
|--------------------|------------|------------|------------|------------|
| ENSMUSG00000068206 | 0.23197819 | 3.35383005 | 0.4750574  | 0.67989635 |
| ENSMUSG00000034574 | 0.23185814 | 4.06852498 | 0.46461944 | 0.6719131  |
| ENSMUSG00000085586 | 0.23178929 | 0.99511143 | 0.56832347 | 0.75089442 |
| ENSMUSG00000025212 | 0.23172205 | 3.52276133 | 0.47687652 | 0.68141465 |
| ENSMUSG00000028884 | 0.23165373 | 6.13198337 | 0.45362442 | 0.66339649 |
| ENSMUSG00000002346 | 0.2315873  | 1.85121334 | 0.55435696 | 0.73950834 |
| ENSMUSG00000001687 | 0.23151991 | 6.43460219 | 0.45209406 | 0.66178666 |
| ENSMUSG00000034121 | 0.23147189 | 3.06159306 | 0.48283588 | 0.68568917 |
| ENSMUSG00000021285 | 0.23147051 | 4.24823685 | 0.4665     | 0.67327837 |
| ENSMUSG00000033762 | 0.23100037 | 3.89305404 | 0.47401164 | 0.67908773 |
| ENSMUSG00000026927 | 0.23096228 | 6.06015701 | 0.45497832 | 0.66487071 |
| ENSMUSG00000032171 | 0.23095965 | 4.30433658 | 0.46912639 | 0.67535162 |
| ENSMUSG00000038690 | 0.23090205 | 4.58780184 | 0.46781334 | 0.67400121 |
| ENSMUSG00000054312 | 0.23075253 | 4.43052017 | 0.4718204  | 0.67772354 |
| ENSMUSG00000060938 | 0.23073861 | 8.43599429 | 0.45127801 | 0.66095098 |
| ENSMUSG00000018567 | 0.23068991 | 7.82844759 | 0.45164047 | 0.66121244 |
| ENSMUSG00000036537 | 0.23052648 | 1.35695607 | 0.59329884 | 0.7686089  |
| ENSMUSG00000041096 | 0.23051877 | 5.32355542 | 0.45942975 | 0.66772108 |
| ENSMUSG00000059883 | 0.23042279 | 3.58691674 | 0.47902986 | 0.68289184 |
| ENSMUSG00000025651 | 0.23007705 | 6.55289515 | 0.45599862 | 0.66558803 |
| ENSMUSG00000031934 | 0.22948558 | 5.08171544 | 0.46213185 | 0.66948279 |
| ENSMUSG00000064210 | 0.22920642 | 5.86623155 | 0.45853004 | 0.66718361 |
| ENSMUSG00000042608 | 0.22836827 | 4.820627   | 0.46812031 | 0.67435338 |
| ENSMUSG00000039367 | 0.22827241 | 8.14488296 | 0.45616555 | 0.66558803 |
| ENSMUSG00000007564 | 0.22797495 | 7.45110625 | 0.45770936 | 0.66692849 |
| ENSMUSG00000014243 | 0.22792331 | 1.85902705 | 0.53927075 | 0.72875886 |
| ENSMUSG00000010663 | 0.22753036 | 6.09393638 | 0.46171124 | 0.66916579 |
| ENSMUSG00000024507 | 0.22749362 | 5.66231627 | 0.46320454 | 0.670352   |
| ENSMUSG00000022074 | 0.22739574 | 5.16077628 | 0.4650016  | 0.67223161 |
| ENSMUSG00000025935 | 0.22721208 | 8.22880552 | 0.45803422 | 0.66695125 |
| ENSMUSG00000006390 | 0.2271987  | 6.39695115 | 0.46132597 | 0.66894436 |
| ENSMUSG00000057738 | 0.22717352 | 7.91629526 | 0.45843941 | 0.66718361 |
| ENSMUSG00000030654 | 0.22716408 | 8.96165618 | 0.45777762 | 0.66693783 |
| ENSMUSG00000036138 | 0.22713335 | 3.63235094 | 0.48622168 | 0.68811215 |
| ENSMUSG00000031993 | 0.22705606 | 6.05972168 | 0.46198697 | 0.66940459 |
| ENSMUSG00000029146 | 0.22695932 | 5.95081637 | 0.46322915 | 0.670352   |
| ENSMUSG00000008035 | 0.22694827 | 3.2429435  | 0.49086723 | 0.69143727 |
| ENSMUSG00000016534 | 0.22693262 | 7.87307087 | 0.45878618 | 0.66741537 |
| ENSMUSG00000028643 | 0.22688069 | 3.06908867 | 0.50125281 | 0.70001428 |
| ENSMUSG00000039568 | 0.22674269 | 3.49487573 | 0.48534708 | 0.68747485 |
| ENSMUSG00000044496 | 0.22671873 | 4.27876566 | 0.47880462 | 0.68289184 |
| ENSMUSG00000038605 | 0.22646978 | 2.5816799  | 0.50562631 | 0.70375247 |
| ENSMUSG00000022621 | 0.22627915 | 2.80022035 | 0.49596733 | 0.69524394 |



|                    |            |            |            |            |
|--------------------|------------|------------|------------|------------|
| ENSMUSG00000033429 | 0.22618442 | 2.56809534 | 0.52524598 | 0.71858811 |
| ENSMUSG00000033039 | 0.22586672 | 4.69570275 | 0.47091027 | 0.67692567 |
| ENSMUSG00000073678 | 0.22556198 | 5.37594322 | 0.46605433 | 0.67290282 |
| ENSMUSG00000074825 | 0.22553682 | 4.81010882 | 0.47298591 | 0.67873563 |
| ENSMUSG00000024142 | 0.2253274  | 4.90162347 | 0.47288815 | 0.67873563 |
| ENSMUSG00000028797 | 0.2252655  | 5.72997135 | 0.46768696 | 0.67390916 |
| ENSMUSG00000026003 | 0.22517504 | 6.9783553  | 0.46360175 | 0.67071121 |
| ENSMUSG00000025374 | 0.2251417  | 4.74242725 | 0.4747557  | 0.67955475 |
| ENSMUSG00000020519 | 0.22503699 | 2.06143348 | 0.55578991 | 0.7406869  |
| ENSMUSG00000017390 | 0.22482297 | 2.29272274 | 0.52614536 | 0.71907812 |
| ENSMUSG00000028567 | 0.22473325 | 4.81018851 | 0.47432118 | 0.67920324 |
| ENSMUSG0000002833  | 0.22456625 | 4.82979681 | 0.47825217 | 0.68258899 |
| ENSMUSG00000087385 | 0.22426397 | 1.34708893 | 0.53817744 | 0.72797388 |
| ENSMUSG00000021501 | 0.22416614 | 4.03130233 | 0.48161878 | 0.68515686 |
| ENSMUSG00000031681 | 0.22413823 | 2.34126648 | 0.52447385 | 0.7181481  |
| ENSMUSG00000021115 | 0.22405913 | 6.72613643 | 0.46633826 | 0.67313502 |
| ENSMUSG00000034709 | 0.22350149 | 5.60520931 | 0.47056145 | 0.67660462 |
| ENSMUSG00000024218 | 0.22329123 | 4.99959961 | 0.47539011 | 0.68026723 |
| ENSMUSG00000072621 | 0.2232448  | 4.31154951 | 0.47853203 | 0.68269473 |
| ENSMUSG00000025137 | 0.22312381 | 4.77025285 | 0.48076053 | 0.68464483 |
| ENSMUSG00000008167 | 0.22278606 | 1.47807646 | 0.56968362 | 0.75167848 |
| ENSMUSG00000032688 | 0.22257713 | 7.72776831 | 0.46750699 | 0.67390916 |
| ENSMUSG00000079442 | 0.22245307 | 5.83711006 | 0.47322687 | 0.67884687 |
| ENSMUSG00000070462 | 0.22233339 | 4.59475003 | 0.47803176 | 0.68252277 |
| ENSMUSG00000030747 | 0.22219988 | 0.96343278 | 0.62378641 | 0.78872304 |
| ENSMUSG00000067365 | 0.22191418 | 5.42190765 | 0.47407962 | 0.67908773 |
| ENSMUSG00000030814 | 0.22188915 | 3.72613058 | 0.49217593 | 0.69244948 |
| ENSMUSG00000020448 | 0.22166276 | 5.29533239 | 0.47642516 | 0.68099409 |
| ENSMUSG00000032786 | 0.22164109 | 4.65685514 | 0.48166072 | 0.68515686 |
| ENSMUSG00000031776 | 0.22150837 | 5.77255548 | 0.47438606 | 0.67920595 |
| ENSMUSG00000079455 | 0.22149744 | 1.13378669 | 0.56610551 | 0.7489174  |
| ENSMUSG00000037824 | 0.22141432 | 4.38998888 | 0.48191982 | 0.68515686 |
| ENSMUSG00000032478 | 0.22122627 | 4.28535077 | 0.48790356 | 0.68940671 |
| ENSMUSG00000026842 | 0.2211812  | 5.19659601 | 0.47750836 | 0.68204637 |
| ENSMUSG00000015971 | 0.2209843  | 4.86333585 | 0.4816342  | 0.68515686 |
| ENSMUSG00000021275 | 0.22094747 | 4.04850887 | 0.49034424 | 0.69114856 |
| ENSMUSG00000021226 | 0.22092032 | 1.76469619 | 0.57418735 | 0.75575185 |
| ENSMUSG00000016637 | 0.22089167 | 3.86802449 | 0.48983298 | 0.69107486 |
| ENSMUSG00000022684 | 0.22053156 | 5.69492827 | 0.4764559  | 0.68099409 |
| ENSMUSG00000038085 | 0.22035993 | 2.047931   | 0.53620379 | 0.72686346 |
| ENSMUSG00000024948 | 0.22024413 | 6.2818909  | 0.47577254 | 0.68064647 |
| ENSMUSG00000035596 | 0.21981037 | 4.98423323 | 0.48265155 | 0.68566912 |
| ENSMUSG00000024048 | 0.21952073 | 6.33148048 | 0.47678656 | 0.6813764  |

|                    |            |            |            |            |
|--------------------|------------|------------|------------|------------|
| ENSMUSG00000052428 | 0.21913078 | 5.99503621 | 0.47793952 | 0.68252277 |
| ENSMUSG00000031974 | 0.21882116 | 4.70775    | 0.48542685 | 0.68747485 |
| ENSMUSG00000070565 | 0.21881296 | 3.2486834  | 0.49956203 | 0.69828606 |
| ENSMUSG00000027194 | 0.21876739 | 5.03475948 | 0.48291999 | 0.68568917 |
| ENSMUSG00000071451 | 0.21839209 | 2.79316994 | 0.52319425 | 0.71691573 |
| ENSMUSG00000038342 | 0.21835058 | 6.64792802 | 0.477987   | 0.68252277 |
| ENSMUSG00000029165 | 0.21827648 | 3.23368189 | 0.50995202 | 0.70703556 |
| ENSMUSG00000081137 | 0.2180845  | 1.44216346 | 0.56066863 | 0.74488734 |
| ENSMUSG00000040128 | 0.21807843 | 4.30604332 | 0.487581   | 0.6892489  |
| ENSMUSG00000007216 | 0.21795792 | 1.75045181 | 0.56928984 | 0.75161871 |
| ENSMUSG00000031979 | 0.21792633 | 4.97637008 | 0.48834241 | 0.68981392 |
| ENSMUSG00000046519 | 0.21746874 | 5.78363846 | 0.48187715 | 0.68515686 |
| ENSMUSG00000026280 | 0.21736965 | 5.07607284 | 0.48715133 | 0.68907012 |
| ENSMUSG00000035048 | 0.21718044 | 2.85622413 | 0.52852595 | 0.72094032 |
| ENSMUSG00000020700 | 0.21713092 | 5.93880201 | 0.48289333 | 0.68568917 |
| ENSMUSG00000087259 | 0.21708449 | 1.90082399 | 0.55108071 | 0.73699733 |
| ENSMUSG00000025495 | 0.21673427 | 3.91854811 | 0.50513265 | 0.70342853 |
| ENSMUSG00000013465 | 0.21648237 | 5.9393367  | 0.48440298 | 0.68661958 |
| ENSMUSG00000005683 | 0.21642964 | 8.70814821 | 0.4795221  | 0.68329057 |
| ENSMUSG00000027429 | 0.21640791 | 7.37664075 | 0.48053716 | 0.68446872 |
| ENSMUSG00000039055 | 0.21623769 | 4.64556462 | 0.49313607 | 0.69309715 |
| ENSMUSG00000035310 | 0.21622127 | 5.83188537 | 0.48372955 | 0.68620619 |
| ENSMUSG00000039210 | 0.21611138 | 5.05053791 | 0.48949194 | 0.69074602 |
| ENSMUSG00000031983 | 0.21608697 | 2.61453403 | 0.52536765 | 0.71858811 |
| ENSMUSG00000028991 | 0.21596204 | 5.9588266  | 0.48466905 | 0.68681617 |
| ENSMUSG00000037936 | 0.21528581 | 4.76555145 | 0.4946379  | 0.69401186 |
| ENSMUSG00000017210 | 0.21514187 | 5.53956263 | 0.4893973  | 0.69070285 |
| ENSMUSG00000039512 | 0.21492095 | 4.29675393 | 0.49852607 | 0.69738036 |
| ENSMUSG00000083086 | 0.2149182  | 1.41471618 | 0.60509749 | 0.77627544 |
| ENSMUSG00000006717 | 0.21481299 | 3.41892767 | 0.51474799 | 0.71039702 |
| ENSMUSG00000005417 | 0.21449346 | 6.1845481  | 0.48766405 | 0.6892489  |
| ENSMUSG00000068250 | 0.21423493 | 2.15928832 | 0.53581609 | 0.72676307 |
| ENSMUSG00000018169 | 0.21379568 | 3.73688925 | 0.51109601 | 0.7074587  |
| ENSMUSG00000043487 | 0.21364266 | 1.89992725 | 0.55108071 | 0.73699733 |
| ENSMUSG00000045973 | 0.21346195 | 6.10762029 | 0.48891866 | 0.69020799 |
| ENSMUSG00000040747 | 0.21330792 | 8.87935428 | 0.48562974 | 0.68763538 |
| ENSMUSG00000022822 | 0.21326576 | 5.34383976 | 0.49264486 | 0.69280496 |
| ENSMUSG00000025332 | 0.21320098 | 7.20743753 | 0.48816722 | 0.68968888 |
| ENSMUSG00000032849 | 0.21307471 | 5.69132123 | 0.4918828  | 0.69226907 |
| ENSMUSG00000062783 | 0.2129064  | 5.6165983  | 0.49069609 | 0.69143727 |
| ENSMUSG00000018820 | 0.21259272 | 4.0159561  | 0.51002095 | 0.70704023 |
| ENSMUSG00000020740 | 0.21241649 | 5.84898645 | 0.49268557 | 0.69280496 |
| ENSMUSG00000001445 | 0.21228536 | 5.67417521 | 0.49422133 | 0.69378844 |

|                    |            |            |            |            |
|--------------------|------------|------------|------------|------------|
| ENSMUSG00000030602 | 0.2120269  | 4.64817941 | 0.50324797 | 0.70143804 |
| ENSMUSG00000035007 | 0.21157231 | 4.00978493 | 0.50881199 | 0.70599954 |
| ENSMUSG00000076591 | 0.21139901 | 3.37240807 | 0.50715199 | 0.70487525 |
| ENSMUSG00000011096 | 0.21133383 | 2.22005561 | 0.56338482 | 0.74711533 |
| ENSMUSG00000003435 | 0.21130783 | 7.13674201 | 0.49191932 | 0.69226907 |
| ENSMUSG00000002496 | 0.2112936  | 5.6707835  | 0.4963425  | 0.69549864 |
| ENSMUSG00000071655 | 0.21127854 | 5.33441374 | 0.49842969 | 0.69733599 |
| ENSMUSG00000037617 | 0.21084653 | 2.67716533 | 0.54288845 | 0.73131094 |
| ENSMUSG00000046550 | 0.21066329 | 1.04011907 | 0.54676299 | 0.73410011 |
| ENSMUSG00000012126 | 0.21057972 | 1.85928834 | 0.59276217 | 0.76812632 |
| ENSMUSG00000020737 | 0.21055563 | 6.7236791  | 0.49387074 | 0.69347683 |
| ENSMUSG00000039515 | 0.21033488 | 6.90155998 | 0.49440487 | 0.69386545 |
| ENSMUSG00000007777 | 0.21029057 | 3.15725908 | 0.52654894 | 0.71922783 |
| ENSMUSG00000044968 | 0.21028018 | 2.37382178 | 0.53512668 | 0.72616158 |
| ENSMUSG00000026112 | 0.21025368 | 7.86444137 | 0.49240121 | 0.69267606 |
| ENSMUSG00000037112 | 0.21018398 | 4.1981084  | 0.50658637 | 0.704634   |
| ENSMUSG00000097287 | 0.21002691 | 2.34738472 | 0.54237115 | 0.73084225 |
| ENSMUSG00000000326 | 0.20998777 | 3.83709185 | 0.51943589 | 0.71422405 |
| ENSMUSG00000031060 | 0.20977028 | 5.98543685 | 0.49812134 | 0.69708545 |
| ENSMUSG00000040269 | 0.20956108 | 3.73628936 | 0.51669903 | 0.71208721 |
| ENSMUSG00000003206 | 0.20947072 | 5.50860738 | 0.50094234 | 0.70001428 |
| ENSMUSG00000037243 | 0.20939037 | 3.74150959 | 0.52303698 | 0.71679131 |
| ENSMUSG00000043154 | 0.20922793 | 2.70166704 | 0.52843545 | 0.72094032 |
| ENSMUSG00000090150 | 0.20909435 | 4.54009396 | 0.50528218 | 0.7035459  |
| ENSMUSG00000053483 | 0.20909215 | 4.22750663 | 0.51098968 | 0.7074587  |
| ENSMUSG00000032527 | 0.20886138 | 4.06000059 | 0.5105893  | 0.70743177 |
| ENSMUSG00000037098 | 0.2086018  | 2.01121817 | 0.57515826 | 0.75602586 |
| ENSMUSG00000015016 | 0.20842229 | 2.43838629 | 0.57636401 | 0.75695564 |
| ENSMUSG00000026594 | 0.20804507 | 7.16505741 | 0.49780158 | 0.69681882 |
| ENSMUSG00000022204 | 0.20782616 | 5.5371017  | 0.50434761 | 0.7025087  |
| ENSMUSG00000051736 | 0.20765726 | 1.27290267 | 0.54544897 | 0.73288354 |
| ENSMUSG00000029298 | 0.20742007 | 7.35403    | 0.49876369 | 0.69744134 |
| ENSMUSG00000004661 | 0.20689209 | 5.31566411 | 0.50617862 | 0.70424851 |
| ENSMUSG00000032059 | 0.20667764 | 4.83861481 | 0.50942107 | 0.70666283 |
| ENSMUSG00000044475 | 0.2065493  | 3.81287173 | 0.52262958 | 0.71641507 |
| ENSMUSG00000037761 | 0.20642383 | 3.18237412 | 0.54003415 | 0.72917895 |
| ENSMUSG00000033400 | 0.206318   | 4.6794361  | 0.51014913 | 0.70712702 |
| ENSMUSG00000043831 | 0.20515312 | 2.69530208 | 0.5369852  | 0.72721944 |
| ENSMUSG00000029467 | 0.20502663 | 9.53384342 | 0.50260257 | 0.70108216 |
| ENSMUSG00000026816 | 0.20501918 | 5.22728098 | 0.51260333 | 0.70874062 |
| ENSMUSG00000038280 | 0.20497141 | 5.81076099 | 0.50707037 | 0.70487525 |
| ENSMUSG00000039041 | 0.20482994 | 4.94210772 | 0.51553876 | 0.71112433 |
| ENSMUSG00000032042 | 0.2048193  | 8.04300711 | 0.50376461 | 0.70197668 |

|                    |            |            |             |            |
|--------------------|------------|------------|-------------|------------|
| ENSMUSG00000038102 | 0.20476168 | 5.86237639 | 0.50745381  | 0.70502214 |
| ENSMUSG00000006307 | 0.20465178 | 6.22248874 | 0.50741605  | 0.70502214 |
| ENSMUSG00000020440 | 0.20462879 | 4.40083083 | 0.52186361  | 0.7159111  |
| ENSMUSG00000026585 | 0.20440359 | 4.17759052 | 0.51610161  | 0.71175882 |
| ENSMUSG00000026656 | 0.20385811 | 7.42608408 | 0.50626888  | 0.70428322 |
| ENSMUSG00000047459 | 0.20373837 | 5.74778809 | 0.51076309  | 0.7074587  |
| ENSMUSG00000024644 | 0.20355262 | 5.88651521 | 0.51086893  | 0.7074587  |
| ENSMUSG00000032422 | 0.20339494 | 4.81329278 | 0.51343121  | 0.70927284 |
| ENSMUSG00000020733 | 0.20312469 | 4.42761278 | 0.5224172   | 0.71635153 |
| ENSMUSG00000049624 | 0.20289852 | 3.65061345 | 0.53093244  | 0.72320013 |
| ENSMUSG00000031835 | 0.2028249  | 6.63187643 | 0.5098866   | 0.70703556 |
| ENSMUSG00000004056 | 0.20263771 | 5.79390965 | 0.51367858  | 0.70946591 |
| ENSMUSG00000034807 | 0.202298   | 6.73123599 | 0.511111005 | 0.7074587  |
| ENSMUSG00000066306 | 0.20226672 | 6.65403978 | 0.51139155  | 0.70766668 |
| ENSMUSG00000038733 | 0.20217698 | 9.45134027 | 0.50851246  | 0.7058564  |
| ENSMUSG00000045482 | 0.20216861 | 6.65784448 | 0.5110623   | 0.7074587  |
| ENSMUSG00000021009 | 0.20209803 | 2.57964887 | 0.55154643  | 0.73724612 |
| ENSMUSG00000024258 | 0.20207203 | 4.83205591 | 0.51991112  | 0.71439026 |
| ENSMUSG00000023007 | 0.20204853 | 1.87164994 | 0.6176805   | 0.78496222 |
| ENSMUSG00000050605 | 0.20171246 | 3.18380256 | 0.54104554  | 0.72969424 |
| ENSMUSG00000039047 | 0.20119195 | 5.66990479 | 0.51635939  | 0.71198308 |
| ENSMUSG00000002083 | 0.20115136 | 0.84872409 | 0.7122628   | 0.846112   |
| ENSMUSG00000057363 | 0.20106346 | 5.15098946 | 0.51892365  | 0.7139235  |
| ENSMUSG00000049600 | 0.20071977 | 2.41627602 | 0.57162525  | 0.75368709 |
| ENSMUSG00000005982 | 0.20067904 | 5.37617868 | 0.51889437  | 0.7139235  |
| ENSMUSG00000037526 | 0.20054949 | 3.21385523 | 0.5418116   | 0.73045334 |
| ENSMUSG00000051007 | 0.20032935 | 3.84620116 | 0.53660676  | 0.72689012 |
| ENSMUSG00000022516 | 0.20025221 | 4.318874   | 0.52623929  | 0.71907812 |
| ENSMUSG00000043290 | 0.20018276 | 1.05981243 | 0.61378433  | 0.78267118 |
| ENSMUSG00000049106 | 0.19986039 | 5.33799589 | 0.52086392  | 0.71508549 |
| ENSMUSG00000082588 | 0.19977989 | 2.07185533 | 0.57737558  | 0.75747181 |
| ENSMUSG00000030271 | 0.1996236  | 2.76614206 | 0.56574274  | 0.748887   |
| ENSMUSG00000084786 | 0.1995806  | 6.28503116 | 0.51785955  | 0.71323083 |
| ENSMUSG00000022394 | 0.19946599 | 6.03963492 | 0.51950793  | 0.71422405 |
| ENSMUSG00000005615 | 0.19931287 | 5.67569808 | 0.51944476  | 0.71422405 |
| ENSMUSG00000030435 | 0.19904399 | 7.71780528 | 0.51652647  | 0.71208721 |
| ENSMUSG00000024962 | 0.1987138  | 2.38768374 | 0.57785968  | 0.75783033 |
| ENSMUSG00000034591 | 0.1982638  | 3.78442436 | 0.5300475   | 0.72217716 |
| ENSMUSG00000051390 | 0.19804248 | 3.40682626 | 0.55013754  | 0.73688135 |
| ENSMUSG00000049717 | 0.19792875 | 4.32579926 | 0.53195517  | 0.72386142 |
| ENSMUSG00000020515 | 0.19787523 | 6.3313249  | 0.52123065  | 0.71540681 |
| ENSMUSG00000020897 | 0.19780428 | 6.66243629 | 0.52070666  | 0.71507506 |
| ENSMUSG00000061533 | 0.1976654  | 5.38823827 | 0.52449318  | 0.7181481  |

|                    |            |            |            |            |
|--------------------|------------|------------|------------|------------|
| ENSMUSG00000020444 | 0.19765459 | 4.03395495 | 0.53738866 | 0.72746746 |
| ENSMUSG00000029507 | 0.19731747 | 4.54196897 | 0.5364009  | 0.72686346 |
| ENSMUSG00000027010 | 0.19729591 | 6.06814389 | 0.52331707 | 0.71699292 |
| ENSMUSG00000028760 | 0.19719288 | 7.28113444 | 0.52073148 | 0.71507506 |
| ENSMUSG00000021287 | 0.19719244 | 2.4920905  | 0.57647114 | 0.75695564 |
| ENSMUSG00000029071 | 0.19697021 | 3.90494332 | 0.54782992 | 0.73480006 |
| ENSMUSG00000017288 | 0.19695723 | 5.75651822 | 0.52499707 | 0.71839007 |
| ENSMUSG00000030279 | 0.19691829 | 6.40612325 | 0.52236849 | 0.71635153 |
| ENSMUSG00000039145 | 0.19682395 | 5.65765389 | 0.52468539 | 0.71832008 |
| ENSMUSG00000031913 | 0.19644088 | 5.79275343 | 0.52589069 | 0.71896618 |
| ENSMUSG00000035944 | 0.19638646 | 2.97226335 | 0.56097434 | 0.74520169 |
| ENSMUSG00000029319 | 0.19637492 | 4.80968703 | 0.53151318 | 0.72380832 |
| ENSMUSG00000019826 | 0.19623579 | 4.16674308 | 0.53661673 | 0.72689012 |
| ENSMUSG00000056899 | 0.19613465 | 2.18041945 | 0.58672218 | 0.76443211 |
| ENSMUSG00000005886 | 0.19589944 | 6.19307689 | 0.52496355 | 0.71839007 |
| ENSMUSG00000097141 | 0.19578167 | 1.10783092 | 0.6240872  | 0.78872304 |
| ENSMUSG00000030522 | 0.19572579 | 3.00656614 | 0.55195737 | 0.73749253 |
| ENSMUSG00000022556 | 0.19561469 | 4.41010526 | 0.54081506 | 0.72965502 |
| ENSMUSG00000042308 | 0.19543027 | 4.68583845 | 0.53459343 | 0.72580329 |
| ENSMUSG00000033396 | 0.19542367 | 5.58359763 | 0.52853804 | 0.72094032 |
| ENSMUSG00000022967 | 0.19524637 | 6.72046379 | 0.52531425 | 0.71858811 |
| ENSMUSG00000061288 | 0.19488624 | 6.85987557 | 0.52617698 | 0.71907812 |
| ENSMUSG00000050973 | 0.19488048 | 3.29407648 | 0.5557087  | 0.74067021 |
| ENSMUSG00000030815 | 0.19451209 | 5.20735177 | 0.53377683 | 0.72542525 |
| ENSMUSG00000035078 | 0.19429418 | 5.58503672 | 0.53123358 | 0.72351894 |
| ENSMUSG00000054484 | 0.1934399  | 4.57917375 | 0.53642472 | 0.72686346 |
| ENSMUSG00000041130 | 0.19343291 | 4.34319655 | 0.54330097 | 0.73154671 |
| ENSMUSG00000045671 | 0.19340596 | 3.83762556 | 0.54467895 | 0.73239623 |
| ENSMUSG00000014349 | 0.19318466 | 7.39645813 | 0.52898436 | 0.72133231 |
| ENSMUSG00000072893 | 0.19310096 | 2.03461606 | 0.59960688 | 0.77337167 |
| ENSMUSG00000052783 | 0.19272321 | 1.53497175 | 0.60902505 | 0.77888289 |
| ENSMUSG00000021610 | 0.1924729  | 7.89849027 | 0.52993282 | 0.72211215 |
| ENSMUSG00000019579 | 0.1921646  | 5.45560289 | 0.53750701 | 0.72746746 |
| ENSMUSG00000051674 | 0.1920661  | 3.29683449 | 0.55753164 | 0.74199941 |
| ENSMUSG00000005150 | 0.19186743 | 3.07325909 | 0.57729044 | 0.75747181 |
| ENSMUSG00000072582 | 0.19179747 | 4.94183694 | 0.54002383 | 0.72917895 |
| ENSMUSG00000039678 | 0.19179141 | 5.18895721 | 0.53935642 | 0.72878331 |
| ENSMUSG00000028995 | 0.19171272 | 6.18910588 | 0.53399331 | 0.72546293 |
| ENSMUSG00000052656 | 0.19164831 | 4.09509085 | 0.54601414 | 0.73327727 |
| ENSMUSG00000026790 | 0.19124203 | 7.27203113 | 0.5333958  | 0.72518158 |
| ENSMUSG00000070733 | 0.19111737 | 6.98108462 | 0.53352911 | 0.72527138 |
| ENSMUSG00000029390 | 0.19101351 | 8.94162942 | 0.53234883 | 0.72421468 |
| ENSMUSG00000031864 | 0.19097022 | 5.7036022  | 0.53757309 | 0.72746746 |

|                    |            |            |            |            |
|--------------------|------------|------------|------------|------------|
| ENSMUSG0000002210  | 0.1909183  | 3.20245929 | 0.56901031 | 0.75145517 |
| ENSMUSG00000012123 | 0.19089893 | 1.02606248 | 0.67046164 | 0.82068767 |
| ENSMUSG00000023353 | 0.19067497 | 3.06225499 | 0.58345583 | 0.76201861 |
| ENSMUSG00000056050 | 0.19063992 | 7.3181253  | 0.53447612 | 0.72580329 |
| ENSMUSG00000027510 | 0.19039199 | 3.66252247 | 0.56741602 | 0.75006305 |
| ENSMUSG00000022263 | 0.19031057 | 3.706493   | 0.54546272 | 0.73288354 |
| ENSMUSG00000094094 | 0.19025019 | 2.62284684 | 0.57536204 | 0.75602586 |
| ENSMUSG00000037740 | 0.18995528 | 4.41439378 | 0.5526006  | 0.73787471 |
| ENSMUSG00000021866 | 0.18966042 | 2.88803595 | 0.60623663 | 0.7771821  |
| ENSMUSG00000028703 | 0.18954698 | 4.53990104 | 0.54876247 | 0.73568554 |
| ENSMUSG00000015790 | 0.18912862 | 4.54620372 | 0.54929667 | 0.7360711  |
| ENSMUSG00000098178 | 0.18890864 | 11.8695321 | 0.53645274 | 0.72686346 |
| ENSMUSG00000021038 | 0.18882041 | 5.89003975 | 0.54226763 | 0.73079407 |
| ENSMUSG00000050357 | 0.18878995 | 3.36986926 | 0.58171601 | 0.76066757 |
| ENSMUSG00000021951 | 0.18840324 | 3.87847623 | 0.56129911 | 0.74544946 |
| ENSMUSG00000070426 | 0.18823623 | 5.04969911 | 0.54751489 | 0.7346523  |
| ENSMUSG00000035840 | 0.18810394 | 5.50272155 | 0.54266716 | 0.73114976 |
| ENSMUSG00000018171 | 0.18796968 | 7.34184561 | 0.54002325 | 0.72917895 |
| ENSMUSG00000063488 | 0.18755875 | 2.12987398 | 0.59073053 | 0.76716376 |
| ENSMUSG00000034300 | 0.1875412  | 6.16804393 | 0.54298901 | 0.73131094 |
| ENSMUSG00000042289 | 0.18717096 | 1.63744833 | 0.60746835 | 0.77802482 |
| ENSMUSG00000023015 | 0.1869495  | 7.00632681 | 0.54299023 | 0.73131094 |
| ENSMUSG00000025465 | 0.18693949 | 4.60833525 | 0.55526163 | 0.74034884 |
| ENSMUSG00000052763 | 0.18691167 | 3.5476908  | 0.56802616 | 0.75068556 |
| ENSMUSG00000027002 | 0.1868151  | 2.12188523 | 0.58887197 | 0.76570921 |
| ENSMUSG00000025159 | 0.18673834 | 5.9022136  | 0.54652664 | 0.73387415 |
| ENSMUSG00000025239 | 0.1866352  | 7.21066755 | 0.543294   | 0.73154671 |
| ENSMUSG00000089989 | 0.1865049  | 3.4107968  | 0.56543351 | 0.74863536 |
| ENSMUSG00000022969 | 0.18645425 | 5.05867956 | 0.55056443 | 0.73694624 |
| ENSMUSG00000016554 | 0.18642346 | 7.48110684 | 0.54399295 | 0.73196093 |
| ENSMUSG00000007610 | 0.18636915 | 2.918046   | 0.58392833 | 0.76226644 |
| ENSMUSG00000035621 | 0.18616209 | 4.44266534 | 0.55664313 | 0.74110899 |
| ENSMUSG00000014601 | 0.18584255 | 5.17604113 | 0.5529325  | 0.73815599 |
| ENSMUSG00000045975 | 0.1856696  | 3.04501195 | 0.57106388 | 0.75313108 |
| ENSMUSG00000014769 | 0.18561224 | 7.61886585 | 0.5451463  | 0.73265923 |
| ENSMUSG00000026478 | 0.18558522 | 6.21456258 | 0.54774402 | 0.73477691 |
| ENSMUSG00000068457 | 0.18542525 | 4.97657232 | 0.53435291 | 0.72575086 |
| ENSMUSG00000022914 | 0.18532323 | 4.98860859 | 0.55265338 | 0.73787471 |
| ENSMUSG00000029407 | 0.18516779 | 7.82640941 | 0.5455396  | 0.73288354 |
| ENSMUSG00000003662 | 0.18465946 | 5.12520654 | 0.55564229 | 0.74067021 |
| ENSMUSG00000069208 | 0.18432991 | 3.33714815 | 0.57495358 | 0.75602586 |
| ENSMUSG00000028343 | 0.1843046  | 7.78611401 | 0.54739736 | 0.73458601 |
| ENSMUSG00000026925 | 0.18415686 | 4.17100205 | 0.56189626 | 0.7458751  |

|                    |            |            |            |            |
|--------------------|------------|------------|------------|------------|
| ENSMUSG00000027465 | 0.18415256 | 5.99995004 | 0.55156729 | 0.73724612 |
| ENSMUSG00000037885 | 0.18370548 | 5.24784588 | 0.55646603 | 0.74110899 |
| ENSMUSG00000027883 | 0.18343843 | 4.54082332 | 0.56050773 | 0.74482107 |
| ENSMUSG00000052429 | 0.18329803 | 7.22034765 | 0.55123826 | 0.73699733 |
| ENSMUSG00000028960 | 0.1831148  | 6.78896879 | 0.55164965 | 0.73726482 |
| ENSMUSG00000100078 | 0.18286084 | 3.1940098  | 0.57646535 | 0.75695564 |
| ENSMUSG00000015702 | 0.18223768 | 1.47551421 | 0.64297653 | 0.80158258 |
| ENSMUSG00000021427 | 0.18206997 | 8.73075464 | 0.55180473 | 0.73738069 |
| ENSMUSG00000039737 | 0.18182633 | 3.73194361 | 0.58033551 | 0.75987593 |
| ENSMUSG00000037944 | 0.18180447 | 5.52754916 | 0.55950895 | 0.7438965  |
| ENSMUSG00000040913 | 0.1816621  | 2.21963881 | 0.59382701 | 0.76895179 |
| ENSMUSG00000024742 | 0.18153839 | 6.75766603 | 0.55535215 | 0.74037799 |
| ENSMUSG00000034773 | 0.18102585 | 3.87080425 | 0.5783616  | 0.75811979 |
| ENSMUSG00000036955 | 0.18085943 | 4.84771918 | 0.56289621 | 0.74692664 |
| ENSMUSG00000070461 | 0.18041147 | 2.421912   | 0.59999412 | 0.77340863 |
| ENSMUSG00000034789 | 0.18032264 | 4.31004879 | 0.575227   | 0.75602586 |
| ENSMUSG00000028229 | 0.18007853 | 1.89937183 | 0.60778945 | 0.77831307 |
| ENSMUSG00000032020 | 0.17978841 | 4.33573794 | 0.56705889 | 0.74968285 |
| ENSMUSG00000030768 | 0.17966414 | 2.3182201  | 0.63248147 | 0.79467321 |
| ENSMUSG00000040710 | 0.17945443 | 7.0628963  | 0.55840105 | 0.74269819 |
| ENSMUSG00000097534 | 0.17890561 | 2.61958566 | 0.59744915 | 0.77132666 |
| ENSMUSG00000041775 | 0.17858245 | 2.79286817 | 0.59424341 | 0.76913981 |
| ENSMUSG00000022557 | 0.17855974 | 5.77725859 | 0.56606885 | 0.7489174  |
| ENSMUSG00000071661 | 0.17843347 | 1.45322041 | 0.66514757 | 0.8167788  |
| ENSMUSG00000074930 | 0.17839421 | 2.65858938 | 0.60653814 | 0.7773334  |
| ENSMUSG00000026080 | 0.17776957 | 5.13424349 | 0.56988108 | 0.75184702 |
| ENSMUSG00000021767 | 0.17734574 | 4.21025436 | 0.57643862 | 0.75695564 |
| ENSMUSG00000038615 | 0.17710176 | 6.72317996 | 0.56517442 | 0.74848834 |
| ENSMUSG00000000409 | 0.17709535 | 3.13531677 | 0.60199931 | 0.77455811 |
| ENSMUSG00000047789 | 0.17694744 | 4.63147939 | 0.57259663 | 0.75465517 |
| ENSMUSG00000014959 | 0.17684952 | 7.05964499 | 0.56495814 | 0.74848834 |
| ENSMUSG00000028015 | 0.17666469 | 5.86020529 | 0.56668226 | 0.74936867 |
| ENSMUSG00000034595 | 0.17660333 | 6.96180593 | 0.56576247 | 0.748887   |
| ENSMUSG00000028837 | 0.17657153 | 6.90763936 | 0.56609055 | 0.7489174  |
| ENSMUSG00000036086 | 0.17631953 | 4.6452032  | 0.57489158 | 0.75602586 |
| ENSMUSG00000039148 | 0.17550049 | 5.55681914 | 0.57410775 | 0.75575185 |
| ENSMUSG00000021420 | 0.17538135 | 3.50871794 | 0.59677238 | 0.77096314 |
| ENSMUSG00000054455 | 0.17528125 | 5.01043529 | 0.57549445 | 0.75610772 |
| ENSMUSG00000000740 | 0.17518679 | 7.81873299 | 0.56782186 | 0.75050754 |
| ENSMUSG00000071477 | 0.17506708 | 3.54350053 | 0.59184983 | 0.76758973 |
| ENSMUSG00000057554 | 0.1747026  | 6.05941286 | 0.57120379 | 0.75322348 |
| ENSMUSG00000013662 | 0.17458841 | 8.25645495 | 0.56842181 | 0.75093236 |
| ENSMUSG00000059689 | 0.17447773 | 3.11425191 | 0.60536947 | 0.77653198 |

|                    |            |            |            |            |
|--------------------|------------|------------|------------|------------|
| ENSMUSG00000026404 | 0.17440878 | 3.60173992 | 0.58841823 | 0.76555569 |
| ENSMUSG00000028958 | 0.1741463  | 0.64734687 | 0.71907586 | 0.84906538 |
| ENSMUSG00000042625 | 0.17379614 | 6.13606017 | 0.57431785 | 0.75575884 |
| ENSMUSG00000048027 | 0.17346545 | 1.78168486 | 0.65945646 | 0.81275183 |
| ENSMUSG00000066640 | 0.17340521 | 3.25925399 | 0.60747116 | 0.77802482 |
| ENSMUSG00000025224 | 0.17322656 | 7.1495666  | 0.5726394  | 0.75465517 |
| ENSMUSG00000037363 | 0.1731895  | 1.38017336 | 0.62425715 | 0.78872304 |
| ENSMUSG00000032425 | 0.17299157 | 3.56652883 | 0.59234202 | 0.76772574 |
| ENSMUSG00000025969 | 0.17279429 | 5.94687494 | 0.57506372 | 0.75602586 |
| ENSMUSG00000029708 | 0.17271605 | 4.24803542 | 0.58620162 | 0.76398826 |
| ENSMUSG00000028796 | 0.172287   | 5.29152619 | 0.58275875 | 0.76149113 |
| ENSMUSG00000031101 | 0.17215083 | 7.98461245 | 0.57424246 | 0.75575185 |
| ENSMUSG00000005469 | 0.17178733 | 5.53255675 | 0.58077428 | 0.76016891 |
| ENSMUSG00000055413 | 0.17156878 | 4.86757048 | 0.58606578 | 0.76394699 |
| ENSMUSG00000030990 | 0.17144171 | 5.0608427  | 0.58430576 | 0.76257452 |
| ENSMUSG00000063524 | 0.17101668 | 7.55676924 | 0.57779787 | 0.75783033 |
| ENSMUSG00000030126 | 0.17099672 | 4.73931141 | 0.586386   | 0.76408732 |
| ENSMUSG00000052102 | 0.17081809 | 6.58533965 | 0.57918966 | 0.75883627 |
| ENSMUSG00000022678 | 0.17033108 | 6.63245401 | 0.58046744 | 0.7599564  |
| ENSMUSG00000079563 | 0.17025526 | 1.52785181 | 0.70356795 | 0.84022461 |
| ENSMUSG00000052155 | 0.17021042 | 2.55308181 | 0.63071021 | 0.79374243 |
| ENSMUSG00000004637 | 0.17011566 | 2.8867773  | 0.61682612 | 0.78462657 |
| ENSMUSG00000030744 | 0.17006815 | 10.0248547 | 0.57806285 | 0.75791244 |
| ENSMUSG00000021411 | 0.16982167 | 3.55844917 | 0.60287535 | 0.77499199 |
| ENSMUSG00000000827 | 0.16902073 | 5.28089457 | 0.58871582 | 0.76564651 |
| ENSMUSG00000074582 | 0.16893293 | 6.56708681 | 0.58303234 | 0.76174227 |
| ENSMUSG00000020149 | 0.16891574 | 7.96183027 | 0.5812899  | 0.76036285 |
| ENSMUSG00000020474 | 0.16873725 | 4.29384211 | 0.60136935 | 0.77425586 |
| ENSMUSG00000015289 | 0.16860198 | 3.98544718 | 0.60233165 | 0.77466243 |
| ENSMUSG00000028894 | 0.16851632 | 5.86112708 | 0.58561419 | 0.76363523 |
| ENSMUSG00000071054 | 0.16843927 | 6.50374423 | 0.58505652 | 0.76339418 |
| ENSMUSG00000038301 | 0.16838527 | 5.19605047 | 0.58748649 | 0.76468971 |
| ENSMUSG00000039997 | 0.16819098 | 8.45704147 | 0.58251259 | 0.76143222 |
| ENSMUSG00000005973 | 0.16818709 | 4.81004499 | 0.59131521 | 0.76717315 |
| ENSMUSG00000038845 | 0.16818619 | 5.69383719 | 0.58890877 | 0.76570921 |
| ENSMUSG00000025156 | 0.16783297 | 5.41848928 | 0.59205746 | 0.76770605 |
| ENSMUSG00000024789 | 0.16782231 | 7.52687874 | 0.58389921 | 0.76226644 |
| ENSMUSG00000032519 | 0.1676052  | 2.89783493 | 0.6285024  | 0.79171634 |
| ENSMUSG00000026385 | 0.16747958 | 6.33285628 | 0.58739016 | 0.76468971 |
| ENSMUSG00000060992 | 0.16738219 | 7.68470986 | 0.58521696 | 0.76339418 |
| ENSMUSG00000049960 | 0.16737134 | 5.05248573 | 0.59530815 | 0.7699452  |
| ENSMUSG00000091562 | 0.16723363 | 3.60134332 | 0.60725708 | 0.77793542 |
| ENSMUSG00000024132 | 0.16708616 | 4.00136229 | 0.60151342 | 0.77425647 |



|                    |            |            |            |            |
|--------------------|------------|------------|------------|------------|
| ENSMUSG00000030591 | 0.16690622 | 8.00379224 | 0.58603529 | 0.76394699 |
| ENSMUSG00000022503 | 0.16666862 | 6.23036609 | 0.59050704 | 0.76704745 |
| ENSMUSG00000052085 | 0.16658308 | 7.72735542 | 0.58679512 | 0.76443211 |
| ENSMUSG00000022837 | 0.16607068 | 5.4414399  | 0.59141442 | 0.76720956 |
| ENSMUSG00000079562 | 0.16587702 | 5.74644254 | 0.59365692 | 0.76882385 |
| ENSMUSG00000031820 | 0.16577796 | 4.8750811  | 0.60116406 | 0.77408397 |
| ENSMUSG00000000902 | 0.16570127 | 6.14992162 | 0.59238185 | 0.76772574 |
| ENSMUSG00000034429 | 0.16564438 | 1.82148984 | 0.68918977 | 0.83255545 |
| ENSMUSG00000032479 | 0.16563791 | 7.394487   | 0.58933301 | 0.76587253 |
| ENSMUSG00000046861 | 0.16559375 | 4.67114629 | 0.59932112 | 0.77328057 |
| ENSMUSG00000045237 | 0.1655724  | 3.11093398 | 0.62268009 | 0.78821501 |
| ENSMUSG00000053604 | 0.16551962 | 6.53316226 | 0.59113952 | 0.76716376 |
| ENSMUSG00000031684 | 0.16524609 | 5.05686218 | 0.5957084  | 0.77018575 |
| ENSMUSG00000025888 | 0.16522552 | 6.79035363 | 0.5908288  | 0.76716376 |
| ENSMUSG00000039640 | 0.16495129 | 5.29545497 | 0.60079714 | 0.77398116 |
| ENSMUSG00000001918 | 0.16485998 | 7.51453774 | 0.59123684 | 0.76716376 |
| ENSMUSG00000031938 | 0.16475747 | 3.5155491  | 0.61210031 | 0.78107795 |
| ENSMUSG00000027284 | 0.1646941  | 5.15597215 | 0.5968408  | 0.77096314 |
| ENSMUSG00000034908 | 0.16464292 | 6.36761737 | 0.594256   | 0.76913981 |
| ENSMUSG00000068040 | 0.16446212 | 6.62192265 | 0.59362351 | 0.76882385 |
| ENSMUSG00000023973 | 0.16439491 | 5.3130991  | 0.59971325 | 0.77340863 |
| ENSMUSG00000070319 | 0.1643728  | 6.68868065 | 0.59410395 | 0.76913981 |
| ENSMUSG00000019986 | 0.16434521 | 4.03174921 | 0.60481568 | 0.77609225 |
| ENSMUSG00000024193 | 0.1642425  | 2.0990992  | 0.66531468 | 0.81679799 |
| ENSMUSG00000049709 | 0.16414536 | 2.77979486 | 0.62346901 | 0.78864486 |
| ENSMUSG00000052395 | 0.16404522 | 4.29010147 | 0.60461116 | 0.7759736  |
| ENSMUSG00000002625 | 0.16399775 | 5.14156974 | 0.60017714 | 0.77350591 |
| ENSMUSG00000028944 | 0.16371524 | 4.41790769 | 0.60279631 | 0.77498276 |
| ENSMUSG00000029804 | 0.16359169 | 5.53419682 | 0.59707132 | 0.77105847 |
| ENSMUSG00000020946 | 0.16353644 | 6.94619011 | 0.59467846 | 0.76949994 |
| ENSMUSG00000049091 | 0.16323613 | 5.63690827 | 0.59941299 | 0.7732992  |
| ENSMUSG00000028550 | 0.1629991  | 3.18871571 | 0.61556577 | 0.78392315 |
| ENSMUSG00000025035 | 0.16294323 | 3.11752033 | 0.61538113 | 0.78392315 |
| ENSMUSG00000031672 | 0.16283774 | 7.77058942 | 0.59550177 | 0.77001092 |
| ENSMUSG00000036391 | 0.16275161 | 6.69685887 | 0.59615388 | 0.77057695 |
| ENSMUSG00000029432 | 0.16273223 | 4.44005557 | 0.60450433 | 0.7759736  |
| ENSMUSG00000050428 | 0.16266175 | 2.44877557 | 0.66039702 | 0.8133533  |
| ENSMUSG00000041638 | 0.16242686 | 5.48437245 | 0.6037881  | 0.77547987 |
| ENSMUSG00000039414 | 0.16235508 | 5.68975634 | 0.59993985 | 0.77340863 |
| ENSMUSG00000018750 | 0.16134467 | 4.49653419 | 0.60691966 | 0.77768794 |
| ENSMUSG00000037536 | 0.16123623 | 4.20345719 | 0.61551967 | 0.78392315 |
| ENSMUSG00000019295 | 0.16111261 | 4.68283511 | 0.60851235 | 0.77871095 |
| ENSMUSG00000014313 | 0.16098805 | 6.13353125 | 0.6025529  | 0.77485458 |

|                    |            |            |            |            |
|--------------------|------------|------------|------------|------------|
| ENSMUSG00000055720 | 0.16054639 | 5.13154695 | 0.60876779 | 0.77885298 |
| ENSMUSG00000038256 | 0.16021836 | 5.06886275 | 0.60951688 | 0.77897962 |
| ENSMUSG00000022771 | 0.16013377 | 6.10838954 | 0.60457316 | 0.7759736  |
| ENSMUSG00000036879 | 0.16011703 | 5.5329363  | 0.60488273 | 0.77609225 |
| ENSMUSG00000022130 | 0.15991078 | 4.80690827 | 0.61039054 | 0.77940596 |
| ENSMUSG00000040297 | 0.15982046 | 7.29961695 | 0.60207357 | 0.77455811 |
| ENSMUSG00000035047 | 0.15961095 | 5.50592602 | 0.60908006 | 0.77888289 |
| ENSMUSG00000029649 | 0.1593644  | 7.40411961 | 0.60364751 | 0.77542999 |
| ENSMUSG00000040018 | 0.15900548 | 5.9938107  | 0.60710451 | 0.77783236 |
| ENSMUSG00000025372 | 0.15855925 | 1.75208839 | 0.69713596 | 0.83647886 |
| ENSMUSG00000004945 | 0.15800385 | 4.65758932 | 0.6177564  | 0.78496222 |
| ENSMUSG00000025572 | 0.15783409 | 3.93577216 | 0.62963155 | 0.79284758 |
| ENSMUSG00000057132 | 0.15769861 | 4.3094063  | 0.62106065 | 0.78738749 |
| ENSMUSG00000029344 | 0.15769592 | 3.98834853 | 0.6272046  | 0.7908751  |
| ENSMUSG00000003208 | 0.15754019 | 2.57061664 | 0.67211206 | 0.82186829 |
| ENSMUSG00000020978 | 0.15727275 | 7.59857587 | 0.60836476 | 0.77864287 |
| ENSMUSG00000053702 | 0.15725038 | 2.46382922 | 0.63702201 | 0.79712757 |
| ENSMUSG00000042302 | 0.15693871 | 2.55166885 | 0.64406234 | 0.80197365 |
| ENSMUSG00000046079 | 0.15673468 | 5.3934185  | 0.61430018 | 0.78277362 |
| ENSMUSG00000078202 | 0.15672144 | 1.01528481 | 0.67046164 | 0.82068767 |
| ENSMUSG00000030345 | 0.15630303 | 1.0138962  | 0.67361378 | 0.82267849 |
| ENSMUSG00000025357 | 0.15605763 | 5.91954923 | 0.61317274 | 0.78199102 |
| ENSMUSG00000023971 | 0.15595201 | 3.35211494 | 0.6442304  | 0.80197365 |
| ENSMUSG00000001632 | 0.1559321  | 5.65482759 | 0.61616297 | 0.78413274 |
| ENSMUSG00000024387 | 0.15590591 | 6.44261441 | 0.61391285 | 0.78270312 |
| ENSMUSG00000014426 | 0.15559702 | 4.668701   | 0.62138166 | 0.78766566 |
| ENSMUSG00000009569 | 0.15558502 | 5.48706362 | 0.61616662 | 0.78413274 |
| ENSMUSG00000022416 | 0.15555373 | 3.21352031 | 0.63628377 | 0.7963886  |
| ENSMUSG00000061589 | 0.15550934 | 5.74045643 | 0.61741476 | 0.78496222 |
| ENSMUSG00000029726 | 0.15544444 | 4.87767271 | 0.62340295 | 0.78864486 |
| ENSMUSG00000006058 | 0.15538468 | 5.74457088 | 0.61684233 | 0.78462657 |
| ENSMUSG00000009108 | 0.15525721 | 1.24928468 | 0.68317089 | 0.82882463 |
| ENSMUSG00000040006 | 0.15477016 | 4.80134645 | 0.6223714  | 0.78821501 |
| ENSMUSG00000019802 | 0.15388046 | 7.61071495 | 0.61569839 | 0.78399946 |
| ENSMUSG00000027255 | 0.15380875 | 6.59238065 | 0.61779636 | 0.78496222 |
| ENSMUSG00000057409 | 0.15363429 | 5.34076428 | 0.61995865 | 0.78680564 |
| ENSMUSG00000039473 | 0.15350338 | 7.01581388 | 0.61713058 | 0.78489635 |
| ENSMUSG00000003528 | 0.15337861 | 5.09508986 | 0.62484791 | 0.78912897 |
| ENSMUSG00000039656 | 0.15337745 | 4.1448656  | 0.63559446 | 0.79580526 |
| ENSMUSG00000035133 | 0.15336781 | 5.8284554  | 0.61878777 | 0.7858918  |
| ENSMUSG00000021575 | 0.15320186 | 3.29613657 | 0.64763238 | 0.80499345 |
| ENSMUSG00000059439 | 0.15310307 | 3.7321595  | 0.63179442 | 0.79427268 |
| ENSMUSG00000036246 | 0.15300302 | 6.11817971 | 0.62096759 | 0.78738749 |

|                    |            |            |            |            |
|--------------------|------------|------------|------------|------------|
| ENSMUSG00000020918 | 0.15297572 | 5.67649079 | 0.62324793 | 0.78864486 |
| ENSMUSG00000000486 | 0.15270929 | 5.78300827 | 0.6237949  | 0.78872304 |
| ENSMUSG00000021697 | 0.1522862  | 3.83465883 | 0.63834137 | 0.79813024 |
| ENSMUSG00000042292 | 0.15221115 | 4.11266646 | 0.63265684 | 0.79477217 |
| ENSMUSG00000026456 | 0.15186603 | 4.98616501 | 0.62853569 | 0.79171634 |
| ENSMUSG00000031534 | 0.15186188 | 3.00672858 | 0.63476792 | 0.7955994  |
| ENSMUSG00000021468 | 0.15184758 | 5.84833875 | 0.62351503 | 0.78864486 |
| ENSMUSG00000069678 | 0.15184557 | 2.33144779 | 0.68089353 | 0.82796432 |
| ENSMUSG00000040263 | 0.15179508 | 5.14114541 | 0.62988612 | 0.79286899 |
| ENSMUSG00000061518 | 0.15169878 | 5.70877454 | 0.62658201 | 0.79039836 |
| ENSMUSG00000002983 | 0.15152497 | 4.25865334 | 0.64075482 | 0.80022003 |
| ENSMUSG00000022389 | 0.15122438 | 4.95864383 | 0.62984603 | 0.79286899 |
| ENSMUSG00000039989 | 0.15102918 | 4.60206371 | 0.63167579 | 0.79427268 |
| ENSMUSG00000074129 | 0.15102686 | 9.03752954 | 0.621749   | 0.7877684  |
| ENSMUSG00000022956 | 0.15099614 | 7.24056588 | 0.6233464  | 0.78864486 |
| ENSMUSG00000039703 | 0.15098468 | 7.5094276  | 0.62266595 | 0.78821501 |
| ENSMUSG00000027809 | 0.15089382 | 5.65680924 | 0.62685132 | 0.79063914 |
| ENSMUSG00000025245 | 0.15082453 | 5.3305075  | 0.62708362 | 0.79083964 |
| ENSMUSG00000046691 | 0.15078513 | 7.06712787 | 0.62393791 | 0.78872304 |
| ENSMUSG00000035885 | 0.15077046 | 6.19827218 | 0.62560806 | 0.78971758 |
| ENSMUSG00000030091 | 0.15068614 | 8.43784841 | 0.62273578 | 0.78821501 |
| ENSMUSG00000020437 | 0.15066091 | 7.38530406 | 0.62401667 | 0.78872304 |
| ENSMUSG00000027452 | 0.15028918 | 4.11527629 | 0.63356155 | 0.79515627 |
| ENSMUSG00000024787 | 0.15009093 | 2.90424159 | 0.67135533 | 0.82131547 |
| ENSMUSG00000032402 | 0.15008975 | 4.34872895 | 0.6338086  | 0.79515627 |
| ENSMUSG00000031960 | 0.15001649 | 7.82864696 | 0.62485595 | 0.78912897 |
| ENSMUSG00000035069 | 0.14969296 | 4.33321517 | 0.63802883 | 0.79801704 |
| ENSMUSG00000041650 | 0.14963715 | 4.98959705 | 0.63202614 | 0.79442051 |
| ENSMUSG00000023961 | 0.14941968 | 1.7786731  | 0.66144943 | 0.8140916  |
| ENSMUSG00000071644 | 0.14930298 | 10.4713912 | 0.62523985 | 0.78943761 |
| ENSMUSG00000026249 | 0.14905977 | 3.89189186 | 0.63540968 | 0.79580392 |
| ENSMUSG00000029715 | 0.14901714 | 2.02543165 | 0.72435626 | 0.85287236 |
| ENSMUSG00000044030 | 0.14898298 | 2.16446744 | 0.67922037 | 0.82690364 |
| ENSMUSG00000022571 | 0.14865117 | 3.7133015  | 0.6506108  | 0.8066437  |
| ENSMUSG00000030374 | 0.14845364 | 5.52541344 | 0.6350047  | 0.79572479 |
| ENSMUSG00000015804 | 0.14794925 | 5.18428617 | 0.63567012 | 0.79580526 |
| ENSMUSG00000030986 | 0.14763085 | 4.42820371 | 0.64101842 | 0.80031711 |
| ENSMUSG00000039686 | 0.14750487 | 3.63253032 | 0.6636746  | 0.81530252 |
| ENSMUSG00000005621 | 0.14731695 | 6.46170156 | 0.63276101 | 0.79477217 |
| ENSMUSG00000002897 | 0.14715577 | 6.32067999 | 0.63407235 | 0.7951897  |
| ENSMUSG00000035051 | 0.14709837 | 6.30838138 | 0.63278185 | 0.79477217 |
| ENSMUSG00000066839 | 0.14697135 | 3.99912246 | 0.65894027 | 0.81230131 |
| ENSMUSG00000055553 | 0.14679247 | 4.47774163 | 0.64844161 | 0.80525038 |

|                    |            |            |            |            |
|--------------------|------------|------------|------------|------------|
| ENSMUSG00000021040 | 0.14679033 | 5.07595125 | 0.63829081 | 0.79813024 |
| ENSMUSG00000075415 | 0.1466629  | 8.63110779 | 0.63179093 | 0.79427268 |
| ENSMUSG00000039230 | 0.14650503 | 6.52679566 | 0.6346721  | 0.7955994  |
| ENSMUSG00000039220 | 0.14646699 | 6.33793196 | 0.635408   | 0.79580392 |
| ENSMUSG00000062647 | 0.14629707 | 5.44600751 | 0.64033386 | 0.80006492 |
| ENSMUSG00000038524 | 0.14621197 | 1.78096854 | 0.70256858 | 0.83985354 |
| ENSMUSG00000049728 | 0.14606444 | 2.38950297 | 0.69111767 | 0.83335668 |
| ENSMUSG00000020458 | 0.14602432 | 7.08374066 | 0.6341759  | 0.79522709 |
| ENSMUSG00000044627 | 0.14568067 | 7.12046017 | 0.63566225 | 0.79580526 |
| ENSMUSG00000005936 | 0.14553476 | 7.29362289 | 0.63544766 | 0.79580392 |
| ENSMUSG00000073437 | 0.14549202 | 3.53912533 | 0.65669976 | 0.81095201 |
| ENSMUSG00000022489 | 0.14522824 | 3.89613149 | 0.65687678 | 0.81095201 |
| ENSMUSG00000052751 | 0.14519281 | 2.97619979 | 0.65651035 | 0.81095201 |
| ENSMUSG00000054150 | 0.14515222 | 5.15556961 | 0.64226902 | 0.80099794 |
| ENSMUSG00000040506 | 0.14478138 | 5.73961811 | 0.64065203 | 0.80018432 |
| ENSMUSG00000024182 | 0.14458926 | 5.77832678 | 0.64198098 | 0.80091658 |
| ENSMUSG00000025494 | 0.14443956 | 2.06788621 | 0.71361186 | 0.84644245 |
| ENSMUSG00000030979 | 0.1442252  | 3.7134628  | 0.65683867 | 0.81095201 |
| ENSMUSG00000037278 | 0.14393207 | 6.0429578  | 0.64245026 | 0.80103868 |
| ENSMUSG00000021877 | 0.14390081 | 7.56226268 | 0.63870321 | 0.79839752 |
| ENSMUSG00000002550 | 0.14362266 | 4.72115497 | 0.65105202 | 0.80691242 |
| ENSMUSG00000020321 | 0.14353035 | 8.17927034 | 0.63942662 | 0.79911654 |
| ENSMUSG00000006010 | 0.14352811 | 5.89632155 | 0.64185029 | 0.80085999 |
| ENSMUSG00000025950 | 0.14335079 | 4.21600799 | 0.64802019 | 0.80516297 |
| ENSMUSG00000030468 | 0.14328061 | 7.09923998 | 0.64105519 | 0.80031711 |
| ENSMUSG00000057177 | 0.14327772 | 6.13505424 | 0.64424126 | 0.80197365 |
| ENSMUSG00000063275 | 0.14323285 | 1.37024914 | 0.70527194 | 0.8412402  |
| ENSMUSG00000051256 | 0.14321554 | 5.02342287 | 0.64763753 | 0.80499345 |
| ENSMUSG00000059995 | 0.14301385 | 6.07338076 | 0.64408208 | 0.80197365 |
| ENSMUSG00000020250 | 0.14291561 | 8.34628567 | 0.64060357 | 0.80018432 |
| ENSMUSG00000004798 | 0.14271528 | 4.93569887 | 0.64815225 | 0.80516921 |
| ENSMUSG00000003348 | 0.14270549 | 6.36401343 | 0.64411683 | 0.80197365 |
| ENSMUSG00000059355 | 0.14259168 | 4.41621188 | 0.65282342 | 0.80845748 |
| ENSMUSG00000036339 | 0.1423578  | 4.92154108 | 0.64748329 | 0.80498729 |
| ENSMUSG00000004285 | 0.14225772 | 4.90556559 | 0.65304002 | 0.80854002 |
| ENSMUSG00000053094 | 0.1421793  | 7.00618774 | 0.64358909 | 0.80197365 |
| ENSMUSG00000020801 | 0.1419272  | 1.9838907  | 0.72002947 | 0.85000524 |
| ENSMUSG00000037351 | 0.14177639 | 5.57838193 | 0.64988032 | 0.80624904 |
| ENSMUSG00000062234 | 0.14118574 | 7.12843345 | 0.64597314 | 0.803573   |
| ENSMUSG00000023861 | 0.14098913 | 5.90258526 | 0.64873362 | 0.80542751 |
| ENSMUSG00000059866 | 0.14077111 | 3.89830586 | 0.668413   | 0.81932801 |
| ENSMUSG00000060450 | 0.14077084 | 6.46655619 | 0.64729799 | 0.8048497  |
| ENSMUSG00000037805 | 0.14055    | 7.81420899 | 0.64684378 | 0.80456325 |

|                    |            |            |            |            |
|--------------------|------------|------------|------------|------------|
| ENSMUSG00000020483 | 0.1405347  | 6.00236273 | 0.64970047 | 0.80624904 |
| ENSMUSG00000034751 | 0.14050203 | 4.40524211 | 0.65034735 | 0.80644253 |
| ENSMUSG00000014498 | 0.14047517 | 7.00681058 | 0.6478031  | 0.80510644 |
| ENSMUSG00000029587 | 0.14046296 | 4.57840377 | 0.65676067 | 0.81095201 |
| ENSMUSG00000033819 | 0.14045529 | 1.52747769 | 0.75558633 | 0.87212277 |
| ENSMUSG00000022329 | 0.14018343 | 4.20178223 | 0.65772439 | 0.81145176 |
| ENSMUSG00000038384 | 0.14016615 | 4.26150393 | 0.66578429 | 0.8171639  |
| ENSMUSG00000029416 | 0.14008458 | 4.86450409 | 0.65613317 | 0.81069432 |
| ENSMUSG00000058454 | 0.13997684 | 5.13799827 | 0.65579814 | 0.81037322 |
| ENSMUSG00000020514 | 0.13974782 | 4.42030357 | 0.66125233 | 0.81394192 |
| ENSMUSG00000028914 | 0.13938362 | 4.42343991 | 0.6619367  | 0.81431957 |
| ENSMUSG00000003039 | 0.13918164 | 5.76427032 | 0.65356167 | 0.80890728 |
| ENSMUSG00000024422 | 0.13882074 | 5.81867168 | 0.65549696 | 0.81009388 |
| ENSMUSG00000021901 | 0.13879064 | 6.22934147 | 0.65392875 | 0.80908302 |
| ENSMUSG00000044783 | 0.13835924 | 8.51650067 | 0.65122137 | 0.80702956 |
| ENSMUSG00000030301 | 0.13825827 | 3.71490037 | 0.66878952 | 0.81932801 |
| ENSMUSG00000009621 | 0.13820084 | 6.8593728  | 0.65356161 | 0.80890728 |
| ENSMUSG00000020228 | 0.13769588 | 5.62842872 | 0.65701852 | 0.81095201 |
| ENSMUSG00000033096 | 0.13761281 | 5.97430882 | 0.65635847 | 0.8108798  |
| ENSMUSG00000002524 | 0.1371791  | 6.21652591 | 0.65798498 | 0.8116804  |
| ENSMUSG00000005481 | 0.13713897 | 7.73108616 | 0.6549845  | 0.8099035  |
| ENSMUSG00000024660 | 0.13710321 | 7.48338603 | 0.65530458 | 0.81001571 |
| ENSMUSG00000030286 | 0.13704634 | 6.44967347 | 0.65695407 | 0.81095201 |
| ENSMUSG00000015314 | 0.13704631 | 8.39714118 | 0.6542933  | 0.80933255 |
| ENSMUSG00000036180 | 0.13656816 | 6.01307908 | 0.65981256 | 0.81307233 |
| ENSMUSG00000092341 | 0.1363962  | 9.30693096 | 0.65534211 | 0.81001571 |
| ENSMUSG00000004996 | 0.13629036 | 3.667285   | 0.67701374 | 0.82514876 |
| ENSMUSG00000063714 | 0.13627602 | 0.90603466 | 0.80117625 | 0.89737066 |
| ENSMUSG00000066026 | 0.13626915 | 3.41529077 | 0.68006198 | 0.82736782 |
| ENSMUSG00000021114 | 0.13624787 | 6.21093853 | 0.65855681 | 0.81201425 |
| ENSMUSG00000025825 | 0.13584063 | 4.38393949 | 0.67232789 | 0.82200151 |
| ENSMUSG00000026201 | 0.13565267 | 4.79350971 | 0.66800096 | 0.81907019 |
| ENSMUSG00000051853 | 0.13563813 | 7.33985229 | 0.65869598 | 0.812093   |
| ENSMUSG00000015846 | 0.13560976 | 4.19315521 | 0.67260417 | 0.82219036 |
| ENSMUSG00000058626 | 0.13546366 | 0.62999572 | 0.90332859 | 0.95364616 |
| ENSMUSG00000001211 | 0.13531893 | 5.41666056 | 0.66530478 | 0.81679799 |
| ENSMUSG00000033458 | 0.13514516 | 3.07422641 | 0.68614612 | 0.83046889 |
| ENSMUSG00000006498 | 0.13484333 | 8.19866831 | 0.6600181  | 0.81307233 |
| ENSMUSG00000025269 | 0.1348409  | 4.21641108 | 0.67349124 | 0.82262199 |
| ENSMUSG00000006289 | 0.1346085  | 5.23393177 | 0.66673654 | 0.81779877 |
| ENSMUSG00000026199 | 0.13457796 | 4.09947504 | 0.67567203 | 0.8241655  |
| ENSMUSG00000002699 | 0.13455554 | 6.38493039 | 0.66325644 | 0.81530252 |
| ENSMUSG00000028678 | 0.13448632 | 6.5793092  | 0.66288101 | 0.81520228 |

|                    |            |            |            |            |
|--------------------|------------|------------|------------|------------|
| ENSMUSG00000066829 | 0.13448101 | 3.66229949 | 0.68297959 | 0.82882463 |
| ENSMUSG00000027933 | 0.1343949  | 6.5995841  | 0.66301635 | 0.81527575 |
| ENSMUSG00000079487 | 0.13423152 | 6.90558287 | 0.66260709 | 0.81505131 |
| ENSMUSG00000031785 | 0.13419237 | 1.30742842 | 0.78170527 | 0.88671643 |
| ENSMUSG00000057229 | 0.13401515 | 4.2629917  | 0.6748125  | 0.82360706 |
| ENSMUSG00000037940 | 0.13396042 | 4.95658525 | 0.66611837 | 0.81731943 |
| ENSMUSG00000037553 | 0.13347958 | 5.23228625 | 0.67073178 | 0.82083378 |
| ENSMUSG00000031029 | 0.13333437 | 8.27478342 | 0.66345704 | 0.81530252 |
| ENSMUSG00000079003 | 0.13328132 | 4.45224    | 0.67875211 | 0.82652018 |
| ENSMUSG00000022335 | 0.13311959 | 2.72695487 | 0.7026305  | 0.83985354 |
| ENSMUSG00000036880 | 0.13300086 | 3.50053611 | 0.69716914 | 0.83647886 |
| ENSMUSG00000020022 | 0.13295206 | 5.09724354 | 0.67285396 | 0.82227802 |
| ENSMUSG00000078584 | 0.13234206 | 4.9638002  | 0.67328856 | 0.82261828 |
| ENSMUSG00000079057 | 0.13227424 | 3.93179273 | 0.68088642 | 0.82796432 |
| ENSMUSG00000033900 | 0.13206292 | 2.35770441 | 0.71606554 | 0.84808541 |
| ENSMUSG00000031591 | 0.13159326 | 6.43509151 | 0.66881904 | 0.81932801 |
| ENSMUSG00000040451 | 0.13143897 | 4.46367064 | 0.67404758 | 0.82292869 |
| ENSMUSG00000000384 | 0.13142581 | 5.74829873 | 0.67341192 | 0.82261828 |
| ENSMUSG00000037466 | 0.13121929 | 3.90671126 | 0.68549987 | 0.83022476 |
| ENSMUSG00000057594 | 0.13120616 | 3.06111781 | 0.69351382 | 0.83460027 |
| ENSMUSG00000028447 | 0.13094903 | 3.44680759 | 0.70093721 | 0.83867297 |
| ENSMUSG00000020451 | 0.13071221 | 5.27852027 | 0.676922   | 0.8251302  |
| ENSMUSG00000022999 | 0.13048761 | 3.56548265 | 0.695355   | 0.83513847 |
| ENSMUSG00000028656 | 0.13038041 | 9.03936603 | 0.66996798 | 0.82053972 |
| ENSMUSG00000029142 | 0.13028821 | 5.39794313 | 0.67510358 | 0.82384486 |
| ENSMUSG00000018293 | 0.13002803 | 9.24959603 | 0.67073324 | 0.82083378 |
| ENSMUSG00000036894 | 0.12991136 | 4.37448073 | 0.6819759  | 0.82829053 |
| ENSMUSG00000040435 | 0.12974499 | 3.77654865 | 0.68740026 | 0.83139654 |
| ENSMUSG00000025724 | 0.12970326 | 6.72624007 | 0.67339226 | 0.82261828 |
| ENSMUSG00000092607 | 0.12969877 | 4.17801095 | 0.68708743 | 0.83113301 |
| ENSMUSG00000100975 | 0.12953206 | 2.07007027 | 0.71361186 | 0.84644245 |
| ENSMUSG00000005465 | 0.12948852 | 4.27981331 | 0.68633265 | 0.83049947 |
| ENSMUSG00000031755 | 0.12944059 | 2.47948903 | 0.72314427 | 0.8523922  |
| ENSMUSG00000027865 | 0.1292205  | 5.57147646 | 0.67661199 | 0.82503207 |
| ENSMUSG00000028104 | 0.12916212 | 3.12792572 | 0.69691858 | 0.83645742 |
| ENSMUSG00000055897 | 0.12912883 | 3.22715706 | 0.69815182 | 0.83707733 |
| ENSMUSG00000041841 | 0.12901597 | 7.33573721 | 0.67483235 | 0.82360706 |
| ENSMUSG00000035152 | 0.12882518 | 8.29763579 | 0.67392863 | 0.82287663 |
| ENSMUSG00000010025 | 0.12871948 | 5.7390201  | 0.67811007 | 0.8261115  |
| ENSMUSG00000033373 | 0.12864591 | 3.44771643 | 0.70093721 | 0.83867297 |
| ENSMUSG00000039191 | 0.12858519 | 7.51459033 | 0.67469715 | 0.82360706 |
| ENSMUSG00000068523 | 0.1283113  | 5.31195605 | 0.6799293  | 0.82729974 |
| ENSMUSG00000012405 | 0.12829208 | 6.74886966 | 0.67784509 | 0.82606064 |

|                    |            |            |            |            |
|--------------------|------------|------------|------------|------------|
| ENSMUSG00000024170 | 0.12826784 | 3.76176256 | 0.7018259  | 0.83935794 |
| ENSMUSG00000067567 | 0.12797843 | 4.08468348 | 0.69156881 | 0.83351479 |
| ENSMUSG00000015112 | 0.12785001 | 4.86361593 | 0.68385654 | 0.82927122 |
| ENSMUSG00000029524 | 0.12762391 | 2.06958744 | 0.73395694 | 0.85892476 |
| ENSMUSG00000007833 | 0.12756865 | 2.32428324 | 0.77155621 | 0.88196547 |
| ENSMUSG00000032258 | 0.12749865 | 3.92361192 | 0.68955393 | 0.83262193 |
| ENSMUSG00000042328 | 0.12737556 | 4.00951802 | 0.69124402 | 0.83335668 |
| ENSMUSG00000003037 | 0.12713168 | 6.89096007 | 0.67961863 | 0.82720172 |
| ENSMUSG00000052632 | 0.12698907 | 2.02376805 | 0.74399995 | 0.86457925 |
| ENSMUSG00000071078 | 0.12683321 | 4.15102439 | 0.69505927 | 0.83506229 |
| ENSMUSG00000039396 | 0.12676239 | 4.58018822 | 0.68564371 | 0.83022476 |
| ENSMUSG00000041319 | 0.12671589 | 3.5996463  | 0.70879669 | 0.84357835 |
| ENSMUSG00000018841 | 0.12652497 | 4.27512578 | 0.6939173  | 0.83471324 |
| ENSMUSG00000025155 | 0.12626089 | 5.46677785 | 0.68661003 | 0.8306487  |
| ENSMUSG00000031545 | 0.12623608 | 7.0520302  | 0.68148732 | 0.82816228 |
| ENSMUSG00000022982 | 0.12595159 | 7.37595478 | 0.68183902 | 0.82822167 |
| ENSMUSG00000019494 | 0.12588194 | 6.65188991 | 0.68320931 | 0.82882463 |
| ENSMUSG00000031232 | 0.12576042 | 8.1400245  | 0.68115561 | 0.82796432 |
| ENSMUSG00000037470 | 0.12575339 | 8.44104712 | 0.68116422 | 0.82796432 |
| ENSMUSG00000028793 | 0.1257203  | 8.05015914 | 0.68163653 | 0.82816228 |
| ENSMUSG00000037257 | 0.1256425  | 5.23287923 | 0.68758379 | 0.83145365 |
| ENSMUSG00000026730 | 0.12563686 | 2.70357834 | 0.72279373 | 0.85224225 |
| ENSMUSG00000021238 | 0.12548999 | 3.21351347 | 0.70423131 | 0.84064982 |
| ENSMUSG00000028383 | 0.12537743 | 5.57472415 | 0.68580827 | 0.83023759 |
| ENSMUSG00000022463 | 0.12535086 | 6.94040726 | 0.68403245 | 0.82939126 |
| ENSMUSG00000037012 | 0.12529033 | 5.93044824 | 0.68648314 | 0.83058838 |
| ENSMUSG00000043683 | 0.12528392 | 6.29007749 | 0.68524976 | 0.83022476 |
| ENSMUSG00000030276 | 0.12523733 | 1.59821968 | 0.7414134  | 0.86268905 |
| ENSMUSG00000027963 | 0.12519634 | 3.92186909 | 0.69967073 | 0.83780248 |
| ENSMUSG00000001403 | 0.12481079 | 6.62901814 | 0.68541749 | 0.83022476 |
| ENSMUSG00000020936 | 0.12461219 | 7.68036375 | 0.68465962 | 0.83001462 |
| ENSMUSG00000006463 | 0.12446576 | 3.57019339 | 0.70346525 | 0.84022461 |
| ENSMUSG00000035268 | 0.12420057 | 5.3716945  | 0.69160704 | 0.83351479 |
| ENSMUSG00000002741 | 0.12416487 | 6.99792337 | 0.6862275  | 0.83046889 |
| ENSMUSG00000033446 | 0.12368586 | 3.63855234 | 0.69688668 | 0.83645742 |
| ENSMUSG00000024026 | 0.1236229  | 5.86181652 | 0.68995071 | 0.83282517 |
| ENSMUSG00000020212 | 0.12358194 | 4.11917183 | 0.69817171 | 0.83707733 |
| ENSMUSG00000032612 | 0.12341684 | 7.64121151 | 0.68745947 | 0.83139654 |
| ENSMUSG00000059791 | 0.12335634 | 4.3633545  | 0.69897377 | 0.8374141  |
| ENSMUSG00000029578 | 0.12318981 | 5.65371915 | 0.69237676 | 0.83397643 |
| ENSMUSG00000021257 | 0.12315251 | 2.60749656 | 0.74363258 | 0.86424547 |
| ENSMUSG00000061544 | 0.12294083 | 3.00151673 | 0.69144881 | 0.83351039 |
| ENSMUSG00000032202 | 0.12292436 | 4.82943545 | 0.69422278 | 0.83475024 |

|                    |            |            |            |            |
|--------------------|------------|------------|------------|------------|
| ENSMUSG00000054199 | 0.12264057 | 5.66668467 | 0.6930751  | 0.83422377 |
| ENSMUSG00000009905 | 0.12260875 | 3.9170203  | 0.6988033  | 0.8374141  |
| ENSMUSG00000031633 | 0.12248738 | 7.17064183 | 0.69037172 | 0.83294737 |
| ENSMUSG00000024571 | 0.12231388 | 6.24253356 | 0.6931236  | 0.83422377 |
| ENSMUSG00000034522 | 0.12220624 | 3.04665881 | 0.71862522 | 0.84892688 |
| ENSMUSG00000091780 | 0.12218497 | 1.67672435 | 0.77792904 | 0.88502867 |
| ENSMUSG00000079020 | 0.12194796 | 2.96457522 | 0.72343992 | 0.8525381  |
| ENSMUSG00000019731 | 0.12175523 | 7.11872989 | 0.69196929 | 0.83373651 |
| ENSMUSG00000031158 | 0.1217545  | 3.54303467 | 0.7255032  | 0.8529024  |
| ENSMUSG00000044770 | 0.12170225 | 2.10705537 | 0.72193437 | 0.85160143 |
| ENSMUSG00000024639 | 0.12168932 | 5.64426621 | 0.69467276 | 0.83502433 |
| ENSMUSG00000005674 | 0.1216831  | 4.8111997  | 0.7011305  | 0.83875344 |
| ENSMUSG00000029434 | 0.12159262 | 6.09285556 | 0.69425769 | 0.83475024 |
| ENSMUSG00000049439 | 0.12157621 | 5.51304085 | 0.69533082 | 0.83513847 |
| ENSMUSG00000024425 | 0.12147219 | 6.62184545 | 0.69292191 | 0.83422377 |
| ENSMUSG00000028826 | 0.12127791 | 5.53670941 | 0.69628184 | 0.8360654  |
| ENSMUSG00000031422 | 0.12124907 | 8.48686173 | 0.69202295 | 0.83373651 |
| ENSMUSG00000071037 | 0.12116676 | 1.24433668 | 0.77419743 | 0.88312601 |
| ENSMUSG00000026427 | 0.12111914 | 5.77551187 | 0.69652257 | 0.83626134 |
| ENSMUSG00000031666 | 0.12096782 | 6.49566968 | 0.69437973 | 0.8348039  |
| ENSMUSG00000001248 | 0.12090452 | 5.73073597 | 0.69834001 | 0.83713858 |
| ENSMUSG00000024069 | 0.12067711 | 4.14583602 | 0.70815327 | 0.84299866 |
| ENSMUSG00000025208 | 0.12027404 | 4.04575913 | 0.7130395  | 0.84629298 |
| ENSMUSG00000018858 | 0.12011754 | 4.24185227 | 0.71278697 | 0.84617951 |
| ENSMUSG00000025508 | 0.12011061 | 6.25786678 | 0.69918531 | 0.8374141  |
| ENSMUSG00000040592 | 0.12007866 | 9.29270249 | 0.69476903 | 0.83502433 |
| ENSMUSG00000031584 | 0.12006178 | 4.87840516 | 0.69992248 | 0.83782965 |
| ENSMUSG00000025505 | 0.11997014 | 2.97741145 | 0.7264707  | 0.85321934 |
| ENSMUSG00000002342 | 0.11965397 | 4.2775869  | 0.71093767 | 0.84524235 |
| ENSMUSG00000021271 | 0.11958494 | 3.3374944  | 0.71887984 | 0.84892688 |
| ENSMUSG00000022350 | 0.1194999  | 7.04273544 | 0.69733344 | 0.83658292 |
| ENSMUSG00000019977 | 0.119484   | 6.72563262 | 0.69802072 | 0.83707733 |
| ENSMUSG00000031176 | 0.11947215 | 5.56869987 | 0.69983823 | 0.83782965 |
| ENSMUSG00000074922 | 0.11941572 | 2.79079942 | 0.73746131 | 0.86125003 |
| ENSMUSG00000018572 | 0.11937094 | 5.67851221 | 0.70233888 | 0.83978517 |
| ENSMUSG00000059824 | 0.11925264 | 2.06164951 | 0.75045115 | 0.86879927 |
| ENSMUSG00000014551 | 0.11900368 | 4.84171906 | 0.70618342 | 0.84186182 |
| ENSMUSG00000052056 | 0.11896644 | 6.67844331 | 0.69919107 | 0.8374141  |
| ENSMUSG00000035392 | 0.11896088 | 4.16649289 | 0.71642727 | 0.8481852  |
| ENSMUSG00000051675 | 0.11837671 | 3.83959657 | 0.71688088 | 0.84842443 |
| ENSMUSG00000043931 | 0.11837588 | 5.04158187 | 0.7035394  | 0.84022461 |
| ENSMUSG00000037742 | 0.1180762  | 13.1998624 | 0.69909231 | 0.8374141  |
| ENSMUSG00000004677 | 0.11799072 | 6.38016391 | 0.70270758 | 0.83985354 |



|                    |            |            |            |            |
|--------------------|------------|------------|------------|------------|
| ENSMUSG00000027455 | 0.11789471 | 5.79432946 | 0.70599839 | 0.84173429 |
| ENSMUSG00000024248 | 0.11756223 | 6.76082086 | 0.70297405 | 0.83998583 |
| ENSMUSG00000004530 | 0.11750598 | 6.27698101 | 0.70490744 | 0.84089843 |
| ENSMUSG00000000374 | 0.11735505 | 6.41203    | 0.70364136 | 0.84022461 |
| ENSMUSG00000042670 | 0.11716692 | 4.39759815 | 0.70588422 | 0.84173429 |
| ENSMUSG00000024096 | 0.11646635 | 5.98899444 | 0.70693731 | 0.84238038 |
| ENSMUSG00000000028 | 0.11633974 | 6.63150277 | 0.70580711 | 0.84173429 |
| ENSMUSG00000010376 | 0.11604693 | 6.77828462 | 0.706321   | 0.84193276 |
| ENSMUSG00000095041 | 0.116006   | 6.48452509 | 0.70798154 | 0.84298033 |
| ENSMUSG00000042502 | 0.11599915 | 6.73933584 | 0.70700898 | 0.84238038 |
| ENSMUSG00000028718 | 0.11599107 | 6.41788611 | 0.70598742 | 0.84173429 |
| ENSMUSG00000032320 | 0.11577313 | 5.41786463 | 0.7095162  | 0.84424834 |
| ENSMUSG00000020087 | 0.11544295 | 3.8200564  | 0.73036497 | 0.85654819 |
| ENSMUSG00000033216 | 0.11517685 | 4.34375415 | 0.72291114 | 0.8522875  |
| ENSMUSG00000068267 | 0.11513251 | 5.21843295 | 0.71555598 | 0.84803477 |
| ENSMUSG00000028107 | 0.11502368 | 5.2712648  | 0.71502026 | 0.84771092 |
| ENSMUSG00000063808 | 0.11474627 | 4.44518748 | 0.71842246 | 0.84892688 |
| ENSMUSG00000027219 | 0.11465626 | 5.95347072 | 0.71019917 | 0.84487456 |
| ENSMUSG00000090319 | 0.11381965 | 2.14950005 | 0.76356987 | 0.87664617 |
| ENSMUSG00000034893 | 0.11381824 | 6.22051861 | 0.71217861 | 0.8461093  |
| ENSMUSG00000022723 | 0.11374917 | 5.04235895 | 0.71550711 | 0.84803477 |
| ENSMUSG00000015087 | 0.11336481 | 6.16411675 | 0.71446407 | 0.8472378  |
| ENSMUSG00000038990 | 0.11327143 | 5.36151896 | 0.71770572 | 0.8487486  |
| ENSMUSG00000031971 | 0.11301141 | 2.58236211 | 0.73996342 | 0.8622113  |
| ENSMUSG00000000711 | 0.11294263 | 6.6167056  | 0.71371488 | 0.84644245 |
| ENSMUSG00000027523 | 0.11285217 | 8.34870373 | 0.71266773 | 0.8461311  |
| ENSMUSG00000039840 | 0.1128315  | 5.48801279 | 0.71599499 | 0.84808541 |
| ENSMUSG00000026189 | 0.11281305 | 3.5087806  | 0.73389789 | 0.85892476 |
| ENSMUSG00000021497 | 0.11255764 | 4.37070838 | 0.7241494  | 0.85281502 |
| ENSMUSG00000020888 | 0.11253098 | 3.12122603 | 0.74981865 | 0.86825344 |
| ENSMUSG00000025139 | 0.11249541 | 6.26192082 | 0.71562993 | 0.84803477 |
| ENSMUSG00000027613 | 0.11240328 | 5.68801004 | 0.72055788 | 0.85031631 |
| ENSMUSG00000074918 | 0.11206789 | 4.22946889 | 0.72360212 | 0.85259837 |
| ENSMUSG00000024687 | 0.11174506 | 7.0333799  | 0.71611069 | 0.84808541 |
| ENSMUSG00000026353 | 0.11162346 | 7.29457258 | 0.71612725 | 0.84808541 |
| ENSMUSG00000032280 | 0.11146443 | 4.75665857 | 0.72391235 | 0.85265789 |
| ENSMUSG00000028453 | 0.11127833 | 4.62632182 | 0.72585181 | 0.85299089 |
| ENSMUSG00000000605 | 0.11123176 | 6.09783291 | 0.71868289 | 0.84892688 |
| ENSMUSG00000039159 | 0.11113896 | 4.76785519 | 0.72435042 | 0.85287236 |
| ENSMUSG00000025369 | 0.11101837 | 6.90528727 | 0.71829645 | 0.84892688 |
| ENSMUSG00000039671 | 0.111012   | 6.72369099 | 0.71844148 | 0.84892688 |
| ENSMUSG00000026213 | 0.11079236 | 4.59453806 | 0.72944924 | 0.85587864 |
| ENSMUSG00000000134 | 0.11078392 | 5.00476854 | 0.72531983 | 0.8529024  |

|                    |            |            |            |            |
|--------------------|------------|------------|------------|------------|
| ENSMUSG00000018974 | 0.11051174 | 5.53571313 | 0.72484969 | 0.8529024  |
| ENSMUSG00000078521 | 0.11030297 | 4.30131986 | 0.73203544 | 0.85760675 |
| ENSMUSG00000055240 | 0.11026004 | 5.61314224 | 0.72224239 | 0.85187158 |
| ENSMUSG00000035399 | 0.10996232 | 4.92076126 | 0.72514169 | 0.8529024  |
| ENSMUSG00000044709 | 0.10956805 | 4.65674511 | 0.72960902 | 0.85597298 |
| ENSMUSG00000059890 | 0.10956202 | 7.65610562 | 0.72068723 | 0.85031631 |
| ENSMUSG00000026277 | 0.10954334 | 5.74182796 | 0.72542559 | 0.8529024  |
| ENSMUSG00000055862 | 0.10939411 | 1.1310516  | 0.85931833 | 0.9309932  |
| ENSMUSG00000037251 | 0.10890778 | 3.73181411 | 0.73921415 | 0.86200869 |
| ENSMUSG00000031953 | 0.10888529 | 2.8006814  | 0.76206704 | 0.8754599  |
| ENSMUSG00000041949 | 0.10876768 | 3.61286545 | 0.74426052 | 0.86461136 |
| ENSMUSG00000004815 | 0.10857344 | 4.47582882 | 0.73227598 | 0.85779537 |
| ENSMUSG00000085399 | 0.10855502 | 2.19145664 | 0.76909166 | 0.88009946 |
| ENSMUSG00000026162 | 0.10853775 | 1.62148716 | 0.8204702  | 0.90896213 |
| ENSMUSG00000031691 | 0.10847893 | 6.87057707 | 0.72483422 | 0.8529024  |
| ENSMUSG00000030225 | 0.10847146 | 4.80926339 | 0.73193137 | 0.85760675 |
| ENSMUSG00000026457 | 0.10841061 | 6.45152208 | 0.72564721 | 0.8529024  |
| ENSMUSG00000060733 | 0.10778217 | 6.64846196 | 0.72644329 | 0.85321934 |
| ENSMUSG00000005087 | 0.10765577 | 9.81873243 | 0.72471713 | 0.8529024  |
| ENSMUSG00000037075 | 0.10763759 | 5.95643905 | 0.72639863 | 0.85321934 |
| ENSMUSG00000005354 | 0.10755349 | 5.83476716 | 0.7305482  | 0.85660887 |
| ENSMUSG00000059291 | 0.10754673 | 8.65659304 | 0.7255172  | 0.8529024  |
| ENSMUSG00000028437 | 0.1074109  | 5.60230991 | 0.72971914 | 0.85600905 |
| ENSMUSG00000039361 | 0.10737991 | 7.74974682 | 0.7258807  | 0.85299089 |
| ENSMUSG00000025366 | 0.10733406 | 7.15634727 | 0.72738976 | 0.85411271 |
| ENSMUSG00000038773 | 0.10727385 | 6.93717608 | 0.72713791 | 0.85390996 |
| ENSMUSG00000030603 | 0.10712427 | 7.36650114 | 0.72759589 | 0.85426174 |
| ENSMUSG00000038518 | 0.10708579 | 5.6695316  | 0.72936413 | 0.8558719  |
| ENSMUSG00000025816 | 0.10691168 | 4.66848384 | 0.73471896 | 0.85936449 |
| ENSMUSG00000029097 | 0.10690579 | 3.06540999 | 0.76064142 | 0.87514746 |
| ENSMUSG00000036099 | 0.10689674 | 4.64990967 | 0.73561636 | 0.85993353 |
| ENSMUSG00000030156 | 0.10633355 | 7.78940616 | 0.72841538 | 0.85494466 |
| ENSMUSG00000018659 | 0.10587354 | 4.98878664 | 0.73826233 | 0.86162565 |
| ENSMUSG00000038393 | 0.10585683 | 6.7159581  | 0.73079315 | 0.85680292 |
| ENSMUSG00000032869 | 0.10582637 | 4.97197142 | 0.7379521  | 0.86162565 |
| ENSMUSG00000018900 | 0.10568109 | 3.52009638 | 0.74325477 | 0.86424547 |
| ENSMUSG00000034892 | 0.10555091 | 6.31067957 | 0.73326756 | 0.85849439 |
| ENSMUSG00000031483 | 0.10554947 | 5.53669776 | 0.73456523 | 0.85936449 |
| ENSMUSG00000026923 | 0.10540959 | 4.9685756  | 0.73929061 | 0.86200869 |
| ENSMUSG00000005483 | 0.10536986 | 6.02592058 | 0.73387284 | 0.85892476 |
| ENSMUSG00000020898 | 0.10533064 | 5.90416384 | 0.73471613 | 0.85936449 |
| ENSMUSG00000048833 | 0.10526733 | 6.57067141 | 0.73254245 | 0.85801431 |
| ENSMUSG00000050567 | 0.10513025 | 4.74633757 | 0.7382149  | 0.86162565 |

|                    |            |            |            |            |
|--------------------|------------|------------|------------|------------|
| ENSMUSG00000022721 | 0.10509272 | 6.07397338 | 0.73535428 | 0.85972035 |
| ENSMUSG00000035828 | 0.10492943 | 3.82938298 | 0.74909431 | 0.86781933 |
| ENSMUSG00000073155 | 0.10483577 | 4.1573399  | 0.74660987 | 0.8664917  |
| ENSMUSG00000029020 | 0.10476977 | 6.16284318 | 0.73518167 | 0.85965123 |
| ENSMUSG00000049299 | 0.10446866 | 5.24004321 | 0.73869387 | 0.86184947 |
| ENSMUSG00000030630 | 0.10445528 | 3.2543166  | 0.76231775 | 0.87558149 |
| ENSMUSG00000028582 | 0.10429608 | 5.62562059 | 0.73816432 | 0.86162565 |
| ENSMUSG00000044617 | 0.10377553 | 3.95147541 | 0.74727279 | 0.86707443 |
| ENSMUSG00000036854 | 0.10372987 | 1.96287197 | 0.77406513 | 0.88312601 |
| ENSMUSG00000024831 | 0.10348174 | 2.94834094 | 0.77281356 | 0.88246733 |
| ENSMUSG00000031781 | 0.10341875 | 4.92565188 | 0.74426811 | 0.86461136 |
| ENSMUSG00000030613 | 0.10322495 | 3.71237105 | 0.75461846 | 0.87136546 |
| ENSMUSG00000039958 | 0.10313972 | 3.24210044 | 0.74352739 | 0.86424547 |
| ENSMUSG00000062729 | 0.10310161 | 4.29218327 | 0.74701444 | 0.86686793 |
| ENSMUSG00000047898 | 0.10304897 | 1.33956649 | 0.81761057 | 0.90718848 |
| ENSMUSG00000020903 | 0.10296767 | 4.6023205  | 0.74654767 | 0.8664917  |
| ENSMUSG00000029575 | 0.1028147  | 3.62730375 | 0.76024984 | 0.87497698 |
| ENSMUSG00000043415 | 0.10272736 | 3.1146756  | 0.74918806 | 0.86781933 |
| ENSMUSG00000039176 | 0.10231337 | 5.95853255 | 0.74208085 | 0.86327938 |
| ENSMUSG00000056692 | 0.10223698 | 6.88511492 | 0.74020101 | 0.86225448 |
| ENSMUSG00000031617 | 0.10162011 | 5.74441197 | 0.7417047  | 0.86293489 |
| ENSMUSG00000003779 | 0.10149079 | 7.70567087 | 0.74079319 | 0.86252578 |
| ENSMUSG00000002635 | 0.10137909 | 3.33487518 | 0.76641577 | 0.87888427 |
| ENSMUSG00000054381 | 0.10118686 | 2.47261631 | 0.79289626 | 0.89263944 |
| ENSMUSG00000022681 | 0.10118116 | 5.28553858 | 0.74621763 | 0.86631617 |
| ENSMUSG00000058239 | 0.10117294 | 5.40498878 | 0.74779559 | 0.86715681 |
| ENSMUSG00000017652 | 0.10107296 | 6.61472582 | 0.74355126 | 0.86424547 |
| ENSMUSG00000025745 | 0.10078235 | 7.49057732 | 0.74279309 | 0.86392156 |
| ENSMUSG00000041915 | 0.10062813 | 6.62317448 | 0.74358517 | 0.86424547 |
| ENSMUSG00000006392 | 0.10037561 | 5.6737351  | 0.74749196 | 0.86714213 |
| ENSMUSG00000074829 | 0.10030891 | 4.17012793 | 0.74911335 | 0.86781933 |
| ENSMUSG00000040621 | 0.09993665 | 2.38604399 | 0.78095586 | 0.88664972 |
| ENSMUSG00000021457 | 0.09991125 | 8.71512447 | 0.74414144 | 0.86461136 |
| ENSMUSG00000025821 | 0.09982747 | 4.06060351 | 0.76450899 | 0.87744412 |
| ENSMUSG00000000276 | 0.09979137 | 4.85320215 | 0.74970007 | 0.86820935 |
| ENSMUSG00000029580 | 0.09959155 | 11.114526  | 0.74449934 | 0.86478682 |
| ENSMUSG00000047824 | 0.09939345 | 5.64479225 | 0.7499849  | 0.86835272 |
| ENSMUSG00000048218 | 0.09937065 | 5.91766327 | 0.74780862 | 0.86715681 |
| ENSMUSG00000079418 | 0.09887025 | 5.02318008 | 0.75160973 | 0.86958044 |
| ENSMUSG00000028459 | 0.09871437 | 6.6856475  | 0.74875336 | 0.86781933 |
| ENSMUSG00000078866 | 0.09847261 | 3.04164673 | 0.75747685 | 0.87299672 |
| ENSMUSG00000032526 | 0.09825808 | 3.74321835 | 0.76582719 | 0.87848956 |
| ENSMUSG00000037509 | 0.09785722 | 1.65054341 | 0.84837336 | 0.92477601 |

|                     |            |            |            |            |
|---------------------|------------|------------|------------|------------|
| ENSMUSG00000037965  | 0.0978383  | 7.79516627 | 0.74949407 | 0.86806402 |
| ENSMUSG00000040524  | 0.09770135 | 5.46533365 | 0.75408413 | 0.87091164 |
| ENSMUSG00000052926  | 0.09751882 | 4.69986805 | 0.76100193 | 0.87527047 |
| ENSMUSG00000029314  | 0.09744498 | 2.97103817 | 0.77661646 | 0.88423954 |
| ENSMUSG00000004100  | 0.0974202  | 4.15215095 | 0.76880111 | 0.88009946 |
| ENSMUSG00000023942  | 0.09737001 | 4.66409094 | 0.76505437 | 0.8778832  |
| ENSMUSG00000002814  | 0.09695885 | 4.65606288 | 0.76115416 | 0.87527047 |
| ENSMUSG00000001062  | 0.09693688 | 2.56071959 | 0.8036108  | 0.89869739 |
| ENSMUSG00000022742  | 0.0968146  | 9.18456936 | 0.75159153 | 0.86958044 |
| ENSMUSG00000061461  | 0.09670857 | 3.96974965 | 0.76611624 | 0.87872767 |
| ENSMUSG00000006273  | 0.09664959 | 7.56441395 | 0.75278217 | 0.87019004 |
| ENSMUSG00000013150  | 0.0965111  | 1.21956266 | 0.86688695 | 0.93419695 |
| ENSMUSG00000033669  | 0.09650613 | 3.62104131 | 0.77234371 | 0.88214569 |
| ENSMUSG00000028680  | 0.09644125 | 4.19978992 | 0.76707173 | 0.87935596 |
| ENSMUSG00000037337  | 0.09611888 | 7.2996759  | 0.75489315 | 0.87141594 |
| ENSMUSG00000028223  | 0.09597902 | 4.67655821 | 0.75966445 | 0.87458326 |
| ENSMUSG00000005682  | 0.09589149 | 5.31202443 | 0.75899944 | 0.87398527 |
| ENSMUSG00000037001  | 0.09576959 | 4.65958717 | 0.76202441 | 0.8754599  |
| ENSMUSG00000001100  | 0.09561891 | 5.83898957 | 0.75867698 | 0.87379605 |
| ENSMUSG000000054520 | 0.09533132 | 5.24498886 | 0.76183654 | 0.87540173 |
| ENSMUSG00000028772  | 0.09513124 | 5.69630541 | 0.76054869 | 0.87513413 |
| ENSMUSG00000007035  | 0.09510413 | 1.30198936 | 0.84311947 | 0.92138228 |
| ENSMUSG00000028798  | 0.09506749 | 7.32669619 | 0.75764087 | 0.87309245 |
| ENSMUSG00000023892  | 0.09467082 | 4.72517234 | 0.76168483 | 0.87532068 |
| ENSMUSG00000029394  | 0.09452589 | 4.64887301 | 0.76820026 | 0.88008835 |
| ENSMUSG00000047515  | 0.09447499 | 1.33954837 | 0.81761057 | 0.90718848 |
| ENSMUSG00000020883  | 0.09428269 | 4.86117105 | 0.76312415 | 0.87622773 |
| ENSMUSG00000026399  | 0.09413527 | 6.15255734 | 0.75976899 | 0.87461024 |
| ENSMUSG00000020692  | 0.09384525 | 3.6315764  | 0.79423242 | 0.89377047 |
| ENSMUSG00000039715  | 0.09353609 | 1.06411508 | 0.85376696 | 0.92753676 |
| ENSMUSG00000021179  | 0.0932552  | 4.18556703 | 0.77420932 | 0.88312601 |
| ENSMUSG00000035505  | 0.09324286 | 3.52312726 | 0.7791297  | 0.88583391 |
| ENSMUSG00000019432  | 0.09309267 | 7.55088228 | 0.76213071 | 0.8754599  |
| ENSMUSG00000029992  | 0.09298845 | 7.87797166 | 0.76148242 | 0.87532068 |
| ENSMUSG00000034071  | 0.09211492 | 1.395403   | 0.8233507  | 0.9106681  |
| ENSMUSG00000031930  | 0.09193328 | 5.61563773 | 0.76977054 | 0.88048425 |
| ENSMUSG00000020546  | 0.09139671 | 3.67932441 | 0.77478481 | 0.8833153  |
| ENSMUSG00000026024  | 0.09131339 | 5.66443338 | 0.76879583 | 0.88009946 |
| ENSMUSG00000025956  | 0.09085204 | 3.51789452 | 0.78569195 | 0.8884009  |
| ENSMUSG00000031295  | 0.09082448 | 5.06935868 | 0.77243874 | 0.88214569 |
| ENSMUSG00000039531  | 0.09079028 | 6.06233548 | 0.76840437 | 0.88009946 |
| ENSMUSG00000070544  | 0.09056711 | 9.4513975  | 0.76703394 | 0.87935596 |
| ENSMUSG00000059409  | 0.0905445  | 6.45710287 | 0.77026435 | 0.88094943 |

|                    |            |            |            |            |
|--------------------|------------|------------|------------|------------|
| ENSMUSG00000033862 | 0.09033703 | 2.99470738 | 0.81026284 | 0.90288131 |
| ENSMUSG00000036214 | 0.090164   | 2.04697998 | 0.78567706 | 0.8884009  |
| ENSMUSG00000010277 | 0.08995646 | 8.55277611 | 0.76886398 | 0.88009946 |
| ENSMUSG00000058173 | 0.08981302 | 2.62310964 | 0.81195516 | 0.90390466 |
| ENSMUSG00000006763 | 0.08963337 | 4.80504514 | 0.77733557 | 0.88463348 |
| ENSMUSG00000028405 | 0.08952207 | 5.98575095 | 0.77307418 | 0.88267147 |
| ENSMUSG00000055670 | 0.0894425  | 6.58512531 | 0.77130644 | 0.88178431 |
| ENSMUSG00000031447 | 0.08934498 | 7.66357079 | 0.77107132 | 0.88169156 |
| ENSMUSG00000037300 | 0.08902833 | 6.07901699 | 0.77432836 | 0.88316838 |
| ENSMUSG00000061983 | 0.0890152  | 8.20433753 | 0.77173727 | 0.88198545 |
| ENSMUSG00000017499 | 0.08895222 | 7.0679724  | 0.77229897 | 0.88214569 |
| ENSMUSG00000068130 | 0.0889262  | 2.0795337  | 0.77197716 | 0.88209717 |
| ENSMUSG00000026848 | 0.08881216 | 5.95428552 | 0.7747749  | 0.8833153  |
| ENSMUSG00000068101 | 0.08846118 | 2.67233866 | 0.83028826 | 0.91468266 |
| ENSMUSG00000026991 | 0.08835083 | 4.71140961 | 0.78124496 | 0.88664972 |
| ENSMUSG00000032518 | 0.08814078 | 9.68671145 | 0.77322213 | 0.88274692 |
| ENSMUSG00000042207 | 0.08813687 | 4.91437342 | 0.77637563 | 0.88420195 |
| ENSMUSG00000026766 | 0.08781314 | 6.92606309 | 0.77499854 | 0.88346556 |
| ENSMUSG00000036327 | 0.08748828 | 4.28940037 | 0.78486645 | 0.8882018  |
| ENSMUSG00000003746 | 0.08731552 | 9.32581034 | 0.77517075 | 0.8834751  |
| ENSMUSG00000030347 | 0.08727976 | 5.75141482 | 0.77877801 | 0.88552742 |
| ENSMUSG00000021235 | 0.0870339  | 3.50894988 | 0.80608654 | 0.90018325 |
| ENSMUSG00000026773 | 0.08692456 | 5.86769465 | 0.77934217 | 0.88586414 |
| ENSMUSG00000020708 | 0.08691058 | 7.19974668 | 0.7778917  | 0.88502867 |
| ENSMUSG00000025162 | 0.08633051 | 6.88181216 | 0.77948304 | 0.88586414 |
| ENSMUSG00000041168 | 0.08628612 | 5.91028906 | 0.78327515 | 0.88755272 |
| ENSMUSG00000042496 | 0.08622363 | 3.50039825 | 0.79739455 | 0.89492503 |
| ENSMUSG00000037134 | 0.08619191 | 5.43889767 | 0.78210129 | 0.88687234 |
| ENSMUSG00000030168 | 0.08616483 | 7.67590441 | 0.77877504 | 0.88552742 |
| ENSMUSG00000021266 | 0.08607426 | 6.03772296 | 0.78231838 | 0.88693274 |
| ENSMUSG00000047694 | 0.08595819 | 6.01430608 | 0.78066772 | 0.88664972 |
| ENSMUSG00000033809 | 0.08576858 | 4.13392938 | 0.79495444 | 0.89420972 |
| ENSMUSG00000050705 | 0.08573979 | 4.15178588 | 0.79270439 | 0.89260981 |
| ENSMUSG00000003868 | 0.08563718 | 5.3227035  | 0.78870561 | 0.89024506 |
| ENSMUSG00000034848 | 0.08553079 | 4.53194978 | 0.78788538 | 0.88965899 |
| ENSMUSG00000032440 | 0.08513469 | 7.26355652 | 0.78161052 | 0.88671643 |
| ENSMUSG00000032599 | 0.08507155 | 3.48472165 | 0.79578446 | 0.89462453 |
| ENSMUSG00000020220 | 0.08506081 | 6.38367597 | 0.78218127 | 0.88687234 |
| ENSMUSG00000001419 | 0.08498727 | 6.27435413 | 0.78408535 | 0.8879335  |
| ENSMUSG00000035929 | 0.08498224 | 6.78022669 | 0.78320514 | 0.88755272 |
| ENSMUSG00000015355 | 0.08482749 | 7.67057675 | 0.78208614 | 0.88687234 |
| ENSMUSG00000029048 | 0.08478499 | 7.29098269 | 0.78248128 | 0.88693274 |
| ENSMUSG00000089917 | 0.08477742 | 3.83854435 | 0.80300533 | 0.89833226 |

|                    |            |            |            |            |
|--------------------|------------|------------|------------|------------|
| ENSMUSG00000034614 | 0.08430709 | 3.33982707 | 0.80786684 | 0.90158708 |
| ENSMUSG00000036528 | 0.08426806 | 4.83295815 | 0.79021067 | 0.89113043 |
| ENSMUSG00000026254 | 0.08424245 | 6.6283077  | 0.78508341 | 0.8882018  |
| ENSMUSG00000039908 | 0.08417215 | 2.0637716  | 0.8257531  | 0.91201571 |
| ENSMUSG00000059923 | 0.08379423 | 7.92973347 | 0.78476136 | 0.8882018  |
| ENSMUSG00000052214 | 0.08360247 | 5.37760322 | 0.79088926 | 0.89149679 |
| ENSMUSG00000044197 | 0.08348161 | 1.25144501 | 0.8703698  | 0.93635814 |
| ENSMUSG00000044991 | 0.08284237 | 1.96745024 | 0.83509657 | 0.91723854 |
| ENSMUSG00000003360 | 0.08282926 | 6.36997052 | 0.78989876 | 0.89097112 |
| ENSMUSG00000022507 | 0.082579   | 6.26390748 | 0.78865447 | 0.89024506 |
| ENSMUSG00000005262 | 0.08254371 | 6.55521033 | 0.78895217 | 0.89033698 |
| ENSMUSG00000027582 | 0.08249095 | 4.31685702 | 0.80130325 | 0.8974197  |
| ENSMUSG00000026670 | 0.08242456 | 6.27399473 | 0.78959788 | 0.89093049 |
| ENSMUSG00000074151 | 0.08216203 | 7.74653717 | 0.78883492 | 0.89029783 |
| ENSMUSG00000062352 | 0.08202089 | 5.25370568 | 0.79374172 | 0.89340473 |
| ENSMUSG00000042901 | 0.08180285 | 7.51785141 | 0.78964333 | 0.89093049 |
| ENSMUSG00000040761 | 0.08170904 | 5.86115738 | 0.79251999 | 0.89249536 |
| ENSMUSG00000028559 | 0.08170111 | 7.44965957 | 0.7899272  | 0.89097112 |
| ENSMUSG00000035297 | 0.08163483 | 6.83191988 | 0.79104474 | 0.89155946 |
| ENSMUSG00000024191 | 0.0815172  | 4.3692891  | 0.80009983 | 0.89672381 |
| ENSMUSG00000011658 | 0.08146977 | 2.53752274 | 0.82931337 | 0.91379538 |
| ENSMUSG00000040945 | 0.08146798 | 7.36144439 | 0.79165243 | 0.89182696 |
| ENSMUSG00000024764 | 0.08146376 | 6.8912054  | 0.79167563 | 0.89182696 |
| ENSMUSG00000021222 | 0.08134405 | 3.36412399 | 0.81077785 | 0.90324672 |
| ENSMUSG00000035376 | 0.08134005 | 4.75996409 | 0.79648243 | 0.89480847 |
| ENSMUSG00000024766 | 0.08107849 | 4.54553476 | 0.79494788 | 0.89420972 |
| ENSMUSG00000030330 | 0.08085506 | 4.37565629 | 0.80097047 | 0.89723336 |
| ENSMUSG00000023938 | 0.08070038 | 2.25576302 | 0.86222884 | 0.93147859 |
| ENSMUSG00000041515 | 0.08054881 | 8.06423925 | 0.79287484 | 0.89263944 |
| ENSMUSG00000027882 | 0.08030537 | 5.03941437 | 0.79551974 | 0.89462453 |
| ENSMUSG00000030685 | 0.08023454 | 2.20933763 | 0.82344688 | 0.91066834 |
| ENSMUSG00000043243 | 0.0801081  | 5.51419758 | 0.7983083  | 0.8952742  |
| ENSMUSG00000029623 | 0.08004639 | 6.55042978 | 0.79604014 | 0.89462453 |
| ENSMUSG00000024603 | 0.07973605 | 6.20060562 | 0.79589303 | 0.89462453 |
| ENSMUSG00000030275 | 0.0795913  | 9.10048005 | 0.79459516 | 0.89403114 |
| ENSMUSG00000023074 | 0.07953433 | 3.8995374  | 0.81101224 | 0.90341453 |
| ENSMUSG00000030157 | 0.07936383 | 6.49874964 | 0.79621678 | 0.89469644 |
| ENSMUSG00000026672 | 0.07934564 | 4.82640065 | 0.8004609  | 0.8967557  |
| ENSMUSG00000001175 | 0.07933656 | 9.60002541 | 0.7952764  | 0.89447858 |
| ENSMUSG00000036678 | 0.0792218  | 5.77089684 | 0.80042923 | 0.8967557  |
| ENSMUSG00000021147 | 0.07919963 | 6.14241202 | 0.79716396 | 0.89492503 |
| ENSMUSG00000006998 | 0.07912568 | 8.88189511 | 0.79606982 | 0.89462453 |
| ENSMUSG00000026843 | 0.07900763 | 4.87012042 | 0.80240625 | 0.89809538 |

|                    |            |            |            |            |
|--------------------|------------|------------|------------|------------|
| ENSMUSG00000020387 | 0.07899922 | 7.22519326 | 0.7976813  | 0.89492503 |
| ENSMUSG00000015714 | 0.07889725 | 7.61630585 | 0.7971265  | 0.89492503 |
| ENSMUSG00000038943 | 0.0788608  | 8.18840101 | 0.79681548 | 0.89492503 |
| ENSMUSG00000048546 | 0.07880655 | 5.60387447 | 0.80149758 | 0.89743054 |
| ENSMUSG00000002028 | 0.07854864 | 7.4531631  | 0.79774273 | 0.89492503 |
| ENSMUSG00000096433 | 0.07845515 | 4.41104806 | 0.79791321 | 0.89501727 |
| ENSMUSG00000029363 | 0.07776264 | 6.5355461  | 0.80164581 | 0.89743054 |
| ENSMUSG00000012519 | 0.07770611 | 5.91660039 | 0.80156995 | 0.89743054 |
| ENSMUSG00000024666 | 0.07741964 | 4.26011584 | 0.81140223 | 0.90356894 |
| ENSMUSG00000019843 | 0.07721024 | 5.89497832 | 0.80343089 | 0.89858937 |
| ENSMUSG00000029474 | 0.07716418 | 5.62964524 | 0.8047623  | 0.89955044 |
| ENSMUSG00000022312 | 0.07712393 | 8.15701215 | 0.80141187 | 0.89743054 |
| ENSMUSG00000001844 | 0.07710279 | 3.74484008 | 0.82154454 | 0.90938484 |
| ENSMUSG00000010392 | 0.0768033  | 5.84444799 | 0.80425911 | 0.89932914 |
| ENSMUSG00000013973 | 0.07666665 | 4.59367231 | 0.81192171 | 0.90390466 |
| ENSMUSG00000062116 | 0.07665252 | 4.34969559 | 0.81421057 | 0.90561718 |
| ENSMUSG00000025232 | 0.07657656 | 5.45205026 | 0.80690193 | 0.90069665 |
| ENSMUSG00000049882 | 0.07655458 | 4.29220434 | 0.81133827 | 0.90356894 |
| ENSMUSG00000009406 | 0.0759869  | 4.79477247 | 0.80970158 | 0.90270049 |
| ENSMUSG00000055932 | 0.0758118  | 5.87671554 | 0.80803957 | 0.90159325 |
| ENSMUSG00000025147 | 0.07564641 | 3.42268887 | 0.82584877 | 0.91202797 |
| ENSMUSG00000024098 | 0.07542812 | 7.07768032 | 0.80603886 | 0.90018325 |
| ENSMUSG00000036615 | 0.07542634 | 3.07796624 | 0.83074679 | 0.91500086 |
| ENSMUSG00000024146 | 0.07529659 | 4.72675375 | 0.80988609 | 0.90271955 |
| ENSMUSG00000072620 | 0.07514805 | 8.23121953 | 0.80619156 | 0.90018325 |
| ENSMUSG00000062646 | 0.07483812 | 4.65192054 | 0.81253467 | 0.90444002 |
| ENSMUSG00000031641 | 0.07462603 | 3.32567703 | 0.81464216 | 0.90568459 |
| ENSMUSG00000044068 | 0.07459373 | 3.7662521  | 0.81817758 | 0.90755267 |
| ENSMUSG00000048076 | 0.07446039 | 8.30806335 | 0.80814127 | 0.90161344 |
| ENSMUSG00000033386 | 0.07414647 | 4.09068229 | 0.81859078 | 0.90774954 |
| ENSMUSG00000079511 | 0.07411711 | 1.37013308 | 0.87979248 | 0.94071645 |
| ENSMUSG00000031948 | 0.07409468 | 8.13742001 | 0.80922548 | 0.90247079 |
| ENSMUSG00000074733 | 0.07407255 | 4.83737602 | 0.81167599 | 0.90378048 |
| ENSMUSG00000004895 | 0.07372419 | 4.95432612 | 0.81759626 | 0.90718848 |
| ENSMUSG00000030751 | 0.07370107 | 8.58213971 | 0.80968282 | 0.90270049 |
| ENSMUSG00000045248 | 0.07364842 | 3.00203778 | 0.83194898 | 0.91541831 |
| ENSMUSG00000020485 | 0.07352734 | 5.33583385 | 0.8148832  | 0.90585512 |
| ENSMUSG00000036860 | 0.07337365 | 2.92658871 | 0.84539432 | 0.92302646 |
| ENSMUSG00000038717 | 0.07279031 | 4.21681539 | 0.82873869 | 0.91362891 |
| ENSMUSG00000027291 | 0.07275092 | 6.08977184 | 0.81464582 | 0.90568459 |
| ENSMUSG00000041815 | 0.07272822 | 7.23088463 | 0.81336915 | 0.90482494 |
| ENSMUSG00000029310 | 0.07265442 | 4.84588726 | 0.82159646 | 0.90938484 |
| ENSMUSG00000046006 | 0.07242135 | 3.05742097 | 0.82849495 | 0.91354699 |

|                    |            |            |            |            |
|--------------------|------------|------------|------------|------------|
| ENSMUSG00000078619 | 0.07239974 | 6.45646734 | 0.81518425 | 0.90600298 |
| ENSMUSG00000034566 | 0.07218116 | 7.19661183 | 0.8146201  | 0.90568459 |
| ENSMUSG00000041774 | 0.07207953 | 2.3317322  | 0.8693916  | 0.93577393 |
| ENSMUSG00000026799 | 0.07178717 | 3.82995928 | 0.8314477  | 0.91524806 |
| ENSMUSG00000021120 | 0.07164212 | 4.11445604 | 0.82642712 | 0.91247979 |
| ENSMUSG00000003099 | 0.07162655 | 6.63734046 | 0.81734402 | 0.90718848 |
| ENSMUSG00000030659 | 0.07161058 | 5.25251763 | 0.81857534 | 0.90774954 |
| ENSMUSG00000076676 | 0.0715268  | 1.08239228 | 0.92730228 | 0.96419555 |
| ENSMUSG00000013275 | 0.0711853  | 4.60725821 | 0.82525139 | 0.911794   |
| ENSMUSG00000049643 | 0.07103698 | 3.89854872 | 0.83886221 | 0.91896486 |
| ENSMUSG00000028059 | 0.07102019 | 6.52649776 | 0.81860759 | 0.90774954 |
| ENSMUSG00000026239 | 0.07074322 | 4.16465211 | 0.82729612 | 0.91296093 |
| ENSMUSG00000047153 | 0.07072311 | 5.37392477 | 0.82101714 | 0.90928856 |
| ENSMUSG00000001783 | 0.07069966 | 8.05055517 | 0.81776513 | 0.90718848 |
| ENSMUSG00000052906 | 0.07040946 | 4.75254795 | 0.82414997 | 0.91108491 |
| ENSMUSG00000027007 | 0.07019905 | 5.95646471 | 0.82109162 | 0.90928856 |
| ENSMUSG00000074794 | 0.06982254 | 5.5382334  | 0.82160019 | 0.90938484 |
| ENSMUSG00000022964 | 0.06978222 | 6.1328537  | 0.82137824 | 0.90938484 |
| ENSMUSG00000037791 | 0.06977604 | 5.92759752 | 0.82289175 | 0.91044061 |
| ENSMUSG00000001018 | 0.06974124 | 4.90701533 | 0.82325913 | 0.91066022 |
| ENSMUSG00000060036 | 0.06955975 | 10.0720885 | 0.82007413 | 0.90872168 |
| ENSMUSG00000024790 | 0.06946306 | 2.65598501 | 0.8545815  | 0.92807723 |
| ENSMUSG00000028452 | 0.06938978 | 9.42769465 | 0.82054399 | 0.90896213 |
| ENSMUSG00000010054 | 0.0689444  | 4.58176921 | 0.8292199  | 0.91379538 |
| ENSMUSG00000006464 | 0.06890088 | 1.42404339 | 0.91218416 | 0.95755807 |
| ENSMUSG00000032750 | 0.06881321 | 1.23417731 | 0.86922956 | 0.93577393 |
| ENSMUSG00000001962 | 0.06869726 | 5.43652006 | 0.82737084 | 0.91296093 |
| ENSMUSG00000003575 | 0.06851957 | 2.74373697 | 0.86229143 | 0.93147859 |
| ENSMUSG00000045503 | 0.06850827 | 4.77600327 | 0.83201455 | 0.91541831 |
| ENSMUSG00000035824 | 0.06827146 | 3.40914876 | 0.84012639 | 0.9194311  |
| ENSMUSG00000027371 | 0.0682304  | 1.77443565 | 0.85971462 | 0.93119469 |
| ENSMUSG00000033712 | 0.06815005 | 6.03433839 | 0.82774083 | 0.9130889  |
| ENSMUSG00000000148 | 0.06774163 | 3.61806288 | 0.84693721 | 0.92390978 |
| ENSMUSG00000028974 | 0.067624   | 5.03367194 | 0.83149288 | 0.91524806 |
| ENSMUSG00000018347 | 0.06738335 | 3.75436966 | 0.83521076 | 0.91723854 |
| ENSMUSG00000018541 | 0.06737073 | 4.98308429 | 0.83086266 | 0.91503502 |
| ENSMUSG00000020956 | 0.06731154 | 3.25659921 | 0.84935323 | 0.92504132 |
| ENSMUSG00000034320 | 0.06729061 | 5.64698493 | 0.82759414 | 0.91302048 |
| ENSMUSG00000023249 | 0.06728419 | 3.54920653 | 0.83988318 | 0.9194311  |
| ENSMUSG00000032788 | 0.06706857 | 5.27360672 | 0.83288483 | 0.9157657  |
| ENSMUSG00000024431 | 0.06701683 | 7.16737359 | 0.82698702 | 0.91296093 |
| ENSMUSG00000067148 | 0.0669096  | 5.42147257 | 0.8333535  | 0.91618759 |
| ENSMUSG00000021400 | 0.06676565 | 5.50033582 | 0.83152637 | 0.91524806 |



|                    |            |            |            |            |
|--------------------|------------|------------|------------|------------|
| ENSMUSG00000034940 | 0.0667632  | 6.18232531 | 0.8290584  | 0.91379454 |
| ENSMUSG00000078684 | 0.06651556 | 4.47921313 | 0.83683107 | 0.91776531 |
| ENSMUSG00000060090 | 0.0665133  | 6.70353978 | 0.82845535 | 0.91354699 |
| ENSMUSG00000050621 | 0.06643337 | 7.53110709 | 0.82904495 | 0.91379454 |
| ENSMUSG00000021807 | 0.06638931 | 7.541656   | 0.82858634 | 0.91355435 |
| ENSMUSG00000015377 | 0.06635463 | 2.2636547  | 0.88013485 | 0.94081009 |
| ENSMUSG00000039157 | 0.06613588 | 3.94368884 | 0.843609   | 0.92182384 |
| ENSMUSG00000044600 | 0.06606269 | 5.98971255 | 0.83145161 | 0.91524806 |
| ENSMUSG00000029625 | 0.06568289 | 4.89763702 | 0.83831888 | 0.91892974 |
| ENSMUSG00000024740 | 0.0654182  | 9.49946237 | 0.83068008 | 0.91500086 |
| ENSMUSG00000020790 | 0.06540857 | 7.59714315 | 0.83105803 | 0.91515672 |
| ENSMUSG00000025487 | 0.06521811 | 7.10835569 | 0.83267209 | 0.91562515 |
| ENSMUSG00000019992 | 0.06515507 | 5.29091823 | 0.83465821 | 0.91706917 |
| ENSMUSG00000070691 | 0.06512699 | 6.13078393 | 0.83452654 | 0.91706917 |
| ENSMUSG00000025794 | 0.06487832 | 9.29505512 | 0.83214444 | 0.91541831 |
| ENSMUSG00000034342 | 0.06485046 | 7.35521744 | 0.83232804 | 0.91552615 |
| ENSMUSG00000053436 | 0.06474371 | 6.3271847  | 0.83470446 | 0.91706917 |
| ENSMUSG00000017615 | 0.06462501 | 5.91909102 | 0.83583929 | 0.91723854 |
| ENSMUSG00000040822 | 0.0644639  | 5.05104424 | 0.83930201 | 0.91916654 |
| ENSMUSG00000002835 | 0.06417714 | 6.52308357 | 0.83673846 | 0.91775707 |
| ENSMUSG00000046836 | 0.06406584 | 6.37492743 | 0.83539688 | 0.91723854 |
| ENSMUSG00000039166 | 0.06396957 | 2.75674828 | 0.86409312 | 0.93248207 |
| ENSMUSG00000041483 | 0.06382542 | 6.64539137 | 0.83539974 | 0.91723854 |
| ENSMUSG00000062328 | 0.06373707 | 7.89097583 | 0.83576947 | 0.91723854 |
| ENSMUSG00000006585 | 0.06366423 | 4.49610966 | 0.84664508 | 0.9237374  |
| ENSMUSG00000079179 | 0.06364077 | 3.70878012 | 0.85618243 | 0.92925501 |
| ENSMUSG00000055725 | 0.06328658 | 1.98970467 | 0.87795488 | 0.94010239 |
| ENSMUSG00000022787 | 0.06326518 | 3.56113872 | 0.84838225 | 0.92477601 |
| ENSMUSG00000017715 | 0.06310256 | 4.59328183 | 0.84878192 | 0.92494586 |
| ENSMUSG00000050945 | 0.06299872 | 2.50902168 | 0.86933525 | 0.93577393 |
| ENSMUSG00000039981 | 0.0628631  | 5.74576007 | 0.83884114 | 0.91896486 |
| ENSMUSG00000050410 | 0.06246253 | 5.29785547 | 0.84435754 | 0.92249831 |
| ENSMUSG00000021671 | 0.06232139 | 5.28595455 | 0.84267737 | 0.9211792  |
| ENSMUSG00000010095 | 0.06231353 | 7.13479222 | 0.83999933 | 0.9194311  |
| ENSMUSG00000028886 | 0.06225007 | 6.73116686 | 0.84001726 | 0.9194311  |
| ENSMUSG00000006728 | 0.06210135 | 7.76411492 | 0.8400459  | 0.9194311  |
| ENSMUSG00000037750 | 0.06194146 | 4.19855293 | 0.84966557 | 0.92506749 |
| ENSMUSG00000046897 | 0.06191443 | 6.44018604 | 0.84143655 | 0.92047594 |
| ENSMUSG00000040725 | 0.06189854 | 8.21714926 | 0.84008226 | 0.9194311  |
| ENSMUSG00000097154 | 0.06173398 | 1.98430327 | 0.85742686 | 0.92962605 |
| ENSMUSG00000031723 | 0.06154101 | 3.18426225 | 0.86035032 | 0.93139517 |
| ENSMUSG00000022354 | 0.06134455 | 5.96460209 | 0.84453553 | 0.92249831 |
| ENSMUSG00000032047 | 0.06126865 | 7.06197292 | 0.84226456 | 0.92100801 |

|                    |            |            |            |            |
|--------------------|------------|------------|------------|------------|
| ENSMUSG00000024442 | 0.06106424 | 4.63504627 | 0.85255634 | 0.92697281 |
| ENSMUSG00000073702 | 0.06087373 | 8.63859538 | 0.842618   | 0.9211792  |
| ENSMUSG00000028629 | 0.06077269 | 4.92776866 | 0.84648951 | 0.92366113 |
| ENSMUSG00000036450 | 0.06074432 | 6.27494733 | 0.84457219 | 0.92249831 |
| ENSMUSG00000022807 | 0.06074189 | 5.08093754 | 0.84697441 | 0.92390978 |
| ENSMUSG00000057230 | 0.06069218 | 4.20628375 | 0.85040728 | 0.92578156 |
| ENSMUSG00000044367 | 0.06025605 | 2.56232681 | 0.8874353  | 0.94491531 |
| ENSMUSG00000018425 | 0.06023886 | 6.79549923 | 0.84465396 | 0.92249831 |
| ENSMUSG00000021192 | 0.06004043 | 6.02591548 | 0.84629103 | 0.92366113 |
| ENSMUSG00000003464 | 0.05996968 | 5.89290104 | 0.84786947 | 0.92453973 |
| ENSMUSG00000024319 | 0.05995947 | 5.5540112  | 0.8495179  | 0.92504132 |
| ENSMUSG00000001755 | 0.05987006 | 3.6820159  | 0.85986987 | 0.93119469 |
| ENSMUSG00000086841 | 0.0597995  | 4.72140653 | 0.85271546 | 0.92697281 |
| ENSMUSG00000005410 | 0.059168   | 8.10725831 | 0.84732731 | 0.92410778 |
| ENSMUSG00000087266 | 0.05915728 | 1.06355145 | 0.92730228 | 0.96419555 |
| ENSMUSG00000028525 | 0.05912075 | 6.19831304 | 0.847909   | 0.92453973 |
| ENSMUSG00000027160 | 0.05881359 | 4.40352304 | 0.85692292 | 0.92940825 |
| ENSMUSG00000005299 | 0.05861792 | 5.80215994 | 0.85262508 | 0.92697281 |
| ENSMUSG00000066643 | 0.05847166 | 3.89680129 | 0.86163455 | 0.93147859 |
| ENSMUSG00000037210 | 0.05838576 | 5.53070771 | 0.85174505 | 0.92658314 |
| ENSMUSG00000029528 | 0.05830406 | 5.93593802 | 0.85225649 | 0.92695249 |
| ENSMUSG00000048175 | 0.05829693 | 4.73164327 | 0.85375237 | 0.92753676 |
| ENSMUSG00000045969 | 0.05801299 | 5.63442262 | 0.85338707 | 0.92734041 |
| ENSMUSG00000034931 | 0.05790899 | 6.721056   | 0.85156276 | 0.92648275 |
| ENSMUSG00000025217 | 0.05789325 | 4.13352027 | 0.85751176 | 0.92962605 |
| ENSMUSG00000022757 | 0.0577446  | 6.20996075 | 0.85247527 | 0.92697281 |
| ENSMUSG00000026311 | 0.05738765 | 4.84194824 | 0.85701369 | 0.92940825 |
| ENSMUSG00000020755 | 0.05667682 | 5.9693994  | 0.85640171 | 0.92939882 |
| ENSMUSG00000021585 | 0.05664869 | 6.79116493 | 0.85391181 | 0.92753676 |
| ENSMUSG00000039178 | 0.05657624 | 3.14466338 | 0.86644893 | 0.93400492 |
| ENSMUSG00000045598 | 0.05657604 | 3.78144339 | 0.86888572 | 0.93569638 |
| ENSMUSG00000054676 | 0.05652267 | 4.3347417  | 0.8629248  | 0.93177069 |
| ENSMUSG00000078994 | 0.05648789 | 4.51403356 | 0.85303687 | 0.92705327 |
| ENSMUSG00000020513 | 0.05634471 | 4.20743262 | 0.86000409 | 0.93124652 |
| ENSMUSG00000037364 | 0.05601132 | 7.61978188 | 0.85577506 | 0.92899922 |
| ENSMUSG00000020184 | 0.0556541  | 7.38749529 | 0.85618303 | 0.92925501 |
| ENSMUSG00000034165 | 0.05565169 | 5.23700062 | 0.86299385 | 0.93177069 |
| ENSMUSG00000082536 | 0.05554188 | 2.73405724 | 0.8744953  | 0.93864411 |
| ENSMUSG00000028245 | 0.05546713 | 6.76481874 | 0.85697275 | 0.92940825 |
| ENSMUSG00000026289 | 0.05544258 | 5.20363239 | 0.86057321 | 0.93139517 |
| ENSMUSG00000062944 | 0.05535826 | 3.039524   | 0.87698757 | 0.93963577 |
| ENSMUSG00000061132 | 0.05531463 | 8.38130883 | 0.85680238 | 0.92940825 |
| ENSMUSG00000044250 | 0.05529976 | 4.53477079 | 0.86676783 | 0.93416193 |

|                    |            |            |            |            |
|--------------------|------------|------------|------------|------------|
| ENSMUSG00000044502 | 0.05500113 | 3.45557607 | 0.88333478 | 0.94260595 |
| ENSMUSG00000020456 | 0.0546821  | 7.80228167 | 0.85887946 | 0.93077641 |
| ENSMUSG00000020091 | 0.05413036 | 6.32150864 | 0.86178757 | 0.93147859 |
| ENSMUSG00000028800 | 0.05389784 | 7.50671798 | 0.86093815 | 0.93141623 |
| ENSMUSG00000003153 | 0.05368255 | 5.296883   | 0.86449861 | 0.93255506 |
| ENSMUSG00000090086 | 0.0533191  | 4.42091924 | 0.87054216 | 0.93635814 |
| ENSMUSG00000034432 | 0.05328561 | 6.18133107 | 0.86410302 | 0.93248207 |
| ENSMUSG00000035299 | 0.05327838 | 4.11198221 | 0.87537826 | 0.93893765 |
| ENSMUSG00000029190 | 0.05275408 | 5.57738676 | 0.86551169 | 0.93308788 |
| ENSMUSG00000032846 | 0.05275327 | 2.87423225 | 0.87398697 | 0.93847212 |
| ENSMUSG00000054509 | 0.05271722 | 6.62327753 | 0.86390904 | 0.93247874 |
| ENSMUSG00000040010 | 0.05258575 | 7.59889524 | 0.8644902  | 0.93255506 |
| ENSMUSG00000017264 | 0.05253682 | 6.97139113 | 0.86489779 | 0.93264449 |
| ENSMUSG00000027889 | 0.05238791 | 5.4087214  | 0.86996734 | 0.93611333 |
| ENSMUSG00000026627 | 0.05234209 | 3.65742088 | 0.88452385 | 0.94349211 |
| ENSMUSG00000042351 | 0.05193676 | 4.17974828 | 0.87606735 | 0.9389447  |
| ENSMUSG00000021408 | 0.05175658 | 6.17679344 | 0.86765147 | 0.93492549 |
| ENSMUSG00000026222 | 0.05137465 | 8.98658686 | 0.86658362 | 0.93405675 |
| ENSMUSG00000025231 | 0.05113365 | 4.7656206  | 0.87493495 | 0.93883567 |
| ENSMUSG00000024213 | 0.05081816 | 4.9258463  | 0.87574798 | 0.9389447  |
| ENSMUSG00000062963 | 0.05064348 | 6.07057774 | 0.87156336 | 0.93717612 |
| ENSMUSG00000026032 | 0.0506006  | 5.16000973 | 0.87536439 | 0.93893765 |
| ENSMUSG00000022604 | 0.05049501 | 4.91745134 | 0.8720787  | 0.93763676 |
| ENSMUSG00000021124 | 0.05018303 | 5.74415561 | 0.87252777 | 0.9377935  |
| ENSMUSG00000032485 | 0.04997319 | 5.48202883 | 0.87611317 | 0.9389447  |
| ENSMUSG00000067288 | 0.04996029 | 6.75647646 | 0.8725105  | 0.9377935  |
| ENSMUSG00000017132 | 0.04979002 | 6.21948623 | 0.87306639 | 0.938097   |
| ENSMUSG00000026933 | 0.04955868 | 5.21498753 | 0.87609239 | 0.9389447  |
| ENSMUSG00000026575 | 0.04948338 | 3.14574156 | 0.88538728 | 0.94394101 |
| ENSMUSG00000029106 | 0.04912298 | 7.10199882 | 0.87333843 | 0.93817364 |
| ENSMUSG00000074649 | 0.04907704 | 3.72540516 | 0.89604264 | 0.95042036 |
| ENSMUSG00000005374 | 0.04899699 | 6.10063657 | 0.87502261 | 0.93883632 |
| ENSMUSG00000027808 | 0.04881001 | 9.74865417 | 0.87311569 | 0.938097   |
| ENSMUSG00000000732 | 0.04879431 | 3.08511863 | 0.8805537  | 0.94111904 |
| ENSMUSG00000028152 | 0.04844792 | 4.69882782 | 0.87850506 | 0.9403274  |
| ENSMUSG00000062604 | 0.04810925 | 6.17384637 | 0.87616248 | 0.9389447  |
| ENSMUSG00000030313 | 0.04808454 | 5.89028868 | 0.87616844 | 0.9389447  |
| ENSMUSG00000020246 | 0.04797033 | 5.42657328 | 0.87812049 | 0.94010239 |
| ENSMUSG00000041870 | 0.04796263 | 7.28705444 | 0.8767768  | 0.93950328 |
| ENSMUSG00000021577 | 0.04785345 | 8.25620125 | 0.87607918 | 0.9389447  |
| ENSMUSG00000034602 | 0.04765703 | 6.69432209 | 0.87721398 | 0.93967786 |
| ENSMUSG00000035953 | 0.04757989 | 6.01851071 | 0.87887881 | 0.94035412 |
| ENSMUSG00000029482 | 0.04749147 | 4.32339563 | 0.88741975 | 0.94491531 |

|                    |            |            |            |            |
|--------------------|------------|------------|------------|------------|
| ENSMUSG00000024006 | 0.04724166 | 7.10479304 | 0.87786156 | 0.94010239 |
| ENSMUSG00000037270 | 0.0468726  | 7.70083439 | 0.87804071 | 0.94010239 |
| ENSMUSG00000039994 | 0.0468428  | 5.59121223 | 0.88317961 | 0.94260595 |
| ENSMUSG00000017716 | 0.046557   | 7.23361939 | 0.87986539 | 0.94071645 |
| ENSMUSG00000009073 | 0.0463592  | 6.46191642 | 0.88147469 | 0.94173931 |
| ENSMUSG00000038379 | 0.04633991 | 6.03653248 | 0.88144775 | 0.94173931 |
| ENSMUSG00000030934 | 0.04591809 | 7.43934555 | 0.88165802 | 0.94173931 |
| ENSMUSG00000038776 | 0.04578475 | 4.06001515 | 0.88625454 | 0.94449738 |
| ENSMUSG00000048490 | 0.04564034 | 4.36070278 | 0.88618197 | 0.94449738 |
| ENSMUSG00000001525 | 0.04557489 | 10.1117803 | 0.88157719 | 0.94173931 |
| ENSMUSG00000021036 | 0.04551119 | 6.32301077 | 0.88293281 | 0.94255931 |
| ENSMUSG00000051978 | 0.04543447 | 2.28180558 | 0.91538505 | 0.95905158 |
| ENSMUSG00000028214 | 0.04531642 | 4.6357762  | 0.8877319  | 0.94506634 |
| ENSMUSG00000021140 | 0.04524338 | 4.80168121 | 0.88546989 | 0.94394101 |
| ENSMUSG00000021290 | 0.04518029 | 6.28567995 | 0.88477663 | 0.94359959 |
| ENSMUSG00000029714 | 0.04503091 | 3.79538157 | 0.90082018 | 0.95327354 |
| ENSMUSG00000022184 | 0.0449212  | 4.39550557 | 0.8889072  | 0.94564222 |
| ENSMUSG00000009090 | 0.04486972 | 6.27034802 | 0.88648299 | 0.94460776 |
| ENSMUSG00000015937 | 0.04434784 | 7.00916114 | 0.88622475 | 0.94449738 |
| ENSMUSG00000016833 | 0.04416114 | 5.27509732 | 0.88861063 | 0.94553115 |
| ENSMUSG00000015839 | 0.04414455 | 6.15859509 | 0.88688532 | 0.94467071 |
| ENSMUSG00000034575 | 0.0440068  | 4.89599208 | 0.89166308 | 0.94764139 |
| ENSMUSG00000035545 | 0.04398937 | 6.02721833 | 0.88886637 | 0.94564222 |
| ENSMUSG00000038884 | 0.04333495 | 4.80054465 | 0.89387969 | 0.9489662  |
| ENSMUSG00000028745 | 0.04318047 | 8.10115123 | 0.88832824 | 0.94549267 |
| ENSMUSG00000030714 | 0.04300578 | 3.22763265 | 0.91816846 | 0.96045251 |
| ENSMUSG00000025157 | 0.04295716 | 5.16808803 | 0.89346149 | 0.9486156  |
| ENSMUSG00000027610 | 0.04290354 | 3.98421365 | 0.90734982 | 0.95532678 |
| ENSMUSG00000024260 | 0.04279938 | 6.20107352 | 0.89085506 | 0.9471538  |
| ENSMUSG00000057667 | 0.04257699 | 2.83910095 | 0.89451201 | 0.94928669 |
| ENSMUSG00000032959 | 0.04256193 | 6.88137265 | 0.89125081 | 0.94738775 |
| ENSMUSG00000040430 | 0.04235913 | 3.11215334 | 0.90215834 | 0.95343743 |
| ENSMUSG00000030878 | 0.0423008  | 4.34465277 | 0.89755629 | 0.95131757 |
| ENSMUSG00000024513 | 0.04223405 | 6.90615565 | 0.89112607 | 0.94734853 |
| ENSMUSG00000054469 | 0.04214202 | 5.3172758  | 0.89210839 | 0.948019   |
| ENSMUSG00000048458 | 0.04209044 | 3.33919376 | 0.90742428 | 0.95532678 |
| ENSMUSG00000038042 | 0.04199846 | 2.49729239 | 0.91147745 | 0.95718891 |
| ENSMUSG00000036503 | 0.04195411 | 5.71166359 | 0.89235336 | 0.9480489  |
| ENSMUSG00000059540 | 0.04179199 | 2.48302767 | 0.92574833 | 0.96419555 |
| ENSMUSG00000029463 | 0.04177945 | 4.07628961 | 0.90268175 | 0.95351088 |
| ENSMUSG00000029922 | 0.04173564 | 5.68810871 | 0.89471068 | 0.94928768 |
| ENSMUSG00000031388 | 0.04158723 | 4.34087791 | 0.90583967 | 0.95470826 |
| ENSMUSG00000040613 | 0.04155146 | 5.81651997 | 0.89397673 | 0.94897579 |

|                    |            |            |            |            |
|--------------------|------------|------------|------------|------------|
| ENSMUSG00000031634 | 0.0414092  | 5.81821536 | 0.89427168 | 0.94919545 |
| ENSMUSG00000029402 | 0.04140208 | 2.40835728 | 0.93747799 | 0.96948242 |
| ENSMUSG00000028191 | 0.04139792 | 6.06624488 | 0.89460273 | 0.94928669 |
| ENSMUSG00000019132 | 0.04131818 | 8.90354588 | 0.89248244 | 0.9480489  |
| ENSMUSG00000022940 | 0.04115949 | 3.19698091 | 0.90766674 | 0.95532678 |
| ENSMUSG00000046711 | 0.04111035 | 3.6174119  | 0.91599796 | 0.9592787  |
| ENSMUSG00000021592 | 0.0410491  | 3.7087425  | 0.90157519 | 0.95338983 |
| ENSMUSG00000048707 | 0.04073253 | 3.21209244 | 0.91737141 | 0.95998645 |
| ENSMUSG00000025173 | 0.04046048 | 5.48894018 | 0.8979191  | 0.95147485 |
| ENSMUSG00000056144 | 0.04032293 | 6.40952497 | 0.89564119 | 0.950088   |
| ENSMUSG00000049916 | 0.03985463 | 3.13773996 | 0.93239131 | 0.96691104 |
| ENSMUSG00000002329 | 0.0394217  | 4.90188461 | 0.90180335 | 0.95343601 |
| ENSMUSG00000029063 | 0.03933861 | 7.03969185 | 0.89902899 | 0.95255734 |
| ENSMUSG00000047084 | 0.03929874 | 4.10340943 | 0.90449512 | 0.95422377 |
| ENSMUSG00000024725 | 0.03925574 | 5.5884064  | 0.90106884 | 0.95327354 |
| ENSMUSG00000020993 | 0.03913645 | 5.48748798 | 0.89913501 | 0.95257608 |
| ENSMUSG00000026812 | 0.03911804 | 6.03092968 | 0.90034366 | 0.95327354 |
| ENSMUSG00000022751 | 0.03885068 | 4.90964574 | 0.90417593 | 0.95407371 |
| ENSMUSG00000021123 | 0.03871908 | 4.53446059 | 0.90407364 | 0.95407371 |
| ENSMUSG00000022105 | 0.03871443 | 7.38296119 | 0.89932516 | 0.95268394 |
| ENSMUSG00000029111 | 0.03860221 | 5.32377723 | 0.90497582 | 0.95445078 |
| ENSMUSG00000024833 | 0.03859295 | 6.15392049 | 0.90258936 | 0.95351088 |
| ENSMUSG00000047539 | 0.03853888 | 5.24169698 | 0.90197131 | 0.95343743 |
| ENSMUSG00000022185 | 0.03838557 | 7.92632433 | 0.90076235 | 0.95327354 |
| ENSMUSG00000032806 | 0.03837115 | 3.88940001 | 0.91279198 | 0.95782317 |
| ENSMUSG00000036975 | 0.03831253 | 3.12829581 | 0.92246284 | 0.96281836 |
| ENSMUSG00000022668 | 0.03809345 | 3.49165666 | 0.90889946 | 0.95597111 |
| ENSMUSG00000022973 | 0.03808478 | 4.95062725 | 0.90252576 | 0.95351088 |
| ENSMUSG00000030754 | 0.03805924 | 8.46950304 | 0.9010513  | 0.95327354 |
| ENSMUSG00000030612 | 0.0380069  | 4.71548502 | 0.91041579 | 0.95691266 |
| ENSMUSG00000024382 | 0.03785596 | 5.99846228 | 0.90387181 | 0.95403285 |
| ENSMUSG00000074141 | 0.03778731 | 7.52300812 | 0.90301129 | 0.95351088 |
| ENSMUSG00000008683 | 0.03778662 | 9.45802703 | 0.90178302 | 0.95343601 |
| ENSMUSG00000035632 | 0.03749994 | 6.01473016 | 0.90531383 | 0.95452721 |
| ENSMUSG00000015697 | 0.0373733  | 7.80249576 | 0.9031407  | 0.95354115 |
| ENSMUSG00000024778 | 0.03732408 | 4.33394701 | 0.90551845 | 0.95464962 |
| ENSMUSG00000025203 | 0.03731037 | 9.38821798 | 0.90292727 | 0.95351088 |
| ENSMUSG00000062202 | 0.03720685 | 4.70963884 | 0.90822059 | 0.95553667 |
| ENSMUSG00000032513 | 0.03720536 | 3.31692234 | 0.93145282 | 0.96640247 |
| ENSMUSG00000028411 | 0.03713124 | 3.88698037 | 0.91265745 | 0.95782317 |
| ENSMUSG00000045327 | 0.0369374  | 1.54753215 | 0.91917156 | 0.96086063 |
| ENSMUSG00000036568 | 0.0368585  | 4.80017946 | 0.90671284 | 0.95506849 |
| ENSMUSG00000030172 | 0.03679988 | 4.78849929 | 0.90855046 | 0.95570946 |

|                    |            |            |            |            |
|--------------------|------------|------------|------------|------------|
| ENSMUSG00000011427 | 0.03667039 | 4.81645041 | 0.90784531 | 0.95536653 |
| ENSMUSG00000051510 | 0.03658482 | 5.01074644 | 0.91121111 | 0.9570707  |
| ENSMUSG00000020089 | 0.03626765 | 7.8448123  | 0.90610559 | 0.95482715 |
| ENSMUSG00000048920 | 0.03622228 | 5.05528486 | 0.91087829 | 0.95705613 |
| ENSMUSG00000030034 | 0.03617444 | 1.12255436 | 0.96448995 | 0.98355174 |
| ENSMUSG00000029550 | 0.03607347 | 5.11822135 | 0.9092882  | 0.95610023 |
| ENSMUSG00000000223 | 0.03569185 | 1.36355683 | 0.93923436 | 0.96999649 |
| ENSMUSG00000022876 | 0.03551069 | 8.9477418  | 0.90763194 | 0.95532678 |
| ENSMUSG00000031819 | 0.03490518 | 4.4348648  | 0.91823677 | 0.96045251 |
| ENSMUSG00000031608 | 0.03488109 | 5.95578367 | 0.91108477 | 0.95705613 |
| ENSMUSG00000021196 | 0.03485585 | 6.69428353 | 0.91127614 | 0.9570707  |
| ENSMUSG00000043881 | 0.03481926 | 4.62837833 | 0.90953546 | 0.95626698 |
| ENSMUSG00000020630 | 0.03469547 | 3.70272816 | 0.9273587  | 0.96419555 |
| ENSMUSG00000090330 | 0.03462782 | 2.70084283 | 0.93543516 | 0.96876335 |
| ENSMUSG00000066647 | 0.03458718 | 2.11059082 | 0.94327815 | 0.9716111  |
| ENSMUSG00000067916 | 0.0344915  | 2.27789752 | 0.88174875 | 0.94174294 |
| ENSMUSG00000006395 | 0.03445977 | 1.08181582 | 0.96379271 | 0.98339867 |
| ENSMUSG00000028161 | 0.03441405 | 7.00656192 | 0.91105754 | 0.95705613 |
| ENSMUSG00000038398 | 0.03416375 | 4.58932525 | 0.92087487 | 0.96190572 |
| ENSMUSG00000022089 | 0.0340585  | 4.96318447 | 0.916771   | 0.95966399 |
| ENSMUSG00000053293 | 0.03386486 | 6.25648662 | 0.91407028 | 0.95856344 |
| ENSMUSG00000058407 | 0.03339798 | 6.71642938 | 0.91351926 | 0.95824136 |
| ENSMUSG00000005575 | 0.03323672 | 6.37534928 | 0.91603947 | 0.9592787  |
| ENSMUSG00000024896 | 0.03323398 | 6.05925353 | 0.91520524 | 0.95905158 |
| ENSMUSG00000069755 | 0.03319948 | 1.46778069 | 0.91550606 | 0.95905158 |
| ENSMUSG00000021236 | 0.03296762 | 6.0106187  | 0.91622502 | 0.9592787  |
| ENSMUSG00000028646 | 0.03282895 | 6.84895695 | 0.91496214 | 0.95905158 |
| ENSMUSG00000085208 | 0.03278845 | 6.95571451 | 0.91556343 | 0.95905158 |
| ENSMUSG00000035678 | 0.03255503 | 1.69529373 | 0.95086185 | 0.97602268 |
| ENSMUSG00000059743 | 0.03229272 | 6.55349905 | 0.91821059 | 0.96045251 |
| ENSMUSG00000053329 | 0.03228061 | 3.15719068 | 0.94283804 | 0.97148532 |
| ENSMUSG00000060181 | 0.03227536 | 4.73694978 | 0.91985809 | 0.96121605 |
| ENSMUSG00000022545 | 0.03226495 | 4.43814739 | 0.92217884 | 0.96270828 |
| ENSMUSG00000025241 | 0.03222288 | 4.65433686 | 0.92377221 | 0.9633208  |
| ENSMUSG00000044715 | 0.03197393 | 4.26312163 | 0.92329756 | 0.96320556 |
| ENSMUSG00000052837 | 0.0319493  | 0.80095734 | 1          | 1          |
| ENSMUSG00000021143 | 0.03153828 | 4.73317969 | 0.92696122 | 0.96419555 |
| ENSMUSG00000027544 | 0.0314956  | 3.62972582 | 0.93060384 | 0.96589334 |
| ENSMUSG00000032637 | 0.03147632 | 7.60334139 | 0.91886942 | 0.96068998 |
| ENSMUSG00000015247 | 0.03126368 | 5.40920243 | 0.92028376 | 0.96147452 |
| ENSMUSG00000027109 | 0.0311524  | 8.01651027 | 0.91890923 | 0.96068998 |
| ENSMUSG00000059482 | 0.0310346  | 3.77574363 | 0.92466486 | 0.96371516 |
| ENSMUSG00000031392 | 0.03103126 | 7.06034992 | 0.92026938 | 0.96147452 |

|                    |            |            |            |            |
|--------------------|------------|------------|------------|------------|
| ENSMUSG00000033272 | 0.03074012 | 6.6564859  | 0.92169532 | 0.96248135 |
| ENSMUSG00000070501 | 0.03061425 | 4.95840236 | 0.91954966 | 0.96098687 |
| ENSMUSG00000000439 | 0.03044638 | 4.18807264 | 0.92871679 | 0.96482277 |
| ENSMUSG00000053286 | 0.03009908 | 6.02307616 | 0.92293104 | 0.96293424 |
| ENSMUSG00000073415 | 0.03005963 | 0.68992971 | 1          | 1          |
| ENSMUSG00000023170 | 0.02999082 | 4.38480903 | 0.93348552 | 0.96758054 |
| ENSMUSG00000027775 | 0.02982971 | 6.99133182 | 0.92287076 | 0.96293424 |
| ENSMUSG00000071076 | 0.02968132 | 4.97630467 | 0.92588285 | 0.96419555 |
| ENSMUSG00000046020 | 0.02956688 | 6.36016687 | 0.92427803 | 0.96350066 |
| ENSMUSG00000064141 | 0.02911807 | 1.44338909 | 0.97113194 | 0.98659321 |
| ENSMUSG00000025645 | 0.02887075 | 2.61642881 | 0.959127   | 0.9804471  |
| ENSMUSG00000024165 | 0.02879346 | 6.63964754 | 0.9262278  | 0.96419555 |
| ENSMUSG00000034190 | 0.02871169 | 5.62814627 | 0.92758688 | 0.96424686 |
| ENSMUSG00000071662 | 0.02859206 | 7.11150426 | 0.92634777 | 0.96419555 |
| ENSMUSG00000026511 | 0.02842697 | 6.89913099 | 0.92666863 | 0.96419555 |
| ENSMUSG00000067713 | 0.02832593 | 5.41989865 | 0.9300899  | 0.96573171 |
| ENSMUSG00000021686 | 0.02823428 | 6.87650111 | 0.92713186 | 0.96419555 |
| ENSMUSG00000041143 | 0.02772479 | 4.81522641 | 0.93478252 | 0.96845948 |
| ENSMUSG00000054836 | 0.02761906 | 2.60150516 | 0.95867763 | 0.9803698  |
| ENSMUSG00000020319 | 0.0275294  | 2.50079124 | 0.92690307 | 0.96419555 |
| ENSMUSG00000024869 | 0.02744149 | 1.78631494 | 1          | 1          |
| ENSMUSG00000037151 | 0.02702912 | 3.00708081 | 0.94735621 | 0.9743447  |
| ENSMUSG00000046324 | 0.02671367 | 6.95899959 | 0.93084791 | 0.96596072 |
| ENSMUSG00000075271 | 0.02657645 | 2.49044794 | 0.94091862 | 0.97071333 |
| ENSMUSG00000000916 | 0.02650114 | 3.40811473 | 0.95164364 | 0.9765463  |
| ENSMUSG00000027706 | 0.02647878 | 6.76236664 | 0.93174745 | 0.96661515 |
| ENSMUSG00000047242 | 0.02638228 | 5.38814772 | 0.93220777 | 0.96681367 |
| ENSMUSG00000031889 | 0.02631999 | 4.61762068 | 0.9365776  | 0.96929489 |
| ENSMUSG00000021262 | 0.02585654 | 5.07268075 | 0.93766715 | 0.96951022 |
| ENSMUSG00000026779 | 0.02567458 | 5.35951855 | 0.93476516 | 0.96845948 |
| ENSMUSG00000055128 | 0.02550724 | 3.02353773 | 0.94793861 | 0.97442905 |
| ENSMUSG00000048327 | 0.02546223 | 7.18540913 | 0.93420527 | 0.96823351 |
| ENSMUSG00000021476 | 0.02537703 | 3.24000843 | 0.95491958 | 0.97851091 |
| ENSMUSG00000024037 | 0.02535796 | 4.34462696 | 0.94437166 | 0.97232232 |
| ENSMUSG00000055067 | 0.0253005  | 3.16955841 | 0.94341059 | 0.9716111  |
| ENSMUSG00000045193 | 0.02528748 | 3.35255441 | 0.94981858 | 0.97545584 |
| ENSMUSG00000021007 | 0.0252669  | 2.48159406 | 0.92604043 | 0.96419555 |
| ENSMUSG00000041375 | 0.02502507 | 4.04446499 | 0.94751046 | 0.9743447  |
| ENSMUSG00000018412 | 0.02499492 | 6.55273408 | 0.93579118 | 0.96885292 |
| ENSMUSG00000024683 | 0.02493503 | 5.41856088 | 0.93904729 | 0.96999649 |
| ENSMUSG00000021893 | 0.02492477 | 7.27119126 | 0.93520767 | 0.96862078 |
| ENSMUSG00000014763 | 0.0249026  | 5.36616767 | 0.93801181 | 0.96969671 |
| ENSMUSG00000027746 | 0.02481263 | 6.44883623 | 0.93598394 | 0.96886646 |

|                    |            |            |            |            |
|--------------------|------------|------------|------------|------------|
| ENSMUSG00000036792 | 0.02460463 | 5.06678773 | 0.93697101 | 0.96942294 |
| ENSMUSG00000037313 | 0.02454646 | 7.62948534 | 0.93675717 | 0.96938771 |
| ENSMUSG00000021182 | 0.02449656 | 5.01447872 | 0.9418696  | 0.97115644 |
| ENSMUSG00000038900 | 0.02426714 | 9.36297574 | 0.93689564 | 0.96942294 |
| ENSMUSG00000024735 | 0.02419533 | 7.87885459 | 0.93768468 | 0.96951022 |
| ENSMUSG00000072568 | 0.0241791  | 3.39114464 | 0.94304848 | 0.97151651 |
| ENSMUSG00000026200 | 0.02397478 | 3.01824536 | 0.93745909 | 0.96948242 |
| ENSMUSG00000031077 | 0.02395807 | 3.70434621 | 0.94727474 | 0.9743447  |
| ENSMUSG00000061032 | 0.02385472 | 7.27202049 | 0.93934758 | 0.97001459 |
| ENSMUSG00000024667 | 0.02376339 | 3.03266305 | 0.948225   | 0.97442905 |
| ENSMUSG00000007415 | 0.02373139 | 6.02614367 | 0.93895754 | 0.96999649 |
| ENSMUSG00000037443 | 0.0237072  | 4.64926542 | 0.94782811 | 0.97442905 |
| ENSMUSG00000030443 | 0.02350011 | 2.82325429 | 0.94072398 | 0.97069825 |
| ENSMUSG00000045962 | 0.02336497 | 9.92443176 | 0.93904237 | 0.96999649 |
| ENSMUSG00000022390 | 0.02304674 | 5.88909994 | 0.94236218 | 0.97127341 |
| ENSMUSG00000006169 | 0.02301425 | 6.91241405 | 0.94086399 | 0.97071333 |
| ENSMUSG00000016493 | 0.02296771 | 0.88714392 | 0.87991532 | 0.94071645 |
| ENSMUSG00000039105 | 0.02250654 | 5.31660034 | 0.94412585 | 0.97225489 |
| ENSMUSG00000021996 | 0.02248826 | 7.0701234  | 0.94188847 | 0.97115644 |
| ENSMUSG00000062070 | 0.02210059 | 8.21534867 | 0.94282641 | 0.97148532 |
| ENSMUSG00000025007 | 0.02207493 | 6.55597643 | 0.94435552 | 0.97232232 |
| ENSMUSG00000016940 | 0.02198259 | 3.36490732 | 0.95858776 | 0.9803698  |
| ENSMUSG00000020628 | 0.02180386 | 5.17269297 | 0.94732143 | 0.9743447  |
| ENSMUSG00000024085 | 0.02126029 | 7.33627102 | 0.94479821 | 0.97257578 |
| ENSMUSG00000028873 | 0.02124358 | 6.15371492 | 0.9474556  | 0.9743447  |
| ENSMUSG00000021357 | 0.02079092 | 6.11428414 | 0.94643738 | 0.97389129 |
| ENSMUSG00000032308 | 0.02075482 | 3.64718333 | 0.95196723 | 0.9767854  |
| ENSMUSG00000001366 | 0.02069919 | 4.34881113 | 0.95307901 | 0.97746115 |
| ENSMUSG00000037119 | 0.02057974 | 7.34862312 | 0.94656417 | 0.97392882 |
| ENSMUSG00000038692 | 0.02054462 | 1.07987032 | 0.92730228 | 0.96419555 |
| ENSMUSG00000021451 | 0.02049024 | 6.73495364 | 0.94795735 | 0.97442905 |
| ENSMUSG00000014668 | 0.02031312 | 6.49226712 | 0.94817635 | 0.97442905 |
| ENSMUSG00000020482 | 0.02019803 | 6.66289185 | 0.94808484 | 0.97442905 |
| ENSMUSG00000026383 | 0.020172   | 2.80879286 | 0.96407385 | 0.98349229 |
| ENSMUSG00000039660 | 0.02007241 | 3.95196261 | 0.9664836  | 0.98418044 |
| ENSMUSG00000015290 | 0.01994843 | 5.05215782 | 0.95444661 | 0.97821253 |
| ENSMUSG00000029125 | 0.01988739 | 4.66493293 | 0.95252781 | 0.9770817  |
| ENSMUSG00000022022 | 0.01952552 | 3.15601063 | 0.95241299 | 0.97707147 |
| ENSMUSG00000039206 | 0.01946305 | 3.28504004 | 0.96497735 | 0.98358372 |
| ENSMUSG00000001089 | 0.01945151 | 5.12849824 | 0.95006088 | 0.97545584 |
| ENSMUSG00000032437 | 0.01927851 | 9.17490647 | 0.94981725 | 0.97545584 |
| ENSMUSG00000079547 | 0.01902175 | 5.94448794 | 0.95330876 | 0.97760381 |
| ENSMUSG00000032556 | 0.01859511 | 2.5320863  | 0.98558599 | 0.99330123 |



|                    |            |            |            |            |
|--------------------|------------|------------|------------|------------|
| ENSMUSG00000087260 | 0.01837175 | 5.74928577 | 0.95409713 | 0.97794729 |
| ENSMUSG00000005505 | 0.01830546 | 5.24434534 | 0.95563709 | 0.97851091 |
| ENSMUSG00000003033 | 0.01811402 | 6.31221311 | 0.95577449 | 0.97851091 |
| ENSMUSG00000024754 | 0.01788727 | 3.78587599 | 0.95626727 | 0.97851091 |
| ENSMUSG00000044477 | 0.01751012 | 4.17656788 | 0.96163189 | 0.98221617 |
| ENSMUSG00000025421 | 0.01742965 | 4.7066206  | 0.96061477 | 0.98145234 |
| ENSMUSG00000020721 | 0.0173208  | 6.55039624 | 0.955418   | 0.97851091 |
| ENSMUSG00000032254 | 0.01731227 | 7.48733916 | 0.95538942 | 0.97851091 |
| ENSMUSG00000025728 | 0.01671992 | 6.11842839 | 0.95900442 | 0.9804471  |
| ENSMUSG00000026181 | 0.01656748 | 5.57535466 | 0.96113158 | 0.98179813 |
| ENSMUSG00000079505 | 0.01645221 | 3.11251149 | 0.97061963 | 0.98616564 |
| ENSMUSG00000030101 | 0.01627878 | 4.78847448 | 0.96244222 | 0.98267155 |
| ENSMUSG00000035199 | 0.01627048 | 6.62525474 | 0.9587333  | 0.9803698  |
| ENSMUSG00000031628 | 0.01622121 | 5.92604279 | 0.95917256 | 0.9804471  |
| ENSMUSG00000036402 | 0.01566063 | 4.76549182 | 0.96275486 | 0.98285034 |
| ENSMUSG00000023988 | 0.01562541 | 5.56107718 | 0.96434835 | 0.98350034 |
| ENSMUSG00000090394 | 0.01554628 | 5.78566915 | 0.96036808 | 0.98129708 |
| ENSMUSG00000028936 | 0.01542186 | 8.40184359 | 0.96013903 | 0.98116702 |
| ENSMUSG00000032009 | 0.01469262 | 5.4187865  | 0.96279961 | 0.98285034 |
| ENSMUSG00000025223 | 0.01437434 | 6.2593546  | 0.96487753 | 0.98358372 |
| ENSMUSG00000039828 | 0.01433325 | 4.78619081 | 0.96639452 | 0.98418044 |
| ENSMUSG00000095981 | 0.01431948 | 4.99811337 | 0.96313106 | 0.98300258 |
| ENSMUSG00000041258 | 0.01429232 | 5.231019   | 0.96550588 | 0.98393644 |
| ENSMUSG00000018442 | 0.01398782 | 6.09706262 | 0.96480255 | 0.98358372 |
| ENSMUSG00000004264 | 0.01380577 | 7.24370548 | 0.96582547 | 0.98407614 |
| ENSMUSG00000006050 | 0.01376919 | 5.72755887 | 0.96653288 | 0.98418044 |
| ENSMUSG00000042997 | 0.01358974 | 4.34927278 | 0.97016489 | 0.98598229 |
| ENSMUSG00000020593 | 0.01345302 | 3.21738424 | 0.97254807 | 0.98703918 |
| ENSMUSG00000054434 | 0.01345    | 2.14788343 | 1          | 1          |
| ENSMUSG00000031778 | 0.01335154 | 1.10575243 | 1          | 1          |
| ENSMUSG00000018565 | 0.01313806 | 5.70163392 | 0.96907323 | 0.98598229 |
| ENSMUSG00000033792 | 0.01275883 | 4.67143197 | 0.96745033 | 0.98470829 |
| ENSMUSG00000070871 | 0.01264647 | 4.49730941 | 0.96485175 | 0.98358372 |
| ENSMUSG00000025781 | 0.01261593 | 8.38007333 | 0.96732096 | 0.98470829 |
| ENSMUSG00000020803 | 0.0122413  | 5.793177   | 0.96988398 | 0.98598229 |
| ENSMUSG00000025193 | 0.01222372 | 3.95584315 | 0.97775112 | 0.98960526 |
| ENSMUSG00000038708 | 0.01209868 | 6.6056514  | 0.96917169 | 0.98598229 |
| ENSMUSG00000021891 | 0.01209529 | 5.69619833 | 0.96975167 | 0.98598229 |
| ENSMUSG00000079260 | 0.01192253 | 5.03919792 | 0.97257774 | 0.98703918 |
| ENSMUSG00000035173 | 0.01173164 | 5.18449598 | 0.96990015 | 0.98598229 |
| ENSMUSG00000029034 | 0.01163274 | 5.98074646 | 0.97245557 | 0.98703918 |
| ENSMUSG00000056962 | 0.01150039 | 5.60190107 | 0.97396816 | 0.98770667 |
| ENSMUSG00000038612 | 0.0114677  | 9.20996861 | 0.9701227  | 0.98598229 |

|                    |            |            |            |            |
|--------------------|------------|------------|------------|------------|
| ENSMUSG00000028455 | 0.01143962 | 5.97196775 | 0.97322386 | 0.98732324 |
| ENSMUSG00000051037 | 0.01125769 | 2.84803125 | 0.9766037  | 0.98880645 |
| ENSMUSG00000037519 | 0.01123035 | 6.14479183 | 0.9725717  | 0.98703918 |
| ENSMUSG00000073139 | 0.01110943 | 5.41406025 | 0.97366327 | 0.98767611 |
| ENSMUSG00000029472 | 0.01071031 | 8.64122244 | 0.97241795 | 0.98703918 |
| ENSMUSG00000071454 | 0.01070127 | 3.60643411 | 0.98589606 | 0.99345011 |
| ENSMUSG00000042851 | 0.01069695 | 3.2938848  | 0.97394152 | 0.98770667 |
| ENSMUSG00000057130 | 0.01048677 | 4.60083117 | 0.98015647 | 0.99016463 |
| ENSMUSG00000032565 | 0.01044921 | 3.40140771 | 0.98383797 | 0.99239628 |
| ENSMUSG00000021361 | 0.01031321 | 5.83811621 | 0.97586239 | 0.98863713 |
| ENSMUSG00000010205 | 0.01002299 | 6.63901084 | 0.97607031 | 0.98868741 |
| ENSMUSG00000040350 | 0.00960831 | 3.67770772 | 0.97984535 | 0.99012858 |
| ENSMUSG00000020493 | 0.00957951 | 7.00655317 | 0.97527823 | 0.98847748 |
| ENSMUSG00000056201 | 0.00946181 | 10.2401339 | 0.97540336 | 0.9885114  |
| ENSMUSG00000016319 | 0.0094607  | 9.00146269 | 0.97558361 | 0.98860116 |
| ENSMUSG00000031549 | 0.00942462 | 3.04686846 | 0.98975104 | 0.99603165 |
| ENSMUSG00000026466 | 0.0091027  | 7.9708898  | 0.97649255 | 0.98880645 |
| ENSMUSG00000030922 | 0.00869831 | 2.18295459 | 0.98198826 | 0.99136505 |
| ENSMUSG00000004268 | 0.00862259 | 7.0868754  | 0.97856885 | 0.98970772 |
| ENSMUSG00000075040 | 0.00861306 | 3.73805753 | 0.99354596 | 0.99817399 |
| ENSMUSG00000090626 | 0.00850497 | 4.28761342 | 0.98221437 | 0.99140769 |
| ENSMUSG00000022680 | 0.00850289 | 6.58784335 | 0.97899826 | 0.98977352 |
| ENSMUSG00000031105 | 0.00838384 | 3.01536991 | 0.97907632 | 0.98977352 |
| ENSMUSG00000036817 | 0.00829306 | 4.86725317 | 0.9818555  | 0.99136505 |
| ENSMUSG00000013663 | 0.00801478 | 8.2466611  | 0.97912684 | 0.98977352 |
| ENSMUSG00000021339 | 0.00789296 | 4.83428372 | 0.98422187 | 0.99269067 |
| ENSMUSG00000002617 | 0.00788198 | 3.58162532 | 0.97850335 | 0.98970772 |
| ENSMUSG00000015942 | 0.00785958 | 2.0657578  | 1          | 1          |
| ENSMUSG00000042787 | 0.00780148 | 4.32025383 | 0.98260436 | 0.99146897 |
| ENSMUSG00000062421 | 0.00767148 | 4.67968795 | 0.98379629 | 0.99239628 |
| ENSMUSG00000022641 | 0.00759812 | 6.69421536 | 0.98004832 | 0.99014812 |
| ENSMUSG00000032053 | 0.00726277 | 9.68184921 | 0.98113249 | 0.99087215 |
| ENSMUSG00000029064 | 0.00702654 | 8.53736524 | 0.98197198 | 0.99136505 |
| ENSMUSG00000037487 | 0.00669134 | 8.79147025 | 0.9826155  | 0.99146897 |
| ENSMUSG00000027593 | 0.00640404 | 6.86500082 | 0.98508365 | 0.99318831 |
| ENSMUSG00000006373 | 0.00624908 | 6.36989293 | 0.9844348  | 0.99281257 |
| ENSMUSG00000028879 | 0.00611529 | 5.82646492 | 0.98558124 | 0.99330123 |
| ENSMUSG00000037426 | 0.00609082 | 6.0593654  | 0.9856562  | 0.99330123 |
| ENSMUSG00000019998 | 0.00600253 | 6.7002805  | 0.98497025 | 0.99316682 |
| ENSMUSG00000033985 | 0.00599563 | 3.1537982  | 1          | 1          |
| ENSMUSG00000028706 | 0.00567717 | 4.34278908 | 0.99143999 | 0.99717485 |
| ENSMUSG00000028689 | 0.0053827  | 3.89241891 | 0.99418375 | 0.99865851 |
| ENSMUSG00000029333 | 0.00532874 | 2.6159612  | 1          | 1          |

|                    |            |            |            |            |
|--------------------|------------|------------|------------|------------|
| ENSMUSG00000048109 | 0.00521181 | 5.70630305 | 0.98867426 | 0.99531957 |
| ENSMUSG00000072494 | 0.0049846  | 2.66153624 | 1          | 1          |
| ENSMUSG00000023723 | 0.00482792 | 5.60403374 | 0.99028648 | 0.99629158 |
| ENSMUSG00000031109 | 0.0048216  | 4.36296581 | 0.9915551  | 0.99717485 |
| ENSMUSG00000034274 | 0.0047875  | 5.95731864 | 0.98958688 | 0.9959594  |
| ENSMUSG00000030102 | 0.00477035 | 7.85753073 | 0.98778789 | 0.99461294 |
| ENSMUSG00000024758 | 0.00443258 | 7.91920754 | 0.98863103 | 0.99531957 |
| ENSMUSG00000041625 | 0.00388329 | 2.6891585  | 1          | 1          |
| ENSMUSG00000006276 | 0.00368711 | 5.64684696 | 0.99350214 | 0.99817399 |
| ENSMUSG00000040048 | 0.0035637  | 5.55605928 | 0.99430605 | 0.99865851 |
| ENSMUSG00000025195 | 0.00334716 | 2.11140463 | 1          | 1          |
| ENSMUSG00000027845 | 0.00327335 | 5.54380008 | 0.99318917 | 0.9980015  |
| ENSMUSG00000033047 | 0.0032341  | 8.18895968 | 0.99201836 | 0.99730325 |
| ENSMUSG00000021643 | 0.00298279 | 1.26729541 | 1          | 1          |
| ENSMUSG00000029387 | 0.00265503 | 5.54311588 | 0.99534146 | 0.99932617 |
| ENSMUSG00000082163 | 0.00263868 | 1.9308522  | 0.97871139 | 0.98972464 |
| ENSMUSG00000026078 | 0.00257707 | 5.50338179 | 0.99637592 | 0.99983459 |
| ENSMUSG00000050148 | 0.00240472 | 4.92510918 | 0.9965335  | 0.99983459 |
| ENSMUSG00000038346 | 0.00209017 | 6.13781377 | 0.99618026 | 0.99983459 |
| ENSMUSG00000020134 | 0.00207642 | 6.72605607 | 0.99503772 | 0.99911423 |
| ENSMUSG00000020390 | 0.00201178 | 6.70663669 | 0.99482531 | 0.99899396 |
| ENSMUSG00000038685 | 0.0019716  | 6.447588   | 0.99677501 | 0.99983459 |
| ENSMUSG00000001127 | 0.00192771 | 6.41844716 | 0.99672294 | 0.99983459 |
| ENSMUSG00000039697 | 0.00173918 | 5.82489523 | 0.99598238 | 0.99983459 |
| ENSMUSG00000028159 | 0.00147605 | 6.25515856 | 0.99687433 | 0.99984122 |
| ENSMUSG00000023977 | 0.0014394  | 7.11061481 | 0.99676655 | 0.99983459 |
| ENSMUSG00000028619 | 0.00135932 | 4.43528643 | 1          | 1          |
| ENSMUSG00000050954 | 0.00092815 | 3.79067194 | 1          | 1          |
| ENSMUSG00000008682 | 0.00052261 | 9.26857977 | 0.99884573 | 1          |
| ENSMUSG00000025544 | 0.00042837 | 8.32192144 | 0.9988844  | 1          |
| ENSMUSG00000075254 | 0.00031436 | 7.40217433 | 0.99958927 | 1          |
| ENSMUSG00000057982 | 0.00028319 | 5.19194923 | 1          | 1          |
| ENSMUSG00000058594 | 0.00011755 | 5.85816335 | 1          | 1          |
| ENSMUSG00000016503 | -7.56E-05  | 4.7441013  | 1          | 1          |
| ENSMUSG00000024127 | -0.000152  | 5.20113843 | 1          | 1          |
| ENSMUSG00000057143 | -0.0001727 | 6.90129215 | 1          | 1          |
| ENSMUSG00000037447 | -0.0004921 | 5.18981498 | 0.99788301 | 1          |
| ENSMUSG00000061477 | -0.0005973 | 8.99190884 | 0.99854417 | 1          |
| ENSMUSG00000027475 | -0.0006341 | 6.01373559 | 1          | 1          |
| ENSMUSG00000059554 | -0.0009021 | 1.71087536 | 1          | 1          |
| ENSMUSG00000021178 | -0.0010135 | 8.16440386 | 0.99749912 | 1          |
| ENSMUSG00000061455 | -0.0010529 | 4.80726375 | 1          | 1          |
| ENSMUSG00000020537 | -0.0014518 | 5.97073007 | 0.99605675 | 0.99983459 |

|                    |            |            |            |            |
|--------------------|------------|------------|------------|------------|
| ENSMUSG00000019863 | -0.0019938 | 5.2089302  | 0.99649687 | 0.99983459 |
| ENSMUSG00000066151 | -0.0023481 | 6.61341197 | 0.99423982 | 0.99865851 |
| ENSMUSG00000021629 | -0.0023537 | 7.6277146  | 0.99467106 | 0.99893208 |
| ENSMUSG00000055480 | -0.0029133 | 2.70489388 | 1          | 1          |
| ENSMUSG00000072694 | -0.0030708 | 3.04640612 | 1          | 1          |
| ENSMUSG00000015889 | -0.0030713 | 7.06552642 | 0.99258414 | 0.99776541 |
| ENSMUSG00000006288 | -0.0033792 | 4.83480913 | 0.99148114 | 0.99717485 |
| ENSMUSG00000031198 | -0.0034696 | 6.24867747 | 0.99295275 | 0.99789804 |
| ENSMUSG00000031839 | -0.0035435 | 5.65766196 | 0.99203189 | 0.99730325 |
| ENSMUSG00000025017 | -0.0035495 | 6.48409539 | 0.99162677 | 0.99717485 |
| ENSMUSG00000002767 | -0.0036066 | 4.23583154 | 0.99078023 | 0.99669534 |
| ENSMUSG00000029614 | -0.0038402 | 9.47181828 | 0.98999419 | 0.99618339 |
| ENSMUSG00000028030 | -0.0044367 | 4.67256847 | 0.99647754 | 0.99983459 |
| ENSMUSG00000020227 | -0.0044963 | 5.0292025  | 0.99187979 | 0.99730325 |
| ENSMUSG00000027778 | -0.004736  | 5.19025416 | 0.99276044 | 0.99784962 |
| ENSMUSG00000022031 | -0.0049    | 6.69670506 | 0.98767174 | 0.99458886 |
| ENSMUSG00000037685 | -0.0051422 | 5.65616238 | 0.99009009 | 0.99618693 |
| ENSMUSG0000002948  | -0.0052338 | 5.48310923 | 0.98709128 | 0.99419001 |
| ENSMUSG00000008604 | -0.005355  | 6.31447638 | 0.9867029  | 0.99395927 |
| ENSMUSG00000042185 | -0.0054909 | 5.70712445 | 0.98660772 | 0.99395927 |
| ENSMUSG00000028811 | -0.0055487 | 7.00056026 | 0.98554538 | 0.99330123 |
| ENSMUSG00000000131 | -0.0056767 | 7.55186055 | 0.98552841 | 0.99330123 |
| ENSMUSG00000030748 | -0.0057372 | 8.38513004 | 0.98496416 | 0.99316682 |
| ENSMUSG00000060950 | -0.0057488 | 3.25796334 | 0.98215235 | 0.99140769 |
| ENSMUSG00000015747 | -0.0057776 | 4.94818303 | 0.98905626 | 0.99551826 |
| ENSMUSG00000090258 | -0.0058881 | 3.05529153 | 0.97964235 | 0.99010901 |
| ENSMUSG00000025257 | -0.0061289 | 1.46356384 | 1          | 1          |
| ENSMUSG00000026803 | -0.0062942 | 5.62369138 | 0.98677003 | 0.99395927 |
| ENSMUSG00000038623 | -0.0065179 | 4.57137652 | 0.98884328 | 0.9953968  |
| ENSMUSG00000074221 | -0.0067496 | 5.10099719 | 0.98633683 | 0.9938014  |
| ENSMUSG00000028099 | -0.0071874 | 6.31151798 | 0.98191593 | 0.99136505 |
| ENSMUSG00000046380 | -0.0074823 | 2.72094524 | 0.98724911 | 0.99425611 |
| ENSMUSG00000022216 | -0.0077036 | 8.0698427  | 0.98003885 | 0.99014812 |
| ENSMUSG0000002844  | -0.0080074 | 5.61860536 | 0.98075418 | 0.99058285 |
| ENSMUSG00000021748 | -0.0080521 | 7.09745121 | 0.97977806 | 0.99012858 |
| ENSMUSG00000022476 | -0.0082395 | 4.322477   | 0.97393915 | 0.98770667 |
| ENSMUSG00000002455 | -0.0084152 | 6.88333983 | 0.97851242 | 0.98970772 |
| ENSMUSG00000040040 | -0.0084743 | 3.61404769 | 0.99299368 | 0.99789804 |
| ENSMUSG00000027519 | -0.0086985 | 5.88821466 | 0.97906999 | 0.98977352 |
| ENSMUSG00000044201 | -0.0088306 | 5.28750141 | 0.9794296  | 0.98998677 |
| ENSMUSG00000029038 | -0.0090453 | 6.26317165 | 0.97738639 | 0.98940531 |
| ENSMUSG00000024042 | -0.0090571 | 6.4938414  | 0.97714549 | 0.98925432 |
| ENSMUSG00000047514 | -0.0091713 | 6.01384084 | 0.97860287 | 0.98970772 |

|                    |            |            |            |            |
|--------------------|------------|------------|------------|------------|
| ENSMUSG00000020843 | -0.009489  | 4.53973338 | 0.9778592  | 0.98960526 |
| ENSMUSG00000042202 | -0.0095326 | 5.89143825 | 0.97784724 | 0.98960526 |
| ENSMUSG00000021188 | -0.0096845 | 6.71143601 | 0.97661141 | 0.98880645 |
| ENSMUSG00000028271 | -0.0097528 | 6.30987885 | 0.97581544 | 0.98863713 |
| ENSMUSG00000028992 | -0.0098198 | 2.95343618 | 0.97816556 | 0.98970772 |
| ENSMUSG00000052593 | -0.0098588 | 7.56363876 | 0.97508674 | 0.98837629 |
| ENSMUSG00000070939 | -0.0100056 | 4.91876121 | 0.97645934 | 0.98880645 |
| ENSMUSG00000043336 | -0.010045  | 5.65768632 | 0.97816938 | 0.98970772 |
| ENSMUSG00000042350 | -0.0101512 | 6.55441984 | 0.97493154 | 0.98837629 |
| ENSMUSG00000020056 | -0.0104762 | 4.67699488 | 0.97589413 | 0.98863713 |
| ENSMUSG00000049489 | -0.0105218 | 3.0987762  | 0.97031062 | 0.98603748 |
| ENSMUSG00000018401 | -0.010596  | 7.43655238 | 0.97281363 | 0.98718567 |
| ENSMUSG00000032489 | -0.0107445 | 2.248402   | 0.98273478 | 0.99146897 |
| ENSMUSG00000027425 | -0.0107473 | 5.47601147 | 0.97296886 | 0.98720032 |
| ENSMUSG00000016541 | -0.0107549 | 7.3426866  | 0.97255959 | 0.98703918 |
| ENSMUSG00000034593 | -0.010826  | 7.91251842 | 0.97237345 | 0.98703918 |
| ENSMUSG00000058444 | -0.01085   | 4.34183756 | 0.97858994 | 0.98970772 |
| ENSMUSG00000029502 | -0.0109436 | 6.59256773 | 0.97246424 | 0.98703918 |
| ENSMUSG00000028277 | -0.0111162 | 7.14782636 | 0.97191814 | 0.98703918 |
| ENSMUSG00000027303 | -0.0111446 | 6.61977826 | 0.97191462 | 0.98703918 |
| ENSMUSG00000066892 | -0.0112262 | 3.29400583 | 0.98260592 | 0.99146897 |
| ENSMUSG00000031629 | -0.0119052 | 3.73409762 | 0.9741215  | 0.98776927 |
| ENSMUSG00000059811 | -0.012128  | 6.93077009 | 0.96964049 | 0.98598229 |
| ENSMUSG00000023021 | -0.012227  | 6.20483853 | 0.96966586 | 0.98598229 |
| ENSMUSG00000038412 | -0.0123072 | 5.0934098  | 0.97009954 | 0.98598229 |
| ENSMUSG00000019297 | -0.0124916 | 6.24605092 | 0.96794084 | 0.98502162 |
| ENSMUSG00000039801 | -0.0125112 | 4.93295961 | 0.97301115 | 0.98720032 |
| ENSMUSG00000006920 | -0.0126086 | 5.09498384 | 0.96911316 | 0.98598229 |
| ENSMUSG00000022234 | -0.0126112 | 9.30535295 | 0.96710106 | 0.98463159 |
| ENSMUSG00000062931 | -0.0132173 | 3.30142864 | 0.98272564 | 0.99146897 |
| ENSMUSG00000039018 | -0.0132317 | 3.54112496 | 0.97052754 | 0.98616499 |
| ENSMUSG00000049323 | -0.0132623 | 7.36577169 | 0.96625527 | 0.98418044 |
| ENSMUSG00000083161 | -0.0132832 | 5.09016206 | 0.96965459 | 0.98598229 |
| ENSMUSG00000035601 | -0.0133657 | 3.20184091 | 0.96308901 | 0.98300258 |
| ENSMUSG00000036291 | -0.0135228 | 5.27784928 | 0.96982442 | 0.98598229 |
| ENSMUSG00000053716 | -0.0135546 | 4.37896162 | 0.96656667 | 0.98418044 |
| ENSMUSG00000020948 | -0.013692  | 4.67922618 | 0.97251741 | 0.98703918 |
| ENSMUSG00000047215 | -0.0137303 | 9.93228412 | 0.96424925 | 0.98349229 |
| ENSMUSG00000038500 | -0.0137331 | 4.41480882 | 0.96739807 | 0.98470829 |
| ENSMUSG00000030697 | -0.0140942 | 6.79375482 | 0.96340768 | 0.98309883 |
| ENSMUSG00000028709 | -0.0146465 | 4.11947196 | 0.97507848 | 0.98837629 |
| ENSMUSG00000089862 | -0.0148172 | 4.48924085 | 0.96510464 | 0.98362049 |
| ENSMUSG00000014177 | -0.0152866 | 4.99821219 | 0.96417535 | 0.98349229 |

|                    |            |            |            |            |
|--------------------|------------|------------|------------|------------|
| ENSMUSG00000036257 | -0.0153141 | 6.65946019 | 0.96173883 | 0.98223236 |
| ENSMUSG00000037656 | -0.0153382 | 3.6440975  | 0.96561825 | 0.98395797 |
| ENSMUSG00000002319 | -0.0154974 | 5.73523021 | 0.95811183 | 0.98001309 |
| ENSMUSG00000027363 | -0.0157217 | 7.18241799 | 0.96014981 | 0.98116702 |
| ENSMUSG00000032643 | -0.0157978 | 3.21632515 | 0.96335843 | 0.98309883 |
| ENSMUSG00000019806 | -0.0159751 | 3.34482946 | 0.95803405 | 0.98001309 |
| ENSMUSG00000002326 | -0.0162258 | 5.40275976 | 0.96070205 | 0.98145234 |
| ENSMUSG00000022014 | -0.0164665 | 5.72729215 | 0.95998357 | 0.98116702 |
| ENSMUSG00000066233 | -0.0166611 | 1.74920781 | 0.97612712 | 0.98868741 |
| ENSMUSG00000021144 | -0.0166759 | 5.40621903 | 0.95680304 | 0.97895294 |
| ENSMUSG00000024118 | -0.0171505 | 3.28516198 | 0.95628028 | 0.97851091 |
| ENSMUSG00000061360 | -0.0174167 | 6.29122451 | 0.95556118 | 0.97851091 |
| ENSMUSG00000051786 | -0.0174751 | 5.26996314 | 0.95595554 | 0.97851091 |
| ENSMUSG00000027079 | -0.0175857 | 5.65277972 | 0.95577209 | 0.97851091 |
| ENSMUSG00000034473 | -0.0176449 | 3.92606257 | 0.96597929 | 0.98413988 |
| ENSMUSG00000059447 | -0.017795  | 6.68645612 | 0.95501257 | 0.97851091 |
| ENSMUSG00000024926 | -0.0180516 | 4.96294951 | 0.95613764 | 0.97851091 |
| ENSMUSG00000048758 | -0.0181257 | 1.88644502 | 0.93432775 | 0.96825405 |
| ENSMUSG00000042644 | -0.0181638 | 5.18430749 | 0.95362817 | 0.97783837 |
| ENSMUSG00000038179 | -0.0181707 | 6.02320023 | 0.95487111 | 0.97851091 |
| ENSMUSG00000056167 | -0.018222  | 6.4232812  | 0.95395145 | 0.97792021 |
| ENSMUSG00000026754 | -0.0183407 | 5.37173442 | 0.95603967 | 0.97851091 |
| ENSMUSG00000005534 | -0.0183826 | 4.80097278 | 0.95883784 | 0.98038374 |
| ENSMUSG00000027131 | -0.0184962 | 5.4862914  | 0.95398002 | 0.97792021 |
| ENSMUSG00000026113 | -0.0185967 | 3.04923463 | 0.96934324 | 0.98598229 |
| ENSMUSG00000073427 | -0.0186032 | 1.75887556 | 1          | 1          |
| ENSMUSG00000028420 | -0.0190049 | 2.90955297 | 0.96632521 | 0.98418044 |
| ENSMUSG00000043445 | -0.0190939 | 2.40300391 | 0.92172911 | 0.96248135 |
| ENSMUSG00000091512 | -0.0191004 | 4.46816207 | 0.95303898 | 0.97746115 |
| ENSMUSG00000026176 | -0.0192639 | 5.45801821 | 0.95061383 | 0.97586097 |
| ENSMUSG00000038542 | -0.0192728 | 5.44138831 | 0.9516045  | 0.9765463  |
| ENSMUSG00000015605 | -0.019273  | 4.21847879 | 0.94872856 | 0.97476074 |
| ENSMUSG00000015659 | -0.0193135 | 2.73548386 | 0.96227173 | 0.98259051 |
| ENSMUSG00000023018 | -0.019364  | 5.29845968 | 0.94995638 | 0.97545584 |
| ENSMUSG00000037072 | -0.0194    | 7.73825867 | 0.94999428 | 0.97545584 |
| ENSMUSG00000028096 | -0.0195069 | 5.56807152 | 0.95012872 | 0.97545584 |
| ENSMUSG00000031337 | -0.0195136 | 3.57220926 | 0.96397429 | 0.98349089 |
| ENSMUSG00000001847 | -0.0195989 | 8.12294923 | 0.94922497 | 0.97517787 |
| ENSMUSG00000066900 | -0.0199458 | 6.38562995 | 0.94858857 | 0.97470978 |
| ENSMUSG00000030956 | -0.0200653 | 4.85431437 | 0.94967525 | 0.97545584 |
| ENSMUSG00000029366 | -0.0202902 | 7.474016   | 0.94792718 | 0.97442905 |
| ENSMUSG00000026526 | -0.0207509 | 7.25537644 | 0.94641642 | 0.97389129 |
| ENSMUSG00000032399 | -0.020754  | 11.4612306 | 0.94583817 | 0.97355338 |

|                    |            |            |            |            |
|--------------------|------------|------------|------------|------------|
| ENSMUSG00000024056 | -0.0214794 | 6.29326289 | 0.9459648  | 0.9735908  |
| ENSMUSG00000036275 | -0.0215231 | 7.05900415 | 0.94471157 | 0.97257578 |
| ENSMUSG00000029036 | -0.0217505 | 5.91461725 | 0.94253564 | 0.97135936 |
| ENSMUSG00000040084 | -0.0219787 | 7.93669517 | 0.94302598 | 0.97151651 |
| ENSMUSG00000085823 | -0.0220429 | 2.94348839 | 0.95622024 | 0.97851091 |
| ENSMUSG00000030780 | -0.0221944 | 3.21040701 | 0.93568857 | 0.96885292 |
| ENSMUSG00000042211 | -0.0222158 | 6.71201189 | 0.94335092 | 0.9716111  |
| ENSMUSG00000025225 | -0.0222769 | 6.01053817 | 0.9414681  | 0.9710944  |
| ENSMUSG00000002846 | -0.0224447 | 4.14731262 | 0.95111175 | 0.97619217 |
| ENSMUSG00000001415 | -0.0228298 | 6.63799412 | 0.9406061  | 0.97069825 |
| ENSMUSG00000029004 | -0.0228779 | 7.90093747 | 0.94109802 | 0.97080554 |
| ENSMUSG00000022094 | -0.0230594 | 6.04392521 | 0.94179895 | 0.97115644 |
| ENSMUSG00000017843 | -0.0231517 | 7.29470972 | 0.94051314 | 0.97069825 |
| ENSMUSG00000020115 | -0.0233553 | 7.04982771 | 0.94032207 | 0.97069825 |
| ENSMUSG00000002870 | -0.0234378 | 7.42167257 | 0.93915469 | 0.96999649 |
| ENSMUSG00000045868 | -0.0234919 | 3.28187602 | 0.96497735 | 0.98358372 |
| ENSMUSG00000032601 | -0.0236659 | 6.10161946 | 0.94049104 | 0.97069825 |
| ENSMUSG00000032777 | -0.0237423 | 6.58096196 | 0.93862557 | 0.96999649 |
| ENSMUSG00000059325 | -0.0237473 | 2.06088095 | 0.98048733 | 0.99040608 |
| ENSMUSG00000003161 | -0.0238162 | 7.13925213 | 0.93880961 | 0.96999649 |
| ENSMUSG00000003813 | -0.0239123 | 4.87692353 | 0.93943178 | 0.97001459 |
| ENSMUSG00000054611 | -0.0242527 | 7.67167989 | 0.93737603 | 0.96948242 |
| ENSMUSG00000032602 | -0.0242816 | 4.69181219 | 0.94213681 | 0.97122678 |
| ENSMUSG00000003316 | -0.0244101 | 7.32942701 | 0.93714359 | 0.96948104 |
| ENSMUSG00000032615 | -0.0245965 | 3.08627304 | 0.93024543 | 0.9657948  |
| ENSMUSG00000040669 | -0.0246273 | 3.2843611  | 0.9388213  | 0.96999649 |
| ENSMUSG00000019518 | -0.0246488 | 4.04694932 | 0.93720696 | 0.96948104 |
| ENSMUSG00000028066 | -0.024815  | 4.52370805 | 0.93625296 | 0.96905192 |
| ENSMUSG00000043505 | -0.0248308 | 4.95033489 | 0.93828214 | 0.969849   |
| ENSMUSG00000027573 | -0.0249826 | 6.25396892 | 0.93592325 | 0.96886646 |
| ENSMUSG00000037773 | -0.025049  | 4.18461435 | 0.93804489 | 0.96969671 |
| ENSMUSG00000039089 | -0.0252213 | 4.77219651 | 0.94235877 | 0.97127341 |
| ENSMUSG00000029763 | -0.0252489 | 7.05974616 | 0.93520567 | 0.96862078 |
| ENSMUSG00000027784 | -0.0254975 | 4.73533517 | 0.94039583 | 0.97069825 |
| ENSMUSG00000004099 | -0.0256147 | 8.48487416 | 0.93331709 | 0.96758054 |
| ENSMUSG00000030451 | -0.0259046 | 6.78071277 | 0.93440466 | 0.96825405 |
| ENSMUSG00000031838 | -0.0260404 | 7.90072799 | 0.93212302 | 0.96681367 |
| ENSMUSG00000007476 | -0.0261206 | 2.11081623 | 0.96207228 | 0.98247987 |
| ENSMUSG00000055024 | -0.0261796 | 7.7086453  | 0.93256174 | 0.96699479 |
| ENSMUSG00000023980 | -0.0262514 | 4.21672832 | 0.93003868 | 0.96573171 |
| ENSMUSG00000027351 | -0.0262906 | 5.434421   | 0.93570338 | 0.96885292 |
| ENSMUSG00000022387 | -0.0263651 | 5.31675048 | 0.93340309 | 0.96758054 |
| ENSMUSG00000024429 | -0.026446  | 4.90992298 | 0.93131281 | 0.96635017 |

|                    |            |            |            |            |
|--------------------|------------|------------|------------|------------|
| ENSMUSG00000033970 | -0.0264596 | 5.59902018 | 0.93295432 | 0.96730885 |
| ENSMUSG00000030868 | -0.0266525 | 6.42822541 | 0.93217562 | 0.96681367 |
| ENSMUSG00000042298 | -0.0266797 | 4.02442986 | 0.94691925 | 0.97420122 |
| ENSMUSG00000026988 | -0.0268265 | 2.43383779 | 0.95395066 | 0.97792021 |
| ENSMUSG00000061650 | -0.0268852 | 3.49334059 | 0.93919397 | 0.96999649 |
| ENSMUSG00000050565 | -0.0272612 | 7.59286967 | 0.92973066 | 0.96554463 |
| ENSMUSG00000048445 | -0.0274451 | 0.76693615 | 0.9559728  | 0.97851091 |
| ENSMUSG00000003810 | -0.0276403 | 5.63700038 | 0.92876718 | 0.96482277 |
| ENSMUSG00000035093 | -0.0279073 | 6.94886562 | 0.92866644 | 0.96482277 |
| ENSMUSG00000078813 | -0.0281113 | 2.58806618 | 0.91700912 | 0.95974381 |
| ENSMUSG00000047434 | -0.0282349 | 4.85543092 | 0.92871494 | 0.96482277 |
| ENSMUSG00000033623 | -0.0282967 | 5.30280176 | 0.92946212 | 0.96545169 |
| ENSMUSG00000028688 | -0.0283405 | 5.01991691 | 0.92668015 | 0.96419555 |
| ENSMUSG00000031393 | -0.0287366 | 6.20808012 | 0.92749527 | 0.96424457 |
| ENSMUSG00000099413 | -0.0287884 | 4.80386821 | 0.93034153 | 0.9657948  |
| ENSMUSG00000086324 | -0.0287902 | 4.79074939 | 0.92607839 | 0.96419555 |
| ENSMUSG00000001056 | -0.0289262 | 5.64937506 | 0.92376793 | 0.9633208  |
| ENSMUSG00000033790 | -0.0289726 | 5.80775053 | 0.92798828 | 0.96457114 |
| ENSMUSG00000053510 | -0.0290113 | 8.77215549 | 0.92470922 | 0.96371516 |
| ENSMUSG00000038160 | -0.0290145 | 5.73612667 | 0.9270213  | 0.96419555 |
| ENSMUSG00000034345 | -0.0290701 | 5.58676103 | 0.92593458 | 0.96419555 |
| ENSMUSG00000033671 | -0.0293161 | 7.23097329 | 0.92517757 | 0.96397246 |
| ENSMUSG00000016831 | -0.0294867 | 7.49367161 | 0.92392684 | 0.9633208  |
| ENSMUSG00000009030 | -0.0295509 | 5.96439935 | 0.92565306 | 0.96419555 |
| ENSMUSG00000002204 | -0.02967   | 7.15393658 | 0.92266374 | 0.96293424 |
| ENSMUSG00000031557 | -0.0296907 | 8.87644151 | 0.92288778 | 0.96293424 |
| ENSMUSG00000041453 | -0.0298369 | 4.14092041 | 0.92639914 | 0.96419555 |
| ENSMUSG00000014554 | -0.0300092 | 3.71813691 | 0.92823826 | 0.96473799 |
| ENSMUSG00000072763 | -0.030298  | 2.99670708 | 0.95769658 | 0.97977421 |
| ENSMUSG00000020386 | -0.0304723 | 5.78280201 | 0.92345904 | 0.96320556 |
| ENSMUSG00000083844 | -0.0304945 | 3.45322511 | 0.92969756 | 0.96554463 |
| ENSMUSG00000007613 | -0.0306029 | 5.74090925 | 0.92502    | 0.9639014  |
| ENSMUSG00000026172 | -0.0307942 | 4.24116974 | 0.92208656 | 0.96270515 |
| ENSMUSG00000021959 | -0.0310189 | 4.85041423 | 0.92387251 | 0.9633208  |
| ENSMUSG00000037907 | -0.0311476 | 0.78972857 | 0.9136348  | 0.95824136 |
| ENSMUSG00000022223 | -0.0312687 | 4.10047944 | 0.91925066 | 0.96086063 |
| ENSMUSG00000014195 | -0.0314117 | 8.90322271 | 0.91841424 | 0.96054497 |
| ENSMUSG00000032077 | -0.0314764 | 5.1234894  | 0.92054849 | 0.96165794 |
| ENSMUSG00000048878 | -0.0314999 | 4.39864304 | 0.92178296 | 0.96248135 |
| ENSMUSG00000031921 | -0.0317337 | 5.66894617 | 0.91941583 | 0.96094013 |
| ENSMUSG00000076435 | -0.0321555 | 5.4855214  | 0.91851915 | 0.96056154 |
| ENSMUSG00000031400 | -0.0325937 | 6.527389   | 0.9161497  | 0.9592787  |
| ENSMUSG00000030145 | -0.0326751 | 3.1241958  | 0.94165743 | 0.97115644 |



|                    |            |            |            |            |
|--------------------|------------|------------|------------|------------|
| ENSMUSG00000032405 | -0.0330111 | 5.84089544 | 0.91702524 | 0.95974381 |
| ENSMUSG00000041890 | -0.0331087 | 5.8430718  | 0.91514892 | 0.95905158 |
| ENSMUSG00000028691 | -0.0333633 | 10.1138954 | 0.91318776 | 0.95814524 |
| ENSMUSG00000021773 | -0.0334905 | 0.56576937 | 0.90068209 | 0.95327354 |
| ENSMUSG00000032579 | -0.0335518 | 3.82545852 | 0.91498238 | 0.95905158 |
| ENSMUSG00000028295 | -0.0335728 | 3.82501784 | 0.92720894 | 0.96419555 |
| ENSMUSG00000059456 | -0.0336472 | 7.5183461  | 0.9127713  | 0.95782317 |
| ENSMUSG00000026721 | -0.0336938 | 7.27374506 | 0.91351255 | 0.95824136 |
| ENSMUSG00000046862 | -0.0337589 | 5.21702265 | 0.91619775 | 0.9592787  |
| ENSMUSG00000034612 | -0.0338225 | 5.2748956  | 0.91648032 | 0.95945284 |
| ENSMUSG00000050323 | -0.0343676 | 3.13097117 | 0.92246284 | 0.96281836 |
| ENSMUSG00000054408 | -0.0343902 | 8.59293086 | 0.91092152 | 0.95705613 |
| ENSMUSG00000031987 | -0.0344985 | 4.44386988 | 0.91746258 | 0.95998645 |
| ENSMUSG00000020741 | -0.0347526 | 6.82484601 | 0.90963258 | 0.95627586 |
| ENSMUSG00000031577 | -0.0347953 | 4.59106365 | 0.91411966 | 0.95856344 |
| ENSMUSG00000035595 | -0.0348381 | 2.49065146 | 0.92604043 | 0.96419555 |
| ENSMUSG00000019942 | -0.0350388 | 7.7473358  | 0.90925668 | 0.95610023 |
| ENSMUSG00000004561 | -0.0350947 | 3.66323918 | 0.91871277 | 0.96067085 |
| ENSMUSG00000056832 | -0.0352291 | 1.62776877 | 0.97431905 | 0.98787671 |
| ENSMUSG00000019842 | -0.0354069 | 4.37476668 | 0.91214338 | 0.95755807 |
| ENSMUSG00000060798 | -0.0354519 | 2.73643138 | 0.9247519  | 0.96371516 |
| ENSMUSG00000039768 | -0.0355366 | 6.60402683 | 0.90723907 | 0.95532678 |
| ENSMUSG00000028085 | -0.0356266 | 3.96833096 | 0.9118227  | 0.95745823 |
| ENSMUSG00000009681 | -0.0356421 | 3.70367308 | 0.91434731 | 0.95870893 |
| ENSMUSG00000036721 | -0.0358331 | 3.42101266 | 0.92836168 | 0.96477329 |
| ENSMUSG00000090019 | -0.0358867 | 4.91926099 | 0.91088617 | 0.95705613 |
| ENSMUSG00000029634 | -0.0359868 | 5.81224142 | 0.90903424 | 0.95601963 |
| ENSMUSG00000048497 | -0.0360487 | 4.22563771 | 0.9121009  | 0.95755807 |
| ENSMUSG00000030798 | -0.0360895 | 6.8325877  | 0.90621809 | 0.95482715 |
| ENSMUSG00000060098 | -0.0362275 | 5.67164364 | 0.90568425 | 0.95470826 |
| ENSMUSG00000029104 | -0.0362836 | 7.11988959 | 0.90650989 | 0.9550033  |
| ENSMUSG00000036435 | -0.0363328 | 6.02682103 | 0.90798088 | 0.95537768 |
| ENSMUSG00000032480 | -0.036336  | 6.21236155 | 0.9057954  | 0.95470826 |
| ENSMUSG00000016481 | -0.0363552 | 6.86513286 | 0.90656239 | 0.9550033  |
| ENSMUSG00000039990 | -0.0364171 | 6.27717328 | 0.90730649 | 0.95532678 |
| ENSMUSG00000021180 | -0.0365975 | 3.57693423 | 0.92099575 | 0.96193881 |
| ENSMUSG00000028367 | -0.0367462 | 8.34447655 | 0.90459935 | 0.95424038 |
| ENSMUSG00000018678 | -0.0371624 | 3.99525849 | 0.90788169 | 0.95536653 |
| ENSMUSG00000037017 | -0.0373978 | 4.60816429 | 0.9071784  | 0.95532678 |
| ENSMUSG00000029003 | -0.0374077 | 4.1228683  | 0.91063046 | 0.95704501 |
| ENSMUSG00000027411 | -0.0374983 | 6.15085304 | 0.90282014 | 0.95351088 |
| ENSMUSG00000027430 | -0.0376956 | 3.4723089  | 0.90759822 | 0.95532678 |
| ENSMUSG00000097354 | -0.0378895 | 2.08800659 | 0.92345565 | 0.96320556 |

|                    |            |            |            |            |
|--------------------|------------|------------|------------|------------|
| ENSMUSG00000005103 | -0.0380515 | 8.43422567 | 0.90116947 | 0.95327354 |
| ENSMUSG00000000976 | -0.0380533 | 5.14247638 | 0.90408999 | 0.95407371 |
| ENSMUSG00000033808 | -0.0380942 | 6.49283108 | 0.90302361 | 0.95351088 |
| ENSMUSG00000057101 | -0.0381096 | 5.09505988 | 0.90509123 | 0.95447915 |
| ENSMUSG00000038383 | -0.0381855 | 5.81274276 | 0.90344132 | 0.95367181 |
| ENSMUSG00000028478 | -0.0382202 | 6.83005481 | 0.90093832 | 0.95327354 |
| ENSMUSG00000039130 | -0.0382453 | 5.36131787 | 0.90236769 | 0.95351088 |
| ENSMUSG00000022407 | -0.0382774 | 6.42563642 | 0.90074587 | 0.95327354 |
| ENSMUSG00000028766 | -0.0383036 | 6.57289972 | 0.90084016 | 0.95327354 |
| ENSMUSG00000037971 | -0.0383825 | 2.57803885 | 0.93041935 | 0.9657948  |
| ENSMUSG00000019854 | -0.0384432 | 6.23433182 | 0.90158286 | 0.95338983 |
| ENSMUSG00000026832 | -0.0386185 | 7.05707041 | 0.90044335 | 0.95327354 |
| ENSMUSG00000063698 | -0.0388074 | 1.74417835 | 0.95242723 | 0.97707147 |
| ENSMUSG00000032586 | -0.039135  | 4.85172163 | 0.90129609 | 0.95327354 |
| ENSMUSG00000036469 | -0.0391682 | 5.72934272 | 0.90208223 | 0.95343743 |
| ENSMUSG00000026017 | -0.0392864 | 3.15859519 | 0.92402584 | 0.96333089 |
| ENSMUSG00000003948 | -0.0393495 | 4.98011252 | 0.90252031 | 0.95351088 |
| ENSMUSG00000031546 | -0.0394799 | 5.42059754 | 0.89957248 | 0.95285234 |
| ENSMUSG00000025271 | -0.039766  | 3.21543733 | 0.90856207 | 0.95570946 |
| ENSMUSG00000010936 | -0.0400598 | 5.85716302 | 0.89675804 | 0.95071164 |
| ENSMUSG00000024104 | -0.0400602 | 7.26618696 | 0.89666573 | 0.95070723 |
| ENSMUSG00000055319 | -0.040094  | 7.52013751 | 0.89643246 | 0.95055336 |
| ENSMUSG00000035704 | -0.0400992 | 6.2850301  | 0.89759424 | 0.95131757 |
| ENSMUSG00000039264 | -0.0402932 | 5.30233826 | 0.89625121 | 0.95052496 |
| ENSMUSG00000025340 | -0.0403338 | 5.02014125 | 0.89992631 | 0.9531335  |
| ENSMUSG00000025393 | -0.0404749 | 10.7807448 | 0.89462172 | 0.94928669 |
| ENSMUSG00000026500 | -0.0405321 | 4.04795842 | 0.90618961 | 0.95482715 |
| ENSMUSG00000027243 | -0.0406242 | 3.55234417 | 0.90524948 | 0.95452721 |
| ENSMUSG00000044308 | -0.0406365 | 7.28021022 | 0.89563433 | 0.950088   |
| ENSMUSG00000047749 | -0.0407125 | 3.12595952 | 0.91269444 | 0.95782317 |
| ENSMUSG00000073968 | -0.0412618 | 3.24294775 | 0.91030166 | 0.95688596 |
| ENSMUSG00000041538 | -0.0414832 | 8.09574284 | 0.89259017 | 0.9480489  |
| ENSMUSG00000008305 | -0.0415407 | 2.99590261 | 0.91550999 | 0.95905158 |
| ENSMUSG00000028998 | -0.0415463 | 5.92749626 | 0.89317427 | 0.94848433 |
| ENSMUSG00000075502 | -0.0415652 | 2.96291073 | 0.93512465 | 0.96862078 |
| ENSMUSG00000027699 | -0.0418159 | 7.09529326 | 0.892664   | 0.9480489  |
| ENSMUSG00000053477 | -0.0422267 | 7.94802581 | 0.8907763  | 0.9471538  |
| ENSMUSG00000018965 | -0.0422305 | 7.83093455 | 0.89078605 | 0.9471538  |
| ENSMUSG00000042572 | -0.0422948 | 7.43525956 | 0.89084532 | 0.9471538  |
| ENSMUSG00000037787 | -0.0423391 | 3.91678685 | 0.89166517 | 0.94764139 |
| ENSMUSG00000020389 | -0.042481  | 3.44171134 | 0.91359241 | 0.95824136 |
| ENSMUSG00000034297 | -0.042519  | 8.53068067 | 0.89002692 | 0.94664665 |
| ENSMUSG00000042709 | -0.0425944 | 4.90736663 | 0.89257838 | 0.9480489  |

|                    |            |            |            |            |
|--------------------|------------|------------|------------|------------|
| ENSMUSG00000078765 | -0.0430504 | 3.90220366 | 0.89631754 | 0.95052496 |
| ENSMUSG00000000884 | -0.0434361 | 1.98639183 | 0.89789885 | 0.95147485 |
| ENSMUSG00000004393 | -0.0436733 | 6.20607302 | 0.88703037 | 0.94467071 |
| ENSMUSG00000022228 | -0.0438389 | 6.12575107 | 0.8884797  | 0.94553115 |
| ENSMUSG00000062981 | -0.0439943 | 6.50705289 | 0.88689451 | 0.94467071 |
| ENSMUSG00000048285 | -0.0440136 | 2.77436392 | 0.90206184 | 0.95343743 |
| ENSMUSG00000004837 | -0.044085  | 7.86537308 | 0.88529181 | 0.9439378  |
| ENSMUSG00000102059 | -0.0441199 | 2.55431927 | 0.91513762 | 0.95905158 |
| ENSMUSG00000010721 | -0.0442882 | 1.85910577 | 0.95554036 | 0.97851091 |
| ENSMUSG00000069895 | -0.0442885 | 5.51353968 | 0.88791727 | 0.94514853 |
| ENSMUSG00000035293 | -0.0444631 | 6.19368329 | 0.88775241 | 0.94506634 |
| ENSMUSG00000074405 | -0.0445631 | 1.91544734 | 0.89263868 | 0.9480489  |
| ENSMUSG00000040658 | -0.0445788 | 3.80842289 | 0.88958395 | 0.94626883 |
| ENSMUSG00000046605 | -0.044714  | 2.76058013 | 0.88862743 | 0.94553115 |
| ENSMUSG00000066406 | -0.0447519 | 7.79056425 | 0.88450134 | 0.94349211 |
| ENSMUSG00000066456 | -0.0449895 | 6.42998902 | 0.88488712 | 0.94359959 |
| ENSMUSG00000042489 | -0.0452064 | 7.3248973  | 0.88325588 | 0.94260595 |
| ENSMUSG00000024696 | -0.0452364 | 8.09989231 | 0.88273725 | 0.94251866 |
| ENSMUSG00000037353 | -0.0453384 | 4.89585538 | 0.88658892 | 0.94460776 |
| ENSMUSG00000018796 | -0.0454311 | 5.20085921 | 0.8866209  | 0.94460776 |
| ENSMUSG00000023089 | -0.0454577 | 5.4026751  | 0.88480782 | 0.94359959 |
| ENSMUSG00000038539 | -0.0455627 | 3.82979946 | 0.89710351 | 0.9509844  |
| ENSMUSG00000039456 | -0.0457483 | 6.83029501 | 0.88295012 | 0.94255931 |
| ENSMUSG00000024989 | -0.0457803 | 7.17161699 | 0.88214491 | 0.94197947 |
| ENSMUSG00000045322 | -0.0458222 | 4.99979073 | 0.88334345 | 0.94260595 |
| ENSMUSG00000026851 | -0.0461384 | 5.46972594 | 0.88187478 | 0.94178427 |
| ENSMUSG00000027340 | -0.0462443 | 6.71572352 | 0.88155111 | 0.94173931 |
| ENSMUSG00000025428 | -0.0464682 | 9.94078015 | 0.87916499 | 0.94046142 |
| ENSMUSG00000079808 | -0.046582  | 2.02950067 | 0.9006034  | 0.95327354 |
| ENSMUSG00000054715 | -0.0466451 | 4.76772102 | 0.88426917 | 0.94349211 |
| ENSMUSG00000005198 | -0.0467016 | 9.12022407 | 0.87872479 | 0.94035412 |
| ENSMUSG00000002910 | -0.0467516 | 1.9247106  | 0.89324989 | 0.94848433 |
| ENSMUSG00000053877 | -0.0468218 | 7.75349914 | 0.87883458 | 0.94035412 |
| ENSMUSG00000038957 | -0.0469566 | 5.7869584  | 0.8801774  | 0.94081009 |
| ENSMUSG00000029918 | -0.0470348 | 3.7739061  | 0.88701633 | 0.94467071 |
| ENSMUSG00000032026 | -0.0470566 | 6.35802905 | 0.87885282 | 0.94035412 |
| ENSMUSG00000036777 | -0.0471805 | 6.18867728 | 0.87932794 | 0.94046142 |
| ENSMUSG00000056429 | -0.0476169 | 7.77202552 | 0.87722194 | 0.93967786 |
| ENSMUSG00000066979 | -0.0482076 | 7.04750507 | 0.87531907 | 0.93893765 |
| ENSMUSG00000034075 | -0.0484595 | 7.4334967  | 0.87471754 | 0.93878921 |
| ENSMUSG00000070883 | -0.0485728 | 1.73924144 | 0.9044138  | 0.95422377 |
| ENSMUSG00000020653 | -0.048662  | 2.61613873 | 0.90481169 | 0.95437102 |
| ENSMUSG00000015536 | -0.0486699 | 4.68437086 | 0.88110434 | 0.94161423 |

|                    |            |            |            |            |
|--------------------|------------|------------|------------|------------|
| ENSMUSG00000036323 | -0.0486933 | 8.64318784 | 0.87380757 | 0.93837292 |
| ENSMUSG00000032577 | -0.0487692 | 5.48494505 | 0.875657   | 0.9389447  |
| ENSMUSG00000029480 | -0.0488548 | 4.92829861 | 0.87491758 | 0.93883567 |
| ENSMUSG00000043866 | -0.0488773 | 5.88267045 | 0.87427516 | 0.93859466 |
| ENSMUSG00000016510 | -0.0488829 | 3.65603583 | 0.88452385 | 0.94349211 |
| ENSMUSG00000074140 | -0.0489646 | 1.40013429 | 0.94068983 | 0.97069825 |
| ENSMUSG00000042404 | -0.0492382 | 5.88687119 | 0.87344801 | 0.93817364 |
| ENSMUSG00000074884 | -0.0494251 | 5.60448216 | 0.87408208 | 0.9384808  |
| ENSMUSG00000027088 | -0.0494303 | 4.92565295 | 0.87959219 | 0.94065075 |
| ENSMUSG00000025358 | -0.0494864 | 6.83025146 | 0.87257233 | 0.9377935  |
| ENSMUSG00000022617 | -0.0495378 | 4.71792213 | 0.87784265 | 0.94010239 |
| ENSMUSG00000084846 | -0.0496805 | 1.27586958 | 0.96788332 | 0.98502162 |
| ENSMUSG00000071528 | -0.0496888 | 5.61344143 | 0.87439998 | 0.93863521 |
| ENSMUSG00000021993 | -0.0499665 | 5.4880723  | 0.87380632 | 0.93837292 |
| ENSMUSG00000034723 | -0.0500656 | 4.60686342 | 0.87924777 | 0.94046142 |
| ENSMUSG00000028542 | -0.0502511 | 0.87042698 | 0.91752414 | 0.95998645 |
| ENSMUSG00000029591 | -0.0502572 | 4.34568051 | 0.87228418 | 0.93776419 |
| ENSMUSG00000032870 | -0.0504655 | 8.45637065 | 0.86924414 | 0.93577393 |
| ENSMUSG00000025646 | -0.0505675 | 4.50661897 | 0.87579104 | 0.9389447  |
| ENSMUSG00000038970 | -0.0507855 | 6.01197624 | 0.87066166 | 0.93639328 |
| ENSMUSG00000078435 | -0.0508615 | 2.06872953 | 0.94211016 | 0.97122678 |
| ENSMUSG00000021868 | -0.0509937 | 5.81215852 | 0.86819581 | 0.93514019 |
| ENSMUSG00000042167 | -0.051037  | 6.79089785 | 0.86951452 | 0.93581283 |
| ENSMUSG00000041431 | -0.0510994 | 7.70217154 | 0.86797837 | 0.93509278 |
| ENSMUSG00000030647 | -0.0517646 | 4.68523265 | 0.8733849  | 0.93817364 |
| ENSMUSG00000052917 | -0.0518566 | 5.67979378 | 0.86938327 | 0.93577393 |
| ENSMUSG00000030327 | -0.0519286 | 5.15820797 | 0.87019916 | 0.93626936 |
| ENSMUSG00000032329 | -0.0522669 | 5.57488957 | 0.86806565 | 0.93509339 |
| ENSMUSG00000062110 | -0.0523065 | 4.47809587 | 0.86886333 | 0.93569638 |
| ENSMUSG00000052459 | -0.0523847 | 7.74537347 | 0.86467118 | 0.93264449 |
| ENSMUSG00000025872 | -0.0524772 | 5.9899437  | 0.86492745 | 0.93264449 |
| ENSMUSG00000051518 | -0.0525629 | 4.08333351 | 0.86773639 | 0.93492549 |
| ENSMUSG00000042694 | -0.0525692 | 4.14319591 | 0.87302776 | 0.938097   |
| ENSMUSG00000034290 | -0.0529828 | 7.3162942  | 0.86346878 | 0.93216155 |
| ENSMUSG00000078812 | -0.0530476 | 9.52207969 | 0.86217829 | 0.93147859 |
| ENSMUSG00000029152 | -0.0530752 | 7.88744567 | 0.86285601 | 0.93177069 |
| ENSMUSG00000033751 | -0.0532832 | 3.31346245 | 0.85479152 | 0.92815983 |
| ENSMUSG00000029388 | -0.0533081 | 6.43233896 | 0.86269032 | 0.93172282 |
| ENSMUSG00000025041 | -0.0533269 | 6.12987065 | 0.86352874 | 0.93216155 |
| ENSMUSG00000038619 | -0.0534788 | 7.00291899 | 0.86213796 | 0.93147859 |
| ENSMUSG00000020640 | -0.0536276 | 8.57076516 | 0.86119287 | 0.93147859 |
| ENSMUSG00000038909 | -0.0537436 | 7.40625415 | 0.86129836 | 0.93147859 |
| ENSMUSG00000052833 | -0.0539234 | 7.88721339 | 0.86050373 | 0.93139517 |

|                    |            |            |            |            |
|--------------------|------------|------------|------------|------------|
| ENSMUSG00000057531 | -0.0540534 | 4.75442634 | 0.86172083 | 0.93147859 |
| ENSMUSG00000026240 | -0.0541387 | 4.93820633 | 0.86259302 | 0.93171105 |
| ENSMUSG00000023764 | -0.0541744 | 4.8772655  | 0.86417153 | 0.93248207 |
| ENSMUSG00000029439 | -0.0541937 | 5.16402964 | 0.86195293 | 0.93147859 |
| ENSMUSG00000020288 | -0.0542045 | 6.32087666 | 0.86152294 | 0.93147859 |
| ENSMUSG00000028878 | -0.0545869 | 4.97302624 | 0.86204904 | 0.93147859 |
| ENSMUSG00000050608 | -0.0546367 | 6.38045555 | 0.85983656 | 0.93119469 |
| ENSMUSG00000021754 | -0.0546762 | 6.88844107 | 0.85933849 | 0.9309932  |
| ENSMUSG00000032458 | -0.0547095 | 8.75220671 | 0.85827408 | 0.93021384 |
| ENSMUSG00000022255 | -0.0548996 | 9.92289558 | 0.85755934 | 0.92962605 |
| ENSMUSG00000035139 | -0.0549714 | 5.23666786 | 0.86136967 | 0.93147859 |
| ENSMUSG00000014418 | -0.055094  | 5.83889066 | 0.86042652 | 0.93139517 |
| ENSMUSG00000057778 | -0.0551738 | 2.62771099 | 0.87910731 | 0.94046142 |
| ENSMUSG00000022194 | -0.0553903 | 4.11617358 | 0.86084067 | 0.93141623 |
| ENSMUSG00000039599 | -0.055463  | 3.93261841 | 0.86492595 | 0.93264449 |
| ENSMUSG00000048756 | -0.0555194 | 4.94315798 | 0.86074802 | 0.93141623 |
| ENSMUSG00000069020 | -0.0556136 | 3.94980745 | 0.86090436 | 0.93141623 |
| ENSMUSG00000026608 | -0.05575   | 4.63373258 | 0.86028188 | 0.93139517 |
| ENSMUSG00000096795 | -0.0558536 | 4.26329035 | 0.86968776 | 0.93590588 |
| ENSMUSG00000054519 | -0.0559737 | 3.27451868 | 0.87728827 | 0.93967786 |
| ENSMUSG00000018809 | -0.0560347 | 3.87454235 | 0.8653974  | 0.93305795 |
| ENSMUSG00000026135 | -0.0562015 | 5.5265222  | 0.85650016 | 0.92940825 |
| ENSMUSG00000025316 | -0.056591  | 3.3887801  | 0.86195764 | 0.93147859 |
| ENSMUSG00000032578 | -0.0566505 | 6.41509789 | 0.85383271 | 0.92753676 |
| ENSMUSG00000063849 | -0.0571323 | 4.45503819 | 0.85683687 | 0.92940825 |
| ENSMUSG00000019794 | -0.0573428 | 5.6679177  | 0.85418649 | 0.92774168 |
| ENSMUSG00000020156 | -0.0574528 | 5.02048597 | 0.85279092 | 0.92697281 |
| ENSMUSG00000028416 | -0.0576128 | 6.96115991 | 0.85156686 | 0.92648275 |
| ENSMUSG00000034928 | -0.0578059 | 5.26438752 | 0.85249426 | 0.92697281 |
| ENSMUSG00000038145 | -0.0579556 | 4.25184808 | 0.85962284 | 0.93119469 |
| ENSMUSG00000023262 | -0.0582714 | 3.09052502 | 0.85119666 | 0.92636036 |
| ENSMUSG00000036078 | -0.0586344 | 5.07154994 | 0.84895863 | 0.92504132 |
| ENSMUSG00000031165 | -0.0587204 | 6.49159457 | 0.84845455 | 0.92477601 |
| ENSMUSG00000022808 | -0.0588565 | 6.65111323 | 0.84920108 | 0.92504132 |
| ENSMUSG00000025880 | -0.0588576 | 2.93121659 | 0.87841357 | 0.94032281 |
| ENSMUSG00000022779 | -0.0589047 | 5.76264995 | 0.84937915 | 0.92504132 |
| ENSMUSG00000095325 | -0.0591364 | 4.66753474 | 0.85503004 | 0.92828389 |
| ENSMUSG00000041124 | -0.0592668 | 5.42008787 | 0.85135519 | 0.92643939 |
| ENSMUSG00000031389 | -0.0592879 | 5.66663435 | 0.84869189 | 0.92494122 |
| ENSMUSG00000067787 | -0.0593282 | 3.55571707 | 0.85482969 | 0.92815983 |
| ENSMUSG00000026134 | -0.0597955 | 5.84982253 | 0.84798057 | 0.92453973 |
| ENSMUSG00000032435 | -0.0598739 | 6.09007334 | 0.84708507 | 0.92393703 |
| ENSMUSG00000021224 | -0.0601391 | 4.36220188 | 0.85295675 | 0.92705327 |

|                    |            |            |            |            |
|--------------------|------------|------------|------------|------------|
| ENSMUSG00000022864 | -0.0603716 | 5.3171164  | 0.84955575 | 0.92504132 |
| ENSMUSG00000039345 | -0.0607757 | 1.66239458 | 0.84938839 | 0.92504132 |
| ENSMUSG00000032290 | -0.0608504 | 6.09265526 | 0.84465181 | 0.92249831 |
| ENSMUSG00000078786 | -0.0609243 | 2.83483484 | 0.85900877 | 0.93082301 |
| ENSMUSG00000040043 | -0.0610819 | 5.3624915  | 0.84491996 | 0.92269538 |
| ENSMUSG00000048234 | -0.0611195 | 4.29623191 | 0.85056626 | 0.92586116 |
| ENSMUSG00000029030 | -0.0612714 | 4.97017972 | 0.84646815 | 0.92366113 |
| ENSMUSG00000021975 | -0.0613611 | 6.19854798 | 0.84295247 | 0.92138228 |
| ENSMUSG00000029594 | -0.0613907 | 4.78559211 | 0.84202295 | 0.92083719 |
| ENSMUSG00000026781 | -0.0614214 | 5.3803579  | 0.84587981 | 0.92346304 |
| ENSMUSG00000010755 | -0.0615511 | 6.59790593 | 0.84153881 | 0.92049443 |
| ENSMUSG00000062761 | -0.0615524 | 4.77145878 | 0.84641833 | 0.92366113 |
| ENSMUSG00000060477 | -0.0621337 | 4.58820407 | 0.8451447  | 0.92284735 |
| ENSMUSG00000056749 | -0.0623822 | 7.29497741 | 0.83885649 | 0.91896486 |
| ENSMUSG00000015711 | -0.0626928 | 4.26571013 | 0.84304164 | 0.92138228 |
| ENSMUSG00000029613 | -0.0627835 | 6.88785042 | 0.83865498 | 0.91896486 |
| ENSMUSG00000022881 | -0.0632148 | 6.51145734 | 0.83827963 | 0.91892974 |
| ENSMUSG00000038696 | -0.0634364 | 5.70050162 | 0.83867943 | 0.91896486 |
| ENSMUSG00000026027 | -0.063452  | 4.42310035 | 0.85093002 | 0.92616364 |
| ENSMUSG00000027834 | -0.063517  | 5.25007278 | 0.84056797 | 0.91980569 |
| ENSMUSG00000063235 | -0.0635311 | 4.06589267 | 0.8407898  | 0.91986336 |
| ENSMUSG00000031751 | -0.0635883 | 7.1131364  | 0.83620828 | 0.91736216 |
| ENSMUSG00000026622 | -0.0636534 | 7.1423192  | 0.83596097 | 0.91723854 |
| ENSMUSG00000039523 | -0.0637056 | 4.87448874 | 0.83864917 | 0.91896486 |
| ENSMUSG00000032336 | -0.0638235 | 7.584115   | 0.83555326 | 0.91723854 |
| ENSMUSG00000027944 | -0.0640643 | 6.05931574 | 0.83635515 | 0.91742996 |
| ENSMUSG00000019849 | -0.0640968 | 6.8686027  | 0.83483569 | 0.91706917 |
| ENSMUSG00000020088 | -0.0641343 | 7.57373621 | 0.83455968 | 0.91706917 |
| ENSMUSG00000029632 | -0.0641442 | 7.16187406 | 0.83482967 | 0.91706917 |
| ENSMUSG00000078789 | -0.0641606 | 3.39288606 | 0.83807761 | 0.91892974 |
| ENSMUSG00000050891 | -0.0642419 | 3.49874249 | 0.85693663 | 0.92940825 |
| ENSMUSG00000022353 | -0.0643113 | 4.825506   | 0.83913165 | 0.9190733  |
| ENSMUSG00000007670 | -0.0643568 | 7.16553214 | 0.8337119  | 0.91639477 |
| ENSMUSG00000031986 | -0.0646075 | 4.13074536 | 0.83789974 | 0.91884389 |
| ENSMUSG00000020143 | -0.0649979 | 9.11454108 | 0.83181878 | 0.91541831 |
| ENSMUSG00000019763 | -0.0650408 | 5.38346623 | 0.83566031 | 0.91723854 |
| ENSMUSG00000031490 | -0.0651095 | 2.9019814  | 0.84263962 | 0.9211792  |
| ENSMUSG00000020491 | -0.065273  | 3.0952071  | 0.8519727  | 0.92673731 |
| ENSMUSG00000004069 | -0.065297  | 6.24412254 | 0.83247431 | 0.91552615 |
| ENSMUSG00000052533 | -0.0653684 | 6.7016943  | 0.83156532 | 0.91524806 |
| ENSMUSG00000028955 | -0.0656112 | 6.37436696 | 0.83249716 | 0.91552615 |
| ENSMUSG00000023075 | -0.0656402 | 6.71724033 | 0.83214301 | 0.91541831 |
| ENSMUSG00000038888 | -0.0661181 | 2.9381819  | 0.85776995 | 0.92976089 |

|                    |            |            |            |            |
|--------------------|------------|------------|------------|------------|
| ENSMUSG00000051351 | -0.0662674 | 4.05842991 | 0.8401404  | 0.9194311  |
| ENSMUSG00000046791 | -0.066389  | 4.15720328 | 0.83592361 | 0.91723854 |
| ENSMUSG00000032536 | -0.0664086 | 5.56726513 | 0.83012918 | 0.91460084 |
| ENSMUSG00000001983 | -0.066493  | 3.7401045  | 0.84618296 | 0.92366113 |
| ENSMUSG00000003190 | -0.0668827 | 1.96232074 | 0.81330465 | 0.90482494 |
| ENSMUSG00000003438 | -0.0670711 | 5.06693149 | 0.82731072 | 0.91296093 |
| ENSMUSG00000005609 | -0.0672174 | 6.56494527 | 0.82801639 | 0.91329945 |
| ENSMUSG00000010453 | -0.0672609 | 5.87025744 | 0.82834644 | 0.91354699 |
| ENSMUSG00000022244 | -0.0675    | 2.45355565 | 0.84947516 | 0.92504132 |
| ENSMUSG00000034278 | -0.0676265 | 2.49224352 | 0.82402301 | 0.91103795 |
| ENSMUSG00000042460 | -0.0676741 | 6.7589986  | 0.82724008 | 0.91296093 |
| ENSMUSG00000028906 | -0.0676996 | 6.57707379 | 0.82623655 | 0.91236278 |
| ENSMUSG00000030722 | -0.067799  | 6.01842969 | 0.82723939 | 0.91296093 |
| ENSMUSG00000032185 | -0.0678075 | 6.18294806 | 0.82502587 | 0.91167938 |
| ENSMUSG00000021072 | -0.0680795 | 7.04109157 | 0.82537156 | 0.911794   |
| ENSMUSG00000003184 | -0.0680826 | 5.12399842 | 0.82568084 | 0.91201571 |
| ENSMUSG00000068854 | -0.0682371 | 2.3431294  | 0.87051359 | 0.93635814 |
| ENSMUSG00000038485 | -0.0683462 | 5.54006595 | 0.82757354 | 0.91302048 |
| ENSMUSG00000037913 | -0.0684746 | 4.0407377  | 0.83816021 | 0.91892974 |
| ENSMUSG00000022386 | -0.0687089 | 3.5772424  | 0.83601053 | 0.91723854 |
| ENSMUSG00000021583 | -0.0688769 | 8.51964575 | 0.82220338 | 0.90995907 |
| ENSMUSG00000027339 | -0.0694185 | 8.28844075 | 0.82084012 | 0.90919678 |
| ENSMUSG00000031767 | -0.0694703 | 3.25577451 | 0.84079128 | 0.91986336 |
| ENSMUSG00000038982 | -0.0696165 | 3.03040136 | 0.83559443 | 0.91723854 |
| ENSMUSG00000035495 | -0.0698593 | 5.79341631 | 0.82288897 | 0.91044061 |
| ENSMUSG00000038812 | -0.0699032 | 4.90950383 | 0.82361232 | 0.91067726 |
| ENSMUSG00000033952 | -0.0704661 | 7.09069578 | 0.81952788 | 0.9082097  |
| ENSMUSG00000074211 | -0.0704774 | 3.82913926 | 0.82538326 | 0.911794   |
| ENSMUSG00000045948 | -0.0708756 | 3.67902434 | 0.82042939 | 0.90896213 |
| ENSMUSG00000020522 | -0.070923  | 6.52810616 | 0.81912619 | 0.90813784 |
| ENSMUSG00000028443 | -0.0709431 | 3.70708501 | 0.82351981 | 0.91066834 |
| ENSMUSG00000024335 | -0.0709928 | 8.63912242 | 0.81664272 | 0.9066895  |
| ENSMUSG00000015522 | -0.071279  | 6.69801148 | 0.81766212 | 0.90718848 |
| ENSMUSG00000018168 | -0.0713851 | 8.40300002 | 0.81585513 | 0.9062816  |
| ENSMUSG00000007880 | -0.0715277 | 7.72632671 | 0.8156314  | 0.90628137 |
| ENSMUSG00000063882 | -0.0715716 | 7.34414422 | 0.81577089 | 0.90628137 |
| ENSMUSG00000041153 | -0.0718079 | 5.70067801 | 0.81908514 | 0.90813784 |
| ENSMUSG00000024969 | -0.0718145 | 5.98982891 | 0.81618109 | 0.90645694 |
| ENSMUSG00000027012 | -0.0719005 | 7.00699455 | 0.81560221 | 0.90628137 |
| ENSMUSG00000075245 | -0.0720589 | 1.27090767 | 0.87149006 | 0.93717612 |
| ENSMUSG00000036712 | -0.072108  | 8.08606767 | 0.81424928 | 0.90561718 |
| ENSMUSG00000028086 | -0.0721816 | 6.713916   | 0.81516287 | 0.90600298 |
| ENSMUSG00000062101 | -0.0722593 | 2.93119798 | 0.85735722 | 0.92962605 |

|                    |            |            |            |            |
|--------------------|------------|------------|------------|------------|
| ENSMUSG0000000579  | -0.0723782 | 4.05997103 | 0.8250244  | 0.91167938 |
| ENSMUSG00000025135 | -0.0724837 | 3.29857184 | 0.81951943 | 0.9082097  |
| ENSMUSG00000098134 | -0.0725441 | 3.87151227 | 0.82460316 | 0.91139905 |
| ENSMUSG00000060038 | -0.0726333 | 4.82058084 | 0.81607746 | 0.90643519 |
| ENSMUSG00000071757 | -0.0726567 | 3.4901615  | 0.83349162 | 0.91624604 |
| ENSMUSG00000034906 | -0.0727497 | 6.96753028 | 0.81307289 | 0.90477536 |
| ENSMUSG00000034501 | -0.0730161 | 3.5169492  | 0.82927198 | 0.91379538 |
| ENSMUSG00000020273 | -0.0734599 | 5.53371064 | 0.81639038 | 0.90659571 |
| ENSMUSG00000030007 | -0.0735774 | 8.90225844 | 0.80982804 | 0.90271955 |
| ENSMUSG00000031732 | -0.0736208 | 5.76633863 | 0.8133455  | 0.90482494 |
| ENSMUSG00000036054 | -0.0738931 | 5.38323684 | 0.8126038  | 0.90444002 |
| ENSMUSG00000057924 | -0.074056  | 1.46907379 | 0.91550606 | 0.95905158 |
| ENSMUSG00000019710 | -0.0741362 | 6.20341537 | 0.81021589 | 0.90288131 |
| ENSMUSG00000031103 | -0.0743247 | 6.86261113 | 0.80945781 | 0.90261534 |
| ENSMUSG00000018765 | -0.074551  | 5.86418497 | 0.80924448 | 0.90247079 |
| ENSMUSG00000038365 | -0.0751175 | 2.67163476 | 0.81776514 | 0.90718848 |
| ENSMUSG00000026154 | -0.0755516 | 3.09561103 | 0.82303974 | 0.91051094 |
| ENSMUSG00000020743 | -0.0755558 | 5.96216669 | 0.80700389 | 0.90071724 |
| ENSMUSG00000025066 | -0.0756464 | 6.91232689 | 0.8060527  | 0.90018325 |
| ENSMUSG00000015120 | -0.0757722 | 8.26202749 | 0.80461368 | 0.89954104 |
| ENSMUSG00000025352 | -0.0761931 | 3.78731353 | 0.81461853 | 0.90568459 |
| ENSMUSG00000020910 | -0.0762193 | 4.93349077 | 0.81062659 | 0.90317152 |
| ENSMUSG00000037373 | -0.0762626 | 5.90076586 | 0.80479067 | 0.89955044 |
| ENSMUSG00000061979 | -0.0763282 | 3.56442554 | 0.80581913 | 0.90018325 |
| ENSMUSG00000038506 | -0.0764247 | 4.25070913 | 0.81028239 | 0.90288131 |
| ENSMUSG00000024566 | -0.076428  | 5.94778872 | 0.80530951 | 0.89994381 |
| ENSMUSG00000029730 | -0.0764957 | 8.10123263 | 0.8026331  | 0.89816242 |
| ENSMUSG00000024844 | -0.07696   | 6.51637887 | 0.80187279 | 0.89759146 |
| ENSMUSG00000039577 | -0.0769645 | 0.69256398 | 0.81760269 | 0.90718848 |
| ENSMUSG00000022972 | -0.0771228 | 3.91166115 | 0.80670519 | 0.9006635  |
| ENSMUSG00000031079 | -0.0773055 | 1.1312168  | 0.93071209 | 0.96591273 |
| ENSMUSG00000014245 | -0.077429  | 3.24273434 | 0.81273928 | 0.90449746 |
| ENSMUSG00000003809 | -0.0775103 | 4.84645389 | 0.80507158 | 0.89977115 |
| ENSMUSG00000030592 | -0.0776037 | 1.82144382 | 0.81927705 | 0.9082097  |
| ENSMUSG00000002052 | -0.077611  | 7.86298609 | 0.80021189 | 0.89674185 |
| ENSMUSG00000047187 | -0.0776732 | 6.15293037 | 0.80253914 | 0.8981509  |
| ENSMUSG00000030357 | -0.0779837 | 7.11574556 | 0.79882368 | 0.89547968 |
| ENSMUSG00000023393 | -0.078178  | 4.0722441  | 0.8061344  | 0.90018325 |
| ENSMUSG00000053841 | -0.0782542 | 7.06457179 | 0.79862498 | 0.8954431  |
| ENSMUSG00000026755 | -0.0783959 | 7.74845289 | 0.79852152 | 0.8954202  |
| ENSMUSG00000032221 | -0.0784815 | 5.36324848 | 0.80028223 | 0.89674185 |
| ENSMUSG00000040105 | -0.0788047 | 3.88190711 | 0.80870787 | 0.90205892 |
| ENSMUSG00000097164 | -0.0788259 | 4.15252101 | 0.81647418 | 0.90659571 |



|                    |            |            |            |            |
|--------------------|------------|------------|------------|------------|
| ENSMUSG00000035941 | -0.078861  | 7.93638435 | 0.79730001 | 0.89492503 |
| ENSMUSG00000031901 | -0.0788829 | 4.03718744 | 0.80686403 | 0.90069665 |
| ENSMUSG00000039005 | -0.079062  | 4.96060689 | 0.80461544 | 0.89954104 |
| ENSMUSG00000020929 | -0.0791237 | 7.93886243 | 0.79600556 | 0.89462453 |
| ENSMUSG00000051671 | -0.0792241 | 2.72516913 | 0.82439898 | 0.91126677 |
| ENSMUSG00000036893 | -0.0794278 | 5.85956143 | 0.79767899 | 0.89492503 |
| ENSMUSG00000018547 | -0.0797581 | 6.47991553 | 0.79574502 | 0.89462453 |
| ENSMUSG00000039384 | -0.0797943 | 5.14760557 | 0.79800352 | 0.89502547 |
| ENSMUSG00000005981 | -0.0801154 | 7.30364186 | 0.79407281 | 0.89368411 |
| ENSMUSG00000000085 | -0.0804234 | 4.02687259 | 0.80553014 | 0.90009709 |
| ENSMUSG00000025857 | -0.0804306 | 4.41060593 | 0.79769856 | 0.89492503 |
| ENSMUSG00000044876 | -0.0806092 | 2.4826213  | 0.80851487 | 0.90193694 |
| ENSMUSG00000042348 | -0.0810727 | 3.16435702 | 0.82146563 | 0.90938484 |
| ENSMUSG00000078517 | -0.0811871 | 5.92913137 | 0.79223574 | 0.89226843 |
| ENSMUSG00000037287 | -0.0812223 | 5.75834361 | 0.79462987 | 0.89403114 |
| ENSMUSG00000090272 | -0.0812479 | 8.42932203 | 0.79111021 | 0.89155946 |
| ENSMUSG00000031148 | -0.0813266 | 6.52857321 | 0.79204482 | 0.89214657 |
| ENSMUSG00000021550 | -0.0813387 | 4.8681257  | 0.7972358  | 0.89492503 |
| ENSMUSG00000027469 | -0.0816329 | 8.4652606  | 0.789831   | 0.89097112 |
| ENSMUSG00000029066 | -0.0817881 | 5.83473508 | 0.79167836 | 0.89182696 |
| ENSMUSG00000021496 | -0.0817952 | 2.72823646 | 0.79980448 | 0.89648597 |
| ENSMUSG00000071350 | -0.0819378 | 5.93859031 | 0.7930869  | 0.89276087 |
| ENSMUSG00000037933 | -0.0822308 | 5.50641595 | 0.79047866 | 0.89113043 |
| ENSMUSG00000049482 | -0.0823661 | 3.29873798 | 0.78541707 | 0.88839288 |
| ENSMUSG00000041506 | -0.0824395 | 4.14844772 | 0.78247043 | 0.88693274 |
| ENSMUSG00000005804 | -0.0825154 | 5.73481015 | 0.79156425 | 0.89182696 |
| ENSMUSG00000050240 | -0.082521  | 2.14060924 | 0.81569914 | 0.90628137 |
| ENSMUSG00000063047 | -0.0826998 | 3.50584288 | 0.80608654 | 0.90018325 |
| ENSMUSG00000027215 | -0.082807  | 6.68997428 | 0.78729035 | 0.8891525  |
| ENSMUSG00000068749 | -0.0828172 | 7.68833098 | 0.78710982 | 0.88909524 |
| ENSMUSG00000038425 | -0.0829159 | 4.0101021  | 0.80335755 | 0.89858937 |
| ENSMUSG00000045983 | -0.0830442 | 9.88284657 | 0.78585952 | 0.88842741 |
| ENSMUSG00000027495 | -0.0833302 | 2.99946002 | 0.81131033 | 0.90356894 |
| ENSMUSG00000021661 | -0.0835272 | 4.25095378 | 0.79713279 | 0.89492503 |
| ENSMUSG00000029198 | -0.083585  | 6.29894407 | 0.78616407 | 0.88851199 |
| ENSMUSG00000062825 | -0.0836408 | 10.5303674 | 0.78430624 | 0.88803316 |
| ENSMUSG00000041341 | -0.083649  | 6.79388656 | 0.7863265  | 0.88854181 |
| ENSMUSG00000020271 | -0.0839254 | 6.46852361 | 0.78618151 | 0.88851199 |
| ENSMUSG00000016252 | -0.0839284 | 5.86371622 | 0.78559767 | 0.8884009  |
| ENSMUSG00000030884 | -0.0840637 | 8.30619535 | 0.78382945 | 0.88790092 |
| ENSMUSG00000076614 | -0.0841168 | 6.92269843 | 0.78410523 | 0.8879335  |
| ENSMUSG00000034560 | -0.0841657 | 7.64497683 | 0.78438638 | 0.88803316 |
| ENSMUSG00000024277 | -0.0842227 | 7.64989956 | 0.78366535 | 0.88781797 |

|                    |            |            |            |            |
|--------------------|------------|------------|------------|------------|
| ENSMUSG00000023088 | -0.0842817 | 6.64500827 | 0.78444027 | 0.88803316 |
| ENSMUSG00000068732 | -0.0843577 | 5.61290388 | 0.78814945 | 0.88980356 |
| ENSMUSG00000025036 | -0.0845948 | 4.11027346 | 0.79647027 | 0.89480847 |
| ENSMUSG00000018736 | -0.0846028 | 5.51263703 | 0.78575369 | 0.8884009  |
| ENSMUSG00000021044 | -0.0847623 | 3.35072283 | 0.78502952 | 0.8882018  |
| ENSMUSG00000021650 | -0.0847808 | 5.82341629 | 0.78524228 | 0.88828834 |
| ENSMUSG00000047866 | -0.0848613 | 5.90134669 | 0.78497285 | 0.8882018  |
| ENSMUSG00000050395 | -0.084984  | 1.16970788 | 0.86445759 | 0.93255506 |
| ENSMUSG00000028322 | -0.0849891 | 5.70191774 | 0.78470466 | 0.8882018  |
| ENSMUSG00000019795 | -0.0851825 | 5.75190886 | 0.7840701  | 0.8879335  |
| ENSMUSG00000031985 | -0.0853594 | 6.85582572 | 0.78117309 | 0.88664972 |
| ENSMUSG00000000751 | -0.0854699 | 8.33998233 | 0.78021814 | 0.88632386 |
| ENSMUSG00000061607 | -0.0854808 | 7.01048059 | 0.78124007 | 0.88664972 |
| ENSMUSG00000027540 | -0.0858091 | 6.08754888 | 0.78112304 | 0.88664972 |
| ENSMUSG00000040928 | -0.0858845 | 6.59980319 | 0.78123044 | 0.88664972 |
| ENSMUSG00000030724 | -0.0859971 | 9.6259584  | 0.77843885 | 0.88532847 |
| ENSMUSG00000022359 | -0.0860529 | 4.77224082 | 0.78637269 | 0.88854181 |
| ENSMUSG00000038718 | -0.0860721 | 2.97637603 | 0.81936627 | 0.9082097  |
| ENSMUSG00000023921 | -0.086138  | 5.46448399 | 0.78367389 | 0.88781797 |
| ENSMUSG00000028126 | -0.0861669 | 5.79098312 | 0.78145847 | 0.88671643 |
| ENSMUSG00000019868 | -0.0861767 | 5.30952866 | 0.78304277 | 0.88747591 |
| ENSMUSG00000048550 | -0.0863759 | 2.69522768 | 0.80795763 | 0.90159325 |
| ENSMUSG00000039795 | -0.0866817 | 4.1121825  | 0.78732541 | 0.8891525  |
| ENSMUSG00000032504 | -0.0867844 | 7.77072954 | 0.77747187 | 0.88469523 |
| ENSMUSG00000042050 | -0.0867966 | 3.1647383  | 0.8030344  | 0.89833226 |
| ENSMUSG00000004707 | -0.0868251 | 7.64072673 | 0.77720109 | 0.88457378 |
| ENSMUSG00000090812 | -0.0868866 | 1.64216456 | 0.82288791 | 0.91044061 |
| ENSMUSG00000010914 | -0.0869265 | 5.05603936 | 0.78099807 | 0.88664972 |
| ENSMUSG00000047766 | -0.0869413 | 2.88431773 | 0.79672984 | 0.89492503 |
| ENSMUSG00000033282 | -0.0870817 | 4.29674557 | 0.79048161 | 0.89113043 |
| ENSMUSG00000053333 | -0.0871071 | 4.73395159 | 0.78210225 | 0.88687234 |
| ENSMUSG00000045328 | -0.087199  | 8.20674488 | 0.7761578  | 0.88420195 |
| ENSMUSG00000090262 | -0.0873928 | 3.9729474  | 0.7879389  | 0.88965899 |
| ENSMUSG00000021302 | -0.0874616 | 5.6360423  | 0.78015812 | 0.88632386 |
| ENSMUSG00000074579 | -0.0875334 | 1.68649725 | 0.90125907 | 0.95327354 |
| ENSMUSG00000051695 | -0.0877044 | 7.64102495 | 0.77465843 | 0.8833153  |
| ENSMUSG00000042015 | -0.0877521 | 4.0364635  | 0.78645751 | 0.88854456 |
| ENSMUSG00000083798 | -0.0879141 | 1.05281346 | 0.92730228 | 0.96419555 |
| ENSMUSG00000041720 | -0.0881193 | 7.53191648 | 0.77406747 | 0.88312601 |
| ENSMUSG00000053950 | -0.0884558 | 5.39025917 | 0.77686606 | 0.88437914 |
| ENSMUSG00000040521 | -0.0887481 | 3.95235964 | 0.77933436 | 0.88586414 |
| ENSMUSG00000023827 | -0.0887999 | 3.76357555 | 0.78069993 | 0.88664972 |
| ENSMUSG00000016946 | -0.0888654 | 5.43567184 | 0.77568555 | 0.88387499 |

|                    |            |            |            |            |
|--------------------|------------|------------|------------|------------|
| ENSMUSG00000034109 | -0.0888843 | 5.26216768 | 0.77646443 | 0.88420195 |
| ENSMUSG00000060261 | -0.0889132 | 6.81616473 | 0.77245008 | 0.88214569 |
| ENSMUSG00000059552 | -0.0889528 | 7.23863088 | 0.77165164 | 0.88198106 |
| ENSMUSG00000028954 | -0.0890646 | 6.798486   | 0.7722103  | 0.88214569 |
| ENSMUSG00000038902 | -0.089117  | 5.91290663 | 0.77367417 | 0.88307292 |
| ENSMUSG00000056131 | -0.0891842 | 4.85658047 | 0.77666144 | 0.88423954 |
| ENSMUSG00000006527 | -0.0893342 | 6.22273086 | 0.77352273 | 0.88299662 |
| ENSMUSG00000055371 | -0.0895547 | 5.77552236 | 0.7738422  | 0.88308088 |
| ENSMUSG00000060636 | -0.0897701 | 7.90054709 | 0.76966335 | 0.88045503 |
| ENSMUSG00000032580 | -0.0898405 | 8.03052274 | 0.76950172 | 0.88045503 |
| ENSMUSG00000021368 | -0.0899197 | 3.43839841 | 0.78168596 | 0.88671643 |
| ENSMUSG00000020832 | -0.0900552 | 4.5659974  | 0.77375334 | 0.88307292 |
| ENSMUSG00000031453 | -0.0900562 | 6.95047879 | 0.76960102 | 0.88045503 |
| ENSMUSG00000028398 | -0.0902029 | 4.76889295 | 0.77516054 | 0.8834751  |
| ENSMUSG00000041623 | -0.0902561 | 3.92971161 | 0.78171487 | 0.88671643 |
| ENSMUSG00000028433 | -0.0903086 | 6.82122693 | 0.76894518 | 0.88009946 |
| ENSMUSG00000005470 | -0.0904541 | 6.76123549 | 0.76881089 | 0.88009946 |
| ENSMUSG00000018362 | -0.0904755 | 8.57601659 | 0.7676008  | 0.87968193 |
| ENSMUSG00000021973 | -0.0907807 | 6.46754866 | 0.76895256 | 0.88009946 |
| ENSMUSG00000097119 | -0.0911954 | 4.1931407  | 0.7755913  | 0.883861   |
| ENSMUSG00000027562 | -0.0912244 | 6.44693945 | 0.76718624 | 0.87939375 |
| ENSMUSG00000022971 | -0.0912445 | 4.84781041 | 0.77199861 | 0.88209717 |
| ENSMUSG00000021785 | -0.0917391 | 5.72859433 | 0.76910769 | 0.88009946 |
| ENSMUSG00000022960 | -0.0919244 | 5.79900986 | 0.76794683 | 0.87989148 |
| ENSMUSG00000040410 | -0.0919538 | 4.17069916 | 0.77700469 | 0.88444359 |
| ENSMUSG00000062054 | -0.0921113 | 4.67945338 | 0.77034061 | 0.88094943 |
| ENSMUSG00000042271 | -0.0921416 | 3.35548785 | 0.78595823 | 0.88844587 |
| ENSMUSG00000034801 | -0.0923668 | 5.69674766 | 0.76751116 | 0.87967269 |
| ENSMUSG00000039901 | -0.0925324 | 4.16425721 | 0.77589082 | 0.88401549 |
| ENSMUSG00000034173 | -0.0926348 | 1.6449838  | 0.79876427 | 0.89547968 |
| ENSMUSG00000029438 | -0.0927277 | 4.62991052 | 0.76844585 | 0.88009946 |
| ENSMUSG00000013629 | -0.0928302 | 7.16812424 | 0.76167962 | 0.87532068 |
| ENSMUSG00000027428 | -0.0928329 | 3.24236304 | 0.78683308 | 0.88887575 |
| ENSMUSG00000040354 | -0.0929212 | 7.32817146 | 0.76162661 | 0.87532068 |
| ENSMUSG00000029414 | -0.0933505 | 7.34267016 | 0.76150802 | 0.87532068 |
| ENSMUSG00000016619 | -0.0933865 | 7.4909515  | 0.76086962 | 0.87527047 |
| ENSMUSG00000034663 | -0.0935494 | 7.21190362 | 0.76111938 | 0.87527047 |
| ENSMUSG00000038855 | -0.0936211 | 5.17894614 | 0.76429971 | 0.87729729 |
| ENSMUSG00000039232 | -0.0936903 | 4.17984939 | 0.77810769 | 0.88504517 |
| ENSMUSG00000031796 | -0.0938831 | 5.06946102 | 0.76521029 | 0.87794903 |
| ENSMUSG00000049775 | -0.093946  | 9.6723891  | 0.75870187 | 0.87379605 |
| ENSMUSG00000030556 | -0.0939845 | 3.62033736 | 0.77966159 | 0.88597162 |
| ENSMUSG00000026648 | -0.0940817 | 5.25154857 | 0.76469487 | 0.87756406 |

|                    |            |            |            |            |
|--------------------|------------|------------|------------|------------|
| ENSMUSG0000006304  | -0.094127  | 9.30601541 | 0.7583446  | 0.87362335 |
| ENSMUSG00000031652 | -0.0941975 | 6.88883863 | 0.76008926 | 0.87488553 |
| ENSMUSG00000055817 | -0.0943851 | 4.22499976 | 0.76666855 | 0.87908067 |
| ENSMUSG00000019996 | -0.0947697 | 4.36880629 | 0.76375725 | 0.87676795 |
| ENSMUSG00000026603 | -0.094954  | 4.91627285 | 0.7603873  | 0.87504179 |
| ENSMUSG00000026605 | -0.0950912 | 7.55288199 | 0.75708015 | 0.87284687 |
| ENSMUSG00000004070 | -0.0953392 | 6.10394426 | 0.75745002 | 0.87299672 |
| ENSMUSG00000020864 | -0.0953471 | 6.55696214 | 0.75696462 | 0.87284687 |
| ENSMUSG00000036249 | -0.0953911 | 5.3942404  | 0.7610368  | 0.87527047 |
| ENSMUSG00000026687 | -0.0955322 | 6.46255476 | 0.75675198 | 0.87272093 |
| ENSMUSG00000066441 | -0.0957188 | 6.62027428 | 0.75606872 | 0.87248292 |
| ENSMUSG00000021156 | -0.0957201 | 6.38793083 | 0.75666812 | 0.87271754 |
| ENSMUSG00000044636 | -0.0958815 | 1.8216283  | 0.79774799 | 0.89492503 |
| ENSMUSG00000035164 | -0.0960963 | 5.91578324 | 0.75830295 | 0.87362335 |
| ENSMUSG00000040359 | -0.0961365 | 6.28516682 | 0.75622198 | 0.87248292 |
| ENSMUSG00000046671 | -0.0962552 | 5.27124513 | 0.75710401 | 0.87284687 |
| ENSMUSG00000022749 | -0.0962631 | 5.07675264 | 0.76132377 | 0.87532068 |
| ENSMUSG00000040247 | -0.0963241 | 5.01046936 | 0.75413324 | 0.87091164 |
| ENSMUSG00000035770 | -0.0964258 | 6.58006211 | 0.75476861 | 0.87136546 |
| ENSMUSG00000023923 | -0.096599  | 5.84850949 | 0.7561684  | 0.87248292 |
| ENSMUSG00000032410 | -0.0966709 | 7.06414613 | 0.75411156 | 0.87091164 |
| ENSMUSG00000054091 | -0.0966938 | 5.20348492 | 0.75632028 | 0.87250298 |
| ENSMUSG00000028251 | -0.0967186 | 4.73779379 | 0.762664   | 0.87579263 |
| ENSMUSG00000000171 | -0.0967888 | 7.19444316 | 0.7526093  | 0.87008348 |
| ENSMUSG00000033773 | -0.0968204 | 5.22736525 | 0.75738228 | 0.87299672 |
| ENSMUSG00000041961 | -0.0968414 | 3.09530062 | 0.77475483 | 0.8833153  |
| ENSMUSG00000019818 | -0.0968942 | 8.70462107 | 0.75174771 | 0.86964678 |
| ENSMUSG00000084803 | -0.0969641 | 1.1279541  | 0.86193651 | 0.93147859 |
| ENSMUSG00000031221 | -0.0969651 | 6.39195665 | 0.75326589 | 0.87047351 |
| ENSMUSG00000024145 | -0.0969709 | 4.29949356 | 0.76527456 | 0.87794903 |
| ENSMUSG00000026395 | -0.0971278 | 10.0621666 | 0.75076652 | 0.8689778  |
| ENSMUSG00000040363 | -0.0973363 | 6.39814165 | 0.75213432 | 0.8698141  |
| ENSMUSG00000075000 | -0.0975496 | 4.58949724 | 0.75873759 | 0.87379605 |
| ENSMUSG00000027598 | -0.0977257 | 7.45763824 | 0.7506125  | 0.86889279 |
| ENSMUSG00000062519 | -0.0978392 | 3.6990716  | 0.77131596 | 0.88178431 |
| ENSMUSG00000049588 | -0.0982105 | 3.81061354 | 0.75802538 | 0.87344221 |
| ENSMUSG00000032712 | -0.0982566 | 7.82304443 | 0.74920234 | 0.86781933 |
| ENSMUSG00000026248 | -0.0984189 | 4.87256673 | 0.75323757 | 0.87047351 |
| ENSMUSG00000038462 | -0.098808  | 6.95403491 | 0.74780975 | 0.86715681 |
| ENSMUSG00000056145 | -0.098931  | 5.56376214 | 0.75225823 | 0.86986412 |
| ENSMUSG00000029617 | -0.0990012 | 7.0946339  | 0.74782626 | 0.86715681 |
| ENSMUSG00000022948 | -0.0991045 | 2.11493104 | 0.77645235 | 0.88420195 |
| ENSMUSG00000043542 | -0.0991511 | 1.67568543 | 0.80271601 | 0.89816242 |

|                    |            |            |            |            |
|--------------------|------------|------------|------------|------------|
| ENSMUSG00000026499 | -0.0991867 | 6.45139552 | 0.74836076 | 0.86759002 |
| ENSMUSG00000003235 | -0.0993627 | 7.04364017 | 0.7458456  | 0.86597749 |
| ENSMUSG00000027300 | -0.0993787 | 4.05022601 | 0.75326955 | 0.87047351 |
| ENSMUSG00000015668 | -0.0994918 | 5.56308712 | 0.7489426  | 0.86781933 |
| ENSMUSG00000043284 | -0.0996677 | 3.92400449 | 0.74806888 | 0.86734489 |
| ENSMUSG00000033502 | -0.1001036 | 5.05959622 | 0.75157272 | 0.86958044 |
| ENSMUSG00000003752 | -0.1002017 | 2.50631667 | 0.76859538 | 0.88009946 |
| ENSMUSG00000048012 | -0.1004047 | 2.67625832 | 0.76780162 | 0.87981858 |
| ENSMUSG00000031171 | -0.1008846 | 4.86232734 | 0.74556222 | 0.86574168 |
| ENSMUSG00000004665 | -0.1009131 | 5.88974343 | 0.7435056  | 0.86424547 |
| ENSMUSG00000030610 | -0.101095  | 2.78101481 | 0.75906399 | 0.87398527 |
| ENSMUSG00000031167 | -0.1012342 | 8.64208217 | 0.74072757 | 0.86252578 |
| ENSMUSG00000026355 | -0.1014064 | 9.26775424 | 0.74022575 | 0.86225448 |
| ENSMUSG00000028138 | -0.1014298 | 7.03685035 | 0.74114853 | 0.86268905 |
| ENSMUSG00000026087 | -0.1015095 | 6.01017021 | 0.74231402 | 0.86345749 |
| ENSMUSG00000096632 | -0.1015113 | 3.38877465 | 0.75113513 | 0.86931114 |
| ENSMUSG00000021794 | -0.1020794 | 7.86875332 | 0.73930994 | 0.86200869 |
| ENSMUSG00000038175 | -0.1021534 | 3.95632763 | 0.75347308 | 0.87061541 |
| ENSMUSG00000008822 | -0.1021557 | 1.03234449 | 0.78001745 | 0.88628261 |
| ENSMUSG00000022801 | -0.1022733 | 6.17862188 | 0.74134932 | 0.86268905 |
| ENSMUSG00000029427 | -0.1025665 | 5.98469817 | 0.73983791 | 0.86218661 |
| ENSMUSG00000030245 | -0.1026964 | 6.16595521 | 0.7397693  | 0.86218661 |
| ENSMUSG00000027286 | -0.1027897 | 4.75729125 | 0.7473817  | 0.8671075  |
| ENSMUSG00000003429 | -0.1030916 | 9.90621593 | 0.73590086 | 0.86009338 |
| ENSMUSG00000033323 | -0.1031241 | 5.04392698 | 0.74101768 | 0.86268905 |
| ENSMUSG00000030965 | -0.1033688 | 5.64360778 | 0.74024035 | 0.86225448 |
| ENSMUSG00000058240 | -0.103465  | 4.91692332 | 0.74313896 | 0.86423062 |
| ENSMUSG00000027884 | -0.1034831 | 5.9842061  | 0.73878072 | 0.86185756 |
| ENSMUSG00000057367 | -0.1035487 | 7.27933238 | 0.7365424  | 0.86050922 |
| ENSMUSG00000026872 | -0.1037026 | 6.93778715 | 0.73658759 | 0.86050922 |
| ENSMUSG00000042605 | -0.1037801 | 4.49010019 | 0.74488137 | 0.86513739 |
| ENSMUSG00000053838 | -0.1037876 | 5.96081734 | 0.73690854 | 0.86073195 |
| ENSMUSG00000072915 | -0.1039488 | 3.01934489 | 0.75356882 | 0.87063275 |
| ENSMUSG00000038533 | -0.104222  | 5.44262276 | 0.73975128 | 0.86218661 |
| ENSMUSG00000020652 | -0.1043706 | 4.9177807  | 0.73986229 | 0.86218661 |
| ENSMUSG00000062232 | -0.1045378 | 3.55742258 | 0.75619244 | 0.87248292 |
| ENSMUSG00000024993 | -0.1045582 | 5.07234003 | 0.74129962 | 0.86268905 |
| ENSMUSG00000025353 | -0.104597  | 5.93814984 | 0.73521544 | 0.85965123 |
| ENSMUSG00000016308 | -0.1046143 | 5.94261141 | 0.7363271  | 0.86039309 |
| ENSMUSG00000027879 | -0.104663  | 6.62747273 | 0.73473114 | 0.85936449 |
| ENSMUSG00000005078 | -0.1047364 | 4.16980347 | 0.74911335 | 0.86781933 |
| ENSMUSG00000021823 | -0.1049198 | 4.2788566  | 0.7449837  | 0.86516307 |
| ENSMUSG00000021982 | -0.1049749 | 4.17742654 | 0.74125187 | 0.86268905 |

|                    |            |            |            |            |
|--------------------|------------|------------|------------|------------|
| ENSMUSG00000028821 | -0.1049944 | 5.88347555 | 0.73423307 | 0.85915467 |
| ENSMUSG00000020038 | -0.1051155 | 4.86124329 | 0.73927886 | 0.86200869 |
| ENSMUSG00000031555 | -0.1051434 | 6.84401331 | 0.73300669 | 0.85837161 |
| ENSMUSG00000034620 | -0.105201  | 4.81155195 | 0.73922927 | 0.86200869 |
| ENSMUSG00000041560 | -0.1052251 | 6.37420869 | 0.73175875 | 0.85756209 |
| ENSMUSG00000008435 | -0.105262  | 4.18759553 | 0.73847914 | 0.86169217 |
| ENSMUSG00000008958 | -0.1054683 | 4.12103912 | 0.73591261 | 0.86009338 |
| ENSMUSG00000053119 | -0.1054727 | 6.0354241  | 0.73327076 | 0.85849439 |
| ENSMUSG00000030752 | -0.1055912 | 3.52613823 | 0.73693788 | 0.86073195 |
| ENSMUSG00000030555 | -0.1057307 | 1.26403082 | 0.83905554 | 0.9190733  |
| ENSMUSG00000034210 | -0.1058735 | 6.62000285 | 0.73158349 | 0.85744989 |
| ENSMUSG00000019796 | -0.105898  | 3.41137039 | 0.75473619 | 0.87136546 |
| ENSMUSG00000029199 | -0.1061113 | 5.37245469 | 0.73380902 | 0.85892476 |
| ENSMUSG00000060336 | -0.106232  | 2.57323259 | 0.77948487 | 0.88586414 |
| ENSMUSG00000032757 | -0.1062782 | 4.64300563 | 0.73803599 | 0.86162565 |
| ENSMUSG00000048351 | -0.1063596 | 4.18902172 | 0.73847914 | 0.86169217 |
| ENSMUSG00000027618 | -0.106949  | 5.1472984  | 0.73195824 | 0.85760675 |
| ENSMUSG00000021218 | -0.1070113 | 9.83628547 | 0.72638352 | 0.85321934 |
| ENSMUSG00000090015 | -0.1070636 | 3.34475867 | 0.75241327 | 0.86995011 |
| ENSMUSG00000036223 | -0.1072159 | 4.34957049 | 0.73632862 | 0.86039309 |
| ENSMUSG00000031004 | -0.1073581 | 10.4978683 | 0.72540738 | 0.8529024  |
| ENSMUSG00000046442 | -0.1073896 | 3.69950835 | 0.74645202 | 0.8664917  |
| ENSMUSG00000029047 | -0.107477  | 2.17319838 | 0.74896461 | 0.86781933 |
| ENSMUSG00000027498 | -0.1075923 | 5.64512208 | 0.72807455 | 0.85470909 |
| ENSMUSG00000035620 | -0.1077915 | 4.27076029 | 0.73939824 | 0.86201844 |
| ENSMUSG00000009927 | -0.1078058 | 9.47677615 | 0.72446226 | 0.8529024  |
| ENSMUSG00000052488 | -0.1080146 | 6.17810752 | 0.72535268 | 0.8529024  |
| ENSMUSG00000031371 | -0.1080951 | 4.96714482 | 0.72982086 | 0.85603526 |
| ENSMUSG00000038416 | -0.1090268 | 6.85338359 | 0.72342564 | 0.8525381  |
| ENSMUSG00000004789 | -0.1090363 | 7.96424491 | 0.72179377 | 0.85152871 |
| ENSMUSG00000047603 | -0.1091617 | 2.38870563 | 0.76622396 | 0.87875776 |
| ENSMUSG00000021576 | -0.1091789 | 6.24053334 | 0.72393691 | 0.85265789 |
| ENSMUSG00000004455 | -0.1096023 | 8.23055816 | 0.7205896  | 0.85031631 |
| ENSMUSG00000091264 | -0.1096326 | 4.60124122 | 0.73129777 | 0.85720817 |
| ENSMUSG00000020272 | -0.1096831 | 5.24218256 | 0.7237942  | 0.85265789 |
| ENSMUSG00000059495 | -0.1101268 | 5.45354141 | 0.7263211  | 0.85321934 |
| ENSMUSG00000028603 | -0.1102948 | 6.36778061 | 0.72063484 | 0.85031631 |
| ENSMUSG00000035329 | -0.1103144 | 5.6207088  | 0.72466356 | 0.8529024  |
| ENSMUSG00000017146 | -0.110379  | 7.15511408 | 0.71978719 | 0.84981225 |
| ENSMUSG00000041225 | -0.1105905 | 5.5325637  | 0.72364919 | 0.85259837 |
| ENSMUSG00000020120 | -0.1108419 | 7.54188788 | 0.71840668 | 0.84892688 |
| ENSMUSG00000043257 | -0.1108772 | 3.00250642 | 0.74052271 | 0.86240466 |
| ENSMUSG00000017405 | -0.1109067 | 2.67195388 | 0.75405236 | 0.87091164 |

|                    |            |            |            |            |
|--------------------|------------|------------|------------|------------|
| ENSMUSG00000020697 | -0.1109239 | 6.70574525 | 0.71878013 | 0.84892688 |
| ENSMUSG00000032328 | -0.1110604 | 7.21900451 | 0.71831364 | 0.84892688 |
| ENSMUSG00000003154 | -0.1112365 | 4.44753812 | 0.72259585 | 0.85210209 |
| ENSMUSG00000035354 | -0.111258  | 6.80750502 | 0.71807669 | 0.84892688 |
| ENSMUSG00000031511 | -0.1112951 | 5.52692755 | 0.72054373 | 0.85031631 |
| ENSMUSG00000028932 | -0.1113115 | 7.83419955 | 0.71648945 | 0.8481852  |
| ENSMUSG00000045854 | -0.1116051 | 3.90014921 | 0.72813542 | 0.85470909 |
| ENSMUSG00000025786 | -0.1116826 | 7.01005886 | 0.71620121 | 0.84808541 |
| ENSMUSG00000028874 | -0.1117676 | 1.55449036 | 0.76241454 | 0.8755994  |
| ENSMUSG00000015994 | -0.1118316 | 6.26698967 | 0.71754108 | 0.84866618 |
| ENSMUSG00000028127 | -0.1118453 | 5.93680561 | 0.71884567 | 0.84892688 |
| ENSMUSG00000097636 | -0.1118689 | 2.73346876 | 0.75202597 | 0.86978207 |
| ENSMUSG00000022526 | -0.1118735 | 4.45126786 | 0.72315803 | 0.8523922  |
| ENSMUSG00000025580 | -0.1119357 | 6.85339701 | 0.71517189 | 0.84779748 |
| ENSMUSG00000014547 | -0.1120906 | 4.13914186 | 0.72513711 | 0.8529024  |
| ENSMUSG00000021171 | -0.1121429 | 6.2761781  | 0.71735467 | 0.84866618 |
| ENSMUSG00000056493 | -0.1124598 | 5.60939369 | 0.71613636 | 0.84808541 |
| ENSMUSG00000048668 | -0.1124872 | 5.13535375 | 0.71660484 | 0.84819082 |
| ENSMUSG00000021594 | -0.1125214 | 1.11764625 | 0.79032088 | 0.89113043 |
| ENSMUSG00000097145 | -0.1126102 | 3.41570281 | 0.74052923 | 0.86240466 |
| ENSMUSG00000025016 | -0.1131718 | 9.00272556 | 0.71161683 | 0.84553503 |
| ENSMUSG00000028622 | -0.1134415 | 6.24797585 | 0.71236377 | 0.846112   |
| ENSMUSG00000034177 | -0.1135749 | 1.82858213 | 0.79774799 | 0.89492503 |
| ENSMUSG00000029028 | -0.1137282 | 6.00648746 | 0.71241626 | 0.846112   |
| ENSMUSG00000058900 | -0.1137802 | 4.11753963 | 0.7310356  | 0.85699401 |
| ENSMUSG00000068917 | -0.1138778 | 5.72150397 | 0.71264957 | 0.8461311  |
| ENSMUSG00000033557 | -0.1139441 | 6.70525727 | 0.71152279 | 0.84551644 |
| ENSMUSG00000024346 | -0.1139825 | 5.48348238 | 0.71368548 | 0.84644245 |
| ENSMUSG00000027341 | -0.1139922 | 5.01999316 | 0.71725584 | 0.84866618 |
| ENSMUSG00000030718 | -0.1143833 | 5.31381691 | 0.71315822 | 0.84634074 |
| ENSMUSG00000017176 | -0.1143933 | 5.14526933 | 0.7129757  | 0.84629298 |
| ENSMUSG00000035572 | -0.1144072 | 5.7057726  | 0.71329151 | 0.84640578 |
| ENSMUSG00000073000 | -0.1144678 | 1.35625715 | 0.73041702 | 0.85654819 |
| ENSMUSG00000056234 | -0.1145092 | 4.98257563 | 0.71652144 | 0.8481852  |
| ENSMUSG00000045751 | -0.1146878 | 6.47887318 | 0.71061346 | 0.84512009 |
| ENSMUSG00000060152 | -0.1147327 | 5.20017355 | 0.71132287 | 0.84537204 |
| ENSMUSG00000015776 | -0.1148155 | 5.63421442 | 0.710778   | 0.84519021 |
| ENSMUSG00000020807 | -0.1148409 | 4.12188506 | 0.72235284 | 0.85190868 |
| ENSMUSG00000025907 | -0.1150737 | 6.22643599 | 0.71113537 | 0.84524235 |
| ENSMUSG00000032386 | -0.1151038 | 6.06645188 | 0.71036489 | 0.84497849 |
| ENSMUSG00000034636 | -0.1151911 | 6.90355305 | 0.70863918 | 0.84348399 |
| ENSMUSG00000003437 | -0.1154667 | 6.52374502 | 0.70752255 | 0.84259607 |
| ENSMUSG00000024454 | -0.1156484 | 6.92475904 | 0.70672741 | 0.84223101 |

|                    |            |            |            |            |
|--------------------|------------|------------|------------|------------|
| ENSMUSG00000027999 | -0.1157785 | 3.6080731  | 0.71721402 | 0.84866618 |
| ENSMUSG00000047388 | -0.1159049 | 5.20734612 | 0.70943272 | 0.84424216 |
| ENSMUSG00000005510 | -0.1159205 | 6.05301123 | 0.70758067 | 0.84259607 |
| ENSMUSG00000039810 | -0.1162241 | 3.81253151 | 0.71755419 | 0.84866618 |
| ENSMUSG00000079426 | -0.1165121 | 7.38210819 | 0.70433229 | 0.8406773  |
| ENSMUSG00000033478 | -0.1166015 | 4.60948472 | 0.71250214 | 0.84612081 |
| ENSMUSG00000036850 | -0.1167565 | 4.0599143  | 0.71568662 | 0.84803477 |
| ENSMUSG00000030534 | -0.1168004 | 5.14632864 | 0.70741169 | 0.84259607 |
| ENSMUSG00000075028 | -0.1168685 | 2.85403876 | 0.72562219 | 0.8529024  |
| ENSMUSG00000064337 | -0.1169417 | 8.47420409 | 0.70252593 | 0.83985354 |
| ENSMUSG00000039357 | -0.1173581 | 3.53743759 | 0.71831384 | 0.84892688 |
| ENSMUSG00000034263 | -0.1174632 | 6.31679486 | 0.70357954 | 0.84022461 |
| ENSMUSG00000038290 | -0.1175852 | 5.83600961 | 0.70477152 | 0.84084533 |
| ENSMUSG00000090100 | -0.1176254 | 3.30333064 | 0.72893185 | 0.85545773 |
| ENSMUSG00000030614 | -0.117659  | 4.59495495 | 0.70977403 | 0.84446195 |
| ENSMUSG00000021254 | -0.1177798 | 4.36476965 | 0.7071538  | 0.84245985 |
| ENSMUSG00000028081 | -0.1181671 | 10.2184941 | 0.69902751 | 0.8374141  |
| ENSMUSG00000029640 | -0.1182957 | 5.98802546 | 0.70293373 | 0.83998583 |
| ENSMUSG00000035248 | -0.1183368 | 6.91193154 | 0.70094209 | 0.83867297 |
| ENSMUSG00000000244 | -0.1183916 | 5.13588933 | 0.70478495 | 0.84084533 |
| ENSMUSG00000033031 | -0.118431  | 7.51986633 | 0.6999265  | 0.83782965 |
| ENSMUSG00000024019 | -0.1186378 | 2.61667446 | 0.73298917 | 0.85837161 |
| ENSMUSG00000026305 | -0.1186514 | 7.27995516 | 0.69910374 | 0.8374141  |
| ENSMUSG00000022451 | -0.118805  | 5.96117501 | 0.7013224  | 0.8388488  |
| ENSMUSG00000014453 | -0.1188293 | 5.51989517 | 0.70233407 | 0.83978517 |
| ENSMUSG00000074735 | -0.1191368 | 3.0261217  | 0.73518419 | 0.85965123 |
| ENSMUSG00000024083 | -0.1192772 | 6.12692184 | 0.70020739 | 0.83807286 |
| ENSMUSG00000060681 | -0.1196157 | 4.74099137 | 0.70473812 | 0.84084533 |
| ENSMUSG00000019715 | -0.1196201 | 6.25649777 | 0.69815685 | 0.83707733 |
| ENSMUSG00000042487 | -0.1198851 | 5.7701255  | 0.69821129 | 0.83707733 |
| ENSMUSG00000021902 | -0.1200875 | 4.17036026 | 0.70380063 | 0.84032175 |
| ENSMUSG00000060073 | -0.1206063 | 8.24425277 | 0.693917   | 0.83471324 |
| ENSMUSG00000025532 | -0.1207642 | 5.20859292 | 0.69866408 | 0.8374141  |
| ENSMUSG00000051341 | -0.120811  | 5.39470951 | 0.7011649  | 0.83875344 |
| ENSMUSG00000020349 | -0.1209257 | 8.72324382 | 0.69285842 | 0.83422377 |
| ENSMUSG00000010406 | -0.1209942 | 3.55023739 | 0.70671241 | 0.84223101 |
| ENSMUSG00000020739 | -0.1210195 | 7.29895175 | 0.69306911 | 0.83422377 |
| ENSMUSG00000018287 | -0.1213811 | 5.05282713 | 0.69526763 | 0.83513847 |
| ENSMUSG00000035401 | -0.1214081 | 6.03589685 | 0.6950004  | 0.83506229 |
| ENSMUSG00000025402 | -0.121425  | 3.00285236 | 0.71107764 | 0.84524235 |
| ENSMUSG00000054823 | -0.1215718 | 7.56705308 | 0.69214116 | 0.83378578 |
| ENSMUSG00000026869 | -0.1216263 | 6.7496896  | 0.69305288 | 0.83422377 |
| ENSMUSG00000032112 | -0.1217481 | 5.16710408 | 0.69493564 | 0.83506229 |



|                    |            |            |            |            |
|--------------------|------------|------------|------------|------------|
| ENSMUSG00000060862 | -0.1217858 | 4.63871121 | 0.69701544 | 0.83647886 |
| ENSMUSG00000038122 | -0.1218871 | 3.51660556 | 0.71456486 | 0.84726415 |
| ENSMUSG00000040596 | -0.1220024 | 5.85303265 | 0.69418672 | 0.83475024 |
| ENSMUSG00000027940 | -0.122056  | 8.48478407 | 0.69000862 | 0.83282517 |
| ENSMUSG00000038762 | -0.1222996 | 7.59903454 | 0.68963085 | 0.83262193 |
| ENSMUSG00000055069 | -0.1223382 | 2.71909191 | 0.72549785 | 0.8529024  |
| ENSMUSG00000070493 | -0.1223921 | 6.65415196 | 0.69119566 | 0.83335668 |
| ENSMUSG00000055991 | -0.1224989 | 3.5361097  | 0.70396702 | 0.84042736 |
| ENSMUSG00000079477 | -0.122554  | 8.0819249  | 0.68906042 | 0.83249245 |
| ENSMUSG00000061436 | -0.1225765 | 6.59340924 | 0.69121222 | 0.83335668 |
| ENSMUSG00000048732 | -0.1226054 | 4.2377298  | 0.7035328  | 0.84022461 |
| ENSMUSG00000035232 | -0.1226846 | 6.50819776 | 0.69113586 | 0.83335668 |
| ENSMUSG00000004446 | -0.1226972 | 6.58201272 | 0.69003087 | 0.83282517 |
| ENSMUSG00000021022 | -0.1227683 | 5.71149577 | 0.6937448  | 0.83469195 |
| ENSMUSG00000026701 | -0.1228205 | 6.69161811 | 0.68962073 | 0.83262193 |
| ENSMUSG00000038482 | -0.1236466 | 7.988183   | 0.68623037 | 0.83046889 |
| ENSMUSG00000031711 | -0.1238183 | 5.9020744  | 0.6890174  | 0.83249245 |
| ENSMUSG00000028788 | -0.1238577 | 9.2223897  | 0.68559175 | 0.83022476 |
| ENSMUSG00000050627 | -0.1239198 | 6.06900878 | 0.68892483 | 0.83249245 |
| ENSMUSG00000025584 | -0.1239277 | 5.00781841 | 0.69401943 | 0.83474297 |
| ENSMUSG00000071253 | -0.1239569 | 5.26061964 | 0.69304902 | 0.83422377 |
| ENSMUSG00000009995 | -0.1240795 | 5.57381112 | 0.68950413 | 0.83262193 |
| ENSMUSG00000021033 | -0.1244541 | 3.04208337 | 0.69945731 | 0.83763994 |
| ENSMUSG00000031774 | -0.1244557 | 5.64808437 | 0.68812821 | 0.83184654 |
| ENSMUSG00000000339 | -0.1245104 | 5.4755118  | 0.68811094 | 0.83184654 |
| ENSMUSG00000021681 | -0.124652  | 6.80557713 | 0.6853376  | 0.83022476 |
| ENSMUSG00000024527 | -0.1247355 | 6.60949977 | 0.68477746 | 0.83001462 |
| ENSMUSG00000047126 | -0.124775  | 11.1545331 | 0.68303925 | 0.82882463 |
| ENSMUSG00000035284 | -0.1249205 | 5.60942333 | 0.69027152 | 0.83292918 |
| ENSMUSG00000049287 | -0.1252456 | 2.87659012 | 0.70809715 | 0.84299866 |
| ENSMUSG00000087687 | -0.1252863 | 3.55882351 | 0.69479537 | 0.83502433 |
| ENSMUSG00000032058 | -0.125448  | 6.81240447 | 0.6836591  | 0.82918113 |
| ENSMUSG00000077450 | -0.1254517 | 5.49262465 | 0.68572072 | 0.8302248  |
| ENSMUSG00000051721 | -0.1255359 | 2.93127299 | 0.71876834 | 0.84892688 |
| ENSMUSG00000040124 | -0.1255418 | 3.01681256 | 0.71338317 | 0.8464214  |
| ENSMUSG00000014402 | -0.125624  | 5.80196856 | 0.68532631 | 0.83022476 |
| ENSMUSG00000026975 | -0.1256848 | 4.59001708 | 0.6901515  | 0.83287755 |
| ENSMUSG00000022404 | -0.1258249 | 6.16958844 | 0.68370536 | 0.82918113 |
| ENSMUSG00000033157 | -0.1259326 | 4.18290439 | 0.69742756 | 0.83660275 |
| ENSMUSG00000078942 | -0.1259896 | 2.5661306  | 0.71064067 | 0.84512009 |
| ENSMUSG00000043067 | -0.1260197 | 6.34995645 | 0.68308408 | 0.82882463 |
| ENSMUSG00000035151 | -0.1261004 | 5.15092223 | 0.68945613 | 0.83262193 |
| ENSMUSG00000006021 | -0.1261329 | 3.48328147 | 0.69365492 | 0.83467693 |

|                    |            |            |            |            |
|--------------------|------------|------------|------------|------------|
| ENSMUSG0000006705  | -0.1261492 | 5.62558007 | 0.68472658 | 0.83001462 |
| ENSMUSG00000027111 | -0.1262732 | 4.86534951 | 0.68860826 | 0.83231915 |
| ENSMUSG00000041781 | -0.1263061 | 7.94889736 | 0.68041671 | 0.82770601 |
| ENSMUSG00000031478 | -0.1264404 | 2.10237139 | 0.75658845 | 0.87271754 |
| ENSMUSG00000024654 | -0.1266231 | 5.07011454 | 0.68532373 | 0.83022476 |
| ENSMUSG00000037111 | -0.1266832 | 6.64681684 | 0.68132026 | 0.82805789 |
| ENSMUSG00000021102 | -0.1270696 | 4.40782535 | 0.68885427 | 0.83249245 |
| ENSMUSG00000055204 | -0.1270722 | 8.53494982 | 0.67822698 | 0.82616059 |
| ENSMUSG00000029433 | -0.1271004 | 5.7786948  | 0.6811665  | 0.82796432 |
| ENSMUSG00000035024 | -0.1271902 | 6.67126311 | 0.67987727 | 0.82729974 |
| ENSMUSG00000024271 | -0.1271922 | 7.40845467 | 0.67852844 | 0.82639308 |
| ENSMUSG00000021518 | -0.1272815 | 6.5925361  | 0.67938177 | 0.82700677 |
| ENSMUSG00000029462 | -0.1272861 | 5.82204572 | 0.68161778 | 0.82816228 |
| ENSMUSG00000020716 | -0.1273335 | 5.5948229  | 0.68313921 | 0.82882463 |
| ENSMUSG00000009112 | -0.1276997 | 6.18616115 | 0.67890331 | 0.82661097 |
| ENSMUSG00000024780 | -0.1280351 | 5.3818188  | 0.68175865 | 0.82821734 |
| ENSMUSG00000064128 | -0.1280494 | 5.77376635 | 0.68094514 | 0.82796432 |
| ENSMUSG00000020070 | -0.1280792 | 4.64269443 | 0.68546868 | 0.83022476 |
| ENSMUSG00000019373 | -0.1284826 | 7.07767181 | 0.67602441 | 0.82450206 |
| ENSMUSG00000074030 | -0.128483  | 4.87329652 | 0.6832577  | 0.82882463 |
| ENSMUSG00000006715 | -0.1291942 | 6.39342909 | 0.67522245 | 0.82389669 |
| ENSMUSG00000063663 | -0.1292401 | 5.87410238 | 0.67791512 | 0.82606064 |
| ENSMUSG00000026000 | -0.1293112 | 3.83350055 | 0.68231207 | 0.82851631 |
| ENSMUSG00000021385 | -0.1295088 | 4.97056093 | 0.68053526 | 0.82775685 |
| ENSMUSG00000062822 | -0.1295181 | 5.82359763 | 0.67678935 | 0.8251302  |
| ENSMUSG00000041219 | -0.1295192 | 7.90444218 | 0.67279204 | 0.82227802 |
| ENSMUSG00000014550 | -0.1296261 | 5.81912839 | 0.67556772 | 0.8241655  |
| ENSMUSG00000073409 | -0.1297971 | 7.860656   | 0.6719278  | 0.82173615 |
| ENSMUSG00000097073 | -0.1298618 | 1.49600653 | 0.75202341 | 0.86978207 |
| ENSMUSG00000015165 | -0.1302748 | 8.98374446 | 0.67018751 | 0.82063155 |
| ENSMUSG00000001150 | -0.1305239 | 6.45636776 | 0.67153816 | 0.82139819 |
| ENSMUSG00000030291 | -0.1305603 | 4.7658754  | 0.67978847 | 0.82729974 |
| ENSMUSG00000095253 | -0.1306437 | 3.92709072 | 0.69044107 | 0.83294737 |
| ENSMUSG00000001964 | -0.1312665 | 6.04936835 | 0.67157528 | 0.82139819 |
| ENSMUSG00000035439 | -0.1314805 | 3.72095241 | 0.68239341 | 0.82852179 |
| ENSMUSG00000028911 | -0.1315898 | 5.72357532 | 0.67003642 | 0.82053972 |
| ENSMUSG00000037434 | -0.1317271 | 4.08928438 | 0.68295875 | 0.82882463 |
| ENSMUSG00000037318 | -0.1318109 | 6.55639937 | 0.66859807 | 0.81932801 |
| ENSMUSG00000031386 | -0.1319738 | 8.48371877 | 0.66635977 | 0.81742962 |
| ENSMUSG00000069844 | -0.1322767 | 5.57713858 | 0.67101305 | 0.82108302 |
| ENSMUSG00000060301 | -0.1323416 | 4.66450092 | 0.67807017 | 0.8261115  |
| ENSMUSG00000029681 | -0.1325782 | 3.43524156 | 0.67691923 | 0.8251302  |
| ENSMUSG00000021962 | -0.1328261 | 6.61470896 | 0.66607735 | 0.81731943 |

|                    |            |            |            |            |
|--------------------|------------|------------|------------|------------|
| ENSMUSG00000022270 | -0.1328689 | 5.58809707 | 0.6702772  | 0.8206482  |
| ENSMUSG00000024853 | -0.133053  | 8.35947559 | 0.66371563 | 0.81530252 |
| ENSMUSG00000020366 | -0.1332431 | 6.35025059 | 0.66633007 | 0.81742962 |
| ENSMUSG00000031425 | -0.1333576 | 1.47206877 | 0.77636569 | 0.88420195 |
| ENSMUSG00000057835 | -0.1334713 | 2.76322191 | 0.71100377 | 0.84524235 |
| ENSMUSG00000049657 | -0.133622  | 5.10077486 | 0.66819014 | 0.81920901 |
| ENSMUSG00000030469 | -0.133778  | 4.43689363 | 0.67616725 | 0.82458302 |
| ENSMUSG00000026554 | -0.1338739 | 6.61996101 | 0.66333027 | 0.81530252 |
| ENSMUSG00000032705 | -0.1338988 | 4.36776122 | 0.67290463 | 0.82227802 |
| ENSMUSG00000047867 | -0.1345934 | 8.67898523 | 0.66014482 | 0.81313555 |
| ENSMUSG00000032398 | -0.1346763 | 4.72953617 | 0.6685226  | 0.81932801 |
| ENSMUSG00000031950 | -0.1348952 | 5.78327923 | 0.66366716 | 0.81530252 |
| ENSMUSG00000028614 | -0.1349129 | 7.18113275 | 0.66074267 | 0.81350028 |
| ENSMUSG00000061882 | -0.134946  | 1.27727763 | 0.7780151  | 0.88503321 |
| ENSMUSG00000034430 | -0.1349614 | 4.43753386 | 0.66881553 | 0.81932801 |
| ENSMUSG00000031231 | -0.1351169 | 7.0502244  | 0.65998498 | 0.81307233 |
| ENSMUSG00000071014 | -0.1355384 | 5.06869182 | 0.66572232 | 0.8171639  |
| ENSMUSG00000027939 | -0.135636  | 2.2440649  | 0.69609615 | 0.83593552 |
| ENSMUSG00000022412 | -0.1358076 | 5.97450492 | 0.66066296 | 0.81349502 |
| ENSMUSG00000004328 | -0.1360539 | 1.39560873 | 0.70754047 | 0.84259607 |
| ENSMUSG00000030691 | -0.1361777 | 8.29540233 | 0.656722   | 0.81095201 |
| ENSMUSG00000007411 | -0.1362944 | 6.49661413 | 0.65822744 | 0.81179377 |
| ENSMUSG00000020128 | -0.1364438 | 6.93322877 | 0.6576511  | 0.81145176 |
| ENSMUSG00000071632 | -0.1365586 | 3.70054928 | 0.67237345 | 0.82200151 |
| ENSMUSG00000068394 | -0.1365948 | 5.27850121 | 0.66052211 | 0.81341446 |
| ENSMUSG00000030509 | -0.1368647 | 4.6325598  | 0.66681588 | 0.81780308 |
| ENSMUSG00000037957 | -0.1369864 | 4.10786297 | 0.66851158 | 0.81932801 |
| ENSMUSG00000024269 | -0.1370418 | 4.45707622 | 0.66584006 | 0.8171639  |
| ENSMUSG00000030203 | -0.1372218 | 5.25442597 | 0.66157186 | 0.81414937 |
| ENSMUSG00000064181 | -0.1376752 | 3.64312537 | 0.66000775 | 0.81307233 |
| ENSMUSG00000032096 | -0.1377376 | 9.09126704 | 0.65260476 | 0.80827952 |
| ENSMUSG00000001518 | -0.137785  | 3.6604795  | 0.66346875 | 0.81530252 |
| ENSMUSG00000046364 | -0.1378054 | 8.76651165 | 0.65248094 | 0.80821898 |
| ENSMUSG00000045757 | -0.1381334 | 3.06714674 | 0.67564582 | 0.8241655  |
| ENSMUSG00000027678 | -0.1383429 | 8.0336097  | 0.6515956  | 0.80731374 |
| ENSMUSG00000063511 | -0.1384902 | 7.37873267 | 0.6516004  | 0.80731374 |
| ENSMUSG00000064215 | -0.1386067 | 4.88967713 | 0.6553586  | 0.81001571 |
| ENSMUSG00000000934 | -0.1387136 | 3.29127057 | 0.66190555 | 0.81431957 |
| ENSMUSG00000026469 | -0.1388551 | 6.05818093 | 0.6550425  | 0.8099035  |
| ENSMUSG00000034343 | -0.1391567 | 6.03580945 | 0.65295466 | 0.80852717 |
| ENSMUSG00000042148 | -0.1391678 | 4.1059519  | 0.65850472 | 0.81201425 |
| ENSMUSG00000098923 | -0.1393903 | 4.65472942 | 0.65926298 | 0.81260624 |
| ENSMUSG00000056019 | -0.139619  | 4.55893759 | 0.66282278 | 0.81520228 |

|                    |            |            |            |            |
|--------------------|------------|------------|------------|------------|
| ENSMUSG00000022536 | -0.139637  | 8.06940193 | 0.64843066 | 0.80525038 |
| ENSMUSG00000033909 | -0.1397564 | 5.91396727 | 0.64976879 | 0.80624904 |
| ENSMUSG00000036769 | -0.1399259 | 5.17641935 | 0.65729843 | 0.81120465 |
| ENSMUSG00000074748 | -0.1400726 | 7.20990185 | 0.64859186 | 0.80534423 |
| ENSMUSG00000030861 | -0.1402692 | 4.42181732 | 0.65807755 | 0.81170174 |
| ENSMUSG00000058388 | -0.1407166 | 6.19169531 | 0.64932297 | 0.80606641 |
| ENSMUSG00000054920 | -0.1410103 | 5.25010061 | 0.65073636 | 0.80670662 |
| ENSMUSG00000069049 | -0.1410889 | 6.62273523 | 0.65386111 | 0.80908302 |
| ENSMUSG00000029196 | -0.1412603 | 5.36601759 | 0.65004486 | 0.80624904 |
| ENSMUSG00000005583 | -0.141419  | 9.07193626 | 0.64396567 | 0.80197365 |
| ENSMUSG00000037262 | -0.1414365 | 5.1653801  | 0.65089571 | 0.80681142 |
| ENSMUSG00000072704 | -0.1416411 | 4.91424771 | 0.65453194 | 0.80945784 |
| ENSMUSG00000024791 | -0.1416748 | 6.20587442 | 0.64596571 | 0.803573   |
| ENSMUSG00000043716 | -0.14198   | 10.8286034 | 0.64219823 | 0.80099794 |
| ENSMUSG00000030557 | -0.1419821 | 7.19796642 | 0.64414762 | 0.80197365 |
| ENSMUSG00000022514 | -0.1420129 | 4.75662155 | 0.65382685 | 0.80908302 |
| ENSMUSG00000025290 | -0.142031  | 10.1130528 | 0.64219507 | 0.80099794 |
| ENSMUSG00000046962 | -0.1420419 | 4.38584326 | 0.64995965 | 0.80624904 |
| ENSMUSG00000022863 | -0.1421585 | 3.24724815 | 0.66917185 | 0.81966711 |
| ENSMUSG00000036299 | -0.1421958 | 5.44438813 | 0.64718354 | 0.80480019 |
| ENSMUSG00000083902 | -0.1424112 | 1.15482746 | 0.79604826 | 0.89462453 |
| ENSMUSG00000027673 | -0.1428194 | 6.61771537 | 0.64303514 | 0.80158258 |
| ENSMUSG00000037725 | -0.1429627 | 5.90429929 | 0.64460758 | 0.80233704 |
| ENSMUSG00000010911 | -0.1429804 | 4.87625981 | 0.64833868 | 0.80525038 |
| ENSMUSG00000040795 | -0.1429892 | 3.82475986 | 0.65234487 | 0.80814326 |
| ENSMUSG00000042389 | -0.1430178 | 3.6724182  | 0.65403811 | 0.8091255  |
| ENSMUSG00000026430 | -0.1430377 | 6.56419122 | 0.64239049 | 0.80103868 |
| ENSMUSG00000027655 | -0.1431612 | 4.56580272 | 0.64805166 | 0.80516297 |
| ENSMUSG00000058291 | -0.1431913 | 6.33314341 | 0.64353228 | 0.80197365 |
| ENSMUSG00000028563 | -0.1433621 | 3.48998181 | 0.66738359 | 0.81840626 |
| ENSMUSG00000044795 | -0.1434043 | 4.00220181 | 0.65006819 | 0.80624904 |
| ENSMUSG00000078941 | -0.1434776 | 5.39637325 | 0.64489858 | 0.80260661 |
| ENSMUSG00000050213 | -0.1434857 | 5.58038792 | 0.64379654 | 0.80197365 |
| ENSMUSG00000020962 | -0.1435993 | 6.44272794 | 0.64186136 | 0.80085999 |
| ENSMUSG00000032652 | -0.1438011 | 2.86101294 | 0.67384892 | 0.82287247 |
| ENSMUSG00000024750 | -0.1438265 | 6.89007239 | 0.64058484 | 0.80018432 |
| ENSMUSG00000022820 | -0.1440223 | 3.90499287 | 0.65435557 | 0.80933255 |
| ENSMUSG00000026229 | -0.1440732 | 8.60182456 | 0.63791113 | 0.79796237 |
| ENSMUSG00000048439 | -0.1444496 | 4.5049975  | 0.64807257 | 0.80516297 |
| ENSMUSG00000008429 | -0.1447406 | 4.81491929 | 0.64506659 | 0.80272307 |
| ENSMUSG00000046032 | -0.144874  | 5.67554592 | 0.64084998 | 0.80024621 |
| ENSMUSG00000023953 | -0.1448907 | 6.18953571 | 0.63849211 | 0.79822616 |
| ENSMUSG00000022462 | -0.1450926 | 8.05549963 | 0.6359117  | 0.79601529 |

|                    |            |            |            |            |
|--------------------|------------|------------|------------|------------|
| ENSMUSG00000027811 | -0.145128  | 4.42008436 | 0.65037376 | 0.80644253 |
| ENSMUSG00000054792 | -0.1455034 | 4.59704236 | 0.64367311 | 0.80197365 |
| ENSMUSG00000063801 | -0.145576  | 5.55201648 | 0.63930884 | 0.79906195 |
| ENSMUSG00000030801 | -0.1456244 | 4.63934234 | 0.64163695 | 0.80085999 |
| ENSMUSG00000021376 | -0.1456413 | 1.0996267  | 0.79032088 | 0.89113043 |
| ENSMUSG00000036810 | -0.1458035 | 5.60343929 | 0.6401604  | 0.79994087 |
| ENSMUSG00000033114 | -0.145989  | 3.53871666 | 0.66372384 | 0.81530252 |
| ENSMUSG00000040174 | -0.1460589 | 3.91610706 | 0.6459706  | 0.803573   |
| ENSMUSG00000021177 | -0.1461118 | 5.34843646 | 0.63696423 | 0.79712757 |
| ENSMUSG00000026600 | -0.1461692 | 6.79812147 | 0.63523776 | 0.79580392 |
| ENSMUSG00000024246 | -0.1463045 | 3.16674541 | 0.66101329 | 0.81374056 |
| ENSMUSG00000032264 | -0.146311  | 6.59912569 | 0.63473751 | 0.7955994  |
| ENSMUSG00000027406 | -0.1464818 | 6.83909496 | 0.63362287 | 0.79515627 |
| ENSMUSG00000011958 | -0.146807  | 7.05978161 | 0.63287321 | 0.79477217 |
| ENSMUSG00000036438 | -0.1468279 | 8.22176392 | 0.63176587 | 0.79427268 |
| ENSMUSG00000057156 | -0.1470118 | 3.6395818  | 0.65346909 | 0.80890728 |
| ENSMUSG00000029017 | -0.1471407 | 6.61595413 | 0.63300243 | 0.79477217 |
| ENSMUSG00000074629 | -0.1471439 | 1.59767819 | 0.71755733 | 0.84866618 |
| ENSMUSG00000005774 | -0.1473694 | 6.11474801 | 0.63318059 | 0.79490332 |
| ENSMUSG00000045098 | -0.147397  | 6.09260121 | 0.63396945 | 0.79515627 |
| ENSMUSG00000038250 | -0.1475592 | 7.2139467  | 0.63121377 | 0.79400551 |
| ENSMUSG00000005871 | -0.1476089 | 6.75186062 | 0.63205935 | 0.79442051 |
| ENSMUSG00000047804 | -0.1478549 | 6.25610862 | 0.63247104 | 0.79467321 |
| ENSMUSG00000058230 | -0.148003  | 5.65113747 | 0.63377652 | 0.79515627 |
| ENSMUSG00000035967 | -0.1481003 | 6.27070475 | 0.63218911 | 0.79449101 |
| ENSMUSG00000049659 | -0.1481621 | 7.61584958 | 0.62930501 | 0.79252893 |
| ENSMUSG00000000127 | -0.1482048 | 0.98216143 | 0.73814205 | 0.86162565 |
| ENSMUSG00000018923 | -0.1483119 | 4.01324383 | 0.63814487 | 0.79806961 |
| ENSMUSG00000007338 | -0.1484963 | 5.96023947 | 0.63097759 | 0.79389073 |
| ENSMUSG00000030652 | -0.1490592 | 3.28972272 | 0.63787986 | 0.79796237 |
| ENSMUSG00000056531 | -0.1495306 | 4.39870281 | 0.64184794 | 0.80085999 |
| ENSMUSG00000029826 | -0.1496766 | 8.65838012 | 0.62492224 | 0.78912897 |
| ENSMUSG00000001376 | -0.149743  | 6.20986846 | 0.62828411 | 0.79170552 |
| ENSMUSG00000019984 | -0.1498181 | 6.32918449 | 0.62767885 | 0.79114527 |
| ENSMUSG00000035725 | -0.1501324 | 5.65076587 | 0.62987407 | 0.79286899 |
| ENSMUSG00000020495 | -0.1501601 | 5.66279335 | 0.62769278 | 0.79114527 |
| ENSMUSG00000051469 | -0.1501781 | 6.41703372 | 0.62658713 | 0.79039836 |
| ENSMUSG00000020412 | -0.1504079 | 6.14360419 | 0.62546121 | 0.78962464 |
| ENSMUSG00000074576 | -0.1504524 | 2.40099042 | 0.66468803 | 0.81630745 |
| ENSMUSG00000046675 | -0.1506333 | 5.03535156 | 0.63159736 | 0.79427268 |
| ENSMUSG00000028898 | -0.1506524 | 4.68917828 | 0.63081387 | 0.79378025 |
| ENSMUSG00000078622 | -0.151244  | 7.21631833 | 0.62273663 | 0.78821501 |
| ENSMUSG00000026273 | -0.1512757 | 4.33153549 | 0.63397196 | 0.79515627 |

|                    |            |            |            |            |
|--------------------|------------|------------|------------|------------|
| ENSMUSG00000026048 | -0.1513279 | 5.03888613 | 0.62994265 | 0.79286899 |
| ENSMUSG00000021972 | -0.151398  | 5.16445078 | 0.62784791 | 0.79124831 |
| ENSMUSG00000031729 | -0.1514722 | 6.77513019 | 0.62258727 | 0.78821501 |
| ENSMUSG00000034269 | -0.1517689 | 8.35502809 | 0.62020212 | 0.78692651 |
| ENSMUSG00000024997 | -0.1520224 | 7.71539554 | 0.62001802 | 0.78680564 |
| ENSMUSG00000034152 | -0.1520489 | 6.69330151 | 0.62103504 | 0.78738749 |
| ENSMUSG00000043411 | -0.1521166 | 7.23015413 | 0.62033218 | 0.78692651 |
| ENSMUSG00000070697 | -0.152367  | 7.0434437  | 0.61988666 | 0.78680564 |
| ENSMUSG00000061313 | -0.1525167 | 5.37074329 | 0.62438136 | 0.78872304 |
| ENSMUSG00000017286 | -0.1526563 | 6.31261233 | 0.62064314 | 0.78713579 |
| ENSMUSG00000035765 | -0.1529839 | 5.22557266 | 0.62325784 | 0.78864486 |
| ENSMUSG00000046185 | -0.1529954 | 5.07601755 | 0.62432056 | 0.78872304 |
| ENSMUSG00000034187 | -0.1532852 | 6.25367683 | 0.61887969 | 0.78591599 |
| ENSMUSG00000050088 | -0.1533211 | 4.13295512 | 0.63337813 | 0.79505875 |
| ENSMUSG00000004221 | -0.1533969 | 5.96539254 | 0.62026983 | 0.78692651 |
| ENSMUSG00000051506 | -0.1534429 | 9.03617216 | 0.6159125  | 0.78413274 |
| ENSMUSG00000015316 | -0.1537217 | 4.35607158 | 0.62852784 | 0.79171634 |
| ENSMUSG00000038594 | -0.153768  | 3.52168892 | 0.64710399 | 0.80479408 |
| ENSMUSG00000033382 | -0.1538413 | 7.33257472 | 0.61684571 | 0.78462657 |
| ENSMUSG00000048581 | -0.1538915 | 1.90001132 | 0.70458917 | 0.84084533 |
| ENSMUSG00000022812 | -0.1539079 | 6.44309132 | 0.61782809 | 0.78496222 |
| ENSMUSG00000061613 | -0.1539975 | 6.85718126 | 0.61595467 | 0.78413274 |
| ENSMUSG00000040731 | -0.1542756 | 8.23896182 | 0.61422709 | 0.78277298 |
| ENSMUSG00000037935 | -0.1543045 | 6.56643002 | 0.61611493 | 0.78413274 |
| ENSMUSG00000042042 | -0.1544121 | 4.9150447  | 0.6261796  | 0.79034654 |
| ENSMUSG00000042472 | -0.1544554 | 5.78597364 | 0.61807437 | 0.78507821 |
| ENSMUSG00000061759 | -0.1545458 | 5.86157448 | 0.61784952 | 0.78496222 |
| ENSMUSG00000057469 | -0.154693  | 5.55898081 | 0.61791027 | 0.78496222 |
| ENSMUSG00000012076 | -0.1547822 | 4.86180037 | 0.62254769 | 0.78821501 |
| ENSMUSG00000017686 | -0.1549157 | 6.64913459 | 0.61538443 | 0.78392315 |
| ENSMUSG00000046603 | -0.1549535 | 3.58161094 | 0.63383466 | 0.79515627 |
| ENSMUSG00000086859 | -0.154957  | 2.32181772 | 0.66379415 | 0.81530252 |
| ENSMUSG00000035266 | -0.1550186 | 5.44928728 | 0.61757    | 0.78496222 |
| ENSMUSG00000020459 | -0.1550755 | 5.89635389 | 0.61761318 | 0.78496222 |
| ENSMUSG00000079469 | -0.1551295 | 4.67790107 | 0.62187244 | 0.7877684  |
| ENSMUSG00000089844 | -0.1551815 | 5.51451273 | 0.61721503 | 0.78491119 |
| ENSMUSG00000043733 | -0.1551815 | 7.3278018  | 0.61299918 | 0.78194737 |
| ENSMUSG00000038816 | -0.1551837 | 5.07301081 | 0.62061049 | 0.78713579 |
| ENSMUSG00000041879 | -0.1552336 | 7.65870726 | 0.61257007 | 0.78149245 |
| ENSMUSG00000022722 | -0.1554591 | 2.8451756  | 0.64973724 | 0.80624904 |
| ENSMUSG00000024981 | -0.1555219 | 9.06029864 | 0.61121205 | 0.78022144 |
| ENSMUSG00000000399 | -0.155577  | 6.94761201 | 0.61252393 | 0.78149245 |
| ENSMUSG00000050043 | -0.1556207 | 6.37117342 | 0.61402712 | 0.78270312 |

|                    |            |            |            |            |
|--------------------|------------|------------|------------|------------|
| ENSMUSG0000001151  | -0.1556247 | 6.0410324  | 0.61411165 | 0.78271835 |
| ENSMUSG00000041498 | -0.1558601 | 6.39234695 | 0.61317842 | 0.78199102 |
| ENSMUSG00000020430 | -0.15631   | 7.49253431 | 0.60994417 | 0.77922089 |
| ENSMUSG00000030678 | -0.1563841 | 6.65384778 | 0.6104928  | 0.77940596 |
| ENSMUSG00000024474 | -0.1565489 | 8.0257714  | 0.60941639 | 0.7789435  |
| ENSMUSG00000097994 | -0.1567684 | 1.99516368 | 0.68204932 | 0.82829053 |
| ENSMUSG00000017776 | -0.1569113 | 7.00190911 | 0.61006695 | 0.77922089 |
| ENSMUSG00000003135 | -0.1570558 | 5.96243665 | 0.61186029 | 0.78095648 |
| ENSMUSG00000024404 | -0.157138  | 7.22263937 | 0.60899106 | 0.77888289 |
| ENSMUSG00000038848 | -0.1571673 | 7.01797979 | 0.6089172  | 0.77888289 |
| ENSMUSG00000043279 | -0.1572474 | 6.84387572 | 0.6093178  | 0.77891253 |
| ENSMUSG00000028078 | -0.1572565 | 3.4328617  | 0.62646121 | 0.79039836 |
| ENSMUSG00000039804 | -0.1573011 | 5.87296257 | 0.61022099 | 0.77932533 |
| ENSMUSG00000029863 | -0.1574328 | 6.91268718 | 0.60874383 | 0.77885298 |
| ENSMUSG00000052915 | -0.1575173 | 7.06879795 | 0.6082481  | 0.77864287 |
| ENSMUSG00000038702 | -0.1575683 | 1.76676853 | 0.6574405  | 0.81128715 |
| ENSMUSG00000051166 | -0.1577045 | 4.32861498 | 0.62183879 | 0.7877684  |
| ENSMUSG00000032525 | -0.1578585 | 8.52234563 | 0.60614824 | 0.77716117 |
| ENSMUSG00000024581 | -0.1579033 | 4.75282975 | 0.61631118 | 0.78422416 |
| ENSMUSG00000024436 | -0.158011  | 5.96460015 | 0.60791274 | 0.77831307 |
| ENSMUSG00000021572 | -0.158042  | 3.55247599 | 0.62725841 | 0.7908751  |
| ENSMUSG00000019927 | -0.1580971 | 4.53217398 | 0.61968802 | 0.78673872 |
| ENSMUSG00000032840 | -0.1582856 | 4.14306882 | 0.61401419 | 0.78270312 |
| ENSMUSG00000060032 | -0.1586339 | 2.87590115 | 0.63506811 | 0.79572479 |
| ENSMUSG00000034587 | -0.1586859 | 2.15242919 | 0.661679   | 0.8141883  |
| ENSMUSG00000042508 | -0.1586894 | 6.08285381 | 0.60838695 | 0.77864287 |
| ENSMUSG00000021619 | -0.1590908 | 3.01849284 | 0.63759126 | 0.79774732 |
| ENSMUSG00000027709 | -0.1592851 | 5.16211475 | 0.61050094 | 0.77940596 |
| ENSMUSG00000002365 | -0.1593789 | 6.58349603 | 0.60458308 | 0.7759736  |
| ENSMUSG00000050312 | -0.1594332 | 4.98517562 | 0.61203889 | 0.78107795 |
| ENSMUSG00000059273 | -0.1594408 | 6.22613862 | 0.60464634 | 0.7759736  |
| ENSMUSG00000061778 | -0.1595534 | 5.30938402 | 0.60960986 | 0.77900613 |
| ENSMUSG00000028430 | -0.1597957 | 6.2229873  | 0.60315106 | 0.7751273  |
| ENSMUSG00000029440 | -0.1597992 | 4.05571984 | 0.60599994 | 0.77706342 |
| ENSMUSG00000042063 | -0.1600003 | 5.3156467  | 0.60924924 | 0.77891253 |
| ENSMUSG00000071369 | -0.160128  | 6.42422923 | 0.60383016 | 0.77547987 |
| ENSMUSG00000009145 | -0.1601719 | 1.59560634 | 0.64399882 | 0.80197365 |
| ENSMUSG00000031467 | -0.1602387 | 6.24851207 | 0.60413025 | 0.77577287 |
| ENSMUSG00000023994 | -0.1602476 | 7.09378967 | 0.6017353  | 0.77444963 |
| ENSMUSG00000047248 | -0.1602835 | 6.9883596  | 0.60218803 | 0.7745701  |
| ENSMUSG00000028792 | -0.160376  | 8.29199207 | 0.60025691 | 0.77350591 |
| ENSMUSG00000097245 | -0.1604165 | 1.43925884 | 0.68814011 | 0.83184654 |
| ENSMUSG00000037759 | -0.1604471 | 0.93248936 | 0.69172203 | 0.83356022 |

|                    |            |            |            |            |
|--------------------|------------|------------|------------|------------|
| ENSMUSG00000014039 | -0.1604921 | 4.72214791 | 0.60984273 | 0.77921137 |
| ENSMUSG00000008763 | -0.160606  | 7.32405153 | 0.60115837 | 0.77408397 |
| ENSMUSG00000042557 | -0.1607677 | 7.41493942 | 0.60059718 | 0.773816   |
| ENSMUSG00000097352 | -0.1607926 | 5.4643106  | 0.6065709  | 0.7773334  |
| ENSMUSG00000028329 | -0.1609702 | 3.54824105 | 0.61974642 | 0.78673872 |
| ENSMUSG00000032252 | -0.160973  | 5.54795304 | 0.60569541 | 0.77685767 |
| ENSMUSG00000078908 | -0.1610666 | 5.62630775 | 0.60305279 | 0.7751273  |
| ENSMUSG00000040213 | -0.1610773 | 4.96350769 | 0.60582325 | 0.77692924 |
| ENSMUSG00000038774 | -0.1610991 | 7.57279061 | 0.59980366 | 0.77340863 |
| ENSMUSG00000026436 | -0.1611945 | 6.85153205 | 0.60088663 | 0.774004   |
| ENSMUSG00000097295 | -0.1612025 | 1.28567119 | 0.69089351 | 0.83335668 |
| ENSMUSG00000053390 | -0.1618152 | 5.00551712 | 0.60633293 | 0.77721316 |
| ENSMUSG00000024902 | -0.1623287 | 5.10720622 | 0.60148081 | 0.77425647 |
| ENSMUSG00000009585 | -0.1625075 | 9.0521599  | 0.59523981 | 0.7699452  |
| ENSMUSG00000080866 | -0.1625522 | 0.86132297 | 0.6785711  | 0.82639308 |
| ENSMUSG00000027346 | -0.1626536 | 7.12850366 | 0.59709841 | 0.77105847 |
| ENSMUSG00000032434 | -0.1627539 | 6.82978182 | 0.59656049 | 0.77082534 |
| ENSMUSG00000048922 | -0.1630977 | 6.71137834 | 0.59593963 | 0.77039235 |
| ENSMUSG00000028653 | -0.1632999 | 4.71934395 | 0.60319624 | 0.7751273  |
| ENSMUSG00000033306 | -0.1633299 | 5.94650668 | 0.59887658 | 0.77305762 |
| ENSMUSG00000038658 | -0.1634869 | 6.45879064 | 0.59631466 | 0.77069239 |
| ENSMUSG00000031537 | -0.1637024 | 6.62006459 | 0.5942575  | 0.76913981 |
| ENSMUSG00000032178 | -0.1637823 | 7.45843202 | 0.59318591 | 0.76858307 |
| ENSMUSG00000059586 | -0.1638222 | 5.31562414 | 0.59947898 | 0.7732992  |
| ENSMUSG00000037242 | -0.1638582 | 9.4357199  | 0.5920819  | 0.76770605 |
| ENSMUSG00000025040 | -0.164392  | 5.34761228 | 0.59920108 | 0.7732182  |
| ENSMUSG00000029186 | -0.1644144 | 4.87714831 | 0.60103216 | 0.77408397 |
| ENSMUSG00000043207 | -0.1644418 | 7.40675109 | 0.59224025 | 0.76772574 |
| ENSMUSG00000020917 | -0.1645092 | 8.23608326 | 0.59087969 | 0.76716376 |
| ENSMUSG00000026142 | -0.1645327 | 4.73663576 | 0.60028477 | 0.77350591 |
| ENSMUSG00000064068 | -0.1645329 | 4.60265564 | 0.59895443 | 0.77305762 |
| ENSMUSG00000051185 | -0.1645945 | 3.88899932 | 0.60931993 | 0.77891253 |
| ENSMUSG00000006412 | -0.1647874 | 5.15426222 | 0.59490751 | 0.76970397 |
| ENSMUSG00000027080 | -0.1647944 | 5.44461107 | 0.5968816  | 0.77096314 |
| ENSMUSG00000030079 | -0.16481   | 6.89579397 | 0.59114068 | 0.76716376 |
| ENSMUSG00000062040 | -0.1650562 | 4.10027488 | 0.60359197 | 0.77542999 |
| ENSMUSG00000020180 | -0.1654281 | 7.37177424 | 0.58959783 | 0.76605097 |
| ENSMUSG00000020107 | -0.165479  | 5.12744837 | 0.59543149 | 0.77001092 |
| ENSMUSG00000025279 | -0.1655345 | 4.98918463 | 0.59733943 | 0.77127735 |
| ENSMUSG00000024966 | -0.1657862 | 8.69536046 | 0.58786684 | 0.76500012 |
| ENSMUSG00000021327 | -0.1658851 | 6.02559076 | 0.59109424 | 0.76716376 |
| ENSMUSG00000019528 | -0.1660009 | 5.67239451 | 0.5933484  | 0.7686089  |
| ENSMUSG00000020326 | -0.1660566 | 9.50323539 | 0.58720582 | 0.76468971 |



|                    |            |            |            |            |
|--------------------|------------|------------|------------|------------|
| ENSMUSG00000047419 | -0.1662665 | 1.60570424 | 0.67115379 | 0.82116207 |
| ENSMUSG00000026039 | -0.1663401 | 6.42542959 | 0.59029128 | 0.76685956 |
| ENSMUSG00000025198 | -0.1664464 | 6.01320087 | 0.5910333  | 0.76716376 |
| ENSMUSG00000027942 | -0.1664929 | 6.50634769 | 0.58915945 | 0.76575816 |
| ENSMUSG00000036941 | -0.1665579 | 4.29688177 | 0.6026504  | 0.77488755 |
| ENSMUSG00000002881 | -0.1666397 | 7.65586737 | 0.58692726 | 0.76443211 |
| ENSMUSG00000025413 | -0.1667029 | 5.78724354 | 0.58938948 | 0.76587253 |
| ENSMUSG00000078676 | -0.1668772 | 6.72774603 | 0.58693415 | 0.76443211 |
| ENSMUSG00000008730 | -0.1672455 | 7.93603272 | 0.58531362 | 0.76342793 |
| ENSMUSG00000097333 | -0.1672628 | 5.07740838 | 0.59446398 | 0.76931472 |
| ENSMUSG00000075486 | -0.1675495 | 4.73328746 | 0.59500496 | 0.7697377  |
| ENSMUSG00000041132 | -0.1678977 | 4.00599601 | 0.60359353 | 0.77542999 |
| ENSMUSG00000005718 | -0.1682697 | 2.81655023 | 0.6100269  | 0.77922089 |
| ENSMUSG00000020973 | -0.1683293 | 5.33133595 | 0.58758655 | 0.76472765 |
| ENSMUSG00000097616 | -0.168557  | 1.15109525 | 0.6968269  | 0.83645742 |
| ENSMUSG00000029234 | -0.1687265 | 6.07949637 | 0.58556846 | 0.76363523 |
| ENSMUSG00000062203 | -0.1688855 | 9.17569484 | 0.58094102 | 0.76020725 |
| ENSMUSG00000030059 | -0.1689226 | 6.80451583 | 0.58333773 | 0.76195664 |
| ENSMUSG00000018042 | -0.1691044 | 5.9195992  | 0.58313098 | 0.76177887 |
| ENSMUSG00000044786 | -0.1694927 | 5.59839366 | 0.58521519 | 0.76339418 |
| ENSMUSG00000068921 | -0.1698695 | 6.27347903 | 0.58130907 | 0.76036285 |
| ENSMUSG00000028607 | -0.1702035 | 4.19293187 | 0.58843575 | 0.76555569 |
| ENSMUSG00000026618 | -0.1702481 | 7.30718922 | 0.57918302 | 0.75883627 |
| ENSMUSG00000026705 | -0.1702896 | 5.74743248 | 0.5825961  | 0.76144907 |
| ENSMUSG00000030204 | -0.1703205 | 7.09240483 | 0.57899077 | 0.75883627 |
| ENSMUSG00000089810 | -0.1704141 | 2.51109667 | 0.63508933 | 0.79572479 |
| ENSMUSG00000062397 | -0.1704608 | 7.93875527 | 0.57818565 | 0.75798129 |
| ENSMUSG00000026155 | -0.170501  | 5.75631049 | 0.58246775 | 0.76143222 |
| ENSMUSG00000024640 | -0.1705304 | 8.12683625 | 0.5775268  | 0.75757803 |
| ENSMUSG00000094114 | -0.1706559 | 1.92167338 | 0.64989867 | 0.80624904 |
| ENSMUSG00000041278 | -0.1707324 | 5.82918791 | 0.58084123 | 0.76016891 |
| ENSMUSG00000024073 | -0.1708788 | 8.54673949 | 0.5768899  | 0.75738747 |
| ENSMUSG00000069631 | -0.1708867 | 5.05227045 | 0.58359914 | 0.76211348 |
| ENSMUSG00000041040 | -0.1709922 | 5.67772968 | 0.58153929 | 0.76052871 |
| ENSMUSG00000020974 | -0.1711516 | 6.0596913  | 0.57959327 | 0.75918059 |
| ENSMUSG00000002055 | -0.1711539 | 7.01904079 | 0.57736582 | 0.75747181 |
| ENSMUSG00000038046 | -0.1713045 | 3.80765876 | 0.58898292 | 0.7657133  |
| ENSMUSG00000044792 | -0.1713142 | 4.14189941 | 0.59230272 | 0.76772574 |
| ENSMUSG00000025235 | -0.1713196 | 3.08475268 | 0.60789519 | 0.77831307 |
| ENSMUSG00000079610 | -0.1714326 | 2.15844661 | 0.62858636 | 0.79171634 |
| ENSMUSG00000026447 | -0.1715322 | 5.18448432 | 0.58080504 | 0.76016891 |
| ENSMUSG00000057691 | -0.1717199 | 4.98957736 | 0.58228031 | 0.76131314 |
| ENSMUSG00000020300 | -0.1717215 | 6.02679019 | 0.57950787 | 0.75916095 |

|                    |            |            |            |            |
|--------------------|------------|------------|------------|------------|
| ENSMUSG0000004040  | -0.1717743 | 7.42295348 | 0.57517048 | 0.75602586 |
| ENSMUSG00000033016 | -0.1718612 | 6.3041929  | 0.5771225  | 0.75747181 |
| ENSMUSG00000005102 | -0.1718883 | 5.80746117 | 0.57918566 | 0.75883627 |
| ENSMUSG00000021830 | -0.1721043 | 6.74439991 | 0.57649079 | 0.75695564 |
| ENSMUSG00000022400 | -0.1725939 | 6.44613256 | 0.5753147  | 0.75602586 |
| ENSMUSG00000020859 | -0.1726699 | 7.43783122 | 0.57391277 | 0.75575185 |
| ENSMUSG00000005656 | -0.172701  | 6.86927218 | 0.5746894  | 0.75602586 |
| ENSMUSG00000028882 | -0.1727873 | 6.6186636  | 0.57407426 | 0.75575185 |
| ENSMUSG00000005370 | -0.172815  | 8.10229174 | 0.57276762 | 0.75473192 |
| ENSMUSG00000029068 | -0.1728667 | 7.44409048 | 0.57303134 | 0.75498717 |
| ENSMUSG00000028861 | -0.172991  | 6.41247515 | 0.57422134 | 0.75575185 |
| ENSMUSG00000006456 | -0.1730827 | 5.51333118 | 0.57503505 | 0.75602586 |
| ENSMUSG00000068966 | -0.1733673 | 4.32291419 | 0.58623913 | 0.76398826 |
| ENSMUSG00000036104 | -0.1733859 | 6.64648009 | 0.57362366 | 0.75549067 |
| ENSMUSG00000013878 | -0.1735763 | 4.67907098 | 0.5827695  | 0.76149113 |
| ENSMUSG00000058267 | -0.1741309 | 5.76216159 | 0.57330412 | 0.75525429 |
| ENSMUSG00000061787 | -0.1741762 | 8.79312662 | 0.56902661 | 0.75145517 |
| ENSMUSG00000039983 | -0.1742589 | 3.66738083 | 0.58728554 | 0.76468971 |
| ENSMUSG00000055065 | -0.1743814 | 8.78776927 | 0.56875987 | 0.75128693 |
| ENSMUSG00000036552 | -0.1744333 | 3.9282797  | 0.58871855 | 0.76564651 |
| ENSMUSG00000021706 | -0.1744999 | 5.6763738  | 0.57513806 | 0.75602586 |
| ENSMUSG00000019845 | -0.1745146 | 4.51986634 | 0.58015482 | 0.75973158 |
| ENSMUSG00000031431 | -0.1745831 | 3.35883609 | 0.60210688 | 0.77455811 |
| ENSMUSG00000027852 | -0.1746393 | 7.68820336 | 0.5691161  | 0.75148132 |
| ENSMUSG00000020063 | -0.1748138 | 6.30558833 | 0.57172335 | 0.75372428 |
| ENSMUSG00000018076 | -0.1752819 | 5.80358397 | 0.57092794 | 0.7530439  |
| ENSMUSG00000022450 | -0.1753912 | 5.21446431 | 0.57355666 | 0.75549067 |
| ENSMUSG00000045538 | -0.1754204 | 3.64046345 | 0.58605565 | 0.76394699 |
| ENSMUSG00000025921 | -0.1755472 | 3.33751888 | 0.59640869 | 0.77072154 |
| ENSMUSG00000034292 | -0.175896  | 3.84569104 | 0.57714952 | 0.75747181 |
| ENSMUSG00000044629 | -0.1759105 | 2.7887678  | 0.61551814 | 0.78392315 |
| ENSMUSG00000034379 | -0.176268  | 3.88823603 | 0.58367046 | 0.76211433 |
| ENSMUSG00000074749 | -0.1764401 | 3.50259626 | 0.58910499 | 0.76575816 |
| ENSMUSG00000035086 | -0.1765117 | 7.34898629 | 0.56499468 | 0.74848834 |
| ENSMUSG00000047888 | -0.1765117 | 6.78724802 | 0.56675595 | 0.74937422 |
| ENSMUSG00000051034 | -0.1766026 | 2.86083058 | 0.60181073 | 0.77445429 |
| ENSMUSG00000032382 | -0.1766292 | 7.11832545 | 0.56504041 | 0.74848834 |
| ENSMUSG00000073647 | -0.1766864 | 1.36778452 | 0.62142613 | 0.78766566 |
| ENSMUSG00000056673 | -0.1766897 | 5.84404377 | 0.57972483 | 0.7592607  |
| ENSMUSG00000089417 | -0.1766978 | 2.57212526 | 0.6345513  | 0.7955994  |
| ENSMUSG00000031349 | -0.1767553 | 5.6194156  | 0.56966222 | 0.75167848 |
| ENSMUSG00000090553 | -0.1768575 | 7.23800601 | 0.56481697 | 0.74848834 |
| ENSMUSG00000025436 | -0.1769392 | 2.12504526 | 0.62172609 | 0.7877684  |

|                    |            |            |            |            |
|--------------------|------------|------------|------------|------------|
| ENSMUSG00000022842 | -0.1769568 | 3.62709388 | 0.5706626  | 0.752786   |
| ENSMUSG00000001855 | -0.1770518 | 6.9830162  | 0.56418272 | 0.74798949 |
| ENSMUSG00000005378 | -0.1771249 | 4.40906142 | 0.57211943 | 0.75415425 |
| ENSMUSG00000038279 | -0.1771555 | 6.94595769 | 0.56330076 | 0.74711533 |
| ENSMUSG00000025404 | -0.1774361 | 6.07081355 | 0.56620211 | 0.7489174  |
| ENSMUSG00000033760 | -0.1774726 | 3.95542073 | 0.58117195 | 0.76036285 |
| ENSMUSG00000056076 | -0.1774768 | 9.03410267 | 0.56168452 | 0.74579571 |
| ENSMUSG00000045176 | -0.1775944 | 1.71894147 | 0.62632232 | 0.79039836 |
| ENSMUSG00000007589 | -0.17773   | 4.82493707 | 0.56943855 | 0.75167848 |
| ENSMUSG00000027312 | -0.1778038 | 5.62214966 | 0.56655592 | 0.74929348 |
| ENSMUSG00000066042 | -0.1779859 | 3.57817831 | 0.58858181 | 0.76564651 |
| ENSMUSG00000027287 | -0.178096  | 6.12943482 | 0.56510601 | 0.74848834 |
| ENSMUSG00000035529 | -0.1781503 | 6.42039939 | 0.56331881 | 0.74711533 |
| ENSMUSG00000042229 | -0.1784856 | 5.55716259 | 0.56597179 | 0.7489174  |
| ENSMUSG00000057649 | -0.1786568 | 5.64445733 | 0.56329171 | 0.74711533 |
| ENSMUSG00000028414 | -0.1789428 | 4.56638055 | 0.56950781 | 0.75167848 |
| ENSMUSG00000001700 | -0.1789502 | 7.39089457 | 0.55977223 | 0.74406308 |
| ENSMUSG00000028385 | -0.1791267 | 6.23506006 | 0.5617673  | 0.74579571 |
| ENSMUSG00000048118 | -0.1791621 | 6.54401137 | 0.56108458 | 0.74525632 |
| ENSMUSG00000026788 | -0.179492  | 5.10701792 | 0.5644781  | 0.74819713 |
| ENSMUSG00000005362 | -0.1799195 | 5.49393608 | 0.56371633 | 0.74746303 |
| ENSMUSG00000030583 | -0.1801261 | 3.14124136 | 0.57735134 | 0.75747181 |
| ENSMUSG00000018372 | -0.1802295 | 5.38222016 | 0.56328554 | 0.74711533 |
| ENSMUSG00000030689 | -0.1803358 | 5.59819082 | 0.55868958 | 0.74299031 |
| ENSMUSG00000057110 | -0.1805727 | 7.81714525 | 0.55591618 | 0.74076363 |
| ENSMUSG00000035901 | -0.1806034 | 6.46270341 | 0.55788521 | 0.74237834 |
| ENSMUSG00000020783 | -0.180618  | 6.64010496 | 0.55736057 | 0.74195486 |
| ENSMUSG00000022855 | -0.1807137 | 7.07393749 | 0.55665642 | 0.74110899 |
| ENSMUSG00000041530 | -0.1808819 | 6.83369889 | 0.55655462 | 0.74110899 |
| ENSMUSG00000037669 | -0.1810878 | 5.7515973  | 0.55883539 | 0.74309258 |
| ENSMUSG00000026473 | -0.1813537 | 5.59801143 | 0.5581479  | 0.74254465 |
| ENSMUSG00000073542 | -0.1819701 | 5.65042019 | 0.55747785 | 0.74199941 |
| ENSMUSG00000046865 | -0.1820204 | 6.13666016 | 0.55367653 | 0.73887485 |
| ENSMUSG00000035202 | -0.1820818 | 11.7166963 | 0.55121746 | 0.73699733 |
| ENSMUSG00000031010 | -0.1824394 | 8.90275931 | 0.55124448 | 0.73699733 |
| ENSMUSG00000000346 | -0.1828131 | 8.47812952 | 0.55040609 | 0.73688135 |
| ENSMUSG00000041028 | -0.182821  | 8.20186836 | 0.55060576 | 0.73694624 |
| ENSMUSG00000029276 | -0.1829331 | 5.29097223 | 0.55797178 | 0.74240194 |
| ENSMUSG00000027936 | -0.1830458 | 6.09435459 | 0.5520252  | 0.73749253 |
| ENSMUSG00000021635 | -0.1832837 | 6.26326206 | 0.55326255 | 0.73850518 |
| ENSMUSG00000027981 | -0.1833067 | 4.50427848 | 0.56613728 | 0.7489174  |
| ENSMUSG00000033004 | -0.1833581 | 8.40896751 | 0.54954947 | 0.73628295 |
| ENSMUSG00000099876 | -0.1834761 | 1.26963735 | 0.84178807 | 0.92067369 |

|                    |            |            |            |            |
|--------------------|------------|------------|------------|------------|
| ENSMUSG00000018770 | -0.183565  | 8.12968862 | 0.54898449 | 0.7358917  |
| ENSMUSG00000020528 | -0.1835742 | 5.6884072  | 0.5536261  | 0.73887485 |
| ENSMUSG00000028293 | -0.1835873 | 4.90452806 | 0.55838236 | 0.74269819 |
| ENSMUSG00000024642 | -0.1837608 | 6.92883934 | 0.55021233 | 0.73688135 |
| ENSMUSG00000048970 | -0.1837746 | 4.42079791 | 0.56525866 | 0.74849575 |
| ENSMUSG00000066043 | -0.1837886 | 4.29353067 | 0.55966764 | 0.74401576 |
| ENSMUSG00000034800 | -0.1838742 | 3.13045593 | 0.58421863 | 0.7625531  |
| ENSMUSG00000021076 | -0.1838809 | 6.7413356  | 0.55035784 | 0.73688135 |
| ENSMUSG00000021481 | -0.1839738 | 5.10348083 | 0.55476164 | 0.73986514 |
| ENSMUSG00000000759 | -0.1840003 | 6.27132138 | 0.55065957 | 0.73694624 |
| ENSMUSG00000070520 | -0.1842337 | 4.13143586 | 0.55999456 | 0.74426686 |
| ENSMUSG00000035397 | -0.1844291 | 4.47781279 | 0.55638651 | 0.74110899 |
| ENSMUSG00000055717 | -0.1845429 | 3.86872246 | 0.56825247 | 0.75089261 |
| ENSMUSG00000019866 | -0.1846041 | 5.86397411 | 0.55095581 | 0.73699733 |
| ENSMUSG00000022707 | -0.1846232 | 4.3718599  | 0.56272899 | 0.74679664 |
| ENSMUSG00000021764 | -0.1846747 | 5.95995412 | 0.55028384 | 0.73688135 |
| ENSMUSG00000036281 | -0.1847838 | 5.43336721 | 0.54932309 | 0.7360711  |
| ENSMUSG00000034601 | -0.1851589 | 5.0630325  | 0.55452966 | 0.73964724 |
| ENSMUSG00000062619 | -0.1852994 | 1.14939601 | 0.66357785 | 0.81530252 |
| ENSMUSG00000046679 | -0.1854627 | 3.98428599 | 0.56518366 | 0.74848834 |
| ENSMUSG00000029610 | -0.1856872 | 5.18004577 | 0.54820572 | 0.73512192 |
| ENSMUSG00000042055 | -0.1857511 | 6.12043112 | 0.54718328 | 0.7343901  |
| ENSMUSG00000034311 | -0.1859078 | 7.51651212 | 0.54449845 | 0.73233615 |
| ENSMUSG00000026915 | -0.1859543 | 7.73409897 | 0.54435248 | 0.73223115 |
| ENSMUSG00000029501 | -0.1861921 | 7.29445399 | 0.54427033 | 0.73221198 |
| ENSMUSG00000015357 | -0.1862278 | 6.16329097 | 0.54700411 | 0.73433242 |
| ENSMUSG00000020894 | -0.1862351 | 5.54428408 | 0.54715836 | 0.7343901  |
| ENSMUSG00000026339 | -0.1862508 | 5.73427493 | 0.54789756 | 0.73480006 |
| ENSMUSG00000039298 | -0.1863603 | 6.32912618 | 0.54590023 | 0.73321561 |
| ENSMUSG00000026260 | -0.1863614 | 6.96154227 | 0.54393588 | 0.73196093 |
| ENSMUSG00000020523 | -0.1866566 | 6.19341194 | 0.54558504 | 0.73288354 |
| ENSMUSG00000027998 | -0.1867078 | 6.78698658 | 0.54357967 | 0.73174939 |
| ENSMUSG00000027329 | -0.1868534 | 1.50010336 | 0.62422712 | 0.78872304 |
| ENSMUSG00000041629 | -0.1874996 | 3.986185   | 0.5565147  | 0.74110899 |
| ENSMUSG00000054939 | -0.1875414 | 1.60794895 | 0.62656942 | 0.79039836 |
| ENSMUSG00000043998 | -0.1878737 | 7.31971171 | 0.54050476 | 0.72939114 |
| ENSMUSG00000001228 | -0.1879867 | 8.14790725 | 0.5390755  | 0.72858632 |
| ENSMUSG00000022016 | -0.1880973 | 7.11841923 | 0.5409488  | 0.72965502 |
| ENSMUSG00000048000 | -0.1881519 | 7.26020682 | 0.54007086 | 0.72917895 |
| ENSMUSG00000029705 | -0.188421  | 5.97977203 | 0.5419563  | 0.73046579 |
| ENSMUSG00000020114 | -0.1885157 | 8.2343015  | 0.53827365 | 0.72797388 |
| ENSMUSG00000030604 | -0.1885316 | 2.87533525 | 0.58520667 | 0.76339418 |
| ENSMUSG00000018322 | -0.1885472 | 5.97350508 | 0.54137626 | 0.73004897 |

|                    |            |            |            |            |
|--------------------|------------|------------|------------|------------|
| ENSMUSG00000046295 | -0.1888316 | 3.60426891 | 0.55220677 | 0.73755237 |
| ENSMUSG00000040943 | -0.1891272 | 6.20182704 | 0.54012254 | 0.72917895 |
| ENSMUSG00000068479 | -0.1891617 | 5.52115432 | 0.54490881 | 0.73252264 |
| ENSMUSG00000038949 | -0.1893141 | 4.9862329  | 0.54465116 | 0.73239623 |
| ENSMUSG00000026718 | -0.1894812 | 4.82174453 | 0.54761401 | 0.73469389 |
| ENSMUSG00000022437 | -0.189725  | 6.92911384 | 0.53667463 | 0.72689012 |
| ENSMUSG00000021423 | -0.189864  | 7.61891218 | 0.5358395  | 0.72676307 |
| ENSMUSG00000029505 | -0.1898709 | 7.89679127 | 0.53563699 | 0.7266712  |
| ENSMUSG00000028702 | -0.1898732 | 6.6448739  | 0.53709961 | 0.72728305 |
| ENSMUSG00000039001 | -0.1898952 | 6.95269328 | 0.53622427 | 0.72686346 |
| ENSMUSG00000036197 | -0.1900802 | 6.1064879  | 0.53886668 | 0.72848572 |
| ENSMUSG00000030424 | -0.1902225 | 1.79004296 | 0.6218012  | 0.7877684  |
| ENSMUSG00000021987 | -0.1902926 | 6.52141998 | 0.53738089 | 0.72746746 |
| ENSMUSG00000039270 | -0.1904168 | 4.01203635 | 0.55422543 | 0.73942435 |
| ENSMUSG00000051147 | -0.1904719 | 4.15910042 | 0.55120784 | 0.73699733 |
| ENSMUSG00000026889 | -0.1906298 | 5.46306962 | 0.54039249 | 0.72936078 |
| ENSMUSG00000037754 | -0.1906859 | 7.59587272 | 0.53400638 | 0.72546293 |
| ENSMUSG00000029397 | -0.1907856 | 5.44704081 | 0.54055026 | 0.72939114 |
| ENSMUSG00000043858 | -0.1908692 | 6.72249635 | 0.5337206  | 0.72542525 |
| ENSMUSG00000057666 | -0.1908858 | 1.88179624 | 0.58134196 | 0.76036285 |
| ENSMUSG00000028318 | -0.1913362 | 5.58887417 | 0.53621928 | 0.72686346 |
| ENSMUSG00000058298 | -0.1913608 | 5.08049296 | 0.53978858 | 0.72917895 |
| ENSMUSG00000021466 | -0.1914885 | 5.74524425 | 0.5364175  | 0.72686346 |
| ENSMUSG00000024340 | -0.1914928 | 2.06346357 | 0.59118663 | 0.76716376 |
| ENSMUSG00000024099 | -0.1918256 | 6.77442379 | 0.53304793 | 0.7248816  |
| ENSMUSG00000031583 | -0.1918575 | 6.1989024  | 0.53504421 | 0.72614104 |
| ENSMUSG00000021432 | -0.1918751 | 4.3474059  | 0.54513292 | 0.73265923 |
| ENSMUSG00000041935 | -0.1919699 | 6.77645519 | 0.53310794 | 0.7248816  |
| ENSMUSG00000020952 | -0.1920762 | 7.11821707 | 0.53202203 | 0.72386142 |
| ENSMUSG00000046179 | -0.1921049 | 6.25401442 | 0.5328292  | 0.72477676 |
| ENSMUSG00000020850 | -0.1921131 | 9.82370904 | 0.52978682 | 0.72206171 |
| ENSMUSG00000006782 | -0.1921479 | 6.69992477 | 0.53172887 | 0.72386142 |
| ENSMUSG00000026279 | -0.1922276 | 3.89343732 | 0.54020495 | 0.72919892 |
| ENSMUSG00000020647 | -0.1923224 | 5.87297766 | 0.53470177 | 0.725859   |
| ENSMUSG00000041229 | -0.1924085 | 6.85922857 | 0.53177626 | 0.72386142 |
| ENSMUSG00000031381 | -0.1925587 | 5.82077856 | 0.53417505 | 0.72560067 |
| ENSMUSG00000025733 | -0.192756  | 4.14295214 | 0.53784103 | 0.72764744 |
| ENSMUSG00000020023 | -0.1928833 | 4.72158141 | 0.53877913 | 0.72845964 |
| ENSMUSG00000058093 | -0.1932873 | 5.19115126 | 0.53828484 | 0.72797388 |
| ENSMUSG00000058600 | -0.193299  | 9.32014441 | 0.52738251 | 0.7200928  |
| ENSMUSG00000014504 | -0.1933002 | 6.51058307 | 0.53028453 | 0.72240884 |
| ENSMUSG00000000826 | -0.1933403 | 7.48828767 | 0.528519   | 0.72094032 |
| ENSMUSG00000079480 | -0.1935545 | 3.95835022 | 0.54401584 | 0.73196093 |

|                    |            |            |            |            |
|--------------------|------------|------------|------------|------------|
| ENSMUSG00000015126 | -0.1939125 | 3.51938805 | 0.541887   | 0.73046367 |
| ENSMUSG00000017781 | -0.1939994 | 8.29526396 | 0.52642712 | 0.71917217 |
| ENSMUSG00000033624 | -0.1941162 | 5.64928509 | 0.53190482 | 0.72386142 |
| ENSMUSG00000032217 | -0.1943773 | 6.25272729 | 0.52879775 | 0.72120335 |
| ENSMUSG00000045404 | -0.1943867 | 1.33069141 | 0.64171146 | 0.80085999 |
| ENSMUSG00000056919 | -0.1944674 | 5.58694825 | 0.53158117 | 0.72380951 |
| ENSMUSG00000030002 | -0.1945585 | 7.91665791 | 0.52567696 | 0.7187651  |
| ENSMUSG00000063229 | -0.1947012 | 9.26791213 | 0.52420748 | 0.71793922 |
| ENSMUSG00000049940 | -0.1948401 | 6.22360092 | 0.52769555 | 0.72042902 |
| ENSMUSG00000017802 | -0.1948815 | 6.14273506 | 0.52780025 | 0.72043751 |
| ENSMUSG00000032305 | -0.1953021 | 4.2857805  | 0.53893352 | 0.72848572 |
| ENSMUSG00000029147 | -0.1957899 | 8.013952   | 0.52245037 | 0.71635153 |
| ENSMUSG00000067847 | -0.1958479 | 1.56836914 | 0.54365506 | 0.73174939 |
| ENSMUSG00000032309 | -0.1960174 | 5.28874316 | 0.52936182 | 0.72160762 |
| ENSMUSG00000028636 | -0.1960538 | 3.58984798 | 0.54362047 | 0.73174939 |
| ENSMUSG00000032939 | -0.1960863 | 7.46674392 | 0.52255772 | 0.71640764 |
| ENSMUSG00000054426 | -0.1961644 | 2.95143177 | 0.55643248 | 0.74110899 |
| ENSMUSG00000032560 | -0.1963051 | 8.2985047  | 0.52168308 | 0.71582608 |
| ENSMUSG00000020330 | -0.1963534 | 7.99381569 | 0.52173525 | 0.71582608 |
| ENSMUSG00000031529 | -0.1965347 | 5.58221426 | 0.5264415  | 0.71917217 |
| ENSMUSG00000031133 | -0.1972955 | 8.97743186 | 0.51914041 | 0.71399186 |
| ENSMUSG00000041540 | -0.1973733 | 1.7476615  | 0.63294888 | 0.79477217 |
| ENSMUSG00000028759 | -0.1973904 | 7.72659284 | 0.5196089  | 0.71427181 |
| ENSMUSG00000030263 | -0.1975058 | 6.60754683 | 0.52079002 | 0.71507506 |
| ENSMUSG00000060550 | -0.1975112 | 7.99659207 | 0.5189891  | 0.7139235  |
| ENSMUSG00000059183 | -0.1976788 | 4.72887443 | 0.52909024 | 0.72133231 |
| ENSMUSG00000025220 | -0.1977026 | 8.18590322 | 0.51877086 | 0.7139235  |
| ENSMUSG00000012422 | -0.1978778 | 7.09490166 | 0.51996005 | 0.71439026 |
| ENSMUSG00000038417 | -0.1980007 | 5.72378441 | 0.52350654 | 0.7171614  |
| ENSMUSG00000069184 | -0.198071  | 2.22592107 | 0.59900496 | 0.77305762 |
| ENSMUSG00000027597 | -0.1981176 | 6.69753223 | 0.51852328 | 0.7139235  |
| ENSMUSG00000037894 | -0.1981226 | 6.23833067 | 0.52042906 | 0.71485251 |
| ENSMUSG00000052707 | -0.1981326 | 7.79486381 | 0.51819907 | 0.71360731 |
| ENSMUSG00000042520 | -0.1984695 | 8.82779496 | 0.51658055 | 0.71208721 |
| ENSMUSG00000033184 | -0.1985493 | 7.8997155  | 0.51724144 | 0.71265258 |
| ENSMUSG00000072109 | -0.1985593 | 4.80227158 | 0.52545101 | 0.71858811 |
| ENSMUSG00000037847 | -0.1989719 | 3.26546258 | 0.54921685 | 0.7360711  |
| ENSMUSG00000022711 | -0.1989984 | 6.02486874 | 0.51881479 | 0.7139235  |
| ENSMUSG00000053754 | -0.1990632 | 7.84642711 | 0.51613074 | 0.71175882 |
| ENSMUSG00000029513 | -0.1990888 | 4.5437804  | 0.52595784 | 0.71896684 |
| ENSMUSG00000062270 | -0.1991304 | 8.68980527 | 0.51530469 | 0.71098334 |
| ENSMUSG00000019734 | -0.1993231 | 1.38233754 | 0.62425715 | 0.78872304 |
| ENSMUSG00000022339 | -0.1993513 | 4.8497957  | 0.52500298 | 0.71839007 |

|                    |            |            |            |            |
|--------------------|------------|------------|------------|------------|
| ENSMUSG00000071266 | -0.1997372 | 3.2282713  | 0.55382772 | 0.73898517 |
| ENSMUSG00000052337 | -0.1997791 | 8.36312934 | 0.51409252 | 0.70976491 |
| ENSMUSG00000021391 | -0.2000014 | 4.15178838 | 0.53292773 | 0.72481935 |
| ENSMUSG00000087396 | -0.2001889 | 2.63427053 | 0.55523755 | 0.74034884 |
| ENSMUSG00000020923 | -0.2003751 | 7.70565814 | 0.5129972  | 0.7090697  |
| ENSMUSG00000042790 | -0.200468  | 5.21280267 | 0.52037296 | 0.71485251 |
| ENSMUSG00000009079 | -0.20062   | 8.66141847 | 0.51205908 | 0.70840861 |
| ENSMUSG00000033126 | -0.2007419 | 2.8230715  | 0.5509023  | 0.73699733 |
| ENSMUSG00000026798 | -0.2008475 | 2.87950085 | 0.52728578 | 0.7200519  |
| ENSMUSG00000032011 | -0.2009143 | 3.59895142 | 0.52790219 | 0.72043751 |
| ENSMUSG00000026708 | -0.2010242 | 5.41425085 | 0.51866032 | 0.7139235  |
| ENSMUSG00000068959 | -0.2011191 | 2.82524493 | 0.55216062 | 0.73755237 |
| ENSMUSG00000031358 | -0.2011706 | 6.34902158 | 0.51439418 | 0.71009048 |
| ENSMUSG00000027067 | -0.2014564 | 9.70649897 | 0.50994698 | 0.70703556 |
| ENSMUSG00000032267 | -0.201548  | 5.40147488 | 0.51756921 | 0.712922   |
| ENSMUSG00000071645 | -0.2021236 | 5.30337931 | 0.51310727 | 0.70910956 |
| ENSMUSG00000028089 | -0.2025188 | 5.6935112  | 0.5122042  | 0.70846695 |
| ENSMUSG00000062867 | -0.2026093 | 8.13121804 | 0.50810833 | 0.70565876 |
| ENSMUSG00000028649 | -0.2026691 | 8.35457244 | 0.50829189 | 0.70573191 |
| ENSMUSG00000038965 | -0.2026781 | 7.55539006 | 0.50867023 | 0.70589368 |
| ENSMUSG00000050697 | -0.2027695 | 6.63274929 | 0.51038919 | 0.70736885 |
| ENSMUSG00000004843 | -0.2029309 | 5.52285934 | 0.51393052 | 0.70963211 |
| ENSMUSG00000021965 | -0.202959  | 5.60288952 | 0.51322331 | 0.70910956 |
| ENSMUSG00000028060 | -0.2029795 | 6.75676932 | 0.50934399 | 0.7066468  |
| ENSMUSG00000020526 | -0.2030122 | 4.1461454  | 0.5190245  | 0.7139235  |
| ENSMUSG00000001380 | -0.2034035 | 7.41473133 | 0.50708618 | 0.70487525 |
| ENSMUSG00000079038 | -0.2034831 | 3.17411306 | 0.54837111 | 0.73525227 |
| ENSMUSG00000021578 | -0.2035093 | 6.77120548 | 0.50845045 | 0.7058564  |
| ENSMUSG00000050079 | -0.2035186 | 5.76504504 | 0.51178149 | 0.70811542 |
| ENSMUSG00000020441 | -0.2037101 | 3.31494668 | 0.52490099 | 0.71839007 |
| ENSMUSG00000030515 | -0.2038432 | 4.31139994 | 0.52098031 | 0.71515423 |
| ENSMUSG00000040720 | -0.2039758 | 7.95825788 | 0.50581525 | 0.7039246  |
| ENSMUSG00000023572 | -0.2040685 | 5.06351863 | 0.51347302 | 0.70927284 |
| ENSMUSG00000058440 | -0.2041539 | 5.79050379 | 0.50801861 | 0.70562503 |
| ENSMUSG00000027366 | -0.2042126 | 7.8900775  | 0.50547275 | 0.70372038 |
| ENSMUSG00000001138 | -0.2045346 | 4.01291272 | 0.51871448 | 0.7139235  |
| ENSMUSG00000028617 | -0.2046077 | 4.96329836 | 0.51248381 | 0.70872345 |
| ENSMUSG00000035629 | -0.2047716 | 5.74152349 | 0.50824329 | 0.70573191 |
| ENSMUSG00000006191 | -0.2048493 | 5.13723042 | 0.51223264 | 0.70846695 |
| ENSMUSG00000028687 | -0.2048525 | 2.22187778 | 0.53563322 | 0.7266712  |
| ENSMUSG00000042541 | -0.2048583 | 6.42768893 | 0.50598166 | 0.70406532 |
| ENSMUSG00000026750 | -0.2054825 | 7.99879699 | 0.50236078 | 0.70083553 |
| ENSMUSG00000059975 | -0.2054991 | 3.59817223 | 0.52790219 | 0.72043751 |

|                    |            |            |            |            |
|--------------------|------------|------------|------------|------------|
| ENSMUSG00000045210 | -0.2055999 | 7.60737973 | 0.5029713  | 0.70123367 |
| ENSMUSG00000045205 | -0.2056023 | 5.60162708 | 0.508591   | 0.70587456 |
| ENSMUSG00000026036 | -0.2056265 | 5.22821886 | 0.50788113 | 0.70552493 |
| ENSMUSG00000022139 | -0.2058145 | 5.75833707 | 0.50694485 | 0.70487525 |
| ENSMUSG00000027087 | -0.2058219 | 5.78083579 | 0.50713743 | 0.70487525 |
| ENSMUSG00000089993 | -0.2059435 | 1.97508987 | 0.55246342 | 0.73780378 |
| ENSMUSG00000022682 | -0.2061239 | 7.46264041 | 0.50181252 | 0.700352   |
| ENSMUSG00000101013 | -0.2061732 | 3.05883403 | 0.54093164 | 0.72965502 |
| ENSMUSG00000026926 | -0.2062422 | 7.64471547 | 0.50118583 | 0.70001428 |
| ENSMUSG00000032126 | -0.2064046 | 5.71082916 | 0.50421571 | 0.70242374 |
| ENSMUSG00000039231 | -0.2065066 | 7.08498144 | 0.50123705 | 0.70001428 |
| ENSMUSG00000063245 | -0.206733  | 0.97441641 | 0.6310489  | 0.79389073 |
| ENSMUSG00000020224 | -0.2067439 | 5.45755042 | 0.50408061 | 0.70232626 |
| ENSMUSG00000039016 | -0.2069495 | 4.84636202 | 0.50733426 | 0.70502214 |
| ENSMUSG00000039128 | -0.2069552 | 6.91018316 | 0.5007928  | 0.6999157  |
| ENSMUSG00000037085 | -0.2071172 | 3.54042007 | 0.51742127 | 0.71280927 |
| ENSMUSG00000027937 | -0.2071693 | 6.10193464 | 0.50291712 | 0.70123367 |
| ENSMUSG00000037174 | -0.2073128 | 6.00137625 | 0.50181936 | 0.700352   |
| ENSMUSG00000021906 | -0.207454  | 3.97464188 | 0.5166679  | 0.71208721 |
| ENSMUSG00000054309 | -0.2074658 | 7.63069878 | 0.49872668 | 0.69744134 |
| ENSMUSG00000000804 | -0.2076941 | 6.29222609 | 0.50168465 | 0.700352   |
| ENSMUSG00000037339 | -0.2078702 | 4.16628291 | 0.51287248 | 0.70898819 |
| ENSMUSG00000040274 | -0.2080638 | 4.5861001  | 0.51061281 | 0.70743177 |
| ENSMUSG00000003382 | -0.2081753 | 6.89291552 | 0.49798876 | 0.69699036 |
| ENSMUSG00000039680 | -0.2082229 | 4.23657436 | 0.51063139 | 0.70743177 |
| ENSMUSG00000049354 | -0.2085108 | 7.90221638 | 0.49623979 | 0.69544508 |
| ENSMUSG00000015671 | -0.2085303 | 8.53492188 | 0.49575985 | 0.69504345 |
| ENSMUSG00000035469 | -0.2085533 | 6.28184508 | 0.49890864 | 0.69755359 |
| ENSMUSG00000073639 | -0.208565  | 6.5034535  | 0.4987057  | 0.69744134 |
| ENSMUSG00000041477 | -0.2086342 | 3.17022983 | 0.52244465 | 0.71635153 |
| ENSMUSG00000018921 | -0.2086945 | 5.60418281 | 0.49823882 | 0.69715939 |
| ENSMUSG00000038914 | -0.2088058 | 7.1015192  | 0.49643224 | 0.69553401 |
| ENSMUSG00000032366 | -0.2089128 | 5.15619996 | 0.50195507 | 0.70045076 |
| ENSMUSG00000010048 | -0.2090994 | 4.60564121 | 0.50114878 | 0.70001428 |
| ENSMUSG00000038215 | -0.2092802 | 4.04681825 | 0.5155308  | 0.71112433 |
| ENSMUSG00000056579 | -0.2096079 | 7.51565737 | 0.49489334 | 0.69418962 |
| ENSMUSG00000043061 | -0.2099149 | 4.88136257 | 0.50278128 | 0.70115005 |
| ENSMUSG00000027176 | -0.2099683 | 6.79583315 | 0.49513139 | 0.69443321 |
| ENSMUSG00000021905 | -0.2100368 | 4.60594616 | 0.50319877 | 0.70143804 |
| ENSMUSG00000022664 | -0.2100686 | 4.72215044 | 0.50560682 | 0.70375247 |
| ENSMUSG00000046201 | -0.2102074 | 7.23043013 | 0.49369403 | 0.69331898 |
| ENSMUSG00000024400 | -0.2106376 | 7.07479249 | 0.49292335 | 0.6929586  |
| ENSMUSG00000021371 | -0.2107764 | 5.648508   | 0.49656724 | 0.69554242 |



|                    |            |            |            |            |
|--------------------|------------|------------|------------|------------|
| ENSMUSG00000039086 | -0.2108138 | 2.78014151 | 0.52982885 | 0.72206171 |
| ENSMUSG00000041417 | -0.2108688 | 6.76513689 | 0.49343464 | 0.69322172 |
| ENSMUSG00000039262 | -0.2110304 | 7.0564525  | 0.49179746 | 0.69226907 |
| ENSMUSG00000030243 | -0.2111652 | 6.39139814 | 0.49356049 | 0.69322172 |
| ENSMUSG00000021366 | -0.2112724 | 6.6355267  | 0.49255952 | 0.69280496 |
| ENSMUSG00000030870 | -0.2113849 | 7.23120644 | 0.49117671 | 0.69156352 |
| ENSMUSG00000051397 | -0.2114259 | 1.60009181 | 0.59991781 | 0.77340863 |
| ENSMUSG00000040396 | -0.2115548 | 6.12356685 | 0.49410498 | 0.69371541 |
| ENSMUSG00000055491 | -0.2117515 | 6.81459237 | 0.4902091  | 0.69114856 |
| ENSMUSG00000025917 | -0.2117548 | 7.3196848  | 0.49029002 | 0.69114856 |
| ENSMUSG00000097284 | -0.2118467 | 0.96420035 | 0.62745244 | 0.79102725 |
| ENSMUSG00000073468 | -0.2119191 | 4.60677835 | 0.50178096 | 0.700352   |
| ENSMUSG00000089756 | -0.2121566 | 1.09750265 | 0.6240872  | 0.78872304 |
| ENSMUSG00000022554 | -0.21217   | 3.6677914  | 0.50229627 | 0.70083553 |
| ENSMUSG00000096883 | -0.2122478 | 2.04986204 | 0.53620379 | 0.72686346 |
| ENSMUSG00000052253 | -0.2123939 | 5.50841868 | 0.49321472 | 0.69309715 |
| ENSMUSG00000097177 | -0.2125708 | 1.66499281 | 0.59152964 | 0.76726673 |
| ENSMUSG00000000340 | -0.2126118 | 5.77067856 | 0.49204752 | 0.69235915 |
| ENSMUSG00000052419 | -0.2126402 | 5.72904506 | 0.4927776  | 0.69284402 |
| ENSMUSG00000005501 | -0.2127278 | 5.25012452 | 0.49526576 | 0.69453134 |
| ENSMUSG00000026775 | -0.2128103 | 8.40210003 | 0.48721277 | 0.68907012 |
| ENSMUSG00000050921 | -0.2128574 | 6.47534903 | 0.49051476 | 0.69128479 |
| ENSMUSG00000038212 | -0.2129148 | 6.45276351 | 0.49026334 | 0.69114856 |
| ENSMUSG00000026309 | -0.2129774 | 6.21061622 | 0.48985314 | 0.69107486 |
| ENSMUSG00000051346 | -0.2129879 | 4.25667902 | 0.497727   | 0.69681882 |
| ENSMUSG00000009647 | -0.2131919 | 3.97562839 | 0.50365569 | 0.7019156  |
| ENSMUSG00000032067 | -0.2132486 | 5.00156177 | 0.49557086 | 0.69486883 |
| ENSMUSG00000085741 | -0.2133328 | 1.70884453 | 0.56174047 | 0.74579571 |
| ENSMUSG00000021520 | -0.2134101 | 6.57435033 | 0.48838902 | 0.68981392 |
| ENSMUSG00000085786 | -0.2134725 | 5.32384377 | 0.49454939 | 0.69397796 |
| ENSMUSG00000038489 | -0.2138187 | 1.40710099 | 0.57801075 | 0.75791244 |
| ENSMUSG00000039463 | -0.2139375 | 5.08260593 | 0.49109634 | 0.69156352 |
| ENSMUSG00000034285 | -0.2142709 | 4.31242038 | 0.49654436 | 0.69554242 |
| ENSMUSG00000071415 | -0.2145373 | 10.4590136 | 0.48277427 | 0.68568917 |
| ENSMUSG00000062861 | -0.2145727 | 2.64868016 | 0.52548088 | 0.71858811 |
| ENSMUSG00000057133 | -0.2145826 | 5.86603381 | 0.48868692 | 0.69006091 |
| ENSMUSG00000027397 | -0.2145848 | 7.01038118 | 0.48491932 | 0.68708054 |
| ENSMUSG00000025893 | -0.2146221 | 1.47046411 | 0.56968362 | 0.75167848 |
| ENSMUSG00000020525 | -0.2148891 | 5.25094761 | 0.49028501 | 0.69114856 |
| ENSMUSG00000078671 | -0.2148895 | 7.43199324 | 0.48395854 | 0.68628846 |
| ENSMUSG00000021772 | -0.214927  | 3.24023211 | 0.51980554 | 0.71436001 |
| ENSMUSG00000033871 | -0.2149696 | 0.89368191 | 0.575084   | 0.75602586 |
| ENSMUSG00000054280 | -0.2152836 | 7.0145976  | 0.48397846 | 0.68628846 |

|                    |            |            |            |            |
|--------------------|------------|------------|------------|------------|
| ENSMUSG00000032078 | -0.2152858 | 6.60634544 | 0.48367264 | 0.68620619 |
| ENSMUSG00000043140 | -0.2153448 | 4.65285906 | 0.49122557 | 0.69156352 |
| ENSMUSG00000029016 | -0.2154485 | 4.55093022 | 0.49035401 | 0.69114856 |
| ENSMUSG00000095832 | -0.2156141 | 4.73690316 | 0.49075531 | 0.69143727 |
| ENSMUSG00000037331 | -0.2156815 | 8.88777441 | 0.48078777 | 0.68464483 |
| ENSMUSG00000032035 | -0.2157727 | 7.72365998 | 0.48165847 | 0.68515686 |
| ENSMUSG00000029571 | -0.216002  | 6.49056012 | 0.48381081 | 0.68623119 |
| ENSMUSG00000036442 | -0.2162769 | 4.30157684 | 0.49352478 | 0.69322172 |
| ENSMUSG00000040195 | -0.2163587 | 6.14434235 | 0.48358154 | 0.68618794 |
| ENSMUSG00000042198 | -0.2165459 | 3.16200819 | 0.51316337 | 0.70910956 |
| ENSMUSG00000028832 | -0.2165573 | 8.04165769 | 0.47947534 | 0.68329057 |
| ENSMUSG00000051890 | -0.2166256 | 3.4481544  | 0.50993102 | 0.70703556 |
| ENSMUSG00000030177 | -0.2166795 | 5.21771483 | 0.48764363 | 0.6892489  |
| ENSMUSG00000028986 | -0.216817  | 4.51034034 | 0.4932079  | 0.69309715 |
| ENSMUSG00000031731 | -0.2169317 | 8.06887385 | 0.47902661 | 0.68289184 |
| ENSMUSG00000030498 | -0.217005  | 2.6788119  | 0.52270571 | 0.71642836 |
| ENSMUSG00000027843 | -0.2171348 | 6.72150308 | 0.48091536 | 0.68464571 |
| ENSMUSG00000035798 | -0.2172674 | 5.35446129 | 0.48582388 | 0.68775706 |
| ENSMUSG00000069237 | -0.2173249 | 5.09748756 | 0.48721807 | 0.68907012 |
| ENSMUSG00000034252 | -0.217371  | 8.0141499  | 0.47828253 | 0.68258899 |
| ENSMUSG00000014850 | -0.2174387 | 6.01388537 | 0.48178912 | 0.68515686 |
| ENSMUSG00000020623 | -0.2175125 | 2.38213042 | 0.53858006 | 0.72828181 |
| ENSMUSG00000097431 | -0.2176482 | 3.22225079 | 0.50687362 | 0.70487525 |
| ENSMUSG00000063172 | -0.2178437 | 3.33445041 | 0.51121414 | 0.70751197 |
| ENSMUSG00000020590 | -0.2179181 | 5.99724727 | 0.48197329 | 0.68515686 |
| ENSMUSG00000028521 | -0.2179829 | 5.16397689 | 0.48510102 | 0.68724769 |
| ENSMUSG00000024891 | -0.218016  | 1.54178277 | 0.53774921 | 0.72761449 |
| ENSMUSG00000020064 | -0.2180179 | 6.99493642 | 0.47842383 | 0.68263066 |
| ENSMUSG00000044894 | -0.2182788 | 3.75301817 | 0.49087943 | 0.69143727 |
| ENSMUSG00000066149 | -0.2183948 | 5.4975626  | 0.48186742 | 0.68515686 |
| ENSMUSG00000075033 | -0.2184158 | 6.30837066 | 0.47890039 | 0.68289184 |
| ENSMUSG00000030706 | -0.2184888 | 4.96083034 | 0.48229323 | 0.68534066 |
| ENSMUSG00000040389 | -0.21867   | 4.29423399 | 0.49474944 | 0.69407804 |
| ENSMUSG00000030105 | -0.2187007 | 8.15072054 | 0.4754427  | 0.68026723 |
| ENSMUSG00000024587 | -0.2188136 | 8.59575603 | 0.47460941 | 0.67943554 |
| ENSMUSG00000039704 | -0.2188897 | 5.37217139 | 0.48346167 | 0.68618723 |
| ENSMUSG00000049504 | -0.2189005 | 5.19867158 | 0.48236677 | 0.68535483 |
| ENSMUSG00000036898 | -0.2189417 | 4.77639903 | 0.48755524 | 0.6892489  |
| ENSMUSG00000022109 | -0.2191552 | 5.69298304 | 0.47833132 | 0.68258899 |
| ENSMUSG00000019437 | -0.21927   | 2.6043013  | 0.52385161 | 0.71754296 |
| ENSMUSG00000027274 | -0.2193381 | 4.86221826 | 0.4843715  | 0.68661958 |
| ENSMUSG00000043535 | -0.2195551 | 8.02865521 | 0.47397156 | 0.67908773 |
| ENSMUSG00000006818 | -0.2195887 | 6.37843054 | 0.47607967 | 0.68072702 |

|                    |            |            |            |            |
|--------------------|------------|------------|------------|------------|
| ENSMUSG00000044147 | -0.2196852 | 8.25047082 | 0.47325397 | 0.67884687 |
| ENSMUSG00000041995 | -0.2198443 | 4.18885317 | 0.48875048 | 0.69006091 |
| ENSMUSG00000034327 | -0.2198604 | 6.09728895 | 0.47702282 | 0.6815334  |
| ENSMUSG00000031696 | -0.2199692 | 8.51157477 | 0.47261712 | 0.67847485 |
| ENSMUSG00000027259 | -0.2200503 | 4.54079867 | 0.48754893 | 0.6892489  |
| ENSMUSG00000020460 | -0.2201588 | 9.61562531 | 0.47157857 | 0.67770567 |
| ENSMUSG00000025010 | -0.2202451 | 4.66553835 | 0.48299939 | 0.68571162 |
| ENSMUSG00000034390 | -0.2203149 | 5.84435202 | 0.47591529 | 0.68067248 |
| ENSMUSG00000022833 | -0.2204417 | 4.62459085 | 0.48358942 | 0.68618794 |
| ENSMUSG00000040374 | -0.2205482 | 5.10720883 | 0.48032021 | 0.68425008 |
| ENSMUSG00000025280 | -0.2208101 | 6.12542358 | 0.47408459 | 0.67908773 |
| ENSMUSG00000032288 | -0.2209021 | 5.51887997 | 0.47583399 | 0.68064647 |
| ENSMUSG00000021810 | -0.2210829 | 6.80780618 | 0.47190524 | 0.67772354 |
| ENSMUSG00000003848 | -0.2211111 | 5.37125709 | 0.47367627 | 0.67908773 |
| ENSMUSG00000024548 | -0.2213287 | 4.88486461 | 0.48100043 | 0.68467643 |
| ENSMUSG00000029729 | -0.2215006 | 6.07141896 | 0.47411457 | 0.67908773 |
| ENSMUSG00000048280 | -0.2217439 | 4.50123106 | 0.484498   | 0.68666401 |
| ENSMUSG00000040738 | -0.22184   | 7.20649035 | 0.47036633 | 0.67650447 |
| ENSMUSG00000008450 | -0.2220807 | 5.61424379 | 0.4732404  | 0.67884687 |
| ENSMUSG00000029249 | -0.2221875 | 6.29074049 | 0.47176245 | 0.67772354 |
| ENSMUSG00000074797 | -0.2222299 | 5.99482107 | 0.47179928 | 0.67772354 |
| ENSMUSG00000037058 | -0.2222356 | 6.81541979 | 0.47026863 | 0.67650447 |
| ENSMUSG00000020003 | -0.2223278 | 5.10797459 | 0.47598158 | 0.68067701 |
| ENSMUSG00000028121 | -0.2224741 | 7.90079988 | 0.46759663 | 0.67390916 |
| ENSMUSG00000007646 | -0.2227545 | 4.35639243 | 0.48225383 | 0.68534066 |
| ENSMUSG00000028953 | -0.2230328 | 7.34172119 | 0.46694115 | 0.6736792  |
| ENSMUSG00000032381 | -0.2231429 | 6.75232918 | 0.46825137 | 0.67444139 |
| ENSMUSG00000008301 | -0.2231619 | 5.7885929  | 0.47068453 | 0.67669137 |
| ENSMUSG00000026683 | -0.2234967 | 6.99366104 | 0.46731957 | 0.67374411 |
| ENSMUSG00000024533 | -0.2235893 | 4.00722679 | 0.47862492 | 0.68273692 |
| ENSMUSG00000006134 | -0.2236532 | 6.85733311 | 0.46706984 | 0.6736792  |
| ENSMUSG00000051412 | -0.2238372 | 5.08844609 | 0.47408476 | 0.67908773 |
| ENSMUSG00000038084 | -0.2240195 | 7.26373945 | 0.46564587 | 0.67258043 |
| ENSMUSG00000069565 | -0.2240583 | 6.10585303 | 0.46716913 | 0.67370312 |
| ENSMUSG00000024776 | -0.2240994 | 5.01608617 | 0.47347788 | 0.67898743 |
| ENSMUSG00000035847 | -0.2242893 | 5.8014342  | 0.46932328 | 0.67554488 |
| ENSMUSG00000022110 | -0.2243688 | 6.92672013 | 0.46570457 | 0.67258043 |
| ENSMUSG00000021067 | -0.2246044 | 6.97398981 | 0.46502669 | 0.67223161 |
| ENSMUSG00000027180 | -0.2248797 | 6.35926372 | 0.46611499 | 0.67290282 |
| ENSMUSG00000048429 | -0.2249906 | 6.43532596 | 0.46530491 | 0.67245352 |
| ENSMUSG00000054051 | -0.2252609 | 5.54501739 | 0.46831235 | 0.67444139 |
| ENSMUSG00000054894 | -0.2254037 | 2.76056193 | 0.51501643 | 0.71067654 |
| ENSMUSG00000005899 | -0.2255128 | 6.35681657 | 0.4634688  | 0.67060882 |

|                    |            |            |            |            |
|--------------------|------------|------------|------------|------------|
| ENSMUSG00000033983 | -0.2256654 | 4.51386726 | 0.47017685 | 0.67650262 |
| ENSMUSG00000033430 | -0.2256982 | 4.85873783 | 0.47235476 | 0.67818849 |
| ENSMUSG00000041777 | -0.2257438 | 4.49267458 | 0.4729876  | 0.67873563 |
| ENSMUSG00000034621 | -0.2257818 | 6.78869354 | 0.46316675 | 0.670352   |
| ENSMUSG00000022295 | -0.2261766 | 6.93686211 | 0.4620158  | 0.66940459 |
| ENSMUSG00000062510 | -0.2262721 | 5.05684848 | 0.4676576  | 0.67390916 |
| ENSMUSG00000038369 | -0.2266414 | 6.5744549  | 0.46172688 | 0.66916579 |
| ENSMUSG00000020368 | -0.2266971 | 10.7541102 | 0.45832396 | 0.66718361 |
| ENSMUSG00000039000 | -0.2267175 | 6.90624921 | 0.46092497 | 0.66863262 |
| ENSMUSG00000029110 | -0.2267726 | 7.99543198 | 0.45924705 | 0.66763551 |
| ENSMUSG00000027710 | -0.2268505 | 6.75721385 | 0.46062153 | 0.66839461 |
| ENSMUSG00000029263 | -0.2271667 | 4.674956   | 0.47108739 | 0.67709002 |
| ENSMUSG00000037795 | -0.2272225 | 6.92626267 | 0.46015607 | 0.66814637 |
| ENSMUSG00000032396 | -0.2274178 | 4.98549554 | 0.46447437 | 0.6717934  |
| ENSMUSG00000062580 | -0.2274791 | 6.54625966 | 0.45960052 | 0.66787927 |
| ENSMUSG00000021598 | -0.2276495 | 4.88978304 | 0.46551554 | 0.67248755 |
| ENSMUSG00000022992 | -0.2277426 | 6.16203078 | 0.46023573 | 0.66817207 |
| ENSMUSG00000044982 | -0.2277863 | 2.48945261 | 0.51698836 | 0.7123949  |
| ENSMUSG00000003721 | -0.2278112 | 4.76455754 | 0.46971507 | 0.67601859 |
| ENSMUSG00000041215 | -0.2279896 | 5.99567129 | 0.46041201 | 0.66824806 |
| ENSMUSG00000031154 | -0.2280223 | 6.62538208 | 0.45848905 | 0.66718361 |
| ENSMUSG00000020572 | -0.2281159 | 8.7681523  | 0.45615045 | 0.66558803 |
| ENSMUSG00000019189 | -0.2281267 | 6.96088279 | 0.45762498 | 0.66689564 |
| ENSMUSG00000004768 | -0.2283097 | 3.97742185 | 0.47360864 | 0.67908464 |
| ENSMUSG00000022901 | -0.2283968 | 6.56718186 | 0.45905914 | 0.66763551 |
| ENSMUSG00000035949 | -0.2284852 | 6.34668103 | 0.458565   | 0.66718361 |
| ENSMUSG00000094410 | -0.2285363 | 8.26288832 | 0.45562068 | 0.66532341 |
| ENSMUSG00000052798 | -0.2286982 | 7.19787467 | 0.45626926 | 0.66563956 |
| ENSMUSG00000022003 | -0.2287194 | 3.45070594 | 0.48584322 | 0.68775706 |
| ENSMUSG00000043572 | -0.2288607 | 3.17309043 | 0.47829031 | 0.68258899 |
| ENSMUSG00000021710 | -0.2289386 | 4.99737833 | 0.46272878 | 0.6700775  |
| ENSMUSG00000022945 | -0.2292158 | 5.40708432 | 0.45922816 | 0.66763551 |
| ENSMUSG00000034042 | -0.2294326 | 6.62266791 | 0.45617221 | 0.66558803 |
| ENSMUSG00000044573 | -0.2296904 | 6.3165817  | 0.4557681  | 0.6653585  |
| ENSMUSG00000028098 | -0.2297461 | 6.9153771  | 0.45515012 | 0.66492574 |
| ENSMUSG00000019837 | -0.2299742 | 5.91604993 | 0.4576098  | 0.66689564 |
| ENSMUSG00000016552 | -0.2299971 | 4.85904748 | 0.46038274 | 0.66824806 |
| ENSMUSG00000094441 | -0.2301243 | 3.2263728  | 0.494392   | 0.69386545 |
| ENSMUSG00000034951 | -0.2301632 | 4.12946887 | 0.46705575 | 0.6736792  |
| ENSMUSG00000009733 | -0.2301838 | 3.00565462 | 0.4833978  | 0.6861869  |
| ENSMUSG00000028920 | -0.2302198 | 5.58909639 | 0.45741785 | 0.66689564 |
| ENSMUSG00000028863 | -0.2302698 | 4.7753906  | 0.46074494 | 0.66846138 |
| ENSMUSG00000039193 | -0.2304079 | 4.18895999 | 0.47043783 | 0.67651708 |

|                    |            |            |            |            |
|--------------------|------------|------------|------------|------------|
| ENSMUSG00000058558 | -0.2304328 | 10.0309606 | 0.45106373 | 0.66079182 |
| ENSMUSG00000074088 | -0.230435  | 7.02026919 | 0.4527498  | 0.66238689 |
| ENSMUSG00000071793 | -0.2305869 | 3.40828704 | 0.4795833  | 0.68329057 |
| ENSMUSG00000001416 | -0.230617  | 9.35152748 | 0.45081884 | 0.66072715 |
| ENSMUSG00000055116 | -0.2307055 | 3.87328121 | 0.47408342 | 0.67908773 |
| ENSMUSG00000027668 | -0.2308605 | 6.11095426 | 0.45500239 | 0.66487071 |
| ENSMUSG00000046034 | -0.2309427 | 6.579021   | 0.45266668 | 0.66238689 |
| ENSMUSG00000042705 | -0.2312414 | 4.53475637 | 0.46250557 | 0.66984422 |
| ENSMUSG00000026088 | -0.2313883 | 5.15444769 | 0.45973186 | 0.66794276 |
| ENSMUSG00000041859 | -0.2315459 | 8.63655035 | 0.44916005 | 0.65917074 |
| ENSMUSG00000073910 | -0.2316946 | 4.24316512 | 0.46541414 | 0.67248755 |
| ENSMUSG00000035772 | -0.2317292 | 6.29946946 | 0.45235798 | 0.66208313 |
| ENSMUSG00000041231 | -0.2319743 | 5.005652   | 0.45993527 | 0.66794276 |
| ENSMUSG00000027130 | -0.2320774 | 6.60228468 | 0.45138887 | 0.66102357 |
| ENSMUSG00000058761 | -0.2321269 | 5.44277122 | 0.45487044 | 0.66485807 |
| ENSMUSG00000019864 | -0.2322181 | 5.25753042 | 0.45516337 | 0.66492574 |
| ENSMUSG00000017478 | -0.2322815 | 6.22963815 | 0.4502399  | 0.66005423 |
| ENSMUSG00000021716 | -0.2326307 | 4.58247904 | 0.46160845 | 0.66916579 |
| ENSMUSG00000046062 | -0.2327604 | 8.53764286 | 0.44714295 | 0.65757393 |
| ENSMUSG00000025287 | -0.2328155 | 6.16856557 | 0.45100923 | 0.66079182 |
| ENSMUSG00000029012 | -0.2328317 | 5.54197464 | 0.45414105 | 0.66406197 |
| ENSMUSG00000074867 | -0.2328377 | 3.85005335 | 0.47634245 | 0.68099409 |
| ENSMUSG00000024785 | -0.233047  | 5.85664963 | 0.44940453 | 0.65928152 |
| ENSMUSG00000035011 | -0.233187  | 4.72523645 | 0.45573997 | 0.6653585  |
| ENSMUSG00000029174 | -0.2332093 | 6.58565167 | 0.44842964 | 0.65874747 |
| ENSMUSG00000006906 | -0.2333799 | 5.09185008 | 0.45533866 | 0.66500165 |
| ENSMUSG00000020409 | -0.2335142 | 6.44043639 | 0.44864512 | 0.65888978 |
| ENSMUSG00000024222 | -0.233662  | 6.07643987 | 0.44881213 | 0.6589561  |
| ENSMUSG00000039536 | -0.2337057 | 5.85775322 | 0.44971287 | 0.65946473 |
| ENSMUSG00000020718 | -0.2338748 | 3.68902086 | 0.46709007 | 0.6736792  |
| ENSMUSG00000022191 | -0.233931  | 6.41075799 | 0.44730235 | 0.65771865 |
| ENSMUSG00000028945 | -0.2339729 | 6.04582888 | 0.44889179 | 0.6589561  |
| ENSMUSG00000027854 | -0.2343257 | 5.16155296 | 0.45308847 | 0.66279247 |
| ENSMUSG00000040877 | -0.2343571 | 1.62239963 | 0.5375209  | 0.72746746 |
| ENSMUSG00000057506 | -0.2349274 | 5.73105521 | 0.44840787 | 0.65874747 |
| ENSMUSG00000024457 | -0.2349412 | 6.76291683 | 0.44481618 | 0.65510145 |
| ENSMUSG00000048796 | -0.2350055 | 3.9701475  | 0.4631565  | 0.670352   |
| ENSMUSG00000018196 | -0.2350143 | 5.09699904 | 0.45147994 | 0.66106716 |
| ENSMUSG00000033628 | -0.235036  | 5.81018288 | 0.44757154 | 0.65802474 |
| ENSMUSG00000057191 | -0.2351252 | 4.54888291 | 0.45440437 | 0.66435693 |
| ENSMUSG00000050890 | -0.2352855 | 5.55748942 | 0.44893829 | 0.6589561  |
| ENSMUSG00000081920 | -0.2352881 | 1.6862057  | 0.53458804 | 0.72580329 |
| ENSMUSG00000015176 | -0.2353313 | 8.22680434 | 0.44189204 | 0.65225346 |

|                    |            |            |            |            |
|--------------------|------------|------------|------------|------------|
| ENSMUSG00000060475 | -0.2353407 | 7.41529209 | 0.44324815 | 0.65371828 |
| ENSMUSG00000026470 | -0.2353562 | 5.13521649 | 0.44970698 | 0.65946473 |
| ENSMUSG00000056394 | -0.2354377 | 7.78039106 | 0.44212264 | 0.65250452 |
| ENSMUSG00000027263 | -0.2356199 | 6.33422539 | 0.44485189 | 0.65510145 |
| ENSMUSG00000036875 | -0.2356337 | 5.84409048 | 0.44597828 | 0.65621909 |
| ENSMUSG00000035126 | -0.2357423 | 2.39888289 | 0.50440698 | 0.7025087  |
| ENSMUSG00000022361 | -0.2357762 | 6.79632518 | 0.44362818 | 0.65401042 |
| ENSMUSG00000008892 | -0.235874  | 7.24185308 | 0.44251273 | 0.65295584 |
| ENSMUSG00000024370 | -0.2358826 | 6.97750388 | 0.44284956 | 0.65329813 |
| ENSMUSG00000033883 | -0.2360645 | 4.26611318 | 0.45852645 | 0.66718361 |
| ENSMUSG00000040549 | -0.2360657 | 8.8158632  | 0.4406211  | 0.65114796 |
| ENSMUSG00000026510 | -0.2365315 | 3.86885073 | 0.45801206 | 0.66695125 |
| ENSMUSG00000042506 | -0.236563  | 7.12095777 | 0.44090547 | 0.65142137 |
| ENSMUSG00000000600 | -0.2367512 | 6.28122453 | 0.44374563 | 0.65408391 |
| ENSMUSG00000022024 | -0.2375688 | 6.92891067 | 0.43972458 | 0.65049746 |
| ENSMUSG00000026584 | -0.2376371 | 5.78811814 | 0.44254954 | 0.65295584 |
| ENSMUSG00000060739 | -0.2376702 | 8.0213853  | 0.43791703 | 0.64949763 |
| ENSMUSG00000070934 | -0.2377344 | 6.15862409 | 0.44105278 | 0.65146831 |
| ENSMUSG00000046010 | -0.237799  | 4.48105633 | 0.44826978 | 0.65869209 |
| ENSMUSG00000050668 | -0.2378798 | 4.63634285 | 0.44949205 | 0.65932022 |
| ENSMUSG00000026035 | -0.2379229 | 5.48504096 | 0.44422298 | 0.65452938 |
| ENSMUSG00000062762 | -0.2380232 | 7.11884454 | 0.4386248  | 0.6499931  |
| ENSMUSG00000056209 | -0.2381303 | 5.8756765  | 0.43970871 | 0.65049746 |
| ENSMUSG00000028901 | -0.2381828 | 5.23933729 | 0.44360241 | 0.65401042 |
| ENSMUSG00000024002 | -0.2382675 | 7.32927271 | 0.43746564 | 0.64918528 |
| ENSMUSG00000037029 | -0.2383576 | 6.1664486  | 0.43979757 | 0.65049746 |
| ENSMUSG00000042369 | -0.2386353 | 5.61411029 | 0.4413246  | 0.65150893 |
| ENSMUSG00000020649 | -0.2386965 | 9.50246933 | 0.43517942 | 0.6474855  |
| ENSMUSG00000042408 | -0.2389234 | 4.78222498 | 0.44788253 | 0.65830246 |
| ENSMUSG00000038013 | -0.2390114 | 5.59079373 | 0.4406231  | 0.65114796 |
| ENSMUSG00000008475 | -0.2392901 | 8.14990244 | 0.43484351 | 0.64716428 |
| ENSMUSG00000060126 | -0.2394781 | 10.7302792 | 0.43341898 | 0.64614914 |
| ENSMUSG00000028016 | -0.2395446 | 5.34670836 | 0.44132722 | 0.65150893 |
| ENSMUSG00000054893 | -0.2398716 | 3.31958    | 0.4660623  | 0.67290282 |
| ENSMUSG00000030788 | -0.2399132 | 5.31602406 | 0.44026871 | 0.65092855 |
| ENSMUSG00000059336 | -0.2399716 | 4.6815671  | 0.44395701 | 0.65422689 |
| ENSMUSG00000009907 | -0.240033  | 7.34486606 | 0.43446223 | 0.64704333 |
| ENSMUSG00000038368 | -0.2401141 | 6.5790497  | 0.43525633 | 0.64751059 |
| ENSMUSG00000031902 | -0.2401456 | 8.63738838 | 0.43284129 | 0.64569933 |
| ENSMUSG00000027306 | -0.2405498 | 7.85780237 | 0.43266146 | 0.64561468 |
| ENSMUSG00000025764 | -0.2407379 | 5.52347367 | 0.43820593 | 0.64968561 |
| ENSMUSG00000078651 | -0.240883  | 2.79653613 | 0.46545677 | 0.67248755 |
| ENSMUSG00000034083 | -0.2409402 | 5.17366478 | 0.43954897 | 0.65049746 |

|                    |            |            |            |            |
|--------------------|------------|------------|------------|------------|
| ENSMUSG00000069089 | -0.241     | 5.70066008 | 0.43708791 | 0.64901466 |
| ENSMUSG00000025154 | -0.2410532 | 7.23245616 | 0.43229825 | 0.64542494 |
| ENSMUSG00000020076 | -0.2411629 | 6.84649988 | 0.4334424  | 0.64614914 |
| ENSMUSG00000062901 | -0.2411818 | 5.70957981 | 0.43772533 | 0.64930261 |
| ENSMUSG00000036430 | -0.2412065 | 2.46145638 | 0.48637241 | 0.68823515 |
| ENSMUSG00000037361 | -0.2413001 | 6.85480582 | 0.43261393 | 0.64561468 |
| ENSMUSG00000063889 | -0.2415114 | 4.6437789  | 0.44379933 | 0.65408391 |
| ENSMUSG00000028729 | -0.2417325 | 6.97631743 | 0.43072636 | 0.64414825 |
| ENSMUSG00000073705 | -0.2422546 | 2.94608668 | 0.45793024 | 0.66695125 |
| ENSMUSG00000061207 | -0.2427245 | 3.41834598 | 0.45109592 | 0.66079182 |
| ENSMUSG00000028890 | -0.2427861 | 5.55620005 | 0.43324639 | 0.64612489 |
| ENSMUSG00000029050 | -0.2427964 | 4.1894915  | 0.44864871 | 0.65888978 |
| ENSMUSG00000054737 | -0.2428071 | 4.46555374 | 0.44672005 | 0.65708222 |
| ENSMUSG00000024949 | -0.2430244 | 8.61812468 | 0.42721471 | 0.64111932 |
| ENSMUSG00000002748 | -0.2432006 | 8.88721478 | 0.42678001 | 0.64064527 |
| ENSMUSG00000024978 | -0.243209  | 4.08815292 | 0.43914128 | 0.65024023 |
| ENSMUSG00000029454 | -0.2432829 | 5.97316516 | 0.43141404 | 0.64464029 |
| ENSMUSG00000024795 | -0.2432992 | 7.76833247 | 0.42765518 | 0.64151252 |
| ENSMUSG00000036940 | -0.2433721 | 7.12130942 | 0.42818923 | 0.64168881 |
| ENSMUSG00000056305 | -0.2433809 | 7.11322702 | 0.42806255 | 0.64166304 |
| ENSMUSG00000027164 | -0.2436684 | 6.6970499  | 0.42850098 | 0.64206677 |
| ENSMUSG00000021666 | -0.243818  | 6.22302346 | 0.42916013 | 0.6427865  |
| ENSMUSG00000006932 | -0.2438195 | 8.2939198  | 0.42587656 | 0.63955617 |
| ENSMUSG00000027472 | -0.2438939 | 5.38731685 | 0.43168593 | 0.64495719 |
| ENSMUSG00000002679 | -0.244074  | 4.76775158 | 0.43719683 | 0.64905432 |
| ENSMUSG00000029283 | -0.2440926 | 6.58826769 | 0.42780906 | 0.64165191 |
| ENSMUSG00000031843 | -0.2441222 | 5.90969637 | 0.43024499 | 0.64375001 |
| ENSMUSG00000044906 | -0.2441964 | 5.3048049  | 0.43372699 | 0.64647075 |
| ENSMUSG00000023965 | -0.2443928 | 4.73650382 | 0.43763237 | 0.64930051 |
| ENSMUSG00000010067 | -0.2444452 | 4.40764514 | 0.43414129 | 0.64683333 |
| ENSMUSG00000020696 | -0.2444754 | 4.52807665 | 0.43710993 | 0.64901466 |
| ENSMUSG00000021958 | -0.2445385 | 4.80064313 | 0.43389615 | 0.64655743 |
| ENSMUSG00000095567 | -0.2445649 | 7.64146803 | 0.42449751 | 0.6384632  |
| ENSMUSG00000028651 | -0.2446409 | 4.99921865 | 0.43204444 | 0.64531403 |
| ENSMUSG00000031446 | -0.2447661 | 5.62187096 | 0.42939373 | 0.6428018  |
| ENSMUSG00000040112 | -0.2448121 | 4.93161731 | 0.43266481 | 0.64561468 |
| ENSMUSG00000027509 | -0.2450062 | 6.4091517  | 0.42573288 | 0.63953178 |
| ENSMUSG00000022151 | -0.2450138 | 4.77217401 | 0.43472226 | 0.64713104 |
| ENSMUSG00000024732 | -0.2450906 | 5.19690381 | 0.42811254 | 0.64166304 |
| ENSMUSG00000005907 | -0.2452882 | 4.54606543 | 0.43476116 | 0.64713104 |
| ENSMUSG00000051212 | -0.2453473 | 6.44175858 | 0.42574171 | 0.63953178 |
| ENSMUSG00000091896 | -0.2455791 | 8.38068306 | 0.42277058 | 0.6372235  |
| ENSMUSG00000029534 | -0.245718  | 6.83894493 | 0.42434797 | 0.63832731 |

|                    |            |            |            |            |
|--------------------|------------|------------|------------|------------|
| ENSMUSG0000004535  | -0.2458319 | 7.86925768 | 0.42272863 | 0.6372235  |
| ENSMUSG00000039050 | -0.2460479 | 4.88119331 | 0.43063724 | 0.64410429 |
| ENSMUSG00000066150 | -0.2460826 | 7.38340394 | 0.42278838 | 0.6372235  |
| ENSMUSG00000027170 | -0.2460923 | 7.79290975 | 0.42207819 | 0.63668921 |
| ENSMUSG00000056820 | -0.2463422 | 6.54041716 | 0.42347193 | 0.6375431  |
| ENSMUSG00000032411 | -0.2467768 | 4.02241406 | 0.43853737 | 0.64997072 |
| ENSMUSG00000042548 | -0.2470722 | 7.52418653 | 0.42042556 | 0.63514811 |
| ENSMUSG00000050107 | -0.2471228 | 5.59676531 | 0.42539498 | 0.63918901 |
| ENSMUSG00000022889 | -0.2472424 | 6.22399426 | 0.42296928 | 0.63727257 |
| ENSMUSG00000015950 | -0.2472688 | 7.7540506  | 0.41971614 | 0.63499142 |
| ENSMUSG00000015214 | -0.2472703 | 6.57762273 | 0.42232511 | 0.63697258 |
| ENSMUSG00000030729 | -0.2473528 | 5.97616597 | 0.42406621 | 0.63825959 |
| ENSMUSG00000058748 | -0.2475138 | 4.51780413 | 0.43691891 | 0.64901466 |
| ENSMUSG00000036819 | -0.2476016 | 4.94462316 | 0.42801454 | 0.64166304 |
| ENSMUSG00000037416 | -0.2479436 | 7.32235818 | 0.41970565 | 0.63499142 |
| ENSMUSG00000038371 | -0.2481367 | 4.74736116 | 0.43098932 | 0.64436279 |
| ENSMUSG00000025078 | -0.2481458 | 4.75582392 | 0.42909091 | 0.6427721  |
| ENSMUSG00000026319 | -0.248186  | 6.24983058 | 0.42152398 | 0.63603115 |
| ENSMUSG00000041840 | -0.2482478 | 5.16917905 | 0.42511835 | 0.6389514  |
| ENSMUSG00000037355 | -0.2483406 | 5.11461521 | 0.42718905 | 0.64111932 |
| ENSMUSG00000060227 | -0.2484635 | 4.79866964 | 0.42936812 | 0.6428018  |
| ENSMUSG00000078453 | -0.2484682 | 6.68935332 | 0.41938709 | 0.63476076 |
| ENSMUSG00000019773 | -0.2485236 | 6.32293178 | 0.41995874 | 0.63514811 |
| ENSMUSG00000020492 | -0.2486443 | 5.99677199 | 0.42121473 | 0.63565347 |
| ENSMUSG00000066442 | -0.2486897 | 1.42668088 | 0.51262767 | 0.70874062 |
| ENSMUSG00000008206 | -0.2488888 | 4.50029654 | 0.42871108 | 0.64229234 |
| ENSMUSG00000048486 | -0.248919  | 3.71589891 | 0.43511321 | 0.64747631 |
| ENSMUSG00000020171 | -0.249083  | 6.07158205 | 0.420241   | 0.63514811 |
| ENSMUSG00000031878 | -0.2491166 | 6.13427728 | 0.42058621 | 0.63514811 |
| ENSMUSG00000067931 | -0.2491236 | 3.12740556 | 0.45788738 | 0.66695125 |
| ENSMUSG00000075470 | -0.249211  | 6.34735826 | 0.41918276 | 0.63454055 |
| ENSMUSG00000036501 | -0.2492145 | 5.72518445 | 0.42171478 | 0.63623003 |
| ENSMUSG00000028029 | -0.249342  | 6.49230405 | 0.41778677 | 0.63278266 |
| ENSMUSG00000055866 | -0.249465  | 3.47433153 | 0.43923991 | 0.65029698 |
| ENSMUSG00000010517 | -0.2495051 | 6.89628818 | 0.41698243 | 0.63165312 |
| ENSMUSG00000029221 | -0.24953   | 6.06296635 | 0.41948229 | 0.63481575 |
| ENSMUSG00000025102 | -0.2495473 | 2.68083654 | 0.46063694 | 0.66839461 |
| ENSMUSG00000071866 | -0.2496219 | 9.91335286 | 0.41430844 | 0.62945931 |
| ENSMUSG00000021771 | -0.2496706 | 8.69864038 | 0.41472651 | 0.62982829 |
| ENSMUSG00000042390 | -0.2497238 | 5.51084559 | 0.42044524 | 0.63514811 |
| ENSMUSG00000026393 | -0.2498324 | 7.89817997 | 0.41517877 | 0.63007147 |
| ENSMUSG00000037601 | -0.2500033 | 7.24438182 | 0.41508683 | 0.6300206  |
| ENSMUSG00000027404 | -0.2502027 | 6.54719907 | 0.41540928 | 0.63015453 |



|                    |            |            |            |            |
|--------------------|------------|------------|------------|------------|
| ENSMUSG0000005882  | -0.2503975 | 5.34419782 | 0.42013441 | 0.63514811 |
| ENSMUSG00000026274 | -0.2504956 | 5.0884516  | 0.42061188 | 0.63514811 |
| ENSMUSG00000083012 | -0.2505068 | 3.73448278 | 0.4362531  | 0.64863552 |
| ENSMUSG00000022706 | -0.2506897 | 5.8864529  | 0.41670566 | 0.63156134 |
| ENSMUSG00000057181 | -0.2506907 | 4.88709767 | 0.42500031 | 0.63886302 |
| ENSMUSG00000079508 | -0.2508389 | 4.505479   | 0.42754508 | 0.64143657 |
| ENSMUSG00000052557 | -0.2510662 | 2.87694844 | 0.45342525 | 0.66319516 |
| ENSMUSG00000026753 | -0.2514239 | 7.18018605 | 0.41340435 | 0.62852847 |
| ENSMUSG00000015341 | -0.2515663 | 6.27078088 | 0.41446053 | 0.629513   |
| ENSMUSG00000027304 | -0.2515761 | 6.9770146  | 0.41303145 | 0.62828662 |
| ENSMUSG00000063870 | -0.2515927 | 9.45377018 | 0.41076551 | 0.62666308 |
| ENSMUSG00000059939 | -0.2517769 | 5.68170407 | 0.41504741 | 0.6300206  |
| ENSMUSG00000030316 | -0.252104  | 4.75547772 | 0.4203977  | 0.63514811 |
| ENSMUSG00000020375 | -0.2523551 | 5.28804966 | 0.41654429 | 0.63143289 |
| ENSMUSG00000037070 | -0.2527782 | 5.77606338 | 0.41294574 | 0.62828662 |
| ENSMUSG00000041264 | -0.2530204 | 6.64267641 | 0.41076352 | 0.62666308 |
| ENSMUSG00000037503 | -0.2531815 | 8.05328584 | 0.40857056 | 0.62434816 |
| ENSMUSG00000041236 | -0.2531903 | 6.69347584 | 0.41084709 | 0.62667256 |
| ENSMUSG00000020694 | -0.253222  | 6.8533704  | 0.41042703 | 0.62638623 |
| ENSMUSG00000066595 | -0.2532246 | 5.83992643 | 0.41336158 | 0.62852847 |
| ENSMUSG00000053470 | -0.2533395 | 6.38479569 | 0.41172081 | 0.62720683 |
| ENSMUSG00000074671 | -0.2533543 | 4.55005425 | 0.42090677 | 0.63536654 |
| ENSMUSG00000056536 | -0.2533657 | 6.33334026 | 0.41192257 | 0.62742557 |
| ENSMUSG00000002129 | -0.2537276 | 8.08076754 | 0.40744486 | 0.62395419 |
| ENSMUSG00000032040 | -0.2538147 | 5.72000876 | 0.41168765 | 0.62720683 |
| ENSMUSG00000026563 | -0.253918  | 5.39923051 | 0.41372316 | 0.62883588 |
| ENSMUSG00000028639 | -0.2540633 | 9.6032842  | 0.4060691  | 0.62344094 |
| ENSMUSG00000027195 | -0.2541099 | 7.26079187 | 0.40813708 | 0.62398323 |
| ENSMUSG00000040667 | -0.2542607 | 7.97060272 | 0.40677914 | 0.62395419 |
| ENSMUSG00000030663 | -0.254523  | 6.58366441 | 0.40810479 | 0.62398323 |
| ENSMUSG00000026516 | -0.2546115 | 7.35676482 | 0.40689703 | 0.62395419 |
| ENSMUSG00000059475 | -0.2547298 | 5.71377867 | 0.41213485 | 0.62766025 |
| ENSMUSG00000028291 | -0.254776  | 6.04115259 | 0.41019756 | 0.62612463 |
| ENSMUSG00000004748 | -0.2548063 | 2.15137696 | 0.44448915 | 0.6548321  |
| ENSMUSG00000028249 | -0.2548155 | 6.98121088 | 0.40731822 | 0.62395419 |
| ENSMUSG00000049744 | -0.2548758 | 6.46693235 | 0.40840107 | 0.62426607 |
| ENSMUSG00000020705 | -0.2550073 | 7.95934706 | 0.40537277 | 0.62299252 |
| ENSMUSG00000029201 | -0.2550989 | 5.47917873 | 0.41144928 | 0.62714757 |
| ENSMUSG00000038039 | -0.2552472 | 6.41329641 | 0.40815817 | 0.62398323 |
| ENSMUSG00000056952 | -0.255414  | 6.72409655 | 0.40588874 | 0.62334152 |
| ENSMUSG00000022529 | -0.255445  | 6.40146565 | 0.40744432 | 0.62395419 |
| ENSMUSG00000041702 | -0.2554577 | 5.014481   | 0.41445287 | 0.629513   |
| ENSMUSG00000070709 | -0.2556303 | 2.91742212 | 0.44995009 | 0.65972288 |

|                    |            |            |            |            |
|--------------------|------------|------------|------------|------------|
| ENSMUSG00000030056 | -0.2556616 | 6.74125873 | 0.40548818 | 0.62299252 |
| ENSMUSG00000022471 | -0.2556799 | 6.74148405 | 0.40546991 | 0.62299252 |
| ENSMUSG00000029775 | -0.2558819 | 5.90029002 | 0.40760938 | 0.62397636 |
| ENSMUSG00000047067 | -0.2559501 | 1.37211659 | 0.54482201 | 0.73249727 |
| ENSMUSG00000021241 | -0.2561594 | 4.76613964 | 0.41479945 | 0.62985036 |
| ENSMUSG00000022370 | -0.2561651 | 6.193476   | 0.40634817 | 0.62369181 |
| ENSMUSG00000045409 | -0.2561864 | 5.89913127 | 0.40728983 | 0.62395419 |
| ENSMUSG00000022635 | -0.2562065 | 5.69330798 | 0.40812504 | 0.62398323 |
| ENSMUSG00000032463 | -0.2564145 | 4.50228507 | 0.41797296 | 0.63297577 |
| ENSMUSG00000026028 | -0.2564828 | 7.0397425  | 0.4038623  | 0.62153509 |
| ENSMUSG00000030879 | -0.2565428 | 5.37627014 | 0.40769078 | 0.62397636 |
| ENSMUSG00000032350 | -0.2565776 | 6.58114396 | 0.40476471 | 0.6225018  |
| ENSMUSG00000027281 | -0.256624  | 5.00522508 | 0.41279636 | 0.62822409 |
| ENSMUSG00000025470 | -0.2568318 | 3.61476732 | 0.42340297 | 0.63752829 |
| ENSMUSG00000051557 | -0.2570062 | 3.55323031 | 0.42000178 | 0.63514811 |
| ENSMUSG00000021945 | -0.2570138 | 6.89675464 | 0.40384266 | 0.62153509 |
| ENSMUSG00000040446 | -0.2570294 | 5.16386647 | 0.40997701 | 0.62589218 |
| ENSMUSG00000072964 | -0.2571019 | 6.28597773 | 0.40498886 | 0.62266893 |
| ENSMUSG00000040663 | -0.2571263 | 4.11591788 | 0.41486586 | 0.62986251 |
| ENSMUSG00000067768 | -0.2571508 | 2.94904687 | 0.45924055 | 0.66763551 |
| ENSMUSG00000099689 | -0.2573759 | 2.85743098 | 0.44924623 | 0.65917074 |
| ENSMUSG00000062794 | -0.2573832 | 4.53637393 | 0.41532326 | 0.63015453 |
| ENSMUSG00000037814 | -0.2574213 | 5.11881984 | 0.40956743 | 0.62551695 |
| ENSMUSG00000018882 | -0.2574841 | 6.61132574 | 0.40243949 | 0.6204994  |
| ENSMUSG00000022314 | -0.2575722 | 8.93736814 | 0.40001209 | 0.61863335 |
| ENSMUSG00000031320 | -0.2577476 | 11.1062383 | 0.39913471 | 0.61795118 |
| ENSMUSG00000050174 | -0.2579367 | 1.44807392 | 0.49111807 | 0.69156352 |
| ENSMUSG00000025190 | -0.2579409 | 6.85189621 | 0.4006347  | 0.61906356 |
| ENSMUSG00000033713 | -0.2581702 | 5.15714778 | 0.40742796 | 0.62395419 |
| ENSMUSG00000059436 | -0.2582316 | 6.37970488 | 0.40152059 | 0.61963338 |
| ENSMUSG00000034211 | -0.2583679 | 5.18232824 | 0.40580453 | 0.62330096 |
| ENSMUSG00000032193 | -0.2584474 | 5.97402749 | 0.40196797 | 0.62023502 |
| ENSMUSG00000030403 | -0.2585235 | 6.46595032 | 0.40039995 | 0.6187895  |
| ENSMUSG00000049755 | -0.2588361 | 4.88121078 | 0.40767664 | 0.62397636 |
| ENSMUSG00000063550 | -0.2588522 | 7.71139796 | 0.39859328 | 0.61750179 |
| ENSMUSG00000074862 | -0.2591339 | 2.30713048 | 0.45270273 | 0.66238689 |
| ENSMUSG00000055239 | -0.2593233 | 6.35481533 | 0.4002539  | 0.61874111 |
| ENSMUSG00000074519 | -0.2593803 | 3.2839283  | 0.43657869 | 0.64885124 |
| ENSMUSG00000019256 | -0.259604  | 5.23342662 | 0.40509373 | 0.62274138 |
| ENSMUSG00000076432 | -0.2599718 | 8.34330604 | 0.39607277 | 0.61504029 |
| ENSMUSG00000022890 | -0.2600523 | 7.59498871 | 0.39659385 | 0.61526686 |
| ENSMUSG00000019761 | -0.2600759 | 1.42656233 | 0.53478355 | 0.72587864 |
| ENSMUSG00000032251 | -0.260107  | 1.77985782 | 0.4817664  | 0.68515686 |

|                    |            |            |            |            |
|--------------------|------------|------------|------------|------------|
| ENSMUSG00000031669 | -0.2604313 | 5.15604651 | 0.4036546  | 0.62150359 |
| ENSMUSG00000039263 | -0.2607346 | 4.90772461 | 0.40073712 | 0.61908336 |
| ENSMUSG00000028173 | -0.2607894 | 4.32194367 | 0.410914   | 0.62668599 |
| ENSMUSG00000061118 | -0.2610076 | 3.67294334 | 0.41674615 | 0.63156134 |
| ENSMUSG00000052738 | -0.261012  | 6.53859072 | 0.39609188 | 0.61504029 |
| ENSMUSG00000052310 | -0.2612127 | 6.34891155 | 0.39651516 | 0.61526686 |
| ENSMUSG00000029389 | -0.2612417 | 4.79693409 | 0.40229627 | 0.6204994  |
| ENSMUSG00000060771 | -0.2612897 | 1.72831029 | 0.48789676 | 0.68940671 |
| ENSMUSG00000022070 | -0.261445  | 5.95359859 | 0.39756822 | 0.61609077 |
| ENSMUSG00000031701 | -0.2615215 | 8.48302462 | 0.39310409 | 0.61287184 |
| ENSMUSG00000034259 | -0.2616663 | 3.33624482 | 0.42036725 | 0.63514811 |
| ENSMUSG00000025979 | -0.2617969 | 5.75143111 | 0.39916694 | 0.61795118 |
| ENSMUSG00000031311 | -0.2618013 | 9.12997525 | 0.39214445 | 0.61226085 |
| ENSMUSG00000012609 | -0.2618456 | 4.77336099 | 0.40231835 | 0.6204994  |
| ENSMUSG00000041921 | -0.2618934 | 4.71337478 | 0.40277808 | 0.62068574 |
| ENSMUSG00000004071 | -0.2619444 | 5.15855473 | 0.39933003 | 0.61802167 |
| ENSMUSG00000039458 | -0.2619984 | 5.46837813 | 0.39900366 | 0.61795118 |
| ENSMUSG00000031540 | -0.2621789 | 7.89270814 | 0.39241276 | 0.61245141 |
| ENSMUSG00000027133 | -0.2622082 | 6.15273789 | 0.39487153 | 0.61406435 |
| ENSMUSG00000029128 | -0.2622296 | 5.21262451 | 0.39993653 | 0.61860522 |
| ENSMUSG00000039318 | -0.26236   | 6.60361107 | 0.39364388 | 0.61309072 |
| ENSMUSG00000030641 | -0.262527  | 6.44794841 | 0.39494205 | 0.61406435 |
| ENSMUSG00000049792 | -0.2625375 | 4.65877428 | 0.40015535 | 0.61867746 |
| ENSMUSG00000086965 | -0.2625815 | 1.36337768 | 0.44509964 | 0.65522314 |
| ENSMUSG00000030493 | -0.2625961 | 4.82165922 | 0.3996202  | 0.61838201 |
| ENSMUSG00000041920 | -0.2626    | 6.06943673 | 0.39478152 | 0.61406435 |
| ENSMUSG00000021000 | -0.2626206 | 7.80265299 | 0.39172538 | 0.61196096 |
| ENSMUSG00000007656 | -0.2628634 | 6.91065762 | 0.39243687 | 0.61245141 |
| ENSMUSG00000039048 | -0.2629152 | 5.87472615 | 0.39420394 | 0.61369428 |
| ENSMUSG00000036550 | -0.2630512 | 9.37005277 | 0.38995447 | 0.61043243 |
| ENSMUSG00000030446 | -0.2630801 | 2.16504522 | 0.47915361 | 0.68294906 |
| ENSMUSG00000045078 | -0.2631325 | 6.2915579  | 0.39303986 | 0.6128603  |
| ENSMUSG00000035142 | -0.2633731 | 4.0499801  | 0.40918781 | 0.62502568 |
| ENSMUSG00000025571 | -0.2634502 | 5.29885721 | 0.39643575 | 0.61526686 |
| ENSMUSG00000044881 | -0.2635585 | 2.88489894 | 0.43123016 | 0.64445483 |
| ENSMUSG00000054626 | -0.2635589 | 0.73906211 | 0.6190178  | 0.78599882 |
| ENSMUSG00000070814 | -0.2638089 | 2.96204802 | 0.42923383 | 0.6428018  |
| ENSMUSG00000024240 | -0.2638915 | 5.93474466 | 0.39336249 | 0.61309072 |
| ENSMUSG00000028409 | -0.2638919 | 7.70451195 | 0.38952403 | 0.61020149 |
| ENSMUSG00000041733 | -0.2638982 | 5.10039613 | 0.39601824 | 0.61504029 |
| ENSMUSG00000038372 | -0.2642212 | 5.56670658 | 0.3942576  | 0.61369428 |
| ENSMUSG00000067369 | -0.2642484 | 5.51079702 | 0.394968   | 0.61406435 |
| ENSMUSG00000027634 | -0.2645904 | 5.9377776  | 0.39159915 | 0.61194105 |

|                    |            |            |            |            |
|--------------------|------------|------------|------------|------------|
| ENSMUSG00000041718 | -0.2645904 | 4.61847183 | 0.40208225 | 0.6203226  |
| ENSMUSG00000074890 | -0.2646052 | 3.47772106 | 0.41251565 | 0.6280628  |
| ENSMUSG00000026634 | -0.2647194 | 6.60763198 | 0.38989449 | 0.61042715 |
| ENSMUSG00000040818 | -0.2647925 | 5.86727038 | 0.39262356 | 0.61252695 |
| ENSMUSG00000054770 | -0.2648294 | 4.24813889 | 0.40258184 | 0.6204994  |
| ENSMUSG00000022772 | -0.2649701 | 6.35133864 | 0.39020098 | 0.61072967 |
| ENSMUSG00000004085 | -0.2650058 | 5.69638256 | 0.3926554  | 0.61252695 |
| ENSMUSG00000017421 | -0.265103  | 8.4488685  | 0.38665257 | 0.60737965 |
| ENSMUSG00000034235 | -0.2651286 | 4.37845482 | 0.40093627 | 0.61911158 |
| ENSMUSG00000031799 | -0.265161  | 9.01317849 | 0.38627059 | 0.60695903 |
| ENSMUSG00000028149 | -0.2651791 | 7.34146847 | 0.38769227 | 0.60830401 |
| ENSMUSG00000066838 | -0.2653718 | 2.59244039 | 0.44572089 | 0.65592987 |
| ENSMUSG00000020077 | -0.265432  | 7.02859971 | 0.38778748 | 0.60833036 |
| ENSMUSG00000036890 | -0.2655432 | 4.40048608 | 0.39969783 | 0.6184134  |
| ENSMUSG00000024235 | -0.2656267 | 6.34596013 | 0.38914383 | 0.60978307 |
| ENSMUSG00000040771 | -0.2657828 | 5.48053391 | 0.39188567 | 0.61203404 |
| ENSMUSG00000038538 | -0.2660806 | 6.6467538  | 0.3878783  | 0.60833036 |
| ENSMUSG00000027487 | -0.2661887 | 4.00290973 | 0.40079638 | 0.61908336 |
| ENSMUSG00000024273 | -0.2663136 | 3.74452429 | 0.40624766 | 0.6236263  |
| ENSMUSG00000031016 | -0.266388  | 5.2118691  | 0.39265568 | 0.61252695 |
| ENSMUSG00000003731 | -0.2666289 | 7.61110652 | 0.3846641  | 0.60610462 |
| ENSMUSG00000023452 | -0.2668466 | 3.62632249 | 0.40673278 | 0.62395419 |
| ENSMUSG00000045730 | -0.2670168 | 2.05672814 | 0.46124745 | 0.66894436 |
| ENSMUSG00000044148 | -0.2673032 | 6.29855689 | 0.38615505 | 0.60695903 |
| ENSMUSG00000000563 | -0.2673613 | 8.34931861 | 0.38271691 | 0.60401276 |
| ENSMUSG00000021051 | -0.2674149 | 6.63373971 | 0.38536781 | 0.60642149 |
| ENSMUSG00000025047 | -0.2675978 | 7.27195891 | 0.38294001 | 0.60409964 |
| ENSMUSG00000029672 | -0.2676673 | 6.60143695 | 0.38471681 | 0.60610462 |
| ENSMUSG00000062376 | -0.267672  | 3.85852147 | 0.40346093 | 0.62142918 |
| ENSMUSG00000038002 | -0.2677894 | 6.12818672 | 0.38546391 | 0.60648421 |
| ENSMUSG00000054604 | -0.2679026 | 7.47348357 | 0.38286497 | 0.60409964 |
| ENSMUSG00000035247 | -0.2679771 | 8.81768852 | 0.38141213 | 0.60265911 |
| ENSMUSG00000032301 | -0.2680784 | 8.56739153 | 0.38130656 | 0.60258059 |
| ENSMUSG00000050619 | -0.2681221 | 5.85028251 | 0.38682778 | 0.60756639 |
| ENSMUSG00000038014 | -0.2685786 | 8.46930306 | 0.38040779 | 0.60162631 |
| ENSMUSG00000031485 | -0.2686341 | 5.64331952 | 0.38526644 | 0.60635046 |
| ENSMUSG00000015133 | -0.2687638 | 5.09694796 | 0.38627224 | 0.60695903 |
| ENSMUSG00000024251 | -0.2688556 | 6.48225422 | 0.38266763 | 0.60401276 |
| ENSMUSG00000028710 | -0.2692174 | 5.0327765  | 0.39045179 | 0.61074145 |
| ENSMUSG00000039233 | -0.269222  | 6.13033512 | 0.38347365 | 0.60479605 |
| ENSMUSG00000029250 | -0.2693232 | 8.49307944 | 0.3791616  | 0.60033457 |
| ENSMUSG00000028842 | -0.2693383 | 4.98484019 | 0.3898929  | 0.61042715 |
| ENSMUSG00000031145 | -0.2694496 | 2.50423799 | 0.44105806 | 0.65146831 |

|                    |            |            |            |            |
|--------------------|------------|------------|------------|------------|
| ENSMUSG00000057322 | -0.269682  | 7.39936081 | 0.37911447 | 0.60033457 |
| ENSMUSG00000022718 | -0.2697551 | 7.20832847 | 0.37957974 | 0.60082019 |
| ENSMUSG00000027900 | -0.269962  | 4.94849925 | 0.39027296 | 0.61074145 |
| ENSMUSG00000010097 | -0.2700292 | 8.20686236 | 0.3780741  | 0.59949289 |
| ENSMUSG00000073791 | -0.2700303 | 2.89722954 | 0.40998724 | 0.62589218 |
| ENSMUSG00000030216 | -0.2700733 | 7.52344499 | 0.37851846 | 0.59994588 |
| ENSMUSG00000072946 | -0.2703542 | 5.6958429  | 0.38291028 | 0.60409964 |
| ENSMUSG00000023947 | -0.2706043 | 6.08769936 | 0.38042376 | 0.60162631 |
| ENSMUSG00000038010 | -0.2707677 | 2.19521162 | 0.44524711 | 0.65532207 |
| ENSMUSG00000014355 | -0.2707823 | 8.81730175 | 0.37639411 | 0.59785289 |
| ENSMUSG00000003031 | -0.2709568 | 5.71831559 | 0.38194545 | 0.60323663 |
| ENSMUSG00000030423 | -0.2709673 | 5.92597386 | 0.38034146 | 0.60162631 |
| ENSMUSG00000100201 | -0.2711349 | 1.0589514  | 0.46474223 | 0.67200057 |
| ENSMUSG00000026571 | -0.2714758 | 4.07082626 | 0.3936993  | 0.61309072 |
| ENSMUSG00000030882 | -0.2717972 | 2.4253517  | 0.42728202 | 0.64113111 |
| ENSMUSG00000031754 | -0.2718754 | 6.73210124 | 0.37736487 | 0.59900637 |
| ENSMUSG00000030309 | -0.2719701 | 2.8909125  | 0.42498063 | 0.63886302 |
| ENSMUSG00000030047 | -0.2721642 | 6.6189101  | 0.3761583  | 0.5975974  |
| ENSMUSG00000030980 | -0.2722142 | 7.13952373 | 0.37530337 | 0.59678326 |
| ENSMUSG00000038679 | -0.2722292 | 2.55615385 | 0.42422338 | 0.63830635 |
| ENSMUSG00000032727 | -0.2724245 | 4.89425497 | 0.38435232 | 0.60579588 |
| ENSMUSG00000004096 | -0.2724719 | 7.19313621 | 0.37479965 | 0.59666954 |
| ENSMUSG00000070034 | -0.2725675 | 7.81488661 | 0.37394767 | 0.59574764 |
| ENSMUSG00000029192 | -0.2725769 | 6.92971363 | 0.37512161 | 0.59678326 |
| ENSMUSG00000021792 | -0.2727419 | 4.92823333 | 0.38245881 | 0.60378214 |
| ENSMUSG00000061079 | -0.2727873 | 5.71655385 | 0.37894837 | 0.60033457 |
| ENSMUSG00000058546 | -0.2728265 | 8.55085216 | 0.37283272 | 0.59450364 |
| ENSMUSG00000031536 | -0.2729721 | 5.10305995 | 0.38184918 | 0.60317292 |
| ENSMUSG00000022160 | -0.2730543 | 5.54079474 | 0.37859024 | 0.59995844 |
| ENSMUSG00000020464 | -0.2730652 | 7.18590675 | 0.37432721 | 0.59609342 |
| ENSMUSG00000037152 | -0.2731939 | 4.68600758 | 0.38400323 | 0.60533414 |
| ENSMUSG00000028809 | -0.2732189 | 8.54925039 | 0.37214042 | 0.59383876 |
| ENSMUSG00000040463 | -0.2732939 | 9.20977987 | 0.37157589 | 0.59352173 |
| ENSMUSG00000064145 | -0.2733227 | 5.63217549 | 0.37787282 | 0.59932154 |
| ENSMUSG00000015202 | -0.2734929 | 1.88390348 | 0.45762162 | 0.66689564 |
| ENSMUSG00000060904 | -0.2735205 | 7.07435718 | 0.37329225 | 0.59497246 |
| ENSMUSG00000036376 | -0.2735457 | 4.09807524 | 0.38786859 | 0.60833036 |
| ENSMUSG00000030335 | -0.2736968 | 5.97551208 | 0.37516565 | 0.59678326 |
| ENSMUSG00000004771 | -0.273976  | 5.89419398 | 0.37648544 | 0.59785289 |
| ENSMUSG00000024798 | -0.2744593 | 3.84986649 | 0.39663717 | 0.61526686 |
| ENSMUSG00000022974 | -0.2745128 | 6.20550207 | 0.37407908 | 0.59578627 |
| ENSMUSG00000037818 | -0.2745929 | 3.69339414 | 0.39487212 | 0.61406435 |
| ENSMUSG00000023944 | -0.2746487 | 12.3093746 | 0.36888595 | 0.59056801 |

|                    |            |            |            |            |
|--------------------|------------|------------|------------|------------|
| ENSMUSG00000041303 | -0.2747398 | 6.15784783 | 0.37391626 | 0.59574764 |
| ENSMUSG00000051413 | -0.2748161 | 7.20156378 | 0.370714   | 0.59252702 |
| ENSMUSG00000087141 | -0.2748291 | 4.67584076 | 0.38123251 | 0.60255187 |
| ENSMUSG00000030166 | -0.2749944 | 3.77032672 | 0.39220847 | 0.61227217 |
| ENSMUSG00000033319 | -0.2755793 | 6.38990179 | 0.37184423 | 0.59358587 |
| ENSMUSG00000021621 | -0.2756093 | 5.6735809  | 0.37360546 | 0.59538367 |
| ENSMUSG00000002416 | -0.2758219 | 4.55488676 | 0.38038382 | 0.60162631 |
| ENSMUSG00000033961 | -0.2759051 | 3.26046608 | 0.38978896 | 0.61042715 |
| ENSMUSG00000027671 | -0.2761333 | 7.16042288 | 0.36825642 | 0.59017346 |
| ENSMUSG00000024908 | -0.2763352 | 8.12970253 | 0.36719449 | 0.58891694 |
| ENSMUSG00000026604 | -0.2764636 | 1.30714468 | 0.47745377 | 0.68204637 |
| ENSMUSG00000079317 | -0.2764814 | 3.57379806 | 0.40081973 | 0.61908336 |
| ENSMUSG00000027650 | -0.2767051 | 5.93542425 | 0.37035778 | 0.59222099 |
| ENSMUSG00000097867 | -0.2768147 | 1.25621597 | 0.48929312 | 0.6906462  |
| ENSMUSG00000024829 | -0.2768771 | 5.18934605 | 0.37318219 | 0.59488496 |
| ENSMUSG00000026867 | -0.2768982 | 7.68482786 | 0.36656526 | 0.58856372 |
| ENSMUSG00000091183 | -0.2771297 | 2.62918697 | 0.43698914 | 0.64901466 |
| ENSMUSG00000032456 | -0.2772032 | 2.67536339 | 0.40120676 | 0.61932633 |
| ENSMUSG00000022996 | -0.2772443 | 4.16319413 | 0.3782605  | 0.59970026 |
| ENSMUSG00000021510 | -0.2773936 | 5.23292805 | 0.37542449 | 0.59678326 |
| ENSMUSG00000056904 | -0.277447  | 1.23962938 | 0.48545261 | 0.68747485 |
| ENSMUSG00000023147 | -0.2776667 | 4.03067993 | 0.38049722 | 0.60163426 |
| ENSMUSG00000021252 | -0.2776949 | 6.09762544 | 0.36799499 | 0.59010527 |
| ENSMUSG00000027651 | -0.2778024 | 6.73238554 | 0.36659704 | 0.58856372 |
| ENSMUSG00000020914 | -0.277936  | 11.0365853 | 0.36331224 | 0.58494464 |
| ENSMUSG00000033918 | -0.2780641 | 6.15400156 | 0.36719933 | 0.58891694 |
| ENSMUSG00000055917 | -0.2784168 | 5.24303568 | 0.37231735 | 0.59403319 |
| ENSMUSG00000039428 | -0.2784295 | 5.82560469 | 0.36881165 | 0.59056801 |
| ENSMUSG00000020079 | -0.2786206 | 5.82779842 | 0.36713523 | 0.58891694 |
| ENSMUSG00000028696 | -0.2787106 | 5.13846517 | 0.37171915 | 0.59358587 |
| ENSMUSG00000020454 | -0.2788917 | 7.66563199 | 0.36305764 | 0.58473405 |
| ENSMUSG00000074994 | -0.2789958 | 5.77167161 | 0.36821767 | 0.59017346 |
| ENSMUSG00000030871 | -0.2790025 | 3.09042732 | 0.38849066 | 0.60902504 |
| ENSMUSG00000030094 | -0.2790822 | 3.92827664 | 0.37702388 | 0.59861978 |
| ENSMUSG00000038722 | -0.2793751 | 6.89665893 | 0.3632691  | 0.58494464 |
| ENSMUSG00000028344 | -0.2797441 | 4.73262437 | 0.37244888 | 0.59415514 |
| ENSMUSG00000021737 | -0.2797804 | 7.6537784  | 0.36170894 | 0.58375774 |
| ENSMUSG00000078995 | -0.2797841 | 4.17118482 | 0.38493421 | 0.60618144 |
| ENSMUSG00000030760 | -0.2799765 | 3.73228975 | 0.3849289  | 0.60618144 |
| ENSMUSG00000018160 | -0.2804678 | 7.87203894 | 0.36029615 | 0.58247522 |
| ENSMUSG00000001786 | -0.2805327 | 4.73101785 | 0.36957428 | 0.59140659 |
| ENSMUSG00000053192 | -0.2806983 | 3.92819893 | 0.38054036 | 0.60163426 |
| ENSMUSG00000002221 | -0.2807381 | 6.49227474 | 0.36130904 | 0.58324159 |

|                    |            |            |            |            |
|--------------------|------------|------------|------------|------------|
| ENSMUSG00000034973 | -0.2808771 | 6.19952117 | 0.36302354 | 0.58473405 |
| ENSMUSG00000030536 | -0.2808853 | 9.76380092 | 0.35846092 | 0.58051398 |
| ENSMUSG00000036822 | -0.2811589 | 6.9625915  | 0.36042815 | 0.58247522 |
| ENSMUSG00000043004 | -0.2812925 | 5.74603874 | 0.36390376 | 0.58554731 |
| ENSMUSG00000022325 | -0.2814787 | 6.16993949 | 0.36090797 | 0.58297405 |
| ENSMUSG00000037722 | -0.28159   | 5.79125347 | 0.36353589 | 0.58513    |
| ENSMUSG00000031660 | -0.2819508 | 7.0578928  | 0.35871662 | 0.58084084 |
| ENSMUSG00000042305 | -0.2820023 | 6.74935667 | 0.35913187 | 0.58133865 |
| ENSMUSG00000031196 | -0.2820079 | 2.1185844  | 0.43766371 | 0.64930051 |
| ENSMUSG00000030846 | -0.2820464 | 7.57329418 | 0.35798896 | 0.57983673 |
| ENSMUSG00000029521 | -0.282111  | 5.28515792 | 0.36446623 | 0.58627743 |
| ENSMUSG00000050555 | -0.2822906 | 4.81823394 | 0.36718823 | 0.58891694 |
| ENSMUSG00000031488 | -0.2824403 | 3.57549226 | 0.37541668 | 0.59678326 |
| ENSMUSG00000034329 | -0.2826828 | 6.62906826 | 0.35894792 | 0.58112812 |
| ENSMUSG00000052299 | -0.2829022 | 7.66328134 | 0.35639565 | 0.57851354 |
| ENSMUSG00000015656 | -0.2829088 | 11.1999975 | 0.35475256 | 0.57745556 |
| ENSMUSG00000054942 | -0.2834217 | 5.50108465 | 0.36195697 | 0.58391051 |
| ENSMUSG00000001383 | -0.283541  | 7.33239368 | 0.35566676 | 0.57834081 |
| ENSMUSG00000034163 | -0.2836217 | 7.14984811 | 0.35612131 | 0.57851354 |
| ENSMUSG00000026439 | -0.2837669 | 6.70596096 | 0.3563864  | 0.57851354 |
| ENSMUSG00000041782 | -0.2840443 | 5.54310341 | 0.35765526 | 0.57973159 |
| ENSMUSG00000074282 | -0.2842002 | 2.72877537 | 0.39922718 | 0.61795118 |
| ENSMUSG00000021037 | -0.2842359 | 7.92609098 | 0.35352413 | 0.57658867 |
| ENSMUSG00000042396 | -0.284412  | 6.77847185 | 0.35533981 | 0.57797655 |
| ENSMUSG00000001016 | -0.2846932 | 7.65245876 | 0.35316767 | 0.57624164 |
| ENSMUSG00000054517 | -0.2847286 | 4.01463692 | 0.37180387 | 0.59358587 |
| ENSMUSG00000057278 | -0.2847726 | 6.43823487 | 0.35480532 | 0.57745556 |
| ENSMUSG00000048058 | -0.2848685 | 2.30947063 | 0.4039056  | 0.62153509 |
| ENSMUSG00000079435 | -0.2849807 | 8.55078819 | 0.35195814 | 0.57525258 |
| ENSMUSG00000032570 | -0.285012  | 7.12434518 | 0.35373246 | 0.57669803 |
| ENSMUSG00000095193 | -0.2850374 | 3.80803353 | 0.37902859 | 0.60033457 |
| ENSMUSG00000040405 | -0.2851367 | 1.44915547 | 0.49779342 | 0.69681882 |
| ENSMUSG00000062743 | -0.2855492 | 3.53178067 | 0.38237709 | 0.60374152 |
| ENSMUSG00000086825 | -0.2855544 | 3.06200417 | 0.39359349 | 0.61309072 |
| ENSMUSG00000021488 | -0.2859146 | 8.55573806 | 0.3505157  | 0.57376462 |
| ENSMUSG00000042729 | -0.2861562 | 5.63865236 | 0.3541107  | 0.57680326 |
| ENSMUSG00000020922 | -0.2862947 | 6.342719   | 0.35241346 | 0.57556062 |
| ENSMUSG00000071659 | -0.2863162 | 9.03664134 | 0.34953031 | 0.57264887 |
| ENSMUSG00000023286 | -0.2863369 | 5.82964468 | 0.35413709 | 0.57680326 |
| ENSMUSG00000029518 | -0.2865078 | 8.07272182 | 0.34970359 | 0.57264887 |
| ENSMUSG00000097318 | -0.2865696 | 1.1423848  | 0.48606798 | 0.68798491 |
| ENSMUSG00000033392 | -0.2865908 | 6.27948974 | 0.35314078 | 0.57624164 |
| ENSMUSG00000017428 | -0.2866335 | 7.96574211 | 0.34962738 | 0.57264887 |

|                    |            |            |            |            |
|--------------------|------------|------------|------------|------------|
| ENSMUSG00000062169 | -0.2866402 | 5.46217148 | 0.35589274 | 0.57848057 |
| ENSMUSG00000073008 | -0.286654  | 6.14401409 | 0.35399009 | 0.57680326 |
| ENSMUSG00000022035 | -0.2866549 | 6.66333529 | 0.35167238 | 0.57498087 |
| ENSMUSG00000078515 | -0.2866564 | 6.45185635 | 0.35216478 | 0.57532874 |
| ENSMUSG00000031429 | -0.2869926 | 5.08386378 | 0.35748193 | 0.57962489 |
| ENSMUSG00000029486 | -0.2871352 | 5.86862447 | 0.35383463 | 0.57669803 |
| ENSMUSG00000066571 | -0.287175  | 4.95901527 | 0.35779957 | 0.57979123 |
| ENSMUSG00000045294 | -0.2873519 | 7.44631528 | 0.34905025 | 0.57253042 |
| ENSMUSG00000061273 | -0.2874693 | 6.40970198 | 0.35118486 | 0.57468551 |
| ENSMUSG00000025968 | -0.2874784 | 7.79522484 | 0.34852768 | 0.57233055 |
| ENSMUSG00000026980 | -0.2875071 | 7.30880559 | 0.34918544 | 0.57254306 |
| ENSMUSG00000041632 | -0.2876987 | 5.60258577 | 0.35188956 | 0.57522768 |
| ENSMUSG00000042599 | -0.2877136 | 6.08932876 | 0.35222186 | 0.57533482 |
| ENSMUSG00000057637 | -0.2880085 | 6.97762709 | 0.34873739 | 0.57233055 |
| ENSMUSG00000021752 | -0.2881493 | 3.7333146  | 0.37127393 | 0.59322705 |
| ENSMUSG00000022401 | -0.2881535 | 4.90803317 | 0.35642099 | 0.57851354 |
| ENSMUSG00000037652 | -0.2881895 | 6.65949786 | 0.34927759 | 0.57260629 |
| ENSMUSG0000002458  | -0.2882483 | 6.26320987 | 0.34934304 | 0.57260629 |
| ENSMUSG00000067194 | -0.2882944 | 7.62913558 | 0.34740096 | 0.57126745 |
| ENSMUSG00000021048 | -0.2883033 | 7.51619024 | 0.34701819 | 0.57089918 |
| ENSMUSG00000035683 | -0.2884511 | 6.14170344 | 0.34972788 | 0.57264887 |
| ENSMUSG00000026694 | -0.2884703 | 5.04365502 | 0.35278008 | 0.57597842 |
| ENSMUSG00000031357 | -0.2887444 | 5.40030429 | 0.35385857 | 0.57669803 |
| ENSMUSG00000029642 | -0.2887785 | 6.58274163 | 0.34786367 | 0.57168921 |
| ENSMUSG00000024712 | -0.2889063 | 5.98764306 | 0.34986103 | 0.57277993 |
| ENSMUSG00000072774 | -0.2890362 | 4.13019619 | 0.36467065 | 0.58651877 |
| ENSMUSG00000040599 | -0.2890759 | 7.02733689 | 0.3469658  | 0.57089918 |
| ENSMUSG00000027667 | -0.2891615 | 5.7954422  | 0.35100935 | 0.57448548 |
| ENSMUSG00000024283 | -0.2891986 | 7.79559531 | 0.34578918 | 0.5695724  |
| ENSMUSG00000020283 | -0.2892926 | 4.84873362 | 0.35771525 | 0.5797417  |
| ENSMUSG00000096401 | -0.2893886 | 1.86739675 | 0.43702261 | 0.64901466 |
| ENSMUSG00000029647 | -0.2895971 | 7.14905958 | 0.34597097 | 0.56969781 |
| ENSMUSG00000096986 | -0.2896906 | 2.09828192 | 0.40318169 | 0.62113019 |
| ENSMUSG00000038784 | -0.2898158 | 6.13311631 | 0.34811417 | 0.57200415 |
| ENSMUSG00000021824 | -0.2898458 | 6.80734388 | 0.3461543  | 0.56991267 |
| ENSMUSG00000028382 | -0.290452  | 9.58728627 | 0.3424599  | 0.56616397 |
| ENSMUSG00000068284 | -0.2904695 | 7.00972529 | 0.34493481 | 0.56868628 |
| ENSMUSG00000041769 | -0.290587  | 5.92542023 | 0.34735041 | 0.57126745 |
| ENSMUSG00000057396 | -0.2908241 | 3.23719128 | 0.37737846 | 0.59900637 |
| ENSMUSG00000063888 | -0.2908689 | 7.77569515 | 0.34251754 | 0.56617246 |
| ENSMUSG00000038670 | -0.2909732 | 1.04847512 | 0.43031828 | 0.64375001 |
| ENSMUSG00000071302 | -0.2913411 | 4.59980657 | 0.35567102 | 0.57834081 |
| ENSMUSG00000039701 | -0.2915814 | 4.05756848 | 0.36091328 | 0.58297405 |



|                    |            |            |            |            |
|--------------------|------------|------------|------------|------------|
| ENSMUSG00000059119 | -0.2916913 | 7.61220725 | 0.34150891 | 0.56511156 |
| ENSMUSG00000043015 | -0.2919006 | 5.70281199 | 0.34635233 | 0.57006464 |
| ENSMUSG00000049553 | -0.2919048 | 7.47253868 | 0.34112316 | 0.56464653 |
| ENSMUSG00000048047 | -0.2919077 | 6.9117623  | 0.34297131 | 0.56657515 |
| ENSMUSG00000044694 | -0.2920034 | 4.33700126 | 0.35592493 | 0.57848057 |
| ENSMUSG00000022285 | -0.2920118 | 9.89279435 | 0.33975978 | 0.56386111 |
| ENSMUSG00000042688 | -0.2920584 | 8.18620998 | 0.34042266 | 0.56435327 |
| ENSMUSG00000057522 | -0.2921271 | 7.41713831 | 0.34108928 | 0.56464653 |
| ENSMUSG00000045160 | -0.2921598 | 4.57677396 | 0.35164363 | 0.57498087 |
| ENSMUSG00000022377 | -0.2922094 | 6.02172321 | 0.34470277 | 0.5685645  |
| ENSMUSG00000035365 | -0.2922133 | 5.80058008 | 0.34536753 | 0.56913867 |
| ENSMUSG00000049969 | -0.2922338 | 6.43222263 | 0.34315374 | 0.5667029  |
| ENSMUSG00000029217 | -0.2923566 | 6.04990222 | 0.34423913 | 0.56814734 |
| ENSMUSG00000040843 | -0.2923995 | 5.79655376 | 0.34517121 | 0.56890207 |
| ENSMUSG00000030763 | -0.2924483 | 4.33552498 | 0.35282951 | 0.57597842 |
| ENSMUSG00000050271 | -0.2926359 | 5.45756257 | 0.34304301 | 0.5666068  |
| ENSMUSG00000036461 | -0.2928253 | 8.41275828 | 0.33915127 | 0.56315466 |
| ENSMUSG00000047036 | -0.2931151 | 6.89825583 | 0.34054751 | 0.56442625 |
| ENSMUSG00000032044 | -0.2932704 | 4.89516245 | 0.34622558 | 0.56994301 |
| ENSMUSG00000050592 | -0.2935529 | 3.65535214 | 0.35460905 | 0.57731039 |
| ENSMUSG00000045251 | -0.2935672 | 1.98062237 | 0.39350442 | 0.61309072 |
| ENSMUSG00000031730 | -0.2935754 | 3.99054156 | 0.35633523 | 0.57851354 |
| ENSMUSG00000090862 | -0.2937241 | 8.95270079 | 0.33722166 | 0.5615501  |
| ENSMUSG00000051232 | -0.2938287 | 5.41497851 | 0.34395199 | 0.56776034 |
| ENSMUSG00000021103 | -0.293844  | 4.78854585 | 0.34748423 | 0.57131727 |
| ENSMUSG00000021890 | -0.2939395 | 7.25205986 | 0.33842039 | 0.56250674 |
| ENSMUSG00000039067 | -0.2939852 | 7.74202236 | 0.33740982 | 0.56160326 |
| ENSMUSG00000101892 | -0.2942642 | 3.76790204 | 0.3571344  | 0.57937895 |
| ENSMUSG00000049550 | -0.2942782 | 6.8688069  | 0.33845368 | 0.56250674 |
| ENSMUSG00000038705 | -0.2944559 | 5.7507132  | 0.34069166 | 0.56450513 |
| ENSMUSG00000030876 | -0.294586  | 5.92321547 | 0.34085344 | 0.56454669 |
| ENSMUSG00000038954 | -0.2947048 | 3.58383334 | 0.36412637 | 0.58581811 |
| ENSMUSG00000022897 | -0.2947092 | 7.34865542 | 0.33721805 | 0.5615501  |
| ENSMUSG00000078970 | -0.2949689 | 5.30375374 | 0.34284987 | 0.56654811 |
| ENSMUSG00000025959 | -0.2950235 | 5.31140052 | 0.3435848  | 0.56732789 |
| ENSMUSG00000035000 | -0.2953183 | 6.70335126 | 0.33754142 | 0.56170279 |
| ENSMUSG00000022702 | -0.295366  | 4.2107343  | 0.34907154 | 0.57253042 |
| ENSMUSG00000037214 | -0.2956001 | 2.83331606 | 0.37190817 | 0.59358587 |
| ENSMUSG00000001998 | -0.2956015 | 5.44202651 | 0.34175207 | 0.56525372 |
| ENSMUSG00000043190 | -0.2957218 | 3.57589037 | 0.36229157 | 0.58391156 |
| ENSMUSG00000020612 | -0.2957613 | 8.34662748 | 0.33423972 | 0.55916746 |
| ENSMUSG00000032412 | -0.2958136 | 7.88321407 | 0.33461225 | 0.55936421 |
| ENSMUSG00000056770 | -0.2959037 | 6.674664   | 0.33616575 | 0.56031089 |

|                    |            |            |            |            |
|--------------------|------------|------------|------------|------------|
| ENSMUSG00000072762 | -0.2959661 | 4.02264011 | 0.35325793 | 0.57624164 |
| ENSMUSG00000052331 | -0.296216  | 7.14091201 | 0.33501591 | 0.55945494 |
| ENSMUSG00000021608 | -0.2962798 | 6.63890482 | 0.33524844 | 0.55950612 |
| ENSMUSG00000032966 | -0.296364  | 7.77167027 | 0.33365615 | 0.55854516 |
| ENSMUSG00000001674 | -0.296422  | 6.93420865 | 0.33479904 | 0.5594163  |
| ENSMUSG00000033653 | -0.2967545 | 5.25511868 | 0.34072366 | 0.56450513 |
| ENSMUSG00000029178 | -0.2968326 | 4.33249115 | 0.34864023 | 0.57233055 |
| ENSMUSG00000025237 | -0.2970206 | 4.49851961 | 0.34561449 | 0.56939112 |
| ENSMUSG00000035437 | -0.2970583 | 6.60898828 | 0.33498669 | 0.55945494 |
| ENSMUSG00000069045 | -0.2971753 | 6.8119255  | 0.33834583 | 0.56250674 |
| ENSMUSG00000026192 | -0.2973228 | 8.15842937 | 0.33169885 | 0.55652855 |
| ENSMUSG00000008200 | -0.2974787 | 8.11603808 | 0.33167005 | 0.55652855 |
| ENSMUSG00000036009 | -0.2976383 | 3.24358231 | 0.36095306 | 0.58297405 |
| ENSMUSG00000020687 | -0.2976613 | 8.47934035 | 0.33120719 | 0.55650982 |
| ENSMUSG00000002733 | -0.2977203 | 6.13848312 | 0.33476847 | 0.5594163  |
| ENSMUSG00000040918 | -0.2981476 | 5.12870713 | 0.33879087 | 0.56277276 |
| ENSMUSG00000030880 | -0.2982447 | 5.19378317 | 0.3358731  | 0.56008281 |
| ENSMUSG00000029772 | -0.2983517 | 6.47534429 | 0.33274942 | 0.55745995 |
| ENSMUSG00000020876 | -0.2984303 | 4.62588515 | 0.33922966 | 0.56315466 |
| ENSMUSG00000048100 | -0.2985514 | 4.46137021 | 0.34873038 | 0.57233055 |
| ENSMUSG00000028397 | -0.2988458 | 5.98336483 | 0.33422411 | 0.55916746 |
| ENSMUSG00000035049 | -0.2989228 | 5.76525165 | 0.33178061 | 0.55652855 |
| ENSMUSG00000021711 | -0.2989273 | 6.4222587  | 0.33217052 | 0.55687742 |
| ENSMUSG00000032263 | -0.2990965 | 3.27477282 | 0.35943177 | 0.58147497 |
| ENSMUSG00000030929 | -0.2991828 | 5.49248723 | 0.33614472 | 0.56031089 |
| ENSMUSG00000017778 | -0.299344  | 4.49467546 | 0.33917518 | 0.56315466 |
| ENSMUSG00000034354 | -0.299727  | 7.15448261 | 0.32893749 | 0.553827   |
| ENSMUSG00000029910 | -0.3001458 | 7.51802925 | 0.32806982 | 0.55314336 |
| ENSMUSG00000042111 | -0.3005688 | 5.37110164 | 0.33196985 | 0.55667281 |
| ENSMUSG00000045100 | -0.3006908 | 1.96885156 | 0.39088085 | 0.61126147 |
| ENSMUSG00000001909 | -0.3009126 | 5.98662624 | 0.32856218 | 0.55354079 |
| ENSMUSG00000030609 | -0.3010463 | 6.48048219 | 0.32789314 | 0.55310489 |
| ENSMUSG00000015342 | -0.3010512 | 4.45895648 | 0.33982268 | 0.56387872 |
| ENSMUSG00000062210 | -0.3013402 | 6.44081338 | 0.32841954 | 0.55338692 |
| ENSMUSG00000012640 | -0.3014357 | 5.61971818 | 0.3313566  | 0.55650982 |
| ENSMUSG00000021039 | -0.3016519 | 7.65471872 | 0.32532687 | 0.55001551 |
| ENSMUSG00000037266 | -0.3016902 | 8.25577359 | 0.32480244 | 0.54961078 |
| ENSMUSG00000003226 | -0.3019149 | 9.6620044  | 0.32378899 | 0.54867072 |
| ENSMUSG00000042406 | -0.3019506 | 8.11586806 | 0.32426592 | 0.5490964  |
| ENSMUSG00000027326 | -0.3020316 | 7.70983955 | 0.32508146 | 0.54982381 |
| ENSMUSG00000082286 | -0.3020723 | 2.04424859 | 0.38599636 | 0.60687924 |
| ENSMUSG00000041570 | -0.3024591 | 5.88885703 | 0.32840698 | 0.55338692 |
| ENSMUSG00000034312 | -0.3024603 | 6.06280062 | 0.32629166 | 0.55100677 |

|                    |            |            |            |            |
|--------------------|------------|------------|------------|------------|
| ENSMUSG00000097061 | -0.3029326 | 2.64067873 | 0.3727884  | 0.59450364 |
| ENSMUSG00000024983 | -0.3030311 | 5.00817697 | 0.33092257 | 0.5563743  |
| ENSMUSG00000074220 | -0.3031419 | 3.04515529 | 0.35930572 | 0.5814455  |
| ENSMUSG00000027652 | -0.3033127 | 7.2058235  | 0.32351187 | 0.54842764 |
| ENSMUSG00000027774 | -0.3033913 | 7.35109733 | 0.32301031 | 0.54786776 |
| ENSMUSG00000024580 | -0.3035168 | 6.35614617 | 0.3246585  | 0.54953381 |
| ENSMUSG00000019303 | -0.3035271 | 3.78594296 | 0.33835908 | 0.56250674 |
| ENSMUSG00000033596 | -0.3035409 | 8.30719004 | 0.32180349 | 0.54671337 |
| ENSMUSG00000085566 | -0.3037331 | 2.78521048 | 0.36537261 | 0.58729739 |
| ENSMUSG00000022426 | -0.3037528 | 5.99874803 | 0.32470599 | 0.54953381 |
| ENSMUSG00000027288 | -0.3037682 | 9.45470513 | 0.3208059  | 0.54556637 |
| ENSMUSG00000022867 | -0.3039504 | 7.5396944  | 0.32194614 | 0.54671337 |
| ENSMUSG00000097290 | -0.3042254 | 3.76018404 | 0.34642018 | 0.57008931 |
| ENSMUSG00000031508 | -0.3043247 | 5.31270527 | 0.32626357 | 0.55100677 |
| ENSMUSG00000028495 | -0.3043907 | 9.32461068 | 0.31980234 | 0.54492741 |
| ENSMUSG00000026577 | -0.3048874 | 5.54288223 | 0.32513227 | 0.54982381 |
| ENSMUSG00000052406 | -0.3051436 | 6.40357618 | 0.32136091 | 0.54610086 |
| ENSMUSG00000078566 | -0.3051904 | 3.83838694 | 0.3443441  | 0.56823363 |
| ENSMUSG00000012535 | -0.305295  | 8.17606819 | 0.31909027 | 0.5440426  |
| ENSMUSG00000028331 | -0.3055231 | 2.69391925 | 0.35459305 | 0.57731039 |
| ENSMUSG00000052997 | -0.3055268 | 8.3551588  | 0.31853169 | 0.54334795 |
| ENSMUSG00000049764 | -0.3055498 | 7.94302998 | 0.31891813 | 0.5439211  |
| ENSMUSG00000001630 | -0.3056689 | 4.17203389 | 0.33685009 | 0.56110462 |
| ENSMUSG00000020659 | -0.3058344 | 5.54309391 | 0.32410141 | 0.54902758 |
| ENSMUSG00000029552 | -0.3058509 | 5.96291391 | 0.32182443 | 0.54671337 |
| ENSMUSG00000059897 | -0.306217  | 4.4775703  | 0.33146031 | 0.55652855 |
| ENSMUSG00000025437 | -0.3065259 | 6.51068529 | 0.31982274 | 0.54492741 |
| ENSMUSG00000023460 | -0.3065416 | 4.36732166 | 0.33289434 | 0.55761612 |
| ENSMUSG00000022978 | -0.3068999 | 4.54155765 | 0.32820909 | 0.55329167 |
| ENSMUSG00000026429 | -0.307083  | 4.38305247 | 0.3301233  | 0.55524161 |
| ENSMUSG00000037461 | -0.3070988 | 7.19561459 | 0.31719497 | 0.541925   |
| ENSMUSG00000047368 | -0.3072751 | 5.96181866 | 0.32036755 | 0.54530228 |
| ENSMUSG00000042444 | -0.3072957 | 6.92870675 | 0.31783677 | 0.54276353 |
| ENSMUSG00000075327 | -0.3073105 | 4.38414493 | 0.32778476 | 0.55300859 |
| ENSMUSG00000004880 | -0.307348  | 8.48833151 | 0.31557752 | 0.54030829 |
| ENSMUSG00000054293 | -0.3073985 | 3.60814167 | 0.3444186  | 0.56826961 |
| ENSMUSG00000032905 | -0.3074599 | 5.36183332 | 0.323573   | 0.54842764 |
| ENSMUSG00000039100 | -0.3075262 | 6.74093124 | 0.31769217 | 0.54265957 |
| ENSMUSG00000054008 | -0.3076889 | 5.087502   | 0.32236787 | 0.54712231 |
| ENSMUSG00000029191 | -0.3077417 | 7.78260115 | 0.31549422 | 0.54030327 |
| ENSMUSG00000031292 | -0.3078311 | 2.43946687 | 0.37778972 | 0.59932154 |
| ENSMUSG00000061859 | -0.3078704 | 4.20307533 | 0.33520394 | 0.55950612 |
| ENSMUSG00000014956 | -0.3079043 | 8.26012543 | 0.31503351 | 0.5398572  |

|                    |            |            |            |            |
|--------------------|------------|------------|------------|------------|
| ENSMUSG00000033793 | -0.3079093 | 6.72907053 | 0.31718025 | 0.541925   |
| ENSMUSG00000020170 | -0.3081354 | 5.41450558 | 0.32197484 | 0.54671337 |
| ENSMUSG00000032555 | -0.3082673 | 8.78376917 | 0.31402049 | 0.53844548 |
| ENSMUSG00000020661 | -0.3085881 | 6.13320702 | 0.31691221 | 0.54178524 |
| ENSMUSG00000026150 | -0.3088412 | 6.4908662  | 0.31623866 | 0.54080522 |
| ENSMUSG00000036983 | -0.3088716 | 4.22935256 | 0.33184475 | 0.55654957 |
| ENSMUSG00000024542 | -0.3089233 | 8.08832103 | 0.31357535 | 0.53821368 |
| ENSMUSG00000020954 | -0.3089518 | 6.7749777  | 0.31559736 | 0.54030829 |
| ENSMUSG00000029603 | -0.3090084 | 3.04568103 | 0.33992781 | 0.56396639 |
| ENSMUSG00000031207 | -0.3091856 | 10.5104262 | 0.3120252  | 0.53662364 |
| ENSMUSG00000022911 | -0.3093605 | 4.19065394 | 0.33093718 | 0.5563743  |
| ENSMUSG00000056383 | -0.3093975 | 4.54435732 | 0.32708191 | 0.55216833 |
| ENSMUSG00000027177 | -0.3094714 | 7.31240866 | 0.31363307 | 0.53822709 |
| ENSMUSG00000026174 | -0.3097768 | 7.65312653 | 0.31257088 | 0.53700245 |
| ENSMUSG00000026127 | -0.3098923 | 6.80595854 | 0.31328775 | 0.53789127 |
| ENSMUSG00000099681 | -0.3099511 | 2.97203809 | 0.36571541 | 0.58758566 |
| ENSMUSG00000053801 | -0.3100185 | 5.45185168 | 0.31527766 | 0.54017859 |
| ENSMUSG00000000355 | -0.3101238 | 6.02868832 | 0.31597606 | 0.54061333 |
| ENSMUSG00000037514 | -0.3105362 | 5.78505841 | 0.31572689 | 0.54032458 |
| ENSMUSG00000054115 | -0.3107253 | 4.89712036 | 0.31941858 | 0.54451628 |
| ENSMUSG00000053253 | -0.3107801 | 5.02561626 | 0.3194795  | 0.54453404 |
| ENSMUSG00000057335 | -0.310784  | 6.57459059 | 0.31292444 | 0.53743863 |
| ENSMUSG00000039046 | -0.3108107 | 6.18810276 | 0.31376125 | 0.53836138 |
| ENSMUSG00000038930 | -0.3108527 | 3.80166453 | 0.33176494 | 0.55652855 |
| ENSMUSG00000007659 | -0.3109163 | 5.69779846 | 0.31381406 | 0.53836635 |
| ENSMUSG00000075284 | -0.3112876 | 7.9014276  | 0.30983224 | 0.53391353 |
| ENSMUSG00000028426 | -0.3114047 | 8.47714053 | 0.30930801 | 0.53344382 |
| ENSMUSG00000034543 | -0.3114479 | 7.21293215 | 0.31042074 | 0.53475675 |
| ENSMUSG00000064339 | -0.3114649 | 10.1582511 | 0.30855265 | 0.53273004 |
| ENSMUSG00000029780 | -0.3115811 | 6.36714226 | 0.3125144  | 0.53699096 |
| ENSMUSG00000064351 | -0.3116176 | 12.6839557 | 0.30806761 | 0.53197776 |
| ENSMUSG00000020257 | -0.3118924 | 8.0092521  | 0.30896297 | 0.53318081 |
| ENSMUSG00000036097 | -0.3121208 | 7.50860702 | 0.30924313 | 0.53344382 |
| ENSMUSG00000079478 | -0.3122434 | 2.25639996 | 0.36338188 | 0.58496943 |
| ENSMUSG00000024811 | -0.3125883 | 8.53751025 | 0.30750675 | 0.53136408 |
| ENSMUSG00000025236 | -0.3128347 | 5.91409906 | 0.31070519 | 0.53507581 |
| ENSMUSG00000036403 | -0.3131299 | 5.93031126 | 0.31095663 | 0.53542333 |
| ENSMUSG00000057388 | -0.3135272 | 6.37875196 | 0.30863253 | 0.53278265 |
| ENSMUSG00000021624 | -0.3135512 | 8.61438681 | 0.30594223 | 0.52954467 |
| ENSMUSG00000052962 | -0.3137098 | 5.89628757 | 0.31032283 | 0.5346735  |
| ENSMUSG00000078877 | -0.3143215 | 2.05121703 | 0.40349102 | 0.62142918 |
| ENSMUSG00000032913 | -0.3147294 | 4.86684645 | 0.31573662 | 0.54032458 |
| ENSMUSG00000029176 | -0.3147298 | 6.84878686 | 0.30616916 | 0.52971735 |

|                     |            |            |            |            |
|---------------------|------------|------------|------------|------------|
| ENSMUSG00000006673  | -0.3147783 | 7.42788729 | 0.30492554 | 0.5285738  |
| ENSMUSG00000002147  | -0.3150306 | 6.65261763 | 0.30549536 | 0.52895836 |
| ENSMUSG000000038683 | -0.3152272 | 6.52418559 | 0.30609689 | 0.52967729 |
| ENSMUSG000000069539 | -0.3152633 | 6.40628756 | 0.30660568 | 0.53030243 |
| ENSMUSG000000024589 | -0.315486  | 4.18662908 | 0.32053192 | 0.54530228 |
| ENSMUSG000000031667 | -0.3155002 | 3.93171158 | 0.32287393 | 0.54783849 |
| ENSMUSG000000039275 | -0.3156316 | 6.90337117 | 0.30411125 | 0.52776564 |
| ENSMUSG000000020549 | -0.3160716 | 6.11507097 | 0.30485031 | 0.52853791 |
| ENSMUSG000000039449 | -0.3163123 | 6.56156703 | 0.30426461 | 0.52794684 |
| ENSMUSG000000033904 | -0.3163149 | 6.51009596 | 0.30464292 | 0.52838684 |
| ENSMUSG000000044702 | -0.3165223 | 4.90274372 | 0.31243904 | 0.53699096 |
| ENSMUSG000000087107 | -0.316534  | 8.79233741 | 0.3011954  | 0.52449763 |
| ENSMUSG000000046982 | -0.3165885 | 4.01118636 | 0.31831946 | 0.54317299 |
| ENSMUSG000000020621 | -0.3166863 | 3.73290537 | 0.33000393 | 0.55518913 |
| ENSMUSG000000087452 | -0.3167447 | 1.6267563  | 0.38370789 | 0.60495701 |
| ENSMUSG000000026767 | -0.3167461 | 6.26711131 | 0.30466519 | 0.52838684 |
| ENSMUSG000000035759 | -0.3169351 | 2.37507173 | 0.36942567 | 0.59134429 |
| ENSMUSG000000093459 | -0.3170221 | 1.33375103 | 0.41681576 | 0.63157808 |
| ENSMUSG000000064302 | -0.3170301 | 7.53829841 | 0.30145853 | 0.52468186 |
| ENSMUSG000000009013 | -0.3170548 | 7.96703269 | 0.30097353 | 0.52426079 |
| ENSMUSG000000028609 | -0.3170985 | 6.90427785 | 0.30239972 | 0.5258108  |
| ENSMUSG000000033972 | -0.3171034 | 3.6583358  | 0.33013809 | 0.55524161 |
| ENSMUSG000000041147 | -0.3171937 | 6.27442867 | 0.30438046 | 0.52806288 |
| ENSMUSG000000033545 | -0.3172347 | 3.59866577 | 0.32294346 | 0.54784053 |
| ENSMUSG000000039182 | -0.3173447 | 3.85446557 | 0.32289146 | 0.54783849 |
| ENSMUSG000000059920 | -0.3175225 | 5.87683359 | 0.30496905 | 0.5285738  |
| ENSMUSG000000046591 | -0.3177587 | 6.68078602 | 0.30175946 | 0.52503614 |
| ENSMUSG000000020847 | -0.3178557 | 1.4980008  | 0.36212848 | 0.58391051 |
| ENSMUSG000000036932 | -0.3182617 | 6.49240213 | 0.30129291 | 0.5245338  |
| ENSMUSG000000021277 | -0.3182961 | 6.27666803 | 0.30132482 | 0.5245338  |
| ENSMUSG000000027835 | -0.3187301 | 6.21016351 | 0.30210774 | 0.52555733 |
| ENSMUSG000000020402 | -0.3189664 | 7.91276105 | 0.2980298  | 0.520394   |
| ENSMUSG000000031327 | -0.3190051 | 2.90714097 | 0.33662507 | 0.56090309 |
| ENSMUSG000000043962 | -0.3190536 | 8.52889413 | 0.29743324 | 0.51960475 |
| ENSMUSG000000024614 | -0.3192629 | 6.89061738 | 0.29960477 | 0.52216863 |
| ENSMUSG000000022159 | -0.3193072 | 4.07957754 | 0.31850858 | 0.54334795 |
| ENSMUSG000000053012 | -0.3195159 | 6.21939947 | 0.30092386 | 0.52425896 |
| ENSMUSG000000042032 | -0.3196748 | 6.23092874 | 0.30007259 | 0.52286036 |
| ENSMUSG000000035614 | -0.3203345 | 6.46927554 | 0.29904575 | 0.52174557 |
| ENSMUSG000000010142 | -0.3203443 | 8.99842738 | 0.29536135 | 0.51724209 |
| ENSMUSG000000031758 | -0.3204903 | 3.74883832 | 0.31820626 | 0.54317299 |
| ENSMUSG000000024843 | -0.3206408 | 4.62424481 | 0.30756441 | 0.53136408 |
| ENSMUSG000000020256 | -0.3206497 | 2.19513896 | 0.36884025 | 0.59056801 |

|                    |            |            |            |            |
|--------------------|------------|------------|------------|------------|
| ENSMUSG00000021113 | -0.3206666 | 4.73824866 | 0.30756114 | 0.53136408 |
| ENSMUSG00000041353 | -0.3208069 | 4.38771426 | 0.30901151 | 0.53318081 |
| ENSMUSG00000031575 | -0.3209909 | 6.81863414 | 0.29653403 | 0.51865535 |
| ENSMUSG00000058638 | -0.3212822 | 6.63374479 | 0.29659733 | 0.51865535 |
| ENSMUSG00000057572 | -0.3213941 | 5.97829861 | 0.29855026 | 0.52115467 |
| ENSMUSG00000059423 | -0.3214202 | 4.54071489 | 0.30783907 | 0.53175341 |
| ENSMUSG00000074071 | -0.3215067 | 5.55140183 | 0.29962718 | 0.52216863 |
| ENSMUSG00000024082 | -0.3215586 | 4.95858429 | 0.30265105 | 0.52607816 |
| ENSMUSG00000026914 | -0.3215724 | 7.95899601 | 0.2942034  | 0.51589203 |
| ENSMUSG00000022360 | -0.321613  | 8.63067818 | 0.29369077 | 0.51582432 |
| ENSMUSG00000029815 | -0.3216536 | 3.98318959 | 0.31287775 | 0.53743863 |
| ENSMUSG00000026374 | -0.3217975 | 7.74101426 | 0.29408811 | 0.51589203 |
| ENSMUSG00000022369 | -0.3219019 | 6.29896775 | 0.29660122 | 0.51865535 |
| ENSMUSG00000001833 | -0.3220321 | 8.53456079 | 0.29318405 | 0.51518606 |
| ENSMUSG00000034024 | -0.3222079 | 9.70099131 | 0.29225231 | 0.5142191  |
| ENSMUSG00000023235 | -0.3223624 | 1.35475452 | 0.40461249 | 0.62235645 |
| ENSMUSG00000041712 | -0.3223756 | 6.9373833  | 0.29417577 | 0.51589203 |
| ENSMUSG00000025967 | -0.3224604 | 9.9833456  | 0.29182274 | 0.51405038 |
| ENSMUSG00000020577 | -0.3226912 | 5.48915148 | 0.29786381 | 0.5201884  |
| ENSMUSG00000029270 | -0.3228888 | 6.52103551 | 0.29482663 | 0.51664127 |
| ENSMUSG00000079641 | -0.3229529 | 8.65557796 | 0.29164624 | 0.51390736 |
| ENSMUSG00000037958 | -0.3232325 | 5.79634871 | 0.29623997 | 0.51852813 |
| ENSMUSG00000033845 | -0.3232639 | 6.64567116 | 0.29362173 | 0.51578705 |
| ENSMUSG00000021244 | -0.3232732 | 7.39772586 | 0.29222679 | 0.5142191  |
| ENSMUSG00000036061 | -0.3234473 | 3.29570026 | 0.32041923 | 0.54530228 |
| ENSMUSG00000024067 | -0.3237954 | 5.86601279 | 0.29521117 | 0.51706306 |
| ENSMUSG00000037730 | -0.3238753 | 5.70129953 | 0.29638294 | 0.51861002 |
| ENSMUSG00000032547 | -0.3240366 | 2.47319026 | 0.34729555 | 0.57126745 |
| ENSMUSG00000038437 | -0.3240374 | 6.26328348 | 0.29306    | 0.51505199 |
| ENSMUSG00000049904 | -0.3241141 | 1.44982296 | 0.40791677 | 0.62398323 |
| ENSMUSG00000027739 | -0.3242165 | 4.207179   | 0.30745287 | 0.53136408 |
| ENSMUSG00000057234 | -0.3242342 | 2.71278124 | 0.33552789 | 0.55976683 |
| ENSMUSG00000074513 | -0.3242785 | 5.95461528 | 0.29422968 | 0.51589203 |
| ENSMUSG00000045466 | -0.3245265 | 3.40618419 | 0.31617391 | 0.54078025 |
| ENSMUSG00000067424 | -0.3245325 | 2.76298214 | 0.32885399 | 0.55377287 |
| ENSMUSG00000029790 | -0.3246818 | 4.01086982 | 0.30534166 | 0.52887137 |
| ENSMUSG00000025742 | -0.3246861 | 7.34912665 | 0.29048041 | 0.51291497 |
| ENSMUSG00000027478 | -0.3246989 | 3.46747852 | 0.31208736 | 0.53662364 |
| ENSMUSG00000031924 | -0.3249367 | 8.3470366  | 0.28883457 | 0.51070536 |
| ENSMUSG00000041837 | -0.3249424 | 4.7053422  | 0.29910157 | 0.52174735 |
| ENSMUSG00000031157 | -0.3249638 | 5.93157753 | 0.29205828 | 0.51421331 |
| ENSMUSG00000032228 | -0.325018  | 7.63709388 | 0.28946079 | 0.51156099 |
| ENSMUSG00000033222 | -0.3251559 | 6.66756376 | 0.2905123  | 0.51291497 |

|                    |            |            |            |            |
|--------------------|------------|------------|------------|------------|
| ENSMUSG00000027663 | -0.3252127 | 5.99572696 | 0.29290638 | 0.51487029 |
| ENSMUSG00000041426 | -0.3255531 | 4.99072297 | 0.29750351 | 0.51964332 |
| ENSMUSG00000069495 | -0.3256146 | 6.33666574 | 0.29132106 | 0.51390128 |
| ENSMUSG00000087213 | -0.3257752 | 2.37894677 | 0.34843144 | 0.57233055 |
| ENSMUSG00000027184 | -0.3257955 | 10.2711327 | 0.28684005 | 0.50859636 |
| ENSMUSG00000056708 | -0.3259196 | 5.86837844 | 0.29161303 | 0.51390736 |
| ENSMUSG00000021930 | -0.3264389 | 4.41194645 | 0.30224005 | 0.52561791 |
| ENSMUSG00000027245 | -0.3264616 | 2.69149065 | 0.33787893 | 0.56203708 |
| ENSMUSG00000074925 | -0.3265837 | 3.67396159 | 0.31405991 | 0.53844548 |
| ENSMUSG00000074093 | -0.3266095 | 1.44631855 | 0.38591033 | 0.60687924 |
| ENSMUSG00000030983 | -0.3266148 | 7.01182046 | 0.2877159  | 0.50973029 |
| ENSMUSG00000012483 | -0.3268431 | 5.29015353 | 0.29396608 | 0.51589203 |
| ENSMUSG00000034484 | -0.3268457 | 9.23875389 | 0.28558539 | 0.50722568 |
| ENSMUSG00000044730 | -0.3268719 | 4.51060056 | 0.29710603 | 0.51920133 |
| ENSMUSG00000043909 | -0.3269131 | 6.48951509 | 0.28864967 | 0.51060411 |
| ENSMUSG00000042446 | -0.3269831 | 6.70047932 | 0.28829691 | 0.5102401  |
| ENSMUSG00000057069 | -0.3271355 | 8.23499319 | 0.28576715 | 0.50736136 |
| ENSMUSG00000074340 | -0.3273193 | 1.29362336 | 0.40895663 | 0.62476106 |
| ENSMUSG00000021540 | -0.3273259 | 5.51924205 | 0.29190111 | 0.51410445 |
| ENSMUSG00000047832 | -0.3275974 | 6.45459504 | 0.28659299 | 0.50832547 |
| ENSMUSG00000030528 | -0.3276064 | 7.13020482 | 0.28633692 | 0.50795482 |
| ENSMUSG00000031309 | -0.3276916 | 6.53609243 | 0.28788596 | 0.50978033 |
| ENSMUSG00000080717 | -0.3276967 | 2.67014873 | 0.33860434 | 0.56254955 |
| ENSMUSG00000019790 | -0.3277816 | 5.92139668 | 0.28873893 | 0.51061997 |
| ENSMUSG00000033781 | -0.3278005 | 4.0517671  | 0.30359486 | 0.52726592 |
| ENSMUSG00000061904 | -0.328002  | 9.08642923 | 0.28389851 | 0.50512483 |
| ENSMUSG00000027272 | -0.3281166 | 6.91771778 | 0.28616507 | 0.50778862 |
| ENSMUSG00000028175 | -0.3284608 | 5.53609258 | 0.29116772 | 0.51381979 |
| ENSMUSG00000063362 | -0.3284717 | 5.75670866 | 0.28910257 | 0.51109542 |
| ENSMUSG00000027282 | -0.3286378 | 7.8225483  | 0.28389339 | 0.50512483 |
| ENSMUSG00000001157 | -0.328674  | 5.40843514 | 0.29050798 | 0.51291497 |
| ENSMUSG00000030960 | -0.3288131 | 4.9706508  | 0.29335951 | 0.51541038 |
| ENSMUSG00000032314 | -0.3289349 | 7.14008992 | 0.28446522 | 0.50588273 |
| ENSMUSG00000028799 | -0.3290217 | 4.38198482 | 0.29428342 | 0.51589203 |
| ENSMUSG00000074165 | -0.3292432 | 4.73784856 | 0.29622968 | 0.51852813 |
| ENSMUSG00000007815 | -0.3294589 | 8.96843593 | 0.28183119 | 0.50278208 |
| ENSMUSG00000033417 | -0.3295495 | 6.77973804 | 0.28416357 | 0.50546555 |
| ENSMUSG00000034538 | -0.3295611 | 2.5104525  | 0.34161624 | 0.56511597 |
| ENSMUSG00000025209 | -0.3296606 | 5.04182592 | 0.28856385 | 0.51056153 |
| ENSMUSG00000070372 | -0.329805  | 8.35890675 | 0.2817992  | 0.50278208 |
| ENSMUSG00000022961 | -0.3302593 | 9.90200596 | 0.28039859 | 0.5013209  |
| ENSMUSG00000068299 | -0.3306583 | 2.74752878 | 0.33101794 | 0.5563743  |
| ENSMUSG00000030766 | -0.3309817 | 6.33774896 | 0.28300451 | 0.50428298 |

|                    |            |            |            |            |
|--------------------|------------|------------|------------|------------|
| ENSMUSG00000031683 | -0.3310564 | 6.35659044 | 0.28262793 | 0.50394504 |
| ENSMUSG00000028080 | -0.3313793 | 7.10316843 | 0.28108648 | 0.5021461  |
| ENSMUSG00000025240 | -0.331632  | 6.93049177 | 0.28095572 | 0.50204901 |
| ENSMUSG00000058690 | -0.3316552 | 6.08736611 | 0.28366379 | 0.50506977 |
| ENSMUSG00000030615 | -0.3320087 | 4.71228462 | 0.29006333 | 0.51245789 |
| ENSMUSG00000076437 | -0.3320484 | 5.47791331 | 0.28389167 | 0.50512483 |
| ENSMUSG00000002297 | -0.3322328 | 7.47478194 | 0.27904717 | 0.49979151 |
| ENSMUSG00000024483 | -0.3323931 | 8.19432003 | 0.27812919 | 0.49831286 |
| ENSMUSG00000024352 | -0.3323935 | 3.51187637 | 0.29467764 | 0.51646411 |
| ENSMUSG00000074909 | -0.3324176 | 5.59979648 | 0.28477385 | 0.50618118 |
| ENSMUSG00000010751 | -0.3324889 | 4.31400035 | 0.29211388 | 0.5142191  |
| ENSMUSG00000032673 | -0.3325511 | 4.18228639 | 0.29392562 | 0.51589203 |
| ENSMUSG00000029833 | -0.3326728 | 6.58968011 | 0.27995957 | 0.5009265  |
| ENSMUSG00000027985 | -0.3328277 | 4.248638   | 0.29386329 | 0.51589203 |
| ENSMUSG00000019952 | -0.3329144 | 5.03302972 | 0.28559665 | 0.50722568 |
| ENSMUSG00000034189 | -0.3329683 | 4.68329008 | 0.28833486 | 0.5102401  |
| ENSMUSG00000031362 | -0.3331035 | 1.19320859 | 0.42299676 | 0.63727257 |
| ENSMUSG00000058729 | -0.3335747 | 5.40422274 | 0.28282859 | 0.50413611 |
| ENSMUSG00000032563 | -0.3337458 | 6.75276552 | 0.27794763 | 0.49815311 |
| ENSMUSG00000003660 | -0.3338213 | 8.72169056 | 0.27557797 | 0.49547063 |
| ENSMUSG00000049076 | -0.3338757 | 7.02614002 | 0.2775677  | 0.49767314 |
| ENSMUSG00000041491 | -0.3339071 | 4.23334682 | 0.29149982 | 0.51390128 |
| ENSMUSG00000036931 | -0.3339863 | 4.94712366 | 0.2825002  | 0.50380058 |
| ENSMUSG00000071646 | -0.3344797 | 8.47259663 | 0.27477639 | 0.49460667 |
| ENSMUSG00000028234 | -0.3345525 | 9.7882336  | 0.27415921 | 0.49402721 |
| ENSMUSG00000022521 | -0.3347109 | 6.65783192 | 0.27713354 | 0.49718984 |
| ENSMUSG00000020453 | -0.3347614 | 4.79232609 | 0.28354618 | 0.50499786 |
| ENSMUSG00000019907 | -0.3347844 | 6.93931229 | 0.27633077 | 0.49645676 |
| ENSMUSG00000033111 | -0.3349358 | 5.09794145 | 0.28335627 | 0.50482636 |
| ENSMUSG00000032477 | -0.3352159 | 7.04799866 | 0.27511346 | 0.4951237  |
| ENSMUSG00000089768 | -0.3352259 | 1.69161695 | 0.36887166 | 0.59056801 |
| ENSMUSG00000024604 | -0.3353801 | 6.69629788 | 0.27545748 | 0.49535423 |
| ENSMUSG00000021555 | -0.3354537 | 6.23208487 | 0.27712412 | 0.49718984 |
| ENSMUSG00000032384 | -0.3354775 | 6.65917187 | 0.2758643  | 0.4958201  |
| ENSMUSG00000041406 | -0.3357356 | 5.67256717 | 0.27890241 | 0.49961521 |
| ENSMUSG00000016257 | -0.3357661 | 6.85632322 | 0.27433793 | 0.4942299  |
| ENSMUSG00000030199 | -0.3357754 | 6.6145895  | 0.27520136 | 0.4951237  |
| ENSMUSG00000006699 | -0.3359289 | 9.86060011 | 0.2722444  | 0.49210252 |
| ENSMUSG00000097743 | -0.335993  | 3.46856108 | 0.29875218 | 0.52140209 |
| ENSMUSG00000027715 | -0.3362028 | 8.80357353 | 0.27221094 | 0.49210252 |
| ENSMUSG00000032582 | -0.3363902 | 7.74816637 | 0.27282733 | 0.49257825 |
| ENSMUSG00000022434 | -0.3367211 | 5.09402699 | 0.28009398 | 0.5010334  |
| ENSMUSG00000026276 | -0.3370136 | 8.56705875 | 0.27121798 | 0.49074073 |



|                    |            |            |            |            |
|--------------------|------------|------------|------------|------------|
| ENSMUSG00000035569 | -0.3370314 | 6.92356815 | 0.27269598 | 0.49242354 |
| ENSMUSG00000047554 | -0.3371392 | 6.52945847 | 0.27372629 | 0.49354026 |
| ENSMUSG00000070282 | -0.337305  | 1.95671759 | 0.33307834 | 0.55783768 |
| ENSMUSG00000058331 | -0.3375382 | 2.45938386 | 0.33477636 | 0.5594163  |
| ENSMUSG00000024174 | -0.338069  | 4.56049861 | 0.28183584 | 0.50278208 |
| ENSMUSG00000024217 | -0.3380913 | 5.63282191 | 0.27477479 | 0.49460667 |
| ENSMUSG00000039187 | -0.338455  | 6.25995666 | 0.27259146 | 0.49239971 |
| ENSMUSG00000024590 | -0.3384742 | 8.26435464 | 0.26919566 | 0.48831051 |
| ENSMUSG00000040236 | -0.3386052 | 4.51586972 | 0.27960039 | 0.50044989 |
| ENSMUSG00000037896 | -0.3387249 | 6.37217863 | 0.27193982 | 0.49188175 |
| ENSMUSG00000026749 | -0.3388462 | 5.08221619 | 0.27572881 | 0.4956592  |
| ENSMUSG00000021395 | -0.3390486 | 6.51216162 | 0.27112979 | 0.49066347 |
| ENSMUSG00000024480 | -0.3391014 | 4.23680885 | 0.28738187 | 0.50930584 |
| ENSMUSG00000052713 | -0.3391581 | 6.42014566 | 0.27098856 | 0.4904902  |
| ENSMUSG00000071180 | -0.3391957 | 6.17848148 | 0.27201525 | 0.49193568 |
| ENSMUSG00000026021 | -0.3394362 | 7.08705152 | 0.26952187 | 0.48860716 |
| ENSMUSG00000022051 | -0.3394948 | 5.03158593 | 0.27703329 | 0.4971754  |
| ENSMUSG00000026219 | -0.3398448 | 9.20787681 | 0.26694793 | 0.48586776 |
| ENSMUSG00000028438 | -0.3399591 | 4.62885242 | 0.27803627 | 0.49822917 |
| ENSMUSG00000020720 | -0.339983  | 7.96225019 | 0.26747926 | 0.48650639 |
| ENSMUSG00000025439 | -0.3400248 | 7.19627725 | 0.2682781  | 0.48720456 |
| ENSMUSG00000039826 | -0.3401548 | 5.20683755 | 0.27359984 | 0.49354026 |
| ENSMUSG00000021670 | -0.3402835 | 8.57313612 | 0.26654115 | 0.48569517 |
| ENSMUSG00000003778 | -0.340393  | 7.59470227 | 0.26710727 | 0.48607574 |
| ENSMUSG00000020392 | -0.3404551 | 6.68628989 | 0.26830672 | 0.48720456 |
| ENSMUSG00000034453 | -0.3404934 | 6.69290129 | 0.26843266 | 0.48733633 |
| ENSMUSG00000018326 | -0.3407708 | 8.67624676 | 0.2658242  | 0.48527028 |
| ENSMUSG00000022201 | -0.3408015 | 7.70917426 | 0.26667295 | 0.48569517 |
| ENSMUSG00000027522 | -0.3409499 | 5.87764349 | 0.27018388 | 0.48936227 |
| ENSMUSG00000028982 | -0.3411198 | 3.80421939 | 0.28095936 | 0.50204901 |
| ENSMUSG00000028868 | -0.3411538 | 7.59875358 | 0.2660267  | 0.48533251 |
| ENSMUSG00000033732 | -0.341185  | 9.5200896  | 0.26486886 | 0.48388036 |
| ENSMUSG00000020982 | -0.3412629 | 7.55895524 | 0.26619146 | 0.48539207 |
| ENSMUSG00000046567 | -0.3416607 | 3.66304578 | 0.28665996 | 0.50836064 |
| ENSMUSG00000021134 | -0.3416744 | 8.51836942 | 0.26457925 | 0.48380069 |
| ENSMUSG00000028140 | -0.3416826 | 6.32948933 | 0.2675757  | 0.48654233 |
| ENSMUSG00000022538 | -0.3417176 | 6.6073787  | 0.26666858 | 0.48569517 |
| ENSMUSG00000029538 | -0.3418715 | 5.87359024 | 0.2683149  | 0.48720456 |
| ENSMUSG00000072640 | -0.3420485 | 3.43851    | 0.28868261 | 0.51060411 |
| ENSMUSG00000022013 | -0.3421979 | 4.54702104 | 0.27755223 | 0.49767314 |
| ENSMUSG00000035666 | -0.3422802 | 6.50411749 | 0.26624756 | 0.48541229 |
| ENSMUSG00000027030 | -0.3422951 | 4.34451306 | 0.27750543 | 0.49767314 |
| ENSMUSG00000020849 | -0.3424748 | 9.65002034 | 0.26304669 | 0.4821852  |

|                    |            |            |            |            |
|--------------------|------------|------------|------------|------------|
| ENSMUSG0000009741  | -0.3426271 | 6.73153159 | 0.2653865  | 0.48466181 |
| ENSMUSG00000025261 | -0.3426354 | 9.8207609  | 0.26281324 | 0.48183917 |
| ENSMUSG00000074865 | -0.3430345 | 1.98649428 | 0.37061076 | 0.59244981 |
| ENSMUSG00000027479 | -0.3430798 | 8.54521694 | 0.26269748 | 0.48170884 |
| ENSMUSG00000019988 | -0.3430955 | 6.31795408 | 0.26597002 | 0.48531653 |
| ENSMUSG00000039156 | -0.3432301 | 5.26391879 | 0.270319   | 0.48944259 |
| ENSMUSG00000022358 | -0.3432505 | 2.59726316 | 0.32534764 | 0.55001551 |
| ENSMUSG00000043241 | -0.3434196 | 7.18034875 | 0.26374274 | 0.48288654 |
| ENSMUSG00000027680 | -0.3435034 | 7.320147   | 0.26341309 | 0.48261073 |
| ENSMUSG00000022351 | -0.343528  | 7.36432313 | 0.26310338 | 0.48220714 |
| ENSMUSG00000034023 | -0.3436639 | 6.85401724 | 0.26388648 | 0.4829857  |
| ENSMUSG00000022673 | -0.3441252 | 8.97648271 | 0.26102172 | 0.48051523 |
| ENSMUSG00000014074 | -0.3441889 | 6.28244628 | 0.26469066 | 0.48380069 |
| ENSMUSG00000030365 | -0.3442658 | 4.93872296 | 0.27233523 | 0.4921725  |
| ENSMUSG00000033538 | -0.3443472 | 5.98183807 | 0.26585468 | 0.48527028 |
| ENSMUSG00000037343 | -0.344363  | 7.23114163 | 0.262304   | 0.48147852 |
| ENSMUSG00000053768 | -0.3445632 | 6.85128439 | 0.26243698 | 0.48154719 |
| ENSMUSG00000019920 | -0.3446265 | 6.80233157 | 0.26261685 | 0.48170884 |
| ENSMUSG00000028268 | -0.3446337 | 8.34752235 | 0.26064202 | 0.48019292 |
| ENSMUSG00000061371 | -0.344739  | 3.1577545  | 0.2988536  | 0.5214947  |
| ENSMUSG00000034154 | -0.3450122 | 6.71621489 | 0.26221942 | 0.48147852 |
| ENSMUSG00000015759 | -0.3451944 | 6.74790624 | 0.2619386  | 0.48129934 |
| ENSMUSG00000062797 | -0.3453208 | 4.78261474 | 0.2694055  | 0.48860716 |
| ENSMUSG00000043090 | -0.3455163 | 5.60924114 | 0.26527871 | 0.48454702 |
| ENSMUSG00000024135 | -0.3455169 | 5.9819318  | 0.26347872 | 0.48264897 |
| ENSMUSG00000030649 | -0.3457261 | 5.09969567 | 0.26480608 | 0.4838556  |
| ENSMUSG00000042473 | -0.3457985 | 4.60008609 | 0.27249636 | 0.4923104  |
| ENSMUSG00000039253 | -0.3458522 | 3.95985235 | 0.27657281 | 0.49667963 |
| ENSMUSG00000041997 | -0.3458604 | 7.90853942 | 0.25941051 | 0.47859472 |
| ENSMUSG00000000295 | -0.3459205 | 4.27471386 | 0.27181708 | 0.49174222 |
| ENSMUSG00000035992 | -0.3460769 | 6.30276298 | 0.262153   | 0.48144719 |
| ENSMUSG00000029430 | -0.3463226 | 9.17270488 | 0.2578615  | 0.47681386 |
| ENSMUSG00000039725 | -0.3464103 | 3.21898679 | 0.27992345 | 0.5009265  |
| ENSMUSG00000020664 | -0.3466232 | 7.55624728 | 0.25875676 | 0.47805942 |
| ENSMUSG00000028851 | -0.3467294 | 7.28104459 | 0.25832966 | 0.47743394 |
| ENSMUSG00000022048 | -0.346736  | 4.69102173 | 0.26884027 | 0.4877479  |
| ENSMUSG00000024427 | -0.3467734 | 1.60719712 | 0.34257933 | 0.56618781 |
| ENSMUSG00000026740 | -0.3472256 | 5.39549536 | 0.26394538 | 0.48301153 |
| ENSMUSG00000028896 | -0.3472452 | 6.91302566 | 0.2582413  | 0.47735246 |
| ENSMUSG00000048279 | -0.347366  | 6.74696397 | 0.2594381  | 0.47859472 |
| ENSMUSG00000095403 | -0.3475173 | 4.82458962 | 0.26763902 | 0.48655077 |
| ENSMUSG00000008226 | -0.3476329 | 3.26943536 | 0.29157389 | 0.51390736 |
| ENSMUSG00000028381 | -0.3477083 | 8.49872124 | 0.25646573 | 0.4754558  |

|                    |            |            |            |            |
|--------------------|------------|------------|------------|------------|
| ENSMUSG00000032897 | -0.3477438 | 5.52620636 | 0.26139834 | 0.48079817 |
| ENSMUSG00000032946 | -0.347852  | 5.29485574 | 0.26247537 | 0.48154719 |
| ENSMUSG00000027379 | -0.3479187 | 7.64910631 | 0.25689332 | 0.47575778 |
| ENSMUSG00000026917 | -0.3479947 | 7.02044048 | 0.25720996 | 0.47618063 |
| ENSMUSG00000030096 | -0.348017  | 6.77394065 | 0.25754409 | 0.47647203 |
| ENSMUSG00000019978 | -0.3483499 | 7.23564389 | 0.25655144 | 0.47553296 |
| ENSMUSG00000030869 | -0.3485724 | 6.11358234 | 0.25924657 | 0.47850612 |
| ENSMUSG00000090673 | -0.3487331 | 4.61287694 | 0.2668229  | 0.48580417 |
| ENSMUSG00000034160 | -0.3489168 | 8.68637997 | 0.25465094 | 0.47323035 |
| ENSMUSG00000063810 | -0.3489919 | 5.58829376 | 0.26115442 | 0.48067746 |
| ENSMUSG00000021770 | -0.3489936 | 4.90562692 | 0.2646397  | 0.48380069 |
| ENSMUSG00000055835 | -0.3490493 | 4.08590526 | 0.2734404  | 0.49343729 |
| ENSMUSG00000027751 | -0.34918   | 6.60965003 | 0.25687345 | 0.47575778 |
| ENSMUSG00000051306 | -0.3493753 | 5.09425188 | 0.26151782 | 0.48085391 |
| ENSMUSG00000038446 | -0.3494231 | 6.92865876 | 0.25585133 | 0.47504333 |
| ENSMUSG00000021365 | -0.3497339 | 7.3784602  | 0.25451018 | 0.47305219 |
| ENSMUSG00000024077 | -0.3497838 | 6.60239594 | 0.25594714 | 0.47504333 |
| ENSMUSG00000036873 | -0.3500378 | 4.36924246 | 0.26690355 | 0.48586776 |
| ENSMUSG00000026659 | -0.3506421 | 5.22498993 | 0.26033311 | 0.47988301 |
| ENSMUSG00000029504 | -0.3507546 | 5.62237583 | 0.2563038  | 0.47531903 |
| ENSMUSG00000028899 | -0.3507812 | 5.80929051 | 0.25619158 | 0.47523402 |
| ENSMUSG00000066613 | -0.350924  | 4.18397647 | 0.27288222 | 0.4925949  |
| ENSMUSG00000022962 | -0.3513266 | 7.97891302 | 0.25150393 | 0.46982824 |
| ENSMUSG00000032551 | -0.3514422 | 4.02432673 | 0.26744531 | 0.48650639 |
| ENSMUSG00000021707 | -0.35176   | 7.14429851 | 0.25220026 | 0.47037834 |
| ENSMUSG00000028106 | -0.3521854 | 6.83304432 | 0.25216762 | 0.47037834 |
| ENSMUSG00000029752 | -0.3523329 | 5.9389813  | 0.25410548 | 0.47262392 |
| ENSMUSG00000021694 | -0.3525339 | 4.36822243 | 0.26434838 | 0.48358488 |
| ENSMUSG00000019804 | -0.3525462 | 6.79786341 | 0.25161091 | 0.46992935 |
| ENSMUSG00000063787 | -0.3525556 | 5.35497107 | 0.25636642 | 0.47535342 |
| ENSMUSG00000041974 | -0.3527092 | 5.45154726 | 0.25597893 | 0.47504333 |
| ENSMUSG00000022672 | -0.3527383 | 6.44138281 | 0.25310451 | 0.47131678 |
| ENSMUSG00000021068 | -0.3532108 | 7.21184103 | 0.2501508  | 0.46787225 |
| ENSMUSG00000026918 | -0.3532388 | 5.04138682 | 0.25595361 | 0.47504333 |
| ENSMUSG00000026696 | -0.35337   | 4.74527604 | 0.26036679 | 0.47988301 |
| ENSMUSG00000028484 | -0.3534789 | 8.30785645 | 0.24871742 | 0.46695136 |
| ENSMUSG00000032498 | -0.3535048 | 5.70089685 | 0.25383636 | 0.47234245 |
| ENSMUSG00000049470 | -0.3536434 | 7.53169667 | 0.24928282 | 0.46736194 |
| ENSMUSG00000098090 | -0.3537404 | 4.3588137  | 0.2636714  | 0.4828379  |
| ENSMUSG00000028309 | -0.353822  | 7.74243918 | 0.2486737  | 0.46695136 |
| ENSMUSG00000014301 | -0.3539108 | 2.50105682 | 0.28474684 | 0.50618118 |
| ENSMUSG00000025602 | -0.3539422 | 3.217425   | 0.28569323 | 0.50731365 |
| ENSMUSG00000059263 | -0.3539527 | 7.78435619 | 0.2486017  | 0.46695136 |

|                    |            |            |            |            |
|--------------------|------------|------------|------------|------------|
| ENSMUSG00000058835 | -0.3541179 | 7.20293584 | 0.24904801 | 0.46724664 |
| ENSMUSG00000026082 | -0.3541856 | 5.98087806 | 0.25178687 | 0.47009516 |
| ENSMUSG00000079800 | -0.3542239 | 2.74873676 | 0.29248383 | 0.51448832 |
| ENSMUSG00000032640 | -0.3542571 | 5.73305186 | 0.25214348 | 0.47037834 |
| ENSMUSG00000047909 | -0.3543047 | 5.38748872 | 0.25349797 | 0.47190093 |
| ENSMUSG00000034729 | -0.354445  | 5.50897096 | 0.25272133 | 0.47088579 |
| ENSMUSG00000019951 | -0.3545242 | 6.72020181 | 0.24949886 | 0.4674252  |
| ENSMUSG00000024645 | -0.3548725 | 5.36705815 | 0.25369356 | 0.47218352 |
| ENSMUSG00000020719 | -0.3549399 | 10.871091  | 0.24591019 | 0.46378025 |
| ENSMUSG00000005610 | -0.3550403 | 11.5797985 | 0.24570066 | 0.46354722 |
| ENSMUSG00000021326 | -0.3551258 | 7.20991683 | 0.24743635 | 0.46576254 |
| ENSMUSG00000042215 | -0.3551604 | 3.41979598 | 0.26969551 | 0.48872398 |
| ENSMUSG00000071281 | -0.3551667 | 4.74301279 | 0.25908738 | 0.47842436 |
| ENSMUSG00000025747 | -0.355307  | 7.03376091 | 0.24757521 | 0.46594259 |
| ENSMUSG00000056851 | -0.3555368 | 9.56871963 | 0.24532773 | 0.46308668 |
| ENSMUSG00000019897 | -0.3559678 | 5.67856801 | 0.25033175 | 0.46802663 |
| ENSMUSG00000032342 | -0.3560392 | 4.78597431 | 0.25516652 | 0.4740251  |
| ENSMUSG00000033658 | -0.3561311 | 6.35552773 | 0.24801258 | 0.46660286 |
| ENSMUSG00000020527 | -0.3563203 | 4.88914375 | 0.25247335 | 0.47072486 |
| ENSMUSG00000062190 | -0.3564683 | 5.51622295 | 0.25085926 | 0.46881925 |
| ENSMUSG00000032388 | -0.3568261 | 6.13529542 | 0.24780471 | 0.46629314 |
| ENSMUSG00000031297 | -0.3569581 | 5.45171488 | 0.24917263 | 0.46736194 |
| ENSMUSG00000020589 | -0.356976  | 5.15046747 | 0.25386654 | 0.47234245 |
| ENSMUSG00000027752 | -0.357112  | 6.76312354 | 0.24559661 | 0.463432   |
| ENSMUSG00000067235 | -0.3574062 | 4.90487458 | 0.25273433 | 0.47088579 |
| ENSMUSG00000026743 | -0.3574966 | 6.49838623 | 0.24582488 | 0.46370045 |
| ENSMUSG00000071337 | -0.3576002 | 6.87996608 | 0.24502633 | 0.46276076 |
| ENSMUSG00000051278 | -0.357619  | 5.61697014 | 0.24876723 | 0.46696359 |
| ENSMUSG00000001134 | -0.3577427 | 4.17687767 | 0.25777617 | 0.47673782 |
| ENSMUSG00000038664 | -0.3579103 | 7.98342278 | 0.24319678 | 0.46075792 |
| ENSMUSG00000046753 | -0.3579318 | 5.41152425 | 0.24965096 | 0.4674252  |
| ENSMUSG00000032199 | -0.3583238 | 7.09060025 | 0.24343171 | 0.46108007 |
| ENSMUSG00000028690 | -0.3583345 | 4.55205356 | 0.25470256 | 0.47324474 |
| ENSMUSG00000033237 | -0.3584814 | 6.79636679 | 0.24399485 | 0.46163131 |
| ENSMUSG00000074158 | -0.3585522 | 2.02255192 | 0.33998185 | 0.56396928 |
| ENSMUSG00000078919 | -0.3585692 | 3.40178965 | 0.2723744  | 0.4921725  |
| ENSMUSG00000072772 | -0.3588983 | 1.77756838 | 0.31827452 | 0.54317299 |
| ENSMUSG00000000420 | -0.3589003 | 7.97707162 | 0.24181835 | 0.459      |
| ENSMUSG00000003038 | -0.3596374 | 8.06667322 | 0.24061078 | 0.45749379 |
| ENSMUSG00000031134 | -0.3596565 | 7.04044773 | 0.2417779  | 0.459      |
| ENSMUSG00000096965 | -0.3596903 | 1.71839775 | 0.31575718 | 0.54032458 |
| ENSMUSG00000090164 | -0.359821  | 6.95753618 | 0.24184329 | 0.459      |
| ENSMUSG00000036513 | -0.3598959 | 4.95120171 | 0.24868766 | 0.46695136 |

|                    |            |            |            |            |
|--------------------|------------|------------|------------|------------|
| ENSMUSG00000067928 | -0.3599466 | 4.00247242 | 0.26644407 | 0.48568844 |
| ENSMUSG00000041966 | -0.3599651 | 5.4337488  | 0.24680484 | 0.46489841 |
| ENSMUSG00000017677 | -0.3601885 | 7.54135055 | 0.24062545 | 0.45749379 |
| ENSMUSG00000082064 | -0.3603442 | 1.87624417 | 0.30806559 | 0.53197776 |
| ENSMUSG00000022000 | -0.3603531 | 6.6583438  | 0.24161689 | 0.4589742  |
| ENSMUSG00000085622 | -0.3606629 | 2.87495905 | 0.27379691 | 0.49358507 |
| ENSMUSG00000009630 | -0.3607081 | 6.31555632 | 0.24190292 | 0.45903239 |
| ENSMUSG00000029536 | -0.3607851 | 4.94283506 | 0.24808728 | 0.466662   |
| ENSMUSG00000072872 | -0.3607872 | 5.90355856 | 0.24404303 | 0.46163131 |
| ENSMUSG00000026196 | -0.3608575 | 6.09897989 | 0.24244712 | 0.45974147 |
| ENSMUSG00000029253 | -0.3611372 | 6.67844332 | 0.24090826 | 0.45794134 |
| ENSMUSG00000036241 | -0.3611426 | 6.0910225  | 0.24231614 | 0.45957391 |
| ENSMUSG00000034525 | -0.3615516 | 6.82370643 | 0.23979644 | 0.456481   |
| ENSMUSG00000026709 | -0.3615548 | 5.92219568 | 0.24213875 | 0.45939906 |
| ENSMUSG00000020152 | -0.3618001 | 10.1457607 | 0.2370435  | 0.45275897 |
| ENSMUSG00000020189 | -0.3618181 | 7.24502426 | 0.23900987 | 0.45545206 |
| ENSMUSG00000047714 | -0.361839  | 6.51754104 | 0.24037937 | 0.45726779 |
| ENSMUSG00000091931 | -0.3621423 | 3.46158515 | 0.26558018 | 0.48493339 |
| ENSMUSG00000031264 | -0.3625258 | 8.18964299 | 0.23692367 | 0.45261024 |
| ENSMUSG00000021712 | -0.3625358 | 5.30532498 | 0.24460409 | 0.46227746 |
| ENSMUSG00000030264 | -0.3627217 | 6.99517986 | 0.23823804 | 0.45431636 |
| ENSMUSG00000048371 | -0.362726  | 4.29132111 | 0.24826928 | 0.46684149 |
| ENSMUSG00000029464 | -0.3631046 | 4.94204633 | 0.24378736 | 0.46148879 |
| ENSMUSG00000040407 | -0.3632245 | 6.72394815 | 0.23801265 | 0.45404714 |
| ENSMUSG00000037062 | -0.3634549 | 7.73134949 | 0.23619954 | 0.45154685 |
| ENSMUSG00000005687 | -0.3637861 | 6.4592746  | 0.23753861 | 0.45346368 |
| ENSMUSG00000028990 | -0.3638629 | 5.85694876 | 0.23924012 | 0.45566328 |
| ENSMUSG00000043183 | -0.3638951 | 5.47928467 | 0.24094577 | 0.45794134 |
| ENSMUSG00000040785 | -0.3638974 | 6.04496662 | 0.23909948 | 0.45547585 |
| ENSMUSG00000040370 | -0.3639459 | 3.89270773 | 0.25754313 | 0.47647203 |
| ENSMUSG00000031353 | -0.3643564 | 9.51769061 | 0.23391547 | 0.44845234 |
| ENSMUSG00000056216 | -0.36438   | 6.2185668  | 0.237714   | 0.45371819 |
| ENSMUSG00000033294 | -0.3647896 | 6.10153243 | 0.23630612 | 0.4515905  |
| ENSMUSG00000075376 | -0.36501   | 6.55445482 | 0.23626837 | 0.4515905  |
| ENSMUSG00000064363 | -0.3650497 | 10.5713588 | 0.23279218 | 0.4472729  |
| ENSMUSG00000042029 | -0.3651046 | 8.11208606 | 0.23372507 | 0.44832642 |
| ENSMUSG00000078185 | -0.3651445 | 3.90473675 | 0.25240915 | 0.47068654 |
| ENSMUSG00000037007 | -0.3653711 | 4.54476189 | 0.24674921 | 0.46489298 |
| ENSMUSG00000054814 | -0.3658493 | 4.85153333 | 0.24295724 | 0.46038497 |
| ENSMUSG00000061474 | -0.3658833 | 4.18950529 | 0.24639428 | 0.46453076 |
| ENSMUSG00000023932 | -0.366029  | 7.71085533 | 0.23280256 | 0.4472729  |
| ENSMUSG00000090958 | -0.3660438 | 3.27218726 | 0.25257327 | 0.47076626 |
| ENSMUSG00000063895 | -0.3661285 | 6.90747964 | 0.23391062 | 0.44845234 |

|                    |            |            |            |            |
|--------------------|------------|------------|------------|------------|
| ENSMUSG00000018583 | -0.3662847 | 9.00124545 | 0.23152988 | 0.44554214 |
| ENSMUSG00000051234 | -0.3664116 | 6.14787397 | 0.23470139 | 0.44936772 |
| ENSMUSG00000001052 | -0.3667294 | 6.83295873 | 0.23311388 | 0.44779125 |
| ENSMUSG00000100033 | -0.3671666 | 1.34290168 | 0.33736331 | 0.56160326 |
| ENSMUSG00000079109 | -0.3671742 | 5.86177831 | 0.23469682 | 0.44936772 |
| ENSMUSG00000052949 | -0.3673282 | 4.76558997 | 0.23796092 | 0.45402877 |
| ENSMUSG00000024122 | -0.3673321 | 7.57413468 | 0.23144853 | 0.44554214 |
| ENSMUSG00000030655 | -0.3674087 | 8.72378146 | 0.23040882 | 0.4444158  |
| ENSMUSG00000024668 | -0.367442  | 6.17831629 | 0.23378532 | 0.44836224 |
| ENSMUSG00000022280 | -0.367507  | 5.27207549 | 0.23778363 | 0.45377078 |
| ENSMUSG00000020677 | -0.36758   | 7.38278919 | 0.2313922  | 0.4455157  |
| ENSMUSG00000038525 | -0.3676706 | 6.29072719 | 0.23340394 | 0.44810897 |
| ENSMUSG00000000628 | -0.3676855 | 6.46001231 | 0.23205901 | 0.44640107 |
| ENSMUSG00000034867 | -0.368046  | 5.76470756 | 0.23359879 | 0.44829845 |
| ENSMUSG00000022034 | -0.3681422 | 6.50321939 | 0.23260108 | 0.44712479 |
| ENSMUSG00000015932 | -0.3681926 | 6.42126822 | 0.2322257  | 0.44656241 |
| ENSMUSG00000040586 | -0.3682076 | 5.47260529 | 0.23614037 | 0.45154685 |
| ENSMUSG00000100199 | -0.3682264 | 1.07217078 | 0.36037663 | 0.58247522 |
| ENSMUSG00000027630 | -0.3682586 | 7.52905665 | 0.23033889 | 0.4444158  |
| ENSMUSG00000022021 | -0.3683216 | 6.36249539 | 0.23230079 | 0.44662716 |
| ENSMUSG00000066148 | -0.3683617 | 6.85294661 | 0.2308026  | 0.44477756 |
| ENSMUSG00000059669 | -0.3685182 | 5.59140703 | 0.23472629 | 0.44936772 |
| ENSMUSG00000024456 | -0.3687778 | 7.85193785 | 0.2291705  | 0.443455   |
| ENSMUSG00000021738 | -0.3688002 | 5.72422359 | 0.23369911 | 0.44832642 |
| ENSMUSG00000032349 | -0.3691167 | 6.88683083 | 0.23009753 | 0.44428201 |
| ENSMUSG00000038806 | -0.3692604 | 6.18960937 | 0.23105726 | 0.44510924 |
| ENSMUSG00000022141 | -0.3692745 | 8.12498792 | 0.22854127 | 0.44271404 |
| ENSMUSG00000041328 | -0.3694246 | 7.7884109  | 0.22859613 | 0.44272938 |
| ENSMUSG00000020361 | -0.3694378 | 9.7466076  | 0.22738724 | 0.44182774 |
| ENSMUSG00000041313 | -0.3695589 | 7.74262125 | 0.22816683 | 0.44237105 |
| ENSMUSG00000015733 | -0.3696314 | 8.50741396 | 0.2277136  | 0.44190907 |
| ENSMUSG00000021831 | -0.3697805 | 7.3923558  | 0.22850497 | 0.44271404 |
| ENSMUSG00000023110 | -0.3699199 | 7.69956688 | 0.22767836 | 0.44190907 |
| ENSMUSG00000028889 | -0.369922  | 5.76960403 | 0.23116575 | 0.4452387  |
| ENSMUSG00000060397 | -0.3699716 | 1.60387247 | 0.34595869 | 0.56969781 |
| ENSMUSG00000039509 | -0.3702298 | 6.96588498 | 0.22826594 | 0.44237105 |
| ENSMUSG00000019726 | -0.3702925 | 7.688122   | 0.22780043 | 0.4419935  |
| ENSMUSG00000027550 | -0.3705546 | 5.65594978 | 0.23264934 | 0.44713785 |
| ENSMUSG00000049038 | -0.3707657 | 3.73935063 | 0.25016241 | 0.46787225 |
| ENSMUSG00000022685 | -0.370777  | 6.06184373 | 0.22993151 | 0.44413064 |
| ENSMUSG00000031935 | -0.3707804 | 6.43975812 | 0.22874586 | 0.4428717  |
| ENSMUSG00000021660 | -0.3710422 | 9.03481447 | 0.22555702 | 0.43922117 |
| ENSMUSG00000030978 | -0.3712719 | 9.69975008 | 0.22510101 | 0.43886133 |

|                    |            |            |            |            |
|--------------------|------------|------------|------------|------------|
| ENSMUSG00000023004 | -0.3715965 | 8.16782063 | 0.22516875 | 0.43886133 |
| ENSMUSG00000026617 | -0.3717926 | 5.21137105 | 0.23136675 | 0.4455157  |
| ENSMUSG00000042323 | -0.3718862 | 8.23018938 | 0.22508724 | 0.43886133 |
| ENSMUSG00000020385 | -0.3719489 | 6.48280509 | 0.22752521 | 0.44187453 |
| ENSMUSG00000039842 | -0.3720005 | 5.70652693 | 0.22935182 | 0.44356707 |
| ENSMUSG00000060441 | -0.3720086 | 4.27737375 | 0.24176257 | 0.459      |
| ENSMUSG00000004364 | -0.3721243 | 8.33717408 | 0.22471733 | 0.43861569 |
| ENSMUSG00000020018 | -0.3722664 | 6.54700586 | 0.22662468 | 0.44082261 |
| ENSMUSG00000014980 | -0.3723381 | 4.30308998 | 0.23859429 | 0.45475447 |
| ENSMUSG00000040423 | -0.3724839 | 7.41245458 | 0.2251661  | 0.43886133 |
| ENSMUSG00000084159 | -0.3725804 | 4.85137535 | 0.23416201 | 0.44876544 |
| ENSMUSG00000042208 | -0.3726718 | 5.61176473 | 0.23012073 | 0.44428201 |
| ENSMUSG00000052139 | -0.3728098 | 5.35513307 | 0.23050056 | 0.44449036 |
| ENSMUSG00000029776 | -0.3730265 | 6.07025214 | 0.22733735 | 0.44181978 |
| ENSMUSG00000038028 | -0.3730435 | 5.06193996 | 0.23077775 | 0.44477756 |
| ENSMUSG00000025049 | -0.3737717 | 5.29995567 | 0.2295703  | 0.44367134 |
| ENSMUSG00000005813 | -0.3738216 | 6.77433074 | 0.22428484 | 0.43824746 |
| ENSMUSG00000030386 | -0.3738928 | 3.65099083 | 0.24926359 | 0.46736194 |
| ENSMUSG00000018405 | -0.3739235 | 3.66526563 | 0.24345233 | 0.46108007 |
| ENSMUSG00000030704 | -0.3740191 | 6.67049833 | 0.22459479 | 0.43861569 |
| ENSMUSG00000053870 | -0.3740307 | 5.15077651 | 0.23039845 | 0.4444158  |
| ENSMUSG00000060288 | -0.3740921 | 6.34303887 | 0.22470324 | 0.43861569 |
| ENSMUSG00000036707 | -0.3744594 | 7.87194681 | 0.22202809 | 0.43494114 |
| ENSMUSG00000047843 | -0.3747069 | 2.93263339 | 0.2545112  | 0.47305219 |
| ENSMUSG00000058706 | -0.3747209 | 6.14238882 | 0.22504606 | 0.43886133 |
| ENSMUSG00000022466 | -0.3748422 | 5.53733861 | 0.22633969 | 0.44042713 |
| ENSMUSG00000060657 | -0.3749629 | 8.18910952 | 0.22128318 | 0.43395486 |
| ENSMUSG00000027635 | -0.3755548 | 5.76656388 | 0.22458392 | 0.43861569 |
| ENSMUSG00000073147 | -0.3758411 | 3.15313392 | 0.2539141  | 0.47234942 |
| ENSMUSG00000027368 | -0.3759951 | 4.4225302  | 0.22804291 | 0.4423048  |
| ENSMUSG00000035161 | -0.3761153 | 6.56008899 | 0.22260064 | 0.43574611 |
| ENSMUSG00000027357 | -0.3761686 | 5.0122913  | 0.22956176 | 0.44367134 |
| ENSMUSG00000020457 | -0.3761725 | 7.5123875  | 0.22034814 | 0.43294744 |
| ENSMUSG00000036572 | -0.3762749 | 6.09110135 | 0.22317465 | 0.43639445 |
| ENSMUSG00000023150 | -0.3763193 | 9.34306095 | 0.21900038 | 0.43190821 |
| ENSMUSG00000005667 | -0.3764281 | 7.05367961 | 0.22031132 | 0.43294744 |
| ENSMUSG00000003923 | -0.3768824 | 6.93394205 | 0.22030884 | 0.43294744 |
| ENSMUSG00000025184 | -0.3769888 | 5.39666764 | 0.22541238 | 0.43917744 |
| ENSMUSG00000028212 | -0.3770087 | 6.41964037 | 0.22157458 | 0.43444732 |
| ENSMUSG00000061894 | -0.3770984 | 3.71583748 | 0.23904476 | 0.45545206 |
| ENSMUSG00000063052 | -0.3773243 | 6.51199417 | 0.22080627 | 0.43352174 |
| ENSMUSG00000026275 | -0.3774402 | 6.98954214 | 0.21948858 | 0.43208558 |
| ENSMUSG00000094942 | -0.3775611 | 3.23584113 | 0.25174566 | 0.47009516 |

|                    |            |            |            |            |
|--------------------|------------|------------|------------|------------|
| ENSMUSG00000030850 | -0.3779922 | 5.94735935 | 0.22176838 | 0.43466926 |
| ENSMUSG00000026029 | -0.3779968 | 8.50303466 | 0.2173218  | 0.42978146 |
| ENSMUSG00000031918 | -0.3780908 | 6.90114585 | 0.21893945 | 0.43190821 |
| ENSMUSG00000056211 | -0.3784004 | 7.14250497 | 0.21816556 | 0.43081805 |
| ENSMUSG00000025403 | -0.378417  | 6.80065913 | 0.21780496 | 0.43042123 |
| ENSMUSG00000000673 | -0.3784469 | 2.84233264 | 0.24947698 | 0.4674252  |
| ENSMUSG00000001891 | -0.3784625 | 6.60331416 | 0.21931107 | 0.43192533 |
| ENSMUSG00000034640 | -0.3786371 | 7.99245882 | 0.21704544 | 0.42962886 |
| ENSMUSG00000056153 | -0.3787023 | 4.92395007 | 0.22553809 | 0.43922117 |
| ENSMUSG00000028557 | -0.3793159 | 5.1750313  | 0.22384968 | 0.43747643 |
| ENSMUSG00000061559 | -0.3796155 | 6.3507016  | 0.21794429 | 0.43053878 |
| ENSMUSG00000021245 | -0.3796273 | 5.42783259 | 0.22227195 | 0.43518168 |
| ENSMUSG00000065954 | -0.3796314 | 7.39835092 | 0.21618125 | 0.4285877  |
| ENSMUSG00000020745 | -0.379645  | 8.59476433 | 0.21532455 | 0.42779291 |
| ENSMUSG00000022789 | -0.3800734 | 7.48083213 | 0.21581818 | 0.42829374 |
| ENSMUSG00000079737 | -0.3801626 | 3.31430934 | 0.24483882 | 0.46256865 |
| ENSMUSG00000038827 | -0.3801888 | 6.25062207 | 0.21801187 | 0.43059341 |
| ENSMUSG00000027589 | -0.3802162 | 4.74244469 | 0.22604258 | 0.44008723 |
| ENSMUSG00000022814 | -0.3802506 | 6.98669301 | 0.21597179 | 0.42836854 |
| ENSMUSG00000027660 | -0.3802997 | 7.87696149 | 0.21506722 | 0.42747997 |
| ENSMUSG00000038323 | -0.3803425 | 4.26460977 | 0.23077504 | 0.44477756 |
| ENSMUSG00000029169 | -0.3805685 | 9.40848337 | 0.21384754 | 0.42587846 |
| ENSMUSG00000033933 | -0.3807252 | 5.23348849 | 0.22101698 | 0.43365787 |
| ENSMUSG00000055296 | -0.3807976 | 6.38121152 | 0.21681855 | 0.42932891 |
| ENSMUSG00000039285 | -0.3808161 | 6.26247609 | 0.21727397 | 0.42976568 |
| ENSMUSG00000034681 | -0.3808222 | 6.0334647  | 0.21678186 | 0.42932891 |
| ENSMUSG00000028284 | -0.3808866 | 7.47543057 | 0.21472101 | 0.42722351 |
| ENSMUSG00000034007 | -0.3809473 | 4.70158842 | 0.22616171 | 0.44023969 |
| ENSMUSG00000042410 | -0.3810399 | 7.99533839 | 0.21407241 | 0.42609023 |
| ENSMUSG00000024537 | -0.3816609 | 5.33804095 | 0.21886869 | 0.4318902  |
| ENSMUSG00000022283 | -0.3818294 | 11.5785116 | 0.21194934 | 0.4232897  |
| ENSMUSG00000030287 | -0.3818699 | 5.15905832 | 0.22071842 | 0.43347796 |
| ENSMUSG00000073096 | -0.3818792 | 3.22911524 | 0.24012951 | 0.45703435 |
| ENSMUSG00000025795 | -0.3820571 | 5.32196053 | 0.21922966 | 0.43192533 |
| ENSMUSG00000038569 | -0.3821914 | 1.75737893 | 0.29649933 | 0.51865535 |
| ENSMUSG00000092558 | -0.3823134 | 5.40073589 | 0.2179082  | 0.43053878 |
| ENSMUSG00000003119 | -0.3824245 | 7.40393997 | 0.21297734 | 0.42453745 |
| ENSMUSG00000044165 | -0.3824256 | 1.01281169 | 0.3681207  | 0.59013135 |
| ENSMUSG00000032235 | -0.3824717 | 5.71491328 | 0.21711901 | 0.42969562 |
| ENSMUSG00000038622 | -0.382696  | 4.84314503 | 0.22095865 | 0.43365787 |
| ENSMUSG00000054302 | -0.3827783 | 5.7357585  | 0.21652068 | 0.42898383 |
| ENSMUSG00000040253 | -0.3827982 | 7.85545178 | 0.2121028  | 0.42334195 |
| ENSMUSG00000032051 | -0.3829424 | 3.17683103 | 0.23729556 | 0.45316014 |



|                    |            |            |            |            |
|--------------------|------------|------------|------------|------------|
| ENSMUSG00000014767 | -0.3830188 | 5.85421259 | 0.21585465 | 0.42829374 |
| ENSMUSG00000029229 | -0.383041  | 5.05884671 | 0.220368   | 0.43294744 |
| ENSMUSG00000033499 | -0.3830423 | 7.91053271 | 0.2116694  | 0.4232897  |
| ENSMUSG00000069729 | -0.3830568 | 5.4487977  | 0.21601572 | 0.42837689 |
| ENSMUSG00000062198 | -0.3831366 | 4.42405261 | 0.22509895 | 0.43886133 |
| ENSMUSG00000038240 | -0.3836033 | 3.66619989 | 0.23362735 | 0.44829845 |
| ENSMUSG00000070730 | -0.3837129 | 5.36668456 | 0.21582366 | 0.42829374 |
| ENSMUSG00000006641 | -0.3838255 | 3.60557618 | 0.22743257 | 0.44183622 |
| ENSMUSG00000032293 | -0.3838255 | 8.09371898 | 0.21074199 | 0.42230076 |
| ENSMUSG00000040661 | -0.3839091 | 6.70988614 | 0.21219377 | 0.42337409 |
| ENSMUSG00000025607 | -0.3839169 | 6.6965485  | 0.21252609 | 0.42387302 |
| ENSMUSG00000064370 | -0.3839704 | 12.2990594 | 0.20937693 | 0.42020092 |
| ENSMUSG00000024982 | -0.3840936 | 6.75109591 | 0.21192276 | 0.4232897  |
| ENSMUSG00000069662 | -0.384284  | 6.78584292 | 0.21196977 | 0.4232897  |
| ENSMUSG00000031590 | -0.3843677 | 6.03786077 | 0.21371784 | 0.42577742 |
| ENSMUSG00000019943 | -0.384386  | 7.32431265 | 0.2107527  | 0.42230076 |
| ENSMUSG00000037458 | -0.3844825 | 8.9109493  | 0.20939909 | 0.42020092 |
| ENSMUSG00000068039 | -0.3845087 | 10.3599847 | 0.20891027 | 0.41968858 |
| ENSMUSG00000001767 | -0.3845361 | 6.57559312 | 0.21203737 | 0.4232897  |
| ENSMUSG00000027569 | -0.3847372 | 4.96909941 | 0.2168541  | 0.42932891 |
| ENSMUSG00000024259 | -0.3847442 | 6.61630099 | 0.21202555 | 0.4232897  |
| ENSMUSG00000020359 | -0.3848373 | 4.09271828 | 0.22272878 | 0.43583872 |
| ENSMUSG00000085793 | -0.3853009 | 4.61230632 | 0.22100243 | 0.43365787 |
| ENSMUSG00000035842 | -0.3853461 | 5.04321319 | 0.2156725  | 0.4282475  |
| ENSMUSG00000024298 | -0.3853717 | 6.89333272 | 0.21043401 | 0.42188518 |
| ENSMUSG00000013701 | -0.3855287 | 6.20342554 | 0.21137982 | 0.4231212  |
| ENSMUSG00000025920 | -0.3856807 | 6.2178386  | 0.21149538 | 0.42322623 |
| ENSMUSG00000044950 | -0.3859938 | 5.42442303 | 0.21401774 | 0.42606004 |
| ENSMUSG00000075700 | -0.3863446 | 8.30123678 | 0.2074974  | 0.4180183  |
| ENSMUSG00000038546 | -0.3864986 | 6.78953028 | 0.20919006 | 0.42009415 |
| ENSMUSG00000022020 | -0.3865143 | 6.20183182 | 0.21075878 | 0.42230076 |
| ENSMUSG00000027893 | -0.386657  | 7.54972076 | 0.20778569 | 0.41828652 |
| ENSMUSG00000004865 | -0.3869506 | 7.55180625 | 0.20733842 | 0.41789279 |
| ENSMUSG00000025782 | -0.3870318 | 5.46256223 | 0.21179284 | 0.4232897  |
| ENSMUSG00000040029 | -0.3870738 | 6.80751118 | 0.2085007  | 0.41933849 |
| ENSMUSG00000026626 | -0.3872269 | 7.12891562 | 0.20769465 | 0.41828652 |
| ENSMUSG00000004896 | -0.3872764 | 4.19614752 | 0.21990956 | 0.43251954 |
| ENSMUSG00000018209 | -0.3873485 | 8.43714174 | 0.20625056 | 0.41665255 |
| ENSMUSG00000020840 | -0.3874542 | 7.27310584 | 0.20709006 | 0.4175406  |
| ENSMUSG00000030452 | -0.3875115 | 6.47570196 | 0.20868537 | 0.41946917 |
| ENSMUSG00000006423 | -0.3875402 | 6.85445725 | 0.20788405 | 0.41840641 |
| ENSMUSG00000028933 | -0.3875795 | 4.94257362 | 0.21545144 | 0.42796616 |
| ENSMUSG00000057193 | -0.3876786 | 6.30072406 | 0.20851512 | 0.41933849 |

|                    |            |            |            |            |
|--------------------|------------|------------|------------|------------|
| ENSMUSG00000031365 | -0.3878347 | 5.94937218 | 0.20949248 | 0.42023193 |
| ENSMUSG00000037720 | -0.388268  | 6.81524557 | 0.2071054  | 0.4175406  |
| ENSMUSG00000061755 | -0.3885603 | 7.39321586 | 0.20594973 | 0.41637832 |
| ENSMUSG00000028568 | -0.3890342 | 5.95039669 | 0.20872325 | 0.41946917 |
| ENSMUSG00000074166 | -0.3891452 | 2.80801782 | 0.2528525  | 0.47102459 |
| ENSMUSG00000070923 | -0.3895708 | 6.3054944  | 0.20691538 | 0.4174079  |
| ENSMUSG00000026970 | -0.3895957 | 7.16158821 | 0.20488445 | 0.41493496 |
| ENSMUSG00000007850 | -0.3896827 | 9.67199236 | 0.2030012  | 0.4126809  |
| ENSMUSG00000031605 | -0.3900697 | 4.79629307 | 0.21199803 | 0.4232897  |
| ENSMUSG00000020074 | -0.3901342 | 8.43425039 | 0.20301114 | 0.4126809  |
| ENSMUSG00000067150 | -0.3903267 | 7.20499778 | 0.2038225  | 0.41355066 |
| ENSMUSG00000027424 | -0.3903418 | 4.41312854 | 0.21384006 | 0.42587846 |
| ENSMUSG00000060373 | -0.3906693 | 9.58662959 | 0.20187361 | 0.41160995 |
| ENSMUSG00000001441 | -0.3909726 | 6.84298819 | 0.20390386 | 0.41363597 |
| ENSMUSG00000048170 | -0.3909922 | 7.25998394 | 0.20291687 | 0.41264484 |
| ENSMUSG00000007080 | -0.3911646 | 7.70296293 | 0.20228023 | 0.41212733 |
| ENSMUSG00000063018 | -0.3911792 | 1.63220666 | 0.2737182  | 0.49354026 |
| ENSMUSG00000079457 | -0.3912022 | 2.84618772 | 0.2374517  | 0.45337804 |
| ENSMUSG00000022008 | -0.391259  | 6.6658853  | 0.20400223 | 0.41368184 |
| ENSMUSG00000006941 | -0.3912885 | 5.2893057  | 0.2083086  | 0.41910447 |
| ENSMUSG00000001436 | -0.3913653 | 4.13343436 | 0.21138695 | 0.4231212  |
| ENSMUSG00000096910 | -0.3916752 | 2.65571856 | 0.25024204 | 0.46794003 |
| ENSMUSG00000038910 | -0.3918244 | 5.8239034  | 0.20554415 | 0.41594745 |
| ENSMUSG00000039108 | -0.3918921 | 4.79588888 | 0.21028873 | 0.42167231 |
| ENSMUSG00000008373 | -0.3918976 | 7.02428713 | 0.20191769 | 0.41162199 |
| ENSMUSG00000022811 | -0.3920452 | 6.98176107 | 0.20247125 | 0.41228284 |
| ENSMUSG00000028552 | -0.3922175 | 8.13929503 | 0.2008471  | 0.41037044 |
| ENSMUSG00000033411 | -0.3922541 | 6.76160136 | 0.20267558 | 0.41246526 |
| ENSMUSG00000020248 | -0.3928315 | 6.21230641 | 0.20307155 | 0.41272589 |
| ENSMUSG00000026667 | -0.3928574 | 8.67323986 | 0.19980002 | 0.40901045 |
| ENSMUSG00000092260 | -0.3929117 | 1.99892118 | 0.28347444 | 0.50495347 |
| ENSMUSG00000021963 | -0.3929258 | 5.17385827 | 0.20682396 | 0.4174079  |
| ENSMUSG00000074102 | -0.3929995 | 6.18374377 | 0.20260134 | 0.41239201 |
| ENSMUSG00000050912 | -0.3930621 | 10.2528421 | 0.19902642 | 0.40804199 |
| ENSMUSG00000026558 | -0.3936611 | 6.11949959 | 0.20160234 | 0.41136476 |
| ENSMUSG00000024231 | -0.3937907 | 7.21576712 | 0.2000588  | 0.40933856 |
| ENSMUSG00000038876 | -0.394085  | 5.77414492 | 0.20316435 | 0.41283669 |
| ENSMUSG00000028741 | -0.3942357 | 6.56882398 | 0.19980221 | 0.40901045 |
| ENSMUSG00000018995 | -0.3946553 | 4.666562   | 0.20939118 | 0.42020092 |
| ENSMUSG00000043510 | -0.394739  | 3.64256114 | 0.21936021 | 0.43192533 |
| ENSMUSG00000037197 | -0.3948646 | 7.76924925 | 0.19800645 | 0.40649182 |
| ENSMUSG00000003198 | -0.3951226 | 4.1256612  | 0.21681959 | 0.42932891 |
| ENSMUSG00000027167 | -0.3952576 | 4.94688338 | 0.20681766 | 0.4174079  |

|                    |            |            |            |            |
|--------------------|------------|------------|------------|------------|
| ENSMUSG00000028496 | -0.3953738 | 6.26693723 | 0.20007637 | 0.40933856 |
| ENSMUSG00000086502 | -0.3955344 | 3.62933984 | 0.22169623 | 0.43460682 |
| ENSMUSG00000024270 | -0.3958978 | 7.01124256 | 0.19774835 | 0.40625723 |
| ENSMUSG00000059878 | -0.3959394 | 5.62937974 | 0.20152644 | 0.41136476 |
| ENSMUSG00000030213 | -0.3959598 | 6.72299085 | 0.19816111 | 0.4066185  |
| ENSMUSG00000040520 | -0.3963589 | 6.66041573 | 0.19818127 | 0.4066185  |
| ENSMUSG00000020130 | -0.3963769 | 7.05424623 | 0.19728472 | 0.40562792 |
| ENSMUSG00000040111 | -0.396417  | 4.82817672 | 0.20495749 | 0.41499466 |
| ENSMUSG00000098702 | -0.3964981 | 2.59065742 | 0.24366347 | 0.46139891 |
| ENSMUSG00000099515 | -0.3965366 | 6.05509479 | 0.19959798 | 0.40887467 |
| ENSMUSG00000039789 | -0.3965605 | 5.69094809 | 0.20076341 | 0.41027716 |
| ENSMUSG00000018651 | -0.39663   | 4.89926794 | 0.20378087 | 0.41354402 |
| ENSMUSG00000017858 | -0.3970161 | 5.63369106 | 0.20001751 | 0.40933856 |
| ENSMUSG00000090000 | -0.3973453 | 5.02262121 | 0.20358312 | 0.41345394 |
| ENSMUSG00000072761 | -0.3973699 | 3.02965445 | 0.23671964 | 0.45230059 |
| ENSMUSG00000029144 | -0.3973896 | 6.15849431 | 0.1977238  | 0.40625723 |
| ENSMUSG00000050350 | -0.3975284 | 4.84280711 | 0.20464995 | 0.41468339 |
| ENSMUSG00000020955 | -0.397534  | 4.02041923 | 0.21231461 | 0.42352955 |
| ENSMUSG00000037234 | -0.3977837 | 6.31677038 | 0.19747062 | 0.40593275 |
| ENSMUSG00000005312 | -0.3978873 | 7.56200871 | 0.19474434 | 0.40248565 |
| ENSMUSG00000016477 | -0.3980179 | 6.25002081 | 0.19699511 | 0.40526426 |
| ENSMUSG00000027641 | -0.3980744 | 7.4569508  | 0.19488065 | 0.402604   |
| ENSMUSG00000032468 | -0.3980834 | 6.32872849 | 0.19691634 | 0.40517952 |
| ENSMUSG00000028655 | -0.3982037 | 4.45233056 | 0.20340086 | 0.41323943 |
| ENSMUSG00000028483 | -0.3982109 | 4.69472178 | 0.20565948 | 0.41594745 |
| ENSMUSG00000083863 | -0.3982467 | 0.68708541 | 0.36114295 | 0.58310609 |
| ENSMUSG00000030061 | -0.3984684 | 6.95505072 | 0.19514761 | 0.40300111 |
| ENSMUSG00000045817 | -0.3990988 | 6.20063047 | 0.19596833 | 0.40414813 |
| ENSMUSG00000060935 | -0.3991053 | 5.67926589 | 0.1980824  | 0.40657036 |
| ENSMUSG00000024054 | -0.3993864 | 9.15691897 | 0.19223298 | 0.39866162 |
| ENSMUSG00000008859 | -0.3994269 | 5.26822333 | 0.19926598 | 0.40837786 |
| ENSMUSG00000025937 | -0.3994829 | 6.0081304  | 0.19600285 | 0.40414813 |
| ENSMUSG00000040746 | -0.3994861 | 5.14586749 | 0.19962214 | 0.40887467 |
| ENSMUSG00000051220 | -0.3999188 | 6.90330034 | 0.19356993 | 0.40074066 |
| ENSMUSG00000044348 | -0.3999583 | 6.74665353 | 0.19370943 | 0.40079864 |
| ENSMUSG00000035762 | -0.4002122 | 4.95145079 | 0.2006747  | 0.41027716 |
| ENSMUSG00000055923 | -0.4002332 | 4.78824304 | 0.20074619 | 0.41027716 |
| ENSMUSG00000092416 | -0.4004522 | 4.86498978 | 0.20121602 | 0.41104632 |
| ENSMUSG00000031314 | -0.4006188 | 8.04578839 | 0.19148376 | 0.3975948  |
| ENSMUSG00000034168 | -0.400649  | 2.8730977  | 0.22956823 | 0.44367134 |
| ENSMUSG00000064367 | -0.4006814 | 11.2409345 | 0.19035171 | 0.39582585 |
| ENSMUSG00000026878 | -0.4007366 | 7.79761286 | 0.19149735 | 0.3975948  |
| ENSMUSG00000047180 | -0.4007587 | 5.54058886 | 0.19661122 | 0.40489228 |

|                    |            |            |            |            |
|--------------------|------------|------------|------------|------------|
| ENSMUSG00000020521 | -0.4009661 | 5.80283725 | 0.1954834  | 0.40353135 |
| ENSMUSG00000017831 | -0.4010623 | 6.55380763 | 0.19307885 | 0.40005765 |
| ENSMUSG00000020397 | -0.4013879 | 5.47990175 | 0.19662656 | 0.40489228 |
| ENSMUSG00000016921 | -0.4015448 | 8.8174731  | 0.18990205 | 0.39532203 |
| ENSMUSG00000022338 | -0.4015921 | 6.19400285 | 0.19309162 | 0.40005765 |
| ENSMUSG00000079084 | -0.4016638 | 5.57341664 | 0.19615031 | 0.40432073 |
| ENSMUSG00000024072 | -0.402103  | 5.75291444 | 0.19469697 | 0.40248565 |
| ENSMUSG00000058655 | -0.4022179 | 9.67548018 | 0.18885534 | 0.39444913 |
| ENSMUSG00000027374 | -0.402342  | 5.34290956 | 0.19419421 | 0.40157527 |
| ENSMUSG00000048271 | -0.4024291 | 7.21558481 | 0.19029604 | 0.39578639 |
| ENSMUSG00000030779 | -0.4024683 | 8.25534229 | 0.18928074 | 0.39475709 |
| ENSMUSG00000029676 | -0.4024767 | 5.79469319 | 0.19370837 | 0.40079864 |
| ENSMUSG00000058013 | -0.4026777 | 8.25485445 | 0.18894175 | 0.39447242 |
| ENSMUSG00000029651 | -0.4027195 | 1.49133468 | 0.24848987 | 0.46695136 |
| ENSMUSG00000028069 | -0.4027278 | 6.13109657 | 0.19111335 | 0.39702685 |
| ENSMUSG00000028902 | -0.4027848 | 7.67954228 | 0.18919191 | 0.39470799 |
| ENSMUSG00000073725 | -0.4031602 | 6.025212   | 0.19220567 | 0.39866162 |
| ENSMUSG00000005204 | -0.4034379 | 7.09458014 | 0.18912189 | 0.39463825 |
| ENSMUSG00000045427 | -0.4034418 | 7.32747079 | 0.1890125  | 0.39448631 |
| ENSMUSG00000022322 | -0.4035118 | 7.1714241  | 0.18933591 | 0.39477928 |
| ENSMUSG00000031631 | -0.4035525 | 5.6601618  | 0.19324686 | 0.40022548 |
| ENSMUSG00000021981 | -0.40362   | 6.55306363 | 0.19023152 | 0.39572854 |
| ENSMUSG00000046985 | -0.4038981 | 6.21496115 | 0.19088657 | 0.39670857 |
| ENSMUSG00000031826 | -0.4040311 | 6.28604315 | 0.18963941 | 0.39487765 |
| ENSMUSG00000075266 | -0.4044244 | 3.46304326 | 0.21182424 | 0.4232897  |
| ENSMUSG00000021474 | -0.4045733 | 7.68294099 | 0.18721315 | 0.39211923 |
| ENSMUSG00000059796 | -0.405081  | 10.1553163 | 0.18565446 | 0.39027245 |
| ENSMUSG00000032018 | -0.4051888 | 6.4182325  | 0.18896926 | 0.39447242 |
| ENSMUSG00000079845 | -0.4056396 | 2.44392361 | 0.24426676 | 0.46181149 |
| ENSMUSG00000025395 | -0.4058816 | 7.06789071 | 0.18669359 | 0.39163612 |
| ENSMUSG00000025878 | -0.4061199 | 6.43053496 | 0.18769835 | 0.39295128 |
| ENSMUSG00000020024 | -0.4061388 | 6.95605241 | 0.18673274 | 0.39163612 |
| ENSMUSG00000039530 | -0.4061696 | 4.72952332 | 0.19520347 | 0.40303929 |
| ENSMUSG00000057551 | -0.4062286 | 5.24524531 | 0.19175091 | 0.39789143 |
| ENSMUSG00000034674 | -0.4063712 | 6.44521823 | 0.1866769  | 0.39163612 |
| ENSMUSG00000022100 | -0.4065079 | 7.71259536 | 0.18526418 | 0.39000726 |
| ENSMUSG00000046138 | -0.4065514 | 5.86297462 | 0.18947534 | 0.39483355 |
| ENSMUSG00000022124 | -0.4066085 | 6.25410378 | 0.18773043 | 0.39295128 |
| ENSMUSG00000069910 | -0.4068631 | 6.14665926 | 0.18724231 | 0.39211923 |
| ENSMUSG00000037275 | -0.4070318 | 7.3291926  | 0.18483745 | 0.38931387 |
| ENSMUSG00000038187 | -0.4072498 | 5.68059148 | 0.18870864 | 0.39431002 |
| ENSMUSG00000022337 | -0.4073053 | 6.5899577  | 0.18632989 | 0.39123472 |
| ENSMUSG00000026034 | -0.4077193 | 7.72808624 | 0.18406339 | 0.38813837 |

|                    |            |            |            |            |
|--------------------|------------|------------|------------|------------|
| ENSMUSG00000039218 | -0.4079503 | 10.4857122 | 0.18251819 | 0.38614625 |
| ENSMUSG00000021012 | -0.4083889 | 7.71771133 | 0.18321942 | 0.3868125  |
| ENSMUSG00000021096 | -0.408557  | 6.11138614 | 0.18558367 | 0.39022922 |
| ENSMUSG00000022724 | -0.4086241 | 7.58953309 | 0.18312181 | 0.38676308 |
| ENSMUSG00000023008 | -0.4086956 | 7.19227631 | 0.18326168 | 0.38682599 |
| ENSMUSG00000043131 | -0.4088024 | 9.14161973 | 0.18197482 | 0.38546778 |
| ENSMUSG00000012443 | -0.4090219 | 9.02930543 | 0.18177546 | 0.38527252 |
| ENSMUSG00000027365 | -0.4091807 | 7.73054964 | 0.18254096 | 0.38614625 |
| ENSMUSG00000005698 | -0.409751  | 8.39483321 | 0.18126651 | 0.38477585 |
| ENSMUSG00000028719 | -0.4098568 | 7.23140292 | 0.18237381 | 0.38600965 |
| ENSMUSG00000066258 | -0.409904  | 6.13752847 | 0.18476876 | 0.38924995 |
| ENSMUSG00000045414 | -0.4099538 | 2.91846454 | 0.22302596 | 0.43634106 |
| ENSMUSG00000062590 | -0.409961  | 1.69530286 | 0.23978588 | 0.456481   |
| ENSMUSG00000040302 | -0.4099803 | 4.09639884 | 0.19851311 | 0.40706701 |
| ENSMUSG00000021027 | -0.4099812 | 7.25078975 | 0.18225601 | 0.3859118  |
| ENSMUSG00000053080 | -0.4101221 | 3.80119682 | 0.19925337 | 0.40837786 |
| ENSMUSG00000029213 | -0.4102969 | 6.28981821 | 0.18356449 | 0.38738932 |
| ENSMUSG00000042426 | -0.4105278 | 6.57266726 | 0.18261364 | 0.38621405 |
| ENSMUSG00000063406 | -0.4106352 | 7.70342527 | 0.18095148 | 0.38443278 |
| ENSMUSG00000044224 | -0.4107159 | 6.5020171  | 0.18254577 | 0.38614625 |
| ENSMUSG00000028218 | -0.4110831 | 4.55929352 | 0.19106413 | 0.39700107 |
| ENSMUSG00000072663 | -0.4111197 | 2.02015117 | 0.25926477 | 0.47850612 |
| ENSMUSG00000046573 | -0.4111746 | 3.62717383 | 0.20235384 | 0.41219943 |
| ENSMUSG00000052681 | -0.411213  | 8.77024655 | 0.17957773 | 0.38249382 |
| ENSMUSG00000025925 | -0.4112201 | 5.22248235 | 0.18625005 | 0.39114324 |
| ENSMUSG00000021193 | -0.4113289 | 8.40780064 | 0.17951349 | 0.38243253 |
| ENSMUSG00000026977 | -0.4115372 | 7.07988313 | 0.18085046 | 0.38443278 |
| ENSMUSG00000038119 | -0.4115758 | 4.26764283 | 0.1936141  | 0.40075518 |
| ENSMUSG00000029202 | -0.4116523 | 8.86439368 | 0.17907379 | 0.3819     |
| ENSMUSG00000023919 | -0.4116546 | 5.42875515 | 0.1855663  | 0.39022922 |
| ENSMUSG00000037013 | -0.4124895 | 6.30411004 | 0.18092977 | 0.38443278 |
| ENSMUSG00000027531 | -0.4125663 | 7.07532402 | 0.17949517 | 0.38243253 |
| ENSMUSG00000031023 | -0.4126205 | 4.46465903 | 0.1887678  | 0.39435721 |
| ENSMUSG00000021918 | -0.4126423 | 4.55561168 | 0.18837849 | 0.39384909 |
| ENSMUSG00000051396 | -0.4128046 | 7.27288134 | 0.1789496  | 0.3819     |
| ENSMUSG00000097944 | -0.4129295 | 0.89091897 | 0.30971748 | 0.53380107 |
| ENSMUSG00000015880 | -0.4129395 | 7.9141167  | 0.17836162 | 0.38118344 |
| ENSMUSG00000091337 | -0.4131146 | 5.63116847 | 0.1829925  | 0.38671197 |
| ENSMUSG00000028243 | -0.413179  | 5.17031218 | 0.18541559 | 0.39015058 |
| ENSMUSG00000027166 | -0.4132524 | 3.46009417 | 0.20074773 | 0.41027716 |
| ENSMUSG00000030629 | -0.4133481 | 6.13079319 | 0.18129137 | 0.38477585 |
| ENSMUSG00000030346 | -0.4142425 | 5.99810755 | 0.18007515 | 0.38302375 |
| ENSMUSG00000048874 | -0.4142437 | 7.67703625 | 0.17718545 | 0.37976603 |

|                    |            |            |            |            |
|--------------------|------------|------------|------------|------------|
| ENSMUSG00000025451 | -0.4144637 | 6.52254889 | 0.17886883 | 0.38181343 |
| ENSMUSG00000073628 | -0.4145027 | 2.29945405 | 0.23018555 | 0.44430303 |
| ENSMUSG00000020516 | -0.4145206 | 7.09342394 | 0.17754062 | 0.38003136 |
| ENSMUSG00000037926 | -0.4145987 | 7.1193968  | 0.17743522 | 0.37993488 |
| ENSMUSG00000022052 | -0.4146532 | 7.6435349  | 0.1768175  | 0.37933383 |
| ENSMUSG00000063281 | -0.4147314 | 6.08105316 | 0.17976999 | 0.38271022 |
| ENSMUSG00000071533 | -0.4147358 | 7.06407059 | 0.17737872 | 0.37993488 |
| ENSMUSG00000019774 | -0.4150473 | 4.12932692 | 0.19302209 | 0.40005765 |
| ENSMUSG00000022965 | -0.4150477 | 7.22861075 | 0.17661258 | 0.37902289 |
| ENSMUSG00000028345 | -0.4151445 | 6.93289797 | 0.17728487 | 0.37986092 |
| ENSMUSG00000047879 | -0.4151661 | 7.51535943 | 0.17647093 | 0.37888647 |
| ENSMUSG00000020462 | -0.4152069 | 4.46904434 | 0.18681159 | 0.39163612 |
| ENSMUSG00000014592 | -0.4152274 | 3.47803307 | 0.20241406 | 0.41224423 |
| ENSMUSG00000079316 | -0.4153329 | 4.70810837 | 0.18572246 | 0.3903393  |
| ENSMUSG00000004233 | -0.4154718 | 4.13287264 | 0.18992763 | 0.39532203 |
| ENSMUSG00000025722 | -0.4155183 | 4.94594009 | 0.18195145 | 0.38546778 |
| ENSMUSG00000039879 | -0.415526  | 5.89008637 | 0.17922968 | 0.38205432 |
| ENSMUSG00000005233 | -0.4155328 | 6.28545851 | 0.17819635 | 0.38098125 |
| ENSMUSG00000021832 | -0.4155596 | 8.26836367 | 0.17529533 | 0.37792578 |
| ENSMUSG00000055302 | -0.4156198 | 8.51673173 | 0.17507466 | 0.3779109  |
| ENSMUSG00000031095 | -0.4156515 | 7.43052777 | 0.17606481 | 0.37868784 |
| ENSMUSG00000029203 | -0.4158373 | 6.72529442 | 0.17682782 | 0.37933383 |
| ENSMUSG00000024943 | -0.4158551 | 7.27414354 | 0.17597533 | 0.37863488 |
| ENSMUSG00000035933 | -0.41588   | 5.81243236 | 0.17908645 | 0.3819     |
| ENSMUSG00000021811 | -0.416027  | 7.62882553 | 0.17535655 | 0.37792578 |
| ENSMUSG00000060679 | -0.416203  | 5.47803567 | 0.17994948 | 0.3829075  |
| ENSMUSG00000026669 | -0.4162151 | 7.18819467 | 0.17536541 | 0.37792578 |
| ENSMUSG00000021500 | -0.4165773 | 8.34430555 | 0.17413761 | 0.37655906 |
| ENSMUSG00000030045 | -0.4169091 | 5.93498002 | 0.17701761 | 0.37966545 |
| ENSMUSG00000029131 | -0.4169189 | 6.75074777 | 0.17564595 | 0.37837914 |
| ENSMUSG00000027599 | -0.4169869 | 6.59336119 | 0.1759274  | 0.37860727 |
| ENSMUSG00000053600 | -0.4170816 | 5.41765802 | 0.17983519 | 0.38273983 |
| ENSMUSG00000021519 | -0.4171847 | 5.29917838 | 0.17975765 | 0.38271022 |
| ENSMUSG00000006005 | -0.4173001 | 9.76353061 | 0.17288735 | 0.37475153 |
| ENSMUSG00000024151 | -0.4177066 | 6.8342687  | 0.17466616 | 0.37747493 |
| ENSMUSG00000056608 | -0.4177711 | 6.78040723 | 0.17496195 | 0.37788697 |
| ENSMUSG00000061130 | -0.4178838 | 6.21556074 | 0.17583394 | 0.37858095 |
| ENSMUSG00000036023 | -0.4181355 | 6.33988025 | 0.17490317 | 0.3778357  |
| ENSMUSG00000025809 | -0.4186204 | 8.4520458  | 0.17203751 | 0.37336538 |
| ENSMUSG00000022677 | -0.4192395 | 5.13106298 | 0.17831856 | 0.38116697 |
| ENSMUSG00000059588 | -0.4192476 | 3.6690262  | 0.19056642 | 0.39611957 |
| ENSMUSG00000029735 | -0.4195473 | 3.16227711 | 0.20178781 | 0.41159064 |
| ENSMUSG00000020021 | -0.4197569 | 4.0262642  | 0.18527515 | 0.39000726 |

|                    |            |            |            |            |
|--------------------|------------|------------|------------|------------|
| ENSMUSG00000054226 | -0.4199539 | 5.53162681 | 0.17584496 | 0.37858095 |
| ENSMUSG00000026987 | -0.4201139 | 6.2247376  | 0.17371391 | 0.37579354 |
| ENSMUSG00000029254 | -0.4204357 | 5.93312192 | 0.17448304 | 0.37715475 |
| ENSMUSG00000048222 | -0.4204781 | 4.50529765 | 0.18146223 | 0.38483554 |
| ENSMUSG00000040021 | -0.4205462 | 7.23283326 | 0.17114479 | 0.37217692 |
| ENSMUSG00000021111 | -0.4207396 | 9.08552416 | 0.16958372 | 0.37012564 |
| ENSMUSG00000066415 | -0.4207491 | 7.44596785 | 0.17081711 | 0.37176421 |
| ENSMUSG00000027206 | -0.4209018 | 8.15177498 | 0.16991854 | 0.37063139 |
| ENSMUSG00000044066 | -0.4212834 | 6.29006701 | 0.17182867 | 0.37303833 |
| ENSMUSG00000048249 | -0.421408  | 5.62722885 | 0.17515373 | 0.3779109  |
| ENSMUSG00000064345 | -0.4214831 | 10.855955  | 0.16845494 | 0.36855713 |
| ENSMUSG00000029405 | -0.4216651 | 8.39165419 | 0.16895658 | 0.36928005 |
| ENSMUSG00000026578 | -0.4219708 | 3.70197571 | 0.18619435 | 0.39110243 |
| ENSMUSG00000019809 | -0.4219878 | 5.23309374 | 0.17544731 | 0.37802672 |
| ENSMUSG00000055884 | -0.4220054 | 6.27061839 | 0.17145081 | 0.37254553 |
| ENSMUSG00000032872 | -0.4221582 | 7.17316757 | 0.1696732  | 0.37024601 |
| ENSMUSG00000042719 | -0.4223258 | 7.69574438 | 0.16875915 | 0.36892331 |
| ENSMUSG00000033701 | -0.4226498 | 4.58818554 | 0.17854    | 0.38132006 |
| ENSMUSG00000058192 | -0.4228552 | 3.33822067 | 0.19555404 | 0.40353135 |
| ENSMUSG00000026095 | -0.4228917 | 4.83677405 | 0.17655588 | 0.37897663 |
| ENSMUSG00000029657 | -0.4230111 | 8.89159947 | 0.16730821 | 0.36716559 |
| ENSMUSG00000030924 | -0.4231231 | 3.46665238 | 0.18813001 | 0.39348216 |
| ENSMUSG00000020309 | -0.4232218 | 2.60158963 | 0.20701032 | 0.41750502 |
| ENSMUSG00000037465 | -0.4232392 | 3.47329169 | 0.18996279 | 0.39532203 |
| ENSMUSG00000036188 | -0.4234378 | 4.9476669  | 0.17577636 | 0.37858095 |
| ENSMUSG00000028330 | -0.4235449 | 7.86628337 | 0.16738188 | 0.36717783 |
| ENSMUSG00000025971 | -0.4236608 | 4.5670086  | 0.17816167 | 0.38098125 |
| ENSMUSG00000032698 | -0.4237851 | 7.12110229 | 0.16787999 | 0.36780296 |
| ENSMUSG00000053553 | -0.4240923 | 3.33850209 | 0.1872602  | 0.39211923 |
| ENSMUSG00000028013 | -0.4241551 | 4.98891907 | 0.17434358 | 0.37692886 |
| ENSMUSG00000079988 | -0.4242494 | 0.92023143 | 0.34786949 | 0.57168921 |
| ENSMUSG00000015748 | -0.4242802 | 6.78904382 | 0.16790993 | 0.36780296 |
| ENSMUSG00000040842 | -0.4243392 | 6.35939431 | 0.16805653 | 0.36794973 |
| ENSMUSG00000022323 | -0.4243408 | 4.14759345 | 0.17978579 | 0.38271022 |
| ENSMUSG00000054693 | -0.4243637 | 7.84506942 | 0.16673195 | 0.36642294 |
| ENSMUSG00000029782 | -0.4245182 | 6.85001509 | 0.16776048 | 0.36763442 |
| ENSMUSG00000005364 | -0.4245194 | 4.69864103 | 0.17610842 | 0.37868784 |
| ENSMUSG00000002728 | -0.4245447 | 6.62049826 | 0.16810908 | 0.36794973 |
| ENSMUSG00000021929 | -0.42497   | 8.29886481 | 0.16576689 | 0.36500424 |
| ENSMUSG00000038225 | -0.4251882 | 5.28980203 | 0.17213382 | 0.37349922 |
| ENSMUSG00000034192 | -0.425481  | 6.56834708 | 0.16710261 | 0.36693841 |
| ENSMUSG00000061950 | -0.4256457 | 6.06320368 | 0.16808994 | 0.36794973 |
| ENSMUSG00000024878 | -0.4257162 | 5.43191086 | 0.17041825 | 0.37127078 |

|                    |            |            |            |            |
|--------------------|------------|------------|------------|------------|
| ENSMUSG00000037646 | -0.425843  | 7.08081428 | 0.16631613 | 0.3657327  |
| ENSMUSG00000025337 | -0.4259767 | 6.14244126 | 0.16747862 | 0.36731533 |
| ENSMUSG00000094936 | -0.4259949 | 3.26876369 | 0.19658692 | 0.40489228 |
| ENSMUSG00000087370 | -0.4260129 | 6.00519966 | 0.16830658 | 0.36830726 |
| ENSMUSG00000025133 | -0.4260881 | 7.72637701 | 0.16496604 | 0.36420491 |
| ENSMUSG00000044026 | -0.4263514 | 4.36986994 | 0.17714564 | 0.37976603 |
| ENSMUSG00000026662 | -0.4264059 | 6.85344021 | 0.16567254 | 0.36491273 |
| ENSMUSG00000031200 | -0.4264743 | 3.68348243 | 0.18312428 | 0.38676308 |
| ENSMUSG00000038374 | -0.426494  | 6.71534703 | 0.16563106 | 0.36489587 |
| ENSMUSG00000020657 | -0.4265339 | 4.95796947 | 0.17167924 | 0.372888   |
| ENSMUSG00000038759 | -0.4265443 | 8.85710257 | 0.16386667 | 0.36205113 |
| ENSMUSG00000003824 | -0.4265647 | 4.78852999 | 0.17300218 | 0.37485543 |
| ENSMUSG00000018068 | -0.4268399 | 7.250162   | 0.16489437 | 0.36416565 |
| ENSMUSG00000047534 | -0.4270873 | 6.48176755 | 0.16629901 | 0.3657327  |
| ENSMUSG00000028577 | -0.4272984 | 8.27512419 | 0.16349736 | 0.3616964  |
| ENSMUSG00000009772 | -0.4273611 | 3.661981   | 0.17921777 | 0.38205432 |
| ENSMUSG00000031262 | -0.4276101 | 6.29975452 | 0.16590617 | 0.36520354 |
| ENSMUSG00000018143 | -0.4278158 | 3.94265922 | 0.17589097 | 0.37860443 |
| ENSMUSG00000020899 | -0.4283773 | 7.17743529 | 0.16308712 | 0.36113583 |
| ENSMUSG00000040331 | -0.4284273 | 7.04451015 | 0.16349725 | 0.3616964  |
| ENSMUSG00000044408 | -0.4284335 | 6.23336035 | 0.16504724 | 0.36420491 |
| ENSMUSG00000063800 | -0.428579  | 6.91596372 | 0.16346415 | 0.3616964  |
| ENSMUSG00000050332 | -0.4286797 | 4.39440618 | 0.17614726 | 0.37868784 |
| ENSMUSG00000040383 | -0.4288484 | 8.08549724 | 0.16203403 | 0.35946822 |
| ENSMUSG00000025199 | -0.4294168 | 7.48048254 | 0.16210515 | 0.35955202 |
| ENSMUSG00000037972 | -0.4295472 | 6.98651351 | 0.16260359 | 0.36047835 |
| ENSMUSG00000025982 | -0.429707  | 10.0396768 | 0.16046022 | 0.35696984 |
| ENSMUSG00000030738 | -0.4300197 | 9.68180357 | 0.16017637 | 0.35658246 |
| ENSMUSG00000060743 | -0.4300356 | 8.00902419 | 0.16080865 | 0.35763261 |
| ENSMUSG00000023156 | -0.4300509 | 4.9062504  | 0.16852401 | 0.36856551 |
| ENSMUSG00000038069 | -0.4300716 | 4.35740964 | 0.17519389 | 0.3779109  |
| ENSMUSG00000033009 | -0.43048   | 5.54265005 | 0.16513528 | 0.36425012 |
| ENSMUSG00000027104 | -0.4307676 | 6.84709307 | 0.1616219  | 0.35888642 |
| ENSMUSG00000040177 | -0.4308173 | 3.93755842 | 0.17720537 | 0.37976603 |
| ENSMUSG00000036977 | -0.430856  | 4.72056159 | 0.17023621 | 0.3710991  |
| ENSMUSG00000025086 | -0.4308915 | 4.89809265 | 0.1679397  | 0.36780296 |
| ENSMUSG00000044847 | -0.4310527 | 3.74757833 | 0.17525085 | 0.3779109  |
| ENSMUSG00000027858 | -0.4312091 | 3.33557132 | 0.1872602  | 0.39211923 |
| ENSMUSG00000001280 | -0.4315818 | 8.23123854 | 0.15932134 | 0.35542436 |
| ENSMUSG00000064341 | -0.4316175 | 11.8810983 | 0.15840234 | 0.35410673 |
| ENSMUSG00000041408 | -0.4318231 | 8.39194615 | 0.15904064 | 0.35494474 |
| ENSMUSG00000059060 | -0.4319216 | 2.67911729 | 0.20034037 | 0.40972322 |
| ENSMUSG00000020305 | -0.4320237 | 4.71988084 | 0.16909916 | 0.36951678 |



|                    |            |            |            |            |
|--------------------|------------|------------|------------|------------|
| ENSMUSG00000018548 | -0.4322416 | 7.30308062 | 0.15948371 | 0.35571215 |
| ENSMUSG00000061315 | -0.4323488 | 8.94775694 | 0.15813932 | 0.35366538 |
| ENSMUSG00000021276 | -0.4323492 | 6.03270254 | 0.16156257 | 0.35888642 |
| ENSMUSG00000053769 | -0.4324373 | 1.52311257 | 0.23960003 | 0.45626818 |
| ENSMUSG00000034206 | -0.4325132 | 6.89380739 | 0.15982156 | 0.35617188 |
| ENSMUSG00000001017 | -0.4327079 | 7.54593579 | 0.158741   | 0.35471674 |
| ENSMUSG00000051727 | -0.4330969 | 5.03905842 | 0.16528248 | 0.36442572 |
| ENSMUSG00000034820 | -0.4333866 | 7.49273019 | 0.15808134 | 0.35361151 |
| ENSMUSG00000022770 | -0.4335621 | 6.79688468 | 0.15894502 | 0.35494474 |
| ENSMUSG00000040675 | -0.4337416 | 7.01684452 | 0.15808245 | 0.35361151 |
| ENSMUSG00000020530 | -0.4339647 | 7.62474972 | 0.15750306 | 0.35275452 |
| ENSMUSG00000046873 | -0.4342537 | 5.50282733 | 0.16287143 | 0.36095468 |
| ENSMUSG00000049672 | -0.434629  | 4.90126742 | 0.1636144  | 0.36178911 |
| ENSMUSG00000079215 | -0.4350983 | 6.15495399 | 0.1586851  | 0.35466532 |
| ENSMUSG00000033014 | -0.4351942 | 6.9883942  | 0.15721775 | 0.35218866 |
| ENSMUSG00000021127 | -0.4352336 | 7.91226396 | 0.15613104 | 0.35062831 |
| ENSMUSG00000030268 | -0.4355894 | 5.98548539 | 0.15800545 | 0.35358597 |
| ENSMUSG00000028580 | -0.4356345 | 6.81212205 | 0.15670835 | 0.35144634 |
| ENSMUSG00000074698 | -0.4359342 | 7.77803488 | 0.15550164 | 0.34972697 |
| ENSMUSG00000027620 | -0.4363091 | 9.17662933 | 0.15437268 | 0.34845317 |
| ENSMUSG00000024695 | -0.4363126 | 8.25466587 | 0.15474647 | 0.34897239 |
| ENSMUSG00000071226 | -0.436438  | 4.03190109 | 0.17038802 | 0.37127078 |
| ENSMUSG00000046111 | -0.4365515 | 7.40413116 | 0.15535426 | 0.34953899 |
| ENSMUSG00000016498 | -0.4367518 | 2.95274009 | 0.18807282 | 0.39343886 |
| ENSMUSG00000029173 | -0.4367977 | 5.29191878 | 0.16021336 | 0.35658246 |
| ENSMUSG00000026974 | -0.436836  | 6.1244184  | 0.15671502 | 0.35144634 |
| ENSMUSG00000040167 | -0.4368564 | 5.26097059 | 0.16023726 | 0.35658246 |
| ENSMUSG00000022403 | -0.4373898 | 8.58837552 | 0.1535034  | 0.34693786 |
| ENSMUSG00000056763 | -0.4374093 | 5.54789383 | 0.15882266 | 0.35482568 |
| ENSMUSG00000054733 | -0.4375289 | 3.41384713 | 0.17617553 | 0.37868784 |
| ENSMUSG00000036781 | -0.4376968 | 7.17744954 | 0.15438699 | 0.34845317 |
| ENSMUSG00000033405 | -0.4379307 | 3.42637669 | 0.17341414 | 0.37537094 |
| ENSMUSG00000064061 | -0.4379597 | 6.20685416 | 0.15631031 | 0.35095781 |
| ENSMUSG00000027014 | -0.4381507 | 6.93710729 | 0.15434273 | 0.34845317 |
| ENSMUSG00000041763 | -0.438641  | 8.31068786 | 0.15260873 | 0.34574642 |
| ENSMUSG00000018501 | -0.4387559 | 8.42444849 | 0.15236225 | 0.34547404 |
| ENSMUSG00000038697 | -0.4388623 | 5.81958299 | 0.15530442 | 0.34949977 |
| ENSMUSG00000000001 | -0.4389882 | 8.46239279 | 0.15220202 | 0.34547404 |
| ENSMUSG00000030051 | -0.4390553 | 3.79255832 | 0.17097376 | 0.37195502 |
| ENSMUSG00000029701 | -0.4391511 | 7.23195109 | 0.15283336 | 0.34594271 |
| ENSMUSG00000038116 | -0.439349  | 6.0349785  | 0.15512999 | 0.34925299 |
| ENSMUSG00000022092 | -0.439368  | 6.92605298 | 0.15327711 | 0.34652837 |
| ENSMUSG00000005371 | -0.4396211 | 7.60311842 | 0.15229183 | 0.34547404 |

|                    |            |            |            |            |
|--------------------|------------|------------|------------|------------|
| ENSMUSG00000058355 | -0.4396312 | 9.48261645 | 0.15117543 | 0.3437225  |
| ENSMUSG00000022913 | -0.4398176 | 5.60053396 | 0.15561373 | 0.34983082 |
| ENSMUSG00000026887 | -0.4398183 | 4.84445551 | 0.15962331 | 0.35584483 |
| ENSMUSG00000071252 | -0.4398986 | 2.43352495 | 0.20278792 | 0.41253819 |
| ENSMUSG00000090115 | -0.4400763 | 3.56971881 | 0.17525338 | 0.3779109  |
| ENSMUSG00000056999 | -0.4401618 | 8.49811786 | 0.15095554 | 0.34351225 |
| ENSMUSG00000089847 | -0.4406171 | 3.07744124 | 0.17634703 | 0.37888647 |
| ENSMUSG00000011752 | -0.4406959 | 8.54543319 | 0.15044854 | 0.34272012 |
| ENSMUSG00000024601 | -0.4412134 | 6.16901048 | 0.15288974 | 0.34594271 |
| ENSMUSG00000032567 | -0.4412737 | 4.2183835  | 0.16262307 | 0.36047835 |
| ENSMUSG00000035530 | -0.4412785 | 8.3320724  | 0.1500465  | 0.34216567 |
| ENSMUSG00000028247 | -0.4413637 | 3.80960058 | 0.16618558 | 0.3656693  |
| ENSMUSG00000040151 | -0.4414885 | 4.88623369 | 0.15771518 | 0.35308294 |
| ENSMUSG00000029422 | -0.4417512 | 7.47293798 | 0.15031889 | 0.34260545 |
| ENSMUSG00000052748 | -0.4419505 | 5.53661782 | 0.15488706 | 0.34907044 |
| ENSMUSG00000033991 | -0.4420563 | 7.25455596 | 0.15033466 | 0.34260545 |
| ENSMUSG00000017291 | -0.4422855 | 7.04239527 | 0.15060687 | 0.34293591 |
| ENSMUSG00000039087 | -0.4424988 | 4.70078385 | 0.1568709  | 0.35155772 |
| ENSMUSG00000006740 | -0.4425673 | 9.05603109 | 0.14858147 | 0.34013182 |
| ENSMUSG00000097885 | -0.4425914 | 1.00883922 | 0.27540079 | 0.49535423 |
| ENSMUSG00000021713 | -0.4428422 | 5.94954569 | 0.15230549 | 0.34547404 |
| ENSMUSG00000099083 | -0.4429859 | 6.31578387 | 0.15108681 | 0.34366592 |
| ENSMUSG00000030189 | -0.4430185 | 7.49056004 | 0.14886784 | 0.34063035 |
| ENSMUSG00000032834 | -0.4431045 | 6.10031121 | 0.1507169  | 0.343114   |
| ENSMUSG00000030726 | -0.443448  | 6.8488606  | 0.14938125 | 0.34115362 |
| ENSMUSG00000095120 | -0.4440278 | 1.71459503 | 0.2321647  | 0.44652472 |
| ENSMUSG00000021428 | -0.4440824 | 6.70453443 | 0.14929486 | 0.34109297 |
| ENSMUSG00000024477 | -0.4446652 | 5.97138426 | 0.15030716 | 0.34260545 |
| ENSMUSG00000019850 | -0.4451383 | 7.83835507 | 0.14681892 | 0.33758961 |
| ENSMUSG00000031928 | -0.4453238 | 6.91566821 | 0.14765111 | 0.33885286 |
| ENSMUSG00000029127 | -0.4455951 | 1.82160992 | 0.20688475 | 0.4174079  |
| ENSMUSG00000079555 | -0.4456618 | 6.49234071 | 0.14850356 | 0.34008546 |
| ENSMUSG00000037572 | -0.4458942 | 7.75669246 | 0.14627078 | 0.33668677 |
| ENSMUSG00000029062 | -0.4460802 | 7.400689   | 0.14630139 | 0.33668677 |
| ENSMUSG00000031904 | -0.4465106 | 6.70491843 | 0.14687458 | 0.33764558 |
| ENSMUSG00000054387 | -0.4467426 | 8.71919143 | 0.14497341 | 0.3350607  |
| ENSMUSG00000053091 | -0.4468774 | 3.7882556  | 0.1619226  | 0.35932593 |
| ENSMUSG00000031479 | -0.4474824 | 6.4158256  | 0.14654353 | 0.33710014 |
| ENSMUSG00000028282 | -0.4475745 | 7.74623626 | 0.14490931 | 0.33498435 |
| ENSMUSG00000007827 | -0.4477209 | 5.51751462 | 0.14927872 | 0.34109297 |
| ENSMUSG00000024759 | -0.4485589 | 7.91216279 | 0.14385214 | 0.33327555 |
| ENSMUSG00000029569 | -0.448635  | 7.33141584 | 0.14433909 | 0.33402419 |
| ENSMUSG00000063179 | -0.4487483 | 3.47125325 | 0.16734249 | 0.36716611 |

|                    |            |            |            |            |
|--------------------|------------|------------|------------|------------|
| ENSMUSG00000069206 | -0.4488027 | 3.97186769 | 0.16163866 | 0.35888642 |
| ENSMUSG00000006599 | -0.4488131 | 7.48565553 | 0.14388635 | 0.33327555 |
| ENSMUSG00000060121 | -0.4489616 | 5.2521479  | 0.14919453 | 0.34109297 |
| ENSMUSG00000049327 | -0.4492558 | 6.97588638 | 0.14389197 | 0.33327555 |
| ENSMUSG00000033450 | -0.4492697 | 6.48465525 | 0.14487332 | 0.33497296 |
| ENSMUSG00000024120 | -0.4493018 | 8.00832209 | 0.14301437 | 0.33198603 |
| ENSMUSG00000021967 | -0.4494005 | 3.61608996 | 0.16111857 | 0.35817412 |
| ENSMUSG00000018986 | -0.4497134 | 4.23205058 | 0.15430464 | 0.34845317 |
| ENSMUSG00000021715 | -0.4498462 | 5.38015822 | 0.14776508 | 0.33904226 |
| ENSMUSG00000020611 | -0.450031  | 7.88099707 | 0.14254268 | 0.33121746 |
| ENSMUSG00000040225 | -0.4500617 | 9.42766134 | 0.14174886 | 0.33015545 |
| ENSMUSG00000067851 | -0.4502517 | 8.46667819 | 0.14199812 | 0.33056066 |
| ENSMUSG00000078495 | -0.450679  | 5.26505087 | 0.1484742  | 0.34008546 |
| ENSMUSG00000090733 | -0.4511538 | 8.46462161 | 0.14112182 | 0.32919266 |
| ENSMUSG00000003604 | -0.4511672 | 5.25033592 | 0.1461315  | 0.33668677 |
| ENSMUSG00000031600 | -0.4511695 | 5.56019991 | 0.14661021 | 0.33718159 |
| ENSMUSG00000002428 | -0.451217  | 6.59814494 | 0.14314008 | 0.33210469 |
| ENSMUSG00000038844 | -0.4516134 | 5.46391187 | 0.14579972 | 0.33617792 |
| ENSMUSG00000024974 | -0.4516172 | 8.51120379 | 0.14072737 | 0.32869914 |
| ENSMUSG00000028145 | -0.4518385 | 2.71257366 | 0.17647874 | 0.37888647 |
| ENSMUSG00000039929 | -0.4520824 | 6.30603692 | 0.14230016 | 0.33086782 |
| ENSMUSG00000029500 | -0.4521788 | 6.38949539 | 0.14237552 | 0.33097167 |
| ENSMUSG00000071660 | -0.4522082 | 6.93279114 | 0.14160038 | 0.32995214 |
| ENSMUSG00000030662 | -0.4524309 | 9.70854265 | 0.13957819 | 0.32686454 |
| ENSMUSG00000048410 | -0.4525657 | 5.56172649 | 0.14469227 | 0.33462608 |
| ENSMUSG00000051224 | -0.4527104 | 3.90179699 | 0.15602448 | 0.35047616 |
| ENSMUSG00000044966 | -0.4527169 | 3.44793976 | 0.16374002 | 0.36191275 |
| ENSMUSG00000022313 | -0.4531039 | 4.76036198 | 0.14780886 | 0.33907057 |
| ENSMUSG00000078773 | -0.4531348 | 5.1238668  | 0.14621646 | 0.33668677 |
| ENSMUSG00000037991 | -0.4532116 | 5.0545335  | 0.14576034 | 0.336159   |
| ENSMUSG00000041415 | -0.4532407 | 7.50566368 | 0.1399972  | 0.32749019 |
| ENSMUSG00000028274 | -0.4533241 | 5.91106766 | 0.14302736 | 0.33198603 |
| ENSMUSG00000052031 | -0.4533424 | 4.16692011 | 0.15288909 | 0.34594271 |
| ENSMUSG00000056014 | -0.4534818 | 3.93814042 | 0.1558774  | 0.35027752 |
| ENSMUSG00000028608 | -0.4535855 | 4.82593207 | 0.14565137 | 0.33605142 |
| ENSMUSG00000007812 | -0.4540191 | 6.20832529 | 0.14165331 | 0.33000417 |
| ENSMUSG00000022241 | -0.4540467 | 7.64577392 | 0.13905368 | 0.32591934 |
| ENSMUSG00000074873 | -0.4540759 | 2.38189732 | 0.18780985 | 0.39304122 |
| ENSMUSG00000000776 | -0.4542342 | 4.79711804 | 0.14462613 | 0.33454487 |
| ENSMUSG00000034377 | -0.4543112 | 6.36414458 | 0.14062539 | 0.3286033  |
| ENSMUSG00000038738 | -0.4546014 | 2.52885314 | 0.17316911 | 0.37514175 |
| ENSMUSG00000042650 | -0.4546437 | 7.3926617  | 0.13881512 | 0.32569099 |
| ENSMUSG00000032279 | -0.4546589 | 7.37960259 | 0.13876698 | 0.32567207 |

|                    |            |            |            |            |
|--------------------|------------|------------|------------|------------|
| ENSMUSG00000021911 | -0.4546887 | 7.02424802 | 0.13944071 | 0.32668447 |
| ENSMUSG00000095432 | -0.4547909 | 5.12073088 | 0.14515842 | 0.33512917 |
| ENSMUSG00000040044 | -0.4548493 | 7.35490749 | 0.13891443 | 0.3258054  |
| ENSMUSG00000014353 | -0.4549854 | 4.78387619 | 0.14704857 | 0.33790151 |
| ENSMUSG00000025103 | -0.4557233 | 6.27504184 | 0.13992895 | 0.32740155 |
| ENSMUSG00000023284 | -0.4558457 | 3.79817042 | 0.15603079 | 0.35047616 |
| ENSMUSG00000024583 | -0.4561245 | 7.73629379 | 0.13733985 | 0.32366593 |
| ENSMUSG00000043008 | -0.4565627 | 5.35392438 | 0.14201479 | 0.33056066 |
| ENSMUSG00000038582 | -0.4571751 | 6.24658879 | 0.138416   | 0.32513136 |
| ENSMUSG00000059288 | -0.4571836 | 4.56430063 | 0.14642945 | 0.33690957 |
| ENSMUSG00000015757 | -0.4572078 | 7.0680721  | 0.13719888 | 0.32362264 |
| ENSMUSG00000031657 | -0.4572139 | 7.66120066 | 0.13640211 | 0.32243761 |
| ENSMUSG00000011254 | -0.4573346 | 5.26239379 | 0.14057713 | 0.32856171 |
| ENSMUSG00000034064 | -0.4573786 | 6.31773423 | 0.1382753  | 0.32501327 |
| ENSMUSG00000075595 | -0.4574377 | 4.80773329 | 0.14350814 | 0.33281544 |
| ENSMUSG00000081400 | -0.4580394 | 1.43957485 | 0.21469523 | 0.42722351 |
| ENSMUSG00000037531 | -0.4580437 | 5.66539582 | 0.13940323 | 0.32666764 |
| ENSMUSG00000025860 | -0.4581659 | 8.06988267 | 0.13540127 | 0.32098643 |
| ENSMUSG00000048701 | -0.4585362 | 6.7378459  | 0.13631275 | 0.32229702 |
| ENSMUSG00000026455 | -0.4587031 | 6.07955785 | 0.13761882 | 0.32396449 |
| ENSMUSG00000022427 | -0.4587282 | 7.43573714 | 0.13530541 | 0.32097087 |
| ENSMUSG00000032998 | -0.4588861 | 6.57676027 | 0.13651287 | 0.3226287  |
| ENSMUSG00000002477 | -0.4589336 | 7.31535508 | 0.13524557 | 0.32097011 |
| ENSMUSG00000027454 | -0.4595016 | 4.7300877  | 0.14207604 | 0.33063186 |
| ENSMUSG00000066880 | -0.4596625 | 4.24342759 | 0.14733218 | 0.33826491 |
| ENSMUSG00000084957 | -0.4598971 | 5.41526269 | 0.13901703 | 0.32591934 |
| ENSMUSG00000021731 | -0.4601439 | 6.18585161 | 0.13624651 | 0.32221105 |
| ENSMUSG00000023755 | -0.4601496 | 3.37037827 | 0.15779304 | 0.35318393 |
| ENSMUSG00000044340 | -0.4601897 | 5.70558098 | 0.13776627 | 0.32424082 |
| ENSMUSG00000027115 | -0.4601999 | 5.97980607 | 0.13692867 | 0.32333717 |
| ENSMUSG00000026245 | -0.4602912 | 7.84694349 | 0.13364065 | 0.31835229 |
| ENSMUSG00000040123 | -0.460672  | 5.94394942 | 0.13693257 | 0.32333717 |
| ENSMUSG00000071669 | -0.4609328 | 5.50361088 | 0.13696417 | 0.32334098 |
| ENSMUSG00000040028 | -0.4611429 | 7.7940553  | 0.13292543 | 0.31767016 |
| ENSMUSG00000046434 | -0.4615688 | 10.3782764 | 0.13167823 | 0.31598088 |
| ENSMUSG00000026049 | -0.4617346 | 5.78911111 | 0.13612052 | 0.32208715 |
| ENSMUSG00000031976 | -0.4617671 | 7.03016966 | 0.13312847 | 0.31783429 |
| ENSMUSG00000022064 | -0.4620269 | 4.63701559 | 0.14139799 | 0.32961417 |
| ENSMUSG00000096199 | -0.4620353 | 3.28620504 | 0.15586443 | 0.35027752 |
| ENSMUSG00000078861 | -0.4621153 | 1.229484   | 0.2473062  | 0.46559882 |
| ENSMUSG00000035171 | -0.4621367 | 6.11075917 | 0.13476208 | 0.32045739 |
| ENSMUSG00000039117 | -0.4622212 | 5.38215301 | 0.13672946 | 0.32299902 |
| ENSMUSG00000036768 | -0.4622719 | 7.85750998 | 0.13206948 | 0.31647145 |

|                    |            |            |            |            |
|--------------------|------------|------------|------------|------------|
| ENSMUSG00000040899 | -0.4623432 | 3.69825974 | 0.15128017 | 0.34381567 |
| ENSMUSG00000027305 | -0.4624622 | 5.18180456 | 0.13788057 | 0.32443904 |
| ENSMUSG00000041135 | -0.4625475 | 5.25294953 | 0.13729539 | 0.32366593 |
| ENSMUSG00000028549 | -0.4626159 | 3.784482   | 0.14998593 | 0.3420999  |
| ENSMUSG00000002949 | -0.4626837 | 6.06693042 | 0.13372221 | 0.31847623 |
| ENSMUSG00000024817 | -0.4628915 | 6.61085665 | 0.13299544 | 0.31772769 |
| ENSMUSG00000036112 | -0.4629329 | 8.67742646 | 0.13097452 | 0.31492337 |
| ENSMUSG00000040242 | -0.4629637 | 7.40950297 | 0.1317853  | 0.31602683 |
| ENSMUSG00000028256 | -0.4629887 | 4.50455433 | 0.14189061 | 0.33041424 |
| ENSMUSG00000015755 | -0.4630754 | 7.7323561  | 0.13147283 | 0.31562845 |
| ENSMUSG00000033364 | -0.4630759 | 6.80342073 | 0.13253849 | 0.31712782 |
| ENSMUSG00000056267 | -0.4631636 | 3.48984814 | 0.15261062 | 0.34574642 |
| ENSMUSG00000026083 | -0.4634074 | 8.60592758 | 0.13063722 | 0.31481381 |
| ENSMUSG00000026104 | -0.4637336 | 7.78521957 | 0.13092223 | 0.31492337 |
| ENSMUSG00000090641 | -0.4638735 | 2.65235145 | 0.17039093 | 0.37127078 |
| ENSMUSG00000028273 | -0.4639498 | 5.93960181 | 0.13346541 | 0.31821601 |
| ENSMUSG00000028948 | -0.4643944 | 7.07647959 | 0.13078283 | 0.31492337 |
| ENSMUSG00000039356 | -0.4645243 | 6.73300796 | 0.13100392 | 0.31492337 |
| ENSMUSG00000024068 | -0.464652  | 6.25805332 | 0.13231347 | 0.31680029 |
| ENSMUSG00000001440 | -0.464729  | 10.5284479 | 0.12904894 | 0.31217221 |
| ENSMUSG00000024293 | -0.4650621 | 6.85121446 | 0.13112496 | 0.31507387 |
| ENSMUSG00000029265 | -0.4650682 | 6.92601957 | 0.1307383  | 0.31492337 |
| ENSMUSG00000021282 | -0.4652433 | 9.7294624  | 0.12878605 | 0.31186423 |
| ENSMUSG00000027323 | -0.4652788 | 6.86932092 | 0.13055187 | 0.31474881 |
| ENSMUSG00000021532 | -0.4652831 | 5.21494439 | 0.13488628 | 0.32061946 |
| ENSMUSG00000035378 | -0.4655629 | 4.30482988 | 0.14091735 | 0.32893318 |
| ENSMUSG00000028217 | -0.4659406 | 5.27882317 | 0.13473051 | 0.32045298 |
| ENSMUSG00000004591 | -0.4660207 | 7.02549467 | 0.12982375 | 0.31327407 |
| ENSMUSG00000057246 | -0.4662166 | 1.1121312  | 0.25201101 | 0.47035077 |
| ENSMUSG00000079427 | -0.4662376 | 2.9292644  | 0.15905585 | 0.35494474 |
| ENSMUSG00000037674 | -0.4664972 | 8.17581432 | 0.12836757 | 0.31157234 |
| ENSMUSG00000041133 | -0.4666529 | 8.92077809 | 0.12781199 | 0.31071338 |
| ENSMUSG00000028018 | -0.4668026 | 5.56954014 | 0.13230077 | 0.31680029 |
| ENSMUSG00000021537 | -0.4668998 | 6.92026524 | 0.12930967 | 0.31259256 |
| ENSMUSG00000029670 | -0.4670074 | 5.32340804 | 0.13261192 | 0.31723313 |
| ENSMUSG00000029179 | -0.4670294 | 4.83935924 | 0.13534575 | 0.32097723 |
| ENSMUSG00000055184 | -0.4670727 | 4.77360114 | 0.13572154 | 0.32167497 |
| ENSMUSG00000014771 | -0.4670957 | 5.11126601 | 0.13353055 | 0.31830093 |
| ENSMUSG00000017376 | -0.4671475 | 5.53565575 | 0.13202857 | 0.31646945 |
| ENSMUSG00000056342 | -0.4672007 | 8.67896522 | 0.12756392 | 0.31034329 |
| ENSMUSG00000029446 | -0.4673283 | 4.40519307 | 0.13616426 | 0.32208715 |
| ENSMUSG00000038344 | -0.4675502 | 5.16536999 | 0.13389165 | 0.31872555 |
| ENSMUSG00000038056 | -0.4675875 | 6.75347634 | 0.1291162  | 0.31226487 |

|                    |            |            |            |            |
|--------------------|------------|------------|------------|------------|
| ENSMUSG00000027905 | -0.4677843 | 6.89855472 | 0.12860373 | 0.31186423 |
| ENSMUSG00000072847 | -0.4678067 | 2.95741029 | 0.16167565 | 0.35889465 |
| ENSMUSG00000055436 | -0.4678238 | 8.35826825 | 0.12710582 | 0.31004505 |
| ENSMUSG00000037533 | -0.4678526 | 7.80055603 | 0.12749721 | 0.31034329 |
| ENSMUSG00000028300 | -0.4681392 | 5.21194959 | 0.13333096 | 0.31810644 |
| ENSMUSG00000045273 | -0.4683118 | 4.83106902 | 0.13497398 | 0.32071894 |
| ENSMUSG00000019143 | -0.4683613 | 5.59714441 | 0.13098596 | 0.31492337 |
| ENSMUSG00000029471 | -0.4686539 | 4.77422449 | 0.13360741 | 0.31835229 |
| ENSMUSG00000025134 | -0.4686737 | 6.90799733 | 0.12740499 | 0.31034329 |
| ENSMUSG00000087174 | -0.4692192 | 4.19362476 | 0.13709332 | 0.32356686 |
| ENSMUSG00000046223 | -0.469296  | 1.93135919 | 0.18114008 | 0.38468189 |
| ENSMUSG00000089911 | -0.4693095 | 6.71301895 | 0.1275157  | 0.31034329 |
| ENSMUSG00000009628 | -0.4693949 | 3.82227403 | 0.14433831 | 0.33402419 |
| ENSMUSG00000037369 | -0.4696889 | 6.72545831 | 0.12689221 | 0.30980431 |
| ENSMUSG00000037851 | -0.4697261 | 8.63219707 | 0.12543648 | 0.30689653 |
| ENSMUSG00000035351 | -0.4697436 | 5.96660823 | 0.12872024 | 0.31186423 |
| ENSMUSG00000049800 | -0.4697831 | 5.10303047 | 0.13166146 | 0.31598088 |
| ENSMUSG00000047221 | -0.4698778 | 4.73552857 | 0.13385173 | 0.31871429 |
| ENSMUSG00000068015 | -0.4701834 | 5.08160694 | 0.13139811 | 0.31558957 |
| ENSMUSG00000032097 | -0.4702167 | 9.89588158 | 0.12472517 | 0.30624686 |
| ENSMUSG00000042447 | -0.4702872 | 6.34352779 | 0.12762033 | 0.31038737 |
| ENSMUSG00000039197 | -0.4704812 | 6.05464761 | 0.1275414  | 0.31034329 |
| ENSMUSG00000041440 | -0.4706322 | 3.41530665 | 0.14574272 | 0.336159   |
| ENSMUSG00000021024 | -0.4707434 | 8.49665065 | 0.12472306 | 0.30624686 |
| ENSMUSG00000034333 | -0.4708066 | 5.775136   | 0.12860245 | 0.31186423 |
| ENSMUSG00000048007 | -0.4708536 | 2.92604039 | 0.15905585 | 0.35494474 |
| ENSMUSG00000029027 | -0.4708622 | 3.86943523 | 0.13883545 | 0.32569099 |
| ENSMUSG00000027324 | -0.4708641 | 4.07631618 | 0.13667235 | 0.32293484 |
| ENSMUSG00000019878 | -0.4709041 | 4.78835853 | 0.13279983 | 0.3176122  |
| ENSMUSG00000015806 | -0.4710226 | 6.11294995 | 0.12718327 | 0.3100937  |
| ENSMUSG00000030016 | -0.4711197 | 8.14650358 | 0.12469149 | 0.30624686 |
| ENSMUSG00000035125 | -0.4712584 | 5.12122041 | 0.13097184 | 0.31492337 |
| ENSMUSG00000022781 | -0.4714333 | 8.73009678 | 0.12406179 | 0.30552828 |
| ENSMUSG00000040351 | -0.4719861 | 6.86925174 | 0.12521239 | 0.30672833 |
| ENSMUSG00000097277 | -0.4720289 | 1.71843203 | 0.17860234 | 0.38132006 |
| ENSMUSG00000017861 | -0.4720306 | 6.45581959 | 0.1248689  | 0.30628842 |
| ENSMUSG00000001158 | -0.4721286 | 5.73099563 | 0.12736077 | 0.31034329 |
| ENSMUSG00000027185 | -0.4721643 | 7.11803634 | 0.1244071  | 0.30567468 |
| ENSMUSG00000020362 | -0.4727394 | 8.85747084 | 0.12301677 | 0.30419924 |
| ENSMUSG00000033075 | -0.4728124 | 6.98412547 | 0.12428249 | 0.30567468 |
| ENSMUSG00000037486 | -0.4729155 | 7.44194055 | 0.1237912  | 0.30527405 |
| ENSMUSG00000020629 | -0.4729924 | 5.88818386 | 0.1263339  | 0.30879075 |
| ENSMUSG00000030254 | -0.4730419 | 6.33281557 | 0.12531525 | 0.30678766 |

|                    |            |            |            |            |
|--------------------|------------|------------|------------|------------|
| ENSMUSG00000032512 | -0.4733651 | 6.32243545 | 0.12482596 | 0.30628842 |
| ENSMUSG00000021607 | -0.4733715 | 5.55360066 | 0.12713693 | 0.31005079 |
| ENSMUSG00000024045 | -0.473449  | 7.59085928 | 0.12308345 | 0.3042246  |
| ENSMUSG00000038005 | -0.4734741 | 6.7453806  | 0.12420662 | 0.30566959 |
| ENSMUSG00000022300 | -0.4735471 | 7.129796   | 0.12361295 | 0.30497417 |
| ENSMUSG00000027959 | -0.4735574 | 5.65206455 | 0.12688046 | 0.30980431 |
| ENSMUSG00000035575 | -0.473811  | 7.79982769 | 0.12267478 | 0.30356237 |
| ENSMUSG00000038206 | -0.4739723 | 4.71718281 | 0.13107402 | 0.31502166 |
| ENSMUSG00000036309 | -0.474078  | 7.62293402 | 0.12266382 | 0.30356237 |
| ENSMUSG00000021733 | -0.4741244 | 8.025617   | 0.12234758 | 0.30323979 |
| ENSMUSG00000093904 | -0.4742125 | 7.36471086 | 0.12264138 | 0.30356237 |
| ENSMUSG00000026333 | -0.4743872 | 4.21344263 | 0.13441019 | 0.31976164 |
| ENSMUSG00000016409 | -0.4745014 | 5.92908356 | 0.12523413 | 0.30672833 |
| ENSMUSG00000027555 | -0.4745223 | 6.81822025 | 0.1232546  | 0.30450803 |
| ENSMUSG00000025085 | -0.4745937 | 9.23947967 | 0.12140842 | 0.30174426 |
| ENSMUSG00000021258 | -0.4746995 | 6.68820267 | 0.12317048 | 0.30436996 |
| ENSMUSG00000027679 | -0.4747798 | 4.99771995 | 0.12830002 | 0.31147848 |
| ENSMUSG00000022023 | -0.4748301 | 6.23061436 | 0.1240359  | 0.30552828 |
| ENSMUSG00000040782 | -0.4754229 | 6.59295569 | 0.12307852 | 0.3042246  |
| ENSMUSG00000038095 | -0.4756543 | 8.487099   | 0.1208818  | 0.30101317 |
| ENSMUSG00000026349 | -0.4759425 | 6.93119539 | 0.12192131 | 0.30250623 |
| ENSMUSG00000025903 | -0.4760636 | 6.8184617  | 0.12199172 | 0.30256641 |
| ENSMUSG00000035623 | -0.4763096 | 6.8476293  | 0.12185915 | 0.30244629 |
| ENSMUSG00000052446 | -0.4763473 | 6.06335369 | 0.12345273 | 0.30471829 |
| ENSMUSG00000034480 | -0.4766248 | 5.55073544 | 0.12522883 | 0.30672833 |
| ENSMUSG00000027665 | -0.4767629 | 7.19489109 | 0.12108696 | 0.30129251 |
| ENSMUSG00000021413 | -0.4768439 | 8.07336382 | 0.12016051 | 0.29968984 |
| ENSMUSG00000030127 | -0.4770595 | 5.20003714 | 0.12403054 | 0.30552828 |
| ENSMUSG00000034445 | -0.477128  | 5.13643386 | 0.12484908 | 0.30628842 |
| ENSMUSG00000025613 | -0.4771406 | 10.0810515 | 0.11925774 | 0.29832416 |
| ENSMUSG00000058064 | -0.4772884 | 1.83223639 | 0.20352935 | 0.41342259 |
| ENSMUSG00000036087 | -0.4773909 | 6.73545338 | 0.12115367 | 0.30138896 |
| ENSMUSG00000036022 | -0.4774057 | 5.23556162 | 0.12529796 | 0.30678766 |
| ENSMUSG00000048696 | -0.4775718 | 2.15371675 | 0.16386977 | 0.36205113 |
| ENSMUSG00000031756 | -0.4778469 | 5.51277574 | 0.12368513 | 0.30508243 |
| ENSMUSG00000037474 | -0.4783331 | 7.50438086 | 0.11940926 | 0.29863391 |
| ENSMUSG00000024991 | -0.4784776 | 10.5003084 | 0.1181611  | 0.29665973 |
| ENSMUSG00000041716 | -0.4786382 | 2.75470325 | 0.15444382 | 0.34850852 |
| ENSMUSG00000074781 | -0.4789652 | 7.97683475 | 0.11859394 | 0.29735342 |
| ENSMUSG00000024592 | -0.4793712 | 4.50271913 | 0.12973025 | 0.31318804 |
| ENSMUSG00000042043 | -0.4795126 | 5.91871596 | 0.12128955 | 0.30158785 |
| ENSMUSG00000038126 | -0.4795126 | 6.19209358 | 0.12051105 | 0.30048349 |
| ENSMUSG00000020380 | -0.4795174 | 7.25745488 | 0.11879522 | 0.29759183 |

|                    |            |            |            |            |
|--------------------|------------|------------|------------|------------|
| ENSMUSG00000031585 | -0.4797255 | 6.49746674 | 0.11973238 | 0.29906995 |
| ENSMUSG00000035958 | -0.4800146 | 5.9400112  | 0.12119084 | 0.30141191 |
| ENSMUSG00000027829 | -0.4800443 | 7.51660623 | 0.11817973 | 0.29665973 |
| ENSMUSG00000025986 | -0.4800653 | 5.82885553 | 0.12088888 | 0.30101317 |
| ENSMUSG00000028668 | -0.4800697 | 8.48075508 | 0.11740009 | 0.29535676 |
| ENSMUSG00000053985 | -0.4804977 | 1.05500152 | 0.23361317 | 0.44829845 |
| ENSMUSG00000035021 | -0.4805242 | 9.03112073 | 0.11690041 | 0.29447653 |
| ENSMUSG00000044221 | -0.4805247 | 7.29786338 | 0.11799156 | 0.29646341 |
| ENSMUSG00000028540 | -0.4806595 | 3.92432098 | 0.12815965 | 0.31126168 |
| ENSMUSG00000034883 | -0.4807431 | 4.09513098 | 0.13185216 | 0.31611688 |
| ENSMUSG00000041685 | -0.4808895 | 4.85225505 | 0.1250347  | 0.30644869 |
| ENSMUSG00000079509 | -0.4813412 | 6.85227333 | 0.11805247 | 0.29654737 |
| ENSMUSG00000040481 | -0.4813512 | 7.90015156 | 0.11681697 | 0.29440389 |
| ENSMUSG00000037286 | -0.4814357 | 7.85237688 | 0.11687089 | 0.29447096 |
| ENSMUSG00000024241 | -0.481447  | 6.42886163 | 0.11856881 | 0.29735342 |
| ENSMUSG00000054648 | -0.4816664 | 5.75330331 | 0.1199829  | 0.29944355 |
| ENSMUSG00000028413 | -0.4818214 | 8.79277571 | 0.11599986 | 0.29337301 |
| ENSMUSG00000051355 | -0.4822028 | 4.65037161 | 0.12437272 | 0.30567468 |
| ENSMUSG00000061838 | -0.4823532 | 6.71603332 | 0.11730639 | 0.29522337 |
| ENSMUSG00000025817 | -0.4824    | 7.24310792 | 0.11649466 | 0.2939018  |
| ENSMUSG00000040774 | -0.4825525 | 6.04284785 | 0.11898225 | 0.29791144 |
| ENSMUSG00000004897 | -0.4826874 | 8.65699317 | 0.11529333 | 0.29234658 |
| ENSMUSG00000041852 | -0.483038  | 7.19407246 | 0.11611532 | 0.2933898  |
| ENSMUSG00000029056 | -0.4830958 | 4.9045029  | 0.12087214 | 0.30101317 |
| ENSMUSG00000031197 | -0.4831441 | 7.12064669 | 0.11629626 | 0.29363077 |
| ENSMUSG00000003847 | -0.4833534 | 6.96760367 | 0.1164164  | 0.29380634 |
| ENSMUSG00000059486 | -0.4834655 | 6.16114189 | 0.11778673 | 0.29607161 |
| ENSMUSG00000032621 | -0.4836843 | 6.96434244 | 0.11590556 | 0.29324035 |
| ENSMUSG00000028869 | -0.4837894 | 7.24240553 | 0.11539587 | 0.2925315  |
| ENSMUSG00000021557 | -0.4840502 | 5.98169964 | 0.11779479 | 0.29607161 |
| ENSMUSG00000049606 | -0.4840616 | 6.17213503 | 0.11723675 | 0.29511698 |
| ENSMUSG00000028576 | -0.4843583 | 3.85740754 | 0.13177107 | 0.31602683 |
| ENSMUSG00000021018 | -0.484526  | 5.22427355 | 0.11879941 | 0.29759183 |
| ENSMUSG00000073563 | -0.484559  | 6.56876967 | 0.11607646 | 0.29338421 |
| ENSMUSG00000040550 | -0.4848115 | 7.15386319 | 0.11490394 | 0.29152784 |
| ENSMUSG00000020580 | -0.4849209 | 8.17312361 | 0.11401712 | 0.2899073  |
| ENSMUSG00000032400 | -0.4852117 | 6.85062172 | 0.11491885 | 0.29152784 |
| ENSMUSG00000022200 | -0.4853894 | 7.10592007 | 0.11453626 | 0.29069405 |
| ENSMUSG00000067430 | -0.4855759 | 3.45350742 | 0.13499103 | 0.32071894 |
| ENSMUSG00000042660 | -0.4856821 | 5.261007   | 0.11721868 | 0.29511698 |
| ENSMUSG00000039585 | -0.4859811 | 5.23719335 | 0.11921507 | 0.29828662 |
| ENSMUSG00000019732 | -0.4860569 | 1.03490643 | 0.24511445 | 0.4627651  |
| ENSMUSG00000073775 | -0.4861369 | 5.20172243 | 0.1186323  | 0.29738046 |



|                    |            |            |            |            |
|--------------------|------------|------------|------------|------------|
| ENSMUSG00000028693 | -0.4861457 | 8.97007147 | 0.11271477 | 0.28776423 |
| ENSMUSG00000037104 | -0.4861511 | 2.73606756 | 0.14514868 | 0.33512917 |
| ENSMUSG00000038544 | -0.4862396 | 6.14171237 | 0.11551767 | 0.29274488 |
| ENSMUSG00000073792 | -0.4865193 | 4.96660914 | 0.11967544 | 0.29902222 |
| ENSMUSG00000047735 | -0.4866648 | 8.68872499 | 0.11253061 | 0.28743014 |
| ENSMUSG00000062627 | -0.487088  | 6.5938842  | 0.11403809 | 0.2899073  |
| ENSMUSG00000006732 | -0.4871355 | 5.17911189 | 0.11631961 | 0.29363077 |
| ENSMUSG00000020124 | -0.4871402 | 8.15609009 | 0.11237149 | 0.28722781 |
| ENSMUSG00000002797 | -0.4875964 | 3.9840995  | 0.12491251 | 0.30628842 |
| ENSMUSG00000034321 | -0.4878205 | 5.5553005  | 0.11572684 | 0.29302611 |
| ENSMUSG00000023066 | -0.4879669 | 5.68511867 | 0.11586508 | 0.29323845 |
| ENSMUSG00000025246 | -0.4882473 | 7.65948424 | 0.1118848  | 0.28639109 |
| ENSMUSG00000038495 | -0.4885698 | 6.01745368 | 0.1137464  | 0.2894387  |
| ENSMUSG00000064037 | -0.4888279 | 6.03247673 | 0.11362912 | 0.2892085  |
| ENSMUSG00000051223 | -0.4889661 | 9.76812532 | 0.11046284 | 0.28411542 |
| ENSMUSG00000031068 | -0.4889818 | 7.39360678 | 0.11159225 | 0.28598166 |
| ENSMUSG00000072501 | -0.4890502 | 7.17000278 | 0.11178326 | 0.28626708 |
| ENSMUSG00000074476 | -0.4891753 | 4.40823217 | 0.11975    | 0.29906995 |
| ENSMUSG00000014873 | -0.4896715 | 5.76144533 | 0.11308996 | 0.28817632 |
| ENSMUSG00000063358 | -0.4896784 | 8.76886109 | 0.11023006 | 0.28383976 |
| ENSMUSG00000033352 | -0.4897093 | 7.07513022 | 0.11139468 | 0.28577832 |
| ENSMUSG00000055760 | -0.4898733 | 5.6085498  | 0.11400946 | 0.2899073  |
| ENSMUSG00000040204 | -0.4898836 | 9.04226783 | 0.10996208 | 0.28367657 |
| ENSMUSG00000026707 | -0.490355  | 3.76370065 | 0.12692158 | 0.30980588 |
| ENSMUSG00000003131 | -0.490644  | 7.58898097 | 0.11017151 | 0.28382456 |
| ENSMUSG00000024855 | -0.4907536 | 5.11091821 | 0.11447357 | 0.29062041 |
| ENSMUSG00000029209 | -0.4912169 | 4.06243971 | 0.12160387 | 0.30215887 |
| ENSMUSG00000071359 | -0.491773  | 5.59535988 | 0.11305864 | 0.28816459 |
| ENSMUSG00000029840 | -0.4918542 | 8.94409069 | 0.10860036 | 0.28145789 |
| ENSMUSG00000027203 | -0.4919409 | 8.08115886 | 0.10885449 | 0.28184557 |
| ENSMUSG00000041658 | -0.4919454 | 3.25348002 | 0.12901101 | 0.31217221 |
| ENSMUSG00000026960 | -0.4922135 | 5.51624853 | 0.11297523 | 0.28808817 |
| ENSMUSG00000097039 | -0.4922294 | 3.88721009 | 0.12242579 | 0.30333842 |
| ENSMUSG00000034903 | -0.4923902 | 5.80813153 | 0.11171843 | 0.28616902 |
| ENSMUSG00000026341 | -0.4924864 | 10.2218168 | 0.10786643 | 0.28023874 |
| ENSMUSG00000021932 | -0.4929033 | 6.17632061 | 0.11046884 | 0.28411542 |
| ENSMUSG00000033863 | -0.4930675 | 1.21250468 | 0.19781683 | 0.40625723 |
| ENSMUSG00000023940 | -0.4931214 | 6.57337754 | 0.10968576 | 0.28311422 |
| ENSMUSG00000021815 | -0.4934464 | 1.67939272 | 0.17858089 | 0.38132006 |
| ENSMUSG00000036208 | -0.493506  | 5.6417084  | 0.11130278 | 0.28564713 |
| ENSMUSG00000058793 | -0.4935255 | 7.14569991 | 0.10846651 | 0.28117857 |
| ENSMUSG00000015002 | -0.4943587 | 7.62793813 | 0.10752531 | 0.28001763 |
| ENSMUSG00000020132 | -0.4944599 | 6.39795153 | 0.10896654 | 0.28200027 |

|                    |            |            |            |            |
|--------------------|------------|------------|------------|------------|
| ENSMUSG00000033105 | -0.4947077 | 5.91819706 | 0.10915664 | 0.28228903 |
| ENSMUSG00000019813 | -0.4950453 | 4.77207705 | 0.11426713 | 0.29028426 |
| ENSMUSG00000049090 | -0.4951325 | 4.98040124 | 0.11280921 | 0.28786902 |
| ENSMUSG00000020919 | -0.4953774 | 5.61998116 | 0.10950356 | 0.28284705 |
| ENSMUSG00000000365 | -0.4955437 | 1.55382325 | 0.20141414 | 0.41121735 |
| ENSMUSG00000004018 | -0.4955578 | 5.09561345 | 0.11248611 | 0.28738456 |
| ENSMUSG00000033285 | -0.4960358 | 7.67200957 | 0.1062843  | 0.27752297 |
| ENSMUSG00000031949 | -0.4965728 | 3.75625255 | 0.11876908 | 0.29759183 |
| ENSMUSG00000041238 | -0.4965984 | 6.52584542 | 0.10742655 | 0.2798972  |
| ENSMUSG00000036698 | -0.4970529 | 7.26481101 | 0.10588311 | 0.2766764  |
| ENSMUSG00000021374 | -0.4972213 | 8.90834441 | 0.10483324 | 0.27506609 |
| ENSMUSG00000034248 | -0.4972537 | 6.00784804 | 0.10761311 | 0.28002618 |
| ENSMUSG00000037149 | -0.4976011 | 8.76253485 | 0.1045894  | 0.27462676 |
| ENSMUSG00000028033 | -0.497764  | 5.02659518 | 0.11066789 | 0.28454855 |
| ENSMUSG00000025266 | -0.4977769 | 6.98280878 | 0.10573296 | 0.276418   |
| ENSMUSG00000047260 | -0.4978731 | 5.53796763 | 0.10829435 | 0.28093487 |
| ENSMUSG00000030671 | -0.4985651 | 6.79770183 | 0.10558383 | 0.27616202 |
| ENSMUSG00000039967 | -0.498609  | 6.91900572 | 0.10543073 | 0.27602938 |
| ENSMUSG00000039748 | -0.4986823 | 6.25949678 | 0.10595226 | 0.27679    |
| ENSMUSG00000095990 | -0.4987704 | 2.07155487 | 0.16534931 | 0.36449857 |
| ENSMUSG00000004980 | -0.4999347 | 11.2375583 | 0.10256376 | 0.27109584 |
| ENSMUSG00000032030 | -0.5000128 | 7.06236128 | 0.10421947 | 0.27393364 |
| ENSMUSG00000023915 | -0.5000855 | 3.30648123 | 0.12257366 | 0.30352109 |
| ENSMUSG00000020706 | -0.5005623 | 8.50962991 | 0.10256593 | 0.27109584 |
| ENSMUSG00000029141 | -0.5007884 | 6.01646353 | 0.10516526 | 0.27546811 |
| ENSMUSG00000038174 | -0.5008377 | 5.30150989 | 0.10787009 | 0.28023874 |
| ENSMUSG00000025758 | -0.5008542 | 7.13163726 | 0.1034772  | 0.27263574 |
| ENSMUSG00000047757 | -0.5009826 | 5.30151678 | 0.10763936 | 0.28002618 |
| ENSMUSG00000021431 | -0.5010946 | 5.18156741 | 0.10782624 | 0.28023874 |
| ENSMUSG00000053536 | -0.5012503 | 6.46617297 | 0.1040333  | 0.27363295 |
| ENSMUSG00000038766 | -0.5014491 | 8.3690942  | 0.10209313 | 0.26997848 |
| ENSMUSG00000094870 | -0.5017787 | 6.80282345 | 0.10335008 | 0.27243395 |
| ENSMUSG00000026356 | -0.5019233 | 8.02204358 | 0.10197306 | 0.26972713 |
| ENSMUSG00000022858 | -0.5023104 | 8.46470954 | 0.10150085 | 0.26898551 |
| ENSMUSG00000037296 | -0.5023387 | 4.5221849  | 0.10922634 | 0.28240154 |
| ENSMUSG00000068134 | -0.5024204 | 5.28138878 | 0.10688992 | 0.27876685 |
| ENSMUSG00000041058 | -0.502555  | 5.57467169 | 0.10561501 | 0.27617659 |
| ENSMUSG00000019797 | -0.5027022 | 3.71278151 | 0.11566729 | 0.29301279 |
| ENSMUSG00000040648 | -0.5028749 | 7.35122959 | 0.10194256 | 0.26972713 |
| ENSMUSG00000075511 | -0.5032888 | 2.72674166 | 0.13875962 | 0.32567207 |
| ENSMUSG00000018848 | -0.5034891 | 8.31401696 | 0.10073814 | 0.26747452 |
| ENSMUSG00000042364 | -0.5034893 | 4.23924116 | 0.11107197 | 0.28519051 |
| ENSMUSG00000016984 | -0.5036197 | 5.88752227 | 0.10390764 | 0.27343582 |

|                    |            |            |            |            |
|--------------------|------------|------------|------------|------------|
| ENSMUSG00000062373 | -0.5038325 | 4.3697804  | 0.11042396 | 0.28411542 |
| ENSMUSG00000073538 | -0.5040349 | 2.56190789 | 0.13084689 | 0.31492337 |
| ENSMUSG00000068882 | -0.5041948 | 9.14867709 | 0.1000048  | 0.26621864 |
| ENSMUSG00000027395 | -0.5043517 | 6.94128891 | 0.10103679 | 0.26810549 |
| ENSMUSG00000004319 | -0.5044959 | 7.88549647 | 0.1003667  | 0.26691848 |
| ENSMUSG00000078502 | -0.504548  | 3.83056409 | 0.11756351 | 0.29566346 |
| ENSMUSG00000036432 | -0.5045646 | 6.59341926 | 0.1014468  | 0.26896731 |
| ENSMUSG00000028621 | -0.5045882 | 3.29264549 | 0.1191082  | 0.29815756 |
| ENSMUSG00000026097 | -0.5046163 | 4.78904142 | 0.10834245 | 0.28099206 |
| ENSMUSG00000028572 | -0.5046233 | 6.80650064 | 0.10133556 | 0.26876603 |
| ENSMUSG00000018481 | -0.5051241 | 7.55194442 | 0.10015159 | 0.26641213 |
| ENSMUSG00000041975 | -0.5052052 | 3.40541498 | 0.11988881 | 0.29934728 |
| ENSMUSG00000003955 | -0.5052692 | 5.32141645 | 0.10382783 | 0.27329249 |
| ENSMUSG00000054405 | -0.5054252 | 7.54852703 | 0.09986012 | 0.26601464 |
| ENSMUSG00000000561 | -0.5055277 | 7.60712282 | 0.09974195 | 0.26585318 |
| ENSMUSG00000029777 | -0.5056877 | 8.62035979 | 0.09910703 | 0.26507196 |
| ENSMUSG00000023068 | -0.5059873 | 7.98064662 | 0.09928993 | 0.26511467 |
| ENSMUSG00000068154 | -0.506111  | 3.86486168 | 0.11569441 | 0.29301279 |
| ENSMUSG00000026999 | -0.5061959 | 5.22323217 | 0.10422382 | 0.27393364 |
| ENSMUSG00000037400 | -0.5064537 | 8.03418488 | 0.09898857 | 0.26495229 |
| ENSMUSG00000030180 | -0.5067941 | 7.70734343 | 0.09897319 | 0.26495229 |
| ENSMUSG00000025616 | -0.5068484 | 7.29347526 | 0.09920327 | 0.26511467 |
| ENSMUSG00000015023 | -0.506992  | 6.63474805 | 0.0997689  | 0.26585318 |
| ENSMUSG00000020532 | -0.5070729 | 7.60396877 | 0.09876537 | 0.26468333 |
| ENSMUSG00000036499 | -0.5071401 | 6.52302328 | 0.10003298 | 0.26622795 |
| ENSMUSG00000078784 | -0.5071988 | 5.80737994 | 0.10151809 | 0.26898551 |
| ENSMUSG00000057337 | -0.5073388 | 7.09726264 | 0.09907628 | 0.26505548 |
| ENSMUSG00000049225 | -0.5074651 | 3.32451861 | 0.12244363 | 0.30333842 |
| ENSMUSG00000061374 | -0.50757   | 5.23257446 | 0.10260167 | 0.27112384 |
| ENSMUSG00000029208 | -0.5078818 | 6.11420572 | 0.10046947 | 0.26712593 |
| ENSMUSG00000062929 | -0.5080842 | 4.47973469 | 0.10765843 | 0.28002618 |
| ENSMUSG00000037640 | -0.5080878 | 5.13274231 | 0.1040323  | 0.27363295 |
| ENSMUSG00000029089 | -0.5081563 | 3.78593767 | 0.11339899 | 0.28882729 |
| ENSMUSG00000026568 | -0.5083926 | 4.50329104 | 0.10578193 | 0.27647899 |
| ENSMUSG00000058446 | -0.5088428 | 6.40191038 | 0.0992791  | 0.26511467 |
| ENSMUSG00000031107 | -0.5090311 | 4.80540975 | 0.10380225 | 0.27329249 |
| ENSMUSG00000029920 | -0.5091651 | 6.82080891 | 0.09831422 | 0.26399915 |
| ENSMUSG00000046707 | -0.5092961 | 6.38534371 | 0.0986201  | 0.26462283 |
| ENSMUSG00000044807 | -0.5095342 | 2.78672135 | 0.12968761 | 0.31315521 |
| ENSMUSG00000025785 | -0.5101224 | 5.61045062 | 0.09906753 | 0.26505548 |
| ENSMUSG00000079108 | -0.510205  | 5.71892108 | 0.09987883 | 0.26601464 |
| ENSMUSG00000052407 | -0.5103019 | 2.62979491 | 0.13522148 | 0.32097011 |
| ENSMUSG00000028035 | -0.5103756 | 4.36213575 | 0.10742716 | 0.2798972  |

|                    |            |            |            |            |
|--------------------|------------|------------|------------|------------|
| ENSMUSG00000026313 | -0.5104437 | 3.87821205 | 0.10777929 | 0.28023874 |
| ENSMUSG00000046785 | -0.5104713 | 6.36844558 | 0.09811064 | 0.26369827 |
| ENSMUSG00000033707 | -0.5105742 | 1.31525345 | 0.16722765 | 0.3670635  |
| ENSMUSG00000037826 | -0.5105908 | 5.72149204 | 0.09992619 | 0.26607508 |
| ENSMUSG00000053113 | -0.510624  | 3.14094946 | 0.11399086 | 0.2899073  |
| ENSMUSG00000050017 | -0.5106403 | 7.21783155 | 0.09671862 | 0.26084958 |
| ENSMUSG00000042772 | -0.5106413 | 8.13983385 | 0.09609325 | 0.26021681 |
| ENSMUSG00000064262 | -0.5108739 | 7.79675638 | 0.09614776 | 0.26021681 |
| ENSMUSG00000011960 | -0.5108825 | 7.63337724 | 0.09632532 | 0.26025491 |
| ENSMUSG00000025531 | -0.5109901 | 6.19056635 | 0.09840688 | 0.26418216 |
| ENSMUSG00000099881 | -0.5110065 | 2.87097337 | 0.12876684 | 0.31186423 |
| ENSMUSG00000040429 | -0.5111125 | 2.58662653 | 0.12902938 | 0.31217221 |
| ENSMUSG00000038024 | -0.5114208 | 5.87854933 | 0.09871276 | 0.26468333 |
| ENSMUSG00000026737 | -0.5118184 | 6.17760102 | 0.09758405 | 0.26256146 |
| ENSMUSG00000052676 | -0.5125242 | 3.66355528 | 0.11408754 | 0.28996465 |
| ENSMUSG00000032244 | -0.5128409 | 7.35451014 | 0.09526768 | 0.2589013  |
| ENSMUSG00000037808 | -0.5133182 | 6.31865009 | 0.0963735  | 0.26027702 |
| ENSMUSG00000025869 | -0.5133771 | 6.48982784 | 0.09548953 | 0.25918615 |
| ENSMUSG00000070732 | -0.5135476 | 2.53383318 | 0.14401508 | 0.33348906 |
| ENSMUSG00000026896 | -0.5136837 | 7.82795638 | 0.09438852 | 0.25762738 |
| ENSMUSG00000029247 | -0.5137498 | 9.12274483 | 0.09375124 | 0.25647219 |
| ENSMUSG00000022752 | -0.5137961 | 8.56730114 | 0.09393889 | 0.25679012 |
| ENSMUSG00000024976 | -0.5139791 | 6.47680263 | 0.09566924 | 0.25941592 |
| ENSMUSG00000028187 | -0.5140115 | 6.12280524 | 0.09645507 | 0.26035125 |
| ENSMUSG00000039634 | -0.5140846 | 3.22404284 | 0.11618866 | 0.29343758 |
| ENSMUSG00000026643 | -0.5141949 | 6.21673138 | 0.09596557 | 0.26015404 |
| ENSMUSG00000015189 | -0.5144096 | 6.12435592 | 0.09628427 | 0.26025491 |
| ENSMUSG00000027770 | -0.5144775 | 7.62459872 | 0.09407404 | 0.25696416 |
| ENSMUSG00000030725 | -0.5145344 | 2.49477237 | 0.12918841 | 0.31236947 |
| ENSMUSG00000026615 | -0.5146019 | 9.63006258 | 0.09309273 | 0.25538337 |
| ENSMUSG00000020290 | -0.5146227 | 9.79029398 | 0.09308101 | 0.25538337 |
| ENSMUSG00000016018 | -0.5148879 | 8.20057275 | 0.09339659 | 0.25582648 |
| ENSMUSG00000047466 | -0.5155039 | 5.33214444 | 0.0972745  | 0.26199007 |
| ENSMUSG00000058503 | -0.5155247 | 5.51922754 | 0.09686137 | 0.26113825 |
| ENSMUSG00000027347 | -0.5159957 | 6.33750043 | 0.094881   | 0.25825259 |
| ENSMUSG00000015749 | -0.5161082 | 8.67730399 | 0.09236297 | 0.25370408 |
| ENSMUSG00000028423 | -0.5161087 | 7.77132746 | 0.09277291 | 0.25470036 |
| ENSMUSG00000024238 | -0.5164749 | 6.1053603  | 0.09466388 | 0.25792224 |
| ENSMUSG00000022019 | -0.5171118 | 4.71296056 | 0.09927973 | 0.26511467 |
| ENSMUSG00000063894 | -0.5171342 | 5.66420946 | 0.09546873 | 0.25918615 |
| ENSMUSG00000028312 | -0.5173098 | 9.3088186  | 0.09148068 | 0.25218189 |
| ENSMUSG00000021938 | -0.5173456 | 6.47127461 | 0.09335312 | 0.25582498 |
| ENSMUSG00000063049 | -0.5174034 | 4.11855691 | 0.10462957 | 0.27466536 |

|                    |            |            |            |            |
|--------------------|------------|------------|------------|------------|
| ENSMUSG00000041846 | -0.5174887 | 7.97668893 | 0.09189088 | 0.2531776  |
| ENSMUSG00000052033 | -0.5175845 | 5.78248473 | 0.09472112 | 0.25794762 |
| ENSMUSG00000046516 | -0.5176322 | 4.56169812 | 0.09828334 | 0.26398194 |
| ENSMUSG00000032002 | -0.5182586 | 7.06951506 | 0.09221033 | 0.25341392 |
| ENSMUSG00000022601 | -0.5185443 | 6.88240749 | 0.09216244 | 0.25334863 |
| ENSMUSG00000041079 | -0.5191077 | 4.39112902 | 0.09946944 | 0.26547767 |
| ENSMUSG00000019782 | -0.5193796 | 6.32650245 | 0.09236076 | 0.25370408 |
| ENSMUSG00000032393 | -0.519652  | 7.89004715 | 0.09057945 | 0.25052802 |
| ENSMUSG00000035898 | -0.5198179 | 6.94294291 | 0.09140201 | 0.25215638 |
| ENSMUSG00000034303 | -0.5202104 | 4.31398885 | 0.10050993 | 0.26716762 |
| ENSMUSG00000060149 | -0.5203379 | 4.59106263 | 0.09872564 | 0.26468333 |
| ENSMUSG00000079658 | -0.5204687 | 6.96412773 | 0.09086803 | 0.25119735 |
| ENSMUSG00000005968 | -0.5206584 | 1.93768422 | 0.13593067 | 0.32178535 |
| ENSMUSG00000038025 | -0.5207165 | 5.13947289 | 0.0939729  | 0.25681798 |
| ENSMUSG00000025059 | -0.5207192 | 5.56828445 | 0.09342401 | 0.2558366  |
| ENSMUSG00000036109 | -0.521069  | 5.56848259 | 0.09321837 | 0.25559798 |
| ENSMUSG00000042978 | -0.5211547 | 4.60107718 | 0.09509517 | 0.25863967 |
| ENSMUSG00000085438 | -0.5214075 | 8.17676423 | 0.08935293 | 0.24783488 |
| ENSMUSG00000022701 | -0.5216257 | 3.5722354  | 0.10727404 | 0.27963337 |
| ENSMUSG00000031562 | -0.5218238 | 4.63298662 | 0.09620784 | 0.26021681 |
| ENSMUSG00000021243 | -0.5221722 | 6.13507908 | 0.09098581 | 0.25131211 |
| ENSMUSG00000034544 | -0.5228352 | 5.00548809 | 0.09387328 | 0.25667582 |
| ENSMUSG00000069769 | -0.5228928 | 6.56326443 | 0.08970298 | 0.24848624 |
| ENSMUSG00000031245 | -0.522896  | 6.51814489 | 0.08993071 | 0.2490531  |
| ENSMUSG00000026655 | -0.5228979 | 8.25931062 | 0.08840633 | 0.24596847 |
| ENSMUSG00000040250 | -0.5229507 | 6.72696997 | 0.08958641 | 0.24829089 |
| ENSMUSG00000051316 | -0.5229754 | 5.0310748  | 0.0938573  | 0.25667582 |
| ENSMUSG00000078616 | -0.5229771 | 3.62852126 | 0.10716688 | 0.27942156 |
| ENSMUSG00000049658 | -0.5233351 | 7.69000237 | 0.08849232 | 0.24614423 |
| ENSMUSG00000019808 | -0.5237473 | 2.95720862 | 0.11195217 | 0.28649555 |
| ENSMUSG00000028820 | -0.5240129 | 9.89612505 | 0.08725388 | 0.24399441 |
| ENSMUSG00000029823 | -0.5245531 | 8.56023778 | 0.08727492 | 0.24399441 |
| ENSMUSG00000026596 | -0.5250971 | 6.26970332 | 0.08890318 | 0.24688361 |
| ENSMUSG00000039480 | -0.5251966 | 5.36552613 | 0.09137694 | 0.25215638 |
| ENSMUSG00000020166 | -0.5255026 | 7.67036848 | 0.08717698 | 0.24393267 |
| ENSMUSG00000007050 | -0.5255176 | 5.62048854 | 0.08947833 | 0.24805509 |
| ENSMUSG00000031155 | -0.5256445 | 7.6922466  | 0.08691719 | 0.24347856 |
| ENSMUSG00000078713 | -0.5257226 | 6.36346018 | 0.08824031 | 0.24563334 |
| ENSMUSG00000098905 | -0.5257235 | 4.4817953  | 0.0955124  | 0.25918615 |
| ENSMUSG00000029686 | -0.5257372 | 7.97934599 | 0.08684851 | 0.24347856 |
| ENSMUSG00000028394 | -0.5263804 | 6.32189583 | 0.08805923 | 0.24531924 |
| ENSMUSG00000040749 | -0.5264928 | 4.15130063 | 0.09660385 | 0.26063945 |
| ENSMUSG00000021273 | -0.5265891 | 6.25701108 | 0.08797161 | 0.24520181 |

|                    |            |            |            |            |
|--------------------|------------|------------|------------|------------|
| ENSMUSG00000022195 | -0.5266101 | 5.84046808 | 0.08886385 | 0.24685928 |
| ENSMUSG00000035356 | -0.5266294 | 6.33414542 | 0.0877508  | 0.24477617 |
| ENSMUSG00000079144 | -0.5267249 | 4.5665151  | 0.09470729 | 0.25794762 |
| ENSMUSG00000030304 | -0.52678   | 7.4669031  | 0.0865498  | 0.24325073 |
| ENSMUSG00000021131 | -0.5267844 | 7.19154268 | 0.08671907 | 0.24334594 |
| ENSMUSG00000028292 | -0.5269288 | 6.29394078 | 0.08785371 | 0.24499986 |
| ENSMUSG00000056537 | -0.5273937 | 8.41399073 | 0.08567262 | 0.24173038 |
| ENSMUSG00000011179 | -0.5274005 | 8.80929707 | 0.0854285  | 0.24135734 |
| ENSMUSG00000025609 | -0.5275782 | 7.09824302 | 0.08647073 | 0.24315516 |
| ENSMUSG00000033257 | -0.5277662 | 6.51664177 | 0.08688911 | 0.24347856 |
| ENSMUSG00000085028 | -0.5278607 | 3.03841081 | 0.10058398 | 0.26729857 |
| ENSMUSG00000060427 | -0.5278626 | 4.49998173 | 0.09296854 | 0.25517249 |
| ENSMUSG00000004642 | -0.5279193 | 8.0541879  | 0.08549152 | 0.24140889 |
| ENSMUSG00000027001 | -0.5281867 | 2.92690419 | 0.11085645 | 0.28485424 |
| ENSMUSG00000042507 | -0.5282889 | 5.98000175 | 0.08738533 | 0.24405088 |
| ENSMUSG00000020463 | -0.5294743 | 8.45068522 | 0.08444027 | 0.23969569 |
| ENSMUSG00000031982 | -0.5297563 | 2.68359587 | 0.11098189 | 0.28509497 |
| ENSMUSG00000042594 | -0.5298059 | 6.26686552 | 0.08598897 | 0.24232866 |
| ENSMUSG00000038608 | -0.5298732 | 10.5321567 | 0.08373344 | 0.23831654 |
| ENSMUSG00000046351 | -0.5299604 | 6.1911007  | 0.08643297 | 0.24315516 |
| ENSMUSG00000031984 | -0.5299907 | 5.9051051  | 0.08657637 | 0.24325514 |
| ENSMUSG00000021023 | -0.5301825 | 4.90180484 | 0.09000946 | 0.24920718 |
| ENSMUSG00000031568 | -0.5302845 | 5.87837242 | 0.08649325 | 0.24315516 |
| ENSMUSG00000034157 | -0.5304571 | 5.7067866  | 0.08646831 | 0.24315516 |
| ENSMUSG00000069094 | -0.5309964 | 5.88621163 | 0.08625949 | 0.24294133 |
| ENSMUSG00000098374 | -0.5311924 | 2.10257226 | 0.12554989 | 0.30707467 |
| ENSMUSG00000034518 | -0.5316383 | 6.00234861 | 0.08547101 | 0.24140889 |
| ENSMUSG00000027122 | -0.5317112 | 5.57673248 | 0.08664694 | 0.24333349 |
| ENSMUSG00000039068 | -0.5317982 | 7.60718134 | 0.08348083 | 0.23779585 |
| ENSMUSG00000068184 | -0.5320838 | 3.99765986 | 0.093125   | 0.25540693 |
| ENSMUSG00000090035 | -0.5325889 | 4.77189633 | 0.08967963 | 0.24848539 |
| ENSMUSG00000020069 | -0.5327504 | 5.78580206 | 0.08529829 | 0.2411305  |
| ENSMUSG00000026281 | -0.5328529 | 6.30324795 | 0.08418289 | 0.23909094 |
| ENSMUSG00000028053 | -0.5330514 | 7.09725772 | 0.08325103 | 0.23731935 |
| ENSMUSG00000027583 | -0.5331663 | 2.27980573 | 0.12435776 | 0.30567468 |
| ENSMUSG00000037857 | -0.5335111 | 7.65910936 | 0.08250672 | 0.23575848 |
| ENSMUSG00000066735 | -0.5336319 | 6.05331777 | 0.08456204 | 0.23985192 |
| ENSMUSG00000066568 | -0.5340722 | 7.98014129 | 0.08193707 | 0.23450355 |
| ENSMUSG00000049300 | -0.5341325 | 4.74132701 | 0.08883354 | 0.24683866 |
| ENSMUSG00000063884 | -0.5344265 | 7.61242179 | 0.08202528 | 0.2346937  |
| ENSMUSG00000063694 | -0.5345318 | 6.95864394 | 0.08237876 | 0.23551764 |
| ENSMUSG00000022765 | -0.5347182 | 6.75802927 | 0.08267861 | 0.23599949 |
| ENSMUSG00000056268 | -0.5350477 | 6.90202084 | 0.08232385 | 0.23542307 |

|                    |            |            |            |            |
|--------------------|------------|------------|------------|------------|
| ENSMUSG00000051705 | -0.535628  | 3.3607479  | 0.09965438 | 0.26581075 |
| ENSMUSG00000035234 | -0.5356498 | 4.89184018 | 0.08730823 | 0.24399441 |
| ENSMUSG00000033454 | -0.5357285 | 6.43991769 | 0.08254197 | 0.23579673 |
| ENSMUSG00000027823 | -0.5357414 | 8.06513013 | 0.08100503 | 0.23251483 |
| ENSMUSG00000024493 | -0.5359944 | 8.33114245 | 0.08066911 | 0.23198285 |
| ENSMUSG00000057236 | -0.5365891 | 9.36699823 | 0.08006372 | 0.23116656 |
| ENSMUSG00000028165 | -0.5366018 | 6.0214343  | 0.08280064 | 0.23628528 |
| ENSMUSG00000027384 | -0.5367944 | 3.96239455 | 0.09199303 | 0.25326485 |
| ENSMUSG00000047044 | -0.5368692 | 5.67015605 | 0.08346219 | 0.23779585 |
| ENSMUSG00000046139 | -0.5371082 | 6.88447513 | 0.08102906 | 0.23252192 |
| ENSMUSG00000054099 | -0.5374361 | 4.43421731 | 0.08867788 | 0.24659677 |
| ENSMUSG00000030967 | -0.5380017 | 5.72615793 | 0.0826648  | 0.23599949 |
| ENSMUSG00000023106 | -0.5381882 | 7.27102237 | 0.08009391 | 0.23119184 |
| ENSMUSG00000033054 | -0.5384075 | 7.08514548 | 0.08024912 | 0.23129658 |
| ENSMUSG00000005893 | -0.5384196 | 7.11053052 | 0.08014641 | 0.2312196  |
| ENSMUSG00000034442 | -0.5384402 | 5.33456248 | 0.08348434 | 0.23779585 |
| ENSMUSG00000026238 | -0.538454  | 9.35804369 | 0.07896627 | 0.22904042 |
| ENSMUSG00000021546 | -0.5385907 | 10.4201243 | 0.07879767 | 0.22871439 |
| ENSMUSG00000044791 | -0.5387908 | 8.16035051 | 0.0792802  | 0.22958047 |
| ENSMUSG00000039242 | -0.5390005 | 6.29720495 | 0.08074478 | 0.23213856 |
| ENSMUSG00000028514 | -0.5391365 | 7.96608371 | 0.0791424  | 0.22930302 |
| ENSMUSG00000090112 | -0.5392866 | 6.44587    | 0.0805052  | 0.23163502 |
| ENSMUSG00000068823 | -0.5395295 | 9.93065295 | 0.07834341 | 0.2277852  |
| ENSMUSG00000028840 | -0.539683  | 2.94912778 | 0.09466397 | 0.25792224 |
| ENSMUSG00000022336 | -0.5396888 | 9.30936985 | 0.07837342 | 0.22781103 |
| ENSMUSG00000020315 | -0.5399221 | 7.3927625  | 0.07900376 | 0.22908753 |
| ENSMUSG00000008496 | -0.5401131 | 7.3451475  | 0.07881145 | 0.22871439 |
| ENSMUSG00000017550 | -0.5403541 | 7.64260799 | 0.07869221 | 0.22850019 |
| ENSMUSG00000045996 | -0.5404988 | 4.72522535 | 0.08492601 | 0.24050474 |
| ENSMUSG00000004043 | -0.5407778 | 5.90523004 | 0.08012768 | 0.2312196  |
| ENSMUSG00000050944 | -0.5409888 | 1.16853283 | 0.15468238 | 0.34890081 |
| ENSMUSG00000074238 | -0.5412535 | 5.81745581 | 0.08025154 | 0.23129658 |
| ENSMUSG00000020812 | -0.5415855 | 4.07719454 | 0.08595625 | 0.24232866 |
| ENSMUSG00000041747 | -0.5417929 | 7.22400438 | 0.07812845 | 0.22728276 |
| ENSMUSG00000030512 | -0.5420703 | 7.30028311 | 0.07792055 | 0.22687966 |
| ENSMUSG00000100214 | -0.5423531 | 1.54990778 | 0.14626761 | 0.33668677 |
| ENSMUSG00000045071 | -0.5424509 | 3.69265908 | 0.09139148 | 0.25215638 |
| ENSMUSG00000019948 | -0.5424907 | 4.61818277 | 0.08453614 | 0.23984154 |
| ENSMUSG00000049184 | -0.5434717 | 1.79128734 | 0.12175447 | 0.30232562 |
| ENSMUSG00000018733 | -0.5437406 | 4.17167292 | 0.0869218  | 0.24347856 |
| ENSMUSG00000090290 | -0.5437717 | 4.61858269 | 0.0826123  | 0.23593513 |
| ENSMUSG00000079043 | -0.5437819 | 4.3295447  | 0.08692132 | 0.24347856 |
| ENSMUSG00000026492 | -0.5439738 | 4.43766002 | 0.08478496 | 0.24019267 |

|                    |            |            |            |            |
|--------------------|------------|------------|------------|------------|
| ENSMUSG00000020413 | -0.5439973 | 6.50746146 | 0.07777174 | 0.22661185 |
| ENSMUSG00000042699 | -0.544128  | 10.2543983 | 0.07580879 | 0.22281873 |
| ENSMUSG00000062175 | -0.5441611 | 3.19657192 | 0.09148141 | 0.25218189 |
| ENSMUSG00000052760 | -0.5444505 | 7.09564711 | 0.07676404 | 0.22434237 |
| ENSMUSG00000026159 | -0.5444665 | 7.53948186 | 0.07647769 | 0.22393034 |
| ENSMUSG00000030619 | -0.5448746 | 7.33282702 | 0.07647528 | 0.22393034 |
| ENSMUSG00000025024 | -0.5450752 | 6.78595223 | 0.07689623 | 0.22448537 |
| ENSMUSG00000022253 | -0.5455989 | 4.81612063 | 0.08115632 | 0.23276324 |
| ENSMUSG00000030138 | -0.5458715 | 8.16992818 | 0.07533704 | 0.22172332 |
| ENSMUSG00000029290 | -0.5459744 | 5.28132897 | 0.07948657 | 0.2299928  |
| ENSMUSG00000027810 | -0.5461492 | 7.92428638 | 0.07537442 | 0.22172332 |
| ENSMUSG00000029787 | -0.5461853 | 6.62367018 | 0.07657813 | 0.22404193 |
| ENSMUSG00000038080 | -0.5462633 | 5.10062987 | 0.07988195 | 0.23070351 |
| ENSMUSG00000006678 | -0.5464309 | 8.00236447 | 0.07519841 | 0.22154206 |
| ENSMUSG00000044827 | -0.5470257 | 6.64587311 | 0.07610057 | 0.22306197 |
| ENSMUSG00000054702 | -0.5471871 | 6.60277597 | 0.07601584 | 0.22306197 |
| ENSMUSG00000021843 | -0.5472291 | 7.4862687  | 0.07505403 | 0.22126371 |
| ENSMUSG00000032215 | -0.5472517 | 6.59679901 | 0.07585706 | 0.22289987 |
| ENSMUSG00000073771 | -0.5474797 | 4.72898003 | 0.08087725 | 0.2322717  |
| ENSMUSG00000022748 | -0.5474917 | 4.59895317 | 0.08105505 | 0.23253461 |
| ENSMUSG00000031256 | -0.5475022 | 7.39858651 | 0.07488348 | 0.22088169 |
| ENSMUSG00000049950 | -0.5480579 | 4.11048943 | 0.08284196 | 0.23634066 |
| ENSMUSG00000031861 | -0.5483395 | 3.63430771 | 0.08700272 | 0.24363473 |
| ENSMUSG00000021461 | -0.5490311 | 4.6293653  | 0.08017097 | 0.23122859 |
| ENSMUSG00000000088 | -0.5491961 | 7.68908365 | 0.0738412  | 0.21876471 |
| ENSMUSG00000091474 | -0.5492353 | 5.36212263 | 0.07781033 | 0.22666304 |
| ENSMUSG00000022828 | -0.5493082 | 6.25475909 | 0.07528202 | 0.2216329  |
| ENSMUSG00000033964 | -0.5493502 | 5.5515252  | 0.07703302 | 0.22482385 |
| ENSMUSG00000050192 | -0.5495018 | 5.31099259 | 0.07767793 | 0.22639967 |
| ENSMUSG00000057406 | -0.5495822 | 8.47918779 | 0.07327545 | 0.21744701 |
| ENSMUSG00000048827 | -0.5500603 | 3.44376242 | 0.08530349 | 0.2411305  |
| ENSMUSG00000033706 | -0.5501437 | 6.08962751 | 0.07458122 | 0.22035175 |
| ENSMUSG00000020268 | -0.5502042 | 2.63314542 | 0.10276307 | 0.27141733 |
| ENSMUSG00000031697 | -0.5502449 | 7.0913697  | 0.07374988 | 0.21861426 |
| ENSMUSG00000037845 | -0.5507585 | 3.59072791 | 0.08741816 | 0.24405088 |
| ENSMUSG00000027957 | -0.5508091 | 6.78881735 | 0.07380247 | 0.21871003 |
| ENSMUSG00000022111 | -0.5508471 | 6.91443061 | 0.07370923 | 0.21855384 |
| ENSMUSG00000049232 | -0.5508907 | 5.64135474 | 0.07604581 | 0.22306197 |
| ENSMUSG00000084350 | -0.5510003 | 1.87847559 | 0.1225579  | 0.30352109 |
| ENSMUSG00000027242 | -0.5510058 | 6.85278714 | 0.07363256 | 0.21838656 |
| ENSMUSG00000032469 | -0.5511032 | 5.9526761  | 0.07488058 | 0.22088169 |
| ENSMUSG00000025234 | -0.5515214 | 8.19105512 | 0.07241788 | 0.21525755 |
| ENSMUSG00000057147 | -0.5518393 | 5.86151539 | 0.07474441 | 0.22071297 |



|                    |            |            |            |            |
|--------------------|------------|------------|------------|------------|
| ENSMUSG00000033752 | -0.5518751 | 2.68446232 | 0.09407358 | 0.25696416 |
| ENSMUSG00000034266 | -0.5519914 | 5.50485483 | 0.07443562 | 0.22004213 |
| ENSMUSG00000059208 | -0.5521379 | 9.24872014 | 0.07175391 | 0.21409399 |
| ENSMUSG00000046441 | -0.5529607 | 4.54333967 | 0.07916313 | 0.22930302 |
| ENSMUSG00000067942 | -0.5530199 | 5.65486219 | 0.0749644  | 0.22105991 |
| ENSMUSG00000057421 | -0.553166  | 7.16216202 | 0.07208729 | 0.21450973 |
| ENSMUSG00000031922 | -0.5532635 | 6.58960943 | 0.07281011 | 0.21618508 |
| ENSMUSG00000042228 | -0.5536602 | 7.0716722  | 0.07207468 | 0.21450973 |
| ENSMUSG00000039682 | -0.5539742 | 6.73751922 | 0.07192647 | 0.21435977 |
| ENSMUSG00000046668 | -0.5544241 | 1.57647575 | 0.12386804 | 0.30532411 |
| ENSMUSG00000042606 | -0.5546815 | 6.46107526 | 0.07178775 | 0.21409399 |
| ENSMUSG00000032803 | -0.5547054 | 9.69080423 | 0.07037564 | 0.21151919 |
| ENSMUSG00000029227 | -0.5549799 | 7.13916382 | 0.07129715 | 0.21321922 |
| ENSMUSG00000022033 | -0.5551816 | 5.97592309 | 0.0728738  | 0.21631463 |
| ENSMUSG00000035696 | -0.5551977 | 6.25071946 | 0.07233245 | 0.2151222  |
| ENSMUSG00000042138 | -0.5553836 | 4.16273607 | 0.08048263 | 0.23163188 |
| ENSMUSG00000028790 | -0.5554756 | 8.80002292 | 0.07017574 | 0.2112717  |
| ENSMUSG00000096740 | -0.5558667 | 4.44522638 | 0.07849037 | 0.2280895  |
| ENSMUSG00000055334 | -0.5559848 | 4.2361473  | 0.07913946 | 0.22930302 |
| ENSMUSG00000019841 | -0.556045  | 7.03750043 | 0.07102847 | 0.21276974 |
| ENSMUSG00000026187 | -0.5560488 | 6.40268741 | 0.07159387 | 0.21375092 |
| ENSMUSG00000005506 | -0.5564175 | 8.82779017 | 0.06969273 | 0.21033782 |
| ENSMUSG00000020671 | -0.5564273 | 7.6583563  | 0.07020877 | 0.21127481 |
| ENSMUSG00000044452 | -0.5565222 | 5.93464962 | 0.07193694 | 0.21435977 |
| ENSMUSG00000033356 | -0.5567604 | 4.70531345 | 0.075901   | 0.22295501 |
| ENSMUSG00000043162 | -0.5568306 | 2.98924614 | 0.09337232 | 0.25582498 |
| ENSMUSG00000030795 | -0.5571006 | 9.01081264 | 0.06929352 | 0.20978702 |
| ENSMUSG00000064340 | -0.5576204 | 2.50342173 | 0.10447778 | 0.27453421 |
| ENSMUSG00000035597 | -0.5578418 | 6.66848714 | 0.07042686 | 0.21152659 |
| ENSMUSG00000028431 | -0.5578542 | 7.1830041  | 0.06974117 | 0.21033782 |
| ENSMUSG00000085334 | -0.5580722 | 3.53933503 | 0.08518894 | 0.24105943 |
| ENSMUSG00000038121 | -0.558102  | 5.98478814 | 0.07139156 | 0.21344237 |
| ENSMUSG00000031433 | -0.5581789 | 4.89821993 | 0.07452193 | 0.2202369  |
| ENSMUSG00000004936 | -0.5583027 | 6.84364249 | 0.06968485 | 0.21033782 |
| ENSMUSG00000039219 | -0.5583336 | 7.0927707  | 0.06977075 | 0.21033782 |
| ENSMUSG00000021116 | -0.5584365 | 8.70661028 | 0.06872967 | 0.20878331 |
| ENSMUSG00000020680 | -0.5586234 | 7.81269589 | 0.06898994 | 0.2091807  |
| ENSMUSG00000032000 | -0.5586353 | 8.09304584 | 0.06884355 | 0.2090115  |
| ENSMUSG00000035851 | -0.5586449 | 7.87015178 | 0.06899627 | 0.2091807  |
| ENSMUSG00000050229 | -0.5588708 | 6.68460032 | 0.06986135 | 0.21044269 |
| ENSMUSG00000007739 | -0.5590339 | 9.79029332 | 0.06822257 | 0.20771094 |
| ENSMUSG00000037315 | -0.5590944 | 5.93665357 | 0.0709611  | 0.21268607 |
| ENSMUSG00000034724 | -0.5591472 | 7.85646633 | 0.06877587 | 0.20886481 |

|                    |            |            |            |            |
|--------------------|------------|------------|------------|------------|
| ENSMUSG00000022142 | -0.5592686 | 7.86098171 | 0.06867284 | 0.20866945 |
| ENSMUSG00000021311 | -0.5600959 | 6.47090747 | 0.06949528 | 0.21004402 |
| ENSMUSG00000036737 | -0.5603411 | 6.82028543 | 0.06888766 | 0.20902771 |
| ENSMUSG00000034667 | -0.5603748 | 7.68366963 | 0.06820389 | 0.20771094 |
| ENSMUSG00000020137 | -0.5607614 | 4.37242288 | 0.0765189  | 0.22399019 |
| ENSMUSG00000057440 | -0.561324  | 4.78001605 | 0.07437464 | 0.21998248 |
| ENSMUSG00000022661 | -0.5616702 | 4.30102313 | 0.07688181 | 0.22448537 |
| ENSMUSG00000024556 | -0.5620731 | 7.03263075 | 0.06777382 | 0.20697026 |
| ENSMUSG00000040325 | -0.5621949 | 7.59845463 | 0.06740933 | 0.20610781 |
| ENSMUSG0000002413  | -0.5624116 | 6.63659031 | 0.06820008 | 0.20771094 |
| ENSMUSG00000032212 | -0.5631779 | 7.83218699 | 0.06674923 | 0.20507955 |
| ENSMUSG00000035476 | -0.5633743 | 5.18062127 | 0.07108618 | 0.21288347 |
| ENSMUSG00000047213 | -0.5635106 | 7.21914589 | 0.06702481 | 0.20551479 |
| ENSMUSG00000021840 | -0.5635968 | 8.19435593 | 0.06638952 | 0.20480965 |
| ENSMUSG00000037608 | -0.5636897 | 9.32992387 | 0.06604622 | 0.20402268 |
| ENSMUSG00000021645 | -0.5638977 | 5.90340879 | 0.06831167 | 0.20786485 |
| ENSMUSG00000015672 | -0.5641394 | 5.54300169 | 0.06935968 | 0.20989911 |
| ENSMUSG00000031601 | -0.5642249 | 6.9839388  | 0.06697492 | 0.20549082 |
| ENSMUSG00000047446 | -0.5644633 | 5.0500057  | 0.07073087 | 0.21223198 |
| ENSMUSG00000035062 | -0.5644648 | 3.32509237 | 0.08562255 | 0.24166591 |
| ENSMUSG00000040620 | -0.5648001 | 7.11868558 | 0.06639601 | 0.20480965 |
| ENSMUSG00000024383 | -0.5648151 | 6.46473378 | 0.06728254 | 0.20601218 |
| ENSMUSG00000041471 | -0.5648169 | 4.72927433 | 0.07209074 | 0.21450973 |
| ENSMUSG00000078762 | -0.5653564 | 2.9129114  | 0.08479354 | 0.24019267 |
| ENSMUSG00000020594 | -0.5654296 | 9.02172039 | 0.06529715 | 0.20304628 |
| ENSMUSG00000051235 | -0.5656487 | 6.14162595 | 0.06738408 | 0.20608903 |
| ENSMUSG00000028907 | -0.5656607 | 6.43242156 | 0.06674974 | 0.20507955 |
| ENSMUSG00000023087 | -0.5656717 | 4.07491506 | 0.07417298 | 0.21962695 |
| ENSMUSG00000064127 | -0.5659912 | 7.25761232 | 0.06586021 | 0.20392655 |
| ENSMUSG00000053931 | -0.5660374 | 6.16982381 | 0.06694234 | 0.20549082 |
| ENSMUSG00000037475 | -0.5661694 | 7.99870294 | 0.06534477 | 0.20313578 |
| ENSMUSG00000027162 | -0.5662531 | 7.01250766 | 0.06591308 | 0.20396172 |
| ENSMUSG00000029238 | -0.5662715 | 5.73542195 | 0.06782701 | 0.20703269 |
| ENSMUSG00000032481 | -0.5662852 | 8.60910396 | 0.06496765 | 0.20233037 |
| ENSMUSG00000027132 | -0.5666575 | 5.09203386 | 0.06967107 | 0.21033782 |
| ENSMUSG00000021816 | -0.5671304 | 7.66665942 | 0.06498516 | 0.20233037 |
| ENSMUSG00000022774 | -0.5672794 | 6.63156609 | 0.06566693 | 0.20360902 |
| ENSMUSG00000036285 | -0.5673463 | 5.76842254 | 0.06700011 | 0.2054975  |
| ENSMUSG00000020255 | -0.5677001 | 7.20403718 | 0.06498662 | 0.20233037 |
| ENSMUSG00000026096 | -0.5680355 | 3.91728499 | 0.07591717 | 0.22295501 |
| ENSMUSG00000059474 | -0.5680463 | 6.39941573 | 0.06586389 | 0.20392655 |
| ENSMUSG00000050812 | -0.5680709 | 8.49552681 | 0.06419819 | 0.20078641 |
| ENSMUSG00000046667 | -0.5681931 | 3.72307511 | 0.07679006 | 0.22435763 |

|                     |            |            |            |            |
|---------------------|------------|------------|------------|------------|
| ENSMUSG00000001467  | -0.5686447 | 8.28695535 | 0.0639938  | 0.20043831 |
| ENSMUSG00000000568  | -0.568949  | 9.16814822 | 0.06360188 | 0.1996166  |
| ENSMUSG000000032459 | -0.5691108 | 5.39668203 | 0.06722321 | 0.20588898 |
| ENSMUSG000000029475 | -0.5696116 | 7.03142799 | 0.06417736 | 0.20078641 |
| ENSMUSG000000019917 | -0.5696708 | 2.97864122 | 0.0863437  | 0.24305154 |
| ENSMUSG000000034349 | -0.5698892 | 9.65217169 | 0.06309111 | 0.19864951 |
| ENSMUSG00000001785  | -0.5699173 | 7.49109445 | 0.06381657 | 0.2001157  |
| ENSMUSG000000027433 | -0.5699857 | 8.63597715 | 0.06326568 | 0.19902482 |
| ENSMUSG000000057858 | -0.5702426 | 5.21630544 | 0.06734186 | 0.20607679 |
| ENSMUSG000000050965 | -0.5702692 | 6.3414244  | 0.06468082 | 0.20176974 |
| ENSMUSG000000035455 | -0.5707101 | 7.59781309 | 0.06339287 | 0.19910187 |
| ENSMUSG000000021936 | -0.571133  | 5.75302713 | 0.06557927 | 0.20357165 |
| ENSMUSG000000038172 | -0.5719114 | 6.2770027  | 0.06417414 | 0.20078641 |
| ENSMUSG000000024576 | -0.5721145 | 9.05334634 | 0.06218171 | 0.19664737 |
| ENSMUSG000000017999 | -0.5722263 | 6.90454172 | 0.06294749 | 0.1983466  |
| ENSMUSG000000020078 | -0.5722391 | 6.76151019 | 0.06335836 | 0.19910187 |
| ENSMUSG000000029916 | -0.5724581 | 5.12862453 | 0.0661629  | 0.20420742 |
| ENSMUSG000000073676 | -0.5725731 | 8.34818429 | 0.06213987 | 0.19664737 |
| ENSMUSG000000074024 | -0.5726168 | 1.90641547 | 0.10865307 | 0.28145921 |
| ENSMUSG000000067873 | -0.5728901 | 7.15713563 | 0.06264836 | 0.19765944 |
| ENSMUSG000000033439 | -0.5730107 | 4.45372117 | 0.07008401 | 0.21105445 |
| ENSMUSG000000035649 | -0.57322   | 6.14937598 | 0.06389163 | 0.20017643 |
| ENSMUSG000000038628 | -0.5732555 | 5.6422133  | 0.06458921 | 0.2016006  |
| ENSMUSG000000075229 | -0.5732677 | 5.56418586 | 0.06485869 | 0.2022076  |
| ENSMUSG000000032475 | -0.5736691 | 5.23340101 | 0.06597852 | 0.20401534 |
| ENSMUSG00000000168  | -0.573914  | 6.52027535 | 0.06275088 | 0.19792499 |
| ENSMUSG000000039033 | -0.5741122 | 4.41155459 | 0.06826332 | 0.20777637 |
| ENSMUSG000000021998 | -0.5742063 | 10.5311049 | 0.06102605 | 0.19389932 |
| ENSMUSG000000038332 | -0.5742118 | 4.92599197 | 0.06647823 | 0.20488128 |
| ENSMUSG000000073016 | -0.5743861 | 4.35532702 | 0.06976938 | 0.21033782 |
| ENSMUSG000000010290 | -0.5745277 | 5.51595484 | 0.06434089 | 0.20105827 |
| ENSMUSG000000042579 | -0.5746682 | 2.23603575 | 0.09506754 | 0.25862977 |
| ENSMUSG000000024472 | -0.5749503 | 7.79587212 | 0.06134284 | 0.19445067 |
| ENSMUSG00000000787  | -0.5751544 | 10.4346261 | 0.06061396 | 0.19282033 |
| ENSMUSG000000028675 | -0.5751965 | 7.04091175 | 0.06179709 | 0.19583305 |
| ENSMUSG000000049164 | -0.5752577 | 5.95070555 | 0.06337827 | 0.19910187 |
| ENSMUSG000000038671 | -0.5755063 | 6.1474944  | 0.06253406 | 0.19745516 |
| ENSMUSG000000037108 | -0.5761196 | 4.57865923 | 0.06717218 | 0.20579112 |
| ENSMUSG000000033554 | -0.5762386 | 5.49385464 | 0.06340095 | 0.19910187 |
| ENSMUSG000000025019 | -0.5763296 | 4.10861051 | 0.07045145 | 0.21152659 |
| ENSMUSG000000027342 | -0.5764346 | 8.43110333 | 0.06040922 | 0.19233925 |
| ENSMUSG000000034111 | -0.5765336 | 8.91959547 | 0.06022242 | 0.19191446 |
| ENSMUSG000000020376 | -0.5766729 | 5.46621126 | 0.06368926 | 0.19977457 |

|                    |            |            |            |            |
|--------------------|------------|------------|------------|------------|
| ENSMUSG00000040760 | -0.5770215 | 7.13895028 | 0.06091576 | 0.19366586 |
| ENSMUSG00000040282 | -0.5780491 | 3.83014754 | 0.06927689 | 0.20978702 |
| ENSMUSG00000030188 | -0.5782273 | 4.35590783 | 0.06712216 | 0.20574461 |
| ENSMUSG00000054435 | -0.5782637 | 9.9785788  | 0.05929419 | 0.19002333 |
| ENSMUSG00000020925 | -0.5783585 | 6.13295869 | 0.06128619 | 0.19444256 |
| ENSMUSG00000055660 | -0.57847   | 5.5119546  | 0.06295813 | 0.1983466  |
| ENSMUSG00000045519 | -0.5788157 | 3.51965803 | 0.07441418 | 0.22003909 |
| ENSMUSG00000014232 | -0.5788244 | 4.33077454 | 0.06665099 | 0.20507955 |
| ENSMUSG00000085492 | -0.5788298 | 3.25225223 | 0.07610283 | 0.22306197 |
| ENSMUSG00000037788 | -0.578898  | 4.19688829 | 0.06843473 | 0.20812187 |
| ENSMUSG00000025364 | -0.5794993 | 9.8727371  | 0.05874399 | 0.18865253 |
| ENSMUSG00000063200 | -0.5795314 | 7.30103154 | 0.05963382 | 0.19071538 |
| ENSMUSG00000029911 | -0.579694  | 6.32668684 | 0.06052339 | 0.19264589 |
| ENSMUSG00000023026 | -0.5797076 | 7.06349008 | 0.05963958 | 0.19071538 |
| ENSMUSG00000097180 | -0.5797368 | 4.32236448 | 0.06604629 | 0.20402268 |
| ENSMUSG00000033486 | -0.5797752 | 1.88029937 | 0.1045327  | 0.2746116  |
| ENSMUSG00000058318 | -0.5797908 | 5.26443964 | 0.06277824 | 0.19795337 |
| ENSMUSG00000047649 | -0.5797938 | 4.41565892 | 0.06420315 | 0.20078641 |
| ENSMUSG00000061458 | -0.5799696 | 6.87863899 | 0.05972463 | 0.19083569 |
| ENSMUSG00000026786 | -0.5804453 | 6.86299202 | 0.05959973 | 0.19071538 |
| ENSMUSG00000024290 | -0.5807012 | 8.31334641 | 0.0586237  | 0.18832232 |
| ENSMUSG00000064289 | -0.581417  | 6.89138478 | 0.05917635 | 0.18970206 |
| ENSMUSG00000026502 | -0.5815305 | 6.41860351 | 0.05966314 | 0.19071538 |
| ENSMUSG00000001569 | -0.5819563 | 6.64892019 | 0.05907623 | 0.18954381 |
| ENSMUSG00000068105 | -0.582004  | 8.16111785 | 0.05804888 | 0.18686542 |
| ENSMUSG00000025525 | -0.5820773 | 5.24677345 | 0.06188426 | 0.19599407 |
| ENSMUSG00000045316 | -0.5822223 | 1.58794044 | 0.11069002 | 0.28454855 |
| ENSMUSG00000024515 | -0.5822381 | 5.45641915 | 0.06093363 | 0.19366586 |
| ENSMUSG00000090110 | -0.5824215 | 2.56713284 | 0.08146309 | 0.23351885 |
| ENSMUSG00000054178 | -0.5825054 | 3.75968298 | 0.07095235 | 0.21268607 |
| ENSMUSG00000059820 | -0.5826633 | 6.06685535 | 0.05975261 | 0.19086852 |
| ENSMUSG00000011257 | -0.5828781 | 7.63925735 | 0.05781342 | 0.18637397 |
| ENSMUSG00000031352 | -0.5834324 | 6.40995901 | 0.05879867 | 0.18877191 |
| ENSMUSG00000027387 | -0.5834371 | 4.22739304 | 0.06499188 | 0.20233037 |
| ENSMUSG00000031347 | -0.5834682 | 5.692982   | 0.06001445 | 0.19142142 |
| ENSMUSG00000096954 | -0.5835673 | 4.09026464 | 0.06588948 | 0.20394723 |
| ENSMUSG00000071456 | -0.5836239 | 5.02810967 | 0.0613353  | 0.19445067 |
| ENSMUSG00000041396 | -0.5837404 | 3.47669785 | 0.07117018 | 0.21307586 |
| ENSMUSG00000028114 | -0.5843312 | 5.54267679 | 0.05995025 | 0.19127321 |
| ENSMUSG00000028248 | -0.5843383 | 7.50906686 | 0.05733001 | 0.18558753 |
| ENSMUSG00000035367 | -0.5848092 | 3.99692949 | 0.06778737 | 0.20697026 |
| ENSMUSG00000034158 | -0.5848279 | 6.73581061 | 0.05775933 | 0.18637397 |
| ENSMUSG00000029447 | -0.5848797 | 9.29144997 | 0.05653745 | 0.18414372 |

|                    |            |            |            |            |
|--------------------|------------|------------|------------|------------|
| ENSMUSG00000021189 | -0.5852363 | 6.29274284 | 0.05830288 | 0.18753476 |
| ENSMUSG00000061136 | -0.5852606 | 8.9209984  | 0.05648093 | 0.18407083 |
| ENSMUSG00000025262 | -0.5854335 | 3.82806266 | 0.06786292 | 0.2070358  |
| ENSMUSG00000035726 | -0.5861016 | 9.37844808 | 0.05602553 | 0.18325125 |
| ENSMUSG00000074305 | -0.5861263 | 5.03518006 | 0.06056704 | 0.19272792 |
| ENSMUSG00000039988 | -0.5863587 | 6.65459316 | 0.05737481 | 0.18558753 |
| ENSMUSG00000031959 | -0.5863989 | 7.03967027 | 0.05674267 | 0.18465999 |
| ENSMUSG00000024841 | -0.5864249 | 6.69234329 | 0.05701591 | 0.18507218 |
| ENSMUSG00000021969 | -0.586433  | 6.63468541 | 0.05730535 | 0.18558753 |
| ENSMUSG00000030750 | -0.5865038 | 6.35340368 | 0.05734923 | 0.18558753 |
| ENSMUSG00000038975 | -0.5867581 | 7.19871244 | 0.0565341  | 0.18414372 |
| ENSMUSG00000030888 | -0.5868251 | 6.6154839  | 0.05699202 | 0.18506532 |
| ENSMUSG00000090935 | -0.5868529 | 6.27335865 | 0.05761419 | 0.18602138 |
| ENSMUSG00000031609 | -0.5873984 | 4.39662458 | 0.06308987 | 0.19864951 |
| ENSMUSG00000036006 | -0.5874949 | 5.88927993 | 0.05776184 | 0.18637397 |
| ENSMUSG00000099481 | -0.5875243 | 3.6242134  | 0.06697888 | 0.20549082 |
| ENSMUSG00000033813 | -0.5878576 | 8.01194609 | 0.05568401 | 0.18241079 |
| ENSMUSG00000027427 | -0.587876  | 6.42493636 | 0.05690316 | 0.18493827 |
| ENSMUSG00000078862 | -0.5883526 | 1.97878768 | 0.09880708 | 0.26472932 |
| ENSMUSG00000068856 | -0.5887993 | 5.49244497 | 0.05794852 | 0.18665378 |
| ENSMUSG00000017679 | -0.5888804 | 7.44658856 | 0.05554414 | 0.18217396 |
| ENSMUSG00000034203 | -0.5893091 | 5.50640359 | 0.0572754  | 0.18558753 |
| ENSMUSG00000025939 | -0.5894169 | 5.60144963 | 0.05782709 | 0.18637397 |
| ENSMUSG00000000581 | -0.5898144 | 6.01590436 | 0.0567105  | 0.18465159 |
| ENSMUSG00000017561 | -0.5901597 | 7.32875312 | 0.0550319  | 0.1808672  |
| ENSMUSG00000024539 | -0.5909018 | 6.80499914 | 0.0552152  | 0.18131568 |
| ENSMUSG00000095123 | -0.591374  | 3.02368137 | 0.07178819 | 0.21409399 |
| ENSMUSG00000022952 | -0.5918694 | 5.72807623 | 0.05646408 | 0.18407083 |
| ENSMUSG00000030042 | -0.5920906 | 6.50813354 | 0.05506185 | 0.1808672  |
| ENSMUSG00000023027 | -0.5924545 | 6.84346978 | 0.05444864 | 0.17972884 |
| ENSMUSG00000051977 | -0.5935143 | 4.63792816 | 0.05978276 | 0.19090827 |
| ENSMUSG00000043168 | -0.5935698 | 1.56850063 | 0.11448029 | 0.29062041 |
| ENSMUSG00000041297 | -0.5935733 | 7.14166518 | 0.0538534  | 0.17880389 |
| ENSMUSG00000021028 | -0.5936269 | 4.50430636 | 0.05985097 | 0.19106953 |
| ENSMUSG00000028136 | -0.5936931 | 7.38867207 | 0.05361438 | 0.17813232 |
| ENSMUSG00000036580 | -0.5939067 | 5.04878727 | 0.05680436 | 0.18473409 |
| ENSMUSG00000020358 | -0.5941289 | 10.1677425 | 0.05266153 | 0.17603903 |
| ENSMUSG00000031482 | -0.5942139 | 5.86373877 | 0.05505767 | 0.1808672  |
| ENSMUSG00000085385 | -0.5945065 | 5.84579638 | 0.05459928 | 0.18006073 |
| ENSMUSG00000063410 | -0.594546  | 7.38298921 | 0.05322914 | 0.17711294 |
| ENSMUSG00000032571 | -0.5945722 | 5.86980711 | 0.05467168 | 0.18018931 |
| ENSMUSG00000030224 | -0.5947567 | 8.63658041 | 0.05265979 | 0.17603903 |
| ENSMUSG00000057561 | -0.594927  | 8.03513435 | 0.05278616 | 0.17623713 |

|                    |            |            |            |            |
|--------------------|------------|------------|------------|------------|
| ENSMUSG00000028647 | -0.5952728 | 4.74047154 | 0.05751831 | 0.18582307 |
| ENSMUSG00000053137 | -0.5953048 | 2.97988208 | 0.06969571 | 0.21033782 |
| ENSMUSG00000040034 | -0.5956632 | 6.08789809 | 0.05402065 | 0.1790285  |
| ENSMUSG00000025862 | -0.5956824 | 8.54403692 | 0.0523713  | 0.1753406  |
| ENSMUSG00000035764 | -0.5963334 | 5.92905177 | 0.05413283 | 0.17917999 |
| ENSMUSG00000067722 | -0.5963339 | 4.55428668 | 0.05743362 | 0.18566071 |
| ENSMUSG00000066637 | -0.5963409 | 3.00198857 | 0.07201945 | 0.21449768 |
| ENSMUSG00000043872 | -0.5963979 | 5.57508421 | 0.05476892 | 0.18034737 |
| ENSMUSG00000057134 | -0.5966299 | 5.11265018 | 0.05568104 | 0.18241079 |
| ENSMUSG00000038047 | -0.596785  | 7.42404267 | 0.05240481 | 0.17534393 |
| ENSMUSG00000038268 | -0.5972517 | 4.83987332 | 0.0568837  | 0.18493633 |
| ENSMUSG00000087497 | -0.5976842 | 1.64973454 | 0.10269281 | 0.27129821 |
| ENSMUSG00000024188 | -0.5978964 | 7.21134375 | 0.0520404  | 0.17449317 |
| ENSMUSG00000024234 | -0.5979402 | 6.22482447 | 0.05306766 | 0.17677771 |
| ENSMUSG00000025200 | -0.5982433 | 5.20203123 | 0.05447185 | 0.17975044 |
| ENSMUSG00000029655 | -0.598368  | 7.41113096 | 0.05179827 | 0.1738539  |
| ENSMUSG00000018377 | -0.5985737 | 6.05231913 | 0.05295454 | 0.17652604 |
| ENSMUSG00000047635 | -0.5986335 | 3.75831046 | 0.0608663  | 0.19356595 |
| ENSMUSG00000037216 | -0.5988243 | 2.30498835 | 0.08056866 | 0.23175578 |
| ENSMUSG00000053774 | -0.5988859 | 7.07564754 | 0.05181941 | 0.17387074 |
| ENSMUSG00000062937 | -0.5989467 | 7.74963647 | 0.05129051 | 0.17290305 |
| ENSMUSG00000018697 | -0.598951  | 6.56280023 | 0.05205346 | 0.17449317 |
| ENSMUSG00000009535 | -0.5989642 | 6.40384392 | 0.05230078 | 0.17519344 |
| ENSMUSG00000036155 | -0.5989823 | 5.44056703 | 0.05407314 | 0.17914737 |
| ENSMUSG00000020691 | -0.5990334 | 5.27180897 | 0.0541887  | 0.17924937 |
| ENSMUSG00000027423 | -0.5991132 | 10.1353554 | 0.05073841 | 0.17168592 |
| ENSMUSG00000031954 | -0.59987   | 7.41181825 | 0.05114112 | 0.17269598 |
| ENSMUSG00000018800 | -0.5999434 | 4.56353964 | 0.05717728 | 0.18533207 |
| ENSMUSG00000042854 | -0.6003656 | 2.26043851 | 0.0797641  | 0.23048661 |
| ENSMUSG00000075528 | -0.6004117 | 1.38149163 | 0.10558329 | 0.27616202 |
| ENSMUSG00000026283 | -0.6004266 | 6.31157015 | 0.05173111 | 0.17376303 |
| ENSMUSG00000078899 | -0.6008692 | 5.77205184 | 0.05274291 | 0.1761976  |
| ENSMUSG00000058704 | -0.6010862 | 6.31407337 | 0.05168542 | 0.17369137 |
| ENSMUSG00000043065 | -0.6016498 | 4.30604067 | 0.05674733 | 0.18465999 |
| ENSMUSG00000024491 | -0.6017128 | 7.8851222  | 0.05024327 | 0.17059931 |
| ENSMUSG00000031201 | -0.6019453 | 6.38934424 | 0.05128386 | 0.17290305 |
| ENSMUSG00000027018 | -0.6020362 | 7.76872848 | 0.05019217 | 0.17047947 |
| ENSMUSG00000049878 | -0.6021462 | 6.36980949 | 0.05130934 | 0.17291247 |
| ENSMUSG00000042742 | -0.602764  | 5.26890806 | 0.05316881 | 0.17702143 |
| ENSMUSG00000027189 | -0.6032447 | 7.65776439 | 0.04975112 | 0.16946632 |
| ENSMUSG00000032407 | -0.603293  | 8.6546067  | 0.04939695 | 0.16875896 |
| ENSMUSG00000058402 | -0.6033167 | 2.88412332 | 0.06967999 | 0.21033782 |
| ENSMUSG00000028587 | -0.6034057 | 6.15811504 | 0.05087632 | 0.17204461 |

|                    |            |            |            |            |
|--------------------|------------|------------|------------|------------|
| ENSMUSG00000024360 | -0.6035219 | 9.45653441 | 0.04914385 | 0.16824359 |
| ENSMUSG00000021870 | -0.6042258 | 7.69007835 | 0.04939897 | 0.16875896 |
| ENSMUSG00000078427 | -0.6042578 | 7.5351935  | 0.04946803 | 0.16876406 |
| ENSMUSG00000018654 | -0.6044683 | 9.39495177 | 0.04880089 | 0.16733507 |
| ENSMUSG00000041671 | -0.6045116 | 4.1427416  | 0.0567925  | 0.18473409 |
| ENSMUSG00000026723 | -0.6045806 | 4.15920381 | 0.05711439 | 0.1852953  |
| ENSMUSG00000028228 | -0.6047993 | 6.61690015 | 0.05000671 | 0.17011745 |
| ENSMUSG00000044098 | -0.6050936 | 6.84359899 | 0.04967848 | 0.16937163 |
| ENSMUSG00000035900 | -0.6060905 | 4.89569507 | 0.05148366 | 0.17329769 |
| ENSMUSG00000027285 | -0.6062853 | 5.98651322 | 0.05030966 | 0.17063717 |
| ENSMUSG00000039478 | -0.6069074 | 2.90734737 | 0.06686661 | 0.20532162 |
| ENSMUSG00000034317 | -0.6077684 | 6.90890149 | 0.04863522 | 0.16692621 |
| ENSMUSG00000025766 | -0.6078377 | 4.00390637 | 0.05647168 | 0.18407083 |
| ENSMUSG00000026074 | -0.6078843 | 7.03214361 | 0.04832782 | 0.16613124 |
| ENSMUSG00000002109 | -0.608791  | 4.6588303  | 0.05240024 | 0.17534393 |
| ENSMUSG00000067995 | -0.6088057 | 6.04668197 | 0.04910207 | 0.16815394 |
| ENSMUSG00000020544 | -0.6088389 | 4.07306486 | 0.05476981 | 0.18034737 |
| ENSMUSG00000024498 | -0.6090719 | 8.31907539 | 0.04734287 | 0.16389906 |
| ENSMUSG00000047141 | -0.6092954 | 4.70433477 | 0.05293963 | 0.17652604 |
| ENSMUSG00000086725 | -0.6095074 | 2.001417   | 0.08633361 | 0.24305154 |
| ENSMUSG00000041459 | -0.6095527 | 9.69722382 | 0.04690381 | 0.16290199 |
| ENSMUSG00000048661 | -0.6100717 | 5.1075294  | 0.05071584 | 0.1716634  |
| ENSMUSG00000061244 | -0.6103674 | 7.19731632 | 0.04746571 | 0.16411358 |
| ENSMUSG00000037876 | -0.6103834 | 7.74933826 | 0.04712548 | 0.16330571 |
| ENSMUSG00000021615 | -0.6103965 | 4.28122986 | 0.05410981 | 0.17917999 |
| ENSMUSG00000027714 | -0.6105266 | 7.02190683 | 0.04748815 | 0.16413854 |
| ENSMUSG00000050310 | -0.6106352 | 6.16684169 | 0.04834909 | 0.16613124 |
| ENSMUSG00000079184 | -0.6111133 | 6.82568244 | 0.04743307 | 0.16405331 |
| ENSMUSG00000033632 | -0.6112222 | 4.2161642  | 0.05340969 | 0.17760411 |
| ENSMUSG00000091811 | -0.611989  | 1.84598079 | 0.0794331  | 0.22989977 |
| ENSMUSG00000002222 | -0.6128287 | 7.22015921 | 0.04651725 | 0.16208143 |
| ENSMUSG00000021460 | -0.612947  | 6.71321793 | 0.04670086 | 0.16251114 |
| ENSMUSG00000016181 | -0.6131456 | 5.82716332 | 0.04761648 | 0.16447664 |
| ENSMUSG00000001627 | -0.6132799 | 6.63030535 | 0.04689425 | 0.16290199 |
| ENSMUSG00000072980 | -0.6133696 | 4.94442635 | 0.04988235 | 0.16974813 |
| ENSMUSG00000079190 | -0.6134125 | 2.12087677 | 0.07888859 | 0.22887666 |
| ENSMUSG00000060708 | -0.6145892 | 3.28021016 | 0.05945919 | 0.19038241 |
| ENSMUSG00000021270 | -0.614728  | 10.9634656 | 0.04498522 | 0.1581743  |
| ENSMUSG00000097536 | -0.614979  | 1.51663374 | 0.10146133 | 0.26896731 |
| ENSMUSG00000034021 | -0.6154292 | 7.78388961 | 0.0453078  | 0.1588956  |
| ENSMUSG00000022456 | -0.6155935 | 2.92696132 | 0.06421665 | 0.20078641 |
| ENSMUSG00000031299 | -0.6155967 | 7.56300383 | 0.04528685 | 0.1588956  |
| ENSMUSG00000041112 | -0.6157041 | 8.12917019 | 0.04503918 | 0.15826438 |

|                    |            |            |            |            |
|--------------------|------------|------------|------------|------------|
| ENSMUSG00000031533 | -0.615991  | 4.97072712 | 0.04866098 | 0.16692828 |
| ENSMUSG00000021264 | -0.6165918 | 6.97885645 | 0.04530823 | 0.1588956  |
| ENSMUSG00000078903 | -0.6166669 | 3.33865066 | 0.05760856 | 0.18602138 |
| ENSMUSG00000026491 | -0.6171886 | 8.75493135 | 0.04440067 | 0.15652725 |
| ENSMUSG00000099697 | -0.617262  | 2.19739306 | 0.07466047 | 0.22052548 |
| ENSMUSG00000091625 | -0.6173223 | 5.72348346 | 0.04661899 | 0.1623283  |
| ENSMUSG00000038822 | -0.6173962 | 5.03132319 | 0.0483709  | 0.16613124 |
| ENSMUSG00000028683 | -0.6174972 | 6.21059258 | 0.04569434 | 0.15993762 |
| ENSMUSG00000024078 | -0.6178657 | 5.96479266 | 0.04580516 | 0.16022149 |
| ENSMUSG00000006494 | -0.6179685 | 5.34807265 | 0.04712605 | 0.16330571 |
| ENSMUSG00000027677 | -0.6180299 | 7.30444715 | 0.04465209 | 0.15715669 |
| ENSMUSG00000028410 | -0.6180688 | 8.73802126 | 0.04409274 | 0.15584926 |
| ENSMUSG00000010608 | -0.6182488 | 9.06660459 | 0.04396323 | 0.15560886 |
| ENSMUSG00000018446 | -0.6182522 | 8.80837804 | 0.04399587 | 0.15560886 |
| ENSMUSG00000049409 | -0.6184514 | 1.75494777 | 0.0829121  | 0.23647819 |
| ENSMUSG00000022768 | -0.6186392 | 2.1903533  | 0.06894734 | 0.20914996 |
| ENSMUSG00000025050 | -0.6188396 | 5.44580424 | 0.04676466 | 0.16262822 |
| ENSMUSG00000024081 | -0.618913  | 8.03114894 | 0.04399344 | 0.15560886 |
| ENSMUSG00000015501 | -0.6189723 | 3.72988374 | 0.05476858 | 0.18034737 |
| ENSMUSG00000040025 | -0.6191008 | 7.42568341 | 0.04418577 | 0.15602467 |
| ENSMUSG00000019961 | -0.6191239 | 9.03993042 | 0.04367263 | 0.15497389 |
| ENSMUSG00000041360 | -0.6194262 | 7.72374125 | 0.04389773 | 0.15551681 |
| ENSMUSG00000032624 | -0.619526  | 8.19165735 | 0.04373404 | 0.15514075 |
| ENSMUSG00000008333 | -0.6199241 | 7.03093636 | 0.0441637  | 0.15599781 |
| ENSMUSG00000038299 | -0.6202713 | 7.75003951 | 0.04364817 | 0.15493808 |
| ENSMUSG00000029326 | -0.6208199 | 4.23776704 | 0.04837278 | 0.16613124 |
| ENSMUSG00000021892 | -0.6208211 | 7.45904563 | 0.04354532 | 0.15472578 |
| ENSMUSG00000037905 | -0.6212104 | 6.22995478 | 0.04430555 | 0.1563964  |
| ENSMUSG00000034826 | -0.6212133 | 6.71320317 | 0.0439477  | 0.15560886 |
| ENSMUSG00000045767 | -0.6212417 | 6.95451396 | 0.04378676 | 0.15527669 |
| ENSMUSG00000028232 | -0.6212533 | 5.95468891 | 0.04486341 | 0.15779747 |
| ENSMUSG00000071855 | -0.6218153 | 3.47631103 | 0.05546006 | 0.18195353 |
| ENSMUSG00000027601 | -0.622108  | 6.23960722 | 0.04404965 | 0.155748   |
| ENSMUSG00000036591 | -0.6221706 | 5.9609432  | 0.04433432 | 0.15641872 |
| ENSMUSG00000042133 | -0.6222365 | 8.29587572 | 0.04281815 | 0.15289764 |
| ENSMUSG00000031333 | -0.6222484 | 7.20328495 | 0.04329337 | 0.1540844  |
| ENSMUSG00000027405 | -0.6224258 | 8.97053921 | 0.04255839 | 0.15217163 |
| ENSMUSG00000020280 | -0.6227737 | 6.77914746 | 0.04342388 | 0.15439602 |
| ENSMUSG00000024505 | -0.6231524 | 3.30141795 | 0.05589435 | 0.18287763 |
| ENSMUSG00000100370 | -0.6233916 | 4.23042375 | 0.04943761 | 0.16875896 |
| ENSMUSG00000016559 | -0.6236222 | 9.49432064 | 0.04209952 | 0.15113223 |
| ENSMUSG00000040681 | -0.6239116 | 8.66781113 | 0.04215305 | 0.15117468 |
| ENSMUSG00000040865 | -0.6239513 | 6.80094311 | 0.04299769 | 0.15338448 |



|                    |            |            |            |            |
|--------------------|------------|------------|------------|------------|
| ENSMUSG00000022710 | -0.6240356 | 9.28014479 | 0.04201541 | 0.15088051 |
| ENSMUSG00000057842 | -0.6247442 | 4.51127017 | 0.048073   | 0.16569422 |
| ENSMUSG00000046404 | -0.6247865 | 5.57261543 | 0.04434088 | 0.15641872 |
| ENSMUSG00000029406 | -0.6251033 | 4.43785164 | 0.04674425 | 0.16260967 |
| ENSMUSG00000035150 | -0.625531  | 9.60733104 | 0.0414469  | 0.14968261 |
| ENSMUSG00000045690 | -0.6257514 | 4.7204763  | 0.04603557 | 0.1608188  |
| ENSMUSG00000036202 | -0.6257724 | 8.4403535  | 0.04162236 | 0.14996844 |
| ENSMUSG00000036093 | -0.6257752 | 7.4352816  | 0.04198277 | 0.15086378 |
| ENSMUSG00000066324 | -0.6258776 | 7.11732126 | 0.04214882 | 0.15117468 |
| ENSMUSG00000020328 | -0.6262472 | 6.52910329 | 0.04247786 | 0.1520213  |
| ENSMUSG00000031578 | -0.6266204 | 7.98719346 | 0.04145975 | 0.14968261 |
| ENSMUSG00000031642 | -0.626765  | 3.13488254 | 0.05644829 | 0.18407083 |
| ENSMUSG00000040264 | -0.6271284 | 7.37735103 | 0.04157288 | 0.14984023 |
| ENSMUSG00000078779 | -0.6271574 | 2.40508382 | 0.06730991 | 0.20603749 |
| ENSMUSG00000097503 | -0.6277186 | 1.0373095  | 0.12766493 | 0.31042583 |
| ENSMUSG00000026361 | -0.6277979 | 7.14217736 | 0.0415106  | 0.14971174 |
| ENSMUSG00000032397 | -0.6283124 | 8.00343089 | 0.0409192  | 0.14821348 |
| ENSMUSG00000059839 | -0.628447  | 3.34820634 | 0.05536348 | 0.18174728 |
| ENSMUSG00000046909 | -0.629199  | 3.46778591 | 0.05150123 | 0.17329769 |
| ENSMUSG00000085172 | -0.6294135 | 0.70095357 | 0.13615279 | 0.32208715 |
| ENSMUSG00000079104 | -0.6295882 | 6.66559713 | 0.04127881 | 0.14917918 |
| ENSMUSG00000022704 | -0.6295928 | 6.10834429 | 0.04174676 | 0.1502159  |
| ENSMUSG00000021668 | -0.6296691 | 5.70781347 | 0.04248815 | 0.1520213  |
| ENSMUSG00000027361 | -0.630124  | 6.53915354 | 0.04118898 | 0.14895439 |
| ENSMUSG00000069114 | -0.6305778 | 3.33325152 | 0.05424898 | 0.17934426 |
| ENSMUSG00000019792 | -0.631035  | 5.19636636 | 0.04305358 | 0.1534335  |
| ENSMUSG00000026875 | -0.6310598 | 6.88045835 | 0.04034443 | 0.14698456 |
| ENSMUSG00000056671 | -0.6312545 | 1.53993131 | 0.08692437 | 0.24347856 |
| ENSMUSG00000070031 | -0.6312905 | 8.38162169 | 0.03986456 | 0.1454973  |
| ENSMUSG00000058392 | -0.6313922 | 7.31770805 | 0.04012569 | 0.14623707 |
| ENSMUSG00000034832 | -0.6320085 | 5.67286923 | 0.04152335 | 0.14971174 |
| ENSMUSG00000041607 | -0.6320906 | 4.95685615 | 0.04296956 | 0.1533721  |
| ENSMUSG00000062906 | -0.6323839 | 3.41397095 | 0.04984487 | 0.16972753 |
| ENSMUSG00000027615 | -0.6324385 | 6.56067022 | 0.04047969 | 0.14727833 |
| ENSMUSG00000066551 | -0.6326846 | 7.65305435 | 0.03970377 | 0.14514896 |
| ENSMUSG00000020142 | -0.63275   | 3.74354912 | 0.04618163 | 0.16112025 |
| ENSMUSG00000025898 | -0.6328224 | 6.32746369 | 0.04065885 | 0.14768103 |
| ENSMUSG00000030417 | -0.6329421 | 6.22845538 | 0.04061203 | 0.14761042 |
| ENSMUSG00000045038 | -0.6332083 | 4.74330758 | 0.04347727 | 0.15453488 |
| ENSMUSG00000004127 | -0.6334112 | 5.03962849 | 0.04226366 | 0.15151972 |
| ENSMUSG00000027881 | -0.6334531 | 7.97983782 | 0.03929728 | 0.14394764 |
| ENSMUSG00000044442 | -0.6337509 | 4.01129629 | 0.04591987 | 0.16046657 |
| ENSMUSG00000055900 | -0.6338021 | 4.9200082  | 0.04280939 | 0.15289764 |

|                    |            |            |            |            |
|--------------------|------------|------------|------------|------------|
| ENSMUSG00000020656 | -0.633936  | 1.90443663 | 0.07668576 | 0.22423514 |
| ENSMUSG00000028560 | -0.6345028 | 8.84089759 | 0.03878109 | 0.1424439  |
| ENSMUSG00000024384 | -0.6349085 | 7.60089074 | 0.03901709 | 0.14321316 |
| ENSMUSG00000022884 | -0.635303  | 9.59613937 | 0.03843    | 0.1417821  |
| ENSMUSG00000042590 | -0.6356405 | 7.09694738 | 0.03906182 | 0.14332858 |
| ENSMUSG00000022292 | -0.6361138 | 5.49337058 | 0.04092871 | 0.14821348 |
| ENSMUSG00000020420 | -0.6361413 | 3.71330697 | 0.04825796 | 0.16605418 |
| ENSMUSG00000031917 | -0.6363072 | 7.1317592  | 0.03877402 | 0.1424439  |
| ENSMUSG00000026646 | -0.6363383 | 4.9564969  | 0.0417335  | 0.1502159  |
| ENSMUSG00000027901 | -0.6364363 | 3.53387482 | 0.0481367  | 0.16579566 |
| ENSMUSG00000074578 | -0.6366718 | 6.69354615 | 0.03888876 | 0.14279073 |
| ENSMUSG00000003929 | -0.637161  | 5.05666489 | 0.04151472 | 0.14971174 |
| ENSMUSG00000002718 | -0.6371938 | 9.2858381  | 0.03789405 | 0.1403811  |
| ENSMUSG00000078578 | -0.6380009 | 8.67221507 | 0.03775289 | 0.14014706 |
| ENSMUSG00000027367 | -0.638272  | 7.97765662 | 0.03784844 | 0.14036452 |
| ENSMUSG00000021549 | -0.6383475 | 6.67574827 | 0.03864929 | 0.14225048 |
| ENSMUSG00000030759 | -0.6386821 | 8.78479489 | 0.03753746 | 0.13949136 |
| ENSMUSG00000053560 | -0.6388236 | 1.26947848 | 0.07245964 | 0.21526301 |
| ENSMUSG00000022983 | -0.6390984 | 6.29099374 | 0.03855667 | 0.14209402 |
| ENSMUSG00000032376 | -0.6398533 | 6.13247203 | 0.03871068 | 0.14237925 |
| ENSMUSG00000022119 | -0.6406216 | 7.4388746  | 0.03737665 | 0.13915755 |
| ENSMUSG00000038481 | -0.6410946 | 6.37529844 | 0.03806673 | 0.14092643 |
| ENSMUSG00000074746 | -0.6411266 | 7.0998392  | 0.03743759 | 0.13926421 |
| ENSMUSG00000029684 | -0.6411888 | 4.55970556 | 0.04177364 | 0.1502625  |
| ENSMUSG00000027782 | -0.6416631 | 8.31355958 | 0.03677557 | 0.13757205 |
| ENSMUSG00000063785 | -0.6422632 | 7.26243901 | 0.03694173 | 0.13799473 |
| ENSMUSG00000027108 | -0.642449  | 7.7535462  | 0.03670269 | 0.13746639 |
| ENSMUSG00000018363 | -0.642973  | 5.5936008  | 0.03858042 | 0.14209402 |
| ENSMUSG00000021025 | -0.6433226 | 7.08700848 | 0.03663401 | 0.13731706 |
| ENSMUSG00000050600 | -0.643426  | 3.40908234 | 0.04698918 | 0.16308881 |
| ENSMUSG00000021639 | -0.6438438 | 5.62607877 | 0.03825976 | 0.14139591 |
| ENSMUSG00000033228 | -0.6439056 | 8.77605873 | 0.0360099  | 0.13573254 |
| ENSMUSG00000066232 | -0.6440344 | 9.2458388  | 0.03590961 | 0.13541923 |
| ENSMUSG00000025899 | -0.6446121 | 5.98442563 | 0.03743168 | 0.13926421 |
| ENSMUSG00000020015 | -0.6447869 | 6.20505391 | 0.03713222 | 0.13839676 |
| ENSMUSG00000062014 | -0.6460382 | 8.04285608 | 0.03559023 | 0.13452681 |
| ENSMUSG00000069727 | -0.6465016 | 2.02594793 | 0.07021596 | 0.21127481 |
| ENSMUSG00000028156 | -0.6467578 | 8.24391436 | 0.03531812 | 0.13373266 |
| ENSMUSG00000048039 | -0.6473155 | 7.78527411 | 0.03529457 | 0.13369043 |
| ENSMUSG00000033931 | -0.647499  | 6.22284403 | 0.0362193  | 0.13618862 |
| ENSMUSG00000025558 | -0.6478653 | 5.12431678 | 0.03788974 | 0.1403811  |
| ENSMUSG00000097705 | -0.6482679 | 2.55671814 | 0.05815644 | 0.1871558  |
| ENSMUSG00000039841 | -0.6483124 | 6.53734259 | 0.03584275 | 0.1352443  |

|                    |            |            |            |            |
|--------------------|------------|------------|------------|------------|
| ENSMUSG00000020608 | -0.6483306 | 7.97230685 | 0.03497967 | 0.13268407 |
| ENSMUSG00000044150 | -0.6487465 | 5.2997456  | 0.03748732 | 0.13940113 |
| ENSMUSG00000090266 | -0.6492431 | 4.97910114 | 0.03809287 | 0.14097238 |
| ENSMUSG00000049957 | -0.6495913 | 5.44240884 | 0.03633958 | 0.13648232 |
| ENSMUSG00000042197 | -0.649828  | 6.58944372 | 0.0352942  | 0.13369043 |
| ENSMUSG00000022905 | -0.649997  | 7.45638751 | 0.03472658 | 0.13214234 |
| ENSMUSG00000058587 | -0.650364  | 7.11166878 | 0.03471806 | 0.13214234 |
| ENSMUSG00000096006 | -0.6503691 | 0.83204306 | 0.11343214 | 0.28884351 |
| ENSMUSG00000040455 | -0.6505192 | 6.15834284 | 0.03549893 | 0.13427196 |
| ENSMUSG00000026388 | -0.6505679 | 1.69413091 | 0.0753729  | 0.22172332 |
| ENSMUSG00000028578 | -0.6506068 | 4.17889676 | 0.03976729 | 0.14532378 |
| ENSMUSG00000054717 | -0.6506729 | 9.53241287 | 0.03400902 | 0.13028536 |
| ENSMUSG00000071172 | -0.6506813 | 8.88592126 | 0.03407869 | 0.13041325 |
| ENSMUSG00000037860 | -0.6507425 | 6.5424354  | 0.03508112 | 0.13297532 |
| ENSMUSG00000089774 | -0.6513955 | 4.14845088 | 0.03970599 | 0.14514896 |
| ENSMUSG00000020817 | -0.6515714 | 6.76303649 | 0.03467798 | 0.1320506  |
| ENSMUSG00000033826 | -0.6516782 | 3.67850053 | 0.04319426 | 0.15378239 |
| ENSMUSG00000031246 | -0.6523576 | 6.98871932 | 0.03432385 | 0.13116526 |
| ENSMUSG00000053453 | -0.6523895 | 6.51186624 | 0.03459942 | 0.13184456 |
| ENSMUSG00000026806 | -0.6524304 | 5.39845729 | 0.03581101 | 0.13517185 |
| ENSMUSG00000017929 | -0.6526117 | 5.82364641 | 0.03499588 | 0.13269888 |
| ENSMUSG00000034617 | -0.6526699 | 5.93391004 | 0.03496269 | 0.13268407 |
| ENSMUSG00000063273 | -0.6528221 | 9.07620029 | 0.03349913 | 0.12851461 |
| ENSMUSG00000028233 | -0.6529001 | 7.25795468 | 0.03402289 | 0.13029218 |
| ENSMUSG00000021215 | -0.6533427 | 6.91124191 | 0.03403561 | 0.13029466 |
| ENSMUSG00000026005 | -0.653468  | 6.65132339 | 0.0342186  | 0.13085583 |
| ENSMUSG00000024091 | -0.6536276 | 7.42123616 | 0.03373161 | 0.12926936 |
| ENSMUSG00000062949 | -0.6537399 | 6.4749339  | 0.03439009 | 0.13127884 |
| ENSMUSG00000018666 | -0.6538954 | 7.32342858 | 0.03367001 | 0.12912424 |
| ENSMUSG00000022533 | -0.6541053 | 8.80190583 | 0.03318905 | 0.12777962 |
| ENSMUSG00000021704 | -0.6541132 | 5.02631263 | 0.03616537 | 0.1360807  |
| ENSMUSG00000059994 | -0.6541659 | 5.83835915 | 0.03463418 | 0.13193041 |
| ENSMUSG00000022827 | -0.6542173 | 5.05947992 | 0.0360668  | 0.13589951 |
| ENSMUSG00000085887 | -0.6543065 | 3.61212946 | 0.04081805 | 0.14805981 |
| ENSMUSG00000041438 | -0.654448  | 7.70530403 | 0.03335572 | 0.12823817 |
| ENSMUSG00000025978 | -0.6546657 | 1.53594462 | 0.07481834 | 0.22087079 |
| ENSMUSG00000021699 | -0.6554018 | 1.72074223 | 0.07507955 | 0.22127845 |
| ENSMUSG00000031604 | -0.6559714 | 7.33294362 | 0.03314318 | 0.1276486  |
| ENSMUSG00000070583 | -0.6561892 | 2.63312402 | 0.0502941  | 0.17063717 |
| ENSMUSG00000078652 | -0.6566857 | 9.14201185 | 0.03244723 | 0.12563151 |
| ENSMUSG00000053332 | -0.6570607 | 8.65501793 | 0.03243486 | 0.12563151 |
| ENSMUSG00000026628 | -0.6570823 | 3.75806901 | 0.04045779 | 0.14724832 |
| ENSMUSG00000020258 | -0.6571048 | 1.93987979 | 0.05842312 | 0.18784584 |

|                    |            |            |            |            |
|--------------------|------------|------------|------------|------------|
| ENSMUSG00000031527 | -0.6581942 | 7.64959258 | 0.03242163 | 0.12563151 |
| ENSMUSG00000028333 | -0.6592718 | 9.71953854 | 0.03171379 | 0.12360009 |
| ENSMUSG00000078700 | -0.6593898 | 3.57446716 | 0.04010337 | 0.14620513 |
| ENSMUSG00000027086 | -0.6596157 | 5.30665152 | 0.03420266 | 0.13084125 |
| ENSMUSG00000044155 | -0.6598909 | 6.17883347 | 0.03288451 | 0.12683352 |
| ENSMUSG00000087153 | -0.6602168 | 4.94082306 | 0.03494181 | 0.13268407 |
| ENSMUSG00000031015 | -0.6607705 | 9.84500057 | 0.03132107 | 0.1225123  |
| ENSMUSG00000020846 | -0.6621034 | 6.96254572 | 0.03173633 | 0.12363548 |
| ENSMUSG00000086629 | -0.6624768 | 1.60685355 | 0.06584992 | 0.20392655 |
| ENSMUSG00000040268 | -0.6624774 | 4.95076483 | 0.03430694 | 0.13114714 |
| ENSMUSG00000023832 | -0.6626096 | 5.93453329 | 0.03236812 | 0.12556037 |
| ENSMUSG00000066037 | -0.6633762 | 7.68432039 | 0.0310628  | 0.12163444 |
| ENSMUSG00000065226 | -0.6639337 | 2.14236747 | 0.06227376 | 0.19688075 |
| ENSMUSG00000024317 | -0.6640713 | 5.58024298 | 0.03271372 | 0.12640084 |
| ENSMUSG00000072258 | -0.6641232 | 4.46797371 | 0.03545213 | 0.13419295 |
| ENSMUSG00000030019 | -0.6642544 | 5.27921019 | 0.03281366 | 0.12665086 |
| ENSMUSG00000047407 | -0.6648572 | 6.02315239 | 0.03175776 | 0.12363548 |
| ENSMUSG00000033106 | -0.6653185 | 5.8257068  | 0.03195948 | 0.12428813 |
| ENSMUSG00000000317 | -0.6657369 | 2.27628751 | 0.05381764 | 0.1787402  |
| ENSMUSG00000017548 | -0.6659714 | 9.07959625 | 0.03011943 | 0.11884667 |
| ENSMUSG00000021952 | -0.6661108 | 7.70120275 | 0.030395   | 0.11962761 |
| ENSMUSG00000020650 | -0.6661562 | 6.70645689 | 0.03088653 | 0.12112013 |
| ENSMUSG00000003418 | -0.6661911 | 6.85328016 | 0.03077431 | 0.12072395 |
| ENSMUSG00000022422 | -0.6668234 | 4.36159752 | 0.03475188 | 0.13219197 |
| ENSMUSG00000040929 | -0.6670412 | 3.94494989 | 0.03738311 | 0.13915755 |
| ENSMUSG00000026761 | -0.667338  | 6.34570232 | 0.03092527 | 0.12118391 |
| ENSMUSG00000022674 | -0.6680107 | 6.61474491 | 0.03052605 | 0.12005578 |
| ENSMUSG00000006154 | -0.668299  | 0.55375752 | 0.06554447 | 0.20357165 |
| ENSMUSG00000006262 | -0.6685469 | 6.8291927  | 0.03022714 | 0.11909734 |
| ENSMUSG00000016529 | -0.6691485 | 4.63335602 | 0.0334728  | 0.12850504 |
| ENSMUSG00000067367 | -0.6698609 | 7.14762663 | 0.02961399 | 0.11728142 |
| ENSMUSG00000022378 | -0.6703382 | 8.33804318 | 0.02919245 | 0.11599535 |
| ENSMUSG00000025323 | -0.6708975 | 5.15962093 | 0.03158679 | 0.12328337 |
| ENSMUSG00000025940 | -0.6723763 | 5.94813536 | 0.03008365 | 0.11881151 |
| ENSMUSG00000030057 | -0.6724805 | 9.70074263 | 0.02847962 | 0.11379185 |
| ENSMUSG00000057329 | -0.6728172 | 6.27932465 | 0.02958945 | 0.11722727 |
| ENSMUSG00000079036 | -0.6729173 | 6.23331776 | 0.02951225 | 0.11705043 |
| ENSMUSG00000031278 | -0.6730357 | 7.32062701 | 0.02887809 | 0.11516324 |
| ENSMUSG00000039096 | -0.6736044 | 3.42136649 | 0.03704886 | 0.13819956 |
| ENSMUSG00000026866 | -0.6739288 | 6.41465094 | 0.02926911 | 0.11617154 |
| ENSMUSG00000027722 | -0.6745394 | 6.18458442 | 0.02924739 | 0.11612806 |
| ENSMUSG00000099966 | -0.6746691 | 3.10638824 | 0.04083721 | 0.14807951 |
| ENSMUSG00000027968 | -0.6751152 | 6.55481535 | 0.02875947 | 0.11476977 |

|                    |            |            |            |            |
|--------------------|------------|------------|------------|------------|
| ENSMUSG00000029629 | -0.6752983 | 6.59559344 | 0.02875635 | 0.11476977 |
| ENSMUSG00000051329 | -0.675631  | 8.15737496 | 0.02798811 | 0.11220216 |
| ENSMUSG00000030232 | -0.6762169 | 8.48963311 | 0.02776585 | 0.11160155 |
| ENSMUSG00000071072 | -0.67685   | 9.05031507 | 0.02754425 | 0.11108345 |
| ENSMUSG00000092222 | -0.6770296 | 2.02191791 | 0.05440339 | 0.17963446 |
| ENSMUSG00000050244 | -0.6771866 | 8.65425911 | 0.02752086 | 0.11103067 |
| ENSMUSG00000031153 | -0.6776051 | 5.41572376 | 0.02919187 | 0.11599535 |
| ENSMUSG00000074497 | -0.6778252 | 2.25228436 | 0.0445171  | 0.15688641 |
| ENSMUSG00000000861 | -0.6778253 | 7.59939084 | 0.02761793 | 0.11125579 |
| ENSMUSG00000053347 | -0.6780973 | 4.25015848 | 0.03339992 | 0.1283166  |
| ENSMUSG00000049313 | -0.6784292 | 7.17805711 | 0.02764656 | 0.11132061 |
| ENSMUSG00000048174 | -0.6791016 | 2.63075217 | 0.04554559 | 0.15957233 |
| ENSMUSG00000074136 | -0.6794222 | 2.17681057 | 0.04909889 | 0.16815394 |
| ENSMUSG00000053907 | -0.6803911 | 9.29115588 | 0.02672416 | 0.10862923 |
| ENSMUSG00000054027 | -0.6807664 | 5.1454349  | 0.02889706 | 0.11516324 |
| ENSMUSG00000063253 | -0.6810835 | 5.12414161 | 0.02921895 | 0.11605789 |
| ENSMUSG00000024528 | -0.68145   | 5.08845291 | 0.02875859 | 0.11476977 |
| ENSMUSG00000040022 | -0.6815848 | 3.86993182 | 0.03285755 | 0.12677489 |
| ENSMUSG00000039756 | -0.6816153 | 7.75779477 | 0.02673973 | 0.10863079 |
| ENSMUSG00000031931 | -0.6816411 | 5.51018781 | 0.02842576 | 0.11361876 |
| ENSMUSG00000086503 | -0.6818762 | 8.72098868 | 0.02624876 | 0.10701184 |
| ENSMUSG00000031229 | -0.6823702 | 9.17907545 | 0.02631346 | 0.10720223 |
| ENSMUSG00000036225 | -0.6826581 | 3.24590582 | 0.03550532 | 0.13427196 |
| ENSMUSG00000070605 | -0.6826614 | 4.08965478 | 0.03176872 | 0.12363548 |
| ENSMUSG00000027193 | -0.6833743 | 8.97730708 | 0.02610986 | 0.10653376 |
| ENSMUSG00000079083 | -0.6834362 | 3.91972984 | 0.03349512 | 0.12851461 |
| ENSMUSG00000047989 | -0.6838684 | 5.84291114 | 0.02734966 | 0.11050532 |
| ENSMUSG00000021595 | -0.684331  | 9.06488353 | 0.02587022 | 0.10587644 |
| ENSMUSG00000057894 | -0.6844043 | 5.49214831 | 0.02777868 | 0.11161153 |
| ENSMUSG00000020547 | -0.6846051 | 7.26021196 | 0.02622523 | 0.10696401 |
| ENSMUSG00000036840 | -0.684661  | 3.34138703 | 0.03657682 | 0.13724579 |
| ENSMUSG00000028771 | -0.6864069 | 5.66539661 | 0.02711816 | 0.10989938 |
| ENSMUSG00000028633 | -0.6865067 | 7.76432558 | 0.02564435 | 0.10535186 |
| ENSMUSG00000022248 | -0.6869192 | 5.48484419 | 0.02724454 | 0.11028719 |
| ENSMUSG00000047022 | -0.6873338 | 2.14528619 | 0.05004518 | 0.17016429 |
| ENSMUSG00000029415 | -0.6875035 | 7.84846055 | 0.02541097 | 0.10488967 |
| ENSMUSG00000021693 | -0.6875717 | 6.67612366 | 0.02594883 | 0.10603721 |
| ENSMUSG00000018433 | -0.6885141 | 7.82795316 | 0.02521024 | 0.10432356 |
| ENSMUSG00000037697 | -0.6886921 | 5.08867502 | 0.02755969 | 0.11111042 |
| ENSMUSG00000039968 | -0.688805  | 6.33662133 | 0.02588769 | 0.10590776 |
| ENSMUSG00000066798 | -0.6888295 | 5.57151304 | 0.02674469 | 0.10863079 |
| ENSMUSG00000024276 | -0.6888753 | 6.834757   | 0.02558452 | 0.10514613 |
| ENSMUSG00000019861 | -0.6889099 | 6.07444997 | 0.02607954 | 0.10645033 |

|                    |            |            |            |            |
|--------------------|------------|------------|------------|------------|
| ENSMUSG00000024999 | -0.6892047 | 7.10928131 | 0.02533111 | 0.10470321 |
| ENSMUSG00000033543 | -0.6898391 | 6.19970988 | 0.02580789 | 0.10570159 |
| ENSMUSG00000097195 | -0.6900117 | 6.48801749 | 0.02549541 | 0.10490514 |
| ENSMUSG00000040139 | -0.6900564 | 2.28014394 | 0.04108737 | 0.14863677 |
| ENSMUSG00000053684 | -0.6903894 | 3.69167287 | 0.03137375 | 0.12267385 |
| ENSMUSG00000043467 | -0.6905877 | 4.01740814 | 0.03017874 | 0.11895012 |
| ENSMUSG00000089857 | -0.6906938 | 3.19307186 | 0.03616089 | 0.1360807  |
| ENSMUSG00000043702 | -0.6908148 | 6.1276086  | 0.02567886 | 0.10542572 |
| ENSMUSG00000030471 | -0.6913677 | 6.00223838 | 0.02571688 | 0.10544898 |
| ENSMUSG00000048379 | -0.6914089 | 6.94913003 | 0.02496205 | 0.1035349  |
| ENSMUSG00000022663 | -0.6918984 | 6.63140883 | 0.02504347 | 0.1038114  |
| ENSMUSG00000042514 | -0.6920563 | 4.18994724 | 0.02954646 | 0.11710011 |
| ENSMUSG00000034653 | -0.6921177 | 6.42493562 | 0.02515444 | 0.1041326  |
| ENSMUSG00000072969 | -0.6921383 | 4.09780851 | 0.02963028 | 0.11730286 |
| ENSMUSG00000091957 | -0.6922946 | 0.8299639  | 0.09097435 | 0.25131211 |
| ENSMUSG00000021597 | -0.6924297 | 5.86443042 | 0.02558437 | 0.10514613 |
| ENSMUSG00000075703 | -0.692625  | 6.75775261 | 0.02479115 | 0.1029845  |
| ENSMUSG00000020949 | -0.692795  | 7.39174472 | 0.02451038 | 0.10189666 |
| ENSMUSG00000035960 | -0.6928281 | 7.15080107 | 0.02449448 | 0.10189666 |
| ENSMUSG00000033943 | -0.6928888 | 8.01682815 | 0.02430125 | 0.10133979 |
| ENSMUSG00000020075 | -0.693342  | 10.1459354 | 0.02392054 | 0.10030766 |
| ENSMUSG00000052137 | -0.6941277 | 4.39714679 | 0.02819467 | 0.1129043  |
| ENSMUSG00000042595 | -0.6942395 | 4.76884562 | 0.02731671 | 0.11041356 |
| ENSMUSG00000097042 | -0.694469  | 3.17184287 | 0.03338887 | 0.1283166  |
| ENSMUSG00000027508 | -0.6946746 | 6.597839   | 0.02450425 | 0.10189666 |
| ENSMUSG00000021418 | -0.6948586 | 4.39713641 | 0.02837211 | 0.11349933 |
| ENSMUSG00000026094 | -0.6949368 | 8.00464636 | 0.02388694 | 0.10030766 |
| ENSMUSG00000001305 | -0.6964533 | 6.38870658 | 0.02414487 | 0.10088271 |
| ENSMUSG00000056260 | -0.696473  | 5.62550117 | 0.02509942 | 0.10398467 |
| ENSMUSG00000030031 | -0.6967257 | 5.32889325 | 0.02544533 | 0.10490514 |
| ENSMUSG00000024286 | -0.6967858 | 6.73697609 | 0.0239814  | 0.10039418 |
| ENSMUSG00000021149 | -0.6972422 | 8.47590655 | 0.02331705 | 0.09856962 |
| ENSMUSG00000036779 | -0.6977506 | 6.63311499 | 0.02379506 | 0.10000231 |
| ENSMUSG00000035868 | -0.6978577 | 3.81514591 | 0.03017218 | 0.11895012 |
| ENSMUSG00000027091 | -0.6985558 | 7.84474291 | 0.02320892 | 0.09822804 |
| ENSMUSG00000052539 | -0.6985884 | 3.62165546 | 0.03017609 | 0.11895012 |
| ENSMUSG00000039221 | -0.6992316 | 6.54162734 | 0.02362889 | 0.09953671 |
| ENSMUSG00000029836 | -0.6995397 | 8.31594938 | 0.02288447 | 0.0972748  |
| ENSMUSG00000044763 | -0.6995991 | 6.09683487 | 0.02393283 | 0.10030766 |
| ENSMUSG00000044934 | -0.6997939 | 5.7901043  | 0.02405519 | 0.10059704 |
| ENSMUSG00000044018 | -0.7001012 | 6.29887033 | 0.02358054 | 0.0994107  |
| ENSMUSG00000027353 | -0.7002415 | 5.4734649  | 0.02439351 | 0.10160663 |
| ENSMUSG00000009575 | -0.7010249 | 9.54611269 | 0.02246487 | 0.09576263 |

|                    |            |            |            |            |
|--------------------|------------|------------|------------|------------|
| ENSMUSG00000038388 | -0.7016013 | 7.3130992  | 0.02275707 | 0.09680956 |
| ENSMUSG00000040990 | -0.7016589 | 6.60113766 | 0.02312146 | 0.09810981 |
| ENSMUSG00000026675 | -0.7022224 | 5.71530731 | 0.02362504 | 0.09953671 |
| ENSMUSG00000049321 | -0.7025477 | 1.51697668 | 0.0545801  | 0.18005254 |
| ENSMUSG00000044465 | -0.7025684 | 2.39523345 | 0.03591422 | 0.13541923 |
| ENSMUSG00000025995 | -0.7026884 | 7.92504513 | 0.02238737 | 0.09557488 |
| ENSMUSG00000021175 | -0.7027381 | 5.59649207 | 0.02364498 | 0.09956557 |
| ENSMUSG00000038335 | -0.7028198 | 8.41255025 | 0.02224678 | 0.0951266  |
| ENSMUSG00000021112 | -0.7034278 | 5.44412322 | 0.02392869 | 0.10030766 |
| ENSMUSG00000024800 | -0.7034343 | 5.71198327 | 0.02346672 | 0.09900648 |
| ENSMUSG00000038214 | -0.703507  | 5.1099732  | 0.024014   | 0.10049166 |
| ENSMUSG00000021514 | -0.7035152 | 4.53964405 | 0.02571084 | 0.10544898 |
| ENSMUSG00000051495 | -0.7036127 | 5.27328759 | 0.02395108 | 0.10034515 |
| ENSMUSG00000098234 | -0.704162  | 5.68969183 | 0.02346443 | 0.09900648 |
| ENSMUSG00000037580 | -0.7042452 | 3.28201308 | 0.03028582 | 0.11928499 |
| ENSMUSG00000036282 | -0.7043382 | 6.0109129  | 0.0231255  | 0.09810981 |
| ENSMUSG00000096916 | -0.7051217 | 5.63982173 | 0.02337282 | 0.09872796 |
| ENSMUSG00000028977 | -0.7058684 | 1.92835185 | 0.03750463 | 0.13941742 |
| ENSMUSG00000022849 | -0.706329  | 3.75351509 | 0.02766906 | 0.111337   |
| ENSMUSG00000031370 | -0.7071102 | 5.76535873 | 0.02268872 | 0.09655688 |
| ENSMUSG00000097052 | -0.7072171 | 3.72890224 | 0.02731116 | 0.11041356 |
| ENSMUSG00000039753 | -0.7081677 | 5.97222709 | 0.02239593 | 0.09557488 |
| ENSMUSG00000029267 | -0.7082866 | 7.40540164 | 0.02149659 | 0.09261655 |
| ENSMUSG00000025326 | -0.7084746 | 7.83375922 | 0.02135294 | 0.09203441 |
| ENSMUSG00000074500 | -0.7086753 | 0.71645671 | 0.08878337 | 0.24676286 |
| ENSMUSG00000033799 | -0.7090425 | 7.72404309 | 0.02126849 | 0.09175881 |
| ENSMUSG00000007617 | -0.7097645 | 4.8424531  | 0.02370091 | 0.09972323 |
| ENSMUSG00000095362 | -0.7101215 | 1.67791261 | 0.05504711 | 0.1808672  |
| ENSMUSG00000058799 | -0.7104855 | 10.1921907 | 0.02068516 | 0.08994709 |
| ENSMUSG00000026064 | -0.7108121 | 7.4929671  | 0.0210217  | 0.09106136 |
| ENSMUSG00000024359 | -0.7111583 | 10.4573733 | 0.02055277 | 0.08947966 |
| ENSMUSG00000090659 | -0.7113168 | 2.64923529 | 0.03496886 | 0.13268407 |
| ENSMUSG00000032249 | -0.7117939 | 8.58206839 | 0.02058763 | 0.08959525 |
| ENSMUSG00000047583 | -0.7119505 | 2.48620323 | 0.0369618  | 0.13799473 |
| ENSMUSG00000027349 | -0.7120753 | 6.74344055 | 0.02100704 | 0.09105302 |
| ENSMUSG00000021692 | -0.7124542 | 5.167482   | 0.02245053 | 0.09576263 |
| ENSMUSG00000038291 | -0.7129254 | 5.79536899 | 0.02153811 | 0.09275838 |
| ENSMUSG00000058006 | -0.7131911 | 8.23411565 | 0.02039888 | 0.08892362 |
| ENSMUSG00000023845 | -0.7135188 | 8.10932717 | 0.02040032 | 0.08892362 |
| ENSMUSG00000008193 | -0.7155135 | 7.0817931  | 0.02025578 | 0.08843656 |
| ENSMUSG00000022247 | -0.7163932 | 7.52667821 | 0.02002324 | 0.08759861 |
| ENSMUSG00000038459 | -0.7167906 | 4.47571052 | 0.0231104  | 0.09810981 |
| ENSMUSG00000020994 | -0.7179845 | 8.09965648 | 0.01958738 | 0.08614614 |

|                    |            |            |            |            |
|--------------------|------------|------------|------------|------------|
| ENSMUSG0000001774  | -0.7184407 | 7.89987636 | 0.01957883 | 0.08614365 |
| ENSMUSG00000050471 | -0.7185028 | 5.42758849 | 0.02091509 | 0.09083703 |
| ENSMUSG00000064138 | -0.7186697 | 6.41709494 | 0.02014045 | 0.08806607 |
| ENSMUSG00000038736 | -0.71902   | 6.91200592 | 0.01980459 | 0.08685346 |
| ENSMUSG00000031592 | -0.7190469 | 7.66365433 | 0.01956209 | 0.0861403  |
| ENSMUSG00000030201 | -0.7194619 | 6.16809402 | 0.02014691 | 0.08806607 |
| ENSMUSG00000079614 | -0.7197635 | 7.51087485 | 0.01944404 | 0.08572547 |
| ENSMUSG00000040464 | -0.7208696 | 5.20596586 | 0.02094177 | 0.0908797  |
| ENSMUSG00000027787 | -0.7210879 | 7.42722379 | 0.01927047 | 0.08509941 |
| ENSMUSG00000038550 | -0.7213579 | 1.87279973 | 0.04124714 | 0.1491147  |
| ENSMUSG00000028252 | -0.7213744 | 6.15915893 | 0.01982746 | 0.08691843 |
| ENSMUSG00000089937 | -0.7215664 | 0.82163861 | 0.07937933 | 0.22980582 |
| ENSMUSG00000028403 | -0.7216457 | 6.41011317 | 0.01960904 | 0.08619214 |
| ENSMUSG00000062078 | -0.7217389 | 7.36839505 | 0.01914365 | 0.08471164 |
| ENSMUSG00000033629 | -0.7221664 | 7.55316623 | 0.0190273  | 0.08433639 |
| ENSMUSG00000087590 | -0.7225872 | 3.17038194 | 0.02773298 | 0.11151099 |
| ENSMUSG00000001707 | -0.7229402 | 6.47725918 | 0.01931896 | 0.08526572 |
| ENSMUSG00000026019 | -0.7230444 | 7.14031347 | 0.01898467 | 0.08421665 |
| ENSMUSG00000101225 | -0.7249606 | 1.36528446 | 0.06235618 | 0.19708355 |
| ENSMUSG00000024805 | -0.7262585 | 5.76500287 | 0.01936165 | 0.08539714 |
| ENSMUSG00000078768 | -0.7268779 | 3.19242175 | 0.02568188 | 0.10542572 |
| ENSMUSG00000083563 | -0.7271231 | 3.89159931 | 0.02340326 | 0.09881783 |
| ENSMUSG00000005846 | -0.7277703 | 9.09732477 | 0.01788642 | 0.08003617 |
| ENSMUSG00000086015 | -0.7282184 | 1.11371    | 0.0600447  | 0.19146127 |
| ENSMUSG00000028093 | -0.7283799 | 3.53303673 | 0.02397977 | 0.10039418 |
| ENSMUSG00000026377 | -0.728525  | 7.83500275 | 0.01794315 | 0.0801902  |
| ENSMUSG00000024070 | -0.7296999 | 7.05621144 | 0.01799811 | 0.08036918 |
| ENSMUSG00000036693 | -0.7302544 | 7.55589168 | 0.01773098 | 0.07958366 |
| ENSMUSG00000063108 | -0.7316864 | 6.89063996 | 0.01776507 | 0.07959225 |
| ENSMUSG00000021548 | -0.7326654 | 6.43179173 | 0.0178444  | 0.07991447 |
| ENSMUSG00000036160 | -0.7342023 | 5.86493904 | 0.01774293 | 0.07958366 |
| ENSMUSG00000030660 | -0.7348208 | 6.62851156 | 0.01745435 | 0.0786905  |
| ENSMUSG00000022009 | -0.7349651 | 6.01742476 | 0.01772133 | 0.07958366 |
| ENSMUSG00000031226 | -0.7352677 | 6.90590356 | 0.01713219 | 0.07749729 |
| ENSMUSG00000030067 | -0.7361432 | 8.28934265 | 0.01670696 | 0.07602018 |
| ENSMUSG00000045464 | -0.73622   | 2.382878   | 0.03170133 | 0.12359621 |
| ENSMUSG00000018239 | -0.7362261 | 5.22809251 | 0.01825604 | 0.08138615 |
| ENSMUSG00000045896 | -0.7362785 | 6.73869051 | 0.01708577 | 0.07738467 |
| ENSMUSG00000042079 | -0.7373871 | 9.26022895 | 0.01642552 | 0.07499271 |
| ENSMUSG00000063480 | -0.7378447 | 8.05500307 | 0.01649511 | 0.07521542 |
| ENSMUSG00000079065 | -0.7379896 | 4.24706995 | 0.02015459 | 0.08806607 |
| ENSMUSG00000024242 | -0.7393194 | 2.65694886 | 0.02900252 | 0.11541077 |
| ENSMUSG00000045411 | -0.7393331 | 6.36629741 | 0.01674727 | 0.07613811 |



|                    |            |            |            |            |
|--------------------|------------|------------|------------|------------|
| ENSMUSG00000033166 | -0.7395998 | 7.89546551 | 0.01627845 | 0.07451051 |
| ENSMUSG00000086370 | -0.7398369 | 4.44855782 | 0.01889943 | 0.08387304 |
| ENSMUSG00000024097 | -0.7403638 | 8.43516997 | 0.01607634 | 0.07383614 |
| ENSMUSG00000031715 | -0.7405089 | 9.12173205 | 0.01600037 | 0.07358122 |
| ENSMUSG00000030521 | -0.7405573 | 7.47228424 | 0.01623668 | 0.07438247 |
| ENSMUSG00000035236 | -0.7407178 | 5.14990188 | 0.01798271 | 0.08033368 |
| ENSMUSG00000034875 | -0.7411114 | 5.19311803 | 0.01759736 | 0.07926896 |
| ENSMUSG00000032745 | -0.7417379 | 7.88852602 | 0.01599899 | 0.07358122 |
| ENSMUSG00000050029 | -0.7420525 | 6.87747527 | 0.01621661 | 0.0743221  |
| ENSMUSG00000046808 | -0.7420597 | 4.73668987 | 0.01821922 | 0.0812556  |
| ENSMUSG00000062939 | -0.7420619 | 5.79778132 | 0.01695506 | 0.07688958 |
| ENSMUSG00000046096 | -0.7420684 | 4.61757668 | 0.01861261 | 0.08287301 |
| ENSMUSG00000038866 | -0.7423235 | 6.87740091 | 0.0161709  | 0.07414412 |
| ENSMUSG00000089788 | -0.7425079 | 5.92187517 | 0.0166721  | 0.07589359 |
| ENSMUSG00000028530 | -0.7427831 | 9.01001547 | 0.01568605 | 0.07238269 |
| ENSMUSG00000023852 | -0.7430906 | 8.67847034 | 0.01567839 | 0.07237833 |
| ENSMUSG00000072653 | -0.7442771 | 2.98000863 | 0.02571668 | 0.10544898 |
| ENSMUSG00000013736 | -0.744574  | 7.81936316 | 0.01559583 | 0.07205886 |
| ENSMUSG00000047632 | -0.7450403 | 0.77457895 | 0.07985705 | 0.23069339 |
| ENSMUSG00000064090 | -0.7466285 | 4.89076739 | 0.0174282  | 0.07860547 |
| ENSMUSG00000048720 | -0.7469169 | 3.2984002  | 0.02200032 | 0.09440966 |
| ENSMUSG00000026037 | -0.7486674 | 7.88403165 | 0.0150457  | 0.07014823 |
| ENSMUSG00000026434 | -0.7490233 | 9.96861381 | 0.01478596 | 0.06932685 |
| ENSMUSG00000034218 | -0.7492181 | 8.45266405 | 0.01488673 | 0.06958754 |
| ENSMUSG00000025104 | -0.7492394 | 1.50284208 | 0.05275798 | 0.1761976  |
| ENSMUSG00000046311 | -0.7492647 | 7.21660471 | 0.01513806 | 0.07039658 |
| ENSMUSG00000063334 | -0.749498  | 7.21046511 | 0.01506721 | 0.07020557 |
| ENSMUSG00000032220 | -0.7498209 | 6.65353712 | 0.01517272 | 0.070527   |
| ENSMUSG00000005732 | -0.7503901 | 8.24202239 | 0.01472523 | 0.06907217 |
| ENSMUSG00000071068 | -0.7506927 | 6.83941166 | 0.01498512 | 0.06997843 |
| ENSMUSG00000044949 | -0.7510229 | 1.67609456 | 0.03691297 | 0.137979   |
| ENSMUSG00000027506 | -0.751229  | 5.83871965 | 0.01552432 | 0.07175967 |
| ENSMUSG00000040459 | -0.7512625 | 7.01638483 | 0.01488628 | 0.06958754 |
| ENSMUSG00000027201 | -0.752194  | 6.78637655 | 0.01485911 | 0.06957908 |
| ENSMUSG00000025060 | -0.7522593 | 6.71276334 | 0.01488509 | 0.06958754 |
| ENSMUSG00000025962 | -0.7524195 | 6.46122567 | 0.01499242 | 0.06997843 |
| ENSMUSG00000027099 | -0.7526414 | 6.20711874 | 0.0150931  | 0.07024772 |
| ENSMUSG00000070407 | -0.7526507 | 1.56935691 | 0.03950653 | 0.14461588 |
| ENSMUSG00000040565 | -0.7531333 | 8.27996226 | 0.01438515 | 0.06775894 |
| ENSMUSG00000021714 | -0.7573221 | 4.6615996  | 0.01625061 | 0.07441466 |
| ENSMUSG00000004356 | -0.7573948 | 8.33181365 | 0.01383965 | 0.06571855 |
| ENSMUSG00000064357 | -0.7578815 | 1.3497552  | 0.0371156  | 0.13839676 |
| ENSMUSG00000022607 | -0.7580153 | 4.72445566 | 0.01611302 | 0.07394162 |

|                    |            |            |            |            |
|--------------------|------------|------------|------------|------------|
| ENSMUSG00000053799 | -0.7592706 | 5.97317588 | 0.01435141 | 0.06767191 |
| ENSMUSG00000001027 | -0.7595582 | 5.62644806 | 0.01450074 | 0.06822687 |
| ENSMUSG00000075581 | -0.7598792 | 0.89721369 | 0.05163809 | 0.1735864  |
| ENSMUSG00000052812 | -0.7603439 | 6.22144147 | 0.014106   | 0.06677749 |
| ENSMUSG00000098148 | -0.7605845 | 3.42146316 | 0.01845803 | 0.08221865 |
| ENSMUSG00000028522 | -0.7607517 | 7.66945407 | 0.01354571 | 0.06466441 |
| ENSMUSG00000018415 | -0.7607564 | 5.69869422 | 0.01433542 | 0.06765566 |
| ENSMUSG00000025949 | -0.7609471 | 6.88194299 | 0.01374329 | 0.06540494 |
| ENSMUSG00000030505 | -0.7623217 | 6.46672336 | 0.0136766  | 0.06520269 |
| ENSMUSG00000026031 | -0.7623543 | 8.20014501 | 0.01324941 | 0.06364437 |
| ENSMUSG00000087177 | -0.762434  | 1.39597985 | 0.04697974 | 0.16308881 |
| ENSMUSG00000019777 | -0.7632797 | 7.60235434 | 0.01324333 | 0.06364352 |
| ENSMUSG00000055531 | -0.764167  | 7.95566154 | 0.01307447 | 0.06305598 |
| ENSMUSG00000037138 | -0.7646891 | 6.56533935 | 0.01336924 | 0.06407728 |
| ENSMUSG00000023169 | -0.7647402 | 8.21765694 | 0.01295562 | 0.06267987 |
| ENSMUSG00000052794 | -0.7651407 | 4.25250383 | 0.01561065 | 0.07209646 |
| ENSMUSG00000030942 | -0.7653803 | 7.26049214 | 0.01305439 | 0.06301634 |
| ENSMUSG00000037643 | -0.7655737 | 6.30819218 | 0.01339621 | 0.06408788 |
| ENSMUSG00000026495 | -0.7656402 | 3.20230151 | 0.02035049 | 0.08877817 |
| ENSMUSG00000032534 | -0.7666036 | 5.4588506  | 0.01376741 | 0.06549084 |
| ENSMUSG00000020738 | -0.7667922 | 8.94465889 | 0.01265814 | 0.0616834  |
| ENSMUSG00000023883 | -0.7668591 | 6.94943088 | 0.01297658 | 0.06272496 |
| ENSMUSG00000058470 | -0.7671699 | 5.4295099  | 0.01399815 | 0.06637668 |
| ENSMUSG00000026784 | -0.7680558 | 4.56717804 | 0.0149961  | 0.06997843 |
| ENSMUSG00000036916 | -0.7680777 | 6.42236436 | 0.01306614 | 0.06304485 |
| ENSMUSG00000074656 | -0.7686233 | 8.75724222 | 0.01246424 | 0.0609429  |
| ENSMUSG00000033186 | -0.7687389 | 5.25248603 | 0.01373023 | 0.06540055 |
| ENSMUSG00000041235 | -0.7694892 | 6.14323785 | 0.0129502  | 0.06267987 |
| ENSMUSG00000038535 | -0.7696574 | 6.30333059 | 0.01296467 | 0.06269553 |
| ENSMUSG00000101599 | -0.7705112 | 2.71090739 | 0.02102585 | 0.09106136 |
| ENSMUSG00000020988 | -0.7706011 | 5.41940367 | 0.01333474 | 0.06399725 |
| ENSMUSG00000032423 | -0.7709445 | 9.20403138 | 0.01217665 | 0.05985093 |
| ENSMUSG00000045624 | -0.7715664 | 7.37880528 | 0.0123417  | 0.06044181 |
| ENSMUSG00000020863 | -0.7715937 | 8.18898893 | 0.0121927  | 0.05988347 |
| ENSMUSG00000031174 | -0.7729912 | 3.33575113 | 0.01871335 | 0.0832528  |
| ENSMUSG00000097589 | -0.7736912 | 2.7761679  | 0.02127198 | 0.09175881 |
| ENSMUSG00000057541 | -0.7737806 | 7.05916624 | 0.01215048 | 0.05983142 |
| ENSMUSG00000042505 | -0.7740035 | 2.81482851 | 0.01945481 | 0.08573315 |
| ENSMUSG00000016087 | -0.7749683 | 7.44022506 | 0.01192857 | 0.05892704 |
| ENSMUSG00000059005 | -0.7755129 | 9.11026626 | 0.01168033 | 0.05793243 |
| ENSMUSG00000040102 | -0.7760284 | 4.82729052 | 0.01332994 | 0.06399725 |
| ENSMUSG00000038510 | -0.7763152 | 7.02064377 | 0.01189614 | 0.05880911 |
| ENSMUSG00000034761 | -0.7769581 | 4.85225257 | 0.01319855 | 0.06348491 |

|                    |            |            |            |            |
|--------------------|------------|------------|------------|------------|
| ENSMUSG00000097188 | -0.7773618 | 7.40640206 | 0.01170246 | 0.05796936 |
| ENSMUSG00000097772 | -0.7773721 | 4.21935763 | 0.01402354 | 0.06641629 |
| ENSMUSG00000031242 | -0.7784006 | 5.71849512 | 0.01230039 | 0.06026689 |
| ENSMUSG00000021569 | -0.7785934 | 6.60224105 | 0.01177594 | 0.0583066  |
| ENSMUSG00000050379 | -0.7787411 | 7.56068025 | 0.01151815 | 0.05747882 |
| ENSMUSG00000019699 | -0.7791816 | 5.50639477 | 0.01239476 | 0.0606741  |
| ENSMUSG00000024294 | -0.7803732 | 6.67613394 | 0.01157376 | 0.05759643 |
| ENSMUSG00000048495 | -0.7812198 | 4.09102827 | 0.01428154 | 0.06743086 |
| ENSMUSG00000027236 | -0.7813354 | 6.56316764 | 0.01155293 | 0.05754589 |
| ENSMUSG00000025980 | -0.7814504 | 10.6973726 | 0.01100363 | 0.05526927 |
| ENSMUSG00000063317 | -0.783138  | 5.96811772 | 0.01157291 | 0.05759643 |
| ENSMUSG00000008976 | -0.7832068 | 7.60919945 | 0.01104442 | 0.05544836 |
| ENSMUSG00000042105 | -0.7833702 | 5.75879997 | 0.01169608 | 0.05796441 |
| ENSMUSG00000030421 | -0.7836328 | 6.38128228 | 0.01134257 | 0.05668131 |
| ENSMUSG00000101609 | -0.7840173 | 2.85340311 | 0.01899648 | 0.08423439 |
| ENSMUSG00000032403 | -0.7844885 | 1.74934964 | 0.03054822 | 0.12009916 |
| ENSMUSG00000051730 | -0.7845745 | 3.83592915 | 0.01421302 | 0.06713675 |
| ENSMUSG00000034647 | -0.7846178 | 6.44868905 | 0.01122865 | 0.05621621 |
| ENSMUSG00000028669 | -0.7851739 | 6.18390989 | 0.01123434 | 0.05621862 |
| ENSMUSG00000022800 | -0.7854965 | 7.18281865 | 0.01091798 | 0.05499274 |
| ENSMUSG00000029328 | -0.7855561 | 8.48967336 | 0.01069515 | 0.05414861 |
| ENSMUSG00000050855 | -0.7856902 | 3.62605383 | 0.0149963  | 0.06997843 |
| ENSMUSG00000037236 | -0.7859998 | 8.7892812  | 0.01063778 | 0.05395948 |
| ENSMUSG00000047710 | -0.7862339 | 6.63571173 | 0.01093275 | 0.05501577 |
| ENSMUSG00000036934 | -0.7867158 | 4.22528162 | 0.01282733 | 0.06225468 |
| ENSMUSG00000032409 | -0.7867694 | 7.15803723 | 0.0108148  | 0.05467736 |
| ENSMUSG00000089824 | -0.7870302 | 5.39715796 | 0.01154034 | 0.05753628 |
| ENSMUSG00000074182 | -0.7880643 | 5.66461355 | 0.01123967 | 0.05621922 |
| ENSMUSG00000022637 | -0.7884008 | 5.17858598 | 0.01168426 | 0.05793243 |
| ENSMUSG00000045102 | -0.7892306 | 0.87187501 | 0.04902354 | 0.16799169 |
| ENSMUSG00000021669 | -0.7894705 | 6.6014285  | 0.0106936  | 0.05414861 |
| ENSMUSG00000051022 | -0.7902333 | 1.95371756 | 0.02162274 | 0.0930494  |
| ENSMUSG00000038563 | -0.7902883 | 7.00817778 | 0.01045093 | 0.05331257 |
| ENSMUSG00000066278 | -0.7907423 | 3.45068806 | 0.01460552 | 0.06860536 |
| ENSMUSG00000025626 | -0.7913103 | 7.59031686 | 0.01028173 | 0.05267374 |
| ENSMUSG00000030393 | -0.7936498 | 4.04179949 | 0.01283979 | 0.06225913 |
| ENSMUSG00000031644 | -0.7936854 | 5.81383571 | 0.01067454 | 0.05409505 |
| ENSMUSG00000018846 | -0.7943058 | 7.48339138 | 0.01000973 | 0.05163054 |
| ENSMUSG00000022299 | -0.7950987 | 5.66812295 | 0.01057216 | 0.0536811  |
| ENSMUSG00000097230 | -0.7958825 | 1.43290148 | 0.03786354 | 0.14036452 |
| ENSMUSG00000045140 | -0.7964829 | 4.40754875 | 0.01182534 | 0.05852429 |
| ENSMUSG00000069135 | -0.7965344 | 6.57907059 | 0.01000026 | 0.05162414 |
| ENSMUSG00000059834 | -0.7977363 | 5.0032131  | 0.01090765 | 0.05496638 |

|                    |            |            |            |            |
|--------------------|------------|------------|------------|------------|
| ENSMUSG00000034998 | -0.7986115 | 6.54768054 | 0.00984181 | 0.05101734 |
| ENSMUSG00000053205 | -0.7987134 | 3.90042412 | 0.01258673 | 0.06144648 |
| ENSMUSG00000027534 | -0.7992429 | 3.25925165 | 0.01507753 | 0.07020557 |
| ENSMUSG00000022237 | -0.7997827 | 6.44812554 | 0.00973717 | 0.05062953 |
| ENSMUSG00000031671 | -0.7998045 | 4.36464236 | 0.01152647 | 0.05749373 |
| ENSMUSG00000031432 | -0.799886  | 7.1559721  | 0.00955545 | 0.04987706 |
| ENSMUSG00000047412 | -0.8006134 | 6.23768328 | 0.00977012 | 0.0507068  |
| ENSMUSG00000042225 | -0.8024508 | 6.07723659 | 0.009661   | 0.05033056 |
| ENSMUSG00000029635 | -0.8028263 | 6.5579544  | 0.00944198 | 0.04933251 |
| ENSMUSG00000046999 | -0.8037274 | 5.22020982 | 0.01001108 | 0.05163054 |
| ENSMUSG00000029817 | -0.8042397 | 7.69204772 | 0.00907764 | 0.04782863 |
| ENSMUSG00000028188 | -0.8053237 | 1.22425938 | 0.03261456 | 0.12613164 |
| ENSMUSG00000052749 | -0.8059151 | 4.38527723 | 0.0110953  | 0.05567786 |
| ENSMUSG00000074527 | -0.8063391 | 1.05079554 | 0.03661789 | 0.13731706 |
| ENSMUSG00000032883 | -0.8063415 | 6.29096056 | 0.00923669 | 0.04858948 |
| ENSMUSG00000037253 | -0.8064372 | 6.94670856 | 0.00903919 | 0.04769011 |
| ENSMUSG00000071796 | -0.8082324 | 4.20004365 | 0.01113825 | 0.05581548 |
| ENSMUSG00000031939 | -0.8086582 | 6.80954634 | 0.00888452 | 0.04703516 |
| ENSMUSG00000027552 | -0.8093036 | 4.47438602 | 0.0104722  | 0.0533454  |
| ENSMUSG00000064368 | -0.8093956 | 6.22729701 | 0.00901533 | 0.04758751 |
| ENSMUSG00000054237 | -0.8096348 | 5.16915228 | 0.00959283 | 0.05004792 |
| ENSMUSG00000086429 | -0.8097192 | 3.27866015 | 0.01316882 | 0.06339848 |
| ENSMUSG00000095315 | -0.8106904 | 1.18050833 | 0.03988224 | 0.1454973  |
| ENSMUSG00000005540 | -0.8110657 | 8.824977   | 0.00840391 | 0.04490969 |
| ENSMUSG00000040321 | -0.8115533 | 5.35716484 | 0.00933606 | 0.0489213  |
| ENSMUSG00000046994 | -0.8123246 | 5.68175496 | 0.00896818 | 0.04736183 |
| ENSMUSG00000049871 | -0.8126209 | 4.24805637 | 0.01057295 | 0.0536811  |
| ENSMUSG00000028163 | -0.8127091 | 9.35158448 | 0.00824749 | 0.04430966 |
| ENSMUSG00000028034 | -0.8134175 | 8.64318017 | 0.00823493 | 0.04426992 |
| ENSMUSG00000031885 | -0.8138416 | 7.94618374 | 0.0082661  | 0.04434904 |
| ENSMUSG00000020561 | -0.8147356 | 6.5208219  | 0.00848829 | 0.04520381 |
| ENSMUSG00000026771 | -0.8148666 | 4.64927036 | 0.00972012 | 0.05058963 |
| ENSMUSG00000097048 | -0.8148866 | 3.45026576 | 0.01201901 | 0.05930435 |
| ENSMUSG00000018189 | -0.8151818 | 6.88171758 | 0.00834421 | 0.04463491 |
| ENSMUSG00000024403 | -0.8160091 | 0.99536145 | 0.03961335 | 0.1449577  |
| ENSMUSG00000050796 | -0.8160684 | 2.51706401 | 0.01635577 | 0.07473755 |
| ENSMUSG00000028180 | -0.8163366 | 7.74551881 | 0.00809076 | 0.04369094 |
| ENSMUSG00000021636 | -0.8165974 | 2.39737439 | 0.01631502 | 0.0746146  |
| ENSMUSG00000024401 | -0.8172586 | 4.76956175 | 0.00939513 | 0.04915919 |
| ENSMUSG00000021690 | -0.817578  | 4.67319318 | 0.00942671 | 0.0492766  |
| ENSMUSG00000010554 | -0.81881   | 7.37274878 | 0.00795765 | 0.04312324 |
| ENSMUSG00000034424 | -0.8198662 | 6.34198186 | 0.00811056 | 0.04375403 |
| ENSMUSG00000042354 | -0.8199112 | 8.48141048 | 0.00775373 | 0.04227312 |

|                    |            |            |            |            |
|--------------------|------------|------------|------------|------------|
| ENSMUSG00000029014 | -0.820664  | 8.26958305 | 0.0077147  | 0.04210289 |
| ENSMUSG00000032113 | -0.8222461 | 6.37189545 | 0.0079436  | 0.04306878 |
| ENSMUSG00000084806 | -0.8224989 | 1.16271003 | 0.04704672 | 0.1631881  |
| ENSMUSG00000058661 | -0.8227901 | 3.27399501 | 0.01212945 | 0.05975981 |
| ENSMUSG00000020534 | -0.8230182 | 7.17855745 | 0.0076397  | 0.04179935 |
| ENSMUSG00000027559 | -0.8249695 | 1.17460409 | 0.03988224 | 0.1454973  |
| ENSMUSG00000025264 | -0.8258683 | 5.95592667 | 0.00779752 | 0.04246893 |
| ENSMUSG00000025001 | -0.8259011 | 8.95203459 | 0.00729985 | 0.0402874  |
| ENSMUSG00000026739 | -0.8269162 | 6.7811678  | 0.00748455 | 0.04111735 |
| ENSMUSG00000048895 | -0.8273536 | 4.37505785 | 0.00890419 | 0.04711616 |
| ENSMUSG00000036371 | -0.8280107 | 9.64554052 | 0.007122   | 0.03944717 |
| ENSMUSG00000015882 | -0.8283877 | 4.14446629 | 0.00926306 | 0.0486807  |
| ENSMUSG00000086290 | -0.8304603 | 5.16270803 | 0.00786072 | 0.04272679 |
| ENSMUSG00000093930 | -0.8305488 | 8.3441544  | 0.0070122  | 0.03897914 |
| ENSMUSG00000041390 | -0.8316476 | 5.34072711 | 0.00770723 | 0.04210289 |
| ENSMUSG00000037316 | -0.8318555 | 5.52114383 | 0.00757311 | 0.04156153 |
| ENSMUSG00000101970 | -0.8322203 | 4.003575   | 0.00915058 | 0.04816003 |
| ENSMUSG00000040413 | -0.8330067 | 4.35413344 | 0.0084381  | 0.04504774 |
| ENSMUSG00000019857 | -0.8338563 | 5.98392036 | 0.00723405 | 0.03998567 |
| ENSMUSG00000038646 | -0.8344771 | 5.17371869 | 0.00761692 | 0.04170281 |
| ENSMUSG00000032415 | -0.8345126 | 3.0838613  | 0.01098079 | 0.05523174 |
| ENSMUSG00000000184 | -0.8346581 | 10.4985987 | 0.00666084 | 0.03741171 |
| ENSMUSG00000014496 | -0.834776  | 6.67154364 | 0.00696176 | 0.03877875 |
| ENSMUSG00000025026 | -0.8348456 | 6.37782214 | 0.00699598 | 0.03890903 |
| ENSMUSG00000021079 | -0.834976  | 5.08153207 | 0.00757976 | 0.04157689 |
| ENSMUSG00000036990 | -0.8355455 | 8.55537936 | 0.00666931 | 0.03743981 |
| ENSMUSG00000005034 | -0.8360392 | 6.44009078 | 0.00693163 | 0.03863211 |
| ENSMUSG00000040850 | -0.8371917 | 7.79335254 | 0.00663566 | 0.03730917 |
| ENSMUSG00000027708 | -0.83778   | 6.31450641 | 0.00687359 | 0.03838674 |
| ENSMUSG00000056459 | -0.8379703 | 4.25698794 | 0.00826244 | 0.04434904 |
| ENSMUSG00000044501 | -0.8381978 | 4.0165699  | 0.0086428  | 0.04595854 |
| ENSMUSG00000016520 | -0.8401178 | 4.19245857 | 0.00810672 | 0.04375403 |
| ENSMUSG00000038400 | -0.8404088 | 5.03937526 | 0.00714328 | 0.03954036 |
| ENSMUSG00000037376 | -0.8404671 | 6.83249221 | 0.00654505 | 0.0369538  |
| ENSMUSG00000063320 | -0.8406912 | 2.50394811 | 0.01339725 | 0.06408788 |
| ENSMUSG00000020794 | -0.8407533 | 6.79182522 | 0.00656539 | 0.03701053 |
| ENSMUSG00000032103 | -0.8408441 | 5.66457973 | 0.00693186 | 0.03863211 |
| ENSMUSG00000009470 | -0.8415139 | 9.10170458 | 0.00627006 | 0.03560629 |
| ENSMUSG00000039410 | -0.8419546 | 2.64381141 | 0.01400903 | 0.06637668 |
| ENSMUSG00000051098 | -0.8423005 | 2.12750997 | 0.0164667  | 0.07514889 |
| ENSMUSG00000097519 | -0.842307  | 1.2812725  | 0.02591046 | 0.10596073 |
| ENSMUSG00000093594 | -0.8423462 | 2.88115464 | 0.01188014 | 0.05876855 |
| ENSMUSG00000053656 | -0.8428138 | 3.59395342 | 0.00907875 | 0.04782863 |

|                    |            |            |            |            |
|--------------------|------------|------------|------------|------------|
| ENSMUSG00000047945 | -0.8430753 | 6.73464767 | 0.0064104  | 0.03627408 |
| ENSMUSG00000028270 | -0.8432032 | 9.42866217 | 0.00615704 | 0.03518682 |
| ENSMUSG00000026623 | -0.8441411 | 8.54409423 | 0.00613734 | 0.03509284 |
| ENSMUSG00000060510 | -0.8456842 | 6.73200326 | 0.00625848 | 0.03559675 |
| ENSMUSG00000029687 | -0.8463966 | 9.01841027 | 0.00598153 | 0.03431108 |
| ENSMUSG00000033847 | -0.8489559 | 2.7532883  | 0.01111232 | 0.05571142 |
| ENSMUSG00000004568 | -0.8495257 | 4.66709479 | 0.00687057 | 0.03838674 |
| ENSMUSG00000009207 | -0.8506298 | 5.68002573 | 0.00626814 | 0.03560629 |
| ENSMUSG00000020679 | -0.8512664 | 1.89465146 | 0.0163481  | 0.07473417 |
| ENSMUSG00000073125 | -0.8521548 | 1.70543139 | 0.02536533 | 0.10480449 |
| ENSMUSG00000030753 | -0.8556066 | 7.49590233 | 0.00556486 | 0.03234455 |
| ENSMUSG00000031403 | -0.856039  | 8.74443954 | 0.00545098 | 0.031792   |
| ENSMUSG00000025630 | -0.8570536 | 8.17129042 | 0.00543038 | 0.0317045  |
| ENSMUSG00000047454 | -0.8593795 | 6.2441704  | 0.00555966 | 0.03234455 |
| ENSMUSG00000025591 | -0.8608604 | 5.85975494 | 0.0056147  | 0.03258822 |
| ENSMUSG00000071267 | -0.861024  | 4.53172255 | 0.0065542  | 0.03696679 |
| ENSMUSG00000097392 | -0.8613612 | 3.91730349 | 0.0070392  | 0.03908897 |
| ENSMUSG00000060548 | -0.8627319 | 0.83243969 | 0.03036361 | 0.11954769 |
| ENSMUSG00000022686 | -0.8653505 | 6.38140159 | 0.00525221 | 0.03081603 |
| ENSMUSG00000043252 | -0.8653943 | 4.81417401 | 0.00593492 | 0.03409811 |
| ENSMUSG00000020275 | -0.8655186 | 7.03798284 | 0.00511496 | 0.03010902 |
| ENSMUSG00000042195 | -0.8655743 | 4.2948989  | 0.00617741 | 0.03522855 |
| ENSMUSG00000024287 | -0.8675418 | 7.10585316 | 0.00500233 | 0.02959138 |
| ENSMUSG00000075232 | -0.867679  | 6.98944575 | 0.00500657 | 0.02960023 |
| ENSMUSG00000053819 | -0.8712684 | 8.10590523 | 0.00472252 | 0.02824606 |
| ENSMUSG00000020570 | -0.8713606 | 8.90316736 | 0.00468128 | 0.02803052 |
| ENSMUSG00000093726 | -0.8720493 | 2.86084978 | 0.00886366 | 0.04694777 |
| ENSMUSG00000062248 | -0.872994  | 6.53889789 | 0.00482024 | 0.02869282 |
| ENSMUSG00000050714 | -0.8743593 | 4.44965096 | 0.00578442 | 0.03342934 |
| ENSMUSG00000022797 | -0.8744476 | 9.81437992 | 0.00451157 | 0.0272107  |
| ENSMUSG00000027763 | -0.8756357 | 9.04887373 | 0.00447552 | 0.02702847 |
| ENSMUSG00000022634 | -0.8757209 | 4.22571775 | 0.00593236 | 0.03409811 |
| ENSMUSG00000026484 | -0.8764668 | 6.71141264 | 0.00463293 | 0.02781769 |
| ENSMUSG00000022346 | -0.8780247 | 6.62302138 | 0.00452477 | 0.02725983 |
| ENSMUSG00000052144 | -0.8794574 | 7.81280043 | 0.00436855 | 0.026586   |
| ENSMUSG00000073627 | -0.8802492 | 1.66246694 | 0.01691948 | 0.07676049 |
| ENSMUSG00000057113 | -0.8806609 | 11.945197  | 0.00421763 | 0.02585723 |
| ENSMUSG00000017485 | -0.8829483 | 8.99181499 | 0.00416326 | 0.02556755 |
| ENSMUSG00000073131 | -0.883013  | 6.232594   | 0.00441769 | 0.02676422 |
| ENSMUSG00000041992 | -0.8839291 | 5.96849959 | 0.00443717 | 0.02684822 |
| ENSMUSG00000041849 | -0.8850484 | 4.84795687 | 0.0049367  | 0.02926739 |
| ENSMUSG00000026020 | -0.8852028 | 9.32824378 | 0.00405806 | 0.02503552 |
| ENSMUSG00000026827 | -0.8855248 | 5.86606918 | 0.00439357 | 0.02668613 |

|                    |            |            |            |            |
|--------------------|------------|------------|------------|------------|
| ENSMUSG00000032307 | -0.8855446 | 6.0659438  | 0.00436669 | 0.026586   |
| ENSMUSG00000024691 | -0.8858297 | 8.96996433 | 0.00404229 | 0.02495253 |
| ENSMUSG00000064360 | -0.8858891 | 1.76421881 | 0.01312839 | 0.06326029 |
| ENSMUSG00000053178 | -0.8868606 | 0.90378611 | 0.02528746 | 0.10456286 |
| ENSMUSG00000094483 | -0.8872093 | 8.88680968 | 0.00398945 | 0.02465332 |
| ENSMUSG00000063972 | -0.888386  | 3.16889001 | 0.00665089 | 0.03737527 |
| ENSMUSG00000042474 | -0.889678  | 5.67846893 | 0.00429389 | 0.02623529 |
| ENSMUSG00000019814 | -0.8898969 | 7.05589712 | 0.00399076 | 0.02465332 |
| ENSMUSG00000042320 | -0.8899567 | 2.58692864 | 0.00787958 | 0.04280774 |
| ENSMUSG00000028676 | -0.8902992 | 8.74474177 | 0.00387029 | 0.024056   |
| ENSMUSG00000015396 | -0.8907325 | 9.70387949 | 0.00382937 | 0.02382914 |
| ENSMUSG00000044149 | -0.8913851 | 6.16763449 | 0.00407746 | 0.02512645 |
| ENSMUSG00000043929 | -0.8928855 | 4.03695092 | 0.00528578 | 0.03097925 |
| ENSMUSG00000040651 | -0.8932091 | 6.40284911 | 0.00396973 | 0.02457493 |
| ENSMUSG00000054079 | -0.8932248 | 7.1022523  | 0.00386353 | 0.02402789 |
| ENSMUSG00000061024 | -0.8939593 | 6.38418912 | 0.00392101 | 0.02434321 |
| ENSMUSG00000027863 | -0.8947838 | 4.22056759 | 0.00498058 | 0.02951128 |
| ENSMUSG00000087368 | -0.8968294 | 2.03775013 | 0.01162593 | 0.05780267 |
| ENSMUSG00000057497 | -0.8972842 | 6.88400372 | 0.00373141 | 0.02330027 |
| ENSMUSG00000014226 | -0.8980131 | 8.4791812  | 0.00358648 | 0.02247336 |
| ENSMUSG00000040723 | -0.8981268 | 6.21899413 | 0.00376489 | 0.02346855 |
| ENSMUSG00000086877 | -0.8989123 | 1.31282381 | 0.01713193 | 0.07749729 |
| ENSMUSG00000071291 | -0.9007754 | 2.82099917 | 0.00680254 | 0.03810834 |
| ENSMUSG00000021709 | -0.9029515 | 7.96074786 | 0.00343673 | 0.02168618 |
| ENSMUSG00000026103 | -0.9048289 | 8.6974868  | 0.00333836 | 0.0211869  |
| ENSMUSG00000041057 | -0.9054291 | 8.80013309 | 0.00331215 | 0.02108514 |
| ENSMUSG00000028224 | -0.9059796 | 6.3051352  | 0.00349784 | 0.0219946  |
| ENSMUSG00000026116 | -0.9063836 | 7.85575739 | 0.00331806 | 0.02109784 |
| ENSMUSG00000073236 | -0.9069161 | 2.46658419 | 0.00832168 | 0.04455861 |
| ENSMUSG00000025314 | -0.9083145 | 6.11220483 | 0.00345546 | 0.02177886 |
| ENSMUSG00000018379 | -0.9091884 | 10.1720315 | 0.00316137 | 0.02025682 |
| ENSMUSG00000022792 | -0.9093594 | 5.67817205 | 0.00350447 | 0.02202342 |
| ENSMUSG00000021470 | -0.9094043 | 9.09232672 | 0.00317347 | 0.02032225 |
| ENSMUSG00000097375 | -0.9095923 | 1.53353223 | 0.01382329 | 0.06566976 |
| ENSMUSG00000028010 | -0.9107481 | 5.91913101 | 0.00337067 | 0.02134427 |
| ENSMUSG00000093565 | -0.9115519 | 2.8508921  | 0.00617504 | 0.03522855 |
| ENSMUSG00000055148 | -0.9116365 | 4.24520208 | 0.0040751  | 0.0251263  |
| ENSMUSG00000026770 | -0.912697  | 6.6906339  | 0.00320563 | 0.02047958 |
| ENSMUSG00000034610 | -0.9159564 | 7.70581593 | 0.003023   | 0.01953267 |
| ENSMUSG00000014030 | -0.9169622 | 5.41058716 | 0.00322733 | 0.02059381 |
| ENSMUSG00000086000 | -0.9208355 | 0.69692097 | 0.02321859 | 0.09823039 |
| ENSMUSG00000053289 | -0.9214867 | 7.2663858  | 0.00287566 | 0.01868136 |
| ENSMUSG00000029246 | -0.9238994 | 7.76013523 | 0.00277318 | 0.01808097 |

|                    |            |            |            |            |
|--------------------|------------|------------|------------|------------|
| ENSMUSG00000021392 | -0.9241936 | 7.71752833 | 0.00277034 | 0.01807338 |
| ENSMUSG00000025423 | -0.9253251 | 6.47275085 | 0.00284963 | 0.01855699 |
| ENSMUSG00000024673 | -0.9260827 | 10.2126402 | 0.00265164 | 0.01743612 |
| ENSMUSG00000058258 | -0.9283797 | 9.06750301 | 0.00260458 | 0.01718959 |
| ENSMUSG00000061665 | -0.9288685 | 7.79826439 | 0.0026344  | 0.01735455 |
| ENSMUSG00000032902 | -0.9345541 | 7.71304729 | 0.00248028 | 0.01652093 |
| ENSMUSG00000021774 | -0.940055  | 6.67565089 | 0.00240943 | 0.01610868 |
| ENSMUSG00000027806 | -0.9413863 | 5.26513182 | 0.00262948 | 0.01733273 |
| ENSMUSG00000019883 | -0.9415272 | 5.4132258  | 0.00259806 | 0.0171732  |
| ENSMUSG00000035834 | -0.9420389 | 5.25820521 | 0.00259069 | 0.01715039 |
| ENSMUSG00000028261 | -0.9426855 | 6.13511568 | 0.00241814 | 0.01615691 |
| ENSMUSG00000012429 | -0.9441295 | 3.81146252 | 0.00333992 | 0.0211869  |
| ENSMUSG00000052397 | -0.9452335 | 7.48338087 | 0.0022191  | 0.01496755 |
| ENSMUSG00000052889 | -0.9459838 | 7.45257587 | 0.00221157 | 0.01493396 |
| ENSMUSG00000101279 | -0.9468229 | 1.88598119 | 0.00813512 | 0.04382277 |
| ENSMUSG00000018476 | -0.9471218 | 3.21111129 | 0.00345364 | 0.02177886 |
| ENSMUSG00000033767 | -0.947189  | 7.00771133 | 0.00220946 | 0.0149291  |
| ENSMUSG00000025958 | -0.9487414 | 7.6680396  | 0.00213994 | 0.01454133 |
| ENSMUSG00000097493 | -0.9503383 | 1.35064396 | 0.01033929 | 0.05289324 |
| ENSMUSG00000021895 | -0.9508035 | 4.61351561 | 0.00260051 | 0.0171732  |
| ENSMUSG00000039630 | -0.9569474 | 8.20258703 | 0.00194043 | 0.01343105 |
| ENSMUSG00000031925 | -0.9572921 | 4.4432019  | 0.0025662  | 0.01700915 |
| ENSMUSG00000034120 | -0.9585387 | 9.26152008 | 0.00188536 | 0.01314266 |
| ENSMUSG00000042097 | -0.9596403 | 3.95681819 | 0.00271714 | 0.01776934 |
| ENSMUSG00000032216 | -0.9602629 | 7.3466278  | 0.00190499 | 0.01324524 |
| ENSMUSG00000052477 | -0.9606523 | 5.89683942 | 0.00203707 | 0.01393015 |
| ENSMUSG00000046546 | -0.960766  | 4.32992739 | 0.00245626 | 0.01637101 |
| ENSMUSG00000023927 | -0.9624898 | 6.23183651 | 0.00195074 | 0.01348513 |
| ENSMUSG00000032253 | -0.9628131 | 9.9861918  | 0.00179473 | 0.01261695 |
| ENSMUSG00000024378 | -0.9633192 | 7.42622181 | 0.00183952 | 0.0128898  |
| ENSMUSG00000085241 | -0.9636234 | 5.84370025 | 0.00197528 | 0.01360244 |
| ENSMUSG00000071748 | -0.965063  | 6.27606921 | 0.00188758 | 0.01314968 |
| ENSMUSG00000023025 | -0.965105  | 8.50764258 | 0.00176931 | 0.01247887 |
| ENSMUSG00000055044 | -0.9666122 | 4.60444274 | 0.00215512 | 0.0146353  |
| ENSMUSG00000022708 | -0.9679991 | 4.75002044 | 0.00216442 | 0.01468915 |
| ENSMUSG00000070056 | -0.9722998 | 5.34314489 | 0.00186883 | 0.01304429 |
| ENSMUSG00000024975 | -0.9726294 | 5.66098272 | 0.00183905 | 0.0128898  |
| ENSMUSG00000054766 | -0.9742117 | 9.73921322 | 0.00158591 | 0.0113186  |
| ENSMUSG00000048031 | -0.9745999 | 7.25355689 | 0.0016338  | 0.01162196 |
| ENSMUSG00000044768 | -0.9800533 | 5.95693681 | 0.0016387  | 0.01164913 |
| ENSMUSG00000090523 | -0.9808115 | 6.55249721 | 0.00156099 | 0.01114816 |
| ENSMUSG00000032449 | -0.9817956 | 6.15955709 | 0.00159408 | 0.01136944 |
| ENSMUSG00000033953 | -0.9877143 | 7.60083114 | 0.001406   | 0.01017602 |



|                    |            |            |            |            |
|--------------------|------------|------------|------------|------------|
| ENSMUSG00000030265 | -0.9926745 | 6.27067733 | 0.00139626 | 0.01011912 |
| ENSMUSG00000036167 | -0.9958828 | 7.48234687 | 0.00128559 | 0.00941834 |
| ENSMUSG00000026234 | -0.9965755 | 12.6240366 | 0.00123154 | 0.00907789 |
| ENSMUSG00000075054 | -0.9976362 | 4.17991637 | 0.00174002 | 0.01230448 |
| ENSMUSG00000030103 | -0.9981974 | 5.69161965 | 0.00136024 | 0.00990234 |
| ENSMUSG00000021054 | -0.9994314 | 5.64254167 | 0.00136176 | 0.00990234 |
| ENSMUSG00000031093 | -0.999516  | 8.11224325 | 0.00122273 | 0.00902528 |
| ENSMUSG00000085156 | -1.0015955 | 5.16716839 | 0.0013825  | 0.01003964 |
| ENSMUSG00000020648 | -1.0028225 | 4.72806661 | 0.00150033 | 0.01078634 |
| ENSMUSG00000000811 | -1.0073146 | 3.92690184 | 0.00164958 | 0.01171878 |
| ENSMUSG00000098183 | -1.0085423 | 0.7223186  | 0.01438872 | 0.06775894 |
| ENSMUSG00000097729 | -1.0105756 | 2.61504296 | 0.00284269 | 0.01852301 |
| ENSMUSG00000051444 | -1.0115064 | 3.47036799 | 0.00189211 | 0.01317271 |
| ENSMUSG00000055612 | -1.0135867 | 7.27404292 | 0.00105997 | 0.00793251 |
| ENSMUSG00000100455 | -1.0137643 | 2.10430992 | 0.00452734 | 0.02726001 |
| ENSMUSG00000097769 | -1.0168419 | 6.04689724 | 0.00107938 | 0.00806653 |
| ENSMUSG00000024726 | -1.0170649 | 5.87781844 | 0.00109858 | 0.00818731 |
| ENSMUSG00000022698 | -1.0172416 | 8.854144   | 0.00099058 | 0.00748067 |
| ENSMUSG00000037868 | -1.0182864 | 2.76343141 | 0.00219413 | 0.01483479 |
| ENSMUSG00000038127 | -1.0199637 | 9.22245034 | 0.00095767 | 0.00726268 |
| ENSMUSG00000090252 | -1.0217539 | 1.4686421  | 0.00631536 | 0.03583412 |
| ENSMUSG00000037172 | -1.0229641 | 5.68527504 | 0.00105055 | 0.00787289 |
| ENSMUSG00000020116 | -1.0241584 | 7.65251984 | 0.00093443 | 0.00711643 |
| ENSMUSG00000038205 | -1.0242414 | 3.98948467 | 0.00134965 | 0.00984463 |
| ENSMUSG00000034833 | -1.0287175 | 3.78712085 | 0.00142897 | 0.01030768 |
| ENSMUSG00000038147 | -1.0300994 | 5.65427427 | 0.00097278 | 0.00737207 |
| ENSMUSG00000063757 | -1.034352  | 0.67677453 | 0.01202145 | 0.05930435 |
| ENSMUSG00000019873 | -1.0345958 | 7.01822228 | 0.00084467 | 0.00649245 |
| ENSMUSG00000050914 | -1.0346485 | 1.32748987 | 0.00651251 | 0.03678934 |
| ENSMUSG00000047880 | -1.0347665 | 7.47542201 | 0.00082856 | 0.00638225 |
| ENSMUSG00000079659 | -1.035349  | 6.49207111 | 0.0008606  | 0.00659608 |
| ENSMUSG00000035095 | -1.0360973 | 5.50527832 | 0.00092227 | 0.00703876 |
| ENSMUSG00000006310 | -1.0368289 | 6.87484155 | 0.00081902 | 0.00633141 |
| ENSMUSG00000002107 | -1.037374  | 8.00414165 | 0.00079737 | 0.00618989 |
| ENSMUSG00000093470 | -1.0394493 | 7.51836232 | 0.00079056 | 0.00615105 |
| ENSMUSG00000025894 | -1.0426457 | 5.54856498 | 0.00084713 | 0.00650672 |
| ENSMUSG00000097571 | -1.0443831 | 1.511288   | 0.00480305 | 0.02863247 |
| ENSMUSG00000057093 | -1.0480439 | 1.18064609 | 0.00742022 | 0.04084722 |
| ENSMUSG00000042638 | -1.0487542 | 2.30113581 | 0.00253199 | 0.01681342 |
| ENSMUSG00000056687 | -1.0496058 | 1.1158967  | 0.0059485  | 0.03415796 |
| ENSMUSG00000053641 | -1.0527272 | 8.73015764 | 0.00066131 | 0.00527479 |
| ENSMUSG00000098188 | -1.0547661 | 4.19615124 | 0.0009355  | 0.0071196  |
| ENSMUSG00000024986 | -1.0587405 | 4.1589031  | 0.00092981 | 0.00708624 |

|                    |            |            |            |            |
|--------------------|------------|------------|------------|------------|
| ENSMUSG00000093483 | -1.060266  | 1.36785396 | 0.00491453 | 0.02918408 |
| ENSMUSG00000062585 | -1.0608189 | 5.93081645 | 0.00066759 | 0.00531312 |
| ENSMUSG00000037071 | -1.0621343 | 9.74545658 | 0.00058689 | 0.00474793 |
| ENSMUSG00000101335 | -1.0656986 | 0.98160245 | 0.00984487 | 0.05101734 |
| ENSMUSG00000094614 | -1.0657707 | 1.58381687 | 0.00365187 | 0.02286977 |
| ENSMUSG00000027011 | -1.0680276 | 6.06249926 | 0.00060722 | 0.00489407 |
| ENSMUSG00000100658 | -1.069522  | 2.41614939 | 0.00173526 | 0.01227892 |
| ENSMUSG00000039987 | -1.0695477 | 6.82915672 | 0.00057002 | 0.00462537 |
| ENSMUSG00000028134 | -1.0722365 | 4.72668045 | 0.00071082 | 0.00558708 |
| ENSMUSG00000007836 | -1.0729368 | 7.42750284 | 0.00053565 | 0.0043761  |
| ENSMUSG00000027804 | -1.0756516 | 8.29883834 | 0.00050834 | 0.00419105 |
| ENSMUSG00000025915 | -1.080259  | 7.07171377 | 0.00049898 | 0.00412455 |
| ENSMUSG00000017418 | -1.0819659 | 4.8545724  | 0.00061209 | 0.00492594 |
| ENSMUSG00000029814 | -1.0840391 | 3.30904603 | 0.00098383 | 0.00744537 |
| ENSMUSG00000092118 | -1.0908891 | 2.11818327 | 0.00196404 | 0.01355101 |
| ENSMUSG00000048924 | -1.0910842 | 2.63109414 | 0.00123501 | 0.00908398 |
| ENSMUSG00000015961 | -1.0945703 | 7.76598553 | 0.00041127 | 0.00345954 |
| ENSMUSG00000030872 | -1.0987042 | 6.87576444 | 0.0004009  | 0.00338813 |
| ENSMUSG00000046230 | -1.0990595 | 6.99241477 | 0.00040154 | 0.00339095 |
| ENSMUSG00000018334 | -1.0991691 | 3.33502065 | 0.00070609 | 0.00555798 |
| ENSMUSG00000090103 | -1.1014358 | 4.32022096 | 0.00054896 | 0.0044713  |
| ENSMUSG00000092203 | -1.1027581 | 6.20666185 | 0.00039441 | 0.00334906 |
| ENSMUSG00000026098 | -1.10964   | 5.35842687 | 0.00040497 | 0.00341183 |
| ENSMUSG00000037110 | -1.111537  | 6.89366674 | 0.00034543 | 0.0029753  |
| ENSMUSG00000032413 | -1.1131254 | 7.32773062 | 0.0003341  | 0.00289621 |
| ENSMUSG00000073062 | -1.1161741 | 3.41798502 | 0.00065355 | 0.00521704 |
| ENSMUSG00000053541 | -1.1167457 | 5.69306842 | 0.00035954 | 0.00308459 |
| ENSMUSG00000039633 | -1.1240637 | 3.74343    | 0.00050946 | 0.00419707 |
| ENSMUSG00000073492 | -1.1277558 | 1.30133027 | 0.00330661 | 0.02106231 |
| ENSMUSG00000043421 | -1.132985  | 3.19462566 | 0.00057193 | 0.0046374  |
| ENSMUSG00000056130 | -1.1377243 | 4.66137155 | 0.00033123 | 0.00287595 |
| ENSMUSG00000071103 | -1.1384276 | 1.89376875 | 0.00149484 | 0.01075405 |
| ENSMUSG00000057098 | -1.1498234 | 6.21492791 | 0.00022546 | 0.0020278  |
| ENSMUSG00000044641 | -1.1548467 | 1.62124315 | 0.00179209 | 0.01260656 |
| ENSMUSG00000000838 | -1.1554443 | 7.07960241 | 0.00020051 | 0.00183712 |
| ENSMUSG00000032776 | -1.1598297 | 2.85288923 | 0.00062058 | 0.00499057 |
| ENSMUSG00000097207 | -1.1616163 | 1.10610027 | 0.0026718  | 0.01753662 |
| ENSMUSG00000041831 | -1.1646517 | 4.45599123 | 0.00024389 | 0.00217362 |
| ENSMUSG00000027878 | -1.1713283 | 6.67597597 | 0.00016592 | 0.00155185 |
| ENSMUSG00000037822 | -1.1769796 | 4.8012939  | 0.00020771 | 0.00188703 |
| ENSMUSG00000024563 | -1.1776688 | 6.48199177 | 0.00015744 | 0.00147993 |
| ENSMUSG00000021377 | -1.1793922 | 9.10276878 | 0.00014129 | 0.00134834 |
| ENSMUSG00000019876 | -1.1821077 | 6.51388081 | 0.00014822 | 0.00140215 |

|                    |            |            |            |            |
|--------------------|------------|------------|------------|------------|
| ENSMUSG00000039942 | -1.182611  | 4.34630969 | 0.00021039 | 0.00190685 |
| ENSMUSG00000073374 | -1.1882595 | 1.50919639 | 0.00140848 | 0.01018718 |
| ENSMUSG00000039985 | -1.1897422 | 6.83852121 | 0.00013204 | 0.00127024 |
| ENSMUSG00000020634 | -1.1930046 | 6.3945086  | 0.00013009 | 0.00125368 |
| ENSMUSG00000031258 | -1.1972614 | 4.17395917 | 0.0001895  | 0.00174966 |
| ENSMUSG00000064356 | -1.1974255 | 5.92787628 | 0.00012518 | 0.00121178 |
| ENSMUSG00000075297 | -1.2079883 | 0.80895596 | 0.00259469 | 0.01716631 |
| ENSMUSG00000055560 | -1.2088562 | 1.26166945 | 0.00155288 | 0.01111234 |
| ENSMUSG00000036452 | -1.2166911 | 5.49313844 | 0.00010548 | 0.00103786 |
| ENSMUSG00000064354 | -1.2186399 | 0.65221876 | 0.00351973 | 0.02209359 |
| ENSMUSG00000055723 | -1.2188026 | 6.89712474 | 9.06E-05   | 0.00091235 |
| ENSMUSG00000029084 | -1.2209984 | 5.57097072 | 0.00010073 | 0.00099931 |
| ENSMUSG00000031112 | -1.2282288 | 5.80452171 | 8.86E-05   | 0.00089447 |
| ENSMUSG00000051451 | -1.2329013 | 6.02956479 | 7.99E-05   | 0.00081376 |
| ENSMUSG00000032369 | -1.235102  | 5.67400375 | 8.11E-05   | 0.00082471 |
| ENSMUSG00000073643 | -1.2374198 | 4.75583799 | 9.43E-05   | 0.00094373 |
| ENSMUSG00000043671 | -1.2512368 | 5.13196669 | 7.20E-05   | 0.00073949 |
| ENSMUSG00000032050 | -1.2553398 | 7.74744577 | 5.40E-05   | 0.00057523 |
| ENSMUSG00000042708 | -1.2640827 | 1.27498813 | 0.00083713 | 0.00644365 |
| ENSMUSG00000047648 | -1.2663714 | 4.88291725 | 6.48E-05   | 0.00067599 |
| ENSMUSG00000021109 | -1.2687577 | 7.37076048 | 4.59E-05   | 0.00049774 |
| ENSMUSG00000032352 | -1.2870355 | 4.04798843 | 6.33E-05   | 0.00066158 |
| ENSMUSG00000071708 | -1.2907133 | 7.48954416 | 3.40E-05   | 0.00038323 |
| ENSMUSG00000097151 | -1.2911851 | 0.97585913 | 0.00196838 | 0.01357222 |
| ENSMUSG00000100967 | -1.2943545 | 2.02651507 | 0.00027616 | 0.0024431  |
| ENSMUSG00000095105 | -1.2965115 | 2.27097717 | 0.00019948 | 0.00183076 |
| ENSMUSG00000026384 | -1.2969041 | 6.3169604  | 3.37E-05   | 0.00038048 |
| ENSMUSG00000036943 | -1.3020853 | 8.38480894 | 2.83E-05   | 0.00032605 |
| ENSMUSG00000025932 | -1.3042522 | 1.47463489 | 0.00037993 | 0.00324139 |
| ENSMUSG00000021775 | -1.3090691 | 4.64583821 | 3.95E-05   | 0.00043963 |
| ENSMUSG00000030431 | -1.3199832 | 1.30381078 | 0.00049912 | 0.00412455 |
| ENSMUSG00000096768 | -1.323263  | 1.82094702 | 0.00019966 | 0.0018309  |
| ENSMUSG00000079470 | -1.3263644 | 6.22331079 | 2.26E-05   | 0.00026423 |
| ENSMUSG00000022120 | -1.3361995 | 5.52875078 | 2.15E-05   | 0.00025346 |
| ENSMUSG00000038570 | -1.3446653 | 4.4576587  | 2.68E-05   | 0.00031055 |
| ENSMUSG00000048621 | -1.3555749 | 1.85316851 | 0.00014921 | 0.00141022 |
| ENSMUSG00000014907 | -1.3742619 | 6.12154923 | 1.18E-05   | 0.00014704 |
| ENSMUSG00000089726 | -1.3833833 | 6.09671317 | 1.02E-05   | 0.00012956 |
| ENSMUSG00000047798 | -1.3834943 | 2.70760895 | 5.00E-05   | 0.00053711 |
| ENSMUSG00000043991 | -1.3918163 | 6.44864745 | 8.85E-06   | 0.00011314 |
| ENSMUSG00000032656 | -1.3967072 | 1.94584413 | 0.00010603 | 0.00104233 |
| ENSMUSG00000037922 | -1.3997653 | 7.74199996 | 7.25E-06   | 9.47E-05   |
| ENSMUSG00000026581 | -1.4145116 | 7.31443116 | 6.00E-06   | 7.94E-05   |

|                    |            |            |            |            |
|--------------------|------------|------------|------------|------------|
| ENSMUSG00000020642 | -1.4160404 | 4.19708221 | 1.12E-05   | 0.00014088 |
| ENSMUSG00000057315 | -1.4212008 | 3.49861585 | 1.59E-05   | 0.00019205 |
| ENSMUSG00000015597 | -1.4253903 | 6.37541155 | 5.52E-06   | 7.35E-05   |
| ENSMUSG00000099065 | -1.4259215 | 8.95892791 | 4.79E-06   | 6.46E-05   |
| ENSMUSG00000054321 | -1.4357549 | 5.94186155 | 4.97E-06   | 6.66E-05   |
| ENSMUSG00000071064 | -1.4472564 | 3.64606959 | 9.48E-06   | 0.00012068 |
| ENSMUSG00000099974 | -1.4596128 | 5.49947098 | 3.86E-06   | 5.32E-05   |
| ENSMUSG00000015766 | -1.4718913 | 4.38053756 | 4.64E-06   | 6.29E-05   |
| ENSMUSG00000028332 | -1.473396  | 1.30780626 | 0.00014563 | 0.00138246 |
| ENSMUSG00000051590 | -1.5095601 | 1.3411208  | 0.0001054  | 0.00103786 |
| ENSMUSG00000098496 | -1.5326945 | 1.26764938 | 9.02E-05   | 0.00090949 |
| ENSMUSG00000037999 | -1.5366357 | 7.59291607 | 9.38E-07   | 1.48E-05   |
| ENSMUSG00000044867 | -1.5425329 | 4.85140213 | 1.40E-06   | 2.12E-05   |
| ENSMUSG00000052013 | -1.5649895 | 6.33988567 | 6.79E-07   | 1.11E-05   |
| ENSMUSG00000028179 | -1.5703142 | 3.74850216 | 1.56E-06   | 2.34E-05   |
| ENSMUSG00000089929 | -1.5765175 | 4.74083253 | 8.84E-07   | 1.42E-05   |
| ENSMUSG00000063659 | -1.6088322 | 7.03938335 | 3.08E-07   | 5.41E-06   |
| ENSMUSG00000032028 | -1.6137406 | 3.52829783 | 1.12E-06   | 1.74E-05   |
| ENSMUSG00000038418 | -1.677747  | 3.79134804 | 2.95E-07   | 5.20E-06   |
| ENSMUSG00000091509 | -1.6858985 | 1.94629374 | 2.55E-06   | 3.65E-05   |
| ENSMUSG00000084854 | -1.7727231 | 0.88283868 | 1.62E-05   | 0.00019532 |
| ENSMUSG00000028341 | -1.7910078 | 2.1665613  | 5.00E-07   | 8.39E-06   |
| ENSMUSG00000050549 | -1.8244723 | 3.76807524 | 3.02E-08   | 6.58E-07   |
| ENSMUSG00000028701 | -1.8281869 | 3.05807615 | 6.53E-08   | 1.32E-06   |
| ENSMUSG00000097418 | -1.8407989 | 5.43614321 | 8.55E-09   | 2.11E-07   |
| ENSMUSG00000040270 | -1.9559858 | 7.00112812 | 7.43E-10   | 2.29E-08   |
| ENSMUSG00000053846 | -1.9787055 | 2.52766398 | 1.31E-08   | 3.08E-07   |
| ENSMUSG00000055320 | -2.0030424 | 1.50461313 | 2.11E-07   | 3.82E-06   |
| ENSMUSG00000099757 | -2.0049453 | 4.3715521  | 9.83E-10   | 2.94E-08   |
| ENSMUSG00000024402 | -2.0252925 | 3.18047007 | 1.97E-09   | 5.54E-08   |
| ENSMUSG00000026357 | -2.0480556 | 2.237342   | 2.24E-08   | 4.99E-07   |
| ENSMUSG00000097451 | -2.0674636 | 1.42315823 | 1.99E-07   | 3.63E-06   |
| ENSMUSG00000031779 | -2.2646877 | 7.68511026 | 1.62E-12   | 9.03E-11   |
| ENSMUSG00000019891 | -2.3618253 | 3.40527582 | 4.01E-12   | 2.07E-10   |
| ENSMUSG00000004698 | -2.3777463 | 5.81486954 | 2.73E-13   | 1.81E-11   |
| ENSMUSG00000040856 | -2.3886858 | 1.62488249 | 2.69E-10   | 9.33E-09   |
| ENSMUSG00000026616 | -2.5699951 | 5.78425645 | 4.86E-15   | 4.74E-13   |
| ENSMUSG00000094924 | -2.683529  | 1.72651763 | 1.51E-11   | 7.07E-10   |
| ENSMUSG00000044337 | -3.3173822 | 2.87865832 | 1.22E-18   | 2.27E-16   |
| ENSMUSG00000000617 | -3.3965154 | 3.69482858 | 2.73E-21   | 8.92E-19   |

TMM normalized H3K79me2-WT B cells

| ID                 | Naive_1     | Naive_2     | Naive_3     | Activated_1 | Activated_2 |
|--------------------|-------------|-------------|-------------|-------------|-------------|
| ENSMUSG00000038151 | 4.952162959 | 12.52111039 | 9.179963621 | 41.07834128 | 26.49919969 |
| ENSMUSG00000022346 | 25.46826665 | 54.25814501 | 60.02283906 | 206.1971641 | 137.5093606 |
| ENSMUSG00000021356 | 103.9954221 | 132.1672763 | 125.6948865 | 196.531672  | 141.8065281 |
| ENSMUSG00000029687 | 22.63845924 | 42.43265187 | 35.30755239 | 158.6751614 | 138.9417498 |
| ENSMUSG00000040270 | 82.7718666  | 108.51629   | 100.2734488 | 68.46390213 | 69.47087488 |
| ENSMUSG00000000001 | 141.4903703 | 168.339373  | 139.8179075 | 184.4498069 | 148.2522794 |
| ENSMUSG00000000056 | 35.37259256 | 51.47567604 | 50.13672439 | 28.9964762  | 45.12025894 |
| ENSMUSG00000000058 | 7.074518513 | 6.260555194 | 9.886114669 | 5.638203705 | 6.445751277 |
| ENSMUSG00000000078 | 106.1177777 | 139.1234488 | 110.8657145 | 140.9550926 | 98.11865833 |
| ENSMUSG00000000088 | 87.72402956 | 131.4716591 | 115.1026208 | 204.5862487 | 136.793166  |
| ENSMUSG00000000093 | 8.489422215 | 3.478086219 | 7.061510478 | 4.832746033 | 5.729556691 |
| ENSMUSG00000000120 | 5.65961481  | 9.043024169 | 10.59226572 | 5.638203705 | 5.729556691 |
| ENSMUSG00000000125 | 5.65961481  | 3.478086219 | 6.35535943  | 7.249119049 | 7.161945863 |
| ENSMUSG00000000168 | 19.80865184 | 37.56333116 | 31.0706461  | 27.38556085 | 32.94495097 |
| ENSMUSG00000000171 | 93.38364437 | 139.1234488 | 121.4579802 | 215.0571984 | 194.0887329 |
| ENSMUSG00000000182 | 8.489422215 | 4.173703463 | 9.179963621 | 7.249119049 | 5.729556691 |
| ENSMUSG00000000183 | 10.61177777 | 5.56493795  | 4.236906287 | 4.832746033 | 5.729556691 |
| ENSMUSG00000000197 | 12.73413332 | 4.173703463 | 6.35535943  | 3.221830688 | 4.297167518 |
| ENSMUSG00000000202 | 7.781970364 | 6.260555194 | 5.649208382 | 6.443661377 | 11.45911338 |
| ENSMUSG00000000216 | 3.537259256 | 6.260555194 | 7.767661525 | 4.832746033 | 4.297167518 |
| ENSMUSG00000000296 | 7.781970364 | 7.651789682 | 3.530755239 | 1.610915344 | 2.864778345 |
| ENSMUSG00000000346 | 65.08557032 | 89.73462445 | 81.91352154 | 115.9859048 | 79.49759908 |
| ENSMUSG00000000359 | 7.781970364 | 8.347406925 | 9.179963621 | 4.832746033 | 7.87814045  |
| ENSMUSG00000000365 | 12.02668147 | 9.043024169 | 9.886114669 | 2.416373016 | 5.729556691 |
| ENSMUSG00000000374 | 70.03773327 | 111.298759  | 90.38733411 | 81.35122488 | 69.47087488 |
| ENSMUSG00000000385 | 7.074518513 | 6.956172438 | 4.943057334 | 2.416373016 | 3.580972932 |
| ENSMUSG00000000402 | 2.829807405 | 6.956172438 | 9.179963621 | 4.832746033 | 2.864778345 |
| ENSMUSG00000000411 | 10.61177777 | 8.347406925 | 10.59226572 | 8.860034393 | 10.02672421 |
| ENSMUSG00000000435 | 11.31922962 | 6.956172438 | 7.767661525 | 7.249119049 | 8.594335036 |
| ENSMUSG00000000439 | 29.71297775 | 47.30197258 | 40.25060972 | 46.71654498 | 32.22875639 |
| ENSMUSG00000000489 | 5.65961481  | 5.56493795  | 4.236906287 | 10.47094974 | 6.445751277 |
| ENSMUSG00000000531 | 4.952162959 | 10.43425866 | 10.59226572 | 13.69278043 | 12.17530797 |
| ENSMUSG00000000552 | 12.73413332 | 14.60796212 | 9.179963621 | 6.443661377 | 12.89150255 |
| ENSMUSG00000000555 | 6.367066661 | 9.738641413 | 12.71071886 | 3.221830688 | 11.45911338 |
| ENSMUSG00000000560 | 5.65961481  | 5.56493795  | 7.767661525 | 2.416373016 | 7.87814045  |
| ENSMUSG00000000562 | 7.781970364 | 9.043024169 | 8.473812573 | 8.054576721 | 9.310529622 |
| ENSMUSG00000000567 | 8.489422215 | 4.173703463 | 5.649208382 | 6.443661377 | 10.02672421 |
| ENSMUSG00000000581 | 61.54831106 | 97.38641413 | 81.91352154 | 111.9586164 | 86.65954495 |
| ENSMUSG00000000594 | 99.04325918 | 134.254128  | 105.9226572 | 84.57305557 | 78.7814045  |
| ENSMUSG00000000605 | 12.02668147 | 13.91234488 | 11.29841676 | 9.665492065 | 22.91822676 |
| ENSMUSG00000000673 | 45.98437033 | 63.30116918 | 59.31668801 | 124.8459392 | 93.10529622 |

|                    |             |             |             |             |             |
|--------------------|-------------|-------------|-------------|-------------|-------------|
| ENSMUSG00000000682 | 180.4002221 | 174.5999282 | 162.414741  | 348.763172  | 263.5596078 |
| ENSMUSG00000000690 | 5.65961481  | 7.651789682 | 6.35535943  | 5.638203705 | 4.297167518 |
| ENSMUSG00000000701 | 10.61177777 | 4.173703463 | 3.530755239 | 10.47094974 | 5.729556691 |
| ENSMUSG00000000711 | 62.25576291 | 86.25653823 | 61.43514116 | 78.93485187 | 82.36237743 |
| ENSMUSG00000000732 | 111.7773925 | 125.2111039 | 122.1641313 | 42.68925662 | 52.2822048  |
| ENSMUSG00000000743 | 56.5961481  | 76.51789682 | 66.37819849 | 70.88027514 | 67.32229112 |
| ENSMUSG00000000791 | 9.904325918 | 13.91234488 | 9.886114669 | 84.57305557 | 52.99839939 |
| ENSMUSG00000000792 | 4.244711108 | 3.478086219 | 7.767661525 | 6.443661377 | 5.729556691 |
| ENSMUSG00000000794 | 4.244711108 | 8.347406925 | 7.061510478 | 5.638203705 | 9.310529622 |
| ENSMUSG00000000889 | 7.781970364 | 6.956172438 | 8.473812573 | 4.832746033 | 6.445751277 |
| ENSMUSG00000000903 | 28.29807405 | 19.47728283 | 26.83373982 | 12.08186508 | 12.17530797 |
| ENSMUSG00000000934 | 7.781970364 | 8.347406925 | 7.061510478 | 11.27640741 | 12.17530797 |
| ENSMUSG00000000948 | 6.367066661 | 6.260555194 | 6.35535943  | 8.054576721 | 6.445751277 |
| ENSMUSG00000000958 | 17.68629628 | 15.30357936 | 22.59683353 | 14.4982381  | 17.18867007 |
| ENSMUSG00000000959 | 64.37811846 | 118.9505487 | 100.9795998 | 144.982381  | 103.848215  |
| ENSMUSG00000000982 | 5.65961481  | 6.260555194 | 7.061510478 | 6.443661377 | 6.445751277 |
| ENSMUSG00000001014 | 5.65961481  | 6.260555194 | 7.061510478 | 11.27640741 | 7.161945863 |
| ENSMUSG00000001020 | 5.65961481  | 9.043024169 | 4.236906287 | 4.02728836  | 7.87814045  |
| ENSMUSG00000001025 | 11.31922962 | 15.30357936 | 9.179963621 | 10.47094974 | 7.161945863 |
| ENSMUSG00000001054 | 24.76081479 | 38.95456565 | 31.77679715 | 34.6346799  | 36.5259239  |
| ENSMUSG00000001056 | 37.49494812 | 60.51870021 | 55.78593277 | 134.5114312 | 113.1587446 |
| ENSMUSG00000001076 | 11.31922962 | 4.869320706 | 6.35535943  | 7.249119049 | 4.297167518 |
| ENSMUSG00000001095 | 6.367066661 | 7.651789682 | 7.767661525 | 7.249119049 | 7.161945863 |
| ENSMUSG00000001103 | 11.31922962 | 4.173703463 | 10.59226572 | 10.47094974 | 8.594335036 |
| ENSMUSG00000001119 | 6.367066661 | 9.043024169 | 5.649208382 | 8.054576721 | 7.87814045  |
| ENSMUSG00000001128 | 6.367066661 | 7.651789682 | 4.236906287 | 34.6346799  | 22.20203218 |
| ENSMUSG00000001134 | 13.44158517 | 16.69481385 | 12.00456781 | 39.46742593 | 29.36397804 |
| ENSMUSG00000001150 | 49.52162959 | 66.7792554  | 60.02283906 | 62.02024075 | 65.88990194 |
| ENSMUSG00000001156 | 22.63845924 | 43.12826911 | 29.65834401 | 18.52552646 | 27.93158887 |
| ENSMUSG00000001229 | 14.14903703 | 26.43345526 | 26.12758877 | 31.41284921 | 36.5259239  |
| ENSMUSG00000001270 | 6.367066661 | 4.173703463 | 8.473812573 | 7.249119049 | 10.02672421 |
| ENSMUSG00000001281 | 69.33028142 | 89.73462445 | 87.56272992 | 33.02376456 | 25.78300511 |
| ENSMUSG00000001305 | 48.10672589 | 70.25734162 | 65.67204744 | 133.7059736 | 116.023523  |
| ENSMUSG00000001333 | 5.65961481  | 4.173703463 | 7.767661525 | 12.08186508 | 10.7429188  |
| ENSMUSG00000001334 | 4.244711108 | 1.391234488 | 2.118453143 | 3.221830688 | 3.580972932 |
| ENSMUSG00000001349 | 4.952162959 | 7.651789682 | 6.35535943  | 6.443661377 | 11.45911338 |
| ENSMUSG00000001380 | 76.40479994 | 100.8645003 | 93.21193831 | 159.4806191 | 141.0903335 |
| ENSMUSG00000001383 | 37.49494812 | 47.30197258 | 50.13672439 | 64.43661377 | 60.87653984 |
| ENSMUSG00000001417 | 4.244711108 | 6.956172438 | 12.71071886 | 9.665492065 | 10.02672421 |
| ENSMUSG00000001440 | 37.49494812 | 68.17048989 | 50.13672439 | 182.8388916 | 152.5494469 |
| ENSMUSG00000001444 | 7.781970364 | 9.738641413 | 7.061510478 | 5.638203705 | 9.310529622 |
| ENSMUSG00000001467 | 24.76081479 | 43.82388636 | 40.25060972 | 124.0404815 | 98.83485292 |
| ENSMUSG00000001473 | 5.65961481  | 7.651789682 | 7.061510478 | 9.665492065 | 6.445751277 |

|                    |             |             |             |             |             |
|--------------------|-------------|-------------|-------------|-------------|-------------|
| ENSMUSG00000001493 | 7.074518513 | 6.956172438 | 4.236906287 | 6.443661377 | 9.310529622 |
| ENSMUSG00000001494 | 6.367066661 | 4.869320706 | 4.236906287 | 7.249119049 | 6.445751277 |
| ENSMUSG00000001510 | 9.196874066 | 4.869320706 | 4.943057334 | 3.221830688 | 5.729556691 |
| ENSMUSG00000001542 | 13.44158517 | 25.04222078 | 24.00913562 | 60.40932541 | 52.2822048  |
| ENSMUSG00000001558 | 16.97884443 | 22.95536904 | 26.12758877 | 23.35827249 | 15.7562809  |
| ENSMUSG00000001566 | 4.952162959 | 5.56493795  | 4.943057334 | 4.02728836  | 5.013362104 |
| ENSMUSG00000001655 | 5.65961481  | 6.956172438 | 5.649208382 | 5.638203705 | 6.445751277 |
| ENSMUSG00000001656 | 7.074518513 | 2.086851731 | 4.943057334 | 4.02728836  | 3.580972932 |
| ENSMUSG00000001657 | 7.074518513 | 11.82549314 | 7.767661525 | 5.638203705 | 10.02672421 |
| ENSMUSG00000001661 | 4.952162959 | 4.173703463 | 8.473812573 | 8.054576721 | 8.594335036 |
| ENSMUSG00000001666 | 12.73413332 | 15.30357936 | 10.59226572 | 28.19101852 | 20.05344842 |
| ENSMUSG00000001700 | 8.489422215 | 13.91234488 | 12.71071886 | 11.27640741 | 12.17530797 |
| ENSMUSG00000001707 | 62.25576291 | 89.0390072  | 82.61967259 | 173.9788572 | 132.4959985 |
| ENSMUSG00000001751 | 16.27139258 | 25.04222078 | 31.0706461  | 21.74735715 | 14.32389173 |
| ENSMUSG00000001761 | 10.61177777 | 5.56493795  | 12.00456781 | 8.860034393 | 5.013362104 |
| ENSMUSG00000001767 | 29.0055259  | 48.69320706 | 44.48751601 | 45.10562964 | 52.2822048  |
| ENSMUSG00000001774 | 65.79302217 | 73.0398106  | 59.31668801 | 155.4533307 | 126.0502472 |
| ENSMUSG00000001783 | 91.26128881 | 126.6023384 | 100.2734488 | 218.2790291 | 168.3057278 |
| ENSMUSG00000001804 | 7.781970364 | 5.56493795  | 8.473812573 | 7.249119049 | 5.729556691 |
| ENSMUSG00000001823 | 7.074518513 | 6.260555194 | 3.530755239 | 3.221830688 | 5.729556691 |
| ENSMUSG00000001865 | 10.61177777 | 3.478086219 | 5.649208382 | 4.832746033 | 5.729556691 |
| ENSMUSG00000001910 | 86.30912585 | 116.1680797 | 121.4579802 | 220.6954022 | 175.4676737 |
| ENSMUSG00000001942 | 7.074518513 | 11.82549314 | 7.767661525 | 10.47094974 | 6.445751277 |
| ENSMUSG00000001943 | 7.074518513 | 9.738641413 | 9.179963621 | 6.443661377 | 9.310529622 |
| ENSMUSG00000001962 | 29.71297775 | 37.56333116 | 35.30755239 | 37.85651059 | 34.37734014 |
| ENSMUSG00000001983 | 13.44158517 | 27.82468975 | 28.95219296 | 40.2728836  | 32.94495097 |
| ENSMUSG00000001985 | 8.489422215 | 2.086851731 | 4.943057334 | 2.416373016 | 6.445751277 |
| ENSMUSG00000001988 | 7.074518513 | 8.347406925 | 2.824604191 | 5.638203705 | 9.310529622 |
| ENSMUSG00000001995 | 20.51610369 | 27.12907251 | 28.24604191 | 9.665492065 | 17.18867007 |
| ENSMUSG00000002007 | 48.10672589 | 42.43265187 | 32.4829482  | 32.21830688 | 32.22875639 |
| ENSMUSG00000002015 | 43.15456293 | 65.38802092 | 60.02283906 | 94.23854763 | 68.0384857  |
| ENSMUSG00000002017 | 44.56946663 | 78.60474855 | 58.61053696 | 108.7367857 | 71.61945863 |
| ENSMUSG00000002052 | 100.4581629 | 132.8628936 | 125.6948865 | 211.8353678 | 169.738117  |
| ENSMUSG00000002055 | 19.80865184 | 27.12907251 | 23.30298458 | 52.35474869 | 35.09353473 |
| ENSMUSG00000002057 | 8.489422215 | 3.478086219 | 3.530755239 | 6.443661377 | 10.7429188  |
| ENSMUSG00000002111 | 110.3624888 | 114.7768452 | 133.462548  | 172.3679418 | 121.0368851 |
| ENSMUSG00000002204 | 87.01657771 | 95.99517964 | 87.56272992 | 198.948045  | 152.5494469 |
| ENSMUSG00000002228 | 6.367066661 | 9.043024169 | 6.35535943  | 7.249119049 | 4.297167518 |
| ENSMUSG00000002257 | 48.81417774 | 76.51789682 | 74.14586002 | 84.57305557 | 68.0384857  |
| ENSMUSG00000002324 | 9.904325918 | 5.56493795  | 7.061510478 | 8.860034393 | 1.432389173 |
| ENSMUSG00000002326 | 103.2879703 | 132.8628936 | 108.0411103 | 188.4770953 | 165.4409494 |
| ENSMUSG00000002329 | 19.10119998 | 42.43265187 | 26.83373982 | 29.80193387 | 37.24211849 |
| ENSMUSG00000002341 | 2.122355554 | 2.086851731 | 5.649208382 | 3.221830688 | 3.580972932 |

|                    |             |             |             |             |             |
|--------------------|-------------|-------------|-------------|-------------|-------------|
| ENSMUSG00000002365 | 125.2189777 | 169.7306075 | 146.1732669 | 179.6170609 | 163.2923657 |
| ENSMUSG00000002372 | 134.4158517 | 151.6445591 | 134.1686991 | 229.5554365 | 179.0486466 |
| ENSMUSG00000002379 | 91.26128881 | 100.8645003 | 127.8133396 | 106.3204127 | 90.95671247 |
| ENSMUSG00000002384 | 9.904325918 | 4.869320706 | 4.943057334 | 4.832746033 | 5.729556691 |
| ENSMUSG00000002396 | 11.31922962 | 20.17290007 | 18.35992724 | 27.38556085 | 16.47247549 |
| ENSMUSG00000002477 | 123.0966221 | 133.5585108 | 111.5718655 | 244.0536746 | 176.9000628 |
| ENSMUSG00000002496 | 12.73413332 | 19.47728283 | 19.06607829 | 13.69278043 | 11.45911338 |
| ENSMUSG00000002580 | 10.61177777 | 11.82549314 | 15.53532305 | 16.91461111 | 18.62105924 |
| ENSMUSG00000002608 | 65.08557032 | 75.12666233 | 67.08434954 | 110.3477011 | 103.848215  |
| ENSMUSG00000002625 | 60.13340736 | 94.60394515 | 79.7950684  | 78.12939419 | 60.87653984 |
| ENSMUSG00000002633 | 9.904325918 | 4.869320706 | 2.824604191 | 5.638203705 | 6.445751277 |
| ENSMUSG00000002658 | 17.68629628 | 45.91073809 | 43.07521391 | 80.54576721 | 69.47087488 |
| ENSMUSG00000002660 | 31.12788146 | 63.99678643 | 42.36906287 | 95.84946298 | 89.52432329 |
| ENSMUSG00000002664 | 12.02668147 | 16.69481385 | 23.30298458 | 12.08186508 | 17.18867007 |
| ENSMUSG00000002668 | 90.55383696 | 124.5154866 | 118.633376  | 68.46390213 | 61.59273443 |
| ENSMUSG00000002688 | 9.196874066 | 5.56493795  | 11.29841676 | 3.221830688 | 4.297167518 |
| ENSMUSG00000002731 | 4.244711108 | 7.651789682 | 2.118453143 | 4.02728836  | 5.013362104 |
| ENSMUSG00000002733 | 50.22908144 | 81.38721752 | 79.08891735 | 124.0404815 | 109.5777717 |
| ENSMUSG00000002741 | 91.96874066 | 109.9075245 | 136.2871522 | 148.2042117 | 123.9016634 |
| ENSMUSG00000002748 | 75.69734809 | 102.2557348 | 95.33039145 | 223.9172328 | 160.4275873 |
| ENSMUSG00000002768 | 47.39927403 | 75.12666233 | 60.72899011 | 111.1531587 | 95.25387998 |
| ENSMUSG00000002769 | 6.367066661 | 11.82549314 | 7.061510478 | 8.054576721 | 6.445751277 |
| ENSMUSG00000002797 | 29.71297775 | 35.47647943 | 34.60140134 | 27.38556085 | 17.18867007 |
| ENSMUSG00000002799 | 4.244711108 | 4.173703463 | 8.473812573 | 5.638203705 | 5.729556691 |
| ENSMUSG00000002804 | 9.904325918 | 17.39043109 | 16.2414741  | 7.249119049 | 12.17530797 |
| ENSMUSG00000002808 | 8.489422215 | 6.260555194 | 6.35535943  | 6.443661377 | 4.297167518 |
| ENSMUSG00000002812 | 47.39927403 | 89.0390072  | 63.5535943  | 53.16020636 | 68.75468029 |
| ENSMUSG00000002820 | 84.1867703  | 129.3848073 | 117.927225  | 78.93485187 | 64.45751277 |
| ENSMUSG00000002825 | 24.76081479 | 31.30277597 | 41.66291182 | 53.16020636 | 47.2688427  |
| ENSMUSG00000002835 | 45.98437033 | 53.56252777 | 46.60596915 | 103.9040397 | 88.09193412 |
| ENSMUSG00000002844 | 19.80865184 | 31.30277597 | 31.0706461  | 45.91108731 | 46.55264811 |
| ENSMUSG00000002846 | 53.05888884 | 69.56172438 | 69.20280268 | 90.21125927 | 89.52432329 |
| ENSMUSG00000002847 | 7.074518513 | 5.56493795  | 2.118453143 | 4.832746033 | 5.729556691 |
| ENSMUSG00000002870 | 34.66514071 | 51.47567604 | 54.37363068 | 131.2896006 | 87.37573953 |
| ENSMUSG00000002897 | 145.0276295 | 171.8174592 | 153.9409284 | 167.5351958 | 136.0769714 |
| ENSMUSG00000002930 | 7.074518513 | 4.869320706 | 7.061510478 | 5.638203705 | 6.445751277 |
| ENSMUSG00000002968 | 50.93653329 | 75.12666233 | 70.61510478 | 82.96214023 | 73.05184781 |
| ENSMUSG00000002992 | 0           | 0           | 0           | 0           | 0           |
| ENSMUSG00000003032 | 4.244711108 | 4.869320706 | 4.943057334 | 0.805457672 | 6.445751277 |
| ENSMUSG00000003039 | 72.86754068 | 97.38641413 | 107.3349593 | 87.79488626 | 83.07857202 |
| ENSMUSG00000003070 | 12.73413332 | 8.347406925 | 9.886114669 | 12.88732275 | 10.02672421 |
| ENSMUSG00000003131 | 66.50047402 | 93.21271067 | 100.2734488 | 152.2315    | 113.8749392 |
| ENSMUSG00000003200 | 60.84085921 | 81.38721752 | 78.3827663  | 210.2244524 | 164.0085603 |



|                    |             |             |             |             |             |
|--------------------|-------------|-------------|-------------|-------------|-------------|
| ENSMUSG00000003206 | 10.61177777 | 11.1298759  | 15.53532305 | 53.96566403 | 43.68786977 |
| ENSMUSG00000003208 | 17.68629628 | 28.52030699 | 37.42600553 | 54.7711217  | 63.0251236  |
| ENSMUSG00000003226 | 84.1867703  | 96.69079689 | 86.15042783 | 238.4154709 | 177.6162574 |
| ENSMUSG00000003227 | 8.489422215 | 4.869320706 | 4.236906287 | 8.054576721 | 7.161945863 |
| ENSMUSG00000003228 | 7.074518513 | 9.043024169 | 12.00456781 | 8.054576721 | 5.013362104 |
| ENSMUSG00000003282 | 6.367066661 | 26.43345526 | 24.00913562 | 20.94189947 | 19.33725383 |
| ENSMUSG00000003341 | 8.489422215 | 9.043024169 | 4.943057334 | 4.832746033 | 7.161945863 |
| ENSMUSG00000003354 | 13.44158517 | 4.869320706 | 7.767661525 | 3.221830688 | 10.02672421 |
| ENSMUSG00000003355 | 12.73413332 | 12.52111039 | 12.00456781 | 7.249119049 | 8.594335036 |
| ENSMUSG00000003378 | 12.73413332 | 9.738641413 | 9.886114669 | 4.02728836  | 10.02672421 |
| ENSMUSG00000003379 | 145.7350814 | 151.6445591 | 151.1163242 | 263.3846588 | 184.0620087 |
| ENSMUSG00000003410 | 10.61177777 | 2.086851731 | 10.59226572 | 5.638203705 | 5.013362104 |
| ENSMUSG00000003420 | 16.27139258 | 25.04222078 | 26.12758877 | 16.91461111 | 12.89150255 |
| ENSMUSG00000003435 | 108.9475851 | 150.9489419 | 129.9317928 | 244.0536746 | 176.9000628 |
| ENSMUSG00000003444 | 67.20792587 | 122.4286349 | 100.9795998 | 150.6205847 | 121.0368851 |
| ENSMUSG00000003469 | 7.781970364 | 5.56493795  | 6.35535943  | 4.832746033 | 10.02672421 |
| ENSMUSG00000003477 | 8.489422215 | 5.56493795  | 3.530755239 | 4.02728836  | 5.729556691 |
| ENSMUSG00000003484 | 36.78749627 | 55.6493795  | 55.78593277 | 25.77464551 | 32.22875639 |
| ENSMUSG00000003527 | 47.39927403 | 58.43184848 | 46.60596915 | 61.21478308 | 58.01176149 |
| ENSMUSG00000003541 | 2.829807405 | 3.478086219 | 3.530755239 | 0.805457672 | 1.432389173 |
| ENSMUSG00000003545 | 4.952162959 | 9.738641413 | 7.767661525 | 2.416373016 | 8.594335036 |
| ENSMUSG00000003546 | 16.97884443 | 41.04141738 | 31.0706461  | 33.02376456 | 32.94495097 |
| ENSMUSG00000003549 | 14.85648888 | 15.99919661 | 19.77222934 | 19.33098413 | 21.48583759 |
| ENSMUSG00000003555 | 3.537259256 | 5.56493795  | 5.649208382 | 0.805457672 | 7.87814045  |
| ENSMUSG00000003559 | 11.31922962 | 15.30357936 | 16.94762515 | 7.249119049 | 10.7429188  |
| ENSMUSG00000003623 | 0           | 0           | 0.706151048 | 0           | 0.716194586 |
| ENSMUSG00000003657 | 7.074518513 | 3.478086219 | 4.943057334 | 3.221830688 | 5.729556691 |
| ENSMUSG00000003665 | 7.781970364 | 8.347406925 | 7.061510478 | 8.054576721 | 5.013362104 |
| ENSMUSG00000003752 | 44.56946663 | 74.43104508 | 72.73355792 | 58.79841006 | 61.59273443 |
| ENSMUSG00000003814 | 50.93653329 | 72.34419335 | 53.66747963 | 272.2446932 | 197.6697058 |
| ENSMUSG00000003849 | 10.61177777 | 7.651789682 | 9.886114669 | 16.10915344 | 15.7562809  |
| ENSMUSG00000003872 | 5.65961481  | 7.651789682 | 10.59226572 | 8.054576721 | 7.161945863 |
| ENSMUSG00000003882 | 44.56946663 | 57.04061399 | 36.71985448 | 16.10915344 | 15.7562809  |
| ENSMUSG00000003934 | 7.074518513 | 11.82549314 | 7.767661525 | 5.638203705 | 10.7429188  |
| ENSMUSG00000003955 | 25.46826665 | 61.21431745 | 49.43057334 | 99.87675134 | 88.09193412 |
| ENSMUSG00000003970 | 36.08004441 | 61.9099347  | 58.61053696 | 268.2174048 | 162.5761711 |
| ENSMUSG00000003974 | 12.02668147 | 5.56493795  | 7.767661525 | 6.443661377 | 9.310529622 |
| ENSMUSG00000004018 | 18.39374813 | 25.04222078 | 19.77222934 | 25.77464551 | 20.05344842 |
| ENSMUSG00000004038 | 12.02668147 | 11.82549314 | 7.767661525 | 9.665492065 | 10.02672421 |
| ENSMUSG00000004044 | 8.489422215 | 6.956172438 | 14.12302096 | 8.054576721 | 11.45911338 |
| ENSMUSG00000004054 | 56.5961481  | 77.9091313  | 72.02740687 | 143.3714656 | 131.7798039 |
| ENSMUSG00000004096 | 26.88317035 | 44.5195036  | 30.36449505 | 84.57305557 | 73.76804239 |
| ENSMUSG00000004098 | 9.196874066 | 7.651789682 | 9.179963621 | 5.638203705 | 10.02672421 |

|                    |             |             |             |             |             |
|--------------------|-------------|-------------|-------------|-------------|-------------|
| ENSMUSG00000004105 | 8.489422215 | 9.043024169 | 7.767661525 | 6.443661377 | 8.594335036 |
| ENSMUSG00000004341 | 10.61177777 | 6.260555194 | 4.236906287 | 4.832746033 | 10.02672421 |
| ENSMUSG00000004356 | 14.14903703 | 18.08604834 | 20.47838039 | 55.57657937 | 48.70123187 |
| ENSMUSG00000004360 | 8.489422215 | 9.738641413 | 12.71071886 | 5.638203705 | 5.729556691 |
| ENSMUSG00000004366 | 9.196874066 | 3.478086219 | 10.59226572 | 5.638203705 | 6.445751277 |
| ENSMUSG00000004462 | 96.92090362 | 118.2549314 | 110.1595635 | 211.0299101 | 153.2656415 |
| ENSMUSG00000004500 | 27.5906222  | 41.73703463 | 33.89525029 | 30.60739154 | 36.5259239  |
| ENSMUSG00000004508 | 8.489422215 | 7.651789682 | 9.886114669 | 4.832746033 | 5.729556691 |
| ENSMUSG00000004540 | 13.44158517 | 4.869320706 | 7.061510478 | 5.638203705 | 6.445751277 |
| ENSMUSG00000004610 | 25.46826665 | 40.34580014 | 34.60140134 | 26.58010318 | 42.25548059 |
| ENSMUSG00000004612 | 6.367066661 | 6.956172438 | 4.943057334 | 8.054576721 | 5.013362104 |
| ENSMUSG00000004613 | 2.829807405 | 0.695617244 | 2.824604191 | 7.249119049 | 4.297167518 |
| ENSMUSG00000004651 | 7.781970364 | 8.347406925 | 9.886114669 | 2.416373016 | 7.161945863 |
| ENSMUSG00000004654 | 4.952162959 | 6.260555194 | 7.767661525 | 1.610915344 | 4.297167518 |
| ENSMUSG00000004655 | 9.196874066 | 6.260555194 | 4.943057334 | 4.832746033 | 5.729556691 |
| ENSMUSG00000004748 | 6.367066661 | 6.260555194 | 7.767661525 | 12.08186508 | 12.17530797 |
| ENSMUSG00000004791 | 7.781970364 | 9.043024169 | 4.943057334 | 5.638203705 | 7.161945863 |
| ENSMUSG00000004821 | 9.196874066 | 6.956172438 | 5.649208382 | 5.638203705 | 7.87814045  |
| ENSMUSG00000004837 | 247.6081479 | 214.2501111 | 211.1391633 | 492.9400953 | 315.125618  |
| ENSMUSG00000004843 | 62.25576291 | 108.51629   | 91.09348516 | 44.30017197 | 65.88990194 |
| ENSMUSG00000004885 | 12.02668147 | 6.956172438 | 11.29841676 | 5.638203705 | 9.310529622 |
| ENSMUSG00000004895 | 113.8997481 | 139.1234488 | 146.1732669 | 146.5932963 | 124.617858  |
| ENSMUSG00000004902 | 7.781970364 | 11.1298759  | 14.829172   | 8.860034393 | 7.87814045  |
| ENSMUSG00000004936 | 89.84638511 | 105.7338211 | 112.9841676 | 186.0607223 | 139.6579443 |
| ENSMUSG00000004937 | 109.6550369 | 123.8198694 | 120.0456781 | 121.6241085 | 114.5911338 |
| ENSMUSG00000004939 | 9.196874066 | 9.738641413 | 7.061510478 | 9.665492065 | 7.161945863 |
| ENSMUSG00000004961 | 5.65961481  | 4.173703463 | 9.179963621 | 3.221830688 | 3.580972932 |
| ENSMUSG00000004988 | 4.244711108 | 4.173703463 | 7.061510478 | 0           | 5.729556691 |
| ENSMUSG00000004996 | 20.51610369 | 33.3896277  | 24.00913562 | 56.38203705 | 45.83645353 |
| ENSMUSG00000005054 | 18.39374813 | 16.69481385 | 28.95219296 | 27.38556085 | 23.63442135 |
| ENSMUSG00000005124 | 4.952162959 | 9.043024169 | 6.35535943  | 4.832746033 | 10.02672421 |
| ENSMUSG00000005131 | 5.65961481  | 6.260555194 | 10.59226572 | 4.832746033 | 7.161945863 |
| ENSMUSG00000005148 | 4.952162959 | 7.651789682 | 6.35535943  | 8.054576721 | 8.594335036 |
| ENSMUSG00000005202 | 7.781970364 | 12.52111039 | 12.71071886 | 3.221830688 | 5.729556691 |
| ENSMUSG00000005299 | 48.81417774 | 82.77845201 | 73.43970897 | 71.68573282 | 68.0384857  |
| ENSMUSG00000005320 | 9.904325918 | 9.043024169 | 11.29841676 | 4.832746033 | 8.594335036 |
| ENSMUSG00000005355 | 4.952162959 | 4.869320706 | 8.473812573 | 4.02728836  | 6.445751277 |
| ENSMUSG00000005357 | 9.196874066 | 6.260555194 | 3.530755239 | 4.02728836  | 8.594335036 |
| ENSMUSG00000005370 | 41.03220737 | 57.73623123 | 65.67204744 | 141.7605503 | 103.1320204 |
| ENSMUSG00000005397 | 9.904325918 | 12.52111039 | 19.06607829 | 7.249119049 | 9.310529622 |
| ENSMUSG00000005410 | 45.27691848 | 48.69320706 | 48.7244223  | 149.0096693 | 118.1721067 |
| ENSMUSG00000005413 | 5.65961481  | 8.347406925 | 7.767661525 | 17.72006879 | 9.310529622 |
| ENSMUSG00000005465 | 12.73413332 | 34.08524495 | 40.95676077 | 37.85651059 | 35.09353473 |

|                    |             |             |             |             |             |
|--------------------|-------------|-------------|-------------|-------------|-------------|
| ENSMUSG00000005470 | 33.95768886 | 29.21592424 | 21.18453143 | 62.02024075 | 47.2688427  |
| ENSMUSG00000005474 | 5.65961481  | 6.260555194 | 6.35535943  | 10.47094974 | 7.161945863 |
| ENSMUSG00000005503 | 6.367066661 | 5.56493795  | 10.59226572 | 4.832746033 | 7.87814045  |
| ENSMUSG00000005510 | 41.03220737 | 80.69160028 | 72.02740687 | 128.0677699 | 111.0101609 |
| ENSMUSG00000005656 | 52.35143699 | 103.6469693 | 74.14586002 | 65.24207144 | 60.87653984 |
| ENSMUSG00000005667 | 26.1757185  | 56.34499675 | 40.95676077 | 155.4533307 | 133.9283876 |
| ENSMUSG00000005674 | 13.44158517 | 12.52111039 | 14.12302096 | 8.054576721 | 7.87814045  |
| ENSMUSG00000005682 | 22.63845924 | 28.52030699 | 22.59683353 | 25.77464551 | 24.35061594 |
| ENSMUSG00000005683 | 69.33028142 | 105.0382038 | 96.74269354 | 215.0571984 | 143.9551119 |
| ENSMUSG00000005718 | 6.367066661 | 20.17290007 | 17.65377619 | 43.49471429 | 28.64778345 |
| ENSMUSG00000005800 | 7.074518513 | 8.347406925 | 6.35535943  | 4.02728836  | 6.445751277 |
| ENSMUSG00000005823 | 13.44158517 | 31.99839321 | 23.30298458 | 15.30369577 | 20.05344842 |
| ENSMUSG00000005824 | 8.489422215 | 7.651789682 | 7.767661525 | 8.054576721 | 10.7429188  |
| ENSMUSG00000005836 | 4.952162959 | 6.260555194 | 5.649208382 | 4.02728836  | 4.297167518 |
| ENSMUSG00000005864 | 2.122355554 | 1.391234488 | 2.118453143 | 3.221830688 | 2.148583759 |
| ENSMUSG00000005873 | 38.20239997 | 50.7800588  | 66.37819849 | 45.91108731 | 60.16034525 |
| ENSMUSG00000005891 | 7.781970364 | 8.347406925 | 9.886114669 | 3.221830688 | 3.580972932 |
| ENSMUSG00000005892 | 8.489422215 | 9.043024169 | 2.824604191 | 5.638203705 | 9.310529622 |
| ENSMUSG00000005949 | 14.85648888 | 26.43345526 | 21.18453143 | 12.08186508 | 18.62105924 |
| ENSMUSG00000005973 | 9.196874066 | 22.2597518  | 15.53532305 | 14.4982381  | 27.21539428 |
| ENSMUSG00000006021 | 9.904325918 | 12.52111039 | 9.886114669 | 10.47094974 | 11.45911338 |
| ENSMUSG00000006127 | 40.32475552 | 77.9091313  | 64.96589639 | 45.91108731 | 45.12025894 |
| ENSMUSG00000006134 | 147.1499851 | 191.294742  | 162.414741  | 220.6954022 | 171.1705061 |
| ENSMUSG00000006179 | 8.489422215 | 8.347406925 | 9.886114669 | 7.249119049 | 5.729556691 |
| ENSMUSG00000006200 | 2.829807405 | 2.782468975 | 6.35535943  | 2.416373016 | 4.297167518 |
| ENSMUSG00000006204 | 12.73413332 | 6.260555194 | 5.649208382 | 8.054576721 | 7.161945863 |
| ENSMUSG00000006218 | 4.244711108 | 4.869320706 | 3.530755239 | 8.054576721 | 6.445751277 |
| ENSMUSG00000006221 | 6.367066661 | 4.869320706 | 7.061510478 | 6.443661377 | 11.45911338 |
| ENSMUSG00000006235 | 9.196874066 | 6.260555194 | 7.767661525 | 4.02728836  | 9.310529622 |
| ENSMUSG00000006269 | 4.244711108 | 5.56493795  | 9.179963621 | 12.88732275 | 8.594335036 |
| ENSMUSG00000006270 | 2.829807405 | 4.869320706 | 5.649208382 | 4.02728836  | 2.148583759 |
| ENSMUSG00000006281 | 21.22355554 | 38.95456565 | 33.18909925 | 22.55281482 | 27.93158887 |
| ENSMUSG00000006288 | 67.20792587 | 98.08203137 | 70.61510478 | 86.98942859 | 73.76804239 |
| ENSMUSG00000006311 | 9.196874066 | 12.52111039 | 7.061510478 | 8.054576721 | 3.580972932 |
| ENSMUSG00000006313 | 9.196874066 | 5.56493795  | 8.473812573 | 8.860034393 | 5.729556691 |
| ENSMUSG00000006315 | 43.86201478 | 51.47567604 | 45.19366706 | 60.40932541 | 56.57937232 |
| ENSMUSG00000006378 | 4.952162959 | 11.1298759  | 7.767661525 | 8.860034393 | 5.013362104 |
| ENSMUSG00000006445 | 24.76081479 | 20.86851731 | 34.60140134 | 11.27640741 | 15.7562809  |
| ENSMUSG00000006457 | 26.88317035 | 33.3896277  | 34.60140134 | 30.60739154 | 24.35061594 |
| ENSMUSG00000006464 | 4.244711108 | 2.782468975 | 11.29841676 | 4.832746033 | 7.161945863 |
| ENSMUSG00000006490 | 12.73413332 | 12.52111039 | 8.473812573 | 4.832746033 | 12.89150255 |
| ENSMUSG00000006517 | 25.46826665 | 38.95456565 | 29.65834401 | 58.79841006 | 56.57937232 |
| ENSMUSG00000006546 | 12.02668147 | 8.347406925 | 4.236906287 | 3.221830688 | 7.161945863 |

|                    |             |             |             |             |             |
|--------------------|-------------|-------------|-------------|-------------|-------------|
| ENSMUSG00000006570 | 9.196874066 | 9.043024169 | 6.35535943  | 5.638203705 | 8.594335036 |
| ENSMUSG00000006585 | 25.46826665 | 31.99839321 | 24.00913562 | 116.7913625 | 90.95671247 |
| ENSMUSG00000006587 | 9.904325918 | 8.347406925 | 10.59226572 | 10.47094974 | 7.161945863 |
| ENSMUSG00000006589 | 16.27139258 | 21.56413456 | 27.53989086 | 84.57305557 | 58.72795608 |
| ENSMUSG00000006642 | 7.074518513 | 9.738641413 | 8.473812573 | 7.249119049 | 9.310529622 |
| ENSMUSG00000006651 | 4.244711108 | 4.869320706 | 7.061510478 | 7.249119049 | 2.864778345 |
| ENSMUSG00000006678 | 26.1757185  | 30.60715873 | 27.53989086 | 70.07481747 | 55.14698315 |
| ENSMUSG00000006717 | 79.94205919 | 113.3856107 | 105.2165061 | 177.2006879 | 136.793166  |
| ENSMUSG00000006736 | 12.02668147 | 13.21672763 | 12.71071886 | 40.2728836  | 32.22875639 |
| ENSMUSG00000006764 | 4.952162959 | 4.869320706 | 12.00456781 | 8.860034393 | 4.297167518 |
| ENSMUSG00000006777 | 12.73413332 | 12.52111039 | 6.35535943  | 4.02728836  | 7.87814045  |
| ENSMUSG00000006818 | 13.44158517 | 23.65098629 | 21.18453143 | 42.68925662 | 34.37734014 |
| ENSMUSG00000006850 | 12.73413332 | 19.47728283 | 22.59683353 | 23.35827249 | 16.47247549 |
| ENSMUSG00000006941 | 14.85648888 | 22.2597518  | 19.06607829 | 50.74383334 | 42.25548059 |
| ENSMUSG00000006948 | 9.196874066 | 3.478086219 | 6.35535943  | 5.638203705 | 7.161945863 |
| ENSMUSG00000007021 | 4.244711108 | 9.738641413 | 4.943057334 | 3.221830688 | 5.729556691 |
| ENSMUSG00000007030 | 11.31922962 | 13.91234488 | 20.47838039 | 13.69278043 | 15.04008631 |
| ENSMUSG00000007033 | 2.122355554 | 5.56493795  | 8.473812573 | 4.832746033 | 5.729556691 |
| ENSMUSG00000007038 | 14.14903703 | 24.34660353 | 33.89525029 | 19.33098413 | 25.06681052 |
| ENSMUSG00000007041 | 24.76081479 | 20.17290007 | 14.829172   | 27.38556085 | 22.20203218 |
| ENSMUSG00000007107 | 5.65961481  | 9.738641413 | 7.767661525 | 4.832746033 | 6.445751277 |
| ENSMUSG00000007209 | 9.904325918 | 11.1298759  | 5.649208382 | 6.443661377 | 9.310529622 |
| ENSMUSG00000007216 | 8.489422215 | 6.956172438 | 11.29841676 | 9.665492065 | 9.310529622 |
| ENSMUSG00000007338 | 146.4425332 | 220.5106663 | 199.8407465 | 413.1997858 | 292.2073912 |
| ENSMUSG00000007480 | 6.367066661 | 4.173703463 | 4.943057334 | 4.832746033 | 6.445751277 |
| ENSMUSG00000007589 | 11.31922962 | 21.56413456 | 16.94762515 | 41.88379895 | 31.5125618  |
| ENSMUSG00000007603 | 17.68629628 | 31.99839321 | 30.36449505 | 43.49471429 | 44.40406435 |
| ENSMUSG00000007670 | 86.30912585 | 106.4294383 | 103.804204  | 328.6267302 | 219.1555434 |
| ENSMUSG00000007682 | 10.61177777 | 6.956172438 | 6.35535943  | 8.054576721 | 6.445751277 |
| ENSMUSG00000007721 | 14.85648888 | 25.73783802 | 22.59683353 | 24.16373016 | 26.49919969 |
| ENSMUSG00000007777 | 15.56394073 | 20.17290007 | 19.06607829 | 32.21830688 | 30.08017263 |
| ENSMUSG00000007805 | 9.196874066 | 6.260555194 | 2.824604191 | 4.832746033 | 7.161945863 |
| ENSMUSG00000007836 | 33.25023701 | 68.17048989 | 60.02283906 | 207.8080794 | 183.3458141 |
| ENSMUSG00000007867 | 5.65961481  | 5.56493795  | 4.236906287 | 7.249119049 | 5.729556691 |
| ENSMUSG00000007872 | 44.56946663 | 63.99678643 | 60.72899011 | 51.54929101 | 47.2688427  |
| ENSMUSG00000007877 | 4.244711108 | 5.56493795  | 4.236906287 | 4.02728836  | 7.87814045  |
| ENSMUSG00000007892 | 20.51610369 | 29.21592424 | 36.01370344 | 161.0915344 | 122.4692743 |
| ENSMUSG00000007907 | 8.489422215 | 13.91234488 | 5.649208382 | 1.610915344 | 4.297167518 |
| ENSMUSG00000007944 | 7.781970364 | 5.56493795  | 5.649208382 | 8.054576721 | 5.013362104 |
| ENSMUSG00000007950 | 24.05336294 | 26.43345526 | 29.65834401 | 23.35827249 | 28.64778345 |
| ENSMUSG00000007989 | 6.367066661 | 6.260555194 | 6.35535943  | 5.638203705 | 7.161945863 |
| ENSMUSG00000008348 | 170.4958962 | 224.6843697 | 201.2530486 | 490.5237223 | 343.0572069 |
| ENSMUSG00000008384 | 19.80865184 | 38.95456565 | 40.25060972 | 45.10562964 | 40.82309142 |

|                    |             |             |             |             |             |
|--------------------|-------------|-------------|-------------|-------------|-------------|
| ENSMUSG00000008393 | 45.27691848 | 36.86771392 | 43.78136496 | 41.88379895 | 36.5259239  |
| ENSMUSG00000008429 | 35.37259256 | 71.64857611 | 50.13672439 | 52.35474869 | 61.59273443 |
| ENSMUSG00000008438 | 6.367066661 | 11.82549314 | 12.00456781 | 8.860034393 | 5.013362104 |
| ENSMUSG00000008450 | 103.9954221 | 118.2549314 | 122.8702823 | 205.3917064 | 171.1705061 |
| ENSMUSG00000008461 | 7.074518513 | 4.173703463 | 5.649208382 | 12.88732275 | 8.594335036 |
| ENSMUSG00000008482 | 4.244711108 | 4.173703463 | 5.649208382 | 6.443661377 | 9.310529622 |
| ENSMUSG00000008590 | 9.904325918 | 2.086851731 | 12.00456781 | 1.610915344 | 5.013362104 |
| ENSMUSG00000008734 | 8.489422215 | 5.56493795  | 5.649208382 | 2.416373016 | 3.580972932 |
| ENSMUSG00000008843 | 8.489422215 | 6.260555194 | 9.179963621 | 7.249119049 | 5.729556691 |
| ENSMUSG00000008845 | 8.489422215 | 5.56493795  | 8.473812573 | 4.832746033 | 7.87814045  |
| ENSMUSG00000008859 | 32.54278516 | 39.6501829  | 45.19366706 | 35.44013757 | 38.67450766 |
| ENSMUSG00000008932 | 7.781970364 | 6.260555194 | 7.061510478 | 11.27640741 | 8.594335036 |
| ENSMUSG00000008999 | 9.196874066 | 2.782468975 | 3.530755239 | 5.638203705 | 9.310529622 |
| ENSMUSG00000009013 | 45.27691848 | 75.12666233 | 61.43514116 | 149.815127  | 122.4692743 |
| ENSMUSG00000009075 | 8.489422215 | 5.56493795  | 9.886114669 | 8.860034393 | 6.445751277 |
| ENSMUSG00000009092 | 8.489422215 | 12.52111039 | 12.00456781 | 12.08186508 | 15.04008631 |
| ENSMUSG00000009093 | 5.65961481  | 3.478086219 | 4.236906287 | 8.054576721 | 6.445751277 |
| ENSMUSG00000009097 | 2.829807405 | 2.782468975 | 6.35535943  | 6.443661377 | 3.580972932 |
| ENSMUSG00000009112 | 48.81417774 | 79.99598303 | 71.32125582 | 80.54576721 | 83.07857202 |
| ENSMUSG00000009115 | 9.196874066 | 2.782468975 | 10.59226572 | 4.02728836  | 7.161945863 |
| ENSMUSG00000009145 | 10.61177777 | 12.52111039 | 13.41686991 | 19.33098413 | 22.20203218 |
| ENSMUSG00000009185 | 7.074518513 | 10.43425866 | 4.943057334 | 4.832746033 | 5.729556691 |
| ENSMUSG00000009214 | 12.02668147 | 7.651789682 | 4.943057334 | 8.054576721 | 10.7429188  |
| ENSMUSG00000009216 | 5.65961481  | 10.43425866 | 8.473812573 | 8.054576721 | 9.310529622 |
| ENSMUSG00000009248 | 9.196874066 | 7.651789682 | 8.473812573 | 4.832746033 | 7.161945863 |
| ENSMUSG00000009281 | 11.31922962 | 6.956172438 | 9.179963621 | 4.832746033 | 5.013362104 |
| ENSMUSG00000009378 | 6.367066661 | 5.56493795  | 4.943057334 | 10.47094974 | 7.161945863 |
| ENSMUSG00000009471 | 8.489422215 | 5.56493795  | 7.061510478 | 3.221830688 | 5.013362104 |
| ENSMUSG00000009551 | 87.01657771 | 100.1688831 | 120.0456781 | 33.02376456 | 49.41742646 |
| ENSMUSG00000009588 | 7.074518513 | 4.869320706 | 11.29841676 | 7.249119049 | 10.7429188  |
| ENSMUSG00000009596 | 2.122355554 | 2.782468975 | 3.530755239 | 3.221830688 | 2.864778345 |
| ENSMUSG00000009633 | 7.074518513 | 4.173703463 | 11.29841676 | 7.249119049 | 8.594335036 |
| ENSMUSG00000009654 | 6.367066661 | 4.173703463 | 7.061510478 | 11.27640741 | 8.594335036 |
| ENSMUSG00000009731 | 4.244711108 | 2.086851731 | 2.824604191 | 4.832746033 | 6.445751277 |
| ENSMUSG00000009733 | 15.56394073 | 20.17290007 | 17.65377619 | 23.35827249 | 31.5125618  |
| ENSMUSG00000009900 | 6.367066661 | 4.869320706 | 1.412302096 | 4.02728836  | 10.02672421 |
| ENSMUSG00000009905 | 21.93100739 | 40.34580014 | 33.89525029 | 28.9964762  | 28.64778345 |
| ENSMUSG00000009927 | 72.16008883 | 98.77764862 | 79.08891735 | 273.0501508 | 216.2907651 |
| ENSMUSG00000010045 | 83.47931845 | 121.0374004 | 96.0365425  | 88.60034393 | 103.848215  |
| ENSMUSG00000010054 | 36.78749627 | 31.30277597 | 32.4829482  | 33.02376456 | 35.80972932 |
| ENSMUSG00000010057 | 23.34591109 | 34.08524495 | 33.18909925 | 20.1364418  | 25.78300511 |
| ENSMUSG00000010154 | 9.904325918 | 7.651789682 | 8.473812573 | 10.47094974 | 9.310529622 |
| ENSMUSG00000010277 | 16.27139258 | 31.30277597 | 27.53989086 | 67.65844446 | 47.2688427  |

|                    |             |             |             |             |             |
|--------------------|-------------|-------------|-------------|-------------|-------------|
| ENSMUSG00000010290 | 45.98437033 | 62.60555194 | 50.13672439 | 43.49471429 | 50.13362104 |
| ENSMUSG00000010307 | 9.904325918 | 7.651789682 | 9.886114669 | 4.832746033 | 4.297167518 |
| ENSMUSG00000010362 | 4.244711108 | 4.869320706 | 4.943057334 | 0.805457672 | 5.729556691 |
| ENSMUSG00000010392 | 62.25576291 | 79.30036579 | 84.03197468 | 74.10210583 | 73.05184781 |
| ENSMUSG00000010435 | 9.904325918 | 6.956172438 | 4.943057334 | 4.832746033 | 3.580972932 |
| ENSMUSG00000010517 | 22.63845924 | 45.21512085 | 40.25060972 | 93.43308996 | 60.87653984 |
| ENSMUSG00000010529 | 8.489422215 | 4.869320706 | 8.473812573 | 7.249119049 | 5.729556691 |
| ENSMUSG00000010592 | 8.489422215 | 7.651789682 | 4.236906287 | 7.249119049 | 7.87814045  |
| ENSMUSG00000010607 | 12.02668147 | 20.86851731 | 19.06607829 | 14.4982381  | 19.33725383 |
| ENSMUSG00000010651 | 5.65961481  | 2.086851731 | 10.59226572 | 4.832746033 | 7.87814045  |
| ENSMUSG00000010660 | 9.196874066 | 5.56493795  | 9.886114669 | 4.832746033 | 6.445751277 |
| ENSMUSG00000010663 | 9.196874066 | 11.82549314 | 6.35535943  | 24.16373016 | 26.49919969 |
| ENSMUSG00000010760 | 7.074518513 | 4.173703463 | 9.179963621 | 8.860034393 | 14.32389173 |
| ENSMUSG00000010797 | 9.196874066 | 9.043024169 | 7.061510478 | 4.832746033 | 4.297167518 |
| ENSMUSG00000010830 | 5.65961481  | 5.56493795  | 5.649208382 | 7.249119049 | 7.87814045  |
| ENSMUSG00000011034 | 7.781970364 | 6.260555194 | 6.35535943  | 4.02728836  | 5.729556691 |
| ENSMUSG00000011118 | 7.781970364 | 6.260555194 | 8.473812573 | 8.054576721 | 7.87814045  |
| ENSMUSG00000011158 | 78.52715549 | 111.9943762 | 108.0411103 | 95.04400531 | 90.24051788 |
| ENSMUSG00000011179 | 4.244711108 | 2.782468975 | 3.530755239 | 2.416373016 | 2.148583759 |
| ENSMUSG00000011267 | 20.51610369 | 23.65098629 | 21.89068248 | 82.96214023 | 74.48423698 |
| ENSMUSG00000011306 | 210.8206517 | 282.420601  | 231.6175437 | 284.3265582 | 237.0604081 |
| ENSMUSG00000011349 | 7.781970364 | 5.56493795  | 9.179963621 | 6.443661377 | 9.310529622 |
| ENSMUSG00000011382 | 8.489422215 | 5.56493795  | 9.886114669 | 4.02728836  | 7.87814045  |
| ENSMUSG00000011463 | 4.952162959 | 9.738641413 | 9.179963621 | 4.02728836  | 9.310529622 |
| ENSMUSG00000011589 | 4.952162959 | 4.869320706 | 9.886114669 | 4.832746033 | 7.87814045  |
| ENSMUSG00000011632 | 18.39374813 | 22.95536904 | 22.59683353 | 39.46742593 | 30.08017263 |
| ENSMUSG00000011752 | 100.4581629 | 109.2119073 | 107.3349593 | 268.2174048 | 194.8049275 |
| ENSMUSG00000011837 | 17.68629628 | 17.39043109 | 22.59683353 | 24.96918783 | 22.20203218 |
| ENSMUSG00000012017 | 6.367066661 | 7.651789682 | 5.649208382 | 2.416373016 | 7.161945863 |
| ENSMUSG00000012042 | 5.65961481  | 3.478086219 | 7.061510478 | 4.832746033 | 5.729556691 |
| ENSMUSG00000012076 | 28.29807405 | 35.47647943 | 30.36449505 | 49.132918   | 39.39070225 |
| ENSMUSG00000012282 | 9.196874066 | 6.260555194 | 3.530755239 | 7.249119049 | 5.013362104 |
| ENSMUSG00000012428 | 10.61177777 | 9.738641413 | 16.2414741  | 8.054576721 | 7.161945863 |
| ENSMUSG00000012429 | 58.0110518  | 78.60474855 | 77.67661525 | 161.0915344 | 128.198831  |
| ENSMUSG00000012443 | 145.7350814 | 164.1656695 | 106.6288082 | 347.1522567 | 252.816689  |
| ENSMUSG00000012483 | 71.45263698 | 123.8198694 | 112.2780166 | 94.23854763 | 101.6996313 |
| ENSMUSG00000012889 | 10.61177777 | 5.56493795  | 4.943057334 | 8.054576721 | 4.297167518 |
| ENSMUSG00000013091 | 9.196874066 | 4.869320706 | 11.29841676 | 8.054576721 | 7.161945863 |
| ENSMUSG00000013158 | 18.39374813 | 19.47728283 | 15.53532305 | 19.33098413 | 12.89150255 |
| ENSMUSG00000013160 | 29.71297775 | 47.30197258 | 50.84287544 | 41.07834128 | 38.67450766 |
| ENSMUSG00000013275 | 22.63845924 | 49.38882431 | 47.3121202  | 53.96566403 | 34.37734014 |
| ENSMUSG00000013367 | 8.489422215 | 4.869320706 | 9.179963621 | 2.416373016 | 7.87814045  |
| ENSMUSG00000013415 | 4.244711108 | 6.956172438 | 5.649208382 | 5.638203705 | 7.161945863 |

|                    |             |             |             |             |             |
|--------------------|-------------|-------------|-------------|-------------|-------------|
| ENSMUSG00000013418 | 4.952162959 | 7.651789682 | 7.061510478 | 6.443661377 | 9.310529622 |
| ENSMUSG00000013419 | 6.367066661 | 3.478086219 | 7.061510478 | 12.08186508 | 5.729556691 |
| ENSMUSG00000013584 | 8.489422215 | 4.173703463 | 9.179963621 | 7.249119049 | 3.580972932 |
| ENSMUSG00000013653 | 7.781970364 | 4.173703463 | 5.649208382 | 4.832746033 | 5.013362104 |
| ENSMUSG00000013662 | 58.71850365 | 75.82227957 | 71.32125582 | 154.647873  | 118.8883013 |
| ENSMUSG00000013663 | 113.8997481 | 139.1234488 | 119.3395271 | 202.1698757 | 153.2656415 |
| ENSMUSG00000013668 | 9.904325918 | 7.651789682 | 9.886114669 | 6.443661377 | 7.161945863 |
| ENSMUSG00000013707 | 17.68629628 | 37.56333116 | 28.24604191 | 53.16020636 | 35.80972932 |
| ENSMUSG00000013822 | 53.7663407  | 66.7792554  | 54.37363068 | 36.24559524 | 39.39070225 |
| ENSMUSG00000013846 | 25.46826665 | 37.56333116 | 36.01370344 | 22.55281482 | 23.63442135 |
| ENSMUSG00000013974 | 11.31922962 | 11.82549314 | 7.767661525 | 13.69278043 | 11.45911338 |
| ENSMUSG00000014243 | 10.61177777 | 15.99919661 | 17.65377619 | 20.94189947 | 21.48583759 |
| ENSMUSG00000014294 | 50.22908144 | 92.51709342 | 82.61967259 | 119.2077355 | 120.3206905 |
| ENSMUSG00000014349 | 62.96321476 | 101.5601176 | 85.44427678 | 160.2860767 | 138.2255552 |
| ENSMUSG00000014361 | 6.367066661 | 9.043024169 | 7.061510478 | 3.221830688 | 5.013362104 |
| ENSMUSG00000014426 | 42.44711108 | 81.38721752 | 72.02740687 | 33.82922223 | 55.14698315 |
| ENSMUSG00000014453 | 152.102148  | 145.3840039 | 147.585569  | 138.5387196 | 104.5644096 |
| ENSMUSG00000014470 | 52.35143699 | 89.0390072  | 80.50121945 | 113.5695318 | 89.52432329 |
| ENSMUSG00000014496 | 19.10119998 | 50.08444155 | 27.53989086 | 56.38203705 | 63.74131818 |
| ENSMUSG00000014498 | 41.73965922 | 67.47487265 | 58.61053696 | 84.57305557 | 66.60609653 |
| ENSMUSG00000014529 | 4.952162959 | 13.21672763 | 6.35535943  | 5.638203705 | 8.594335036 |
| ENSMUSG00000014542 | 9.196874066 | 8.347406925 | 9.179963621 | 8.860034393 | 7.161945863 |
| ENSMUSG00000014551 | 30.4204296  | 63.99678643 | 56.49208382 | 46.71654498 | 45.12025894 |
| ENSMUSG00000014603 | 7.781970364 | 7.651789682 | 7.061510478 | 6.443661377 | 8.594335036 |
| ENSMUSG00000014686 | 9.196874066 | 14.60796212 | 13.41686991 | 12.08186508 | 5.729556691 |
| ENSMUSG00000014747 | 12.02668147 | 9.043024169 | 9.886114669 | 10.47094974 | 6.445751277 |
| ENSMUSG00000014763 | 71.45263698 | 118.9505487 | 91.79963621 | 101.4876667 | 78.7814045  |
| ENSMUSG00000014769 | 99.04325918 | 150.2533247 | 121.4579802 | 210.2244524 | 192.6563437 |
| ENSMUSG00000014776 | 9.196874066 | 6.956172438 | 9.179963621 | 6.443661377 | 8.594335036 |
| ENSMUSG00000014786 | 29.71297775 | 47.30197258 | 56.49208382 | 24.16373016 | 38.67450766 |
| ENSMUSG00000014813 | 5.65961481  | 9.738641413 | 8.473812573 | 6.443661377 | 7.87814045  |
| ENSMUSG00000014859 | 58.71850365 | 75.12666233 | 66.37819849 | 163.5079074 | 122.4692743 |
| ENSMUSG00000014867 | 19.80865184 | 40.34580014 | 36.01370344 | 111.9586164 | 74.48423698 |
| ENSMUSG00000014905 | 29.0055259  | 68.86610713 | 55.78593277 | 107.9313281 | 103.1320204 |
| ENSMUSG00000015013 | 24.76081479 | 36.17209668 | 43.07521391 | 66.04752911 | 48.70123187 |
| ENSMUSG00000015016 | 25.46826665 | 27.82468975 | 31.0706461  | 19.33098413 | 25.06681052 |
| ENSMUSG00000015023 | 74.98989623 | 89.0390072  | 92.50578726 | 117.5968201 | 114.5911338 |
| ENSMUSG00000015085 | 7.074518513 | 3.478086219 | 5.649208382 | 8.054576721 | 10.7429188  |
| ENSMUSG00000015092 | 70.74518513 | 91.12585893 | 65.67204744 | 181.2279762 | 139.6579443 |
| ENSMUSG00000015126 | 47.39927403 | 57.73623123 | 58.61053696 | 99.07129367 | 87.37573953 |
| ENSMUSG00000015243 | 87.01657771 | 123.8198694 | 86.85657888 | 40.2728836  | 45.83645353 |
| ENSMUSG00000015289 | 11.31922962 | 10.43425866 | 16.94762515 | 17.72006879 | 15.04008631 |
| ENSMUSG00000015305 | 9.196874066 | 9.738641413 | 5.649208382 | 7.249119049 | 5.729556691 |

|                    |             |             |             |             |             |
|--------------------|-------------|-------------|-------------|-------------|-------------|
| ENSMUSG00000015312 | 11.31922962 | 15.99919661 | 13.41686991 | 121.6241085 | 80.21379367 |
| ENSMUSG00000015337 | 6.367066661 | 7.651789682 | 7.767661525 | 11.27640741 | 13.60769714 |
| ENSMUSG00000015342 | 12.02668147 | 22.95536904 | 12.71071886 | 19.33098413 | 18.62105924 |
| ENSMUSG00000015354 | 9.904325918 | 7.651789682 | 5.649208382 | 4.02728836  | 3.580972932 |
| ENSMUSG00000015377 | 16.97884443 | 23.65098629 | 28.24604191 | 24.96918783 | 20.769643   |
| ENSMUSG00000015396 | 116.7295555 | 134.254128  | 129.9317928 | 356.8177487 | 254.2490782 |
| ENSMUSG00000015437 | 9.904325918 | 7.651789682 | 4.943057334 | 11.27640741 | 6.445751277 |
| ENSMUSG00000015441 | 14.14903703 | 8.347406925 | 7.767661525 | 7.249119049 | 10.02672421 |
| ENSMUSG00000015443 | 12.02668147 | 3.478086219 | 5.649208382 | 6.443661377 | 5.013362104 |
| ENSMUSG00000015476 | 3.537259256 | 7.651789682 | 4.943057334 | 8.860034393 | 8.594335036 |
| ENSMUSG00000015484 | 7.074518513 | 8.347406925 | 9.179963621 | 5.638203705 | 5.013362104 |
| ENSMUSG00000015533 | 11.31922962 | 6.956172438 | 9.179963621 | 0.805457672 | 7.87814045  |
| ENSMUSG00000015579 | 4.244711108 | 6.956172438 | 7.061510478 | 4.02728836  | 3.580972932 |
| ENSMUSG00000015599 | 8.489422215 | 5.56493795  | 4.236906287 | 6.443661377 | 9.310529622 |
| ENSMUSG00000015605 | 49.52162959 | 75.12666233 | 84.73812573 | 83.7675979  | 81.64618284 |
| ENSMUSG00000015627 | 7.781970364 | 2.782468975 | 4.236906287 | 8.054576721 | 9.310529622 |
| ENSMUSG00000015647 | 4.952162959 | 8.347406925 | 6.35535943  | 4.832746033 | 2.148583759 |
| ENSMUSG00000015652 | 9.196874066 | 4.173703463 | 7.061510478 | 4.02728836  | 6.445751277 |
| ENSMUSG00000015665 | 6.367066661 | 2.782468975 | 2.824604191 | 3.221830688 | 5.729556691 |
| ENSMUSG00000015672 | 67.20792587 | 119.6461659 | 112.2780166 | 198.1425873 | 164.0085603 |
| ENSMUSG00000015709 | 4.952162959 | 2.782468975 | 5.649208382 | 4.832746033 | 4.297167518 |
| ENSMUSG00000015711 | 19.10119998 | 37.56333116 | 25.42143772 | 23.35827249 | 27.93158887 |
| ENSMUSG00000015745 | 81.3569629  | 114.081228  | 91.09348516 | 145.7878386 | 131.0636093 |
| ENSMUSG00000015747 | 14.85648888 | 20.86851731 | 21.18453143 | 25.77464551 | 18.62105924 |
| ENSMUSG00000015812 | 7.781970364 | 7.651789682 | 6.35535943  | 4.832746033 | 5.729556691 |
| ENSMUSG00000015839 | 34.66514071 | 63.30116918 | 48.7244223  | 153.8424154 | 100.9834367 |
| ENSMUSG00000015854 | 6.367066661 | 8.347406925 | 7.061510478 | 4.832746033 | 7.161945863 |
| ENSMUSG00000015879 | 9.904325918 | 8.347406925 | 6.35535943  | 3.221830688 | 5.013362104 |
| ENSMUSG00000015889 | 39.61730367 | 63.99678643 | 66.37819849 | 63.6311561  | 46.55264811 |
| ENSMUSG00000015890 | 7.781970364 | 6.260555194 | 9.179963621 | 12.88732275 | 10.02672421 |
| ENSMUSG00000015932 | 15.56394073 | 29.91154148 | 24.00913562 | 42.68925662 | 37.95831308 |
| ENSMUSG00000015942 | 24.76081479 | 46.60635533 | 36.71985448 | 68.46390213 | 62.30892901 |
| ENSMUSG00000015944 | 17.68629628 | 11.1298759  | 16.2414741  | 12.88732275 | 9.310529622 |
| ENSMUSG00000015961 | 70.74518513 | 111.9943762 | 83.32582364 | 191.698926  | 140.3741389 |
| ENSMUSG00000015962 | 7.074518513 | 6.260555194 | 7.061510478 | 5.638203705 | 7.161945863 |
| ENSMUSG00000015971 | 31.83533331 | 65.38802092 | 36.71985448 | 41.07834128 | 34.37734014 |
| ENSMUSG00000016018 | 99.75071103 | 124.5154866 | 135.5810012 | 234.3881826 | 176.9000628 |
| ENSMUSG00000016024 | 12.02668147 | 9.043024169 | 6.35535943  | 5.638203705 | 9.310529622 |
| ENSMUSG00000016028 | 9.196874066 | 5.56493795  | 8.473812573 | 5.638203705 | 4.297167518 |
| ENSMUSG00000016181 | 39.61730367 | 59.82308296 | 47.3121202  | 123.2350238 | 80.21379367 |
| ENSMUSG00000016206 | 38.20239997 | 64.69240367 | 50.13672439 | 110.3477011 | 88.80812871 |
| ENSMUSG00000016252 | 51.64398514 | 75.82227957 | 76.26431316 | 117.5968201 | 104.5644096 |
| ENSMUSG00000016255 | 5.65961481  | 7.651789682 | 5.649208382 | 8.054576721 | 8.594335036 |



|                    |             |             |             |             |             |
|--------------------|-------------|-------------|-------------|-------------|-------------|
| ENSMUSG00000016319 | 19.10119998 | 22.95536904 | 19.06607829 | 87.79488626 | 52.99839939 |
| ENSMUSG00000016327 | 4.244711108 | 2.086851731 | 7.767661525 | 2.416373016 | 5.013362104 |
| ENSMUSG00000016409 | 44.56946663 | 44.5195036  | 41.66291182 | 63.6311561  | 58.72795608 |
| ENSMUSG00000016427 | 27.5906222  | 46.60635533 | 38.83830763 | 49.132918   | 47.2688427  |
| ENSMUSG00000016494 | 5.65961481  | 10.43425866 | 5.649208382 | 8.054576721 | 6.445751277 |
| ENSMUSG00000016496 | 57.30359995 | 81.38721752 | 67.79050059 | 189.2825529 | 119.6044959 |
| ENSMUSG00000016498 | 12.73413332 | 6.260555194 | 14.12302096 | 4.02728836  | 5.729556691 |
| ENSMUSG00000016520 | 149.2723406 | 212.1632594 | 167.3577983 | 202.1698757 | 173.3190899 |
| ENSMUSG00000016526 | 8.489422215 | 8.347406925 | 17.65377619 | 16.10915344 | 12.17530797 |
| ENSMUSG00000016529 | 13.44158517 | 7.651789682 | 10.59226572 | 23.35827249 | 14.32389173 |
| ENSMUSG00000016541 | 24.05336294 | 35.47647943 | 38.13215658 | 69.2693598  | 58.01176149 |
| ENSMUSG00000016554 | 85.601674   | 114.081228  | 97.44884459 | 330.2376456 | 224.1689055 |
| ENSMUSG00000016619 | 60.13340736 | 85.56092098 | 67.08434954 | 183.6443492 | 158.9951982 |
| ENSMUSG00000016637 | 12.02668147 | 12.52111039 | 12.00456781 | 13.69278043 | 14.32389173 |
| ENSMUSG00000016758 | 4.244711108 | 10.43425866 | 5.649208382 | 7.249119049 | 6.445751277 |
| ENSMUSG00000016942 | 6.367066661 | 8.347406925 | 2.118453143 | 5.638203705 | 7.87814045  |
| ENSMUSG00000016946 | 53.7663407  | 58.43184848 | 51.54902649 | 107.9313281 | 80.92998826 |
| ENSMUSG00000016982 | 4.952162959 | 6.956172438 | 7.767661525 | 5.638203705 | 1.432389173 |
| ENSMUSG00000016984 | 24.05336294 | 50.08444155 | 45.19366706 | 78.93485187 | 64.45751277 |
| ENSMUSG00000016998 | 7.781970364 | 5.56493795  | 4.236906287 | 7.249119049 | 7.161945863 |
| ENSMUSG00000017000 | 6.367066661 | 10.43425866 | 9.886114669 | 5.638203705 | 10.02672421 |
| ENSMUSG00000017003 | 12.73413332 | 9.043024169 | 11.29841676 | 5.638203705 | 12.17530797 |
| ENSMUSG00000017004 | 7.781970364 | 6.260555194 | 5.649208382 | 5.638203705 | 4.297167518 |
| ENSMUSG00000017007 | 10.61177777 | 2.782468975 | 7.767661525 | 7.249119049 | 4.297167518 |
| ENSMUSG00000017009 | 79.94205919 | 95.2995624  | 88.97503202 | 122.4295662 | 93.82149081 |
| ENSMUSG00000017049 | 7.074518513 | 7.651789682 | 4.943057334 | 6.443661377 | 8.594335036 |
| ENSMUSG00000017057 | 4.952162959 | 3.478086219 | 2.118453143 | 2.416373016 | 5.729556691 |
| ENSMUSG00000017064 | 9.904325918 | 7.651789682 | 4.943057334 | 7.249119049 | 7.87814045  |
| ENSMUSG00000017144 | 4.952162959 | 8.347406925 | 9.179963621 | 1.610915344 | 4.297167518 |
| ENSMUSG00000017165 | 9.196874066 | 5.56493795  | 9.179963621 | 6.443661377 | 8.594335036 |
| ENSMUSG00000017167 | 8.489422215 | 8.347406925 | 14.12302096 | 12.88732275 | 7.87814045  |
| ENSMUSG00000017188 | 20.51610369 | 22.2597518  | 20.47838039 | 27.38556085 | 26.49919969 |
| ENSMUSG00000017204 | 8.489422215 | 6.956172438 | 7.061510478 | 14.4982381  | 10.02672421 |
| ENSMUSG00000017300 | 5.65961481  | 6.956172438 | 8.473812573 | 8.054576721 | 10.02672421 |
| ENSMUSG00000017310 | 5.65961481  | 10.43425866 | 7.061510478 | 10.47094974 | 7.161945863 |
| ENSMUSG00000017344 | 7.781970364 | 6.260555194 | 8.473812573 | 6.443661377 | 6.445751277 |
| ENSMUSG00000017453 | 10.61177777 | 7.651789682 | 9.179963621 | 2.416373016 | 9.310529622 |
| ENSMUSG00000017466 | 7.074518513 | 6.260555194 | 9.886114669 | 13.69278043 | 6.445751277 |
| ENSMUSG00000017491 | 8.489422215 | 8.347406925 | 9.179963621 | 8.860034393 | 5.729556691 |
| ENSMUSG00000017588 | 10.61177777 | 8.347406925 | 6.35535943  | 7.249119049 | 10.7429188  |
| ENSMUSG00000017607 | 6.367066661 | 2.782468975 | 7.061510478 | 7.249119049 | 7.87814045  |
| ENSMUSG00000017667 | 7.781970364 | 8.347406925 | 6.35535943  | 7.249119049 | 5.013362104 |
| ENSMUSG00000017692 | 10.61177777 | 6.260555194 | 8.473812573 | 6.443661377 | 3.580972932 |

|                    |             |             |             |             |             |
|--------------------|-------------|-------------|-------------|-------------|-------------|
| ENSMUSG00000017697 | 11.31922962 | 18.08604834 | 14.829172   | 13.69278043 | 15.7562809  |
| ENSMUSG00000017707 | 94.79854807 | 120.3417832 | 107.3349593 | 200.5589604 | 146.1036956 |
| ENSMUSG00000017713 | 9.196874066 | 15.30357936 | 16.94762515 | 4.832746033 | 7.87814045  |
| ENSMUSG00000017720 | 15.56394073 | 11.82549314 | 12.00456781 | 8.860034393 | 8.594335036 |
| ENSMUSG00000017733 | 9.196874066 | 9.738641413 | 7.061510478 | 4.832746033 | 5.729556691 |
| ENSMUSG00000017737 | 7.074518513 | 6.956172438 | 9.179963621 | 7.249119049 | 7.87814045  |
| ENSMUSG00000017756 | 7.781970364 | 11.82549314 | 11.29841676 | 9.665492065 | 10.7429188  |
| ENSMUSG00000017764 | 16.27139258 | 20.86851731 | 16.94762515 | 20.94189947 | 22.91822676 |
| ENSMUSG00000017767 | 20.51610369 | 29.21592424 | 23.30298458 | 20.1364418  | 20.769643   |
| ENSMUSG00000017831 | 91.26128881 | 104.3425866 | 91.79963621 | 152.2315    | 119.6044959 |
| ENSMUSG00000017832 | 8.489422215 | 26.43345526 | 24.00913562 | 15.30369577 | 22.91822676 |
| ENSMUSG00000018008 | 47.39927403 | 70.95295887 | 87.56272992 | 103.098582  | 90.24051788 |
| ENSMUSG00000018040 | 33.95768886 | 51.47567604 | 58.61053696 | 95.04400531 | 99.5510475  |
| ENSMUSG00000018102 | 9.904325918 | 12.52111039 | 12.00456781 | 7.249119049 | 10.7429188  |
| ENSMUSG00000018166 | 10.61177777 | 9.043024169 | 9.886114669 | 4.832746033 | 11.45911338 |
| ENSMUSG00000018168 | 145.7350814 | 146.7752384 | 138.4056054 | 248.8864207 | 164.0085603 |
| ENSMUSG00000018171 | 77.81970364 | 126.6023384 | 123.5764334 | 219.8899445 | 183.3458141 |
| ENSMUSG00000018199 | 42.44711108 | 64.69240367 | 53.66747963 | 114.3749894 | 90.95671247 |
| ENSMUSG00000018238 | 4.952162959 | 9.043024169 | 8.473812573 | 8.054576721 | 7.87814045  |
| ENSMUSG00000018239 | 50.93653329 | 98.08203137 | 66.37819849 | 96.65492065 | 85.22715578 |
| ENSMUSG00000018286 | 19.10119998 | 30.60715873 | 28.95219296 | 46.71654498 | 50.13362104 |
| ENSMUSG00000018293 | 45.98437033 | 61.9099347  | 62.84744325 | 235.1936403 | 166.157144  |
| ENSMUSG00000018326 | 96.92090362 | 133.5585108 | 107.3349593 | 173.9788572 | 134.6445822 |
| ENSMUSG00000018405 | 15.56394073 | 24.34660353 | 19.77222934 | 37.05105292 | 26.49919969 |
| ENSMUSG00000018427 | 19.10119998 | 25.73783802 | 30.36449505 | 14.4982381  | 20.05344842 |
| ENSMUSG00000018446 | 30.4204296  | 47.99758982 | 62.84744325 | 205.3917064 | 143.9551119 |
| ENSMUSG00000018470 | 3.537259256 | 5.56493795  | 7.767661525 | 2.416373016 | 2.864778345 |
| ENSMUSG00000018476 | 10.61177777 | 5.56493795  | 6.35535943  | 12.08186508 | 9.310529622 |
| ENSMUSG00000018481 | 78.52715549 | 114.081228  | 91.79963621 | 172.3679418 | 155.4142252 |
| ENSMUSG00000018486 | 10.61177777 | 4.173703463 | 5.649208382 | 5.638203705 | 10.02672421 |
| ENSMUSG00000018500 | 5.65961481  | 6.956172438 | 9.179963621 | 7.249119049 | 3.580972932 |
| ENSMUSG00000018509 | 8.489422215 | 11.1298759  | 5.649208382 | 9.665492065 | 13.60769714 |
| ENSMUSG00000018543 | 11.31922962 | 17.39043109 | 12.00456781 | 14.4982381  | 21.48583759 |
| ENSMUSG00000018547 | 41.03220737 | 75.12666233 | 62.84744325 | 99.87675134 | 82.36237743 |
| ENSMUSG00000018583 | 130.8785925 | 143.9927695 | 120.0456781 | 302.046627  | 216.2907651 |
| ENSMUSG00000018585 | 18.39374813 | 34.08524495 | 21.89068248 | 26.58010318 | 30.08017263 |
| ENSMUSG00000018589 | 4.952162959 | 3.478086219 | 2.824604191 | 1.610915344 | 2.864778345 |
| ENSMUSG00000018595 | 7.781970364 | 6.956172438 | 0.706151048 | 3.221830688 | 2.864778345 |
| ENSMUSG00000018599 | 4.952162959 | 6.260555194 | 9.179963621 | 4.832746033 | 7.87814045  |
| ENSMUSG00000018620 | 14.14903703 | 10.43425866 | 6.35535943  | 5.638203705 | 5.013362104 |
| ENSMUSG00000018623 | 10.61177777 | 6.260555194 | 7.767661525 | 4.832746033 | 10.02672421 |
| ENSMUSG00000018656 | 7.074518513 | 5.56493795  | 4.943057334 | 4.832746033 | 9.310529622 |
| ENSMUSG00000018677 | 8.489422215 | 6.956172438 | 9.179963621 | 16.10915344 | 22.91822676 |

|                    |             |             |             |             |             |
|--------------------|-------------|-------------|-------------|-------------|-------------|
| ENSMUSG00000018765 | 41.03220737 | 79.99598303 | 68.49665163 | 115.9859048 | 88.80812871 |
| ENSMUSG00000018770 | 21.93100739 | 45.21512085 | 43.78136496 | 123.2350238 | 95.97007457 |
| ENSMUSG00000018776 | 12.02668147 | 18.78166558 | 12.00456781 | 9.665492065 | 7.87814045  |
| ENSMUSG00000018809 | 136.5382073 | 173.2086937 | 130.6379438 | 162.7024498 | 147.5360848 |
| ENSMUSG00000018821 | 3.537259256 | 4.869320706 | 4.236906287 | 7.249119049 | 6.445751277 |
| ENSMUSG00000018822 | 12.02668147 | 5.56493795  | 4.236906287 | 4.832746033 | 10.02672421 |
| ENSMUSG00000018830 | 3.537259256 | 5.56493795  | 9.886114669 | 6.443661377 | 4.297167518 |
| ENSMUSG00000018844 | 7.074518513 | 15.99919661 | 16.2414741  | 9.665492065 | 12.89150255 |
| ENSMUSG00000018846 | 74.28244438 | 105.7338211 | 87.56272992 | 142.566008  | 146.1036956 |
| ENSMUSG00000018848 | 53.7663407  | 93.21271067 | 73.43970897 | 169.9515688 | 134.6445822 |
| ENSMUSG00000018849 | 9.196874066 | 4.173703463 | 6.35535943  | 8.054576721 | 7.161945863 |
| ENSMUSG00000018861 | 13.44158517 | 14.60796212 | 21.18453143 | 17.72006879 | 21.48583759 |
| ENSMUSG00000018865 | 4.244711108 | 6.260555194 | 6.35535943  | 4.02728836  | 8.594335036 |
| ENSMUSG00000018868 | 7.781970364 | 4.173703463 | 10.59226572 | 6.443661377 | 5.729556691 |
| ENSMUSG00000018900 | 19.10119998 | 31.99839321 | 30.36449505 | 29.80193387 | 28.64778345 |
| ENSMUSG00000018914 | 9.196874066 | 8.347406925 | 4.943057334 | 12.88732275 | 2.864778345 |
| ENSMUSG00000018916 | 12.02668147 | 6.260555194 | 5.649208382 | 8.860034393 | 4.297167518 |
| ENSMUSG00000018924 | 4.952162959 | 9.043024169 | 11.29841676 | 5.638203705 | 6.445751277 |
| ENSMUSG00000018925 | 6.367066661 | 2.086851731 | 9.179963621 | 6.443661377 | 10.7429188  |
| ENSMUSG00000018927 | 16.27139258 | 9.043024169 | 4.943057334 | 8.860034393 | 7.161945863 |
| ENSMUSG00000018930 | 7.074518513 | 6.956172438 | 12.00456781 | 9.665492065 | 7.87814045  |
| ENSMUSG00000018931 | 25.46826665 | 41.73703463 | 40.95676077 | 22.55281482 | 26.49919969 |
| ENSMUSG00000018932 | 36.08004441 | 67.47487265 | 49.43057334 | 66.85298678 | 78.06520991 |
| ENSMUSG00000018973 | 6.367066661 | 4.869320706 | 7.061510478 | 5.638203705 | 6.445751277 |
| ENSMUSG00000018974 | 153.5170517 | 173.2086937 | 165.2393452 | 320.5721535 | 217.0069597 |
| ENSMUSG00000018983 | 36.08004441 | 33.3896277  | 40.25060972 | 145.7878386 | 111.7263555 |
| ENSMUSG00000019027 | 9.196874066 | 9.043024169 | 8.473812573 | 8.054576721 | 5.729556691 |
| ENSMUSG00000019080 | 7.781970364 | 10.43425866 | 9.886114669 | 12.08186508 | 12.89150255 |
| ENSMUSG00000019122 | 8.489422215 | 8.347406925 | 5.649208382 | 6.443661377 | 4.297167518 |
| ENSMUSG00000019146 | 9.196874066 | 4.869320706 | 4.943057334 | 4.02728836  | 3.580972932 |
| ENSMUSG00000019158 | 16.97884443 | 29.21592424 | 29.65834401 | 25.77464551 | 21.48583759 |
| ENSMUSG00000019235 | 7.074518513 | 6.956172438 | 10.59226572 | 7.249119049 | 6.445751277 |
| ENSMUSG00000019261 | 41.03220737 | 57.04061399 | 51.54902649 | 111.9586164 | 82.36237743 |
| ENSMUSG00000019278 | 7.074518513 | 6.260555194 | 5.649208382 | 9.665492065 | 8.594335036 |
| ENSMUSG00000019295 | 53.7663407  | 78.60474855 | 73.43970897 | 128.8732275 | 121.7530797 |
| ENSMUSG00000019297 | 43.86201478 | 79.30036579 | 75.55816211 | 124.8459392 | 98.83485292 |
| ENSMUSG00000019301 | 12.02668147 | 9.043024169 | 16.94762515 | 11.27640741 | 7.161945863 |
| ENSMUSG00000019362 | 72.16008883 | 89.0390072  | 91.09348516 | 86.18397091 | 73.05184781 |
| ENSMUSG00000019429 | 7.781970364 | 6.956172438 | 10.59226572 | 6.443661377 | 3.580972932 |
| ENSMUSG00000019433 | 9.904325918 | 16.69481385 | 24.00913562 | 22.55281482 | 25.06681052 |
| ENSMUSG00000019464 | 8.489422215 | 14.60796212 | 12.71071886 | 11.27640741 | 7.87814045  |
| ENSMUSG00000019489 | 4.244711108 | 6.956172438 | 7.061510478 | 5.638203705 | 7.161945863 |
| ENSMUSG00000019505 | 103.2879703 | 136.3409798 | 112.2780166 | 219.0844868 | 158.2790036 |

|                    |             |             |             |             |             |
|--------------------|-------------|-------------|-------------|-------------|-------------|
| ENSMUSG00000019577 | 10.61177777 | 9.043024169 | 5.649208382 | 4.832746033 | 7.161945863 |
| ENSMUSG00000019659 | 38.20239997 | 61.9099347  | 43.78136496 | 74.10210583 | 65.88990194 |
| ENSMUSG00000019689 | 9.904325918 | 23.65098629 | 20.47838039 | 33.82922223 | 18.62105924 |
| ENSMUSG00000019718 | 7.781970364 | 15.30357936 | 10.59226572 | 13.69278043 | 23.63442135 |
| ENSMUSG00000019762 | 12.73413332 | 4.869320706 | 4.236906287 | 1.610915344 | 5.013362104 |
| ENSMUSG00000019772 | 6.367066661 | 2.086851731 | 7.767661525 | 3.221830688 | 4.297167518 |
| ENSMUSG00000019773 | 112.4848444 | 134.254128  | 138.4056054 | 194.115299  | 148.2522794 |
| ENSMUSG00000019774 | 50.93653329 | 62.60555194 | 64.96589639 | 82.15668255 | 74.48423698 |
| ENSMUSG00000019787 | 11.31922962 | 8.347406925 | 6.35535943  | 2.416373016 | 7.161945863 |
| ENSMUSG00000019789 | 8.489422215 | 6.956172438 | 9.179963621 | 5.638203705 | 7.161945863 |
| ENSMUSG00000019792 | 21.93100739 | 38.25894841 | 33.18909925 | 64.43661377 | 57.29556691 |
| ENSMUSG00000019808 | 21.22355554 | 56.34499675 | 38.13215658 | 57.18749472 | 45.83645353 |
| ENSMUSG00000019814 | 19.10119998 | 40.34580014 | 28.24604191 | 53.16020636 | 49.41742646 |
| ENSMUSG00000019815 | 9.196874066 | 6.956172438 | 9.886114669 | 9.665492065 | 9.310529622 |
| ENSMUSG00000019832 | 12.73413332 | 9.738641413 | 7.767661525 | 3.221830688 | 9.310529622 |
| ENSMUSG00000019837 | 21.22355554 | 31.30277597 | 24.00913562 | 29.80193387 | 30.08017263 |
| ENSMUSG00000019842 | 97.62835547 | 101.5601176 | 88.97503202 | 128.8732275 | 109.5777717 |
| ENSMUSG00000019845 | 10.61177777 | 11.1298759  | 14.829172   | 13.69278043 | 20.05344842 |
| ENSMUSG00000019851 | 8.489422215 | 8.347406925 | 7.061510478 | 4.832746033 | 2.864778345 |
| ENSMUSG00000019852 | 10.61177777 | 4.173703463 | 3.530755239 | 6.443661377 | 10.7429188  |
| ENSMUSG00000019853 | 12.73413332 | 8.347406925 | 7.767661525 | 5.638203705 | 7.87814045  |
| ENSMUSG00000019857 | 31.83533331 | 41.73703463 | 39.54445867 | 121.6241085 | 100.9834367 |
| ENSMUSG00000019863 | 62.25576291 | 91.12585893 | 84.03197468 | 108.7367857 | 90.95671247 |
| ENSMUSG00000019865 | 10.61177777 | 9.043024169 | 6.35535943  | 4.02728836  | 2.864778345 |
| ENSMUSG00000019867 | 6.367066661 | 6.956172438 | 5.649208382 | 4.832746033 | 5.013362104 |
| ENSMUSG00000019873 | 47.39927403 | 68.17048989 | 62.1412922  | 132.9005159 | 119.6044959 |
| ENSMUSG00000019878 | 9.904325918 | 17.39043109 | 13.41686991 | 28.19101852 | 25.06681052 |
| ENSMUSG00000019890 | 8.489422215 | 4.173703463 | 4.236906287 | 2.416373016 | 6.445751277 |
| ENSMUSG00000019897 | 39.61730367 | 65.38802092 | 59.31668801 | 103.9040397 | 86.65954495 |
| ENSMUSG00000019905 | 13.44158517 | 8.347406925 | 6.35535943  | 4.832746033 | 7.87814045  |
| ENSMUSG00000019909 | 7.781970364 | 7.651789682 | 5.649208382 | 4.02728836  | 8.594335036 |
| ENSMUSG00000019913 | 5.65961481  | 10.43425866 | 4.943057334 | 4.02728836  | 2.148583759 |
| ENSMUSG00000019927 | 53.7663407  | 82.08283477 | 88.97503202 | 45.91108731 | 61.59273443 |
| ENSMUSG00000019932 | 6.367066661 | 2.086851731 | 10.59226572 | 6.443661377 | 5.729556691 |
| ENSMUSG00000019948 | 35.37259256 | 59.82308296 | 60.72899011 | 54.7711217  | 52.2822048  |
| ENSMUSG00000019960 | 67.20792587 | 71.64857611 | 67.08434954 | 43.49471429 | 33.66114556 |
| ENSMUSG00000019987 | 4.244711108 | 4.869320706 | 9.179963621 | 4.832746033 | 7.87814045  |
| ENSMUSG00000019988 | 26.1757185  | 34.78086219 | 27.53989086 | 45.10562964 | 44.40406435 |
| ENSMUSG00000019989 | 5.65961481  | 5.56493795  | 7.767661525 | 7.249119049 | 4.297167518 |
| ENSMUSG00000019992 | 16.27139258 | 14.60796212 | 14.829172   | 36.24559524 | 34.37734014 |
| ENSMUSG00000019998 | 68.62282957 | 92.51709342 | 87.56272992 | 131.2896006 | 107.429188  |
| ENSMUSG00000020000 | 8.489422215 | 4.869320706 | 10.59226572 | 4.832746033 | 6.445751277 |
| ENSMUSG00000020007 | 9.904325918 | 5.56493795  | 4.943057334 | 5.638203705 | 5.729556691 |

|                    |             |             |             |             |             |
|--------------------|-------------|-------------|-------------|-------------|-------------|
| ENSMUSG00000020010 | 13.44158517 | 7.651789682 | 4.236906287 | 5.638203705 | 7.87814045  |
| ENSMUSG00000020018 | 77.11225179 | 96.69079689 | 103.804204  | 193.3098413 | 144.6713064 |
| ENSMUSG00000020019 | 7.074518513 | 5.56493795  | 6.35535943  | 4.832746033 | 7.87814045  |
| ENSMUSG00000020020 | 8.489422215 | 8.347406925 | 2.118453143 | 4.832746033 | 6.445751277 |
| ENSMUSG00000020021 | 41.73965922 | 67.47487265 | 53.66747963 | 49.132918   | 52.2822048  |
| ENSMUSG00000020024 | 28.29807405 | 52.17129328 | 43.78136496 | 94.23854763 | 62.30892901 |
| ENSMUSG00000020029 | 57.30359995 | 60.51870021 | 57.90438592 | 82.96214023 | 70.18706946 |
| ENSMUSG00000020034 | 117.4370073 | 154.4270281 | 157.4716837 | 67.65844446 | 44.40406435 |
| ENSMUSG00000020052 | 8.489422215 | 2.782468975 | 7.061510478 | 5.638203705 | 10.02672421 |
| ENSMUSG00000020057 | 5.65961481  | 4.869320706 | 4.943057334 | 4.832746033 | 5.013362104 |
| ENSMUSG00000020059 | 9.904325918 | 2.086851731 | 3.530755239 | 8.860034393 | 8.594335036 |
| ENSMUSG00000020062 | 4.244711108 | 9.043024169 | 5.649208382 | 6.443661377 | 7.161945863 |
| ENSMUSG00000020064 | 111.0699406 | 116.863697  | 109.4534124 | 121.6241085 | 121.0368851 |
| ENSMUSG00000020067 | 4.952162959 | 4.869320706 | 8.473812573 | 6.443661377 | 7.161945863 |
| ENSMUSG00000020074 | 49.52162959 | 67.47487265 | 70.61510478 | 124.8459392 | 103.848215  |
| ENSMUSG00000020075 | 103.2879703 | 137.036597  | 108.7472614 | 278.6883545 | 226.3174893 |
| ENSMUSG00000020076 | 63.67066661 | 96.69079689 | 84.73812573 | 153.0369577 | 118.8883013 |
| ENSMUSG00000020080 | 11.31922962 | 9.738641413 | 3.530755239 | 8.054576721 | 5.013362104 |
| ENSMUSG00000020081 | 7.074518513 | 6.260555194 | 8.473812573 | 5.638203705 | 7.87814045  |
| ENSMUSG00000020086 | 8.489422215 | 2.782468975 | 4.943057334 | 5.638203705 | 2.864778345 |
| ENSMUSG00000020087 | 26.1757185  | 32.69401046 | 44.48751601 | 56.38203705 | 54.43078856 |
| ENSMUSG00000020089 | 7.781970364 | 13.91234488 | 12.71071886 | 71.68573282 | 49.41742646 |
| ENSMUSG00000020092 | 7.781970364 | 5.56493795  | 8.473812573 | 4.832746033 | 7.87814045  |
| ENSMUSG00000020098 | 10.61177777 | 5.56493795  | 6.35535943  | 4.02728836  | 5.013362104 |
| ENSMUSG00000020099 | 10.61177777 | 2.086851731 | 7.061510478 | 4.832746033 | 4.297167518 |
| ENSMUSG00000020105 | 9.904325918 | 4.869320706 | 12.00456781 | 4.02728836  | 5.729556691 |
| ENSMUSG00000020108 | 33.95768886 | 55.6493795  | 45.19366706 | 115.9859048 | 80.92998826 |
| ENSMUSG00000020115 | 82.7718666  | 110.6031418 | 124.9887355 | 184.4498069 | 146.8198902 |
| ENSMUSG00000020116 | 54.47379255 | 96.69079689 | 74.85201106 | 136.1223466 | 116.7397176 |
| ENSMUSG00000020123 | 10.61177777 | 8.347406925 | 8.473812573 | 5.638203705 | 6.445751277 |
| ENSMUSG00000020125 | 6.367066661 | 9.043024169 | 9.179963621 | 8.860034393 | 8.594335036 |
| ENSMUSG00000020130 | 101.8730666 | 129.3848073 | 120.7518292 | 138.5387196 | 112.4425501 |
| ENSMUSG00000020133 | 52.35143699 | 84.86530374 | 89.68118307 | 96.65492065 | 76.63282074 |
| ENSMUSG00000020137 | 73.57499253 | 121.0374004 | 96.0365425  | 216.6681138 | 138.9417498 |
| ENSMUSG00000020152 | 77.81970364 | 123.1242521 | 106.6288082 | 245.66459   | 175.4676737 |
| ENSMUSG00000020155 | 5.65961481  | 2.782468975 | 7.061510478 | 8.054576721 | 5.729556691 |
| ENSMUSG00000020159 | 7.781970364 | 8.347406925 | 4.943057334 | 8.054576721 | 7.87814045  |
| ENSMUSG00000020169 | 5.65961481  | 6.260555194 | 9.886114669 | 8.860034393 | 5.729556691 |
| ENSMUSG00000020170 | 89.13893326 | 130.7760418 | 116.5149229 | 114.3749894 | 100.2672421 |
| ENSMUSG00000020171 | 76.40479994 | 114.081228  | 110.1595635 | 141.7605503 | 121.0368851 |
| ENSMUSG00000020178 | 17.68629628 | 18.08604834 | 17.65377619 | 21.74735715 | 30.08017263 |
| ENSMUSG00000020186 | 18.39374813 | 25.73783802 | 25.42143772 | 16.91461111 | 10.02672421 |
| ENSMUSG00000020193 | 9.196874066 | 15.30357936 | 19.77222934 | 15.30369577 | 15.7562809  |

|                    |             |             |             |             |             |
|--------------------|-------------|-------------|-------------|-------------|-------------|
| ENSMUSG00000020198 | 106.1177777 | 159.2963488 | 141.9363606 | 186.8661799 | 153.2656415 |
| ENSMUSG00000020205 | 7.781970364 | 16.69481385 | 19.77222934 | 20.1364418  | 19.33725383 |
| ENSMUSG00000020213 | 6.367066661 | 6.956172438 | 7.061510478 | 8.860034393 | 5.013362104 |
| ENSMUSG00000020219 | 46.69182218 | 45.91073809 | 45.8998181  | 101.4876667 | 79.49759908 |
| ENSMUSG00000020226 | 7.074518513 | 6.956172438 | 6.35535943  | 6.443661377 | 5.729556691 |
| ENSMUSG00000020229 | 14.85648888 | 6.956172438 | 8.473812573 | 9.665492065 | 8.594335036 |
| ENSMUSG00000020255 | 47.39927403 | 83.47406925 | 57.19823487 | 135.3168889 | 103.848215  |
| ENSMUSG00000020260 | 24.05336294 | 36.17209668 | 25.42143772 | 31.41284921 | 45.83645353 |
| ENSMUSG00000020264 | 14.14903703 | 8.347406925 | 7.061510478 | 4.02728836  | 7.161945863 |
| ENSMUSG00000020267 | 46.69182218 | 59.12746572 | 52.25517753 | 156.2587884 | 113.1587446 |
| ENSMUSG00000020270 | 6.367066661 | 6.260555194 | 9.179963621 | 2.416373016 | 9.310529622 |
| ENSMUSG00000020272 | 77.11225179 | 118.2549314 | 103.804204  | 86.98942859 | 72.33565322 |
| ENSMUSG00000020275 | 38.20239997 | 47.99758982 | 38.13215658 | 128.8732275 | 94.5376854  |
| ENSMUSG00000020283 | 70.74518513 | 130.0804246 | 87.56272992 | 102.2931244 | 102.4158258 |
| ENSMUSG00000020295 | 4.952162959 | 4.173703463 | 5.649208382 | 5.638203705 | 5.013362104 |
| ENSMUSG00000020299 | 7.074518513 | 4.869320706 | 5.649208382 | 3.221830688 | 4.297167518 |
| ENSMUSG00000020303 | 7.074518513 | 2.086851731 | 3.530755239 | 2.416373016 | 6.445751277 |
| ENSMUSG00000020309 | 36.78749627 | 67.47487265 | 60.72899011 | 62.02024075 | 50.84981563 |
| ENSMUSG00000020310 | 10.61177777 | 11.1298759  | 7.061510478 | 4.832746033 | 10.02672421 |
| ENSMUSG00000020319 | 48.10672589 | 74.43104508 | 69.90895373 | 71.68573282 | 60.87653984 |
| ENSMUSG00000020326 | 36.78749627 | 67.47487265 | 41.66291182 | 114.3749894 | 67.32229112 |
| ENSMUSG00000020331 | 2.122355554 | 4.173703463 | 14.12302096 | 7.249119049 | 3.580972932 |
| ENSMUSG00000020332 | 10.61177777 | 6.956172438 | 6.35535943  | 8.054576721 | 10.02672421 |
| ENSMUSG00000020334 | 6.367066661 | 6.260555194 | 7.061510478 | 8.054576721 | 5.013362104 |
| ENSMUSG00000020349 | 130.8785925 | 130.0804246 | 140.5240585 | 271.4392355 | 222.7365164 |
| ENSMUSG00000020357 | 1.414903703 | 2.782468975 | 7.767661525 | 7.249119049 | 6.445751277 |
| ENSMUSG00000020363 | 7.781970364 | 4.173703463 | 8.473812573 | 5.638203705 | 6.445751277 |
| ENSMUSG00000020375 | 39.61730367 | 54.25814501 | 59.31668801 | 41.88379895 | 44.40406435 |
| ENSMUSG00000020383 | 7.781970364 | 7.651789682 | 7.767661525 | 5.638203705 | 7.87814045  |
| ENSMUSG00000020386 | 66.50047402 | 98.08203137 | 98.15499564 | 98.265836   | 98.11865833 |
| ENSMUSG00000020392 | 36.08004441 | 61.9099347  | 55.07978173 | 89.4058016  | 78.7814045  |
| ENSMUSG00000020396 | 6.367066661 | 6.260555194 | 12.71071886 | 8.054576721 | 10.02672421 |
| ENSMUSG00000020401 | 14.14903703 | 10.43425866 | 6.35535943  | 9.665492065 | 10.7429188  |
| ENSMUSG00000020405 | 2.829807405 | 4.173703463 | 4.236906287 | 9.665492065 | 7.161945863 |
| ENSMUSG00000020411 | 4.244711108 | 6.260555194 | 7.061510478 | 4.02728836  | 5.013362104 |
| ENSMUSG00000020423 | 183.2300295 | 163.4700523 | 163.8270431 | 209.4189947 | 154.6980307 |
| ENSMUSG00000020424 | 7.781970364 | 10.43425866 | 7.061510478 | 4.832746033 | 8.594335036 |
| ENSMUSG00000020429 | 3.537259256 | 6.260555194 | 4.236906287 | 4.832746033 | 7.161945863 |
| ENSMUSG00000020431 | 2.829807405 | 4.869320706 | 4.943057334 | 5.638203705 | 4.297167518 |
| ENSMUSG00000020434 | 4.244711108 | 6.260555194 | 6.35535943  | 6.443661377 | 7.87814045  |
| ENSMUSG00000020441 | 29.71297775 | 46.60635533 | 42.36906287 | 74.10210583 | 68.0384857  |
| ENSMUSG00000020447 | 10.61177777 | 8.347406925 | 9.886114669 | 4.02728836  | 7.161945863 |
| ENSMUSG00000020469 | 4.244711108 | 6.260555194 | 2.824604191 | 6.443661377 | 5.013362104 |

|                    |             |             |             |             |             |
|--------------------|-------------|-------------|-------------|-------------|-------------|
| ENSMUSG00000020475 | 9.196874066 | 6.260555194 | 9.179963621 | 7.249119049 | 8.594335036 |
| ENSMUSG00000020482 | 58.71850365 | 73.73542784 | 69.90895373 | 112.7640741 | 113.8749392 |
| ENSMUSG00000020493 | 70.74518513 | 73.0398106  | 69.90895373 | 135.3168889 | 95.97007457 |
| ENSMUSG00000020496 | 39.61730367 | 66.08363816 | 53.66747963 | 58.79841006 | 44.40406435 |
| ENSMUSG00000020514 | 28.29807405 | 43.12826911 | 37.42600553 | 45.91108731 | 31.5125618  |
| ENSMUSG00000020519 | 47.39927403 | 52.86691053 | 60.72899011 | 50.74383334 | 47.98503729 |
| ENSMUSG00000020521 | 29.71297775 | 42.43265187 | 35.30755239 | 37.85651059 | 35.80972932 |
| ENSMUSG00000020537 | 47.39927403 | 46.60635533 | 57.90438592 | 99.07129367 | 88.80812871 |
| ENSMUSG00000020547 | 41.73965922 | 63.99678643 | 67.08434954 | 101.4876667 | 111.0101609 |
| ENSMUSG00000020553 | 14.14903703 | 12.52111039 | 15.53532305 | 11.27640741 | 4.297167518 |
| ENSMUSG00000020561 | 90.55383696 | 126.6023384 | 105.2165061 | 168.3406535 | 119.6044959 |
| ENSMUSG00000020562 | 14.85648888 | 6.956172438 | 7.767661525 | 8.860034393 | 10.7429188  |
| ENSMUSG00000020572 | 2.829807405 | 2.782468975 | 1.412302096 | 2.416373016 | 4.297167518 |
| ENSMUSG00000020583 | 7.074518513 | 6.956172438 | 10.59226572 | 4.02728836  | 7.161945863 |
| ENSMUSG00000020585 | 54.47379255 | 79.30036579 | 60.72899011 | 148.2042117 | 108.1453825 |
| ENSMUSG00000020601 | 29.71297775 | 31.99839321 | 41.66291182 | 16.91461111 | 21.48583759 |
| ENSMUSG00000020605 | 13.44158517 | 16.69481385 | 20.47838039 | 9.665492065 | 15.04008631 |
| ENSMUSG00000020607 | 14.85648888 | 2.782468975 | 9.179963621 | 3.221830688 | 7.161945863 |
| ENSMUSG00000020608 | 74.98989623 | 111.298759  | 95.33039145 | 164.3133651 | 142.5227227 |
| ENSMUSG00000020621 | 29.0055259  | 52.17129328 | 33.89525029 | 38.66196826 | 32.94495097 |
| ENSMUSG00000020630 | 36.08004441 | 46.60635533 | 52.96132858 | 66.85298678 | 62.30892901 |
| ENSMUSG00000020635 | 5.65961481  | 9.043024169 | 11.29841676 | 16.10915344 | 10.02672421 |
| ENSMUSG00000020638 | 16.97884443 | 17.39043109 | 15.53532305 | 19.33098413 | 15.04008631 |
| ENSMUSG00000020644 | 6.367066661 | 16.69481385 | 15.53532305 | 26.58010318 | 19.33725383 |
| ENSMUSG00000020648 | 65.08557032 | 116.1680797 | 93.21193831 | 105.514955  | 123.9016634 |
| ENSMUSG00000020651 | 7.781970364 | 6.956172438 | 6.35535943  | 3.221830688 | 5.729556691 |
| ENSMUSG00000020660 | 5.65961481  | 6.260555194 | 5.649208382 | 4.02728836  | 8.594335036 |
| ENSMUSG00000020671 | 63.67066661 | 96.69079689 | 83.32582364 | 178.0061455 | 150.4008631 |
| ENSMUSG00000020676 | 12.73413332 | 5.56493795  | 8.473812573 | 3.221830688 | 7.87814045  |
| ENSMUSG00000020677 | 26.1757185  | 40.34580014 | 33.18909925 | 54.7711217  | 64.45751277 |
| ENSMUSG00000020689 | 8.489422215 | 6.956172438 | 13.41686991 | 16.91461111 | 10.7429188  |
| ENSMUSG00000020703 | 6.367066661 | 9.043024169 | 5.649208382 | 3.221830688 | 8.594335036 |
| ENSMUSG00000020705 | 159.8841184 | 203.1202352 | 187.1300277 | 361.6504948 | 266.4243861 |
| ENSMUSG00000020707 | 9.904325918 | 16.69481385 | 26.12758877 | 27.38556085 | 25.06681052 |
| ENSMUSG00000020713 | 28.29807405 | 39.6501829  | 37.42600553 | 26.58010318 | 25.06681052 |
| ENSMUSG00000020715 | 12.73413332 | 18.08604834 | 18.35992724 | 20.94189947 | 28.64778345 |
| ENSMUSG00000020722 | 7.074518513 | 4.869320706 | 9.886114669 | 8.054576721 | 8.594335036 |
| ENSMUSG00000020723 | 10.61177777 | 3.478086219 | 4.236906287 | 4.832746033 | 3.580972932 |
| ENSMUSG00000020733 | 138.6605628 | 142.601535  | 138.4056054 | 102.2931244 | 98.83485292 |
| ENSMUSG00000020755 | 125.9264295 | 181.5561006 | 145.4671158 | 192.5043836 | 153.9818361 |
| ENSMUSG00000020766 | 15.56394073 | 23.65098629 | 28.95219296 | 35.44013757 | 32.22875639 |
| ENSMUSG00000020774 | 7.781970364 | 7.651789682 | 15.53532305 | 8.054576721 | 10.7429188  |
| ENSMUSG00000020793 | 7.781970364 | 9.738641413 | 9.179963621 | 5.638203705 | 15.04008631 |

|                    |             |             |             |             |             |
|--------------------|-------------|-------------|-------------|-------------|-------------|
| ENSMUSG00000020801 | 10.61177777 | 8.347406925 | 8.473812573 | 24.96918783 | 17.90486466 |
| ENSMUSG00000020802 | 29.71297775 | 50.7800588  | 39.54445867 | 54.7711217  | 44.40406435 |
| ENSMUSG00000020803 | 53.05888884 | 70.25734162 | 76.97046421 | 65.24207144 | 58.72795608 |
| ENSMUSG00000020808 | 14.85648888 | 9.043024169 | 23.30298458 | 17.72006879 | 17.18867007 |
| ENSMUSG00000020810 | 7.781970364 | 6.260555194 | 6.35535943  | 3.221830688 | 10.02672421 |
| ENSMUSG00000020826 | 7.074518513 | 4.869320706 | 4.943057334 | 8.860034393 | 5.013362104 |
| ENSMUSG00000020829 | 8.489422215 | 13.21672763 | 9.179963621 | 8.860034393 | 5.013362104 |
| ENSMUSG00000020830 | 7.074518513 | 7.651789682 | 4.943057334 | 8.054576721 | 6.445751277 |
| ENSMUSG00000020841 | 2.829807405 | 9.738641413 | 7.061510478 | 7.249119049 | 8.594335036 |
| ENSMUSG00000020844 | 9.904325918 | 22.95536904 | 16.94762515 | 16.91461111 | 22.91822676 |
| ENSMUSG00000020846 | 19.80865184 | 19.47728283 | 21.89068248 | 60.40932541 | 54.43078856 |
| ENSMUSG00000020848 | 9.904325918 | 5.56493795  | 6.35535943  | 6.443661377 | 6.445751277 |
| ENSMUSG00000020869 | 74.28244438 | 88.34338996 | 82.61967259 | 217.4735715 | 165.4409494 |
| ENSMUSG00000020871 | 7.781970364 | 6.956172438 | 4.943057334 | 4.832746033 | 5.729556691 |
| ENSMUSG00000020872 | 8.489422215 | 6.260555194 | 5.649208382 | 7.249119049 | 12.89150255 |
| ENSMUSG00000020875 | 6.367066661 | 5.56493795  | 4.236906287 | 6.443661377 | 5.729556691 |
| ENSMUSG00000020878 | 69.33028142 | 74.43104508 | 69.20280268 | 110.3477011 | 89.52432329 |
| ENSMUSG00000020907 | 9.196874066 | 4.869320706 | 4.943057334 | 8.054576721 | 6.445751277 |
| ENSMUSG00000020912 | 13.44158517 | 0.695617244 | 6.35535943  | 5.638203705 | 6.445751277 |
| ENSMUSG00000020913 | 6.367066661 | 3.478086219 | 9.179963621 | 4.02728836  | 7.87814045  |
| ENSMUSG00000020916 | 4.952162959 | 9.738641413 | 6.35535943  | 2.416373016 | 7.87814045  |
| ENSMUSG00000020921 | 7.074518513 | 17.39043109 | 19.77222934 | 12.88732275 | 10.02672421 |
| ENSMUSG00000020930 | 50.93653329 | 62.60555194 | 48.01827125 | 112.7640741 | 84.51096119 |
| ENSMUSG00000020935 | 18.39374813 | 34.08524495 | 41.66291182 | 61.21478308 | 58.01176149 |
| ENSMUSG00000020936 | 91.96874066 | 118.2549314 | 90.38733411 | 198.948045  | 142.5227227 |
| ENSMUSG00000020941 | 12.02668147 | 9.043024169 | 11.29841676 | 18.52552646 | 18.62105924 |
| ENSMUSG00000020948 | 121.6817184 | 176.6867799 | 154.6470795 | 163.5079074 | 143.2389173 |
| ENSMUSG00000020949 | 42.44711108 | 86.25653823 | 71.32125582 | 66.85298678 | 82.36237743 |
| ENSMUSG00000020955 | 82.06441475 | 150.2533247 | 136.9933033 | 230.3608942 | 204.8316517 |
| ENSMUSG00000020973 | 34.66514071 | 45.91073809 | 41.66291182 | 122.4295662 | 99.5510475  |
| ENSMUSG00000020974 | 16.27139258 | 19.47728283 | 14.829172   | 39.46742593 | 38.67450766 |
| ENSMUSG00000020982 | 43.86201478 | 70.25734162 | 55.07978173 | 115.9859048 | 103.848215  |
| ENSMUSG00000020988 | 11.31922962 | 25.04222078 | 26.12758877 | 47.52200265 | 40.10689684 |
| ENSMUSG00000020990 | 8.489422215 | 13.21672763 | 14.12302096 | 12.88732275 | 4.297167518 |
| ENSMUSG00000020993 | 130.8785925 | 157.2094971 | 156.7655326 | 176.3952302 | 151.1170577 |
| ENSMUSG00000020994 | 45.98437033 | 86.95215547 | 84.73812573 | 201.364418  | 135.3607768 |
| ENSMUSG00000021018 | 8.489422215 | 11.82549314 | 9.886114669 | 37.85651059 | 25.06681052 |
| ENSMUSG00000021022 | 42.44711108 | 69.56172438 | 64.96589639 | 53.16020636 | 55.86317773 |
| ENSMUSG00000021025 | 74.28244438 | 99.47326586 | 73.43970897 | 220.6954022 | 160.4275873 |
| ENSMUSG00000021028 | 54.47379255 | 94.60394515 | 91.79963621 | 76.51847885 | 81.64618284 |
| ENSMUSG00000021037 | 49.52162959 | 89.73462445 | 90.38733411 | 175.5897725 | 149.6846685 |
| ENSMUSG00000021039 | 72.86754068 | 125.9067211 | 87.56272992 | 125.6513968 | 100.9834367 |
| ENSMUSG00000021047 | 7.074518513 | 7.651789682 | 5.649208382 | 4.832746033 | 3.580972932 |



|                    |             |             |             |             |             |
|--------------------|-------------|-------------|-------------|-------------|-------------|
| ENSMUSG00000021048 | 16.97884443 | 33.3896277  | 28.24604191 | 90.21125927 | 85.22715578 |
| ENSMUSG00000021054 | 61.54831106 | 92.51709342 | 77.67661525 | 82.96214023 | 76.63282074 |
| ENSMUSG00000021056 | 7.781970364 | 4.869320706 | 8.473812573 | 7.249119049 | 4.297167518 |
| ENSMUSG00000021066 | 45.27691848 | 65.38802092 | 59.31668801 | 41.88379895 | 47.2688427  |
| ENSMUSG00000021067 | 33.95768886 | 42.43265187 | 41.66291182 | 82.96214023 | 70.90326405 |
| ENSMUSG00000021070 | 8.489422215 | 10.43425866 | 3.530755239 | 6.443661377 | 5.729556691 |
| ENSMUSG00000021076 | 47.39927403 | 80.69160028 | 71.32125582 | 90.21125927 | 74.48423698 |
| ENSMUSG00000021078 | 3.537259256 | 12.52111039 | 14.12302096 | 5.638203705 | 3.580972932 |
| ENSMUSG00000021086 | 10.61177777 | 8.347406925 | 5.649208382 | 4.832746033 | 6.445751277 |
| ENSMUSG00000021091 | 5.65961481  | 8.347406925 | 10.59226572 | 6.443661377 | 5.013362104 |
| ENSMUSG00000021095 | 5.65961481  | 5.56493795  | 3.530755239 | 1.610915344 | 2.148583759 |
| ENSMUSG00000021099 | 7.781970364 | 4.869320706 | 9.179963621 | 4.02728836  | 3.580972932 |
| ENSMUSG00000021102 | 62.96321476 | 87.64777272 | 84.73812573 | 219.0844868 | 199.8182896 |
| ENSMUSG00000021112 | 22.63845924 | 38.95456565 | 39.54445867 | 33.02376456 | 30.08017263 |
| ENSMUSG00000021113 | 40.32475552 | 89.0390072  | 69.20280268 | 45.10562964 | 57.29556691 |
| ENSMUSG00000021114 | 105.4103258 | 153.0357936 | 146.1732669 | 249.6918783 | 214.8583759 |
| ENSMUSG00000021118 | 7.781970364 | 9.043024169 | 14.829172   | 4.832746033 | 8.594335036 |
| ENSMUSG00000021125 | 6.367066661 | 8.347406925 | 5.649208382 | 9.665492065 | 8.594335036 |
| ENSMUSG00000021127 | 168.3735406 | 185.0341868 | 176.5377619 | 322.9885265 | 292.9235858 |
| ENSMUSG00000021130 | 5.65961481  | 6.260555194 | 6.35535943  | 4.832746033 | 5.729556691 |
| ENSMUSG00000021133 | 50.93653329 | 87.64777272 | 79.7950684  | 56.38203705 | 41.53928601 |
| ENSMUSG00000021135 | 10.61177777 | 9.043024169 | 8.473812573 | 6.443661377 | 6.445751277 |
| ENSMUSG00000021140 | 43.86201478 | 61.9099347  | 45.19366706 | 28.9964762  | 42.25548059 |
| ENSMUSG00000021149 | 118.851911  | 177.3823972 | 141.9363606 | 291.5756773 | 218.4393488 |
| ENSMUSG00000021171 | 22.63845924 | 49.38882431 | 40.95676077 | 54.7711217  | 40.10689684 |
| ENSMUSG00000021176 | 9.904325918 | 24.34660353 | 14.829172   | 24.16373016 | 25.06681052 |
| ENSMUSG00000021178 | 50.22908144 | 69.56172438 | 66.37819849 | 168.3406535 | 133.9283876 |
| ENSMUSG00000021179 | 48.10672589 | 77.21351406 | 66.37819849 | 57.18749472 | 53.71459398 |
| ENSMUSG00000021180 | 73.57499253 | 87.64777272 | 86.85657888 | 45.10562964 | 55.86317773 |
| ENSMUSG00000021186 | 7.781970364 | 3.478086219 | 4.943057334 | 7.249119049 | 6.445751277 |
| ENSMUSG00000021194 | 9.904325918 | 6.956172438 | 4.236906287 | 5.638203705 | 6.445751277 |
| ENSMUSG00000021207 | 7.074518513 | 9.043024169 | 4.943057334 | 6.443661377 | 2.148583759 |
| ENSMUSG00000021208 | 12.73413332 | 13.21672763 | 12.00456781 | 9.665492065 | 5.729556691 |
| ENSMUSG00000021211 | 8.489422215 | 6.956172438 | 7.061510478 | 7.249119049 | 6.445751277 |
| ENSMUSG00000021216 | 7.781970364 | 7.651789682 | 4.943057334 | 7.249119049 | 5.729556691 |
| ENSMUSG00000021217 | 9.196874066 | 8.347406925 | 5.649208382 | 4.02728836  | 6.445751277 |
| ENSMUSG00000021222 | 19.10119998 | 23.65098629 | 24.71528667 | 24.96918783 | 27.93158887 |
| ENSMUSG00000021226 | 14.14903703 | 25.73783802 | 32.4829482  | 16.91461111 | 12.17530797 |
| ENSMUSG00000021234 | 41.73965922 | 70.25734162 | 65.67204744 | 62.02024075 | 71.61945863 |
| ENSMUSG00000021240 | 12.02668147 | 20.17290007 | 19.77222934 | 18.52552646 | 15.7562809  |
| ENSMUSG00000021241 | 30.4204296  | 47.30197258 | 48.7244223  | 76.51847885 | 78.7814045  |
| ENSMUSG00000021242 | 40.32475552 | 56.34499675 | 46.60596915 | 100.682209  | 73.05184781 |
| ENSMUSG00000021248 | 50.93653329 | 70.25734162 | 73.43970897 | 162.7024498 | 102.4158258 |

|                    |             |             |             |             |             |
|--------------------|-------------|-------------|-------------|-------------|-------------|
| ENSMUSG00000021253 | 2.829807405 | 12.52111039 | 7.767661525 | 3.221830688 | 5.729556691 |
| ENSMUSG00000021254 | 45.98437033 | 67.47487265 | 43.78136496 | 56.38203705 | 62.30892901 |
| ENSMUSG00000021256 | 4.244711108 | 7.651789682 | 7.767661525 | 7.249119049 | 9.310529622 |
| ENSMUSG00000021259 | 6.367066661 | 10.43425866 | 4.943057334 | 3.221830688 | 8.594335036 |
| ENSMUSG00000021260 | 9.904325918 | 1.391234488 | 10.59226572 | 4.02728836  | 3.580972932 |
| ENSMUSG00000021265 | 23.34591109 | 24.34660353 | 24.00913562 | 31.41284921 | 20.769643   |
| ENSMUSG00000021271 | 9.196874066 | 9.738641413 | 10.59226572 | 15.30369577 | 18.62105924 |
| ENSMUSG00000021278 | 8.489422215 | 6.956172438 | 9.886114669 | 8.054576721 | 7.161945863 |
| ENSMUSG00000021279 | 10.61177777 | 13.21672763 | 14.829172   | 21.74735715 | 19.33725383 |
| ENSMUSG00000021280 | 4.952162959 | 4.869320706 | 6.35535943  | 5.638203705 | 7.87814045  |
| ENSMUSG00000021286 | 19.10119998 | 20.86851731 | 22.59683353 | 33.02376456 | 27.93158887 |
| ENSMUSG00000021290 | 79.94205919 | 86.25653823 | 96.74269354 | 123.2350238 | 107.429188  |
| ENSMUSG00000021294 | 7.781970364 | 0           | 7.767661525 | 3.221830688 | 2.148583759 |
| ENSMUSG00000021298 | 81.3569629  | 123.1242521 | 91.09348516 | 240.831844  | 156.1304198 |
| ENSMUSG00000021301 | 9.196874066 | 6.956172438 | 7.767661525 | 6.443661377 | 7.87814045  |
| ENSMUSG00000021311 | 26.1757185  | 38.25894841 | 27.53989086 | 53.16020636 | 47.2688427  |
| ENSMUSG00000021319 | 10.61177777 | 2.782468975 | 9.886114669 | 2.416373016 | 7.87814045  |
| ENSMUSG00000021322 | 9.196874066 | 5.56493795  | 8.473812573 | 4.832746033 | 4.297167518 |
| ENSMUSG00000021337 | 8.489422215 | 6.260555194 | 2.118453143 | 4.02728836  | 4.297167518 |
| ENSMUSG00000021339 | 60.13340736 | 82.77845201 | 78.3827663  | 76.51847885 | 52.99839939 |
| ENSMUSG00000021347 | 3.537259256 | 3.478086219 | 5.649208382 | 6.443661377 | 3.580972932 |
| ENSMUSG00000021348 | 13.44158517 | 9.738641413 | 8.473812573 | 3.221830688 | 10.7429188  |
| ENSMUSG00000021361 | 34.66514071 | 83.47406925 | 72.02740687 | 86.98942859 | 69.47087488 |
| ENSMUSG00000021362 | 9.904325918 | 6.260555194 | 8.473812573 | 3.221830688 | 7.161945863 |
| ENSMUSG00000021366 | 24.05336294 | 46.60635533 | 37.42600553 | 68.46390213 | 58.72795608 |
| ENSMUSG00000021367 | 2.829807405 | 6.956172438 | 11.29841676 | 8.054576721 | 6.445751277 |
| ENSMUSG00000021371 | 37.49494812 | 63.99678643 | 54.37363068 | 53.16020636 | 56.57937232 |
| ENSMUSG00000021379 | 8.489422215 | 8.347406925 | 7.767661525 | 4.02728836  | 5.729556691 |
| ENSMUSG00000021381 | 8.489422215 | 5.56493795  | 7.061510478 | 7.249119049 | 4.297167518 |
| ENSMUSG00000021390 | 10.61177777 | 13.21672763 | 12.71071886 | 5.638203705 | 7.161945863 |
| ENSMUSG00000021392 | 24.76081479 | 52.86691053 | 46.60596915 | 68.46390213 | 61.59273443 |
| ENSMUSG00000021396 | 6.367066661 | 9.738641413 | 7.061510478 | 6.443661377 | 7.161945863 |
| ENSMUSG00000021400 | 36.78749627 | 67.47487265 | 67.08434954 | 71.68573282 | 78.7814045  |
| ENSMUSG00000021403 | 12.02668147 | 4.173703463 | 4.236906287 | 9.665492065 | 10.7429188  |
| ENSMUSG00000021413 | 97.62835547 | 127.2979556 | 110.8657145 | 207.8080794 | 161.1437819 |
| ENSMUSG00000021414 | 12.73413332 | 11.1298759  | 6.35535943  | 8.054576721 | 6.445751277 |
| ENSMUSG00000021423 | 118.1444592 | 149.5577074 | 129.9317928 | 201.364418  | 152.5494469 |
| ENSMUSG00000021428 | 81.3569629  | 137.7322143 | 134.8748501 | 177.2006879 | 139.6579443 |
| ENSMUSG00000021439 | 12.73413332 | 7.651789682 | 8.473812573 | 3.221830688 | 9.310529622 |
| ENSMUSG00000021440 | 9.904325918 | 12.52111039 | 7.767661525 | 4.832746033 | 2.864778345 |
| ENSMUSG00000021441 | 7.781970364 | 8.347406925 | 9.886114669 | 11.27640741 | 3.580972932 |
| ENSMUSG00000021453 | 23.34591109 | 33.3896277  | 41.66291182 | 116.7913625 | 98.11865833 |
| ENSMUSG00000021456 | 5.65961481  | 11.1298759  | 2.824604191 | 4.02728836  | 5.013362104 |

|                    |             |             |             |             |             |
|--------------------|-------------|-------------|-------------|-------------|-------------|
| ENSMUSG00000021468 | 42.44711108 | 54.95376226 | 60.02283906 | 75.71302118 | 72.33565322 |
| ENSMUSG00000021469 | 5.65961481  | 2.782468975 | 4.236906287 | 8.054576721 | 2.148583759 |
| ENSMUSG00000021474 | 29.0055259  | 34.78086219 | 29.65834401 | 84.57305557 | 73.05184781 |
| ENSMUSG00000021476 | 10.61177777 | 20.17290007 | 15.53532305 | 8.054576721 | 17.18867007 |
| ENSMUSG00000021477 | 7.074518513 | 5.56493795  | 6.35535943  | 7.249119049 | 5.013362104 |
| ENSMUSG00000021478 | 6.367066661 | 3.478086219 | 6.35535943  | 4.832746033 | 5.013362104 |
| ENSMUSG00000021483 | 6.367066661 | 7.651789682 | 7.767661525 | 9.665492065 | 2.864778345 |
| ENSMUSG00000021484 | 125.9264295 | 161.3832006 | 152.5286263 | 242.4427593 | 176.9000628 |
| ENSMUSG00000021486 | 86.30912585 | 126.6023384 | 96.0365425  | 199.7535027 | 128.198831  |
| ENSMUSG00000021488 | 7.074518513 | 7.651789682 | 12.71071886 | 7.249119049 | 10.02672421 |
| ENSMUSG00000021494 | 57.30359995 | 72.34419335 | 76.97046421 | 101.4876667 | 84.51096119 |
| ENSMUSG00000021495 | 84.89422215 | 104.3425866 | 107.3349593 | 74.9075635  | 71.61945863 |
| ENSMUSG00000021501 | 35.37259256 | 61.9099347  | 41.66291182 | 52.35474869 | 44.40406435 |
| ENSMUSG00000021506 | 9.904325918 | 8.347406925 | 7.061510478 | 1.610915344 | 4.297167518 |
| ENSMUSG00000021509 | 6.367066661 | 5.56493795  | 3.530755239 | 2.416373016 | 5.013362104 |
| ENSMUSG00000021518 | 68.62282957 | 116.1680797 | 93.21193831 | 110.3477011 | 94.5376854  |
| ENSMUSG00000021520 | 40.32475552 | 57.04061399 | 40.95676077 | 91.82217462 | 70.90326405 |
| ENSMUSG00000021534 | 14.85648888 | 6.956172438 | 4.943057334 | 7.249119049 | 7.161945863 |
| ENSMUSG00000021536 | 5.65961481  | 6.956172438 | 4.943057334 | 3.221830688 | 4.297167518 |
| ENSMUSG00000021537 | 20.51610369 | 35.47647943 | 33.18909925 | 33.82922223 | 41.53928601 |
| ENSMUSG00000021538 | 9.196874066 | 9.043024169 | 4.236906287 | 4.832746033 | 6.445751277 |
| ENSMUSG00000021539 | 7.074518513 | 4.869320706 | 9.179963621 | 4.832746033 | 3.580972932 |
| ENSMUSG00000021545 | 8.489422215 | 6.956172438 | 7.767661525 | 6.443661377 | 7.87814045  |
| ENSMUSG00000021550 | 12.73413332 | 26.43345526 | 16.94762515 | 20.94189947 | 17.90486466 |
| ENSMUSG00000021552 | 9.196874066 | 8.347406925 | 9.179963621 | 4.832746033 | 7.87814045  |
| ENSMUSG00000021572 | 12.73413332 | 20.86851731 | 22.59683353 | 16.91461111 | 16.47247549 |
| ENSMUSG00000021576 | 19.80865184 | 38.25894841 | 28.24604191 | 49.132918   | 42.25548059 |
| ENSMUSG00000021579 | 9.196874066 | 8.347406925 | 16.94762515 | 11.27640741 | 8.594335036 |
| ENSMUSG00000021583 | 29.71297775 | 42.43265187 | 33.18909925 | 50.74383334 | 46.55264811 |
| ENSMUSG00000021585 | 46.69182218 | 67.47487265 | 52.96132858 | 22.55281482 | 32.22875639 |
| ENSMUSG00000021587 | 12.02668147 | 7.651789682 | 5.649208382 | 4.02728836  | 7.161945863 |
| ENSMUSG00000021590 | 10.61177777 | 9.043024169 | 7.061510478 | 4.02728836  | 3.580972932 |
| ENSMUSG00000021591 | 23.34591109 | 28.52030699 | 36.01370344 | 56.38203705 | 49.41742646 |
| ENSMUSG00000021598 | 37.49494812 | 73.73542784 | 72.73355792 | 96.65492065 | 76.63282074 |
| ENSMUSG00000021600 | 12.73413332 | 9.043024169 | 14.12302096 | 1.610915344 | 9.310529622 |
| ENSMUSG00000021606 | 39.61730367 | 67.47487265 | 64.96589639 | 70.07481747 | 75.20043157 |
| ENSMUSG00000021607 | 26.88317035 | 39.6501829  | 40.95676077 | 42.68925662 | 49.41742646 |
| ENSMUSG00000021609 | 7.074518513 | 6.260555194 | 7.767661525 | 6.443661377 | 7.161945863 |
| ENSMUSG00000021610 | 33.25023701 | 44.5195036  | 52.25517753 | 111.1531587 | 103.848215  |
| ENSMUSG00000021611 | 9.904325918 | 8.347406925 | 4.236906287 | 6.443661377 | 5.013362104 |
| ENSMUSG00000021613 | 7.781970364 | 9.043024169 | 15.53532305 | 5.638203705 | 7.161945863 |
| ENSMUSG00000021619 | 7.074518513 | 16.69481385 | 12.71071886 | 15.30369577 | 7.161945863 |
| ENSMUSG00000021620 | 9.196874066 | 9.738641413 | 7.061510478 | 8.054576721 | 5.729556691 |

|                    |             |             |             |             |             |
|--------------------|-------------|-------------|-------------|-------------|-------------|
| ENSMUSG00000021622 | 9.904325918 | 9.043024169 | 8.473812573 | 6.443661377 | 8.594335036 |
| ENSMUSG00000021624 | 151.3946962 | 139.819066  | 144.7609648 | 246.4700477 | 175.4676737 |
| ENSMUSG00000021640 | 12.73413332 | 7.651789682 | 8.473812573 | 5.638203705 | 5.013362104 |
| ENSMUSG00000021646 | 12.02668147 | 17.39043109 | 16.94762515 | 8.054576721 | 17.18867007 |
| ENSMUSG00000021647 | 8.489422215 | 6.956172438 | 12.71071886 | 2.416373016 | 5.729556691 |
| ENSMUSG00000021650 | 54.47379255 | 92.51709342 | 86.85657888 | 123.2350238 | 117.4559122 |
| ENSMUSG00000021665 | 45.98437033 | 59.12746572 | 64.25974535 | 39.46742593 | 40.82309142 |
| ENSMUSG00000021671 | 42.44711108 | 59.82308296 | 58.61053696 | 91.01671695 | 83.7947666  |
| ENSMUSG00000021675 | 7.074518513 | 8.347406925 | 8.473812573 | 8.054576721 | 4.297167518 |
| ENSMUSG00000021676 | 4.952162959 | 5.56493795  | 9.179963621 | 6.443661377 | 6.445751277 |
| ENSMUSG00000021678 | 9.196874066 | 15.30357936 | 12.00456781 | 12.08186508 | 11.45911338 |
| ENSMUSG00000021680 | 4.952162959 | 4.869320706 | 7.767661525 | 4.02728836  | 4.297167518 |
| ENSMUSG00000021681 | 94.09109622 | 134.254128  | 143.3486627 | 176.3952302 | 136.0769714 |
| ENSMUSG00000021686 | 43.15456293 | 93.90832791 | 67.79050059 | 86.18397091 | 75.20043157 |
| ENSMUSG00000021692 | 38.20239997 | 51.47567604 | 53.66747963 | 112.7640741 | 84.51096119 |
| ENSMUSG00000021696 | 4.244711108 | 7.651789682 | 8.473812573 | 3.221830688 | 3.580972932 |
| ENSMUSG00000021701 | 8.489422215 | 6.260555194 | 10.59226572 | 5.638203705 | 9.310529622 |
| ENSMUSG00000021702 | 5.65961481  | 9.043024169 | 2.824604191 | 3.221830688 | 5.013362104 |
| ENSMUSG00000021703 | 63.67066661 | 75.82227957 | 68.49665163 | 33.02376456 | 31.5125618  |
| ENSMUSG00000021707 | 32.54278516 | 45.91073809 | 34.60140134 | 57.99295239 | 55.86317773 |
| ENSMUSG00000021713 | 54.47379255 | 82.77845201 | 59.31668801 | 137.7332619 | 118.8883013 |
| ENSMUSG00000021718 | 5.65961481  | 10.43425866 | 6.35535943  | 8.054576721 | 8.594335036 |
| ENSMUSG00000021719 | 8.489422215 | 4.173703463 | 5.649208382 | 3.221830688 | 5.013362104 |
| ENSMUSG00000021721 | 9.904325918 | 7.651789682 | 9.886114669 | 4.832746033 | 5.729556691 |
| ENSMUSG00000021725 | 16.97884443 | 22.95536904 | 29.65834401 | 24.16373016 | 25.06681052 |
| ENSMUSG00000021728 | 7.074518513 | 9.738641413 | 5.649208382 | 17.72006879 | 9.310529622 |
| ENSMUSG00000021730 | 5.65961481  | 8.347406925 | 7.061510478 | 4.02728836  | 5.013362104 |
| ENSMUSG00000021737 | 35.37259256 | 57.04061399 | 42.36906287 | 84.57305557 | 71.61945863 |
| ENSMUSG00000021738 | 22.63845924 | 34.08524495 | 32.4829482  | 28.9964762  | 38.67450766 |
| ENSMUSG00000021743 | 6.367066661 | 6.260555194 | 9.179963621 | 6.443661377 | 4.297167518 |
| ENSMUSG00000021748 | 22.63845924 | 31.99839321 | 30.36449505 | 77.32393652 | 50.84981563 |
| ENSMUSG00000021749 | 6.367066661 | 6.956172438 | 7.061510478 | 1.610915344 | 7.87814045  |
| ENSMUSG00000021760 | 9.196874066 | 11.82549314 | 9.886114669 | 7.249119049 | 6.445751277 |
| ENSMUSG00000021764 | 75.69734809 | 119.6461659 | 98.15499564 | 103.9040397 | 78.06520991 |
| ENSMUSG00000021765 | 5.65961481  | 5.56493795  | 6.35535943  | 4.832746033 | 4.297167518 |
| ENSMUSG00000021785 | 35.37259256 | 77.9091313  | 69.20280268 | 57.99295239 | 50.13362104 |
| ENSMUSG00000021791 | 14.85648888 | 8.347406925 | 8.473812573 | 8.054576721 | 9.310529622 |
| ENSMUSG00000021797 | 8.489422215 | 8.347406925 | 7.767661525 | 7.249119049 | 7.161945863 |
| ENSMUSG00000021799 | 11.31922962 | 5.56493795  | 4.236906287 | 4.02728836  | 4.297167518 |
| ENSMUSG00000021804 | 7.074518513 | 0.695617244 | 4.236906287 | 10.47094974 | 9.310529622 |
| ENSMUSG00000021806 | 6.367066661 | 9.738641413 | 7.061510478 | 10.47094974 | 10.02672421 |
| ENSMUSG00000021807 | 37.49494812 | 70.95295887 | 55.78593277 | 88.60034393 | 93.82149081 |
| ENSMUSG00000021810 | 57.30359995 | 117.5593142 | 106.6288082 | 123.2350238 | 106.7129934 |

|                    |             |             |             |             |             |
|--------------------|-------------|-------------|-------------|-------------|-------------|
| ENSMUSG00000021811 | 106.1177777 | 132.1672763 | 120.7518292 | 188.4770953 | 131.7798039 |
| ENSMUSG00000021815 | 10.61177777 | 10.43425866 | 9.886114669 | 11.27640741 | 15.7562809  |
| ENSMUSG00000021822 | 7.074518513 | 2.782468975 | 7.767661525 | 5.638203705 | 10.02672421 |
| ENSMUSG00000021831 | 20.51610369 | 23.65098629 | 24.71528667 | 86.18397091 | 69.47087488 |
| ENSMUSG00000021832 | 56.5961481  | 71.64857611 | 46.60596915 | 135.3168889 | 90.24051788 |
| ENSMUSG00000021846 | 7.074518513 | 4.869320706 | 6.35535943  | 5.638203705 | 5.013362104 |
| ENSMUSG00000021868 | 24.76081479 | 30.60715873 | 31.77679715 | 70.88027514 | 63.0251236  |
| ENSMUSG00000021872 | 11.31922962 | 7.651789682 | 5.649208382 | 4.832746033 | 7.161945863 |
| ENSMUSG00000021880 | 55.1812444  | 88.34338996 | 76.26431316 | 71.68573282 | 56.57937232 |
| ENSMUSG00000021886 | 9.904325918 | 20.86851731 | 22.59683353 | 41.88379895 | 25.78300511 |
| ENSMUSG00000021890 | 136.5382073 | 185.0341868 | 166.6516473 | 260.9682858 | 212.7097921 |
| ENSMUSG00000021891 | 124.5115258 | 190.5991248 | 154.6470795 | 229.5554365 | 184.0620087 |
| ENSMUSG00000021902 | 45.98437033 | 65.38802092 | 60.72899011 | 132.9005159 | 95.25387998 |
| ENSMUSG00000021904 | 9.904325918 | 4.173703463 | 9.886114669 | 8.054576721 | 7.161945863 |
| ENSMUSG00000021913 | 4.244711108 | 2.086851731 | 4.236906287 | 5.638203705 | 7.161945863 |
| ENSMUSG00000021918 | 9.196874066 | 6.956172438 | 9.179963621 | 10.47094974 | 8.594335036 |
| ENSMUSG00000021919 | 3.537259256 | 2.086851731 | 1.412302096 | 1.610915344 | 2.864778345 |
| ENSMUSG00000021928 | 9.904325918 | 16.69481385 | 19.06607829 | 14.4982381  | 12.89150255 |
| ENSMUSG00000021929 | 36.08004441 | 64.69240367 | 55.07978173 | 111.9586164 | 92.38910164 |
| ENSMUSG00000021939 | 33.95768886 | 38.95456565 | 40.95676077 | 31.41284921 | 37.24211849 |
| ENSMUSG00000021940 | 12.02668147 | 2.782468975 | 7.061510478 | 6.443661377 | 9.310529622 |
| ENSMUSG00000021943 | 8.489422215 | 1.391234488 | 8.473812573 | 0.805457672 | 11.45911338 |
| ENSMUSG00000021945 | 60.84085921 | 91.82147618 | 94.6242404  | 122.4295662 | 106.7129934 |
| ENSMUSG00000021951 | 9.196874066 | 22.2597518  | 10.59226572 | 17.72006879 | 10.7429188  |
| ENSMUSG00000021957 | 55.88869625 | 67.47487265 | 64.25974535 | 190.8934683 | 138.2255552 |
| ENSMUSG00000021958 | 29.0055259  | 43.82388636 | 39.54445867 | 78.12939419 | 73.76804239 |
| ENSMUSG00000021961 | 3.537259256 | 4.173703463 | 7.767661525 | 4.832746033 | 7.87814045  |
| ENSMUSG00000021962 | 41.03220737 | 95.99517964 | 91.09348516 | 111.9586164 | 97.40246374 |
| ENSMUSG00000021965 | 50.22908144 | 86.25653823 | 63.5535943  | 161.8969921 | 133.2121931 |
| ENSMUSG00000021966 | 4.952162959 | 6.260555194 | 7.061510478 | 7.249119049 | 10.7429188  |
| ENSMUSG00000021967 | 56.5961481  | 77.9091313  | 55.07978173 | 133.7059736 | 114.5911338 |
| ENSMUSG00000021969 | 48.10672589 | 66.08363816 | 65.67204744 | 72.49119049 | 63.74131818 |
| ENSMUSG00000021973 | 17.68629628 | 27.12907251 | 31.77679715 | 37.05105292 | 44.40406435 |
| ENSMUSG00000021975 | 72.16008883 | 146.0796212 | 109.4534124 | 102.2931244 | 109.5777717 |
| ENSMUSG00000021978 | 60.84085921 | 82.77845201 | 88.97503202 | 66.85298678 | 60.16034525 |
| ENSMUSG00000021986 | 9.904325918 | 6.260555194 | 6.35535943  | 4.832746033 | 3.580972932 |
| ENSMUSG00000021987 | 67.20792587 | 99.47326586 | 103.098053  | 53.96566403 | 58.01176149 |
| ENSMUSG00000021991 | 7.074518513 | 3.478086219 | 2.824604191 | 6.443661377 | 8.594335036 |
| ENSMUSG00000021997 | 14.85648888 | 28.52030699 | 28.24604191 | 15.30369577 | 22.91822676 |
| ENSMUSG00000021999 | 5.65961481  | 9.043024169 | 4.943057334 | 4.02728836  | 6.445751277 |
| ENSMUSG00000022002 | 9.904325918 | 8.347406925 | 8.473812573 | 6.443661377 | 5.013362104 |
| ENSMUSG00000022003 | 31.83533331 | 50.7800588  | 48.01827125 | 26.58010318 | 30.79636721 |
| ENSMUSG00000022008 | 72.16008883 | 119.6461659 | 105.9226572 | 184.4498069 | 148.968474  |

|                    |             |             |             |             |             |
|--------------------|-------------|-------------|-------------|-------------|-------------|
| ENSMUSG00000022009 | 74.28244438 | 125.2111039 | 110.8657145 | 179.6170609 | 164.0085603 |
| ENSMUSG00000022012 | 7.074518513 | 4.173703463 | 5.649208382 | 4.832746033 | 7.87814045  |
| ENSMUSG00000022013 | 25.46826665 | 50.08444155 | 36.71985448 | 23.35827249 | 35.80972932 |
| ENSMUSG00000022015 | 2.829807405 | 3.478086219 | 3.530755239 | 5.638203705 | 2.864778345 |
| ENSMUSG00000022018 | 4.244711108 | 7.651789682 | 6.35535943  | 7.249119049 | 10.02672421 |
| ENSMUSG00000022022 | 12.02668147 | 17.39043109 | 14.829172   | 12.08186508 | 15.04008631 |
| ENSMUSG00000022023 | 58.71850365 | 70.95295887 | 76.26431316 | 115.1804471 | 108.1453825 |
| ENSMUSG00000022024 | 60.84085921 | 82.08283477 | 72.02740687 | 119.2077355 | 105.9967988 |
| ENSMUSG00000022026 | 9.904325918 | 8.347406925 | 4.236906287 | 4.832746033 | 8.594335036 |
| ENSMUSG00000022031 | 21.93100739 | 41.73703463 | 34.60140134 | 57.99295239 | 37.95831308 |
| ENSMUSG00000022033 | 119.5593629 | 122.4286349 | 127.1071886 | 161.0915344 | 132.4959985 |
| ENSMUSG00000022035 | 72.86754068 | 91.82147618 | 68.49665163 | 107.9313281 | 92.38910164 |
| ENSMUSG00000022039 | 13.44158517 | 8.347406925 | 7.767661525 | 6.443661377 | 7.87814045  |
| ENSMUSG00000022040 | 9.196874066 | 6.956172438 | 6.35535943  | 7.249119049 | 4.297167518 |
| ENSMUSG00000022048 | 25.46826665 | 44.5195036  | 39.54445867 | 31.41284921 | 29.36397804 |
| ENSMUSG00000022052 | 142.905274  | 173.2086937 | 147.585569  | 244.8591323 | 195.5211221 |
| ENSMUSG00000022055 | 8.489422215 | 8.347406925 | 8.473812573 | 1.610915344 | 11.45911338 |
| ENSMUSG00000022056 | 12.73413332 | 4.869320706 | 6.35535943  | 2.416373016 | 5.013362104 |
| ENSMUSG00000022057 | 9.904325918 | 6.260555194 | 7.767661525 | 4.02728836  | 5.729556691 |
| ENSMUSG00000022061 | 9.196874066 | 9.043024169 | 6.35535943  | 6.443661377 | 7.161945863 |
| ENSMUSG00000022064 | 33.95768886 | 56.34499675 | 47.3121202  | 136.1223466 | 98.11865833 |
| ENSMUSG00000022070 | 62.96321476 | 78.60474855 | 74.14586002 | 192.5043836 | 146.1036956 |
| ENSMUSG00000022074 | 6.367066661 | 5.56493795  | 8.473812573 | 26.58010318 | 18.62105924 |
| ENSMUSG00000022075 | 39.61730367 | 52.17129328 | 38.83830763 | 110.3477011 | 91.67290705 |
| ENSMUSG00000022076 | 5.65961481  | 6.956172438 | 10.59226572 | 5.638203705 | 10.02672421 |
| ENSMUSG00000022085 | 10.61177777 | 3.478086219 | 4.236906287 | 4.02728836  | 5.729556691 |
| ENSMUSG00000022089 | 39.61730367 | 71.64857611 | 64.25974535 | 77.32393652 | 73.76804239 |
| ENSMUSG00000022091 | 8.489422215 | 11.82549314 | 9.179963621 | 8.054576721 | 7.161945863 |
| ENSMUSG00000022095 | 29.71297775 | 57.04061399 | 67.08434954 | 33.82922223 | 53.71459398 |
| ENSMUSG00000022097 | 9.196874066 | 6.956172438 | 6.35535943  | 11.27640741 | 5.729556691 |
| ENSMUSG00000022098 | 5.65961481  | 8.347406925 | 10.59226572 | 5.638203705 | 8.594335036 |
| ENSMUSG00000022101 | 7.781970364 | 5.56493795  | 4.943057334 | 4.832746033 | 6.445751277 |
| ENSMUSG00000022103 | 12.73413332 | 7.651789682 | 10.59226572 | 4.832746033 | 8.594335036 |
| ENSMUSG00000022105 | 38.20239997 | 62.60555194 | 44.48751601 | 49.132918   | 54.43078856 |
| ENSMUSG00000022108 | 157.7617628 | 183.6429524 | 140.5240585 | 160.2860767 | 121.0368851 |
| ENSMUSG00000022109 | 55.1812444  | 84.86530374 | 55.78593277 | 102.2931244 | 94.5376854  |
| ENSMUSG00000022111 | 47.39927403 | 50.08444155 | 47.3121202  | 76.51847885 | 70.18706946 |
| ENSMUSG00000022113 | 8.489422215 | 6.956172438 | 5.649208382 | 3.221830688 | 2.864778345 |
| ENSMUSG00000022114 | 12.73413332 | 11.1298759  | 11.29841676 | 10.47094974 | 7.87814045  |
| ENSMUSG00000022120 | 43.15456293 | 70.25734162 | 67.79050059 | 103.9040397 | 82.36237743 |
| ENSMUSG00000022123 | 9.904325918 | 3.478086219 | 6.35535943  | 8.054576721 | 4.297167518 |
| ENSMUSG00000022125 | 21.93100739 | 27.12907251 | 23.30298458 | 58.79841006 | 35.09353473 |
| ENSMUSG00000022126 | 9.196874066 | 9.738641413 | 7.061510478 | 5.638203705 | 6.445751277 |

|                    |             |             |             |             |             |
|--------------------|-------------|-------------|-------------|-------------|-------------|
| ENSMUSG00000022129 | 11.31922962 | 7.651789682 | 3.530755239 | 7.249119049 | 7.87814045  |
| ENSMUSG00000022130 | 16.97884443 | 34.08524495 | 26.83373982 | 29.80193387 | 32.22875639 |
| ENSMUSG00000022131 | 10.61177777 | 21.56413456 | 19.06607829 | 9.665492065 | 19.33725383 |
| ENSMUSG00000022136 | 48.81417774 | 89.0390072  | 75.55816211 | 146.5932963 | 142.5227227 |
| ENSMUSG00000022141 | 27.5906222  | 41.73703463 | 44.48751601 | 153.0369577 | 114.5911338 |
| ENSMUSG00000022142 | 51.64398514 | 48.69320706 | 66.37819849 | 145.7878386 | 108.8615771 |
| ENSMUSG00000022144 | 6.367066661 | 6.956172438 | 7.767661525 | 6.443661377 | 2.864778345 |
| ENSMUSG00000022155 | 8.489422215 | 4.869320706 | 9.179963621 | 4.832746033 | 6.445751277 |
| ENSMUSG00000022156 | 4.952162959 | 4.869320706 | 4.943057334 | 7.249119049 | 6.445751277 |
| ENSMUSG00000022157 | 2.122355554 | 6.260555194 | 4.236906287 | 4.832746033 | 6.445751277 |
| ENSMUSG00000022174 | 69.33028142 | 99.47326586 | 84.73812573 | 116.7913625 | 88.80812871 |
| ENSMUSG00000022175 | 16.97884443 | 31.99839321 | 39.54445867 | 84.57305557 | 76.63282074 |
| ENSMUSG00000022177 | 10.61177777 | 18.08604834 | 10.59226572 | 23.35827249 | 18.62105924 |
| ENSMUSG00000022179 | 11.31922962 | 9.043024169 | 9.179963621 | 7.249119049 | 8.594335036 |
| ENSMUSG00000022180 | 10.61177777 | 6.956172438 | 4.943057334 | 2.416373016 | 7.87814045  |
| ENSMUSG00000022184 | 9.904325918 | 18.78166558 | 22.59683353 | 19.33098413 | 21.48583759 |
| ENSMUSG00000022193 | 2.829807405 | 3.478086219 | 2.118453143 | 4.832746033 | 0.716194586 |
| ENSMUSG00000022195 | 24.76081479 | 37.56333116 | 33.89525029 | 71.68573282 | 58.72795608 |
| ENSMUSG00000022200 | 122.3891703 | 195.4684455 | 154.6470795 | 176.3952302 | 143.2389173 |
| ENSMUSG00000022203 | 9.904325918 | 8.347406925 | 9.179963621 | 1.610915344 | 5.013362104 |
| ENSMUSG00000022204 | 35.37259256 | 57.73623123 | 49.43057334 | 75.71302118 | 76.63282074 |
| ENSMUSG00000022206 | 8.489422215 | 7.651789682 | 8.473812573 | 3.221830688 | 9.310529622 |
| ENSMUSG00000022210 | 7.781970364 | 7.651789682 | 11.29841676 | 13.69278043 | 10.7429188  |
| ENSMUSG00000022211 | 5.65961481  | 6.260555194 | 9.179963621 | 8.860034393 | 6.445751277 |
| ENSMUSG00000022215 | 5.65961481  | 4.869320706 | 9.179963621 | 4.832746033 | 3.580972932 |
| ENSMUSG00000022219 | 7.781970364 | 6.260555194 | 13.41686991 | 4.832746033 | 8.594335036 |
| ENSMUSG00000022223 | 16.27139258 | 18.78166558 | 9.179963621 | 29.80193387 | 25.78300511 |
| ENSMUSG00000022225 | 11.31922962 | 4.869320706 | 5.649208382 | 5.638203705 | 5.013362104 |
| ENSMUSG00000022226 | 6.367066661 | 3.478086219 | 9.179963621 | 4.02728836  | 1.432389173 |
| ENSMUSG00000022227 | 10.61177777 | 6.956172438 | 11.29841676 | 3.221830688 | 1.432389173 |
| ENSMUSG00000022229 | 8.489422215 | 4.173703463 | 4.236906287 | 7.249119049 | 5.729556691 |
| ENSMUSG00000022231 | 13.44158517 | 12.52111039 | 14.12302096 | 8.860034393 | 7.161945863 |
| ENSMUSG00000022236 | 10.61177777 | 6.956172438 | 9.886114669 | 4.832746033 | 8.594335036 |
| ENSMUSG00000022240 | 9.196874066 | 3.478086219 | 5.649208382 | 5.638203705 | 5.013362104 |
| ENSMUSG00000022241 | 48.81417774 | 70.25734162 | 74.85201106 | 130.4841429 | 105.2806042 |
| ENSMUSG00000022244 | 9.196874066 | 10.43425866 | 10.59226572 | 8.054576721 | 10.7429188  |
| ENSMUSG00000022257 | 4.952162959 | 6.956172438 | 7.767661525 | 6.443661377 | 6.445751277 |
| ENSMUSG00000022261 | 13.44158517 | 6.956172438 | 4.943057334 | 6.443661377 | 10.02672421 |
| ENSMUSG00000022262 | 7.781970364 | 6.260555194 | 3.530755239 | 5.638203705 | 5.729556691 |
| ENSMUSG00000022263 | 14.14903703 | 22.95536904 | 23.30298458 | 8.054576721 | 12.17530797 |
| ENSMUSG00000022265 | 6.367066661 | 8.347406925 | 10.59226572 | 4.832746033 | 5.729556691 |
| ENSMUSG00000022280 | 46.69182218 | 62.60555194 | 52.96132858 | 58.79841006 | 50.13362104 |
| ENSMUSG00000022288 | 10.61177777 | 6.260555194 | 9.886114669 | 3.221830688 | 2.864778345 |

|                    |             |             |             |             |             |
|--------------------|-------------|-------------|-------------|-------------|-------------|
| ENSMUSG00000022295 | 87.72402956 | 119.6461659 | 120.7518292 | 117.5968201 | 108.1453825 |
| ENSMUSG00000022299 | 88.43148141 | 130.7760418 | 109.4534124 | 158.6751614 | 161.8599765 |
| ENSMUSG00000022300 | 99.04325918 | 146.0796212 | 127.1071886 | 175.5897725 | 148.2522794 |
| ENSMUSG00000022303 | 8.489422215 | 2.086851731 | 9.179963621 | 5.638203705 | 4.297167518 |
| ENSMUSG00000022306 | 12.02668147 | 5.56493795  | 5.649208382 | 9.665492065 | 2.864778345 |
| ENSMUSG00000022309 | 12.02668147 | 9.043024169 | 5.649208382 | 4.02728836  | 9.310529622 |
| ENSMUSG00000022314 | 157.054311  | 164.1656695 | 152.5286263 | 209.4189947 | 164.0085603 |
| ENSMUSG00000022315 | 7.074518513 | 6.260555194 | 7.061510478 | 6.443661377 | 4.297167518 |
| ENSMUSG00000022322 | 67.91537772 | 75.12666233 | 65.67204744 | 96.65492065 | 88.80812871 |
| ENSMUSG00000022330 | 4.244711108 | 8.347406925 | 4.236906287 | 3.221830688 | 4.297167518 |
| ENSMUSG00000022332 | 4.952162959 | 5.56493795  | 7.767661525 | 5.638203705 | 3.580972932 |
| ENSMUSG00000022336 | 108.2401332 | 122.4286349 | 127.1071886 | 201.364418  | 159.7113928 |
| ENSMUSG00000022337 | 42.44711108 | 73.0398106  | 65.67204744 | 43.49471429 | 61.59273443 |
| ENSMUSG00000022338 | 31.12788146 | 66.08363816 | 54.37363068 | 121.6241085 | 76.63282074 |
| ENSMUSG00000022339 | 22.63845924 | 40.34580014 | 30.36449505 | 35.44013757 | 33.66114556 |
| ENSMUSG00000022342 | 9.196874066 | 9.738641413 | 12.00456781 | 6.443661377 | 5.729556691 |
| ENSMUSG00000022347 | 9.904325918 | 5.56493795  | 3.530755239 | 4.832746033 | 7.161945863 |
| ENSMUSG00000022350 | 95.50599992 | 124.5154866 | 136.9933033 | 120.0131931 | 100.9834367 |
| ENSMUSG00000022353 | 112.4848444 | 130.7760418 | 134.1686991 | 74.10210583 | 80.21379367 |
| ENSMUSG00000022354 | 75.69734809 | 116.863697  | 79.7950684  | 157.8697037 | 126.0502472 |
| ENSMUSG00000022357 | 12.02668147 | 4.869320706 | 4.943057334 | 5.638203705 | 7.161945863 |
| ENSMUSG00000022358 | 24.76081479 | 47.30197258 | 45.8998181  | 14.4982381  | 18.62105924 |
| ENSMUSG00000022359 | 78.52715549 | 117.5593142 | 105.2165061 | 82.15668255 | 87.37573953 |
| ENSMUSG00000022360 | 27.5906222  | 34.78086219 | 33.89525029 | 140.1496349 | 118.8883013 |
| ENSMUSG00000022365 | 101.8730666 | 105.0382038 | 115.8087718 | 182.0334339 | 134.6445822 |
| ENSMUSG00000022367 | 11.31922962 | 6.956172438 | 5.649208382 | 8.054576721 | 7.161945863 |
| ENSMUSG00000022375 | 10.61177777 | 6.260555194 | 9.886114669 | 12.08186508 | 4.297167518 |
| ENSMUSG00000022376 | 6.367066661 | 4.173703463 | 5.649208382 | 5.638203705 | 4.297167518 |
| ENSMUSG00000022400 | 62.25576291 | 114.081228  | 91.79963621 | 172.3679418 | 123.9016634 |
| ENSMUSG00000022404 | 29.71297775 | 39.6501829  | 37.42600553 | 63.6311561  | 43.68786977 |
| ENSMUSG00000022407 | 75.69734809 | 84.1696865  | 81.91352154 | 207.8080794 | 149.6846685 |
| ENSMUSG00000022408 | 12.02668147 | 7.651789682 | 9.179963621 | 4.02728836  | 10.02672421 |
| ENSMUSG00000022414 | 51.64398514 | 63.99678643 | 67.79050059 | 98.265836   | 67.32229112 |
| ENSMUSG00000022426 | 38.20239997 | 53.56252777 | 47.3121202  | 93.43308996 | 75.20043157 |
| ENSMUSG00000022427 | 54.47379255 | 56.34499675 | 69.90895373 | 101.4876667 | 93.10529622 |
| ENSMUSG00000022428 | 14.14903703 | 34.08524495 | 14.829172   | 10.47094974 | 13.60769714 |
| ENSMUSG00000022431 | 5.65961481  | 11.82549314 | 6.35535943  | 4.02728836  | 12.17530797 |
| ENSMUSG00000022432 | 10.61177777 | 5.56493795  | 4.943057334 | 5.638203705 | 7.161945863 |
| ENSMUSG00000022434 | 28.29807405 | 36.86771392 | 28.24604191 | 37.05105292 | 38.67450766 |
| ENSMUSG00000022435 | 9.196874066 | 5.56493795  | 4.943057334 | 9.665492065 | 6.445751277 |
| ENSMUSG00000022437 | 50.93653329 | 73.73542784 | 56.49208382 | 124.8459392 | 84.51096119 |
| ENSMUSG00000022438 | 4.952162959 | 5.56493795  | 5.649208382 | 6.443661377 | 8.594335036 |
| ENSMUSG00000022439 | 86.30912585 | 90.43024169 | 93.21193831 | 85.37851324 | 88.09193412 |



|                    |             |             |             |             |             |
|--------------------|-------------|-------------|-------------|-------------|-------------|
| ENSMUSG00000022440 | 4.244711108 | 4.869320706 | 8.473812573 | 4.832746033 | 7.161945863 |
| ENSMUSG00000022445 | 9.904325918 | 2.086851731 | 7.767661525 | 4.832746033 | 6.445751277 |
| ENSMUSG00000022450 | 86.30912585 | 133.5585108 | 107.3349593 | 118.4022778 | 116.023523  |
| ENSMUSG00000022453 | 10.61177777 | 10.43425866 | 5.649208382 | 9.665492065 | 6.445751277 |
| ENSMUSG00000022455 | 6.367066661 | 8.347406925 | 12.00456781 | 9.665492065 | 7.87814045  |
| ENSMUSG00000022462 | 67.20792587 | 86.25653823 | 67.79050059 | 167.5351958 | 126.7664418 |
| ENSMUSG00000022463 | 91.96874066 | 143.2971522 | 128.5194907 | 228.7499789 | 170.4543116 |
| ENSMUSG00000022466 | 36.08004441 | 66.7792554  | 42.36906287 | 65.24207144 | 52.2822048  |
| ENSMUSG00000022476 | 32.54278516 | 50.08444155 | 47.3121202  | 82.15668255 | 80.21379367 |
| ENSMUSG00000022484 | 10.61177777 | 10.43425866 | 5.649208382 | 4.832746033 | 5.729556691 |
| ENSMUSG00000022485 | 3.537259256 | 1.391234488 | 2.824604191 | 0           | 2.864778345 |
| ENSMUSG00000022488 | 70.03773327 | 81.38721752 | 105.2165061 | 120.8186508 | 108.1453825 |
| ENSMUSG00000022489 | 6.367066661 | 8.347406925 | 9.179963621 | 4.832746033 | 8.594335036 |
| ENSMUSG00000022490 | 6.367066661 | 3.478086219 | 7.767661525 | 5.638203705 | 6.445751277 |
| ENSMUSG00000022491 | 8.489422215 | 7.651789682 | 12.00456781 | 4.02728836  | 6.445751277 |
| ENSMUSG00000022496 | 9.904325918 | 7.651789682 | 7.061510478 | 9.665492065 | 8.594335036 |
| ENSMUSG00000022501 | 7.074518513 | 4.173703463 | 6.35535943  | 5.638203705 | 12.89150255 |
| ENSMUSG00000022504 | 179.6927702 | 181.5561006 | 175.8316109 | 227.1390635 | 176.1838682 |
| ENSMUSG00000022505 | 7.781970364 | 4.173703463 | 7.767661525 | 10.47094974 | 6.445751277 |
| ENSMUSG00000022507 | 90.55383696 | 125.2111039 | 118.633376  | 202.9753334 | 166.8733386 |
| ENSMUSG00000022508 | 38.20239997 | 74.43104508 | 58.61053696 | 48.32746033 | 63.0251236  |
| ENSMUSG00000022512 | 7.781970364 | 4.869320706 | 6.35535943  | 4.832746033 | 7.161945863 |
| ENSMUSG00000022515 | 47.39927403 | 77.21351406 | 93.21193831 | 87.79488626 | 85.22715578 |
| ENSMUSG00000022516 | 20.51610369 | 32.69401046 | 31.0706461  | 40.2728836  | 37.95831308 |
| ENSMUSG00000022523 | 5.65961481  | 8.347406925 | 7.061510478 | 7.249119049 | 7.87814045  |
| ENSMUSG00000022526 | 16.27139258 | 41.73703463 | 28.95219296 | 34.6346799  | 22.91822676 |
| ENSMUSG00000022528 | 18.39374813 | 27.82468975 | 24.71528667 | 14.4982381  | 17.18867007 |
| ENSMUSG00000022542 | 8.489422215 | 11.82549314 | 5.649208382 | 4.02728836  | 8.594335036 |
| ENSMUSG00000022546 | 9.196874066 | 6.956172438 | 9.179963621 | 8.054576721 | 9.310529622 |
| ENSMUSG00000022551 | 43.86201478 | 59.12746572 | 52.96132858 | 124.8459392 | 100.9834367 |
| ENSMUSG00000022554 | 29.0055259  | 43.12826911 | 40.25060972 | 97.46037832 | 78.06520991 |
| ENSMUSG00000022556 | 157.7617628 | 205.9027042 | 204.0776528 | 277.0774392 | 230.6146568 |
| ENSMUSG00000022559 | 29.0055259  | 40.34580014 | 40.25060972 | 53.16020636 | 47.98503729 |
| ENSMUSG00000022560 | 16.97884443 | 41.04141738 | 36.71985448 | 55.57657937 | 45.12025894 |
| ENSMUSG00000022564 | 5.65961481  | 6.260555194 | 4.236906287 | 3.221830688 | 2.864778345 |
| ENSMUSG00000022570 | 20.51610369 | 18.78166558 | 17.65377619 | 24.16373016 | 13.60769714 |
| ENSMUSG00000022571 | 19.10119998 | 24.34660353 | 23.30298458 | 35.44013757 | 42.97167518 |
| ENSMUSG00000022574 | 7.781970364 | 13.21672763 | 7.767661525 | 5.638203705 | 12.17530797 |
| ENSMUSG00000022575 | 9.904325918 | 11.82549314 | 21.18453143 | 18.52552646 | 20.05344842 |
| ENSMUSG00000022582 | 12.73413332 | 7.651789682 | 6.35535943  | 8.860034393 | 8.594335036 |
| ENSMUSG00000022589 | 7.781970364 | 6.956172438 | 5.649208382 | 8.054576721 | 9.310529622 |
| ENSMUSG00000022595 | 7.781970364 | 9.738641413 | 9.179963621 | 4.832746033 | 7.161945863 |
| ENSMUSG00000022596 | 5.65961481  | 11.1298759  | 12.00456781 | 9.665492065 | 10.7429188  |

|                    |             |             |             |             |             |
|--------------------|-------------|-------------|-------------|-------------|-------------|
| ENSMUSG00000022598 | 7.074518513 | 5.56493795  | 7.767661525 | 7.249119049 | 7.87814045  |
| ENSMUSG00000022603 | 3.537259256 | 2.782468975 | 9.179963621 | 4.02728836  | 4.297167518 |
| ENSMUSG00000022610 | 11.31922962 | 18.08604834 | 12.00456781 | 10.47094974 | 17.90486466 |
| ENSMUSG00000022613 | 8.489422215 | 8.347406925 | 8.473812573 | 6.443661377 | 7.161945863 |
| ENSMUSG00000022614 | 79.94205919 | 111.298759  | 99.56729774 | 165.9242805 | 131.7798039 |
| ENSMUSG00000022615 | 2.122355554 | 2.086851731 | 1.412302096 | 6.443661377 | 2.864778345 |
| ENSMUSG00000022619 | 7.074518513 | 10.43425866 | 7.767661525 | 8.054576721 | 5.729556691 |
| ENSMUSG00000022622 | 13.44158517 | 2.782468975 | 6.35535943  | 4.832746033 | 7.87814045  |
| ENSMUSG00000022634 | 22.63845924 | 30.60715873 | 27.53989086 | 29.80193387 | 37.95831308 |
| ENSMUSG00000022635 | 94.09109622 | 159.2963488 | 133.462548  | 278.6883545 | 218.4393488 |
| ENSMUSG00000022650 | 5.65961481  | 6.956172438 | 9.886114669 | 7.249119049 | 7.161945863 |
| ENSMUSG00000022651 | 7.074518513 | 10.43425866 | 7.061510478 | 6.443661377 | 5.013362104 |
| ENSMUSG00000022652 | 11.31922962 | 7.651789682 | 7.767661525 | 4.02728836  | 9.310529622 |
| ENSMUSG00000022657 | 6.367066661 | 5.56493795  | 9.886114669 | 15.30369577 | 3.580972932 |
| ENSMUSG00000022663 | 50.22908144 | 98.08203137 | 90.38733411 | 107.9313281 | 79.49759908 |
| ENSMUSG00000022673 | 31.83533331 | 48.69320706 | 42.36906287 | 87.79488626 | 82.36237743 |
| ENSMUSG00000022676 | 12.73413332 | 10.43425866 | 4.236906287 | 4.02728836  | 7.87814045  |
| ENSMUSG00000022682 | 37.49494812 | 54.25814501 | 51.54902649 | 99.87675134 | 95.97007457 |
| ENSMUSG00000022685 | 19.80865184 | 47.30197258 | 24.71528667 | 33.82922223 | 39.39070225 |
| ENSMUSG00000022705 | 7.074518513 | 7.651789682 | 7.061510478 | 11.27640741 | 10.02672421 |
| ENSMUSG00000022715 | 9.196874066 | 7.651789682 | 9.886114669 | 10.47094974 | 12.17530797 |
| ENSMUSG00000022738 | 6.367066661 | 4.173703463 | 5.649208382 | 4.832746033 | 11.45911338 |
| ENSMUSG00000022742 | 29.71297775 | 36.17209668 | 28.24604191 | 244.8591323 | 179.0486466 |
| ENSMUSG00000022748 | 17.68629628 | 33.3896277  | 35.30755239 | 58.79841006 | 46.55264811 |
| ENSMUSG00000022749 | 40.32475552 | 84.1696865  | 61.43514116 | 65.24207144 | 74.48423698 |
| ENSMUSG00000022751 | 12.73413332 | 15.30357936 | 18.35992724 | 30.60739154 | 26.49919969 |
| ENSMUSG00000022752 | 93.38364437 | 140.5146832 | 132.756397  | 220.6954022 | 174.0352845 |
| ENSMUSG00000022754 | 9.196874066 | 2.086851731 | 7.767661525 | 7.249119049 | 10.02672421 |
| ENSMUSG00000022755 | 10.61177777 | 5.56493795  | 8.473812573 | 3.221830688 | 4.297167518 |
| ENSMUSG00000022765 | 124.5115258 | 158.6007316 | 159.5901368 | 135.3168889 | 120.3206905 |
| ENSMUSG00000022769 | 14.14903703 | 16.69481385 | 15.53532305 | 105.514955  | 66.60609653 |
| ENSMUSG00000022780 | 7.781970364 | 6.260555194 | 5.649208382 | 2.416373016 | 9.310529622 |
| ENSMUSG00000022781 | 91.96874066 | 107.8206728 | 79.08891735 | 187.6716376 | 163.2923657 |
| ENSMUSG00000022798 | 12.73413332 | 6.956172438 | 4.943057334 | 7.249119049 | 7.161945863 |
| ENSMUSG00000022799 | 7.074518513 | 9.043024169 | 14.12302096 | 3.221830688 | 9.310529622 |
| ENSMUSG00000022802 | 7.781970364 | 11.1298759  | 14.829172   | 15.30369577 | 10.7429188  |
| ENSMUSG00000022807 | 36.08004441 | 58.43184848 | 47.3121202  | 42.68925662 | 41.53928601 |
| ENSMUSG00000022808 | 90.55383696 | 141.9059177 | 115.1026208 | 80.54576721 | 92.38910164 |
| ENSMUSG00000022809 | 9.904325918 | 5.56493795  | 9.886114669 | 11.27640741 | 6.445751277 |
| ENSMUSG00000022814 | 53.7663407  | 84.86530374 | 55.78593277 | 173.1733995 | 120.3206905 |
| ENSMUSG00000022820 | 55.1812444  | 89.73462445 | 74.85201106 | 70.07481747 | 67.32229112 |
| ENSMUSG00000022833 | 8.489422215 | 6.956172438 | 7.767661525 | 21.74735715 | 21.48583759 |
| ENSMUSG00000022840 | 6.367066661 | 1.391234488 | 4.236906287 | 4.02728836  | 3.580972932 |

|                    |             |             |             |             |             |
|--------------------|-------------|-------------|-------------|-------------|-------------|
| ENSMUSG00000022844 | 12.73413332 | 6.956172438 | 9.886114669 | 5.638203705 | 7.87814045  |
| ENSMUSG00000022848 | 48.10672589 | 80.69160028 | 76.26431316 | 44.30017197 | 58.01176149 |
| ENSMUSG00000022849 | 55.88869625 | 89.0390072  | 72.73355792 | 53.16020636 | 60.16034525 |
| ENSMUSG00000022853 | 12.73413332 | 22.95536904 | 28.95219296 | 17.72006879 | 15.04008631 |
| ENSMUSG00000022855 | 56.5961481  | 83.47406925 | 74.85201106 | 109.5422434 | 88.09193412 |
| ENSMUSG00000022856 | 9.904325918 | 11.1298759  | 10.59226572 | 9.665492065 | 11.45911338 |
| ENSMUSG00000022867 | 69.33028142 | 111.298759  | 86.15042783 | 130.4841429 | 110.2939663 |
| ENSMUSG00000022868 | 11.31922962 | 4.173703463 | 4.943057334 | 2.416373016 | 2.864778345 |
| ENSMUSG00000022877 | 7.074518513 | 5.56493795  | 9.179963621 | 3.221830688 | 3.580972932 |
| ENSMUSG00000022878 | 9.904325918 | 11.1298759  | 7.767661525 | 9.665492065 | 10.7429188  |
| ENSMUSG00000022886 | 9.196874066 | 5.56493795  | 4.943057334 | 4.02728836  | 5.013362104 |
| ENSMUSG00000022887 | 8.489422215 | 8.347406925 | 8.473812573 | 11.27640741 | 6.445751277 |
| ENSMUSG00000022889 | 16.27139258 | 29.21592424 | 30.36449505 | 66.04752911 | 45.12025894 |
| ENSMUSG00000022894 | 6.367066661 | 3.478086219 | 7.767661525 | 6.443661377 | 5.729556691 |
| ENSMUSG00000022899 | 5.65961481  | 7.651789682 | 8.473812573 | 7.249119049 | 6.445751277 |
| ENSMUSG00000022902 | 10.61177777 | 11.82549314 | 6.35535943  | 4.832746033 | 8.594335036 |
| ENSMUSG00000022912 | 7.781970364 | 3.478086219 | 9.179963621 | 8.054576721 | 7.161945863 |
| ENSMUSG00000022931 | 7.074518513 | 9.043024169 | 7.061510478 | 4.832746033 | 5.013362104 |
| ENSMUSG00000022938 | 7.781970364 | 5.56493795  | 6.35535943  | 8.054576721 | 7.87814045  |
| ENSMUSG00000022941 | 8.489422215 | 10.43425866 | 11.29841676 | 8.054576721 | 3.580972932 |
| ENSMUSG00000022946 | 12.73413332 | 27.82468975 | 27.53989086 | 9.665492065 | 15.04008631 |
| ENSMUSG00000022947 | 7.781970364 | 10.43425866 | 9.179963621 | 4.02728836  | 7.161945863 |
| ENSMUSG00000022949 | 4.244711108 | 6.260555194 | 9.179963621 | 7.249119049 | 5.729556691 |
| ENSMUSG00000022965 | 115.3146518 | 151.6445591 | 115.1026208 | 310.9066614 | 234.1956297 |
| ENSMUSG00000022972 | 9.196874066 | 12.52111039 | 12.71071886 | 17.72006879 | 17.18867007 |
| ENSMUSG00000022982 | 43.86201478 | 84.1696865  | 60.72899011 | 105.514955  | 103.1320204 |
| ENSMUSG00000022986 | 6.367066661 | 3.478086219 | 7.767661525 | 2.416373016 | 7.161945863 |
| ENSMUSG00000022991 | 9.196874066 | 6.956172438 | 5.649208382 | 8.860034393 | 8.594335036 |
| ENSMUSG00000022993 | 7.074518513 | 8.347406925 | 12.00456781 | 14.4982381  | 10.02672421 |
| ENSMUSG00000022994 | 9.196874066 | 9.043024169 | 5.649208382 | 9.665492065 | 7.87814045  |
| ENSMUSG00000022997 | 6.367066661 | 5.56493795  | 4.943057334 | 5.638203705 | 5.729556691 |
| ENSMUSG00000023000 | 7.074518513 | 10.43425866 | 5.649208382 | 6.443661377 | 6.445751277 |
| ENSMUSG00000023004 | 22.63845924 | 19.47728283 | 21.18453143 | 242.4427593 | 179.0486466 |
| ENSMUSG00000023011 | 10.61177777 | 4.869320706 | 4.236906287 | 8.860034393 | 5.729556691 |
| ENSMUSG00000023013 | 6.367066661 | 9.738641413 | 7.767661525 | 4.02728836  | 6.445751277 |
| ENSMUSG00000023017 | 17.68629628 | 11.1298759  | 9.179963621 | 3.221830688 | 11.45911338 |
| ENSMUSG00000023018 | 24.76081479 | 29.91154148 | 24.00913562 | 41.88379895 | 42.97167518 |
| ENSMUSG00000023020 | 21.22355554 | 27.82468975 | 28.95219296 | 41.88379895 | 47.98503729 |
| ENSMUSG00000023031 | 4.952162959 | 5.56493795  | 9.886114669 | 9.665492065 | 9.310529622 |
| ENSMUSG00000023034 | 12.02668147 | 22.95536904 | 21.18453143 | 25.77464551 | 21.48583759 |
| ENSMUSG00000023036 | 7.781970364 | 4.869320706 | 5.649208382 | 4.832746033 | 0.716194586 |
| ENSMUSG00000023041 | 12.73413332 | 6.260555194 | 8.473812573 | 11.27640741 | 2.864778345 |
| ENSMUSG00000023043 | 8.489422215 | 7.651789682 | 3.530755239 | 3.221830688 | 9.310529622 |

|                    |             |             |             |             |             |
|--------------------|-------------|-------------|-------------|-------------|-------------|
| ENSMUSG00000023044 | 15.56394073 | 13.91234488 | 12.71071886 | 14.4982381  | 8.594335036 |
| ENSMUSG00000023046 | 8.489422215 | 11.82549314 | 7.061510478 | 6.443661377 | 4.297167518 |
| ENSMUSG00000023050 | 7.781970364 | 6.956172438 | 10.59226572 | 11.27640741 | 11.45911338 |
| ENSMUSG00000023052 | 12.73413332 | 18.78166558 | 16.94762515 | 16.10915344 | 20.769643   |
| ENSMUSG00000023055 | 16.27139258 | 28.52030699 | 24.00913562 | 11.27640741 | 11.45911338 |
| ENSMUSG00000023057 | 7.074518513 | 4.869320706 | 12.00456781 | 6.443661377 | 9.310529622 |
| ENSMUSG00000023064 | 9.904325918 | 6.956172438 | 7.061510478 | 3.221830688 | 4.297167518 |
| ENSMUSG00000023066 | 0           | 0           | 1.412302096 | 0.805457672 | 0           |
| ENSMUSG00000023070 | 6.367066661 | 4.173703463 | 6.35535943  | 6.443661377 | 2.148583759 |
| ENSMUSG00000023073 | 14.14903703 | 8.347406925 | 11.29841676 | 1.610915344 | 7.87814045  |
| ENSMUSG00000023075 | 97.62835547 | 119.6461659 | 88.97503202 | 155.4533307 | 136.0769714 |
| ENSMUSG00000023078 | 9.904325918 | 11.1298759  | 9.179963621 | 3.221830688 | 2.864778345 |
| ENSMUSG00000023083 | 6.367066661 | 5.56493795  | 7.061510478 | 9.665492065 | 10.7429188  |
| ENSMUSG00000023104 | 27.5906222  | 40.34580014 | 36.71985448 | 121.6241085 | 93.82149081 |
| ENSMUSG00000023120 | 14.14903703 | 4.869320706 | 9.886114669 | 5.638203705 | 6.445751277 |
| ENSMUSG00000023122 | 12.02668147 | 6.260555194 | 7.767661525 | 8.054576721 | 6.445751277 |
| ENSMUSG00000023132 | 9.196874066 | 6.260555194 | 4.943057334 | 6.443661377 | 8.594335036 |
| ENSMUSG00000023140 | 7.781970364 | 10.43425866 | 8.473812573 | 3.221830688 | 5.013362104 |
| ENSMUSG00000023151 | 10.61177777 | 4.173703463 | 13.41686991 | 5.638203705 | 7.161945863 |
| ENSMUSG00000023153 | 9.904325918 | 5.56493795  | 3.530755239 | 7.249119049 | 7.87814045  |
| ENSMUSG00000023156 | 43.15456293 | 66.7792554  | 62.84744325 | 107.9313281 | 92.38910164 |
| ENSMUSG00000023159 | 4.244711108 | 9.738641413 | 7.061510478 | 4.832746033 | 7.87814045  |
| ENSMUSG00000023176 | 3.537259256 | 6.956172438 | 2.824604191 | 11.27640741 | 8.594335036 |
| ENSMUSG00000023185 | 4.952162959 | 8.347406925 | 9.886114669 | 1.610915344 | 10.02672421 |
| ENSMUSG00000023191 | 6.367066661 | 6.956172438 | 6.35535943  | 7.249119049 | 5.729556691 |
| ENSMUSG00000023210 | 7.781970364 | 6.260555194 | 7.061510478 | 7.249119049 | 7.161945863 |
| ENSMUSG00000023236 | 13.44158517 | 12.52111039 | 5.649208382 | 11.27640741 | 10.02672421 |
| ENSMUSG00000023243 | 50.93653329 | 95.99517964 | 90.38733411 | 76.51847885 | 73.76804239 |
| ENSMUSG00000023247 | 3.537259256 | 7.651789682 | 6.35535943  | 6.443661377 | 4.297167518 |
| ENSMUSG00000023257 | 5.65961481  | 3.478086219 | 2.118453143 | 4.02728836  | 2.864778345 |
| ENSMUSG00000023263 | 7.781970364 | 7.651789682 | 4.236906287 | 10.47094974 | 7.87814045  |
| ENSMUSG00000023272 | 31.12788146 | 42.43265187 | 45.8998181  | 103.9040397 | 75.91662615 |
| ENSMUSG00000023279 | 8.489422215 | 2.086851731 | 2.824604191 | 3.221830688 | 1.432389173 |
| ENSMUSG00000023333 | 8.489422215 | 6.956172438 | 5.649208382 | 4.02728836  | 5.013362104 |
| ENSMUSG00000023336 | 8.489422215 | 4.869320706 | 5.649208382 | 6.443661377 | 5.729556691 |
| ENSMUSG00000023350 | 12.02668147 | 11.1298759  | 9.886114669 | 4.02728836  | 5.013362104 |
| ENSMUSG00000023391 | 3.537259256 | 3.478086219 | 7.061510478 | 5.638203705 | 4.297167518 |
| ENSMUSG00000023433 | 9.904325918 | 4.173703463 | 7.061510478 | 8.054576721 | 7.161945863 |
| ENSMUSG00000023571 | 12.02668147 | 9.738641413 | 12.71071886 | 17.72006879 | 12.17530797 |
| ENSMUSG00000023755 | 9.904325918 | 4.869320706 | 13.41686991 | 28.19101852 | 20.05344842 |
| ENSMUSG00000023781 | 6.367066661 | 4.869320706 | 4.236906287 | 6.443661377 | 7.161945863 |
| ENSMUSG00000023802 | 7.781970364 | 7.651789682 | 5.649208382 | 2.416373016 | 6.445751277 |
| ENSMUSG00000023806 | 9.904325918 | 12.52111039 | 18.35992724 | 25.77464551 | 16.47247549 |

|                    |             |             |             |             |             |
|--------------------|-------------|-------------|-------------|-------------|-------------|
| ENSMUSG00000023809 | 8.489422215 | 8.347406925 | 8.473812573 | 4.832746033 | 6.445751277 |
| ENSMUSG00000023827 | 12.73413332 | 24.34660353 | 25.42143772 | 36.24559524 | 30.08017263 |
| ENSMUSG00000023828 | 10.61177777 | 5.56493795  | 7.061510478 | 5.638203705 | 6.445751277 |
| ENSMUSG00000023829 | 6.367066661 | 9.043024169 | 7.061510478 | 7.249119049 | 6.445751277 |
| ENSMUSG00000023845 | 126.6338814 | 168.339373  | 133.462548  | 278.6883545 | 217.7231542 |
| ENSMUSG00000023885 | 8.489422215 | 4.869320706 | 7.767661525 | 9.665492065 | 6.445751277 |
| ENSMUSG00000023886 | 11.31922962 | 6.260555194 | 3.530755239 | 1.610915344 | 6.445751277 |
| ENSMUSG00000023892 | 26.1757185  | 56.34499675 | 51.54902649 | 44.30017197 | 46.55264811 |
| ENSMUSG00000023903 | 5.65961481  | 8.347406925 | 7.061510478 | 8.860034393 | 5.729556691 |
| ENSMUSG00000023906 | 6.367066661 | 9.738641413 | 7.767661525 | 7.249119049 | 10.7429188  |
| ENSMUSG00000023908 | 15.56394073 | 11.82549314 | 16.94762515 | 32.21830688 | 23.63442135 |
| ENSMUSG00000023909 | 7.074518513 | 4.869320706 | 5.649208382 | 5.638203705 | 7.161945863 |
| ENSMUSG00000023912 | 24.05336294 | 33.3896277  | 33.89525029 | 10.47094974 | 12.89150255 |
| ENSMUSG00000023915 | 11.31922962 | 16.69481385 | 11.29841676 | 8.054576721 | 7.161945863 |
| ENSMUSG00000023919 | 19.10119998 | 20.17290007 | 38.13215658 | 41.07834128 | 43.68786977 |
| ENSMUSG00000023921 | 15.56394073 | 35.47647943 | 28.95219296 | 45.10562964 | 37.24211849 |
| ENSMUSG00000023926 | 11.31922962 | 7.651789682 | 9.179963621 | 10.47094974 | 2.148583759 |
| ENSMUSG00000023931 | 11.31922962 | 13.21672763 | 6.35535943  | 7.249119049 | 7.161945863 |
| ENSMUSG00000023932 | 95.50599992 | 101.5601176 | 102.3919019 | 156.2587884 | 147.5360848 |
| ENSMUSG00000023935 | 11.31922962 | 8.347406925 | 4.236906287 | 10.47094974 | 12.89150255 |
| ENSMUSG00000023938 | 9.196874066 | 11.82549314 | 12.71071886 | 9.665492065 | 12.89150255 |
| ENSMUSG00000023939 | 36.08004441 | 71.64857611 | 54.37363068 | 77.32393652 | 79.49759908 |
| ENSMUSG00000023943 | 7.074518513 | 9.043024169 | 9.179963621 | 4.832746033 | 10.02672421 |
| ENSMUSG00000023945 | 12.73413332 | 4.869320706 | 14.12302096 | 5.638203705 | 4.297167518 |
| ENSMUSG00000023947 | 75.69734809 | 82.77845201 | 94.6242404  | 286.7429313 | 204.1154571 |
| ENSMUSG00000023949 | 9.904325918 | 6.260555194 | 7.767661525 | 4.832746033 | 8.594335036 |
| ENSMUSG00000023953 | 82.7718666  | 116.863697  | 110.8657145 | 215.0571984 | 189.0753708 |
| ENSMUSG00000023959 | 7.781970364 | 6.260555194 | 6.35535943  | 6.443661377 | 7.161945863 |
| ENSMUSG00000023963 | 21.93100739 | 39.6501829  | 33.89525029 | 14.4982381  | 18.62105924 |
| ENSMUSG00000023966 | 16.27139258 | 31.30277597 | 25.42143772 | 19.33098413 | 16.47247549 |
| ENSMUSG00000023967 | 55.1812444  | 106.4294383 | 69.90895373 | 74.9075635  | 62.30892901 |
| ENSMUSG00000023971 | 45.27691848 | 89.0390072  | 62.84744325 | 117.5968201 | 113.8749392 |
| ENSMUSG00000023972 | 5.65961481  | 10.43425866 | 10.59226572 | 3.221830688 | 7.87814045  |
| ENSMUSG00000023978 | 7.074518513 | 6.260555194 | 7.061510478 | 6.443661377 | 7.87814045  |
| ENSMUSG00000023980 | 70.74518513 | 108.51629   | 94.6242404  | 82.15668255 | 70.90326405 |
| ENSMUSG00000023982 | 10.61177777 | 9.738641413 | 9.179963621 | 13.69278043 | 12.17530797 |
| ENSMUSG00000023988 | 113.8997481 | 165.556904  | 146.8794179 | 288.3538466 | 242.0737702 |
| ENSMUSG00000023993 | 10.61177777 | 6.956172438 | 9.886114669 | 6.443661377 | 4.297167518 |
| ENSMUSG00000024014 | 56.5961481  | 65.38802092 | 83.32582364 | 314.9339498 | 229.1822676 |
| ENSMUSG00000024027 | 7.074518513 | 5.56493795  | 9.179963621 | 4.02728836  | 7.161945863 |
| ENSMUSG00000024028 | 9.904325918 | 8.347406925 | 10.59226572 | 5.638203705 | 7.161945863 |
| ENSMUSG00000024029 | 6.367066661 | 7.651789682 | 4.236906287 | 8.054576721 | 7.161945863 |
| ENSMUSG00000024030 | 8.489422215 | 12.52111039 | 10.59226572 | 2.416373016 | 7.87814045  |

|                    |             |             |             |             |             |
|--------------------|-------------|-------------|-------------|-------------|-------------|
| ENSMUSG00000024032 | 7.074518513 | 1.391234488 | 8.473812573 | 8.054576721 | 3.580972932 |
| ENSMUSG00000024033 | 7.074518513 | 9.043024169 | 7.767661525 | 5.638203705 | 5.729556691 |
| ENSMUSG00000024041 | 7.781970364 | 4.869320706 | 7.061510478 | 8.054576721 | 9.310529622 |
| ENSMUSG00000024042 | 80.64951104 | 84.86530374 | 103.098053  | 316.5448651 | 233.4794351 |
| ENSMUSG00000024045 | 147.1499851 | 153.7314109 | 165.2393452 | 272.2446932 | 198.3859004 |
| ENSMUSG00000024056 | 40.32475552 | 70.95295887 | 51.54902649 | 81.35122488 | 68.0384857  |
| ENSMUSG00000024059 | 11.31922962 | 6.956172438 | 7.061510478 | 4.02728836  | 6.445751277 |
| ENSMUSG00000024065 | 12.73413332 | 15.99919661 | 16.2414741  | 13.69278043 | 14.32389173 |
| ENSMUSG00000024066 | 6.367066661 | 5.56493795  | 9.179963621 | 10.47094974 | 9.310529622 |
| ENSMUSG00000024068 | 43.86201478 | 75.12666233 | 48.01827125 | 75.71302118 | 59.44415067 |
| ENSMUSG00000024072 | 48.10672589 | 68.17048989 | 69.90895373 | 61.21478308 | 61.59273443 |
| ENSMUSG00000024074 | 8.489422215 | 14.60796212 | 12.00456781 | 9.665492065 | 12.89150255 |
| ENSMUSG00000024076 | 14.14903703 | 11.1298759  | 6.35535943  | 7.249119049 | 8.594335036 |
| ENSMUSG00000024078 | 15.56394073 | 27.12907251 | 21.89068248 | 35.44013757 | 37.95831308 |
| ENSMUSG00000024079 | 26.1757185  | 40.34580014 | 39.54445867 | 128.8732275 | 70.18706946 |
| ENSMUSG00000024081 | 50.93653329 | 72.34419335 | 57.90438592 | 142.566008  | 114.5911338 |
| ENSMUSG00000024082 | 47.39927403 | 74.43104508 | 70.61510478 | 124.0404815 | 85.22715578 |
| ENSMUSG00000024084 | 9.904325918 | 5.56493795  | 9.886114669 | 4.832746033 | 7.87814045  |
| ENSMUSG00000024087 | 4.952162959 | 5.56493795  | 9.179963621 | 5.638203705 | 8.594335036 |
| ENSMUSG00000024088 | 8.489422215 | 8.347406925 | 8.473812573 | 8.860034393 | 7.87814045  |
| ENSMUSG00000024091 | 69.33028142 | 109.9075245 | 80.50121945 | 159.4806191 | 151.8332523 |
| ENSMUSG00000024098 | 32.54278516 | 41.04141738 | 36.71985448 | 79.74030954 | 74.48423698 |
| ENSMUSG00000024105 | 7.074518513 | 13.91234488 | 7.767661525 | 6.443661377 | 6.445751277 |
| ENSMUSG00000024107 | 8.489422215 | 8.347406925 | 5.649208382 | 10.47094974 | 7.87814045  |
| ENSMUSG00000024116 | 7.781970364 | 6.956172438 | 3.530755239 | 5.638203705 | 5.729556691 |
| ENSMUSG00000024124 | 6.367066661 | 6.260555194 | 5.649208382 | 1.610915344 | 7.161945863 |
| ENSMUSG00000024125 | 5.65961481  | 1.391234488 | 7.061510478 | 4.832746033 | 10.02672421 |
| ENSMUSG00000024131 | 7.074518513 | 12.52111039 | 10.59226572 | 9.665492065 | 7.161945863 |
| ENSMUSG00000024132 | 33.25023701 | 52.86691053 | 36.71985448 | 57.99295239 | 46.55264811 |
| ENSMUSG00000024135 | 24.76081479 | 42.43265187 | 42.36906287 | 45.10562964 | 50.84981563 |
| ENSMUSG00000024137 | 38.90985182 | 57.73623123 | 50.84287544 | 87.79488626 | 73.05184781 |
| ENSMUSG00000024140 | 2.829807405 | 9.043024169 | 6.35535943  | 1.610915344 | 5.729556691 |
| ENSMUSG00000024145 | 61.54831106 | 99.47326586 | 86.15042783 | 77.32393652 | 66.60609653 |
| ENSMUSG00000024146 | 59.42595551 | 103.6469693 | 81.20737049 | 86.18397091 | 85.22715578 |
| ENSMUSG00000024155 | 4.244711108 | 9.738641413 | 9.886114669 | 4.02728836  | 7.87814045  |
| ENSMUSG00000024165 | 36.08004441 | 52.86691053 | 51.54902649 | 97.46037832 | 77.34901533 |
| ENSMUSG00000024168 | 9.196874066 | 13.21672763 | 12.71071886 | 6.443661377 | 12.17530797 |
| ENSMUSG00000024171 | 5.65961481  | 2.782468975 | 6.35535943  | 7.249119049 | 3.580972932 |
| ENSMUSG00000024174 | 14.14903703 | 22.95536904 | 16.94762515 | 17.72006879 | 15.04008631 |
| ENSMUSG00000024175 | 9.904325918 | 6.956172438 | 10.59226572 | 2.416373016 | 8.594335036 |
| ENSMUSG00000024177 | 7.781970364 | 9.043024169 | 4.943057334 | 5.638203705 | 6.445751277 |
| ENSMUSG00000024181 | 43.86201478 | 59.12746572 | 69.90895373 | 72.49119049 | 64.45751277 |
| ENSMUSG00000024190 | 15.56394073 | 15.30357936 | 14.12302096 | 16.10915344 | 18.62105924 |

|                    |             |             |             |             |             |
|--------------------|-------------|-------------|-------------|-------------|-------------|
| ENSMUSG00000024193 | 11.31922962 | 15.99919661 | 19.77222934 | 5.638203705 | 12.89150255 |
| ENSMUSG00000024197 | 9.904325918 | 12.52111039 | 12.71071886 | 11.27640741 | 19.33725383 |
| ENSMUSG00000024207 | 9.904325918 | 6.956172438 | 8.473812573 | 5.638203705 | 7.161945863 |
| ENSMUSG00000024209 | 7.074518513 | 3.478086219 | 8.473812573 | 2.416373016 | 12.89150255 |
| ENSMUSG00000024210 | 7.074518513 | 3.478086219 | 7.767661525 | 9.665492065 | 6.445751277 |
| ENSMUSG00000024212 | 58.71850365 | 64.69240367 | 69.90895373 | 107.1258704 | 75.20043157 |
| ENSMUSG00000024217 | 30.4204296  | 61.21431745 | 43.78136496 | 86.98942859 | 68.75468029 |
| ENSMUSG00000024223 | 8.489422215 | 6.260555194 | 8.473812573 | 1.610915344 | 6.445751277 |
| ENSMUSG00000024224 | 11.31922962 | 5.56493795  | 11.29841676 | 3.221830688 | 9.310529622 |
| ENSMUSG00000024225 | 2.829807405 | 2.782468975 | 3.530755239 | 4.832746033 | 1.432389173 |
| ENSMUSG00000024232 | 4.244711108 | 6.956172438 | 7.061510478 | 8.054576721 | 14.32389173 |
| ENSMUSG00000024234 | 90.55383696 | 116.863697  | 108.7472614 | 201.364418  | 158.2790036 |
| ENSMUSG00000024241 | 41.03220737 | 68.86610713 | 58.61053696 | 85.37851324 | 98.11865833 |
| ENSMUSG00000024245 | 10.61177777 | 11.1298759  | 8.473812573 | 1.610915344 | 2.864778345 |
| ENSMUSG00000024246 | 17.68629628 | 29.21592424 | 24.00913562 | 20.94189947 | 20.05344842 |
| ENSMUSG00000024251 | 26.1757185  | 47.99758982 | 40.95676077 | 71.68573282 | 54.43078856 |
| ENSMUSG00000024253 | 6.367066661 | 3.478086219 | 3.530755239 | 2.416373016 | 7.87814045  |
| ENSMUSG00000024256 | 6.367066661 | 6.956172438 | 8.473812573 | 4.02728836  | 6.445751277 |
| ENSMUSG00000024258 | 72.16008883 | 99.47326586 | 85.44427678 | 174.7843148 | 133.2121931 |
| ENSMUSG00000024259 | 38.20239997 | 47.30197258 | 48.01827125 | 58.79841006 | 54.43078856 |
| ENSMUSG00000024261 | 11.31922962 | 9.043024169 | 7.061510478 | 1.610915344 | 10.7429188  |
| ENSMUSG00000024266 | 9.196874066 | 3.478086219 | 4.943057334 | 3.221830688 | 7.87814045  |
| ENSMUSG00000024271 | 31.12788146 | 47.99758982 | 45.19366706 | 111.9586164 | 85.94335036 |
| ENSMUSG00000024273 | 12.02668147 | 21.56413456 | 18.35992724 | 31.41284921 | 22.91822676 |
| ENSMUSG00000024276 | 24.05336294 | 36.86771392 | 38.83830763 | 91.82217462 | 97.40246374 |
| ENSMUSG00000024286 | 50.22908144 | 75.82227957 | 76.26431316 | 95.04400531 | 75.91662615 |
| ENSMUSG00000024287 | 17.68629628 | 25.73783802 | 24.71528667 | 45.10562964 | 50.84981563 |
| ENSMUSG00000024290 | 80.64951104 | 127.2979556 | 93.91808935 | 183.6443492 | 123.1854689 |
| ENSMUSG00000024301 | 33.25023701 | 35.47647943 | 33.18909925 | 88.60034393 | 65.88990194 |
| ENSMUSG00000024312 | 60.84085921 | 79.99598303 | 80.50121945 | 128.8732275 | 103.1320204 |
| ENSMUSG00000024313 | 4.952162959 | 6.260555194 | 8.473812573 | 6.443661377 | 9.310529622 |
| ENSMUSG00000024325 | 0.707451851 | 3.478086219 | 4.236906287 | 2.416373016 | 2.148583759 |
| ENSMUSG00000024334 | 123.804074  | 149.5577074 | 128.5194907 | 92.62763229 | 99.5510475  |
| ENSMUSG00000024346 | 41.03220737 | 58.43184848 | 51.54902649 | 68.46390213 | 48.70123187 |
| ENSMUSG00000024349 | 25.46826665 | 31.99839321 | 38.13215658 | 108.7367857 | 77.34901533 |
| ENSMUSG00000024350 | 29.0055259  | 54.95376226 | 35.30755239 | 26.58010318 | 32.22875639 |
| ENSMUSG00000024353 | 39.61730367 | 66.08363816 | 53.66747963 | 212.6408254 | 151.8332523 |
| ENSMUSG00000024357 | 7.781970364 | 20.86851731 | 14.12302096 | 28.9964762  | 25.78300511 |
| ENSMUSG00000024359 | 75.69734809 | 102.9513521 | 108.7472614 | 268.2174048 | 199.8182896 |
| ENSMUSG00000024360 | 129.4636888 | 182.2517179 | 170.1824025 | 424.4761932 | 290.0588075 |
| ENSMUSG00000024365 | 6.367066661 | 7.651789682 | 7.061510478 | 12.88732275 | 7.161945863 |
| ENSMUSG00000024366 | 9.196874066 | 4.869320706 | 9.179963621 | 9.665492065 | 7.161945863 |
| ENSMUSG00000024376 | 3.537259256 | 3.478086219 | 11.29841676 | 3.221830688 | 2.864778345 |

|                    |             |             |             |             |             |
|--------------------|-------------|-------------|-------------|-------------|-------------|
| ENSMUSG00000024378 | 19.80865184 | 37.56333116 | 41.66291182 | 86.98942859 | 82.36237743 |
| ENSMUSG00000024379 | 11.31922962 | 4.173703463 | 2.824604191 | 3.221830688 | 10.02672421 |
| ENSMUSG00000024383 | 74.98989623 | 108.51629   | 86.15042783 | 99.87675134 | 89.52432329 |
| ENSMUSG00000024384 | 74.98989623 | 118.2549314 | 90.38733411 | 147.398754  | 129.6312201 |
| ENSMUSG00000024386 | 7.781970364 | 6.260555194 | 5.649208382 | 8.054576721 | 5.729556691 |
| ENSMUSG00000024391 | 16.27139258 | 20.86851731 | 26.83373982 | 23.35827249 | 26.49919969 |
| ENSMUSG00000024395 | 10.61177777 | 4.173703463 | 6.35535943  | 5.638203705 | 6.445751277 |
| ENSMUSG00000024399 | 0.707451851 | 2.086851731 | 4.943057334 | 1.610915344 | 2.148583759 |
| ENSMUSG00000024402 | 8.489422215 | 18.08604834 | 11.29841676 | 3.221830688 | 5.013362104 |
| ENSMUSG00000024404 | 161.2990221 | 189.9035076 | 176.5377619 | 213.4462831 | 176.1838682 |
| ENSMUSG00000024409 | 4.244711108 | 6.260555194 | 7.767661525 | 9.665492065 | 5.729556691 |
| ENSMUSG00000024411 | 10.61177777 | 8.347406925 | 7.767661525 | 4.832746033 | 8.594335036 |
| ENSMUSG00000024420 | 6.367066661 | 6.260555194 | 4.236906287 | 3.221830688 | 2.148583759 |
| ENSMUSG00000024423 | 6.367066661 | 6.956172438 | 7.767661525 | 13.69278043 | 15.04008631 |
| ENSMUSG00000024425 | 65.79302217 | 96.69079689 | 97.44884459 | 146.5932963 | 111.0101609 |
| ENSMUSG00000024427 | 4.244711108 | 5.56493795  | 9.179963621 | 15.30369577 | 10.02672421 |
| ENSMUSG00000024429 | 20.51610369 | 41.73703463 | 37.42600553 | 123.2350238 | 72.33565322 |
| ENSMUSG00000024442 | 21.22355554 | 31.99839321 | 21.89068248 | 47.52200265 | 39.39070225 |
| ENSMUSG00000024451 | 7.074518513 | 7.651789682 | 6.35535943  | 8.860034393 | 7.161945863 |
| ENSMUSG00000024472 | 137.2456591 | 162.0788178 | 128.5194907 | 198.948045  | 138.9417498 |
| ENSMUSG00000024474 | 58.71850365 | 82.77845201 | 75.55816211 | 142.566008  | 104.5644096 |
| ENSMUSG00000024477 | 116.7295555 | 162.0788178 | 131.3440949 | 168.3406535 | 147.5360848 |
| ENSMUSG00000024479 | 12.02668147 | 5.56493795  | 4.236906287 | 8.860034393 | 5.729556691 |
| ENSMUSG00000024480 | 69.33028142 | 115.4724625 | 98.15499564 | 91.82217462 | 83.7947666  |
| ENSMUSG00000024481 | 9.196874066 | 6.956172438 | 4.236906287 | 6.443661377 | 7.87814045  |
| ENSMUSG00000024486 | 5.65961481  | 6.956172438 | 7.767661525 | 7.249119049 | 8.594335036 |
| ENSMUSG00000024487 | 44.56946663 | 64.69240367 | 45.19366706 | 67.65844446 | 66.60609653 |
| ENSMUSG00000024493 | 55.1812444  | 54.95376226 | 47.3121202  | 120.0131931 | 113.8749392 |
| ENSMUSG00000024497 | 8.489422215 | 6.260555194 | 10.59226572 | 9.665492065 | 7.161945863 |
| ENSMUSG00000024502 | 11.31922962 | 6.260555194 | 6.35535943  | 11.27640741 | 5.013362104 |
| ENSMUSG00000024503 | 9.196874066 | 10.43425866 | 7.767661525 | 3.221830688 | 7.161945863 |
| ENSMUSG00000024507 | 20.51610369 | 33.3896277  | 26.83373982 | 18.52552646 | 15.04008631 |
| ENSMUSG00000024510 | 10.61177777 | 10.43425866 | 9.179963621 | 3.221830688 | 2.864778345 |
| ENSMUSG00000024512 | 12.02668147 | 6.260555194 | 9.179963621 | 7.249119049 | 6.445751277 |
| ENSMUSG00000024518 | 7.074518513 | 4.173703463 | 7.767661525 | 4.02728836  | 1.432389173 |
| ENSMUSG00000024519 | 7.781970364 | 3.478086219 | 7.767661525 | 3.221830688 | 7.161945863 |
| ENSMUSG00000024521 | 26.88317035 | 40.34580014 | 40.95676077 | 112.7640741 | 83.07857202 |
| ENSMUSG00000024525 | 6.367066661 | 14.60796212 | 16.2414741  | 23.35827249 | 21.48583759 |
| ENSMUSG00000024526 | 3.537259256 | 6.956172438 | 5.649208382 | 7.249119049 | 6.445751277 |
| ENSMUSG00000024527 | 37.49494812 | 52.17129328 | 43.78136496 | 82.96214023 | 80.21379367 |
| ENSMUSG00000024528 | 57.30359995 | 105.0382038 | 63.5535943  | 158.6751614 | 118.1721067 |
| ENSMUSG00000024530 | 2.122355554 | 4.173703463 | 7.767661525 | 5.638203705 | 5.729556691 |
| ENSMUSG00000024537 | 28.29807405 | 46.60635533 | 38.13215658 | 86.98942859 | 75.91662615 |



|                    |             |             |             |             |             |
|--------------------|-------------|-------------|-------------|-------------|-------------|
| ENSMUSG00000024538 | 12.02668147 | 4.173703463 | 2.118453143 | 6.443661377 | 5.729556691 |
| ENSMUSG00000024542 | 24.76081479 | 50.08444155 | 48.7244223  | 83.7675979  | 80.92998826 |
| ENSMUSG00000024544 | 5.65961481  | 14.60796212 | 9.886114669 | 8.054576721 | 6.445751277 |
| ENSMUSG00000024553 | 9.196874066 | 5.56493795  | 6.35535943  | 5.638203705 | 6.445751277 |
| ENSMUSG00000024556 | 94.09109622 | 110.6031418 | 105.2165061 | 88.60034393 | 97.40246374 |
| ENSMUSG00000024560 | 25.46826665 | 37.56333116 | 30.36449505 | 51.54929101 | 46.55264811 |
| ENSMUSG00000024561 | 48.10672589 | 65.38802092 | 56.49208382 | 128.0677699 | 85.94335036 |
| ENSMUSG00000024565 | 2.122355554 | 3.478086219 | 0.706151048 | 0           | 1.432389173 |
| ENSMUSG00000024566 | 46.69182218 | 72.34419335 | 67.08434954 | 66.85298678 | 93.82149081 |
| ENSMUSG00000024570 | 40.32475552 | 57.73623123 | 62.1412922  | 52.35474869 | 50.13362104 |
| ENSMUSG00000024578 | 4.244711108 | 6.260555194 | 6.35535943  | 11.27640741 | 7.87814045  |
| ENSMUSG00000024579 | 11.31922962 | 11.1298759  | 12.00456781 | 19.33098413 | 23.63442135 |
| ENSMUSG00000024580 | 77.11225179 | 127.2979556 | 93.21193831 | 246.4700477 | 204.8316517 |
| ENSMUSG00000024583 | 72.86754068 | 123.1242521 | 88.97503202 | 188.4770953 | 139.6579443 |
| ENSMUSG00000024587 | 33.25023701 | 75.82227957 | 60.72899011 | 134.5114312 | 98.83485292 |
| ENSMUSG00000024588 | 14.14903703 | 27.82468975 | 33.18909925 | 20.1364418  | 20.769643   |
| ENSMUSG00000024590 | 37.49494812 | 42.43265187 | 40.25060972 | 143.3714656 | 115.3073284 |
| ENSMUSG00000024594 | 45.27691848 | 85.56092098 | 79.08891735 | 45.10562964 | 53.71459398 |
| ENSMUSG00000024598 | 8.489422215 | 8.347406925 | 7.061510478 | 7.249119049 | 5.729556691 |
| ENSMUSG00000024600 | 11.31922962 | 9.738641413 | 8.473812573 | 4.02728836  | 5.729556691 |
| ENSMUSG00000024601 | 13.44158517 | 24.34660353 | 21.18453143 | 18.52552646 | 19.33725383 |
| ENSMUSG00000024603 | 90.55383696 | 102.9513521 | 106.6288082 | 161.0915344 | 116.7397176 |
| ENSMUSG00000024604 | 60.84085921 | 79.99598303 | 75.55816211 | 123.2350238 | 105.2806042 |
| ENSMUSG00000024614 | 52.35143699 | 92.51709342 | 63.5535943  | 78.12939419 | 64.45751277 |
| ENSMUSG00000024619 | 7.074518513 | 10.43425866 | 7.767661525 | 5.638203705 | 5.729556691 |
| ENSMUSG00000024622 | 35.37259256 | 56.34499675 | 46.60596915 | 127.2623122 | 83.7947666  |
| ENSMUSG00000024639 | 22.63845924 | 38.25894841 | 47.3121202  | 62.02024075 | 57.29556691 |
| ENSMUSG00000024640 | 18.39374813 | 20.17290007 | 26.12758877 | 101.4876667 | 63.74131818 |
| ENSMUSG00000024645 | 12.73413332 | 21.56413456 | 16.94762515 | 28.9964762  | 28.64778345 |
| ENSMUSG00000024650 | 11.31922962 | 6.260555194 | 7.767661525 | 3.221830688 | 10.02672421 |
| ENSMUSG00000024653 | 2.829807405 | 3.478086219 | 10.59226572 | 8.054576721 | 8.594335036 |
| ENSMUSG00000024654 | 14.85648888 | 15.99919661 | 14.12302096 | 28.19101852 | 29.36397804 |
| ENSMUSG00000024660 | 140.7829184 | 146.0796212 | 117.2210739 | 289.964762  | 229.1822676 |
| ENSMUSG00000024661 | 67.20792587 | 106.4294383 | 86.85657888 | 164.3133651 | 139.6579443 |
| ENSMUSG00000024664 | 7.781970364 | 6.956172438 | 7.061510478 | 5.638203705 | 7.161945863 |
| ENSMUSG00000024665 | 7.074518513 | 7.651789682 | 5.649208382 | 11.27640741 | 10.7429188  |
| ENSMUSG00000024666 | 118.851911  | 162.0788178 | 134.8748501 | 217.4735715 | 158.2790036 |
| ENSMUSG00000024668 | 88.43148141 | 110.6031418 | 100.9795998 | 198.1425873 | 161.8599765 |
| ENSMUSG00000024669 | 10.61177777 | 8.347406925 | 5.649208382 | 8.860034393 | 7.87814045  |
| ENSMUSG00000024673 | 112.4848444 | 127.9935729 | 122.1641313 | 281.9101852 | 223.4527109 |
| ENSMUSG00000024678 | 13.44158517 | 10.43425866 | 7.767661525 | 8.860034393 | 12.17530797 |
| ENSMUSG00000024682 | 8.489422215 | 8.347406925 | 5.649208382 | 7.249119049 | 10.7429188  |
| ENSMUSG00000024683 | 19.80865184 | 25.73783802 | 23.30298458 | 70.07481747 | 49.41742646 |

|                    |             |             |             |             |             |
|--------------------|-------------|-------------|-------------|-------------|-------------|
| ENSMUSG00000024694 | 11.31922962 | 7.651789682 | 5.649208382 | 6.443661377 | 10.02672421 |
| ENSMUSG00000024696 | 64.37811846 | 126.6023384 | 81.20737049 | 269.0228625 | 181.1972303 |
| ENSMUSG00000024697 | 9.196874066 | 4.173703463 | 4.236906287 | 3.221830688 | 11.45911338 |
| ENSMUSG00000024712 | 41.03220737 | 51.47567604 | 61.43514116 | 24.16373016 | 34.37734014 |
| ENSMUSG00000024726 | 24.05336294 | 38.25894841 | 40.25060972 | 75.71302118 | 67.32229112 |
| ENSMUSG00000024727 | 8.489422215 | 6.260555194 | 9.179963621 | 9.665492065 | 11.45911338 |
| ENSMUSG00000024729 | 9.196874066 | 4.173703463 | 8.473812573 | 6.443661377 | 4.297167518 |
| ENSMUSG00000024730 | 10.61177777 | 7.651789682 | 6.35535943  | 7.249119049 | 5.729556691 |
| ENSMUSG00000024732 | 44.56946663 | 76.51789682 | 67.08434954 | 241.6373016 | 173.3190899 |
| ENSMUSG00000024734 | 8.489422215 | 8.347406925 | 7.767661525 | 8.054576721 | 5.729556691 |
| ENSMUSG00000024737 | 14.85648888 | 15.99919661 | 18.35992724 | 150.6205847 | 103.848215  |
| ENSMUSG00000024738 | 5.65961481  | 6.956172438 | 7.061510478 | 11.27640741 | 4.297167518 |
| ENSMUSG00000024740 | 62.96321476 | 98.08203137 | 75.55816211 | 197.3371297 | 123.1854689 |
| ENSMUSG00000024747 | 9.196874066 | 4.869320706 | 14.12302096 | 6.443661377 | 7.161945863 |
| ENSMUSG00000024749 | 12.02668147 | 3.478086219 | 10.59226572 | 5.638203705 | 7.161945863 |
| ENSMUSG00000024757 | 14.14903703 | 5.56493795  | 8.473812573 | 8.054576721 | 5.729556691 |
| ENSMUSG00000024764 | 32.54278516 | 41.73703463 | 38.83830763 | 95.04400531 | 71.61945863 |
| ENSMUSG00000024768 | 8.489422215 | 9.738641413 | 4.236906287 | 5.638203705 | 6.445751277 |
| ENSMUSG00000024769 | 5.65961481  | 11.82549314 | 13.41686991 | 12.88732275 | 12.89150255 |
| ENSMUSG00000024771 | 9.196874066 | 9.738641413 | 7.061510478 | 3.221830688 | 3.580972932 |
| ENSMUSG00000024772 | 28.29807405 | 36.17209668 | 45.8998181  | 81.35122488 | 74.48423698 |
| ENSMUSG00000024777 | 11.31922962 | 15.30357936 | 10.59226572 | 5.638203705 | 15.7562809  |
| ENSMUSG00000024780 | 44.56946663 | 86.25653823 | 68.49665163 | 77.32393652 | 80.21379367 |
| ENSMUSG00000024782 | 19.10119998 | 27.12907251 | 30.36449505 | 36.24559524 | 27.93158887 |
| ENSMUSG00000024785 | 61.54831106 | 75.82227957 | 76.26431316 | 148.2042117 | 118.8883013 |
| ENSMUSG00000024786 | 6.367066661 | 6.260555194 | 7.061510478 | 5.638203705 | 4.297167518 |
| ENSMUSG00000024792 | 33.25023701 | 42.43265187 | 29.65834401 | 96.65492065 | 70.90326405 |
| ENSMUSG00000024800 | 33.95768886 | 44.5195036  | 44.48751601 | 86.98942859 | 55.86317773 |
| ENSMUSG00000024803 | 7.781970364 | 4.173703463 | 9.179963621 | 7.249119049 | 4.297167518 |
| ENSMUSG00000024806 | 4.952162959 | 9.738641413 | 7.061510478 | 8.860034393 | 5.013362104 |
| ENSMUSG00000024812 | 4.952162959 | 6.260555194 | 7.767661525 | 6.443661377 | 4.297167518 |
| ENSMUSG00000024815 | 7.781970364 | 2.782468975 | 9.886114669 | 9.665492065 | 2.864778345 |
| ENSMUSG00000024824 | 125.2189777 | 155.1226454 | 153.2347774 | 132.0950582 | 122.4692743 |
| ENSMUSG00000024827 | 8.489422215 | 4.173703463 | 1.412302096 | 2.416373016 | 7.87814045  |
| ENSMUSG00000024841 | 53.05888884 | 93.21271067 | 86.85657888 | 256.9409974 | 181.9134249 |
| ENSMUSG00000024842 | 18.39374813 | 21.56413456 | 26.83373982 | 20.1364418  | 17.90486466 |
| ENSMUSG00000024846 | 8.489422215 | 6.956172438 | 6.35535943  | 8.860034393 | 5.729556691 |
| ENSMUSG00000024853 | 42.44711108 | 68.17048989 | 64.96589639 | 125.6513968 | 106.7129934 |
| ENSMUSG00000024854 | 26.1757185  | 57.73623123 | 49.43057334 | 78.93485187 | 60.16034525 |
| ENSMUSG00000024855 | 41.03220737 | 62.60555194 | 56.49208382 | 49.93837567 | 58.01176149 |
| ENSMUSG00000024863 | 9.196874066 | 4.173703463 | 8.473812573 | 4.02728836  | 9.310529622 |
| ENSMUSG00000024866 | 7.781970364 | 10.43425866 | 12.71071886 | 7.249119049 | 4.297167518 |
| ENSMUSG00000024868 | 14.14903703 | 5.56493795  | 6.35535943  | 9.665492065 | 4.297167518 |

|                    |             |             |             |             |             |
|--------------------|-------------|-------------|-------------|-------------|-------------|
| ENSMUSG00000024869 | 4.952162959 | 6.956172438 | 4.943057334 | 7.249119049 | 5.729556691 |
| ENSMUSG00000024870 | 26.88317035 | 52.17129328 | 43.07521391 | 41.07834128 | 41.53928601 |
| ENSMUSG00000024873 | 10.61177777 | 6.956172438 | 10.59226572 | 5.638203705 | 7.87814045  |
| ENSMUSG00000024875 | 13.44158517 | 17.39043109 | 21.89068248 | 20.1364418  | 22.20203218 |
| ENSMUSG00000024878 | 24.05336294 | 45.91073809 | 32.4829482  | 49.132918   | 42.97167518 |
| ENSMUSG00000024883 | 8.489422215 | 8.347406925 | 8.473812573 | 14.4982381  | 7.161945863 |
| ENSMUSG00000024885 | 24.76081479 | 38.95456565 | 32.4829482  | 52.35474869 | 35.09353473 |
| ENSMUSG00000024887 | 7.074518513 | 9.738641413 | 4.943057334 | 4.832746033 | 7.161945863 |
| ENSMUSG00000024891 | 7.781970364 | 9.043024169 | 14.829172   | 18.52552646 | 14.32389173 |
| ENSMUSG00000024896 | 31.12788146 | 49.38882431 | 46.60596915 | 124.0404815 | 86.65954495 |
| ENSMUSG00000024897 | 3.537259256 | 13.21672763 | 2.824604191 | 3.221830688 | 6.445751277 |
| ENSMUSG00000024899 | 10.61177777 | 8.347406925 | 9.886114669 | 9.665492065 | 10.7429188  |
| ENSMUSG00000024900 | 18.39374813 | 25.04222078 | 21.89068248 | 15.30369577 | 21.48583759 |
| ENSMUSG00000024902 | 7.074518513 | 15.99919661 | 12.71071886 | 10.47094974 | 20.769643   |
| ENSMUSG00000024906 | 11.31922962 | 15.99919661 | 11.29841676 | 30.60739154 | 26.49919969 |
| ENSMUSG00000024907 | 7.074518513 | 11.1298759  | 3.530755239 | 5.638203705 | 4.297167518 |
| ENSMUSG00000024910 | 7.781970364 | 6.956172438 | 7.061510478 | 12.08186508 | 12.17530797 |
| ENSMUSG00000024911 | 18.39374813 | 28.52030699 | 29.65834401 | 29.80193387 | 22.20203218 |
| ENSMUSG00000024912 | 4.952162959 | 8.347406925 | 6.35535943  | 14.4982381  | 12.17530797 |
| ENSMUSG00000024922 | 6.367066661 | 4.869320706 | 12.71071886 | 6.443661377 | 10.02672421 |
| ENSMUSG00000024926 | 18.39374813 | 34.78086219 | 29.65834401 | 38.66196826 | 40.82309142 |
| ENSMUSG00000024927 | 67.20792587 | 103.6469693 | 95.33039145 | 119.2077355 | 117.4559122 |
| ENSMUSG00000024936 | 13.44158517 | 10.43425866 | 12.71071886 | 10.47094974 | 10.7429188  |
| ENSMUSG00000024939 | 32.54278516 | 36.17209668 | 35.30755239 | 19.33098413 | 20.05344842 |
| ENSMUSG00000024941 | 30.4204296  | 43.82388636 | 35.30755239 | 52.35474869 | 37.95831308 |
| ENSMUSG00000024943 | 36.78749627 | 51.47567604 | 48.7244223  | 69.2693598  | 44.40406435 |
| ENSMUSG00000024944 | 8.489422215 | 12.52111039 | 16.94762515 | 10.47094974 | 7.87814045  |
| ENSMUSG00000024957 | 8.489422215 | 9.738641413 | 10.59226572 | 7.249119049 | 7.87814045  |
| ENSMUSG00000024960 | 7.074518513 | 20.17290007 | 11.29841676 | 7.249119049 | 7.87814045  |
| ENSMUSG00000024965 | 48.81417774 | 45.21512085 | 48.01827125 | 165.9242805 | 126.0502472 |
| ENSMUSG00000024966 | 87.72402956 | 119.6461659 | 107.3349593 | 227.1390635 | 178.332452  |
| ENSMUSG00000024970 | 11.31922962 | 20.86851731 | 21.18453143 | 24.96918783 | 25.78300511 |
| ENSMUSG00000024981 | 38.90985182 | 53.56252777 | 64.96589639 | 76.51847885 | 57.29556691 |
| ENSMUSG00000024987 | 5.65961481  | 6.956172438 | 6.35535943  | 3.221830688 | 9.310529622 |
| ENSMUSG00000024991 | 175.4480591 | 173.9043109 | 161.7085899 | 319.7666958 | 267.1405807 |
| ENSMUSG00000024997 | 19.80865184 | 31.30277597 | 28.95219296 | 60.40932541 | 51.56601022 |
| ENSMUSG00000024999 | 45.27691848 | 64.69240367 | 48.01827125 | 88.60034393 | 74.48423698 |
| ENSMUSG00000025002 | 7.074518513 | 9.738641413 | 4.236906287 | 7.249119049 | 6.445751277 |
| ENSMUSG00000025003 | 7.781970364 | 9.738641413 | 12.71071886 | 5.638203705 | 7.87814045  |
| ENSMUSG00000025017 | 99.75071103 | 131.4716591 | 108.7472614 | 78.93485187 | 64.45751277 |
| ENSMUSG00000025024 | 55.1812444  | 113.3856107 | 77.67661525 | 189.2825529 | 155.4142252 |
| ENSMUSG00000025034 | 48.10672589 | 52.86691053 | 52.96132858 | 138.5387196 | 122.4692743 |
| ENSMUSG00000025035 | 19.80865184 | 47.99758982 | 41.66291182 | 27.38556085 | 32.94495097 |

|                    |             |             |             |             |             |
|--------------------|-------------|-------------|-------------|-------------|-------------|
| ENSMUSG00000025036 | 25.46826665 | 42.43265187 | 37.42600553 | 20.1364418  | 34.37734014 |
| ENSMUSG00000025037 | 6.367066661 | 4.869320706 | 1.412302096 | 2.416373016 | 1.432389173 |
| ENSMUSG00000025038 | 1.414903703 | 2.086851731 | 4.236906287 | 4.02728836  | 2.148583759 |
| ENSMUSG00000025043 | 6.367066661 | 5.56493795  | 5.649208382 | 2.416373016 | 0.716194586 |
| ENSMUSG00000025047 | 111.0699406 | 169.7306075 | 161.7085899 | 274.6610662 | 213.4259867 |
| ENSMUSG00000025049 | 27.5906222  | 50.08444155 | 45.8998181  | 93.43308996 | 85.22715578 |
| ENSMUSG00000025050 | 14.14903703 | 18.78166558 | 16.94762515 | 50.74383334 | 52.99839939 |
| ENSMUSG00000025051 | 4.244711108 | 2.086851731 | 1.412302096 | 2.416373016 | 2.864778345 |
| ENSMUSG00000025056 | 4.952162959 | 3.478086219 | 2.824604191 | 1.610915344 | 3.580972932 |
| ENSMUSG00000025058 | 67.91537772 | 86.25653823 | 75.55816211 | 107.9313281 | 78.06520991 |
| ENSMUSG00000025066 | 21.93100739 | 33.3896277  | 31.77679715 | 33.82922223 | 43.68786977 |
| ENSMUSG00000025068 | 4.952162959 | 7.651789682 | 7.061510478 | 11.27640741 | 8.594335036 |
| ENSMUSG00000025076 | 13.44158517 | 18.08604834 | 21.18453143 | 10.47094974 | 18.62105924 |
| ENSMUSG00000025078 | 54.47379255 | 84.1696865  | 72.02740687 | 66.85298678 | 77.34901533 |
| ENSMUSG00000025082 | 7.781970364 | 4.173703463 | 2.824604191 | 4.832746033 | 5.013362104 |
| ENSMUSG00000025090 | 4.244711108 | 8.347406925 | 7.061510478 | 5.638203705 | 7.87814045  |
| ENSMUSG00000025091 | 10.61177777 | 4.173703463 | 10.59226572 | 7.249119049 | 6.445751277 |
| ENSMUSG00000025092 | 5.65961481  | 16.69481385 | 10.59226572 | 7.249119049 | 10.7429188  |
| ENSMUSG00000025094 | 12.73413332 | 2.782468975 | 8.473812573 | 5.638203705 | 5.729556691 |
| ENSMUSG00000025103 | 88.43148141 | 100.8645003 | 97.44884459 | 144.982381  | 128.198831  |
| ENSMUSG00000025105 | 8.489422215 | 6.260555194 | 9.886114669 | 8.860034393 | 7.161945863 |
| ENSMUSG00000025128 | 10.61177777 | 10.43425866 | 7.061510478 | 2.416373016 | 7.87814045  |
| ENSMUSG00000025129 | 2.829807405 | 3.478086219 | 1.412302096 | 1.610915344 | 3.580972932 |
| ENSMUSG00000025133 | 19.80865184 | 32.69401046 | 30.36449505 | 108.7367857 | 97.40246374 |
| ENSMUSG00000025134 | 52.35143699 | 95.2995624  | 87.56272992 | 192.5043836 | 175.4676737 |
| ENSMUSG00000025141 | 10.61177777 | 11.1298759  | 4.236906287 | 8.054576721 | 9.310529622 |
| ENSMUSG00000025147 | 95.50599992 | 125.2111039 | 111.5718655 | 80.54576721 | 71.61945863 |
| ENSMUSG00000025153 | 19.10119998 | 41.73703463 | 30.36449505 | 240.831844  | 175.4676737 |
| ENSMUSG00000025157 | 65.08557032 | 95.99517964 | 97.44884459 | 161.8969921 | 141.8065281 |
| ENSMUSG00000025158 | 26.1757185  | 27.82468975 | 38.13215658 | 73.29664816 | 65.17370736 |
| ENSMUSG00000025159 | 58.0110518  | 104.3425866 | 93.91808935 | 75.71302118 | 83.07857202 |
| ENSMUSG00000025163 | 7.074518513 | 4.173703463 | 6.35535943  | 4.832746033 | 7.161945863 |
| ENSMUSG00000025169 | 13.44158517 | 15.99919661 | 20.47838039 | 16.91461111 | 13.60769714 |
| ENSMUSG00000025171 | 31.83533331 | 48.69320706 | 50.84287544 | 70.07481747 | 55.14698315 |
| ENSMUSG00000025172 | 8.489422215 | 7.651789682 | 8.473812573 | 5.638203705 | 5.013362104 |
| ENSMUSG00000025178 | 30.4204296  | 41.04141738 | 31.77679715 | 50.74383334 | 44.40406435 |
| ENSMUSG00000025189 | 7.781970364 | 6.260555194 | 4.236906287 | 6.443661377 | 6.445751277 |
| ENSMUSG00000025194 | 8.489422215 | 9.738641413 | 4.236906287 | 4.832746033 | 7.161945863 |
| ENSMUSG00000025195 | 15.56394073 | 19.47728283 | 16.94762515 | 11.27640741 | 12.89150255 |
| ENSMUSG00000025196 | 6.367066661 | 5.56493795  | 4.943057334 | 6.443661377 | 7.161945863 |
| ENSMUSG00000025197 | 7.781970364 | 9.738641413 | 4.943057334 | 5.638203705 | 4.297167518 |
| ENSMUSG00000025200 | 43.86201478 | 73.73542784 | 57.19823487 | 93.43308996 | 73.76804239 |
| ENSMUSG00000025202 | 9.196874066 | 2.782468975 | 6.35535943  | 8.860034393 | 9.310529622 |

|                    |             |             |             |             |             |
|--------------------|-------------|-------------|-------------|-------------|-------------|
| ENSMUSG00000025203 | 45.98437033 | 53.56252777 | 43.07521391 | 125.6513968 | 82.36237743 |
| ENSMUSG00000025208 | 26.1757185  | 47.30197258 | 45.19366706 | 92.62763229 | 72.33565322 |
| ENSMUSG00000025209 | 25.46826665 | 40.34580014 | 34.60140134 | 87.79488626 | 91.67290705 |
| ENSMUSG00000025216 | 2.829807405 | 8.347406925 | 6.35535943  | 9.665492065 | 7.87814045  |
| ENSMUSG00000025218 | 11.31922962 | 20.17290007 | 25.42143772 | 17.72006879 | 22.91822676 |
| ENSMUSG00000025220 | 117.4370073 | 158.6007316 | 146.8794179 | 191.698926  | 166.8733386 |
| ENSMUSG00000025228 | 147.1499851 | 172.5130765 | 146.8794179 | 154.647873  | 151.8332523 |
| ENSMUSG00000025232 | 33.25023701 | 59.82308296 | 52.25517753 | 49.93837567 | 49.41742646 |
| ENSMUSG00000025235 | 10.61177777 | 15.99919661 | 12.71071886 | 8.860034393 | 18.62105924 |
| ENSMUSG00000025239 | 83.47931845 | 105.0382038 | 111.5718655 | 223.1117752 | 156.1304198 |
| ENSMUSG00000025240 | 60.84085921 | 116.863697  | 102.3919019 | 82.15668255 | 95.97007457 |
| ENSMUSG00000025257 | 48.81417774 | 57.73623123 | 55.78593277 | 95.84946298 | 68.0384857  |
| ENSMUSG00000025262 | 17.68629628 | 35.47647943 | 19.77222934 | 56.38203705 | 66.60609653 |
| ENSMUSG00000025278 | 14.85648888 | 16.69481385 | 15.53532305 | 31.41284921 | 29.36397804 |
| ENSMUSG00000025279 | 16.27139258 | 20.17290007 | 30.36449505 | 55.57657937 | 34.37734014 |
| ENSMUSG00000025280 | 42.44711108 | 66.7792554  | 61.43514116 | 122.4295662 | 90.95671247 |
| ENSMUSG00000025288 | 2.829807405 | 4.869320706 | 6.35535943  | 4.02728836  | 3.580972932 |
| ENSMUSG00000025317 | 12.02668147 | 7.651789682 | 9.886114669 | 6.443661377 | 5.729556691 |
| ENSMUSG00000025324 | 9.196874066 | 3.478086219 | 4.236906287 | 16.10915344 | 12.17530797 |
| ENSMUSG00000025328 | 8.489422215 | 6.956172438 | 3.530755239 | 10.47094974 | 5.729556691 |
| ENSMUSG00000025329 | 4.952162959 | 9.738641413 | 3.530755239 | 1.610915344 | 6.445751277 |
| ENSMUSG00000025330 | 7.074518513 | 9.738641413 | 10.59226572 | 2.416373016 | 5.729556691 |
| ENSMUSG00000025347 | 4.244711108 | 7.651789682 | 4.943057334 | 2.416373016 | 7.87814045  |
| ENSMUSG00000025348 | 11.31922962 | 3.478086219 | 7.767661525 | 6.443661377 | 7.161945863 |
| ENSMUSG00000025352 | 31.12788146 | 52.86691053 | 52.96132858 | 18.52552646 | 20.769643   |
| ENSMUSG00000025353 | 68.62282957 | 106.4294383 | 96.74269354 | 217.4735715 | 149.6846685 |
| ENSMUSG00000025354 | 64.37811846 | 91.12585893 | 84.03197468 | 86.18397091 | 90.24051788 |
| ENSMUSG00000025355 | 9.196874066 | 6.956172438 | 9.179963621 | 7.249119049 | 11.45911338 |
| ENSMUSG00000025357 | 111.7773925 | 155.8182626 | 136.2871522 | 85.37851324 | 93.10529622 |
| ENSMUSG00000025362 | 41.03220737 | 62.60555194 | 54.37363068 | 240.0263863 | 143.2389173 |
| ENSMUSG00000025366 | 24.05336294 | 22.95536904 | 27.53989086 | 59.60386773 | 47.2688427  |
| ENSMUSG00000025380 | 8.489422215 | 6.260555194 | 4.943057334 | 7.249119049 | 9.310529622 |
| ENSMUSG00000025381 | 25.46826665 | 30.60715873 | 22.59683353 | 34.6346799  | 46.55264811 |
| ENSMUSG00000025383 | 2.829807405 | 3.478086219 | 2.118453143 | 3.221830688 | 4.297167518 |
| ENSMUSG00000025386 | 12.02668147 | 7.651789682 | 7.767661525 | 11.27640741 | 10.02672421 |
| ENSMUSG00000025389 | 9.196874066 | 6.260555194 | 11.29841676 | 8.860034393 | 9.310529622 |
| ENSMUSG00000025396 | 6.367066661 | 4.173703463 | 11.29841676 | 7.249119049 | 6.445751277 |
| ENSMUSG00000025401 | 10.61177777 | 6.260555194 | 5.649208382 | 8.860034393 | 8.594335036 |
| ENSMUSG00000025403 | 26.88317035 | 30.60715873 | 28.24604191 | 128.8732275 | 113.8749392 |
| ENSMUSG00000025405 | 6.367066661 | 6.260555194 | 7.767661525 | 8.860034393 | 5.729556691 |
| ENSMUSG00000025407 | 4.952162959 | 11.1298759  | 9.886114669 | 8.054576721 | 11.45911338 |
| ENSMUSG00000025417 | 48.81417774 | 67.47487265 | 60.02283906 | 63.6311561  | 58.01176149 |
| ENSMUSG00000025418 | 5.65961481  | 8.347406925 | 8.473812573 | 7.249119049 | 6.445751277 |

|                    |             |             |             |             |             |
|--------------------|-------------|-------------|-------------|-------------|-------------|
| ENSMUSG00000025422 | 127.3413332 | 176.6867799 | 166.6516473 | 117.5968201 | 113.8749392 |
| ENSMUSG00000025429 | 9.196874066 | 7.651789682 | 11.29841676 | 4.832746033 | 7.161945863 |
| ENSMUSG00000025431 | 5.65961481  | 7.651789682 | 6.35535943  | 3.221830688 | 10.7429188  |
| ENSMUSG00000025433 | 11.31922962 | 17.39043109 | 14.12302096 | 9.665492065 | 5.729556691 |
| ENSMUSG00000025439 | 60.13340736 | 94.60394515 | 92.50578726 | 140.9550926 | 120.3206905 |
| ENSMUSG00000025467 | 9.196874066 | 5.56493795  | 5.649208382 | 7.249119049 | 10.02672421 |
| ENSMUSG00000025474 | 26.1757185  | 43.12826911 | 35.30755239 | 75.71302118 | 62.30892901 |
| ENSMUSG00000025479 | 5.65961481  | 4.173703463 | 3.530755239 | 9.665492065 | 9.310529622 |
| ENSMUSG00000025480 | 6.367066661 | 8.347406925 | 8.473812573 | 4.832746033 | 9.310529622 |
| ENSMUSG00000025484 | 43.15456293 | 61.21431745 | 64.96589639 | 115.9859048 | 104.5644096 |
| ENSMUSG00000025488 | 11.31922962 | 10.43425866 | 4.943057334 | 4.832746033 | 8.594335036 |
| ENSMUSG00000025489 | 8.489422215 | 2.782468975 | 9.179963621 | 4.02728836  | 6.445751277 |
| ENSMUSG00000025492 | 9.904325918 | 5.56493795  | 3.530755239 | 7.249119049 | 4.297167518 |
| ENSMUSG00000025494 | 7.781970364 | 2.782468975 | 8.473812573 | 4.832746033 | 7.161945863 |
| ENSMUSG00000025496 | 5.65961481  | 6.260555194 | 7.061510478 | 2.416373016 | 5.013362104 |
| ENSMUSG00000025503 | 61.54831106 | 80.69160028 | 85.44427678 | 85.37851324 | 78.06520991 |
| ENSMUSG00000025519 | 10.61177777 | 9.738641413 | 6.35535943  | 8.860034393 | 6.445751277 |
| ENSMUSG00000025527 | 5.65961481  | 5.56493795  | 4.236906287 | 1.610915344 | 5.013362104 |
| ENSMUSG00000025545 | 9.904325918 | 13.91234488 | 12.71071886 | 15.30369577 | 10.02672421 |
| ENSMUSG00000025557 | 12.02668147 | 8.347406925 | 9.886114669 | 7.249119049 | 5.013362104 |
| ENSMUSG00000025573 | 8.489422215 | 18.78166558 | 12.71071886 | 38.66196826 | 32.94495097 |
| ENSMUSG00000025577 | 8.489422215 | 10.43425866 | 10.59226572 | 6.443661377 | 12.89150255 |
| ENSMUSG00000025578 | 10.61177777 | 23.65098629 | 26.83373982 | 12.08186508 | 15.04008631 |
| ENSMUSG00000025582 | 4.244711108 | 4.869320706 | 6.35535943  | 6.443661377 | 7.87814045  |
| ENSMUSG00000025588 | 9.196874066 | 5.56493795  | 6.35535943  | 7.249119049 | 10.7429188  |
| ENSMUSG00000025591 | 19.10119998 | 37.56333116 | 37.42600553 | 149.0096693 | 115.3073284 |
| ENSMUSG00000025608 | 6.367066661 | 4.869320706 | 8.473812573 | 8.054576721 | 11.45911338 |
| ENSMUSG00000025610 | 9.196874066 | 6.956172438 | 5.649208382 | 4.02728836  | 7.87814045  |
| ENSMUSG00000025612 | 37.49494812 | 70.25734162 | 69.20280268 | 62.82569842 | 64.45751277 |
| ENSMUSG00000025630 | 33.95768886 | 49.38882431 | 32.4829482  | 99.87675134 | 70.18706946 |
| ENSMUSG00000025645 | 92.67619252 | 118.2549314 | 112.2780166 | 182.8388916 | 133.9283876 |
| ENSMUSG00000025646 | 34.66514071 | 59.82308296 | 52.96132858 | 128.0677699 | 105.9967988 |
| ENSMUSG00000025652 | 7.074518513 | 9.738641413 | 2.824604191 | 4.02728836  | 7.161945863 |
| ENSMUSG00000025727 | 9.196874066 | 6.260555194 | 9.179963621 | 12.08186508 | 9.310529622 |
| ENSMUSG00000025732 | 11.31922962 | 13.21672763 | 7.061510478 | 24.16373016 | 11.45911338 |
| ENSMUSG00000025737 | 28.29807405 | 36.86771392 | 36.01370344 | 37.85651059 | 39.39070225 |
| ENSMUSG00000025738 | 7.781970364 | 6.956172438 | 6.35535943  | 7.249119049 | 8.594335036 |
| ENSMUSG00000025742 | 38.20239997 | 63.30116918 | 57.90438592 | 45.10562964 | 48.70123187 |
| ENSMUSG00000025777 | 5.65961481  | 2.782468975 | 7.767661525 | 1.610915344 | 6.445751277 |
| ENSMUSG00000025780 | 9.196874066 | 6.260555194 | 11.29841676 | 4.832746033 | 5.729556691 |
| ENSMUSG00000025784 | 11.31922962 | 6.260555194 | 7.061510478 | 6.443661377 | 7.161945863 |
| ENSMUSG00000025785 | 51.64398514 | 72.34419335 | 86.85657888 | 153.8424154 | 143.2389173 |
| ENSMUSG00000025787 | 9.904325918 | 11.82549314 | 5.649208382 | 5.638203705 | 7.87814045  |

|                    |             |             |             |             |             |
|--------------------|-------------|-------------|-------------|-------------|-------------|
| ENSMUSG00000025789 | 12.73413332 | 6.956172438 | 7.061510478 | 2.416373016 | 5.729556691 |
| ENSMUSG00000025792 | 9.196874066 | 22.2597518  | 12.00456781 | 20.1364418  | 27.21539428 |
| ENSMUSG00000025794 | 22.63845924 | 54.25814501 | 43.07521391 | 240.0263863 | 150.4008631 |
| ENSMUSG00000025795 | 98.33580733 | 126.6023384 | 121.4579802 | 145.7878386 | 110.2939663 |
| ENSMUSG00000025804 | 15.56394073 | 15.99919661 | 14.12302096 | 7.249119049 | 12.17530797 |
| ENSMUSG00000025810 | 0           | 0           | 0           | 0           | 0           |
| ENSMUSG00000025821 | 17.68629628 | 29.21592424 | 26.12758877 | 47.52200265 | 42.25548059 |
| ENSMUSG00000025823 | 47.39927403 | 79.30036579 | 64.96589639 | 290.7702196 | 196.2373167 |
| ENSMUSG00000025867 | 12.02668147 | 13.91234488 | 16.94762515 | 10.47094974 | 7.161945863 |
| ENSMUSG00000025868 | 48.10672589 | 92.51709342 | 70.61510478 | 124.8459392 | 96.68626916 |
| ENSMUSG00000025872 | 41.03220737 | 58.43184848 | 71.32125582 | 125.6513968 | 105.2806042 |
| ENSMUSG00000025888 | 41.73965922 | 75.12666233 | 52.25517753 | 57.18749472 | 50.84981563 |
| ENSMUSG00000025893 | 32.54278516 | 63.30116918 | 48.7244223  | 93.43308996 | 75.20043157 |
| ENSMUSG00000025898 | 62.96321476 | 98.08203137 | 76.26431316 | 76.51847885 | 55.86317773 |
| ENSMUSG00000025917 | 62.25576291 | 99.47326586 | 79.08891735 | 165.9242805 | 136.0769714 |
| ENSMUSG00000025921 | 21.22355554 | 27.82468975 | 30.36449505 | 77.32393652 | 63.0251236  |
| ENSMUSG00000025929 | 13.44158517 | 9.738641413 | 9.179963621 | 5.638203705 | 8.594335036 |
| ENSMUSG00000025930 | 11.31922962 | 9.738641413 | 5.649208382 | 8.054576721 | 5.729556691 |
| ENSMUSG00000025937 | 20.51610369 | 20.17290007 | 19.77222934 | 49.93837567 | 33.66114556 |
| ENSMUSG00000025940 | 38.20239997 | 74.43104508 | 51.54902649 | 116.7913625 | 98.83485292 |
| ENSMUSG00000025961 | 6.367066661 | 6.956172438 | 4.943057334 | 4.832746033 | 6.445751277 |
| ENSMUSG00000025963 | 16.97884443 | 34.78086219 | 24.00913562 | 37.85651059 | 35.80972932 |
| ENSMUSG00000025971 | 60.84085921 | 94.60394515 | 89.68118307 | 129.6786852 | 103.1320204 |
| ENSMUSG00000025986 | 11.31922962 | 15.99919661 | 24.00913562 | 32.21830688 | 30.08017263 |
| ENSMUSG00000025991 | 10.61177777 | 6.956172438 | 6.35535943  | 7.249119049 | 7.87814045  |
| ENSMUSG00000026003 | 47.39927403 | 56.34499675 | 49.43057334 | 53.16020636 | 52.2822048  |
| ENSMUSG00000026012 | 8.489422215 | 4.173703463 | 2.118453143 | 8.054576721 | 7.87814045  |
| ENSMUSG00000026020 | 117.4370073 | 149.5577074 | 121.4579802 | 355.2068334 | 247.0871323 |
| ENSMUSG00000026032 | 66.50047402 | 126.6023384 | 84.73812573 | 97.46037832 | 90.95671247 |
| ENSMUSG00000026039 | 41.03220737 | 48.69320706 | 40.95676077 | 61.21478308 | 60.87653984 |
| ENSMUSG00000026051 | 14.85648888 | 7.651789682 | 9.886114669 | 8.054576721 | 7.87814045  |
| ENSMUSG00000026063 | 12.73413332 | 6.956172438 | 7.767661525 | 3.221830688 | 4.297167518 |
| ENSMUSG00000026065 | 9.196874066 | 5.56493795  | 3.530755239 | 5.638203705 | 5.013362104 |
| ENSMUSG00000026097 | 0           | 0           | 0           | 0           | 0           |
| ENSMUSG00000026100 | 10.61177777 | 4.173703463 | 5.649208382 | 4.832746033 | 5.729556691 |
| ENSMUSG00000026102 | 5.65961481  | 16.69481385 | 17.65377619 | 13.69278043 | 10.02672421 |
| ENSMUSG00000026112 | 51.64398514 | 100.1688831 | 100.2734488 | 114.3749894 | 84.51096119 |
| ENSMUSG00000026124 | 8.489422215 | 6.956172438 | 9.886114669 | 4.02728836  | 2.864778345 |
| ENSMUSG00000026125 | 5.65961481  | 9.738641413 | 13.41686991 | 5.638203705 | 12.17530797 |
| ENSMUSG00000026149 | 11.31922962 | 4.869320706 | 10.59226572 | 7.249119049 | 8.594335036 |
| ENSMUSG00000026154 | 16.27139258 | 18.08604834 | 19.06607829 | 12.08186508 | 11.45911338 |
| ENSMUSG00000026156 | 5.65961481  | 6.260555194 | 8.473812573 | 10.47094974 | 4.297167518 |
| ENSMUSG00000026170 | 12.73413332 | 16.69481385 | 17.65377619 | 5.638203705 | 7.161945863 |

|                    |             |             |             |             |             |
|--------------------|-------------|-------------|-------------|-------------|-------------|
| ENSMUSG00000026174 | 100.4581629 | 146.7752384 | 123.5764334 | 258.5519127 | 207.69643   |
| ENSMUSG00000026180 | 4.952162959 | 2.782468975 | 4.236906287 | 8.860034393 | 5.729556691 |
| ENSMUSG00000026182 | 12.02668147 | 4.869320706 | 10.59226572 | 4.832746033 | 8.594335036 |
| ENSMUSG00000026185 | 6.367066661 | 6.260555194 | 8.473812573 | 4.832746033 | 7.87814045  |
| ENSMUSG00000026187 | 12.73413332 | 18.08604834 | 21.18453143 | 12.88732275 | 20.05344842 |
| ENSMUSG00000026196 | 16.27139258 | 22.2597518  | 13.41686991 | 59.60386773 | 34.37734014 |
| ENSMUSG00000026205 | 3.537259256 | 6.260555194 | 3.530755239 | 4.02728836  | 5.729556691 |
| ENSMUSG00000026208 | 7.074518513 | 5.56493795  | 3.530755239 | 4.02728836  | 9.310529622 |
| ENSMUSG00000026220 | 5.65961481  | 5.56493795  | 7.767661525 | 7.249119049 | 5.013362104 |
| ENSMUSG00000026228 | 13.44158517 | 29.91154148 | 15.53532305 | 16.91461111 | 24.35061594 |
| ENSMUSG00000026237 | 10.61177777 | 7.651789682 | 9.179963621 | 4.832746033 | 8.594335036 |
| ENSMUSG00000026241 | 7.074518513 | 0.695617244 | 3.530755239 | 6.443661377 | 7.161945863 |
| ENSMUSG00000026248 | 28.29807405 | 59.12746572 | 39.54445867 | 81.35122488 | 60.16034525 |
| ENSMUSG00000026258 | 7.781970364 | 7.651789682 | 7.767661525 | 4.02728836  | 13.60769714 |
| ENSMUSG00000026272 | 3.537259256 | 6.260555194 | 6.35535943  | 8.054576721 | 5.013362104 |
| ENSMUSG00000026276 | 64.37811846 | 111.298759  | 87.56272992 | 250.497336  | 189.0753708 |
| ENSMUSG00000026285 | 7.781970364 | 9.043024169 | 8.473812573 | 17.72006879 | 14.32389173 |
| ENSMUSG00000026303 | 11.31922962 | 9.043024169 | 4.236906287 | 4.02728836  | 4.297167518 |
| ENSMUSG00000026308 | 7.074518513 | 7.651789682 | 4.236906287 | 5.638203705 | 6.445751277 |
| ENSMUSG00000026317 | 5.65961481  | 5.56493795  | 4.943057334 | 8.054576721 | 5.013362104 |
| ENSMUSG00000026321 | 4.244711108 | 6.260555194 | 8.473812573 | 4.832746033 | 5.013362104 |
| ENSMUSG00000026322 | 6.367066661 | 4.173703463 | 6.35535943  | 6.443661377 | 5.013362104 |
| ENSMUSG00000026327 | 9.196874066 | 11.1298759  | 8.473812573 | 9.665492065 | 5.729556691 |
| ENSMUSG00000026343 | 4.244711108 | 5.56493795  | 4.943057334 | 4.02728836  | 7.87814045  |
| ENSMUSG00000026344 | 8.489422215 | 4.173703463 | 4.236906287 | 4.02728836  | 7.87814045  |
| ENSMUSG00000026348 | 14.85648888 | 4.173703463 | 5.649208382 | 4.832746033 | 6.445751277 |
| ENSMUSG00000026353 | 40.32475552 | 53.56252777 | 50.13672439 | 76.51847885 | 73.76804239 |
| ENSMUSG00000026354 | 10.61177777 | 6.260555194 | 9.179963621 | 10.47094974 | 12.17530797 |
| ENSMUSG00000026357 | 15.56394073 | 31.30277597 | 22.59683353 | 9.665492065 | 12.17530797 |
| ENSMUSG00000026360 | 23.34591109 | 20.86851731 | 22.59683353 | 15.30369577 | 10.7429188  |
| ENSMUSG00000026361 | 58.71850365 | 100.1688831 | 68.49665163 | 129.6786852 | 93.10529622 |
| ENSMUSG00000026368 | 6.367066661 | 5.56493795  | 9.886114669 | 4.832746033 | 5.013362104 |
| ENSMUSG00000026390 | 9.904325918 | 3.478086219 | 10.59226572 | 6.443661377 | 2.864778345 |
| ENSMUSG00000026394 | 11.31922962 | 22.2597518  | 14.829172   | 13.69278043 | 10.02672421 |
| ENSMUSG00000026424 | 11.31922962 | 8.347406925 | 6.35535943  | 7.249119049 | 10.7429188  |
| ENSMUSG00000026429 | 23.34591109 | 31.99839321 | 24.00913562 | 37.05105292 | 34.37734014 |
| ENSMUSG00000026432 | 9.196874066 | 8.347406925 | 7.061510478 | 4.02728836  | 3.580972932 |
| ENSMUSG00000026443 | 9.196874066 | 4.869320706 | 6.35535943  | 4.02728836  | 9.310529622 |
| ENSMUSG00000026459 | 9.196874066 | 6.956172438 | 4.236906287 | 2.416373016 | 9.310529622 |
| ENSMUSG00000026475 | 12.02668147 | 3.478086219 | 11.29841676 | 6.443661377 | 8.594335036 |
| ENSMUSG00000026495 | 4.244711108 | 13.21672763 | 5.649208382 | 13.69278043 | 11.45911338 |
| ENSMUSG00000026497 | 8.489422215 | 6.956172438 | 6.35535943  | 8.860034393 | 6.445751277 |
| ENSMUSG00000026499 | 88.43148141 | 128.6891901 | 110.8657145 | 147.398754  | 123.9016634 |



|                    |             |             |             |             |             |
|--------------------|-------------|-------------|-------------|-------------|-------------|
| ENSMUSG00000026500 | 53.05888884 | 72.34419335 | 62.1412922  | 66.04752911 | 61.59273443 |
| ENSMUSG00000026511 | 86.30912585 | 108.51629   | 102.3919019 | 145.7878386 | 119.6044959 |
| ENSMUSG00000026516 | 50.22908144 | 77.9091313  | 74.14586002 | 202.9753334 | 139.6579443 |
| ENSMUSG00000026520 | 45.27691848 | 70.25734162 | 58.61053696 | 83.7675979  | 85.22715578 |
| ENSMUSG00000026525 | 24.76081479 | 50.08444155 | 39.54445867 | 38.66196826 | 32.22875639 |
| ENSMUSG00000026531 | 4.244711108 | 8.347406925 | 7.061510478 | 6.443661377 | 7.87814045  |
| ENSMUSG00000026532 | 7.781970364 | 9.738641413 | 9.179963621 | 4.832746033 | 7.87814045  |
| ENSMUSG00000026535 | 5.65961481  | 5.56493795  | 7.061510478 | 5.638203705 | 7.87814045  |
| ENSMUSG00000026536 | 12.02668147 | 10.43425866 | 8.473812573 | 33.82922223 | 23.63442135 |
| ENSMUSG00000026542 | 7.074518513 | 6.956172438 | 8.473812573 | 5.638203705 | 6.445751277 |
| ENSMUSG00000026544 | 2.829807405 | 6.260555194 | 3.530755239 | 6.443661377 | 12.89150255 |
| ENSMUSG00000026548 | 17.68629628 | 17.39043109 | 20.47838039 | 11.27640741 | 17.18867007 |
| ENSMUSG00000026564 | 10.61177777 | 3.478086219 | 10.59226572 | 4.02728836  | 7.161945863 |
| ENSMUSG00000026568 | 24.76081479 | 50.08444155 | 40.95676077 | 33.82922223 | 45.12025894 |
| ENSMUSG00000026573 | 5.65961481  | 9.738641413 | 9.886114669 | 5.638203705 | 7.161945863 |
| ENSMUSG00000026578 | 7.781970364 | 18.78166558 | 6.35535943  | 7.249119049 | 10.7429188  |
| ENSMUSG00000026579 | 7.781970364 | 13.21672763 | 2.824604191 | 8.054576721 | 7.161945863 |
| ENSMUSG00000026582 | 11.31922962 | 9.043024169 | 9.179963621 | 7.249119049 | 7.87814045  |
| ENSMUSG00000026602 | 9.904325918 | 4.173703463 | 7.767661525 | 6.443661377 | 5.729556691 |
| ENSMUSG00000026614 | 9.196874066 | 6.260555194 | 9.179963621 | 8.860034393 | 8.594335036 |
| ENSMUSG00000026627 | 47.39927403 | 61.21431745 | 74.14586002 | 51.54929101 | 48.70123187 |
| ENSMUSG00000026630 | 7.074518513 | 6.956172438 | 5.649208382 | 3.221830688 | 7.161945863 |
| ENSMUSG00000026641 | 19.10119998 | 23.65098629 | 22.59683353 | 12.88732275 | 10.02672421 |
| ENSMUSG00000026644 | 9.904325918 | 9.738641413 | 6.35535943  | 8.054576721 | 4.297167518 |
| ENSMUSG00000026663 | 69.33028142 | 107.1250555 | 83.32582364 | 151.4260424 | 109.5777717 |
| ENSMUSG00000026664 | 14.14903703 | 22.2597518  | 27.53989086 | 10.47094974 | 17.90486466 |
| ENSMUSG00000026674 | 9.904325918 | 4.173703463 | 6.35535943  | 4.832746033 | 5.729556691 |
| ENSMUSG00000026676 | 4.244711108 | 9.738641413 | 10.59226572 | 5.638203705 | 7.87814045  |
| ENSMUSG00000026679 | 7.781970364 | 12.52111039 | 16.94762515 | 9.665492065 | 7.87814045  |
| ENSMUSG00000026688 | 6.367066661 | 9.738641413 | 10.59226572 | 8.054576721 | 8.594335036 |
| ENSMUSG00000026698 | 16.27139258 | 22.2597518  | 16.2414741  | 28.9964762  | 29.36397804 |
| ENSMUSG00000026700 | 6.367066661 | 4.173703463 | 11.29841676 | 4.832746033 | 9.310529622 |
| ENSMUSG00000026712 | 9.904325918 | 9.043024169 | 7.061510478 | 8.054576721 | 7.87814045  |
| ENSMUSG00000026728 | 10.61177777 | 22.95536904 | 24.00913562 | 37.05105292 | 27.93158887 |
| ENSMUSG00000026734 | 8.489422215 | 4.173703463 | 4.236906287 | 6.443661377 | 6.445751277 |
| ENSMUSG00000026735 | 7.074518513 | 3.478086219 | 4.943057334 | 7.249119049 | 3.580972932 |
| ENSMUSG00000026736 | 43.86201478 | 66.08363816 | 78.3827663  | 86.18397091 | 58.72795608 |
| ENSMUSG00000026750 | 34.66514071 | 50.08444155 | 51.54902649 | 99.87675134 | 98.11865833 |
| ENSMUSG00000026753 | 104.702874  | 153.7314109 | 119.3395271 | 127.2623122 | 108.8615771 |
| ENSMUSG00000026770 | 22.63845924 | 22.2597518  | 19.06607829 | 54.7711217  | 39.39070225 |
| ENSMUSG00000026775 | 82.7718666  | 100.1688831 | 93.21193831 | 165.9242805 | 137.5093606 |
| ENSMUSG00000026779 | 57.30359995 | 86.25653823 | 79.7950684  | 140.9550926 | 118.8883013 |
| ENSMUSG00000026787 | 7.074518513 | 6.260555194 | 4.943057334 | 4.02728836  | 3.580972932 |

|                    |             |             |             |             |             |
|--------------------|-------------|-------------|-------------|-------------|-------------|
| ENSMUSG00000026807 | 8.489422215 | 10.43425866 | 5.649208382 | 7.249119049 | 5.013362104 |
| ENSMUSG00000026820 | 9.196874066 | 15.99919661 | 17.65377619 | 28.19101852 | 18.62105924 |
| ENSMUSG00000026829 | 8.489422215 | 4.869320706 | 12.00456781 | 5.638203705 | 6.445751277 |
| ENSMUSG00000026830 | 8.489422215 | 8.347406925 | 5.649208382 | 3.221830688 | 4.297167518 |
| ENSMUSG00000026841 | 7.781970364 | 5.56493795  | 10.59226572 | 7.249119049 | 3.580972932 |
| ENSMUSG00000026851 | 24.05336294 | 30.60715873 | 33.89525029 | 47.52200265 | 52.2822048  |
| ENSMUSG00000026857 | 58.71850365 | 82.77845201 | 74.14586002 | 120.0131931 | 107.429188  |
| ENSMUSG00000026873 | 6.367066661 | 9.738641413 | 7.767661525 | 32.21830688 | 22.91822676 |
| ENSMUSG00000026882 | 11.31922962 | 2.782468975 | 7.767661525 | 4.02728836  | 9.310529622 |
| ENSMUSG00000026887 | 62.96321476 | 103.6469693 | 80.50121945 | 103.9040397 | 93.10529622 |
| ENSMUSG00000026893 | 7.074518513 | 6.260555194 | 10.59226572 | 10.47094974 | 10.02672421 |
| ENSMUSG00000026894 | 57.30359995 | 70.25734162 | 59.31668801 | 74.9075635  | 77.34901533 |
| ENSMUSG00000026895 | 53.05888884 | 90.43024169 | 72.73355792 | 85.37851324 | 78.06520991 |
| ENSMUSG00000026919 | 7.074518513 | 9.043024169 | 9.886114669 | 5.638203705 | 7.161945863 |
| ENSMUSG00000026936 | 5.65961481  | 8.347406925 | 4.943057334 | 4.832746033 | 5.729556691 |
| ENSMUSG00000026940 | 7.781970364 | 2.782468975 | 12.71071886 | 8.054576721 | 6.445751277 |
| ENSMUSG00000026946 | 29.71297775 | 41.04141738 | 33.18909925 | 35.44013757 | 30.08017263 |
| ENSMUSG00000026960 | 65.79302217 | 98.77764862 | 79.7950684  | 177.2006879 | 156.8466144 |
| ENSMUSG00000026961 | 0           | 0           | 0           | 0           | 0           |
| ENSMUSG00000026963 | 2.829807405 | 2.782468975 | 2.118453143 | 4.832746033 | 4.297167518 |
| ENSMUSG00000026966 | 55.88869625 | 75.82227957 | 83.32582364 | 116.7913625 | 88.80812871 |
| ENSMUSG00000026969 | 19.10119998 | 13.21672763 | 15.53532305 | 11.27640741 | 7.87814045  |
| ENSMUSG00000026984 | 9.904325918 | 6.956172438 | 12.71071886 | 1.610915344 | 5.013362104 |
| ENSMUSG00000026985 | 12.02668147 | 7.651789682 | 7.061510478 | 5.638203705 | 5.729556691 |
| ENSMUSG00000026989 | 6.367066661 | 4.869320706 | 3.530755239 | 4.832746033 | 8.594335036 |
| ENSMUSG00000026994 | 4.952162959 | 6.260555194 | 4.236906287 | 2.416373016 | 3.580972932 |
| ENSMUSG00000027004 | 11.31922962 | 2.782468975 | 8.473812573 | 8.054576721 | 5.729556691 |
| ENSMUSG00000027015 | 7.781970364 | 9.043024169 | 6.35535943  | 4.832746033 | 7.161945863 |
| ENSMUSG00000027068 | 8.489422215 | 6.260555194 | 5.649208382 | 8.860034393 | 4.297167518 |
| ENSMUSG00000027073 | 6.367066661 | 6.260555194 | 11.29841676 | 4.832746033 | 10.7429188  |
| ENSMUSG00000027077 | 13.44158517 | 8.347406925 | 7.767661525 | 8.860034393 | 8.594335036 |
| ENSMUSG00000027080 | 66.50047402 | 101.5601176 | 81.91352154 | 132.9005159 | 132.4959985 |
| ENSMUSG00000027099 | 23.34591109 | 46.60635533 | 36.71985448 | 53.96566403 | 41.53928601 |
| ENSMUSG00000027102 | 10.61177777 | 5.56493795  | 5.649208382 | 3.221830688 | 6.445751277 |
| ENSMUSG00000027107 | 8.489422215 | 6.956172438 | 4.236906287 | 10.47094974 | 8.594335036 |
| ENSMUSG00000027120 | 12.02668147 | 7.651789682 | 6.35535943  | 1.610915344 | 5.013362104 |
| ENSMUSG00000027131 | 6.367066661 | 28.52030699 | 30.36449505 | 74.10210583 | 56.57937232 |
| ENSMUSG00000027132 | 74.28244438 | 113.3856107 | 79.7950684  | 94.23854763 | 88.80812871 |
| ENSMUSG00000027133 | 41.73965922 | 67.47487265 | 44.48751601 | 86.98942859 | 65.88990194 |
| ENSMUSG00000027134 | 9.196874066 | 14.60796212 | 11.29841676 | 16.91461111 | 10.02672421 |
| ENSMUSG00000027162 | 64.37811846 | 132.1672763 | 103.804204  | 146.5932963 | 120.3206905 |
| ENSMUSG00000027164 | 89.84638511 | 125.2111039 | 123.5764334 | 119.2077355 | 98.83485292 |
| ENSMUSG00000027173 | 4.244711108 | 6.956172438 | 7.767661525 | 3.221830688 | 5.729556691 |

|                    |             |             |             |             |             |
|--------------------|-------------|-------------|-------------|-------------|-------------|
| ENSMUSG00000027176 | 111.0699406 | 159.2963488 | 122.1641313 | 211.8353678 | 174.0352845 |
| ENSMUSG00000027188 | 12.73413332 | 6.956172438 | 4.943057334 | 10.47094974 | 3.580972932 |
| ENSMUSG00000027220 | 7.781970364 | 4.869320706 | 4.943057334 | 8.054576721 | 5.729556691 |
| ENSMUSG00000027221 | 6.367066661 | 5.56493795  | 2.824604191 | 4.02728836  | 5.013362104 |
| ENSMUSG00000027225 | 5.65961481  | 5.56493795  | 4.236906287 | 5.638203705 | 7.87814045  |
| ENSMUSG00000027227 | 9.904325918 | 11.82549314 | 12.00456781 | 5.638203705 | 5.729556691 |
| ENSMUSG00000027229 | 11.31922962 | 9.738641413 | 7.767661525 | 8.054576721 | 5.729556691 |
| ENSMUSG00000027230 | 6.367066661 | 6.260555194 | 9.886114669 | 4.02728836  | 6.445751277 |
| ENSMUSG00000027233 | 15.56394073 | 10.43425866 | 7.767661525 | 8.860034393 | 10.7429188  |
| ENSMUSG00000027236 | 55.88869625 | 95.99517964 | 76.26431316 | 202.9753334 | 166.8733386 |
| ENSMUSG00000027243 | 67.20792587 | 87.64777272 | 78.3827663  | 48.32746033 | 69.47087488 |
| ENSMUSG00000027261 | 7.781970364 | 5.56493795  | 12.00456781 | 8.054576721 | 7.161945863 |
| ENSMUSG00000027272 | 73.57499253 | 121.7330177 | 99.56729774 | 107.9313281 | 111.0101609 |
| ENSMUSG00000027276 | 5.65961481  | 4.869320706 | 7.061510478 | 2.416373016 | 7.161945863 |
| ENSMUSG00000027296 | 4.244711108 | 12.52111039 | 9.886114669 | 7.249119049 | 5.013362104 |
| ENSMUSG00000027300 | 0           | 0           | 0           | 0           | 0           |
| ENSMUSG00000027301 | 7.781970364 | 6.260555194 | 9.886114669 | 9.665492065 | 6.445751277 |
| ENSMUSG00000027305 | 38.90985182 | 58.43184848 | 44.48751601 | 65.24207144 | 56.57937232 |
| ENSMUSG00000027313 | 10.61177777 | 5.56493795  | 12.00456781 | 29.80193387 | 22.91822676 |
| ENSMUSG00000027314 | 6.367066661 | 7.651789682 | 7.767661525 | 10.47094974 | 5.013362104 |
| ENSMUSG00000027317 | 7.781970364 | 7.651789682 | 4.943057334 | 8.860034393 | 7.87814045  |
| ENSMUSG00000027324 | 9.904325918 | 14.60796212 | 12.71071886 | 51.54929101 | 45.83645353 |
| ENSMUSG00000027329 | 50.22908144 | 68.17048989 | 79.7950684  | 37.05105292 | 47.98503729 |
| ENSMUSG00000027335 | 4.952162959 | 5.56493795  | 4.943057334 | 5.638203705 | 5.729556691 |
| ENSMUSG00000027349 | 48.81417774 | 58.43184848 | 57.90438592 | 77.32393652 | 58.01176149 |
| ENSMUSG00000027350 | 7.074518513 | 7.651789682 | 12.00456781 | 5.638203705 | 7.161945863 |
| ENSMUSG00000027356 | 8.489422215 | 4.869320706 | 7.061510478 | 2.416373016 | 8.594335036 |
| ENSMUSG00000027358 | 5.65961481  | 4.173703463 | 2.118453143 | 3.221830688 | 7.87814045  |
| ENSMUSG00000027360 | 11.31922962 | 11.1298759  | 7.061510478 | 12.08186508 | 6.445751277 |
| ENSMUSG00000027368 | 28.29807405 | 38.95456565 | 51.54902649 | 57.99295239 | 46.55264811 |
| ENSMUSG00000027377 | 11.31922962 | 11.1298759  | 12.00456781 | 7.249119049 | 15.7562809  |
| ENSMUSG00000027384 | 74.28244438 | 117.5593142 | 96.0365425  | 160.2860767 | 136.793166  |
| ENSMUSG00000027386 | 9.196874066 | 6.260555194 | 9.886114669 | 8.054576721 | 9.310529622 |
| ENSMUSG00000027399 | 11.31922962 | 7.651789682 | 6.35535943  | 8.860034393 | 10.02672421 |
| ENSMUSG00000027401 | 10.61177777 | 6.260555194 | 11.29841676 | 4.02728836  | 7.161945863 |
| ENSMUSG00000027408 | 7.781970364 | 8.347406925 | 6.35535943  | 6.443661377 | 7.161945863 |
| ENSMUSG00000027409 | 0           | 0           | 0           | 0           | 0           |
| ENSMUSG00000027416 | 12.02668147 | 4.869320706 | 9.179963621 | 4.832746033 | 7.87814045  |
| ENSMUSG00000027419 | 6.367066661 | 11.1298759  | 9.886114669 | 4.02728836  | 13.60769714 |
| ENSMUSG00000027428 | 13.44158517 | 16.69481385 | 16.2414741  | 12.08186508 | 10.7429188  |
| ENSMUSG00000027431 | 12.73413332 | 5.56493795  | 4.943057334 | 9.665492065 | 10.7429188  |
| ENSMUSG00000027433 | 91.26128881 | 103.6469693 | 93.21193831 | 222.3063175 | 167.5895332 |
| ENSMUSG00000027435 | 33.25023701 | 28.52030699 | 31.77679715 | 39.46742593 | 34.37734014 |

|                    |             |             |             |             |             |
|--------------------|-------------|-------------|-------------|-------------|-------------|
| ENSMUSG00000027439 | 21.22355554 | 31.99839321 | 31.0706461  | 20.94189947 | 20.05344842 |
| ENSMUSG00000027444 | 7.781970364 | 5.56493795  | 7.061510478 | 6.443661377 | 8.594335036 |
| ENSMUSG00000027445 | 7.781970364 | 6.956172438 | 9.179963621 | 8.054576721 | 7.161945863 |
| ENSMUSG00000027446 | 7.781970364 | 7.651789682 | 7.061510478 | 5.638203705 | 9.310529622 |
| ENSMUSG00000027447 | 54.47379255 | 94.60394515 | 76.97046421 | 33.82922223 | 37.24211849 |
| ENSMUSG00000027456 | 7.074518513 | 4.173703463 | 9.886114669 | 7.249119049 | 10.02672421 |
| ENSMUSG00000027460 | 7.074518513 | 5.56493795  | 6.35535943  | 8.860034393 | 7.161945863 |
| ENSMUSG00000027468 | 7.074518513 | 8.347406925 | 6.35535943  | 4.832746033 | 5.729556691 |
| ENSMUSG00000027470 | 6.367066661 | 3.478086219 | 4.236906287 | 7.249119049 | 4.297167518 |
| ENSMUSG00000027475 | 53.05888884 | 71.64857611 | 70.61510478 | 45.91108731 | 53.71459398 |
| ENSMUSG00000027481 | 8.489422215 | 5.56493795  | 6.35535943  | 6.443661377 | 8.594335036 |
| ENSMUSG00000027483 | 8.489422215 | 4.173703463 | 6.35535943  | 6.443661377 | 10.02672421 |
| ENSMUSG00000027484 | 7.074518513 | 3.478086219 | 6.35535943  | 7.249119049 | 6.445751277 |
| ENSMUSG00000027495 | 13.44158517 | 31.30277597 | 24.00913562 | 10.47094974 | 15.04008631 |
| ENSMUSG00000027505 | 9.196874066 | 9.043024169 | 6.35535943  | 8.054576721 | 11.45911338 |
| ENSMUSG00000027518 | 9.904325918 | 9.738641413 | 7.061510478 | 4.832746033 | 6.445751277 |
| ENSMUSG00000027524 | 5.65961481  | 11.1298759  | 9.886114669 | 4.832746033 | 6.445751277 |
| ENSMUSG00000027536 | 8.489422215 | 4.869320706 | 9.179963621 | 7.249119049 | 9.310529622 |
| ENSMUSG00000027555 | 8.489422215 | 9.738641413 | 8.473812573 | 19.33098413 | 20.769643   |
| ENSMUSG00000027559 | 8.489422215 | 9.043024169 | 6.35535943  | 6.443661377 | 9.310529622 |
| ENSMUSG00000027560 | 9.196874066 | 4.173703463 | 5.649208382 | 3.221830688 | 5.729556691 |
| ENSMUSG00000027564 | 11.31922962 | 6.956172438 | 9.179963621 | 2.416373016 | 5.729556691 |
| ENSMUSG00000027568 | 7.781970364 | 6.260555194 | 7.767661525 | 1.610915344 | 5.729556691 |
| ENSMUSG00000027579 | 9.904325918 | 17.39043109 | 12.00456781 | 12.08186508 | 5.729556691 |
| ENSMUSG00000027599 | 57.30359995 | 91.12585893 | 72.02740687 | 107.9313281 | 95.97007457 |
| ENSMUSG00000027602 | 6.367066661 | 3.478086219 | 9.886114669 | 4.02728836  | 7.161945863 |
| ENSMUSG00000027612 | 9.904325918 | 6.260555194 | 4.943057334 | 2.416373016 | 5.729556691 |
| ENSMUSG00000027637 | 49.52162959 | 74.43104508 | 72.73355792 | 135.3168889 | 122.4692743 |
| ENSMUSG00000027643 | 8.489422215 | 6.260555194 | 9.179963621 | 7.249119049 | 10.7429188  |
| ENSMUSG00000027654 | 34.66514071 | 37.56333116 | 37.42600553 | 88.60034393 | 83.07857202 |
| ENSMUSG00000027656 | 9.904325918 | 4.869320706 | 14.12302096 | 7.249119049 | 6.445751277 |
| ENSMUSG00000027661 | 7.074518513 | 4.173703463 | 4.236906287 | 4.02728836  | 6.445751277 |
| ENSMUSG00000027670 | 4.952162959 | 6.956172438 | 6.35535943  | 11.27640741 | 5.013362104 |
| ENSMUSG00000027702 | 13.44158517 | 7.651789682 | 5.649208382 | 9.665492065 | 6.445751277 |
| ENSMUSG00000027706 | 68.62282957 | 108.51629   | 81.20737049 | 98.265836   | 88.09193412 |
| ENSMUSG00000027709 | 14.14903703 | 31.30277597 | 26.83373982 | 17.72006879 | 24.35061594 |
| ENSMUSG00000027713 | 6.367066661 | 8.347406925 | 9.179963621 | 4.832746033 | 8.594335036 |
| ENSMUSG00000027715 | 72.16008883 | 64.69240367 | 68.49665163 | 165.1188228 | 111.7263555 |
| ENSMUSG00000027718 | 7.074518513 | 4.869320706 | 9.179963621 | 7.249119049 | 8.594335036 |
| ENSMUSG00000027720 | 9.904325918 | 6.260555194 | 3.530755239 | 11.27640741 | 5.729556691 |
| ENSMUSG00000027739 | 56.5961481  | 86.95215547 | 70.61510478 | 57.99295239 | 50.84981563 |
| ENSMUSG00000027744 | 8.489422215 | 9.043024169 | 8.473812573 | 2.416373016 | 5.013362104 |
| ENSMUSG00000027761 | 7.074518513 | 10.43425866 | 3.530755239 | 7.249119049 | 6.445751277 |

|                    |             |             |             |             |             |
|--------------------|-------------|-------------|-------------|-------------|-------------|
| ENSMUSG00000027762 | 6.367066661 | 11.1298759  | 5.649208382 | 3.221830688 | 2.148583759 |
| ENSMUSG00000027765 | 4.244711108 | 9.738641413 | 12.00456781 | 4.02728836  | 4.297167518 |
| ENSMUSG00000027770 | 76.40479994 | 122.4286349 | 113.6903187 | 124.8459392 | 112.4425501 |
| ENSMUSG00000027775 | 10.61177777 | 27.12907251 | 27.53989086 | 36.24559524 | 30.08017263 |
| ENSMUSG00000027777 | 8.489422215 | 2.782468975 | 4.943057334 | 5.638203705 | 8.594335036 |
| ENSMUSG00000027788 | 4.952162959 | 6.956172438 | 12.00456781 | 5.638203705 | 7.161945863 |
| ENSMUSG00000027793 | 9.904325918 | 5.56493795  | 7.767661525 | 6.443661377 | 3.580972932 |
| ENSMUSG00000027794 | 6.367066661 | 6.956172438 | 12.00456781 | 9.665492065 | 6.445751277 |
| ENSMUSG00000027796 | 6.367066661 | 5.56493795  | 7.767661525 | 5.638203705 | 7.161945863 |
| ENSMUSG00000027801 | 12.73413332 | 7.651789682 | 9.886114669 | 8.860034393 | 5.013362104 |
| ENSMUSG00000027808 | 192.4269035 | 245.5528871 | 194.8976892 | 417.2270741 | 327.300926  |
| ENSMUSG00000027811 | 21.93100739 | 23.65098629 | 27.53989086 | 28.19101852 | 37.95831308 |
| ENSMUSG00000027823 | 79.94205919 | 126.6023384 | 99.56729774 | 143.3714656 | 100.9834367 |
| ENSMUSG00000027831 | 6.367066661 | 2.782468975 | 5.649208382 | 5.638203705 | 7.87814045  |
| ENSMUSG00000027832 | 12.73413332 | 4.173703463 | 10.59226572 | 5.638203705 | 7.87814045  |
| ENSMUSG00000027840 | 9.196874066 | 6.956172438 | 6.35535943  | 4.02728836  | 11.45911338 |
| ENSMUSG00000027863 | 120.2668147 | 119.6461659 | 141.2302096 | 80.54576721 | 69.47087488 |
| ENSMUSG00000027864 | 5.65961481  | 6.956172438 | 7.767661525 | 4.832746033 | 5.013362104 |
| ENSMUSG00000027870 | 14.85648888 | 5.56493795  | 4.943057334 | 4.02728836  | 5.729556691 |
| ENSMUSG00000027876 | 11.31922962 | 8.347406925 | 8.473812573 | 8.860034393 | 10.02672421 |
| ENSMUSG00000027879 | 98.33580733 | 126.6023384 | 114.3964697 | 143.3714656 | 128.9150255 |
| ENSMUSG00000027880 | 12.02668147 | 8.347406925 | 4.943057334 | 8.860034393 | 6.445751277 |
| ENSMUSG00000027886 | 4.952162959 | 6.956172438 | 13.41686991 | 6.443661377 | 6.445751277 |
| ENSMUSG00000027895 | 9.904325918 | 4.173703463 | 7.767661525 | 4.832746033 | 7.161945863 |
| ENSMUSG00000027902 | 4.952162959 | 7.651789682 | 8.473812573 | 8.054576721 | 5.729556691 |
| ENSMUSG00000027907 | 35.37259256 | 66.08363816 | 43.78136496 | 27.38556085 | 35.80972932 |
| ENSMUSG00000027908 | 10.61177777 | 4.173703463 | 7.061510478 | 9.665492065 | 10.02672421 |
| ENSMUSG00000027912 | 9.196874066 | 6.956172438 | 7.061510478 | 4.832746033 | 2.864778345 |
| ENSMUSG00000027913 | 9.196874066 | 5.56493795  | 2.824604191 | 5.638203705 | 6.445751277 |
| ENSMUSG00000027919 | 7.781970364 | 5.56493795  | 11.29841676 | 4.832746033 | 7.161945863 |
| ENSMUSG00000027923 | 9.196874066 | 5.56493795  | 6.35535943  | 4.02728836  | 5.013362104 |
| ENSMUSG00000027925 | 7.781970364 | 5.56493795  | 5.649208382 | 5.638203705 | 6.445751277 |
| ENSMUSG00000027927 | 5.65961481  | 6.956172438 | 11.29841676 | 1.610915344 | 5.013362104 |
| ENSMUSG00000027950 | 10.61177777 | 6.956172438 | 8.473812573 | 7.249119049 | 9.310529622 |
| ENSMUSG00000027954 | 12.73413332 | 12.52111039 | 9.886114669 | 10.47094974 | 8.594335036 |
| ENSMUSG00000027961 | 21.22355554 | 15.99919661 | 11.29841676 | 16.10915344 | 17.90486466 |
| ENSMUSG00000027967 | 6.367066661 | 5.56493795  | 7.767661525 | 6.443661377 | 4.297167518 |
| ENSMUSG00000027978 | 2.829807405 | 10.43425866 | 9.886114669 | 4.832746033 | 7.161945863 |
| ENSMUSG00000027984 | 15.56394073 | 27.12907251 | 21.89068248 | 13.69278043 | 11.45911338 |
| ENSMUSG00000027997 | 16.27139258 | 25.04222078 | 24.00913562 | 16.10915344 | 15.04008631 |
| ENSMUSG00000028003 | 11.31922962 | 3.478086219 | 6.35535943  | 5.638203705 | 11.45911338 |
| ENSMUSG00000028015 | 65.08557032 | 119.6461659 | 93.91808935 | 49.93837567 | 60.87653984 |
| ENSMUSG00000028016 | 37.49494812 | 59.12746572 | 59.31668801 | 103.9040397 | 81.64618284 |

|                    |             |             |             |             |             |
|--------------------|-------------|-------------|-------------|-------------|-------------|
| ENSMUSG00000028017 | 5.65961481  | 6.260555194 | 11.29841676 | 4.832746033 | 7.161945863 |
| ENSMUSG00000028019 | 6.367066661 | 3.478086219 | 8.473812573 | 3.221830688 | 6.445751277 |
| ENSMUSG00000028031 | 7.074518513 | 11.1298759  | 4.943057334 | 2.416373016 | 7.161945863 |
| ENSMUSG00000028036 | 7.074518513 | 7.651789682 | 6.35535943  | 7.249119049 | 3.580972932 |
| ENSMUSG00000028040 | 7.074518513 | 9.043024169 | 4.943057334 | 6.443661377 | 7.161945863 |
| ENSMUSG00000028044 | 43.15456293 | 43.12826911 | 64.25974535 | 161.0915344 | 125.3340526 |
| ENSMUSG00000028070 | 12.02668147 | 23.65098629 | 22.59683353 | 20.1364418  | 19.33725383 |
| ENSMUSG00000028072 | 11.31922962 | 7.651789682 | 6.35535943  | 6.443661377 | 5.729556691 |
| ENSMUSG00000028081 | 8.489422215 | 14.60796212 | 16.2414741  | 16.91461111 | 20.769643   |
| ENSMUSG00000028089 | 51.64398514 | 70.25734162 | 54.37363068 | 61.21478308 | 64.45751277 |
| ENSMUSG00000028099 | 73.57499253 | 123.1242521 | 105.2165061 | 181.2279762 | 139.6579443 |
| ENSMUSG00000028111 | 8.489422215 | 8.347406925 | 12.71071886 | 7.249119049 | 5.729556691 |
| ENSMUSG00000028121 | 109.6550369 | 146.0796212 | 108.7472614 | 391.4524286 | 294.355975  |
| ENSMUSG00000028137 | 4.244711108 | 4.869320706 | 2.118453143 | 5.638203705 | 12.17530797 |
| ENSMUSG00000028138 | 35.37259256 | 63.99678643 | 46.60596915 | 57.18749472 | 52.2822048  |
| ENSMUSG00000028139 | 9.196874066 | 10.43425866 | 7.767661525 | 5.638203705 | 7.161945863 |
| ENSMUSG00000028145 | 9.904325918 | 14.60796212 | 9.179963621 | 6.443661377 | 9.310529622 |
| ENSMUSG00000028165 | 82.06441475 | 125.9067211 | 91.79963621 | 152.2315    | 152.5494469 |
| ENSMUSG00000028172 | 21.22355554 | 6.956172438 | 12.00456781 | 8.860034393 | 6.445751277 |
| ENSMUSG00000028195 | 4.244711108 | 6.956172438 | 4.943057334 | 6.443661377 | 2.864778345 |
| ENSMUSG00000028197 | 9.196874066 | 8.347406925 | 4.943057334 | 4.832746033 | 3.580972932 |
| ENSMUSG00000028221 | 9.196874066 | 17.39043109 | 14.829172   | 16.10915344 | 14.32389173 |
| ENSMUSG00000028222 | 8.489422215 | 2.782468975 | 5.649208382 | 4.832746033 | 2.148583759 |
| ENSMUSG00000028223 | 9.196874066 | 11.1298759  | 7.767661525 | 11.27640741 | 8.594335036 |
| ENSMUSG00000028228 | 22.63845924 | 33.3896277  | 28.24604191 | 17.72006879 | 22.91822676 |
| ENSMUSG00000028233 | 84.89422215 | 123.1242521 | 116.5149229 | 175.5897725 | 147.5360848 |
| ENSMUSG00000028234 | 2.122355554 | 2.782468975 | 0.706151048 | 0           | 0.716194586 |
| ENSMUSG00000028236 | 10.61177777 | 13.91234488 | 6.35535943  | 2.416373016 | 6.445751277 |
| ENSMUSG00000028238 | 7.781970364 | 4.869320706 | 11.29841676 | 7.249119049 | 7.161945863 |
| ENSMUSG00000028240 | 7.781970364 | 5.56493795  | 8.473812573 | 4.02728836  | 2.864778345 |
| ENSMUSG00000028243 | 29.71297775 | 43.12826911 | 37.42600553 | 25.77464551 | 27.21539428 |
| ENSMUSG00000028247 | 5.65961481  | 13.91234488 | 9.179963621 | 15.30369577 | 12.89150255 |
| ENSMUSG00000028251 | 20.51610369 | 34.78086219 | 28.95219296 | 15.30369577 | 25.06681052 |
| ENSMUSG00000028255 | 4.244711108 | 7.651789682 | 7.767661525 | 4.02728836  | 3.580972932 |
| ENSMUSG00000028271 | 120.9742666 | 201.0333835 | 150.4101732 | 154.647873  | 130.3474147 |
| ENSMUSG00000028280 | 7.781970364 | 2.086851731 | 6.35535943  | 4.832746033 | 7.87814045  |
| ENSMUSG00000028287 | 12.02668147 | 5.56493795  | 5.649208382 | 2.416373016 | 7.161945863 |
| ENSMUSG00000028291 | 141.4903703 | 195.4684455 | 173.7131578 | 268.2174048 | 186.926787  |
| ENSMUSG00000028307 | 7.074518513 | 9.738641413 | 7.061510478 | 4.02728836  | 3.580972932 |
| ENSMUSG00000028310 | 9.196874066 | 6.956172438 | 7.767661525 | 6.443661377 | 5.729556691 |
| ENSMUSG00000028314 | 6.367066661 | 5.56493795  | 8.473812573 | 4.832746033 | 7.161945863 |
| ENSMUSG00000028330 | 130.1711406 | 189.2078903 | 170.1824025 | 204.5862487 | 162.5761711 |
| ENSMUSG00000028341 | 4.952162959 | 12.52111039 | 11.29841676 | 7.249119049 | 7.161945863 |

|                    |             |             |             |             |             |
|--------------------|-------------|-------------|-------------|-------------|-------------|
| ENSMUSG00000028348 | 12.73413332 | 4.869320706 | 7.767661525 | 4.832746033 | 7.161945863 |
| ENSMUSG00000028351 | 9.196874066 | 6.956172438 | 6.35535943  | 4.832746033 | 5.729556691 |
| ENSMUSG00000028356 | 9.196874066 | 2.782468975 | 7.061510478 | 5.638203705 | 5.729556691 |
| ENSMUSG00000028359 | 12.02668147 | 3.478086219 | 9.179963621 | 12.08186508 | 7.87814045  |
| ENSMUSG00000028360 | 13.44158517 | 2.086851731 | 10.59226572 | 1.610915344 | 10.7429188  |
| ENSMUSG00000028362 | 9.196874066 | 10.43425866 | 6.35535943  | 19.33098413 | 12.17530797 |
| ENSMUSG00000028367 | 16.97884443 | 25.73783802 | 33.18909925 | 202.9753334 | 136.0769714 |
| ENSMUSG00000028370 | 6.367066661 | 7.651789682 | 4.943057334 | 3.221830688 | 2.864778345 |
| ENSMUSG00000028378 | 11.31922962 | 13.91234488 | 14.12302096 | 9.665492065 | 7.87814045  |
| ENSMUSG00000028381 | 100.4581629 | 116.1680797 | 106.6288082 | 227.9445212 | 179.0486466 |
| ENSMUSG00000028386 | 8.489422215 | 5.56493795  | 7.061510478 | 2.416373016 | 6.445751277 |
| ENSMUSG00000028394 | 15.56394073 | 29.21592424 | 25.42143772 | 35.44013757 | 30.79636721 |
| ENSMUSG00000028396 | 6.367066661 | 3.478086219 | 8.473812573 | 6.443661377 | 5.013362104 |
| ENSMUSG00000028398 | 40.32475552 | 50.08444155 | 52.25517753 | 51.54929101 | 47.2688427  |
| ENSMUSG00000028405 | 14.14903703 | 11.82549314 | 20.47838039 | 16.91461111 | 18.62105924 |
| ENSMUSG00000028415 | 13.44158517 | 6.260555194 | 6.35535943  | 11.27640741 | 11.45911338 |
| ENSMUSG00000028417 | 8.489422215 | 5.56493795  | 11.29841676 | 4.02728836  | 4.297167518 |
| ENSMUSG00000028419 | 36.78749627 | 52.86691053 | 47.3121202  | 80.54576721 | 84.51096119 |
| ENSMUSG00000028435 | 6.367066661 | 4.173703463 | 10.59226572 | 6.443661377 | 7.87814045  |
| ENSMUSG00000028436 | 36.78749627 | 36.17209668 | 47.3121202  | 22.55281482 | 29.36397804 |
| ENSMUSG00000028443 | 16.97884443 | 17.39043109 | 15.53532305 | 41.88379895 | 50.84981563 |
| ENSMUSG00000028445 | 4.952162959 | 9.738641413 | 13.41686991 | 6.443661377 | 7.87814045  |
| ENSMUSG00000028452 | 54.47379255 | 66.08363816 | 66.37819849 | 244.8591323 | 158.2790036 |
| ENSMUSG00000028460 | 16.27139258 | 16.69481385 | 14.829172   | 7.249119049 | 13.60769714 |
| ENSMUSG00000028517 | 28.29807405 | 52.17129328 | 42.36906287 | 23.35827249 | 20.769643   |
| ENSMUSG00000028518 | 5.65961481  | 4.869320706 | 7.767661525 | 8.054576721 | 2.864778345 |
| ENSMUSG00000028540 | 28.29807405 | 38.95456565 | 45.8998181  | 57.18749472 | 63.0251236  |
| ENSMUSG00000028567 | 60.13340736 | 99.47326586 | 99.56729774 | 83.7675979  | 75.20043157 |
| ENSMUSG00000028578 | 42.44711108 | 89.0390072  | 60.02283906 | 70.88027514 | 64.45751277 |
| ENSMUSG00000028584 | 8.489422215 | 2.086851731 | 5.649208382 | 5.638203705 | 5.729556691 |
| ENSMUSG00000028589 | 9.904325918 | 8.347406925 | 5.649208382 | 4.832746033 | 12.17530797 |
| ENSMUSG00000028593 | 8.489422215 | 8.347406925 | 7.061510478 | 8.860034393 | 5.729556691 |
| ENSMUSG00000028609 | 43.86201478 | 81.38721752 | 60.02283906 | 102.2931244 | 100.2672421 |
| ENSMUSG00000028626 | 12.73413332 | 6.956172438 | 11.29841676 | 11.27640741 | 12.17530797 |
| ENSMUSG00000028629 | 29.71297775 | 43.82388636 | 39.54445867 | 57.18749472 | 56.57937232 |
| ENSMUSG00000028630 | 99.04325918 | 136.3409798 | 121.4579802 | 74.9075635  | 82.36237743 |
| ENSMUSG00000028631 | 7.781970364 | 4.173703463 | 7.767661525 | 7.249119049 | 7.161945863 |
| ENSMUSG00000028633 | 36.78749627 | 49.38882431 | 35.30755239 | 123.2350238 | 90.24051788 |
| ENSMUSG00000028635 | 4.244711108 | 4.173703463 | 4.943057334 | 6.443661377 | 7.87814045  |
| ENSMUSG00000028642 | 8.489422215 | 7.651789682 | 4.943057334 | 4.02728836  | 6.445751277 |
| ENSMUSG00000028661 | 9.196874066 | 5.56493795  | 4.943057334 | 8.054576721 | 7.87814045  |
| ENSMUSG00000028668 | 60.13340736 | 80.69160028 | 76.97046421 | 179.6170609 | 127.4826364 |
| ENSMUSG00000028690 | 21.93100739 | 24.34660353 | 17.65377619 | 24.96918783 | 22.20203218 |

|                    |             |             |             |             |             |
|--------------------|-------------|-------------|-------------|-------------|-------------|
| ENSMUSG00000028699 | 8.489422215 | 4.869320706 | 10.59226572 | 9.665492065 | 12.17530797 |
| ENSMUSG00000028701 | 17.68629628 | 24.34660353 | 16.94762515 | 23.35827249 | 25.78300511 |
| ENSMUSG00000028709 | 29.71297775 | 38.25894841 | 36.71985448 | 37.05105292 | 25.78300511 |
| ENSMUSG00000028715 | 8.489422215 | 9.043024169 | 4.943057334 | 7.249119049 | 3.580972932 |
| ENSMUSG00000028719 | 33.25023701 | 52.86691053 | 48.7244223  | 53.16020636 | 61.59273443 |
| ENSMUSG00000028743 | 60.84085921 | 111.298759  | 88.26888097 | 32.21830688 | 51.56601022 |
| ENSMUSG00000028749 | 9.904325918 | 2.782468975 | 7.061510478 | 4.02728836  | 7.87814045  |
| ENSMUSG00000028755 | 9.904325918 | 4.869320706 | 2.118453143 | 5.638203705 | 5.729556691 |
| ENSMUSG00000028757 | 46.69182218 | 49.38882431 | 38.13215658 | 132.9005159 | 93.10529622 |
| ENSMUSG00000028773 | 7.781970364 | 1.391234488 | 9.886114669 | 3.221830688 | 5.729556691 |
| ENSMUSG00000028777 | 7.074518513 | 6.956172438 | 7.061510478 | 6.443661377 | 7.161945863 |
| ENSMUSG00000028807 | 5.65961481  | 10.43425866 | 7.767661525 | 9.665492065 | 16.47247549 |
| ENSMUSG00000028813 | 9.904325918 | 9.043024169 | 9.886114669 | 8.054576721 | 8.594335036 |
| ENSMUSG00000028821 | 52.35143699 | 106.4294383 | 90.38733411 | 82.15668255 | 93.82149081 |
| ENSMUSG00000028825 | 5.65961481  | 5.56493795  | 4.236906287 | 12.08186508 | 15.04008631 |
| ENSMUSG00000028837 | 87.72402956 | 139.819066  | 110.1595635 | 249.6918783 | 204.1154571 |
| ENSMUSG00000028843 | 179.6927702 | 170.4262247 | 182.8931214 | 206.1971641 | 166.157144  |
| ENSMUSG00000028847 | 51.64398514 | 71.64857611 | 68.49665163 | 47.52200265 | 46.55264811 |
| ENSMUSG00000028850 | 11.31922962 | 19.47728283 | 20.47838039 | 29.80193387 | 33.66114556 |
| ENSMUSG00000028851 | 53.7663407  | 80.69160028 | 79.7950684  | 205.3917064 | 141.8065281 |
| ENSMUSG00000028854 | 0           | 0           | 0           | 0           | 0           |
| ENSMUSG00000028862 | 8.489422215 | 9.738641413 | 5.649208382 | 5.638203705 | 7.161945863 |
| ENSMUSG00000028864 | 10.61177777 | 9.738641413 | 7.767661525 | 3.221830688 | 5.013362104 |
| ENSMUSG00000028871 | 4.244711108 | 3.478086219 | 5.649208382 | 7.249119049 | 6.445751277 |
| ENSMUSG00000028876 | 15.56394073 | 9.043024169 | 9.886114669 | 4.02728836  | 9.310529622 |
| ENSMUSG00000028879 | 40.32475552 | 57.04061399 | 62.84744325 | 74.10210583 | 67.32229112 |
| ENSMUSG00000028885 | 7.074518513 | 9.043024169 | 11.29841676 | 10.47094974 | 5.729556691 |
| ENSMUSG00000028893 | 1.414903703 | 3.478086219 | 2.824604191 | 0.805457672 | 0.716194586 |
| ENSMUSG00000028902 | 36.08004441 | 60.51870021 | 48.7244223  | 104.7094974 | 75.91662615 |
| ENSMUSG00000028907 | 62.96321476 | 97.38641413 | 87.56272992 | 143.3714656 | 100.2672421 |
| ENSMUSG00000028920 | 104.702874  | 143.9927695 | 130.6379438 | 120.8186508 | 128.198831  |
| ENSMUSG00000028927 | 2.829807405 | 9.738641413 | 12.00456781 | 8.860034393 | 5.729556691 |
| ENSMUSG00000028932 | 50.93653329 | 77.21351406 | 78.3827663  | 174.7843148 | 139.6579443 |
| ENSMUSG00000028938 | 9.196874066 | 8.347406925 | 7.061510478 | 4.02728836  | 9.310529622 |
| ENSMUSG00000028940 | 9.904325918 | 4.869320706 | 15.53532305 | 10.47094974 | 7.87814045  |
| ENSMUSG00000028945 | 94.79854807 | 83.47406925 | 89.68118307 | 164.3133651 | 143.2389173 |
| ENSMUSG00000028946 | 10.61177777 | 6.260555194 | 5.649208382 | 6.443661377 | 8.594335036 |
| ENSMUSG00000028950 | 54.47379255 | 69.56172438 | 71.32125582 | 136.1223466 | 116.7397176 |
| ENSMUSG00000028955 | 28.29807405 | 70.95295887 | 48.7244223  | 49.93837567 | 59.44415067 |
| ENSMUSG00000028963 | 5.65961481  | 10.43425866 | 4.236906287 | 4.832746033 | 5.013362104 |
| ENSMUSG00000028970 | 8.489422215 | 9.043024169 | 12.71071886 | 37.85651059 | 34.37734014 |
| ENSMUSG00000028971 | 8.489422215 | 13.21672763 | 10.59226572 | 8.860034393 | 10.02672421 |
| ENSMUSG00000028982 | 18.39374813 | 29.91154148 | 30.36449505 | 45.91108731 | 46.55264811 |



|                    |             |             |             |             |             |
|--------------------|-------------|-------------|-------------|-------------|-------------|
| ENSMUSG00000028989 | 12.02668147 | 20.86851731 | 26.12758877 | 17.72006879 | 21.48583759 |
| ENSMUSG00000028996 | 11.31922962 | 6.260555194 | 7.061510478 | 4.832746033 | 4.297167518 |
| ENSMUSG00000028998 | 33.25023701 | 41.04141738 | 37.42600553 | 81.35122488 | 75.20043157 |
| ENSMUSG00000029005 | 11.31922962 | 6.956172438 | 7.767661525 | 8.054576721 | 4.297167518 |
| ENSMUSG00000029007 | 12.73413332 | 29.21592424 | 26.12758877 | 17.72006879 | 16.47247549 |
| ENSMUSG00000029015 | 8.489422215 | 4.869320706 | 4.943057334 | 2.416373016 | 7.161945863 |
| ENSMUSG00000029019 | 8.489422215 | 8.347406925 | 2.118453143 | 7.249119049 | 7.161945863 |
| ENSMUSG00000029027 | 58.71850365 | 112.6899935 | 80.50121945 | 92.62763229 | 78.7814045  |
| ENSMUSG00000029034 | 53.05888884 | 95.99517964 | 70.61510478 | 138.5387196 | 104.5644096 |
| ENSMUSG00000029038 | 84.1867703  | 120.3417832 | 111.5718655 | 156.2587884 | 122.4692743 |
| ENSMUSG00000029048 | 91.26128881 | 121.0374004 | 110.1595635 | 192.5043836 | 150.4008631 |
| ENSMUSG00000029054 | 7.074518513 | 4.173703463 | 5.649208382 | 4.832746033 | 11.45911338 |
| ENSMUSG00000029059 | 5.65961481  | 9.043024169 | 2.824604191 | 8.054576721 | 8.594335036 |
| ENSMUSG00000029061 | 10.61177777 | 6.260555194 | 7.061510478 | 5.638203705 | 7.87814045  |
| ENSMUSG00000029070 | 5.65961481  | 8.347406925 | 9.886114669 | 13.69278043 | 14.32389173 |
| ENSMUSG00000029072 | 12.02668147 | 11.82549314 | 11.29841676 | 13.69278043 | 11.45911338 |
| ENSMUSG00000029073 | 65.08557032 | 70.95295887 | 62.1412922  | 117.5968201 | 110.2939663 |
| ENSMUSG00000029075 | 13.44158517 | 9.738641413 | 14.12302096 | 15.30369577 | 9.310529622 |
| ENSMUSG00000029084 | 212.9430072 | 223.9887525 | 204.7838039 | 111.1531587 | 114.5911338 |
| ENSMUSG00000029089 | 14.85648888 | 20.17290007 | 14.829172   | 28.9964762  | 23.63442135 |
| ENSMUSG00000029102 | 12.02668147 | 2.086851731 | 2.824604191 | 2.416373016 | 3.580972932 |
| ENSMUSG00000029111 | 67.20792587 | 98.77764862 | 81.20737049 | 146.5932963 | 123.9016634 |
| ENSMUSG00000029119 | 14.85648888 | 31.30277597 | 28.24604191 | 20.94189947 | 16.47247549 |
| ENSMUSG00000029123 | 6.367066661 | 6.260555194 | 9.179963621 | 5.638203705 | 6.445751277 |
| ENSMUSG00000029126 | 7.781970364 | 3.478086219 | 8.473812573 | 8.860034393 | 4.297167518 |
| ENSMUSG00000029136 | 21.22355554 | 36.86771392 | 35.30755239 | 35.44013757 | 46.55264811 |
| ENSMUSG00000029138 | 7.781970364 | 6.956172438 | 5.649208382 | 7.249119049 | 10.7429188  |
| ENSMUSG00000029158 | 5.65961481  | 8.347406925 | 6.35535943  | 4.832746033 | 7.161945863 |
| ENSMUSG00000029161 | 10.61177777 | 4.173703463 | 6.35535943  | 8.054576721 | 5.013362104 |
| ENSMUSG00000029163 | 12.73413332 | 6.260555194 | 7.767661525 | 4.832746033 | 10.02672421 |
| ENSMUSG00000029177 | 51.64398514 | 61.21431745 | 60.02283906 | 154.647873  | 97.40246374 |
| ENSMUSG00000029193 | 8.489422215 | 6.956172438 | 9.886114669 | 6.443661377 | 7.161945863 |
| ENSMUSG00000029196 | 60.84085921 | 86.95215547 | 91.79963621 | 90.21125927 | 77.34901533 |
| ENSMUSG00000029198 | 103.2879703 | 122.4286349 | 131.3440949 | 174.7843148 | 130.3474147 |
| ENSMUSG00000029204 | 199.5014221 | 204.5114697 | 170.1824025 | 208.6135371 | 166.8733386 |
| ENSMUSG00000029229 | 60.84085921 | 68.17048989 | 80.50121945 | 90.21125927 | 63.0251236  |
| ENSMUSG00000029236 | 9.904325918 | 7.651789682 | 9.179963621 | 6.443661377 | 9.310529622 |
| ENSMUSG00000029250 | 103.2879703 | 132.1672763 | 129.9317928 | 233.5827249 | 181.1972303 |
| ENSMUSG00000029255 | 5.65961481  | 7.651789682 | 10.59226572 | 4.02728836  | 10.02672421 |
| ENSMUSG00000029265 | 50.93653329 | 66.08363816 | 62.84744325 | 111.1531587 | 100.2672421 |
| ENSMUSG00000029268 | 6.367066661 | 9.043024169 | 2.824604191 | 4.02728836  | 3.580972932 |
| ENSMUSG00000029272 | 6.367066661 | 6.260555194 | 7.061510478 | 5.638203705 | 8.594335036 |
| ENSMUSG00000029282 | 9.196874066 | 7.651789682 | 7.061510478 | 8.860034393 | 4.297167518 |

|                    |             |             |             |             |             |
|--------------------|-------------|-------------|-------------|-------------|-------------|
| ENSMUSG00000029306 | 3.537259256 | 6.956172438 | 2.824604191 | 1.610915344 | 2.148583759 |
| ENSMUSG00000029307 | 9.196874066 | 6.956172438 | 10.59226572 | 6.443661377 | 7.87814045  |
| ENSMUSG00000029309 | 9.196874066 | 4.173703463 | 12.00456781 | 4.02728836  | 6.445751277 |
| ENSMUSG00000029319 | 21.93100739 | 42.43265187 | 33.18909925 | 62.02024075 | 44.40406435 |
| ENSMUSG00000029321 | 8.489422215 | 4.173703463 | 6.35535943  | 5.638203705 | 7.161945863 |
| ENSMUSG00000029330 | 6.367066661 | 5.56493795  | 7.767661525 | 3.221830688 | 5.013362104 |
| ENSMUSG00000029335 | 14.14903703 | 3.478086219 | 5.649208382 | 8.860034393 | 5.013362104 |
| ENSMUSG00000029337 | 9.904325918 | 4.869320706 | 5.649208382 | 3.221830688 | 5.729556691 |
| ENSMUSG00000029371 | 8.489422215 | 9.043024169 | 5.649208382 | 5.638203705 | 4.297167518 |
| ENSMUSG00000029372 | 7.074518513 | 2.782468975 | 12.00456781 | 7.249119049 | 7.87814045  |
| ENSMUSG00000029373 | 7.074518513 | 9.738641413 | 8.473812573 | 5.638203705 | 5.013362104 |
| ENSMUSG00000029375 | 8.489422215 | 6.956172438 | 5.649208382 | 4.832746033 | 7.87814045  |
| ENSMUSG00000029376 | 7.781970364 | 9.738641413 | 17.65377619 | 9.665492065 | 14.32389173 |
| ENSMUSG00000029377 | 9.196874066 | 7.651789682 | 6.35535943  | 4.832746033 | 9.310529622 |
| ENSMUSG00000029378 | 9.904325918 | 7.651789682 | 7.061510478 | 3.221830688 | 4.297167518 |
| ENSMUSG00000029384 | 77.11225179 | 99.47326586 | 103.804204  | 121.6241085 | 112.4425501 |
| ENSMUSG00000029401 | 25.46826665 | 27.82468975 | 30.36449505 | 305.2684577 | 197.6697058 |
| ENSMUSG00000029402 | 28.29807405 | 47.30197258 | 43.07521391 | 42.68925662 | 43.68786977 |
| ENSMUSG00000029409 | 8.489422215 | 7.651789682 | 9.179963621 | 4.832746033 | 8.594335036 |
| ENSMUSG00000029415 | 77.11225179 | 95.99517964 | 104.5103551 | 203.780791  | 147.5360848 |
| ENSMUSG00000029417 | 11.31922962 | 15.30357936 | 4.236906287 | 4.02728836  | 7.87814045  |
| ENSMUSG00000029419 | 9.196874066 | 10.43425866 | 7.767661525 | 11.27640741 | 9.310529622 |
| ENSMUSG00000029426 | 24.05336294 | 50.08444155 | 34.60140134 | 24.16373016 | 30.79636721 |
| ENSMUSG00000029431 | 4.952162959 | 4.173703463 | 3.530755239 | 4.832746033 | 7.161945863 |
| ENSMUSG00000029436 | 0           | 0           | 0.706151048 | 0           | 0           |
| ENSMUSG00000029438 | 55.1812444  | 66.7792554  | 74.14586002 | 57.99295239 | 47.98503729 |
| ENSMUSG00000029463 | 36.08004441 | 58.43184848 | 48.01827125 | 83.7675979  | 68.75468029 |
| ENSMUSG00000029474 | 45.98437033 | 72.34419335 | 62.1412922  | 87.79488626 | 72.33565322 |
| ENSMUSG00000029482 | 41.03220737 | 68.17048989 | 77.67661525 | 93.43308996 | 77.34901533 |
| ENSMUSG00000029490 | 8.489422215 | 9.738641413 | 3.530755239 | 5.638203705 | 7.161945863 |
| ENSMUSG00000029491 | 9.196874066 | 9.043024169 | 7.767661525 | 5.638203705 | 8.594335036 |
| ENSMUSG00000029504 | 29.0055259  | 50.08444155 | 43.07521391 | 132.0950582 | 99.5510475  |
| ENSMUSG00000029521 | 14.85648888 | 38.95456565 | 30.36449505 | 56.38203705 | 49.41742646 |
| ENSMUSG00000029526 | 9.196874066 | 6.260555194 | 4.943057334 | 8.860034393 | 6.445751277 |
| ENSMUSG00000029535 | 66.50047402 | 99.47326586 | 77.67661525 | 115.1804471 | 108.1453825 |
| ENSMUSG00000029536 | 47.39927403 | 104.3425866 | 104.5103551 | 109.5422434 | 105.9967988 |
| ENSMUSG00000029557 | 24.05336294 | 30.60715873 | 31.77679715 | 29.80193387 | 20.05344842 |
| ENSMUSG00000029569 | 82.7718666  | 105.0382038 | 89.68118307 | 114.3749894 | 83.07857202 |
| ENSMUSG00000029570 | 99.75071103 | 98.08203137 | 89.68118307 | 91.82217462 | 90.24051788 |
| ENSMUSG00000029586 | 14.14903703 | 17.39043109 | 16.94762515 | 12.88732275 | 15.7562809  |
| ENSMUSG00000029595 | 12.02668147 | 6.956172438 | 7.061510478 | 10.47094974 | 10.7429188  |
| ENSMUSG00000029616 | 24.76081479 | 33.3896277  | 35.30755239 | 116.7913625 | 103.1320204 |
| ENSMUSG00000029620 | 7.074518513 | 4.173703463 | 6.35535943  | 6.443661377 | 6.445751277 |

|                    |             |             |             |             |             |
|--------------------|-------------|-------------|-------------|-------------|-------------|
| ENSMUSG00000029632 | 70.74518513 | 129.3848073 | 107.3349593 | 157.0642461 | 137.5093606 |
| ENSMUSG00000029641 | 7.781970364 | 6.956172438 | 8.473812573 | 5.638203705 | 6.445751277 |
| ENSMUSG00000029644 | 6.367066661 | 4.869320706 | 7.767661525 | 9.665492065 | 5.013362104 |
| ENSMUSG00000029646 | 4.244711108 | 7.651789682 | 4.943057334 | 6.443661377 | 5.013362104 |
| ENSMUSG00000029678 | 7.781970364 | 8.347406925 | 6.35535943  | 4.02728836  | 5.729556691 |
| ENSMUSG00000029679 | 10.61177777 | 6.956172438 | 7.061510478 | 4.02728836  | 8.594335036 |
| ENSMUSG00000029680 | 12.73413332 | 4.173703463 | 7.767661525 | 3.221830688 | 7.161945863 |
| ENSMUSG00000029682 | 7.074518513 | 6.260555194 | 7.767661525 | 6.443661377 | 9.310529622 |
| ENSMUSG00000029683 | 5.65961481  | 5.56493795  | 6.35535943  | 4.832746033 | 4.297167518 |
| ENSMUSG00000029697 | 6.367066661 | 6.956172438 | 6.35535943  | 4.832746033 | 4.297167518 |
| ENSMUSG00000029707 | 12.73413332 | 12.52111039 | 9.886114669 | 8.860034393 | 15.04008631 |
| ENSMUSG00000029708 | 5.65961481  | 9.043024169 | 9.179963621 | 4.02728836  | 9.310529622 |
| ENSMUSG00000029715 | 12.02668147 | 20.17290007 | 24.71528667 | 35.44013757 | 39.39070225 |
| ENSMUSG00000029727 | 7.074518513 | 9.738641413 | 6.35535943  | 7.249119049 | 9.310529622 |
| ENSMUSG00000029759 | 10.61177777 | 8.347406925 | 5.649208382 | 14.4982381  | 7.87814045  |
| ENSMUSG00000029762 | 6.367066661 | 7.651789682 | 6.35535943  | 4.832746033 | 8.594335036 |
| ENSMUSG00000029766 | 16.97884443 | 4.869320706 | 6.35535943  | 2.416373016 | 3.580972932 |
| ENSMUSG00000029781 | 12.02668147 | 8.347406925 | 7.767661525 | 5.638203705 | 7.161945863 |
| ENSMUSG00000029813 | 10.61177777 | 4.869320706 | 5.649208382 | 4.02728836  | 9.310529622 |
| ENSMUSG00000029819 | 7.781970364 | 2.086851731 | 3.530755239 | 5.638203705 | 8.594335036 |
| ENSMUSG00000029828 | 4.952162959 | 5.56493795  | 7.767661525 | 8.054576721 | 10.02672421 |
| ENSMUSG00000029829 | 11.31922962 | 8.347406925 | 4.236906287 | 5.638203705 | 9.310529622 |
| ENSMUSG00000029831 | 6.367066661 | 6.260555194 | 6.35535943  | 5.638203705 | 4.297167518 |
| ENSMUSG00000029840 | 72.16008883 | 63.30116918 | 76.26431316 | 186.0607223 | 117.4559122 |
| ENSMUSG00000029843 | 8.489422215 | 9.738641413 | 4.236906287 | 6.443661377 | 4.297167518 |
| ENSMUSG00000029844 | 9.904325918 | 6.260555194 | 7.767661525 | 4.02728836  | 5.013362104 |
| ENSMUSG00000029851 | 11.31922962 | 6.956172438 | 5.649208382 | 6.443661377 | 5.729556691 |
| ENSMUSG00000029859 | 4.952162959 | 5.56493795  | 9.179963621 | 4.02728836  | 3.580972932 |
| ENSMUSG00000029864 | 6.367066661 | 8.347406925 | 7.061510478 | 8.054576721 | 9.310529622 |
| ENSMUSG00000029865 | 7.781970364 | 4.869320706 | 6.35535943  | 3.221830688 | 8.594335036 |
| ENSMUSG00000029867 | 5.65961481  | 9.738641413 | 7.767661525 | 6.443661377 | 4.297167518 |
| ENSMUSG00000029869 | 6.367066661 | 6.260555194 | 4.943057334 | 3.221830688 | 2.148583759 |
| ENSMUSG00000029875 | 6.367066661 | 4.869320706 | 6.35535943  | 8.054576721 | 9.310529622 |
| ENSMUSG00000029882 | 9.196874066 | 6.260555194 | 7.767661525 | 11.27640741 | 9.310529622 |
| ENSMUSG00000029909 | 12.02668147 | 7.651789682 | 8.473812573 | 3.221830688 | 9.310529622 |
| ENSMUSG00000029918 | 24.05336294 | 43.82388636 | 29.65834401 | 39.46742593 | 34.37734014 |
| ENSMUSG00000029919 | 13.44158517 | 14.60796212 | 15.53532305 | 48.32746033 | 40.10689684 |
| ENSMUSG00000029920 | 25.46826665 | 41.73703463 | 36.71985448 | 55.57657937 | 46.55264811 |
| ENSMUSG00000029923 | 20.51610369 | 26.43345526 | 20.47838039 | 12.88732275 | 20.05344842 |
| ENSMUSG00000030001 | 4.952162959 | 7.651789682 | 6.35535943  | 8.054576721 | 3.580972932 |
| ENSMUSG00000030004 | 6.367066661 | 7.651789682 | 4.943057334 | 6.443661377 | 7.161945863 |
| ENSMUSG00000030007 | 70.74518513 | 108.51629   | 88.26888097 | 207.0026217 | 153.9818361 |
| ENSMUSG00000030008 | 48.81417774 | 76.51789682 | 60.72899011 | 152.2315    | 123.9016634 |

|                    |             |             |             |             |             |
|--------------------|-------------|-------------|-------------|-------------|-------------|
| ENSMUSG00000030017 | 11.31922962 | 7.651789682 | 8.473812573 | 4.832746033 | 2.148583759 |
| ENSMUSG00000030019 | 39.61730367 | 65.38802092 | 67.79050059 | 151.4260424 | 108.8615771 |
| ENSMUSG00000030030 | 8.489422215 | 9.738641413 | 7.767661525 | 4.832746033 | 5.729556691 |
| ENSMUSG00000030036 | 26.1757185  | 64.69240367 | 50.13672439 | 89.4058016  | 83.07857202 |
| ENSMUSG00000030037 | 24.05336294 | 47.99758982 | 42.36906287 | 62.02024075 | 65.17370736 |
| ENSMUSG00000030041 | 9.196874066 | 10.43425866 | 12.00456781 | 4.832746033 | 6.445751277 |
| ENSMUSG00000030046 | 9.196874066 | 5.56493795  | 7.767661525 | 1.610915344 | 7.161945863 |
| ENSMUSG00000030048 | 7.781970364 | 6.260555194 | 7.061510478 | 5.638203705 | 10.7429188  |
| ENSMUSG00000030049 | 9.196874066 | 5.56493795  | 10.59226572 | 8.054576721 | 11.45911338 |
| ENSMUSG00000030050 | 8.489422215 | 11.1298759  | 5.649208382 | 6.443661377 | 8.594335036 |
| ENSMUSG00000030054 | 9.904325918 | 9.738641413 | 8.473812573 | 12.08186508 | 7.161945863 |
| ENSMUSG00000030056 | 40.32475552 | 59.82308296 | 46.60596915 | 95.04400531 | 81.64618284 |
| ENSMUSG00000030062 | 70.03773327 | 111.9943762 | 89.68118307 | 190.0880106 | 134.6445822 |
| ENSMUSG00000030074 | 8.489422215 | 5.56493795  | 7.061510478 | 2.416373016 | 6.445751277 |
| ENSMUSG00000030093 | 8.489422215 | 5.56493795  | 6.35535943  | 3.221830688 | 6.445751277 |
| ENSMUSG00000030094 | 46.69182218 | 75.82227957 | 68.49665163 | 118.4022778 | 94.5376854  |
| ENSMUSG00000030096 | 58.71850365 | 84.86530374 | 82.61967259 | 99.87675134 | 101.6996313 |
| ENSMUSG00000030104 | 88.43148141 | 126.6023384 | 113.6903187 | 244.0536746 | 186.926787  |
| ENSMUSG00000030105 | 98.33580733 | 152.3401764 | 123.5764334 | 193.3098413 | 175.4676737 |
| ENSMUSG00000030111 | 12.02668147 | 3.478086219 | 3.530755239 | 10.47094974 | 4.297167518 |
| ENSMUSG00000030114 | 9.196874066 | 8.347406925 | 9.179963621 | 5.638203705 | 6.445751277 |
| ENSMUSG00000030117 | 11.31922962 | 6.956172438 | 6.35535943  | 6.443661377 | 11.45911338 |
| ENSMUSG00000030124 | 7.781970364 | 6.260555194 | 10.59226572 | 10.47094974 | 11.45911338 |
| ENSMUSG00000030131 | 12.02668147 | 4.173703463 | 6.35535943  | 7.249119049 | 4.297167518 |
| ENSMUSG00000030137 | 8.489422215 | 4.173703463 | 6.35535943  | 9.665492065 | 7.87814045  |
| ENSMUSG00000030138 | 29.0055259  | 45.21512085 | 62.84744325 | 114.3749894 | 75.20043157 |
| ENSMUSG00000030143 | 12.02668147 | 8.347406925 | 6.35535943  | 4.832746033 | 5.729556691 |
| ENSMUSG00000030144 | 7.781970364 | 6.956172438 | 12.00456781 | 7.249119049 | 5.013362104 |
| ENSMUSG00000030155 | 8.489422215 | 7.651789682 | 9.886114669 | 8.860034393 | 7.161945863 |
| ENSMUSG00000030156 | 83.47931845 | 105.0382038 | 77.67661525 | 279.4938122 | 182.6296195 |
| ENSMUSG00000030157 | 94.09109622 | 102.9513521 | 91.79963621 | 154.647873  | 142.5227227 |
| ENSMUSG00000030160 | 12.73413332 | 2.782468975 | 3.530755239 | 6.443661377 | 9.310529622 |
| ENSMUSG00000030161 | 8.489422215 | 16.69481385 | 17.65377619 | 19.33098413 | 17.90486466 |
| ENSMUSG00000030214 | 34.66514071 | 54.95376226 | 49.43057334 | 36.24559524 | 37.95831308 |
| ENSMUSG00000030217 | 7.074518513 | 9.738641413 | 4.943057334 | 9.665492065 | 8.594335036 |
| ENSMUSG00000030218 | 10.61177777 | 6.260555194 | 4.943057334 | 8.054576721 | 5.013362104 |
| ENSMUSG00000030244 | 16.97884443 | 6.260555194 | 12.00456781 | 2.416373016 | 5.013362104 |
| ENSMUSG00000030247 | 10.61177777 | 9.043024169 | 9.886114669 | 4.832746033 | 4.297167518 |
| ENSMUSG00000030275 | 120.2668147 | 132.1672763 | 113.6903187 | 237.6100133 | 175.4676737 |
| ENSMUSG00000030283 | 7.781970364 | 9.043024169 | 7.061510478 | 8.860034393 | 10.7429188  |
| ENSMUSG00000030286 | 81.3569629  | 121.7330177 | 108.0411103 | 87.79488626 | 87.37573953 |
| ENSMUSG00000030307 | 9.904325918 | 5.56493795  | 4.236906287 | 5.638203705 | 4.297167518 |
| ENSMUSG00000030317 | 7.074518513 | 6.260555194 | 6.35535943  | 8.054576721 | 9.310529622 |

|                    |             |             |             |             |             |
|--------------------|-------------|-------------|-------------|-------------|-------------|
| ENSMUSG00000030319 | 2.829807405 | 2.086851731 | 1.412302096 | 3.221830688 | 2.148583759 |
| ENSMUSG00000030324 | 7.074518513 | 5.56493795  | 4.236906287 | 6.443661377 | 8.594335036 |
| ENSMUSG00000030327 | 69.33028142 | 110.6031418 | 82.61967259 | 151.4260424 | 121.7530797 |
| ENSMUSG00000030335 | 20.51610369 | 46.60635533 | 37.42600553 | 161.8969921 | 116.023523  |
| ENSMUSG00000030339 | 7.781970364 | 6.260555194 | 3.530755239 | 6.443661377 | 9.310529622 |
| ENSMUSG00000030342 | 16.97884443 | 20.17290007 | 12.71071886 | 20.1364418  | 18.62105924 |
| ENSMUSG00000030347 | 28.29807405 | 40.34580014 | 20.47838039 | 62.02024075 | 70.90326405 |
| ENSMUSG00000030350 | 9.196874066 | 2.782468975 | 4.236906287 | 0.805457672 | 7.87814045  |
| ENSMUSG00000030351 | 11.31922962 | 6.260555194 | 6.35535943  | 3.221830688 | 6.445751277 |
| ENSMUSG00000030364 | 6.367066661 | 9.043024169 | 3.530755239 | 6.443661377 | 6.445751277 |
| ENSMUSG00000030373 | 11.31922962 | 12.52111039 | 3.530755239 | 4.832746033 | 5.013362104 |
| ENSMUSG00000030376 | 5.65961481  | 10.43425866 | 12.00456781 | 6.443661377 | 5.013362104 |
| ENSMUSG00000030385 | 8.489422215 | 6.956172438 | 6.35535943  | 5.638203705 | 9.310529622 |
| ENSMUSG00000030393 | 9.904325918 | 13.21672763 | 9.886114669 | 8.860034393 | 7.161945863 |
| ENSMUSG00000030399 | 9.196874066 | 6.956172438 | 5.649208382 | 5.638203705 | 7.161945863 |
| ENSMUSG00000030402 | 10.61177777 | 9.043024169 | 9.886114669 | 8.054576721 | 5.729556691 |
| ENSMUSG00000030403 | 29.0055259  | 36.17209668 | 40.25060972 | 115.9859048 | 68.0384857  |
| ENSMUSG00000030406 | 5.65961481  | 6.260555194 | 7.767661525 | 8.860034393 | 9.310529622 |
| ENSMUSG00000030407 | 24.05336294 | 36.86771392 | 36.01370344 | 77.32393652 | 68.75468029 |
| ENSMUSG00000030413 | 20.51610369 | 42.43265187 | 30.36449505 | 17.72006879 | 15.04008631 |
| ENSMUSG00000030421 | 47.39927403 | 75.12666233 | 59.31668801 | 76.51847885 | 70.18706946 |
| ENSMUSG00000030423 | 43.86201478 | 54.25814501 | 52.25517753 | 82.15668255 | 73.05184781 |
| ENSMUSG00000030431 | 10.61177777 | 21.56413456 | 15.53532305 | 24.96918783 | 25.78300511 |
| ENSMUSG00000030463 | 7.074518513 | 9.738641413 | 6.35535943  | 3.221830688 | 7.161945863 |
| ENSMUSG00000030472 | 7.781970364 | 4.869320706 | 5.649208382 | 1.610915344 | 6.445751277 |
| ENSMUSG00000030474 | 7.074518513 | 8.347406925 | 4.943057334 | 6.443661377 | 3.580972932 |
| ENSMUSG00000030484 | 14.14903703 | 6.956172438 | 6.35535943  | 6.443661377 | 7.161945863 |
| ENSMUSG00000030499 | 10.61177777 | 8.347406925 | 6.35535943  | 1.610915344 | 5.729556691 |
| ENSMUSG00000030500 | 5.65961481  | 2.782468975 | 8.473812573 | 8.054576721 | 4.297167518 |
| ENSMUSG00000030507 | 5.65961481  | 5.56493795  | 7.061510478 | 2.416373016 | 3.580972932 |
| ENSMUSG00000030515 | 8.489422215 | 9.043024169 | 9.179963621 | 13.69278043 | 6.445751277 |
| ENSMUSG00000030525 | 3.537259256 | 7.651789682 | 4.236906287 | 2.416373016 | 8.594335036 |
| ENSMUSG00000030532 | 14.14903703 | 18.08604834 | 12.00456781 | 10.47094974 | 11.45911338 |
| ENSMUSG00000030544 | 7.781970364 | 2.782468975 | 3.530755239 | 1.610915344 | 7.161945863 |
| ENSMUSG00000030545 | 12.02668147 | 6.956172438 | 7.767661525 | 7.249119049 | 10.02672421 |
| ENSMUSG00000030549 | 9.904325918 | 3.478086219 | 7.767661525 | 8.054576721 | 7.87814045  |
| ENSMUSG00000030553 | 18.39374813 | 14.60796212 | 10.59226572 | 11.27640741 | 10.7429188  |
| ENSMUSG00000030559 | 4.244711108 | 6.956172438 | 7.767661525 | 8.860034393 | 6.445751277 |
| ENSMUSG00000030587 | 11.31922962 | 14.60796212 | 6.35535943  | 4.02728836  | 10.02672421 |
| ENSMUSG00000030602 | 68.62282957 | 93.21271067 | 91.09348516 | 66.85298678 | 66.60609653 |
| ENSMUSG00000030606 | 1.414903703 | 3.478086219 | 2.824604191 | 6.443661377 | 2.864778345 |
| ENSMUSG00000030607 | 8.489422215 | 5.56493795  | 4.943057334 | 5.638203705 | 8.594335036 |
| ENSMUSG00000030612 | 38.20239997 | 73.0398106  | 79.7950684  | 99.87675134 | 85.94335036 |

|                    |             |             |             |             |             |
|--------------------|-------------|-------------|-------------|-------------|-------------|
| ENSMUSG00000030614 | 40.32475552 | 50.7800588  | 43.07521391 | 38.66196826 | 51.56601022 |
| ENSMUSG00000030619 | 58.71850365 | 83.47406925 | 64.25974535 | 161.8969921 | 125.3340526 |
| ENSMUSG00000030647 | 80.64951104 | 107.8206728 | 99.56729774 | 144.1769233 | 103.848215  |
| ENSMUSG00000030653 | 7.781970364 | 8.347406925 | 6.35535943  | 7.249119049 | 9.310529622 |
| ENSMUSG00000030654 | 92.67619252 | 137.036597  | 88.26888097 | 248.8864207 | 163.2923657 |
| ENSMUSG00000030660 | 44.56946663 | 66.7792554  | 79.08891735 | 55.57657937 | 71.61945863 |
| ENSMUSG00000030662 | 43.15456293 | 51.47567604 | 51.54902649 | 146.5932963 | 97.40246374 |
| ENSMUSG00000030671 | 26.1757185  | 32.69401046 | 33.18909925 | 82.96214023 | 84.51096119 |
| ENSMUSG00000030674 | 6.367066661 | 4.869320706 | 12.00456781 | 8.054576721 | 8.594335036 |
| ENSMUSG00000030677 | 82.06441475 | 84.1696865  | 90.38733411 | 100.682209  | 96.68626916 |
| ENSMUSG00000030678 | 36.78749627 | 49.38882431 | 51.54902649 | 173.9788572 | 128.198831  |
| ENSMUSG00000030680 | 1.414903703 | 4.173703463 | 4.236906287 | 1.610915344 | 2.148583759 |
| ENSMUSG00000030682 | 71.45263698 | 86.95215547 | 74.14586002 | 104.7094974 | 87.37573953 |
| ENSMUSG00000030685 | 31.12788146 | 42.43265187 | 43.78136496 | 35.44013757 | 40.10689684 |
| ENSMUSG00000030697 | 55.88869625 | 90.43024169 | 84.73812573 | 202.1698757 | 146.8198902 |
| ENSMUSG00000030703 | 5.65961481  | 10.43425866 | 15.53532305 | 10.47094974 | 10.7429188  |
| ENSMUSG00000030713 | 3.537259256 | 2.086851731 | 4.236906287 | 7.249119049 | 7.161945863 |
| ENSMUSG00000030717 | 15.56394073 | 6.260555194 | 4.236906287 | 6.443661377 | 6.445751277 |
| ENSMUSG00000030718 | 71.45263698 | 107.1250555 | 87.56272992 | 103.098582  | 100.2672421 |
| ENSMUSG00000030722 | 22.63845924 | 34.08524495 | 31.77679715 | 41.88379895 | 43.68786977 |
| ENSMUSG00000030724 | 220.7249776 | 231.6405422 | 215.3760696 | 552.5439631 | 367.4078228 |
| ENSMUSG00000030725 | 2.829807405 | 6.956172438 | 10.59226572 | 9.665492065 | 9.310529622 |
| ENSMUSG00000030742 | 4.244711108 | 2.782468975 | 9.179963621 | 6.443661377 | 5.013362104 |
| ENSMUSG00000030745 | 161.2990221 | 155.8182626 | 163.8270431 | 391.4524286 | 270.7215536 |
| ENSMUSG00000030747 | 4.952162959 | 7.651789682 | 7.767661525 | 9.665492065 | 5.729556691 |
| ENSMUSG00000030748 | 234.8740146 | 209.3807904 | 215.3760696 | 463.1381615 | 343.7734014 |
| ENSMUSG00000030752 | 29.0055259  | 34.08524495 | 37.42600553 | 43.49471429 | 45.12025894 |
| ENSMUSG00000030754 | 67.20792587 | 97.38641413 | 62.84744325 | 81.35122488 | 70.18706946 |
| ENSMUSG00000030763 | 37.49494812 | 57.04061399 | 55.07978173 | 38.66196826 | 46.55264811 |
| ENSMUSG00000030772 | 5.65961481  | 6.260555194 | 8.473812573 | 7.249119049 | 5.013362104 |
| ENSMUSG00000030775 | 8.489422215 | 6.956172438 | 2.824604191 | 8.860034393 | 7.161945863 |
| ENSMUSG00000030785 | 7.781970364 | 4.869320706 | 7.061510478 | 9.665492065 | 9.310529622 |
| ENSMUSG00000030787 | 6.367066661 | 8.347406925 | 8.473812573 | 3.221830688 | 7.87814045  |
| ENSMUSG00000030789 | 4.244711108 | 6.260555194 | 4.236906287 | 4.832746033 | 7.87814045  |
| ENSMUSG00000030792 | 9.904325918 | 8.347406925 | 10.59226572 | 7.249119049 | 10.7429188  |
| ENSMUSG00000030793 | 25.46826665 | 25.04222078 | 35.30755239 | 32.21830688 | 22.20203218 |
| ENSMUSG00000030806 | 9.196874066 | 5.56493795  | 6.35535943  | 8.860034393 | 4.297167518 |
| ENSMUSG00000030816 | 47.39927403 | 72.34419335 | 55.78593277 | 53.96566403 | 60.87653984 |
| ENSMUSG00000030823 | 15.56394073 | 55.6493795  | 50.13672439 | 28.19101852 | 41.53928601 |
| ENSMUSG00000030827 | 5.65961481  | 7.651789682 | 3.530755239 | 10.47094974 | 8.594335036 |
| ENSMUSG00000030834 | 11.31922962 | 9.043024169 | 7.061510478 | 5.638203705 | 10.02672421 |
| ENSMUSG00000030835 | 43.86201478 | 82.08283477 | 59.31668801 | 116.7913625 | 121.0368851 |
| ENSMUSG00000030847 | 7.074518513 | 5.56493795  | 7.061510478 | 10.47094974 | 5.013362104 |

|                    |             |             |             |             |             |
|--------------------|-------------|-------------|-------------|-------------|-------------|
| ENSMUSG00000030859 | 6.367066661 | 5.56493795  | 7.061510478 | 3.221830688 | 6.445751277 |
| ENSMUSG00000030865 | 7.074518513 | 5.56493795  | 7.061510478 | 5.638203705 | 5.013362104 |
| ENSMUSG00000030866 | 6.367066661 | 7.651789682 | 6.35535943  | 4.832746033 | 10.7429188  |
| ENSMUSG00000030867 | 66.50047402 | 47.99758982 | 62.84744325 | 124.0404815 | 96.68626916 |
| ENSMUSG00000030868 | 22.63845924 | 53.56252777 | 27.53989086 | 43.49471429 | 32.22875639 |
| ENSMUSG00000030873 | 9.196874066 | 9.043024169 | 7.061510478 | 9.665492065 | 5.013362104 |
| ENSMUSG00000030876 | 21.93100739 | 38.95456565 | 29.65834401 | 64.43661377 | 47.98503729 |
| ENSMUSG00000030887 | 7.074518513 | 8.347406925 | 13.41686991 | 11.27640741 | 11.45911338 |
| ENSMUSG00000030894 | 21.22355554 | 38.25894841 | 29.65834401 | 28.9964762  | 20.769643   |
| ENSMUSG00000030895 | 9.904325918 | 1.391234488 | 2.824604191 | 8.860034393 | 5.013362104 |
| ENSMUSG00000030897 | 7.781970364 | 6.956172438 | 10.59226572 | 4.832746033 | 7.161945863 |
| ENSMUSG00000030905 | 11.31922962 | 4.869320706 | 7.061510478 | 3.221830688 | 7.87814045  |
| ENSMUSG00000030909 | 7.074518513 | 7.651789682 | 7.767661525 | 7.249119049 | 5.013362104 |
| ENSMUSG00000030911 | 10.61177777 | 6.260555194 | 8.473812573 | 4.832746033 | 9.310529622 |
| ENSMUSG00000030934 | 74.28244438 | 79.99598303 | 69.20280268 | 80.54576721 | 67.32229112 |
| ENSMUSG00000030942 | 25.46826665 | 36.17209668 | 20.47838039 | 80.54576721 | 56.57937232 |
| ENSMUSG00000030963 | 5.65961481  | 8.347406925 | 4.236906287 | 6.443661377 | 5.013362104 |
| ENSMUSG00000030968 | 8.489422215 | 8.347406925 | 5.649208382 | 6.443661377 | 5.729556691 |
| ENSMUSG00000030972 | 9.904325918 | 9.738641413 | 4.236906287 | 7.249119049 | 7.87814045  |
| ENSMUSG00000030976 | 7.781970364 | 3.478086219 | 5.649208382 | 8.054576721 | 7.87814045  |
| ENSMUSG00000030981 | 12.02668147 | 6.260555194 | 7.061510478 | 7.249119049 | 7.87814045  |
| ENSMUSG00000030983 | 50.93653329 | 77.21351406 | 71.32125582 | 82.15668255 | 70.90326405 |
| ENSMUSG00000030987 | 60.13340736 | 95.2995624  | 78.3827663  | 56.38203705 | 65.88990194 |
| ENSMUSG00000030996 | 6.367066661 | 8.347406925 | 9.886114669 | 8.054576721 | 12.17530797 |
| ENSMUSG00000031004 | 118.1444592 | 121.0374004 | 111.5718655 | 286.7429313 | 206.9802355 |
| ENSMUSG00000031007 | 33.95768886 | 47.30197258 | 49.43057334 | 48.32746033 | 42.25548059 |
| ENSMUSG00000031015 | 176.155511  | 226.0756042 | 175.1254598 | 333.4594762 | 245.6547431 |
| ENSMUSG00000031023 | 8.489422215 | 9.738641413 | 10.59226572 | 15.30369577 | 15.04008631 |
| ENSMUSG00000031029 | 59.42595551 | 95.99517964 | 69.90895373 | 159.4806191 | 136.0769714 |
| ENSMUSG00000031059 | 45.98437033 | 47.99758982 | 62.84744325 | 145.7878386 | 93.10529622 |
| ENSMUSG00000031068 | 69.33028142 | 86.95215547 | 88.97503202 | 111.9586164 | 86.65954495 |
| ENSMUSG00000031073 | 8.489422215 | 3.478086219 | 12.00456781 | 0.805457672 | 1.432389173 |
| ENSMUSG00000031077 | 9.904325918 | 16.69481385 | 19.06607829 | 19.33098413 | 17.18867007 |
| ENSMUSG00000031089 | 0.707451851 | 0.695617244 | 0.706151048 | 0           | 0.716194586 |
| ENSMUSG00000031101 | 62.25576291 | 63.99678643 | 60.02283906 | 136.9278043 | 84.51096119 |
| ENSMUSG00000031104 | 6.367066661 | 4.173703463 | 4.236906287 | 0.805457672 | 2.864778345 |
| ENSMUSG00000031107 | 19.80865184 | 27.12907251 | 19.06607829 | 40.2728836  | 26.49919969 |
| ENSMUSG00000031118 | 5.65961481  | 2.782468975 | 5.649208382 | 1.610915344 | 0.716194586 |
| ENSMUSG00000031119 | 4.952162959 | 2.086851731 | 3.530755239 | 4.02728836  | 2.148583759 |
| ENSMUSG00000031125 | 6.367066661 | 6.260555194 | 6.35535943  | 4.02728836  | 3.580972932 |
| ENSMUSG00000031129 | 9.904325918 | 17.39043109 | 12.71071886 | 5.638203705 | 7.161945863 |
| ENSMUSG00000031130 | 3.537259256 | 3.478086219 | 3.530755239 | 5.638203705 | 0.716194586 |
| ENSMUSG00000031132 | 3.537259256 | 2.782468975 | 2.824604191 | 4.832746033 | 1.432389173 |

|                    |             |             |             |             |             |
|--------------------|-------------|-------------|-------------|-------------|-------------|
| ENSMUSG00000031143 | 10.61177777 | 20.17290007 | 19.77222934 | 15.30369577 | 12.17530797 |
| ENSMUSG00000031146 | 24.05336294 | 25.04222078 | 24.00913562 | 75.71302118 | 60.87653984 |
| ENSMUSG00000031147 | 1.414903703 | 4.869320706 | 6.35535943  | 8.054576721 | 9.310529622 |
| ENSMUSG00000031149 | 6.367066661 | 9.738641413 | 10.59226572 | 8.054576721 | 11.45911338 |
| ENSMUSG00000031160 | 1.414903703 | 4.869320706 | 4.943057334 | 2.416373016 | 5.729556691 |
| ENSMUSG00000031163 | 6.367066661 | 2.782468975 | 6.35535943  | 3.221830688 | 5.013362104 |
| ENSMUSG00000031165 | 45.27691848 | 69.56172438 | 67.79050059 | 99.07129367 | 75.91662615 |
| ENSMUSG00000031176 | 25.46826665 | 44.5195036  | 39.54445867 | 27.38556085 | 22.91822676 |
| ENSMUSG00000031181 | 7.781970364 | 2.086851731 | 4.236906287 | 3.221830688 | 3.580972932 |
| ENSMUSG00000031194 | 6.367066661 | 3.478086219 | 5.649208382 | 0.805457672 | 2.864778345 |
| ENSMUSG00000031198 | 16.97884443 | 30.60715873 | 16.2414741  | 20.94189947 | 22.91822676 |
| ENSMUSG00000031202 | 1.414903703 | 0           | 0.706151048 | 0           | 2.148583759 |
| ENSMUSG00000031204 | 4.952162959 | 3.478086219 | 4.943057334 | 2.416373016 | 3.580972932 |
| ENSMUSG00000031212 | 5.65961481  | 2.782468975 | 5.649208382 | 1.610915344 | 2.148583759 |
| ENSMUSG00000031217 | 2.122355554 | 6.956172438 | 7.767661525 | 4.02728836  | 5.729556691 |
| ENSMUSG00000031221 | 17.68629628 | 30.60715873 | 26.12758877 | 41.88379895 | 30.08017263 |
| ENSMUSG00000031224 | 3.537259256 | 4.173703463 | 4.236906287 | 3.221830688 | 6.445751277 |
| ENSMUSG00000031227 | 6.367066661 | 2.782468975 | 6.35535943  | 1.610915344 | 1.432389173 |
| ENSMUSG00000031230 | 4.244711108 | 2.782468975 | 3.530755239 | 3.221830688 | 2.148583759 |
| ENSMUSG00000031231 | 32.54278516 | 45.91073809 | 46.60596915 | 109.5422434 | 80.21379367 |
| ENSMUSG00000031233 | 8.489422215 | 4.869320706 | 9.886114669 | 7.249119049 | 3.580972932 |
| ENSMUSG00000031239 | 2.122355554 | 2.782468975 | 2.824604191 | 0.805457672 | 5.013362104 |
| ENSMUSG00000031242 | 2.122355554 | 11.82549314 | 14.12302096 | 8.054576721 | 9.310529622 |
| ENSMUSG00000031245 | 8.489422215 | 9.738641413 | 4.943057334 | 9.665492065 | 10.7429188  |
| ENSMUSG00000031250 | 4.244711108 | 3.478086219 | 3.530755239 | 0.805457672 | 6.445751277 |
| ENSMUSG00000031258 | 72.16008883 | 77.21351406 | 88.26888097 | 37.85651059 | 30.79636721 |
| ENSMUSG00000031266 | 36.08004441 | 88.34338996 | 67.08434954 | 95.84946298 | 73.76804239 |
| ENSMUSG00000031270 | 5.65961481  | 4.173703463 | 0.706151048 | 6.443661377 | 2.148583759 |
| ENSMUSG00000031286 | 8.489422215 | 7.651789682 | 6.35535943  | 6.443661377 | 11.45911338 |
| ENSMUSG00000031312 | 3.537259256 | 6.260555194 | 3.530755239 | 9.665492065 | 7.87814045  |
| ENSMUSG00000031320 | 15.56394073 | 18.78166558 | 19.06607829 | 111.1531587 | 72.33565322 |
| ENSMUSG00000031323 | 4.244711108 | 1.391234488 | 2.118453143 | 1.610915344 | 1.432389173 |
| ENSMUSG00000031326 | 0           | 0.695617244 | 2.118453143 | 1.610915344 | 1.432389173 |
| ENSMUSG00000031329 | 9.196874066 | 2.782468975 | 6.35535943  | 2.416373016 | 2.148583759 |
| ENSMUSG00000031330 | 6.367066661 | 6.956172438 | 2.824604191 | 4.02728836  | 0           |
| ENSMUSG00000031333 | 52.35143699 | 84.1696865  | 58.61053696 | 69.2693598  | 54.43078856 |
| ENSMUSG00000031340 | 2.829807405 | 2.782468975 | 4.943057334 | 4.02728836  | 3.580972932 |
| ENSMUSG00000031349 | 24.76081479 | 31.99839321 | 21.89068248 | 31.41284921 | 30.79636721 |
| ENSMUSG00000031357 | 25.46826665 | 44.5195036  | 40.25060972 | 29.80193387 | 30.79636721 |
| ENSMUSG00000031364 | 1.414903703 | 4.173703463 | 4.236906287 | 2.416373016 | 2.148583759 |
| ENSMUSG00000031372 | 2.829807405 | 4.173703463 | 4.236906287 | 2.416373016 | 2.148583759 |
| ENSMUSG00000031373 | 2.122355554 | 2.086851731 | 1.412302096 | 3.221830688 | 3.580972932 |
| ENSMUSG00000031383 | 0           | 0.695617244 | 4.943057334 | 3.221830688 | 4.297167518 |



|                    |             |             |             |             |             |
|--------------------|-------------|-------------|-------------|-------------|-------------|
| ENSMUSG00000031384 | 4.952162959 | 2.086851731 | 2.824604191 | 1.610915344 | 2.864778345 |
| ENSMUSG00000031390 | 6.367066661 | 5.56493795  | 9.179963621 | 2.416373016 | 4.297167518 |
| ENSMUSG00000031409 | 5.65961481  | 4.869320706 | 3.530755239 | 6.443661377 | 2.864778345 |
| ENSMUSG00000031430 | 2.829807405 | 1.391234488 | 2.824604191 | 1.610915344 | 2.864778345 |
| ENSMUSG00000031432 | 28.29807405 | 38.25894841 | 33.18909925 | 49.132918   | 36.5259239  |
| ENSMUSG00000031443 | 8.489422215 | 4.869320706 | 4.236906287 | 11.27640741 | 7.161945863 |
| ENSMUSG00000031445 | 13.44158517 | 9.738641413 | 5.649208382 | 8.860034393 | 5.013362104 |
| ENSMUSG00000031447 | 56.5961481  | 91.12585893 | 88.26888097 | 100.682209  | 74.48423698 |
| ENSMUSG00000031450 | 7.074518513 | 6.956172438 | 5.649208382 | 7.249119049 | 10.02672421 |
| ENSMUSG00000031451 | 7.781970364 | 4.173703463 | 5.649208382 | 5.638203705 | 4.297167518 |
| ENSMUSG00000031458 | 7.781970364 | 6.260555194 | 9.179963621 | 5.638203705 | 9.310529622 |
| ENSMUSG00000031461 | 5.65961481  | 8.347406925 | 6.35535943  | 7.249119049 | 3.580972932 |
| ENSMUSG00000031465 | 10.61177777 | 11.82549314 | 7.061510478 | 9.665492065 | 12.89150255 |
| ENSMUSG00000031471 | 12.02668147 | 3.478086219 | 7.767661525 | 6.443661377 | 5.729556691 |
| ENSMUSG00000031479 | 38.20239997 | 57.73623123 | 37.42600553 | 67.65844446 | 63.74131818 |
| ENSMUSG00000031481 | 11.31922962 | 11.82549314 | 6.35535943  | 4.02728836  | 5.729556691 |
| ENSMUSG00000031482 | 10.61177777 | 12.52111039 | 16.94762515 | 26.58010318 | 20.05344842 |
| ENSMUSG00000031483 | 14.14903703 | 30.60715873 | 24.71528667 | 29.80193387 | 17.18867007 |
| ENSMUSG00000031487 | 14.85648888 | 22.95536904 | 21.89068248 | 37.05105292 | 30.79636721 |
| ENSMUSG00000031490 | 21.22355554 | 40.34580014 | 36.71985448 | 48.32746033 | 40.82309142 |
| ENSMUSG00000031494 | 7.781970364 | 4.869320706 | 12.71071886 | 5.638203705 | 6.445751277 |
| ENSMUSG00000031495 | 7.074518513 | 8.347406925 | 10.59226572 | 4.832746033 | 6.445751277 |
| ENSMUSG00000031504 | 16.97884443 | 22.2597518  | 23.30298458 | 29.80193387 | 30.79636721 |
| ENSMUSG00000031513 | 21.93100739 | 27.12907251 | 33.18909925 | 12.08186508 | 13.60769714 |
| ENSMUSG00000031517 | 12.73413332 | 8.347406925 | 6.35535943  | 5.638203705 | 10.7429188  |
| ENSMUSG00000031518 | 9.196874066 | 14.60796212 | 5.649208382 | 7.249119049 | 5.729556691 |
| ENSMUSG00000031519 | 13.44158517 | 4.173703463 | 8.473812573 | 5.638203705 | 4.297167518 |
| ENSMUSG00000031520 | 2.829807405 | 2.086851731 | 4.236906287 | 4.02728836  | 4.297167518 |
| ENSMUSG00000031521 | 15.56394073 | 24.34660353 | 22.59683353 | 18.52552646 | 25.06681052 |
| ENSMUSG00000031527 | 91.26128881 | 108.51629   | 94.6242404  | 132.9005159 | 133.2121931 |
| ENSMUSG00000031529 | 42.44711108 | 63.30116918 | 61.43514116 | 95.84946298 | 90.24051788 |
| ENSMUSG00000031530 | 40.32475552 | 53.56252777 | 67.08434954 | 202.1698757 | 147.5360848 |
| ENSMUSG00000031532 | 6.367066661 | 12.52111039 | 11.29841676 | 11.27640741 | 11.45911338 |
| ENSMUSG00000031533 | 54.47379255 | 89.0390072  | 48.7244223  | 66.85298678 | 73.05184781 |
| ENSMUSG00000031535 | 8.489422215 | 12.52111039 | 9.179963621 | 7.249119049 | 3.580972932 |
| ENSMUSG00000031536 | 36.08004441 | 70.25734162 | 45.8998181  | 49.93837567 | 49.41742646 |
| ENSMUSG00000031538 | 9.904325918 | 6.956172438 | 3.530755239 | 12.88732275 | 10.7429188  |
| ENSMUSG00000031539 | 11.31922962 | 41.04141738 | 28.95219296 | 18.52552646 | 16.47247549 |
| ENSMUSG00000031545 | 38.20239997 | 78.60474855 | 67.08434954 | 110.3477011 | 96.68626916 |
| ENSMUSG00000031546 | 20.51610369 | 31.30277597 | 28.95219296 | 24.16373016 | 30.79636721 |
| ENSMUSG00000031548 | 9.904325918 | 5.56493795  | 8.473812573 | 3.221830688 | 5.013362104 |
| ENSMUSG00000031556 | 55.1812444  | 73.0398106  | 74.14586002 | 109.5422434 | 123.9016634 |
| ENSMUSG00000031563 | 6.367066661 | 2.086851731 | 8.473812573 | 7.249119049 | 8.594335036 |

|                    |             |             |             |             |             |
|--------------------|-------------|-------------|-------------|-------------|-------------|
| ENSMUSG00000031574 | 12.73413332 | 6.956172438 | 11.29841676 | 6.443661377 | 7.87814045  |
| ENSMUSG00000031578 | 79.94205919 | 111.9943762 | 98.15499564 | 227.1390635 | 153.2656415 |
| ENSMUSG00000031590 | 65.08557032 | 103.6469693 | 80.50121945 | 97.46037832 | 69.47087488 |
| ENSMUSG00000031594 | 5.65961481  | 10.43425866 | 6.35535943  | 1.610915344 | 5.729556691 |
| ENSMUSG00000031595 | 7.781970364 | 6.260555194 | 16.94762515 | 7.249119049 | 7.87814045  |
| ENSMUSG00000031605 | 19.10119998 | 43.82388636 | 36.01370344 | 54.7711217  | 60.16034525 |
| ENSMUSG00000031609 | 16.97884443 | 16.69481385 | 23.30298458 | 28.19101852 | 25.06681052 |
| ENSMUSG00000031610 | 5.65961481  | 5.56493795  | 7.767661525 | 6.443661377 | 10.7429188  |
| ENSMUSG00000031613 | 8.489422215 | 11.82549314 | 12.00456781 | 5.638203705 | 6.445751277 |
| ENSMUSG00000031616 | 8.489422215 | 4.869320706 | 7.061510478 | 7.249119049 | 7.161945863 |
| ENSMUSG00000031621 | 3.537259256 | 6.260555194 | 9.179963621 | 5.638203705 | 8.594335036 |
| ENSMUSG00000031627 | 193.1343554 | 226.0756042 | 218.9068248 | 430.9198546 | 310.8284505 |
| ENSMUSG00000031628 | 35.37259256 | 48.69320706 | 39.54445867 | 82.96214023 | 74.48423698 |
| ENSMUSG00000031633 | 9.904325918 | 24.34660353 | 21.18453143 | 62.82569842 | 48.70123187 |
| ENSMUSG00000031636 | 7.781970364 | 4.173703463 | 3.530755239 | 4.832746033 | 6.445751277 |
| ENSMUSG00000031642 | 9.904325918 | 6.260555194 | 9.179963621 | 14.4982381  | 22.91822676 |
| ENSMUSG00000031645 | 7.781970364 | 5.56493795  | 11.29841676 | 4.02728836  | 5.013362104 |
| ENSMUSG00000031651 | 9.196874066 | 4.869320706 | 8.473812573 | 4.02728836  | 5.729556691 |
| ENSMUSG00000031662 | 121.6817184 | 141.9059177 | 121.4579802 | 304.4630001 | 200.5344842 |
| ENSMUSG00000031665 | 9.196874066 | 4.869320706 | 9.886114669 | 4.02728836  | 5.729556691 |
| ENSMUSG00000031672 | 43.15456293 | 51.47567604 | 61.43514116 | 128.0677699 | 89.52432329 |
| ENSMUSG00000031673 | 6.367066661 | 4.173703463 | 6.35535943  | 4.02728836  | 5.013362104 |
| ENSMUSG00000031682 | 9.904325918 | 5.56493795  | 6.35535943  | 8.860034393 | 10.02672421 |
| ENSMUSG00000031688 | 6.367066661 | 11.1298759  | 7.767661525 | 2.416373016 | 7.87814045  |
| ENSMUSG00000031696 | 135.1233036 | 184.3385696 | 172.3008557 | 268.2174048 | 224.1689055 |
| ENSMUSG00000031701 | 79.23460734 | 78.60474855 | 83.32582364 | 207.8080794 | 174.0352845 |
| ENSMUSG00000031703 | 26.1757185  | 53.56252777 | 51.54902649 | 49.132918   | 55.86317773 |
| ENSMUSG00000031706 | 56.5961481  | 76.51789682 | 60.72899011 | 67.65844446 | 71.61945863 |
| ENSMUSG00000031710 | 9.196874066 | 6.260555194 | 9.179963621 | 0.805457672 | 7.87814045  |
| ENSMUSG00000031711 | 42.44711108 | 63.99678643 | 60.02283906 | 121.6241085 | 85.94335036 |
| ENSMUSG00000031714 | 9.196874066 | 9.043024169 | 4.943057334 | 8.860034393 | 4.297167518 |
| ENSMUSG00000031723 | 29.71297775 | 48.69320706 | 40.95676077 | 102.2931244 | 74.48423698 |
| ENSMUSG00000031725 | 10.61177777 | 4.173703463 | 3.530755239 | 6.443661377 | 7.87814045  |
| ENSMUSG00000031727 | 5.65961481  | 8.347406925 | 4.943057334 | 5.638203705 | 5.729556691 |
| ENSMUSG00000031729 | 154.2245036 | 194.7728283 | 165.2393452 | 198.948045  | 156.8466144 |
| ENSMUSG00000031740 | 7.074518513 | 5.56493795  | 4.943057334 | 1.610915344 | 6.445751277 |
| ENSMUSG00000031755 | 24.05336294 | 34.78086219 | 40.25060972 | 33.82922223 | 32.22875639 |
| ENSMUSG00000031756 | 21.22355554 | 20.86851731 | 27.53989086 | 40.2728836  | 36.5259239  |
| ENSMUSG00000031757 | 7.781970364 | 6.956172438 | 9.179963621 | 6.443661377 | 8.594335036 |
| ENSMUSG00000031760 | 8.489422215 | 4.173703463 | 7.767661525 | 4.832746033 | 5.013362104 |
| ENSMUSG00000031762 | 7.074518513 | 10.43425866 | 6.35535943  | 1.610915344 | 5.729556691 |
| ENSMUSG00000031765 | 14.14903703 | 20.86851731 | 13.41686991 | 15.30369577 | 17.90486466 |
| ENSMUSG00000031766 | 11.31922962 | 9.738641413 | 6.35535943  | 8.860034393 | 7.87814045  |

|                    |             |             |             |             |             |
|--------------------|-------------|-------------|-------------|-------------|-------------|
| ENSMUSG00000031774 | 154.9319554 | 199.642149  | 172.3008557 | 152.2315    | 144.6713064 |
| ENSMUSG00000031775 | 2.122355554 | 4.173703463 | 4.236906287 | 3.221830688 | 2.864778345 |
| ENSMUSG00000031779 | 8.489422215 | 9.043024169 | 11.29841676 | 15.30369577 | 11.45911338 |
| ENSMUSG00000031780 | 9.196874066 | 6.260555194 | 5.649208382 | 3.221830688 | 10.7429188  |
| ENSMUSG00000031786 | 6.367066661 | 10.43425866 | 8.473812573 | 3.221830688 | 8.594335036 |
| ENSMUSG00000031787 | 15.56394073 | 26.43345526 | 19.06607829 | 20.1364418  | 15.04008631 |
| ENSMUSG00000031790 | 7.074518513 | 7.651789682 | 4.943057334 | 4.02728836  | 5.013362104 |
| ENSMUSG00000031791 | 21.22355554 | 39.6501829  | 31.0706461  | 37.05105292 | 45.12025894 |
| ENSMUSG00000031796 | 35.37259256 | 59.12746572 | 50.84287544 | 58.79841006 | 70.18706946 |
| ENSMUSG00000031799 | 41.73965922 | 70.95295887 | 62.1412922  | 105.514955  | 70.90326405 |
| ENSMUSG00000031803 | 4.952162959 | 5.56493795  | 8.473812573 | 9.665492065 | 7.161945863 |
| ENSMUSG00000031808 | 3.537259256 | 4.869320706 | 4.943057334 | 4.02728836  | 6.445751277 |
| ENSMUSG00000031813 | 21.22355554 | 36.17209668 | 23.30298458 | 36.24559524 | 27.21539428 |
| ENSMUSG00000031820 | 21.93100739 | 36.17209668 | 43.78136496 | 48.32746033 | 42.97167518 |
| ENSMUSG00000031828 | 12.73413332 | 24.34660353 | 22.59683353 | 12.88732275 | 20.05344842 |
| ENSMUSG00000031831 | 73.57499253 | 110.6031418 | 98.86114669 | 67.65844446 | 55.86317773 |
| ENSMUSG00000031839 | 54.47379255 | 63.99678643 | 53.66747963 | 42.68925662 | 47.98503729 |
| ENSMUSG00000031843 | 30.4204296  | 44.5195036  | 52.96132858 | 119.2077355 | 93.10529622 |
| ENSMUSG00000031844 | 9.196874066 | 6.260555194 | 7.061510478 | 4.832746033 | 7.161945863 |
| ENSMUSG00000031847 | 5.65961481  | 3.478086219 | 4.943057334 | 4.832746033 | 6.445751277 |
| ENSMUSG00000031849 | 7.781970364 | 9.738641413 | 8.473812573 | 7.249119049 | 5.729556691 |
| ENSMUSG00000031853 | 6.367066661 | 2.782468975 | 7.061510478 | 7.249119049 | 3.580972932 |
| ENSMUSG00000031871 | 7.781970364 | 6.956172438 | 4.236906287 | 6.443661377 | 10.7429188  |
| ENSMUSG00000031875 | 5.65961481  | 6.956172438 | 5.649208382 | 5.638203705 | 10.7429188  |
| ENSMUSG00000031876 | 5.65961481  | 13.21672763 | 8.473812573 | 8.860034393 | 13.60769714 |
| ENSMUSG00000031877 | 5.65961481  | 9.043024169 | 8.473812573 | 4.02728836  | 6.445751277 |
| ENSMUSG00000031880 | 9.196874066 | 9.738641413 | 12.71071886 | 16.10915344 | 20.769643   |
| ENSMUSG00000031881 | 7.074518513 | 8.347406925 | 2.824604191 | 5.638203705 | 3.580972932 |
| ENSMUSG00000031889 | 45.98437033 | 73.73542784 | 50.84287544 | 64.43661377 | 60.87653984 |
| ENSMUSG00000031891 | 13.44158517 | 6.260555194 | 9.886114669 | 12.08186508 | 10.7429188  |
| ENSMUSG00000031893 | 58.0110518  | 78.60474855 | 64.96589639 | 53.96566403 | 59.44415067 |
| ENSMUSG00000031896 | 12.02668147 | 15.30357936 | 12.71071886 | 16.91461111 | 15.7562809  |
| ENSMUSG00000031897 | 16.97884443 | 21.56413456 | 19.06607829 | 33.82922223 | 40.10689684 |
| ENSMUSG00000031898 | 9.904325918 | 6.260555194 | 8.473812573 | 6.443661377 | 10.7429188  |
| ENSMUSG00000031903 | 46.69182218 | 34.78086219 | 38.13215658 | 25.77464551 | 27.21539428 |
| ENSMUSG00000031904 | 19.10119998 | 43.82388636 | 38.83830763 | 81.35122488 | 65.17370736 |
| ENSMUSG00000031906 | 4.952162959 | 10.43425866 | 7.061510478 | 8.860034393 | 11.45911338 |
| ENSMUSG00000031907 | 10.61177777 | 29.91154148 | 22.59683353 | 16.91461111 | 23.63442135 |
| ENSMUSG00000031913 | 24.76081479 | 38.25894841 | 26.83373982 | 46.71654498 | 43.68786977 |
| ENSMUSG00000031919 | 6.367066661 | 9.738641413 | 6.35535943  | 15.30369577 | 16.47247549 |
| ENSMUSG00000031924 | 91.96874066 | 138.4278315 | 132.756397  | 247.2755053 | 162.5761711 |
| ENSMUSG00000031927 | 7.074518513 | 6.956172438 | 8.473812573 | 8.054576721 | 5.729556691 |
| ENSMUSG00000031931 | 21.22355554 | 32.69401046 | 32.4829482  | 73.29664816 | 63.74131818 |

|                    |             |             |             |             |             |
|--------------------|-------------|-------------|-------------|-------------|-------------|
| ENSMUSG00000031935 | 39.61730367 | 86.95215547 | 76.26431316 | 146.5932963 | 108.1453825 |
| ENSMUSG00000031936 | 6.367066661 | 8.347406925 | 8.473812573 | 4.02728836  | 7.87814045  |
| ENSMUSG00000031937 | 8.489422215 | 6.260555194 | 5.649208382 | 6.443661377 | 9.310529622 |
| ENSMUSG00000031950 | 37.49494812 | 66.7792554  | 71.32125582 | 41.88379895 | 44.40406435 |
| ENSMUSG00000031951 | 10.61177777 | 8.347406925 | 7.061510478 | 8.860034393 | 9.310529622 |
| ENSMUSG00000031952 | 8.489422215 | 7.651789682 | 3.530755239 | 15.30369577 | 10.7429188  |
| ENSMUSG00000031953 | 14.85648888 | 20.17290007 | 15.53532305 | 14.4982381  | 16.47247549 |
| ENSMUSG00000031954 | 47.39927403 | 79.99598303 | 60.72899011 | 75.71302118 | 60.16034525 |
| ENSMUSG00000031957 | 1.414903703 | 2.782468975 | 1.412302096 | 4.02728836  | 2.864778345 |
| ENSMUSG00000031962 | 7.781970364 | 5.56493795  | 4.943057334 | 6.443661377 | 7.161945863 |
| ENSMUSG00000031963 | 4.952162959 | 3.478086219 | 7.767661525 | 4.02728836  | 5.729556691 |
| ENSMUSG00000031966 | 6.367066661 | 8.347406925 | 8.473812573 | 5.638203705 | 7.161945863 |
| ENSMUSG00000031972 | 9.196874066 | 6.260555194 | 8.473812573 | 7.249119049 | 6.445751277 |
| ENSMUSG00000031974 | 9.904325918 | 18.08604834 | 16.94762515 | 21.74735715 | 12.89150255 |
| ENSMUSG00000031980 | 9.904325918 | 6.260555194 | 4.943057334 | 6.443661377 | 6.445751277 |
| ENSMUSG00000031981 | 9.904325918 | 4.869320706 | 6.35535943  | 8.860034393 | 7.161945863 |
| ENSMUSG00000031982 | 91.26128881 | 116.1680797 | 111.5718655 | 121.6241085 | 101.6996313 |
| ENSMUSG00000031983 | 12.02668147 | 9.738641413 | 9.886114669 | 11.27640741 | 9.310529622 |
| ENSMUSG00000031984 | 79.94205919 | 130.0804246 | 113.6903187 | 158.6751614 | 141.8065281 |
| ENSMUSG00000031985 | 74.98989623 | 126.6023384 | 120.0456781 | 165.9242805 | 141.0903335 |
| ENSMUSG00000031986 | 86.30912585 | 123.1242521 | 106.6288082 | 139.3441773 | 146.8198902 |
| ENSMUSG00000031987 | 34.66514071 | 41.04141738 | 48.7244223  | 45.10562964 | 52.2822048  |
| ENSMUSG00000031993 | 43.86201478 | 65.38802092 | 64.96589639 | 45.91108731 | 58.72795608 |
| ENSMUSG00000031995 | 9.904325918 | 11.82549314 | 10.59226572 | 10.47094974 | 6.445751277 |
| ENSMUSG00000031997 | 9.904325918 | 4.869320706 | 9.886114669 | 4.832746033 | 10.7429188  |
| ENSMUSG00000031998 | 9.196874066 | 7.651789682 | 7.061510478 | 6.443661377 | 9.310529622 |
| ENSMUSG00000032009 | 56.5961481  | 109.2119073 | 83.32582364 | 90.21125927 | 79.49759908 |
| ENSMUSG00000032011 | 6.367066661 | 4.173703463 | 7.767661525 | 17.72006879 | 12.17530797 |
| ENSMUSG00000032012 | 9.196874066 | 9.738641413 | 9.886114669 | 16.91461111 | 22.20203218 |
| ENSMUSG00000032013 | 10.61177777 | 2.782468975 | 5.649208382 | 4.832746033 | 4.297167518 |
| ENSMUSG00000032014 | 9.904325918 | 7.651789682 | 15.53532305 | 8.054576721 | 10.7429188  |
| ENSMUSG00000032023 | 7.074518513 | 9.043024169 | 6.35535943  | 6.443661377 | 9.310529622 |
| ENSMUSG00000032026 | 12.73413332 | 38.25894841 | 21.89068248 | 41.88379895 | 34.37734014 |
| ENSMUSG00000032034 | 7.074518513 | 6.260555194 | 5.649208382 | 8.860034393 | 9.310529622 |
| ENSMUSG00000032038 | 8.489422215 | 12.52111039 | 16.2414741  | 8.054576721 | 10.7429188  |
| ENSMUSG00000032044 | 45.27691848 | 82.08283477 | 76.97046421 | 87.79488626 | 89.52432329 |
| ENSMUSG00000032047 | 34.66514071 | 49.38882431 | 45.8998181  | 39.46742593 | 35.09353473 |
| ENSMUSG00000032051 | 15.56394073 | 17.39043109 | 14.12302096 | 15.30369577 | 22.20203218 |
| ENSMUSG00000032053 | 132.2934962 | 144.6883867 | 117.2210739 | 270.6337778 | 197.6697058 |
| ENSMUSG00000032057 | 1.414903703 | 1.391234488 | 2.824604191 | 4.02728836  | 2.864778345 |
| ENSMUSG00000032062 | 8.489422215 | 6.260555194 | 3.530755239 | 4.832746033 | 8.594335036 |
| ENSMUSG00000032065 | 9.904325918 | 12.52111039 | 11.29841676 | 11.27640741 | 7.87814045  |
| ENSMUSG00000032066 | 9.904325918 | 11.82549314 | 9.886114669 | 12.08186508 | 8.594335036 |

|                    |             |             |             |             |             |
|--------------------|-------------|-------------|-------------|-------------|-------------|
| ENSMUSG00000032067 | 53.7663407  | 75.12666233 | 66.37819849 | 50.74383334 | 54.43078856 |
| ENSMUSG00000032077 | 49.52162959 | 69.56172438 | 58.61053696 | 91.01671695 | 78.06520991 |
| ENSMUSG00000032080 | 8.489422215 | 7.651789682 | 3.530755239 | 5.638203705 | 7.87814045  |
| ENSMUSG00000032083 | 12.02668147 | 8.347406925 | 11.29841676 | 2.416373016 | 7.161945863 |
| ENSMUSG00000032085 | 9.904325918 | 10.43425866 | 7.767661525 | 6.443661377 | 11.45911338 |
| ENSMUSG00000032092 | 9.196874066 | 6.956172438 | 7.767661525 | 7.249119049 | 7.87814045  |
| ENSMUSG00000032093 | 5.65961481  | 6.956172438 | 5.649208382 | 6.443661377 | 7.87814045  |
| ENSMUSG00000032094 | 7.781970364 | 4.869320706 | 4.943057334 | 8.860034393 | 7.87814045  |
| ENSMUSG00000032099 | 9.904325918 | 11.82549314 | 5.649208382 | 1.610915344 | 7.161945863 |
| ENSMUSG00000032101 | 33.95768886 | 47.99758982 | 45.19366706 | 56.38203705 | 56.57937232 |
| ENSMUSG00000032105 | 6.367066661 | 8.347406925 | 7.061510478 | 8.054576721 | 4.297167518 |
| ENSMUSG00000032108 | 0           | 0           | 0           | 0           | 0           |
| ENSMUSG00000032110 | 9.196874066 | 7.651789682 | 5.649208382 | 8.860034393 | 6.445751277 |
| ENSMUSG00000032114 | 3.537259256 | 13.91234488 | 8.473812573 | 4.832746033 | 6.445751277 |
| ENSMUSG00000032119 | 22.63845924 | 29.21592424 | 46.60596915 | 57.99295239 | 53.71459398 |
| ENSMUSG00000032121 | 9.904325918 | 12.52111039 | 12.00456781 | 6.443661377 | 7.87814045  |
| ENSMUSG00000032123 | 23.34591109 | 42.43265187 | 33.18909925 | 55.57657937 | 36.5259239  |
| ENSMUSG00000032127 | 31.12788146 | 38.95456565 | 45.8998181  | 38.66196826 | 45.83645353 |
| ENSMUSG00000032134 | 7.781970364 | 6.260555194 | 7.061510478 | 8.054576721 | 4.297167518 |
| ENSMUSG00000032171 | 90.55383696 | 114.081228  | 100.2734488 | 190.0880106 | 136.793166  |
| ENSMUSG00000032172 | 7.074518513 | 6.260555194 | 3.530755239 | 7.249119049 | 8.594335036 |
| ENSMUSG00000032174 | 4.244711108 | 4.173703463 | 4.943057334 | 6.443661377 | 5.729556691 |
| ENSMUSG00000032179 | 5.65961481  | 6.260555194 | 9.179963621 | 4.832746033 | 2.148583759 |
| ENSMUSG00000032181 | 8.489422215 | 6.260555194 | 6.35535943  | 7.249119049 | 3.580972932 |
| ENSMUSG00000032184 | 9.904325918 | 4.869320706 | 7.767661525 | 9.665492065 | 7.161945863 |
| ENSMUSG00000032191 | 18.39374813 | 22.95536904 | 13.41686991 | 8.860034393 | 12.89150255 |
| ENSMUSG00000032193 | 31.12788146 | 31.99839321 | 44.48751601 | 150.6205847 | 118.8883013 |
| ENSMUSG00000032194 | 7.781970364 | 6.956172438 | 2.118453143 | 4.02728836  | 9.310529622 |
| ENSMUSG00000032198 | 9.904325918 | 8.347406925 | 6.35535943  | 8.054576721 | 7.87814045  |
| ENSMUSG00000032218 | 31.83533331 | 50.7800588  | 41.66291182 | 29.80193387 | 44.40406435 |
| ENSMUSG00000032226 | 3.537259256 | 4.869320706 | 6.35535943  | 7.249119049 | 11.45911338 |
| ENSMUSG00000032243 | 8.489422215 | 6.260555194 | 5.649208382 | 5.638203705 | 4.297167518 |
| ENSMUSG00000032244 | 83.47931845 | 123.8198694 | 99.56729774 | 173.1733995 | 144.6713064 |
| ENSMUSG00000032257 | 7.781970364 | 6.260555194 | 5.649208382 | 3.221830688 | 3.580972932 |
| ENSMUSG00000032259 | 16.27139258 | 2.782468975 | 6.35535943  | 4.02728836  | 11.45911338 |
| ENSMUSG00000032264 | 34.66514071 | 52.17129328 | 46.60596915 | 28.9964762  | 47.2688427  |
| ENSMUSG00000032267 | 19.80865184 | 43.82388636 | 42.36906287 | 46.71654498 | 32.22875639 |
| ENSMUSG00000032269 | 5.65961481  | 5.56493795  | 7.061510478 | 6.443661377 | 6.445751277 |
| ENSMUSG00000032274 | 7.074518513 | 14.60796212 | 7.767661525 | 4.02728836  | 5.729556691 |
| ENSMUSG00000032288 | 58.0110518  | 102.9513521 | 69.90895373 | 161.0915344 | 135.3607768 |
| ENSMUSG00000032290 | 14.85648888 | 16.69481385 | 12.71071886 | 37.85651059 | 30.08017263 |
| ENSMUSG00000032291 | 4.244711108 | 4.869320706 | 5.649208382 | 8.054576721 | 3.580972932 |
| ENSMUSG00000032292 | 4.244711108 | 6.260555194 | 8.473812573 | 8.860034393 | 5.729556691 |

|                    |             |             |             |             |             |
|--------------------|-------------|-------------|-------------|-------------|-------------|
| ENSMUSG00000032293 | 93.38364437 | 146.7752384 | 139.1117564 | 182.8388916 | 136.0769714 |
| ENSMUSG00000032300 | 45.27691848 | 52.17129328 | 45.8998181  | 226.3336059 | 187.6429816 |
| ENSMUSG00000032303 | 6.367066661 | 6.260555194 | 11.29841676 | 5.638203705 | 4.297167518 |
| ENSMUSG00000032308 | 20.51610369 | 29.91154148 | 37.42600553 | 21.74735715 | 26.49919969 |
| ENSMUSG00000032310 | 9.196874066 | 6.956172438 | 8.473812573 | 8.860034393 | 7.161945863 |
| ENSMUSG00000032312 | 81.3569629  | 100.1688831 | 110.8657145 | 274.6610662 | 198.3859004 |
| ENSMUSG00000032315 | 7.781970364 | 6.956172438 | 12.00456781 | 16.91461111 | 17.18867007 |
| ENSMUSG00000032316 | 91.96874066 | 115.4724625 | 128.5194907 | 161.0915344 | 124.617858  |
| ENSMUSG00000032320 | 16.27139258 | 26.43345526 | 31.0706461  | 25.77464551 | 25.06681052 |
| ENSMUSG00000032329 | 27.5906222  | 57.04061399 | 45.19366706 | 41.88379895 | 52.99839939 |
| ENSMUSG00000032330 | 59.42595551 | 88.34338996 | 68.49665163 | 144.982381  | 110.2939663 |
| ENSMUSG00000032333 | 23.34591109 | 22.95536904 | 24.71528667 | 70.07481747 | 45.83645353 |
| ENSMUSG00000032340 | 9.196874066 | 7.651789682 | 4.236906287 | 6.443661377 | 4.297167518 |
| ENSMUSG00000032346 | 9.196874066 | 6.260555194 | 10.59226572 | 8.860034393 | 10.7429188  |
| ENSMUSG00000032348 | 4.952162959 | 6.956172438 | 8.473812573 | 8.860034393 | 9.310529622 |
| ENSMUSG00000032350 | 36.78749627 | 59.82308296 | 63.5535943  | 63.6311561  | 50.13362104 |
| ENSMUSG00000032353 | 7.781970364 | 15.30357936 | 15.53532305 | 15.30369577 | 12.89150255 |
| ENSMUSG00000032370 | 8.489422215 | 9.043024169 | 14.829172   | 12.88732275 | 12.17530797 |
| ENSMUSG00000032377 | 9.904325918 | 13.91234488 | 4.943057334 | 7.249119049 | 8.594335036 |
| ENSMUSG00000032380 | 8.489422215 | 6.956172438 | 6.35535943  | 20.94189947 | 19.33725383 |
| ENSMUSG00000032381 | 53.7663407  | 92.51709342 | 68.49665163 | 103.098582  | 81.64618284 |
| ENSMUSG00000032383 | 37.49494812 | 57.73623123 | 40.25060972 | 89.4058016  | 83.07857202 |
| ENSMUSG00000032388 | 47.39927403 | 59.82308296 | 67.79050059 | 60.40932541 | 47.2688427  |
| ENSMUSG00000032394 | 6.367066661 | 5.56493795  | 7.061510478 | 8.860034393 | 1.432389173 |
| ENSMUSG00000032397 | 50.22908144 | 71.64857611 | 55.07978173 | 173.1733995 | 133.2121931 |
| ENSMUSG00000032398 | 14.14903703 | 24.34660353 | 24.71528667 | 20.1364418  | 24.35061594 |
| ENSMUSG00000032399 | 20.51610369 | 23.65098629 | 18.35992724 | 117.5968201 | 75.91662615 |
| ENSMUSG00000032403 | 34.66514071 | 58.43184848 | 50.13672439 | 99.07129367 | 90.95671247 |
| ENSMUSG00000032412 | 33.25023701 | 45.21512085 | 57.90438592 | 115.9859048 | 100.2672421 |
| ENSMUSG00000032419 | 9.196874066 | 4.173703463 | 4.236906287 | 2.416373016 | 8.594335036 |
| ENSMUSG00000032420 | 14.85648888 | 8.347406925 | 5.649208382 | 7.249119049 | 6.445751277 |
| ENSMUSG00000032431 | 11.31922962 | 16.69481385 | 14.12302096 | 24.96918783 | 26.49919969 |
| ENSMUSG00000032434 | 106.1177777 | 130.7760418 | 110.1595635 | 127.2623122 | 118.1721067 |
| ENSMUSG00000032435 | 44.56946663 | 80.69160028 | 73.43970897 | 52.35474869 | 55.86317773 |
| ENSMUSG00000032451 | 11.31922962 | 4.869320706 | 4.943057334 | 2.416373016 | 11.45911338 |
| ENSMUSG00000032454 | 7.781970364 | 2.782468975 | 6.35535943  | 7.249119049 | 5.729556691 |
| ENSMUSG00000032458 | 83.47931845 | 130.7760418 | 129.9317928 | 125.6513968 | 126.7664418 |
| ENSMUSG00000032459 | 48.10672589 | 75.82227957 | 60.02283906 | 64.43661377 | 66.60609653 |
| ENSMUSG00000032482 | 7.074518513 | 2.782468975 | 7.061510478 | 4.832746033 | 5.013362104 |
| ENSMUSG00000032484 | 9.904325918 | 7.651789682 | 14.12302096 | 9.665492065 | 8.594335036 |
| ENSMUSG00000032487 | 7.781970364 | 9.043024169 | 9.886114669 | 5.638203705 | 7.161945863 |
| ENSMUSG00000032493 | 14.85648888 | 6.956172438 | 7.061510478 | 8.860034393 | 10.7429188  |
| ENSMUSG00000032495 | 10.61177777 | 9.738641413 | 7.061510478 | 6.443661377 | 5.013362104 |

|                    |             |             |             |             |             |
|--------------------|-------------|-------------|-------------|-------------|-------------|
| ENSMUSG00000032496 | 4.952162959 | 6.956172438 | 9.886114669 | 8.860034393 | 8.594335036 |
| ENSMUSG00000032498 | 32.54278516 | 61.21431745 | 48.01827125 | 171.5624842 | 131.0636093 |
| ENSMUSG00000032501 | 8.489422215 | 15.30357936 | 21.89068248 | 17.72006879 | 14.32389173 |
| ENSMUSG00000032502 | 9.904325918 | 6.956172438 | 7.061510478 | 5.638203705 | 10.7429188  |
| ENSMUSG00000032508 | 29.71297775 | 51.47567604 | 45.8998181  | 70.07481747 | 58.01176149 |
| ENSMUSG00000032512 | 65.79302217 | 98.77764862 | 96.0365425  | 80.54576721 | 80.92998826 |
| ENSMUSG00000032513 | 19.80865184 | 23.65098629 | 29.65834401 | 50.74383334 | 44.40406435 |
| ENSMUSG00000032515 | 87.72402956 | 139.819066  | 132.756397  | 302.8520847 | 213.4259867 |
| ENSMUSG00000032518 | 0.707451851 | 4.173703463 | 2.824604191 | 1.610915344 | 4.297167518 |
| ENSMUSG00000032528 | 7.074518513 | 6.956172438 | 4.236906287 | 8.054576721 | 6.445751277 |
| ENSMUSG00000032532 | 7.781970364 | 4.869320706 | 9.179963621 | 7.249119049 | 7.161945863 |
| ENSMUSG00000032549 | 10.61177777 | 17.39043109 | 16.2414741  | 8.054576721 | 10.02672421 |
| ENSMUSG00000032551 | 97.62835547 | 132.1672763 | 91.09348516 | 190.8934683 | 171.1705061 |
| ENSMUSG00000032565 | 37.49494812 | 57.04061399 | 58.61053696 | 35.44013757 | 51.56601022 |
| ENSMUSG00000032566 | 7.074518513 | 5.56493795  | 7.061510478 | 4.832746033 | 5.729556691 |
| ENSMUSG00000032572 | 10.61177777 | 7.651789682 | 13.41686991 | 8.054576721 | 7.161945863 |
| ENSMUSG00000032578 | 10.61177777 | 4.173703463 | 4.236906287 | 205.3917064 | 142.5227227 |
| ENSMUSG00000032583 | 22.63845924 | 46.60635533 | 34.60140134 | 29.80193387 | 30.08017263 |
| ENSMUSG00000032586 | 26.88317035 | 35.47647943 | 38.83830763 | 66.04752911 | 47.2688427  |
| ENSMUSG00000032593 | 3.537259256 | 6.956172438 | 5.649208382 | 8.054576721 | 4.297167518 |
| ENSMUSG00000032598 | 10.61177777 | 15.30357936 | 18.35992724 | 17.72006879 | 27.21539428 |
| ENSMUSG00000032602 | 20.51610369 | 25.04222078 | 25.42143772 | 19.33098413 | 20.769643   |
| ENSMUSG00000032606 | 9.904325918 | 15.30357936 | 15.53532305 | 10.47094974 | 8.594335036 |
| ENSMUSG00000032611 | 15.56394073 | 15.30357936 | 14.829172   | 11.27640741 | 15.04008631 |
| ENSMUSG00000032621 | 28.29807405 | 38.25894841 | 29.65834401 | 34.6346799  | 29.36397804 |
| ENSMUSG00000032623 | 10.61177777 | 4.869320706 | 2.824604191 | 8.860034393 | 12.17530797 |
| ENSMUSG00000032661 | 3.537259256 | 4.869320706 | 9.179963621 | 31.41284921 | 12.17530797 |
| ENSMUSG00000032671 | 4.952162959 | 5.56493795  | 6.35535943  | 8.860034393 | 6.445751277 |
| ENSMUSG00000032673 | 16.97884443 | 27.82468975 | 24.71528667 | 45.91108731 | 42.97167518 |
| ENSMUSG00000032688 | 154.2245036 | 193.3815938 | 151.8224753 | 182.8388916 | 134.6445822 |
| ENSMUSG00000032705 | 24.05336294 | 43.82388636 | 33.89525029 | 24.96918783 | 20.769643   |
| ENSMUSG00000032714 | 3.537259256 | 6.956172438 | 8.473812573 | 12.08186508 | 2.864778345 |
| ENSMUSG00000032715 | 6.367066661 | 9.738641413 | 9.179963621 | 12.08186508 | 8.594335036 |
| ENSMUSG00000032718 | 7.074518513 | 7.651789682 | 6.35535943  | 8.054576721 | 7.161945863 |
| ENSMUSG00000032719 | 10.61177777 | 6.956172438 | 6.35535943  | 6.443661377 | 9.310529622 |
| ENSMUSG00000032724 | 12.73413332 | 21.56413456 | 19.06607829 | 16.91461111 | 22.91822676 |
| ENSMUSG00000032733 | 16.27139258 | 25.73783802 | 12.00456781 | 11.27640741 | 15.7562809  |
| ENSMUSG00000032741 | 24.76081479 | 39.6501829  | 32.4829482  | 12.08186508 | 9.310529622 |
| ENSMUSG00000032744 | 7.074518513 | 11.1298759  | 7.061510478 | 7.249119049 | 4.297167518 |
| ENSMUSG00000032757 | 23.34591109 | 25.73783802 | 21.89068248 | 19.33098413 | 20.769643   |
| ENSMUSG00000032758 | 9.196874066 | 3.478086219 | 8.473812573 | 6.443661377 | 7.87814045  |
| ENSMUSG00000032766 | 7.074518513 | 4.869320706 | 7.767661525 | 4.02728836  | 7.87814045  |
| ENSMUSG00000032769 | 9.196874066 | 7.651789682 | 11.29841676 | 1.610915344 | 10.02672421 |

|                    |             |             |             |             |             |
|--------------------|-------------|-------------|-------------|-------------|-------------|
| ENSMUSG00000032773 | 9.196874066 | 3.478086219 | 5.649208382 | 5.638203705 | 4.297167518 |
| ENSMUSG00000032776 | 27.5906222  | 44.5195036  | 46.60596915 | 24.96918783 | 25.06681052 |
| ENSMUSG00000032777 | 70.74518513 | 107.1250555 | 119.3395271 | 116.7913625 | 97.40246374 |
| ENSMUSG00000032783 | 16.27139258 | 18.08604834 | 18.35992724 | 47.52200265 | 42.25548059 |
| ENSMUSG00000032796 | 10.61177777 | 3.478086219 | 8.473812573 | 8.054576721 | 10.7429188  |
| ENSMUSG00000032802 | 7.781970364 | 4.869320706 | 8.473812573 | 6.443661377 | 3.580972932 |
| ENSMUSG00000032807 | 7.781970364 | 5.56493795  | 12.00456781 | 6.443661377 | 7.87814045  |
| ENSMUSG00000032808 | 11.31922962 | 7.651789682 | 3.530755239 | 4.02728836  | 8.594335036 |
| ENSMUSG00000032840 | 34.66514071 | 57.04061399 | 52.25517753 | 39.46742593 | 40.82309142 |
| ENSMUSG00000032852 | 4.244711108 | 3.478086219 | 8.473812573 | 1.610915344 | 8.594335036 |
| ENSMUSG00000032855 | 36.78749627 | 59.82308296 | 45.8998181  | 37.05105292 | 48.70123187 |
| ENSMUSG00000032860 | 6.367066661 | 4.869320706 | 7.767661525 | 7.249119049 | 9.310529622 |
| ENSMUSG00000032864 | 26.1757185  | 24.34660353 | 16.2414741  | 9.665492065 | 10.02672421 |
| ENSMUSG00000032867 | 19.80865184 | 27.12907251 | 26.83373982 | 42.68925662 | 44.40406435 |
| ENSMUSG00000032870 | 117.4370073 | 125.9067211 | 114.3964697 | 278.6883545 | 189.7915654 |
| ENSMUSG00000032875 | 2.829807405 | 5.56493795  | 7.767661525 | 5.638203705 | 7.87814045  |
| ENSMUSG00000032898 | 26.88317035 | 37.56333116 | 38.13215658 | 23.35827249 | 37.95831308 |
| ENSMUSG00000032902 | 51.64398514 | 61.9099347  | 57.19823487 | 165.9242805 | 105.2806042 |
| ENSMUSG00000032905 | 62.96321476 | 111.298759  | 104.5103551 | 95.04400531 | 93.82149081 |
| ENSMUSG00000032908 | 7.781970364 | 4.173703463 | 9.179963621 | 9.665492065 | 6.445751277 |
| ENSMUSG00000032911 | 8.489422215 | 4.173703463 | 6.35535943  | 8.860034393 | 4.297167518 |
| ENSMUSG00000032915 | 9.904325918 | 13.21672763 | 6.35535943  | 8.860034393 | 7.87814045  |
| ENSMUSG00000032968 | 9.196874066 | 6.956172438 | 7.061510478 | 7.249119049 | 7.161945863 |
| ENSMUSG00000032977 | 65.08557032 | 109.2119073 | 109.4534124 | 172.3679418 | 125.3340526 |
| ENSMUSG00000032988 | 12.02668147 | 11.1298759  | 7.061510478 | 8.054576721 | 6.445751277 |
| ENSMUSG00000033006 | 4.244711108 | 6.956172438 | 2.824604191 | 4.02728836  | 7.161945863 |
| ENSMUSG00000033020 | 47.39927403 | 66.7792554  | 47.3121202  | 97.46037832 | 70.18706946 |
| ENSMUSG00000033022 | 6.367066661 | 9.043024169 | 11.29841676 | 8.054576721 | 8.594335036 |
| ENSMUSG00000033039 | 34.66514071 | 54.25814501 | 41.66291182 | 23.35827249 | 34.37734014 |
| ENSMUSG00000033047 | 45.98437033 | 75.82227957 | 52.25517753 | 134.5114312 | 98.11865833 |
| ENSMUSG00000033053 | 10.61177777 | 8.347406925 | 8.473812573 | 9.665492065 | 8.594335036 |
| ENSMUSG00000033054 | 73.57499253 | 103.6469693 | 101.6857509 | 193.3098413 | 155.4142252 |
| ENSMUSG00000033059 | 34.66514071 | 61.21431745 | 76.97046421 | 46.71654498 | 39.39070225 |
| ENSMUSG00000033063 | 10.61177777 | 10.43425866 | 4.236906287 | 4.02728836  | 9.310529622 |
| ENSMUSG00000033080 | 5.65961481  | 8.347406925 | 7.061510478 | 6.443661377 | 5.729556691 |
| ENSMUSG00000033096 | 29.0055259  | 50.7800588  | 50.13672439 | 53.96566403 | 44.40406435 |
| ENSMUSG00000033099 | 26.88317035 | 55.6493795  | 53.66747963 | 77.32393652 | 74.48423698 |
| ENSMUSG00000033106 | 41.73965922 | 66.7792554  | 52.25517753 | 151.4260424 | 125.3340526 |
| ENSMUSG00000033107 | 8.489422215 | 8.347406925 | 6.35535943  | 6.443661377 | 2.864778345 |
| ENSMUSG00000033126 | 40.32475552 | 69.56172438 | 64.25974535 | 58.79841006 | 68.0384857  |
| ENSMUSG00000033128 | 9.196874066 | 29.91154148 | 16.2414741  | 35.44013757 | 32.94495097 |
| ENSMUSG00000033156 | 12.73413332 | 4.173703463 | 10.59226572 | 7.249119049 | 8.594335036 |
| ENSMUSG00000033186 | 92.67619252 | 118.2549314 | 99.56729774 | 204.5862487 | 151.8332523 |



|                    |             |             |             |             |             |
|--------------------|-------------|-------------|-------------|-------------|-------------|
| ENSMUSG00000033187 | 6.367066661 | 8.347406925 | 7.767661525 | 5.638203705 | 3.580972932 |
| ENSMUSG00000033192 | 16.27139258 | 13.91234488 | 15.53532305 | 6.443661377 | 7.161945863 |
| ENSMUSG00000033207 | 8.489422215 | 6.260555194 | 7.061510478 | 9.665492065 | 5.729556691 |
| ENSMUSG00000033208 | 12.73413332 | 4.869320706 | 6.35535943  | 7.249119049 | 6.445751277 |
| ENSMUSG00000033214 | 10.61177777 | 8.347406925 | 9.886114669 | 5.638203705 | 6.445751277 |
| ENSMUSG00000033216 | 42.44711108 | 47.99758982 | 46.60596915 | 50.74383334 | 65.88990194 |
| ENSMUSG00000033219 | 50.93653329 | 15.99919661 | 18.35992724 | 17.72006879 | 12.17530797 |
| ENSMUSG00000033220 | 129.4636888 | 150.9489419 | 132.756397  | 326.2103572 | 217.0069597 |
| ENSMUSG00000033227 | 4.952162959 | 6.260555194 | 6.35535943  | 2.416373016 | 6.445751277 |
| ENSMUSG00000033228 | 91.96874066 | 156.5138799 | 120.0456781 | 201.364418  | 177.6162574 |
| ENSMUSG00000033255 | 10.61177777 | 14.60796212 | 12.71071886 | 13.69278043 | 10.02672421 |
| ENSMUSG00000033268 | 9.904325918 | 2.782468975 | 7.061510478 | 6.443661377 | 9.310529622 |
| ENSMUSG00000033307 | 9.196874066 | 22.2597518  | 25.42143772 | 88.60034393 | 67.32229112 |
| ENSMUSG00000033318 | 3.537259256 | 10.43425866 | 8.473812573 | 49.132918   | 37.24211849 |
| ENSMUSG00000033319 | 38.90985182 | 61.21431745 | 48.7244223  | 126.4568545 | 105.9967988 |
| ENSMUSG00000033350 | 8.489422215 | 5.56493795  | 7.767661525 | 4.832746033 | 5.729556691 |
| ENSMUSG00000033355 | 12.02668147 | 22.95536904 | 17.65377619 | 91.82217462 | 53.71459398 |
| ENSMUSG00000033356 | 24.76081479 | 40.34580014 | 31.77679715 | 27.38556085 | 35.80972932 |
| ENSMUSG00000033368 | 16.97884443 | 17.39043109 | 13.41686991 | 10.47094974 | 14.32389173 |
| ENSMUSG00000033383 | 7.074518513 | 6.956172438 | 9.179963621 | 3.221830688 | 4.297167518 |
| ENSMUSG00000033405 | 14.14903703 | 4.173703463 | 2.824604191 | 5.638203705 | 7.87814045  |
| ENSMUSG00000033446 | 41.73965922 | 75.12666233 | 67.08434954 | 48.32746033 | 61.59273443 |
| ENSMUSG00000033450 | 58.0110518  | 83.47406925 | 73.43970897 | 194.9207566 | 141.8065281 |
| ENSMUSG00000033453 | 6.367066661 | 5.56493795  | 9.179963621 | 4.02728836  | 7.161945863 |
| ENSMUSG00000033454 | 62.25576291 | 93.21271067 | 84.73812573 | 225.5281482 | 187.6429816 |
| ENSMUSG00000033478 | 90.55383696 | 141.2103005 | 119.3395271 | 131.2896006 | 146.8198902 |
| ENSMUSG00000033501 | 11.31922962 | 10.43425866 | 7.767661525 | 7.249119049 | 8.594335036 |
| ENSMUSG00000033520 | 11.31922962 | 8.347406925 | 6.35535943  | 6.443661377 | 8.594335036 |
| ENSMUSG00000033530 | 21.93100739 | 25.04222078 | 33.18909925 | 24.16373016 | 36.5259239  |
| ENSMUSG00000033544 | 84.89422215 | 127.2979556 | 113.6903187 | 53.96566403 | 70.90326405 |
| ENSMUSG00000033578 | 4.244711108 | 3.478086219 | 2.824604191 | 2.416373016 | 4.297167518 |
| ENSMUSG00000033585 | 10.61177777 | 4.869320706 | 7.767661525 | 4.832746033 | 7.161945863 |
| ENSMUSG00000033589 | 27.5906222  | 38.25894841 | 43.78136496 | 71.68573282 | 60.16034525 |
| ENSMUSG00000033590 | 6.367066661 | 10.43425866 | 5.649208382 | 4.832746033 | 6.445751277 |
| ENSMUSG00000033595 | 11.31922962 | 5.56493795  | 5.649208382 | 2.416373016 | 10.02672421 |
| ENSMUSG00000033596 | 48.81417774 | 68.17048989 | 67.08434954 | 169.9515688 | 130.3474147 |
| ENSMUSG00000033597 | 5.65961481  | 6.260555194 | 8.473812573 | 8.054576721 | 10.02672421 |
| ENSMUSG00000033615 | 9.196874066 | 4.869320706 | 4.943057334 | 4.02728836  | 5.013362104 |
| ENSMUSG00000033629 | 38.90985182 | 75.12666233 | 57.90438592 | 95.04400531 | 102.4158258 |
| ENSMUSG00000033634 | 6.367066661 | 6.956172438 | 9.886114669 | 7.249119049 | 7.87814045  |
| ENSMUSG00000033644 | 0.707451851 | 1.391234488 | 0.706151048 | 0.805457672 | 1.432389173 |
| ENSMUSG00000033669 | 29.0055259  | 34.08524495 | 37.42600553 | 35.44013757 | 34.37734014 |
| ENSMUSG00000033703 | 17.68629628 | 31.30277597 | 23.30298458 | 25.77464551 | 24.35061594 |

|                    |             |             |             |             |             |
|--------------------|-------------|-------------|-------------|-------------|-------------|
| ENSMUSG00000033707 | 7.074518513 | 10.43425866 | 9.886114669 | 20.1364418  | 24.35061594 |
| ENSMUSG00000033712 | 25.46826665 | 27.82468975 | 43.07521391 | 65.24207144 | 60.87653984 |
| ENSMUSG00000033717 | 12.02668147 | 6.956172438 | 5.649208382 | 5.638203705 | 3.580972932 |
| ENSMUSG00000033722 | 7.074518513 | 4.173703463 | 10.59226572 | 6.443661377 | 7.161945863 |
| ENSMUSG00000033726 | 6.367066661 | 3.478086219 | 5.649208382 | 7.249119049 | 6.445751277 |
| ENSMUSG00000033735 | 6.367066661 | 6.260555194 | 9.886114669 | 9.665492065 | 5.013362104 |
| ENSMUSG00000033739 | 2.829807405 | 3.478086219 | 7.767661525 | 3.221830688 | 3.580972932 |
| ENSMUSG00000033751 | 48.10672589 | 80.69160028 | 55.78593277 | 130.4841429 | 127.4826364 |
| ENSMUSG00000033752 | 19.80865184 | 22.2597518  | 20.47838039 | 17.72006879 | 15.04008631 |
| ENSMUSG00000033762 | 22.63845924 | 35.47647943 | 33.18909925 | 53.96566403 | 55.86317773 |
| ENSMUSG00000033765 | 4.244711108 | 4.173703463 | 6.35535943  | 4.832746033 | 6.445751277 |
| ENSMUSG00000033774 | 7.074518513 | 4.869320706 | 5.649208382 | 9.665492065 | 12.17530797 |
| ENSMUSG00000033777 | 4.244711108 | 4.173703463 | 5.649208382 | 2.416373016 | 4.297167518 |
| ENSMUSG00000033781 | 52.35143699 | 67.47487265 | 91.09348516 | 48.32746033 | 49.41742646 |
| ENSMUSG00000033794 | 5.65961481  | 6.260555194 | 8.473812573 | 7.249119049 | 7.87814045  |
| ENSMUSG00000033825 | 9.904325918 | 2.782468975 | 5.649208382 | 4.832746033 | 5.729556691 |
| ENSMUSG00000033826 | 21.22355554 | 11.82549314 | 17.65377619 | 9.665492065 | 10.02672421 |
| ENSMUSG00000033831 | 11.31922962 | 9.043024169 | 4.943057334 | 3.221830688 | 6.445751277 |
| ENSMUSG00000033834 | 10.61177777 | 7.651789682 | 5.649208382 | 5.638203705 | 6.445751277 |
| ENSMUSG00000033837 | 12.02668147 | 8.347406925 | 10.59226572 | 12.08186508 | 3.580972932 |
| ENSMUSG00000033849 | 30.4204296  | 66.7792554  | 53.66747963 | 50.74383334 | 56.57937232 |
| ENSMUSG00000033862 | 16.97884443 | 21.56413456 | 26.12758877 | 21.74735715 | 24.35061594 |
| ENSMUSG00000033863 | 8.489422215 | 15.99919661 | 24.00913562 | 8.860034393 | 19.33725383 |
| ENSMUSG00000033906 | 5.65961481  | 4.173703463 | 2.824604191 | 4.02728836  | 4.297167518 |
| ENSMUSG00000033916 | 26.1757185  | 33.3896277  | 28.95219296 | 63.6311561  | 58.72795608 |
| ENSMUSG00000033931 | 37.49494812 | 59.12746572 | 65.67204744 | 109.5422434 | 75.91662615 |
| ENSMUSG00000033938 | 68.62282957 | 116.863697  | 91.09348516 | 98.265836   | 95.25387998 |
| ENSMUSG00000033940 | 118.851911  | 175.9911627 | 134.1686991 | 203.780791  | 174.0352845 |
| ENSMUSG00000033948 | 7.781970364 | 8.347406925 | 2.824604191 | 4.02728836  | 5.729556691 |
| ENSMUSG00000033960 | 6.367066661 | 8.347406925 | 6.35535943  | 6.443661377 | 7.87814045  |
| ENSMUSG00000033966 | 48.10672589 | 71.64857611 | 59.31668801 | 57.99295239 | 61.59273443 |
| ENSMUSG00000033967 | 5.65961481  | 4.869320706 | 3.530755239 | 12.08186508 | 16.47247549 |
| ENSMUSG00000033972 | 74.98989623 | 93.90832791 | 104.5103551 | 93.43308996 | 90.95671247 |
| ENSMUSG00000033991 | 26.88317035 | 54.25814501 | 34.60140134 | 68.46390213 | 47.2688427  |
| ENSMUSG00000033998 | 12.02668147 | 3.478086219 | 7.061510478 | 4.02728836  | 3.580972932 |
| ENSMUSG00000034022 | 39.61730367 | 77.9091313  | 74.85201106 | 89.4058016  | 82.36237743 |
| ENSMUSG00000034024 | 31.12788146 | 65.38802092 | 46.60596915 | 136.9278043 | 100.2672421 |
| ENSMUSG00000034031 | 10.61177777 | 1.391234488 | 7.767661525 | 6.443661377 | 10.02672421 |
| ENSMUSG00000034039 | 7.781970364 | 11.1298759  | 4.236906287 | 8.054576721 | 10.02672421 |
| ENSMUSG00000034041 | 21.22355554 | 36.86771392 | 34.60140134 | 138.5387196 | 118.1721067 |
| ENSMUSG00000034057 | 9.904325918 | 8.347406925 | 4.943057334 | 5.638203705 | 6.445751277 |
| ENSMUSG00000034105 | 12.73413332 | 28.52030699 | 21.89068248 | 16.10915344 | 17.18867007 |
| ENSMUSG00000034108 | 17.68629628 | 17.39043109 | 14.12302096 | 22.55281482 | 14.32389173 |

|                    |             |             |             |             |             |
|--------------------|-------------|-------------|-------------|-------------|-------------|
| ENSMUSG00000034110 | 11.31922962 | 26.43345526 | 14.829172   | 20.1364418  | 16.47247549 |
| ENSMUSG00000034111 | 69.33028142 | 109.2119073 | 84.03197468 | 207.8080794 | 166.8733386 |
| ENSMUSG00000034112 | 9.196874066 | 7.651789682 | 4.943057334 | 4.832746033 | 5.013362104 |
| ENSMUSG00000034117 | 7.074518513 | 4.173703463 | 9.886114669 | 5.638203705 | 5.729556691 |
| ENSMUSG00000034126 | 16.27139258 | 33.3896277  | 25.42143772 | 52.35474869 | 28.64778345 |
| ENSMUSG00000034139 | 7.781970364 | 10.43425866 | 7.767661525 | 3.221830688 | 5.729556691 |
| ENSMUSG00000034152 | 45.98437033 | 54.95376226 | 42.36906287 | 93.43308996 | 76.63282074 |
| ENSMUSG00000034158 | 50.22908144 | 62.60555194 | 65.67204744 | 123.2350238 | 112.4425501 |
| ENSMUSG00000034161 | 34.66514071 | 43.12826911 | 53.66747963 | 82.15668255 | 65.17370736 |
| ENSMUSG00000034168 | 94.09109622 | 123.1242521 | 107.3349593 | 84.57305557 | 71.61945863 |
| ENSMUSG00000034189 | 87.72402956 | 119.6461659 | 110.8657145 | 62.02024075 | 73.76804239 |
| ENSMUSG00000034190 | 55.1812444  | 74.43104508 | 95.33039145 | 69.2693598  | 63.74131818 |
| ENSMUSG00000034192 | 55.88869625 | 86.25653823 | 69.90895373 | 112.7640741 | 88.09193412 |
| ENSMUSG00000034203 | 54.47379255 | 79.99598303 | 74.85201106 | 136.9278043 | 115.3073284 |
| ENSMUSG00000034209 | 9.904325918 | 6.260555194 | 12.00456781 | 6.443661377 | 7.161945863 |
| ENSMUSG00000034220 | 9.196874066 | 6.956172438 | 8.473812573 | 3.221830688 | 3.580972932 |
| ENSMUSG00000034226 | 7.074518513 | 10.43425866 | 7.061510478 | 8.054576721 | 2.864778345 |
| ENSMUSG00000034227 | 9.904325918 | 9.043024169 | 12.71071886 | 5.638203705 | 7.87814045  |
| ENSMUSG00000034247 | 179.6927702 | 204.5114697 | 174.4193088 | 140.1496349 | 118.1721067 |
| ENSMUSG00000034248 | 51.64398514 | 76.51789682 | 65.67204744 | 53.16020636 | 52.99839939 |
| ENSMUSG00000034258 | 7.074518513 | 7.651789682 | 9.179963621 | 10.47094974 | 7.161945863 |
| ENSMUSG00000034259 | 13.44158517 | 29.21592424 | 24.71528667 | 73.29664816 | 63.0251236  |
| ENSMUSG00000034265 | 24.05336294 | 25.73783802 | 29.65834401 | 20.94189947 | 20.05344842 |
| ENSMUSG00000034266 | 45.98437033 | 47.30197258 | 45.8998181  | 231.1663519 | 166.8733386 |
| ENSMUSG00000034278 | 49.52162959 | 59.12746572 | 51.54902649 | 51.54929101 | 47.98503729 |
| ENSMUSG00000034282 | 9.196874066 | 8.347406925 | 8.473812573 | 8.054576721 | 10.7429188  |
| ENSMUSG00000034290 | 28.29807405 | 45.21512085 | 31.77679715 | 63.6311561  | 52.99839939 |
| ENSMUSG00000034295 | 5.65961481  | 6.956172438 | 8.473812573 | 3.221830688 | 6.445751277 |
| ENSMUSG00000034303 | 9.904325918 | 20.86851731 | 30.36449505 | 27.38556085 | 24.35061594 |
| ENSMUSG00000034310 | 16.27139258 | 10.43425866 | 9.179963621 | 6.443661377 | 6.445751277 |
| ENSMUSG00000034311 | 26.1757185  | 29.91154148 | 32.4829482  | 58.79841006 | 50.84981563 |
| ENSMUSG00000034334 | 8.489422215 | 6.260555194 | 7.061510478 | 7.249119049 | 5.013362104 |
| ENSMUSG00000034336 | 8.489422215 | 4.869320706 | 7.061510478 | 7.249119049 | 10.02672421 |
| ENSMUSG00000034342 | 55.1812444  | 63.30116918 | 59.31668801 | 202.9753334 | 174.7514791 |
| ENSMUSG00000034362 | 8.489422215 | 6.260555194 | 7.061510478 | 9.665492065 | 6.445751277 |
| ENSMUSG00000034371 | 34.66514071 | 53.56252777 | 45.19366706 | 68.46390213 | 56.57937232 |
| ENSMUSG00000034379 | 22.63845924 | 44.5195036  | 33.18909925 | 47.52200265 | 48.70123187 |
| ENSMUSG00000034402 | 4.952162959 | 4.173703463 | 8.473812573 | 4.832746033 | 5.729556691 |
| ENSMUSG00000034424 | 5.65961481  | 11.82549314 | 17.65377619 | 16.91461111 | 20.769643   |
| ENSMUSG00000034435 | 8.489422215 | 10.43425866 | 5.649208382 | 0.805457672 | 5.013362104 |
| ENSMUSG00000034445 | 131.5860443 | 159.9919661 | 159.5901368 | 232.7772672 | 161.8599765 |
| ENSMUSG00000034449 | 18.39374813 | 23.65098629 | 25.42143772 | 47.52200265 | 28.64778345 |
| ENSMUSG00000034450 | 9.196874066 | 7.651789682 | 10.59226572 | 8.860034393 | 8.594335036 |

|                    |             |             |             |             |             |
|--------------------|-------------|-------------|-------------|-------------|-------------|
| ENSMUSG00000034452 | 10.61177777 | 2.782468975 | 4.236906287 | 4.832746033 | 7.161945863 |
| ENSMUSG00000034453 | 19.80865184 | 34.78086219 | 36.01370344 | 49.132918   | 47.2688427  |
| ENSMUSG00000034459 | 11.31922962 | 15.30357936 | 14.829172   | 57.18749472 | 42.25548059 |
| ENSMUSG00000034460 | 12.73413332 | 7.651789682 | 4.943057334 | 5.638203705 | 8.594335036 |
| ENSMUSG00000034462 | 7.781970364 | 6.260555194 | 3.530755239 | 3.221830688 | 5.013362104 |
| ENSMUSG00000034463 | 4.244711108 | 6.260555194 | 7.061510478 | 2.416373016 | 5.013362104 |
| ENSMUSG00000034467 | 9.196874066 | 4.173703463 | 4.943057334 | 4.832746033 | 2.864778345 |
| ENSMUSG00000034482 | 13.44158517 | 6.260555194 | 10.59226572 | 9.665492065 | 9.310529622 |
| ENSMUSG00000034484 | 87.01657771 | 135.6453625 | 98.86114669 | 212.6408254 | 162.5761711 |
| ENSMUSG00000034486 | 4.952162959 | 3.478086219 | 7.767661525 | 5.638203705 | 9.310529622 |
| ENSMUSG00000034487 | 8.489422215 | 7.651789682 | 9.886114669 | 8.054576721 | 3.580972932 |
| ENSMUSG00000034501 | 15.56394073 | 28.52030699 | 26.83373982 | 19.33098413 | 31.5125618  |
| ENSMUSG00000034509 | 72.86754068 | 92.51709342 | 95.33039145 | 78.93485187 | 68.75468029 |
| ENSMUSG00000034525 | 82.7718666  | 127.2979556 | 106.6288082 | 109.5422434 | 114.5911338 |
| ENSMUSG00000034532 | 9.904325918 | 9.738641413 | 9.179963621 | 4.02728836  | 9.310529622 |
| ENSMUSG00000034538 | 7.074518513 | 15.30357936 | 13.41686991 | 10.47094974 | 7.87814045  |
| ENSMUSG00000034552 | 6.367066661 | 8.347406925 | 6.35535943  | 3.221830688 | 5.729556691 |
| ENSMUSG00000034560 | 107.5326814 | 151.6445591 | 117.2210739 | 151.4260424 | 134.6445822 |
| ENSMUSG00000034583 | 7.074518513 | 2.782468975 | 2.824604191 | 4.02728836  | 1.432389173 |
| ENSMUSG00000034584 | 13.44158517 | 9.043024169 | 9.179963621 | 4.02728836  | 8.594335036 |
| ENSMUSG00000034591 | 14.14903703 | 28.52030699 | 28.95219296 | 21.74735715 | 17.18867007 |
| ENSMUSG00000034607 | 1.414903703 | 1.391234488 | 3.530755239 | 1.610915344 | 4.297167518 |
| ENSMUSG00000034612 | 13.44158517 | 26.43345526 | 27.53989086 | 24.96918783 | 32.22875639 |
| ENSMUSG00000034617 | 21.22355554 | 50.08444155 | 42.36906287 | 128.8732275 | 93.82149081 |
| ENSMUSG00000034634 | 109.6550369 | 113.3856107 | 108.0411103 | 141.7605503 | 99.5510475  |
| ENSMUSG00000034636 | 51.64398514 | 91.82147618 | 85.44427678 | 73.29664816 | 59.44415067 |
| ENSMUSG00000034639 | 12.73413332 | 9.738641413 | 9.886114669 | 8.054576721 | 6.445751277 |
| ENSMUSG00000034640 | 27.5906222  | 40.34580014 | 45.19366706 | 224.7226905 | 194.8049275 |
| ENSMUSG00000034641 | 5.65961481  | 4.173703463 | 6.35535943  | 7.249119049 | 7.161945863 |
| ENSMUSG00000034648 | 11.31922962 | 9.043024169 | 4.943057334 | 4.832746033 | 5.729556691 |
| ENSMUSG00000034660 | 4.952162959 | 12.52111039 | 8.473812573 | 6.443661377 | 5.013362104 |
| ENSMUSG00000034667 | 39.61730367 | 54.25814501 | 50.84287544 | 121.6241085 | 97.40246374 |
| ENSMUSG00000034685 | 5.65961481  | 7.651789682 | 10.59226572 | 4.02728836  | 4.297167518 |
| ENSMUSG00000034686 | 14.14903703 | 13.21672763 | 12.00456781 | 11.27640741 | 15.7562809  |
| ENSMUSG00000034687 | 7.074518513 | 6.260555194 | 7.061510478 | 4.832746033 | 3.580972932 |
| ENSMUSG00000034689 | 5.65961481  | 2.782468975 | 8.473812573 | 7.249119049 | 5.013362104 |
| ENSMUSG00000034701 | 0           | 1.391234488 | 0           | 0           | 0           |
| ENSMUSG00000034707 | 96.21345177 | 125.9067211 | 127.1071886 | 149.815127  | 142.5227227 |
| ENSMUSG00000034709 | 38.90985182 | 64.69240367 | 67.08434954 | 76.51847885 | 60.87653984 |
| ENSMUSG00000034714 | 8.489422215 | 19.47728283 | 14.12302096 | 18.52552646 | 9.310529622 |
| ENSMUSG00000034732 | 6.367066661 | 2.086851731 | 2.824604191 | 1.610915344 | 3.580972932 |
| ENSMUSG00000034738 | 9.196874066 | 8.347406925 | 5.649208382 | 5.638203705 | 7.161945863 |
| ENSMUSG00000034762 | 0.707451851 | 0           | 0.706151048 | 0.805457672 | 0.716194586 |

|                    |             |             |             |             |             |
|--------------------|-------------|-------------|-------------|-------------|-------------|
| ENSMUSG00000034765 | 24.05336294 | 36.86771392 | 38.13215658 | 31.41284921 | 20.05344842 |
| ENSMUSG00000034768 | 14.14903703 | 20.86851731 | 16.2414741  | 18.52552646 | 16.47247549 |
| ENSMUSG00000034774 | 10.61177777 | 4.869320706 | 6.35535943  | 3.221830688 | 7.87814045  |
| ENSMUSG00000034777 | 0.707451851 | 1.391234488 | 1.412302096 | 1.610915344 | 0           |
| ENSMUSG00000034780 | 11.31922962 | 9.043024169 | 6.35535943  | 7.249119049 | 5.729556691 |
| ENSMUSG00000034781 | 135.8307554 | 150.2533247 | 137.6994543 | 144.1769233 | 112.4425501 |
| ENSMUSG00000034783 | 12.73413332 | 7.651789682 | 3.530755239 | 8.860034393 | 5.729556691 |
| ENSMUSG00000034789 | 82.06441475 | 103.6469693 | 111.5718655 | 196.531672  | 146.8198902 |
| ENSMUSG00000034792 | 26.1757185  | 36.17209668 | 29.65834401 | 67.65844446 | 65.17370736 |
| ENSMUSG00000034807 | 28.29807405 | 40.34580014 | 49.43057334 | 64.43661377 | 60.87653984 |
| ENSMUSG00000034810 | 12.73413332 | 6.956172438 | 7.767661525 | 5.638203705 | 7.161945863 |
| ENSMUSG00000034820 | 81.3569629  | 116.1680797 | 99.56729774 | 215.0571984 | 177.6162574 |
| ENSMUSG00000034829 | 7.781970364 | 9.043024169 | 5.649208382 | 4.832746033 | 4.297167518 |
| ENSMUSG00000034839 | 8.489422215 | 4.869320706 | 11.29841676 | 3.221830688 | 10.7429188  |
| ENSMUSG00000034845 | 9.196874066 | 11.82549314 | 3.530755239 | 6.443661377 | 5.729556691 |
| ENSMUSG00000034854 | 15.56394073 | 22.2597518  | 18.35992724 | 35.44013757 | 35.09353473 |
| ENSMUSG00000034863 | 14.85648888 | 18.78166558 | 17.65377619 | 13.69278043 | 12.89150255 |
| ENSMUSG00000034868 | 91.26128881 | 141.2103005 | 122.8702823 | 97.46037832 | 98.83485292 |
| ENSMUSG00000034871 | 12.02668147 | 4.173703463 | 7.061510478 | 5.638203705 | 9.310529622 |
| ENSMUSG00000034872 | 13.44158517 | 7.651789682 | 9.886114669 | 5.638203705 | 10.02672421 |
| ENSMUSG00000034875 | 7.781970364 | 18.78166558 | 10.59226572 | 14.4982381  | 15.7562809  |
| ENSMUSG00000034880 | 15.56394073 | 31.99839321 | 24.00913562 | 20.1364418  | 28.64778345 |
| ENSMUSG00000034881 | 12.02668147 | 11.82549314 | 15.53532305 | 22.55281482 | 20.769643   |
| ENSMUSG00000034883 | 41.03220737 | 39.6501829  | 39.54445867 | 44.30017197 | 52.2822048  |
| ENSMUSG00000034889 | 68.62282957 | 91.82147618 | 79.7950684  | 137.7332619 | 107.429188  |
| ENSMUSG00000034892 | 71.45263698 | 94.60394515 | 77.67661525 | 173.9788572 | 148.968474  |
| ENSMUSG00000034893 | 78.52715549 | 110.6031418 | 99.56729774 | 160.2860767 | 121.7530797 |
| ENSMUSG00000034910 | 15.56394073 | 2.086851731 | 9.179963621 | 8.054576721 | 6.445751277 |
| ENSMUSG00000034911 | 24.05336294 | 41.73703463 | 26.83373982 | 37.85651059 | 37.24211849 |
| ENSMUSG00000034913 | 7.781970364 | 6.956172438 | 8.473812573 | 3.221830688 | 8.594335036 |
| ENSMUSG00000034917 | 7.074518513 | 12.52111039 | 22.59683353 | 25.77464551 | 18.62105924 |
| ENSMUSG00000034918 | 11.31922962 | 14.60796212 | 16.94762515 | 10.47094974 | 11.45911338 |
| ENSMUSG00000034919 | 9.196874066 | 3.478086219 | 8.473812573 | 7.249119049 | 7.87814045  |
| ENSMUSG00000034923 | 11.31922962 | 10.43425866 | 6.35535943  | 12.08186508 | 12.17530797 |
| ENSMUSG00000034926 | 3.537259256 | 12.52111039 | 9.179963621 | 50.74383334 | 42.25548059 |
| ENSMUSG00000034932 | 32.54278516 | 63.99678643 | 56.49208382 | 82.96214023 | 75.20043157 |
| ENSMUSG00000034936 | 11.31922962 | 9.738641413 | 10.59226572 | 8.054576721 | 10.02672421 |
| ENSMUSG00000034959 | 67.91537772 | 108.51629   | 96.74269354 | 57.99295239 | 61.59273443 |
| ENSMUSG00000034968 | 7.074518513 | 9.043024169 | 4.236906287 | 8.860034393 | 8.594335036 |
| ENSMUSG00000034981 | 12.02668147 | 8.347406925 | 12.00456781 | 7.249119049 | 3.580972932 |
| ENSMUSG00000034987 | 12.73413332 | 9.738641413 | 12.00456781 | 70.88027514 | 48.70123187 |
| ENSMUSG00000034993 | 7.074518513 | 9.043024169 | 7.767661525 | 8.860034393 | 10.02672421 |
| ENSMUSG00000034997 | 6.367066661 | 4.173703463 | 7.767661525 | 4.02728836  | 8.594335036 |

|                    |             |             |             |             |             |
|--------------------|-------------|-------------|-------------|-------------|-------------|
| ENSMUSG00000035000 | 45.27691848 | 51.47567604 | 38.13215658 | 44.30017197 | 43.68786977 |
| ENSMUSG00000035004 | 14.14903703 | 11.82549314 | 7.767661525 | 9.665492065 | 2.864778345 |
| ENSMUSG00000035007 | 25.46826665 | 35.47647943 | 31.0706461  | 66.04752911 | 40.82309142 |
| ENSMUSG00000035041 | 15.56394073 | 9.043024169 | 12.71071886 | 4.832746033 | 8.594335036 |
| ENSMUSG00000035042 | 12.02668147 | 4.869320706 | 4.236906287 | 6.443661377 | 5.013362104 |
| ENSMUSG00000035047 | 42.44711108 | 58.43184848 | 56.49208382 | 114.3749894 | 81.64618284 |
| ENSMUSG00000035049 | 9.904325918 | 20.17290007 | 15.53532305 | 78.12939419 | 63.0251236  |
| ENSMUSG00000035057 | 9.196874066 | 5.56493795  | 4.236906287 | 3.221830688 | 7.161945863 |
| ENSMUSG00000035067 | 5.65961481  | 5.56493795  | 6.35535943  | 8.054576721 | 2.864778345 |
| ENSMUSG00000035069 | 17.68629628 | 19.47728283 | 21.89068248 | 18.52552646 | 20.05344842 |
| ENSMUSG00000035078 | 25.46826665 | 43.12826911 | 28.24604191 | 40.2728836  | 46.55264811 |
| ENSMUSG00000035085 | 8.489422215 | 6.956172438 | 8.473812573 | 8.054576721 | 7.161945863 |
| ENSMUSG00000035105 | 4.952162959 | 4.869320706 | 7.061510478 | 12.08186508 | 6.445751277 |
| ENSMUSG00000035121 | 12.02668147 | 6.956172438 | 9.886114669 | 4.02728836  | 5.013362104 |
| ENSMUSG00000035133 | 9.904325918 | 11.82549314 | 9.179963621 | 20.94189947 | 24.35061594 |
| ENSMUSG00000035148 | 12.73413332 | 8.347406925 | 8.473812573 | 4.02728836  | 8.594335036 |
| ENSMUSG00000035161 | 23.34591109 | 25.73783802 | 29.65834401 | 83.7675979  | 80.92998826 |
| ENSMUSG00000035171 | 144.3201777 | 210.0764076 | 156.7655326 | 284.3265582 | 196.2373167 |
| ENSMUSG00000035177 | 9.196874066 | 8.347406925 | 10.59226572 | 5.638203705 | 5.013362104 |
| ENSMUSG00000035179 | 10.61177777 | 8.347406925 | 7.061510478 | 7.249119049 | 5.729556691 |
| ENSMUSG00000035181 | 17.68629628 | 23.65098629 | 16.94762515 | 21.74735715 | 13.60769714 |
| ENSMUSG00000035186 | 10.61177777 | 6.956172438 | 9.179963621 | 8.054576721 | 2.148583759 |
| ENSMUSG00000035198 | 178.9853184 | 212.1632594 | 197.7222934 | 172.3679418 | 145.387501  |
| ENSMUSG00000035199 | 45.27691848 | 77.21351406 | 69.90895373 | 88.60034393 | 92.38910164 |
| ENSMUSG00000035200 | 9.196874066 | 6.260555194 | 9.886114669 | 6.443661377 | 5.729556691 |
| ENSMUSG00000035202 | 13.44158517 | 24.34660353 | 23.30298458 | 24.96918783 | 27.93158887 |
| ENSMUSG00000035211 | 79.94205919 | 100.1688831 | 88.97503202 | 122.4295662 | 89.52432329 |
| ENSMUSG00000035215 | 54.47379255 | 75.12666233 | 91.09348516 | 126.4568545 | 98.83485292 |
| ENSMUSG00000035227 | 79.94205919 | 92.51709342 | 100.9795998 | 154.647873  | 114.5911338 |
| ENSMUSG00000035232 | 10.61177777 | 17.39043109 | 14.829172   | 29.80193387 | 25.78300511 |
| ENSMUSG00000035237 | 7.781970364 | 8.347406925 | 3.530755239 | 10.47094974 | 10.02672421 |
| ENSMUSG00000035238 | 9.904325918 | 4.173703463 | 9.886114669 | 4.02728836  | 7.87814045  |
| ENSMUSG00000035239 | 7.074518513 | 7.651789682 | 9.886114669 | 3.221830688 | 4.297167518 |
| ENSMUSG00000035248 | 32.54278516 | 58.43184848 | 53.66747963 | 86.18397091 | 68.75468029 |
| ENSMUSG00000035278 | 116.7295555 | 159.9919661 | 144.0548137 | 365.6777831 | 238.4927973 |
| ENSMUSG00000035279 | 6.367066661 | 9.043024169 | 6.35535943  | 4.832746033 | 2.864778345 |
| ENSMUSG00000035285 | 6.367066661 | 12.52111039 | 13.41686991 | 7.249119049 | 7.87814045  |
| ENSMUSG00000035298 | 11.31922962 | 7.651789682 | 9.179963621 | 8.860034393 | 7.161945863 |
| ENSMUSG00000035305 | 6.367066661 | 4.173703463 | 2.824604191 | 1.610915344 | 7.87814045  |
| ENSMUSG00000035329 | 128.0487851 | 144.6883867 | 122.8702823 | 188.4770953 | 153.2656415 |
| ENSMUSG00000035337 | 154.9319554 | 237.2054801 | 190.6607829 | 169.1461111 | 156.8466144 |
| ENSMUSG00000035352 | 14.14903703 | 4.173703463 | 8.473812573 | 6.443661377 | 5.729556691 |
| ENSMUSG00000035354 | 113.8997481 | 137.036597  | 120.7518292 | 240.0263863 | 183.3458141 |

|                    |             |             |             |             |             |
|--------------------|-------------|-------------|-------------|-------------|-------------|
| ENSMUSG00000035367 | 140.0754665 | 189.2078903 | 177.950064  | 317.3503228 | 271.4377482 |
| ENSMUSG00000035370 | 2.829807405 | 2.782468975 | 0.706151048 | 0.805457672 | 1.432389173 |
| ENSMUSG00000035371 | 4.952162959 | 4.869320706 | 4.236906287 | 1.610915344 | 5.729556691 |
| ENSMUSG00000035372 | 15.56394073 | 20.86851731 | 12.00456781 | 12.08186508 | 12.89150255 |
| ENSMUSG00000035373 | 9.196874066 | 5.56493795  | 4.943057334 | 6.443661377 | 5.013362104 |
| ENSMUSG00000035376 | 17.68629628 | 18.78166558 | 21.18453143 | 19.33098413 | 17.18867007 |
| ENSMUSG00000035382 | 47.39927403 | 95.2995624  | 84.73812573 | 91.82217462 | 95.25387998 |
| ENSMUSG00000035383 | 7.781970364 | 9.738641413 | 5.649208382 | 1.610915344 | 5.729556691 |
| ENSMUSG00000035385 | 9.196874066 | 6.260555194 | 6.35535943  | 4.832746033 | 9.310529622 |
| ENSMUSG00000035387 | 4.244711108 | 1.391234488 | 4.236906287 | 0           | 1.432389173 |
| ENSMUSG00000035397 | 84.1867703  | 108.51629   | 100.9795998 | 134.5114312 | 113.8749392 |
| ENSMUSG00000035401 | 36.08004441 | 61.21431745 | 60.72899011 | 82.15668255 | 84.51096119 |
| ENSMUSG00000035407 | 7.074518513 | 3.478086219 | 7.767661525 | 6.443661377 | 6.445751277 |
| ENSMUSG00000035413 | 5.65961481  | 6.956172438 | 5.649208382 | 5.638203705 | 4.297167518 |
| ENSMUSG00000035420 | 10.61177777 | 13.21672763 | 7.061510478 | 6.443661377 | 8.594335036 |
| ENSMUSG00000035431 | 9.196874066 | 5.56493795  | 7.767661525 | 6.443661377 | 5.729556691 |
| ENSMUSG00000035448 | 8.489422215 | 4.173703463 | 6.35535943  | 7.249119049 | 5.729556691 |
| ENSMUSG00000035451 | 7.781970364 | 6.260555194 | 8.473812573 | 8.054576721 | 4.297167518 |
| ENSMUSG00000035454 | 6.367066661 | 7.651789682 | 5.649208382 | 1.610915344 | 5.729556691 |
| ENSMUSG00000035456 | 2.122355554 | 7.651789682 | 7.061510478 | 4.02728836  | 3.580972932 |
| ENSMUSG00000035476 | 24.05336294 | 33.3896277  | 28.24604191 | 33.02376456 | 23.63442135 |
| ENSMUSG00000035491 | 3.537259256 | 1.391234488 | 4.943057334 | 4.832746033 | 3.580972932 |
| ENSMUSG00000035522 | 4.952162959 | 1.391234488 | 2.118453143 | 3.221830688 | 2.864778345 |
| ENSMUSG00000035523 | 13.44158517 | 10.43425866 | 4.943057334 | 4.02728836  | 2.148583759 |
| ENSMUSG00000035528 | 12.73413332 | 6.260555194 | 4.943057334 | 5.638203705 | 12.89150255 |
| ENSMUSG00000035551 | 7.074518513 | 0.695617244 | 4.236906287 | 5.638203705 | 4.297167518 |
| ENSMUSG00000035557 | 11.31922962 | 6.260555194 | 4.943057334 | 1.610915344 | 8.594335036 |
| ENSMUSG00000035559 | 21.93100739 | 31.30277597 | 32.4829482  | 25.77464551 | 36.5259239  |
| ENSMUSG00000035560 | 9.904325918 | 6.260555194 | 9.886114669 | 8.860034393 | 7.87814045  |
| ENSMUSG00000035561 | 16.27139258 | 15.99919661 | 19.06607829 | 14.4982381  | 11.45911338 |
| ENSMUSG00000035566 | 10.61177777 | 8.347406925 | 5.649208382 | 4.832746033 | 4.297167518 |
| ENSMUSG00000035592 | 14.14903703 | 9.043024169 | 8.473812573 | 5.638203705 | 12.89150255 |
| ENSMUSG00000035595 | 31.12788146 | 51.47567604 | 52.25517753 | 36.24559524 | 39.39070225 |
| ENSMUSG00000035601 | 16.27139258 | 36.86771392 | 28.95219296 | 13.69278043 | 22.91822676 |
| ENSMUSG00000035606 | 10.61177777 | 6.260555194 | 4.236906287 | 6.443661377 | 6.445751277 |
| ENSMUSG00000035626 | 4.952162959 | 4.869320706 | 8.473812573 | 3.221830688 | 7.87814045  |
| ENSMUSG00000035651 | 6.367066661 | 5.56493795  | 4.943057334 | 2.416373016 | 3.580972932 |
| ENSMUSG00000035671 | 24.05336294 | 47.30197258 | 43.78136496 | 22.55281482 | 35.09353473 |
| ENSMUSG00000035678 | 7.074518513 | 12.52111039 | 10.59226572 | 45.10562964 | 27.21539428 |
| ENSMUSG00000035681 | 7.074518513 | 5.56493795  | 10.59226572 | 3.221830688 | 6.445751277 |
| ENSMUSG00000035686 | 6.367066661 | 9.043024169 | 5.649208382 | 8.860034393 | 5.013362104 |
| ENSMUSG00000035692 | 15.56394073 | 27.82468975 | 12.00456781 | 95.04400531 | 53.71459398 |
| ENSMUSG00000035699 | 12.02668147 | 3.478086219 | 7.767661525 | 5.638203705 | 7.87814045  |

|                    |             |             |             |             |             |
|--------------------|-------------|-------------|-------------|-------------|-------------|
| ENSMUSG00000035711 | 45.27691848 | 64.69240367 | 67.79050059 | 42.68925662 | 41.53928601 |
| ENSMUSG00000035726 | 97.62835547 | 118.2549314 | 132.0502459 | 239.2209286 | 174.7514791 |
| ENSMUSG00000035745 | 7.781970364 | 9.043024169 | 7.061510478 | 12.08186508 | 6.445751277 |
| ENSMUSG00000035754 | 26.1757185  | 44.5195036  | 31.0706461  | 78.93485187 | 64.45751277 |
| ENSMUSG00000035759 | 7.074518513 | 9.738641413 | 10.59226572 | 12.88732275 | 17.18867007 |
| ENSMUSG00000035764 | 25.46826665 | 59.12746572 | 45.8998181  | 77.32393652 | 73.76804239 |
| ENSMUSG00000035765 | 33.95768886 | 64.69240367 | 68.49665163 | 30.60739154 | 48.70123187 |
| ENSMUSG00000035769 | 7.074518513 | 6.956172438 | 8.473812573 | 7.249119049 | 8.594335036 |
| ENSMUSG00000035770 | 68.62282957 | 87.64777272 | 89.68118307 | 77.32393652 | 83.07857202 |
| ENSMUSG00000035773 | 64.37811846 | 87.64777272 | 86.85657888 | 57.18749472 | 54.43078856 |
| ENSMUSG00000035775 | 10.61177777 | 11.82549314 | 7.767661525 | 6.443661377 | 5.729556691 |
| ENSMUSG00000035780 | 11.31922962 | 15.99919661 | 9.179963621 | 2.416373016 | 5.729556691 |
| ENSMUSG00000035783 | 7.781970364 | 11.82549314 | 5.649208382 | 4.832746033 | 4.297167518 |
| ENSMUSG00000035785 | 1.414903703 | 1.391234488 | 2.118453143 | 0.805457672 | 2.148583759 |
| ENSMUSG00000035799 | 6.367066661 | 7.651789682 | 4.236906287 | 4.832746033 | 5.729556691 |
| ENSMUSG00000035804 | 12.73413332 | 4.173703463 | 13.41686991 | 2.416373016 | 5.729556691 |
| ENSMUSG00000035824 | 15.56394073 | 32.69401046 | 21.89068248 | 13.69278043 | 22.20203218 |
| ENSMUSG00000035831 | 7.781970364 | 9.738641413 | 7.767661525 | 4.832746033 | 5.729556691 |
| ENSMUSG00000035836 | 5.65961481  | 7.651789682 | 2.824604191 | 3.221830688 | 2.148583759 |
| ENSMUSG00000035840 | 40.32475552 | 66.08363816 | 47.3121202  | 45.10562964 | 43.68786977 |
| ENSMUSG00000035860 | 10.61177777 | 9.043024169 | 6.35535943  | 3.221830688 | 6.445751277 |
| ENSMUSG00000035861 | 7.781970364 | 4.173703463 | 2.824604191 | 3.221830688 | 5.729556691 |
| ENSMUSG00000035873 | 7.781970364 | 6.26055194  | 4.943057334 | 7.249119049 | 5.013362104 |
| ENSMUSG00000035885 | 102.5805184 | 139.819066  | 116.5149229 | 223.1117752 | 166.8733386 |
| ENSMUSG00000035890 | 101.1656147 | 126.6023384 | 105.2165061 | 222.3063175 | 175.4676737 |
| ENSMUSG00000035896 | 8.489422215 | 5.56493795  | 12.00456781 | 4.832746033 | 15.04008631 |
| ENSMUSG00000035916 | 9.196874066 | 11.1298759  | 7.061510478 | 7.249119049 | 8.594335036 |
| ENSMUSG00000035923 | 5.65961481  | 8.347406925 | 9.886114669 | 6.443661377 | 7.87814045  |
| ENSMUSG00000035930 | 7.074518513 | 2.782468975 | 7.767661525 | 4.02728836  | 7.87814045  |
| ENSMUSG00000035932 | 10.61177777 | 8.347406925 | 5.649208382 | 5.638203705 | 5.729556691 |
| ENSMUSG00000035933 | 67.20792587 | 123.1242521 | 99.56729774 | 104.7094974 | 92.38910164 |
| ENSMUSG00000035936 | 7.781970364 | 6.26055194  | 8.473812573 | 5.638203705 | 7.87814045  |
| ENSMUSG00000035946 | 5.65961481  | 9.738641413 | 11.29841676 | 11.27640741 | 5.729556691 |
| ENSMUSG00000035951 | 14.14903703 | 3.478086219 | 6.35535943  | 7.249119049 | 10.02672421 |
| ENSMUSG00000035958 | 89.84638511 | 125.2111039 | 105.9226572 | 206.1971641 | 157.562809  |
| ENSMUSG00000035963 | 8.489422215 | 9.043024169 | 9.886114669 | 6.443661377 | 4.297167518 |
| ENSMUSG00000035964 | 3.537259256 | 4.173703463 | 7.767661525 | 4.832746033 | 6.445751277 |
| ENSMUSG00000036019 | 6.367066661 | 4.869320706 | 7.767661525 | 4.832746033 | 5.013362104 |
| ENSMUSG00000036023 | 24.76081479 | 38.95456565 | 37.42600553 | 53.16020636 | 46.55264811 |
| ENSMUSG00000036030 | 4.952162959 | 11.1298759  | 9.179963621 | 3.221830688 | 6.445751277 |
| ENSMUSG00000036061 | 19.10119998 | 19.47728283 | 31.0706461  | 20.1364418  | 21.48583759 |
| ENSMUSG00000036091 | 5.65961481  | 5.56493795  | 7.061510478 | 5.638203705 | 4.297167518 |
| ENSMUSG00000036093 | 87.72402956 | 114.7768452 | 104.5103551 | 131.2896006 | 100.9834367 |



|                    |             |             |             |             |             |
|--------------------|-------------|-------------|-------------|-------------|-------------|
| ENSMUSG00000036097 | 70.74518513 | 115.4724625 | 84.73812573 | 115.9859048 | 116.023523  |
| ENSMUSG00000036103 | 9.904325918 | 8.347406925 | 2.118453143 | 4.02728836  | 5.013362104 |
| ENSMUSG00000036111 | 8.489422215 | 3.478086219 | 9.179963621 | 4.832746033 | 5.729556691 |
| ENSMUSG00000036114 | 28.29807405 | 43.82388636 | 44.48751601 | 40.2728836  | 45.83645353 |
| ENSMUSG00000036117 | 7.781970364 | 6.956172438 | 6.35535943  | 8.054576721 | 8.594335036 |
| ENSMUSG00000036136 | 4.244711108 | 6.956172438 | 8.473812573 | 6.443661377 | 7.161945863 |
| ENSMUSG00000036139 | 8.489422215 | 8.347406925 | 10.59226572 | 6.443661377 | 5.013362104 |
| ENSMUSG00000036144 | 14.85648888 | 9.043024169 | 12.00456781 | 3.221830688 | 6.445751277 |
| ENSMUSG00000036169 | 7.074518513 | 5.56493795  | 4.236906287 | 2.416373016 | 4.297167518 |
| ENSMUSG00000036181 | 5.65961481  | 7.651789682 | 6.35535943  | 4.02728836  | 6.445751277 |
| ENSMUSG00000036185 | 25.46826665 | 26.43345526 | 28.95219296 | 16.91461111 | 12.17530797 |
| ENSMUSG00000036186 | 8.489422215 | 11.82549314 | 4.236906287 | 8.054576721 | 8.594335036 |
| ENSMUSG00000036188 | 38.20239997 | 61.9099347  | 64.25974535 | 99.87675134 | 76.63282074 |
| ENSMUSG00000036199 | 4.952162959 | 9.043024169 | 9.886114669 | 10.47094974 | 7.87814045  |
| ENSMUSG00000036211 | 7.781970364 | 9.738641413 | 9.179963621 | 7.249119049 | 5.013362104 |
| ENSMUSG00000036216 | 12.73413332 | 6.956172438 | 10.59226572 | 4.832746033 | 8.594335036 |
| ENSMUSG00000036231 | 8.489422215 | 9.043024169 | 6.35535943  | 5.638203705 | 11.45911338 |
| ENSMUSG00000036241 | 59.42595551 | 107.8206728 | 87.56272992 | 105.514955  | 93.10529622 |
| ENSMUSG00000036244 | 10.61177777 | 3.478086219 | 4.236906287 | 8.860034393 | 7.87814045  |
| ENSMUSG00000036264 | 10.61177777 | 3.478086219 | 9.179963621 | 10.47094974 | 7.87814045  |
| ENSMUSG00000036278 | 8.489422215 | 9.043024169 | 9.179963621 | 11.27640741 | 8.594335036 |
| ENSMUSG00000036291 | 70.74518513 | 124.5154866 | 108.0411103 | 143.3714656 | 121.7530797 |
| ENSMUSG00000036295 | 9.196874066 | 11.82549314 | 11.29841676 | 6.443661377 | 10.02672421 |
| ENSMUSG00000036299 | 46.69182218 | 99.47326586 | 87.56272992 | 116.7913625 | 113.1587446 |
| ENSMUSG00000036357 | 4.952162959 | 5.56493795  | 4.943057334 | 2.416373016 | 2.864778345 |
| ENSMUSG00000036362 | 9.904325918 | 14.60796212 | 7.061510478 | 5.638203705 | 15.7562809  |
| ENSMUSG00000036368 | 12.02668147 | 16.69481385 | 10.59226572 | 13.69278043 | 16.47247549 |
| ENSMUSG00000036371 | 155.6394073 | 149.5577074 | 157.4716837 | 322.1830688 | 205.5478463 |
| ENSMUSG00000036376 | 22.63845924 | 31.30277597 | 27.53989086 | 92.62763229 | 68.0384857  |
| ENSMUSG00000036390 | 6.367066661 | 16.69481385 | 16.2414741  | 9.665492065 | 13.60769714 |
| ENSMUSG00000036401 | 9.196874066 | 6.260555194 | 4.943057334 | 7.249119049 | 3.580972932 |
| ENSMUSG00000036412 | 7.074518513 | 10.43425866 | 9.179963621 | 8.054576721 | 5.729556691 |
| ENSMUSG00000036427 | 43.15456293 | 70.95295887 | 55.78593277 | 133.7059736 | 96.68626916 |
| ENSMUSG00000036430 | 66.50047402 | 102.2557348 | 79.08891735 | 112.7640741 | 98.83485292 |
| ENSMUSG00000036432 | 25.46826665 | 55.6493795  | 50.13672439 | 264.1901164 | 199.102095  |
| ENSMUSG00000036437 | 11.31922962 | 7.651789682 | 7.061510478 | 6.443661377 | 8.594335036 |
| ENSMUSG00000036442 | 21.93100739 | 40.34580014 | 43.78136496 | 34.6346799  | 35.09353473 |
| ENSMUSG00000036446 | 14.85648888 | 8.347406925 | 9.179963621 | 7.249119049 | 7.87814045  |
| ENSMUSG00000036449 | 4.952162959 | 2.782468975 | 9.886114669 | 10.47094974 | 9.310529622 |
| ENSMUSG00000036450 | 67.91537772 | 92.51709342 | 83.32582364 | 71.68573282 | 78.06520991 |
| ENSMUSG00000036463 | 9.196874066 | 7.651789682 | 7.767661525 | 4.832746033 | 0.716194586 |
| ENSMUSG00000036478 | 103.9954221 | 148.8620902 | 117.927225  | 190.0880106 | 144.6713064 |
| ENSMUSG00000036480 | 10.61177777 | 4.173703463 | 2.118453143 | 4.02728836  | 5.729556691 |

|                    |             |             |             |             |             |
|--------------------|-------------|-------------|-------------|-------------|-------------|
| ENSMUSG00000036499 | 18.39374813 | 33.3896277  | 35.30755239 | 51.54929101 | 44.40406435 |
| ENSMUSG00000036501 | 78.52715549 | 101.5601176 | 109.4534124 | 102.2931244 | 86.65954495 |
| ENSMUSG00000036504 | 12.73413332 | 18.08604834 | 20.47838039 | 27.38556085 | 21.48583759 |
| ENSMUSG00000036521 | 12.02668147 | 9.043024169 | 9.179963621 | 2.416373016 | 10.7429188  |
| ENSMUSG00000036526 | 147.1499851 | 161.3832006 | 147.585569  | 190.0880106 | 174.7514791 |
| ENSMUSG00000036533 | 26.1757185  | 34.08524495 | 38.13215658 | 15.30369577 | 17.18867007 |
| ENSMUSG00000036534 | 16.27139258 | 18.78166558 | 20.47838039 | 18.52552646 | 15.04008631 |
| ENSMUSG00000036537 | 24.76081479 | 40.34580014 | 38.83830763 | 49.93837567 | 34.37734014 |
| ENSMUSG00000036545 | 7.074518513 | 5.56493795  | 5.649208382 | 8.054576721 | 7.161945863 |
| ENSMUSG00000036551 | 2.122355554 | 2.086851731 | 4.236906287 | 2.416373016 | 2.864778345 |
| ENSMUSG00000036557 | 13.44158517 | 11.82549314 | 11.29841676 | 16.10915344 | 10.7429188  |
| ENSMUSG00000036565 | 72.16008883 | 89.73462445 | 112.2780166 | 50.74383334 | 43.68786977 |
| ENSMUSG00000036568 | 79.94205919 | 115.4724625 | 91.79963621 | 46.71654498 | 53.71459398 |
| ENSMUSG00000036574 | 2.829807405 | 8.347406925 | 6.35535943  | 9.665492065 | 9.310529622 |
| ENSMUSG00000036578 | 6.367066661 | 6.956172438 | 9.886114669 | 8.054576721 | 3.580972932 |
| ENSMUSG00000036586 | 8.489422215 | 4.869320706 | 9.886114669 | 7.249119049 | 7.161945863 |
| ENSMUSG00000036596 | 7.074518513 | 5.56493795  | 2.824604191 | 8.860034393 | 8.594335036 |
| ENSMUSG00000036598 | 6.367066661 | 7.651789682 | 7.061510478 | 11.27640741 | 8.594335036 |
| ENSMUSG00000036611 | 5.65961481  | 6.260555194 | 6.35535943  | 6.443661377 | 6.445751277 |
| ENSMUSG00000036613 | 69.33028142 | 100.1688831 | 96.74269354 | 88.60034393 | 75.20043157 |
| ENSMUSG00000036615 | 24.76081479 | 46.60635533 | 50.84287544 | 50.74383334 | 52.2822048  |
| ENSMUSG00000036632 | 45.98437033 | 88.34338996 | 73.43970897 | 128.8732275 | 125.3340526 |
| ENSMUSG00000036636 | 47.39927403 | 64.69240367 | 55.78593277 | 66.04752911 | 76.63282074 |
| ENSMUSG00000036641 | 11.31922962 | 6.260555194 | 9.179963621 | 8.860034393 | 8.594335036 |
| ENSMUSG00000036655 | 9.196874066 | 2.782468975 | 4.236906287 | 8.860034393 | 4.297167518 |
| ENSMUSG00000036672 | 12.73413332 | 30.60715873 | 22.59683353 | 24.96918783 | 25.06681052 |
| ENSMUSG00000036678 | 16.27139258 | 28.52030699 | 26.83373982 | 41.88379895 | 33.66114556 |
| ENSMUSG00000036731 | 9.196874066 | 4.869320706 | 6.35535943  | 8.860034393 | 3.580972932 |
| ENSMUSG00000036743 | 5.65961481  | 8.347406925 | 6.35535943  | 7.249119049 | 8.594335036 |
| ENSMUSG00000036751 | 59.42595551 | 108.51629   | 87.56272992 | 126.4568545 | 100.2672421 |
| ENSMUSG00000036752 | 47.39927403 | 59.12746572 | 48.7244223  | 181.2279762 | 133.2121931 |
| ENSMUSG00000036768 | 101.1656147 | 132.1672763 | 122.1641313 | 197.3371297 | 152.5494469 |
| ENSMUSG00000036777 | 47.39927403 | 62.60555194 | 60.02283906 | 101.4876667 | 74.48423698 |
| ENSMUSG00000036790 | 4.952162959 | 4.173703463 | 4.943057334 | 3.221830688 | 2.864778345 |
| ENSMUSG00000036800 | 4.952162959 | 6.956172438 | 6.35535943  | 4.02728836  | 6.445751277 |
| ENSMUSG00000036822 | 77.11225179 | 92.51709342 | 84.73812573 | 152.2315    | 123.1854689 |
| ENSMUSG00000036832 | 7.074518513 | 4.173703463 | 3.530755239 | 5.638203705 | 7.161945863 |
| ENSMUSG00000036835 | 47.39927403 | 55.6493795  | 42.36906287 | 56.38203705 | 50.13362104 |
| ENSMUSG00000036840 | 86.30912585 | 107.1250555 | 115.8087718 | 104.7094974 | 79.49759908 |
| ENSMUSG00000036850 | 31.12788146 | 39.6501829  | 38.13215658 | 60.40932541 | 68.0384857  |
| ENSMUSG00000036853 | 6.367066661 | 16.69481385 | 12.71071886 | 2.416373016 | 10.02672421 |
| ENSMUSG00000036855 | 7.074518513 | 5.56493795  | 9.886114669 | 8.054576721 | 5.729556691 |
| ENSMUSG00000036856 | 10.61177777 | 3.478086219 | 7.061510478 | 9.665492065 | 4.297167518 |

|                    |             |             |             |             |             |
|--------------------|-------------|-------------|-------------|-------------|-------------|
| ENSMUSG00000036858 | 7.074518513 | 12.52111039 | 10.59226572 | 7.249119049 | 10.02672421 |
| ENSMUSG00000036867 | 5.65961481  | 9.738641413 | 8.473812573 | 5.638203705 | 5.729556691 |
| ENSMUSG00000036880 | 15.56394073 | 28.52030699 | 15.53532305 | 17.72006879 | 20.05344842 |
| ENSMUSG00000036887 | 8.489422215 | 6.956172438 | 7.767661525 | 4.832746033 | 7.87814045  |
| ENSMUSG00000036894 | 20.51610369 | 18.78166558 | 33.18909925 | 30.60739154 | 32.22875639 |
| ENSMUSG00000036896 | 2.122355554 | 4.869320706 | 7.767661525 | 4.832746033 | 6.445751277 |
| ENSMUSG00000036904 | 10.61177777 | 8.347406925 | 10.59226572 | 4.832746033 | 9.310529622 |
| ENSMUSG00000036905 | 4.952162959 | 4.869320706 | 7.767661525 | 8.860034393 | 7.87814045  |
| ENSMUSG00000036907 | 7.074518513 | 4.869320706 | 4.943057334 | 7.249119049 | 5.729556691 |
| ENSMUSG00000036921 | 7.074518513 | 6.260555194 | 5.649208382 | 10.47094974 | 8.594335036 |
| ENSMUSG00000036924 | 9.904325918 | 11.82549314 | 6.35535943  | 7.249119049 | 8.594335036 |
| ENSMUSG00000036925 | 19.80865184 | 14.60796212 | 18.35992724 | 17.72006879 | 18.62105924 |
| ENSMUSG00000036934 | 92.67619252 | 111.298759  | 96.0365425  | 146.5932963 | 143.9551119 |
| ENSMUSG00000036941 | 15.56394073 | 14.60796212 | 19.06607829 | 15.30369577 | 17.90486466 |
| ENSMUSG00000036943 | 14.14903703 | 22.2597518  | 34.60140134 | 154.647873  | 103.848215  |
| ENSMUSG00000036944 | 31.83533331 | 54.95376226 | 42.36906287 | 17.72006879 | 28.64778345 |
| ENSMUSG00000036951 | 4.952162959 | 5.56493795  | 8.473812573 | 4.02728836  | 7.161945863 |
| ENSMUSG00000036957 | 5.65961481  | 4.869320706 | 9.179963621 | 8.054576721 | 5.013362104 |
| ENSMUSG00000036958 | 9.196874066 | 4.869320706 | 7.061510478 | 8.054576721 | 10.02672421 |
| ENSMUSG00000036961 | 7.074518513 | 10.43425866 | 12.71071886 | 2.416373016 | 10.02672421 |
| ENSMUSG00000036975 | 12.02668147 | 15.99919661 | 17.65377619 | 17.72006879 | 19.33725383 |
| ENSMUSG00000036977 | 80.64951104 | 120.3417832 | 92.50578726 | 217.4735715 | 177.6162574 |
| ENSMUSG00000036995 | 8.489422215 | 4.869320706 | 6.35535943  | 7.249119049 | 10.02672421 |
| ENSMUSG00000037010 | 3.537259256 | 4.869320706 | 4.236906287 | 3.221830688 | 4.297167518 |
| ENSMUSG00000037014 | 10.61177777 | 11.82549314 | 6.35535943  | 8.860034393 | 7.161945863 |
| ENSMUSG00000037022 | 26.88317035 | 46.60635533 | 38.13215658 | 36.24559524 | 52.2822048  |
| ENSMUSG00000037029 | 108.2401332 | 161.3832006 | 123.5764334 | 202.9753334 | 148.2522794 |
| ENSMUSG00000037033 | 11.31922962 | 11.1298759  | 9.179963621 | 4.02728836  | 5.729556691 |
| ENSMUSG00000037035 | 4.952162959 | 6.260555194 | 3.530755239 | 1.610915344 | 5.013362104 |
| ENSMUSG00000037049 | 30.4204296  | 43.82388636 | 36.71985448 | 14.4982381  | 31.5125618  |
| ENSMUSG00000037053 | 9.196874066 | 5.56493795  | 4.236906287 | 3.221830688 | 5.729556691 |
| ENSMUSG00000037060 | 4.952162959 | 6.260555194 | 7.061510478 | 7.249119049 | 7.161945863 |
| ENSMUSG00000037070 | 93.38364437 | 155.1226454 | 123.5764334 | 201.364418  | 175.4676737 |
| ENSMUSG00000037071 | 232.0442072 | 238.5967146 | 199.1345955 | 305.2684577 | 232.047046  |
| ENSMUSG00000037075 | 33.25023701 | 57.04061399 | 36.71985448 | 93.43308996 | 77.34901533 |
| ENSMUSG00000037085 | 20.51610369 | 51.47567604 | 38.83830763 | 68.46390213 | 67.32229112 |
| ENSMUSG00000037086 | 3.537259256 | 6.260555194 | 5.649208382 | 0           | 5.729556691 |
| ENSMUSG00000037095 | 6.367066661 | 3.478086219 | 4.943057334 | 6.443661377 | 6.445751277 |
| ENSMUSG00000037103 | 83.47931845 | 93.21271067 | 92.50578726 | 95.84946298 | 90.24051788 |
| ENSMUSG00000037104 | 26.1757185  | 46.60635533 | 40.95676077 | 17.72006879 | 22.20203218 |
| ENSMUSG00000037106 | 8.489422215 | 8.347406925 | 6.35535943  | 8.860034393 | 4.297167518 |
| ENSMUSG00000037111 | 41.03220737 | 48.69320706 | 41.66291182 | 60.40932541 | 71.61945863 |
| ENSMUSG00000037119 | 44.56946663 | 75.82227957 | 53.66747963 | 132.9005159 | 107.429188  |

|                    |             |             |             |             |             |
|--------------------|-------------|-------------|-------------|-------------|-------------|
| ENSMUSG00000037124 | 7.074518513 | 6.956172438 | 9.886114669 | 5.638203705 | 5.013362104 |
| ENSMUSG00000037129 | 8.489422215 | 7.651789682 | 3.530755239 | 8.054576721 | 10.02672421 |
| ENSMUSG00000037130 | 12.02668147 | 6.956172438 | 10.59226572 | 7.249119049 | 5.729556691 |
| ENSMUSG00000037148 | 7.074518513 | 7.651789682 | 10.59226572 | 20.1364418  | 12.89150255 |
| ENSMUSG00000037151 | 12.02668147 | 20.86851731 | 26.12758877 | 21.74735715 | 17.90486466 |
| ENSMUSG00000037157 | 8.489422215 | 5.56493795  | 3.530755239 | 2.416373016 | 4.297167518 |
| ENSMUSG00000037166 | 9.904325918 | 4.869320706 | 7.061510478 | 5.638203705 | 5.729556691 |
| ENSMUSG00000037167 | 6.367066661 | 3.478086219 | 8.473812573 | 5.638203705 | 5.013362104 |
| ENSMUSG00000037171 | 7.074518513 | 9.043024169 | 10.59226572 | 11.27640741 | 8.594335036 |
| ENSMUSG00000037185 | 9.196874066 | 6.260555194 | 4.943057334 | 5.638203705 | 3.580972932 |
| ENSMUSG00000037188 | 9.196874066 | 4.173703463 | 6.35535943  | 6.443661377 | 5.013362104 |
| ENSMUSG00000037196 | 4.244711108 | 11.1298759  | 6.35535943  | 2.416373016 | 3.580972932 |
| ENSMUSG00000037202 | 4.952162959 | 11.82549314 | 5.649208382 | 1.610915344 | 15.04008631 |
| ENSMUSG00000037204 | 76.40479994 | 89.0390072  | 84.03197468 | 53.96566403 | 66.60609653 |
| ENSMUSG00000037216 | 12.73413332 | 18.78166558 | 12.00456781 | 14.4982381  | 15.04008631 |
| ENSMUSG00000037239 | 5.65961481  | 7.651789682 | 3.530755239 | 5.638203705 | 5.013362104 |
| ENSMUSG00000037242 | 41.73965922 | 68.86610713 | 55.07978173 | 254.5246244 | 193.3725383 |
| ENSMUSG00000037251 | 10.61177777 | 9.738641413 | 12.71071886 | 9.665492065 | 15.04008631 |
| ENSMUSG00000037257 | 119.5593629 | 143.9927695 | 129.2256417 | 102.2931244 | 78.06520991 |
| ENSMUSG00000037260 | 5.65961481  | 14.60796212 | 12.00456781 | 8.860034393 | 15.7562809  |
| ENSMUSG00000037262 | 166.251185  | 235.1186284 | 201.9591997 | 304.4630001 | 230.6146568 |
| ENSMUSG00000037278 | 17.68629628 | 29.21592424 | 31.77679715 | 82.15668255 | 82.36237743 |
| ENSMUSG00000037295 | 54.47379255 | 92.51709342 | 80.50121945 | 34.6346799  | 47.98503729 |
| ENSMUSG00000037296 | 72.16008883 | 132.1672763 | 105.9226572 | 132.0950582 | 125.3340526 |
| ENSMUSG00000037316 | 68.62282957 | 117.5593142 | 108.7472614 | 99.87675134 | 126.7664418 |
| ENSMUSG00000037334 | 7.781970364 | 9.738641413 | 8.473812573 | 4.832746033 | 11.45911338 |
| ENSMUSG00000037343 | 25.46826665 | 36.17209668 | 41.66291182 | 37.85651059 | 33.66114556 |
| ENSMUSG00000037346 | 6.367066661 | 4.173703463 | 6.35535943  | 3.221830688 | 5.013362104 |
| ENSMUSG00000037347 | 0.707451851 | 4.869320706 | 4.943057334 | 6.443661377 | 3.580972932 |
| ENSMUSG00000037349 | 11.31922962 | 8.347406925 | 9.179963621 | 8.054576721 | 15.04008631 |
| ENSMUSG00000037351 | 64.37811846 | 86.95215547 | 91.09348516 | 91.82217462 | 88.09193412 |
| ENSMUSG00000037353 | 16.97884443 | 25.73783802 | 27.53989086 | 28.19101852 | 32.94495097 |
| ENSMUSG00000037358 | 5.65961481  | 3.478086219 | 4.236906287 | 2.416373016 | 2.864778345 |
| ENSMUSG00000037361 | 55.88869625 | 113.3856107 | 79.08891735 | 146.5932963 | 123.9016634 |
| ENSMUSG00000037362 | 10.61177777 | 3.478086219 | 7.061510478 | 7.249119049 | 3.580972932 |
| ENSMUSG00000037363 | 12.73413332 | 26.43345526 | 21.18453143 | 10.47094974 | 17.18867007 |
| ENSMUSG00000037379 | 10.61177777 | 1.391234488 | 7.061510478 | 6.443661377 | 8.594335036 |
| ENSMUSG00000037393 | 12.02668147 | 9.043024169 | 9.886114669 | 4.832746033 | 6.445751277 |
| ENSMUSG00000037405 | 41.73965922 | 57.73623123 | 47.3121202  | 201.364418  | 136.0769714 |
| ENSMUSG00000037406 | 12.73413332 | 15.30357936 | 16.94762515 | 17.72006879 | 19.33725383 |
| ENSMUSG00000037415 | 70.74518513 | 80.69160028 | 86.15042783 | 72.49119049 | 73.76804239 |
| ENSMUSG00000037418 | 7.074518513 | 10.43425866 | 6.35535943  | 4.02728836  | 8.594335036 |
| ENSMUSG00000037419 | 26.1757185  | 27.82468975 | 33.18909925 | 19.33098413 | 18.62105924 |

|                    |             |             |             |             |             |
|--------------------|-------------|-------------|-------------|-------------|-------------|
| ENSMUSG00000037434 | 26.1757185  | 46.60635533 | 35.30755239 | 31.41284921 | 35.80972932 |
| ENSMUSG00000037440 | 7.781970364 | 2.782468975 | 3.530755239 | 7.249119049 | 6.445751277 |
| ENSMUSG00000037451 | 9.904325918 | 9.043024169 | 8.473812573 | 9.665492065 | 8.594335036 |
| ENSMUSG00000037465 | 3.537259256 | 6.260555194 | 7.061510478 | 8.860034393 | 12.17530797 |
| ENSMUSG00000037469 | 5.65961481  | 2.782468975 | 7.767661525 | 4.832746033 | 7.161945863 |
| ENSMUSG00000037477 | 7.781970364 | 9.043024169 | 4.943057334 | 5.638203705 | 7.87814045  |
| ENSMUSG00000037482 | 8.489422215 | 6.956172438 | 7.061510478 | 6.443661377 | 8.594335036 |
| ENSMUSG00000037487 | 85.601674   | 120.3417832 | 100.2734488 | 178.0061455 | 146.8198902 |
| ENSMUSG00000037490 | 7.074518513 | 4.869320706 | 5.649208382 | 6.443661377 | 8.594335036 |
| ENSMUSG00000037493 | 5.65961481  | 8.347406925 | 5.649208382 | 5.638203705 | 7.161945863 |
| ENSMUSG00000037499 | 9.904325918 | 11.82549314 | 14.829172   | 17.72006879 | 10.7429188  |
| ENSMUSG00000037525 | 7.781970364 | 15.30357936 | 17.65377619 | 15.30369577 | 15.7562809  |
| ENSMUSG00000037526 | 21.93100739 | 33.3896277  | 31.77679715 | 29.80193387 | 29.36397804 |
| ENSMUSG00000037531 | 57.30359995 | 78.60474855 | 74.85201106 | 121.6241085 | 118.1721067 |
| ENSMUSG00000037573 | 21.22355554 | 32.69401046 | 38.83830763 | 30.60739154 | 25.78300511 |
| ENSMUSG00000037578 | 8.489422215 | 8.347406925 | 9.179963621 | 8.054576721 | 6.445751277 |
| ENSMUSG00000037580 | 22.63845924 | 47.30197258 | 38.83830763 | 49.132918   | 55.14698315 |
| ENSMUSG00000037583 | 13.44158517 | 3.478086219 | 9.179963621 | 10.47094974 | 7.87814045  |
| ENSMUSG00000037621 | 4.244711108 | 6.956172438 | 2.824604191 | 10.47094974 | 11.45911338 |
| ENSMUSG00000037625 | 9.196874066 | 4.869320706 | 8.473812573 | 10.47094974 | 11.45911338 |
| ENSMUSG00000037628 | 11.31922962 | 19.47728283 | 19.06607829 | 18.52552646 | 22.20203218 |
| ENSMUSG00000037636 | 5.65961481  | 9.738641413 | 6.35535943  | 5.638203705 | 4.297167518 |
| ENSMUSG00000037638 | 7.781970364 | 11.82549314 | 12.71071886 | 6.443661377 | 5.013362104 |
| ENSMUSG00000037646 | 41.73965922 | 81.38721752 | 69.90895373 | 70.88027514 | 62.30892901 |
| ENSMUSG00000037649 | 133.7083999 | 145.3840039 | 141.9363606 | 240.831844  | 179.0486466 |
| ENSMUSG00000037653 | 7.781970364 | 9.043024169 | 4.943057334 | 4.02728836  | 6.445751277 |
| ENSMUSG00000037656 | 14.14903703 | 28.52030699 | 14.829172   | 38.66196826 | 26.49919969 |
| ENSMUSG00000037660 | 7.781970364 | 7.651789682 | 7.061510478 | 6.443661377 | 7.161945863 |
| ENSMUSG00000037679 | 23.34591109 | 34.08524495 | 31.0706461  | 132.0950582 | 105.2806042 |
| ENSMUSG00000037686 | 3.537259256 | 2.086851731 | 1.412302096 | 5.638203705 | 5.013362104 |
| ENSMUSG00000037689 | 12.02668147 | 5.56493795  | 5.649208382 | 8.860034393 | 10.02672421 |
| ENSMUSG00000037710 | 35.37259256 | 68.17048989 | 59.31668801 | 109.5422434 | 91.67290705 |
| ENSMUSG00000037722 | 10.61177777 | 16.69481385 | 20.47838039 | 28.19101852 | 27.93158887 |
| ENSMUSG00000037725 | 16.27139258 | 29.91154148 | 19.77222934 | 39.46742593 | 34.37734014 |
| ENSMUSG00000037727 | 7.074518513 | 4.173703463 | 9.886114669 | 3.221830688 | 3.580972932 |
| ENSMUSG00000037731 | 106.8252295 | 151.6445591 | 128.5194907 | 144.982381  | 113.8749392 |
| ENSMUSG00000037737 | 6.367066661 | 8.347406925 | 5.649208382 | 2.416373016 | 6.445751277 |
| ENSMUSG00000037740 | 34.66514071 | 54.25814501 | 50.13672439 | 70.07481747 | 74.48423698 |
| ENSMUSG00000037747 | 8.489422215 | 9.043024169 | 9.886114669 | 3.221830688 | 5.013362104 |
| ENSMUSG00000037752 | 12.73413332 | 20.86851731 | 11.29841676 | 12.08186508 | 10.02672421 |
| ENSMUSG00000037759 | 8.489422215 | 9.043024169 | 9.886114669 | 9.665492065 | 7.161945863 |
| ENSMUSG00000037762 | 4.244711108 | 2.086851731 | 5.649208382 | 5.638203705 | 8.594335036 |
| ENSMUSG00000037780 | 9.904325918 | 3.478086219 | 8.473812573 | 3.221830688 | 7.87814045  |

|                    |             |             |             |             |             |
|--------------------|-------------|-------------|-------------|-------------|-------------|
| ENSMUSG00000037790 | 4.244711108 | 6.260555194 | 4.236906287 | 2.416373016 | 2.148583759 |
| ENSMUSG00000037798 | 11.31922962 | 8.347406925 | 4.236906287 | 3.221830688 | 7.161945863 |
| ENSMUSG00000037815 | 21.22355554 | 22.95536904 | 32.4829482  | 29.80193387 | 27.21539428 |
| ENSMUSG00000037824 | 111.0699406 | 118.9505487 | 133.462548  | 124.0404815 | 116.7397176 |
| ENSMUSG00000037826 | 72.16008883 | 120.3417832 | 86.15042783 | 74.10210583 | 75.91662615 |
| ENSMUSG00000037843 | 7.781970364 | 7.651789682 | 4.236906287 | 6.443661377 | 5.013362104 |
| ENSMUSG00000037849 | 37.49494812 | 66.08363816 | 55.07978173 | 71.68573282 | 50.13362104 |
| ENSMUSG00000037852 | 8.489422215 | 4.869320706 | 8.473812573 | 7.249119049 | 3.580972932 |
| ENSMUSG00000037872 | 7.074518513 | 2.086851731 | 10.59226572 | 8.054576721 | 6.445751277 |
| ENSMUSG00000037924 | 8.489422215 | 9.043024169 | 7.061510478 | 5.638203705 | 6.445751277 |
| ENSMUSG00000037938 | 12.73413332 | 19.47728283 | 12.00456781 | 22.55281482 | 19.33725383 |
| ENSMUSG00000037942 | 10.61177777 | 8.347406925 | 8.473812573 | 5.638203705 | 7.87814045  |
| ENSMUSG00000037944 | 153.5170517 | 182.9473351 | 158.1778347 | 191.698926  | 162.5761711 |
| ENSMUSG00000037949 | 24.76081479 | 32.69401046 | 37.42600553 | 28.19101852 | 24.35061594 |
| ENSMUSG00000037953 | 14.14903703 | 4.869320706 | 5.649208382 | 5.638203705 | 5.013362104 |
| ENSMUSG00000037962 | 9.196874066 | 6.260555194 | 4.943057334 | 6.443661377 | 9.310529622 |
| ENSMUSG00000037972 | 292.1776146 | 240.6835663 | 262.6881898 | 289.1593043 | 204.1154571 |
| ENSMUSG00000037973 | 12.02668147 | 7.651789682 | 7.061510478 | 4.02728836  | 4.297167518 |
| ENSMUSG00000037977 | 7.781970364 | 13.91234488 | 9.886114669 | 17.72006879 | 11.45911338 |
| ENSMUSG00000037984 | 9.196874066 | 2.086851731 | 2.824604191 | 6.443661377 | 4.297167518 |
| ENSMUSG00000037991 | 22.63845924 | 25.04222078 | 23.30298458 | 128.0677699 | 90.95671247 |
| ENSMUSG00000037993 | 45.27691848 | 61.21431745 | 66.37819849 | 118.4022778 | 106.7129934 |
| ENSMUSG00000038002 | 60.13340736 | 99.47326586 | 86.15042783 | 143.3714656 | 113.8749392 |
| ENSMUSG00000038009 | 4.244711108 | 4.869320706 | 5.649208382 | 4.02728836  | 3.580972932 |
| ENSMUSG00000038014 | 36.08004441 | 74.43104508 | 57.19823487 | 279.4938122 | 171.1705061 |
| ENSMUSG00000038015 | 0.707451851 | 3.478086219 | 3.530755239 | 1.610915344 | 2.148583759 |
| ENSMUSG00000038020 | 18.39374813 | 14.60796212 | 17.65377619 | 14.4982381  | 10.02672421 |
| ENSMUSG00000038025 | 109.6550369 | 139.1234488 | 129.2256417 | 142.566008  | 123.9016634 |
| ENSMUSG00000038028 | 36.08004441 | 49.38882431 | 55.78593277 | 57.99295239 | 56.57937232 |
| ENSMUSG00000038037 | 12.02668147 | 18.08604834 | 17.65377619 | 223.1117752 | 161.1437819 |
| ENSMUSG00000038044 | 8.489422215 | 6.260555194 | 9.179963621 | 5.638203705 | 5.729556691 |
| ENSMUSG00000038046 | 27.5906222  | 57.73623123 | 36.01370344 | 86.18397091 | 81.64618284 |
| ENSMUSG00000038057 | 19.80865184 | 29.21592424 | 23.30298458 | 64.43661377 | 60.16034525 |
| ENSMUSG00000038059 | 7.074518513 | 9.043024169 | 11.29841676 | 17.72006879 | 16.47247549 |
| ENSMUSG00000038064 | 2.122355554 | 3.478086219 | 4.236906287 | 4.02728836  | 2.864778345 |
| ENSMUSG00000038067 | 10.61177777 | 4.173703463 | 7.061510478 | 4.832746033 | 8.594335036 |
| ENSMUSG00000038069 | 31.12788146 | 52.86691053 | 57.19823487 | 60.40932541 | 54.43078856 |
| ENSMUSG00000038071 | 6.367066661 | 4.173703463 | 9.179963621 | 4.832746033 | 8.594335036 |
| ENSMUSG00000038077 | 9.196874066 | 5.56493795  | 9.179963621 | 4.832746033 | 7.87814045  |
| ENSMUSG00000038086 | 6.367066661 | 7.651789682 | 7.061510478 | 8.054576721 | 4.297167518 |
| ENSMUSG00000038092 | 13.44158517 | 6.956172438 | 9.886114669 | 10.47094974 | 9.310529622 |
| ENSMUSG00000038121 | 43.86201478 | 92.51709342 | 64.96589639 | 112.7640741 | 107.429188  |
| ENSMUSG00000038122 | 10.61177777 | 13.21672763 | 8.473812573 | 5.638203705 | 10.02672421 |

|                    |             |             |             |             |             |
|--------------------|-------------|-------------|-------------|-------------|-------------|
| ENSMUSG00000038128 | 7.781970364 | 4.869320706 | 2.118453143 | 8.860034393 | 7.161945863 |
| ENSMUSG00000038132 | 5.65961481  | 6.956172438 | 9.179963621 | 10.47094974 | 5.729556691 |
| ENSMUSG00000038135 | 4.244711108 | 9.043024169 | 6.35535943  | 4.832746033 | 7.161945863 |
| ENSMUSG00000038141 | 9.196874066 | 24.34660353 | 23.30298458 | 15.30369577 | 13.60769714 |
| ENSMUSG00000038146 | 7.074518513 | 8.347406925 | 8.473812573 | 3.221830688 | 5.729556691 |
| ENSMUSG00000038150 | 77.11225179 | 92.51709342 | 94.6242404  | 76.51847885 | 75.20043157 |
| ENSMUSG00000038160 | 47.39927403 | 98.08203137 | 80.50121945 | 79.74030954 | 88.80812871 |
| ENSMUSG00000038167 | 7.074518513 | 3.478086219 | 7.061510478 | 0.805457672 | 5.729556691 |
| ENSMUSG00000038168 | 9.196874066 | 4.173703463 | 7.061510478 | 6.443661377 | 8.594335036 |
| ENSMUSG00000038192 | 6.367066661 | 4.869320706 | 7.767661525 | 4.02728836  | 4.297167518 |
| ENSMUSG00000038193 | 7.781970364 | 6.260555194 | 4.236906287 | 1.610915344 | 7.161945863 |
| ENSMUSG00000038195 | 4.952162959 | 9.043024169 | 5.649208382 | 9.665492065 | 3.580972932 |
| ENSMUSG00000038213 | 21.93100739 | 43.12826911 | 36.71985448 | 72.49119049 | 55.14698315 |
| ENSMUSG00000038216 | 7.781970364 | 3.478086219 | 4.943057334 | 4.832746033 | 3.580972932 |
| ENSMUSG00000038233 | 7.781970364 | 9.738641413 | 8.473812573 | 8.860034393 | 7.87814045  |
| ENSMUSG00000038235 | 9.196874066 | 9.043024169 | 8.473812573 | 7.249119049 | 10.7429188  |
| ENSMUSG00000038236 | 4.244711108 | 5.56493795  | 7.061510478 | 6.443661377 | 5.729556691 |
| ENSMUSG00000038246 | 9.196874066 | 9.043024169 | 9.886114669 | 5.638203705 | 6.445751277 |
| ENSMUSG00000038248 | 8.489422215 | 6.260555194 | 4.943057334 | 8.054576721 | 3.580972932 |
| ENSMUSG00000038250 | 131.5860443 | 162.774435  | 143.3486627 | 251.3027937 | 191.9401491 |
| ENSMUSG00000038253 | 11.31922962 | 5.56493795  | 8.473812573 | 5.638203705 | 2.864778345 |
| ENSMUSG00000038255 | 8.489422215 | 6.260555194 | 7.061510478 | 8.054576721 | 5.729556691 |
| ENSMUSG00000038257 | 14.85648888 | 10.43425866 | 6.35535943  | 2.416373016 | 8.594335036 |
| ENSMUSG00000038259 | 6.367066661 | 6.956172438 | 12.00456781 | 7.249119049 | 10.7429188  |
| ENSMUSG00000038264 | 54.47379255 | 82.08283477 | 55.07978173 | 107.9313281 | 103.848215  |
| ENSMUSG00000038268 | 9.196874066 | 13.91234488 | 14.829172   | 32.21830688 | 32.94495097 |
| ENSMUSG00000038300 | 7.074518513 | 6.260555194 | 2.824604191 | 8.860034393 | 7.87814045  |
| ENSMUSG00000038323 | 30.4204296  | 50.7800588  | 45.19366706 | 20.1364418  | 30.08017263 |
| ENSMUSG00000038327 | 9.904325918 | 5.56493795  | 9.179963621 | 5.638203705 | 6.445751277 |
| ENSMUSG00000038365 | 33.95768886 | 50.7800588  | 48.01827125 | 28.9964762  | 32.94495097 |
| ENSMUSG00000038370 | 7.074518513 | 10.43425866 | 7.061510478 | 8.054576721 | 1.432389173 |
| ENSMUSG00000038387 | 14.14903703 | 19.47728283 | 13.41686991 | 14.4982381  | 14.32389173 |
| ENSMUSG00000038398 | 15.56394073 | 30.60715873 | 22.59683353 | 13.69278043 | 24.35061594 |
| ENSMUSG00000038402 | 6.367066661 | 4.869320706 | 9.179963621 | 4.832746033 | 8.594335036 |
| ENSMUSG00000038412 | 24.05336294 | 43.12826911 | 34.60140134 | 63.6311561  | 61.59273443 |
| ENSMUSG00000038417 | 55.88869625 | 105.7338211 | 74.14586002 | 54.7711217  | 60.16034525 |
| ENSMUSG00000038418 | 8.489422215 | 11.82549314 | 10.59226572 | 12.08186508 | 9.310529622 |
| ENSMUSG00000038422 | 11.31922962 | 6.260555194 | 12.71071886 | 2.416373016 | 5.729556691 |
| ENSMUSG00000038446 | 91.96874066 | 130.7760418 | 121.4579802 | 88.60034393 | 80.92998826 |
| ENSMUSG00000038456 | 9.904325918 | 5.56493795  | 9.886114669 | 7.249119049 | 5.729556691 |
| ENSMUSG00000038462 | 72.16008883 | 109.9075245 | 100.9795998 | 177.2006879 | 120.3206905 |
| ENSMUSG00000038463 | 8.489422215 | 7.651789682 | 6.35535943  | 5.638203705 | 3.580972932 |
| ENSMUSG00000038473 | 7.074518513 | 5.56493795  | 9.179963621 | 5.638203705 | 3.580972932 |

|                    |             |             |             |             |             |
|--------------------|-------------|-------------|-------------|-------------|-------------|
| ENSMUSG00000038485 | 48.81417774 | 47.99758982 | 47.3121202  | 71.68573282 | 65.17370736 |
| ENSMUSG00000038486 | 12.02668147 | 15.30357936 | 10.59226572 | 15.30369577 | 12.17530797 |
| ENSMUSG00000038489 | 69.33028142 | 109.2119073 | 88.97503202 | 146.5932963 | 126.7664418 |
| ENSMUSG00000038497 | 29.71297775 | 33.3896277  | 33.89525029 | 37.85651059 | 35.09353473 |
| ENSMUSG00000038507 | 8.489422215 | 2.782468975 | 8.473812573 | 6.443661377 | 10.7429188  |
| ENSMUSG00000038508 | 10.61177777 | 8.347406925 | 10.59226572 | 6.443661377 | 9.310529622 |
| ENSMUSG00000038522 | 7.074518513 | 8.347406925 | 3.530755239 | 3.221830688 | 5.729556691 |
| ENSMUSG00000038527 | 12.02668147 | 6.260555194 | 6.35535943  | 4.02728836  | 5.013362104 |
| ENSMUSG00000038537 | 9.196874066 | 9.738641413 | 3.530755239 | 4.832746033 | 10.7429188  |
| ENSMUSG00000038541 | 7.781970364 | 7.651789682 | 9.179963621 | 4.02728836  | 5.729556691 |
| ENSMUSG00000038546 | 99.04325918 | 141.9059177 | 110.1595635 | 183.6443492 | 138.9417498 |
| ENSMUSG00000038555 | 4.244711108 | 21.56413456 | 24.00913562 | 12.88732275 | 9.310529622 |
| ENSMUSG00000038560 | 10.61177777 | 10.43425866 | 2.118453143 | 8.860034393 | 5.013362104 |
| ENSMUSG00000038567 | 4.952162959 | 2.782468975 | 7.767661525 | 1.610915344 | 5.729556691 |
| ENSMUSG00000038572 | 5.65961481  | 2.086851731 | 9.886114669 | 7.249119049 | 10.02672421 |
| ENSMUSG00000038587 | 73.57499253 | 66.7792554  | 56.49208382 | 33.02376456 | 26.49919969 |
| ENSMUSG00000038591 | 8.489422215 | 6.260555194 | 9.179963621 | 5.638203705 | 0.716194586 |
| ENSMUSG00000038594 | 14.85648888 | 26.43345526 | 24.00913562 | 23.35827249 | 33.66114556 |
| ENSMUSG00000038598 | 1.414903703 | 2.782468975 | 6.35535943  | 4.02728836  | 4.297167518 |
| ENSMUSG00000038602 | 7.781970364 | 9.043024169 | 9.179963621 | 5.638203705 | 8.594335036 |
| ENSMUSG00000038604 | 29.0055259  | 45.91073809 | 39.54445867 | 18.52552646 | 24.35061594 |
| ENSMUSG00000038622 | 53.7663407  | 100.8645003 | 88.26888097 | 53.96566403 | 57.29556691 |
| ENSMUSG00000038623 | 21.22355554 | 34.08524495 | 24.00913562 | 18.52552646 | 19.33725383 |
| ENSMUSG00000038628 | 22.63845924 | 34.78086219 | 36.71985448 | 43.49471429 | 44.40406435 |
| ENSMUSG00000038630 | 12.73413332 | 17.39043109 | 13.41686991 | 6.443661377 | 10.7429188  |
| ENSMUSG00000038633 | 38.20239997 | 63.30116918 | 56.49208382 | 95.04400531 | 82.36237743 |
| ENSMUSG00000038648 | 9.904325918 | 18.08604834 | 16.2414741  | 21.74735715 | 23.63442135 |
| ENSMUSG00000038656 | 16.27139258 | 9.738641413 | 9.886114669 | 8.054576721 | 9.310529622 |
| ENSMUSG00000038663 | 10.61177777 | 6.956172438 | 6.35535943  | 8.054576721 | 8.594335036 |
| ENSMUSG00000038676 | 2.122355554 | 3.478086219 | 2.824604191 | 4.02728836  | 2.148583759 |
| ENSMUSG00000038691 | 7.781970364 | 4.173703463 | 6.35535943  | 1.610915344 | 5.729556691 |
| ENSMUSG00000038692 | 3.537259256 | 5.56493795  | 5.649208382 | 5.638203705 | 3.580972932 |
| ENSMUSG00000038700 | 7.074518513 | 6.260555194 | 3.530755239 | 7.249119049 | 2.864778345 |
| ENSMUSG00000038702 | 12.73413332 | 7.651789682 | 4.236906287 | 4.832746033 | 7.161945863 |
| ENSMUSG00000038717 | 126.6338814 | 155.8182626 | 150.4101732 | 213.4462831 | 173.3190899 |
| ENSMUSG00000038721 | 4.952162959 | 9.043024169 | 7.061510478 | 6.443661377 | 5.013362104 |
| ENSMUSG00000038736 | 33.25023701 | 74.43104508 | 52.96132858 | 120.0131931 | 115.3073284 |
| ENSMUSG00000038740 | 4.244711108 | 6.956172438 | 5.649208382 | 2.416373016 | 10.7429188  |
| ENSMUSG00000038742 | 9.196874066 | 9.738641413 | 9.179963621 | 6.443661377 | 10.02672421 |
| ENSMUSG00000038751 | 12.02668147 | 10.43425866 | 8.473812573 | 4.832746033 | 9.310529622 |
| ENSMUSG00000038754 | 7.074518513 | 6.956172438 | 5.649208382 | 8.860034393 | 10.7429188  |
| ENSMUSG00000038768 | 7.781970364 | 2.782468975 | 9.179963621 | 7.249119049 | 10.02672421 |
| ENSMUSG00000038774 | 33.25023701 | 75.82227957 | 50.84287544 | 74.10210583 | 69.47087488 |



|                    |             |             |             |             |             |
|--------------------|-------------|-------------|-------------|-------------|-------------|
| ENSMUSG00000038781 | 10.61177777 | 12.52111039 | 13.41686991 | 8.054576721 | 12.89150255 |
| ENSMUSG00000038782 | 12.02668147 | 5.56493795  | 5.649208382 | 4.02728836  | 7.161945863 |
| ENSMUSG00000038793 | 7.781970364 | 10.43425866 | 9.886114669 | 6.443661377 | 8.594335036 |
| ENSMUSG00000038801 | 3.537259256 | 1.391234488 | 5.649208382 | 4.832746033 | 6.445751277 |
| ENSMUSG00000038803 | 38.90985182 | 52.86691053 | 57.90438592 | 112.7640741 | 85.94335036 |
| ENSMUSG00000038806 | 100.4581629 | 138.4278315 | 124.2825844 | 164.3133651 | 129.6312201 |
| ENSMUSG00000038840 | 7.781970364 | 5.56493795  | 6.35535943  | 4.02728836  | 2.864778345 |
| ENSMUSG00000038844 | 16.97884443 | 32.69401046 | 25.42143772 | 20.1364418  | 19.33725383 |
| ENSMUSG00000038859 | 8.489422215 | 9.043024169 | 10.59226572 | 4.832746033 | 6.445751277 |
| ENSMUSG00000038871 | 17.68629628 | 37.56333116 | 23.30298458 | 12.08186508 | 17.18867007 |
| ENSMUSG00000038879 | 7.781970364 | 5.56493795  | 8.473812573 | 1.610915344 | 7.87814045  |
| ENSMUSG00000038883 | 13.44158517 | 3.478086219 | 9.179963621 | 4.832746033 | 5.729556691 |
| ENSMUSG00000038888 | 31.12788146 | 44.5195036  | 35.30755239 | 28.9964762  | 27.93158887 |
| ENSMUSG00000038891 | 8.489422215 | 8.347406925 | 7.767661525 | 4.02728836  | 4.297167518 |
| ENSMUSG00000038894 | 31.83533331 | 47.99758982 | 52.25517753 | 34.6346799  | 35.09353473 |
| ENSMUSG00000038910 | 108.9475851 | 123.8198694 | 134.8748501 | 111.9586164 | 113.1587446 |
| ENSMUSG00000038916 | 12.02668147 | 8.347406925 | 6.35535943  | 3.221830688 | 6.445751277 |
| ENSMUSG00000038949 | 89.84638511 | 113.3856107 | 105.9226572 | 113.5695318 | 109.5777717 |
| ENSMUSG00000038968 | 12.73413332 | 6.956172438 | 9.886114669 | 4.832746033 | 4.297167518 |
| ENSMUSG00000038970 | 65.08557032 | 115.4724625 | 86.85657888 | 71.68573282 | 92.38910164 |
| ENSMUSG00000038973 | 6.367066661 | 2.782468975 | 6.35535943  | 6.443661377 | 4.297167518 |
| ENSMUSG00000038980 | 6.367066661 | 9.043024169 | 7.767661525 | 8.054576721 | 5.729556691 |
| ENSMUSG00000038984 | 7.074518513 | 6.956172438 | 8.473812573 | 4.02728836  | 8.594335036 |
| ENSMUSG00000038987 | 12.73413332 | 4.173703463 | 7.061510478 | 11.27640741 | 7.87814045  |
| ENSMUSG00000038994 | 6.367066661 | 4.869320706 | 10.59226572 | 12.88732275 | 7.161945863 |
| ENSMUSG00000038997 | 15.56394073 | 6.956172438 | 3.530755239 | 7.249119049 | 8.594335036 |
| ENSMUSG00000039000 | 43.15456293 | 69.56172438 | 57.90438592 | 87.79488626 | 80.21379367 |
| ENSMUSG00000039004 | 10.61177777 | 6.260555194 | 4.943057334 | 7.249119049 | 4.297167518 |
| ENSMUSG00000039007 | 9.196874066 | 5.56493795  | 7.767661525 | 8.860034393 | 5.013362104 |
| ENSMUSG00000039016 | 89.13893326 | 144.6883867 | 119.3395271 | 214.2517408 | 186.926787  |
| ENSMUSG00000039032 | 5.65961481  | 4.869320706 | 8.473812573 | 4.832746033 | 9.310529622 |
| ENSMUSG00000039037 | 9.904325918 | 4.173703463 | 4.943057334 | 6.443661377 | 8.594335036 |
| ENSMUSG00000039043 | 12.02668147 | 2.086851731 | 5.649208382 | 1.610915344 | 5.013362104 |
| ENSMUSG00000039050 | 29.0055259  | 44.5195036  | 43.07521391 | 37.05105292 | 40.82309142 |
| ENSMUSG00000039055 | 38.90985182 | 50.7800588  | 48.7244223  | 81.35122488 | 76.63282074 |
| ENSMUSG00000039063 | 7.074518513 | 8.347406925 | 9.179963621 | 9.665492065 | 6.445751277 |
| ENSMUSG00000039067 | 53.7663407  | 77.21351406 | 72.02740687 | 227.9445212 | 147.5360848 |
| ENSMUSG00000039070 | 11.31922962 | 6.956172438 | 8.473812573 | 6.443661377 | 6.445751277 |
| ENSMUSG00000039079 | 9.196874066 | 10.43425866 | 7.767661525 | 7.249119049 | 8.594335036 |
| ENSMUSG00000039084 | 11.31922962 | 11.82549314 | 14.829172   | 6.443661377 | 9.310529622 |
| ENSMUSG00000039086 | 72.16008883 | 105.7338211 | 92.50578726 | 208.6135371 | 159.7113928 |
| ENSMUSG00000039092 | 8.489422215 | 9.043024169 | 8.473812573 | 7.249119049 | 8.594335036 |
| ENSMUSG00000039095 | 7.074518513 | 4.173703463 | 7.767661525 | 4.832746033 | 6.445751277 |

|                    |             |             |             |             |             |
|--------------------|-------------|-------------|-------------|-------------|-------------|
| ENSMUSG00000039097 | 9.196874066 | 4.173703463 | 5.649208382 | 7.249119049 | 5.729556691 |
| ENSMUSG00000039098 | 8.489422215 | 11.82549314 | 8.473812573 | 4.02728836  | 6.445751277 |
| ENSMUSG00000039099 | 4.952162959 | 8.347406925 | 7.767661525 | 8.054576721 | 8.594335036 |
| ENSMUSG00000039100 | 76.40479994 | 100.8645003 | 89.68118307 | 124.0404815 | 105.2806042 |
| ENSMUSG00000039105 | 32.54278516 | 51.47567604 | 50.84287544 | 86.18397091 | 81.64618284 |
| ENSMUSG00000039106 | 7.781970364 | 6.260555194 | 4.943057334 | 7.249119049 | 7.161945863 |
| ENSMUSG00000039116 | 5.65961481  | 5.56493795  | 8.473812573 | 3.221830688 | 4.297167518 |
| ENSMUSG00000039148 | 94.79854807 | 108.51629   | 117.2210739 | 202.1698757 | 169.738117  |
| ENSMUSG00000039154 | 3.537259256 | 4.869320706 | 9.886114669 | 10.47094974 | 7.87814045  |
| ENSMUSG00000039164 | 78.52715549 | 107.1250555 | 121.4579802 | 142.566008  | 103.1320204 |
| ENSMUSG00000039178 | 5.65961481  | 12.52111039 | 9.179963621 | 9.665492065 | 10.02672421 |
| ENSMUSG00000039182 | 14.14903703 | 33.3896277  | 28.24604191 | 43.49471429 | 37.24211849 |
| ENSMUSG00000039183 | 80.64951104 | 98.08203137 | 96.0365425  | 120.8186508 | 101.6996313 |
| ENSMUSG00000039193 | 38.90985182 | 74.43104508 | 67.79050059 | 33.82922223 | 43.68786977 |
| ENSMUSG00000039195 | 12.73413332 | 20.86851731 | 15.53532305 | 6.443661377 | 18.62105924 |
| ENSMUSG00000039196 | 10.61177777 | 4.869320706 | 8.473812573 | 6.443661377 | 5.729556691 |
| ENSMUSG00000039198 | 8.489422215 | 2.086851731 | 9.886114669 | 8.860034393 | 8.594335036 |
| ENSMUSG00000039199 | 9.196874066 | 2.782468975 | 3.530755239 | 12.88732275 | 11.45911338 |
| ENSMUSG00000039201 | 9.196874066 | 13.91234488 | 11.29841676 | 19.33098413 | 16.47247549 |
| ENSMUSG00000039215 | 5.65961481  | 4.173703463 | 7.767661525 | 6.443661377 | 8.594335036 |
| ENSMUSG00000039224 | 4.244711108 | 6.260555194 | 12.71071886 | 3.221830688 | 7.161945863 |
| ENSMUSG00000039238 | 14.85648888 | 18.08604834 | 15.53532305 | 17.72006879 | 27.93158887 |
| ENSMUSG00000039246 | 8.489422215 | 1.391234488 | 9.179963621 | 6.443661377 | 3.580972932 |
| ENSMUSG00000039253 | 9.904325918 | 15.99919661 | 18.35992724 | 10.47094974 | 15.04008631 |
| ENSMUSG00000039269 | 11.31922962 | 6.260555194 | 12.00456781 | 3.221830688 | 7.87814045  |
| ENSMUSG00000039270 | 10.61177777 | 16.69481385 | 16.94762515 | 12.08186508 | 9.310529622 |
| ENSMUSG00000039275 | 82.06441475 | 109.2119073 | 112.2780166 | 259.3573704 | 198.3859004 |
| ENSMUSG00000039308 | 33.25023701 | 26.43345526 | 40.95676077 | 13.69278043 | 20.769643   |
| ENSMUSG00000039321 | 12.73413332 | 7.651789682 | 8.473812573 | 8.054576721 | 7.161945863 |
| ENSMUSG00000039329 | 6.367066661 | 6.260555194 | 4.236906287 | 7.249119049 | 3.580972932 |
| ENSMUSG00000039337 | 9.196874066 | 5.56493795  | 8.473812573 | 6.443661377 | 5.729556691 |
| ENSMUSG00000039339 | 8.489422215 | 8.347406925 | 11.29841676 | 6.443661377 | 9.310529622 |
| ENSMUSG00000039342 | 7.781970364 | 8.347406925 | 4.236906287 | 3.221830688 | 6.445751277 |
| ENSMUSG00000039347 | 3.537259256 | 6.956172438 | 8.473812573 | 4.02728836  | 6.445751277 |
| ENSMUSG00000039349 | 8.489422215 | 1.391234488 | 2.824604191 | 6.443661377 | 8.594335036 |
| ENSMUSG00000039357 | 31.83533331 | 46.60635533 | 40.95676077 | 66.85298678 | 63.0251236  |
| ENSMUSG00000039358 | 14.14903703 | 9.043024169 | 6.35535943  | 4.02728836  | 5.013362104 |
| ENSMUSG00000039372 | 10.61177777 | 4.173703463 | 4.236906287 | 8.860034393 | 4.297167518 |
| ENSMUSG00000039377 | 16.97884443 | 21.56413456 | 18.35992724 | 32.21830688 | 22.20203218 |
| ENSMUSG00000039384 | 79.23460734 | 84.1696865  | 85.44427678 | 190.8934683 | 147.5360848 |
| ENSMUSG00000039385 | 10.61177777 | 6.260555194 | 5.649208382 | 4.832746033 | 3.580972932 |
| ENSMUSG00000039395 | 11.31922962 | 22.2597518  | 19.77222934 | 45.91108731 | 45.83645353 |
| ENSMUSG00000039405 | 9.904325918 | 7.651789682 | 9.886114669 | 5.638203705 | 7.161945863 |

|                    |             |             |             |             |             |
|--------------------|-------------|-------------|-------------|-------------|-------------|
| ENSMUSG00000039414 | 29.71297775 | 59.12746572 | 41.66291182 | 40.2728836  | 53.71459398 |
| ENSMUSG00000039438 | 9.904325918 | 9.043024169 | 7.061510478 | 8.860034393 | 10.7429188  |
| ENSMUSG00000039452 | 7.781970364 | 5.56493795  | 8.473812573 | 7.249119049 | 8.594335036 |
| ENSMUSG00000039456 | 96.92090362 | 110.6031418 | 109.4534124 | 162.7024498 | 118.1721067 |
| ENSMUSG00000039457 | 7.074518513 | 9.043024169 | 6.35535943  | 6.443661377 | 7.161945863 |
| ENSMUSG00000039462 | 10.61177777 | 10.43425866 | 14.829172   | 10.47094974 | 12.17530797 |
| ENSMUSG00000039473 | 77.81970364 | 109.2119073 | 108.0411103 | 204.5862487 | 181.9134249 |
| ENSMUSG00000039481 | 5.65961481  | 9.738641413 | 4.236906287 | 5.638203705 | 7.161945863 |
| ENSMUSG00000039485 | 14.85648888 | 29.91154148 | 23.30298458 | 8.054576721 | 19.33725383 |
| ENSMUSG00000039492 | 6.367066661 | 4.869320706 | 1.412302096 | 3.221830688 | 1.432389173 |
| ENSMUSG00000039496 | 53.7663407  | 82.08283477 | 71.32125582 | 101.4876667 | 95.97007457 |
| ENSMUSG00000039497 | 9.196874066 | 11.82549314 | 10.59226572 | 9.665492065 | 8.594335036 |
| ENSMUSG00000039508 | 9.196874066 | 6.260555194 | 4.943057334 | 4.02728836  | 3.580972932 |
| ENSMUSG00000039509 | 23.34591109 | 31.30277597 | 33.89525029 | 83.7675979  | 75.20043157 |
| ENSMUSG00000039518 | 11.31922962 | 6.956172438 | 5.649208382 | 8.054576721 | 6.445751277 |
| ENSMUSG00000039519 | 12.73413332 | 11.82549314 | 6.35535943  | 4.832746033 | 5.729556691 |
| ENSMUSG00000039529 | 4.244711108 | 4.869320706 | 6.35535943  | 4.02728836  | 9.310529622 |
| ENSMUSG00000039531 | 63.67066661 | 89.73462445 | 97.44884459 | 156.2587884 | 125.3340526 |
| ENSMUSG00000039533 | 9.904325918 | 5.56493795  | 5.649208382 | 4.832746033 | 5.013362104 |
| ENSMUSG00000039540 | 9.196874066 | 6.260555194 | 4.943057334 | 4.832746033 | 7.161945863 |
| ENSMUSG00000039546 | 7.781970364 | 2.086851731 | 9.886114669 | 3.221830688 | 4.297167518 |
| ENSMUSG00000039568 | 89.13893326 | 106.4294383 | 96.0365425  | 115.9859048 | 100.2672421 |
| ENSMUSG00000039608 | 8.489422215 | 6.260555194 | 10.59226572 | 4.02728836  | 7.87814045  |
| ENSMUSG00000039611 | 7.781970364 | 9.738641413 | 7.767661525 | 3.221830688 | 8.594335036 |
| ENSMUSG00000039615 | 16.27139258 | 25.73783802 | 22.59683353 | 19.33098413 | 25.78300511 |
| ENSMUSG00000039616 | 5.65961481  | 5.56493795  | 9.179963621 | 4.02728836  | 7.161945863 |
| ENSMUSG00000039628 | 5.65961481  | 10.43425866 | 7.767661525 | 8.054576721 | 10.7429188  |
| ENSMUSG00000039633 | 12.02668147 | 10.43425866 | 7.061510478 | 19.33098413 | 19.33725383 |
| ENSMUSG00000039639 | 9.904325918 | 4.173703463 | 7.767661525 | 6.443661377 | 7.87814045  |
| ENSMUSG00000039640 | 48.81417774 | 66.08363816 | 72.73355792 | 193.3098413 | 161.1437819 |
| ENSMUSG00000039646 | 24.76081479 | 35.47647943 | 31.77679715 | 18.52552646 | 25.06681052 |
| ENSMUSG00000039653 | 9.196874066 | 9.043024169 | 6.35535943  | 5.638203705 | 8.594335036 |
| ENSMUSG00000039670 | 54.47379255 | 70.25734162 | 61.43514116 | 112.7640741 | 96.68626916 |
| ENSMUSG00000039676 | 8.489422215 | 7.651789682 | 5.649208382 | 5.638203705 | 7.161945863 |
| ENSMUSG00000039680 | 0           | 0           | 0           | 0           | 0           |
| ENSMUSG00000039704 | 26.88317035 | 43.82388636 | 48.7244223  | 56.38203705 | 50.13362104 |
| ENSMUSG00000039714 | 8.489422215 | 8.347406925 | 11.29841676 | 5.638203705 | 10.7429188  |
| ENSMUSG00000039715 | 6.367066661 | 12.52111039 | 9.886114669 | 16.10915344 | 17.90486466 |
| ENSMUSG00000039720 | 8.489422215 | 8.347406925 | 5.649208382 | 3.221830688 | 5.729556691 |
| ENSMUSG00000039725 | 31.12788146 | 47.99758982 | 43.07521391 | 64.43661377 | 63.74131818 |
| ENSMUSG00000039740 | 64.37811846 | 97.38641413 | 83.32582364 | 154.647873  | 127.4826364 |
| ENSMUSG00000039745 | 9.904325918 | 18.78166558 | 22.59683353 | 16.91461111 | 15.7562809  |
| ENSMUSG00000039760 | 8.489422215 | 6.956172438 | 7.767661525 | 10.47094974 | 6.445751277 |

|                    |             |             |             |             |             |
|--------------------|-------------|-------------|-------------|-------------|-------------|
| ENSMUSG00000039763 | 8.489422215 | 30.60715873 | 15.53532305 | 8.054576721 | 8.594335036 |
| ENSMUSG00000039770 | 47.39927403 | 68.17048989 | 62.1412922  | 26.58010318 | 35.80972932 |
| ENSMUSG00000039775 | 9.904325918 | 6.260555194 | 7.061510478 | 4.832746033 | 8.594335036 |
| ENSMUSG00000039785 | 12.02668147 | 6.956172438 | 12.00456781 | 8.860034393 | 7.161945863 |
| ENSMUSG00000039789 | 41.73965922 | 62.60555194 | 69.20280268 | 50.74383334 | 42.25548059 |
| ENSMUSG00000039801 | 12.73413332 | 16.69481385 | 20.47838039 | 12.88732275 | 23.63442135 |
| ENSMUSG00000039824 | 23.34591109 | 37.56333116 | 24.00913562 | 20.1364418  | 20.05344842 |
| ENSMUSG00000039828 | 40.32475552 | 61.21431745 | 57.19823487 | 71.68573282 | 80.92998826 |
| ENSMUSG00000039830 | 5.65961481  | 2.782468975 | 2.118453143 | 5.638203705 | 5.729556691 |
| ENSMUSG00000039840 | 67.20792587 | 93.90832791 | 89.68118307 | 70.07481747 | 58.72795608 |
| ENSMUSG00000039849 | 82.06441475 | 105.7338211 | 90.38733411 | 144.982381  | 121.0368851 |
| ENSMUSG00000039865 | 6.367066661 | 6.260555194 | 7.767661525 | 7.249119049 | 2.864778345 |
| ENSMUSG00000039873 | 29.0055259  | 41.04141738 | 46.60596915 | 39.46742593 | 48.70123187 |
| ENSMUSG00000039879 | 41.03220737 | 51.47567604 | 48.7244223  | 66.04752911 | 65.88990194 |
| ENSMUSG00000039883 | 6.367066661 | 6.260555194 | 10.59226572 | 12.08186508 | 7.161945863 |
| ENSMUSG00000039886 | 12.73413332 | 18.08604834 | 20.47838039 | 12.08186508 | 7.161945863 |
| ENSMUSG00000039891 | 9.904325918 | 6.956172438 | 5.649208382 | 4.02728836  | 6.445751277 |
| ENSMUSG00000039899 | 10.61177777 | 10.43425866 | 6.35535943  | 69.2693598  | 47.2688427  |
| ENSMUSG00000039901 | 17.68629628 | 40.34580014 | 37.42600553 | 32.21830688 | 40.10689684 |
| ENSMUSG00000039904 | 7.781970364 | 7.651789682 | 13.41686991 | 4.832746033 | 7.161945863 |
| ENSMUSG00000039914 | 9.196874066 | 12.52111039 | 10.59226572 | 9.665492065 | 12.89150255 |
| ENSMUSG00000039954 | 7.074518513 | 4.173703463 | 4.236906287 | 4.02728836  | 7.161945863 |
| ENSMUSG00000039956 | 7.074518513 | 2.782468975 | 6.35535943  | 6.443661377 | 5.013362104 |
| ENSMUSG00000039960 | 9.904325918 | 6.956172438 | 3.530755239 | 6.443661377 | 6.445751277 |
| ENSMUSG00000039968 | 183.2300295 | 230.2493077 | 218.2006738 | 278.6883545 | 216.2907651 |
| ENSMUSG00000039976 | 2.829807405 | 2.782468975 | 3.530755239 | 8.860034393 | 9.310529622 |
| ENSMUSG00000039981 | 44.56946663 | 58.43184848 | 71.32125582 | 47.52200265 | 53.71459398 |
| ENSMUSG00000039982 | 9.196874066 | 7.651789682 | 9.886114669 | 7.249119049 | 15.7562809  |
| ENSMUSG00000039989 | 35.37259256 | 50.08444155 | 50.84287544 | 143.3714656 | 105.2806042 |
| ENSMUSG00000040007 | 50.93653329 | 64.69240367 | 64.25974535 | 70.07481747 | 54.43078856 |
| ENSMUSG00000040009 | 4.244711108 | 6.260555194 | 10.59226572 | 8.054576721 | 4.297167518 |
| ENSMUSG00000040017 | 8.489422215 | 9.043024169 | 8.473812573 | 3.221830688 | 6.445751277 |
| ENSMUSG00000040018 | 18.39374813 | 20.86851731 | 29.65834401 | 44.30017197 | 40.10689684 |
| ENSMUSG00000040026 | 8.489422215 | 8.347406925 | 5.649208382 | 1.610915344 | 4.297167518 |
| ENSMUSG00000040055 | 14.14903703 | 4.869320706 | 8.473812573 | 2.416373016 | 5.013362104 |
| ENSMUSG00000040065 | 7.781970364 | 4.869320706 | 9.179963621 | 7.249119049 | 7.161945863 |
| ENSMUSG00000040084 | 41.03220737 | 35.47647943 | 33.89525029 | 104.7094974 | 65.88990194 |
| ENSMUSG00000040105 | 14.14903703 | 13.91234488 | 9.886114669 | 27.38556085 | 22.91822676 |
| ENSMUSG00000040112 | 31.83533331 | 68.86610713 | 68.49665163 | 58.79841006 | 70.90326405 |
| ENSMUSG00000040121 | 9.196874066 | 11.1298759  | 9.886114669 | 4.832746033 | 5.013362104 |
| ENSMUSG00000040124 | 60.84085921 | 114.081228  | 85.44427678 | 78.12939419 | 83.7947666  |
| ENSMUSG00000040125 | 5.65961481  | 4.869320706 | 5.649208382 | 9.665492065 | 7.87814045  |
| ENSMUSG00000040128 | 59.42595551 | 79.99598303 | 69.20280268 | 74.10210583 | 55.86317773 |

|                    |             |             |             |             |             |
|--------------------|-------------|-------------|-------------|-------------|-------------|
| ENSMUSG00000040132 | 4.244711108 | 9.043024169 | 6.35535943  | 11.27640741 | 5.013362104 |
| ENSMUSG00000040133 | 4.244711108 | 8.347406925 | 5.649208382 | 4.02728836  | 8.594335036 |
| ENSMUSG00000040134 | 10.61177777 | 7.651789682 | 4.943057334 | 8.054576721 | 7.87814045  |
| ENSMUSG00000040138 | 3.537259256 | 3.478086219 | 2.118453143 | 2.416373016 | 5.013362104 |
| ENSMUSG00000040146 | 7.781970364 | 4.869320706 | 12.00456781 | 4.02728836  | 4.297167518 |
| ENSMUSG00000040148 | 3.537259256 | 6.956172438 | 7.061510478 | 4.02728836  | 4.297167518 |
| ENSMUSG00000040151 | 52.35143699 | 70.95295887 | 63.5535943  | 97.46037832 | 107.429188  |
| ENSMUSG00000040152 | 8.489422215 | 5.56493795  | 11.29841676 | 2.416373016 | 8.594335036 |
| ENSMUSG00000040164 | 8.489422215 | 8.347406925 | 12.00456781 | 3.221830688 | 9.310529622 |
| ENSMUSG00000040197 | 7.781970364 | 9.738641413 | 6.35535943  | 3.221830688 | 8.594335036 |
| ENSMUSG00000040204 | 44.56946663 | 54.25814501 | 48.01827125 | 148.2042117 | 116.023523  |
| ENSMUSG00000040205 | 7.781970364 | 3.478086219 | 7.767661525 | 5.638203705 | 5.013362104 |
| ENSMUSG00000040219 | 7.074518513 | 10.43425866 | 8.473812573 | 7.249119049 | 7.161945863 |
| ENSMUSG00000040236 | 67.20792587 | 86.25653823 | 90.38733411 | 195.7262143 | 109.5777717 |
| ENSMUSG00000040247 | 239.1187257 | 252.5090595 | 249.9774709 | 318.9612381 | 244.9385485 |
| ENSMUSG00000040258 | 8.489422215 | 6.956172438 | 4.236906287 | 4.02728836  | 3.580972932 |
| ENSMUSG00000040260 | 7.074518513 | 10.43425866 | 7.767661525 | 9.665492065 | 5.013362104 |
| ENSMUSG00000040264 | 50.22908144 | 78.60474855 | 65.67204744 | 104.7094974 | 78.06520991 |
| ENSMUSG00000040269 | 26.1757185  | 51.47567604 | 39.54445867 | 56.38203705 | 59.44415067 |
| ENSMUSG00000040284 | 12.73413332 | 8.347406925 | 1.412302096 | 7.249119049 | 9.310529622 |
| ENSMUSG00000040287 | 6.367066661 | 2.086851731 | 7.767661525 | 5.638203705 | 4.297167518 |
| ENSMUSG00000040289 | 9.904325918 | 7.651789682 | 4.236906287 | 4.02728836  | 5.013362104 |
| ENSMUSG00000040298 | 8.489422215 | 4.173703463 | 3.530755239 | 4.832746033 | 5.729556691 |
| ENSMUSG00000040314 | 13.44158517 | 5.56493795  | 3.530755239 | 10.47094974 | 7.87814045  |
| ENSMUSG00000040321 | 34.66514071 | 77.21351406 | 41.66291182 | 77.32393652 | 75.91662615 |
| ENSMUSG00000040364 | 6.367066661 | 7.651789682 | 3.530755239 | 5.638203705 | 6.445751277 |
| ENSMUSG00000040367 | 6.367066661 | 6.260555194 | 7.061510478 | 8.054576721 | 10.02672421 |
| ENSMUSG00000040372 | 11.31922962 | 9.043024169 | 6.35535943  | 5.638203705 | 7.161945863 |
| ENSMUSG00000040385 | 200.9163258 | 215.6413456 | 228.0867884 | 314.9339498 | 235.6280189 |
| ENSMUSG00000040414 | 86.30912585 | 113.3856107 | 115.1026208 | 109.5422434 | 118.1721067 |
| ENSMUSG00000040429 | 8.489422215 | 12.52111039 | 20.47838039 | 34.6346799  | 26.49919969 |
| ENSMUSG00000040432 | 5.65961481  | 5.56493795  | 4.943057334 | 3.221830688 | 5.729556691 |
| ENSMUSG00000040446 | 52.35143699 | 70.95295887 | 59.31668801 | 86.98942859 | 83.07857202 |
| ENSMUSG00000040452 | 7.074518513 | 7.651789682 | 7.061510478 | 6.443661377 | 6.445751277 |
| ENSMUSG00000040456 | 3.537259256 | 2.782468975 | 2.824604191 | 0           | 2.864778345 |
| ENSMUSG00000040485 | 7.781970364 | 6.260555194 | 8.473812573 | 8.054576721 | 3.580972932 |
| ENSMUSG00000040489 | 7.781970364 | 4.173703463 | 7.061510478 | 6.443661377 | 5.729556691 |
| ENSMUSG00000040490 | 11.31922962 | 5.56493795  | 6.35535943  | 0.805457672 | 7.87814045  |
| ENSMUSG00000040498 | 12.73413332 | 11.82549314 | 7.767661525 | 5.638203705 | 7.161945863 |
| ENSMUSG00000040502 | 12.73413332 | 12.52111039 | 11.29841676 | 8.054576721 | 7.87814045  |
| ENSMUSG00000040514 | 4.952162959 | 5.56493795  | 8.473812573 | 4.02728836  | 15.04008631 |
| ENSMUSG00000040520 | 33.95768886 | 58.43184848 | 48.01827125 | 78.93485187 | 85.22715578 |
| ENSMUSG00000040522 | 2.122355554 | 2.782468975 | 6.35535943  | 3.221830688 | 3.580972932 |

|                    |             |             |             |             |             |
|--------------------|-------------|-------------|-------------|-------------|-------------|
| ENSMUSG00000040524 | 19.80865184 | 27.82468975 | 24.00913562 | 33.02376456 | 32.94495097 |
| ENSMUSG00000040533 | 14.14903703 | 13.21672763 | 11.29841676 | 15.30369577 | 10.02672421 |
| ENSMUSG00000040541 | 12.02668147 | 6.260555194 | 6.35535943  | 5.638203705 | 4.297167518 |
| ENSMUSG00000040552 | 9.904325918 | 7.651789682 | 9.886114669 | 5.638203705 | 9.310529622 |
| ENSMUSG00000040560 | 21.93100739 | 43.12826911 | 47.3121202  | 37.05105292 | 29.36397804 |
| ENSMUSG00000040565 | 128.0487851 | 211.4676421 | 116.5149229 | 234.3881826 | 243.5061594 |
| ENSMUSG00000040576 | 9.904325918 | 6.260555194 | 4.943057334 | 5.638203705 | 6.445751277 |
| ENSMUSG00000040583 | 9.904325918 | 9.043024169 | 9.179963621 | 4.832746033 | 5.013362104 |
| ENSMUSG00000040584 | 8.489422215 | 8.347406925 | 6.35535943  | 7.249119049 | 7.161945863 |
| ENSMUSG00000040586 | 26.88317035 | 58.43184848 | 57.90438592 | 32.21830688 | 37.24211849 |
| ENSMUSG00000040600 | 7.074518513 | 5.56493795  | 4.943057334 | 4.02728836  | 10.7429188  |
| ENSMUSG00000040605 | 8.489422215 | 6.260555194 | 5.649208382 | 6.443661377 | 5.729556691 |
| ENSMUSG00000040610 | 6.367066661 | 6.956172438 | 3.530755239 | 5.638203705 | 3.580972932 |
| ENSMUSG00000040616 | 6.367066661 | 6.260555194 | 9.886114669 | 8.860034393 | 7.161945863 |
| ENSMUSG00000040618 | 12.02668147 | 20.86851731 | 23.30298458 | 54.7711217  | 37.95831308 |
| ENSMUSG00000040629 | 9.196874066 | 8.347406925 | 4.236906287 | 3.221830688 | 2.864778345 |
| ENSMUSG00000040631 | 7.074518513 | 9.738641413 | 9.179963621 | 4.02728836  | 10.02672421 |
| ENSMUSG00000040650 | 9.196874066 | 9.043024169 | 7.767661525 | 4.02728836  | 9.310529622 |
| ENSMUSG00000040651 | 54.47379255 | 78.60474855 | 81.20737049 | 63.6311561  | 63.74131818 |
| ENSMUSG00000040653 | 10.61177777 | 5.56493795  | 2.824604191 | 4.832746033 | 3.580972932 |
| ENSMUSG00000040658 | 4.244711108 | 7.651789682 | 8.473812573 | 9.665492065 | 5.013362104 |
| ENSMUSG00000040659 | 31.12788146 | 50.7800588  | 55.07978173 | 122.4295662 | 89.52432329 |
| ENSMUSG00000040660 | 9.196874066 | 6.260555194 | 9.179963621 | 7.249119049 | 8.594335036 |
| ENSMUSG00000040661 | 36.08004441 | 61.9099347  | 55.07978173 | 82.96214023 | 61.59273443 |
| ENSMUSG00000040663 | 59.42595551 | 82.08283477 | 78.3827663  | 119.2077355 | 111.0101609 |
| ENSMUSG00000040680 | 7.074518513 | 6.956172438 | 8.473812573 | 4.832746033 | 9.310529622 |
| ENSMUSG00000040693 | 7.074518513 | 4.173703463 | 4.236906287 | 2.416373016 | 6.445751277 |
| ENSMUSG00000040694 | 6.367066661 | 7.651789682 | 13.41686991 | 4.832746033 | 8.594335036 |
| ENSMUSG00000040706 | 12.02668147 | 6.260555194 | 7.767661525 | 8.860034393 | 4.297167518 |
| ENSMUSG00000040711 | 4.244711108 | 6.260555194 | 8.473812573 | 2.416373016 | 6.445751277 |
| ENSMUSG00000040717 | 3.537259256 | 9.043024169 | 9.179963621 | 4.02728836  | 7.161945863 |
| ENSMUSG00000040721 | 21.22355554 | 37.56333116 | 35.30755239 | 21.74735715 | 30.79636721 |
| ENSMUSG00000040722 | 9.196874066 | 7.651789682 | 4.943057334 | 8.054576721 | 7.87814045  |
| ENSMUSG00000040724 | 6.367066661 | 9.043024169 | 3.530755239 | 4.02728836  | 9.310529622 |
| ENSMUSG00000040729 | 13.44158517 | 6.956172438 | 5.649208382 | 5.638203705 | 9.310529622 |
| ENSMUSG00000040740 | 7.074518513 | 6.260555194 | 4.943057334 | 4.832746033 | 5.729556691 |
| ENSMUSG00000040747 | 103.2879703 | 137.036597  | 110.1595635 | 136.9278043 | 121.7530797 |
| ENSMUSG00000040759 | 4.952162959 | 6.260555194 | 4.236906287 | 5.638203705 | 8.594335036 |
| ENSMUSG00000040770 | 7.781970364 | 4.869320706 | 9.179963621 | 5.638203705 | 6.445751277 |
| ENSMUSG00000040794 | 7.781970364 | 13.21672763 | 13.41686991 | 6.443661377 | 7.161945863 |
| ENSMUSG00000040808 | 15.56394073 | 23.65098629 | 19.06607829 | 8.054576721 | 22.20203218 |
| ENSMUSG00000040822 | 186.7672887 | 233.7273939 | 216.7883717 | 244.0536746 | 222.0203218 |
| ENSMUSG00000040824 | 24.05336294 | 42.43265187 | 40.95676077 | 93.43308996 | 63.0251236  |

|                    |             |             |             |             |             |
|--------------------|-------------|-------------|-------------|-------------|-------------|
| ENSMUSG00000040828 | 18.39374813 | 28.52030699 | 24.71528667 | 41.88379895 | 35.09353473 |
| ENSMUSG00000040841 | 4.952162959 | 6.260555194 | 6.35535943  | 2.416373016 | 12.17530797 |
| ENSMUSG00000040852 | 7.781970364 | 9.738641413 | 3.530755239 | 5.638203705 | 2.864778345 |
| ENSMUSG00000040888 | 5.65961481  | 8.347406925 | 4.943057334 | 27.38556085 | 28.64778345 |
| ENSMUSG00000040891 | 41.73965922 | 63.30116918 | 52.25517753 | 75.71302118 | 40.10689684 |
| ENSMUSG00000040901 | 5.65961481  | 7.651789682 | 9.179963621 | 6.443661377 | 10.7429188  |
| ENSMUSG00000040966 | 12.73413332 | 9.043024169 | 5.649208382 | 4.832746033 | 7.87814045  |
| ENSMUSG00000040972 | 8.489422215 | 4.173703463 | 4.943057334 | 4.832746033 | 5.013362104 |
| ENSMUSG00000040978 | 9.904325918 | 4.173703463 | 4.943057334 | 4.832746033 | 8.594335036 |
| ENSMUSG00000041000 | 4.952162959 | 11.1298759  | 4.943057334 | 9.665492065 | 7.161945863 |
| ENSMUSG00000041009 | 10.61177777 | 6.260555194 | 7.061510478 | 5.638203705 | 6.445751277 |
| ENSMUSG00000041012 | 7.074518513 | 4.173703463 | 7.061510478 | 10.47094974 | 8.594335036 |
| ENSMUSG00000041035 | 15.56394073 | 31.30277597 | 21.18453143 | 30.60739154 | 27.21539428 |
| ENSMUSG00000041037 | 29.0055259  | 60.51870021 | 38.13215658 | 32.21830688 | 31.5125618  |
| ENSMUSG00000041044 | 12.73413332 | 6.260555194 | 12.71071886 | 7.249119049 | 5.013362104 |
| ENSMUSG00000041046 | 7.074518513 | 3.478086219 | 7.061510478 | 4.02728836  | 9.310529622 |
| ENSMUSG00000041052 | 3.537259256 | 5.56493795  | 8.473812573 | 4.02728836  | 6.445751277 |
| ENSMUSG00000041057 | 149.9797925 | 167.6437558 | 161.0024389 | 305.2684577 | 254.2490782 |
| ENSMUSG00000041062 | 9.904325918 | 4.869320706 | 2.824604191 | 8.054576721 | 5.729556691 |
| ENSMUSG00000041068 | 8.489422215 | 6.956172438 | 9.886114669 | 5.638203705 | 3.580972932 |
| ENSMUSG00000041075 | 9.904325918 | 7.651789682 | 3.530755239 | 4.02728836  | 7.87814045  |
| ENSMUSG00000041078 | 4.244711108 | 4.173703463 | 7.061510478 | 4.02728836  | 9.310529622 |
| ENSMUSG00000041084 | 66.50047402 | 118.2549314 | 99.56729774 | 122.4295662 | 105.9967988 |
| ENSMUSG00000041117 | 4.244711108 | 5.56493795  | 9.179963621 | 6.443661377 | 4.297167518 |
| ENSMUSG00000041120 | 8.489422215 | 6.956172438 | 9.886114669 | 11.27640741 | 8.594335036 |
| ENSMUSG00000041130 | 63.67066661 | 86.95215547 | 82.61967259 | 99.87675134 | 93.10529622 |
| ENSMUSG00000041141 | 7.781970364 | 8.347406925 | 6.35535943  | 6.443661377 | 10.02672421 |
| ENSMUSG00000041153 | 1.414903703 | 6.956172438 | 5.649208382 | 7.249119049 | 3.580972932 |
| ENSMUSG00000041161 | 16.97884443 | 26.43345526 | 27.53989086 | 18.52552646 | 21.48583759 |
| ENSMUSG00000041165 | 7.781970364 | 2.782468975 | 7.061510478 | 5.638203705 | 5.729556691 |
| ENSMUSG00000041168 | 45.27691848 | 62.60555194 | 40.25060972 | 126.4568545 | 98.11865833 |
| ENSMUSG00000041189 | 7.781970364 | 9.043024169 | 9.179963621 | 5.638203705 | 8.594335036 |
| ENSMUSG00000041199 | 14.85648888 | 15.99919661 | 18.35992724 | 33.82922223 | 31.5125618  |
| ENSMUSG00000041203 | 117.4370073 | 169.7306075 | 147.585569  | 295.6029657 | 209.8450138 |
| ENSMUSG00000041205 | 5.65961481  | 6.260555194 | 5.649208382 | 6.443661377 | 5.013362104 |
| ENSMUSG00000041236 | 37.49494812 | 68.17048989 | 76.97046421 | 43.49471429 | 38.67450766 |
| ENSMUSG00000041247 | 6.367066661 | 8.347406925 | 9.179963621 | 8.860034393 | 5.729556691 |
| ENSMUSG00000041248 | 12.02668147 | 9.738641413 | 8.473812573 | 11.27640741 | 8.594335036 |
| ENSMUSG00000041255 | 4.952162959 | 4.173703463 | 3.530755239 | 3.221830688 | 7.161945863 |
| ENSMUSG00000041261 | 12.73413332 | 6.260555194 | 5.649208382 | 4.02728836  | 2.148583759 |
| ENSMUSG00000041287 | 10.61177777 | 27.12907251 | 17.65377619 | 13.69278043 | 17.18867007 |
| ENSMUSG00000041293 | 7.074518513 | 4.173703463 | 6.35535943  | 7.249119049 | 5.013362104 |
| ENSMUSG00000041297 | 50.22908144 | 77.9091313  | 88.97503202 | 203.780791  | 161.1437819 |

|                    |             |             |             |             |             |
|--------------------|-------------|-------------|-------------|-------------|-------------|
| ENSMUSG00000041303 | 22.63845924 | 42.43265187 | 30.36449505 | 45.91108731 | 32.94495097 |
| ENSMUSG00000041308 | 9.904325918 | 15.99919661 | 23.30298458 | 11.27640741 | 11.45911338 |
| ENSMUSG00000041323 | 10.61177777 | 8.347406925 | 6.35535943  | 8.054576721 | 6.445751277 |
| ENSMUSG00000041333 | 12.73413332 | 11.82549314 | 6.35535943  | 8.054576721 | 8.594335036 |
| ENSMUSG00000041347 | 7.781970364 | 5.56493795  | 7.767661525 | 9.665492065 | 8.594335036 |
| ENSMUSG00000041358 | 8.489422215 | 18.08604834 | 10.59226572 | 7.249119049 | 9.310529622 |
| ENSMUSG00000041360 | 50.93653329 | 105.7338211 | 78.3827663  | 171.5624842 | 125.3340526 |
| ENSMUSG00000041378 | 9.196874066 | 6.956172438 | 6.35535943  | 4.832746033 | 7.87814045  |
| ENSMUSG00000041399 | 9.904325918 | 6.956172438 | 3.530755239 | 8.054576721 | 2.864778345 |
| ENSMUSG00000041429 | 12.73413332 | 17.39043109 | 18.35992724 | 16.91461111 | 17.18867007 |
| ENSMUSG00000041438 | 135.1233036 | 150.2533247 | 130.6379438 | 297.213881  | 237.7766027 |
| ENSMUSG00000041445 | 4.244711108 | 3.478086219 | 5.649208382 | 4.832746033 | 7.161945863 |
| ENSMUSG00000041468 | 9.904325918 | 17.39043109 | 13.41686991 | 9.665492065 | 10.7429188  |
| ENSMUSG00000041471 | 40.32475552 | 64.69240367 | 63.5535943  | 93.43308996 | 76.63282074 |
| ENSMUSG00000041491 | 14.85648888 | 23.65098629 | 23.30298458 | 20.1364418  | 33.66114556 |
| ENSMUSG00000041515 | 248.3155998 | 207.2939386 | 213.2576164 | 426.8925662 | 285.76164   |
| ENSMUSG00000041523 | 7.074518513 | 5.56493795  | 5.649208382 | 4.02728836  | 7.87814045  |
| ENSMUSG00000041534 | 12.73413332 | 6.260555194 | 11.29841676 | 6.443661377 | 12.17530797 |
| ENSMUSG00000041548 | 10.61177777 | 9.043024169 | 6.35535943  | 3.221830688 | 4.297167518 |
| ENSMUSG00000041550 | 12.02668147 | 8.347406925 | 5.649208382 | 6.443661377 | 6.445751277 |
| ENSMUSG00000041552 | 1.414903703 | 5.56493795  | 5.649208382 | 2.416373016 | 2.864778345 |
| ENSMUSG00000041556 | 6.367066661 | 6.956172438 | 5.649208382 | 8.054576721 | 5.013362104 |
| ENSMUSG00000041559 | 5.65961481  | 9.043024169 | 8.473812573 | 5.638203705 | 5.729556691 |
| ENSMUSG00000041566 | 12.73413332 | 12.52111039 | 9.179963621 | 8.860034393 | 8.594335036 |
| ENSMUSG00000041567 | 11.31922962 | 5.56493795  | 8.473812573 | 4.02728836  | 6.445751277 |
| ENSMUSG00000041571 | 55.1812444  | 79.30036579 | 75.55816211 | 274.6610662 | 193.3725383 |
| ENSMUSG00000041577 | 9.196874066 | 7.651789682 | 7.061510478 | 3.221830688 | 9.310529622 |
| ENSMUSG00000041583 | 11.31922962 | 6.956172438 | 7.061510478 | 6.443661377 | 5.729556691 |
| ENSMUSG00000041598 | 11.31922962 | 12.52111039 | 22.59683353 | 12.08186508 | 7.161945863 |
| ENSMUSG00000041608 | 10.61177777 | 4.869320706 | 9.179963621 | 3.221830688 | 7.161945863 |
| ENSMUSG00000041616 | 7.074518513 | 8.347406925 | 6.35535943  | 7.249119049 | 8.594335036 |
| ENSMUSG00000041620 | 7.781970364 | 3.478086219 | 4.236906287 | 2.416373016 | 7.161945863 |
| ENSMUSG00000041629 | 125.9264295 | 177.3823972 | 135.5810012 | 248.080963  | 211.277403  |
| ENSMUSG00000041632 | 58.0110518  | 111.298759  | 105.9226572 | 126.4568545 | 108.8615771 |
| ENSMUSG00000041653 | 0           | 0.695617244 | 1.412302096 | 2.416373016 | 0           |
| ENSMUSG00000041660 | 12.73413332 | 4.869320706 | 8.473812573 | 2.416373016 | 6.445751277 |
| ENSMUSG00000041679 | 45.98437033 | 58.43184848 | 54.37363068 | 79.74030954 | 76.63282074 |
| ENSMUSG00000041681 | 9.196874066 | 4.869320706 | 7.061510478 | 4.02728836  | 4.297167518 |
| ENSMUSG00000041695 | 7.781970364 | 4.869320706 | 4.943057334 | 2.416373016 | 4.297167518 |
| ENSMUSG00000041697 | 60.13340736 | 90.43024169 | 74.14586002 | 117.5968201 | 121.7530797 |
| ENSMUSG00000041700 | 2.122355554 | 2.782468975 | 1.412302096 | 4.832746033 | 5.013362104 |
| ENSMUSG00000041702 | 53.05888884 | 92.51709342 | 68.49665163 | 79.74030954 | 73.76804239 |
| ENSMUSG00000041703 | 2.829807405 | 4.173703463 | 8.473812573 | 4.02728836  | 5.729556691 |



|                    |             |             |             |             |             |
|--------------------|-------------|-------------|-------------|-------------|-------------|
| ENSMUSG00000041707 | 8.489422215 | 7.651789682 | 10.59226572 | 9.665492065 | 11.45911338 |
| ENSMUSG00000041710 | 7.074518513 | 2.086851731 | 4.943057334 | 1.610915344 | 1.432389173 |
| ENSMUSG00000041712 | 96.21345177 | 121.0374004 | 122.1641313 | 221.5008598 | 184.0620087 |
| ENSMUSG00000041716 | 16.97884443 | 28.52030699 | 26.83373982 | 56.38203705 | 41.53928601 |
| ENSMUSG00000041722 | 12.73413332 | 5.56493795  | 5.649208382 | 6.443661377 | 7.161945863 |
| ENSMUSG00000041736 | 36.08004441 | 59.82308296 | 40.25060972 | 36.24559524 | 30.08017263 |
| ENSMUSG00000041737 | 9.196874066 | 7.651789682 | 4.943057334 | 4.832746033 | 7.161945863 |
| ENSMUSG00000041747 | 72.86754068 | 107.8206728 | 88.26888097 | 167.5351958 | 139.6579443 |
| ENSMUSG00000041754 | 7.074518513 | 9.738641413 | 9.179963621 | 5.638203705 | 10.7429188  |
| ENSMUSG00000041765 | 89.13893326 | 125.2111039 | 100.9795998 | 95.04400531 | 91.67290705 |
| ENSMUSG00000041773 | 10.61177777 | 18.78166558 | 14.12302096 | 25.77464551 | 15.7562809  |
| ENSMUSG00000041775 | 78.52715549 | 95.99517964 | 81.91352154 | 78.93485187 | 93.10529622 |
| ENSMUSG00000041779 | 40.32475552 | 65.38802092 | 52.25517753 | 37.05105292 | 35.09353473 |
| ENSMUSG00000041781 | 134.4158517 | 191.294742  | 192.073085  | 274.6610662 | 236.3442135 |
| ENSMUSG00000041791 | 9.196874066 | 7.651789682 | 4.236906287 | 4.02728836  | 9.310529622 |
| ENSMUSG00000041797 | 8.489422215 | 5.56493795  | 6.35535943  | 5.638203705 | 7.161945863 |
| ENSMUSG00000041801 | 4.952162959 | 7.651789682 | 5.649208382 | 39.46742593 | 30.79636721 |
| ENSMUSG00000041805 | 10.61177777 | 6.260555194 | 4.236906287 | 6.443661377 | 7.161945863 |
| ENSMUSG00000041809 | 6.367066661 | 6.260555194 | 2.824604191 | 8.860034393 | 6.445751277 |
| ENSMUSG00000041837 | 86.30912585 | 115.4724625 | 103.098053  | 124.8459392 | 118.8883013 |
| ENSMUSG00000041840 | 14.85648888 | 27.82468975 | 19.77222934 | 24.96918783 | 25.06681052 |
| ENSMUSG00000041841 | 10.61177777 | 26.43345526 | 20.47838039 | 20.1364418  | 32.22875639 |
| ENSMUSG00000041849 | 135.1233036 | 172.5130765 | 151.1163242 | 91.82217462 | 85.94335036 |
| ENSMUSG00000041872 | 11.31922962 | 3.478086219 | 8.473812573 | 6.443661377 | 4.297167518 |
| ENSMUSG00000041889 | 9.904325918 | 4.173703463 | 6.35535943  | 8.054576721 | 5.729556691 |
| ENSMUSG00000041907 | 7.074518513 | 4.173703463 | 7.061510478 | 4.832746033 | 7.87814045  |
| ENSMUSG00000041911 | 4.244711108 | 6.956172438 | 5.649208382 | 4.02728836  | 5.013362104 |
| ENSMUSG00000041915 | 32.54278516 | 37.56333116 | 46.60596915 | 57.99295239 | 48.70123187 |
| ENSMUSG00000041930 | 21.93100739 | 26.43345526 | 21.18453143 | 16.10915344 | 20.769643   |
| ENSMUSG00000041935 | 29.71297775 | 56.34499675 | 49.43057334 | 76.51847885 | 79.49759908 |
| ENSMUSG00000041949 | 12.02668147 | 22.95536904 | 14.829172   | 19.33098413 | 21.48583759 |
| ENSMUSG00000041974 | 12.02668147 | 18.08604834 | 19.06607829 | 18.52552646 | 17.18867007 |
| ENSMUSG00000041984 | 10.61177777 | 3.478086219 | 5.649208382 | 6.443661377 | 10.02672421 |
| ENSMUSG00000041992 | 9.196874066 | 6.956172438 | 10.59226572 | 7.249119049 | 8.594335036 |
| ENSMUSG00000041995 | 21.22355554 | 41.04141738 | 37.42600553 | 74.10210583 | 46.55264811 |
| ENSMUSG00000042029 | 37.49494812 | 36.17209668 | 44.48751601 | 101.4876667 | 68.0384857  |
| ENSMUSG00000042031 | 9.904325918 | 7.651789682 | 9.179963621 | 2.416373016 | 5.013362104 |
| ENSMUSG00000042041 | 9.904325918 | 10.43425866 | 8.473812573 | 7.249119049 | 7.87814045  |
| ENSMUSG00000042043 | 49.52162959 | 80.69160028 | 60.72899011 | 79.74030954 | 61.59273443 |
| ENSMUSG00000042045 | 9.196874066 | 2.782468975 | 8.473812573 | 3.221830688 | 7.87814045  |
| ENSMUSG00000042050 | 9.196874066 | 13.21672763 | 10.59226572 | 12.88732275 | 8.594335036 |
| ENSMUSG00000042082 | 10.61177777 | 15.30357936 | 20.47838039 | 9.665492065 | 9.310529622 |
| ENSMUSG00000042092 | 9.196874066 | 9.738641413 | 8.473812573 | 7.249119049 | 5.013362104 |

|                    |             |             |             |             |             |
|--------------------|-------------|-------------|-------------|-------------|-------------|
| ENSMUSG00000042102 | 4.952162959 | 6.956172438 | 7.061510478 | 5.638203705 | 5.013362104 |
| ENSMUSG00000042106 | 11.31922962 | 15.30357936 | 15.53532305 | 61.21478308 | 45.12025894 |
| ENSMUSG00000042109 | 13.44158517 | 16.69481385 | 18.35992724 | 18.52552646 | 12.17530797 |
| ENSMUSG00000042111 | 41.73965922 | 55.6493795  | 58.61053696 | 159.4806191 | 126.7664418 |
| ENSMUSG00000042115 | 11.31922962 | 9.043024169 | 5.649208382 | 4.832746033 | 7.161945863 |
| ENSMUSG00000042116 | 10.61177777 | 6.956172438 | 13.41686991 | 11.27640741 | 7.161945863 |
| ENSMUSG00000042118 | 7.074518513 | 10.43425866 | 4.943057334 | 8.054576721 | 7.161945863 |
| ENSMUSG00000042124 | 12.02668147 | 6.956172438 | 4.943057334 | 5.638203705 | 5.729556691 |
| ENSMUSG00000042129 | 38.20239997 | 36.17209668 | 37.42600553 | 20.94189947 | 22.91822676 |
| ENSMUSG00000042138 | 34.66514071 | 67.47487265 | 55.78593277 | 49.93837567 | 52.2822048  |
| ENSMUSG00000042148 | 49.52162959 | 63.99678643 | 51.54902649 | 79.74030954 | 63.0251236  |
| ENSMUSG00000042155 | 9.904325918 | 5.56493795  | 3.530755239 | 2.416373016 | 8.594335036 |
| ENSMUSG00000042157 | 14.85648888 | 7.651789682 | 7.767661525 | 4.02728836  | 8.594335036 |
| ENSMUSG00000042167 | 103.9954221 | 131.4716591 | 104.5103551 | 207.0026217 | 154.6980307 |
| ENSMUSG00000042178 | 8.489422215 | 22.2597518  | 19.77222934 | 33.02376456 | 31.5125618  |
| ENSMUSG00000042179 | 12.02668147 | 8.347406925 | 5.649208382 | 4.832746033 | 7.161945863 |
| ENSMUSG00000042189 | 7.781970364 | 5.56493795  | 9.179963621 | 8.054576721 | 7.161945863 |
| ENSMUSG00000042195 | 8.489422215 | 11.82549314 | 13.41686991 | 20.94189947 | 16.47247549 |
| ENSMUSG00000042200 | 9.904325918 | 8.347406925 | 5.649208382 | 6.443661377 | 3.580972932 |
| ENSMUSG00000042203 | 0           | 0           | 0           | 0           | 0           |
| ENSMUSG00000042211 | 145.0276295 | 205.9027042 | 168.0639494 | 205.3917064 | 161.1437819 |
| ENSMUSG00000042212 | 10.61177777 | 8.347406925 | 4.236906287 | 8.860034393 | 7.87814045  |
| ENSMUSG00000042215 | 7.074518513 | 12.52111039 | 6.35535943  | 12.88732275 | 8.594335036 |
| ENSMUSG00000042225 | 27.5906222  | 47.99758982 | 38.83830763 | 48.32746033 | 42.25548059 |
| ENSMUSG00000042229 | 61.54831106 | 102.2557348 | 100.2734488 | 89.4058016  | 84.51096119 |
| ENSMUSG00000042244 | 12.73413332 | 6.956172438 | 12.00456781 | 4.02728836  | 7.161945863 |
| ENSMUSG00000042246 | 4.244711108 | 8.347406925 | 5.649208382 | 2.416373016 | 7.161945863 |
| ENSMUSG00000042248 | 9.904325918 | 6.260555194 | 6.35535943  | 4.832746033 | 7.161945863 |
| ENSMUSG00000042256 | 9.196874066 | 4.173703463 | 3.530755239 | 4.02728836  | 11.45911338 |
| ENSMUSG00000042262 | 7.781970364 | 4.173703463 | 7.061510478 | 7.249119049 | 9.310529622 |
| ENSMUSG00000042275 | 23.34591109 | 29.21592424 | 31.0706461  | 57.18749472 | 42.97167518 |
| ENSMUSG00000042282 | 4.244711108 | 3.478086219 | 1.412302096 | 3.221830688 | 2.148583759 |
| ENSMUSG00000042293 | 43.86201478 | 82.08283477 | 55.07978173 | 144.982381  | 126.0502472 |
| ENSMUSG00000042312 | 18.39374813 | 22.2597518  | 28.95219296 | 15.30369577 | 25.78300511 |
| ENSMUSG00000042340 | 6.367066661 | 6.260555194 | 4.236906287 | 6.443661377 | 10.02672421 |
| ENSMUSG00000042351 | 139.3680147 | 165.556904  | 170.1824025 | 73.29664816 | 78.7814045  |
| ENSMUSG00000042354 | 53.7663407  | 77.21351406 | 51.54902649 | 216.6681138 | 160.4275873 |
| ENSMUSG00000042357 | 6.367066661 | 6.260555194 | 4.943057334 | 8.054576721 | 6.445751277 |
| ENSMUSG00000042369 | 38.90985182 | 59.82308296 | 56.49208382 | 98.265836   | 82.36237743 |
| ENSMUSG00000042372 | 3.537259256 | 4.869320706 | 4.236906287 | 4.02728836  | 4.297167518 |
| ENSMUSG00000042377 | 6.367066661 | 11.1298759  | 18.35992724 | 11.27640741 | 15.04008631 |
| ENSMUSG00000042379 | 9.196874066 | 9.738641413 | 9.179963621 | 3.221830688 | 7.87814045  |
| ENSMUSG00000042380 | 35.37259256 | 59.82308296 | 57.19823487 | 49.132918   | 58.72795608 |

|                    |             |             |             |             |             |
|--------------------|-------------|-------------|-------------|-------------|-------------|
| ENSMUSG00000042386 | 7.074518513 | 3.478086219 | 2.118453143 | 2.416373016 | 5.013362104 |
| ENSMUSG00000042390 | 85.601674   | 127.2979556 | 114.3964697 | 95.04400531 | 86.65954495 |
| ENSMUSG00000042401 | 12.73413332 | 4.869320706 | 4.236906287 | 4.832746033 | 7.87814045  |
| ENSMUSG00000042406 | 31.83533331 | 48.69320706 | 40.95676077 | 231.1663519 | 172.6028953 |
| ENSMUSG00000042414 | 4.952162959 | 4.173703463 | 6.35535943  | 6.443661377 | 7.87814045  |
| ENSMUSG00000042417 | 6.367066661 | 6.260555194 | 7.767661525 | 4.832746033 | 2.148583759 |
| ENSMUSG00000042419 | 32.54278516 | 54.95376226 | 49.43057334 | 79.74030954 | 79.49759908 |
| ENSMUSG00000042423 | 44.56946663 | 77.9091313  | 62.84744325 | 70.07481747 | 73.76804239 |
| ENSMUSG00000042426 | 81.3569629  | 89.73462445 | 105.9226572 | 181.2279762 | 136.793166  |
| ENSMUSG00000042428 | 6.367066661 | 8.347406925 | 7.061510478 | 3.221830688 | 6.445751277 |
| ENSMUSG00000042429 | 4.244711108 | 4.869320706 | 8.473812573 | 8.860034393 | 7.161945863 |
| ENSMUSG00000042433 | 4.952162959 | 4.173703463 | 5.649208382 | 2.416373016 | 3.580972932 |
| ENSMUSG00000042448 | 4.244711108 | 5.56493795  | 4.943057334 | 5.638203705 | 3.580972932 |
| ENSMUSG00000042459 | 4.244711108 | 4.173703463 | 7.061510478 | 3.221830688 | 7.87814045  |
| ENSMUSG00000042460 | 38.20239997 | 56.34499675 | 49.43057334 | 79.74030954 | 69.47087488 |
| ENSMUSG00000042462 | 12.02668147 | 20.17290007 | 12.71071886 | 41.07834128 | 31.5125618  |
| ENSMUSG00000042473 | 24.05336294 | 34.78086219 | 33.18909925 | 20.94189947 | 20.769643   |
| ENSMUSG00000042474 | 164.1288295 | 156.5138799 | 135.5810012 | 127.2623122 | 106.7129934 |
| ENSMUSG00000042477 | 8.489422215 | 4.173703463 | 9.179963621 | 7.249119049 | 7.87814045  |
| ENSMUSG00000042485 | 14.14903703 | 13.21672763 | 4.943057334 | 6.443661377 | 10.02672421 |
| ENSMUSG00000042487 | 38.90985182 | 46.60635533 | 48.01827125 | 80.54576721 | 67.32229112 |
| ENSMUSG00000042505 | 17.68629628 | 18.78166558 | 14.12302096 | 15.30369577 | 21.48583759 |
| ENSMUSG00000042510 | 7.074518513 | 8.347406925 | 9.886114669 | 6.443661377 | 6.445751277 |
| ENSMUSG00000042525 | 7.781970364 | 5.56493795  | 4.943057334 | 3.221830688 | 7.161945863 |
| ENSMUSG00000042535 | 4.952162959 | 4.869320706 | 4.236906287 | 4.832746033 | 0.716194586 |
| ENSMUSG00000042595 | 7.781970364 | 20.17290007 | 26.12758877 | 16.10915344 | 27.21539428 |
| ENSMUSG00000042596 | 12.73413332 | 4.173703463 | 6.35535943  | 3.221830688 | 7.87814045  |
| ENSMUSG00000042599 | 19.10119998 | 29.21592424 | 27.53989086 | 20.1364418  | 28.64778345 |
| ENSMUSG00000042604 | 0.707451851 | 1.391234488 | 5.649208382 | 4.832746033 | 2.864778345 |
| ENSMUSG00000042606 | 29.0055259  | 31.99839321 | 40.95676077 | 141.7605503 | 97.40246374 |
| ENSMUSG00000042613 | 28.29807405 | 52.86691053 | 39.54445867 | 35.44013757 | 45.12025894 |
| ENSMUSG00000042616 | 12.02668147 | 10.43425866 | 7.061510478 | 9.665492065 | 8.594335036 |
| ENSMUSG00000042628 | 34.66514071 | 41.73703463 | 38.83830763 | 36.24559524 | 32.94495097 |
| ENSMUSG00000042631 | 3.537259256 | 6.956172438 | 6.35535943  | 5.638203705 | 9.310529622 |
| ENSMUSG00000042644 | 108.2401332 | 124.5154866 | 134.1686991 | 108.7367857 | 85.22715578 |
| ENSMUSG00000042650 | 99.04325918 | 132.8628936 | 110.8657145 | 234.3881826 | 176.1838682 |
| ENSMUSG00000042655 | 9.904325918 | 5.56493795  | 4.236906287 | 6.443661377 | 3.580972932 |
| ENSMUSG00000042660 | 37.49494812 | 57.04061399 | 47.3121202  | 107.1258704 | 90.24051788 |
| ENSMUSG00000042670 | 26.88317035 | 58.43184848 | 52.25517753 | 43.49471429 | 48.70123187 |
| ENSMUSG00000042677 | 120.2668147 | 131.4716591 | 115.8087718 | 219.8899445 | 186.2105924 |
| ENSMUSG00000042680 | 6.367066661 | 0.695617244 | 4.236906287 | 5.638203705 | 5.729556691 |
| ENSMUSG00000042682 | 28.29807405 | 45.91073809 | 45.19366706 | 74.9075635  | 73.05184781 |
| ENSMUSG00000042684 | 5.65961481  | 6.956172438 | 9.179963621 | 4.832746033 | 7.161945863 |

|                    |             |             |             |             |             |
|--------------------|-------------|-------------|-------------|-------------|-------------|
| ENSMUSG00000042686 | 9.904325918 | 6.260555194 | 10.59226572 | 8.860034393 | 7.87814045  |
| ENSMUSG00000042705 | 12.73413332 | 21.56413456 | 14.12302096 | 18.52552646 | 15.04008631 |
| ENSMUSG00000042707 | 45.27691848 | 58.43184848 | 59.31668801 | 70.88027514 | 79.49759908 |
| ENSMUSG00000042717 | 7.781970364 | 11.1298759  | 7.061510478 | 6.443661377 | 5.729556691 |
| ENSMUSG00000042724 | 21.93100739 | 33.3896277  | 36.01370344 | 12.08186508 | 24.35061594 |
| ENSMUSG00000042734 | 7.074518513 | 9.738641413 | 7.767661525 | 7.249119049 | 5.013362104 |
| ENSMUSG00000042737 | 44.56946663 | 66.7792554  | 53.66747963 | 53.96566403 | 46.55264811 |
| ENSMUSG00000042742 | 93.38364437 | 141.2103005 | 121.4579802 | 131.2896006 | 120.3206905 |
| ENSMUSG00000042745 | 6.367066661 | 10.43425866 | 12.71071886 | 5.638203705 | 7.87814045  |
| ENSMUSG00000042750 | 4.244711108 | 5.56493795  | 2.824604191 | 3.221830688 | 2.864778345 |
| ENSMUSG00000042763 | 5.65961481  | 7.651789682 | 9.179963621 | 14.4982381  | 7.161945863 |
| ENSMUSG00000042770 | 8.489422215 | 6.260555194 | 7.767661525 | 5.638203705 | 6.445751277 |
| ENSMUSG00000042774 | 5.65961481  | 6.956172438 | 10.59226572 | 4.02728836  | 9.310529622 |
| ENSMUSG00000042784 | 7.781970364 | 6.260555194 | 8.473812573 | 4.832746033 | 10.02672421 |
| ENSMUSG00000042797 | 4.952162959 | 7.651789682 | 8.473812573 | 7.249119049 | 6.445751277 |
| ENSMUSG00000042800 | 8.489422215 | 4.869320706 | 3.530755239 | 8.054576721 | 8.594335036 |
| ENSMUSG00000042801 | 10.61177777 | 5.56493795  | 4.943057334 | 2.416373016 | 7.87814045  |
| ENSMUSG00000042808 | 9.904325918 | 2.782468975 | 7.061510478 | 2.416373016 | 5.013362104 |
| ENSMUSG00000042812 | 5.65961481  | 6.956172438 | 6.35535943  | 1.610915344 | 5.013362104 |
| ENSMUSG00000042814 | 26.88317035 | 25.73783802 | 24.00913562 | 25.77464551 | 27.21539428 |
| ENSMUSG00000042816 | 3.537259256 | 8.347406925 | 8.473812573 | 8.860034393 | 11.45911338 |
| ENSMUSG00000042821 | 6.367066661 | 13.21672763 | 9.179963621 | 15.30369577 | 13.60769714 |
| ENSMUSG00000042845 | 9.196874066 | 5.56493795  | 8.473812573 | 5.638203705 | 5.013362104 |
| ENSMUSG00000042846 | 13.44158517 | 3.478086219 | 10.59226572 | 6.443661377 | 10.02672421 |
| ENSMUSG00000042854 | 34.66514071 | 42.43265187 | 33.89525029 | 61.21478308 | 63.0251236  |
| ENSMUSG00000042861 | 9.904325918 | 4.173703463 | 8.473812573 | 4.832746033 | 5.013362104 |
| ENSMUSG00000042895 | 6.367066661 | 4.869320706 | 12.00456781 | 5.638203705 | 3.580972932 |
| ENSMUSG00000042903 | 12.73413332 | 15.99919661 | 19.77222934 | 12.88732275 | 16.47247549 |
| ENSMUSG00000042943 | 10.61177777 | 8.347406925 | 6.35535943  | 1.610915344 | 5.013362104 |
| ENSMUSG00000042985 | 5.65961481  | 6.956172438 | 5.649208382 | 2.416373016 | 6.445751277 |
| ENSMUSG00000042993 | 9.904325918 | 25.04222078 | 24.00913562 | 38.66196826 | 25.06681052 |
| ENSMUSG00000043008 | 147.8574369 | 166.9481385 | 157.4716837 | 97.46037832 | 80.21379367 |
| ENSMUSG00000043017 | 10.61177777 | 6.260555194 | 7.767661525 | 16.91461111 | 13.60769714 |
| ENSMUSG00000043029 | 10.61177777 | 6.956172438 | 8.473812573 | 7.249119049 | 7.161945863 |
| ENSMUSG00000043050 | 2.122355554 | 3.478086219 | 2.824604191 | 16.91461111 | 7.161945863 |
| ENSMUSG00000043060 | 12.02668147 | 6.956172438 | 8.473812573 | 4.832746033 | 4.297167518 |
| ENSMUSG00000043066 | 9.904325918 | 9.043024169 | 9.886114669 | 5.638203705 | 7.87814045  |
| ENSMUSG00000043087 | 8.489422215 | 7.651789682 | 10.59226572 | 6.443661377 | 6.445751277 |
| ENSMUSG00000043089 | 7.074518513 | 6.260555194 | 9.886114669 | 5.638203705 | 5.729556691 |
| ENSMUSG00000043091 | 24.76081479 | 41.73703463 | 36.71985448 | 99.07129367 | 86.65954495 |
| ENSMUSG00000043102 | 10.61177777 | 13.91234488 | 14.12302096 | 12.88732275 | 10.02672421 |
| ENSMUSG00000043110 | 8.489422215 | 5.56493795  | 3.530755239 | 4.02728836  | 3.580972932 |
| ENSMUSG00000043122 | 7.074518513 | 10.43425866 | 1.412302096 | 4.02728836  | 8.594335036 |

|                    |             |             |             |             |             |
|--------------------|-------------|-------------|-------------|-------------|-------------|
| ENSMUSG00000043140 | 69.33028142 | 103.6469693 | 91.79963621 | 203.780791  | 174.0352845 |
| ENSMUSG00000043144 | 9.196874066 | 6.260555194 | 3.530755239 | 5.638203705 | 6.445751277 |
| ENSMUSG00000043153 | 4.952162959 | 4.869320706 | 9.179963621 | 3.221830688 | 9.310529622 |
| ENSMUSG00000043155 | 9.196874066 | 4.173703463 | 9.886114669 | 6.443661377 | 8.594335036 |
| ENSMUSG00000043157 | 11.31922962 | 7.651789682 | 4.943057334 | 6.443661377 | 5.013362104 |
| ENSMUSG00000043162 | 5.65961481  | 2.782468975 | 5.649208382 | 3.221830688 | 4.297167518 |
| ENSMUSG00000043164 | 7.074518513 | 6.956172438 | 15.53532305 | 4.832746033 | 3.580972932 |
| ENSMUSG00000043165 | 8.489422215 | 6.260555194 | 5.649208382 | 3.221830688 | 2.864778345 |
| ENSMUSG00000043219 | 4.244711108 | 4.869320706 | 9.179963621 | 4.02728836  | 8.594335036 |
| ENSMUSG00000043230 | 8.489422215 | 4.173703463 | 8.473812573 | 4.02728836  | 8.594335036 |
| ENSMUSG00000043251 | 34.66514071 | 39.6501829  | 41.66291182 | 49.132918   | 39.39070225 |
| ENSMUSG00000043252 | 87.01657771 | 102.9513521 | 107.3349593 | 57.99295239 | 65.17370736 |
| ENSMUSG00000043279 | 75.69734809 | 110.6031418 | 102.3919019 | 118.4022778 | 123.1854689 |
| ENSMUSG00000043282 | 8.489422215 | 9.738641413 | 12.71071886 | 5.638203705 | 8.594335036 |
| ENSMUSG00000043290 | 14.85648888 | 27.12907251 | 21.89068248 | 18.52552646 | 30.08017263 |
| ENSMUSG00000043298 | 9.196874066 | 8.347406925 | 10.59226572 | 14.4982381  | 12.89150255 |
| ENSMUSG00000043300 | 8.489422215 | 6.956172438 | 4.943057334 | 8.054576721 | 5.013362104 |
| ENSMUSG00000043311 | 29.71297775 | 52.86691053 | 43.78136496 | 74.10210583 | 66.60609653 |
| ENSMUSG00000043312 | 7.074518513 | 7.651789682 | 10.59226572 | 3.221830688 | 7.161945863 |
| ENSMUSG00000043313 | 14.85648888 | 6.260555194 | 7.767661525 | 5.638203705 | 5.013362104 |
| ENSMUSG00000043319 | 12.02668147 | 1.391234488 | 7.061510478 | 10.47094974 | 13.60769714 |
| ENSMUSG00000043342 | 2.122355554 | 3.478086219 | 2.118453143 | 0.805457672 | 2.148583759 |
| ENSMUSG00000043388 | 9.196874066 | 4.869320706 | 6.35535943  | 4.02728836  | 11.45911338 |
| ENSMUSG00000043391 | 3.537259256 | 6.956172438 | 4.943057334 | 5.638203705 | 5.729556691 |
| ENSMUSG00000043415 | 58.71850365 | 67.47487265 | 64.96589639 | 99.07129367 | 61.59273443 |
| ENSMUSG00000043418 | 12.02668147 | 8.347406925 | 7.767661525 | 4.832746033 | 9.310529622 |
| ENSMUSG00000043421 | 18.39374813 | 27.82468975 | 22.59683353 | 47.52200265 | 55.14698315 |
| ENSMUSG00000043429 | 8.489422215 | 8.347406925 | 5.649208382 | 11.27640741 | 10.02672421 |
| ENSMUSG00000043430 | 16.97884443 | 11.1298759  | 6.35535943  | 7.249119049 | 5.729556691 |
| ENSMUSG00000043432 | 29.0055259  | 34.08524495 | 29.65834401 | 14.4982381  | 22.91822676 |
| ENSMUSG00000043439 | 7.781970364 | 7.651789682 | 7.061510478 | 16.10915344 | 13.60769714 |
| ENSMUSG00000043441 | 13.44158517 | 6.956172438 | 9.886114669 | 3.221830688 | 5.013362104 |
| ENSMUSG00000043445 | 18.39374813 | 54.95376226 | 34.60140134 | 107.9313281 | 73.05184781 |
| ENSMUSG00000043453 | 2.122355554 | 2.782468975 | 2.118453143 | 0           | 1.432389173 |
| ENSMUSG00000043458 | 12.02668147 | 11.1298759  | 11.29841676 | 4.832746033 | 8.594335036 |
| ENSMUSG00000043460 | 7.781970364 | 6.260555194 | 0.706151048 | 6.443661377 | 6.445751277 |
| ENSMUSG00000043463 | 4.244711108 | 4.173703463 | 5.649208382 | 6.443661377 | 2.148583759 |
| ENSMUSG00000043468 | 7.781970364 | 4.173703463 | 7.061510478 | 6.443661377 | 7.87814045  |
| ENSMUSG00000043485 | 7.074518513 | 4.173703463 | 4.236906287 | 3.221830688 | 11.45911338 |
| ENSMUSG00000043487 | 12.02668147 | 9.043024169 | 7.767661525 | 5.638203705 | 5.013362104 |
| ENSMUSG00000043496 | 7.781970364 | 8.347406925 | 3.530755239 | 4.832746033 | 6.445751277 |
| ENSMUSG00000043501 | 11.31922962 | 4.869320706 | 11.29841676 | 9.665492065 | 7.161945863 |
| ENSMUSG00000043505 | 61.54831106 | 105.0382038 | 80.50121945 | 168.3406535 | 131.7798039 |

|                    |             |             |             |             |             |
|--------------------|-------------|-------------|-------------|-------------|-------------|
| ENSMUSG00000043518 | 4.244711108 | 5.56493795  | 5.649208382 | 0           | 3.580972932 |
| ENSMUSG00000043529 | 16.27139258 | 10.43425866 | 12.71071886 | 6.443661377 | 12.89150255 |
| ENSMUSG00000043569 | 2.829807405 | 2.086851731 | 4.943057334 | 0.805457672 | 1.432389173 |
| ENSMUSG00000043572 | 16.97884443 | 22.95536904 | 17.65377619 | 33.02376456 | 35.09353473 |
| ENSMUSG00000043583 | 4.952162959 | 5.56493795  | 12.00456781 | 5.638203705 | 5.729556691 |
| ENSMUSG00000043602 | 7.781970364 | 14.60796212 | 6.35535943  | 13.69278043 | 10.02672421 |
| ENSMUSG00000043605 | 9.904325918 | 7.651789682 | 7.767661525 | 4.832746033 | 7.87814045  |
| ENSMUSG00000043613 | 9.196874066 | 6.956172438 | 4.236906287 | 6.443661377 | 11.45911338 |
| ENSMUSG00000043631 | 12.73413332 | 9.738641413 | 10.59226572 | 6.443661377 | 6.445751277 |
| ENSMUSG00000043633 | 4.952162959 | 8.347406925 | 6.35535943  | 4.02728836  | 8.594335036 |
| ENSMUSG00000043648 | 9.904325918 | 6.260555194 | 9.886114669 | 4.832746033 | 8.594335036 |
| ENSMUSG00000043664 | 8.489422215 | 4.869320706 | 7.061510478 | 9.665492065 | 7.87814045  |
| ENSMUSG00000043670 | 7.074518513 | 5.56493795  | 5.649208382 | 8.054576721 | 8.594335036 |
| ENSMUSG00000043681 | 7.781970364 | 6.260555194 | 7.767661525 | 7.249119049 | 7.161945863 |
| ENSMUSG00000043683 | 50.93653329 | 67.47487265 | 69.20280268 | 207.8080794 | 161.1437819 |
| ENSMUSG00000043702 | 0.707451851 | 2.086851731 | 2.824604191 | 1.610915344 | 0.716194586 |
| ENSMUSG00000043705 | 9.196874066 | 6.956172438 | 9.179963621 | 8.054576721 | 7.161945863 |
| ENSMUSG00000043727 | 7.074518513 | 5.56493795  | 6.35535943  | 5.638203705 | 7.161945863 |
| ENSMUSG00000043753 | 10.61177777 | 4.173703463 | 8.473812573 | 5.638203705 | 2.864778345 |
| ENSMUSG00000043782 | 5.65961481  | 6.956172438 | 7.767661525 | 5.638203705 | 7.87814045  |
| ENSMUSG00000043787 | 9.904325918 | 8.347406925 | 6.35535943  | 5.638203705 | 8.594335036 |
| ENSMUSG00000043789 | 11.31922962 | 9.738641413 | 9.886114669 | 8.860034393 | 5.013362104 |
| ENSMUSG00000043807 | 6.367066661 | 21.56413456 | 15.53532305 | 14.4982381  | 20.05344842 |
| ENSMUSG00000043811 | 6.367066661 | 4.173703463 | 3.530755239 | 4.832746033 | 2.148583759 |
| ENSMUSG00000043827 | 7.781970364 | 4.869320706 | 6.35535943  | 8.054576721 | 7.161945863 |
| ENSMUSG00000043855 | 7.781970364 | 6.956172438 | 9.886114669 | 4.832746033 | 7.87814045  |
| ENSMUSG00000043881 | 14.14903703 | 29.91154148 | 35.30755239 | 34.6346799  | 35.80972932 |
| ENSMUSG00000043895 | 7.074518513 | 6.956172438 | 7.767661525 | 6.443661377 | 11.45911338 |
| ENSMUSG00000043911 | 10.61177777 | 2.782468975 | 4.943057334 | 3.221830688 | 2.864778345 |
| ENSMUSG00000043923 | 26.1757185  | 34.78086219 | 40.95676077 | 38.66196826 | 34.37734014 |
| ENSMUSG00000043925 | 11.31922962 | 11.1298759  | 5.649208382 | 5.638203705 | 7.161945863 |
| ENSMUSG00000043932 | 8.489422215 | 12.52111039 | 5.649208382 | 7.249119049 | 10.02672421 |
| ENSMUSG00000043945 | 2.829807405 | 2.086851731 | 5.649208382 | 1.610915344 | 2.864778345 |
| ENSMUSG00000043969 | 4.952162959 | 4.173703463 | 6.35535943  | 7.249119049 | 4.297167518 |
| ENSMUSG00000043972 | 9.196874066 | 6.260555194 | 7.767661525 | 5.638203705 | 9.310529622 |
| ENSMUSG00000043982 | 7.781970364 | 6.956172438 | 10.59226572 | 3.221830688 | 5.013362104 |
| ENSMUSG00000043986 | 10.61177777 | 4.869320706 | 5.649208382 | 4.02728836  | 5.729556691 |
| ENSMUSG00000043991 | 32.54278516 | 57.73623123 | 52.96132858 | 45.10562964 | 56.57937232 |
| ENSMUSG00000043999 | 10.61177777 | 5.56493795  | 7.061510478 | 9.665492065 | 7.87814045  |
| ENSMUSG00000044006 | 7.074518513 | 6.956172438 | 12.71071886 | 9.665492065 | 7.87814045  |
| ENSMUSG00000044014 | 9.904325918 | 8.347406925 | 4.943057334 | 3.221830688 | 4.297167518 |
| ENSMUSG00000044018 | 70.03773327 | 132.1672763 | 103.804204  | 132.0950582 | 127.4826364 |
| ENSMUSG00000044022 | 9.904325918 | 11.1298759  | 4.943057334 | 5.638203705 | 4.297167518 |

|                    |              |             |             |             |             |
|--------------------|--------------|-------------|-------------|-------------|-------------|
| ENSMUSG00000044025 | 6.367066661  | 8.347406925 | 8.473812573 | 2.416373016 | 3.580972932 |
| ENSMUSG00000044026 | 7.781970364  | 7.651789682 | 9.179963621 | 21.74735715 | 15.7562809  |
| ENSMUSG00000044030 | 53.7663407   | 68.17048989 | 74.14586002 | 45.10562964 | 46.55264811 |
| ENSMUSG00000044041 | 11.31922962  | 4.869320706 | 5.649208382 | 5.638203705 | 5.013362104 |
| ENSMUSG00000044043 | 4.2447111108 | 4.869320706 | 9.886114669 | 2.416373016 | 5.013362104 |
| ENSMUSG00000044052 | 7.781970364  | 9.043024169 | 12.71071886 | 12.08186508 | 10.02672421 |
| ENSMUSG00000044055 | 4.2447111108 | 11.82549314 | 7.061510478 | 3.221830688 | 6.445751277 |
| ENSMUSG00000044056 | 12.02668147  | 21.56413456 | 24.71528667 | 8.860034393 | 15.04008631 |
| ENSMUSG00000044060 | 13.44158517  | 11.1298759  | 12.00456781 | 7.249119049 | 12.17530797 |
| ENSMUSG00000044067 | 33.25023701  | 48.69320706 | 43.07521391 | 22.55281482 | 30.79636721 |
| ENSMUSG00000044068 | 106.1177777  | 144.6883867 | 128.5194907 | 138.5387196 | 109.5777717 |
| ENSMUSG00000044071 | 7.781970364  | 7.651789682 | 4.943057334 | 7.249119049 | 7.161945863 |
| ENSMUSG00000044080 | 19.10119998  | 25.04222078 | 26.12758877 | 28.19101852 | 17.18867007 |
| ENSMUSG00000044084 | 10.61177777  | 3.478086219 | 12.00456781 | 8.054576721 | 5.729556691 |
| ENSMUSG00000044086 | 6.367066661  | 6.260555194 | 5.649208382 | 8.860034393 | 5.013362104 |
| ENSMUSG00000044092 | 13.44158517  | 15.30357936 | 15.53532305 | 17.72006879 | 21.48583759 |
| ENSMUSG00000044103 | 6.367066661  | 6.260555194 | 5.649208382 | 4.832746033 | 6.445751277 |
| ENSMUSG00000044121 | 6.367066661  | 2.086851731 | 5.649208382 | 1.610915344 | 2.148583759 |
| ENSMUSG00000044134 | 12.73413332  | 27.12907251 | 24.00913562 | 20.1364418  | 19.33725383 |
| ENSMUSG00000044145 | 47.39927403  | 55.6493795  | 60.72899011 | 120.0131931 | 80.21379367 |
| ENSMUSG00000044147 | 117.4370073  | 135.6453625 | 122.1641313 | 320.5721535 | 229.8984622 |
| ENSMUSG00000044148 | 19.10119998  | 36.17209668 | 31.0706461  | 36.24559524 | 30.79636721 |
| ENSMUSG00000044149 | 18.39374813  | 16.69481385 | 16.94762515 | 91.82217462 | 61.59273443 |
| ENSMUSG00000044164 | 4.952162959  | 3.478086219 | 9.179963621 | 4.832746033 | 8.594335036 |
| ENSMUSG00000044167 | 180.4002221  | 191.294742  | 180.7746682 | 228.7499789 | 169.738117  |
| ENSMUSG00000044172 | 7.781970364  | 7.651789682 | 8.473812573 | 4.832746033 | 4.297167518 |
| ENSMUSG00000044177 | 6.367066661  | 9.043024169 | 10.59226572 | 4.832746033 | 10.7429188  |
| ENSMUSG00000044197 | 26.1757185   | 20.86851731 | 24.71528667 | 33.02376456 | 20.769643   |
| ENSMUSG00000044199 | 106.1177777  | 119.6461659 | 132.756397  | 128.0677699 | 123.1854689 |
| ENSMUSG00000044201 | 24.05336294  | 36.17209668 | 29.65834401 | 43.49471429 | 30.08017263 |
| ENSMUSG00000044205 | 10.61177777  | 6.956172438 | 9.886114669 | 5.638203705 | 8.594335036 |
| ENSMUSG00000044206 | 4.952162959  | 2.086851731 | 4.236906287 | 1.610915344 | 1.432389173 |
| ENSMUSG00000044216 | 4.2447111108 | 4.869320706 | 4.943057334 | 5.638203705 | 5.013362104 |
| ENSMUSG00000044222 | 11.31922962  | 7.651789682 | 7.061510478 | 5.638203705 | 9.310529622 |
| ENSMUSG00000044227 | 7.074518513  | 8.347406925 | 4.943057334 | 8.860034393 | 6.445751277 |
| ENSMUSG00000044229 | 12.73413332  | 18.08604834 | 17.65377619 | 12.88732275 | 9.310529622 |
| ENSMUSG00000044231 | 9.196874066  | 7.651789682 | 4.236906287 | 3.221830688 | 8.594335036 |
| ENSMUSG00000044243 | 9.196874066  | 5.56493795  | 7.061510478 | 7.249119049 | 5.729556691 |
| ENSMUSG00000044248 | 6.367066661  | 9.043024169 | 9.179963621 | 5.638203705 | 3.580972932 |
| ENSMUSG00000044249 | 9.196874066  | 6.956172438 | 8.473812573 | 7.249119049 | 7.87814045  |
| ENSMUSG00000044250 | 21.93100739  | 38.95456565 | 37.42600553 | 106.3204127 | 100.9834367 |
| ENSMUSG00000044254 | 6.367066661  | 4.173703463 | 4.943057334 | 4.832746033 | 7.161945863 |
| ENSMUSG00000044286 | 9.904325918  | 8.347406925 | 9.179963621 | 4.02728836  | 6.445751277 |

|                    |             |             |             |             |             |
|--------------------|-------------|-------------|-------------|-------------|-------------|
| ENSMUSG00000044287 | 8.489422215 | 16.69481385 | 9.179963621 | 8.860034393 | 3.580972932 |
| ENSMUSG00000044288 | 6.367066661 | 4.869320706 | 7.061510478 | 5.638203705 | 2.864778345 |
| ENSMUSG00000044294 | 7.781970364 | 2.782468975 | 7.061510478 | 9.665492065 | 8.594335036 |
| ENSMUSG00000044303 | 7.074518513 | 7.651789682 | 8.473812573 | 4.832746033 | 6.445751277 |
| ENSMUSG00000044309 | 8.489422215 | 6.260555194 | 4.943057334 | 5.638203705 | 12.17530797 |
| ENSMUSG00000044312 | 7.781970364 | 2.782468975 | 8.473812573 | 4.832746033 | 3.580972932 |
| ENSMUSG00000044317 | 2.829807405 | 4.869320706 | 9.886114669 | 9.665492065 | 7.87814045  |
| ENSMUSG00000044322 | 11.31922962 | 4.869320706 | 7.061510478 | 7.249119049 | 7.87814045  |
| ENSMUSG00000044337 | 10.61177777 | 22.95536904 | 9.886114669 | 41.88379895 | 32.22875639 |
| ENSMUSG00000044338 | 8.489422215 | 4.173703463 | 5.649208382 | 5.638203705 | 8.594335036 |
| ENSMUSG00000044340 | 33.95768886 | 45.91073809 | 33.18909925 | 109.5422434 | 93.10529622 |
| ENSMUSG00000044345 | 7.074518513 | 4.173703463 | 6.35535943  | 8.860034393 | 5.729556691 |
| ENSMUSG00000044352 | 7.781970364 | 7.651789682 | 2.118453143 | 4.832746033 | 5.729556691 |
| ENSMUSG00000044359 | 5.65961481  | 4.869320706 | 2.118453143 | 4.02728836  | 2.864778345 |
| ENSMUSG00000044362 | 9.196874066 | 6.260555194 | 7.061510478 | 5.638203705 | 2.864778345 |
| ENSMUSG00000044364 | 5.65961481  | 3.478086219 | 8.473812573 | 2.416373016 | 5.729556691 |
| ENSMUSG00000044367 | 9.904325918 | 24.34660353 | 20.47838039 | 30.60739154 | 35.80972932 |
| ENSMUSG00000044375 | 5.65961481  | 3.478086219 | 7.767661525 | 4.02728836  | 3.580972932 |
| ENSMUSG00000044390 | 15.56394073 | 15.30357936 | 14.12302096 | 20.1364418  | 12.89150255 |
| ENSMUSG00000044400 | 2.122355554 | 2.782468975 | 7.061510478 | 3.221830688 | 1.432389173 |
| ENSMUSG00000044405 | 7.781970364 | 7.651789682 | 6.35535943  | 4.832746033 | 5.013362104 |
| ENSMUSG00000044408 | 21.93100739 | 30.60715873 | 27.53989086 | 28.19101852 | 30.08017263 |
| ENSMUSG00000044429 | 14.14903703 | 9.043024169 | 11.29841676 | 8.860034393 | 5.729556691 |
| ENSMUSG00000044441 | 5.65961481  | 4.173703463 | 7.767661525 | 6.443661377 | 7.161945863 |
| ENSMUSG00000044447 | 3.537259256 | 6.956172438 | 1.412302096 | 4.832746033 | 3.580972932 |
| ENSMUSG00000044453 | 11.31922962 | 17.39043109 | 19.77222934 | 16.10915344 | 15.7562809  |
| ENSMUSG00000044461 | 6.367066661 | 7.651789682 | 5.649208382 | 4.832746033 | 8.594335036 |
| ENSMUSG00000044469 | 7.781970364 | 5.56493795  | 9.179963621 | 6.443661377 | 11.45911338 |
| ENSMUSG00000044485 | 7.074518513 | 5.56493795  | 10.59226572 | 8.860034393 | 6.445751277 |
| ENSMUSG00000044496 | 78.52715549 | 111.298759  | 100.9795998 | 127.2623122 | 126.7664418 |
| ENSMUSG00000044505 | 7.781970364 | 4.869320706 | 7.061510478 | 4.02728836  | 9.310529622 |
| ENSMUSG00000044519 | 14.14903703 | 2.086851731 | 6.35535943  | 3.221830688 | 3.580972932 |
| ENSMUSG00000044526 | 1.414903703 | 5.56493795  | 10.59226572 | 4.02728836  | 7.161945863 |
| ENSMUSG00000044528 | 8.489422215 | 6.956172438 | 10.59226572 | 1.610915344 | 6.445751277 |
| ENSMUSG00000044534 | 8.489422215 | 9.043024169 | 8.473812573 | 11.27640741 | 7.87814045  |
| ENSMUSG00000044542 | 8.489422215 | 8.347406925 | 8.473812573 | 4.02728836  | 7.161945863 |
| ENSMUSG00000044556 | 7.781970364 | 7.651789682 | 16.2414741  | 4.832746033 | 6.445751277 |
| ENSMUSG00000044576 | 7.781970364 | 6.260555194 | 5.649208382 | 4.832746033 | 7.161945863 |
| ENSMUSG00000044581 | 9.904325918 | 4.173703463 | 7.767661525 | 4.02728836  | 7.161945863 |
| ENSMUSG00000044597 | 4.952162959 | 0.695617244 | 4.236906287 | 1.610915344 | 3.580972932 |
| ENSMUSG00000044617 | 26.1757185  | 43.12826911 | 41.66291182 | 33.82922223 | 35.09353473 |
| ENSMUSG00000044624 | 11.31922962 | 6.260555194 | 9.886114669 | 6.443661377 | 5.013362104 |
| ENSMUSG00000044628 | 3.537259256 | 6.260555194 | 2.824604191 | 8.860034393 | 9.310529622 |



|                    |             |             |             |             |             |
|--------------------|-------------|-------------|-------------|-------------|-------------|
| ENSMUSG00000044629 | 12.73413332 | 16.69481385 | 14.12302096 | 9.665492065 | 11.45911338 |
| ENSMUSG00000044636 | 19.10119998 | 29.91154148 | 29.65834401 | 16.91461111 | 21.48583759 |
| ENSMUSG00000044641 | 12.02668147 | 11.82549314 | 11.29841676 | 20.94189947 | 8.594335036 |
| ENSMUSG00000044645 | 11.31922962 | 8.347406925 | 8.473812573 | 15.30369577 | 10.7429188  |
| ENSMUSG00000044649 | 4.952162959 | 7.651789682 | 6.35535943  | 3.221830688 | 7.87814045  |
| ENSMUSG00000044664 | 13.44158517 | 11.1298759  | 12.00456781 | 17.72006879 | 11.45911338 |
| ENSMUSG00000044674 | 5.65961481  | 4.869320706 | 3.530755239 | 4.832746033 | 2.864778345 |
| ENSMUSG00000044701 | 9.196874066 | 2.086851731 | 4.943057334 | 10.47094974 | 13.60769714 |
| ENSMUSG00000044703 | 21.22355554 | 27.12907251 | 26.12758877 | 27.38556085 | 22.91822676 |
| ENSMUSG00000044707 | 4.244711108 | 6.260555194 | 9.179963621 | 3.221830688 | 5.013362104 |
| ENSMUSG00000044708 | 7.074518513 | 6.260555194 | 7.061510478 | 7.249119049 | 6.445751277 |
| ENSMUSG00000044709 | 76.40479994 | 112.6899935 | 105.2165061 | 164.3133651 | 141.0903335 |
| ENSMUSG00000044715 | 36.78749627 | 70.25734162 | 64.25974535 | 104.7094974 | 105.9967988 |
| ENSMUSG00000044719 | 16.97884443 | 9.738641413 | 5.649208382 | 7.249119049 | 10.02672421 |
| ENSMUSG00000044724 | 20.51610369 | 24.34660353 | 29.65834401 | 16.10915344 | 17.18867007 |
| ENSMUSG00000044726 | 6.367066661 | 6.260555194 | 5.649208382 | 6.443661377 | 5.729556691 |
| ENSMUSG00000044737 | 7.781970364 | 5.56493795  | 7.061510478 | 9.665492065 | 8.594335036 |
| ENSMUSG00000044743 | 11.31922962 | 3.478086219 | 9.179963621 | 5.638203705 | 5.729556691 |
| ENSMUSG00000044748 | 10.61177777 | 5.56493795  | 7.767661525 | 10.47094974 | 13.60769714 |
| ENSMUSG00000044763 | 3.537259256 | 7.651789682 | 7.061510478 | 1.610915344 | 6.445751277 |
| ENSMUSG00000044772 | 15.56394073 | 9.043024169 | 8.473812573 | 4.02728836  | 4.297167518 |
| ENSMUSG00000044786 | 154.2245036 | 168.339373  | 153.9409284 | 296.4084233 | 207.69643   |
| ENSMUSG00000044787 | 5.65961481  | 8.347406925 | 9.886114669 | 10.47094974 | 10.7429188  |
| ENSMUSG00000044792 | 58.71850365 | 111.9943762 | 107.3349593 | 79.74030954 | 81.64618284 |
| ENSMUSG00000044798 | 7.781970364 | 11.82549314 | 4.943057334 | 5.638203705 | 5.013362104 |
| ENSMUSG00000044814 | 9.196874066 | 4.869320706 | 11.29841676 | 10.47094974 | 5.013362104 |
| ENSMUSG00000044819 | 7.074518513 | 6.260555194 | 9.179963621 | 6.443661377 | 7.161945863 |
| ENSMUSG00000044820 | 35.37259256 | 73.0398106  | 55.78593277 | 110.3477011 | 78.06520991 |
| ENSMUSG00000044854 | 64.37811846 | 74.43104508 | 79.08891735 | 159.4806191 | 130.3474147 |
| ENSMUSG00000044857 | 30.4204296  | 38.25894841 | 42.36906287 | 45.91108731 | 42.97167518 |
| ENSMUSG00000044860 | 9.904325918 | 8.347406925 | 7.061510478 | 4.02728836  | 6.445751277 |
| ENSMUSG00000044863 | 4.952162959 | 4.869320706 | 11.29841676 | 4.832746033 | 12.17530797 |
| ENSMUSG00000044881 | 14.85648888 | 18.08604834 | 19.06607829 | 19.33098413 | 25.06681052 |
| ENSMUSG00000044899 | 12.02668147 | 4.869320706 | 9.179963621 | 9.665492065 | 7.161945863 |
| ENSMUSG00000044906 | 10.61177777 | 15.30357936 | 17.65377619 | 27.38556085 | 24.35061594 |
| ENSMUSG00000044921 | 7.074518513 | 5.56493795  | 10.59226572 | 2.416373016 | 11.45911338 |
| ENSMUSG00000044927 | 8.489422215 | 3.478086219 | 3.530755239 | 7.249119049 | 6.445751277 |
| ENSMUSG00000044933 | 7.781970364 | 4.173703463 | 5.649208382 | 10.47094974 | 7.161945863 |
| ENSMUSG00000044938 | 10.61177777 | 6.956172438 | 8.473812573 | 8.054576721 | 7.87814045  |
| ENSMUSG00000044949 | 14.14903703 | 15.30357936 | 14.829172   | 12.08186508 | 22.91822676 |
| ENSMUSG00000044950 | 38.20239997 | 57.73623123 | 35.30755239 | 76.51847885 | 79.49759908 |
| ENSMUSG00000044952 | 8.489422215 | 23.65098629 | 16.94762515 | 13.69278043 | 17.90486466 |
| ENSMUSG00000044957 | 8.489422215 | 10.43425866 | 11.29841676 | 7.249119049 | 7.161945863 |

|                    |             |             |             |             |             |
|--------------------|-------------|-------------|-------------|-------------|-------------|
| ENSMUSG00000044966 | 21.22355554 | 35.47647943 | 24.00913562 | 28.19101852 | 22.91822676 |
| ENSMUSG00000044982 | 31.12788146 | 47.30197258 | 41.66291182 | 35.44013757 | 41.53928601 |
| ENSMUSG00000044985 | 7.781970364 | 4.173703463 | 6.35535943  | 4.02728836  | 4.297167518 |
| ENSMUSG00000044986 | 10.61177777 | 20.17290007 | 16.94762515 | 11.27640741 | 17.18867007 |
| ENSMUSG00000044988 | 11.31922962 | 6.956172438 | 7.061510478 | 7.249119049 | 5.729556691 |
| ENSMUSG00000045004 | 13.44158517 | 6.956172438 | 6.35535943  | 8.054576721 | 5.013362104 |
| ENSMUSG00000045005 | 8.489422215 | 9.738641413 | 9.179963621 | 7.249119049 | 10.7429188  |
| ENSMUSG00000045007 | 9.196874066 | 13.91234488 | 6.35535943  | 17.72006879 | 13.60769714 |
| ENSMUSG00000045008 | 4.244711108 | 2.086851731 | 3.530755239 | 2.416373016 | 5.729556691 |
| ENSMUSG00000045009 | 14.85648888 | 10.43425866 | 10.59226572 | 9.665492065 | 7.161945863 |
| ENSMUSG00000045013 | 7.781970364 | 9.043024169 | 2.824604191 | 5.638203705 | 5.013362104 |
| ENSMUSG00000045019 | 7.781970364 | 6.260555194 | 9.886114669 | 6.443661377 | 5.729556691 |
| ENSMUSG00000045022 | 7.781970364 | 9.043024169 | 9.179963621 | 8.054576721 | 8.594335036 |
| ENSMUSG00000045027 | 7.074518513 | 3.478086219 | 7.061510478 | 3.221830688 | 4.297167518 |
| ENSMUSG00000045030 | 9.904325918 | 4.173703463 | 4.236906287 | 8.860034393 | 5.729556691 |
| ENSMUSG00000045039 | 7.074518513 | 5.56493795  | 3.530755239 | 2.416373016 | 10.02672421 |
| ENSMUSG00000045045 | 6.367066661 | 4.869320706 | 6.35535943  | 7.249119049 | 8.594335036 |
| ENSMUSG00000045052 | 6.367066661 | 10.43425866 | 9.886114669 | 3.221830688 | 7.161945863 |
| ENSMUSG00000045053 | 10.61177777 | 6.260555194 | 8.473812573 | 4.832746033 | 6.445751277 |
| ENSMUSG00000045062 | 7.074518513 | 9.738641413 | 8.473812573 | 3.221830688 | 1.432389173 |
| ENSMUSG00000045064 | 4.244711108 | 5.56493795  | 4.943057334 | 4.02728836  | 6.445751277 |
| ENSMUSG00000045087 | 5.65961481  | 12.52111039 | 8.473812573 | 6.443661377 | 9.310529622 |
| ENSMUSG00000045091 | 8.489422215 | 8.347406925 | 9.179963621 | 4.02728836  | 4.297167518 |
| ENSMUSG00000045092 | 55.1812444  | 73.0398106  | 60.72899011 | 41.88379895 | 49.41742646 |
| ENSMUSG00000045094 | 4.244711108 | 6.260555194 | 8.473812573 | 1.610915344 | 5.729556691 |
| ENSMUSG00000045107 | 14.85648888 | 18.78166558 | 14.12302096 | 15.30369577 | 21.48583759 |
| ENSMUSG00000045109 | 8.489422215 | 10.43425866 | 6.35535943  | 8.860034393 | 5.013362104 |
| ENSMUSG00000045126 | 9.904325918 | 9.043024169 | 8.473812573 | 6.443661377 | 5.013362104 |
| ENSMUSG00000045128 | 3.537259256 | 2.782468975 | 2.824604191 | 5.638203705 | 3.580972932 |
| ENSMUSG00000045136 | 11.31922962 | 9.043024169 | 13.41686991 | 11.27640741 | 14.32389173 |
| ENSMUSG00000045140 | 29.71297775 | 62.60555194 | 42.36906287 | 85.37851324 | 80.21379367 |
| ENSMUSG00000045165 | 154.2245036 | 168.339373  | 168.7701004 | 193.3098413 | 151.8332523 |
| ENSMUSG00000045176 | 33.95768886 | 61.21431745 | 43.78136496 | 45.10562964 | 41.53928601 |
| ENSMUSG00000045201 | 5.65961481  | 8.347406925 | 6.35535943  | 8.054576721 | 10.02672421 |
| ENSMUSG00000045202 | 10.61177777 | 8.347406925 | 7.767661525 | 6.443661377 | 5.013362104 |
| ENSMUSG00000045210 | 75.69734809 | 90.43024169 | 76.97046421 | 192.5043836 | 141.0903335 |
| ENSMUSG00000045211 | 12.02668147 | 14.60796212 | 10.59226572 | 5.638203705 | 13.60769714 |
| ENSMUSG00000045216 | 60.13340736 | 68.17048989 | 81.91352154 | 81.35122488 | 73.76804239 |
| ENSMUSG00000045232 | 13.44158517 | 14.60796212 | 14.12302096 | 5.638203705 | 5.729556691 |
| ENSMUSG00000045236 | 9.196874066 | 6.260555194 | 9.886114669 | 3.221830688 | 6.445751277 |
| ENSMUSG00000045237 | 12.73413332 | 15.99919661 | 21.89068248 | 16.91461111 | 13.60769714 |
| ENSMUSG00000045248 | 115.3146518 | 159.2963488 | 149.7040221 | 194.115299  | 153.2656415 |
| ENSMUSG00000045257 | 36.78749627 | 49.38882431 | 48.01827125 | 93.43308996 | 88.09193412 |

|                    |             |             |             |             |             |
|--------------------|-------------|-------------|-------------|-------------|-------------|
| ENSMUSG00000045259 | 10.61177777 | 16.69481385 | 16.94762515 | 16.10915344 | 20.05344842 |
| ENSMUSG00000045267 | 6.367066661 | 3.478086219 | 8.473812573 | 3.221830688 | 7.161945863 |
| ENSMUSG00000045273 | 26.88317035 | 27.12907251 | 31.0706461  | 37.05105292 | 43.68786977 |
| ENSMUSG00000045281 | 6.367066661 | 3.478086219 | 12.00456781 | 7.249119049 | 9.310529622 |
| ENSMUSG00000045282 | 11.31922962 | 15.30357936 | 16.2414741  | 16.91461111 | 6.445751277 |
| ENSMUSG00000045284 | 4.244711108 | 6.956172438 | 7.767661525 | 3.221830688 | 5.013362104 |
| ENSMUSG00000045287 | 4.952162959 | 7.651789682 | 9.179963621 | 6.443661377 | 5.729556691 |
| ENSMUSG00000045306 | 12.02668147 | 14.60796212 | 6.35535943  | 6.443661377 | 2.864778345 |
| ENSMUSG00000045314 | 7.074518513 | 3.478086219 | 3.530755239 | 3.221830688 | 7.161945863 |
| ENSMUSG00000045316 | 17.68629628 | 25.04222078 | 30.36449505 | 27.38556085 | 29.36397804 |
| ENSMUSG00000045318 | 8.489422215 | 2.086851731 | 2.824604191 | 5.638203705 | 7.161945863 |
| ENSMUSG00000045330 | 4.244711108 | 3.478086219 | 2.824604191 | 3.221830688 | 2.864778345 |
| ENSMUSG00000045331 | 10.61177777 | 6.260555194 | 6.35535943  | 5.638203705 | 3.580972932 |
| ENSMUSG00000045336 | 12.02668147 | 9.738641413 | 6.35535943  | 6.443661377 | 5.729556691 |
| ENSMUSG00000045337 | 9.904325918 | 6.260555194 | 5.649208382 | 8.054576721 | 5.013362104 |
| ENSMUSG00000045362 | 46.69182218 | 79.30036579 | 62.1412922  | 59.60386773 | 58.72795608 |
| ENSMUSG00000045364 | 3.537259256 | 3.478086219 | 4.236906287 | 4.02728836  | 9.310529622 |
| ENSMUSG00000045377 | 4.952162959 | 13.21672763 | 18.35992724 | 10.47094974 | 11.45911338 |
| ENSMUSG00000045378 | 7.781970364 | 7.651789682 | 9.886114669 | 9.665492065 | 10.02672421 |
| ENSMUSG00000045381 | 8.489422215 | 11.82549314 | 14.12302096 | 10.47094974 | 11.45911338 |
| ENSMUSG00000045382 | 55.88869625 | 76.51789682 | 79.7950684  | 54.7711217  | 59.44415067 |
| ENSMUSG00000045394 | 4.952162959 | 6.956172438 | 6.35535943  | 8.860034393 | 6.445751277 |
| ENSMUSG00000045395 | 8.489422215 | 3.478086219 | 9.179963621 | 8.860034393 | 6.445751277 |
| ENSMUSG00000045414 | 11.31922962 | 7.651789682 | 9.886114669 | 14.4982381  | 7.161945863 |
| ENSMUSG00000045435 | 108.2401332 | 177.3823972 | 139.1117564 | 186.0607223 | 164.7247549 |
| ENSMUSG00000045440 | 7.781970364 | 9.043024169 | 9.179963621 | 4.832746033 | 8.594335036 |
| ENSMUSG00000045441 | 11.31922962 | 9.043024169 | 4.236906287 | 7.249119049 | 10.7429188  |
| ENSMUSG00000045471 | 7.074518513 | 6.956172438 | 5.649208382 | 6.443661377 | 4.297167518 |
| ENSMUSG00000045474 | 8.489422215 | 9.043024169 | 5.649208382 | 7.249119049 | 6.445751277 |
| ENSMUSG00000045475 | 5.65961481  | 7.651789682 | 7.767661525 | 5.638203705 | 5.013362104 |
| ENSMUSG00000045479 | 7.781970364 | 3.478086219 | 11.29841676 | 8.054576721 | 6.445751277 |
| ENSMUSG00000045493 | 4.244711108 | 2.782468975 | 1.412302096 | 4.832746033 | 2.148583759 |
| ENSMUSG00000045498 | 11.31922962 | 9.738641413 | 6.35535943  | 8.054576721 | 5.013362104 |
| ENSMUSG00000045502 | 15.56394073 | 8.347406925 | 4.943057334 | 4.832746033 | 8.594335036 |
| ENSMUSG00000045509 | 5.65961481  | 11.82549314 | 10.59226572 | 3.221830688 | 6.445751277 |
| ENSMUSG00000045514 | 12.02668147 | 4.869320706 | 7.061510478 | 10.47094974 | 7.161945863 |
| ENSMUSG00000045515 | 2.122355554 | 0           | 2.118453143 | 0.805457672 | 2.864778345 |
| ENSMUSG00000045518 | 8.489422215 | 7.651789682 | 7.767661525 | 7.249119049 | 5.729556691 |
| ENSMUSG00000045521 | 14.85648888 | 11.1298759  | 14.12302096 | 9.665492065 | 14.32389173 |
| ENSMUSG00000045532 | 4.244711108 | 4.173703463 | 9.179963621 | 8.054576721 | 7.87814045  |
| ENSMUSG00000045534 | 7.074518513 | 8.347406925 | 7.767661525 | 1.610915344 | 5.729556691 |
| ENSMUSG00000045538 | 26.1757185  | 36.86771392 | 32.4829482  | 74.9075635  | 55.86317773 |
| ENSMUSG00000045539 | 9.904325918 | 7.651789682 | 3.530755239 | 5.638203705 | 6.445751277 |

|                    |             |             |             |             |             |
|--------------------|-------------|-------------|-------------|-------------|-------------|
| ENSMUSG00000045545 | 9.904325918 | 9.043024169 | 7.767661525 | 5.638203705 | 5.729556691 |
| ENSMUSG00000045551 | 9.904325918 | 11.1298759  | 6.35535943  | 7.249119049 | 7.161945863 |
| ENSMUSG00000045555 | 10.61177777 | 6.260555194 | 7.767661525 | 2.416373016 | 5.013362104 |
| ENSMUSG00000045559 | 9.904325918 | 6.260555194 | 4.943057334 | 5.638203705 | 5.729556691 |
| ENSMUSG00000045569 | 9.196874066 | 7.651789682 | 5.649208382 | 5.638203705 | 5.013362104 |
| ENSMUSG00000045573 | 7.781970364 | 6.956172438 | 6.35535943  | 4.02728836  | 6.445751277 |
| ENSMUSG00000045581 | 4.952162959 | 9.043024169 | 6.35535943  | 4.02728836  | 8.594335036 |
| ENSMUSG00000045587 | 7.781970364 | 6.956172438 | 9.179963621 | 11.27640741 | 10.02672421 |
| ENSMUSG00000045589 | 9.904325918 | 6.956172438 | 7.767661525 | 8.054576721 | 5.729556691 |
| ENSMUSG00000045591 | 7.074518513 | 5.56493795  | 6.35535943  | 9.665492065 | 9.310529622 |
| ENSMUSG00000045608 | 4.952162959 | 6.260555194 | 8.473812573 | 6.443661377 | 6.445751277 |
| ENSMUSG00000045613 | 6.367066661 | 5.56493795  | 9.886114669 | 4.832746033 | 7.161945863 |
| ENSMUSG00000045620 | 11.31922962 | 4.173703463 | 7.061510478 | 7.249119049 | 9.310529622 |
| ENSMUSG00000045625 | 4.244711108 | 8.347406925 | 12.71071886 | 8.860034393 | 3.580972932 |
| ENSMUSG00000045629 | 12.02668147 | 10.43425866 | 9.179963621 | 6.443661377 | 5.729556691 |
| ENSMUSG00000045631 | 12.02668147 | 6.260555194 | 7.061510478 | 4.02728836  | 7.87814045  |
| ENSMUSG00000045655 | 21.22355554 | 8.347406925 | 11.29841676 | 10.47094974 | 5.729556691 |
| ENSMUSG00000045657 | 9.904325918 | 6.260555194 | 9.886114669 | 1.610915344 | 5.013362104 |
| ENSMUSG00000045664 | 9.196874066 | 12.52111039 | 7.767661525 | 9.665492065 | 7.161945863 |
| ENSMUSG00000045665 | 41.73965922 | 43.82388636 | 55.07978173 | 77.32393652 | 68.75468029 |
| ENSMUSG00000045680 | 7.074518513 | 7.651789682 | 4.943057334 | 8.054576721 | 7.87814045  |
| ENSMUSG00000045689 | 7.781970364 | 8.347406925 | 7.767661525 | 3.221830688 | 3.580972932 |
| ENSMUSG00000045690 | 26.1757185  | 45.21512085 | 49.43057334 | 107.1258704 | 90.24051788 |
| ENSMUSG00000045693 | 7.781970364 | 11.1298759  | 8.473812573 | 6.443661377 | 9.310529622 |
| ENSMUSG00000045725 | 4.952162959 | 4.869320706 | 7.061510478 | 4.832746033 | 5.013362104 |
| ENSMUSG00000045730 | 150.6872443 | 180.1648661 | 161.0024389 | 80.54576721 | 71.61945863 |
| ENSMUSG00000045731 | 7.781970364 | 4.869320706 | 8.473812573 | 4.02728836  | 3.580972932 |
| ENSMUSG00000045733 | 9.904325918 | 4.173703463 | 7.061510478 | 6.443661377 | 11.45911338 |
| ENSMUSG00000045757 | 24.76081479 | 34.08524495 | 31.77679715 | 21.74735715 | 30.79636721 |
| ENSMUSG00000045763 | 5.65961481  | 6.260555194 | 4.236906287 | 10.47094974 | 7.161945863 |
| ENSMUSG00000045767 | 149.2723406 | 133.5585108 | 136.9933033 | 295.6029657 | 204.8316517 |
| ENSMUSG00000045776 | 7.074518513 | 7.651789682 | 12.00456781 | 9.665492065 | 2.864778345 |
| ENSMUSG00000045794 | 14.85648888 | 18.08604834 | 16.94762515 | 9.665492065 | 12.17530797 |
| ENSMUSG00000045797 | 3.537259256 | 5.56493795  | 1.412302096 | 0.805457672 | 5.013362104 |
| ENSMUSG00000045817 | 82.7718666  | 84.86530374 | 91.09348516 | 159.4806191 | 127.4826364 |
| ENSMUSG00000045822 | 63.67066661 | 97.38641413 | 89.68118307 | 89.4058016  | 89.52432329 |
| ENSMUSG00000045826 | 65.79302217 | 89.73462445 | 87.56272992 | 201.364418  | 166.8733386 |
| ENSMUSG00000045835 | 7.074518513 | 6.260555194 | 10.59226572 | 5.638203705 | 6.445751277 |
| ENSMUSG00000045838 | 7.074518513 | 5.56493795  | 8.473812573 | 4.832746033 | 7.87814045  |
| ENSMUSG00000045854 | 14.14903703 | 11.82549314 | 6.35535943  | 23.35827249 | 16.47247549 |
| ENSMUSG00000045871 | 7.074518513 | 6.956172438 | 8.473812573 | 4.02728836  | 5.013362104 |
| ENSMUSG00000045903 | 9.196874066 | 8.347406925 | 9.179963621 | 6.443661377 | 8.594335036 |
| ENSMUSG00000045912 | 9.196874066 | 6.956172438 | 4.943057334 | 4.832746033 | 10.02672421 |

|                    |             |             |             |             |             |
|--------------------|-------------|-------------|-------------|-------------|-------------|
| ENSMUSG00000045930 | 14.14903703 | 6.956172438 | 8.473812573 | 6.443661377 | 5.729556691 |
| ENSMUSG00000045948 | 12.73413332 | 28.52030699 | 20.47838039 | 43.49471429 | 30.79636721 |
| ENSMUSG00000045954 | 8.489422215 | 6.260555194 | 7.767661525 | 4.832746033 | 6.445751277 |
| ENSMUSG00000045968 | 12.73413332 | 6.260555194 | 5.649208382 | 5.638203705 | 5.729556691 |
| ENSMUSG00000045969 | 12.73413332 | 34.08524495 | 26.12758877 | 78.93485187 | 64.45751277 |
| ENSMUSG00000045975 | 14.85648888 | 21.56413456 | 12.71071886 | 13.69278043 | 16.47247549 |
| ENSMUSG00000045989 | 8.489422215 | 7.651789682 | 8.473812573 | 7.249119049 | 9.310529622 |
| ENSMUSG00000046000 | 8.489422215 | 8.347406925 | 4.943057334 | 3.221830688 | 6.445751277 |
| ENSMUSG00000046006 | 21.93100739 | 38.25894841 | 29.65834401 | 16.91461111 | 24.35061594 |
| ENSMUSG00000046008 | 12.73413332 | 3.478086219 | 7.767661525 | 4.02728836  | 2.864778345 |
| ENSMUSG00000046010 | 31.12788146 | 62.60555194 | 43.78136496 | 111.1531587 | 88.80812871 |
| ENSMUSG00000046031 | 13.44158517 | 18.78166558 | 10.59226572 | 7.249119049 | 12.89150255 |
| ENSMUSG00000046034 | 94.79854807 | 132.8628936 | 124.9887355 | 273.8556085 | 206.2640409 |
| ENSMUSG00000046049 | 7.074518513 | 5.56493795  | 4.943057334 | 8.860034393 | 5.013362104 |
| ENSMUSG00000046058 | 4.952162959 | 6.956172438 | 5.649208382 | 3.221830688 | 7.87814045  |
| ENSMUSG00000046062 | 157.054311  | 166.2525213 | 138.4056054 | 372.9269022 | 257.1138565 |
| ENSMUSG00000046070 | 9.904325918 | 5.56493795  | 8.473812573 | 4.832746033 | 4.297167518 |
| ENSMUSG00000046082 | 7.074518513 | 5.56493795  | 7.061510478 | 5.638203705 | 7.161945863 |
| ENSMUSG00000046093 | 2.829807405 | 7.651789682 | 9.179963621 | 4.832746033 | 7.161945863 |
| ENSMUSG00000046096 | 60.13340736 | 109.2119073 | 76.97046421 | 110.3477011 | 93.82149081 |
| ENSMUSG00000046108 | 19.80865184 | 34.08524495 | 48.7244223  | 23.35827249 | 27.21539428 |
| ENSMUSG00000046133 | 5.65961481  | 6.260555194 | 4.236906287 | 3.221830688 | 7.161945863 |
| ENSMUSG00000046139 | 46.69182218 | 83.47406925 | 86.85657888 | 118.4022778 | 106.7129934 |
| ENSMUSG00000046160 | 7.781970364 | 7.651789682 | 8.473812573 | 4.02728836  | 5.729556691 |
| ENSMUSG00000046167 | 8.489422215 | 4.173703463 | 6.35535943  | 5.638203705 | 7.87814045  |
| ENSMUSG00000046168 | 6.367066661 | 8.347406925 | 6.35535943  | 5.638203705 | 13.60769714 |
| ENSMUSG00000046173 | 4.952162959 | 4.173703463 | 6.35535943  | 6.443661377 | 5.729556691 |
| ENSMUSG00000046178 | 8.489422215 | 2.782468975 | 7.767661525 | 2.416373016 | 9.310529622 |
| ENSMUSG00000046182 | 7.781970364 | 6.956172438 | 6.35535943  | 6.443661377 | 5.729556691 |
| ENSMUSG00000046186 | 9.196874066 | 7.651789682 | 6.35535943  | 4.832746033 | 7.161945863 |
| ENSMUSG00000046191 | 4.952162959 | 12.52111039 | 9.886114669 | 6.443661377 | 7.87814045  |
| ENSMUSG00000046192 | 10.61177777 | 4.869320706 | 6.35535943  | 8.054576721 | 5.013362104 |
| ENSMUSG00000046196 | 87.72402956 | 112.6899935 | 103.804204  | 292.381135  | 189.0753708 |
| ENSMUSG00000046201 | 99.75071103 | 135.6453625 | 116.5149229 | 242.4427593 | 186.2105924 |
| ENSMUSG00000046213 | 9.196874066 | 9.738641413 | 4.943057334 | 5.638203705 | 7.161945863 |
| ENSMUSG00000046215 | 10.61177777 | 9.043024169 | 4.943057334 | 8.054576721 | 5.729556691 |
| ENSMUSG00000046229 | 28.29807405 | 50.08444155 | 36.01370344 | 105.514955  | 90.24051788 |
| ENSMUSG00000046240 | 10.61177777 | 10.43425866 | 5.649208382 | 6.443661377 | 5.729556691 |
| ENSMUSG00000046248 | 9.196874066 | 6.260555194 | 13.41686991 | 4.02728836  | 9.310529622 |
| ENSMUSG00000046258 | 6.367066661 | 6.956172438 | 5.649208382 | 5.638203705 | 4.297167518 |
| ENSMUSG00000046259 | 4.952162959 | 8.347406925 | 7.061510478 | 8.054576721 | 15.04008631 |
| ENSMUSG00000046272 | 7.074518513 | 4.869320706 | 13.41686991 | 2.416373016 | 5.013362104 |
| ENSMUSG00000046275 | 8.489422215 | 4.173703463 | 12.00456781 | 8.054576721 | 9.310529622 |

|                    |             |             |             |             |             |
|--------------------|-------------|-------------|-------------|-------------|-------------|
| ENSMUSG00000046280 | 9.196874066 | 9.043024169 | 6.35535943  | 6.443661377 | 7.87814045  |
| ENSMUSG00000046282 | 4.244711108 | 6.956172438 | 3.530755239 | 3.221830688 | 4.297167518 |
| ENSMUSG00000046287 | 4.244711108 | 1.391234488 | 0           | 0.805457672 | 3.580972932 |
| ENSMUSG00000046300 | 2.829807405 | 2.782468975 | 0.706151048 | 3.221830688 | 2.148583759 |
| ENSMUSG00000046312 | 8.489422215 | 13.21672763 | 9.179963621 | 10.47094974 | 6.445751277 |
| ENSMUSG00000046321 | 5.65961481  | 3.478086219 | 2.824604191 | 8.054576721 | 7.161945863 |
| ENSMUSG00000046323 | 6.367066661 | 7.651789682 | 4.236906287 | 3.221830688 | 0.716194586 |
| ENSMUSG00000046338 | 4.952162959 | 2.782468975 | 14.12302096 | 9.665492065 | 7.161945863 |
| ENSMUSG00000046345 | 12.73413332 | 5.56493795  | 10.59226572 | 8.054576721 | 5.729556691 |
| ENSMUSG00000046352 | 9.196874066 | 6.956172438 | 7.061510478 | 2.416373016 | 8.594335036 |
| ENSMUSG00000046380 | 20.51610369 | 19.47728283 | 18.35992724 | 40.2728836  | 42.25548059 |
| ENSMUSG00000046387 | 12.02668147 | 9.043024169 | 9.179963621 | 6.443661377 | 7.87814045  |
| ENSMUSG00000046404 | 38.90985182 | 68.17048989 | 43.78136496 | 95.84946298 | 78.7814045  |
| ENSMUSG00000046435 | 5.65961481  | 12.52111039 | 6.35535943  | 2.416373016 | 7.161945863 |
| ENSMUSG00000046438 | 8.489422215 | 4.173703463 | 7.061510478 | 4.832746033 | 6.445751277 |
| ENSMUSG00000046441 | 23.34591109 | 34.78086219 | 43.78136496 | 41.88379895 | 52.2822048  |
| ENSMUSG00000046442 | 18.39374813 | 23.65098629 | 32.4829482  | 19.33098413 | 19.33725383 |
| ENSMUSG00000046447 | 4.244711108 | 4.869320706 | 9.179963621 | 7.249119049 | 3.580972932 |
| ENSMUSG00000046450 | 8.489422215 | 5.56493795  | 7.061510478 | 6.443661377 | 12.17530797 |
| ENSMUSG00000046470 | 7.781970364 | 5.56493795  | 7.767661525 | 7.249119049 | 6.445751277 |
| ENSMUSG00000046474 | 6.367066661 | 5.56493795  | 6.35535943  | 4.832746033 | 6.445751277 |
| ENSMUSG00000046480 | 9.904325918 | 5.56493795  | 10.59226572 | 6.443661377 | 10.7429188  |
| ENSMUSG00000046490 | 8.489422215 | 6.956172438 | 8.473812573 | 4.832746033 | 9.310529622 |
| ENSMUSG00000046493 | 12.73413332 | 6.260555194 | 14.829172   | 9.665492065 | 1.432389173 |
| ENSMUSG00000046500 | 9.196874066 | 6.260555194 | 3.530755239 | 5.638203705 | 7.87814045  |
| ENSMUSG00000046518 | 13.44158517 | 6.956172438 | 4.943057334 | 3.221830688 | 6.445751277 |
| ENSMUSG00000046523 | 31.12788146 | 62.60555194 | 56.49208382 | 72.49119049 | 65.88990194 |
| ENSMUSG00000046532 | 6.367066661 | 1.391234488 | 2.824604191 | 2.416373016 | 0.716194586 |
| ENSMUSG00000046541 | 58.71850365 | 102.9513521 | 96.0365425  | 94.23854763 | 85.94335036 |
| ENSMUSG00000046546 | 65.08557032 | 73.0398106  | 69.90895373 | 97.46037832 | 100.2672421 |
| ENSMUSG00000046550 | 3.537259256 | 2.782468975 | 2.118453143 | 1.610915344 | 2.148583759 |
| ENSMUSG00000046556 | 41.73965922 | 37.56333116 | 50.13672439 | 53.96566403 | 52.99839939 |
| ENSMUSG00000046561 | 7.074518513 | 8.347406925 | 8.473812573 | 4.832746033 | 5.013362104 |
| ENSMUSG00000046562 | 19.10119998 | 30.60715873 | 36.71985448 | 43.49471429 | 35.09353473 |
| ENSMUSG00000046573 | 29.71297775 | 54.95376226 | 40.95676077 | 41.88379895 | 49.41742646 |
| ENSMUSG00000046585 | 6.367066661 | 6.956172438 | 6.35535943  | 5.638203705 | 10.02672421 |
| ENSMUSG00000046589 | 7.781970364 | 4.869320706 | 9.179963621 | 4.02728836  | 7.87814045  |
| ENSMUSG00000046593 | 10.61177777 | 9.043024169 | 4.943057334 | 2.416373016 | 8.594335036 |
| ENSMUSG00000046607 | 4.244711108 | 5.56493795  | 2.824604191 | 4.02728836  | 7.161945863 |
| ENSMUSG00000046615 | 4.952162959 | 5.56493795  | 6.35535943  | 0           | 4.297167518 |
| ENSMUSG00000046618 | 7.781970364 | 6.260555194 | 12.00456781 | 4.832746033 | 7.87814045  |
| ENSMUSG00000046623 | 4.952162959 | 2.782468975 | 8.473812573 | 8.054576721 | 2.864778345 |
| ENSMUSG00000046637 | 9.904325918 | 5.56493795  | 4.943057334 | 7.249119049 | 5.013362104 |

|                    |             |             |             |             |             |
|--------------------|-------------|-------------|-------------|-------------|-------------|
| ENSMUSG00000046668 | 60.13340736 | 76.51789682 | 80.50121945 | 31.41284921 | 34.37734014 |
| ENSMUSG00000046675 | 27.5906222  | 43.12826911 | 50.13672439 | 82.15668255 | 81.64618284 |
| ENSMUSG00000046676 | 5.65961481  | 9.043024169 | 6.35535943  | 3.221830688 | 7.161945863 |
| ENSMUSG00000046678 | 11.31922962 | 4.173703463 | 11.29841676 | 4.832746033 | 7.161945863 |
| ENSMUSG00000046687 | 3.537259256 | 10.43425866 | 9.886114669 | 3.221830688 | 7.161945863 |
| ENSMUSG00000046694 | 3.537259256 | 5.56493795  | 8.473812573 | 4.832746033 | 7.161945863 |
| ENSMUSG00000046707 | 55.1812444  | 73.73542784 | 82.61967259 | 94.23854763 | 96.68626916 |
| ENSMUSG00000046714 | 8.489422215 | 11.1298759  | 4.236906287 | 6.443661377 | 7.161945863 |
| ENSMUSG00000046716 | 5.65961481  | 3.478086219 | 6.35535943  | 2.416373016 | 4.297167518 |
| ENSMUSG00000046718 | 14.14903703 | 26.43345526 | 27.53989086 | 86.98942859 | 59.44415067 |
| ENSMUSG00000046719 | 11.31922962 | 6.956172438 | 7.061510478 | 8.054576721 | 4.297167518 |
| ENSMUSG00000046723 | 9.904325918 | 4.173703463 | 7.767661525 | 8.054576721 | 2.148583759 |
| ENSMUSG00000046731 | 8.489422215 | 9.738641413 | 7.767661525 | 9.665492065 | 16.47247549 |
| ENSMUSG00000046733 | 4.952162959 | 6.260555194 | 12.00456781 | 8.860034393 | 5.729556691 |
| ENSMUSG00000046743 | 11.31922962 | 4.869320706 | 4.236906287 | 6.443661377 | 5.729556691 |
| ENSMUSG00000046748 | 11.31922962 | 5.56493795  | 9.179963621 | 6.443661377 | 6.445751277 |
| ENSMUSG00000046755 | 9.904325918 | 3.478086219 | 7.061510478 | 4.02728836  | 6.445751277 |
| ENSMUSG00000046785 | 45.27691848 | 63.30116918 | 73.43970897 | 186.0607223 | 151.8332523 |
| ENSMUSG00000046791 | 14.85648888 | 37.56333116 | 36.01370344 | 99.87675134 | 73.76804239 |
| ENSMUSG00000046792 | 55.88869625 | 73.73542784 | 67.08434954 | 120.0131931 | 94.5376854  |
| ENSMUSG00000046793 | 7.781970364 | 8.347406925 | 9.179963621 | 7.249119049 | 6.445751277 |
| ENSMUSG00000046794 | 4.952162959 | 5.56493795  | 4.943057334 | 3.221830688 | 6.445751277 |
| ENSMUSG00000046805 | 29.71297775 | 38.95456565 | 34.60140134 | 165.1188228 | 88.09193412 |
| ENSMUSG00000046811 | 10.61177777 | 11.1298759  | 9.179963621 | 7.249119049 | 9.310529622 |
| ENSMUSG00000046814 | 8.489422215 | 3.478086219 | 7.061510478 | 4.02728836  | 3.580972932 |
| ENSMUSG00000046818 | 5.65961481  | 6.260555194 | 2.118453143 | 4.02728836  | 4.297167518 |
| ENSMUSG00000046826 | 10.61177777 | 9.043024169 | 12.00456781 | 4.832746033 | 8.594335036 |
| ENSMUSG00000046828 | 5.65961481  | 7.651789682 | 7.061510478 | 5.638203705 | 7.161945863 |
| ENSMUSG00000046834 | 6.367066661 | 7.651789682 | 2.118453143 | 6.443661377 | 9.310529622 |
| ENSMUSG00000046841 | 16.27139258 | 22.95536904 | 23.30298458 | 37.05105292 | 32.94495097 |
| ENSMUSG00000046844 | 7.781970364 | 3.478086219 | 7.061510478 | 7.249119049 | 3.580972932 |
| ENSMUSG00000046845 | 9.196874066 | 9.043024169 | 4.943057334 | 3.221830688 | 5.013362104 |
| ENSMUSG00000046846 | 9.904325918 | 11.1298759  | 9.886114669 | 7.249119049 | 7.87814045  |
| ENSMUSG00000046861 | 21.93100739 | 33.3896277  | 28.24604191 | 12.08186508 | 29.36397804 |
| ENSMUSG00000046865 | 54.47379255 | 82.08283477 | 70.61510478 | 272.2446932 | 209.1288192 |
| ENSMUSG00000046879 | 92.67619252 | 127.9935729 | 112.2780166 | 364.0668678 | 223.4527109 |
| ENSMUSG00000046886 | 12.02668147 | 16.69481385 | 10.59226572 | 4.02728836  | 7.87814045  |
| ENSMUSG00000046899 | 7.074518513 | 9.043024169 | 6.35535943  | 4.02728836  | 4.297167518 |
| ENSMUSG00000046908 | 14.14903703 | 10.43425866 | 5.649208382 | 4.832746033 | 6.445751277 |
| ENSMUSG00000046909 | 19.10119998 | 23.65098629 | 28.24604191 | 41.88379895 | 49.41742646 |
| ENSMUSG00000046916 | 9.904325918 | 6.260555194 | 8.473812573 | 4.832746033 | 5.729556691 |
| ENSMUSG00000046922 | 4.952162959 | 6.956172438 | 11.29841676 | 4.832746033 | 2.148583759 |
| ENSMUSG00000046934 | 7.781970364 | 6.260555194 | 9.886114669 | 6.443661377 | 4.297167518 |

|                    |             |             |             |             |             |
|--------------------|-------------|-------------|-------------|-------------|-------------|
| ENSMUSG00000046957 | 9.904325918 | 6.260555194 | 12.00456781 | 4.832746033 | 13.60769714 |
| ENSMUSG00000046961 | 12.73413332 | 9.738641413 | 9.179963621 | 3.221830688 | 2.864778345 |
| ENSMUSG00000046971 | 12.73413332 | 6.956172438 | 10.59226572 | 10.47094974 | 8.594335036 |
| ENSMUSG00000046974 | 12.02668147 | 9.738641413 | 14.829172   | 7.249119049 | 7.161945863 |
| ENSMUSG00000046994 | 30.4204296  | 47.99758982 | 42.36906287 | 115.9859048 | 91.67290705 |
| ENSMUSG00000046997 | 9.196874066 | 6.260555194 | 7.061510478 | 10.47094974 | 2.864778345 |
| ENSMUSG00000046999 | 7.781970364 | 9.043024169 | 9.179963621 | 64.43661377 | 33.66114556 |
| ENSMUSG00000047014 | 7.781970364 | 6.956172438 | 8.473812573 | 9.665492065 | 7.161945863 |
| ENSMUSG00000047025 | 5.65961481  | 4.869320706 | 6.35535943  | 4.02728836  | 5.729556691 |
| ENSMUSG00000047026 | 7.781970364 | 8.347406925 | 7.061510478 | 10.47094974 | 12.17530797 |
| ENSMUSG00000047033 | 10.61177777 | 9.738641413 | 12.00456781 | 7.249119049 | 5.729556691 |
| ENSMUSG00000047034 | 10.61177777 | 9.738641413 | 8.473812573 | 7.249119049 | 6.445751277 |
| ENSMUSG00000047037 | 7.074518513 | 6.956172438 | 5.649208382 | 4.832746033 | 7.161945863 |
| ENSMUSG00000047040 | 6.367066661 | 6.956172438 | 12.71071886 | 5.638203705 | 5.729556691 |
| ENSMUSG00000047044 | 53.7663407  | 63.99678643 | 76.97046421 | 153.0369577 | 114.5911338 |
| ENSMUSG00000047053 | 8.489422215 | 7.651789682 | 7.061510478 | 4.02728836  | 5.013362104 |
| ENSMUSG00000047067 | 12.73413332 | 18.78166558 | 19.77222934 | 14.4982381  | 20.769643   |
| ENSMUSG00000047079 | 5.65961481  | 4.173703463 | 1.412302096 | 2.416373016 | 2.148583759 |
| ENSMUSG00000047084 | 41.03220737 | 54.95376226 | 50.84287544 | 90.21125927 | 83.07857202 |
| ENSMUSG00000047094 | 9.904325918 | 8.347406925 | 4.943057334 | 6.443661377 | 5.729556691 |
| ENSMUSG00000047108 | 33.25023701 | 57.73623123 | 54.37363068 | 43.49471429 | 56.57937232 |
| ENSMUSG00000047123 | 36.08004441 | 68.17048989 | 53.66747963 | 178.8116032 | 129.6312201 |
| ENSMUSG00000047139 | 138.6605628 | 125.2111039 | 143.3486627 | 95.04400531 | 81.64618284 |
| ENSMUSG00000047141 | 14.14903703 | 9.738641413 | 11.29841676 | 4.832746033 | 7.87814045  |
| ENSMUSG00000047143 | 5.65961481  | 5.56493795  | 1.412302096 | 6.443661377 | 4.297167518 |
| ENSMUSG00000047150 | 9.904325918 | 4.869320706 | 5.649208382 | 2.416373016 | 11.45911338 |
| ENSMUSG00000047153 | 18.39374813 | 25.04222078 | 28.95219296 | 39.46742593 | 32.94495097 |
| ENSMUSG00000047171 | 7.781970364 | 5.56493795  | 7.061510478 | 5.638203705 | 3.580972932 |
| ENSMUSG00000047180 | 63.67066661 | 76.51789682 | 79.08891735 | 45.91108731 | 58.01176149 |
| ENSMUSG00000047182 | 6.367066661 | 11.1298759  | 15.53532305 | 7.249119049 | 10.02672421 |
| ENSMUSG00000047187 | 84.89422215 | 111.298759  | 96.0365425  | 136.9278043 | 93.82149081 |
| ENSMUSG00000047207 | 9.196874066 | 11.1298759  | 12.71071886 | 11.27640741 | 6.445751277 |
| ENSMUSG00000047216 | 10.61177777 | 4.869320706 | 5.649208382 | 5.638203705 | 4.297167518 |
| ENSMUSG00000047220 | 3.537259256 | 4.869320706 | 2.118453143 | 4.832746033 | 2.148583759 |
| ENSMUSG00000047221 | 13.44158517 | 23.65098629 | 32.4829482  | 46.71654498 | 25.78300511 |
| ENSMUSG00000047222 | 12.73413332 | 6.260555194 | 7.767661525 | 4.832746033 | 11.45911338 |
| ENSMUSG00000047227 | 7.074518513 | 11.1298759  | 12.00456781 | 6.443661377 | 10.7429188  |
| ENSMUSG00000047228 | 9.904325918 | 10.43425866 | 7.767661525 | 11.27640741 | 4.297167518 |
| ENSMUSG00000047230 | 4.244711108 | 4.869320706 | 0.706151048 | 7.249119049 | 3.580972932 |
| ENSMUSG00000047238 | 2.829807405 | 2.782468975 | 4.943057334 | 1.610915344 | 0.716194586 |
| ENSMUSG00000047246 | 0           | 0           | 0           | 0           | 0           |
| ENSMUSG00000047253 | 6.367066661 | 4.173703463 | 4.236906287 | 0.805457672 | 3.580972932 |
| ENSMUSG00000047259 | 8.489422215 | 10.43425866 | 5.649208382 | 4.02728836  | 4.297167518 |



|                    |             |             |             |             |             |
|--------------------|-------------|-------------|-------------|-------------|-------------|
| ENSMUSG00000047260 | 85.601674   | 109.2119073 | 103.098053  | 163.5079074 | 144.6713064 |
| ENSMUSG00000047261 | 10.61177777 | 4.869320706 | 9.179963621 | 5.638203705 | 5.013362104 |
| ENSMUSG00000047264 | 9.196874066 | 21.56413456 | 13.41686991 | 8.860034393 | 10.7429188  |
| ENSMUSG00000047281 | 10.61177777 | 11.1298759  | 15.53532305 | 16.91461111 | 10.02672421 |
| ENSMUSG00000047286 | 9.904325918 | 9.738641413 | 4.943057334 | 2.416373016 | 10.7429188  |
| ENSMUSG00000047298 | 9.196874066 | 7.651789682 | 7.767661525 | 5.638203705 | 4.297167518 |
| ENSMUSG00000047307 | 12.73413332 | 5.56493795  | 4.943057334 | 5.638203705 | 7.161945863 |
| ENSMUSG00000047330 | 7.074518513 | 4.869320706 | 5.649208382 | 1.610915344 | 9.310529622 |
| ENSMUSG00000047343 | 4.244711108 | 5.56493795  | 2.118453143 | 0.805457672 | 2.864778345 |
| ENSMUSG00000047344 | 1.414903703 | 3.478086219 | 0.706151048 | 4.02728836  | 5.013362104 |
| ENSMUSG00000047352 | 10.61177777 | 4.173703463 | 10.59226572 | 7.249119049 | 9.310529622 |
| ENSMUSG00000047356 | 6.367066661 | 6.260555194 | 7.061510478 | 2.416373016 | 10.7429188  |
| ENSMUSG00000047363 | 14.14903703 | 14.60796212 | 16.2414741  | 17.72006879 | 17.90486466 |
| ENSMUSG00000047368 | 163.4213776 | 236.5098629 | 175.1254598 | 327.0158149 | 245.6547431 |
| ENSMUSG00000047371 | 2.122355554 | 4.869320706 | 11.29841676 | 6.443661377 | 10.02672421 |
| ENSMUSG00000047379 | 5.65961481  | 12.52111039 | 13.41686991 | 4.02728836  | 9.310529622 |
| ENSMUSG00000047390 | 12.02668147 | 3.478086219 | 5.649208382 | 10.47094974 | 4.297167518 |
| ENSMUSG00000047394 | 2.122355554 | 2.086851731 | 2.118453143 | 1.610915344 | 4.297167518 |
| ENSMUSG00000047414 | 4.952162959 | 4.869320706 | 4.943057334 | 3.221830688 | 5.729556691 |
| ENSMUSG00000047419 | 6.367066661 | 13.21672763 | 7.061510478 | 8.860034393 | 4.297167518 |
| ENSMUSG00000047420 | 5.65961481  | 5.56493795  | 4.236906287 | 1.610915344 | 7.161945863 |
| ENSMUSG00000047423 | 48.81417774 | 64.69240367 | 79.7950684  | 98.265836   | 71.61945863 |
| ENSMUSG00000047441 | 9.904325918 | 8.347406925 | 9.886114669 | 7.249119049 | 6.445751277 |
| ENSMUSG00000047466 | 112.4848444 | 148.8620902 | 134.1686991 | 159.4806191 | 134.6445822 |
| ENSMUSG00000047492 | 5.65961481  | 9.738641413 | 11.29841676 | 8.860034393 | 8.594335036 |
| ENSMUSG00000047496 | 5.65961481  | 4.869320706 | 5.649208382 | 3.221830688 | 6.445751277 |
| ENSMUSG00000047497 | 5.65961481  | 6.260555194 | 9.179963621 | 5.638203705 | 6.445751277 |
| ENSMUSG00000047501 | 7.781970364 | 4.869320706 | 9.179963621 | 4.02728836  | 7.161945863 |
| ENSMUSG00000047508 | 5.65961481  | 3.478086219 | 9.179963621 | 5.638203705 | 11.45911338 |
| ENSMUSG00000047511 | 15.56394073 | 6.956172438 | 7.061510478 | 13.69278043 | 10.02672421 |
| ENSMUSG00000047514 | 132.2934962 | 187.8166558 | 160.2962878 | 136.9278043 | 121.0368851 |
| ENSMUSG00000047515 | 41.03220737 | 55.6493795  | 54.37363068 | 107.1258704 | 91.67290705 |
| ENSMUSG00000047518 | 5.65961481  | 8.347406925 | 11.29841676 | 3.221830688 | 5.013362104 |
| ENSMUSG00000047531 | 7.074518513 | 2.782468975 | 6.35535943  | 4.832746033 | 6.445751277 |
| ENSMUSG00000047539 | 29.71297775 | 67.47487265 | 54.37363068 | 54.7711217  | 72.33565322 |
| ENSMUSG00000047557 | 14.14903703 | 18.08604834 | 23.30298458 | 13.69278043 | 26.49919969 |
| ENSMUSG00000047562 | 2.829807405 | 4.173703463 | 8.473812573 | 6.443661377 | 9.310529622 |
| ENSMUSG00000047564 | 7.074518513 | 6.260555194 | 5.649208382 | 8.860034393 | 3.580972932 |
| ENSMUSG00000047565 | 3.537259256 | 8.347406925 | 3.530755239 | 4.832746033 | 3.580972932 |
| ENSMUSG00000047583 | 12.02668147 | 16.69481385 | 14.829172   | 11.27640741 | 13.60769714 |
| ENSMUSG00000047586 | 5.65961481  | 5.56493795  | 11.29841676 | 5.638203705 | 3.580972932 |
| ENSMUSG00000047603 | 16.27139258 | 27.12907251 | 24.71528667 | 20.94189947 | 17.90486466 |
| ENSMUSG00000047604 | 16.27139258 | 24.34660353 | 31.0706461  | 7.249119049 | 15.7562809  |

|                    |             |             |             |             |             |
|--------------------|-------------|-------------|-------------|-------------|-------------|
| ENSMUSG00000047606 | 7.074518513 | 6.956172438 | 9.886114669 | 4.02728836  | 5.013362104 |
| ENSMUSG00000047619 | 12.02668147 | 9.043024169 | 11.29841676 | 6.443661377 | 4.297167518 |
| ENSMUSG00000047631 | 8.489422215 | 12.52111039 | 10.59226572 | 5.638203705 | 12.17530797 |
| ENSMUSG00000047635 | 29.0055259  | 48.69320706 | 38.83830763 | 80.54576721 | 83.7947666  |
| ENSMUSG00000047636 | 5.65961481  | 3.478086219 | 7.061510478 | 8.860034393 | 9.310529622 |
| ENSMUSG00000047641 | 6.367066661 | 4.869320706 | 6.35535943  | 4.02728836  | 10.02672421 |
| ENSMUSG00000047649 | 6.367066661 | 18.08604834 | 14.829172   | 39.46742593 | 25.78300511 |
| ENSMUSG00000047654 | 40.32475552 | 79.30036579 | 60.02283906 | 67.65844446 | 72.33565322 |
| ENSMUSG00000047656 | 10.61177777 | 9.043024169 | 16.2414741  | 13.69278043 | 13.60769714 |
| ENSMUSG00000047658 | 15.56394073 | 15.30357936 | 21.18453143 | 8.054576721 | 8.594335036 |
| ENSMUSG00000047667 | 7.074518513 | 6.956172438 | 7.767661525 | 4.832746033 | 5.013362104 |
| ENSMUSG00000047669 | 6.367066661 | 12.52111039 | 10.59226572 | 3.221830688 | 2.864778345 |
| ENSMUSG00000047671 | 7.074518513 | 8.347406925 | 4.943057334 | 19.33098413 | 22.91822676 |
| ENSMUSG00000047674 | 14.14903703 | 8.347406925 | 11.29841676 | 4.02728836  | 7.87814045  |
| ENSMUSG00000047678 | 4.244711108 | 5.56493795  | 4.943057334 | 4.832746033 | 4.297167518 |
| ENSMUSG00000047686 | 2.829807405 | 4.869320706 | 2.824604191 | 4.832746033 | 2.148583759 |
| ENSMUSG00000047710 | 45.27691848 | 61.9099347  | 55.07978173 | 106.3204127 | 92.38910164 |
| ENSMUSG00000047712 | 4.952162959 | 4.173703463 | 9.886114669 | 4.02728836  | 6.445751277 |
| ENSMUSG00000047719 | 6.367066661 | 13.91234488 | 7.767661525 | 6.443661377 | 11.45911338 |
| ENSMUSG00000047720 | 9.196874066 | 6.260555194 | 3.530755239 | 8.054576721 | 12.17530797 |
| ENSMUSG00000047721 | 24.76081479 | 39.6501829  | 38.83830763 | 127.2623122 | 85.94335036 |
| ENSMUSG00000047749 | 7.781970364 | 5.56493795  | 9.179963621 | 4.832746033 | 10.02672421 |
| ENSMUSG00000047751 | 7.781970364 | 4.173703463 | 9.179963621 | 6.443661377 | 4.297167518 |
| ENSMUSG00000047759 | 4.244711108 | 9.738641413 | 4.236906287 | 3.221830688 | 5.729556691 |
| ENSMUSG00000047777 | 16.97884443 | 15.30357936 | 21.89068248 | 18.52552646 | 15.7562809  |
| ENSMUSG00000047787 | 4.244711108 | 11.1298759  | 8.473812573 | 4.832746033 | 13.60769714 |
| ENSMUSG00000047789 | 30.4204296  | 52.17129328 | 48.7244223  | 30.60739154 | 36.5259239  |
| ENSMUSG00000047794 | 10.61177777 | 4.173703463 | 9.886114669 | 6.443661377 | 4.297167518 |
| ENSMUSG00000047810 | 17.68629628 | 30.60715873 | 28.95219296 | 43.49471429 | 37.24211849 |
| ENSMUSG00000047819 | 7.074518513 | 9.738641413 | 11.29841676 | 3.221830688 | 3.580972932 |
| ENSMUSG00000047822 | 12.02668147 | 2.782468975 | 6.35535943  | 5.638203705 | 12.89150255 |
| ENSMUSG00000047832 | 60.84085921 | 86.95215547 | 70.61510478 | 323.7939842 | 233.4794351 |
| ENSMUSG00000047841 | 4.952162959 | 16.69481385 | 14.829172   | 4.832746033 | 9.310529622 |
| ENSMUSG00000047842 | 11.31922962 | 22.95536904 | 16.2414741  | 8.054576721 | 15.04008631 |
| ENSMUSG00000047844 | 2.122355554 | 2.782468975 | 4.943057334 | 3.221830688 | 3.580972932 |
| ENSMUSG00000047854 | 12.02668147 | 5.56493795  | 10.59226572 | 4.832746033 | 7.87814045  |
| ENSMUSG00000047861 | 10.61177777 | 12.52111039 | 12.00456781 | 8.860034393 | 6.445751277 |
| ENSMUSG00000047875 | 5.65961481  | 6.956172438 | 2.824604191 | 18.52552646 | 12.89150255 |
| ENSMUSG00000047884 | 7.781970364 | 3.478086219 | 9.179963621 | 8.054576721 | 5.013362104 |
| ENSMUSG00000047888 | 53.7663407  | 91.12585893 | 83.32582364 | 46.71654498 | 55.86317773 |
| ENSMUSG00000047889 | 12.73413332 | 4.869320706 | 8.473812573 | 4.02728836  | 7.87814045  |
| ENSMUSG00000047898 | 11.31922962 | 3.478086219 | 6.35535943  | 12.08186508 | 10.7429188  |
| ENSMUSG00000047904 | 6.367066661 | 4.173703463 | 6.35535943  | 5.638203705 | 8.594335036 |

|                    |             |             |             |             |             |
|--------------------|-------------|-------------|-------------|-------------|-------------|
| ENSMUSG00000047910 | 16.97884443 | 7.651789682 | 6.35535943  | 5.638203705 | 7.87814045  |
| ENSMUSG00000047911 | 33.95768886 | 34.08524495 | 22.59683353 | 35.44013757 | 32.22875639 |
| ENSMUSG00000047945 | 13.44158517 | 18.08604834 | 20.47838039 | 62.02024075 | 58.72795608 |
| ENSMUSG00000047953 | 8.489422215 | 6.956172438 | 9.179963621 | 6.443661377 | 5.729556691 |
| ENSMUSG00000047959 | 19.10119998 | 36.86771392 | 35.30755239 | 46.71654498 | 33.66114556 |
| ENSMUSG00000047960 | 3.537259256 | 6.956172438 | 2.824604191 | 3.221830688 | 4.297167518 |
| ENSMUSG00000047963 | 3.537259256 | 3.478086219 | 4.943057334 | 4.832746033 | 10.02672421 |
| ENSMUSG00000047976 | 12.73413332 | 4.869320706 | 4.236906287 | 4.832746033 | 7.161945863 |
| ENSMUSG00000047977 | 7.074518513 | 7.651789682 | 13.41686991 | 8.860034393 | 6.445751277 |
| ENSMUSG00000047980 | 9.196874066 | 4.869320706 | 5.649208382 | 4.02728836  | 7.87814045  |
| ENSMUSG00000047988 | 3.537259256 | 5.56493795  | 4.943057334 | 8.054576721 | 5.013362104 |
| ENSMUSG00000047990 | 9.196874066 | 4.173703463 | 3.530755239 | 10.47094974 | 6.445751277 |
| ENSMUSG00000047995 | 4.952162959 | 4.869320706 | 5.649208382 | 4.02728836  | 7.87814045  |
| ENSMUSG00000048001 | 19.80865184 | 29.91154148 | 24.71528667 | 53.96566403 | 41.53928601 |
| ENSMUSG00000048007 | 12.02668147 | 27.12907251 | 18.35992724 | 64.43661377 | 55.86317773 |
| ENSMUSG00000048013 | 9.196874066 | 3.478086219 | 8.473812573 | 5.638203705 | 8.594335036 |
| ENSMUSG00000048015 | 6.367066661 | 7.651789682 | 8.473812573 | 3.221830688 | 6.445751277 |
| ENSMUSG00000048027 | 14.14903703 | 22.2597518  | 15.53532305 | 29.80193387 | 27.21539428 |
| ENSMUSG00000048038 | 11.31922962 | 3.478086219 | 9.179963621 | 9.665492065 | 7.87814045  |
| ENSMUSG00000048039 | 90.55383696 | 123.8198694 | 121.4579802 | 268.2174048 | 206.2640409 |
| ENSMUSG00000048040 | 1.414903703 | 5.56493795  | 3.530755239 | 3.221830688 | 5.013362104 |
| ENSMUSG00000048047 | 58.71850365 | 90.43024169 | 67.08434954 | 117.5968201 | 91.67290705 |
| ENSMUSG00000048065 | 8.489422215 | 8.347406925 | 8.473812573 | 5.638203705 | 10.02672421 |
| ENSMUSG00000048067 | 7.781970364 | 9.738641413 | 6.35535943  | 5.638203705 | 10.02672421 |
| ENSMUSG00000048070 | 6.367066661 | 6.260555194 | 4.236906287 | 4.832746033 | 7.161945863 |
| ENSMUSG00000048077 | 7.781970364 | 4.173703463 | 5.649208382 | 6.443661377 | 5.013362104 |
| ENSMUSG00000048087 | 9.904325918 | 9.738641413 | 7.061510478 | 6.443661377 | 8.594335036 |
| ENSMUSG00000048096 | 11.31922962 | 6.260555194 | 9.886114669 | 7.249119049 | 8.594335036 |
| ENSMUSG00000048101 | 9.904325918 | 12.52111039 | 7.767661525 | 4.832746033 | 3.580972932 |
| ENSMUSG00000048138 | 4.952162959 | 11.82549314 | 8.473812573 | 0.805457672 | 5.729556691 |
| ENSMUSG00000048142 | 7.074518513 | 6.260555194 | 4.943057334 | 7.249119049 | 10.02672421 |
| ENSMUSG00000048153 | 12.73413332 | 6.260555194 | 7.767661525 | 8.054576721 | 6.445751277 |
| ENSMUSG00000048155 | 2.829807405 | 2.782468975 | 1.412302096 | 0.805457672 | 1.432389173 |
| ENSMUSG00000048174 | 9.196874066 | 10.43425866 | 12.00456781 | 10.47094974 | 12.17530797 |
| ENSMUSG00000048206 | 7.781970364 | 3.478086219 | 5.649208382 | 2.416373016 | 6.445751277 |
| ENSMUSG00000048218 | 24.76081479 | 42.43265187 | 36.71985448 | 119.2077355 | 98.83485292 |
| ENSMUSG00000048222 | 89.13893326 | 127.9935729 | 130.6379438 | 112.7640741 | 108.8615771 |
| ENSMUSG00000048230 | 12.02668147 | 7.651789682 | 4.236906287 | 4.832746033 | 5.729556691 |
| ENSMUSG00000048236 | 2.829807405 | 5.56493795  | 5.649208382 | 3.221830688 | 6.445751277 |
| ENSMUSG00000048281 | 9.196874066 | 5.56493795  | 4.943057334 | 4.832746033 | 5.013362104 |
| ENSMUSG00000048285 | 4.244711108 | 20.86851731 | 9.179963621 | 11.27640741 | 15.7562809  |
| ENSMUSG00000048294 | 9.196874066 | 5.56493795  | 5.649208382 | 4.02728836  | 7.87814045  |
| ENSMUSG00000048299 | 7.781970364 | 5.56493795  | 7.767661525 | 4.832746033 | 5.729556691 |

|                    |              |             |             |             |             |
|--------------------|--------------|-------------|-------------|-------------|-------------|
| ENSMUSG00000048304 | 9.904325918  | 6.260555194 | 7.061510478 | 3.221830688 | 3.580972932 |
| ENSMUSG00000048307 | 18.39374813  | 38.95456565 | 24.71528667 | 22.55281482 | 26.49919969 |
| ENSMUSG00000048310 | 36.78749627  | 63.99678643 | 51.54902649 | 44.30017197 | 48.70123187 |
| ENSMUSG00000048312 | 7.781970364  | 6.956172438 | 11.29841676 | 7.249119049 | 6.445751277 |
| ENSMUSG00000048327 | 38.20239997  | 41.73703463 | 28.95219296 | 58.79841006 | 48.70123187 |
| ENSMUSG00000048329 | 9.196874066  | 6.260555194 | 8.473812573 | 6.443661377 | 3.580972932 |
| ENSMUSG00000048337 | 10.61177777  | 4.869320706 | 5.649208382 | 6.443661377 | 2.864778345 |
| ENSMUSG00000048347 | 8.489422215  | 5.56493795  | 5.649208382 | 3.221830688 | 6.445751277 |
| ENSMUSG00000048349 | 7.074518513  | 6.260555194 | 9.179963621 | 8.054576721 | 4.297167518 |
| ENSMUSG00000048355 | 4.952162959  | 11.1298759  | 3.530755239 | 2.416373016 | 0           |
| ENSMUSG00000048356 | 7.781970364  | 6.956172438 | 1.412302096 | 4.02728836  | 10.7429188  |
| ENSMUSG00000048368 | 2.122355554  | 6.956172438 | 9.179963621 | 5.638203705 | 8.594335036 |
| ENSMUSG00000048371 | 26.88317035  | 31.99839321 | 23.30298458 | 53.96566403 | 46.55264811 |
| ENSMUSG00000048373 | 12.02668147  | 10.43425866 | 6.35535943  | 7.249119049 | 5.013362104 |
| ENSMUSG00000048376 | 4.952162959  | 6.260555194 | 7.767661525 | 5.638203705 | 7.161945863 |
| ENSMUSG00000048377 | 5.65961481   | 4.173703463 | 6.35535943  | 8.860034393 | 6.445751277 |
| ENSMUSG00000048379 | 128.7562369  | 148.8620902 | 141.2302096 | 252.913709  | 192.6563437 |
| ENSMUSG00000048385 | 9.904325918  | 6.260555194 | 5.649208382 | 7.249119049 | 8.594335036 |
| ENSMUSG00000048387 | 9.196874066  | 12.52111039 | 7.061510478 | 4.832746033 | 4.297167518 |
| ENSMUSG00000048388 | 6.367066661  | 6.260555194 | 8.473812573 | 7.249119049 | 10.7429188  |
| ENSMUSG00000048391 | 8.489422215  | 5.56493795  | 6.35535943  | 8.054576721 | 6.445751277 |
| ENSMUSG00000048398 | 12.02668147  | 9.043024169 | 2.824604191 | 5.638203705 | 7.87814045  |
| ENSMUSG00000048399 | 5.65961481   | 6.956172438 | 2.118453143 | 4.832746033 | 8.594335036 |
| ENSMUSG00000048411 | 10.61177777  | 10.43425866 | 6.35535943  | 8.054576721 | 4.297167518 |
| ENSMUSG00000048425 | 7.074518513  | 9.043024169 | 8.473812573 | 4.832746033 | 4.297167518 |
| ENSMUSG00000048445 | 12.02668147  | 13.91234488 | 14.12302096 | 15.30369577 | 7.161945863 |
| ENSMUSG00000048455 | 8.489422215  | 6.956172438 | 9.179963621 | 4.02728836  | 5.013362104 |
| ENSMUSG00000048458 | 11.31922962  | 11.1298759  | 7.767661525 | 18.52552646 | 17.90486466 |
| ENSMUSG00000048478 | 42.447111108 | 60.51870021 | 64.96589639 | 66.04752911 | 63.0251236  |
| ENSMUSG00000048480 | 4.952162959  | 7.651789682 | 7.767661525 | 4.832746033 | 8.594335036 |
| ENSMUSG00000048486 | 14.85648888  | 26.43345526 | 22.59683353 | 24.16373016 | 31.5125618  |
| ENSMUSG00000048498 | 7.781970364  | 7.651789682 | 2.824604191 | 5.638203705 | 10.02672421 |
| ENSMUSG00000048500 | 11.31922962  | 9.738641413 | 5.649208382 | 1.610915344 | 2.864778345 |
| ENSMUSG00000048501 | 6.367066661  | 2.782468975 | 5.649208382 | 2.416373016 | 3.580972932 |
| ENSMUSG00000048503 | 12.02668147  | 9.738641413 | 11.29841676 | 5.638203705 | 10.02672421 |
| ENSMUSG00000048516 | 4.952162959  | 8.347406925 | 4.943057334 | 4.832746033 | 6.445751277 |
| ENSMUSG00000048521 | 16.27139258  | 18.08604834 | 16.94762515 | 6.443661377 | 11.45911338 |
| ENSMUSG00000048528 | 6.367066661  | 4.869320706 | 7.767661525 | 6.443661377 | 9.310529622 |
| ENSMUSG00000048534 | 27.5906222   | 41.04141738 | 25.42143772 | 10.47094974 | 20.05344842 |
| ENSMUSG00000048540 | 14.14903703  | 7.651789682 | 7.767661525 | 4.02728836  | 5.729556691 |
| ENSMUSG00000048546 | 19.10119998  | 15.30357936 | 21.89068248 | 23.35827249 | 20.05344842 |
| ENSMUSG00000048562 | 7.074518513  | 9.043024169 | 7.767661525 | 7.249119049 | 5.013362104 |
| ENSMUSG00000048572 | 6.367066661  | 7.651789682 | 15.53532305 | 9.665492065 | 10.02672421 |

|                    |             |             |             |             |             |
|--------------------|-------------|-------------|-------------|-------------|-------------|
| ENSMUSG00000048573 | 4.952162959 | 4.173703463 | 1.412302096 | 2.416373016 | 2.148583759 |
| ENSMUSG00000048582 | 9.196874066 | 7.651789682 | 7.767661525 | 5.638203705 | 6.445751277 |
| ENSMUSG00000048602 | 4.244711108 | 5.56493795  | 5.649208382 | 8.054576721 | 10.7429188  |
| ENSMUSG00000048616 | 5.65961481  | 6.956172438 | 9.179963621 | 7.249119049 | 2.864778345 |
| ENSMUSG00000048621 | 8.489422215 | 47.30197258 | 28.24604191 | 16.10915344 | 22.20203218 |
| ENSMUSG00000048626 | 9.196874066 | 5.56493795  | 4.236906287 | 4.832746033 | 10.7429188  |
| ENSMUSG00000048636 | 11.31922962 | 5.56493795  | 9.886114669 | 4.832746033 | 5.013362104 |
| ENSMUSG00000048644 | 8.489422215 | 12.52111039 | 9.179963621 | 12.88732275 | 12.89150255 |
| ENSMUSG00000048647 | 43.15456293 | 71.64857611 | 59.31668801 | 44.30017197 | 44.40406435 |
| ENSMUSG00000048677 | 30.4204296  | 32.69401046 | 51.54902649 | 29.80193387 | 41.53928601 |
| ENSMUSG00000048686 | 6.367066661 | 5.56493795  | 4.236906287 | 8.860034393 | 9.310529622 |
| ENSMUSG00000048699 | 9.196874066 | 7.651789682 | 5.649208382 | 5.638203705 | 9.310529622 |
| ENSMUSG00000048703 | 15.56394073 | 12.52111039 | 13.41686991 | 4.02728836  | 12.89150255 |
| ENSMUSG00000048706 | 7.781970364 | 9.043024169 | 6.35535943  | 5.638203705 | 5.013362104 |
| ENSMUSG00000048707 | 12.02668147 | 16.69481385 | 24.00913562 | 37.05105292 | 39.39070225 |
| ENSMUSG00000048720 | 12.02668147 | 18.08604834 | 12.71071886 | 15.30369577 | 22.20203218 |
| ENSMUSG00000048721 | 26.1757185  | 43.82388636 | 32.4829482  | 24.16373016 | 26.49919969 |
| ENSMUSG00000048732 | 107.5326814 | 157.9051143 | 147.585569  | 157.8697037 | 126.7664418 |
| ENSMUSG00000048745 | 12.02668147 | 4.173703463 | 4.943057334 | 7.249119049 | 6.445751277 |
| ENSMUSG00000048752 | 11.31922962 | 4.869320706 | 6.35535943  | 3.221830688 | 10.02672421 |
| ENSMUSG00000048755 | 12.02668147 | 32.69401046 | 13.41686991 | 24.96918783 | 24.35061594 |
| ENSMUSG00000048766 | 11.31922962 | 7.651789682 | 7.767661525 | 8.054576721 | 6.445751277 |
| ENSMUSG00000048776 | 13.44158517 | 6.260555194 | 4.236906287 | 3.221830688 | 6.445751277 |
| ENSMUSG00000048779 | 9.196874066 | 6.260555194 | 16.2414741  | 11.27640741 | 5.729556691 |
| ENSMUSG00000048796 | 30.4204296  | 50.7800588  | 48.7244223  | 33.02376456 | 38.67450766 |
| ENSMUSG00000048799 | 84.1867703  | 121.0374004 | 102.3919019 | 66.04752911 | 61.59273443 |
| ENSMUSG00000048807 | 4.244711108 | 8.347406925 | 13.41686991 | 5.638203705 | 6.445751277 |
| ENSMUSG00000048826 | 8.489422215 | 4.869320706 | 5.649208382 | 3.221830688 | 6.445751277 |
| ENSMUSG00000048830 | 7.781970364 | 10.43425866 | 6.35535943  | 4.832746033 | 7.161945863 |
| ENSMUSG00000048832 | 37.49494812 | 68.17048989 | 56.49208382 | 58.79841006 | 66.60609653 |
| ENSMUSG00000048833 | 83.47931845 | 127.9935729 | 112.9841676 | 202.9753334 | 204.1154571 |
| ENSMUSG00000048856 | 3.537259256 | 2.782468975 | 7.061510478 | 2.416373016 | 7.87814045  |
| ENSMUSG00000048875 | 12.73413332 | 6.956172438 | 8.473812573 | 1.610915344 | 5.013362104 |
| ENSMUSG00000048878 | 24.76081479 | 36.17209668 | 43.78136496 | 61.21478308 | 48.70123187 |
| ENSMUSG00000048899 | 11.31922962 | 12.52111039 | 7.061510478 | 7.249119049 | 5.013362104 |
| ENSMUSG00000048904 | 7.074518513 | 5.56493795  | 2.824604191 | 8.054576721 | 6.445751277 |
| ENSMUSG00000048905 | 13.44158517 | 6.260555194 | 10.59226572 | 11.27640741 | 8.594335036 |
| ENSMUSG00000048920 | 152.102148  | 178.0780144 | 184.3054235 | 255.3300821 | 204.8316517 |
| ENSMUSG00000048933 | 8.489422215 | 8.347406925 | 7.767661525 | 4.832746033 | 5.013362104 |
| ENSMUSG00000048965 | 21.22355554 | 37.56333116 | 47.3121202  | 28.9964762  | 25.78300511 |
| ENSMUSG00000048970 | 24.05336294 | 47.30197258 | 38.13215658 | 32.21830688 | 41.53928601 |
| ENSMUSG00000048981 | 13.44158517 | 6.260555194 | 7.767661525 | 6.443661377 | 5.729556691 |
| ENSMUSG00000048982 | 11.31922962 | 5.56493795  | 10.59226572 | 8.860034393 | 5.729556691 |

|                    |             |             |             |             |             |
|--------------------|-------------|-------------|-------------|-------------|-------------|
| ENSMUSG00000048988 | 9.904325918 | 5.56493795  | 4.943057334 | 3.221830688 | 6.445751277 |
| ENSMUSG00000048992 | 8.489422215 | 4.869320706 | 12.00456781 | 7.249119049 | 6.445751277 |
| ENSMUSG00000048994 | 6.367066661 | 2.782468975 | 3.530755239 | 3.221830688 | 2.148583759 |
| ENSMUSG00000048996 | 9.196874066 | 5.56493795  | 5.649208382 | 3.221830688 | 8.594335036 |
| ENSMUSG00000049001 | 6.367066661 | 4.869320706 | 7.061510478 | 6.443661377 | 7.161945863 |
| ENSMUSG00000049008 | 7.781970364 | 6.956172438 | 7.767661525 | 8.054576721 | 6.445751277 |
| ENSMUSG00000049028 | 15.56394073 | 10.43425866 | 6.35535943  | 11.27640741 | 6.445751277 |
| ENSMUSG00000049036 | 4.952162959 | 4.173703463 | 8.473812573 | 4.832746033 | 5.013362104 |
| ENSMUSG00000049037 | 4.952162959 | 10.43425866 | 5.649208382 | 2.416373016 | 7.161945863 |
| ENSMUSG00000049038 | 27.5906222  | 36.86771392 | 33.18909925 | 28.9964762  | 20.05344842 |
| ENSMUSG00000049041 | 10.61177777 | 5.56493795  | 9.179963621 | 4.832746033 | 11.45911338 |
| ENSMUSG00000049052 | 8.489422215 | 4.869320706 | 10.59226572 | 6.443661377 | 5.013362104 |
| ENSMUSG00000049057 | 11.31922962 | 4.173703463 | 4.943057334 | 2.416373016 | 10.7429188  |
| ENSMUSG00000049073 | 9.904325918 | 6.260555194 | 6.35535943  | 2.416373016 | 3.580972932 |
| ENSMUSG00000049076 | 49.52162959 | 71.64857611 | 81.91352154 | 104.7094974 | 75.20043157 |
| ENSMUSG00000049086 | 24.05336294 | 30.60715873 | 24.71528667 | 24.96918783 | 25.78300511 |
| ENSMUSG00000049090 | 38.90985182 | 45.91073809 | 50.13672439 | 52.35474869 | 61.59273443 |
| ENSMUSG00000049093 | 7.074518513 | 10.43425866 | 8.473812573 | 6.443661377 | 5.013362104 |
| ENSMUSG00000049097 | 12.02668147 | 8.347406925 | 9.886114669 | 8.860034393 | 5.729556691 |
| ENSMUSG00000049098 | 12.02668147 | 7.651789682 | 5.649208382 | 8.054576721 | 6.445751277 |
| ENSMUSG00000049106 | 16.27139258 | 22.2597518  | 24.71528667 | 54.7711217  | 41.53928601 |
| ENSMUSG00000049112 | 8.489422215 | 7.651789682 | 5.649208382 | 9.665492065 | 8.594335036 |
| ENSMUSG00000049128 | 9.196874066 | 9.043024169 | 7.061510478 | 4.832746033 | 6.445751277 |
| ENSMUSG00000049130 | 7.781970364 | 4.173703463 | 7.061510478 | 4.02728836  | 8.594335036 |
| ENSMUSG00000049148 | 12.73413332 | 6.260555194 | 11.29841676 | 5.638203705 | 4.297167518 |
| ENSMUSG00000049149 | 10.61177777 | 4.173703463 | 9.179963621 | 3.221830688 | 10.02672421 |
| ENSMUSG00000049164 | 0           | 0           | 0           | 0           | 0.716194586 |
| ENSMUSG00000049168 | 15.56394073 | 6.260555194 | 10.59226572 | 5.638203705 | 7.87814045  |
| ENSMUSG00000049173 | 7.074518513 | 5.56493795  | 7.767661525 | 6.443661377 | 5.013362104 |
| ENSMUSG00000049184 | 26.88317035 | 47.99758982 | 37.42600553 | 26.58010318 | 39.39070225 |
| ENSMUSG00000049232 | 22.63845924 | 40.34580014 | 40.95676077 | 36.24559524 | 40.10689684 |
| ENSMUSG00000049233 | 12.73413332 | 6.260555194 | 5.649208382 | 6.443661377 | 5.729556691 |
| ENSMUSG00000049241 | 6.367066661 | 6.260555194 | 9.886114669 | 8.054576721 | 5.729556691 |
| ENSMUSG00000049265 | 9.196874066 | 3.478086219 | 6.35535943  | 4.02728836  | 5.013362104 |
| ENSMUSG00000049280 | 7.074518513 | 10.43425866 | 5.649208382 | 7.249119049 | 7.87814045  |
| ENSMUSG00000049285 | 5.65961481  | 7.651789682 | 9.179963621 | 8.054576721 | 10.02672421 |
| ENSMUSG00000049287 | 16.27139258 | 20.86851731 | 26.12758877 | 19.33098413 | 21.48583759 |
| ENSMUSG00000049288 | 7.074518513 | 6.956172438 | 3.530755239 | 2.416373016 | 10.7429188  |
| ENSMUSG00000049291 | 7.781970364 | 2.782468975 | 7.767661525 | 4.02728836  | 6.445751277 |
| ENSMUSG00000049305 | 45.98437033 | 81.38721752 | 60.72899011 | 107.1258704 | 76.63282074 |
| ENSMUSG00000049307 | 3.537259256 | 4.869320706 | 8.473812573 | 8.054576721 | 6.445751277 |
| ENSMUSG00000049313 | 154.9319554 | 175.2955454 | 151.1163242 | 142.566008  | 99.5510475  |
| ENSMUSG00000049315 | 6.367066661 | 8.347406925 | 5.649208382 | 6.443661377 | 6.445751277 |

|                    |             |             |             |             |             |
|--------------------|-------------|-------------|-------------|-------------|-------------|
| ENSMUSG00000049323 | 142.1978221 | 182.2517179 | 188.5423298 | 240.0263863 | 201.2506788 |
| ENSMUSG00000049334 | 10.61177777 | 5.56493795  | 8.473812573 | 7.249119049 | 6.445751277 |
| ENSMUSG00000049349 | 8.489422215 | 6.956172438 | 7.767661525 | 4.832746033 | 8.594335036 |
| ENSMUSG00000049350 | 4.952162959 | 7.651789682 | 8.473812573 | 6.443661377 | 3.580972932 |
| ENSMUSG00000049354 | 126.6338814 | 150.9489419 | 151.8224753 | 183.6443492 | 158.9951982 |
| ENSMUSG00000049362 | 9.196874066 | 7.651789682 | 7.061510478 | 7.249119049 | 5.013362104 |
| ENSMUSG00000049382 | 7.781970364 | 6.956172438 | 6.35535943  | 8.860034393 | 2.148583759 |
| ENSMUSG00000049396 | 14.85648888 | 27.82468975 | 24.00913562 | 72.49119049 | 67.32229112 |
| ENSMUSG00000049409 | 10.61177777 | 4.869320706 | 8.473812573 | 8.054576721 | 4.297167518 |
| ENSMUSG00000049420 | 7.781970364 | 7.651789682 | 6.35535943  | 3.221830688 | 3.580972932 |
| ENSMUSG00000049422 | 60.84085921 | 53.56252777 | 45.19366706 | 23.35827249 | 21.48583759 |
| ENSMUSG00000049436 | 7.074518513 | 8.347406925 | 5.649208382 | 6.443661377 | 9.310529622 |
| ENSMUSG00000049456 | 9.904325918 | 11.82549314 | 4.236906287 | 5.638203705 | 7.87814045  |
| ENSMUSG00000049489 | 10.61177777 | 11.82549314 | 12.00456781 | 43.49471429 | 32.22875639 |
| ENSMUSG00000049498 | 7.781970364 | 8.347406925 | 4.943057334 | 2.416373016 | 5.013362104 |
| ENSMUSG00000049506 | 7.074518513 | 4.173703463 | 6.35535943  | 6.443661377 | 5.729556691 |
| ENSMUSG00000049511 | 7.781970364 | 9.738641413 | 4.943057334 | 3.221830688 | 2.148583759 |
| ENSMUSG00000049516 | 97.62835547 | 123.1242521 | 115.1026208 | 86.98942859 | 68.0384857  |
| ENSMUSG00000049517 | 31.12788146 | 57.73623123 | 40.95676077 | 136.9278043 | 88.80812871 |
| ENSMUSG00000049521 | 7.781970364 | 6.956172438 | 3.530755239 | 3.221830688 | 5.729556691 |
| ENSMUSG00000049526 | 13.44158517 | 14.60796212 | 12.00456781 | 15.30369577 | 12.17530797 |
| ENSMUSG00000049528 | 7.074518513 | 11.1298759  | 13.41686991 | 7.249119049 | 5.729556691 |
| ENSMUSG00000049530 | 6.367066661 | 9.043024169 | 5.649208382 | 4.02728836  | 5.729556691 |
| ENSMUSG00000049536 | 4.952162959 | 2.086851731 | 2.824604191 | 1.610915344 | 1.432389173 |
| ENSMUSG00000049548 | 2.829807405 | 3.478086219 | 5.649208382 | 4.02728836  | 7.87814045  |
| ENSMUSG00000049551 | 5.65961481  | 10.43425866 | 7.061510478 | 9.665492065 | 8.594335036 |
| ENSMUSG00000049556 | 5.65961481  | 5.56493795  | 4.943057334 | 4.832746033 | 7.161945863 |
| ENSMUSG00000049560 | 11.31922962 | 5.56493795  | 10.59226572 | 3.221830688 | 5.729556691 |
| ENSMUSG00000049561 | 2.829807405 | 4.869320706 | 7.061510478 | 2.416373016 | 6.445751277 |
| ENSMUSG00000049562 | 45.98437033 | 51.47567604 | 50.13672439 | 35.44013757 | 44.40406435 |
| ENSMUSG00000049573 | 6.367066661 | 9.043024169 | 4.236906287 | 7.249119049 | 3.580972932 |
| ENSMUSG00000049593 | 9.904325918 | 11.1298759  | 11.29841676 | 4.832746033 | 7.161945863 |
| ENSMUSG00000049598 | 5.65961481  | 7.651789682 | 5.649208382 | 9.665492065 | 5.729556691 |
| ENSMUSG00000049600 | 23.34591109 | 20.17290007 | 24.71528667 | 27.38556085 | 27.93158887 |
| ENSMUSG00000049604 | 8.489422215 | 4.869320706 | 6.35535943  | 14.4982381  | 5.013362104 |
| ENSMUSG00000049605 | 8.489422215 | 7.651789682 | 7.061510478 | 8.054576721 | 4.297167518 |
| ENSMUSG00000049608 | 3.537259256 | 8.347406925 | 7.767661525 | 34.6346799  | 35.09353473 |
| ENSMUSG00000049618 | 11.31922962 | 6.260555194 | 7.767661525 | 3.221830688 | 2.864778345 |
| ENSMUSG00000049620 | 8.489422215 | 8.347406925 | 5.649208382 | 4.02728836  | 7.87814045  |
| ENSMUSG00000049625 | 15.56394073 | 11.1298759  | 13.41686991 | 13.69278043 | 12.89150255 |
| ENSMUSG00000049630 | 12.02668147 | 4.173703463 | 8.473812573 | 4.02728836  | 5.013362104 |
| ENSMUSG00000049648 | 9.196874066 | 6.956172438 | 9.179963621 | 4.02728836  | 9.310529622 |
| ENSMUSG00000049649 | 7.781970364 | 9.043024169 | 4.236906287 | 6.443661377 | 6.445751277 |

|                    |             |             |             |             |             |
|--------------------|-------------|-------------|-------------|-------------|-------------|
| ENSMUSG00000049653 | 9.904325918 | 9.043024169 | 1.412302096 | 7.249119049 | 5.013362104 |
| ENSMUSG00000049657 | 62.25576291 | 89.73462445 | 72.02740687 | 121.6241085 | 118.8883013 |
| ENSMUSG00000049670 | 12.02668147 | 8.347406925 | 7.767661525 | 6.443661377 | 3.580972932 |
| ENSMUSG00000049687 | 2.122355554 | 0           | 2.118453143 | 2.416373016 | 2.148583759 |
| ENSMUSG00000049691 | 3.537259256 | 3.478086219 | 5.649208382 | 7.249119049 | 3.580972932 |
| ENSMUSG00000049692 | 2.122355554 | 0.695617244 | 2.824604191 | 1.610915344 | 2.148583759 |
| ENSMUSG00000049699 | 9.904325918 | 5.56493795  | 11.29841676 | 10.47094974 | 7.87814045  |
| ENSMUSG00000049709 | 16.97884443 | 22.95536904 | 12.00456781 | 14.4982381  | 17.90486466 |
| ENSMUSG00000049717 | 60.13340736 | 85.56092098 | 78.3827663  | 48.32746033 | 66.60609653 |
| ENSMUSG00000049734 | 36.08004441 | 45.21512085 | 53.66747963 | 168.3406535 | 106.7129934 |
| ENSMUSG00000049751 | 67.91537772 | 105.7338211 | 86.15042783 | 255.3300821 | 213.4259867 |
| ENSMUSG00000049760 | 32.54278516 | 50.7800588  | 56.49208382 | 71.68573282 | 58.01176149 |
| ENSMUSG00000049764 | 61.54831106 | 71.64857611 | 50.13672439 | 298.8247963 | 208.4126246 |
| ENSMUSG00000049791 | 2.829807405 | 5.56493795  | 8.473812573 | 3.221830688 | 6.445751277 |
| ENSMUSG00000049792 | 66.50047402 | 93.21271067 | 88.26888097 | 132.9005159 | 112.4425501 |
| ENSMUSG00000049796 | 7.781970364 | 11.82549314 | 8.473812573 | 3.221830688 | 5.013362104 |
| ENSMUSG00000049804 | 2.122355554 | 2.782468975 | 1.412302096 | 2.416373016 | 6.445751277 |
| ENSMUSG00000049809 | 5.65961481  | 13.21672763 | 5.649208382 | 7.249119049 | 6.445751277 |
| ENSMUSG00000049815 | 4.952162959 | 1.391234488 | 5.649208382 | 3.221830688 | 2.864778345 |
| ENSMUSG00000049823 | 13.44158517 | 25.04222078 | 21.89068248 | 28.9964762  | 25.06681052 |
| ENSMUSG00000049848 | 9.196874066 | 8.347406925 | 7.767661525 | 10.47094974 | 11.45911338 |
| ENSMUSG00000049858 | 7.074518513 | 17.39043109 | 10.59226572 | 6.443661377 | 10.7429188  |
| ENSMUSG00000049872 | 4.952162959 | 7.651789682 | 9.886114669 | 8.860034393 | 9.310529622 |
| ENSMUSG00000049882 | 46.69182218 | 73.0398106  | 77.67661525 | 126.4568545 | 90.24051788 |
| ENSMUSG00000049892 | 9.196874066 | 9.043024169 | 11.29841676 | 19.33098413 | 10.7429188  |
| ENSMUSG00000049902 | 6.367066661 | 7.651789682 | 7.767661525 | 5.638203705 | 9.310529622 |
| ENSMUSG00000049904 | 12.73413332 | 13.21672763 | 15.53532305 | 8.860034393 | 14.32389173 |
| ENSMUSG00000049907 | 4.244711108 | 4.869320706 | 7.767661525 | 6.443661377 | 4.297167518 |
| ENSMUSG00000049908 | 9.196874066 | 9.043024169 | 9.179963621 | 3.221830688 | 10.02672421 |
| ENSMUSG00000049922 | 29.71297775 | 39.6501829  | 50.13672439 | 43.49471429 | 46.55264811 |
| ENSMUSG00000049929 | 4.952162959 | 2.086851731 | 2.118453143 | 1.610915344 | 2.148583759 |
| ENSMUSG00000049932 | 62.25576291 | 58.43184848 | 50.13672439 | 152.2315    | 121.0368851 |
| ENSMUSG00000049939 | 9.904325918 | 11.1298759  | 12.00456781 | 15.30369577 | 22.20203218 |
| ENSMUSG00000049940 | 39.61730367 | 66.7792554  | 62.84744325 | 85.37851324 | 95.97007457 |
| ENSMUSG00000049946 | 7.074518513 | 11.1298759  | 9.179963621 | 4.832746033 | 4.297167518 |
| ENSMUSG00000049950 | 17.68629628 | 37.56333116 | 27.53989086 | 53.16020636 | 60.87653984 |
| ENSMUSG00000049960 | 20.51610369 | 42.43265187 | 31.77679715 | 66.04752911 | 68.0384857  |
| ENSMUSG00000049969 | 105.4103258 | 116.1680797 | 111.5718655 | 147.398754  | 114.5911338 |
| ENSMUSG00000049972 | 12.73413332 | 5.56493795  | 6.35535943  | 4.02728836  | 7.87814045  |
| ENSMUSG00000049988 | 12.73413332 | 9.738641413 | 15.53532305 | 20.1364418  | 15.7562809  |
| ENSMUSG00000049999 | 3.537259256 | 2.782468975 | 5.649208382 | 3.221830688 | 5.729556691 |
| ENSMUSG00000050010 | 5.65961481  | 7.651789682 | 4.236906287 | 6.443661377 | 5.729556691 |
| ENSMUSG00000050014 | 4.244711108 | 9.043024169 | 7.767661525 | 8.860034393 | 7.87814045  |



|                    |             |             |             |             |             |
|--------------------|-------------|-------------|-------------|-------------|-------------|
| ENSMUSG00000050028 | 14.85648888 | 7.651789682 | 7.061510478 | 6.443661377 | 3.580972932 |
| ENSMUSG00000050029 | 15.56394073 | 25.73783802 | 35.30755239 | 41.88379895 | 33.66114556 |
| ENSMUSG00000050035 | 14.85648888 | 20.86851731 | 31.77679715 | 36.24559524 | 35.09353473 |
| ENSMUSG00000050058 | 0           | 0           | 0           | 0           | 0           |
| ENSMUSG00000050069 | 5.65961481  | 6.260555194 | 5.649208382 | 4.832746033 | 7.87814045  |
| ENSMUSG00000050071 | 2.122355554 | 4.173703463 | 2.824604191 | 2.416373016 | 5.729556691 |
| ENSMUSG00000050075 | 78.52715549 | 127.9935729 | 108.7472614 | 124.0404815 | 116.023523  |
| ENSMUSG00000050088 | 22.63845924 | 34.08524495 | 31.77679715 | 37.05105292 | 41.53928601 |
| ENSMUSG00000050092 | 7.781970364 | 6.956172438 | 7.061510478 | 5.638203705 | 6.445751277 |
| ENSMUSG00000050097 | 13.44158517 | 6.260555194 | 7.061510478 | 7.249119049 | 8.594335036 |
| ENSMUSG00000050102 | 9.196874066 | 8.347406925 | 2.824604191 | 4.02728836  | 9.310529622 |
| ENSMUSG00000050105 | 5.65961481  | 10.43425866 | 9.886114669 | 6.443661377 | 8.594335036 |
| ENSMUSG00000050107 | 35.37259256 | 38.25894841 | 48.01827125 | 120.8186508 | 104.5644096 |
| ENSMUSG00000050114 | 10.61177777 | 6.956172438 | 4.943057334 | 4.02728836  | 3.580972932 |
| ENSMUSG00000050121 | 8.489422215 | 2.086851731 | 4.236906287 | 9.665492065 | 5.013362104 |
| ENSMUSG00000050138 | 5.65961481  | 8.347406925 | 7.061510478 | 8.860034393 | 2.148583759 |
| ENSMUSG00000050147 | 9.904325918 | 6.956172438 | 10.59226572 | 4.02728836  | 8.594335036 |
| ENSMUSG00000050148 | 16.97884443 | 42.43265187 | 33.18909925 | 29.80193387 | 27.21539428 |
| ENSMUSG00000050158 | 6.367066661 | 4.869320706 | 7.061510478 | 6.443661377 | 5.013362104 |
| ENSMUSG00000050188 | 29.71297775 | 47.30197258 | 47.3121202  | 41.07834128 | 42.97167518 |
| ENSMUSG00000050190 | 9.904325918 | 8.347406925 | 9.886114669 | 7.249119049 | 3.580972932 |
| ENSMUSG00000050192 | 4.952162959 | 5.56493795  | 6.35535943  | 10.47094974 | 3.580972932 |
| ENSMUSG00000050195 | 9.196874066 | 5.56493795  | 6.35535943  | 9.665492065 | 5.013362104 |
| ENSMUSG00000050197 | 4.244711108 | 3.478086219 | 3.530755239 | 4.832746033 | 3.580972932 |
| ENSMUSG00000050201 | 8.489422215 | 6.956172438 | 6.35535943  | 6.443661377 | 1.432389173 |
| ENSMUSG00000050212 | 5.65961481  | 2.782468975 | 5.649208382 | 3.221830688 | 4.297167518 |
| ENSMUSG00000050213 | 87.01657771 | 124.5154866 | 106.6288082 | 168.3406535 | 135.3607768 |
| ENSMUSG00000050215 | 9.196874066 | 6.260555194 | 7.767661525 | 5.638203705 | 7.87814045  |
| ENSMUSG00000050224 | 12.02668147 | 6.260555194 | 7.061510478 | 4.832746033 | 5.729556691 |
| ENSMUSG00000050229 | 47.39927403 | 82.77845201 | 77.67661525 | 169.9515688 | 148.968474  |
| ENSMUSG00000050232 | 5.65961481  | 2.086851731 | 4.943057334 | 4.832746033 | 2.864778345 |
| ENSMUSG00000050234 | 10.61177777 | 7.651789682 | 7.061510478 | 6.443661377 | 6.445751277 |
| ENSMUSG00000050239 | 4.244711108 | 3.478086219 | 5.649208382 | 2.416373016 | 2.864778345 |
| ENSMUSG00000050241 | 7.781970364 | 9.738641413 | 4.943057334 | 3.221830688 | 4.297167518 |
| ENSMUSG00000050244 | 12.73413332 | 21.56413456 | 21.89068248 | 85.37851324 | 56.57937232 |
| ENSMUSG00000050251 | 9.904325918 | 4.173703463 | 5.649208382 | 8.054576721 | 5.013362104 |
| ENSMUSG00000050266 | 9.904325918 | 9.738641413 | 5.649208382 | 7.249119049 | 4.297167518 |
| ENSMUSG00000050272 | 7.074518513 | 4.869320706 | 7.061510478 | 3.221830688 | 6.445751277 |
| ENSMUSG00000050276 | 9.196874066 | 6.956172438 | 9.886114669 | 5.638203705 | 9.310529622 |
| ENSMUSG00000050281 | 10.61177777 | 6.956172438 | 10.59226572 | 4.832746033 | 5.729556691 |
| ENSMUSG00000050288 | 4.952162959 | 4.173703463 | 8.473812573 | 8.860034393 | 8.594335036 |
| ENSMUSG00000050295 | 9.904325918 | 4.173703463 | 9.179963621 | 4.832746033 | 9.310529622 |
| ENSMUSG00000050304 | 24.05336294 | 36.17209668 | 31.77679715 | 41.07834128 | 38.67450766 |

|                    |             |             |             |             |             |
|--------------------|-------------|-------------|-------------|-------------|-------------|
| ENSMUSG00000050310 | 84.89422215 | 102.2557348 | 93.91808935 | 90.21125927 | 78.06520991 |
| ENSMUSG00000050321 | 10.61177777 | 4.869320706 | 6.35535943  | 2.416373016 | 5.729556691 |
| ENSMUSG00000050328 | 12.73413332 | 8.347406925 | 7.767661525 | 5.638203705 | 5.013362104 |
| ENSMUSG00000050332 | 19.10119998 | 21.56413456 | 16.94762515 | 12.88732275 | 12.17530797 |
| ENSMUSG00000050345 | 15.56394073 | 7.651789682 | 9.886114669 | 3.221830688 | 5.013362104 |
| ENSMUSG00000050350 | 152.102148  | 148.1664729 | 148.29172   | 213.4462831 | 157.562809  |
| ENSMUSG00000050357 | 25.46826665 | 29.91154148 | 30.36449505 | 31.41284921 | 24.35061594 |
| ENSMUSG00000050359 | 11.31922962 | 7.651789682 | 4.943057334 | 8.054576721 | 5.729556691 |
| ENSMUSG00000050366 | 8.489422215 | 4.869320706 | 8.473812573 | 7.249119049 | 7.161945863 |
| ENSMUSG00000050368 | 7.074518513 | 6.260555194 | 4.943057334 | 5.638203705 | 5.729556691 |
| ENSMUSG00000050370 | 6.367066661 | 5.56493795  | 4.943057334 | 7.249119049 | 7.161945863 |
| ENSMUSG00000050377 | 6.367066661 | 9.738641413 | 9.179963621 | 9.665492065 | 7.87814045  |
| ENSMUSG00000050383 | 9.196874066 | 6.956172438 | 12.71071886 | 7.249119049 | 9.310529622 |
| ENSMUSG00000050395 | 12.73413332 | 6.260555194 | 4.236906287 | 7.249119049 | 11.45911338 |
| ENSMUSG00000050397 | 7.074518513 | 4.173703463 | 4.236906287 | 3.221830688 | 5.013362104 |
| ENSMUSG00000050424 | 3.537259256 | 4.869320706 | 4.236906287 | 3.221830688 | 2.148583759 |
| ENSMUSG00000050425 | 4.952162959 | 11.82549314 | 6.35535943  | 4.832746033 | 3.580972932 |
| ENSMUSG00000050428 | 99.04325918 | 130.0804246 | 119.3395271 | 93.43308996 | 83.07857202 |
| ENSMUSG00000050435 | 7.074518513 | 4.869320706 | 4.236906287 | 4.02728836  | 5.013362104 |
| ENSMUSG00000050439 | 10.61177777 | 11.1298759  | 11.29841676 | 10.47094974 | 8.594335036 |
| ENSMUSG00000050440 | 9.196874066 | 9.738641413 | 5.649208382 | 8.860034393 | 10.7429188  |
| ENSMUSG00000050445 | 5.65961481  | 6.956172438 | 4.236906287 | 4.02728836  | 7.87814045  |
| ENSMUSG00000050463 | 9.196874066 | 5.56493795  | 5.649208382 | 1.610915344 | 7.87814045  |
| ENSMUSG00000050473 | 6.367066661 | 4.869320706 | 4.236906287 | 8.054576721 | 7.87814045  |
| ENSMUSG00000050478 | 5.65961481  | 6.956172438 | 5.649208382 | 6.443661377 | 7.161945863 |
| ENSMUSG00000050493 | 9.196874066 | 13.21672763 | 18.35992724 | 15.30369577 | 12.17530797 |
| ENSMUSG00000050503 | 14.85648888 | 13.91234488 | 12.00456781 | 24.16373016 | 10.7429188  |
| ENSMUSG00000050505 | 4.952162959 | 6.260555194 | 7.061510478 | 3.221830688 | 7.161945863 |
| ENSMUSG00000050511 | 7.074518513 | 2.782468975 | 6.35535943  | 8.054576721 | 5.013362104 |
| ENSMUSG00000050520 | 9.904325918 | 6.260555194 | 7.767661525 | 4.832746033 | 7.161945863 |
| ENSMUSG00000050526 | 5.65961481  | 7.651789682 | 4.236906287 | 7.249119049 | 7.161945863 |
| ENSMUSG00000050534 | 8.489422215 | 4.869320706 | 5.649208382 | 6.443661377 | 3.580972932 |
| ENSMUSG00000050549 | 12.02668147 | 19.47728283 | 14.12302096 | 41.07834128 | 22.20203218 |
| ENSMUSG00000050552 | 21.22355554 | 22.95536904 | 14.12302096 | 19.33098413 | 22.20203218 |
| ENSMUSG00000050553 | 5.65961481  | 5.56493795  | 10.59226572 | 7.249119049 | 7.161945863 |
| ENSMUSG00000050555 | 18.39374813 | 34.08524495 | 26.83373982 | 51.54929101 | 38.67450766 |
| ENSMUSG00000050556 | 7.781970364 | 11.1298759  | 6.35535943  | 8.860034393 | 10.02672421 |
| ENSMUSG00000050592 | 53.7663407  | 86.25653823 | 65.67204744 | 62.02024075 | 68.0384857  |
| ENSMUSG00000050612 | 4.952162959 | 4.869320706 | 3.530755239 | 3.221830688 | 5.729556691 |
| ENSMUSG00000050613 | 9.904325918 | 4.869320706 | 7.061510478 | 4.02728836  | 7.87814045  |
| ENSMUSG00000050621 | 12.02668147 | 12.52111039 | 9.179963621 | 18.52552646 | 15.7562809  |
| ENSMUSG00000050623 | 7.074518513 | 9.043024169 | 7.767661525 | 5.638203705 | 10.02672421 |
| ENSMUSG00000050625 | 7.074518513 | 6.956172438 | 9.179963621 | 6.443661377 | 7.161945863 |

|                    |             |             |             |             |             |
|--------------------|-------------|-------------|-------------|-------------|-------------|
| ENSMUSG00000050628 | 43.15456293 | 43.82388636 | 52.96132858 | 179.6170609 | 118.1721067 |
| ENSMUSG00000050635 | 3.537259256 | 9.043024169 | 9.179963621 | 2.416373016 | 4.297167518 |
| ENSMUSG00000050641 | 9.196874066 | 10.43425866 | 9.886114669 | 4.832746033 | 5.729556691 |
| ENSMUSG00000050645 | 9.196874066 | 1.391234488 | 7.061510478 | 10.47094974 | 5.729556691 |
| ENSMUSG00000050650 | 14.14903703 | 11.1298759  | 9.886114669 | 4.02728836  | 11.45911338 |
| ENSMUSG00000050654 | 12.02668147 | 9.043024169 | 9.886114669 | 5.638203705 | 10.02672421 |
| ENSMUSG00000050663 | 7.074518513 | 4.173703463 | 6.35535943  | 3.221830688 | 7.87814045  |
| ENSMUSG00000050668 | 36.08004441 | 58.43184848 | 43.07521391 | 51.54929101 | 49.41742646 |
| ENSMUSG00000050675 | 6.367066661 | 5.56493795  | 12.71071886 | 5.638203705 | 5.729556691 |
| ENSMUSG00000050677 | 63.67066661 | 62.60555194 | 89.68118307 | 75.71302118 | 65.17370736 |
| ENSMUSG00000050685 | 8.489422215 | 6.260555194 | 5.649208382 | 5.638203705 | 5.013362104 |
| ENSMUSG00000050697 | 37.49494812 | 43.82388636 | 42.36906287 | 88.60034393 | 67.32229112 |
| ENSMUSG00000050702 | 9.196874066 | 8.347406925 | 11.29841676 | 8.054576721 | 9.310529622 |
| ENSMUSG00000050704 | 9.904325918 | 5.56493795  | 10.59226572 | 7.249119049 | 6.445751277 |
| ENSMUSG00000050711 | 9.196874066 | 10.43425866 | 6.35535943  | 3.221830688 | 6.445751277 |
| ENSMUSG00000050714 | 76.40479994 | 121.7330177 | 102.3919019 | 121.6241085 | 108.1453825 |
| ENSMUSG00000050721 | 86.30912585 | 105.7338211 | 100.9795998 | 261.7737434 | 169.738117  |
| ENSMUSG00000050732 | 29.0055259  | 52.17129328 | 47.3121202  | 26.58010318 | 34.37734014 |
| ENSMUSG00000050742 | 7.781970364 | 8.347406925 | 9.179963621 | 12.88732275 | 5.729556691 |
| ENSMUSG00000050756 | 12.73413332 | 10.43425866 | 9.179963621 | 5.638203705 | 5.013362104 |
| ENSMUSG00000050761 | 4.952162959 | 4.173703463 | 7.061510478 | 11.27640741 | 9.310529622 |
| ENSMUSG00000050762 | 7.074518513 | 7.651789682 | 4.943057334 | 6.443661377 | 10.02672421 |
| ENSMUSG00000050777 | 8.489422215 | 5.56493795  | 4.236906287 | 9.665492065 | 7.87814045  |
| ENSMUSG00000050783 | 9.904325918 | 6.260555194 | 7.061510478 | 4.02728836  | 8.594335036 |
| ENSMUSG00000050786 | 11.31922962 | 15.30357936 | 9.179963621 | 13.69278043 | 13.60769714 |
| ENSMUSG00000050788 | 9.904325918 | 12.52111039 | 7.061510478 | 3.221830688 | 6.445751277 |
| ENSMUSG00000050796 | 81.3569629  | 107.8206728 | 89.68118307 | 185.2552646 | 137.5093606 |
| ENSMUSG00000050803 | 9.196874066 | 7.651789682 | 10.59226572 | 6.443661377 | 5.729556691 |
| ENSMUSG00000050810 | 6.367066661 | 5.56493795  | 10.59226572 | 8.054576721 | 5.729556691 |
| ENSMUSG00000050813 | 4.244711108 | 5.56493795  | 4.943057334 | 5.638203705 | 12.89150255 |
| ENSMUSG00000050815 | 6.367066661 | 6.956172438 | 7.767661525 | 4.02728836  | 8.594335036 |
| ENSMUSG00000050840 | 7.074518513 | 4.173703463 | 7.767661525 | 8.860034393 | 5.729556691 |
| ENSMUSG00000050844 | 9.904325918 | 5.56493795  | 8.473812573 | 4.02728836  | 6.445751277 |
| ENSMUSG00000050846 | 7.074518513 | 10.43425866 | 8.473812573 | 12.88732275 | 9.310529622 |
| ENSMUSG00000050854 | 5.65961481  | 3.478086219 | 3.530755239 | 3.221830688 | 3.580972932 |
| ENSMUSG00000050860 | 9.196874066 | 4.869320706 | 8.473812573 | 8.054576721 | 5.729556691 |
| ENSMUSG00000050866 | 12.02668147 | 9.043024169 | 4.943057334 | 8.054576721 | 1.432389173 |
| ENSMUSG00000050870 | 8.489422215 | 9.043024169 | 6.35535943  | 4.02728836  | 3.580972932 |
| ENSMUSG00000050876 | 6.367066661 | 6.260555194 | 7.767661525 | 9.665492065 | 11.45911338 |
| ENSMUSG00000050891 | 59.42595551 | 117.5593142 | 95.33039145 | 150.6205847 | 133.2121931 |
| ENSMUSG00000050901 | 10.61177777 | 4.869320706 | 6.35535943  | 5.638203705 | 12.89150255 |
| ENSMUSG00000050910 | 9.904325918 | 7.651789682 | 5.649208382 | 5.638203705 | 3.580972932 |
| ENSMUSG00000050917 | 7.781970364 | 6.956172438 | 9.179963621 | 1.610915344 | 6.445751277 |

|                    |             |             |             |             |             |
|--------------------|-------------|-------------|-------------|-------------|-------------|
| ENSMUSG00000050919 | 7.074518513 | 5.56493795  | 7.061510478 | 4.02728836  | 7.87814045  |
| ENSMUSG00000050926 | 5.65961481  | 2.782468975 | 2.824604191 | 2.416373016 | 5.729556691 |
| ENSMUSG00000050930 | 9.196874066 | 6.260555194 | 4.943057334 | 4.832746033 | 5.013362104 |
| ENSMUSG00000050931 | 10.61177777 | 6.956172438 | 13.41686991 | 7.249119049 | 5.013362104 |
| ENSMUSG00000050945 | 16.27139258 | 18.08604834 | 19.06607829 | 12.88732275 | 13.60769714 |
| ENSMUSG00000050947 | 7.074518513 | 12.52111039 | 13.41686991 | 5.638203705 | 5.729556691 |
| ENSMUSG00000050957 | 10.61177777 | 11.82549314 | 8.473812573 | 8.054576721 | 13.60769714 |
| ENSMUSG00000050963 | 6.367066661 | 6.956172438 | 7.767661525 | 4.832746033 | 6.445751277 |
| ENSMUSG00000050966 | 8.489422215 | 2.782468975 | 4.943057334 | 11.27640741 | 8.594335036 |
| ENSMUSG00000050967 | 7.781970364 | 4.869320706 | 7.061510478 | 8.054576721 | 7.161945863 |
| ENSMUSG00000050989 | 7.074518513 | 4.869320706 | 7.767661525 | 5.638203705 | 5.729556691 |
| ENSMUSG00000050996 | 4.244711108 | 11.82549314 | 4.236906287 | 4.02728836  | 5.729556691 |
| ENSMUSG00000051022 | 40.32475552 | 73.73542784 | 57.90438592 | 61.21478308 | 56.57937232 |
| ENSMUSG00000051029 | 6.367066661 | 6.956172438 | 10.59226572 | 12.08186508 | 5.013362104 |
| ENSMUSG00000051034 | 16.97884443 | 20.86851731 | 14.12302096 | 14.4982381  | 16.47247549 |
| ENSMUSG00000051041 | 11.31922962 | 6.956172438 | 9.886114669 | 4.832746033 | 9.310529622 |
| ENSMUSG00000051046 | 13.44158517 | 10.43425866 | 6.35535943  | 4.832746033 | 2.864778345 |
| ENSMUSG00000051050 | 12.02668147 | 6.260555194 | 9.886114669 | 1.610915344 | 7.161945863 |
| ENSMUSG00000051051 | 7.074518513 | 5.56493795  | 6.35535943  | 4.02728836  | 2.148583759 |
| ENSMUSG00000051054 | 13.44158517 | 4.869320706 | 4.236906287 | 12.08186508 | 5.013362104 |
| ENSMUSG00000051056 | 10.61177777 | 9.043024169 | 7.061510478 | 9.665492065 | 7.87814045  |
| ENSMUSG00000051062 | 9.904325918 | 5.56493795  | 3.530755239 | 4.02728836  | 3.580972932 |
| ENSMUSG00000051065 | 9.196874066 | 5.56493795  | 9.886114669 | 5.638203705 | 5.013362104 |
| ENSMUSG00000051067 | 3.537259256 | 6.956172438 | 8.473812573 | 5.638203705 | 10.7429188  |
| ENSMUSG00000051076 | 10.61177777 | 1.391234488 | 4.943057334 | 12.08186508 | 5.729556691 |
| ENSMUSG00000051079 | 7.074518513 | 5.56493795  | 7.061510478 | 4.832746033 | 5.013362104 |
| ENSMUSG00000051081 | 8.489422215 | 6.260555194 | 6.35535943  | 2.416373016 | 3.580972932 |
| ENSMUSG00000051095 | 7.074518513 | 9.043024169 | 4.943057334 | 6.443661377 | 10.02672421 |
| ENSMUSG00000051098 | 22.63845924 | 54.95376226 | 47.3121202  | 41.88379895 | 48.70123187 |
| ENSMUSG00000051113 | 52.35143699 | 62.60555194 | 68.49665163 | 82.15668255 | 71.61945863 |
| ENSMUSG00000051118 | 8.489422215 | 5.56493795  | 7.767661525 | 4.832746033 | 2.864778345 |
| ENSMUSG00000051124 | 68.62282957 | 112.6899935 | 93.21193831 | 126.4568545 | 103.848215  |
| ENSMUSG00000051136 | 7.074518513 | 4.869320706 | 7.767661525 | 4.832746033 | 10.02672421 |
| ENSMUSG00000051146 | 4.244711108 | 4.173703463 | 6.35535943  | 5.638203705 | 10.02672421 |
| ENSMUSG00000051153 | 0           | 1.391234488 | 0           | 0           | 0           |
| ENSMUSG00000051176 | 8.489422215 | 11.82549314 | 8.473812573 | 4.832746033 | 7.87814045  |
| ENSMUSG00000051180 | 10.61177777 | 4.173703463 | 7.767661525 | 8.860034393 | 7.161945863 |
| ENSMUSG00000051184 | 18.39374813 | 29.21592424 | 26.12758877 | 29.80193387 | 32.22875639 |
| ENSMUSG00000051185 | 32.54278516 | 66.7792554  | 45.8998181  | 46.71654498 | 46.55264811 |
| ENSMUSG00000051207 | 11.31922962 | 3.478086219 | 10.59226572 | 8.860034393 | 12.89150255 |
| ENSMUSG00000051209 | 4.244711108 | 5.56493795  | 2.824604191 | 2.416373016 | 5.013362104 |
| ENSMUSG00000051212 | 186.7672887 | 223.9887525 | 185.7177256 | 279.4938122 | 199.102095  |
| ENSMUSG00000051220 | 43.15456293 | 46.60635533 | 50.84287544 | 70.07481747 | 60.87653984 |

|                    |             |             |             |             |             |
|--------------------|-------------|-------------|-------------|-------------|-------------|
| ENSMUSG00000051225 | 4.952162959 | 9.043024169 | 4.236906287 | 11.27640741 | 7.87814045  |
| ENSMUSG00000051228 | 2.122355554 | 3.478086219 | 6.35535943  | 4.02728836  | 1.432389173 |
| ENSMUSG00000051234 | 89.84638511 | 130.7760418 | 99.56729774 | 184.4498069 | 151.1170577 |
| ENSMUSG00000051238 | 8.489422215 | 6.956172438 | 12.00456781 | 16.91461111 | 14.32389173 |
| ENSMUSG00000051242 | 4.952162959 | 7.651789682 | 3.530755239 | 3.221830688 | 4.297167518 |
| ENSMUSG00000051246 | 4.952162959 | 5.56493795  | 9.179963621 | 8.054576721 | 10.7429188  |
| ENSMUSG00000051251 | 7.074518513 | 6.260555194 | 8.473812573 | 5.638203705 | 5.729556691 |
| ENSMUSG00000051257 | 5.65961481  | 6.956172438 | 6.35535943  | 3.221830688 | 3.580972932 |
| ENSMUSG00000051262 | 14.85648888 | 6.956172438 | 7.061510478 | 8.054576721 | 8.594335036 |
| ENSMUSG00000051276 | 6.367066661 | 5.56493795  | 6.35535943  | 4.832746033 | 9.310529622 |
| ENSMUSG00000051279 | 9.904325918 | 4.173703463 | 7.061510478 | 4.832746033 | 7.87814045  |
| ENSMUSG00000051306 | 22.63845924 | 45.21512085 | 24.00913562 | 49.93837567 | 61.59273443 |
| ENSMUSG00000051316 | 43.86201478 | 84.86530374 | 67.08434954 | 124.0404815 | 103.848215  |
| ENSMUSG00000051319 | 10.61177777 | 18.08604834 | 13.41686991 | 14.4982381  | 16.47247549 |
| ENSMUSG00000051335 | 43.86201478 | 46.60635533 | 60.72899011 | 23.35827249 | 22.20203218 |
| ENSMUSG00000051346 | 22.63845924 | 36.86771392 | 38.13215658 | 61.21478308 | 48.70123187 |
| ENSMUSG00000051361 | 3.537259256 | 4.869320706 | 2.824604191 | 3.221830688 | 5.729556691 |
| ENSMUSG00000051367 | 4.244711108 | 2.782468975 | 7.061510478 | 4.832746033 | 7.161945863 |
| ENSMUSG00000051373 | 7.781970364 | 13.21672763 | 11.29841676 | 9.665492065 | 10.02672421 |
| ENSMUSG00000051390 | 1.414903703 | 2.782468975 | 4.236906287 | 5.638203705 | 5.013362104 |
| ENSMUSG00000051391 | 55.1812444  | 94.60394515 | 84.03197468 | 202.9753334 | 171.8867007 |
| ENSMUSG00000051397 | 9.904325918 | 10.43425866 | 10.59226572 | 17.72006879 | 15.7562809  |
| ENSMUSG00000051403 | 115.3146518 | 155.8182626 | 129.9317928 | 120.0131931 | 108.1453825 |
| ENSMUSG00000051437 | 10.61177777 | 7.651789682 | 6.35535943  | 6.443661377 | 5.013362104 |
| ENSMUSG00000051439 | 7.074518513 | 11.82549314 | 7.061510478 | 7.249119049 | 7.161945863 |
| ENSMUSG00000051444 | 11.31922962 | 13.21672763 | 9.886114669 | 13.69278043 | 16.47247549 |
| ENSMUSG00000051451 | 109.6550369 | 137.036597  | 114.3964697 | 251.3027937 | 189.7915654 |
| ENSMUSG00000051452 | 7.781970364 | 6.260555194 | 8.473812573 | 8.860034393 | 14.32389173 |
| ENSMUSG00000051456 | 8.489422215 | 9.738641413 | 9.886114669 | 4.02728836  | 10.02672421 |
| ENSMUSG00000051457 | 16.27139258 | 15.99919661 | 26.83373982 | 21.74735715 | 20.05344842 |
| ENSMUSG00000051481 | 7.074518513 | 4.869320706 | 6.35535943  | 4.02728836  | 5.013362104 |
| ENSMUSG00000051483 | 7.781970364 | 9.043024169 | 15.53532305 | 8.860034393 | 10.02672421 |
| ENSMUSG00000051486 | 9.196874066 | 9.738641413 | 9.179963621 | 8.860034393 | 7.87814045  |
| ENSMUSG00000051490 | 6.367066661 | 4.869320706 | 9.886114669 | 6.443661377 | 4.297167518 |
| ENSMUSG00000051493 | 5.65961481  | 7.651789682 | 7.767661525 | 4.02728836  | 3.580972932 |
| ENSMUSG00000051495 | 65.08557032 | 89.0390072  | 74.85201106 | 229.5554365 | 174.0352845 |
| ENSMUSG00000051498 | 11.31922962 | 31.30277597 | 23.30298458 | 12.88732275 | 22.91822676 |
| ENSMUSG00000051499 | 4.952162959 | 8.347406925 | 10.59226572 | 10.47094974 | 11.45911338 |
| ENSMUSG00000051502 | 4.244711108 | 1.391234488 | 4.236906287 | 6.443661377 | 6.445751277 |
| ENSMUSG00000051503 | 10.61177777 | 15.99919661 | 19.77222934 | 12.08186508 | 26.49919969 |
| ENSMUSG00000051518 | 30.4204296  | 53.56252777 | 45.8998181  | 78.12939419 | 64.45751277 |
| ENSMUSG00000051590 | 9.196874066 | 15.99919661 | 5.649208382 | 3.221830688 | 8.594335036 |
| ENSMUSG00000051591 | 9.196874066 | 11.1298759  | 4.943057334 | 1.610915344 | 7.161945863 |

|                    |             |             |             |             |             |
|--------------------|-------------|-------------|-------------|-------------|-------------|
| ENSMUSG00000051593 | 9.904325918 | 6.260555194 | 4.236906287 | 4.832746033 | 6.445751277 |
| ENSMUSG00000051599 | 8.489422215 | 5.56493795  | 7.061510478 | 3.221830688 | 4.297167518 |
| ENSMUSG00000051611 | 5.65961481  | 5.56493795  | 5.649208382 | 4.832746033 | 4.297167518 |
| ENSMUSG00000051617 | 9.196874066 | 4.869320706 | 4.236906287 | 7.249119049 | 5.729556691 |
| ENSMUSG00000051618 | 3.537259256 | 4.173703463 | 8.473812573 | 3.221830688 | 11.45911338 |
| ENSMUSG00000051627 | 3.537259256 | 4.173703463 | 1.412302096 | 4.02728836  | 2.864778345 |
| ENSMUSG00000051652 | 7.074518513 | 6.260555194 | 7.061510478 | 12.08186508 | 5.013362104 |
| ENSMUSG00000051669 | 9.196874066 | 5.56493795  | 9.886114669 | 10.47094974 | 8.594335036 |
| ENSMUSG00000051671 | 24.05336294 | 65.38802092 | 41.66291182 | 57.99295239 | 45.12025894 |
| ENSMUSG00000051678 | 9.904325918 | 7.651789682 | 9.179963621 | 7.249119049 | 7.161945863 |
| ENSMUSG00000051680 | 8.489422215 | 4.869320706 | 6.35535943  | 8.054576721 | 5.729556691 |
| ENSMUSG00000051695 | 87.01657771 | 109.2119073 | 102.3919019 | 305.2684577 | 229.8984622 |
| ENSMUSG00000051716 | 9.904325918 | 11.1298759  | 11.29841676 | 14.4982381  | 9.310529622 |
| ENSMUSG00000051721 | 27.5906222  | 61.9099347  | 43.78136496 | 56.38203705 | 49.41742646 |
| ENSMUSG00000051726 | 12.73413332 | 4.173703463 | 7.061510478 | 8.054576721 | 5.013362104 |
| ENSMUSG00000051728 | 6.367066661 | 7.651789682 | 6.35535943  | 7.249119049 | 10.02672421 |
| ENSMUSG00000051732 | 7.074518513 | 9.738641413 | 11.29841676 | 7.249119049 | 4.297167518 |
| ENSMUSG00000051735 | 16.27139258 | 25.73783802 | 26.12758877 | 10.47094974 | 11.45911338 |
| ENSMUSG00000051736 | 11.31922962 | 13.91234488 | 11.29841676 | 18.52552646 | 12.17530797 |
| ENSMUSG00000051748 | 9.904325918 | 13.21672763 | 11.29841676 | 8.860034393 | 12.89150255 |
| ENSMUSG00000051768 | 48.10672589 | 67.47487265 | 49.43057334 | 82.15668255 | 61.59273443 |
| ENSMUSG00000051769 | 7.781970364 | 4.869320706 | 7.061510478 | 4.832746033 | 5.013362104 |
| ENSMUSG00000051777 | 12.73413332 | 5.56493795  | 8.473812573 | 8.054576721 | 6.445751277 |
| ENSMUSG00000051788 | 14.14903703 | 11.1298759  | 4.236906287 | 5.638203705 | 10.7429188  |
| ENSMUSG00000051802 | 9.904325918 | 8.347406925 | 5.649208382 | 6.443661377 | 4.297167518 |
| ENSMUSG00000051804 | 10.61177777 | 6.956172438 | 14.12302096 | 9.665492065 | 8.594335036 |
| ENSMUSG00000051817 | 8.489422215 | 5.56493795  | 8.473812573 | 4.832746033 | 7.161945863 |
| ENSMUSG00000051839 | 4.952162959 | 6.956172438 | 12.00456781 | 6.443661377 | 3.580972932 |
| ENSMUSG00000051851 | 5.65961481  | 4.173703463 | 2.118453143 | 4.02728836  | 2.148583759 |
| ENSMUSG00000051853 | 65.79302217 | 87.64777272 | 97.44884459 | 103.9040397 | 90.95671247 |
| ENSMUSG00000051864 | 103.2879703 | 129.3848073 | 110.1595635 | 141.7605503 | 116.7397176 |
| ENSMUSG00000051879 | 7.074518513 | 6.260555194 | 4.943057334 | 6.443661377 | 6.445751277 |
| ENSMUSG00000051896 | 12.73413332 | 7.651789682 | 7.767661525 | 5.638203705 | 8.594335036 |
| ENSMUSG00000051920 | 7.074518513 | 4.173703463 | 6.35535943  | 7.249119049 | 4.297167518 |
| ENSMUSG00000051934 | 5.65961481  | 6.260555194 | 6.35535943  | 3.221830688 | 7.161945863 |
| ENSMUSG00000051936 | 11.31922962 | 7.651789682 | 5.649208382 | 8.054576721 | 5.729556691 |
| ENSMUSG00000051940 | 17.68629628 | 10.43425866 | 14.829172   | 11.27640741 | 14.32389173 |
| ENSMUSG00000051951 | 2.829807405 | 8.347406925 | 8.473812573 | 8.054576721 | 4.297167518 |
| ENSMUSG00000051956 | 7.074518513 | 4.869320706 | 7.061510478 | 9.665492065 | 6.445751277 |
| ENSMUSG00000051965 | 6.367066661 | 10.43425866 | 4.236906287 | 7.249119049 | 7.87814045  |
| ENSMUSG00000051969 | 10.61177777 | 6.260555194 | 8.473812573 | 2.416373016 | 8.594335036 |
| ENSMUSG00000051978 | 18.39374813 | 15.30357936 | 14.12302096 | 14.4982381  | 15.04008631 |
| ENSMUSG00000052014 | 10.61177777 | 3.478086219 | 7.061510478 | 4.832746033 | 5.013362104 |

|                    |             |             |             |             |             |
|--------------------|-------------|-------------|-------------|-------------|-------------|
| ENSMUSG00000052026 | 11.31922962 | 2.086851731 | 4.943057334 | 7.249119049 | 6.445751277 |
| ENSMUSG00000052031 | 58.0110518  | 66.7792554  | 69.20280268 | 123.2350238 | 85.94335036 |
| ENSMUSG00000052075 | 7.781970364 | 10.43425866 | 7.061510478 | 6.443661377 | 8.594335036 |
| ENSMUSG00000052085 | 7.781970364 | 15.99919661 | 11.29841676 | 16.91461111 | 23.63442135 |
| ENSMUSG00000052117 | 8.489422215 | 8.347406925 | 4.943057334 | 8.860034393 | 7.161945863 |
| ENSMUSG00000052131 | 7.074518513 | 6.956172438 | 6.35535943  | 4.02728836  | 7.87814045  |
| ENSMUSG00000052135 | 7.074518513 | 7.651789682 | 7.767661525 | 3.221830688 | 7.87814045  |
| ENSMUSG00000052144 | 66.50047402 | 109.9075245 | 93.91808935 | 157.0642461 | 123.9016634 |
| ENSMUSG00000052155 | 7.074518513 | 6.956172438 | 7.767661525 | 4.832746033 | 10.02672421 |
| ENSMUSG00000052160 | 34.66514071 | 54.95376226 | 47.3121202  | 56.38203705 | 48.70123187 |
| ENSMUSG00000052187 | 5.65961481  | 4.173703463 | 8.473812573 | 1.610915344 | 7.87814045  |
| ENSMUSG00000052212 | 12.02668147 | 6.956172438 | 6.35535943  | 7.249119049 | 7.161945863 |
| ENSMUSG00000052214 | 21.93100739 | 43.12826911 | 40.95676077 | 62.82569842 | 65.17370736 |
| ENSMUSG00000052217 | 5.65961481  | 5.56493795  | 4.943057334 | 2.416373016 | 5.729556691 |
| ENSMUSG00000052221 | 9.196874066 | 8.347406925 | 7.767661525 | 6.443661377 | 7.87814045  |
| ENSMUSG00000052229 | 7.781970364 | 4.869320706 | 7.767661525 | 8.054576721 | 8.594335036 |
| ENSMUSG00000052234 | 6.367066661 | 4.173703463 | 12.00456781 | 8.054576721 | 5.013362104 |
| ENSMUSG00000052253 | 117.4370073 | 164.8612868 | 139.1117564 | 264.1901164 | 171.8867007 |
| ENSMUSG00000052270 | 14.85648888 | 4.173703463 | 8.473812573 | 2.416373016 | 5.729556691 |
| ENSMUSG00000052271 | 15.56394073 | 13.91234488 | 16.2414741  | 17.72006879 | 24.35061594 |
| ENSMUSG00000052276 | 10.61177777 | 15.30357936 | 7.767661525 | 5.638203705 | 5.729556691 |
| ENSMUSG00000052296 | 160.5915702 | 166.2525213 | 174.4193088 | 289.964762  | 211.277403  |
| ENSMUSG00000052299 | 82.7718666  | 140.5146832 | 98.86114669 | 141.7605503 | 123.1854689 |
| ENSMUSG00000052302 | 5.65961481  | 9.738641413 | 11.29841676 | 29.80193387 | 42.25548059 |
| ENSMUSG00000052303 | 7.781970364 | 10.43425866 | 16.2414741  | 4.02728836  | 8.594335036 |
| ENSMUSG00000052305 | 11.31922962 | 9.043024169 | 10.59226572 | 6.443661377 | 7.161945863 |
| ENSMUSG00000052310 | 21.93100739 | 47.30197258 | 37.42600553 | 101.4876667 | 88.80812871 |
| ENSMUSG00000052316 | 5.65961481  | 6.260555194 | 7.767661525 | 4.832746033 | 6.445751277 |
| ENSMUSG00000052336 | 5.65961481  | 3.478086219 | 8.473812573 | 9.665492065 | 7.87814045  |
| ENSMUSG00000052363 | 16.27139258 | 7.651789682 | 7.767661525 | 4.832746033 | 10.7429188  |
| ENSMUSG00000052364 | 2.122355554 | 5.56493795  | 2.118453143 | 1.610915344 | 4.297167518 |
| ENSMUSG00000052369 | 9.196874066 | 16.69481385 | 21.18453143 | 12.88732275 | 17.18867007 |
| ENSMUSG00000052382 | 8.489422215 | 8.347406925 | 7.061510478 | 8.860034393 | 5.729556691 |
| ENSMUSG00000052392 | 7.074518513 | 6.956172438 | 8.473812573 | 8.860034393 | 2.864778345 |
| ENSMUSG00000052396 | 9.196874066 | 6.260555194 | 5.649208382 | 6.443661377 | 6.445751277 |
| ENSMUSG00000052397 | 117.4370073 | 145.3840039 | 130.6379438 | 193.3098413 | 122.4692743 |
| ENSMUSG00000052417 | 9.196874066 | 6.956172438 | 4.943057334 | 7.249119049 | 5.729556691 |
| ENSMUSG00000052435 | 11.31922962 | 6.260555194 | 4.236906287 | 8.054576721 | 8.594335036 |
| ENSMUSG00000052456 | 67.91537772 | 116.863697  | 104.5103551 | 109.5422434 | 94.5376854  |
| ENSMUSG00000052468 | 11.31922962 | 2.086851731 | 11.29841676 | 4.02728836  | 9.310529622 |
| ENSMUSG00000052469 | 21.93100739 | 13.91234488 | 18.35992724 | 20.1364418  | 18.62105924 |
| ENSMUSG00000052471 | 5.65961481  | 9.738641413 | 7.767661525 | 7.249119049 | 13.60769714 |
| ENSMUSG00000052485 | 5.65961481  | 9.738641413 | 4.236906287 | 6.443661377 | 5.013362104 |

|                    |             |             |             |             |             |
|--------------------|-------------|-------------|-------------|-------------|-------------|
| ENSMUSG00000052488 | 47.39927403 | 71.64857611 | 56.49208382 | 178.0061455 | 156.1304198 |
| ENSMUSG00000052504 | 9.196874066 | 6.260555194 | 9.179963621 | 2.416373016 | 6.445751277 |
| ENSMUSG00000052520 | 7.781970364 | 10.43425866 | 8.473812573 | 7.249119049 | 3.580972932 |
| ENSMUSG00000052537 | 6.367066661 | 6.260555194 | 7.767661525 | 4.832746033 | 6.445751277 |
| ENSMUSG00000052549 | 7.781970364 | 7.651789682 | 2.118453143 | 4.832746033 | 4.297167518 |
| ENSMUSG00000052565 | 9.904325918 | 11.82549314 | 12.00456781 | 7.249119049 | 4.297167518 |
| ENSMUSG00000052566 | 13.44158517 | 11.82549314 | 12.71071886 | 15.30369577 | 24.35061594 |
| ENSMUSG00000052584 | 11.31922962 | 9.738641413 | 12.00456781 | 4.832746033 | 10.02672421 |
| ENSMUSG00000052595 | 6.367066661 | 5.56493795  | 7.061510478 | 3.221830688 | 7.161945863 |
| ENSMUSG00000052609 | 26.1757185  | 37.56333116 | 36.01370344 | 17.72006879 | 17.90486466 |
| ENSMUSG00000052642 | 12.02668147 | 5.56493795  | 2.118453143 | 6.443661377 | 7.161945863 |
| ENSMUSG00000052681 | 118.1444592 | 130.0804246 | 94.6242404  | 265.8010318 | 202.6830679 |
| ENSMUSG00000052684 | 7.074518513 | 9.738641413 | 18.35992724 | 132.9005159 | 89.52432329 |
| ENSMUSG00000052707 | 65.79302217 | 143.2971522 | 89.68118307 | 93.43308996 | 97.40246374 |
| ENSMUSG00000052713 | 106.8252295 | 132.1672763 | 107.3349593 | 132.9005159 | 121.0368851 |
| ENSMUSG00000052727 | 8.489422215 | 9.043024169 | 9.179963621 | 8.054576721 | 4.297167518 |
| ENSMUSG00000052730 | 4.952162959 | 4.173703463 | 6.35535943  | 12.08186508 | 6.445751277 |
| ENSMUSG00000052749 | 24.76081479 | 41.73703463 | 36.71985448 | 29.80193387 | 29.36397804 |
| ENSMUSG00000052763 | 92.67619252 | 116.863697  | 104.5103551 | 106.3204127 | 101.6996313 |
| ENSMUSG00000052812 | 24.76081479 | 39.6501829  | 39.54445867 | 85.37851324 | 63.74131818 |
| ENSMUSG00000052819 | 10.61177777 | 7.651789682 | 7.767661525 | 10.47094974 | 10.02672421 |
| ENSMUSG00000052821 | 4.952162959 | 2.782468975 | 2.824604191 | 0           | 2.864778345 |
| ENSMUSG00000052833 | 88.43148141 | 130.0804246 | 96.74269354 | 236.8045556 | 186.926787  |
| ENSMUSG00000052837 | 24.76081479 | 38.25894841 | 34.60140134 | 202.9753334 | 138.2255552 |
| ENSMUSG00000052852 | 10.61177777 | 8.347406925 | 11.29841676 | 8.054576721 | 6.445751277 |
| ENSMUSG00000052906 | 24.05336294 | 32.69401046 | 18.35992724 | 19.33098413 | 26.49919969 |
| ENSMUSG00000052911 | 7.074518513 | 6.956172438 | 5.649208382 | 7.249119049 | 11.45911338 |
| ENSMUSG00000052914 | 13.44158517 | 6.956172438 | 7.061510478 | 3.221830688 | 7.161945863 |
| ENSMUSG00000052922 | 12.73413332 | 4.869320706 | 4.943057334 | 5.638203705 | 7.87814045  |
| ENSMUSG00000052928 | 2.122355554 | 6.260555194 | 9.179963621 | 4.02728836  | 5.729556691 |
| ENSMUSG00000052955 | 9.196874066 | 4.173703463 | 7.767661525 | 6.443661377 | 5.013362104 |
| ENSMUSG00000052957 | 7.781970364 | 8.347406925 | 9.179963621 | 2.416373016 | 6.445751277 |
| ENSMUSG00000052962 | 45.27691848 | 52.86691053 | 54.37363068 | 65.24207144 | 62.30892901 |
| ENSMUSG00000052974 | 9.904325918 | 6.956172438 | 9.886114669 | 4.832746033 | 5.729556691 |
| ENSMUSG00000052981 | 6.367066661 | 2.782468975 | 5.649208382 | 7.249119049 | 3.580972932 |
| ENSMUSG00000053004 | 6.367066661 | 4.869320706 | 3.530755239 | 8.860034393 | 7.87814045  |
| ENSMUSG00000053007 | 10.61177777 | 2.782468975 | 9.886114669 | 10.47094974 | 3.580972932 |
| ENSMUSG00000053044 | 9.904325918 | 6.956172438 | 2.118453143 | 8.860034393 | 6.445751277 |
| ENSMUSG00000053070 | 10.61177777 | 8.347406925 | 10.59226572 | 7.249119049 | 6.445751277 |
| ENSMUSG00000053101 | 7.781970364 | 5.56493795  | 7.061510478 | 5.638203705 | 7.161945863 |
| ENSMUSG00000053113 | 12.73413332 | 24.34660353 | 18.35992724 | 77.32393652 | 68.0384857  |
| ENSMUSG00000053129 | 4.952162959 | 7.651789682 | 4.943057334 | 4.832746033 | 9.310529622 |
| ENSMUSG00000053137 | 12.02668147 | 25.73783802 | 16.2414741  | 21.74735715 | 11.45911338 |



|                    |             |             |             |             |             |
|--------------------|-------------|-------------|-------------|-------------|-------------|
| ENSMUSG00000053164 | 17.68629628 | 20.86851731 | 16.2414741  | 12.08186508 | 10.7429188  |
| ENSMUSG00000053178 | 14.85648888 | 20.17290007 | 32.4829482  | 26.58010318 | 27.93158887 |
| ENSMUSG00000053181 | 60.13340736 | 83.47406925 | 96.0365425  | 53.96566403 | 63.0251236  |
| ENSMUSG00000053192 | 106.1177777 | 126.6023384 | 116.5149229 | 302.046627  | 224.1689055 |
| ENSMUSG00000053194 | 7.781970364 | 9.043024169 | 10.59226572 | 9.665492065 | 7.161945863 |
| ENSMUSG00000053226 | 16.97884443 | 21.56413456 | 20.47838039 | 10.47094974 | 15.04008631 |
| ENSMUSG00000053251 | 11.31922962 | 4.173703463 | 9.179963621 | 6.443661377 | 5.013362104 |
| ENSMUSG00000053268 | 7.074518513 | 8.347406925 | 6.35535943  | 4.02728836  | 8.594335036 |
| ENSMUSG00000053279 | 7.074518513 | 6.956172438 | 8.473812573 | 2.416373016 | 7.87814045  |
| ENSMUSG00000053289 | 50.22908144 | 78.60474855 | 72.02740687 | 76.51847885 | 83.7947666  |
| ENSMUSG00000053293 | 55.88869625 | 66.08363816 | 68.49665163 | 129.6786852 | 110.2939663 |
| ENSMUSG00000053318 | 8.489422215 | 5.56493795  | 6.35535943  | 4.832746033 | 5.013362104 |
| ENSMUSG00000053329 | 26.1757185  | 41.04141738 | 37.42600553 | 37.05105292 | 38.67450766 |
| ENSMUSG00000053334 | 24.76081479 | 35.47647943 | 38.13215658 | 30.60739154 | 32.22875639 |
| ENSMUSG00000053375 | 5.65961481  | 7.651789682 | 5.649208382 | 5.638203705 | 10.7429188  |
| ENSMUSG00000053389 | 12.73413332 | 11.82549314 | 6.35535943  | 1.610915344 | 5.013362104 |
| ENSMUSG00000053399 | 7.781970364 | 9.043024169 | 3.530755239 | 3.221830688 | 7.87814045  |
| ENSMUSG00000053414 | 2.829807405 | 5.56493795  | 6.35535943  | 8.054576721 | 7.87814045  |
| ENSMUSG00000053420 | 6.367066661 | 10.43425866 | 4.943057334 | 8.860034393 | 7.161945863 |
| ENSMUSG00000053441 | 6.367066661 | 8.347406925 | 5.649208382 | 3.221830688 | 3.580972932 |
| ENSMUSG00000053453 | 35.37259256 | 66.7792554  | 41.66291182 | 100.682209  | 100.2672421 |
| ENSMUSG00000053460 | 16.27139258 | 27.82468975 | 26.12758877 | 30.60739154 | 40.10689684 |
| ENSMUSG00000053461 | 9.196874066 | 9.738641413 | 7.767661525 | 7.249119049 | 7.87814045  |
| ENSMUSG00000053475 | 5.65961481  | 4.869320706 | 7.767661525 | 7.249119049 | 10.02672421 |
| ENSMUSG00000053490 | 0           | 0           | 0           | 0           | 0           |
| ENSMUSG00000053508 | 7.074518513 | 3.478086219 | 10.59226572 | 11.27640741 | 7.161945863 |
| ENSMUSG00000053536 | 32.54278516 | 43.12826911 | 42.36906287 | 97.46037832 | 90.24051788 |
| ENSMUSG00000053560 | 21.22355554 | 45.21512085 | 53.66747963 | 123.2350238 | 104.5644096 |
| ENSMUSG00000053600 | 127.3413332 | 166.9481385 | 141.9363606 | 184.4498069 | 163.2923657 |
| ENSMUSG00000053604 | 41.03220737 | 70.95295887 | 81.20737049 | 76.51847885 | 64.45751277 |
| ENSMUSG00000053624 | 12.02668147 | 4.173703463 | 2.118453143 | 5.638203705 | 5.013362104 |
| ENSMUSG00000053626 | 14.14903703 | 5.56493795  | 7.767661525 | 2.416373016 | 3.580972932 |
| ENSMUSG00000053641 | 86.30912585 | 123.8198694 | 98.15499564 | 250.497336  | 200.5344842 |
| ENSMUSG00000053647 | 11.31922962 | 9.738641413 | 6.35535943  | 12.88732275 | 15.04008631 |
| ENSMUSG00000053675 | 9.904325918 | 6.956172438 | 7.767661525 | 7.249119049 | 4.297167518 |
| ENSMUSG00000053678 | 9.904325918 | 10.43425866 | 12.00456781 | 4.832746033 | 2.148583759 |
| ENSMUSG00000053684 | 32.54278516 | 45.21512085 | 33.89525029 | 39.46742593 | 47.2688427  |
| ENSMUSG00000053695 | 7.781970364 | 4.173703463 | 6.35535943  | 8.860034393 | 5.729556691 |
| ENSMUSG00000053716 | 55.88869625 | 64.69240367 | 68.49665163 | 72.49119049 | 60.87653984 |
| ENSMUSG00000053720 | 9.196874066 | 10.43425866 | 8.473812573 | 5.638203705 | 9.310529622 |
| ENSMUSG00000053729 | 3.537259256 | 4.173703463 | 4.236906287 | 4.02728836  | 4.297167518 |
| ENSMUSG00000053742 | 8.489422215 | 8.347406925 | 9.179963621 | 7.249119049 | 7.87814045  |
| ENSMUSG00000053746 | 7.074518513 | 11.1298759  | 7.767661525 | 10.47094974 | 7.161945863 |

|                    |             |             |             |             |             |
|--------------------|-------------|-------------|-------------|-------------|-------------|
| ENSMUSG00000053747 | 8.489422215 | 3.478086219 | 4.236906287 | 4.832746033 | 7.161945863 |
| ENSMUSG00000053765 | 9.904325918 | 6.956172438 | 5.649208382 | 5.638203705 | 5.729556691 |
| ENSMUSG00000053769 | 24.05336294 | 47.99758982 | 45.19366706 | 58.79841006 | 45.12025894 |
| ENSMUSG00000053774 | 74.28244438 | 100.1688831 | 84.03197468 | 136.1223466 | 118.8883013 |
| ENSMUSG00000053783 | 8.489422215 | 4.173703463 | 5.649208382 | 6.443661377 | 5.729556691 |
| ENSMUSG00000053790 | 6.367066661 | 9.043024169 | 6.35535943  | 8.860034393 | 7.87814045  |
| ENSMUSG00000053799 | 68.62282957 | 84.86530374 | 76.97046421 | 62.82569842 | 63.74131818 |
| ENSMUSG00000053815 | 12.02668147 | 5.56493795  | 2.824604191 | 5.638203705 | 5.013362104 |
| ENSMUSG00000053820 | 9.196874066 | 5.56493795  | 12.00456781 | 14.4982381  | 13.60769714 |
| ENSMUSG00000053846 | 4.952162959 | 7.651789682 | 4.236906287 | 7.249119049 | 7.161945863 |
| ENSMUSG00000053856 | 15.56394073 | 10.43425866 | 7.061510478 | 7.249119049 | 9.310529622 |
| ENSMUSG00000053862 | 10.61177777 | 5.56493795  | 7.767661525 | 5.638203705 | 9.310529622 |
| ENSMUSG00000053863 | 12.02668147 | 6.956172438 | 7.767661525 | 3.221830688 | 10.02672421 |
| ENSMUSG00000053868 | 12.73413332 | 9.043024169 | 12.00456781 | 8.054576721 | 10.02672421 |
| ENSMUSG00000053870 | 7.074518513 | 15.99919661 | 14.12302096 | 8.054576721 | 9.310529622 |
| ENSMUSG00000053873 | 7.781970364 | 5.56493795  | 6.35535943  | 5.638203705 | 7.87814045  |
| ENSMUSG00000053886 | 7.781970364 | 9.043024169 | 8.473812573 | 5.638203705 | 7.161945863 |
| ENSMUSG00000053909 | 5.65961481  | 2.086851731 | 3.530755239 | 3.221830688 | 4.297167518 |
| ENSMUSG00000053914 | 24.76081479 | 40.34580014 | 31.77679715 | 65.24207144 | 70.90326405 |
| ENSMUSG00000053916 | 1.414903703 | 0           | 0           | 0           | 0           |
| ENSMUSG00000053961 | 6.367066661 | 6.956172438 | 7.767661525 | 5.638203705 | 5.013362104 |
| ENSMUSG00000053963 | 9.904325918 | 13.21672763 | 10.59226572 | 8.054576721 | 5.013362104 |
| ENSMUSG00000054000 | 6.367066661 | 6.260555194 | 6.35535943  | 4.02728836  | 5.729556691 |
| ENSMUSG00000054005 | 12.02668147 | 2.782468975 | 1.412302096 | 4.02728836  | 6.445751277 |
| ENSMUSG00000054008 | 74.98989623 | 125.9067211 | 120.7518292 | 47.52200265 | 60.87653984 |
| ENSMUSG00000054013 | 2.122355554 | 6.956172438 | 3.530755239 | 5.638203705 | 3.580972932 |
| ENSMUSG00000054021 | 10.61177777 | 13.91234488 | 5.649208382 | 6.443661377 | 7.87814045  |
| ENSMUSG00000054027 | 29.71297775 | 59.12746572 | 51.54902649 | 80.54576721 | 57.29556691 |
| ENSMUSG00000054033 | 11.31922962 | 7.651789682 | 7.061510478 | 7.249119049 | 8.594335036 |
| ENSMUSG00000054046 | 7.781970364 | 6.956172438 | 12.00456781 | 7.249119049 | 6.445751277 |
| ENSMUSG00000054051 | 38.90985182 | 77.21351406 | 64.25974535 | 43.49471429 | 68.75468029 |
| ENSMUSG00000054052 | 9.904325918 | 6.956172438 | 4.236906287 | 8.054576721 | 7.161945863 |
| ENSMUSG00000054054 | 8.489422215 | 9.043024169 | 6.35535943  | 1.610915344 | 2.864778345 |
| ENSMUSG00000054057 | 9.904325918 | 7.651789682 | 12.00456781 | 6.443661377 | 8.594335036 |
| ENSMUSG00000054074 | 7.781970364 | 13.21672763 | 7.061510478 | 8.054576721 | 11.45911338 |
| ENSMUSG00000054083 | 4.952162959 | 4.869320706 | 9.886114669 | 7.249119049 | 10.02672421 |
| ENSMUSG00000054087 | 9.904325918 | 9.738641413 | 7.061510478 | 8.860034393 | 9.310529622 |
| ENSMUSG00000054091 | 21.93100739 | 31.30277597 | 26.83373982 | 48.32746033 | 35.80972932 |
| ENSMUSG00000054106 | 8.489422215 | 7.651789682 | 10.59226572 | 6.443661377 | 4.297167518 |
| ENSMUSG00000054117 | 9.196874066 | 8.347406925 | 6.35535943  | 9.665492065 | 2.864778345 |
| ENSMUSG00000054136 | 4.952162959 | 4.869320706 | 10.59226572 | 7.249119049 | 5.729556691 |
| ENSMUSG00000054141 | 10.61177777 | 5.56493795  | 4.236906287 | 3.221830688 | 6.445751277 |
| ENSMUSG00000054142 | 6.367066661 | 7.651789682 | 6.35535943  | 6.443661377 | 10.02672421 |

|                    |             |             |             |             |             |
|--------------------|-------------|-------------|-------------|-------------|-------------|
| ENSMUSG00000054146 | 7.074518513 | 5.56493795  | 5.649208382 | 7.249119049 | 7.87814045  |
| ENSMUSG00000054160 | 9.196874066 | 2.086851731 | 7.061510478 | 2.416373016 | 6.445751277 |
| ENSMUSG00000054169 | 10.61177777 | 8.347406925 | 8.473812573 | 14.4982381  | 7.87814045  |
| ENSMUSG00000054191 | 7.781970364 | 6.260555194 | 9.886114669 | 7.249119049 | 3.580972932 |
| ENSMUSG00000054196 | 15.56394073 | 3.478086219 | 9.886114669 | 3.221830688 | 4.297167518 |
| ENSMUSG00000054200 | 9.196874066 | 5.56493795  | 6.35535943  | 7.249119049 | 4.297167518 |
| ENSMUSG00000054203 | 14.14903703 | 10.43425866 | 4.943057334 | 6.443661377 | 5.013362104 |
| ENSMUSG00000054204 | 6.367066661 | 9.043024169 | 8.473812573 | 6.443661377 | 6.445751277 |
| ENSMUSG00000054206 | 13.44158517 | 16.69481385 | 16.2414741  | 22.55281482 | 22.20203218 |
| ENSMUSG00000054215 | 4.952162959 | 4.869320706 | 7.061510478 | 7.249119049 | 6.445751277 |
| ENSMUSG00000054237 | 14.14903703 | 20.86851731 | 17.65377619 | 26.58010318 | 29.36397804 |
| ENSMUSG00000054266 | 8.489422215 | 6.260555194 | 8.473812573 | 5.638203705 | 10.7429188  |
| ENSMUSG00000054272 | 4.952162959 | 4.869320706 | 4.943057334 | 5.638203705 | 5.013362104 |
| ENSMUSG00000054277 | 7.781970364 | 17.39043109 | 21.18453143 | 20.1364418  | 22.91822676 |
| ENSMUSG00000054309 | 16.97884443 | 41.04141738 | 36.71985448 | 42.68925662 | 34.37734014 |
| ENSMUSG00000054312 | 87.72402956 | 116.1680797 | 108.7472614 | 150.6205847 | 131.7798039 |
| ENSMUSG00000054321 | 12.73413332 | 30.60715873 | 26.12758877 | 53.96566403 | 50.13362104 |
| ENSMUSG00000054325 | 7.781970364 | 9.738641413 | 9.886114669 | 6.443661377 | 7.161945863 |
| ENSMUSG00000054342 | 11.31922962 | 12.52111039 | 15.53532305 | 132.9005159 | 65.88990194 |
| ENSMUSG00000054360 | 6.367066661 | 2.782468975 | 9.179963621 | 4.02728836  | 2.864778345 |
| ENSMUSG00000054362 | 5.65961481  | 2.782468975 | 5.649208382 | 4.832746033 | 5.729556691 |
| ENSMUSG00000054364 | 12.73413332 | 34.08524495 | 33.18909925 | 19.33098413 | 27.21539428 |
| ENSMUSG00000054381 | 35.37259256 | 49.38882431 | 41.66291182 | 33.82922223 | 52.99839939 |
| ENSMUSG00000054383 | 14.14903703 | 13.21672763 | 12.71071886 | 8.054576721 | 10.7429188  |
| ENSMUSG00000054408 | 47.39927403 | 84.1696865  | 72.73355792 | 94.23854763 | 91.67290705 |
| ENSMUSG00000054409 | 9.196874066 | 6.956172438 | 9.179963621 | 7.249119049 | 4.297167518 |
| ENSMUSG00000054414 | 25.46826665 | 47.99758982 | 43.78136496 | 65.24207144 | 62.30892901 |
| ENSMUSG00000054417 | 12.73413332 | 6.956172438 | 8.473812573 | 5.638203705 | 9.310529622 |
| ENSMUSG00000054422 | 11.31922962 | 6.956172438 | 9.886114669 | 7.249119049 | 9.310529622 |
| ENSMUSG00000054446 | 9.196874066 | 8.347406925 | 7.061510478 | 7.249119049 | 5.729556691 |
| ENSMUSG00000054455 | 112.4848444 | 137.036597  | 132.0502459 | 110.3477011 | 95.25387998 |
| ENSMUSG00000054459 | 10.61177777 | 8.347406925 | 6.35535943  | 5.638203705 | 7.161945863 |
| ENSMUSG00000054497 | 8.489422215 | 6.956172438 | 3.530755239 | 3.221830688 | 2.148583759 |
| ENSMUSG00000054498 | 4.952162959 | 7.651789682 | 4.943057334 | 5.638203705 | 5.729556691 |
| ENSMUSG00000054499 | 17.68629628 | 33.3896277  | 24.00913562 | 19.33098413 | 22.20203218 |
| ENSMUSG00000054509 | 40.32475552 | 63.99678643 | 50.13672439 | 54.7711217  | 59.44415067 |
| ENSMUSG00000054517 | 31.12788146 | 31.30277597 | 47.3121202  | 44.30017197 | 35.09353473 |
| ENSMUSG00000054519 | 16.97884443 | 32.69401046 | 28.24604191 | 24.96918783 | 15.04008631 |
| ENSMUSG00000054526 | 8.489422215 | 7.651789682 | 10.59226572 | 2.416373016 | 5.729556691 |
| ENSMUSG00000054537 | 12.02668147 | 9.043024169 | 8.473812573 | 6.443661377 | 5.729556691 |
| ENSMUSG00000054568 | 14.85648888 | 6.956172438 | 4.943057334 | 2.416373016 | 5.729556691 |
| ENSMUSG00000054582 | 9.904325918 | 10.43425866 | 4.943057334 | 6.443661377 | 8.594335036 |
| ENSMUSG00000054589 | 142.1978221 | 180.8604834 | 149.7040221 | 76.51847885 | 67.32229112 |

|                    |             |             |             |             |             |
|--------------------|-------------|-------------|-------------|-------------|-------------|
| ENSMUSG00000054604 | 118.1444592 | 143.2971522 | 146.8794179 | 212.6408254 | 184.0620087 |
| ENSMUSG00000054612 | 12.02668147 | 13.91234488 | 9.886114669 | 12.88732275 | 9.310529622 |
| ENSMUSG00000054619 | 16.27139258 | 19.47728283 | 19.06607829 | 15.30369577 | 14.32389173 |
| ENSMUSG00000054630 | 7.781970364 | 8.347406925 | 6.35535943  | 2.416373016 | 8.594335036 |
| ENSMUSG00000054662 | 7.781970364 | 2.086851731 | 4.236906287 | 3.221830688 | 6.445751277 |
| ENSMUSG00000054666 | 5.65961481  | 3.478086219 | 5.649208382 | 2.416373016 | 6.445751277 |
| ENSMUSG00000054667 | 5.65961481  | 2.086851731 | 7.061510478 | 1.610915344 | 3.580972932 |
| ENSMUSG00000054675 | 12.02668147 | 4.869320706 | 3.530755239 | 4.832746033 | 6.445751277 |
| ENSMUSG00000054679 | 9.196874066 | 6.956172438 | 7.061510478 | 3.221830688 | 5.013362104 |
| ENSMUSG00000054716 | 31.12788146 | 52.17129328 | 34.60140134 | 62.02024075 | 63.74131818 |
| ENSMUSG00000054717 | 13.44158517 | 15.30357936 | 9.886114669 | 132.9005159 | 94.5376854  |
| ENSMUSG00000054723 | 54.47379255 | 63.30116918 | 75.55816211 | 53.96566403 | 58.72795608 |
| ENSMUSG00000054727 | 1.414903703 | 3.478086219 | 2.824604191 | 3.221830688 | 3.580972932 |
| ENSMUSG00000054733 | 7.781970364 | 8.347406925 | 7.767661525 | 7.249119049 | 10.02672421 |
| ENSMUSG00000054753 | 9.904325918 | 7.651789682 | 7.061510478 | 8.860034393 | 9.310529622 |
| ENSMUSG00000054759 | 7.074518513 | 6.260555194 | 3.530755239 | 4.02728836  | 4.297167518 |
| ENSMUSG00000054763 | 6.367066661 | 5.56493795  | 9.886114669 | 4.832746033 | 8.594335036 |
| ENSMUSG00000054764 | 11.31922962 | 6.260555194 | 9.886114669 | 7.249119049 | 6.445751277 |
| ENSMUSG00000054793 | 9.904325918 | 7.651789682 | 10.59226572 | 7.249119049 | 6.445751277 |
| ENSMUSG00000054843 | 12.02668147 | 11.1298759  | 14.829172   | 12.08186508 | 12.17530797 |
| ENSMUSG00000054850 | 3.537259256 | 4.869320706 | 5.649208382 | 0.805457672 | 2.864778345 |
| ENSMUSG00000054863 | 4.244711108 | 11.82549314 | 2.118453143 | 3.221830688 | 4.297167518 |
| ENSMUSG00000054871 | 9.196874066 | 6.260555194 | 7.767661525 | 8.860034393 | 5.013362104 |
| ENSMUSG00000054894 | 19.80865184 | 31.99839321 | 31.0706461  | 47.52200265 | 42.25548059 |
| ENSMUSG00000054901 | 9.196874066 | 8.347406925 | 10.59226572 | 4.02728836  | 7.87814045  |
| ENSMUSG00000054905 | 11.31922962 | 7.651789682 | 9.886114669 | 1.610915344 | 7.161945863 |
| ENSMUSG00000054931 | 7.781970364 | 7.651789682 | 3.530755239 | 5.638203705 | 10.7429188  |
| ENSMUSG00000054932 | 11.31922962 | 9.043024169 | 6.35535943  | 6.443661377 | 2.864778345 |
| ENSMUSG00000054938 | 10.61177777 | 3.478086219 | 7.061510478 | 4.02728836  | 9.310529622 |
| ENSMUSG00000054939 | 7.074518513 | 11.82549314 | 8.473812573 | 8.860034393 | 12.89150255 |
| ENSMUSG00000054940 | 9.196874066 | 5.56493795  | 12.00456781 | 8.054576721 | 5.729556691 |
| ENSMUSG00000054945 | 36.08004441 | 49.38882431 | 50.13672439 | 122.4295662 | 92.38910164 |
| ENSMUSG00000054951 | 9.904325918 | 7.651789682 | 5.649208382 | 4.02728836  | 5.013362104 |
| ENSMUSG00000054958 | 9.904325918 | 5.56493795  | 6.35535943  | 6.443661377 | 7.87814045  |
| ENSMUSG00000054988 | 11.31922962 | 11.82549314 | 8.473812573 | 4.02728836  | 8.594335036 |
| ENSMUSG00000054994 | 6.367066661 | 7.651789682 | 3.530755239 | 3.221830688 | 5.013362104 |
| ENSMUSG00000054999 | 5.65961481  | 9.043024169 | 10.59226572 | 9.665492065 | 9.310529622 |
| ENSMUSG00000055015 | 18.39374813 | 22.95536904 | 31.77679715 | 18.52552646 | 17.90486466 |
| ENSMUSG00000055030 | 9.904325918 | 4.869320706 | 9.886114669 | 5.638203705 | 3.580972932 |
| ENSMUSG00000055033 | 10.61177777 | 4.173703463 | 4.943057334 | 1.610915344 | 7.87814045  |
| ENSMUSG00000055041 | 31.12788146 | 56.34499675 | 48.01827125 | 41.88379895 | 40.82309142 |
| ENSMUSG00000055065 | 72.16008883 | 107.8206728 | 107.3349593 | 207.8080794 | 171.1705061 |
| ENSMUSG00000055069 | 21.22355554 | 37.56333116 | 39.54445867 | 16.91461111 | 20.769643   |

|                    |             |             |             |             |             |
|--------------------|-------------|-------------|-------------|-------------|-------------|
| ENSMUSG00000055078 | 6.367066661 | 6.260555194 | 5.649208382 | 5.638203705 | 3.580972932 |
| ENSMUSG00000055095 | 4.952162959 | 9.043024169 | 8.473812573 | 4.832746033 | 6.445751277 |
| ENSMUSG00000055116 | 37.49494812 | 59.12746572 | 57.90438592 | 22.55281482 | 35.80972932 |
| ENSMUSG00000055138 | 5.65961481  | 5.56493795  | 6.35535943  | 8.054576721 | 5.013362104 |
| ENSMUSG00000055148 | 158.4692147 | 153.0357936 | 154.6470795 | 175.5897725 | 153.9818361 |
| ENSMUSG00000055170 | 6.367066661 | 11.1298759  | 9.179963621 | 4.832746033 | 3.580972932 |
| ENSMUSG00000055184 | 28.29807405 | 38.25894841 | 34.60140134 | 109.5422434 | 84.51096119 |
| ENSMUSG00000055194 | 10.61177777 | 6.260555194 | 8.473812573 | 5.638203705 | 7.87814045  |
| ENSMUSG00000055197 | 7.074518513 | 4.869320706 | 7.767661525 | 3.221830688 | 5.729556691 |
| ENSMUSG00000055200 | 28.29807405 | 41.73703463 | 30.36449505 | 24.16373016 | 25.78300511 |
| ENSMUSG00000055210 | 6.367066661 | 14.60796212 | 12.71071886 | 4.832746033 | 4.297167518 |
| ENSMUSG00000055298 | 13.44158517 | 6.956172438 | 6.35535943  | 7.249119049 | 3.580972932 |
| ENSMUSG00000055301 | 8.489422215 | 8.347406925 | 8.473812573 | 7.249119049 | 4.297167518 |
| ENSMUSG00000055302 | 19.10119998 | 34.08524495 | 28.24604191 | 100.682209  | 89.52432329 |
| ENSMUSG00000055312 | 4.952162959 | 4.869320706 | 10.59226572 | 5.638203705 | 7.161945863 |
| ENSMUSG00000055319 | 76.40479994 | 118.9505487 | 103.098053  | 129.6786852 | 109.5777717 |
| ENSMUSG00000055334 | 21.93100739 | 25.73783802 | 23.30298458 | 19.33098413 | 27.21539428 |
| ENSMUSG00000055357 | 5.65961481  | 3.478086219 | 6.35535943  | 2.416373016 | 4.297167518 |
| ENSMUSG00000055373 | 9.196874066 | 6.956172438 | 5.649208382 | 4.832746033 | 9.310529622 |
| ENSMUSG00000055415 | 9.196874066 | 6.260555194 | 7.061510478 | 8.860034393 | 7.161945863 |
| ENSMUSG00000055430 | 9.196874066 | 12.52111039 | 9.886114669 | 5.638203705 | 11.45911338 |
| ENSMUSG00000055435 | 3.537259256 | 3.478086219 | 8.473812573 | 2.416373016 | 7.161945863 |
| ENSMUSG00000055480 | 33.25023701 | 56.34499675 | 40.25060972 | 29.80193387 | 40.10689684 |
| ENSMUSG00000055485 | 9.196874066 | 9.738641413 | 7.767661525 | 5.638203705 | 10.02672421 |
| ENSMUSG00000055489 | 7.781970364 | 7.651789682 | 8.473812573 | 2.416373016 | 7.87814045  |
| ENSMUSG00000055493 | 8.489422215 | 7.651789682 | 9.886114669 | 4.02728836  | 7.87814045  |
| ENSMUSG00000055515 | 10.61177777 | 2.782468975 | 7.767661525 | 8.860034393 | 9.310529622 |
| ENSMUSG00000055538 | 14.14903703 | 13.91234488 | 10.59226572 | 11.27640741 | 10.02672421 |
| ENSMUSG00000055546 | 12.02668147 | 9.738641413 | 8.473812573 | 8.054576721 | 11.45911338 |
| ENSMUSG00000055547 | 9.904325918 | 9.738641413 | 9.179963621 | 5.638203705 | 15.04008631 |
| ENSMUSG00000055555 | 6.367066661 | 5.56493795  | 1.412302096 | 3.221830688 | 1.432389173 |
| ENSMUSG00000055560 | 14.14903703 | 23.65098629 | 22.59683353 | 12.88732275 | 12.17530797 |
| ENSMUSG00000055561 | 9.904325918 | 4.173703463 | 10.59226572 | 1.610915344 | 7.161945863 |
| ENSMUSG00000055594 | 7.781970364 | 6.956172438 | 9.179963621 | 7.249119049 | 4.297167518 |
| ENSMUSG00000055609 | 13.44158517 | 6.260555194 | 8.473812573 | 4.02728836  | 4.297167518 |
| ENSMUSG00000055610 | 8.489422215 | 11.1298759  | 7.061510478 | 1.610915344 | 3.580972932 |
| ENSMUSG00000055633 | 2.829807405 | 10.43425866 | 6.35535943  | 5.638203705 | 8.594335036 |
| ENSMUSG00000055643 | 13.44158517 | 3.478086219 | 7.061510478 | 3.221830688 | 9.310529622 |
| ENSMUSG00000055660 | 29.71297775 | 43.12826911 | 46.60596915 | 107.1258704 | 81.64618284 |
| ENSMUSG00000055675 | 7.074518513 | 7.651789682 | 9.886114669 | 4.832746033 | 5.013362104 |
| ENSMUSG00000055679 | 8.489422215 | 9.043024169 | 7.767661525 | 5.638203705 | 5.729556691 |
| ENSMUSG00000055691 | 13.44158517 | 11.82549314 | 8.473812573 | 6.443661377 | 8.594335036 |
| ENSMUSG00000055723 | 81.3569629  | 121.0374004 | 138.4056054 | 99.07129367 | 122.4692743 |

|                    |             |             |             |             |             |
|--------------------|-------------|-------------|-------------|-------------|-------------|
| ENSMUSG00000055733 | 4.244711108 | 3.478086219 | 2.824604191 | 2.416373016 | 3.580972932 |
| ENSMUSG00000055745 | 26.88317035 | 50.08444155 | 53.66747963 | 22.55281482 | 26.49919969 |
| ENSMUSG00000055746 | 4.952162959 | 2.782468975 | 1.412302096 | 3.221830688 | 3.580972932 |
| ENSMUSG00000055782 | 9.904325918 | 9.043024169 | 5.649208382 | 5.638203705 | 7.87814045  |
| ENSMUSG00000055789 | 4.244711108 | 6.260555194 | 7.767661525 | 5.638203705 | 7.87814045  |
| ENSMUSG00000055809 | 9.904325918 | 4.869320706 | 7.767661525 | 8.860034393 | 8.594335036 |
| ENSMUSG00000055811 | 9.904325918 | 6.260555194 | 8.473812573 | 4.02728836  | 5.729556691 |
| ENSMUSG00000055826 | 4.244711108 | 3.478086219 | 0.706151048 | 2.416373016 | 5.013362104 |
| ENSMUSG00000055839 | 31.83533331 | 45.91073809 | 31.77679715 | 92.62763229 | 82.36237743 |
| ENSMUSG00000055862 | 23.34591109 | 27.12907251 | 33.89525029 | 70.07481747 | 63.74131818 |
| ENSMUSG00000055865 | 9.196874066 | 7.651789682 | 7.061510478 | 1.610915344 | 8.594335036 |
| ENSMUSG00000055866 | 16.27139258 | 19.47728283 | 18.35992724 | 12.08186508 | 17.90486466 |
| ENSMUSG00000055874 | 9.904325918 | 8.347406925 | 7.767661525 | 7.249119049 | 7.161945863 |
| ENSMUSG00000055882 | 7.074518513 | 2.782468975 | 11.29841676 | 8.860034393 | 9.310529622 |
| ENSMUSG00000055884 | 31.12788146 | 57.73623123 | 55.07978173 | 75.71302118 | 61.59273443 |
| ENSMUSG00000055891 | 5.65961481  | 4.173703463 | 11.29841676 | 6.443661377 | 7.87814045  |
| ENSMUSG00000055895 | 12.02668147 | 8.347406925 | 4.236906287 | 3.221830688 | 7.161945863 |
| ENSMUSG00000055912 | 11.31922962 | 20.86851731 | 15.53532305 | 17.72006879 | 14.32389173 |
| ENSMUSG00000055926 | 8.489422215 | 9.738641413 | 12.71071886 | 9.665492065 | 10.7429188  |
| ENSMUSG00000055937 | 7.074518513 | 5.56493795  | 3.530755239 | 8.860034393 | 7.161945863 |
| ENSMUSG00000055943 | 82.7718666  | 141.2103005 | 85.44427678 | 130.4841429 | 128.9150255 |
| ENSMUSG00000055945 | 9.196874066 | 7.651789682 | 9.179963621 | 10.47094974 | 12.89150255 |
| ENSMUSG00000055976 | 11.31922962 | 3.478086219 | 7.061510478 | 4.02728836  | 5.013362104 |
| ENSMUSG00000055978 | 8.489422215 | 11.1298759  | 7.061510478 | 5.638203705 | 7.87814045  |
| ENSMUSG00000055980 | 9.904325918 | 13.21672763 | 7.061510478 | 5.638203705 | 5.729556691 |
| ENSMUSG00000056008 | 6.367066661 | 4.869320706 | 9.179963621 | 5.638203705 | 7.87814045  |
| ENSMUSG00000056035 | 10.61177777 | 7.651789682 | 5.649208382 | 6.443661377 | 5.729556691 |
| ENSMUSG00000056043 | 20.51610369 | 29.91154148 | 33.89525029 | 21.74735715 | 29.36397804 |
| ENSMUSG00000056054 | 7.781970364 | 2.782468975 | 9.179963621 | 7.249119049 | 7.161945863 |
| ENSMUSG00000056069 | 29.0055259  | 38.95456565 | 23.30298458 | 14.4982381  | 25.06681052 |
| ENSMUSG00000056078 | 3.537259256 | 9.043024169 | 7.061510478 | 8.054576721 | 6.445751277 |
| ENSMUSG00000056124 | 8.489422215 | 4.173703463 | 5.649208382 | 5.638203705 | 3.580972932 |
| ENSMUSG00000056130 | 7.781970364 | 15.30357936 | 16.2414741  | 57.18749472 | 43.68786977 |
| ENSMUSG00000056133 | 14.85648888 | 9.043024169 | 9.886114669 | 8.054576721 | 10.7429188  |
| ENSMUSG00000056148 | 11.31922962 | 3.478086219 | 8.473812573 | 5.638203705 | 8.594335036 |
| ENSMUSG00000056155 | 7.781970364 | 6.956172438 | 9.179963621 | 3.221830688 | 6.445751277 |
| ENSMUSG00000056167 | 51.64398514 | 70.25734162 | 66.37819849 | 103.098582  | 85.94335036 |
| ENSMUSG00000056174 | 6.367066661 | 6.260555194 | 9.886114669 | 10.47094974 | 7.161945863 |
| ENSMUSG00000056184 | 18.39374813 | 11.82549314 | 8.473812573 | 4.02728836  | 9.310529622 |
| ENSMUSG00000056185 | 46.69182218 | 70.95295887 | 81.20737049 | 52.35474869 | 47.2688427  |
| ENSMUSG00000056197 | 8.489422215 | 4.173703463 | 1.412302096 | 8.054576721 | 3.580972932 |
| ENSMUSG00000056201 | 61.54831106 | 82.08283477 | 69.20280268 | 263.3846588 | 183.3458141 |
| ENSMUSG00000056203 | 4.244711108 | 3.478086219 | 9.179963621 | 4.832746033 | 2.864778345 |

|                    |             |             |             |             |             |
|--------------------|-------------|-------------|-------------|-------------|-------------|
| ENSMUSG00000056204 | 25.46826665 | 38.95456565 | 36.71985448 | 38.66196826 | 42.97167518 |
| ENSMUSG00000056209 | 26.1757185  | 43.82388636 | 33.18909925 | 49.93837567 | 55.14698315 |
| ENSMUSG00000056214 | 9.196874066 | 14.60796212 | 15.53532305 | 18.52552646 | 15.04008631 |
| ENSMUSG00000056216 | 146.4425332 | 190.5991248 | 181.4808193 | 211.8353678 | 171.8867007 |
| ENSMUSG00000056223 | 7.781970364 | 7.651789682 | 7.061510478 | 6.443661377 | 7.87814045  |
| ENSMUSG00000056270 | 12.02668147 | 8.347406925 | 7.061510478 | 4.02728836  | 5.729556691 |
| ENSMUSG00000056305 | 111.0699406 | 137.7322143 | 115.1026208 | 182.0334339 | 146.1036956 |
| ENSMUSG00000056306 | 10.61177777 | 3.478086219 | 7.061510478 | 1.610915344 | 9.310529622 |
| ENSMUSG00000056313 | 8.489422215 | 6.956172438 | 9.886114669 | 9.665492065 | 5.729556691 |
| ENSMUSG00000056350 | 9.196874066 | 7.651789682 | 9.179963621 | 9.665492065 | 5.729556691 |
| ENSMUSG00000056379 | 13.44158517 | 5.56493795  | 8.473812573 | 6.443661377 | 2.864778345 |
| ENSMUSG00000056399 | 4.952162959 | 8.347406925 | 5.649208382 | 8.860034393 | 5.729556691 |
| ENSMUSG00000056423 | 7.781970364 | 3.478086219 | 2.824604191 | 7.249119049 | 4.297167518 |
| ENSMUSG00000056426 | 8.489422215 | 8.347406925 | 4.943057334 | 6.443661377 | 7.161945863 |
| ENSMUSG00000056429 | 89.84638511 | 121.0374004 | 90.38733411 | 135.3168889 | 102.4158258 |
| ENSMUSG00000056436 | 9.904325918 | 11.1298759  | 12.71071886 | 4.832746033 | 9.310529622 |
| ENSMUSG00000056457 | 22.63845924 | 18.08604834 | 21.18453143 | 16.10915344 | 17.18867007 |
| ENSMUSG00000056468 | 6.367066661 | 5.56493795  | 2.824604191 | 4.832746033 | 7.161945863 |
| ENSMUSG00000056481 | 7.074518513 | 9.043024169 | 10.59226572 | 7.249119049 | 5.729556691 |
| ENSMUSG00000056487 | 0           | 0           | 0           | 0           | 0           |
| ENSMUSG00000056492 | 4.952162959 | 5.56493795  | 12.71071886 | 5.638203705 | 4.297167518 |
| ENSMUSG00000056493 | 179.6927702 | 213.5544938 | 192.779236  | 212.6408254 | 171.1705061 |
| ENSMUSG00000056494 | 11.31922962 | 5.56493795  | 6.35535943  | 4.02728836  | 7.87814045  |
| ENSMUSG00000056501 | 3.537259256 | 0.695617244 | 8.473812573 | 4.02728836  | 10.02672421 |
| ENSMUSG00000056508 | 7.074518513 | 11.1298759  | 2.824604191 | 9.665492065 | 8.594335036 |
| ENSMUSG00000056515 | 15.56394073 | 9.738641413 | 12.00456781 | 17.72006879 | 23.63442135 |
| ENSMUSG00000056529 | 7.781970364 | 13.91234488 | 7.061510478 | 1.610915344 | 12.17530797 |
| ENSMUSG00000056544 | 4.952162959 | 6.260555194 | 6.35535943  | 3.221830688 | 5.729556691 |
| ENSMUSG00000056586 | 14.85648888 | 7.651789682 | 8.473812573 | 13.69278043 | 15.7562809  |
| ENSMUSG00000056596 | 7.781970364 | 6.956172438 | 3.530755239 | 6.443661377 | 5.729556691 |
| ENSMUSG00000056600 | 11.31922962 | 12.52111039 | 9.886114669 | 7.249119049 | 7.161945863 |
| ENSMUSG00000056612 | 15.56394073 | 24.34660353 | 20.47838039 | 162.7024498 | 100.9834367 |
| ENSMUSG00000056632 | 10.61177777 | 13.21672763 | 8.473812573 | 8.860034393 | 7.161945863 |
| ENSMUSG00000056643 | 8.489422215 | 4.173703463 | 2.118453143 | 5.638203705 | 7.87814045  |
| ENSMUSG00000056648 | 6.367066661 | 4.173703463 | 9.886114669 | 5.638203705 | 11.45911338 |
| ENSMUSG00000056656 | 10.61177777 | 3.478086219 | 5.649208382 | 13.69278043 | 13.60769714 |
| ENSMUSG00000056665 | 12.73413332 | 18.78166558 | 27.53989086 | 40.2728836  | 42.25548059 |
| ENSMUSG00000056671 | 9.196874066 | 8.347406925 | 9.886114669 | 8.860034393 | 6.445751277 |
| ENSMUSG00000056706 | 5.65961481  | 7.651789682 | 8.473812573 | 5.638203705 | 7.87814045  |
| ENSMUSG00000056708 | 134.4158517 | 134.254128  | 125.6948865 | 248.080963  | 189.7915654 |
| ENSMUSG00000056728 | 7.074518513 | 5.56493795  | 5.649208382 | 4.832746033 | 5.729556691 |
| ENSMUSG00000056749 | 4.244711108 | 9.043024169 | 6.35535943  | 298.0193387 | 219.871738  |
| ENSMUSG00000056815 | 4.244711108 | 2.782468975 | 4.236906287 | 2.416373016 | 7.161945863 |

|                    |             |             |             |             |             |
|--------------------|-------------|-------------|-------------|-------------|-------------|
| ENSMUSG00000056820 | 12.02668147 | 15.30357936 | 14.12302096 | 26.58010318 | 26.49919969 |
| ENSMUSG00000056822 | 4.244711108 | 10.43425866 | 6.35535943  | 4.832746033 | 7.161945863 |
| ENSMUSG00000056829 | 9.904325918 | 3.478086219 | 7.767661525 | 0.805457672 | 6.445751277 |
| ENSMUSG00000056854 | 8.489422215 | 5.56493795  | 1.412302096 | 0.805457672 | 3.580972932 |
| ENSMUSG00000056863 | 7.074518513 | 6.956172438 | 2.824604191 | 4.832746033 | 7.161945863 |
| ENSMUSG00000056870 | 10.61177777 | 6.956172438 | 6.35535943  | 2.416373016 | 4.297167518 |
| ENSMUSG00000056883 | 9.904325918 | 6.956172438 | 10.59226572 | 3.221830688 | 6.445751277 |
| ENSMUSG00000056895 | 9.904325918 | 11.1298759  | 5.649208382 | 2.416373016 | 3.580972932 |
| ENSMUSG00000056919 | 20.51610369 | 34.78086219 | 32.4829482  | 16.91461111 | 21.48583759 |
| ENSMUSG00000056946 | 11.31922962 | 3.478086219 | 4.943057334 | 7.249119049 | 2.148583759 |
| ENSMUSG00000056947 | 14.14903703 | 6.260555194 | 9.886114669 | 8.054576721 | 7.161945863 |
| ENSMUSG00000056966 | 8.489422215 | 4.869320706 | 7.061510478 | 7.249119049 | 5.013362104 |
| ENSMUSG00000056972 | 10.61177777 | 5.56493795  | 5.649208382 | 4.832746033 | 2.148583759 |
| ENSMUSG00000056973 | 9.904325918 | 4.869320706 | 7.767661525 | 5.638203705 | 6.445751277 |
| ENSMUSG00000056978 | 7.781970364 | 4.869320706 | 7.061510478 | 6.443661377 | 5.729556691 |
| ENSMUSG00000056987 | 7.074518513 | 8.347406925 | 7.767661525 | 4.02728836  | 10.02672421 |
| ENSMUSG00000057037 | 6.367066661 | 4.869320706 | 4.943057334 | 8.054576721 | 7.87814045  |
| ENSMUSG00000057047 | 7.781970364 | 5.56493795  | 8.473812573 | 1.610915344 | 9.310529622 |
| ENSMUSG00000057060 | 3.537259256 | 1.391234488 | 4.236906287 | 3.221830688 | 5.729556691 |
| ENSMUSG00000057069 | 139.3680147 | 148.1664729 | 135.5810012 | 198.948045  | 167.5895332 |
| ENSMUSG00000057074 | 13.44158517 | 6.260555194 | 8.473812573 | 6.443661377 | 6.445751277 |
| ENSMUSG00000057101 | 61.54831106 | 75.12666233 | 68.49665163 | 75.71302118 | 65.17370736 |
| ENSMUSG00000057134 | 58.71850365 | 97.38641413 | 76.26431316 | 174.7843148 | 138.2255552 |
| ENSMUSG00000057137 | 23.34591109 | 34.78086219 | 22.59683353 | 24.96918783 | 21.48583759 |
| ENSMUSG00000057163 | 7.781970364 | 7.651789682 | 7.061510478 | 4.832746033 | 2.864778345 |
| ENSMUSG00000057170 | 9.196874066 | 8.347406925 | 13.41686991 | 4.02728836  | 2.864778345 |
| ENSMUSG00000057173 | 8.489422215 | 8.347406925 | 7.061510478 | 8.054576721 | 10.7429188  |
| ENSMUSG00000057174 | 15.56394073 | 6.260555194 | 9.179963621 | 5.638203705 | 9.310529622 |
| ENSMUSG00000057176 | 50.22908144 | 65.38802092 | 50.84287544 | 68.46390213 | 62.30892901 |
| ENSMUSG00000057179 | 10.61177777 | 6.956172438 | 4.943057334 | 5.638203705 | 6.445751277 |
| ENSMUSG00000057193 | 205.1610369 | 253.900294  | 251.389773  | 115.1804471 | 121.7530797 |
| ENSMUSG00000057223 | 7.781970364 | 6.956172438 | 4.943057334 | 8.860034393 | 7.161945863 |
| ENSMUSG00000057228 | 11.31922962 | 6.260555194 | 7.061510478 | 4.832746033 | 3.580972932 |
| ENSMUSG00000057234 | 9.904325918 | 20.17290007 | 14.12302096 | 12.88732275 | 12.17530797 |
| ENSMUSG00000057286 | 6.367066661 | 5.56493795  | 3.530755239 | 6.443661377 | 8.594335036 |
| ENSMUSG00000057329 | 53.7663407  | 93.90832791 | 84.03197468 | 128.0677699 | 115.3073284 |
| ENSMUSG00000057388 | 74.28244438 | 113.3856107 | 88.26888097 | 312.5175768 | 221.3041272 |
| ENSMUSG00000057396 | 12.73413332 | 35.47647943 | 23.30298458 | 21.74735715 | 24.35061594 |
| ENSMUSG00000057402 | 2.829807405 | 3.478086219 | 4.236906287 | 2.416373016 | 1.432389173 |
| ENSMUSG00000057411 | 17.68629628 | 22.2597518  | 30.36449505 | 33.82922223 | 27.93158887 |
| ENSMUSG00000057417 | 4.952162959 | 4.173703463 | 5.649208382 | 8.860034393 | 9.310529622 |
| ENSMUSG00000057425 | 5.65961481  | 4.869320706 | 6.35535943  | 3.221830688 | 5.013362104 |
| ENSMUSG00000057440 | 13.44158517 | 19.47728283 | 14.829172   | 21.74735715 | 13.60769714 |



|                    |             |             |             |             |             |
|--------------------|-------------|-------------|-------------|-------------|-------------|
| ENSMUSG00000057446 | 9.904325918 | 6.956172438 | 4.943057334 | 7.249119049 | 7.87814045  |
| ENSMUSG00000057454 | 13.44158517 | 10.43425866 | 6.35535943  | 4.02728836  | 9.310529622 |
| ENSMUSG00000057465 | 9.904325918 | 7.651789682 | 6.35535943  | 4.832746033 | 7.161945863 |
| ENSMUSG00000057469 | 20.51610369 | 20.86851731 | 26.83373982 | 54.7711217  | 42.97167518 |
| ENSMUSG00000057497 | 13.44158517 | 19.47728283 | 17.65377619 | 62.02024075 | 46.55264811 |
| ENSMUSG00000057503 | 7.781970364 | 6.260555194 | 7.061510478 | 5.638203705 | 10.02672421 |
| ENSMUSG00000057506 | 28.29807405 | 53.56252777 | 40.95676077 | 57.99295239 | 52.99839939 |
| ENSMUSG00000057540 | 9.904325918 | 2.782468975 | 4.943057334 | 4.832746033 | 6.445751277 |
| ENSMUSG00000057561 | 79.23460734 | 123.1242521 | 116.5149229 | 287.5483889 | 233.4794351 |
| ENSMUSG00000057604 | 7.781970364 | 7.651789682 | 7.061510478 | 8.860034393 | 10.02672421 |
| ENSMUSG00000057609 | 7.781970364 | 6.260555194 | 7.061510478 | 4.832746033 | 7.161945863 |
| ENSMUSG00000057614 | 9.904325918 | 6.956172438 | 4.236906287 | 8.860034393 | 2.864778345 |
| ENSMUSG00000057615 | 4.952162959 | 2.782468975 | 4.236906287 | 0.805457672 | 2.864778345 |
| ENSMUSG00000057649 | 23.34591109 | 27.12907251 | 20.47838039 | 53.16020636 | 51.56601022 |
| ENSMUSG00000057650 | 9.904325918 | 11.82549314 | 8.473812573 | 4.832746033 | 7.161945863 |
| ENSMUSG00000057654 | 12.02668147 | 8.347406925 | 6.35535943  | 4.02728836  | 7.161945863 |
| ENSMUSG00000057667 | 36.78749627 | 49.38882431 | 43.07521391 | 58.79841006 | 60.16034525 |
| ENSMUSG00000057674 | 9.904325918 | 4.173703463 | 4.236906287 | 5.638203705 | 7.161945863 |
| ENSMUSG00000057691 | 19.80865184 | 37.56333116 | 28.95219296 | 74.9075635  | 75.91662615 |
| ENSMUSG00000057697 | 5.65961481  | 6.956172438 | 7.061510478 | 8.860034393 | 7.161945863 |
| ENSMUSG00000057699 | 10.61177777 | 7.651789682 | 6.35535943  | 7.249119049 | 5.729556691 |
| ENSMUSG00000057706 | 14.85648888 | 24.34660353 | 19.06607829 | 11.27640741 | 10.02672421 |
| ENSMUSG00000057716 | 8.489422215 | 7.651789682 | 7.767661525 | 6.443661377 | 6.445751277 |
| ENSMUSG00000057723 | 11.31922962 | 4.869320706 | 5.649208382 | 5.638203705 | 10.02672421 |
| ENSMUSG00000057726 | 7.781970364 | 4.869320706 | 5.649208382 | 5.638203705 | 7.161945863 |
| ENSMUSG00000057777 | 6.367066661 | 11.82549314 | 9.179963621 | 8.860034393 | 7.161945863 |
| ENSMUSG00000057801 | 11.31922962 | 5.56493795  | 7.767661525 | 4.832746033 | 7.87814045  |
| ENSMUSG00000057805 | 2.829807405 | 4.869320706 | 2.824604191 | 3.221830688 | 5.013362104 |
| ENSMUSG00000057817 | 10.61177777 | 2.782468975 | 5.649208382 | 3.221830688 | 5.013362104 |
| ENSMUSG00000057832 | 8.489422215 | 6.956172438 | 7.061510478 | 5.638203705 | 9.310529622 |
| ENSMUSG00000057835 | 35.37259256 | 52.86691053 | 44.48751601 | 44.30017197 | 50.84981563 |
| ENSMUSG00000057841 | 2.122355554 | 1.391234488 | 1.412302096 | 2.416373016 | 2.148583759 |
| ENSMUSG00000057858 | 68.62282957 | 103.6469693 | 103.804204  | 87.79488626 | 94.5376854  |
| ENSMUSG00000057863 | 70.03773327 | 93.21271067 | 89.68118307 | 248.080963  | 214.8583759 |
| ENSMUSG00000057899 | 8.489422215 | 8.347406925 | 5.649208382 | 7.249119049 | 10.02672421 |
| ENSMUSG00000057963 | 24.05336294 | 34.08524495 | 28.24604191 | 48.32746033 | 40.10689684 |
| ENSMUSG00000057982 | 48.10672589 | 79.30036579 | 57.90438592 | 86.98942859 | 68.75468029 |
| ENSMUSG00000057997 | 5.65961481  | 5.56493795  | 9.886114669 | 4.02728836  | 12.17530797 |
| ENSMUSG00000058014 | 7.074518513 | 2.086851731 | 6.35535943  | 2.416373016 | 6.445751277 |
| ENSMUSG00000058017 | 13.44158517 | 2.782468975 | 3.530755239 | 3.221830688 | 3.580972932 |
| ENSMUSG00000058030 | 9.904325918 | 6.260555194 | 7.061510478 | 10.47094974 | 7.161945863 |
| ENSMUSG00000058046 | 14.85648888 | 20.86851731 | 26.12758877 | 40.2728836  | 32.94495097 |
| ENSMUSG00000058057 | 7.074518513 | 11.82549314 | 4.236906287 | 4.02728836  | 10.02672421 |

|                    |             |             |             |             |             |
|--------------------|-------------|-------------|-------------|-------------|-------------|
| ENSMUSG00000058063 | 12.02668147 | 6.956172438 | 5.649208382 | 5.638203705 | 4.297167518 |
| ENSMUSG00000058114 | 4.952162959 | 10.43425866 | 6.35535943  | 6.443661377 | 5.729556691 |
| ENSMUSG00000058119 | 5.65961481  | 8.347406925 | 9.886114669 | 4.832746033 | 6.445751277 |
| ENSMUSG00000058124 | 7.781970364 | 7.651789682 | 7.767661525 | 4.832746033 | 7.87814045  |
| ENSMUSG00000058147 | 3.537259256 | 2.086851731 | 4.943057334 | 0.805457672 | 5.729556691 |
| ENSMUSG00000058152 | 9.196874066 | 6.956172438 | 9.886114669 | 5.638203705 | 9.310529622 |
| ENSMUSG00000058172 | 9.904325918 | 10.43425866 | 6.35535943  | 3.221830688 | 7.87814045  |
| ENSMUSG00000058174 | 7.074518513 | 9.043024169 | 9.179963621 | 5.638203705 | 3.580972932 |
| ENSMUSG00000058207 | 0           | 0           | 0           | 0           | 0           |
| ENSMUSG00000058244 | 9.196874066 | 9.043024169 | 4.236906287 | 4.02728836  | 8.594335036 |
| ENSMUSG00000058251 | 7.074518513 | 6.956172438 | 7.061510478 | 4.832746033 | 9.310529622 |
| ENSMUSG00000058252 | 4.952162959 | 6.956172438 | 5.649208382 | 1.610915344 | 4.297167518 |
| ENSMUSG00000058260 | 8.489422215 | 6.260555194 | 7.767661525 | 7.249119049 | 5.729556691 |
| ENSMUSG00000058270 | 4.952162959 | 5.56493795  | 6.35535943  | 9.665492065 | 2.864778345 |
| ENSMUSG00000058287 | 9.196874066 | 9.738641413 | 9.179963621 | 4.832746033 | 7.161945863 |
| ENSMUSG00000058290 | 25.46826665 | 27.82468975 | 22.59683353 | 45.10562964 | 41.53928601 |
| ENSMUSG00000058295 | 12.02668147 | 7.651789682 | 7.061510478 | 4.02728836  | 7.161945863 |
| ENSMUSG00000058301 | 180.4002221 | 193.3815938 | 182.8931214 | 360.0395794 | 257.8300511 |
| ENSMUSG00000058325 | 7.074518513 | 5.56493795  | 7.061510478 | 2.416373016 | 9.310529622 |
| ENSMUSG00000058349 | 10.61177777 | 9.043024169 | 10.59226572 | 4.832746033 | 10.7429188  |
| ENSMUSG00000058354 | 7.781970364 | 2.782468975 | 7.061510478 | 6.443661377 | 8.594335036 |
| ENSMUSG00000058355 | 62.96321476 | 121.0374004 | 103.098053  | 249.6918783 | 192.6563437 |
| ENSMUSG00000058368 | 10.61177777 | 9.043024169 | 8.473812573 | 7.249119049 | 10.02672421 |
| ENSMUSG00000058385 | 4.952162959 | 5.56493795  | 10.59226572 | 4.832746033 | 7.87814045  |
| ENSMUSG00000058396 | 7.781970364 | 5.56493795  | 9.886114669 | 12.08186508 | 8.594335036 |
| ENSMUSG00000058398 | 8.489422215 | 4.869320706 | 7.061510478 | 5.638203705 | 7.161945863 |
| ENSMUSG00000058420 | 9.904325918 | 5.56493795  | 6.35535943  | 6.443661377 | 5.729556691 |
| ENSMUSG00000058441 | 8.489422215 | 6.956172438 | 4.236906287 | 9.665492065 | 15.7562809  |
| ENSMUSG00000058443 | 6.367066661 | 13.21672763 | 11.29841676 | 11.27640741 | 7.161945863 |
| ENSMUSG00000058488 | 8.489422215 | 6.956172438 | 2.824604191 | 8.054576721 | 6.445751277 |
| ENSMUSG00000058491 | 8.489422215 | 4.869320706 | 2.118453143 | 1.610915344 | 6.445751277 |
| ENSMUSG00000058499 | 8.489422215 | 6.956172438 | 9.179963621 | 7.249119049 | 3.580972932 |
| ENSMUSG00000058515 | 8.489422215 | 8.347406925 | 7.767661525 | 4.02728836  | 2.864778345 |
| ENSMUSG00000058523 | 20.51610369 | 20.86851731 | 14.829172   | 10.47094974 | 16.47247549 |
| ENSMUSG00000058537 | 74.28244438 | 45.21512085 | 75.55816211 | 70.07481747 | 69.47087488 |
| ENSMUSG00000058546 | 1.414903703 | 3.478086219 | 1.412302096 | 1.610915344 | 1.432389173 |
| ENSMUSG00000058568 | 12.73413332 | 8.347406925 | 5.649208382 | 6.443661377 | 8.594335036 |
| ENSMUSG00000058569 | 30.4204296  | 38.95456565 | 55.78593277 | 118.4022778 | 88.09193412 |
| ENSMUSG00000058579 | 5.65961481  | 4.869320706 | 9.179963621 | 5.638203705 | 8.594335036 |
| ENSMUSG00000058587 | 156.3468591 | 155.8182626 | 139.8179075 | 113.5695318 | 109.5777717 |
| ENSMUSG00000058588 | 7.781970364 | 4.173703463 | 7.061510478 | 4.02728836  | 5.729556691 |
| ENSMUSG00000058618 | 1.414903703 | 0           | 0.706151048 | 0           | 1.432389173 |
| ENSMUSG00000058620 | 7.781970364 | 7.651789682 | 7.767661525 | 11.27640741 | 10.7429188  |

|                    |             |             |             |             |             |
|--------------------|-------------|-------------|-------------|-------------|-------------|
| ENSMUSG00000058628 | 9.196874066 | 5.56493795  | 5.649208382 | 2.416373016 | 7.161945863 |
| ENSMUSG00000058631 | 5.65961481  | 3.478086219 | 4.236906287 | 3.221830688 | 5.013362104 |
| ENSMUSG00000058643 | 12.02668147 | 7.651789682 | 5.649208382 | 11.27640741 | 12.17530797 |
| ENSMUSG00000058655 | 133.7083999 | 160.6875833 | 125.6948865 | 266.6064895 | 201.9668733 |
| ENSMUSG00000058665 | 3.537259256 | 7.651789682 | 6.35535943  | 5.638203705 | 7.87814045  |
| ENSMUSG00000058669 | 5.65961481  | 3.478086219 | 7.767661525 | 5.638203705 | 7.161945863 |
| ENSMUSG00000058670 | 6.367066661 | 4.173703463 | 4.236906287 | 3.221830688 | 1.432389173 |
| ENSMUSG00000058672 | 4.952162959 | 6.260555194 | 6.35535943  | 11.27640741 | 5.013362104 |
| ENSMUSG00000058692 | 13.44158517 | 4.173703463 | 9.179963621 | 1.610915344 | 7.87814045  |
| ENSMUSG00000058704 | 39.61730367 | 54.25814501 | 50.13672439 | 132.0950582 | 108.8615771 |
| ENSMUSG00000058706 | 60.13340736 | 89.73462445 | 99.56729774 | 88.60034393 | 77.34901533 |
| ENSMUSG00000058741 | 11.31922962 | 4.173703463 | 7.061510478 | 9.665492065 | 13.60769714 |
| ENSMUSG00000058743 | 17.68629628 | 15.30357936 | 19.06607829 | 50.74383334 | 41.53928601 |
| ENSMUSG00000058755 | 4.952162959 | 11.1298759  | 15.53532305 | 22.55281482 | 21.48583759 |
| ENSMUSG00000058761 | 103.2879703 | 146.0796212 | 129.9317928 | 94.23854763 | 95.97007457 |
| ENSMUSG00000058773 | 2.829807405 | 3.478086219 | 4.943057334 | 4.832746033 | 7.161945863 |
| ENSMUSG00000058802 | 5.65961481  | 9.738641413 | 7.767661525 | 6.443661377 | 8.594335036 |
| ENSMUSG00000058820 | 8.489422215 | 6.956172438 | 6.35535943  | 3.221830688 | 7.87814045  |
| ENSMUSG00000058856 | 6.367066661 | 9.738641413 | 12.00456781 | 4.832746033 | 7.161945863 |
| ENSMUSG00000058886 | 34.66514071 | 57.04061399 | 51.54902649 | 63.6311561  | 53.71459398 |
| ENSMUSG00000058900 | 69.33028142 | 81.38721752 | 69.20280268 | 63.6311561  | 65.17370736 |
| ENSMUSG00000058904 | 2.829807405 | 1.391234488 | 2.118453143 | 3.221830688 | 2.148583759 |
| ENSMUSG00000058921 | 9.904325918 | 5.56493795  | 4.943057334 | 3.221830688 | 5.729556691 |
| ENSMUSG00000058923 | 9.904325918 | 5.56493795  | 4.943057334 | 2.416373016 | 5.729556691 |
| ENSMUSG00000058975 | 8.489422215 | 7.651789682 | 7.767661525 | 7.249119049 | 5.729556691 |
| ENSMUSG00000058976 | 0.707451851 | 2.086851731 | 0           | 0           | 0.716194586 |
| ENSMUSG00000058979 | 46.69182218 | 77.9091313  | 59.31668801 | 45.10562964 | 48.70123187 |
| ENSMUSG00000058981 | 9.196874066 | 2.782468975 | 11.29841676 | 6.443661377 | 7.87814045  |
| ENSMUSG00000058997 | 12.73413332 | 23.65098629 | 23.30298458 | 15.30369577 | 14.32389173 |
| ENSMUSG00000059030 | 12.02668147 | 7.651789682 | 8.473812573 | 4.02728836  | 10.7429188  |
| ENSMUSG00000059040 | 12.02668147 | 13.21672763 | 10.59226572 | 5.638203705 | 8.594335036 |
| ENSMUSG00000059042 | 4.244711108 | 7.651789682 | 6.35535943  | 3.221830688 | 5.729556691 |
| ENSMUSG00000059069 | 9.196874066 | 7.651789682 | 4.236906287 | 7.249119049 | 3.580972932 |
| ENSMUSG00000059077 | 6.367066661 | 8.347406925 | 7.767661525 | 7.249119049 | 8.594335036 |
| ENSMUSG00000059089 | 4.952162959 | 9.043024169 | 9.179963621 | 9.665492065 | 9.310529622 |
| ENSMUSG00000059105 | 7.074518513 | 9.738641413 | 9.886114669 | 7.249119049 | 5.013362104 |
| ENSMUSG00000059106 | 14.85648888 | 6.260555194 | 5.649208382 | 8.054576721 | 8.594335036 |
| ENSMUSG00000059108 | 12.02668147 | 6.956172438 | 8.473812573 | 10.47094974 | 5.013362104 |
| ENSMUSG00000059113 | 12.02668147 | 8.347406925 | 5.649208382 | 0           | 7.161945863 |
| ENSMUSG00000059114 | 9.196874066 | 11.1298759  | 3.530755239 | 4.832746033 | 9.310529622 |
| ENSMUSG00000059119 | 57.30359995 | 83.47406925 | 79.08891735 | 186.0607223 | 121.0368851 |
| ENSMUSG00000059128 | 9.196874066 | 9.043024169 | 5.649208382 | 9.665492065 | 4.297167518 |
| ENSMUSG00000059182 | 19.10119998 | 25.73783802 | 26.12758877 | 18.52552646 | 30.08017263 |

|                    |             |             |             |             |             |
|--------------------|-------------|-------------|-------------|-------------|-------------|
| ENSMUSG00000059189 | 7.781970364 | 8.347406925 | 3.530755239 | 4.02728836  | 5.013362104 |
| ENSMUSG00000059206 | 13.44158517 | 7.651789682 | 6.35535943  | 2.416373016 | 10.02672421 |
| ENSMUSG00000059213 | 10.61177777 | 9.738641413 | 7.061510478 | 9.665492065 | 5.013362104 |
| ENSMUSG00000059227 | 9.196874066 | 9.043024169 | 7.767661525 | 8.860034393 | 5.729556691 |
| ENSMUSG00000059230 | 7.781970364 | 6.956172438 | 7.061510478 | 7.249119049 | 3.580972932 |
| ENSMUSG00000059246 | 12.02668147 | 6.260555194 | 7.061510478 | 6.443661377 | 9.310529622 |
| ENSMUSG00000059256 | 12.02668147 | 9.738641413 | 8.473812573 | 8.054576721 | 11.45911338 |
| ENSMUSG00000059263 | 41.03220737 | 79.30036579 | 72.02740687 | 102.2931244 | 88.09193412 |
| ENSMUSG00000059273 | 51.64398514 | 68.17048989 | 54.37363068 | 216.6681138 | 153.2656415 |
| ENSMUSG00000059278 | 18.39374813 | 41.04141738 | 39.54445867 | 62.02024075 | 54.43078856 |
| ENSMUSG00000059279 | 14.14903703 | 6.956172438 | 7.061510478 | 4.832746033 | 7.87814045  |
| ENSMUSG00000059301 | 7.074518513 | 9.738641413 | 8.473812573 | 7.249119049 | 9.310529622 |
| ENSMUSG00000059316 | 9.196874066 | 18.78166558 | 14.829172   | 16.10915344 | 12.89150255 |
| ENSMUSG00000059319 | 8.489422215 | 9.738641413 | 4.943057334 | 4.832746033 | 3.580972932 |
| ENSMUSG00000059326 | 4.244711108 | 6.260555194 | 4.236906287 | 5.638203705 | 7.87814045  |
| ENSMUSG00000059327 | 2.829807405 | 6.260555194 | 6.35535943  | 5.638203705 | 0.716194586 |
| ENSMUSG00000059334 | 3.537259256 | 3.478086219 | 3.530755239 | 0.805457672 | 4.297167518 |
| ENSMUSG00000059343 | 7.074518513 | 4.869320706 | 8.473812573 | 3.221830688 | 3.580972932 |
| ENSMUSG00000059361 | 13.44158517 | 8.347406925 | 2.118453143 | 12.08186508 | 5.013362104 |
| ENSMUSG00000059366 | 9.904325918 | 8.347406925 | 7.767661525 | 5.638203705 | 4.297167518 |
| ENSMUSG00000059375 | 10.61177777 | 11.1298759  | 7.767661525 | 6.443661377 | 4.297167518 |
| ENSMUSG00000059395 | 4.244711108 | 9.043024169 | 8.473812573 | 3.221830688 | 9.310529622 |
| ENSMUSG00000059406 | 6.367066661 | 4.869320706 | 9.886114669 | 3.221830688 | 10.02672421 |
| ENSMUSG00000059408 | 9.904325918 | 4.173703463 | 6.35535943  | 2.416373016 | 6.445751277 |
| ENSMUSG00000059409 | 41.73965922 | 52.17129328 | 60.02283906 | 83.7675979  | 70.18706946 |
| ENSMUSG00000059411 | 9.904325918 | 6.260555194 | 6.35535943  | 5.638203705 | 4.297167518 |
| ENSMUSG00000059412 | 12.73413332 | 6.260555194 | 4.943057334 | 5.638203705 | 5.729556691 |
| ENSMUSG00000059434 | 9.904325918 | 7.651789682 | 12.00456781 | 5.638203705 | 7.161945863 |
| ENSMUSG00000059455 | 6.367066661 | 5.56493795  | 7.061510478 | 5.638203705 | 6.445751277 |
| ENSMUSG00000059463 | 11.31922962 | 9.043024169 | 9.179963621 | 6.443661377 | 11.45911338 |
| ENSMUSG00000059473 | 7.781970364 | 6.260555194 | 9.179963621 | 8.860034393 | 9.310529622 |
| ENSMUSG00000059479 | 204.453585  | 191.294742  | 217.4945227 | 63.6311561  | 76.63282074 |
| ENSMUSG00000059481 | 9.196874066 | 6.956172438 | 9.886114669 | 8.054576721 | 10.7429188  |
| ENSMUSG00000059488 | 7.781970364 | 8.347406925 | 10.59226572 | 4.832746033 | 7.87814045  |
| ENSMUSG00000059503 | 12.73413332 | 7.651789682 | 7.767661525 | 7.249119049 | 5.013362104 |
| ENSMUSG00000059534 | 77.11225179 | 109.2119073 | 90.38733411 | 160.2860767 | 117.4559122 |
| ENSMUSG00000059547 | 11.31922962 | 7.651789682 | 7.767661525 | 8.054576721 | 6.445751277 |
| ENSMUSG00000059555 | 13.44158517 | 16.69481385 | 14.12302096 | 31.41284921 | 32.22875639 |
| ENSMUSG00000059586 | 89.84638511 | 138.4278315 | 123.5764334 | 124.0404815 | 104.5644096 |
| ENSMUSG00000059606 | 8.489422215 | 5.56493795  | 3.530755239 | 3.221830688 | 10.7429188  |
| ENSMUSG00000059623 | 6.367066661 | 5.56493795  | 8.473812573 | 6.443661377 | 1.432389173 |
| ENSMUSG00000059625 | 6.367066661 | 4.173703463 | 7.767661525 | 4.02728836  | 9.310529622 |
| ENSMUSG00000059632 | 9.904325918 | 4.869320706 | 4.943057334 | 4.832746033 | 4.297167518 |

|                    |             |             |             |             |             |
|--------------------|-------------|-------------|-------------|-------------|-------------|
| ENSMUSG00000059645 | 12.73413332 | 7.651789682 | 12.00456781 | 11.27640741 | 5.729556691 |
| ENSMUSG00000059648 | 9.196874066 | 11.1298759  | 4.943057334 | 7.249119049 | 7.161945863 |
| ENSMUSG00000059654 | 10.61177777 | 11.1298759  | 4.943057334 | 5.638203705 | 9.310529622 |
| ENSMUSG00000059657 | 7.781970364 | 9.738641413 | 5.649208382 | 5.638203705 | 5.729556691 |
| ENSMUSG00000059663 | 4.952162959 | 7.651789682 | 3.530755239 | 4.02728836  | 2.148583759 |
| ENSMUSG00000059668 | 10.61177777 | 4.869320706 | 3.530755239 | 6.443661377 | 4.297167518 |
| ENSMUSG00000059669 | 29.71297775 | 51.47567604 | 42.36906287 | 35.44013757 | 45.12025894 |
| ENSMUSG00000059674 | 10.61177777 | 13.91234488 | 13.41686991 | 9.665492065 | 17.90486466 |
| ENSMUSG00000059687 | 14.85648888 | 9.738641413 | 9.886114669 | 11.27640741 | 13.60769714 |
| ENSMUSG00000059690 | 4.244711108 | 3.478086219 | 4.236906287 | 4.832746033 | 6.445751277 |
| ENSMUSG00000059734 | 43.86201478 | 59.82308296 | 67.08434954 | 91.82217462 | 88.09193412 |
| ENSMUSG00000059762 | 8.489422215 | 10.43425866 | 8.473812573 | 7.249119049 | 10.02672421 |
| ENSMUSG00000059816 | 10.61177777 | 18.78166558 | 10.59226572 | 4.832746033 | 12.17530797 |
| ENSMUSG00000059832 | 11.31922962 | 7.651789682 | 7.061510478 | 12.08186508 | 4.297167518 |
| ENSMUSG00000059839 | 45.98437033 | 83.47406925 | 57.90438592 | 29.80193387 | 31.5125618  |
| ENSMUSG00000059845 | 8.489422215 | 3.478086219 | 4.943057334 | 8.054576721 | 9.310529622 |
| ENSMUSG00000059852 | 7.781970364 | 7.651789682 | 9.886114669 | 5.638203705 | 5.013362104 |
| ENSMUSG00000059854 | 11.31922962 | 5.56493795  | 7.767661525 | 6.443661377 | 7.87814045  |
| ENSMUSG00000059867 | 8.489422215 | 7.651789682 | 5.649208382 | 6.443661377 | 7.161945863 |
| ENSMUSG00000059887 | 9.196874066 | 7.651789682 | 10.59226572 | 2.416373016 | 7.87814045  |
| ENSMUSG00000059898 | 11.31922962 | 4.173703463 | 8.473812573 | 9.665492065 | 4.297167518 |
| ENSMUSG00000059908 | 4.244711108 | 4.869320706 | 7.061510478 | 5.638203705 | 6.445751277 |
| ENSMUSG00000059920 | 29.71297775 | 57.73623123 | 54.37363068 | 59.60386773 | 55.14698315 |
| ENSMUSG00000059964 | 8.489422215 | 6.956172438 | 9.886114669 | 6.443661377 | 9.310529622 |
| ENSMUSG00000059970 | 12.02668147 | 13.91234488 | 15.53532305 | 8.860034393 | 10.7429188  |
| ENSMUSG00000059991 | 3.537259256 | 6.956172438 | 4.236906287 | 3.221830688 | 5.729556691 |
| ENSMUSG00000060012 | 46.69182218 | 85.56092098 | 60.02283906 | 49.132918   | 37.95831308 |
| ENSMUSG00000060017 | 8.489422215 | 6.956172438 | 7.061510478 | 4.02728836  | 7.87814045  |
| ENSMUSG00000060032 | 52.35143699 | 89.0390072  | 62.1412922  | 177.2006879 | 118.8883013 |
| ENSMUSG00000060034 | 14.14903703 | 5.56493795  | 4.943057334 | 8.054576721 | 6.445751277 |
| ENSMUSG00000060044 | 12.73413332 | 25.04222078 | 19.77222934 | 10.47094974 | 12.89150255 |
| ENSMUSG00000060049 | 9.196874066 | 4.869320706 | 6.35535943  | 5.638203705 | 6.445751277 |
| ENSMUSG00000060057 | 7.781970364 | 10.43425866 | 10.59226572 | 4.832746033 | 5.013362104 |
| ENSMUSG00000060063 | 9.196874066 | 12.52111039 | 7.767661525 | 5.638203705 | 9.310529622 |
| ENSMUSG00000060073 | 123.804074  | 141.9059177 | 120.0456781 | 288.3538466 | 225.6012947 |
| ENSMUSG00000060093 | 0           | 0.695617244 | 1.412302096 | 0.805457672 | 0           |
| ENSMUSG00000060114 | 9.904325918 | 9.738641413 | 8.473812573 | 3.221830688 | 3.580972932 |
| ENSMUSG00000060166 | 26.1757185  | 40.34580014 | 44.48751601 | 40.2728836  | 37.24211849 |
| ENSMUSG00000060177 | 3.537259256 | 4.173703463 | 12.00456781 | 4.832746033 | 7.87814045  |
| ENSMUSG00000060181 | 33.95768886 | 60.51870021 | 52.25517753 | 47.52200265 | 32.94495097 |
| ENSMUSG00000060183 | 8.489422215 | 10.43425866 | 7.061510478 | 5.638203705 | 5.013362104 |
| ENSMUSG00000060187 | 12.73413332 | 11.82549314 | 12.00456781 | 7.249119049 | 7.87814045  |
| ENSMUSG00000060188 | 5.65961481  | 6.260555194 | 5.649208382 | 8.860034393 | 9.310529622 |

|                    |             |             |             |             |             |
|--------------------|-------------|-------------|-------------|-------------|-------------|
| ENSMUSG00000060204 | 9.904325918 | 3.478086219 | 6.35535943  | 4.832746033 | 6.445751277 |
| ENSMUSG00000060205 | 9.196874066 | 9.738641413 | 6.35535943  | 9.665492065 | 7.87814045  |
| ENSMUSG00000060208 | 9.904325918 | 5.56493795  | 7.767661525 | 7.249119049 | 8.594335036 |
| ENSMUSG00000060224 | 5.65961481  | 6.956172438 | 7.061510478 | 2.416373016 | 5.013362104 |
| ENSMUSG00000060244 | 9.196874066 | 11.1298759  | 14.829172   | 13.69278043 | 9.310529622 |
| ENSMUSG00000060245 | 5.65961481  | 6.956172438 | 9.179963621 | 5.638203705 | 7.161945863 |
| ENSMUSG00000060257 | 5.65961481  | 6.260555194 | 3.530755239 | 5.638203705 | 3.580972932 |
| ENSMUSG00000060284 | 6.367066661 | 1.391234488 | 4.943057334 | 11.27640741 | 7.87814045  |
| ENSMUSG00000060301 | 43.86201478 | 73.0398106  | 63.5535943  | 37.85651059 | 45.83645353 |
| ENSMUSG00000060303 | 6.367066661 | 3.478086219 | 6.35535943  | 2.416373016 | 7.87814045  |
| ENSMUSG00000060317 | 10.61177777 | 4.869320706 | 10.59226572 | 5.638203705 | 9.310529622 |
| ENSMUSG00000060332 | 3.537259256 | 5.56493795  | 4.236906287 | 4.832746033 | 8.594335036 |
| ENSMUSG00000060336 | 21.22355554 | 37.56333116 | 28.95219296 | 23.35827249 | 29.36397804 |
| ENSMUSG00000060376 | 116.7295555 | 176.6867799 | 139.1117564 | 101.4876667 | 90.95671247 |
| ENSMUSG00000060397 | 16.97884443 | 22.2597518  | 26.83373982 | 12.08186508 | 4.297167518 |
| ENSMUSG00000060402 | 8.489422215 | 2.782468975 | 8.473812573 | 2.416373016 | 6.445751277 |
| ENSMUSG00000060407 | 9.904325918 | 6.956172438 | 5.649208382 | 5.638203705 | 4.297167518 |
| ENSMUSG00000060461 | 9.904325918 | 6.956172438 | 8.473812573 | 4.832746033 | 5.729556691 |
| ENSMUSG00000060469 | 12.73413332 | 7.651789682 | 4.943057334 | 6.443661377 | 3.580972932 |
| ENSMUSG00000060470 | 5.65961481  | 6.260555194 | 6.35535943  | 4.832746033 | 7.87814045  |
| ENSMUSG00000060487 | 5.65961481  | 4.173703463 | 4.236906287 | 3.221830688 | 8.594335036 |
| ENSMUSG00000060499 | 11.31922962 | 9.043024169 | 8.473812573 | 3.221830688 | 8.594335036 |
| ENSMUSG00000060503 | 15.56394073 | 3.478086219 | 8.473812573 | 12.88732275 | 6.445751277 |
| ENSMUSG00000060509 | 2.829807405 | 7.651789682 | 9.179963621 | 5.638203705 | 10.7429188  |
| ENSMUSG00000060512 | 10.61177777 | 6.260555194 | 2.824604191 | 4.02728836  | 4.297167518 |
| ENSMUSG00000060556 | 12.02668147 | 8.347406925 | 6.35535943  | 1.610915344 | 6.445751277 |
| ENSMUSG00000060560 | 6.367066661 | 4.869320706 | 3.530755239 | 7.249119049 | 6.445751277 |
| ENSMUSG00000060565 | 12.73413332 | 5.56493795  | 20.47838039 | 8.860034393 | 9.310529622 |
| ENSMUSG00000060583 | 9.196874066 | 5.56493795  | 3.530755239 | 3.221830688 | 5.729556691 |
| ENSMUSG00000060591 | 11.31922962 | 8.347406925 | 11.29841676 | 21.74735715 | 15.7562809  |
| ENSMUSG00000060594 | 3.537259256 | 6.260555194 | 6.35535943  | 6.443661377 | 7.161945863 |
| ENSMUSG00000060615 | 4.244711108 | 6.956172438 | 7.061510478 | 4.832746033 | 5.013362104 |
| ENSMUSG00000060630 | 7.781970364 | 10.43425866 | 8.473812573 | 2.416373016 | 5.729556691 |
| ENSMUSG00000060639 | 1.414903703 | 2.782468975 | 3.530755239 | 4.02728836  | 2.148583759 |
| ENSMUSG00000060657 | 77.11225179 | 121.0374004 | 105.9226572 | 147.398754  | 128.9150255 |
| ENSMUSG00000060663 | 9.904325918 | 7.651789682 | 6.35535943  | 2.416373016 | 5.013362104 |
| ENSMUSG00000060673 | 2.829807405 | 4.173703463 | 4.236906287 | 0.805457672 | 4.297167518 |
| ENSMUSG00000060678 | 2.829807405 | 6.260555194 | 3.530755239 | 1.610915344 | 2.864778345 |
| ENSMUSG00000060685 | 2.829807405 | 0.695617244 | 1.412302096 | 1.610915344 | 2.864778345 |
| ENSMUSG00000060688 | 10.61177777 | 5.56493795  | 5.649208382 | 4.02728836  | 4.297167518 |
| ENSMUSG00000060691 | 6.367066661 | 9.738641413 | 6.35535943  | 6.443661377 | 5.729556691 |
| ENSMUSG00000060708 | 33.25023701 | 54.25814501 | 52.25517753 | 83.7675979  | 65.88990194 |
| ENSMUSG00000060715 | 12.02668147 | 7.651789682 | 8.473812573 | 5.638203705 | 7.87814045  |

|                    |             |             |             |             |             |
|--------------------|-------------|-------------|-------------|-------------|-------------|
| ENSMUSG00000060716 | 10.61177777 | 7.651789682 | 6.35535943  | 5.638203705 | 8.594335036 |
| ENSMUSG00000060735 | 7.781970364 | 5.56493795  | 7.061510478 | 1.610915344 | 5.013362104 |
| ENSMUSG00000060738 | 14.85648888 | 7.651789682 | 7.061510478 | 8.860034393 | 5.729556691 |
| ENSMUSG00000060739 | 53.7663407  | 108.51629   | 86.15042783 | 153.8424154 | 105.9967988 |
| ENSMUSG00000060756 | 9.904325918 | 9.043024169 | 4.943057334 | 4.832746033 | 5.013362104 |
| ENSMUSG00000060780 | 4.244711108 | 6.260555194 | 5.649208382 | 3.221830688 | 5.729556691 |
| ENSMUSG00000060794 | 7.781970364 | 9.043024169 | 4.943057334 | 10.47094974 | 12.17530797 |
| ENSMUSG00000060798 | 4.244711108 | 11.82549314 | 9.886114669 | 4.832746033 | 4.297167518 |
| ENSMUSG00000060802 | 150.6872443 | 185.0341868 | 166.6516473 | 388.2305979 | 275.7349157 |
| ENSMUSG00000060803 | 21.93100739 | 28.52030699 | 29.65834401 | 44.30017197 | 41.53928601 |
| ENSMUSG00000060807 | 6.367066661 | 7.651789682 | 7.767661525 | 6.443661377 | 6.445751277 |
| ENSMUSG00000060860 | 67.20792587 | 83.47406925 | 78.3827663  | 272.2446932 | 189.7915654 |
| ENSMUSG00000060878 | 7.781970364 | 4.173703463 | 9.886114669 | 6.443661377 | 2.864778345 |
| ENSMUSG00000060882 | 7.781970364 | 4.173703463 | 10.59226572 | 8.054576721 | 10.02672421 |
| ENSMUSG00000060913 | 5.65961481  | 8.347406925 | 11.29841676 | 3.221830688 | 3.580972932 |
| ENSMUSG00000060923 | 9.904325918 | 9.738641413 | 11.29841676 | 3.221830688 | 2.148583759 |
| ENSMUSG00000060935 | 23.34591109 | 27.82468975 | 29.65834401 | 37.05105292 | 41.53928601 |
| ENSMUSG00000060967 | 6.367066661 | 2.086851731 | 2.118453143 | 0.805457672 | 4.297167518 |
| ENSMUSG00000060969 | 9.196874066 | 11.1298759  | 2.118453143 | 2.416373016 | 5.013362104 |
| ENSMUSG00000060974 | 14.14903703 | 11.1298759  | 12.00456781 | 4.02728836  | 7.87814045  |
| ENSMUSG00000060981 | 1.414903703 | 5.56493795  | 2.824604191 | 5.638203705 | 1.432389173 |
| ENSMUSG00000060992 | 77.81970364 | 104.3425866 | 92.50578726 | 95.04400531 | 75.20043157 |
| ENSMUSG00000061013 | 6.367066661 | 8.347406925 | 7.767661525 | 4.02728836  | 3.580972932 |
| ENSMUSG00000061024 | 19.80865184 | 14.60796212 | 24.00913562 | 49.132918   | 42.97167518 |
| ENSMUSG00000061028 | 15.56394073 | 23.65098629 | 12.00456781 | 10.47094974 | 11.45911338 |
| ENSMUSG00000061039 | 8.489422215 | 8.347406925 | 10.59226572 | 7.249119049 | 5.729556691 |
| ENSMUSG00000061046 | 15.56394073 | 29.91154148 | 34.60140134 | 13.69278043 | 20.05344842 |
| ENSMUSG00000061048 | 10.61177777 | 5.56493795  | 9.886114669 | 1.610915344 | 7.87814045  |
| ENSMUSG00000061065 | 5.65961481  | 3.478086219 | 1.412302096 | 0.805457672 | 3.580972932 |
| ENSMUSG00000061068 | 7.781970364 | 10.43425866 | 7.061510478 | 7.249119049 | 5.729556691 |
| ENSMUSG00000061100 | 12.02668147 | 6.260555194 | 11.29841676 | 4.02728836  | 6.445751277 |
| ENSMUSG00000061104 | 14.85648888 | 16.69481385 | 19.06607829 | 24.96918783 | 11.45911338 |
| ENSMUSG00000061111 | 12.73413332 | 33.3896277  | 30.36449505 | 32.21830688 | 27.93158887 |
| ENSMUSG00000061118 | 33.95768886 | 52.17129328 | 57.90438592 | 68.46390213 | 68.75468029 |
| ENSMUSG00000061119 | 24.05336294 | 53.56252777 | 45.19366706 | 58.79841006 | 61.59273443 |
| ENSMUSG00000061144 | 7.781970364 | 9.738641413 | 5.649208382 | 8.860034393 | 10.7429188  |
| ENSMUSG00000061184 | 5.65961481  | 12.52111039 | 7.767661525 | 4.02728836  | 6.445751277 |
| ENSMUSG00000061208 | 9.196874066 | 9.738641413 | 6.35535943  | 5.638203705 | 9.310529622 |
| ENSMUSG00000061210 | 7.074518513 | 6.956172438 | 4.236906287 | 6.443661377 | 6.445751277 |
| ENSMUSG00000061273 | 14.85648888 | 19.47728283 | 21.89068248 | 45.91108731 | 37.95831308 |
| ENSMUSG00000061286 | 103.9954221 | 143.2971522 | 138.4056054 | 91.82217462 | 86.65954495 |
| ENSMUSG00000061295 | 13.44158517 | 6.260555194 | 12.00456781 | 4.02728836  | 6.445751277 |
| ENSMUSG00000061311 | 0           | 0           | 0.706151048 | 0           | 0           |

|                    |             |             |             |             |             |
|--------------------|-------------|-------------|-------------|-------------|-------------|
| ENSMUSG00000061313 | 12.02668147 | 16.69481385 | 12.00456781 | 39.46742593 | 37.95831308 |
| ENSMUSG00000061360 | 64.37811846 | 98.08203137 | 110.1595635 | 223.9172328 | 174.0352845 |
| ENSMUSG00000061392 | 3.537259256 | 4.173703463 | 4.236906287 | 3.221830688 | 0.716194586 |
| ENSMUSG00000061397 | 5.65961481  | 6.260555194 | 5.649208382 | 4.02728836  | 5.729556691 |
| ENSMUSG00000061410 | 7.074518513 | 3.478086219 | 4.943057334 | 4.02728836  | 5.013362104 |
| ENSMUSG00000061414 | 9.196874066 | 4.869320706 | 9.179963621 | 4.832746033 | 3.580972932 |
| ENSMUSG00000061457 | 6.367066661 | 8.347406925 | 8.473812573 | 1.610915344 | 3.580972932 |
| ENSMUSG00000061477 | 38.90985182 | 63.99678643 | 66.37819849 | 241.6373016 | 186.2105924 |
| ENSMUSG00000061482 | 10.61177777 | 14.60796212 | 8.473812573 | 8.054576721 | 6.445751277 |
| ENSMUSG00000061489 | 11.31922962 | 11.1298759  | 9.886114669 | 5.638203705 | 10.7429188  |
| ENSMUSG00000061517 | 6.367066661 | 2.086851731 | 4.943057334 | 4.832746033 | 6.445751277 |
| ENSMUSG00000061524 | 6.367066661 | 8.347406925 | 9.179963621 | 4.832746033 | 1.432389173 |
| ENSMUSG00000061525 | 6.367066661 | 9.043024169 | 9.179963621 | 6.443661377 | 11.45911338 |
| ENSMUSG00000061527 | 9.904325918 | 2.782468975 | 8.473812573 | 4.02728836  | 12.17530797 |
| ENSMUSG00000061531 | 6.367066661 | 2.782468975 | 8.473812573 | 8.054576721 | 10.7429188  |
| ENSMUSG00000061540 | 9.904325918 | 6.956172438 | 12.00456781 | 7.249119049 | 6.445751277 |
| ENSMUSG00000061549 | 4.952162959 | 6.260555194 | 4.943057334 | 6.443661377 | 5.729556691 |
| ENSMUSG00000061578 | 13.44158517 | 12.52111039 | 7.061510478 | 6.443661377 | 12.17530797 |
| ENSMUSG00000061584 | 6.367066661 | 6.260555194 | 7.061510478 | 5.638203705 | 7.161945863 |
| ENSMUSG00000061603 | 9.196874066 | 9.043024169 | 4.943057334 | 1.610915344 | 5.729556691 |
| ENSMUSG00000061614 | 5.65961481  | 7.651789682 | 8.473812573 | 7.249119049 | 10.02672421 |
| ENSMUSG00000061615 | 2.829807405 | 1.391234488 | 0.706151048 | 0.805457672 | 1.432389173 |
| ENSMUSG00000061616 | 9.904325918 | 2.782468975 | 9.886114669 | 4.02728836  | 7.161945863 |
| ENSMUSG00000061633 | 10.61177777 | 11.82549314 | 6.35535943  | 6.443661377 | 6.445751277 |
| ENSMUSG00000061650 | 36.08004441 | 41.04141738 | 31.77679715 | 58.79841006 | 42.25548059 |
| ENSMUSG00000061665 | 50.93653329 | 74.43104508 | 79.08891735 | 99.07129367 | 87.37573953 |
| ENSMUSG00000061666 | 3.537259256 | 0           | 3.530755239 | 2.416373016 | 4.297167518 |
| ENSMUSG00000061707 | 11.31922962 | 7.651789682 | 6.35535943  | 8.054576721 | 9.310529622 |
| ENSMUSG00000061731 | 16.27139258 | 20.17290007 | 24.71528667 | 22.55281482 | 12.89150255 |
| ENSMUSG00000061740 | 7.074518513 | 7.651789682 | 8.473812573 | 6.443661377 | 9.310529622 |
| ENSMUSG00000061769 | 5.65961481  | 8.347406925 | 4.236906287 | 2.416373016 | 4.297167518 |
| ENSMUSG00000061780 | 7.074518513 | 6.260555194 | 6.35535943  | 8.860034393 | 11.45911338 |
| ENSMUSG00000061802 | 9.196874066 | 5.56493795  | 6.35535943  | 2.416373016 | 7.87814045  |
| ENSMUSG00000061808 | 12.02668147 | 7.651789682 | 9.886114669 | 5.638203705 | 7.161945863 |
| ENSMUSG00000061809 | 10.61177777 | 10.43425866 | 8.473812573 | 8.860034393 | 5.013362104 |
| ENSMUSG00000061838 | 21.93100739 | 38.95456565 | 29.65834401 | 31.41284921 | 24.35061594 |
| ENSMUSG00000061845 | 10.61177777 | 5.56493795  | 10.59226572 | 4.02728836  | 9.310529622 |
| ENSMUSG00000061864 | 9.904325918 | 6.956172438 | 7.767661525 | 4.02728836  | 5.729556691 |
| ENSMUSG00000061906 | 7.074518513 | 9.043024169 | 2.118453143 | 4.832746033 | 5.729556691 |
| ENSMUSG00000061923 | 10.61177777 | 4.869320706 | 7.061510478 | 11.27640741 | 7.161945863 |
| ENSMUSG00000061928 | 12.73413332 | 7.651789682 | 7.061510478 | 2.416373016 | 1.432389173 |
| ENSMUSG00000061937 | 8.489422215 | 6.956172438 | 7.767661525 | 5.638203705 | 6.445751277 |
| ENSMUSG00000061979 | 38.20239997 | 57.73623123 | 56.49208382 | 94.23854763 | 77.34901533 |



|                    |             |             |             |             |             |
|--------------------|-------------|-------------|-------------|-------------|-------------|
| ENSMUSG00000061983 | 2.829807405 | 2.782468975 | 2.118453143 | 2.416373016 | 2.148583759 |
| ENSMUSG00000061984 | 8.489422215 | 9.043024169 | 5.649208382 | 4.832746033 | 4.297167518 |
| ENSMUSG00000061991 | 0.707451851 | 0.695617244 | 0           | 0.805457672 | 0.716194586 |
| ENSMUSG00000062028 | 14.14903703 | 12.52111039 | 14.12302096 | 12.88732275 | 10.02672421 |
| ENSMUSG00000062054 | 21.22355554 | 22.95536904 | 19.77222934 | 14.4982381  | 23.63442135 |
| ENSMUSG00000062061 | 5.65961481  | 4.869320706 | 7.767661525 | 8.054576721 | 7.161945863 |
| ENSMUSG00000062073 | 9.904325918 | 5.56493795  | 7.767661525 | 7.249119049 | 5.013362104 |
| ENSMUSG00000062074 | 7.781970364 | 4.173703463 | 9.179963621 | 3.221830688 | 10.02672421 |
| ENSMUSG00000062105 | 4.952162959 | 9.738641413 | 9.179963621 | 4.832746033 | 4.297167518 |
| ENSMUSG00000062121 | 7.781970364 | 9.738641413 | 5.649208382 | 7.249119049 | 5.013362104 |
| ENSMUSG00000062124 | 10.61177777 | 4.173703463 | 5.649208382 | 5.638203705 | 5.729556691 |
| ENSMUSG00000062128 | 7.781970364 | 7.651789682 | 7.061510478 | 7.249119049 | 5.013362104 |
| ENSMUSG00000062148 | 7.781970364 | 3.478086219 | 5.649208382 | 5.638203705 | 8.594335036 |
| ENSMUSG00000062157 | 4.244711108 | 8.347406925 | 8.473812573 | 12.08186508 | 9.310529622 |
| ENSMUSG00000062165 | 14.14903703 | 7.651789682 | 9.179963621 | 9.665492065 | 6.445751277 |
| ENSMUSG00000062198 | 73.57499253 | 121.0374004 | 96.74269354 | 172.3679418 | 143.9551119 |
| ENSMUSG00000062201 | 4.952162959 | 7.651789682 | 7.061510478 | 2.416373016 | 2.148583759 |
| ENSMUSG00000062245 | 12.02668147 | 7.651789682 | 6.35535943  | 3.221830688 | 8.594335036 |
| ENSMUSG00000062248 | 24.76081479 | 27.82468975 | 31.77679715 | 106.3204127 | 76.63282074 |
| ENSMUSG00000062252 | 7.074518513 | 4.869320706 | 10.59226572 | 4.832746033 | 7.87814045  |
| ENSMUSG00000062275 | 14.85648888 | 6.260555194 | 6.35535943  | 6.443661377 | 8.594335036 |
| ENSMUSG00000062278 | 7.074518513 | 2.782468975 | 6.35535943  | 3.221830688 | 10.02672421 |
| ENSMUSG00000062296 | 6.367066661 | 4.173703463 | 8.473812573 | 3.221830688 | 7.87814045  |
| ENSMUSG00000062309 | 8.489422215 | 6.260555194 | 7.767661525 | 3.221830688 | 6.445751277 |
| ENSMUSG00000062310 | 6.367066661 | 6.260555194 | 4.943057334 | 5.638203705 | 6.445751277 |
| ENSMUSG00000062312 | 6.367066661 | 10.43425866 | 13.41686991 | 4.02728836  | 5.013362104 |
| ENSMUSG00000062314 | 12.73413332 | 6.260555194 | 9.886114669 | 4.02728836  | 6.445751277 |
| ENSMUSG00000062328 | 0.707451851 | 0           | 0.706151048 | 0           | 0.716194586 |
| ENSMUSG00000062329 | 9.904325918 | 4.173703463 | 6.35535943  | 4.02728836  | 7.161945863 |
| ENSMUSG00000062342 | 12.02668147 | 13.91234488 | 5.649208382 | 6.443661377 | 10.7429188  |
| ENSMUSG00000062369 | 9.904325918 | 4.869320706 | 5.649208382 | 6.443661377 | 5.729556691 |
| ENSMUSG00000062373 | 19.80865184 | 38.25894841 | 31.77679715 | 28.9964762  | 22.91822676 |
| ENSMUSG00000062376 | 28.29807405 | 51.47567604 | 38.83830763 | 33.02376456 | 36.5259239  |
| ENSMUSG00000062380 | 8.489422215 | 7.651789682 | 5.649208382 | 5.638203705 | 5.013362104 |
| ENSMUSG00000062397 | 65.79302217 | 87.64777272 | 72.73355792 | 235.9990979 | 155.4142252 |
| ENSMUSG00000062400 | 10.61177777 | 9.043024169 | 7.767661525 | 3.221830688 | 5.729556691 |
| ENSMUSG00000062432 | 9.904325918 | 12.52111039 | 7.767661525 | 5.638203705 | 9.310529622 |
| ENSMUSG00000062433 | 9.196874066 | 6.260555194 | 10.59226572 | 4.02728836  | 8.594335036 |
| ENSMUSG00000062438 | 11.31922962 | 2.086851731 | 8.473812573 | 8.054576721 | 7.87814045  |
| ENSMUSG00000062464 | 8.489422215 | 9.738641413 | 5.649208382 | 8.860034393 | 7.161945863 |
| ENSMUSG00000062483 | 12.73413332 | 6.260555194 | 6.35535943  | 0.805457672 | 5.729556691 |
| ENSMUSG00000062488 | 25.46826665 | 33.3896277  | 22.59683353 | 16.91461111 | 20.05344842 |
| ENSMUSG00000062497 | 5.65961481  | 6.956172438 | 10.59226572 | 8.860034393 | 8.594335036 |

|                    |             |             |             |             |             |
|--------------------|-------------|-------------|-------------|-------------|-------------|
| ENSMUSG00000062511 | 5.65961481  | 11.1298759  | 8.473812573 | 5.638203705 | 6.445751277 |
| ENSMUSG00000062515 | 4.952162959 | 6.956172438 | 3.530755239 | 10.47094974 | 6.445751277 |
| ENSMUSG00000062518 | 24.05336294 | 15.30357936 | 17.65377619 | 9.665492065 | 8.594335036 |
| ENSMUSG00000062524 | 12.02668147 | 7.651789682 | 12.00456781 | 7.249119049 | 4.297167518 |
| ENSMUSG00000062526 | 26.88317035 | 33.3896277  | 45.8998181  | 35.44013757 | 31.5125618  |
| ENSMUSG00000062527 | 9.904325918 | 9.738641413 | 5.649208382 | 8.860034393 | 5.729556691 |
| ENSMUSG00000062545 | 11.31922962 | 23.65098629 | 13.41686991 | 18.52552646 | 16.47247549 |
| ENSMUSG00000062546 | 11.31922962 | 9.738641413 | 6.35535943  | 4.832746033 | 8.594335036 |
| ENSMUSG00000062556 | 7.781970364 | 9.043024169 | 8.473812573 | 11.27640741 | 11.45911338 |
| ENSMUSG00000062580 | 44.56946663 | 76.51789682 | 66.37819849 | 189.2825529 | 166.157144  |
| ENSMUSG00000062591 | 18.39374813 | 14.60796212 | 26.12758877 | 10.47094974 | 15.04008631 |
| ENSMUSG00000062608 | 8.489422215 | 2.086851731 | 6.35535943  | 2.416373016 | 5.013362104 |
| ENSMUSG00000062619 | 17.68629628 | 31.30277597 | 30.36449505 | 36.24559524 | 38.67450766 |
| ENSMUSG00000062621 | 4.244711108 | 6.956172438 | 7.767661525 | 5.638203705 | 13.60769714 |
| ENSMUSG00000062624 | 9.904325918 | 11.82549314 | 7.767661525 | 3.221830688 | 5.729556691 |
| ENSMUSG00000062627 | 99.75071103 | 140.5146832 | 111.5718655 | 136.9278043 | 110.2939663 |
| ENSMUSG00000062629 | 7.781970364 | 4.173703463 | 6.35535943  | 7.249119049 | 7.161945863 |
| ENSMUSG00000062649 | 9.196874066 | 7.651789682 | 7.767661525 | 3.221830688 | 9.310529622 |
| ENSMUSG00000062651 | 4.952162959 | 2.782468975 | 5.649208382 | 4.832746033 | 1.432389173 |
| ENSMUSG00000062661 | 4.244711108 | 6.260555194 | 9.179963621 | 8.054576721 | 5.013362104 |
| ENSMUSG00000062687 | 9.196874066 | 4.869320706 | 9.886114669 | 6.443661377 | 4.297167518 |
| ENSMUSG00000062694 | 5.65961481  | 3.478086219 | 8.473812573 | 1.610915344 | 7.161945863 |
| ENSMUSG00000062705 | 9.196874066 | 6.956172438 | 10.59226572 | 4.02728836  | 5.729556691 |
| ENSMUSG00000062713 | 4.952162959 | 5.56493795  | 7.061510478 | 4.832746033 | 10.02672421 |
| ENSMUSG00000062727 | 8.489422215 | 9.043024169 | 7.767661525 | 7.249119049 | 5.729556691 |
| ENSMUSG00000062743 | 21.22355554 | 36.86771392 | 35.30755239 | 23.35827249 | 26.49919969 |
| ENSMUSG00000062751 | 9.196874066 | 9.043024169 | 10.59226572 | 3.221830688 | 5.729556691 |
| ENSMUSG00000062761 | 53.05888884 | 53.56252777 | 36.71985448 | 67.65844446 | 41.53928601 |
| ENSMUSG00000062773 | 4.244711108 | 7.651789682 | 6.35535943  | 8.860034393 | 8.594335036 |
| ENSMUSG00000062782 | 5.65961481  | 6.260555194 | 4.236906287 | 7.249119049 | 4.297167518 |
| ENSMUSG00000062791 | 4.244711108 | 2.086851731 | 6.35535943  | 0.805457672 | 4.297167518 |
| ENSMUSG00000062794 | 21.93100739 | 17.39043109 | 15.53532305 | 32.21830688 | 31.5125618  |
| ENSMUSG00000062818 | 9.196874066 | 8.347406925 | 9.886114669 | 5.638203705 | 14.32389173 |
| ENSMUSG00000062822 | 65.08557032 | 98.77764862 | 89.68118307 | 87.79488626 | 72.33565322 |
| ENSMUSG00000062826 | 13.44158517 | 5.56493795  | 7.061510478 | 6.443661377 | 10.02672421 |
| ENSMUSG00000062861 | 4.244711108 | 11.1298759  | 4.236906287 | 7.249119049 | 10.02672421 |
| ENSMUSG00000062873 | 10.61177777 | 4.173703463 | 5.649208382 | 3.221830688 | 5.729556691 |
| ENSMUSG00000062901 | 62.25576291 | 86.95215547 | 93.21193831 | 37.85651059 | 45.12025894 |
| ENSMUSG00000062905 | 9.196874066 | 8.347406925 | 10.59226572 | 4.02728836  | 5.729556691 |
| ENSMUSG00000062929 | 34.66514071 | 60.51870021 | 50.84287544 | 66.04752911 | 65.17370736 |
| ENSMUSG00000062937 | 29.0055259  | 49.38882431 | 47.3121202  | 78.12939419 | 68.75468029 |
| ENSMUSG00000062944 | 16.27139258 | 25.04222078 | 23.30298458 | 46.71654498 | 29.36397804 |
| ENSMUSG00000062961 | 9.196874066 | 8.347406925 | 9.886114669 | 8.054576721 | 5.013362104 |

|                    |             |             |             |             |             |
|--------------------|-------------|-------------|-------------|-------------|-------------|
| ENSMUSG00000062981 | 21.22355554 | 36.17209668 | 27.53989086 | 41.88379895 | 34.37734014 |
| ENSMUSG00000062997 | 85.601674   | 122.4286349 | 118.633376  | 284.3265582 | 231.3308514 |
| ENSMUSG00000063011 | 8.489422215 | 4.173703463 | 5.649208382 | 4.02728836  | 7.161945863 |
| ENSMUSG00000063019 | 47.39927403 | 68.17048989 | 74.14586002 | 88.60034393 | 85.22715578 |
| ENSMUSG00000063047 | 32.54278516 | 61.9099347  | 59.31668801 | 44.30017197 | 53.71459398 |
| ENSMUSG00000063049 | 19.80865184 | 33.3896277  | 29.65834401 | 68.46390213 | 66.60609653 |
| ENSMUSG00000063052 | 154.2245036 | 217.7281973 | 192.779236  | 300.4357117 | 242.0737702 |
| ENSMUSG00000063058 | 9.904325918 | 14.60796212 | 6.35535943  | 7.249119049 | 9.310529622 |
| ENSMUSG00000063060 | 10.61177777 | 5.56493795  | 4.943057334 | 6.443661377 | 7.161945863 |
| ENSMUSG00000063089 | 8.489422215 | 4.173703463 | 3.530755239 | 2.416373016 | 2.864778345 |
| ENSMUSG00000063106 | 12.73413332 | 4.173703463 | 5.649208382 | 3.221830688 | 7.161945863 |
| ENSMUSG00000063129 | 9.904325918 | 7.651789682 | 4.236906287 | 4.02728836  | 6.445751277 |
| ENSMUSG00000063130 | 9.196874066 | 5.56493795  | 7.767661525 | 5.638203705 | 10.7429188  |
| ENSMUSG00000063133 | 8.489422215 | 4.173703463 | 5.649208382 | 5.638203705 | 10.02672421 |
| ENSMUSG00000063157 | 8.489422215 | 5.56493795  | 7.061510478 | 8.054576721 | 7.161945863 |
| ENSMUSG00000063171 | 9.196874066 | 7.651789682 | 7.061510478 | 4.832746033 | 9.310529622 |
| ENSMUSG00000063177 | 3.537259256 | 6.956172438 | 6.35535943  | 7.249119049 | 8.594335036 |
| ENSMUSG00000063188 | 8.489422215 | 4.173703463 | 10.59226572 | 4.832746033 | 9.310529622 |
| ENSMUSG00000063193 | 6.367066661 | 2.782468975 | 9.179963621 | 7.249119049 | 6.445751277 |
| ENSMUSG00000063200 | 16.97884443 | 28.52030699 | 23.30298458 | 78.93485187 | 59.44415067 |
| ENSMUSG00000063230 | 5.65961481  | 6.260555194 | 6.35535943  | 5.638203705 | 6.445751277 |
| ENSMUSG00000063234 | 4.244711108 | 10.43425866 | 12.71071886 | 5.638203705 | 7.161945863 |
| ENSMUSG00000063240 | 7.074518513 | 10.43425866 | 5.649208382 | 6.443661377 | 5.729556691 |
| ENSMUSG00000063251 | 6.367066661 | 6.956172438 | 9.179963621 | 5.638203705 | 2.864778345 |
| ENSMUSG00000063260 | 9.196874066 | 3.478086219 | 4.236906287 | 3.221830688 | 5.729556691 |
| ENSMUSG00000063281 | 36.08004441 | 45.21512085 | 54.37363068 | 48.32746033 | 54.43078856 |
| ENSMUSG00000063296 | 12.73413332 | 6.260555194 | 5.649208382 | 4.02728836  | 6.445751277 |
| ENSMUSG00000063354 | 7.074518513 | 15.30357936 | 7.767661525 | 26.58010318 | 25.06681052 |
| ENSMUSG00000063374 | 8.489422215 | 4.869320706 | 8.473812573 | 7.249119049 | 8.594335036 |
| ENSMUSG00000063376 | 4.952162959 | 9.043024169 | 6.35535943  | 4.832746033 | 5.013362104 |
| ENSMUSG00000063380 | 7.781970364 | 6.260555194 | 9.179963621 | 1.610915344 | 5.013362104 |
| ENSMUSG00000063382 | 33.25023701 | 43.82388636 | 40.95676077 | 62.02024075 | 61.59273443 |
| ENSMUSG00000063383 | 6.367066661 | 7.651789682 | 10.59226572 | 5.638203705 | 10.7429188  |
| ENSMUSG00000063410 | 123.0966221 | 146.0796212 | 128.5194907 | 174.7843148 | 138.9417498 |
| ENSMUSG00000063428 | 7.074518513 | 4.869320706 | 6.35535943  | 4.832746033 | 7.161945863 |
| ENSMUSG00000063430 | 4.952162959 | 6.260555194 | 6.35535943  | 6.443661377 | 5.729556691 |
| ENSMUSG00000063434 | 5.65961481  | 8.347406925 | 6.35535943  | 7.249119049 | 6.445751277 |
| ENSMUSG00000063439 | 21.93100739 | 37.56333116 | 32.4829482  | 28.19101852 | 37.95831308 |
| ENSMUSG00000063446 | 4.244711108 | 6.260555194 | 7.061510478 | 6.443661377 | 5.013362104 |
| ENSMUSG00000063447 | 24.76081479 | 29.21592424 | 32.4829482  | 18.52552646 | 30.79636721 |
| ENSMUSG00000063452 | 3.537259256 | 6.260555194 | 3.530755239 | 7.249119049 | 5.729556691 |
| ENSMUSG00000063480 | 149.2723406 | 167.6437558 | 144.0548137 | 356.0122911 | 247.0871323 |
| ENSMUSG00000063488 | 7.781970364 | 9.043024169 | 9.179963621 | 7.249119049 | 5.013362104 |

|                    |             |             |             |             |             |
|--------------------|-------------|-------------|-------------|-------------|-------------|
| ENSMUSG00000063522 | 9.904325918 | 11.1298759  | 9.886114669 | 8.054576721 | 7.87814045  |
| ENSMUSG00000063529 | 7.074518513 | 4.869320706 | 7.061510478 | 2.416373016 | 5.729556691 |
| ENSMUSG00000063531 | 10.61177777 | 5.56493795  | 9.179963621 | 6.443661377 | 7.161945863 |
| ENSMUSG00000063535 | 16.27139258 | 17.39043109 | 21.18453143 | 13.69278043 | 10.02672421 |
| ENSMUSG00000063550 | 118.1444592 | 174.5999282 | 145.4671158 | 195.7262143 | 152.5494469 |
| ENSMUSG00000063558 | 6.367066661 | 6.260555194 | 11.29841676 | 10.47094974 | 7.161945863 |
| ENSMUSG00000063590 | 9.196874066 | 4.869320706 | 9.886114669 | 7.249119049 | 8.594335036 |
| ENSMUSG00000063594 | 9.904325918 | 9.738641413 | 8.473812573 | 8.860034393 | 7.161945863 |
| ENSMUSG00000063605 | 4.952162959 | 2.782468975 | 5.649208382 | 5.638203705 | 5.013362104 |
| ENSMUSG00000063632 | 4.244711108 | 6.956172438 | 5.649208382 | 3.221830688 | 5.013362104 |
| ENSMUSG00000063660 | 9.196874066 | 13.21672763 | 9.179963621 | 9.665492065 | 5.013362104 |
| ENSMUSG00000063661 | 6.367066661 | 4.173703463 | 7.767661525 | 8.860034393 | 5.013362104 |
| ENSMUSG00000063672 | 4.244711108 | 7.651789682 | 3.530755239 | 9.665492065 | 5.013362104 |
| ENSMUSG00000063687 | 6.367066661 | 8.347406925 | 7.767661525 | 5.638203705 | 10.02672421 |
| ENSMUSG00000063689 | 3.537259256 | 4.869320706 | 2.118453143 | 0           | 2.148583759 |
| ENSMUSG00000063694 | 29.71297775 | 41.04141738 | 33.18909925 | 100.682209  | 80.92998826 |
| ENSMUSG00000063698 | 14.85648888 | 20.17290007 | 19.77222934 | 12.08186508 | 11.45911338 |
| ENSMUSG00000063713 | 11.31922962 | 6.260555194 | 7.767661525 | 8.860034393 | 10.02672421 |
| ENSMUSG00000063727 | 13.44158517 | 5.56493795  | 12.00456781 | 5.638203705 | 6.445751277 |
| ENSMUSG00000063767 | 9.904325918 | 6.956172438 | 7.767661525 | 7.249119049 | 6.445751277 |
| ENSMUSG00000063779 | 9.196874066 | 14.60796212 | 14.829172   | 8.054576721 | 7.87814045  |
| ENSMUSG00000063780 | 9.196874066 | 5.56493795  | 14.12302096 | 6.443661377 | 10.7429188  |
| ENSMUSG00000063787 | 12.02668147 | 31.30277597 | 33.89525029 | 49.93837567 | 31.5125618  |
| ENSMUSG00000063796 | 2.829807405 | 4.869320706 | 4.236906287 | 8.054576721 | 5.729556691 |
| ENSMUSG00000063800 | 67.91537772 | 93.90832791 | 73.43970897 | 212.6408254 | 148.968474  |
| ENSMUSG00000063801 | 48.81417774 | 61.9099347  | 54.37363068 | 50.74383334 | 56.57937232 |
| ENSMUSG00000063802 | 14.85648888 | 19.47728283 | 16.94762515 | 45.91108731 | 33.66114556 |
| ENSMUSG00000063804 | 5.65961481  | 6.956172438 | 9.179963621 | 2.416373016 | 7.161945863 |
| ENSMUSG00000063810 | 20.51610369 | 18.78166558 | 26.12758877 | 34.6346799  | 25.78300511 |
| ENSMUSG00000063821 | 11.31922962 | 6.956172438 | 4.943057334 | 2.416373016 | 8.594335036 |
| ENSMUSG00000063838 | 12.02668147 | 5.56493795  | 8.473812573 | 7.249119049 | 3.580972932 |
| ENSMUSG00000063842 | 8.489422215 | 9.043024169 | 9.179963621 | 4.02728836  | 7.161945863 |
| ENSMUSG00000063849 | 14.85648888 | 13.91234488 | 18.35992724 | 12.88732275 | 13.60769714 |
| ENSMUSG00000063856 | 41.03220737 | 70.95295887 | 67.79050059 | 133.7059736 | 100.2672421 |
| ENSMUSG00000063884 | 90.55383696 | 126.6023384 | 109.4534124 | 264.9955741 | 211.277403  |
| ENSMUSG00000063888 | 58.0110518  | 75.82227957 | 56.49208382 | 212.6408254 | 153.2656415 |
| ENSMUSG00000063895 | 65.79302217 | 77.21351406 | 71.32125582 | 157.8697037 | 124.617858  |
| ENSMUSG00000063900 | 10.61177777 | 11.1298759  | 4.943057334 | 5.638203705 | 2.864778345 |
| ENSMUSG00000063903 | 7.781970364 | 7.651789682 | 7.767661525 | 2.416373016 | 7.87814045  |
| ENSMUSG00000063904 | 42.44711108 | 77.9091313  | 72.73355792 | 57.18749472 | 65.17370736 |
| ENSMUSG00000063932 | 7.781970364 | 6.260555194 | 4.943057334 | 2.416373016 | 5.013362104 |
| ENSMUSG00000063935 | 7.074518513 | 9.043024169 | 9.886114669 | 10.47094974 | 7.161945863 |
| ENSMUSG00000063953 | 14.14903703 | 13.21672763 | 15.53532305 | 17.72006879 | 14.32389173 |

|                    |             |             |             |             |             |
|--------------------|-------------|-------------|-------------|-------------|-------------|
| ENSMUSG00000063954 | 7.074518513 | 15.30357936 | 16.2414741  | 0.805457672 | 3.580972932 |
| ENSMUSG00000063971 | 15.56394073 | 6.260555194 | 4.236906287 | 4.832746033 | 9.310529622 |
| ENSMUSG00000063998 | 5.65961481  | 5.56493795  | 4.943057334 | 1.610915344 | 3.580972932 |
| ENSMUSG00000064016 | 4.244711108 | 3.478086219 | 3.530755239 | 1.610915344 | 4.297167518 |
| ENSMUSG00000064023 | 11.31922962 | 5.56493795  | 6.35535943  | 5.638203705 | 5.013362104 |
| ENSMUSG00000064052 | 9.196874066 | 3.478086219 | 7.767661525 | 4.832746033 | 8.594335036 |
| ENSMUSG00000064063 | 12.73413332 | 5.56493795  | 5.649208382 | 10.47094974 | 10.02672421 |
| ENSMUSG00000064109 | 24.05336294 | 50.08444155 | 40.25060972 | 46.71654498 | 57.29556691 |
| ENSMUSG00000064121 | 11.31922962 | 8.347406925 | 7.767661525 | 4.832746033 | 9.310529622 |
| ENSMUSG00000064128 | 32.54278516 | 52.86691053 | 30.36449505 | 36.24559524 | 30.08017263 |
| ENSMUSG00000064129 | 3.537259256 | 2.086851731 | 2.824604191 | 4.832746033 | 3.580972932 |
| ENSMUSG00000064137 | 7.781970364 | 3.478086219 | 4.943057334 | 4.02728836  | 2.864778345 |
| ENSMUSG00000064147 | 14.85648888 | 11.82549314 | 6.35535943  | 4.02728836  | 10.7429188  |
| ENSMUSG00000064156 | 5.65961481  | 5.56493795  | 5.649208382 | 6.443661377 | 3.580972932 |
| ENSMUSG00000064158 | 41.03220737 | 39.6501829  | 33.89525029 | 34.6346799  | 38.67450766 |
| ENSMUSG00000064165 | 12.73413332 | 2.782468975 | 9.179963621 | 4.832746033 | 4.297167518 |
| ENSMUSG00000064168 | 12.73413332 | 15.99919661 | 17.65377619 | 9.665492065 | 4.297167518 |
| ENSMUSG00000064177 | 31.12788146 | 27.12907251 | 36.71985448 | 25.77464551 | 36.5259239  |
| ENSMUSG00000064181 | 71.45263698 | 86.25653823 | 81.20737049 | 70.88027514 | 68.0384857  |
| ENSMUSG00000064201 | 7.074518513 | 5.56493795  | 4.236906287 | 2.416373016 | 5.729556691 |
| ENSMUSG00000064210 | 36.78749627 | 63.30116918 | 57.19823487 | 25.77464551 | 22.91822676 |
| ENSMUSG00000064213 | 7.074518513 | 10.43425866 | 6.35535943  | 6.443661377 | 5.729556691 |
| ENSMUSG00000064220 | 0           | 0           | 0.706151048 | 0           | 0.716194586 |
| ENSMUSG00000064225 | 11.31922962 | 7.651789682 | 7.767661525 | 10.47094974 | 2.864778345 |
| ENSMUSG00000064254 | 7.074518513 | 10.43425866 | 7.061510478 | 7.249119049 | 7.161945863 |
| ENSMUSG00000064262 | 188.1821924 | 238.5967146 | 204.7838039 | 302.8520847 | 216.2907651 |
| ENSMUSG00000064272 | 5.65961481  | 4.869320706 | 2.118453143 | 4.02728836  | 5.013362104 |
| ENSMUSG00000064325 | 7.781970364 | 4.173703463 | 2.118453143 | 8.054576721 | 6.445751277 |
| ENSMUSG00000064330 | 16.97884443 | 9.738641413 | 8.473812573 | 7.249119049 | 10.02672421 |
| ENSMUSG00000064333 | 10.61177777 | 7.651789682 | 4.943057334 | 0.805457672 | 7.161945863 |
| ENSMUSG00000065956 | 12.73413332 | 4.173703463 | 10.59226572 | 8.054576721 | 3.580972932 |
| ENSMUSG00000065968 | 7.781970364 | 4.869320706 | 12.71071886 | 8.860034393 | 12.17530797 |
| ENSMUSG00000066009 | 19.10119998 | 11.1298759  | 14.829172   | 10.47094974 | 12.89150255 |
| ENSMUSG00000066027 | 8.489422215 | 6.260555194 | 6.35535943  | 5.638203705 | 6.445751277 |
| ENSMUSG00000066030 | 9.904325918 | 7.651789682 | 9.886114669 | 4.832746033 | 6.445751277 |
| ENSMUSG00000066042 | 74.28244438 | 109.2119073 | 84.73812573 | 175.5897725 | 133.2121931 |
| ENSMUSG00000066061 | 7.074518513 | 4.173703463 | 12.00456781 | 8.054576721 | 11.45911338 |
| ENSMUSG00000066071 | 13.44158517 | 6.260555194 | 10.59226572 | 5.638203705 | 4.297167518 |
| ENSMUSG00000066090 | 11.31922962 | 9.043024169 | 6.35535943  | 1.610915344 | 7.161945863 |
| ENSMUSG00000066097 | 10.61177777 | 8.347406925 | 6.35535943  | 6.443661377 | 4.297167518 |
| ENSMUSG00000066100 | 10.61177777 | 6.260555194 | 4.943057334 | 4.02728836  | 2.864778345 |
| ENSMUSG00000066108 | 8.489422215 | 4.173703463 | 7.061510478 | 7.249119049 | 5.729556691 |
| ENSMUSG00000066122 | 11.31922962 | 9.738641413 | 6.35535943  | 5.638203705 | 6.445751277 |

|                    |             |             |             |             |             |
|--------------------|-------------|-------------|-------------|-------------|-------------|
| ENSMUSG00000066141 | 10.61177777 | 9.738641413 | 8.473812573 | 4.832746033 | 7.161945863 |
| ENSMUSG00000066148 | 54.47379255 | 93.90832791 | 74.85201106 | 169.9515688 | 168.3057278 |
| ENSMUSG00000066153 | 8.489422215 | 2.086851731 | 7.767661525 | 5.638203705 | 10.7429188  |
| ENSMUSG00000066189 | 8.489422215 | 3.478086219 | 11.29841676 | 8.054576721 | 7.161945863 |
| ENSMUSG00000066233 | 25.46826665 | 39.6501829  | 29.65834401 | 38.66196826 | 34.37734014 |
| ENSMUSG00000066235 | 7.781970364 | 2.086851731 | 6.35535943  | 5.638203705 | 11.45911338 |
| ENSMUSG00000066240 | 5.65961481  | 6.956172438 | 9.179963621 | 7.249119049 | 5.729556691 |
| ENSMUSG00000066257 | 7.074518513 | 2.086851731 | 6.35535943  | 6.443661377 | 8.594335036 |
| ENSMUSG00000066272 | 9.904325918 | 8.347406925 | 4.236906287 | 2.416373016 | 7.87814045  |
| ENSMUSG00000066278 | 121.6817184 | 162.0788178 | 165.2393452 | 164.3133651 | 129.6312201 |
| ENSMUSG00000066279 | 10.61177777 | 4.869320706 | 10.59226572 | 8.860034393 | 8.594335036 |
| ENSMUSG00000066324 | 65.79302217 | 100.8645003 | 75.55816211 | 113.5695318 | 111.7263555 |
| ENSMUSG00000066357 | 45.27691848 | 52.17129328 | 46.60596915 | 59.60386773 | 47.98503729 |
| ENSMUSG00000066359 | 9.904325918 | 4.173703463 | 2.824604191 | 6.443661377 | 5.729556691 |
| ENSMUSG00000066361 | 11.31922962 | 4.869320706 | 6.35535943  | 3.221830688 | 5.013362104 |
| ENSMUSG00000066364 | 10.61177777 | 2.782468975 | 4.236906287 | 4.02728836  | 7.161945863 |
| ENSMUSG00000066368 | 9.196874066 | 3.478086219 | 10.59226572 | 7.249119049 | 5.729556691 |
| ENSMUSG00000066382 | 8.489422215 | 10.43425866 | 7.767661525 | 7.249119049 | 6.445751277 |
| ENSMUSG00000066383 | 13.44158517 | 6.956172438 | 14.12302096 | 8.860034393 | 7.161945863 |
| ENSMUSG00000066415 | 105.4103258 | 139.1234488 | 126.4010376 | 314.9339498 | 220.5879326 |
| ENSMUSG00000066438 | 10.61177777 | 6.956172438 | 6.35535943  | 5.638203705 | 2.148583759 |
| ENSMUSG00000066440 | 30.4204296  | 39.6501829  | 42.36906287 | 55.57657937 | 50.84981563 |
| ENSMUSG00000066512 | 8.489422215 | 9.738641413 | 11.29841676 | 8.054576721 | 7.161945863 |
| ENSMUSG00000066513 | 5.65961481  | 4.173703463 | 5.649208382 | 5.638203705 | 8.594335036 |
| ENSMUSG00000066515 | 8.489422215 | 7.651789682 | 4.943057334 | 5.638203705 | 8.594335036 |
| ENSMUSG00000066516 | 7.074518513 | 7.651789682 | 9.179963621 | 3.221830688 | 7.161945863 |
| ENSMUSG00000066583 | 2.122355554 | 9.738641413 | 3.530755239 | 4.832746033 | 5.013362104 |
| ENSMUSG00000066586 | 7.781970364 | 7.651789682 | 7.767661525 | 5.638203705 | 10.02672421 |
| ENSMUSG00000066595 | 20.51610369 | 29.21592424 | 17.65377619 | 28.19101852 | 34.37734014 |
| ENSMUSG00000066607 | 7.074518513 | 6.956172438 | 6.35535943  | 9.665492065 | 5.729556691 |
| ENSMUSG00000066637 | 20.51610369 | 39.6501829  | 31.0706461  | 14.4982381  | 20.05344842 |
| ENSMUSG00000066647 | 89.13893326 | 139.819066  | 122.1641313 | 166.7297381 | 123.9016634 |
| ENSMUSG00000066652 | 3.537259256 | 5.56493795  | 9.179963621 | 9.665492065 | 5.013362104 |
| ENSMUSG00000066687 | 5.65961481  | 3.478086219 | 4.236906287 | 7.249119049 | 5.013362104 |
| ENSMUSG00000066704 | 8.489422215 | 3.478086219 | 10.59226572 | 5.638203705 | 4.297167518 |
| ENSMUSG00000066705 | 13.44158517 | 6.260555194 | 5.649208382 | 4.02728836  | 2.864778345 |
| ENSMUSG00000066720 | 7.781970364 | 7.651789682 | 4.236906287 | 6.443661377 | 8.594335036 |
| ENSMUSG00000066721 | 7.074518513 | 2.782468975 | 10.59226572 | 5.638203705 | 10.7429188  |
| ENSMUSG00000066735 | 22.63845924 | 42.43265187 | 35.30755239 | 43.49471429 | 47.98503729 |
| ENSMUSG00000066747 | 8.489422215 | 5.56493795  | 10.59226572 | 8.054576721 | 4.297167518 |
| ENSMUSG00000066748 | 7.781970364 | 10.43425866 | 9.886114669 | 10.47094974 | 7.161945863 |
| ENSMUSG00000066750 | 9.196874066 | 5.56493795  | 7.767661525 | 5.638203705 | 7.87814045  |
| ENSMUSG00000066755 | 3.537259256 | 6.956172438 | 5.649208382 | 4.02728836  | 6.445751277 |

|                    |             |             |             |             |             |
|--------------------|-------------|-------------|-------------|-------------|-------------|
| ENSMUSG00000066756 | 6.367066661 | 6.260555194 | 4.943057334 | 8.054576721 | 5.729556691 |
| ENSMUSG00000066797 | 9.904325918 | 4.173703463 | 5.649208382 | 4.02728836  | 8.594335036 |
| ENSMUSG00000066798 | 26.1757185  | 52.86691053 | 43.07521391 | 76.51847885 | 75.91662615 |
| ENSMUSG00000066804 | 6.367066661 | 9.043024169 | 4.943057334 | 8.054576721 | 12.17530797 |
| ENSMUSG00000066828 | 12.73413332 | 9.043024169 | 6.35535943  | 5.638203705 | 7.87814045  |
| ENSMUSG00000066829 | 21.93100739 | 30.60715873 | 28.95219296 | 27.38556085 | 18.62105924 |
| ENSMUSG00000066838 | 16.27139258 | 22.95536904 | 26.12758877 | 13.69278043 | 18.62105924 |
| ENSMUSG00000066850 | 10.61177777 | 8.347406925 | 4.236906287 | 2.416373016 | 7.87814045  |
| ENSMUSG00000066867 | 4.952162959 | 6.956172438 | 5.649208382 | 9.665492065 | 8.594335036 |
| ENSMUSG00000066896 | 7.781970364 | 5.56493795  | 4.236906287 | 6.443661377 | 8.594335036 |
| ENSMUSG00000066897 | 8.489422215 | 6.956172438 | 5.649208382 | 5.638203705 | 5.729556691 |
| ENSMUSG00000066905 | 8.489422215 | 4.173703463 | 6.35535943  | 4.832746033 | 6.445751277 |
| ENSMUSG00000066964 | 5.65961481  | 6.260555194 | 5.649208382 | 3.221830688 | 7.87814045  |
| ENSMUSG00000066979 | 32.54278516 | 45.91073809 | 45.19366706 | 107.9313281 | 95.25387998 |
| ENSMUSG00000067010 | 11.31922962 | 4.869320706 | 9.886114669 | 4.02728836  | 7.87814045  |
| ENSMUSG00000067049 | 17.68629628 | 9.043024169 | 12.00456781 | 11.27640741 | 9.310529622 |
| ENSMUSG00000067071 | 25.46826665 | 22.2597518  | 28.24604191 | 10.47094974 | 10.7429188  |
| ENSMUSG00000067144 | 1.414903703 | 2.782468975 | 4.236906287 | 2.416373016 | 7.87814045  |
| ENSMUSG00000067149 | 9.196874066 | 7.651789682 | 7.767661525 | 6.443661377 | 6.445751277 |
| ENSMUSG00000067150 | 77.81970364 | 111.298759  | 98.15499564 | 186.0607223 | 160.4275873 |
| ENSMUSG00000067158 | 8.489422215 | 9.738641413 | 7.767661525 | 8.860034393 | 2.864778345 |
| ENSMUSG00000067173 | 5.65961481  | 9.738641413 | 6.35535943  | 4.02728836  | 5.729556691 |
| ENSMUSG00000067194 | 33.25023701 | 52.17129328 | 43.07521391 | 122.4295662 | 83.07857202 |
| ENSMUSG00000067206 | 6.367066661 | 11.82549314 | 6.35535943  | 4.02728836  | 4.297167518 |
| ENSMUSG00000067212 | 93.38364437 | 126.6023384 | 122.8702823 | 180.4225185 | 148.968474  |
| ENSMUSG00000067215 | 0.707451851 | 1.391234488 | 4.236906287 | 2.416373016 | 2.148583759 |
| ENSMUSG00000067219 | 4.244711108 | 7.651789682 | 8.473812573 | 2.416373016 | 5.013362104 |
| ENSMUSG00000067229 | 12.02668147 | 6.260555194 | 7.767661525 | 8.054576721 | 7.161945863 |
| ENSMUSG00000067231 | 4.952162959 | 8.347406925 | 7.767661525 | 6.443661377 | 6.445751277 |
| ENSMUSG00000067261 | 4.952162959 | 2.086851731 | 2.824604191 | 0.805457672 | 1.432389173 |
| ENSMUSG00000067276 | 4.244711108 | 3.478086219 | 5.649208382 | 2.416373016 | 4.297167518 |
| ENSMUSG00000067279 | 4.952162959 | 2.782468975 | 7.767661525 | 7.249119049 | 4.297167518 |
| ENSMUSG00000067297 | 8.489422215 | 18.08604834 | 9.179963621 | 53.96566403 | 38.67450766 |
| ENSMUSG00000067336 | 2.829807405 | 9.738641413 | 9.179963621 | 5.638203705 | 7.161945863 |
| ENSMUSG00000067338 | 7.781970364 | 7.651789682 | 9.179963621 | 4.832746033 | 6.445751277 |
| ENSMUSG00000067341 | 65.08557032 | 105.0382038 | 75.55816211 | 134.5114312 | 108.8615771 |
| ENSMUSG00000067367 | 92.67619252 | 124.5154866 | 132.0502459 | 175.5897725 | 135.3607768 |
| ENSMUSG00000067370 | 24.76081479 | 40.34580014 | 44.48751601 | 77.32393652 | 67.32229112 |
| ENSMUSG00000067430 | 19.80865184 | 27.12907251 | 23.30298458 | 20.94189947 | 22.91822676 |
| ENSMUSG00000067438 | 10.61177777 | 4.173703463 | 2.824604191 | 8.054576721 | 3.580972932 |
| ENSMUSG00000067455 | 5.65961481  | 8.347406925 | 8.473812573 | 6.443661377 | 7.87814045  |
| ENSMUSG00000067522 | 13.44158517 | 9.043024169 | 11.29841676 | 4.832746033 | 3.580972932 |
| ENSMUSG00000067525 | 9.904325918 | 6.956172438 | 11.29841676 | 5.638203705 | 7.87814045  |

|                    |             |             |             |             |             |
|--------------------|-------------|-------------|-------------|-------------|-------------|
| ENSMUSG00000067541 | 9.904325918 | 12.52111039 | 5.649208382 | 5.638203705 | 7.161945863 |
| ENSMUSG00000067543 | 10.61177777 | 6.260555194 | 8.473812573 | 4.02728836  | 7.161945863 |
| ENSMUSG00000067545 | 7.074518513 | 5.56493795  | 9.886114669 | 8.054576721 | 5.729556691 |
| ENSMUSG00000067571 | 5.65961481  | 8.347406925 | 6.35535943  | 8.054576721 | 6.445751277 |
| ENSMUSG00000067578 | 10.61177777 | 5.56493795  | 8.473812573 | 2.416373016 | 6.445751277 |
| ENSMUSG00000067586 | 30.4204296  | 42.43265187 | 36.01370344 | 161.8969921 | 118.1721067 |
| ENSMUSG00000067594 | 11.31922962 | 4.173703463 | 4.943057334 | 6.443661377 | 8.594335036 |
| ENSMUSG00000067596 | 9.904325918 | 6.956172438 | 7.061510478 | 7.249119049 | 12.17530797 |
| ENSMUSG00000067597 | 4.244711108 | 2.782468975 | 4.943057334 | 2.416373016 | 4.297167518 |
| ENSMUSG00000067604 | 7.074518513 | 8.347406925 | 5.649208382 | 12.08186508 | 7.161945863 |
| ENSMUSG00000067610 | 6.367066661 | 10.43425866 | 4.943057334 | 5.638203705 | 5.729556691 |
| ENSMUSG00000067613 | 7.074518513 | 2.782468975 | 7.767661525 | 8.860034393 | 7.161945863 |
| ENSMUSG00000067614 | 5.65961481  | 4.173703463 | 7.061510478 | 3.221830688 | 5.729556691 |
| ENSMUSG00000067615 | 10.61177777 | 12.52111039 | 4.236906287 | 3.221830688 | 10.7429188  |
| ENSMUSG00000067649 | 2.829807405 | 6.956172438 | 2.118453143 | 2.416373016 | 2.148583759 |
| ENSMUSG00000067679 | 5.65961481  | 5.56493795  | 2.824604191 | 0.805457672 | 1.432389173 |
| ENSMUSG00000067684 | 4.952162959 | 4.173703463 | 5.649208382 | 5.638203705 | 1.432389173 |
| ENSMUSG00000067698 | 14.85648888 | 9.738641413 | 15.53532305 | 6.443661377 | 9.310529622 |
| ENSMUSG00000067700 | 17.68629628 | 12.52111039 | 13.41686991 | 12.08186508 | 12.17530797 |
| ENSMUSG00000067702 | 7.074518513 | 7.651789682 | 7.767661525 | 5.638203705 | 4.297167518 |
| ENSMUSG00000067704 | 11.31922962 | 6.956172438 | 7.767661525 | 8.054576721 | 5.013362104 |
| ENSMUSG00000067713 | 65.79302217 | 86.95215547 | 82.61967259 | 80.54576721 | 70.18706946 |
| ENSMUSG00000067722 | 24.76081479 | 56.34499675 | 45.19366706 | 78.93485187 | 74.48423698 |
| ENSMUSG00000067724 | 7.074518513 | 4.869320706 | 5.649208382 | 8.054576721 | 6.445751277 |
| ENSMUSG00000067750 | 10.61177777 | 6.956172438 | 9.179963621 | 5.638203705 | 5.729556691 |
| ENSMUSG00000067767 | 11.31922962 | 5.56493795  | 6.35535943  | 4.02728836  | 4.297167518 |
| ENSMUSG00000067771 | 1.414903703 | 2.782468975 | 4.236906287 | 4.02728836  | 3.580972932 |
| ENSMUSG00000067773 | 2.122355554 | 1.391234488 | 1.412302096 | 1.610915344 | 3.580972932 |
| ENSMUSG00000067780 | 5.65961481  | 4.869320706 | 7.767661525 | 8.054576721 | 7.87814045  |
| ENSMUSG00000067813 | 11.31922962 | 9.043024169 | 6.35535943  | 7.249119049 | 7.161945863 |
| ENSMUSG00000067818 | 7.781970364 | 7.651789682 | 7.767661525 | 7.249119049 | 10.02672421 |
| ENSMUSG00000067855 | 18.39374813 | 7.651789682 | 7.767661525 | 3.221830688 | 8.594335036 |
| ENSMUSG00000067872 | 9.904325918 | 18.78166558 | 22.59683353 | 12.88732275 | 17.18867007 |
| ENSMUSG00000067879 | 14.85648888 | 4.869320706 | 10.59226572 | 8.054576721 | 8.594335036 |
| ENSMUSG00000067889 | 9.196874066 | 2.782468975 | 9.179963621 | 8.054576721 | 5.729556691 |
| ENSMUSG00000067909 | 10.61177777 | 2.086851731 | 4.236906287 | 3.221830688 | 1.432389173 |
| ENSMUSG00000067916 | 49.52162959 | 53.56252777 | 55.78593277 | 49.93837567 | 55.86317773 |
| ENSMUSG00000067919 | 31.12788146 | 18.78166558 | 32.4829482  | 13.69278043 | 23.63442135 |
| ENSMUSG00000067924 | 6.367066661 | 5.56493795  | 2.824604191 | 6.443661377 | 3.580972932 |
| ENSMUSG00000067925 | 2.829807405 | 4.869320706 | 4.236906287 | 1.610915344 | 4.297167518 |
| ENSMUSG00000067928 | 11.31922962 | 25.73783802 | 16.2414741  | 19.33098413 | 15.04008631 |
| ENSMUSG00000067931 | 9.904325918 | 15.30357936 | 12.71071886 | 16.10915344 | 22.20203218 |
| ENSMUSG00000067942 | 57.30359995 | 95.99517964 | 62.84744325 | 107.9313281 | 80.21379367 |



|                    |             |             |             |             |             |
|--------------------|-------------|-------------|-------------|-------------|-------------|
| ENSMUSG00000067995 | 74.28244438 | 128.6891901 | 86.85657888 | 146.5932963 | 121.7530797 |
| ENSMUSG00000067996 | 8.489422215 | 6.260555194 | 7.767661525 | 6.443661377 | 8.594335036 |
| ENSMUSG00000068008 | 10.61177777 | 4.869320706 | 2.824604191 | 6.443661377 | 10.7429188  |
| ENSMUSG00000068011 | 8.489422215 | 7.651789682 | 4.236906287 | 4.02728836  | 10.02672421 |
| ENSMUSG00000068015 | 78.52715549 | 118.9505487 | 94.6242404  | 126.4568545 | 114.5911338 |
| ENSMUSG00000068048 | 4.952162959 | 6.956172438 | 4.236906287 | 2.416373016 | 7.161945863 |
| ENSMUSG00000068067 | 9.904325918 | 9.043024169 | 4.943057334 | 3.221830688 | 5.729556691 |
| ENSMUSG00000068071 | 9.904325918 | 8.347406925 | 8.473812573 | 8.054576721 | 6.445751277 |
| ENSMUSG00000068073 | 11.31922962 | 5.56493795  | 9.179963621 | 2.416373016 | 7.87814045  |
| ENSMUSG00000068074 | 9.904325918 | 6.260555194 | 6.35535943  | 5.638203705 | 5.729556691 |
| ENSMUSG00000068075 | 8.489422215 | 5.56493795  | 8.473812573 | 4.832746033 | 2.864778345 |
| ENSMUSG00000068078 | 5.65961481  | 4.869320706 | 5.649208382 | 8.054576721 | 2.148583759 |
| ENSMUSG00000068079 | 12.02668147 | 6.956172438 | 6.35535943  | 7.249119049 | 3.580972932 |
| ENSMUSG00000068083 | 3.537259256 | 5.56493795  | 8.473812573 | 7.249119049 | 6.445751277 |
| ENSMUSG00000068085 | 0           | 0           | 0           | 0           | 0           |
| ENSMUSG00000068086 | 0           | 0           | 0           | 0           | 0.716194586 |
| ENSMUSG00000068099 | 9.196874066 | 13.91234488 | 6.35535943  | 9.665492065 | 7.161945863 |
| ENSMUSG00000068113 | 3.537259256 | 3.478086219 | 4.943057334 | 4.832746033 | 2.864778345 |
| ENSMUSG00000068114 | 38.20239997 | 62.60555194 | 61.43514116 | 78.93485187 | 65.17370736 |
| ENSMUSG00000068117 | 12.02668147 | 6.956172438 | 5.649208382 | 9.665492065 | 7.161945863 |
| ENSMUSG00000068129 | 9.904325918 | 11.1298759  | 12.00456781 | 8.860034393 | 14.32389173 |
| ENSMUSG00000068149 | 3.537259256 | 4.173703463 | 2.118453143 | 3.221830688 | 2.148583759 |
| ENSMUSG00000068154 | 6.367066661 | 6.956172438 | 6.35535943  | 55.57657937 | 40.10689684 |
| ENSMUSG00000068167 | 7.074518513 | 7.651789682 | 9.179963621 | 7.249119049 | 8.594335036 |
| ENSMUSG00000068184 | 20.51610369 | 32.69401046 | 40.95676077 | 53.96566403 | 68.0384857  |
| ENSMUSG00000068196 | 10.61177777 | 6.956172438 | 7.767661525 | 3.221830688 | 8.594335036 |
| ENSMUSG00000068218 | 5.65961481  | 2.782468975 | 4.236906287 | 4.832746033 | 4.297167518 |
| ENSMUSG00000068219 | 5.65961481  | 4.173703463 | 2.824604191 | 1.610915344 | 4.297167518 |
| ENSMUSG00000068220 | 16.27139258 | 18.08604834 | 17.65377619 | 10.47094974 | 18.62105924 |
| ENSMUSG00000068227 | 9.196874066 | 5.56493795  | 4.943057334 | 12.88732275 | 15.7562809  |
| ENSMUSG00000068232 | 9.196874066 | 5.56493795  | 9.886114669 | 4.832746033 | 9.310529622 |
| ENSMUSG00000068234 | 8.489422215 | 9.738641413 | 12.00456781 | 5.638203705 | 2.148583759 |
| ENSMUSG00000068240 | 11.31922962 | 7.651789682 | 9.886114669 | 15.30369577 | 20.769643   |
| ENSMUSG00000068246 | 13.44158517 | 10.43425866 | 11.29841676 | 6.443661377 | 9.310529622 |
| ENSMUSG00000068252 | 6.367066661 | 3.478086219 | 4.236906287 | 4.832746033 | 1.432389173 |
| ENSMUSG00000068267 | 15.56394073 | 32.69401046 | 26.83373982 | 79.74030954 | 69.47087488 |
| ENSMUSG00000068289 | 7.074518513 | 7.651789682 | 7.061510478 | 4.02728836  | 7.161945863 |
| ENSMUSG00000068302 | 4.244711108 | 6.260555194 | 5.649208382 | 3.221830688 | 7.161945863 |
| ENSMUSG00000068327 | 7.781970364 | 9.043024169 | 6.35535943  | 5.638203705 | 5.013362104 |
| ENSMUSG00000068328 | 34.66514071 | 65.38802092 | 60.02283906 | 186.8661799 | 123.1854689 |
| ENSMUSG00000068335 | 26.1757185  | 43.82388636 | 45.8998181  | 43.49471429 | 53.71459398 |
| ENSMUSG00000068341 | 4.244711108 | 8.347406925 | 8.473812573 | 6.443661377 | 3.580972932 |
| ENSMUSG00000068391 | 23.34591109 | 38.25894841 | 26.83373982 | 33.82922223 | 39.39070225 |

|                    |             |             |             |             |             |
|--------------------|-------------|-------------|-------------|-------------|-------------|
| ENSMUSG00000068392 | 7.781970364 | 6.956172438 | 5.649208382 | 7.249119049 | 9.310529622 |
| ENSMUSG00000068394 | 51.64398514 | 67.47487265 | 71.32125582 | 90.21125927 | 86.65954495 |
| ENSMUSG00000068407 | 5.65961481  | 5.56493795  | 7.061510478 | 5.638203705 | 5.013362104 |
| ENSMUSG00000068417 | 13.44158517 | 18.08604834 | 14.12302096 | 16.91461111 | 13.60769714 |
| ENSMUSG00000068426 | 11.31922962 | 4.173703463 | 7.061510478 | 4.02728836  | 4.297167518 |
| ENSMUSG00000068428 | 9.196874066 | 4.173703463 | 9.179963621 | 4.02728836  | 5.013362104 |
| ENSMUSG00000068431 | 8.489422215 | 6.260555194 | 7.061510478 | 3.221830688 | 8.594335036 |
| ENSMUSG00000068437 | 11.31922962 | 9.043024169 | 6.35535943  | 3.221830688 | 5.729556691 |
| ENSMUSG00000068479 | 154.2245036 | 200.3377662 | 176.5377619 | 199.7535027 | 182.6296195 |
| ENSMUSG00000068506 | 4.244711108 | 6.260555194 | 9.179963621 | 6.443661377 | 5.013362104 |
| ENSMUSG00000068522 | 7.781970364 | 4.869320706 | 9.886114669 | 5.638203705 | 10.7429188  |
| ENSMUSG00000068547 | 10.61177777 | 9.738641413 | 2.824604191 | 4.02728836  | 9.310529622 |
| ENSMUSG00000068587 | 12.73413332 | 4.869320706 | 9.886114669 | 4.832746033 | 6.445751277 |
| ENSMUSG00000068606 | 6.367066661 | 6.956172438 | 8.473812573 | 7.249119049 | 7.87814045  |
| ENSMUSG00000068614 | 14.14903703 | 7.651789682 | 9.179963621 | 2.416373016 | 5.013362104 |
| ENSMUSG00000068615 | 7.781970364 | 5.56493795  | 6.35535943  | 10.47094974 | 4.297167518 |
| ENSMUSG00000068617 | 14.14903703 | 11.82549314 | 6.35535943  | 4.02728836  | 5.729556691 |
| ENSMUSG00000068696 | 7.074518513 | 6.260555194 | 12.00456781 | 4.02728836  | 6.445751277 |
| ENSMUSG00000068697 | 8.489422215 | 6.956172438 | 2.824604191 | 6.443661377 | 4.297167518 |
| ENSMUSG00000068732 | 35.37259256 | 52.17129328 | 50.13672439 | 49.132918   | 49.41742646 |
| ENSMUSG00000068745 | 4.952162959 | 6.260555194 | 4.236906287 | 6.443661377 | 9.310529622 |
| ENSMUSG00000068748 | 7.074518513 | 5.56493795  | 9.886114669 | 6.443661377 | 8.594335036 |
| ENSMUSG00000068749 | 91.26128881 | 121.7330177 | 110.1595635 | 190.8934683 | 158.9951982 |
| ENSMUSG00000068758 | 2.122355554 | 4.173703463 | 2.824604191 | 4.02728836  | 7.87814045  |
| ENSMUSG00000068794 | 9.904325918 | 15.30357936 | 5.649208382 | 6.443661377 | 10.02672421 |
| ENSMUSG00000068854 | 17.68629628 | 21.56413456 | 24.00913562 | 12.88732275 | 18.62105924 |
| ENSMUSG00000068855 | 7.074518513 | 10.43425866 | 14.12302096 | 8.860034393 | 8.594335036 |
| ENSMUSG00000068856 | 74.98989623 | 99.47326586 | 96.0365425  | 179.6170609 | 166.8733386 |
| ENSMUSG00000068859 | 5.65961481  | 6.956172438 | 13.41686991 | 1.610915344 | 10.02672421 |
| ENSMUSG00000068860 | 9.904325918 | 15.99919661 | 16.94762515 | 10.47094974 | 10.7429188  |
| ENSMUSG00000068885 | 7.074518513 | 3.478086219 | 10.59226572 | 5.638203705 | 5.013362104 |
| ENSMUSG00000068887 | 11.31922962 | 7.651789682 | 7.061510478 | 3.221830688 | 5.729556691 |
| ENSMUSG00000068888 | 9.196874066 | 9.043024169 | 11.29841676 | 3.221830688 | 3.580972932 |
| ENSMUSG00000068889 | 5.65961481  | 7.651789682 | 7.061510478 | 4.02728836  | 6.445751277 |
| ENSMUSG00000068890 | 8.489422215 | 6.956172438 | 6.35535943  | 1.610915344 | 4.297167518 |
| ENSMUSG00000068893 | 26.88317035 | 16.69481385 | 28.95219296 | 8.860034393 | 11.45911338 |
| ENSMUSG00000068940 | 9.904325918 | 6.260555194 | 12.71071886 | 5.638203705 | 7.161945863 |
| ENSMUSG00000068959 | 10.61177777 | 22.2597518  | 13.41686991 | 9.665492065 | 13.60769714 |
| ENSMUSG00000069020 | 86.30912585 | 98.77764862 | 91.79963621 | 97.46037832 | 85.94335036 |
| ENSMUSG00000069041 | 11.31922962 | 4.869320706 | 7.767661525 | 5.638203705 | 8.594335036 |
| ENSMUSG00000069044 | 2.829807405 | 4.869320706 | 2.118453143 | 1.610915344 | 5.729556691 |
| ENSMUSG00000069072 | 10.61177777 | 3.478086219 | 12.00456781 | 10.47094974 | 5.013362104 |
| ENSMUSG00000069080 | 4.244711108 | 6.260555194 | 11.29841676 | 9.665492065 | 8.594335036 |

|                    |             |             |             |             |             |
|--------------------|-------------|-------------|-------------|-------------|-------------|
| ENSMUSG00000069085 | 10.61177777 | 6.956172438 | 5.649208382 | 7.249119049 | 7.87814045  |
| ENSMUSG00000069089 | 85.601674   | 109.2119073 | 86.85657888 | 122.4295662 | 119.6044959 |
| ENSMUSG00000069114 | 27.5906222  | 43.12826911 | 39.54445867 | 29.80193387 | 27.21539428 |
| ENSMUSG00000069118 | 8.489422215 | 6.260555194 | 6.35535943  | 4.832746033 | 5.729556691 |
| ENSMUSG00000069132 | 9.196874066 | 6.956172438 | 9.886114669 | 4.02728836  | 4.297167518 |
| ENSMUSG00000069184 | 8.489422215 | 6.956172438 | 9.179963621 | 4.832746033 | 10.02672421 |
| ENSMUSG00000069189 | 12.73413332 | 7.651789682 | 7.767661525 | 4.02728836  | 14.32389173 |
| ENSMUSG00000069227 | 10.61177777 | 6.260555194 | 4.236906287 | 4.02728836  | 9.310529622 |
| ENSMUSG00000069237 | 21.93100739 | 37.56333116 | 35.30755239 | 37.05105292 | 35.80972932 |
| ENSMUSG00000069265 | 0.707451851 | 2.086851731 | 3.530755239 | 1.610915344 | 3.580972932 |
| ENSMUSG00000069266 | 9.196874066 | 7.651789682 | 5.649208382 | 9.665492065 | 7.161945863 |
| ENSMUSG00000069267 | 1.414903703 | 4.173703463 | 0           | 0.805457672 | 2.148583759 |
| ENSMUSG00000069268 | 9.904325918 | 7.651789682 | 7.061510478 | 6.443661377 | 5.729556691 |
| ENSMUSG00000069270 | 2.829807405 | 2.086851731 | 0.706151048 | 2.416373016 | 0.716194586 |
| ENSMUSG00000069272 | 3.537259256 | 6.260555194 | 8.473812573 | 6.443661377 | 5.729556691 |
| ENSMUSG00000069273 | 6.367066661 | 9.738641413 | 10.59226572 | 5.638203705 | 7.87814045  |
| ENSMUSG00000069274 | 2.829807405 | 8.347406925 | 9.179963621 | 8.054576721 | 8.594335036 |
| ENSMUSG00000069300 | 3.537259256 | 2.782468975 | 6.35535943  | 3.221830688 | 8.594335036 |
| ENSMUSG00000069301 | 2.829807405 | 4.173703463 | 1.412302096 | 3.221830688 | 2.148583759 |
| ENSMUSG00000069302 | 4.952162959 | 13.21672763 | 9.179963621 | 5.638203705 | 5.729556691 |
| ENSMUSG00000069303 | 4.952162959 | 5.56493795  | 7.767661525 | 7.249119049 | 5.729556691 |
| ENSMUSG00000069305 | 2.829807405 | 2.782468975 | 2.118453143 | 4.02728836  | 1.432389173 |
| ENSMUSG00000069306 | 5.65961481  | 7.651789682 | 6.35535943  | 4.832746033 | 7.87814045  |
| ENSMUSG00000069308 | 2.829807405 | 6.260555194 | 7.767661525 | 7.249119049 | 7.87814045  |
| ENSMUSG00000069310 | 7.074518513 | 6.956172438 | 7.061510478 | 4.02728836  | 2.148583759 |
| ENSMUSG00000069372 | 9.196874066 | 4.173703463 | 7.061510478 | 4.832746033 | 8.594335036 |
| ENSMUSG00000069385 | 5.65961481  | 9.738641413 | 11.29841676 | 8.860034393 | 11.45911338 |
| ENSMUSG00000069421 | 6.367066661 | 6.260555194 | 7.061510478 | 6.443661377 | 12.17530797 |
| ENSMUSG00000069430 | 9.904325918 | 10.43425866 | 9.179963621 | 6.443661377 | 12.17530797 |
| ENSMUSG00000069441 | 8.489422215 | 4.869320706 | 7.061510478 | 4.02728836  | 4.297167518 |
| ENSMUSG00000069456 | 12.02668147 | 2.782468975 | 6.35535943  | 6.443661377 | 5.729556691 |
| ENSMUSG00000069515 | 9.904325918 | 7.651789682 | 6.35535943  | 8.054576721 | 10.02672421 |
| ENSMUSG00000069516 | 11.31922962 | 6.956172438 | 7.767661525 | 4.832746033 | 2.864778345 |
| ENSMUSG00000069520 | 22.63845924 | 38.25894841 | 28.24604191 | 30.60739154 | 30.79636721 |
| ENSMUSG00000069582 | 7.074518513 | 4.869320706 | 4.943057334 | 9.665492065 | 5.013362104 |
| ENSMUSG00000069583 | 9.196874066 | 6.956172438 | 5.649208382 | 4.832746033 | 4.297167518 |
| ENSMUSG00000069588 | 8.489422215 | 9.043024169 | 6.35535943  | 8.860034393 | 11.45911338 |
| ENSMUSG00000069607 | 9.904325918 | 7.651789682 | 7.061510478 | 4.832746033 | 8.594335036 |
| ENSMUSG00000069609 | 12.02668147 | 6.956172438 | 6.35535943  | 8.860034393 | 8.594335036 |
| ENSMUSG00000069662 | 22.63845924 | 34.08524495 | 31.77679715 | 95.84946298 | 65.88990194 |
| ENSMUSG00000069668 | 9.196874066 | 6.260555194 | 9.179963621 | 5.638203705 | 3.580972932 |
| ENSMUSG00000069670 | 7.781970364 | 11.1298759  | 9.886114669 | 5.638203705 | 7.161945863 |
| ENSMUSG00000069717 | 3.537259256 | 4.173703463 | 2.118453143 | 1.610915344 | 4.297167518 |

|                    |             |             |             |             |             |
|--------------------|-------------|-------------|-------------|-------------|-------------|
| ENSMUSG00000069718 | 10.61177777 | 11.82549314 | 7.061510478 | 7.249119049 | 7.87814045  |
| ENSMUSG00000069720 | 30.4204296  | 10.43425866 | 8.473812573 | 19.33098413 | 11.45911338 |
| ENSMUSG00000069721 | 3.537259256 | 4.869320706 | 8.473812573 | 3.221830688 | 2.864778345 |
| ENSMUSG00000069722 | 4.244711108 | 6.260555194 | 4.943057334 | 6.443661377 | 4.297167518 |
| ENSMUSG00000069727 | 16.27139258 | 36.17209668 | 33.18909925 | 14.4982381  | 29.36397804 |
| ENSMUSG00000069743 | 19.10119998 | 20.17290007 | 19.77222934 | 11.27640741 | 17.18867007 |
| ENSMUSG00000069744 | 60.84085921 | 88.34338996 | 81.91352154 | 127.2623122 | 105.2806042 |
| ENSMUSG00000069763 | 6.367066661 | 10.43425866 | 15.53532305 | 3.221830688 | 10.02672421 |
| ENSMUSG00000069792 | 7.074518513 | 5.56493795  | 6.35535943  | 4.832746033 | 5.013362104 |
| ENSMUSG00000069806 | 7.781970364 | 5.56493795  | 5.649208382 | 7.249119049 | 5.729556691 |
| ENSMUSG00000069814 | 12.73413332 | 4.173703463 | 4.236906287 | 6.443661377 | 7.87814045  |
| ENSMUSG00000069818 | 9.904325918 | 5.56493795  | 4.236906287 | 4.832746033 | 5.729556691 |
| ENSMUSG00000069855 | 7.074518513 | 5.56493795  | 7.767661525 | 1.610915344 | 6.445751277 |
| ENSMUSG00000069867 | 0           | 1.391234488 | 0           | 0           | 2.148583759 |
| ENSMUSG00000069873 | 7.781970364 | 4.869320706 | 9.886114669 | 9.665492065 | 7.161945863 |
| ENSMUSG00000069874 | 0           | 0.695617244 | 0.706151048 | 0.805457672 | 0           |
| ENSMUSG00000069892 | 45.98437033 | 84.86530374 | 54.37363068 | 80.54576721 | 54.43078856 |
| ENSMUSG00000069895 | 50.22908144 | 45.91073809 | 50.84287544 | 76.51847885 | 66.60609653 |
| ENSMUSG00000069910 | 41.73965922 | 47.30197258 | 50.84287544 | 174.7843148 | 119.6044959 |
| ENSMUSG00000069917 | 7.781970364 | 11.1298759  | 7.061510478 | 7.249119049 | 8.594335036 |
| ENSMUSG00000069919 | 9.196874066 | 4.869320706 | 2.118453143 | 4.832746033 | 3.580972932 |
| ENSMUSG00000069971 | 8.489422215 | 7.651789682 | 6.35535943  | 11.27640741 | 7.87814045  |
| ENSMUSG00000069998 | 11.31922962 | 14.60796212 | 9.886114669 | 4.02728836  | 8.594335036 |
| ENSMUSG00000070002 | 81.3569629  | 111.298759  | 97.44884459 | 106.3204127 | 123.1854689 |
| ENSMUSG00000070056 | 26.88317035 | 31.30277597 | 38.83830763 | 74.10210583 | 63.74131818 |
| ENSMUSG00000070283 | 9.196874066 | 13.91234488 | 12.00456781 | 20.1364418  | 15.7562809  |
| ENSMUSG00000070287 | 7.781970364 | 8.347406925 | 10.59226572 | 7.249119049 | 9.310529622 |
| ENSMUSG00000070291 | 7.074518513 | 6.956172438 | 4.943057334 | 9.665492065 | 7.161945863 |
| ENSMUSG00000070298 | 8.489422215 | 7.651789682 | 2.118453143 | 7.249119049 | 4.297167518 |
| ENSMUSG00000070306 | 5.65961481  | 13.21672763 | 13.41686991 | 5.638203705 | 15.04008631 |
| ENSMUSG00000070311 | 9.196874066 | 4.869320706 | 5.649208382 | 1.610915344 | 7.161945863 |
| ENSMUSG00000070313 | 12.73413332 | 6.260555194 | 9.886114669 | 4.832746033 | 4.297167518 |
| ENSMUSG00000070319 | 58.0110518  | 86.25653823 | 99.56729774 | 199.7535027 | 165.4409494 |
| ENSMUSG00000070324 | 4.952162959 | 5.56493795  | 8.473812573 | 5.638203705 | 6.445751277 |
| ENSMUSG00000070332 | 10.61177777 | 4.173703463 | 7.767661525 | 4.832746033 | 5.013362104 |
| ENSMUSG00000070334 | 10.61177777 | 9.043024169 | 4.943057334 | 12.88732275 | 7.161945863 |
| ENSMUSG00000070335 | 8.489422215 | 4.869320706 | 9.886114669 | 2.416373016 | 8.594335036 |
| ENSMUSG00000070336 | 10.61177777 | 11.82549314 | 9.179963621 | 16.10915344 | 17.90486466 |
| ENSMUSG00000070345 | 13.44158517 | 18.78166558 | 19.06607829 | 17.72006879 | 21.48583759 |
| ENSMUSG00000070348 | 6.367066661 | 2.782468975 | 9.886114669 | 3.221830688 | 4.297167518 |
| ENSMUSG00000070360 | 8.489422215 | 8.347406925 | 7.767661525 | 4.832746033 | 8.594335036 |
| ENSMUSG00000070366 | 6.367066661 | 6.260555194 | 6.35535943  | 4.02728836  | 7.161945863 |
| ENSMUSG00000070368 | 6.367066661 | 9.043024169 | 10.59226572 | 5.638203705 | 5.729556691 |

|                    |             |             |             |             |             |
|--------------------|-------------|-------------|-------------|-------------|-------------|
| ENSMUSG00000070374 | 10.61177777 | 8.347406925 | 8.473812573 | 7.249119049 | 6.445751277 |
| ENSMUSG00000070375 | 9.904325918 | 9.738641413 | 10.59226572 | 7.249119049 | 5.729556691 |
| ENSMUSG00000070383 | 6.367066661 | 8.347406925 | 4.236906287 | 4.02728836  | 5.013362104 |
| ENSMUSG00000070388 | 9.196874066 | 9.043024169 | 7.767661525 | 10.47094974 | 7.87814045  |
| ENSMUSG00000070407 | 4.244711108 | 9.043024169 | 14.829172   | 6.443661377 | 7.161945863 |
| ENSMUSG00000070417 | 7.074518513 | 8.347406925 | 7.767661525 | 7.249119049 | 5.729556691 |
| ENSMUSG00000070420 | 99.75071103 | 157.9051143 | 134.8748501 | 216.6681138 | 182.6296195 |
| ENSMUSG00000070421 | 8.489422215 | 5.56493795  | 7.061510478 | 7.249119049 | 7.161945863 |
| ENSMUSG00000070423 | 7.781970364 | 3.478086219 | 9.886114669 | 5.638203705 | 5.729556691 |
| ENSMUSG00000070427 | 8.489422215 | 12.52111039 | 12.71071886 | 14.4982381  | 12.89150255 |
| ENSMUSG00000070462 | 27.5906222  | 33.3896277  | 43.07521391 | 68.46390213 | 70.18706946 |
| ENSMUSG00000070471 | 5.65961481  | 11.1298759  | 7.767661525 | 12.08186508 | 7.161945863 |
| ENSMUSG00000070473 | 9.196874066 | 3.478086219 | 3.530755239 | 6.443661377 | 9.310529622 |
| ENSMUSG00000070493 | 72.86754068 | 112.6899935 | 108.7472614 | 202.1698757 | 179.7648412 |
| ENSMUSG00000070498 | 4.244711108 | 4.869320706 | 9.886114669 | 3.221830688 | 7.87814045  |
| ENSMUSG00000070504 | 7.074518513 | 9.043024169 | 9.886114669 | 8.860034393 | 5.729556691 |
| ENSMUSG00000070520 | 22.63845924 | 32.69401046 | 33.89525029 | 63.6311561  | 47.98503729 |
| ENSMUSG00000070526 | 7.074518513 | 8.347406925 | 2.824604191 | 3.221830688 | 5.013362104 |
| ENSMUSG00000070527 | 9.904325918 | 6.260555194 | 5.649208382 | 4.02728836  | 5.729556691 |
| ENSMUSG00000070529 | 6.367066661 | 4.173703463 | 4.236906287 | 3.221830688 | 8.594335036 |
| ENSMUSG00000070530 | 6.367066661 | 8.347406925 | 4.236906287 | 7.249119049 | 5.013362104 |
| ENSMUSG00000070531 | 4.952162959 | 7.651789682 | 9.179963621 | 5.638203705 | 5.013362104 |
| ENSMUSG00000070532 | 9.904325918 | 6.956172438 | 6.35535943  | 3.221830688 | 5.013362104 |
| ENSMUSG00000070544 | 40.32475552 | 70.25734162 | 56.49208382 | 111.9586164 | 97.40246374 |
| ENSMUSG00000070546 | 8.489422215 | 4.869320706 | 7.767661525 | 7.249119049 | 5.729556691 |
| ENSMUSG00000070547 | 5.65961481  | 6.956172438 | 7.767661525 | 7.249119049 | 9.310529622 |
| ENSMUSG00000070550 | 12.73413332 | 10.43425866 | 10.59226572 | 3.221830688 | 7.87814045  |
| ENSMUSG00000070551 | 9.196874066 | 11.1298759  | 9.179963621 | 4.832746033 | 7.161945863 |
| ENSMUSG00000070552 | 6.367066661 | 9.738641413 | 8.473812573 | 4.832746033 | 7.161945863 |
| ENSMUSG00000070563 | 7.781970364 | 6.956172438 | 6.35535943  | 21.74735715 | 15.7562809  |
| ENSMUSG00000070570 | 9.196874066 | 6.260555194 | 7.767661525 | 8.860034393 | 9.310529622 |
| ENSMUSG00000070576 | 4.952162959 | 2.782468975 | 9.179963621 | 4.02728836  | 5.729556691 |
| ENSMUSG00000070577 | 9.196874066 | 5.56493795  | 9.179963621 | 8.860034393 | 9.310529622 |
| ENSMUSG00000070604 | 12.02668147 | 5.56493795  | 4.943057334 | 4.832746033 | 7.161945863 |
| ENSMUSG00000070605 | 31.83533331 | 29.91154148 | 30.36449505 | 24.16373016 | 21.48583759 |
| ENSMUSG00000070617 | 9.904325918 | 11.1298759  | 6.35535943  | 3.221830688 | 7.87814045  |
| ENSMUSG00000070619 | 7.074518513 | 6.260555194 | 9.179963621 | 2.416373016 | 3.580972932 |
| ENSMUSG00000070637 | 14.85648888 | 11.82549314 | 11.29841676 | 12.08186508 | 7.87814045  |
| ENSMUSG00000070639 | 6.367066661 | 13.21672763 | 7.767661525 | 15.30369577 | 12.17530797 |
| ENSMUSG00000070645 | 12.73413332 | 7.651789682 | 9.886114669 | 8.054576721 | 4.297167518 |
| ENSMUSG00000070661 | 4.244711108 | 7.651789682 | 7.061510478 | 8.054576721 | 11.45911338 |
| ENSMUSG00000070677 | 7.074518513 | 5.56493795  | 8.473812573 | 2.416373016 | 5.729556691 |
| ENSMUSG00000070683 | 9.904325918 | 2.782468975 | 5.649208382 | 6.443661377 | 5.013362104 |

|                    |              |             |             |             |             |
|--------------------|--------------|-------------|-------------|-------------|-------------|
| ENSMUSG00000070690 | 6.367066661  | 6.956172438 | 3.530755239 | 4.832746033 | 7.161945863 |
| ENSMUSG00000070695 | 7.074518513  | 7.651789682 | 7.767661525 | 2.416373016 | 2.864778345 |
| ENSMUSG00000070697 | 43.86201478  | 63.30116918 | 48.01827125 | 227.9445212 | 172.6028953 |
| ENSMUSG00000070699 | 27.5906222   | 22.2597518  | 16.2414741  | 36.24559524 | 26.49919969 |
| ENSMUSG00000070702 | 4.2447111108 | 9.043024169 | 6.35535943  | 4.832746033 | 3.580972932 |
| ENSMUSG00000070705 | 14.14903703  | 22.95536904 | 21.18453143 | 8.054576721 | 14.32389173 |
| ENSMUSG00000070708 | 4.2447111108 | 5.56493795  | 11.29841676 | 4.02728836  | 4.297167518 |
| ENSMUSG00000070719 | 12.73413332  | 5.56493795  | 5.649208382 | 8.860034393 | 7.87814045  |
| ENSMUSG00000070732 | 9.196874066  | 9.738641413 | 10.59226572 | 9.665492065 | 10.7429188  |
| ENSMUSG00000070777 | 6.367066661  | 6.956172438 | 2.118453143 | 7.249119049 | 5.729556691 |
| ENSMUSG00000070797 | 7.781970364  | 6.260555194 | 5.649208382 | 4.02728836  | 10.7429188  |
| ENSMUSG00000070798 | 7.074518513  | 8.347406925 | 8.473812573 | 6.443661377 | 7.87814045  |
| ENSMUSG00000070799 | 10.61177777  | 9.043024169 | 7.061510478 | 6.443661377 | 5.013362104 |
| ENSMUSG00000070802 | 2.122355554  | 5.56493795  | 6.35535943  | 5.638203705 | 2.864778345 |
| ENSMUSG00000070803 | 4.952162959  | 4.869320706 | 10.59226572 | 5.638203705 | 7.87814045  |
| ENSMUSG00000070806 | 9.196874066  | 25.04222078 | 19.06607829 | 19.33098413 | 15.04008631 |
| ENSMUSG00000070808 | 131.5860443  | 134.254128  | 147.585569  | 127.2623122 | 116.7397176 |
| ENSMUSG00000070811 | 7.781970364  | 7.651789682 | 5.649208382 | 2.416373016 | 4.297167518 |
| ENSMUSG00000070822 | 13.44158517  | 11.1298759  | 8.473812573 | 4.832746033 | 5.729556691 |
| ENSMUSG00000070823 | 4.952162959  | 8.347406925 | 8.473812573 | 4.02728836  | 7.87814045  |
| ENSMUSG00000070828 | 5.65961481   | 8.347406925 | 7.061510478 | 2.416373016 | 7.161945863 |
| ENSMUSG00000070841 | 19.10119998  | 8.347406925 | 2.824604191 | 7.249119049 | 7.87814045  |
| ENSMUSG00000070866 | 11.31922962  | 6.260555194 | 7.061510478 | 7.249119049 | 4.297167518 |
| ENSMUSG00000070867 | 7.074518513  | 7.651789682 | 4.236906287 | 3.221830688 | 7.87814045  |
| ENSMUSG00000070870 | 8.489422215  | 10.43425866 | 6.35535943  | 5.638203705 | 5.013362104 |
| ENSMUSG00000070873 | 10.61177777  | 5.56493795  | 9.179963621 | 8.054576721 | 4.297167518 |
| ENSMUSG00000070877 | 9.904325918  | 6.260555194 | 6.35535943  | 6.443661377 | 5.013362104 |
| ENSMUSG00000070883 | 12.73413332  | 24.34660353 | 19.06607829 | 14.4982381  | 22.91822676 |
| ENSMUSG00000070902 | 9.196874066  | 6.260555194 | 9.886114669 | 4.02728836  | 5.729556691 |
| ENSMUSG00000070908 | 2.122355554  | 3.478086219 | 7.061510478 | 5.638203705 | 6.445751277 |
| ENSMUSG00000070923 | 53.05888884  | 68.86610713 | 57.19823487 | 66.04752911 | 65.17370736 |
| ENSMUSG00000070934 | 79.94205919  | 97.38641413 | 86.15042783 | 175.5897725 | 123.9016634 |
| ENSMUSG00000070939 | 41.73965922  | 77.21351406 | 67.08434954 | 57.18749472 | 55.86317773 |
| ENSMUSG00000070942 | 7.074518513  | 4.173703463 | 7.061510478 | 5.638203705 | 4.297167518 |
| ENSMUSG00000070979 | 3.537259256  | 7.651789682 | 6.35535943  | 10.47094974 | 8.594335036 |
| ENSMUSG00000070980 | 7.074518513  | 9.043024169 | 10.59226572 | 3.221830688 | 9.310529622 |
| ENSMUSG00000070985 | 9.196874066  | 6.956172438 | 9.179963621 | 8.860034393 | 6.445751277 |
| ENSMUSG00000070990 | 8.489422215  | 9.738641413 | 4.943057334 | 7.249119049 | 2.864778345 |
| ENSMUSG00000070999 | 9.904325918  | 5.56493795  | 4.236906287 | 7.249119049 | 7.161945863 |
| ENSMUSG00000071000 | 9.904325918  | 6.260555194 | 9.886114669 | 5.638203705 | 5.013362104 |
| ENSMUSG00000071001 | 5.65961481   | 1.391234488 | 4.236906287 | 8.054576721 | 7.87814045  |
| ENSMUSG00000071005 | 1.414903703  | 0.695617244 | 2.824604191 | 4.832746033 | 2.864778345 |
| ENSMUSG00000071015 | 7.781970364  | 8.347406925 | 8.473812573 | 5.638203705 | 5.729556691 |

|                    |             |             |             |             |             |
|--------------------|-------------|-------------|-------------|-------------|-------------|
| ENSMUSG00000071047 | 10.61177777 | 6.956172438 | 12.00456781 | 9.665492065 | 7.161945863 |
| ENSMUSG00000071068 | 49.52162959 | 66.7792554  | 60.02283906 | 116.7913625 | 92.38910164 |
| ENSMUSG00000071073 | 7.781970364 | 9.738641413 | 4.943057334 | 12.08186508 | 15.7562809  |
| ENSMUSG00000071074 | 45.27691848 | 73.0398106  | 74.14586002 | 136.9278043 | 121.0368851 |
| ENSMUSG00000071076 | 16.27139258 | 33.3896277  | 28.95219296 | 124.8459392 | 105.2806042 |
| ENSMUSG00000071078 | 33.25023701 | 32.69401046 | 46.60596915 | 99.87675134 | 78.06520991 |
| ENSMUSG00000071089 | 17.68629628 | 5.56493795  | 8.473812573 | 5.638203705 | 7.161945863 |
| ENSMUSG00000071103 | 17.68629628 | 26.43345526 | 24.71528667 | 24.96918783 | 26.49919969 |
| ENSMUSG00000071113 | 9.904325918 | 8.347406925 | 10.59226572 | 4.832746033 | 5.729556691 |
| ENSMUSG00000071138 | 10.61177777 | 7.651789682 | 12.00456781 | 7.249119049 | 5.013362104 |
| ENSMUSG00000071147 | 9.904325918 | 9.043024169 | 10.59226572 | 5.638203705 | 2.864778345 |
| ENSMUSG00000071149 | 4.952162959 | 4.869320706 | 9.179963621 | 5.638203705 | 5.729556691 |
| ENSMUSG00000071158 | 7.074518513 | 5.56493795  | 7.767661525 | 5.638203705 | 5.729556691 |
| ENSMUSG00000071165 | 9.904325918 | 6.260555194 | 10.59226572 | 6.443661377 | 5.013362104 |
| ENSMUSG00000071177 | 4.244711108 | 4.869320706 | 5.649208382 | 10.47094974 | 7.161945863 |
| ENSMUSG00000071179 | 7.781970364 | 8.347406925 | 4.236906287 | 3.221830688 | 9.310529622 |
| ENSMUSG00000071180 | 41.03220737 | 75.12666233 | 54.37363068 | 75.71302118 | 73.76804239 |
| ENSMUSG00000071185 | 7.781970364 | 8.347406925 | 12.71071886 | 6.443661377 | 8.594335036 |
| ENSMUSG00000071192 | 10.61177777 | 9.738641413 | 11.29841676 | 8.860034393 | 13.60769714 |
| ENSMUSG00000071202 | 12.73413332 | 20.17290007 | 20.47838039 | 23.35827249 | 16.47247549 |
| ENSMUSG00000071203 | 10.61177777 | 18.08604834 | 19.77222934 | 16.10915344 | 9.310529622 |
| ENSMUSG00000071229 | 9.196874066 | 14.60796212 | 10.59226572 | 13.69278043 | 10.02672421 |
| ENSMUSG00000071230 | 5.65961481  | 9.043024169 | 7.767661525 | 5.638203705 | 8.594335036 |
| ENSMUSG00000071234 | 7.074518513 | 4.173703463 | 6.35535943  | 4.832746033 | 5.729556691 |
| ENSMUSG00000071252 | 26.88317035 | 59.82308296 | 38.13215658 | 55.57657937 | 45.83645353 |
| ENSMUSG00000071253 | 18.39374813 | 38.25894841 | 28.95219296 | 24.16373016 | 22.20203218 |
| ENSMUSG00000071256 | 33.95768886 | 51.47567604 | 33.89525029 | 64.43661377 | 72.33565322 |
| ENSMUSG00000071262 | 9.904325918 | 8.347406925 | 3.530755239 | 9.665492065 | 5.013362104 |
| ENSMUSG00000071317 | 9.904325918 | 4.869320706 | 7.767661525 | 3.221830688 | 7.161945863 |
| ENSMUSG00000071335 | 9.196874066 | 7.651789682 | 6.35535943  | 4.02728836  | 8.594335036 |
| ENSMUSG00000071340 | 11.31922962 | 4.173703463 | 3.530755239 | 6.443661377 | 10.02672421 |
| ENSMUSG00000071341 | 6.367066661 | 4.869320706 | 6.35535943  | 2.416373016 | 4.297167518 |
| ENSMUSG00000071342 | 7.074518513 | 12.52111039 | 6.35535943  | 2.416373016 | 6.445751277 |
| ENSMUSG00000071347 | 10.61177777 | 7.651789682 | 9.179963621 | 8.054576721 | 5.729556691 |
| ENSMUSG00000071356 | 10.61177777 | 5.56493795  | 5.649208382 | 7.249119049 | 5.729556691 |
| ENSMUSG00000071361 | 9.196874066 | 2.086851731 | 10.59226572 | 5.638203705 | 5.013362104 |
| ENSMUSG00000071379 | 18.39374813 | 16.69481385 | 24.71528667 | 16.91461111 | 17.18867007 |
| ENSMUSG00000071392 | 7.781970364 | 5.56493795  | 7.061510478 | 4.832746033 | 7.161945863 |
| ENSMUSG00000071398 | 5.65961481  | 4.173703463 | 12.00456781 | 3.221830688 | 5.729556691 |
| ENSMUSG00000071415 | 0           | 4.173703463 | 2.118453143 | 2.416373016 | 3.580972932 |
| ENSMUSG00000071452 | 10.61177777 | 9.738641413 | 14.12302096 | 3.221830688 | 7.87814045  |
| ENSMUSG00000071470 | 7.074518513 | 5.56493795  | 8.473812573 | 5.638203705 | 7.87814045  |
| ENSMUSG00000071471 | 13.44158517 | 9.738641413 | 9.179963621 | 3.221830688 | 3.580972932 |

|                    |             |             |             |             |             |
|--------------------|-------------|-------------|-------------|-------------|-------------|
| ENSMUSG00000071478 | 0.707451851 | 4.173703463 | 2.118453143 | 0           | 0.716194586 |
| ENSMUSG00000071481 | 8.489422215 | 9.043024169 | 9.886114669 | 1.610915344 | 8.594335036 |
| ENSMUSG00000071489 | 12.73413332 | 5.56493795  | 4.943057334 | 4.832746033 | 8.594335036 |
| ENSMUSG00000071497 | 5.65961481  | 6.260555194 | 9.179963621 | 8.860034393 | 8.594335036 |
| ENSMUSG00000071506 | 7.781970364 | 2.782468975 | 8.473812573 | 5.638203705 | 3.580972932 |
| ENSMUSG00000071510 | 14.14903703 | 8.347406925 | 7.061510478 | 8.054576721 | 11.45911338 |
| ENSMUSG00000071517 | 9.904325918 | 9.043024169 | 5.649208382 | 8.054576721 | 7.161945863 |
| ENSMUSG00000071519 | 9.196874066 | 9.043024169 | 7.061510478 | 6.443661377 | 7.161945863 |
| ENSMUSG00000071521 | 13.44158517 | 5.56493795  | 6.35535943  | 3.221830688 | 7.161945863 |
| ENSMUSG00000071522 | 10.61177777 | 6.956172438 | 9.179963621 | 4.832746033 | 7.87814045  |
| ENSMUSG00000071528 | 125.2189777 | 185.7298041 | 170.8885536 | 256.9409974 | 210.5612084 |
| ENSMUSG00000071531 | 7.781970364 | 4.869320706 | 3.530755239 | 4.832746033 | 8.594335036 |
| ENSMUSG00000071537 | 10.61177777 | 4.173703463 | 8.473812573 | 4.832746033 | 5.013362104 |
| ENSMUSG00000071540 | 8.489422215 | 5.56493795  | 7.061510478 | 12.08186508 | 5.013362104 |
| ENSMUSG00000071547 | 17.68629628 | 8.347406925 | 8.473812573 | 9.665492065 | 5.013362104 |
| ENSMUSG00000071552 | 8.489422215 | 6.260555194 | 6.35535943  | 20.94189947 | 13.60769714 |
| ENSMUSG00000071561 | 9.904325918 | 8.347406925 | 12.71071886 | 6.443661377 | 6.445751277 |
| ENSMUSG00000071562 | 8.489422215 | 4.869320706 | 7.061510478 | 7.249119049 | 9.310529622 |
| ENSMUSG00000071604 | 11.31922962 | 4.869320706 | 7.767661525 | 6.443661377 | 7.161945863 |
| ENSMUSG00000071629 | 8.489422215 | 6.260555194 | 3.530755239 | 3.221830688 | 3.580972932 |
| ENSMUSG00000071636 | 5.65961481  | 12.52111039 | 9.179963621 | 9.665492065 | 9.310529622 |
| ENSMUSG00000071645 | 42.44711108 | 67.47487265 | 61.43514116 | 168.3406535 | 133.9283876 |
| ENSMUSG00000071646 | 42.44711108 | 70.25734162 | 78.3827663  | 242.4427593 | 181.9134249 |
| ENSMUSG00000071647 | 15.56394073 | 31.30277597 | 24.00913562 | 40.2728836  | 34.37734014 |
| ENSMUSG00000071648 | 22.63845924 | 31.30277597 | 28.24604191 | 30.60739154 | 25.78300511 |
| ENSMUSG00000071649 | 33.25023701 | 52.86691053 | 42.36906287 | 86.18397091 | 73.05184781 |
| ENSMUSG00000071650 | 74.98989623 | 116.863697  | 100.9795998 | 170.7570265 | 135.3607768 |
| ENSMUSG00000071652 | 58.0110518  | 84.1696865  | 82.61967259 | 160.2860767 | 123.9016634 |
| ENSMUSG00000071653 | 39.61730367 | 66.08363816 | 58.61053696 | 160.2860767 | 137.5093606 |
| ENSMUSG00000071654 | 22.63845924 | 50.7800588  | 26.12758877 | 30.60739154 | 37.24211849 |
| ENSMUSG00000071656 | 9.904325918 | 7.651789682 | 12.00456781 | 6.443661377 | 10.02672421 |
| ENSMUSG00000071658 | 12.73413332 | 16.69481385 | 16.2414741  | 15.30369577 | 15.7562809  |
| ENSMUSG00000071659 | 44.56946663 | 54.95376226 | 72.02740687 | 248.080963  | 184.0620087 |
| ENSMUSG00000071661 | 26.1757185  | 60.51870021 | 51.54902649 | 42.68925662 | 42.25548059 |
| ENSMUSG00000071662 | 48.10672589 | 57.73623123 | 42.36906287 | 133.7059736 | 88.80812871 |
| ENSMUSG00000071679 | 3.537259256 | 2.782468975 | 7.767661525 | 1.610915344 | 3.580972932 |
| ENSMUSG00000071686 | 4.952162959 | 5.56493795  | 4.236906287 | 2.416373016 | 3.580972932 |
| ENSMUSG00000071713 | 17.68629628 | 32.69401046 | 19.06607829 | 38.66196826 | 46.55264811 |
| ENSMUSG00000071714 | 10.61177777 | 5.56493795  | 4.943057334 | 17.72006879 | 4.297167518 |
| ENSMUSG00000071716 | 9.904325918 | 6.260555194 | 9.886114669 | 5.638203705 | 8.594335036 |
| ENSMUSG00000071719 | 4.952162959 | 2.086851731 | 0           | 5.638203705 | 2.148583759 |
| ENSMUSG00000071722 | 2.122355554 | 3.478086219 | 2.118453143 | 5.638203705 | 2.864778345 |
| ENSMUSG00000071723 | 3.537259256 | 1.391234488 | 3.530755239 | 5.638203705 | 5.729556691 |



|                    |             |             |             |             |             |
|--------------------|-------------|-------------|-------------|-------------|-------------|
| ENSMUSG00000071726 | 5.65961481  | 3.478086219 | 4.943057334 | 1.610915344 | 3.580972932 |
| ENSMUSG00000071738 | 4.952162959 | 2.782468975 | 2.118453143 | 3.221830688 | 4.297167518 |
| ENSMUSG00000071745 | 7.074518513 | 2.086851731 | 4.943057334 | 3.221830688 | 2.148583759 |
| ENSMUSG00000071749 | 9.196874066 | 3.478086219 | 13.41686991 | 4.832746033 | 7.87814045  |
| ENSMUSG00000071767 | 8.489422215 | 4.173703463 | 6.35535943  | 1.610915344 | 1.432389173 |
| ENSMUSG00000071770 | 5.65961481  | 4.869320706 | 7.061510478 | 4.02728836  | 5.013362104 |
| ENSMUSG00000071771 | 8.489422215 | 4.869320706 | 2.824604191 | 4.02728836  | 1.432389173 |
| ENSMUSG00000071773 | 4.244711108 | 6.260555194 | 5.649208382 | 4.832746033 | 5.013362104 |
| ENSMUSG00000071788 | 7.781970364 | 4.869320706 | 1.412302096 | 4.02728836  | 3.580972932 |
| ENSMUSG00000071815 | 4.952162959 | 2.782468975 | 1.412302096 | 2.416373016 | 2.864778345 |
| ENSMUSG00000071816 | 1.414903703 | 2.086851731 | 2.118453143 | 3.221830688 | 1.432389173 |
| ENSMUSG00000071855 | 8.489422215 | 11.82549314 | 7.061510478 | 11.27640741 | 16.47247549 |
| ENSMUSG00000071858 | 7.781970364 | 13.91234488 | 6.35535943  | 6.443661377 | 6.445751277 |
| ENSMUSG00000071860 | 4.952162959 | 2.086851731 | 2.118453143 | 4.02728836  | 0.716194586 |
| ENSMUSG00000071862 | 15.56394073 | 19.47728283 | 11.29841676 | 6.443661377 | 10.7429188  |
| ENSMUSG00000071890 | 8.489422215 | 9.043024169 | 9.886114669 | 4.02728836  | 7.161945863 |
| ENSMUSG00000071893 | 9.196874066 | 7.651789682 | 9.179963621 | 5.638203705 | 8.594335036 |
| ENSMUSG00000071909 | 7.781970364 | 6.260555194 | 11.29841676 | 6.443661377 | 5.729556691 |
| ENSMUSG00000071937 | 9.904325918 | 4.869320706 | 11.29841676 | 7.249119049 | 2.148583759 |
| ENSMUSG00000072049 | 10.61177777 | 11.82549314 | 4.236906287 | 3.221830688 | 4.297167518 |
| ENSMUSG00000072082 | 31.12788146 | 22.95536904 | 26.12758877 | 98.265836   | 57.29556691 |
| ENSMUSG00000072100 | 6.367066661 | 5.56493795  | 12.00456781 | 4.02728836  | 4.297167518 |
| ENSMUSG00000072145 | 11.31922962 | 10.43425866 | 7.061510478 | 8.860034393 | 7.87814045  |
| ENSMUSG00000072188 | 46.69182218 | 13.91234488 | 19.06607829 | 17.72006879 | 13.60769714 |
| ENSMUSG00000072214 | 8.489422215 | 2.782468975 | 4.943057334 | 4.02728836  | 7.161945863 |
| ENSMUSG00000072235 | 31.12788146 | 34.78086219 | 37.42600553 | 40.2728836  | 30.08017263 |
| ENSMUSG00000072249 | 2.122355554 | 2.782468975 | 4.236906287 | 4.02728836  | 4.297167518 |
| ENSMUSG00000072259 | 8.489422215 | 13.21672763 | 6.35535943  | 8.054576721 | 7.161945863 |
| ENSMUSG00000072295 | 12.02668147 | 5.56493795  | 4.236906287 | 4.832746033 | 5.013362104 |
| ENSMUSG00000072419 | 6.367066661 | 9.738641413 | 9.179963621 | 9.665492065 | 7.87814045  |
| ENSMUSG00000072423 | 7.781970364 | 9.738641413 | 6.35535943  | 8.860034393 | 7.87814045  |
| ENSMUSG00000072437 | 10.61177777 | 9.738641413 | 9.886114669 | 14.4982381  | 14.32389173 |
| ENSMUSG00000072473 | 7.074518513 | 6.260555194 | 4.236906287 | 9.665492065 | 9.310529622 |
| ENSMUSG00000072494 | 5.65961481  | 7.651789682 | 4.236906287 | 12.88732275 | 9.310529622 |
| ENSMUSG00000072501 | 60.84085921 | 84.86530374 | 74.14586002 | 86.18397091 | 78.06520991 |
| ENSMUSG00000072511 | 7.074518513 | 2.086851731 | 10.59226572 | 5.638203705 | 4.297167518 |
| ENSMUSG00000072568 | 9.904325918 | 27.82468975 | 26.12758877 | 16.10915344 | 16.47247549 |
| ENSMUSG00000072571 | 12.02668147 | 10.43425866 | 10.59226572 | 17.72006879 | 12.89150255 |
| ENSMUSG00000072572 | 8.489422215 | 4.869320706 | 7.767661525 | 8.860034393 | 6.445751277 |
| ENSMUSG00000072575 | 4.952162959 | 5.56493795  | 6.35535943  | 6.443661377 | 2.148583759 |
| ENSMUSG00000072582 | 78.52715549 | 139.819066  | 119.3395271 | 249.6918783 | 196.2373167 |
| ENSMUSG00000072595 | 9.196874066 | 4.173703463 | 14.12302096 | 7.249119049 | 2.864778345 |
| ENSMUSG00000072596 | 10.61177777 | 4.173703463 | 4.943057334 | 6.443661377 | 8.594335036 |

|                    |             |             |             |             |             |
|--------------------|-------------|-------------|-------------|-------------|-------------|
| ENSMUSG00000072598 | 7.074518513 | 8.347406925 | 6.35535943  | 1.610915344 | 8.594335036 |
| ENSMUSG00000072601 | 7.074518513 | 6.956172438 | 7.767661525 | 8.860034393 | 7.87814045  |
| ENSMUSG00000072618 | 9.196874066 | 11.82549314 | 4.943057334 | 11.27640741 | 7.87814045  |
| ENSMUSG00000072620 | 96.21345177 | 111.298759  | 86.85657888 | 270.6337778 | 188.3591762 |
| ENSMUSG00000072623 | 7.781970364 | 3.478086219 | 5.649208382 | 7.249119049 | 6.445751277 |
| ENSMUSG00000072624 | 10.61177777 | 8.347406925 | 6.35535943  | 3.221830688 | 5.729556691 |
| ENSMUSG00000072625 | 8.489422215 | 4.173703463 | 3.530755239 | 7.249119049 | 7.161945863 |
| ENSMUSG00000072647 | 11.31922962 | 7.651789682 | 9.179963621 | 8.054576721 | 8.594335036 |
| ENSMUSG00000072662 | 11.31922962 | 15.30357936 | 8.473812573 | 4.832746033 | 8.594335036 |
| ENSMUSG00000072694 | 41.03220737 | 53.56252777 | 42.36906287 | 74.9075635  | 78.06520991 |
| ENSMUSG00000072704 | 14.85648888 | 29.91154148 | 21.89068248 | 25.77464551 | 26.49919969 |
| ENSMUSG00000072708 | 7.074518513 | 8.347406925 | 7.061510478 | 0.805457672 | 10.02672421 |
| ENSMUSG00000072709 | 8.489422215 | 11.1298759  | 9.179963621 | 6.443661377 | 7.87814045  |
| ENSMUSG00000072718 | 7.781970364 | 10.43425866 | 6.35535943  | 4.832746033 | 7.161945863 |
| ENSMUSG00000072722 | 10.61177777 | 6.956172438 | 5.649208382 | 5.638203705 | 8.594335036 |
| ENSMUSG00000072726 | 8.489422215 | 3.478086219 | 9.886114669 | 5.638203705 | 5.729556691 |
| ENSMUSG00000072739 | 10.61177777 | 9.043024169 | 7.767661525 | 2.416373016 | 5.013362104 |
| ENSMUSG00000072754 | 11.31922962 | 12.52111039 | 7.767661525 | 9.665492065 | 9.310529622 |
| ENSMUSG00000072762 | 53.7663407  | 87.64777272 | 82.61967259 | 50.74383334 | 66.60609653 |
| ENSMUSG00000072770 | 7.781970364 | 17.39043109 | 15.53532305 | 8.860034393 | 12.17530797 |
| ENSMUSG00000072772 | 0           | 0.695617244 | 2.824604191 | 0           | 2.148583759 |
| ENSMUSG00000072813 | 14.14903703 | 2.782468975 | 7.061510478 | 6.443661377 | 12.17530797 |
| ENSMUSG00000072821 | 8.489422215 | 6.260555194 | 7.767661525 | 4.832746033 | 7.87814045  |
| ENSMUSG00000072822 | 13.44158517 | 9.738641413 | 6.35535943  | 4.832746033 | 5.729556691 |
| ENSMUSG00000072845 | 9.196874066 | 7.651789682 | 7.061510478 | 4.832746033 | 7.87814045  |
| ENSMUSG00000072872 | 30.4204296  | 59.12746572 | 50.84287544 | 49.132918   | 52.2822048  |
| ENSMUSG00000072878 | 7.074518513 | 7.651789682 | 12.00456781 | 2.416373016 | 5.729556691 |
| ENSMUSG00000072888 | 3.537259256 | 6.956172438 | 2.118453143 | 2.416373016 | 1.432389173 |
| ENSMUSG00000072889 | 14.85648888 | 27.82468975 | 19.77222934 | 15.30369577 | 16.47247549 |
| ENSMUSG00000072905 | 12.73413332 | 10.43425866 | 7.061510478 | 4.832746033 | 8.594335036 |
| ENSMUSG00000072915 | 9.196874066 | 6.956172438 | 6.35535943  | 7.249119049 | 4.297167518 |
| ENSMUSG00000072923 | 1.414903703 | 4.173703463 | 2.824604191 | 0.805457672 | 6.445751277 |
| ENSMUSG00000072930 | 4.952162959 | 4.869320706 | 4.943057334 | 4.832746033 | 2.864778345 |
| ENSMUSG00000072931 | 2.829807405 | 2.782468975 | 4.943057334 | 0.805457672 | 3.580972932 |
| ENSMUSG00000072941 | 9.196874066 | 7.651789682 | 5.649208382 | 7.249119049 | 7.87814045  |
| ENSMUSG00000072945 | 2.829807405 | 5.56493795  | 1.412302096 | 2.416373016 | 2.864778345 |
| ENSMUSG00000072949 | 5.65961481  | 11.1298759  | 3.530755239 | 2.416373016 | 10.7429188  |
| ENSMUSG00000072952 | 6.367066661 | 5.56493795  | 3.530755239 | 8.054576721 | 5.729556691 |
| ENSMUSG00000072969 | 0           | 0           | 0           | 0           | 0           |
| ENSMUSG00000072972 | 5.65961481  | 9.043024169 | 6.35535943  | 8.860034393 | 7.87814045  |
| ENSMUSG00000072974 | 8.489422215 | 10.43425866 | 4.943057334 | 6.443661377 | 7.87814045  |
| ENSMUSG00000072980 | 56.5961481  | 54.25814501 | 59.31668801 | 98.265836   | 90.95671247 |
| ENSMUSG00000072983 | 14.85648888 | 5.56493795  | 10.59226572 | 4.02728836  | 6.445751277 |

|                    |             |             |             |             |             |
|--------------------|-------------|-------------|-------------|-------------|-------------|
| ENSMUSG00000072995 | 6.367066661 | 3.478086219 | 2.118453143 | 3.221830688 | 1.432389173 |
| ENSMUSG00000073002 | 10.61177777 | 15.99919661 | 16.2414741  | 16.10915344 | 10.7429188  |
| ENSMUSG00000073006 | 2.829807405 | 2.086851731 | 5.649208382 | 3.221830688 | 4.297167518 |
| ENSMUSG00000073010 | 3.537259256 | 2.782468975 | 4.943057334 | 3.221830688 | 4.297167518 |
| ENSMUSG00000073012 | 4.952162959 | 4.869320706 | 2.118453143 | 4.02728836  | 2.148583759 |
| ENSMUSG00000073016 | 33.25023701 | 49.38882431 | 38.83830763 | 34.6346799  | 35.09353473 |
| ENSMUSG00000073043 | 5.65961481  | 3.478086219 | 4.236906287 | 3.221830688 | 5.729556691 |
| ENSMUSG00000073062 | 14.85648888 | 29.21592424 | 24.71528667 | 49.132918   | 37.24211849 |
| ENSMUSG00000073063 | 6.367066661 | 9.738641413 | 5.649208382 | 3.221830688 | 5.013362104 |
| ENSMUSG00000073085 | 3.537259256 | 2.782468975 | 6.35535943  | 4.02728836  | 0.716194586 |
| ENSMUSG00000073094 | 2.829807405 | 1.391234488 | 4.943057334 | 6.443661377 | 3.580972932 |
| ENSMUSG00000073102 | 8.489422215 | 9.738641413 | 5.649208382 | 6.443661377 | 5.729556691 |
| ENSMUSG00000073110 | 8.489422215 | 15.30357936 | 5.649208382 | 5.638203705 | 4.297167518 |
| ENSMUSG00000073116 | 14.85648888 | 9.043024169 | 8.473812573 | 10.47094974 | 12.89150255 |
| ENSMUSG00000073117 | 14.14903703 | 8.347406925 | 10.59226572 | 6.443661377 | 15.04008631 |
| ENSMUSG00000073119 | 21.93100739 | 9.738641413 | 12.00456781 | 11.27640741 | 12.17530797 |
| ENSMUSG00000073130 | 4.244711108 | 2.782468975 | 2.824604191 | 2.416373016 | 2.148583759 |
| ENSMUSG00000073139 | 17.68629628 | 34.78086219 | 35.30755239 | 34.6346799  | 21.48583759 |
| ENSMUSG00000073141 | 6.367066661 | 5.56493795  | 2.118453143 | 4.02728836  | 4.297167518 |
| ENSMUSG00000073176 | 4.952162959 | 1.391234488 | 4.943057334 | 2.416373016 | 7.161945863 |
| ENSMUSG00000073177 | 7.074518513 | 5.56493795  | 4.943057334 | 4.02728836  | 2.148583759 |
| ENSMUSG00000073207 | 5.65961481  | 4.173703463 | 2.824604191 | 2.416373016 | 3.580972932 |
| ENSMUSG00000073209 | 5.65961481  | 6.956172438 | 6.35535943  | 1.610915344 | 5.729556691 |
| ENSMUSG00000073234 | 2.122355554 | 1.391234488 | 2.824604191 | 0.805457672 | 1.432389173 |
| ENSMUSG00000073243 | 2.829807405 | 4.869320706 | 2.824604191 | 1.610915344 | 6.445751277 |
| ENSMUSG00000073247 | 4.244711108 | 1.391234488 | 2.824604191 | 1.610915344 | 5.013362104 |
| ENSMUSG00000073257 | 5.65961481  | 4.173703463 | 2.118453143 | 3.221830688 | 3.580972932 |
| ENSMUSG00000073267 | 5.65961481  | 2.086851731 | 2.824604191 | 3.221830688 | 2.864778345 |
| ENSMUSG00000073293 | 8.489422215 | 2.086851731 | 2.824604191 | 1.610915344 | 3.580972932 |
| ENSMUSG00000073294 | 4.244711108 | 2.782468975 | 5.649208382 | 1.610915344 | 5.013362104 |
| ENSMUSG00000073295 | 1.414903703 | 1.391234488 | 5.649208382 | 4.832746033 | 5.013362104 |
| ENSMUSG00000073375 | 7.074518513 | 4.173703463 | 4.943057334 | 3.221830688 | 8.594335036 |
| ENSMUSG00000073380 | 9.196874066 | 16.69481385 | 12.71071886 | 8.054576721 | 11.45911338 |
| ENSMUSG00000073386 | 7.074518513 | 6.956172438 | 9.179963621 | 5.638203705 | 5.729556691 |
| ENSMUSG00000073396 | 5.65961481  | 6.260555194 | 7.061510478 | 3.221830688 | 2.864778345 |
| ENSMUSG00000073399 | 9.196874066 | 5.56493795  | 4.236906287 | 6.443661377 | 5.013362104 |
| ENSMUSG00000073407 | 121.6817184 | 189.9035076 | 163.120892  | 255.3300821 | 179.0486466 |
| ENSMUSG00000073408 | 11.31922962 | 6.260555194 | 12.00456781 | 7.249119049 | 5.013362104 |
| ENSMUSG00000073412 | 8.489422215 | 13.91234488 | 16.94762515 | 16.91461111 | 10.02672421 |
| ENSMUSG00000073413 | 9.196874066 | 7.651789682 | 8.473812573 | 9.665492065 | 8.594335036 |
| ENSMUSG00000073414 | 11.31922962 | 9.043024169 | 10.59226572 | 12.08186508 | 7.87814045  |
| ENSMUSG00000073418 | 6.367066661 | 4.173703463 | 1.412302096 | 3.221830688 | 6.445751277 |
| ENSMUSG00000073421 | 181.8151258 | 195.4684455 | 185.0115745 | 351.179545  | 274.3025266 |

|                    |             |             |             |             |             |
|--------------------|-------------|-------------|-------------|-------------|-------------|
| ENSMUSG00000073423 | 2.829807405 | 2.086851731 | 2.824604191 | 3.221830688 | 5.729556691 |
| ENSMUSG00000073424 | 7.781970364 | 5.56493795  | 4.236906287 | 8.054576721 | 7.161945863 |
| ENSMUSG00000073457 | 24.76081479 | 21.56413456 | 19.77222934 | 10.47094974 | 26.49919969 |
| ENSMUSG00000073458 | 25.46826665 | 22.95536904 | 21.18453143 | 17.72006879 | 12.89150255 |
| ENSMUSG00000073460 | 16.27139258 | 17.39043109 | 14.12302096 | 22.55281482 | 25.78300511 |
| ENSMUSG00000073471 | 5.65961481  | 16.69481385 | 16.94762515 | 35.44013757 | 35.09353473 |
| ENSMUSG00000073481 | 54.47379255 | 66.7792554  | 72.02740687 | 46.71654498 | 32.94495097 |
| ENSMUSG00000073489 | 9.904325918 | 5.56493795  | 2.824604191 | 10.47094974 | 12.17530797 |
| ENSMUSG00000073494 | 12.02668147 | 5.56493795  | 6.35535943  | 4.02728836  | 7.161945863 |
| ENSMUSG00000073497 | 10.61177777 | 11.1298759  | 13.41686991 | 12.08186508 | 10.02672421 |
| ENSMUSG00000073514 | 12.73413332 | 11.1298759  | 4.943057334 | 3.221830688 | 7.87814045  |
| ENSMUSG00000073532 | 15.56394073 | 6.260555194 | 6.35535943  | 5.638203705 | 5.013362104 |
| ENSMUSG00000073542 | 25.46826665 | 37.56333116 | 32.4829482  | 84.57305557 | 75.20043157 |
| ENSMUSG00000073551 | 10.61177777 | 8.347406925 | 11.29841676 | 5.638203705 | 7.161945863 |
| ENSMUSG00000073555 | 4.952162959 | 7.651789682 | 10.59226572 | 2.416373016 | 11.45911338 |
| ENSMUSG00000073563 | 111.7773925 | 136.3409798 | 110.1595635 | 193.3098413 | 144.6713064 |
| ENSMUSG00000073565 | 7.074518513 | 4.869320706 | 9.179963621 | 6.443661377 | 5.013362104 |
| ENSMUSG00000073568 | 4.952162959 | 4.173703463 | 6.35535943  | 11.27640741 | 8.594335036 |
| ENSMUSG00000073574 | 16.27139258 | 7.651789682 | 6.35535943  | 4.02728836  | 6.445751277 |
| ENSMUSG00000073591 | 4.952162959 | 5.56493795  | 7.767661525 | 2.416373016 | 5.013362104 |
| ENSMUSG00000073598 | 8.489422215 | 7.651789682 | 9.179963621 | 8.860034393 | 13.60769714 |
| ENSMUSG00000073599 | 10.61177777 | 7.651789682 | 6.35535943  | 9.665492065 | 3.580972932 |
| ENSMUSG00000073600 | 12.73413332 | 27.82468975 | 19.06607829 | 16.10915344 | 10.02672421 |
| ENSMUSG00000073601 | 0           | 0           | 0           | 0           | 0           |
| ENSMUSG00000073608 | 9.196874066 | 10.43425866 | 11.29841676 | 6.443661377 | 11.45911338 |
| ENSMUSG00000073609 | 16.97884443 | 20.17290007 | 24.71528667 | 16.91461111 | 28.64778345 |
| ENSMUSG00000073633 | 34.66514071 | 41.73703463 | 54.37363068 | 112.7640741 | 88.80812871 |
| ENSMUSG00000073639 | 52.35143699 | 102.9513521 | 69.90895373 | 74.9075635  | 85.22715578 |
| ENSMUSG00000073640 | 12.73413332 | 7.651789682 | 12.00456781 | 32.21830688 | 16.47247549 |
| ENSMUSG00000073650 | 8.489422215 | 8.347406925 | 9.886114669 | 7.249119049 | 7.161945863 |
| ENSMUSG00000073658 | 8.489422215 | 6.956172438 | 5.649208382 | 4.832746033 | 6.445751277 |
| ENSMUSG00000073676 | 54.47379255 | 95.2995624  | 76.97046421 | 460.7217884 | 307.2474775 |
| ENSMUSG00000073678 | 101.8730666 | 156.5138799 | 108.0411103 | 78.93485187 | 73.76804239 |
| ENSMUSG00000073680 | 5.65961481  | 9.043024169 | 8.473812573 | 7.249119049 | 9.310529622 |
| ENSMUSG00000073700 | 55.88869625 | 54.95376226 | 93.21193831 | 53.16020636 | 47.2688427  |
| ENSMUSG00000073722 | 43.15456293 | 30.60715873 | 31.0706461  | 20.1364418  | 29.36397804 |
| ENSMUSG00000073725 | 132.2934962 | 160.6875833 | 138.4056054 | 178.0061455 | 129.6312201 |
| ENSMUSG00000073730 | 11.31922962 | 8.347406925 | 7.767661525 | 4.832746033 | 8.594335036 |
| ENSMUSG00000073733 | 12.02668147 | 22.2597518  | 11.29841676 | 14.4982381  | 11.45911338 |
| ENSMUSG00000073747 | 6.367066661 | 1.391234488 | 4.236906287 | 3.221830688 | 7.87814045  |
| ENSMUSG00000073755 | 7.074518513 | 5.56493795  | 7.767661525 | 6.443661377 | 7.87814045  |
| ENSMUSG00000073764 | 15.56394073 | 7.651789682 | 10.59226572 | 7.249119049 | 5.729556691 |
| ENSMUSG00000073769 | 6.367066661 | 4.869320706 | 7.061510478 | 8.054576721 | 2.148583759 |

|                    |             |             |             |             |             |
|--------------------|-------------|-------------|-------------|-------------|-------------|
| ENSMUSG00000073770 | 13.44158517 | 6.260555194 | 7.061510478 | 4.832746033 | 5.729556691 |
| ENSMUSG00000073774 | 7.781970364 | 4.173703463 | 7.767661525 | 7.249119049 | 6.445751277 |
| ENSMUSG00000073775 | 36.78749627 | 50.7800588  | 42.36906287 | 101.4876667 | 98.11865833 |
| ENSMUSG00000073785 | 7.781970364 | 6.260555194 | 10.59226572 | 5.638203705 | 8.594335036 |
| ENSMUSG00000073794 | 16.97884443 | 29.21592424 | 18.35992724 | 16.10915344 | 22.91822676 |
| ENSMUSG00000073802 | 4.244711108 | 6.956172438 | 7.767661525 | 10.47094974 | 5.013362104 |
| ENSMUSG00000073805 | 9.904325918 | 9.738641413 | 9.179963621 | 3.221830688 | 11.45911338 |
| ENSMUSG00000073811 | 13.44158517 | 8.347406925 | 7.061510478 | 5.638203705 | 9.310529622 |
| ENSMUSG00000073876 | 3.537259256 | 0.695617244 | 1.412302096 | 0.805457672 | 0.716194586 |
| ENSMUSG00000073878 | 2.829807405 | 1.391234488 | 4.943057334 | 1.610915344 | 4.297167518 |
| ENSMUSG00000073894 | 11.31922962 | 5.56493795  | 7.061510478 | 7.249119049 | 4.297167518 |
| ENSMUSG00000073896 | 7.074518513 | 6.956172438 | 2.824604191 | 5.638203705 | 5.729556691 |
| ENSMUSG00000073906 | 11.31922962 | 11.1298759  | 8.473812573 | 8.054576721 | 5.013362104 |
| ENSMUSG00000073907 | 13.44158517 | 5.56493795  | 6.35535943  | 4.02728836  | 7.161945863 |
| ENSMUSG00000073920 | 12.02668147 | 9.043024169 | 9.179963621 | 7.249119049 | 7.87814045  |
| ENSMUSG00000073926 | 4.952162959 | 9.043024169 | 6.35535943  | 8.054576721 | 4.297167518 |
| ENSMUSG00000073927 | 7.074518513 | 6.956172438 | 8.473812573 | 3.221830688 | 6.445751277 |
| ENSMUSG00000073940 | 11.31922962 | 8.347406925 | 5.649208382 | 6.443661377 | 5.729556691 |
| ENSMUSG00000073956 | 12.02668147 | 3.478086219 | 4.943057334 | 4.02728836  | 4.297167518 |
| ENSMUSG00000073964 | 4.952162959 | 11.82549314 | 7.061510478 | 7.249119049 | 5.729556691 |
| ENSMUSG00000073966 | 4.952162959 | 6.260555194 | 2.824604191 | 1.610915344 | 9.310529622 |
| ENSMUSG00000073967 | 10.61177777 | 6.260555194 | 8.473812573 | 3.221830688 | 5.013362104 |
| ENSMUSG00000073968 | 5.65961481  | 6.260555194 | 4.943057334 | 5.638203705 | 6.445751277 |
| ENSMUSG00000073969 | 9.196874066 | 6.956172438 | 9.886114669 | 10.47094974 | 5.729556691 |
| ENSMUSG00000073974 | 9.904325918 | 3.478086219 | 8.473812573 | 5.638203705 | 3.580972932 |
| ENSMUSG00000073975 | 4.952162959 | 6.260555194 | 9.179963621 | 9.665492065 | 7.161945863 |
| ENSMUSG00000073987 | 9.196874066 | 11.1298759  | 5.649208382 | 4.832746033 | 4.297167518 |
| ENSMUSG00000074001 | 12.02668147 | 6.260555194 | 5.649208382 | 4.832746033 | 7.87814045  |
| ENSMUSG00000074004 | 6.367066661 | 6.956172438 | 4.943057334 | 5.638203705 | 5.729556691 |
| ENSMUSG00000074006 | 9.904325918 | 7.651789682 | 9.179963621 | 12.08186508 | 7.161945863 |
| ENSMUSG00000074028 | 9.196874066 | 6.956172438 | 12.00456781 | 4.02728836  | 3.580972932 |
| ENSMUSG00000074030 | 87.01657771 | 115.4724625 | 115.1026208 | 159.4806191 | 155.4142252 |
| ENSMUSG00000074037 | 7.074518513 | 9.738641413 | 7.061510478 | 10.47094974 | 7.87814045  |
| ENSMUSG00000074059 | 8.489422215 | 4.173703463 | 4.943057334 | 9.665492065 | 8.594335036 |
| ENSMUSG00000074061 | 9.196874066 | 6.956172438 | 8.473812573 | 2.416373016 | 6.445751277 |
| ENSMUSG00000074062 | 7.781970364 | 9.738641413 | 11.29841676 | 4.02728836  | 10.02672421 |
| ENSMUSG00000074064 | 41.03220737 | 67.47487265 | 53.66747963 | 28.9964762  | 35.80972932 |
| ENSMUSG00000074088 | 103.2879703 | 136.3409798 | 136.2871522 | 219.0844868 | 186.2105924 |
| ENSMUSG00000074093 | 4.952162959 | 5.56493795  | 6.35535943  | 6.443661377 | 5.013362104 |
| ENSMUSG00000074102 | 29.0055259  | 57.04061399 | 45.8998181  | 155.4533307 | 131.0636093 |
| ENSMUSG00000074109 | 8.489422215 | 3.478086219 | 5.649208382 | 5.638203705 | 8.594335036 |
| ENSMUSG00000074111 | 9.904325918 | 8.347406925 | 7.061510478 | 4.02728836  | 10.7429188  |
| ENSMUSG00000074115 | 9.196874066 | 11.1298759  | 7.767661525 | 8.054576721 | 7.87814045  |

|                    |             |             |             |             |             |
|--------------------|-------------|-------------|-------------|-------------|-------------|
| ENSMUSG00000074121 | 7.781970364 | 7.651789682 | 9.179963621 | 9.665492065 | 10.02672421 |
| ENSMUSG00000074123 | 9.904325918 | 4.173703463 | 8.473812573 | 4.02728836  | 6.445751277 |
| ENSMUSG00000074127 | 8.489422215 | 7.651789682 | 9.886114669 | 7.249119049 | 9.310529622 |
| ENSMUSG00000074139 | 11.31922962 | 6.260555194 | 9.886114669 | 4.832746033 | 5.013362104 |
| ENSMUSG00000074155 | 6.367066661 | 3.478086219 | 8.473812573 | 7.249119049 | 7.87814045  |
| ENSMUSG00000074156 | 7.074518513 | 8.347406925 | 8.473812573 | 9.665492065 | 8.594335036 |
| ENSMUSG00000074158 | 10.61177777 | 14.60796212 | 12.00456781 | 9.665492065 | 9.310529622 |
| ENSMUSG00000074166 | 0.707451851 | 0.695617244 | 0.706151048 | 0           | 0           |
| ENSMUSG00000074170 | 7.781970364 | 6.260555194 | 4.236906287 | 10.47094974 | 9.310529622 |
| ENSMUSG00000074182 | 17.68629628 | 26.43345526 | 21.89068248 | 60.40932541 | 60.16034525 |
| ENSMUSG00000074183 | 11.31922962 | 14.60796212 | 7.061510478 | 12.08186508 | 5.729556691 |
| ENSMUSG00000074195 | 9.196874066 | 4.869320706 | 11.29841676 | 10.47094974 | 5.729556691 |
| ENSMUSG00000074199 | 12.02668147 | 6.260555194 | 7.061510478 | 8.860034393 | 5.729556691 |
| ENSMUSG00000074211 | 8.489422215 | 9.738641413 | 9.886114669 | 14.4982381  | 18.62105924 |
| ENSMUSG00000074212 | 9.196874066 | 11.82549314 | 14.12302096 | 27.38556085 | 20.769643   |
| ENSMUSG00000074217 | 0           | 0           | 0.706151048 | 2.416373016 | 0           |
| ENSMUSG00000074218 | 8.489422215 | 5.56493795  | 9.886114669 | 9.665492065 | 8.594335036 |
| ENSMUSG00000074224 | 6.367066661 | 7.651789682 | 6.35535943  | 6.443661377 | 9.310529622 |
| ENSMUSG00000074238 | 57.30359995 | 91.82147618 | 67.79050059 | 74.9075635  | 71.61945863 |
| ENSMUSG00000074240 | 3.537259256 | 2.782468975 | 0           | 4.02728836  | 2.148583759 |
| ENSMUSG00000074254 | 10.61177777 | 5.56493795  | 4.236906287 | 3.221830688 | 6.445751277 |
| ENSMUSG00000074261 | 8.489422215 | 11.82549314 | 12.00456781 | 7.249119049 | 12.17530797 |
| ENSMUSG00000074268 | 6.367066661 | 13.21672763 | 13.41686991 | 7.249119049 | 10.7429188  |
| ENSMUSG00000074277 | 33.25023701 | 40.34580014 | 34.60140134 | 18.52552646 | 18.62105924 |
| ENSMUSG00000074305 | 26.88317035 | 48.69320706 | 26.83373982 | 43.49471429 | 48.70123187 |
| ENSMUSG00000074311 | 9.196874066 | 3.478086219 | 9.179963621 | 4.832746033 | 1.432389173 |
| ENSMUSG00000074336 | 0           | 0           | 0           | 0           | 0           |
| ENSMUSG00000074340 | 6.367066661 | 9.043024169 | 7.767661525 | 8.054576721 | 9.310529622 |
| ENSMUSG00000074342 | 7.781970364 | 22.95536904 | 13.41686991 | 6.443661377 | 10.7429188  |
| ENSMUSG00000074344 | 14.14903703 | 4.869320706 | 11.29841676 | 9.665492065 | 10.7429188  |
| ENSMUSG00000074345 | 4.952162959 | 6.260555194 | 4.236906287 | 7.249119049 | 6.445751277 |
| ENSMUSG00000074358 | 44.56946663 | 54.25814501 | 44.48751601 | 28.19101852 | 33.66114556 |
| ENSMUSG00000074359 | 10.61177777 | 6.260555194 | 6.35535943  | 8.054576721 | 6.445751277 |
| ENSMUSG00000074364 | 12.02668147 | 13.21672763 | 12.00456781 | 11.27640741 | 12.17530797 |
| ENSMUSG00000074366 | 7.781970364 | 6.260555194 | 14.829172   | 8.860034393 | 8.594335036 |
| ENSMUSG00000074375 | 12.02668147 | 6.956172438 | 12.00456781 | 6.443661377 | 7.161945863 |
| ENSMUSG00000074378 | 11.31922962 | 6.956172438 | 7.061510478 | 3.221830688 | 7.161945863 |
| ENSMUSG00000074384 | 12.02668147 | 5.56493795  | 6.35535943  | 8.054576721 | 2.864778345 |
| ENSMUSG00000074397 | 4.952162959 | 6.260555194 | 9.886114669 | 5.638203705 | 8.594335036 |
| ENSMUSG00000074401 | 4.952162959 | 5.56493795  | 8.473812573 | 6.443661377 | 9.310529622 |
| ENSMUSG00000074402 | 9.196874066 | 9.738641413 | 7.061510478 | 8.054576721 | 8.594335036 |
| ENSMUSG00000074403 | 2.122355554 | 5.56493795  | 7.061510478 | 1.610915344 | 2.148583759 |
| ENSMUSG00000074405 | 31.12788146 | 59.82308296 | 44.48751601 | 108.7367857 | 90.24051788 |

|                    |             |             |             |             |             |
|--------------------|-------------|-------------|-------------|-------------|-------------|
| ENSMUSG00000074406 | 43.86201478 | 82.08283477 | 62.1412922  | 57.18749472 | 63.0251236  |
| ENSMUSG00000074417 | 16.97884443 | 14.60796212 | 18.35992724 | 11.27640741 | 16.47247549 |
| ENSMUSG00000074424 | 11.31922962 | 5.56493795  | 10.59226572 | 6.443661377 | 2.148583759 |
| ENSMUSG00000074433 | 16.27139258 | 9.043024169 | 10.59226572 | 6.443661377 | 8.594335036 |
| ENSMUSG00000074437 | 0.707451851 | 0           | 0           | 0.805457672 | 1.432389173 |
| ENSMUSG00000074440 | 14.14903703 | 6.260555194 | 4.236906287 | 3.221830688 | 8.594335036 |
| ENSMUSG00000074441 | 6.367066661 | 6.260555194 | 11.29841676 | 2.416373016 | 9.310529622 |
| ENSMUSG00000074443 | 9.904325918 | 9.043024169 | 9.886114669 | 4.832746033 | 5.729556691 |
| ENSMUSG00000074444 | 14.14903703 | 11.82549314 | 6.35535943  | 4.02728836  | 5.729556691 |
| ENSMUSG00000074445 | 19.80865184 | 6.956172438 | 18.35992724 | 12.88732275 | 15.7562809  |
| ENSMUSG00000074446 | 8.489422215 | 5.56493795  | 9.179963621 | 4.832746033 | 4.297167518 |
| ENSMUSG00000074447 | 13.44158517 | 4.173703463 | 7.061510478 | 2.416373016 | 8.594335036 |
| ENSMUSG00000074448 | 9.904325918 | 9.738641413 | 9.179963621 | 4.832746033 | 5.729556691 |
| ENSMUSG00000074449 | 48.10672589 | 33.3896277  | 38.83830763 | 28.19101852 | 32.22875639 |
| ENSMUSG00000074454 | 9.904325918 | 6.956172438 | 5.649208382 | 8.054576721 | 5.013362104 |
| ENSMUSG00000074476 | 16.97884443 | 20.86851731 | 24.00913562 | 46.71654498 | 45.12025894 |
| ENSMUSG00000074483 | 7.781970364 | 15.99919661 | 2.824604191 | 5.638203705 | 7.161945863 |
| ENSMUSG00000074486 | 9.904325918 | 9.738641413 | 5.649208382 | 5.638203705 | 11.45911338 |
| ENSMUSG00000074489 | 4.952162959 | 8.347406925 | 8.473812573 | 5.638203705 | 5.729556691 |
| ENSMUSG00000074491 | 12.02668147 | 9.738641413 | 16.2414741  | 13.69278043 | 8.594335036 |
| ENSMUSG00000074497 | 70.74518513 | 80.69160028 | 102.3919019 | 65.24207144 | 47.2688427  |
| ENSMUSG00000074502 | 12.73413332 | 5.56493795  | 7.061510478 | 7.249119049 | 10.02672421 |
| ENSMUSG00000074505 | 14.14903703 | 10.43425866 | 6.35535943  | 4.832746033 | 6.445751277 |
| ENSMUSG00000074513 | 29.71297775 | 48.69320706 | 57.19823487 | 49.93837567 | 63.74131818 |
| ENSMUSG00000074569 | 48.81417774 | 59.12746572 | 61.43514116 | 33.02376456 | 41.53928601 |
| ENSMUSG00000074575 | 12.73413332 | 9.043024169 | 7.767661525 | 7.249119049 | 4.297167518 |
| ENSMUSG00000074576 | 85.601674   | 109.2119073 | 93.21193831 | 178.0061455 | 158.2790036 |
| ENSMUSG00000074577 | 13.44158517 | 7.651789682 | 9.886114669 | 8.054576721 | 7.87814045  |
| ENSMUSG00000074591 | 14.85648888 | 17.39043109 | 8.473812573 | 5.638203705 | 5.729556691 |
| ENSMUSG00000074594 | 9.904325918 | 6.260555194 | 9.886114669 | 4.832746033 | 9.310529622 |
| ENSMUSG00000074595 | 14.14903703 | 6.260555194 | 2.118453143 | 5.638203705 | 11.45911338 |
| ENSMUSG00000074596 | 7.074518513 | 5.56493795  | 8.473812573 | 5.638203705 | 9.310529622 |
| ENSMUSG00000074604 | 7.074518513 | 7.651789682 | 8.473812573 | 8.054576721 | 8.594335036 |
| ENSMUSG00000074619 | 14.85648888 | 27.82468975 | 15.53532305 | 5.638203705 | 17.18867007 |
| ENSMUSG00000074622 | 5.65961481  | 8.347406925 | 4.943057334 | 5.638203705 | 7.161945863 |
| ENSMUSG00000074623 | 17.68629628 | 7.651789682 | 4.943057334 | 3.221830688 | 5.013362104 |
| ENSMUSG00000074628 | 6.367066661 | 6.956172438 | 7.061510478 | 7.249119049 | 7.161945863 |
| ENSMUSG00000074635 | 16.97884443 | 15.99919661 | 18.35992724 | 15.30369577 | 20.769643   |
| ENSMUSG00000074637 | 21.93100739 | 67.47487265 | 33.89525029 | 48.32746033 | 53.71459398 |
| ENSMUSG00000074639 | 9.904325918 | 3.478086219 | 12.71071886 | 8.860034393 | 7.87814045  |
| ENSMUSG00000074647 | 5.65961481  | 5.56493795  | 7.061510478 | 7.249119049 | 8.594335036 |
| ENSMUSG00000074651 | 7.781970364 | 9.738641413 | 9.179963621 | 6.443661377 | 5.729556691 |
| ENSMUSG00000074652 | 11.31922962 | 5.56493795  | 7.767661525 | 4.832746033 | 5.729556691 |

|                    |             |             |             |             |             |
|--------------------|-------------|-------------|-------------|-------------|-------------|
| ENSMUSG00000074655 | 6.367066661 | 4.173703463 | 6.35535943  | 8.054576721 | 7.87814045  |
| ENSMUSG00000074657 | 4.952162959 | 8.347406925 | 9.179963621 | 8.054576721 | 6.445751277 |
| ENSMUSG00000074671 | 46.69182218 | 60.51870021 | 45.8998181  | 47.52200265 | 52.99839939 |
| ENSMUSG00000074676 | 7.074518513 | 1.391234488 | 9.179963621 | 9.665492065 | 9.310529622 |
| ENSMUSG00000074678 | 7.074518513 | 2.782468975 | 6.35535943  | 8.860034393 | 7.161945863 |
| ENSMUSG00000074679 | 6.367066661 | 4.869320706 | 5.649208382 | 4.02728836  | 7.161945863 |
| ENSMUSG00000074681 | 7.074518513 | 6.956172438 | 9.886114669 | 12.08186508 | 3.580972932 |
| ENSMUSG00000074682 | 8.489422215 | 6.260555194 | 11.29841676 | 17.72006879 | 20.05344842 |
| ENSMUSG00000074695 | 7.781970364 | 12.52111039 | 9.886114669 | 9.665492065 | 10.02672421 |
| ENSMUSG00000074715 | 6.367066661 | 7.651789682 | 5.649208382 | 6.443661377 | 8.594335036 |
| ENSMUSG00000074731 | 9.904325918 | 13.21672763 | 9.179963621 | 4.832746033 | 6.445751277 |
| ENSMUSG00000074734 | 13.44158517 | 8.347406925 | 7.767661525 | 4.832746033 | 6.445751277 |
| ENSMUSG00000074738 | 7.074518513 | 9.738641413 | 7.767661525 | 14.4982381  | 10.02672421 |
| ENSMUSG00000074743 | 31.83533331 | 34.08524495 | 50.13672439 | 16.91461111 | 16.47247549 |
| ENSMUSG00000074746 | 96.21345177 | 120.3417832 | 118.633376  | 161.8969921 | 133.9283876 |
| ENSMUSG00000074748 | 50.22908144 | 92.51709342 | 85.44427678 | 114.3749894 | 89.52432329 |
| ENSMUSG00000074754 | 14.14903703 | 17.39043109 | 17.65377619 | 21.74735715 | 22.20203218 |
| ENSMUSG00000074768 | 9.904325918 | 6.956172438 | 9.179963621 | 5.638203705 | 3.580972932 |
| ENSMUSG00000074781 | 108.2401332 | 139.819066  | 139.1117564 | 218.2790291 | 193.3725383 |
| ENSMUSG00000074811 | 39.61730367 | 50.08444155 | 48.01827125 | 56.38203705 | 51.56601022 |
| ENSMUSG00000074817 | 7.781970364 | 6.260555194 | 8.473812573 | 4.02728836  | 6.445751277 |
| ENSMUSG00000074824 | 9.904325918 | 9.738641413 | 5.649208382 | 8.860034393 | 12.17530797 |
| ENSMUSG00000074825 | 17.68629628 | 29.21592424 | 32.4829482  | 28.19101852 | 35.09353473 |
| ENSMUSG00000074849 | 11.31922962 | 6.260555194 | 3.530755239 | 7.249119049 | 10.7429188  |
| ENSMUSG00000074867 | 20.51610369 | 37.56333116 | 24.71528667 | 20.94189947 | 26.49919969 |
| ENSMUSG00000074870 | 9.196874066 | 8.347406925 | 8.473812573 | 2.416373016 | 5.729556691 |
| ENSMUSG00000074871 | 5.65961481  | 4.869320706 | 9.886114669 | 4.02728836  | 4.297167518 |
| ENSMUSG00000074872 | 7.781970364 | 11.1298759  | 6.35535943  | 7.249119049 | 6.445751277 |
| ENSMUSG00000074881 | 69.33028142 | 88.34338996 | 90.38733411 | 135.3168889 | 115.3073284 |
| ENSMUSG00000074882 | 16.27139258 | 6.956172438 | 5.649208382 | 3.221830688 | 7.161945863 |
| ENSMUSG00000074890 | 65.79302217 | 91.82147618 | 83.32582364 | 128.0677699 | 110.2939663 |
| ENSMUSG00000074892 | 9.904325918 | 4.869320706 | 7.061510478 | 3.221830688 | 4.297167518 |
| ENSMUSG00000074896 | 14.85648888 | 30.60715873 | 23.30298458 | 13.69278043 | 10.02672421 |
| ENSMUSG00000074909 | 55.1812444  | 61.9099347  | 77.67661525 | 68.46390213 | 51.56601022 |
| ENSMUSG00000074913 | 8.489422215 | 4.173703463 | 5.649208382 | 12.88732275 | 7.87814045  |
| ENSMUSG00000074916 | 10.61177777 | 17.39043109 | 19.77222934 | 13.69278043 | 16.47247549 |
| ENSMUSG00000074925 | 28.29807405 | 41.04141738 | 37.42600553 | 47.52200265 | 48.70123187 |
| ENSMUSG00000074928 | 7.781970364 | 12.52111039 | 9.886114669 | 4.832746033 | 9.310529622 |
| ENSMUSG00000074934 | 4.244711108 | 4.869320706 | 4.943057334 | 4.02728836  | 5.013362104 |
| ENSMUSG00000074971 | 8.489422215 | 4.173703463 | 8.473812573 | 5.638203705 | 8.594335036 |
| ENSMUSG00000074991 | 10.61177777 | 4.869320706 | 12.71071886 | 5.638203705 | 3.580972932 |
| ENSMUSG00000074994 | 16.97884443 | 22.95536904 | 21.18453143 | 34.6346799  | 27.93158887 |
| ENSMUSG00000074996 | 7.074518513 | 6.956172438 | 3.530755239 | 4.02728836  | 6.445751277 |



|                    |             |             |             |             |             |
|--------------------|-------------|-------------|-------------|-------------|-------------|
| ENSMUSG00000074997 | 8.489422215 | 10.43425866 | 13.41686991 | 7.249119049 | 12.17530797 |
| ENSMUSG00000075002 | 9.904325918 | 10.43425866 | 4.236906287 | 3.221830688 | 9.310529622 |
| ENSMUSG00000075012 | 3.537259256 | 11.1298759  | 7.061510478 | 8.054576721 | 4.297167518 |
| ENSMUSG00000075031 | 12.73413332 | 9.043024169 | 9.179963621 | 6.443661377 | 5.013362104 |
| ENSMUSG00000075033 | 79.23460734 | 106.4294383 | 112.9841676 | 211.8353678 | 169.0219224 |
| ENSMUSG00000075040 | 76.40479994 | 102.2557348 | 115.1026208 | 115.9859048 | 121.0368851 |
| ENSMUSG00000075045 | 28.29807405 | 19.47728283 | 28.24604191 | 18.52552646 | 20.05344842 |
| ENSMUSG00000075054 | 16.97884443 | 34.78086219 | 22.59683353 | 41.07834128 | 28.64778345 |
| ENSMUSG00000075068 | 9.196874066 | 10.43425866 | 2.824604191 | 8.860034393 | 7.161945863 |
| ENSMUSG00000075073 | 7.074518513 | 7.651789682 | 9.886114669 | 4.02728836  | 7.161945863 |
| ENSMUSG00000075074 | 8.489422215 | 11.82549314 | 8.473812573 | 4.02728836  | 5.013362104 |
| ENSMUSG00000075078 | 8.489422215 | 11.1298759  | 10.59226572 | 4.832746033 | 5.729556691 |
| ENSMUSG00000075081 | 5.65961481  | 6.260555194 | 8.473812573 | 4.832746033 | 5.013362104 |
| ENSMUSG00000075085 | 9.196874066 | 8.347406925 | 3.530755239 | 2.416373016 | 6.445751277 |
| ENSMUSG00000075090 | 8.489422215 | 9.043024169 | 8.473812573 | 6.443661377 | 4.297167518 |
| ENSMUSG00000075095 | 9.196874066 | 9.043024169 | 10.59226572 | 2.416373016 | 4.297167518 |
| ENSMUSG00000075122 | 14.85648888 | 14.60796212 | 13.41686991 | 44.30017197 | 37.24211849 |
| ENSMUSG00000075139 | 10.61177777 | 10.43425866 | 10.59226572 | 9.665492065 | 5.729556691 |
| ENSMUSG00000075169 | 7.074518513 | 4.869320706 | 6.35535943  | 4.832746033 | 7.87814045  |
| ENSMUSG00000075170 | 6.367066661 | 9.043024169 | 5.649208382 | 2.416373016 | 2.864778345 |
| ENSMUSG00000075179 | 9.196874066 | 9.738641413 | 4.943057334 | 6.443661377 | 5.729556691 |
| ENSMUSG00000075217 | 8.489422215 | 4.869320706 | 7.767661525 | 4.02728836  | 5.729556691 |
| ENSMUSG00000075218 | 10.61177777 | 7.651789682 | 3.530755239 | 4.02728836  | 5.013362104 |
| ENSMUSG00000075222 | 8.489422215 | 4.173703463 | 5.649208382 | 4.02728836  | 6.445751277 |
| ENSMUSG00000075223 | 9.196874066 | 9.738641413 | 4.943057334 | 5.638203705 | 8.594335036 |
| ENSMUSG00000075224 | 10.61177777 | 3.478086219 | 8.473812573 | 3.221830688 | 5.013362104 |
| ENSMUSG00000075227 | 33.25023701 | 36.17209668 | 30.36449505 | 97.46037832 | 78.06520991 |
| ENSMUSG00000075232 | 111.0699406 | 138.4278315 | 140.5240585 | 224.7226905 | 183.3458141 |
| ENSMUSG00000075266 | 16.97884443 | 23.65098629 | 18.35992724 | 80.54576721 | 59.44415067 |
| ENSMUSG00000075267 | 9.196874066 | 6.956172438 | 7.767661525 | 3.221830688 | 5.013362104 |
| ENSMUSG00000075269 | 11.31922962 | 11.1298759  | 8.473812573 | 8.054576721 | 5.729556691 |
| ENSMUSG00000075271 | 8.489422215 | 9.043024169 | 11.29841676 | 7.249119049 | 9.310529622 |
| ENSMUSG00000075272 | 7.074518513 | 9.738641413 | 7.061510478 | 4.832746033 | 7.161945863 |
| ENSMUSG00000075273 | 6.367066661 | 8.347406925 | 9.179963621 | 7.249119049 | 7.87814045  |
| ENSMUSG00000075289 | 32.54278516 | 38.95456565 | 33.18909925 | 15.30369577 | 17.18867007 |
| ENSMUSG00000075296 | 6.367066661 | 4.173703463 | 4.943057334 | 4.832746033 | 7.161945863 |
| ENSMUSG00000075304 | 7.074518513 | 6.956172438 | 8.473812573 | 5.638203705 | 6.445751277 |
| ENSMUSG00000075307 | 3.537259256 | 5.56493795  | 7.061510478 | 8.054576721 | 6.445751277 |
| ENSMUSG00000075334 | 9.196874066 | 3.478086219 | 6.35535943  | 5.638203705 | 2.864778345 |
| ENSMUSG00000075394 | 10.61177777 | 6.260555194 | 6.35535943  | 4.02728836  | 4.297167518 |
| ENSMUSG00000075402 | 2.829807405 | 7.651789682 | 7.061510478 | 1.610915344 | 5.013362104 |
| ENSMUSG00000075419 | 80.64951104 | 114.081228  | 107.3349593 | 153.0369577 | 117.4559122 |
| ENSMUSG00000075420 | 18.39374813 | 27.82468975 | 21.18453143 | 16.10915344 | 24.35061594 |

|                    |             |             |             |             |             |
|--------------------|-------------|-------------|-------------|-------------|-------------|
| ENSMUSG00000075467 | 20.51610369 | 25.73783802 | 32.4829482  | 37.05105292 | 38.67450766 |
| ENSMUSG00000075470 | 0.707451851 | 0           | 0           | 0           | 0           |
| ENSMUSG00000075478 | 12.02668147 | 8.347406925 | 11.29841676 | 7.249119049 | 4.297167518 |
| ENSMUSG00000075486 | 26.88317035 | 44.5195036  | 36.71985448 | 41.07834128 | 46.55264811 |
| ENSMUSG00000075502 | 18.39374813 | 25.04222078 | 11.29841676 | 25.77464551 | 26.49919969 |
| ENSMUSG00000075510 | 7.074518513 | 9.738641413 | 9.179963621 | 9.665492065 | 7.161945863 |
| ENSMUSG00000075524 | 11.31922962 | 7.651789682 | 8.473812573 | 7.249119049 | 9.310529622 |
| ENSMUSG00000075543 | 8.489422215 | 8.347406925 | 8.473812573 | 4.832746033 | 7.161945863 |
| ENSMUSG00000075551 | 23.34591109 | 11.1298759  | 10.59226572 | 5.638203705 | 7.87814045  |
| ENSMUSG00000075552 | 10.61177777 | 9.738641413 | 10.59226572 | 8.054576721 | 7.87814045  |
| ENSMUSG00000075553 | 21.22355554 | 37.56333116 | 42.36906287 | 33.02376456 | 31.5125618  |
| ENSMUSG00000075566 | 5.65961481  | 5.56493795  | 5.649208382 | 5.638203705 | 8.594335036 |
| ENSMUSG00000075567 | 7.074518513 | 9.043024169 | 3.530755239 | 6.443661377 | 4.297167518 |
| ENSMUSG00000075570 | 8.489422215 | 6.260555194 | 12.71071886 | 5.638203705 | 5.729556691 |
| ENSMUSG00000075571 | 7.781970364 | 4.869320706 | 7.767661525 | 7.249119049 | 7.161945863 |
| ENSMUSG00000075572 | 9.904325918 | 2.782468975 | 7.061510478 | 9.665492065 | 7.87814045  |
| ENSMUSG00000075574 | 6.367066661 | 9.738641413 | 8.473812573 | 4.02728836  | 7.161945863 |
| ENSMUSG00000075588 | 5.65961481  | 4.869320706 | 4.236906287 | 4.02728836  | 6.445751277 |
| ENSMUSG00000075590 | 4.952162959 | 4.173703463 | 4.236906287 | 7.249119049 | 6.445751277 |
| ENSMUSG00000075592 | 12.73413332 | 4.869320706 | 7.767661525 | 2.416373016 | 7.87814045  |
| ENSMUSG00000075595 | 33.95768886 | 63.30116918 | 57.90438592 | 32.21830688 | 32.22875639 |
| ENSMUSG00000075596 | 203.7461332 | 267.8126389 | 228.0867884 | 129.6786852 | 137.5093606 |
| ENSMUSG00000075598 | 4.952162959 | 5.56493795  | 4.236906287 | 3.221830688 | 3.580972932 |
| ENSMUSG00000075599 | 0           | 0           | 0           | 0           | 0           |
| ENSMUSG00000075600 | 15.56394073 | 34.08524495 | 33.89525029 | 36.24559524 | 32.22875639 |
| ENSMUSG00000075604 | 4.952162959 | 6.260555194 | 5.649208382 | 8.860034393 | 7.161945863 |
| ENSMUSG00000075605 | 9.196874066 | 21.56413456 | 14.829172   | 7.249119049 | 9.310529622 |
| ENSMUSG00000075610 | 8.489422215 | 5.56493795  | 8.473812573 | 4.832746033 | 5.729556691 |
| ENSMUSG00000075700 | 72.86754068 | 91.12585893 | 96.0365425  | 189.2825529 | 143.2389173 |
| ENSMUSG00000075701 | 29.0055259  | 61.21431745 | 48.7244223  | 76.51847885 | 73.05184781 |
| ENSMUSG00000075702 | 2.829807405 | 6.956172438 | 8.473812573 | 4.832746033 | 7.161945863 |
| ENSMUSG00000075707 | 8.489422215 | 5.56493795  | 3.530755239 | 6.443661377 | 11.45911338 |
| ENSMUSG00000076430 | 60.13340736 | 102.9513521 | 85.44427678 | 48.32746033 | 61.59273443 |
| ENSMUSG00000076431 | 25.46826665 | 18.08604834 | 25.42143772 | 8.860034393 | 8.594335036 |
| ENSMUSG00000076433 | 8.489422215 | 4.173703463 | 9.179963621 | 7.249119049 | 9.310529622 |
| ENSMUSG00000076434 | 10.61177777 | 9.738641413 | 12.00456781 | 9.665492065 | 8.594335036 |
| ENSMUSG00000076435 | 60.84085921 | 75.82227957 | 69.20280268 | 64.43661377 | 53.71459398 |
| ENSMUSG00000076436 | 7.074518513 | 4.869320706 | 4.236906287 | 8.054576721 | 5.013362104 |
| ENSMUSG00000076438 | 4.952162959 | 6.260555194 | 3.530755239 | 7.249119049 | 9.310529622 |
| ENSMUSG00000076441 | 7.074518513 | 7.651789682 | 9.886114669 | 12.08186508 | 11.45911338 |
| ENSMUSG00000078118 | 8.489422215 | 8.347406925 | 7.061510478 | 3.221830688 | 2.864778345 |
| ENSMUSG00000078127 | 7.781970364 | 4.173703463 | 7.061510478 | 9.665492065 | 7.161945863 |
| ENSMUSG00000078129 | 5.65961481  | 6.956172438 | 2.824604191 | 6.443661377 | 2.148583759 |

|                    |             |             |             |             |             |
|--------------------|-------------|-------------|-------------|-------------|-------------|
| ENSMUSG00000078130 | 19.80865184 | 7.651789682 | 12.71071886 | 8.860034393 | 7.161945863 |
| ENSMUSG00000078131 | 7.074518513 | 9.738641413 | 10.59226572 | 4.02728836  | 5.729556691 |
| ENSMUSG00000078137 | 7.781970364 | 10.43425866 | 9.179963621 | 4.02728836  | 7.161945863 |
| ENSMUSG00000078144 | 8.489422215 | 7.651789682 | 13.41686991 | 8.054576721 | 5.013362104 |
| ENSMUSG00000078153 | 76.40479994 | 98.77764862 | 95.33039145 | 46.71654498 | 37.24211849 |
| ENSMUSG00000078157 | 7.074518513 | 13.21672763 | 9.886114669 | 22.55281482 | 19.33725383 |
| ENSMUSG00000078173 | 13.44158517 | 15.99919661 | 21.18453143 | 12.08186508 | 16.47247549 |
| ENSMUSG00000078179 | 10.61177777 | 6.956172438 | 8.473812573 | 3.221830688 | 5.013362104 |
| ENSMUSG00000078201 | 41.03220737 | 77.21351406 | 52.96132858 | 87.79488626 | 84.51096119 |
| ENSMUSG00000078202 | 4.952162959 | 12.52111039 | 9.886114669 | 7.249119049 | 13.60769714 |
| ENSMUSG00000078206 | 4.952162959 | 4.173703463 | 3.530755239 | 1.610915344 | 0.716194586 |
| ENSMUSG00000078208 | 2.122355554 | 0.695617244 | 3.530755239 | 2.416373016 | 3.580972932 |
| ENSMUSG00000078218 | 1.414903703 | 2.782468975 | 1.412302096 | 1.610915344 | 3.580972932 |
| ENSMUSG00000078234 | 0.707451851 | 0.695617244 | 0.706151048 | 0.805457672 | 1.432389173 |
| ENSMUSG00000078235 | 6.367066661 | 6.260555194 | 8.473812573 | 5.638203705 | 4.297167518 |
| ENSMUSG00000078249 | 7.781970364 | 10.43425866 | 9.886114669 | 18.52552646 | 11.45911338 |
| ENSMUSG00000078252 | 9.196874066 | 4.869320706 | 5.649208382 | 11.27640741 | 7.87814045  |
| ENSMUSG00000078253 | 2.122355554 | 2.086851731 | 2.824604191 | 4.02728836  | 2.864778345 |
| ENSMUSG00000078256 | 7.074518513 | 3.478086219 | 8.473812573 | 4.832746033 | 2.864778345 |
| ENSMUSG00000078257 | 9.196874066 | 4.869320706 | 4.236906287 | 4.832746033 | 4.297167518 |
| ENSMUSG00000078258 | 8.489422215 | 3.478086219 | 7.767661525 | 5.638203705 | 5.729556691 |
| ENSMUSG00000078259 | 13.44158517 | 9.738641413 | 9.886114669 | 12.08186508 | 5.013362104 |
| ENSMUSG00000078260 | 11.31922962 | 9.738641413 | 7.767661525 | 5.638203705 | 8.594335036 |
| ENSMUSG00000078261 | 12.02668147 | 6.260555194 | 9.179963621 | 8.054576721 | 7.87814045  |
| ENSMUSG00000078262 | 12.02668147 | 3.478086219 | 8.473812573 | 7.249119049 | 7.161945863 |
| ENSMUSG00000078302 | 8.489422215 | 7.651789682 | 5.649208382 | 4.832746033 | 5.729556691 |
| ENSMUSG00000078307 | 13.44158517 | 2.782468975 | 4.943057334 | 4.832746033 | 5.729556691 |
| ENSMUSG00000078315 | 7.781970364 | 2.782468975 | 3.530755239 | 4.832746033 | 2.148583759 |
| ENSMUSG00000078317 | 15.56394073 | 21.56413456 | 31.77679715 | 24.16373016 | 13.60769714 |
| ENSMUSG00000078320 | 2.122355554 | 3.478086219 | 7.061510478 | 2.416373016 | 3.580972932 |
| ENSMUSG00000078324 | 6.367066661 | 2.782468975 | 4.236906287 | 4.02728836  | 2.864778345 |
| ENSMUSG00000078346 | 5.65961481  | 3.478086219 | 3.530755239 | 2.416373016 | 2.864778345 |
| ENSMUSG00000078348 | 8.489422215 | 5.56493795  | 7.767661525 | 7.249119049 | 9.310529622 |
| ENSMUSG00000078354 | 13.44158517 | 4.173703463 | 9.179963621 | 3.221830688 | 8.594335036 |
| ENSMUSG00000078355 | 6.367066661 | 8.347406925 | 6.35535943  | 4.02728836  | 5.729556691 |
| ENSMUSG00000078365 | 7.074518513 | 10.43425866 | 4.236906287 | 7.249119049 | 5.013362104 |
| ENSMUSG00000078427 | 76.40479994 | 123.1242521 | 115.8087718 | 214.2517408 | 182.6296195 |
| ENSMUSG00000078429 | 0           | 0           | 0           | 0           | 0           |
| ENSMUSG00000078439 | 12.73413332 | 9.738641413 | 12.00456781 | 9.665492065 | 12.89150255 |
| ENSMUSG00000078441 | 14.14903703 | 20.17290007 | 14.829172   | 41.07834128 | 32.22875639 |
| ENSMUSG00000078442 | 7.074518513 | 3.478086219 | 7.061510478 | 4.02728836  | 9.310529622 |
| ENSMUSG00000078451 | 13.44158517 | 20.17290007 | 24.71528667 | 14.4982381  | 13.60769714 |
| ENSMUSG00000078453 | 50.93653329 | 61.9099347  | 69.20280268 | 77.32393652 | 75.20043157 |

|                    |              |             |             |             |             |
|--------------------|--------------|-------------|-------------|-------------|-------------|
| ENSMUSG00000078484 | 9.904325918  | 16.69481385 | 12.71071886 | 78.93485187 | 61.59273443 |
| ENSMUSG00000078486 | 12.02668147  | 12.52111039 | 14.829172   | 17.72006879 | 9.310529622 |
| ENSMUSG00000078487 | 2.829807405  | 2.086851731 | 2.824604191 | 2.416373016 | 4.297167518 |
| ENSMUSG00000078490 | 9.196874066  | 6.260555194 | 6.35535943  | 11.27640741 | 5.729556691 |
| ENSMUSG00000078491 | 6.367066661  | 3.478086219 | 8.473812573 | 5.638203705 | 3.580972932 |
| ENSMUSG00000078496 | 14.14903703  | 20.86851731 | 16.2414741  | 10.47094974 | 11.45911338 |
| ENSMUSG00000078503 | 18.39374813  | 15.99919661 | 13.41686991 | 14.4982381  | 7.87814045  |
| ENSMUSG00000078504 | 10.61177777  | 4.869320706 | 4.236906287 | 4.832746033 | 5.013362104 |
| ENSMUSG00000078507 | 8.489422215  | 9.043024169 | 9.886114669 | 4.02728836  | 9.310529622 |
| ENSMUSG00000078511 | 7.781970364  | 10.43425866 | 4.236906287 | 7.249119049 | 7.161945863 |
| ENSMUSG00000078512 | 8.489422215  | 6.956172438 | 7.767661525 | 5.638203705 | 7.161945863 |
| ENSMUSG00000078513 | 3.537259256  | 6.260555194 | 8.473812573 | 6.443661377 | 5.013362104 |
| ENSMUSG00000078515 | 83.47931845  | 110.6031418 | 103.098053  | 183.6443492 | 166.8733386 |
| ENSMUSG00000078518 | 7.074518513  | 6.260555194 | 6.35535943  | 5.638203705 | 8.594335036 |
| ENSMUSG00000078520 | 10.61177777  | 13.91234488 | 4.236906287 | 8.860034393 | 7.161945863 |
| ENSMUSG00000078521 | 24.05336294  | 27.12907251 | 24.71528667 | 73.29664816 | 51.56601022 |
| ENSMUSG00000078532 | 5.65961481   | 4.869320706 | 4.236906287 | 7.249119049 | 6.445751277 |
| ENSMUSG00000078537 | 7.074518513  | 9.738641413 | 5.649208382 | 8.054576721 | 7.161945863 |
| ENSMUSG00000078546 | 10.61177777  | 8.347406925 | 7.767661525 | 9.665492065 | 5.013362104 |
| ENSMUSG00000078554 | 6.367066661  | 13.91234488 | 13.41686991 | 10.47094974 | 8.594335036 |
| ENSMUSG00000078566 | 21.93100739  | 25.73783802 | 14.12302096 | 13.69278043 | 17.18867007 |
| ENSMUSG00000078572 | 28.29807405  | 33.3896277  | 31.77679715 | 45.10562964 | 47.2688427  |
| ENSMUSG00000078576 | 12.02668147  | 10.43425866 | 7.061510478 | 5.638203705 | 5.729556691 |
| ENSMUSG00000078577 | 8.489422215  | 13.21672763 | 12.00456781 | 9.665492065 | 8.594335036 |
| ENSMUSG00000078578 | 42.447111108 | 65.38802092 | 63.5535943  | 188.4770953 | 143.9551119 |
| ENSMUSG00000078580 | 16.97884443  | 34.78086219 | 28.24604191 | 21.74735715 | 19.33725383 |
| ENSMUSG00000078584 | 23.34591109  | 31.30277597 | 22.59683353 | 33.82922223 | 27.93158887 |
| ENSMUSG00000078591 | 5.65961481   | 6.956172438 | 1.412302096 | 4.02728836  | 7.161945863 |
| ENSMUSG00000078593 | 4.952162959  | 7.651789682 | 7.061510478 | 7.249119049 | 5.729556691 |
| ENSMUSG00000078597 | 10.61177777  | 4.869320706 | 6.35535943  | 2.416373016 | 10.7429188  |
| ENSMUSG00000078599 | 2.829807405  | 8.347406925 | 4.943057334 | 6.443661377 | 6.445751277 |
| ENSMUSG00000078605 | 8.489422215  | 11.1298759  | 7.061510478 | 6.443661377 | 11.45911338 |
| ENSMUSG00000078606 | 79.23460734  | 109.2119073 | 84.73812573 | 206.1971641 | 127.4826364 |
| ENSMUSG00000078612 | 7.074518513  | 6.956172438 | 7.061510478 | 2.416373016 | 7.87814045  |
| ENSMUSG00000078622 | 135.8307554  | 184.3385696 | 150.4101732 | 322.1830688 | 264.9919969 |
| ENSMUSG00000078624 | 7.781970364  | 6.260555194 | 7.767661525 | 7.249119049 | 6.445751277 |
| ENSMUSG00000078627 | 5.65961481   | 6.956172438 | 9.179963621 | 4.02728836  | 6.445751277 |
| ENSMUSG00000078630 | 5.65961481   | 13.91234488 | 9.179963621 | 10.47094974 | 15.7562809  |
| ENSMUSG00000078639 | 12.02668147  | 10.43425866 | 8.473812573 | 3.221830688 | 1.432389173 |
| ENSMUSG00000078640 | 9.196874066  | 10.43425866 | 6.35535943  | 8.054576721 | 9.310529622 |
| ENSMUSG00000078648 | 113.1922962  | 123.8198694 | 150.4101732 | 63.6311561  | 67.32229112 |
| ENSMUSG00000078650 | 20.51610369  | 27.12907251 | 21.18453143 | 14.4982381  | 23.63442135 |
| ENSMUSG00000078651 | 9.196874066  | 13.91234488 | 12.00456781 | 12.08186508 | 12.89150255 |

|                    |             |             |             |             |             |
|--------------------|-------------|-------------|-------------|-------------|-------------|
| ENSMUSG00000078652 | 101.1656147 | 114.081228  | 115.1026208 | 252.913709  | 176.1838682 |
| ENSMUSG00000078653 | 19.80865184 | 19.47728283 | 25.42143772 | 15.30369577 | 25.06681052 |
| ENSMUSG00000078657 | 10.61177777 | 4.173703463 | 7.767661525 | 4.832746033 | 3.580972932 |
| ENSMUSG00000078664 | 21.93100739 | 14.60796212 | 28.24604191 | 8.054576721 | 16.47247549 |
| ENSMUSG00000078668 | 12.02668147 | 5.56493795  | 9.179963621 | 4.02728836  | 5.729556691 |
| ENSMUSG00000078670 | 10.61177777 | 9.738641413 | 5.649208382 | 1.610915344 | 5.729556691 |
| ENSMUSG00000078672 | 7.074518513 | 11.1298759  | 7.767661525 | 6.443661377 | 7.161945863 |
| ENSMUSG00000078674 | 15.56394073 | 9.043024169 | 14.829172   | 12.88732275 | 5.729556691 |
| ENSMUSG00000078675 | 16.27139258 | 6.260555194 | 9.886114669 | 7.249119049 | 10.7429188  |
| ENSMUSG00000078676 | 40.32475552 | 83.47406925 | 60.72899011 | 161.8969921 | 139.6579443 |
| ENSMUSG00000078680 | 11.31922962 | 12.52111039 | 9.886114669 | 4.02728836  | 7.87814045  |
| ENSMUSG00000078683 | 12.73413332 | 4.173703463 | 11.29841676 | 4.02728836  | 5.013362104 |
| ENSMUSG00000078687 | 7.074518513 | 6.260555194 | 13.41686991 | 8.860034393 | 5.729556691 |
| ENSMUSG00000078689 | 9.196874066 | 4.869320706 | 7.767661525 | 8.054576721 | 10.7429188  |
| ENSMUSG00000078695 | 8.489422215 | 14.60796212 | 12.00456781 | 13.69278043 | 13.60769714 |
| ENSMUSG00000078698 | 7.074518513 | 4.869320706 | 4.236906287 | 5.638203705 | 9.310529622 |
| ENSMUSG00000078713 | 21.22355554 | 42.43265187 | 40.95676077 | 204.5862487 | 131.0636093 |
| ENSMUSG00000078716 | 8.489422215 | 9.043024169 | 5.649208382 | 4.02728836  | 4.297167518 |
| ENSMUSG00000078719 | 9.904325918 | 11.82549314 | 9.886114669 | 5.638203705 | 5.013362104 |
| ENSMUSG00000078721 | 3.537259256 | 4.173703463 | 1.412302096 | 1.610915344 | 4.297167518 |
| ENSMUSG00000078746 | 4.244711108 | 1.391234488 | 3.530755239 | 1.610915344 | 4.297167518 |
| ENSMUSG00000078747 | 4.244711108 | 1.391234488 | 4.236906287 | 2.416373016 | 4.297167518 |
| ENSMUSG00000078752 | 7.074518513 | 4.173703463 | 2.824604191 | 5.638203705 | 8.594335036 |
| ENSMUSG00000078759 | 9.196874066 | 3.478086219 | 9.886114669 | 2.416373016 | 6.445751277 |
| ENSMUSG00000078763 | 22.63845924 | 31.99839321 | 25.42143772 | 18.52552646 | 17.18867007 |
| ENSMUSG00000078768 | 0.707451851 | 0           | 0           | 0.805457672 | 0.716194586 |
| ENSMUSG00000078776 | 9.904325918 | 6.260555194 | 9.886114669 | 7.249119049 | 7.161945863 |
| ENSMUSG00000078780 | 7.781970364 | 4.173703463 | 7.767661525 | 4.02728836  | 8.594335036 |
| ENSMUSG00000078783 | 12.73413332 | 21.56413456 | 20.47838039 | 6.443661377 | 14.32389173 |
| ENSMUSG00000078784 | 37.49494812 | 63.99678643 | 53.66747963 | 109.5422434 | 98.11865833 |
| ENSMUSG00000078786 | 39.61730367 | 60.51870021 | 59.31668801 | 196.531672  | 142.5227227 |
| ENSMUSG00000078787 | 5.65961481  | 8.347406925 | 10.59226572 | 7.249119049 | 10.02672421 |
| ENSMUSG00000078789 | 18.39374813 | 25.04222078 | 16.94762515 | 45.10562964 | 28.64778345 |
| ENSMUSG00000078793 | 5.65961481  | 6.260555194 | 6.35535943  | 7.249119049 | 7.87814045  |
| ENSMUSG00000078794 | 12.02668147 | 6.956172438 | 12.00456781 | 7.249119049 | 8.594335036 |
| ENSMUSG00000078795 | 9.904325918 | 7.651789682 | 4.236906287 | 4.832746033 | 7.161945863 |
| ENSMUSG00000078798 | 10.61177777 | 6.260555194 | 10.59226572 | 4.02728836  | 6.445751277 |
| ENSMUSG00000078799 | 9.196874066 | 11.82549314 | 6.35535943  | 4.02728836  | 4.297167518 |
| ENSMUSG00000078800 | 9.904325918 | 9.043024169 | 7.767661525 | 4.02728836  | 5.729556691 |
| ENSMUSG00000078808 | 5.65961481  | 8.347406925 | 9.886114669 | 4.02728836  | 4.297167518 |
| ENSMUSG00000078810 | 5.65961481  | 9.738641413 | 5.649208382 | 10.47094974 | 7.87814045  |
| ENSMUSG00000078813 | 26.88317035 | 56.34499675 | 52.96132858 | 76.51847885 | 60.16034525 |
| ENSMUSG00000078816 | 10.61177777 | 8.347406925 | 12.71071886 | 6.443661377 | 5.729556691 |

|                    |             |             |             |             |             |
|--------------------|-------------|-------------|-------------|-------------|-------------|
| ENSMUSG00000078817 | 7.074518513 | 11.1298759  | 7.767661525 | 6.443661377 | 7.161945863 |
| ENSMUSG00000078851 | 0           | 0           | 0           | 0           | 0           |
| ENSMUSG00000078853 | 0           | 0           | 0           | 0           | 0           |
| ENSMUSG00000078861 | 14.85648888 | 25.73783802 | 31.77679715 | 24.96918783 | 20.769643   |
| ENSMUSG00000078878 | 19.80865184 | 31.99839321 | 24.00913562 | 29.80193387 | 31.5125618  |
| ENSMUSG00000078894 | 17.68629628 | 14.60796212 | 19.77222934 | 16.91461111 | 22.20203218 |
| ENSMUSG00000078898 | 11.31922962 | 18.08604834 | 17.65377619 | 16.10915344 | 20.769643   |
| ENSMUSG00000078899 | 12.02668147 | 17.39043109 | 21.89068248 | 18.52552646 | 19.33725383 |
| ENSMUSG00000078901 | 14.85648888 | 14.60796212 | 18.35992724 | 16.91461111 | 17.18867007 |
| ENSMUSG00000078905 | 18.39374813 | 9.738641413 | 9.179963621 | 4.02728836  | 10.02672421 |
| ENSMUSG00000078907 | 7.074518513 | 9.738641413 | 4.236906287 | 7.249119049 | 7.161945863 |
| ENSMUSG00000078920 | 73.57499253 | 106.4294383 | 75.55816211 | 215.0571984 | 141.0903335 |
| ENSMUSG00000078921 | 46.69182218 | 81.38721752 | 50.13672439 | 140.9550926 | 75.91662615 |
| ENSMUSG00000078922 | 0           | 0           | 0           | 0.805457672 | 0.716194586 |
| ENSMUSG00000078924 | 4.244711108 | 5.56493795  | 7.061510478 | 10.47094974 | 9.310529622 |
| ENSMUSG00000078931 | 35.37259256 | 45.21512085 | 50.13672439 | 134.5114312 | 124.617858  |
| ENSMUSG00000078935 | 7.781970364 | 6.260555194 | 7.061510478 | 7.249119049 | 7.87814045  |
| ENSMUSG00000078937 | 4.952162959 | 6.956172438 | 10.59226572 | 12.08186508 | 7.87814045  |
| ENSMUSG00000078938 | 9.904325918 | 7.651789682 | 11.29841676 | 7.249119049 | 5.013362104 |
| ENSMUSG00000078940 | 5.65961481  | 6.260555194 | 5.649208382 | 4.832746033 | 4.297167518 |
| ENSMUSG00000078941 | 2.829807405 | 15.30357936 | 4.943057334 | 8.860034393 | 1.432389173 |
| ENSMUSG00000078949 | 13.44158517 | 4.869320706 | 7.061510478 | 6.443661377 | 8.594335036 |
| ENSMUSG00000078954 | 7.781970364 | 6.956172438 | 8.473812573 | 4.02728836  | 11.45911338 |
| ENSMUSG00000078958 | 5.65961481  | 4.869320706 | 2.824604191 | 3.221830688 | 7.87814045  |
| ENSMUSG00000078963 | 9.196874066 | 9.043024169 | 4.943057334 | 3.221830688 | 1.432389173 |
| ENSMUSG00000078964 | 7.781970364 | 6.260555194 | 6.35535943  | 0.805457672 | 8.594335036 |
| ENSMUSG00000078970 | 61.54831106 | 100.8645003 | 96.0365425  | 138.5387196 | 128.198831  |
| ENSMUSG00000078994 | 62.25576291 | 102.2557348 | 84.73812573 | 74.10210583 | 83.7947666  |
| ENSMUSG00000078998 | 4.952162959 | 4.173703463 | 10.59226572 | 6.443661377 | 5.013362104 |
| ENSMUSG00000079005 | 9.904325918 | 4.869320706 | 8.473812573 | 9.665492065 | 7.87814045  |
| ENSMUSG00000079006 | 10.61177777 | 3.478086219 | 11.29841676 | 5.638203705 | 6.445751277 |
| ENSMUSG00000079007 | 13.44158517 | 9.043024169 | 6.35535943  | 4.832746033 | 6.445751277 |
| ENSMUSG00000079008 | 7.074518513 | 9.738641413 | 9.179963621 | 10.47094974 | 2.148583759 |
| ENSMUSG00000079009 | 9.196874066 | 7.651789682 | 7.767661525 | 11.27640741 | 5.013362104 |
| ENSMUSG00000079013 | 4.952162959 | 6.260555194 | 3.530755239 | 4.832746033 | 8.594335036 |
| ENSMUSG00000079014 | 8.489422215 | 7.651789682 | 5.649208382 | 12.08186508 | 8.594335036 |
| ENSMUSG00000079015 | 12.02668147 | 7.651789682 | 3.530755239 | 8.860034393 | 12.89150255 |
| ENSMUSG00000079017 | 71.45263698 | 74.43104508 | 61.43514116 | 182.0334339 | 126.0502472 |
| ENSMUSG00000079019 | 5.65961481  | 4.173703463 | 9.179963621 | 8.860034393 | 10.7429188  |
| ENSMUSG00000079020 | 12.02668147 | 32.69401046 | 31.0706461  | 12.88732275 | 25.06681052 |
| ENSMUSG00000079022 | 10.61177777 | 9.738641413 | 8.473812573 | 1.610915344 | 7.161945863 |
| ENSMUSG00000079025 | 12.73413332 | 5.56493795  | 7.767661525 | 7.249119049 | 8.594335036 |
| ENSMUSG00000079029 | 16.97884443 | 11.1298759  | 10.59226572 | 7.249119049 | 14.32389173 |

|                    |             |             |             |             |             |
|--------------------|-------------|-------------|-------------|-------------|-------------|
| ENSMUSG00000079031 | 9.196874066 | 6.956172438 | 9.886114669 | 3.221830688 | 7.161945863 |
| ENSMUSG00000079033 | 14.14903703 | 31.30277597 | 27.53989086 | 126.4568545 | 95.25387998 |
| ENSMUSG00000079034 | 12.02668147 | 5.56493795  | 13.41686991 | 10.47094974 | 6.445751277 |
| ENSMUSG00000079042 | 0           | 0           | 0           | 0           | 0           |
| ENSMUSG00000079043 | 0.707451851 | 0.695617244 | 0.706151048 | 0           | 0.716194586 |
| ENSMUSG00000079057 | 16.97884443 | 38.25894841 | 29.65834401 | 14.4982381  | 15.7562809  |
| ENSMUSG00000079058 | 9.196874066 | 2.086851731 | 8.473812573 | 2.416373016 | 5.013362104 |
| ENSMUSG00000079065 | 29.0055259  | 41.04141738 | 33.89525029 | 36.24559524 | 42.25548059 |
| ENSMUSG00000079071 | 14.14903703 | 20.17290007 | 13.41686991 | 11.27640741 | 16.47247549 |
| ENSMUSG00000079076 | 6.367066661 | 15.30357936 | 19.06607829 | 13.69278043 | 18.62105924 |
| ENSMUSG00000079083 | 27.5906222  | 50.7800588  | 48.7244223  | 50.74383334 | 43.68786977 |
| ENSMUSG00000079091 | 13.44158517 | 9.043024169 | 8.473812573 | 8.860034393 | 6.445751277 |
| ENSMUSG00000079092 | 9.904325918 | 7.651789682 | 11.29841676 | 13.69278043 | 2.864778345 |
| ENSMUSG00000079103 | 9.904325918 | 8.347406925 | 10.59226572 | 5.638203705 | 7.87814045  |
| ENSMUSG00000079104 | 0           | 0           | 0.706151048 | 0           | 0           |
| ENSMUSG00000079105 | 7.781970364 | 9.043024169 | 6.35535943  | 7.249119049 | 8.594335036 |
| ENSMUSG00000079108 | 86.30912585 | 108.51629   | 90.38733411 | 155.4533307 | 125.3340526 |
| ENSMUSG00000079111 | 77.11225179 | 79.99598303 | 85.44427678 | 153.8424154 | 125.3340526 |
| ENSMUSG00000079112 | 9.196874066 | 11.82549314 | 4.236906287 | 6.443661377 | 10.7429188  |
| ENSMUSG00000079113 | 0           | 0           | 0.706151048 | 0           | 0           |
| ENSMUSG00000079114 | 0.707451851 | 0.695617244 | 0.706151048 | 0           | 0.716194586 |
| ENSMUSG00000079116 | 9.196874066 | 9.738641413 | 14.12302096 | 7.249119049 | 4.297167518 |
| ENSMUSG00000079120 | 14.85648888 | 13.21672763 | 14.12302096 | 6.443661377 | 10.02672421 |
| ENSMUSG00000079144 | 17.68629628 | 44.5195036  | 31.77679715 | 44.30017197 | 60.16034525 |
| ENSMUSG00000079162 | 9.904325918 | 7.651789682 | 8.473812573 | 5.638203705 | 7.161945863 |
| ENSMUSG00000079164 | 4.952162959 | 4.173703463 | 7.061510478 | 7.249119049 | 5.013362104 |
| ENSMUSG00000079168 | 7.781970364 | 7.651789682 | 9.886114669 | 5.638203705 | 8.594335036 |
| ENSMUSG00000079177 | 8.489422215 | 14.60796212 | 7.767661525 | 8.860034393 | 5.013362104 |
| ENSMUSG00000079180 | 7.781970364 | 6.260555194 | 8.473812573 | 4.832746033 | 7.161945863 |
| ENSMUSG00000079186 | 5.65961481  | 4.869320706 | 7.061510478 | 6.443661377 | 6.445751277 |
| ENSMUSG00000079215 | 28.29807405 | 35.47647943 | 36.01370344 | 51.54929101 | 38.67450766 |
| ENSMUSG00000079243 | 12.02668147 | 9.043024169 | 7.767661525 | 10.47094974 | 6.445751277 |
| ENSMUSG00000079244 | 7.781970364 | 6.260555194 | 7.767661525 | 8.860034393 | 5.729556691 |
| ENSMUSG00000079259 | 7.781970364 | 6.260555194 | 6.35535943  | 5.638203705 | 7.87814045  |
| ENSMUSG00000079260 | 0           | 2.782468975 | 0           | 0           | 0.716194586 |
| ENSMUSG00000079262 | 8.489422215 | 9.738641413 | 8.473812573 | 6.443661377 | 6.445751277 |
| ENSMUSG00000079263 | 7.781970364 | 6.956172438 | 12.00456781 | 8.860034393 | 8.594335036 |
| ENSMUSG00000079277 | 7.781970364 | 9.738641413 | 7.061510478 | 3.221830688 | 8.594335036 |
| ENSMUSG00000079278 | 7.074518513 | 3.478086219 | 4.236906287 | 7.249119049 | 7.161945863 |
| ENSMUSG00000079283 | 13.44158517 | 15.99919661 | 16.2414741  | 16.10915344 | 17.18867007 |
| ENSMUSG00000079298 | 11.31922962 | 6.260555194 | 3.530755239 | 7.249119049 | 6.445751277 |
| ENSMUSG00000079304 | 18.39374813 | 12.52111039 | 16.2414741  | 12.08186508 | 10.02672421 |
| ENSMUSG00000079330 | 5.65961481  | 6.956172438 | 6.35535943  | 7.249119049 | 6.445751277 |

|                    |             |             |             |             |             |
|--------------------|-------------|-------------|-------------|-------------|-------------|
| ENSMUSG00000079334 | 1.414903703 | 0           | 0.706151048 | 0           | 0           |
| ENSMUSG00000079339 | 43.15456293 | 74.43104508 | 55.78593277 | 27.38556085 | 22.91822676 |
| ENSMUSG00000079343 | 6.367066661 | 4.173703463 | 7.061510478 | 7.249119049 | 8.594335036 |
| ENSMUSG00000079346 | 13.44158517 | 10.43425866 | 5.649208382 | 6.443661377 | 6.445751277 |
| ENSMUSG00000079349 | 2.829807405 | 1.391234488 | 5.649208382 | 3.221830688 | 4.297167518 |
| ENSMUSG00000079350 | 3.537259256 | 2.782468975 | 7.061510478 | 0.805457672 | 2.148583759 |
| ENSMUSG00000079355 | 4.952162959 | 4.173703463 | 7.061510478 | 3.221830688 | 2.864778345 |
| ENSMUSG00000079362 | 11.31922962 | 11.1298759  | 8.473812573 | 16.10915344 | 10.02672421 |
| ENSMUSG00000079363 | 0           | 0.695617244 | 0           | 0           | 0           |
| ENSMUSG00000079364 | 7.074518513 | 4.869320706 | 7.767661525 | 7.249119049 | 2.864778345 |
| ENSMUSG00000079371 | 7.781970364 | 6.260555194 | 6.35535943  | 5.638203705 | 2.864778345 |
| ENSMUSG00000079378 | 12.02668147 | 6.260555194 | 7.767661525 | 6.443661377 | 9.310529622 |
| ENSMUSG00000079388 | 12.02668147 | 9.738641413 | 11.29841676 | 4.832746033 | 4.297167518 |
| ENSMUSG00000079395 | 4.244711108 | 4.869320706 | 7.061510478 | 0.805457672 | 1.432389173 |
| ENSMUSG00000079396 | 7.781970364 | 9.043024169 | 6.35535943  | 3.221830688 | 13.60769714 |
| ENSMUSG00000079409 | 11.31922962 | 6.260555194 | 10.59226572 | 8.860034393 | 4.297167518 |
| ENSMUSG00000079410 | 7.781970364 | 6.260555194 | 7.767661525 | 4.832746033 | 4.297167518 |
| ENSMUSG00000079414 | 5.65961481  | 9.738641413 | 12.71071886 | 47.52200265 | 36.5259239  |
| ENSMUSG00000079415 | 9.196874066 | 21.56413456 | 17.65377619 | 25.77464551 | 30.79636721 |
| ENSMUSG00000079418 | 36.78749627 | 60.51870021 | 47.3121202  | 41.07834128 | 47.2688427  |
| ENSMUSG00000079419 | 18.39374813 | 20.17290007 | 16.94762515 | 84.57305557 | 58.01176149 |
| ENSMUSG00000079421 | 5.65961481  | 15.30357936 | 13.41686991 | 7.249119049 | 10.7429188  |
| ENSMUSG00000079423 | 11.31922962 | 12.52111039 | 7.767661525 | 2.416373016 | 7.161945863 |
| ENSMUSG00000079424 | 14.14903703 | 6.260555194 | 9.886114669 | 8.054576721 | 9.310529622 |
| ENSMUSG00000079428 | 3.537259256 | 1.391234488 | 4.943057334 | 1.610915344 | 3.580972932 |
| ENSMUSG00000079429 | 51.64398514 | 42.43265187 | 37.42600553 | 32.21830688 | 34.37734014 |
| ENSMUSG00000079432 | 4.952162959 | 2.782468975 | 4.943057334 | 3.221830688 | 2.864778345 |
| ENSMUSG00000079434 | 10.61177777 | 10.43425866 | 7.767661525 | 12.88732275 | 9.310529622 |
| ENSMUSG00000079435 | 35.37259256 | 77.21351406 | 65.67204744 | 128.0677699 | 87.37573953 |
| ENSMUSG00000079436 | 10.61177777 | 26.43345526 | 20.47838039 | 16.10915344 | 9.310529622 |
| ENSMUSG00000079440 | 10.61177777 | 5.56493795  | 7.767661525 | 4.832746033 | 4.297167518 |
| ENSMUSG00000079445 | 17.68629628 | 41.04141738 | 38.83830763 | 48.32746033 | 47.98503729 |
| ENSMUSG00000079451 | 11.31922962 | 6.260555194 | 7.767661525 | 6.443661377 | 5.729556691 |
| ENSMUSG00000079465 | 10.61177777 | 8.347406925 | 5.649208382 | 4.02728836  | 11.45911338 |
| ENSMUSG00000079466 | 5.65961481  | 5.56493795  | 9.179963621 | 5.638203705 | 0.716194586 |
| ENSMUSG00000079470 | 7.074518513 | 6.260555194 | 11.29841676 | 27.38556085 | 17.90486466 |
| ENSMUSG00000079471 | 4.244711108 | 3.478086219 | 4.236906287 | 4.02728836  | 6.445751277 |
| ENSMUSG00000079476 | 2.829807405 | 2.086851731 | 5.649208382 | 0.805457672 | 3.580972932 |
| ENSMUSG00000079477 | 171.9107999 | 254.5959112 | 230.9113926 | 207.0026217 | 182.6296195 |
| ENSMUSG00000079478 | 2.829807405 | 8.347406925 | 9.179963621 | 0.805457672 | 6.445751277 |
| ENSMUSG00000079479 | 4.952162959 | 2.782468975 | 1.412302096 | 3.221830688 | 6.445751277 |
| ENSMUSG00000079480 | 25.46826665 | 35.47647943 | 36.71985448 | 44.30017197 | 39.39070225 |
| ENSMUSG00000079491 | 108.9475851 | 187.1210386 | 139.8179075 | 227.9445212 | 172.6028953 |



|                    |             |             |             |             |             |
|--------------------|-------------|-------------|-------------|-------------|-------------|
| ENSMUSG00000079492 | 7.074518513 | 12.52111039 | 14.12302096 | 12.08186508 | 19.33725383 |
| ENSMUSG00000079494 | 7.781970364 | 10.43425866 | 4.943057334 | 6.443661377 | 6.445751277 |
| ENSMUSG00000079495 | 8.489422215 | 5.56493795  | 8.473812573 | 7.249119049 | 7.87814045  |
| ENSMUSG00000079502 | 4.952162959 | 6.260555194 | 3.530755239 | 5.638203705 | 5.729556691 |
| ENSMUSG00000079508 | 16.97884443 | 26.43345526 | 19.77222934 | 33.02376456 | 22.91822676 |
| ENSMUSG00000079511 | 10.61177777 | 10.43425866 | 11.29841676 | 10.47094974 | 18.62105924 |
| ENSMUSG00000079513 | 5.65961481  | 2.086851731 | 5.649208382 | 0.805457672 | 2.148583759 |
| ENSMUSG00000079516 | 9.196874066 | 10.43425866 | 7.061510478 | 2.416373016 | 7.87814045  |
| ENSMUSG00000079517 | 4.952162959 | 6.260555194 | 3.530755239 | 5.638203705 | 2.864778345 |
| ENSMUSG00000079519 | 4.244711108 | 3.478086219 | 4.236906287 | 1.610915344 | 2.148583759 |
| ENSMUSG00000079521 | 10.61177777 | 7.651789682 | 2.118453143 | 1.610915344 | 2.148583759 |
| ENSMUSG00000079522 | 2.829807405 | 4.173703463 | 4.943057334 | 4.832746033 | 4.297167518 |
| ENSMUSG00000079523 | 102.5805184 | 113.3856107 | 105.9226572 | 118.4022778 | 108.1453825 |
| ENSMUSG00000079525 | 4.244711108 | 3.478086219 | 1.412302096 | 1.610915344 | 1.432389173 |
| ENSMUSG00000079531 | 2.829807405 | 1.391234488 | 2.824604191 | 2.416373016 | 2.148583759 |
| ENSMUSG00000079534 | 2.122355554 | 3.478086219 | 4.236906287 | 2.416373016 | 3.580972932 |
| ENSMUSG00000079539 | 8.489422215 | 4.869320706 | 3.530755239 | 4.832746033 | 4.297167518 |
| ENSMUSG00000079547 | 133.7083999 | 153.0357936 | 138.4056054 | 264.1901164 | 163.2923657 |
| ENSMUSG00000079550 | 8.489422215 | 7.651789682 | 8.473812573 | 9.665492065 | 3.580972932 |
| ENSMUSG00000079554 | 9.904325918 | 5.56493795  | 6.35535943  | 4.02728836  | 5.013362104 |
| ENSMUSG00000079555 | 0           | 0           | 0           | 0           | 0           |
| ENSMUSG00000079559 | 11.31922962 | 15.99919661 | 15.53532305 | 14.4982381  | 12.17530797 |
| ENSMUSG00000079562 | 142.1978221 | 167.6437558 | 161.0024389 | 178.8116032 | 130.3474147 |
| ENSMUSG00000079563 | 12.73413332 | 14.60796212 | 12.00456781 | 14.4982381  | 13.60769714 |
| ENSMUSG00000079566 | 9.904325918 | 1.391234488 | 3.530755239 | 3.221830688 | 7.161945863 |
| ENSMUSG00000079579 | 6.367066661 | 2.782468975 | 0.706151048 | 4.02728836  | 3.580972932 |
| ENSMUSG00000079580 | 21.22355554 | 51.47567604 | 43.07521391 | 55.57657937 | 35.09353473 |
| ENSMUSG00000079583 | 9.904325918 | 1.391234488 | 6.35535943  | 4.02728836  | 5.013362104 |
| ENSMUSG00000079584 | 3.537259256 | 2.782468975 | 3.530755239 | 1.610915344 | 2.864778345 |
| ENSMUSG00000079588 | 12.73413332 | 6.260555194 | 8.473812573 | 6.443661377 | 9.310529622 |
| ENSMUSG00000079592 | 71.45263698 | 79.99598303 | 64.25974535 | 114.3749894 | 98.83485292 |
| ENSMUSG00000079593 | 4.244711108 | 4.173703463 | 2.824604191 | 2.416373016 | 1.432389173 |
| ENSMUSG00000079594 | 7.074518513 | 9.043024169 | 11.29841676 | 3.221830688 | 10.02672421 |
| ENSMUSG00000079597 | 11.31922962 | 8.347406925 | 8.473812573 | 6.443661377 | 5.729556691 |
| ENSMUSG00000079598 | 8.489422215 | 4.173703463 | 9.886114669 | 5.638203705 | 1.432389173 |
| ENSMUSG00000079602 | 8.489422215 | 7.651789682 | 5.649208382 | 6.443661377 | 5.729556691 |
| ENSMUSG00000079605 | 0           | 0.695617244 | 0           | 0           | 0.716194586 |
| ENSMUSG00000079606 | 6.367066661 | 3.478086219 | 6.35535943  | 1.610915344 | 2.148583759 |
| ENSMUSG00000079614 | 50.93653329 | 73.73542784 | 62.84744325 | 169.9515688 | 140.3741389 |
| ENSMUSG00000079619 | 4.244711108 | 5.56493795  | 1.412302096 | 2.416373016 | 2.864778345 |
| ENSMUSG00000079625 | 13.44158517 | 12.52111039 | 10.59226572 | 4.02728836  | 8.594335036 |
| ENSMUSG00000079627 | 7.074518513 | 2.782468975 | 3.530755239 | 4.832746033 | 4.297167518 |
| ENSMUSG00000079628 | 4.952162959 | 2.782468975 | 7.061510478 | 0.805457672 | 6.445751277 |

|                    |             |             |             |             |             |
|--------------------|-------------|-------------|-------------|-------------|-------------|
| ENSMUSG00000079629 | 4.952162959 | 3.478086219 | 4.236906287 | 5.638203705 | 1.432389173 |
| ENSMUSG00000079630 | 7.074518513 | 3.478086219 | 5.649208382 | 6.443661377 | 4.297167518 |
| ENSMUSG00000079633 | 5.65961481  | 4.869320706 | 5.649208382 | 3.221830688 | 2.148583759 |
| ENSMUSG00000079635 | 5.65961481  | 4.869320706 | 4.943057334 | 2.416373016 | 5.729556691 |
| ENSMUSG00000079638 | 4.952162959 | 2.782468975 | 0.706151048 | 5.638203705 | 6.445751277 |
| ENSMUSG00000079639 | 6.367066661 | 2.782468975 | 4.943057334 | 2.416373016 | 2.864778345 |
| ENSMUSG00000079641 | 4.952162959 | 4.869320706 | 4.943057334 | 12.88732275 | 7.87814045  |
| ENSMUSG00000079644 | 7.781970364 | 6.260555194 | 9.886114669 | 8.054576721 | 8.594335036 |
| ENSMUSG00000079652 | 7.074518513 | 5.56493795  | 11.29841676 | 4.02728836  | 7.87814045  |
| ENSMUSG00000079654 | 7.074518513 | 7.651789682 | 6.35535943  | 5.638203705 | 7.161945863 |
| ENSMUSG00000079655 | 4.952162959 | 4.173703463 | 5.649208382 | 2.416373016 | 2.864778345 |
| ENSMUSG00000079658 | 75.69734809 | 100.8645003 | 76.26431316 | 206.1971641 | 131.7798039 |
| ENSMUSG00000079659 | 120.9742666 | 154.4270281 | 151.1163242 | 221.5008598 | 185.4943979 |
| ENSMUSG00000079666 | 12.02668147 | 7.651789682 | 3.530755239 | 11.27640741 | 8.594335036 |
| ENSMUSG00000079677 | 20.51610369 | 33.3896277  | 20.47838039 | 63.6311561  | 47.2688427  |
| ENSMUSG00000079679 | 10.61177777 | 6.956172438 | 8.473812573 | 7.249119049 | 5.013362104 |
| ENSMUSG00000079681 | 9.196874066 | 8.347406925 | 15.53532305 | 16.91461111 | 15.04008631 |
| ENSMUSG00000079700 | 6.367066661 | 5.56493795  | 7.061510478 | 4.02728836  | 10.02672421 |
| ENSMUSG00000079701 | 4.952162959 | 4.173703463 | 2.118453143 | 4.832746033 | 2.864778345 |
| ENSMUSG00000079702 | 2.829807405 | 4.173703463 | 2.824604191 | 3.221830688 | 5.013362104 |
| ENSMUSG00000079705 | 4.952162959 | 8.347406925 | 2.118453143 | 4.02728836  | 5.013362104 |
| ENSMUSG00000079707 | 12.02668147 | 41.73703463 | 21.18453143 | 53.96566403 | 40.82309142 |
| ENSMUSG00000079710 | 15.56394073 | 28.52030699 | 19.77222934 | 57.99295239 | 52.2822048  |
| ENSMUSG00000079737 | 5.65961481  | 6.260555194 | 3.530755239 | 0.805457672 | 4.297167518 |
| ENSMUSG00000079842 | 13.44158517 | 6.260555194 | 6.35535943  | 4.02728836  | 5.729556691 |
| ENSMUSG00000079845 | 7.781970364 | 3.478086219 | 6.35535943  | 10.47094974 | 6.445751277 |
| ENSMUSG00000079852 | 11.31922962 | 7.651789682 | 6.35535943  | 5.638203705 | 10.02672421 |
| ENSMUSG00000079853 | 9.904325918 | 9.043024169 | 8.473812573 | 3.221830688 | 6.445751277 |
| ENSMUSG00000080115 | 8.489422215 | 17.39043109 | 20.47838039 | 28.19101852 | 25.78300511 |
| ENSMUSG00000080268 | 43.15456293 | 68.86610713 | 64.25974535 | 49.132918   | 53.71459398 |
| ENSMUSG00000080725 | 7.074518513 | 3.478086219 | 3.530755239 | 0.805457672 | 2.148583759 |
| ENSMUSG00000080907 | 7.074518513 | 4.869320706 | 6.35535943  | 8.054576721 | 8.594335036 |
| ENSMUSG00000080933 | 1.414903703 | 1.391234488 | 3.530755239 | 0.805457672 | 0           |
| ENSMUSG00000081044 | 9.196874066 | 2.782468975 | 4.236906287 | 1.610915344 | 5.729556691 |
| ENSMUSG00000081058 | 5.65961481  | 12.52111039 | 7.767661525 | 8.860034393 | 3.580972932 |
| ENSMUSG00000081218 | 4.952162959 | 4.869320706 | 2.824604191 | 1.610915344 | 1.432389173 |
| ENSMUSG00000081225 | 10.61177777 | 6.260555194 | 6.35535943  | 4.02728836  | 6.445751277 |
| ENSMUSG00000081534 | 24.05336294 | 36.86771392 | 27.53989086 | 48.32746033 | 39.39070225 |
| ENSMUSG00000081683 | 7.781970364 | 4.173703463 | 2.824604191 | 4.02728836  | 5.729556691 |
| ENSMUSG00000081769 | 19.80865184 | 29.91154148 | 21.89068248 | 21.74735715 | 25.78300511 |
| ENSMUSG00000081984 | 8.489422215 | 6.260555194 | 7.767661525 | 6.443661377 | 3.580972932 |
| ENSMUSG00000082101 | 8.489422215 | 6.956172438 | 10.59226572 | 7.249119049 | 10.02672421 |
| ENSMUSG00000082211 | 6.367066661 | 9.738641413 | 7.767661525 | 8.860034393 | 7.87814045  |

|                    |             |             |             |             |             |
|--------------------|-------------|-------------|-------------|-------------|-------------|
| ENSMUSG00000082229 | 2.829807405 | 4.173703463 | 3.530755239 | 2.416373016 | 1.432389173 |
| ENSMUSG00000082361 | 11.31922962 | 5.56493795  | 12.00456781 | 4.832746033 | 7.161945863 |
| ENSMUSG00000082639 | 5.65961481  | 5.56493795  | 2.824604191 | 2.416373016 | 3.580972932 |
| ENSMUSG00000083012 | 24.76081479 | 41.73703463 | 48.7244223  | 29.80193387 | 40.10689684 |
| ENSMUSG00000083193 | 273.0764146 | 307.4628218 | 313.5310652 | 323.7939842 | 285.0454454 |
| ENSMUSG00000083282 | 9.196874066 | 4.869320706 | 4.943057334 | 5.638203705 | 5.729556691 |
| ENSMUSG00000083628 | 4.952162959 | 5.56493795  | 4.943057334 | 1.610915344 | 5.013362104 |
| ENSMUSG00000083649 | 1.414903703 | 6.956172438 | 1.412302096 | 4.02728836  | 2.864778345 |
| ENSMUSG00000083695 | 4.952162959 | 2.782468975 | 1.412302096 | 1.610915344 | 2.148583759 |
| ENSMUSG00000083947 | 11.31922962 | 8.347406925 | 4.943057334 | 2.416373016 | 5.729556691 |
| ENSMUSG00000084063 | 7.781970364 | 3.478086219 | 3.530755239 | 0           | 6.445751277 |
| ENSMUSG00000084174 | 11.31922962 | 5.56493795  | 8.473812573 | 8.054576721 | 8.594335036 |
| ENSMUSG00000084234 | 8.489422215 | 6.956172438 | 10.59226572 | 3.221830688 | 7.87814045  |
| ENSMUSG00000084786 | 219.3100739 | 240.6835663 | 226.6744863 | 233.5827249 | 198.3859004 |
| ENSMUSG00000084845 | 7.781970364 | 10.43425866 | 12.71071886 | 7.249119049 | 10.02672421 |
| ENSMUSG00000084883 | 7.074518513 | 3.478086219 | 7.061510478 | 8.054576721 | 7.161945863 |
| ENSMUSG00000084897 | 9.904325918 | 9.738641413 | 9.886114669 | 4.832746033 | 7.161945863 |
| ENSMUSG00000084902 | 7.074518513 | 9.738641413 | 4.943057334 | 7.249119049 | 5.729556691 |
| ENSMUSG00000084927 | 6.367066661 | 9.738641413 | 8.473812573 | 3.221830688 | 5.729556691 |
| ENSMUSG00000084957 | 63.67066661 | 97.38641413 | 86.15042783 | 84.57305557 | 74.48423698 |
| ENSMUSG00000085079 | 12.73413332 | 9.043024169 | 9.179963621 | 6.443661377 | 7.161945863 |
| ENSMUSG00000085111 | 8.489422215 | 6.260555194 | 7.061510478 | 5.638203705 | 7.87814045  |
| ENSMUSG00000085272 | 7.781970364 | 6.260555194 | 8.473812573 | 11.27640741 | 10.02672421 |
| ENSMUSG00000085576 | 12.73413332 | 3.478086219 | 5.649208382 | 9.665492065 | 7.161945863 |
| ENSMUSG00000085601 | 24.05336294 | 38.25894841 | 34.60140134 | 16.91461111 | 20.05344842 |
| ENSMUSG00000085793 | 33.25023701 | 47.30197258 | 36.71985448 | 66.85298678 | 63.74131818 |
| ENSMUSG00000085795 | 15.56394073 | 19.47728283 | 23.30298458 | 41.88379895 | 25.78300511 |
| ENSMUSG00000085925 | 12.73413332 | 7.651789682 | 9.179963621 | 8.860034393 | 3.580972932 |
| ENSMUSG00000085957 | 8.489422215 | 5.56493795  | 7.061510478 | 12.88732275 | 5.729556691 |
| ENSMUSG00000086040 | 6.367066661 | 7.651789682 | 6.35535943  | 12.08186508 | 6.445751277 |
| ENSMUSG00000086056 | 12.73413332 | 9.043024169 | 7.767661525 | 8.054576721 | 7.161945863 |
| ENSMUSG00000086158 | 17.68629628 | 36.17209668 | 36.01370344 | 16.91461111 | 27.93158887 |
| ENSMUSG00000086228 | 7.781970364 | 16.69481385 | 5.649208382 | 11.27640741 | 9.310529622 |
| ENSMUSG00000086277 | 6.367066661 | 10.43425866 | 9.179963621 | 9.665492065 | 9.310529622 |
| ENSMUSG00000086564 | 10.61177777 | 6.260555194 | 8.473812573 | 5.638203705 | 8.594335036 |
| ENSMUSG00000086596 | 9.904325918 | 9.738641413 | 8.473812573 | 3.221830688 | 7.161945863 |
| ENSMUSG00000086727 | 12.73413332 | 9.738641413 | 9.179963621 | 4.02728836  | 6.445751277 |
| ENSMUSG00000086784 | 12.02668147 | 19.47728283 | 14.12302096 | 15.30369577 | 16.47247549 |
| ENSMUSG00000086848 | 7.074518513 | 7.651789682 | 2.824604191 | 1.610915344 | 5.729556691 |
| ENSMUSG00000087006 | 7.074518513 | 2.782468975 | 7.767661525 | 6.443661377 | 5.729556691 |
| ENSMUSG00000087075 | 12.73413332 | 3.478086219 | 5.649208382 | 8.860034393 | 7.87814045  |
| ENSMUSG00000087141 | 29.71297775 | 25.73783802 | 24.71528667 | 53.96566403 | 40.10689684 |
| ENSMUSG00000087166 | 9.196874066 | 6.260555194 | 5.649208382 | 4.832746033 | 7.161945863 |

|                    |             |             |             |             |             |
|--------------------|-------------|-------------|-------------|-------------|-------------|
| ENSMUSG00000087194 | 7.781970364 | 8.347406925 | 8.473812573 | 3.221830688 | 2.864778345 |
| ENSMUSG00000087236 | 9.196874066 | 10.43425866 | 7.767661525 | 9.665492065 | 11.45911338 |
| ENSMUSG00000087260 | 62.25576291 | 89.73462445 | 77.67661525 | 61.21478308 | 70.90326405 |
| ENSMUSG00000087303 | 10.61177777 | 7.651789682 | 8.473812573 | 6.443661377 | 5.729556691 |
| ENSMUSG00000087444 | 23.34591109 | 26.43345526 | 34.60140134 | 49.132918   | 41.53928601 |
| ENSMUSG00000087598 | 9.904325918 | 6.956172438 | 8.473812573 | 5.638203705 | 6.445751277 |
| ENSMUSG00000087651 | 4.952162959 | 8.347406925 | 4.236906287 | 3.221830688 | 7.161945863 |
| ENSMUSG00000087687 | 81.3569629  | 116.863697  | 104.5103551 | 184.4498069 | 134.6445822 |
| ENSMUSG00000089661 | 0           | 0           | 0           | 0           | 0           |
| ENSMUSG00000089669 | 9.904325918 | 7.651789682 | 2.824604191 | 4.02728836  | 7.87814045  |
| ENSMUSG00000089672 | 0           | 0           | 0           | 0           | 0           |
| ENSMUSG00000089678 | 9.904325918 | 2.086851731 | 7.767661525 | 7.249119049 | 3.580972932 |
| ENSMUSG00000089682 | 0           | 0           | 0           | 0           | 0.716194586 |
| ENSMUSG00000089687 | 9.904325918 | 11.1298759  | 10.59226572 | 9.665492065 | 10.02672421 |
| ENSMUSG00000089694 | 11.31922962 | 4.173703463 | 12.71071886 | 7.249119049 | 6.445751277 |
| ENSMUSG00000089704 | 19.10119998 | 31.99839321 | 40.25060972 | 27.38556085 | 31.5125618  |
| ENSMUSG00000089722 | 6.367066661 | 4.173703463 | 12.71071886 | 7.249119049 | 7.161945863 |
| ENSMUSG00000089724 | 9.196874066 | 2.086851731 | 9.179963621 | 4.832746033 | 6.445751277 |
| ENSMUSG00000089727 | 12.02668147 | 6.956172438 | 6.35535943  | 7.249119049 | 5.013362104 |
| ENSMUSG00000089736 | 9.196874066 | 11.1298759  | 11.29841676 | 10.47094974 | 13.60769714 |
| ENSMUSG00000089756 | 13.44158517 | 17.39043109 | 19.77222934 | 21.74735715 | 25.06681052 |
| ENSMUSG00000089762 | 2.122355554 | 6.260555194 | 7.061510478 | 7.249119049 | 7.161945863 |
| ENSMUSG00000089768 | 0           | 0           | 0           | 0           | 0           |
| ENSMUSG00000089773 | 7.781970364 | 3.478086219 | 5.649208382 | 2.416373016 | 4.297167518 |
| ENSMUSG00000089774 | 0           | 0.695617244 | 0           | 0           | 0           |
| ENSMUSG00000089789 | 0           | 0.695617244 | 0           | 0           | 0           |
| ENSMUSG00000089798 | 9.904325918 | 9.738641413 | 6.35535943  | 4.832746033 | 10.02672421 |
| ENSMUSG00000089809 | 5.65961481  | 4.869320706 | 6.35535943  | 12.88732275 | 10.02672421 |
| ENSMUSG00000089832 | 9.196874066 | 11.82549314 | 16.94762515 | 12.08186508 | 11.45911338 |
| ENSMUSG00000089837 | 3.537259256 | 3.478086219 | 5.649208382 | 3.221830688 | 3.580972932 |
| ENSMUSG00000089844 | 111.0699406 | 127.2979556 | 120.0456781 | 202.9753334 | 171.1705061 |
| ENSMUSG00000089847 | 47.39927403 | 89.0390072  | 58.61053696 | 100.682209  | 78.7814045  |
| ENSMUSG00000089857 | 0           | 0           | 0           | 0           | 0           |
| ENSMUSG00000089862 | 39.61730367 | 63.30116918 | 58.61053696 | 32.21830688 | 47.98503729 |
| ENSMUSG00000089873 | 10.61177777 | 10.43425866 | 14.829172   | 8.054576721 | 10.7429188  |
| ENSMUSG00000089876 | 4.244711108 | 9.043024169 | 5.649208382 | 4.02728836  | 7.161945863 |
| ENSMUSG00000089911 | 88.43148141 | 118.9505487 | 93.91808935 | 170.7570265 | 143.2389173 |
| ENSMUSG00000089917 | 50.22908144 | 69.56172438 | 86.15042783 | 59.60386773 | 55.14698315 |
| ENSMUSG00000089929 | 0           | 1.391234488 | 2.118453143 | 5.638203705 | 5.729556691 |
| ENSMUSG00000089942 | 7.781970364 | 9.738641413 | 6.35535943  | 6.443661377 | 8.594335036 |
| ENSMUSG00000089943 | 9.196874066 | 4.173703463 | 11.29841676 | 7.249119049 | 5.729556691 |
| ENSMUSG00000089953 | 3.537259256 | 2.782468975 | 0.706151048 | 4.02728836  | 6.445751277 |
| ENSMUSG00000089960 | 42.44711108 | 29.91154148 | 36.01370344 | 16.91461111 | 33.66114556 |

|                    |              |             |             |             |             |
|--------------------|--------------|-------------|-------------|-------------|-------------|
| ENSMUSG00000089984 | 26.88317035  | 36.86771392 | 24.71528667 | 93.43308996 | 69.47087488 |
| ENSMUSG00000089989 | 0.707451851  | 1.391234488 | 0           | 0           | 0           |
| ENSMUSG00000089996 | 4.952162959  | 2.782468975 | 4.943057334 | 7.249119049 | 5.013362104 |
| ENSMUSG00000090000 | 60.84085921  | 66.08363816 | 67.08434954 | 66.04752911 | 62.30892901 |
| ENSMUSG00000090015 | 42.447111108 | 84.1696865  | 78.3827663  | 62.02024075 | 63.0251236  |
| ENSMUSG00000090019 | 162.7139258  | 193.3815938 | 165.2393452 | 382.5923942 | 272.1539428 |
| ENSMUSG00000090035 | 26.1757185   | 47.30197258 | 41.66291182 | 32.21830688 | 27.93158887 |
| ENSMUSG00000090053 | 0            | 0           | 0           | 0           | 0           |
| ENSMUSG00000090061 | 7.781970364  | 7.651789682 | 7.767661525 | 6.443661377 | 2.148583759 |
| ENSMUSG00000090071 | 12.73413332  | 4.869320706 | 4.943057334 | 7.249119049 | 2.864778345 |
| ENSMUSG00000090077 | 12.73413332  | 17.39043109 | 16.2414741  | 26.58010318 | 20.769643   |
| ENSMUSG00000090084 | 4.952162959  | 4.869320706 | 2.118453143 | 4.832746033 | 2.148583759 |
| ENSMUSG00000090093 | 17.68629628  | 20.86851731 | 24.71528667 | 16.91461111 | 26.49919969 |
| ENSMUSG00000090097 | 2.122355554  | 3.478086219 | 3.530755239 | 3.221830688 | 4.297167518 |
| ENSMUSG00000090100 | 14.14903703  | 21.56413456 | 15.53532305 | 12.08186508 | 21.48583759 |
| ENSMUSG00000090110 | 8.489422215  | 13.21672763 | 10.59226572 | 14.4982381  | 12.89150255 |
| ENSMUSG00000090112 | 48.81417774  | 62.60555194 | 59.31668801 | 85.37851324 | 65.88990194 |
| ENSMUSG00000090113 | 0            | 0.695617244 | 0.706151048 | 0           | 0.716194586 |
| ENSMUSG00000090115 | 12.02668147  | 13.21672763 | 17.65377619 | 9.665492065 | 21.48583759 |
| ENSMUSG00000090122 | 4.244711108  | 3.478086219 | 4.943057334 | 0           | 3.580972932 |
| ENSMUSG00000090124 | 6.367066661  | 6.956172438 | 7.061510478 | 9.665492065 | 7.87814045  |
| ENSMUSG00000090125 | 9.904325918  | 2.086851731 | 4.236906287 | 4.02728836  | 7.161945863 |
| ENSMUSG00000090129 | 12.02668147  | 10.43425866 | 8.473812573 | 5.638203705 | 9.310529622 |
| ENSMUSG00000090132 | 2.829807405  | 1.391234488 | 2.824604191 | 0.805457672 | 5.013362104 |
| ENSMUSG00000090141 | 24.05336294  | 34.08524495 | 30.36449505 | 53.96566403 | 40.82309142 |
| ENSMUSG00000090145 | 5.65961481   | 6.956172438 | 6.35535943  | 6.443661377 | 5.013362104 |
| ENSMUSG00000090164 | 90.55383696  | 133.5585108 | 120.0456781 | 264.1901164 | 217.7231542 |
| ENSMUSG00000090165 | 11.31922962  | 6.956172438 | 5.649208382 | 6.443661377 | 6.445751277 |
| ENSMUSG00000090166 | 11.31922962  | 6.956172438 | 9.886114669 | 4.832746033 | 3.580972932 |
| ENSMUSG00000090171 | 6.367066661  | 6.260555194 | 5.649208382 | 3.221830688 | 7.87814045  |
| ENSMUSG00000090173 | 7.781970364  | 12.52111039 | 9.179963621 | 4.02728836  | 8.594335036 |
| ENSMUSG00000090175 | 7.074518513  | 6.956172438 | 7.767661525 | 4.832746033 | 9.310529622 |
| ENSMUSG00000090176 | 9.196874066  | 11.1298759  | 12.00456781 | 4.832746033 | 5.013362104 |
| ENSMUSG00000090202 | 8.489422215  | 3.478086219 | 7.061510478 | 3.221830688 | 4.297167518 |
| ENSMUSG00000090206 | 15.56394073  | 9.043024169 | 6.35535943  | 4.832746033 | 9.310529622 |
| ENSMUSG00000090210 | 6.367066661  | 12.52111039 | 13.41686991 | 6.443661377 | 12.17530797 |
| ENSMUSG00000090213 | 0            | 0           | 0           | 0.805457672 | 0           |
| ENSMUSG00000090215 | 19.10119998  | 35.47647943 | 25.42143772 | 25.77464551 | 36.5259239  |
| ENSMUSG00000090219 | 9.196874066  | 5.56493795  | 5.649208382 | 2.416373016 | 6.445751277 |
| ENSMUSG00000090223 | 11.31922962  | 8.347406925 | 7.061510478 | 8.860034393 | 5.013362104 |
| ENSMUSG00000090225 | 4.244711108  | 6.956172438 | 9.179963621 | 3.221830688 | 7.161945863 |
| ENSMUSG00000090236 | 12.02668147  | 7.651789682 | 9.179963621 | 8.860034393 | 3.580972932 |
| ENSMUSG00000090247 | 2.829807405  | 8.347406925 | 4.943057334 | 1.610915344 | 1.432389173 |

|                    |             |             |             |             |             |
|--------------------|-------------|-------------|-------------|-------------|-------------|
| ENSMUSG00000090258 | 0           | 0           | 0           | 0           | 0           |
| ENSMUSG00000090262 | 11.31922962 | 30.60715873 | 25.42143772 | 16.91461111 | 12.17530797 |
| ENSMUSG00000090264 | 11.31922962 | 20.86851731 | 18.35992724 | 17.72006879 | 18.62105924 |
| ENSMUSG00000090272 | 9.904325918 | 15.30357936 | 9.179963621 | 22.55281482 | 15.04008631 |
| ENSMUSG00000090273 | 7.074518513 | 10.43425866 | 8.473812573 | 6.443661377 | 10.02672421 |
| ENSMUSG00000090291 | 8.489422215 | 10.43425866 | 8.473812573 | 5.638203705 | 7.161945863 |
| ENSMUSG00000090302 | 8.489422215 | 10.43425866 | 9.179963621 | 9.665492065 | 7.87814045  |
| ENSMUSG00000090306 | 8.489422215 | 6.260555194 | 9.886114669 | 5.638203705 | 9.310529622 |
| ENSMUSG00000090314 | 12.73413332 | 7.651789682 | 7.767661525 | 6.443661377 | 10.02672421 |
| ENSMUSG00000090326 | 8.489422215 | 9.738641413 | 7.767661525 | 3.221830688 | 5.729556691 |
| ENSMUSG00000090336 | 8.489422215 | 4.869320706 | 7.061510478 | 5.638203705 | 8.594335036 |
| ENSMUSG00000090346 | 9.196874066 | 10.43425866 | 7.767661525 | 2.416373016 | 7.161945863 |
| ENSMUSG00000090356 | 8.489422215 | 13.91234488 | 8.473812573 | 3.221830688 | 6.445751277 |
| ENSMUSG00000090364 | 16.27139258 | 10.43425866 | 17.65377619 | 5.638203705 | 6.445751277 |
| ENSMUSG00000090369 | 9.904325918 | 5.56493795  | 7.061510478 | 6.443661377 | 5.013362104 |
| ENSMUSG00000090394 | 43.15456293 | 50.7800588  | 56.49208382 | 95.84946298 | 70.90326405 |
| ENSMUSG00000090439 | 5.65961481  | 7.651789682 | 8.473812573 | 4.02728836  | 4.297167518 |
| ENSMUSG00000090461 | 4.952162959 | 9.043024169 | 8.473812573 | 6.443661377 | 7.161945863 |
| ENSMUSG00000090470 | 6.367066661 | 5.56493795  | 7.767661525 | 3.221830688 | 2.148583759 |
| ENSMUSG00000090487 | 6.367066661 | 7.651789682 | 9.179963621 | 4.02728836  | 7.161945863 |
| ENSMUSG00000090509 | 4.952162959 | 2.086851731 | 2.118453143 | 3.221830688 | 2.864778345 |
| ENSMUSG00000090512 | 9.196874066 | 12.52111039 | 4.943057334 | 0.805457672 | 9.310529622 |
| ENSMUSG00000090515 | 4.244711108 | 4.173703463 | 5.649208382 | 4.832746033 | 7.87814045  |
| ENSMUSG00000090523 | 32.54278516 | 51.47567604 | 33.89525029 | 138.5387196 | 115.3073284 |
| ENSMUSG00000090527 | 6.367066661 | 15.30357936 | 7.767661525 | 7.249119049 | 7.161945863 |
| ENSMUSG00000090539 | 9.196874066 | 10.43425866 | 9.179963621 | 5.638203705 | 4.297167518 |
| ENSMUSG00000090553 | 43.86201478 | 81.38721752 | 63.5535943  | 165.9242805 | 133.9283876 |
| ENSMUSG00000090581 | 9.904325918 | 4.869320706 | 7.767661525 | 5.638203705 | 7.87814045  |
| ENSMUSG00000090588 | 9.196874066 | 4.173703463 | 9.886114669 | 7.249119049 | 6.445751277 |
| ENSMUSG00000090622 | 8.489422215 | 11.82549314 | 8.473812573 | 15.30369577 | 10.02672421 |
| ENSMUSG00000090626 | 26.1757185  | 37.56333116 | 26.83373982 | 27.38556085 | 22.91822676 |
| ENSMUSG00000090627 | 8.489422215 | 13.91234488 | 12.71071886 | 8.054576721 | 3.580972932 |
| ENSMUSG00000090629 | 6.367066661 | 8.347406925 | 3.530755239 | 3.221830688 | 9.310529622 |
| ENSMUSG00000090641 | 47.39927403 | 79.30036579 | 62.84744325 | 36.24559524 | 42.97167518 |
| ENSMUSG00000090659 | 15.56394073 | 15.30357936 | 12.71071886 | 7.249119049 | 10.7429188  |
| ENSMUSG00000090662 | 14.14903703 | 13.21672763 | 14.829172   | 3.221830688 | 11.45911338 |
| ENSMUSG00000090667 | 8.489422215 | 5.56493795  | 7.061510478 | 4.02728836  | 7.87814045  |
| ENSMUSG00000090675 | 15.56394073 | 7.651789682 | 10.59226572 | 3.221830688 | 0.716194586 |
| ENSMUSG00000090685 | 11.31922962 | 12.52111039 | 7.767661525 | 4.832746033 | 13.60769714 |
| ENSMUSG00000090693 | 7.074518513 | 9.738641413 | 11.29841676 | 6.443661377 | 6.445751277 |
| ENSMUSG00000090698 | 4.952162959 | 7.651789682 | 8.473812573 | 3.221830688 | 7.161945863 |
| ENSMUSG00000090700 | 7.781970364 | 4.173703463 | 4.236906287 | 3.221830688 | 6.445751277 |
| ENSMUSG00000090738 | 9.904325918 | 6.956172438 | 6.35535943  | 4.832746033 | 7.161945863 |

|                    |             |             |             |             |             |
|--------------------|-------------|-------------|-------------|-------------|-------------|
| ENSMUSG00000090744 | 12.02668147 | 11.82549314 | 5.649208382 | 5.638203705 | 8.594335036 |
| ENSMUSG00000090747 | 7.781970364 | 10.43425866 | 8.473812573 | 6.443661377 | 7.87814045  |
| ENSMUSG00000090764 | 9.196874066 | 11.82549314 | 9.179963621 | 8.054576721 | 6.445751277 |
| ENSMUSG00000090817 | 14.14903703 | 6.956172438 | 11.29841676 | 8.054576721 | 6.445751277 |
| ENSMUSG00000090824 | 9.904325918 | 6.260555194 | 7.061510478 | 3.221830688 | 7.161945863 |
| ENSMUSG00000090840 | 5.65961481  | 7.651789682 | 11.29841676 | 10.47094974 | 7.87814045  |
| ENSMUSG00000090841 | 63.67066661 | 77.21351406 | 94.6242404  | 158.6751614 | 123.9016634 |
| ENSMUSG00000090854 | 12.02668147 | 6.956172438 | 7.061510478 | 4.832746033 | 10.7429188  |
| ENSMUSG00000090862 | 8.489422215 | 6.956172438 | 5.649208382 | 20.94189947 | 18.62105924 |
| ENSMUSG00000090874 | 6.367066661 | 9.043024169 | 6.35535943  | 3.221830688 | 6.445751277 |
| ENSMUSG00000090877 | 7.781970364 | 11.82549314 | 12.00456781 | 8.860034393 | 12.17530797 |
| ENSMUSG00000090881 | 16.27139258 | 16.69481385 | 19.06607829 | 9.665492065 | 17.90486466 |
| ENSMUSG00000090892 | 12.73413332 | 7.651789682 | 12.00456781 | 8.054576721 | 10.7429188  |
| ENSMUSG00000090894 | 7.074518513 | 9.738641413 | 7.767661525 | 7.249119049 | 5.729556691 |
| ENSMUSG00000090897 | 0           | 0           | 0           | 0           | 0           |
| ENSMUSG00000090919 | 10.61177777 | 6.956172438 | 7.767661525 | 4.02728836  | 10.7429188  |
| ENSMUSG00000090942 | 7.074518513 | 6.260555194 | 7.061510478 | 2.416373016 | 8.594335036 |
| ENSMUSG00000090946 | 18.39374813 | 23.65098629 | 12.71071886 | 38.66196826 | 30.08017263 |
| ENSMUSG00000090951 | 13.44158517 | 5.56493795  | 9.179963621 | 3.221830688 | 5.013362104 |
| ENSMUSG00000091002 | 7.781970364 | 3.478086219 | 10.59226572 | 3.221830688 | 5.729556691 |
| ENSMUSG00000091013 | 4.952162959 | 3.478086219 | 5.649208382 | 8.054576721 | 7.161945863 |
| ENSMUSG00000091017 | 9.196874066 | 9.043024169 | 4.943057334 | 3.221830688 | 6.445751277 |
| ENSMUSG00000091022 | 8.489422215 | 6.956172438 | 7.767661525 | 8.054576721 | 5.729556691 |
| ENSMUSG00000091034 | 9.196874066 | 4.869320706 | 8.473812573 | 7.249119049 | 7.161945863 |
| ENSMUSG00000091039 | 6.367066661 | 7.651789682 | 5.649208382 | 4.02728836  | 5.013362104 |
| ENSMUSG00000091049 | 20.51610369 | 9.738641413 | 12.71071886 | 14.4982381  | 9.310529622 |
| ENSMUSG00000091055 | 9.196874066 | 5.56493795  | 5.649208382 | 6.443661377 | 7.161945863 |
| ENSMUSG00000091060 | 9.196874066 | 4.173703463 | 6.35535943  | 8.860034393 | 5.729556691 |
| ENSMUSG00000091077 | 6.367066661 | 7.651789682 | 4.236906287 | 3.221830688 | 3.580972932 |
| ENSMUSG00000091080 | 11.31922962 | 7.651789682 | 5.649208382 | 4.832746033 | 5.013362104 |
| ENSMUSG00000091101 | 6.367066661 | 5.56493795  | 3.530755239 | 3.221830688 | 2.864778345 |
| ENSMUSG00000091119 | 10.61177777 | 4.869320706 | 6.35535943  | 2.416373016 | 3.580972932 |
| ENSMUSG00000091142 | 4.244711108 | 11.82549314 | 9.886114669 | 11.27640741 | 7.161945863 |
| ENSMUSG00000091144 | 15.56394073 | 20.17290007 | 12.71071886 | 17.72006879 | 16.47247549 |
| ENSMUSG00000091148 | 12.73413332 | 7.651789682 | 9.886114669 | 10.47094974 | 6.445751277 |
| ENSMUSG00000091155 | 8.489422215 | 6.260555194 | 9.886114669 | 8.860034393 | 4.297167518 |
| ENSMUSG00000091175 | 9.904325918 | 7.651789682 | 4.943057334 | 5.638203705 | 10.7429188  |
| ENSMUSG00000091185 | 7.074518513 | 7.651789682 | 8.473812573 | 8.054576721 | 6.445751277 |
| ENSMUSG00000091212 | 9.904325918 | 6.260555194 | 7.061510478 | 6.443661377 | 5.729556691 |
| ENSMUSG00000091255 | 31.12788146 | 9.043024169 | 16.94762515 | 20.1364418  | 10.02672421 |
| ENSMUSG00000091264 | 13.44158517 | 18.08604834 | 19.06607829 | 16.91461111 | 15.04008631 |
| ENSMUSG00000091297 | 7.781970364 | 5.56493795  | 8.473812573 | 6.443661377 | 7.161945863 |
| ENSMUSG00000091311 | 8.489422215 | 6.956172438 | 4.236906287 | 6.443661377 | 7.161945863 |

|                    |             |             |             |             |             |
|--------------------|-------------|-------------|-------------|-------------|-------------|
| ENSMUSG00000091318 | 9.904325918 | 6.956172438 | 9.179963621 | 4.832746033 | 6.445751277 |
| ENSMUSG00000091337 | 6.367066661 | 17.39043109 | 9.179963621 | 18.52552646 | 17.18867007 |
| ENSMUSG00000091345 | 10.61177777 | 4.869320706 | 5.649208382 | 4.832746033 | 3.580972932 |
| ENSMUSG00000091376 | 8.489422215 | 9.043024169 | 9.886114669 | 4.832746033 | 9.310529622 |
| ENSMUSG00000091381 | 7.781970364 | 3.478086219 | 8.473812573 | 4.02728836  | 7.87814045  |
| ENSMUSG00000091382 | 7.781970364 | 9.043024169 | 10.59226572 | 6.443661377 | 2.864778345 |
| ENSMUSG00000091387 | 6.367066661 | 4.869320706 | 4.943057334 | 7.249119049 | 6.445751277 |
| ENSMUSG00000091402 | 4.952162959 | 5.56493795  | 7.767661525 | 4.832746033 | 10.02672421 |
| ENSMUSG00000091405 | 14.14903703 | 20.17290007 | 19.77222934 | 11.27640741 | 20.769643   |
| ENSMUSG00000091411 | 6.367066661 | 5.56493795  | 9.886114669 | 8.054576721 | 5.729556691 |
| ENSMUSG00000091455 | 5.65961481  | 4.869320706 | 9.886114669 | 1.610915344 | 4.297167518 |
| ENSMUSG00000091468 | 9.196874066 | 9.738641413 | 8.473812573 | 7.249119049 | 10.02672421 |
| ENSMUSG00000091474 | 41.73965922 | 72.34419335 | 60.02283906 | 54.7711217  | 57.29556691 |
| ENSMUSG00000091476 | 7.781970364 | 6.956172438 | 7.061510478 | 10.47094974 | 7.161945863 |
| ENSMUSG00000091477 | 13.44158517 | 13.91234488 | 10.59226572 | 6.443661377 | 8.594335036 |
| ENSMUSG00000091490 | 5.65961481  | 8.347406925 | 7.767661525 | 2.416373016 | 7.161945863 |
| ENSMUSG00000091512 | 70.03773327 | 102.9513521 | 93.91808935 | 106.3204127 | 102.4158258 |
| ENSMUSG00000091519 | 10.61177777 | 6.260555194 | 7.061510478 | 4.832746033 | 6.445751277 |
| ENSMUSG00000091531 | 13.44158517 | 5.56493795  | 6.35535943  | 5.638203705 | 12.89150255 |
| ENSMUSG00000091537 | 79.23460734 | 132.1672763 | 128.5194907 | 153.0369577 | 151.1170577 |
| ENSMUSG00000091541 | 8.489422215 | 7.651789682 | 10.59226572 | 6.443661377 | 6.445751277 |
| ENSMUSG00000091572 | 3.537259256 | 11.1298759  | 9.886114669 | 7.249119049 | 7.87814045  |
| ENSMUSG00000091586 | 5.65961481  | 12.52111039 | 7.061510478 | 8.054576721 | 5.729556691 |
| ENSMUSG00000091594 | 7.781970364 | 4.173703463 | 11.29841676 | 8.054576721 | 5.729556691 |
| ENSMUSG00000091601 | 7.781970364 | 6.260555194 | 4.943057334 | 4.02728836  | 8.594335036 |
| ENSMUSG00000091618 | 12.73413332 | 9.738641413 | 6.35535943  | 9.665492065 | 5.013362104 |
| ENSMUSG00000091625 | 23.34591109 | 49.38882431 | 33.89525029 | 57.99295239 | 55.14698315 |
| ENSMUSG00000091636 | 8.489422215 | 5.56493795  | 7.061510478 | 2.416373016 | 5.013362104 |
| ENSMUSG00000091648 | 4.952162959 | 5.56493795  | 5.649208382 | 2.416373016 | 7.161945863 |
| ENSMUSG00000091649 | 65.08557032 | 90.43024169 | 69.90895373 | 70.88027514 | 50.13362104 |
| ENSMUSG00000091650 | 10.61177777 | 9.043024169 | 7.767661525 | 8.860034393 | 8.594335036 |
| ENSMUSG00000091662 | 13.44158517 | 6.260555194 | 9.179963621 | 4.02728836  | 10.02672421 |
| ENSMUSG00000091676 | 6.367066661 | 6.956172438 | 7.061510478 | 2.416373016 | 7.87814045  |
| ENSMUSG00000091679 | 6.367066661 | 7.651789682 | 7.061510478 | 1.610915344 | 5.729556691 |
| ENSMUSG00000091680 | 7.781970364 | 5.56493795  | 4.943057334 | 1.610915344 | 6.445751277 |
| ENSMUSG00000091685 | 9.196874066 | 1.391234488 | 8.473812573 | 3.221830688 | 7.87814045  |
| ENSMUSG00000091692 | 7.074518513 | 4.173703463 | 11.29841676 | 6.443661377 | 6.445751277 |
| ENSMUSG00000091694 | 4.244711108 | 6.260555194 | 7.767661525 | 4.832746033 | 6.445751277 |
| ENSMUSG00000091700 | 11.31922962 | 6.956172438 | 8.473812573 | 4.02728836  | 9.310529622 |
| ENSMUSG00000091712 | 4.244711108 | 7.651789682 | 5.649208382 | 9.665492065 | 7.87814045  |
| ENSMUSG00000091721 | 12.73413332 | 4.869320706 | 11.29841676 | 5.638203705 | 4.297167518 |
| ENSMUSG00000091722 | 7.781970364 | 9.738641413 | 5.649208382 | 5.638203705 | 7.161945863 |
| ENSMUSG00000091734 | 14.14903703 | 5.56493795  | 6.35535943  | 7.249119049 | 7.161945863 |



|                    |             |             |             |             |             |
|--------------------|-------------|-------------|-------------|-------------|-------------|
| ENSMUSG00000091735 | 9.196874066 | 8.347406925 | 4.236906287 | 12.88732275 | 7.161945863 |
| ENSMUSG00000091736 | 5.65961481  | 9.043024169 | 4.236906287 | 11.27640741 | 5.729556691 |
| ENSMUSG00000091754 | 11.31922962 | 4.869320706 | 10.59226572 | 9.665492065 | 11.45911338 |
| ENSMUSG00000091779 | 9.196874066 | 4.173703463 | 8.473812573 | 5.638203705 | 5.013362104 |
| ENSMUSG00000091780 | 4.952162959 | 13.21672763 | 16.94762515 | 53.96566403 | 25.78300511 |
| ENSMUSG00000091794 | 8.489422215 | 4.869320706 | 7.767661525 | 8.860034393 | 6.445751277 |
| ENSMUSG00000091803 | 29.0055259  | 63.30116918 | 40.95676077 | 48.32746033 | 50.84981563 |
| ENSMUSG00000091811 | 8.489422215 | 17.39043109 | 12.71071886 | 22.55281482 | 16.47247549 |
| ENSMUSG00000091814 | 8.489422215 | 6.260555194 | 7.767661525 | 8.054576721 | 10.02672421 |
| ENSMUSG00000091827 | 16.27139258 | 8.347406925 | 4.236906287 | 11.27640741 | 5.013362104 |
| ENSMUSG00000091867 | 9.196874066 | 5.56493795  | 9.179963621 | 9.665492065 | 8.594335036 |
| ENSMUSG00000091873 | 7.781970364 | 9.043024169 | 9.179963621 | 3.221830688 | 4.297167518 |
| ENSMUSG00000091874 | 10.61177777 | 7.651789682 | 4.943057334 | 4.832746033 | 4.297167518 |
| ENSMUSG00000091882 | 15.56394073 | 9.043024169 | 8.473812573 | 11.27640741 | 10.02672421 |
| ENSMUSG00000091888 | 8.489422215 | 4.869320706 | 16.2414741  | 4.02728836  | 5.729556691 |
| ENSMUSG00000091896 | 89.13893326 | 113.3856107 | 86.15042783 | 177.2006879 | 124.617858  |
| ENSMUSG00000091897 | 30.4204296  | 22.95536904 | 16.94762515 | 24.16373016 | 8.594335036 |
| ENSMUSG00000091898 | 33.25023701 | 50.7800588  | 44.48751601 | 45.91108731 | 38.67450766 |
| ENSMUSG00000091903 | 13.44158517 | 6.260555194 | 6.35535943  | 12.88732275 | 6.445751277 |
| ENSMUSG00000091923 | 12.02668147 | 5.56493795  | 10.59226572 | 7.249119049 | 6.445751277 |
| ENSMUSG00000091924 | 13.44158517 | 6.956172438 | 8.473812573 | 5.638203705 | 7.161945863 |
| ENSMUSG00000091931 | 0           | 0           | 0           | 0           | 0           |
| ENSMUSG00000091937 | 7.781970364 | 7.651789682 | 6.35535943  | 2.416373016 | 6.445751277 |
| ENSMUSG00000091950 | 7.781970364 | 7.651789682 | 7.061510478 | 5.638203705 | 9.310529622 |
| ENSMUSG00000091956 | 12.73413332 | 6.260555194 | 6.35535943  | 4.832746033 | 8.594335036 |
| ENSMUSG00000091962 | 16.97884443 | 6.956172438 | 11.29841676 | 4.832746033 | 7.87814045  |
| ENSMUSG00000091971 | 8.489422215 | 2.782468975 | 9.886114669 | 7.249119049 | 12.17530797 |
| ENSMUSG00000091972 | 12.02668147 | 7.651789682 | 12.00456781 | 4.832746033 | 5.729556691 |
| ENSMUSG00000091983 | 12.02668147 | 6.956172438 | 7.061510478 | 7.249119049 | 10.7429188  |
| ENSMUSG00000091987 | 9.904325918 | 6.956172438 | 14.829172   | 3.221830688 | 6.445751277 |
| ENSMUSG00000091996 | 9.904325918 | 8.347406925 | 8.473812573 | 5.638203705 | 6.445751277 |
| ENSMUSG00000092008 | 7.074518513 | 9.043024169 | 7.767661525 | 4.832746033 | 7.161945863 |
| ENSMUSG00000092019 | 9.904325918 | 11.82549314 | 8.473812573 | 5.638203705 | 7.161945863 |
| ENSMUSG00000092035 | 6.367066661 | 3.478086219 | 7.061510478 | 4.02728836  | 4.297167518 |
| ENSMUSG00000092043 | 0           | 0           | 0           | 0           | 0           |
| ENSMUSG00000092049 | 9.196874066 | 6.956172438 | 5.649208382 | 0.805457672 | 10.02672421 |
| ENSMUSG00000092060 | 4.244711108 | 11.1298759  | 7.767661525 | 4.832746033 | 9.310529622 |
| ENSMUSG00000092074 | 18.39374813 | 22.2597518  | 22.59683353 | 12.88732275 | 24.35061594 |
| ENSMUSG00000092077 | 6.367066661 | 6.260555194 | 9.886114669 | 4.02728836  | 9.310529622 |
| ENSMUSG00000092083 | 10.61177777 | 5.56493795  | 4.943057334 | 5.638203705 | 6.445751277 |
| ENSMUSG00000092086 | 40.32475552 | 60.51870021 | 63.5535943  | 38.66196826 | 41.53928601 |
| ENSMUSG00000092118 | 19.80865184 | 28.52030699 | 25.42143772 | 26.58010318 | 33.66114556 |
| ENSMUSG00000092164 | 10.61177777 | 7.651789682 | 7.767661525 | 8.054576721 | 10.02672421 |

|                    |             |             |             |             |             |
|--------------------|-------------|-------------|-------------|-------------|-------------|
| ENSMUSG00000092167 | 9.904325918 | 10.43425866 | 9.886114669 | 5.638203705 | 5.013362104 |
| ENSMUSG00000092192 | 0           | 0           | 0           | 0.805457672 | 0           |
| ENSMUSG00000092210 | 4.244711108 | 4.173703463 | 7.767661525 | 8.054576721 | 8.594335036 |
| ENSMUSG00000092216 | 7.074518513 | 6.956172438 | 8.473812573 | 7.249119049 | 12.17530797 |
| ENSMUSG00000092225 | 9.196874066 | 6.956172438 | 7.061510478 | 8.054576721 | 8.594335036 |
| ENSMUSG00000092243 | 21.93100739 | 22.95536904 | 26.12758877 | 31.41284921 | 26.49919969 |
| ENSMUSG00000092244 | 10.61177777 | 4.869320706 | 12.71071886 | 3.221830688 | 6.445751277 |
| ENSMUSG00000092260 | 20.51610369 | 31.99839321 | 33.89525029 | 19.33098413 | 23.63442135 |
| ENSMUSG00000092292 | 4.952162959 | 9.043024169 | 12.00456781 | 1.610915344 | 3.580972932 |
| ENSMUSG00000092305 | 8.489422215 | 6.260555194 | 11.29841676 | 6.443661377 | 7.161945863 |
| ENSMUSG00000092322 | 5.65961481  | 9.738641413 | 6.35535943  | 3.221830688 | 5.013362104 |
| ENSMUSG00000092342 | 8.489422215 | 6.956172438 | 8.473812573 | 4.832746033 | 2.864778345 |
| ENSMUSG00000092416 | 45.27691848 | 57.04061399 | 49.43057334 | 33.82922223 | 45.12025894 |
| ENSMUSG00000092417 | 77.81970364 | 121.7330177 | 100.9795998 | 123.2350238 | 105.9967988 |
| ENSMUSG00000092456 | 11.31922962 | 9.043024169 | 6.35535943  | 5.638203705 | 4.297167518 |
| ENSMUSG00000092473 | 7.781970364 | 4.173703463 | 3.530755239 | 6.443661377 | 6.445751277 |
| ENSMUSG00000092486 | 0           | 0           | 0           | 0           | 0           |
| ENSMUSG00000092517 | 7.074518513 | 4.869320706 | 8.473812573 | 6.443661377 | 7.161945863 |
| ENSMUSG00000092518 | 7.781970364 | 3.478086219 | 4.236906287 | 10.47094974 | 7.87814045  |
| ENSMUSG00000092519 | 12.02668147 | 6.260555194 | 7.767661525 | 8.860034393 | 4.297167518 |
| ENSMUSG00000092558 | 0           | 0           | 0.706151048 | 1.610915344 | 1.432389173 |
| ENSMUSG00000092572 | 7.781970364 | 8.347406925 | 7.061510478 | 6.443661377 | 9.310529622 |
| ENSMUSG00000092579 | 2.829807405 | 5.56493795  | 3.530755239 | 0.805457672 | 2.864778345 |
| ENSMUSG00000092586 | 7.781970364 | 10.43425866 | 6.35535943  | 13.69278043 | 7.161945863 |
| ENSMUSG00000092607 | 15.56394073 | 52.86691053 | 34.60140134 | 51.54929101 | 37.24211849 |
| ENSMUSG00000092622 | 0.707451851 | 0.695617244 | 0.706151048 | 0           | 0.716194586 |
| ENSMUSG00000093376 | 15.56394073 | 6.260555194 | 9.886114669 | 4.832746033 | 3.580972932 |
| ENSMUSG00000093379 | 7.074518513 | 5.56493795  | 5.649208382 | 1.610915344 | 9.310529622 |
| ENSMUSG00000093411 | 8.489422215 | 7.651789682 | 9.886114669 | 4.02728836  | 5.013362104 |
| ENSMUSG00000093445 | 16.27139258 | 13.91234488 | 14.829172   | 37.05105292 | 28.64778345 |
| ENSMUSG00000093451 | 9.196874066 | 11.1298759  | 10.59226572 | 7.249119049 | 10.02672421 |
| ENSMUSG00000093501 | 8.489422215 | 8.347406925 | 10.59226572 | 5.638203705 | 7.87814045  |
| ENSMUSG00000093523 | 12.02668147 | 4.869320706 | 5.649208382 | 4.02728836  | 5.729556691 |
| ENSMUSG00000093536 | 4.952162959 | 5.56493795  | 5.649208382 | 4.02728836  | 6.445751277 |
| ENSMUSG00000093550 | 10.61177777 | 2.782468975 | 7.061510478 | 9.665492065 | 5.729556691 |
| ENSMUSG00000093632 | 7.781970364 | 6.260555194 | 4.236906287 | 8.054576721 | 7.161945863 |
| ENSMUSG00000093635 | 5.65961481  | 10.43425866 | 9.179963621 | 3.221830688 | 9.310529622 |
| ENSMUSG00000093661 | 0           | 0           | 2.118453143 | 0           | 0           |
| ENSMUSG00000093668 | 7.074518513 | 8.347406925 | 9.179963621 | 4.832746033 | 5.729556691 |
| ENSMUSG00000093674 | 5.65961481  | 5.56493795  | 3.530755239 | 4.02728836  | 5.729556691 |
| ENSMUSG00000093679 | 9.904325918 | 5.56493795  | 8.473812573 | 4.832746033 | 5.729556691 |
| ENSMUSG00000093692 | 8.489422215 | 6.260555194 | 7.767661525 | 1.610915344 | 7.161945863 |
| ENSMUSG00000093696 | 9.904325918 | 3.478086219 | 4.943057334 | 6.443661377 | 7.87814045  |

|                    |             |             |             |             |             |
|--------------------|-------------|-------------|-------------|-------------|-------------|
| ENSMUSG00000093755 | 7.781970364 | 9.738641413 | 7.767661525 | 7.249119049 | 7.87814045  |
| ENSMUSG00000093764 | 10.61177777 | 9.043024169 | 6.35535943  | 9.665492065 | 5.013362104 |
| ENSMUSG00000093769 | 6.367066661 | 11.1298759  | 11.29841676 | 7.249119049 | 3.580972932 |
| ENSMUSG00000093785 | 11.31922962 | 8.347406925 | 10.59226572 | 3.221830688 | 7.161945863 |
| ENSMUSG00000093789 | 0           | 0.695617244 | 0           | 0           | 1.432389173 |
| ENSMUSG00000093803 | 2.829807405 | 0.695617244 | 4.943057334 | 3.221830688 | 5.013362104 |
| ENSMUSG00000093805 | 10.61177777 | 6.956172438 | 10.59226572 | 5.638203705 | 5.013362104 |
| ENSMUSG00000093806 | 28.29807405 | 39.6501829  | 41.66291182 | 47.52200265 | 47.98503729 |
| ENSMUSG00000093825 | 6.367066661 | 9.043024169 | 10.59226572 | 1.610915344 | 10.02672421 |
| ENSMUSG00000093848 | 7.781970364 | 6.956172438 | 5.649208382 | 4.02728836  | 5.013362104 |
| ENSMUSG00000093868 | 4.244711108 | 4.173703463 | 5.649208382 | 3.221830688 | 5.729556691 |
| ENSMUSG00000093895 | 0.707451851 | 3.478086219 | 3.530755239 | 2.416373016 | 2.864778345 |
| ENSMUSG00000093901 | 9.904325918 | 8.347406925 | 7.061510478 | 6.443661377 | 3.580972932 |
| ENSMUSG00000093903 | 4.244711108 | 6.956172438 | 4.236906287 | 0.805457672 | 2.148583759 |
| ENSMUSG00000093904 | 4.244711108 | 2.782468975 | 2.118453143 | 1.610915344 | 4.297167518 |
| ENSMUSG00000093918 | 7.074518513 | 5.56493795  | 7.061510478 | 4.832746033 | 7.87814045  |
| ENSMUSG00000093923 | 5.65961481  | 4.173703463 | 4.943057334 | 3.221830688 | 5.729556691 |
| ENSMUSG00000093927 | 3.537259256 | 1.391234488 | 7.061510478 | 0           | 2.148583759 |
| ENSMUSG00000093930 | 67.20792587 | 100.1688831 | 84.03197468 | 205.3917064 | 156.8466144 |
| ENSMUSG00000093931 | 14.85648888 | 11.82549314 | 9.886114669 | 4.832746033 | 11.45911338 |
| ENSMUSG00000093938 | 128.7562369 | 153.7314109 | 119.3395271 | 192.5043836 | 148.968474  |
| ENSMUSG00000093950 | 5.65961481  | 1.391234488 | 4.236906287 | 1.610915344 | 2.148583759 |
| ENSMUSG00000093957 | 5.65961481  | 4.869320706 | 10.59226572 | 4.02728836  | 7.87814045  |
| ENSMUSG00000093962 | 7.781970364 | 2.782468975 | 7.061510478 | 3.221830688 | 9.310529622 |
| ENSMUSG00000093973 | 7.074518513 | 7.651789682 | 8.473812573 | 6.443661377 | 2.864778345 |
| ENSMUSG00000093979 | 9.904325918 | 9.043024169 | 15.53532305 | 11.27640741 | 12.17530797 |
| ENSMUSG00000093985 | 9.196874066 | 7.651789682 | 4.943057334 | 4.832746033 | 2.864778345 |
| ENSMUSG00000093987 | 0           | 0           | 0           | 0           | 0           |
| ENSMUSG00000093989 | 0           | 0           | 0           | 0           | 0           |
| ENSMUSG00000093993 | 6.367066661 | 7.651789682 | 3.530755239 | 4.02728836  | 7.161945863 |
| ENSMUSG00000094004 | 4.952162959 | 5.56493795  | 3.530755239 | 3.221830688 | 2.864778345 |
| ENSMUSG00000094021 | 9.904325918 | 9.043024169 | 7.061510478 | 5.638203705 | 5.729556691 |
| ENSMUSG00000094024 | 8.489422215 | 4.869320706 | 6.35535943  | 1.610915344 | 5.729556691 |
| ENSMUSG00000094052 | 9.196874066 | 5.56493795  | 4.236906287 | 1.610915344 | 4.297167518 |
| ENSMUSG00000094053 | 7.781970364 | 6.956172438 | 5.649208382 | 4.02728836  | 3.580972932 |
| ENSMUSG00000094065 | 1.414903703 | 3.478086219 | 4.943057334 | 4.832746033 | 0.716194586 |
| ENSMUSG00000094076 | 9.904325918 | 18.78166558 | 14.829172   | 12.08186508 | 14.32389173 |
| ENSMUSG00000094081 | 6.367066661 | 2.086851731 | 4.943057334 | 2.416373016 | 2.148583759 |
| ENSMUSG00000094084 | 7.074518513 | 9.738641413 | 3.530755239 | 6.443661377 | 7.161945863 |
| ENSMUSG00000094103 | 34.66514071 | 44.5195036  | 51.54902649 | 35.44013757 | 33.66114556 |
| ENSMUSG00000094113 | 0           | 0           | 0           | 0           | 0           |
| ENSMUSG00000094116 | 12.73413332 | 6.956172438 | 9.179963621 | 4.02728836  | 8.594335036 |
| ENSMUSG00000094132 | 6.367066661 | 7.651789682 | 10.59226572 | 8.860034393 | 5.729556691 |

|                    |             |             |             |             |             |
|--------------------|-------------|-------------|-------------|-------------|-------------|
| ENSMUSG00000094144 | 9.196874066 | 6.956172438 | 8.473812573 | 6.443661377 | 5.729556691 |
| ENSMUSG00000094151 | 9.196874066 | 9.738641413 | 9.886114669 | 4.02728836  | 5.013362104 |
| ENSMUSG00000094186 | 8.489422215 | 10.43425866 | 9.179963621 | 7.249119049 | 5.729556691 |
| ENSMUSG00000094192 | 7.074518513 | 12.52111039 | 8.473812573 | 3.221830688 | 3.580972932 |
| ENSMUSG00000094200 | 5.65961481  | 5.56493795  | 6.35535943  | 8.054576721 | 8.594335036 |
| ENSMUSG00000094206 | 4.952162959 | 7.651789682 | 4.943057334 | 8.054576721 | 2.148583759 |
| ENSMUSG00000094237 | 12.73413332 | 4.173703463 | 7.061510478 | 7.249119049 | 7.87814045  |
| ENSMUSG00000094248 | 1.414903703 | 1.391234488 | 0.706151048 | 1.610915344 | 2.864778345 |
| ENSMUSG00000094271 | 7.074518513 | 6.956172438 | 1.412302096 | 4.832746033 | 4.297167518 |
| ENSMUSG00000094273 | 4.244711108 | 2.086851731 | 3.530755239 | 3.221830688 | 4.297167518 |
| ENSMUSG00000094291 | 7.074518513 | 6.956172438 | 14.829172   | 3.221830688 | 6.445751277 |
| ENSMUSG00000094294 | 5.65961481  | 6.956172438 | 7.767661525 | 3.221830688 | 4.297167518 |
| ENSMUSG00000094305 | 8.489422215 | 4.173703463 | 9.886114669 | 4.02728836  | 9.310529622 |
| ENSMUSG00000094307 | 4.244711108 | 4.869320706 | 5.649208382 | 2.416373016 | 3.580972932 |
| ENSMUSG00000094309 | 7.074518513 | 3.478086219 | 4.943057334 | 3.221830688 | 2.864778345 |
| ENSMUSG00000094311 | 8.489422215 | 4.869320706 | 7.767661525 | 5.638203705 | 2.148583759 |
| ENSMUSG00000094314 | 3.537259256 | 7.651789682 | 9.179963621 | 1.610915344 | 2.864778345 |
| ENSMUSG00000094325 | 4.244711108 | 3.478086219 | 2.824604191 | 0.805457672 | 0.716194586 |
| ENSMUSG00000094328 | 9.904325918 | 9.043024169 | 8.473812573 | 4.832746033 | 9.310529622 |
| ENSMUSG00000094352 | 6.367066661 | 2.086851731 | 6.35535943  | 0.805457672 | 5.013362104 |
| ENSMUSG00000094362 | 6.367066661 | 9.738641413 | 4.943057334 | 5.638203705 | 6.445751277 |
| ENSMUSG00000094378 | 9.904325918 | 3.478086219 | 2.118453143 | 3.221830688 | 2.864778345 |
| ENSMUSG00000094399 | 4.952162959 | 6.260555194 | 1.412302096 | 1.610915344 | 2.864778345 |
| ENSMUSG00000094430 | 9.904325918 | 7.651789682 | 7.767661525 | 8.054576721 | 6.445751277 |
| ENSMUSG00000094443 | 13.44158517 | 6.260555194 | 8.473812573 | 6.443661377 | 6.445751277 |
| ENSMUSG00000094445 | 11.31922962 | 11.82549314 | 7.061510478 | 8.054576721 | 8.594335036 |
| ENSMUSG00000094460 | 15.56394073 | 10.43425866 | 11.29841676 | 8.054576721 | 7.87814045  |
| ENSMUSG00000094483 | 53.05888884 | 86.95215547 | 74.14586002 | 230.3608942 | 179.0486466 |
| ENSMUSG00000094484 | 4.244711108 | 2.086851731 | 3.530755239 | 0.805457672 | 3.580972932 |
| ENSMUSG00000094500 | 41.03220737 | 71.64857611 | 50.13672439 | 65.24207144 | 56.57937232 |
| ENSMUSG00000094511 | 11.31922962 | 5.56493795  | 7.767661525 | 4.832746033 | 7.161945863 |
| ENSMUSG00000094558 | 3.537259256 | 2.086851731 | 6.35535943  | 4.02728836  | 0           |
| ENSMUSG00000094559 | 5.65961481  | 9.043024169 | 4.943057334 | 5.638203705 | 4.297167518 |
| ENSMUSG00000094560 | 12.73413332 | 6.956172438 | 12.00456781 | 4.832746033 | 2.864778345 |
| ENSMUSG00000094570 | 7.074518513 | 4.173703463 | 6.35535943  | 2.416373016 | 7.87814045  |
| ENSMUSG00000094575 | 1.414903703 | 4.173703463 | 7.061510478 | 3.221830688 | 6.445751277 |
| ENSMUSG00000094577 | 6.367066661 | 11.1298759  | 9.886114669 | 2.416373016 | 5.013362104 |
| ENSMUSG00000094584 | 2.829807405 | 8.347406925 | 10.59226572 | 5.638203705 | 9.310529622 |
| ENSMUSG00000094590 | 11.31922962 | 7.651789682 | 7.767661525 | 4.832746033 | 7.87814045  |
| ENSMUSG00000094592 | 4.952162959 | 6.260555194 | 5.649208382 | 4.02728836  | 7.161945863 |
| ENSMUSG00000094595 | 14.14903703 | 17.39043109 | 15.53532305 | 28.19101852 | 26.49919969 |
| ENSMUSG00000094596 | 3.537259256 | 2.782468975 | 3.530755239 | 0.805457672 | 1.432389173 |
| ENSMUSG00000094613 | 3.537259256 | 4.869320706 | 3.530755239 | 8.054576721 | 12.89150255 |

|                    |             |             |             |             |             |
|--------------------|-------------|-------------|-------------|-------------|-------------|
| ENSMUSG00000094616 | 6.367066661 | 4.869320706 | 9.886114669 | 3.221830688 | 3.580972932 |
| ENSMUSG00000094624 | 6.367066661 | 6.260555194 | 6.35535943  | 3.221830688 | 4.297167518 |
| ENSMUSG00000094626 | 11.31922962 | 9.738641413 | 9.886114669 | 8.860034393 | 9.310529622 |
| ENSMUSG00000094647 | 5.65961481  | 4.869320706 | 6.35535943  | 3.221830688 | 4.297167518 |
| ENSMUSG00000094649 | 9.904325918 | 11.1298759  | 10.59226572 | 8.860034393 | 15.7562809  |
| ENSMUSG00000094651 | 8.489422215 | 9.738641413 | 6.35535943  | 5.638203705 | 10.02672421 |
| ENSMUSG00000094658 | 0           | 0           | 0           | 0           | 0           |
| ENSMUSG00000094660 | 7.781970364 | 3.478086219 | 3.530755239 | 4.832746033 | 1.432389173 |
| ENSMUSG00000094682 | 12.02668147 | 6.956172438 | 2.118453143 | 3.221830688 | 6.445751277 |
| ENSMUSG00000094686 | 2.829807405 | 3.478086219 | 4.236906287 | 0.805457672 | 4.297167518 |
| ENSMUSG00000094690 | 3.537259256 | 6.956172438 | 7.767661525 | 6.443661377 | 9.310529622 |
| ENSMUSG00000094714 | 9.196874066 | 6.956172438 | 4.236906287 | 2.416373016 | 3.580972932 |
| ENSMUSG00000094719 | 7.781970364 | 11.1298759  | 9.179963621 | 8.860034393 | 8.594335036 |
| ENSMUSG00000094724 | 57.30359995 | 83.47406925 | 67.79050059 | 105.514955  | 74.48423698 |
| ENSMUSG00000094727 | 6.367066661 | 6.260555194 | 5.649208382 | 2.416373016 | 4.297167518 |
| ENSMUSG00000094729 | 7.781970364 | 6.956172438 | 4.943057334 | 2.416373016 | 3.580972932 |
| ENSMUSG00000094739 | 4.244711108 | 5.56493795  | 4.943057334 | 4.02728836  | 6.445751277 |
| ENSMUSG00000094746 | 4.952162959 | 2.782468975 | 4.236906287 | 3.221830688 | 5.729556691 |
| ENSMUSG00000094759 | 8.489422215 | 4.173703463 | 4.943057334 | 1.610915344 | 1.432389173 |
| ENSMUSG00000094777 | 1.414903703 | 1.391234488 | 0.706151048 | 4.02728836  | 1.432389173 |
| ENSMUSG00000094793 | 12.02668147 | 8.347406925 | 12.71071886 | 6.443661377 | 10.02672421 |
| ENSMUSG00000094802 | 4.952162959 | 2.086851731 | 4.236906287 | 7.249119049 | 4.297167518 |
| ENSMUSG00000094806 | 0           | 0           | 0           | 0           | 0           |
| ENSMUSG00000094808 | 10.61177777 | 2.782468975 | 7.061510478 | 4.832746033 | 8.594335036 |
| ENSMUSG00000094811 | 7.074518513 | 8.347406925 | 9.886114669 | 8.054576721 | 6.445751277 |
| ENSMUSG00000094813 | 4.244711108 | 2.782468975 | 4.943057334 | 2.416373016 | 2.864778345 |
| ENSMUSG00000094817 | 0.707451851 | 0           | 0           | 0           | 0           |
| ENSMUSG00000094818 | 9.196874066 | 9.738641413 | 9.179963621 | 8.054576721 | 4.297167518 |
| ENSMUSG00000094819 | 7.781970364 | 6.956172438 | 10.59226572 | 7.249119049 | 5.013362104 |
| ENSMUSG00000094821 | 8.489422215 | 4.173703463 | 9.179963621 | 10.47094974 | 3.580972932 |
| ENSMUSG00000094825 | 8.489422215 | 8.347406925 | 4.943057334 | 12.08186508 | 5.013362104 |
| ENSMUSG00000094838 | 3.537259256 | 5.56493795  | 1.412302096 | 2.416373016 | 1.432389173 |
| ENSMUSG00000094860 | 8.489422215 | 4.869320706 | 4.943057334 | 5.638203705 | 5.013362104 |
| ENSMUSG00000094870 | 40.32475552 | 57.04061399 | 48.01827125 | 87.79488626 | 68.75468029 |
| ENSMUSG00000094876 | 2.122355554 | 4.869320706 | 7.767661525 | 3.221830688 | 2.864778345 |
| ENSMUSG00000094885 | 6.367066661 | 3.478086219 | 8.473812573 | 0.805457672 | 4.297167518 |
| ENSMUSG00000094910 | 7.781970364 | 5.56493795  | 5.649208382 | 8.054576721 | 10.7429188  |
| ENSMUSG00000094918 | 7.074518513 | 9.738641413 | 11.29841676 | 8.860034393 | 14.32389173 |
| ENSMUSG00000094925 | 14.85648888 | 9.043024169 | 10.59226572 | 9.665492065 | 10.02672421 |
| ENSMUSG00000094928 | 7.781970364 | 8.347406925 | 12.00456781 | 4.02728836  | 4.297167518 |
| ENSMUSG00000094936 | 99.04325918 | 151.6445591 | 113.6903187 | 244.8591323 | 182.6296195 |
| ENSMUSG00000094941 | 6.367066661 | 4.173703463 | 2.824604191 | 3.221830688 | 5.013362104 |
| ENSMUSG00000094942 | 19.80865184 | 33.3896277  | 17.65377619 | 19.33098413 | 16.47247549 |

|                    |             |             |             |             |             |
|--------------------|-------------|-------------|-------------|-------------|-------------|
| ENSMUSG00000094944 | 5.65961481  | 4.173703463 | 2.824604191 | 2.416373016 | 2.148583759 |
| ENSMUSG00000094945 | 7.781970364 | 4.869320706 | 5.649208382 | 1.610915344 | 7.87814045  |
| ENSMUSG00000094970 | 6.367066661 | 5.56493795  | 7.767661525 | 2.416373016 | 4.297167518 |
| ENSMUSG00000094978 | 6.367066661 | 2.782468975 | 9.886114669 | 1.610915344 | 5.729556691 |
| ENSMUSG00000094995 | 10.61177777 | 6.260555194 | 9.886114669 | 4.832746033 | 5.729556691 |
| ENSMUSG00000095015 | 13.44158517 | 6.260555194 | 6.35535943  | 4.02728836  | 3.580972932 |
| ENSMUSG00000095022 | 12.73413332 | 11.1298759  | 12.00456781 | 4.832746033 | 5.729556691 |
| ENSMUSG00000095026 | 8.489422215 | 6.260555194 | 6.35535943  | 12.08186508 | 7.161945863 |
| ENSMUSG00000095028 | 18.39374813 | 11.82549314 | 9.179963621 | 5.638203705 | 12.89150255 |
| ENSMUSG00000095032 | 0.707451851 | 5.56493795  | 6.35535943  | 2.416373016 | 2.148583759 |
| ENSMUSG00000095040 | 11.31922962 | 8.347406925 | 10.59226572 | 7.249119049 | 5.013362104 |
| ENSMUSG00000095048 | 6.367066661 | 7.651789682 | 7.767661525 | 4.832746033 | 5.729556691 |
| ENSMUSG00000095056 | 3.537259256 | 4.173703463 | 7.767661525 | 7.249119049 | 8.594335036 |
| ENSMUSG00000095061 | 293.5925183 | 266.4214044 | 254.2143772 | 186.0607223 | 154.6980307 |
| ENSMUSG00000095063 | 3.537259256 | 4.173703463 | 0           | 2.416373016 | 2.148583759 |
| ENSMUSG00000095066 | 14.85648888 | 5.56493795  | 7.767661525 | 11.27640741 | 5.013362104 |
| ENSMUSG00000095071 | 12.02668147 | 15.99919661 | 11.29841676 | 4.832746033 | 6.445751277 |
| ENSMUSG00000095082 | 7.074518513 | 2.086851731 | 6.35535943  | 3.221830688 | 5.013362104 |
| ENSMUSG00000095101 | 4.952162959 | 3.478086219 | 4.236906287 | 4.02728836  | 2.864778345 |
| ENSMUSG00000095104 | 11.31922962 | 7.651789682 | 5.649208382 | 6.443661377 | 7.161945863 |
| ENSMUSG00000095105 | 69.33028142 | 114.7768452 | 93.91808935 | 38.66196826 | 50.13362104 |
| ENSMUSG00000095115 | 7.074518513 | 4.869320706 | 6.35535943  | 6.443661377 | 7.87814045  |
| ENSMUSG00000095139 | 3.537259256 | 4.869320706 | 9.886114669 | 4.02728836  | 7.161945863 |
| ENSMUSG00000095148 | 4.244711108 | 4.869320706 | 8.473812573 | 0.805457672 | 0           |
| ENSMUSG00000095153 | 8.489422215 | 4.869320706 | 4.943057334 | 4.02728836  | 4.297167518 |
| ENSMUSG00000095172 | 4.244711108 | 5.56493795  | 3.530755239 | 3.221830688 | 2.148583759 |
| ENSMUSG00000095190 | 13.44158517 | 3.478086219 | 4.943057334 | 9.665492065 | 6.445751277 |
| ENSMUSG00000095194 | 1.414903703 | 0.695617244 | 0.706151048 | 1.610915344 | 3.580972932 |
| ENSMUSG00000095226 | 8.489422215 | 9.043024169 | 12.71071886 | 9.665492065 | 7.161945863 |
| ENSMUSG00000095232 | 8.489422215 | 4.869320706 | 4.236906287 | 7.249119049 | 8.594335036 |
| ENSMUSG00000095240 | 5.65961481  | 6.260555194 | 5.649208382 | 3.221830688 | 2.148583759 |
| ENSMUSG00000095241 | 8.489422215 | 11.82549314 | 5.649208382 | 5.638203705 | 9.310529622 |
| ENSMUSG00000095242 | 3.537259256 | 4.173703463 | 2.118453143 | 4.02728836  | 4.297167518 |
| ENSMUSG00000095257 | 6.367066661 | 7.651789682 | 5.649208382 | 4.832746033 | 8.594335036 |
| ENSMUSG00000095267 | 6.367066661 | 4.173703463 | 4.236906287 | 4.02728836  | 3.580972932 |
| ENSMUSG00000095276 | 7.781970364 | 4.173703463 | 5.649208382 | 4.02728836  | 6.445751277 |
| ENSMUSG00000095295 | 8.489422215 | 9.043024169 | 9.179963621 | 3.221830688 | 8.594335036 |
| ENSMUSG00000095300 | 9.904325918 | 7.651789682 | 7.061510478 | 5.638203705 | 6.445751277 |
| ENSMUSG00000095302 | 4.952162959 | 5.56493795  | 7.767661525 | 6.443661377 | 5.729556691 |
| ENSMUSG00000095304 | 9.904325918 | 5.56493795  | 4.943057334 | 8.054576721 | 6.445751277 |
| ENSMUSG00000095324 | 5.65961481  | 3.478086219 | 9.179963621 | 3.221830688 | 3.580972932 |
| ENSMUSG00000095339 | 10.61177777 | 4.869320706 | 8.473812573 | 4.02728836  | 6.445751277 |
| ENSMUSG00000095341 | 12.02668147 | 6.260555194 | 9.886114669 | 5.638203705 | 11.45911338 |

|                    |             |             |             |             |             |
|--------------------|-------------|-------------|-------------|-------------|-------------|
| ENSMUSG00000095360 | 7.074518513 | 6.260555194 | 10.59226572 | 7.249119049 | 5.729556691 |
| ENSMUSG00000095362 | 32.54278516 | 53.56252777 | 48.01827125 | 36.24559524 | 43.68786977 |
| ENSMUSG00000095363 | 17.68629628 | 2.782468975 | 2.824604191 | 12.88732275 | 6.445751277 |
| ENSMUSG00000095365 | 3.537259256 | 4.173703463 | 2.824604191 | 2.416373016 | 1.432389173 |
| ENSMUSG00000095384 | 31.12788146 | 14.60796212 | 19.77222934 | 12.08186508 | 23.63442135 |
| ENSMUSG00000095388 | 12.02668147 | 10.43425866 | 7.767661525 | 5.638203705 | 6.445751277 |
| ENSMUSG00000095407 | 12.02668147 | 5.56493795  | 6.35535943  | 6.443661377 | 6.445751277 |
| ENSMUSG00000095409 | 8.489422215 | 4.173703463 | 6.35535943  | 8.860034393 | 5.013362104 |
| ENSMUSG00000095413 | 1.414903703 | 2.086851731 | 2.118453143 | 2.416373016 | 2.864778345 |
| ENSMUSG00000095432 | 105.4103258 | 146.0796212 | 118.633376  | 120.0131931 | 102.4158258 |
| ENSMUSG00000095452 | 4.244711108 | 4.869320706 | 6.35535943  | 3.221830688 | 2.864778345 |
| ENSMUSG00000095463 | 10.61177777 | 18.78166558 | 12.00456781 | 12.88732275 | 23.63442135 |
| ENSMUSG00000095493 | 12.02668147 | 5.56493795  | 7.767661525 | 5.638203705 | 5.013362104 |
| ENSMUSG00000095508 | 4.952162959 | 2.086851731 | 3.530755239 | 4.02728836  | 2.148583759 |
| ENSMUSG00000095510 | 0.707451851 | 5.56493795  | 3.530755239 | 4.02728836  | 4.297167518 |
| ENSMUSG00000095520 | 2.829807405 | 4.869320706 | 2.824604191 | 4.832746033 | 4.297167518 |
| ENSMUSG00000095528 | 9.904325918 | 11.1298759  | 16.94762515 | 10.47094974 | 11.45911338 |
| ENSMUSG00000095540 | 7.781970364 | 5.56493795  | 7.767661525 | 7.249119049 | 5.729556691 |
| ENSMUSG00000095546 | 2.122355554 | 4.869320706 | 4.943057334 | 3.221830688 | 2.864778345 |
| ENSMUSG00000095567 | 16.27139258 | 32.69401046 | 25.42143772 | 201.364418  | 152.5494469 |
| ENSMUSG00000095576 | 9.196874066 | 9.043024169 | 5.649208382 | 4.832746033 | 4.297167518 |
| ENSMUSG00000095595 | 26.88317035 | 46.60635533 | 57.19823487 | 39.46742593 | 45.12025894 |
| ENSMUSG00000095601 | 6.367066661 | 6.956172438 | 4.943057334 | 4.02728836  | 2.864778345 |
| ENSMUSG00000095606 | 9.196874066 | 4.869320706 | 4.943057334 | 1.610915344 | 2.864778345 |
| ENSMUSG00000095620 | 6.367066661 | 8.347406925 | 5.649208382 | 5.638203705 | 7.161945863 |
| ENSMUSG00000095621 | 5.65961481  | 4.173703463 | 6.35535943  | 0.805457672 | 2.864778345 |
| ENSMUSG00000095634 | 4.244711108 | 5.56493795  | 5.649208382 | 4.02728836  | 2.148583759 |
| ENSMUSG00000095650 | 4.952162959 | 2.782468975 | 4.236906287 | 0.805457672 | 3.580972932 |
| ENSMUSG00000095654 | 5.65961481  | 9.043024169 | 9.179963621 | 4.02728836  | 8.594335036 |
| ENSMUSG00000095662 | 2.829807405 | 1.391234488 | 1.412302096 | 2.416373016 | 1.432389173 |
| ENSMUSG00000095670 | 10.61177777 | 6.260555194 | 8.473812573 | 1.610915344 | 7.161945863 |
| ENSMUSG00000095677 | 14.85648888 | 27.12907251 | 26.12758877 | 32.21830688 | 25.06681052 |
| ENSMUSG00000095683 | 12.73413332 | 4.173703463 | 7.061510478 | 4.832746033 | 4.297167518 |
| ENSMUSG00000095687 | 76.40479994 | 79.30036579 | 79.7950684  | 103.9040397 | 82.36237743 |
| ENSMUSG00000095698 | 2.122355554 | 4.173703463 | 7.767661525 | 4.832746033 | 3.580972932 |
| ENSMUSG00000095710 | 0           | 0           | 0           | 0           | 0           |
| ENSMUSG00000095716 | 4.244711108 | 3.478086219 | 5.649208382 | 0           | 1.432389173 |
| ENSMUSG00000095724 | 7.074518513 | 4.869320706 | 9.886114669 | 4.832746033 | 9.310529622 |
| ENSMUSG00000095741 | 7.781970364 | 1.391234488 | 3.530755239 | 4.02728836  | 7.161945863 |
| ENSMUSG00000095770 | 6.367066661 | 4.173703463 | 6.35535943  | 3.221830688 | 3.580972932 |
| ENSMUSG00000095773 | 9.904325918 | 9.738641413 | 9.886114669 | 2.416373016 | 7.87814045  |
| ENSMUSG00000095779 | 8.489422215 | 3.478086219 | 4.236906287 | 4.02728836  | 6.445751277 |
| ENSMUSG00000095785 | 4.952162959 | 4.869320706 | 5.649208382 | 4.02728836  | 4.297167518 |

|                    |             |             |             |             |             |
|--------------------|-------------|-------------|-------------|-------------|-------------|
| ENSMUSG00000095788 | 12.02668147 | 5.56493795  | 7.061510478 | 2.416373016 | 5.729556691 |
| ENSMUSG00000095789 | 8.489422215 | 7.651789682 | 9.179963621 | 6.443661377 | 8.594335036 |
| ENSMUSG00000095793 | 9.196874066 | 5.56493795  | 4.943057334 | 2.416373016 | 0           |
| ENSMUSG00000095814 | 4.244711108 | 3.478086219 | 7.061510478 | 2.416373016 | 5.013362104 |
| ENSMUSG00000095829 | 16.27139258 | 7.651789682 | 9.886114669 | 6.443661377 | 8.594335036 |
| ENSMUSG00000095845 | 10.61177777 | 22.2597518  | 16.94762515 | 12.08186508 | 10.7429188  |
| ENSMUSG00000095852 | 0           | 0           | 0           | 0           | 0           |
| ENSMUSG00000095867 | 8.489422215 | 4.173703463 | 5.649208382 | 3.221830688 | 5.729556691 |
| ENSMUSG00000095870 | 7.781970364 | 9.043024169 | 12.71071886 | 7.249119049 | 5.729556691 |
| ENSMUSG00000095872 | 3.537259256 | 2.086851731 | 5.649208382 | 4.02728836  | 2.864778345 |
| ENSMUSG00000095887 | 4.952162959 | 2.086851731 | 2.824604191 | 4.832746033 | 2.148583759 |
| ENSMUSG00000095893 | 14.14903703 | 6.260555194 | 7.061510478 | 4.02728836  | 5.013362104 |
| ENSMUSG00000095930 | 8.489422215 | 11.1298759  | 11.29841676 | 8.860034393 | 7.161945863 |
| ENSMUSG00000095934 | 7.781970364 | 3.478086219 | 0.706151048 | 3.221830688 | 4.297167518 |
| ENSMUSG00000095935 | 10.61177777 | 8.347406925 | 6.35535943  | 5.638203705 | 5.013362104 |
| ENSMUSG00000095948 | 0           | 0           | 0           | 0           | 0           |
| ENSMUSG00000095950 | 5.65961481  | 2.086851731 | 4.236906287 | 0.805457672 | 5.013362104 |
| ENSMUSG00000095975 | 9.196874066 | 6.260555194 | 8.473812573 | 10.47094974 | 8.594335036 |
| ENSMUSG00000095976 | 11.31922962 | 4.869320706 | 5.649208382 | 8.860034393 | 4.297167518 |
| ENSMUSG00000095979 | 6.367066661 | 6.260555194 | 2.824604191 | 2.416373016 | 2.864778345 |
| ENSMUSG00000095990 | 56.5961481  | 91.12585893 | 88.97503202 | 82.15668255 | 83.07857202 |
| ENSMUSG00000095992 | 7.074518513 | 11.82549314 | 9.179963621 | 7.249119049 | 6.445751277 |
| ENSMUSG00000095996 | 9.196874066 | 9.043024169 | 7.061510478 | 8.054576721 | 4.297167518 |
| ENSMUSG00000096001 | 6.367066661 | 4.173703463 | 8.473812573 | 8.860034393 | 7.161945863 |
| ENSMUSG00000096003 | 10.61177777 | 6.956172438 | 9.179963621 | 3.221830688 | 7.87814045  |
| ENSMUSG00000096010 | 4.244711108 | 6.260555194 | 7.767661525 | 8.054576721 | 5.729556691 |
| ENSMUSG00000096014 | 2.122355554 | 2.086851731 | 2.118453143 | 1.610915344 | 0           |
| ENSMUSG00000096016 | 4.952162959 | 4.173703463 | 5.649208382 | 3.221830688 | 4.297167518 |
| ENSMUSG00000096029 | 10.61177777 | 8.347406925 | 6.35535943  | 5.638203705 | 2.864778345 |
| ENSMUSG00000096035 | 16.27139258 | 12.52111039 | 10.59226572 | 6.443661377 | 14.32389173 |
| ENSMUSG00000096036 | 5.65961481  | 4.173703463 | 6.35535943  | 1.610915344 | 1.432389173 |
| ENSMUSG00000096045 | 13.44158517 | 7.651789682 | 12.00456781 | 2.416373016 | 4.297167518 |
| ENSMUSG00000096054 | 7.781970364 | 7.651789682 | 4.943057334 | 4.02728836  | 10.02672421 |
| ENSMUSG00000096094 | 11.31922962 | 4.869320706 | 7.061510478 | 9.665492065 | 12.17530797 |
| ENSMUSG00000096122 | 6.367066661 | 4.173703463 | 5.649208382 | 4.02728836  | 7.87814045  |
| ENSMUSG00000096141 | 6.367066661 | 9.738641413 | 8.473812573 | 4.02728836  | 4.297167518 |
| ENSMUSG00000096144 | 10.61177777 | 7.651789682 | 9.886114669 | 11.27640741 | 8.594335036 |
| ENSMUSG00000096145 | 0           | 0           | 0           | 0.805457672 | 0           |
| ENSMUSG00000096154 | 0           | 0           | 0           | 0           | 0           |
| ENSMUSG00000096175 | 9.196874066 | 7.651789682 | 7.767661525 | 1.610915344 | 7.161945863 |
| ENSMUSG00000096183 | 14.85648888 | 6.260555194 | 6.35535943  | 4.832746033 | 3.580972932 |
| ENSMUSG00000096188 | 6.367066661 | 10.43425866 | 7.767661525 | 7.249119049 | 12.17530797 |
| ENSMUSG00000096194 | 3.537259256 | 2.782468975 | 4.943057334 | 4.02728836  | 3.580972932 |



|                    |             |             |             |             |             |
|--------------------|-------------|-------------|-------------|-------------|-------------|
| ENSMUSG00000096197 | 7.781970364 | 8.347406925 | 9.179963621 | 5.638203705 | 3.580972932 |
| ENSMUSG00000096210 | 7.074518513 | 9.738641413 | 11.29841676 | 8.860034393 | 3.580972932 |
| ENSMUSG00000096215 | 9.196874066 | 10.43425866 | 14.12302096 | 7.249119049 | 7.87814045  |
| ENSMUSG00000096225 | 4.952162959 | 6.956172438 | 6.35535943  | 4.832746033 | 5.729556691 |
| ENSMUSG00000096228 | 5.65961481  | 3.478086219 | 6.35535943  | 0           | 5.013362104 |
| ENSMUSG00000096254 | 7.074518513 | 6.260555194 | 9.179963621 | 5.638203705 | 9.310529622 |
| ENSMUSG00000096255 | 29.71297775 | 43.12826911 | 41.66291182 | 47.52200265 | 44.40406435 |
| ENSMUSG00000096257 | 7.781970364 | 4.869320706 | 9.179963621 | 10.47094974 | 14.32389173 |
| ENSMUSG00000096268 | 5.65961481  | 6.956172438 | 5.649208382 | 3.221830688 | 3.580972932 |
| ENSMUSG00000096276 | 9.196874066 | 8.347406925 | 6.35535943  | 6.443661377 | 4.297167518 |
| ENSMUSG00000096278 | 10.61177777 | 5.56493795  | 8.473812573 | 3.221830688 | 7.87814045  |
| ENSMUSG00000096284 | 10.61177777 | 6.260555194 | 7.767661525 | 8.860034393 | 9.310529622 |
| ENSMUSG00000096316 | 9.196874066 | 6.260555194 | 7.061510478 | 5.638203705 | 4.297167518 |
| ENSMUSG00000096330 | 14.14903703 | 5.56493795  | 6.35535943  | 4.832746033 | 2.148583759 |
| ENSMUSG00000096333 | 7.781970364 | 4.869320706 | 14.829172   | 6.443661377 | 10.7429188  |
| ENSMUSG00000096344 | 8.489422215 | 5.56493795  | 7.061510478 | 6.443661377 | 7.87814045  |
| ENSMUSG00000096345 | 4.244711108 | 9.738641413 | 4.943057334 | 2.416373016 | 7.161945863 |
| ENSMUSG00000096351 | 3.537259256 | 1.391234488 | 2.118453143 | 1.610915344 | 5.013362104 |
| ENSMUSG00000096370 | 2.122355554 | 2.782468975 | 1.412302096 | 2.416373016 | 0.716194586 |
| ENSMUSG00000096393 | 7.781970364 | 8.347406925 | 9.179963621 | 8.054576721 | 4.297167518 |
| ENSMUSG00000096405 | 12.02668147 | 7.651789682 | 6.35535943  | 5.638203705 | 5.729556691 |
| ENSMUSG00000096433 | 16.27139258 | 24.34660353 | 22.59683353 | 23.35827249 | 25.78300511 |
| ENSMUSG00000096445 | 12.02668147 | 6.260555194 | 7.767661525 | 6.443661377 | 7.161945863 |
| ENSMUSG00000096446 | 12.02668147 | 9.043024169 | 11.29841676 | 4.02728836  | 8.594335036 |
| ENSMUSG00000096458 | 24.05336294 | 31.30277597 | 28.95219296 | 81.35122488 | 73.76804239 |
| ENSMUSG00000096467 | 6.367066661 | 6.260555194 | 7.767661525 | 4.02728836  | 6.445751277 |
| ENSMUSG00000096468 | 7.074518513 | 2.086851731 | 2.118453143 | 2.416373016 | 3.580972932 |
| ENSMUSG00000096472 | 43.15456293 | 57.73623123 | 48.01827125 | 42.68925662 | 50.13362104 |
| ENSMUSG00000096488 | 4.952162959 | 9.738641413 | 8.473812573 | 5.638203705 | 5.729556691 |
| ENSMUSG00000096508 | 6.367066661 | 6.260555194 | 6.35535943  | 4.02728836  | 2.148583759 |
| ENSMUSG00000096520 | 7.781970364 | 6.260555194 | 9.886114669 | 7.249119049 | 9.310529622 |
| ENSMUSG00000096525 | 5.65961481  | 6.956172438 | 3.530755239 | 7.249119049 | 4.297167518 |
| ENSMUSG00000096527 | 9.904325918 | 6.260555194 | 8.473812573 | 6.443661377 | 10.7429188  |
| ENSMUSG00000096530 | 4.244711108 | 8.347406925 | 7.061510478 | 7.249119049 | 4.297167518 |
| ENSMUSG00000096534 | 12.73413332 | 6.956172438 | 4.943057334 | 4.02728836  | 2.148583759 |
| ENSMUSG00000096537 | 10.61177777 | 6.260555194 | 5.649208382 | 8.054576721 | 10.02672421 |
| ENSMUSG00000096546 | 9.904325918 | 6.260555194 | 2.824604191 | 8.054576721 | 9.310529622 |
| ENSMUSG00000096569 | 17.68629628 | 5.56493795  | 19.77222934 | 5.638203705 | 12.89150255 |
| ENSMUSG00000096576 | 8.489422215 | 4.173703463 | 8.473812573 | 8.860034393 | 10.02672421 |
| ENSMUSG00000096606 | 8.489422215 | 2.782468975 | 7.061510478 | 5.638203705 | 7.161945863 |
| ENSMUSG00000096607 | 8.489422215 | 7.651789682 | 7.061510478 | 8.054576721 | 10.02672421 |
| ENSMUSG00000096620 | 3.537259256 | 4.173703463 | 6.35535943  | 3.221830688 | 1.432389173 |
| ENSMUSG00000096629 | 14.85648888 | 6.956172438 | 9.886114669 | 7.249119049 | 6.445751277 |

|                    |             |             |             |             |             |
|--------------------|-------------|-------------|-------------|-------------|-------------|
| ENSMUSG00000096640 | 4.244711108 | 2.782468975 | 4.236906287 | 6.443661377 | 2.864778345 |
| ENSMUSG00000096641 | 10.61177777 | 7.651789682 | 6.35535943  | 8.860034393 | 10.7429188  |
| ENSMUSG00000096644 | 4.244711108 | 3.478086219 | 3.530755239 | 5.638203705 | 3.580972932 |
| ENSMUSG00000096650 | 5.65961481  | 4.173703463 | 2.824604191 | 0.805457672 | 3.580972932 |
| ENSMUSG00000096658 | 10.61177777 | 6.956172438 | 5.649208382 | 4.832746033 | 5.013362104 |
| ENSMUSG00000096664 | 5.65961481  | 7.651789682 | 8.473812573 | 6.443661377 | 10.02672421 |
| ENSMUSG00000096666 | 6.367066661 | 8.347406925 | 2.824604191 | 3.221830688 | 3.580972932 |
| ENSMUSG00000096674 | 14.14903703 | 7.651789682 | 9.886114669 | 6.443661377 | 5.013362104 |
| ENSMUSG00000096685 | 14.85648888 | 7.651789682 | 10.59226572 | 8.054576721 | 9.310529622 |
| ENSMUSG00000096686 | 3.537259256 | 2.086851731 | 1.412302096 | 0.805457672 | 5.013362104 |
| ENSMUSG00000096688 | 13.44158517 | 4.869320706 | 10.59226572 | 5.638203705 | 5.013362104 |
| ENSMUSG00000096696 | 16.27139258 | 30.60715873 | 25.42143772 | 15.30369577 | 20.05344842 |
| ENSMUSG00000096697 | 4.952162959 | 6.260555194 | 2.118453143 | 4.832746033 | 4.297167518 |
| ENSMUSG00000096700 | 14.85648888 | 6.260555194 | 12.71071886 | 5.638203705 | 3.580972932 |
| ENSMUSG00000096719 | 12.73413332 | 9.738641413 | 7.767661525 | 8.860034393 | 5.729556691 |
| ENSMUSG00000096727 | 181.1076739 | 196.85968   | 193.4853871 | 521.9365715 | 356.664904  |
| ENSMUSG00000096740 | 11.31922962 | 15.30357936 | 17.65377619 | 7.249119049 | 10.7429188  |
| ENSMUSG00000096742 | 18.39374813 | 8.347406925 | 14.829172   | 13.69278043 | 6.445751277 |
| ENSMUSG00000096744 | 6.367066661 | 4.173703463 | 7.767661525 | 5.638203705 | 4.297167518 |
| ENSMUSG00000096750 | 10.61177777 | 9.043024169 | 11.29841676 | 5.638203705 | 10.02672421 |
| ENSMUSG00000096753 | 12.02668147 | 4.869320706 | 5.649208382 | 7.249119049 | 5.729556691 |
| ENSMUSG00000096764 | 8.489422215 | 13.91234488 | 6.35535943  | 11.27640741 | 10.7429188  |
| ENSMUSG00000096768 | 14.85648888 | 15.99919661 | 98.86114669 | 16.10915344 | 17.18867007 |
| ENSMUSG00000096769 | 8.489422215 | 6.260555194 | 7.767661525 | 1.610915344 | 3.580972932 |
| ENSMUSG00000096770 | 14.85648888 | 8.347406925 | 9.886114669 | 8.860034393 | 9.310529622 |
| ENSMUSG00000096775 | 7.074518513 | 10.43425866 | 12.71071886 | 5.638203705 | 10.7429188  |
| ENSMUSG00000096788 | 7.781970364 | 4.173703463 | 7.061510478 | 5.638203705 | 4.297167518 |
| ENSMUSG00000096794 | 5.65961481  | 6.260555194 | 6.35535943  | 4.832746033 | 7.161945863 |
| ENSMUSG00000096798 | 9.196874066 | 6.956172438 | 4.943057334 | 9.665492065 | 9.310529622 |
| ENSMUSG00000096819 | 4.244711108 | 1.391234488 | 4.236906287 | 3.221830688 | 1.432389173 |
| ENSMUSG00000096826 | 2.829807405 | 3.478086219 | 5.649208382 | 8.054576721 | 3.580972932 |
| ENSMUSG00000096834 | 7.074518513 | 1.391234488 | 7.061510478 | 1.610915344 | 2.864778345 |
| ENSMUSG00000096847 | 7.781970364 | 2.086851731 | 7.767661525 | 6.443661377 | 9.310529622 |
| ENSMUSG00000096852 | 0           | 0           | 0           | 0           | 0           |
| ENSMUSG00000096854 | 3.537259256 | 4.173703463 | 3.530755239 | 2.416373016 | 2.148583759 |
| ENSMUSG00000096856 | 68.62282957 | 110.6031418 | 86.85657888 | 73.29664816 | 88.80812871 |
| ENSMUSG00000096867 | 6.367066661 | 4.173703463 | 4.236906287 | 4.832746033 | 3.580972932 |
| ENSMUSG00000096869 | 14.85648888 | 8.347406925 | 4.943057334 | 4.832746033 | 10.7429188  |
| ENSMUSG00000096872 | 9.196874066 | 8.347406925 | 4.236906287 | 7.249119049 | 3.580972932 |
| ENSMUSG00000096883 | 28.29807405 | 30.60715873 | 38.13215658 | 207.0026217 | 148.2522794 |
| ENSMUSG00000096887 | 5.65961481  | 10.43425866 | 6.35535943  | 4.832746033 | 5.013362104 |
| ENSMUSG00000096898 | 7.074518513 | 6.260555194 | 3.530755239 | 3.221830688 | 7.87814045  |
| ENSMUSG00000096902 | 3.537259256 | 4.869320706 | 4.943057334 | 0           | 7.87814045  |

|                    |             |             |             |             |             |
|--------------------|-------------|-------------|-------------|-------------|-------------|
| ENSMUSG00000096904 | 10.61177777 | 7.651789682 | 11.29841676 | 4.02728836  | 7.161945863 |
| ENSMUSG00000096916 | 6.367066661 | 7.651789682 | 7.767661525 | 8.860034393 | 5.729556691 |
| ENSMUSG00000097084 | 4.244711108 | 6.260555194 | 6.35535943  | 5.638203705 | 5.013362104 |
| ENSMUSG00000097129 | 51.64398514 | 72.34419335 | 58.61053696 | 170.7570265 | 107.429188  |
| ENSMUSG00000097327 | 14.14903703 | 31.99839321 | 26.12758877 | 25.77464551 | 22.20203218 |
| ENSMUSG00000097328 | 0           | 2.086851731 | 0           | 1.610915344 | 1.432389173 |
| ENSMUSG00000097333 | 1.414903703 | 4.173703463 | 2.824604191 | 2.416373016 | 3.580972932 |
| ENSMUSG00000097425 | 9.904325918 | 9.043024169 | 8.473812573 | 4.02728836  | 4.297167518 |
| ENSMUSG00000097427 | 10.61177777 | 10.43425866 | 11.29841676 | 7.249119049 | 8.594335036 |
| ENSMUSG00000097437 | 0           | 0           | 0           | 0.805457672 | 0           |
| ENSMUSG00000097487 | 7.781970364 | 13.21672763 | 15.53532305 | 14.4982381  | 11.45911338 |
| ENSMUSG00000097550 | 5.65961481  | 7.651789682 | 9.179963621 | 10.47094974 | 7.87814045  |
| ENSMUSG00000097878 | 14.14903703 | 8.347406925 | 9.179963621 | 7.249119049 | 11.45911338 |
| ENSMUSG00000097919 | 21.93100739 | 15.99919661 | 20.47838039 | 26.58010318 | 28.64778345 |
| ENSMUSG00000097972 | 6.367066661 | 6.956172438 | 4.943057334 | 3.221830688 | 8.594335036 |
| ENSMUSG00000097982 | 14.85648888 | 6.260555194 | 8.473812573 | 6.443661377 | 5.013362104 |
| ENSMUSG00000098022 | 19.80865184 | 9.738641413 | 23.30298458 | 24.96918783 | 18.62105924 |
| ENSMUSG00000098094 | 6.367066661 | 6.260555194 | 7.061510478 | 6.443661377 | 7.161945863 |
| ENSMUSG00000098112 | 97.62835547 | 110.6031418 | 110.8657145 | 114.3749894 | 96.68626916 |
| ENSMUSG00000098132 | 9.196874066 | 6.260555194 | 7.061510478 | 4.832746033 | 8.594335036 |
| ENSMUSG00000098134 | 9.196874066 | 17.39043109 | 13.41686991 | 19.33098413 | 20.769643   |
| ENSMUSG00000098176 | 9.904325918 | 13.91234488 | 19.77222934 | 12.88732275 | 15.04008631 |
| ENSMUSG00000098188 | 16.27139258 | 18.08604834 | 15.53532305 | 53.16020636 | 34.37734014 |
| ENSMUSG00000098207 | 8.489422215 | 6.956172438 | 9.179963621 | 8.860034393 | 10.02672421 |
| ENSMUSG00000098274 | 0           | 0           | 0           | 0           | 0           |
| ENSMUSG00000098306 | 6.367066661 | 9.738641413 | 7.061510478 | 8.054576721 | 7.161945863 |
| ENSMUSG00000098348 | 4.244711108 | 2.782468975 | 2.824604191 | 3.221830688 | 1.432389173 |
| ENSMUSG00000098387 | 0.707451851 | 0           | 0.706151048 | 0           | 0.716194586 |
| ENSMUSG00000098463 | 0           | 0           | 0           | 0.805457672 | 0           |
| ENSMUSG00000098470 | 8.489422215 | 3.478086219 | 4.236906287 | 6.443661377 | 3.580972932 |
| ENSMUSG00000098488 | 4.244711108 | 6.260555194 | 8.473812573 | 7.249119049 | 5.013362104 |
| ENSMUSG00000098509 | 9.904325918 | 6.260555194 | 5.649208382 | 7.249119049 | 8.594335036 |
| ENSMUSG00000098557 | 0           | 0           | 0           | 0           | 0           |
| ENSMUSG00000098678 | 5.65961481  | 6.956172438 | 12.00456781 | 3.221830688 | 5.729556691 |
| ENSMUSG00000098754 | 0           | 0.695617244 | 0           | 0           | 0           |
| ENSMUSG00000098789 | 0.707451851 | 0           | 0           | 0           | 0           |
| ENSMUSG00000098905 | 0.707451851 | 0           | 0           | 0           | 0           |
| ENSMUSG00000098923 | 16.97884443 | 21.56413456 | 20.47838039 | 33.02376456 | 35.80972932 |
| ENSMUSG00000099032 | 11.31922962 | 10.43425866 | 7.767661525 | 11.27640741 | 3.580972932 |
| ENSMUSG00000099083 | 0           | 0           | 0           | 0           | 0           |
| ENSMUSG00000099269 | 7.781970364 | 5.56493795  | 8.473812573 | 8.860034393 | 5.013362104 |
| ENSMUSG00000099353 | 5.65961481  | 6.260555194 | 7.061510478 | 6.443661377 | 7.87814045  |
| ENSMUSG00000099398 | 6.367066661 | 13.91234488 | 9.886114669 | 11.27640741 | 5.013362104 |

|                    |             |             |             |             |             |
|--------------------|-------------|-------------|-------------|-------------|-------------|
| ENSMUSG00000099481 | 0.707451851 | 1.391234488 | 0.706151048 | 0           | 0           |
| ENSMUSG00000099517 | 7.781970364 | 9.738641413 | 16.94762515 | 5.638203705 | 4.297167518 |
| ENSMUSG00000099531 | 1.414903703 | 4.173703463 | 4.236906287 | 6.443661377 | 5.013362104 |
| ENSMUSG00000099541 | 7.781970364 | 2.782468975 | 4.943057334 | 2.416373016 | 2.864778345 |
| ENSMUSG00000099581 | 9.196874066 | 7.651789682 | 8.473812573 | 4.832746033 | 3.580972932 |
| ENSMUSG00000099583 | 6.367066661 | 8.347406925 | 10.59226572 | 4.832746033 | 2.864778345 |
| ENSMUSG00000099689 | 8.489422215 | 25.73783802 | 26.12758877 | 16.91461111 | 22.20203218 |
| ENSMUSG00000099711 | 7.781970364 | 8.347406925 | 6.35535943  | 4.832746033 | 5.013362104 |
| ENSMUSG00000099729 | 8.489422215 | 5.56493795  | 2.824604191 | 6.443661377 | 8.594335036 |
| ENSMUSG00000099782 | 7.781970364 | 7.651789682 | 7.061510478 | 3.221830688 | 4.297167518 |
| ENSMUSG00000099840 | 4.244711108 | 7.651789682 | 4.943057334 | 3.221830688 | 3.580972932 |
| ENSMUSG00000099856 | 2.829807405 | 2.782468975 | 4.943057334 | 3.221830688 | 7.87814045  |
| ENSMUSG00000099894 | 8.489422215 | 2.782468975 | 7.061510478 | 3.221830688 | 2.864778345 |
| ENSMUSG00000099898 | 12.73413332 | 5.56493795  | 3.530755239 | 7.249119049 | 5.729556691 |
| ENSMUSG00000099900 | 11.31922962 | 9.043024169 | 2.824604191 | 6.443661377 | 5.013362104 |
| ENSMUSG00000099974 | 48.81417774 | 70.95295887 | 69.20280268 | 207.8080794 | 141.0903335 |
| ENSMUSG00000100045 | 6.367066661 | 6.956172438 | 5.649208382 | 4.02728836  | 3.580972932 |
| ENSMUSG00000100055 | 7.781970364 | 3.478086219 | 3.530755239 | 4.02728836  | 1.432389173 |
| ENSMUSG00000100058 | 10.61177777 | 10.43425866 | 12.00456781 | 5.638203705 | 7.87814045  |
| ENSMUSG00000100079 | 9.196874066 | 7.651789682 | 6.35535943  | 4.02728836  | 8.594335036 |
| ENSMUSG00000100133 | 1.414903703 | 3.478086219 | 4.236906287 | 0.805457672 | 3.580972932 |
| ENSMUSG00000100194 | 3.537259256 | 2.086851731 | 4.943057334 | 4.832746033 | 2.864778345 |
| ENSMUSG00000100200 | 4.952162959 | 6.260555194 | 10.59226572 | 4.832746033 | 3.580972932 |
| ENSMUSG00000100210 | 10.61177777 | 20.86851731 | 13.41686991 | 5.638203705 | 13.60769714 |
| ENSMUSG00000100240 | 4.952162959 | 6.956172438 | 4.236906287 | 0           | 2.864778345 |
| ENSMUSG00000100241 | 4.952162959 | 0           | 1.412302096 | 0.805457672 | 2.148583759 |
| ENSMUSG00000100249 | 4.244711108 | 4.869320706 | 2.824604191 | 2.416373016 | 3.580972932 |
| ENSMUSG00000100254 | 11.31922962 | 6.956172438 | 14.12302096 | 12.88732275 | 6.445751277 |
| ENSMUSG00000100448 | 4.244711108 | 6.956172438 | 8.473812573 | 6.443661377 | 5.729556691 |
| ENSMUSG00000100485 | 4.244711108 | 2.086851731 | 7.767661525 | 0.805457672 | 5.013362104 |
| ENSMUSG00000100505 | 3.537259256 | 4.173703463 | 1.412302096 | 2.416373016 | 3.580972932 |
| ENSMUSG00000100512 | 9.196874066 | 6.956172438 | 7.061510478 | 6.443661377 | 7.87814045  |
| ENSMUSG00000100535 | 2.829807405 | 2.086851731 | 7.061510478 | 0           | 4.297167518 |
| ENSMUSG00000100586 | 11.31922962 | 6.260555194 | 7.767661525 | 9.665492065 | 10.02672421 |
| ENSMUSG00000100626 | 2.122355554 | 2.086851731 | 3.530755239 | 4.02728836  | 1.432389173 |
| ENSMUSG00000100645 | 4.244711108 | 4.173703463 | 5.649208382 | 0.805457672 | 3.580972932 |
| ENSMUSG00000100856 | 6.367066661 | 4.173703463 | 4.943057334 | 4.832746033 | 2.148583759 |
| ENSMUSG00000100892 | 4.952162959 | 6.260555194 | 5.649208382 | 2.416373016 | 2.148583759 |
| ENSMUSG00000100902 | 9.196874066 | 4.173703463 | 4.943057334 | 2.416373016 | 4.297167518 |
| ENSMUSG00000100916 | 4.952162959 | 6.260555194 | 3.530755239 | 4.02728836  | 5.013362104 |
| ENSMUSG00000100937 | 31.83533331 | 70.95295887 | 55.78593277 | 32.21830688 | 39.39070225 |
| ENSMUSG00000100939 | 4.952162959 | 1.391234488 | 2.118453143 | 4.02728836  | 2.148583759 |
| ENSMUSG00000100972 | 4.244711108 | 4.869320706 | 7.061510478 | 4.02728836  | 2.864778345 |

|                    |             |             |             |             |             |
|--------------------|-------------|-------------|-------------|-------------|-------------|
| ENSMUSG00000101026 | 10.61177777 | 4.869320706 | 5.649208382 | 8.054576721 | 5.729556691 |
| ENSMUSG00000101053 | 3.537259256 | 6.260555194 | 7.061510478 | 2.416373016 | 1.432389173 |
| ENSMUSG00000101113 | 10.61177777 | 6.956172438 | 5.649208382 | 9.665492065 | 7.161945863 |
| ENSMUSG00000101146 | 8.489422215 | 3.478086219 | 1.412302096 | 4.02728836  | 3.580972932 |
| ENSMUSG00000101155 | 7.781970364 | 6.260555194 | 5.649208382 | 3.221830688 | 4.297167518 |
| ENSMUSG00000101157 | 5.65961481  | 4.869320706 | 7.767661525 | 2.416373016 | 2.148583759 |
| ENSMUSG00000101158 | 5.65961481  | 4.869320706 | 4.943057334 | 1.610915344 | 2.864778345 |
| ENSMUSG00000101174 | 10.61177777 | 6.260555194 | 8.473812573 | 9.665492065 | 5.729556691 |
| ENSMUSG00000101232 | 10.61177777 | 7.651789682 | 6.35535943  | 6.443661377 | 7.161945863 |
| ENSMUSG00000101286 | 2.829807405 | 3.478086219 | 3.530755239 | 0.805457672 | 2.864778345 |
| ENSMUSG00000101294 | 7.074518513 | 4.173703463 | 4.943057334 | 0.805457672 | 2.864778345 |
| ENSMUSG00000101315 | 4.952162959 | 6.260555194 | 7.767661525 | 7.249119049 | 10.7429188  |
| ENSMUSG00000101337 | 9.904325918 | 7.651789682 | 8.473812573 | 4.02728836  | 10.02672421 |
| ENSMUSG00000101381 | 3.537259256 | 1.391234488 | 4.236906287 | 2.416373016 | 2.148583759 |
| ENSMUSG00000101389 | 8.489422215 | 9.043024169 | 7.061510478 | 9.665492065 | 5.013362104 |
| ENSMUSG00000101436 | 11.31922962 | 4.173703463 | 4.943057334 | 7.249119049 | 5.013362104 |
| ENSMUSG00000101500 | 5.65961481  | 6.260555194 | 1.412302096 | 1.610915344 | 5.013362104 |
| ENSMUSG00000101520 | 8.489422215 | 9.738641413 | 6.35535943  | 8.054576721 | 7.87814045  |
| ENSMUSG00000101645 | 12.02668147 | 15.99919661 | 19.06607829 | 33.02376456 | 33.66114556 |
| ENSMUSG00000101766 | 6.367066661 | 2.782468975 | 6.35535943  | 2.416373016 | 2.148583759 |
| ENSMUSG00000101818 | 4.244711108 | 7.651789682 | 3.530755239 | 4.02728836  | 3.580972932 |
| ENSMUSG00000101819 | 3.537259256 | 0.695617244 | 3.530755239 | 2.416373016 | 2.864778345 |
| ENSMUSG00000101892 | 19.80865184 | 22.95536904 | 23.30298458 | 35.44013757 | 40.10689684 |
| ENSMUSG00000101928 | 3.537259256 | 5.56493795  | 4.943057334 | 0           | 4.297167518 |
| ENSMUSG00000101933 | 2.829807405 | 1.391234488 | 5.649208382 | 3.221830688 | 3.580972932 |
| ENSMUSG00000101959 | 11.31922962 | 21.56413456 | 22.59683353 | 12.88732275 | 22.20203218 |
| ENSMUSG00000102018 | 7.074518513 | 4.173703463 | 4.943057334 | 4.832746033 | 5.013362104 |
| ENSMUSG00000102037 | 14.85648888 | 20.86851731 | 28.24604191 | 41.88379895 | 37.95831308 |
| ENSMUSG00000102049 | 22.63845924 | 25.04222078 | 20.47838039 | 43.49471429 | 19.33725383 |
| ENSMUSG00000102053 | 4.952162959 | 4.173703463 | 7.767661525 | 1.610915344 | 5.729556691 |
| ENSMUSG00000102122 | 5.65961481  | 2.782468975 | 6.35535943  | 3.221830688 | 4.297167518 |
| ENSMUSG00000000003 | 8.489422215 | 3.478086219 | 7.767661525 | 4.832746033 | 5.729556691 |
| ENSMUSG00000000028 | 62.25576291 | 94.60394515 | 81.20737049 | 140.1496349 | 117.4559122 |
| ENSMUSG00000000037 | 5.65961481  | 2.086851731 | 3.530755239 | 1.610915344 | 6.445751277 |
| ENSMUSG00000000049 | 25.46826665 | 38.25894841 | 36.01370344 | 78.93485187 | 72.33565322 |
| ENSMUSG00000000085 | 24.05336294 | 32.69401046 | 26.83373982 | 32.21830688 | 26.49919969 |
| ENSMUSG00000000094 | 12.02668147 | 6.260555194 | 4.943057334 | 6.443661377 | 2.864778345 |
| ENSMUSG00000000103 | 2.829807405 | 4.869320706 | 1.412302096 | 0.805457672 | 1.432389173 |
| ENSMUSG00000000126 | 7.074518513 | 6.956172438 | 6.35535943  | 4.02728836  | 2.864778345 |
| ENSMUSG00000000127 | 7.074518513 | 7.651789682 | 7.061510478 | 3.221830688 | 8.594335036 |
| ENSMUSG00000000131 | 162.7139258 | 197.5552972 | 167.3577983 | 228.7499789 | 177.6162574 |
| ENSMUSG00000000134 | 16.27139258 | 18.78166558 | 17.65377619 | 28.19101852 | 30.08017263 |
| ENSMUSG00000000142 | 7.074518513 | 2.782468975 | 5.649208382 | 1.610915344 | 4.297167518 |

|                    |             |             |             |             |             |
|--------------------|-------------|-------------|-------------|-------------|-------------|
| ENSMUSG00000000148 | 35.37259256 | 57.04061399 | 52.96132858 | 30.60739154 | 35.80972932 |
| ENSMUSG00000000149 | 24.76081479 | 31.30277597 | 38.83830763 | 30.60739154 | 32.22875639 |
| ENSMUSG00000000154 | 9.904325918 | 4.869320706 | 4.943057334 | 6.443661377 | 5.729556691 |
| ENSMUSG00000000157 | 8.489422215 | 5.56493795  | 10.59226572 | 8.054576721 | 7.161945863 |
| ENSMUSG00000000159 | 9.904325918 | 7.651789682 | 7.767661525 | 12.88732275 | 5.013362104 |
| ENSMUSG00000000167 | 48.10672589 | 57.04061399 | 57.19823487 | 94.23854763 | 86.65954495 |
| ENSMUSG00000000184 | 24.05336294 | 23.65098629 | 21.89068248 | 229.5554365 | 171.1705061 |
| ENSMUSG00000000194 | 123.804074  | 167.6437558 | 151.1163242 | 108.7367857 | 123.9016634 |
| ENSMUSG00000000204 | 7.781970364 | 6.260555194 | 5.649208382 | 9.665492065 | 8.594335036 |
| ENSMUSG00000000214 | 7.781970364 | 3.478086219 | 9.179963621 | 7.249119049 | 7.87814045  |
| ENSMUSG00000000215 | 10.61177777 | 4.869320706 | 4.943057334 | 4.832746033 | 8.594335036 |
| ENSMUSG00000000223 | 2.829807405 | 4.173703463 | 7.061510478 | 3.221830688 | 3.580972932 |
| ENSMUSG00000000244 | 74.98989623 | 80.69160028 | 81.20737049 | 152.2315    | 118.8883013 |
| ENSMUSG00000000247 | 6.367066661 | 6.956172438 | 8.473812573 | 4.832746033 | 7.161945863 |
| ENSMUSG00000000248 | 4.952162959 | 8.347406925 | 8.473812573 | 8.860034393 | 6.445751277 |
| ENSMUSG00000000253 | 7.781970364 | 5.56493795  | 10.59226572 | 4.832746033 | 5.013362104 |
| ENSMUSG00000000263 | 9.904325918 | 4.173703463 | 5.649208382 | 4.832746033 | 5.013362104 |
| ENSMUSG00000000266 | 0.707451851 | 2.782468975 | 0.706151048 | 5.638203705 | 2.148583759 |
| ENSMUSG00000000275 | 176.8629628 | 219.1194318 | 185.0115745 | 300.4357117 | 231.3308514 |
| ENSMUSG00000000276 | 12.02668147 | 9.738641413 | 5.649208382 | 8.054576721 | 2.864778345 |
| ENSMUSG00000000278 | 43.15456293 | 70.95295887 | 68.49665163 | 93.43308996 | 72.33565322 |
| ENSMUSG00000000282 | 33.95768886 | 34.78086219 | 36.01370344 | 34.6346799  | 29.36397804 |
| ENSMUSG00000000290 | 122.3891703 | 151.6445591 | 134.1686991 | 93.43308996 | 94.5376854  |
| ENSMUSG00000000295 | 9.196874066 | 12.52111039 | 12.71071886 | 12.08186508 | 12.17530797 |
| ENSMUSG00000000301 | 6.367066661 | 9.043024169 | 9.179963621 | 4.832746033 | 5.729556691 |
| ENSMUSG00000000303 | 9.904325918 | 6.260555194 | 9.886114669 | 7.249119049 | 5.013362104 |
| ENSMUSG00000000305 | 4.244711108 | 4.869320706 | 4.236906287 | 5.638203705 | 11.45911338 |
| ENSMUSG00000000308 | 9.196874066 | 8.347406925 | 5.649208382 | 6.443661377 | 7.161945863 |
| ENSMUSG00000000317 | 4.952162959 | 6.956172438 | 7.061510478 | 8.054576721 | 12.17530797 |
| ENSMUSG00000000318 | 15.56394073 | 10.43425866 | 6.35535943  | 8.860034393 | 12.89150255 |
| ENSMUSG00000000320 | 8.489422215 | 3.478086219 | 7.061510478 | 6.443661377 | 5.013362104 |
| ENSMUSG00000000325 | 6.367066661 | 7.651789682 | 7.767661525 | 6.443661377 | 7.87814045  |
| ENSMUSG00000000326 | 19.80865184 | 22.95536904 | 33.18909925 | 41.88379895 | 56.57937232 |
| ENSMUSG00000000339 | 41.03220737 | 77.21351406 | 69.90895373 | 96.65492065 | 80.92998826 |
| ENSMUSG00000000340 | 22.63845924 | 29.91154148 | 30.36449505 | 41.07834128 | 31.5125618  |
| ENSMUSG00000000355 | 16.97884443 | 28.52030699 | 19.06607829 | 64.43661377 | 43.68786977 |
| ENSMUSG00000000378 | 118.851911  | 159.2963488 | 124.9887355 | 243.248217  | 171.8867007 |
| ENSMUSG00000000381 | 7.781970364 | 8.347406925 | 9.886114669 | 9.665492065 | 9.310529622 |
| ENSMUSG00000000384 | 90.55383696 | 123.8198694 | 116.5149229 | 279.4938122 | 227.0336839 |
| ENSMUSG00000000386 | 28.29807405 | 34.08524495 | 28.24604191 | 62.82569842 | 45.83645353 |
| ENSMUSG00000000392 | 9.904325918 | 6.260555194 | 9.179963621 | 3.221830688 | 5.729556691 |
| ENSMUSG00000000394 | 12.73413332 | 8.347406925 | 8.473812573 | 6.443661377 | 8.594335036 |
| ENSMUSG00000000399 | 58.0110518  | 82.08283477 | 80.50121945 | 107.1258704 | 73.76804239 |

|                    |             |             |             |             |             |
|--------------------|-------------|-------------|-------------|-------------|-------------|
| ENSMUSG00000000409 | 10.61177777 | 20.86851731 | 25.42143772 | 10.47094974 | 17.18867007 |
| ENSMUSG00000000416 | 8.489422215 | 9.043024169 | 4.943057334 | 6.443661377 | 5.729556691 |
| ENSMUSG00000000420 | 24.76081479 | 59.12746572 | 38.83830763 | 71.68573282 | 50.84981563 |
| ENSMUSG00000000440 | 8.489422215 | 9.043024169 | 5.649208382 | 4.832746033 | 6.445751277 |
| ENSMUSG00000000441 | 49.52162959 | 61.9099347  | 61.43514116 | 133.7059736 | 92.38910164 |
| ENSMUSG00000000486 | 116.0221036 | 131.4716591 | 136.9933033 | 99.07129367 | 87.37573953 |
| ENSMUSG00000000530 | 7.781970364 | 4.869320706 | 11.29841676 | 10.47094974 | 6.445751277 |
| ENSMUSG00000000532 | 48.10672589 | 78.60474855 | 57.19823487 | 42.68925662 | 49.41742646 |
| ENSMUSG00000000538 | 17.68629628 | 27.12907251 | 22.59683353 | 25.77464551 | 15.04008631 |
| ENSMUSG00000000544 | 9.904325918 | 6.956172438 | 5.649208382 | 3.221830688 | 8.594335036 |
| ENSMUSG00000000561 | 87.72402956 | 120.3417832 | 100.2734488 | 273.0501508 | 218.4393488 |
| ENSMUSG00000000563 | 71.45263698 | 107.1250555 | 105.2165061 | 250.497336  | 196.9535112 |
| ENSMUSG00000000568 | 125.9264295 | 131.4716591 | 117.927225  | 276.2719815 | 209.8450138 |
| ENSMUSG00000000579 | 26.1757185  | 34.78086219 | 26.83373982 | 29.80193387 | 36.5259239  |
| ENSMUSG00000000600 | 79.94205919 | 130.7760418 | 104.5103551 | 162.7024498 | 161.1437819 |
| ENSMUSG00000000617 | 4.952162959 | 10.43425866 | 8.473812573 | 45.10562964 | 37.95831308 |
| ENSMUSG00000000627 | 8.489422215 | 4.869320706 | 1.412302096 | 6.443661377 | 4.297167518 |
| ENSMUSG00000000628 | 9.196874066 | 10.43425866 | 5.649208382 | 66.85298678 | 51.56601022 |
| ENSMUSG00000000631 | 9.196874066 | 10.43425866 | 6.35535943  | 6.443661377 | 7.87814045  |
| ENSMUSG00000000632 | 5.65961481  | 7.651789682 | 7.767661525 | 5.638203705 | 8.594335036 |
| ENSMUSG00000000686 | 8.489422215 | 15.30357936 | 14.12302096 | 10.47094974 | 10.7429188  |
| ENSMUSG00000000693 | 16.27139258 | 34.08524495 | 31.0706461  | 47.52200265 | 39.39070225 |
| ENSMUSG00000000706 | 4.952162959 | 4.869320706 | 1.412302096 | 0.805457672 | 4.297167518 |
| ENSMUSG00000000708 | 29.71297775 | 46.60635533 | 45.8998181  | 60.40932541 | 39.39070225 |
| ENSMUSG00000000724 | 10.61177777 | 4.869320706 | 7.061510478 | 8.860034393 | 11.45911338 |
| ENSMUSG00000000730 | 4.952162959 | 6.956172438 | 7.767661525 | 11.27640741 | 11.45911338 |
| ENSMUSG00000000731 | 8.489422215 | 8.347406925 | 4.943057334 | 6.443661377 | 10.02672421 |
| ENSMUSG00000000738 | 39.61730367 | 57.73623123 | 56.49208382 | 41.07834128 | 32.94495097 |
| ENSMUSG00000000739 | 9.196874066 | 5.56493795  | 5.649208382 | 3.221830688 | 5.729556691 |
| ENSMUSG00000000740 | 3.537259256 | 2.086851731 | 2.824604191 | 1.610915344 | 3.580972932 |
| ENSMUSG00000000751 | 154.2245036 | 173.2086937 | 169.4762515 | 172.3679418 | 141.8065281 |
| ENSMUSG00000000753 | 2.829807405 | 0.695617244 | 0.706151048 | 0.805457672 | 0           |
| ENSMUSG00000000759 | 80.64951104 | 127.9935729 | 122.1641313 | 110.3477011 | 96.68626916 |
| ENSMUSG00000000766 | 13.44158517 | 11.1298759  | 5.649208382 | 4.02728836  | 4.297167518 |
| ENSMUSG00000000776 | 12.02668147 | 8.347406925 | 9.179963621 | 36.24559524 | 27.93158887 |
| ENSMUSG00000000782 | 7.781970364 | 3.478086219 | 5.649208382 | 4.832746033 | 7.87814045  |
| ENSMUSG00000000787 | 87.72402956 | 95.2995624  | 90.38733411 | 153.8424154 | 107.429188  |
| ENSMUSG00000000804 | 33.95768886 | 66.08363816 | 56.49208382 | 66.85298678 | 58.72795608 |
| ENSMUSG00000000805 | 11.31922962 | 6.260555194 | 4.943057334 | 8.860034393 | 6.445751277 |
| ENSMUSG00000000811 | 7.781970364 | 7.651789682 | 7.767661525 | 12.88732275 | 7.161945863 |
| ENSMUSG00000000817 | 6.367066661 | 7.651789682 | 2.824604191 | 7.249119049 | 8.594335036 |
| ENSMUSG00000000823 | 14.14903703 | 16.69481385 | 21.18453143 | 25.77464551 | 25.06681052 |
| ENSMUSG00000000826 | 112.4848444 | 145.3840039 | 118.633376  | 195.7262143 | 176.9000628 |

|                    |             |             |             |             |             |
|--------------------|-------------|-------------|-------------|-------------|-------------|
| ENSMUSG00000000827 | 61.54831106 | 107.8206728 | 99.56729774 | 99.87675134 | 86.65954495 |
| ENSMUSG00000000838 | 1.414903703 | 0.695617244 | 0.706151048 | 1.610915344 | 1.432389173 |
| ENSMUSG00000000861 | 31.83533331 | 45.21512085 | 35.30755239 | 175.5897725 | 140.3741389 |
| ENSMUSG00000000869 | 9.196874066 | 7.651789682 | 7.061510478 | 8.054576721 | 7.161945863 |
| ENSMUSG00000000876 | 32.54278516 | 48.69320706 | 38.13215658 | 27.38556085 | 33.66114556 |
| ENSMUSG00000000881 | 5.65961481  | 2.782468975 | 4.236906287 | 4.02728836  | 1.432389173 |
| ENSMUSG00000000884 | 0           | 0           | 0           | 0           | 0           |
| ENSMUSG00000000901 | 13.44158517 | 18.78166558 | 19.06607829 | 9.665492065 | 12.17530797 |
| ENSMUSG00000000902 | 83.47931845 | 143.2971522 | 111.5718655 | 132.9005159 | 131.0636093 |
| ENSMUSG00000000915 | 48.81417774 | 52.86691053 | 58.61053696 | 88.60034393 | 64.45751277 |
| ENSMUSG00000000916 | 14.85648888 | 27.12907251 | 24.00913562 | 62.82569842 | 47.2688427  |
| ENSMUSG00000000938 | 4.952162959 | 6.260555194 | 2.824604191 | 4.02728836  | 7.87814045  |
| ENSMUSG00000000942 | 7.781970364 | 5.56493795  | 5.649208382 | 4.02728836  | 3.580972932 |
| ENSMUSG00000000957 | 7.781970364 | 8.347406925 | 12.71071886 | 8.054576721 | 6.445751277 |
| ENSMUSG00000000976 | 41.03220737 | 45.21512085 | 48.7244223  | 49.93837567 | 51.56601022 |
| ENSMUSG00000000983 | 10.61177777 | 6.260555194 | 6.35535943  | 5.638203705 | 6.445751277 |
| ENSMUSG00000001016 | 65.79302217 | 80.69160028 | 81.20737049 | 138.5387196 | 105.2806042 |
| ENSMUSG00000001017 | 62.96321476 | 111.298759  | 81.91352154 | 158.6751614 | 130.3474147 |
| ENSMUSG00000001018 | 15.56394073 | 19.47728283 | 19.06607829 | 26.58010318 | 25.78300511 |
| ENSMUSG00000001021 | 9.196874066 | 6.260555194 | 5.649208382 | 7.249119049 | 7.161945863 |
| ENSMUSG00000001023 | 8.489422215 | 6.956172438 | 13.41686991 | 9.665492065 | 11.45911338 |
| ENSMUSG00000001029 | 109.6550369 | 133.5585108 | 127.1071886 | 69.2693598  | 75.91662615 |
| ENSMUSG00000001034 | 12.73413332 | 14.60796212 | 17.65377619 | 12.08186508 | 15.04008631 |
| ENSMUSG00000001036 | 9.904325918 | 9.043024169 | 12.71071886 | 5.638203705 | 16.47247549 |
| ENSMUSG00000001039 | 6.367066661 | 9.043024169 | 7.061510478 | 6.443661377 | 8.594335036 |
| ENSMUSG00000001052 | 86.30912585 | 86.25653823 | 71.32125582 | 103.9040397 | 98.83485292 |
| ENSMUSG00000001053 | 61.54831106 | 84.1696865  | 89.68118307 | 34.6346799  | 41.53928601 |
| ENSMUSG00000001062 | 33.25023701 | 29.21592424 | 40.95676077 | 34.6346799  | 45.83645353 |
| ENSMUSG00000001065 | 26.1757185  | 47.30197258 | 33.89525029 | 32.21830688 | 39.39070225 |
| ENSMUSG00000001082 | 14.85648888 | 27.12907251 | 15.53532305 | 47.52200265 | 27.21539428 |
| ENSMUSG00000001089 | 10.61177777 | 11.1298759  | 10.59226572 | 13.69278043 | 13.60769714 |
| ENSMUSG00000001098 | 128.0487851 | 155.1226454 | 163.120892  | 128.0677699 | 131.7798039 |
| ENSMUSG00000001100 | 31.12788146 | 33.3896277  | 36.71985448 | 74.9075635  | 60.87653984 |
| ENSMUSG00000001105 | 60.84085921 | 95.99517964 | 86.15042783 | 114.3749894 | 108.1453825 |
| ENSMUSG00000001120 | 9.904325918 | 10.43425866 | 10.59226572 | 8.860034393 | 10.7429188  |
| ENSMUSG00000001123 | 108.9475851 | 129.3848073 | 108.7472614 | 174.7843148 | 126.0502472 |
| ENSMUSG00000001127 | 3.537259256 | 2.086851731 | 4.236906287 | 1.610915344 | 2.864778345 |
| ENSMUSG00000001131 | 4.244711108 | 4.869320706 | 7.767661525 | 0           | 3.580972932 |
| ENSMUSG00000001138 | 12.73413332 | 24.34660353 | 25.42143772 | 29.80193387 | 30.79636721 |
| ENSMUSG00000001143 | 13.44158517 | 22.2597518  | 34.60140134 | 13.69278043 | 22.91822676 |
| ENSMUSG00000001151 | 55.1812444  | 69.56172438 | 70.61510478 | 95.84946298 | 78.7814045  |
| ENSMUSG00000001155 | 8.489422215 | 4.869320706 | 8.473812573 | 4.02728836  | 4.297167518 |
| ENSMUSG00000001157 | 52.35143699 | 84.1696865  | 62.1412922  | 62.82569842 | 53.71459398 |



|                    |             |             |             |             |             |
|--------------------|-------------|-------------|-------------|-------------|-------------|
| ENSMUSG00000001158 | 26.1757185  | 46.60635533 | 37.42600553 | 55.57657937 | 42.25548059 |
| ENSMUSG00000001166 | 107.5326814 | 125.2111039 | 119.3395271 | 118.4022778 | 100.2672421 |
| ENSMUSG00000001168 | 9.904325918 | 4.173703463 | 7.767661525 | 8.860034393 | 11.45911338 |
| ENSMUSG00000001173 | 9.196874066 | 7.651789682 | 4.943057334 | 4.02728836  | 3.580972932 |
| ENSMUSG00000001175 | 72.86754068 | 103.6469693 | 103.098053  | 187.6716376 | 156.8466144 |
| ENSMUSG00000001211 | 16.97884443 | 22.2597518  | 17.65377619 | 35.44013757 | 37.24211849 |
| ENSMUSG00000001225 | 12.02668147 | 6.260555194 | 3.530755239 | 2.416373016 | 7.161945863 |
| ENSMUSG00000001227 | 8.489422215 | 11.82549314 | 9.179963621 | 12.88732275 | 7.87814045  |
| ENSMUSG00000001228 | 16.97884443 | 20.17290007 | 21.18453143 | 118.4022778 | 67.32229112 |
| ENSMUSG00000001240 | 9.196874066 | 9.738641413 | 8.473812573 | 7.249119049 | 8.594335036 |
| ENSMUSG00000001247 | 4.244711108 | 5.56493795  | 6.35535943  | 6.443661377 | 5.013362104 |
| ENSMUSG00000001248 | 18.39374813 | 26.43345526 | 26.12758877 | 13.69278043 | 22.20203218 |
| ENSMUSG00000001249 | 12.02668147 | 2.086851731 | 4.236906287 | 10.47094974 | 5.729556691 |
| ENSMUSG00000001260 | 12.02668147 | 4.869320706 | 2.118453143 | 5.638203705 | 8.594335036 |
| ENSMUSG00000001280 | 47.39927403 | 46.60635533 | 48.01827125 | 86.18397091 | 84.51096119 |
| ENSMUSG00000001285 | 36.08004441 | 63.30116918 | 63.5535943  | 64.43661377 | 50.84981563 |
| ENSMUSG00000001288 | 9.196874066 | 7.651789682 | 9.179963621 | 8.054576721 | 8.594335036 |
| ENSMUSG00000001289 | 35.37259256 | 60.51870021 | 40.25060972 | 53.96566403 | 37.24211849 |
| ENSMUSG00000001300 | 7.074518513 | 9.738641413 | 20.47838039 | 9.665492065 | 12.17530797 |
| ENSMUSG00000001313 | 7.074518513 | 8.347406925 | 14.829172   | 8.054576721 | 7.161945863 |
| ENSMUSG00000001323 | 77.11225179 | 120.3417832 | 101.6857509 | 102.2931244 | 100.2672421 |
| ENSMUSG00000001348 | 6.367066661 | 9.738641413 | 8.473812573 | 4.832746033 | 9.310529622 |
| ENSMUSG00000001366 | 24.76081479 | 52.17129328 | 31.0706461  | 31.41284921 | 33.66114556 |
| ENSMUSG00000001376 | 48.10672589 | 100.8645003 | 58.61053696 | 62.82569842 | 63.0251236  |
| ENSMUSG00000001403 | 25.46826665 | 29.91154148 | 29.65834401 | 89.4058016  | 67.32229112 |
| ENSMUSG00000001415 | 96.21345177 | 118.9505487 | 98.86114669 | 207.8080794 | 141.8065281 |
| ENSMUSG00000001416 | 55.88869625 | 101.5601176 | 86.15042783 | 286.7429313 | 190.50776   |
| ENSMUSG00000001418 | 86.30912585 | 125.9067211 | 114.3964697 | 57.18749472 | 75.91662615 |
| ENSMUSG00000001419 | 162.0064739 | 169.0349902 | 166.6516473 | 290.7702196 | 189.7915654 |
| ENSMUSG00000001420 | 40.32475552 | 33.3896277  | 40.25060972 | 48.32746033 | 44.40406435 |
| ENSMUSG00000001424 | 5.65961481  | 9.738641413 | 9.886114669 | 8.860034393 | 4.297167518 |
| ENSMUSG00000001435 | 7.781970364 | 8.347406925 | 7.061510478 | 4.02728836  | 5.729556691 |
| ENSMUSG00000001436 | 9.196874066 | 14.60796212 | 17.65377619 | 41.07834128 | 25.06681052 |
| ENSMUSG00000001441 | 52.35143699 | 88.34338996 | 92.50578726 | 75.71302118 | 77.34901533 |
| ENSMUSG00000001445 | 53.7663407  | 78.60474855 | 74.14586002 | 111.9586164 | 94.5376854  |
| ENSMUSG00000001472 | 76.40479994 | 98.08203137 | 104.5103551 | 160.2860767 | 126.7664418 |
| ENSMUSG00000001482 | 9.196874066 | 20.86851731 | 15.53532305 | 16.10915344 | 13.60769714 |
| ENSMUSG00000001496 | 7.074518513 | 6.260555194 | 7.061510478 | 5.638203705 | 5.729556691 |
| ENSMUSG00000001497 | 9.196874066 | 2.782468975 | 6.35535943  | 6.443661377 | 3.580972932 |
| ENSMUSG00000001504 | 6.367066661 | 9.738641413 | 3.530755239 | 4.832746033 | 5.729556691 |
| ENSMUSG00000001506 | 4.952162959 | 9.738641413 | 5.649208382 | 7.249119049 | 2.148583759 |
| ENSMUSG00000001507 | 7.781970364 | 4.173703463 | 7.767661525 | 3.221830688 | 7.161945863 |
| ENSMUSG00000001508 | 9.196874066 | 5.56493795  | 6.35535943  | 5.638203705 | 10.02672421 |

|                    |             |             |             |             |             |
|--------------------|-------------|-------------|-------------|-------------|-------------|
| ENSMUSG00000001517 | 55.88869625 | 61.9099347  | 68.49665163 | 120.8186508 | 98.11865833 |
| ENSMUSG00000001518 | 34.66514071 | 45.21512085 | 48.01827125 | 55.57657937 | 50.13362104 |
| ENSMUSG00000001520 | 9.196874066 | 6.956172438 | 7.767661525 | 5.638203705 | 14.32389173 |
| ENSMUSG00000001521 | 17.68629628 | 18.78166558 | 19.77222934 | 18.52552646 | 21.48583759 |
| ENSMUSG00000001524 | 4.952162959 | 13.91234488 | 9.886114669 | 16.10915344 | 15.7562809  |
| ENSMUSG00000001525 | 33.95768886 | 50.7800588  | 40.95676077 | 221.5008598 | 162.5761711 |
| ENSMUSG00000001552 | 3.537259256 | 7.651789682 | 3.530755239 | 9.665492065 | 4.297167518 |
| ENSMUSG00000001555 | 2.122355554 | 4.173703463 | 6.35535943  | 4.02728836  | 3.580972932 |
| ENSMUSG00000001569 | 38.90985182 | 50.7800588  | 48.01827125 | 98.265836   | 86.65954495 |
| ENSMUSG00000001576 | 29.0055259  | 41.04141738 | 37.42600553 | 55.57657937 | 38.67450766 |
| ENSMUSG00000001583 | 8.489422215 | 8.347406925 | 10.59226572 | 5.638203705 | 4.297167518 |
| ENSMUSG00000001588 | 66.50047402 | 100.8645003 | 85.44427678 | 126.4568545 | 106.7129934 |
| ENSMUSG00000001604 | 7.074518513 | 8.347406925 | 6.35535943  | 8.054576721 | 7.87814045  |
| ENSMUSG00000001622 | 7.781970364 | 7.651789682 | 8.473812573 | 7.249119049 | 5.013362104 |
| ENSMUSG00000001627 | 8.489422215 | 7.651789682 | 10.59226572 | 2.416373016 | 3.580972932 |
| ENSMUSG00000001630 | 25.46826665 | 34.78086219 | 41.66291182 | 24.96918783 | 32.22875639 |
| ENSMUSG00000001632 | 88.43148141 | 98.08203137 | 86.15042783 | 169.9515688 | 132.4959985 |
| ENSMUSG00000001642 | 43.86201478 | 62.60555194 | 60.72899011 | 74.9075635  | 62.30892901 |
| ENSMUSG00000001663 | 7.781970364 | 8.347406925 | 9.179963621 | 8.860034393 | 7.161945863 |
| ENSMUSG00000001665 | 1.414903703 | 0.695617244 | 2.118453143 | 0.805457672 | 0           |
| ENSMUSG00000001670 | 11.31922962 | 7.651789682 | 9.179963621 | 7.249119049 | 9.310529622 |
| ENSMUSG00000001672 | 4.244711108 | 4.869320706 | 5.649208382 | 8.860034393 | 8.594335036 |
| ENSMUSG00000001674 | 50.22908144 | 84.1696865  | 60.72899011 | 132.0950582 | 95.97007457 |
| ENSMUSG00000001687 | 41.73965922 | 45.91073809 | 47.3121202  | 108.7367857 | 98.83485292 |
| ENSMUSG00000001729 | 35.37259256 | 52.86691053 | 50.84287544 | 60.40932541 | 63.0251236  |
| ENSMUSG00000001739 | 4.952162959 | 7.651789682 | 11.29841676 | 6.443661377 | 9.310529622 |
| ENSMUSG00000001741 | 8.489422215 | 9.043024169 | 8.473812573 | 8.860034393 | 5.729556691 |
| ENSMUSG00000001750 | 31.12788146 | 41.04141738 | 42.36906287 | 71.68573282 | 60.87653984 |
| ENSMUSG00000001755 | 31.83533331 | 25.04222078 | 32.4829482  | 44.30017197 | 35.09353473 |
| ENSMUSG00000001763 | 5.65961481  | 5.56493795  | 7.061510478 | 7.249119049 | 10.7429188  |
| ENSMUSG00000001768 | 12.02668147 | 5.56493795  | 5.649208382 | 4.832746033 | 5.013362104 |
| ENSMUSG00000001773 | 16.27139258 | 9.738641413 | 13.41686991 | 3.221830688 | 11.45911338 |
| ENSMUSG00000001785 | 31.12788146 | 42.43265187 | 50.84287544 | 131.2896006 | 85.22715578 |
| ENSMUSG00000001786 | 42.44711108 | 64.69240367 | 61.43514116 | 43.49471429 | 64.45751277 |
| ENSMUSG00000001794 | 21.93100739 | 35.47647943 | 33.89525029 | 44.30017197 | 39.39070225 |
| ENSMUSG00000001802 | 5.65961481  | 5.56493795  | 4.943057334 | 11.27640741 | 8.594335036 |
| ENSMUSG00000001815 | 6.367066661 | 3.478086219 | 8.473812573 | 6.443661377 | 4.297167518 |
| ENSMUSG00000001827 | 6.367066661 | 7.651789682 | 8.473812573 | 4.02728836  | 6.445751277 |
| ENSMUSG00000001829 | 7.781970364 | 14.60796212 | 12.00456781 | 16.91461111 | 16.47247549 |
| ENSMUSG00000001833 | 79.23460734 | 119.6461659 | 117.927225  | 237.6100133 | 171.8867007 |
| ENSMUSG00000001844 | 31.12788146 | 50.7800588  | 39.54445867 | 73.29664816 | 52.99839939 |
| ENSMUSG00000001847 | 125.2189777 | 137.7322143 | 112.9841676 | 203.780791  | 164.7247549 |
| ENSMUSG00000001855 | 44.56946663 | 73.73542784 | 52.25517753 | 153.0369577 | 113.1587446 |

|                    |             |             |             |             |             |
|--------------------|-------------|-------------|-------------|-------------|-------------|
| ENSMUSG00000001864 | 2.829807405 | 6.956172438 | 3.530755239 | 8.054576721 | 5.013362104 |
| ENSMUSG00000001870 | 6.367066661 | 3.478086219 | 3.530755239 | 3.221830688 | 7.87814045  |
| ENSMUSG00000001891 | 26.1757185  | 53.56252777 | 45.8998181  | 33.02376456 | 46.55264811 |
| ENSMUSG00000001901 | 10.61177777 | 10.43425866 | 8.473812573 | 11.27640741 | 7.161945863 |
| ENSMUSG00000001909 | 131.5860443 | 180.8604834 | 170.1824025 | 331.0431032 | 244.9385485 |
| ENSMUSG00000001911 | 3.537259256 | 6.956172438 | 5.649208382 | 7.249119049 | 9.310529622 |
| ENSMUSG00000001918 | 70.74518513 | 81.38721752 | 84.03197468 | 244.8591323 | 158.9951982 |
| ENSMUSG00000001924 | 7.781970364 | 4.869320706 | 8.473812573 | 12.88732275 | 10.7429188  |
| ENSMUSG00000001930 | 7.074518513 | 6.956172438 | 5.649208382 | 3.221830688 | 6.445751277 |
| ENSMUSG00000001946 | 9.196874066 | 8.347406925 | 2.824604191 | 9.665492065 | 7.161945863 |
| ENSMUSG00000001948 | 6.367066661 | 8.347406925 | 12.00456781 | 8.860034393 | 6.445751277 |
| ENSMUSG00000001964 | 9.904325918 | 22.95536904 | 16.94762515 | 68.46390213 | 63.0251236  |
| ENSMUSG00000001986 | 7.074518513 | 2.782468975 | 6.35535943  | 4.832746033 | 2.864778345 |
| ENSMUSG00000001998 | 50.93653329 | 56.34499675 | 50.84287544 | 62.02024075 | 63.0251236  |
| ENSMUSG00000001999 | 16.97884443 | 39.6501829  | 33.18909925 | 28.19101852 | 30.08017263 |
| ENSMUSG00000002006 | 4.244711108 | 2.782468975 | 3.530755239 | 2.416373016 | 6.445751277 |
| ENSMUSG00000002010 | 113.8997481 | 96.69079689 | 100.9795998 | 217.4735715 | 143.9551119 |
| ENSMUSG00000002012 | 3.537259256 | 3.478086219 | 2.824604191 | 0.805457672 | 2.148583759 |
| ENSMUSG00000002014 | 79.23460734 | 96.69079689 | 112.2780166 | 207.8080794 | 146.8198902 |
| ENSMUSG00000002020 | 4.244711108 | 8.347406925 | 6.35535943  | 5.638203705 | 7.87814045  |
| ENSMUSG00000002028 | 110.3624888 | 135.6453625 | 120.7518292 | 178.8116032 | 131.7798039 |
| ENSMUSG00000002031 | 23.34591109 | 31.30277597 | 39.54445867 | 21.74735715 | 31.5125618  |
| ENSMUSG00000002032 | 10.61177777 | 6.956172438 | 9.179963621 | 5.638203705 | 6.445751277 |
| ENSMUSG00000002033 | 12.02668147 | 4.173703463 | 6.35535943  | 6.443661377 | 8.594335036 |
| ENSMUSG00000002043 | 36.08004441 | 52.17129328 | 44.48751601 | 59.60386773 | 56.57937232 |
| ENSMUSG00000002058 | 26.1757185  | 50.7800588  | 46.60596915 | 24.16373016 | 25.78300511 |
| ENSMUSG00000002059 | 4.244711108 | 10.43425866 | 8.473812573 | 8.860034393 | 9.310529622 |
| ENSMUSG00000002064 | 110.3624888 | 148.8620902 | 119.3395271 | 202.1698757 | 184.0620087 |
| ENSMUSG00000002068 | 18.39374813 | 20.86851731 | 25.42143772 | 54.7711217  | 46.55264811 |
| ENSMUSG00000002076 | 14.85648888 | 15.30357936 | 14.829172   | 20.1364418  | 17.90486466 |
| ENSMUSG00000002083 | 10.61177777 | 7.651789682 | 9.179963621 | 82.15668255 | 45.83645353 |
| ENSMUSG00000002100 | 10.61177777 | 2.086851731 | 7.767661525 | 10.47094974 | 6.445751277 |
| ENSMUSG00000002102 | 36.08004441 | 54.95376226 | 55.78593277 | 84.57305557 | 62.30892901 |
| ENSMUSG00000002103 | 10.61177777 | 23.65098629 | 17.65377619 | 14.4982381  | 28.64778345 |
| ENSMUSG00000002104 | 10.61177777 | 7.651789682 | 11.29841676 | 6.443661377 | 6.445751277 |
| ENSMUSG00000002105 | 7.781970364 | 14.60796212 | 16.94762515 | 17.72006879 | 12.89150255 |
| ENSMUSG00000002107 | 6.367066661 | 6.260555194 | 12.71071886 | 6.443661377 | 5.729556691 |
| ENSMUSG00000002108 | 4.244711108 | 8.347406925 | 7.767661525 | 8.860034393 | 7.161945863 |
| ENSMUSG00000002109 | 9.904325918 | 35.47647943 | 21.89068248 | 34.6346799  | 37.24211849 |
| ENSMUSG00000002129 | 51.64398514 | 70.95295887 | 71.32125582 | 121.6241085 | 89.52432329 |
| ENSMUSG00000002147 | 87.01657771 | 98.77764862 | 105.9226572 | 103.098582  | 88.80812871 |
| ENSMUSG00000002190 | 8.489422215 | 9.738641413 | 5.649208382 | 7.249119049 | 2.864778345 |
| ENSMUSG00000002205 | 18.39374813 | 48.69320706 | 48.7244223  | 43.49471429 | 48.70123187 |

|                    |             |             |             |             |             |
|--------------------|-------------|-------------|-------------|-------------|-------------|
| ENSMUSG00000002210 | 40.32475552 | 47.99758982 | 56.49208382 | 57.99295239 | 52.99839939 |
| ENSMUSG00000002221 | 30.4204296  | 59.82308296 | 55.07978173 | 107.9313281 | 95.25387998 |
| ENSMUSG00000002222 | 53.7663407  | 76.51789682 | 60.02283906 | 62.02024075 | 75.20043157 |
| ENSMUSG00000002227 | 26.88317035 | 32.69401046 | 39.54445867 | 32.21830688 | 30.08017263 |
| ENSMUSG00000002233 | 7.074518513 | 4.869320706 | 9.179963621 | 9.665492065 | 7.161945863 |
| ENSMUSG00000002240 | 12.02668147 | 4.173703463 | 5.649208382 | 5.638203705 | 3.580972932 |
| ENSMUSG00000002249 | 7.781970364 | 2.086851731 | 5.649208382 | 7.249119049 | 6.445751277 |
| ENSMUSG00000002250 | 59.42595551 | 81.38721752 | 76.26431316 | 66.04752911 | 63.0251236  |
| ENSMUSG00000002265 | 9.904325918 | 1.391234488 | 11.29841676 | 3.221830688 | 10.02672421 |
| ENSMUSG00000002266 | 14.85648888 | 7.651789682 | 9.886114669 | 8.054576721 | 5.013362104 |
| ENSMUSG00000002274 | 21.93100739 | 21.56413456 | 24.71528667 | 18.52552646 | 21.48583759 |
| ENSMUSG00000002279 | 26.88317035 | 37.56333116 | 36.71985448 | 20.1364418  | 20.05344842 |
| ENSMUSG00000002280 | 26.88317035 | 39.6501829  | 36.71985448 | 29.80193387 | 40.82309142 |
| ENSMUSG00000002289 | 9.196874066 | 11.82549314 | 9.179963621 | 4.02728836  | 10.02672421 |
| ENSMUSG00000002297 | 21.93100739 | 36.17209668 | 38.13215658 | 77.32393652 | 79.49759908 |
| ENSMUSG00000002307 | 51.64398514 | 66.08363816 | 41.66291182 | 167.5351958 | 110.2939663 |
| ENSMUSG00000002308 | 7.781970364 | 22.95536904 | 16.94762515 | 21.74735715 | 12.89150255 |
| ENSMUSG00000002319 | 12.02668147 | 18.08604834 | 16.94762515 | 46.71654498 | 40.10689684 |
| ENSMUSG00000002320 | 75.69734809 | 95.2995624  | 96.74269354 | 207.8080794 | 158.9951982 |
| ENSMUSG00000002325 | 36.08004441 | 43.12826911 | 41.66291182 | 167.5351958 | 118.1721067 |
| ENSMUSG00000002332 | 53.05888884 | 70.95295887 | 65.67204744 | 119.2077355 | 95.25387998 |
| ENSMUSG00000002342 | 34.66514071 | 56.34499675 | 57.90438592 | 45.10562964 | 55.14698315 |
| ENSMUSG00000002343 | 33.25023701 | 67.47487265 | 58.61053696 | 84.57305557 | 92.38910164 |
| ENSMUSG00000002345 | 77.11225179 | 91.12585893 | 79.08891735 | 96.65492065 | 85.94335036 |
| ENSMUSG00000002346 | 8.489422215 | 16.69481385 | 12.00456781 | 12.88732275 | 13.60769714 |
| ENSMUSG00000002393 | 7.074518513 | 9.738641413 | 13.41686991 | 10.47094974 | 9.310529622 |
| ENSMUSG00000002395 | 20.51610369 | 23.65098629 | 31.0706461  | 37.05105292 | 32.94495097 |
| ENSMUSG00000002409 | 41.03220737 | 53.56252777 | 69.90895373 | 69.2693598  | 54.43078856 |
| ENSMUSG00000002413 | 25.46826665 | 45.91073809 | 24.71528667 | 54.7711217  | 45.83645353 |
| ENSMUSG00000002416 | 41.03220737 | 68.86610713 | 42.36906287 | 62.02024075 | 47.98503729 |
| ENSMUSG00000002428 | 37.49494812 | 73.0398106  | 59.31668801 | 47.52200265 | 39.39070225 |
| ENSMUSG00000002455 | 17.68629628 | 25.73783802 | 18.35992724 | 28.9964762  | 17.18867007 |
| ENSMUSG00000002458 | 99.04325918 | 137.036597  | 134.8748501 | 157.8697037 | 126.0502472 |
| ENSMUSG00000002459 | 8.489422215 | 6.956172438 | 4.236906287 | 9.665492065 | 5.013362104 |
| ENSMUSG00000002475 | 5.65961481  | 5.56493795  | 7.767661525 | 7.249119049 | 4.297167518 |
| ENSMUSG00000002486 | 16.97884443 | 22.95536904 | 19.06607829 | 22.55281482 | 23.63442135 |
| ENSMUSG00000002489 | 9.904325918 | 6.956172438 | 7.767661525 | 4.832746033 | 9.310529622 |
| ENSMUSG00000002500 | 6.367066661 | 6.260555194 | 7.061510478 | 7.249119049 | 5.013362104 |
| ENSMUSG00000002504 | 7.781970364 | 4.869320706 | 4.943057334 | 7.249119049 | 6.445751277 |
| ENSMUSG00000002524 | 107.5326814 | 114.7768452 | 109.4534124 | 248.080963  | 189.7915654 |
| ENSMUSG00000002546 | 53.05888884 | 109.2119073 | 74.14586002 | 99.07129367 | 83.7947666  |
| ENSMUSG00000002550 | 24.76081479 | 29.91154148 | 36.71985448 | 79.74030954 | 60.87653984 |
| ENSMUSG00000002565 | 8.489422215 | 5.56493795  | 7.767661525 | 3.221830688 | 9.310529622 |

|                    |             |             |             |             |             |
|--------------------|-------------|-------------|-------------|-------------|-------------|
| ENSMUSG00000002578 | 7.074518513 | 7.651789682 | 5.649208382 | 9.665492065 | 7.161945863 |
| ENSMUSG00000002588 | 9.196874066 | 4.869320706 | 7.061510478 | 4.832746033 | 9.310529622 |
| ENSMUSG00000002602 | 9.904325918 | 9.043024169 | 9.179963621 | 8.860034393 | 11.45911338 |
| ENSMUSG00000002603 | 106.1177777 | 132.8628936 | 117.2210739 | 156.2587884 | 116.023523  |
| ENSMUSG00000002617 | 18.39374813 | 15.99919661 | 22.59683353 | 7.249119049 | 15.04008631 |
| ENSMUSG00000002635 | 53.7663407  | 70.25734162 | 79.08891735 | 49.93837567 | 54.43078856 |
| ENSMUSG00000002661 | 18.39374813 | 20.17290007 | 22.59683353 | 9.665492065 | 19.33725383 |
| ENSMUSG00000002679 | 29.71297775 | 43.12826911 | 37.42600553 | 78.12939419 | 54.43078856 |
| ENSMUSG00000002699 | 6.367066661 | 5.56493795  | 7.061510478 | 39.46742593 | 34.37734014 |
| ENSMUSG00000002718 | 70.03773327 | 89.0390072  | 101.6857509 | 277.8828969 | 177.6162574 |
| ENSMUSG00000002728 | 33.95768886 | 55.6493795  | 62.1412922  | 72.49119049 | 72.33565322 |
| ENSMUSG00000002732 | 20.51610369 | 18.78166558 | 18.35992724 | 16.91461111 | 22.91822676 |
| ENSMUSG00000002763 | 65.08557032 | 95.99517964 | 85.44427678 | 122.4295662 | 108.8615771 |
| ENSMUSG00000002767 | 31.12788146 | 43.82388636 | 53.66747963 | 46.71654498 | 55.86317773 |
| ENSMUSG00000002771 | 15.56394073 | 12.52111039 | 16.2414741  | 8.054576721 | 8.594335036 |
| ENSMUSG00000002778 | 37.49494812 | 52.17129328 | 54.37363068 | 74.10210583 | 68.0384857  |
| ENSMUSG00000002781 | 6.367066661 | 10.43425866 | 12.71071886 | 10.47094974 | 8.594335036 |
| ENSMUSG00000002803 | 14.85648888 | 17.39043109 | 19.06607829 | 18.52552646 | 35.09353473 |
| ENSMUSG00000002814 | 126.6338814 | 164.8612868 | 172.3008557 | 231.9718096 | 185.4943979 |
| ENSMUSG00000002831 | 9.196874066 | 8.347406925 | 7.061510478 | 6.443661377 | 7.161945863 |
| ENSMUSG00000002833 | 33.95768886 | 51.47567604 | 48.01827125 | 70.88027514 | 50.13362104 |
| ENSMUSG00000002845 | 4.952162959 | 8.347406925 | 9.179963621 | 4.832746033 | 6.445751277 |
| ENSMUSG00000002871 | 32.54278516 | 43.82388636 | 38.13215658 | 33.82922223 | 35.80972932 |
| ENSMUSG00000002881 | 36.78749627 | 52.86691053 | 44.48751601 | 109.5422434 | 92.38910164 |
| ENSMUSG00000002885 | 87.01657771 | 100.1688831 | 91.09348516 | 43.49471429 | 40.82309142 |
| ENSMUSG00000002900 | 14.14903703 | 3.478086219 | 12.00456781 | 11.27640741 | 8.594335036 |
| ENSMUSG00000002908 | 7.781970364 | 6.956172438 | 7.767661525 | 8.054576721 | 7.87814045  |
| ENSMUSG00000002910 | 11.31922962 | 19.47728283 | 12.00456781 | 18.52552646 | 20.05344842 |
| ENSMUSG00000002944 | 11.31922962 | 4.869320706 | 5.649208382 | 4.02728836  | 4.297167518 |
| ENSMUSG00000002948 | 67.20792587 | 97.38641413 | 81.91352154 | 120.0131931 | 101.6996313 |
| ENSMUSG00000002949 | 20.51610369 | 31.99839321 | 37.42600553 | 78.93485187 | 60.87653984 |
| ENSMUSG00000002957 | 59.42595551 | 84.1696865  | 66.37819849 | 62.02024075 | 60.87653984 |
| ENSMUSG00000002963 | 29.0055259  | 42.43265187 | 44.48751601 | 64.43661377 | 60.16034525 |
| ENSMUSG00000002980 | 9.196874066 | 6.260555194 | 4.943057334 | 6.443661377 | 7.161945863 |
| ENSMUSG00000002981 | 120.2668147 | 165.556904  | 148.29172   | 207.0026217 | 146.1036956 |
| ENSMUSG00000002983 | 14.85648888 | 22.95536904 | 24.71528667 | 40.2728836  | 45.12025894 |
| ENSMUSG00000002984 | 21.22355554 | 34.08524495 | 27.53989086 | 128.0677699 | 113.1587446 |
| ENSMUSG00000002985 | 13.44158517 | 15.30357936 | 14.12302096 | 8.860034393 | 12.89150255 |
| ENSMUSG00000002996 | 55.1812444  | 89.0390072  | 53.66747963 | 31.41284921 | 33.66114556 |
| ENSMUSG00000002997 | 6.367066661 | 7.651789682 | 11.29841676 | 1.610915344 | 6.445751277 |
| ENSMUSG00000003031 | 72.86754068 | 97.38641413 | 107.3349593 | 203.780791  | 161.8599765 |
| ENSMUSG00000003033 | 67.91537772 | 107.8206728 | 82.61967259 | 118.4022778 | 85.22715578 |
| ENSMUSG00000003037 | 164.1288295 | 190.5991248 | 170.1824025 | 310.9066614 | 232.7632406 |

|                    |             |             |             |             |             |
|--------------------|-------------|-------------|-------------|-------------|-------------|
| ENSMUSG00000003038 | 14.14903703 | 22.2597518  | 17.65377619 | 63.6311561  | 60.16034525 |
| ENSMUSG00000003051 | 9.904325918 | 3.478086219 | 5.649208382 | 5.638203705 | 3.580972932 |
| ENSMUSG00000003053 | 16.97884443 | 5.56493795  | 15.53532305 | 7.249119049 | 6.445751277 |
| ENSMUSG00000003062 | 26.1757185  | 33.3896277  | 24.71528667 | 23.35827249 | 24.35061594 |
| ENSMUSG00000003068 | 68.62282957 | 107.1250555 | 106.6288082 | 207.8080794 | 158.2790036 |
| ENSMUSG00000003072 | 33.95768886 | 61.9099347  | 31.0706461  | 95.04400531 | 68.0384857  |
| ENSMUSG00000003099 | 24.76081479 | 36.17209668 | 38.83830763 | 146.5932963 | 97.40246374 |
| ENSMUSG00000003119 | 102.5805184 | 134.254128  | 132.756397  | 236.8045556 | 205.5478463 |
| ENSMUSG00000003123 | 12.02668147 | 8.347406925 | 12.71071886 | 12.88732275 | 12.89150255 |
| ENSMUSG00000003134 | 2.829807405 | 3.478086219 | 9.886114669 | 8.054576721 | 2.148583759 |
| ENSMUSG00000003135 | 15.56394073 | 20.17290007 | 16.2414741  | 39.46742593 | 43.68786977 |
| ENSMUSG00000003153 | 7.781970364 | 11.82549314 | 7.061510478 | 17.72006879 | 22.91822676 |
| ENSMUSG00000003154 | 53.05888884 | 86.95215547 | 79.08891735 | 70.07481747 | 79.49759908 |
| ENSMUSG00000003161 | 7.074518513 | 9.738641413 | 11.29841676 | 5.638203705 | 4.297167518 |
| ENSMUSG00000003166 | 0           | 0           | 0           | 0           | 0           |
| ENSMUSG00000003178 | 38.20239997 | 63.99678643 | 38.13215658 | 32.21830688 | 29.36397804 |
| ENSMUSG00000003184 | 65.08557032 | 93.90832791 | 91.09348516 | 161.0915344 | 122.4692743 |
| ENSMUSG00000003190 | 61.54831106 | 82.77845201 | 88.97503202 | 146.5932963 | 115.3073284 |
| ENSMUSG00000003198 | 29.71297775 | 56.34499675 | 48.01827125 | 62.02024075 | 50.84981563 |
| ENSMUSG00000003199 | 17.68629628 | 19.47728283 | 12.71071886 | 15.30369577 | 10.02672421 |
| ENSMUSG00000003233 | 32.54278516 | 55.6493795  | 49.43057334 | 53.96566403 | 41.53928601 |
| ENSMUSG00000003234 | 41.03220737 | 81.38721752 | 52.25517753 | 69.2693598  | 62.30892901 |
| ENSMUSG00000003235 | 26.88317035 | 54.95376226 | 55.07978173 | 78.12939419 | 68.0384857  |
| ENSMUSG00000003269 | 32.54278516 | 42.43265187 | 41.66291182 | 49.93837567 | 35.09353473 |
| ENSMUSG00000003271 | 8.489422215 | 4.869320706 | 6.35535943  | 8.054576721 | 12.17530797 |
| ENSMUSG00000003273 | 6.367066661 | 6.956172438 | 2.824604191 | 4.832746033 | 12.17530797 |
| ENSMUSG00000003279 | 6.367066661 | 2.782468975 | 9.886114669 | 5.638203705 | 3.580972932 |
| ENSMUSG00000003283 | 75.69734809 | 84.86530374 | 102.3919019 | 24.16373016 | 33.66114556 |
| ENSMUSG00000003299 | 16.97884443 | 22.95536904 | 17.65377619 | 28.9964762  | 25.78300511 |
| ENSMUSG00000003308 | 27.5906222  | 43.82388636 | 34.60140134 | 86.18397091 | 62.30892901 |
| ENSMUSG00000003309 | 11.31922962 | 19.47728283 | 15.53532305 | 14.4982381  | 17.18867007 |
| ENSMUSG00000003316 | 56.5961481  | 84.1696865  | 81.91352154 | 97.46037832 | 87.37573953 |
| ENSMUSG00000003344 | 36.78749627 | 60.51870021 | 45.8998181  | 37.05105292 | 51.56601022 |
| ENSMUSG00000003345 | 66.50047402 | 77.9091313  | 74.85201106 | 115.1804471 | 118.1721067 |
| ENSMUSG00000003346 | 1.414903703 | 2.086851731 | 2.824604191 | 0.805457672 | 2.864778345 |
| ENSMUSG00000003348 | 38.20239997 | 53.56252777 | 63.5535943  | 168.3406535 | 116.7397176 |
| ENSMUSG00000003352 | 6.367066661 | 8.347406925 | 8.473812573 | 5.638203705 | 5.013362104 |
| ENSMUSG00000003360 | 68.62282957 | 91.12585893 | 76.97046421 | 138.5387196 | 95.25387998 |
| ENSMUSG00000003363 | 34.66514071 | 47.30197258 | 46.60596915 | 85.37851324 | 66.60609653 |
| ENSMUSG00000003380 | 9.196874066 | 16.69481385 | 11.29841676 | 8.054576721 | 10.02672421 |
| ENSMUSG00000003382 | 64.37811846 | 102.2557348 | 91.79963621 | 179.6170609 | 167.5895332 |
| ENSMUSG00000003402 | 18.39374813 | 19.47728283 | 24.71528667 | 28.19101852 | 29.36397804 |
| ENSMUSG00000003411 | 6.367066661 | 5.56493795  | 3.530755239 | 8.054576721 | 7.161945863 |

|                    |             |             |             |             |             |
|--------------------|-------------|-------------|-------------|-------------|-------------|
| ENSMUSG00000003418 | 5.65961481  | 6.260555194 | 9.179963621 | 26.58010318 | 15.04008631 |
| ENSMUSG00000003421 | 85.601674   | 128.6891901 | 105.2165061 | 128.0677699 | 113.1587446 |
| ENSMUSG00000003423 | 25.46826665 | 34.78086219 | 22.59683353 | 25.77464551 | 35.09353473 |
| ENSMUSG00000003429 | 0           | 0           | 0           | 0           | 0           |
| ENSMUSG00000003436 | 7.781970364 | 11.82549314 | 10.59226572 | 12.08186508 | 6.445751277 |
| ENSMUSG00000003437 | 65.79302217 | 98.08203137 | 100.2734488 | 135.3168889 | 128.198831  |
| ENSMUSG00000003438 | 36.78749627 | 47.99758982 | 50.13672439 | 82.15668255 | 75.20043157 |
| ENSMUSG00000003452 | 2.829807405 | 6.956172438 | 8.473812573 | 7.249119049 | 5.013362104 |
| ENSMUSG00000003458 | 174.7406073 | 215.6413456 | 221.731429  | 228.7499789 | 199.8182896 |
| ENSMUSG00000003464 | 42.44711108 | 52.17129328 | 39.54445867 | 40.2728836  | 52.99839939 |
| ENSMUSG00000003476 | 9.196874066 | 5.56493795  | 5.649208382 | 8.054576721 | 10.02672421 |
| ENSMUSG00000003500 | 12.02668147 | 8.347406925 | 10.59226572 | 5.638203705 | 10.02672421 |
| ENSMUSG00000003505 | 9.196874066 | 8.347406925 | 7.767661525 | 4.832746033 | 3.580972932 |
| ENSMUSG00000003518 | 9.904325918 | 6.260555194 | 4.943057334 | 9.665492065 | 3.580972932 |
| ENSMUSG00000003526 | 7.074518513 | 2.086851731 | 5.649208382 | 7.249119049 | 5.729556691 |
| ENSMUSG00000003528 | 9.196874066 | 14.60796212 | 7.061510478 | 28.9964762  | 22.91822676 |
| ENSMUSG00000003531 | 12.02668147 | 6.956172438 | 5.649208382 | 7.249119049 | 6.445751277 |
| ENSMUSG00000003534 | 10.61177777 | 6.956172438 | 4.236906287 | 5.638203705 | 7.161945863 |
| ENSMUSG00000003573 | 11.31922962 | 13.91234488 | 7.061510478 | 5.638203705 | 10.02672421 |
| ENSMUSG00000003575 | 35.37259256 | 54.95376226 | 57.90438592 | 44.30017197 | 41.53928601 |
| ENSMUSG00000003581 | 19.10119998 | 28.52030699 | 21.89068248 | 26.58010318 | 24.35061594 |
| ENSMUSG00000003585 | 9.196874066 | 8.347406925 | 2.824604191 | 7.249119049 | 6.445751277 |
| ENSMUSG00000003604 | 16.27139258 | 30.60715873 | 32.4829482  | 42.68925662 | 34.37734014 |
| ENSMUSG00000003617 | 7.781970364 | 9.043024169 | 9.886114669 | 5.638203705 | 6.445751277 |
| ENSMUSG00000003644 | 21.22355554 | 22.95536904 | 13.41686991 | 19.33098413 | 21.48583759 |
| ENSMUSG00000003660 | 47.39927403 | 61.9099347  | 64.25974535 | 115.9859048 | 108.1453825 |
| ENSMUSG00000003662 | 99.04325918 | 143.9927695 | 134.1686991 | 96.65492065 | 108.8615771 |
| ENSMUSG00000003680 | 22.63845924 | 34.78086219 | 30.36449505 | 32.21830688 | 29.36397804 |
| ENSMUSG00000003721 | 18.39374813 | 26.43345526 | 31.77679715 | 13.69278043 | 15.04008631 |
| ENSMUSG00000003731 | 50.22908144 | 77.9091313  | 64.25974535 | 111.1531587 | 94.5376854  |
| ENSMUSG00000003746 | 174.0331554 | 182.9473351 | 158.1778347 | 322.1830688 | 233.4794351 |
| ENSMUSG00000003762 | 19.80865184 | 30.60715873 | 34.60140134 | 22.55281482 | 26.49919969 |
| ENSMUSG00000003778 | 102.5805184 | 105.7338211 | 88.26888097 | 223.9172328 | 152.5494469 |
| ENSMUSG00000003779 | 73.57499253 | 100.1688831 | 91.09348516 | 195.7262143 | 134.6445822 |
| ENSMUSG00000003808 | 78.52715549 | 122.4286349 | 97.44884459 | 182.8388916 | 146.8198902 |
| ENSMUSG00000003809 | 15.56394073 | 16.69481385 | 10.59226572 | 11.27640741 | 12.17530797 |
| ENSMUSG00000003810 | 24.76081479 | 27.82468975 | 26.83373982 | 42.68925662 | 37.95831308 |
| ENSMUSG00000003812 | 21.22355554 | 28.52030699 | 27.53989086 | 34.6346799  | 32.22875639 |
| ENSMUSG00000003813 | 40.32475552 | 59.82308296 | 52.25517753 | 69.2693598  | 56.57937232 |
| ENSMUSG00000003824 | 4.952162959 | 6.260555194 | 9.179963621 | 6.443661377 | 12.17530797 |
| ENSMUSG00000003847 | 60.84085921 | 83.47406925 | 80.50121945 | 82.96214023 | 85.94335036 |
| ENSMUSG00000003848 | 50.93653329 | 105.7338211 | 81.20737049 | 155.4533307 | 121.0368851 |
| ENSMUSG00000003863 | 3.537259256 | 5.56493795  | 3.530755239 | 6.443661377 | 8.594335036 |

|                    |             |             |             |             |             |
|--------------------|-------------|-------------|-------------|-------------|-------------|
| ENSMUSG00000003865 | 70.03773327 | 66.7792554  | 67.08434954 | 149.815127  | 113.8749392 |
| ENSMUSG00000003868 | 6.367066661 | 15.30357936 | 15.53532305 | 12.88732275 | 12.89150255 |
| ENSMUSG00000003873 | 45.27691848 | 73.73542784 | 64.96589639 | 133.7059736 | 105.2806042 |
| ENSMUSG00000003923 | 66.50047402 | 105.0382038 | 84.03197468 | 149.815127  | 117.4559122 |
| ENSMUSG00000003929 | 50.22908144 | 86.95215547 | 60.02283906 | 83.7675979  | 69.47087488 |
| ENSMUSG00000003948 | 40.32475552 | 75.12666233 | 62.84744325 | 36.24559524 | 48.70123187 |
| ENSMUSG00000003949 | 5.65961481  | 8.347406925 | 7.767661525 | 2.416373016 | 4.297167518 |
| ENSMUSG00000003992 | 10.61177777 | 13.21672763 | 7.767661525 | 13.69278043 | 10.7429188  |
| ENSMUSG00000004031 | 9.904325918 | 3.478086219 | 7.767661525 | 8.860034393 | 5.013362104 |
| ENSMUSG00000004032 | 7.074518513 | 7.651789682 | 7.061510478 | 4.02728836  | 7.161945863 |
| ENSMUSG00000004035 | 5.65961481  | 4.869320706 | 6.35535943  | 6.443661377 | 8.594335036 |
| ENSMUSG00000004040 | 87.72402956 | 118.2549314 | 114.3964697 | 237.6100133 | 174.7514791 |
| ENSMUSG00000004043 | 17.68629628 | 22.2597518  | 24.71528667 | 62.02024075 | 47.98503729 |
| ENSMUSG00000004056 | 69.33028142 | 93.90832791 | 90.38733411 | 98.265836   | 73.05184781 |
| ENSMUSG00000004069 | 50.93653329 | 93.21271067 | 81.91352154 | 95.04400531 | 84.51096119 |
| ENSMUSG00000004070 | 83.47931845 | 90.43024169 | 90.38733411 | 78.12939419 | 65.17370736 |
| ENSMUSG00000004071 | 48.10672589 | 82.08283477 | 53.66747963 | 47.52200265 | 53.71459398 |
| ENSMUSG00000004085 | 9.196874066 | 13.21672763 | 10.59226572 | 12.08186508 | 22.91822676 |
| ENSMUSG00000004099 | 8.489422215 | 9.738641413 | 4.943057334 | 8.054576721 | 12.17530797 |
| ENSMUSG00000004100 | 3.537259256 | 8.347406925 | 5.649208382 | 4.02728836  | 3.580972932 |
| ENSMUSG00000004110 | 10.61177777 | 9.738641413 | 9.886114669 | 9.665492065 | 6.445751277 |
| ENSMUSG00000004113 | 8.489422215 | 4.173703463 | 12.00456781 | 2.416373016 | 4.297167518 |
| ENSMUSG00000004127 | 8.489422215 | 7.651789682 | 7.061510478 | 25.77464551 | 27.21539428 |
| ENSMUSG00000004151 | 7.074518513 | 4.173703463 | 5.649208382 | 3.221830688 | 7.161945863 |
| ENSMUSG00000004187 | 7.074518513 | 8.347406925 | 12.71071886 | 8.054576721 | 9.310529622 |
| ENSMUSG00000004207 | 123.0966221 | 156.5138799 | 154.6470795 | 194.9207566 | 166.8733386 |
| ENSMUSG00000004221 | 7.781970364 | 17.39043109 | 14.829172   | 14.4982381  | 21.48583759 |
| ENSMUSG00000004231 | 7.781970364 | 1.391234488 | 2.824604191 | 5.638203705 | 4.297167518 |
| ENSMUSG00000004233 | 14.85648888 | 16.69481385 | 13.41686991 | 35.44013757 | 15.04008631 |
| ENSMUSG00000004263 | 29.0055259  | 34.78086219 | 28.95219296 | 41.07834128 | 35.80972932 |
| ENSMUSG00000004264 | 101.8730666 | 146.0796212 | 137.6994543 | 344.7358837 | 258.5462457 |
| ENSMUSG00000004266 | 27.5906222  | 42.43265187 | 52.25517753 | 27.38556085 | 17.18867007 |
| ENSMUSG00000004267 | 7.074518513 | 8.347406925 | 10.59226572 | 4.02728836  | 5.729556691 |
| ENSMUSG00000004268 | 142.905274  | 189.9035076 | 163.120892  | 461.5272461 | 340.9086231 |
| ENSMUSG00000004270 | 24.76081479 | 49.38882431 | 46.60596915 | 57.99295239 | 55.86317773 |
| ENSMUSG00000004285 | 24.76081479 | 43.12826911 | 38.13215658 | 54.7711217  | 48.70123187 |
| ENSMUSG00000004296 | 8.489422215 | 6.260555194 | 6.35535943  | 7.249119049 | 6.445751277 |
| ENSMUSG00000004317 | 9.196874066 | 10.43425866 | 11.29841676 | 12.88732275 | 12.89150255 |
| ENSMUSG00000004319 | 44.56946663 | 75.82227957 | 60.02283906 | 144.1769233 | 119.6044959 |
| ENSMUSG00000004328 | 9.904325918 | 8.347406925 | 9.886114669 | 9.665492065 | 7.87814045  |
| ENSMUSG00000004344 | 4.952162959 | 10.43425866 | 7.767661525 | 6.443661377 | 4.297167518 |
| ENSMUSG00000004347 | 11.31922962 | 7.651789682 | 5.649208382 | 4.832746033 | 4.297167518 |
| ENSMUSG00000004359 | 14.85648888 | 10.43425866 | 12.71071886 | 7.249119049 | 9.310529622 |



|                    |             |             |             |             |             |
|--------------------|-------------|-------------|-------------|-------------|-------------|
| ENSMUSG00000004364 | 124.5115258 | 139.819066  | 122.1641313 | 244.0536746 | 198.3859004 |
| ENSMUSG00000004371 | 9.196874066 | 11.82549314 | 10.59226572 | 4.832746033 | 12.89150255 |
| ENSMUSG00000004383 | 9.904325918 | 6.260555194 | 9.886114669 | 4.832746033 | 2.864778345 |
| ENSMUSG00000004393 | 46.69182218 | 68.17048989 | 56.49208382 | 149.0096693 | 130.3474147 |
| ENSMUSG00000004394 | 34.66514071 | 48.69320706 | 36.01370344 | 58.79841006 | 45.12025894 |
| ENSMUSG00000004415 | 10.61177777 | 8.347406925 | 2.118453143 | 9.665492065 | 8.594335036 |
| ENSMUSG00000004446 | 18.39374813 | 29.91154148 | 24.00913562 | 99.07129367 | 79.49759908 |
| ENSMUSG00000004451 | 9.904325918 | 17.39043109 | 9.886114669 | 10.47094974 | 14.32389173 |
| ENSMUSG00000004455 | 209.405748  | 196.1640627 | 181.4808193 | 367.2886985 | 269.2891645 |
| ENSMUSG00000004460 | 93.38364437 | 141.2103005 | 127.1071886 | 242.4427593 | 177.6162574 |
| ENSMUSG00000004473 | 6.367066661 | 5.56493795  | 4.236906287 | 6.443661377 | 7.161945863 |
| ENSMUSG00000004530 | 11.31922962 | 19.47728283 | 21.89068248 | 77.32393652 | 44.40406435 |
| ENSMUSG00000004535 | 118.851911  | 128.6891901 | 105.9226572 | 138.5387196 | 99.5510475  |
| ENSMUSG00000004542 | 6.367066661 | 8.347406925 | 7.767661525 | 8.054576721 | 9.310529622 |
| ENSMUSG00000004552 | 73.57499253 | 105.7338211 | 96.74269354 | 37.85651059 | 39.39070225 |
| ENSMUSG00000004558 | 7.781970364 | 3.478086219 | 4.236906287 | 6.443661377 | 7.87814045  |
| ENSMUSG00000004561 | 9.904325918 | 19.47728283 | 23.30298458 | 29.80193387 | 30.79636721 |
| ENSMUSG00000004562 | 8.489422215 | 4.869320706 | 8.473812573 | 6.443661377 | 9.310529622 |
| ENSMUSG00000004565 | 16.27139258 | 14.60796212 | 5.649208382 | 12.88732275 | 15.7562809  |
| ENSMUSG00000004567 | 23.34591109 | 47.99758982 | 39.54445867 | 43.49471429 | 35.09353473 |
| ENSMUSG00000004568 | 65.79302217 | 77.21351406 | 91.79963621 | 36.24559524 | 48.70123187 |
| ENSMUSG00000004591 | 57.30359995 | 94.60394515 | 76.26431316 | 128.0677699 | 100.9834367 |
| ENSMUSG00000004609 | 5.65961481  | 2.782468975 | 6.35535943  | 3.221830688 | 7.161945863 |
| ENSMUSG00000004626 | 53.05888884 | 69.56172438 | 72.02740687 | 93.43308996 | 64.45751277 |
| ENSMUSG00000004630 | 10.61177777 | 9.043024169 | 9.886114669 | 7.249119049 | 10.02672421 |
| ENSMUSG00000004631 | 4.244711108 | 8.347406925 | 6.35535943  | 4.832746033 | 4.297167518 |
| ENSMUSG00000004633 | 9.904325918 | 5.56493795  | 11.29841676 | 7.249119049 | 5.729556691 |
| ENSMUSG00000004637 | 9.196874066 | 4.869320706 | 9.886114669 | 11.27640741 | 15.04008631 |
| ENSMUSG00000004642 | 44.56946663 | 59.12746572 | 49.43057334 | 204.5862487 | 148.2522794 |
| ENSMUSG00000004661 | 50.22908144 | 67.47487265 | 68.49665163 | 103.9040397 | 73.76804239 |
| ENSMUSG00000004665 | 94.79854807 | 117.5593142 | 126.4010376 | 122.4295662 | 129.6312201 |
| ENSMUSG00000004667 | 94.09109622 | 128.6891901 | 117.2210739 | 143.3714656 | 122.4692743 |
| ENSMUSG00000004668 | 9.904325918 | 6.956172438 | 9.886114669 | 7.249119049 | 6.445751277 |
| ENSMUSG00000004677 | 80.64951104 | 125.9067211 | 93.91808935 | 119.2077355 | 90.95671247 |
| ENSMUSG00000004698 | 67.20792587 | 81.38721752 | 84.03197468 | 50.74383334 | 57.29556691 |
| ENSMUSG00000004707 | 53.7663407  | 68.86610713 | 69.90895373 | 79.74030954 | 76.63282074 |
| ENSMUSG00000004709 | 5.65961481  | 7.651789682 | 10.59226572 | 9.665492065 | 12.17530797 |
| ENSMUSG00000004730 | 5.65961481  | 8.347406925 | 8.473812573 | 18.52552646 | 25.06681052 |
| ENSMUSG00000004768 | 8.489422215 | 12.52111039 | 8.473812573 | 15.30369577 | 17.90486466 |
| ENSMUSG00000004771 | 60.84085921 | 77.21351406 | 81.91352154 | 64.43661377 | 78.7814045  |
| ENSMUSG00000004788 | 41.03220737 | 46.60635533 | 55.07978173 | 72.49119049 | 61.59273443 |
| ENSMUSG00000004789 | 91.96874066 | 121.0374004 | 93.91808935 | 219.0844868 | 199.102095  |
| ENSMUSG00000004798 | 12.02668147 | 25.04222078 | 12.71071886 | 13.69278043 | 10.02672421 |

|                    |             |             |             |             |             |
|--------------------|-------------|-------------|-------------|-------------|-------------|
| ENSMUSG00000004814 | 10.61177777 | 2.086851731 | 7.061510478 | 5.638203705 | 15.04008631 |
| ENSMUSG00000004815 | 19.80865184 | 38.95456565 | 33.89525029 | 30.60739154 | 30.79636721 |
| ENSMUSG00000004842 | 7.781970364 | 6.260555194 | 7.061510478 | 2.416373016 | 3.580972932 |
| ENSMUSG00000004846 | 18.39374813 | 17.39043109 | 16.94762515 | 23.35827249 | 18.62105924 |
| ENSMUSG00000004849 | 9.904325918 | 11.1298759  | 9.179963621 | 17.72006879 | 14.32389173 |
| ENSMUSG00000004864 | 12.02668147 | 10.43425866 | 6.35535943  | 12.08186508 | 12.89150255 |
| ENSMUSG00000004865 | 41.73965922 | 75.12666233 | 69.90895373 | 108.7367857 | 90.24051788 |
| ENSMUSG00000004872 | 7.781970364 | 4.869320706 | 5.649208382 | 5.638203705 | 5.729556691 |
| ENSMUSG00000004880 | 19.80865184 | 20.86851731 | 25.42143772 | 12.88732275 | 12.89150255 |
| ENSMUSG00000004891 | 7.074518513 | 4.869320706 | 7.061510478 | 5.638203705 | 2.148583759 |
| ENSMUSG00000004892 | 9.196874066 | 7.651789682 | 5.649208382 | 6.443661377 | 7.87814045  |
| ENSMUSG00000004894 | 11.31922962 | 4.173703463 | 6.35535943  | 8.860034393 | 10.02672421 |
| ENSMUSG00000004896 | 83.47931845 | 120.3417832 | 106.6288082 | 264.9955741 | 219.1555434 |
| ENSMUSG00000004897 | 135.8307554 | 130.7760418 | 133.462548  | 291.5756773 | 200.5344842 |
| ENSMUSG00000004929 | 9.904325918 | 22.95536904 | 21.89068248 | 59.60386773 | 35.80972932 |
| ENSMUSG00000004931 | 20.51610369 | 25.04222078 | 34.60140134 | 43.49471429 | 37.24211849 |
| ENSMUSG00000004933 | 6.367066661 | 9.738641413 | 3.530755239 | 8.054576721 | 5.013362104 |
| ENSMUSG00000004934 | 146.4425332 | 151.6445591 | 149.7040221 | 176.3952302 | 148.2522794 |
| ENSMUSG00000004945 | 31.12788146 | 48.69320706 | 39.54445867 | 42.68925662 | 54.43078856 |
| ENSMUSG00000004947 | 60.13340736 | 99.47326586 | 89.68118307 | 60.40932541 | 69.47087488 |
| ENSMUSG00000004948 | 7.074518513 | 9.738641413 | 7.767661525 | 8.054576721 | 7.87814045  |
| ENSMUSG00000004951 | 7.074518513 | 4.869320706 | 7.061510478 | 6.443661377 | 7.161945863 |
| ENSMUSG00000004952 | 8.489422215 | 15.99919661 | 15.53532305 | 21.74735715 | 23.63442135 |
| ENSMUSG00000004980 | 114.6071999 | 148.1664729 | 132.756397  | 302.8520847 | 222.0203218 |
| ENSMUSG00000004994 | 21.93100739 | 36.17209668 | 30.36449505 | 32.21830688 | 32.94495097 |
| ENSMUSG00000005034 | 16.27139258 | 29.21592424 | 21.18453143 | 20.94189947 | 25.78300511 |
| ENSMUSG00000005043 | 22.63845924 | 25.04222078 | 25.42143772 | 15.30369577 | 22.91822676 |
| ENSMUSG00000005045 | 7.781970364 | 4.173703463 | 4.943057334 | 4.832746033 | 10.02672421 |
| ENSMUSG00000005057 | 12.73413332 | 13.91234488 | 15.53532305 | 20.94189947 | 16.47247549 |
| ENSMUSG00000005069 | 17.68629628 | 30.60715873 | 24.71528667 | 20.94189947 | 30.08017263 |
| ENSMUSG00000005078 | 9.904325918 | 18.08604834 | 15.53532305 | 15.30369577 | 17.18867007 |
| ENSMUSG00000005087 | 33.95768886 | 50.08444155 | 56.49208382 | 245.66459   | 172.6028953 |
| ENSMUSG00000005089 | 11.31922962 | 5.56493795  | 6.35535943  | 7.249119049 | 10.02672421 |
| ENSMUSG00000005102 | 34.66514071 | 58.43184848 | 34.60140134 | 35.44013757 | 49.41742646 |
| ENSMUSG00000005103 | 108.9475851 | 141.9059177 | 134.1686991 | 199.7535027 | 138.2255552 |
| ENSMUSG00000005107 | 10.61177777 | 2.782468975 | 8.473812573 | 6.443661377 | 12.89150255 |
| ENSMUSG00000005125 | 12.73413332 | 4.173703463 | 4.943057334 | 5.638203705 | 5.729556691 |
| ENSMUSG00000005142 | 34.66514071 | 50.7800588  | 48.01827125 | 45.10562964 | 48.70123187 |
| ENSMUSG00000005150 | 29.71297775 | 37.56333116 | 34.60140134 | 55.57657937 | 50.84981563 |
| ENSMUSG00000005161 | 13.44158517 | 20.86851731 | 31.0706461  | 54.7711217  | 37.95831308 |
| ENSMUSG00000005198 | 67.91537772 | 101.5601176 | 69.90895373 | 186.8661799 | 123.1854689 |
| ENSMUSG00000005204 | 27.5906222  | 52.86691053 | 57.19823487 | 138.5387196 | 116.023523  |
| ENSMUSG00000005220 | 10.61177777 | 6.260555194 | 4.236906287 | 4.832746033 | 5.729556691 |

|                    |             |             |             |             |             |
|--------------------|-------------|-------------|-------------|-------------|-------------|
| ENSMUSG00000005225 | 10.61177777 | 6.956172438 | 9.886114669 | 7.249119049 | 6.445751277 |
| ENSMUSG00000005232 | 11.31922962 | 5.56493795  | 7.061510478 | 4.832746033 | 7.161945863 |
| ENSMUSG00000005233 | 26.1757185  | 22.2597518  | 24.71528667 | 35.44013757 | 40.10689684 |
| ENSMUSG00000005237 | 11.31922962 | 6.260555194 | 4.943057334 | 5.638203705 | 4.297167518 |
| ENSMUSG00000005251 | 4.952162959 | 3.478086219 | 1.412302096 | 6.443661377 | 3.580972932 |
| ENSMUSG00000005262 | 56.5961481  | 95.2995624  | 74.14586002 | 155.4533307 | 118.1721067 |
| ENSMUSG00000005267 | 9.904325918 | 14.60796212 | 8.473812573 | 14.4982381  | 8.594335036 |
| ENSMUSG00000005268 | 4.952162959 | 7.651789682 | 9.179963621 | 4.832746033 | 10.02672421 |
| ENSMUSG00000005312 | 77.11225179 | 122.4286349 | 95.33039145 | 185.2552646 | 159.7113928 |
| ENSMUSG00000005338 | 10.61177777 | 4.869320706 | 7.061510478 | 3.221830688 | 7.161945863 |
| ENSMUSG00000005339 | 13.44158517 | 7.651789682 | 10.59226572 | 6.443661377 | 8.594335036 |
| ENSMUSG00000005354 | 36.78749627 | 51.47567604 | 57.19823487 | 110.3477011 | 108.1453825 |
| ENSMUSG00000005360 | 6.367066661 | 4.869320706 | 5.649208382 | 5.638203705 | 8.594335036 |
| ENSMUSG00000005362 | 128.7562369 | 171.8174592 | 151.8224753 | 108.7367857 | 91.67290705 |
| ENSMUSG00000005364 | 42.44711108 | 61.9099347  | 72.73355792 | 50.74383334 | 46.55264811 |
| ENSMUSG00000005371 | 83.47931845 | 115.4724625 | 102.3919019 | 321.3776112 | 224.1689055 |
| ENSMUSG00000005373 | 4.244711108 | 6.260555194 | 7.767661525 | 6.443661377 | 9.310529622 |
| ENSMUSG00000005374 | 24.76081479 | 31.30277597 | 30.36449505 | 44.30017197 | 37.24211849 |
| ENSMUSG00000005378 | 29.0055259  | 43.82388636 | 38.83830763 | 73.29664816 | 47.98503729 |
| ENSMUSG00000005417 | 47.39927403 | 68.86610713 | 60.02283906 | 49.132918   | 42.97167518 |
| ENSMUSG00000005442 | 12.02668147 | 21.56413456 | 23.30298458 | 41.07834128 | 29.36397804 |
| ENSMUSG00000005447 | 15.56394073 | 18.08604834 | 13.41686991 | 13.69278043 | 12.17530797 |
| ENSMUSG00000005469 | 31.83533331 | 47.30197258 | 45.19366706 | 27.38556085 | 32.94495097 |
| ENSMUSG00000005481 | 142.1978221 | 177.3823972 | 141.9363606 | 298.0193387 | 209.8450138 |
| ENSMUSG00000005483 | 74.98989623 | 96.69079689 | 99.56729774 | 147.398754  | 126.7664418 |
| ENSMUSG00000005493 | 14.14903703 | 11.1298759  | 12.71071886 | 54.7711217  | 51.56601022 |
| ENSMUSG00000005501 | 11.31922962 | 21.56413456 | 25.42143772 | 17.72006879 | 17.18867007 |
| ENSMUSG00000005505 | 46.69182218 | 81.38721752 | 84.73812573 | 124.0404815 | 100.9834367 |
| ENSMUSG00000005506 | 94.09109622 | 105.0382038 | 84.03197468 | 194.9207566 | 132.4959985 |
| ENSMUSG00000005514 | 14.14903703 | 7.651789682 | 4.236906287 | 9.665492065 | 15.04008631 |
| ENSMUSG00000005534 | 37.49494812 | 61.21431745 | 45.8998181  | 41.88379895 | 37.24211849 |
| ENSMUSG00000005540 | 129.4636888 | 120.3417832 | 125.6948865 | 217.4735715 | 133.2121931 |
| ENSMUSG00000005547 | 16.27139258 | 6.260555194 | 9.886114669 | 5.638203705 | 7.87814045  |
| ENSMUSG00000005553 | 6.367066661 | 3.478086219 | 2.824604191 | 1.610915344 | 7.161945863 |
| ENSMUSG00000005566 | 37.49494812 | 53.56252777 | 51.54902649 | 215.0571984 | 165.4409494 |
| ENSMUSG00000005575 | 28.29807405 | 47.99758982 | 38.13215658 | 113.5695318 | 83.07857202 |
| ENSMUSG00000005580 | 12.02668147 | 4.173703463 | 5.649208382 | 8.054576721 | 6.445751277 |
| ENSMUSG00000005583 | 5.65961481  | 6.260555194 | 12.00456781 | 7.249119049 | 11.45911338 |
| ENSMUSG00000005609 | 31.12788146 | 45.91073809 | 43.78136496 | 45.10562964 | 42.97167518 |
| ENSMUSG00000005610 | 27.5906222  | 47.99758982 | 35.30755239 | 248.080963  | 195.5211221 |
| ENSMUSG00000005611 | 12.73413332 | 9.738641413 | 7.061510478 | 5.638203705 | 7.161945863 |
| ENSMUSG00000005615 | 15.56394073 | 27.12907251 | 29.65834401 | 28.9964762  | 17.90486466 |
| ENSMUSG00000005621 | 118.851911  | 178.7736317 | 146.1732669 | 256.9409974 | 181.1972303 |

|                    |             |             |             |             |             |
|--------------------|-------------|-------------|-------------|-------------|-------------|
| ENSMUSG00000005625 | 107.5326814 | 139.1234488 | 113.6903187 | 150.6205847 | 121.7530797 |
| ENSMUSG00000005628 | 10.61177777 | 11.1298759  | 10.59226572 | 7.249119049 | 10.02672421 |
| ENSMUSG00000005640 | 4.244711108 | 4.869320706 | 9.179963621 | 4.832746033 | 2.864778345 |
| ENSMUSG00000005649 | 7.074518513 | 7.651789682 | 7.061510478 | 6.443661377 | 2.864778345 |
| ENSMUSG00000005672 | 8.489422215 | 4.173703463 | 4.943057334 | 7.249119049 | 6.445751277 |
| ENSMUSG00000005677 | 5.65961481  | 5.56493795  | 14.12302096 | 5.638203705 | 7.161945863 |
| ENSMUSG00000005681 | 7.074518513 | 9.738641413 | 3.530755239 | 8.054576721 | 8.594335036 |
| ENSMUSG00000005686 | 16.27139258 | 27.12907251 | 17.65377619 | 8.860034393 | 10.7429188  |
| ENSMUSG00000005687 | 39.61730367 | 75.12666233 | 50.84287544 | 78.93485187 | 58.01176149 |
| ENSMUSG00000005696 | 5.65961481  | 2.782468975 | 3.530755239 | 4.832746033 | 2.864778345 |
| ENSMUSG00000005698 | 73.57499253 | 108.51629   | 83.32582364 | 283.5211006 | 201.2506788 |
| ENSMUSG00000005699 | 9.904325918 | 22.2597518  | 25.42143772 | 40.2728836  | 32.22875639 |
| ENSMUSG00000005705 | 8.489422215 | 13.21672763 | 14.12302096 | 7.249119049 | 9.310529622 |
| ENSMUSG00000005716 | 4.952162959 | 7.651789682 | 9.886114669 | 6.443661377 | 7.87814045  |
| ENSMUSG00000005732 | 56.5961481  | 92.51709342 | 52.96132858 | 327.0158149 | 260.6948294 |
| ENSMUSG00000005763 | 7.074518513 | 6.260555194 | 9.886114669 | 3.221830688 | 7.87814045  |
| ENSMUSG00000005774 | 45.27691848 | 46.60635533 | 59.31668801 | 104.7094974 | 96.68626916 |
| ENSMUSG00000005779 | 47.39927403 | 60.51870021 | 45.19366706 | 130.4841429 | 98.11865833 |
| ENSMUSG00000005802 | 16.97884443 | 35.47647943 | 27.53989086 | 40.2728836  | 37.95831308 |
| ENSMUSG00000005803 | 2.829807405 | 5.56493795  | 9.179963621 | 4.02728836  | 5.729556691 |
| ENSMUSG00000005804 | 26.1757185  | 50.7800588  | 30.36449505 | 43.49471429 | 44.40406435 |
| ENSMUSG00000005813 | 70.74518513 | 86.25653823 | 74.85201106 | 173.9788572 | 113.1587446 |
| ENSMUSG00000005846 | 59.42595551 | 101.5601176 | 98.86114669 | 251.3027937 | 182.6296195 |
| ENSMUSG00000005871 | 42.44711108 | 84.1696865  | 54.37363068 | 99.07129367 | 79.49759908 |
| ENSMUSG00000005881 | 6.367066661 | 11.82549314 | 17.65377619 | 19.33098413 | 21.48583759 |
| ENSMUSG00000005882 | 42.44711108 | 63.30116918 | 61.43514116 | 66.85298678 | 67.32229112 |
| ENSMUSG00000005883 | 10.61177777 | 7.651789682 | 5.649208382 | 6.443661377 | 5.013362104 |
| ENSMUSG00000005886 | 43.86201478 | 70.25734162 | 66.37819849 | 49.132918   | 42.97167518 |
| ENSMUSG00000005893 | 79.94205919 | 96.69079689 | 89.68118307 | 98.265836   | 78.7814045  |
| ENSMUSG00000005897 | 12.73413332 | 18.78166558 | 11.29841676 | 24.16373016 | 25.78300511 |
| ENSMUSG00000005899 | 24.05336294 | 36.17209668 | 27.53989086 | 56.38203705 | 47.98503729 |
| ENSMUSG00000005907 | 41.73965922 | 75.12666233 | 60.72899011 | 83.7675979  | 63.0251236  |
| ENSMUSG00000005917 | 4.952162959 | 9.043024169 | 6.35535943  | 6.443661377 | 5.013362104 |
| ENSMUSG00000005936 | 69.33028142 | 91.12585893 | 76.97046421 | 111.1531587 | 89.52432329 |
| ENSMUSG00000005947 | 3.537259256 | 0.695617244 | 5.649208382 | 7.249119049 | 2.864778345 |
| ENSMUSG00000005950 | 9.904325918 | 6.956172438 | 13.41686991 | 5.638203705 | 7.161945863 |
| ENSMUSG00000005951 | 16.27139258 | 25.73783802 | 22.59683353 | 8.054576721 | 17.90486466 |
| ENSMUSG00000005952 | 12.02668147 | 10.43425866 | 7.061510478 | 8.860034393 | 6.445751277 |
| ENSMUSG00000005958 | 7.074518513 | 5.56493795  | 6.35535943  | 1.610915344 | 3.580972932 |
| ENSMUSG00000005968 | 7.781970364 | 6.260555194 | 9.179963621 | 10.47094974 | 4.297167518 |
| ENSMUSG00000005980 | 9.904325918 | 9.043024169 | 12.71071886 | 7.249119049 | 7.87814045  |
| ENSMUSG00000005981 | 67.20792587 | 68.86610713 | 73.43970897 | 116.7913625 | 100.9834367 |
| ENSMUSG00000005982 | 45.27691848 | 62.60555194 | 57.90438592 | 49.93837567 | 37.95831308 |

|                    |             |             |             |             |             |
|--------------------|-------------|-------------|-------------|-------------|-------------|
| ENSMUSG00000005983 | 29.0055259  | 39.6501829  | 28.95219296 | 45.91108731 | 49.41742646 |
| ENSMUSG00000005986 | 22.63845924 | 31.30277597 | 21.89068248 | 20.1364418  | 17.18867007 |
| ENSMUSG00000005994 | 7.074518513 | 6.956172438 | 5.649208382 | 5.638203705 | 8.594335036 |
| ENSMUSG00000006005 | 65.79302217 | 94.60394515 | 81.91352154 | 140.1496349 | 108.8615771 |
| ENSMUSG00000006007 | 4.952162959 | 8.347406925 | 7.061510478 | 4.832746033 | 7.161945863 |
| ENSMUSG00000006010 | 57.30359995 | 89.73462445 | 79.7950684  | 150.6205847 | 118.1721067 |
| ENSMUSG00000006014 | 10.61177777 | 6.260555194 | 9.179963621 | 1.610915344 | 7.87814045  |
| ENSMUSG00000006019 | 29.71297775 | 59.82308296 | 53.66747963 | 37.05105292 | 37.95831308 |
| ENSMUSG00000006024 | 65.08557032 | 104.3425866 | 97.44884459 | 168.3406535 | 111.7263555 |
| ENSMUSG00000006050 | 43.15456293 | 74.43104508 | 48.01827125 | 116.7913625 | 95.25387998 |
| ENSMUSG00000006056 | 8.489422215 | 6.260555194 | 6.35535943  | 5.638203705 | 7.87814045  |
| ENSMUSG00000006057 | 31.12788146 | 57.04061399 | 38.83830763 | 94.23854763 | 83.07857202 |
| ENSMUSG00000006058 | 22.63845924 | 51.47567604 | 38.13215658 | 53.96566403 | 51.56601022 |
| ENSMUSG00000006095 | 12.73413332 | 13.21672763 | 18.35992724 | 34.6346799  | 28.64778345 |
| ENSMUSG00000006143 | 5.65961481  | 8.347406925 | 10.59226572 | 8.860034393 | 10.7429188  |
| ENSMUSG00000006154 | 22.63845924 | 36.17209668 | 11.29841676 | 22.55281482 | 19.33725383 |
| ENSMUSG00000006169 | 33.95768886 | 66.7792554  | 47.3121202  | 89.4058016  | 84.51096119 |
| ENSMUSG00000006191 | 34.66514071 | 58.43184848 | 41.66291182 | 68.46390213 | 63.74131818 |
| ENSMUSG00000006205 | 5.65961481  | 6.956172438 | 7.061510478 | 3.221830688 | 11.45911338 |
| ENSMUSG00000006215 | 49.52162959 | 82.77845201 | 81.20737049 | 66.04752911 | 68.75468029 |
| ENSMUSG00000006216 | 8.489422215 | 8.347406925 | 8.473812573 | 4.02728836  | 7.87814045  |
| ENSMUSG00000006219 | 6.367066661 | 6.260555194 | 11.29841676 | 12.08186508 | 9.310529622 |
| ENSMUSG00000006241 | 10.61177777 | 2.782468975 | 7.061510478 | 9.665492065 | 8.594335036 |
| ENSMUSG00000006262 | 77.11225179 | 107.1250555 | 106.6288082 | 131.2896006 | 122.4692743 |
| ENSMUSG00000006273 | 41.73965922 | 84.1696865  | 58.61053696 | 82.15668255 | 73.76804239 |
| ENSMUSG00000006276 | 96.21345177 | 98.77764862 | 87.56272992 | 128.0677699 | 127.4826364 |
| ENSMUSG00000006289 | 39.61730367 | 52.86691053 | 52.25517753 | 133.7059736 | 118.8883013 |
| ENSMUSG00000006299 | 37.49494812 | 69.56172438 | 48.7244223  | 57.99295239 | 59.44415067 |
| ENSMUSG00000006301 | 10.61177777 | 6.260555194 | 11.29841676 | 13.69278043 | 7.161945863 |
| ENSMUSG00000006304 | 42.44711108 | 57.73623123 | 64.25974535 | 210.2244524 | 141.0903335 |
| ENSMUSG00000006307 | 53.7663407  | 80.69160028 | 77.67661525 | 281.1047276 | 204.8316517 |
| ENSMUSG00000006310 | 4.952162959 | 4.173703463 | 6.35535943  | 11.27640741 | 7.87814045  |
| ENSMUSG00000006333 | 36.78749627 | 89.73462445 | 52.96132858 | 264.9955741 | 204.1154571 |
| ENSMUSG00000006335 | 66.50047402 | 89.0390072  | 80.50121945 | 166.7297381 | 143.9551119 |
| ENSMUSG00000006342 | 14.14903703 | 4.869320706 | 7.767661525 | 8.054576721 | 10.7429188  |
| ENSMUSG00000006344 | 15.56394073 | 17.39043109 | 26.12758877 | 4.832746033 | 15.7562809  |
| ENSMUSG00000006345 | 7.781970364 | 6.956172438 | 9.179963621 | 4.832746033 | 11.45911338 |
| ENSMUSG00000006356 | 6.367066661 | 9.738641413 | 4.236906287 | 8.054576721 | 7.87814045  |
| ENSMUSG00000006360 | 51.64398514 | 56.34499675 | 58.61053696 | 22.55281482 | 25.06681052 |
| ENSMUSG00000006362 | 38.90985182 | 45.91073809 | 49.43057334 | 62.02024075 | 37.24211849 |
| ENSMUSG00000006369 | 4.952162959 | 4.173703463 | 8.473812573 | 7.249119049 | 7.161945863 |
| ENSMUSG00000006373 | 19.10119998 | 20.17290007 | 22.59683353 | 29.80193387 | 37.24211849 |
| ENSMUSG00000006386 | 7.781970364 | 4.869320706 | 7.767661525 | 5.638203705 | 5.013362104 |

|                    |             |             |             |             |             |
|--------------------|-------------|-------------|-------------|-------------|-------------|
| ENSMUSG00000006389 | 8.489422215 | 11.82549314 | 5.649208382 | 2.416373016 | 10.02672421 |
| ENSMUSG00000006390 | 51.64398514 | 70.25734162 | 64.25974535 | 126.4568545 | 103.848215  |
| ENSMUSG00000006392 | 63.67066661 | 113.3856107 | 105.9226572 | 98.265836   | 94.5376854  |
| ENSMUSG00000006395 | 7.781970364 | 13.21672763 | 12.00456781 | 10.47094974 | 13.60769714 |
| ENSMUSG00000006398 | 39.61730367 | 39.6501829  | 33.89525029 | 77.32393652 | 62.30892901 |
| ENSMUSG00000006403 | 7.781970364 | 10.43425866 | 8.473812573 | 5.638203705 | 5.013362104 |
| ENSMUSG00000006411 | 7.781970364 | 5.56493795  | 8.473812573 | 5.638203705 | 5.729556691 |
| ENSMUSG00000006412 | 93.38364437 | 159.9919661 | 123.5764334 | 158.6751614 | 137.5093606 |
| ENSMUSG00000006418 | 66.50047402 | 78.60474855 | 94.6242404  | 131.2896006 | 98.83485292 |
| ENSMUSG00000006423 | 36.08004441 | 43.12826911 | 33.89525029 | 63.6311561  | 45.83645353 |
| ENSMUSG00000006435 | 4.952162959 | 6.260555194 | 7.767661525 | 5.638203705 | 5.013362104 |
| ENSMUSG00000006442 | 21.22355554 | 43.82388636 | 42.36906287 | 264.1901164 | 172.6028953 |
| ENSMUSG00000006456 | 0           | 0           | 0           | 0           | 0           |
| ENSMUSG00000006463 | 41.03220737 | 52.86691053 | 42.36906287 | 39.46742593 | 37.95831308 |
| ENSMUSG00000006469 | 7.781970364 | 6.260555194 | 4.236906287 | 3.221830688 | 3.580972932 |
| ENSMUSG00000006471 | 36.78749627 | 63.99678643 | 58.61053696 | 84.57305557 | 78.7814045  |
| ENSMUSG00000006476 | 7.781970364 | 13.21672763 | 12.71071886 | 12.08186508 | 16.47247549 |
| ENSMUSG00000006488 | 11.31922962 | 4.869320706 | 7.767661525 | 8.054576721 | 5.013362104 |
| ENSMUSG00000006494 | 21.22355554 | 27.12907251 | 30.36449505 | 16.10915344 | 30.08017263 |
| ENSMUSG00000006498 | 99.04325918 | 113.3856107 | 105.9226572 | 356.0122911 | 264.2758024 |
| ENSMUSG00000006519 | 89.84638511 | 122.4286349 | 107.3349593 | 219.0844868 | 165.4409494 |
| ENSMUSG00000006522 | 4.952162959 | 3.478086219 | 9.886114669 | 5.638203705 | 6.445751277 |
| ENSMUSG00000006526 | 36.78749627 | 47.99758982 | 46.60596915 | 65.24207144 | 62.30892901 |
| ENSMUSG00000006527 | 4.244711108 | 6.956172438 | 9.179963621 | 16.91461111 | 20.05344842 |
| ENSMUSG00000006529 | 5.65961481  | 6.260555194 | 8.473812573 | 8.054576721 | 7.161945863 |
| ENSMUSG00000006538 | 8.489422215 | 8.347406925 | 4.943057334 | 3.221830688 | 7.161945863 |
| ENSMUSG00000006542 | 7.781970364 | 7.651789682 | 11.29841676 | 4.832746033 | 7.161945863 |
| ENSMUSG00000006567 | 21.93100739 | 27.12907251 | 24.00913562 | 40.2728836  | 36.5259239  |
| ENSMUSG00000006574 | 6.367066661 | 6.956172438 | 3.530755239 | 4.832746033 | 10.7429188  |
| ENSMUSG00000006575 | 7.781970364 | 5.56493795  | 10.59226572 | 4.832746033 | 9.310529622 |
| ENSMUSG00000006576 | 4.952162959 | 10.43425866 | 11.29841676 | 11.27640741 | 10.02672421 |
| ENSMUSG00000006586 | 13.44158517 | 9.043024169 | 7.061510478 | 4.02728836  | 10.02672421 |
| ENSMUSG00000006599 | 100.4581629 | 148.8620902 | 143.3486627 | 249.6918783 | 176.9000628 |
| ENSMUSG00000006611 | 7.781970364 | 6.956172438 | 2.824604191 | 4.02728836  | 7.87814045  |
| ENSMUSG00000006641 | 24.76081479 | 41.73703463 | 40.25060972 | 43.49471429 | 48.70123187 |
| ENSMUSG00000006649 | 4.952162959 | 4.173703463 | 2.824604191 | 1.610915344 | 6.445751277 |
| ENSMUSG00000006673 | 41.73965922 | 53.56252777 | 57.90438592 | 189.2825529 | 152.5494469 |
| ENSMUSG00000006675 | 10.61177777 | 11.1298759  | 11.29841676 | 5.638203705 | 11.45911338 |
| ENSMUSG00000006676 | 53.7663407  | 43.12826911 | 46.60596915 | 110.3477011 | 69.47087488 |
| ENSMUSG00000006699 | 193.1343554 | 206.5983214 | 192.073085  | 343.1249683 | 229.8984622 |
| ENSMUSG00000006705 | 45.27691848 | 60.51870021 | 48.7244223  | 74.9075635  | 69.47087488 |
| ENSMUSG00000006711 | 8.489422215 | 8.347406925 | 10.59226572 | 8.860034393 | 7.161945863 |
| ENSMUSG00000006715 | 45.98437033 | 59.12746572 | 43.78136496 | 173.1733995 | 128.9150255 |

|                    |             |             |             |             |             |
|--------------------|-------------|-------------|-------------|-------------|-------------|
| ENSMUSG00000006720 | 6.367066661 | 4.869320706 | 2.824604191 | 2.416373016 | 4.297167518 |
| ENSMUSG00000006724 | 9.904325918 | 6.260555194 | 12.00456781 | 9.665492065 | 7.87814045  |
| ENSMUSG00000006728 | 28.29807405 | 33.3896277  | 34.60140134 | 136.9278043 | 95.97007457 |
| ENSMUSG00000006731 | 82.06441475 | 120.3417832 | 103.804204  | 85.37851324 | 94.5376854  |
| ENSMUSG00000006732 | 8.489422215 | 15.30357936 | 20.47838039 | 25.77464551 | 27.93158887 |
| ENSMUSG00000006740 | 199.5014221 | 194.7728283 | 201.9591997 | 296.4084233 | 222.0203218 |
| ENSMUSG00000006763 | 20.51610369 | 34.08524495 | 28.95219296 | 38.66196826 | 33.66114556 |
| ENSMUSG00000006782 | 154.2245036 | 132.1672763 | 137.6994543 | 167.5351958 | 110.2939663 |
| ENSMUSG00000006784 | 8.489422215 | 11.82549314 | 6.35535943  | 8.860034393 | 12.17530797 |
| ENSMUSG00000006800 | 4.952162959 | 5.56493795  | 6.35535943  | 10.47094974 | 7.161945863 |
| ENSMUSG00000006906 | 12.73413332 | 12.52111039 | 21.89068248 | 49.93837567 | 35.80972932 |
| ENSMUSG00000006920 | 31.12788146 | 53.56252777 | 46.60596915 | 38.66196826 | 37.95831308 |
| ENSMUSG00000006930 | 9.904325918 | 7.651789682 | 4.943057334 | 5.638203705 | 5.729556691 |
| ENSMUSG00000006931 | 7.074518513 | 7.651789682 | 8.473812573 | 8.054576721 | 3.580972932 |
| ENSMUSG00000006932 | 10.61177777 | 11.82549314 | 8.473812573 | 8.054576721 | 6.445751277 |
| ENSMUSG00000006958 | 10.61177777 | 4.869320706 | 7.061510478 | 7.249119049 | 7.161945863 |
| ENSMUSG00000006998 | 34.66514071 | 61.21431745 | 55.07978173 | 120.0131931 | 78.06520991 |
| ENSMUSG00000007029 | 119.5593629 | 118.9505487 | 139.8179075 | 285.9374736 | 181.9134249 |
| ENSMUSG00000007034 | 6.367066661 | 1.391234488 | 7.767661525 | 14.4982381  | 16.47247549 |
| ENSMUSG00000007035 | 17.68629628 | 11.82549314 | 14.12302096 | 26.58010318 | 22.91822676 |
| ENSMUSG00000007036 | 28.29807405 | 45.21512085 | 34.60140134 | 23.35827249 | 30.79636721 |
| ENSMUSG00000007039 | 17.68629628 | 18.08604834 | 33.89525029 | 20.94189947 | 30.08017263 |
| ENSMUSG00000007050 | 41.73965922 | 72.34419335 | 60.72899011 | 171.5624842 | 126.7664418 |
| ENSMUSG00000007080 | 21.93100739 | 20.86851731 | 16.94762515 | 56.38203705 | 42.25548059 |
| ENSMUSG00000007097 | 16.27139258 | 4.869320706 | 12.71071886 | 6.443661377 | 5.729556691 |
| ENSMUSG00000007122 | 9.904325918 | 6.956172438 | 11.29841676 | 8.860034393 | 7.161945863 |
| ENSMUSG00000007207 | 8.489422215 | 10.43425866 | 9.179963621 | 11.27640741 | 8.594335036 |
| ENSMUSG00000007279 | 7.781970364 | 2.782468975 | 2.824604191 | 8.860034393 | 7.161945863 |
| ENSMUSG00000007379 | 4.952162959 | 6.260555194 | 8.473812573 | 6.443661377 | 4.297167518 |
| ENSMUSG00000007411 | 105.4103258 | 127.9935729 | 111.5718655 | 161.8969921 | 134.6445822 |
| ENSMUSG00000007415 | 21.22355554 | 28.52030699 | 27.53989086 | 33.82922223 | 42.97167518 |
| ENSMUSG00000007457 | 0           | 0           | 0           | 0           | 0           |
| ENSMUSG00000007458 | 45.98437033 | 89.73462445 | 59.31668801 | 151.4260424 | 131.7798039 |
| ENSMUSG00000007476 | 26.1757185  | 40.34580014 | 33.89525029 | 23.35827249 | 37.24211849 |
| ENSMUSG00000007564 | 111.7773925 | 127.2979556 | 135.5810012 | 155.4533307 | 134.6445822 |
| ENSMUSG00000007570 | 24.05336294 | 29.21592424 | 25.42143772 | 27.38556085 | 23.63442135 |
| ENSMUSG00000007591 | 11.31922962 | 17.39043109 | 17.65377619 | 8.054576721 | 15.04008631 |
| ENSMUSG00000007594 | 5.65961481  | 4.173703463 | 8.473812573 | 4.832746033 | 5.013362104 |
| ENSMUSG00000007610 | 20.51610369 | 31.30277597 | 21.89068248 | 27.38556085 | 27.93158887 |
| ENSMUSG00000007613 | 53.05888884 | 79.30036579 | 63.5535943  | 54.7711217  | 63.74131818 |
| ENSMUSG00000007617 | 11.31922962 | 20.86851731 | 20.47838039 | 31.41284921 | 29.36397804 |
| ENSMUSG00000007646 | 8.489422215 | 16.69481385 | 9.179963621 | 13.69278043 | 16.47247549 |
| ENSMUSG00000007653 | 10.61177777 | 2.086851731 | 3.530755239 | 6.443661377 | 5.013362104 |

|                    |             |             |             |             |             |
|--------------------|-------------|-------------|-------------|-------------|-------------|
| ENSMUSG00000007655 | 11.31922962 | 7.651789682 | 6.35535943  | 4.02728836  | 7.87814045  |
| ENSMUSG00000007656 | 88.43148141 | 87.64777272 | 91.09348516 | 166.7297381 | 125.3340526 |
| ENSMUSG00000007659 | 28.29807405 | 31.30277597 | 29.65834401 | 68.46390213 | 46.55264811 |
| ENSMUSG00000007739 | 51.64398514 | 68.17048989 | 69.90895373 | 269.8283202 | 187.6429816 |
| ENSMUSG00000007783 | 6.367066661 | 7.651789682 | 5.649208382 | 11.27640741 | 10.02672421 |
| ENSMUSG00000007812 | 60.84085921 | 88.34338996 | 85.44427678 | 144.1769233 | 108.8615771 |
| ENSMUSG00000007815 | 116.0221036 | 149.5577074 | 127.8133396 | 237.6100133 | 181.9134249 |
| ENSMUSG00000007817 | 53.05888884 | 67.47487265 | 63.5535943  | 37.05105292 | 41.53928601 |
| ENSMUSG00000007827 | 18.39374813 | 27.12907251 | 28.95219296 | 20.94189947 | 23.63442135 |
| ENSMUSG00000007833 | 19.80865184 | 38.95456565 | 38.13215658 | 26.58010318 | 36.5259239  |
| ENSMUSG00000007837 | 86.30912585 | 112.6899935 | 110.1595635 | 103.9040397 | 90.24051788 |
| ENSMUSG00000007850 | 29.0055259  | 34.78086219 | 30.36449505 | 118.4022778 | 75.20043157 |
| ENSMUSG00000007880 | 16.27139258 | 15.30357936 | 7.061510478 | 21.74735715 | 24.35061594 |
| ENSMUSG00000007888 | 2.829807405 | 5.56493795  | 7.061510478 | 8.054576721 | 7.161945863 |
| ENSMUSG00000007891 | 38.20239997 | 47.30197258 | 42.36906287 | 37.85651059 | 40.10689684 |
| ENSMUSG00000007908 | 19.10119998 | 18.78166558 | 11.29841676 | 5.638203705 | 7.87814045  |
| ENSMUSG00000007946 | 7.074518513 | 5.56493795  | 4.236906287 | 4.832746033 | 7.161945863 |
| ENSMUSG00000007987 | 21.93100739 | 23.65098629 | 31.0706461  | 16.10915344 | 20.05344842 |
| ENSMUSG00000008028 | 7.781970364 | 6.956172438 | 4.236906287 | 6.443661377 | 6.445751277 |
| ENSMUSG00000008035 | 3.537259256 | 6.956172438 | 4.236906287 | 12.08186508 | 13.60769714 |
| ENSMUSG00000008036 | 113.1922962 | 109.9075245 | 115.8087718 | 106.3204127 | 102.4158258 |
| ENSMUSG00000008090 | 5.65961481  | 5.56493795  | 10.59226572 | 5.638203705 | 5.013362104 |
| ENSMUSG00000008129 | 25.46826665 | 54.95376226 | 35.30755239 | 35.44013757 | 37.24211849 |
| ENSMUSG00000008136 | 8.489422215 | 6.260555194 | 6.35535943  | 9.665492065 | 7.161945863 |
| ENSMUSG00000008140 | 50.93653329 | 70.95295887 | 75.55816211 | 95.84946298 | 88.09193412 |
| ENSMUSG00000008153 | 9.196874066 | 4.173703463 | 7.767661525 | 10.47094974 | 9.310529622 |
| ENSMUSG00000008167 | 5.65961481  | 5.56493795  | 7.061510478 | 3.221830688 | 3.580972932 |
| ENSMUSG00000008193 | 109.6550369 | 124.5154866 | 124.9887355 | 203.780791  | 156.8466144 |
| ENSMUSG00000008200 | 58.0110518  | 95.2995624  | 76.26431316 | 288.3538466 | 208.4126246 |
| ENSMUSG00000008206 | 50.93653329 | 55.6493795  | 60.72899011 | 33.02376456 | 40.10689684 |
| ENSMUSG00000008226 | 36.78749627 | 61.21431745 | 52.96132858 | 44.30017197 | 37.24211849 |
| ENSMUSG00000008301 | 7.074518513 | 6.956172438 | 8.473812573 | 8.054576721 | 5.729556691 |
| ENSMUSG00000008305 | 3.537259256 | 9.738641413 | 9.179963621 | 13.69278043 | 8.594335036 |
| ENSMUSG00000008307 | 10.61177777 | 13.91234488 | 14.12302096 | 16.91461111 | 12.89150255 |
| ENSMUSG00000008318 | 31.12788146 | 42.43265187 | 32.4829482  | 59.60386773 | 55.14698315 |
| ENSMUSG00000008333 | 25.46826665 | 56.34499675 | 53.66747963 | 70.88027514 | 64.45751277 |
| ENSMUSG00000008373 | 65.79302217 | 86.95215547 | 75.55816211 | 183.6443492 | 128.198831  |
| ENSMUSG00000008398 | 40.32475552 | 50.08444155 | 45.19366706 | 53.16020636 | 37.95831308 |
| ENSMUSG00000008435 | 8.489422215 | 13.21672763 | 9.886114669 | 9.665492065 | 18.62105924 |
| ENSMUSG00000008475 | 32.54278516 | 54.95376226 | 52.25517753 | 87.79488626 | 78.7814045  |
| ENSMUSG00000008489 | 10.61177777 | 11.1298759  | 10.59226572 | 1.610915344 | 5.729556691 |
| ENSMUSG00000008496 | 137.2456591 | 127.2979556 | 139.1117564 | 267.4119471 | 186.926787  |
| ENSMUSG00000008540 | 19.10119998 | 21.56413456 | 20.47838039 | 8.860034393 | 8.594335036 |



|                    |             |             |             |             |             |
|--------------------|-------------|-------------|-------------|-------------|-------------|
| ENSMUSG00000008575 | 4.952162959 | 6.260555194 | 7.061510478 | 10.47094974 | 6.445751277 |
| ENSMUSG00000008601 | 16.27139258 | 11.82549314 | 12.00456781 | 11.27640741 | 12.17530797 |
| ENSMUSG00000008604 | 15.56394073 | 22.2597518  | 27.53989086 | 49.93837567 | 45.12025894 |
| ENSMUSG00000008658 | 6.367066661 | 11.1298759  | 7.767661525 | 8.054576721 | 3.580972932 |
| ENSMUSG00000008668 | 53.7663407  | 82.77845201 | 81.20737049 | 352.7904604 | 244.9385485 |
| ENSMUSG00000008682 | 2.829807405 | 3.478086219 | 0           | 2.416373016 | 2.864778345 |
| ENSMUSG00000008683 | 120.2668147 | 161.3832006 | 143.3486627 | 335.0703916 | 242.7899648 |
| ENSMUSG00000008690 | 89.13893326 | 130.0804246 | 98.15499564 | 192.5043836 | 148.968474  |
| ENSMUSG00000008730 | 116.0221036 | 139.819066  | 124.9887355 | 128.8732275 | 126.7664418 |
| ENSMUSG00000008763 | 87.72402956 | 114.081228  | 118.633376  | 140.9550926 | 123.1854689 |
| ENSMUSG00000008789 | 11.31922962 | 4.869320706 | 4.943057334 | 12.08186508 | 9.310529622 |
| ENSMUSG00000008813 | 5.65961481  | 7.651789682 | 7.061510478 | 7.249119049 | 10.02672421 |
| ENSMUSG00000008822 | 6.367066661 | 4.869320706 | 6.35535943  | 2.416373016 | 6.445751277 |
| ENSMUSG00000008855 | 0           | 0           | 0           | 0           | 0           |
| ENSMUSG00000008892 | 61.54831106 | 90.43024169 | 91.09348516 | 115.9859048 | 88.80812871 |
| ENSMUSG00000008958 | 33.95768886 | 59.12746572 | 42.36906287 | 54.7711217  | 62.30892901 |
| ENSMUSG00000008976 | 63.67066661 | 94.60394515 | 86.85657888 | 219.0844868 | 189.7915654 |
| ENSMUSG00000009030 | 16.97884443 | 18.78166558 | 17.65377619 | 28.9964762  | 28.64778345 |
| ENSMUSG00000009035 | 68.62282957 | 114.7768452 | 80.50121945 | 74.9075635  | 72.33565322 |
| ENSMUSG00000009070 | 12.02668147 | 9.043024169 | 7.061510478 | 12.08186508 | 11.45911338 |
| ENSMUSG00000009073 | 19.10119998 | 27.82468975 | 20.47838039 | 57.99295239 | 49.41742646 |
| ENSMUSG00000009076 | 77.11225179 | 111.9943762 | 83.32582364 | 136.1223466 | 103.848215  |
| ENSMUSG00000009079 | 188.8896443 | 234.4230112 | 208.3145591 | 360.8450371 | 255.6814673 |
| ENSMUSG00000009090 | 40.32475552 | 68.17048989 | 58.61053696 | 64.43661377 | 59.44415067 |
| ENSMUSG00000009108 | 14.14903703 | 9.043024169 | 6.35535943  | 7.249119049 | 5.013362104 |
| ENSMUSG00000009114 | 6.367066661 | 5.56493795  | 10.59226572 | 8.860034393 | 10.7429188  |
| ENSMUSG00000009207 | 31.83533331 | 43.12826911 | 42.36906287 | 63.6311561  | 62.30892901 |
| ENSMUSG00000009210 | 4.952162959 | 11.1298759  | 8.473812573 | 8.054576721 | 10.7429188  |
| ENSMUSG00000009246 | 10.61177777 | 6.260555194 | 5.649208382 | 5.638203705 | 9.310529622 |
| ENSMUSG00000009291 | 42.44711108 | 86.95215547 | 67.08434954 | 63.6311561  | 47.98503729 |
| ENSMUSG00000009292 | 7.074518513 | 9.043024169 | 7.061510478 | 8.860034393 | 6.445751277 |
| ENSMUSG00000009293 | 95.50599992 | 123.1242521 | 98.86114669 | 152.2315    | 125.3340526 |
| ENSMUSG00000009350 | 11.31922962 | 6.956172438 | 10.59226572 | 6.443661377 | 7.161945863 |
| ENSMUSG00000009356 | 12.02668147 | 8.347406925 | 8.473812573 | 4.02728836  | 10.02672421 |
| ENSMUSG00000009376 | 8.489422215 | 6.956172438 | 4.236906287 | 4.02728836  | 4.297167518 |
| ENSMUSG00000009394 | 10.61177777 | 7.651789682 | 13.41686991 | 2.416373016 | 7.87814045  |
| ENSMUSG00000009406 | 12.02668147 | 20.86851731 | 18.35992724 | 20.1364418  | 24.35061594 |
| ENSMUSG00000009418 | 7.781970364 | 9.043024169 | 6.35535943  | 8.054576721 | 11.45911338 |
| ENSMUSG00000009470 | 54.47379255 | 91.12585893 | 69.20280268 | 121.6241085 | 118.8883013 |
| ENSMUSG00000009487 | 8.489422215 | 2.782468975 | 7.061510478 | 3.221830688 | 7.161945863 |
| ENSMUSG00000009535 | 48.81417774 | 102.9513521 | 74.85201106 | 111.1531587 | 113.8749392 |
| ENSMUSG00000009545 | 10.61177777 | 4.869320706 | 9.886114669 | 4.832746033 | 7.161945863 |
| ENSMUSG00000009549 | 60.84085921 | 106.4294383 | 100.2734488 | 101.4876667 | 101.6996313 |

|                    |             |             |             |             |             |
|--------------------|-------------|-------------|-------------|-------------|-------------|
| ENSMUSG0000009555  | 1.414903703 | 0           | 0           | 0           | 0.716194586 |
| ENSMUSG0000009563  | 19.80865184 | 25.73783802 | 28.95219296 | 24.96918783 | 13.60769714 |
| ENSMUSG0000009566  | 18.39374813 | 20.17290007 | 22.59683353 | 15.30369577 | 12.89150255 |
| ENSMUSG0000009569  | 39.61730367 | 63.30116918 | 64.96589639 | 33.82922223 | 48.70123187 |
| ENSMUSG0000009575  | 35.37259256 | 50.7800588  | 52.96132858 | 277.8828969 | 200.5344842 |
| ENSMUSG0000009580  | 7.781970364 | 10.43425866 | 4.943057334 | 3.221830688 | 5.729556691 |
| ENSMUSG0000009585  | 115.3146518 | 164.1656695 | 141.2302096 | 324.5994419 | 251.3842998 |
| ENSMUSG0000009614  | 7.074518513 | 5.56493795  | 7.061510478 | 8.860034393 | 5.013362104 |
| ENSMUSG0000009621  | 116.7295555 | 139.1234488 | 133.462548  | 292.381135  | 225.6012947 |
| ENSMUSG0000009628  | 7.781970364 | 6.956172438 | 6.35535943  | 7.249119049 | 9.310529622 |
| ENSMUSG0000009630  | 80.64951104 | 105.0382038 | 95.33039145 | 122.4295662 | 99.5510475  |
| ENSMUSG0000009640  | 12.02668147 | 26.43345526 | 20.47838039 | 17.72006879 | 25.78300511 |
| ENSMUSG0000009646  | 14.14903703 | 6.260555194 | 9.886114669 | 4.02728836  | 7.161945863 |
| ENSMUSG0000009647  | 21.93100739 | 37.56333116 | 43.07521391 | 44.30017197 | 44.40406435 |
| ENSMUSG0000009670  | 9.196874066 | 4.173703463 | 4.236906287 | 4.832746033 | 5.013362104 |
| ENSMUSG0000009681  | 53.05888884 | 73.0398106  | 64.25974535 | 28.19101852 | 41.53928601 |
| ENSMUSG0000009687  | 9.904325918 | 15.99919661 | 9.886114669 | 12.08186508 | 13.60769714 |
| ENSMUSG0000009734  | 6.367066661 | 7.651789682 | 8.473812573 | 6.443661377 | 6.445751277 |
| ENSMUSG0000009739  | 10.61177777 | 8.347406925 | 11.29841676 | 12.88732275 | 10.02672421 |
| ENSMUSG0000009741  | 82.06441475 | 88.34338996 | 93.21193831 | 128.8732275 | 104.5644096 |
| ENSMUSG0000009772  | 120.9742666 | 156.5138799 | 135.5810012 | 99.07129367 | 112.4425501 |
| ENSMUSG0000009828  | 19.10119998 | 38.95456565 | 33.89525029 | 26.58010318 | 37.24211849 |
| ENSMUSG0000009863  | 51.64398514 | 79.99598303 | 72.02740687 | 129.6786852 | 111.0101609 |
| ENSMUSG0000009876  | 10.61177777 | 3.478086219 | 8.473812573 | 10.47094974 | 8.594335036 |
| ENSMUSG0000009894  | 19.10119998 | 35.47647943 | 33.89525029 | 33.82922223 | 32.22875639 |
| ENSMUSG0000009907  | 123.0966221 | 160.6875833 | 145.4671158 | 166.7297381 | 139.6579443 |
| ENSMUSG0000009941  | 1.414903703 | 2.782468975 | 5.649208382 | 2.416373016 | 1.432389173 |
| ENSMUSG0000009995  | 27.5906222  | 31.99839321 | 34.60140134 | 56.38203705 | 47.98503729 |
| ENSMUSG00000010021 | 4.952162959 | 8.347406925 | 8.473812573 | 8.860034393 | 4.297167518 |
| ENSMUSG00000010025 | 22.63845924 | 37.56333116 | 37.42600553 | 33.02376456 | 35.09353473 |
| ENSMUSG00000010044 | 5.65961481  | 18.78166558 | 18.35992724 | 16.10915344 | 13.60769714 |
| ENSMUSG00000010047 | 16.27139258 | 29.21592424 | 22.59683353 | 25.77464551 | 25.06681052 |
| ENSMUSG00000010048 | 20.51610369 | 35.47647943 | 41.66291182 | 109.5422434 | 68.75468029 |
| ENSMUSG00000010051 | 10.61177777 | 6.956172438 | 9.179963621 | 3.221830688 | 7.161945863 |
| ENSMUSG00000010064 | 13.44158517 | 2.086851731 | 4.943057334 | 8.054576721 | 9.310529622 |
| ENSMUSG00000010066 | 8.489422215 | 3.478086219 | 8.473812573 | 7.249119049 | 9.310529622 |
| ENSMUSG00000010067 | 19.10119998 | 24.34660353 | 24.00913562 | 18.52552646 | 17.18867007 |
| ENSMUSG00000010080 | 8.489422215 | 2.086851731 | 8.473812573 | 6.443661377 | 7.161945863 |
| ENSMUSG00000010086 | 8.489422215 | 4.173703463 | 12.00456781 | 4.832746033 | 7.87814045  |
| ENSMUSG00000010095 | 39.61730367 | 57.04061399 | 50.84287544 | 248.8864207 | 196.2373167 |
| ENSMUSG00000010097 | 136.5382073 | 178.7736317 | 165.9454962 | 279.4938122 | 208.4126246 |
| ENSMUSG00000010110 | 0           | 0           | 0           | 0           | 0           |
| ENSMUSG00000010122 | 13.44158517 | 2.086851731 | 6.35535943  | 5.638203705 | 6.445751277 |

|                    |             |             |             |             |             |
|--------------------|-------------|-------------|-------------|-------------|-------------|
| ENSMUSG00000010136 | 21.93100739 | 22.95536904 | 32.4829482  | 10.47094974 | 14.32389173 |
| ENSMUSG00000010142 | 35.37259256 | 68.17048989 | 47.3121202  | 202.1698757 | 147.5360848 |
| ENSMUSG00000010175 | 13.44158517 | 2.782468975 | 8.473812573 | 2.416373016 | 10.7429188  |
| ENSMUSG00000010205 | 99.04325918 | 116.1680797 | 110.1595635 | 264.1901164 | 169.0219224 |
| ENSMUSG00000010311 | 7.781970364 | 2.086851731 | 7.061510478 | 6.443661377 | 5.013362104 |
| ENSMUSG00000010342 | 5.65961481  | 11.1298759  | 13.41686991 | 13.69278043 | 10.02672421 |
| ENSMUSG00000010358 | 51.64398514 | 82.77845201 | 65.67204744 | 178.0061455 | 109.5777717 |
| ENSMUSG00000010376 | 102.5805184 | 157.9051143 | 141.2302096 | 202.9753334 | 181.9134249 |
| ENSMUSG00000010406 | 12.02668147 | 6.956172438 | 5.649208382 | 15.30369577 | 11.45911338 |
| ENSMUSG00000010453 | 75.69734809 | 103.6469693 | 112.9841676 | 110.3477011 | 96.68626916 |
| ENSMUSG00000010461 | 12.02668147 | 6.956172438 | 10.59226572 | 2.416373016 | 5.013362104 |
| ENSMUSG00000010476 | 8.489422215 | 4.173703463 | 6.35535943  | 2.416373016 | 5.013362104 |
| ENSMUSG00000010505 | 7.074518513 | 5.56493795  | 10.59226572 | 5.638203705 | 8.594335036 |
| ENSMUSG00000010538 | 53.7663407  | 82.08283477 | 91.79963621 | 265.8010318 | 199.8182896 |
| ENSMUSG00000010554 | 44.56946663 | 78.60474855 | 70.61510478 | 165.9242805 | 125.3340526 |
| ENSMUSG00000010601 | 7.781970364 | 5.56493795  | 4.943057334 | 4.832746033 | 4.297167518 |
| ENSMUSG00000010608 | 36.78749627 | 61.21431745 | 40.25060972 | 114.3749894 | 97.40246374 |
| ENSMUSG00000010609 | 4.244711108 | 13.21672763 | 7.061510478 | 8.860034393 | 12.17530797 |
| ENSMUSG00000010721 | 8.489422215 | 11.1298759  | 11.29841676 | 0.805457672 | 5.013362104 |
| ENSMUSG00000010751 | 9.904325918 | 13.21672763 | 10.59226572 | 20.94189947 | 14.32389173 |
| ENSMUSG00000010755 | 53.7663407  | 64.69240367 | 57.90438592 | 150.6205847 | 117.4559122 |
| ENSMUSG00000010796 | 9.196874066 | 4.869320706 | 4.943057334 | 4.832746033 | 5.729556691 |
| ENSMUSG00000010803 | 14.85648888 | 5.56493795  | 5.649208382 | 3.221830688 | 6.445751277 |
| ENSMUSG00000010825 | 8.489422215 | 5.56493795  | 8.473812573 | 7.249119049 | 7.87814045  |
| ENSMUSG00000010841 | 9.196874066 | 10.43425866 | 5.649208382 | 15.30369577 | 10.7429188  |
| ENSMUSG00000010911 | 37.49494812 | 62.60555194 | 69.20280268 | 93.43308996 | 68.75468029 |
| ENSMUSG00000010914 | 33.95768886 | 62.60555194 | 73.43970897 | 85.37851324 | 82.36237743 |
| ENSMUSG00000010936 | 55.1812444  | 79.99598303 | 79.08891735 | 86.18397091 | 77.34901533 |
| ENSMUSG00000011008 | 22.63845924 | 20.17290007 | 24.00913562 | 14.4982381  | 16.47247549 |
| ENSMUSG00000011096 | 9.196874066 | 14.60796212 | 9.886114669 | 7.249119049 | 12.17530797 |
| ENSMUSG00000011114 | 7.074518513 | 13.21672763 | 14.12302096 | 20.94189947 | 22.20203218 |
| ENSMUSG00000011148 | 17.68629628 | 20.17290007 | 16.94762515 | 15.30369577 | 18.62105924 |
| ENSMUSG00000011154 | 7.074518513 | 7.651789682 | 4.943057334 | 1.610915344 | 10.02672421 |
| ENSMUSG00000011171 | 6.367066661 | 8.347406925 | 8.473812573 | 1.610915344 | 2.864778345 |
| ENSMUSG00000011254 | 10.61177777 | 20.17290007 | 21.18453143 | 20.94189947 | 16.47247549 |
| ENSMUSG00000011256 | 50.22908144 | 56.34499675 | 54.37363068 | 80.54576721 | 64.45751277 |
| ENSMUSG00000011257 | 37.49494812 | 52.17129328 | 56.49208382 | 272.2446932 | 202.6830679 |
| ENSMUSG00000011263 | 11.31922962 | 6.956172438 | 8.473812573 | 8.860034393 | 8.594335036 |
| ENSMUSG00000011305 | 7.074518513 | 5.56493795  | 7.061510478 | 11.27640741 | 7.87814045  |
| ENSMUSG00000011427 | 41.03220737 | 37.56333116 | 41.66291182 | 30.60739154 | 33.66114556 |
| ENSMUSG00000011486 | 8.489422215 | 7.651789682 | 8.473812573 | 6.443661377 | 9.310529622 |
| ENSMUSG00000011658 | 12.73413332 | 9.043024169 | 17.65377619 | 20.1364418  | 10.02672421 |
| ENSMUSG00000011751 | 33.95768886 | 40.34580014 | 46.60596915 | 14.4982381  | 19.33725383 |

|                    |             |             |             |             |             |
|--------------------|-------------|-------------|-------------|-------------|-------------|
| ENSMUSG00000011831 | 7.074518513 | 9.043024169 | 3.530755239 | 6.443661377 | 4.297167518 |
| ENSMUSG00000011832 | 12.02668147 | 18.78166558 | 11.29841676 | 8.054576721 | 12.17530797 |
| ENSMUSG00000011877 | 23.34591109 | 29.91154148 | 34.60140134 | 60.40932541 | 56.57937232 |
| ENSMUSG00000011884 | 55.88869625 | 84.1696865  | 91.09348516 | 60.40932541 | 75.91662615 |
| ENSMUSG00000011958 | 57.30359995 | 85.56092098 | 79.08891735 | 92.62763229 | 69.47087488 |
| ENSMUSG00000011960 | 13.44158517 | 13.91234488 | 16.94762515 | 37.85651059 | 30.79636721 |
| ENSMUSG00000012114 | 120.9742666 | 146.7752384 | 139.8179075 | 158.6751614 | 148.2522794 |
| ENSMUSG00000012117 | 24.76081479 | 43.12826911 | 35.30755239 | 66.04752911 | 52.2822048  |
| ENSMUSG00000012123 | 10.61177777 | 6.956172438 | 6.35535943  | 12.08186508 | 9.310529622 |
| ENSMUSG00000012126 | 19.80865184 | 32.69401046 | 43.78136496 | 59.60386773 | 50.13362104 |
| ENSMUSG00000012187 | 7.781970364 | 9.738641413 | 7.767661525 | 2.416373016 | 7.87814045  |
| ENSMUSG00000012211 | 7.781970364 | 9.043024169 | 7.061510478 | 11.27640741 | 8.594335036 |
| ENSMUSG00000012296 | 76.40479994 | 100.1688831 | 89.68118307 | 79.74030954 | 87.37573953 |
| ENSMUSG00000012350 | 12.02668147 | 5.56493795  | 9.179963621 | 10.47094974 | 6.445751277 |
| ENSMUSG00000012396 | 9.196874066 | 8.347406925 | 6.35535943  | 8.860034393 | 8.594335036 |
| ENSMUSG00000012405 | 38.20239997 | 66.08363816 | 44.48751601 | 166.7297381 | 152.5494469 |
| ENSMUSG00000012422 | 57.30359995 | 118.2549314 | 98.86114669 | 131.2896006 | 104.5644096 |
| ENSMUSG00000012519 | 5.65961481  | 7.651789682 | 9.886114669 | 80.54576721 | 55.86317773 |
| ENSMUSG00000012520 | 9.904325918 | 5.56493795  | 9.886114669 | 2.416373016 | 5.729556691 |
| ENSMUSG00000012535 | 82.7718666  | 122.4286349 | 96.0365425  | 162.7024498 | 143.9551119 |
| ENSMUSG00000012609 | 33.95768886 | 68.86610713 | 51.54902649 | 120.8186508 | 95.25387998 |
| ENSMUSG00000012640 | 35.37259256 | 46.60635533 | 40.95676077 | 66.04752911 | 65.17370736 |
| ENSMUSG00000012705 | 8.489422215 | 5.56493795  | 12.00456781 | 4.832746033 | 10.02672421 |
| ENSMUSG00000012777 | 7.074518513 | 7.651789682 | 9.886114669 | 5.638203705 | 9.310529622 |
| ENSMUSG00000012819 | 9.904325918 | 7.651789682 | 9.179963621 | 8.054576721 | 10.02672421 |
| ENSMUSG00000012848 | 31.12788146 | 43.12826911 | 44.48751601 | 183.6443492 | 122.4692743 |
| ENSMUSG00000013033 | 9.196874066 | 9.043024169 | 10.59226572 | 8.860034393 | 7.87814045  |
| ENSMUSG00000013076 | 4.952162959 | 3.478086219 | 5.649208382 | 5.638203705 | 6.445751277 |
| ENSMUSG00000013089 | 9.196874066 | 13.21672763 | 10.59226572 | 16.10915344 | 3.580972932 |
| ENSMUSG00000013150 | 11.31922962 | 18.08604834 | 16.94762515 | 14.4982381  | 12.89150255 |
| ENSMUSG00000013155 | 22.63845924 | 24.34660353 | 14.12302096 | 15.30369577 | 14.32389173 |
| ENSMUSG00000013236 | 8.489422215 | 15.30357936 | 11.29841676 | 8.054576721 | 4.297167518 |
| ENSMUSG00000013353 | 7.781970364 | 4.869320706 | 7.767661525 | 8.054576721 | 9.310529622 |
| ENSMUSG00000013465 | 62.25576291 | 106.4294383 | 101.6857509 | 113.5695318 | 116.023523  |
| ENSMUSG00000013483 | 10.61177777 | 8.347406925 | 9.179963621 | 5.638203705 | 9.310529622 |
| ENSMUSG00000013495 | 107.5326814 | 141.9059177 | 145.4671158 | 149.815127  | 131.7798039 |
| ENSMUSG00000013523 | 12.02668147 | 8.347406925 | 7.767661525 | 8.054576721 | 9.310529622 |
| ENSMUSG00000013539 | 9.904325918 | 6.260555194 | 5.649208382 | 3.221830688 | 12.17530797 |
| ENSMUSG00000013562 | 7.781970364 | 9.738641413 | 8.473812573 | 9.665492065 | 6.445751277 |
| ENSMUSG00000013593 | 41.73965922 | 73.0398106  | 59.31668801 | 77.32393652 | 58.01176149 |
| ENSMUSG00000013611 | 9.904325918 | 9.738641413 | 9.179963621 | 8.054576721 | 5.729556691 |
| ENSMUSG00000013622 | 11.31922962 | 12.52111039 | 20.47838039 | 20.1364418  | 20.05344842 |
| ENSMUSG00000013629 | 16.97884443 | 31.30277597 | 27.53989086 | 79.74030954 | 63.0251236  |

|                    |             |             |             |             |             |
|--------------------|-------------|-------------|-------------|-------------|-------------|
| ENSMUSG00000013643 | 7.781970364 | 4.869320706 | 7.061510478 | 4.832746033 | 5.729556691 |
| ENSMUSG00000013646 | 85.601674   | 121.0374004 | 104.5103551 | 127.2623122 | 103.848215  |
| ENSMUSG00000013698 | 8.489422215 | 13.21672763 | 11.29841676 | 12.08186508 | 16.47247549 |
| ENSMUSG00000013701 | 120.9742666 | 217.0325801 | 165.9454962 | 287.5483889 | 235.6280189 |
| ENSMUSG00000013736 | 61.54831106 | 77.9091313  | 96.0365425  | 133.7059736 | 110.2939663 |
| ENSMUSG00000013766 | 11.31922962 | 9.043024169 | 7.061510478 | 7.249119049 | 7.87814045  |
| ENSMUSG00000013787 | 23.34591109 | 34.08524495 | 38.83830763 | 136.1223466 | 104.5644096 |
| ENSMUSG00000013833 | 19.10119998 | 27.12907251 | 26.83373982 | 30.60739154 | 34.37734014 |
| ENSMUSG00000013858 | 82.7718666  | 105.0382038 | 98.15499564 | 219.8899445 | 175.4676737 |
| ENSMUSG00000013878 | 29.71297775 | 54.95376226 | 43.78136496 | 70.07481747 | 65.88990194 |
| ENSMUSG00000013921 | 7.074518513 | 4.173703463 | 7.767661525 | 8.860034393 | 11.45911338 |
| ENSMUSG00000013928 | 12.73413332 | 20.17290007 | 14.829172   | 33.82922223 | 24.35061594 |
| ENSMUSG00000013936 | 8.489422215 | 7.651789682 | 7.767661525 | 6.443661377 | 5.729556691 |
| ENSMUSG00000013973 | 45.27691848 | 73.0398106  | 61.43514116 | 127.2623122 | 115.3073284 |
| ENSMUSG00000013997 | 94.79854807 | 116.863697  | 92.50578726 | 153.8424154 | 158.2790036 |
| ENSMUSG00000014030 | 164.1288295 | 185.7298041 | 170.1824025 | 440.5853466 | 282.180667  |
| ENSMUSG00000014039 | 31.83533331 | 36.86771392 | 48.01827125 | 58.79841006 | 40.10689684 |
| ENSMUSG00000014074 | 48.81417774 | 74.43104508 | 72.02740687 | 146.5932963 | 120.3206905 |
| ENSMUSG00000014075 | 5.65961481  | 4.173703463 | 10.59226572 | 8.860034393 | 7.87814045  |
| ENSMUSG00000014077 | 48.10672589 | 91.12585893 | 67.08434954 | 34.6346799  | 47.2688427  |
| ENSMUSG00000014104 | 9.196874066 | 6.956172438 | 5.649208382 | 0.805457672 | 6.445751277 |
| ENSMUSG00000014158 | 3.537259256 | 8.347406925 | 12.00456781 | 2.416373016 | 5.013362104 |
| ENSMUSG00000014164 | 7.074518513 | 8.347406925 | 7.767661525 | 4.832746033 | 7.87814045  |
| ENSMUSG00000014177 | 20.51610369 | 43.82388636 | 42.36906287 | 42.68925662 | 39.39070225 |
| ENSMUSG00000014195 | 99.04325918 | 116.863697  | 110.1595635 | 193.3098413 | 133.9283876 |
| ENSMUSG00000014198 | 9.904325918 | 8.347406925 | 9.179963621 | 10.47094974 | 12.89150255 |
| ENSMUSG00000014226 | 62.25576291 | 78.60474855 | 77.67661525 | 222.3063175 | 158.2790036 |
| ENSMUSG00000014232 | 27.5906222  | 54.95376226 | 43.07521391 | 65.24207144 | 50.13362104 |
| ENSMUSG00000014301 | 56.5961481  | 70.95295887 | 62.1412922  | 84.57305557 | 63.74131818 |
| ENSMUSG00000014303 | 5.65961481  | 8.347406925 | 9.886114669 | 9.665492065 | 4.297167518 |
| ENSMUSG00000014313 | 65.79302217 | 86.95215547 | 76.97046421 | 127.2623122 | 93.10529622 |
| ENSMUSG00000014329 | 9.196874066 | 6.260555194 | 4.943057334 | 6.443661377 | 4.297167518 |
| ENSMUSG00000014351 | 12.73413332 | 3.478086219 | 9.886114669 | 7.249119049 | 5.729556691 |
| ENSMUSG00000014353 | 53.05888884 | 78.60474855 | 68.49665163 | 45.10562964 | 54.43078856 |
| ENSMUSG00000014355 | 46.69182218 | 68.86610713 | 60.02283906 | 82.15668255 | 78.7814045  |
| ENSMUSG00000014402 | 60.13340736 | 88.34338996 | 76.26431316 | 82.96214023 | 83.7947666  |
| ENSMUSG00000014418 | 106.8252295 | 146.7752384 | 121.4579802 | 247.2755053 | 171.8867007 |
| ENSMUSG00000014444 | 27.5906222  | 39.6501829  | 39.54445867 | 103.9040397 | 87.37573953 |
| ENSMUSG00000014503 | 10.61177777 | 9.043024169 | 12.71071886 | 9.665492065 | 10.7429188  |
| ENSMUSG00000014504 | 38.90985182 | 79.99598303 | 72.02740687 | 106.3204127 | 89.52432329 |
| ENSMUSG00000014543 | 7.781970364 | 9.738641413 | 7.767661525 | 8.054576721 | 7.161945863 |
| ENSMUSG00000014547 | 0           | 0           | 0           | 0           | 0.716194586 |
| ENSMUSG00000014550 | 57.30359995 | 86.95215547 | 74.14586002 | 74.10210583 | 75.91662615 |

|                    |             |             |             |             |             |
|--------------------|-------------|-------------|-------------|-------------|-------------|
| ENSMUSG00000014554 | 24.76081479 | 43.82388636 | 38.83830763 | 41.88379895 | 33.66114556 |
| ENSMUSG00000014592 | 29.0055259  | 52.86691053 | 57.19823487 | 43.49471429 | 57.29556691 |
| ENSMUSG00000014599 | 8.489422215 | 6.260555194 | 9.886114669 | 20.1364418  | 11.45911338 |
| ENSMUSG00000014601 | 26.88317035 | 38.25894841 | 48.01827125 | 42.68925662 | 30.79636721 |
| ENSMUSG00000014602 | 5.65961481  | 6.260555194 | 7.767661525 | 5.638203705 | 8.594335036 |
| ENSMUSG00000014606 | 41.73965922 | 50.7800588  | 56.49208382 | 160.2860767 | 122.4692743 |
| ENSMUSG00000014609 | 9.196874066 | 5.56493795  | 13.41686991 | 9.665492065 | 13.60769714 |
| ENSMUSG00000014633 | 23.34591109 | 23.65098629 | 22.59683353 | 32.21830688 | 38.67450766 |
| ENSMUSG00000014668 | 32.54278516 | 69.56172438 | 55.78593277 | 59.60386773 | 53.71459398 |
| ENSMUSG00000014704 | 4.952162959 | 9.738641413 | 4.943057334 | 5.638203705 | 8.594335036 |
| ENSMUSG00000014725 | 12.73413332 | 10.43425866 | 9.179963621 | 4.02728836  | 6.445751277 |
| ENSMUSG00000014748 | 39.61730367 | 49.38882431 | 36.71985448 | 63.6311561  | 52.99839939 |
| ENSMUSG00000014767 | 58.0110518  | 84.1696865  | 68.49665163 | 133.7059736 | 116.023523  |
| ENSMUSG00000014771 | 44.56946663 | 65.38802092 | 55.78593277 | 88.60034393 | 83.7947666  |
| ENSMUSG00000014773 | 11.31922962 | 7.651789682 | 11.29841676 | 0.805457672 | 8.594335036 |
| ENSMUSG00000014778 | 32.54278516 | 59.82308296 | 54.37363068 | 15.30369577 | 41.53928601 |
| ENSMUSG00000014782 | 9.196874066 | 7.651789682 | 9.886114669 | 8.054576721 | 8.594335036 |
| ENSMUSG00000014791 | 7.781970364 | 13.91234488 | 9.179963621 | 20.1364418  | 16.47247549 |
| ENSMUSG00000014837 | 4.244711108 | 5.56493795  | 13.41686991 | 12.08186508 | 7.87814045  |
| ENSMUSG00000014846 | 8.489422215 | 6.260555194 | 7.061510478 | 8.860034393 | 6.445751277 |
| ENSMUSG00000014850 | 23.34591109 | 33.3896277  | 32.4829482  | 61.21478308 | 49.41742646 |
| ENSMUSG00000014852 | 5.65961481  | 11.1298759  | 8.473812573 | 3.221830688 | 9.310529622 |
| ENSMUSG00000014856 | 33.95768886 | 59.82308296 | 69.90895373 | 88.60034393 | 88.80812871 |
| ENSMUSG00000014873 | 78.52715549 | 114.081228  | 111.5718655 | 208.6135371 | 158.9951982 |
| ENSMUSG00000014907 | 11.31922962 | 23.65098629 | 19.77222934 | 84.57305557 | 68.75468029 |
| ENSMUSG00000014932 | 6.367066661 | 6.956172438 | 9.886114669 | 6.443661377 | 7.161945863 |
| ENSMUSG00000014956 | 91.26128881 | 114.7768452 | 86.85657888 | 183.6443492 | 132.4959985 |
| ENSMUSG00000014959 | 110.3624888 | 125.9067211 | 121.4579802 | 140.9550926 | 121.0368851 |
| ENSMUSG00000014980 | 19.10119998 | 31.99839321 | 30.36449505 | 40.2728836  | 53.71459398 |
| ENSMUSG00000015001 | 9.904325918 | 9.043024169 | 5.649208382 | 8.054576721 | 3.580972932 |
| ENSMUSG00000015002 | 38.90985182 | 52.17129328 | 56.49208382 | 45.10562964 | 48.70123187 |
| ENSMUSG00000015027 | 29.71297775 | 47.99758982 | 53.66747963 | 55.57657937 | 42.25548059 |
| ENSMUSG00000015053 | 7.781970364 | 4.173703463 | 4.943057334 | 7.249119049 | 6.445751277 |
| ENSMUSG00000015083 | 31.83533331 | 45.91073809 | 55.78593277 | 54.7711217  | 69.47087488 |
| ENSMUSG00000015087 | 50.93653329 | 112.6899935 | 69.90895373 | 78.12939419 | 85.94335036 |
| ENSMUSG00000015090 | 4.244711108 | 4.869320706 | 9.179963621 | 12.08186508 | 11.45911338 |
| ENSMUSG00000015093 | 14.85648888 | 18.78166558 | 26.12758877 | 14.4982381  | 8.594335036 |
| ENSMUSG00000015094 | 4.952162959 | 13.21672763 | 6.35535943  | 4.832746033 | 9.310529622 |
| ENSMUSG00000015095 | 35.37259256 | 54.95376226 | 54.37363068 | 61.21478308 | 49.41742646 |
| ENSMUSG00000015112 | 8.489422215 | 9.738641413 | 8.473812573 | 10.47094974 | 11.45911338 |
| ENSMUSG00000015120 | 91.26128881 | 89.0390072  | 86.15042783 | 147.398754  | 103.1320204 |
| ENSMUSG00000015127 | 50.93653329 | 84.86530374 | 76.97046421 | 75.71302118 | 58.72795608 |
| ENSMUSG00000015133 | 42.44711108 | 54.95376226 | 48.7244223  | 61.21478308 | 63.74131818 |

|                    |              |             |             |             |             |
|--------------------|--------------|-------------|-------------|-------------|-------------|
| ENSMUSG00000015134 | 11.31922962  | 9.738641413 | 6.35535943  | 6.443661377 | 2.148583759 |
| ENSMUSG00000015143 | 8.489422215  | 12.52111039 | 9.179963621 | 5.638203705 | 5.729556691 |
| ENSMUSG00000015149 | 106.8252295  | 132.1672763 | 132.756397  | 129.6786852 | 118.1721067 |
| ENSMUSG00000015165 | 4.952162959  | 7.651789682 | 12.00456781 | 23.35827249 | 20.05344842 |
| ENSMUSG00000015176 | 51.64398514  | 88.34338996 | 76.97046421 | 262.5792011 | 211.9935976 |
| ENSMUSG00000015189 | 38.20239997  | 58.43184848 | 45.8998181  | 38.66196826 | 43.68786977 |
| ENSMUSG00000015202 | 20.51610369  | 31.30277597 | 33.18909925 | 13.69278043 | 20.05344842 |
| ENSMUSG00000015214 | 7.781970364  | 21.56413456 | 11.29841676 | 20.94189947 | 12.17530797 |
| ENSMUSG00000015217 | 4.952162959  | 2.782468975 | 4.943057334 | 11.27640741 | 12.17530797 |
| ENSMUSG00000015222 | 7.074518513  | 6.260555194 | 7.061510478 | 7.249119049 | 6.445751277 |
| ENSMUSG00000015224 | 5.65961481   | 8.347406925 | 7.767661525 | 5.638203705 | 8.594335036 |
| ENSMUSG00000015242 | 3.537259256  | 10.43425866 | 5.649208382 | 3.221830688 | 10.02672421 |
| ENSMUSG00000015247 | 14.85648888  | 20.86851731 | 23.30298458 | 28.19101852 | 25.78300511 |
| ENSMUSG00000015290 | 2.122355554  | 0           | 1.412302096 | 0.805457672 | 0           |
| ENSMUSG00000015291 | 42.447111108 | 45.21512085 | 52.96132858 | 98.265836   | 80.21379367 |
| ENSMUSG00000015314 | 35.37259256  | 61.9099347  | 51.54902649 | 164.3133651 | 105.2806042 |
| ENSMUSG00000015316 | 99.04325918  | 109.9075245 | 112.9841676 | 57.18749472 | 57.29556691 |
| ENSMUSG00000015335 | 23.34591109  | 27.12907251 | 29.65834401 | 71.68573282 | 46.55264811 |
| ENSMUSG00000015340 | 4.244711108  | 4.173703463 | 4.943057334 | 4.832746033 | 4.297167518 |
| ENSMUSG00000015341 | 56.5961481   | 91.12585893 | 71.32125582 | 136.9278043 | 106.7129934 |
| ENSMUSG00000015355 | 128.0487851  | 130.7760418 | 105.2165061 | 203.780791  | 128.198831  |
| ENSMUSG00000015357 | 53.7663407   | 109.2119073 | 84.03197468 | 83.7675979  | 103.848215  |
| ENSMUSG00000015363 | 49.52162959  | 52.17129328 | 38.13215658 | 78.93485187 | 65.88990194 |
| ENSMUSG00000015365 | 9.196874066  | 2.782468975 | 4.943057334 | 8.054576721 | 7.161945863 |
| ENSMUSG00000015401 | 2.829807405  | 4.173703463 | 0.706151048 | 1.610915344 | 3.580972932 |
| ENSMUSG00000015405 | 10.61177777  | 5.56493795  | 4.236906287 | 1.610915344 | 3.580972932 |
| ENSMUSG00000015452 | 8.489422215  | 8.347406925 | 8.473812573 | 1.610915344 | 5.729556691 |
| ENSMUSG00000015461 | 20.51610369  | 38.25894841 | 42.36906287 | 54.7711217  | 47.2688427  |
| ENSMUSG00000015467 | 5.65961481   | 9.738641413 | 8.473812573 | 11.27640741 | 7.87814045  |
| ENSMUSG00000015468 | 4.952162959  | 7.651789682 | 9.886114669 | 7.249119049 | 6.445751277 |
| ENSMUSG00000015474 | 1.414903703  | 2.782468975 | 2.118453143 | 1.610915344 | 3.580972932 |
| ENSMUSG00000015478 | 24.05336294  | 38.95456565 | 32.4829482  | 42.68925662 | 40.10689684 |
| ENSMUSG00000015488 | 48.10672589  | 57.73623123 | 58.61053696 | 71.68573282 | 60.16034525 |
| ENSMUSG00000015501 | 24.05336294  | 39.6501829  | 38.83830763 | 18.52552646 | 20.769643   |
| ENSMUSG00000015519 | 12.02668147  | 7.651789682 | 7.061510478 | 3.221830688 | 7.161945863 |
| ENSMUSG00000015522 | 40.32475552  | 91.82147618 | 71.32125582 | 66.85298678 | 71.61945863 |
| ENSMUSG00000015536 | 45.27691848  | 70.25734162 | 68.49665163 | 38.66196826 | 48.70123187 |
| ENSMUSG00000015542 | 16.27139258  | 29.21592424 | 35.30755239 | 20.1364418  | 23.63442135 |
| ENSMUSG00000015568 | 8.489422215  | 5.56493795  | 6.35535943  | 5.638203705 | 5.729556691 |
| ENSMUSG00000015575 | 97.62835547  | 109.2119073 | 102.3919019 | 118.4022778 | 103.1320204 |
| ENSMUSG00000015597 | 87.01657771  | 99.47326586 | 100.9795998 | 44.30017197 | 50.84981563 |
| ENSMUSG00000015619 | 8.489422215  | 7.651789682 | 4.943057334 | 5.638203705 | 7.161945863 |
| ENSMUSG00000015653 | 12.02668147  | 9.043024169 | 7.767661525 | 4.832746033 | 5.013362104 |

|                    |             |             |             |             |             |
|--------------------|-------------|-------------|-------------|-------------|-------------|
| ENSMUSG00000015656 | 24.76081479 | 22.2597518  | 31.0706461  | 59.60386773 | 49.41742646 |
| ENSMUSG00000015659 | 17.68629628 | 50.08444155 | 31.0706461  | 78.93485187 | 60.87653984 |
| ENSMUSG00000015668 | 28.29807405 | 39.6501829  | 39.54445867 | 88.60034393 | 55.14698315 |
| ENSMUSG00000015671 | 87.72402956 | 132.1672763 | 110.1595635 | 215.0571984 | 166.157144  |
| ENSMUSG00000015697 | 20.51610369 | 36.17209668 | 31.77679715 | 70.07481747 | 51.56601022 |
| ENSMUSG00000015702 | 14.14903703 | 7.651789682 | 11.29841676 | 7.249119049 | 12.89150255 |
| ENSMUSG00000015714 | 43.86201478 | 63.99678643 | 53.66747963 | 110.3477011 | 85.22715578 |
| ENSMUSG00000015721 | 8.489422215 | 6.956172438 | 7.061510478 | 4.832746033 | 7.161945863 |
| ENSMUSG00000015733 | 123.804074  | 137.036597  | 131.3440949 | 205.3917064 | 161.1437819 |
| ENSMUSG00000015748 | 58.71850365 | 86.25653823 | 81.91352154 | 113.5695318 | 82.36237743 |
| ENSMUSG00000015749 | 74.98989623 | 97.38641413 | 99.56729774 | 185.2552646 | 149.6846685 |
| ENSMUSG00000015750 | 35.37259256 | 51.47567604 | 60.02283906 | 70.88027514 | 57.29556691 |
| ENSMUSG00000015755 | 114.6071999 | 150.9489419 | 129.2256417 | 289.964762  | 241.3575756 |
| ENSMUSG00000015757 | 99.75071103 | 162.0788178 | 149.7040221 | 283.5211006 | 219.1555434 |
| ENSMUSG00000015759 | 86.30912585 | 94.60394515 | 91.79963621 | 116.7913625 | 117.4559122 |
| ENSMUSG00000015766 | 4.244711108 | 5.56493795  | 4.236906287 | 4.832746033 | 10.02672421 |
| ENSMUSG00000015776 | 74.28244438 | 108.51629   | 96.0365425  | 319.7666958 | 225.6012947 |
| ENSMUSG00000015787 | 5.65961481  | 6.956172438 | 9.886114669 | 10.47094974 | 6.445751277 |
| ENSMUSG00000015790 | 79.23460734 | 91.82147618 | 96.0365425  | 207.8080794 | 151.1170577 |
| ENSMUSG00000015804 | 96.21345177 | 128.6891901 | 120.0456781 | 153.0369577 | 102.4158258 |
| ENSMUSG00000015806 | 15.56394073 | 20.86851731 | 19.06607829 | 17.72006879 | 25.06681052 |
| ENSMUSG00000015829 | 8.489422215 | 4.869320706 | 2.118453143 | 7.249119049 | 5.729556691 |
| ENSMUSG00000015837 | 74.28244438 | 100.1688831 | 85.44427678 | 149.0096693 | 113.8749392 |
| ENSMUSG00000015843 | 9.904325918 | 6.956172438 | 4.943057334 | 8.054576721 | 5.729556691 |
| ENSMUSG00000015846 | 7.074518513 | 5.56493795  | 5.649208382 | 10.47094974 | 10.02672421 |
| ENSMUSG00000015850 | 9.904325918 | 11.82549314 | 9.886114669 | 15.30369577 | 7.161945863 |
| ENSMUSG00000015852 | 7.781970364 | 4.173703463 | 5.649208382 | 8.860034393 | 5.729556691 |
| ENSMUSG00000015869 | 12.02668147 | 8.347406925 | 9.179963621 | 8.860034393 | 7.161945863 |
| ENSMUSG00000015880 | 16.27139258 | 17.39043109 | 15.53532305 | 49.93837567 | 39.39070225 |
| ENSMUSG00000015882 | 39.61730367 | 57.73623123 | 36.71985448 | 64.43661377 | 49.41742646 |
| ENSMUSG00000015937 | 59.42595551 | 63.99678643 | 77.67661525 | 88.60034393 | 93.10529622 |
| ENSMUSG00000015943 | 0.707451851 | 2.086851731 | 0           | 1.610915344 | 2.148583759 |
| ENSMUSG00000015947 | 7.781970364 | 4.869320706 | 5.649208382 | 4.832746033 | 7.87814045  |
| ENSMUSG00000015950 | 70.74518513 | 87.64777272 | 86.85657888 | 214.2517408 | 147.5360848 |
| ENSMUSG00000015957 | 6.367066661 | 5.56493795  | 4.943057334 | 3.221830688 | 2.864778345 |
| ENSMUSG00000015966 | 5.65961481  | 5.56493795  | 8.473812573 | 6.443661377 | 7.87814045  |
| ENSMUSG00000015968 | 42.44711108 | 70.95295887 | 66.37819849 | 53.96566403 | 51.56601022 |
| ENSMUSG00000015970 | 8.489422215 | 5.56493795  | 4.943057334 | 7.249119049 | 7.161945863 |
| ENSMUSG00000015980 | 2.122355554 | 6.260555194 | 4.236906287 | 4.832746033 | 2.148583759 |
| ENSMUSG00000015981 | 4.952162959 | 5.56493795  | 4.943057334 | 2.416373016 | 7.161945863 |
| ENSMUSG00000015994 | 21.93100739 | 41.73703463 | 33.89525029 | 24.16373016 | 37.95831308 |
| ENSMUSG00000016087 | 78.52715549 | 108.51629   | 91.79963621 | 152.2315    | 129.6312201 |
| ENSMUSG00000016128 | 9.196874066 | 4.869320706 | 8.473812573 | 4.832746033 | 5.013362104 |



|                    |             |             |             |             |             |
|--------------------|-------------|-------------|-------------|-------------|-------------|
| ENSMUSG00000016150 | 4.244711108 | 4.173703463 | 2.118453143 | 2.416373016 | 4.297167518 |
| ENSMUSG00000016179 | 9.196874066 | 6.260555194 | 6.35535943  | 3.221830688 | 6.445751277 |
| ENSMUSG00000016194 | 12.02668147 | 16.69481385 | 12.71071886 | 12.08186508 | 15.7562809  |
| ENSMUSG00000016200 | 9.904325918 | 8.347406925 | 12.71071886 | 4.832746033 | 5.729556691 |
| ENSMUSG00000016239 | 2.829807405 | 2.782468975 | 4.236906287 | 0.805457672 | 2.148583759 |
| ENSMUSG00000016253 | 79.23460734 | 111.9943762 | 87.56272992 | 73.29664816 | 81.64618284 |
| ENSMUSG00000016256 | 31.12788146 | 40.34580014 | 42.36906287 | 152.2315    | 103.1320204 |
| ENSMUSG00000016257 | 86.30912585 | 95.99517964 | 102.3919019 | 230.3608942 | 163.2923657 |
| ENSMUSG00000016262 | 7.074518513 | 6.956172438 | 8.473812573 | 4.02728836  | 7.161945863 |
| ENSMUSG00000016283 | 13.44158517 | 6.956172438 | 5.649208382 | 8.860034393 | 6.445751277 |
| ENSMUSG00000016308 | 39.61730367 | 54.25814501 | 47.3121202  | 70.07481747 | 49.41742646 |
| ENSMUSG00000016344 | 16.97884443 | 20.86851731 | 14.829172   | 29.80193387 | 20.769643   |
| ENSMUSG00000016346 | 4.952162959 | 6.260555194 | 7.061510478 | 7.249119049 | 9.310529622 |
| ENSMUSG00000016349 | 8.489422215 | 6.260555194 | 3.530755239 | 7.249119049 | 10.7429188  |
| ENSMUSG00000016382 | 2.122355554 | 3.478086219 | 1.412302096 | 0.805457672 | 2.148583759 |
| ENSMUSG00000016386 | 14.85648888 | 5.56493795  | 5.649208382 | 2.416373016 | 5.729556691 |
| ENSMUSG00000016458 | 5.65961481  | 4.869320706 | 8.473812573 | 4.02728836  | 4.297167518 |
| ENSMUSG00000016477 | 29.0055259  | 41.04141738 | 41.66291182 | 233.5827249 | 148.2522794 |
| ENSMUSG00000016481 | 33.95768886 | 68.86610713 | 53.66747963 | 78.93485187 | 72.33565322 |
| ENSMUSG00000016487 | 4.952162959 | 5.56493795  | 7.061510478 | 6.443661377 | 7.161945863 |
| ENSMUSG00000016493 | 4.952162959 | 9.738641413 | 11.29841676 | 9.665492065 | 7.161945863 |
| ENSMUSG00000016495 | 50.22908144 | 69.56172438 | 67.08434954 | 156.2587884 | 101.6996313 |
| ENSMUSG00000016503 | 43.15456293 | 59.12746572 | 52.25517753 | 82.96214023 | 70.90326405 |
| ENSMUSG00000016510 | 32.54278516 | 42.43265187 | 39.54445867 | 41.07834128 | 51.56601022 |
| ENSMUSG00000016524 | 7.781970364 | 9.738641413 | 7.061510478 | 2.416373016 | 7.161945863 |
| ENSMUSG00000016528 | 65.79302217 | 79.30036579 | 72.73355792 | 94.23854763 | 85.94335036 |
| ENSMUSG00000016534 | 34.66514071 | 52.17129328 | 45.19366706 | 70.07481747 | 53.71459398 |
| ENSMUSG00000016552 | 7.074518513 | 8.347406925 | 7.061510478 | 14.4982381  | 15.7562809  |
| ENSMUSG00000016559 | 17.68629628 | 23.65098629 | 27.53989086 | 15.30369577 | 20.769643   |
| ENSMUSG00000016624 | 5.65961481  | 7.651789682 | 5.649208382 | 5.638203705 | 9.310529622 |
| ENSMUSG00000016626 | 12.73413332 | 8.347406925 | 9.886114669 | 8.054576721 | 9.310529622 |
| ENSMUSG00000016664 | 58.0110518  | 73.0398106  | 69.20280268 | 82.96214023 | 73.05184781 |
| ENSMUSG00000016756 | 7.781970364 | 8.347406925 | 12.00456781 | 8.054576721 | 5.729556691 |
| ENSMUSG00000016757 | 19.10119998 | 24.34660353 | 23.30298458 | 44.30017197 | 33.66114556 |
| ENSMUSG00000016763 | 6.367066661 | 6.260555194 | 9.179963621 | 9.665492065 | 8.594335036 |
| ENSMUSG00000016831 | 25.46826665 | 60.51870021 | 48.7244223  | 115.9859048 | 89.52432329 |
| ENSMUSG00000016833 | 25.46826665 | 43.82388636 | 36.01370344 | 71.68573282 | 64.45751277 |
| ENSMUSG00000016918 | 5.65961481  | 5.56493795  | 10.59226572 | 2.416373016 | 8.594335036 |
| ENSMUSG00000016921 | 50.22908144 | 89.73462445 | 74.14586002 | 178.8116032 | 129.6312201 |
| ENSMUSG00000016933 | 22.63845924 | 35.47647943 | 26.83373982 | 19.33098413 | 24.35061594 |
| ENSMUSG00000016940 | 55.88869625 | 100.8645003 | 97.44884459 | 124.0404815 | 114.5911338 |
| ENSMUSG00000016995 | 10.61177777 | 7.651789682 | 7.061510478 | 5.638203705 | 10.02672421 |
| ENSMUSG00000017002 | 7.074518513 | 8.347406925 | 6.35535943  | 4.832746033 | 6.445751277 |

|                    |             |             |             |             |             |
|--------------------|-------------|-------------|-------------|-------------|-------------|
| ENSMUSG00000017119 | 65.79302217 | 92.51709342 | 67.79050059 | 98.265836   | 93.82149081 |
| ENSMUSG00000017132 | 160.5915702 | 168.339373  | 175.1254598 | 349.5686297 | 217.7231542 |
| ENSMUSG00000017146 | 56.5961481  | 71.64857611 | 60.72899011 | 100.682209  | 85.94335036 |
| ENSMUSG00000017176 | 3.537259256 | 4.869320706 | 3.530755239 | 4.832746033 | 5.013362104 |
| ENSMUSG00000017195 | 13.44158517 | 19.47728283 | 20.47838039 | 17.72006879 | 12.89150255 |
| ENSMUSG00000017210 | 24.05336294 | 27.82468975 | 22.59683353 | 22.55281482 | 22.91822676 |
| ENSMUSG00000017211 | 4.952162959 | 6.956172438 | 10.59226572 | 4.832746033 | 7.161945863 |
| ENSMUSG00000017221 | 59.42595551 | 82.08283477 | 81.91352154 | 170.7570265 | 142.5227227 |
| ENSMUSG00000017264 | 21.22355554 | 44.5195036  | 38.83830763 | 69.2693598  | 60.16034525 |
| ENSMUSG00000017286 | 29.0055259  | 48.69320706 | 44.48751601 | 82.15668255 | 80.92998826 |
| ENSMUSG00000017288 | 50.93653329 | 67.47487265 | 53.66747963 | 107.9313281 | 82.36237743 |
| ENSMUSG00000017291 | 119.5593629 | 161.3832006 | 148.9978711 | 184.4498069 | 138.9417498 |
| ENSMUSG00000017299 | 54.47379255 | 88.34338996 | 88.26888097 | 67.65844446 | 74.48423698 |
| ENSMUSG00000017307 | 84.1867703  | 129.3848073 | 121.4579802 | 94.23854763 | 88.09193412 |
| ENSMUSG00000017309 | 7.074518513 | 6.956172438 | 12.00456781 | 8.054576721 | 7.87814045  |
| ENSMUSG00000017311 | 3.537259256 | 4.173703463 | 5.649208382 | 10.47094974 | 6.445751277 |
| ENSMUSG00000017314 | 7.781970364 | 3.478086219 | 7.061510478 | 8.860034393 | 5.729556691 |
| ENSMUSG00000017316 | 4.244711108 | 7.651789682 | 5.649208382 | 6.443661377 | 9.310529622 |
| ENSMUSG00000017376 | 29.0055259  | 48.69320706 | 36.01370344 | 33.82922223 | 44.40406435 |
| ENSMUSG00000017386 | 67.20792587 | 98.08203137 | 96.74269354 | 105.514955  | 85.94335036 |
| ENSMUSG00000017390 | 10.61177777 | 7.651789682 | 14.829172   | 11.27640741 | 10.7429188  |
| ENSMUSG00000017400 | 14.14903703 | 11.82549314 | 10.59226572 | 5.638203705 | 10.02672421 |
| ENSMUSG00000017404 | 34.66514071 | 52.17129328 | 49.43057334 | 70.88027514 | 68.75468029 |
| ENSMUSG00000017405 | 11.31922962 | 5.56493795  | 10.59226572 | 10.47094974 | 15.7562809  |
| ENSMUSG00000017412 | 7.074518513 | 6.956172438 | 2.118453143 | 5.638203705 | 2.864778345 |
| ENSMUSG00000017417 | 17.68629628 | 14.60796212 | 12.71071886 | 12.88732275 | 13.60769714 |
| ENSMUSG00000017418 | 17.68629628 | 31.99839321 | 24.00913562 | 24.96918783 | 30.08017263 |
| ENSMUSG00000017421 | 162.7139258 | 210.7720249 | 163.120892  | 324.5994419 | 227.7498785 |
| ENSMUSG00000017428 | 107.5326814 | 150.2533247 | 118.633376  | 236.8045556 | 164.0085603 |
| ENSMUSG00000017446 | 6.367066661 | 6.260555194 | 7.061510478 | 8.860034393 | 8.594335036 |
| ENSMUSG00000017478 | 69.33028142 | 86.25653823 | 91.09348516 | 152.2315    | 116.7397176 |
| ENSMUSG00000017485 | 121.6817184 | 142.601535  | 135.5810012 | 117.5968201 | 114.5911338 |
| ENSMUSG00000017493 | 11.31922962 | 9.738641413 | 12.71071886 | 11.27640741 | 10.7429188  |
| ENSMUSG00000017499 | 16.27139258 | 33.3896277  | 23.30298458 | 68.46390213 | 51.56601022 |
| ENSMUSG00000017548 | 77.11225179 | 127.9935729 | 90.38733411 | 226.3336059 | 161.1437819 |
| ENSMUSG00000017550 | 81.3569629  | 90.43024169 | 84.73812573 | 127.2623122 | 98.11865833 |
| ENSMUSG00000017561 | 78.52715549 | 93.21271067 | 91.09348516 | 223.9172328 | 163.2923657 |
| ENSMUSG00000017615 | 48.10672589 | 86.95215547 | 88.97503202 | 144.1769233 | 108.1453825 |
| ENSMUSG00000017631 | 7.074518513 | 4.173703463 | 2.824604191 | 6.443661377 | 7.161945863 |
| ENSMUSG00000017639 | 9.904325918 | 2.782468975 | 10.59226572 | 4.832746033 | 7.161945863 |
| ENSMUSG00000017652 | 75.69734809 | 87.64777272 | 86.85657888 | 153.0369577 | 108.8615771 |
| ENSMUSG00000017664 | 16.27139258 | 27.82468975 | 22.59683353 | 17.72006879 | 22.91822676 |
| ENSMUSG00000017670 | 65.08557032 | 75.12666233 | 81.20737049 | 62.82569842 | 62.30892901 |

|                    |             |             |             |             |             |
|--------------------|-------------|-------------|-------------|-------------|-------------|
| ENSMUSG00000017677 | 71.45263698 | 102.2557348 | 84.03197468 | 184.4498069 | 128.198831  |
| ENSMUSG00000017679 | 128.0487851 | 143.9927695 | 123.5764334 | 169.1461111 | 145.387501  |
| ENSMUSG00000017686 | 50.93653329 | 91.82147618 | 82.61967259 | 93.43308996 | 86.65954495 |
| ENSMUSG00000017688 | 7.074518513 | 5.56493795  | 7.767661525 | 2.416373016 | 8.594335036 |
| ENSMUSG00000017715 | 78.52715549 | 107.8206728 | 112.2780166 | 115.1804471 | 112.4425501 |
| ENSMUSG00000017716 | 111.0699406 | 94.60394515 | 101.6857509 | 214.2517408 | 164.0085603 |
| ENSMUSG00000017718 | 55.1812444  | 84.1696865  | 60.72899011 | 244.0536746 | 199.102095  |
| ENSMUSG00000017721 | 34.66514071 | 43.12826911 | 46.60596915 | 61.21478308 | 57.29556691 |
| ENSMUSG00000017723 | 6.367066661 | 4.869320706 | 7.767661525 | 5.638203705 | 5.013362104 |
| ENSMUSG00000017724 | 7.074518513 | 9.043024169 | 4.236906287 | 4.832746033 | 4.297167518 |
| ENSMUSG00000017734 | 10.61177777 | 6.260555194 | 11.29841676 | 4.02728836  | 12.89150255 |
| ENSMUSG00000017740 | 0           | 0           | 0           | 0           | 0           |
| ENSMUSG00000017747 | 14.85648888 | 28.52030699 | 19.06607829 | 10.47094974 | 18.62105924 |
| ENSMUSG00000017754 | 11.31922962 | 8.347406925 | 10.59226572 | 9.665492065 | 7.161945863 |
| ENSMUSG00000017760 | 29.71297775 | 45.91073809 | 30.36449505 | 41.88379895 | 47.2688427  |
| ENSMUSG00000017765 | 10.61177777 | 21.56413456 | 16.94762515 | 20.1364418  | 22.91822676 |
| ENSMUSG00000017774 | 29.71297775 | 59.12746572 | 59.31668801 | 89.4058016  | 60.16034525 |
| ENSMUSG00000017776 | 111.0699406 | 130.7760418 | 97.44884459 | 274.6610662 | 199.8182896 |
| ENSMUSG00000017778 | 3.537259256 | 2.086851731 | 6.35535943  | 3.221830688 | 4.297167518 |
| ENSMUSG00000017781 | 125.9264295 | 146.0796212 | 135.5810012 | 191.698926  | 140.3741389 |
| ENSMUSG00000017801 | 17.68629628 | 32.69401046 | 36.01370344 | 33.82922223 | 40.10689684 |
| ENSMUSG00000017802 | 193.8418072 | 198.2509145 | 181.4808193 | 166.7297381 | 117.4559122 |
| ENSMUSG00000017817 | 5.65961481  | 6.260555194 | 9.886114669 | 8.860034393 | 5.013362104 |
| ENSMUSG00000017830 | 13.44158517 | 25.73783802 | 17.65377619 | 59.60386773 | 37.95831308 |
| ENSMUSG00000017837 | 163.4213776 | 147.4708557 | 169.4762515 | 285.9374736 | 201.9668733 |
| ENSMUSG00000017843 | 124.5115258 | 130.7760418 | 147.585569  | 200.5589604 | 169.0219224 |
| ENSMUSG00000017858 | 43.86201478 | 53.56252777 | 45.8998181  | 50.74383334 | 47.2688427  |
| ENSMUSG00000017861 | 33.25023701 | 31.30277597 | 35.30755239 | 178.0061455 | 129.6312201 |
| ENSMUSG00000017868 | 12.02668147 | 5.56493795  | 9.179963621 | 5.638203705 | 3.580972932 |
| ENSMUSG00000017897 | 9.904325918 | 9.738641413 | 7.767661525 | 8.860034393 | 6.445751277 |
| ENSMUSG00000017922 | 10.61177777 | 6.260555194 | 3.530755239 | 4.02728836  | 5.729556691 |
| ENSMUSG00000017929 | 40.32475552 | 68.17048989 | 64.96589639 | 268.2174048 | 187.6429816 |
| ENSMUSG00000017943 | 6.367066661 | 2.782468975 | 6.35535943  | 10.47094974 | 6.445751277 |
| ENSMUSG00000017950 | 7.781970364 | 7.651789682 | 12.00456781 | 8.054576721 | 5.729556691 |
| ENSMUSG00000017969 | 12.73413332 | 3.478086219 | 5.649208382 | 7.249119049 | 7.87814045  |
| ENSMUSG00000017978 | 9.904325918 | 6.956172438 | 8.473812573 | 5.638203705 | 6.445751277 |
| ENSMUSG00000017999 | 91.96874066 | 139.1234488 | 129.2256417 | 252.913709  | 190.50776   |
| ENSMUSG00000018001 | 9.196874066 | 16.69481385 | 14.829172   | 12.88732275 | 15.7562809  |
| ENSMUSG00000018012 | 4.244711108 | 9.043024169 | 6.35535943  | 4.02728836  | 7.87814045  |
| ENSMUSG00000018042 | 27.5906222  | 46.60635533 | 38.83830763 | 81.35122488 | 60.87653984 |
| ENSMUSG00000018068 | 19.10119998 | 36.86771392 | 30.36449505 | 35.44013757 | 36.5259239  |
| ENSMUSG00000018076 | 64.37811846 | 104.3425866 | 76.26431316 | 83.7675979  | 84.51096119 |
| ENSMUSG00000018126 | 7.781970364 | 6.260555194 | 6.35535943  | 5.638203705 | 3.580972932 |

|                    |             |             |             |             |             |
|--------------------|-------------|-------------|-------------|-------------|-------------|
| ENSMUSG00000018143 | 53.7663407  | 84.86530374 | 69.20280268 | 173.1733995 | 106.7129934 |
| ENSMUSG00000018160 | 77.11225179 | 116.863697  | 98.86114669 | 256.1355397 | 197.6697058 |
| ENSMUSG00000018167 | 66.50047402 | 90.43024169 | 94.6242404  | 50.74383334 | 47.98503729 |
| ENSMUSG00000018169 | 57.30359995 | 76.51789682 | 71.32125582 | 128.8732275 | 105.2806042 |
| ENSMUSG00000018189 | 1.414903703 | 1.391234488 | 1.412302096 | 0.805457672 | 0.716194586 |
| ENSMUSG00000018196 | 12.02668147 | 20.17290007 | 25.42143772 | 24.16373016 | 15.04008631 |
| ENSMUSG00000018209 | 137.2456591 | 173.2086937 | 158.8839857 | 261.7737434 | 198.3859004 |
| ENSMUSG00000018211 | 12.02668147 | 7.651789682 | 8.473812573 | 4.832746033 | 5.013362104 |
| ENSMUSG00000018217 | 9.196874066 | 4.173703463 | 7.061510478 | 4.02728836  | 7.161945863 |
| ENSMUSG00000018259 | 7.781970364 | 7.651789682 | 7.767661525 | 8.054576721 | 10.02672421 |
| ENSMUSG00000018263 | 5.65961481  | 4.173703463 | 4.236906287 | 5.638203705 | 5.013362104 |
| ENSMUSG00000018287 | 36.08004441 | 36.17209668 | 43.78136496 | 66.04752911 | 55.86317773 |
| ENSMUSG00000018322 | 142.905274  | 175.9911627 | 150.4101732 | 179.6170609 | 160.4275873 |
| ENSMUSG00000018334 | 19.80865184 | 33.3896277  | 31.77679715 | 70.07481747 | 75.20043157 |
| ENSMUSG00000018339 | 9.196874066 | 8.347406925 | 8.473812573 | 8.054576721 | 8.594335036 |
| ENSMUSG00000018340 | 36.78749627 | 48.69320706 | 56.49208382 | 44.30017197 | 43.68786977 |
| ENSMUSG00000018341 | 6.367066661 | 9.043024169 | 8.473812573 | 9.665492065 | 6.445751277 |
| ENSMUSG00000018347 | 60.13340736 | 96.69079689 | 86.15042783 | 74.10210583 | 67.32229112 |
| ENSMUSG00000018362 | 68.62282957 | 91.12585893 | 69.90895373 | 273.0501508 | 213.4259867 |
| ENSMUSG00000018363 | 2.122355554 | 2.086851731 | 3.530755239 | 0           | 4.297167518 |
| ENSMUSG00000018372 | 75.69734809 | 125.9067211 | 98.15499564 | 235.1936403 | 181.9134249 |
| ENSMUSG00000018377 | 83.47931845 | 130.0804246 | 93.21193831 | 91.82217462 | 99.5510475  |
| ENSMUSG00000018378 | 11.31922962 | 6.260555194 | 9.179963621 | 12.08186508 | 7.161945863 |
| ENSMUSG00000018379 | 72.86754068 | 121.7330177 | 98.86114669 | 279.4938122 | 233.4794351 |
| ENSMUSG00000018381 | 173.3257036 | 155.1226454 | 182.1869703 | 160.2860767 | 116.023523  |
| ENSMUSG00000018387 | 9.196874066 | 6.956172438 | 6.35535943  | 4.02728836  | 5.729556691 |
| ENSMUSG00000018395 | 7.781970364 | 9.043024169 | 6.35535943  | 7.249119049 | 5.729556691 |
| ENSMUSG00000018398 | 8.489422215 | 2.782468975 | 4.236906287 | 5.638203705 | 5.729556691 |
| ENSMUSG00000018401 | 33.95768886 | 43.82388636 | 49.43057334 | 107.1258704 | 104.5644096 |
| ENSMUSG00000018411 | 4.952162959 | 6.956172438 | 6.35535943  | 4.02728836  | 8.594335036 |
| ENSMUSG00000018412 | 38.90985182 | 60.51870021 | 49.43057334 | 37.85651059 | 47.98503729 |
| ENSMUSG00000018415 | 44.56946663 | 95.99517964 | 75.55816211 | 135.3168889 | 104.5644096 |
| ENSMUSG00000018417 | 4.244711108 | 2.782468975 | 6.35535943  | 4.832746033 | 5.013362104 |
| ENSMUSG00000018425 | 14.14903703 | 24.34660353 | 31.77679715 | 42.68925662 | 42.97167518 |
| ENSMUSG00000018428 | 7.074518513 | 6.956172438 | 12.00456781 | 28.9964762  | 25.78300511 |
| ENSMUSG00000018433 | 36.78749627 | 88.34338996 | 62.1412922  | 170.7570265 | 128.198831  |
| ENSMUSG00000018442 | 106.1177777 | 157.2094971 | 141.9363606 | 270.6337778 | 218.4393488 |
| ENSMUSG00000018449 | 56.5961481  | 90.43024169 | 71.32125582 | 119.2077355 | 92.38910164 |
| ENSMUSG00000018459 | 8.489422215 | 4.869320706 | 9.886114669 | 6.443661377 | 4.297167518 |
| ENSMUSG00000018474 | 14.85648888 | 22.2597518  | 33.89525029 | 57.99295239 | 37.95831308 |
| ENSMUSG00000018479 | 7.781970364 | 11.82549314 | 9.179963621 | 4.02728836  | 6.445751277 |
| ENSMUSG00000018501 | 70.03773327 | 96.69079689 | 80.50121945 | 180.4225185 | 159.7113928 |
| ENSMUSG00000018507 | 20.51610369 | 34.08524495 | 30.36449505 | 41.88379895 | 44.40406435 |

|                    |             |             |             |             |             |
|--------------------|-------------|-------------|-------------|-------------|-------------|
| ENSMUSG00000018537 | 5.65961481  | 7.651789682 | 4.943057334 | 8.860034393 | 6.445751277 |
| ENSMUSG00000018541 | 82.7718666  | 109.2119073 | 110.1595635 | 119.2077355 | 121.7530797 |
| ENSMUSG00000018548 | 7.781970364 | 11.1298759  | 12.00456781 | 44.30017197 | 37.24211849 |
| ENSMUSG00000018554 | 10.61177777 | 10.43425866 | 6.35535943  | 3.221830688 | 10.7429188  |
| ENSMUSG00000018559 | 44.56946663 | 54.95376226 | 55.78593277 | 169.1461111 | 152.5494469 |
| ENSMUSG00000018565 | 42.44711108 | 73.0398106  | 83.32582364 | 213.4462831 | 174.0352845 |
| ENSMUSG00000018566 | 4.952162959 | 9.738641413 | 4.943057334 | 4.832746033 | 9.310529622 |
| ENSMUSG00000018567 | 76.40479994 | 115.4724625 | 103.098053  | 91.82217462 | 75.91662615 |
| ENSMUSG00000018569 | 5.65961481  | 2.782468975 | 9.179963621 | 4.832746033 | 8.594335036 |
| ENSMUSG00000018570 | 14.14903703 | 23.65098629 | 30.36449505 | 25.77464551 | 30.08017263 |
| ENSMUSG00000018572 | 25.46826665 | 50.08444155 | 45.8998181  | 158.6751614 | 105.9967988 |
| ENSMUSG00000018574 | 21.22355554 | 22.2597518  | 10.59226572 | 16.10915344 | 16.47247549 |
| ENSMUSG00000018581 | 7.074518513 | 3.478086219 | 2.824604191 | 7.249119049 | 6.445751277 |
| ENSMUSG00000018593 | 5.65961481  | 8.347406925 | 5.649208382 | 7.249119049 | 8.594335036 |
| ENSMUSG00000018604 | 7.074518513 | 5.56493795  | 7.061510478 | 5.638203705 | 5.013362104 |
| ENSMUSG00000018634 | 2.122355554 | 4.173703463 | 10.59226572 | 9.665492065 | 8.594335036 |
| ENSMUSG00000018648 | 7.781970364 | 4.869320706 | 4.943057334 | 6.443661377 | 6.445751277 |
| ENSMUSG00000018651 | 6.367066661 | 6.260555194 | 11.29841676 | 28.19101852 | 17.90486466 |
| ENSMUSG00000018654 | 17.68629628 | 23.65098629 | 31.77679715 | 82.15668255 | 50.13362104 |
| ENSMUSG00000018659 | 9.196874066 | 18.08604834 | 14.12302096 | 28.9964762  | 35.80972932 |
| ENSMUSG00000018661 | 21.22355554 | 20.86851731 | 29.65834401 | 43.49471429 | 32.94495097 |
| ENSMUSG00000018666 | 77.81970364 | 117.5593142 | 98.86114669 | 145.7878386 | 121.0368851 |
| ENSMUSG00000018669 | 14.14903703 | 26.43345526 | 26.83373982 | 30.60739154 | 21.48583759 |
| ENSMUSG00000018672 | 0.707451851 | 1.391234488 | 1.412302096 | 1.610915344 | 0           |
| ENSMUSG00000018678 | 10.61177777 | 13.91234488 | 9.886114669 | 8.860034393 | 12.17530797 |
| ENSMUSG00000018697 | 22.63845924 | 31.99839321 | 36.71985448 | 56.38203705 | 50.84981563 |
| ENSMUSG00000018698 | 7.781970364 | 4.173703463 | 2.824604191 | 6.443661377 | 4.297167518 |
| ENSMUSG00000018707 | 52.35143699 | 74.43104508 | 72.02740687 | 101.4876667 | 91.67290705 |
| ENSMUSG00000018727 | 11.31922962 | 4.869320706 | 4.943057334 | 11.27640741 | 10.02672421 |
| ENSMUSG00000018733 | 101.8730666 | 129.3848073 | 105.9226572 | 109.5422434 | 104.5644096 |
| ENSMUSG00000018736 | 7.074518513 | 6.260555194 | 13.41686991 | 9.665492065 | 8.594335036 |
| ENSMUSG00000018740 | 12.73413332 | 17.39043109 | 11.29841676 | 5.638203705 | 10.7429188  |
| ENSMUSG00000018750 | 58.0110518  | 83.47406925 | 81.91352154 | 33.02376456 | 36.5259239  |
| ENSMUSG00000018752 | 1.414903703 | 2.086851731 | 0.706151048 | 0           | 2.148583759 |
| ENSMUSG00000018761 | 30.4204296  | 59.82308296 | 46.60596915 | 86.98942859 | 69.47087488 |
| ENSMUSG00000018774 | 8.489422215 | 9.738641413 | 12.00456781 | 8.860034393 | 10.7429188  |
| ENSMUSG00000018796 | 17.68629628 | 13.91234488 | 19.77222934 | 14.4982381  | 15.7562809  |
| ENSMUSG00000018800 | 7.781970364 | 4.869320706 | 7.061510478 | 4.02728836  | 6.445751277 |
| ENSMUSG00000018819 | 171.203348  | 189.9035076 | 198.4284444 | 137.7332619 | 78.7814045  |
| ENSMUSG00000018820 | 58.0110518  | 93.21271067 | 74.14586002 | 65.24207144 | 68.0384857  |
| ENSMUSG00000018841 | 26.1757185  | 38.95456565 | 35.30755239 | 37.85651059 | 32.22875639 |
| ENSMUSG00000018845 | 12.73413332 | 9.738641413 | 9.886114669 | 9.665492065 | 12.17530797 |
| ENSMUSG00000018858 | 24.05336294 | 43.82388636 | 36.71985448 | 27.38556085 | 35.80972932 |

|                    |             |             |             |             |             |
|--------------------|-------------|-------------|-------------|-------------|-------------|
| ENSMUSG00000018862 | 7.781970364 | 4.173703463 | 6.35535943  | 6.443661377 | 3.580972932 |
| ENSMUSG00000018882 | 12.73413332 | 30.60715873 | 21.89068248 | 41.88379895 | 48.70123187 |
| ENSMUSG00000018893 | 5.65961481  | 3.478086219 | 5.649208382 | 8.054576721 | 7.87814045  |
| ENSMUSG00000018899 | 76.40479994 | 102.2557348 | 105.9226572 | 377.7596482 | 239.2089918 |
| ENSMUSG00000018906 | 6.367066661 | 9.043024169 | 9.179963621 | 5.638203705 | 7.87814045  |
| ENSMUSG00000018907 | 6.367066661 | 4.869320706 | 4.943057334 | 2.416373016 | 8.594335036 |
| ENSMUSG00000018909 | 13.44158517 | 15.30357936 | 16.94762515 | 10.47094974 | 14.32389173 |
| ENSMUSG00000018919 | 5.65961481  | 5.56493795  | 9.886114669 | 4.02728836  | 4.297167518 |
| ENSMUSG00000018920 | 6.367066661 | 8.347406925 | 5.649208382 | 8.054576721 | 15.04008631 |
| ENSMUSG00000018921 | 62.25576291 | 90.43024169 | 74.85201106 | 174.7843148 | 133.9283876 |
| ENSMUSG00000018923 | 18.39374813 | 25.73783802 | 21.18453143 | 39.46742593 | 44.40406435 |
| ENSMUSG00000018965 | 48.81417774 | 56.34499675 | 53.66747963 | 146.5932963 | 117.4559122 |
| ENSMUSG00000018986 | 16.27139258 | 27.82468975 | 24.00913562 | 42.68925662 | 30.08017263 |
| ENSMUSG00000018995 | 14.85648888 | 28.52030699 | 22.59683353 | 36.24559524 | 27.21539428 |
| ENSMUSG00000018999 | 29.71297775 | 54.95376226 | 40.95676077 | 30.60739154 | 35.80972932 |
| ENSMUSG00000019039 | 5.65961481  | 9.738641413 | 9.886114669 | 19.33098413 | 11.45911338 |
| ENSMUSG00000019054 | 12.02668147 | 9.043024169 | 9.179963621 | 12.08186508 | 8.594335036 |
| ENSMUSG00000019055 | 13.44158517 | 15.99919661 | 16.2414741  | 4.02728836  | 9.310529622 |
| ENSMUSG00000019066 | 10.61177777 | 5.56493795  | 6.35535943  | 4.832746033 | 7.161945863 |
| ENSMUSG00000019082 | 40.32475552 | 54.95376226 | 46.60596915 | 68.46390213 | 51.56601022 |
| ENSMUSG00000019087 | 45.27691848 | 40.34580014 | 51.54902649 | 68.46390213 | 44.40406435 |
| ENSMUSG00000019088 | 27.5906222  | 35.47647943 | 33.18909925 | 56.38203705 | 44.40406435 |
| ENSMUSG00000019102 | 7.074518513 | 6.260555194 | 8.473812573 | 13.69278043 | 10.02672421 |
| ENSMUSG00000019124 | 6.367066661 | 2.782468975 | 12.71071886 | 3.221830688 | 7.161945863 |
| ENSMUSG00000019132 | 105.4103258 | 171.121842  | 147.585569  | 289.1593043 | 222.0203218 |
| ENSMUSG00000019139 | 12.02668147 | 15.30357936 | 16.2414741  | 34.6346799  | 37.24211849 |
| ENSMUSG00000019143 | 58.71850365 | 104.3425866 | 81.20737049 | 209.4189947 | 142.5227227 |
| ENSMUSG00000019173 | 84.89422215 | 110.6031418 | 98.15499564 | 203.780791  | 150.4008631 |
| ENSMUSG00000019178 | 70.03773327 | 111.9943762 | 86.15042783 | 158.6751614 | 118.8883013 |
| ENSMUSG00000019179 | 77.81970364 | 99.47326586 | 110.1595635 | 176.3952302 | 126.0502472 |
| ENSMUSG00000019188 | 50.22908144 | 62.60555194 | 60.72899011 | 124.8459392 | 83.7947666  |
| ENSMUSG00000019189 | 142.1978221 | 180.1648661 | 144.0548137 | 199.7535027 | 171.1705061 |
| ENSMUSG00000019194 | 9.904325918 | 6.260555194 | 6.35535943  | 2.416373016 | 6.445751277 |
| ENSMUSG00000019210 | 95.50599992 | 114.081228  | 111.5718655 | 167.5351958 | 116.023523  |
| ENSMUSG00000019214 | 13.44158517 | 15.30357936 | 16.94762515 | 30.60739154 | 24.35061594 |
| ENSMUSG00000019230 | 7.781970364 | 11.1298759  | 5.649208382 | 8.054576721 | 7.161945863 |
| ENSMUSG00000019232 | 7.781970364 | 7.651789682 | 4.943057334 | 5.638203705 | 12.89150255 |
| ENSMUSG00000019254 | 89.13893326 | 108.51629   | 109.4534124 | 144.982381  | 106.7129934 |
| ENSMUSG00000019256 | 8.489422215 | 13.21672763 | 9.886114669 | 50.74383334 | 73.76804239 |
| ENSMUSG00000019302 | 36.78749627 | 52.86691053 | 36.01370344 | 62.82569842 | 59.44415067 |
| ENSMUSG00000019303 | 15.56394073 | 20.17290007 | 20.47838039 | 43.49471429 | 32.94495097 |
| ENSMUSG00000019312 | 14.14903703 | 15.99919661 | 20.47838039 | 7.249119049 | 8.594335036 |
| ENSMUSG00000019320 | 8.489422215 | 7.651789682 | 8.473812573 | 28.19101852 | 30.08017263 |

|                    |             |             |             |             |             |
|--------------------|-------------|-------------|-------------|-------------|-------------|
| ENSMUSG00000019326 | 4.244711108 | 6.260555194 | 14.12302096 | 8.860034393 | 10.7429188  |
| ENSMUSG00000019338 | 31.83533331 | 59.82308296 | 45.19366706 | 49.93837567 | 62.30892901 |
| ENSMUSG00000019359 | 4.244711108 | 4.869320706 | 4.943057334 | 1.610915344 | 2.148583759 |
| ENSMUSG00000019368 | 7.074518513 | 10.43425866 | 7.767661525 | 4.02728836  | 7.161945863 |
| ENSMUSG00000019370 | 99.04325918 | 82.77845201 | 90.38733411 | 170.7570265 | 113.1587446 |
| ENSMUSG00000019373 | 50.93653329 | 102.9513521 | 84.03197468 | 132.0950582 | 106.7129934 |
| ENSMUSG00000019428 | 73.57499253 | 91.12585893 | 101.6857509 | 95.04400531 | 87.37573953 |
| ENSMUSG00000019432 | 6.367066661 | 9.043024169 | 10.59226572 | 5.638203705 | 6.445751277 |
| ENSMUSG00000019437 | 8.489422215 | 7.651789682 | 2.824604191 | 15.30369577 | 15.04008631 |
| ENSMUSG00000019461 | 9.196874066 | 7.651789682 | 14.12302096 | 10.47094974 | 8.594335036 |
| ENSMUSG00000019467 | 7.074518513 | 6.260555194 | 8.473812573 | 4.02728836  | 7.87814045  |
| ENSMUSG00000019470 | 82.06441475 | 111.298759  | 117.927225  | 229.5554365 | 153.2656415 |
| ENSMUSG00000019471 | 60.84085921 | 89.0390072  | 79.7950684  | 184.4498069 | 133.9283876 |
| ENSMUSG00000019478 | 14.85648888 | 4.869320706 | 9.179963621 | 7.249119049 | 7.161945863 |
| ENSMUSG00000019487 | 7.781970364 | 16.69481385 | 15.53532305 | 9.665492065 | 14.32389173 |
| ENSMUSG00000019494 | 28.29807405 | 50.08444155 | 48.7244223  | 70.07481747 | 55.14698315 |
| ENSMUSG00000019518 | 29.71297775 | 24.34660353 | 28.24604191 | 182.0334339 | 116.7397176 |
| ENSMUSG00000019528 | 24.76081479 | 31.30277597 | 31.77679715 | 22.55281482 | 19.33725383 |
| ENSMUSG00000019539 | 12.02668147 | 9.043024169 | 14.12302096 | 7.249119049 | 14.32389173 |
| ENSMUSG00000019558 | 4.952162959 | 2.782468975 | 4.236906287 | 4.832746033 | 0.716194586 |
| ENSMUSG00000019564 | 55.88869625 | 46.60635533 | 51.54902649 | 134.5114312 | 95.25387998 |
| ENSMUSG00000019578 | 9.196874066 | 27.12907251 | 19.77222934 | 16.91461111 | 15.04008631 |
| ENSMUSG00000019579 | 23.34591109 | 22.95536904 | 29.65834401 | 74.10210583 | 54.43078856 |
| ENSMUSG00000019590 | 11.31922962 | 7.651789682 | 5.649208382 | 4.832746033 | 8.594335036 |
| ENSMUSG00000019647 | 7.074518513 | 6.260555194 | 9.179963621 | 4.02728836  | 3.580972932 |
| ENSMUSG00000019699 | 46.69182218 | 69.56172438 | 67.08434954 | 60.40932541 | 59.44415067 |
| ENSMUSG00000019710 | 21.22355554 | 37.56333116 | 31.77679715 | 41.07834128 | 40.10689684 |
| ENSMUSG00000019715 | 23.34591109 | 45.91073809 | 35.30755239 | 50.74383334 | 33.66114556 |
| ENSMUSG00000019726 | 68.62282957 | 130.7760418 | 103.098053  | 148.2042117 | 111.0101609 |
| ENSMUSG00000019731 | 57.30359995 | 105.7338211 | 83.32582364 | 192.5043836 | 148.968474  |
| ENSMUSG00000019732 | 12.02668147 | 19.47728283 | 16.2414741  | 35.44013757 | 25.78300511 |
| ENSMUSG00000019734 | 10.61177777 | 12.52111039 | 7.767661525 | 5.638203705 | 10.02672421 |
| ENSMUSG00000019737 | 2.829807405 | 6.956172438 | 3.530755239 | 8.054576721 | 5.729556691 |
| ENSMUSG00000019738 | 13.44158517 | 17.39043109 | 21.89068248 | 38.66196826 | 31.5125618  |
| ENSMUSG00000019756 | 10.61177777 | 9.738641413 | 9.886114669 | 4.02728836  | 2.148583759 |
| ENSMUSG00000019761 | 10.61177777 | 9.043024169 | 2.824604191 | 4.832746033 | 8.594335036 |
| ENSMUSG00000019763 | 35.37259256 | 75.82227957 | 63.5535943  | 114.3749894 | 76.63282074 |
| ENSMUSG00000019767 | 1.414903703 | 4.869320706 | 6.35535943  | 3.221830688 | 2.148583759 |
| ENSMUSG00000019768 | 9.904325918 | 10.43425866 | 8.473812573 | 4.02728836  | 13.60769714 |
| ENSMUSG00000019775 | 7.074518513 | 8.347406925 | 5.649208382 | 7.249119049 | 8.594335036 |
| ENSMUSG00000019777 | 63.67066661 | 91.82147618 | 98.86114669 | 95.84946298 | 103.848215  |
| ENSMUSG00000019779 | 9.904325918 | 6.260555194 | 5.649208382 | 3.221830688 | 7.87814045  |
| ENSMUSG00000019782 | 53.05888884 | 99.47326586 | 81.20737049 | 119.2077355 | 109.5777717 |

|                    |             |             |             |             |             |
|--------------------|-------------|-------------|-------------|-------------|-------------|
| ENSMUSG00000019785 | 12.02668147 | 3.478086219 | 5.649208382 | 4.832746033 | 7.161945863 |
| ENSMUSG00000019790 | 20.51610369 | 44.5195036  | 37.42600553 | 45.10562964 | 55.14698315 |
| ENSMUSG00000019791 | 16.97884443 | 36.17209668 | 23.30298458 | 24.16373016 | 20.05344842 |
| ENSMUSG00000019794 | 46.69182218 | 73.0398106  | 51.54902649 | 78.12939419 | 56.57937232 |
| ENSMUSG00000019795 | 177.5704147 | 203.8158524 | 186.4238766 | 319.7666958 | 232.7632406 |
| ENSMUSG00000019796 | 7.074518513 | 8.347406925 | 7.061510478 | 8.860034393 | 13.60769714 |
| ENSMUSG00000019797 | 19.80865184 | 34.78086219 | 26.12758877 | 36.24559524 | 27.21539428 |
| ENSMUSG00000019802 | 82.7718666  | 109.2119073 | 96.0365425  | 123.2350238 | 100.2672421 |
| ENSMUSG00000019803 | 5.65961481  | 2.782468975 | 3.530755239 | 4.02728836  | 6.445751277 |
| ENSMUSG00000019804 | 34.66514071 | 61.21431745 | 63.5535943  | 98.265836   | 70.90326405 |
| ENSMUSG00000019806 | 4.952162959 | 11.82549314 | 12.00456781 | 8.860034393 | 16.47247549 |
| ENSMUSG00000019809 | 29.71297775 | 43.12826911 | 39.54445867 | 50.74383334 | 53.71459398 |
| ENSMUSG00000019810 | 5.65961481  | 11.1298759  | 10.59226572 | 4.832746033 | 11.45911338 |
| ENSMUSG00000019813 | 16.97884443 | 27.82468975 | 22.59683353 | 38.66196826 | 33.66114556 |
| ENSMUSG00000019817 | 9.196874066 | 5.56493795  | 7.061510478 | 4.02728836  | 6.445751277 |
| ENSMUSG00000019818 | 77.81970364 | 95.2995624  | 71.32125582 | 177.2006879 | 128.9150255 |
| ENSMUSG00000019820 | 9.196874066 | 7.651789682 | 16.2414741  | 3.221830688 | 9.310529622 |
| ENSMUSG00000019822 | 19.80865184 | 26.43345526 | 26.83373982 | 14.4982381  | 24.35061594 |
| ENSMUSG00000019823 | 25.46826665 | 35.47647943 | 36.71985448 | 32.21830688 | 32.94495097 |
| ENSMUSG00000019826 | 53.05888884 | 82.77845201 | 79.7950684  | 64.43661377 | 73.05184781 |
| ENSMUSG00000019828 | 10.61177777 | 9.738641413 | 7.061510478 | 4.02728836  | 10.02672421 |
| ENSMUSG00000019831 | 64.37811846 | 94.60394515 | 76.26431316 | 76.51847885 | 60.16034525 |
| ENSMUSG00000019834 | 9.904325918 | 6.956172438 | 6.35535943  | 4.832746033 | 6.445751277 |
| ENSMUSG00000019838 | 7.074518513 | 10.43425866 | 14.829172   | 9.665492065 | 13.60769714 |
| ENSMUSG00000019841 | 15.56394073 | 43.82388636 | 40.95676077 | 90.21125927 | 65.88990194 |
| ENSMUSG00000019843 | 11.31922962 | 30.60715873 | 12.71071886 | 19.33098413 | 17.90486466 |
| ENSMUSG00000019846 | 7.074518513 | 8.347406925 | 10.59226572 | 4.02728836  | 6.445751277 |
| ENSMUSG00000019848 | 9.196874066 | 9.043024169 | 5.649208382 | 6.443661377 | 12.89150255 |
| ENSMUSG00000019849 | 66.50047402 | 82.08283477 | 97.44884459 | 95.04400531 | 87.37573953 |
| ENSMUSG00000019850 | 80.64951104 | 97.38641413 | 89.68118307 | 231.1663519 | 154.6980307 |
| ENSMUSG00000019854 | 60.84085921 | 82.77845201 | 74.14586002 | 100.682209  | 94.5376854  |
| ENSMUSG00000019861 | 74.28244438 | 112.6899935 | 96.0365425  | 126.4568545 | 111.7263555 |
| ENSMUSG00000019864 | 65.08557032 | 107.1250555 | 88.97503202 | 88.60034393 | 95.25387998 |
| ENSMUSG00000019866 | 14.14903703 | 27.12907251 | 31.77679715 | 14.4982381  | 17.18867007 |
| ENSMUSG00000019868 | 123.804074  | 150.2533247 | 134.8748501 | 135.3168889 | 94.5376854  |
| ENSMUSG00000019872 | 22.63845924 | 32.69401046 | 21.18453143 | 12.08186508 | 15.04008631 |
| ENSMUSG00000019874 | 4.244711108 | 4.869320706 | 4.236906287 | 4.832746033 | 2.864778345 |
| ENSMUSG00000019876 | 29.0055259  | 51.47567604 | 35.30755239 | 149.0096693 | 107.429188  |
| ENSMUSG00000019877 | 84.89422215 | 123.1242521 | 92.50578726 | 99.07129367 | 99.5510475  |
| ENSMUSG00000019880 | 5.65961481  | 6.956172438 | 7.767661525 | 3.221830688 | 2.864778345 |
| ENSMUSG00000019883 | 22.63845924 | 48.69320706 | 40.95676077 | 33.02376456 | 47.98503729 |
| ENSMUSG00000019888 | 7.074518513 | 4.869320706 | 5.649208382 | 3.221830688 | 2.864778345 |
| ENSMUSG00000019889 | 6.367066661 | 6.260555194 | 5.649208382 | 1.610915344 | 7.161945863 |



|                    |             |             |             |             |             |
|--------------------|-------------|-------------|-------------|-------------|-------------|
| ENSMUSG00000019891 | 11.31922962 | 20.86851731 | 17.65377619 | 45.91108731 | 29.36397804 |
| ENSMUSG00000019892 | 7.074518513 | 9.738641413 | 8.473812573 | 10.47094974 | 5.013362104 |
| ENSMUSG00000019893 | 12.02668147 | 4.869320706 | 7.061510478 | 2.416373016 | 10.02672421 |
| ENSMUSG00000019894 | 9.196874066 | 7.651789682 | 13.41686991 | 5.638203705 | 3.580972932 |
| ENSMUSG00000019899 | 16.27139258 | 8.347406925 | 7.061510478 | 4.832746033 | 5.729556691 |
| ENSMUSG00000019900 | 7.781970364 | 9.738641413 | 4.236906287 | 6.443661377 | 3.580972932 |
| ENSMUSG00000019906 | 4.952162959 | 6.260555194 | 7.767661525 | 4.832746033 | 5.013362104 |
| ENSMUSG00000019916 | 8.489422215 | 38.25894841 | 33.89525029 | 35.44013757 | 22.91822676 |
| ENSMUSG00000019917 | 12.73413332 | 22.2597518  | 18.35992724 | 46.71654498 | 44.40406435 |
| ENSMUSG00000019920 | 21.22355554 | 43.12826911 | 27.53989086 | 66.04752911 | 39.39070225 |
| ENSMUSG00000019923 | 21.93100739 | 20.86851731 | 27.53989086 | 77.32393652 | 52.99839939 |
| ENSMUSG00000019929 | 4.244711108 | 8.347406925 | 6.35535943  | 4.02728836  | 4.297167518 |
| ENSMUSG00000019935 | 9.904325918 | 4.869320706 | 8.473812573 | 4.02728836  | 5.013362104 |
| ENSMUSG00000019936 | 11.31922962 | 7.651789682 | 4.236906287 | 6.443661377 | 5.013362104 |
| ENSMUSG00000019942 | 68.62282957 | 50.08444155 | 57.90438592 | 216.6681138 | 143.2389173 |
| ENSMUSG00000019943 | 95.50599992 | 118.2549314 | 112.9841676 | 153.8424154 | 141.8065281 |
| ENSMUSG00000019944 | 13.44158517 | 12.52111039 | 7.767661525 | 3.221830688 | 5.013362104 |
| ENSMUSG00000019945 | 4.244711108 | 6.956172438 | 7.767661525 | 4.02728836  | 6.445751277 |
| ENSMUSG00000019947 | 23.34591109 | 31.30277597 | 38.13215658 | 64.43661377 | 61.59273443 |
| ENSMUSG00000019951 | 51.64398514 | 77.9091313  | 69.20280268 | 58.79841006 | 57.29556691 |
| ENSMUSG00000019952 | 5.65961481  | 4.173703463 | 8.473812573 | 11.27640741 | 8.594335036 |
| ENSMUSG00000019961 | 98.33580733 | 125.2111039 | 99.56729774 | 213.4462831 | 179.7648412 |
| ENSMUSG00000019966 | 12.73413332 | 7.651789682 | 9.886114669 | 1.610915344 | 3.580972932 |
| ENSMUSG00000019969 | 33.25023701 | 34.78086219 | 47.3121202  | 102.2931244 | 73.76804239 |
| ENSMUSG00000019970 | 7.074518513 | 4.173703463 | 4.236906287 | 8.054576721 | 3.580972932 |
| ENSMUSG00000019971 | 5.65961481  | 6.956172438 | 5.649208382 | 2.416373016 | 8.594335036 |
| ENSMUSG00000019975 | 16.97884443 | 31.99839321 | 20.47838039 | 41.88379895 | 30.79636721 |
| ENSMUSG00000019977 | 107.5326814 | 156.5138799 | 134.8748501 | 164.3133651 | 137.5093606 |
| ENSMUSG00000019978 | 94.79854807 | 112.6899935 | 110.1595635 | 78.93485187 | 81.64618284 |
| ENSMUSG00000019979 | 18.39374813 | 23.65098629 | 27.53989086 | 28.19101852 | 35.09353473 |
| ENSMUSG00000019982 | 20.51610369 | 16.69481385 | 19.06607829 | 34.6346799  | 16.47247549 |
| ENSMUSG00000019984 | 25.46826665 | 29.21592424 | 25.42143772 | 32.21830688 | 32.22875639 |
| ENSMUSG00000019986 | 4.244711108 | 8.347406925 | 10.59226572 | 8.054576721 | 13.60769714 |
| ENSMUSG00000019990 | 4.952162959 | 6.956172438 | 9.179963621 | 8.054576721 | 8.594335036 |
| ENSMUSG00000019996 | 6.367066661 | 8.347406925 | 6.35535943  | 9.665492065 | 5.013362104 |
| ENSMUSG00000019997 | 7.781970364 | 6.956172438 | 7.061510478 | 2.416373016 | 5.013362104 |
| ENSMUSG00000020003 | 11.31922962 | 22.2597518  | 21.18453143 | 19.33098413 | 15.7562809  |
| ENSMUSG00000020009 | 61.54831106 | 94.60394515 | 81.91352154 | 62.02024075 | 54.43078856 |
| ENSMUSG00000020014 | 7.781970364 | 11.1298759  | 7.767661525 | 6.443661377 | 4.297167518 |
| ENSMUSG00000020015 | 4.244711108 | 4.173703463 | 5.649208382 | 2.416373016 | 6.445751277 |
| ENSMUSG00000020017 | 6.367066661 | 5.56493795  | 7.061510478 | 10.47094974 | 7.87814045  |
| ENSMUSG00000020022 | 31.12788146 | 52.86691053 | 52.25517753 | 114.3749894 | 81.64618284 |
| ENSMUSG00000020023 | 5.65961481  | 6.956172438 | 3.530755239 | 12.08186508 | 7.161945863 |

|                    |             |             |             |             |             |
|--------------------|-------------|-------------|-------------|-------------|-------------|
| ENSMUSG00000020027 | 8.489422215 | 5.56493795  | 6.35535943  | 25.77464551 | 25.06681052 |
| ENSMUSG00000020032 | 12.73413332 | 19.47728283 | 19.06607829 | 12.88732275 | 14.32389173 |
| ENSMUSG00000020037 | 7.074518513 | 4.173703463 | 6.35535943  | 7.249119049 | 8.594335036 |
| ENSMUSG00000020038 | 20.51610369 | 25.73783802 | 33.18909925 | 26.58010318 | 22.20203218 |
| ENSMUSG00000020042 | 10.61177777 | 4.869320706 | 4.943057334 | 2.416373016 | 2.864778345 |
| ENSMUSG00000020044 | 8.489422215 | 9.738641413 | 5.649208382 | 4.832746033 | 8.594335036 |
| ENSMUSG00000020048 | 0           | 0           | 0           | 0           | 0           |
| ENSMUSG00000020051 | 7.781970364 | 7.651789682 | 8.473812573 | 5.638203705 | 7.161945863 |
| ENSMUSG00000020053 | 7.781970364 | 4.173703463 | 4.236906287 | 8.860034393 | 6.445751277 |
| ENSMUSG00000020056 | 16.27139258 | 25.73783802 | 19.77222934 | 13.69278043 | 22.91822676 |
| ENSMUSG00000020061 | 3.537259256 | 6.956172438 | 2.824604191 | 1.610915344 | 3.580972932 |
| ENSMUSG00000020063 | 9.904325918 | 6.956172438 | 6.35535943  | 6.443661377 | 7.87814045  |
| ENSMUSG00000020069 | 74.28244438 | 86.25653823 | 81.20737049 | 136.1223466 | 107.429188  |
| ENSMUSG00000020070 | 33.95768886 | 52.17129328 | 46.60596915 | 38.66196826 | 47.2688427  |
| ENSMUSG00000020072 | 61.54831106 | 67.47487265 | 61.43514116 | 114.3749894 | 85.94335036 |
| ENSMUSG00000020077 | 13.44158517 | 15.30357936 | 15.53532305 | 10.47094974 | 17.90486466 |
| ENSMUSG00000020078 | 79.23460734 | 119.6461659 | 114.3964697 | 103.098582  | 105.9967988 |
| ENSMUSG00000020079 | 41.73965922 | 79.99598303 | 55.78593277 | 164.3133651 | 130.3474147 |
| ENSMUSG00000020083 | 9.196874066 | 2.782468975 | 6.35535943  | 4.02728836  | 7.87814045  |
| ENSMUSG00000020085 | 9.196874066 | 6.956172438 | 6.35535943  | 8.054576721 | 9.310529622 |
| ENSMUSG00000020088 | 116.7295555 | 180.1648661 | 126.4010376 | 229.5554365 | 189.7915654 |
| ENSMUSG00000020091 | 117.4370073 | 155.8182626 | 127.8133396 | 169.1461111 | 146.1036956 |
| ENSMUSG00000020096 | 9.196874066 | 6.956172438 | 7.767661525 | 4.02728836  | 2.864778345 |
| ENSMUSG00000020097 | 13.44158517 | 10.43425866 | 18.35992724 | 70.88027514 | 58.72795608 |
| ENSMUSG00000020100 | 76.40479994 | 95.2995624  | 69.90895373 | 66.04752911 | 88.09193412 |
| ENSMUSG00000020101 | 12.02668147 | 15.99919661 | 12.71071886 | 17.72006879 | 17.18867007 |
| ENSMUSG00000020102 | 5.65961481  | 8.347406925 | 10.59226572 | 7.249119049 | 5.013362104 |
| ENSMUSG00000020107 | 85.601674   | 100.8645003 | 96.0365425  | 116.7913625 | 118.8883013 |
| ENSMUSG00000020109 | 99.75071103 | 132.1672763 | 112.9841676 | 107.9313281 | 90.24051788 |
| ENSMUSG00000020111 | 9.196874066 | 16.69481385 | 10.59226572 | 20.1364418  | 17.90486466 |
| ENSMUSG00000020114 | 140.0754665 | 143.2971522 | 151.1163242 | 201.364418  | 180.4810358 |
| ENSMUSG00000020120 | 12.73413332 | 16.69481385 | 16.94762515 | 8.054576721 | 12.17530797 |
| ENSMUSG00000020121 | 5.65961481  | 11.1298759  | 8.473812573 | 3.221830688 | 8.594335036 |
| ENSMUSG00000020122 | 6.367066661 | 3.478086219 | 6.35535943  | 8.860034393 | 7.161945863 |
| ENSMUSG00000020124 | 2.829807405 | 2.782468975 | 0           | 0.805457672 | 0           |
| ENSMUSG00000020128 | 123.804074  | 163.4700523 | 144.0548137 | 239.2209286 | 206.9802355 |
| ENSMUSG00000020131 | 7.781970364 | 4.173703463 | 6.35535943  | 4.02728836  | 10.02672421 |
| ENSMUSG00000020132 | 48.10672589 | 70.95295887 | 71.32125582 | 140.1496349 | 123.1854689 |
| ENSMUSG00000020134 | 30.4204296  | 66.08363816 | 64.25974535 | 186.8661799 | 147.5360848 |
| ENSMUSG00000020135 | 5.65961481  | 9.738641413 | 12.00456781 | 21.74735715 | 8.594335036 |
| ENSMUSG00000020140 | 9.904325918 | 5.56493795  | 7.061510478 | 8.860034393 | 4.297167518 |
| ENSMUSG00000020142 | 7.074518513 | 6.260555194 | 13.41686991 | 23.35827249 | 14.32389173 |
| ENSMUSG00000020143 | 80.64951104 | 135.6453625 | 99.56729774 | 207.8080794 | 162.5761711 |

|                    |             |             |             |             |             |
|--------------------|-------------|-------------|-------------|-------------|-------------|
| ENSMUSG00000020149 | 178.2778665 | 185.7298041 | 160.2962878 | 257.7464551 | 201.2506788 |
| ENSMUSG00000020150 | 8.489422215 | 13.21672763 | 11.29841676 | 11.27640741 | 15.04008631 |
| ENSMUSG00000020151 | 10.61177777 | 3.478086219 | 4.943057334 | 5.638203705 | 4.297167518 |
| ENSMUSG00000020153 | 63.67066661 | 76.51789682 | 74.14586002 | 114.3749894 | 93.82149081 |
| ENSMUSG00000020154 | 5.65961481  | 6.260555194 | 8.473812573 | 8.054576721 | 7.161945863 |
| ENSMUSG00000020156 | 16.97884443 | 22.2597518  | 21.18453143 | 21.74735715 | 22.20203218 |
| ENSMUSG00000020160 | 7.781970364 | 4.869320706 | 9.886114669 | 4.02728836  | 10.02672421 |
| ENSMUSG00000020163 | 84.1867703  | 105.0382038 | 108.7472614 | 147.398754  | 138.2255552 |
| ENSMUSG00000020166 | 91.26128881 | 115.4724625 | 96.0365425  | 228.7499789 | 181.1972303 |
| ENSMUSG00000020167 | 72.86754068 | 98.08203137 | 98.15499564 | 178.8116032 | 128.198831  |
| ENSMUSG00000020173 | 4.244711108 | 4.173703463 | 9.179963621 | 4.832746033 | 2.864778345 |
| ENSMUSG00000020175 | 2.829807405 | 10.43425866 | 10.59226572 | 3.221830688 | 5.729556691 |
| ENSMUSG00000020176 | 9.904325918 | 6.956172438 | 5.649208382 | 5.638203705 | 7.87814045  |
| ENSMUSG00000020177 | 9.196874066 | 10.43425866 | 8.473812573 | 4.832746033 | 4.297167518 |
| ENSMUSG00000020180 | 97.62835547 | 145.3840039 | 141.2302096 | 240.0263863 | 195.5211221 |
| ENSMUSG00000020182 | 13.44158517 | 9.043024169 | 6.35535943  | 8.054576721 | 11.45911338 |
| ENSMUSG00000020183 | 42.44711108 | 55.6493795  | 50.13672439 | 20.1364418  | 25.78300511 |
| ENSMUSG00000020184 | 91.96874066 | 111.298759  | 114.3964697 | 153.8424154 | 125.3340526 |
| ENSMUSG00000020185 | 22.63845924 | 13.21672763 | 12.00456781 | 16.10915344 | 13.60769714 |
| ENSMUSG00000020189 | 53.05888884 | 95.99517964 | 79.7950684  | 103.098582  | 79.49759908 |
| ENSMUSG00000020190 | 239.1187257 | 230.9449249 | 243.6221115 | 316.5448651 | 237.7766027 |
| ENSMUSG00000020191 | 11.31922962 | 14.60796212 | 4.943057334 | 8.054576721 | 5.013362104 |
| ENSMUSG00000020196 | 47.39927403 | 62.60555194 | 48.01827125 | 109.5422434 | 70.90326405 |
| ENSMUSG00000020211 | 101.1656147 | 134.254128  | 119.3395271 | 360.0395794 | 244.9385485 |
| ENSMUSG00000020212 | 19.80865184 | 17.39043109 | 19.77222934 | 8.054576721 | 14.32389173 |
| ENSMUSG00000020214 | 9.196874066 | 10.43425866 | 7.767661525 | 4.832746033 | 10.02672421 |
| ENSMUSG00000020216 | 7.781970364 | 9.738641413 | 6.35535943  | 4.832746033 | 6.445751277 |
| ENSMUSG00000020218 | 4.952162959 | 12.52111039 | 8.473812573 | 6.443661377 | 8.594335036 |
| ENSMUSG00000020220 | 102.5805184 | 121.7330177 | 131.3440949 | 82.15668255 | 90.24051788 |
| ENSMUSG00000020224 | 81.3569629  | 103.6469693 | 102.3919019 | 187.6716376 | 131.0636093 |
| ENSMUSG00000020225 | 38.90985182 | 61.21431745 | 65.67204744 | 40.2728836  | 32.22875639 |
| ENSMUSG00000020227 | 33.25023701 | 57.04061399 | 43.78136496 | 26.58010318 | 37.24211849 |
| ENSMUSG00000020228 | 22.63845924 | 32.69401046 | 31.77679715 | 24.16373016 | 38.67450766 |
| ENSMUSG00000020230 | 18.39374813 | 22.2597518  | 19.77222934 | 12.88732275 | 22.20203218 |
| ENSMUSG00000020231 | 11.31922962 | 13.91234488 | 6.35535943  | 5.638203705 | 12.89150255 |
| ENSMUSG00000020232 | 12.02668147 | 18.08604834 | 14.829172   | 17.72006879 | 23.63442135 |
| ENSMUSG00000020234 | 16.27139258 | 12.52111039 | 17.65377619 | 8.054576721 | 15.7562809  |
| ENSMUSG00000020235 | 63.67066661 | 75.12666233 | 88.97503202 | 140.9550926 | 95.25387998 |
| ENSMUSG00000020238 | 129.4636888 | 148.1664729 | 159.5901368 | 178.0061455 | 165.4409494 |
| ENSMUSG00000020241 | 4.952162959 | 3.478086219 | 3.530755239 | 6.443661377 | 7.161945863 |
| ENSMUSG00000020246 | 29.0055259  | 36.17209668 | 33.18909925 | 41.07834128 | 35.09353473 |
| ENSMUSG00000020248 | 22.63845924 | 42.43265187 | 40.95676077 | 84.57305557 | 58.01176149 |
| ENSMUSG00000020250 | 17.68629628 | 15.30357936 | 16.94762515 | 92.62763229 | 58.01176149 |

|                    |             |             |             |             |             |
|--------------------|-------------|-------------|-------------|-------------|-------------|
| ENSMUSG00000020251 | 10.61177777 | 5.56493795  | 8.473812573 | 5.638203705 | 5.013362104 |
| ENSMUSG00000020253 | 41.73965922 | 45.91073809 | 46.60596915 | 65.24207144 | 52.99839939 |
| ENSMUSG00000020256 | 7.074518513 | 8.347406925 | 9.886114669 | 3.221830688 | 10.7429188  |
| ENSMUSG00000020257 | 88.43148141 | 106.4294383 | 98.15499564 | 213.4462831 | 168.3057278 |
| ENSMUSG00000020258 | 13.44158517 | 22.2597518  | 16.94762515 | 6.443661377 | 10.7429188  |
| ENSMUSG00000020261 | 29.0055259  | 38.95456565 | 38.13215658 | 23.35827249 | 29.36397804 |
| ENSMUSG00000020262 | 6.367066661 | 4.173703463 | 9.179963621 | 7.249119049 | 7.87814045  |
| ENSMUSG00000020263 | 5.65961481  | 12.52111039 | 10.59226572 | 8.054576721 | 9.310529622 |
| ENSMUSG00000020265 | 32.54278516 | 34.78086219 | 37.42600553 | 57.18749472 | 65.17370736 |
| ENSMUSG00000020268 | 16.97884443 | 33.3896277  | 19.77222934 | 37.05105292 | 27.21539428 |
| ENSMUSG00000020271 | 101.8730666 | 137.036597  | 115.1026208 | 140.9550926 | 133.9283876 |
| ENSMUSG00000020273 | 36.78749627 | 48.69320706 | 49.43057334 | 58.79841006 | 65.88990194 |
| ENSMUSG00000020277 | 48.81417774 | 55.6493795  | 60.72899011 | 69.2693598  | 58.01176149 |
| ENSMUSG00000020279 | 14.85648888 | 26.43345526 | 22.59683353 | 20.1364418  | 13.60769714 |
| ENSMUSG00000020280 | 58.71850365 | 114.081228  | 102.3919019 | 107.9313281 | 100.2672421 |
| ENSMUSG00000020282 | 13.44158517 | 17.39043109 | 20.47838039 | 12.08186508 | 17.90486466 |
| ENSMUSG00000020284 | 12.73413332 | 12.52111039 | 14.829172   | 12.88732275 | 14.32389173 |
| ENSMUSG00000020286 | 7.074518513 | 7.651789682 | 7.061510478 | 5.638203705 | 6.445751277 |
| ENSMUSG00000020287 | 13.44158517 | 21.56413456 | 24.00913562 | 15.30369577 | 25.06681052 |
| ENSMUSG00000020288 | 17.68629628 | 18.08604834 | 19.06607829 | 42.68925662 | 28.64778345 |
| ENSMUSG00000020289 | 45.27691848 | 82.77845201 | 59.31668801 | 70.07481747 | 80.21379367 |
| ENSMUSG00000020290 | 17.68629628 | 43.12826911 | 41.66291182 | 164.3133651 | 128.198831  |
| ENSMUSG00000020297 | 7.781970364 | 5.56493795  | 8.473812573 | 11.27640741 | 6.445751277 |
| ENSMUSG00000020300 | 79.23460734 | 127.9935729 | 120.7518292 | 93.43308996 | 93.10529622 |
| ENSMUSG00000020305 | 44.56946663 | 82.08283477 | 75.55816211 | 74.10210583 | 64.45751277 |
| ENSMUSG00000020307 | 86.30912585 | 109.9075245 | 112.9841676 | 289.1593043 | 195.5211221 |
| ENSMUSG00000020311 | 38.90985182 | 67.47487265 | 65.67204744 | 57.18749472 | 58.72795608 |
| ENSMUSG00000020312 | 11.31922962 | 10.43425866 | 7.061510478 | 4.832746033 | 3.580972932 |
| ENSMUSG00000020315 | 8.489422215 | 4.173703463 | 6.35535943  | 5.638203705 | 4.297167518 |
| ENSMUSG00000020317 | 9.196874066 | 6.956172438 | 7.061510478 | 7.249119049 | 5.013362104 |
| ENSMUSG00000020321 | 41.73965922 | 75.82227957 | 60.72899011 | 69.2693598  | 55.86317773 |
| ENSMUSG00000020323 | 9.904325918 | 8.347406925 | 14.829172   | 8.054576721 | 10.02672421 |
| ENSMUSG00000020325 | 5.65961481  | 6.260555194 | 8.473812573 | 10.47094974 | 7.161945863 |
| ENSMUSG00000020328 | 77.81970364 | 99.47326586 | 80.50121945 | 207.8080794 | 156.1304198 |
| ENSMUSG00000020329 | 19.80865184 | 29.91154148 | 36.71985448 | 33.82922223 | 31.5125618  |
| ENSMUSG00000020330 | 75.69734809 | 89.73462445 | 74.14586002 | 211.0299101 | 166.157144  |
| ENSMUSG00000020333 | 9.196874066 | 11.82549314 | 2.824604191 | 8.860034393 | 8.594335036 |
| ENSMUSG00000020335 | 3.537259256 | 6.956172438 | 11.29841676 | 4.02728836  | 12.89150255 |
| ENSMUSG00000020340 | 109.6550369 | 130.7760418 | 112.9841676 | 151.4260424 | 116.7397176 |
| ENSMUSG00000020346 | 15.56394073 | 27.12907251 | 33.18909925 | 53.16020636 | 31.5125618  |
| ENSMUSG00000020354 | 7.074518513 | 6.260555194 | 6.35535943  | 5.638203705 | 5.013362104 |
| ENSMUSG00000020358 | 86.30912585 | 116.1680797 | 110.8657145 | 303.6575424 | 234.9118243 |
| ENSMUSG00000020359 | 19.10119998 | 38.95456565 | 40.25060972 | 62.02024075 | 42.25548059 |

|                    |             |             |             |             |             |
|--------------------|-------------|-------------|-------------|-------------|-------------|
| ENSMUSG00000020361 | 102.5805184 | 134.254128  | 122.1641313 | 282.7156429 | 227.0336839 |
| ENSMUSG00000020362 | 78.52715549 | 118.2549314 | 103.804204  | 144.982381  | 127.4826364 |
| ENSMUSG00000020364 | 8.489422215 | 5.56493795  | 14.12302096 | 8.054576721 | 8.594335036 |
| ENSMUSG00000020366 | 34.66514071 | 40.34580014 | 48.01827125 | 45.10562964 | 41.53928601 |
| ENSMUSG00000020368 | 145.7350814 | 187.8166558 | 156.0593816 | 362.4559524 | 242.0737702 |
| ENSMUSG00000020372 | 6.367066661 | 8.347406925 | 5.649208382 | 12.08186508 | 7.87814045  |
| ENSMUSG00000020374 | 6.367066661 | 6.956172438 | 4.943057334 | 4.832746033 | 5.729556691 |
| ENSMUSG00000020376 | 65.08557032 | 93.90832791 | 78.3827663  | 71.68573282 | 76.63282074 |
| ENSMUSG00000020377 | 10.61177777 | 11.82549314 | 10.59226572 | 8.054576721 | 7.87814045  |
| ENSMUSG00000020380 | 23.34591109 | 43.12826911 | 34.60140134 | 60.40932541 | 52.2822048  |
| ENSMUSG00000020381 | 12.73413332 | 18.08604834 | 12.00456781 | 13.69278043 | 18.62105924 |
| ENSMUSG00000020385 | 46.69182218 | 73.0398106  | 55.78593277 | 74.10210583 | 51.56601022 |
| ENSMUSG00000020387 | 16.97884443 | 24.34660353 | 24.00913562 | 114.3749894 | 82.36237743 |
| ENSMUSG00000020388 | 7.074518513 | 7.651789682 | 6.35535943  | 9.665492065 | 5.013362104 |
| ENSMUSG00000020389 | 14.85648888 | 25.04222078 | 16.2414741  | 43.49471429 | 40.10689684 |
| ENSMUSG00000020390 | 123.0966221 | 146.0796212 | 154.6470795 | 165.9242805 | 143.9551119 |
| ENSMUSG00000020393 | 10.61177777 | 24.34660353 | 22.59683353 | 12.08186508 | 20.05344842 |
| ENSMUSG00000020395 | 13.44158517 | 9.043024169 | 7.767661525 | 9.665492065 | 5.013362104 |
| ENSMUSG00000020397 | 60.13340736 | 89.73462445 | 92.50578726 | 153.8424154 | 97.40246374 |
| ENSMUSG00000020399 | 10.61177777 | 6.260555194 | 6.35535943  | 4.832746033 | 8.594335036 |
| ENSMUSG00000020400 | 14.85648888 | 27.12907251 | 35.30755239 | 38.66196826 | 28.64778345 |
| ENSMUSG00000020402 | 44.56946663 | 67.47487265 | 68.49665163 | 78.93485187 | 75.91662615 |
| ENSMUSG00000020407 | 6.367066661 | 7.651789682 | 7.061510478 | 5.638203705 | 5.013362104 |
| ENSMUSG00000020409 | 84.1867703  | 130.7760418 | 109.4534124 | 128.0677699 | 98.11865833 |
| ENSMUSG00000020412 | 19.10119998 | 23.65098629 | 23.30298458 | 57.18749472 | 52.2822048  |
| ENSMUSG00000020413 | 24.05336294 | 36.86771392 | 24.71528667 | 46.71654498 | 59.44415067 |
| ENSMUSG00000020415 | 14.85648888 | 25.04222078 | 24.71528667 | 17.72006879 | 20.769643   |
| ENSMUSG00000020419 | 12.02668147 | 9.043024169 | 7.061510478 | 4.02728836  | 9.310529622 |
| ENSMUSG00000020422 | 16.27139258 | 23.65098629 | 19.77222934 | 10.47094974 | 12.17530797 |
| ENSMUSG00000020427 | 8.489422215 | 5.56493795  | 5.649208382 | 5.638203705 | 4.297167518 |
| ENSMUSG00000020428 | 8.489422215 | 4.173703463 | 7.061510478 | 4.832746033 | 4.297167518 |
| ENSMUSG00000020430 | 60.84085921 | 89.73462445 | 76.26431316 | 207.8080794 | 137.5093606 |
| ENSMUSG00000020432 | 7.781970364 | 9.738641413 | 7.061510478 | 5.638203705 | 9.310529622 |
| ENSMUSG00000020435 | 7.781970364 | 4.869320706 | 9.179963621 | 4.832746033 | 7.161945863 |
| ENSMUSG00000020436 | 8.489422215 | 9.738641413 | 8.473812573 | 4.02728836  | 4.297167518 |
| ENSMUSG00000020437 | 56.5961481  | 75.12666233 | 81.20737049 | 280.2992699 | 219.871738  |
| ENSMUSG00000020439 | 2.829807405 | 10.43425866 | 10.59226572 | 6.443661377 | 8.594335036 |
| ENSMUSG00000020440 | 26.1757185  | 44.5195036  | 52.25517753 | 46.71654498 | 40.82309142 |
| ENSMUSG00000020444 | 18.39374813 | 22.2597518  | 21.89068248 | 26.58010318 | 19.33725383 |
| ENSMUSG00000020448 | 65.08557032 | 105.7338211 | 91.79963621 | 87.79488626 | 73.05184781 |
| ENSMUSG00000020451 | 99.04325918 | 127.2979556 | 113.6903187 | 108.7367857 | 110.2939663 |
| ENSMUSG00000020453 | 26.88317035 | 40.34580014 | 30.36449505 | 57.99295239 | 52.2822048  |
| ENSMUSG00000020454 | 113.8997481 | 148.1664729 | 145.4671158 | 253.7191667 | 179.7648412 |

|                    |             |             |             |             |             |
|--------------------|-------------|-------------|-------------|-------------|-------------|
| ENSMUSG00000020455 | 214.3579109 | 251.8134422 | 210.4330122 | 280.2992699 | 206.9802355 |
| ENSMUSG00000020456 | 65.79302217 | 79.99598303 | 64.96589639 | 140.9550926 | 95.97007457 |
| ENSMUSG00000020457 | 67.91537772 | 126.6023384 | 115.8087718 | 176.3952302 | 158.2790036 |
| ENSMUSG00000020458 | 36.08004441 | 50.08444155 | 41.66291182 | 68.46390213 | 60.16034525 |
| ENSMUSG00000020459 | 25.46826665 | 25.04222078 | 26.83373982 | 45.91108731 | 44.40406435 |
| ENSMUSG00000020460 | 31.12788146 | 45.91073809 | 52.25517753 | 165.9242805 | 107.429188  |
| ENSMUSG00000020461 | 36.78749627 | 45.21512085 | 31.0706461  | 140.9550926 | 118.1721067 |
| ENSMUSG00000020462 | 16.27139258 | 20.17290007 | 19.06607829 | 18.52552646 | 20.05344842 |
| ENSMUSG00000020463 | 101.1656147 | 156.5138799 | 127.8133396 | 211.8353678 | 150.4008631 |
| ENSMUSG00000020464 | 28.29807405 | 46.60635533 | 33.18909925 | 97.46037832 | 67.32229112 |
| ENSMUSG00000020467 | 7.781970364 | 8.347406925 | 8.473812573 | 8.860034393 | 10.02672421 |
| ENSMUSG00000020471 | 21.22355554 | 38.25894841 | 38.83830763 | 67.65844446 | 58.72795608 |
| ENSMUSG00000020472 | 9.196874066 | 14.60796212 | 19.77222934 | 8.860034393 | 11.45911338 |
| ENSMUSG00000020473 | 9.196874066 | 8.347406925 | 7.061510478 | 8.054576721 | 7.87814045  |
| ENSMUSG00000020474 | 17.68629628 | 16.69481385 | 25.42143772 | 22.55281482 | 23.63442135 |
| ENSMUSG00000020476 | 21.93100739 | 29.21592424 | 28.24604191 | 113.5695318 | 89.52432329 |
| ENSMUSG00000020477 | 31.83533331 | 49.38882431 | 54.37363068 | 66.04752911 | 61.59273443 |
| ENSMUSG00000020481 | 4.952162959 | 6.260555194 | 10.59226572 | 9.665492065 | 6.445751277 |
| ENSMUSG00000020483 | 16.97884443 | 20.17290007 | 21.89068248 | 60.40932541 | 40.82309142 |
| ENSMUSG00000020484 | 45.98437033 | 63.99678643 | 54.37363068 | 200.5589604 | 129.6312201 |
| ENSMUSG00000020485 | 142.1978221 | 182.9473351 | 158.8839857 | 173.1733995 | 131.7798039 |
| ENSMUSG00000020486 | 6.367066661 | 2.782468975 | 1.412302096 | 8.054576721 | 5.013362104 |
| ENSMUSG00000020490 | 7.074518513 | 8.347406925 | 9.179963621 | 6.443661377 | 5.013362104 |
| ENSMUSG00000020491 | 6.367066661 | 6.956172438 | 9.886114669 | 8.860034393 | 8.594335036 |
| ENSMUSG00000020492 | 59.42595551 | 65.38802092 | 79.7950684  | 107.9313281 | 103.848215  |
| ENSMUSG00000020495 | 51.64398514 | 70.25734162 | 73.43970897 | 94.23854763 | 87.37573953 |
| ENSMUSG00000020513 | 84.89422215 | 122.4286349 | 129.2256417 | 170.7570265 | 134.6445822 |
| ENSMUSG00000020515 | 57.30359995 | 79.30036579 | 62.1412922  | 133.7059736 | 127.4826364 |
| ENSMUSG00000020516 | 98.33580733 | 143.9927695 | 112.9841676 | 190.8934683 | 152.5494469 |
| ENSMUSG00000020520 | 50.22908144 | 88.34338996 | 80.50121945 | 24.96918783 | 39.39070225 |
| ENSMUSG00000020522 | 104.702874  | 157.9051143 | 134.1686991 | 155.4533307 | 136.793166  |
| ENSMUSG00000020523 | 84.1867703  | 155.1226454 | 134.8748501 | 149.815127  | 137.5093606 |
| ENSMUSG00000020524 | 12.73413332 | 6.260555194 | 4.943057334 | 7.249119049 | 6.445751277 |
| ENSMUSG00000020525 | 49.52162959 | 75.82227957 | 55.07978173 | 98.265836   | 88.80812871 |
| ENSMUSG00000020526 | 34.66514071 | 43.82388636 | 45.19366706 | 69.2693598  | 67.32229112 |
| ENSMUSG00000020527 | 29.71297775 | 40.34580014 | 40.25060972 | 88.60034393 | 73.05184781 |
| ENSMUSG00000020528 | 18.39374813 | 38.25894841 | 33.18909925 | 44.30017197 | 47.98503729 |
| ENSMUSG00000020530 | 45.98437033 | 73.0398106  | 69.90895373 | 177.2006879 | 155.4142252 |
| ENSMUSG00000020532 | 7.074518513 | 13.91234488 | 10.59226572 | 18.52552646 | 19.33725383 |
| ENSMUSG00000020534 | 9.196874066 | 16.69481385 | 23.30298458 | 115.9859048 | 75.20043157 |
| ENSMUSG00000020536 | 14.85648888 | 28.52030699 | 31.77679715 | 27.38556085 | 30.79636721 |
| ENSMUSG00000020538 | 112.4848444 | 157.9051143 | 134.8748501 | 163.5079074 | 136.793166  |
| ENSMUSG00000020541 | 9.904325918 | 6.956172438 | 4.943057334 | 4.832746033 | 3.580972932 |

|                    |             |             |             |             |             |
|--------------------|-------------|-------------|-------------|-------------|-------------|
| ENSMUSG00000020542 | 7.074518513 | 5.56493795  | 5.649208382 | 8.860034393 | 7.87814045  |
| ENSMUSG00000020544 | 77.81970364 | 91.82147618 | 86.85657888 | 115.9859048 | 111.0101609 |
| ENSMUSG00000020545 | 7.074518513 | 7.651789682 | 8.473812573 | 6.443661377 | 10.02672421 |
| ENSMUSG00000020546 | 55.88869625 | 94.60394515 | 88.97503202 | 109.5422434 | 105.9967988 |
| ENSMUSG00000020548 | 7.781970364 | 3.478086219 | 5.649208382 | 0.805457672 | 2.864778345 |
| ENSMUSG00000020549 | 18.39374813 | 20.17290007 | 17.65377619 | 40.2728836  | 36.5259239  |
| ENSMUSG00000020564 | 36.08004441 | 50.08444155 | 36.01370344 | 41.88379895 | 34.37734014 |
| ENSMUSG00000020566 | 5.65961481  | 7.651789682 | 8.473812573 | 4.832746033 | 10.7429188  |
| ENSMUSG00000020570 | 49.52162959 | 79.99598303 | 57.19823487 | 120.8186508 | 92.38910164 |
| ENSMUSG00000020571 | 87.01657771 | 102.9513521 | 103.098053  | 201.364418  | 144.6713064 |
| ENSMUSG00000020573 | 49.52162959 | 84.86530374 | 67.79050059 | 42.68925662 | 35.80972932 |
| ENSMUSG00000020576 | 26.88317035 | 39.6501829  | 35.30755239 | 59.60386773 | 42.25548059 |
| ENSMUSG00000020577 | 52.35143699 | 77.9091313  | 78.3827663  | 51.54929101 | 42.25548059 |
| ENSMUSG00000020580 | 68.62282957 | 94.60394515 | 75.55816211 | 182.0334339 | 123.1854689 |
| ENSMUSG00000020581 | 10.61177777 | 4.869320706 | 4.236906287 | 6.443661377 | 4.297167518 |
| ENSMUSG00000020589 | 51.64398514 | 77.9091313  | 64.25974535 | 32.21830688 | 33.66114556 |
| ENSMUSG00000020590 | 71.45263698 | 110.6031418 | 93.91808935 | 125.6513968 | 93.10529622 |
| ENSMUSG00000020591 | 9.196874066 | 10.43425866 | 7.767661525 | 4.02728836  | 8.594335036 |
| ENSMUSG00000020592 | 11.31922962 | 12.52111039 | 15.53532305 | 8.860034393 | 15.7562809  |
| ENSMUSG00000020593 | 15.56394073 | 27.12907251 | 22.59683353 | 22.55281482 | 25.06681052 |
| ENSMUSG00000020594 | 135.8307554 | 178.0780144 | 155.3532305 | 250.497336  | 166.8733386 |
| ENSMUSG00000020598 | 10.61177777 | 5.56493795  | 10.59226572 | 8.054576721 | 8.594335036 |
| ENSMUSG00000020599 | 12.02668147 | 4.173703463 | 4.943057334 | 5.638203705 | 10.02672421 |
| ENSMUSG00000020600 | 8.489422215 | 4.869320706 | 7.767661525 | 7.249119049 | 9.310529622 |
| ENSMUSG00000020604 | 13.44158517 | 23.65098629 | 19.77222934 | 82.15668255 | 68.0384857  |
| ENSMUSG00000020609 | 7.074518513 | 7.651789682 | 6.35535943  | 5.638203705 | 3.580972932 |
| ENSMUSG00000020610 | 12.73413332 | 15.99919661 | 15.53532305 | 13.69278043 | 12.17530797 |
| ENSMUSG00000020611 | 62.96321476 | 81.38721752 | 82.61967259 | 182.8388916 | 155.4142252 |
| ENSMUSG00000020612 | 50.93653329 | 55.6493795  | 55.78593277 | 60.40932541 | 46.55264811 |
| ENSMUSG00000020614 | 6.367066661 | 4.869320706 | 5.649208382 | 4.832746033 | 7.87814045  |
| ENSMUSG00000020617 | 8.489422215 | 3.478086219 | 7.767661525 | 4.02728836  | 5.729556691 |
| ENSMUSG00000020620 | 4.952162959 | 7.651789682 | 7.767661525 | 4.02728836  | 7.161945863 |
| ENSMUSG00000020622 | 9.904325918 | 6.956172438 | 2.824604191 | 6.443661377 | 9.310529622 |
| ENSMUSG00000020623 | 29.0055259  | 52.86691053 | 35.30755239 | 15.30369577 | 18.62105924 |
| ENSMUSG00000020627 | 7.781970364 | 6.956172438 | 8.473812573 | 3.221830688 | 6.445751277 |
| ENSMUSG00000020628 | 67.91537772 | 86.95215547 | 74.85201106 | 99.87675134 | 84.51096119 |
| ENSMUSG00000020629 | 28.29807405 | 35.47647943 | 24.00913562 | 30.60739154 | 35.09353473 |
| ENSMUSG00000020633 | 7.781970364 | 8.347406925 | 8.473812573 | 4.832746033 | 5.013362104 |
| ENSMUSG00000020634 | 19.80865184 | 41.04141738 | 27.53989086 | 63.6311561  | 56.57937232 |
| ENSMUSG00000020636 | 12.73413332 | 8.347406925 | 7.767661525 | 6.443661377 | 6.445751277 |
| ENSMUSG00000020639 | 7.074518513 | 4.173703463 | 8.473812573 | 8.860034393 | 7.87814045  |
| ENSMUSG00000020640 | 97.62835547 | 110.6031418 | 101.6857509 | 249.6918783 | 191.9401491 |
| ENSMUSG00000020641 | 12.02668147 | 11.82549314 | 14.829172   | 15.30369577 | 12.89150255 |

|                    |             |             |             |             |             |
|--------------------|-------------|-------------|-------------|-------------|-------------|
| ENSMUSG00000020642 | 0.707451851 | 2.086851731 | 3.530755239 | 0           | 0           |
| ENSMUSG00000020646 | 9.904325918 | 2.086851731 | 4.236906287 | 8.054576721 | 8.594335036 |
| ENSMUSG00000020647 | 41.73965922 | 65.38802092 | 46.60596915 | 45.91108731 | 47.2688427  |
| ENSMUSG00000020649 | 19.10119998 | 29.91154148 | 21.89068248 | 145.7878386 | 104.5644096 |
| ENSMUSG00000020650 | 14.14903703 | 19.47728283 | 19.06607829 | 38.66196826 | 30.79636721 |
| ENSMUSG00000020652 | 41.73965922 | 77.9091313  | 67.08434954 | 104.7094974 | 75.20043157 |
| ENSMUSG00000020653 | 9.904325918 | 22.2597518  | 15.53532305 | 15.30369577 | 15.7562809  |
| ENSMUSG00000020654 | 5.65961481  | 13.91234488 | 13.41686991 | 14.4982381  | 10.7429188  |
| ENSMUSG00000020656 | 4.244711108 | 6.956172438 | 11.29841676 | 17.72006879 | 12.89150255 |
| ENSMUSG00000020657 | 15.56394073 | 19.47728283 | 26.83373982 | 45.91108731 | 35.09353473 |
| ENSMUSG00000020658 | 3.537259256 | 7.651789682 | 6.35535943  | 10.47094974 | 5.729556691 |
| ENSMUSG00000020659 | 70.74518513 | 78.60474855 | 71.32125582 | 90.21125927 | 83.7947666  |
| ENSMUSG00000020661 | 28.29807405 | 56.34499675 | 42.36906287 | 53.16020636 | 49.41742646 |
| ENSMUSG00000020664 | 58.71850365 | 84.86530374 | 81.91352154 | 113.5695318 | 85.22715578 |
| ENSMUSG00000020668 | 12.02668147 | 19.47728283 | 16.94762515 | 19.33098413 | 17.18867007 |
| ENSMUSG00000020669 | 38.90985182 | 61.9099347  | 50.13672439 | 57.18749472 | 55.14698315 |
| ENSMUSG00000020672 | 14.14903703 | 6.260555194 | 8.473812573 | 6.443661377 | 10.02672421 |
| ENSMUSG00000020673 | 7.781970364 | 7.651789682 | 12.00456781 | 5.638203705 | 8.594335036 |
| ENSMUSG00000020674 | 10.61177777 | 4.173703463 | 7.767661525 | 4.02728836  | 8.594335036 |
| ENSMUSG00000020679 | 2.829807405 | 9.043024169 | 7.061510478 | 28.9964762  | 33.66114556 |
| ENSMUSG00000020680 | 153.5170517 | 155.8182626 | 149.7040221 | 205.3917064 | 185.4943979 |
| ENSMUSG00000020681 | 10.61177777 | 6.260555194 | 6.35535943  | 5.638203705 | 7.87814045  |
| ENSMUSG00000020682 | 10.61177777 | 9.043024169 | 8.473812573 | 4.832746033 | 13.60769714 |
| ENSMUSG00000020684 | 7.074518513 | 3.478086219 | 4.236906287 | 9.665492065 | 6.445751277 |
| ENSMUSG00000020686 | 9.904325918 | 8.347406925 | 5.649208382 | 12.88732275 | 9.310529622 |
| ENSMUSG00000020687 | 116.0221036 | 141.9059177 | 125.6948865 | 218.2790291 | 172.6028953 |
| ENSMUSG00000020690 | 9.904325918 | 4.173703463 | 8.473812573 | 4.832746033 | 6.445751277 |
| ENSMUSG00000020691 | 39.61730367 | 56.34499675 | 48.01827125 | 95.04400531 | 97.40246374 |
| ENSMUSG00000020692 | 14.14903703 | 29.91154148 | 17.65377619 | 74.9075635  | 47.2688427  |
| ENSMUSG00000020694 | 12.73413332 | 14.60796212 | 12.00456781 | 30.60739154 | 29.36397804 |
| ENSMUSG00000020695 | 7.781970364 | 4.173703463 | 6.35535943  | 4.02728836  | 8.594335036 |
| ENSMUSG00000020696 | 20.51610369 | 25.04222078 | 24.71528667 | 28.9964762  | 24.35061594 |
| ENSMUSG00000020697 | 42.44711108 | 70.25734162 | 52.96132858 | 99.07129367 | 69.47087488 |
| ENSMUSG00000020698 | 33.25023701 | 48.69320706 | 36.01370344 | 101.4876667 | 88.09193412 |
| ENSMUSG00000020700 | 91.26128881 | 121.7330177 | 94.6242404  | 103.098582  | 95.97007457 |
| ENSMUSG00000020701 | 18.39374813 | 22.2597518  | 17.65377619 | 11.27640741 | 9.310529622 |
| ENSMUSG00000020702 | 7.781970364 | 6.260555194 | 7.061510478 | 8.054576721 | 7.87814045  |
| ENSMUSG00000020704 | 7.781970364 | 6.260555194 | 10.59226572 | 8.860034393 | 4.297167518 |
| ENSMUSG00000020706 | 77.11225179 | 130.0804246 | 114.3964697 | 255.3300821 | 206.2640409 |
| ENSMUSG00000020708 | 74.98989623 | 118.9505487 | 109.4534124 | 260.1628281 | 206.9802355 |
| ENSMUSG00000020709 | 7.781970364 | 7.651789682 | 4.236906287 | 10.47094974 | 10.02672421 |
| ENSMUSG00000020712 | 15.56394073 | 18.78166558 | 14.829172   | 12.08186508 | 13.60769714 |
| ENSMUSG00000020716 | 7.781970364 | 16.69481385 | 14.12302096 | 23.35827249 | 19.33725383 |



|                    |             |             |             |             |             |
|--------------------|-------------|-------------|-------------|-------------|-------------|
| ENSMUSG00000020717 | 65.79302217 | 89.73462445 | 75.55816211 | 99.07129367 | 78.06520991 |
| ENSMUSG00000020718 | 41.73965922 | 75.12666233 | 55.78593277 | 96.65492065 | 83.07857202 |
| ENSMUSG00000020719 | 82.7718666  | 125.2111039 | 94.6242404  | 256.9409974 | 206.9802355 |
| ENSMUSG00000020720 | 44.56946663 | 39.6501829  | 45.19366706 | 49.132918   | 40.82309142 |
| ENSMUSG00000020721 | 60.84085921 | 93.90832791 | 93.91808935 | 69.2693598  | 73.76804239 |
| ENSMUSG00000020728 | 5.65961481  | 6.260555194 | 4.236906287 | 3.221830688 | 3.580972932 |
| ENSMUSG00000020732 | 10.61177777 | 6.956172438 | 6.35535943  | 5.638203705 | 8.594335036 |
| ENSMUSG00000020734 | 9.904325918 | 4.869320706 | 9.886114669 | 6.443661377 | 11.45911338 |
| ENSMUSG00000020736 | 30.4204296  | 54.95376226 | 40.25060972 | 47.52200265 | 50.84981563 |
| ENSMUSG00000020737 | 76.40479994 | 83.47406925 | 81.91352154 | 217.4735715 | 180.4810358 |
| ENSMUSG00000020738 | 48.10672589 | 62.60555194 | 62.1412922  | 217.4735715 | 170.4543116 |
| ENSMUSG00000020739 | 32.54278516 | 47.99758982 | 47.3121202  | 118.4022778 | 95.97007457 |
| ENSMUSG00000020740 | 69.33028142 | 107.1250555 | 94.6242404  | 295.6029657 | 252.816689  |
| ENSMUSG00000020741 | 53.7663407  | 82.08283477 | 74.14586002 | 159.4806191 | 150.4008631 |
| ENSMUSG00000020743 | 69.33028142 | 101.5601176 | 76.26431316 | 112.7640741 | 88.09193412 |
| ENSMUSG00000020744 | 114.6071999 | 152.3401764 | 122.8702823 | 339.9031376 | 243.5061594 |
| ENSMUSG00000020745 | 128.7562369 | 143.2971522 | 129.9317928 | 199.7535027 | 155.4142252 |
| ENSMUSG00000020747 | 31.12788146 | 49.38882431 | 43.07521391 | 19.33098413 | 33.66114556 |
| ENSMUSG00000020752 | 119.5593629 | 169.7306075 | 176.5377619 | 178.8116032 | 141.8065281 |
| ENSMUSG00000020758 | 7.781970364 | 6.956172438 | 6.35535943  | 4.02728836  | 6.445751277 |
| ENSMUSG00000020770 | 36.08004441 | 54.95376226 | 37.42600553 | 112.7640741 | 93.10529622 |
| ENSMUSG00000020773 | 7.781970364 | 9.043024169 | 1.412302096 | 4.832746033 | 2.864778345 |
| ENSMUSG00000020775 | 21.93100739 | 36.86771392 | 25.42143772 | 60.40932541 | 52.2822048  |
| ENSMUSG00000020776 | 12.73413332 | 11.1298759  | 16.94762515 | 12.88732275 | 10.7429188  |
| ENSMUSG00000020777 | 43.86201478 | 76.51789682 | 70.61510478 | 41.07834128 | 63.0251236  |
| ENSMUSG00000020778 | 42.44711108 | 63.30116918 | 58.61053696 | 37.05105292 | 52.99839939 |
| ENSMUSG00000020780 | 65.08557032 | 118.9505487 | 74.14586002 | 120.0131931 | 111.7263555 |
| ENSMUSG00000020781 | 12.02668147 | 21.56413456 | 28.24604191 | 30.60739154 | 37.24211849 |
| ENSMUSG00000020782 | 25.46826665 | 34.78086219 | 40.25060972 | 21.74735715 | 19.33725383 |
| ENSMUSG00000020783 | 53.05888884 | 67.47487265 | 58.61053696 | 62.82569842 | 74.48423698 |
| ENSMUSG00000020785 | 9.196874066 | 11.1298759  | 7.061510478 | 14.4982381  | 11.45911338 |
| ENSMUSG00000020787 | 11.31922962 | 6.956172438 | 6.35535943  | 12.88732275 | 8.594335036 |
| ENSMUSG00000020788 | 82.7718666  | 92.51709342 | 90.38733411 | 84.57305557 | 63.74131818 |
| ENSMUSG00000020790 | 123.0966221 | 134.254128  | 122.8702823 | 166.7297381 | 119.6044959 |
| ENSMUSG00000020792 | 20.51610369 | 31.30277597 | 27.53989086 | 28.19101852 | 26.49919969 |
| ENSMUSG00000020794 | 41.73965922 | 73.73542784 | 52.96132858 | 92.62763229 | 75.91662615 |
| ENSMUSG00000020798 | 74.98989623 | 93.90832791 | 76.26431316 | 37.05105292 | 29.36397804 |
| ENSMUSG00000020799 | 7.781970364 | 3.478086219 | 6.35535943  | 10.47094974 | 6.445751277 |
| ENSMUSG00000020804 | 9.904325918 | 13.21672763 | 16.2414741  | 3.221830688 | 7.161945863 |
| ENSMUSG00000020805 | 6.367066661 | 6.260555194 | 4.236906287 | 5.638203705 | 2.864778345 |
| ENSMUSG00000020806 | 21.93100739 | 29.91154148 | 21.89068248 | 8.860034393 | 10.7429188  |
| ENSMUSG00000020807 | 53.05888884 | 76.51789682 | 72.73355792 | 60.40932541 | 62.30892901 |
| ENSMUSG00000020811 | 12.73413332 | 8.347406925 | 10.59226572 | 7.249119049 | 4.297167518 |

|                    |             |             |             |             |             |
|--------------------|-------------|-------------|-------------|-------------|-------------|
| ENSMUSG00000020812 | 1.414903703 | 0.695617244 | 3.530755239 | 1.610915344 | 0.716194586 |
| ENSMUSG00000020814 | 7.074518513 | 6.956172438 | 9.179963621 | 8.054576721 | 5.729556691 |
| ENSMUSG00000020817 | 109.6550369 | 152.3401764 | 132.756397  | 127.2623122 | 115.3073284 |
| ENSMUSG00000020818 | 64.37811846 | 106.4294383 | 89.68118307 | 350.3740874 | 247.8033269 |
| ENSMUSG00000020821 | 37.49494812 | 53.56252777 | 48.01827125 | 32.21830688 | 37.24211849 |
| ENSMUSG00000020823 | 36.78749627 | 59.12746572 | 56.49208382 | 30.60739154 | 39.39070225 |
| ENSMUSG00000020827 | 24.76081479 | 48.69320706 | 26.12758877 | 37.85651059 | 48.70123187 |
| ENSMUSG00000020828 | 5.65961481  | 8.347406925 | 7.061510478 | 4.02728836  | 6.445751277 |
| ENSMUSG00000020831 | 4.244711108 | 6.260555194 | 3.530755239 | 5.638203705 | 10.02672421 |
| ENSMUSG00000020832 | 20.51610369 | 35.47647943 | 23.30298458 | 38.66196826 | 37.24211849 |
| ENSMUSG00000020834 | 7.781970364 | 8.347406925 | 12.71071886 | 6.443661377 | 14.32389173 |
| ENSMUSG00000020836 | 12.02668147 | 6.956172438 | 7.767661525 | 6.443661377 | 12.17530797 |
| ENSMUSG00000020838 | 4.952162959 | 6.260555194 | 4.943057334 | 5.638203705 | 5.729556691 |
| ENSMUSG00000020839 | 10.61177777 | 6.956172438 | 9.179963621 | 4.832746033 | 10.7429188  |
| ENSMUSG00000020840 | 4.244711108 | 4.869320706 | 3.530755239 | 4.832746033 | 12.17530797 |
| ENSMUSG00000020843 | 26.88317035 | 47.30197258 | 35.30755239 | 56.38203705 | 43.68786977 |
| ENSMUSG00000020847 | 10.61177777 | 10.43425866 | 19.77222934 | 11.27640741 | 8.594335036 |
| ENSMUSG00000020849 | 169.0809925 | 194.7728283 | 169.4762515 | 292.381135  | 222.0203218 |
| ENSMUSG00000020850 | 121.6817184 | 150.2533247 | 142.6425116 | 221.5008598 | 189.7915654 |
| ENSMUSG00000020857 | 31.83533331 | 47.30197258 | 46.60596915 | 140.9550926 | 94.5376854  |
| ENSMUSG00000020859 | 48.10672589 | 86.95215547 | 69.20280268 | 133.7059736 | 123.1854689 |
| ENSMUSG00000020863 | 126.6338814 | 162.774435  | 141.9363606 | 317.3503228 | 221.3041272 |
| ENSMUSG00000020864 | 33.25023701 | 63.30116918 | 48.01827125 | 59.60386773 | 55.14698315 |
| ENSMUSG00000020865 | 9.196874066 | 5.56493795  | 9.886114669 | 7.249119049 | 7.87814045  |
| ENSMUSG00000020866 | 9.904325918 | 8.347406925 | 6.35535943  | 1.610915344 | 5.013362104 |
| ENSMUSG00000020867 | 9.196874066 | 5.56493795  | 6.35535943  | 4.832746033 | 5.013362104 |
| ENSMUSG00000020868 | 25.46826665 | 36.17209668 | 38.13215658 | 21.74735715 | 30.79636721 |
| ENSMUSG00000020870 | 7.781970364 | 6.260555194 | 2.824604191 | 12.88732275 | 11.45911338 |
| ENSMUSG00000020873 | 29.71297775 | 43.12826911 | 40.25060972 | 115.1804471 | 75.20043157 |
| ENSMUSG00000020876 | 19.80865184 | 41.73703463 | 35.30755239 | 61.21478308 | 55.86317773 |
| ENSMUSG00000020877 | 12.02668147 | 21.56413456 | 17.65377619 | 12.08186508 | 18.62105924 |
| ENSMUSG00000020882 | 10.61177777 | 12.52111039 | 16.2414741  | 19.33098413 | 8.594335036 |
| ENSMUSG00000020883 | 48.10672589 | 73.0398106  | 50.84287544 | 35.44013757 | 37.95831308 |
| ENSMUSG00000020884 | 7.074518513 | 8.347406925 | 5.649208382 | 4.832746033 | 6.445751277 |
| ENSMUSG00000020886 | 10.61177777 | 13.91234488 | 9.179963621 | 6.443661377 | 7.161945863 |
| ENSMUSG00000020887 | 7.074518513 | 6.260555194 | 8.473812573 | 3.221830688 | 10.02672421 |
| ENSMUSG00000020888 | 52.35143699 | 63.99678643 | 72.73355792 | 103.098582  | 103.1320204 |
| ENSMUSG00000020889 | 8.489422215 | 5.56493795  | 11.29841676 | 5.638203705 | 10.02672421 |
| ENSMUSG00000020890 | 4.952162959 | 8.347406925 | 9.886114669 | 7.249119049 | 5.013362104 |
| ENSMUSG00000020891 | 7.781970364 | 5.56493795  | 9.179963621 | 5.638203705 | 8.594335036 |
| ENSMUSG00000020892 | 7.781970364 | 6.956172438 | 3.530755239 | 8.860034393 | 7.87814045  |
| ENSMUSG00000020893 | 8.489422215 | 16.69481385 | 14.12302096 | 25.77464551 | 20.769643   |
| ENSMUSG00000020894 | 101.8730666 | 116.1680797 | 141.9363606 | 142.566008  | 123.1854689 |

|                    |              |             |             |             |             |
|--------------------|--------------|-------------|-------------|-------------|-------------|
| ENSMUSG00000020895 | 3.537259256  | 9.738641413 | 12.00456781 | 7.249119049 | 9.310529622 |
| ENSMUSG00000020897 | 55.88869625  | 61.9099347  | 48.01827125 | 130.4841429 | 105.9967988 |
| ENSMUSG00000020898 | 41.03220737  | 59.82308296 | 49.43057334 | 82.15668255 | 53.71459398 |
| ENSMUSG00000020899 | 28.29807405  | 35.47647943 | 43.78136496 | 141.7605503 | 90.95671247 |
| ENSMUSG00000020900 | 2.122355554  | 4.173703463 | 8.473812573 | 6.443661377 | 5.013362104 |
| ENSMUSG00000020901 | 31.12788146  | 45.91073809 | 40.25060972 | 24.16373016 | 29.36397804 |
| ENSMUSG00000020902 | 9.904325918  | 4.869320706 | 2.824604191 | 10.47094974 | 6.445751277 |
| ENSMUSG00000020903 | 43.15456293  | 73.0398106  | 55.07978173 | 44.30017197 | 46.55264811 |
| ENSMUSG00000020904 | 42.447111108 | 54.95376226 | 42.36906287 | 33.02376456 | 35.09353473 |
| ENSMUSG00000020905 | 10.61177777  | 8.347406925 | 2.824604191 | 5.638203705 | 4.297167518 |
| ENSMUSG00000020908 | 12.02668147  | 4.869320706 | 9.179963621 | 4.832746033 | 6.445751277 |
| ENSMUSG00000020910 | 45.27691848  | 76.51789682 | 70.61510478 | 176.3952302 | 121.7530797 |
| ENSMUSG00000020911 | 5.65961481   | 1.391234488 | 7.767661525 | 2.416373016 | 5.013362104 |
| ENSMUSG00000020914 | 94.79854807  | 95.99517964 | 100.2734488 | 247.2755053 | 184.0620087 |
| ENSMUSG00000020917 | 62.25576291  | 85.56092098 | 75.55816211 | 130.4841429 | 90.24051788 |
| ENSMUSG00000020918 | 29.71297775  | 31.99839321 | 40.25060972 | 46.71654498 | 40.10689684 |
| ENSMUSG00000020919 | 56.5961481   | 84.1696865  | 83.32582364 | 149.0096693 | 116.023523  |
| ENSMUSG00000020922 | 43.86201478  | 77.9091313  | 66.37819849 | 206.1971641 | 142.5227227 |
| ENSMUSG00000020923 | 27.5906222   | 39.6501829  | 35.30755239 | 202.9753334 | 170.4543116 |
| ENSMUSG00000020925 | 28.29807405  | 47.30197258 | 44.48751601 | 39.46742593 | 38.67450766 |
| ENSMUSG00000020926 | 6.367066661  | 6.956172438 | 6.35535943  | 2.416373016 | 9.310529622 |
| ENSMUSG00000020928 | 8.489422215  | 7.651789682 | 6.35535943  | 8.860034393 | 5.729556691 |
| ENSMUSG00000020929 | 48.81417774  | 78.60474855 | 75.55816211 | 112.7640741 | 80.92998826 |
| ENSMUSG00000020932 | 4.244711108  | 4.173703463 | 7.061510478 | 6.443661377 | 7.87814045  |
| ENSMUSG00000020937 | 17.68629628  | 16.69481385 | 18.35992724 | 20.1364418  | 18.62105924 |
| ENSMUSG00000020940 | 16.27139258  | 7.651789682 | 7.061510478 | 8.054576721 | 4.297167518 |
| ENSMUSG00000020945 | 10.61177777  | 11.1298759  | 3.530755239 | 8.054576721 | 12.17530797 |
| ENSMUSG00000020946 | 38.20239997  | 77.9091313  | 56.49208382 | 82.15668255 | 88.80812871 |
| ENSMUSG00000020950 | 4.244711108  | 5.56493795  | 2.118453143 | 3.221830688 | 3.580972932 |
| ENSMUSG00000020952 | 37.49494812  | 79.30036579 | 66.37819849 | 100.682209  | 83.07857202 |
| ENSMUSG00000020953 | 7.074518513  | 4.869320706 | 10.59226572 | 4.832746033 | 7.87814045  |
| ENSMUSG00000020954 | 53.05888884  | 103.6469693 | 95.33039145 | 194.9207566 | 149.6846685 |
| ENSMUSG00000020956 | 9.904325918  | 13.21672763 | 9.886114669 | 15.30369577 | 14.32389173 |
| ENSMUSG00000020961 | 9.196874066  | 4.173703463 | 5.649208382 | 5.638203705 | 9.310529622 |
| ENSMUSG00000020962 | 17.68629628  | 22.2597518  | 21.18453143 | 70.07481747 | 63.0251236  |
| ENSMUSG00000020963 | 12.02668147  | 10.43425866 | 9.886114669 | 7.249119049 | 4.297167518 |
| ENSMUSG00000020964 | 60.13340736  | 100.8645003 | 74.14586002 | 98.265836   | 79.49759908 |
| ENSMUSG00000020978 | 19.80865184  | 41.73703463 | 39.54445867 | 113.5695318 | 93.10529622 |
| ENSMUSG00000020986 | 35.37259256  | 63.30116918 | 45.8998181  | 46.71654498 | 42.25548059 |
| ENSMUSG00000021000 | 20.51610369  | 36.86771392 | 19.06607829 | 27.38556085 | 37.24211849 |
| ENSMUSG00000021003 | 2.122355554  | 6.260555194 | 8.473812573 | 5.638203705 | 11.45911338 |
| ENSMUSG00000021007 | 5.65961481   | 1.391234488 | 5.649208382 | 11.27640741 | 11.45911338 |
| ENSMUSG00000021009 | 7.781970364  | 7.651789682 | 12.71071886 | 5.638203705 | 9.310529622 |

|                    |              |             |             |             |             |
|--------------------|--------------|-------------|-------------|-------------|-------------|
| ENSMUSG00000021012 | 50.22908144  | 80.69160028 | 67.79050059 | 110.3477011 | 82.36237743 |
| ENSMUSG00000021013 | 7.781970364  | 13.21672763 | 2.824604191 | 3.221830688 | 7.87814045  |
| ENSMUSG00000021023 | 42.447111108 | 61.9099347  | 51.54902649 | 60.40932541 | 58.72795608 |
| ENSMUSG00000021024 | 9.196874066  | 13.91234488 | 6.35535943  | 11.27640741 | 11.45911338 |
| ENSMUSG00000021027 | 0            | 0           | 0           | 0           | 0           |
| ENSMUSG00000021032 | 8.489422215  | 3.478086219 | 5.649208382 | 6.443661377 | 5.729556691 |
| ENSMUSG00000021033 | 15.56394073  | 29.91154148 | 34.60140134 | 38.66196826 | 33.66114556 |
| ENSMUSG00000021036 | 43.15456293  | 79.99598303 | 65.67204744 | 55.57657937 | 74.48423698 |
| ENSMUSG00000021038 | 59.42595551  | 110.6031418 | 91.79963621 | 192.5043836 | 131.0636093 |
| ENSMUSG00000021040 | 102.5805184  | 170.4262247 | 151.8224753 | 339.9031376 | 262.1272186 |
| ENSMUSG00000021044 | 13.44158517  | 31.30277597 | 25.42143772 | 21.74735715 | 13.60769714 |
| ENSMUSG00000021051 | 72.16008883  | 97.38641413 | 94.6242404  | 116.7913625 | 87.37573953 |
| ENSMUSG00000021055 | 4.952162959  | 2.782468975 | 5.649208382 | 4.832746033 | 3.580972932 |
| ENSMUSG00000021057 | 9.904325918  | 10.43425866 | 12.71071886 | 5.638203705 | 10.7429188  |
| ENSMUSG00000021061 | 2.829807405  | 8.347406925 | 5.649208382 | 4.02728836  | 7.87814045  |
| ENSMUSG00000021062 | 6.367066661  | 8.347406925 | 7.061510478 | 6.443661377 | 4.297167518 |
| ENSMUSG00000021065 | 7.781970364  | 11.1298759  | 17.65377619 | 16.10915344 | 24.35061594 |
| ENSMUSG00000021068 | 32.54278516  | 51.47567604 | 40.25060972 | 67.65844446 | 47.98503729 |
| ENSMUSG00000021069 | 7.074518513  | 11.1298759  | 8.473812573 | 14.4982381  | 12.17530797 |
| ENSMUSG00000021071 | 7.781970364  | 6.956172438 | 4.236906287 | 6.443661377 | 4.297167518 |
| ENSMUSG00000021072 | 87.01657771  | 122.4286349 | 119.3395271 | 126.4568545 | 91.67290705 |
| ENSMUSG00000021079 | 51.64398514  | 98.08203137 | 80.50121945 | 170.7570265 | 124.617858  |
| ENSMUSG00000021081 | 10.61177777  | 6.956172438 | 9.886114669 | 6.443661377 | 7.161945863 |
| ENSMUSG00000021087 | 8.489422215  | 6.956172438 | 7.767661525 | 2.416373016 | 8.594335036 |
| ENSMUSG00000021090 | 10.61177777  | 9.738641413 | 9.886114669 | 5.638203705 | 5.013362104 |
| ENSMUSG00000021094 | 14.14903703  | 25.73783802 | 26.12758877 | 16.91461111 | 14.32389173 |
| ENSMUSG00000021096 | 61.54831106  | 77.9091313  | 65.67204744 | 97.46037832 | 88.80812871 |
| ENSMUSG00000021097 | 9.196874066  | 6.260555194 | 5.649208382 | 4.832746033 | 5.013362104 |
| ENSMUSG00000021098 | 12.02668147  | 11.1298759  | 4.943057334 | 3.221830688 | 6.445751277 |
| ENSMUSG00000021103 | 33.95768886  | 54.95376226 | 38.83830763 | 53.16020636 | 52.2822048  |
| ENSMUSG00000021108 | 11.31922962  | 4.173703463 | 4.943057334 | 11.27640741 | 7.87814045  |
| ENSMUSG00000021109 | 9.904325918  | 7.651789682 | 7.767661525 | 5.638203705 | 6.445751277 |
| ENSMUSG00000021111 | 124.5115258  | 114.081228  | 97.44884459 | 204.5862487 | 153.2656415 |
| ENSMUSG00000021115 | 53.05888884  | 95.99517964 | 74.85201106 | 114.3749894 | 94.5376854  |
| ENSMUSG00000021116 | 106.1177777  | 165.556904  | 133.462548  | 269.0228625 | 217.0069597 |
| ENSMUSG00000021120 | 38.90985182  | 48.69320706 | 39.54445867 | 34.6346799  | 40.82309142 |
| ENSMUSG00000021123 | 20.51610369  | 25.73783802 | 22.59683353 | 16.10915344 | 17.90486466 |
| ENSMUSG00000021124 | 53.7663407   | 100.1688831 | 67.08434954 | 90.21125927 | 83.07857202 |
| ENSMUSG00000021131 | 71.45263698  | 125.9067211 | 117.927225  | 236.8045556 | 176.1838682 |
| ENSMUSG00000021134 | 72.16008883  | 109.9075245 | 103.098053  | 191.698926  | 163.2923657 |
| ENSMUSG00000021136 | 7.781970364  | 4.869320706 | 6.35535943  | 4.02728836  | 6.445751277 |
| ENSMUSG00000021139 | 0            | 0           | 0           | 0           | 0           |
| ENSMUSG00000021143 | 24.05336294  | 27.12907251 | 39.54445867 | 16.91461111 | 27.93158887 |

|                    |             |             |             |             |             |
|--------------------|-------------|-------------|-------------|-------------|-------------|
| ENSMUSG00000021144 | 30.4204296  | 36.86771392 | 24.71528667 | 88.60034393 | 62.30892901 |
| ENSMUSG00000021147 | 21.22355554 | 40.34580014 | 28.95219296 | 63.6311561  | 43.68786977 |
| ENSMUSG00000021148 | 4.244711108 | 4.869320706 | 2.118453143 | 5.638203705 | 2.148583759 |
| ENSMUSG00000021156 | 62.96321476 | 75.12666233 | 70.61510478 | 79.74030954 | 62.30892901 |
| ENSMUSG00000021175 | 11.31922962 | 22.2597518  | 18.35992724 | 24.16373016 | 23.63442135 |
| ENSMUSG00000021177 | 27.5906222  | 38.25894841 | 31.0706461  | 49.93837567 | 42.25548059 |
| ENSMUSG00000021182 | 74.28244438 | 89.73462445 | 79.08891735 | 147.398754  | 120.3206905 |
| ENSMUSG00000021185 | 4.244711108 | 15.30357936 | 13.41686991 | 10.47094974 | 14.32389173 |
| ENSMUSG00000021187 | 9.196874066 | 6.956172438 | 4.943057334 | 4.02728836  | 5.729556691 |
| ENSMUSG00000021188 | 45.98437033 | 75.12666233 | 63.5535943  | 73.29664816 | 76.63282074 |
| ENSMUSG00000021189 | 74.28244438 | 90.43024169 | 85.44427678 | 71.68573282 | 65.17370736 |
| ENSMUSG00000021190 | 123.804074  | 146.0796212 | 144.7609648 | 115.9859048 | 100.9834367 |
| ENSMUSG00000021192 | 24.76081479 | 34.08524495 | 21.18453143 | 33.82922223 | 39.39070225 |
| ENSMUSG00000021193 | 20.51610369 | 27.12907251 | 19.77222934 | 53.96566403 | 41.53928601 |
| ENSMUSG00000021196 | 21.22355554 | 31.99839321 | 31.77679715 | 62.02024075 | 65.88990194 |
| ENSMUSG00000021198 | 7.781970364 | 7.651789682 | 7.061510478 | 9.665492065 | 10.02672421 |
| ENSMUSG00000021200 | 12.02668147 | 7.651789682 | 9.179963621 | 11.27640741 | 9.310529622 |
| ENSMUSG00000021203 | 104.702874  | 91.82147618 | 93.21193831 | 48.32746033 | 44.40406435 |
| ENSMUSG00000021209 | 4.244711108 | 7.651789682 | 8.473812573 | 5.638203705 | 5.013362104 |
| ENSMUSG00000021210 | 3.537259256 | 10.43425866 | 12.00456781 | 5.638203705 | 4.297167518 |
| ENSMUSG00000021213 | 12.02668147 | 4.869320706 | 13.41686991 | 0           | 3.580972932 |
| ENSMUSG00000021214 | 12.02668147 | 6.956172438 | 2.118453143 | 6.443661377 | 4.297167518 |
| ENSMUSG00000021215 | 30.4204296  | 30.60715873 | 38.83830763 | 47.52200265 | 51.56601022 |
| ENSMUSG00000021218 | 129.4636888 | 146.0796212 | 126.4010376 | 253.7191667 | 211.277403  |
| ENSMUSG00000021219 | 10.61177777 | 6.260555194 | 2.118453143 | 2.416373016 | 5.013362104 |
| ENSMUSG00000021221 | 7.781970364 | 10.43425866 | 4.943057334 | 4.02728836  | 5.013362104 |
| ENSMUSG00000021223 | 9.196874066 | 8.347406925 | 4.943057334 | 6.443661377 | 9.310529622 |
| ENSMUSG00000021224 | 19.80865184 | 49.38882431 | 37.42600553 | 29.80193387 | 32.94495097 |
| ENSMUSG00000021228 | 7.781970364 | 4.173703463 | 10.59226572 | 4.832746033 | 5.013362104 |
| ENSMUSG00000021235 | 55.1812444  | 54.25814501 | 57.90438592 | 57.99295239 | 59.44415067 |
| ENSMUSG00000021236 | 19.10119998 | 33.3896277  | 27.53989086 | 18.52552646 | 20.05344842 |
| ENSMUSG00000021238 | 19.10119998 | 30.60715873 | 26.12758877 | 37.85651059 | 50.84981563 |
| ENSMUSG00000021239 | 8.489422215 | 4.869320706 | 7.767661525 | 5.638203705 | 8.594335036 |
| ENSMUSG00000021243 | 94.09109622 | 143.2971522 | 144.0548137 | 182.8388916 | 153.2656415 |
| ENSMUSG00000021244 | 91.26128881 | 126.6023384 | 126.4010376 | 138.5387196 | 108.1453825 |
| ENSMUSG00000021245 | 10.61177777 | 9.043024169 | 12.00456781 | 8.054576721 | 12.17530797 |
| ENSMUSG00000021250 | 5.65961481  | 8.347406925 | 8.473812573 | 8.054576721 | 9.310529622 |
| ENSMUSG00000021252 | 31.83533331 | 52.86691053 | 57.90438592 | 136.1223466 | 113.1587446 |
| ENSMUSG00000021255 | 10.61177777 | 6.956172438 | 8.473812573 | 6.443661377 | 5.729556691 |
| ENSMUSG00000021257 | 2.122355554 | 6.956172438 | 10.59226572 | 4.832746033 | 9.310529622 |
| ENSMUSG00000021258 | 90.55383696 | 159.2963488 | 120.0456781 | 222.3063175 | 176.9000628 |
| ENSMUSG00000021262 | 7.074518513 | 3.478086219 | 7.061510478 | 6.443661377 | 8.594335036 |
| ENSMUSG00000021263 | 11.31922962 | 2.086851731 | 10.59226572 | 7.249119049 | 10.02672421 |

|                    |             |             |             |             |             |
|--------------------|-------------|-------------|-------------|-------------|-------------|
| ENSMUSG00000021264 | 82.7718666  | 116.863697  | 95.33039145 | 302.8520847 | 240.641381  |
| ENSMUSG00000021266 | 39.61730367 | 47.99758982 | 41.66291182 | 95.84946298 | 79.49759908 |
| ENSMUSG00000021270 | 9.904325918 | 6.956172438 | 5.649208382 | 8.860034393 | 10.02672421 |
| ENSMUSG00000021273 | 34.66514071 | 61.21431745 | 60.02283906 | 114.3749894 | 119.6044959 |
| ENSMUSG00000021275 | 36.78749627 | 58.43184848 | 57.90438592 | 90.21125927 | 76.63282074 |
| ENSMUSG00000021276 | 36.08004441 | 59.12746572 | 55.78593277 | 99.07129367 | 83.07857202 |
| ENSMUSG00000021277 | 75.69734809 | 127.9935729 | 97.44884459 | 184.4498069 | 138.2255552 |
| ENSMUSG00000021281 | 7.781970364 | 3.478086219 | 4.236906287 | 4.832746033 | 7.161945863 |
| ENSMUSG00000021282 | 31.12788146 | 50.08444155 | 35.30755239 | 106.3204127 | 86.65954495 |
| ENSMUSG00000021285 | 19.10119998 | 51.47567604 | 40.95676077 | 36.24559524 | 48.70123187 |
| ENSMUSG00000021287 | 12.73413332 | 18.78166558 | 15.53532305 | 33.82922223 | 26.49919969 |
| ENSMUSG00000021288 | 142.1978221 | 162.774435  | 146.1732669 | 196.531672  | 158.9951982 |
| ENSMUSG00000021302 | 113.8997481 | 146.7752384 | 107.3349593 | 227.9445212 | 179.7648412 |
| ENSMUSG00000021303 | 9.196874066 | 5.56493795  | 6.35535943  | 5.638203705 | 5.729556691 |
| ENSMUSG00000021306 | 31.12788146 | 54.95376226 | 51.54902649 | 20.94189947 | 18.62105924 |
| ENSMUSG00000021313 | 9.196874066 | 10.43425866 | 4.236906287 | 9.665492065 | 16.47247549 |
| ENSMUSG00000021314 | 12.73413332 | 9.738641413 | 10.59226572 | 5.638203705 | 2.148583759 |
| ENSMUSG00000021318 | 7.781970364 | 6.260555194 | 7.767661525 | 6.443661377 | 3.580972932 |
| ENSMUSG00000021326 | 33.25023701 | 44.5195036  | 40.25060972 | 169.1461111 | 125.3340526 |
| ENSMUSG00000021327 | 36.08004441 | 60.51870021 | 55.78593277 | 42.68925662 | 54.43078856 |
| ENSMUSG00000021335 | 9.196874066 | 6.260555194 | 7.767661525 | 9.665492065 | 8.594335036 |
| ENSMUSG00000021336 | 8.489422215 | 5.56493795  | 13.41686991 | 4.832746033 | 9.310529622 |
| ENSMUSG00000021338 | 9.904325918 | 9.738641413 | 14.829172   | 13.69278043 | 10.02672421 |
| ENSMUSG00000021340 | 9.904325918 | 7.651789682 | 11.29841676 | 6.443661377 | 6.445751277 |
| ENSMUSG00000021342 | 9.196874066 | 13.91234488 | 7.061510478 | 5.638203705 | 10.02672421 |
| ENSMUSG00000021345 | 12.73413332 | 9.738641413 | 8.473812573 | 0.805457672 | 4.297167518 |
| ENSMUSG00000021346 | 9.904325918 | 6.956172438 | 7.061510478 | 5.638203705 | 5.013362104 |
| ENSMUSG00000021357 | 32.54278516 | 50.08444155 | 40.25060972 | 34.6346799  | 34.37734014 |
| ENSMUSG00000021359 | 4.952162959 | 9.043024169 | 4.236906287 | 3.221830688 | 7.87814045  |
| ENSMUSG00000021360 | 5.65961481  | 5.56493795  | 7.767661525 | 4.832746033 | 7.87814045  |
| ENSMUSG00000021363 | 7.781970364 | 6.956172438 | 9.179963621 | 4.832746033 | 5.013362104 |
| ENSMUSG00000021364 | 9.904325918 | 6.956172438 | 3.530755239 | 4.832746033 | 7.161945863 |
| ENSMUSG00000021365 | 182.5225776 | 200.3377662 | 189.2484808 | 196.531672  | 179.7648412 |
| ENSMUSG00000021368 | 10.61177777 | 13.91234488 | 10.59226572 | 4.02728836  | 12.17530797 |
| ENSMUSG00000021373 | 7.781970364 | 5.56493795  | 8.473812573 | 4.832746033 | 5.013362104 |
| ENSMUSG00000021374 | 60.13340736 | 86.95215547 | 76.97046421 | 215.8626561 | 171.1705061 |
| ENSMUSG00000021375 | 5.65961481  | 6.956172438 | 6.35535943  | 6.443661377 | 5.729556691 |
| ENSMUSG00000021376 | 42.44711108 | 51.47567604 | 59.31668801 | 33.02376456 | 25.06681052 |
| ENSMUSG00000021377 | 49.52162959 | 65.38802092 | 67.79050059 | 189.2825529 | 121.7530797 |
| ENSMUSG00000021384 | 118.1444592 | 124.5154866 | 136.9933033 | 59.60386773 | 58.01176149 |
| ENSMUSG00000021385 | 46.69182218 | 66.08363816 | 72.02740687 | 87.79488626 | 82.36237743 |
| ENSMUSG00000021388 | 9.904325918 | 7.651789682 | 9.179963621 | 2.416373016 | 12.17530797 |
| ENSMUSG00000021391 | 26.1757185  | 50.08444155 | 40.95676077 | 67.65844446 | 50.13362104 |

|                    |             |             |             |             |             |
|--------------------|-------------|-------------|-------------|-------------|-------------|
| ENSMUSG00000021395 | 81.3569629  | 134.9497453 | 90.38733411 | 97.46037832 | 97.40246374 |
| ENSMUSG00000021404 | 8.489422215 | 9.043024169 | 9.179963621 | 5.638203705 | 7.161945863 |
| ENSMUSG00000021408 | 48.81417774 | 84.86530374 | 61.43514116 | 70.07481747 | 84.51096119 |
| ENSMUSG00000021411 | 137.2456591 | 133.5585108 | 119.3395271 | 71.68573282 | 63.0251236  |
| ENSMUSG00000021415 | 10.61177777 | 7.651789682 | 7.767661525 | 3.221830688 | 6.445751277 |
| ENSMUSG00000021416 | 8.489422215 | 4.173703463 | 9.886114669 | 4.02728836  | 10.02672421 |
| ENSMUSG00000021417 | 7.074518513 | 10.43425866 | 6.35535943  | 5.638203705 | 6.445751277 |
| ENSMUSG00000021418 | 9.904325918 | 9.043024169 | 8.473812573 | 14.4982381  | 10.02672421 |
| ENSMUSG00000021420 | 33.25023701 | 54.25814501 | 48.7244223  | 36.24559524 | 46.55264811 |
| ENSMUSG00000021427 | 69.33028142 | 123.1242521 | 97.44884459 | 166.7297381 | 169.738117  |
| ENSMUSG00000021431 | 106.1177777 | 139.819066  | 120.0456781 | 145.7878386 | 126.0502472 |
| ENSMUSG00000021432 | 89.13893326 | 125.9067211 | 117.927225  | 115.1804471 | 103.848215  |
| ENSMUSG00000021451 | 78.52715549 | 105.7338211 | 97.44884459 | 153.8424154 | 116.023523  |
| ENSMUSG00000021457 | 66.50047402 | 88.34338996 | 72.73355792 | 62.02024075 | 47.98503729 |
| ENSMUSG00000021458 | 9.904325918 | 15.30357936 | 10.59226572 | 8.054576721 | 10.02672421 |
| ENSMUSG00000021460 | 69.33028142 | 101.5601176 | 80.50121945 | 228.7499789 | 186.926787  |
| ENSMUSG00000021461 | 4.952162959 | 5.56493795  | 2.824604191 | 5.638203705 | 9.310529622 |
| ENSMUSG00000021464 | 7.781970364 | 4.869320706 | 4.236906287 | 4.832746033 | 8.594335036 |
| ENSMUSG00000021470 | 16.27139258 | 36.86771392 | 23.30298458 | 127.2623122 | 111.7263555 |
| ENSMUSG00000021481 | 74.98989623 | 97.38641413 | 106.6288082 | 107.1258704 | 99.5510475  |
| ENSMUSG00000021482 | 13.44158517 | 22.95536904 | 18.35992724 | 16.91461111 | 12.89150255 |
| ENSMUSG00000021485 | 18.39374813 | 20.86851731 | 23.30298458 | 16.91461111 | 18.62105924 |
| ENSMUSG00000021490 | 6.367066661 | 4.173703463 | 10.59226572 | 9.665492065 | 9.310529622 |
| ENSMUSG00000021492 | 11.31922962 | 13.91234488 | 23.30298458 | 8.054576721 | 13.60769714 |
| ENSMUSG00000021493 | 21.93100739 | 45.91073809 | 45.19366706 | 25.77464551 | 26.49919969 |
| ENSMUSG00000021496 | 7.074518513 | 19.47728283 | 16.2414741  | 17.72006879 | 26.49919969 |
| ENSMUSG00000021497 | 22.63845924 | 38.25894841 | 40.25060972 | 35.44013757 | 30.08017263 |
| ENSMUSG00000021499 | 10.61177777 | 11.82549314 | 4.236906287 | 4.832746033 | 8.594335036 |
| ENSMUSG00000021500 | 110.3624888 | 180.1648661 | 144.7609648 | 193.3098413 | 169.738117  |
| ENSMUSG00000021504 | 25.46826665 | 35.47647943 | 29.65834401 | 40.2728836  | 31.5125618  |
| ENSMUSG00000021508 | 10.61177777 | 4.869320706 | 4.236906287 | 6.443661377 | 5.013362104 |
| ENSMUSG00000021510 | 85.601674   | 120.3417832 | 96.0365425  | 79.74030954 | 73.76804239 |
| ENSMUSG00000021514 | 38.90985182 | 62.60555194 | 56.49208382 | 60.40932541 | 66.60609653 |
| ENSMUSG00000021519 | 74.98989623 | 121.7330177 | 98.15499564 | 118.4022778 | 96.68626916 |
| ENSMUSG00000021532 | 34.66514071 | 48.69320706 | 52.96132858 | 124.0404815 | 100.9834367 |
| ENSMUSG00000021540 | 0           | 0           | 0           | 0           | 0           |
| ENSMUSG00000021541 | 13.44158517 | 3.478086219 | 7.061510478 | 4.832746033 | 5.013362104 |
| ENSMUSG00000021546 | 135.1233036 | 186.4254213 | 156.0593816 | 247.2755053 | 215.5745705 |
| ENSMUSG00000021548 | 21.22355554 | 37.56333116 | 28.24604191 | 31.41284921 | 43.68786977 |
| ENSMUSG00000021549 | 47.39927403 | 80.69160028 | 68.49665163 | 116.7913625 | 80.92998826 |
| ENSMUSG00000021553 | 7.074518513 | 9.738641413 | 5.649208382 | 4.02728836  | 2.864778345 |
| ENSMUSG00000021555 | 26.88317035 | 23.65098629 | 38.13215658 | 32.21830688 | 34.37734014 |
| ENSMUSG00000021556 | 12.73413332 | 19.47728283 | 27.53989086 | 9.665492065 | 20.769643   |

|                    |             |             |             |             |             |
|--------------------|-------------|-------------|-------------|-------------|-------------|
| ENSMUSG00000021557 | 23.34591109 | 47.99758982 | 33.18909925 | 41.07834128 | 36.5259239  |
| ENSMUSG00000021559 | 10.61177777 | 6.260555194 | 6.35535943  | 6.443661377 | 5.013362104 |
| ENSMUSG00000021565 | 5.65961481  | 3.478086219 | 7.767661525 | 5.638203705 | 10.7429188  |
| ENSMUSG00000021567 | 6.367066661 | 6.260555194 | 5.649208382 | 3.221830688 | 2.148583759 |
| ENSMUSG00000021569 | 15.56394073 | 34.08524495 | 22.59683353 | 68.46390213 | 54.43078856 |
| ENSMUSG00000021573 | 10.61177777 | 6.260555194 | 7.061510478 | 7.249119049 | 5.729556691 |
| ENSMUSG00000021575 | 9.904325918 | 4.173703463 | 3.530755239 | 13.69278043 | 17.18867007 |
| ENSMUSG00000021577 | 134.4158517 | 226.7712215 | 189.9546318 | 211.8353678 | 182.6296195 |
| ENSMUSG00000021578 | 128.0487851 | 198.2509145 | 146.1732669 | 226.3336059 | 187.6429816 |
| ENSMUSG00000021589 | 9.196874066 | 8.347406925 | 7.767661525 | 4.02728836  | 5.729556691 |
| ENSMUSG00000021592 | 26.1757185  | 46.60635533 | 37.42600553 | 62.82569842 | 46.55264811 |
| ENSMUSG00000021594 | 22.63845924 | 35.47647943 | 28.24604191 | 74.9075635  | 54.43078856 |
| ENSMUSG00000021595 | 48.10672589 | 50.7800588  | 48.7244223  | 128.0677699 | 103.848215  |
| ENSMUSG00000021596 | 6.367066661 | 4.869320706 | 7.061510478 | 5.638203705 | 5.729556691 |
| ENSMUSG00000021597 | 31.83533331 | 63.99678643 | 44.48751601 | 46.71654498 | 73.05184781 |
| ENSMUSG00000021604 | 9.196874066 | 4.869320706 | 2.824604191 | 4.832746033 | 7.161945863 |
| ENSMUSG00000021608 | 98.33580733 | 145.3840039 | 124.9887355 | 218.2790291 | 165.4409494 |
| ENSMUSG00000021612 | 10.61177777 | 7.651789682 | 5.649208382 | 4.02728836  | 5.013362104 |
| ENSMUSG00000021614 | 7.781970364 | 7.651789682 | 6.35535943  | 11.27640741 | 7.161945863 |
| ENSMUSG00000021615 | 91.26128881 | 121.0374004 | 115.1026208 | 130.4841429 | 129.6312201 |
| ENSMUSG00000021621 | 45.98437033 | 68.86610713 | 58.61053696 | 85.37851324 | 86.65954495 |
| ENSMUSG00000021629 | 71.45263698 | 102.2557348 | 81.20737049 | 222.3063175 | 163.2923657 |
| ENSMUSG00000021635 | 147.8574369 | 194.077211  | 158.8839857 | 248.8864207 | 235.6280189 |
| ENSMUSG00000021636 | 20.51610369 | 43.82388636 | 42.36906287 | 14.4982381  | 32.22875639 |
| ENSMUSG00000021638 | 7.074518513 | 6.260555194 | 6.35535943  | 3.221830688 | 5.013362104 |
| ENSMUSG00000021639 | 44.56946663 | 46.60635533 | 51.54902649 | 74.9075635  | 68.75468029 |
| ENSMUSG00000021643 | 7.074518513 | 6.956172438 | 4.943057334 | 8.054576721 | 12.17530797 |
| ENSMUSG00000021645 | 31.83533331 | 44.5195036  | 47.3121202  | 90.21125927 | 71.61945863 |
| ENSMUSG00000021660 | 113.1922962 | 150.9489419 | 130.6379438 | 281.9101852 | 212.7097921 |
| ENSMUSG00000021661 | 56.5961481  | 88.34338996 | 98.15499564 | 162.7024498 | 138.2255552 |
| ENSMUSG00000021662 | 4.952162959 | 6.260555194 | 5.649208382 | 6.443661377 | 5.729556691 |
| ENSMUSG00000021666 | 60.13340736 | 102.2557348 | 79.7950684  | 146.5932963 | 118.8883013 |
| ENSMUSG00000021668 | 70.03773327 | 114.7768452 | 110.1595635 | 144.982381  | 118.1721067 |
| ENSMUSG00000021669 | 62.96321476 | 103.6469693 | 84.73812573 | 136.9278043 | 105.2806042 |
| ENSMUSG00000021670 | 77.81970364 | 107.8206728 | 91.09348516 | 268.2174048 | 184.7782033 |
| ENSMUSG00000021684 | 9.904325918 | 8.347406925 | 8.473812573 | 4.832746033 | 7.87814045  |
| ENSMUSG00000021685 | 8.489422215 | 8.347406925 | 4.236906287 | 6.443661377 | 6.445751277 |
| ENSMUSG00000021687 | 4.244711108 | 6.956172438 | 8.473812573 | 6.443661377 | 5.013362104 |
| ENSMUSG00000021690 | 21.22355554 | 33.3896277  | 29.65834401 | 28.9964762  | 26.49919969 |
| ENSMUSG00000021693 | 44.56946663 | 69.56172438 | 57.19823487 | 84.57305557 | 83.7947666  |
| ENSMUSG00000021694 | 18.39374813 | 45.91073809 | 32.4829482  | 74.10210583 | 57.29556691 |
| ENSMUSG00000021697 | 16.27139258 | 15.30357936 | 15.53532305 | 12.08186508 | 15.7562809  |
| ENSMUSG00000021699 | 7.074518513 | 9.738641413 | 8.473812573 | 4.02728836  | 9.310529622 |



|                    |             |             |             |             |             |
|--------------------|-------------|-------------|-------------|-------------|-------------|
| ENSMUSG00000021700 | 10.61177777 | 6.260555194 | 9.179963621 | 4.832746033 | 5.729556691 |
| ENSMUSG00000021706 | 15.56394073 | 32.69401046 | 16.94762515 | 24.96918783 | 27.93158887 |
| ENSMUSG00000021708 | 10.61177777 | 8.347406925 | 7.061510478 | 3.221830688 | 6.445751277 |
| ENSMUSG00000021709 | 42.44711108 | 80.69160028 | 67.79050059 | 113.5695318 | 79.49759908 |
| ENSMUSG00000021710 | 9.196874066 | 20.86851731 | 16.94762515 | 15.30369577 | 20.05344842 |
| ENSMUSG00000021711 | 89.84638511 | 132.8628936 | 120.0456781 | 162.7024498 | 145.387501  |
| ENSMUSG00000021712 | 89.84638511 | 132.8628936 | 124.2825844 | 124.8459392 | 118.8883013 |
| ENSMUSG00000021714 | 43.86201478 | 73.0398106  | 50.84287544 | 127.2623122 | 91.67290705 |
| ENSMUSG00000021715 | 33.25023701 | 44.5195036  | 43.78136496 | 52.35474869 | 48.70123187 |
| ENSMUSG00000021716 | 29.71297775 | 50.08444155 | 39.54445867 | 53.16020636 | 67.32229112 |
| ENSMUSG00000021731 | 26.1757185  | 56.34499675 | 48.01827125 | 90.21125927 | 82.36237743 |
| ENSMUSG00000021732 | 7.781970364 | 6.260555194 | 7.061510478 | 4.832746033 | 7.87814045  |
| ENSMUSG00000021733 | 82.7718666  | 95.2995624  | 100.9795998 | 144.982381  | 116.023523  |
| ENSMUSG00000021745 | 4.952162959 | 2.782468975 | 7.767661525 | 4.02728836  | 7.161945863 |
| ENSMUSG00000021747 | 8.489422215 | 4.869320706 | 6.35535943  | 2.416373016 | 8.594335036 |
| ENSMUSG00000021750 | 12.02668147 | 6.260555194 | 7.767661525 | 5.638203705 | 6.445751277 |
| ENSMUSG00000021751 | 10.61177777 | 9.043024169 | 5.649208382 | 2.416373016 | 3.580972932 |
| ENSMUSG00000021752 | 7.074518513 | 22.95536904 | 18.35992724 | 17.72006879 | 22.91822676 |
| ENSMUSG00000021754 | 90.55383696 | 126.6023384 | 115.8087718 | 190.0880106 | 153.2656415 |
| ENSMUSG00000021756 | 20.51610369 | 27.12907251 | 26.83373982 | 43.49471429 | 28.64778345 |
| ENSMUSG00000021758 | 9.904325918 | 6.260555194 | 9.179963621 | 9.665492065 | 3.580972932 |
| ENSMUSG00000021759 | 7.781970364 | 7.651789682 | 6.35535943  | 42.68925662 | 28.64778345 |
| ENSMUSG00000021763 | 10.61177777 | 5.56493795  | 7.767661525 | 4.02728836  | 7.87814045  |
| ENSMUSG00000021767 | 8.489422215 | 6.956172438 | 11.29841676 | 8.860034393 | 10.7429188  |
| ENSMUSG00000021768 | 14.85648888 | 23.65098629 | 21.89068248 | 10.47094974 | 15.7562809  |
| ENSMUSG00000021770 | 41.73965922 | 66.7792554  | 69.20280268 | 82.15668255 | 65.88990194 |
| ENSMUSG00000021771 | 50.93653329 | 82.08283477 | 65.67204744 | 169.9515688 | 134.6445822 |
| ENSMUSG00000021772 | 33.25023701 | 60.51870021 | 60.72899011 | 160.2860767 | 133.9283876 |
| ENSMUSG00000021773 | 10.61177777 | 4.869320706 | 14.829172   | 21.74735715 | 22.91822676 |
| ENSMUSG00000021774 | 30.4204296  | 34.78086219 | 43.78136496 | 26.58010318 | 42.25548059 |
| ENSMUSG00000021775 | 19.10119998 | 27.12907251 | 24.00913562 | 13.69278043 | 20.05344842 |
| ENSMUSG00000021779 | 7.781970364 | 9.043024169 | 8.473812573 | 4.02728836  | 7.161945863 |
| ENSMUSG00000021782 | 3.537259256 | 2.782468975 | 4.943057334 | 4.832746033 | 5.729556691 |
| ENSMUSG00000021786 | 47.39927403 | 96.69079689 | 84.73812573 | 62.02024075 | 58.01176149 |
| ENSMUSG00000021789 | 12.02668147 | 13.91234488 | 9.886114669 | 12.08186508 | 6.445751277 |
| ENSMUSG00000021790 | 16.97884443 | 10.43425866 | 11.29841676 | 6.443661377 | 10.02672421 |
| ENSMUSG00000021792 | 17.68629628 | 29.91154148 | 28.24604191 | 19.33098413 | 21.48583759 |
| ENSMUSG00000021794 | 62.25576291 | 96.69079689 | 81.91352154 | 111.1531587 | 95.97007457 |
| ENSMUSG00000021795 | 12.73413332 | 6.956172438 | 10.59226572 | 9.665492065 | 10.02672421 |
| ENSMUSG00000021796 | 4.244711108 | 9.738641413 | 4.236906287 | 4.02728836  | 7.161945863 |
| ENSMUSG00000021798 | 11.31922962 | 4.869320706 | 6.35535943  | 5.638203705 | 5.013362104 |
| ENSMUSG00000021803 | 13.44158517 | 10.43425866 | 7.767661525 | 4.832746033 | 5.729556691 |
| ENSMUSG00000021809 | 20.51610369 | 29.91154148 | 33.89525029 | 22.55281482 | 20.05344842 |

|                    |             |             |             |             |             |
|--------------------|-------------|-------------|-------------|-------------|-------------|
| ENSMUSG00000021814 | 28.29807405 | 41.73703463 | 50.13672439 | 50.74383334 | 40.10689684 |
| ENSMUSG00000021816 | 71.45263698 | 95.99517964 | 87.56272992 | 168.3406535 | 119.6044959 |
| ENSMUSG00000021819 | 45.27691848 | 82.77845201 | 65.67204744 | 66.85298678 | 65.17370736 |
| ENSMUSG00000021820 | 17.68629628 | 26.43345526 | 24.00913562 | 23.35827249 | 27.21539428 |
| ENSMUSG00000021823 | 10.61177777 | 20.86851731 | 26.83373982 | 13.69278043 | 12.17530797 |
| ENSMUSG00000021824 | 29.0055259  | 50.08444155 | 40.95676077 | 96.65492065 | 76.63282074 |
| ENSMUSG00000021830 | 25.46826665 | 34.08524495 | 36.71985448 | 46.71654498 | 27.93158887 |
| ENSMUSG00000021835 | 10.61177777 | 3.478086219 | 8.473812573 | 6.443661377 | 13.60769714 |
| ENSMUSG00000021838 | 6.367066661 | 4.173703463 | 4.943057334 | 4.02728836  | 8.594335036 |
| ENSMUSG00000021840 | 135.1233036 | 192.6859765 | 163.8270431 | 240.831844  | 206.2640409 |
| ENSMUSG00000021843 | 50.93653329 | 77.21351406 | 79.7950684  | 71.68573282 | 72.33565322 |
| ENSMUSG00000021848 | 15.56394073 | 4.173703463 | 10.59226572 | 6.443661377 | 4.297167518 |
| ENSMUSG00000021850 | 6.367066661 | 6.956172438 | 2.118453143 | 4.02728836  | 3.580972932 |
| ENSMUSG00000021852 | 8.489422215 | 6.956172438 | 6.35535943  | 3.221830688 | 6.445751277 |
| ENSMUSG00000021866 | 43.15456293 | 77.21351406 | 62.1412922  | 46.71654498 | 63.74131818 |
| ENSMUSG00000021867 | 9.904325918 | 10.43425866 | 12.71071886 | 12.08186508 | 7.161945863 |
| ENSMUSG00000021870 | 80.64951104 | 83.47406925 | 86.15042783 | 112.7640741 | 98.83485292 |
| ENSMUSG00000021871 | 35.37259256 | 58.43184848 | 55.07978173 | 69.2693598  | 62.30892901 |
| ENSMUSG00000021876 | 0           | 0           | 0           | 0           | 0           |
| ENSMUSG00000021877 | 95.50599992 | 120.3417832 | 102.3919019 | 201.364418  | 141.8065281 |
| ENSMUSG00000021879 | 12.73413332 | 4.869320706 | 8.473812573 | 4.02728836  | 7.161945863 |
| ENSMUSG00000021884 | 31.12788146 | 64.69240367 | 50.13672439 | 41.07834128 | 39.39070225 |
| ENSMUSG00000021892 | 157.054311  | 171.8174592 | 158.8839857 | 266.6064895 | 237.0604081 |
| ENSMUSG00000021893 | 43.86201478 | 73.0398106  | 52.25517753 | 109.5422434 | 83.7947666  |
| ENSMUSG00000021895 | 21.93100739 | 45.21512085 | 38.83830763 | 17.72006879 | 24.35061594 |
| ENSMUSG00000021898 | 10.61177777 | 3.478086219 | 7.767661525 | 8.860034393 | 5.729556691 |
| ENSMUSG00000021900 | 31.83533331 | 52.17129328 | 52.25517753 | 33.02376456 | 45.12025894 |
| ENSMUSG00000021901 | 45.27691848 | 78.60474855 | 65.67204744 | 132.0950582 | 108.1453825 |
| ENSMUSG00000021903 | 3.537259256 | 4.869320706 | 9.886114669 | 11.27640741 | 7.161945863 |
| ENSMUSG00000021905 | 22.63845924 | 47.99758982 | 42.36906287 | 73.29664816 | 54.43078856 |
| ENSMUSG00000021906 | 27.5906222  | 43.82388636 | 36.01370344 | 74.10210583 | 55.14698315 |
| ENSMUSG00000021907 | 10.61177777 | 3.478086219 | 4.943057334 | 4.832746033 | 3.580972932 |
| ENSMUSG00000021908 | 12.73413332 | 15.30357936 | 8.473812573 | 12.88732275 | 10.02672421 |
| ENSMUSG00000021910 | 47.39927403 | 65.38802092 | 68.49665163 | 136.9278043 | 105.2806042 |
| ENSMUSG00000021911 | 122.3891703 | 193.3815938 | 175.1254598 | 290.7702196 | 246.3709377 |
| ENSMUSG00000021916 | 42.44711108 | 60.51870021 | 58.61053696 | 59.60386773 | 58.01176149 |
| ENSMUSG00000021917 | 37.49494812 | 61.9099347  | 58.61053696 | 65.24207144 | 60.87653984 |
| ENSMUSG00000021922 | 10.61177777 | 3.478086219 | 9.179963621 | 8.054576721 | 9.310529622 |
| ENSMUSG00000021930 | 7.781970364 | 7.651789682 | 13.41686991 | 10.47094974 | 19.33725383 |
| ENSMUSG00000021932 | 4.952162959 | 6.260555194 | 3.530755239 | 3.221830688 | 13.60769714 |
| ENSMUSG00000021933 | 12.02668147 | 6.956172438 | 7.767661525 | 5.638203705 | 7.161945863 |
| ENSMUSG00000021936 | 29.71297775 | 46.60635533 | 41.66291182 | 42.68925662 | 46.55264811 |
| ENSMUSG00000021938 | 89.84638511 | 108.51629   | 91.79963621 | 211.8353678 | 169.0219224 |

|                    |             |             |             |             |             |
|--------------------|-------------|-------------|-------------|-------------|-------------|
| ENSMUSG00000021944 | 5.65961481  | 5.56493795  | 2.824604191 | 5.638203705 | 7.87814045  |
| ENSMUSG00000021947 | 10.61177777 | 6.956172438 | 7.061510478 | 12.08186508 | 8.594335036 |
| ENSMUSG00000021948 | 154.9319554 | 164.8612868 | 158.8839857 | 253.7191667 | 174.7514791 |
| ENSMUSG00000021950 | 6.367066661 | 5.56493795  | 8.473812573 | 4.832746033 | 6.445751277 |
| ENSMUSG00000021952 | 90.55383696 | 143.9927695 | 103.098053  | 186.0607223 | 149.6846685 |
| ENSMUSG00000021953 | 8.489422215 | 6.260555194 | 3.530755239 | 4.02728836  | 10.02672421 |
| ENSMUSG00000021959 | 12.02668147 | 17.39043109 | 7.061510478 | 5.638203705 | 7.161945863 |
| ENSMUSG00000021963 | 1.414903703 | 1.391234488 | 0           | 2.416373016 | 1.432389173 |
| ENSMUSG00000021972 | 93.38364437 | 121.7330177 | 117.927225  | 107.9313281 | 94.5376854  |
| ENSMUSG00000021974 | 7.781970364 | 4.869320706 | 6.35535943  | 5.638203705 | 6.445751277 |
| ENSMUSG00000021977 | 6.367066661 | 2.782468975 | 7.767661525 | 7.249119049 | 10.02672421 |
| ENSMUSG00000021981 | 69.33028142 | 103.6469693 | 74.85201106 | 161.8969921 | 109.5777717 |
| ENSMUSG00000021983 | 9.196874066 | 4.869320706 | 8.473812573 | 5.638203705 | 7.161945863 |
| ENSMUSG00000021990 | 4.952162959 | 9.043024169 | 12.71071886 | 7.249119049 | 10.7429188  |
| ENSMUSG00000021993 | 15.56394073 | 29.91154148 | 24.00913562 | 20.1364418  | 30.08017263 |
| ENSMUSG00000021994 | 12.02668147 | 6.956172438 | 8.473812573 | 3.221830688 | 11.45911338 |
| ENSMUSG00000021996 | 26.1757185  | 43.82388636 | 44.48751601 | 58.79841006 | 56.57937232 |
| ENSMUSG00000021998 | 19.10119998 | 39.6501829  | 36.71985448 | 10.47094974 | 21.48583759 |
| ENSMUSG00000022000 | 74.98989623 | 122.4286349 | 118.633376  | 124.0404815 | 106.7129934 |
| ENSMUSG00000022010 | 6.367066661 | 6.260555194 | 7.767661525 | 8.860034393 | 5.729556691 |
| ENSMUSG00000022014 | 37.49494812 | 75.12666233 | 61.43514116 | 33.82922223 | 46.55264811 |
| ENSMUSG00000022016 | 43.15456293 | 70.25734162 | 75.55816211 | 54.7711217  | 54.43078856 |
| ENSMUSG00000022019 | 15.56394073 | 29.91154148 | 38.13215658 | 48.32746033 | 52.2822048  |
| ENSMUSG00000022020 | 62.96321476 | 87.64777272 | 86.15042783 | 151.4260424 | 133.2121931 |
| ENSMUSG00000022021 | 20.51610369 | 20.17290007 | 15.53532305 | 41.07834128 | 30.08017263 |
| ENSMUSG00000022025 | 6.367066661 | 4.869320706 | 9.179963621 | 6.443661377 | 5.729556691 |
| ENSMUSG00000022032 | 9.196874066 | 4.173703463 | 11.29841676 | 6.443661377 | 7.87814045  |
| ENSMUSG00000022034 | 7.781970364 | 14.60796212 | 11.29841676 | 39.46742593 | 27.93158887 |
| ENSMUSG00000022037 | 7.781970364 | 4.173703463 | 6.35535943  | 5.638203705 | 6.445751277 |
| ENSMUSG00000022041 | 9.196874066 | 5.56493795  | 10.59226572 | 2.416373016 | 6.445751277 |
| ENSMUSG00000022043 | 37.49494812 | 50.08444155 | 43.07521391 | 118.4022778 | 106.7129934 |
| ENSMUSG00000022044 | 4.244711108 | 6.956172438 | 2.118453143 | 8.860034393 | 12.17530797 |
| ENSMUSG00000022051 | 47.39927403 | 102.2557348 | 74.14586002 | 39.46742593 | 45.12025894 |
| ENSMUSG00000022053 | 7.074518513 | 7.651789682 | 7.061510478 | 3.221830688 | 3.580972932 |
| ENSMUSG00000022054 | 7.781970364 | 4.869320706 | 4.943057334 | 0.805457672 | 5.013362104 |
| ENSMUSG00000022066 | 15.56394073 | 11.1298759  | 18.35992724 | 16.91461111 | 27.21539428 |
| ENSMUSG00000022090 | 9.196874066 | 9.043024169 | 10.59226572 | 8.860034393 | 6.445751277 |
| ENSMUSG00000022092 | 77.81970364 | 114.081228  | 101.6857509 | 218.2790291 | 161.1437819 |
| ENSMUSG00000022094 | 14.85648888 | 13.91234488 | 16.94762515 | 49.93837567 | 45.12025894 |
| ENSMUSG00000022096 | 6.367066661 | 6.260555194 | 6.35535943  | 4.832746033 | 7.161945863 |
| ENSMUSG00000022099 | 5.65961481  | 5.56493795  | 7.061510478 | 3.221830688 | 10.7429188  |
| ENSMUSG00000022100 | 64.37811846 | 91.12585893 | 72.73355792 | 95.84946298 | 95.25387998 |
| ENSMUSG00000022102 | 9.904325918 | 4.869320706 | 9.886114669 | 3.221830688 | 4.297167518 |

|                    |             |             |             |             |             |
|--------------------|-------------|-------------|-------------|-------------|-------------|
| ENSMUSG00000022106 | 7.781970364 | 11.82549314 | 14.12302096 | 10.47094974 | 7.161945863 |
| ENSMUSG00000022110 | 13.44158517 | 13.91234488 | 9.179963621 | 12.08186508 | 19.33725383 |
| ENSMUSG00000022112 | 10.61177777 | 6.260555194 | 7.767661525 | 3.221830688 | 5.729556691 |
| ENSMUSG00000022119 | 165.5437332 | 187.8166558 | 161.7085899 | 220.6954022 | 168.3057278 |
| ENSMUSG00000022122 | 9.196874066 | 3.478086219 | 9.886114669 | 5.638203705 | 3.580972932 |
| ENSMUSG00000022124 | 60.13340736 | 79.99598303 | 60.02283906 | 97.46037832 | 80.21379367 |
| ENSMUSG00000022132 | 4.952162959 | 7.651789682 | 14.12302096 | 8.860034393 | 5.013362104 |
| ENSMUSG00000022139 | 43.86201478 | 63.99678643 | 53.66747963 | 62.02024075 | 55.14698315 |
| ENSMUSG00000022146 | 4.244711108 | 9.043024169 | 8.473812573 | 4.832746033 | 10.7429188  |
| ENSMUSG00000022148 | 4.244711108 | 9.043024169 | 9.886114669 | 7.249119049 | 5.013362104 |
| ENSMUSG00000022149 | 9.904325918 | 7.651789682 | 7.767661525 | 4.832746033 | 6.445751277 |
| ENSMUSG00000022150 | 6.367066661 | 7.651789682 | 10.59226572 | 4.832746033 | 3.580972932 |
| ENSMUSG00000022151 | 37.49494812 | 58.43184848 | 33.18909925 | 38.66196826 | 48.70123187 |
| ENSMUSG00000022159 | 43.86201478 | 78.60474855 | 61.43514116 | 120.0131931 | 113.8749392 |
| ENSMUSG00000022160 | 56.5961481  | 67.47487265 | 52.25517753 | 90.21125927 | 86.65954495 |
| ENSMUSG00000022176 | 13.44158517 | 5.56493795  | 11.29841676 | 6.443661377 | 2.864778345 |
| ENSMUSG00000022178 | 7.074518513 | 9.043024169 | 5.649208382 | 8.054576721 | 7.161945863 |
| ENSMUSG00000022181 | 8.489422215 | 9.738641413 | 9.886114669 | 4.02728836  | 5.013362104 |
| ENSMUSG00000022185 | 183.2300295 | 232.3361594 | 216.0822206 | 249.6918783 | 199.102095  |
| ENSMUSG00000022186 | 8.489422215 | 11.82549314 | 14.829172   | 38.66196826 | 24.35061594 |
| ENSMUSG00000022191 | 21.93100739 | 38.25894841 | 30.36449505 | 70.07481747 | 55.14698315 |
| ENSMUSG00000022194 | 26.1757185  | 41.73703463 | 34.60140134 | 49.132918   | 47.98503729 |
| ENSMUSG00000022197 | 15.56394073 | 12.52111039 | 19.77222934 | 11.27640741 | 10.02672421 |
| ENSMUSG00000022199 | 9.904325918 | 9.043024169 | 6.35535943  | 5.638203705 | 9.310529622 |
| ENSMUSG00000022201 | 85.601674   | 112.6899935 | 104.5103551 | 144.982381  | 124.617858  |
| ENSMUSG00000022205 | 46.69182218 | 61.21431745 | 46.60596915 | 151.4260424 | 123.9016634 |
| ENSMUSG00000022208 | 5.65961481  | 6.260555194 | 8.473812573 | 7.249119049 | 6.445751277 |
| ENSMUSG00000022209 | 12.73413332 | 6.956172438 | 2.824604191 | 11.27640741 | 4.297167518 |
| ENSMUSG00000022212 | 7.074518513 | 5.56493795  | 4.236906287 | 5.638203705 | 2.148583759 |
| ENSMUSG00000022214 | 47.39927403 | 69.56172438 | 81.20737049 | 70.88027514 | 58.72795608 |
| ENSMUSG00000022216 | 24.76081479 | 45.21512085 | 38.83830763 | 153.0369577 | 97.40246374 |
| ENSMUSG00000022217 | 11.31922962 | 19.47728283 | 21.18453143 | 18.52552646 | 19.33725383 |
| ENSMUSG00000022218 | 14.14903703 | 2.086851731 | 4.943057334 | 6.443661377 | 9.310529622 |
| ENSMUSG00000022220 | 10.61177777 | 6.956172438 | 7.767661525 | 0.805457672 | 5.729556691 |
| ENSMUSG00000022221 | 6.367066661 | 7.651789682 | 11.29841676 | 4.02728836  | 8.594335036 |
| ENSMUSG00000022228 | 40.32475552 | 76.51789682 | 43.78136496 | 45.91108731 | 46.55264811 |
| ENSMUSG00000022234 | 135.1233036 | 171.121842  | 156.7655326 | 300.4357117 | 210.5612084 |
| ENSMUSG00000022235 | 9.904325918 | 4.173703463 | 5.649208382 | 5.638203705 | 9.310529622 |
| ENSMUSG00000022237 | 10.61177777 | 16.69481385 | 20.47838039 | 124.8459392 | 126.0502472 |
| ENSMUSG00000022243 | 7.781970364 | 5.56493795  | 4.943057334 | 4.832746033 | 3.580972932 |
| ENSMUSG00000022245 | 10.61177777 | 6.956172438 | 10.59226572 | 4.02728836  | 5.013362104 |
| ENSMUSG00000022246 | 8.489422215 | 3.478086219 | 7.061510478 | 8.054576721 | 3.580972932 |
| ENSMUSG00000022247 | 98.33580733 | 155.1226454 | 116.5149229 | 244.0536746 | 191.2239546 |

|                    |             |             |             |             |             |
|--------------------|-------------|-------------|-------------|-------------|-------------|
| ENSMUSG00000022248 | 92.67619252 | 137.7322143 | 112.2780166 | 259.3573704 | 181.1972303 |
| ENSMUSG00000022249 | 7.781970364 | 4.869320706 | 8.473812573 | 3.221830688 | 6.445751277 |
| ENSMUSG00000022253 | 19.80865184 | 45.91073809 | 36.71985448 | 36.24559524 | 39.39070225 |
| ENSMUSG00000022255 | 100.4581629 | 149.5577074 | 132.0502459 | 433.3362276 | 294.355975  |
| ENSMUSG00000022269 | 9.196874066 | 6.260555194 | 5.649208382 | 8.054576721 | 5.729556691 |
| ENSMUSG00000022270 | 65.79302217 | 111.9943762 | 92.50578726 | 78.12939419 | 74.48423698 |
| ENSMUSG00000022272 | 6.367066661 | 6.956172438 | 4.943057334 | 4.832746033 | 2.148583759 |
| ENSMUSG00000022283 | 83.47931845 | 125.2111039 | 100.9795998 | 331.0431032 | 223.4527109 |
| ENSMUSG00000022285 | 28.29807405 | 36.86771392 | 37.42600553 | 123.2350238 | 74.48423698 |
| ENSMUSG00000022286 | 9.196874066 | 4.869320706 | 7.061510478 | 5.638203705 | 6.445751277 |
| ENSMUSG00000022292 | 38.90985182 | 51.47567604 | 52.96132858 | 28.19101852 | 29.36397804 |
| ENSMUSG00000022296 | 6.367066661 | 8.347406925 | 2.118453143 | 6.443661377 | 5.729556691 |
| ENSMUSG00000022297 | 8.489422215 | 3.478086219 | 4.236906287 | 4.832746033 | 6.445751277 |
| ENSMUSG00000022304 | 7.781970364 | 6.956172438 | 9.179963621 | 4.02728836  | 5.013362104 |
| ENSMUSG00000022305 | 7.074518513 | 4.173703463 | 6.35535943  | 4.832746033 | 5.729556691 |
| ENSMUSG00000022307 | 8.489422215 | 4.173703463 | 13.41686991 | 4.02728836  | 5.013362104 |
| ENSMUSG00000022311 | 6.367066661 | 5.56493795  | 9.179963621 | 2.416373016 | 5.013362104 |
| ENSMUSG00000022312 | 120.9742666 | 162.774435  | 141.2302096 | 207.0026217 | 184.0620087 |
| ENSMUSG00000022313 | 45.27691848 | 73.73542784 | 60.02283906 | 82.15668255 | 73.05184781 |
| ENSMUSG00000022321 | 13.44158517 | 10.43425866 | 8.473812573 | 7.249119049 | 5.729556691 |
| ENSMUSG00000022323 | 47.39927403 | 89.73462445 | 73.43970897 | 173.9788572 | 114.5911338 |
| ENSMUSG00000022324 | 8.489422215 | 6.260555194 | 10.59226572 | 12.88732275 | 10.7429188  |
| ENSMUSG00000022325 | 56.5961481  | 97.38641413 | 70.61510478 | 150.6205847 | 141.0903335 |
| ENSMUSG00000022329 | 6.367066661 | 9.738641413 | 8.473812573 | 10.47094974 | 7.87814045  |
| ENSMUSG00000022335 | 12.73413332 | 17.39043109 | 14.829172   | 20.94189947 | 20.769643   |
| ENSMUSG00000022340 | 8.489422215 | 6.260555194 | 4.943057334 | 7.249119049 | 10.02672421 |
| ENSMUSG00000022351 | 15.56394073 | 21.56413456 | 24.71528667 | 180.4225185 | 124.617858  |
| ENSMUSG00000022361 | 0           | 0           | 0           | 0.805457672 | 0           |
| ENSMUSG00000022362 | 1.414903703 | 1.391234488 | 0.706151048 | 2.416373016 | 2.148583759 |
| ENSMUSG00000022364 | 17.68629628 | 24.34660353 | 23.30298458 | 28.9964762  | 25.78300511 |
| ENSMUSG00000022366 | 7.781970364 | 7.651789682 | 5.649208382 | 4.832746033 | 4.297167518 |
| ENSMUSG00000022369 | 51.64398514 | 84.86530374 | 79.7950684  | 120.0131931 | 80.21379367 |
| ENSMUSG00000022370 | 45.98437033 | 75.12666233 | 75.55816211 | 105.514955  | 75.20043157 |
| ENSMUSG00000022371 | 7.781970364 | 4.869320706 | 2.824604191 | 6.443661377 | 7.161945863 |
| ENSMUSG00000022372 | 10.61177777 | 13.91234488 | 14.829172   | 6.443661377 | 9.310529622 |
| ENSMUSG00000022377 | 6.367066661 | 4.869320706 | 6.35535943  | 8.860034393 | 6.445751277 |
| ENSMUSG00000022378 | 74.98989623 | 82.77845201 | 96.0365425  | 173.1733995 | 127.4826364 |
| ENSMUSG00000022382 | 4.952162959 | 6.956172438 | 9.886114669 | 4.832746033 | 7.87814045  |
| ENSMUSG00000022383 | 8.489422215 | 2.782468975 | 8.473812573 | 9.665492065 | 8.594335036 |
| ENSMUSG00000022385 | 39.61730367 | 32.69401046 | 40.95676077 | 88.60034393 | 68.75468029 |
| ENSMUSG00000022386 | 15.56394073 | 31.99839321 | 24.00913562 | 41.07834128 | 42.25548059 |
| ENSMUSG00000022387 | 78.52715549 | 103.6469693 | 94.6242404  | 193.3098413 | 161.1437819 |
| ENSMUSG00000022388 | 7.074518513 | 4.869320706 | 6.35535943  | 2.416373016 | 7.161945863 |

|                    |             |             |             |             |             |
|--------------------|-------------|-------------|-------------|-------------|-------------|
| ENSMUSG00000022389 | 9.904325918 | 6.260555194 | 6.35535943  | 7.249119049 | 7.161945863 |
| ENSMUSG00000022390 | 25.46826665 | 36.86771392 | 47.3121202  | 46.71654498 | 52.2822048  |
| ENSMUSG00000022391 | 133.000948  | 152.3401764 | 137.6994543 | 356.0122911 | 278.5996941 |
| ENSMUSG00000022394 | 44.56946663 | 60.51870021 | 53.66747963 | 111.1531587 | 94.5376854  |
| ENSMUSG00000022401 | 72.86754068 | 130.0804246 | 100.2734488 | 203.780791  | 151.8332523 |
| ENSMUSG00000022403 | 82.06441475 | 138.4278315 | 114.3964697 | 226.3336059 | 163.2923657 |
| ENSMUSG00000022412 | 58.0110518  | 86.25653823 | 73.43970897 | 135.3168889 | 103.1320204 |
| ENSMUSG00000022415 | 4.244711108 | 4.869320706 | 8.473812573 | 4.832746033 | 6.445751277 |
| ENSMUSG00000022416 | 4.244711108 | 10.43425866 | 9.886114669 | 6.443661377 | 6.445751277 |
| ENSMUSG00000022419 | 6.367066661 | 6.260555194 | 2.824604191 | 7.249119049 | 7.87814045  |
| ENSMUSG00000022420 | 20.51610369 | 19.47728283 | 27.53989086 | 17.72006879 | 23.63442135 |
| ENSMUSG00000022421 | 8.489422215 | 10.43425866 | 7.767661525 | 9.665492065 | 7.87814045  |
| ENSMUSG00000022422 | 12.73413332 | 18.08604834 | 7.767661525 | 21.74735715 | 20.769643   |
| ENSMUSG00000022425 | 9.196874066 | 6.956172438 | 9.179963621 | 5.638203705 | 5.013362104 |
| ENSMUSG00000022429 | 8.489422215 | 8.347406925 | 9.179963621 | 8.054576721 | 15.04008631 |
| ENSMUSG00000022433 | 4.952162959 | 12.52111039 | 8.473812573 | 7.249119049 | 8.594335036 |
| ENSMUSG00000022436 | 12.02668147 | 15.99919661 | 18.35992724 | 12.08186508 | 23.63442135 |
| ENSMUSG00000022441 | 8.489422215 | 6.956172438 | 7.767661525 | 3.221830688 | 4.297167518 |
| ENSMUSG00000022442 | 13.44158517 | 17.39043109 | 14.12302096 | 8.860034393 | 11.45911338 |
| ENSMUSG00000022443 | 16.27139258 | 27.12907251 | 19.77222934 | 5.638203705 | 15.7562809  |
| ENSMUSG00000022449 | 7.781970364 | 6.260555194 | 4.236906287 | 7.249119049 | 7.161945863 |
| ENSMUSG00000022451 | 66.50047402 | 84.1696865  | 76.97046421 | 111.9586164 | 93.82149081 |
| ENSMUSG00000022452 | 34.66514071 | 45.91073809 | 41.66291182 | 72.49119049 | 50.84981563 |
| ENSMUSG00000022454 | 16.97884443 | 6.956172438 | 10.59226572 | 4.02728836  | 2.148583759 |
| ENSMUSG00000022456 | 9.904325918 | 4.869320706 | 8.473812573 | 5.638203705 | 3.580972932 |
| ENSMUSG00000022464 | 6.367066661 | 3.478086219 | 12.71071886 | 7.249119049 | 4.297167518 |
| ENSMUSG00000022468 | 10.61177777 | 11.1298759  | 9.179963621 | 12.88732275 | 7.161945863 |
| ENSMUSG00000022469 | 7.781970364 | 8.347406925 | 8.473812573 | 8.860034393 | 5.013362104 |
| ENSMUSG00000022471 | 12.02668147 | 6.260555194 | 10.59226572 | 8.054576721 | 10.02672421 |
| ENSMUSG00000022472 | 75.69734809 | 91.12585893 | 86.15042783 | 117.5968201 | 111.0101609 |
| ENSMUSG00000022474 | 15.56394073 | 14.60796212 | 21.18453143 | 33.02376456 | 32.22875639 |
| ENSMUSG00000022475 | 7.074518513 | 6.260555194 | 12.71071886 | 5.638203705 | 7.87814045  |
| ENSMUSG00000022477 | 84.89422215 | 104.3425866 | 128.5194907 | 194.115299  | 172.6028953 |
| ENSMUSG00000022479 | 7.781970364 | 8.347406925 | 3.530755239 | 4.02728836  | 9.310529622 |
| ENSMUSG00000022483 | 6.367066661 | 4.173703463 | 4.943057334 | 6.443661377 | 4.297167518 |
| ENSMUSG00000022487 | 10.61177777 | 5.56493795  | 3.530755239 | 7.249119049 | 6.445751277 |
| ENSMUSG00000022498 | 141.4903703 | 147.4708557 | 125.6948865 | 140.9550926 | 124.617858  |
| ENSMUSG00000022500 | 243.3634368 | 268.5082561 | 245.7405646 | 293.1865926 | 177.6162574 |
| ENSMUSG00000022503 | 39.61730367 | 66.7792554  | 57.90438592 | 112.7640741 | 97.40246374 |
| ENSMUSG00000022510 | 16.97884443 | 5.56493795  | 7.767661525 | 4.832746033 | 8.594335036 |
| ENSMUSG00000022514 | 6.367066661 | 17.39043109 | 19.77222934 | 12.88732275 | 11.45911338 |
| ENSMUSG00000022517 | 59.42595551 | 92.51709342 | 84.03197468 | 95.84946298 | 75.91662615 |
| ENSMUSG00000022518 | 6.367066661 | 6.260555194 | 7.061510478 | 6.443661377 | 6.445751277 |

|                    |             |             |             |             |             |
|--------------------|-------------|-------------|-------------|-------------|-------------|
| ENSMUSG00000022519 | 15.56394073 | 8.347406925 | 7.061510478 | 7.249119049 | 9.310529622 |
| ENSMUSG00000022521 | 119.5593629 | 159.2963488 | 128.5194907 | 178.8116032 | 137.5093606 |
| ENSMUSG00000022525 | 7.781970364 | 5.56493795  | 6.35535943  | 4.832746033 | 3.580972932 |
| ENSMUSG00000022529 | 73.57499253 | 105.7338211 | 93.91808935 | 215.0571984 | 186.2105924 |
| ENSMUSG00000022533 | 55.1812444  | 57.73623123 | 69.20280268 | 125.6513968 | 113.1587446 |
| ENSMUSG00000022534 | 6.367066661 | 5.56493795  | 5.649208382 | 4.02728836  | 2.864778345 |
| ENSMUSG00000022536 | 67.20792587 | 118.2549314 | 100.9795998 | 196.531672  | 158.2790036 |
| ENSMUSG00000022537 | 8.489422215 | 11.1298759  | 9.179963621 | 7.249119049 | 3.580972932 |
| ENSMUSG00000022538 | 91.26128881 | 106.4294383 | 103.804204  | 207.8080794 | 140.3741389 |
| ENSMUSG00000022540 | 6.367066661 | 16.69481385 | 17.65377619 | 13.69278043 | 15.04008631 |
| ENSMUSG00000022543 | 13.44158517 | 12.52111039 | 14.12302096 | 8.860034393 | 16.47247549 |
| ENSMUSG00000022544 | 11.31922962 | 22.2597518  | 23.30298458 | 19.33098413 | 22.20203218 |
| ENSMUSG00000022545 | 19.10119998 | 22.2597518  | 20.47838039 | 37.05105292 | 26.49919969 |
| ENSMUSG00000022548 | 9.904325918 | 5.56493795  | 12.71071886 | 5.638203705 | 6.445751277 |
| ENSMUSG00000022550 | 30.4204296  | 34.78086219 | 26.12758877 | 37.05105292 | 39.39070225 |
| ENSMUSG00000022552 | 67.20792587 | 126.6023384 | 87.56272992 | 136.9278043 | 133.9283876 |
| ENSMUSG00000022553 | 62.96321476 | 102.2557348 | 84.03197468 | 117.5968201 | 107.429188  |
| ENSMUSG00000022555 | 16.97884443 | 18.08604834 | 19.77222934 | 12.88732275 | 15.04008631 |
| ENSMUSG00000022557 | 137.2456591 | 205.9027042 | 163.8270431 | 283.5211006 | 226.3174893 |
| ENSMUSG00000022558 | 24.76081479 | 37.56333116 | 35.30755239 | 28.19101852 | 26.49919969 |
| ENSMUSG00000022561 | 22.63845924 | 29.91154148 | 17.65377619 | 57.99295239 | 50.13362104 |
| ENSMUSG00000022562 | 29.0055259  | 41.04141738 | 34.60140134 | 99.07129367 | 83.07857202 |
| ENSMUSG00000022565 | 10.61177777 | 13.21672763 | 7.061510478 | 9.665492065 | 7.161945863 |
| ENSMUSG00000022568 | 34.66514071 | 50.7800588  | 57.19823487 | 57.99295239 | 60.87653984 |
| ENSMUSG00000022577 | 12.73413332 | 9.738641413 | 4.236906287 | 5.638203705 | 6.445751277 |
| ENSMUSG00000022579 | 8.489422215 | 6.956172438 | 7.061510478 | 10.47094974 | 2.864778345 |
| ENSMUSG00000022580 | 6.367066661 | 5.56493795  | 6.35535943  | 3.221830688 | 5.013362104 |
| ENSMUSG00000022583 | 6.367066661 | 4.869320706 | 8.473812573 | 7.249119049 | 8.594335036 |
| ENSMUSG00000022584 | 9.196874066 | 8.347406925 | 5.649208382 | 11.27640741 | 5.013362104 |
| ENSMUSG00000022586 | 12.02668147 | 17.39043109 | 9.886114669 | 16.10915344 | 17.18867007 |
| ENSMUSG00000022587 | 134.4158517 | 150.9489419 | 146.8794179 | 270.6337778 | 205.5478463 |
| ENSMUSG00000022591 | 10.61177777 | 9.738641413 | 4.943057334 | 3.221830688 | 7.87814045  |
| ENSMUSG00000022594 | 90.55383696 | 86.25653823 | 86.85657888 | 68.46390213 | 56.57937232 |
| ENSMUSG00000022601 | 74.98989623 | 107.8206728 | 84.73812573 | 194.115299  | 149.6846685 |
| ENSMUSG00000022602 | 9.904325918 | 7.651789682 | 7.767661525 | 7.249119049 | 11.45911338 |
| ENSMUSG00000022604 | 26.88317035 | 50.7800588  | 33.18909925 | 24.96918783 | 37.24211849 |
| ENSMUSG00000022607 | 7.781970364 | 18.08604834 | 10.59226572 | 16.10915344 | 19.33725383 |
| ENSMUSG00000022617 | 7.074518513 | 15.30357936 | 19.77222934 | 31.41284921 | 32.94495097 |
| ENSMUSG00000022620 | 13.44158517 | 13.91234488 | 16.94762515 | 8.860034393 | 17.90486466 |
| ENSMUSG00000022621 | 6.367066661 | 9.738641413 | 4.943057334 | 3.221830688 | 5.729556691 |
| ENSMUSG00000022623 | 7.074518513 | 6.260555194 | 3.530755239 | 2.416373016 | 5.013362104 |
| ENSMUSG00000022629 | 9.196874066 | 4.173703463 | 6.35535943  | 3.221830688 | 8.594335036 |
| ENSMUSG00000022636 | 14.14903703 | 14.60796212 | 20.47838039 | 35.44013757 | 28.64778345 |

|                    |             |             |             |             |             |
|--------------------|-------------|-------------|-------------|-------------|-------------|
| ENSMUSG00000022637 | 104.702874  | 145.3840039 | 132.756397  | 70.07481747 | 78.06520991 |
| ENSMUSG00000022641 | 14.14903703 | 26.43345526 | 18.35992724 | 37.85651059 | 35.09353473 |
| ENSMUSG00000022656 | 11.31922962 | 4.173703463 | 5.649208382 | 4.832746033 | 7.161945863 |
| ENSMUSG00000022658 | 9.904325918 | 5.56493795  | 4.943057334 | 4.02728836  | 10.02672421 |
| ENSMUSG00000022659 | 10.61177777 | 4.173703463 | 5.649208382 | 2.416373016 | 5.013362104 |
| ENSMUSG00000022661 | 38.20239997 | 89.0390072  | 62.84744325 | 42.68925662 | 45.12025894 |
| ENSMUSG00000022664 | 43.15456293 | 84.1696865  | 76.97046421 | 78.12939419 | 93.82149081 |
| ENSMUSG00000022665 | 8.489422215 | 4.869320706 | 6.35535943  | 4.832746033 | 9.310529622 |
| ENSMUSG00000022667 | 7.781970364 | 8.347406925 | 4.236906287 | 4.832746033 | 9.310529622 |
| ENSMUSG00000022668 | 19.10119998 | 32.69401046 | 21.89068248 | 43.49471429 | 37.24211849 |
| ENSMUSG00000022671 | 2.829807405 | 5.56493795  | 7.767661525 | 7.249119049 | 10.02672421 |
| ENSMUSG00000022674 | 38.20239997 | 64.69240367 | 58.61053696 | 85.37851324 | 86.65954495 |
| ENSMUSG00000022677 | 1.414903703 | 0           | 0           | 0           | 0           |
| ENSMUSG00000022678 | 53.7663407  | 79.30036579 | 75.55816211 | 130.4841429 | 101.6996313 |
| ENSMUSG00000022679 | 51.64398514 | 70.95295887 | 67.79050059 | 77.32393652 | 85.22715578 |
| ENSMUSG00000022680 | 60.13340736 | 85.56092098 | 71.32125582 | 82.15668255 | 74.48423698 |
| ENSMUSG00000022681 | 0           | 0.695617244 | 0.706151048 | 0.805457672 | 0.716194586 |
| ENSMUSG00000022683 | 7.781970364 | 6.260555194 | 10.59226572 | 3.221830688 | 7.161945863 |
| ENSMUSG00000022684 | 0           | 1.391234488 | 0           | 0.805457672 | 0           |
| ENSMUSG00000022686 | 96.92090362 | 111.9943762 | 117.2210739 | 94.23854763 | 107.429188  |
| ENSMUSG00000022687 | 0.707451851 | 0.695617244 | 2.118453143 | 1.610915344 | 0           |
| ENSMUSG00000022696 | 14.85648888 | 20.86851731 | 19.06607829 | 11.27640741 | 7.87814045  |
| ENSMUSG00000022698 | 58.0110518  | 97.38641413 | 78.3827663  | 213.4462831 | 148.2522794 |
| ENSMUSG00000022701 | 24.76081479 | 54.95376226 | 45.19366706 | 86.98942859 | 67.32229112 |
| ENSMUSG00000022702 | 29.71297775 | 52.86691053 | 35.30755239 | 157.8697037 | 107.429188  |
| ENSMUSG00000022704 | 21.22355554 | 39.6501829  | 24.71528667 | 59.60386773 | 40.82309142 |
| ENSMUSG00000022706 | 18.39374813 | 38.25894841 | 26.12758877 | 129.6786852 | 84.51096119 |
| ENSMUSG00000022707 | 13.44158517 | 33.3896277  | 21.18453143 | 9.665492065 | 16.47247549 |
| ENSMUSG00000022708 | 38.20239997 | 84.1696865  | 60.72899011 | 33.82922223 | 37.95831308 |
| ENSMUSG00000022710 | 5.65961481  | 3.478086219 | 11.29841676 | 3.221830688 | 9.310529622 |
| ENSMUSG00000022711 | 62.96321476 | 72.34419335 | 93.91808935 | 184.4498069 | 157.562809  |
| ENSMUSG00000022718 | 118.851911  | 122.4286349 | 139.8179075 | 240.831844  | 207.69643   |
| ENSMUSG00000022721 | 49.52162959 | 76.51789682 | 64.96589639 | 338.2922223 | 232.047046  |
| ENSMUSG00000022722 | 5.65961481  | 10.43425866 | 7.061510478 | 6.443661377 | 10.02672421 |
| ENSMUSG00000022723 | 7.074518513 | 9.043024169 | 6.35535943  | 10.47094974 | 6.445751277 |
| ENSMUSG00000022724 | 61.54831106 | 88.34338996 | 72.02740687 | 144.982381  | 127.4826364 |
| ENSMUSG00000022744 | 21.93100739 | 38.25894841 | 31.0706461  | 243.248217  | 171.8867007 |
| ENSMUSG00000022747 | 15.56394073 | 19.47728283 | 13.41686991 | 24.16373016 | 20.769643   |
| ENSMUSG00000022750 | 16.27139258 | 13.21672763 | 12.00456781 | 12.88732275 | 7.87814045  |
| ENSMUSG00000022753 | 8.489422215 | 6.956172438 | 7.061510478 | 8.860034393 | 5.729556691 |
| ENSMUSG00000022756 | 11.31922962 | 4.173703463 | 7.767661525 | 4.832746033 | 4.297167518 |
| ENSMUSG00000022757 | 16.97884443 | 26.43345526 | 26.12758877 | 69.2693598  | 73.76804239 |
| ENSMUSG00000022758 | 9.904325918 | 3.478086219 | 3.530755239 | 6.443661377 | 7.161945863 |



|                    |             |             |             |             |             |
|--------------------|-------------|-------------|-------------|-------------|-------------|
| ENSMUSG00000022759 | 7.781970364 | 7.651789682 | 7.061510478 | 8.860034393 | 5.013362104 |
| ENSMUSG00000022760 | 17.68629628 | 30.60715873 | 30.36449505 | 45.91108731 | 48.70123187 |
| ENSMUSG00000022761 | 19.80865184 | 20.17290007 | 26.83373982 | 22.55281482 | 27.93158887 |
| ENSMUSG00000022762 | 11.31922962 | 6.260555194 | 5.649208382 | 3.221830688 | 4.297167518 |
| ENSMUSG00000022763 | 11.31922962 | 10.43425866 | 9.179963621 | 10.47094974 | 10.7429188  |
| ENSMUSG00000022766 | 15.56394073 | 18.08604834 | 17.65377619 | 8.860034393 | 10.02672421 |
| ENSMUSG00000022768 | 12.02668147 | 11.1298759  | 10.59226572 | 23.35827249 | 20.05344842 |
| ENSMUSG00000022770 | 20.51610369 | 34.78086219 | 30.36449505 | 28.19101852 | 27.93158887 |
| ENSMUSG00000022771 | 73.57499253 | 126.6023384 | 114.3964697 | 78.93485187 | 83.7947666  |
| ENSMUSG00000022772 | 84.1867703  | 119.6461659 | 100.2734488 | 185.2552646 | 127.4826364 |
| ENSMUSG00000022773 | 7.074518513 | 8.347406925 | 7.061510478 | 4.02728836  | 3.580972932 |
| ENSMUSG00000022774 | 87.72402956 | 121.7330177 | 102.3919019 | 194.115299  | 169.738117  |
| ENSMUSG00000022779 | 32.54278516 | 43.12826911 | 40.95676077 | 48.32746033 | 66.60609653 |
| ENSMUSG00000022783 | 6.367066661 | 7.651789682 | 9.179963621 | 4.02728836  | 12.17530797 |
| ENSMUSG00000022787 | 45.98437033 | 59.82308296 | 60.72899011 | 118.4022778 | 111.0101609 |
| ENSMUSG00000022788 | 9.196874066 | 6.260555194 | 10.59226572 | 2.416373016 | 5.013362104 |
| ENSMUSG00000022789 | 54.47379255 | 76.51789682 | 67.08434954 | 131.2896006 | 109.5777717 |
| ENSMUSG00000022790 | 4.952162959 | 6.260555194 | 4.943057334 | 5.638203705 | 4.297167518 |
| ENSMUSG00000022791 | 45.27691848 | 54.95376226 | 57.19823487 | 45.10562964 | 39.39070225 |
| ENSMUSG00000022792 | 33.95768886 | 58.43184848 | 52.96132858 | 116.7913625 | 95.97007457 |
| ENSMUSG00000022793 | 5.65961481  | 6.260555194 | 7.767661525 | 4.02728836  | 8.594335036 |
| ENSMUSG00000022797 | 93.38364437 | 100.8645003 | 95.33039145 | 156.2587884 | 132.4959985 |
| ENSMUSG00000022800 | 79.94205919 | 129.3848073 | 120.0456781 | 107.9313281 | 116.7397176 |
| ENSMUSG00000022801 | 84.1867703  | 126.6023384 | 108.7472614 | 93.43308996 | 98.83485292 |
| ENSMUSG00000022803 | 9.904325918 | 6.260555194 | 8.473812573 | 5.638203705 | 10.02672421 |
| ENSMUSG00000022805 | 7.781970364 | 6.956172438 | 4.943057334 | 4.02728836  | 11.45911338 |
| ENSMUSG00000022811 | 94.79854807 | 134.254128  | 117.927225  | 205.3917064 | 170.4543116 |
| ENSMUSG00000022812 | 48.10672589 | 59.82308296 | 40.25060972 | 74.10210583 | 57.29556691 |
| ENSMUSG00000022816 | 5.65961481  | 8.347406925 | 11.29841676 | 2.416373016 | 4.297167518 |
| ENSMUSG00000022817 | 7.074518513 | 11.82549314 | 3.530755239 | 11.27640741 | 10.02672421 |
| ENSMUSG00000022818 | 7.074518513 | 4.869320706 | 7.767661525 | 5.638203705 | 6.445751277 |
| ENSMUSG00000022821 | 12.73413332 | 7.651789682 | 2.824604191 | 3.221830688 | 6.445751277 |
| ENSMUSG00000022822 | 14.85648888 | 23.65098629 | 19.77222934 | 19.33098413 | 20.769643   |
| ENSMUSG00000022824 | 6.367066661 | 5.56493795  | 4.236906287 | 6.443661377 | 8.594335036 |
| ENSMUSG00000022827 | 25.46826665 | 53.56252777 | 48.01827125 | 68.46390213 | 63.0251236  |
| ENSMUSG00000022828 | 29.0055259  | 59.82308296 | 37.42600553 | 57.99295239 | 59.44415067 |
| ENSMUSG00000022829 | 7.074518513 | 6.956172438 | 7.767661525 | 7.249119049 | 6.445751277 |
| ENSMUSG00000022831 | 63.67066661 | 83.47406925 | 69.90895373 | 167.5351958 | 106.7129934 |
| ENSMUSG00000022832 | 12.02668147 | 2.086851731 | 4.943057334 | 4.832746033 | 10.02672421 |
| ENSMUSG00000022836 | 5.65961481  | 4.173703463 | 8.473812573 | 4.02728836  | 3.580972932 |
| ENSMUSG00000022837 | 25.46826665 | 41.73703463 | 31.0706461  | 64.43661377 | 49.41742646 |
| ENSMUSG00000022838 | 52.35143699 | 79.99598303 | 72.73355792 | 91.01671695 | 75.91662615 |
| ENSMUSG00000022841 | 79.94205919 | 107.8206728 | 92.50578726 | 123.2350238 | 106.7129934 |

|                    |             |             |             |             |             |
|--------------------|-------------|-------------|-------------|-------------|-------------|
| ENSMUSG00000022842 | 17.68629628 | 34.78086219 | 21.89068248 | 74.9075635  | 63.0251236  |
| ENSMUSG00000022843 | 4.952162959 | 8.347406925 | 8.473812573 | 32.21830688 | 24.35061594 |
| ENSMUSG00000022847 | 7.781970364 | 4.869320706 | 7.061510478 | 8.054576721 | 5.013362104 |
| ENSMUSG00000022857 | 9.196874066 | 10.43425866 | 7.061510478 | 8.860034393 | 5.013362104 |
| ENSMUSG00000022858 | 108.2401332 | 149.5577074 | 127.1071886 | 311.7121191 | 227.7498785 |
| ENSMUSG00000022860 | 4.244711108 | 3.478086219 | 5.649208382 | 6.443661377 | 8.594335036 |
| ENSMUSG00000022861 | 9.904325918 | 4.869320706 | 5.649208382 | 8.860034393 | 7.87814045  |
| ENSMUSG00000022863 | 18.39374813 | 20.86851731 | 13.41686991 | 42.68925662 | 42.25548059 |
| ENSMUSG00000022864 | 14.14903703 | 26.43345526 | 23.30298458 | 103.9040397 | 83.07857202 |
| ENSMUSG00000022865 | 4.244711108 | 7.651789682 | 4.943057334 | 6.443661377 | 8.594335036 |
| ENSMUSG00000022871 | 7.074518513 | 6.956172438 | 5.649208382 | 4.832746033 | 7.87814045  |
| ENSMUSG00000022875 | 7.074518513 | 9.043024169 | 7.767661525 | 6.443661377 | 15.7562809  |
| ENSMUSG00000022876 | 11.31922962 | 9.738641413 | 3.530755239 | 4.02728836  | 4.297167518 |
| ENSMUSG00000022881 | 26.88317035 | 51.47567604 | 45.8998181  | 134.5114312 | 109.5777717 |
| ENSMUSG00000022883 | 10.61177777 | 4.869320706 | 7.061510478 | 4.02728836  | 5.729556691 |
| ENSMUSG00000022884 | 2.122355554 | 7.651789682 | 7.061510478 | 4.02728836  | 7.161945863 |
| ENSMUSG00000022885 | 50.93653329 | 84.86530374 | 66.37819849 | 74.9075635  | 60.87653984 |
| ENSMUSG00000022890 | 72.86754068 | 97.38641413 | 98.86114669 | 231.9718096 | 166.157144  |
| ENSMUSG00000022892 | 4.952162959 | 8.347406925 | 7.061510478 | 8.054576721 | 5.729556691 |
| ENSMUSG00000022893 | 7.074518513 | 4.869320706 | 2.824604191 | 4.832746033 | 10.02672421 |
| ENSMUSG00000022895 | 32.54278516 | 60.51870021 | 51.54902649 | 37.05105292 | 26.49919969 |
| ENSMUSG00000022897 | 85.601674   | 100.1688831 | 100.9795998 | 250.497336  | 173.3190899 |
| ENSMUSG00000022898 | 55.88869625 | 84.1696865  | 64.25974535 | 66.85298678 | 75.91662615 |
| ENSMUSG00000022900 | 5.65961481  | 10.43425866 | 7.061510478 | 9.665492065 | 7.87814045  |
| ENSMUSG00000022901 | 21.93100739 | 61.9099347  | 38.83830763 | 82.15668255 | 66.60609653 |
| ENSMUSG00000022905 | 74.98989623 | 111.298759  | 104.5103551 | 161.0915344 | 133.9283876 |
| ENSMUSG00000022906 | 40.32475552 | 72.34419335 | 57.19823487 | 276.2719815 | 168.3057278 |
| ENSMUSG00000022911 | 24.76081479 | 38.25894841 | 23.30298458 | 19.33098413 | 22.20203218 |
| ENSMUSG00000022913 | 23.34591109 | 20.17290007 | 17.65377619 | 26.58010318 | 27.93158887 |
| ENSMUSG00000022914 | 71.45263698 | 96.69079689 | 85.44427678 | 41.88379895 | 33.66114556 |
| ENSMUSG00000022935 | 6.367066661 | 6.956172438 | 8.473812573 | 6.443661377 | 7.161945863 |
| ENSMUSG00000022940 | 35.37259256 | 58.43184848 | 52.96132858 | 35.44013757 | 40.10689684 |
| ENSMUSG00000022945 | 8.489422215 | 15.99919661 | 16.2414741  | 22.55281482 | 22.20203218 |
| ENSMUSG00000022948 | 11.31922962 | 13.21672763 | 12.00456781 | 17.72006879 | 10.02672421 |
| ENSMUSG00000022951 | 14.14903703 | 26.43345526 | 19.06607829 | 14.4982381  | 22.20203218 |
| ENSMUSG00000022952 | 91.96874066 | 131.4716591 | 102.3919019 | 148.2042117 | 121.0368851 |
| ENSMUSG00000022956 | 50.93653329 | 75.82227957 | 67.79050059 | 130.4841429 | 100.9834367 |
| ENSMUSG00000022957 | 29.71297775 | 48.69320706 | 39.54445867 | 29.80193387 | 32.22875639 |
| ENSMUSG00000022960 | 41.03220737 | 79.99598303 | 69.90895373 | 78.12939419 | 85.22715578 |
| ENSMUSG00000022961 | 96.21345177 | 128.6891901 | 110.8657145 | 278.6883545 | 206.9802355 |
| ENSMUSG00000022962 | 65.79302217 | 85.56092098 | 84.73812573 | 210.2244524 | 171.8867007 |
| ENSMUSG00000022964 | 42.44711108 | 54.95376226 | 52.96132858 | 112.7640741 | 85.22715578 |
| ENSMUSG00000022967 | 79.23460734 | 118.2549314 | 103.098053  | 124.8459392 | 103.1320204 |

|                    |             |             |             |             |             |
|--------------------|-------------|-------------|-------------|-------------|-------------|
| ENSMUSG00000022969 | 46.69182218 | 62.60555194 | 69.20280268 | 51.54929101 | 68.75468029 |
| ENSMUSG00000022971 | 112.4848444 | 139.819066  | 141.2302096 | 126.4568545 | 115.3073284 |
| ENSMUSG00000022973 | 16.97884443 | 31.30277597 | 21.89068248 | 14.4982381  | 26.49919969 |
| ENSMUSG00000022974 | 50.22908144 | 84.86530374 | 76.97046421 | 109.5422434 | 96.68626916 |
| ENSMUSG00000022978 | 27.5906222  | 38.95456565 | 40.25060972 | 38.66196826 | 29.36397804 |
| ENSMUSG00000022983 | 107.5326814 | 121.0374004 | 115.1026208 | 207.0026217 | 166.8733386 |
| ENSMUSG00000022987 | 10.61177777 | 8.347406925 | 5.649208382 | 2.416373016 | 7.161945863 |
| ENSMUSG00000022992 | 87.72402956 | 101.5601176 | 82.61967259 | 202.9753334 | 152.5494469 |
| ENSMUSG00000022995 | 6.367066661 | 6.260555194 | 6.35535943  | 4.832746033 | 5.729556691 |
| ENSMUSG00000022996 | 7.074518513 | 12.52111039 | 16.94762515 | 11.27640741 | 12.89150255 |
| ENSMUSG00000022999 | 70.74518513 | 94.60394515 | 73.43970897 | 63.6311561  | 55.86317773 |
| ENSMUSG00000023007 | 11.31922962 | 6.956172438 | 7.767661525 | 13.69278043 | 7.161945863 |
| ENSMUSG00000023008 | 24.76081479 | 34.78086219 | 29.65834401 | 18.52552646 | 23.63442135 |
| ENSMUSG00000023009 | 9.196874066 | 7.651789682 | 5.649208382 | 6.443661377 | 5.013362104 |
| ENSMUSG00000023010 | 140.0754665 | 175.2955454 | 146.1732669 | 215.8626561 | 176.1838682 |
| ENSMUSG00000023015 | 73.57499253 | 86.25653823 | 79.7950684  | 132.0950582 | 88.09193412 |
| ENSMUSG00000023019 | 6.367066661 | 3.478086219 | 7.061510478 | 6.443661377 | 5.729556691 |
| ENSMUSG00000023021 | 12.73413332 | 8.347406925 | 12.71071886 | 32.21830688 | 25.06681052 |
| ENSMUSG00000023022 | 8.489422215 | 6.260555194 | 10.59226572 | 8.860034393 | 7.161945863 |
| ENSMUSG00000023025 | 12.02668147 | 9.738641413 | 9.886114669 | 10.47094974 | 6.445751277 |
| ENSMUSG00000023026 | 62.96321476 | 98.08203137 | 83.32582364 | 105.514955  | 93.82149081 |
| ENSMUSG00000023027 | 65.08557032 | 94.60394515 | 72.73355792 | 158.6751614 | 106.7129934 |
| ENSMUSG00000023030 | 10.61177777 | 12.52111039 | 21.18453143 | 12.08186508 | 7.87814045  |
| ENSMUSG00000023032 | 12.02668147 | 13.91234488 | 13.41686991 | 10.47094974 | 9.310529622 |
| ENSMUSG00000023033 | 6.367066661 | 5.56493795  | 9.179963621 | 4.832746033 | 7.161945863 |
| ENSMUSG00000023039 | 7.074518513 | 7.651789682 | 5.649208382 | 4.02728836  | 7.87814045  |
| ENSMUSG00000023045 | 5.65961481  | 4.173703463 | 6.35535943  | 8.054576721 | 8.594335036 |
| ENSMUSG00000023047 | 9.904325918 | 5.56493795  | 7.061510478 | 8.054576721 | 10.7429188  |
| ENSMUSG00000023048 | 20.51610369 | 27.82468975 | 28.95219296 | 33.02376456 | 28.64778345 |
| ENSMUSG00000023051 | 19.80865184 | 24.34660353 | 32.4829482  | 71.68573282 | 50.84981563 |
| ENSMUSG00000023067 | 9.904325918 | 6.956172438 | 5.649208382 | 12.08186508 | 6.445751277 |
| ENSMUSG00000023068 | 72.16008883 | 105.0382038 | 90.38733411 | 179.6170609 | 133.9283876 |
| ENSMUSG00000023072 | 43.86201478 | 62.60555194 | 60.72899011 | 78.93485187 | 63.0251236  |
| ENSMUSG00000023074 | 21.22355554 | 24.34660353 | 32.4829482  | 20.1364418  | 26.49919969 |
| ENSMUSG00000023079 | 9.904325918 | 8.347406925 | 5.649208382 | 6.443661377 | 12.17530797 |
| ENSMUSG00000023084 | 6.367066661 | 4.173703463 | 5.649208382 | 3.221830688 | 10.7429188  |
| ENSMUSG00000023087 | 10.61177777 | 21.56413456 | 16.2414741  | 41.07834128 | 37.24211849 |
| ENSMUSG00000023088 | 40.32475552 | 68.17048989 | 53.66747963 | 95.84946298 | 86.65954495 |
| ENSMUSG00000023089 | 27.5906222  | 52.86691053 | 43.78136496 | 43.49471429 | 43.68786977 |
| ENSMUSG00000023092 | 8.489422215 | 2.782468975 | 7.061510478 | 3.221830688 | 2.148583759 |
| ENSMUSG00000023094 | 8.489422215 | 17.39043109 | 16.2414741  | 9.665492065 | 10.02672421 |
| ENSMUSG00000023106 | 79.23460734 | 99.47326586 | 84.73812573 | 115.9859048 | 90.24051788 |
| ENSMUSG00000023110 | 11.31922962 | 33.3896277  | 28.24604191 | 74.10210583 | 59.44415067 |

|                    |             |             |             |             |             |
|--------------------|-------------|-------------|-------------|-------------|-------------|
| ENSMUSG00000023118 | 65.79302217 | 107.1250555 | 98.15499564 | 88.60034393 | 94.5376854  |
| ENSMUSG00000023143 | 24.76081479 | 39.6501829  | 33.18909925 | 51.54929101 | 45.83645353 |
| ENSMUSG00000023147 | 17.68629628 | 26.43345526 | 23.30298458 | 20.94189947 | 29.36397804 |
| ENSMUSG00000023150 | 84.1867703  | 118.2549314 | 105.2165061 | 194.115299  | 157.562809  |
| ENSMUSG00000023165 | 5.65961481  | 2.782468975 | 2.824604191 | 4.02728836  | 1.432389173 |
| ENSMUSG00000023169 | 56.5961481  | 80.69160028 | 83.32582364 | 158.6751614 | 108.1453825 |
| ENSMUSG00000023170 | 53.7663407  | 68.17048989 | 62.84744325 | 94.23854763 | 80.92998826 |
| ENSMUSG00000023175 | 101.1656147 | 132.8628936 | 120.0456781 | 170.7570265 | 151.1170577 |
| ENSMUSG00000023186 | 12.02668147 | 17.39043109 | 22.59683353 | 24.16373016 | 17.18867007 |
| ENSMUSG00000023192 | 11.31922962 | 7.651789682 | 3.530755239 | 8.054576721 | 11.45911338 |
| ENSMUSG00000023206 | 12.73413332 | 19.47728283 | 13.41686991 | 19.33098413 | 17.90486466 |
| ENSMUSG00000023216 | 13.44158517 | 5.56493795  | 4.236906287 | 4.02728836  | 8.594335036 |
| ENSMUSG00000023224 | 7.074518513 | 4.173703463 | 8.473812573 | 4.02728836  | 6.445751277 |
| ENSMUSG00000023232 | 2.829807405 | 4.869320706 | 8.473812573 | 8.860034393 | 10.02672421 |
| ENSMUSG00000023235 | 110.3624888 | 152.3401764 | 122.8702823 | 203.780791  | 185.4943979 |
| ENSMUSG00000023249 | 38.20239997 | 81.38721752 | 55.78593277 | 133.7059736 | 107.429188  |
| ENSMUSG00000023259 | 8.489422215 | 8.347406925 | 3.530755239 | 12.08186508 | 11.45911338 |
| ENSMUSG00000023262 | 9.904325918 | 7.651789682 | 4.943057334 | 17.72006879 | 17.18867007 |
| ENSMUSG00000023266 | 0.707451851 | 2.086851731 | 1.412302096 | 4.02728836  | 2.864778345 |
| ENSMUSG00000023267 | 6.367066661 | 3.478086219 | 7.061510478 | 4.02728836  | 6.445751277 |
| ENSMUSG00000023274 | 9.196874066 | 4.173703463 | 6.35535943  | 7.249119049 | 8.594335036 |
| ENSMUSG00000023277 | 116.7295555 | 118.2549314 | 117.2210739 | 99.87675134 | 93.10529622 |
| ENSMUSG00000023284 | 14.14903703 | 27.82468975 | 19.06607829 | 19.33098413 | 20.05344842 |
| ENSMUSG00000023286 | 103.2879703 | 153.0357936 | 130.6379438 | 241.6373016 | 206.2640409 |
| ENSMUSG00000023289 | 12.02668147 | 7.651789682 | 9.179963621 | 6.443661377 | 7.161945863 |
| ENSMUSG00000023307 | 37.49494812 | 61.21431745 | 45.8998181  | 81.35122488 | 76.63282074 |
| ENSMUSG00000023328 | 6.367066661 | 8.347406925 | 5.649208382 | 6.443661377 | 4.297167518 |
| ENSMUSG00000023330 | 10.61177777 | 19.47728283 | 14.12302096 | 17.72006879 | 15.7562809  |
| ENSMUSG00000023341 | 26.1757185  | 34.78086219 | 28.24604191 | 68.46390213 | 45.83645353 |
| ENSMUSG00000023345 | 18.39374813 | 22.95536904 | 14.829172   | 24.96918783 | 17.18867007 |
| ENSMUSG00000023348 | 8.489422215 | 7.651789682 | 13.41686991 | 8.860034393 | 11.45911338 |
| ENSMUSG00000023349 | 7.781970364 | 6.956172438 | 7.767661525 | 6.443661377 | 7.87814045  |
| ENSMUSG00000023353 | 24.76081479 | 49.38882431 | 31.77679715 | 48.32746033 | 58.72795608 |
| ENSMUSG00000023367 | 7.074518513 | 9.738641413 | 8.473812573 | 36.24559524 | 30.08017263 |
| ENSMUSG00000023393 | 15.56394073 | 17.39043109 | 14.12302096 | 67.65844446 | 52.2822048  |
| ENSMUSG00000023403 | 7.074518513 | 6.956172438 | 4.236906287 | 7.249119049 | 7.161945863 |
| ENSMUSG00000023411 | 5.65961481  | 6.956172438 | 3.530755239 | 7.249119049 | 2.148583759 |
| ENSMUSG00000023439 | 10.61177777 | 13.21672763 | 9.886114669 | 9.665492065 | 14.32389173 |
| ENSMUSG00000023443 | 5.65961481  | 3.478086219 | 2.118453143 | 4.832746033 | 4.297167518 |
| ENSMUSG00000023452 | 29.71297775 | 46.60635533 | 44.48751601 | 62.02024075 | 50.84981563 |
| ENSMUSG00000023456 | 13.44158517 | 9.738641413 | 13.41686991 | 86.98942859 | 67.32229112 |
| ENSMUSG00000023460 | 81.3569629  | 125.9067211 | 98.86114669 | 99.87675134 | 97.40246374 |
| ENSMUSG00000023467 | 11.31922962 | 10.43425866 | 9.179963621 | 2.416373016 | 12.17530797 |

|                    |              |             |             |             |             |
|--------------------|--------------|-------------|-------------|-------------|-------------|
| ENSMUSG00000023484 | 6.367066661  | 4.173703463 | 4.236906287 | 4.832746033 | 8.594335036 |
| ENSMUSG00000023495 | 6.367066661  | 13.91234488 | 4.236906287 | 4.832746033 | 8.594335036 |
| ENSMUSG00000023505 | 51.64398514  | 52.17129328 | 61.43514116 | 111.9586164 | 82.36237743 |
| ENSMUSG00000023572 | 15.56394073  | 32.69401046 | 24.71528667 | 20.94189947 | 28.64778345 |
| ENSMUSG00000023577 | 2.829807405  | 4.173703463 | 5.649208382 | 6.443661377 | 2.148583759 |
| ENSMUSG00000023707 | 18.39374813  | 26.43345526 | 19.77222934 | 16.10915344 | 15.04008631 |
| ENSMUSG00000023723 | 25.46826665  | 45.21512085 | 55.78593277 | 66.85298678 | 55.14698315 |
| ENSMUSG00000023764 | 83.47931845  | 85.56092098 | 74.85201106 | 76.51847885 | 70.18706946 |
| ENSMUSG00000023791 | 42.447111108 | 73.73542784 | 55.07978173 | 41.07834128 | 60.87653984 |
| ENSMUSG00000023800 | 7.781970364  | 6.260555194 | 4.943057334 | 7.249119049 | 7.161945863 |
| ENSMUSG00000023805 | 8.489422215  | 13.91234488 | 9.886114669 | 6.443661377 | 12.89150255 |
| ENSMUSG00000023826 | 5.65961481   | 4.173703463 | 3.530755239 | 5.638203705 | 5.013362104 |
| ENSMUSG00000023830 | 20.51610369  | 23.65098629 | 25.42143772 | 32.21830688 | 30.08017263 |
| ENSMUSG00000023832 | 12.02668147  | 20.86851731 | 17.65377619 | 32.21830688 | 30.79636721 |
| ENSMUSG00000023852 | 56.5961481   | 82.77845201 | 74.14586002 | 179.6170609 | 147.5360848 |
| ENSMUSG00000023861 | 45.98437033  | 59.82308296 | 42.36906287 | 50.74383334 | 57.29556691 |
| ENSMUSG00000023868 | 6.367066661  | 2.086851731 | 9.886114669 | 5.638203705 | 6.445751277 |
| ENSMUSG00000023873 | 9.196874066  | 15.99919661 | 14.12302096 | 8.860034393 | 21.48583759 |
| ENSMUSG00000023882 | 12.02668147  | 20.17290007 | 14.829172   | 16.10915344 | 26.49919969 |
| ENSMUSG00000023883 | 19.10119998  | 23.65098629 | 19.77222934 | 43.49471429 | 34.37734014 |
| ENSMUSG00000023902 | 6.367066661  | 8.347406925 | 7.061510478 | 4.02728836  | 10.02672421 |
| ENSMUSG00000023904 | 31.12788146  | 34.08524495 | 37.42600553 | 24.96918783 | 29.36397804 |
| ENSMUSG00000023905 | 11.31922962  | 17.39043109 | 15.53532305 | 11.27640741 | 14.32389173 |
| ENSMUSG00000023911 | 5.65961481   | 7.651789682 | 6.35535943  | 4.832746033 | 7.87814045  |
| ENSMUSG00000023913 | 5.65961481   | 9.043024169 | 7.767661525 | 4.832746033 | 5.013362104 |
| ENSMUSG00000023914 | 7.781970364  | 5.56493795  | 9.179963621 | 4.832746033 | 7.161945863 |
| ENSMUSG00000023918 | 10.61177777  | 6.956172438 | 7.767661525 | 9.665492065 | 5.729556691 |
| ENSMUSG00000023923 | 24.05336294  | 42.43265187 | 29.65834401 | 32.21830688 | 35.80972932 |
| ENSMUSG00000023927 | 77.81970364  | 98.08203137 | 91.09348516 | 105.514955  | 104.5644096 |
| ENSMUSG00000023930 | 8.489422215  | 4.869320706 | 7.767661525 | 4.832746033 | 5.013362104 |
| ENSMUSG00000023940 | 33.95768886  | 39.6501829  | 35.30755239 | 61.21478308 | 62.30892901 |
| ENSMUSG00000023942 | 4.952162959  | 2.782468975 | 0.706151048 | 4.02728836  | 2.148583759 |
| ENSMUSG00000023944 | 57.30359995  | 93.21271067 | 87.56272992 | 302.046627  | 212.7097921 |
| ENSMUSG00000023951 | 11.31922962  | 16.69481385 | 19.06607829 | 30.60739154 | 25.78300511 |
| ENSMUSG00000023952 | 24.05336294  | 27.82468975 | 36.01370344 | 39.46742593 | 35.09353473 |
| ENSMUSG00000023960 | 7.074518513  | 2.782468975 | 10.59226572 | 6.443661377 | 6.445751277 |
| ENSMUSG00000023961 | 5.65961481   | 8.347406925 | 4.236906287 | 6.443661377 | 3.580972932 |
| ENSMUSG00000023964 | 11.31922962  | 6.260555194 | 8.473812573 | 4.832746033 | 4.297167518 |
| ENSMUSG00000023965 | 59.42595551  | 111.298759  | 87.56272992 | 53.96566403 | 53.71459398 |
| ENSMUSG00000023968 | 5.65961481   | 8.347406925 | 12.00456781 | 4.02728836  | 12.89150255 |
| ENSMUSG00000023973 | 31.83533331  | 47.30197258 | 40.95676077 | 134.5114312 | 100.2672421 |
| ENSMUSG00000023977 | 58.71850365  | 94.60394515 | 81.20737049 | 144.1769233 | 126.0502472 |
| ENSMUSG00000023979 | 9.196874066  | 3.478086219 | 4.943057334 | 8.054576721 | 5.729556691 |

|                    |             |             |             |             |             |
|--------------------|-------------|-------------|-------------|-------------|-------------|
| ENSMUSG00000023984 | 0           | 2.086851731 | 1.412302096 | 0.805457672 | 0.716194586 |
| ENSMUSG00000023987 | 11.31922962 | 9.043024169 | 7.767661525 | 7.249119049 | 7.161945863 |
| ENSMUSG00000023990 | 18.39374813 | 20.17290007 | 27.53989086 | 41.07834128 | 40.10689684 |
| ENSMUSG00000023991 | 47.39927403 | 67.47487265 | 69.20280268 | 67.65844446 | 72.33565322 |
| ENSMUSG00000023992 | 4.244711108 | 2.782468975 | 7.767661525 | 11.27640741 | 9.310529622 |
| ENSMUSG00000023994 | 33.25023701 | 55.6493795  | 50.13672439 | 209.4189947 | 146.1036956 |
| ENSMUSG00000023995 | 6.367066661 | 5.56493795  | 2.824604191 | 7.249119049 | 7.161945863 |
| ENSMUSG00000023999 | 6.367066661 | 7.651789682 | 14.12302096 | 6.443661377 | 9.310529622 |
| ENSMUSG00000024002 | 110.3624888 | 129.3848073 | 122.1641313 | 238.4154709 | 204.1154571 |
| ENSMUSG00000024006 | 112.4848444 | 115.4724625 | 122.1641313 | 161.8969921 | 122.4692743 |
| ENSMUSG00000024007 | 82.06441475 | 127.9935729 | 95.33039145 | 165.1188228 | 119.6044959 |
| ENSMUSG00000024008 | 9.196874066 | 5.56493795  | 6.35535943  | 6.443661377 | 7.87814045  |
| ENSMUSG00000024011 | 8.489422215 | 9.738641413 | 7.061510478 | 6.443661377 | 7.87814045  |
| ENSMUSG00000024012 | 85.601674   | 120.3417832 | 132.0502459 | 144.1769233 | 121.0368851 |
| ENSMUSG00000024013 | 31.83533331 | 35.47647943 | 51.54902649 | 104.7094974 | 78.06520991 |
| ENSMUSG00000024018 | 20.51610369 | 22.95536904 | 29.65834401 | 43.49471429 | 35.09353473 |
| ENSMUSG00000024019 | 53.7663407  | 112.6899935 | 81.91352154 | 117.5968201 | 99.5510475  |
| ENSMUSG00000024026 | 35.37259256 | 42.43265187 | 33.18909925 | 34.6346799  | 47.2688427  |
| ENSMUSG00000024034 | 9.196874066 | 9.738641413 | 9.179963621 | 7.249119049 | 7.161945863 |
| ENSMUSG00000024036 | 15.56394073 | 23.65098629 | 26.12758877 | 16.10915344 | 15.04008631 |
| ENSMUSG00000024037 | 23.34591109 | 43.12826911 | 42.36906287 | 39.46742593 | 32.22875639 |
| ENSMUSG00000024038 | 36.08004441 | 39.6501829  | 43.78136496 | 35.44013757 | 27.21539428 |
| ENSMUSG00000024039 | 11.31922962 | 6.260555194 | 14.829172   | 8.860034393 | 7.87814045  |
| ENSMUSG00000024043 | 9.196874066 | 5.56493795  | 7.767661525 | 7.249119049 | 6.445751277 |
| ENSMUSG00000024044 | 5.65961481  | 6.260555194 | 11.29841676 | 4.02728836  | 5.729556691 |
| ENSMUSG00000024048 | 62.96321476 | 107.8206728 | 102.3919019 | 98.265836   | 100.9834367 |
| ENSMUSG00000024049 | 5.65961481  | 7.651789682 | 7.767661525 | 8.860034393 | 8.594335036 |
| ENSMUSG00000024050 | 9.196874066 | 10.43425866 | 4.236906287 | 7.249119049 | 7.161945863 |
| ENSMUSG00000024052 | 36.08004441 | 42.43265187 | 40.25060972 | 40.2728836  | 47.98503729 |
| ENSMUSG00000024053 | 8.489422215 | 6.260555194 | 8.473812573 | 4.832746033 | 7.161945863 |
| ENSMUSG00000024054 | 149.2723406 | 185.7298041 | 164.5331941 | 273.0501508 | 199.102095  |
| ENSMUSG00000024055 | 19.10119998 | 31.99839321 | 28.24604191 | 24.96918783 | 26.49919969 |
| ENSMUSG00000024063 | 150.6872443 | 141.2103005 | 141.2302096 | 93.43308996 | 78.7814045  |
| ENSMUSG00000024064 | 4.952162959 | 6.260555194 | 4.943057334 | 6.443661377 | 7.161945863 |
| ENSMUSG00000024067 | 12.02668147 | 11.1298759  | 5.649208382 | 3.221830688 | 7.87814045  |
| ENSMUSG00000024069 | 32.54278516 | 63.99678643 | 55.78593277 | 71.68573282 | 48.70123187 |
| ENSMUSG00000024070 | 44.56946663 | 57.04061399 | 55.07978173 | 57.99295239 | 53.71459398 |
| ENSMUSG00000024073 | 78.52715549 | 85.56092098 | 91.09348516 | 245.66459   | 156.1304198 |
| ENSMUSG00000024077 | 47.39927403 | 55.6493795  | 56.49208382 | 38.66196826 | 35.09353473 |
| ENSMUSG00000024083 | 26.1757185  | 57.73623123 | 55.78593277 | 33.82922223 | 36.5259239  |
| ENSMUSG00000024085 | 70.03773327 | 113.3856107 | 86.15042783 | 55.57657937 | 60.16034525 |
| ENSMUSG00000024095 | 6.367066661 | 7.651789682 | 5.649208382 | 11.27640741 | 8.594335036 |
| ENSMUSG00000024096 | 41.73965922 | 59.82308296 | 58.61053696 | 40.2728836  | 36.5259239  |

|                    |             |             |             |             |             |
|--------------------|-------------|-------------|-------------|-------------|-------------|
| ENSMUSG00000024097 | 86.30912585 | 146.0796212 | 100.9795998 | 297.213881  | 224.1689055 |
| ENSMUSG00000024099 | 82.06441475 | 114.081228  | 98.86114669 | 134.5114312 | 114.5911338 |
| ENSMUSG00000024101 | 29.71297775 | 60.51870021 | 51.54902649 | 49.132918   | 47.2688427  |
| ENSMUSG00000024104 | 20.51610369 | 24.34660353 | 17.65377619 | 42.68925662 | 37.24211849 |
| ENSMUSG00000024109 | 6.367066661 | 9.043024169 | 5.649208382 | 4.02728836  | 6.445751277 |
| ENSMUSG00000024112 | 5.65961481  | 6.956172438 | 9.179963621 | 4.02728836  | 7.161945863 |
| ENSMUSG00000024114 | 6.367066661 | 6.260555194 | 9.886114669 | 10.47094974 | 8.594335036 |
| ENSMUSG00000024118 | 12.73413332 | 14.60796212 | 26.12758877 | 22.55281482 | 20.05344842 |
| ENSMUSG00000024120 | 107.5326814 | 137.7322143 | 133.462548  | 231.9718096 | 158.9951982 |
| ENSMUSG00000024121 | 33.25023701 | 47.99758982 | 51.54902649 | 158.6751614 | 121.0368851 |
| ENSMUSG00000024122 | 11.31922962 | 11.1298759  | 10.59226572 | 6.443661377 | 10.02672421 |
| ENSMUSG00000024127 | 31.12788146 | 49.38882431 | 58.61053696 | 24.16373016 | 32.94495097 |
| ENSMUSG00000024128 | 8.489422215 | 6.956172438 | 7.767661525 | 8.860034393 | 8.594335036 |
| ENSMUSG00000024130 | 39.61730367 | 66.08363816 | 61.43514116 | 34.6346799  | 47.98503729 |
| ENSMUSG00000024134 | 8.489422215 | 5.56493795  | 4.236906287 | 4.832746033 | 7.87814045  |
| ENSMUSG00000024136 | 10.61177777 | 11.82549314 | 7.061510478 | 8.860034393 | 7.161945863 |
| ENSMUSG00000024142 | 31.83533331 | 31.99839321 | 30.36449505 | 41.07834128 | 33.66114556 |
| ENSMUSG00000024143 | 83.47931845 | 91.12585893 | 97.44884459 | 67.65844446 | 60.87653984 |
| ENSMUSG00000024150 | 35.37259256 | 61.21431745 | 39.54445867 | 36.24559524 | 38.67450766 |
| ENSMUSG00000024151 | 42.44711108 | 54.95376226 | 48.01827125 | 47.52200265 | 41.53928601 |
| ENSMUSG00000024154 | 4.952162959 | 4.869320706 | 9.179963621 | 8.860034393 | 6.445751277 |
| ENSMUSG00000024158 | 5.65961481  | 7.651789682 | 9.886114669 | 1.610915344 | 9.310529622 |
| ENSMUSG00000024160 | 89.13893326 | 123.8198694 | 107.3349593 | 118.4022778 | 99.5510475  |
| ENSMUSG00000024163 | 89.13893326 | 90.43024169 | 91.09348516 | 128.0677699 | 119.6044959 |
| ENSMUSG00000024164 | 8.489422215 | 6.260555194 | 7.767661525 | 8.860034393 | 6.445751277 |
| ENSMUSG00000024169 | 42.44711108 | 57.04061399 | 45.8998181  | 105.514955  | 73.76804239 |
| ENSMUSG00000024170 | 11.31922962 | 26.43345526 | 19.77222934 | 21.74735715 | 32.22875639 |
| ENSMUSG00000024172 | 9.196874066 | 6.956172438 | 6.35535943  | 4.832746033 | 7.161945863 |
| ENSMUSG00000024173 | 14.85648888 | 6.956172438 | 4.236906287 | 9.665492065 | 7.161945863 |
| ENSMUSG00000024176 | 7.781970364 | 6.956172438 | 6.35535943  | 4.02728836  | 9.310529622 |
| ENSMUSG00000024180 | 7.781970364 | 11.1298759  | 12.00456781 | 5.638203705 | 12.17530797 |
| ENSMUSG00000024182 | 108.9475851 | 136.3409798 | 136.2871522 | 130.4841429 | 118.8883013 |
| ENSMUSG00000024184 | 6.367066661 | 4.173703463 | 4.943057334 | 1.610915344 | 5.729556691 |
| ENSMUSG00000024186 | 13.44158517 | 2.782468975 | 6.35535943  | 7.249119049 | 7.87814045  |
| ENSMUSG00000024187 | 8.489422215 | 13.91234488 | 8.473812573 | 10.47094974 | 6.445751277 |
| ENSMUSG00000024188 | 58.71850365 | 95.99517964 | 80.50121945 | 211.8353678 | 180.4810358 |
| ENSMUSG00000024191 | 36.78749627 | 54.25814501 | 38.13215658 | 37.05105292 | 37.24211849 |
| ENSMUSG00000024194 | 15.56394073 | 21.56413456 | 22.59683353 | 30.60739154 | 25.78300511 |
| ENSMUSG00000024201 | 67.20792587 | 101.5601176 | 97.44884459 | 66.04752911 | 68.75468029 |
| ENSMUSG00000024206 | 12.02668147 | 20.17290007 | 15.53532305 | 5.638203705 | 8.594335036 |
| ENSMUSG00000024208 | 25.46826665 | 41.04141738 | 45.8998181  | 42.68925662 | 46.55264811 |
| ENSMUSG00000024211 | 7.781970364 | 5.56493795  | 8.473812573 | 5.638203705 | 2.864778345 |
| ENSMUSG00000024213 | 39.61730367 | 61.9099347  | 70.61510478 | 86.18397091 | 83.07857202 |

|                    |             |             |             |             |             |
|--------------------|-------------|-------------|-------------|-------------|-------------|
| ENSMUSG00000024215 | 11.31922962 | 5.56493795  | 11.29841676 | 8.054576721 | 5.013362104 |
| ENSMUSG00000024218 | 18.39374813 | 28.52030699 | 28.95219296 | 34.6346799  | 36.5259239  |
| ENSMUSG00000024219 | 23.34591109 | 39.6501829  | 31.77679715 | 29.80193387 | 37.24211849 |
| ENSMUSG00000024220 | 12.02668147 | 11.82549314 | 13.41686991 | 19.33098413 | 11.45911338 |
| ENSMUSG00000024222 | 11.31922962 | 3.478086219 | 9.179963621 | 9.665492065 | 6.445751277 |
| ENSMUSG00000024227 | 12.73413332 | 17.39043109 | 12.00456781 | 7.249119049 | 10.02672421 |
| ENSMUSG00000024228 | 8.489422215 | 7.651789682 | 8.473812573 | 4.02728836  | 4.297167518 |
| ENSMUSG00000024231 | 51.64398514 | 102.2557348 | 84.73812573 | 99.07129367 | 86.65954495 |
| ENSMUSG00000024233 | 9.196874066 | 6.956172438 | 5.649208382 | 8.054576721 | 5.729556691 |
| ENSMUSG00000024235 | 94.79854807 | 107.8206728 | 100.2734488 | 263.3846588 | 164.0085603 |
| ENSMUSG00000024236 | 7.074518513 | 6.260555194 | 11.29841676 | 8.054576721 | 7.87814045  |
| ENSMUSG00000024238 | 57.30359995 | 61.9099347  | 55.07978173 | 98.265836   | 100.2672421 |
| ENSMUSG00000024240 | 58.71850365 | 78.60474855 | 63.5535943  | 52.35474869 | 56.57937232 |
| ENSMUSG00000024242 | 15.56394073 | 34.78086219 | 31.77679715 | 20.94189947 | 17.18867007 |
| ENSMUSG00000024247 | 9.196874066 | 6.956172438 | 7.061510478 | 7.249119049 | 5.729556691 |
| ENSMUSG00000024248 | 84.1867703  | 102.9513521 | 109.4534124 | 149.815127  | 132.4959985 |
| ENSMUSG00000024254 | 9.196874066 | 9.738641413 | 7.061510478 | 4.02728836  | 7.87814045  |
| ENSMUSG00000024260 | 39.61730367 | 52.17129328 | 52.96132858 | 61.21478308 | 42.97167518 |
| ENSMUSG00000024268 | 9.904325918 | 5.56493795  | 10.59226572 | 2.416373016 | 7.161945863 |
| ENSMUSG00000024269 | 17.68629628 | 54.25814501 | 45.8998181  | 19.33098413 | 33.66114556 |
| ENSMUSG00000024270 | 25.46826665 | 48.69320706 | 62.84744325 | 111.9586164 | 91.67290705 |
| ENSMUSG00000024274 | 9.904325918 | 13.21672763 | 9.886114669 | 11.27640741 | 15.7562809  |
| ENSMUSG00000024277 | 5.65961481  | 4.173703463 | 9.179963621 | 4.02728836  | 3.580972932 |
| ENSMUSG00000024283 | 40.32475552 | 75.82227957 | 68.49665163 | 170.7570265 | 161.1437819 |
| ENSMUSG00000024292 | 9.904325918 | 5.56493795  | 9.179963621 | 10.47094974 | 7.161945863 |
| ENSMUSG00000024293 | 41.03220737 | 53.56252777 | 50.13672439 | 111.1531587 | 95.97007457 |
| ENSMUSG00000024294 | 12.73413332 | 22.2597518  | 18.35992724 | 37.05105292 | 42.25548059 |
| ENSMUSG00000024298 | 147.1499851 | 169.7306075 | 152.5286263 | 227.9445212 | 163.2923657 |
| ENSMUSG00000024299 | 15.56394073 | 25.73783802 | 18.35992724 | 41.88379895 | 34.37734014 |
| ENSMUSG00000024300 | 12.73413332 | 25.04222078 | 18.35992724 | 16.10915344 | 12.89150255 |
| ENSMUSG00000024302 | 7.781970364 | 4.869320706 | 12.00456781 | 4.832746033 | 10.02672421 |
| ENSMUSG00000024304 | 7.781970364 | 1.391234488 | 6.35535943  | 2.416373016 | 2.864778345 |
| ENSMUSG00000024306 | 7.781970364 | 9.043024169 | 7.061510478 | 4.832746033 | 9.310529622 |
| ENSMUSG00000024308 | 3.537259256 | 3.478086219 | 6.35535943  | 16.10915344 | 10.02672421 |
| ENSMUSG00000024309 | 57.30359995 | 71.64857611 | 71.32125582 | 120.0131931 | 96.68626916 |
| ENSMUSG00000024317 | 50.93653329 | 71.64857611 | 67.08434954 | 83.7675979  | 84.51096119 |
| ENSMUSG00000024319 | 52.35143699 | 94.60394515 | 85.44427678 | 348.763172  | 233.4794351 |
| ENSMUSG00000024327 | 0           | 0           | 0.706151048 | 1.610915344 | 2.864778345 |
| ENSMUSG00000024330 | 8.489422215 | 6.260555194 | 7.767661525 | 3.221830688 | 10.02672421 |
| ENSMUSG00000024331 | 3.537259256 | 10.43425866 | 2.824604191 | 4.02728836  | 2.864778345 |
| ENSMUSG00000024335 | 57.30359995 | 101.5601176 | 83.32582364 | 243.248217  | 194.0887329 |
| ENSMUSG00000024338 | 128.0487851 | 145.3840039 | 134.1686991 | 298.0193387 | 210.5612084 |
| ENSMUSG00000024339 | 56.5961481  | 85.56092098 | 83.32582364 | 161.8969921 | 119.6044959 |



|                    |             |             |             |             |             |
|--------------------|-------------|-------------|-------------|-------------|-------------|
| ENSMUSG00000024340 | 26.88317035 | 44.5195036  | 40.95676077 | 27.38556085 | 27.93158887 |
| ENSMUSG00000024347 | 9.904325918 | 3.478086219 | 4.943057334 | 4.832746033 | 8.594335036 |
| ENSMUSG00000024352 | 14.85648888 | 15.99919661 | 20.47838039 | 16.91461111 | 20.769643   |
| ENSMUSG00000024354 | 11.31922962 | 20.17290007 | 18.35992724 | 9.665492065 | 11.45911338 |
| ENSMUSG00000024369 | 36.78749627 | 60.51870021 | 40.25060972 | 71.68573282 | 60.87653984 |
| ENSMUSG00000024370 | 71.45263698 | 79.99598303 | 67.79050059 | 140.9550926 | 113.1587446 |
| ENSMUSG00000024371 | 19.80865184 | 35.47647943 | 26.83373982 | 42.68925662 | 42.97167518 |
| ENSMUSG00000024381 | 9.196874066 | 5.56493795  | 9.886114669 | 9.665492065 | 5.013362104 |
| ENSMUSG00000024382 | 38.20239997 | 52.17129328 | 51.54902649 | 61.21478308 | 63.0251236  |
| ENSMUSG00000024387 | 119.5593629 | 157.2094971 | 148.9978711 | 181.2279762 | 158.2790036 |
| ENSMUSG00000024388 | 5.65961481  | 2.782468975 | 5.649208382 | 8.054576721 | 10.7429188  |
| ENSMUSG00000024392 | 109.6550369 | 147.4708557 | 127.1071886 | 199.7535027 | 148.968474  |
| ENSMUSG00000024393 | 23.34591109 | 38.95456565 | 32.4829482  | 22.55281482 | 31.5125618  |
| ENSMUSG00000024397 | 11.31922962 | 21.56413456 | 23.30298458 | 12.08186508 | 15.04008631 |
| ENSMUSG00000024400 | 171.203348  | 190.5991248 | 173.0070067 | 228.7499789 | 199.8182896 |
| ENSMUSG00000024401 | 40.32475552 | 55.6493795  | 59.31668801 | 148.2042117 | 95.25387998 |
| ENSMUSG00000024403 | 25.46826665 | 48.69320706 | 38.13215658 | 93.43308996 | 94.5376854  |
| ENSMUSG00000024406 | 7.074518513 | 6.260555194 | 8.473812573 | 10.47094974 | 8.594335036 |
| ENSMUSG00000024410 | 53.05888884 | 68.17048989 | 56.49208382 | 57.99295239 | 50.13362104 |
| ENSMUSG00000024413 | 48.81417774 | 70.95295887 | 57.90438592 | 31.41284921 | 47.98503729 |
| ENSMUSG00000024414 | 45.27691848 | 61.9099347  | 55.78593277 | 79.74030954 | 63.0251236  |
| ENSMUSG00000024421 | 9.904325918 | 11.1298759  | 4.943057334 | 3.221830688 | 9.310529622 |
| ENSMUSG00000024422 | 42.44711108 | 64.69240367 | 71.32125582 | 103.9040397 | 88.09193412 |
| ENSMUSG00000024424 | 6.367066661 | 5.56493795  | 4.943057334 | 4.02728836  | 4.297167518 |
| ENSMUSG00000024426 | 18.39374813 | 30.60715873 | 24.71528667 | 32.21830688 | 35.09353473 |
| ENSMUSG00000024430 | 5.65961481  | 6.956172438 | 4.943057334 | 4.832746033 | 6.445751277 |
| ENSMUSG00000024431 | 6.367066661 | 15.99919661 | 19.06607829 | 24.96918783 | 26.49919969 |
| ENSMUSG00000024436 | 74.98989623 | 123.8198694 | 88.97503202 | 296.4084233 | 206.9802355 |
| ENSMUSG00000024440 | 9.904325918 | 5.56493795  | 8.473812573 | 6.443661377 | 12.89150255 |
| ENSMUSG00000024446 | 12.02668147 | 26.43345526 | 21.89068248 | 16.10915344 | 26.49919969 |
| ENSMUSG00000024448 | 9.196874066 | 6.260555194 | 5.649208382 | 4.832746033 | 5.729556691 |
| ENSMUSG00000024454 | 45.27691848 | 58.43184848 | 62.84744325 | 58.79841006 | 49.41742646 |
| ENSMUSG00000024456 | 89.84638511 | 121.7330177 | 118.633376  | 178.0061455 | 126.7664418 |
| ENSMUSG00000024457 | 55.88869625 | 86.25653823 | 55.07978173 | 82.15668255 | 70.18706946 |
| ENSMUSG00000024462 | 7.074518513 | 9.043024169 | 7.767661525 | 8.054576721 | 8.594335036 |
| ENSMUSG00000024471 | 9.904325918 | 10.43425866 | 9.886114669 | 4.02728836  | 5.013362104 |
| ENSMUSG00000024483 | 82.06441475 | 121.0374004 | 110.8657145 | 240.0263863 | 195.5211221 |
| ENSMUSG00000024485 | 6.367066661 | 7.651789682 | 4.943057334 | 5.638203705 | 8.594335036 |
| ENSMUSG00000024491 | 141.4903703 | 178.0780144 | 153.9409284 | 200.5589604 | 176.1838682 |
| ENSMUSG00000024498 | 120.2668147 | 125.9067211 | 126.4010376 | 251.3027937 | 173.3190899 |
| ENSMUSG00000024500 | 11.31922962 | 9.043024169 | 7.767661525 | 2.416373016 | 9.310529622 |
| ENSMUSG00000024501 | 12.73413332 | 6.956172438 | 7.767661525 | 4.832746033 | 5.729556691 |
| ENSMUSG00000024505 | 21.22355554 | 27.12907251 | 30.36449505 | 29.80193387 | 29.36397804 |

|                    |             |             |             |             |             |
|--------------------|-------------|-------------|-------------|-------------|-------------|
| ENSMUSG00000024511 | 9.196874066 | 9.043024169 | 12.00456781 | 4.832746033 | 7.87814045  |
| ENSMUSG00000024513 | 84.89422215 | 121.0374004 | 97.44884459 | 136.1223466 | 117.4559122 |
| ENSMUSG00000024515 | 101.1656147 | 124.5154866 | 109.4534124 | 110.3477011 | 126.7664418 |
| ENSMUSG00000024516 | 36.78749627 | 54.95376226 | 43.07521391 | 101.4876667 | 73.76804239 |
| ENSMUSG00000024517 | 9.196874066 | 4.869320706 | 9.179963621 | 4.02728836  | 7.87814045  |
| ENSMUSG00000024524 | 7.781970364 | 8.347406925 | 7.767661525 | 8.054576721 | 5.729556691 |
| ENSMUSG00000024529 | 15.56394073 | 4.869320706 | 4.943057334 | 1.610915344 | 10.02672421 |
| ENSMUSG00000024532 | 7.074518513 | 4.173703463 | 3.530755239 | 4.02728836  | 7.87814045  |
| ENSMUSG00000024533 | 6.367066661 | 6.956172438 | 10.59226572 | 1.610915344 | 9.310529622 |
| ENSMUSG00000024534 | 9.904325918 | 8.347406925 | 7.061510478 | 5.638203705 | 7.161945863 |
| ENSMUSG00000024535 | 7.781970364 | 9.738641413 | 10.59226572 | 6.443661377 | 7.87814045  |
| ENSMUSG00000024539 | 58.0110518  | 86.95215547 | 91.09348516 | 171.5624842 | 140.3741389 |
| ENSMUSG00000024548 | 21.93100739 | 37.56333116 | 28.24604191 | 27.38556085 | 35.80972932 |
| ENSMUSG00000024552 | 11.31922962 | 4.869320706 | 5.649208382 | 8.054576721 | 7.87814045  |
| ENSMUSG00000024558 | 7.781970364 | 5.56493795  | 6.35535943  | 5.638203705 | 7.87814045  |
| ENSMUSG00000024563 | 50.22908144 | 86.95215547 | 83.32582364 | 92.62763229 | 94.5376854  |
| ENSMUSG00000024571 | 0.707451851 | 0           | 0.706151048 | 0           | 0           |
| ENSMUSG00000024575 | 7.781970364 | 8.347406925 | 8.473812573 | 5.638203705 | 5.729556691 |
| ENSMUSG00000024576 | 138.6605628 | 157.2094971 | 147.585569  | 255.3300821 | 211.9935976 |
| ENSMUSG00000024581 | 60.13340736 | 74.43104508 | 59.31668801 | 50.74383334 | 65.17370736 |
| ENSMUSG00000024589 | 53.7663407  | 52.86691053 | 70.61510478 | 33.82922223 | 35.80972932 |
| ENSMUSG00000024592 | 9.904325918 | 11.1298759  | 12.71071886 | 10.47094974 | 17.90486466 |
| ENSMUSG00000024593 | 6.367066661 | 4.173703463 | 9.179963621 | 8.860034393 | 7.161945863 |
| ENSMUSG00000024597 | 12.73413332 | 5.56493795  | 3.530755239 | 25.77464551 | 20.769643   |
| ENSMUSG00000024608 | 84.1867703  | 121.7330177 | 122.8702823 | 363.2614101 | 252.816689  |
| ENSMUSG00000024610 | 113.8997481 | 135.6453625 | 118.633376  | 263.3846588 | 167.5895332 |
| ENSMUSG00000024613 | 112.4848444 | 126.6023384 | 134.8748501 | 210.2244524 | 171.1705061 |
| ENSMUSG00000024617 | 6.367066661 | 8.347406925 | 8.473812573 | 10.47094974 | 5.013362104 |
| ENSMUSG00000024620 | 8.489422215 | 3.478086219 | 6.35535943  | 8.860034393 | 8.594335036 |
| ENSMUSG00000024621 | 5.65961481  | 8.347406925 | 8.473812573 | 4.02728836  | 5.729556691 |
| ENSMUSG00000024642 | 22.63845924 | 34.78086219 | 33.89525029 | 136.9278043 | 90.24051788 |
| ENSMUSG00000024644 | 9.196874066 | 22.2597518  | 21.18453143 | 16.91461111 | 23.63442135 |
| ENSMUSG00000024646 | 31.12788146 | 45.21512085 | 57.90438592 | 47.52200265 | 42.25548059 |
| ENSMUSG00000024647 | 6.367066661 | 6.956172438 | 5.649208382 | 3.221830688 | 5.013362104 |
| ENSMUSG00000024659 | 11.31922962 | 9.043024169 | 9.179963621 | 5.638203705 | 7.161945863 |
| ENSMUSG00000024663 | 7.074518513 | 6.260555194 | 4.236906287 | 9.665492065 | 2.148583759 |
| ENSMUSG00000024667 | 18.39374813 | 20.17290007 | 19.06607829 | 16.10915344 | 13.60769714 |
| ENSMUSG00000024670 | 6.367066661 | 4.869320706 | 8.473812573 | 5.638203705 | 6.445751277 |
| ENSMUSG00000024672 | 14.85648888 | 18.08604834 | 14.12302096 | 9.665492065 | 15.04008631 |
| ENSMUSG00000024675 | 39.61730367 | 67.47487265 | 46.60596915 | 39.46742593 | 30.08017263 |
| ENSMUSG00000024677 | 8.489422215 | 11.1298759  | 16.94762515 | 11.27640741 | 12.89150255 |
| ENSMUSG00000024679 | 4.952162959 | 2.086851731 | 2.824604191 | 4.832746033 | 4.297167518 |
| ENSMUSG00000024680 | 9.196874066 | 2.086851731 | 4.236906287 | 4.02728836  | 7.87814045  |

|                    |             |             |             |             |             |
|--------------------|-------------|-------------|-------------|-------------|-------------|
| ENSMUSG00000024681 | 7.781970364 | 6.260555194 | 2.824604191 | 6.443661377 | 11.45911338 |
| ENSMUSG00000024687 | 44.56946663 | 65.38802092 | 83.32582364 | 108.7367857 | 90.95671247 |
| ENSMUSG00000024691 | 164.8362813 | 228.8580732 | 195.6038402 | 140.9550926 | 105.2806042 |
| ENSMUSG00000024695 | 39.61730367 | 57.73623123 | 58.61053696 | 136.9278043 | 105.2806042 |
| ENSMUSG00000024713 | 9.196874066 | 4.869320706 | 8.473812573 | 8.860034393 | 5.013362104 |
| ENSMUSG00000024725 | 110.3624888 | 122.4286349 | 120.0456781 | 103.098582  | 86.65954495 |
| ENSMUSG00000024728 | 7.074518513 | 11.82549314 | 1.412302096 | 8.054576721 | 9.310529622 |
| ENSMUSG00000024731 | 9.904325918 | 6.956172438 | 6.35535943  | 12.88732275 | 7.87814045  |
| ENSMUSG00000024735 | 57.30359995 | 71.64857611 | 81.20737049 | 184.4498069 | 148.2522794 |
| ENSMUSG00000024736 | 3.537259256 | 8.347406925 | 6.35535943  | 6.443661377 | 7.87814045  |
| ENSMUSG00000024742 | 50.93653329 | 82.77845201 | 63.5535943  | 186.0607223 | 118.8883013 |
| ENSMUSG00000024743 | 7.781970364 | 7.651789682 | 6.35535943  | 4.02728836  | 5.729556691 |
| ENSMUSG00000024750 | 89.84638511 | 117.5593142 | 93.21193831 | 192.5043836 | 169.0219224 |
| ENSMUSG00000024754 | 20.51610369 | 26.43345526 | 28.24604191 | 14.4982381  | 17.18867007 |
| ENSMUSG00000024758 | 82.06441475 | 115.4724625 | 126.4010376 | 113.5695318 | 111.0101609 |
| ENSMUSG00000024759 | 19.80865184 | 39.6501829  | 33.89525029 | 54.7711217  | 43.68786977 |
| ENSMUSG00000024766 | 5.65961481  | 8.347406925 | 8.473812573 | 6.443661377 | 12.89150255 |
| ENSMUSG00000024767 | 53.7663407  | 87.64777272 | 74.14586002 | 115.1804471 | 93.82149081 |
| ENSMUSG00000024770 | 4.952162959 | 1.391234488 | 4.236906287 | 0           | 1.432389173 |
| ENSMUSG00000024773 | 38.20239997 | 39.6501829  | 49.43057334 | 48.32746033 | 37.95831308 |
| ENSMUSG00000024774 | 10.61177777 | 4.173703463 | 9.886114669 | 4.02728836  | 10.02672421 |
| ENSMUSG00000024776 | 46.69182218 | 62.60555194 | 62.1412922  | 86.98942859 | 74.48423698 |
| ENSMUSG00000024778 | 14.85648888 | 10.43425866 | 7.767661525 | 31.41284921 | 24.35061594 |
| ENSMUSG00000024781 | 29.71297775 | 36.17209668 | 33.18909925 | 21.74735715 | 22.20203218 |
| ENSMUSG00000024784 | 8.489422215 | 6.260555194 | 13.41686991 | 8.054576721 | 10.7429188  |
| ENSMUSG00000024787 | 10.61177777 | 22.2597518  | 10.59226572 | 16.10915344 | 12.17530797 |
| ENSMUSG00000024789 | 16.27139258 | 21.56413456 | 16.94762515 | 53.16020636 | 50.13362104 |
| ENSMUSG00000024791 | 52.35143699 | 85.56092098 | 64.25974535 | 144.1769233 | 99.5510475  |
| ENSMUSG00000024793 | 14.14903703 | 2.782468975 | 11.29841676 | 9.665492065 | 7.87814045  |
| ENSMUSG00000024795 | 45.98437033 | 63.30116918 | 54.37363068 | 156.2587884 | 112.4425501 |
| ENSMUSG00000024797 | 7.074518513 | 13.91234488 | 6.35535943  | 7.249119049 | 5.729556691 |
| ENSMUSG00000024798 | 4.952162959 | 6.260555194 | 7.061510478 | 32.21830688 | 28.64778345 |
| ENSMUSG00000024799 | 14.14903703 | 21.56413456 | 17.65377619 | 15.30369577 | 15.04008631 |
| ENSMUSG00000024805 | 16.27139258 | 15.30357936 | 18.35992724 | 63.6311561  | 46.55264811 |
| ENSMUSG00000024807 | 100.4581629 | 116.1680797 | 108.0411103 | 258.5519127 | 186.926787  |
| ENSMUSG00000024810 | 4.952162959 | 4.869320706 | 6.35535943  | 3.221830688 | 7.161945863 |
| ENSMUSG00000024811 | 141.4903703 | 154.4270281 | 128.5194907 | 219.8899445 | 167.5895332 |
| ENSMUSG00000024816 | 46.69182218 | 82.77845201 | 46.60596915 | 41.88379895 | 46.55264811 |
| ENSMUSG00000024817 | 87.72402956 | 101.5601176 | 88.97503202 | 140.9550926 | 110.2939663 |
| ENSMUSG00000024818 | 23.34591109 | 40.34580014 | 26.83373982 | 37.85651059 | 44.40406435 |
| ENSMUSG00000024826 | 159.8841184 | 183.6429524 | 163.120892  | 167.5351958 | 161.8599765 |
| ENSMUSG00000024829 | 31.12788146 | 44.5195036  | 48.7244223  | 94.23854763 | 79.49759908 |
| ENSMUSG00000024830 | 38.90985182 | 64.69240367 | 53.66747963 | 59.60386773 | 51.56601022 |

|                    |             |             |             |             |             |
|--------------------|-------------|-------------|-------------|-------------|-------------|
| ENSMUSG00000024831 | 33.25023701 | 53.56252777 | 52.96132858 | 80.54576721 | 79.49759908 |
| ENSMUSG00000024833 | 37.49494812 | 57.04061399 | 61.43514116 | 125.6513968 | 92.38910164 |
| ENSMUSG00000024835 | 41.73965922 | 49.38882431 | 61.43514116 | 86.18397091 | 60.87653984 |
| ENSMUSG00000024837 | 7.781970364 | 4.869320706 | 5.649208382 | 6.443661377 | 4.297167518 |
| ENSMUSG00000024843 | 25.46826665 | 34.78086219 | 36.01370344 | 43.49471429 | 48.70123187 |
| ENSMUSG00000024844 | 56.5961481  | 90.43024169 | 93.91808935 | 244.8591323 | 196.9535112 |
| ENSMUSG00000024847 | 103.9954221 | 123.8198694 | 135.5810012 | 127.2623122 | 115.3073284 |
| ENSMUSG00000024851 | 16.97884443 | 23.65098629 | 38.83830763 | 36.24559524 | 43.68786977 |
| ENSMUSG00000024856 | 8.489422215 | 11.82549314 | 12.00456781 | 21.74735715 | 24.35061594 |
| ENSMUSG00000024857 | 6.367066661 | 6.260555194 | 12.71071886 | 5.638203705 | 5.729556691 |
| ENSMUSG00000024858 | 55.88869625 | 77.9091313  | 71.32125582 | 160.2860767 | 123.1854689 |
| ENSMUSG00000024862 | 21.22355554 | 24.34660353 | 12.00456781 | 14.4982381  | 18.62105924 |
| ENSMUSG00000024867 | 19.80865184 | 25.04222078 | 21.89068248 | 15.30369577 | 14.32389173 |
| ENSMUSG00000024871 | 6.367066661 | 7.651789682 | 8.473812573 | 6.443661377 | 8.594335036 |
| ENSMUSG00000024892 | 4.244711108 | 4.173703463 | 7.061510478 | 4.02728836  | 6.445751277 |
| ENSMUSG00000024901 | 6.367066661 | 9.043024169 | 11.29841676 | 4.02728836  | 10.7429188  |
| ENSMUSG00000024903 | 10.61177777 | 2.782468975 | 9.179963621 | 8.860034393 | 12.89150255 |
| ENSMUSG00000024905 | 10.61177777 | 10.43425866 | 7.767661525 | 8.860034393 | 7.87814045  |
| ENSMUSG00000024908 | 152.8095999 | 203.1202352 | 158.1778347 | 202.1698757 | 161.1437819 |
| ENSMUSG00000024909 | 11.31922962 | 5.56493795  | 5.649208382 | 2.416373016 | 9.310529622 |
| ENSMUSG00000024913 | 7.074518513 | 9.738641413 | 9.179963621 | 4.832746033 | 11.45911338 |
| ENSMUSG00000024914 | 50.93653329 | 79.30036579 | 76.26431316 | 120.0131931 | 77.34901533 |
| ENSMUSG00000024921 | 12.02668147 | 15.99919661 | 12.71071886 | 16.10915344 | 11.45911338 |
| ENSMUSG00000024924 | 5.65961481  | 4.173703463 | 9.886114669 | 4.02728836  | 5.013362104 |
| ENSMUSG00000024925 | 12.73413332 | 28.52030699 | 26.12758877 | 49.132918   | 42.25548059 |
| ENSMUSG00000024935 | 9.904325918 | 6.956172438 | 8.473812573 | 4.832746033 | 8.594335036 |
| ENSMUSG00000024937 | 50.22908144 | 59.12746572 | 58.61053696 | 81.35122488 | 73.05184781 |
| ENSMUSG00000024940 | 7.074518513 | 2.782468975 | 9.179963621 | 4.02728836  | 8.594335036 |
| ENSMUSG00000024942 | 21.93100739 | 31.99839321 | 33.18909925 | 25.77464551 | 31.5125618  |
| ENSMUSG00000024947 | 33.25023701 | 46.60635533 | 53.66747963 | 52.35474869 | 44.40406435 |
| ENSMUSG00000024948 | 53.05888884 | 79.30036579 | 76.97046421 | 74.9075635  | 70.90326405 |
| ENSMUSG00000024949 | 86.30912585 | 117.5593142 | 106.6288082 | 242.4427593 | 192.6563437 |
| ENSMUSG00000024952 | 9.196874066 | 17.39043109 | 13.41686991 | 14.4982381  | 19.33725383 |
| ENSMUSG00000024953 | 57.30359995 | 72.34419335 | 79.7950684  | 135.3168889 | 97.40246374 |
| ENSMUSG00000024955 | 43.15456293 | 54.25814501 | 48.7244223  | 74.9075635  | 65.88990194 |
| ENSMUSG00000024958 | 16.97884443 | 20.17290007 | 23.30298458 | 23.35827249 | 27.21539428 |
| ENSMUSG00000024959 | 16.97884443 | 18.08604834 | 21.18453143 | 16.10915344 | 20.769643   |
| ENSMUSG00000024962 | 11.31922962 | 25.73783802 | 20.47838039 | 23.35827249 | 17.18867007 |
| ENSMUSG00000024963 | 14.85648888 | 20.17290007 | 11.29841676 | 16.91461111 | 7.161945863 |
| ENSMUSG00000024968 | 6.367066661 | 7.651789682 | 4.236906287 | 10.47094974 | 5.013362104 |
| ENSMUSG00000024969 | 77.11225179 | 76.51789682 | 87.56272992 | 128.0677699 | 125.3340526 |
| ENSMUSG00000024972 | 7.781970364 | 5.56493795  | 6.35535943  | 4.832746033 | 5.013362104 |
| ENSMUSG00000024973 | 6.367066661 | 8.347406925 | 4.943057334 | 6.443661377 | 5.729556691 |

|                    |             |             |             |             |             |
|--------------------|-------------|-------------|-------------|-------------|-------------|
| ENSMUSG00000024974 | 69.33028142 | 80.69160028 | 67.08434954 | 124.0404815 | 107.429188  |
| ENSMUSG00000024975 | 14.14903703 | 19.47728283 | 14.12302096 | 10.47094974 | 12.89150255 |
| ENSMUSG00000024976 | 57.30359995 | 72.34419335 | 83.32582364 | 87.79488626 | 83.7947666  |
| ENSMUSG00000024978 | 28.29807405 | 38.95456565 | 39.54445867 | 28.9964762  | 24.35061594 |
| ENSMUSG00000024979 | 5.65961481  | 6.260555194 | 1.412302096 | 5.638203705 | 5.729556691 |
| ENSMUSG00000024982 | 34.66514071 | 59.82308296 | 67.79050059 | 120.0131931 | 105.9967988 |
| ENSMUSG00000024983 | 34.66514071 | 56.34499675 | 48.7244223  | 132.9005159 | 85.94335036 |
| ENSMUSG00000024985 | 9.196874066 | 6.260555194 | 10.59226572 | 11.27640741 | 6.445751277 |
| ENSMUSG00000024986 | 24.76081479 | 55.6493795  | 45.19366706 | 36.24559524 | 40.10689684 |
| ENSMUSG00000024989 | 21.22355554 | 17.39043109 | 26.83373982 | 68.46390213 | 52.2822048  |
| ENSMUSG00000024990 | 6.367066661 | 9.043024169 | 7.767661525 | 6.443661377 | 3.580972932 |
| ENSMUSG00000024992 | 12.73413332 | 7.651789682 | 14.12302096 | 4.832746033 | 3.580972932 |
| ENSMUSG00000024993 | 35.37259256 | 63.30116918 | 50.84287544 | 56.38203705 | 62.30892901 |
| ENSMUSG00000024998 | 9.196874066 | 7.651789682 | 10.59226572 | 7.249119049 | 5.729556691 |
| ENSMUSG00000025001 | 55.88869625 | 47.30197258 | 53.66747963 | 162.7024498 | 123.1854689 |
| ENSMUSG00000025004 | 7.781970364 | 11.82549314 | 5.649208382 | 8.860034393 | 2.864778345 |
| ENSMUSG00000025007 | 9.196874066 | 13.91234488 | 20.47838039 | 77.32393652 | 54.43078856 |
| ENSMUSG00000025008 | 5.65961481  | 11.82549314 | 10.59226572 | 12.08186508 | 16.47247549 |
| ENSMUSG00000025010 | 74.28244438 | 105.7338211 | 88.26888097 | 98.265836   | 81.64618284 |
| ENSMUSG00000025013 | 14.14903703 | 11.1298759  | 7.767661525 | 4.832746033 | 7.161945863 |
| ENSMUSG00000025014 | 12.02668147 | 15.30357936 | 9.886114669 | 10.47094974 | 10.7429188  |
| ENSMUSG00000025016 | 62.96321476 | 87.64777272 | 81.20737049 | 169.1461111 | 121.7530797 |
| ENSMUSG00000025019 | 63.67066661 | 85.56092098 | 78.3827663  | 130.4841429 | 109.5777717 |
| ENSMUSG00000025020 | 9.904325918 | 6.260555194 | 7.767661525 | 6.443661377 | 7.87814045  |
| ENSMUSG00000025025 | 7.074518513 | 14.60796212 | 12.71071886 | 8.054576721 | 7.87814045  |
| ENSMUSG00000025026 | 28.29807405 | 32.69401046 | 31.0706461  | 14.4982381  | 18.62105924 |
| ENSMUSG00000025027 | 6.367066661 | 12.52111039 | 14.829172   | 11.27640741 | 7.87814045  |
| ENSMUSG00000025040 | 14.14903703 | 22.95536904 | 16.94762515 | 10.47094974 | 16.47247549 |
| ENSMUSG00000025041 | 7.781970364 | 9.738641413 | 7.061510478 | 8.054576721 | 7.87814045  |
| ENSMUSG00000025044 | 9.196874066 | 8.347406925 | 7.767661525 | 3.221830688 | 2.864778345 |
| ENSMUSG00000025059 | 10.61177777 | 19.47728283 | 14.12302096 | 15.30369577 | 18.62105924 |
| ENSMUSG00000025060 | 33.25023701 | 57.04061399 | 42.36906287 | 29.80193387 | 47.2688427  |
| ENSMUSG00000025064 | 9.904325918 | 8.347406925 | 4.943057334 | 8.860034393 | 5.729556691 |
| ENSMUSG00000025069 | 7.074518513 | 6.260555194 | 6.35535943  | 6.443661377 | 3.580972932 |
| ENSMUSG00000025075 | 7.781970364 | 7.651789682 | 4.943057334 | 5.638203705 | 8.594335036 |
| ENSMUSG00000025077 | 53.05888884 | 71.64857611 | 62.1412922  | 66.04752911 | 65.88990194 |
| ENSMUSG00000025081 | 12.02668147 | 8.347406925 | 9.886114669 | 8.054576721 | 7.87814045  |
| ENSMUSG00000025083 | 8.489422215 | 1.391234488 | 6.35535943  | 8.860034393 | 4.297167518 |
| ENSMUSG00000025085 | 11.31922962 | 15.30357936 | 13.41686991 | 11.27640741 | 8.594335036 |
| ENSMUSG00000025086 | 20.51610369 | 22.95536904 | 27.53989086 | 33.82922223 | 27.21539428 |
| ENSMUSG00000025089 | 10.61177777 | 6.260555194 | 9.179963621 | 3.221830688 | 5.013362104 |
| ENSMUSG00000025102 | 9.904325918 | 20.17290007 | 19.06607829 | 31.41284921 | 27.93158887 |
| ENSMUSG00000025104 | 7.074518513 | 8.347406925 | 9.179963621 | 7.249119049 | 4.297167518 |

|                    |             |             |             |             |             |
|--------------------|-------------|-------------|-------------|-------------|-------------|
| ENSMUSG00000025127 | 9.196874066 | 7.651789682 | 1.412302096 | 4.02728836  | 11.45911338 |
| ENSMUSG00000025130 | 41.03220737 | 61.21431745 | 43.07521391 | 170.7570265 | 115.3073284 |
| ENSMUSG00000025132 | 72.86754068 | 95.2995624  | 88.26888097 | 225.5281482 | 185.4943979 |
| ENSMUSG00000025135 | 56.5961481  | 79.30036579 | 70.61510478 | 200.5589604 | 156.8466144 |
| ENSMUSG00000025137 | 34.66514071 | 48.69320706 | 43.07521391 | 95.04400531 | 93.82149081 |
| ENSMUSG00000025138 | 3.537259256 | 4.869320706 | 6.35535943  | 6.443661377 | 3.580972932 |
| ENSMUSG00000025139 | 5.65961481  | 6.260555194 | 8.473812573 | 7.249119049 | 5.729556691 |
| ENSMUSG00000025140 | 7.781970364 | 6.260555194 | 9.179963621 | 6.443661377 | 5.729556691 |
| ENSMUSG00000025142 | 31.12788146 | 41.04141738 | 30.36449505 | 28.9964762  | 35.80972932 |
| ENSMUSG00000025144 | 9.904325918 | 23.65098629 | 23.30298458 | 16.91461111 | 20.769643   |
| ENSMUSG00000025145 | 9.904325918 | 15.30357936 | 13.41686991 | 16.10915344 | 22.91822676 |
| ENSMUSG00000025150 | 10.61177777 | 7.651789682 | 5.649208382 | 7.249119049 | 5.013362104 |
| ENSMUSG00000025151 | 4.244711108 | 2.086851731 | 4.236906287 | 2.416373016 | 0           |
| ENSMUSG00000025154 | 17.68629628 | 32.69401046 | 26.83373982 | 40.2728836  | 34.37734014 |
| ENSMUSG00000025155 | 38.90985182 | 58.43184848 | 58.61053696 | 120.0131931 | 93.10529622 |
| ENSMUSG00000025156 | 31.83533331 | 38.95456565 | 43.78136496 | 69.2693598  | 48.70123187 |
| ENSMUSG00000025161 | 9.904325918 | 6.956172438 | 6.35535943  | 4.02728836  | 7.87814045  |
| ENSMUSG00000025162 | 138.6605628 | 172.5130765 | 149.7040221 | 252.913709  | 183.3458141 |
| ENSMUSG00000025165 | 11.31922962 | 8.347406925 | 12.71071886 | 6.443661377 | 5.013362104 |
| ENSMUSG00000025170 | 0           | 0.695617244 | 2.824604191 | 0           | 0           |
| ENSMUSG00000025173 | 108.9475851 | 155.8182626 | 147.585569  | 169.1461111 | 146.8198902 |
| ENSMUSG00000025175 | 7.074518513 | 5.56493795  | 5.649208382 | 4.832746033 | 7.87814045  |
| ENSMUSG00000025176 | 8.489422215 | 6.956172438 | 9.179963621 | 4.02728836  | 7.161945863 |
| ENSMUSG00000025184 | 97.62835547 | 146.7752384 | 117.927225  | 82.15668255 | 81.64618284 |
| ENSMUSG00000025185 | 6.367066661 | 3.478086219 | 6.35535943  | 7.249119049 | 5.729556691 |
| ENSMUSG00000025188 | 14.85648888 | 13.21672763 | 9.886114669 | 7.249119049 | 9.310529622 |
| ENSMUSG00000025190 | 11.31922962 | 24.34660353 | 15.53532305 | 138.5387196 | 88.80812871 |
| ENSMUSG00000025192 | 12.02668147 | 16.69481385 | 16.2414741  | 19.33098413 | 20.769643   |
| ENSMUSG00000025193 | 21.22355554 | 29.91154148 | 24.00913562 | 39.46742593 | 35.80972932 |
| ENSMUSG00000025198 | 14.85648888 | 22.2597518  | 29.65834401 | 29.80193387 | 17.90486466 |
| ENSMUSG00000025199 | 78.52715549 | 114.7768452 | 94.6242404  | 136.9278043 | 91.67290705 |
| ENSMUSG00000025204 | 30.4204296  | 57.04061399 | 41.66291182 | 35.44013757 | 39.39070225 |
| ENSMUSG00000025207 | 5.65961481  | 12.52111039 | 7.061510478 | 11.27640741 | 5.013362104 |
| ENSMUSG00000025212 | 12.73413332 | 24.34660353 | 21.18453143 | 16.10915344 | 10.7429188  |
| ENSMUSG00000025213 | 4.952162959 | 9.738641413 | 5.649208382 | 2.416373016 | 6.445751277 |
| ENSMUSG00000025215 | 7.074518513 | 4.173703463 | 5.649208382 | 3.221830688 | 5.013362104 |
| ENSMUSG00000025217 | 38.20239997 | 57.73623123 | 49.43057334 | 31.41284921 | 42.97167518 |
| ENSMUSG00000025219 | 3.537259256 | 5.56493795  | 6.35535943  | 6.443661377 | 6.445751277 |
| ENSMUSG00000025221 | 9.904325918 | 11.82549314 | 9.179963621 | 7.249119049 | 7.161945863 |
| ENSMUSG00000025223 | 49.52162959 | 71.64857611 | 79.08891735 | 190.0880106 | 142.5227227 |
| ENSMUSG00000025224 | 82.06441475 | 106.4294383 | 96.74269354 | 83.7675979  | 90.24051788 |
| ENSMUSG00000025225 | 38.20239997 | 58.43184848 | 66.37819849 | 111.9586164 | 100.9834367 |
| ENSMUSG00000025226 | 5.65961481  | 10.43425866 | 8.473812573 | 12.08186508 | 12.17530797 |

|                    |             |             |             |             |             |
|--------------------|-------------|-------------|-------------|-------------|-------------|
| ENSMUSG00000025227 | 0           | 2.782468975 | 4.236906287 | 1.610915344 | 2.148583759 |
| ENSMUSG00000025229 | 6.367066661 | 8.347406925 | 9.886114669 | 9.665492065 | 10.7429188  |
| ENSMUSG00000025231 | 68.62282957 | 93.21271067 | 93.91808935 | 77.32393652 | 86.65954495 |
| ENSMUSG00000025234 | 74.28244438 | 102.9513521 | 97.44884459 | 274.6610662 | 189.7915654 |
| ENSMUSG00000025236 | 21.22355554 | 36.17209668 | 36.71985448 | 71.68573282 | 67.32229112 |
| ENSMUSG00000025237 | 26.1757185  | 47.30197258 | 48.7244223  | 27.38556085 | 35.09353473 |
| ENSMUSG00000025241 | 19.80865184 | 36.17209668 | 21.89068248 | 58.79841006 | 40.10689684 |
| ENSMUSG00000025243 | 7.074518513 | 9.738641413 | 10.59226572 | 10.47094974 | 7.161945863 |
| ENSMUSG00000025245 | 15.56394073 | 21.56413456 | 24.00913562 | 14.4982381  | 17.90486466 |
| ENSMUSG00000025246 | 31.12788146 | 45.21512085 | 43.07521391 | 70.88027514 | 54.43078856 |
| ENSMUSG00000025255 | 9.196874066 | 6.260555194 | 9.886114669 | 4.02728836  | 6.445751277 |
| ENSMUSG00000025260 | 4.244711108 | 6.956172438 | 11.29841676 | 12.08186508 | 7.161945863 |
| ENSMUSG00000025261 | 45.98437033 | 66.08363816 | 45.8998181  | 173.1733995 | 120.3206905 |
| ENSMUSG00000025264 | 20.51610369 | 50.08444155 | 36.71985448 | 62.82569842 | 58.72795608 |
| ENSMUSG00000025265 | 5.65961481  | 2.782468975 | 4.943057334 | 3.221830688 | 2.864778345 |
| ENSMUSG00000025266 | 21.22355554 | 26.43345526 | 21.18453143 | 46.71654498 | 42.25548059 |
| ENSMUSG00000025268 | 3.537259256 | 5.56493795  | 2.824604191 | 2.416373016 | 2.864778345 |
| ENSMUSG00000025269 | 5.65961481  | 11.1298759  | 11.29841676 | 14.4982381  | 13.60769714 |
| ENSMUSG00000025270 | 2.829807405 | 4.173703463 | 6.35535943  | 5.638203705 | 5.013362104 |
| ENSMUSG00000025271 | 8.489422215 | 20.86851731 | 14.829172   | 44.30017197 | 29.36397804 |
| ENSMUSG00000025272 | 4.244711108 | 5.56493795  | 4.236906287 | 2.416373016 | 1.432389173 |
| ENSMUSG00000025277 | 13.44158517 | 22.95536904 | 24.71528667 | 24.16373016 | 11.45911338 |
| ENSMUSG00000025283 | 16.97884443 | 25.73783802 | 22.59683353 | 30.60739154 | 18.62105924 |
| ENSMUSG00000025287 | 21.22355554 | 36.17209668 | 31.0706461  | 33.02376456 | 35.09353473 |
| ENSMUSG00000025289 | 2.829807405 | 1.391234488 | 4.943057334 | 5.638203705 | 2.864778345 |
| ENSMUSG00000025290 | 54.47379255 | 87.64777272 | 70.61510478 | 223.9172328 | 172.6028953 |
| ENSMUSG00000025314 | 67.91537772 | 78.60474855 | 93.21193831 | 62.82569842 | 60.16034525 |
| ENSMUSG00000025316 | 30.4204296  | 47.30197258 | 36.71985448 | 92.62763229 | 78.7814045  |
| ENSMUSG00000025318 | 7.781970364 | 5.56493795  | 5.649208382 | 4.832746033 | 3.580972932 |
| ENSMUSG00000025321 | 7.781970364 | 6.956172438 | 7.061510478 | 5.638203705 | 4.297167518 |
| ENSMUSG00000025323 | 37.49494812 | 40.34580014 | 36.71985448 | 18.52552646 | 30.79636721 |
| ENSMUSG00000025326 | 48.10672589 | 91.82147618 | 76.26431316 | 176.3952302 | 148.968474  |
| ENSMUSG00000025332 | 94.79854807 | 114.7768452 | 98.86114669 | 169.1461111 | 101.6996313 |
| ENSMUSG00000025333 | 7.074518513 | 4.869320706 | 2.824604191 | 0.805457672 | 2.864778345 |
| ENSMUSG00000025337 | 88.43148141 | 138.4278315 | 91.79963621 | 160.2860767 | 141.8065281 |
| ENSMUSG00000025340 | 109.6550369 | 166.9481385 | 134.8748501 | 132.9005159 | 114.5911338 |
| ENSMUSG00000025350 | 1.414903703 | 2.086851731 | 0.706151048 | 3.221830688 | 2.148583759 |
| ENSMUSG00000025351 | 7.781970364 | 6.956172438 | 7.061510478 | 4.02728836  | 7.161945863 |
| ENSMUSG00000025358 | 15.56394073 | 20.86851731 | 17.65377619 | 71.68573282 | 57.29556691 |
| ENSMUSG00000025359 | 16.97884443 | 22.2597518  | 12.00456781 | 39.46742593 | 33.66114556 |
| ENSMUSG00000025364 | 35.37259256 | 48.69320706 | 55.78593277 | 306.8793731 | 230.6146568 |
| ENSMUSG00000025369 | 4.952162959 | 6.956172438 | 12.00456781 | 15.30369577 | 10.7429188  |
| ENSMUSG00000025371 | 21.22355554 | 40.34580014 | 35.30755239 | 50.74383334 | 42.97167518 |

|                    |             |             |             |             |             |
|--------------------|-------------|-------------|-------------|-------------|-------------|
| ENSMUSG00000025372 | 14.14903703 | 27.12907251 | 28.95219296 | 51.54929101 | 44.40406435 |
| ENSMUSG00000025373 | 96.92090362 | 141.2103005 | 132.756397  | 114.3749894 | 118.8883013 |
| ENSMUSG00000025374 | 84.89422215 | 137.7322143 | 117.927225  | 123.2350238 | 93.82149081 |
| ENSMUSG00000025375 | 4.952162959 | 4.869320706 | 6.35535943  | 7.249119049 | 6.445751277 |
| ENSMUSG00000025377 | 29.0055259  | 36.17209668 | 40.95676077 | 47.52200265 | 47.2688427  |
| ENSMUSG00000025384 | 20.51610369 | 20.86851731 | 19.77222934 | 16.10915344 | 23.63442135 |
| ENSMUSG00000025393 | 2.829807405 | 8.347406925 | 6.35535943  | 5.638203705 | 7.161945863 |
| ENSMUSG00000025395 | 21.22355554 | 27.82468975 | 24.00913562 | 39.46742593 | 32.22875639 |
| ENSMUSG00000025400 | 11.31922962 | 7.651789682 | 5.649208382 | 7.249119049 | 8.594335036 |
| ENSMUSG00000025402 | 8.489422215 | 13.91234488 | 14.829172   | 23.35827249 | 19.33725383 |
| ENSMUSG00000025404 | 54.47379255 | 57.04061399 | 57.90438592 | 46.71654498 | 47.98503729 |
| ENSMUSG00000025408 | 39.61730367 | 72.34419335 | 67.08434954 | 127.2623122 | 92.38910164 |
| ENSMUSG00000025409 | 14.14903703 | 8.347406925 | 17.65377619 | 56.38203705 | 28.64778345 |
| ENSMUSG00000025410 | 27.5906222  | 40.34580014 | 46.60596915 | 37.85651059 | 52.99839939 |
| ENSMUSG00000025413 | 15.56394073 | 24.34660353 | 20.47838039 | 37.05105292 | 28.64778345 |
| ENSMUSG00000025420 | 2.122355554 | 7.651789682 | 12.00456781 | 8.860034393 | 8.594335036 |
| ENSMUSG00000025421 | 35.37259256 | 57.04061399 | 36.71985448 | 67.65844446 | 57.29556691 |
| ENSMUSG00000025423 | 13.44158517 | 20.86851731 | 16.94762515 | 68.46390213 | 60.16034525 |
| ENSMUSG00000025425 | 10.61177777 | 3.478086219 | 6.35535943  | 8.054576721 | 7.161945863 |
| ENSMUSG00000025427 | 8.489422215 | 5.56493795  | 7.767661525 | 2.416373016 | 7.87814045  |
| ENSMUSG00000025428 | 107.5326814 | 159.9919661 | 142.6425116 | 269.8283202 | 209.8450138 |
| ENSMUSG00000025432 | 7.074518513 | 4.173703463 | 5.649208382 | 4.832746033 | 5.729556691 |
| ENSMUSG00000025436 | 15.56394073 | 22.2597518  | 28.24604191 | 30.60739154 | 31.5125618  |
| ENSMUSG00000025437 | 47.39927403 | 85.56092098 | 81.91352154 | 59.60386773 | 66.60609653 |
| ENSMUSG00000025451 | 32.54278516 | 57.73623123 | 57.90438592 | 111.9586164 | 88.80812871 |
| ENSMUSG00000025453 | 29.0055259  | 39.6501829  | 27.53989086 | 16.91461111 | 22.20203218 |
| ENSMUSG00000025461 | 6.367066661 | 6.260555194 | 6.35535943  | 9.665492065 | 5.729556691 |
| ENSMUSG00000025464 | 13.44158517 | 14.60796212 | 13.41686991 | 8.860034393 | 12.17530797 |
| ENSMUSG00000025465 | 14.85648888 | 14.60796212 | 16.2414741  | 19.33098413 | 21.48583759 |
| ENSMUSG00000025466 | 12.02668147 | 3.478086219 | 7.767661525 | 6.443661377 | 7.161945863 |
| ENSMUSG00000025468 | 9.904325918 | 3.478086219 | 6.35535943  | 4.832746033 | 2.864778345 |
| ENSMUSG00000025469 | 5.65961481  | 7.651789682 | 7.061510478 | 3.221830688 | 5.729556691 |
| ENSMUSG00000025470 | 29.71297775 | 43.12826911 | 45.19366706 | 73.29664816 | 54.43078856 |
| ENSMUSG00000025473 | 8.489422215 | 2.782468975 | 4.236906287 | 6.443661377 | 10.7429188  |
| ENSMUSG00000025475 | 11.31922962 | 4.869320706 | 2.824604191 | 4.02728836  | 8.594335036 |
| ENSMUSG00000025477 | 47.39927403 | 62.60555194 | 75.55816211 | 31.41284921 | 46.55264811 |
| ENSMUSG00000025478 | 7.074518513 | 2.086851731 | 8.473812573 | 7.249119049 | 7.161945863 |
| ENSMUSG00000025481 | 9.904325918 | 5.56493795  | 9.179963621 | 7.249119049 | 6.445751277 |
| ENSMUSG00000025482 | 3.537259256 | 2.782468975 | 4.943057334 | 8.860034393 | 5.013362104 |
| ENSMUSG00000025485 | 50.22908144 | 85.56092098 | 75.55816211 | 140.1496349 | 124.617858  |
| ENSMUSG00000025486 | 78.52715549 | 114.081228  | 96.74269354 | 123.2350238 | 103.1320204 |
| ENSMUSG00000025487 | 79.94205919 | 109.9075245 | 86.15042783 | 111.9586164 | 100.9834367 |
| ENSMUSG00000025491 | 7.781970364 | 6.956172438 | 9.179963621 | 4.832746033 | 10.02672421 |



|                    |             |             |             |             |             |
|--------------------|-------------|-------------|-------------|-------------|-------------|
| ENSMUSG00000025495 | 9.196874066 | 6.956172438 | 8.473812573 | 9.665492065 | 7.87814045  |
| ENSMUSG00000025497 | 4.952162959 | 7.651789682 | 4.236906287 | 5.638203705 | 3.580972932 |
| ENSMUSG00000025498 | 8.489422215 | 11.82549314 | 9.886114669 | 6.443661377 | 8.594335036 |
| ENSMUSG00000025499 | 32.54278516 | 48.69320706 | 45.19366706 | 37.85651059 | 45.12025894 |
| ENSMUSG00000025500 | 11.31922962 | 10.43425866 | 9.179963621 | 7.249119049 | 8.594335036 |
| ENSMUSG00000025504 | 9.196874066 | 7.651789682 | 7.767661525 | 7.249119049 | 8.594335036 |
| ENSMUSG00000025505 | 27.5906222  | 46.60635533 | 37.42600553 | 56.38203705 | 55.14698315 |
| ENSMUSG00000025507 | 31.12788146 | 34.78086219 | 32.4829482  | 63.6311561  | 41.53928601 |
| ENSMUSG00000025508 | 3.537259256 | 4.869320706 | 2.118453143 | 2.416373016 | 5.729556691 |
| ENSMUSG00000025509 | 19.80865184 | 31.30277597 | 33.18909925 | 33.82922223 | 32.94495097 |
| ENSMUSG00000025510 | 21.93100739 | 31.99839321 | 36.01370344 | 24.96918783 | 24.35061594 |
| ENSMUSG00000025511 | 62.96321476 | 79.99598303 | 93.91808935 | 129.6786852 | 100.9834367 |
| ENSMUSG00000025512 | 24.76081479 | 32.69401046 | 28.24604191 | 55.57657937 | 40.82309142 |
| ENSMUSG00000025515 | 7.074518513 | 9.043024169 | 9.886114669 | 5.638203705 | 10.02672421 |
| ENSMUSG00000025521 | 26.88317035 | 45.91073809 | 31.0706461  | 37.85651059 | 40.82309142 |
| ENSMUSG00000025525 | 18.39374813 | 21.56413456 | 20.47838039 | 22.55281482 | 15.7562809  |
| ENSMUSG00000025528 | 6.367066661 | 4.173703463 | 3.530755239 | 1.610915344 | 2.864778345 |
| ENSMUSG00000025529 | 7.781970364 | 3.478086219 | 3.530755239 | 2.416373016 | 2.864778345 |
| ENSMUSG00000025531 | 38.20239997 | 57.04061399 | 51.54902649 | 33.82922223 | 44.40406435 |
| ENSMUSG00000025532 | 54.47379255 | 82.08283477 | 85.44427678 | 89.4058016  | 87.37573953 |
| ENSMUSG00000025533 | 12.02668147 | 21.56413456 | 12.00456781 | 11.27640741 | 13.60769714 |
| ENSMUSG00000025534 | 21.93100739 | 25.04222078 | 19.06607829 | 43.49471429 | 34.37734014 |
| ENSMUSG00000025537 | 11.31922962 | 13.21672763 | 16.2414741  | 24.96918783 | 21.48583759 |
| ENSMUSG00000025538 | 26.1757185  | 61.9099347  | 35.30755239 | 55.57657937 | 45.83645353 |
| ENSMUSG00000025544 | 146.4425332 | 192.6859765 | 146.8794179 | 252.913709  | 176.9000628 |
| ENSMUSG00000025551 | 10.61177777 | 4.869320706 | 8.473812573 | 7.249119049 | 2.864778345 |
| ENSMUSG00000025555 | 4.244711108 | 6.260555194 | 8.473812573 | 4.832746033 | 5.013362104 |
| ENSMUSG00000025558 | 7.781970364 | 16.69481385 | 12.71071886 | 23.35827249 | 24.35061594 |
| ENSMUSG00000025571 | 41.73965922 | 45.21512085 | 45.8998181  | 73.29664816 | 75.20043157 |
| ENSMUSG00000025572 | 19.10119998 | 23.65098629 | 11.29841676 | 41.88379895 | 37.24211849 |
| ENSMUSG00000025574 | 47.39927403 | 83.47406925 | 55.07978173 | 250.497336  | 170.4543116 |
| ENSMUSG00000025575 | 60.84085921 | 91.82147618 | 82.61967259 | 66.04752911 | 69.47087488 |
| ENSMUSG00000025576 | 9.904325918 | 4.173703463 | 4.236906287 | 5.638203705 | 2.148583759 |
| ENSMUSG00000025579 | 13.44158517 | 10.43425866 | 13.41686991 | 17.72006879 | 17.90486466 |
| ENSMUSG00000025580 | 72.86754068 | 122.4286349 | 100.2734488 | 263.3846588 | 213.4259867 |
| ENSMUSG00000025583 | 42.44711108 | 70.25734162 | 64.96589639 | 87.79488626 | 72.33565322 |
| ENSMUSG00000025584 | 3.537259256 | 19.47728283 | 15.53532305 | 18.52552646 | 22.20203218 |
| ENSMUSG00000025586 | 8.489422215 | 5.56493795  | 2.824604191 | 7.249119049 | 6.445751277 |
| ENSMUSG00000025592 | 2.829807405 | 4.173703463 | 4.943057334 | 2.416373016 | 3.580972932 |
| ENSMUSG00000025597 | 5.65961481  | 5.56493795  | 4.236906287 | 1.610915344 | 4.297167518 |
| ENSMUSG00000025602 | 7.074518513 | 11.1298759  | 6.35535943  | 20.1364418  | 13.60769714 |
| ENSMUSG00000025607 | 22.63845924 | 25.73783802 | 28.24604191 | 19.33098413 | 21.48583759 |
| ENSMUSG00000025609 | 147.1499851 | 180.8604834 | 164.5331941 | 117.5968201 | 131.7798039 |

|                    |             |             |             |             |             |
|--------------------|-------------|-------------|-------------|-------------|-------------|
| ENSMUSG00000025613 | 87.01657771 | 109.9075245 | 120.7518292 | 270.6337778 | 217.0069597 |
| ENSMUSG00000025616 | 70.74518513 | 97.38641413 | 79.7950684  | 152.2315    | 118.8883013 |
| ENSMUSG00000025626 | 32.54278516 | 49.38882431 | 36.71985448 | 103.098582  | 69.47087488 |
| ENSMUSG00000025647 | 62.96321476 | 82.08283477 | 96.0365425  | 33.82922223 | 37.24211849 |
| ENSMUSG00000025648 | 39.61730367 | 61.9099347  | 52.96132858 | 22.55281482 | 23.63442135 |
| ENSMUSG00000025650 | 9.904325918 | 4.173703463 | 7.767661525 | 2.416373016 | 7.161945863 |
| ENSMUSG00000025651 | 80.64951104 | 102.9513521 | 96.0365425  | 91.01671695 | 88.80812871 |
| ENSMUSG00000025656 | 5.65961481  | 3.478086219 | 3.530755239 | 3.221830688 | 4.297167518 |
| ENSMUSG00000025658 | 2.122355554 | 4.869320706 | 2.824604191 | 1.610915344 | 0           |
| ENSMUSG00000025665 | 3.537259256 | 1.391234488 | 4.943057334 | 0           | 5.013362104 |
| ENSMUSG00000025666 | 4.952162959 | 1.391234488 | 2.824604191 | 3.221830688 | 3.580972932 |
| ENSMUSG00000025701 | 7.074518513 | 11.82549314 | 7.767661525 | 10.47094974 | 9.310529622 |
| ENSMUSG00000025702 | 9.196874066 | 6.260555194 | 6.35535943  | 9.665492065 | 8.594335036 |
| ENSMUSG00000025716 | 9.904325918 | 6.260555194 | 9.179963621 | 2.416373016 | 8.594335036 |
| ENSMUSG00000025722 | 29.71297775 | 47.99758982 | 40.95676077 | 48.32746033 | 41.53928601 |
| ENSMUSG00000025723 | 7.074518513 | 15.99919661 | 16.94762515 | 15.30369577 | 10.7429188  |
| ENSMUSG00000025724 | 89.13893326 | 122.4286349 | 130.6379438 | 149.815127  | 100.9834367 |
| ENSMUSG00000025726 | 9.196874066 | 5.56493795  | 4.943057334 | 4.02728836  | 11.45911338 |
| ENSMUSG00000025728 | 3.537259256 | 6.260555194 | 9.886114669 | 0           | 2.148583759 |
| ENSMUSG00000025730 | 67.91537772 | 114.081228  | 103.098053  | 77.32393652 | 62.30892901 |
| ENSMUSG00000025731 | 24.05336294 | 27.12907251 | 21.18453143 | 24.96918783 | 26.49919969 |
| ENSMUSG00000025733 | 19.80865184 | 23.65098629 | 16.94762515 | 15.30369577 | 25.78300511 |
| ENSMUSG00000025735 | 8.489422215 | 13.21672763 | 24.71528667 | 16.91461111 | 14.32389173 |
| ENSMUSG00000025736 | 18.39374813 | 30.60715873 | 32.4829482  | 34.6346799  | 37.24211849 |
| ENSMUSG00000025739 | 8.489422215 | 6.956172438 | 5.649208382 | 5.638203705 | 2.148583759 |
| ENSMUSG00000025743 | 11.31922962 | 6.956172438 | 7.767661525 | 9.665492065 | 15.04008631 |
| ENSMUSG00000025745 | 89.13893326 | 138.4278315 | 108.0411103 | 120.8186508 | 151.1170577 |
| ENSMUSG00000025746 | 16.27139258 | 28.52030699 | 36.01370344 | 70.07481747 | 56.57937232 |
| ENSMUSG00000025747 | 14.14903703 | 15.99919661 | 12.00456781 | 84.57305557 | 56.57937232 |
| ENSMUSG00000025754 | 8.489422215 | 8.347406925 | 7.061510478 | 3.221830688 | 5.013362104 |
| ENSMUSG00000025757 | 5.65961481  | 22.2597518  | 16.2414741  | 12.88732275 | 19.33725383 |
| ENSMUSG00000025758 | 24.05336294 | 31.99839321 | 23.30298458 | 71.68573282 | 60.87653984 |
| ENSMUSG00000025759 | 24.76081479 | 53.56252777 | 34.60140134 | 35.44013757 | 32.94495097 |
| ENSMUSG00000025762 | 14.85648888 | 8.347406925 | 12.71071886 | 4.02728836  | 4.297167518 |
| ENSMUSG00000025764 | 5.65961481  | 4.869320706 | 3.530755239 | 4.832746033 | 3.580972932 |
| ENSMUSG00000025766 | 12.73413332 | 38.95456565 | 20.47838039 | 32.21830688 | 27.21539428 |
| ENSMUSG00000025774 | 7.074518513 | 5.56493795  | 8.473812573 | 4.02728836  | 7.161945863 |
| ENSMUSG00000025776 | 6.367066661 | 6.260555194 | 7.061510478 | 4.02728836  | 7.87814045  |
| ENSMUSG00000025779 | 10.61177777 | 19.47728283 | 24.71528667 | 30.60739154 | 31.5125618  |
| ENSMUSG00000025781 | 192.4269035 | 247.6397388 | 233.0298458 | 331.0431032 | 252.816689  |
| ENSMUSG00000025782 | 74.98989623 | 128.6891901 | 107.3349593 | 101.4876667 | 98.11865833 |
| ENSMUSG00000025783 | 4.952162959 | 6.260555194 | 4.236906287 | 4.832746033 | 4.297167518 |
| ENSMUSG00000025786 | 48.81417774 | 88.34338996 | 77.67661525 | 154.647873  | 149.6846685 |

|                    |             |             |             |             |             |
|--------------------|-------------|-------------|-------------|-------------|-------------|
| ENSMUSG00000025790 | 6.367066661 | 4.173703463 | 6.35535943  | 17.72006879 | 20.769643   |
| ENSMUSG00000025791 | 16.27139258 | 27.82468975 | 21.89068248 | 18.52552646 | 24.35061594 |
| ENSMUSG00000025793 | 65.79302217 | 97.38641413 | 70.61510478 | 107.9313281 | 72.33565322 |
| ENSMUSG00000025808 | 11.31922962 | 9.043024169 | 6.35535943  | 7.249119049 | 7.161945863 |
| ENSMUSG00000025809 | 25.46826665 | 25.73783802 | 31.77679715 | 98.265836   | 70.18706946 |
| ENSMUSG00000025812 | 11.31922962 | 6.260555194 | 3.530755239 | 5.638203705 | 6.445751277 |
| ENSMUSG00000025813 | 9.904325918 | 4.869320706 | 7.061510478 | 5.638203705 | 3.580972932 |
| ENSMUSG00000025815 | 7.781970364 | 5.56493795  | 10.59226572 | 4.832746033 | 10.7429188  |
| ENSMUSG00000025816 | 13.44158517 | 30.60715873 | 21.18453143 | 38.66196826 | 31.5125618  |
| ENSMUSG00000025817 | 65.08557032 | 123.8198694 | 94.6242404  | 129.6786852 | 141.0903335 |
| ENSMUSG00000025825 | 67.20792587 | 96.69079689 | 98.86114669 | 187.6716376 | 134.6445822 |
| ENSMUSG00000025838 | 9.904325918 | 7.651789682 | 5.649208382 | 4.02728836  | 9.310529622 |
| ENSMUSG00000025854 | 3.537259256 | 5.56493795  | 5.649208382 | 7.249119049 | 8.594335036 |
| ENSMUSG00000025855 | 1.414903703 | 3.478086219 | 7.061510478 | 1.610915344 | 5.013362104 |
| ENSMUSG00000025856 | 7.074518513 | 4.869320706 | 4.943057334 | 6.443661377 | 2.864778345 |
| ENSMUSG00000025857 | 14.85648888 | 20.86851731 | 18.35992724 | 24.16373016 | 18.62105924 |
| ENSMUSG00000025858 | 55.1812444  | 72.34419335 | 62.1412922  | 157.8697037 | 105.9967988 |
| ENSMUSG00000025860 | 25.46826665 | 31.30277597 | 33.18909925 | 58.79841006 | 54.43078856 |
| ENSMUSG00000025862 | 22.63845924 | 29.21592424 | 26.12758877 | 36.24559524 | 31.5125618  |
| ENSMUSG00000025869 | 49.52162959 | 69.56172438 | 76.26431316 | 140.1496349 | 105.2806042 |
| ENSMUSG00000025870 | 7.074518513 | 15.30357936 | 13.41686991 | 5.638203705 | 10.7429188  |
| ENSMUSG00000025871 | 66.50047402 | 122.4286349 | 82.61967259 | 53.96566403 | 47.98503729 |
| ENSMUSG00000025873 | 103.9954221 | 130.7760418 | 127.8133396 | 164.3133651 | 122.4692743 |
| ENSMUSG00000025875 | 9.904325918 | 10.43425866 | 6.35535943  | 8.054576721 | 10.7429188  |
| ENSMUSG00000025876 | 7.074518513 | 6.260555194 | 5.649208382 | 8.054576721 | 5.013362104 |
| ENSMUSG00000025877 | 5.65961481  | 6.956172438 | 8.473812573 | 4.832746033 | 10.7429188  |
| ENSMUSG00000025878 | 36.78749627 | 49.38882431 | 36.01370344 | 72.49119049 | 61.59273443 |
| ENSMUSG00000025880 | 62.25576291 | 68.86610713 | 76.26431316 | 130.4841429 | 116.7397176 |
| ENSMUSG00000025885 | 5.65961481  | 9.043024169 | 5.649208382 | 4.832746033 | 8.594335036 |
| ENSMUSG00000025887 | 9.904325918 | 5.56493795  | 6.35535943  | 5.638203705 | 5.729556691 |
| ENSMUSG00000025889 | 6.367066661 | 6.956172438 | 9.886114669 | 2.416373016 | 2.864778345 |
| ENSMUSG00000025892 | 6.367066661 | 5.56493795  | 7.767661525 | 5.638203705 | 9.310529622 |
| ENSMUSG00000025894 | 38.90985182 | 72.34419335 | 52.25517753 | 97.46037832 | 63.0251236  |
| ENSMUSG00000025899 | 31.12788146 | 54.95376226 | 48.01827125 | 34.6346799  | 32.22875639 |
| ENSMUSG00000025900 | 10.61177777 | 10.43425866 | 7.061510478 | 3.221830688 | 5.729556691 |
| ENSMUSG00000025902 | 9.904325918 | 9.738641413 | 8.473812573 | 8.054576721 | 2.864778345 |
| ENSMUSG00000025903 | 44.56946663 | 70.95295887 | 45.19366706 | 43.49471429 | 40.82309142 |
| ENSMUSG00000025905 | 7.781970364 | 9.043024169 | 4.236906287 | 5.638203705 | 6.445751277 |
| ENSMUSG00000025907 | 17.68629628 | 24.34660353 | 33.18909925 | 15.30369577 | 10.7429188  |
| ENSMUSG00000025909 | 8.489422215 | 6.956172438 | 3.530755239 | 5.638203705 | 10.7429188  |
| ENSMUSG00000025911 | 26.1757185  | 35.47647943 | 35.30755239 | 122.4295662 | 96.68626916 |
| ENSMUSG00000025912 | 7.074518513 | 13.91234488 | 11.29841676 | 20.1364418  | 17.18867007 |
| ENSMUSG00000025915 | 66.50047402 | 100.1688831 | 105.2165061 | 171.5624842 | 136.0769714 |

|                    |             |             |             |             |             |
|--------------------|-------------|-------------|-------------|-------------|-------------|
| ENSMUSG00000025916 | 0.707451851 | 0.695617244 | 0.706151048 | 0.805457672 | 0.716194586 |
| ENSMUSG00000025920 | 9.196874066 | 8.347406925 | 4.943057334 | 15.30369577 | 16.47247549 |
| ENSMUSG00000025925 | 80.64951104 | 127.9935729 | 97.44884459 | 123.2350238 | 101.6996313 |
| ENSMUSG00000025927 | 4.952162959 | 5.56493795  | 7.061510478 | 5.638203705 | 8.594335036 |
| ENSMUSG00000025931 | 8.489422215 | 9.738641413 | 9.179963621 | 8.860034393 | 7.161945863 |
| ENSMUSG00000025932 | 20.51610369 | 18.08604834 | 17.65377619 | 10.47094974 | 12.89150255 |
| ENSMUSG00000025933 | 12.73413332 | 11.1298759  | 14.12302096 | 11.27640741 | 5.013362104 |
| ENSMUSG00000025934 | 8.489422215 | 8.347406925 | 7.767661525 | 8.054576721 | 5.729556691 |
| ENSMUSG00000025935 | 59.42595551 | 93.90832791 | 80.50121945 | 127.2623122 | 110.2939663 |
| ENSMUSG00000025938 | 7.074518513 | 6.956172438 | 7.061510478 | 4.832746033 | 4.297167518 |
| ENSMUSG00000025939 | 55.1812444  | 77.21351406 | 69.90895373 | 148.2042117 | 113.8749392 |
| ENSMUSG00000025945 | 7.781970364 | 9.043024169 | 4.943057334 | 7.249119049 | 4.297167518 |
| ENSMUSG00000025946 | 4.952162959 | 11.1298759  | 3.530755239 | 8.860034393 | 3.580972932 |
| ENSMUSG00000025949 | 44.56946663 | 73.0398106  | 66.37819849 | 87.79488626 | 67.32229112 |
| ENSMUSG00000025950 | 43.15456293 | 70.25734162 | 54.37363068 | 75.71302118 | 63.0251236  |
| ENSMUSG00000025952 | 6.367066661 | 7.651789682 | 5.649208382 | 4.832746033 | 6.445751277 |
| ENSMUSG00000025955 | 7.781970364 | 7.651789682 | 8.473812573 | 5.638203705 | 9.310529622 |
| ENSMUSG00000025956 | 7.781970364 | 6.260555194 | 7.767661525 | 8.860034393 | 10.7429188  |
| ENSMUSG00000025958 | 31.83533331 | 55.6493795  | 44.48751601 | 103.098582  | 85.94335036 |
| ENSMUSG00000025959 | 7.074518513 | 23.65098629 | 16.2414741  | 28.9964762  | 21.48583759 |
| ENSMUSG00000025962 | 20.51610369 | 27.82468975 | 26.83373982 | 43.49471429 | 34.37734014 |
| ENSMUSG00000025964 | 10.61177777 | 6.260555194 | 6.35535943  | 6.443661377 | 9.310529622 |
| ENSMUSG00000025967 | 35.37259256 | 59.82308296 | 62.1412922  | 100.682209  | 60.16034525 |
| ENSMUSG00000025968 | 96.21345177 | 140.5146832 | 131.3440949 | 321.3776112 | 235.6280189 |
| ENSMUSG00000025969 | 10.61177777 | 6.956172438 | 5.649208382 | 24.16373016 | 28.64778345 |
| ENSMUSG00000025977 | 9.196874066 | 9.043024169 | 5.649208382 | 7.249119049 | 8.594335036 |
| ENSMUSG00000025978 | 12.02668147 | 20.86851731 | 16.2414741  | 11.27640741 | 20.769643   |
| ENSMUSG00000025979 | 153.5170517 | 196.1640627 | 167.3577983 | 246.4700477 | 184.7782033 |
| ENSMUSG00000025980 | 43.86201478 | 86.25653823 | 81.91352154 | 432.5307699 | 330.1657043 |
| ENSMUSG00000025981 | 33.25023701 | 63.30116918 | 40.25060972 | 24.16373016 | 47.2688427  |
| ENSMUSG00000025982 | 101.1656147 | 127.2979556 | 117.927225  | 272.2446932 | 189.0753708 |
| ENSMUSG00000025983 | 7.074518513 | 9.043024169 | 5.649208382 | 4.02728836  | 3.580972932 |
| ENSMUSG00000025993 | 11.31922962 | 7.651789682 | 7.767661525 | 3.221830688 | 5.013362104 |
| ENSMUSG00000025995 | 33.95768886 | 60.51870021 | 58.61053696 | 124.0404815 | 84.51096119 |
| ENSMUSG00000025997 | 11.31922962 | 11.1298759  | 7.061510478 | 4.832746033 | 3.580972932 |
| ENSMUSG00000026000 | 8.489422215 | 13.91234488 | 9.886114669 | 9.665492065 | 6.445751277 |
| ENSMUSG00000026004 | 14.85648888 | 39.6501829  | 31.77679715 | 34.6346799  | 27.93158887 |
| ENSMUSG00000026005 | 40.32475552 | 62.60555194 | 44.48751601 | 93.43308996 | 82.36237743 |
| ENSMUSG00000026009 | 5.65961481  | 9.043024169 | 8.473812573 | 4.832746033 | 10.02672421 |
| ENSMUSG00000026011 | 3.537259256 | 6.260555194 | 4.943057334 | 16.91461111 | 8.594335036 |
| ENSMUSG00000026014 | 9.904325918 | 4.869320706 | 6.35535943  | 2.416373016 | 5.729556691 |
| ENSMUSG00000026017 | 19.10119998 | 31.30277597 | 27.53989086 | 53.96566403 | 47.98503729 |
| ENSMUSG00000026018 | 10.61177777 | 5.56493795  | 7.061510478 | 1.610915344 | 8.594335036 |

|                    |             |             |             |             |             |
|--------------------|-------------|-------------|-------------|-------------|-------------|
| ENSMUSG00000026019 | 15.56394073 | 34.08524495 | 20.47838039 | 58.79841006 | 45.83645353 |
| ENSMUSG00000026021 | 138.6605628 | 189.2078903 | 177.950064  | 199.7535027 | 161.8599765 |
| ENSMUSG00000026023 | 8.489422215 | 6.260555194 | 4.943057334 | 6.443661377 | 9.310529622 |
| ENSMUSG00000026024 | 16.97884443 | 27.12907251 | 15.53532305 | 26.58010318 | 29.36397804 |
| ENSMUSG00000026027 | 128.0487851 | 162.774435  | 150.4101732 | 120.0131931 | 105.9967988 |
| ENSMUSG00000026028 | 144.3201777 | 199.642149  | 156.7655326 | 144.982381  | 134.6445822 |
| ENSMUSG00000026029 | 41.73965922 | 64.69240367 | 51.54902649 | 206.1971641 | 122.4692743 |
| ENSMUSG00000026031 | 21.93100739 | 53.56252777 | 45.8998181  | 111.9586164 | 93.10529622 |
| ENSMUSG00000026034 | 142.905274  | 195.4684455 | 144.0548137 | 281.1047276 | 226.3174893 |
| ENSMUSG00000026035 | 22.63845924 | 30.60715873 | 29.65834401 | 79.74030954 | 52.99839939 |
| ENSMUSG00000026036 | 25.46826665 | 25.04222078 | 33.18909925 | 64.43661377 | 59.44415067 |
| ENSMUSG00000026037 | 46.69182218 | 81.38721752 | 51.54902649 | 133.7059736 | 127.4826364 |
| ENSMUSG00000026042 | 9.904325918 | 4.173703463 | 12.00456781 | 3.221830688 | 3.580972932 |
| ENSMUSG00000026043 | 5.65961481  | 7.651789682 | 4.943057334 | 4.832746033 | 5.013362104 |
| ENSMUSG00000026047 | 4.244711108 | 9.043024169 | 9.179963621 | 12.08186508 | 12.17530797 |
| ENSMUSG00000026048 | 12.02668147 | 31.30277597 | 19.06607829 | 18.52552646 | 30.08017263 |
| ENSMUSG00000026049 | 31.12788146 | 37.56333116 | 52.96132858 | 101.4876667 | 103.848215  |
| ENSMUSG00000026058 | 7.781970364 | 7.651789682 | 4.943057334 | 3.221830688 | 10.7429188  |
| ENSMUSG00000026062 | 11.31922962 | 5.56493795  | 7.061510478 | 4.02728836  | 7.87814045  |
| ENSMUSG00000026064 | 34.66514071 | 56.34499675 | 45.19366706 | 137.7332619 | 113.8749392 |
| ENSMUSG00000026068 | 14.85648888 | 5.56493795  | 9.886114669 | 4.832746033 | 5.729556691 |
| ENSMUSG00000026069 | 11.31922962 | 2.782468975 | 6.35535943  | 2.416373016 | 5.729556691 |
| ENSMUSG00000026070 | 9.196874066 | 6.260555194 | 7.061510478 | 4.832746033 | 6.445751277 |
| ENSMUSG00000026072 | 6.367066661 | 6.956172438 | 6.35535943  | 9.665492065 | 6.445751277 |
| ENSMUSG00000026073 | 7.074518513 | 8.347406925 | 7.061510478 | 4.832746033 | 7.161945863 |
| ENSMUSG00000026074 | 43.86201478 | 66.08363816 | 68.49665163 | 83.7675979  | 75.91662615 |
| ENSMUSG00000026077 | 8.489422215 | 3.478086219 | 3.530755239 | 6.443661377 | 2.864778345 |
| ENSMUSG00000026078 | 41.73965922 | 59.12746572 | 39.54445867 | 47.52200265 | 54.43078856 |
| ENSMUSG00000026080 | 16.27139258 | 20.17290007 | 12.71071886 | 36.24559524 | 32.22875639 |
| ENSMUSG00000026082 | 36.78749627 | 66.08363816 | 43.78136496 | 107.9313281 | 80.92998826 |
| ENSMUSG00000026083 | 62.96321476 | 96.69079689 | 85.44427678 | 204.5862487 | 160.4275873 |
| ENSMUSG00000026085 | 8.489422215 | 9.738641413 | 4.943057334 | 7.249119049 | 5.013362104 |
| ENSMUSG00000026087 | 81.3569629  | 113.3856107 | 115.8087718 | 147.398754  | 127.4826364 |
| ENSMUSG00000026088 | 70.03773327 | 122.4286349 | 91.79963621 | 132.9005159 | 123.1854689 |
| ENSMUSG00000026090 | 4.952162959 | 4.173703463 | 7.061510478 | 4.02728836  | 4.297167518 |
| ENSMUSG00000026094 | 162.0064739 | 176.6867799 | 168.7701004 | 281.9101852 | 200.5344842 |
| ENSMUSG00000026095 | 0           | 0           | 0           | 0           | 0           |
| ENSMUSG00000026096 | 16.97884443 | 30.60715873 | 26.83373982 | 16.10915344 | 19.33725383 |
| ENSMUSG00000026098 | 50.22908144 | 65.38802092 | 64.25974535 | 50.74383334 | 63.0251236  |
| ENSMUSG00000026103 | 93.38364437 | 121.7330177 | 103.804204  | 223.1117752 | 153.9818361 |
| ENSMUSG00000026104 | 69.33028142 | 95.99517964 | 76.26431316 | 241.6373016 | 191.2239546 |
| ENSMUSG00000026107 | 28.29807405 | 43.12826911 | 33.89525029 | 172.3679418 | 116.7397176 |
| ENSMUSG00000026109 | 9.904325918 | 6.956172438 | 8.473812573 | 6.443661377 | 5.013362104 |

|                    |             |             |             |             |             |
|--------------------|-------------|-------------|-------------|-------------|-------------|
| ENSMUSG00000026110 | 29.0055259  | 45.91073809 | 47.3121202  | 52.35474869 | 47.2688427  |
| ENSMUSG00000026111 | 50.22908144 | 84.86530374 | 64.25974535 | 91.82217462 | 99.5510475  |
| ENSMUSG00000026113 | 19.10119998 | 42.43265187 | 37.42600553 | 21.74735715 | 22.91822676 |
| ENSMUSG00000026114 | 9.196874066 | 7.651789682 | 7.767661525 | 4.832746033 | 7.87814045  |
| ENSMUSG00000026115 | 8.489422215 | 9.738641413 | 8.473812573 | 4.832746033 | 11.45911338 |
| ENSMUSG00000026116 | 78.52715549 | 137.7322143 | 108.7472614 | 199.7535027 | 144.6713064 |
| ENSMUSG00000026117 | 6.367066661 | 6.260555194 | 7.767661525 | 4.832746033 | 6.445751277 |
| ENSMUSG00000026121 | 4.244711108 | 7.651789682 | 3.530755239 | 6.443661377 | 8.594335036 |
| ENSMUSG00000026123 | 19.10119998 | 35.47647943 | 40.95676077 | 41.88379895 | 60.87653984 |
| ENSMUSG00000026126 | 7.781970364 | 11.1298759  | 7.767661525 | 3.221830688 | 5.729556691 |
| ENSMUSG00000026127 | 45.27691848 | 49.38882431 | 60.02283906 | 173.9788572 | 125.3340526 |
| ENSMUSG00000026131 | 4.244711108 | 5.56493795  | 7.061510478 | 4.832746033 | 5.729556691 |
| ENSMUSG00000026134 | 22.63845924 | 14.60796212 | 21.18453143 | 20.94189947 | 26.49919969 |
| ENSMUSG00000026135 | 7.781970364 | 5.56493795  | 12.71071886 | 16.10915344 | 8.594335036 |
| ENSMUSG00000026141 | 9.196874066 | 6.956172438 | 9.886114669 | 6.443661377 | 6.445751277 |
| ENSMUSG00000026142 | 23.34591109 | 34.78086219 | 26.12758877 | 57.18749472 | 42.25548059 |
| ENSMUSG00000026147 | 14.85648888 | 6.260555194 | 5.649208382 | 9.665492065 | 7.87814045  |
| ENSMUSG00000026150 | 55.88869625 | 100.1688831 | 83.32582364 | 77.32393652 | 58.72795608 |
| ENSMUSG00000026153 | 7.781970364 | 4.869320706 | 5.649208382 | 5.638203705 | 6.445751277 |
| ENSMUSG00000026155 | 53.7663407  | 77.9091313  | 66.37819849 | 61.21478308 | 56.57937232 |
| ENSMUSG00000026158 | 5.65961481  | 6.260555194 | 4.943057334 | 6.443661377 | 5.013362104 |
| ENSMUSG00000026159 | 2.122355554 | 0.695617244 | 0.706151048 | 4.832746033 | 1.432389173 |
| ENSMUSG00000026163 | 7.781970364 | 9.738641413 | 7.061510478 | 8.054576721 | 12.17530797 |
| ENSMUSG00000026166 | 8.489422215 | 3.478086219 | 4.236906287 | 4.02728836  | 6.445751277 |
| ENSMUSG00000026167 | 9.904325918 | 6.260555194 | 12.00456781 | 14.4982381  | 9.310529622 |
| ENSMUSG00000026171 | 26.88317035 | 35.47647943 | 40.95676077 | 49.93837567 | 45.12025894 |
| ENSMUSG00000026172 | 28.29807405 | 55.6493795  | 55.78593277 | 98.265836   | 73.05184781 |
| ENSMUSG00000026173 | 9.904325918 | 9.738641413 | 6.35535943  | 2.416373016 | 10.02672421 |
| ENSMUSG00000026175 | 12.73413332 | 8.347406925 | 8.473812573 | 7.249119049 | 9.310529622 |
| ENSMUSG00000026176 | 20.51610369 | 28.52030699 | 29.65834401 | 18.52552646 | 24.35061594 |
| ENSMUSG00000026177 | 7.074518513 | 4.173703463 | 7.061510478 | 8.054576721 | 7.87814045  |
| ENSMUSG00000026179 | 45.27691848 | 59.12746572 | 58.61053696 | 57.18749472 | 62.30892901 |
| ENSMUSG00000026181 | 22.63845924 | 27.82468975 | 39.54445867 | 29.80193387 | 25.78300511 |
| ENSMUSG00000026188 | 6.367066661 | 6.260555194 | 10.59226572 | 8.054576721 | 12.89150255 |
| ENSMUSG00000026189 | 9.196874066 | 7.651789682 | 4.943057334 | 10.47094974 | 17.18867007 |
| ENSMUSG00000026192 | 28.29807405 | 42.43265187 | 37.42600553 | 91.82217462 | 78.7814045  |
| ENSMUSG00000026193 | 6.367066661 | 8.347406925 | 11.29841676 | 4.832746033 | 4.297167518 |
| ENSMUSG00000026197 | 16.27139258 | 17.39043109 | 16.94762515 | 16.91461111 | 16.47247549 |
| ENSMUSG00000026198 | 10.61177777 | 9.043024169 | 9.179963621 | 20.94189947 | 20.769643   |
| ENSMUSG00000026199 | 24.76081479 | 40.34580014 | 33.89525029 | 29.80193387 | 33.66114556 |
| ENSMUSG00000026200 | 24.05336294 | 25.04222078 | 19.77222934 | 37.85651059 | 27.93158887 |
| ENSMUSG00000026201 | 52.35143699 | 70.25734162 | 70.61510478 | 100.682209  | 76.63282074 |
| ENSMUSG00000026202 | 20.51610369 | 29.91154148 | 31.0706461  | 62.82569842 | 45.83645353 |

|                    |             |             |             |             |             |
|--------------------|-------------|-------------|-------------|-------------|-------------|
| ENSMUSG00000026203 | 9.196874066 | 17.39043109 | 12.00456781 | 19.33098413 | 12.17530797 |
| ENSMUSG00000026204 | 8.489422215 | 6.260555194 | 3.530755239 | 2.416373016 | 8.594335036 |
| ENSMUSG00000026207 | 10.61177777 | 4.869320706 | 4.943057334 | 8.054576721 | 6.445751277 |
| ENSMUSG00000026209 | 7.074518513 | 10.43425866 | 13.41686991 | 14.4982381  | 15.7562809  |
| ENSMUSG00000026211 | 5.65961481  | 11.1298759  | 7.767661525 | 2.416373016 | 3.580972932 |
| ENSMUSG00000026213 | 50.93653329 | 73.73542784 | 74.85201106 | 31.41284921 | 37.95831308 |
| ENSMUSG00000026219 | 31.83533331 | 61.21431745 | 48.7244223  | 74.9075635  | 79.49759908 |
| ENSMUSG00000026222 | 122.3891703 | 130.0804246 | 117.2210739 | 220.6954022 | 156.1304198 |
| ENSMUSG00000026223 | 12.73413332 | 11.1298759  | 8.473812573 | 12.88732275 | 15.04008631 |
| ENSMUSG00000026224 | 9.904325918 | 9.738641413 | 7.767661525 | 9.665492065 | 2.864778345 |
| ENSMUSG00000026226 | 4.952162959 | 6.956172438 | 9.886114669 | 4.832746033 | 9.310529622 |
| ENSMUSG00000026227 | 8.489422215 | 4.173703463 | 6.35535943  | 7.249119049 | 7.87814045  |
| ENSMUSG00000026229 | 79.23460734 | 131.4716591 | 101.6857509 | 214.2517408 | 146.8198902 |
| ENSMUSG00000026234 | 36.08004441 | 63.99678643 | 51.54902649 | 219.8899445 | 173.3190899 |
| ENSMUSG00000026235 | 4.952162959 | 4.869320706 | 8.473812573 | 4.02728836  | 8.594335036 |
| ENSMUSG00000026238 | 89.13893326 | 99.47326586 | 96.0365425  | 296.4084233 | 264.2758024 |
| ENSMUSG00000026239 | 28.29807405 | 36.86771392 | 42.36906287 | 34.6346799  | 45.83645353 |
| ENSMUSG00000026240 | 28.29807405 | 47.99758982 | 49.43057334 | 36.24559524 | 48.70123187 |
| ENSMUSG00000026245 | 54.47379255 | 107.1250555 | 76.97046421 | 162.7024498 | 117.4559122 |
| ENSMUSG00000026246 | 7.781970364 | 11.1298759  | 9.886114669 | 7.249119049 | 5.729556691 |
| ENSMUSG00000026247 | 7.074518513 | 9.043024169 | 8.473812573 | 6.443661377 | 10.02672421 |
| ENSMUSG00000026249 | 5.65961481  | 9.738641413 | 7.061510478 | 4.02728836  | 5.013362104 |
| ENSMUSG00000026251 | 5.65961481  | 3.478086219 | 8.473812573 | 8.860034393 | 4.297167518 |
| ENSMUSG00000026253 | 11.31922962 | 5.56493795  | 9.886114669 | 7.249119049 | 7.161945863 |
| ENSMUSG00000026254 | 67.91537772 | 96.69079689 | 82.61967259 | 166.7297381 | 123.1854689 |
| ENSMUSG00000026255 | 5.65961481  | 5.56493795  | 8.473812573 | 4.832746033 | 7.161945863 |
| ENSMUSG00000026259 | 9.196874066 | 8.347406925 | 10.59226572 | 7.249119049 | 10.02672421 |
| ENSMUSG00000026260 | 38.20239997 | 60.51870021 | 41.66291182 | 84.57305557 | 55.14698315 |
| ENSMUSG00000026269 | 64.37811846 | 92.51709342 | 86.85657888 | 92.62763229 | 85.22715578 |
| ENSMUSG00000026270 | 19.10119998 | 27.82468975 | 26.12758877 | 23.35827249 | 28.64778345 |
| ENSMUSG00000026271 | 10.61177777 | 6.260555194 | 6.35535943  | 7.249119049 | 9.310529622 |
| ENSMUSG00000026273 | 12.73413332 | 14.60796212 | 14.12302096 | 16.10915344 | 10.7429188  |
| ENSMUSG00000026274 | 59.42595551 | 84.1696865  | 83.32582364 | 98.265836   | 74.48423698 |
| ENSMUSG00000026275 | 45.27691848 | 70.25734162 | 67.79050059 | 77.32393652 | 76.63282074 |
| ENSMUSG00000026277 | 9.196874066 | 6.260555194 | 9.179963621 | 10.47094974 | 7.161945863 |
| ENSMUSG00000026278 | 7.781970364 | 6.956172438 | 8.473812573 | 8.054576721 | 7.161945863 |
| ENSMUSG00000026279 | 60.13340736 | 98.08203137 | 93.91808935 | 102.2931244 | 118.1721067 |
| ENSMUSG00000026280 | 61.54831106 | 105.0382038 | 87.56272992 | 76.51847885 | 80.92998826 |
| ENSMUSG00000026281 | 15.56394073 | 22.95536904 | 26.83373982 | 104.7094974 | 83.07857202 |
| ENSMUSG00000026283 | 38.20239997 | 52.17129328 | 45.8998181  | 99.07129367 | 65.88990194 |
| ENSMUSG00000026288 | 130.8785925 | 133.5585108 | 131.3440949 | 268.2174048 | 161.8599765 |
| ENSMUSG00000026289 | 69.33028142 | 126.6023384 | 98.15499564 | 138.5387196 | 106.7129934 |
| ENSMUSG00000026295 | 5.65961481  | 4.869320706 | 3.530755239 | 3.221830688 | 5.013362104 |

|                    |             |             |             |             |             |
|--------------------|-------------|-------------|-------------|-------------|-------------|
| ENSMUSG00000026301 | 7.781970364 | 5.56493795  | 6.35535943  | 7.249119049 | 7.87814045  |
| ENSMUSG00000026304 | 6.367066661 | 4.173703463 | 7.767661525 | 4.02728836  | 11.45911338 |
| ENSMUSG00000026305 | 3.537259256 | 3.478086219 | 8.473812573 | 8.054576721 | 6.445751277 |
| ENSMUSG00000026307 | 8.489422215 | 27.82468975 | 20.47838039 | 21.74735715 | 25.78300511 |
| ENSMUSG00000026309 | 136.5382073 | 181.5561006 | 148.9978711 | 185.2552646 | 146.1036956 |
| ENSMUSG00000026311 | 24.05336294 | 25.04222078 | 33.89525029 | 37.05105292 | 31.5125618  |
| ENSMUSG00000026312 | 8.489422215 | 5.56493795  | 9.179963621 | 8.054576721 | 4.297167518 |
| ENSMUSG00000026313 | 15.56394073 | 33.3896277  | 26.12758877 | 35.44013757 | 42.25548059 |
| ENSMUSG00000026315 | 5.65961481  | 7.651789682 | 5.649208382 | 1.610915344 | 7.161945863 |
| ENSMUSG00000026319 | 123.804074  | 164.8612868 | 148.29172   | 178.0061455 | 156.8466144 |
| ENSMUSG00000026331 | 7.781970364 | 6.260555194 | 6.35535943  | 6.443661377 | 5.013362104 |
| ENSMUSG00000026333 | 43.15456293 | 77.9091313  | 50.84287544 | 83.7675979  | 87.37573953 |
| ENSMUSG00000026335 | 6.367066661 | 2.086851731 | 7.061510478 | 4.02728836  | 4.297167518 |
| ENSMUSG00000026336 | 8.489422215 | 7.651789682 | 7.767661525 | 4.02728836  | 4.297167518 |
| ENSMUSG00000026339 | 21.22355554 | 63.99678643 | 49.43057334 | 38.66196826 | 40.82309142 |
| ENSMUSG00000026341 | 89.84638511 | 91.82147618 | 85.44427678 | 186.8661799 | 153.2656415 |
| ENSMUSG00000026342 | 8.489422215 | 8.347406925 | 7.061510478 | 13.69278043 | 16.47247549 |
| ENSMUSG00000026347 | 19.80865184 | 32.69401046 | 38.83830763 | 19.33098413 | 20.05344842 |
| ENSMUSG00000026349 | 142.1978221 | 168.339373  | 141.9363606 | 236.8045556 | 194.0887329 |
| ENSMUSG00000026355 | 48.81417774 | 75.12666233 | 64.25974535 | 177.2006879 | 114.5911338 |
| ENSMUSG00000026356 | 19.10119998 | 34.08524495 | 24.71528667 | 66.04752911 | 55.14698315 |
| ENSMUSG00000026358 | 7.074518513 | 4.869320706 | 7.061510478 | 8.860034393 | 3.580972932 |
| ENSMUSG00000026365 | 11.31922962 | 9.043024169 | 9.886114669 | 1.610915344 | 5.729556691 |
| ENSMUSG00000026374 | 43.15456293 | 52.86691053 | 52.25517753 | 81.35122488 | 85.94335036 |
| ENSMUSG00000026377 | 78.52715549 | 100.8645003 | 108.0411103 | 206.1971641 | 156.8466144 |
| ENSMUSG00000026380 | 10.61177777 | 6.260555194 | 9.179963621 | 8.054576721 | 4.297167518 |
| ENSMUSG00000026383 | 7.781970364 | 6.956172438 | 6.35535943  | 8.860034393 | 5.013362104 |
| ENSMUSG00000026384 | 22.63845924 | 31.30277597 | 24.00913562 | 49.93837567 | 37.24211849 |
| ENSMUSG00000026385 | 29.71297775 | 40.34580014 | 42.36906287 | 64.43661377 | 60.87653984 |
| ENSMUSG00000026387 | 10.61177777 | 4.173703463 | 4.236906287 | 3.221830688 | 12.89150255 |
| ENSMUSG00000026388 | 27.5906222  | 43.82388636 | 35.30755239 | 64.43661377 | 67.32229112 |
| ENSMUSG00000026389 | 7.074518513 | 5.56493795  | 6.35535943  | 5.638203705 | 5.729556691 |
| ENSMUSG00000026393 | 29.0055259  | 38.95456565 | 40.25060972 | 57.18749472 | 54.43078856 |
| ENSMUSG00000026395 | 133.000948  | 178.0780144 | 127.8133396 | 226.3336059 | 166.157144  |
| ENSMUSG00000026398 | 7.074518513 | 2.782468975 | 7.061510478 | 3.221830688 | 9.310529622 |
| ENSMUSG00000026399 | 66.50047402 | 85.56092098 | 84.03197468 | 63.6311561  | 50.13362104 |
| ENSMUSG00000026401 | 36.08004441 | 36.86771392 | 36.01370344 | 26.58010318 | 28.64778345 |
| ENSMUSG00000026404 | 6.367066661 | 18.78166558 | 16.2414741  | 14.4982381  | 17.90486466 |
| ENSMUSG00000026405 | 11.31922962 | 7.651789682 | 7.061510478 | 7.249119049 | 9.310529622 |
| ENSMUSG00000026407 | 3.537259256 | 2.086851731 | 2.118453143 | 2.416373016 | 3.580972932 |
| ENSMUSG00000026409 | 12.02668147 | 11.82549314 | 7.767661525 | 10.47094974 | 11.45911338 |
| ENSMUSG00000026411 | 9.196874066 | 5.56493795  | 7.061510478 | 7.249119049 | 7.161945863 |
| ENSMUSG00000026413 | 7.781970364 | 3.478086219 | 6.35535943  | 7.249119049 | 7.87814045  |



|                    |             |             |             |             |             |
|--------------------|-------------|-------------|-------------|-------------|-------------|
| ENSMUSG00000026414 | 11.31922962 | 5.56493795  | 11.29841676 | 4.832746033 | 4.297167518 |
| ENSMUSG00000026415 | 9.196874066 | 5.56493795  | 11.29841676 | 9.665492065 | 8.594335036 |
| ENSMUSG00000026416 | 7.074518513 | 4.869320706 | 5.649208382 | 8.860034393 | 7.87814045  |
| ENSMUSG00000026417 | 9.196874066 | 7.651789682 | 7.767661525 | 7.249119049 | 6.445751277 |
| ENSMUSG00000026418 | 7.074518513 | 7.651789682 | 6.35535943  | 8.860034393 | 6.445751277 |
| ENSMUSG00000026420 | 16.27139258 | 6.956172438 | 4.943057334 | 6.443661377 | 7.87814045  |
| ENSMUSG00000026421 | 7.781970364 | 13.21672763 | 7.767661525 | 5.638203705 | 9.310529622 |
| ENSMUSG00000026425 | 19.80865184 | 31.99839321 | 36.01370344 | 99.07129367 | 81.64618284 |
| ENSMUSG00000026426 | 67.91537772 | 90.43024169 | 91.09348516 | 75.71302118 | 72.33565322 |
| ENSMUSG00000026427 | 22.63845924 | 43.12826911 | 36.01370344 | 39.46742593 | 37.95831308 |
| ENSMUSG00000026430 | 9.196874066 | 3.478086219 | 12.00456781 | 8.860034393 | 10.02672421 |
| ENSMUSG00000026433 | 13.44158517 | 21.56413456 | 19.06607829 | 16.10915344 | 19.33725383 |
| ENSMUSG00000026434 | 90.55383696 | 97.38641413 | 91.79963621 | 207.8080794 | 162.5761711 |
| ENSMUSG00000026435 | 0           | 0           | 0           | 0           | 0           |
| ENSMUSG00000026436 | 67.91537772 | 94.60394515 | 81.20737049 | 140.9550926 | 123.9016634 |
| ENSMUSG00000026437 | 9.196874066 | 4.173703463 | 6.35535943  | 6.443661377 | 6.445751277 |
| ENSMUSG00000026439 | 101.8730666 | 169.0349902 | 136.2871522 | 167.5351958 | 148.968474  |
| ENSMUSG00000026442 | 10.61177777 | 4.173703463 | 7.767661525 | 8.860034393 | 5.013362104 |
| ENSMUSG00000026447 | 45.27691848 | 54.95376226 | 59.31668801 | 51.54929101 | 50.84981563 |
| ENSMUSG00000026450 | 6.367066661 | 3.478086219 | 2.824604191 | 1.610915344 | 1.432389173 |
| ENSMUSG00000026452 | 6.367066661 | 6.956172438 | 7.061510478 | 6.443661377 | 10.02672421 |
| ENSMUSG00000026455 | 29.71297775 | 44.5195036  | 36.01370344 | 35.44013757 | 32.22875639 |
| ENSMUSG00000026456 | 5.65961481  | 6.260555194 | 13.41686991 | 14.4982381  | 17.18867007 |
| ENSMUSG00000026457 | 89.13893326 | 143.9927695 | 100.9795998 | 109.5422434 | 98.83485292 |
| ENSMUSG00000026458 | 4.244711108 | 8.347406925 | 4.943057334 | 4.02728836  | 10.02672421 |
| ENSMUSG00000026463 | 9.196874066 | 6.260555194 | 6.35535943  | 3.221830688 | 11.45911338 |
| ENSMUSG00000026466 | 43.86201478 | 64.69240367 | 64.25974535 | 154.647873  | 146.8198902 |
| ENSMUSG00000026468 | 7.074518513 | 7.651789682 | 7.061510478 | 5.638203705 | 5.729556691 |
| ENSMUSG00000026469 | 51.64398514 | 63.30116918 | 70.61510478 | 57.18749472 | 47.2688427  |
| ENSMUSG00000026470 | 55.88869625 | 57.04061399 | 51.54902649 | 64.43661377 | 52.2822048  |
| ENSMUSG00000026471 | 9.196874066 | 22.2597518  | 26.12758877 | 16.91461111 | 14.32389173 |
| ENSMUSG00000026473 | 0           | 0           | 0           | 0.805457672 | 0           |
| ENSMUSG00000026478 | 14.14903703 | 26.43345526 | 16.94762515 | 46.71654498 | 35.09353473 |
| ENSMUSG00000026479 | 12.02668147 | 4.173703463 | 6.35535943  | 4.832746033 | 5.013362104 |
| ENSMUSG00000026480 | 12.02668147 | 5.56493795  | 9.179963621 | 8.054576721 | 7.161945863 |
| ENSMUSG00000026482 | 26.1757185  | 57.04061399 | 48.01827125 | 88.60034393 | 80.92998826 |
| ENSMUSG00000026483 | 5.65961481  | 4.869320706 | 9.886114669 | 10.47094974 | 12.89150255 |
| ENSMUSG00000026484 | 52.35143699 | 72.34419335 | 55.07978173 | 83.7675979  | 82.36237743 |
| ENSMUSG00000026489 | 26.1757185  | 47.30197258 | 45.19366706 | 27.38556085 | 21.48583759 |
| ENSMUSG00000026490 | 7.074518513 | 9.043024169 | 4.236906287 | 1.610915344 | 5.013362104 |
| ENSMUSG00000026491 | 39.61730367 | 58.43184848 | 45.19366706 | 202.9753334 | 136.793166  |
| ENSMUSG00000026492 | 79.23460734 | 113.3856107 | 95.33039145 | 118.4022778 | 94.5376854  |
| ENSMUSG00000026494 | 2.829807405 | 4.869320706 | 8.473812573 | 3.221830688 | 5.013362104 |

|                    |             |             |             |             |             |
|--------------------|-------------|-------------|-------------|-------------|-------------|
| ENSMUSG00000026496 | 146.4425332 | 159.9919661 | 144.0548137 | 200.5589604 | 136.0769714 |
| ENSMUSG00000026502 | 15.56394073 | 33.3896277  | 44.48751601 | 34.6346799  | 39.39070225 |
| ENSMUSG00000026504 | 109.6550369 | 149.5577074 | 139.1117564 | 109.5422434 | 100.2672421 |
| ENSMUSG00000026509 | 17.68629628 | 20.86851731 | 16.94762515 | 12.08186508 | 24.35061594 |
| ENSMUSG00000026510 | 50.22908144 | 86.95215547 | 81.91352154 | 47.52200265 | 62.30892901 |
| ENSMUSG00000026514 | 9.904325918 | 6.956172438 | 13.41686991 | 2.416373016 | 5.013362104 |
| ENSMUSG00000026519 | 18.39374813 | 45.21512085 | 44.48751601 | 15.30369577 | 22.20203218 |
| ENSMUSG00000026523 | 7.074518513 | 4.869320706 | 9.886114669 | 4.832746033 | 7.87814045  |
| ENSMUSG00000026526 | 94.79854807 | 119.6461659 | 103.098053  | 106.3204127 | 110.2939663 |
| ENSMUSG00000026546 | 5.65961481  | 9.738641413 | 7.767661525 | 8.860034393 | 5.013362104 |
| ENSMUSG00000026547 | 37.49494812 | 43.12826911 | 35.30755239 | 115.1804471 | 94.5376854  |
| ENSMUSG00000026553 | 173.3257036 | 206.5983214 | 194.8976892 | 227.1390635 | 190.50776   |
| ENSMUSG00000026554 | 41.03220737 | 59.12746572 | 57.90438592 | 84.57305557 | 77.34901533 |
| ENSMUSG00000026556 | 12.02668147 | 9.043024169 | 14.829172   | 7.249119049 | 12.17530797 |
| ENSMUSG00000026558 | 16.27139258 | 29.91154148 | 33.89525029 | 87.79488626 | 73.76804239 |
| ENSMUSG00000026560 | 13.44158517 | 9.043024169 | 12.71071886 | 4.832746033 | 7.87814045  |
| ENSMUSG00000026563 | 24.05336294 | 32.69401046 | 24.00913562 | 50.74383334 | 50.13362104 |
| ENSMUSG00000026565 | 33.95768886 | 41.73703463 | 40.95676077 | 79.74030954 | 63.0251236  |
| ENSMUSG00000026566 | 4.952162959 | 7.651789682 | 10.59226572 | 8.860034393 | 2.864778345 |
| ENSMUSG00000026567 | 10.61177777 | 11.82549314 | 4.943057334 | 8.860034393 | 6.445751277 |
| ENSMUSG00000026571 | 20.51610369 | 52.86691053 | 45.8998181  | 37.05105292 | 40.10689684 |
| ENSMUSG00000026572 | 7.074518513 | 5.56493795  | 10.59226572 | 6.443661377 | 4.297167518 |
| ENSMUSG00000026576 | 36.08004441 | 29.21592424 | 32.4829482  | 14.4982381  | 12.89150255 |
| ENSMUSG00000026577 | 27.5906222  | 42.43265187 | 40.25060972 | 49.93837567 | 48.70123187 |
| ENSMUSG00000026580 | 12.02668147 | 6.956172438 | 6.35535943  | 10.47094974 | 5.013362104 |
| ENSMUSG00000026581 | 73.57499253 | 86.25653823 | 79.08891735 | 62.02024075 | 55.14698315 |
| ENSMUSG00000026584 | 44.56946663 | 67.47487265 | 57.19823487 | 74.9075635  | 45.12025894 |
| ENSMUSG00000026585 | 8.489422215 | 11.82549314 | 7.767661525 | 1.610915344 | 6.445751277 |
| ENSMUSG00000026586 | 7.781970364 | 6.260555194 | 9.886114669 | 6.443661377 | 2.864778345 |
| ENSMUSG00000026587 | 12.73413332 | 13.21672763 | 8.473812573 | 6.443661377 | 7.87814045  |
| ENSMUSG00000026589 | 5.65961481  | 9.043024169 | 5.649208382 | 4.832746033 | 6.445751277 |
| ENSMUSG00000026592 | 7.781970364 | 5.56493795  | 7.061510478 | 9.665492065 | 9.310529622 |
| ENSMUSG00000026594 | 181.1076739 | 209.3807904 | 170.8885536 | 199.7535027 | 149.6846685 |
| ENSMUSG00000026596 | 89.84638511 | 124.5154866 | 110.1595635 | 115.9859048 | 88.80812871 |
| ENSMUSG00000026600 | 29.71297775 | 63.99678643 | 55.07978173 | 47.52200265 | 52.99839939 |
| ENSMUSG00000026601 | 4.244711108 | 10.43425866 | 7.061510478 | 8.860034393 | 6.445751277 |
| ENSMUSG00000026603 | 7.074518513 | 9.043024169 | 6.35535943  | 33.02376456 | 25.78300511 |
| ENSMUSG00000026604 | 24.05336294 | 24.34660353 | 20.47838039 | 11.27640741 | 11.45911338 |
| ENSMUSG00000026605 | 68.62282957 | 56.34499675 | 62.1412922  | 53.96566403 | 46.55264811 |
| ENSMUSG00000026608 | 99.75071103 | 128.6891901 | 127.8133396 | 89.4058016  | 80.21379367 |
| ENSMUSG00000026610 | 5.65961481  | 3.478086219 | 5.649208382 | 6.443661377 | 5.013362104 |
| ENSMUSG00000026611 | 53.05888884 | 84.86530374 | 62.1412922  | 60.40932541 | 59.44415067 |
| ENSMUSG00000026615 | 47.39927403 | 89.73462445 | 72.73355792 | 187.6716376 | 161.8599765 |

|                    |             |             |             |             |             |
|--------------------|-------------|-------------|-------------|-------------|-------------|
| ENSMUSG00000026616 | 129.4636888 | 158.6007316 | 129.2256417 | 63.6311561  | 56.57937232 |
| ENSMUSG00000026617 | 33.95768886 | 62.60555194 | 51.54902649 | 41.88379895 | 34.37734014 |
| ENSMUSG00000026618 | 14.85648888 | 29.91154148 | 33.18909925 | 34.6346799  | 35.80972932 |
| ENSMUSG00000026620 | 7.074518513 | 4.173703463 | 9.179963621 | 8.054576721 | 6.445751277 |
| ENSMUSG00000026621 | 8.489422215 | 5.56493795  | 5.649208382 | 10.47094974 | 5.013362104 |
| ENSMUSG00000026622 | 17.68629628 | 33.3896277  | 25.42143772 | 57.18749472 | 47.2688427  |
| ENSMUSG00000026623 | 87.72402956 | 114.081228  | 124.2825844 | 219.0844868 | 200.5344842 |
| ENSMUSG00000026626 | 71.45263698 | 100.1688831 | 80.50121945 | 181.2279762 | 129.6312201 |
| ENSMUSG00000026628 | 4.244711108 | 4.869320706 | 8.473812573 | 68.46390213 | 38.67450766 |
| ENSMUSG00000026632 | 24.76081479 | 41.04141738 | 28.95219296 | 101.4876667 | 73.05184781 |
| ENSMUSG00000026634 | 8.489422215 | 5.56493795  | 7.061510478 | 8.054576721 | 7.161945863 |
| ENSMUSG00000026637 | 56.5961481  | 88.34338996 | 79.08891735 | 77.32393652 | 65.88990194 |
| ENSMUSG00000026638 | 7.074518513 | 11.1298759  | 8.473812573 | 7.249119049 | 10.7429188  |
| ENSMUSG00000026639 | 8.489422215 | 10.43425866 | 9.179963621 | 5.638203705 | 9.310529622 |
| ENSMUSG00000026640 | 7.781970364 | 4.869320706 | 4.236906287 | 4.832746033 | 5.013362104 |
| ENSMUSG00000026643 | 14.85648888 | 26.43345526 | 13.41686991 | 33.02376456 | 27.93158887 |
| ENSMUSG00000026645 | 8.489422215 | 6.956172438 | 7.061510478 | 4.832746033 | 4.297167518 |
| ENSMUSG00000026646 | 8.489422215 | 11.82549314 | 14.829172   | 34.6346799  | 29.36397804 |
| ENSMUSG00000026648 | 41.03220737 | 61.9099347  | 58.61053696 | 37.85651059 | 52.99839939 |
| ENSMUSG00000026649 | 4.244711108 | 4.173703463 | 4.943057334 | 7.249119049 | 5.013362104 |
| ENSMUSG00000026650 | 13.44158517 | 35.47647943 | 15.53532305 | 12.88732275 | 19.33725383 |
| ENSMUSG00000026655 | 11.31922962 | 9.738641413 | 7.061510478 | 8.860034393 | 10.7429188  |
| ENSMUSG00000026656 | 120.9742666 | 159.9919661 | 128.5194907 | 111.1531587 | 83.7947666  |
| ENSMUSG00000026657 | 12.73413332 | 6.260555194 | 9.886114669 | 8.054576721 | 9.310529622 |
| ENSMUSG00000026659 | 29.71297775 | 57.04061399 | 52.25517753 | 84.57305557 | 91.67290705 |
| ENSMUSG00000026662 | 20.51610369 | 38.25894841 | 24.00913562 | 71.68573282 | 49.41742646 |
| ENSMUSG00000026667 | 64.37811846 | 96.69079689 | 81.91352154 | 140.9550926 | 116.7397176 |
| ENSMUSG00000026668 | 8.489422215 | 4.173703463 | 9.886114669 | 9.665492065 | 7.87814045  |
| ENSMUSG00000026669 | 21.22355554 | 13.91234488 | 24.00913562 | 70.88027514 | 50.84981563 |
| ENSMUSG00000026670 | 29.71297775 | 45.91073809 | 47.3121202  | 70.88027514 | 58.72795608 |
| ENSMUSG00000026672 | 7.074518513 | 20.86851731 | 9.179963621 | 24.96918783 | 17.18867007 |
| ENSMUSG00000026675 | 7.074518513 | 9.043024169 | 13.41686991 | 33.02376456 | 27.21539428 |
| ENSMUSG00000026678 | 4.952162959 | 3.478086219 | 8.473812573 | 4.832746033 | 4.297167518 |
| ENSMUSG00000026683 | 63.67066661 | 65.38802092 | 60.02283906 | 132.9005159 | 85.22715578 |
| ENSMUSG00000026686 | 8.489422215 | 10.43425866 | 7.061510478 | 10.47094974 | 2.148583759 |
| ENSMUSG00000026687 | 3.537259256 | 7.651789682 | 7.061510478 | 5.638203705 | 8.594335036 |
| ENSMUSG00000026691 | 8.489422215 | 12.52111039 | 7.767661525 | 3.221830688 | 9.310529622 |
| ENSMUSG00000026692 | 21.93100739 | 18.78166558 | 16.94762515 | 18.52552646 | 12.89150255 |
| ENSMUSG00000026694 | 19.10119998 | 42.43265187 | 27.53989086 | 58.79841006 | 53.71459398 |
| ENSMUSG00000026696 | 29.0055259  | 50.08444155 | 49.43057334 | 40.2728836  | 45.12025894 |
| ENSMUSG00000026697 | 7.781970364 | 8.347406925 | 9.886114669 | 4.832746033 | 7.161945863 |
| ENSMUSG00000026701 | 29.71297775 | 43.12826911 | 39.54445867 | 62.02024075 | 61.59273443 |
| ENSMUSG00000026705 | 30.4204296  | 51.47567604 | 39.54445867 | 55.57657937 | 47.98503729 |

|                    |             |             |             |             |             |
|--------------------|-------------|-------------|-------------|-------------|-------------|
| ENSMUSG00000026707 | 41.03220737 | 86.25653823 | 64.25974535 | 68.46390213 | 53.71459398 |
| ENSMUSG00000026708 | 70.74518513 | 64.69240367 | 56.49208382 | 101.4876667 | 88.09193412 |
| ENSMUSG00000026709 | 38.20239997 | 51.47567604 | 45.19366706 | 95.04400531 | 58.72795608 |
| ENSMUSG00000026715 | 7.074518513 | 10.43425866 | 7.767661525 | 6.443661377 | 10.02672421 |
| ENSMUSG00000026718 | 78.52715549 | 117.5593142 | 100.2734488 | 80.54576721 | 68.0384857  |
| ENSMUSG00000026721 | 16.27139258 | 25.73783802 | 20.47838039 | 144.1769233 | 99.5510475  |
| ENSMUSG00000026723 | 24.76081479 | 36.86771392 | 37.42600553 | 34.6346799  | 25.78300511 |
| ENSMUSG00000026725 | 13.44158517 | 6.260555194 | 7.767661525 | 4.832746033 | 5.729556691 |
| ENSMUSG00000026726 | 10.61177777 | 7.651789682 | 7.061510478 | 4.832746033 | 5.729556691 |
| ENSMUSG00000026727 | 9.904325918 | 30.60715873 | 17.65377619 | 20.94189947 | 20.05344842 |
| ENSMUSG00000026729 | 12.02668147 | 24.34660353 | 16.2414741  | 12.08186508 | 14.32389173 |
| ENSMUSG00000026730 | 7.074518513 | 4.869320706 | 11.29841676 | 8.054576721 | 6.445751277 |
| ENSMUSG00000026737 | 70.74518513 | 90.43024169 | 89.68118307 | 78.93485187 | 66.60609653 |
| ENSMUSG00000026739 | 15.56394073 | 22.95536904 | 18.35992724 | 29.80193387 | 32.22875639 |
| ENSMUSG00000026740 | 25.46826665 | 44.5195036  | 32.4829482  | 33.02376456 | 42.25548059 |
| ENSMUSG00000026743 | 4.952162959 | 4.869320706 | 5.649208382 | 4.832746033 | 6.445751277 |
| ENSMUSG00000026748 | 9.904325918 | 6.260555194 | 3.530755239 | 4.832746033 | 6.445751277 |
| ENSMUSG00000026749 | 5.65961481  | 5.56493795  | 8.473812573 | 24.96918783 | 24.35061594 |
| ENSMUSG00000026751 | 10.61177777 | 2.782468975 | 3.530755239 | 8.054576721 | 3.580972932 |
| ENSMUSG00000026754 | 29.71297775 | 50.7800588  | 46.60596915 | 48.32746033 | 46.55264811 |
| ENSMUSG00000026755 | 67.91537772 | 115.4724625 | 105.9226572 | 266.6064895 | 167.5895332 |
| ENSMUSG00000026761 | 81.3569629  | 123.1242521 | 112.2780166 | 186.8661799 | 139.6579443 |
| ENSMUSG00000026764 | 3.537259256 | 6.260555194 | 6.35535943  | 4.832746033 | 5.013362104 |
| ENSMUSG00000026765 | 5.65961481  | 7.651789682 | 9.886114669 | 4.02728836  | 5.013362104 |
| ENSMUSG00000026766 | 38.90985182 | 66.08363816 | 62.1412922  | 85.37851324 | 75.20043157 |
| ENSMUSG00000026767 | 56.5961481  | 86.25653823 | 84.73812573 | 119.2077355 | 98.11865833 |
| ENSMUSG00000026768 | 9.904325918 | 7.651789682 | 4.943057334 | 4.02728836  | 5.729556691 |
| ENSMUSG00000026771 | 57.30359995 | 82.77845201 | 81.91352154 | 86.18397091 | 80.92998826 |
| ENSMUSG00000026773 | 47.39927403 | 52.86691053 | 46.60596915 | 38.66196826 | 32.22875639 |
| ENSMUSG00000026774 | 10.61177777 | 9.043024169 | 7.061510478 | 5.638203705 | 7.161945863 |
| ENSMUSG00000026778 | 6.367066661 | 4.869320706 | 6.35535943  | 12.08186508 | 10.02672421 |
| ENSMUSG00000026781 | 9.196874066 | 12.52111039 | 10.59226572 | 36.24559524 | 24.35061594 |
| ENSMUSG00000026782 | 9.196874066 | 9.738641413 | 4.943057334 | 11.27640741 | 2.864778345 |
| ENSMUSG00000026784 | 21.22355554 | 36.17209668 | 43.78136496 | 86.18397091 | 68.75468029 |
| ENSMUSG00000026785 | 9.904325918 | 18.08604834 | 10.59226572 | 15.30369577 | 13.60769714 |
| ENSMUSG00000026786 | 34.66514071 | 61.21431745 | 48.7244223  | 83.7675979  | 80.92998826 |
| ENSMUSG00000026788 | 57.30359995 | 102.9513521 | 94.6242404  | 69.2693598  | 78.7814045  |
| ENSMUSG00000026790 | 29.0055259  | 48.69320706 | 40.95676077 | 49.132918   | 58.01176149 |
| ENSMUSG00000026791 | 11.31922962 | 7.651789682 | 15.53532305 | 9.665492065 | 9.310529622 |
| ENSMUSG00000026792 | 45.98437033 | 55.6493795  | 74.14586002 | 297.213881  | 194.0887329 |
| ENSMUSG00000026796 | 6.367066661 | 15.99919661 | 10.59226572 | 8.054576721 | 15.7562809  |
| ENSMUSG00000026797 | 7.781970364 | 8.347406925 | 8.473812573 | 6.443661377 | 8.594335036 |
| ENSMUSG00000026798 | 16.97884443 | 38.95456565 | 30.36449505 | 84.57305557 | 58.72795608 |

|                    |             |             |             |             |             |
|--------------------|-------------|-------------|-------------|-------------|-------------|
| ENSMUSG00000026799 | 35.37259256 | 72.34419335 | 51.54902649 | 55.57657937 | 43.68786977 |
| ENSMUSG00000026803 | 54.47379255 | 63.99678643 | 61.43514116 | 73.29664816 | 70.90326405 |
| ENSMUSG00000026805 | 4.952162959 | 3.478086219 | 10.59226572 | 4.832746033 | 8.594335036 |
| ENSMUSG00000026806 | 87.72402956 | 117.5593142 | 93.21193831 | 217.4735715 | 178.332452  |
| ENSMUSG00000026809 | 14.85648888 | 10.43425866 | 12.71071886 | 5.638203705 | 7.87814045  |
| ENSMUSG00000026810 | 45.27691848 | 66.08363816 | 60.72899011 | 71.68573282 | 68.0384857  |
| ENSMUSG00000026811 | 8.489422215 | 6.260555194 | 14.12302096 | 18.52552646 | 14.32389173 |
| ENSMUSG00000026812 | 64.37811846 | 100.1688831 | 77.67661525 | 62.02024075 | 68.75468029 |
| ENSMUSG00000026814 | 8.489422215 | 6.956172438 | 8.473812573 | 5.638203705 | 13.60769714 |
| ENSMUSG00000026815 | 4.244711108 | 10.43425866 | 9.886114669 | 11.27640741 | 15.04008631 |
| ENSMUSG00000026816 | 10.61177777 | 22.2597518  | 23.30298458 | 41.88379895 | 46.55264811 |
| ENSMUSG00000026817 | 4.244711108 | 9.043024169 | 6.35535943  | 4.832746033 | 11.45911338 |
| ENSMUSG00000026819 | 62.25576291 | 101.5601176 | 100.9795998 | 100.682209  | 84.51096119 |
| ENSMUSG00000026821 | 19.80865184 | 22.95536904 | 20.47838039 | 12.08186508 | 16.47247549 |
| ENSMUSG00000026822 | 6.367066661 | 4.173703463 | 7.061510478 | 10.47094974 | 5.013362104 |
| ENSMUSG00000026824 | 10.61177777 | 6.956172438 | 5.649208382 | 7.249119049 | 4.297167518 |
| ENSMUSG00000026825 | 7.781970364 | 8.347406925 | 7.767661525 | 7.249119049 | 8.594335036 |
| ENSMUSG00000026826 | 8.489422215 | 5.56493795  | 9.886114669 | 10.47094974 | 7.87814045  |
| ENSMUSG00000026827 | 16.27139258 | 37.56333116 | 26.83373982 | 25.77464551 | 31.5125618  |
| ENSMUSG00000026828 | 4.952162959 | 10.43425866 | 7.061510478 | 3.221830688 | 7.161945863 |
| ENSMUSG00000026831 | 11.31922962 | 16.69481385 | 16.94762515 | 15.30369577 | 14.32389173 |
| ENSMUSG00000026832 | 94.09109622 | 101.5601176 | 102.3919019 | 141.7605503 | 101.6996313 |
| ENSMUSG00000026833 | 7.074518513 | 6.260555194 | 6.35535943  | 6.443661377 | 9.310529622 |
| ENSMUSG00000026834 | 9.196874066 | 6.956172438 | 6.35535943  | 3.221830688 | 6.445751277 |
| ENSMUSG00000026835 | 2.829807405 | 6.956172438 | 4.943057334 | 7.249119049 | 5.013362104 |
| ENSMUSG00000026836 | 10.61177777 | 4.173703463 | 3.530755239 | 8.054576721 | 8.594335036 |
| ENSMUSG00000026837 | 4.952162959 | 3.478086219 | 9.886114669 | 5.638203705 | 5.013362104 |
| ENSMUSG00000026839 | 6.367066661 | 5.56493795  | 7.061510478 | 7.249119049 | 7.161945863 |
| ENSMUSG00000026840 | 8.489422215 | 5.56493795  | 4.236906287 | 4.832746033 | 5.013362104 |
| ENSMUSG00000026842 | 41.73965922 | 51.47567604 | 48.01827125 | 46.71654498 | 50.13362104 |
| ENSMUSG00000026843 | 16.27139258 | 31.30277597 | 21.89068248 | 35.44013757 | 27.93158887 |
| ENSMUSG00000026848 | 24.05336294 | 36.86771392 | 30.36449505 | 77.32393652 | 66.60609653 |
| ENSMUSG00000026849 | 27.5906222  | 52.17129328 | 38.83830763 | 61.21478308 | 52.2822048  |
| ENSMUSG00000026853 | 54.47379255 | 86.25653823 | 78.3827663  | 143.3714656 | 98.83485292 |
| ENSMUSG00000026854 | 21.93100739 | 45.21512085 | 25.42143772 | 41.07834128 | 46.55264811 |
| ENSMUSG00000026856 | 17.68629628 | 22.95536904 | 29.65834401 | 43.49471429 | 37.24211849 |
| ENSMUSG00000026858 | 21.22355554 | 40.34580014 | 33.18909925 | 37.05105292 | 57.29556691 |
| ENSMUSG00000026860 | 29.71297775 | 41.04141738 | 51.54902649 | 28.9964762  | 31.5125618  |
| ENSMUSG00000026864 | 100.4581629 | 127.9935729 | 105.9226572 | 370.5105292 | 264.9919969 |
| ENSMUSG00000026866 | 33.95768886 | 51.47567604 | 50.13672439 | 57.18749472 | 59.44415067 |
| ENSMUSG00000026867 | 49.52162959 | 70.95295887 | 59.31668801 | 94.23854763 | 70.18706946 |
| ENSMUSG00000026869 | 70.74518513 | 123.8198694 | 93.91808935 | 135.3168889 | 119.6044959 |
| ENSMUSG00000026870 | 9.904325918 | 6.260555194 | 5.649208382 | 7.249119049 | 5.013362104 |

|                    |             |             |             |             |             |
|--------------------|-------------|-------------|-------------|-------------|-------------|
| ENSMUSG00000026872 | 9.196874066 | 9.043024169 | 11.29841676 | 9.665492065 | 5.729556691 |
| ENSMUSG00000026874 | 7.781970364 | 9.738641413 | 8.473812573 | 10.47094974 | 2.148583759 |
| ENSMUSG00000026875 | 12.02668147 | 17.39043109 | 10.59226572 | 106.3204127 | 73.76804239 |
| ENSMUSG00000026878 | 197.3790665 | 179.4692489 | 180.7746682 | 266.6064895 | 229.8984622 |
| ENSMUSG00000026879 | 22.63845924 | 39.6501829  | 45.19366706 | 9.665492065 | 20.05344842 |
| ENSMUSG00000026880 | 7.781970364 | 13.91234488 | 6.35535943  | 7.249119049 | 9.310529622 |
| ENSMUSG00000026883 | 7.781970364 | 5.56493795  | 7.767661525 | 8.054576721 | 7.161945863 |
| ENSMUSG00000026885 | 15.56394073 | 19.47728283 | 23.30298458 | 49.93837567 | 32.94495097 |
| ENSMUSG00000026888 | 5.65961481  | 8.347406925 | 3.530755239 | 6.443661377 | 5.013362104 |
| ENSMUSG00000026889 | 19.10119998 | 23.65098629 | 17.65377619 | 24.16373016 | 20.769643   |
| ENSMUSG00000026890 | 9.196874066 | 9.738641413 | 3.530755239 | 4.02728836  | 7.87814045  |
| ENSMUSG00000026896 | 3.537259256 | 6.260555194 | 5.649208382 | 67.65844446 | 50.84981563 |
| ENSMUSG00000026904 | 10.61177777 | 6.260555194 | 8.473812573 | 6.443661377 | 7.87814045  |
| ENSMUSG00000026914 | 116.7295555 | 157.9051143 | 133.462548  | 182.0334339 | 158.2790036 |
| ENSMUSG00000026915 | 82.7718666  | 79.99598303 | 88.26888097 | 96.65492065 | 78.7814045  |
| ENSMUSG00000026917 | 90.55383696 | 117.5593142 | 95.33039145 | 182.0334339 | 134.6445822 |
| ENSMUSG00000026918 | 9.904325918 | 7.651789682 | 9.886114669 | 10.47094974 | 12.89150255 |
| ENSMUSG00000026921 | 9.196874066 | 5.56493795  | 4.943057334 | 8.054576721 | 3.580972932 |
| ENSMUSG00000026922 | 7.781970364 | 12.52111039 | 12.71071886 | 12.08186508 | 16.47247549 |
| ENSMUSG00000026923 | 9.196874066 | 8.347406925 | 3.530755239 | 5.638203705 | 10.7429188  |
| ENSMUSG00000026924 | 57.30359995 | 89.73462445 | 74.14586002 | 120.0131931 | 95.25387998 |
| ENSMUSG00000026925 | 53.05888884 | 61.21431745 | 68.49665163 | 49.93837567 | 51.56601022 |
| ENSMUSG00000026926 | 72.86754068 | 105.7338211 | 103.098053  | 194.9207566 | 126.0502472 |
| ENSMUSG00000026927 | 73.57499253 | 109.2119073 | 105.2165061 | 174.7843148 | 164.7247549 |
| ENSMUSG00000026928 | 10.61177777 | 6.956172438 | 6.35535943  | 5.638203705 | 4.297167518 |
| ENSMUSG00000026930 | 22.63845924 | 25.04222078 | 26.12758877 | 19.33098413 | 25.78300511 |
| ENSMUSG00000026931 | 4.952162959 | 2.086851731 | 2.118453143 | 3.221830688 | 7.161945863 |
| ENSMUSG00000026932 | 7.074518513 | 5.56493795  | 7.061510478 | 6.443661377 | 6.445751277 |
| ENSMUSG00000026933 | 24.76081479 | 50.08444155 | 34.60140134 | 62.02024075 | 58.01176149 |
| ENSMUSG00000026934 | 6.367066661 | 6.260555194 | 7.061510478 | 4.02728836  | 8.594335036 |
| ENSMUSG00000026937 | 5.65961481  | 2.782468975 | 7.767661525 | 0.805457672 | 5.729556691 |
| ENSMUSG00000026938 | 8.489422215 | 5.56493795  | 5.649208382 | 4.02728836  | 5.013362104 |
| ENSMUSG00000026939 | 5.65961481  | 7.651789682 | 7.767661525 | 5.638203705 | 13.60769714 |
| ENSMUSG00000026941 | 11.31922962 | 13.21672763 | 7.767661525 | 15.30369577 | 17.18867007 |
| ENSMUSG00000026942 | 138.6605628 | 173.2086937 | 149.7040221 | 258.5519127 | 180.4810358 |
| ENSMUSG00000026943 | 7.781970364 | 3.478086219 | 7.061510478 | 5.638203705 | 8.594335036 |
| ENSMUSG00000026944 | 9.904325918 | 15.30357936 | 17.65377619 | 9.665492065 | 9.310529622 |
| ENSMUSG00000026950 | 9.196874066 | 4.173703463 | 7.767661525 | 6.443661377 | 7.161945863 |
| ENSMUSG00000026955 | 31.12788146 | 25.73783802 | 22.59683353 | 45.91108731 | 34.37734014 |
| ENSMUSG00000026956 | 8.489422215 | 14.60796212 | 21.18453143 | 13.69278043 | 24.35061594 |
| ENSMUSG00000026958 | 16.27139258 | 29.91154148 | 21.18453143 | 15.30369577 | 23.63442135 |
| ENSMUSG00000026959 | 9.904325918 | 5.56493795  | 9.179963621 | 4.832746033 | 10.02672421 |
| ENSMUSG00000026965 | 61.54831106 | 75.12666233 | 67.08434954 | 102.2931244 | 90.95671247 |

|                    |             |             |             |             |             |
|--------------------|-------------|-------------|-------------|-------------|-------------|
| ENSMUSG00000026970 | 9.196874066 | 7.651789682 | 4.943057334 | 5.638203705 | 3.580972932 |
| ENSMUSG00000026971 | 6.367066661 | 7.651789682 | 5.649208382 | 5.638203705 | 6.445751277 |
| ENSMUSG00000026972 | 63.67066661 | 89.73462445 | 68.49665163 | 74.10210583 | 78.7814045  |
| ENSMUSG00000026974 | 23.34591109 | 29.21592424 | 31.0706461  | 111.9586164 | 88.09193412 |
| ENSMUSG00000026975 | 38.20239997 | 58.43184848 | 55.78593277 | 61.21478308 | 55.14698315 |
| ENSMUSG00000026976 | 9.196874066 | 6.956172438 | 3.530755239 | 8.054576721 | 5.013362104 |
| ENSMUSG00000026977 | 203.0386813 | 223.2931353 | 201.9591997 | 264.1901164 | 200.5344842 |
| ENSMUSG00000026979 | 8.489422215 | 11.1298759  | 7.767661525 | 8.054576721 | 5.729556691 |
| ENSMUSG00000026980 | 14.85648888 | 21.56413456 | 18.35992724 | 41.88379895 | 48.70123187 |
| ENSMUSG00000026981 | 3.537259256 | 7.651789682 | 7.767661525 | 8.054576721 | 10.7429188  |
| ENSMUSG00000026983 | 7.781970364 | 7.651789682 | 5.649208382 | 7.249119049 | 5.013362104 |
| ENSMUSG00000026986 | 5.65961481  | 8.347406925 | 4.943057334 | 7.249119049 | 8.594335036 |
| ENSMUSG00000026987 | 89.13893326 | 111.298759  | 86.15042783 | 88.60034393 | 92.38910164 |
| ENSMUSG00000026988 | 9.196874066 | 9.738641413 | 9.179963621 | 8.860034393 | 11.45911338 |
| ENSMUSG00000026991 | 6.367066661 | 6.956172438 | 9.886114669 | 13.69278043 | 8.594335036 |
| ENSMUSG00000026999 | 52.35143699 | 86.95215547 | 79.08891735 | 96.65492065 | 73.76804239 |
| ENSMUSG00000027001 | 10.61177777 | 20.86851731 | 21.89068248 | 8.860034393 | 21.48583759 |
| ENSMUSG00000027002 | 5.65961481  | 11.1298759  | 8.473812573 | 5.638203705 | 5.729556691 |
| ENSMUSG00000027006 | 15.56394073 | 30.60715873 | 24.71528667 | 27.38556085 | 32.94495097 |
| ENSMUSG00000027007 | 22.63845924 | 37.56333116 | 28.24604191 | 44.30017197 | 46.55264811 |
| ENSMUSG00000027009 | 26.1757185  | 45.21512085 | 45.19366706 | 52.35474869 | 39.39070225 |
| ENSMUSG00000027010 | 20.51610369 | 27.12907251 | 36.01370344 | 28.19101852 | 26.49919969 |
| ENSMUSG00000027011 | 7.074518513 | 7.651789682 | 6.35535943  | 16.91461111 | 20.05344842 |
| ENSMUSG00000027012 | 51.64398514 | 77.9091313  | 72.02740687 | 56.38203705 | 58.01176149 |
| ENSMUSG00000027014 | 70.74518513 | 112.6899935 | 79.7950684  | 123.2350238 | 87.37573953 |
| ENSMUSG00000027016 | 8.489422215 | 9.738641413 | 7.767661525 | 0.805457672 | 8.594335036 |
| ENSMUSG00000027018 | 20.51610369 | 31.99839321 | 31.77679715 | 45.10562964 | 52.99839939 |
| ENSMUSG00000027022 | 11.31922962 | 7.651789682 | 10.59226572 | 0.805457672 | 5.729556691 |
| ENSMUSG00000027030 | 6.367066661 | 1.391234488 | 7.767661525 | 7.249119049 | 10.7429188  |
| ENSMUSG00000027035 | 11.31922962 | 6.956172438 | 12.71071886 | 8.054576721 | 15.04008631 |
| ENSMUSG00000027048 | 7.781970364 | 4.869320706 | 6.35535943  | 6.443661377 | 5.729556691 |
| ENSMUSG00000027067 | 67.20792587 | 107.1250555 | 101.6857509 | 169.9515688 | 145.387501  |
| ENSMUSG00000027070 | 9.904325918 | 8.347406925 | 2.118453143 | 6.443661377 | 6.445751277 |
| ENSMUSG00000027071 | 74.98989623 | 102.2557348 | 88.97503202 | 153.8424154 | 123.9016634 |
| ENSMUSG00000027072 | 10.61177777 | 8.347406925 | 10.59226572 | 8.860034393 | 7.161945863 |
| ENSMUSG00000027074 | 16.27139258 | 20.17290007 | 9.179963621 | 137.7332619 | 77.34901533 |
| ENSMUSG00000027075 | 8.489422215 | 13.21672763 | 14.12302096 | 8.860034393 | 11.45911338 |
| ENSMUSG00000027076 | 25.46826665 | 42.43265187 | 31.0706461  | 100.682209  | 78.06520991 |
| ENSMUSG00000027078 | 2.829807405 | 13.21672763 | 11.29841676 | 7.249119049 | 15.04008631 |
| ENSMUSG00000027079 | 67.91537772 | 112.6899935 | 115.8087718 | 146.5932963 | 112.4425501 |
| ENSMUSG00000027082 | 7.074518513 | 6.956172438 | 10.59226572 | 8.054576721 | 5.013362104 |
| ENSMUSG00000027086 | 18.39374813 | 20.17290007 | 19.77222934 | 16.91461111 | 19.33725383 |
| ENSMUSG00000027087 | 39.61730367 | 76.51789682 | 83.32582364 | 72.49119049 | 83.7947666  |

|                    |             |             |             |             |             |
|--------------------|-------------|-------------|-------------|-------------|-------------|
| ENSMUSG00000027088 | 14.85648888 | 28.52030699 | 24.00913562 | 21.74735715 | 23.63442135 |
| ENSMUSG00000027091 | 124.5115258 | 174.5999282 | 141.2302096 | 223.9172328 | 146.1036956 |
| ENSMUSG00000027104 | 95.50599992 | 152.3401764 | 127.1071886 | 130.4841429 | 128.198831  |
| ENSMUSG00000027108 | 19.10119998 | 35.47647943 | 29.65834401 | 41.88379895 | 40.10689684 |
| ENSMUSG00000027109 | 30.4204296  | 50.08444155 | 44.48751601 | 102.2931244 | 89.52432329 |
| ENSMUSG00000027111 | 14.85648888 | 16.69481385 | 22.59683353 | 9.665492065 | 16.47247549 |
| ENSMUSG00000027115 | 41.03220737 | 33.3896277  | 31.77679715 | 90.21125927 | 63.74131818 |
| ENSMUSG00000027122 | 48.81417774 | 70.95295887 | 45.19366706 | 102.2931244 | 71.61945863 |
| ENSMUSG00000027130 | 9.904325918 | 16.69481385 | 16.94762515 | 16.10915344 | 16.47247549 |
| ENSMUSG00000027157 | 4.952162959 | 1.391234488 | 2.824604191 | 2.416373016 | 2.864778345 |
| ENSMUSG00000027160 | 12.73413332 | 21.56413456 | 12.71071886 | 23.35827249 | 22.91822676 |
| ENSMUSG00000027163 | 21.93100739 | 56.34499675 | 53.66747963 | 24.16373016 | 30.79636721 |
| ENSMUSG00000027165 | 0           | 0           | 0           | 0           | 0.716194586 |
| ENSMUSG00000027166 | 17.68629628 | 25.04222078 | 28.95219296 | 19.33098413 | 20.769643   |
| ENSMUSG00000027167 | 32.54278516 | 54.25814501 | 50.13672439 | 48.32746033 | 47.98503729 |
| ENSMUSG00000027168 | 6.367066661 | 4.869320706 | 5.649208382 | 3.221830688 | 3.580972932 |
| ENSMUSG00000027170 | 65.79302217 | 116.863697  | 92.50578726 | 173.9788572 | 126.7664418 |
| ENSMUSG00000027171 | 4.952162959 | 7.651789682 | 4.943057334 | 4.02728836  | 5.013362104 |
| ENSMUSG00000027175 | 2.122355554 | 9.738641413 | 2.118453143 | 2.416373016 | 7.161945863 |
| ENSMUSG00000027177 | 17.68629628 | 41.04141738 | 29.65834401 | 83.7675979  | 73.76804239 |
| ENSMUSG00000027180 | 56.5961481  | 67.47487265 | 64.25974535 | 36.24559524 | 56.57937232 |
| ENSMUSG00000027184 | 21.93100739 | 31.30277597 | 30.36449505 | 145.7878386 | 100.9834367 |
| ENSMUSG00000027185 | 17.68629628 | 29.91154148 | 31.0706461  | 98.265836   | 83.7947666  |
| ENSMUSG00000027186 | 9.904325918 | 3.478086219 | 9.886114669 | 8.054576721 | 10.02672421 |
| ENSMUSG00000027187 | 84.89422215 | 100.8645003 | 100.2734488 | 65.24207144 | 79.49759908 |
| ENSMUSG00000027189 | 11.31922962 | 9.043024169 | 7.061510478 | 4.02728836  | 8.594335036 |
| ENSMUSG00000027193 | 81.3569629  | 118.2549314 | 107.3349593 | 184.4498069 | 137.5093606 |
| ENSMUSG00000027194 | 54.47379255 | 92.51709342 | 96.0365425  | 78.12939419 | 75.20043157 |
| ENSMUSG00000027195 | 41.73965922 | 63.99678643 | 60.72899011 | 96.65492065 | 103.1320204 |
| ENSMUSG00000027198 | 20.51610369 | 37.56333116 | 35.30755239 | 24.16373016 | 30.08017263 |
| ENSMUSG00000027199 | 7.781970364 | 6.260555194 | 8.473812573 | 10.47094974 | 5.013362104 |
| ENSMUSG00000027200 | 12.73413332 | 3.478086219 | 4.943057334 | 2.416373016 | 5.729556691 |
| ENSMUSG00000027201 | 101.1656147 | 132.8628936 | 102.3919019 | 175.5897725 | 127.4826364 |
| ENSMUSG00000027202 | 9.904325918 | 5.56493795  | 7.767661525 | 7.249119049 | 4.297167518 |
| ENSMUSG00000027203 | 24.05336294 | 36.86771392 | 31.0706461  | 104.7094974 | 96.68626916 |
| ENSMUSG00000027204 | 8.489422215 | 4.173703463 | 12.00456781 | 4.832746033 | 7.161945863 |
| ENSMUSG00000027206 | 58.0110518  | 107.1250555 | 79.08891735 | 153.0369577 | 140.3741389 |
| ENSMUSG00000027207 | 66.50047402 | 85.56092098 | 88.26888097 | 153.0369577 | 136.0769714 |
| ENSMUSG00000027208 | 11.31922962 | 8.347406925 | 12.71071886 | 5.638203705 | 5.729556691 |
| ENSMUSG00000027209 | 12.73413332 | 13.91234488 | 13.41686991 | 21.74735715 | 17.90486466 |
| ENSMUSG00000027210 | 3.537259256 | 3.478086219 | 4.236906287 | 0.805457672 | 1.432389173 |
| ENSMUSG00000027215 | 29.0055259  | 53.56252777 | 57.19823487 | 66.85298678 | 55.14698315 |
| ENSMUSG00000027217 | 8.489422215 | 7.651789682 | 4.236906287 | 4.832746033 | 7.87814045  |



|                    |             |             |             |             |             |
|--------------------|-------------|-------------|-------------|-------------|-------------|
| ENSMUSG00000027219 | 2.122355554 | 1.391234488 | 2.118453143 | 1.610915344 | 0.716194586 |
| ENSMUSG00000027222 | 20.51610369 | 28.52030699 | 35.30755239 | 56.38203705 | 52.2822048  |
| ENSMUSG00000027223 | 7.074518513 | 5.56493795  | 9.179963621 | 8.860034393 | 10.7429188  |
| ENSMUSG00000027224 | 7.074518513 | 7.651789682 | 5.649208382 | 4.02728836  | 4.297167518 |
| ENSMUSG00000027238 | 7.074518513 | 3.478086219 | 7.061510478 | 4.832746033 | 6.445751277 |
| ENSMUSG00000027239 | 7.781970364 | 5.56493795  | 6.35535943  | 8.860034393 | 8.594335036 |
| ENSMUSG00000027242 | 154.2245036 | 187.8166558 | 168.0639494 | 210.2244524 | 167.5895332 |
| ENSMUSG00000027244 | 76.40479994 | 114.081228  | 97.44884459 | 66.85298678 | 83.07857202 |
| ENSMUSG00000027245 | 33.25023701 | 44.5195036  | 34.60140134 | 60.40932541 | 45.12025894 |
| ENSMUSG00000027246 | 12.02668147 | 9.738641413 | 8.473812573 | 19.33098413 | 7.87814045  |
| ENSMUSG00000027247 | 59.42595551 | 106.4294383 | 106.6288082 | 107.9313281 | 118.1721067 |
| ENSMUSG00000027248 | 60.13340736 | 107.1250555 | 100.2734488 | 268.2174048 | 197.6697058 |
| ENSMUSG00000027249 | 8.489422215 | 8.347406925 | 6.35535943  | 6.443661377 | 6.445751277 |
| ENSMUSG00000027253 | 2.829807405 | 4.173703463 | 8.473812573 | 4.832746033 | 7.87814045  |
| ENSMUSG00000027254 | 9.904325918 | 7.651789682 | 7.767661525 | 3.221830688 | 5.013362104 |
| ENSMUSG00000027255 | 41.73965922 | 57.04061399 | 46.60596915 | 105.514955  | 77.34901533 |
| ENSMUSG00000027257 | 6.367066661 | 5.56493795  | 9.886114669 | 6.443661377 | 12.89150255 |
| ENSMUSG00000027259 | 65.08557032 | 105.7338211 | 90.38733411 | 121.6241085 | 92.38910164 |
| ENSMUSG00000027263 | 63.67066661 | 84.86530374 | 97.44884459 | 107.1258704 | 86.65954495 |
| ENSMUSG00000027270 | 12.02668147 | 2.782468975 | 9.886114669 | 5.638203705 | 10.7429188  |
| ENSMUSG00000027273 | 12.73413332 | 6.956172438 | 6.35535943  | 2.416373016 | 6.445751277 |
| ENSMUSG00000027274 | 36.08004441 | 66.08363816 | 49.43057334 | 68.46390213 | 64.45751277 |
| ENSMUSG00000027281 | 31.12788146 | 61.9099347  | 62.84744325 | 69.2693598  | 61.59273443 |
| ENSMUSG00000027282 | 34.66514071 | 66.08363816 | 67.79050059 | 79.74030954 | 78.06520991 |
| ENSMUSG00000027284 | 26.1757185  | 30.60715873 | 31.0706461  | 45.91108731 | 51.56601022 |
| ENSMUSG00000027285 | 50.22908144 | 61.9099347  | 51.54902649 | 97.46037832 | 85.22715578 |
| ENSMUSG00000027286 | 43.86201478 | 65.38802092 | 60.72899011 | 94.23854763 | 81.64618284 |
| ENSMUSG00000027287 | 55.88869625 | 100.8645003 | 85.44427678 | 82.96214023 | 73.76804239 |
| ENSMUSG00000027288 | 77.81970364 | 122.4286349 | 98.15499564 | 157.0642461 | 152.5494469 |
| ENSMUSG00000027291 | 48.10672589 | 86.25653823 | 68.49665163 | 74.10210583 | 63.74131818 |
| ENSMUSG00000027293 | 26.88317035 | 34.78086219 | 43.07521391 | 37.85651059 | 39.39070225 |
| ENSMUSG00000027297 | 4.952162959 | 12.52111039 | 11.29841676 | 7.249119049 | 11.45911338 |
| ENSMUSG00000027298 | 9.196874066 | 6.260555194 | 4.236906287 | 8.860034393 | 9.310529622 |
| ENSMUSG00000027303 | 71.45263698 | 91.82147618 | 89.68118307 | 76.51847885 | 66.60609653 |
| ENSMUSG00000027306 | 59.42595551 | 56.34499675 | 60.02283906 | 102.2931244 | 70.18706946 |
| ENSMUSG00000027309 | 0.707451851 | 0.695617244 | 0.706151048 | 0           | 0           |
| ENSMUSG00000027312 | 35.37259256 | 67.47487265 | 78.3827663  | 56.38203705 | 65.17370736 |
| ENSMUSG00000027315 | 7.781970364 | 9.043024169 | 7.767661525 | 4.832746033 | 5.013362104 |
| ENSMUSG00000027318 | 9.904325918 | 8.347406925 | 5.649208382 | 2.416373016 | 5.013362104 |
| ENSMUSG00000027322 | 8.489422215 | 6.956172438 | 8.473812573 | 4.02728836  | 7.87814045  |
| ENSMUSG00000027323 | 32.54278516 | 32.69401046 | 36.71985448 | 117.5968201 | 88.80812871 |
| ENSMUSG00000027326 | 54.47379255 | 56.34499675 | 73.43970897 | 78.93485187 | 72.33565322 |
| ENSMUSG00000027327 | 9.196874066 | 21.56413456 | 19.06607829 | 13.69278043 | 15.7562809  |

|                    |             |             |             |             |             |
|--------------------|-------------|-------------|-------------|-------------|-------------|
| ENSMUSG00000027330 | 49.52162959 | 61.9099347  | 46.60596915 | 43.49471429 | 45.12025894 |
| ENSMUSG00000027331 | 14.85648888 | 13.21672763 | 15.53532305 | 14.4982381  | 25.06681052 |
| ENSMUSG00000027332 | 29.0055259  | 38.25894841 | 29.65834401 | 16.91461111 | 20.05344842 |
| ENSMUSG00000027333 | 5.65961481  | 3.478086219 | 5.649208382 | 5.638203705 | 4.297167518 |
| ENSMUSG00000027338 | 4.244711108 | 4.869320706 | 7.767661525 | 8.860034393 | 4.297167518 |
| ENSMUSG00000027339 | 72.86754068 | 84.86530374 | 63.5535943  | 149.0096693 | 105.9967988 |
| ENSMUSG00000027340 | 31.83533331 | 53.56252777 | 36.71985448 | 50.74383334 | 53.71459398 |
| ENSMUSG00000027341 | 9.196874066 | 30.60715873 | 36.01370344 | 63.6311561  | 59.44415067 |
| ENSMUSG00000027342 | 45.98437033 | 94.60394515 | 64.25974535 | 193.3098413 | 150.4008631 |
| ENSMUSG00000027344 | 12.02668147 | 14.60796212 | 19.77222934 | 9.665492065 | 11.45911338 |
| ENSMUSG00000027346 | 8.489422215 | 9.043024169 | 9.179963621 | 3.221830688 | 9.310529622 |
| ENSMUSG00000027347 | 65.08557032 | 87.64777272 | 101.6857509 | 71.68573282 | 60.87653984 |
| ENSMUSG00000027351 | 12.73413332 | 18.78166558 | 22.59683353 | 29.80193387 | 31.5125618  |
| ENSMUSG00000027353 | 45.98437033 | 60.51870021 | 52.25517753 | 129.6786852 | 89.52432329 |
| ENSMUSG00000027355 | 7.074518513 | 3.478086219 | 9.886114669 | 9.665492065 | 8.594335036 |
| ENSMUSG00000027357 | 30.4204296  | 44.5195036  | 29.65834401 | 56.38203705 | 43.68786977 |
| ENSMUSG00000027359 | 12.73413332 | 6.260555194 | 6.35535943  | 9.665492065 | 6.445751277 |
| ENSMUSG00000027361 | 126.6338814 | 164.8612868 | 178.6562151 | 264.1901164 | 252.816689  |
| ENSMUSG00000027363 | 58.71850365 | 75.82227957 | 52.25517753 | 83.7675979  | 87.37573953 |
| ENSMUSG00000027364 | 7.781970364 | 7.651789682 | 7.061510478 | 8.054576721 | 4.297167518 |
| ENSMUSG00000027365 | 48.81417774 | 68.86610713 | 55.07978173 | 109.5422434 | 93.82149081 |
| ENSMUSG00000027366 | 38.20239997 | 57.04061399 | 50.13672439 | 69.2693598  | 65.88990194 |
| ENSMUSG00000027367 | 44.56946663 | 76.51789682 | 69.90895373 | 127.2623122 | 123.1854689 |
| ENSMUSG00000027371 | 16.97884443 | 31.99839321 | 21.18453143 | 20.94189947 | 20.769643   |
| ENSMUSG00000027374 | 50.93653329 | 61.21431745 | 72.73355792 | 72.49119049 | 65.88990194 |
| ENSMUSG00000027375 | 5.65961481  | 7.651789682 | 9.179963621 | 5.638203705 | 5.729556691 |
| ENSMUSG00000027376 | 8.489422215 | 6.260555194 | 7.061510478 | 5.638203705 | 5.013362104 |
| ENSMUSG00000027378 | 5.65961481  | 9.043024169 | 9.886114669 | 7.249119049 | 10.7429188  |
| ENSMUSG00000027379 | 31.12788146 | 38.25894841 | 28.95219296 | 68.46390213 | 58.01176149 |
| ENSMUSG00000027380 | 7.074518513 | 6.260555194 | 7.767661525 | 7.249119049 | 2.148583759 |
| ENSMUSG00000027381 | 7.781970364 | 15.99919661 | 17.65377619 | 42.68925662 | 37.95831308 |
| ENSMUSG00000027387 | 10.61177777 | 15.30357936 | 16.94762515 | 30.60739154 | 27.21539428 |
| ENSMUSG00000027394 | 12.73413332 | 12.52111039 | 15.53532305 | 9.665492065 | 13.60769714 |
| ENSMUSG00000027395 | 32.54278516 | 43.82388636 | 46.60596915 | 103.098582  | 75.20043157 |
| ENSMUSG00000027397 | 17.68629628 | 25.73783802 | 32.4829482  | 59.60386773 | 42.25548059 |
| ENSMUSG00000027398 | 8.489422215 | 5.56493795  | 7.767661525 | 8.860034393 | 12.89150255 |
| ENSMUSG00000027400 | 7.781970364 | 4.173703463 | 5.649208382 | 4.832746033 | 5.013362104 |
| ENSMUSG00000027403 | 4.952162959 | 9.043024169 | 5.649208382 | 7.249119049 | 6.445751277 |
| ENSMUSG00000027404 | 59.42595551 | 76.51789682 | 67.79050059 | 242.4427593 | 167.5895332 |
| ENSMUSG00000027405 | 7.781970364 | 18.08604834 | 7.061510478 | 14.4982381  | 11.45911338 |
| ENSMUSG00000027406 | 24.05336294 | 43.82388636 | 40.95676077 | 124.0404815 | 86.65954495 |
| ENSMUSG00000027411 | 68.62282957 | 92.51709342 | 74.85201106 | 152.2315    | 129.6312201 |
| ENSMUSG00000027412 | 7.074518513 | 6.956172438 | 17.65377619 | 5.638203705 | 9.310529622 |

|                    |             |             |             |             |             |
|--------------------|-------------|-------------|-------------|-------------|-------------|
| ENSMUSG00000027420 | 7.074518513 | 9.043024169 | 7.767661525 | 7.249119049 | 10.02672421 |
| ENSMUSG00000027422 | 21.22355554 | 40.34580014 | 36.01370344 | 102.2931244 | 89.52432329 |
| ENSMUSG00000027423 | 103.2879703 | 117.5593142 | 104.5103551 | 341.514053  | 258.5462457 |
| ENSMUSG00000027424 | 89.84638511 | 134.254128  | 131.3440949 | 343.930426  | 248.5195215 |
| ENSMUSG00000027425 | 0           | 0           | 0           | 0           | 0           |
| ENSMUSG00000027427 | 51.64398514 | 63.99678643 | 57.19823487 | 78.93485187 | 58.72795608 |
| ENSMUSG00000027429 | 41.03220737 | 77.21351406 | 60.02283906 | 91.01671695 | 65.17370736 |
| ENSMUSG00000027430 | 12.73413332 | 13.21672763 | 11.29841676 | 16.10915344 | 17.18867007 |
| ENSMUSG00000027434 | 7.781970364 | 5.56493795  | 7.061510478 | 3.221830688 | 2.864778345 |
| ENSMUSG00000027438 | 6.367066661 | 6.260555194 | 6.35535943  | 3.221830688 | 6.445751277 |
| ENSMUSG00000027442 | 7.074518513 | 4.869320706 | 12.00456781 | 8.054576721 | 7.87814045  |
| ENSMUSG00000027443 | 6.367066661 | 3.478086219 | 9.179963621 | 10.47094974 | 12.17530797 |
| ENSMUSG00000027452 | 22.63845924 | 37.56333116 | 31.0706461  | 9.665492065 | 15.04008631 |
| ENSMUSG00000027454 | 14.85648888 | 14.60796212 | 16.2414741  | 39.46742593 | 29.36397804 |
| ENSMUSG00000027455 | 44.56946663 | 78.60474855 | 71.32125582 | 128.8732275 | 95.25387998 |
| ENSMUSG00000027457 | 8.489422215 | 8.347406925 | 9.886114669 | 2.416373016 | 8.594335036 |
| ENSMUSG00000027459 | 46.69182218 | 35.47647943 | 42.36906287 | 22.55281482 | 27.21539428 |
| ENSMUSG00000027463 | 9.196874066 | 12.52111039 | 3.530755239 | 8.860034393 | 8.594335036 |
| ENSMUSG00000027465 | 92.67619252 | 143.2971522 | 125.6948865 | 121.6241085 | 108.1453825 |
| ENSMUSG00000027466 | 61.54831106 | 89.73462445 | 84.03197468 | 124.8459392 | 101.6996313 |
| ENSMUSG00000027469 | 79.23460734 | 69.56172438 | 72.73355792 | 181.2279762 | 124.617858  |
| ENSMUSG00000027472 | 45.98437033 | 56.34499675 | 60.02283906 | 91.82217462 | 88.09193412 |
| ENSMUSG00000027474 | 9.196874066 | 12.52111039 | 10.59226572 | 14.4982381  | 9.310529622 |
| ENSMUSG00000027478 | 2.122355554 | 15.30357936 | 10.59226572 | 10.47094974 | 17.18867007 |
| ENSMUSG00000027479 | 119.5593629 | 146.7752384 | 155.3532305 | 183.6443492 | 156.1304198 |
| ENSMUSG00000027480 | 6.367066661 | 6.956172438 | 7.767661525 | 11.27640741 | 10.7429188  |
| ENSMUSG00000027482 | 12.73413332 | 4.173703463 | 9.886114669 | 8.860034393 | 2.864778345 |
| ENSMUSG00000027485 | 8.489422215 | 6.260555194 | 5.649208382 | 9.665492065 | 7.87814045  |
| ENSMUSG00000027487 | 14.85648888 | 15.99919661 | 21.18453143 | 14.4982381  | 16.47247549 |
| ENSMUSG00000027488 | 10.61177777 | 4.869320706 | 7.061510478 | 8.054576721 | 7.87814045  |
| ENSMUSG00000027489 | 10.61177777 | 8.347406925 | 11.29841676 | 10.47094974 | 6.445751277 |
| ENSMUSG00000027490 | 12.73413332 | 11.82549314 | 24.00913562 | 66.04752911 | 50.13362104 |
| ENSMUSG00000027496 | 117.4370073 | 129.3848073 | 128.5194907 | 272.2446932 | 172.6028953 |
| ENSMUSG00000027498 | 114.6071999 | 121.0374004 | 131.3440949 | 254.5246244 | 188.3591762 |
| ENSMUSG00000027499 | 12.02668147 | 11.1298759  | 10.59226572 | 4.02728836  | 6.445751277 |
| ENSMUSG00000027500 | 9.904325918 | 4.869320706 | 9.886114669 | 3.221830688 | 5.729556691 |
| ENSMUSG00000027502 | 147.1499851 | 158.6007316 | 163.8270431 | 154.647873  | 136.0769714 |
| ENSMUSG00000027506 | 38.90985182 | 72.34419335 | 56.49208382 | 47.52200265 | 50.84981563 |
| ENSMUSG00000027508 | 131.5860443 | 176.6867799 | 167.3577983 | 111.9586164 | 105.2806042 |
| ENSMUSG00000027509 | 80.64951104 | 106.4294383 | 107.3349593 | 178.0061455 | 150.4008631 |
| ENSMUSG00000027510 | 55.1812444  | 82.08283477 | 62.1412922  | 74.10210583 | 52.2822048  |
| ENSMUSG00000027513 | 12.02668147 | 3.478086219 | 2.824604191 | 10.47094974 | 12.89150255 |
| ENSMUSG00000027514 | 18.39374813 | 29.21592424 | 26.12758877 | 138.5387196 | 76.63282074 |

|                    |             |             |             |             |             |
|--------------------|-------------|-------------|-------------|-------------|-------------|
| ENSMUSG00000027517 | 6.367066661 | 8.347406925 | 7.767661525 | 8.054576721 | 7.161945863 |
| ENSMUSG00000027519 | 55.1812444  | 102.9513521 | 88.97503202 | 84.57305557 | 86.65954495 |
| ENSMUSG00000027520 | 5.65961481  | 6.260555194 | 12.71071886 | 4.832746033 | 8.594335036 |
| ENSMUSG00000027522 | 29.71297775 | 39.6501829  | 38.13215658 | 82.96214023 | 79.49759908 |
| ENSMUSG00000027523 | 6.367066661 | 7.651789682 | 6.35535943  | 14.4982381  | 11.45911338 |
| ENSMUSG00000027525 | 5.65961481  | 6.260555194 | 7.767661525 | 3.221830688 | 5.729556691 |
| ENSMUSG00000027528 | 12.73413332 | 6.260555194 | 7.061510478 | 7.249119049 | 6.445751277 |
| ENSMUSG00000027530 | 8.489422215 | 9.738641413 | 9.886114669 | 4.02728836  | 10.7429188  |
| ENSMUSG00000027531 | 36.08004441 | 53.56252777 | 58.61053696 | 68.46390213 | 45.83645353 |
| ENSMUSG00000027533 | 9.196874066 | 6.260555194 | 7.767661525 | 27.38556085 | 16.47247549 |
| ENSMUSG00000027534 | 4.952162959 | 10.43425866 | 10.59226572 | 13.69278043 | 12.89150255 |
| ENSMUSG00000027540 | 162.7139258 | 181.5561006 | 157.4716837 | 240.0263863 | 201.9668733 |
| ENSMUSG00000027544 | 5.65961481  | 6.260555194 | 7.061510478 | 5.638203705 | 7.161945863 |
| ENSMUSG00000027546 | 4.244711108 | 2.782468975 | 4.236906287 | 5.638203705 | 5.729556691 |
| ENSMUSG00000027547 | 2.829807405 | 4.869320706 | 7.767661525 | 4.02728836  | 4.297167518 |
| ENSMUSG00000027550 | 14.14903703 | 19.47728283 | 15.53532305 | 25.77464551 | 27.21539428 |
| ENSMUSG00000027551 | 21.93100739 | 50.7800588  | 50.13672439 | 72.49119049 | 56.57937232 |
| ENSMUSG00000027552 | 12.02668147 | 23.65098629 | 21.18453143 | 39.46742593 | 39.39070225 |
| ENSMUSG00000027556 | 8.489422215 | 8.347406925 | 7.767661525 | 5.638203705 | 5.729556691 |
| ENSMUSG00000027562 | 7.781970364 | 7.651789682 | 10.59226572 | 10.47094974 | 10.02672421 |
| ENSMUSG00000027566 | 70.03773327 | 96.69079689 | 103.098053  | 239.2209286 | 180.4810358 |
| ENSMUSG00000027569 | 19.80865184 | 24.34660353 | 27.53989086 | 43.49471429 | 35.09353473 |
| ENSMUSG00000027570 | 6.367066661 | 7.651789682 | 9.179963621 | 5.638203705 | 9.310529622 |
| ENSMUSG00000027573 | 139.3680147 | 210.7720249 | 170.8885536 | 279.4938122 | 216.2907651 |
| ENSMUSG00000027574 | 6.367066661 | 7.651789682 | 5.649208382 | 4.02728836  | 12.17530797 |
| ENSMUSG00000027575 | 74.98989623 | 120.3417832 | 102.3919019 | 136.1223466 | 120.3206905 |
| ENSMUSG00000027577 | 7.781970364 | 4.869320706 | 5.649208382 | 4.832746033 | 5.729556691 |
| ENSMUSG00000027580 | 205.1610369 | 201.0333835 | 189.9546318 | 318.1557805 | 196.9535112 |
| ENSMUSG00000027581 | 10.61177777 | 10.43425866 | 9.179963621 | 8.860034393 | 12.17530797 |
| ENSMUSG00000027582 | 70.74518513 | 112.6899935 | 83.32582364 | 194.9207566 | 163.2923657 |
| ENSMUSG00000027583 | 4.244711108 | 3.478086219 | 7.767661525 | 12.08186508 | 12.17530797 |
| ENSMUSG00000027584 | 11.31922962 | 6.260555194 | 8.473812573 | 4.02728836  | 7.161945863 |
| ENSMUSG00000027589 | 52.35143699 | 88.34338996 | 60.72899011 | 33.02376456 | 35.09353473 |
| ENSMUSG00000027593 | 0           | 0.695617244 | 0.706151048 | 0           | 0.716194586 |
| ENSMUSG00000027596 | 10.61177777 | 19.47728283 | 16.94762515 | 27.38556085 | 21.48583759 |
| ENSMUSG00000027597 | 43.86201478 | 68.86610713 | 54.37363068 | 120.0131931 | 95.25387998 |
| ENSMUSG00000027598 | 48.81417774 | 69.56172438 | 64.25974535 | 98.265836   | 90.95671247 |
| ENSMUSG00000027601 | 13.44158517 | 25.73783802 | 18.35992724 | 23.35827249 | 23.63442135 |
| ENSMUSG00000027603 | 9.196874066 | 10.43425866 | 9.886114669 | 17.72006879 | 7.87814045  |
| ENSMUSG00000027605 | 12.02668147 | 11.1298759  | 12.00456781 | 10.47094974 | 5.729556691 |
| ENSMUSG00000027606 | 8.489422215 | 7.651789682 | 10.59226572 | 7.249119049 | 12.17530797 |
| ENSMUSG00000027610 | 3.537259256 | 4.869320706 | 4.236906287 | 8.860034393 | 7.87814045  |
| ENSMUSG00000027611 | 12.02668147 | 8.347406925 | 7.767661525 | 6.443661377 | 10.02672421 |

|                    |             |             |             |             |             |
|--------------------|-------------|-------------|-------------|-------------|-------------|
| ENSMUSG00000027613 | 30.4204296  | 43.82388636 | 43.78136496 | 128.8732275 | 83.7947666  |
| ENSMUSG00000027615 | 80.64951104 | 98.08203137 | 72.73355792 | 120.8186508 | 81.64618284 |
| ENSMUSG00000027618 | 36.08004441 | 51.47567604 | 45.8998181  | 85.37851324 | 77.34901533 |
| ENSMUSG00000027620 | 123.804074  | 178.0780144 | 144.7609648 | 314.1284921 | 227.7498785 |
| ENSMUSG00000027624 | 9.196874066 | 5.56493795  | 2.824604191 | 9.665492065 | 3.580972932 |
| ENSMUSG00000027628 | 56.5961481  | 100.8645003 | 78.3827663  | 144.982381  | 124.617858  |
| ENSMUSG00000027630 | 85.601674   | 123.1242521 | 102.3919019 | 184.4498069 | 135.3607768 |
| ENSMUSG00000027634 | 19.80865184 | 48.69320706 | 42.36906287 | 26.58010318 | 20.769643   |
| ENSMUSG00000027635 | 9.196874066 | 18.08604834 | 9.886114669 | 35.44013757 | 18.62105924 |
| ENSMUSG00000027636 | 8.489422215 | 6.956172438 | 7.061510478 | 4.832746033 | 11.45911338 |
| ENSMUSG00000027639 | 87.72402956 | 103.6469693 | 80.50121945 | 174.7843148 | 113.1587446 |
| ENSMUSG00000027641 | 36.78749627 | 49.38882431 | 43.07521391 | 94.23854763 | 63.74131818 |
| ENSMUSG00000027642 | 43.86201478 | 68.17048989 | 50.13672439 | 153.0369577 | 113.8749392 |
| ENSMUSG00000027646 | 4.952162959 | 7.651789682 | 9.179963621 | 4.02728836  | 10.02672421 |
| ENSMUSG00000027649 | 47.39927403 | 84.1696865  | 67.08434954 | 54.7711217  | 61.59273443 |
| ENSMUSG00000027650 | 115.3146518 | 182.9473351 | 134.1686991 | 178.0061455 | 159.7113928 |
| ENSMUSG00000027651 | 117.4370073 | 169.0349902 | 161.0024389 | 186.8661799 | 179.7648412 |
| ENSMUSG00000027652 | 68.62282957 | 91.12585893 | 97.44884459 | 79.74030954 | 68.75468029 |
| ENSMUSG00000027655 | 30.4204296  | 54.95376226 | 40.25060972 | 42.68925662 | 54.43078856 |
| ENSMUSG00000027660 | 26.1757185  | 41.73703463 | 42.36906287 | 132.9005159 | 111.0101609 |
| ENSMUSG00000027663 | 19.10119998 | 24.34660353 | 17.65377619 | 50.74383334 | 30.08017263 |
| ENSMUSG00000027665 | 122.3891703 | 140.5146832 | 125.6948865 | 169.9515688 | 144.6713064 |
| ENSMUSG00000027668 | 17.68629628 | 24.34660353 | 25.42143772 | 24.16373016 | 22.91822676 |
| ENSMUSG00000027669 | 5.65961481  | 2.782468975 | 4.236906287 | 16.10915344 | 10.7429188  |
| ENSMUSG00000027671 | 32.54278516 | 50.08444155 | 47.3121202  | 106.3204127 | 82.36237743 |
| ENSMUSG00000027673 | 53.05888884 | 75.12666233 | 64.96589639 | 131.2896006 | 121.7530797 |
| ENSMUSG00000027674 | 4.952162959 | 10.43425866 | 9.886114669 | 3.221830688 | 7.87814045  |
| ENSMUSG00000027676 | 9.904325918 | 8.347406925 | 7.767661525 | 2.416373016 | 6.445751277 |
| ENSMUSG00000027677 | 46.69182218 | 82.77845201 | 65.67204744 | 135.3168889 | 98.83485292 |
| ENSMUSG00000027678 | 132.2934962 | 164.1656695 | 130.6379438 | 343.930426  | 242.7899648 |
| ENSMUSG00000027679 | 15.56394073 | 40.34580014 | 19.77222934 | 27.38556085 | 31.5125618  |
| ENSMUSG00000027680 | 102.5805184 | 138.4278315 | 124.9887355 | 189.2825529 | 155.4142252 |
| ENSMUSG00000027684 | 10.61177777 | 9.043024169 | 9.886114669 | 3.221830688 | 5.013362104 |
| ENSMUSG00000027690 | 6.367066661 | 7.651789682 | 6.35535943  | 4.02728836  | 6.445751277 |
| ENSMUSG00000027692 | 4.952162959 | 9.738641413 | 14.829172   | 15.30369577 | 10.02672421 |
| ENSMUSG00000027695 | 8.489422215 | 5.56493795  | 6.35535943  | 6.443661377 | 5.013362104 |
| ENSMUSG00000027698 | 12.73413332 | 29.91154148 | 16.94762515 | 19.33098413 | 25.06681052 |
| ENSMUSG00000027699 | 43.86201478 | 49.38882431 | 40.25060972 | 112.7640741 | 68.75468029 |
| ENSMUSG00000027703 | 7.074518513 | 7.651789682 | 5.649208382 | 5.638203705 | 5.013362104 |
| ENSMUSG00000027708 | 45.98437033 | 61.21431745 | 63.5535943  | 56.38203705 | 47.98503729 |
| ENSMUSG00000027710 | 48.81417774 | 82.77845201 | 56.49208382 | 110.3477011 | 99.5510475  |
| ENSMUSG00000027712 | 1.414903703 | 0           | 0           | 0           | 0           |
| ENSMUSG00000027714 | 16.97884443 | 21.56413456 | 21.89068248 | 54.7711217  | 40.82309142 |

|                    |             |             |             |             |             |
|--------------------|-------------|-------------|-------------|-------------|-------------|
| ENSMUSG00000027716 | 9.904325918 | 4.173703463 | 7.061510478 | 4.02728836  | 7.161945863 |
| ENSMUSG00000027719 | 7.781970364 | 5.56493795  | 9.886114669 | 6.443661377 | 4.297167518 |
| ENSMUSG00000027722 | 23.34591109 | 48.69320706 | 33.18909925 | 129.6786852 | 113.8749392 |
| ENSMUSG00000027737 | 9.196874066 | 8.347406925 | 9.179963621 | 3.221830688 | 4.297167518 |
| ENSMUSG00000027742 | 16.97884443 | 35.47647943 | 31.77679715 | 14.4982381  | 30.08017263 |
| ENSMUSG00000027746 | 42.44711108 | 82.08283477 | 81.91352154 | 93.43308996 | 71.61945863 |
| ENSMUSG00000027748 | 2.829807405 | 4.869320706 | 6.35535943  | 4.02728836  | 7.161945863 |
| ENSMUSG00000027750 | 4.244711108 | 7.651789682 | 6.35535943  | 4.02728836  | 6.445751277 |
| ENSMUSG00000027751 | 1.414903703 | 5.56493795  | 5.649208382 | 5.638203705 | 5.013362104 |
| ENSMUSG00000027752 | 42.44711108 | 71.64857611 | 67.08434954 | 140.9550926 | 103.1320204 |
| ENSMUSG00000027763 | 188.1821924 | 258.0739974 | 211.8453143 | 354.4013757 | 276.4511103 |
| ENSMUSG00000027774 | 29.71297775 | 45.21512085 | 50.13672439 | 79.74030954 | 93.10529622 |
| ENSMUSG00000027776 | 30.4204296  | 29.21592424 | 27.53989086 | 30.60739154 | 24.35061594 |
| ENSMUSG00000027778 | 55.1812444  | 77.21351406 | 71.32125582 | 238.4154709 | 183.3458141 |
| ENSMUSG00000027782 | 108.9475851 | 139.819066  | 105.2165061 | 190.0880106 | 151.1170577 |
| ENSMUSG00000027784 | 16.97884443 | 38.25894841 | 27.53989086 | 37.85651059 | 43.68786977 |
| ENSMUSG00000027787 | 67.20792587 | 104.3425866 | 96.74269354 | 207.0026217 | 165.4409494 |
| ENSMUSG00000027790 | 8.489422215 | 7.651789682 | 2.824604191 | 2.416373016 | 6.445751277 |
| ENSMUSG00000027792 | 9.904325918 | 2.086851731 | 9.179963621 | 4.832746033 | 7.87814045  |
| ENSMUSG00000027797 | 7.781970364 | 9.043024169 | 6.35535943  | 2.416373016 | 7.87814045  |
| ENSMUSG00000027799 | 9.904325918 | 4.869320706 | 6.35535943  | 2.416373016 | 7.87814045  |
| ENSMUSG00000027800 | 7.074518513 | 6.956172438 | 7.767661525 | 7.249119049 | 9.310529622 |
| ENSMUSG00000027803 | 5.65961481  | 6.260555194 | 7.061510478 | 2.416373016 | 4.297167518 |
| ENSMUSG00000027804 | 35.37259256 | 65.38802092 | 50.13672439 | 157.8697037 | 147.5360848 |
| ENSMUSG00000027805 | 9.904325918 | 7.651789682 | 8.473812573 | 6.443661377 | 7.161945863 |
| ENSMUSG00000027809 | 24.05336294 | 36.17209668 | 27.53989086 | 39.46742593 | 30.79636721 |
| ENSMUSG00000027810 | 214.3579109 | 235.8142456 | 206.902257  | 392.2578863 | 282.8968616 |
| ENSMUSG00000027820 | 5.65961481  | 6.260555194 | 7.767661525 | 6.443661377 | 5.013362104 |
| ENSMUSG00000027822 | 28.29807405 | 47.30197258 | 34.60140134 | 58.79841006 | 65.88990194 |
| ENSMUSG00000027827 | 10.61177777 | 4.869320706 | 4.236906287 | 8.054576721 | 5.013362104 |
| ENSMUSG00000027828 | 57.30359995 | 89.0390072  | 76.26431316 | 169.1461111 | 124.617858  |
| ENSMUSG00000027829 | 81.3569629  | 95.99517964 | 93.91808935 | 260.9682858 | 180.4810358 |
| ENSMUSG00000027833 | 5.65961481  | 10.43425866 | 8.473812573 | 4.832746033 | 6.445751277 |
| ENSMUSG00000027834 | 91.96874066 | 131.4716591 | 122.8702823 | 134.5114312 | 96.68626916 |
| ENSMUSG00000027835 | 122.3891703 | 181.5561006 | 146.1732669 | 181.2279762 | 145.387501  |
| ENSMUSG00000027843 | 29.0055259  | 45.91073809 | 26.83373982 | 74.9075635  | 76.63282074 |
| ENSMUSG00000027845 | 53.7663407  | 70.25734162 | 66.37819849 | 93.43308996 | 80.92998826 |
| ENSMUSG00000027848 | 11.31922962 | 19.47728283 | 15.53532305 | 5.638203705 | 12.17530797 |
| ENSMUSG00000027849 | 7.781970364 | 5.56493795  | 7.767661525 | 1.610915344 | 10.02672421 |
| ENSMUSG00000027852 | 29.0055259  | 48.69320706 | 53.66747963 | 62.02024075 | 47.2688427  |
| ENSMUSG00000027854 | 40.32475552 | 68.86610713 | 39.54445867 | 59.60386773 | 52.99839939 |
| ENSMUSG00000027855 | 7.074518513 | 6.956172438 | 6.35535943  | 7.249119049 | 6.445751277 |
| ENSMUSG00000027857 | 5.65961481  | 9.043024169 | 8.473812573 | 6.443661377 | 8.594335036 |

|                    |             |             |             |             |             |
|--------------------|-------------|-------------|-------------|-------------|-------------|
| ENSMUSG00000027858 | 25.46826665 | 28.52030699 | 33.89525029 | 16.91461111 | 26.49919969 |
| ENSMUSG00000027859 | 9.904325918 | 8.347406925 | 6.35535943  | 3.221830688 | 5.729556691 |
| ENSMUSG00000027860 | 9.904325918 | 6.260555194 | 6.35535943  | 5.638203705 | 6.445751277 |
| ENSMUSG00000027861 | 8.489422215 | 3.478086219 | 9.179963621 | 6.443661377 | 6.445751277 |
| ENSMUSG00000027865 | 60.84085921 | 95.99517964 | 86.85657888 | 111.9586164 | 109.5777717 |
| ENSMUSG00000027867 | 9.196874066 | 9.738641413 | 10.59226572 | 8.054576721 | 7.161945863 |
| ENSMUSG00000027868 | 7.074518513 | 8.347406925 | 5.649208382 | 0           | 3.580972932 |
| ENSMUSG00000027869 | 12.73413332 | 11.82549314 | 9.886114669 | 5.638203705 | 9.310529622 |
| ENSMUSG00000027871 | 9.904325918 | 6.260555194 | 10.59226572 | 7.249119049 | 5.013362104 |
| ENSMUSG00000027875 | 7.781970364 | 6.956172438 | 6.35535943  | 7.249119049 | 3.580972932 |
| ENSMUSG00000027878 | 141.4903703 | 166.9481385 | 163.120892  | 149.0096693 | 122.4692743 |
| ENSMUSG00000027881 | 67.20792587 | 104.3425866 | 76.97046421 | 291.5756773 | 191.2239546 |
| ENSMUSG00000027882 | 88.43148141 | 131.4716591 | 98.15499564 | 97.46037832 | 71.61945863 |
| ENSMUSG00000027883 | 19.80865184 | 13.21672763 | 17.65377619 | 13.69278043 | 11.45911338 |
| ENSMUSG00000027884 | 29.71297775 | 45.91073809 | 34.60140134 | 47.52200265 | 47.2688427  |
| ENSMUSG00000027887 | 4.244711108 | 4.173703463 | 8.473812573 | 4.02728836  | 5.013362104 |
| ENSMUSG00000027889 | 21.22355554 | 23.65098629 | 38.13215658 | 76.51847885 | 52.99839939 |
| ENSMUSG00000027890 | 7.781970364 | 6.260555194 | 6.35535943  | 6.443661377 | 5.013362104 |
| ENSMUSG00000027893 | 45.98437033 | 68.86610713 | 64.96589639 | 115.9859048 | 79.49759908 |
| ENSMUSG00000027894 | 11.31922962 | 3.478086219 | 6.35535943  | 4.832746033 | 5.729556691 |
| ENSMUSG00000027896 | 8.489422215 | 4.173703463 | 8.473812573 | 5.638203705 | 5.013362104 |
| ENSMUSG00000027900 | 133.000948  | 186.4254213 | 144.0548137 | 142.566008  | 141.0903335 |
| ENSMUSG00000027901 | 11.31922962 | 22.95536904 | 19.77222934 | 14.4982381  | 12.89150255 |
| ENSMUSG00000027905 | 18.39374813 | 20.86851731 | 20.47838039 | 70.88027514 | 55.14698315 |
| ENSMUSG00000027931 | 4.952162959 | 4.173703463 | 4.236906287 | 8.860034393 | 7.87814045  |
| ENSMUSG00000027932 | 6.367066661 | 9.043024169 | 11.29841676 | 5.638203705 | 7.87814045  |
| ENSMUSG00000027933 | 16.97884443 | 27.82468975 | 23.30298458 | 42.68925662 | 41.53928601 |
| ENSMUSG00000027935 | 77.81970364 | 116.863697  | 98.86114669 | 228.7499789 | 156.8466144 |
| ENSMUSG00000027936 | 102.5805184 | 114.7768452 | 122.1641313 | 227.9445212 | 171.1705061 |
| ENSMUSG00000027937 | 43.15456293 | 59.12746572 | 52.25517753 | 114.3749894 | 89.52432329 |
| ENSMUSG00000027938 | 8.489422215 | 11.82549314 | 14.12302096 | 7.249119049 | 12.17530797 |
| ENSMUSG00000027939 | 10.61177777 | 23.65098629 | 12.00456781 | 11.27640741 | 11.45911338 |
| ENSMUSG00000027940 | 6.367066661 | 3.478086219 | 4.943057334 | 7.249119049 | 2.148583759 |
| ENSMUSG00000027942 | 145.7350814 | 197.5552972 | 163.8270431 | 376.9541905 | 262.1272186 |
| ENSMUSG00000027944 | 31.83533331 | 62.60555194 | 43.07521391 | 89.4058016  | 67.32229112 |
| ENSMUSG00000027947 | 9.904325918 | 18.78166558 | 10.59226572 | 16.91461111 | 21.48583759 |
| ENSMUSG00000027951 | 9.904325918 | 15.30357936 | 16.2414741  | 47.52200265 | 43.68786977 |
| ENSMUSG00000027952 | 16.27139258 | 20.17290007 | 17.65377619 | 36.24559524 | 27.21539428 |
| ENSMUSG00000027953 | 35.37259256 | 54.95376226 | 48.01827125 | 40.2728836  | 35.80972932 |
| ENSMUSG00000027955 | 7.781970364 | 5.56493795  | 4.943057334 | 4.832746033 | 5.013362104 |
| ENSMUSG00000027956 | 5.65961481  | 9.738641413 | 4.236906287 | 7.249119049 | 7.87814045  |
| ENSMUSG00000027957 | 13.44158517 | 37.56333116 | 43.78136496 | 49.93837567 | 45.83645353 |
| ENSMUSG00000027959 | 53.05888884 | 85.56092098 | 78.3827663  | 124.0404815 | 108.8615771 |

|                    |             |             |             |             |             |
|--------------------|-------------|-------------|-------------|-------------|-------------|
| ENSMUSG00000027962 | 12.02668147 | 6.956172438 | 7.061510478 | 9.665492065 | 9.310529622 |
| ENSMUSG00000027963 | 19.10119998 | 45.91073809 | 37.42600553 | 66.04752911 | 57.29556691 |
| ENSMUSG00000027965 | 4.244711108 | 6.260555194 | 11.29841676 | 5.638203705 | 6.445751277 |
| ENSMUSG00000027966 | 7.074518513 | 6.260555194 | 7.767661525 | 4.832746033 | 5.729556691 |
| ENSMUSG00000027968 | 40.32475552 | 56.34499675 | 52.25517753 | 95.84946298 | 78.06520991 |
| ENSMUSG00000027971 | 9.904325918 | 4.869320706 | 7.061510478 | 4.02728836  | 6.445751277 |
| ENSMUSG00000027973 | 9.904325918 | 5.56493795  | 9.179963621 | 3.221830688 | 7.161945863 |
| ENSMUSG00000027977 | 7.781970364 | 5.56493795  | 9.886114669 | 3.221830688 | 3.580972932 |
| ENSMUSG00000027981 | 29.71297775 | 52.17129328 | 40.95676077 | 65.24207144 | 60.87653984 |
| ENSMUSG00000027983 | 7.781970364 | 7.651789682 | 7.767661525 | 3.221830688 | 7.87814045  |
| ENSMUSG00000027985 | 13.44158517 | 9.738641413 | 14.829172   | 6.443661377 | 8.594335036 |
| ENSMUSG00000027993 | 9.904325918 | 6.260555194 | 9.179963621 | 4.02728836  | 5.729556691 |
| ENSMUSG00000027994 | 7.074518513 | 4.173703463 | 8.473812573 | 5.638203705 | 5.013362104 |
| ENSMUSG00000027995 | 10.61177777 | 6.260555194 | 10.59226572 | 4.02728836  | 9.310529622 |
| ENSMUSG00000027996 | 7.074518513 | 7.651789682 | 7.767661525 | 4.02728836  | 6.445751277 |
| ENSMUSG00000027998 | 48.10672589 | 76.51789682 | 63.5535943  | 78.93485187 | 73.76804239 |
| ENSMUSG00000027999 | 14.14903703 | 32.69401046 | 27.53989086 | 25.77464551 | 22.91822676 |
| ENSMUSG00000028001 | 11.31922962 | 5.56493795  | 8.473812573 | 2.416373016 | 7.161945863 |
| ENSMUSG00000028004 | 10.61177777 | 7.651789682 | 9.886114669 | 4.832746033 | 4.297167518 |
| ENSMUSG00000028005 | 7.781970364 | 11.1298759  | 7.061510478 | 6.443661377 | 9.310529622 |
| ENSMUSG00000028007 | 4.244711108 | 7.651789682 | 7.061510478 | 5.638203705 | 5.729556691 |
| ENSMUSG00000028008 | 4.952162959 | 10.43425866 | 4.943057334 | 4.832746033 | 5.013362104 |
| ENSMUSG00000028010 | 34.66514071 | 60.51870021 | 42.36906287 | 137.7332619 | 109.5777717 |
| ENSMUSG00000028011 | 7.781970364 | 6.956172438 | 9.886114669 | 5.638203705 | 6.445751277 |
| ENSMUSG00000028012 | 10.61177777 | 18.08604834 | 6.35535943  | 14.4982381  | 15.7562809  |
| ENSMUSG00000028013 | 9.196874066 | 17.39043109 | 12.71071886 | 17.72006879 | 17.18867007 |
| ENSMUSG00000028018 | 55.1812444  | 73.0398106  | 49.43057334 | 100.682209  | 98.83485292 |
| ENSMUSG00000028020 | 8.489422215 | 7.651789682 | 3.530755239 | 6.443661377 | 3.580972932 |
| ENSMUSG00000028023 | 8.489422215 | 7.651789682 | 3.530755239 | 8.054576721 | 5.013362104 |
| ENSMUSG00000028024 | 10.61177777 | 15.30357936 | 7.061510478 | 7.249119049 | 7.161945863 |
| ENSMUSG00000028028 | 10.61177777 | 8.347406925 | 12.00456781 | 5.638203705 | 10.7429188  |
| ENSMUSG00000028029 | 78.52715549 | 115.4724625 | 94.6242404  | 125.6513968 | 118.8883013 |
| ENSMUSG00000028030 | 63.67066661 | 110.6031418 | 110.1595635 | 98.265836   | 105.9967988 |
| ENSMUSG00000028032 | 12.02668147 | 34.78086219 | 29.65834401 | 21.74735715 | 18.62105924 |
| ENSMUSG00000028033 | 10.61177777 | 11.82549314 | 12.71071886 | 32.21830688 | 20.769643   |
| ENSMUSG00000028034 | 169.7884443 | 223.2931353 | 168.7701004 | 385.0087673 | 249.9519106 |
| ENSMUSG00000028035 | 152.8095999 | 175.2955454 | 161.7085899 | 298.0193387 | 222.0203218 |
| ENSMUSG00000028037 | 8.489422215 | 11.1298759  | 7.061510478 | 5.638203705 | 5.013362104 |
| ENSMUSG00000028039 | 8.489422215 | 4.869320706 | 4.943057334 | 8.054576721 | 3.580972932 |
| ENSMUSG00000028041 | 5.65961481  | 15.99919661 | 7.061510478 | 7.249119049 | 9.310529622 |
| ENSMUSG00000028042 | 28.29807405 | 43.12826911 | 48.7244223  | 24.96918783 | 23.63442135 |
| ENSMUSG00000028047 | 7.781970364 | 11.82549314 | 11.29841676 | 20.1364418  | 12.17530797 |
| ENSMUSG00000028048 | 27.5906222  | 38.95456565 | 38.83830763 | 29.80193387 | 35.09353473 |



|                    |             |             |             |             |             |
|--------------------|-------------|-------------|-------------|-------------|-------------|
| ENSMUSG00000028049 | 26.1757185  | 38.25894841 | 45.19366706 | 43.49471429 | 45.83645353 |
| ENSMUSG00000028051 | 7.781970364 | 7.651789682 | 9.179963621 | 12.08186508 | 13.60769714 |
| ENSMUSG00000028053 | 82.7718666  | 123.8198694 | 94.6242404  | 232.7772672 | 189.0753708 |
| ENSMUSG00000028057 | 24.05336294 | 29.91154148 | 28.95219296 | 26.58010318 | 27.93158887 |
| ENSMUSG00000028059 | 10.61177777 | 16.69481385 | 19.06607829 | 8.054576721 | 9.310529622 |
| ENSMUSG00000028060 | 95.50599992 | 121.7330177 | 105.2165061 | 247.2755053 | 171.8867007 |
| ENSMUSG00000028062 | 16.27139258 | 38.95456565 | 43.07521391 | 44.30017197 | 41.53928601 |
| ENSMUSG00000028063 | 7.074518513 | 6.260555194 | 7.767661525 | 8.054576721 | 7.161945863 |
| ENSMUSG00000028064 | 4.244711108 | 5.56493795  | 7.061510478 | 10.47094974 | 9.310529622 |
| ENSMUSG00000028066 | 33.95768886 | 38.95456565 | 42.36906287 | 66.85298678 | 58.01176149 |
| ENSMUSG00000028068 | 7.781970364 | 13.91234488 | 13.41686991 | 16.91461111 | 17.90486466 |
| ENSMUSG00000028069 | 35.37259256 | 54.95376226 | 46.60596915 | 117.5968201 | 77.34901533 |
| ENSMUSG00000028071 | 11.31922962 | 21.56413456 | 21.18453143 | 23.35827249 | 31.5125618  |
| ENSMUSG00000028073 | 9.904325918 | 7.651789682 | 2.824604191 | 10.47094974 | 9.310529622 |
| ENSMUSG00000028076 | 8.489422215 | 15.30357936 | 14.829172   | 8.054576721 | 7.161945863 |
| ENSMUSG00000028078 | 14.14903703 | 13.91234488 | 17.65377619 | 16.91461111 | 15.7562809  |
| ENSMUSG00000028080 | 31.83533331 | 55.6493795  | 50.13672439 | 66.04752911 | 52.99839939 |
| ENSMUSG00000028082 | 7.781970364 | 9.738641413 | 5.649208382 | 4.832746033 | 11.45911338 |
| ENSMUSG00000028085 | 6.367066661 | 11.82549314 | 12.71071886 | 11.27640741 | 12.17530797 |
| ENSMUSG00000028086 | 46.69182218 | 87.64777272 | 72.02740687 | 208.6135371 | 189.0753708 |
| ENSMUSG00000028088 | 5.65961481  | 9.738641413 | 10.59226572 | 9.665492065 | 9.310529622 |
| ENSMUSG00000028093 | 16.27139258 | 25.73783802 | 21.18453143 | 24.16373016 | 17.90486466 |
| ENSMUSG00000028096 | 14.85648888 | 31.99839321 | 30.36449505 | 37.05105292 | 29.36397804 |
| ENSMUSG00000028098 | 106.1177777 | 139.1234488 | 124.2825844 | 231.9718096 | 189.0753708 |
| ENSMUSG00000028100 | 8.489422215 | 13.91234488 | 7.767661525 | 7.249119049 | 9.310529622 |
| ENSMUSG00000028101 | 19.80865184 | 27.12907251 | 24.00913562 | 8.860034393 | 7.161945863 |
| ENSMUSG00000028102 | 14.14903703 | 30.60715873 | 20.47838039 | 28.19101852 | 22.91822676 |
| ENSMUSG00000028104 | 19.80865184 | 34.08524495 | 33.89525029 | 26.58010318 | 21.48583759 |
| ENSMUSG00000028106 | 87.01657771 | 120.3417832 | 105.2165061 | 184.4498069 | 155.4142252 |
| ENSMUSG00000028107 | 14.85648888 | 25.73783802 | 16.2414741  | 32.21830688 | 25.78300511 |
| ENSMUSG00000028108 | 4.244711108 | 5.56493795  | 9.886114669 | 7.249119049 | 10.02672421 |
| ENSMUSG00000028109 | 6.367066661 | 7.651789682 | 7.061510478 | 5.638203705 | 8.594335036 |
| ENSMUSG00000028114 | 48.81417774 | 80.69160028 | 57.90438592 | 61.21478308 | 60.87653984 |
| ENSMUSG00000028115 | 11.31922962 | 15.99919661 | 7.061510478 | 7.249119049 | 6.445751277 |
| ENSMUSG00000028116 | 9.904325918 | 4.869320706 | 7.767661525 | 4.832746033 | 6.445751277 |
| ENSMUSG00000028124 | 12.73413332 | 13.91234488 | 10.59226572 | 52.35474869 | 45.12025894 |
| ENSMUSG00000028125 | 7.781970364 | 6.260555194 | 8.473812573 | 3.221830688 | 7.161945863 |
| ENSMUSG00000028126 | 87.01657771 | 129.3848073 | 126.4010376 | 121.6241085 | 107.429188  |
| ENSMUSG00000028127 | 7.781970364 | 8.347406925 | 7.767661525 | 20.1364418  | 10.02672421 |
| ENSMUSG00000028128 | 9.904325918 | 6.956172438 | 9.179963621 | 7.249119049 | 9.310529622 |
| ENSMUSG00000028132 | 5.65961481  | 8.347406925 | 5.649208382 | 10.47094974 | 11.45911338 |
| ENSMUSG00000028133 | 12.73413332 | 11.82549314 | 9.179963621 | 9.665492065 | 11.45911338 |
| ENSMUSG00000028134 | 45.98437033 | 73.73542784 | 64.25974535 | 70.07481747 | 76.63282074 |

|                    |             |             |             |             |             |
|--------------------|-------------|-------------|-------------|-------------|-------------|
| ENSMUSG00000028136 | 39.61730367 | 62.60555194 | 52.25517753 | 62.82569842 | 63.0251236  |
| ENSMUSG00000028140 | 20.51610369 | 34.78086219 | 31.0706461  | 88.60034393 | 65.17370736 |
| ENSMUSG00000028141 | 13.44158517 | 6.956172438 | 6.35535943  | 6.443661377 | 4.297167518 |
| ENSMUSG00000028148 | 8.489422215 | 7.651789682 | 7.061510478 | 8.860034393 | 9.310529622 |
| ENSMUSG00000028149 | 45.27691848 | 84.1696865  | 62.1412922  | 91.82217462 | 79.49759908 |
| ENSMUSG00000028150 | 9.904325918 | 9.043024169 | 11.29841676 | 12.08186508 | 4.297167518 |
| ENSMUSG00000028152 | 19.10119998 | 33.3896277  | 26.83373982 | 35.44013757 | 30.08017263 |
| ENSMUSG00000028156 | 0.707451851 | 0           | 0.706151048 | 0           | 1.432389173 |
| ENSMUSG00000028158 | 7.074518513 | 9.738641413 | 13.41686991 | 22.55281482 | 19.33725383 |
| ENSMUSG00000028159 | 97.62835547 | 128.6891901 | 100.9795998 | 119.2077355 | 121.0368851 |
| ENSMUSG00000028161 | 79.94205919 | 111.9943762 | 107.3349593 | 107.1258704 | 100.9834367 |
| ENSMUSG00000028163 | 72.16008883 | 105.7338211 | 103.804204  | 211.0299101 | 179.7648412 |
| ENSMUSG00000028164 | 24.76081479 | 44.5195036  | 46.60596915 | 32.21830688 | 32.94495097 |
| ENSMUSG00000028167 | 8.489422215 | 8.347406925 | 8.473812573 | 12.08186508 | 10.02672421 |
| ENSMUSG00000028173 | 16.97884443 | 17.39043109 | 15.53532305 | 15.30369577 | 15.04008631 |
| ENSMUSG00000028175 | 23.34591109 | 27.12907251 | 26.83373982 | 25.77464551 | 29.36397804 |
| ENSMUSG00000028176 | 9.904325918 | 2.782468975 | 5.649208382 | 10.47094974 | 8.594335036 |
| ENSMUSG00000028179 | 8.489422215 | 4.869320706 | 7.767661525 | 16.10915344 | 10.7429188  |
| ENSMUSG00000028180 | 30.4204296  | 59.12746572 | 46.60596915 | 137.7332619 | 90.95671247 |
| ENSMUSG00000028182 | 3.537259256 | 2.086851731 | 4.236906287 | 4.832746033 | 2.864778345 |
| ENSMUSG00000028184 | 4.952162959 | 9.738641413 | 9.179963621 | 4.832746033 | 10.7429188  |
| ENSMUSG00000028185 | 7.074518513 | 4.869320706 | 11.29841676 | 4.832746033 | 4.297167518 |
| ENSMUSG00000028186 | 6.367066661 | 3.478086219 | 7.061510478 | 8.860034393 | 10.7429188  |
| ENSMUSG00000028187 | 29.0055259  | 62.60555194 | 48.7244223  | 75.71302118 | 78.7814045  |
| ENSMUSG00000028188 | 53.05888884 | 77.21351406 | 82.61967259 | 169.9515688 | 113.1587446 |
| ENSMUSG00000028189 | 19.10119998 | 17.39043109 | 31.77679715 | 18.52552646 | 18.62105924 |
| ENSMUSG00000028191 | 115.3146518 | 150.9489419 | 132.0502459 | 168.3406535 | 140.3741389 |
| ENSMUSG00000028194 | 9.196874066 | 6.260555194 | 12.00456781 | 5.638203705 | 7.161945863 |
| ENSMUSG00000028199 | 14.14903703 | 15.99919661 | 11.29841676 | 16.10915344 | 9.310529622 |
| ENSMUSG00000028207 | 4.244711108 | 9.738641413 | 5.649208382 | 5.638203705 | 9.310529622 |
| ENSMUSG00000028211 | 70.03773327 | 70.25734162 | 67.08434954 | 49.93837567 | 55.86317773 |
| ENSMUSG00000028212 | 15.56394073 | 18.08604834 | 14.12302096 | 59.60386773 | 44.40406435 |
| ENSMUSG00000028214 | 15.56394073 | 44.5195036  | 28.95219296 | 62.02024075 | 45.83645353 |
| ENSMUSG00000028217 | 7.074518513 | 10.43425866 | 9.179963621 | 23.35827249 | 15.04008631 |
| ENSMUSG00000028218 | 8.489422215 | 11.82549314 | 12.00456781 | 9.665492065 | 11.45911338 |
| ENSMUSG00000028224 | 9.904325918 | 20.17290007 | 19.77222934 | 53.16020636 | 52.99839939 |
| ENSMUSG00000028226 | 11.31922962 | 4.869320706 | 7.767661525 | 8.860034393 | 7.87814045  |
| ENSMUSG00000028229 | 12.02668147 | 20.17290007 | 18.35992724 | 13.69278043 | 17.90486466 |
| ENSMUSG00000028232 | 86.30912585 | 114.081228  | 105.2165061 | 197.3371297 | 151.1170577 |
| ENSMUSG00000028245 | 41.73965922 | 63.30116918 | 62.84744325 | 53.96566403 | 62.30892901 |
| ENSMUSG00000028246 | 7.781970364 | 4.173703463 | 9.886114669 | 2.416373016 | 7.87814045  |
| ENSMUSG00000028248 | 80.64951104 | 111.9943762 | 91.79963621 | 153.8424154 | 109.5777717 |
| ENSMUSG00000028249 | 99.04325918 | 132.8628936 | 108.7472614 | 106.3204127 | 90.95671247 |

|                    |             |             |             |             |             |
|--------------------|-------------|-------------|-------------|-------------|-------------|
| ENSMUSG00000028252 | 36.78749627 | 74.43104508 | 56.49208382 | 56.38203705 | 62.30892901 |
| ENSMUSG00000028256 | 9.196874066 | 11.82549314 | 8.473812573 | 11.27640741 | 13.60769714 |
| ENSMUSG00000028259 | 11.31922962 | 6.260555194 | 7.767661525 | 4.832746033 | 7.161945863 |
| ENSMUSG00000028261 | 22.63845924 | 40.34580014 | 35.30755239 | 95.04400531 | 73.05184781 |
| ENSMUSG00000028262 | 8.489422215 | 9.043024169 | 12.00456781 | 6.443661377 | 10.02672421 |
| ENSMUSG00000028264 | 6.367066661 | 4.869320706 | 9.886114669 | 5.638203705 | 5.729556691 |
| ENSMUSG00000028266 | 27.5906222  | 43.12826911 | 36.71985448 | 35.44013757 | 38.67450766 |
| ENSMUSG00000028268 | 31.12788146 | 44.5195036  | 37.42600553 | 71.68573282 | 61.59273443 |
| ENSMUSG00000028270 | 9.196874066 | 15.99919661 | 16.94762515 | 109.5422434 | 63.0251236  |
| ENSMUSG00000028273 | 13.44158517 | 30.60715873 | 26.12758877 | 31.41284921 | 20.769643   |
| ENSMUSG00000028274 | 62.25576291 | 75.82227957 | 78.3827663  | 90.21125927 | 80.92998826 |
| ENSMUSG00000028277 | 36.08004441 | 81.38721752 | 57.90438592 | 97.46037832 | 85.94335036 |
| ENSMUSG00000028278 | 8.489422215 | 6.956172438 | 6.35535943  | 7.249119049 | 5.013362104 |
| ENSMUSG00000028282 | 100.4581629 | 114.081228  | 104.5103551 | 157.0642461 | 111.7263555 |
| ENSMUSG00000028284 | 61.54831106 | 95.99517964 | 85.44427678 | 107.9313281 | 111.7263555 |
| ENSMUSG00000028289 | 7.074518513 | 9.043024169 | 12.00456781 | 8.860034393 | 4.297167518 |
| ENSMUSG00000028292 | 85.601674   | 112.6899935 | 117.2210739 | 136.9278043 | 113.8749392 |
| ENSMUSG00000028293 | 11.31922962 | 13.21672763 | 14.12302096 | 15.30369577 | 21.48583759 |
| ENSMUSG00000028294 | 7.781970364 | 6.956172438 | 5.649208382 | 4.832746033 | 5.013362104 |
| ENSMUSG00000028295 | 27.5906222  | 40.34580014 | 36.01370344 | 32.21830688 | 40.82309142 |
| ENSMUSG00000028298 | 10.61177777 | 11.82549314 | 7.061510478 | 8.054576721 | 7.161945863 |
| ENSMUSG00000028300 | 27.5906222  | 45.91073809 | 34.60140134 | 57.99295239 | 42.25548059 |
| ENSMUSG00000028309 | 54.47379255 | 80.69160028 | 66.37819849 | 70.88027514 | 69.47087488 |
| ENSMUSG00000028312 | 36.08004441 | 57.73623123 | 43.78136496 | 114.3749894 | 85.22715578 |
| ENSMUSG00000028318 | 43.15456293 | 66.08363816 | 51.54902649 | 78.93485187 | 68.75468029 |
| ENSMUSG00000028322 | 22.63845924 | 41.73703463 | 31.77679715 | 77.32393652 | 78.7814045  |
| ENSMUSG00000028327 | 9.196874066 | 5.56493795  | 7.061510478 | 6.443661377 | 8.594335036 |
| ENSMUSG00000028328 | 10.61177777 | 3.478086219 | 8.473812573 | 4.02728836  | 6.445751277 |
| ENSMUSG00000028329 | 0.707451851 | 0.695617244 | 2.118453143 | 0           | 0           |
| ENSMUSG00000028331 | 31.83533331 | 54.95376226 | 38.83830763 | 52.35474869 | 49.41742646 |
| ENSMUSG00000028332 | 10.61177777 | 9.738641413 | 8.473812573 | 8.860034393 | 10.02672421 |
| ENSMUSG00000028333 | 26.88317035 | 42.43265187 | 36.01370344 | 170.7570265 | 134.6445822 |
| ENSMUSG00000028334 | 45.98437033 | 70.95295887 | 74.14586002 | 90.21125927 | 81.64618284 |
| ENSMUSG00000028337 | 63.67066661 | 101.5601176 | 106.6288082 | 278.6883545 | 162.5761711 |
| ENSMUSG00000028339 | 6.367066661 | 8.347406925 | 4.943057334 | 4.832746033 | 5.013362104 |
| ENSMUSG00000028343 | 138.6605628 | 154.4270281 | 150.4101732 | 212.6408254 | 181.9134249 |
| ENSMUSG00000028344 | 128.7562369 | 153.7314109 | 137.6994543 | 165.1188228 | 144.6713064 |
| ENSMUSG00000028345 | 48.10672589 | 84.1696865  | 74.85201106 | 131.2896006 | 106.7129934 |
| ENSMUSG00000028347 | 11.31922962 | 9.738641413 | 8.473812573 | 3.221830688 | 4.297167518 |
| ENSMUSG00000028354 | 9.904325918 | 9.043024169 | 10.59226572 | 8.054576721 | 6.445751277 |
| ENSMUSG00000028357 | 7.781970364 | 2.086851731 | 4.943057334 | 2.416373016 | 9.310529622 |
| ENSMUSG00000028358 | 3.537259256 | 6.956172438 | 7.061510478 | 3.221830688 | 5.013362104 |
| ENSMUSG00000028364 | 13.44158517 | 6.260555194 | 7.061510478 | 6.443661377 | 7.161945863 |

|                    |             |             |             |             |             |
|--------------------|-------------|-------------|-------------|-------------|-------------|
| ENSMUSG00000028369 | 11.31922962 | 7.651789682 | 9.886114669 | 8.054576721 | 5.013362104 |
| ENSMUSG00000028373 | 9.904325918 | 6.956172438 | 12.00456781 | 4.02728836  | 7.161945863 |
| ENSMUSG00000028382 | 104.702874  | 132.1672763 | 120.0456781 | 214.2517408 | 171.8867007 |
| ENSMUSG00000028383 | 25.46826665 | 50.7800588  | 40.95676077 | 37.85651059 | 49.41742646 |
| ENSMUSG00000028385 | 121.6817184 | 121.7330177 | 92.50578726 | 210.2244524 | 136.793166  |
| ENSMUSG00000028389 | 9.196874066 | 7.651789682 | 3.530755239 | 6.443661377 | 5.013362104 |
| ENSMUSG00000028391 | 5.65961481  | 11.1298759  | 7.767661525 | 4.832746033 | 9.310529622 |
| ENSMUSG00000028392 | 4.244711108 | 4.869320706 | 2.118453143 | 4.832746033 | 2.864778345 |
| ENSMUSG00000028393 | 19.10119998 | 27.82468975 | 21.89068248 | 30.60739154 | 35.80972932 |
| ENSMUSG00000028397 | 8.489422215 | 9.043024169 | 10.59226572 | 6.443661377 | 4.297167518 |
| ENSMUSG00000028399 | 12.73413332 | 6.956172438 | 10.59226572 | 1.610915344 | 2.864778345 |
| ENSMUSG00000028402 | 8.489422215 | 3.478086219 | 5.649208382 | 0.805457672 | 5.013362104 |
| ENSMUSG00000028403 | 24.76081479 | 44.5195036  | 41.66291182 | 46.71654498 | 49.41742646 |
| ENSMUSG00000028409 | 48.10672589 | 80.69160028 | 73.43970897 | 135.3168889 | 106.7129934 |
| ENSMUSG00000028410 | 2.122355554 | 0.695617244 | 2.118453143 | 1.610915344 | 4.297167518 |
| ENSMUSG00000028411 | 43.86201478 | 63.30116918 | 50.13672439 | 54.7711217  | 53.71459398 |
| ENSMUSG00000028412 | 8.489422215 | 20.86851731 | 13.41686991 | 9.665492065 | 12.89150255 |
| ENSMUSG00000028413 | 32.54278516 | 37.56333116 | 34.60140134 | 200.5589604 | 149.6846685 |
| ENSMUSG00000028414 | 6.367066661 | 11.82549314 | 13.41686991 | 16.10915344 | 16.47247549 |
| ENSMUSG00000028416 | 38.20239997 | 59.82308296 | 43.07521391 | 86.18397091 | 88.09193412 |
| ENSMUSG00000028420 | 6.367066661 | 15.30357936 | 11.29841676 | 14.4982381  | 10.7429188  |
| ENSMUSG00000028423 | 50.22908144 | 84.1696865  | 72.02740687 | 167.5351958 | 139.6579443 |
| ENSMUSG00000028426 | 84.89422215 | 139.819066  | 112.2780166 | 206.1971641 | 176.1838682 |
| ENSMUSG00000028427 | 10.61177777 | 4.869320706 | 12.00456781 | 6.443661377 | 10.7429188  |
| ENSMUSG00000028430 | 11.31922962 | 20.17290007 | 14.12302096 | 61.21478308 | 38.67450766 |
| ENSMUSG00000028431 | 53.05888884 | 103.6469693 | 86.85657888 | 169.1461111 | 145.387501  |
| ENSMUSG00000028433 | 82.7718666  | 87.64777272 | 97.44884459 | 190.8934683 | 147.5360848 |
| ENSMUSG00000028434 | 14.14903703 | 11.1298759  | 17.65377619 | 10.47094974 | 9.310529622 |
| ENSMUSG00000028437 | 112.4848444 | 153.7314109 | 153.2347774 | 98.265836   | 102.4158258 |
| ENSMUSG00000028438 | 19.80865184 | 29.91154148 | 26.83373982 | 58.79841006 | 49.41742646 |
| ENSMUSG00000028439 | 8.489422215 | 15.30357936 | 9.179963621 | 15.30369577 | 10.7429188  |
| ENSMUSG00000028441 | 8.489422215 | 8.347406925 | 9.179963621 | 11.27640741 | 11.45911338 |
| ENSMUSG00000028444 | 7.074518513 | 4.869320706 | 2.824604191 | 1.610915344 | 5.729556691 |
| ENSMUSG00000028447 | 41.73965922 | 68.86610713 | 55.07978173 | 38.66196826 | 41.53928601 |
| ENSMUSG00000028451 | 11.31922962 | 9.043024169 | 2.824604191 | 4.02728836  | 5.729556691 |
| ENSMUSG00000028453 | 11.31922962 | 21.56413456 | 18.35992724 | 15.30369577 | 22.20203218 |
| ENSMUSG00000028454 | 14.14903703 | 16.69481385 | 15.53532305 | 27.38556085 | 27.21539428 |
| ENSMUSG00000028455 | 14.85648888 | 18.78166558 | 12.71071886 | 51.54929101 | 40.82309142 |
| ENSMUSG00000028456 | 7.781970364 | 7.651789682 | 7.061510478 | 8.860034393 | 6.445751277 |
| ENSMUSG00000028457 | 10.61177777 | 9.738641413 | 7.061510478 | 5.638203705 | 7.161945863 |
| ENSMUSG00000028458 | 15.56394073 | 26.43345526 | 23.30298458 | 16.91461111 | 27.93158887 |
| ENSMUSG00000028459 | 100.4581629 | 128.6891901 | 109.4534124 | 139.3441773 | 100.9834367 |
| ENSMUSG00000028461 | 12.02668147 | 11.82549314 | 9.886114669 | 16.10915344 | 18.62105924 |

|                    |             |             |             |             |             |
|--------------------|-------------|-------------|-------------|-------------|-------------|
| ENSMUSG00000028463 | 4.244711108 | 7.651789682 | 8.473812573 | 8.054576721 | 5.013362104 |
| ENSMUSG00000028464 | 5.65961481  | 6.956172438 | 12.71071886 | 4.832746033 | 7.87814045  |
| ENSMUSG00000028465 | 63.67066661 | 67.47487265 | 59.31668801 | 149.0096693 | 121.0368851 |
| ENSMUSG00000028466 | 44.56946663 | 64.69240367 | 57.19823487 | 147.398754  | 125.3340526 |
| ENSMUSG00000028467 | 53.05888884 | 79.99598303 | 72.02740687 | 56.38203705 | 56.57937232 |
| ENSMUSG00000028468 | 50.22908144 | 82.77845201 | 79.7950684  | 59.60386773 | 72.33565322 |
| ENSMUSG00000028469 | 2.829807405 | 0           | 0           | 0.805457672 | 0.716194586 |
| ENSMUSG00000028470 | 7.781970364 | 9.738641413 | 7.767661525 | 3.221830688 | 5.729556691 |
| ENSMUSG00000028476 | 6.367066661 | 8.347406925 | 7.767661525 | 4.832746033 | 10.02672421 |
| ENSMUSG00000028478 | 12.02668147 | 5.56493795  | 8.473812573 | 8.860034393 | 11.45911338 |
| ENSMUSG00000028479 | 7.074518513 | 5.56493795  | 6.35535943  | 4.02728836  | 4.297167518 |
| ENSMUSG00000028480 | 8.489422215 | 9.738641413 | 12.71071886 | 21.74735715 | 19.33725383 |
| ENSMUSG00000028483 | 96.92090362 | 175.9911627 | 122.1641313 | 116.7913625 | 111.7263555 |
| ENSMUSG00000028484 | 26.1757185  | 42.43265187 | 42.36906287 | 65.24207144 | 64.45751277 |
| ENSMUSG00000028487 | 6.367066661 | 6.260555194 | 4.943057334 | 8.860034393 | 4.297167518 |
| ENSMUSG00000028488 | 9.196874066 | 6.260555194 | 9.179963621 | 4.832746033 | 4.297167518 |
| ENSMUSG00000028492 | 11.31922962 | 7.651789682 | 4.236906287 | 8.054576721 | 2.864778345 |
| ENSMUSG00000028494 | 7.781970364 | 13.21672763 | 9.179963621 | 7.249119049 | 10.7429188  |
| ENSMUSG00000028495 | 20.51610369 | 40.34580014 | 33.18909925 | 176.3952302 | 123.9016634 |
| ENSMUSG00000028496 | 5.65961481  | 10.43425866 | 9.179963621 | 35.44013757 | 21.48583759 |
| ENSMUSG00000028497 | 7.074518513 | 6.956172438 | 9.179963621 | 5.638203705 | 5.729556691 |
| ENSMUSG00000028514 | 116.0221036 | 143.9927695 | 134.1686991 | 199.7535027 | 173.3190899 |
| ENSMUSG00000028519 | 9.196874066 | 8.347406925 | 10.59226572 | 6.443661377 | 6.445751277 |
| ENSMUSG00000028520 | 7.074518513 | 7.651789682 | 7.061510478 | 4.02728836  | 10.02672421 |
| ENSMUSG00000028521 | 18.39374813 | 22.2597518  | 16.2414741  | 41.07834128 | 42.25548059 |
| ENSMUSG00000028522 | 50.22908144 | 58.43184848 | 60.72899011 | 53.16020636 | 52.2822048  |
| ENSMUSG00000028523 | 7.781970364 | 6.956172438 | 8.473812573 | 5.638203705 | 5.729556691 |
| ENSMUSG00000028524 | 8.489422215 | 7.651789682 | 4.943057334 | 2.416373016 | 8.594335036 |
| ENSMUSG00000028525 | 7.781970364 | 2.782468975 | 4.943057334 | 4.832746033 | 5.729556691 |
| ENSMUSG00000028527 | 6.367066661 | 7.651789682 | 6.35535943  | 7.249119049 | 10.7429188  |
| ENSMUSG00000028528 | 7.074518513 | 5.56493795  | 3.530755239 | 5.638203705 | 6.445751277 |
| ENSMUSG00000028530 | 175.4480591 | 190.5991248 | 154.6470795 | 178.0061455 | 162.5761711 |
| ENSMUSG00000028532 | 8.489422215 | 4.869320706 | 4.943057334 | 6.443661377 | 5.013362104 |
| ENSMUSG00000028533 | 10.61177777 | 9.738641413 | 8.473812573 | 6.443661377 | 6.445751277 |
| ENSMUSG00000028536 | 7.781970364 | 2.782468975 | 3.530755239 | 6.443661377 | 9.310529622 |
| ENSMUSG00000028538 | 32.54278516 | 50.08444155 | 40.95676077 | 29.80193387 | 35.80972932 |
| ENSMUSG00000028539 | 6.367066661 | 7.651789682 | 9.179963621 | 4.02728836  | 10.7429188  |
| ENSMUSG00000028541 | 9.196874066 | 6.260555194 | 7.767661525 | 5.638203705 | 6.445751277 |
| ENSMUSG00000028542 | 4.952162959 | 7.651789682 | 4.943057334 | 8.054576721 | 4.297167518 |
| ENSMUSG00000028544 | 10.61177777 | 9.738641413 | 5.649208382 | 4.02728836  | 6.445751277 |
| ENSMUSG00000028545 | 58.0110518  | 90.43024169 | 86.15042783 | 95.04400531 | 110.2939663 |
| ENSMUSG00000028546 | 10.61177777 | 9.043024169 | 5.649208382 | 4.02728836  | 6.445751277 |
| ENSMUSG00000028549 | 16.27139258 | 34.08524495 | 29.65834401 | 30.60739154 | 29.36397804 |

|                    |             |             |             |             |             |
|--------------------|-------------|-------------|-------------|-------------|-------------|
| ENSMUSG00000028550 | 14.85648888 | 31.99839321 | 16.94762515 | 11.27640741 | 20.769643   |
| ENSMUSG00000028551 | 31.83533331 | 31.30277597 | 33.89525029 | 73.29664816 | 40.82309142 |
| ENSMUSG00000028552 | 52.35143699 | 77.9091313  | 59.31668801 | 70.07481747 | 77.34901533 |
| ENSMUSG00000028553 | 9.904325918 | 6.260555194 | 8.473812573 | 6.443661377 | 2.148583759 |
| ENSMUSG00000028555 | 7.781970364 | 2.086851731 | 9.179963621 | 4.02728836  | 5.013362104 |
| ENSMUSG00000028556 | 4.952162959 | 2.782468975 | 7.767661525 | 8.860034393 | 6.445751277 |
| ENSMUSG00000028557 | 9.904325918 | 6.956172438 | 9.886114669 | 6.443661377 | 3.580972932 |
| ENSMUSG00000028558 | 10.61177777 | 9.738641413 | 7.767661525 | 6.443661377 | 7.87814045  |
| ENSMUSG00000028559 | 27.5906222  | 47.30197258 | 28.95219296 | 20.1364418  | 27.93158887 |
| ENSMUSG00000028560 | 59.42595551 | 80.69160028 | 58.61053696 | 208.6135371 | 145.387501  |
| ENSMUSG00000028563 | 0           | 6.956172438 | 2.118453143 | 3.221830688 | 2.148583759 |
| ENSMUSG00000028565 | 3.537259256 | 6.260555194 | 5.649208382 | 6.443661377 | 6.445751277 |
| ENSMUSG00000028568 | 67.20792587 | 100.1688831 | 76.97046421 | 95.84946298 | 96.68626916 |
| ENSMUSG00000028571 | 12.02668147 | 4.869320706 | 7.061510478 | 12.08186508 | 6.445751277 |
| ENSMUSG00000028572 | 12.73413332 | 16.69481385 | 13.41686991 | 18.52552646 | 21.48583759 |
| ENSMUSG00000028573 | 12.02668147 | 7.651789682 | 4.943057334 | 11.27640741 | 8.594335036 |
| ENSMUSG00000028575 | 4.952162959 | 9.043024169 | 5.649208382 | 12.08186508 | 6.445751277 |
| ENSMUSG00000028576 | 10.61177777 | 13.21672763 | 16.94762515 | 11.27640741 | 9.310529622 |
| ENSMUSG00000028577 | 84.89422215 | 113.3856107 | 103.098053  | 107.9313281 | 118.8883013 |
| ENSMUSG00000028580 | 151.3946962 | 173.9043109 | 142.6425116 | 268.2174048 | 202.6830679 |
| ENSMUSG00000028581 | 149.2723406 | 157.2094971 | 141.9363606 | 277.0774392 | 184.7782033 |
| ENSMUSG00000028582 | 39.61730367 | 63.30116918 | 65.67204744 | 71.68573282 | 74.48423698 |
| ENSMUSG00000028583 | 7.074518513 | 7.651789682 | 4.943057334 | 3.221830688 | 9.310529622 |
| ENSMUSG00000028587 | 64.37811846 | 82.77845201 | 79.08891735 | 215.8626561 | 162.5761711 |
| ENSMUSG00000028591 | 7.781970364 | 9.738641413 | 4.236906287 | 5.638203705 | 7.161945863 |
| ENSMUSG00000028597 | 8.489422215 | 9.738641413 | 14.12302096 | 8.054576721 | 4.297167518 |
| ENSMUSG00000028599 | 36.78749627 | 64.69240367 | 45.8998181  | 100.682209  | 77.34901533 |
| ENSMUSG00000028600 | 12.02668147 | 9.738641413 | 7.767661525 | 10.47094974 | 7.87814045  |
| ENSMUSG00000028601 | 4.952162959 | 5.56493795  | 7.767661525 | 10.47094974 | 5.729556691 |
| ENSMUSG00000028602 | 8.489422215 | 3.478086219 | 6.35535943  | 50.74383334 | 34.37734014 |
| ENSMUSG00000028603 | 10.61177777 | 6.956172438 | 9.886114669 | 10.47094974 | 11.45911338 |
| ENSMUSG00000028607 | 12.02668147 | 20.17290007 | 16.2414741  | 33.02376456 | 31.5125618  |
| ENSMUSG00000028608 | 10.61177777 | 11.1298759  | 14.829172   | 28.19101852 | 25.06681052 |
| ENSMUSG00000028610 | 6.367066661 | 6.956172438 | 6.35535943  | 6.443661377 | 5.729556691 |
| ENSMUSG00000028613 | 8.489422215 | 5.56493795  | 7.767661525 | 12.88732275 | 7.161945863 |
| ENSMUSG00000028614 | 24.76081479 | 28.52030699 | 28.95219296 | 96.65492065 | 70.90326405 |
| ENSMUSG00000028617 | 19.80865184 | 47.30197258 | 26.12758877 | 34.6346799  | 33.66114556 |
| ENSMUSG00000028618 | 142.1978221 | 154.4270281 | 156.0593816 | 168.3406535 | 141.0903335 |
| ENSMUSG00000028619 | 166.251185  | 184.3385696 | 173.7131578 | 187.6716376 | 179.7648412 |
| ENSMUSG00000028621 | 23.34591109 | 38.95456565 | 37.42600553 | 49.93837567 | 43.68786977 |
| ENSMUSG00000028622 | 30.4204296  | 41.73703463 | 38.83830763 | 45.91108731 | 45.83645353 |
| ENSMUSG00000028634 | 7.781970364 | 13.91234488 | 6.35535943  | 4.832746033 | 7.87814045  |
| ENSMUSG00000028636 | 18.39374813 | 27.12907251 | 25.42143772 | 19.33098413 | 17.90486466 |

|                    |             |             |             |             |             |
|--------------------|-------------|-------------|-------------|-------------|-------------|
| ENSMUSG00000028637 | 6.367066661 | 7.651789682 | 7.061510478 | 4.02728836  | 7.161945863 |
| ENSMUSG00000028639 | 65.79302217 | 101.5601176 | 74.14586002 | 261.7737434 | 201.2506788 |
| ENSMUSG00000028640 | 5.65961481  | 6.260555194 | 3.530755239 | 5.638203705 | 4.297167518 |
| ENSMUSG00000028641 | 22.63845924 | 39.6501829  | 25.42143772 | 14.4982381  | 18.62105924 |
| ENSMUSG00000028643 | 6.367066661 | 9.738641413 | 15.53532305 | 14.4982381  | 18.62105924 |
| ENSMUSG00000028644 | 10.61177777 | 5.56493795  | 10.59226572 | 7.249119049 | 11.45911338 |
| ENSMUSG00000028645 | 63.67066661 | 94.60394515 | 91.79963621 | 128.8732275 | 90.95671247 |
| ENSMUSG00000028646 | 97.62835547 | 155.8182626 | 139.8179075 | 168.3406535 | 151.1170577 |
| ENSMUSG00000028647 | 15.56394073 | 27.12907251 | 25.42143772 | 34.6346799  | 36.5259239  |
| ENSMUSG00000028648 | 27.5906222  | 36.17209668 | 33.89525029 | 63.6311561  | 57.29556691 |
| ENSMUSG00000028649 | 11.31922962 | 8.347406925 | 7.061510478 | 5.638203705 | 5.013362104 |
| ENSMUSG00000028651 | 26.1757185  | 36.17209668 | 31.77679715 | 81.35122488 | 55.86317773 |
| ENSMUSG00000028653 | 111.7773925 | 154.4270281 | 117.2210739 | 171.5624842 | 125.3340526 |
| ENSMUSG00000028654 | 12.73413332 | 9.043024169 | 12.00456781 | 8.860034393 | 7.87814045  |
| ENSMUSG00000028655 | 4.952162959 | 11.1298759  | 8.473812573 | 160.2860767 | 103.1320204 |
| ENSMUSG00000028656 | 132.2934962 | 157.2094971 | 137.6994543 | 240.0263863 | 163.2923657 |
| ENSMUSG00000028657 | 48.81417774 | 72.34419335 | 64.25974535 | 37.85651059 | 47.98503729 |
| ENSMUSG00000028664 | 7.074518513 | 7.651789682 | 4.236906287 | 3.221830688 | 9.310529622 |
| ENSMUSG00000028669 | 41.73965922 | 71.64857611 | 58.61053696 | 152.2315    | 104.5644096 |
| ENSMUSG00000028670 | 19.10119998 | 37.56333116 | 21.18453143 | 77.32393652 | 53.71459398 |
| ENSMUSG00000028671 | 12.02668147 | 22.2597518  | 18.35992724 | 29.80193387 | 17.90486466 |
| ENSMUSG00000028672 | 52.35143699 | 99.47326586 | 79.7950684  | 63.6311561  | 65.88990194 |
| ENSMUSG00000028673 | 50.93653329 | 83.47406925 | 68.49665163 | 82.15668255 | 73.76804239 |
| ENSMUSG00000028675 | 114.6071999 | 140.5146832 | 114.3964697 | 178.0061455 | 143.2389173 |
| ENSMUSG00000028676 | 100.4581629 | 115.4724625 | 117.2210739 | 252.913709  | 195.5211221 |
| ENSMUSG00000028677 | 5.65961481  | 9.043024169 | 7.061510478 | 5.638203705 | 10.7429188  |
| ENSMUSG00000028678 | 31.12788146 | 43.82388636 | 31.0706461  | 65.24207144 | 63.0251236  |
| ENSMUSG00000028680 | 12.73413332 | 15.30357936 | 14.12302096 | 148.2042117 | 141.0903335 |
| ENSMUSG00000028681 | 11.31922962 | 11.82549314 | 6.35535943  | 4.832746033 | 7.161945863 |
| ENSMUSG00000028683 | 14.85648888 | 36.17209668 | 28.24604191 | 63.6311561  | 61.59273443 |
| ENSMUSG00000028684 | 26.1757185  | 36.86771392 | 32.4829482  | 14.4982381  | 25.06681052 |
| ENSMUSG00000028687 | 21.22355554 | 38.95456565 | 34.60140134 | 87.79488626 | 66.60609653 |
| ENSMUSG00000028688 | 26.1757185  | 41.73703463 | 40.25060972 | 91.82217462 | 82.36237743 |
| ENSMUSG00000028689 | 7.781970364 | 25.04222078 | 14.12302096 | 20.94189947 | 25.78300511 |
| ENSMUSG00000028691 | 36.78749627 | 70.95295887 | 58.61053696 | 235.1936403 | 174.0352845 |
| ENSMUSG00000028692 | 133.7083999 | 182.2517179 | 167.3577983 | 228.7499789 | 191.2239546 |
| ENSMUSG00000028693 | 21.93100739 | 25.73783802 | 25.42143772 | 143.3714656 | 83.07857202 |
| ENSMUSG00000028696 | 24.76081479 | 32.69401046 | 34.60140134 | 37.05105292 | 36.5259239  |
| ENSMUSG00000028698 | 4.244711108 | 9.738641413 | 7.767661525 | 7.249119049 | 9.310529622 |
| ENSMUSG00000028700 | 3.537259256 | 15.99919661 | 9.179963621 | 16.91461111 | 16.47247549 |
| ENSMUSG00000028702 | 23.34591109 | 45.21512085 | 32.4829482  | 54.7711217  | 54.43078856 |
| ENSMUSG00000028703 | 90.55383696 | 114.7768452 | 111.5718655 | 200.5589604 | 159.7113928 |
| ENSMUSG00000028706 | 16.97884443 | 31.30277597 | 26.83373982 | 24.96918783 | 24.35061594 |

|                    |             |             |             |             |             |
|--------------------|-------------|-------------|-------------|-------------|-------------|
| ENSMUSG00000028707 | 7.781970364 | 3.478086219 | 5.649208382 | 4.832746033 | 6.445751277 |
| ENSMUSG00000028708 | 51.64398514 | 93.90832791 | 67.08434954 | 40.2728836  | 65.88990194 |
| ENSMUSG00000028710 | 21.22355554 | 29.21592424 | 24.00913562 | 36.24559524 | 30.79636721 |
| ENSMUSG00000028712 | 7.781970364 | 7.651789682 | 7.061510478 | 4.832746033 | 5.013362104 |
| ENSMUSG00000028713 | 12.02668147 | 6.956172438 | 7.061510478 | 8.860034393 | 6.445751277 |
| ENSMUSG00000028716 | 9.196874066 | 2.086851731 | 7.767661525 | 5.638203705 | 6.445751277 |
| ENSMUSG00000028717 | 7.074518513 | 5.56493795  | 4.943057334 | 4.832746033 | 7.161945863 |
| ENSMUSG00000028718 | 47.39927403 | 50.7800588  | 46.60596915 | 73.29664816 | 56.57937232 |
| ENSMUSG00000028729 | 37.49494812 | 57.73623123 | 44.48751601 | 99.87675134 | 100.9834367 |
| ENSMUSG00000028730 | 41.73965922 | 45.21512085 | 57.90438592 | 105.514955  | 92.38910164 |
| ENSMUSG00000028736 | 2.829807405 | 3.478086219 | 7.061510478 | 5.638203705 | 5.013362104 |
| ENSMUSG00000028737 | 27.5906222  | 54.25814501 | 40.95676077 | 16.91461111 | 30.08017263 |
| ENSMUSG00000028738 | 6.367066661 | 0           | 5.649208382 | 8.054576721 | 8.594335036 |
| ENSMUSG00000028741 | 49.52162959 | 64.69240367 | 67.08434954 | 269.0228625 | 204.1154571 |
| ENSMUSG00000028744 | 58.71850365 | 97.38641413 | 83.32582364 | 28.9964762  | 42.25548059 |
| ENSMUSG00000028745 | 190.304548  | 177.3823972 | 199.1345955 | 314.9339498 | 209.1288192 |
| ENSMUSG00000028747 | 6.367066661 | 6.956172438 | 5.649208382 | 4.832746033 | 4.297167518 |
| ENSMUSG00000028750 | 9.196874066 | 9.043024169 | 5.649208382 | 4.832746033 | 10.7429188  |
| ENSMUSG00000028751 | 15.56394073 | 6.260555194 | 4.236906287 | 1.610915344 | 5.729556691 |
| ENSMUSG00000028753 | 7.781970364 | 6.260555194 | 6.35535943  | 7.249119049 | 7.161945863 |
| ENSMUSG00000028756 | 0           | 0.695617244 | 1.412302096 | 0.805457672 | 0           |
| ENSMUSG00000028758 | 0           | 0           | 0           | 0           | 0           |
| ENSMUSG00000028759 | 14.14903703 | 22.2597518  | 25.42143772 | 39.46742593 | 30.79636721 |
| ENSMUSG00000028760 | 10.61177777 | 22.2597518  | 33.89525029 | 113.5695318 | 102.4158258 |
| ENSMUSG00000028763 | 10.61177777 | 7.651789682 | 7.767661525 | 8.054576721 | 6.445751277 |
| ENSMUSG00000028766 | 13.44158517 | 9.738641413 | 14.829172   | 59.60386773 | 43.68786977 |
| ENSMUSG00000028771 | 26.88317035 | 49.38882431 | 45.8998181  | 46.71654498 | 57.29556691 |
| ENSMUSG00000028772 | 79.94205919 | 141.9059177 | 122.8702823 | 235.9990979 | 194.8049275 |
| ENSMUSG00000028776 | 9.904325918 | 4.173703463 | 6.35535943  | 8.860034393 | 9.310529622 |
| ENSMUSG00000028778 | 7.781970364 | 4.869320706 | 5.649208382 | 8.860034393 | 6.445751277 |
| ENSMUSG00000028779 | 9.904325918 | 4.869320706 | 7.767661525 | 4.02728836  | 7.87814045  |
| ENSMUSG00000028780 | 10.61177777 | 6.956172438 | 9.179963621 | 3.221830688 | 7.87814045  |
| ENSMUSG00000028782 | 8.489422215 | 5.56493795  | 7.061510478 | 7.249119049 | 6.445751277 |
| ENSMUSG00000028784 | 9.196874066 | 6.260555194 | 6.35535943  | 11.27640741 | 12.17530797 |
| ENSMUSG00000028785 | 7.074518513 | 10.43425866 | 4.943057334 | 8.054576721 | 5.729556691 |
| ENSMUSG00000028786 | 12.02668147 | 5.56493795  | 5.649208382 | 5.638203705 | 10.02672421 |
| ENSMUSG00000028788 | 123.0966221 | 148.1664729 | 110.1595635 | 260.1628281 | 184.7782033 |
| ENSMUSG00000028789 | 12.02668147 | 6.956172438 | 7.061510478 | 20.94189947 | 26.49919969 |
| ENSMUSG00000028790 | 146.4425332 | 173.2086937 | 181.4808193 | 284.3265582 | 196.9535112 |
| ENSMUSG00000028792 | 125.9264295 | 155.1226454 | 146.1732669 | 391.4524286 | 293.6397804 |
| ENSMUSG00000028793 | 65.08557032 | 98.77764862 | 72.73355792 | 361.6504948 | 250.6681052 |
| ENSMUSG00000028794 | 7.781970364 | 11.82549314 | 7.767661525 | 10.47094974 | 12.17530797 |
| ENSMUSG00000028795 | 7.074518513 | 11.1298759  | 15.53532305 | 26.58010318 | 17.18867007 |



|                    |             |             |             |             |             |
|--------------------|-------------|-------------|-------------|-------------|-------------|
| ENSMUSG00000028796 | 7.781970364 | 16.69481385 | 7.767661525 | 11.27640741 | 12.89150255 |
| ENSMUSG00000028797 | 154.2245036 | 201.7290007 | 180.0685172 | 339.09768   | 285.76164   |
| ENSMUSG00000028798 | 127.3413332 | 191.9903593 | 175.1254598 | 353.595918  | 285.76164   |
| ENSMUSG00000028799 | 66.50047402 | 77.9091313  | 79.7950684  | 128.8732275 | 110.2939663 |
| ENSMUSG00000028800 | 85.601674   | 125.2111039 | 97.44884459 | 207.8080794 | 137.5093606 |
| ENSMUSG00000028801 | 7.074518513 | 13.21672763 | 9.886114669 | 7.249119049 | 12.89150255 |
| ENSMUSG00000028803 | 25.46826665 | 47.30197258 | 33.89525029 | 12.08186508 | 25.06681052 |
| ENSMUSG00000028809 | 154.2245036 | 187.8166558 | 185.7177256 | 318.9612381 | 227.0336839 |
| ENSMUSG00000028811 | 72.16008883 | 117.5593142 | 109.4534124 | 219.8899445 | 183.3458141 |
| ENSMUSG00000028820 | 157.7617628 | 203.8158524 | 167.3577983 | 318.9612381 | 251.3842998 |
| ENSMUSG00000028822 | 67.20792587 | 105.7338211 | 96.0365425  | 97.46037832 | 91.67290705 |
| ENSMUSG00000028826 | 24.05336294 | 43.12826911 | 42.36906287 | 45.91108731 | 44.40406435 |
| ENSMUSG00000028830 | 59.42595551 | 77.9091313  | 74.85201106 | 78.93485187 | 65.88990194 |
| ENSMUSG00000028832 | 0           | 0           | 0           | 0           | 1.432389173 |
| ENSMUSG00000028833 | 54.47379255 | 77.9091313  | 74.14586002 | 83.7675979  | 76.63282074 |
| ENSMUSG00000028834 | 9.904325918 | 9.738641413 | 5.649208382 | 8.860034393 | 5.729556691 |
| ENSMUSG00000028836 | 4.244711108 | 6.956172438 | 6.35535943  | 10.47094974 | 6.445751277 |
| ENSMUSG00000028838 | 9.196874066 | 5.56493795  | 9.179963621 | 11.27640741 | 8.594335036 |
| ENSMUSG00000028840 | 19.80865184 | 26.43345526 | 25.42143772 | 53.16020636 | 35.09353473 |
| ENSMUSG00000028841 | 12.73413332 | 9.738641413 | 7.767661525 | 4.832746033 | 9.310529622 |
| ENSMUSG00000028842 | 19.10119998 | 23.65098629 | 28.24604191 | 41.88379895 | 30.08017263 |
| ENSMUSG00000028845 | 9.904325918 | 6.260555194 | 7.061510478 | 3.221830688 | 10.02672421 |
| ENSMUSG00000028848 | 62.25576291 | 96.69079689 | 69.90895373 | 109.5422434 | 97.40246374 |
| ENSMUSG00000028849 | 51.64398514 | 84.86530374 | 69.90895373 | 70.88027514 | 65.17370736 |
| ENSMUSG00000028857 | 48.10672589 | 68.86610713 | 60.02283906 | 90.21125927 | 96.68626916 |
| ENSMUSG00000028859 | 9.904325918 | 5.56493795  | 5.649208382 | 4.02728836  | 8.594335036 |
| ENSMUSG00000028860 | 14.14903703 | 9.043024169 | 7.767661525 | 7.249119049 | 7.87814045  |
| ENSMUSG00000028861 | 8.489422215 | 13.21672763 | 12.00456781 | 37.05105292 | 30.08017263 |
| ENSMUSG00000028863 | 31.12788146 | 57.73623123 | 50.13672439 | 47.52200265 | 49.41742646 |
| ENSMUSG00000028865 | 12.02668147 | 6.956172438 | 12.00456781 | 11.27640741 | 8.594335036 |
| ENSMUSG00000028868 | 124.5115258 | 142.601535  | 132.0502459 | 195.7262143 | 151.1170577 |
| ENSMUSG00000028869 | 2.829807405 | 4.173703463 | 2.824604191 | 4.02728836  | 5.729556691 |
| ENSMUSG00000028873 | 22.63845924 | 39.6501829  | 52.96132858 | 57.99295239 | 53.71459398 |
| ENSMUSG00000028874 | 12.73413332 | 18.78166558 | 19.77222934 | 11.27640741 | 11.45911338 |
| ENSMUSG00000028878 | 9.904325918 | 31.30277597 | 26.83373982 | 24.16373016 | 20.769643   |
| ENSMUSG00000028882 | 43.15456293 | 73.0398106  | 67.79050059 | 181.2279762 | 135.3607768 |
| ENSMUSG00000028883 | 8.489422215 | 9.043024169 | 7.767661525 | 5.638203705 | 7.87814045  |
| ENSMUSG00000028884 | 33.25023701 | 45.91073809 | 39.54445867 | 124.0404815 | 92.38910164 |
| ENSMUSG00000028886 | 45.27691848 | 94.60394515 | 72.02740687 | 112.7640741 | 85.22715578 |
| ENSMUSG00000028889 | 64.37811846 | 104.3425866 | 97.44884459 | 255.3300821 | 194.8049275 |
| ENSMUSG00000028890 | 55.88869625 | 80.69160028 | 69.90895373 | 84.57305557 | 81.64618284 |
| ENSMUSG00000028894 | 4.952162959 | 12.52111039 | 9.179963621 | 4.02728836  | 2.148583759 |
| ENSMUSG00000028896 | 0           | 0           | 0           | 0           | 0           |

|                    |             |             |             |             |             |
|--------------------|-------------|-------------|-------------|-------------|-------------|
| ENSMUSG00000028898 | 23.34591109 | 37.56333116 | 36.71985448 | 82.15668255 | 59.44415067 |
| ENSMUSG00000028899 | 29.71297775 | 70.95295887 | 53.66747963 | 78.12939419 | 61.59273443 |
| ENSMUSG00000028901 | 62.96321476 | 79.99598303 | 79.7950684  | 120.0131931 | 107.429188  |
| ENSMUSG00000028906 | 29.0055259  | 32.69401046 | 37.42600553 | 20.94189947 | 20.05344842 |
| ENSMUSG00000028909 | 2.829807405 | 2.782468975 | 7.061510478 | 7.249119049 | 3.580972932 |
| ENSMUSG00000028910 | 18.39374813 | 31.99839321 | 29.65834401 | 57.99295239 | 49.41742646 |
| ENSMUSG00000028911 | 104.702874  | 139.819066  | 127.1071886 | 261.7737434 | 199.8182896 |
| ENSMUSG00000028914 | 26.1757185  | 34.78086219 | 28.95219296 | 23.35827249 | 35.09353473 |
| ENSMUSG00000028917 | 12.73413332 | 14.60796212 | 14.829172   | 33.82922223 | 40.82309142 |
| ENSMUSG00000028919 | 4.952162959 | 9.043024169 | 4.943057334 | 5.638203705 | 8.594335036 |
| ENSMUSG00000028923 | 49.52162959 | 65.38802092 | 79.08891735 | 94.23854763 | 63.74131818 |
| ENSMUSG00000028926 | 4.244711108 | 5.56493795  | 8.473812573 | 8.054576721 | 11.45911338 |
| ENSMUSG00000028931 | 13.44158517 | 21.56413456 | 20.47838039 | 13.69278043 | 15.7562809  |
| ENSMUSG00000028933 | 22.63845924 | 23.65098629 | 21.18453143 | 62.02024075 | 42.25548059 |
| ENSMUSG00000028936 | 79.94205919 | 100.1688831 | 108.7472614 | 265.8010318 | 185.4943979 |
| ENSMUSG00000028937 | 16.27139258 | 9.043024169 | 11.29841676 | 41.07834128 | 22.91822676 |
| ENSMUSG00000028943 | 9.196874066 | 2.086851731 | 5.649208382 | 8.054576721 | 8.594335036 |
| ENSMUSG00000028944 | 4.952162959 | 8.347406925 | 7.767661525 | 8.860034393 | 6.445751277 |
| ENSMUSG00000028948 | 82.06441475 | 86.95215547 | 98.86114669 | 194.9207566 | 178.332452  |
| ENSMUSG00000028949 | 4.244711108 | 8.347406925 | 7.767661525 | 4.832746033 | 4.297167518 |
| ENSMUSG00000028952 | 49.52162959 | 46.60635533 | 84.73812573 | 90.21125927 | 65.17370736 |
| ENSMUSG00000028953 | 22.63845924 | 31.99839321 | 28.95219296 | 56.38203705 | 46.55264811 |
| ENSMUSG00000028954 | 32.54278516 | 50.08444155 | 46.60596915 | 82.96214023 | 64.45751277 |
| ENSMUSG00000028957 | 11.31922962 | 10.43425866 | 12.00456781 | 7.249119049 | 9.310529622 |
| ENSMUSG00000028958 | 13.44158517 | 12.52111039 | 12.00456781 | 5.638203705 | 5.729556691 |
| ENSMUSG00000028959 | 19.80865184 | 31.30277597 | 38.13215658 | 64.43661377 | 59.44415067 |
| ENSMUSG00000028960 | 58.71850365 | 84.1696865  | 74.14586002 | 73.29664816 | 78.06520991 |
| ENSMUSG00000028961 | 24.05336294 | 30.60715873 | 26.12758877 | 69.2693598  | 50.84981563 |
| ENSMUSG00000028962 | 14.14903703 | 25.04222078 | 26.12758877 | 24.16373016 | 32.22875639 |
| ENSMUSG00000028964 | 11.31922962 | 27.82468975 | 15.53532305 | 12.08186508 | 25.06681052 |
| ENSMUSG00000028965 | 15.56394073 | 22.95536904 | 12.71071886 | 20.1364418  | 17.18867007 |
| ENSMUSG00000028967 | 9.196874066 | 8.347406925 | 7.767661525 | 4.02728836  | 5.729556691 |
| ENSMUSG00000028969 | 18.39374813 | 21.56413456 | 16.2414741  | 29.80193387 | 20.769643   |
| ENSMUSG00000028972 | 8.489422215 | 6.956172438 | 8.473812573 | 8.054576721 | 9.310529622 |
| ENSMUSG00000028973 | 7.781970364 | 11.82549314 | 15.53532305 | 12.08186508 | 16.47247549 |
| ENSMUSG00000028974 | 32.54278516 | 54.95376226 | 48.7244223  | 38.66196826 | 40.82309142 |
| ENSMUSG00000028975 | 78.52715549 | 104.3425866 | 91.09348516 | 82.96214023 | 78.7814045  |
| ENSMUSG00000028976 | 9.196874066 | 8.347406925 | 8.473812573 | 3.221830688 | 8.594335036 |
| ENSMUSG00000028977 | 9.196874066 | 8.347406925 | 11.29841676 | 8.860034393 | 5.013362104 |
| ENSMUSG00000028978 | 7.074518513 | 1.391234488 | 8.473812573 | 12.08186508 | 6.445751277 |
| ENSMUSG00000028979 | 8.489422215 | 13.21672763 | 4.943057334 | 6.443661377 | 6.445751277 |
| ENSMUSG00000028980 | 16.27139258 | 24.34660353 | 26.83373982 | 23.35827249 | 13.60769714 |
| ENSMUSG00000028986 | 11.31922962 | 23.65098629 | 19.77222934 | 10.47094974 | 20.769643   |

|                    |             |             |             |             |             |
|--------------------|-------------|-------------|-------------|-------------|-------------|
| ENSMUSG00000028988 | 6.367066661 | 3.478086219 | 7.767661525 | 7.249119049 | 5.729556691 |
| ENSMUSG00000028990 | 22.63845924 | 34.78086219 | 36.71985448 | 83.7675979  | 64.45751277 |
| ENSMUSG00000028991 | 61.54831106 | 82.77845201 | 78.3827663  | 95.84946298 | 84.51096119 |
| ENSMUSG00000028992 | 15.56394073 | 47.99758982 | 37.42600553 | 71.68573282 | 55.86317773 |
| ENSMUSG00000028995 | 26.1757185  | 34.78086219 | 26.83373982 | 47.52200265 | 29.36397804 |
| ENSMUSG00000028999 | 28.29807405 | 43.12826911 | 28.95219296 | 47.52200265 | 36.5259239  |
| ENSMUSG00000029001 | 7.781970364 | 8.347406925 | 2.118453143 | 4.832746033 | 5.729556691 |
| ENSMUSG00000029003 | 7.074518513 | 1.391234488 | 6.35535943  | 7.249119049 | 2.148583759 |
| ENSMUSG00000029004 | 130.8785925 | 159.2963488 | 137.6994543 | 279.4938122 | 211.9935976 |
| ENSMUSG00000029009 | 23.34591109 | 27.82468975 | 20.47838039 | 51.54929101 | 37.95831308 |
| ENSMUSG00000029012 | 24.76081479 | 48.69320706 | 34.60140134 | 34.6346799  | 37.24211849 |
| ENSMUSG00000029014 | 50.93653329 | 82.08283477 | 72.73355792 | 151.4260424 | 143.9551119 |
| ENSMUSG00000029016 | 21.93100739 | 37.56333116 | 27.53989086 | 47.52200265 | 35.80972932 |
| ENSMUSG00000029017 | 21.22355554 | 41.73703463 | 37.42600553 | 58.79841006 | 47.2688427  |
| ENSMUSG00000029020 | 38.90985182 | 57.04061399 | 44.48751601 | 46.71654498 | 41.53928601 |
| ENSMUSG00000029022 | 66.50047402 | 72.34419335 | 67.79050059 | 86.18397091 | 73.76804239 |
| ENSMUSG00000029026 | 11.31922962 | 9.043024169 | 6.35535943  | 4.832746033 | 7.161945863 |
| ENSMUSG00000029028 | 126.6338814 | 138.4278315 | 153.2347774 | 211.8353678 | 179.7648412 |
| ENSMUSG00000029029 | 31.12788146 | 51.47567604 | 38.13215658 | 33.02376456 | 35.80972932 |
| ENSMUSG00000029030 | 50.22908144 | 65.38802092 | 76.26431316 | 39.46742593 | 41.53928601 |
| ENSMUSG00000029032 | 6.367066661 | 2.782468975 | 8.473812573 | 5.638203705 | 7.87814045  |
| ENSMUSG00000029033 | 26.88317035 | 35.47647943 | 38.83830763 | 66.04752911 | 52.99839939 |
| ENSMUSG00000029036 | 52.35143699 | 93.90832791 | 84.03197468 | 182.8388916 | 151.8332523 |
| ENSMUSG00000029044 | 9.196874066 | 4.173703463 | 4.236906287 | 5.638203705 | 7.87814045  |
| ENSMUSG00000029047 | 12.73413332 | 25.04222078 | 23.30298458 | 19.33098413 | 22.20203218 |
| ENSMUSG00000029049 | 72.86754068 | 108.51629   | 110.8657145 | 170.7570265 | 126.7664418 |
| ENSMUSG00000029050 | 31.12788146 | 52.17129328 | 45.8998181  | 42.68925662 | 50.13362104 |
| ENSMUSG00000029053 | 6.367066661 | 11.82549314 | 14.12302096 | 10.47094974 | 11.45911338 |
| ENSMUSG00000029055 | 14.14903703 | 2.086851731 | 6.35535943  | 5.638203705 | 5.013362104 |
| ENSMUSG00000029056 | 68.62282957 | 108.51629   | 92.50578726 | 161.8969921 | 131.7798039 |
| ENSMUSG00000029060 | 11.31922962 | 17.39043109 | 12.71071886 | 11.27640741 | 13.60769714 |
| ENSMUSG00000029062 | 36.78749627 | 61.21431745 | 36.71985448 | 106.3204127 | 108.1453825 |
| ENSMUSG00000029063 | 13.44158517 | 19.47728283 | 16.2414741  | 24.16373016 | 34.37734014 |
| ENSMUSG00000029064 | 168.3735406 | 159.2963488 | 189.9546318 | 299.630254  | 232.7632406 |
| ENSMUSG00000029066 | 33.25023701 | 61.21431745 | 55.07978173 | 140.9550926 | 119.6044959 |
| ENSMUSG00000029068 | 108.2401332 | 154.4270281 | 127.8133396 | 308.4902884 | 226.3174893 |
| ENSMUSG00000029071 | 49.52162959 | 78.60474855 | 72.73355792 | 75.71302118 | 98.83485292 |
| ENSMUSG00000029074 | 0           | 0           | 0           | 0           | 0           |
| ENSMUSG00000029076 | 109.6550369 | 146.7752384 | 118.633376  | 231.1663519 | 173.3190899 |
| ENSMUSG00000029082 | 15.56394073 | 16.69481385 | 15.53532305 | 6.443661377 | 8.594335036 |
| ENSMUSG00000029086 | 9.904325918 | 2.782468975 | 7.767661525 | 8.860034393 | 7.87814045  |
| ENSMUSG00000029088 | 8.489422215 | 4.173703463 | 6.35535943  | 4.832746033 | 4.297167518 |
| ENSMUSG00000029090 | 4.244711108 | 9.043024169 | 6.35535943  | 4.832746033 | 5.729556691 |

|                    |             |             |             |             |             |
|--------------------|-------------|-------------|-------------|-------------|-------------|
| ENSMUSG00000029093 | 12.73413332 | 13.21672763 | 7.767661525 | 8.860034393 | 6.445751277 |
| ENSMUSG00000029094 | 15.56394073 | 14.60796212 | 7.767661525 | 10.47094974 | 9.310529622 |
| ENSMUSG00000029095 | 7.781970364 | 1.391234488 | 4.236906287 | 8.860034393 | 9.310529622 |
| ENSMUSG00000029096 | 4.244711108 | 5.56493795  | 6.35535943  | 3.221830688 | 5.013362104 |
| ENSMUSG00000029097 | 19.10119998 | 29.21592424 | 36.71985448 | 53.16020636 | 46.55264811 |
| ENSMUSG00000029098 | 14.14903703 | 20.86851731 | 26.12758877 | 25.77464551 | 22.91822676 |
| ENSMUSG00000029101 | 9.904325918 | 7.651789682 | 4.943057334 | 8.860034393 | 10.02672421 |
| ENSMUSG00000029103 | 40.32475552 | 61.9099347  | 65.67204744 | 46.71654498 | 43.68786977 |
| ENSMUSG00000029104 | 41.73965922 | 49.38882431 | 52.25517753 | 93.43308996 | 81.64618284 |
| ENSMUSG00000029106 | 0.707451851 | 3.478086219 | 3.530755239 | 0.805457672 | 1.432389173 |
| ENSMUSG00000029108 | 4.244711108 | 4.173703463 | 1.412302096 | 3.221830688 | 7.161945863 |
| ENSMUSG00000029110 | 159.8841184 | 165.556904  | 144.7609648 | 319.7666958 | 217.0069597 |
| ENSMUSG00000029120 | 4.952162959 | 6.956172438 | 8.473812573 | 4.832746033 | 8.594335036 |
| ENSMUSG00000029121 | 3.537259256 | 4.869320706 | 4.236906287 | 6.443661377 | 6.445751277 |
| ENSMUSG00000029122 | 8.489422215 | 2.782468975 | 3.530755239 | 10.47094974 | 7.87814045  |
| ENSMUSG00000029125 | 24.05336294 | 56.34499675 | 31.77679715 | 34.6346799  | 37.95831308 |
| ENSMUSG00000029127 | 97.62835547 | 161.3832006 | 141.2302096 | 187.6716376 | 154.6980307 |
| ENSMUSG00000029128 | 21.93100739 | 32.69401046 | 28.95219296 | 28.9964762  | 29.36397804 |
| ENSMUSG00000029130 | 15.56394073 | 4.869320706 | 6.35535943  | 7.249119049 | 7.161945863 |
| ENSMUSG00000029131 | 140.0754665 | 160.6875833 | 143.3486627 | 195.7262143 | 157.562809  |
| ENSMUSG00000029134 | 7.074518513 | 7.651789682 | 5.649208382 | 7.249119049 | 7.87814045  |
| ENSMUSG00000029135 | 10.61177777 | 3.478086219 | 6.35535943  | 7.249119049 | 7.161945863 |
| ENSMUSG00000029141 | 65.08557032 | 103.6469693 | 89.68118307 | 112.7640741 | 113.8749392 |
| ENSMUSG00000029142 | 25.46826665 | 35.47647943 | 21.18453143 | 50.74383334 | 40.82309142 |
| ENSMUSG00000029144 | 1.414903703 | 2.782468975 | 1.412302096 | 0           | 2.148583759 |
| ENSMUSG00000029145 | 48.81417774 | 73.0398106  | 60.02283906 | 122.4295662 | 112.4425501 |
| ENSMUSG00000029146 | 39.61730367 | 74.43104508 | 66.37819849 | 128.0677699 | 100.2672421 |
| ENSMUSG00000029147 | 70.74518513 | 111.298759  | 93.21193831 | 213.4462831 | 184.7782033 |
| ENSMUSG00000029148 | 84.1867703  | 112.6899935 | 91.09348516 | 80.54576721 | 94.5376854  |
| ENSMUSG00000029149 | 10.61177777 | 21.56413456 | 16.94762515 | 11.27640741 | 14.32389173 |
| ENSMUSG00000029151 | 11.31922962 | 12.52111039 | 13.41686991 | 4.832746033 | 10.7429188  |
| ENSMUSG00000029152 | 62.25576291 | 89.0390072  | 79.7950684  | 115.1804471 | 103.848215  |
| ENSMUSG00000029153 | 9.904325918 | 3.478086219 | 4.943057334 | 7.249119049 | 5.013362104 |
| ENSMUSG00000029154 | 12.73413332 | 9.738641413 | 4.943057334 | 4.02728836  | 7.87814045  |
| ENSMUSG00000029155 | 8.489422215 | 5.56493795  | 4.943057334 | 7.249119049 | 5.013362104 |
| ENSMUSG00000029162 | 9.904325918 | 9.738641413 | 14.829172   | 8.054576721 | 15.04008631 |
| ENSMUSG00000029165 | 7.781970364 | 10.43425866 | 5.649208382 | 10.47094974 | 9.310529622 |
| ENSMUSG00000029166 | 7.781970364 | 11.82549314 | 10.59226572 | 5.638203705 | 6.445751277 |
| ENSMUSG00000029167 | 7.074518513 | 9.043024169 | 6.35535943  | 1.610915344 | 5.013362104 |
| ENSMUSG00000029168 | 9.904325918 | 7.651789682 | 4.943057334 | 4.832746033 | 5.729556691 |
| ENSMUSG00000029169 | 152.102148  | 167.6437558 | 153.2347774 | 277.0774392 | 202.6830679 |
| ENSMUSG00000029171 | 13.44158517 | 18.78166558 | 21.18453143 | 20.1364418  | 20.769643   |
| ENSMUSG00000029173 | 24.76081479 | 29.21592424 | 28.95219296 | 37.85651059 | 37.95831308 |

|                    |             |             |             |             |             |
|--------------------|-------------|-------------|-------------|-------------|-------------|
| ENSMUSG00000029174 | 25.46826665 | 48.69320706 | 38.83830763 | 69.2693598  | 61.59273443 |
| ENSMUSG00000029175 | 0           | 0           | 0           | 0           | 0           |
| ENSMUSG00000029176 | 31.12788146 | 50.08444155 | 48.7244223  | 43.49471429 | 48.70123187 |
| ENSMUSG00000029178 | 112.4848444 | 130.0804246 | 130.6379438 | 101.4876667 | 83.7947666  |
| ENSMUSG00000029179 | 9.904325918 | 8.347406925 | 12.00456781 | 13.69278043 | 5.729556691 |
| ENSMUSG00000029182 | 10.61177777 | 6.260555194 | 5.649208382 | 2.416373016 | 8.594335036 |
| ENSMUSG00000029185 | 0.707451851 | 0.695617244 | 0           | 0           | 0.716194586 |
| ENSMUSG00000029186 | 13.44158517 | 27.12907251 | 21.89068248 | 19.33098413 | 15.7562809  |
| ENSMUSG00000029188 | 10.61177777 | 6.260555194 | 6.35535943  | 4.832746033 | 7.161945863 |
| ENSMUSG00000029189 | 5.65961481  | 4.173703463 | 3.530755239 | 8.054576721 | 8.594335036 |
| ENSMUSG00000029190 | 38.20239997 | 66.08363816 | 44.48751601 | 64.43661377 | 58.72795608 |
| ENSMUSG00000029191 | 110.3624888 | 141.2103005 | 105.9226572 | 129.6786852 | 92.38910164 |
| ENSMUSG00000029192 | 8.489422215 | 6.260555194 | 11.29841676 | 9.665492065 | 11.45911338 |
| ENSMUSG00000029195 | 11.31922962 | 7.651789682 | 6.35535943  | 3.221830688 | 8.594335036 |
| ENSMUSG00000029199 | 74.98989623 | 108.51629   | 105.9226572 | 264.9955741 | 204.8316517 |
| ENSMUSG00000029201 | 22.63845924 | 33.3896277  | 31.77679715 | 28.19101852 | 22.91822676 |
| ENSMUSG00000029202 | 72.86754068 | 94.60394515 | 82.61967259 | 226.3336059 | 157.562809  |
| ENSMUSG00000029203 | 50.22908144 | 91.82147618 | 65.67204744 | 230.3608942 | 166.157144  |
| ENSMUSG00000029205 | 21.22355554 | 13.91234488 | 15.53532305 | 13.69278043 | 7.161945863 |
| ENSMUSG00000029206 | 5.65961481  | 8.347406925 | 5.649208382 | 7.249119049 | 6.445751277 |
| ENSMUSG00000029207 | 7.074518513 | 8.347406925 | 3.530755239 | 7.249119049 | 8.594335036 |
| ENSMUSG00000029208 | 12.73413332 | 20.17290007 | 16.94762515 | 28.19101852 | 27.21539428 |
| ENSMUSG00000029209 | 21.22355554 | 41.73703463 | 29.65834401 | 25.77464551 | 29.36397804 |
| ENSMUSG00000029211 | 7.781970364 | 6.956172438 | 7.061510478 | 5.638203705 | 6.445751277 |
| ENSMUSG00000029212 | 9.904325918 | 4.173703463 | 5.649208382 | 9.665492065 | 5.729556691 |
| ENSMUSG00000029213 | 106.1177777 | 147.4708557 | 126.4010376 | 118.4022778 | 89.52432329 |
| ENSMUSG00000029217 | 132.2934962 | 139.1234488 | 113.6903187 | 130.4841429 | 102.4158258 |
| ENSMUSG00000029219 | 7.781970364 | 12.52111039 | 9.179963621 | 7.249119049 | 8.594335036 |
| ENSMUSG00000029221 | 60.13340736 | 104.3425866 | 74.85201106 | 82.96214023 | 68.75468029 |
| ENSMUSG00000029223 | 9.904325918 | 6.260555194 | 9.179963621 | 5.638203705 | 3.580972932 |
| ENSMUSG00000029227 | 64.37811846 | 103.6469693 | 89.68118307 | 147.398754  | 124.617858  |
| ENSMUSG00000029228 | 7.781970364 | 4.869320706 | 9.179963621 | 4.832746033 | 7.87814045  |
| ENSMUSG00000029231 | 4.244711108 | 6.956172438 | 4.236906287 | 2.416373016 | 3.580972932 |
| ENSMUSG00000029233 | 21.93100739 | 36.17209668 | 35.30755239 | 26.58010318 | 22.91822676 |
| ENSMUSG00000029234 | 43.15456293 | 70.25734162 | 67.08434954 | 97.46037832 | 91.67290705 |
| ENSMUSG00000029235 | 3.537259256 | 7.651789682 | 6.35535943  | 8.054576721 | 6.445751277 |
| ENSMUSG00000029238 | 12.73413332 | 36.86771392 | 35.30755239 | 45.10562964 | 39.39070225 |
| ENSMUSG00000029245 | 5.65961481  | 5.56493795  | 6.35535943  | 2.416373016 | 4.297167518 |
| ENSMUSG00000029246 | 81.3569629  | 134.254128  | 123.5764334 | 238.4154709 | 213.4259867 |
| ENSMUSG00000029247 | 75.69734809 | 137.7322143 | 96.0365425  | 258.5519127 | 213.4259867 |
| ENSMUSG00000029248 | 6.367066661 | 7.651789682 | 9.179963621 | 3.221830688 | 2.148583759 |
| ENSMUSG00000029249 | 26.88317035 | 46.60635533 | 29.65834401 | 57.18749472 | 62.30892901 |
| ENSMUSG00000029253 | 45.98437033 | 77.21351406 | 55.78593277 | 108.7367857 | 88.80812871 |

|                    |             |             |             |             |             |
|--------------------|-------------|-------------|-------------|-------------|-------------|
| ENSMUSG00000029254 | 106.1177777 | 156.5138799 | 133.462548  | 84.57305557 | 89.52432329 |
| ENSMUSG00000029260 | 11.31922962 | 4.869320706 | 5.649208382 | 4.02728836  | 5.729556691 |
| ENSMUSG00000029263 | 16.97884443 | 27.82468975 | 21.89068248 | 37.85651059 | 35.09353473 |
| ENSMUSG00000029267 | 137.2456591 | 192.6859765 | 175.8316109 | 219.0844868 | 165.4409494 |
| ENSMUSG00000029269 | 7.074518513 | 6.260555194 | 10.59226572 | 7.249119049 | 3.580972932 |
| ENSMUSG00000029270 | 60.13340736 | 77.21351406 | 68.49665163 | 132.0950582 | 102.4158258 |
| ENSMUSG00000029273 | 9.904325918 | 6.956172438 | 7.061510478 | 4.832746033 | 5.013362104 |
| ENSMUSG00000029275 | 19.80865184 | 13.21672763 | 15.53532305 | 11.27640741 | 13.60769714 |
| ENSMUSG00000029276 | 21.93100739 | 45.21512085 | 32.4829482  | 48.32746033 | 33.66114556 |
| ENSMUSG00000029279 | 9.196874066 | 5.56493795  | 9.179963621 | 6.443661377 | 1.432389173 |
| ENSMUSG00000029280 | 7.074518513 | 11.82549314 | 9.179963621 | 4.832746033 | 2.864778345 |
| ENSMUSG00000029281 | 9.196874066 | 5.56493795  | 12.71071886 | 0.805457672 | 8.594335036 |
| ENSMUSG00000029283 | 17.68629628 | 32.69401046 | 26.83373982 | 52.35474869 | 47.2688427  |
| ENSMUSG00000029286 | 5.65961481  | 7.651789682 | 6.35535943  | 6.443661377 | 5.729556691 |
| ENSMUSG00000029287 | 4.952162959 | 4.173703463 | 9.179963621 | 1.610915344 | 2.864778345 |
| ENSMUSG00000029288 | 4.244711108 | 4.173703463 | 7.061510478 | 8.860034393 | 10.02672421 |
| ENSMUSG00000029290 | 91.96874066 | 110.6031418 | 102.3919019 | 80.54576721 | 86.65954495 |
| ENSMUSG00000029291 | 43.15456293 | 55.6493795  | 54.37363068 | 38.66196826 | 43.68786977 |
| ENSMUSG00000029298 | 0           | 0           | 0           | 0.805457672 | 0           |
| ENSMUSG00000029299 | 16.27139258 | 25.04222078 | 24.00913562 | 7.249119049 | 9.310529622 |
| ENSMUSG00000029304 | 8.489422215 | 6.260555194 | 7.061510478 | 7.249119049 | 3.580972932 |
| ENSMUSG00000029310 | 2.829807405 | 3.478086219 | 7.767661525 | 4.02728836  | 5.729556691 |
| ENSMUSG00000029311 | 22.63845924 | 41.04141738 | 25.42143772 | 21.74735715 | 20.05344842 |
| ENSMUSG00000029312 | 6.367066661 | 13.91234488 | 12.71071886 | 9.665492065 | 12.17530797 |
| ENSMUSG00000029313 | 55.88869625 | 91.12585893 | 67.79050059 | 85.37851324 | 91.67290705 |
| ENSMUSG00000029314 | 21.93100739 | 30.60715873 | 31.0706461  | 9.665492065 | 15.7562809  |
| ENSMUSG00000029320 | 8.489422215 | 7.651789682 | 10.59226572 | 8.054576721 | 5.729556691 |
| ENSMUSG00000029322 | 40.32475552 | 70.95295887 | 51.54902649 | 79.74030954 | 55.14698315 |
| ENSMUSG00000029326 | 79.94205919 | 114.081228  | 112.9841676 | 199.7535027 | 165.4409494 |
| ENSMUSG00000029328 | 119.5593629 | 150.9489419 | 100.9795998 | 298.8247963 | 219.1555434 |
| ENSMUSG00000029333 | 131.5860443 | 146.0796212 | 139.8179075 | 53.96566403 | 51.56601022 |
| ENSMUSG00000029334 | 9.196874066 | 9.738641413 | 9.179963621 | 4.02728836  | 4.297167518 |
| ENSMUSG00000029338 | 16.27139258 | 22.2597518  | 19.06607829 | 9.665492065 | 15.7562809  |
| ENSMUSG00000029343 | 9.196874066 | 7.651789682 | 12.71071886 | 4.832746033 | 16.47247549 |
| ENSMUSG00000029344 | 55.1812444  | 75.82227957 | 72.02740687 | 138.5387196 | 98.83485292 |
| ENSMUSG00000029345 | 41.73965922 | 62.60555194 | 62.1412922  | 76.51847885 | 73.05184781 |
| ENSMUSG00000029346 | 15.56394073 | 27.12907251 | 21.89068248 | 45.10562964 | 50.84981563 |
| ENSMUSG00000029348 | 3.537259256 | 9.043024169 | 4.236906287 | 4.832746033 | 6.445751277 |
| ENSMUSG00000029352 | 4.952162959 | 6.956172438 | 5.649208382 | 6.443661377 | 5.729556691 |
| ENSMUSG00000029359 | 5.65961481  | 2.782468975 | 9.179963621 | 4.02728836  | 4.297167518 |
| ENSMUSG00000029360 | 9.904325918 | 7.651789682 | 7.061510478 | 11.27640741 | 12.89150255 |
| ENSMUSG00000029361 | 6.367066661 | 3.478086219 | 3.530755239 | 4.832746033 | 7.87814045  |
| ENSMUSG00000029363 | 18.39374813 | 20.17290007 | 19.06607829 | 54.7711217  | 42.97167518 |

|                    |             |             |             |             |             |
|--------------------|-------------|-------------|-------------|-------------|-------------|
| ENSMUSG00000029364 | 12.73413332 | 32.69401046 | 31.77679715 | 20.1364418  | 24.35061594 |
| ENSMUSG00000029366 | 24.05336294 | 40.34580014 | 29.65834401 | 49.93837567 | 52.2822048  |
| ENSMUSG00000029368 | 12.73413332 | 8.347406925 | 7.767661525 | 4.02728836  | 5.013362104 |
| ENSMUSG00000029369 | 5.65961481  | 6.956172438 | 8.473812573 | 10.47094974 | 7.87814045  |
| ENSMUSG00000029370 | 13.44158517 | 13.21672763 | 14.829172   | 5.638203705 | 9.310529622 |
| ENSMUSG00000029379 | 8.489422215 | 6.956172438 | 7.767661525 | 4.832746033 | 2.864778345 |
| ENSMUSG00000029380 | 3.537259256 | 4.173703463 | 4.236906287 | 2.416373016 | 4.297167518 |
| ENSMUSG00000029381 | 12.02668147 | 2.782468975 | 9.886114669 | 3.221830688 | 5.013362104 |
| ENSMUSG00000029385 | 33.95768886 | 44.5195036  | 52.96132858 | 32.21830688 | 21.48583759 |
| ENSMUSG00000029387 | 40.32475552 | 75.82227957 | 65.67204744 | 144.982381  | 119.6044959 |
| ENSMUSG00000029388 | 50.93653329 | 81.38721752 | 67.08434954 | 132.9005159 | 126.0502472 |
| ENSMUSG00000029389 | 19.80865184 | 23.65098629 | 25.42143772 | 69.2693598  | 55.14698315 |
| ENSMUSG00000029390 | 45.98437033 | 84.86530374 | 58.61053696 | 200.5589604 | 164.0085603 |
| ENSMUSG00000029392 | 7.781970364 | 4.869320706 | 4.236906287 | 6.443661377 | 7.87814045  |
| ENSMUSG00000029394 | 21.93100739 | 31.30277597 | 26.83373982 | 176.3952302 | 136.0769714 |
| ENSMUSG00000029397 | 53.7663407  | 61.9099347  | 47.3121202  | 58.79841006 | 48.70123187 |
| ENSMUSG00000029403 | 7.074518513 | 9.738641413 | 12.71071886 | 8.054576721 | 6.445751277 |
| ENSMUSG00000029404 | 41.03220737 | 60.51870021 | 55.07978173 | 78.93485187 | 77.34901533 |
| ENSMUSG00000029405 | 87.72402956 | 105.0382038 | 108.7472614 | 173.1733995 | 112.4425501 |
| ENSMUSG00000029406 | 24.05336294 | 37.56333116 | 45.19366706 | 47.52200265 | 40.82309142 |
| ENSMUSG00000029407 | 79.94205919 | 92.51709342 | 76.97046421 | 99.87675134 | 97.40246374 |
| ENSMUSG00000029408 | 5.65961481  | 9.043024169 | 6.35535943  | 8.860034393 | 7.87814045  |
| ENSMUSG00000029413 | 19.10119998 | 42.43265187 | 32.4829482  | 18.52552646 | 27.93158887 |
| ENSMUSG00000029414 | 100.4581629 | 147.4708557 | 111.5718655 | 293.1865926 | 199.8182896 |
| ENSMUSG00000029416 | 12.02668147 | 19.47728283 | 19.77222934 | 8.054576721 | 10.02672421 |
| ENSMUSG00000029420 | 12.73413332 | 3.478086219 | 5.649208382 | 5.638203705 | 10.02672421 |
| ENSMUSG00000029422 | 154.9319554 | 200.3377662 | 163.8270431 | 378.5651059 | 251.3842998 |
| ENSMUSG00000029423 | 11.31922962 | 7.651789682 | 8.473812573 | 8.054576721 | 11.45911338 |
| ENSMUSG00000029427 | 61.54831106 | 89.0390072  | 78.3827663  | 103.9040397 | 81.64618284 |
| ENSMUSG00000029428 | 12.73413332 | 27.82468975 | 26.12758877 | 14.4982381  | 17.18867007 |
| ENSMUSG00000029430 | 43.15456293 | 63.99678643 | 64.25974535 | 219.8899445 | 153.9818361 |
| ENSMUSG00000029432 | 7.781970364 | 17.39043109 | 10.59226572 | 12.08186508 | 12.17530797 |
| ENSMUSG00000029433 | 4.244711108 | 7.651789682 | 1.412302096 | 3.221830688 | 6.445751277 |
| ENSMUSG00000029434 | 42.44711108 | 92.51709342 | 67.79050059 | 71.68573282 | 64.45751277 |
| ENSMUSG00000029437 | 4.952162959 | 7.651789682 | 9.179963621 | 8.860034393 | 10.02672421 |
| ENSMUSG00000029439 | 73.57499253 | 127.9935729 | 139.1117564 | 153.8424154 | 138.9417498 |
| ENSMUSG00000029440 | 26.88317035 | 49.38882431 | 36.71985448 | 45.91108731 | 49.41742646 |
| ENSMUSG00000029442 | 5.65961481  | 9.043024169 | 7.767661525 | 5.638203705 | 8.594335036 |
| ENSMUSG00000029445 | 12.73413332 | 9.043024169 | 7.061510478 | 9.665492065 | 7.87814045  |
| ENSMUSG00000029446 | 58.0110518  | 64.69240367 | 66.37819849 | 199.7535027 | 174.0352845 |
| ENSMUSG00000029449 | 118.1444592 | 125.9067211 | 141.2302096 | 164.3133651 | 124.617858  |
| ENSMUSG00000029451 | 7.781970364 | 5.56493795  | 4.943057334 | 6.443661377 | 7.161945863 |
| ENSMUSG00000029452 | 14.14903703 | 38.25894841 | 26.83373982 | 94.23854763 | 91.67290705 |

|                    |             |             |             |             |             |
|--------------------|-------------|-------------|-------------|-------------|-------------|
| ENSMUSG00000029454 | 82.7718666  | 116.863697  | 112.2780166 | 138.5387196 | 115.3073284 |
| ENSMUSG00000029455 | 59.42595551 | 82.77845201 | 72.02740687 | 28.9964762  | 42.97167518 |
| ENSMUSG00000029456 | 45.98437033 | 71.64857611 | 86.85657888 | 70.88027514 | 73.76804239 |
| ENSMUSG00000029458 | 59.42595551 | 81.38721752 | 84.73812573 | 69.2693598  | 76.63282074 |
| ENSMUSG00000029461 | 33.25023701 | 52.17129328 | 36.01370344 | 27.38556085 | 32.94495097 |
| ENSMUSG00000029462 | 47.39927403 | 63.99678643 | 69.20280268 | 73.29664816 | 65.88990194 |
| ENSMUSG00000029464 | 39.61730367 | 62.60555194 | 55.78593277 | 75.71302118 | 83.07857202 |
| ENSMUSG00000029465 | 82.06441475 | 129.3848073 | 120.0456781 | 158.6751614 | 131.7798039 |
| ENSMUSG00000029466 | 78.52715549 | 122.4286349 | 96.0365425  | 86.18397091 | 76.63282074 |
| ENSMUSG00000029467 | 21.22355554 | 45.91073809 | 43.07521391 | 151.4260424 | 134.6445822 |
| ENSMUSG00000029468 | 9.196874066 | 8.347406925 | 5.649208382 | 4.832746033 | 5.729556691 |
| ENSMUSG00000029469 | 9.904325918 | 8.347406925 | 4.943057334 | 5.638203705 | 2.864778345 |
| ENSMUSG00000029470 | 26.88317035 | 47.99758982 | 53.66747963 | 35.44013757 | 40.10689684 |
| ENSMUSG00000029471 | 23.34591109 | 36.17209668 | 29.65834401 | 41.88379895 | 39.39070225 |
| ENSMUSG00000029472 | 40.32475552 | 43.12826911 | 37.42600553 | 91.01671695 | 75.20043157 |
| ENSMUSG00000029475 | 10.61177777 | 11.1298759  | 9.886114669 | 15.30369577 | 15.7562809  |
| ENSMUSG00000029477 | 9.904325918 | 13.91234488 | 8.473812573 | 6.443661377 | 5.013362104 |
| ENSMUSG00000029478 | 33.95768886 | 68.17048989 | 57.19823487 | 85.37851324 | 77.34901533 |
| ENSMUSG00000029480 | 46.69182218 | 73.0398106  | 70.61510478 | 83.7675979  | 74.48423698 |
| ENSMUSG00000029484 | 12.02668147 | 4.173703463 | 7.061510478 | 3.221830688 | 2.864778345 |
| ENSMUSG00000029486 | 27.5906222  | 52.86691053 | 57.90438592 | 91.01671695 | 72.33565322 |
| ENSMUSG00000029499 | 17.68629628 | 16.69481385 | 13.41686991 | 53.96566403 | 33.66114556 |
| ENSMUSG00000029500 | 67.20792587 | 110.6031418 | 72.02740687 | 178.0061455 | 141.8065281 |
| ENSMUSG00000029501 | 26.1757185  | 35.47647943 | 36.01370344 | 101.4876667 | 83.7947666  |
| ENSMUSG00000029502 | 55.88869625 | 90.43024169 | 67.79050059 | 54.7711217  | 64.45751277 |
| ENSMUSG00000029503 | 9.904325918 | 6.260555194 | 7.767661525 | 5.638203705 | 3.580972932 |
| ENSMUSG00000029505 | 110.3624888 | 127.2979556 | 106.6288082 | 254.5246244 | 148.968474  |
| ENSMUSG00000029507 | 36.08004441 | 50.08444155 | 50.84287544 | 136.1223466 | 113.8749392 |
| ENSMUSG00000029510 | 5.65961481  | 8.347406925 | 12.00456781 | 5.638203705 | 7.161945863 |
| ENSMUSG00000029512 | 16.97884443 | 27.12907251 | 43.07521391 | 27.38556085 | 15.7562809  |
| ENSMUSG00000029513 | 24.76081479 | 41.73703463 | 38.13215658 | 46.71654498 | 48.70123187 |
| ENSMUSG00000029516 | 24.76081479 | 25.73783802 | 25.42143772 | 70.88027514 | 50.13362104 |
| ENSMUSG00000029517 | 8.489422215 | 9.738641413 | 14.12302096 | 7.249119049 | 12.17530797 |
| ENSMUSG00000029518 | 107.5326814 | 123.8198694 | 120.7518292 | 470.3872805 | 317.9903963 |
| ENSMUSG00000029522 | 4.244711108 | 6.260555194 | 7.767661525 | 6.443661377 | 5.013362104 |
| ENSMUSG00000029524 | 12.02668147 | 18.78166558 | 23.30298458 | 20.1364418  | 24.35061594 |
| ENSMUSG00000029528 | 64.37811846 | 104.3425866 | 105.9226572 | 172.3679418 | 134.6445822 |
| ENSMUSG00000029530 | 0.707451851 | 0           | 0.706151048 | 0           | 0           |
| ENSMUSG00000029534 | 0           | 0           | 0           | 0           | 0           |
| ENSMUSG00000029538 | 120.2668147 | 149.5577074 | 131.3440949 | 227.1390635 | 196.2373167 |
| ENSMUSG00000029541 | 4.952162959 | 6.956172438 | 5.649208382 | 8.054576721 | 9.310529622 |
| ENSMUSG00000029544 | 6.367066661 | 8.347406925 | 6.35535943  | 7.249119049 | 12.89150255 |
| ENSMUSG00000029545 | 14.14903703 | 28.52030699 | 24.00913562 | 32.21830688 | 18.62105924 |



|                    |             |             |             |             |             |
|--------------------|-------------|-------------|-------------|-------------|-------------|
| ENSMUSG00000029546 | 5.65961481  | 2.782468975 | 4.943057334 | 3.221830688 | 2.148583759 |
| ENSMUSG00000029547 | 40.32475552 | 55.6493795  | 49.43057334 | 66.85298678 | 55.14698315 |
| ENSMUSG00000029550 | 105.4103258 | 145.3840039 | 120.0456781 | 165.1188228 | 121.0368851 |
| ENSMUSG00000029551 | 0.707451851 | 0.695617244 | 0           | 0.805457672 | 0           |
| ENSMUSG00000029552 | 35.37259256 | 30.60715873 | 27.53989086 | 42.68925662 | 57.29556691 |
| ENSMUSG00000029553 | 11.31922962 | 10.43425866 | 14.829172   | 5.638203705 | 7.87814045  |
| ENSMUSG00000029554 | 62.25576291 | 116.863697  | 88.97503202 | 132.0950582 | 111.7263555 |
| ENSMUSG00000029556 | 7.781970364 | 4.869320706 | 9.179963621 | 10.47094974 | 7.161945863 |
| ENSMUSG00000029559 | 35.37259256 | 63.99678643 | 62.84744325 | 70.07481747 | 52.99839939 |
| ENSMUSG00000029560 | 81.3569629  | 101.5601176 | 86.15042783 | 207.0026217 | 152.5494469 |
| ENSMUSG00000029561 | 13.44158517 | 11.82549314 | 14.12302096 | 30.60739154 | 18.62105924 |
| ENSMUSG00000029563 | 12.02668147 | 4.869320706 | 4.943057334 | 0.805457672 | 5.013362104 |
| ENSMUSG00000029564 | 0.707451851 | 2.086851731 | 0.706151048 | 4.832746033 | 1.432389173 |
| ENSMUSG00000029571 | 38.90985182 | 68.17048989 | 66.37819849 | 47.52200265 | 32.22875639 |
| ENSMUSG00000029575 | 8.489422215 | 14.60796212 | 13.41686991 | 25.77464551 | 24.35061594 |
| ENSMUSG00000029576 | 9.196874066 | 5.56493795  | 3.530755239 | 8.860034393 | 3.580972932 |
| ENSMUSG00000029577 | 118.851911  | 169.7306075 | 144.7609648 | 155.4533307 | 114.5911338 |
| ENSMUSG00000029578 | 83.47931845 | 132.1672763 | 108.0411103 | 83.7675979  | 75.91662615 |
| ENSMUSG00000029580 | 103.2879703 | 137.036597  | 143.3486627 | 398.7015477 | 272.8701374 |
| ENSMUSG00000029581 | 8.489422215 | 5.56493795  | 3.530755239 | 8.860034393 | 6.445751277 |
| ENSMUSG00000029587 | 11.31922962 | 29.21592424 | 28.95219296 | 21.74735715 | 22.20203218 |
| ENSMUSG00000029591 | 7.074518513 | 14.60796212 | 8.473812573 | 30.60739154 | 28.64778345 |
| ENSMUSG00000029592 | 26.88317035 | 47.99758982 | 57.90438592 | 36.24559524 | 43.68786977 |
| ENSMUSG00000029594 | 15.56394073 | 28.52030699 | 23.30298458 | 64.43661377 | 52.99839939 |
| ENSMUSG00000029596 | 10.61177777 | 5.56493795  | 8.473812573 | 5.638203705 | 6.445751277 |
| ENSMUSG00000029597 | 11.31922962 | 8.347406925 | 5.649208382 | 5.638203705 | 5.729556691 |
| ENSMUSG00000029598 | 40.32475552 | 54.25814501 | 36.01370344 | 38.66196826 | 42.97167518 |
| ENSMUSG00000029599 | 102.5805184 | 136.3409798 | 111.5718655 | 177.2006879 | 158.9951982 |
| ENSMUSG00000029600 | 60.13340736 | 94.60394515 | 63.5535943  | 139.3441773 | 102.4158258 |
| ENSMUSG00000029601 | 19.10119998 | 18.08604834 | 31.0706461  | 12.08186508 | 16.47247549 |
| ENSMUSG00000029602 | 6.367066661 | 5.56493795  | 4.943057334 | 13.69278043 | 10.7429188  |
| ENSMUSG00000029603 | 93.38364437 | 142.601535  | 117.2210739 | 105.514955  | 109.5777717 |
| ENSMUSG00000029605 | 96.21345177 | 138.4278315 | 138.4056054 | 135.3168889 | 104.5644096 |
| ENSMUSG00000029607 | 16.97884443 | 19.47728283 | 22.59683353 | 13.69278043 | 18.62105924 |
| ENSMUSG00000029608 | 5.65961481  | 5.56493795  | 10.59226572 | 8.860034393 | 10.02672421 |
| ENSMUSG00000029610 | 79.94205919 | 102.9513521 | 81.91352154 | 210.2244524 | 168.3057278 |
| ENSMUSG00000029613 | 79.23460734 | 89.73462445 | 93.21193831 | 86.98942859 | 79.49759908 |
| ENSMUSG00000029614 | 1.414903703 | 2.782468975 | 2.118453143 | 1.610915344 | 1.432389173 |
| ENSMUSG00000029617 | 33.25023701 | 63.30116918 | 55.07978173 | 96.65492065 | 71.61945863 |
| ENSMUSG00000029618 | 14.14903703 | 7.651789682 | 5.649208382 | 8.860034393 | 5.013362104 |
| ENSMUSG00000029621 | 121.6817184 | 143.9927695 | 146.1732669 | 140.1496349 | 136.793166  |
| ENSMUSG00000029622 | 70.03773327 | 69.56172438 | 78.3827663  | 157.8697037 | 131.0636093 |
| ENSMUSG00000029623 | 94.09109622 | 130.0804246 | 115.8087718 | 252.1082514 | 196.9535112 |

|                    |             |             |             |             |             |
|--------------------|-------------|-------------|-------------|-------------|-------------|
| ENSMUSG00000029624 | 100.4581629 | 141.2103005 | 124.2825844 | 166.7297381 | 146.8198902 |
| ENSMUSG00000029625 | 87.72402956 | 137.036597  | 116.5149229 | 204.5862487 | 161.1437819 |
| ENSMUSG00000029627 | 46.69182218 | 69.56172438 | 48.01827125 | 69.2693598  | 61.59273443 |
| ENSMUSG00000029629 | 59.42595551 | 68.86610713 | 79.7950684  | 63.6311561  | 61.59273443 |
| ENSMUSG00000029630 | 15.56394073 | 4.173703463 | 9.886114669 | 9.665492065 | 5.729556691 |
| ENSMUSG00000029634 | 36.78749627 | 44.5195036  | 48.7244223  | 74.10210583 | 53.71459398 |
| ENSMUSG00000029635 | 46.69182218 | 74.43104508 | 52.25517753 | 111.9586164 | 83.07857202 |
| ENSMUSG00000029636 | 6.367066661 | 4.173703463 | 6.35535943  | 2.416373016 | 6.445751277 |
| ENSMUSG00000029638 | 140.0754665 | 169.0349902 | 145.4671158 | 137.7332619 | 126.0502472 |
| ENSMUSG00000029640 | 81.3569629  | 121.7330177 | 96.74269354 | 95.84946298 | 88.09193412 |
| ENSMUSG00000029642 | 142.905274  | 225.379987  | 175.8316109 | 256.1355397 | 185.4943979 |
| ENSMUSG00000029647 | 86.30912585 | 153.0357936 | 96.0365425  | 238.4154709 | 186.926787  |
| ENSMUSG00000029648 | 3.537259256 | 4.173703463 | 6.35535943  | 7.249119049 | 3.580972932 |
| ENSMUSG00000029649 | 55.1812444  | 83.47406925 | 78.3827663  | 175.5897725 | 119.6044959 |
| ENSMUSG00000029650 | 7.074518513 | 22.95536904 | 19.77222934 | 11.27640741 | 7.87814045  |
| ENSMUSG00000029651 | 8.489422215 | 6.260555194 | 10.59226572 | 8.054576721 | 6.445751277 |
| ENSMUSG00000029655 | 118.1444592 | 138.4278315 | 125.6948865 | 235.9990979 | 186.2105924 |
| ENSMUSG00000029656 | 8.489422215 | 4.869320706 | 7.767661525 | 3.221830688 | 6.445751277 |
| ENSMUSG00000029657 | 29.0055259  | 45.21512085 | 36.71985448 | 108.7367857 | 68.0384857  |
| ENSMUSG00000029658 | 8.489422215 | 3.478086219 | 5.649208382 | 8.054576721 | 5.729556691 |
| ENSMUSG00000029659 | 9.904325918 | 4.869320706 | 6.35535943  | 5.638203705 | 5.729556691 |
| ENSMUSG00000029660 | 7.074518513 | 5.56493795  | 4.943057334 | 6.443661377 | 7.87814045  |
| ENSMUSG00000029661 | 5.65961481  | 6.260555194 | 12.00456781 | 5.638203705 | 10.02672421 |
| ENSMUSG00000029663 | 14.14903703 | 6.956172438 | 14.829172   | 5.638203705 | 2.864778345 |
| ENSMUSG00000029664 | 8.489422215 | 5.56493795  | 4.943057334 | 5.638203705 | 7.161945863 |
| ENSMUSG00000029669 | 10.61177777 | 8.347406925 | 9.886114669 | 1.610915344 | 7.161945863 |
| ENSMUSG00000029670 | 16.97884443 | 28.52030699 | 21.18453143 | 33.82922223 | 32.94495097 |
| ENSMUSG00000029671 | 5.65961481  | 11.82549314 | 1.412302096 | 7.249119049 | 6.445751277 |
| ENSMUSG00000029672 | 106.8252295 | 105.7338211 | 110.8657145 | 170.7570265 | 109.5777717 |
| ENSMUSG00000029673 | 7.074518513 | 9.043024169 | 7.767661525 | 4.832746033 | 7.87814045  |
| ENSMUSG00000029674 | 7.781970364 | 6.260555194 | 16.2414741  | 11.27640741 | 13.60769714 |
| ENSMUSG00000029676 | 50.93653329 | 85.56092098 | 56.49208382 | 56.38203705 | 51.56601022 |
| ENSMUSG00000029681 | 33.95768886 | 50.08444155 | 48.01827125 | 61.21478308 | 59.44415067 |
| ENSMUSG00000029684 | 79.94205919 | 117.5593142 | 92.50578726 | 148.2042117 | 108.8615771 |
| ENSMUSG00000029685 | 21.22355554 | 47.30197258 | 28.24604191 | 37.85651059 | 43.68786977 |
| ENSMUSG00000029686 | 24.05336294 | 23.65098629 | 26.83373982 | 86.18397091 | 66.60609653 |
| ENSMUSG00000029695 | 8.489422215 | 9.738641413 | 9.886114669 | 5.638203705 | 12.89150255 |
| ENSMUSG00000029699 | 8.489422215 | 8.347406925 | 6.35535943  | 8.860034393 | 9.310529622 |
| ENSMUSG00000029700 | 11.31922962 | 11.82549314 | 7.767661525 | 1.610915344 | 12.17530797 |
| ENSMUSG00000029701 | 35.37259256 | 35.47647943 | 47.3121202  | 58.79841006 | 45.83645353 |
| ENSMUSG00000029703 | 67.20792587 | 82.77845201 | 61.43514116 | 60.40932541 | 73.76804239 |
| ENSMUSG00000029705 | 120.9742666 | 127.2979556 | 133.462548  | 71.68573282 | 72.33565322 |
| ENSMUSG00000029706 | 9.904325918 | 5.56493795  | 7.061510478 | 6.443661377 | 10.7429188  |

|                    |             |             |             |             |             |
|--------------------|-------------|-------------|-------------|-------------|-------------|
| ENSMUSG00000029710 | 5.65961481  | 6.956172438 | 5.649208382 | 6.443661377 | 6.445751277 |
| ENSMUSG00000029711 | 0           | 0           | 0           | 0           | 0           |
| ENSMUSG00000029712 | 4.952162959 | 12.52111039 | 7.061510478 | 8.860034393 | 10.7429188  |
| ENSMUSG00000029713 | 0.707451851 | 2.086851731 | 0           | 0           | 0.716194586 |
| ENSMUSG00000029714 | 79.94205919 | 95.2995624  | 120.0456781 | 81.35122488 | 70.90326405 |
| ENSMUSG00000029716 | 7.074518513 | 8.347406925 | 7.061510478 | 5.638203705 | 5.729556691 |
| ENSMUSG00000029718 | 9.196874066 | 11.82549314 | 8.473812573 | 8.860034393 | 7.87814045  |
| ENSMUSG00000029720 | 1.414903703 | 1.391234488 | 2.824604191 | 1.610915344 | 2.148583759 |
| ENSMUSG00000029722 | 28.29807405 | 27.82468975 | 30.36449505 | 43.49471429 | 35.09353473 |
| ENSMUSG00000029723 | 53.7663407  | 85.56092098 | 94.6242404  | 122.4295662 | 100.9834367 |
| ENSMUSG00000029725 | 29.0055259  | 32.69401046 | 41.66291182 | 34.6346799  | 37.95831308 |
| ENSMUSG00000029726 | 50.93653329 | 59.82308296 | 70.61510478 | 137.7332619 | 101.6996313 |
| ENSMUSG00000029729 | 92.67619252 | 112.6899935 | 109.4534124 | 134.5114312 | 122.4692743 |
| ENSMUSG00000029730 | 19.80865184 | 38.95456565 | 28.95219296 | 115.1804471 | 90.24051788 |
| ENSMUSG00000029735 | 6.367066661 | 15.99919661 | 17.65377619 | 11.27640741 | 17.18867007 |
| ENSMUSG00000029736 | 7.781970364 | 10.43425866 | 6.35535943  | 3.221830688 | 10.02672421 |
| ENSMUSG00000029752 | 7.781970364 | 6.260555194 | 10.59226572 | 23.35827249 | 20.769643   |
| ENSMUSG00000029754 | 7.781970364 | 4.173703463 | 5.649208382 | 6.443661377 | 2.864778345 |
| ENSMUSG00000029755 | 10.61177777 | 4.869320706 | 8.473812573 | 8.860034393 | 6.445751277 |
| ENSMUSG00000029757 | 12.73413332 | 5.56493795  | 9.179963621 | 4.832746033 | 10.02672421 |
| ENSMUSG00000029761 | 10.61177777 | 8.347406925 | 7.767661525 | 6.443661377 | 7.161945863 |
| ENSMUSG00000029763 | 38.90985182 | 70.95295887 | 62.84744325 | 63.6311561  | 58.72795608 |
| ENSMUSG00000029765 | 4.952162959 | 6.956172438 | 3.530755239 | 4.02728836  | 8.594335036 |
| ENSMUSG00000029767 | 62.96321476 | 82.08283477 | 88.97503202 | 88.60034393 | 70.18706946 |
| ENSMUSG00000029769 | 0           | 0           | 0           | 0.805457672 | 0           |
| ENSMUSG00000029771 | 51.64398514 | 73.73542784 | 91.09348516 | 160.2860767 | 128.9150255 |
| ENSMUSG00000029772 | 21.22355554 | 27.12907251 | 15.53532305 | 32.21830688 | 32.94495097 |
| ENSMUSG00000029775 | 21.22355554 | 52.17129328 | 36.71985448 | 36.24559524 | 30.08017263 |
| ENSMUSG00000029776 | 5.65961481  | 4.869320706 | 4.943057334 | 2.416373016 | 5.013362104 |
| ENSMUSG00000029777 | 60.13340736 | 112.6899935 | 70.61510478 | 127.2623122 | 130.3474147 |
| ENSMUSG00000029778 | 7.074518513 | 2.086851731 | 7.767661525 | 4.832746033 | 4.297167518 |
| ENSMUSG00000029780 | 41.73965922 | 79.99598303 | 65.67204744 | 80.54576721 | 73.76804239 |
| ENSMUSG00000029782 | 24.05336294 | 34.08524495 | 31.0706461  | 53.96566403 | 32.94495097 |
| ENSMUSG00000029784 | 16.27139258 | 22.2597518  | 31.77679715 | 42.68925662 | 43.68786977 |
| ENSMUSG00000029787 | 70.03773327 | 116.1680797 | 80.50121945 | 126.4568545 | 91.67290705 |
| ENSMUSG00000029788 | 11.31922962 | 9.043024169 | 6.35535943  | 4.832746033 | 7.87814045  |
| ENSMUSG00000029790 | 14.14903703 | 8.347406925 | 12.00456781 | 24.96918783 | 15.04008631 |
| ENSMUSG00000029798 | 16.97884443 | 28.52030699 | 21.18453143 | 56.38203705 | 49.41742646 |
| ENSMUSG00000029802 | 12.02668147 | 5.56493795  | 4.236906287 | 9.665492065 | 3.580972932 |
| ENSMUSG00000029804 | 14.85648888 | 26.43345526 | 21.18453143 | 25.77464551 | 13.60769714 |
| ENSMUSG00000029810 | 7.781970364 | 9.738641413 | 10.59226572 | 41.07834128 | 32.22875639 |
| ENSMUSG00000029811 | 2.829807405 | 5.56493795  | 2.118453143 | 5.638203705 | 2.864778345 |
| ENSMUSG00000029814 | 6.367066661 | 6.956172438 | 8.473812573 | 22.55281482 | 17.18867007 |

|                    |             |             |             |             |             |
|--------------------|-------------|-------------|-------------|-------------|-------------|
| ENSMUSG00000029815 | 78.52715549 | 146.7752384 | 114.3964697 | 106.3204127 | 108.8615771 |
| ENSMUSG00000029816 | 9.904325918 | 6.260555194 | 9.179963621 | 6.443661377 | 5.013362104 |
| ENSMUSG00000029817 | 89.13893326 | 119.6461659 | 88.26888097 | 189.2825529 | 128.9150255 |
| ENSMUSG00000029821 | 8.489422215 | 2.782468975 | 7.767661525 | 5.638203705 | 7.161945863 |
| ENSMUSG00000029822 | 7.074518513 | 5.56493795  | 7.767661525 | 5.638203705 | 9.310529622 |
| ENSMUSG00000029823 | 36.78749627 | 69.56172438 | 48.7244223  | 148.2042117 | 118.8883013 |
| ENSMUSG00000029826 | 120.2668147 | 134.9497453 | 120.0456781 | 288.3538466 | 220.5879326 |
| ENSMUSG00000029830 | 6.367066661 | 4.173703463 | 7.061510478 | 4.02728836  | 5.013362104 |
| ENSMUSG00000029832 | 4.952162959 | 13.21672763 | 4.236906287 | 3.221830688 | 5.013362104 |
| ENSMUSG00000029833 | 25.46826665 | 36.17209668 | 36.71985448 | 100.682209  | 73.05184781 |
| ENSMUSG00000029836 | 95.50599992 | 158.6007316 | 119.3395271 | 351.179545  | 249.235716  |
| ENSMUSG00000029838 | 9.196874066 | 6.956172438 | 7.061510478 | 4.832746033 | 6.445751277 |
| ENSMUSG00000029847 | 12.73413332 | 6.260555194 | 4.943057334 | 6.443661377 | 10.02672421 |
| ENSMUSG00000029848 | 9.196874066 | 3.478086219 | 5.649208382 | 5.638203705 | 5.013362104 |
| ENSMUSG00000029860 | 9.196874066 | 17.39043109 | 14.12302096 | 10.47094974 | 11.45911338 |
| ENSMUSG00000029861 | 5.65961481  | 6.956172438 | 6.35535943  | 7.249119049 | 6.445751277 |
| ENSMUSG00000029862 | 4.244711108 | 9.043024169 | 9.886114669 | 8.054576721 | 7.87814045  |
| ENSMUSG00000029863 | 75.69734809 | 101.5601176 | 88.97503202 | 119.2077355 | 99.5510475  |
| ENSMUSG00000029866 | 5.65961481  | 6.260555194 | 12.00456781 | 4.02728836  | 7.87814045  |
| ENSMUSG00000029868 | 6.367066661 | 8.347406925 | 3.530755239 | 3.221830688 | 10.7429188  |
| ENSMUSG00000029878 | 9.196874066 | 9.043024169 | 5.649208382 | 8.860034393 | 8.594335036 |
| ENSMUSG00000029883 | 4.952162959 | 8.347406925 | 10.59226572 | 5.638203705 | 3.580972932 |
| ENSMUSG00000029910 | 10.61177777 | 13.21672763 | 16.94762515 | 73.29664816 | 63.74131818 |
| ENSMUSG00000029911 | 23.34591109 | 41.73703463 | 36.71985448 | 56.38203705 | 48.70123187 |
| ENSMUSG00000029913 | 6.367066661 | 4.173703463 | 7.767661525 | 8.054576721 | 10.02672421 |
| ENSMUSG00000029915 | 8.489422215 | 9.043024169 | 7.767661525 | 5.638203705 | 7.87814045  |
| ENSMUSG00000029916 | 20.51610369 | 21.56413456 | 18.35992724 | 41.88379895 | 38.67450766 |
| ENSMUSG00000029917 | 4.244711108 | 5.56493795  | 6.35535943  | 5.638203705 | 5.013362104 |
| ENSMUSG00000029922 | 31.83533331 | 48.69320706 | 38.13215658 | 45.91108731 | 43.68786977 |
| ENSMUSG00000029924 | 32.54278516 | 61.21431745 | 46.60596915 | 40.2728836  | 36.5259239  |
| ENSMUSG00000029925 | 24.76081479 | 39.6501829  | 40.95676077 | 101.4876667 | 89.52432329 |
| ENSMUSG00000029992 | 30.4204296  | 46.60635533 | 42.36906287 | 70.07481747 | 60.16034525 |
| ENSMUSG00000029993 | 27.5906222  | 36.17209668 | 34.60140134 | 46.71654498 | 42.25548059 |
| ENSMUSG00000029994 | 7.781970364 | 6.956172438 | 8.473812573 | 6.443661377 | 10.02672421 |
| ENSMUSG00000029998 | 14.14903703 | 20.86851731 | 21.89068248 | 19.33098413 | 15.7562809  |
| ENSMUSG00000029999 | 6.367066661 | 6.956172438 | 8.473812573 | 3.221830688 | 5.729556691 |
| ENSMUSG00000030000 | 7.781970364 | 6.260555194 | 9.179963621 | 5.638203705 | 9.310529622 |
| ENSMUSG00000030002 | 139.3680147 | 160.6875833 | 147.585569  | 185.2552646 | 156.8466144 |
| ENSMUSG00000030016 | 92.67619252 | 118.9505487 | 104.5103551 | 124.0404815 | 116.7397176 |
| ENSMUSG00000030020 | 14.14903703 | 9.738641413 | 4.236906287 | 4.832746033 | 7.161945863 |
| ENSMUSG00000030022 | 9.196874066 | 6.260555194 | 5.649208382 | 7.249119049 | 4.297167518 |
| ENSMUSG00000030029 | 4.952162959 | 9.043024169 | 7.061510478 | 5.638203705 | 5.013362104 |
| ENSMUSG00000030031 | 12.02668147 | 27.12907251 | 19.77222934 | 27.38556085 | 28.64778345 |

|                    |             |             |             |             |             |
|--------------------|-------------|-------------|-------------|-------------|-------------|
| ENSMUSG00000030032 | 12.73413332 | 9.738641413 | 9.179963621 | 6.443661377 | 9.310529622 |
| ENSMUSG00000030034 | 25.46826665 | 33.3896277  | 31.0706461  | 21.74735715 | 17.90486466 |
| ENSMUSG00000030035 | 31.12788146 | 36.86771392 | 41.66291182 | 22.55281482 | 23.63442135 |
| ENSMUSG00000030042 | 18.39374813 | 29.91154148 | 22.59683353 | 42.68925662 | 30.08017263 |
| ENSMUSG00000030043 | 6.367066661 | 4.173703463 | 11.29841676 | 5.638203705 | 5.013362104 |
| ENSMUSG00000030045 | 19.80865184 | 34.08524495 | 21.89068248 | 56.38203705 | 46.55264811 |
| ENSMUSG00000030047 | 124.5115258 | 138.4278315 | 110.8657145 | 178.0061455 | 118.8883013 |
| ENSMUSG00000030051 | 12.02668147 | 21.56413456 | 19.06607829 | 25.77464551 | 23.63442135 |
| ENSMUSG00000030055 | 43.15456293 | 35.47647943 | 39.54445867 | 68.46390213 | 71.61945863 |
| ENSMUSG00000030057 | 159.1766665 | 208.6851731 | 155.3532305 | 322.9885265 | 248.5195215 |
| ENSMUSG00000030058 | 45.98437033 | 59.82308296 | 50.13672439 | 119.2077355 | 96.68626916 |
| ENSMUSG00000030059 | 101.8730666 | 157.9051143 | 134.8748501 | 167.5351958 | 126.7664418 |
| ENSMUSG00000030060 | 12.73413332 | 21.56413456 | 21.89068248 | 15.30369577 | 10.7429188  |
| ENSMUSG00000030061 | 77.81970364 | 101.5601176 | 103.098053  | 91.01671695 | 102.4158258 |
| ENSMUSG00000030064 | 9.196874066 | 4.869320706 | 9.886114669 | 4.02728836  | 7.87814045  |
| ENSMUSG00000030067 | 12.73413332 | 20.17290007 | 13.41686991 | 12.88732275 | 10.7429188  |
| ENSMUSG00000030068 | 0           | 0           | 0           | 0           | 0           |
| ENSMUSG00000030069 | 8.489422215 | 4.173703463 | 6.35535943  | 4.832746033 | 3.580972932 |
| ENSMUSG00000030075 | 11.31922962 | 8.347406925 | 7.061510478 | 5.638203705 | 6.445751277 |
| ENSMUSG00000030077 | 9.196874066 | 6.260555194 | 9.179963621 | 5.638203705 | 9.310529622 |
| ENSMUSG00000030079 | 29.0055259  | 55.6493795  | 32.4829482  | 107.1258704 | 87.37573953 |
| ENSMUSG00000030082 | 46.69182218 | 80.69160028 | 69.90895373 | 170.7570265 | 140.3741389 |
| ENSMUSG00000030083 | 21.22355554 | 25.04222078 | 31.77679715 | 16.10915344 | 15.7562809  |
| ENSMUSG00000030084 | 10.61177777 | 5.56493795  | 7.061510478 | 23.35827249 | 12.89150255 |
| ENSMUSG00000030086 | 4.244711108 | 9.043024169 | 4.943057334 | 12.08186508 | 6.445751277 |
| ENSMUSG00000030087 | 9.904325918 | 4.173703463 | 7.061510478 | 6.443661377 | 7.161945863 |
| ENSMUSG00000030088 | 7.781970364 | 4.869320706 | 3.530755239 | 6.443661377 | 7.161945863 |
| ENSMUSG00000030089 | 4.952162959 | 7.651789682 | 12.71071886 | 4.02728836  | 7.161945863 |
| ENSMUSG00000030091 | 47.39927403 | 70.95295887 | 77.67661525 | 186.8661799 | 160.4275873 |
| ENSMUSG00000030092 | 7.781970364 | 10.43425866 | 5.649208382 | 2.416373016 | 5.729556691 |
| ENSMUSG00000030095 | 47.39927403 | 78.60474855 | 76.26431316 | 111.9586164 | 108.8615771 |
| ENSMUSG00000030098 | 7.074518513 | 9.738641413 | 12.00456781 | 7.249119049 | 7.161945863 |
| ENSMUSG00000030101 | 49.52162959 | 94.60394515 | 79.7950684  | 48.32746033 | 44.40406435 |
| ENSMUSG00000030102 | 50.22908144 | 66.08363816 | 61.43514116 | 91.82217462 | 62.30892901 |
| ENSMUSG00000030103 | 12.73413332 | 17.39043109 | 17.65377619 | 70.07481747 | 59.44415067 |
| ENSMUSG00000030107 | 17.68629628 | 25.73783802 | 19.77222934 | 70.88027514 | 43.68786977 |
| ENSMUSG00000030108 | 9.904325918 | 4.173703463 | 8.473812573 | 5.638203705 | 7.87814045  |
| ENSMUSG00000030109 | 6.367066661 | 10.43425866 | 5.649208382 | 4.02728836  | 5.013362104 |
| ENSMUSG00000030110 | 4.952162959 | 7.651789682 | 3.530755239 | 7.249119049 | 5.729556691 |
| ENSMUSG00000030116 | 6.367066661 | 9.043024169 | 5.649208382 | 5.638203705 | 7.161945863 |
| ENSMUSG00000030120 | 23.34591109 | 43.82388636 | 28.24604191 | 45.10562964 | 41.53928601 |
| ENSMUSG00000030122 | 7.781970364 | 19.47728283 | 15.53532305 | 9.665492065 | 13.60769714 |
| ENSMUSG00000030123 | 6.367066661 | 18.08604834 | 17.65377619 | 78.93485187 | 72.33565322 |

|                    |             |             |             |             |             |
|--------------------|-------------|-------------|-------------|-------------|-------------|
| ENSMUSG00000030125 | 9.196874066 | 15.30357936 | 10.59226572 | 8.054576721 | 8.594335036 |
| ENSMUSG00000030126 | 26.1757185  | 45.21512085 | 40.95676077 | 48.32746033 | 47.2688427  |
| ENSMUSG00000030127 | 17.68629628 | 34.78086219 | 34.60140134 | 87.79488626 | 78.7814045  |
| ENSMUSG00000030134 | 5.65961481  | 9.043024169 | 3.530755239 | 4.02728836  | 10.02672421 |
| ENSMUSG00000030142 | 9.196874066 | 6.956172438 | 6.35535943  | 6.443661377 | 2.148583759 |
| ENSMUSG00000030145 | 4.952162959 | 4.173703463 | 8.473812573 | 6.443661377 | 7.87814045  |
| ENSMUSG00000030147 | 6.367066661 | 7.651789682 | 9.179963621 | 8.860034393 | 9.310529622 |
| ENSMUSG00000030148 | 4.952162959 | 9.043024169 | 4.943057334 | 4.832746033 | 9.310529622 |
| ENSMUSG00000030149 | 6.367066661 | 9.738641413 | 5.649208382 | 1.610915344 | 7.161945863 |
| ENSMUSG00000030154 | 14.85648888 | 11.82549314 | 7.061510478 | 2.416373016 | 10.7429188  |
| ENSMUSG00000030158 | 6.367066661 | 8.347406925 | 6.35535943  | 8.860034393 | 10.7429188  |
| ENSMUSG00000030159 | 7.781970364 | 9.738641413 | 5.649208382 | 6.443661377 | 5.729556691 |
| ENSMUSG00000030162 | 4.244711108 | 8.347406925 | 4.236906287 | 9.665492065 | 5.013362104 |
| ENSMUSG00000030165 | 6.367066661 | 8.347406925 | 4.236906287 | 6.443661377 | 5.013362104 |
| ENSMUSG00000030166 | 50.22908144 | 68.86610713 | 64.25974535 | 66.85298678 | 65.17370736 |
| ENSMUSG00000030167 | 7.074518513 | 8.347406925 | 8.473812573 | 3.221830688 | 9.310529622 |
| ENSMUSG00000030168 | 7.781970364 | 9.043024169 | 7.061510478 | 5.638203705 | 9.310529622 |
| ENSMUSG00000030170 | 2.829807405 | 7.651789682 | 8.473812573 | 7.249119049 | 5.013362104 |
| ENSMUSG00000030172 | 13.44158517 | 20.86851731 | 14.12302096 | 11.27640741 | 12.89150255 |
| ENSMUSG00000030173 | 4.244711108 | 4.869320706 | 10.59226572 | 6.443661377 | 6.445751277 |
| ENSMUSG00000030177 | 94.79854807 | 137.036597  | 123.5764334 | 213.4462831 | 160.4275873 |
| ENSMUSG00000030180 | 85.601674   | 141.2103005 | 111.5718655 | 200.5589604 | 158.2790036 |
| ENSMUSG00000030187 | 8.489422215 | 6.260555194 | 6.35535943  | 4.832746033 | 8.594335036 |
| ENSMUSG00000030188 | 13.44158517 | 28.52030699 | 21.89068248 | 28.19101852 | 25.78300511 |
| ENSMUSG00000030189 | 31.12788146 | 53.56252777 | 60.72899011 | 136.1223466 | 120.3206905 |
| ENSMUSG00000030199 | 22.63845924 | 24.34660353 | 26.83373982 | 101.4876667 | 63.0251236  |
| ENSMUSG00000030200 | 12.73413332 | 4.173703463 | 9.179963621 | 5.638203705 | 10.7429188  |
| ENSMUSG00000030201 | 79.23460734 | 123.8198694 | 118.633376  | 111.1531587 | 96.68626916 |
| ENSMUSG00000030203 | 19.10119998 | 40.34580014 | 24.00913562 | 29.80193387 | 37.24211849 |
| ENSMUSG00000030204 | 58.0110518  | 67.47487265 | 67.08434954 | 114.3749894 | 93.10529622 |
| ENSMUSG00000030205 | 8.489422215 | 6.956172438 | 6.35535943  | 8.860034393 | 6.445751277 |
| ENSMUSG00000030206 | 9.196874066 | 11.82549314 | 7.061510478 | 4.832746033 | 5.013362104 |
| ENSMUSG00000030207 | 9.904325918 | 9.043024169 | 7.767661525 | 7.249119049 | 10.7429188  |
| ENSMUSG00000030208 | 4.952162959 | 5.56493795  | 10.59226572 | 8.054576721 | 6.445751277 |
| ENSMUSG00000030209 | 9.196874066 | 6.260555194 | 8.473812573 | 7.249119049 | 7.87814045  |
| ENSMUSG00000030213 | 54.47379255 | 72.34419335 | 58.61053696 | 74.9075635  | 59.44415067 |
| ENSMUSG00000030216 | 49.52162959 | 79.99598303 | 73.43970897 | 152.2315    | 128.198831  |
| ENSMUSG00000030219 | 16.97884443 | 15.99919661 | 28.24604191 | 13.69278043 | 20.05344842 |
| ENSMUSG00000030220 | 104.702874  | 121.0374004 | 129.9317928 | 187.6716376 | 158.2790036 |
| ENSMUSG00000030222 | 11.31922962 | 8.347406925 | 7.061510478 | 5.638203705 | 3.580972932 |
| ENSMUSG00000030223 | 7.074518513 | 5.56493795  | 9.179963621 | 9.665492065 | 4.297167518 |
| ENSMUSG00000030224 | 92.67619252 | 110.6031418 | 108.0411103 | 200.5589604 | 171.8867007 |
| ENSMUSG00000030225 | 25.46826665 | 51.47567604 | 59.31668801 | 30.60739154 | 33.66114556 |

|                    |             |             |             |             |             |
|--------------------|-------------|-------------|-------------|-------------|-------------|
| ENSMUSG00000030226 | 12.73413332 | 11.1298759  | 4.943057334 | 6.443661377 | 7.87814045  |
| ENSMUSG00000030228 | 9.904325918 | 11.82549314 | 7.767661525 | 4.02728836  | 6.445751277 |
| ENSMUSG00000030230 | 7.074518513 | 7.651789682 | 6.35535943  | 1.610915344 | 5.013362104 |
| ENSMUSG00000030231 | 8.489422215 | 5.56493795  | 3.530755239 | 8.860034393 | 10.7429188  |
| ENSMUSG00000030232 | 26.1757185  | 36.17209668 | 30.36449505 | 109.5422434 | 95.25387998 |
| ENSMUSG00000030235 | 13.44158517 | 8.347406925 | 12.00456781 | 6.443661377 | 9.310529622 |
| ENSMUSG00000030236 | 12.02668147 | 11.1298759  | 7.061510478 | 4.02728836  | 6.445751277 |
| ENSMUSG00000030237 | 3.537259256 | 6.956172438 | 4.236906287 | 1.610915344 | 5.013362104 |
| ENSMUSG00000030243 | 96.21345177 | 150.2533247 | 127.8133396 | 169.9515688 | 133.9283876 |
| ENSMUSG00000030245 | 109.6550369 | 154.4270281 | 129.9317928 | 175.5897725 | 147.5360848 |
| ENSMUSG00000030246 | 9.196874066 | 11.1298759  | 2.824604191 | 4.02728836  | 5.729556691 |
| ENSMUSG00000030249 | 9.904325918 | 4.173703463 | 9.886114669 | 8.054576721 | 4.297167518 |
| ENSMUSG00000030254 | 22.63845924 | 40.34580014 | 43.07521391 | 86.98942859 | 78.06520991 |
| ENSMUSG00000030255 | 8.489422215 | 10.43425866 | 16.2414741  | 12.08186508 | 17.18867007 |
| ENSMUSG00000030256 | 13.44158517 | 16.69481385 | 19.77222934 | 44.30017197 | 29.36397804 |
| ENSMUSG00000030257 | 14.14903703 | 11.1298759  | 5.649208382 | 8.860034393 | 10.02672421 |
| ENSMUSG00000030259 | 4.244711108 | 4.173703463 | 3.530755239 | 4.832746033 | 6.445751277 |
| ENSMUSG00000030263 | 8.489422215 | 17.39043109 | 13.41686991 | 16.91461111 | 17.18867007 |
| ENSMUSG00000030264 | 24.05336294 | 34.08524495 | 26.12758877 | 115.1804471 | 92.38910164 |
| ENSMUSG00000030265 | 30.4204296  | 40.34580014 | 39.54445867 | 99.07129367 | 85.22715578 |
| ENSMUSG00000030268 | 18.39374813 | 19.47728283 | 17.65377619 | 41.88379895 | 35.09353473 |
| ENSMUSG00000030269 | 103.2879703 | 117.5593142 | 119.3395271 | 173.9788572 | 123.9016634 |
| ENSMUSG00000030270 | 7.781970364 | 2.782468975 | 9.886114669 | 7.249119049 | 8.594335036 |
| ENSMUSG00000030271 | 17.68629628 | 24.34660353 | 24.71528667 | 32.21830688 | 37.95831308 |
| ENSMUSG00000030272 | 6.367066661 | 7.651789682 | 8.473812573 | 8.860034393 | 10.7429188  |
| ENSMUSG00000030276 | 12.02668147 | 12.52111039 | 14.12302096 | 13.69278043 | 14.32389173 |
| ENSMUSG00000030278 | 13.44158517 | 8.347406925 | 2.118453143 | 8.054576721 | 10.7429188  |
| ENSMUSG00000030279 | 31.83533331 | 47.30197258 | 52.25517753 | 31.41284921 | 38.67450766 |
| ENSMUSG00000030281 | 5.65961481  | 4.869320706 | 7.061510478 | 5.638203705 | 9.310529622 |
| ENSMUSG00000030282 | 43.86201478 | 60.51870021 | 69.20280268 | 43.49471429 | 54.43078856 |
| ENSMUSG00000030284 | 11.31922962 | 23.65098629 | 8.473812573 | 19.33098413 | 20.769643   |
| ENSMUSG00000030287 | 58.0110518  | 63.30116918 | 62.84744325 | 54.7711217  | 58.72795608 |
| ENSMUSG00000030291 | 49.52162959 | 75.12666233 | 62.1412922  | 51.54929101 | 70.90326405 |
| ENSMUSG00000030292 | 4.952162959 | 7.651789682 | 4.236906287 | 4.832746033 | 8.594335036 |
| ENSMUSG00000030298 | 93.38364437 | 140.5146832 | 133.462548  | 173.9788572 | 147.5360848 |
| ENSMUSG00000030301 | 9.904325918 | 9.738641413 | 15.53532305 | 8.860034393 | 12.17530797 |
| ENSMUSG00000030302 | 9.196874066 | 3.478086219 | 3.530755239 | 8.860034393 | 8.594335036 |
| ENSMUSG00000030303 | 7.781970364 | 6.260555194 | 7.767661525 | 7.249119049 | 5.013362104 |
| ENSMUSG00000030304 | 65.08557032 | 99.47326586 | 86.85657888 | 146.5932963 | 113.1587446 |
| ENSMUSG00000030306 | 4.952162959 | 3.478086219 | 2.824604191 | 4.832746033 | 8.594335036 |
| ENSMUSG00000030309 | 8.489422215 | 6.956172438 | 7.767661525 | 5.638203705 | 7.161945863 |
| ENSMUSG00000030310 | 8.489422215 | 4.869320706 | 7.061510478 | 4.02728836  | 5.013362104 |
| ENSMUSG00000030313 | 96.21345177 | 122.4286349 | 119.3395271 | 70.07481747 | 65.17370736 |

|                    |             |             |             |             |             |
|--------------------|-------------|-------------|-------------|-------------|-------------|
| ENSMUSG00000030314 | 32.54278516 | 43.82388636 | 43.07521391 | 28.19101852 | 32.22875639 |
| ENSMUSG00000030315 | 5.65961481  | 8.347406925 | 10.59226572 | 20.94189947 | 13.60769714 |
| ENSMUSG00000030316 | 28.29807405 | 42.43265187 | 37.42600553 | 48.32746033 | 49.41742646 |
| ENSMUSG00000030321 | 12.02668147 | 14.60796212 | 4.943057334 | 5.638203705 | 8.594335036 |
| ENSMUSG00000030322 | 41.73965922 | 45.91073809 | 49.43057334 | 77.32393652 | 72.33565322 |
| ENSMUSG00000030323 | 33.95768886 | 49.38882431 | 46.60596915 | 81.35122488 | 50.84981563 |
| ENSMUSG00000030325 | 7.074518513 | 7.651789682 | 8.473812573 | 6.443661377 | 12.17530797 |
| ENSMUSG00000030329 | 9.904325918 | 11.82549314 | 8.473812573 | 4.832746033 | 6.445751277 |
| ENSMUSG00000030330 | 46.69182218 | 63.99678643 | 37.42600553 | 42.68925662 | 54.43078856 |
| ENSMUSG00000030336 | 9.904325918 | 10.43425866 | 9.179963621 | 9.665492065 | 7.87814045  |
| ENSMUSG00000030337 | 67.20792587 | 105.7338211 | 86.85657888 | 43.49471429 | 47.2688427  |
| ENSMUSG00000030340 | 9.904325918 | 8.347406925 | 7.061510478 | 2.416373016 | 9.310529622 |
| ENSMUSG00000030341 | 9.904325918 | 9.738641413 | 5.649208382 | 5.638203705 | 7.161945863 |
| ENSMUSG00000030344 | 8.489422215 | 6.956172438 | 10.59226572 | 8.860034393 | 8.594335036 |
| ENSMUSG00000030345 | 7.074518513 | 6.260555194 | 7.767661525 | 8.054576721 | 10.7429188  |
| ENSMUSG00000030346 | 25.46826665 | 32.69401046 | 31.0706461  | 80.54576721 | 68.75468029 |
| ENSMUSG00000030352 | 3.537259256 | 6.260555194 | 8.473812573 | 4.832746033 | 6.445751277 |
| ENSMUSG00000030353 | 4.952162959 | 9.043024169 | 7.767661525 | 1.610915344 | 6.445751277 |
| ENSMUSG00000030357 | 33.25023701 | 50.08444155 | 45.19366706 | 121.6241085 | 85.94335036 |
| ENSMUSG00000030359 | 7.074518513 | 9.043024169 | 8.473812573 | 6.443661377 | 8.594335036 |
| ENSMUSG00000030361 | 9.904325918 | 9.738641413 | 6.35535943  | 7.249119049 | 7.161945863 |
| ENSMUSG00000030365 | 234.8740146 | 267.1170216 | 244.3282625 | 573.4858625 | 390.3260496 |
| ENSMUSG00000030366 | 12.02668147 | 7.651789682 | 7.061510478 | 6.443661377 | 7.161945863 |
| ENSMUSG00000030368 | 8.489422215 | 6.260555194 | 7.767661525 | 5.638203705 | 7.87814045  |
| ENSMUSG00000030374 | 87.01657771 | 166.9481385 | 144.0548137 | 169.1461111 | 144.6713064 |
| ENSMUSG00000030378 | 14.14903703 | 9.043024169 | 6.35535943  | 8.054576721 | 6.445751277 |
| ENSMUSG00000030380 | 5.65961481  | 10.43425866 | 7.767661525 | 6.443661377 | 10.7429188  |
| ENSMUSG00000030382 | 9.904325918 | 12.52111039 | 9.886114669 | 7.249119049 | 8.594335036 |
| ENSMUSG00000030386 | 30.4204296  | 56.34499675 | 50.84287544 | 33.82922223 | 31.5125618  |
| ENSMUSG00000030400 | 38.20239997 | 59.82308296 | 50.13672439 | 78.12939419 | 75.91662615 |
| ENSMUSG00000030401 | 9.196874066 | 7.651789682 | 7.767661525 | 8.860034393 | 7.161945863 |
| ENSMUSG00000030409 | 5.65961481  | 2.782468975 | 6.35535943  | 0.805457672 | 6.445751277 |
| ENSMUSG00000030410 | 4.952162959 | 9.738641413 | 4.236906287 | 1.610915344 | 7.87814045  |
| ENSMUSG00000030411 | 11.31922962 | 6.956172438 | 7.061510478 | 4.02728836  | 9.310529622 |
| ENSMUSG00000030417 | 13.44158517 | 27.82468975 | 23.30298458 | 59.60386773 | 57.29556691 |
| ENSMUSG00000030427 | 9.904325918 | 16.69481385 | 17.65377619 | 6.443661377 | 7.161945863 |
| ENSMUSG00000030428 | 9.196874066 | 6.260555194 | 8.473812573 | 3.221830688 | 5.729556691 |
| ENSMUSG00000030432 | 30.4204296  | 41.73703463 | 36.01370344 | 193.3098413 | 116.023523  |
| ENSMUSG00000030433 | 7.074518513 | 5.56493795  | 9.886114669 | 7.249119049 | 7.161945863 |
| ENSMUSG00000030435 | 92.67619252 | 103.6469693 | 95.33039145 | 236.8045556 | 181.1972303 |
| ENSMUSG00000030443 | 11.31922962 | 17.39043109 | 8.473812573 | 11.27640741 | 8.594335036 |
| ENSMUSG00000030446 | 20.51610369 | 49.38882431 | 37.42600553 | 6.443661377 | 27.93158887 |
| ENSMUSG00000030447 | 26.1757185  | 50.08444155 | 23.30298458 | 32.21830688 | 25.78300511 |



|                    |             |             |             |             |             |
|--------------------|-------------|-------------|-------------|-------------|-------------|
| ENSMUSG00000030450 | 8.489422215 | 6.956172438 | 11.29841676 | 0.805457672 | 9.310529622 |
| ENSMUSG00000030451 | 38.90985182 | 82.08283477 | 57.19823487 | 72.49119049 | 65.88990194 |
| ENSMUSG00000030452 | 60.84085921 | 77.21351406 | 68.49665163 | 165.9242805 | 135.3607768 |
| ENSMUSG00000030465 | 21.93100739 | 29.21592424 | 37.42600553 | 4.02728836  | 12.89150255 |
| ENSMUSG00000030468 | 123.804074  | 148.1664729 | 118.633376  | 112.7640741 | 114.5911338 |
| ENSMUSG00000030469 | 24.76081479 | 54.95376226 | 36.71985448 | 49.93837567 | 50.13362104 |
| ENSMUSG00000030470 | 13.44158517 | 11.1298759  | 8.473812573 | 9.665492065 | 5.729556691 |
| ENSMUSG00000030471 | 70.74518513 | 98.08203137 | 80.50121945 | 65.24207144 | 83.7947666  |
| ENSMUSG00000030483 | 9.904325918 | 6.260555194 | 9.179963621 | 8.860034393 | 5.729556691 |
| ENSMUSG00000030491 | 14.14903703 | 7.651789682 | 8.473812573 | 5.638203705 | 3.580972932 |
| ENSMUSG00000030492 | 8.489422215 | 4.869320706 | 4.943057334 | 4.832746033 | 10.7429188  |
| ENSMUSG00000030493 | 42.44711108 | 68.17048989 | 55.78593277 | 74.10210583 | 67.32229112 |
| ENSMUSG00000030494 | 4.952162959 | 9.043024169 | 11.29841676 | 7.249119049 | 3.580972932 |
| ENSMUSG00000030495 | 9.196874066 | 4.869320706 | 7.767661525 | 5.638203705 | 5.013362104 |
| ENSMUSG00000030498 | 17.68629628 | 29.21592424 | 27.53989086 | 42.68925662 | 32.22875639 |
| ENSMUSG00000030505 | 10.61177777 | 31.30277597 | 21.89068248 | 41.88379895 | 33.66114556 |
| ENSMUSG00000030509 | 21.22355554 | 25.73783802 | 32.4829482  | 27.38556085 | 40.10689684 |
| ENSMUSG00000030510 | 4.952162959 | 4.869320706 | 4.943057334 | 9.665492065 | 5.013362104 |
| ENSMUSG00000030512 | 67.91537772 | 89.73462445 | 93.91808935 | 195.7262143 | 148.968474  |
| ENSMUSG00000030513 | 5.65961481  | 6.956172438 | 7.767661525 | 8.860034393 | 3.580972932 |
| ENSMUSG00000030516 | 7.781970364 | 4.869320706 | 14.12302096 | 4.832746033 | 10.02672421 |
| ENSMUSG00000030518 | 9.196874066 | 4.869320706 | 9.886114669 | 7.249119049 | 5.013362104 |
| ENSMUSG00000030519 | 5.65961481  | 2.086851731 | 7.767661525 | 4.832746033 | 10.7429188  |
| ENSMUSG00000030521 | 43.15456293 | 98.77764862 | 74.85201106 | 168.3406535 | 129.6312201 |
| ENSMUSG00000030522 | 6.367066661 | 10.43425866 | 12.71071886 | 6.443661377 | 7.161945863 |
| ENSMUSG00000030523 | 7.781970364 | 5.56493795  | 8.473812573 | 2.416373016 | 7.161945863 |
| ENSMUSG00000030527 | 36.78749627 | 64.69240367 | 52.96132858 | 57.99295239 | 53.71459398 |
| ENSMUSG00000030528 | 35.37259256 | 38.95456565 | 40.25060972 | 100.682209  | 73.76804239 |
| ENSMUSG00000030530 | 3.537259256 | 6.260555194 | 10.59226572 | 9.665492065 | 9.310529622 |
| ENSMUSG00000030533 | 14.85648888 | 23.65098629 | 21.89068248 | 20.94189947 | 18.62105924 |
| ENSMUSG00000030534 | 50.22908144 | 72.34419335 | 59.31668801 | 74.10210583 | 79.49759908 |
| ENSMUSG00000030536 | 149.2723406 | 149.5577074 | 155.3532305 | 228.7499789 | 164.0085603 |
| ENSMUSG00000030538 | 101.1656147 | 137.7322143 | 130.6379438 | 127.2623122 | 97.40246374 |
| ENSMUSG00000030539 | 11.31922962 | 17.39043109 | 17.65377619 | 8.860034393 | 10.02672421 |
| ENSMUSG00000030541 | 32.54278516 | 41.73703463 | 50.13672439 | 34.6346799  | 31.5125618  |
| ENSMUSG00000030543 | 9.904325918 | 6.260555194 | 8.473812573 | 4.832746033 | 10.02672421 |
| ENSMUSG00000030546 | 6.367066661 | 6.260555194 | 5.649208382 | 7.249119049 | 5.013362104 |
| ENSMUSG00000030551 | 8.489422215 | 9.043024169 | 8.473812573 | 2.416373016 | 5.013362104 |
| ENSMUSG00000030554 | 7.074518513 | 9.738641413 | 6.35535943  | 4.02728836  | 4.297167518 |
| ENSMUSG00000030555 | 8.489422215 | 17.39043109 | 13.41686991 | 12.08186508 | 14.32389173 |
| ENSMUSG00000030556 | 19.80865184 | 40.34580014 | 24.71528667 | 28.19101852 | 25.78300511 |
| ENSMUSG00000030557 | 58.0110518  | 75.82227957 | 69.90895373 | 128.8732275 | 113.8749392 |
| ENSMUSG00000030560 | 145.0276295 | 155.8182626 | 145.4671158 | 204.5862487 | 137.5093606 |

|                    |             |             |             |             |             |
|--------------------|-------------|-------------|-------------|-------------|-------------|
| ENSMUSG00000030562 | 9.904325918 | 5.56493795  | 4.943057334 | 4.02728836  | 6.445751277 |
| ENSMUSG00000030577 | 164.8362813 | 199.642149  | 169.4762515 | 282.7156429 | 201.2506788 |
| ENSMUSG00000030579 | 14.14903703 | 27.82468975 | 18.35992724 | 10.47094974 | 7.87814045  |
| ENSMUSG00000030583 | 43.15456293 | 95.2995624  | 51.54902649 | 49.93837567 | 60.87653984 |
| ENSMUSG00000030584 | 7.074518513 | 4.869320706 | 9.886114669 | 11.27640741 | 8.594335036 |
| ENSMUSG00000030588 | 16.97884443 | 34.08524495 | 25.42143772 | 20.1364418  | 22.20203218 |
| ENSMUSG00000030589 | 9.904325918 | 6.956172438 | 8.473812573 | 12.08186508 | 9.310529622 |
| ENSMUSG00000030590 | 9.196874066 | 17.39043109 | 12.00456781 | 8.860034393 | 10.02672421 |
| ENSMUSG00000030591 | 43.15456293 | 59.82308296 | 68.49665163 | 156.2587884 | 96.68626916 |
| ENSMUSG00000030592 | 4.952162959 | 9.738641413 | 7.061510478 | 6.443661377 | 7.161945863 |
| ENSMUSG00000030595 | 96.92090362 | 137.7322143 | 120.7518292 | 99.87675134 | 104.5644096 |
| ENSMUSG00000030598 | 4.244711108 | 9.738641413 | 9.886114669 | 7.249119049 | 5.013362104 |
| ENSMUSG00000030600 | 15.56394073 | 8.347406925 | 10.59226572 | 8.054576721 | 7.161945863 |
| ENSMUSG00000030603 | 41.73965922 | 66.08363816 | 45.8998181  | 138.5387196 | 85.94335036 |
| ENSMUSG00000030605 | 8.489422215 | 5.56493795  | 9.886114669 | 4.832746033 | 10.02672421 |
| ENSMUSG00000030609 | 89.84638511 | 139.819066  | 123.5764334 | 252.1082514 | 216.2907651 |
| ENSMUSG00000030610 | 23.34591109 | 31.30277597 | 24.00913562 | 40.2728836  | 27.21539428 |
| ENSMUSG00000030611 | 43.15456293 | 82.08283477 | 61.43514116 | 112.7640741 | 87.37573953 |
| ENSMUSG00000030613 | 7.074518513 | 11.82549314 | 7.061510478 | 3.221830688 | 11.45911338 |
| ENSMUSG00000030615 | 19.10119998 | 26.43345526 | 26.83373982 | 31.41284921 | 25.78300511 |
| ENSMUSG00000030616 | 9.904325918 | 10.43425866 | 7.767661525 | 5.638203705 | 10.7429188  |
| ENSMUSG00000030617 | 13.44158517 | 5.56493795  | 9.886114669 | 8.054576721 | 3.580972932 |
| ENSMUSG00000030621 | 14.85648888 | 5.56493795  | 5.649208382 | 9.665492065 | 3.580972932 |
| ENSMUSG00000030629 | 109.6550369 | 211.4676421 | 170.1824025 | 169.9515688 | 138.2255552 |
| ENSMUSG00000030630 | 4.244711108 | 6.956172438 | 5.649208382 | 7.249119049 | 12.89150255 |
| ENSMUSG00000030636 | 14.85648888 | 13.91234488 | 6.35535943  | 4.832746033 | 8.594335036 |
| ENSMUSG00000030638 | 7.074518513 | 6.260555194 | 4.943057334 | 7.249119049 | 3.580972932 |
| ENSMUSG00000030641 | 21.22355554 | 31.99839321 | 27.53989086 | 51.54929101 | 44.40406435 |
| ENSMUSG00000030643 | 38.90985182 | 79.30036579 | 71.32125582 | 96.65492065 | 86.65954495 |
| ENSMUSG00000030649 | 0           | 0           | 0           | 1.610915344 | 0           |
| ENSMUSG00000030650 | 9.196874066 | 9.043024169 | 6.35535943  | 6.443661377 | 4.297167518 |
| ENSMUSG00000030652 | 10.61177777 | 13.91234488 | 7.061510478 | 19.33098413 | 17.18867007 |
| ENSMUSG00000030655 | 128.7562369 | 123.1242521 | 117.927225  | 218.2790291 | 169.738117  |
| ENSMUSG00000030657 | 67.20792587 | 104.3425866 | 90.38733411 | 128.0677699 | 135.3607768 |
| ENSMUSG00000030659 | 21.93100739 | 28.52030699 | 21.89068248 | 22.55281482 | 18.62105924 |
| ENSMUSG00000030663 | 78.52715549 | 141.9059177 | 110.8657145 | 123.2350238 | 121.7530797 |
| ENSMUSG00000030666 | 7.074518513 | 2.782468975 | 7.767661525 | 8.054576721 | 5.729556691 |
| ENSMUSG00000030669 | 4.952162959 | 7.651789682 | 5.649208382 | 7.249119049 | 7.87814045  |
| ENSMUSG00000030670 | 9.904325918 | 28.52030699 | 23.30298458 | 14.4982381  | 18.62105924 |
| ENSMUSG00000030672 | 14.14903703 | 25.73783802 | 22.59683353 | 9.665492065 | 20.05344842 |
| ENSMUSG00000030681 | 46.69182218 | 63.99678643 | 84.03197468 | 82.96214023 | 79.49759908 |
| ENSMUSG00000030683 | 6.367066661 | 4.173703463 | 7.061510478 | 8.860034393 | 7.87814045  |
| ENSMUSG00000030688 | 14.85648888 | 16.69481385 | 12.71071886 | 8.054576721 | 11.45911338 |

|                    |             |             |             |             |             |
|--------------------|-------------|-------------|-------------|-------------|-------------|
| ENSMUSG00000030689 | 21.93100739 | 47.99758982 | 38.83830763 | 137.7332619 | 99.5510475  |
| ENSMUSG00000030691 | 114.6071999 | 125.9067211 | 122.8702823 | 242.4427593 | 158.9951982 |
| ENSMUSG00000030693 | 9.196874066 | 2.086851731 | 4.943057334 | 5.638203705 | 7.161945863 |
| ENSMUSG00000030695 | 9.904325918 | 14.60796212 | 12.00456781 | 28.9964762  | 27.21539428 |
| ENSMUSG00000030699 | 14.85648888 | 25.04222078 | 33.89525029 | 20.1364418  | 19.33725383 |
| ENSMUSG00000030701 | 12.02668147 | 4.173703463 | 7.767661525 | 7.249119049 | 6.445751277 |
| ENSMUSG00000030704 | 62.25576291 | 75.12666233 | 71.32125582 | 103.9040397 | 95.97007457 |
| ENSMUSG00000030706 | 8.489422215 | 15.99919661 | 23.30298458 | 17.72006879 | 23.63442135 |
| ENSMUSG00000030707 | 19.10119998 | 31.30277597 | 20.47838039 | 14.4982381  | 17.18867007 |
| ENSMUSG00000030708 | 9.196874066 | 4.869320706 | 10.59226572 | 9.665492065 | 4.297167518 |
| ENSMUSG00000030711 | 6.367066661 | 7.651789682 | 7.767661525 | 8.054576721 | 7.161945863 |
| ENSMUSG00000030714 | 25.46826665 | 56.34499675 | 44.48751601 | 70.07481747 | 58.01176149 |
| ENSMUSG00000030720 | 6.367066661 | 4.869320706 | 8.473812573 | 8.860034393 | 10.7429188  |
| ENSMUSG00000030726 | 24.05336294 | 31.30277597 | 25.42143772 | 62.02024075 | 46.55264811 |
| ENSMUSG00000030727 | 108.2401332 | 127.9935729 | 126.4010376 | 149.815127  | 118.8883013 |
| ENSMUSG00000030729 | 7.074518513 | 22.95536904 | 16.2414741  | 28.19101852 | 11.45911338 |
| ENSMUSG00000030730 | 9.196874066 | 6.956172438 | 6.35535943  | 10.47094974 | 10.02672421 |
| ENSMUSG00000030731 | 7.074518513 | 5.56493795  | 3.530755239 | 5.638203705 | 7.87814045  |
| ENSMUSG00000030732 | 8.489422215 | 2.086851731 | 5.649208382 | 5.638203705 | 3.580972932 |
| ENSMUSG00000030733 | 21.93100739 | 38.95456565 | 28.24604191 | 85.37851324 | 80.92998826 |
| ENSMUSG00000030735 | 9.196874066 | 10.43425866 | 7.767661525 | 26.58010318 | 23.63442135 |
| ENSMUSG00000030737 | 9.904325918 | 6.260555194 | 3.530755239 | 7.249119049 | 6.445751277 |
| ENSMUSG00000030738 | 0           | 0           | 0           | 0           | 0           |
| ENSMUSG00000030739 | 11.31922962 | 6.260555194 | 5.649208382 | 8.860034393 | 6.445751277 |
| ENSMUSG00000030741 | 13.44158517 | 14.60796212 | 21.18453143 | 23.35827249 | 25.06681052 |
| ENSMUSG00000030744 | 0.707451851 | 2.086851731 | 2.118453143 | 2.416373016 | 1.432389173 |
| ENSMUSG00000030750 | 42.44711108 | 61.9099347  | 63.5535943  | 176.3952302 | 142.5227227 |
| ENSMUSG00000030751 | 38.20239997 | 72.34419335 | 58.61053696 | 144.982381  | 114.5911338 |
| ENSMUSG00000030753 | 43.15456293 | 76.51789682 | 69.20280268 | 136.9278043 | 116.023523  |
| ENSMUSG00000030757 | 16.27139258 | 9.738641413 | 6.35535943  | 8.054576721 | 7.87814045  |
| ENSMUSG00000030759 | 82.06441475 | 109.2119073 | 88.97503202 | 182.0334339 | 148.2522794 |
| ENSMUSG00000030760 | 7.781970364 | 8.347406925 | 8.473812573 | 2.416373016 | 9.310529622 |
| ENSMUSG00000030761 | 9.904325918 | 3.478086219 | 4.943057334 | 3.221830688 | 7.161945863 |
| ENSMUSG00000030762 | 7.074518513 | 5.56493795  | 4.943057334 | 4.832746033 | 6.445751277 |
| ENSMUSG00000030766 | 65.08557032 | 98.77764862 | 74.85201106 | 140.9550926 | 103.848215  |
| ENSMUSG00000030768 | 31.83533331 | 43.12826911 | 33.89525029 | 33.82922223 | 41.53928601 |
| ENSMUSG00000030769 | 8.489422215 | 5.56493795  | 4.943057334 | 4.832746033 | 5.729556691 |
| ENSMUSG00000030770 | 9.196874066 | 4.173703463 | 5.649208382 | 7.249119049 | 5.729556691 |
| ENSMUSG00000030771 | 6.367066661 | 8.347406925 | 8.473812573 | 5.638203705 | 5.013362104 |
| ENSMUSG00000030774 | 9.196874066 | 6.260555194 | 10.59226572 | 5.638203705 | 9.310529622 |
| ENSMUSG00000030779 | 16.97884443 | 9.738641413 | 7.767661525 | 10.47094974 | 17.18867007 |
| ENSMUSG00000030780 | 12.02668147 | 16.69481385 | 12.00456781 | 19.33098413 | 20.05344842 |
| ENSMUSG00000030781 | 10.61177777 | 6.956172438 | 9.886114669 | 12.88732275 | 6.445751277 |

|                    |             |             |             |             |             |
|--------------------|-------------|-------------|-------------|-------------|-------------|
| ENSMUSG00000030782 | 9.904325918 | 8.347406925 | 8.473812573 | 8.054576721 | 7.161945863 |
| ENSMUSG00000030786 | 11.31922962 | 9.738641413 | 11.29841676 | 7.249119049 | 8.594335036 |
| ENSMUSG00000030788 | 38.20239997 | 50.7800588  | 52.96132858 | 40.2728836  | 41.53928601 |
| ENSMUSG00000030790 | 16.27139258 | 18.78166558 | 20.47838039 | 42.68925662 | 27.21539428 |
| ENSMUSG00000030795 | 130.8785925 | 149.5577074 | 155.3532305 | 263.3846588 | 180.4810358 |
| ENSMUSG00000030796 | 4.952162959 | 8.347406925 | 8.473812573 | 8.054576721 | 10.02672421 |
| ENSMUSG00000030798 | 66.50047402 | 93.90832791 | 79.08891735 | 197.3371297 | 138.2255552 |
| ENSMUSG00000030800 | 13.44158517 | 13.21672763 | 12.71071886 | 6.443661377 | 5.013362104 |
| ENSMUSG00000030801 | 28.29807405 | 46.60635533 | 40.95676077 | 42.68925662 | 41.53928601 |
| ENSMUSG00000030802 | 16.27139258 | 31.99839321 | 20.47838039 | 26.58010318 | 20.05344842 |
| ENSMUSG00000030805 | 22.63845924 | 22.95536904 | 24.71528667 | 24.96918783 | 26.49919969 |
| ENSMUSG00000030811 | 5.65961481  | 4.173703463 | 9.886114669 | 12.08186508 | 9.310529622 |
| ENSMUSG00000030814 | 5.65961481  | 14.60796212 | 15.53532305 | 18.52552646 | 17.18867007 |
| ENSMUSG00000030815 | 21.22355554 | 45.91073809 | 51.54902649 | 77.32393652 | 69.47087488 |
| ENSMUSG00000030822 | 29.0055259  | 53.56252777 | 40.25060972 | 49.132918   | 50.13362104 |
| ENSMUSG00000030824 | 13.44158517 | 29.91154148 | 22.59683353 | 24.96918783 | 27.93158887 |
| ENSMUSG00000030825 | 9.196874066 | 6.260555194 | 6.35535943  | 8.054576721 | 10.7429188  |
| ENSMUSG00000030826 | 16.27139258 | 22.95536904 | 20.47838039 | 41.07834128 | 31.5125618  |
| ENSMUSG00000030830 | 21.22355554 | 49.38882431 | 37.42600553 | 200.5589604 | 138.9417498 |
| ENSMUSG00000030838 | 5.65961481  | 5.56493795  | 4.236906287 | 3.221830688 | 7.87814045  |
| ENSMUSG00000030839 | 20.51610369 | 30.60715873 | 25.42143772 | 22.55281482 | 27.93158887 |
| ENSMUSG00000030842 | 39.61730367 | 61.21431745 | 54.37363068 | 88.60034393 | 83.07857202 |
| ENSMUSG00000030844 | 10.61177777 | 12.52111039 | 11.29841676 | 7.249119049 | 15.7562809  |
| ENSMUSG00000030846 | 89.13893326 | 124.5154866 | 116.5149229 | 161.0915344 | 120.3206905 |
| ENSMUSG00000030849 | 1.414903703 | 2.086851731 | 1.412302096 | 0.805457672 | 0           |
| ENSMUSG00000030850 | 57.30359995 | 82.08283477 | 78.3827663  | 81.35122488 | 70.90326405 |
| ENSMUSG00000030851 | 6.367066661 | 4.869320706 | 5.649208382 | 5.638203705 | 10.7429188  |
| ENSMUSG00000030852 | 12.73413332 | 5.56493795  | 4.236906287 | 4.832746033 | 8.594335036 |
| ENSMUSG00000030854 | 4.244711108 | 4.869320706 | 7.767661525 | 2.416373016 | 8.594335036 |
| ENSMUSG00000030858 | 6.367066661 | 5.56493795  | 7.061510478 | 5.638203705 | 7.161945863 |
| ENSMUSG00000030861 | 74.28244438 | 105.7338211 | 97.44884459 | 66.04752911 | 76.63282074 |
| ENSMUSG00000030862 | 10.61177777 | 4.173703463 | 9.886114669 | 8.054576721 | 7.161945863 |
| ENSMUSG00000030869 | 61.54831106 | 95.99517964 | 73.43970897 | 164.3133651 | 121.7530797 |
| ENSMUSG00000030870 | 53.7663407  | 95.99517964 | 82.61967259 | 130.4841429 | 110.2939663 |
| ENSMUSG00000030871 | 57.30359995 | 93.21271067 | 63.5535943  | 107.1258704 | 127.4826364 |
| ENSMUSG00000030872 | 112.4848444 | 130.7760418 | 123.5764334 | 108.7367857 | 87.37573953 |
| ENSMUSG00000030877 | 4.952162959 | 6.260555194 | 7.061510478 | 25.77464551 | 25.06681052 |
| ENSMUSG00000030878 | 8.489422215 | 9.043024169 | 9.179963621 | 36.24559524 | 16.47247549 |
| ENSMUSG00000030879 | 21.93100739 | 30.60715873 | 34.60140134 | 93.43308996 | 72.33565322 |
| ENSMUSG00000030880 | 18.39374813 | 34.08524495 | 24.00913562 | 96.65492065 | 83.7947666  |
| ENSMUSG00000030881 | 14.85648888 | 24.34660353 | 17.65377619 | 24.96918783 | 15.7562809  |
| ENSMUSG00000030882 | 4.244711108 | 14.60796212 | 17.65377619 | 8.860034393 | 11.45911338 |
| ENSMUSG00000030884 | 61.54831106 | 89.73462445 | 75.55816211 | 132.0950582 | 105.2806042 |

|                    |             |             |             |             |             |
|--------------------|-------------|-------------|-------------|-------------|-------------|
| ENSMUSG00000030888 | 43.86201478 | 77.21351406 | 51.54902649 | 93.43308996 | 78.06520991 |
| ENSMUSG00000030889 | 11.31922962 | 9.738641413 | 6.35535943  | 9.665492065 | 5.729556691 |
| ENSMUSG00000030890 | 35.37259256 | 58.43184848 | 69.20280268 | 118.4022778 | 94.5376854  |
| ENSMUSG00000030898 | 11.31922962 | 4.173703463 | 2.118453143 | 5.638203705 | 7.161945863 |
| ENSMUSG00000030917 | 9.196874066 | 5.56493795  | 3.530755239 | 4.832746033 | 5.729556691 |
| ENSMUSG00000030921 | 99.04325918 | 150.9489419 | 112.2780166 | 211.0299101 | 132.4959985 |
| ENSMUSG00000030922 | 26.88317035 | 47.99758982 | 38.83830763 | 32.21830688 | 42.97167518 |
| ENSMUSG00000030924 | 9.904325918 | 18.08604834 | 16.2414741  | 28.19101852 | 24.35061594 |
| ENSMUSG00000030929 | 16.27139258 | 11.1298759  | 12.00456781 | 26.58010318 | 21.48583759 |
| ENSMUSG00000030930 | 93.38364437 | 97.38641413 | 94.6242404  | 59.60386773 | 60.16034525 |
| ENSMUSG00000030935 | 5.65961481  | 4.869320706 | 2.118453143 | 7.249119049 | 6.445751277 |
| ENSMUSG00000030945 | 11.31922962 | 4.869320706 | 8.473812573 | 7.249119049 | 4.297167518 |
| ENSMUSG00000030946 | 8.489422215 | 10.43425866 | 7.767661525 | 4.832746033 | 8.594335036 |
| ENSMUSG00000030954 | 5.65961481  | 6.956172438 | 8.473812573 | 9.665492065 | 7.87814045  |
| ENSMUSG00000030956 | 28.29807405 | 41.73703463 | 41.66291182 | 74.9075635  | 58.72795608 |
| ENSMUSG00000030960 | 23.34591109 | 29.21592424 | 45.19366706 | 42.68925662 | 40.82309142 |
| ENSMUSG00000030965 | 53.7663407  | 86.95215547 | 67.08434954 | 111.9586164 | 82.36237743 |
| ENSMUSG00000030966 | 50.22908144 | 61.9099347  | 74.85201106 | 66.04752911 | 67.32229112 |
| ENSMUSG00000030967 | 70.03773327 | 94.60394515 | 88.26888097 | 120.8186508 | 103.848215  |
| ENSMUSG00000030970 | 3.537259256 | 1.391234488 | 2.118453143 | 1.610915344 | 2.148583759 |
| ENSMUSG00000030978 | 43.15456293 | 50.08444155 | 46.60596915 | 133.7059736 | 101.6996313 |
| ENSMUSG00000030979 | 58.0110518  | 82.77845201 | 79.08891735 | 85.37851324 | 70.90326405 |
| ENSMUSG00000030980 | 41.73965922 | 57.04061399 | 55.07978173 | 70.07481747 | 64.45751277 |
| ENSMUSG00000030982 | 25.46826665 | 40.34580014 | 33.18909925 | 16.10915344 | 22.20203218 |
| ENSMUSG00000030986 | 12.73413332 | 6.260555194 | 5.649208382 | 8.054576721 | 7.87814045  |
| ENSMUSG00000030990 | 86.30912585 | 144.6883867 | 116.5149229 | 190.0880106 | 136.0769714 |
| ENSMUSG00000030994 | 12.02668147 | 4.869320706 | 7.767661525 | 4.832746033 | 5.013362104 |
| ENSMUSG00000031010 | 7.781970364 | 15.99919661 | 12.00456781 | 51.54929101 | 43.68786977 |
| ENSMUSG00000031012 | 3.537259256 | 7.651789682 | 4.236906287 | 3.221830688 | 4.297167518 |
| ENSMUSG00000031021 | 33.95768886 | 51.47567604 | 56.49208382 | 38.66196826 | 52.2822048  |
| ENSMUSG00000031022 | 5.65961481  | 12.52111039 | 6.35535943  | 3.221830688 | 7.87814045  |
| ENSMUSG00000031024 | 8.489422215 | 6.260555194 | 5.649208382 | 1.610915344 | 8.594335036 |
| ENSMUSG00000031026 | 8.489422215 | 6.260555194 | 10.59226572 | 4.02728836  | 11.45911338 |
| ENSMUSG00000031027 | 10.61177777 | 4.173703463 | 4.236906287 | 6.443661377 | 8.594335036 |
| ENSMUSG00000031028 | 11.31922962 | 9.738641413 | 7.767661525 | 7.249119049 | 5.013362104 |
| ENSMUSG00000031060 | 62.96321476 | 69.56172438 | 62.84744325 | 181.2279762 | 118.8883013 |
| ENSMUSG00000031065 | 26.88317035 | 41.73703463 | 43.78136496 | 87.79488626 | 55.86317773 |
| ENSMUSG00000031066 | 5.65961481  | 10.43425866 | 8.473812573 | 15.30369577 | 18.62105924 |
| ENSMUSG00000031070 | 10.61177777 | 4.173703463 | 6.35535943  | 8.860034393 | 8.594335036 |
| ENSMUSG00000031072 | 38.90985182 | 61.9099347  | 51.54902649 | 53.96566403 | 38.67450766 |
| ENSMUSG00000031074 | 7.074518513 | 6.260555194 | 3.530755239 | 2.416373016 | 8.594335036 |
| ENSMUSG00000031075 | 7.781970364 | 4.173703463 | 5.649208382 | 4.832746033 | 9.310529622 |
| ENSMUSG00000031078 | 3.537259256 | 2.086851731 | 1.412302096 | 0.805457672 | 4.297167518 |

|                    |             |             |             |             |             |
|--------------------|-------------|-------------|-------------|-------------|-------------|
| ENSMUSG00000031079 | 6.367066661 | 4.173703463 | 3.530755239 | 3.221830688 | 4.297167518 |
| ENSMUSG00000031090 | 28.29807405 | 55.6493795  | 40.95676077 | 21.74735715 | 30.08017263 |
| ENSMUSG00000031093 | 47.39927403 | 52.86691053 | 56.49208382 | 92.62763229 | 60.16034525 |
| ENSMUSG00000031095 | 7.074518513 | 4.869320706 | 6.35535943  | 5.638203705 | 7.161945863 |
| ENSMUSG00000031097 | 10.61177777 | 12.52111039 | 19.06607829 | 5.638203705 | 10.7429188  |
| ENSMUSG00000031098 | 9.196874066 | 5.56493795  | 6.35535943  | 3.221830688 | 3.580972932 |
| ENSMUSG00000031099 | 2.122355554 | 4.173703463 | 2.118453143 | 0           | 8.594335036 |
| ENSMUSG00000031103 | 11.31922962 | 6.956172438 | 13.41686991 | 3.221830688 | 4.297167518 |
| ENSMUSG00000031105 | 14.14903703 | 12.52111039 | 14.12302096 | 7.249119049 | 16.47247549 |
| ENSMUSG00000031109 | 8.489422215 | 18.08604834 | 14.12302096 | 13.69278043 | 11.45911338 |
| ENSMUSG00000031111 | 3.537259256 | 4.869320706 | 3.530755239 | 2.416373016 | 1.432389173 |
| ENSMUSG00000031112 | 29.0055259  | 43.82388636 | 36.71985448 | 29.80193387 | 26.49919969 |
| ENSMUSG00000031131 | 5.65961481  | 2.086851731 | 3.530755239 | 2.416373016 | 2.864778345 |
| ENSMUSG00000031133 | 21.93100739 | 29.21592424 | 31.77679715 | 44.30017197 | 27.93158887 |
| ENSMUSG00000031134 | 3.537259256 | 2.782468975 | 2.824604191 | 0.805457672 | 1.432389173 |
| ENSMUSG00000031137 | 4.244711108 | 6.956172438 | 4.236906287 | 1.610915344 | 4.297167518 |
| ENSMUSG00000031139 | 4.244711108 | 2.782468975 | 5.649208382 | 2.416373016 | 2.148583759 |
| ENSMUSG00000031142 | 5.65961481  | 9.043024169 | 8.473812573 | 4.832746033 | 5.013362104 |
| ENSMUSG00000031144 | 1.414903703 | 2.782468975 | 2.824604191 | 2.416373016 | 3.580972932 |
| ENSMUSG00000031145 | 14.14903703 | 18.78166558 | 23.30298458 | 12.88732275 | 11.45911338 |
| ENSMUSG00000031148 | 26.88317035 | 48.69320706 | 45.8998181  | 92.62763229 | 72.33565322 |
| ENSMUSG00000031150 | 4.952162959 | 2.086851731 | 2.118453143 | 2.416373016 | 4.297167518 |
| ENSMUSG00000031153 | 56.5961481  | 73.73542784 | 60.02283906 | 60.40932541 | 57.29556691 |
| ENSMUSG00000031154 | 76.40479994 | 89.0390072  | 71.32125582 | 99.07129367 | 84.51096119 |
| ENSMUSG00000031155 | 30.4204296  | 38.25894841 | 44.48751601 | 98.265836   | 80.21379367 |
| ENSMUSG00000031156 | 26.88317035 | 42.43265187 | 36.01370344 | 47.52200265 | 37.95831308 |
| ENSMUSG00000031157 | 38.20239997 | 56.34499675 | 56.49208382 | 56.38203705 | 61.59273443 |
| ENSMUSG00000031158 | 29.71297775 | 58.43184848 | 64.96589639 | 74.9075635  | 62.30892901 |
| ENSMUSG00000031161 | 0.707451851 | 3.478086219 | 4.236906287 | 4.02728836  | 3.580972932 |
| ENSMUSG00000031162 | 7.074518513 | 4.869320706 | 4.943057334 | 4.832746033 | 6.445751277 |
| ENSMUSG00000031166 | 6.367066661 | 9.738641413 | 7.767661525 | 15.30369577 | 10.02672421 |
| ENSMUSG00000031167 | 40.32475552 | 58.43184848 | 38.83830763 | 140.9550926 | 86.65954495 |
| ENSMUSG00000031168 | 31.12788146 | 40.34580014 | 36.01370344 | 37.85651059 | 35.09353473 |
| ENSMUSG00000031169 | 1.414903703 | 4.173703463 | 2.118453143 | 2.416373016 | 1.432389173 |
| ENSMUSG00000031170 | 2.122355554 | 3.478086219 | 3.530755239 | 4.02728836  | 2.864778345 |
| ENSMUSG00000031171 | 21.22355554 | 25.04222078 | 24.71528667 | 35.44013757 | 31.5125618  |
| ENSMUSG00000031173 | 3.537259256 | 2.782468975 | 0.706151048 | 3.221830688 | 2.864778345 |
| ENSMUSG00000031174 | 4.244711108 | 2.782468975 | 6.35535943  | 2.416373016 | 3.580972932 |
| ENSMUSG00000031179 | 3.537259256 | 7.651789682 | 4.236906287 | 7.249119049 | 2.864778345 |
| ENSMUSG00000031182 | 7.074518513 | 4.869320706 | 0           | 0           | 3.580972932 |
| ENSMUSG00000031189 | 3.537259256 | 2.782468975 | 2.118453143 | 0           | 5.013362104 |
| ENSMUSG00000031196 | 13.44158517 | 24.34660353 | 16.2414741  | 12.88732275 | 22.91822676 |
| ENSMUSG00000031197 | 60.13340736 | 58.43184848 | 48.01827125 | 75.71302118 | 70.18706946 |

|                    |             |             |             |             |             |
|--------------------|-------------|-------------|-------------|-------------|-------------|
| ENSMUSG00000031200 | 21.22355554 | 35.47647943 | 36.01370344 | 68.46390213 | 67.32229112 |
| ENSMUSG00000031201 | 25.46826665 | 50.08444155 | 40.25060972 | 69.2693598  | 62.30892901 |
| ENSMUSG00000031207 | 53.05888884 | 61.21431745 | 40.95676077 | 108.7367857 | 65.88990194 |
| ENSMUSG00000031209 | 7.074518513 | 3.478086219 | 3.530755239 | 2.416373016 | 2.864778345 |
| ENSMUSG00000031210 | 7.074518513 | 4.869320706 | 1.412302096 | 2.416373016 | 5.013362104 |
| ENSMUSG00000031214 | 2.122355554 | 3.478086219 | 1.412302096 | 4.02728836  | 3.580972932 |
| ENSMUSG00000031216 | 2.122355554 | 0.695617244 | 0.706151048 | 1.610915344 | 3.580972932 |
| ENSMUSG00000031220 | 12.02668147 | 13.21672763 | 12.71071886 | 14.4982381  | 16.47247549 |
| ENSMUSG00000031226 | 14.85648888 | 15.30357936 | 18.35992724 | 43.49471429 | 42.25548059 |
| ENSMUSG00000031229 | 41.03220737 | 57.73623123 | 46.60596915 | 96.65492065 | 78.06520991 |
| ENSMUSG00000031232 | 31.12788146 | 41.73703463 | 38.83830763 | 82.96214023 | 73.76804239 |
| ENSMUSG00000031241 | 5.65961481  | 4.173703463 | 4.236906287 | 1.610915344 | 3.580972932 |
| ENSMUSG00000031246 | 55.1812444  | 75.12666233 | 57.90438592 | 54.7711217  | 39.39070225 |
| ENSMUSG00000031253 | 5.65961481  | 5.56493795  | 2.824604191 | 4.832746033 | 4.297167518 |
| ENSMUSG00000031255 | 4.952162959 | 1.391234488 | 4.943057334 | 5.638203705 | 7.161945863 |
| ENSMUSG00000031256 | 11.31922962 | 15.30357936 | 16.94762515 | 54.7711217  | 36.5259239  |
| ENSMUSG00000031257 | 8.489422215 | 5.56493795  | 4.943057334 | 6.443661377 | 7.161945863 |
| ENSMUSG00000031262 | 14.14903703 | 11.82549314 | 7.061510478 | 24.16373016 | 22.20203218 |
| ENSMUSG00000031264 | 92.67619252 | 91.82147618 | 88.26888097 | 149.0096693 | 100.2672421 |
| ENSMUSG00000031271 | 3.537259256 | 4.173703463 | 1.412302096 | 3.221830688 | 3.580972932 |
| ENSMUSG00000031273 | 2.829807405 | 4.173703463 | 2.824604191 | 0.805457672 | 4.297167518 |
| ENSMUSG00000031274 | 4.244711108 | 4.173703463 | 4.943057334 | 1.610915344 | 2.864778345 |
| ENSMUSG00000031278 | 32.54278516 | 43.82388636 | 28.24604191 | 57.99295239 | 54.43078856 |
| ENSMUSG00000031283 | 8.489422215 | 2.782468975 | 3.530755239 | 4.02728836  | 3.580972932 |
| ENSMUSG00000031284 | 6.367066661 | 7.651789682 | 2.118453143 | 3.221830688 | 3.580972932 |
| ENSMUSG00000031285 | 6.367066661 | 5.56493795  | 6.35535943  | 1.610915344 | 2.148583759 |
| ENSMUSG00000031289 | 1.414903703 | 2.782468975 | 7.767661525 | 3.221830688 | 2.148583759 |
| ENSMUSG00000031292 | 5.65961481  | 9.738641413 | 8.473812573 | 14.4982381  | 14.32389173 |
| ENSMUSG00000031293 | 3.537259256 | 7.651789682 | 2.824604191 | 2.416373016 | 2.864778345 |
| ENSMUSG00000031295 | 25.46826665 | 25.73783802 | 19.77222934 | 12.88732275 | 14.32389173 |
| ENSMUSG00000031297 | 4.244711108 | 2.086851731 | 4.943057334 | 7.249119049 | 7.161945863 |
| ENSMUSG00000031298 | 6.367066661 | 3.478086219 | 4.236906287 | 0.805457672 | 5.013362104 |
| ENSMUSG00000031299 | 27.5906222  | 41.04141738 | 36.01370344 | 57.18749472 | 54.43078856 |
| ENSMUSG00000031302 | 0.707451851 | 4.869320706 | 3.530755239 | 3.221830688 | 1.432389173 |
| ENSMUSG00000031304 | 15.56394073 | 20.86851731 | 14.12302096 | 22.55281482 | 22.91822676 |
| ENSMUSG00000031309 | 2.122355554 | 3.478086219 | 2.118453143 | 2.416373016 | 1.432389173 |
| ENSMUSG00000031310 | 12.02668147 | 9.043024169 | 8.473812573 | 13.69278043 | 12.89150255 |
| ENSMUSG00000031311 | 41.73965922 | 58.43184848 | 57.90438592 | 128.0677699 | 91.67290705 |
| ENSMUSG00000031314 | 15.56394073 | 34.78086219 | 22.59683353 | 43.49471429 | 28.64778345 |
| ENSMUSG00000031327 | 7.074518513 | 5.56493795  | 12.71071886 | 9.665492065 | 9.310529622 |
| ENSMUSG00000031328 | 7.074518513 | 8.347406925 | 11.29841676 | 13.69278043 | 11.45911338 |
| ENSMUSG00000031337 | 5.65961481  | 4.869320706 | 2.118453143 | 1.610915344 | 3.580972932 |
| ENSMUSG00000031342 | 1.414903703 | 4.173703463 | 2.824604191 | 3.221830688 | 0.716194586 |

|                    |             |             |             |             |             |
|--------------------|-------------|-------------|-------------|-------------|-------------|
| ENSMUSG00000031343 | 6.367066661 | 2.782468975 | 3.530755239 | 0.805457672 | 3.580972932 |
| ENSMUSG00000031344 | 4.952162959 | 3.478086219 | 5.649208382 | 4.02728836  | 2.148583759 |
| ENSMUSG00000031347 | 20.51610369 | 28.52030699 | 28.24604191 | 33.02376456 | 22.20203218 |
| ENSMUSG00000031351 | 3.537259256 | 4.173703463 | 3.530755239 | 4.832746033 | 2.864778345 |
| ENSMUSG00000031352 | 5.65961481  | 15.30357936 | 12.00456781 | 32.21830688 | 32.22875639 |
| ENSMUSG00000031353 | 27.5906222  | 39.6501829  | 44.48751601 | 113.5695318 | 95.25387998 |
| ENSMUSG00000031354 | 5.65961481  | 15.30357936 | 5.649208382 | 6.443661377 | 5.013362104 |
| ENSMUSG00000031355 | 5.65961481  | 4.173703463 | 4.943057334 | 1.610915344 | 1.432389173 |
| ENSMUSG00000031358 | 4.244711108 | 8.347406925 | 5.649208382 | 19.33098413 | 12.89150255 |
| ENSMUSG00000031360 | 15.56394073 | 22.95536904 | 24.00913562 | 21.74735715 | 25.06681052 |
| ENSMUSG00000031362 | 6.367066661 | 6.260555194 | 3.530755239 | 7.249119049 | 6.445751277 |
| ENSMUSG00000031365 | 33.25023701 | 41.04141738 | 45.19366706 | 57.18749472 | 60.87653984 |
| ENSMUSG00000031367 | 5.65961481  | 13.21672763 | 11.29841676 | 9.665492065 | 8.594335036 |
| ENSMUSG00000031370 | 20.51610369 | 35.47647943 | 32.4829482  | 75.71302118 | 49.41742646 |
| ENSMUSG00000031371 | 4.952162959 | 7.651789682 | 12.71071886 | 7.249119049 | 10.02672421 |
| ENSMUSG00000031374 | 5.65961481  | 0.695617244 | 2.118453143 | 2.416373016 | 4.297167518 |
| ENSMUSG00000031375 | 4.244711108 | 2.086851731 | 4.236906287 | 1.610915344 | 6.445751277 |
| ENSMUSG00000031376 | 2.829807405 | 3.478086219 | 2.118453143 | 2.416373016 | 2.864778345 |
| ENSMUSG00000031377 | 1.414903703 | 4.869320706 | 3.530755239 | 3.221830688 | 3.580972932 |
| ENSMUSG00000031378 | 42.44711108 | 57.04061399 | 41.66291182 | 86.98942859 | 65.17370736 |
| ENSMUSG00000031379 | 5.65961481  | 6.260555194 | 2.824604191 | 3.221830688 | 5.729556691 |
| ENSMUSG00000031380 | 4.244711108 | 0           | 2.824604191 | 0           | 3.580972932 |
| ENSMUSG00000031381 | 14.14903703 | 17.39043109 | 12.00456781 | 27.38556085 | 27.93158887 |
| ENSMUSG00000031382 | 2.829807405 | 4.869320706 | 2.824604191 | 4.02728836  | 7.161945863 |
| ENSMUSG00000031385 | 4.952162959 | 2.782468975 | 9.179963621 | 4.02728836  | 5.729556691 |
| ENSMUSG00000031386 | 26.1757185  | 43.82388636 | 36.01370344 | 213.4462831 | 141.8065281 |
| ENSMUSG00000031387 | 9.196874066 | 9.738641413 | 15.53532305 | 14.4982381  | 10.02672421 |
| ENSMUSG00000031388 | 19.10119998 | 35.47647943 | 33.89525029 | 78.12939419 | 57.29556691 |
| ENSMUSG00000031389 | 60.84085921 | 71.64857611 | 66.37819849 | 62.82569842 | 66.60609653 |
| ENSMUSG00000031391 | 6.367066661 | 5.56493795  | 4.943057334 | 3.221830688 | 1.432389173 |
| ENSMUSG00000031392 | 0           | 0           | 0           | 0           | 0           |
| ENSMUSG00000031393 | 1.414903703 | 1.391234488 | 1.412302096 | 0.805457672 | 3.580972932 |
| ENSMUSG00000031394 | 2.829807405 | 6.956172438 | 6.35535943  | 4.02728836  | 5.013362104 |
| ENSMUSG00000031397 | 6.367066661 | 3.478086219 | 6.35535943  | 3.221830688 | 5.013362104 |
| ENSMUSG00000031398 | 6.367066661 | 5.56493795  | 2.824604191 | 3.221830688 | 5.013362104 |
| ENSMUSG00000031399 | 8.489422215 | 14.60796212 | 18.35992724 | 20.94189947 | 17.90486466 |
| ENSMUSG00000031400 | 14.85648888 | 19.47728283 | 20.47838039 | 31.41284921 | 24.35061594 |
| ENSMUSG00000031402 | 35.37259256 | 39.6501829  | 42.36906287 | 31.41284921 | 32.22875639 |
| ENSMUSG00000031403 | 19.80865184 | 26.43345526 | 22.59683353 | 95.84946298 | 65.88990194 |
| ENSMUSG00000031410 | 5.65961481  | 3.478086219 | 6.35535943  | 0.805457672 | 2.148583759 |
| ENSMUSG00000031411 | 4.244711108 | 1.391234488 | 2.824604191 | 2.416373016 | 1.432389173 |
| ENSMUSG00000031422 | 8.489422215 | 13.91234488 | 9.886114669 | 8.860034393 | 14.32389173 |
| ENSMUSG00000031424 | 5.65961481  | 7.651789682 | 7.767661525 | 3.221830688 | 4.297167518 |



|                    |             |             |             |             |             |
|--------------------|-------------|-------------|-------------|-------------|-------------|
| ENSMUSG00000031425 | 4.244711108 | 3.478086219 | 2.824604191 | 4.832746033 | 4.297167518 |
| ENSMUSG00000031428 | 37.49494812 | 47.99758982 | 44.48751601 | 156.2587884 | 127.4826364 |
| ENSMUSG00000031429 | 42.44711108 | 57.73623123 | 42.36906287 | 33.82922223 | 43.68786977 |
| ENSMUSG00000031431 | 2.122355554 | 2.086851731 | 7.061510478 | 2.416373016 | 8.594335036 |
| ENSMUSG00000031433 | 30.4204296  | 50.7800588  | 50.13672439 | 39.46742593 | 43.68786977 |
| ENSMUSG00000031434 | 6.367066661 | 5.56493795  | 6.35535943  | 2.416373016 | 2.864778345 |
| ENSMUSG00000031438 | 4.952162959 | 5.56493795  | 1.412302096 | 4.02728836  | 2.864778345 |
| ENSMUSG00000031441 | 7.074518513 | 3.478086219 | 7.061510478 | 18.52552646 | 9.310529622 |
| ENSMUSG00000031442 | 7.781970364 | 6.956172438 | 7.061510478 | 5.638203705 | 2.864778345 |
| ENSMUSG00000031444 | 12.73413332 | 1.391234488 | 4.236906287 | 7.249119049 | 5.013362104 |
| ENSMUSG00000031446 | 62.96321476 | 102.9513521 | 86.15042783 | 101.4876667 | 106.7129934 |
| ENSMUSG00000031448 | 7.074518513 | 4.173703463 | 6.35535943  | 6.443661377 | 9.310529622 |
| ENSMUSG00000031449 | 9.904325918 | 5.56493795  | 7.061510478 | 6.443661377 | 4.297167518 |
| ENSMUSG00000031452 | 11.31922962 | 8.347406925 | 9.886114669 | 4.832746033 | 6.445751277 |
| ENSMUSG00000031453 | 98.33580733 | 114.7768452 | 100.9795998 | 66.85298678 | 74.48423698 |
| ENSMUSG00000031467 | 20.51610369 | 29.21592424 | 23.30298458 | 77.32393652 | 81.64618284 |
| ENSMUSG00000031478 | 12.02668147 | 13.91234488 | 10.59226572 | 11.27640741 | 15.7562809  |
| ENSMUSG00000031480 | 9.196874066 | 6.260555194 | 6.35535943  | 2.416373016 | 10.02672421 |
| ENSMUSG00000031485 | 14.14903703 | 28.52030699 | 30.36449505 | 50.74383334 | 46.55264811 |
| ENSMUSG00000031486 | 7.781970364 | 7.651789682 | 7.061510478 | 7.249119049 | 9.310529622 |
| ENSMUSG00000031488 | 15.56394073 | 23.65098629 | 31.0706461  | 20.1364418  | 22.20203218 |
| ENSMUSG00000031489 | 7.781970364 | 4.869320706 | 4.943057334 | 4.832746033 | 7.87814045  |
| ENSMUSG00000031491 | 7.074518513 | 6.956172438 | 10.59226572 | 10.47094974 | 6.445751277 |
| ENSMUSG00000031492 | 8.489422215 | 9.043024169 | 7.061510478 | 6.443661377 | 7.87814045  |
| ENSMUSG00000031493 | 6.367066661 | 8.347406925 | 4.943057334 | 9.665492065 | 5.013362104 |
| ENSMUSG00000031502 | 4.244711108 | 2.086851731 | 5.649208382 | 3.221830688 | 3.580972932 |
| ENSMUSG00000031503 | 6.367066661 | 6.260555194 | 6.35535943  | 6.443661377 | 7.161945863 |
| ENSMUSG00000031505 | 70.74518513 | 84.86530374 | 90.38733411 | 91.82217462 | 84.51096119 |
| ENSMUSG00000031506 | 18.39374813 | 27.82468975 | 21.18453143 | 45.10562964 | 35.09353473 |
| ENSMUSG00000031508 | 60.84085921 | 81.38721752 | 96.74269354 | 149.815127  | 120.3206905 |
| ENSMUSG00000031509 | 12.73413332 | 8.347406925 | 8.473812573 | 4.02728836  | 12.17530797 |
| ENSMUSG00000031511 | 7.074518513 | 6.260555194 | 5.649208382 | 3.221830688 | 7.87814045  |
| ENSMUSG00000031512 | 5.65961481  | 4.173703463 | 7.767661525 | 8.054576721 | 7.161945863 |
| ENSMUSG00000031516 | 25.46826665 | 43.82388636 | 30.36449505 | 26.58010318 | 26.49919969 |
| ENSMUSG00000031523 | 9.196874066 | 7.651789682 | 8.473812573 | 4.832746033 | 5.729556691 |
| ENSMUSG00000031534 | 20.51610369 | 33.3896277  | 28.24604191 | 62.82569842 | 45.12025894 |
| ENSMUSG00000031537 | 74.28244438 | 102.9513521 | 96.74269354 | 94.23854763 | 80.92998826 |
| ENSMUSG00000031540 | 72.16008883 | 111.9943762 | 108.0411103 | 116.7913625 | 116.023523  |
| ENSMUSG00000031543 | 7.074518513 | 6.260555194 | 6.35535943  | 6.443661377 | 7.87814045  |
| ENSMUSG00000031549 | 9.196874066 | 4.869320706 | 7.767661525 | 6.443661377 | 10.02672421 |
| ENSMUSG00000031551 | 12.02668147 | 5.56493795  | 4.943057334 | 9.665492065 | 7.161945863 |
| ENSMUSG00000031552 | 6.367066661 | 8.347406925 | 7.061510478 | 4.832746033 | 5.729556691 |
| ENSMUSG00000031553 | 3.537259256 | 6.260555194 | 7.767661525 | 4.832746033 | 8.594335036 |

|                    |             |             |             |             |             |
|--------------------|-------------|-------------|-------------|-------------|-------------|
| ENSMUSG00000031554 | 5.65961481  | 6.956172438 | 8.473812573 | 2.416373016 | 9.310529622 |
| ENSMUSG00000031555 | 52.35143699 | 86.95215547 | 77.67661525 | 147.398754  | 108.8615771 |
| ENSMUSG00000031557 | 108.9475851 | 114.081228  | 129.2256417 | 293.1865926 | 216.2907651 |
| ENSMUSG00000031558 | 5.65961481  | 6.956172438 | 5.649208382 | 4.832746033 | 5.729556691 |
| ENSMUSG00000031559 | 14.85648888 | 9.043024169 | 7.767661525 | 5.638203705 | 4.297167518 |
| ENSMUSG00000031561 | 7.781970364 | 11.1298759  | 7.767661525 | 3.221830688 | 8.594335036 |
| ENSMUSG00000031562 | 4.244711108 | 11.82549314 | 10.59226572 | 3.221830688 | 5.729556691 |
| ENSMUSG00000031565 | 9.904325918 | 4.173703463 | 9.886114669 | 5.638203705 | 6.445751277 |
| ENSMUSG00000031568 | 40.32475552 | 76.51789682 | 62.1412922  | 112.7640741 | 88.09193412 |
| ENSMUSG00000031570 | 6.367066661 | 12.52111039 | 7.061510478 | 21.74735715 | 20.769643   |
| ENSMUSG00000031575 | 7.074518513 | 11.1298759  | 9.886114669 | 3.221830688 | 7.87814045  |
| ENSMUSG00000031576 | 11.31922962 | 6.956172438 | 8.473812573 | 4.832746033 | 7.87814045  |
| ENSMUSG00000031577 | 43.86201478 | 73.73542784 | 60.02283906 | 115.9859048 | 77.34901533 |
| ENSMUSG00000031583 | 48.81417774 | 56.34499675 | 59.31668801 | 49.93837567 | 50.84981563 |
| ENSMUSG00000031584 | 7.781970364 | 9.043024169 | 15.53532305 | 8.054576721 | 17.90486466 |
| ENSMUSG00000031585 | 26.88317035 | 54.25814501 | 41.66291182 | 56.38203705 | 44.40406435 |
| ENSMUSG00000031586 | 11.31922962 | 28.52030699 | 21.18453143 | 12.88732275 | 12.17530797 |
| ENSMUSG00000031591 | 21.93100739 | 51.47567604 | 49.43057334 | 51.54929101 | 55.14698315 |
| ENSMUSG00000031592 | 80.64951104 | 115.4724625 | 87.56272992 | 102.2931244 | 108.8615771 |
| ENSMUSG00000031596 | 12.73413332 | 8.347406925 | 4.943057334 | 6.443661377 | 5.013362104 |
| ENSMUSG00000031600 | 68.62282957 | 98.08203137 | 89.68118307 | 119.2077355 | 128.198831  |
| ENSMUSG00000031601 | 74.28244438 | 143.2971522 | 117.927225  | 86.98942859 | 102.4158258 |
| ENSMUSG00000031603 | 2.829807405 | 4.869320706 | 2.118453143 | 3.221830688 | 3.580972932 |
| ENSMUSG00000031604 | 21.22355554 | 45.91073809 | 32.4829482  | 133.7059736 | 96.68626916 |
| ENSMUSG00000031608 | 14.14903703 | 17.39043109 | 26.12758877 | 30.60739154 | 25.78300511 |
| ENSMUSG00000031617 | 22.63845924 | 48.69320706 | 37.42600553 | 44.30017197 | 42.97167518 |
| ENSMUSG00000031618 | 7.074518513 | 5.56493795  | 7.061510478 | 2.416373016 | 5.729556691 |
| ENSMUSG00000031620 | 8.489422215 | 6.260555194 | 7.061510478 | 8.054576721 | 5.013362104 |
| ENSMUSG00000031622 | 41.03220737 | 67.47487265 | 60.72899011 | 45.10562964 | 47.98503729 |
| ENSMUSG00000031626 | 17.68629628 | 27.12907251 | 15.53532305 | 23.35827249 | 23.63442135 |
| ENSMUSG00000031629 | 8.489422215 | 12.52111039 | 20.47838039 | 21.74735715 | 22.20203218 |
| ENSMUSG00000031631 | 17.68629628 | 28.52030699 | 20.47838039 | 28.19101852 | 17.90486466 |
| ENSMUSG00000031634 | 23.34591109 | 43.82388636 | 40.95676077 | 22.55281482 | 40.10689684 |
| ENSMUSG00000031635 | 7.074518513 | 9.043024169 | 8.473812573 | 2.416373016 | 5.729556691 |
| ENSMUSG00000031637 | 15.56394073 | 18.78166558 | 23.30298458 | 12.08186508 | 18.62105924 |
| ENSMUSG00000031639 | 7.074518513 | 13.91234488 | 7.061510478 | 3.221830688 | 10.7429188  |
| ENSMUSG00000031640 | 7.781970364 | 7.651789682 | 9.179963621 | 4.832746033 | 7.87814045  |
| ENSMUSG00000031641 | 7.781970364 | 13.21672763 | 14.12302096 | 5.638203705 | 7.161945863 |
| ENSMUSG00000031644 | 12.02668147 | 17.39043109 | 10.59226572 | 24.16373016 | 24.35061594 |
| ENSMUSG00000031647 | 8.489422215 | 7.651789682 | 4.943057334 | 8.054576721 | 4.297167518 |
| ENSMUSG00000031652 | 45.98437033 | 68.86610713 | 53.66747963 | 134.5114312 | 109.5777717 |
| ENSMUSG00000031654 | 8.489422215 | 3.478086219 | 9.179963621 | 4.832746033 | 4.297167518 |
| ENSMUSG00000031657 | 2.829807405 | 1.391234488 | 0.706151048 | 1.610915344 | 0.716194586 |

|                    |             |             |             |             |             |
|--------------------|-------------|-------------|-------------|-------------|-------------|
| ENSMUSG00000031659 | 9.904325918 | 13.21672763 | 16.94762515 | 4.02728836  | 8.594335036 |
| ENSMUSG00000031660 | 67.91537772 | 89.73462445 | 78.3827663  | 124.0404815 | 98.83485292 |
| ENSMUSG00000031661 | 4.244711108 | 4.869320706 | 4.236906287 | 4.832746033 | 5.729556691 |
| ENSMUSG00000031666 | 55.1812444  | 68.86610713 | 81.20737049 | 70.07481747 | 66.60609653 |
| ENSMUSG00000031667 | 16.27139258 | 31.99839321 | 31.0706461  | 20.94189947 | 23.63442135 |
| ENSMUSG00000031668 | 84.89422215 | 109.2119073 | 100.2734488 | 132.9005159 | 105.9967988 |
| ENSMUSG00000031669 | 30.4204296  | 29.91154148 | 18.35992724 | 46.71654498 | 43.68786977 |
| ENSMUSG00000031671 | 14.14903703 | 15.99919661 | 13.41686991 | 50.74383334 | 30.08017263 |
| ENSMUSG00000031681 | 9.904325918 | 18.78166558 | 21.18453143 | 17.72006879 | 16.47247549 |
| ENSMUSG00000031683 | 27.5906222  | 34.08524495 | 34.60140134 | 71.68573282 | 62.30892901 |
| ENSMUSG00000031684 | 93.38364437 | 158.6007316 | 127.8133396 | 182.8388916 | 169.0219224 |
| ENSMUSG00000031691 | 32.54278516 | 54.25814501 | 59.31668801 | 151.4260424 | 112.4425501 |
| ENSMUSG00000031697 | 128.7562369 | 215.6413456 | 161.0024389 | 298.0193387 | 219.871738  |
| ENSMUSG00000031698 | 12.02668147 | 5.56493795  | 7.767661525 | 10.47094974 | 12.17530797 |
| ENSMUSG00000031700 | 5.65961481  | 6.956172438 | 11.29841676 | 8.860034393 | 10.7429188  |
| ENSMUSG00000031708 | 60.13340736 | 107.1250555 | 84.03197468 | 140.1496349 | 121.0368851 |
| ENSMUSG00000031709 | 11.31922962 | 14.60796212 | 11.29841676 | 37.85651059 | 37.24211849 |
| ENSMUSG00000031712 | 9.196874066 | 8.347406925 | 7.061510478 | 10.47094974 | 7.161945863 |
| ENSMUSG00000031715 | 71.45263698 | 99.47326586 | 91.09348516 | 173.1733995 | 137.5093606 |
| ENSMUSG00000031722 | 3.537259256 | 4.173703463 | 9.179963621 | 4.02728836  | 4.297167518 |
| ENSMUSG00000031728 | 43.86201478 | 51.47567604 | 43.07521391 | 47.52200265 | 40.82309142 |
| ENSMUSG00000031730 | 19.80865184 | 17.39043109 | 13.41686991 | 20.94189947 | 21.48583759 |
| ENSMUSG00000031731 | 62.96321476 | 92.51709342 | 79.7950684  | 148.2042117 | 116.023523  |
| ENSMUSG00000031732 | 43.86201478 | 82.08283477 | 54.37363068 | 47.52200265 | 57.29556691 |
| ENSMUSG00000031734 | 9.196874066 | 9.043024169 | 5.649208382 | 1.610915344 | 5.729556691 |
| ENSMUSG00000031737 | 7.781970364 | 7.651789682 | 5.649208382 | 3.221830688 | 6.445751277 |
| ENSMUSG00000031738 | 12.02668147 | 4.173703463 | 4.236906287 | 4.832746033 | 6.445751277 |
| ENSMUSG00000031748 | 6.367066661 | 5.56493795  | 6.35535943  | 3.221830688 | 5.013362104 |
| ENSMUSG00000031749 | 16.27139258 | 25.73783802 | 16.94762515 | 22.55281482 | 30.08017263 |
| ENSMUSG00000031750 | 14.85648888 | 7.651789682 | 7.767661525 | 8.054576721 | 5.013362104 |
| ENSMUSG00000031751 | 30.4204296  | 64.69240367 | 45.8998181  | 104.7094974 | 95.25387998 |
| ENSMUSG00000031753 | 127.3413332 | 201.0333835 | 169.4762515 | 405.1452091 | 296.5045587 |
| ENSMUSG00000031754 | 93.38364437 | 114.7768452 | 112.2780166 | 169.1461111 | 140.3741389 |
| ENSMUSG00000031758 | 22.63845924 | 39.6501829  | 32.4829482  | 33.02376456 | 22.20203218 |
| ENSMUSG00000031767 | 19.10119998 | 27.82468975 | 28.95219296 | 16.10915344 | 22.20203218 |
| ENSMUSG00000031770 | 114.6071999 | 137.036597  | 134.1686991 | 277.8828969 | 219.871738  |
| ENSMUSG00000031772 | 7.074518513 | 4.173703463 | 9.179963621 | 9.665492065 | 5.013362104 |
| ENSMUSG00000031776 | 14.14903703 | 25.04222078 | 32.4829482  | 33.02376456 | 31.5125618  |
| ENSMUSG00000031778 | 6.367066661 | 8.347406925 | 4.236906287 | 11.27640741 | 8.594335036 |
| ENSMUSG00000031781 | 85.601674   | 125.2111039 | 112.2780166 | 157.8697037 | 129.6312201 |
| ENSMUSG00000031782 | 14.14903703 | 30.60715873 | 28.95219296 | 37.05105292 | 50.84981563 |
| ENSMUSG00000031783 | 57.30359995 | 87.64777272 | 74.85201106 | 105.514955  | 88.80812871 |
| ENSMUSG00000031785 | 7.074518513 | 9.043024169 | 9.179963621 | 7.249119049 | 12.89150255 |

|                    |             |             |             |             |             |
|--------------------|-------------|-------------|-------------|-------------|-------------|
| ENSMUSG00000031788 | 6.367066661 | 3.478086219 | 4.236906287 | 11.27640741 | 5.013362104 |
| ENSMUSG00000031789 | 11.31922962 | 2.086851731 | 7.061510478 | 6.443661377 | 4.297167518 |
| ENSMUSG00000031792 | 31.12788146 | 49.38882431 | 45.8998181  | 45.10562964 | 52.99839939 |
| ENSMUSG00000031802 | 48.81417774 | 102.9513521 | 82.61967259 | 39.46742593 | 59.44415067 |
| ENSMUSG00000031805 | 16.27139258 | 18.08604834 | 17.65377619 | 51.54929101 | 42.25548059 |
| ENSMUSG00000031807 | 63.67066661 | 87.64777272 | 69.90895373 | 111.1531587 | 97.40246374 |
| ENSMUSG00000031809 | 14.85648888 | 5.56493795  | 3.530755239 | 6.443661377 | 8.594335036 |
| ENSMUSG00000031812 | 125.9264295 | 141.2103005 | 127.1071886 | 87.79488626 | 92.38910164 |
| ENSMUSG00000031816 | 31.12788146 | 38.25894841 | 28.95219296 | 37.05105292 | 39.39070225 |
| ENSMUSG00000031818 | 55.1812444  | 91.82147618 | 84.73812573 | 247.2755053 | 194.8049275 |
| ENSMUSG00000031819 | 4.244711108 | 9.738641413 | 12.00456781 | 30.60739154 | 25.78300511 |
| ENSMUSG00000031821 | 15.56394073 | 11.82549314 | 18.35992724 | 32.21830688 | 25.06681052 |
| ENSMUSG00000031822 | 7.074518513 | 3.478086219 | 6.35535943  | 8.054576721 | 6.445751277 |
| ENSMUSG00000031823 | 108.2401332 | 156.5138799 | 136.9933033 | 115.9859048 | 128.9150255 |
| ENSMUSG00000031824 | 5.65961481  | 4.869320706 | 7.767661525 | 7.249119049 | 5.729556691 |
| ENSMUSG00000031825 | 5.65961481  | 6.956172438 | 7.061510478 | 5.638203705 | 6.445751277 |
| ENSMUSG00000031826 | 0           | 0           | 0.706151048 | 0           | 1.432389173 |
| ENSMUSG00000031827 | 157.7617628 | 189.2078903 | 154.6470795 | 147.398754  | 116.023523  |
| ENSMUSG00000031832 | 7.781970364 | 12.52111039 | 11.29841676 | 8.860034393 | 18.62105924 |
| ENSMUSG00000031833 | 64.37811846 | 86.25653823 | 90.38733411 | 113.5695318 | 103.848215  |
| ENSMUSG00000031834 | 16.27139258 | 32.69401046 | 31.77679715 | 40.2728836  | 38.67450766 |
| ENSMUSG00000031835 | 117.4370073 | 139.1234488 | 117.927225  | 157.0642461 | 145.387501  |
| ENSMUSG00000031837 | 5.65961481  | 6.260555194 | 7.061510478 | 9.665492065 | 8.594335036 |
| ENSMUSG00000031838 | 26.1757185  | 32.69401046 | 27.53989086 | 219.0844868 | 161.1437819 |
| ENSMUSG00000031840 | 20.51610369 | 28.52030699 | 26.12758877 | 11.27640741 | 23.63442135 |
| ENSMUSG00000031841 | 7.781970364 | 8.347406925 | 6.35535943  | 4.832746033 | 4.297167518 |
| ENSMUSG00000031842 | 10.61177777 | 8.347406925 | 9.179963621 | 8.860034393 | 5.729556691 |
| ENSMUSG00000031845 | 7.781970364 | 9.043024169 | 7.061510478 | 7.249119049 | 9.310529622 |
| ENSMUSG00000031848 | 25.46826665 | 30.60715873 | 37.42600553 | 92.62763229 | 75.91662615 |
| ENSMUSG00000031851 | 5.65961481  | 4.173703463 | 7.061510478 | 7.249119049 | 7.161945863 |
| ENSMUSG00000031858 | 238.4112739 | 301.8978838 | 293.7588359 | 307.6848307 | 270.0053591 |
| ENSMUSG00000031860 | 15.56394073 | 14.60796212 | 15.53532305 | 11.27640741 | 12.17530797 |
| ENSMUSG00000031861 | 33.95768886 | 52.86691053 | 48.7244223  | 33.82922223 | 27.21539428 |
| ENSMUSG00000031862 | 58.0110518  | 95.99517964 | 67.79050059 | 190.0880106 | 148.968474  |
| ENSMUSG00000031864 | 14.14903703 | 18.78166558 | 26.12758877 | 25.77464551 | 35.09353473 |
| ENSMUSG00000031865 | 35.37259256 | 71.64857611 | 70.61510478 | 42.68925662 | 56.57937232 |
| ENSMUSG00000031870 | 4.244711108 | 10.43425866 | 8.473812573 | 5.638203705 | 5.729556691 |
| ENSMUSG00000031872 | 7.781970364 | 5.56493795  | 4.943057334 | 7.249119049 | 7.161945863 |
| ENSMUSG00000031878 | 65.79302217 | 94.60394515 | 78.3827663  | 60.40932541 | 63.74131818 |
| ENSMUSG00000031879 | 11.31922962 | 21.56413456 | 24.71528667 | 43.49471429 | 40.82309142 |
| ENSMUSG00000031883 | 60.84085921 | 94.60394515 | 80.50121945 | 66.85298678 | 58.01176149 |
| ENSMUSG00000031885 | 3.537259256 | 9.043024169 | 5.649208382 | 5.638203705 | 6.445751277 |
| ENSMUSG00000031886 | 12.73413332 | 2.782468975 | 7.767661525 | 7.249119049 | 5.729556691 |

|                    |             |             |             |             |             |
|--------------------|-------------|-------------|-------------|-------------|-------------|
| ENSMUSG00000031887 | 24.05336294 | 49.38882431 | 45.19366706 | 27.38556085 | 37.95831308 |
| ENSMUSG00000031901 | 9.904325918 | 15.30357936 | 16.94762515 | 4.832746033 | 15.7562809  |
| ENSMUSG00000031902 | 71.45263698 | 115.4724625 | 84.03197468 | 207.0026217 | 174.7514791 |
| ENSMUSG00000031910 | 10.61177777 | 7.651789682 | 7.061510478 | 9.665492065 | 8.594335036 |
| ENSMUSG00000031916 | 96.92090362 | 139.1234488 | 120.0456781 | 299.630254  | 230.6146568 |
| ENSMUSG00000031917 | 84.89422215 | 121.7330177 | 114.3964697 | 276.2719815 | 209.1288192 |
| ENSMUSG00000031918 | 46.69182218 | 89.0390072  | 70.61510478 | 99.87675134 | 95.97007457 |
| ENSMUSG00000031921 | 4.952162959 | 6.260555194 | 7.061510478 | 3.221830688 | 3.580972932 |
| ENSMUSG00000031922 | 83.47931845 | 132.1672763 | 99.56729774 | 168.3406535 | 141.0903335 |
| ENSMUSG00000031925 | 2.122355554 | 6.956172438 | 2.118453143 | 0.805457672 | 5.729556691 |
| ENSMUSG00000031928 | 37.49494812 | 65.38802092 | 62.84744325 | 109.5422434 | 94.5376854  |
| ENSMUSG00000031930 | 45.98437033 | 64.69240367 | 66.37819849 | 41.88379895 | 60.87653984 |
| ENSMUSG00000031932 | 6.367066661 | 8.347406925 | 5.649208382 | 9.665492065 | 9.310529622 |
| ENSMUSG00000031933 | 7.074518513 | 9.043024169 | 6.35535943  | 4.832746033 | 7.161945863 |
| ENSMUSG00000031934 | 63.67066661 | 84.86530374 | 89.68118307 | 86.98942859 | 75.20043157 |
| ENSMUSG00000031938 | 39.61730367 | 54.25814501 | 51.54902649 | 277.0774392 | 190.50776   |
| ENSMUSG00000031939 | 41.03220737 | 65.38802092 | 55.07978173 | 258.5519127 | 198.3859004 |
| ENSMUSG00000031948 | 109.6550369 | 137.7322143 | 117.2210739 | 215.8626561 | 185.4943979 |
| ENSMUSG00000031949 | 21.93100739 | 22.2597518  | 24.71528667 | 21.74735715 | 22.20203218 |
| ENSMUSG00000031955 | 7.781970364 | 4.173703463 | 5.649208382 | 7.249119049 | 7.161945863 |
| ENSMUSG00000031958 | 10.61177777 | 7.651789682 | 11.29841676 | 12.88732275 | 7.87814045  |
| ENSMUSG00000031959 | 37.49494812 | 59.12746572 | 58.61053696 | 122.4295662 | 103.1320204 |
| ENSMUSG00000031960 | 29.71297775 | 50.08444155 | 44.48751601 | 99.07129367 | 88.80812871 |
| ENSMUSG00000031965 | 9.904325918 | 5.56493795  | 4.943057334 | 3.221830688 | 6.445751277 |
| ENSMUSG00000031967 | 40.32475552 | 75.82227957 | 77.67661525 | 76.51847885 | 78.06520991 |
| ENSMUSG00000031969 | 9.196874066 | 15.99919661 | 10.59226572 | 15.30369577 | 7.87814045  |
| ENSMUSG00000031970 | 7.781970364 | 4.173703463 | 7.061510478 | 6.443661377 | 6.445751277 |
| ENSMUSG00000031971 | 18.39374813 | 13.91234488 | 12.00456781 | 22.55281482 | 22.91822676 |
| ENSMUSG00000031976 | 32.54278516 | 45.21512085 | 36.71985448 | 86.18397091 | 66.60609653 |
| ENSMUSG00000031979 | 81.3569629  | 123.1242521 | 103.098053  | 104.7094974 | 101.6996313 |
| ENSMUSG00000031988 | 36.08004441 | 31.99839321 | 31.77679715 | 40.2728836  | 41.53928601 |
| ENSMUSG00000031990 | 5.65961481  | 10.43425866 | 12.00456781 | 5.638203705 | 8.594335036 |
| ENSMUSG00000031991 | 12.02668147 | 6.956172438 | 8.473812573 | 8.860034393 | 4.297167518 |
| ENSMUSG00000031994 | 7.074518513 | 5.56493795  | 6.35535943  | 3.221830688 | 3.580972932 |
| ENSMUSG00000031996 | 10.61177777 | 21.56413456 | 16.94762515 | 20.94189947 | 15.7562809  |
| ENSMUSG00000032000 | 89.84638511 | 105.7338211 | 95.33039145 | 205.3917064 | 160.4275873 |
| ENSMUSG00000032002 | 81.3569629  | 144.6883867 | 108.0411103 | 184.4498069 | 131.7798039 |
| ENSMUSG00000032006 | 12.73413332 | 4.869320706 | 7.061510478 | 4.832746033 | 5.729556691 |
| ENSMUSG00000032010 | 5.65961481  | 9.043024169 | 4.943057334 | 4.02728836  | 5.729556691 |
| ENSMUSG00000032015 | 5.65961481  | 4.869320706 | 4.236906287 | 8.054576721 | 8.594335036 |
| ENSMUSG00000032017 | 10.61177777 | 4.173703463 | 7.061510478 | 5.638203705 | 7.161945863 |
| ENSMUSG00000032018 | 37.49494812 | 67.47487265 | 67.08434954 | 122.4295662 | 102.4158258 |
| ENSMUSG00000032020 | 7.074518513 | 9.043024169 | 10.59226572 | 9.665492065 | 10.02672421 |

|                    |             |             |             |             |             |
|--------------------|-------------|-------------|-------------|-------------|-------------|
| ENSMUSG00000032021 | 9.196874066 | 2.782468975 | 7.061510478 | 6.443661377 | 7.87814045  |
| ENSMUSG00000032024 | 4.952162959 | 3.478086219 | 4.236906287 | 8.054576721 | 11.45911338 |
| ENSMUSG00000032028 | 6.367066661 | 13.21672763 | 20.47838039 | 9.665492065 | 12.17530797 |
| ENSMUSG00000032030 | 24.76081479 | 43.82388636 | 40.25060972 | 16.10915344 | 22.20203218 |
| ENSMUSG00000032033 | 10.61177777 | 4.869320706 | 8.473812573 | 4.02728836  | 10.7429188  |
| ENSMUSG00000032035 | 203.0386813 | 203.8158524 | 206.1961059 | 202.9753334 | 149.6846685 |
| ENSMUSG00000032036 | 7.074518513 | 4.869320706 | 8.473812573 | 4.832746033 | 4.297167518 |
| ENSMUSG00000032040 | 25.46826665 | 46.60635533 | 54.37363068 | 39.46742593 | 43.68786977 |
| ENSMUSG00000032041 | 21.93100739 | 38.25894841 | 36.01370344 | 21.74735715 | 23.63442135 |
| ENSMUSG00000032042 | 33.25023701 | 56.34499675 | 53.66747963 | 122.4295662 | 98.83485292 |
| ENSMUSG00000032046 | 43.86201478 | 70.25734162 | 72.73355792 | 60.40932541 | 52.99839939 |
| ENSMUSG00000032050 | 28.29807405 | 33.3896277  | 36.01370344 | 41.07834128 | 33.66114556 |
| ENSMUSG00000032056 | 13.44158517 | 5.56493795  | 7.767661525 | 5.638203705 | 8.594335036 |
| ENSMUSG00000032058 | 28.29807405 | 34.08524495 | 29.65834401 | 33.82922223 | 32.94495097 |
| ENSMUSG00000032059 | 19.10119998 | 38.95456565 | 31.77679715 | 53.96566403 | 45.12025894 |
| ENSMUSG00000032060 | 7.781970364 | 9.043024169 | 4.236906287 | 8.054576721 | 14.32389173 |
| ENSMUSG00000032064 | 8.489422215 | 5.56493795  | 10.59226572 | 3.221830688 | 5.013362104 |
| ENSMUSG00000032068 | 7.074518513 | 8.347406925 | 5.649208382 | 4.02728836  | 8.594335036 |
| ENSMUSG00000032076 | 11.31922962 | 4.869320706 | 4.943057334 | 5.638203705 | 3.580972932 |
| ENSMUSG00000032078 | 34.66514071 | 55.6493795  | 48.7244223  | 120.8186508 | 78.7814045  |
| ENSMUSG00000032079 | 4.952162959 | 6.260555194 | 10.59226572 | 6.443661377 | 7.161945863 |
| ENSMUSG00000032081 | 3.537259256 | 6.260555194 | 13.41686991 | 12.08186508 | 9.310529622 |
| ENSMUSG00000032086 | 5.65961481  | 4.869320706 | 8.473812573 | 10.47094974 | 11.45911338 |
| ENSMUSG00000032089 | 55.88869625 | 68.17048989 | 69.90895373 | 65.24207144 | 52.99839939 |
| ENSMUSG00000032091 | 2.122355554 | 9.043024169 | 7.061510478 | 9.665492065 | 8.594335036 |
| ENSMUSG00000032096 | 135.8307554 | 177.3823972 | 144.0548137 | 237.6100133 | 191.9401491 |
| ENSMUSG00000032097 | 186.7672887 | 207.2939386 | 210.4330122 | 371.3159868 | 280.7482778 |
| ENSMUSG00000032098 | 9.904325918 | 4.173703463 | 5.649208382 | 6.443661377 | 9.310529622 |
| ENSMUSG00000032103 | 50.93653329 | 68.17048989 | 64.25974535 | 96.65492065 | 81.64618284 |
| ENSMUSG00000032109 | 8.489422215 | 12.52111039 | 6.35535943  | 8.054576721 | 5.729556691 |
| ENSMUSG00000032112 | 58.0110518  | 119.6461659 | 100.2734488 | 257.7464551 | 204.1154571 |
| ENSMUSG00000032113 | 23.34591109 | 22.2597518  | 20.47838039 | 46.71654498 | 30.79636721 |
| ENSMUSG00000032115 | 38.20239997 | 48.69320706 | 45.8998181  | 170.7570265 | 135.3607768 |
| ENSMUSG00000032116 | 93.38364437 | 111.9943762 | 84.03197468 | 190.0880106 | 150.4008631 |
| ENSMUSG00000032118 | 9.904325918 | 9.043024169 | 11.29841676 | 0.805457672 | 5.729556691 |
| ENSMUSG00000032120 | 33.95768886 | 41.73703463 | 42.36906287 | 41.07834128 | 37.95831308 |
| ENSMUSG00000032122 | 21.93100739 | 36.86771392 | 43.78136496 | 37.85651059 | 29.36397804 |
| ENSMUSG00000032125 | 10.61177777 | 5.56493795  | 6.35535943  | 5.638203705 | 7.87814045  |
| ENSMUSG00000032126 | 23.34591109 | 37.56333116 | 28.24604191 | 50.74383334 | 54.43078856 |
| ENSMUSG00000032128 | 8.489422215 | 6.260555194 | 5.649208382 | 4.832746033 | 8.594335036 |
| ENSMUSG00000032131 | 6.367066661 | 10.43425866 | 7.061510478 | 6.443661377 | 8.594335036 |
| ENSMUSG00000032135 | 7.074518513 | 5.56493795  | 10.59226572 | 6.443661377 | 5.729556691 |
| ENSMUSG00000032175 | 29.71297775 | 31.30277597 | 26.83373982 | 26.58010318 | 31.5125618  |

|                    |             |             |             |             |             |
|--------------------|-------------|-------------|-------------|-------------|-------------|
| ENSMUSG00000032177 | 6.367066661 | 9.043024169 | 7.767661525 | 8.054576721 | 5.729556691 |
| ENSMUSG00000032178 | 72.86754068 | 99.47326586 | 79.08891735 | 218.2790291 | 152.5494469 |
| ENSMUSG00000032180 | 8.489422215 | 17.39043109 | 19.77222934 | 33.82922223 | 25.06681052 |
| ENSMUSG00000032182 | 31.12788146 | 43.82388636 | 31.77679715 | 89.4058016  | 73.05184781 |
| ENSMUSG00000032185 | 19.80865184 | 27.82468975 | 36.71985448 | 70.07481747 | 51.56601022 |
| ENSMUSG00000032186 | 7.781970364 | 5.56493795  | 8.473812573 | 4.832746033 | 9.310529622 |
| ENSMUSG00000032187 | 109.6550369 | 153.0357936 | 109.4534124 | 178.0061455 | 157.562809  |
| ENSMUSG00000032199 | 92.67619252 | 114.7768452 | 108.7472614 | 211.8353678 | 163.2923657 |
| ENSMUSG00000032202 | 21.93100739 | 34.78086219 | 37.42600553 | 26.58010318 | 32.22875639 |
| ENSMUSG00000032204 | 8.489422215 | 6.260555194 | 4.943057334 | 5.638203705 | 7.161945863 |
| ENSMUSG00000032207 | 5.65961481  | 6.260555194 | 11.29841676 | 6.443661377 | 10.02672421 |
| ENSMUSG00000032215 | 41.03220737 | 70.95295887 | 73.43970897 | 198.948045  | 164.7247549 |
| ENSMUSG00000032216 | 27.5906222  | 38.95456565 | 30.36449505 | 39.46742593 | 51.56601022 |
| ENSMUSG00000032217 | 89.13893326 | 121.0374004 | 101.6857509 | 178.0061455 | 133.2121931 |
| ENSMUSG00000032220 | 71.45263698 | 131.4716591 | 111.5718655 | 124.8459392 | 116.023523  |
| ENSMUSG00000032221 | 10.61177777 | 19.47728283 | 11.29841676 | 15.30369577 | 17.18867007 |
| ENSMUSG00000032224 | 6.367066661 | 8.347406925 | 7.061510478 | 4.02728836  | 7.87814045  |
| ENSMUSG00000032228 | 44.56946663 | 70.25734162 | 58.61053696 | 68.46390213 | 65.17370736 |
| ENSMUSG00000032231 | 5.65961481  | 3.478086219 | 4.236906287 | 5.638203705 | 5.013362104 |
| ENSMUSG00000032232 | 11.31922962 | 8.347406925 | 6.35535943  | 5.638203705 | 5.729556691 |
| ENSMUSG00000032235 | 23.34591109 | 35.47647943 | 30.36449505 | 33.82922223 | 32.94495097 |
| ENSMUSG00000032238 | 4.952162959 | 6.260555194 | 7.061510478 | 5.638203705 | 3.580972932 |
| ENSMUSG00000032239 | 60.84085921 | 69.56172438 | 75.55816211 | 72.49119049 | 60.87653984 |
| ENSMUSG00000032245 | 4.952162959 | 9.043024169 | 12.00456781 | 7.249119049 | 9.310529622 |
| ENSMUSG00000032246 | 9.904325918 | 5.56493795  | 5.649208382 | 9.665492065 | 5.013362104 |
| ENSMUSG00000032249 | 35.37259256 | 69.56172438 | 57.90438592 | 188.4770953 | 159.7113928 |
| ENSMUSG00000032251 | 6.367066661 | 12.52111039 | 6.35535943  | 24.16373016 | 15.7562809  |
| ENSMUSG00000032252 | 0           | 0           | 0           | 0           | 0.716194586 |
| ENSMUSG00000032253 | 76.40479994 | 100.1688831 | 79.7950684  | 192.5043836 | 156.8466144 |
| ENSMUSG00000032254 | 23.34591109 | 31.99839321 | 29.65834401 | 73.29664816 | 49.41742646 |
| ENSMUSG00000032258 | 14.14903703 | 25.04222078 | 14.829172   | 23.35827249 | 17.90486466 |
| ENSMUSG00000032261 | 9.196874066 | 8.347406925 | 5.649208382 | 7.249119049 | 6.445751277 |
| ENSMUSG00000032262 | 7.074518513 | 4.173703463 | 7.767661525 | 4.832746033 | 3.580972932 |
| ENSMUSG00000032263 | 10.61177777 | 14.60796212 | 16.2414741  | 21.74735715 | 15.04008631 |
| ENSMUSG00000032265 | 29.71297775 | 36.17209668 | 30.36449505 | 15.30369577 | 19.33725383 |
| ENSMUSG00000032268 | 9.196874066 | 11.82549314 | 5.649208382 | 6.443661377 | 8.594335036 |
| ENSMUSG00000032271 | 7.781970364 | 11.1298759  | 5.649208382 | 9.665492065 | 9.310529622 |
| ENSMUSG00000032278 | 7.781970364 | 4.173703463 | 7.767661525 | 8.860034393 | 2.148583759 |
| ENSMUSG00000032279 | 28.29807405 | 28.52030699 | 38.13215658 | 68.46390213 | 52.2822048  |
| ENSMUSG00000032280 | 56.5961481  | 91.82147618 | 77.67661525 | 60.40932541 | 76.63282074 |
| ENSMUSG00000032281 | 7.781970364 | 7.651789682 | 5.649208382 | 8.054576721 | 7.161945863 |
| ENSMUSG00000032285 | 7.781970364 | 5.56493795  | 9.886114669 | 10.47094974 | 9.310529622 |
| ENSMUSG00000032289 | 7.781970364 | 8.347406925 | 7.061510478 | 8.860034393 | 10.7429188  |

|                    |             |             |             |             |             |
|--------------------|-------------|-------------|-------------|-------------|-------------|
| ENSMUSG00000032294 | 24.05336294 | 45.91073809 | 40.95676077 | 205.3917064 | 138.9417498 |
| ENSMUSG00000032295 | 26.88317035 | 22.2597518  | 32.4829482  | 42.68925662 | 51.56601022 |
| ENSMUSG00000032297 | 11.31922962 | 6.956172438 | 10.59226572 | 8.860034393 | 8.594335036 |
| ENSMUSG00000032298 | 29.0055259  | 36.17209668 | 40.95676077 | 22.55281482 | 19.33725383 |
| ENSMUSG00000032299 | 26.88317035 | 39.6501829  | 32.4829482  | 16.10915344 | 21.48583759 |
| ENSMUSG00000032301 | 36.78749627 | 52.86691053 | 53.66747963 | 109.5422434 | 104.5644096 |
| ENSMUSG00000032305 | 19.80865184 | 24.34660353 | 30.36449505 | 47.52200265 | 45.83645353 |
| ENSMUSG00000032306 | 14.14903703 | 18.78166558 | 26.12758877 | 20.94189947 | 18.62105924 |
| ENSMUSG00000032307 | 19.80865184 | 27.82468975 | 20.47838039 | 26.58010318 | 23.63442135 |
| ENSMUSG00000032309 | 18.39374813 | 41.73703463 | 35.30755239 | 39.46742593 | 34.37734014 |
| ENSMUSG00000032311 | 8.489422215 | 9.043024169 | 5.649208382 | 3.221830688 | 10.02672421 |
| ENSMUSG00000032313 | 7.781970364 | 4.173703463 | 3.530755239 | 4.832746033 | 7.161945863 |
| ENSMUSG00000032314 | 24.05336294 | 35.47647943 | 23.30298458 | 61.21478308 | 47.2688427  |
| ENSMUSG00000032318 | 4.952162959 | 2.782468975 | 7.061510478 | 5.638203705 | 5.013362104 |
| ENSMUSG00000032322 | 68.62282957 | 82.77845201 | 86.15042783 | 117.5968201 | 104.5644096 |
| ENSMUSG00000032323 | 8.489422215 | 9.738641413 | 9.886114669 | 13.69278043 | 12.17530797 |
| ENSMUSG00000032324 | 12.02668147 | 19.47728283 | 13.41686991 | 29.80193387 | 32.22875639 |
| ENSMUSG00000032327 | 4.952162959 | 5.56493795  | 2.824604191 | 4.02728836  | 2.864778345 |
| ENSMUSG00000032328 | 70.03773327 | 89.73462445 | 77.67661525 | 128.0677699 | 95.97007457 |
| ENSMUSG00000032332 | 7.781970364 | 13.21672763 | 9.179963621 | 4.02728836  | 6.445751277 |
| ENSMUSG00000032334 | 7.074518513 | 3.478086219 | 9.886114669 | 7.249119049 | 6.445751277 |
| ENSMUSG00000032336 | 32.54278516 | 66.7792554  | 57.90438592 | 145.7878386 | 107.429188  |
| ENSMUSG00000032342 | 21.22355554 | 36.86771392 | 39.54445867 | 54.7711217  | 32.22875639 |
| ENSMUSG00000032343 | 12.73413332 | 10.43425866 | 7.767661525 | 6.443661377 | 4.297167518 |
| ENSMUSG00000032344 | 4.244711108 | 5.56493795  | 7.767661525 | 4.832746033 | 8.594335036 |
| ENSMUSG00000032349 | 24.05336294 | 64.69240367 | 53.66747963 | 68.46390213 | 58.01176149 |
| ENSMUSG00000032352 | 16.27139258 | 20.17290007 | 24.00913562 | 41.07834128 | 45.12025894 |
| ENSMUSG00000032355 | 8.489422215 | 6.260555194 | 8.473812573 | 3.221830688 | 10.7429188  |
| ENSMUSG00000032356 | 3.537259256 | 4.869320706 | 4.236906287 | 4.02728836  | 7.87814045  |
| ENSMUSG00000032357 | 6.367066661 | 5.56493795  | 9.179963621 | 5.638203705 | 5.729556691 |
| ENSMUSG00000032358 | 9.904325918 | 4.869320706 | 12.71071886 | 2.416373016 | 3.580972932 |
| ENSMUSG00000032359 | 159.1766665 | 164.1656695 | 151.8224753 | 145.7878386 | 121.0368851 |
| ENSMUSG00000032360 | 7.074518513 | 6.260555194 | 7.767661525 | 5.638203705 | 7.87814045  |
| ENSMUSG00000032363 | 9.196874066 | 9.043024169 | 12.71071886 | 4.832746033 | 9.310529622 |
| ENSMUSG00000032366 | 16.27139258 | 16.69481385 | 10.59226572 | 12.08186508 | 7.161945863 |
| ENSMUSG00000032368 | 9.196874066 | 4.173703463 | 6.35535943  | 1.610915344 | 5.013362104 |
| ENSMUSG00000032369 | 10.61177777 | 9.738641413 | 11.29841676 | 49.132918   | 35.09353473 |
| ENSMUSG00000032372 | 8.489422215 | 9.738641413 | 2.824604191 | 6.443661377 | 7.161945863 |
| ENSMUSG00000032373 | 7.781970364 | 6.260555194 | 2.824604191 | 4.832746033 | 7.87814045  |
| ENSMUSG00000032374 | 6.367066661 | 4.173703463 | 6.35535943  | 7.249119049 | 4.297167518 |
| ENSMUSG00000032375 | 5.65961481  | 6.260555194 | 9.179963621 | 9.665492065 | 5.013362104 |
| ENSMUSG00000032376 | 93.38364437 | 111.298759  | 99.56729774 | 167.5351958 | 143.2389173 |
| ENSMUSG00000032382 | 54.47379255 | 111.9943762 | 68.49665163 | 95.84946298 | 98.11865833 |



|                    |              |             |             |             |             |
|--------------------|--------------|-------------|-------------|-------------|-------------|
| ENSMUSG00000032384 | 54.47379255  | 95.2995624  | 82.61967259 | 92.62763229 | 100.2672421 |
| ENSMUSG00000032386 | 59.42595551  | 95.99517964 | 67.79050059 | 62.82569842 | 68.75468029 |
| ENSMUSG00000032387 | 7.074518513  | 9.738641413 | 5.649208382 | 2.416373016 | 6.445751277 |
| ENSMUSG00000032392 | 16.27139258  | 11.1298759  | 15.53532305 | 13.69278043 | 12.89150255 |
| ENSMUSG00000032393 | 42.447111108 | 66.08363816 | 60.02283906 | 63.6311561  | 78.7814045  |
| ENSMUSG00000032396 | 10.61177777  | 18.78166558 | 14.829172   | 33.82922223 | 30.79636721 |
| ENSMUSG00000032400 | 106.1177777  | 150.2533247 | 96.74269354 | 402.728836  | 272.8701374 |
| ENSMUSG00000032401 | 7.781970364  | 6.956172438 | 10.59226572 | 4.832746033 | 5.729556691 |
| ENSMUSG00000032402 | 16.27139258  | 29.91154148 | 30.36449505 | 28.9964762  | 34.37734014 |
| ENSMUSG00000032405 | 139.3680147  | 155.8182626 | 153.2347774 | 137.7332619 | 105.2806042 |
| ENSMUSG00000032407 | 101.1656147  | 149.5577074 | 124.2825844 | 195.7262143 | 164.0085603 |
| ENSMUSG00000032409 | 15.56394073  | 34.08524495 | 25.42143772 | 39.46742593 | 29.36397804 |
| ENSMUSG00000032410 | 72.16008883  | 127.2979556 | 81.20737049 | 110.3477011 | 94.5376854  |
| ENSMUSG00000032411 | 12.73413332  | 11.1298759  | 12.71071886 | 12.88732275 | 11.45911338 |
| ENSMUSG00000032413 | 34.66514071  | 57.73623123 | 38.83830763 | 103.9040397 | 85.22715578 |
| ENSMUSG00000032415 | 7.781970364  | 11.1298759  | 9.179963621 | 9.665492065 | 10.7429188  |
| ENSMUSG00000032417 | 9.904325918  | 19.47728283 | 17.65377619 | 12.88732275 | 18.62105924 |
| ENSMUSG00000032418 | 8.489422215  | 4.869320706 | 8.473812573 | 3.221830688 | 3.580972932 |
| ENSMUSG00000032422 | 12.73413332  | 26.43345526 | 17.65377619 | 16.10915344 | 19.33725383 |
| ENSMUSG00000032423 | 37.49494812  | 47.99758982 | 52.25517753 | 232.7772672 | 186.926787  |
| ENSMUSG00000032425 | 21.22355554  | 48.69320706 | 36.71985448 | 33.82922223 | 28.64778345 |
| ENSMUSG00000032436 | 82.06441475  | 129.3848073 | 120.0456781 | 84.57305557 | 95.97007457 |
| ENSMUSG00000032437 | 103.2879703  | 113.3856107 | 103.804204  | 220.6954022 | 181.9134249 |
| ENSMUSG00000032440 | 159.8841184  | 162.774435  | 134.8748501 | 218.2790291 | 196.2373167 |
| ENSMUSG00000032446 | 7.074518513  | 8.347406925 | 6.35535943  | 4.02728836  | 9.310529622 |
| ENSMUSG00000032449 | 52.35143699  | 79.99598303 | 52.96132858 | 88.60034393 | 69.47087488 |
| ENSMUSG00000032452 | 7.781970364  | 7.651789682 | 7.767661525 | 4.02728836  | 7.87814045  |
| ENSMUSG00000032456 | 9.196874066  | 3.478086219 | 6.35535943  | 8.054576721 | 4.297167518 |
| ENSMUSG00000032462 | 5.65961481   | 4.173703463 | 9.179963621 | 4.832746033 | 6.445751277 |
| ENSMUSG00000032463 | 58.71850365  | 89.73462445 | 68.49665163 | 66.85298678 | 47.2688427  |
| ENSMUSG00000032468 | 87.72402956  | 110.6031418 | 91.09348516 | 95.04400531 | 95.97007457 |
| ENSMUSG00000032469 | 41.03220737  | 75.82227957 | 61.43514116 | 138.5387196 | 100.2672421 |
| ENSMUSG00000032470 | 7.781970364  | 4.173703463 | 7.767661525 | 7.249119049 | 7.87814045  |
| ENSMUSG00000032473 | 7.074518513  | 9.043024169 | 6.35535943  | 5.638203705 | 4.297167518 |
| ENSMUSG00000032475 | 92.67619252  | 114.081228  | 107.3349593 | 95.84946298 | 108.8615771 |
| ENSMUSG00000032477 | 23.34591109  | 21.56413456 | 27.53989086 | 222.3063175 | 143.9551119 |
| ENSMUSG00000032478 | 19.10119998  | 14.60796212 | 17.65377619 | 28.19101852 | 32.22875639 |
| ENSMUSG00000032479 | 38.20239997  | 49.38882431 | 61.43514116 | 48.32746033 | 42.97167518 |
| ENSMUSG00000032480 | 37.49494812  | 67.47487265 | 43.07521391 | 89.4058016  | 67.32229112 |
| ENSMUSG00000032481 | 66.50047402  | 95.2995624  | 93.21193831 | 148.2042117 | 128.198831  |
| ENSMUSG00000032485 | 40.32475552  | 85.56092098 | 85.44427678 | 96.65492065 | 84.51096119 |
| ENSMUSG00000032489 | 44.56946663  | 66.7792554  | 67.08434954 | 49.93837567 | 60.87653984 |
| ENSMUSG00000032491 | 9.196874066  | 6.956172438 | 7.061510478 | 5.638203705 | 7.87814045  |

|                    |              |             |             |             |             |
|--------------------|--------------|-------------|-------------|-------------|-------------|
| ENSMUSG00000032492 | 4.952162959  | 8.347406925 | 6.35535943  | 4.832746033 | 5.013362104 |
| ENSMUSG00000032494 | 9.196874066  | 6.956172438 | 7.767661525 | 6.443661377 | 7.87814045  |
| ENSMUSG00000032497 | 19.80865184  | 37.56333116 | 26.12758877 | 17.72006879 | 24.35061594 |
| ENSMUSG00000032500 | 9.904325918  | 6.260555194 | 5.649208382 | 3.221830688 | 4.297167518 |
| ENSMUSG00000032503 | 8.489422215  | 6.956172438 | 5.649208382 | 4.832746033 | 6.445751277 |
| ENSMUSG00000032504 | 134.4158517  | 162.774435  | 152.5286263 | 174.7843148 | 149.6846685 |
| ENSMUSG00000032507 | 9.904325918  | 5.56493795  | 5.649208382 | 8.054576721 | 5.013362104 |
| ENSMUSG00000032511 | 14.85648888  | 3.478086219 | 6.35535943  | 6.443661377 | 4.297167518 |
| ENSMUSG00000032514 | 11.31922962  | 31.30277597 | 36.01370344 | 50.74383334 | 49.41742646 |
| ENSMUSG00000032517 | 7.781970364  | 4.173703463 | 6.35535943  | 7.249119049 | 5.729556691 |
| ENSMUSG00000032519 | 28.29807405  | 37.56333116 | 38.83830763 | 68.46390213 | 65.88990194 |
| ENSMUSG00000032523 | 11.31922962  | 3.478086219 | 4.943057334 | 3.221830688 | 5.013362104 |
| ENSMUSG00000032525 | 42.447111108 | 64.69240367 | 61.43514116 | 147.398754  | 98.83485292 |
| ENSMUSG00000032526 | 21.93100739  | 50.08444155 | 35.30755239 | 46.71654498 | 55.14698315 |
| ENSMUSG00000032527 | 19.10119998  | 22.95536904 | 14.12302096 | 22.55281482 | 16.47247549 |
| ENSMUSG00000032530 | 8.489422215  | 6.260555194 | 4.943057334 | 7.249119049 | 5.729556691 |
| ENSMUSG00000032531 | 6.367066661  | 9.738641413 | 6.35535943  | 4.832746033 | 8.594335036 |
| ENSMUSG00000032534 | 41.03220737  | 69.56172438 | 50.13672439 | 67.65844446 | 57.29556691 |
| ENSMUSG00000032536 | 88.43148141  | 102.2557348 | 118.633376  | 68.46390213 | 58.72795608 |
| ENSMUSG00000032537 | 9.904325918  | 7.651789682 | 6.35535943  | 2.416373016 | 2.864778345 |
| ENSMUSG00000032540 | 9.904325918  | 9.043024169 | 9.179963621 | 7.249119049 | 7.87814045  |
| ENSMUSG00000032547 | 7.781970364  | 11.82549314 | 9.886114669 | 4.832746033 | 10.02672421 |
| ENSMUSG00000032548 | 14.14903703  | 9.738641413 | 4.943057334 | 5.638203705 | 8.594335036 |
| ENSMUSG00000032553 | 30.4204296   | 37.56333116 | 42.36906287 | 50.74383334 | 45.12025894 |
| ENSMUSG00000032554 | 0            | 0           | 0           | 0           | 0           |
| ENSMUSG00000032555 | 33.25023701  | 63.99678643 | 57.19823487 | 126.4568545 | 97.40246374 |
| ENSMUSG00000032556 | 7.074518513  | 10.43425866 | 6.35535943  | 7.249119049 | 5.729556691 |
| ENSMUSG00000032557 | 39.61730367  | 71.64857611 | 59.31668801 | 69.2693598  | 79.49759908 |
| ENSMUSG00000032558 | 10.61177777  | 7.651789682 | 5.649208382 | 4.02728836  | 6.445751277 |
| ENSMUSG00000032560 | 65.79302217  | 100.8645003 | 87.56272992 | 102.2931244 | 74.48423698 |
| ENSMUSG00000032561 | 7.074518513  | 6.260555194 | 5.649208382 | 2.416373016 | 8.594335036 |
| ENSMUSG00000032562 | 167.6660887  | 172.5130765 | 162.414741  | 247.2755053 | 195.5211221 |
| ENSMUSG00000032563 | 20.51610369  | 36.17209668 | 40.25060972 | 98.265836   | 81.64618284 |
| ENSMUSG00000032564 | 7.781970364  | 7.651789682 | 7.061510478 | 6.443661377 | 6.445751277 |
| ENSMUSG00000032567 | 29.0055259   | 46.60635533 | 42.36906287 | 38.66196826 | 48.70123187 |
| ENSMUSG00000032570 | 12.02668147  | 8.347406925 | 4.943057334 | 5.638203705 | 5.729556691 |
| ENSMUSG00000032571 | 47.39927403  | 72.34419335 | 68.49665163 | 58.79841006 | 46.55264811 |
| ENSMUSG00000032575 | 26.1757185   | 40.34580014 | 37.42600553 | 236.8045556 | 170.4543116 |
| ENSMUSG00000032577 | 17.68629628  | 30.60715873 | 26.12758877 | 53.96566403 | 41.53928601 |
| ENSMUSG00000032579 | 10.61177777  | 11.1298759  | 12.71071886 | 55.57657937 | 41.53928601 |
| ENSMUSG00000032580 | 120.9742666  | 143.9927695 | 138.4056054 | 212.6408254 | 169.0219224 |
| ENSMUSG00000032582 | 88.43148141  | 116.863697  | 96.74269354 | 153.8424154 | 140.3741389 |
| ENSMUSG00000032584 | 0.707451851  | 4.173703463 | 1.412302096 | 6.443661377 | 3.580972932 |

|                    |             |             |             |             |             |
|--------------------|-------------|-------------|-------------|-------------|-------------|
| ENSMUSG00000032589 | 12.02668147 | 2.782468975 | 9.179963621 | 7.249119049 | 2.864778345 |
| ENSMUSG00000032590 | 23.34591109 | 45.21512085 | 48.01827125 | 41.88379895 | 45.12025894 |
| ENSMUSG00000032591 | 4.244711108 | 8.347406925 | 6.35535943  | 19.33098413 | 21.48583759 |
| ENSMUSG00000032594 | 128.7562369 | 167.6437558 | 115.8087718 | 151.4260424 | 126.0502472 |
| ENSMUSG00000032595 | 7.074518513 | 12.52111039 | 10.59226572 | 8.860034393 | 9.310529622 |
| ENSMUSG00000032596 | 60.13340736 | 72.34419335 | 58.61053696 | 77.32393652 | 78.06520991 |
| ENSMUSG00000032599 | 180.4002221 | 182.2517179 | 188.5423298 | 116.7913625 | 126.0502472 |
| ENSMUSG00000032601 | 10.61177777 | 13.21672763 | 8.473812573 | 16.91461111 | 17.90486466 |
| ENSMUSG00000032604 | 30.4204296  | 60.51870021 | 53.66747963 | 62.82569842 | 49.41742646 |
| ENSMUSG00000032607 | 10.61177777 | 13.91234488 | 14.829172   | 5.638203705 | 6.445751277 |
| ENSMUSG00000032609 | 5.65961481  | 9.043024169 | 5.649208382 | 7.249119049 | 4.297167518 |
| ENSMUSG00000032612 | 117.4370073 | 144.6883867 | 145.4671158 | 154.647873  | 153.2656415 |
| ENSMUSG00000032615 | 33.25023701 | 52.17129328 | 52.96132858 | 70.88027514 | 75.20043157 |
| ENSMUSG00000032624 | 108.9475851 | 122.4286349 | 126.4010376 | 190.0880106 | 154.6980307 |
| ENSMUSG00000032625 | 8.489422215 | 8.347406925 | 6.35535943  | 3.221830688 | 6.445751277 |
| ENSMUSG00000032633 | 34.66514071 | 54.95376226 | 55.07978173 | 70.88027514 | 73.05184781 |
| ENSMUSG00000032637 | 35.37259256 | 41.04141738 | 40.95676077 | 127.2623122 | 100.2672421 |
| ENSMUSG00000032640 | 69.33028142 | 81.38721752 | 78.3827663  | 85.37851324 | 78.7814045  |
| ENSMUSG00000032641 | 7.781970364 | 11.82549314 | 7.767661525 | 12.88732275 | 13.60769714 |
| ENSMUSG00000032643 | 29.71297775 | 35.47647943 | 38.13215658 | 161.0915344 | 98.83485292 |
| ENSMUSG00000032648 | 10.61177777 | 26.43345526 | 15.53532305 | 9.665492065 | 10.02672421 |
| ENSMUSG00000032649 | 6.367066661 | 7.651789682 | 5.649208382 | 3.221830688 | 5.729556691 |
| ENSMUSG00000032652 | 26.1757185  | 57.73623123 | 46.60596915 | 14.4982381  | 27.21539428 |
| ENSMUSG00000032656 | 17.68629628 | 30.60715873 | 35.30755239 | 67.65844446 | 51.56601022 |
| ENSMUSG00000032657 | 13.44158517 | 11.82549314 | 12.00456781 | 8.860034393 | 10.7429188  |
| ENSMUSG00000032666 | 7.074518513 | 5.56493795  | 9.179963621 | 10.47094974 | 5.729556691 |
| ENSMUSG00000032667 | 50.93653329 | 65.38802092 | 62.84744325 | 57.18749472 | 45.12025894 |
| ENSMUSG00000032679 | 8.489422215 | 9.738641413 | 9.179963621 | 8.860034393 | 10.02672421 |
| ENSMUSG00000032680 | 0.707451851 | 2.086851731 | 2.118453143 | 14.4982381  | 16.47247549 |
| ENSMUSG00000032690 | 13.44158517 | 18.78166558 | 8.473812573 | 12.08186508 | 17.18867007 |
| ENSMUSG00000032691 | 11.31922962 | 9.738641413 | 11.29841676 | 3.221830688 | 2.148583759 |
| ENSMUSG00000032698 | 4.244711108 | 7.651789682 | 7.061510478 | 6.443661377 | 12.17530797 |
| ENSMUSG00000032702 | 3.537259256 | 9.043024169 | 4.236906287 | 3.221830688 | 4.297167518 |
| ENSMUSG00000032712 | 72.86754068 | 130.0804246 | 101.6857509 | 84.57305557 | 91.67290705 |
| ENSMUSG00000032717 | 12.73413332 | 3.478086219 | 8.473812573 | 6.443661377 | 7.161945863 |
| ENSMUSG00000032725 | 9.196874066 | 9.043024169 | 7.767661525 | 4.02728836  | 6.445751277 |
| ENSMUSG00000032726 | 7.074518513 | 6.956172438 | 8.473812573 | 4.832746033 | 3.580972932 |
| ENSMUSG00000032727 | 31.83533331 | 33.3896277  | 29.65834401 | 28.19101852 | 26.49919969 |
| ENSMUSG00000032735 | 4.952162959 | 5.56493795  | 5.649208382 | 4.832746033 | 10.02672421 |
| ENSMUSG00000032737 | 5.65961481  | 6.260555194 | 9.179963621 | 7.249119049 | 7.87814045  |
| ENSMUSG00000032739 | 15.56394073 | 11.1298759  | 18.35992724 | 9.665492065 | 9.310529622 |
| ENSMUSG00000032740 | 5.65961481  | 5.56493795  | 9.886114669 | 8.054576721 | 10.02672421 |
| ENSMUSG00000032743 | 69.33028142 | 102.2557348 | 98.15499564 | 93.43308996 | 107.429188  |

|                    |             |             |             |             |             |
|--------------------|-------------|-------------|-------------|-------------|-------------|
| ENSMUSG00000032745 | 128.0487851 | 139.1234488 | 132.756397  | 215.0571984 | 146.1036956 |
| ENSMUSG00000032750 | 7.781970364 | 13.91234488 | 12.71071886 | 10.47094974 | 2.864778345 |
| ENSMUSG00000032754 | 22.63845924 | 19.47728283 | 19.77222934 | 14.4982381  | 12.89150255 |
| ENSMUSG00000032763 | 19.80865184 | 27.82468975 | 20.47838039 | 16.91461111 | 15.04008631 |
| ENSMUSG00000032782 | 25.46826665 | 29.91154148 | 26.83373982 | 28.19101852 | 24.35061594 |
| ENSMUSG00000032786 | 22.63845924 | 31.30277597 | 31.0706461  | 37.85651059 | 35.80972932 |
| ENSMUSG00000032788 | 16.97884443 | 25.73783802 | 22.59683353 | 22.55281482 | 24.35061594 |
| ENSMUSG00000032803 | 70.03773327 | 103.6469693 | 84.73812573 | 206.1971641 | 181.9134249 |
| ENSMUSG00000032806 | 0           | 0           | 0           | 0           | 0           |
| ENSMUSG00000032812 | 172.6182517 | 160.6875833 | 144.0548137 | 157.8697037 | 129.6312201 |
| ENSMUSG00000032815 | 9.196874066 | 14.60796212 | 14.829172   | 24.16373016 | 25.78300511 |
| ENSMUSG00000032816 | 7.781970364 | 3.478086219 | 7.061510478 | 4.02728836  | 5.729556691 |
| ENSMUSG00000032818 | 9.904325918 | 11.1298759  | 4.943057334 | 8.054576721 | 4.297167518 |
| ENSMUSG00000032826 | 14.85648888 | 5.56493795  | 7.767661525 | 8.860034393 | 5.729556691 |
| ENSMUSG00000032827 | 5.65961481  | 9.738641413 | 9.179963621 | 7.249119049 | 5.729556691 |
| ENSMUSG00000032834 | 21.93100739 | 32.69401046 | 33.18909925 | 86.98942859 | 58.72795608 |
| ENSMUSG00000032839 | 8.489422215 | 5.56493795  | 7.767661525 | 3.221830688 | 4.297167518 |
| ENSMUSG00000032841 | 6.367066661 | 8.347406925 | 12.71071886 | 4.832746033 | 9.310529622 |
| ENSMUSG00000032842 | 13.44158517 | 23.65098629 | 16.2414741  | 14.4982381  | 18.62105924 |
| ENSMUSG00000032845 | 11.31922962 | 18.78166558 | 13.41686991 | 7.249119049 | 12.89150255 |
| ENSMUSG00000032846 | 32.54278516 | 48.69320706 | 45.19366706 | 20.1364418  | 36.5259239  |
| ENSMUSG00000032849 | 16.27139258 | 36.86771392 | 31.0706461  | 31.41284921 | 31.5125618  |
| ENSMUSG00000032850 | 33.95768886 | 54.95376226 | 43.78136496 | 33.82922223 | 40.82309142 |
| ENSMUSG00000032854 | 3.537259256 | 6.260555194 | 7.767661525 | 6.443661377 | 5.729556691 |
| ENSMUSG00000032869 | 28.29807405 | 49.38882431 | 31.77679715 | 16.10915344 | 17.90486466 |
| ENSMUSG00000032872 | 27.5906222  | 61.21431745 | 55.07978173 | 53.16020636 | 39.39070225 |
| ENSMUSG00000032878 | 6.367066661 | 7.651789682 | 7.061510478 | 5.638203705 | 10.02672421 |
| ENSMUSG00000032883 | 2.122355554 | 2.782468975 | 2.118453143 | 0           | 0           |
| ENSMUSG00000032889 | 12.73413332 | 6.956172438 | 7.767661525 | 7.249119049 | 12.89150255 |
| ENSMUSG00000032890 | 3.537259256 | 5.56493795  | 8.473812573 | 4.02728836  | 10.7429188  |
| ENSMUSG00000032892 | 8.489422215 | 9.043024169 | 4.236906287 | 9.665492065 | 7.87814045  |
| ENSMUSG00000032894 | 4.952162959 | 4.869320706 | 6.35535943  | 4.832746033 | 4.297167518 |
| ENSMUSG00000032897 | 8.489422215 | 13.91234488 | 6.35535943  | 12.88732275 | 6.445751277 |
| ENSMUSG00000032899 | 12.73413332 | 8.347406925 | 9.886114669 | 7.249119049 | 5.729556691 |
| ENSMUSG00000032900 | 10.61177777 | 8.347406925 | 12.00456781 | 13.69278043 | 17.90486466 |
| ENSMUSG00000032913 | 79.94205919 | 98.08203137 | 89.68118307 | 77.32393652 | 74.48423698 |
| ENSMUSG00000032921 | 6.367066661 | 3.478086219 | 7.767661525 | 8.054576721 | 7.161945863 |
| ENSMUSG00000032925 | 13.44158517 | 7.651789682 | 4.943057334 | 4.02728836  | 5.013362104 |
| ENSMUSG00000032932 | 23.34591109 | 22.2597518  | 22.59683353 | 33.02376456 | 30.08017263 |
| ENSMUSG00000032936 | 9.196874066 | 7.651789682 | 12.71071886 | 9.665492065 | 5.729556691 |
| ENSMUSG00000032939 | 29.71297775 | 23.65098629 | 28.95219296 | 69.2693598  | 54.43078856 |
| ENSMUSG00000032940 | 5.65961481  | 9.043024169 | 6.35535943  | 4.02728836  | 4.297167518 |
| ENSMUSG00000032942 | 9.196874066 | 6.956172438 | 9.179963621 | 6.443661377 | 7.161945863 |

|                    |             |             |             |             |             |
|--------------------|-------------|-------------|-------------|-------------|-------------|
| ENSMUSG00000032946 | 33.95768886 | 39.6501829  | 35.30755239 | 28.19101852 | 26.49919969 |
| ENSMUSG00000032948 | 9.196874066 | 4.869320706 | 4.236906287 | 4.02728836  | 4.297167518 |
| ENSMUSG00000032952 | 47.39927403 | 75.82227957 | 53.66747963 | 103.9040397 | 85.22715578 |
| ENSMUSG00000032959 | 29.0055259  | 42.43265187 | 50.84287544 | 78.93485187 | 59.44415067 |
| ENSMUSG00000032965 | 8.489422215 | 17.39043109 | 13.41686991 | 12.08186508 | 19.33725383 |
| ENSMUSG00000032966 | 42.44711108 | 59.12746572 | 50.13672439 | 96.65492065 | 87.37573953 |
| ENSMUSG00000032978 | 7.074518513 | 9.738641413 | 6.35535943  | 5.638203705 | 7.161945863 |
| ENSMUSG00000032985 | 5.65961481  | 6.260555194 | 7.061510478 | 3.221830688 | 6.445751277 |
| ENSMUSG00000032997 | 2.829807405 | 7.651789682 | 7.767661525 | 8.860034393 | 8.594335036 |
| ENSMUSG00000032998 | 10.61177777 | 9.043024169 | 13.41686991 | 8.860034393 | 10.02672421 |
| ENSMUSG00000032999 | 11.31922962 | 10.43425866 | 4.236906287 | 5.638203705 | 10.02672421 |
| ENSMUSG00000033004 | 66.50047402 | 108.51629   | 79.08891735 | 177.2006879 | 127.4826364 |
| ENSMUSG00000033007 | 4.244711108 | 6.956172438 | 4.943057334 | 5.638203705 | 5.013362104 |
| ENSMUSG00000033009 | 77.11225179 | 123.1242521 | 101.6857509 | 136.1223466 | 133.2121931 |
| ENSMUSG00000033014 | 77.11225179 | 92.51709342 | 88.97503202 | 126.4568545 | 106.7129934 |
| ENSMUSG00000033016 | 22.63845924 | 41.73703463 | 48.7244223  | 68.46390213 | 61.59273443 |
| ENSMUSG00000033021 | 14.14903703 | 16.69481385 | 17.65377619 | 21.74735715 | 10.02672421 |
| ENSMUSG00000033024 | 6.367066661 | 4.869320706 | 12.00456781 | 4.832746033 | 7.161945863 |
| ENSMUSG00000033027 | 7.781970364 | 9.043024169 | 6.35535943  | 3.221830688 | 7.87814045  |
| ENSMUSG00000033029 | 42.44711108 | 65.38802092 | 57.19823487 | 100.682209  | 90.24051788 |
| ENSMUSG00000033031 | 51.64398514 | 68.86610713 | 64.96589639 | 179.6170609 | 134.6445822 |
| ENSMUSG00000033032 | 12.73413332 | 5.56493795  | 9.886114669 | 6.443661377 | 3.580972932 |
| ENSMUSG00000033033 | 78.52715549 | 110.6031418 | 103.804204  | 39.46742593 | 47.2688427  |
| ENSMUSG00000033044 | 9.904325918 | 8.347406925 | 7.767661525 | 4.832746033 | 10.7429188  |
| ENSMUSG00000033055 | 42.44711108 | 66.7792554  | 58.61053696 | 82.96214023 | 70.90326405 |
| ENSMUSG00000033060 | 13.44158517 | 8.347406925 | 9.886114669 | 9.665492065 | 15.7562809  |
| ENSMUSG00000033061 | 7.074518513 | 8.347406925 | 5.649208382 | 7.249119049 | 2.864778345 |
| ENSMUSG00000033065 | 18.39374813 | 24.34660353 | 12.71071886 | 35.44013757 | 32.22875639 |
| ENSMUSG00000033066 | 8.489422215 | 4.869320706 | 4.236906287 | 4.02728836  | 7.161945863 |
| ENSMUSG00000033068 | 19.10119998 | 31.99839321 | 31.0706461  | 37.85651059 | 35.09353473 |
| ENSMUSG00000033075 | 38.90985182 | 55.6493795  | 52.96132858 | 103.098582  | 79.49759908 |
| ENSMUSG00000033082 | 7.074518513 | 9.738641413 | 11.29841676 | 8.054576721 | 7.87814045  |
| ENSMUSG00000033083 | 7.074518513 | 13.21672763 | 9.886114669 | 6.443661377 | 7.161945863 |
| ENSMUSG00000033088 | 9.904325918 | 8.347406925 | 6.35535943  | 8.860034393 | 5.013362104 |
| ENSMUSG00000033102 | 5.65961481  | 10.43425866 | 9.179963621 | 4.832746033 | 7.161945863 |
| ENSMUSG00000033105 | 9.196874066 | 15.30357936 | 16.94762515 | 33.82922223 | 33.66114556 |
| ENSMUSG00000033111 | 11.31922962 | 14.60796212 | 9.886114669 | 22.55281482 | 17.90486466 |
| ENSMUSG00000033114 | 14.85648888 | 25.04222078 | 17.65377619 | 22.55281482 | 20.769643   |
| ENSMUSG00000033122 | 8.489422215 | 6.260555194 | 10.59226572 | 5.638203705 | 7.161945863 |
| ENSMUSG00000033124 | 24.05336294 | 43.82388636 | 45.8998181  | 28.19101852 | 40.82309142 |
| ENSMUSG00000033147 | 7.074518513 | 8.347406925 | 9.179963621 | 1.610915344 | 2.864778345 |
| ENSMUSG00000033149 | 7.781970364 | 6.956172438 | 12.00456781 | 8.860034393 | 5.013362104 |
| ENSMUSG00000033152 | 9.196874066 | 4.869320706 | 6.35535943  | 7.249119049 | 7.161945863 |

|                    |             |             |             |             |             |
|--------------------|-------------|-------------|-------------|-------------|-------------|
| ENSMUSG00000033157 | 37.49494812 | 61.21431745 | 45.8998181  | 81.35122488 | 69.47087488 |
| ENSMUSG00000033159 | 27.5906222  | 47.30197258 | 41.66291182 | 57.18749472 | 59.44415067 |
| ENSMUSG00000033161 | 17.68629628 | 32.69401046 | 31.77679715 | 66.85298678 | 68.0384857  |
| ENSMUSG00000033166 | 39.61730367 | 53.56252777 | 56.49208382 | 115.9859048 | 83.07857202 |
| ENSMUSG00000033170 | 5.65961481  | 11.1298759  | 7.767661525 | 5.638203705 | 7.161945863 |
| ENSMUSG00000033174 | 7.781970364 | 6.956172438 | 7.061510478 | 3.221830688 | 8.594335036 |
| ENSMUSG00000033177 | 7.781970364 | 6.956172438 | 7.061510478 | 6.443661377 | 5.729556691 |
| ENSMUSG00000033182 | 12.02668147 | 4.869320706 | 8.473812573 | 3.221830688 | 7.161945863 |
| ENSMUSG00000033184 | 87.72402956 | 121.0374004 | 98.86114669 | 314.9339498 | 219.871738  |
| ENSMUSG00000033191 | 8.489422215 | 9.738641413 | 12.00456781 | 9.665492065 | 7.87814045  |
| ENSMUSG00000033196 | 7.781970364 | 4.173703463 | 9.886114669 | 7.249119049 | 9.310529622 |
| ENSMUSG00000033200 | 2.829807405 | 2.086851731 | 3.530755239 | 4.02728836  | 5.013362104 |
| ENSMUSG00000033209 | 9.196874066 | 11.82549314 | 9.179963621 | 9.665492065 | 7.161945863 |
| ENSMUSG00000033210 | 7.074518513 | 2.782468975 | 9.179963621 | 4.832746033 | 6.445751277 |
| ENSMUSG00000033213 | 9.904325918 | 6.956172438 | 5.649208382 | 2.416373016 | 9.310529622 |
| ENSMUSG00000033222 | 19.80865184 | 27.82468975 | 17.65377619 | 24.96918783 | 27.93158887 |
| ENSMUSG00000033233 | 7.074518513 | 12.52111039 | 4.236906287 | 6.443661377 | 5.729556691 |
| ENSMUSG00000033237 | 29.0055259  | 39.6501829  | 45.19366706 | 117.5968201 | 85.94335036 |
| ENSMUSG00000033249 | 7.781970364 | 11.82549314 | 14.829172   | 5.638203705 | 13.60769714 |
| ENSMUSG00000033253 | 69.33028142 | 113.3856107 | 109.4534124 | 118.4022778 | 98.83485292 |
| ENSMUSG00000033256 | 9.904325918 | 17.39043109 | 14.829172   | 8.054576721 | 12.17530797 |
| ENSMUSG00000033257 | 22.63845924 | 29.21592424 | 22.59683353 | 24.16373016 | 32.22875639 |
| ENSMUSG00000033272 | 43.86201478 | 70.25734162 | 51.54902649 | 124.0404815 | 122.4692743 |
| ENSMUSG00000033276 | 25.46826665 | 43.12826911 | 48.01827125 | 52.35474869 | 35.09353473 |
| ENSMUSG00000033278 | 5.65961481  | 5.56493795  | 5.649208382 | 4.02728836  | 5.729556691 |
| ENSMUSG00000033282 | 50.93653329 | 77.9091313  | 64.96589639 | 57.18749472 | 58.01176149 |
| ENSMUSG00000033285 | 65.08557032 | 92.51709342 | 81.91352154 | 97.46037832 | 106.7129934 |
| ENSMUSG00000033287 | 5.65961481  | 4.869320706 | 7.061510478 | 13.69278043 | 7.161945863 |
| ENSMUSG00000033294 | 21.93100739 | 55.6493795  | 43.78136496 | 157.0642461 | 108.8615771 |
| ENSMUSG00000033295 | 6.367066661 | 6.956172438 | 5.649208382 | 4.832746033 | 4.297167518 |
| ENSMUSG00000033306 | 25.46826665 | 32.69401046 | 31.0706461  | 57.18749472 | 49.41742646 |
| ENSMUSG00000033308 | 9.904325918 | 8.347406925 | 9.179963621 | 4.832746033 | 5.013362104 |
| ENSMUSG00000033313 | 28.29807405 | 41.04141738 | 38.83830763 | 25.77464551 | 30.08017263 |
| ENSMUSG00000033316 | 4.244711108 | 7.651789682 | 5.649208382 | 2.416373016 | 5.013362104 |
| ENSMUSG00000033323 | 92.67619252 | 117.5593142 | 105.9226572 | 119.2077355 | 113.1587446 |
| ENSMUSG00000033326 | 60.84085921 | 82.08283477 | 68.49665163 | 59.60386773 | 48.70123187 |
| ENSMUSG00000033335 | 180.4002221 | 189.2078903 | 177.243913  | 212.6408254 | 183.3458141 |
| ENSMUSG00000033342 | 9.904325918 | 5.56493795  | 5.649208382 | 11.27640741 | 3.580972932 |
| ENSMUSG00000033352 | 69.33028142 | 98.08203137 | 81.20737049 | 106.3204127 | 100.9834367 |
| ENSMUSG00000033361 | 6.367066661 | 3.478086219 | 1.412302096 | 4.832746033 | 5.013362104 |
| ENSMUSG00000033364 | 12.02668147 | 7.651789682 | 12.00456781 | 11.27640741 | 11.45911338 |
| ENSMUSG00000033365 | 41.03220737 | 73.73542784 | 64.96589639 | 54.7711217  | 61.59273443 |
| ENSMUSG00000033373 | 0           | 2.086851731 | 0.706151048 | 0           | 0.716194586 |

|                    |             |             |             |             |             |
|--------------------|-------------|-------------|-------------|-------------|-------------|
| ENSMUSG00000033377 | 6.367066661 | 7.651789682 | 7.767661525 | 4.02728836  | 9.310529622 |
| ENSMUSG00000033379 | 32.54278516 | 35.47647943 | 25.42143772 | 24.16373016 | 35.09353473 |
| ENSMUSG00000033382 | 103.9954221 | 139.1234488 | 126.4010376 | 132.9005159 | 116.023523  |
| ENSMUSG00000033386 | 11.31922962 | 6.956172438 | 6.35535943  | 4.02728836  | 9.310529622 |
| ENSMUSG00000033389 | 6.367066661 | 5.56493795  | 2.824604191 | 5.638203705 | 3.580972932 |
| ENSMUSG00000033392 | 21.22355554 | 40.34580014 | 28.24604191 | 24.16373016 | 35.09353473 |
| ENSMUSG00000033396 | 55.88869625 | 78.60474855 | 62.1412922  | 58.79841006 | 42.25548059 |
| ENSMUSG00000033400 | 11.31922962 | 9.043024169 | 9.179963621 | 3.221830688 | 4.297167518 |
| ENSMUSG00000033409 | 9.196874066 | 11.82549314 | 12.71071886 | 4.02728836  | 12.17530797 |
| ENSMUSG00000033411 | 84.1867703  | 98.77764862 | 92.50578726 | 138.5387196 | 113.1587446 |
| ENSMUSG00000033416 | 103.9954221 | 144.6883867 | 144.7609648 | 265.8010318 | 217.7231542 |
| ENSMUSG00000033417 | 63.67066661 | 106.4294383 | 90.38733411 | 112.7640741 | 111.7263555 |
| ENSMUSG00000033419 | 8.489422215 | 5.56493795  | 7.061510478 | 4.832746033 | 2.864778345 |
| ENSMUSG00000033420 | 11.31922962 | 5.56493795  | 9.179963621 | 8.054576721 | 8.594335036 |
| ENSMUSG00000033423 | 33.95768886 | 47.99758982 | 43.07521391 | 42.68925662 | 37.95831308 |
| ENSMUSG00000033427 | 7.781970364 | 7.651789682 | 12.71071886 | 4.832746033 | 8.594335036 |
| ENSMUSG00000033429 | 43.15456293 | 66.08363816 | 65.67204744 | 133.7059736 | 131.0636093 |
| ENSMUSG00000033430 | 98.33580733 | 140.5146832 | 134.1686991 | 244.0536746 | 199.102095  |
| ENSMUSG00000033434 | 14.14903703 | 31.99839321 | 17.65377619 | 120.8186508 | 80.92998826 |
| ENSMUSG00000033436 | 8.489422215 | 9.738641413 | 7.767661525 | 14.4982381  | 10.02672421 |
| ENSMUSG00000033439 | 11.31922962 | 10.43425866 | 13.41686991 | 11.27640741 | 17.90486466 |
| ENSMUSG00000033444 | 74.28244438 | 109.2119073 | 87.56272992 | 99.07129367 | 78.7814045  |
| ENSMUSG00000033458 | 6.367066661 | 13.21672763 | 10.59226572 | 13.69278043 | 6.445751277 |
| ENSMUSG00000033460 | 3.537259256 | 5.56493795  | 4.943057334 | 1.610915344 | 1.432389173 |
| ENSMUSG00000033467 | 4.952162959 | 5.56493795  | 7.061510478 | 4.02728836  | 6.445751277 |
| ENSMUSG00000033470 | 12.02668147 | 3.478086219 | 8.473812573 | 5.638203705 | 3.580972932 |
| ENSMUSG00000033475 | 11.31922962 | 17.39043109 | 26.12758877 | 59.60386773 | 63.0251236  |
| ENSMUSG00000033486 | 67.91537772 | 80.69160028 | 73.43970897 | 274.6610662 | 189.0753708 |
| ENSMUSG00000033487 | 29.0055259  | 46.60635533 | 42.36906287 | 103.9040397 | 80.92998826 |
| ENSMUSG00000033488 | 6.367066661 | 8.347406925 | 7.061510478 | 8.860034393 | 6.445751277 |
| ENSMUSG00000033491 | 11.31922962 | 2.782468975 | 6.35535943  | 7.249119049 | 7.161945863 |
| ENSMUSG00000033498 | 9.904325918 | 4.869320706 | 7.061510478 | 8.860034393 | 6.445751277 |
| ENSMUSG00000033499 | 102.5805184 | 137.7322143 | 114.3964697 | 183.6443492 | 167.5895332 |
| ENSMUSG00000033502 | 20.51610369 | 29.21592424 | 28.95219296 | 24.96918783 | 39.39070225 |
| ENSMUSG00000033510 | 6.367066661 | 4.173703463 | 12.00456781 | 3.221830688 | 4.297167518 |
| ENSMUSG00000033526 | 19.10119998 | 20.17290007 | 19.77222934 | 18.52552646 | 22.20203218 |
| ENSMUSG00000033533 | 12.73413332 | 4.173703463 | 10.59226572 | 6.443661377 | 5.013362104 |
| ENSMUSG00000033538 | 38.90985182 | 71.64857611 | 44.48751601 | 109.5422434 | 86.65954495 |
| ENSMUSG00000033540 | 25.46826665 | 31.99839321 | 32.4829482  | 28.9964762  | 28.64778345 |
| ENSMUSG00000033542 | 8.489422215 | 6.956172438 | 7.061510478 | 1.610915344 | 2.864778345 |
| ENSMUSG00000033543 | 80.64951104 | 131.4716591 | 124.9887355 | 163.5079074 | 138.9417498 |
| ENSMUSG00000033545 | 31.83533331 | 29.91154148 | 30.36449505 | 33.82922223 | 33.66114556 |
| ENSMUSG00000033554 | 71.45263698 | 122.4286349 | 76.97046421 | 103.9040397 | 92.38910164 |

|                    |             |             |             |             |             |
|--------------------|-------------|-------------|-------------|-------------|-------------|
| ENSMUSG00000033557 | 22.63845924 | 41.73703463 | 37.42600553 | 49.132918   | 36.5259239  |
| ENSMUSG00000033565 | 2.829807405 | 4.869320706 | 5.649208382 | 7.249119049 | 4.297167518 |
| ENSMUSG00000033569 | 8.489422215 | 7.651789682 | 7.061510478 | 4.02728836  | 3.580972932 |
| ENSMUSG00000033576 | 4.952162959 | 5.56493795  | 7.061510478 | 5.638203705 | 4.297167518 |
| ENSMUSG00000033577 | 7.781970364 | 6.956172438 | 7.767661525 | 8.860034393 | 7.161945863 |
| ENSMUSG00000033579 | 5.65961481  | 6.260555194 | 9.179963621 | 5.638203705 | 7.161945863 |
| ENSMUSG00000033581 | 5.65961481  | 6.956172438 | 7.767661525 | 8.054576721 | 8.594335036 |
| ENSMUSG00000033594 | 17.68629628 | 27.12907251 | 17.65377619 | 9.665492065 | 14.32389173 |
| ENSMUSG00000033610 | 12.73413332 | 27.12907251 | 26.83373982 | 14.4982381  | 30.79636721 |
| ENSMUSG00000033623 | 118.851911  | 154.4270281 | 149.7040221 | 124.0404815 | 89.52432329 |
| ENSMUSG00000033624 | 31.83533331 | 57.04061399 | 52.25517753 | 41.07834128 | 44.40406435 |
| ENSMUSG00000033628 | 53.7663407  | 86.95215547 | 55.07978173 | 59.60386773 | 63.0251236  |
| ENSMUSG00000033632 | 27.5906222  | 37.56333116 | 43.07521391 | 25.77464551 | 27.21539428 |
| ENSMUSG00000033633 | 6.367066661 | 13.21672763 | 6.35535943  | 5.638203705 | 9.310529622 |
| ENSMUSG00000033653 | 16.27139258 | 20.86851731 | 22.59683353 | 14.4982381  | 15.04008631 |
| ENSMUSG00000033658 | 10.61177777 | 20.17290007 | 18.35992724 | 22.55281482 | 19.33725383 |
| ENSMUSG00000033671 | 93.38364437 | 125.2111039 | 102.3919019 | 120.8186508 | 137.5093606 |
| ENSMUSG00000033676 | 7.074518513 | 9.738641413 | 8.473812573 | 3.221830688 | 5.729556691 |
| ENSMUSG00000033684 | 12.73413332 | 20.86851731 | 16.94762515 | 11.27640741 | 16.47247549 |
| ENSMUSG00000033685 | 120.9742666 | 155.1226454 | 132.756397  | 273.0501508 | 199.102095  |
| ENSMUSG00000033688 | 47.39927403 | 58.43184848 | 53.66747963 | 82.15668255 | 82.36237743 |
| ENSMUSG00000033697 | 10.61177777 | 19.47728283 | 20.47838039 | 15.30369577 | 20.05344842 |
| ENSMUSG00000033701 | 28.29807405 | 34.78086219 | 38.83830763 | 82.96214023 | 76.63282074 |
| ENSMUSG00000033705 | 7.781970364 | 1.391234488 | 7.061510478 | 8.054576721 | 4.297167518 |
| ENSMUSG00000033706 | 24.05336294 | 43.12826911 | 40.25060972 | 125.6513968 | 97.40246374 |
| ENSMUSG00000033713 | 83.47931845 | 127.9935729 | 111.5718655 | 49.93837567 | 68.75468029 |
| ENSMUSG00000033715 | 9.196874066 | 5.56493795  | 8.473812573 | 6.443661377 | 8.594335036 |
| ENSMUSG00000033720 | 5.65961481  | 13.91234488 | 9.886114669 | 8.860034393 | 5.729556691 |
| ENSMUSG00000033721 | 7.074518513 | 11.1298759  | 4.943057334 | 7.249119049 | 7.161945863 |
| ENSMUSG00000033728 | 23.34591109 | 36.86771392 | 36.71985448 | 57.18749472 | 58.72795608 |
| ENSMUSG00000033732 | 120.2668147 | 182.9473351 | 170.1824025 | 394.6742593 | 303.6665046 |
| ENSMUSG00000033737 | 4.952162959 | 3.478086219 | 3.530755239 | 1.610915344 | 3.580972932 |
| ENSMUSG00000033740 | 12.02668147 | 9.738641413 | 4.943057334 | 5.638203705 | 10.7429188  |
| ENSMUSG00000033760 | 29.71297775 | 56.34499675 | 40.25060972 | 49.93837567 | 59.44415067 |
| ENSMUSG00000033763 | 7.074518513 | 4.173703463 | 4.943057334 | 15.30369577 | 6.445751277 |
| ENSMUSG00000033767 | 66.50047402 | 84.86530374 | 72.73355792 | 96.65492065 | 83.7947666  |
| ENSMUSG00000033768 | 4.244711108 | 10.43425866 | 9.886114669 | 8.860034393 | 6.445751277 |
| ENSMUSG00000033769 | 12.73413332 | 18.08604834 | 17.65377619 | 14.4982381  | 9.310529622 |
| ENSMUSG00000033770 | 8.489422215 | 6.260555194 | 7.061510478 | 7.249119049 | 4.297167518 |
| ENSMUSG00000033773 | 27.5906222  | 38.25894841 | 33.89525029 | 32.21830688 | 34.37734014 |
| ENSMUSG00000033788 | 12.73413332 | 10.43425866 | 4.943057334 | 9.665492065 | 3.580972932 |
| ENSMUSG00000033790 | 24.76081479 | 45.91073809 | 41.66291182 | 63.6311561  | 58.72795608 |
| ENSMUSG00000033792 | 22.63845924 | 29.91154148 | 27.53989086 | 32.21830688 | 18.62105924 |



|                    |             |             |             |             |             |
|--------------------|-------------|-------------|-------------|-------------|-------------|
| ENSMUSG00000033793 | 39.61730367 | 62.60555194 | 54.37363068 | 51.54929101 | 59.44415067 |
| ENSMUSG00000033799 | 47.39927403 | 71.64857611 | 64.25974535 | 164.3133651 | 136.0769714 |
| ENSMUSG00000033805 | 2.122355554 | 0.695617244 | 3.530755239 | 2.416373016 | 3.580972932 |
| ENSMUSG00000033808 | 103.2879703 | 143.2971522 | 132.0502459 | 150.6205847 | 139.6579443 |
| ENSMUSG00000033809 | 22.63845924 | 40.34580014 | 31.0706461  | 81.35122488 | 65.17370736 |
| ENSMUSG00000033813 | 77.81970364 | 108.51629   | 86.85657888 | 159.4806191 | 123.9016634 |
| ENSMUSG00000033819 | 16.27139258 | 20.86851731 | 21.18453143 | 25.77464551 | 21.48583759 |
| ENSMUSG00000033845 | 37.49494812 | 79.30036579 | 52.25517753 | 122.4295662 | 94.5376854  |
| ENSMUSG00000033847 | 8.489422215 | 4.869320706 | 8.473812573 | 9.665492065 | 7.87814045  |
| ENSMUSG00000033852 | 0           | 0           | 0           | 0           | 0           |
| ENSMUSG00000033854 | 8.489422215 | 6.260555194 | 13.41686991 | 8.054576721 | 5.013362104 |
| ENSMUSG00000033855 | 5.65961481  | 9.738641413 | 11.29841676 | 2.416373016 | 5.729556691 |
| ENSMUSG00000033857 | 16.27139258 | 12.52111039 | 12.71071886 | 12.08186508 | 14.32389173 |
| ENSMUSG00000033860 | 9.904325918 | 4.869320706 | 7.061510478 | 6.443661377 | 10.02672421 |
| ENSMUSG00000033871 | 12.02668147 | 19.47728283 | 18.35992724 | 40.2728836  | 33.66114556 |
| ENSMUSG00000033880 | 9.196874066 | 19.47728283 | 11.29841676 | 53.16020636 | 29.36397804 |
| ENSMUSG00000033882 | 9.904325918 | 6.260555194 | 6.35535943  | 8.054576721 | 2.864778345 |
| ENSMUSG00000033885 | 138.6605628 | 157.2094971 | 159.5901368 | 231.1663519 | 171.1705061 |
| ENSMUSG00000033898 | 13.44158517 | 8.347406925 | 5.649208382 | 4.02728836  | 4.297167518 |
| ENSMUSG00000033900 | 5.65961481  | 8.347406925 | 2.118453143 | 4.832746033 | 2.864778345 |
| ENSMUSG00000033902 | 14.14903703 | 20.86851731 | 27.53989086 | 24.16373016 | 18.62105924 |
| ENSMUSG00000033904 | 9.196874066 | 20.17290007 | 14.12302096 | 18.52552646 | 10.02672421 |
| ENSMUSG00000033909 | 58.0110518  | 81.38721752 | 82.61967259 | 171.5624842 | 142.5227227 |
| ENSMUSG00000033910 | 9.904325918 | 4.869320706 | 9.179963621 | 2.416373016 | 4.297167518 |
| ENSMUSG00000033917 | 48.81417774 | 100.1688831 | 90.38733411 | 79.74030954 | 63.0251236  |
| ENSMUSG00000033918 | 68.62282957 | 88.34338996 | 88.97503202 | 140.9550926 | 114.5911338 |
| ENSMUSG00000033933 | 36.08004441 | 59.12746572 | 60.02283906 | 62.02024075 | 58.72795608 |
| ENSMUSG00000033943 | 41.73965922 | 54.95376226 | 42.36906287 | 66.85298678 | 74.48423698 |
| ENSMUSG00000033949 | 6.367066661 | 5.56493795  | 9.886114669 | 10.47094974 | 3.580972932 |
| ENSMUSG00000033952 | 21.22355554 | 30.60715873 | 32.4829482  | 48.32746033 | 40.10689684 |
| ENSMUSG00000033953 | 80.64951104 | 117.5593142 | 83.32582364 | 143.3714656 | 118.1721067 |
| ENSMUSG00000033955 | 11.31922962 | 13.91234488 | 14.12302096 | 16.10915344 | 14.32389173 |
| ENSMUSG00000033961 | 6.367066661 | 8.347406925 | 7.767661525 | 12.08186508 | 20.05344842 |
| ENSMUSG00000033963 | 14.85648888 | 7.651789682 | 7.061510478 | 7.249119049 | 5.729556691 |
| ENSMUSG00000033964 | 35.37259256 | 66.08363816 | 58.61053696 | 59.60386773 | 48.70123187 |
| ENSMUSG00000033965 | 5.65961481  | 4.869320706 | 4.236906287 | 3.221830688 | 3.580972932 |
| ENSMUSG00000033970 | 22.63845924 | 27.12907251 | 31.0706461  | 31.41284921 | 31.5125618  |
| ENSMUSG00000033981 | 6.367066661 | 6.260555194 | 4.236906287 | 6.443661377 | 6.445751277 |
| ENSMUSG00000033983 | 44.56946663 | 36.86771392 | 32.4829482  | 32.21830688 | 33.66114556 |
| ENSMUSG00000033985 | 26.1757185  | 34.78086219 | 36.01370344 | 25.77464551 | 23.63442135 |
| ENSMUSG00000033987 | 12.02668147 | 7.651789682 | 8.473812573 | 7.249119049 | 7.161945863 |
| ENSMUSG00000034000 | 7.781970364 | 6.956172438 | 9.886114669 | 7.249119049 | 6.445751277 |
| ENSMUSG00000034006 | 12.73413332 | 12.52111039 | 9.179963621 | 7.249119049 | 7.87814045  |

|                    |             |             |             |             |             |
|--------------------|-------------|-------------|-------------|-------------|-------------|
| ENSMUSG00000034007 | 9.904325918 | 21.56413456 | 16.94762515 | 3.221830688 | 7.161945863 |
| ENSMUSG00000034009 | 8.489422215 | 6.956172438 | 3.530755239 | 5.638203705 | 5.729556691 |
| ENSMUSG00000034021 | 67.20792587 | 75.12666233 | 79.08891735 | 105.514955  | 95.25387998 |
| ENSMUSG00000034023 | 105.4103258 | 163.4700523 | 136.2871522 | 126.4568545 | 131.0636093 |
| ENSMUSG00000034028 | 11.31922962 | 14.60796212 | 5.649208382 | 5.638203705 | 8.594335036 |
| ENSMUSG00000034032 | 33.95768886 | 35.47647943 | 31.0706461  | 38.66196826 | 27.21539428 |
| ENSMUSG00000034035 | 14.85648888 | 20.86851731 | 22.59683353 | 23.35827249 | 18.62105924 |
| ENSMUSG00000034037 | 4.952162959 | 4.869320706 | 2.118453143 | 4.832746033 | 8.594335036 |
| ENSMUSG00000034040 | 7.781970364 | 2.782468975 | 4.943057334 | 1.610915344 | 5.729556691 |
| ENSMUSG00000034042 | 118.1444592 | 159.9919661 | 140.5240585 | 151.4260424 | 131.0636093 |
| ENSMUSG00000034055 | 9.904325918 | 13.21672763 | 14.12302096 | 10.47094974 | 8.594335036 |
| ENSMUSG00000034059 | 7.781970364 | 11.1298759  | 7.767661525 | 6.443661377 | 7.87814045  |
| ENSMUSG00000034064 | 15.56394073 | 27.12907251 | 23.30298458 | 34.6346799  | 37.95831308 |
| ENSMUSG00000034066 | 11.31922962 | 14.60796212 | 9.886114669 | 8.054576721 | 10.7429188  |
| ENSMUSG00000034071 | 7.074518513 | 12.52111039 | 12.00456781 | 7.249119049 | 14.32389173 |
| ENSMUSG00000034075 | 48.10672589 | 62.60555194 | 52.25517753 | 128.0677699 | 120.3206905 |
| ENSMUSG00000034083 | 53.7663407  | 70.25734162 | 64.25974535 | 70.88027514 | 68.75468029 |
| ENSMUSG00000034087 | 7.781970364 | 7.651789682 | 7.061510478 | 11.27640741 | 4.297167518 |
| ENSMUSG00000034088 | 70.03773327 | 101.5601176 | 79.7950684  | 211.0299101 | 150.4008631 |
| ENSMUSG00000034098 | 10.61177777 | 7.651789682 | 6.35535943  | 4.832746033 | 4.297167518 |
| ENSMUSG00000034101 | 10.61177777 | 6.956172438 | 5.649208382 | 9.665492065 | 9.310529622 |
| ENSMUSG00000034107 | 10.61177777 | 9.043024169 | 7.767661525 | 8.054576721 | 12.17530797 |
| ENSMUSG00000034109 | 12.02668147 | 15.30357936 | 15.53532305 | 16.91461111 | 16.47247549 |
| ENSMUSG00000034115 | 7.781970364 | 6.956172438 | 4.943057334 | 4.832746033 | 3.580972932 |
| ENSMUSG00000034116 | 115.3146518 | 122.4286349 | 132.0502459 | 197.3371297 | 143.9551119 |
| ENSMUSG00000034118 | 5.65961481  | 6.956172438 | 8.473812573 | 8.860034393 | 10.02672421 |
| ENSMUSG00000034120 | 57.30359995 | 77.9091313  | 64.96589639 | 255.3300821 | 208.4126246 |
| ENSMUSG00000034121 | 4.952162959 | 8.347406925 | 5.649208382 | 4.832746033 | 10.02672421 |
| ENSMUSG00000034127 | 5.65961481  | 7.651789682 | 4.943057334 | 10.47094974 | 6.445751277 |
| ENSMUSG00000034135 | 32.54278516 | 45.91073809 | 48.01827125 | 64.43661377 | 61.59273443 |
| ENSMUSG00000034145 | 10.61177777 | 5.56493795  | 12.00456781 | 10.47094974 | 8.594335036 |
| ENSMUSG00000034151 | 9.196874066 | 4.173703463 | 8.473812573 | 4.02728836  | 5.013362104 |
| ENSMUSG00000034154 | 41.73965922 | 65.38802092 | 57.19823487 | 158.6751614 | 126.0502472 |
| ENSMUSG00000034156 | 26.88317035 | 38.95456565 | 46.60596915 | 37.85651059 | 30.08017263 |
| ENSMUSG00000034157 | 36.08004441 | 46.60635533 | 38.13215658 | 103.9040397 | 72.33565322 |
| ENSMUSG00000034159 | 8.489422215 | 6.260555194 | 3.530755239 | 8.054576721 | 6.445751277 |
| ENSMUSG00000034160 | 99.04325918 | 123.1242521 | 91.79963621 | 167.5351958 | 124.617858  |
| ENSMUSG00000034163 | 67.91537772 | 148.1664729 | 115.1026208 | 202.9753334 | 189.7915654 |
| ENSMUSG00000034164 | 7.781970364 | 8.347406925 | 12.71071886 | 8.860034393 | 7.161945863 |
| ENSMUSG00000034165 | 178.9853184 | 166.9481385 | 159.5901368 | 92.62763229 | 82.36237743 |
| ENSMUSG00000034171 | 16.27139258 | 12.52111039 | 14.12302096 | 11.27640741 | 17.18867007 |
| ENSMUSG00000034173 | 7.074518513 | 5.56493795  | 9.179963621 | 10.47094974 | 7.161945863 |
| ENSMUSG00000034175 | 216.4802665 | 221.2062835 | 213.2576164 | 414.0052435 | 297.9369479 |

|                    |             |             |             |             |             |
|--------------------|-------------|-------------|-------------|-------------|-------------|
| ENSMUSG00000034177 | 22.63845924 | 37.56333116 | 24.71528667 | 26.58010318 | 27.21539428 |
| ENSMUSG00000034187 | 57.30359995 | 73.73542784 | 64.96589639 | 47.52200265 | 57.29556691 |
| ENSMUSG00000034194 | 16.97884443 | 15.30357936 | 16.2414741  | 20.94189947 | 21.48583759 |
| ENSMUSG00000034201 | 2.829807405 | 9.043024169 | 8.473812573 | 5.638203705 | 5.729556691 |
| ENSMUSG00000034205 | 11.31922962 | 9.043024169 | 10.59226572 | 6.443661377 | 7.161945863 |
| ENSMUSG00000034206 | 32.54278516 | 38.95456565 | 34.60140134 | 85.37851324 | 49.41742646 |
| ENSMUSG00000034210 | 30.4204296  | 45.21512085 | 36.01370344 | 94.23854763 | 75.20043157 |
| ENSMUSG00000034211 | 12.02668147 | 24.34660353 | 17.65377619 | 27.38556085 | 33.66114556 |
| ENSMUSG00000034212 | 11.31922962 | 13.21672763 | 12.71071886 | 8.860034393 | 8.594335036 |
| ENSMUSG00000034216 | 42.44711108 | 64.69240367 | 59.31668801 | 94.23854763 | 66.60609653 |
| ENSMUSG00000034218 | 62.25576291 | 102.9513521 | 86.85657888 | 194.9207566 | 146.8198902 |
| ENSMUSG00000034219 | 5.65961481  | 8.347406925 | 8.473812573 | 5.638203705 | 10.7429188  |
| ENSMUSG00000034224 | 5.65961481  | 2.086851731 | 3.530755239 | 5.638203705 | 2.864778345 |
| ENSMUSG00000034235 | 11.31922962 | 17.39043109 | 10.59226572 | 14.4982381  | 15.04008631 |
| ENSMUSG00000034239 | 6.367066661 | 11.1298759  | 5.649208382 | 7.249119049 | 6.445751277 |
| ENSMUSG00000034243 | 55.1812444  | 88.34338996 | 71.32125582 | 93.43308996 | 83.07857202 |
| ENSMUSG00000034245 | 12.73413332 | 9.043024169 | 9.886114669 | 5.638203705 | 11.45911338 |
| ENSMUSG00000034252 | 45.98437033 | 58.43184848 | 53.66747963 | 172.3679418 | 128.198831  |
| ENSMUSG00000034254 | 21.93100739 | 33.3896277  | 28.24604191 | 36.24559524 | 22.20203218 |
| ENSMUSG00000034255 | 9.196874066 | 20.86851731 | 17.65377619 | 11.27640741 | 7.161945863 |
| ENSMUSG00000034263 | 30.4204296  | 39.6501829  | 40.95676077 | 70.07481747 | 55.14698315 |
| ENSMUSG00000034269 | 140.7829184 | 182.9473351 | 147.585569  | 330.2376456 | 252.1004944 |
| ENSMUSG00000034271 | 10.61177777 | 5.56493795  | 8.473812573 | 7.249119049 | 9.310529622 |
| ENSMUSG00000034274 | 54.47379255 | 70.25734162 | 79.08891735 | 66.85298678 | 67.32229112 |
| ENSMUSG00000034275 | 9.196874066 | 2.086851731 | 8.473812573 | 4.02728836  | 7.161945863 |
| ENSMUSG00000034285 | 26.88317035 | 36.17209668 | 41.66291182 | 28.9964762  | 24.35061594 |
| ENSMUSG00000034292 | 14.85648888 | 32.69401046 | 28.24604191 | 23.35827249 | 35.80972932 |
| ENSMUSG00000034297 | 138.6605628 | 159.2963488 | 163.120892  | 306.0739154 | 239.9251864 |
| ENSMUSG00000034300 | 50.93653329 | 89.73462445 | 67.79050059 | 52.35474869 | 68.0384857  |
| ENSMUSG00000034308 | 8.489422215 | 10.43425866 | 12.00456781 | 8.054576721 | 12.17530797 |
| ENSMUSG00000034312 | 9.196874066 | 13.21672763 | 14.12302096 | 11.27640741 | 11.45911338 |
| ENSMUSG00000034317 | 113.1922962 | 141.2103005 | 137.6994543 | 121.6241085 | 111.7263555 |
| ENSMUSG00000034320 | 16.27139258 | 29.91154148 | 16.2414741  | 13.69278043 | 20.769643   |
| ENSMUSG00000034321 | 61.54831106 | 95.2995624  | 78.3827663  | 176.3952302 | 146.8198902 |
| ENSMUSG00000034324 | 8.489422215 | 4.173703463 | 11.29841676 | 11.27640741 | 4.297167518 |
| ENSMUSG00000034327 | 36.08004441 | 52.86691053 | 41.66291182 | 122.4295662 | 104.5644096 |
| ENSMUSG00000034329 | 84.89422215 | 85.56092098 | 78.3827663  | 120.8186508 | 118.1721067 |
| ENSMUSG00000034330 | 98.33580733 | 105.0382038 | 109.4534124 | 126.4568545 | 114.5911338 |
| ENSMUSG00000034333 | 35.37259256 | 57.04061399 | 52.25517753 | 101.4876667 | 91.67290705 |
| ENSMUSG00000034341 | 66.50047402 | 94.60394515 | 98.86114669 | 85.37851324 | 69.47087488 |
| ENSMUSG00000034343 | 65.08557032 | 96.69079689 | 88.97503202 | 98.265836   | 85.94335036 |
| ENSMUSG00000034345 | 30.4204296  | 50.08444155 | 48.01827125 | 60.40932541 | 62.30892901 |
| ENSMUSG00000034349 | 72.16008883 | 89.73462445 | 64.96589639 | 273.0501508 | 202.6830679 |

|                    |             |             |             |             |             |
|--------------------|-------------|-------------|-------------|-------------|-------------|
| ENSMUSG00000034353 | 15.56394073 | 20.17290007 | 10.59226572 | 11.27640741 | 8.594335036 |
| ENSMUSG00000034354 | 102.5805184 | 140.5146832 | 112.9841676 | 170.7570265 | 133.9283876 |
| ENSMUSG00000034359 | 9.904325918 | 5.56493795  | 7.767661525 | 5.638203705 | 4.297167518 |
| ENSMUSG00000034361 | 10.61177777 | 6.956172438 | 7.767661525 | 5.638203705 | 5.013362104 |
| ENSMUSG00000034377 | 19.80865184 | 25.04222078 | 36.71985448 | 28.9964762  | 32.22875639 |
| ENSMUSG00000034382 | 5.65961481  | 10.43425866 | 6.35535943  | 8.054576721 | 7.161945863 |
| ENSMUSG00000034384 | 3.537259256 | 7.651789682 | 5.649208382 | 6.443661377 | 2.864778345 |
| ENSMUSG00000034387 | 9.196874066 | 5.56493795  | 8.473812573 | 4.832746033 | 9.310529622 |
| ENSMUSG00000034390 | 111.7773925 | 140.5146832 | 122.8702823 | 174.7843148 | 132.4959985 |
| ENSMUSG00000034394 | 7.074518513 | 7.651789682 | 5.649208382 | 4.832746033 | 5.013362104 |
| ENSMUSG00000034401 | 9.196874066 | 14.60796212 | 12.71071886 | 20.94189947 | 19.33725383 |
| ENSMUSG00000034403 | 6.367066661 | 6.260555194 | 5.649208382 | 16.91461111 | 4.297167518 |
| ENSMUSG00000034412 | 50.93653329 | 85.56092098 | 79.08891735 | 60.40932541 | 60.87653984 |
| ENSMUSG00000034413 | 14.85648888 | 11.1298759  | 12.71071886 | 7.249119049 | 7.87814045  |
| ENSMUSG00000034422 | 75.69734809 | 124.5154866 | 88.97503202 | 280.2992699 | 194.8049275 |
| ENSMUSG00000034427 | 9.196874066 | 8.347406925 | 8.473812573 | 2.416373016 | 7.161945863 |
| ENSMUSG00000034429 | 21.93100739 | 38.25894841 | 31.0706461  | 38.66196826 | 33.66114556 |
| ENSMUSG00000034430 | 31.83533331 | 45.91073809 | 38.13215658 | 47.52200265 | 50.13362104 |
| ENSMUSG00000034432 | 36.08004441 | 51.47567604 | 38.13215658 | 71.68573282 | 68.75468029 |
| ENSMUSG00000034438 | 0           | 0           | 0           | 0           | 0           |
| ENSMUSG00000034442 | 18.39374813 | 25.73783802 | 26.12758877 | 40.2728836  | 41.53928601 |
| ENSMUSG00000034456 | 7.781970364 | 5.56493795  | 8.473812573 | 8.860034393 | 7.161945863 |
| ENSMUSG00000034457 | 4.952162959 | 3.478086219 | 4.943057334 | 2.416373016 | 3.580972932 |
| ENSMUSG00000034471 | 14.85648888 | 14.60796212 | 23.30298458 | 28.19101852 | 22.91822676 |
| ENSMUSG00000034472 | 4.952162959 | 3.478086219 | 7.767661525 | 10.47094974 | 7.161945863 |
| ENSMUSG00000034473 | 10.61177777 | 18.08604834 | 12.00456781 | 11.27640741 | 11.45911338 |
| ENSMUSG00000034480 | 7.781970364 | 5.56493795  | 12.71071886 | 17.72006879 | 19.33725383 |
| ENSMUSG00000034485 | 7.781970364 | 7.651789682 | 2.824604191 | 4.832746033 | 9.310529622 |
| ENSMUSG00000034488 | 7.074518513 | 7.651789682 | 6.35535943  | 4.832746033 | 7.161945863 |
| ENSMUSG00000034493 | 11.31922962 | 11.82549314 | 6.35535943  | 16.10915344 | 7.87814045  |
| ENSMUSG00000034518 | 18.39374813 | 22.95536904 | 21.89068248 | 47.52200265 | 44.40406435 |
| ENSMUSG00000034520 | 5.65961481  | 6.956172438 | 7.061510478 | 7.249119049 | 7.87814045  |
| ENSMUSG00000034522 | 27.5906222  | 36.86771392 | 42.36906287 | 15.30369577 | 27.93158887 |
| ENSMUSG00000034528 | 9.196874066 | 9.738641413 | 13.41686991 | 5.638203705 | 4.297167518 |
| ENSMUSG00000034533 | 11.31922962 | 4.869320706 | 4.236906287 | 6.443661377 | 10.02672421 |
| ENSMUSG00000034543 | 87.72402956 | 130.0804246 | 112.2780166 | 148.2042117 | 140.3741389 |
| ENSMUSG00000034544 | 4.244711108 | 6.260555194 | 6.35535943  | 7.249119049 | 7.87814045  |
| ENSMUSG00000034551 | 7.074518513 | 6.260555194 | 7.061510478 | 2.416373016 | 3.580972932 |
| ENSMUSG00000034555 | 3.537259256 | 4.869320706 | 6.35535943  | 1.610915344 | 1.432389173 |
| ENSMUSG00000034557 | 5.65961481  | 6.260555194 | 7.767661525 | 6.443661377 | 5.013362104 |
| ENSMUSG00000034563 | 31.83533331 | 53.56252777 | 43.07521391 | 14.4982381  | 21.48583759 |
| ENSMUSG00000034566 | 80.64951104 | 89.73462445 | 84.73812573 | 130.4841429 | 121.7530797 |
| ENSMUSG00000034570 | 5.65961481  | 6.260555194 | 6.35535943  | 4.02728836  | 7.87814045  |

|                    |             |             |             |             |             |
|--------------------|-------------|-------------|-------------|-------------|-------------|
| ENSMUSG00000034573 | 10.61177777 | 6.260555194 | 9.886114669 | 14.4982381  | 7.87814045  |
| ENSMUSG00000034574 | 12.02668147 | 6.956172438 | 9.886114669 | 5.638203705 | 5.729556691 |
| ENSMUSG00000034575 | 41.03220737 | 66.7792554  | 48.01827125 | 111.1531587 | 120.3206905 |
| ENSMUSG00000034579 | 7.781970364 | 2.782468975 | 7.767661525 | 1.610915344 | 7.87814045  |
| ENSMUSG00000034586 | 4.952162959 | 7.651789682 | 7.767661525 | 4.832746033 | 7.161945863 |
| ENSMUSG00000034593 | 44.56946663 | 68.17048989 | 64.96589639 | 70.07481747 | 55.86317773 |
| ENSMUSG00000034595 | 36.08004441 | 46.60635533 | 48.7244223  | 124.0404815 | 95.25387998 |
| ENSMUSG00000034601 | 45.27691848 | 66.08363816 | 65.67204744 | 140.9550926 | 111.7263555 |
| ENSMUSG00000034602 | 92.67619252 | 159.2963488 | 121.4579802 | 103.9040397 | 104.5644096 |
| ENSMUSG00000034610 | 29.71297775 | 49.38882431 | 38.13215658 | 113.5695318 | 93.82149081 |
| ENSMUSG00000034613 | 0.707451851 | 0           | 2.118453143 | 0           | 0.716194586 |
| ENSMUSG00000034614 | 9.904325918 | 18.08604834 | 19.77222934 | 7.249119049 | 15.04008631 |
| ENSMUSG00000034616 | 10.61177777 | 30.60715873 | 23.30298458 | 8.054576721 | 20.05344842 |
| ENSMUSG00000034620 | 8.489422215 | 11.82549314 | 16.2414741  | 12.88732275 | 11.45911338 |
| ENSMUSG00000034621 | 139.3680147 | 169.0349902 | 154.6470795 | 147.398754  | 125.3340526 |
| ENSMUSG00000034623 | 7.074518513 | 4.869320706 | 9.179963621 | 8.860034393 | 10.02672421 |
| ENSMUSG00000034645 | 7.781970364 | 4.869320706 | 5.649208382 | 2.416373016 | 12.17530797 |
| ENSMUSG00000034647 | 38.20239997 | 53.56252777 | 51.54902649 | 82.15668255 | 80.92998826 |
| ENSMUSG00000034652 | 7.074518513 | 4.869320706 | 2.118453143 | 8.054576721 | 8.594335036 |
| ENSMUSG00000034653 | 25.46826665 | 24.34660353 | 30.36449505 | 41.07834128 | 24.35061594 |
| ENSMUSG00000034656 | 4.244711108 | 5.56493795  | 5.649208382 | 7.249119049 | 5.729556691 |
| ENSMUSG00000034659 | 11.31922962 | 20.17290007 | 19.77222934 | 28.19101852 | 21.48583759 |
| ENSMUSG00000034663 | 125.9264295 | 147.4708557 | 128.5194907 | 258.5519127 | 205.5478463 |
| ENSMUSG00000034664 | 12.73413332 | 7.651789682 | 10.59226572 | 5.638203705 | 7.87814045  |
| ENSMUSG00000034673 | 7.781970364 | 13.91234488 | 13.41686991 | 14.4982381  | 10.7429188  |
| ENSMUSG00000034674 | 94.09109622 | 116.1680797 | 108.7472614 | 137.7332619 | 125.3340526 |
| ENSMUSG00000034675 | 3.537259256 | 7.651789682 | 9.179963621 | 7.249119049 | 8.594335036 |
| ENSMUSG00000034681 | 140.0754665 | 151.6445591 | 139.8179075 | 324.5994419 | 249.9519106 |
| ENSMUSG00000034683 | 2.829807405 | 5.56493795  | 2.824604191 | 6.443661377 | 5.729556691 |
| ENSMUSG00000034684 | 11.31922962 | 4.173703463 | 7.767661525 | 12.88732275 | 5.013362104 |
| ENSMUSG00000034690 | 10.61177777 | 9.738641413 | 12.71071886 | 7.249119049 | 8.594335036 |
| ENSMUSG00000034706 | 4.952162959 | 4.869320706 | 2.824604191 | 7.249119049 | 8.594335036 |
| ENSMUSG00000034708 | 10.61177777 | 15.99919661 | 17.65377619 | 37.85651059 | 32.94495097 |
| ENSMUSG00000034723 | 9.904325918 | 20.17290007 | 9.886114669 | 12.08186508 | 12.89150255 |
| ENSMUSG00000034724 | 8.489422215 | 15.99919661 | 16.2414741  | 31.41284921 | 30.79636721 |
| ENSMUSG00000034729 | 22.63845924 | 21.56413456 | 28.24604191 | 47.52200265 | 43.68786977 |
| ENSMUSG00000034730 | 4.244711108 | 5.56493795  | 5.649208382 | 3.221830688 | 4.297167518 |
| ENSMUSG00000034739 | 13.44158517 | 18.78166558 | 9.886114669 | 15.30369577 | 22.20203218 |
| ENSMUSG00000034744 | 11.31922962 | 10.43425866 | 11.29841676 | 12.08186508 | 11.45911338 |
| ENSMUSG00000034748 | 8.489422215 | 15.30357936 | 16.2414741  | 23.35827249 | 20.769643   |
| ENSMUSG00000034751 | 10.61177777 | 7.651789682 | 10.59226572 | 2.416373016 | 2.148583759 |
| ENSMUSG00000034755 | 1.414903703 | 3.478086219 | 4.236906287 | 3.221830688 | 2.864778345 |
| ENSMUSG00000034757 | 21.93100739 | 36.17209668 | 26.83373982 | 31.41284921 | 42.25548059 |

|                    |             |             |             |             |             |
|--------------------|-------------|-------------|-------------|-------------|-------------|
| ENSMUSG00000034758 | 4.244711108 | 11.82549314 | 1.412302096 | 8.860034393 | 6.445751277 |
| ENSMUSG00000034761 | 44.56946663 | 82.77845201 | 58.61053696 | 36.24559524 | 44.40406435 |
| ENSMUSG00000034771 | 3.537259256 | 6.956172438 | 9.886114669 | 2.416373016 | 7.161945863 |
| ENSMUSG00000034773 | 12.73413332 | 18.78166558 | 10.59226572 | 49.132918   | 30.79636721 |
| ENSMUSG00000034785 | 14.14903703 | 7.651789682 | 7.061510478 | 4.832746033 | 8.594335036 |
| ENSMUSG00000034786 | 54.47379255 | 70.25734162 | 55.07978173 | 29.80193387 | 22.20203218 |
| ENSMUSG00000034793 | 21.22355554 | 29.21592424 | 15.53532305 | 38.66196826 | 33.66114556 |
| ENSMUSG00000034795 | 8.489422215 | 9.043024169 | 7.061510478 | 7.249119049 | 7.87814045  |
| ENSMUSG00000034796 | 7.074518513 | 8.347406925 | 12.00456781 | 8.860034393 | 10.02672421 |
| ENSMUSG00000034799 | 5.65961481  | 10.43425866 | 8.473812573 | 9.665492065 | 7.161945863 |
| ENSMUSG00000034800 | 31.12788146 | 50.08444155 | 48.7244223  | 58.79841006 | 53.71459398 |
| ENSMUSG00000034801 | 30.4204296  | 52.17129328 | 53.66747963 | 49.132918   | 54.43078856 |
| ENSMUSG00000034813 | 8.489422215 | 6.260555194 | 8.473812573 | 4.832746033 | 5.729556691 |
| ENSMUSG00000034818 | 11.31922962 | 7.651789682 | 9.179963621 | 8.054576721 | 10.7429188  |
| ENSMUSG00000034825 | 3.537259256 | 13.91234488 | 5.649208382 | 7.249119049 | 8.594335036 |
| ENSMUSG00000034826 | 68.62282957 | 104.3425866 | 89.68118307 | 128.0677699 | 123.1854689 |
| ENSMUSG00000034832 | 7.074518513 | 11.82549314 | 9.179963621 | 7.249119049 | 7.87814045  |
| ENSMUSG00000034833 | 70.03773327 | 94.60394515 | 86.15042783 | 62.82569842 | 63.0251236  |
| ENSMUSG00000034837 | 4.952162959 | 9.043024169 | 6.35535943  | 8.860034393 | 3.580972932 |
| ENSMUSG00000034842 | 10.61177777 | 7.651789682 | 9.179963621 | 7.249119049 | 7.161945863 |
| ENSMUSG00000034848 | 7.781970364 | 14.60796212 | 16.2414741  | 11.27640741 | 10.7429188  |
| ENSMUSG00000034850 | 96.92090362 | 134.254128  | 133.462548  | 108.7367857 | 96.68626916 |
| ENSMUSG00000034853 | 12.02668147 | 7.651789682 | 8.473812573 | 12.88732275 | 10.7429188  |
| ENSMUSG00000034855 | 6.367066661 | 4.869320706 | 8.473812573 | 7.249119049 | 6.445751277 |
| ENSMUSG00000034858 | 21.93100739 | 43.82388636 | 41.66291182 | 41.07834128 | 27.93158887 |
| ENSMUSG00000034867 | 27.5906222  | 48.69320706 | 45.19366706 | 27.38556085 | 38.67450766 |
| ENSMUSG00000034891 | 9.904325918 | 4.173703463 | 6.35535943  | 6.443661377 | 6.445751277 |
| ENSMUSG00000034898 | 7.781970364 | 3.478086219 | 4.236906287 | 5.638203705 | 9.310529622 |
| ENSMUSG00000034902 | 158.4692147 | 159.9919661 | 156.0593816 | 274.6610662 | 214.1421813 |
| ENSMUSG00000034903 | 26.1757185  | 33.3896277  | 44.48751601 | 32.21830688 | 35.80972932 |
| ENSMUSG00000034906 | 70.74518513 | 82.77845201 | 68.49665163 | 99.87675134 | 80.92998826 |
| ENSMUSG00000034908 | 67.91537772 | 93.90832791 | 84.73812573 | 70.88027514 | 78.7814045  |
| ENSMUSG00000034912 | 9.904325918 | 6.956172438 | 4.943057334 | 4.832746033 | 5.013362104 |
| ENSMUSG00000034928 | 63.67066661 | 70.25734162 | 72.02740687 | 124.0404815 | 95.25387998 |
| ENSMUSG00000034930 | 7.781970364 | 1.391234488 | 5.649208382 | 6.443661377 | 7.87814045  |
| ENSMUSG00000034931 | 38.90985182 | 75.82227957 | 43.78136496 | 104.7094974 | 74.48423698 |
| ENSMUSG00000034940 | 34.66514071 | 54.95376226 | 43.78136496 | 33.82922223 | 37.95831308 |
| ENSMUSG00000034947 | 6.367066661 | 6.260555194 | 11.29841676 | 8.860034393 | 10.02672421 |
| ENSMUSG00000034949 | 5.65961481  | 6.260555194 | 8.473812573 | 6.443661377 | 10.02672421 |
| ENSMUSG00000034951 | 26.1757185  | 38.25894841 | 22.59683353 | 23.35827249 | 25.06681052 |
| ENSMUSG00000034957 | 4.952162959 | 3.478086219 | 7.061510478 | 7.249119049 | 5.729556691 |
| ENSMUSG00000034958 | 7.781970364 | 9.043024169 | 8.473812573 | 5.638203705 | 9.310529622 |
| ENSMUSG00000034973 | 38.20239997 | 64.69240367 | 56.49208382 | 45.91108731 | 53.71459398 |

|                    |             |             |             |             |             |
|--------------------|-------------|-------------|-------------|-------------|-------------|
| ENSMUSG00000034974 | 38.20239997 | 61.9099347  | 57.19823487 | 72.49119049 | 72.33565322 |
| ENSMUSG00000034990 | 7.781970364 | 6.260555194 | 7.061510478 | 4.02728836  | 7.161945863 |
| ENSMUSG00000034994 | 27.5906222  | 28.52030699 | 17.65377619 | 41.07834128 | 35.80972932 |
| ENSMUSG00000034998 | 11.31922962 | 19.47728283 | 16.2414741  | 71.68573282 | 55.14698315 |
| ENSMUSG00000035011 | 14.14903703 | 24.34660353 | 36.71985448 | 31.41284921 | 32.94495097 |
| ENSMUSG00000035020 | 4.244711108 | 5.56493795  | 4.943057334 | 1.610915344 | 7.161945863 |
| ENSMUSG00000035021 | 10.61177777 | 13.91234488 | 13.41686991 | 9.665492065 | 12.17530797 |
| ENSMUSG00000035024 | 46.69182218 | 51.47567604 | 45.8998181  | 46.71654498 | 32.94495097 |
| ENSMUSG00000035027 | 77.11225179 | 79.30036579 | 93.21193831 | 140.1496349 | 106.7129934 |
| ENSMUSG00000035031 | 10.61177777 | 8.347406925 | 10.59226572 | 4.02728836  | 3.580972932 |
| ENSMUSG00000035032 | 24.05336294 | 37.56333116 | 36.01370344 | 52.35474869 | 50.13362104 |
| ENSMUSG00000035033 | 8.489422215 | 6.956172438 | 6.35535943  | 6.443661377 | 6.445751277 |
| ENSMUSG00000035045 | 3.537259256 | 6.260555194 | 6.35535943  | 0.805457672 | 5.013362104 |
| ENSMUSG00000035048 | 40.32475552 | 61.21431745 | 43.78136496 | 67.65844446 | 58.72795608 |
| ENSMUSG00000035051 | 38.90985182 | 63.30116918 | 64.25974535 | 106.3204127 | 90.24051788 |
| ENSMUSG00000035062 | 4.244711108 | 15.30357936 | 7.767661525 | 3.221830688 | 8.594335036 |
| ENSMUSG00000035064 | 7.781970364 | 9.043024169 | 10.59226572 | 10.47094974 | 12.17530797 |
| ENSMUSG00000035086 | 48.10672589 | 84.1696865  | 63.5535943  | 126.4568545 | 94.5376854  |
| ENSMUSG00000035093 | 41.73965922 | 83.47406925 | 79.7950684  | 76.51847885 | 83.7947666  |
| ENSMUSG00000035095 | 24.76081479 | 57.73623123 | 45.19366706 | 41.88379895 | 33.66114556 |
| ENSMUSG00000035104 | 8.489422215 | 3.478086219 | 6.35535943  | 4.832746033 | 7.161945863 |
| ENSMUSG00000035107 | 5.65961481  | 7.651789682 | 5.649208382 | 4.02728836  | 10.02672421 |
| ENSMUSG00000035109 | 7.074518513 | 5.56493795  | 4.943057334 | 2.416373016 | 7.87814045  |
| ENSMUSG00000035112 | 7.074518513 | 10.43425866 | 9.179963621 | 7.249119049 | 12.89150255 |
| ENSMUSG00000035125 | 11.31922962 | 25.73783802 | 32.4829482  | 33.02376456 | 22.20203218 |
| ENSMUSG00000035126 | 38.20239997 | 69.56172438 | 77.67661525 | 62.82569842 | 63.74131818 |
| ENSMUSG00000035131 | 6.367066661 | 2.782468975 | 10.59226572 | 5.638203705 | 7.161945863 |
| ENSMUSG00000035139 | 48.10672589 | 75.82227957 | 70.61510478 | 128.8732275 | 97.40246374 |
| ENSMUSG00000035142 | 8.489422215 | 10.43425866 | 4.943057334 | 5.638203705 | 7.87814045  |
| ENSMUSG00000035150 | 24.05336294 | 51.47567604 | 48.01827125 | 127.2623122 | 85.94335036 |
| ENSMUSG00000035151 | 9.196874066 | 20.17290007 | 16.2414741  | 12.88732275 | 17.18867007 |
| ENSMUSG00000035152 | 17.68629628 | 31.99839321 | 20.47838039 | 39.46742593 | 36.5259239  |
| ENSMUSG00000035158 | 5.65961481  | 7.651789682 | 4.236906287 | 3.221830688 | 9.310529622 |
| ENSMUSG00000035165 | 6.367066661 | 6.956172438 | 5.649208382 | 8.860034393 | 7.87814045  |
| ENSMUSG00000035168 | 7.074518513 | 8.347406925 | 9.886114669 | 7.249119049 | 11.45911338 |
| ENSMUSG00000035172 | 4.244711108 | 6.956172438 | 9.179963621 | 8.054576721 | 11.45911338 |
| ENSMUSG00000035173 | 65.08557032 | 89.73462445 | 76.26431316 | 45.10562964 | 55.86317773 |
| ENSMUSG00000035183 | 7.074518513 | 5.56493795  | 7.061510478 | 5.638203705 | 5.729556691 |
| ENSMUSG00000035184 | 4.952162959 | 6.956172438 | 4.236906287 | 4.02728836  | 8.594335036 |
| ENSMUSG00000035187 | 5.65961481  | 9.043024169 | 5.649208382 | 4.02728836  | 5.013362104 |
| ENSMUSG00000035189 | 10.61177777 | 8.347406925 | 8.473812573 | 5.638203705 | 6.445751277 |
| ENSMUSG00000035191 | 12.73413332 | 10.43425866 | 2.824604191 | 7.249119049 | 6.445751277 |
| ENSMUSG00000035201 | 8.489422215 | 7.651789682 | 10.59226572 | 8.860034393 | 7.161945863 |

|                    |             |             |             |             |             |
|--------------------|-------------|-------------|-------------|-------------|-------------|
| ENSMUSG00000035203 | 95.50599992 | 120.3417832 | 108.0411103 | 189.2825529 | 143.2389173 |
| ENSMUSG00000035206 | 55.88869625 | 84.1696865  | 79.7950684  | 116.7913625 | 95.25387998 |
| ENSMUSG00000035208 | 60.84085921 | 73.73542784 | 77.67661525 | 81.35122488 | 53.71459398 |
| ENSMUSG00000035212 | 16.97884443 | 44.5195036  | 28.95219296 | 25.77464551 | 31.5125618  |
| ENSMUSG00000035228 | 9.904325918 | 4.173703463 | 11.29841676 | 7.249119049 | 8.594335036 |
| ENSMUSG00000035234 | 29.71297775 | 38.95456565 | 33.89525029 | 56.38203705 | 42.97167518 |
| ENSMUSG00000035235 | 9.196874066 | 11.82549314 | 7.767661525 | 4.02728836  | 9.310529622 |
| ENSMUSG00000035236 | 31.83533331 | 43.82388636 | 37.42600553 | 41.07834128 | 42.25548059 |
| ENSMUSG00000035242 | 14.85648888 | 27.82468975 | 24.00913562 | 14.4982381  | 18.62105924 |
| ENSMUSG00000035245 | 11.31922962 | 19.47728283 | 15.53532305 | 12.08186508 | 14.32389173 |
| ENSMUSG00000035246 | 5.65961481  | 2.086851731 | 3.530755239 | 1.610915344 | 1.432389173 |
| ENSMUSG00000035247 | 63.67066661 | 121.7330177 | 74.14586002 | 198.1425873 | 155.4142252 |
| ENSMUSG00000035258 | 14.14903703 | 9.043024169 | 11.29841676 | 6.443661377 | 11.45911338 |
| ENSMUSG00000035266 | 25.46826665 | 42.43265187 | 29.65834401 | 83.7675979  | 68.0384857  |
| ENSMUSG00000035268 | 132.2934962 | 155.8182626 | 139.8179075 | 224.7226905 | 163.2923657 |
| ENSMUSG00000035270 | 16.97884443 | 13.21672763 | 10.59226572 | 4.832746033 | 8.594335036 |
| ENSMUSG00000035273 | 16.97884443 | 30.60715873 | 18.35992724 | 15.30369577 | 21.48583759 |
| ENSMUSG00000035274 | 4.952162959 | 4.869320706 | 8.473812573 | 5.638203705 | 3.580972932 |
| ENSMUSG00000035275 | 7.074518513 | 6.956172438 | 9.886114669 | 6.443661377 | 7.87814045  |
| ENSMUSG00000035277 | 0.707451851 | 2.086851731 | 2.824604191 | 2.416373016 | 2.864778345 |
| ENSMUSG00000035284 | 20.51610369 | 37.56333116 | 45.8998181  | 26.58010318 | 23.63442135 |
| ENSMUSG00000035293 | 29.71297775 | 30.60715873 | 39.54445867 | 82.96214023 | 77.34901533 |
| ENSMUSG00000035295 | 5.65961481  | 9.043024169 | 15.53532305 | 12.88732275 | 11.45911338 |
| ENSMUSG00000035296 | 9.196874066 | 9.043024169 | 10.59226572 | 5.638203705 | 7.161945863 |
| ENSMUSG00000035297 | 74.28244438 | 105.0382038 | 91.09348516 | 109.5422434 | 85.94335036 |
| ENSMUSG00000035299 | 2.122355554 | 4.869320706 | 3.530755239 | 0.805457672 | 2.148583759 |
| ENSMUSG00000035310 | 0.707451851 | 2.086851731 | 0           | 0           | 2.864778345 |
| ENSMUSG00000035311 | 66.50047402 | 91.82147618 | 89.68118307 | 70.07481747 | 70.90326405 |
| ENSMUSG00000035314 | 9.196874066 | 8.347406925 | 4.943057334 | 7.249119049 | 6.445751277 |
| ENSMUSG00000035325 | 65.08557032 | 131.4716591 | 105.9226572 | 116.7913625 | 108.1453825 |
| ENSMUSG00000035342 | 8.489422215 | 6.956172438 | 7.767661525 | 7.249119049 | 6.445751277 |
| ENSMUSG00000035349 | 4.244711108 | 11.1298759  | 6.35535943  | 4.832746033 | 5.729556691 |
| ENSMUSG00000035351 | 24.76081479 | 25.73783802 | 23.30298458 | 84.57305557 | 59.44415067 |
| ENSMUSG00000035355 | 4.244711108 | 6.260555194 | 4.236906287 | 5.638203705 | 6.445751277 |
| ENSMUSG00000035356 | 21.22355554 | 38.25894841 | 36.01370344 | 58.79841006 | 60.87653984 |
| ENSMUSG00000035357 | 7.074518513 | 9.738641413 | 3.530755239 | 8.860034393 | 5.013362104 |
| ENSMUSG00000035365 | 26.1757185  | 34.08524495 | 28.95219296 | 71.68573282 | 58.01176149 |
| ENSMUSG00000035378 | 11.31922962 | 13.91234488 | 12.00456781 | 22.55281482 | 15.04008631 |
| ENSMUSG00000035390 | 4.952162959 | 6.956172438 | 2.824604191 | 7.249119049 | 5.729556691 |
| ENSMUSG00000035392 | 24.76081479 | 39.6501829  | 34.60140134 | 41.88379895 | 48.70123187 |
| ENSMUSG00000035394 | 14.14903703 | 13.21672763 | 8.473812573 | 8.860034393 | 16.47247549 |
| ENSMUSG00000035395 | 4.244711108 | 2.086851731 | 4.236906287 | 1.610915344 | 2.864778345 |
| ENSMUSG00000035399 | 14.85648888 | 22.95536904 | 33.89525029 | 19.33098413 | 17.18867007 |



|                    |             |             |             |             |             |
|--------------------|-------------|-------------|-------------|-------------|-------------|
| ENSMUSG00000035403 | 9.904325918 | 6.956172438 | 7.061510478 | 9.665492065 | 7.87814045  |
| ENSMUSG00000035427 | 5.65961481  | 2.782468975 | 2.824604191 | 2.416373016 | 1.432389173 |
| ENSMUSG00000035429 | 10.61177777 | 6.956172438 | 8.473812573 | 9.665492065 | 5.013362104 |
| ENSMUSG00000035435 | 19.80865184 | 31.99839321 | 46.60596915 | 25.77464551 | 27.93158887 |
| ENSMUSG00000035437 | 84.89422215 | 132.8628936 | 115.1026208 | 141.7605503 | 108.8615771 |
| ENSMUSG00000035439 | 77.81970364 | 105.0382038 | 106.6288082 | 135.3168889 | 86.65954495 |
| ENSMUSG00000035441 | 11.31922962 | 9.738641413 | 1.412302096 | 4.02728836  | 8.594335036 |
| ENSMUSG00000035443 | 12.02668147 | 16.69481385 | 7.767661525 | 12.08186508 | 14.32389173 |
| ENSMUSG00000035455 | 23.34591109 | 38.95456565 | 35.30755239 | 99.87675134 | 81.64618284 |
| ENSMUSG00000035458 | 7.074518513 | 3.478086219 | 5.649208382 | 6.443661377 | 4.297167518 |
| ENSMUSG00000035459 | 9.904325918 | 8.347406925 | 4.943057334 | 5.638203705 | 4.297167518 |
| ENSMUSG00000035469 | 21.22355554 | 39.6501829  | 30.36449505 | 36.24559524 | 37.95831308 |
| ENSMUSG00000035472 | 5.65961481  | 5.56493795  | 6.35535943  | 4.832746033 | 2.864778345 |
| ENSMUSG00000035473 | 4.952162959 | 9.043024169 | 5.649208382 | 4.02728836  | 5.729556691 |
| ENSMUSG00000035478 | 36.08004441 | 43.82388636 | 39.54445867 | 88.60034393 | 74.48423698 |
| ENSMUSG00000035486 | 2.122355554 | 4.869320706 | 7.061510478 | 9.665492065 | 8.594335036 |
| ENSMUSG00000035493 | 9.904325918 | 4.173703463 | 5.649208382 | 4.832746033 | 5.729556691 |
| ENSMUSG00000035495 | 127.3413332 | 179.4692489 | 144.7609648 | 217.4735715 | 161.1437819 |
| ENSMUSG00000035498 | 10.61177777 | 9.738641413 | 6.35535943  | 4.02728836  | 3.580972932 |
| ENSMUSG00000035504 | 5.65961481  | 4.869320706 | 9.179963621 | 8.054576721 | 5.013362104 |
| ENSMUSG00000035505 | 13.44158517 | 30.60715873 | 34.60140134 | 82.96214023 | 60.87653984 |
| ENSMUSG00000035506 | 6.367066661 | 6.260555194 | 5.649208382 | 8.054576721 | 7.87814045  |
| ENSMUSG00000035509 | 14.14903703 | 8.347406925 | 9.179963621 | 2.416373016 | 4.297167518 |
| ENSMUSG00000035513 | 0           | 0           | 0           | 0           | 0           |
| ENSMUSG00000035517 | 11.31922962 | 9.043024169 | 12.00456781 | 8.860034393 | 9.310529622 |
| ENSMUSG00000035521 | 39.61730367 | 70.95295887 | 60.72899011 | 93.43308996 | 83.07857202 |
| ENSMUSG00000035529 | 32.54278516 | 47.99758982 | 44.48751601 | 62.02024075 | 68.75468029 |
| ENSMUSG00000035530 | 26.1757185  | 29.21592424 | 40.25060972 | 164.3133651 | 117.4559122 |
| ENSMUSG00000035539 | 10.61177777 | 12.52111039 | 7.061510478 | 2.416373016 | 5.013362104 |
| ENSMUSG00000035540 | 8.489422215 | 7.651789682 | 5.649208382 | 3.221830688 | 4.297167518 |
| ENSMUSG00000035545 | 106.1177777 | 149.5577074 | 124.2825844 | 211.8353678 | 163.2923657 |
| ENSMUSG00000035547 | 14.85648888 | 20.17290007 | 24.71528667 | 7.249119049 | 12.17530797 |
| ENSMUSG00000035569 | 263.1720887 | 317.2014632 | 269.7497002 | 288.3538466 | 207.69643   |
| ENSMUSG00000035572 | 38.90985182 | 69.56172438 | 62.84744325 | 78.12939419 | 81.64618284 |
| ENSMUSG00000035575 | 32.54278516 | 58.43184848 | 52.96132858 | 86.18397091 | 77.34901533 |
| ENSMUSG00000035576 | 8.489422215 | 7.651789682 | 9.886114669 | 12.08186508 | 7.161945863 |
| ENSMUSG00000035578 | 41.73965922 | 55.6493795  | 42.36906287 | 191.698926  | 145.387501  |
| ENSMUSG00000035580 | 7.074518513 | 2.782468975 | 4.943057334 | 4.02728836  | 11.45911338 |
| ENSMUSG00000035582 | 10.61177777 | 8.347406925 | 9.886114669 | 4.02728836  | 7.87814045  |
| ENSMUSG00000035585 | 16.27139258 | 24.34660353 | 21.18453143 | 50.74383334 | 45.12025894 |
| ENSMUSG00000035594 | 4.952162959 | 5.56493795  | 2.118453143 | 5.638203705 | 7.87814045  |
| ENSMUSG00000035596 | 16.27139258 | 24.34660353 | 20.47838039 | 49.93837567 | 51.56601022 |
| ENSMUSG00000035597 | 123.0966221 | 137.036597  | 122.1641313 | 181.2279762 | 135.3607768 |

|                    |             |             |             |             |             |
|--------------------|-------------|-------------|-------------|-------------|-------------|
| ENSMUSG00000035614 | 92.67619252 | 182.9473351 | 121.4579802 | 174.7843148 | 166.157144  |
| ENSMUSG00000035615 | 10.61177777 | 6.956172438 | 9.179963621 | 4.832746033 | 5.013362104 |
| ENSMUSG00000035620 | 69.33028142 | 94.60394515 | 85.44427678 | 53.96566403 | 66.60609653 |
| ENSMUSG00000035621 | 42.44711108 | 50.08444155 | 55.78593277 | 101.4876667 | 86.65954495 |
| ENSMUSG00000035623 | 64.37811846 | 82.77845201 | 86.85657888 | 137.7332619 | 121.7530797 |
| ENSMUSG00000035629 | 87.72402956 | 131.4716591 | 99.56729774 | 116.7913625 | 111.7263555 |
| ENSMUSG00000035632 | 117.4370073 | 137.036597  | 127.1071886 | 260.9682858 | 186.2105924 |
| ENSMUSG00000035637 | 43.86201478 | 58.43184848 | 68.49665163 | 57.99295239 | 59.44415067 |
| ENSMUSG00000035638 | 6.367066661 | 5.56493795  | 7.767661525 | 8.054576721 | 8.594335036 |
| ENSMUSG00000035640 | 16.27139258 | 16.69481385 | 24.71528667 | 33.82922223 | 31.5125618  |
| ENSMUSG00000035642 | 29.71297775 | 51.47567604 | 56.49208382 | 102.2931244 | 88.09193412 |
| ENSMUSG00000035649 | 79.94205919 | 126.6023384 | 91.79963621 | 116.7913625 | 108.1453825 |
| ENSMUSG00000035653 | 6.367066661 | 11.1298759  | 6.35535943  | 4.832746033 | 4.297167518 |
| ENSMUSG00000035666 | 70.03773327 | 127.2979556 | 103.098053  | 198.1425873 | 172.6028953 |
| ENSMUSG00000035673 | 197.3790665 | 222.597518  | 213.2576164 | 179.6170609 | 155.4142252 |
| ENSMUSG00000035674 | 21.22355554 | 37.56333116 | 28.24604191 | 54.7711217  | 37.24211849 |
| ENSMUSG00000035683 | 16.97884443 | 15.30357936 | 12.71071886 | 24.16373016 | 21.48583759 |
| ENSMUSG00000035694 | 7.781970364 | 5.56493795  | 5.649208382 | 6.443661377 | 4.297167518 |
| ENSMUSG00000035696 | 24.76081479 | 36.86771392 | 33.89525029 | 39.46742593 | 44.40406435 |
| ENSMUSG00000035697 | 92.67619252 | 109.9075245 | 107.3349593 | 127.2623122 | 105.9967988 |
| ENSMUSG00000035704 | 16.97884443 | 27.82468975 | 20.47838039 | 53.96566403 | 49.41742646 |
| ENSMUSG00000035713 | 16.27139258 | 28.52030699 | 15.53532305 | 12.08186508 | 14.32389173 |
| ENSMUSG00000035722 | 20.51610369 | 43.82388636 | 37.42600553 | 27.38556085 | 40.82309142 |
| ENSMUSG00000035725 | 29.71297775 | 41.73703463 | 39.54445867 | 20.1364418  | 27.21539428 |
| ENSMUSG00000035735 | 7.781970364 | 7.651789682 | 7.061510478 | 1.610915344 | 7.87814045  |
| ENSMUSG00000035757 | 19.80865184 | 35.47647943 | 36.71985448 | 32.21830688 | 40.82309142 |
| ENSMUSG00000035762 | 58.0110518  | 86.25653823 | 63.5535943  | 79.74030954 | 73.05184781 |
| ENSMUSG00000035772 | 16.27139258 | 26.43345526 | 26.12758877 | 47.52200265 | 43.68786977 |
| ENSMUSG00000035776 | 6.367066661 | 11.82549314 | 7.061510478 | 9.665492065 | 10.02672421 |
| ENSMUSG00000035778 | 137.2456591 | 161.3832006 | 142.6425116 | 149.0096693 | 141.8065281 |
| ENSMUSG00000035781 | 66.50047402 | 94.60394515 | 89.68118307 | 50.74383334 | 62.30892901 |
| ENSMUSG00000035790 | 38.90985182 | 56.34499675 | 67.79050059 | 53.96566403 | 52.99839939 |
| ENSMUSG00000035798 | 54.47379255 | 88.34338996 | 69.90895373 | 70.88027514 | 50.13362104 |
| ENSMUSG00000035805 | 7.781970364 | 4.869320706 | 8.473812573 | 4.832746033 | 11.45911338 |
| ENSMUSG00000035811 | 8.489422215 | 6.956172438 | 11.29841676 | 6.443661377 | 3.580972932 |
| ENSMUSG00000035818 | 4.952162959 | 7.651789682 | 8.473812573 | 4.832746033 | 9.310529622 |
| ENSMUSG00000035828 | 13.44158517 | 17.39043109 | 28.24604191 | 66.85298678 | 46.55264811 |
| ENSMUSG00000035829 | 7.781970364 | 6.260555194 | 7.061510478 | 8.860034393 | 6.445751277 |
| ENSMUSG00000035834 | 20.51610369 | 38.25894841 | 36.01370344 | 55.57657937 | 49.41742646 |
| ENSMUSG00000035835 | 8.489422215 | 11.82549314 | 10.59226572 | 8.054576721 | 12.89150255 |
| ENSMUSG00000035842 | 13.44158517 | 25.73783802 | 26.83373982 | 32.21830688 | 48.70123187 |
| ENSMUSG00000035845 | 24.76081479 | 38.95456565 | 39.54445867 | 98.265836   | 95.97007457 |
| ENSMUSG00000035847 | 7.074518513 | 9.738641413 | 14.12302096 | 6.443661377 | 10.7429188  |

|                    |             |             |             |             |             |
|--------------------|-------------|-------------|-------------|-------------|-------------|
| ENSMUSG00000035849 | 10.61177777 | 13.21672763 | 13.41686991 | 12.88732275 | 9.310529622 |
| ENSMUSG00000035851 | 59.42595551 | 88.34338996 | 92.50578726 | 194.9207566 | 166.157144  |
| ENSMUSG00000035852 | 9.196874066 | 2.782468975 | 5.649208382 | 5.638203705 | 3.580972932 |
| ENSMUSG00000035863 | 9.196874066 | 9.738641413 | 15.53532305 | 7.249119049 | 15.04008631 |
| ENSMUSG00000035864 | 12.73413332 | 8.347406925 | 7.061510478 | 3.221830688 | 4.297167518 |
| ENSMUSG00000035875 | 12.73413332 | 4.173703463 | 8.473812573 | 9.665492065 | 9.310529622 |
| ENSMUSG00000035877 | 9.196874066 | 9.043024169 | 7.767661525 | 10.47094974 | 7.87814045  |
| ENSMUSG00000035878 | 7.074518513 | 4.869320706 | 8.473812573 | 6.443661377 | 7.87814045  |
| ENSMUSG00000035891 | 240.5336294 | 231.6405422 | 256.3328303 | 116.7913625 | 113.1587446 |
| ENSMUSG00000035898 | 19.10119998 | 37.56333116 | 31.0706461  | 46.71654498 | 42.25548059 |
| ENSMUSG00000035900 | 44.56946663 | 59.82308296 | 52.25517753 | 66.04752911 | 60.16034525 |
| ENSMUSG00000035901 | 31.12788146 | 71.64857611 | 49.43057334 | 47.52200265 | 48.70123187 |
| ENSMUSG00000035910 | 7.781970364 | 4.173703463 | 4.236906287 | 5.638203705 | 3.580972932 |
| ENSMUSG00000035914 | 7.781970364 | 6.956172438 | 7.061510478 | 9.665492065 | 9.310529622 |
| ENSMUSG00000035919 | 14.85648888 | 11.1298759  | 8.473812573 | 7.249119049 | 9.310529622 |
| ENSMUSG00000035929 | 55.1812444  | 81.38721752 | 80.50121945 | 190.0880106 | 133.9283876 |
| ENSMUSG00000035934 | 7.074518513 | 5.56493795  | 4.236906287 | 3.221830688 | 2.864778345 |
| ENSMUSG00000035941 | 68.62282957 | 85.56092098 | 67.79050059 | 114.3749894 | 85.22715578 |
| ENSMUSG00000035944 | 11.31922962 | 23.65098629 | 20.47838039 | 10.47094974 | 20.05344842 |
| ENSMUSG00000035948 | 7.074518513 | 9.738641413 | 7.061510478 | 4.02728836  | 10.02672421 |
| ENSMUSG00000035949 | 61.54831106 | 98.08203137 | 81.20737049 | 107.1258704 | 98.83485292 |
| ENSMUSG00000035953 | 19.80865184 | 29.91154148 | 24.00913562 | 97.46037832 | 68.0384857  |
| ENSMUSG00000035954 | 30.4204296  | 59.12746572 | 48.01827125 | 32.21830688 | 23.63442135 |
| ENSMUSG00000035960 | 36.78749627 | 59.82308296 | 62.1412922  | 144.1769233 | 115.3073284 |
| ENSMUSG00000035967 | 7.074518513 | 9.043024169 | 9.179963621 | 16.10915344 | 7.87814045  |
| ENSMUSG00000035969 | 7.781970364 | 4.173703463 | 7.061510478 | 7.249119049 | 5.729556691 |
| ENSMUSG00000035983 | 60.84085921 | 94.60394515 | 99.56729774 | 214.2517408 | 204.8316517 |
| ENSMUSG00000035984 | 7.781970364 | 6.956172438 | 7.061510478 | 11.27640741 | 8.594335036 |
| ENSMUSG00000035992 | 67.91537772 | 95.2995624  | 91.79963621 | 126.4568545 | 101.6996313 |
| ENSMUSG00000036002 | 4.952162959 | 9.043024169 | 11.29841676 | 6.443661377 | 9.310529622 |
| ENSMUSG00000036006 | 45.27691848 | 66.08363816 | 59.31668801 | 35.44013757 | 39.39070225 |
| ENSMUSG00000036009 | 43.86201478 | 66.7792554  | 69.90895373 | 80.54576721 | 74.48423698 |
| ENSMUSG00000036013 | 2.122355554 | 0.695617244 | 2.824604191 | 3.221830688 | 1.432389173 |
| ENSMUSG00000036022 | 8.489422215 | 8.347406925 | 8.473812573 | 8.054576721 | 11.45911338 |
| ENSMUSG00000036026 | 37.49494812 | 71.64857611 | 53.66747963 | 81.35122488 | 73.76804239 |
| ENSMUSG00000036027 | 7.781970364 | 7.651789682 | 10.59226572 | 4.832746033 | 5.013362104 |
| ENSMUSG00000036036 | 7.074518513 | 6.956172438 | 6.35535943  | 8.054576721 | 3.580972932 |
| ENSMUSG00000036040 | 5.65961481  | 5.56493795  | 7.061510478 | 7.249119049 | 3.580972932 |
| ENSMUSG00000036046 | 42.44711108 | 49.38882431 | 53.66747963 | 30.60739154 | 46.55264811 |
| ENSMUSG00000036052 | 13.44158517 | 13.21672763 | 14.12302096 | 10.47094974 | 11.45911338 |
| ENSMUSG00000036053 | 7.781970364 | 4.173703463 | 7.061510478 | 16.10915344 | 6.445751277 |
| ENSMUSG00000036054 | 41.73965922 | 50.08444155 | 56.49208382 | 82.15668255 | 73.76804239 |
| ENSMUSG00000036057 | 26.1757185  | 44.5195036  | 48.01827125 | 107.1258704 | 90.24051788 |

|                    |             |             |             |             |             |
|--------------------|-------------|-------------|-------------|-------------|-------------|
| ENSMUSG00000036062 | 9.196874066 | 4.869320706 | 5.649208382 | 8.054576721 | 4.297167518 |
| ENSMUSG00000036067 | 14.14903703 | 24.34660353 | 20.47838039 | 277.0774392 | 186.926787  |
| ENSMUSG00000036073 | 9.904325918 | 8.347406925 | 9.179963621 | 8.860034393 | 9.310529622 |
| ENSMUSG00000036078 | 16.27139258 | 11.1298759  | 6.35535943  | 33.82922223 | 24.35061594 |
| ENSMUSG00000036083 | 7.074518513 | 8.347406925 | 8.473812573 | 5.638203705 | 3.580972932 |
| ENSMUSG00000036086 | 62.96321476 | 90.43024169 | 84.73812573 | 126.4568545 | 88.09193412 |
| ENSMUSG00000036087 | 57.30359995 | 93.21271067 | 93.21193831 | 104.7094974 | 94.5376854  |
| ENSMUSG00000036095 | 12.73413332 | 15.99919661 | 6.35535943  | 0.805457672 | 7.161945863 |
| ENSMUSG00000036098 | 4.952162959 | 8.347406925 | 5.649208382 | 5.638203705 | 6.445751277 |
| ENSMUSG00000036099 | 54.47379255 | 64.69240367 | 57.19823487 | 54.7711217  | 48.70123187 |
| ENSMUSG00000036104 | 46.69182218 | 75.12666233 | 69.90895373 | 74.9075635  | 68.75468029 |
| ENSMUSG00000036106 | 4.952162959 | 5.56493795  | 6.35535943  | 8.054576721 | 7.87814045  |
| ENSMUSG00000036109 | 7.781970364 | 7.651789682 | 8.473812573 | 10.47094974 | 8.594335036 |
| ENSMUSG00000036110 | 4.952162959 | 7.651789682 | 4.236906287 | 8.054576721 | 6.445751277 |
| ENSMUSG00000036112 | 82.7718666  | 96.69079689 | 96.0365425  | 108.7367857 | 86.65954495 |
| ENSMUSG00000036120 | 53.05888884 | 86.95215547 | 76.97046421 | 86.98942859 | 79.49759908 |
| ENSMUSG00000036138 | 35.37259256 | 44.5195036  | 33.18909925 | 62.02024075 | 58.01176149 |
| ENSMUSG00000036151 | 4.952162959 | 5.56493795  | 7.061510478 | 4.832746033 | 4.297167518 |
| ENSMUSG00000036155 | 31.12788146 | 42.43265187 | 41.66291182 | 65.24207144 | 66.60609653 |
| ENSMUSG00000036158 | 9.904325918 | 5.56493795  | 3.530755239 | 4.02728836  | 8.594335036 |
| ENSMUSG00000036160 | 70.03773327 | 98.77764862 | 78.3827663  | 238.4154709 | 189.0753708 |
| ENSMUSG00000036167 | 79.23460734 | 148.1664729 | 129.9317928 | 236.8045556 | 224.1689055 |
| ENSMUSG00000036168 | 5.65961481  | 11.1298759  | 8.473812573 | 2.416373016 | 4.297167518 |
| ENSMUSG00000036172 | 5.65961481  | 6.956172438 | 11.29841676 | 3.221830688 | 2.148583759 |
| ENSMUSG00000036180 | 49.52162959 | 64.69240367 | 89.68118307 | 83.7675979  | 82.36237743 |
| ENSMUSG00000036192 | 8.489422215 | 9.738641413 | 10.59226572 | 6.443661377 | 7.87814045  |
| ENSMUSG00000036196 | 19.80865184 | 18.78166558 | 21.89068248 | 27.38556085 | 25.06681052 |
| ENSMUSG00000036197 | 90.55383696 | 142.601535  | 125.6948865 | 104.7094974 | 98.83485292 |
| ENSMUSG00000036198 | 1.414903703 | 4.173703463 | 2.824604191 | 1.610915344 | 4.297167518 |
| ENSMUSG00000036202 | 14.85648888 | 29.91154148 | 22.59683353 | 78.12939419 | 82.36237743 |
| ENSMUSG00000036206 | 0.707451851 | 4.869320706 | 8.473812573 | 6.443661377 | 7.161945863 |
| ENSMUSG00000036208 | 31.83533331 | 67.47487265 | 60.02283906 | 91.82217462 | 65.88990194 |
| ENSMUSG00000036214 | 16.97884443 | 17.39043109 | 20.47838039 | 26.58010318 | 42.25548059 |
| ENSMUSG00000036218 | 5.65961481  | 6.956172438 | 5.649208382 | 4.02728836  | 6.445751277 |
| ENSMUSG00000036223 | 13.44158517 | 20.86851731 | 11.29841676 | 28.9964762  | 27.21539428 |
| ENSMUSG00000036225 | 9.904325918 | 4.173703463 | 7.061510478 | 6.443661377 | 6.445751277 |
| ENSMUSG00000036242 | 4.952162959 | 6.260555194 | 9.179963621 | 5.638203705 | 8.594335036 |
| ENSMUSG00000036246 | 65.08557032 | 91.82147618 | 79.08891735 | 80.54576721 | 64.45751277 |
| ENSMUSG00000036249 | 20.51610369 | 25.04222078 | 28.95219296 | 36.24559524 | 41.53928601 |
| ENSMUSG00000036251 | 53.7663407  | 40.34580014 | 45.19366706 | 23.35827249 | 47.98503729 |
| ENSMUSG00000036256 | 12.73413332 | 6.956172438 | 12.00456781 | 9.665492065 | 8.594335036 |
| ENSMUSG00000036257 | 4.244711108 | 5.56493795  | 5.649208382 | 4.02728836  | 7.87814045  |
| ENSMUSG00000036270 | 79.94205919 | 123.8198694 | 108.7472614 | 119.2077355 | 120.3206905 |

|                    |             |             |             |             |             |
|--------------------|-------------|-------------|-------------|-------------|-------------|
| ENSMUSG00000036273 | 51.64398514 | 80.69160028 | 55.07978173 | 40.2728836  | 30.79636721 |
| ENSMUSG00000036275 | 43.86201478 | 59.82308296 | 49.43057334 | 76.51847885 | 66.60609653 |
| ENSMUSG00000036281 | 32.54278516 | 42.43265187 | 40.95676077 | 97.46037832 | 77.34901533 |
| ENSMUSG00000036282 | 50.93653329 | 67.47487265 | 60.02283906 | 95.04400531 | 74.48423698 |
| ENSMUSG00000036285 | 101.8730666 | 127.2979556 | 107.3349593 | 221.5008598 | 171.1705061 |
| ENSMUSG00000036292 | 7.074518513 | 4.173703463 | 8.473812573 | 2.416373016 | 10.02672421 |
| ENSMUSG00000036298 | 6.367066661 | 2.782468975 | 8.473812573 | 5.638203705 | 5.729556691 |
| ENSMUSG00000036304 | 6.367066661 | 5.56493795  | 11.29841676 | 8.054576721 | 12.17530797 |
| ENSMUSG00000036306 | 9.904325918 | 7.651789682 | 7.767661525 | 8.860034393 | 4.297167518 |
| ENSMUSG00000036309 | 6.367066661 | 4.173703463 | 10.59226572 | 6.443661377 | 6.445751277 |
| ENSMUSG00000036315 | 14.14903703 | 22.2597518  | 18.35992724 | 41.07834128 | 40.10689684 |
| ENSMUSG00000036323 | 48.81417774 | 70.25734162 | 64.25974535 | 107.1258704 | 95.97007457 |
| ENSMUSG00000036327 | 8.489422215 | 12.52111039 | 15.53532305 | 23.35827249 | 25.78300511 |
| ENSMUSG00000036330 | 53.05888884 | 92.51709342 | 81.91352154 | 103.9040397 | 90.24051788 |
| ENSMUSG00000036333 | 46.69182218 | 101.5601176 | 72.02740687 | 66.04752911 | 65.17370736 |
| ENSMUSG00000036334 | 12.02668147 | 8.347406925 | 7.061510478 | 3.221830688 | 8.594335036 |
| ENSMUSG00000036339 | 19.80865184 | 32.69401046 | 25.42143772 | 41.07834128 | 30.08017263 |
| ENSMUSG00000036352 | 30.4204296  | 52.86691053 | 36.01370344 | 44.30017197 | 53.71459398 |
| ENSMUSG00000036353 | 7.781970364 | 5.56493795  | 7.061510478 | 10.47094974 | 7.87814045  |
| ENSMUSG00000036356 | 7.074518513 | 6.956172438 | 9.179963621 | 6.443661377 | 7.161945863 |
| ENSMUSG00000036372 | 50.22908144 | 70.25734162 | 67.79050059 | 161.8969921 | 127.4826364 |
| ENSMUSG00000036377 | 5.65961481  | 6.956172438 | 6.35535943  | 7.249119049 | 7.161945863 |
| ENSMUSG00000036381 | 5.65961481  | 6.956172438 | 7.061510478 | 7.249119049 | 7.161945863 |
| ENSMUSG00000036391 | 28.29807405 | 52.86691053 | 37.42600553 | 90.21125927 | 83.07857202 |
| ENSMUSG00000036395 | 4.244711108 | 4.869320706 | 5.649208382 | 7.249119049 | 7.161945863 |
| ENSMUSG00000036398 | 14.14903703 | 40.34580014 | 35.30755239 | 75.71302118 | 70.90326405 |
| ENSMUSG00000036402 | 9.196874066 | 9.738641413 | 16.2414741  | 27.38556085 | 27.21539428 |
| ENSMUSG00000036403 | 14.85648888 | 16.69481385 | 21.18453143 | 23.35827249 | 34.37734014 |
| ENSMUSG00000036411 | 9.904325918 | 11.1298759  | 6.35535943  | 10.47094974 | 11.45911338 |
| ENSMUSG00000036422 | 11.31922962 | 7.651789682 | 9.179963621 | 4.832746033 | 2.864778345 |
| ENSMUSG00000036435 | 41.73965922 | 63.30116918 | 49.43057334 | 59.60386773 | 51.56601022 |
| ENSMUSG00000036438 | 104.702874  | 114.7768452 | 97.44884459 | 167.5351958 | 144.6713064 |
| ENSMUSG00000036452 | 14.14903703 | 4.173703463 | 7.767661525 | 4.02728836  | 6.445751277 |
| ENSMUSG00000036459 | 5.65961481  | 8.347406925 | 4.236906287 | 5.638203705 | 4.297167518 |
| ENSMUSG00000036461 | 58.71850365 | 91.12585893 | 73.43970897 | 118.4022778 | 103.848215  |
| ENSMUSG00000036466 | 5.65961481  | 6.260555194 | 6.35535943  | 1.610915344 | 7.87814045  |
| ENSMUSG00000036469 | 10.61177777 | 6.956172438 | 8.473812573 | 2.416373016 | 4.297167518 |
| ENSMUSG00000036473 | 5.65961481  | 9.738641413 | 5.649208382 | 10.47094974 | 10.02672421 |
| ENSMUSG00000036492 | 6.367066661 | 7.651789682 | 7.061510478 | 3.221830688 | 5.729556691 |
| ENSMUSG00000036502 | 1.414903703 | 3.478086219 | 2.118453143 | 2.416373016 | 2.864778345 |
| ENSMUSG00000036503 | 38.90985182 | 57.04061399 | 60.72899011 | 50.74383334 | 41.53928601 |
| ENSMUSG00000036510 | 13.44158517 | 9.738641413 | 2.824604191 | 7.249119049 | 4.297167518 |
| ENSMUSG00000036513 | 29.71297775 | 45.21512085 | 42.36906287 | 46.71654498 | 50.13362104 |

|                    |             |             |             |             |             |
|--------------------|-------------|-------------|-------------|-------------|-------------|
| ENSMUSG00000036523 | 6.367066661 | 6.260555194 | 3.530755239 | 7.249119049 | 2.148583759 |
| ENSMUSG00000036528 | 17.68629628 | 34.78086219 | 26.12758877 | 27.38556085 | 31.5125618  |
| ENSMUSG00000036529 | 177.5704147 | 212.1632594 | 194.8976892 | 115.1804471 | 126.0502472 |
| ENSMUSG00000036550 | 152.102148  | 154.4270281 | 153.9409284 | 286.7429313 | 223.4527109 |
| ENSMUSG00000036552 | 13.44158517 | 31.30277597 | 23.30298458 | 42.68925662 | 59.44415067 |
| ENSMUSG00000036553 | 38.20239997 | 59.82308296 | 62.84744325 | 32.21830688 | 40.82309142 |
| ENSMUSG00000036555 | 16.27139258 | 19.47728283 | 23.30298458 | 17.72006879 | 23.63442135 |
| ENSMUSG00000036560 | 12.02668147 | 5.56493795  | 7.767661525 | 7.249119049 | 5.013362104 |
| ENSMUSG00000036564 | 8.489422215 | 4.173703463 | 7.061510478 | 9.665492065 | 10.02672421 |
| ENSMUSG00000036570 | 7.781970364 | 5.56493795  | 5.649208382 | 5.638203705 | 3.580972932 |
| ENSMUSG00000036572 | 9.196874066 | 25.73783802 | 16.94762515 | 26.58010318 | 27.93158887 |
| ENSMUSG00000036580 | 24.05336294 | 38.95456565 | 27.53989086 | 36.24559524 | 22.91822676 |
| ENSMUSG00000036585 | 6.367066661 | 3.478086219 | 7.767661525 | 9.665492065 | 7.161945863 |
| ENSMUSG00000036587 | 7.074518513 | 1.391234488 | 10.59226572 | 5.638203705 | 3.580972932 |
| ENSMUSG00000036591 | 9.196874066 | 22.2597518  | 22.59683353 | 36.24559524 | 32.94495097 |
| ENSMUSG00000036594 | 185.352385  | 228.162456  | 189.9546318 | 365.6777831 | 275.0187212 |
| ENSMUSG00000036599 | 48.10672589 | 52.86691053 | 59.31668801 | 73.29664816 | 78.06520991 |
| ENSMUSG00000036602 | 3.537259256 | 1.391234488 | 1.412302096 | 3.221830688 | 2.148583759 |
| ENSMUSG00000036606 | 16.27139258 | 11.82549314 | 11.29841676 | 20.94189947 | 7.87814045  |
| ENSMUSG00000036617 | 9.196874066 | 6.260555194 | 12.71071886 | 1.610915344 | 4.297167518 |
| ENSMUSG00000036620 | 60.84085921 | 100.8645003 | 83.32582364 | 140.1496349 | 100.2672421 |
| ENSMUSG00000036622 | 49.52162959 | 72.34419335 | 71.32125582 | 67.65844446 | 48.70123187 |
| ENSMUSG00000036634 | 5.65961481  | 10.43425866 | 4.943057334 | 14.4982381  | 10.02672421 |
| ENSMUSG00000036639 | 21.22355554 | 45.21512085 | 36.71985448 | 35.44013757 | 28.64778345 |
| ENSMUSG00000036644 | 21.93100739 | 38.95456565 | 42.36906287 | 37.85651059 | 30.79636721 |
| ENSMUSG00000036646 | 29.0055259  | 54.25814501 | 50.13672439 | 82.15668255 | 74.48423698 |
| ENSMUSG00000036661 | 48.10672589 | 66.08363816 | 45.19366706 | 37.85651059 | 42.97167518 |
| ENSMUSG00000036667 | 10.61177777 | 6.260555194 | 8.473812573 | 5.638203705 | 10.02672421 |
| ENSMUSG00000036676 | 7.781970364 | 9.738641413 | 7.767661525 | 10.47094974 | 5.013362104 |
| ENSMUSG00000036686 | 27.5906222  | 37.56333116 | 43.78136496 | 28.9964762  | 37.24211849 |
| ENSMUSG00000036687 | 7.074518513 | 6.260555194 | 9.179963621 | 12.88732275 | 7.87814045  |
| ENSMUSG00000036693 | 27.5906222  | 59.12746572 | 37.42600553 | 178.8116032 | 106.7129934 |
| ENSMUSG00000036698 | 113.1922962 | 131.4716591 | 131.3440949 | 210.2244524 | 166.157144  |
| ENSMUSG00000036699 | 1.414903703 | 2.086851731 | 5.649208382 | 1.610915344 | 5.013362104 |
| ENSMUSG00000036707 | 90.55383696 | 116.1680797 | 105.9226572 | 199.7535027 | 191.9401491 |
| ENSMUSG00000036712 | 60.84085921 | 100.1688831 | 89.68118307 | 149.815127  | 99.5510475  |
| ENSMUSG00000036718 | 3.537259256 | 4.173703463 | 7.061510478 | 11.27640741 | 2.148583759 |
| ENSMUSG00000036721 | 7.781970364 | 9.738641413 | 7.061510478 | 6.443661377 | 12.89150255 |
| ENSMUSG00000036733 | 35.37259256 | 78.60474855 | 53.66747963 | 69.2693598  | 62.30892901 |
| ENSMUSG00000036737 | 57.30359995 | 70.25734162 | 65.67204744 | 95.84946298 | 76.63282074 |
| ENSMUSG00000036744 | 9.904325918 | 12.52111039 | 12.00456781 | 7.249119049 | 5.013362104 |
| ENSMUSG00000036745 | 9.196874066 | 4.869320706 | 3.530755239 | 7.249119049 | 5.729556691 |
| ENSMUSG00000036748 | 9.904325918 | 26.43345526 | 20.47838039 | 20.94189947 | 24.35061594 |

|                    |             |             |             |             |             |
|--------------------|-------------|-------------|-------------|-------------|-------------|
| ENSMUSG00000036749 | 8.489422215 | 5.56493795  | 9.179963621 | 11.27640741 | 7.87814045  |
| ENSMUSG00000036764 | 8.489422215 | 7.651789682 | 9.886114669 | 4.02728836  | 8.594335036 |
| ENSMUSG00000036766 | 7.074518513 | 6.956172438 | 5.649208382 | 3.221830688 | 8.594335036 |
| ENSMUSG00000036769 | 37.49494812 | 54.25814501 | 41.66291182 | 67.65844446 | 48.70123187 |
| ENSMUSG00000036770 | 5.65961481  | 8.347406925 | 8.473812573 | 8.860034393 | 9.310529622 |
| ENSMUSG00000036775 | 12.73413332 | 7.651789682 | 6.35535943  | 14.4982381  | 14.32389173 |
| ENSMUSG00000036779 | 34.66514071 | 52.17129328 | 54.37363068 | 80.54576721 | 71.61945863 |
| ENSMUSG00000036781 | 38.90985182 | 50.08444155 | 45.19366706 | 91.01671695 | 75.20043157 |
| ENSMUSG00000036782 | 0           | 0           | 0           | 0           | 0           |
| ENSMUSG00000036792 | 105.4103258 | 162.0788178 | 135.5810012 | 205.3917064 | 176.9000628 |
| ENSMUSG00000036805 | 10.61177777 | 6.260555194 | 7.061510478 | 5.638203705 | 7.161945863 |
| ENSMUSG00000036810 | 38.90985182 | 63.30116918 | 55.07978173 | 68.46390213 | 63.0251236  |
| ENSMUSG00000036813 | 10.61177777 | 7.651789682 | 6.35535943  | 4.02728836  | 7.161945863 |
| ENSMUSG00000036814 | 12.02668147 | 9.738641413 | 7.767661525 | 6.443661377 | 2.864778345 |
| ENSMUSG00000036815 | 5.65961481  | 8.347406925 | 11.29841676 | 6.443661377 | 5.729556691 |
| ENSMUSG00000036817 | 93.38364437 | 120.3417832 | 110.1595635 | 62.82569842 | 83.07857202 |
| ENSMUSG00000036819 | 23.34591109 | 29.21592424 | 32.4829482  | 37.05105292 | 39.39070225 |
| ENSMUSG00000036820 | 31.83533331 | 39.6501829  | 50.13672439 | 26.58010318 | 42.97167518 |
| ENSMUSG00000036825 | 10.61177777 | 11.1298759  | 7.767661525 | 6.443661377 | 12.89150255 |
| ENSMUSG00000036826 | 9.904325918 | 9.043024169 | 13.41686991 | 8.860034393 | 7.161945863 |
| ENSMUSG00000036833 | 29.71297775 | 41.73703463 | 45.8998181  | 52.35474869 | 50.13362104 |
| ENSMUSG00000036834 | 4.952162959 | 5.56493795  | 4.943057334 | 8.054576721 | 5.013362104 |
| ENSMUSG00000036845 | 26.88317035 | 35.47647943 | 50.84287544 | 50.74383334 | 52.99839939 |
| ENSMUSG00000036854 | 12.73413332 | 13.21672763 | 15.53532305 | 16.10915344 | 18.62105924 |
| ENSMUSG00000036860 | 29.0055259  | 53.56252777 | 49.43057334 | 64.43661377 | 55.14698315 |
| ENSMUSG00000036862 | 11.31922962 | 9.043024169 | 4.943057334 | 8.054576721 | 2.148583759 |
| ENSMUSG00000036863 | 7.781970364 | 7.651789682 | 4.943057334 | 8.860034393 | 5.729556691 |
| ENSMUSG00000036864 | 10.61177777 | 15.99919661 | 19.06607829 | 16.91461111 | 12.89150255 |
| ENSMUSG00000036872 | 9.196874066 | 6.956172438 | 4.236906287 | 5.638203705 | 4.297167518 |
| ENSMUSG00000036873 | 92.67619252 | 132.1672763 | 122.8702823 | 106.3204127 | 133.2121931 |
| ENSMUSG00000036875 | 12.02668147 | 11.82549314 | 12.00456781 | 24.96918783 | 20.05344842 |
| ENSMUSG00000036879 | 20.51610369 | 57.04061399 | 41.66291182 | 53.16020636 | 57.29556691 |
| ENSMUSG00000036885 | 11.31922962 | 6.260555194 | 8.473812573 | 4.02728836  | 6.445751277 |
| ENSMUSG00000036890 | 16.97884443 | 33.3896277  | 28.24604191 | 36.24559524 | 27.93158887 |
| ENSMUSG00000036892 | 7.781970364 | 6.260555194 | 7.767661525 | 6.443661377 | 5.729556691 |
| ENSMUSG00000036893 | 82.7718666  | 97.38641413 | 88.26888097 | 120.8186508 | 107.429188  |
| ENSMUSG00000036898 | 51.64398514 | 66.08363816 | 57.90438592 | 75.71302118 | 62.30892901 |
| ENSMUSG00000036899 | 6.367066661 | 9.043024169 | 9.886114669 | 4.832746033 | 7.87814045  |
| ENSMUSG00000036908 | 45.27691848 | 47.30197258 | 56.49208382 | 107.9313281 | 84.51096119 |
| ENSMUSG00000036912 | 8.489422215 | 6.956172438 | 5.649208382 | 8.054576721 | 11.45911338 |
| ENSMUSG00000036913 | 7.074518513 | 7.651789682 | 9.179963621 | 6.443661377 | 5.013362104 |
| ENSMUSG00000036915 | 11.31922962 | 7.651789682 | 6.35535943  | 5.638203705 | 7.87814045  |
| ENSMUSG00000036916 | 5.65961481  | 15.30357936 | 10.59226572 | 35.44013757 | 32.94495097 |

|                    |             |             |             |             |             |
|--------------------|-------------|-------------|-------------|-------------|-------------|
| ENSMUSG00000036918 | 42.44711108 | 82.08283477 | 67.08434954 | 48.32746033 | 44.40406435 |
| ENSMUSG00000036923 | 5.65961481  | 4.173703463 | 9.886114669 | 6.443661377 | 8.594335036 |
| ENSMUSG00000036928 | 7.781970364 | 7.651789682 | 4.236906287 | 5.638203705 | 2.864778345 |
| ENSMUSG00000036931 | 31.83533331 | 63.99678643 | 52.25517753 | 202.9753334 | 113.8749392 |
| ENSMUSG00000036932 | 19.80865184 | 24.34660353 | 24.00913562 | 29.80193387 | 32.94495097 |
| ENSMUSG00000036938 | 11.31922962 | 7.651789682 | 6.35535943  | 6.443661377 | 6.445751277 |
| ENSMUSG00000036940 | 68.62282957 | 77.9091313  | 72.73355792 | 128.0677699 | 108.1453825 |
| ENSMUSG00000036948 | 0           | 0           | 0           | 0           | 0           |
| ENSMUSG00000036949 | 9.904325918 | 7.651789682 | 7.767661525 | 3.221830688 | 9.310529622 |
| ENSMUSG00000036955 | 35.37259256 | 50.08444155 | 48.01827125 | 47.52200265 | 44.40406435 |
| ENSMUSG00000036959 | 3.537259256 | 6.260555194 | 4.236906287 | 3.221830688 | 3.580972932 |
| ENSMUSG00000036960 | 8.489422215 | 6.260555194 | 9.179963621 | 7.249119049 | 2.864778345 |
| ENSMUSG00000036962 | 8.489422215 | 4.869320706 | 5.649208382 | 3.221830688 | 7.161945863 |
| ENSMUSG00000036964 | 0           | 0           | 0           | 0           | 0           |
| ENSMUSG00000036966 | 60.84085921 | 82.08283477 | 93.21193831 | 57.99295239 | 60.87653984 |
| ENSMUSG00000036968 | 45.98437033 | 57.04061399 | 48.7244223  | 46.71654498 | 45.83645353 |
| ENSMUSG00000036972 | 11.31922962 | 5.56493795  | 6.35535943  | 8.860034393 | 7.161945863 |
| ENSMUSG00000036980 | 30.4204296  | 65.38802092 | 50.84287544 | 58.79841006 | 50.84981563 |
| ENSMUSG00000036985 | 11.31922962 | 22.2597518  | 19.77222934 | 17.72006879 | 14.32389173 |
| ENSMUSG00000036986 | 147.8574369 | 164.8612868 | 140.5240585 | 284.3265582 | 195.5211221 |
| ENSMUSG00000036989 | 12.73413332 | 9.738641413 | 14.829172   | 8.054576721 | 14.32389173 |
| ENSMUSG00000036990 | 79.94205919 | 95.99517964 | 84.73812573 | 220.6954022 | 150.4008631 |
| ENSMUSG00000036992 | 80.64951104 | 96.69079689 | 84.73812573 | 132.9005159 | 98.83485292 |
| ENSMUSG00000037001 | 29.0055259  | 50.08444155 | 57.90438592 | 57.18749472 | 49.41742646 |
| ENSMUSG00000037003 | 7.074518513 | 6.260555194 | 9.179963621 | 5.638203705 | 10.7429188  |
| ENSMUSG00000037005 | 7.074518513 | 0.695617244 | 6.35535943  | 2.416373016 | 5.729556691 |
| ENSMUSG00000037007 | 21.93100739 | 43.12826911 | 27.53989086 | 36.24559524 | 30.79636721 |
| ENSMUSG00000037012 | 8.489422215 | 2.782468975 | 3.530755239 | 9.665492065 | 7.161945863 |
| ENSMUSG00000037013 | 48.10672589 | 73.73542784 | 62.1412922  | 112.7640741 | 93.10529622 |
| ENSMUSG00000037016 | 9.196874066 | 6.260555194 | 8.473812573 | 2.416373016 | 4.297167518 |
| ENSMUSG00000037017 | 19.80865184 | 34.08524495 | 31.0706461  | 20.94189947 | 22.20203218 |
| ENSMUSG00000037020 | 17.68629628 | 13.91234488 | 12.71071886 | 28.19101852 | 25.78300511 |
| ENSMUSG00000037025 | 7.074518513 | 5.56493795  | 4.943057334 | 5.638203705 | 5.729556691 |
| ENSMUSG00000037031 | 14.14903703 | 22.2597518  | 14.829172   | 8.860034393 | 11.45911338 |
| ENSMUSG00000037032 | 3.537259256 | 4.173703463 | 12.00456781 | 7.249119049 | 5.729556691 |
| ENSMUSG00000037034 | 9.904325918 | 6.956172438 | 6.35535943  | 5.638203705 | 3.580972932 |
| ENSMUSG00000037058 | 84.1867703  | 107.1250555 | 95.33039145 | 87.79488626 | 59.44415067 |
| ENSMUSG00000037062 | 59.42595551 | 96.69079689 | 70.61510478 | 128.0677699 | 117.4559122 |
| ENSMUSG00000037072 | 53.7663407  | 101.5601176 | 74.85201106 | 109.5422434 | 97.40246374 |
| ENSMUSG00000037089 | 26.1757185  | 47.30197258 | 37.42600553 | 89.4058016  | 65.88990194 |
| ENSMUSG00000037098 | 12.73413332 | 15.99919661 | 23.30298458 | 16.10915344 | 20.05344842 |
| ENSMUSG00000037101 | 9.904325918 | 8.347406925 | 9.886114669 | 12.08186508 | 6.445751277 |
| ENSMUSG00000037108 | 10.61177777 | 25.04222078 | 19.06607829 | 24.16373016 | 27.93158887 |



|                    |             |             |             |             |             |
|--------------------|-------------|-------------|-------------|-------------|-------------|
| ENSMUSG00000037110 | 27.5906222  | 44.5195036  | 50.13672439 | 34.6346799  | 35.80972932 |
| ENSMUSG00000037112 | 12.73413332 | 31.99839321 | 19.06607829 | 29.80193387 | 30.08017263 |
| ENSMUSG00000037126 | 7.074518513 | 10.43425866 | 10.59226572 | 8.054576721 | 8.594335036 |
| ENSMUSG00000037134 | 71.45263698 | 93.90832791 | 82.61967259 | 63.6311561  | 73.76804239 |
| ENSMUSG00000037138 | 116.0221036 | 133.5585108 | 118.633376  | 168.3406535 | 133.2121931 |
| ENSMUSG00000037139 | 4.952162959 | 6.956172438 | 7.767661525 | 8.054576721 | 9.310529622 |
| ENSMUSG00000037143 | 33.25023701 | 54.25814501 | 48.01827125 | 53.16020636 | 41.53928601 |
| ENSMUSG00000037145 | 14.14903703 | 3.478086219 | 4.236906287 | 8.860034393 | 7.87814045  |
| ENSMUSG00000037149 | 15.56394073 | 25.04222078 | 26.83373982 | 115.1804471 | 70.18706946 |
| ENSMUSG00000037152 | 16.27139258 | 29.21592424 | 28.95219296 | 28.9964762  | 32.22875639 |
| ENSMUSG00000037159 | 12.73413332 | 5.56493795  | 8.473812573 | 4.832746033 | 5.729556691 |
| ENSMUSG00000037161 | 11.31922962 | 7.651789682 | 12.00456781 | 12.88732275 | 7.87814045  |
| ENSMUSG00000037169 | 7.074518513 | 6.260555194 | 8.473812573 | 3.221830688 | 8.594335036 |
| ENSMUSG00000037172 | 12.02668147 | 28.52030699 | 14.829172   | 23.35827249 | 19.33725383 |
| ENSMUSG00000037174 | 72.86754068 | 60.51870021 | 76.26431316 | 89.4058016  | 85.94335036 |
| ENSMUSG00000037190 | 25.46826665 | 27.12907251 | 29.65834401 | 28.9964762  | 32.94495097 |
| ENSMUSG00000037197 | 59.42595551 | 69.56172438 | 64.25974535 | 138.5387196 | 96.68626916 |
| ENSMUSG00000037206 | 9.904325918 | 6.956172438 | 10.59226572 | 7.249119049 | 5.729556691 |
| ENSMUSG00000037210 | 81.3569629  | 123.8198694 | 95.33039145 | 99.87675134 | 85.22715578 |
| ENSMUSG00000037211 | 8.489422215 | 5.56493795  | 6.35535943  | 4.832746033 | 2.864778345 |
| ENSMUSG00000037214 | 28.29807405 | 46.60635533 | 46.60596915 | 72.49119049 | 70.90326405 |
| ENSMUSG00000037217 | 3.537259256 | 2.782468975 | 4.943057334 | 5.638203705 | 5.013362104 |
| ENSMUSG00000037221 | 29.71297775 | 48.69320706 | 69.20280268 | 44.30017197 | 40.82309142 |
| ENSMUSG00000037224 | 8.489422215 | 3.478086219 | 6.35535943  | 5.638203705 | 3.580972932 |
| ENSMUSG00000037225 | 7.781970364 | 4.173703463 | 5.649208382 | 2.416373016 | 5.729556691 |
| ENSMUSG00000037234 | 45.98437033 | 77.21351406 | 63.5535943  | 73.29664816 | 73.05184781 |
| ENSMUSG00000037235 | 71.45263698 | 95.2995624  | 110.1595635 | 46.71654498 | 47.2688427  |
| ENSMUSG00000037236 | 60.13340736 | 91.12585893 | 105.2165061 | 223.1117752 | 171.1705061 |
| ENSMUSG00000037243 | 9.196874066 | 9.043024169 | 10.59226572 | 8.054576721 | 15.7562809  |
| ENSMUSG00000037254 | 6.367066661 | 9.738641413 | 9.179963621 | 8.054576721 | 10.7429188  |
| ENSMUSG00000037259 | 29.0055259  | 52.17129328 | 41.66291182 | 72.49119049 | 63.0251236  |
| ENSMUSG00000037263 | 7.781970364 | 8.347406925 | 7.767661525 | 5.638203705 | 10.02672421 |
| ENSMUSG00000037266 | 130.1711406 | 156.5138799 | 161.0024389 | 307.6848307 | 224.8851001 |
| ENSMUSG00000037270 | 33.25023701 | 59.12746572 | 45.8998181  | 41.88379895 | 54.43078856 |
| ENSMUSG00000037275 | 24.76081479 | 31.30277597 | 26.83373982 | 114.3749894 | 64.45751277 |
| ENSMUSG00000037279 | 7.074518513 | 7.651789682 | 4.943057334 | 7.249119049 | 6.445751277 |
| ENSMUSG00000037280 | 27.5906222  | 42.43265187 | 49.43057334 | 23.35827249 | 30.08017263 |
| ENSMUSG00000037286 | 12.02668147 | 9.043024169 | 4.943057334 | 5.638203705 | 7.87814045  |
| ENSMUSG00000037287 | 19.80865184 | 6.956172438 | 11.29841676 | 9.665492065 | 2.864778345 |
| ENSMUSG00000037300 | 85.601674   | 122.4286349 | 115.8087718 | 112.7640741 | 115.3073284 |
| ENSMUSG00000037306 | 4.244711108 | 3.478086219 | 7.767661525 | 3.221830688 | 12.17530797 |
| ENSMUSG00000037307 | 9.904325918 | 2.782468975 | 12.00456781 | 8.054576721 | 7.161945863 |
| ENSMUSG00000037313 | 49.52162959 | 85.56092098 | 69.20280268 | 141.7605503 | 112.4425501 |

|                    |             |             |             |             |             |
|--------------------|-------------|-------------|-------------|-------------|-------------|
| ENSMUSG00000037315 | 6.367066661 | 7.651789682 | 4.236906287 | 24.16373016 | 18.62105924 |
| ENSMUSG00000037318 | 110.3624888 | 117.5593142 | 134.8748501 | 227.9445212 | 158.9951982 |
| ENSMUSG00000037321 | 191.7194517 | 235.8142456 | 213.2576164 | 529.9911482 | 365.259239  |
| ENSMUSG00000037325 | 12.73413332 | 9.738641413 | 8.473812573 | 5.638203705 | 4.297167518 |
| ENSMUSG00000037326 | 54.47379255 | 75.12666233 | 74.14586002 | 65.24207144 | 67.32229112 |
| ENSMUSG00000037331 | 49.52162959 | 76.51789682 | 72.73355792 | 277.8828969 | 205.5478463 |
| ENSMUSG00000037335 | 7.781970364 | 4.869320706 | 5.649208382 | 5.638203705 | 2.864778345 |
| ENSMUSG00000037336 | 9.904325918 | 10.43425866 | 9.179963621 | 8.860034393 | 5.013362104 |
| ENSMUSG00000037337 | 163.4213776 | 188.5122731 | 185.0115745 | 322.1830688 | 234.9118243 |
| ENSMUSG00000037339 | 25.46826665 | 38.95456565 | 41.66291182 | 74.10210583 | 62.30892901 |
| ENSMUSG00000037341 | 80.64951104 | 81.38721752 | 76.26431316 | 138.5387196 | 95.97007457 |
| ENSMUSG00000037344 | 29.0055259  | 38.95456565 | 52.25517753 | 29.80193387 | 38.67450766 |
| ENSMUSG00000037348 | 4.952162959 | 6.956172438 | 4.236906287 | 8.860034393 | 7.161945863 |
| ENSMUSG00000037355 | 11.31922962 | 14.60796212 | 14.829172   | 12.08186508 | 13.60769714 |
| ENSMUSG00000037364 | 38.90985182 | 69.56172438 | 43.07521391 | 182.0334339 | 151.8332523 |
| ENSMUSG00000037366 | 6.367066661 | 6.956172438 | 4.943057334 | 4.832746033 | 7.161945863 |
| ENSMUSG00000037369 | 31.83533331 | 42.43265187 | 40.25060972 | 70.07481747 | 60.16034525 |
| ENSMUSG00000037370 | 16.27139258 | 23.65098629 | 19.77222934 | 14.4982381  | 15.04008631 |
| ENSMUSG00000037373 | 96.92090362 | 139.819066  | 117.2210739 | 132.9005159 | 100.2672421 |
| ENSMUSG00000037375 | 6.367066661 | 8.347406925 | 12.00456781 | 7.249119049 | 8.594335036 |
| ENSMUSG00000037376 | 45.98437033 | 66.7792554  | 57.19823487 | 117.5968201 | 100.2672421 |
| ENSMUSG00000037386 | 5.65961481  | 4.869320706 | 7.061510478 | 6.443661377 | 6.445751277 |
| ENSMUSG00000037395 | 10.61177777 | 17.39043109 | 12.71071886 | 17.72006879 | 14.32389173 |
| ENSMUSG00000037400 | 45.27691848 | 81.38721752 | 55.07978173 | 136.1223466 | 103.848215  |
| ENSMUSG00000037408 | 16.27139258 | 29.91154148 | 26.12758877 | 20.1364418  | 26.49919969 |
| ENSMUSG00000037410 | 9.904325918 | 5.56493795  | 6.35535943  | 8.054576721 | 10.02672421 |
| ENSMUSG00000037411 | 9.904325918 | 2.086851731 | 8.473812573 | 7.249119049 | 6.445751277 |
| ENSMUSG00000037416 | 94.79854807 | 132.1672763 | 114.3964697 | 119.2077355 | 110.2939663 |
| ENSMUSG00000037426 | 34.66514071 | 61.9099347  | 47.3121202  | 36.24559524 | 31.5125618  |
| ENSMUSG00000037428 | 7.781970364 | 5.56493795  | 6.35535943  | 4.832746033 | 6.445751277 |
| ENSMUSG00000037437 | 9.196874066 | 4.869320706 | 9.179963621 | 4.02728836  | 11.45911338 |
| ENSMUSG00000037443 | 45.98437033 | 52.17129328 | 52.25517753 | 105.514955  | 85.94335036 |
| ENSMUSG00000037446 | 4.244711108 | 6.956172438 | 4.943057334 | 8.054576721 | 13.60769714 |
| ENSMUSG00000037447 | 61.54831106 | 79.99598303 | 82.61967259 | 205.3917064 | 134.6445822 |
| ENSMUSG00000037455 | 11.31922962 | 10.43425866 | 11.29841676 | 2.416373016 | 5.013362104 |
| ENSMUSG00000037458 | 72.16008883 | 95.2995624  | 79.08891735 | 188.4770953 | 158.2790036 |
| ENSMUSG00000037461 | 99.75071103 | 144.6883867 | 120.0456781 | 243.248217  | 200.5344842 |
| ENSMUSG00000037463 | 7.074518513 | 4.869320706 | 5.649208382 | 4.02728836  | 7.161945863 |
| ENSMUSG00000037466 | 28.29807405 | 20.86851731 | 28.95219296 | 28.19101852 | 28.64778345 |
| ENSMUSG00000037470 | 105.4103258 | 125.2111039 | 110.1595635 | 164.3133651 | 133.2121931 |
| ENSMUSG00000037474 | 81.3569629  | 116.863697  | 98.86114669 | 237.6100133 | 204.1154571 |
| ENSMUSG00000037475 | 2.829807405 | 2.086851731 | 7.061510478 | 2.416373016 | 2.148583759 |
| ENSMUSG00000037486 | 69.33028142 | 98.08203137 | 91.79963621 | 229.5554365 | 166.8733386 |

|                    |             |             |             |             |             |
|--------------------|-------------|-------------|-------------|-------------|-------------|
| ENSMUSG00000037492 | 7.781970364 | 6.956172438 | 4.943057334 | 8.054576721 | 7.87814045  |
| ENSMUSG00000037503 | 146.4425332 | 188.5122731 | 142.6425116 | 213.4462831 | 165.4409494 |
| ENSMUSG00000037509 | 9.196874066 | 5.56493795  | 5.649208382 | 6.443661377 | 6.445751277 |
| ENSMUSG00000037514 | 57.30359995 | 76.51789682 | 68.49665163 | 132.9005159 | 95.97007457 |
| ENSMUSG00000037519 | 57.30359995 | 73.73542784 | 66.37819849 | 60.40932541 | 62.30892901 |
| ENSMUSG00000037523 | 17.68629628 | 24.34660353 | 23.30298458 | 44.30017197 | 36.5259239  |
| ENSMUSG00000037529 | 9.904325918 | 7.651789682 | 7.767661525 | 6.443661377 | 7.87814045  |
| ENSMUSG00000037533 | 75.69734809 | 85.56092098 | 90.38733411 | 156.2587884 | 130.3474147 |
| ENSMUSG00000037536 | 27.5906222  | 50.08444155 | 45.8998181  | 62.02024075 | 56.57937232 |
| ENSMUSG00000037541 | 5.65961481  | 5.56493795  | 5.649208382 | 4.832746033 | 2.864778345 |
| ENSMUSG00000037542 | 9.196874066 | 6.956172438 | 9.886114669 | 8.054576721 | 10.02672421 |
| ENSMUSG00000037544 | 18.39374813 | 18.78166558 | 24.71528667 | 55.57657937 | 40.10689684 |
| ENSMUSG00000037548 | 202.3312295 | 217.7281973 | 221.731429  | 425.2816509 | 317.9903963 |
| ENSMUSG00000037552 | 29.71297775 | 41.73703463 | 44.48751601 | 35.44013757 | 24.35061594 |
| ENSMUSG00000037553 | 188.8896443 | 191.9903593 | 185.0115745 | 250.497336  | 190.50776   |
| ENSMUSG00000037563 | 4.244711108 | 0.695617244 | 3.530755239 | 1.610915344 | 0.716194586 |
| ENSMUSG00000037568 | 6.367066661 | 8.347406925 | 6.35535943  | 12.88732275 | 7.161945863 |
| ENSMUSG00000037570 | 44.56946663 | 64.69240367 | 71.32125582 | 49.132918   | 44.40406435 |
| ENSMUSG00000037572 | 122.3891703 | 162.774435  | 126.4010376 | 246.4700477 | 213.4259867 |
| ENSMUSG00000037577 | 8.489422215 | 7.651789682 | 12.71071886 | 12.08186508 | 8.594335036 |
| ENSMUSG00000037593 | 5.65961481  | 4.869320706 | 9.179963621 | 9.665492065 | 15.04008631 |
| ENSMUSG00000037594 | 6.367066661 | 12.52111039 | 6.35535943  | 6.443661377 | 8.594335036 |
| ENSMUSG00000037600 | 11.31922962 | 7.651789682 | 7.767661525 | 10.47094974 | 6.445751277 |
| ENSMUSG00000037601 | 0.707451851 | 1.391234488 | 2.824604191 | 0.805457672 | 1.432389173 |
| ENSMUSG00000037605 | 8.489422215 | 5.56493795  | 8.473812573 | 4.832746033 | 3.580972932 |
| ENSMUSG00000037606 | 7.781970364 | 6.956172438 | 7.767661525 | 9.665492065 | 8.594335036 |
| ENSMUSG00000037608 | 84.89422215 | 116.1680797 | 101.6857509 | 222.3063175 | 151.1170577 |
| ENSMUSG00000037610 | 7.074518513 | 5.56493795  | 9.179963621 | 6.443661377 | 7.87814045  |
| ENSMUSG00000037613 | 8.489422215 | 10.43425866 | 7.061510478 | 10.47094974 | 12.17530797 |
| ENSMUSG00000037617 | 7.781970364 | 14.60796212 | 9.886114669 | 12.08186508 | 8.594335036 |
| ENSMUSG00000037622 | 24.76081479 | 26.43345526 | 27.53989086 | 22.55281482 | 25.06681052 |
| ENSMUSG00000037624 | 8.489422215 | 1.391234488 | 9.179963621 | 2.416373016 | 6.445751277 |
| ENSMUSG00000037627 | 8.489422215 | 2.086851731 | 2.118453143 | 4.832746033 | 5.013362104 |
| ENSMUSG00000037640 | 43.15456293 | 52.86691053 | 41.66291182 | 56.38203705 | 55.14698315 |
| ENSMUSG00000037643 | 28.29807405 | 47.99758982 | 43.07521391 | 35.44013757 | 36.5259239  |
| ENSMUSG00000037652 | 60.13340736 | 73.0398106  | 64.25974535 | 86.18397091 | 85.22715578 |
| ENSMUSG00000037661 | 13.44158517 | 11.82549314 | 4.943057334 | 4.832746033 | 7.87814045  |
| ENSMUSG00000037664 | 7.074518513 | 6.260555194 | 6.35535943  | 4.02728836  | 8.594335036 |
| ENSMUSG00000037669 | 33.25023701 | 61.9099347  | 62.84744325 | 58.79841006 | 54.43078856 |
| ENSMUSG00000037674 | 60.84085921 | 82.77845201 | 57.19823487 | 172.3679418 | 133.2121931 |
| ENSMUSG00000037681 | 7.781970364 | 3.478086219 | 7.061510478 | 4.832746033 | 4.297167518 |
| ENSMUSG00000037683 | 5.65961481  | 2.782468975 | 7.061510478 | 5.638203705 | 10.02672421 |
| ENSMUSG00000037685 | 67.91537772 | 78.60474855 | 74.85201106 | 46.71654498 | 52.99839939 |

|                    |             |             |             |             |             |
|--------------------|-------------|-------------|-------------|-------------|-------------|
| ENSMUSG00000037692 | 48.10672589 | 66.08363816 | 62.1412922  | 41.07834128 | 43.68786977 |
| ENSMUSG00000037697 | 0           | 0           | 0           | 0.805457672 | 0           |
| ENSMUSG00000037703 | 10.61177777 | 3.478086219 | 4.236906287 | 6.443661377 | 7.161945863 |
| ENSMUSG00000037705 | 11.31922962 | 6.956172438 | 10.59226572 | 9.665492065 | 7.161945863 |
| ENSMUSG00000037706 | 107.5326814 | 126.6023384 | 112.2780166 | 107.1258704 | 97.40246374 |
| ENSMUSG00000037708 | 5.65961481  | 5.56493795  | 4.236906287 | 4.832746033 | 7.87814045  |
| ENSMUSG00000037709 | 7.074518513 | 6.956172438 | 6.35535943  | 4.02728836  | 7.161945863 |
| ENSMUSG00000037712 | 9.904325918 | 3.478086219 | 2.824604191 | 5.638203705 | 2.864778345 |
| ENSMUSG00000037716 | 10.61177777 | 7.651789682 | 4.236906287 | 4.832746033 | 6.445751277 |
| ENSMUSG00000037720 | 35.37259256 | 58.43184848 | 45.19366706 | 86.18397091 | 81.64618284 |
| ENSMUSG00000037730 | 33.95768886 | 59.82308296 | 47.3121202  | 66.04752911 | 60.16034525 |
| ENSMUSG00000037736 | 11.31922962 | 6.956172438 | 4.236906287 | 1.610915344 | 5.013362104 |
| ENSMUSG00000037738 | 4.952162959 | 10.43425866 | 4.236906287 | 4.02728836  | 4.297167518 |
| ENSMUSG00000037742 | 7.781970364 | 9.738641413 | 7.767661525 | 8.054576721 | 11.45911338 |
| ENSMUSG00000037750 | 36.78749627 | 78.60474855 | 64.25974535 | 102.2931244 | 78.06520991 |
| ENSMUSG00000037754 | 25.46826665 | 28.52030699 | 29.65834401 | 50.74383334 | 58.01176149 |
| ENSMUSG00000037761 | 39.61730367 | 49.38882431 | 57.90438592 | 62.82569842 | 55.14698315 |
| ENSMUSG00000037771 | 4.244711108 | 4.173703463 | 8.473812573 | 4.832746033 | 2.864778345 |
| ENSMUSG00000037772 | 20.51610369 | 20.17290007 | 23.30298458 | 35.44013757 | 27.21539428 |
| ENSMUSG00000037773 | 75.69734809 | 108.51629   | 93.21193831 | 147.398754  | 138.9417498 |
| ENSMUSG00000037784 | 9.196874066 | 6.956172438 | 7.767661525 | 6.443661377 | 9.310529622 |
| ENSMUSG00000037787 | 70.74518513 | 133.5585108 | 95.33039145 | 140.1496349 | 131.0636093 |
| ENSMUSG00000037788 | 2.829807405 | 15.99919661 | 14.12302096 | 12.88732275 | 10.02672421 |
| ENSMUSG00000037791 | 31.83533331 | 45.21512085 | 47.3121202  | 202.1698757 | 150.4008631 |
| ENSMUSG00000037795 | 16.27139258 | 25.73783802 | 32.4829482  | 18.52552646 | 18.62105924 |
| ENSMUSG00000037797 | 7.074518513 | 2.086851731 | 10.59226572 | 8.054576721 | 5.013362104 |
| ENSMUSG00000037801 | 107.5326814 | 154.4270281 | 137.6994543 | 99.07129367 | 99.5510475  |
| ENSMUSG00000037805 | 12.73413332 | 23.65098629 | 24.00913562 | 179.6170609 | 148.968474  |
| ENSMUSG00000037808 | 92.67619252 | 126.6023384 | 120.0456781 | 134.5114312 | 146.8198902 |
| ENSMUSG00000037813 | 5.65961481  | 6.260555194 | 3.530755239 | 10.47094974 | 5.013362104 |
| ENSMUSG00000037814 | 9.196874066 | 18.08604834 | 15.53532305 | 31.41284921 | 27.93158887 |
| ENSMUSG00000037816 | 10.61177777 | 9.043024169 | 7.767661525 | 13.69278043 | 12.89150255 |
| ENSMUSG00000037818 | 22.63845924 | 47.99758982 | 43.78136496 | 37.05105292 | 37.95831308 |
| ENSMUSG00000037820 | 5.65961481  | 6.260555194 | 9.179963621 | 8.054576721 | 11.45911338 |
| ENSMUSG00000037822 | 48.81417774 | 72.34419335 | 73.43970897 | 192.5043836 | 154.6980307 |
| ENSMUSG00000037827 | 12.02668147 | 8.347406925 | 11.29841676 | 7.249119049 | 9.310529622 |
| ENSMUSG00000037833 | 7.781970364 | 6.260555194 | 10.59226572 | 6.443661377 | 10.02672421 |
| ENSMUSG00000037845 | 17.68629628 | 36.17209668 | 30.36449505 | 33.02376456 | 30.08017263 |
| ENSMUSG00000037846 | 13.44158517 | 18.78166558 | 11.29841676 | 12.88732275 | 6.445751277 |
| ENSMUSG00000037847 | 88.43148141 | 111.298759  | 105.9226572 | 78.12939419 | 78.7814045  |
| ENSMUSG00000037851 | 19.10119998 | 36.86771392 | 34.60140134 | 29.80193387 | 22.20203218 |
| ENSMUSG00000037855 | 9.196874066 | 8.347406925 | 4.236906287 | 4.02728836  | 7.161945863 |
| ENSMUSG00000037857 | 63.67066661 | 82.08283477 | 83.32582364 | 247.2755053 | 214.1421813 |

|                    |             |             |             |             |             |
|--------------------|-------------|-------------|-------------|-------------|-------------|
| ENSMUSG00000037860 | 6.367066661 | 7.651789682 | 9.886114669 | 10.47094974 | 6.445751277 |
| ENSMUSG00000037868 | 3.537259256 | 9.043024169 | 2.118453143 | 6.443661377 | 12.89150255 |
| ENSMUSG00000037876 | 35.37259256 | 63.99678643 | 50.84287544 | 134.5114312 | 114.5911338 |
| ENSMUSG00000037885 | 16.97884443 | 41.73703463 | 27.53989086 | 33.02376456 | 38.67450766 |
| ENSMUSG00000037887 | 7.074518513 | 4.173703463 | 8.473812573 | 4.832746033 | 2.864778345 |
| ENSMUSG00000037890 | 6.367066661 | 7.651789682 | 6.35535943  | 7.249119049 | 9.310529622 |
| ENSMUSG00000037892 | 10.61177777 | 7.651789682 | 9.886114669 | 4.02728836  | 5.729556691 |
| ENSMUSG00000037894 | 13.44158517 | 16.69481385 | 19.77222934 | 48.32746033 | 56.57937232 |
| ENSMUSG00000037896 | 59.42595551 | 77.21351406 | 70.61510478 | 80.54576721 | 77.34901533 |
| ENSMUSG00000037902 | 7.074518513 | 11.1298759  | 10.59226572 | 8.860034393 | 8.594335036 |
| ENSMUSG00000037904 | 21.22355554 | 18.78166558 | 33.18909925 | 13.69278043 | 22.20203218 |
| ENSMUSG00000037905 | 27.5906222  | 51.47567604 | 36.71985448 | 81.35122488 | 73.05184781 |
| ENSMUSG00000037907 | 14.85648888 | 8.347406925 | 5.649208382 | 8.054576721 | 7.161945863 |
| ENSMUSG00000037910 | 12.02668147 | 8.347406925 | 8.473812573 | 5.638203705 | 6.445751277 |
| ENSMUSG00000037913 | 33.25023701 | 54.25814501 | 50.13672439 | 67.65844446 | 65.17370736 |
| ENSMUSG00000037916 | 19.80865184 | 31.30277597 | 29.65834401 | 23.35827249 | 40.82309142 |
| ENSMUSG00000037921 | 19.10119998 | 37.56333116 | 27.53989086 | 28.9964762  | 37.95831308 |
| ENSMUSG00000037922 | 130.8785925 | 149.5577074 | 127.8133396 | 117.5968201 | 90.24051788 |
| ENSMUSG00000037926 | 33.95768886 | 58.43184848 | 47.3121202  | 82.96214023 | 60.87653984 |
| ENSMUSG00000037933 | 84.1867703  | 100.1688831 | 92.50578726 | 114.3749894 | 112.4425501 |
| ENSMUSG00000037935 | 80.64951104 | 135.6453625 | 112.9841676 | 194.9207566 | 143.9551119 |
| ENSMUSG00000037936 | 16.97884443 | 24.34660353 | 26.83373982 | 53.16020636 | 40.82309142 |
| ENSMUSG00000037940 | 26.88317035 | 50.08444155 | 67.79050059 | 46.71654498 | 52.99839939 |
| ENSMUSG00000037946 | 7.074518513 | 11.1298759  | 11.29841676 | 8.054576721 | 9.310529622 |
| ENSMUSG00000037957 | 106.1177777 | 153.7314109 | 134.8748501 | 126.4568545 | 101.6996313 |
| ENSMUSG00000037958 | 0           | 0           | 0           | 0.805457672 | 1.432389173 |
| ENSMUSG00000037960 | 14.14903703 | 25.04222078 | 27.53989086 | 18.52552646 | 18.62105924 |
| ENSMUSG00000037965 | 58.71850365 | 87.64777272 | 65.67204744 | 121.6241085 | 85.22715578 |
| ENSMUSG00000037966 | 16.97884443 | 27.12907251 | 15.53532305 | 19.33098413 | 20.769643   |
| ENSMUSG00000037971 | 11.31922962 | 33.3896277  | 21.89068248 | 26.58010318 | 26.49919969 |
| ENSMUSG00000037974 | 7.074518513 | 4.869320706 | 7.767661525 | 3.221830688 | 7.161945863 |
| ENSMUSG00000037979 | 23.34591109 | 32.69401046 | 32.4829482  | 35.44013757 | 33.66114556 |
| ENSMUSG00000037989 | 4.244711108 | 9.738641413 | 9.179963621 | 4.02728836  | 7.161945863 |
| ENSMUSG00000037990 | 4.952162959 | 7.651789682 | 7.061510478 | 6.443661377 | 7.161945863 |
| ENSMUSG00000037992 | 14.85648888 | 11.82549314 | 15.53532305 | 9.665492065 | 12.17530797 |
| ENSMUSG00000037994 | 11.31922962 | 4.173703463 | 5.649208382 | 4.832746033 | 6.445751277 |
| ENSMUSG00000037995 | 5.65961481  | 15.30357936 | 12.71071886 | 8.054576721 | 12.89150255 |
| ENSMUSG00000037996 | 9.196874066 | 4.869320706 | 9.886114669 | 3.221830688 | 5.013362104 |
| ENSMUSG00000037997 | 4.952162959 | 8.347406925 | 5.649208382 | 41.88379895 | 26.49919969 |
| ENSMUSG00000037999 | 45.98437033 | 89.0390072  | 52.25517753 | 144.1769233 | 111.0101609 |
| ENSMUSG00000038000 | 21.22355554 | 29.91154148 | 29.65834401 | 30.60739154 | 45.83645353 |
| ENSMUSG00000038005 | 53.05888884 | 87.64777272 | 69.20280268 | 109.5422434 | 73.05184781 |
| ENSMUSG00000038007 | 11.31922962 | 4.869320706 | 9.886114669 | 5.638203705 | 6.445751277 |

|                    |             |             |             |             |             |
|--------------------|-------------|-------------|-------------|-------------|-------------|
| ENSMUSG00000038011 | 10.61177777 | 8.347406925 | 9.179963621 | 4.02728836  | 7.87814045  |
| ENSMUSG00000038013 | 45.27691848 | 64.69240367 | 62.1412922  | 99.87675134 | 88.80812871 |
| ENSMUSG00000038022 | 9.196874066 | 5.56493795  | 4.943057334 | 7.249119049 | 10.02672421 |
| ENSMUSG00000038023 | 39.61730367 | 59.82308296 | 57.19823487 | 49.132918   | 58.01176149 |
| ENSMUSG00000038024 | 14.85648888 | 11.82549314 | 15.53532305 | 20.94189947 | 14.32389173 |
| ENSMUSG00000038026 | 9.196874066 | 5.56493795  | 9.179963621 | 8.054576721 | 5.013362104 |
| ENSMUSG00000038034 | 6.367066661 | 6.956172438 | 8.473812573 | 5.638203705 | 8.594335036 |
| ENSMUSG00000038039 | 13.44158517 | 27.12907251 | 20.47838039 | 20.1364418  | 20.769643   |
| ENSMUSG00000038042 | 7.781970364 | 10.43425866 | 7.767661525 | 9.665492065 | 4.297167518 |
| ENSMUSG00000038045 | 8.489422215 | 6.956172438 | 9.179963621 | 8.860034393 | 4.297167518 |
| ENSMUSG00000038047 | 74.98989623 | 107.1250555 | 77.67661525 | 182.8388916 | 137.5093606 |
| ENSMUSG00000038055 | 43.86201478 | 79.99598303 | 49.43057334 | 133.7059736 | 121.0368851 |
| ENSMUSG00000038056 | 36.08004441 | 79.99598303 | 67.79050059 | 70.07481747 | 68.0384857  |
| ENSMUSG00000038058 | 33.95768886 | 47.99758982 | 43.07521391 | 15.30369577 | 13.60769714 |
| ENSMUSG00000038060 | 8.489422215 | 7.651789682 | 5.649208382 | 4.02728836  | 5.013362104 |
| ENSMUSG00000038065 | 9.196874066 | 18.08604834 | 14.12302096 | 12.88732275 | 10.7429188  |
| ENSMUSG00000038068 | 7.781970364 | 7.651789682 | 4.236906287 | 4.02728836  | 5.013362104 |
| ENSMUSG00000038070 | 9.196874066 | 6.956172438 | 9.886114669 | 8.860034393 | 4.297167518 |
| ENSMUSG00000038072 | 41.03220737 | 58.43184848 | 52.25517753 | 53.16020636 | 47.2688427  |
| ENSMUSG00000038074 | 10.61177777 | 9.738641413 | 8.473812573 | 12.88732275 | 15.7562809  |
| ENSMUSG00000038079 | 9.196874066 | 9.738641413 | 9.179963621 | 8.860034393 | 10.7429188  |
| ENSMUSG00000038080 | 19.10119998 | 25.73783802 | 31.77679715 | 20.1364418  | 20.05344842 |
| ENSMUSG00000038084 | 94.79854807 | 117.5593142 | 103.098053  | 120.8186508 | 121.0368851 |
| ENSMUSG00000038085 | 31.12788146 | 43.12826911 | 38.13215658 | 97.46037832 | 88.09193412 |
| ENSMUSG00000038094 | 6.367066661 | 4.869320706 | 3.530755239 | 5.638203705 | 3.580972932 |
| ENSMUSG00000038095 | 2.829807405 | 2.086851731 | 0           | 0           | 2.148583759 |
| ENSMUSG00000038102 | 46.69182218 | 63.99678643 | 53.66747963 | 111.9586164 | 92.38910164 |
| ENSMUSG00000038112 | 10.61177777 | 5.56493795  | 7.767661525 | 4.02728836  | 4.297167518 |
| ENSMUSG00000038115 | 7.074518513 | 3.478086219 | 4.943057334 | 4.832746033 | 8.594335036 |
| ENSMUSG00000038116 | 82.7718666  | 111.298759  | 88.26888097 | 113.5695318 | 89.52432329 |
| ENSMUSG00000038119 | 13.44158517 | 14.60796212 | 11.29841676 | 7.249119049 | 10.7429188  |
| ENSMUSG00000038126 | 32.54278516 | 49.38882431 | 48.7244223  | 85.37851324 | 73.76804239 |
| ENSMUSG00000038127 | 85.601674   | 125.2111039 | 114.3964697 | 250.497336  | 184.0620087 |
| ENSMUSG00000038143 | 5.65961481  | 4.869320706 | 8.473812573 | 2.416373016 | 2.864778345 |
| ENSMUSG00000038145 | 45.27691848 | 79.99598303 | 56.49208382 | 47.52200265 | 53.71459398 |
| ENSMUSG00000038147 | 87.72402956 | 118.2549314 | 93.91808935 | 48.32746033 | 52.99839939 |
| ENSMUSG00000038148 | 7.074518513 | 6.956172438 | 8.473812573 | 2.416373016 | 5.729556691 |
| ENSMUSG00000038155 | 9.904325918 | 15.30357936 | 19.77222934 | 16.10915344 | 18.62105924 |
| ENSMUSG00000038156 | 6.367066661 | 4.869320706 | 7.061510478 | 8.054576721 | 4.297167518 |
| ENSMUSG00000038170 | 7.074518513 | 7.651789682 | 5.649208382 | 6.443661377 | 10.7429188  |
| ENSMUSG00000038172 | 22.63845924 | 38.95456565 | 30.36449505 | 45.10562964 | 51.56601022 |
| ENSMUSG00000038173 | 9.904325918 | 11.1298759  | 4.236906287 | 5.638203705 | 7.87814045  |
| ENSMUSG00000038174 | 72.86754068 | 106.4294383 | 102.3919019 | 97.46037832 | 102.4158258 |

|                    |              |             |             |             |             |
|--------------------|--------------|-------------|-------------|-------------|-------------|
| ENSMUSG00000038175 | 127.3413332  | 154.4270281 | 142.6425116 | 92.62763229 | 83.07857202 |
| ENSMUSG00000038178 | 31.12788146  | 52.86691053 | 53.66747963 | 43.49471429 | 50.84981563 |
| ENSMUSG00000038179 | 47.39927403  | 47.99758982 | 36.71985448 | 185.2552646 | 113.8749392 |
| ENSMUSG00000038180 | 9.196874066  | 7.651789682 | 10.59226572 | 9.665492065 | 8.594335036 |
| ENSMUSG00000038181 | 68.62282957  | 95.2995624  | 86.85657888 | 128.0677699 | 102.4158258 |
| ENSMUSG00000038187 | 30.4204296   | 48.69320706 | 49.43057334 | 49.93837567 | 32.94495097 |
| ENSMUSG00000038188 | 7.074518513  | 11.1298759  | 10.59226572 | 4.832746033 | 10.02672421 |
| ENSMUSG00000038199 | 6.367066661  | 5.56493795  | 7.767661525 | 8.054576721 | 7.87814045  |
| ENSMUSG00000038201 | 4.952162959  | 6.260555194 | 10.59226572 | 12.08186508 | 3.580972932 |
| ENSMUSG00000038203 | 4.244711108  | 6.260555194 | 5.649208382 | 2.416373016 | 4.297167518 |
| ENSMUSG00000038204 | 7.781970364  | 6.260555194 | 6.35535943  | 7.249119049 | 10.02672421 |
| ENSMUSG00000038205 | 32.54278516  | 55.6493795  | 45.8998181  | 33.02376456 | 27.93158887 |
| ENSMUSG00000038206 | 61.54831106  | 115.4724625 | 92.50578726 | 76.51847885 | 75.20043157 |
| ENSMUSG00000038208 | 6.367066661  | 6.260555194 | 7.061510478 | 9.665492065 | 7.161945863 |
| ENSMUSG00000038209 | 8.489422215  | 9.738641413 | 9.179963621 | 7.249119049 | 15.04008631 |
| ENSMUSG00000038210 | 7.074518513  | 9.043024169 | 8.473812573 | 6.443661377 | 8.594335036 |
| ENSMUSG00000038212 | 50.93653329  | 103.6469693 | 62.1412922  | 78.93485187 | 80.21379367 |
| ENSMUSG00000038214 | 9.196874066  | 15.30357936 | 9.886114669 | 28.9964762  | 27.93158887 |
| ENSMUSG00000038215 | 60.13340736  | 98.77764862 | 86.85657888 | 71.68573282 | 78.06520991 |
| ENSMUSG00000038217 | 4.952162959  | 7.651789682 | 4.943057334 | 13.69278043 | 9.310529622 |
| ENSMUSG00000038224 | 18.39374813  | 14.60796212 | 14.12302096 | 8.054576721 | 15.04008631 |
| ENSMUSG00000038225 | 27.5906222   | 50.7800588  | 53.66747963 | 70.88027514 | 68.0384857  |
| ENSMUSG00000038227 | 6.367066661  | 7.651789682 | 4.236906287 | 4.02728836  | 4.297167518 |
| ENSMUSG00000038239 | 9.196874066  | 3.478086219 | 8.473812573 | 10.47094974 | 8.594335036 |
| ENSMUSG00000038240 | 32.54278516  | 66.08363816 | 53.66747963 | 61.21478308 | 52.99839939 |
| ENSMUSG00000038241 | 32.54278516  | 52.86691053 | 53.66747963 | 50.74383334 | 37.95831308 |
| ENSMUSG00000038242 | 7.781970364  | 6.956172438 | 7.767661525 | 4.02728836  | 8.594335036 |
| ENSMUSG00000038244 | 8.489422215  | 5.56493795  | 9.886114669 | 10.47094974 | 3.580972932 |
| ENSMUSG00000038252 | 42.447111108 | 58.43184848 | 44.48751601 | 173.9788572 | 137.5093606 |
| ENSMUSG00000038256 | 13.44158517  | 29.21592424 | 17.65377619 | 35.44013757 | 30.08017263 |
| ENSMUSG00000038260 | 9.904325918  | 6.956172438 | 8.473812573 | 5.638203705 | 6.445751277 |
| ENSMUSG00000038267 | 7.074518513  | 8.347406925 | 5.649208382 | 4.02728836  | 2.864778345 |
| ENSMUSG00000038271 | 58.71850365  | 71.64857611 | 88.97503202 | 49.93837567 | 61.59273443 |
| ENSMUSG00000038274 | 118.851911   | 187.8166558 | 158.8839857 | 343.930426  | 269.2891645 |
| ENSMUSG00000038276 | 9.196874066  | 9.738641413 | 8.473812573 | 10.47094974 | 8.594335036 |
| ENSMUSG00000038279 | 50.22908144  | 54.25814501 | 45.19366706 | 187.6716376 | 143.9551119 |
| ENSMUSG00000038280 | 9.196874066  | 6.956172438 | 3.530755239 | 2.416373016 | 2.864778345 |
| ENSMUSG00000038286 | 15.56394073  | 15.30357936 | 12.00456781 | 17.72006879 | 20.05344842 |
| ENSMUSG00000038290 | 74.98989623  | 110.6031418 | 95.33039145 | 104.7094974 | 88.09193412 |
| ENSMUSG00000038291 | 36.78749627  | 52.86691053 | 45.8998181  | 57.99295239 | 49.41742646 |
| ENSMUSG00000038292 | 9.196874066  | 10.43425866 | 5.649208382 | 6.443661377 | 7.87814045  |
| ENSMUSG00000038295 | 9.196874066  | 9.043024169 | 8.473812573 | 4.832746033 | 4.297167518 |
| ENSMUSG00000038296 | 10.61177777  | 6.956172438 | 4.943057334 | 6.443661377 | 7.161945863 |

|                    |             |             |             |             |             |
|--------------------|-------------|-------------|-------------|-------------|-------------|
| ENSMUSG00000038298 | 8.489422215 | 5.56493795  | 4.943057334 | 8.860034393 | 5.729556691 |
| ENSMUSG00000038299 | 27.5906222  | 59.82308296 | 49.43057334 | 127.2623122 | 103.848215  |
| ENSMUSG00000038301 | 8.489422215 | 6.260555194 | 9.179963621 | 8.054576721 | 6.445751277 |
| ENSMUSG00000038302 | 16.97884443 | 33.3896277  | 20.47838039 | 41.07834128 | 36.5259239  |
| ENSMUSG00000038304 | 4.952162959 | 2.086851731 | 6.35535943  | 1.610915344 | 4.297167518 |
| ENSMUSG00000038305 | 5.65961481  | 6.956172438 | 8.473812573 | 4.02728836  | 4.297167518 |
| ENSMUSG00000038312 | 24.05336294 | 45.21512085 | 33.89525029 | 33.82922223 | 26.49919969 |
| ENSMUSG00000038319 | 8.489422215 | 9.738641413 | 4.236906287 | 4.832746033 | 5.013362104 |
| ENSMUSG00000038324 | 120.2668147 | 148.8620902 | 152.5286263 | 104.7094974 | 98.11865833 |
| ENSMUSG00000038330 | 12.02668147 | 7.651789682 | 6.35535943  | 6.443661377 | 10.7429188  |
| ENSMUSG00000038331 | 7.074518513 | 5.56493795  | 3.530755239 | 4.832746033 | 6.445751277 |
| ENSMUSG00000038332 | 35.37259256 | 64.69240367 | 44.48751601 | 61.21478308 | 35.80972932 |
| ENSMUSG00000038335 | 43.15456293 | 47.30197258 | 46.60596915 | 202.9753334 | 159.7113928 |
| ENSMUSG00000038342 | 132.2934962 | 155.8182626 | 161.0024389 | 176.3952302 | 146.1036956 |
| ENSMUSG00000038344 | 24.05336294 | 31.30277597 | 33.89525029 | 70.88027514 | 57.29556691 |
| ENSMUSG00000038346 | 24.76081479 | 48.69320706 | 41.66291182 | 96.65492065 | 101.6996313 |
| ENSMUSG00000038347 | 2.122355554 | 2.782468975 | 3.530755239 | 1.610915344 | 1.432389173 |
| ENSMUSG00000038349 | 6.367066661 | 6.956172438 | 8.473812573 | 7.249119049 | 5.729556691 |
| ENSMUSG00000038351 | 16.27139258 | 18.08604834 | 25.42143772 | 112.7640741 | 87.37573953 |
| ENSMUSG00000038352 | 36.78749627 | 34.78086219 | 46.60596915 | 18.52552646 | 16.47247549 |
| ENSMUSG00000038354 | 4.952162959 | 4.869320706 | 7.061510478 | 4.832746033 | 6.445751277 |
| ENSMUSG00000038357 | 4.952162959 | 5.56493795  | 5.649208382 | 7.249119049 | 7.87814045  |
| ENSMUSG00000038366 | 14.14903703 | 28.52030699 | 32.4829482  | 30.60739154 | 36.5259239  |
| ENSMUSG00000038368 | 10.61177777 | 13.91234488 | 16.2414741  | 53.16020636 | 41.53928601 |
| ENSMUSG00000038369 | 59.42595551 | 89.0390072  | 79.7950684  | 77.32393652 | 73.76804239 |
| ENSMUSG00000038371 | 10.61177777 | 13.91234488 | 14.829172   | 10.47094974 | 7.87814045  |
| ENSMUSG00000038372 | 9.196874066 | 18.78166558 | 18.35992724 | 36.24559524 | 35.09353473 |
| ENSMUSG00000038374 | 35.37259256 | 65.38802092 | 67.79050059 | 95.04400531 | 90.24051788 |
| ENSMUSG00000038375 | 18.39374813 | 9.738641413 | 9.179963621 | 7.249119049 | 13.60769714 |
| ENSMUSG00000038379 | 47.39927403 | 50.7800588  | 31.0706461  | 58.79841006 | 41.53928601 |
| ENSMUSG00000038383 | 60.13340736 | 92.51709342 | 84.03197468 | 89.4058016  | 67.32229112 |
| ENSMUSG00000038384 | 75.69734809 | 98.08203137 | 109.4534124 | 235.1936403 | 189.7915654 |
| ENSMUSG00000038388 | 10.61177777 | 14.60796212 | 7.767661525 | 37.05105292 | 35.09353473 |
| ENSMUSG00000038390 | 4.244711108 | 4.869320706 | 7.061510478 | 4.832746033 | 7.87814045  |
| ENSMUSG00000038393 | 131.5860443 | 147.4708557 | 118.633376  | 179.6170609 | 126.7664418 |
| ENSMUSG00000038400 | 12.02668147 | 20.17290007 | 15.53532305 | 198.1425873 | 146.1036956 |
| ENSMUSG00000038403 | 4.952162959 | 4.173703463 | 5.649208382 | 9.665492065 | 5.729556691 |
| ENSMUSG00000038406 | 38.20239997 | 66.7792554  | 49.43057334 | 82.15668255 | 59.44415067 |
| ENSMUSG00000038415 | 7.781970364 | 8.347406925 | 5.649208382 | 2.416373016 | 6.445751277 |
| ENSMUSG00000038416 | 45.98437033 | 82.77845201 | 67.08434954 | 112.7640741 | 93.10529622 |
| ENSMUSG00000038421 | 4.952162959 | 5.56493795  | 5.649208382 | 2.416373016 | 2.148583759 |
| ENSMUSG00000038425 | 15.56394073 | 26.43345526 | 21.89068248 | 33.02376456 | 25.78300511 |
| ENSMUSG00000038429 | 48.10672589 | 62.60555194 | 67.08434954 | 112.7640741 | 88.80812871 |



|                    |             |             |             |             |             |
|--------------------|-------------|-------------|-------------|-------------|-------------|
| ENSMUSG00000038437 | 44.56946663 | 71.64857611 | 59.31668801 | 137.7332619 | 92.38910164 |
| ENSMUSG00000038451 | 16.97884443 | 11.82549314 | 24.71528667 | 22.55281482 | 14.32389173 |
| ENSMUSG00000038453 | 7.074518513 | 6.260555194 | 8.473812573 | 7.249119049 | 4.297167518 |
| ENSMUSG00000038457 | 4.244711108 | 2.782468975 | 6.35535943  | 7.249119049 | 6.445751277 |
| ENSMUSG00000038459 | 35.37259256 | 52.86691053 | 52.96132858 | 44.30017197 | 49.41742646 |
| ENSMUSG00000038467 | 91.26128881 | 100.1688831 | 83.32582364 | 180.4225185 | 129.6312201 |
| ENSMUSG00000038481 | 48.10672589 | 52.86691053 | 58.61053696 | 45.91108731 | 53.71459398 |
| ENSMUSG00000038482 | 34.66514071 | 40.34580014 | 44.48751601 | 214.2517408 | 158.9951982 |
| ENSMUSG00000038495 | 40.32475552 | 67.47487265 | 58.61053696 | 55.57657937 | 53.71459398 |
| ENSMUSG00000038496 | 7.781970364 | 5.56493795  | 6.35535943  | 5.638203705 | 6.445751277 |
| ENSMUSG00000038500 | 26.1757185  | 37.56333116 | 41.66291182 | 109.5422434 | 80.21379367 |
| ENSMUSG00000038502 | 11.31922962 | 15.99919661 | 9.179963621 | 6.443661377 | 8.594335036 |
| ENSMUSG00000038503 | 21.22355554 | 31.30277597 | 18.35992724 | 70.07481747 | 57.29556691 |
| ENSMUSG00000038506 | 22.63845924 | 50.7800588  | 33.89525029 | 27.38556085 | 48.70123187 |
| ENSMUSG00000038510 | 29.71297775 | 60.51870021 | 45.19366706 | 111.1531587 | 101.6996313 |
| ENSMUSG00000038515 | 10.61177777 | 7.651789682 | 11.29841676 | 1.610915344 | 4.297167518 |
| ENSMUSG00000038517 | 4.244711108 | 11.82549314 | 10.59226572 | 5.638203705 | 6.445751277 |
| ENSMUSG00000038518 | 9.904325918 | 18.78166558 | 19.06607829 | 28.19101852 | 22.91822676 |
| ENSMUSG00000038520 | 24.76081479 | 43.82388636 | 33.18909925 | 62.82569842 | 55.14698315 |
| ENSMUSG00000038521 | 7.074518513 | 6.260555194 | 8.473812573 | 4.02728836  | 4.297167518 |
| ENSMUSG00000038523 | 5.65961481  | 2.782468975 | 7.767661525 | 4.02728836  | 8.594335036 |
| ENSMUSG00000038524 | 10.61177777 | 15.99919661 | 18.35992724 | 10.47094974 | 14.32389173 |
| ENSMUSG00000038525 | 17.68629628 | 33.3896277  | 29.65834401 | 33.02376456 | 36.5259239  |
| ENSMUSG00000038526 | 4.952162959 | 10.43425866 | 3.530755239 | 9.665492065 | 11.45911338 |
| ENSMUSG00000038528 | 7.781970364 | 4.173703463 | 7.061510478 | 3.221830688 | 10.02672421 |
| ENSMUSG00000038530 | 4.244711108 | 7.651789682 | 4.236906287 | 8.054576721 | 10.02672421 |
| ENSMUSG00000038533 | 50.22908144 | 87.64777272 | 64.25974535 | 58.79841006 | 70.18706946 |
| ENSMUSG00000038534 | 38.20239997 | 49.38882431 | 55.78593277 | 43.49471429 | 45.83645353 |
| ENSMUSG00000038535 | 84.89422215 | 120.3417832 | 81.91352154 | 139.3441773 | 92.38910164 |
| ENSMUSG00000038538 | 33.95768886 | 63.99678643 | 43.07521391 | 72.49119049 | 75.20043157 |
| ENSMUSG00000038539 | 139.3680147 | 175.2955454 | 159.5901368 | 444.612635  | 277.8834995 |
| ENSMUSG00000038540 | 12.73413332 | 6.260555194 | 7.767661525 | 12.88732275 | 10.7429188  |
| ENSMUSG00000038542 | 58.0110518  | 100.8645003 | 81.20737049 | 124.0404815 | 108.8615771 |
| ENSMUSG00000038543 | 45.27691848 | 59.82308296 | 60.72899011 | 55.57657937 | 42.97167518 |
| ENSMUSG00000038544 | 27.5906222  | 35.47647943 | 28.24604191 | 19.33098413 | 20.769643   |
| ENSMUSG00000038545 | 12.02668147 | 11.82549314 | 11.29841676 | 15.30369577 | 18.62105924 |
| ENSMUSG00000038550 | 12.73413332 | 13.21672763 | 13.41686991 | 15.30369577 | 17.18867007 |
| ENSMUSG00000038552 | 8.489422215 | 8.347406925 | 12.00456781 | 4.02728836  | 7.87814045  |
| ENSMUSG00000038563 | 33.95768886 | 38.95456565 | 38.13215658 | 153.8424154 | 139.6579443 |
| ENSMUSG00000038564 | 6.367066661 | 8.347406925 | 5.649208382 | 11.27640741 | 7.87814045  |
| ENSMUSG00000038569 | 40.32475552 | 61.9099347  | 62.84744325 | 77.32393652 | 70.18706946 |
| ENSMUSG00000038570 | 26.88317035 | 34.78086219 | 48.7244223  | 169.9515688 | 111.7263555 |
| ENSMUSG00000038576 | 5.65961481  | 6.260555194 | 4.943057334 | 4.832746033 | 7.87814045  |

|                    |             |             |             |             |             |
|--------------------|-------------|-------------|-------------|-------------|-------------|
| ENSMUSG00000038578 | 49.52162959 | 53.56252777 | 55.78593277 | 35.44013757 | 30.79636721 |
| ENSMUSG00000038580 | 3.537259256 | 6.260555194 | 6.35535943  | 7.249119049 | 5.013362104 |
| ENSMUSG00000038582 | 126.6338814 | 146.7752384 | 144.0548137 | 270.6337778 | 233.4794351 |
| ENSMUSG00000038583 | 23.34591109 | 27.12907251 | 24.00913562 | 21.74735715 | 22.91822676 |
| ENSMUSG00000038593 | 43.15456293 | 68.86610713 | 73.43970897 | 59.60386773 | 55.14698315 |
| ENSMUSG00000038599 | 7.781970364 | 4.173703463 | 7.061510478 | 4.832746033 | 5.729556691 |
| ENSMUSG00000038600 | 5.65961481  | 4.869320706 | 9.886114669 | 4.832746033 | 7.161945863 |
| ENSMUSG00000038605 | 15.56394073 | 32.69401046 | 30.36449505 | 15.30369577 | 21.48583759 |
| ENSMUSG00000038607 | 9.904325918 | 19.47728283 | 21.18453143 | 39.46742593 | 31.5125618  |
| ENSMUSG00000038608 | 36.78749627 | 55.6493795  | 35.30755239 | 78.12939419 | 73.76804239 |
| ENSMUSG00000038611 | 153.5170517 | 185.7298041 | 161.7085899 | 218.2790291 | 169.738117  |
| ENSMUSG00000038612 | 188.1821924 | 228.162456  | 203.3715018 | 385.8142249 | 313.6932288 |
| ENSMUSG00000038615 | 53.05888884 | 86.95215547 | 83.32582364 | 124.0404815 | 105.9967988 |
| ENSMUSG00000038618 | 11.31922962 | 16.69481385 | 11.29841676 | 10.47094974 | 12.89150255 |
| ENSMUSG00000038619 | 62.25576291 | 96.69079689 | 85.44427678 | 151.4260424 | 115.3073284 |
| ENSMUSG00000038624 | 8.489422215 | 6.956172438 | 8.473812573 | 5.638203705 | 6.445751277 |
| ENSMUSG00000038637 | 24.76081479 | 48.69320706 | 38.13215658 | 40.2728836  | 55.14698315 |
| ENSMUSG00000038641 | 8.489422215 | 6.260555194 | 9.179963621 | 8.860034393 | 7.161945863 |
| ENSMUSG00000038642 | 113.8997481 | 147.4708557 | 137.6994543 | 169.9515688 | 120.3206905 |
| ENSMUSG00000038644 | 26.88317035 | 44.5195036  | 43.07521391 | 82.15668255 | 70.90326405 |
| ENSMUSG00000038646 | 77.81970364 | 133.5585108 | 126.4010376 | 103.098582  | 104.5644096 |
| ENSMUSG00000038650 | 29.0055259  | 44.5195036  | 39.54445867 | 33.82922223 | 30.79636721 |
| ENSMUSG00000038651 | 12.02668147 | 7.651789682 | 5.649208382 | 4.832746033 | 6.445751277 |
| ENSMUSG00000038658 | 99.75071103 | 132.1672763 | 117.2210739 | 153.0369577 | 126.7664418 |
| ENSMUSG00000038664 | 84.89422215 | 137.036597  | 97.44884459 | 147.398754  | 125.3340526 |
| ENSMUSG00000038665 | 5.65961481  | 6.260555194 | 9.179963621 | 6.443661377 | 3.580972932 |
| ENSMUSG00000038668 | 7.074518513 | 6.260555194 | 4.943057334 | 2.416373016 | 3.580972932 |
| ENSMUSG00000038670 | 12.73413332 | 16.69481385 | 13.41686991 | 14.4982381  | 12.89150255 |
| ENSMUSG00000038671 | 69.33028142 | 125.2111039 | 112.2780166 | 224.7226905 | 165.4409494 |
| ENSMUSG00000038677 | 1.414903703 | 4.173703463 | 4.236906287 | 4.02728836  | 7.161945863 |
| ENSMUSG00000038679 | 1.414903703 | 2.782468975 | 3.530755239 | 0           | 2.148583759 |
| ENSMUSG00000038683 | 97.62835547 | 103.6469693 | 126.4010376 | 147.398754  | 133.2121931 |
| ENSMUSG00000038685 | 12.02668147 | 27.82468975 | 26.83373982 | 33.82922223 | 27.93158887 |
| ENSMUSG00000038690 | 96.92090362 | 139.819066  | 115.1026208 | 160.2860767 | 132.4959985 |
| ENSMUSG00000038695 | 0           | 0           | 1.412302096 | 0.805457672 | 2.148583759 |
| ENSMUSG00000038696 | 33.25023701 | 65.38802092 | 58.61053696 | 52.35474869 | 52.99839939 |
| ENSMUSG00000038697 | 69.33028142 | 92.51709342 | 103.804204  | 184.4498069 | 157.562809  |
| ENSMUSG00000038704 | 5.65961481  | 3.478086219 | 2.824604191 | 2.416373016 | 4.297167518 |
| ENSMUSG00000038705 | 88.43148141 | 130.0804246 | 117.2210739 | 153.8424154 | 146.1036956 |
| ENSMUSG00000038708 | 97.62835547 | 157.9051143 | 123.5764334 | 119.2077355 | 124.617858  |
| ENSMUSG00000038709 | 7.781970364 | 6.956172438 | 17.65377619 | 2.416373016 | 7.87814045  |
| ENSMUSG00000038712 | 13.44158517 | 23.65098629 | 28.24604191 | 21.74735715 | 27.93158887 |
| ENSMUSG00000038718 | 4.244711108 | 8.347406925 | 9.179963621 | 8.054576721 | 8.594335036 |

|                    |             |             |             |             |             |
|--------------------|-------------|-------------|-------------|-------------|-------------|
| ENSMUSG00000038722 | 72.86754068 | 121.7330177 | 108.0411103 | 242.4427593 | 199.102095  |
| ENSMUSG00000038729 | 6.367066661 | 5.56493795  | 6.35535943  | 11.27640741 | 9.310529622 |
| ENSMUSG00000038732 | 9.904325918 | 4.869320706 | 9.179963621 | 4.02728836  | 5.729556691 |
| ENSMUSG00000038733 | 186.7672887 | 212.1632594 | 219.6129759 | 447.029008  | 313.6932288 |
| ENSMUSG00000038738 | 9.196874066 | 8.347406925 | 5.649208382 | 23.35827249 | 17.90486466 |
| ENSMUSG00000038745 | 4.952162959 | 2.782468975 | 7.061510478 | 4.832746033 | 5.729556691 |
| ENSMUSG00000038750 | 6.367066661 | 7.651789682 | 4.943057334 | 7.249119049 | 7.161945863 |
| ENSMUSG00000038756 | 7.781970364 | 6.260555194 | 3.530755239 | 6.443661377 | 8.594335036 |
| ENSMUSG00000038759 | 49.52162959 | 71.64857611 | 70.61510478 | 109.5422434 | 83.07857202 |
| ENSMUSG00000038760 | 8.489422215 | 8.347406925 | 8.473812573 | 8.054576721 | 7.161945863 |
| ENSMUSG00000038762 | 100.4581629 | 116.1680797 | 105.9226572 | 194.115299  | 151.1170577 |
| ENSMUSG00000038763 | 3.537259256 | 1.391234488 | 0.706151048 | 1.610915344 | 7.161945863 |
| ENSMUSG00000038764 | 4.244711108 | 4.869320706 | 7.767661525 | 4.02728836  | 7.161945863 |
| ENSMUSG00000038766 | 48.10672589 | 65.38802092 | 50.13672439 | 98.265836   | 74.48423698 |
| ENSMUSG00000038770 | 134.4158517 | 169.0349902 | 156.7655326 | 136.9278043 | 131.7798039 |
| ENSMUSG00000038773 | 62.25576291 | 77.21351406 | 58.61053696 | 129.6786852 | 116.023523  |
| ENSMUSG00000038775 | 3.537259256 | 2.086851731 | 5.649208382 | 4.02728836  | 7.87814045  |
| ENSMUSG00000038776 | 9.196874066 | 8.347406925 | 12.00456781 | 9.665492065 | 10.7429188  |
| ENSMUSG00000038777 | 7.781970364 | 6.260555194 | 9.886114669 | 8.860034393 | 7.161945863 |
| ENSMUSG00000038780 | 17.68629628 | 32.69401046 | 32.4829482  | 18.52552646 | 17.90486466 |
| ENSMUSG00000038784 | 85.601674   | 107.1250555 | 91.79963621 | 136.1223466 | 95.97007457 |
| ENSMUSG00000038791 | 7.074518513 | 5.56493795  | 6.35535943  | 4.02728836  | 8.594335036 |
| ENSMUSG00000038797 | 28.29807405 | 45.91073809 | 40.95676077 | 28.19101852 | 25.78300511 |
| ENSMUSG00000038805 | 0           | 0           | 0           | 0           | 0           |
| ENSMUSG00000038807 | 7.781970364 | 3.478086219 | 4.943057334 | 5.638203705 | 4.297167518 |
| ENSMUSG00000038811 | 85.601674   | 100.1688831 | 122.8702823 | 78.93485187 | 75.20043157 |
| ENSMUSG00000038812 | 55.88869625 | 76.51789682 | 79.7950684  | 114.3749894 | 100.2672421 |
| ENSMUSG00000038816 | 9.904325918 | 9.043024169 | 4.236906287 | 9.665492065 | 18.62105924 |
| ENSMUSG00000038822 | 17.68629628 | 31.30277597 | 19.06607829 | 25.77464551 | 30.08017263 |
| ENSMUSG00000038827 | 45.98437033 | 105.0382038 | 75.55816211 | 167.5351958 | 141.0903335 |
| ENSMUSG00000038828 | 31.12788146 | 56.34499675 | 48.01827125 | 46.71654498 | 57.29556691 |
| ENSMUSG00000038831 | 10.61177777 | 20.86851731 | 21.89068248 | 12.88732275 | 12.89150255 |
| ENSMUSG00000038836 | 6.367066661 | 13.21672763 | 9.179963621 | 5.638203705 | 9.310529622 |
| ENSMUSG00000038838 | 7.781970364 | 18.78166558 | 10.59226572 | 14.4982381  | 18.62105924 |
| ENSMUSG00000038843 | 64.37811846 | 87.64777272 | 80.50121945 | 61.21478308 | 53.71459398 |
| ENSMUSG00000038845 | 19.10119998 | 20.17290007 | 19.06607829 | 36.24559524 | 24.35061594 |
| ENSMUSG00000038848 | 93.38364437 | 137.7322143 | 115.8087718 | 198.948045  | 145.387501  |
| ENSMUSG00000038855 | 51.64398514 | 83.47406925 | 72.02740687 | 100.682209  | 86.65954495 |
| ENSMUSG00000038860 | 7.781970364 | 5.56493795  | 7.061510478 | 4.02728836  | 5.013362104 |
| ENSMUSG00000038861 | 68.62282957 | 112.6899935 | 97.44884459 | 86.18397091 | 88.09193412 |
| ENSMUSG00000038866 | 45.27691848 | 74.43104508 | 74.85201106 | 177.2006879 | 150.4008631 |
| ENSMUSG00000038872 | 8.489422215 | 5.56493795  | 4.943057334 | 4.832746033 | 4.297167518 |
| ENSMUSG00000038876 | 39.61730367 | 60.51870021 | 43.78136496 | 83.7675979  | 68.0384857  |

|                    |             |             |             |             |             |
|--------------------|-------------|-------------|-------------|-------------|-------------|
| ENSMUSG00000038880 | 7.781970364 | 10.43425866 | 12.00456781 | 46.71654498 | 30.08017263 |
| ENSMUSG00000038884 | 7.781970364 | 10.43425866 | 11.29841676 | 16.91461111 | 13.60769714 |
| ENSMUSG00000038886 | 15.56394073 | 9.738641413 | 21.89068248 | 12.08186508 | 10.7429188  |
| ENSMUSG00000038893 | 64.37811846 | 86.25653823 | 72.73355792 | 55.57657937 | 49.41742646 |
| ENSMUSG00000038895 | 15.56394073 | 24.34660353 | 28.24604191 | 22.55281482 | 22.20203218 |
| ENSMUSG00000038900 | 3.537259256 | 9.738641413 | 11.29841676 | 8.860034393 | 16.47247549 |
| ENSMUSG00000038902 | 30.4204296  | 38.95456565 | 35.30755239 | 57.18749472 | 51.56601022 |
| ENSMUSG00000038903 | 12.02668147 | 4.173703463 | 5.649208382 | 4.02728836  | 10.02672421 |
| ENSMUSG00000038909 | 115.3146518 | 141.9059177 | 114.3964697 | 248.8864207 | 169.0219224 |
| ENSMUSG00000038914 | 152.102148  | 223.9887525 | 165.9454962 | 282.7156429 | 234.9118243 |
| ENSMUSG00000038925 | 5.65961481  | 4.869320706 | 5.649208382 | 2.416373016 | 2.864778345 |
| ENSMUSG00000038930 | 19.10119998 | 40.34580014 | 37.42600553 | 41.07834128 | 39.39070225 |
| ENSMUSG00000038932 | 7.074518513 | 4.173703463 | 2.824604191 | 5.638203705 | 6.445751277 |
| ENSMUSG00000038936 | 7.074518513 | 7.651789682 | 4.236906287 | 4.832746033 | 4.297167518 |
| ENSMUSG00000038943 | 51.64398514 | 48.69320706 | 49.43057334 | 135.3168889 | 80.21379367 |
| ENSMUSG00000038954 | 9.904325918 | 11.1298759  | 18.35992724 | 12.88732275 | 15.7562809  |
| ENSMUSG00000038957 | 73.57499253 | 107.1250555 | 80.50121945 | 89.4058016  | 96.68626916 |
| ENSMUSG00000038963 | 55.1812444  | 41.04141738 | 48.01827125 | 44.30017197 | 37.24211849 |
| ENSMUSG00000038965 | 53.05888884 | 76.51789682 | 64.25974535 | 109.5422434 | 88.09193412 |
| ENSMUSG00000038967 | 9.196874066 | 11.82549314 | 9.886114669 | 4.02728836  | 5.013362104 |
| ENSMUSG00000038975 | 2.122355554 | 1.391234488 | 2.824604191 | 4.02728836  | 1.432389173 |
| ENSMUSG00000038976 | 38.20239997 | 53.56252777 | 63.5535943  | 45.10562964 | 48.70123187 |
| ENSMUSG00000038982 | 18.39374813 | 18.78166558 | 12.00456781 | 9.665492065 | 13.60769714 |
| ENSMUSG00000038990 | 53.7663407  | 85.56092098 | 86.15042783 | 55.57657937 | 45.83645353 |
| ENSMUSG00000038991 | 67.20792587 | 70.25734162 | 76.97046421 | 94.23854763 | 83.7947666  |
| ENSMUSG00000039001 | 0           | 1.391234488 | 0           | 0           | 1.432389173 |
| ENSMUSG00000039005 | 41.73965922 | 63.30116918 | 45.19366706 | 46.71654498 | 44.40406435 |
| ENSMUSG00000039013 | 9.904325918 | 6.956172438 | 7.767661525 | 8.054576721 | 8.594335036 |
| ENSMUSG00000039018 | 10.61177777 | 15.99919661 | 11.29841676 | 18.52552646 | 17.18867007 |
| ENSMUSG00000039021 | 10.61177777 | 7.651789682 | 7.767661525 | 10.47094974 | 4.297167518 |
| ENSMUSG00000039031 | 5.65961481  | 6.956172438 | 2.824604191 | 3.221830688 | 6.445751277 |
| ENSMUSG00000039033 | 19.10119998 | 35.47647943 | 29.65834401 | 29.80193387 | 34.37734014 |
| ENSMUSG00000039041 | 44.56946663 | 84.1696865  | 88.26888097 | 230.3608942 | 158.2790036 |
| ENSMUSG00000039046 | 84.89422215 | 92.51709342 | 84.73812573 | 73.29664816 | 74.48423698 |
| ENSMUSG00000039047 | 26.88317035 | 44.5195036  | 48.7244223  | 53.16020636 | 60.87653984 |
| ENSMUSG00000039048 | 37.49494812 | 46.60635533 | 52.25517753 | 118.4022778 | 111.0101609 |
| ENSMUSG00000039058 | 8.489422215 | 6.956172438 | 4.943057334 | 4.02728836  | 10.7429188  |
| ENSMUSG00000039059 | 10.61177777 | 11.1298759  | 12.00456781 | 8.860034393 | 8.594335036 |
| ENSMUSG00000039062 | 12.02668147 | 6.956172438 | 6.35535943  | 7.249119049 | 4.297167518 |
| ENSMUSG00000039065 | 114.6071999 | 132.1672763 | 132.0502459 | 240.831844  | 166.8733386 |
| ENSMUSG00000039068 | 26.88317035 | 43.82388636 | 50.13672439 | 78.93485187 | 61.59273443 |
| ENSMUSG00000039069 | 18.39374813 | 17.39043109 | 21.18453143 | 20.1364418  | 21.48583759 |
| ENSMUSG00000039081 | 6.367066661 | 3.478086219 | 4.943057334 | 7.249119049 | 10.7429188  |

|                    |             |             |             |             |             |
|--------------------|-------------|-------------|-------------|-------------|-------------|
| ENSMUSG00000039087 | 8.489422215 | 9.043024169 | 8.473812573 | 8.054576721 | 8.594335036 |
| ENSMUSG00000039089 | 12.73413332 | 16.69481385 | 12.00456781 | 8.860034393 | 16.47247549 |
| ENSMUSG00000039096 | 10.61177777 | 16.69481385 | 14.12302096 | 16.91461111 | 13.60769714 |
| ENSMUSG00000039103 | 7.781970364 | 8.347406925 | 7.061510478 | 2.416373016 | 8.594335036 |
| ENSMUSG00000039108 | 33.95768886 | 41.04141738 | 50.84287544 | 28.19101852 | 54.43078856 |
| ENSMUSG00000039109 | 5.65961481  | 4.173703463 | 7.061510478 | 7.249119049 | 6.445751277 |
| ENSMUSG00000039110 | 11.31922962 | 4.173703463 | 12.71071886 | 4.832746033 | 2.864778345 |
| ENSMUSG00000039114 | 9.196874066 | 4.173703463 | 6.35535943  | 5.638203705 | 6.445751277 |
| ENSMUSG00000039115 | 7.781970364 | 9.043024169 | 14.829172   | 6.443661377 | 5.729556691 |
| ENSMUSG00000039126 | 8.489422215 | 3.478086219 | 5.649208382 | 4.02728836  | 3.580972932 |
| ENSMUSG00000039128 | 67.20792587 | 114.081228  | 85.44427678 | 124.8459392 | 121.7530797 |
| ENSMUSG00000039130 | 35.37259256 | 66.7792554  | 53.66747963 | 57.18749472 | 67.32229112 |
| ENSMUSG00000039131 | 8.489422215 | 4.869320706 | 3.530755239 | 7.249119049 | 7.161945863 |
| ENSMUSG00000039133 | 7.781970364 | 5.56493795  | 4.943057334 | 6.443661377 | 8.594335036 |
| ENSMUSG00000039137 | 22.63845924 | 30.60715873 | 35.30755239 | 18.52552646 | 34.37734014 |
| ENSMUSG00000039145 | 21.93100739 | 41.04141738 | 38.13215658 | 27.38556085 | 27.21539428 |
| ENSMUSG00000039153 | 5.65961481  | 16.69481385 | 13.41686991 | 8.054576721 | 9.310529622 |
| ENSMUSG00000039155 | 5.65961481  | 5.56493795  | 9.179963621 | 6.443661377 | 10.7429188  |
| ENSMUSG00000039156 | 29.0055259  | 50.08444155 | 46.60596915 | 63.6311561  | 62.30892901 |
| ENSMUSG00000039157 | 16.27139258 | 35.47647943 | 34.60140134 | 33.02376456 | 37.24211849 |
| ENSMUSG00000039158 | 98.33580733 | 97.38641413 | 103.098053  | 295.6029657 | 200.5344842 |
| ENSMUSG00000039159 | 69.33028142 | 96.69079689 | 79.08891735 | 94.23854763 | 72.33565322 |
| ENSMUSG00000039163 | 9.904325918 | 13.21672763 | 9.886114669 | 10.47094974 | 10.7429188  |
| ENSMUSG00000039166 | 7.781970364 | 3.478086219 | 4.943057334 | 4.832746033 | 10.7429188  |
| ENSMUSG00000039167 | 6.367066661 | 12.52111039 | 7.767661525 | 5.638203705 | 2.148583759 |
| ENSMUSG00000039168 | 17.68629628 | 22.2597518  | 16.2414741  | 17.72006879 | 20.05344842 |
| ENSMUSG00000039174 | 5.65961481  | 7.651789682 | 4.943057334 | 4.02728836  | 5.013362104 |
| ENSMUSG00000039176 | 22.63845924 | 27.82468975 | 40.25060972 | 52.35474869 | 52.2822048  |
| ENSMUSG00000039179 | 7.074518513 | 11.1298759  | 7.767661525 | 10.47094974 | 7.87814045  |
| ENSMUSG00000039187 | 16.27139258 | 17.39043109 | 17.65377619 | 16.91461111 | 13.60769714 |
| ENSMUSG00000039191 | 8.489422215 | 6.956172438 | 9.179963621 | 11.27640741 | 6.445751277 |
| ENSMUSG00000039194 | 4.952162959 | 4.173703463 | 10.59226572 | 8.860034393 | 7.161945863 |
| ENSMUSG00000039197 | 26.88317035 | 35.47647943 | 43.78136496 | 86.98942859 | 65.88990194 |
| ENSMUSG00000039200 | 7.781970364 | 10.43425866 | 7.061510478 | 4.02728836  | 7.87814045  |
| ENSMUSG00000039202 | 49.52162959 | 99.47326586 | 70.61510478 | 80.54576721 | 61.59273443 |
| ENSMUSG00000039205 | 4.952162959 | 4.173703463 | 6.35535943  | 8.054576721 | 9.310529622 |
| ENSMUSG00000039206 | 18.39374813 | 33.3896277  | 26.12758877 | 38.66196826 | 37.24211849 |
| ENSMUSG00000039208 | 6.367066661 | 6.260555194 | 7.767661525 | 4.832746033 | 6.445751277 |
| ENSMUSG00000039209 | 8.489422215 | 6.260555194 | 6.35535943  | 3.221830688 | 14.32389173 |
| ENSMUSG00000039210 | 48.10672589 | 94.60394515 | 64.96589639 | 55.57657937 | 58.72795608 |
| ENSMUSG00000039218 | 0           | 0           | 0.706151048 | 0           | 0.716194586 |
| ENSMUSG00000039219 | 75.69734809 | 106.4294383 | 106.6288082 | 223.1117752 | 164.7247549 |
| ENSMUSG00000039220 | 33.25023701 | 47.30197258 | 41.66291182 | 102.2931244 | 73.76804239 |

|                    |             |             |             |             |             |
|--------------------|-------------|-------------|-------------|-------------|-------------|
| ENSMUSG00000039221 | 23.34591109 | 29.21592424 | 31.77679715 | 86.98942859 | 60.87653984 |
| ENSMUSG00000039230 | 11.31922962 | 15.99919661 | 21.18453143 | 41.07834128 | 29.36397804 |
| ENSMUSG00000039231 | 22.63845924 | 35.47647943 | 36.71985448 | 76.51847885 | 70.18706946 |
| ENSMUSG00000039232 | 14.14903703 | 18.78166558 | 21.89068248 | 38.66196826 | 32.22875639 |
| ENSMUSG00000039233 | 89.13893326 | 98.08203137 | 100.9795998 | 130.4841429 | 104.5644096 |
| ENSMUSG00000039234 | 8.489422215 | 9.738641413 | 2.118453143 | 13.69278043 | 9.310529622 |
| ENSMUSG00000039236 | 12.73413332 | 20.86851731 | 24.00913562 | 55.57657937 | 37.24211849 |
| ENSMUSG00000039239 | 10.61177777 | 4.869320706 | 11.29841676 | 4.02728836  | 2.864778345 |
| ENSMUSG00000039242 | 28.29807405 | 43.12826911 | 31.77679715 | 34.6346799  | 47.98503729 |
| ENSMUSG00000039244 | 29.71297775 | 45.21512085 | 43.78136496 | 66.85298678 | 47.98503729 |
| ENSMUSG00000039252 | 7.781970364 | 4.869320706 | 9.179963621 | 11.27640741 | 7.161945863 |
| ENSMUSG00000039254 | 19.10119998 | 31.30277597 | 21.89068248 | 49.132918   | 30.08017263 |
| ENSMUSG00000039257 | 8.489422215 | 7.651789682 | 2.824604191 | 5.638203705 | 4.297167518 |
| ENSMUSG00000039262 | 88.43148141 | 93.90832791 | 85.44427678 | 137.7332619 | 116.023523  |
| ENSMUSG00000039263 | 19.80865184 | 24.34660353 | 15.53532305 | 53.96566403 | 37.24211849 |
| ENSMUSG00000039278 | 3.537259256 | 2.086851731 | 7.767661525 | 2.416373016 | 2.148583759 |
| ENSMUSG00000039285 | 25.46826665 | 34.08524495 | 28.24604191 | 53.16020636 | 51.56601022 |
| ENSMUSG00000039286 | 17.68629628 | 9.738641413 | 9.886114669 | 10.47094974 | 15.7562809  |
| ENSMUSG00000039294 | 67.91537772 | 90.43024169 | 76.97046421 | 110.3477011 | 73.76804239 |
| ENSMUSG00000039296 | 8.489422215 | 5.56493795  | 9.179963621 | 4.832746033 | 9.310529622 |
| ENSMUSG00000039298 | 7.781970364 | 19.47728283 | 16.2414741  | 25.77464551 | 22.20203218 |
| ENSMUSG00000039304 | 8.489422215 | 13.21672763 | 15.53532305 | 8.054576721 | 5.729556691 |
| ENSMUSG00000039307 | 8.489422215 | 19.47728283 | 16.2414741  | 16.10915344 | 20.05344842 |
| ENSMUSG00000039313 | 11.31922962 | 3.478086219 | 5.649208382 | 8.054576721 | 9.310529622 |
| ENSMUSG00000039315 | 7.781970364 | 4.869320706 | 6.35535943  | 4.02728836  | 5.729556691 |
| ENSMUSG00000039316 | 108.9475851 | 130.0804246 | 133.462548  | 258.5519127 | 189.7915654 |
| ENSMUSG00000039318 | 99.75071103 | 116.863697  | 105.9226572 | 111.9586164 | 101.6996313 |
| ENSMUSG00000039323 | 9.196874066 | 4.869320706 | 4.943057334 | 6.443661377 | 8.594335036 |
| ENSMUSG00000039328 | 62.96321476 | 114.7768452 | 112.2780166 | 45.91108731 | 61.59273443 |
| ENSMUSG00000039335 | 10.61177777 | 7.651789682 | 11.29841676 | 3.221830688 | 5.013362104 |
| ENSMUSG00000039345 | 16.97884443 | 29.21592424 | 18.35992724 | 31.41284921 | 32.22875639 |
| ENSMUSG00000039354 | 44.56946663 | 51.47567604 | 45.19366706 | 47.52200265 | 46.55264811 |
| ENSMUSG00000039356 | 39.61730367 | 50.08444155 | 61.43514116 | 171.5624842 | 123.1854689 |
| ENSMUSG00000039361 | 187.4747406 | 171.121842  | 194.1915381 | 273.8556085 | 206.9802355 |
| ENSMUSG00000039364 | 12.73413332 | 3.478086219 | 4.236906287 | 5.638203705 | 9.310529622 |
| ENSMUSG00000039367 | 83.47931845 | 134.254128  | 120.7518292 | 161.0915344 | 123.9016634 |
| ENSMUSG00000039375 | 8.489422215 | 6.956172438 | 7.767661525 | 4.02728836  | 5.729556691 |
| ENSMUSG00000039376 | 5.65961481  | 6.260555194 | 8.473812573 | 8.054576721 | 6.445751277 |
| ENSMUSG00000039382 | 30.4204296  | 41.04141738 | 35.30755239 | 22.55281482 | 21.48583759 |
| ENSMUSG00000039391 | 14.14903703 | 5.56493795  | 9.886114669 | 9.665492065 | 6.445751277 |
| ENSMUSG00000039396 | 30.4204296  | 25.73783802 | 36.01370344 | 33.82922223 | 32.94495097 |
| ENSMUSG00000039410 | 6.367066661 | 3.478086219 | 4.236906287 | 4.02728836  | 2.148583759 |
| ENSMUSG00000039419 | 11.31922962 | 7.651789682 | 7.767661525 | 1.610915344 | 8.594335036 |

|                    |             |             |             |             |             |
|--------------------|-------------|-------------|-------------|-------------|-------------|
| ENSMUSG00000039427 | 12.73413332 | 18.08604834 | 29.65834401 | 36.24559524 | 33.66114556 |
| ENSMUSG00000039428 | 55.1812444  | 99.47326586 | 84.73812573 | 63.6311561  | 61.59273443 |
| ENSMUSG00000039431 | 17.68629628 | 22.2597518  | 16.2414741  | 11.27640741 | 21.48583759 |
| ENSMUSG00000039449 | 139.3680147 | 131.4716591 | 151.8224753 | 162.7024498 | 143.9551119 |
| ENSMUSG00000039450 | 5.65961481  | 9.738641413 | 12.00456781 | 10.47094974 | 5.013362104 |
| ENSMUSG00000039458 | 52.35143699 | 82.77845201 | 66.37819849 | 86.18397091 | 73.76804239 |
| ENSMUSG00000039461 | 87.72402956 | 109.9075245 | 103.098053  | 191.698926  | 156.8466144 |
| ENSMUSG00000039463 | 42.44711108 | 76.51789682 | 67.08434954 | 132.9005159 | 98.83485292 |
| ENSMUSG00000039470 | 12.02668147 | 7.651789682 | 5.649208382 | 8.054576721 | 8.594335036 |
| ENSMUSG00000039474 | 18.39374813 | 27.12907251 | 13.41686991 | 23.35827249 | 22.20203218 |
| ENSMUSG00000039476 | 45.98437033 | 46.60635533 | 57.19823487 | 38.66196826 | 47.98503729 |
| ENSMUSG00000039477 | 21.93100739 | 29.91154148 | 18.35992724 | 16.91461111 | 20.769643   |
| ENSMUSG00000039478 | 16.97884443 | 31.30277597 | 27.53989086 | 32.21830688 | 28.64778345 |
| ENSMUSG00000039480 | 33.95768886 | 81.38721752 | 60.02283906 | 41.88379895 | 41.53928601 |
| ENSMUSG00000039483 | 11.31922962 | 14.60796212 | 12.00456781 | 12.08186508 | 7.161945863 |
| ENSMUSG00000039488 | 11.31922962 | 11.1298759  | 4.943057334 | 2.416373016 | 5.729556691 |
| ENSMUSG00000039501 | 58.0110518  | 98.08203137 | 71.32125582 | 377.7596482 | 242.7899648 |
| ENSMUSG00000039512 | 9.196874066 | 12.52111039 | 12.00456781 | 20.94189947 | 21.48583759 |
| ENSMUSG00000039515 | 69.33028142 | 105.7338211 | 89.68118307 | 129.6786852 | 118.8883013 |
| ENSMUSG00000039521 | 2.122355554 | 6.260555194 | 7.061510478 | 3.221830688 | 3.580972932 |
| ENSMUSG00000039523 | 53.05888884 | 94.60394515 | 90.38733411 | 81.35122488 | 99.5510475  |
| ENSMUSG00000039530 | 21.93100739 | 39.6501829  | 38.13215658 | 32.21830688 | 30.08017263 |
| ENSMUSG00000039536 | 61.54831106 | 92.51709342 | 83.32582364 | 118.4022778 | 108.1453825 |
| ENSMUSG00000039539 | 6.367066661 | 2.782468975 | 6.35535943  | 1.610915344 | 6.445751277 |
| ENSMUSG00000039542 | 9.196874066 | 6.956172438 | 5.649208382 | 5.638203705 | 6.445751277 |
| ENSMUSG00000039543 | 8.489422215 | 9.043024169 | 6.35535943  | 5.638203705 | 3.580972932 |
| ENSMUSG00000039552 | 9.196874066 | 11.1298759  | 5.649208382 | 5.638203705 | 5.013362104 |
| ENSMUSG00000039555 | 10.61177777 | 9.738641413 | 7.767661525 | 5.638203705 | 4.297167518 |
| ENSMUSG00000039556 | 6.367066661 | 21.56413456 | 21.89068248 | 23.35827249 | 30.79636721 |
| ENSMUSG00000039577 | 13.44158517 | 16.69481385 | 19.06607829 | 17.72006879 | 28.64778345 |
| ENSMUSG00000039578 | 7.074518513 | 7.651789682 | 5.649208382 | 3.221830688 | 4.297167518 |
| ENSMUSG00000039579 | 7.074518513 | 6.956172438 | 7.061510478 | 5.638203705 | 5.729556691 |
| ENSMUSG00000039585 | 16.27139258 | 33.3896277  | 19.77222934 | 20.94189947 | 21.48583759 |
| ENSMUSG00000039599 | 65.79302217 | 95.2995624  | 83.32582364 | 132.9005159 | 103.848215  |
| ENSMUSG00000039601 | 10.61177777 | 4.173703463 | 7.767661525 | 4.02728836  | 8.594335036 |
| ENSMUSG00000039607 | 10.61177777 | 8.347406925 | 7.061510478 | 8.054576721 | 7.161945863 |
| ENSMUSG00000039620 | 8.489422215 | 4.173703463 | 5.649208382 | 1.610915344 | 7.161945863 |
| ENSMUSG00000039621 | 33.25023701 | 59.82308296 | 59.31668801 | 83.7675979  | 48.70123187 |
| ENSMUSG00000039623 | 14.14903703 | 25.04222078 | 16.94762515 | 19.33098413 | 26.49919969 |
| ENSMUSG00000039629 | 7.781970364 | 7.651789682 | 4.943057334 | 8.054576721 | 4.297167518 |
| ENSMUSG00000039630 | 0           | 0.695617244 | 0           | 0           | 0           |
| ENSMUSG00000039632 | 13.44158517 | 14.60796212 | 12.71071886 | 36.24559524 | 28.64778345 |
| ENSMUSG00000039634 | 60.84085921 | 109.9075245 | 91.79963621 | 123.2350238 | 113.1587446 |

|                    |             |             |             |             |             |
|--------------------|-------------|-------------|-------------|-------------|-------------|
| ENSMUSG00000039637 | 56.5961481  | 79.30036579 | 84.03197468 | 113.5695318 | 82.36237743 |
| ENSMUSG00000039648 | 13.44158517 | 18.08604834 | 16.94762515 | 12.08186508 | 5.729556691 |
| ENSMUSG00000039652 | 52.35143699 | 73.73542784 | 84.73812573 | 98.265836   | 92.38910164 |
| ENSMUSG00000039656 | 71.45263698 | 82.77845201 | 100.9795998 | 244.0536746 | 187.6429816 |
| ENSMUSG00000039660 | 14.85648888 | 20.86851731 | 17.65377619 | 24.16373016 | 22.91822676 |
| ENSMUSG00000039661 | 6.367066661 | 5.56493795  | 4.236906287 | 10.47094974 | 7.161945863 |
| ENSMUSG00000039662 | 45.27691848 | 57.73623123 | 50.13672439 | 44.30017197 | 31.5125618  |
| ENSMUSG00000039671 | 10.61177777 | 11.82549314 | 10.59226572 | 5.638203705 | 7.87814045  |
| ENSMUSG00000039672 | 10.61177777 | 5.56493795  | 11.29841676 | 5.638203705 | 11.45911338 |
| ENSMUSG00000039678 | 31.12788146 | 55.6493795  | 60.02283906 | 43.49471429 | 50.13362104 |
| ENSMUSG00000039682 | 11.31922962 | 8.347406925 | 7.767661525 | 45.10562964 | 45.12025894 |
| ENSMUSG00000039683 | 4.952162959 | 6.260555194 | 8.473812573 | 4.02728836  | 3.580972932 |
| ENSMUSG00000039684 | 11.31922962 | 13.21672763 | 7.767661525 | 10.47094974 | 5.729556691 |
| ENSMUSG00000039686 | 63.67066661 | 87.64777272 | 68.49665163 | 33.02376456 | 49.41742646 |
| ENSMUSG00000039691 | 9.196874066 | 6.260555194 | 4.236906287 | 11.27640741 | 6.445751277 |
| ENSMUSG00000039693 | 6.367066661 | 5.56493795  | 7.061510478 | 7.249119049 | 7.161945863 |
| ENSMUSG00000039697 | 7.781970364 | 11.1298759  | 12.00456781 | 19.33098413 | 12.89150255 |
| ENSMUSG00000039699 | 4.952162959 | 4.869320706 | 9.886114669 | 10.47094974 | 10.7429188  |
| ENSMUSG00000039701 | 16.97884443 | 28.52030699 | 16.2414741  | 33.02376456 | 24.35061594 |
| ENSMUSG00000039703 | 67.20792587 | 100.1688831 | 84.03197468 | 161.0915344 | 100.9834367 |
| ENSMUSG00000039706 | 9.904325918 | 9.043024169 | 9.886114669 | 6.443661377 | 6.445751277 |
| ENSMUSG00000039710 | 12.02668147 | 2.782468975 | 7.061510478 | 4.02728836  | 7.87814045  |
| ENSMUSG00000039713 | 10.61177777 | 2.782468975 | 11.29841676 | 7.249119049 | 10.7429188  |
| ENSMUSG00000039716 | 0.707451851 | 0           | 0           | 0           | 0           |
| ENSMUSG00000039717 | 7.781970364 | 9.738641413 | 4.236906287 | 8.054576721 | 7.87814045  |
| ENSMUSG00000039728 | 9.196874066 | 4.869320706 | 5.649208382 | 4.02728836  | 5.013362104 |
| ENSMUSG00000039735 | 9.904325918 | 6.956172438 | 7.767661525 | 6.443661377 | 10.7429188  |
| ENSMUSG00000039737 | 45.98437033 | 51.47567604 | 50.13672439 | 113.5695318 | 86.65954495 |
| ENSMUSG00000039738 | 30.4204296  | 47.30197258 | 42.36906287 | 48.32746033 | 50.84981563 |
| ENSMUSG00000039741 | 4.952162959 | 9.043024169 | 4.943057334 | 5.638203705 | 5.013362104 |
| ENSMUSG00000039742 | 5.65961481  | 10.43425866 | 7.767661525 | 3.221830688 | 8.594335036 |
| ENSMUSG00000039747 | 43.86201478 | 61.21431745 | 69.20280268 | 31.41284921 | 29.36397804 |
| ENSMUSG00000039748 | 14.14903703 | 9.738641413 | 16.2414741  | 42.68925662 | 39.39070225 |
| ENSMUSG00000039753 | 16.27139258 | 22.95536904 | 24.00913562 | 7.249119049 | 10.02672421 |
| ENSMUSG00000039754 | 59.42595551 | 88.34338996 | 73.43970897 | 86.18397091 | 73.76804239 |
| ENSMUSG00000039756 | 21.22355554 | 34.78086219 | 33.89525029 | 146.5932963 | 111.0101609 |
| ENSMUSG00000039759 | 55.1812444  | 59.82308296 | 69.90895373 | 33.02376456 | 32.22875639 |
| ENSMUSG00000039765 | 6.367066661 | 6.260555194 | 6.35535943  | 7.249119049 | 7.161945863 |
| ENSMUSG00000039768 | 120.9742666 | 107.8206728 | 161.7085899 | 256.9409974 | 163.2923657 |
| ENSMUSG00000039771 | 79.23460734 | 87.64777272 | 86.15042783 | 107.1258704 | 108.1453825 |
| ENSMUSG00000039774 | 15.56394073 | 28.52030699 | 25.42143772 | 20.94189947 | 17.18867007 |
| ENSMUSG00000039781 | 14.14903703 | 10.43425866 | 8.473812573 | 8.054576721 | 13.60769714 |
| ENSMUSG00000039782 | 11.31922962 | 14.60796212 | 14.12302096 | 52.35474869 | 47.2688427  |



|                    |             |             |             |             |             |
|--------------------|-------------|-------------|-------------|-------------|-------------|
| ENSMUSG00000039783 | 99.75071103 | 140.5146832 | 138.4056054 | 100.682209  | 100.2672421 |
| ENSMUSG00000039787 | 9.196874066 | 8.347406925 | 12.00456781 | 6.443661377 | 7.161945863 |
| ENSMUSG00000039795 | 9.196874066 | 23.65098629 | 23.30298458 | 12.08186508 | 22.20203218 |
| ENSMUSG00000039804 | 78.52715549 | 127.2979556 | 105.9226572 | 115.9859048 | 110.2939663 |
| ENSMUSG00000039809 | 6.367066661 | 3.478086219 | 3.530755239 | 4.832746033 | 10.02672421 |
| ENSMUSG00000039810 | 15.56394073 | 31.30277597 | 26.12758877 | 23.35827249 | 37.24211849 |
| ENSMUSG00000039813 | 12.02668147 | 11.82549314 | 11.29841676 | 14.4982381  | 11.45911338 |
| ENSMUSG00000039814 | 7.781970364 | 6.956172438 | 7.061510478 | 8.860034393 | 7.87814045  |
| ENSMUSG00000039826 | 22.63845924 | 35.47647943 | 29.65834401 | 86.98942859 | 54.43078856 |
| ENSMUSG00000039831 | 4.952162959 | 8.347406925 | 3.530755239 | 5.638203705 | 5.013362104 |
| ENSMUSG00000039834 | 45.98437033 | 60.51870021 | 62.84744325 | 136.1223466 | 103.1320204 |
| ENSMUSG00000039835 | 6.367066661 | 0.695617244 | 6.35535943  | 4.832746033 | 6.445751277 |
| ENSMUSG00000039838 | 9.196874066 | 2.782468975 | 8.473812573 | 5.638203705 | 6.445751277 |
| ENSMUSG00000039841 | 12.02668147 | 9.043024169 | 7.767661525 | 8.860034393 | 6.445751277 |
| ENSMUSG00000039842 | 24.76081479 | 20.86851731 | 23.30298458 | 59.60386773 | 55.14698315 |
| ENSMUSG00000039844 | 174.0331554 | 182.9473351 | 175.1254598 | 275.4665239 | 206.2640409 |
| ENSMUSG00000039850 | 33.25023701 | 56.34499675 | 55.78593277 | 50.74383334 | 47.2688427  |
| ENSMUSG00000039851 | 6.367066661 | 5.56493795  | 10.59226572 | 4.832746033 | 6.445751277 |
| ENSMUSG00000039852 | 24.76081479 | 55.6493795  | 40.25060972 | 41.88379895 | 47.2688427  |
| ENSMUSG00000039853 | 35.37259256 | 41.73703463 | 51.54902649 | 83.7675979  | 74.48423698 |
| ENSMUSG00000039860 | 9.196874066 | 5.56493795  | 7.061510478 | 5.638203705 | 7.87814045  |
| ENSMUSG00000039878 | 12.02668147 | 9.738641413 | 9.179963621 | 7.249119049 | 10.7429188  |
| ENSMUSG00000039887 | 23.34591109 | 33.3896277  | 34.60140134 | 23.35827249 | 18.62105924 |
| ENSMUSG00000039903 | 3.537259256 | 2.086851731 | 7.767661525 | 8.054576721 | 7.87814045  |
| ENSMUSG00000039908 | 18.39374813 | 22.95536904 | 26.12758877 | 13.69278043 | 21.48583759 |
| ENSMUSG00000039910 | 16.27139258 | 26.43345526 | 28.95219296 | 132.9005159 | 81.64618284 |
| ENSMUSG00000039911 | 4.244711108 | 3.478086219 | 9.179963621 | 33.82922223 | 24.35061594 |
| ENSMUSG00000039913 | 7.781970364 | 7.651789682 | 9.886114669 | 4.02728836  | 5.013362104 |
| ENSMUSG00000039917 | 30.4204296  | 35.47647943 | 31.77679715 | 32.21830688 | 37.95831308 |
| ENSMUSG00000039929 | 23.34591109 | 37.56333116 | 34.60140134 | 62.82569842 | 65.17370736 |
| ENSMUSG00000039934 | 16.27139258 | 20.17290007 | 18.35992724 | 12.08186508 | 17.18867007 |
| ENSMUSG00000039936 | 84.1867703  | 112.6899935 | 96.74269354 | 163.5079074 | 116.7397176 |
| ENSMUSG00000039942 | 19.10119998 | 16.69481385 | 31.77679715 | 108.7367857 | 85.22715578 |
| ENSMUSG00000039943 | 9.904325918 | 5.56493795  | 4.943057334 | 4.832746033 | 5.729556691 |
| ENSMUSG00000039952 | 19.80865184 | 36.86771392 | 33.89525029 | 25.77464551 | 28.64778345 |
| ENSMUSG00000039953 | 10.61177777 | 9.043024169 | 8.473812573 | 11.27640741 | 5.729556691 |
| ENSMUSG00000039958 | 11.31922962 | 8.347406925 | 14.829172   | 9.665492065 | 9.310529622 |
| ENSMUSG00000039959 | 9.196874066 | 15.30357936 | 14.12302096 | 14.4982381  | 12.17530797 |
| ENSMUSG00000039963 | 7.074518513 | 4.173703463 | 7.767661525 | 2.416373016 | 7.161945863 |
| ENSMUSG00000039967 | 171.203348  | 209.3807904 | 185.0115745 | 207.0026217 | 157.562809  |
| ENSMUSG00000039977 | 10.61177777 | 8.347406925 | 9.886114669 | 4.02728836  | 7.161945863 |
| ENSMUSG00000039983 | 30.4204296  | 40.34580014 | 44.48751601 | 32.21830688 | 38.67450766 |
| ENSMUSG00000039985 | 32.54278516 | 52.86691053 | 52.25517753 | 120.8186508 | 138.2255552 |

|                    |             |             |             |             |             |
|--------------------|-------------|-------------|-------------|-------------|-------------|
| ENSMUSG00000039987 | 111.0699406 | 152.3401764 | 141.9363606 | 187.6716376 | 170.4543116 |
| ENSMUSG00000039988 | 59.42595551 | 88.34338996 | 68.49665163 | 135.3168889 | 147.5360848 |
| ENSMUSG00000039990 | 41.03220737 | 60.51870021 | 62.84744325 | 84.57305557 | 77.34901533 |
| ENSMUSG00000039994 | 23.34591109 | 26.43345526 | 33.89525029 | 46.71654498 | 35.09353473 |
| ENSMUSG00000039997 | 0.707451851 | 2.086851731 | 1.412302096 | 0.805457672 | 0.716194586 |
| ENSMUSG00000040003 | 4.952162959 | 7.651789682 | 4.236906287 | 6.443661377 | 7.161945863 |
| ENSMUSG00000040006 | 19.80865184 | 37.56333116 | 33.18909925 | 24.16373016 | 33.66114556 |
| ENSMUSG00000040010 | 27.5906222  | 36.86771392 | 38.13215658 | 256.9409974 | 183.3458141 |
| ENSMUSG00000040016 | 6.367066661 | 4.869320706 | 6.35535943  | 4.02728836  | 5.729556691 |
| ENSMUSG00000040021 | 181.8151258 | 219.815049  | 216.0822206 | 368.0941561 | 259.2624403 |
| ENSMUSG00000040022 | 23.34591109 | 30.60715873 | 33.18909925 | 20.1364418  | 19.33725383 |
| ENSMUSG00000040025 | 83.47931845 | 116.863697  | 86.85657888 | 235.1936403 | 186.926787  |
| ENSMUSG00000040028 | 130.1711406 | 152.3401764 | 161.0024389 | 235.1936403 | 201.2506788 |
| ENSMUSG00000040029 | 31.83533331 | 59.82308296 | 54.37363068 | 57.18749472 | 58.01176149 |
| ENSMUSG00000040033 | 80.64951104 | 94.60394515 | 100.2734488 | 153.0369577 | 107.429188  |
| ENSMUSG00000040034 | 30.4204296  | 28.52030699 | 33.18909925 | 44.30017197 | 44.40406435 |
| ENSMUSG00000040035 | 7.074518513 | 1.391234488 | 2.824604191 | 7.249119049 | 7.161945863 |
| ENSMUSG00000040037 | 6.367066661 | 4.869320706 | 2.824604191 | 4.02728836  | 5.013362104 |
| ENSMUSG00000040040 | 7.781970364 | 13.21672763 | 13.41686991 | 12.08186508 | 9.310529622 |
| ENSMUSG00000040043 | 9.904325918 | 10.43425866 | 12.00456781 | 7.249119049 | 11.45911338 |
| ENSMUSG00000040044 | 81.3569629  | 143.2971522 | 130.6379438 | 132.9005159 | 135.3607768 |
| ENSMUSG00000040046 | 12.73413332 | 4.173703463 | 8.473812573 | 4.832746033 | 10.02672421 |
| ENSMUSG00000040048 | 39.61730367 | 46.60635533 | 52.96132858 | 96.65492065 | 73.05184781 |
| ENSMUSG00000040054 | 25.46826665 | 40.34580014 | 38.83830763 | 49.93837567 | 50.13362104 |
| ENSMUSG00000040061 | 19.10119998 | 27.82468975 | 33.18909925 | 19.33098413 | 21.48583759 |
| ENSMUSG00000040086 | 11.31922962 | 7.651789682 | 9.179963621 | 4.832746033 | 7.87814045  |
| ENSMUSG00000040093 | 5.65961481  | 27.12907251 | 14.829172   | 12.08186508 | 12.17530797 |
| ENSMUSG00000040097 | 13.44158517 | 40.34580014 | 24.71528667 | 37.05105292 | 29.36397804 |
| ENSMUSG00000040102 | 85.601674   | 109.9075245 | 101.6857509 | 139.3441773 | 112.4425501 |
| ENSMUSG00000040111 | 9.196874066 | 4.173703463 | 7.767661525 | 1.610915344 | 8.594335036 |
| ENSMUSG00000040113 | 4.952162959 | 7.651789682 | 9.179963621 | 4.832746033 | 12.17530797 |
| ENSMUSG00000040118 | 9.196874066 | 7.651789682 | 4.943057334 | 4.02728836  | 7.161945863 |
| ENSMUSG00000040123 | 54.47379255 | 91.82147618 | 62.1412922  | 65.24207144 | 67.32229112 |
| ENSMUSG00000040127 | 6.367066661 | 6.956172438 | 7.767661525 | 4.832746033 | 4.297167518 |
| ENSMUSG00000040136 | 8.489422215 | 9.738641413 | 4.236906287 | 6.443661377 | 6.445751277 |
| ENSMUSG00000040139 | 6.367066661 | 15.30357936 | 20.47838039 | 10.47094974 | 11.45911338 |
| ENSMUSG00000040140 | 3.537259256 | 7.651789682 | 5.649208382 | 2.416373016 | 8.594335036 |
| ENSMUSG00000040147 | 4.952162959 | 4.869320706 | 2.118453143 | 1.610915344 | 6.445751277 |
| ENSMUSG00000040154 | 4.952162959 | 5.56493795  | 5.649208382 | 9.665492065 | 7.161945863 |
| ENSMUSG00000040158 | 66.50047402 | 105.7338211 | 103.804204  | 156.2587884 | 130.3474147 |
| ENSMUSG00000040163 | 13.44158517 | 8.347406925 | 5.649208382 | 5.638203705 | 6.445751277 |
| ENSMUSG00000040165 | 21.22355554 | 11.1298759  | 12.71071886 | 9.665492065 | 13.60769714 |
| ENSMUSG00000040167 | 88.43148141 | 115.4724625 | 106.6288082 | 86.98942859 | 83.7947666  |

|                    |             |             |             |             |             |
|--------------------|-------------|-------------|-------------|-------------|-------------|
| ENSMUSG00000040170 | 11.31922962 | 9.043024169 | 9.886114669 | 3.221830688 | 8.594335036 |
| ENSMUSG00000040174 | 25.46826665 | 33.3896277  | 38.83830763 | 42.68925662 | 43.68786977 |
| ENSMUSG00000040177 | 14.14903703 | 19.47728283 | 22.59683353 | 28.9964762  | 24.35061594 |
| ENSMUSG00000040181 | 12.73413332 | 4.869320706 | 5.649208382 | 6.443661377 | 8.594335036 |
| ENSMUSG00000040183 | 8.489422215 | 8.347406925 | 10.59226572 | 7.249119049 | 5.013362104 |
| ENSMUSG00000040187 | 8.489422215 | 5.56493795  | 4.236906287 | 9.665492065 | 7.87814045  |
| ENSMUSG00000040188 | 43.15456293 | 64.69240367 | 55.07978173 | 83.7675979  | 73.05184781 |
| ENSMUSG00000040189 | 7.074518513 | 15.30357936 | 4.236906287 | 6.443661377 | 5.729556691 |
| ENSMUSG00000040195 | 9.196874066 | 13.91234488 | 13.41686991 | 28.19101852 | 29.36397804 |
| ENSMUSG00000040209 | 9.196874066 | 6.956172438 | 5.649208382 | 2.416373016 | 7.87814045  |
| ENSMUSG00000040212 | 72.86754068 | 79.30036579 | 66.37819849 | 78.12939419 | 55.86317773 |
| ENSMUSG00000040213 | 12.02668147 | 15.99919661 | 14.829172   | 12.08186508 | 22.20203218 |
| ENSMUSG00000040220 | 12.02668147 | 13.21672763 | 14.829172   | 16.91461111 | 17.18867007 |
| ENSMUSG00000040225 | 138.6605628 | 162.0788178 | 121.4579802 | 273.0501508 | 206.2640409 |
| ENSMUSG00000040229 | 4.952162959 | 16.69481385 | 7.767661525 | 4.02728836  | 7.87814045  |
| ENSMUSG00000040231 | 7.074518513 | 10.43425866 | 9.886114669 | 7.249119049 | 10.7429188  |
| ENSMUSG00000040234 | 7.074518513 | 6.956172438 | 12.71071886 | 6.443661377 | 11.45911338 |
| ENSMUSG00000040242 | 118.851911  | 153.7314109 | 152.5286263 | 169.1461111 | 152.5494469 |
| ENSMUSG00000040249 | 6.367066661 | 3.478086219 | 6.35535943  | 9.665492065 | 7.161945863 |
| ENSMUSG00000040250 | 118.1444592 | 173.2086937 | 154.6470795 | 204.5862487 | 161.1437819 |
| ENSMUSG00000040253 | 10.61177777 | 21.56413456 | 14.829172   | 70.88027514 | 67.32229112 |
| ENSMUSG00000040254 | 9.196874066 | 10.43425866 | 10.59226572 | 4.832746033 | 8.594335036 |
| ENSMUSG00000040263 | 139.3680147 | 159.2963488 | 144.0548137 | 254.5246244 | 199.8182896 |
| ENSMUSG00000040265 | 8.489422215 | 5.56493795  | 12.71071886 | 6.443661377 | 9.310529622 |
| ENSMUSG00000040268 | 38.20239997 | 50.08444155 | 45.19366706 | 26.58010318 | 35.80972932 |
| ENSMUSG00000040272 | 9.904325918 | 13.21672763 | 12.00456781 | 12.08186508 | 6.445751277 |
| ENSMUSG00000040274 | 32.54278516 | 48.69320706 | 38.83830763 | 59.60386773 | 54.43078856 |
| ENSMUSG00000040276 | 22.63845924 | 26.43345526 | 32.4829482  | 20.1364418  | 15.04008631 |
| ENSMUSG00000040280 | 10.61177777 | 7.651789682 | 6.35535943  | 12.08186508 | 7.87814045  |
| ENSMUSG00000040282 | 14.85648888 | 30.60715873 | 21.18453143 | 19.33098413 | 18.62105924 |
| ENSMUSG00000040283 | 12.02668147 | 6.956172438 | 9.886114669 | 10.47094974 | 8.594335036 |
| ENSMUSG00000040296 | 50.93653329 | 82.77845201 | 65.67204744 | 63.6311561  | 68.0384857  |
| ENSMUSG00000040297 | 70.03773327 | 118.9505487 | 83.32582364 | 163.5079074 | 133.2121931 |
| ENSMUSG00000040302 | 31.83533331 | 61.21431745 | 60.02283906 | 66.04752911 | 53.71459398 |
| ENSMUSG00000040310 | 6.367066661 | 8.347406925 | 4.943057334 | 2.416373016 | 4.297167518 |
| ENSMUSG00000040312 | 7.781970364 | 12.52111039 | 14.12302096 | 27.38556085 | 21.48583759 |
| ENSMUSG00000040322 | 14.85648888 | 9.738641413 | 14.829172   | 11.27640741 | 12.17530797 |
| ENSMUSG00000040325 | 11.31922962 | 15.99919661 | 16.94762515 | 91.01671695 | 66.60609653 |
| ENSMUSG00000040327 | 14.85648888 | 18.78166558 | 12.00456781 | 14.4982381  | 13.60769714 |
| ENSMUSG00000040328 | 65.08557032 | 71.64857611 | 74.85201106 | 91.01671695 | 59.44415067 |
| ENSMUSG00000040329 | 11.31922962 | 5.56493795  | 9.179963621 | 4.02728836  | 5.013362104 |
| ENSMUSG00000040331 | 10.61177777 | 7.651789682 | 5.649208382 | 6.443661377 | 5.013362104 |
| ENSMUSG00000040339 | 7.074518513 | 18.08604834 | 14.12302096 | 4.832746033 | 7.161945863 |

|                    |             |             |             |             |             |
|--------------------|-------------|-------------|-------------|-------------|-------------|
| ENSMUSG00000040340 | 5.65961481  | 7.651789682 | 9.886114669 | 6.443661377 | 2.864778345 |
| ENSMUSG00000040345 | 29.0055259  | 47.30197258 | 38.13215658 | 23.35827249 | 20.05344842 |
| ENSMUSG00000040350 | 8.489422215 | 7.651789682 | 9.179963621 | 16.91461111 | 17.90486466 |
| ENSMUSG00000040351 | 61.54831106 | 116.1680797 | 86.85657888 | 169.1461111 | 150.4008631 |
| ENSMUSG00000040354 | 24.76081479 | 32.69401046 | 32.4829482  | 94.23854763 | 63.0251236  |
| ENSMUSG00000040356 | 31.12788146 | 52.17129328 | 48.7244223  | 76.51847885 | 68.75468029 |
| ENSMUSG00000040359 | 7.781970364 | 20.17290007 | 19.06607829 | 20.1364418  | 21.48583759 |
| ENSMUSG00000040363 | 4.244711108 | 4.173703463 | 2.118453143 | 5.638203705 | 2.148583759 |
| ENSMUSG00000040365 | 29.0055259  | 33.3896277  | 36.71985448 | 95.04400531 | 71.61945863 |
| ENSMUSG00000040370 | 17.68629628 | 25.73783802 | 19.06607829 | 17.72006879 | 30.79636721 |
| ENSMUSG00000040373 | 13.44158517 | 4.869320706 | 9.179963621 | 6.443661377 | 9.310529622 |
| ENSMUSG00000040374 | 29.71297775 | 43.82388636 | 36.01370344 | 62.02024075 | 54.43078856 |
| ENSMUSG00000040380 | 12.02668147 | 22.2597518  | 17.65377619 | 15.30369577 | 15.04008631 |
| ENSMUSG00000040383 | 57.30359995 | 94.60394515 | 84.73812573 | 123.2350238 | 100.2672421 |
| ENSMUSG00000040387 | 7.781970364 | 9.043024169 | 10.59226572 | 7.249119049 | 7.161945863 |
| ENSMUSG00000040389 | 17.68629628 | 34.08524495 | 26.12758877 | 23.35827249 | 19.33725383 |
| ENSMUSG00000040390 | 12.73413332 | 20.86851731 | 21.18453143 | 16.91461111 | 11.45911338 |
| ENSMUSG00000040396 | 111.0699406 | 152.3401764 | 131.3440949 | 152.2315    | 129.6312201 |
| ENSMUSG00000040405 | 16.97884443 | 11.1298759  | 5.649208382 | 8.860034393 | 8.594335036 |
| ENSMUSG00000040407 | 53.7663407  | 66.7792554  | 69.90895373 | 66.85298678 | 74.48423698 |
| ENSMUSG00000040410 | 19.80865184 | 24.34660353 | 40.25060972 | 33.02376456 | 38.67450766 |
| ENSMUSG00000040412 | 9.196874066 | 3.478086219 | 9.886114669 | 5.638203705 | 2.864778345 |
| ENSMUSG00000040413 | 10.61177777 | 10.43425866 | 8.473812573 | 8.860034393 | 10.02672421 |
| ENSMUSG00000040415 | 9.196874066 | 11.82549314 | 7.767661525 | 11.27640741 | 16.47247549 |
| ENSMUSG00000040420 | 8.489422215 | 5.56493795  | 3.530755239 | 5.638203705 | 7.87814045  |
| ENSMUSG00000040423 | 87.72402956 | 136.3409798 | 102.3919019 | 172.3679418 | 133.2121931 |
| ENSMUSG00000040424 | 11.31922962 | 4.869320706 | 9.886114669 | 6.443661377 | 5.729556691 |
| ENSMUSG00000040428 | 22.63845924 | 29.21592424 | 33.89525029 | 121.6241085 | 91.67290705 |
| ENSMUSG00000040430 | 16.97884443 | 29.91154148 | 34.60140134 | 17.72006879 | 14.32389173 |
| ENSMUSG00000040433 | 8.489422215 | 5.56493795  | 8.473812573 | 11.27640741 | 10.02672421 |
| ENSMUSG00000040434 | 19.80865184 | 23.65098629 | 26.12758877 | 50.74383334 | 40.10689684 |
| ENSMUSG00000040435 | 25.46826665 | 40.34580014 | 32.4829482  | 150.6205847 | 89.52432329 |
| ENSMUSG00000040441 | 6.367066661 | 2.086851731 | 5.649208382 | 8.860034393 | 7.87814045  |
| ENSMUSG00000040447 | 24.05336294 | 38.25894841 | 59.31668801 | 19.33098413 | 19.33725383 |
| ENSMUSG00000040451 | 3.537259256 | 5.56493795  | 9.886114669 | 17.72006879 | 12.17530797 |
| ENSMUSG00000040455 | 16.97884443 | 43.82388636 | 33.89525029 | 32.21830688 | 35.09353473 |
| ENSMUSG00000040459 | 1.414903703 | 3.478086219 | 1.412302096 | 1.610915344 | 0           |
| ENSMUSG00000040462 | 36.08004441 | 47.99758982 | 40.25060972 | 29.80193387 | 32.22875639 |
| ENSMUSG00000040463 | 71.45263698 | 94.60394515 | 87.56272992 | 281.1047276 | 186.2105924 |
| ENSMUSG00000040464 | 10.61177777 | 20.17290007 | 23.30298458 | 20.94189947 | 14.32389173 |
| ENSMUSG00000040466 | 34.66514071 | 58.43184848 | 54.37363068 | 28.9964762  | 21.48583759 |
| ENSMUSG00000040467 | 12.73413332 | 15.30357936 | 9.886114669 | 22.55281482 | 23.63442135 |
| ENSMUSG00000040471 | 11.31922962 | 7.651789682 | 7.767661525 | 10.47094974 | 8.594335036 |

|                    |             |             |             |             |             |
|--------------------|-------------|-------------|-------------|-------------|-------------|
| ENSMUSG00000040472 | 12.73413332 | 16.69481385 | 13.41686991 | 10.47094974 | 12.17530797 |
| ENSMUSG00000040473 | 9.196874066 | 11.82549314 | 3.530755239 | 4.832746033 | 5.013362104 |
| ENSMUSG00000040478 | 7.781970364 | 5.56493795  | 4.236906287 | 4.02728836  | 5.729556691 |
| ENSMUSG00000040479 | 10.61177777 | 6.956172438 | 9.886114669 | 5.638203705 | 5.729556691 |
| ENSMUSG00000040481 | 85.601674   | 125.2111039 | 98.15499564 | 145.7878386 | 111.7263555 |
| ENSMUSG00000040482 | 26.1757185  | 54.25814501 | 43.07521391 | 70.88027514 | 58.72795608 |
| ENSMUSG00000040483 | 35.37259256 | 45.91073809 | 38.83830763 | 113.5695318 | 80.21379367 |
| ENSMUSG00000040488 | 7.074518513 | 5.56493795  | 6.35535943  | 7.249119049 | 5.729556691 |
| ENSMUSG00000040505 | 7.074518513 | 9.043024169 | 4.236906287 | 2.416373016 | 6.445751277 |
| ENSMUSG00000040506 | 82.06441475 | 134.9497453 | 103.098053  | 125.6513968 | 108.8615771 |
| ENSMUSG00000040511 | 11.31922962 | 14.60796212 | 16.2414741  | 32.21830688 | 25.06681052 |
| ENSMUSG00000040521 | 9.904325918 | 23.65098629 | 31.77679715 | 33.82922223 | 35.09353473 |
| ENSMUSG00000040525 | 4.952162959 | 8.347406925 | 9.886114669 | 4.02728836  | 7.161945863 |
| ENSMUSG00000040528 | 50.93653329 | 70.25734162 | 60.02283906 | 98.265836   | 63.74131818 |
| ENSMUSG00000040532 | 4.952162959 | 9.043024169 | 5.649208382 | 7.249119049 | 8.594335036 |
| ENSMUSG00000040536 | 8.489422215 | 6.956172438 | 10.59226572 | 3.221830688 | 6.445751277 |
| ENSMUSG00000040537 | 11.31922962 | 6.260555194 | 6.35535943  | 4.02728836  | 7.87814045  |
| ENSMUSG00000040543 | 7.781970364 | 6.956172438 | 7.767661525 | 5.638203705 | 7.87814045  |
| ENSMUSG00000040548 | 16.97884443 | 20.17290007 | 18.35992724 | 19.33098413 | 16.47247549 |
| ENSMUSG00000040549 | 82.7718666  | 113.3856107 | 91.79963621 | 153.0369577 | 133.2121931 |
| ENSMUSG00000040550 | 11.31922962 | 24.34660353 | 17.65377619 | 38.66196826 | 42.97167518 |
| ENSMUSG00000040554 | 8.489422215 | 9.738641413 | 4.943057334 | 4.832746033 | 2.864778345 |
| ENSMUSG00000040557 | 4.244711108 | 5.56493795  | 4.236906287 | 4.832746033 | 4.297167518 |
| ENSMUSG00000040562 | 6.367066661 | 17.39043109 | 7.767661525 | 12.08186508 | 11.45911338 |
| ENSMUSG00000040563 | 6.367066661 | 9.738641413 | 9.179963621 | 5.638203705 | 7.87814045  |
| ENSMUSG00000040564 | 7.074518513 | 4.869320706 | 5.649208382 | 12.08186508 | 10.7429188  |
| ENSMUSG00000040569 | 12.02668147 | 9.738641413 | 9.179963621 | 4.02728836  | 7.161945863 |
| ENSMUSG00000040570 | 5.65961481  | 5.56493795  | 7.061510478 | 4.832746033 | 7.161945863 |
| ENSMUSG00000040591 | 11.31922962 | 11.1298759  | 14.12302096 | 12.08186508 | 10.7429188  |
| ENSMUSG00000040592 | 147.8574369 | 146.7752384 | 155.3532305 | 328.6267302 | 214.8583759 |
| ENSMUSG00000040594 | 8.489422215 | 4.173703463 | 7.061510478 | 5.638203705 | 8.594335036 |
| ENSMUSG00000040596 | 9.904325918 | 6.260555194 | 5.649208382 | 8.860034393 | 10.7429188  |
| ENSMUSG00000040599 | 106.8252295 | 150.2533247 | 151.1163242 | 248.8864207 | 206.2640409 |
| ENSMUSG00000040601 | 7.781970364 | 6.260555194 | 4.943057334 | 4.832746033 | 7.87814045  |
| ENSMUSG00000040606 | 6.367066661 | 7.651789682 | 7.767661525 | 7.249119049 | 6.445751277 |
| ENSMUSG00000040612 | 4.244711108 | 6.260555194 | 4.943057334 | 5.638203705 | 4.297167518 |
| ENSMUSG00000040613 | 51.64398514 | 89.0390072  | 61.43514116 | 128.0677699 | 104.5644096 |
| ENSMUSG00000040614 | 7.074518513 | 6.260555194 | 7.767661525 | 9.665492065 | 7.161945863 |
| ENSMUSG00000040620 | 36.78749627 | 52.86691053 | 43.07521391 | 126.4568545 | 108.1453825 |
| ENSMUSG00000040621 | 16.27139258 | 11.82549314 | 18.35992724 | 22.55281482 | 12.89150255 |
| ENSMUSG00000040624 | 6.367066661 | 8.347406925 | 6.35535943  | 7.249119049 | 7.87814045  |
| ENSMUSG00000040627 | 7.074518513 | 6.260555194 | 6.35535943  | 69.2693598  | 47.2688427  |
| ENSMUSG00000040632 | 8.489422215 | 5.56493795  | 5.649208382 | 8.054576721 | 8.594335036 |

|                    |             |             |             |             |             |
|--------------------|-------------|-------------|-------------|-------------|-------------|
| ENSMUSG00000040640 | 8.489422215 | 6.956172438 | 4.236906287 | 6.443661377 | 5.013362104 |
| ENSMUSG00000040648 | 48.10672589 | 86.95215547 | 71.32125582 | 90.21125927 | 84.51096119 |
| ENSMUSG00000040649 | 5.65961481  | 6.956172438 | 6.35535943  | 8.860034393 | 8.594335036 |
| ENSMUSG00000040652 | 27.5906222  | 52.17129328 | 46.60596915 | 24.16373016 | 28.64778345 |
| ENSMUSG00000040657 | 6.367066661 | 6.260555194 | 8.473812573 | 8.054576721 | 6.445751277 |
| ENSMUSG00000040666 | 9.196874066 | 7.651789682 | 9.886114669 | 6.443661377 | 5.013362104 |
| ENSMUSG00000040667 | 53.7663407  | 78.60474855 | 86.85657888 | 131.2896006 | 117.4559122 |
| ENSMUSG00000040669 | 10.61177777 | 21.56413456 | 23.30298458 | 9.665492065 | 13.60769714 |
| ENSMUSG00000040675 | 16.27139258 | 17.39043109 | 30.36449505 | 70.88027514 | 53.71459398 |
| ENSMUSG00000040681 | 32.54278516 | 48.69320706 | 38.13215658 | 64.43661377 | 50.84981563 |
| ENSMUSG00000040687 | 30.4204296  | 38.95456565 | 43.78136496 | 57.18749472 | 43.68786977 |
| ENSMUSG00000040688 | 21.22355554 | 23.65098629 | 21.89068248 | 97.46037832 | 68.0384857  |
| ENSMUSG00000040690 | 9.196874066 | 5.56493795  | 3.530755239 | 8.860034393 | 9.310529622 |
| ENSMUSG00000040697 | 15.56394073 | 28.52030699 | 14.829172   | 26.58010318 | 35.09353473 |
| ENSMUSG00000040699 | 29.0055259  | 30.60715873 | 43.07521391 | 84.57305557 | 58.01176149 |
| ENSMUSG00000040701 | 16.97884443 | 24.34660353 | 21.89068248 | 23.35827249 | 23.63442135 |
| ENSMUSG00000040703 | 9.904325918 | 4.869320706 | 7.767661525 | 7.249119049 | 7.87814045  |
| ENSMUSG00000040705 | 11.31922962 | 7.651789682 | 9.886114669 | 3.221830688 | 7.161945863 |
| ENSMUSG00000040710 | 58.0110518  | 84.1696865  | 74.85201106 | 123.2350238 | 103.848215  |
| ENSMUSG00000040712 | 14.14903703 | 27.12907251 | 26.12758877 | 24.96918783 | 31.5125618  |
| ENSMUSG00000040713 | 17.68629628 | 31.99839321 | 22.59683353 | 23.35827249 | 18.62105924 |
| ENSMUSG00000040714 | 4.952162959 | 8.347406925 | 9.179963621 | 4.832746033 | 5.729556691 |
| ENSMUSG00000040720 | 94.09109622 | 137.036597  | 97.44884459 | 120.0131931 | 111.7263555 |
| ENSMUSG00000040723 | 90.55383696 | 109.9075245 | 122.8702823 | 194.115299  | 143.2389173 |
| ENSMUSG00000040725 | 137.2456591 | 157.9051143 | 154.6470795 | 309.2957461 | 224.1689055 |
| ENSMUSG00000040726 | 12.73413332 | 8.347406925 | 8.473812573 | 12.08186508 | 4.297167518 |
| ENSMUSG00000040728 | 2.829807405 | 6.956172438 | 8.473812573 | 7.249119049 | 5.013362104 |
| ENSMUSG00000040731 | 142.1978221 | 162.0788178 | 152.5286263 | 298.8247963 | 242.0737702 |
| ENSMUSG00000040732 | 4.952162959 | 2.782468975 | 7.061510478 | 4.02728836  | 7.161945863 |
| ENSMUSG00000040734 | 14.14903703 | 8.347406925 | 8.473812573 | 31.41284921 | 33.66114556 |
| ENSMUSG00000040738 | 57.30359995 | 73.73542784 | 69.90895373 | 90.21125927 | 80.92998826 |
| ENSMUSG00000040746 | 32.54278516 | 58.43184848 | 59.31668801 | 145.7878386 | 131.7798039 |
| ENSMUSG00000040749 | 14.85648888 | 12.52111039 | 16.2414741  | 46.71654498 | 35.80972932 |
| ENSMUSG00000040751 | 83.47931845 | 107.1250555 | 103.098053  | 243.248217  | 189.0753708 |
| ENSMUSG00000040752 | 10.61177777 | 4.173703463 | 5.649208382 | 5.638203705 | 8.594335036 |
| ENSMUSG00000040760 | 33.95768886 | 59.82308296 | 67.79050059 | 45.91108731 | 50.84981563 |
| ENSMUSG00000040761 | 31.83533331 | 52.86691053 | 38.83830763 | 101.4876667 | 89.52432329 |
| ENSMUSG00000040767 | 25.46826665 | 26.43345526 | 26.83373982 | 28.19101852 | 32.94495097 |
| ENSMUSG00000040771 | 30.4204296  | 37.56333116 | 44.48751601 | 165.1188228 | 126.0502472 |
| ENSMUSG00000040774 | 106.8252295 | 166.9481385 | 153.9409284 | 136.1223466 | 131.0636093 |
| ENSMUSG00000040782 | 70.74518513 | 77.9091313  | 86.15042783 | 135.3168889 | 133.9283876 |
| ENSMUSG00000040785 | 25.46826665 | 38.95456565 | 50.84287544 | 35.44013757 | 40.10689684 |
| ENSMUSG00000040795 | 24.05336294 | 27.82468975 | 25.42143772 | 28.9964762  | 38.67450766 |

|                    |             |             |             |             |             |
|--------------------|-------------|-------------|-------------|-------------|-------------|
| ENSMUSG00000040797 | 8.489422215 | 4.173703463 | 5.649208382 | 8.054576721 | 7.87814045  |
| ENSMUSG00000040809 | 14.14903703 | 15.30357936 | 12.71071886 | 11.27640741 | 14.32389173 |
| ENSMUSG00000040811 | 4.244711108 | 6.260555194 | 4.236906287 | 9.665492065 | 8.594335036 |
| ENSMUSG00000040812 | 9.196874066 | 7.651789682 | 12.00456781 | 11.27640741 | 6.445751277 |
| ENSMUSG00000040813 | 8.489422215 | 10.43425866 | 10.59226572 | 14.4982381  | 13.60769714 |
| ENSMUSG00000040818 | 92.67619252 | 132.1672763 | 112.2780166 | 144.982381  | 105.2806042 |
| ENSMUSG00000040820 | 11.31922962 | 19.47728283 | 9.179963621 | 8.054576721 | 10.02672421 |
| ENSMUSG00000040829 | 4.244711108 | 9.738641413 | 9.179963621 | 11.27640741 | 10.7429188  |
| ENSMUSG00000040836 | 3.537259256 | 8.347406925 | 6.35535943  | 4.02728836  | 7.87814045  |
| ENSMUSG00000040838 | 11.31922962 | 11.1298759  | 7.061510478 | 7.249119049 | 10.02672421 |
| ENSMUSG00000040842 | 37.49494812 | 66.08363816 | 57.90438592 | 186.0607223 | 139.6579443 |
| ENSMUSG00000040843 | 58.71850365 | 88.34338996 | 65.67204744 | 98.265836   | 93.82149081 |
| ENSMUSG00000040848 | 23.34591109 | 54.25814501 | 49.43057334 | 55.57657937 | 51.56601022 |
| ENSMUSG00000040850 | 114.6071999 | 180.8604834 | 164.5331941 | 125.6513968 | 112.4425501 |
| ENSMUSG00000040855 | 4.952162959 | 4.173703463 | 4.236906287 | 3.221830688 | 7.161945863 |
| ENSMUSG00000040856 | 7.781970364 | 5.56493795  | 1.412302096 | 9.665492065 | 7.161945863 |
| ENSMUSG00000040857 | 13.44158517 | 20.17290007 | 26.12758877 | 36.24559524 | 32.22875639 |
| ENSMUSG00000040859 | 72.86754068 | 109.9075245 | 92.50578726 | 85.37851324 | 75.20043157 |
| ENSMUSG00000040860 | 8.489422215 | 15.30357936 | 14.12302096 | 12.88732275 | 11.45911338 |
| ENSMUSG00000040865 | 79.23460734 | 98.77764862 | 113.6903187 | 226.3336059 | 159.7113928 |
| ENSMUSG00000040866 | 6.367066661 | 6.956172438 | 3.530755239 | 6.443661377 | 5.729556691 |
| ENSMUSG00000040867 | 7.781970364 | 8.347406925 | 11.29841676 | 15.30369577 | 12.17530797 |
| ENSMUSG00000040875 | 5.65961481  | 4.869320706 | 8.473812573 | 7.249119049 | 5.729556691 |
| ENSMUSG00000040877 | 28.29807405 | 40.34580014 | 37.42600553 | 82.96214023 | 69.47087488 |
| ENSMUSG00000040883 | 4.952162959 | 10.43425866 | 5.649208382 | 8.054576721 | 4.297167518 |
| ENSMUSG00000040896 | 7.781970364 | 4.173703463 | 9.886114669 | 7.249119049 | 5.729556691 |
| ENSMUSG00000040899 | 30.4204296  | 45.21512085 | 43.07521391 | 19.33098413 | 22.20203218 |
| ENSMUSG00000040904 | 0           | 0           | 0           | 0           | 0           |
| ENSMUSG00000040907 | 8.489422215 | 6.956172438 | 7.061510478 | 3.221830688 | 6.445751277 |
| ENSMUSG00000040913 | 43.86201478 | 87.64777272 | 64.25974535 | 66.85298678 | 76.63282074 |
| ENSMUSG00000040918 | 13.44158517 | 19.47728283 | 19.06607829 | 43.49471429 | 50.84981563 |
| ENSMUSG00000040919 | 12.73413332 | 8.347406925 | 9.179963621 | 4.02728836  | 8.594335036 |
| ENSMUSG00000040928 | 89.84638511 | 118.2549314 | 110.1595635 | 224.7226905 | 181.1972303 |
| ENSMUSG00000040929 | 21.22355554 | 36.86771392 | 37.42600553 | 28.9964762  | 36.5259239  |
| ENSMUSG00000040935 | 6.367066661 | 4.173703463 | 6.35535943  | 7.249119049 | 7.161945863 |
| ENSMUSG00000040936 | 12.02668147 | 9.043024169 | 11.29841676 | 11.27640741 | 8.594335036 |
| ENSMUSG00000040938 | 7.074518513 | 5.56493795  | 5.649208382 | 4.832746033 | 6.445751277 |
| ENSMUSG00000040940 | 75.69734809 | 86.25653823 | 83.32582364 | 147.398754  | 125.3340526 |
| ENSMUSG00000040943 | 31.83533331 | 50.08444155 | 39.54445867 | 89.4058016  | 74.48423698 |
| ENSMUSG00000040945 | 19.10119998 | 20.86851731 | 22.59683353 | 73.29664816 | 50.84981563 |
| ENSMUSG00000040950 | 2.122355554 | 7.651789682 | 9.179963621 | 8.054576721 | 7.161945863 |
| ENSMUSG00000040952 | 107.5326814 | 134.254128  | 142.6425116 | 312.5175768 | 231.3308514 |
| ENSMUSG00000040957 | 8.489422215 | 5.56493795  | 9.179963621 | 4.832746033 | 2.864778345 |

|                    |             |             |             |             |             |
|--------------------|-------------|-------------|-------------|-------------|-------------|
| ENSMUSG00000040963 | 6.367066661 | 4.173703463 | 3.530755239 | 3.221830688 | 10.02672421 |
| ENSMUSG00000040964 | 11.31922962 | 5.56493795  | 4.236906287 | 4.832746033 | 9.310529622 |
| ENSMUSG00000040969 | 5.65961481  | 5.56493795  | 9.179963621 | 3.221830688 | 4.297167518 |
| ENSMUSG00000040985 | 11.31922962 | 6.956172438 | 7.767661525 | 4.832746033 | 4.297167518 |
| ENSMUSG00000040987 | 13.44158517 | 4.869320706 | 6.35535943  | 8.054576721 | 5.013362104 |
| ENSMUSG00000040990 | 41.73965922 | 59.82308296 | 53.66747963 | 51.54929101 | 42.25548059 |
| ENSMUSG00000040997 | 60.13340736 | 102.2557348 | 74.14586002 | 112.7640741 | 90.24051788 |
| ENSMUSG00000040998 | 4.952162959 | 4.173703463 | 8.473812573 | 10.47094974 | 2.864778345 |
| ENSMUSG00000041014 | 10.61177777 | 5.56493795  | 6.35535943  | 2.416373016 | 7.161945863 |
| ENSMUSG00000041020 | 3.537259256 | 4.173703463 | 5.649208382 | 5.638203705 | 6.445751277 |
| ENSMUSG00000041025 | 7.074518513 | 6.260555194 | 11.29841676 | 4.02728836  | 7.87814045  |
| ENSMUSG00000041028 | 47.39927403 | 61.9099347  | 62.84744325 | 134.5114312 | 88.80812871 |
| ENSMUSG00000041040 | 35.37259256 | 47.99758982 | 39.54445867 | 38.66196826 | 42.97167518 |
| ENSMUSG00000041058 | 21.93100739 | 36.17209668 | 24.00913562 | 37.05105292 | 22.91822676 |
| ENSMUSG00000041064 | 23.34591109 | 22.2597518  | 17.65377619 | 24.96918783 | 24.35061594 |
| ENSMUSG00000041073 | 15.56394073 | 12.52111039 | 19.77222934 | 4.832746033 | 6.445751277 |
| ENSMUSG00000041079 | 19.80865184 | 27.82468975 | 19.77222934 | 25.77464551 | 23.63442135 |
| ENSMUSG00000041096 | 4.952162959 | 17.39043109 | 9.886114669 | 32.21830688 | 17.18867007 |
| ENSMUSG00000041112 | 19.80865184 | 29.21592424 | 40.95676077 | 45.10562964 | 47.98503729 |
| ENSMUSG00000041115 | 2.122355554 | 4.173703463 | 2.118453143 | 2.416373016 | 4.297167518 |
| ENSMUSG00000041119 | 7.074518513 | 6.260555194 | 3.530755239 | 5.638203705 | 4.297167518 |
| ENSMUSG00000041124 | 16.27139258 | 22.95536904 | 31.0706461  | 27.38556085 | 27.21539428 |
| ENSMUSG00000041126 | 74.28244438 | 99.47326586 | 96.0365425  | 72.49119049 | 51.56601022 |
| ENSMUSG00000041132 | 21.93100739 | 42.43265187 | 33.89525029 | 97.46037832 | 75.91662615 |
| ENSMUSG00000041133 | 45.27691848 | 66.7792554  | 54.37363068 | 125.6513968 | 88.09193412 |
| ENSMUSG00000041134 | 5.65961481  | 6.956172438 | 5.649208382 | 4.02728836  | 3.580972932 |
| ENSMUSG00000041135 | 54.47379255 | 93.21271067 | 86.85657888 | 113.5695318 | 92.38910164 |
| ENSMUSG00000041138 | 6.367066661 | 3.478086219 | 6.35535943  | 2.416373016 | 6.445751277 |
| ENSMUSG00000041143 | 13.44158517 | 23.65098629 | 19.77222934 | 45.91108731 | 38.67450766 |
| ENSMUSG00000041147 | 9.904325918 | 14.60796212 | 13.41686991 | 18.52552646 | 10.02672421 |
| ENSMUSG00000041164 | 43.86201478 | 73.0398106  | 72.02740687 | 169.9515688 | 127.4826364 |
| ENSMUSG00000041180 | 4.952162959 | 4.173703463 | 4.236906287 | 3.221830688 | 4.297167518 |
| ENSMUSG00000041187 | 74.28244438 | 92.51709342 | 92.50578726 | 192.5043836 | 141.0903335 |
| ENSMUSG00000041193 | 7.781970364 | 4.173703463 | 7.767661525 | 5.638203705 | 7.161945863 |
| ENSMUSG00000041202 | 12.02668147 | 4.869320706 | 7.767661525 | 6.443661377 | 6.445751277 |
| ENSMUSG00000041215 | 33.25023701 | 41.04141738 | 27.53989086 | 71.68573282 | 52.2822048  |
| ENSMUSG00000041216 | 8.489422215 | 11.82549314 | 9.886114669 | 5.638203705 | 5.013362104 |
| ENSMUSG00000041219 | 42.44711108 | 55.6493795  | 55.07978173 | 194.9207566 | 156.1304198 |
| ENSMUSG00000041220 | 14.14903703 | 18.08604834 | 10.59226572 | 11.27640741 | 15.04008631 |
| ENSMUSG00000041225 | 41.73965922 | 73.73542784 | 53.66747963 | 76.51847885 | 75.20043157 |
| ENSMUSG00000041229 | 24.05336294 | 27.12907251 | 27.53989086 | 26.58010318 | 27.93158887 |
| ENSMUSG00000041231 | 19.10119998 | 38.25894841 | 31.77679715 | 27.38556085 | 39.39070225 |
| ENSMUSG00000041235 | 42.44711108 | 59.82308296 | 63.5535943  | 66.85298678 | 74.48423698 |



|                    |             |             |             |             |             |
|--------------------|-------------|-------------|-------------|-------------|-------------|
| ENSMUSG00000041237 | 7.074518513 | 4.869320706 | 8.473812573 | 6.443661377 | 9.310529622 |
| ENSMUSG00000041238 | 13.44158517 | 4.869320706 | 10.59226572 | 8.054576721 | 5.013362104 |
| ENSMUSG00000041241 | 41.73965922 | 63.99678643 | 66.37819849 | 81.35122488 | 73.76804239 |
| ENSMUSG00000041245 | 4.244711108 | 2.782468975 | 6.35535943  | 4.832746033 | 2.148583759 |
| ENSMUSG00000041258 | 49.52162959 | 61.21431745 | 65.67204744 | 66.04752911 | 75.20043157 |
| ENSMUSG00000041263 | 7.781970364 | 15.30357936 | 12.00456781 | 9.665492065 | 10.7429188  |
| ENSMUSG00000041264 | 52.35143699 | 73.73542784 | 77.67661525 | 169.1461111 | 125.3340526 |
| ENSMUSG00000041268 | 9.196874066 | 6.260555194 | 6.35535943  | 4.02728836  | 7.161945863 |
| ENSMUSG00000041272 | 4.952162959 | 8.347406925 | 8.473812573 | 2.416373016 | 2.148583759 |
| ENSMUSG00000041278 | 40.32475552 | 76.51789682 | 72.02740687 | 74.10210583 | 71.61945863 |
| ENSMUSG00000041298 | 4.952162959 | 10.43425866 | 7.061510478 | 0.805457672 | 4.297167518 |
| ENSMUSG00000041301 | 11.31922962 | 4.173703463 | 7.767661525 | 3.221830688 | 5.729556691 |
| ENSMUSG00000041309 | 4.244711108 | 2.782468975 | 7.061510478 | 2.416373016 | 4.297167518 |
| ENSMUSG00000041313 | 36.78749627 | 58.43184848 | 43.07521391 | 173.1733995 | 114.5911338 |
| ENSMUSG00000041319 | 15.56394073 | 43.82388636 | 28.95219296 | 32.21830688 | 22.91822676 |
| ENSMUSG00000041324 | 5.65961481  | 4.869320706 | 8.473812573 | 5.638203705 | 9.310529622 |
| ENSMUSG00000041328 | 117.4370073 | 141.2103005 | 148.29172   | 278.6883545 | 200.5344842 |
| ENSMUSG00000041329 | 7.074518513 | 10.43425866 | 11.29841676 | 4.02728836  | 9.310529622 |
| ENSMUSG00000041341 | 45.98437033 | 84.86530374 | 91.09348516 | 131.2896006 | 116.023523  |
| ENSMUSG00000041343 | 14.14903703 | 41.73703463 | 30.36449505 | 50.74383334 | 35.80972932 |
| ENSMUSG00000041346 | 76.40479994 | 127.9935729 | 95.33039145 | 186.8661799 | 161.8599765 |
| ENSMUSG00000041351 | 7.781970364 | 1.391234488 | 4.943057334 | 6.443661377 | 8.594335036 |
| ENSMUSG00000041353 | 12.73413332 | 21.56413456 | 18.35992724 | 15.30369577 | 22.20203218 |
| ENSMUSG00000041354 | 24.05336294 | 40.34580014 | 39.54445867 | 54.7711217  | 52.2822048  |
| ENSMUSG00000041355 | 41.73965922 | 53.56252777 | 50.84287544 | 68.46390213 | 63.74131818 |
| ENSMUSG00000041359 | 7.074518513 | 9.738641413 | 6.35535943  | 4.832746033 | 9.310529622 |
| ENSMUSG00000041361 | 0           | 0.695617244 | 0           | 0           | 0.716194586 |
| ENSMUSG00000041362 | 13.44158517 | 1.391234488 | 7.061510478 | 1.610915344 | 5.729556691 |
| ENSMUSG00000041375 | 19.10119998 | 22.95536904 | 24.00913562 | 56.38203705 | 35.09353473 |
| ENSMUSG00000041377 | 10.61177777 | 7.651789682 | 12.71071886 | 8.860034393 | 8.594335036 |
| ENSMUSG00000041380 | 4.952162959 | 2.086851731 | 0.706151048 | 1.610915344 | 2.864778345 |
| ENSMUSG00000041390 | 14.85648888 | 25.04222078 | 24.00913562 | 64.43661377 | 49.41742646 |
| ENSMUSG00000041396 | 20.51610369 | 34.08524495 | 35.30755239 | 40.2728836  | 38.67450766 |
| ENSMUSG00000041406 | 24.76081479 | 38.25894841 | 32.4829482  | 35.44013757 | 39.39070225 |
| ENSMUSG00000041408 | 43.15456293 | 89.0390072  | 47.3121202  | 132.0950582 | 121.0368851 |
| ENSMUSG00000041415 | 62.96321476 | 86.95215547 | 93.91808935 | 118.4022778 | 107.429188  |
| ENSMUSG00000041417 | 72.16008883 | 90.43024169 | 69.90895373 | 85.37851324 | 78.06520991 |
| ENSMUSG00000041420 | 7.781970364 | 9.738641413 | 7.767661525 | 12.88732275 | 10.7429188  |
| ENSMUSG00000041423 | 14.85648888 | 10.43425866 | 6.35535943  | 10.47094974 | 7.87814045  |
| ENSMUSG00000041426 | 14.85648888 | 35.47647943 | 28.24604191 | 23.35827249 | 26.49919969 |
| ENSMUSG00000041431 | 14.14903703 | 18.08604834 | 9.179963621 | 92.62763229 | 72.33565322 |
| ENSMUSG00000041439 | 7.074518513 | 13.21672763 | 9.886114669 | 12.88732275 | 9.310529622 |
| ENSMUSG00000041440 | 9.904325918 | 11.82549314 | 14.829172   | 6.443661377 | 5.013362104 |

|                    |             |             |             |             |             |
|--------------------|-------------|-------------|-------------|-------------|-------------|
| ENSMUSG00000041444 | 9.196874066 | 8.347406925 | 7.061510478 | 7.249119049 | 3.580972932 |
| ENSMUSG00000041453 | 2.122355554 | 9.043024169 | 2.118453143 | 4.832746033 | 7.161945863 |
| ENSMUSG00000041459 | 65.08557032 | 97.38641413 | 77.67661525 | 194.9207566 | 166.157144  |
| ENSMUSG00000041460 | 10.61177777 | 4.173703463 | 8.473812573 | 4.02728836  | 6.445751277 |
| ENSMUSG00000041476 | 6.367066661 | 3.478086219 | 4.943057334 | 3.221830688 | 7.161945863 |
| ENSMUSG00000041477 | 13.44158517 | 16.69481385 | 20.47838039 | 20.94189947 | 22.20203218 |
| ENSMUSG00000041479 | 13.44158517 | 3.478086219 | 2.824604191 | 8.054576721 | 7.87814045  |
| ENSMUSG00000041481 | 32.54278516 | 57.04061399 | 34.60140134 | 133.7059736 | 71.61945863 |
| ENSMUSG00000041482 | 7.074518513 | 3.478086219 | 6.35535943  | 4.832746033 | 9.310529622 |
| ENSMUSG00000041483 | 46.69182218 | 73.0398106  | 69.20280268 | 111.1531587 | 85.22715578 |
| ENSMUSG00000041488 | 9.196874066 | 5.56493795  | 4.943057334 | 6.443661377 | 7.161945863 |
| ENSMUSG00000041498 | 35.37259256 | 50.7800588  | 50.13672439 | 45.91108731 | 55.14698315 |
| ENSMUSG00000041506 | 48.81417774 | 74.43104508 | 67.79050059 | 134.5114312 | 117.4559122 |
| ENSMUSG00000041512 | 13.44158517 | 8.347406925 | 5.649208382 | 10.47094974 | 5.013362104 |
| ENSMUSG00000041528 | 16.27139258 | 13.21672763 | 19.06607829 | 11.27640741 | 7.161945863 |
| ENSMUSG00000041530 | 38.90985182 | 39.6501829  | 45.19366706 | 49.93837567 | 38.67450766 |
| ENSMUSG00000041536 | 7.781970364 | 7.651789682 | 5.649208382 | 7.249119049 | 4.297167518 |
| ENSMUSG00000041538 | 46.69182218 | 57.04061399 | 64.96589639 | 97.46037832 | 89.52432329 |
| ENSMUSG00000041540 | 4.244711108 | 4.869320706 | 7.061510478 | 7.249119049 | 7.87814045  |
| ENSMUSG00000041544 | 7.074518513 | 6.956172438 | 6.35535943  | 6.443661377 | 5.729556691 |
| ENSMUSG00000041560 | 44.56946663 | 73.0398106  | 50.13672439 | 132.9005159 | 104.5644096 |
| ENSMUSG00000041565 | 3.537259256 | 6.260555194 | 4.943057334 | 4.832746033 | 6.445751277 |
| ENSMUSG00000041570 | 28.29807405 | 50.7800588  | 50.84287544 | 68.46390213 | 55.14698315 |
| ENSMUSG00000041578 | 7.074518513 | 3.478086219 | 5.649208382 | 7.249119049 | 8.594335036 |
| ENSMUSG00000041592 | 4.244711108 | 4.869320706 | 6.35535943  | 6.443661377 | 0.716194586 |
| ENSMUSG00000041594 | 5.65961481  | 10.43425866 | 11.29841676 | 14.4982381  | 12.17530797 |
| ENSMUSG00000041605 | 9.904325918 | 8.347406925 | 9.886114669 | 4.832746033 | 5.729556691 |
| ENSMUSG00000041607 | 52.35143699 | 73.73542784 | 66.37819849 | 66.04752911 | 54.43078856 |
| ENSMUSG00000041609 | 4.244711108 | 2.782468975 | 7.061510478 | 6.443661377 | 7.161945863 |
| ENSMUSG00000041617 | 7.074518513 | 12.52111039 | 9.886114669 | 4.02728836  | 5.729556691 |
| ENSMUSG00000041623 | 103.9954221 | 176.6867799 | 139.8179075 | 225.5281482 | 187.6429816 |
| ENSMUSG00000041624 | 7.781970364 | 6.956172438 | 5.649208382 | 1.610915344 | 5.013362104 |
| ENSMUSG00000041625 | 16.97884443 | 24.34660353 | 16.2414741  | 20.1364418  | 22.20203218 |
| ENSMUSG00000041633 | 4.244711108 | 4.173703463 | 3.530755239 | 3.221830688 | 1.432389173 |
| ENSMUSG00000041638 | 98.33580733 | 162.0788178 | 133.462548  | 205.3917064 | 153.9818361 |
| ENSMUSG00000041642 | 130.8785925 | 141.9059177 | 150.4101732 | 68.46390213 | 69.47087488 |
| ENSMUSG00000041644 | 9.904325918 | 6.260555194 | 10.59226572 | 5.638203705 | 10.02672421 |
| ENSMUSG00000041645 | 156.3468591 | 178.7736317 | 145.4671158 | 262.5792011 | 202.6830679 |
| ENSMUSG00000041649 | 4.952162959 | 2.782468975 | 4.236906287 | 2.416373016 | 6.445751277 |
| ENSMUSG00000041650 | 22.63845924 | 29.91154148 | 21.89068248 | 23.35827249 | 25.78300511 |
| ENSMUSG00000041654 | 21.93100739 | 29.91154148 | 30.36449505 | 44.30017197 | 33.66114556 |
| ENSMUSG00000041658 | 1.414903703 | 6.260555194 | 4.236906287 | 6.443661377 | 7.161945863 |
| ENSMUSG00000041669 | 9.196874066 | 1.391234488 | 7.767661525 | 9.665492065 | 6.445751277 |

|                    |             |             |             |             |             |
|--------------------|-------------|-------------|-------------|-------------|-------------|
| ENSMUSG00000041670 | 7.781970364 | 13.21672763 | 8.473812573 | 7.249119049 | 5.013362104 |
| ENSMUSG00000041671 | 12.73413332 | 27.12907251 | 21.89068248 | 16.91461111 | 18.62105924 |
| ENSMUSG00000041673 | 24.76081479 | 37.56333116 | 37.42600553 | 30.60739154 | 19.33725383 |
| ENSMUSG00000041684 | 3.537259256 | 9.738641413 | 5.649208382 | 11.27640741 | 9.310529622 |
| ENSMUSG00000041685 | 16.27139258 | 36.17209668 | 28.24604191 | 37.05105292 | 42.97167518 |
| ENSMUSG00000041688 | 2.829807405 | 4.869320706 | 4.236906287 | 1.610915344 | 5.013362104 |
| ENSMUSG00000041696 | 8.489422215 | 5.56493795  | 5.649208382 | 6.443661377 | 2.864778345 |
| ENSMUSG00000041698 | 7.781970364 | 6.956172438 | 7.767661525 | 7.249119049 | 4.297167518 |
| ENSMUSG00000041708 | 8.489422215 | 5.56493795  | 4.236906287 | 5.638203705 | 4.297167518 |
| ENSMUSG00000041718 | 7.074518513 | 11.1298759  | 5.649208382 | 17.72006879 | 20.769643   |
| ENSMUSG00000041720 | 120.9742666 | 175.9911627 | 144.0548137 | 136.1223466 | 128.9150255 |
| ENSMUSG00000041729 | 9.196874066 | 4.869320706 | 5.649208382 | 8.054576721 | 6.445751277 |
| ENSMUSG00000041730 | 5.65961481  | 6.260555194 | 9.179963621 | 4.02728836  | 4.297167518 |
| ENSMUSG00000041731 | 7.074518513 | 4.173703463 | 7.767661525 | 2.416373016 | 5.013362104 |
| ENSMUSG00000041733 | 36.08004441 | 67.47487265 | 55.07978173 | 103.9040397 | 70.90326405 |
| ENSMUSG00000041734 | 9.904325918 | 6.260555194 | 5.649208382 | 3.221830688 | 10.7429188  |
| ENSMUSG00000041740 | 152.102148  | 176.6867799 | 162.414741  | 168.3406535 | 141.8065281 |
| ENSMUSG00000041741 | 7.781970364 | 8.347406925 | 7.767661525 | 9.665492065 | 4.297167518 |
| ENSMUSG00000041750 | 4.952162959 | 12.52111039 | 11.29841676 | 8.860034393 | 6.445751277 |
| ENSMUSG00000041757 | 11.31922962 | 6.956172438 | 7.061510478 | 6.443661377 | 5.729556691 |
| ENSMUSG00000041762 | 26.1757185  | 38.25894841 | 37.42600553 | 20.1364418  | 22.91822676 |
| ENSMUSG00000041763 | 91.26128881 | 118.2549314 | 103.098053  | 205.3917064 | 173.3190899 |
| ENSMUSG00000041769 | 72.86754068 | 90.43024169 | 92.50578726 | 82.96214023 | 88.09193412 |
| ENSMUSG00000041771 | 9.196874066 | 4.173703463 | 6.35535943  | 4.02728836  | 5.729556691 |
| ENSMUSG00000041774 | 9.904325918 | 8.347406925 | 10.59226572 | 9.665492065 | 10.7429188  |
| ENSMUSG00000041777 | 36.78749627 | 65.38802092 | 56.49208382 | 47.52200265 | 45.83645353 |
| ENSMUSG00000041782 | 7.074518513 | 3.478086219 | 4.943057334 | 86.18397091 | 50.84981563 |
| ENSMUSG00000041794 | 3.537259256 | 5.56493795  | 9.179963621 | 1.610915344 | 7.161945863 |
| ENSMUSG00000041798 | 9.196874066 | 9.738641413 | 12.00456781 | 7.249119049 | 12.17530797 |
| ENSMUSG00000041815 | 118.851911  | 146.7752384 | 124.9887355 | 219.0844868 | 151.8332523 |
| ENSMUSG00000041817 | 4.952162959 | 5.56493795  | 4.943057334 | 5.638203705 | 9.310529622 |
| ENSMUSG00000041827 | 35.37259256 | 41.04141738 | 41.66291182 | 260.1628281 | 169.0219224 |
| ENSMUSG00000041828 | 9.904325918 | 9.043024169 | 6.35535943  | 4.832746033 | 7.161945863 |
| ENSMUSG00000041831 | 13.44158517 | 8.347406925 | 9.179963621 | 17.72006879 | 15.04008631 |
| ENSMUSG00000041836 | 8.489422215 | 2.782468975 | 7.767661525 | 7.249119049 | 7.161945863 |
| ENSMUSG00000041842 | 7.074518513 | 8.347406925 | 8.473812573 | 6.443661377 | 5.729556691 |
| ENSMUSG00000041845 | 6.367066661 | 6.260555194 | 6.35535943  | 5.638203705 | 13.60769714 |
| ENSMUSG00000041846 | 155.6394073 | 173.9043109 | 180.0685172 | 306.0739154 | 223.4527109 |
| ENSMUSG00000041852 | 9.904325918 | 11.1298759  | 13.41686991 | 7.249119049 | 10.02672421 |
| ENSMUSG00000041857 | 6.367066661 | 9.043024169 | 8.473812573 | 6.443661377 | 7.161945863 |
| ENSMUSG00000041859 | 37.49494812 | 43.82388636 | 32.4829482  | 174.7843148 | 126.0502472 |
| ENSMUSG00000041870 | 105.4103258 | 164.8612868 | 141.9363606 | 173.1733995 | 164.7247549 |
| ENSMUSG00000041879 | 48.10672589 | 83.47406925 | 83.32582364 | 90.21125927 | 80.21379367 |

|                    |             |             |             |             |             |
|--------------------|-------------|-------------|-------------|-------------|-------------|
| ENSMUSG00000041881 | 54.47379255 | 77.9091313  | 73.43970897 | 277.0774392 | 190.50776   |
| ENSMUSG00000041890 | 24.76081479 | 27.82468975 | 24.71528667 | 25.77464551 | 20.769643   |
| ENSMUSG00000041891 | 6.367066661 | 7.651789682 | 5.649208382 | 7.249119049 | 2.864778345 |
| ENSMUSG00000041895 | 4.952162959 | 7.651789682 | 8.473812573 | 4.832746033 | 5.729556691 |
| ENSMUSG00000041912 | 4.952162959 | 8.347406925 | 10.59226572 | 4.02728836  | 9.310529622 |
| ENSMUSG00000041920 | 17.68629628 | 13.21672763 | 11.29841676 | 88.60034393 | 69.47087488 |
| ENSMUSG00000041921 | 9.904325918 | 11.82549314 | 14.829172   | 10.47094974 | 9.310529622 |
| ENSMUSG00000041923 | 8.489422215 | 4.173703463 | 7.061510478 | 2.416373016 | 6.445751277 |
| ENSMUSG00000041926 | 14.14903703 | 19.47728283 | 16.2414741  | 27.38556085 | 32.94495097 |
| ENSMUSG00000041936 | 3.537259256 | 7.651789682 | 8.473812573 | 11.27640741 | 12.89150255 |
| ENSMUSG00000041939 | 9.904325918 | 13.21672763 | 11.29841676 | 20.94189947 | 27.21539428 |
| ENSMUSG00000041945 | 2.829807405 | 10.43425866 | 14.829172   | 7.249119049 | 10.7429188  |
| ENSMUSG00000041954 | 23.34591109 | 26.43345526 | 30.36449505 | 17.72006879 | 20.05344842 |
| ENSMUSG00000041957 | 9.904325918 | 8.347406925 | 9.886114669 | 7.249119049 | 10.02672421 |
| ENSMUSG00000041958 | 34.66514071 | 57.73623123 | 62.1412922  | 42.68925662 | 43.68786977 |
| ENSMUSG00000041959 | 127.3413332 | 135.6453625 | 132.756397  | 55.57657937 | 64.45751277 |
| ENSMUSG00000041961 | 3.537259256 | 9.043024169 | 7.061510478 | 28.9964762  | 17.90486466 |
| ENSMUSG00000041966 | 26.1757185  | 43.12826911 | 39.54445867 | 33.82922223 | 32.94495097 |
| ENSMUSG00000041975 | 23.34591109 | 38.95456565 | 40.95676077 | 29.80193387 | 33.66114556 |
| ENSMUSG00000041977 | 4.244711108 | 3.478086219 | 6.35535943  | 1.610915344 | 2.148583759 |
| ENSMUSG00000041986 | 7.074518513 | 6.260555194 | 9.886114669 | 7.249119049 | 8.594335036 |
| ENSMUSG00000041991 | 13.44158517 | 9.043024169 | 6.35535943  | 7.249119049 | 5.013362104 |
| ENSMUSG00000041997 | 70.03773327 | 96.69079689 | 76.26431316 | 132.9005159 | 88.80812871 |
| ENSMUSG00000042002 | 6.367066661 | 7.651789682 | 9.179963621 | 6.443661377 | 6.445751277 |
| ENSMUSG00000042010 | 11.31922962 | 8.347406925 | 11.29841676 | 11.27640741 | 11.45911338 |
| ENSMUSG00000042015 | 13.44158517 | 21.56413456 | 20.47838039 | 12.88732275 | 17.18867007 |
| ENSMUSG00000042032 | 7.781970364 | 16.69481385 | 15.53532305 | 14.4982381  | 12.89150255 |
| ENSMUSG00000042035 | 6.367066661 | 6.956172438 | 2.118453143 | 7.249119049 | 2.864778345 |
| ENSMUSG00000042042 | 12.02668147 | 25.04222078 | 21.89068248 | 17.72006879 | 17.90486466 |
| ENSMUSG00000042046 | 16.27139258 | 19.47728283 | 19.77222934 | 14.4982381  | 13.60769714 |
| ENSMUSG00000042055 | 13.44158517 | 20.17290007 | 12.00456781 | 37.05105292 | 25.78300511 |
| ENSMUSG00000042063 | 46.69182218 | 86.95215547 | 64.96589639 | 65.24207144 | 63.74131818 |
| ENSMUSG00000042064 | 0.707451851 | 0.695617244 | 0.706151048 | 0           | 0.716194586 |
| ENSMUSG00000042066 | 7.074518513 | 4.869320706 | 4.943057334 | 5.638203705 | 7.87814045  |
| ENSMUSG00000042073 | 9.196874066 | 14.60796212 | 14.829172   | 13.69278043 | 12.17530797 |
| ENSMUSG00000042078 | 4.244711108 | 6.260555194 | 7.061510478 | 4.02728836  | 8.594335036 |
| ENSMUSG00000042079 | 58.0110518  | 68.86610713 | 61.43514116 | 69.2693598  | 47.2688427  |
| ENSMUSG00000042096 | 7.074518513 | 5.56493795  | 8.473812573 | 8.054576721 | 9.310529622 |
| ENSMUSG00000042097 | 19.10119998 | 22.95536904 | 17.65377619 | 10.47094974 | 25.78300511 |
| ENSMUSG00000042099 | 8.489422215 | 9.043024169 | 9.179963621 | 7.249119049 | 8.594335036 |
| ENSMUSG00000042104 | 10.61177777 | 6.260555194 | 5.649208382 | 5.638203705 | 7.161945863 |
| ENSMUSG00000042105 | 60.84085921 | 82.77845201 | 79.08891735 | 47.52200265 | 59.44415067 |
| ENSMUSG00000042121 | 18.39374813 | 32.69401046 | 31.0706461  | 28.9964762  | 27.21539428 |

|                    |             |             |             |             |             |
|--------------------|-------------|-------------|-------------|-------------|-------------|
| ENSMUSG00000042133 | 74.98989623 | 131.4716591 | 76.97046421 | 149.0096693 | 126.7664418 |
| ENSMUSG00000042156 | 3.537259256 | 13.21672763 | 10.59226572 | 6.443661377 | 15.04008631 |
| ENSMUSG00000042165 | 12.02668147 | 13.21672763 | 12.71071886 | 31.41284921 | 18.62105924 |
| ENSMUSG00000042182 | 8.489422215 | 4.173703463 | 2.824604191 | 5.638203705 | 2.864778345 |
| ENSMUSG00000042184 | 6.367066661 | 12.52111039 | 7.767661525 | 4.832746033 | 7.161945863 |
| ENSMUSG00000042185 | 111.7773925 | 128.6891901 | 124.9887355 | 125.6513968 | 118.8883013 |
| ENSMUSG00000042190 | 5.65961481  | 2.782468975 | 4.943057334 | 4.832746033 | 2.148583759 |
| ENSMUSG00000042197 | 28.29807405 | 48.69320706 | 50.13672439 | 68.46390213 | 80.92998826 |
| ENSMUSG00000042198 | 16.27139258 | 27.12907251 | 27.53989086 | 18.52552646 | 30.08017263 |
| ENSMUSG00000042202 | 19.10119998 | 37.56333116 | 30.36449505 | 76.51847885 | 57.29556691 |
| ENSMUSG00000042207 | 48.81417774 | 68.86610713 | 61.43514116 | 33.02376456 | 47.2688427  |
| ENSMUSG00000042208 | 9.196874066 | 15.30357936 | 12.00456781 | 8.054576721 | 15.04008631 |
| ENSMUSG00000042210 | 11.31922962 | 11.82549314 | 14.829172   | 18.52552646 | 18.62105924 |
| ENSMUSG00000042213 | 7.074518513 | 11.82549314 | 13.41686991 | 14.4982381  | 9.310529622 |
| ENSMUSG00000042216 | 6.367066661 | 4.173703463 | 8.473812573 | 4.832746033 | 5.729556691 |
| ENSMUSG00000042228 | 138.6605628 | 191.294742  | 162.414741  | 144.982381  | 123.9016634 |
| ENSMUSG00000042240 | 5.65961481  | 4.173703463 | 13.41686991 | 5.638203705 | 7.161945863 |
| ENSMUSG00000042243 | 5.65961481  | 6.260555194 | 4.943057334 | 5.638203705 | 7.87814045  |
| ENSMUSG00000042249 | 11.31922962 | 13.21672763 | 13.41686991 | 8.860034393 | 13.60769714 |
| ENSMUSG00000042250 | 7.781970364 | 4.173703463 | 8.473812573 | 11.27640741 | 5.013362104 |
| ENSMUSG00000042251 | 6.367066661 | 5.56493795  | 3.530755239 | 8.860034393 | 6.445751277 |
| ENSMUSG00000042254 | 7.074518513 | 4.869320706 | 7.767661525 | 1.610915344 | 8.594335036 |
| ENSMUSG00000042258 | 7.781970364 | 6.956172438 | 6.35535943  | 5.638203705 | 2.864778345 |
| ENSMUSG00000042265 | 9.904325918 | 16.69481385 | 13.41686991 | 6.443661377 | 3.580972932 |
| ENSMUSG00000042268 | 7.781970364 | 3.478086219 | 7.767661525 | 2.416373016 | 5.013362104 |
| ENSMUSG00000042269 | 6.367066661 | 4.869320706 | 7.061510478 | 6.443661377 | 7.87814045  |
| ENSMUSG00000042271 | 3.537259256 | 8.347406925 | 3.530755239 | 5.638203705 | 5.013362104 |
| ENSMUSG00000042272 | 4.244711108 | 4.173703463 | 8.473812573 | 6.443661377 | 3.580972932 |
| ENSMUSG00000042279 | 7.781970364 | 4.869320706 | 9.886114669 | 5.638203705 | 5.013362104 |
| ENSMUSG00000042284 | 9.196874066 | 4.173703463 | 7.767661525 | 4.02728836  | 8.594335036 |
| ENSMUSG00000042286 | 11.31922962 | 6.260555194 | 4.943057334 | 3.221830688 | 5.729556691 |
| ENSMUSG00000042289 | 4.952162959 | 6.260555194 | 7.061510478 | 12.88732275 | 9.310529622 |
| ENSMUSG00000042292 | 42.44711108 | 63.30116918 | 50.13672439 | 36.24559524 | 41.53928601 |
| ENSMUSG00000042298 | 11.31922962 | 20.17290007 | 13.41686991 | 13.69278043 | 25.06681052 |
| ENSMUSG00000042302 | 9.196874066 | 10.43425866 | 4.943057334 | 5.638203705 | 10.7429188  |
| ENSMUSG00000042303 | 12.73413332 | 15.99919661 | 15.53532305 | 16.10915344 | 17.90486466 |
| ENSMUSG00000042305 | 43.86201478 | 75.82227957 | 68.49665163 | 79.74030954 | 84.51096119 |
| ENSMUSG00000042306 | 10.61177777 | 6.260555194 | 7.061510478 | 5.638203705 | 3.580972932 |
| ENSMUSG00000042308 | 32.54278516 | 65.38802092 | 55.07978173 | 90.21125927 | 80.92998826 |
| ENSMUSG00000042320 | 14.14903703 | 13.21672763 | 16.2414741  | 36.24559524 | 29.36397804 |
| ENSMUSG00000042323 | 70.03773327 | 104.3425866 | 84.73812573 | 353.595918  | 251.3842998 |
| ENSMUSG00000042328 | 12.02668147 | 22.95536904 | 31.0706461  | 50.74383334 | 36.5259239  |
| ENSMUSG00000042331 | 7.074518513 | 7.651789682 | 4.943057334 | 4.02728836  | 6.445751277 |

|                    |             |             |             |             |             |
|--------------------|-------------|-------------|-------------|-------------|-------------|
| ENSMUSG00000042333 | 36.78749627 | 52.17129328 | 51.54902649 | 99.87675134 | 78.06520991 |
| ENSMUSG00000042345 | 19.10119998 | 13.91234488 | 15.53532305 | 9.665492065 | 12.17530797 |
| ENSMUSG00000042348 | 16.97884443 | 26.43345526 | 31.0706461  | 19.33098413 | 23.63442135 |
| ENSMUSG00000042349 | 7.781970364 | 11.1298759  | 12.00456781 | 78.93485187 | 55.86317773 |
| ENSMUSG00000042350 | 120.2668147 | 169.7306075 | 137.6994543 | 182.0334339 | 160.4275873 |
| ENSMUSG00000042359 | 8.489422215 | 6.260555194 | 4.943057334 | 0.805457672 | 6.445751277 |
| ENSMUSG00000042363 | 1.414903703 | 1.391234488 | 2.824604191 | 0.805457672 | 1.432389173 |
| ENSMUSG00000042364 | 61.54831106 | 86.25653823 | 85.44427678 | 63.6311561  | 61.59273443 |
| ENSMUSG00000042367 | 4.952162959 | 6.260555194 | 7.767661525 | 5.638203705 | 4.297167518 |
| ENSMUSG00000042371 | 9.904325918 | 10.43425866 | 7.767661525 | 3.221830688 | 8.594335036 |
| ENSMUSG00000042385 | 13.44158517 | 5.56493795  | 2.824604191 | 9.665492065 | 7.87814045  |
| ENSMUSG00000042388 | 7.781970364 | 8.347406925 | 7.767661525 | 4.832746033 | 7.87814045  |
| ENSMUSG00000042389 | 8.489422215 | 14.60796212 | 12.71071886 | 19.33098413 | 22.20203218 |
| ENSMUSG00000042396 | 56.5961481  | 93.21271067 | 65.67204744 | 144.1769233 | 138.2255552 |
| ENSMUSG00000042404 | 55.1812444  | 53.56252777 | 47.3121202  | 105.514955  | 75.91662615 |
| ENSMUSG00000042408 | 15.56394073 | 20.86851731 | 11.29841676 | 25.77464551 | 22.20203218 |
| ENSMUSG00000042410 | 58.71850365 | 75.12666233 | 71.32125582 | 103.098582  | 76.63282074 |
| ENSMUSG00000042425 | 3.537259256 | 1.391234488 | 3.530755239 | 3.221830688 | 2.148583759 |
| ENSMUSG00000042436 | 6.367066661 | 3.478086219 | 9.886114669 | 5.638203705 | 7.87814045  |
| ENSMUSG00000042439 | 7.074518513 | 11.1298759  | 5.649208382 | 4.02728836  | 4.297167518 |
| ENSMUSG00000042444 | 72.16008883 | 123.1242521 | 93.21193831 | 83.7675979  | 78.06520991 |
| ENSMUSG00000042446 | 33.25023701 | 50.08444155 | 43.78136496 | 77.32393652 | 73.05184781 |
| ENSMUSG00000042447 | 25.46826665 | 38.25894841 | 27.53989086 | 61.21478308 | 49.41742646 |
| ENSMUSG00000042451 | 11.31922962 | 9.043024169 | 5.649208382 | 8.860034393 | 10.02672421 |
| ENSMUSG00000042453 | 9.196874066 | 9.043024169 | 7.061510478 | 0.805457672 | 6.445751277 |
| ENSMUSG00000042472 | 48.10672589 | 63.99678643 | 70.61510478 | 99.87675134 | 76.63282074 |
| ENSMUSG00000042476 | 8.489422215 | 9.043024169 | 9.886114669 | 3.221830688 | 7.87814045  |
| ENSMUSG00000042489 | 24.76081479 | 29.91154148 | 16.94762515 | 35.44013757 | 25.78300511 |
| ENSMUSG00000042492 | 86.30912585 | 107.8206728 | 101.6857509 | 194.115299  | 140.3741389 |
| ENSMUSG00000042496 | 21.93100739 | 39.6501829  | 31.0706461  | 26.58010318 | 34.37734014 |
| ENSMUSG00000042498 | 2.829807405 | 7.651789682 | 4.943057334 | 1.610915344 | 4.297167518 |
| ENSMUSG00000042499 | 2.829807405 | 0.695617244 | 1.412302096 | 1.610915344 | 0.716194586 |
| ENSMUSG00000042500 | 6.367066661 | 14.60796212 | 10.59226572 | 4.02728836  | 12.17530797 |
| ENSMUSG00000042501 | 12.73413332 | 6.956172438 | 6.35535943  | 4.02728836  | 8.594335036 |
| ENSMUSG00000042502 | 21.22355554 | 38.25894841 | 40.95676077 | 115.1804471 | 99.5510475  |
| ENSMUSG00000042506 | 43.86201478 | 60.51870021 | 62.84744325 | 123.2350238 | 105.9967988 |
| ENSMUSG00000042507 | 118.1444592 | 157.2094971 | 141.9363606 | 125.6513968 | 117.4559122 |
| ENSMUSG00000042508 | 71.45263698 | 117.5593142 | 110.1595635 | 118.4022778 | 111.7263555 |
| ENSMUSG00000042514 | 23.34591109 | 21.56413456 | 38.83830763 | 20.94189947 | 32.94495097 |
| ENSMUSG00000042515 | 5.65961481  | 3.478086219 | 4.943057334 | 3.221830688 | 2.148583759 |
| ENSMUSG00000042520 | 157.054311  | 207.9895559 | 170.1824025 | 340.7085953 | 254.9652727 |
| ENSMUSG00000042523 | 4.952162959 | 13.21672763 | 9.886114669 | 8.054576721 | 2.864778345 |
| ENSMUSG00000042524 | 46.69182218 | 89.73462445 | 74.14586002 | 67.65844446 | 69.47087488 |

|                    |             |             |             |             |             |
|--------------------|-------------|-------------|-------------|-------------|-------------|
| ENSMUSG00000042529 | 8.489422215 | 6.260555194 | 5.649208382 | 2.416373016 | 5.729556691 |
| ENSMUSG00000042532 | 11.31922962 | 6.956172438 | 9.179963621 | 5.638203705 | 5.729556691 |
| ENSMUSG00000042540 | 8.489422215 | 6.260555194 | 7.061510478 | 8.860034393 | 7.87814045  |
| ENSMUSG00000042541 | 86.30912585 | 139.819066  | 109.4534124 | 159.4806191 | 112.4425501 |
| ENSMUSG00000042548 | 37.49494812 | 54.95376226 | 66.37819849 | 163.5079074 | 123.9016634 |
| ENSMUSG00000042554 | 9.196874066 | 9.043024169 | 7.767661525 | 5.638203705 | 6.445751277 |
| ENSMUSG00000042557 | 13.44158517 | 16.69481385 | 12.00456781 | 18.52552646 | 18.62105924 |
| ENSMUSG00000042558 | 26.1757185  | 36.17209668 | 46.60596915 | 70.88027514 | 61.59273443 |
| ENSMUSG00000042564 | 10.61177777 | 25.73783802 | 19.06607829 | 9.665492065 | 12.89150255 |
| ENSMUSG00000042567 | 10.61177777 | 8.347406925 | 7.767661525 | 7.249119049 | 8.594335036 |
| ENSMUSG00000042569 | 29.0055259  | 57.73623123 | 37.42600553 | 63.6311561  | 45.83645353 |
| ENSMUSG00000042570 | 32.54278516 | 44.5195036  | 39.54445867 | 45.91108731 | 40.10689684 |
| ENSMUSG00000042572 | 57.30359995 | 66.08363816 | 63.5535943  | 226.3336059 | 174.0352845 |
| ENSMUSG00000042579 | 38.20239997 | 66.7792554  | 64.25974535 | 225.5281482 | 160.4275873 |
| ENSMUSG00000042581 | 7.074518513 | 2.782468975 | 9.179963621 | 7.249119049 | 5.729556691 |
| ENSMUSG00000042589 | 6.367066661 | 6.260555194 | 5.649208382 | 7.249119049 | 6.445751277 |
| ENSMUSG00000042590 | 54.47379255 | 93.90832791 | 61.43514116 | 111.1531587 | 93.82149081 |
| ENSMUSG00000042594 | 53.05888884 | 69.56172438 | 55.07978173 | 238.4154709 | 177.6162574 |
| ENSMUSG00000042605 | 35.37259256 | 57.73623123 | 55.78593277 | 59.60386773 | 61.59273443 |
| ENSMUSG00000042607 | 11.31922962 | 6.956172438 | 7.767661525 | 5.638203705 | 6.445751277 |
| ENSMUSG00000042608 | 58.0110518  | 87.64777272 | 77.67661525 | 107.9313281 | 87.37573953 |
| ENSMUSG00000042622 | 7.781970364 | 5.56493795  | 10.59226572 | 8.054576721 | 12.89150255 |
| ENSMUSG00000042625 | 168.3735406 | 191.9903593 | 201.9591997 | 476.0254842 | 328.0171205 |
| ENSMUSG00000042626 | 36.08004441 | 57.04061399 | 52.96132858 | 149.815127  | 112.4425501 |
| ENSMUSG00000042632 | 4.952162959 | 11.1298759  | 8.473812573 | 14.4982381  | 12.89150255 |
| ENSMUSG00000042638 | 10.61177777 | 5.56493795  | 6.35535943  | 4.832746033 | 9.310529622 |
| ENSMUSG00000042641 | 11.31922962 | 8.347406925 | 12.00456781 | 12.08186508 | 7.161945863 |
| ENSMUSG00000042642 | 31.83533331 | 51.47567604 | 50.84287544 | 41.88379895 | 37.95831308 |
| ENSMUSG00000042647 | 27.5906222  | 29.21592424 | 42.36906287 | 22.55281482 | 42.97167518 |
| ENSMUSG00000042659 | 12.73413332 | 8.347406925 | 6.35535943  | 4.832746033 | 6.445751277 |
| ENSMUSG00000042662 | 7.074518513 | 5.56493795  | 6.35535943  | 8.054576721 | 7.161945863 |
| ENSMUSG00000042671 | 7.074518513 | 4.869320706 | 9.179963621 | 11.27640741 | 6.445751277 |
| ENSMUSG00000042672 | 7.074518513 | 6.956172438 | 5.649208382 | 12.08186508 | 5.013362104 |
| ENSMUSG00000042675 | 85.601674   | 104.3425866 | 93.91808935 | 43.49471429 | 47.2688427  |
| ENSMUSG00000042678 | 10.61177777 | 9.738641413 | 4.943057334 | 8.860034393 | 5.729556691 |
| ENSMUSG00000042688 | 68.62282957 | 92.51709342 | 86.85657888 | 155.4533307 | 123.1854689 |
| ENSMUSG00000042694 | 16.97884443 | 19.47728283 | 16.2414741  | 12.88732275 | 14.32389173 |
| ENSMUSG00000042699 | 177.5704147 | 201.7290007 | 181.4808193 | 401.9233784 | 312.9770342 |
| ENSMUSG00000042700 | 14.14903703 | 29.21592424 | 28.95219296 | 28.9964762  | 27.21539428 |
| ENSMUSG00000042708 | 8.489422215 | 10.43425866 | 6.35535943  | 11.27640741 | 13.60769714 |
| ENSMUSG00000042709 | 43.86201478 | 84.86530374 | 82.61967259 | 108.7367857 | 97.40246374 |
| ENSMUSG00000042712 | 5.65961481  | 8.347406925 | 7.061510478 | 8.860034393 | 7.161945863 |
| ENSMUSG00000042719 | 115.3146518 | 133.5585108 | 137.6994543 | 310.1012038 | 209.1288192 |

|                    |             |             |             |             |             |
|--------------------|-------------|-------------|-------------|-------------|-------------|
| ENSMUSG00000042726 | 9.196874066 | 19.47728283 | 17.65377619 | 62.02024075 | 42.25548059 |
| ENSMUSG00000042729 | 33.25023701 | 54.95376226 | 39.54445867 | 132.9005159 | 104.5644096 |
| ENSMUSG00000042743 | 11.31922962 | 12.52111039 | 19.06607829 | 12.88732275 | 15.04008631 |
| ENSMUSG00000042744 | 38.20239997 | 75.12666233 | 59.31668801 | 66.85298678 | 47.98503729 |
| ENSMUSG00000042747 | 21.22355554 | 31.30277597 | 34.60140134 | 37.85651059 | 42.97167518 |
| ENSMUSG00000042751 | 7.781970364 | 5.56493795  | 3.530755239 | 2.416373016 | 8.594335036 |
| ENSMUSG00000042757 | 12.02668147 | 6.956172438 | 9.179963621 | 7.249119049 | 6.445751277 |
| ENSMUSG00000042759 | 4.952162959 | 4.869320706 | 9.886114669 | 8.860034393 | 5.729556691 |
| ENSMUSG00000042761 | 13.44158517 | 6.260555194 | 3.530755239 | 7.249119049 | 5.729556691 |
| ENSMUSG00000042766 | 18.39374813 | 33.3896277  | 32.4829482  | 45.91108731 | 40.82309142 |
| ENSMUSG00000042772 | 84.89422215 | 109.9075245 | 91.09348516 | 236.8045556 | 166.157144  |
| ENSMUSG00000042787 | 9.196874066 | 18.78166558 | 13.41686991 | 37.85651059 | 35.09353473 |
| ENSMUSG00000042788 | 5.65961481  | 6.260555194 | 4.236906287 | 2.416373016 | 7.87814045  |
| ENSMUSG00000042790 | 70.74518513 | 95.2995624  | 77.67661525 | 93.43308996 | 92.38910164 |
| ENSMUSG00000042793 | 6.367066661 | 6.260555194 | 7.061510478 | 0.805457672 | 9.310529622 |
| ENSMUSG00000042804 | 9.196874066 | 4.173703463 | 11.29841676 | 5.638203705 | 7.87814045  |
| ENSMUSG00000042807 | 5.65961481  | 2.782468975 | 5.649208382 | 2.416373016 | 6.445751277 |
| ENSMUSG00000042810 | 12.02668147 | 19.47728283 | 10.59226572 | 12.88732275 | 15.04008631 |
| ENSMUSG00000042817 | 9.196874066 | 7.651789682 | 9.886114669 | 23.35827249 | 20.769643   |
| ENSMUSG00000042826 | 4.952162959 | 9.043024169 | 10.59226572 | 7.249119049 | 5.729556691 |
| ENSMUSG00000042828 | 6.367066661 | 4.173703463 | 8.473812573 | 8.054576721 | 10.7429188  |
| ENSMUSG00000042831 | 16.97884443 | 26.43345526 | 24.71528667 | 21.74735715 | 20.05344842 |
| ENSMUSG00000042834 | 10.61177777 | 4.869320706 | 8.473812573 | 4.02728836  | 2.148583759 |
| ENSMUSG00000042842 | 7.781970364 | 8.347406925 | 2.824604191 | 14.4982381  | 22.20203218 |
| ENSMUSG00000042849 | 4.952162959 | 6.956172438 | 5.649208382 | 4.02728836  | 7.161945863 |
| ENSMUSG00000042851 | 15.56394073 | 32.69401046 | 24.00913562 | 33.02376456 | 41.53928601 |
| ENSMUSG00000042857 | 36.78749627 | 63.30116918 | 60.72899011 | 67.65844446 | 66.60609653 |
| ENSMUSG00000042870 | 11.31922962 | 31.99839321 | 22.59683353 | 16.10915344 | 17.18867007 |
| ENSMUSG00000042873 | 13.44158517 | 11.82549314 | 8.473812573 | 5.638203705 | 8.594335036 |
| ENSMUSG00000042888 | 8.489422215 | 7.651789682 | 5.649208382 | 6.443661377 | 6.445751277 |
| ENSMUSG00000042894 | 13.44158517 | 9.738641413 | 8.473812573 | 7.249119049 | 3.580972932 |
| ENSMUSG00000042901 | 94.09109622 | 118.9505487 | 131.3440949 | 232.7772672 | 165.4409494 |
| ENSMUSG00000042918 | 3.537259256 | 5.56493795  | 3.530755239 | 7.249119049 | 7.161945863 |
| ENSMUSG00000042940 | 10.61177777 | 11.1298759  | 9.886114669 | 11.27640741 | 8.594335036 |
| ENSMUSG00000042942 | 6.367066661 | 4.869320706 | 5.649208382 | 9.665492065 | 9.310529622 |
| ENSMUSG00000042961 | 8.489422215 | 12.52111039 | 5.649208382 | 4.02728836  | 3.580972932 |
| ENSMUSG00000042978 | 152.8095999 | 133.5585108 | 151.8224753 | 109.5422434 | 101.6996313 |
| ENSMUSG00000042988 | 7.074518513 | 9.738641413 | 6.35535943  | 11.27640741 | 7.161945863 |
| ENSMUSG00000042992 | 21.22355554 | 25.73783802 | 23.30298458 | 21.74735715 | 19.33725383 |
| ENSMUSG00000042997 | 87.72402956 | 151.6445591 | 124.2825844 | 149.0096693 | 131.0636093 |
| ENSMUSG00000043003 | 6.367066661 | 5.56493795  | 8.473812573 | 4.02728836  | 3.580972932 |
| ENSMUSG00000043004 | 28.29807405 | 41.73703463 | 37.42600553 | 36.24559524 | 45.83645353 |
| ENSMUSG00000043013 | 9.196874066 | 5.56493795  | 4.236906287 | 8.054576721 | 5.013362104 |



|                    |             |             |             |             |             |
|--------------------|-------------|-------------|-------------|-------------|-------------|
| ENSMUSG00000043015 | 49.52162959 | 81.38721752 | 67.08434954 | 108.7367857 | 84.51096119 |
| ENSMUSG00000043019 | 60.13340736 | 82.08283477 | 74.14586002 | 79.74030954 | 68.75468029 |
| ENSMUSG00000043020 | 7.074518513 | 6.260555194 | 8.473812573 | 4.832746033 | 7.87814045  |
| ENSMUSG00000043036 | 7.074518513 | 8.347406925 | 7.061510478 | 3.221830688 | 4.297167518 |
| ENSMUSG00000043051 | 9.904325918 | 9.043024169 | 10.59226572 | 8.054576721 | 7.87814045  |
| ENSMUSG00000043059 | 24.76081479 | 27.12907251 | 34.60140134 | 81.35122488 | 65.88990194 |
| ENSMUSG00000043061 | 15.56394073 | 21.56413456 | 19.06607829 | 28.19101852 | 22.91822676 |
| ENSMUSG00000043065 | 8.489422215 | 19.47728283 | 12.00456781 | 12.88732275 | 17.18867007 |
| ENSMUSG00000043067 | 12.73413332 | 22.2597518  | 22.59683353 | 56.38203705 | 43.68786977 |
| ENSMUSG00000043079 | 7.781970364 | 4.869320706 | 9.886114669 | 3.221830688 | 7.87814045  |
| ENSMUSG00000043085 | 7.781970364 | 7.651789682 | 6.35535943  | 8.054576721 | 12.89150255 |
| ENSMUSG00000043088 | 10.61177777 | 6.956172438 | 5.649208382 | 8.860034393 | 5.729556691 |
| ENSMUSG00000043090 | 53.7663407  | 86.95215547 | 81.91352154 | 174.7843148 | 131.7798039 |
| ENSMUSG00000043126 | 16.97884443 | 38.25894841 | 44.48751601 | 20.94189947 | 27.93158887 |
| ENSMUSG00000043131 | 138.6605628 | 174.5999282 | 153.9409284 | 273.8556085 | 191.2239546 |
| ENSMUSG00000043154 | 8.489422215 | 7.651789682 | 7.767661525 | 0.805457672 | 5.013362104 |
| ENSMUSG00000043183 | 14.85648888 | 26.43345526 | 18.35992724 | 46.71654498 | 40.10689684 |
| ENSMUSG00000043190 | 15.56394073 | 39.6501829  | 33.89525029 | 38.66196826 | 43.68786977 |
| ENSMUSG00000043207 | 35.37259256 | 47.99758982 | 63.5535943  | 56.38203705 | 59.44415067 |
| ENSMUSG00000043241 | 84.89422215 | 118.9505487 | 94.6242404  | 137.7332619 | 113.8749392 |
| ENSMUSG00000043243 | 70.74518513 | 89.73462445 | 87.56272992 | 103.098582  | 81.64618284 |
| ENSMUSG00000043257 | 29.0055259  | 50.7800588  | 40.95676077 | 37.85651059 | 42.25548059 |
| ENSMUSG00000043259 | 8.489422215 | 4.869320706 | 5.649208382 | 3.221830688 | 8.594335036 |
| ENSMUSG00000043262 | 14.14903703 | 19.47728283 | 23.30298458 | 12.88732275 | 16.47247549 |
| ENSMUSG00000043263 | 138.6605628 | 159.2963488 | 137.6994543 | 145.7878386 | 105.9967988 |
| ENSMUSG00000043284 | 99.04325918 | 111.9943762 | 109.4534124 | 202.1698757 | 148.2522794 |
| ENSMUSG00000043286 | 7.781970364 | 5.56493795  | 6.35535943  | 10.47094974 | 5.729556691 |
| ENSMUSG00000043289 | 8.489422215 | 5.56493795  | 5.649208382 | 4.02728836  | 4.297167518 |
| ENSMUSG00000043301 | 4.952162959 | 3.478086219 | 2.824604191 | 4.832746033 | 10.7429188  |
| ENSMUSG00000043323 | 60.13340736 | 67.47487265 | 82.61967259 | 97.46037832 | 88.09193412 |
| ENSMUSG00000043333 | 7.781970364 | 8.347406925 | 6.35535943  | 7.249119049 | 5.729556691 |
| ENSMUSG00000043336 | 11.31922962 | 10.43425866 | 11.29841676 | 5.638203705 | 10.02672421 |
| ENSMUSG00000043340 | 7.074518513 | 9.738641413 | 5.649208382 | 12.08186508 | 8.594335036 |
| ENSMUSG00000043346 | 17.68629628 | 13.91234488 | 9.179963621 | 5.638203705 | 10.02672421 |
| ENSMUSG00000043357 | 19.10119998 | 6.956172438 | 4.236906287 | 6.443661377 | 7.161945863 |
| ENSMUSG00000043366 | 4.244711108 | 6.956172438 | 5.649208382 | 6.443661377 | 11.45911338 |
| ENSMUSG00000043372 | 90.55383696 | 116.1680797 | 115.1026208 | 103.9040397 | 111.7263555 |
| ENSMUSG00000043384 | 0           | 0           | 0           | 0           | 0           |
| ENSMUSG00000043410 | 10.61177777 | 6.260555194 | 5.649208382 | 4.02728836  | 8.594335036 |
| ENSMUSG00000043411 | 31.12788146 | 48.69320706 | 34.60140134 | 104.7094974 | 94.5376854  |
| ENSMUSG00000043424 | 0           | 0           | 0           | 0           | 0           |
| ENSMUSG00000043448 | 9.196874066 | 9.738641413 | 4.943057334 | 13.69278043 | 9.310529622 |
| ENSMUSG00000043456 | 4.952162959 | 6.956172438 | 4.236906287 | 8.054576721 | 5.729556691 |

|                    |             |             |             |             |             |
|--------------------|-------------|-------------|-------------|-------------|-------------|
| ENSMUSG00000043461 | 6.367066661 | 6.956172438 | 9.179963621 | 5.638203705 | 7.161945863 |
| ENSMUSG00000043467 | 27.5906222  | 50.08444155 | 45.19366706 | 211.0299101 | 173.3190899 |
| ENSMUSG00000043472 | 7.074518513 | 6.260555194 | 7.061510478 | 2.416373016 | 5.013362104 |
| ENSMUSG00000043510 | 23.34591109 | 33.3896277  | 26.83373982 | 50.74383334 | 50.84981563 |
| ENSMUSG00000043531 | 9.904325918 | 4.869320706 | 7.767661525 | 7.249119049 | 7.87814045  |
| ENSMUSG00000043535 | 14.14903703 | 18.78166558 | 17.65377619 | 27.38556085 | 33.66114556 |
| ENSMUSG00000043541 | 24.05336294 | 25.04222078 | 24.00913562 | 22.55281482 | 30.08017263 |
| ENSMUSG00000043542 | 2.122355554 | 11.1298759  | 7.767661525 | 4.02728836  | 5.013362104 |
| ENSMUSG00000043549 | 14.14903703 | 10.43425866 | 9.179963621 | 21.74735715 | 14.32389173 |
| ENSMUSG00000043557 | 6.367066661 | 7.651789682 | 7.061510478 | 4.02728836  | 4.297167518 |
| ENSMUSG00000043587 | 4.952162959 | 7.651789682 | 12.00456781 | 6.443661377 | 6.445751277 |
| ENSMUSG00000043592 | 7.074518513 | 7.651789682 | 6.35535943  | 8.860034393 | 10.02672421 |
| ENSMUSG00000043614 | 6.367066661 | 6.956172438 | 7.767661525 | 6.443661377 | 10.02672421 |
| ENSMUSG00000043621 | 7.781970364 | 6.260555194 | 6.35535943  | 9.665492065 | 4.297167518 |
| ENSMUSG00000043629 | 10.61177777 | 5.56493795  | 3.530755239 | 4.832746033 | 7.87814045  |
| ENSMUSG00000043635 | 8.489422215 | 4.869320706 | 5.649208382 | 3.221830688 | 4.297167518 |
| ENSMUSG00000043639 | 7.074518513 | 6.260555194 | 7.767661525 | 3.221830688 | 6.445751277 |
| ENSMUSG00000043659 | 7.074518513 | 9.043024169 | 5.649208382 | 4.832746033 | 4.297167518 |
| ENSMUSG00000043668 | 7.074518513 | 3.478086219 | 7.767661525 | 5.638203705 | 5.729556691 |
| ENSMUSG00000043671 | 7.781970364 | 16.69481385 | 13.41686991 | 25.77464551 | 17.18867007 |
| ENSMUSG00000043673 | 6.367066661 | 6.956172438 | 6.35535943  | 2.416373016 | 3.580972932 |
| ENSMUSG00000043687 | 7.074518513 | 6.260555194 | 11.29841676 | 8.054576721 | 8.594335036 |
| ENSMUSG00000043716 | 29.0055259  | 45.21512085 | 51.54902649 | 166.7297381 | 127.4826364 |
| ENSMUSG00000043719 | 4.952162959 | 9.043024169 | 6.35535943  | 4.832746033 | 9.310529622 |
| ENSMUSG00000043733 | 60.13340736 | 95.99517964 | 79.7950684  | 103.098582  | 77.34901533 |
| ENSMUSG00000043740 | 17.68629628 | 21.56413456 | 19.77222934 | 8.054576721 | 13.60769714 |
| ENSMUSG00000043760 | 7.074518513 | 9.043024169 | 4.236906287 | 1.610915344 | 10.7429188  |
| ENSMUSG00000043773 | 8.489422215 | 18.08604834 | 24.00913562 | 19.33098413 | 17.18867007 |
| ENSMUSG00000043795 | 5.65961481  | 9.043024169 | 4.943057334 | 4.832746033 | 7.87814045  |
| ENSMUSG00000043822 | 8.489422215 | 5.56493795  | 12.00456781 | 7.249119049 | 7.161945863 |
| ENSMUSG00000043831 | 7.074518513 | 20.86851731 | 24.00913562 | 20.1364418  | 10.02672421 |
| ENSMUSG00000043832 | 6.367066661 | 8.347406925 | 9.179963621 | 4.832746033 | 6.445751277 |
| ENSMUSG00000043843 | 6.367066661 | 8.347406925 | 4.943057334 | 9.665492065 | 7.161945863 |
| ENSMUSG00000043850 | 11.31922962 | 8.347406925 | 10.59226572 | 4.832746033 | 11.45911338 |
| ENSMUSG00000043857 | 4.952162959 | 4.869320706 | 6.35535943  | 3.221830688 | 5.729556691 |
| ENSMUSG00000043858 | 4.244711108 | 0           | 0           | 0.805457672 | 1.432389173 |
| ENSMUSG00000043866 | 24.76081479 | 39.6501829  | 38.13215658 | 89.4058016  | 76.63282074 |
| ENSMUSG00000043872 | 46.69182218 | 69.56172438 | 56.49208382 | 91.82217462 | 83.7947666  |
| ENSMUSG00000043873 | 14.14903703 | 15.30357936 | 12.00456781 | 7.249119049 | 7.161945863 |
| ENSMUSG00000043885 | 19.10119998 | 20.17290007 | 21.89068248 | 9.665492065 | 15.04008631 |
| ENSMUSG00000043897 | 11.31922962 | 10.43425866 | 7.767661525 | 5.638203705 | 3.580972932 |
| ENSMUSG00000043909 | 24.76081479 | 43.82388636 | 31.77679715 | 19.33098413 | 22.20203218 |
| ENSMUSG00000043913 | 8.489422215 | 3.478086219 | 7.061510478 | 5.638203705 | 7.161945863 |

|                    |             |             |             |             |             |
|--------------------|-------------|-------------|-------------|-------------|-------------|
| ENSMUSG00000043924 | 7.781970364 | 9.738641413 | 10.59226572 | 9.665492065 | 6.445751277 |
| ENSMUSG00000043929 | 15.56394073 | 25.04222078 | 14.829172   | 33.82922223 | 25.06681052 |
| ENSMUSG00000043931 | 0           | 0.695617244 | 0.706151048 | 0.805457672 | 1.432389173 |
| ENSMUSG00000043939 | 7.781970364 | 9.738641413 | 5.649208382 | 8.054576721 | 6.445751277 |
| ENSMUSG00000043940 | 4.952162959 | 3.478086219 | 7.767661525 | 4.02728836  | 5.013362104 |
| ENSMUSG00000043943 | 11.31922962 | 10.43425866 | 10.59226572 | 6.443661377 | 8.594335036 |
| ENSMUSG00000043953 | 7.074518513 | 13.91234488 | 6.35535943  | 12.08186508 | 11.45911338 |
| ENSMUSG00000043962 | 2.829807405 | 9.043024169 | 14.829172   | 13.69278043 | 7.161945863 |
| ENSMUSG00000043964 | 24.76081479 | 26.43345526 | 26.83373982 | 44.30017197 | 47.2688427  |
| ENSMUSG00000043987 | 6.367066661 | 13.21672763 | 9.886114669 | 9.665492065 | 6.445751277 |
| ENSMUSG00000043998 | 63.67066661 | 86.25653823 | 78.3827663  | 254.5246244 | 204.8316517 |
| ENSMUSG00000044005 | 7.074518513 | 12.52111039 | 7.061510478 | 8.054576721 | 5.013362104 |
| ENSMUSG00000044017 | 7.074518513 | 6.956172438 | 6.35535943  | 6.443661377 | 6.445751277 |
| ENSMUSG00000044021 | 0           | 0           | 0           | 0           | 0           |
| ENSMUSG00000044024 | 38.90985182 | 67.47487265 | 46.60596915 | 61.21478308 | 59.44415067 |
| ENSMUSG00000044033 | 9.196874066 | 4.173703463 | 7.061510478 | 10.47094974 | 7.161945863 |
| ENSMUSG00000044034 | 9.196874066 | 11.1298759  | 9.886114669 | 8.860034393 | 7.87814045  |
| ENSMUSG00000044037 | 8.489422215 | 6.260555194 | 4.236906287 | 6.443661377 | 7.161945863 |
| ENSMUSG00000044042 | 8.489422215 | 5.56493795  | 5.649208382 | 6.443661377 | 5.729556691 |
| ENSMUSG00000044066 | 40.32475552 | 79.30036579 | 54.37363068 | 91.01671695 | 74.48423698 |
| ENSMUSG00000044072 | 6.367066661 | 6.260555194 | 12.71071886 | 2.416373016 | 4.297167518 |
| ENSMUSG00000044083 | 9.904325918 | 2.782468975 | 7.767661525 | 4.02728836  | 9.310529622 |
| ENSMUSG00000044098 | 40.32475552 | 73.0398106  | 69.90895373 | 125.6513968 | 98.83485292 |
| ENSMUSG00000044106 | 5.65961481  | 7.651789682 | 4.943057334 | 1.610915344 | 9.310529622 |
| ENSMUSG00000044117 | 9.196874066 | 5.56493795  | 4.236906287 | 7.249119049 | 8.594335036 |
| ENSMUSG00000044122 | 9.904325918 | 11.1298759  | 9.179963621 | 5.638203705 | 5.729556691 |
| ENSMUSG00000044139 | 14.85648888 | 15.30357936 | 7.061510478 | 14.4982381  | 10.02672421 |
| ENSMUSG00000044150 | 4.952162959 | 3.478086219 | 4.236906287 | 3.221830688 | 2.148583759 |
| ENSMUSG00000044155 | 49.52162959 | 85.56092098 | 64.96589639 | 84.57305557 | 78.06520991 |
| ENSMUSG00000044156 | 53.05888884 | 66.7792554  | 69.20280268 | 55.57657937 | 54.43078856 |
| ENSMUSG00000044162 | 9.904325918 | 5.56493795  | 5.649208382 | 10.47094974 | 10.02672421 |
| ENSMUSG00000044165 | 9.904325918 | 9.043024169 | 10.59226572 | 4.832746033 | 6.445751277 |
| ENSMUSG00000044176 | 121.6817184 | 175.9911627 | 151.1163242 | 204.5862487 | 156.1304198 |
| ENSMUSG00000044217 | 9.904325918 | 5.56493795  | 3.530755239 | 6.443661377 | 7.87814045  |
| ENSMUSG00000044220 | 5.65961481  | 9.738641413 | 4.236906287 | 2.416373016 | 5.013362104 |
| ENSMUSG00000044221 | 26.1757185  | 49.38882431 | 47.3121202  | 90.21125927 | 69.47087488 |
| ENSMUSG00000044224 | 62.96321476 | 114.7768452 | 69.20280268 | 94.23854763 | 88.09193412 |
| ENSMUSG00000044244 | 12.73413332 | 15.99919661 | 15.53532305 | 13.69278043 | 14.32389173 |
| ENSMUSG00000044252 | 11.31922962 | 4.173703463 | 8.473812573 | 6.443661377 | 6.445751277 |
| ENSMUSG00000044258 | 7.781970364 | 7.651789682 | 7.767661525 | 7.249119049 | 5.729556691 |
| ENSMUSG00000044265 | 6.367066661 | 5.56493795  | 5.649208382 | 5.638203705 | 6.445751277 |
| ENSMUSG00000044279 | 4.952162959 | 6.956172438 | 5.649208382 | 5.638203705 | 6.445751277 |
| ENSMUSG00000044296 | 4.952162959 | 5.56493795  | 7.767661525 | 6.443661377 | 10.7429188  |

|                    |             |             |             |             |             |
|--------------------|-------------|-------------|-------------|-------------|-------------|
| ENSMUSG00000044308 | 64.37811846 | 59.82308296 | 67.08434954 | 134.5114312 | 93.10529622 |
| ENSMUSG00000044313 | 7.074518513 | 9.043024169 | 5.649208382 | 6.443661377 | 8.594335036 |
| ENSMUSG00000044320 | 7.781970364 | 8.347406925 | 6.35535943  | 5.638203705 | 5.729556691 |
| ENSMUSG00000044328 | 13.44158517 | 19.47728283 | 19.77222934 | 15.30369577 | 10.7429188  |
| ENSMUSG00000044339 | 12.02668147 | 15.30357936 | 13.41686991 | 11.27640741 | 15.7562809  |
| ENSMUSG00000044348 | 23.34591109 | 36.86771392 | 33.89525029 | 46.71654498 | 32.94495097 |
| ENSMUSG00000044349 | 8.489422215 | 2.086851731 | 8.473812573 | 6.443661377 | 4.297167518 |
| ENSMUSG00000044350 | 12.02668147 | 11.82549314 | 4.943057334 | 14.4982381  | 9.310529622 |
| ENSMUSG00000044361 | 6.367066661 | 5.56493795  | 4.943057334 | 6.443661377 | 9.310529622 |
| ENSMUSG00000044365 | 4.244711108 | 4.173703463 | 5.649208382 | 5.638203705 | 5.729556691 |
| ENSMUSG00000044378 | 11.31922962 | 3.478086219 | 9.179963621 | 5.638203705 | 7.161945863 |
| ENSMUSG00000044393 | 10.61177777 | 6.260555194 | 6.35535943  | 5.638203705 | 8.594335036 |
| ENSMUSG00000044430 | 11.31922962 | 6.956172438 | 6.35535943  | 3.221830688 | 4.297167518 |
| ENSMUSG00000044433 | 7.781970364 | 8.347406925 | 4.943057334 | 3.221830688 | 5.729556691 |
| ENSMUSG00000044442 | 9.904325918 | 14.60796212 | 12.00456781 | 15.30369577 | 10.02672421 |
| ENSMUSG00000044452 | 41.03220737 | 66.7792554  | 60.02283906 | 71.68573282 | 79.49759908 |
| ENSMUSG00000044456 | 23.34591109 | 35.47647943 | 38.13215658 | 25.77464551 | 35.80972932 |
| ENSMUSG00000044465 | 11.31922962 | 23.65098629 | 25.42143772 | 9.665492065 | 13.60769714 |
| ENSMUSG00000044468 | 6.367066661 | 8.347406925 | 4.943057334 | 95.04400531 | 60.87653984 |
| ENSMUSG00000044475 | 79.23460734 | 113.3856107 | 102.3919019 | 140.9550926 | 132.4959985 |
| ENSMUSG00000044477 | 53.7663407  | 70.95295887 | 57.90438592 | 69.2693598  | 63.0251236  |
| ENSMUSG00000044499 | 5.65961481  | 5.56493795  | 7.767661525 | 4.02728836  | 11.45911338 |
| ENSMUSG00000044501 | 74.98989623 | 118.2549314 | 94.6242404  | 100.682209  | 104.5644096 |
| ENSMUSG00000044502 | 31.12788146 | 47.30197258 | 47.3121202  | 52.35474869 | 42.97167518 |
| ENSMUSG00000044522 | 9.904325918 | 9.738641413 | 8.473812573 | 2.416373016 | 9.310529622 |
| ENSMUSG00000044533 | 14.85648888 | 7.651789682 | 9.179963621 | 24.96918783 | 22.20203218 |
| ENSMUSG00000044544 | 9.904325918 | 7.651789682 | 4.943057334 | 4.02728836  | 5.729556691 |
| ENSMUSG00000044548 | 5.65961481  | 5.56493795  | 7.767661525 | 2.416373016 | 3.580972932 |
| ENSMUSG00000044550 | 6.367066661 | 3.478086219 | 4.943057334 | 4.832746033 | 2.148583759 |
| ENSMUSG00000044551 | 11.31922962 | 7.651789682 | 13.41686991 | 11.27640741 | 7.87814045  |
| ENSMUSG00000044562 | 4.952162959 | 2.782468975 | 4.236906287 | 8.054576721 | 6.445751277 |
| ENSMUSG00000044566 | 81.3569629  | 149.5577074 | 123.5764334 | 169.9515688 | 147.5360848 |
| ENSMUSG00000044573 | 45.98437033 | 57.04061399 | 56.49208382 | 70.07481747 | 50.13362104 |
| ENSMUSG00000044583 | 26.1757185  | 46.60635533 | 43.78136496 | 104.7094974 | 50.13362104 |
| ENSMUSG00000044594 | 10.61177777 | 11.1298759  | 6.35535943  | 7.249119049 | 6.445751277 |
| ENSMUSG00000044595 | 5.65961481  | 7.651789682 | 12.00456781 | 13.69278043 | 16.47247549 |
| ENSMUSG00000044600 | 50.22908144 | 66.08363816 | 56.49208382 | 81.35122488 | 60.16034525 |
| ENSMUSG00000044626 | 5.65961481  | 6.956172438 | 11.29841676 | 5.638203705 | 3.580972932 |
| ENSMUSG00000044627 | 80.64951104 | 118.2549314 | 95.33039145 | 101.4876667 | 103.1320204 |
| ENSMUSG00000044646 | 9.196874066 | 3.478086219 | 7.061510478 | 9.665492065 | 7.87814045  |
| ENSMUSG00000044647 | 10.61177777 | 4.173703463 | 7.767661525 | 4.02728836  | 7.161945863 |
| ENSMUSG00000044667 | 8.489422215 | 4.869320706 | 8.473812573 | 5.638203705 | 10.7429188  |
| ENSMUSG00000044676 | 7.074518513 | 8.347406925 | 7.061510478 | 8.860034393 | 13.60769714 |

|                    |             |             |             |             |             |
|--------------------|-------------|-------------|-------------|-------------|-------------|
| ENSMUSG00000044678 | 9.904325918 | 8.347406925 | 13.41686991 | 5.638203705 | 11.45911338 |
| ENSMUSG00000044681 | 9.196874066 | 6.956172438 | 11.29841676 | 3.221830688 | 5.013362104 |
| ENSMUSG00000044700 | 48.10672589 | 54.25814501 | 63.5535943  | 73.29664816 | 68.0384857  |
| ENSMUSG00000044702 | 59.42595551 | 80.69160028 | 62.84744325 | 124.8459392 | 107.429188  |
| ENSMUSG00000044712 | 13.44158517 | 22.2597518  | 26.12758877 | 43.49471429 | 42.97167518 |
| ENSMUSG00000044716 | 7.074518513 | 9.738641413 | 4.236906287 | 5.638203705 | 5.729556691 |
| ENSMUSG00000044734 | 71.45263698 | 86.25653823 | 86.85657888 | 38.66196826 | 41.53928601 |
| ENSMUSG00000044749 | 12.73413332 | 6.260555194 | 4.943057334 | 8.054576721 | 7.161945863 |
| ENSMUSG00000044768 | 19.80865184 | 37.56333116 | 26.12758877 | 100.682209  | 82.36237743 |
| ENSMUSG00000044770 | 15.56394073 | 25.73783802 | 14.12302096 | 12.08186508 | 19.33725383 |
| ENSMUSG00000044783 | 116.0221036 | 121.0374004 | 122.1641313 | 292.381135  | 212.7097921 |
| ENSMUSG00000044788 | 5.65961481  | 9.043024169 | 8.473812573 | 5.638203705 | 8.594335036 |
| ENSMUSG00000044791 | 109.6550369 | 134.9497453 | 123.5764334 | 260.9682858 | 209.1288192 |
| ENSMUSG00000044795 | 20.51610369 | 30.60715873 | 24.71528667 | 45.10562964 | 35.80972932 |
| ENSMUSG00000044807 | 14.85648888 | 18.78166558 | 22.59683353 | 14.4982381  | 14.32389173 |
| ENSMUSG00000044811 | 8.489422215 | 6.260555194 | 4.236906287 | 5.638203705 | 5.729556691 |
| ENSMUSG00000044813 | 6.367066661 | 6.956172438 | 5.649208382 | 3.221830688 | 10.02672421 |
| ENSMUSG00000044816 | 13.44158517 | 6.956172438 | 4.236906287 | 4.02728836  | 5.729556691 |
| ENSMUSG00000044827 | 116.7295555 | 152.3401764 | 144.7609648 | 121.6241085 | 102.4158258 |
| ENSMUSG00000044835 | 13.44158517 | 8.347406925 | 7.061510478 | 6.443661377 | 8.594335036 |
| ENSMUSG00000044847 | 31.12788146 | 40.34580014 | 40.95676077 | 40.2728836  | 29.36397804 |
| ENSMUSG00000044864 | 14.85648888 | 21.56413456 | 16.94762515 | 8.860034393 | 13.60769714 |
| ENSMUSG00000044876 | 17.68629628 | 22.2597518  | 27.53989086 | 27.38556085 | 26.49919969 |
| ENSMUSG00000044894 | 26.88317035 | 31.30277597 | 26.12758877 | 86.98942859 | 73.76804239 |
| ENSMUSG00000044903 | 9.904325918 | 9.043024169 | 7.767661525 | 5.638203705 | 6.445751277 |
| ENSMUSG00000044912 | 4.952162959 | 9.043024169 | 6.35535943  | 7.249119049 | 7.161945863 |
| ENSMUSG00000044916 | 9.196874066 | 8.347406925 | 9.179963621 | 9.665492065 | 10.7429188  |
| ENSMUSG00000044934 | 28.29807405 | 27.82468975 | 30.36449505 | 132.9005159 | 112.4425501 |
| ENSMUSG00000044937 | 46.69182218 | 57.73623123 | 49.43057334 | 194.9207566 | 135.3607768 |
| ENSMUSG00000044948 | 0           | 0           | 0           | 0           | 0.716194586 |
| ENSMUSG00000044951 | 4.244711108 | 8.347406925 | 11.29841676 | 3.221830688 | 5.729556691 |
| ENSMUSG00000044968 | 13.44158517 | 21.56413456 | 15.53532305 | 4.832746033 | 13.60769714 |
| ENSMUSG00000044976 | 7.781970364 | 10.43425866 | 9.179963621 | 3.221830688 | 9.310529622 |
| ENSMUSG00000044991 | 7.074518513 | 15.99919661 | 14.12302096 | 13.69278043 | 14.32389173 |
| ENSMUSG00000044994 | 13.44158517 | 7.651789682 | 4.236906287 | 5.638203705 | 5.729556691 |
| ENSMUSG00000045031 | 9.904325918 | 12.52111039 | 12.71071886 | 18.52552646 | 12.17530797 |
| ENSMUSG00000045034 | 12.02668147 | 6.260555194 | 9.179963621 | 5.638203705 | 5.013362104 |
| ENSMUSG00000045036 | 16.27139258 | 6.956172438 | 4.943057334 | 5.638203705 | 4.297167518 |
| ENSMUSG00000045038 | 66.50047402 | 96.69079689 | 98.15499564 | 84.57305557 | 73.05184781 |
| ENSMUSG00000045065 | 13.44158517 | 11.1298759  | 15.53532305 | 11.27640741 | 10.02672421 |
| ENSMUSG00000045071 | 29.0055259  | 39.6501829  | 33.89525029 | 37.05105292 | 34.37734014 |
| ENSMUSG00000045078 | 113.8997481 | 149.5577074 | 131.3440949 | 141.7605503 | 117.4559122 |
| ENSMUSG00000045083 | 5.65961481  | 6.260555194 | 8.473812573 | 4.02728836  | 5.013362104 |

|                    |             |             |             |             |             |
|--------------------|-------------|-------------|-------------|-------------|-------------|
| ENSMUSG00000045095 | 2.829807405 | 10.43425866 | 4.236906287 | 1.610915344 | 5.729556691 |
| ENSMUSG00000045098 | 13.44158517 | 29.91154148 | 23.30298458 | 37.05105292 | 27.93158887 |
| ENSMUSG00000045100 | 23.34591109 | 40.34580014 | 36.71985448 | 23.35827249 | 27.93158887 |
| ENSMUSG00000045102 | 0           | 0           | 0           | 0           | 0           |
| ENSMUSG00000045103 | 6.367066661 | 4.173703463 | 0.706151048 | 4.02728836  | 5.729556691 |
| ENSMUSG00000045106 | 7.781970364 | 9.043024169 | 5.649208382 | 4.832746033 | 3.580972932 |
| ENSMUSG00000045114 | 7.074518513 | 6.260555194 | 4.943057334 | 15.30369577 | 9.310529622 |
| ENSMUSG00000045160 | 24.76081479 | 38.95456565 | 38.83830763 | 40.2728836  | 35.09353473 |
| ENSMUSG00000045174 | 6.367066661 | 4.173703463 | 7.061510478 | 9.665492065 | 7.161945863 |
| ENSMUSG00000045180 | 4.952162959 | 4.869320706 | 6.35535943  | 2.416373016 | 4.297167518 |
| ENSMUSG00000045193 | 24.05336294 | 31.30277597 | 33.89525029 | 14.4982381  | 19.33725383 |
| ENSMUSG00000045205 | 12.02668147 | 27.82468975 | 28.95219296 | 28.19101852 | 28.64778345 |
| ENSMUSG00000045215 | 5.65961481  | 5.56493795  | 10.59226572 | 3.221830688 | 5.729556691 |
| ENSMUSG00000045231 | 72.16008883 | 95.99517964 | 83.32582364 | 117.5968201 | 76.63282074 |
| ENSMUSG00000045246 | 6.367066661 | 4.869320706 | 9.179963621 | 5.638203705 | 6.445751277 |
| ENSMUSG00000045251 | 30.4204296  | 45.21512085 | 33.89525029 | 34.6346799  | 35.09353473 |
| ENSMUSG00000045252 | 90.55383696 | 112.6899935 | 91.09348516 | 167.5351958 | 122.4692743 |
| ENSMUSG00000045268 | 26.88317035 | 47.30197258 | 24.71528667 | 21.74735715 | 33.66114556 |
| ENSMUSG00000045275 | 7.074518513 | 8.347406925 | 4.943057334 | 7.249119049 | 6.445751277 |
| ENSMUSG00000045288 | 7.074518513 | 6.260555194 | 4.943057334 | 6.443661377 | 8.594335036 |
| ENSMUSG00000045294 | 16.27139258 | 38.95456565 | 33.18909925 | 182.8388916 | 114.5911338 |
| ENSMUSG00000045302 | 25.46826665 | 35.47647943 | 53.66747963 | 80.54576721 | 63.74131818 |
| ENSMUSG00000045312 | 7.781970364 | 4.173703463 | 9.179963621 | 2.416373016 | 6.445751277 |
| ENSMUSG00000045319 | 4.952162959 | 4.869320706 | 8.473812573 | 5.638203705 | 4.297167518 |
| ENSMUSG00000045322 | 128.0487851 | 142.601535  | 141.9363606 | 169.1461111 | 146.1036956 |
| ENSMUSG00000045326 | 7.781970364 | 11.1298759  | 7.061510478 | 5.638203705 | 12.17530797 |
| ENSMUSG00000045328 | 45.98437033 | 42.43265187 | 38.13215658 | 70.07481747 | 59.44415067 |
| ENSMUSG00000045333 | 6.367066661 | 7.651789682 | 9.886114669 | 5.638203705 | 1.432389173 |
| ENSMUSG00000045348 | 12.02668147 | 13.21672763 | 11.29841676 | 11.27640741 | 6.445751277 |
| ENSMUSG00000045349 | 0           | 0           | 0           | 0           | 0           |
| ENSMUSG00000045350 | 14.85648888 | 5.56493795  | 9.179963621 | 6.443661377 | 7.87814045  |
| ENSMUSG00000045374 | 65.79302217 | 95.2995624  | 96.74269354 | 58.79841006 | 65.88990194 |
| ENSMUSG00000045404 | 9.904325918 | 13.21672763 | 12.00456781 | 15.30369577 | 17.90486466 |
| ENSMUSG00000045409 | 99.75071103 | 147.4708557 | 135.5810012 | 212.6408254 | 171.8867007 |
| ENSMUSG00000045410 | 6.367066661 | 9.043024169 | 12.71071886 | 10.47094974 | 6.445751277 |
| ENSMUSG00000045411 | 0           | 0           | 0           | 0           | 0           |
| ENSMUSG00000045427 | 48.81417774 | 75.82227957 | 64.25974535 | 107.9313281 | 101.6996313 |
| ENSMUSG00000045438 | 29.71297775 | 41.04141738 | 39.54445867 | 54.7711217  | 60.87653984 |
| ENSMUSG00000045455 | 12.02668147 | 6.956172438 | 12.00456781 | 16.91461111 | 12.17530797 |
| ENSMUSG00000045463 | 7.074518513 | 9.043024169 | 5.649208382 | 4.02728836  | 7.161945863 |
| ENSMUSG00000045466 | 28.29807405 | 36.17209668 | 36.71985448 | 18.52552646 | 35.09353473 |
| ENSMUSG00000045467 | 9.196874066 | 13.91234488 | 7.061510478 | 15.30369577 | 10.7429188  |
| ENSMUSG00000045482 | 70.03773327 | 91.82147618 | 98.15499564 | 99.87675134 | 79.49759908 |

|                    |             |             |             |             |             |
|--------------------|-------------|-------------|-------------|-------------|-------------|
| ENSMUSG00000045503 | 12.02668147 | 13.21672763 | 13.41686991 | 27.38556085 | 22.91822676 |
| ENSMUSG00000045519 | 30.4204296  | 56.34499675 | 37.42600553 | 26.58010318 | 35.80972932 |
| ENSMUSG00000045520 | 5.65961481  | 7.651789682 | 7.767661525 | 16.91461111 | 7.87814045  |
| ENSMUSG00000045576 | 117.4370073 | 143.9927695 | 109.4534124 | 243.248217  | 171.8867007 |
| ENSMUSG00000045594 | 0           | 0           | 0           | 0           | 0           |
| ENSMUSG00000045598 | 60.13340736 | 94.60394515 | 88.26888097 | 153.0369577 | 130.3474147 |
| ENSMUSG00000045624 | 74.98989623 | 116.863697  | 83.32582364 | 182.0334339 | 145.387501  |
| ENSMUSG00000045636 | 7.781970364 | 7.651789682 | 7.767661525 | 3.221830688 | 4.297167518 |
| ENSMUSG00000045639 | 8.489422215 | 7.651789682 | 10.59226572 | 8.054576721 | 7.87814045  |
| ENSMUSG00000045648 | 5.65961481  | 10.43425866 | 8.473812573 | 4.02728836  | 4.297167518 |
| ENSMUSG00000045658 | 15.56394073 | 8.347406925 | 7.061510478 | 3.221830688 | 7.161945863 |
| ENSMUSG00000045659 | 5.65961481  | 2.086851731 | 4.236906287 | 5.638203705 | 5.729556691 |
| ENSMUSG00000045662 | 7.781970364 | 8.347406925 | 6.35535943  | 4.832746033 | 3.580972932 |
| ENSMUSG00000045667 | 7.074518513 | 7.651789682 | 9.886114669 | 4.02728836  | 7.87814045  |
| ENSMUSG00000045671 | 9.904325918 | 18.08604834 | 11.29841676 | 13.69278043 | 15.7562809  |
| ENSMUSG00000045672 | 4.244711108 | 8.347406925 | 9.179963621 | 7.249119049 | 8.594335036 |
| ENSMUSG00000045679 | 11.31922962 | 15.30357936 | 13.41686991 | 19.33098413 | 17.90486466 |
| ENSMUSG00000045684 | 11.31922962 | 6.260555194 | 5.649208382 | 4.832746033 | 9.310529622 |
| ENSMUSG00000045691 | 0           | 0           | 0           | 0           | 0           |
| ENSMUSG00000045699 | 14.14903703 | 13.21672763 | 17.65377619 | 7.249119049 | 10.02672421 |
| ENSMUSG00000045744 | 12.02668147 | 14.60796212 | 15.53532305 | 23.35827249 | 18.62105924 |
| ENSMUSG00000045751 | 33.95768886 | 41.73703463 | 31.77679715 | 81.35122488 | 77.34901533 |
| ENSMUSG00000045752 | 24.05336294 | 31.30277597 | 28.24604191 | 86.98942859 | 60.87653984 |
| ENSMUSG00000045761 | 9.196874066 | 6.260555194 | 4.943057334 | 7.249119049 | 9.310529622 |
| ENSMUSG00000045775 | 7.074518513 | 10.43425866 | 2.118453143 | 8.860034393 | 8.594335036 |
| ENSMUSG00000045777 | 8.489422215 | 6.956172438 | 6.35535943  | 8.054576721 | 11.45911338 |
| ENSMUSG00000045790 | 9.196874066 | 4.173703463 | 12.00456781 | 7.249119049 | 3.580972932 |
| ENSMUSG00000045795 | 33.95768886 | 57.04061399 | 46.60596915 | 80.54576721 | 88.80812871 |
| ENSMUSG00000045802 | 5.65961481  | 4.869320706 | 3.530755239 | 0.805457672 | 3.580972932 |
| ENSMUSG00000045827 | 4.244711108 | 8.347406925 | 2.824604191 | 12.08186508 | 12.89150255 |
| ENSMUSG00000045867 | 9.196874066 | 13.21672763 | 11.29841676 | 16.10915344 | 10.7429188  |
| ENSMUSG00000045868 | 70.03773327 | 109.2119073 | 100.2734488 | 202.1698757 | 130.3474147 |
| ENSMUSG00000045875 | 12.02668147 | 5.56493795  | 7.767661525 | 4.02728836  | 5.729556691 |
| ENSMUSG00000045877 | 8.489422215 | 6.956172438 | 4.943057334 | 5.638203705 | 2.148583759 |
| ENSMUSG00000045886 | 12.02668147 | 3.478086219 | 12.00456781 | 7.249119049 | 12.89150255 |
| ENSMUSG00000045896 | 19.10119998 | 42.43265187 | 30.36449505 | 24.16373016 | 36.5259239  |
| ENSMUSG00000045915 | 14.14903703 | 6.260555194 | 4.236906287 | 5.638203705 | 6.445751277 |
| ENSMUSG00000045917 | 13.44158517 | 28.52030699 | 21.89068248 | 24.16373016 | 30.79636721 |
| ENSMUSG00000045928 | 7.781970364 | 4.869320706 | 12.71071886 | 4.832746033 | 4.297167518 |
| ENSMUSG00000045929 | 13.44158517 | 9.043024169 | 5.649208382 | 8.860034393 | 10.7429188  |
| ENSMUSG00000045932 | 12.73413332 | 21.56413456 | 14.829172   | 9.665492065 | 11.45911338 |
| ENSMUSG00000045934 | 13.44158517 | 8.347406925 | 10.59226572 | 10.47094974 | 7.87814045  |
| ENSMUSG00000045942 | 132.2934962 | 127.9935729 | 136.9933033 | 200.5589604 | 143.9551119 |

|                    |             |             |             |             |             |
|--------------------|-------------|-------------|-------------|-------------|-------------|
| ENSMUSG00000045962 | 1.414903703 | 6.260555194 | 4.943057334 | 16.91461111 | 15.7562809  |
| ENSMUSG00000045967 | 5.65961481  | 4.173703463 | 7.767661525 | 6.443661377 | 12.17530797 |
| ENSMUSG00000045973 | 80.64951104 | 104.3425866 | 76.97046421 | 72.49119049 | 80.92998826 |
| ENSMUSG00000045980 | 23.34591109 | 23.65098629 | 31.77679715 | 23.35827249 | 23.63442135 |
| ENSMUSG00000045983 | 63.67066661 | 90.43024169 | 93.91808935 | 294.797508  | 204.8316517 |
| ENSMUSG00000045991 | 12.02668147 | 7.651789682 | 3.530755239 | 4.832746033 | 7.87814045  |
| ENSMUSG00000045994 | 8.489422215 | 2.086851731 | 4.943057334 | 8.054576721 | 6.445751277 |
| ENSMUSG00000045996 | 20.51610369 | 35.47647943 | 19.06607829 | 41.88379895 | 46.55264811 |
| ENSMUSG00000046020 | 58.71850365 | 74.43104508 | 57.90438592 | 219.8899445 | 148.2522794 |
| ENSMUSG00000046027 | 71.45263698 | 97.38641413 | 86.85657888 | 62.82569842 | 61.59273443 |
| ENSMUSG00000046032 | 31.83533331 | 49.38882431 | 33.18909925 | 42.68925662 | 35.09353473 |
| ENSMUSG00000046056 | 6.367066661 | 4.173703463 | 5.649208382 | 7.249119049 | 4.297167518 |
| ENSMUSG00000046079 | 36.78749627 | 68.86610713 | 58.61053696 | 56.38203705 | 64.45751277 |
| ENSMUSG00000046080 | 4.244711108 | 5.56493795  | 10.59226572 | 4.02728836  | 4.297167518 |
| ENSMUSG00000046085 | 55.1812444  | 82.77845201 | 80.50121945 | 57.99295239 | 55.14698315 |
| ENSMUSG00000046101 | 10.61177777 | 9.043024169 | 6.35535943  | 6.443661377 | 4.297167518 |
| ENSMUSG00000046109 | 4.952162959 | 4.173703463 | 2.824604191 | 4.832746033 | 6.445751277 |
| ENSMUSG00000046110 | 20.51610369 | 41.73703463 | 36.71985448 | 32.21830688 | 43.68786977 |
| ENSMUSG00000046111 | 30.4204296  | 54.95376226 | 47.3121202  | 103.098582  | 72.33565322 |
| ENSMUSG00000046138 | 44.56946663 | 82.77845201 | 74.14586002 | 74.9075635  | 62.30892901 |
| ENSMUSG00000046152 | 7.074518513 | 10.43425866 | 5.649208382 | 4.832746033 | 4.297167518 |
| ENSMUSG00000046157 | 8.489422215 | 19.47728283 | 15.53532305 | 8.860034393 | 14.32389173 |
| ENSMUSG00000046159 | 9.196874066 | 3.478086219 | 4.943057334 | 5.638203705 | 3.580972932 |
| ENSMUSG00000046169 | 32.54278516 | 49.38882431 | 37.42600553 | 24.96918783 | 41.53928601 |
| ENSMUSG00000046179 | 16.27139258 | 19.47728283 | 14.829172   | 34.6346799  | 30.79636721 |
| ENSMUSG00000046180 | 7.781970364 | 2.782468975 | 1.412302096 | 2.416373016 | 2.148583759 |
| ENSMUSG00000046185 | 61.54831106 | 109.9075245 | 112.9841676 | 135.3168889 | 110.2939663 |
| ENSMUSG00000046203 | 9.196874066 | 6.956172438 | 9.886114669 | 4.02728836  | 5.013362104 |
| ENSMUSG00000046204 | 9.196874066 | 3.478086219 | 4.943057334 | 4.832746033 | 7.161945863 |
| ENSMUSG00000046207 | 4.952162959 | 7.651789682 | 9.886114669 | 28.19101852 | 25.06681052 |
| ENSMUSG00000046223 | 73.57499253 | 101.5601176 | 79.08891735 | 44.30017197 | 60.87653984 |
| ENSMUSG00000046230 | 53.05888884 | 105.7338211 | 106.6288082 | 95.84946298 | 83.07857202 |
| ENSMUSG00000046245 | 9.196874066 | 7.651789682 | 9.886114669 | 11.27640741 | 9.310529622 |
| ENSMUSG00000046262 | 9.904325918 | 9.043024169 | 9.886114669 | 8.860034393 | 6.445751277 |
| ENSMUSG00000046269 | 5.65961481  | 6.956172438 | 5.649208382 | 4.832746033 | 7.161945863 |
| ENSMUSG00000046295 | 15.56394073 | 18.78166558 | 17.65377619 | 38.66196826 | 39.39070225 |
| ENSMUSG00000046311 | 55.88869625 | 70.25734162 | 55.78593277 | 189.2825529 | 152.5494469 |
| ENSMUSG00000046314 | 8.489422215 | 7.651789682 | 11.29841676 | 5.638203705 | 5.729556691 |
| ENSMUSG00000046317 | 6.367066661 | 9.043024169 | 7.767661525 | 4.02728836  | 5.013362104 |
| ENSMUSG00000046318 | 8.489422215 | 7.651789682 | 7.061510478 | 4.02728836  | 5.729556691 |
| ENSMUSG00000046324 | 13.44158517 | 34.78086219 | 28.24604191 | 41.88379895 | 37.95831308 |
| ENSMUSG00000046329 | 4.952162959 | 6.260555194 | 10.59226572 | 6.443661377 | 5.729556691 |
| ENSMUSG00000046330 | 25.46826665 | 43.82388636 | 45.8998181  | 186.0607223 | 136.793166  |



|                    |             |             |             |             |             |
|--------------------|-------------|-------------|-------------|-------------|-------------|
| ENSMUSG00000046337 | 9.904325918 | 9.738641413 | 4.236906287 | 7.249119049 | 3.580972932 |
| ENSMUSG00000046351 | 48.10672589 | 75.12666233 | 57.19823487 | 75.71302118 | 50.84981563 |
| ENSMUSG00000046364 | 1.414903703 | 1.391234488 | 4.236906287 | 3.221830688 | 0.716194586 |
| ENSMUSG00000046367 | 7.781970364 | 11.82549314 | 12.00456781 | 8.860034393 | 13.60769714 |
| ENSMUSG00000046378 | 7.074518513 | 7.651789682 | 6.35535943  | 10.47094974 | 6.445751277 |
| ENSMUSG00000046402 | 9.904325918 | 4.869320706 | 6.35535943  | 5.638203705 | 7.87814045  |
| ENSMUSG00000046408 | 14.85648888 | 18.08604834 | 17.65377619 | 21.74735715 | 23.63442135 |
| ENSMUSG00000046410 | 5.65961481  | 4.869320706 | 11.29841676 | 5.638203705 | 7.161945863 |
| ENSMUSG00000046417 | 29.0055259  | 43.12826911 | 36.01370344 | 39.46742593 | 39.39070225 |
| ENSMUSG00000046432 | 2.122355554 | 2.086851731 | 4.943057334 | 5.638203705 | 3.580972932 |
| ENSMUSG00000046434 | 33.95768886 | 61.9099347  | 49.43057334 | 247.2755053 | 200.5344842 |
| ENSMUSG00000046449 | 4.952162959 | 4.173703463 | 3.530755239 | 0.805457672 | 0.716194586 |
| ENSMUSG00000046456 | 7.781970364 | 7.651789682 | 7.061510478 | 8.054576721 | 5.013362104 |
| ENSMUSG00000046460 | 5.65961481  | 1.391234488 | 2.824604191 | 2.416373016 | 2.148583759 |
| ENSMUSG00000046491 | 4.244711108 | 4.173703463 | 8.473812573 | 4.02728836  | 7.161945863 |
| ENSMUSG00000046516 | 0           | 0           | 0           | 0           | 0           |
| ENSMUSG00000046519 | 55.88869625 | 98.08203137 | 60.02283906 | 67.65844446 | 63.0251236  |
| ENSMUSG00000046548 | 12.02668147 | 10.43425866 | 7.767661525 | 5.638203705 | 4.297167518 |
| ENSMUSG00000046567 | 9.904325918 | 11.82549314 | 12.71071886 | 12.88732275 | 13.60769714 |
| ENSMUSG00000046572 | 12.73413332 | 6.956172438 | 8.473812573 | 11.27640741 | 13.60769714 |
| ENSMUSG00000046591 | 72.86754068 | 77.9091313  | 69.20280268 | 140.1496349 | 95.97007457 |
| ENSMUSG00000046598 | 12.73413332 | 6.260555194 | 7.061510478 | 4.832746033 | 15.04008631 |
| ENSMUSG00000046603 | 18.39374813 | 30.60715873 | 29.65834401 | 15.30369577 | 26.49919969 |
| ENSMUSG00000046605 | 7.074518513 | 19.47728283 | 12.71071886 | 12.08186508 | 13.60769714 |
| ENSMUSG00000046610 | 6.367066661 | 7.651789682 | 7.767661525 | 8.054576721 | 7.161945863 |
| ENSMUSG00000046613 | 4.952162959 | 4.173703463 | 5.649208382 | 11.27640741 | 6.445751277 |
| ENSMUSG00000046658 | 10.61177777 | 13.21672763 | 16.2414741  | 8.054576721 | 17.90486466 |
| ENSMUSG00000046667 | 54.47379255 | 91.12585893 | 88.26888097 | 78.93485187 | 83.7947666  |
| ENSMUSG00000046671 | 14.14903703 | 18.08604834 | 31.0706461  | 17.72006879 | 24.35061594 |
| ENSMUSG00000046679 | 10.61177777 | 20.17290007 | 19.06607829 | 42.68925662 | 32.94495097 |
| ENSMUSG00000046688 | 26.88317035 | 19.47728283 | 19.06607829 | 11.27640741 | 16.47247549 |
| ENSMUSG00000046691 | 123.0966221 | 178.0780144 | 146.1732669 | 299.630254  | 215.5745705 |
| ENSMUSG00000046697 | 7.074518513 | 9.738641413 | 2.824604191 | 6.443661377 | 7.161945863 |
| ENSMUSG00000046699 | 2.829807405 | 4.869320706 | 3.530755239 | 3.221830688 | 2.864778345 |
| ENSMUSG00000046709 | 8.489422215 | 4.173703463 | 5.649208382 | 5.638203705 | 3.580972932 |
| ENSMUSG00000046711 | 76.40479994 | 70.25734162 | 76.97046421 | 227.9445212 | 146.8198902 |
| ENSMUSG00000046722 | 96.92090362 | 140.5146832 | 139.1117564 | 317.3503228 | 219.871738  |
| ENSMUSG00000046727 | 5.65961481  | 4.869320706 | 8.473812573 | 4.832746033 | 5.013362104 |
| ENSMUSG00000046750 | 7.074518513 | 1.391234488 | 4.943057334 | 5.638203705 | 12.89150255 |
| ENSMUSG00000046753 | 22.63845924 | 27.82468975 | 24.71528667 | 25.77464551 | 25.06681052 |
| ENSMUSG00000046756 | 33.25023701 | 58.43184848 | 44.48751601 | 160.2860767 | 135.3607768 |
| ENSMUSG00000046761 | 4.952162959 | 5.56493795  | 7.061510478 | 9.665492065 | 5.729556691 |
| ENSMUSG00000046764 | 9.904325918 | 9.043024169 | 5.649208382 | 5.638203705 | 2.148583759 |

|                    |             |             |             |             |             |
|--------------------|-------------|-------------|-------------|-------------|-------------|
| ENSMUSG00000046768 | 6.367066661 | 4.869320706 | 9.179963621 | 4.832746033 | 2.148583759 |
| ENSMUSG00000046774 | 2.122355554 | 7.651789682 | 2.118453143 | 2.416373016 | 2.148583759 |
| ENSMUSG00000046782 | 11.31922962 | 9.043024169 | 4.943057334 | 9.665492065 | 5.729556691 |
| ENSMUSG00000046798 | 3.537259256 | 5.56493795  | 9.179963621 | 7.249119049 | 4.297167518 |
| ENSMUSG00000046804 | 4.244711108 | 8.347406925 | 5.649208382 | 7.249119049 | 6.445751277 |
| ENSMUSG00000046806 | 7.074518513 | 20.86851731 | 27.53989086 | 41.07834128 | 32.94495097 |
| ENSMUSG00000046807 | 6.367066661 | 8.347406925 | 14.829172   | 6.443661377 | 8.594335036 |
| ENSMUSG00000046822 | 8.489422215 | 17.39043109 | 23.30298458 | 17.72006879 | 21.48583759 |
| ENSMUSG00000046836 | 171.9107999 | 175.9911627 | 144.7609648 | 255.3300821 | 180.4810358 |
| ENSMUSG00000046854 | 6.367066661 | 13.91234488 | 8.473812573 | 9.665492065 | 18.62105924 |
| ENSMUSG00000046856 | 8.489422215 | 5.56493795  | 7.061510478 | 6.443661377 | 7.87814045  |
| ENSMUSG00000046862 | 12.02668147 | 25.04222078 | 16.2414741  | 12.88732275 | 37.24211849 |
| ENSMUSG00000046873 | 18.39374813 | 29.91154148 | 31.0706461  | 41.88379895 | 40.10689684 |
| ENSMUSG00000046876 | 8.489422215 | 22.2597518  | 19.06607829 | 91.01671695 | 63.74131818 |
| ENSMUSG00000046881 | 11.31922962 | 7.651789682 | 9.179963621 | 11.27640741 | 10.02672421 |
| ENSMUSG00000046897 | 35.37259256 | 65.38802092 | 59.31668801 | 36.24559524 | 42.97167518 |
| ENSMUSG00000046942 | 7.074518513 | 4.869320706 | 5.649208382 | 1.610915344 | 2.148583759 |
| ENSMUSG00000046947 | 14.14903703 | 22.95536904 | 19.77222934 | 13.69278043 | 17.90486466 |
| ENSMUSG00000046949 | 18.39374813 | 22.95536904 | 23.30298458 | 20.94189947 | 12.17530797 |
| ENSMUSG00000046959 | 12.02668147 | 15.30357936 | 22.59683353 | 12.08186508 | 12.89150255 |
| ENSMUSG00000046962 | 26.88317035 | 56.34499675 | 43.07521391 | 51.54929101 | 45.12025894 |
| ENSMUSG00000046982 | 17.68629628 | 18.08604834 | 28.95219296 | 40.2728836  | 39.39070225 |
| ENSMUSG00000046985 | 79.94205919 | 93.90832791 | 98.86114669 | 110.3477011 | 95.97007457 |
| ENSMUSG00000047003 | 21.93100739 | 18.08604834 | 24.71528667 | 9.665492065 | 15.7562809  |
| ENSMUSG00000047013 | 7.781970364 | 4.173703463 | 9.179963621 | 8.054576721 | 5.729556691 |
| ENSMUSG00000047021 | 6.367066661 | 6.260555194 | 9.886114669 | 8.054576721 | 11.45911338 |
| ENSMUSG00000047022 | 0           | 0           | 2.118453143 | 0.805457672 | 0.716194586 |
| ENSMUSG00000047030 | 62.25576291 | 91.12585893 | 81.20737049 | 134.5114312 | 90.95671247 |
| ENSMUSG00000047045 | 9.196874066 | 15.30357936 | 18.35992724 | 16.91461111 | 17.18867007 |
| ENSMUSG00000047061 | 7.074518513 | 3.478086219 | 3.530755239 | 10.47094974 | 12.17530797 |
| ENSMUSG00000047085 | 4.952162959 | 3.478086219 | 2.824604191 | 7.249119049 | 6.445751277 |
| ENSMUSG00000047090 | 24.05336294 | 34.08524495 | 36.01370344 | 33.02376456 | 30.79636721 |
| ENSMUSG00000047098 | 21.22355554 | 42.43265187 | 51.54902649 | 180.4225185 | 118.1721067 |
| ENSMUSG00000047109 | 7.781970364 | 7.651789682 | 7.767661525 | 6.443661377 | 9.310529622 |
| ENSMUSG00000047115 | 9.196874066 | 5.56493795  | 7.061510478 | 7.249119049 | 7.161945863 |
| ENSMUSG00000047117 | 4.244711108 | 5.56493795  | 3.530755239 | 4.832746033 | 5.013362104 |
| ENSMUSG00000047126 | 161.2990221 | 193.3815938 | 152.5286263 | 356.0122911 | 248.5195215 |
| ENSMUSG00000047129 | 7.074518513 | 4.869320706 | 4.236906287 | 4.02728836  | 6.445751277 |
| ENSMUSG00000047146 | 10.61177777 | 3.478086219 | 9.886114669 | 8.054576721 | 2.864778345 |
| ENSMUSG00000047155 | 7.781970364 | 8.347406925 | 4.943057334 | 5.638203705 | 4.297167518 |
| ENSMUSG00000047161 | 4.952162959 | 5.56493795  | 4.236906287 | 4.832746033 | 5.729556691 |
| ENSMUSG00000047181 | 5.65961481  | 4.869320706 | 3.530755239 | 7.249119049 | 5.013362104 |
| ENSMUSG00000047193 | 91.26128881 | 157.9051143 | 121.4579802 | 182.8388916 | 161.1437819 |

|                    |             |             |             |             |             |
|--------------------|-------------|-------------|-------------|-------------|-------------|
| ENSMUSG00000047205 | 9.196874066 | 5.56493795  | 10.59226572 | 6.443661377 | 2.864778345 |
| ENSMUSG00000047213 | 43.86201478 | 75.12666233 | 59.31668801 | 138.5387196 | 114.5911338 |
| ENSMUSG00000047215 | 65.79302217 | 95.2995624  | 84.03197468 | 269.0228625 | 202.6830679 |
| ENSMUSG00000047237 | 11.31922962 | 4.173703463 | 7.061510478 | 5.638203705 | 3.580972932 |
| ENSMUSG00000047242 | 2.829807405 | 4.173703463 | 6.35535943  | 6.443661377 | 1.432389173 |
| ENSMUSG00000047248 | 69.33028142 | 99.47326586 | 86.85657888 | 88.60034393 | 73.76804239 |
| ENSMUSG00000047250 | 9.904325918 | 4.173703463 | 8.473812573 | 6.443661377 | 5.729556691 |
| ENSMUSG00000047257 | 9.904325918 | 6.260555194 | 9.179963621 | 10.47094974 | 7.161945863 |
| ENSMUSG00000047284 | 12.02668147 | 20.17290007 | 21.18453143 | 32.21830688 | 25.78300511 |
| ENSMUSG00000047295 | 0.707451851 | 0           | 0           | 0           | 0           |
| ENSMUSG00000047342 | 7.074518513 | 6.956172438 | 11.29841676 | 4.832746033 | 7.87814045  |
| ENSMUSG00000047361 | 13.44158517 | 5.56493795  | 7.767661525 | 9.665492065 | 5.729556691 |
| ENSMUSG00000047369 | 8.489422215 | 11.1298759  | 7.061510478 | 8.860034393 | 10.02672421 |
| ENSMUSG00000047370 | 9.196874066 | 12.52111039 | 7.061510478 | 18.52552646 | 16.47247549 |
| ENSMUSG00000047384 | 7.074518513 | 4.869320706 | 9.179963621 | 4.02728836  | 7.87814045  |
| ENSMUSG00000047388 | 31.12788146 | 45.91073809 | 41.66291182 | 25.77464551 | 35.09353473 |
| ENSMUSG00000047407 | 3.537259256 | 17.39043109 | 11.29841676 | 83.7675979  | 79.49759908 |
| ENSMUSG00000047409 | 3.537259256 | 2.782468975 | 4.236906287 | 3.221830688 | 3.580972932 |
| ENSMUSG00000047412 | 52.35143699 | 77.9091313  | 68.49665163 | 86.98942859 | 82.36237743 |
| ENSMUSG00000047415 | 10.61177777 | 7.651789682 | 9.179963621 | 12.08186508 | 5.729556691 |
| ENSMUSG00000047417 | 187.4747406 | 213.5544938 | 198.4284444 | 221.5008598 | 167.5895332 |
| ENSMUSG00000047428 | 4.952162959 | 7.651789682 | 6.35535943  | 3.221830688 | 7.87814045  |
| ENSMUSG00000047434 | 17.68629628 | 31.30277597 | 31.0706461  | 33.82922223 | 40.82309142 |
| ENSMUSG00000047443 | 9.196874066 | 7.651789682 | 4.943057334 | 9.665492065 | 7.87814045  |
| ENSMUSG00000047446 | 19.80865184 | 35.47647943 | 28.95219296 | 45.10562964 | 34.37734014 |
| ENSMUSG00000047454 | 9.196874066 | 31.99839321 | 22.59683353 | 73.29664816 | 75.91662615 |
| ENSMUSG00000047459 | 121.6817184 | 170.4262247 | 158.8839857 | 130.4841429 | 118.8883013 |
| ENSMUSG00000047462 | 10.61177777 | 7.651789682 | 7.061510478 | 4.832746033 | 7.87814045  |
| ENSMUSG00000047473 | 9.904325918 | 16.69481385 | 14.12302096 | 4.832746033 | 5.729556691 |
| ENSMUSG00000047490 | 11.31922962 | 5.56493795  | 6.35535943  | 7.249119049 | 6.445751277 |
| ENSMUSG00000047495 | 4.952162959 | 3.478086219 | 7.767661525 | 4.02728836  | 7.161945863 |
| ENSMUSG00000047502 | 12.73413332 | 8.347406925 | 4.236906287 | 5.638203705 | 6.445751277 |
| ENSMUSG00000047507 | 4.952162959 | 6.260555194 | 5.649208382 | 12.88732275 | 5.729556691 |
| ENSMUSG00000047517 | 9.904325918 | 4.869320706 | 4.236906287 | 6.443661377 | 7.87814045  |
| ENSMUSG00000047528 | 6.367066661 | 13.91234488 | 10.59226572 | 8.860034393 | 13.60769714 |
| ENSMUSG00000047534 | 56.5961481  | 49.38882431 | 51.54902649 | 103.098582  | 77.34901533 |
| ENSMUSG00000047547 | 12.02668147 | 13.91234488 | 16.2414741  | 13.69278043 | 6.445751277 |
| ENSMUSG00000047554 | 17.68629628 | 36.17209668 | 27.53989086 | 50.74383334 | 46.55264811 |
| ENSMUSG00000047592 | 14.14903703 | 6.956172438 | 7.061510478 | 8.054576721 | 8.594335036 |
| ENSMUSG00000047613 | 24.05336294 | 13.91234488 | 19.06607829 | 33.02376456 | 29.36397804 |
| ENSMUSG00000047617 | 33.95768886 | 41.04141738 | 48.01827125 | 35.44013757 | 40.82309142 |
| ENSMUSG00000047632 | 68.62282957 | 90.43024169 | 45.8998181  | 114.3749894 | 119.6044959 |
| ENSMUSG00000047638 | 7.074518513 | 6.260555194 | 7.767661525 | 4.02728836  | 3.580972932 |

|                    |              |             |             |             |             |
|--------------------|--------------|-------------|-------------|-------------|-------------|
| ENSMUSG00000047642 | 5.65961481   | 5.56493795  | 12.00456781 | 4.832746033 | 6.445751277 |
| ENSMUSG00000047648 | 11.31922962  | 22.2597518  | 19.06607829 | 28.9964762  | 27.21539428 |
| ENSMUSG00000047661 | 7.781970364  | 4.173703463 | 10.59226572 | 5.638203705 | 7.161945863 |
| ENSMUSG00000047675 | 0            | 0           | 0           | 0           | 0           |
| ENSMUSG00000047676 | 7.781970364  | 13.91234488 | 12.00456781 | 16.91461111 | 10.7429188  |
| ENSMUSG00000047692 | 7.074518513  | 12.52111039 | 10.59226572 | 8.054576721 | 5.013362104 |
| ENSMUSG00000047694 | 2.829807405  | 2.782468975 | 2.118453143 | 7.249119049 | 6.445751277 |
| ENSMUSG00000047696 | 12.02668147  | 10.43425866 | 4.943057334 | 4.02728836  | 5.013362104 |
| ENSMUSG00000047714 | 89.84638511  | 115.4724625 | 117.2210739 | 137.7332619 | 110.2939663 |
| ENSMUSG00000047728 | 12.02668147  | 6.260555194 | 7.061510478 | 3.221830688 | 4.297167518 |
| ENSMUSG00000047730 | 11.31922962  | 5.56493795  | 5.649208382 | 8.860034393 | 10.7429188  |
| ENSMUSG00000047731 | 106.8252295  | 127.9935729 | 136.2871522 | 110.3477011 | 111.0101609 |
| ENSMUSG00000047733 | 16.97884443  | 22.2597518  | 25.42143772 | 16.91461111 | 16.47247549 |
| ENSMUSG00000047735 | 135.1233036  | 172.5130765 | 139.1117564 | 206.1971641 | 149.6846685 |
| ENSMUSG00000047746 | 10.61177777  | 4.173703463 | 9.886114669 | 4.832746033 | 9.310529622 |
| ENSMUSG00000047747 | 5.65961481   | 6.260555194 | 10.59226572 | 4.02728836  | 8.594335036 |
| ENSMUSG00000047757 | 12.02668147  | 22.95536904 | 14.829172   | 37.85651059 | 30.79636721 |
| ENSMUSG00000047766 | 5.65961481   | 2.782468975 | 5.649208382 | 8.054576721 | 11.45911338 |
| ENSMUSG00000047767 | 55.88869625  | 86.95215547 | 79.7950684  | 49.93837567 | 59.44415067 |
| ENSMUSG00000047786 | 9.196874066  | 7.651789682 | 12.00456781 | 7.249119049 | 8.594335036 |
| ENSMUSG00000047793 | 6.367066661  | 4.869320706 | 7.767661525 | 8.054576721 | 7.87814045  |
| ENSMUSG00000047797 | 5.65961481   | 2.086851731 | 4.236906287 | 3.221830688 | 4.297167518 |
| ENSMUSG00000047798 | 9.196874066  | 16.69481385 | 14.12302096 | 12.88732275 | 16.47247549 |
| ENSMUSG00000047799 | 7.781970364  | 3.478086219 | 9.886114669 | 1.610915344 | 4.297167518 |
| ENSMUSG00000047804 | 58.0110518   | 77.21351406 | 67.79050059 | 127.2623122 | 93.10529622 |
| ENSMUSG00000047821 | 10.61177777  | 6.260555194 | 9.886114669 | 8.054576721 | 7.87814045  |
| ENSMUSG00000047824 | 28.29807405  | 36.17209668 | 43.07521391 | 69.2693598  | 52.2822048  |
| ENSMUSG00000047828 | 10.61177777  | 6.956172438 | 4.943057334 | 5.638203705 | 5.013362104 |
| ENSMUSG00000047843 | 12.02668147  | 7.651789682 | 9.179963621 | 4.02728836  | 9.310529622 |
| ENSMUSG00000047866 | 44.56946663  | 62.60555194 | 53.66747963 | 57.18749472 | 58.72795608 |
| ENSMUSG00000047867 | 137.2456591  | 193.3815938 | 169.4762515 | 265.8010318 | 205.5478463 |
| ENSMUSG00000047878 | 10.61177777  | 5.56493795  | 5.649208382 | 8.054576721 | 15.04008631 |
| ENSMUSG00000047879 | 42.447111108 | 69.56172438 | 69.20280268 | 136.1223466 | 103.1320204 |
| ENSMUSG00000047880 | 7.781970364  | 13.21672763 | 12.00456781 | 8.860034393 | 12.17530797 |
| ENSMUSG00000047881 | 24.76081479  | 36.17209668 | 30.36449505 | 16.91461111 | 21.48583759 |
| ENSMUSG00000047897 | 13.44158517  | 8.347406925 | 9.886114669 | 4.02728836  | 3.580972932 |
| ENSMUSG00000047907 | 8.489422215  | 4.869320706 | 9.179963621 | 4.832746033 | 10.7429188  |
| ENSMUSG00000047909 | 50.93653329  | 70.95295887 | 71.32125582 | 78.93485187 | 75.20043157 |
| ENSMUSG00000047921 | 14.85648888  | 14.60796212 | 8.473812573 | 20.1364418  | 23.63442135 |
| ENSMUSG00000047940 | 6.367066661  | 6.956172438 | 7.061510478 | 5.638203705 | 5.729556691 |
| ENSMUSG00000047986 | 8.489422215  | 12.52111039 | 7.061510478 | 10.47094974 | 5.729556691 |
| ENSMUSG00000047989 | 70.74518513  | 82.08283477 | 70.61510478 | 63.6311561  | 69.47087488 |
| ENSMUSG00000047992 | 6.367066661  | 3.478086219 | 7.061510478 | 4.02728836  | 5.013362104 |

|                    |             |             |             |             |             |
|--------------------|-------------|-------------|-------------|-------------|-------------|
| ENSMUSG00000047996 | 4.244711108 | 2.782468975 | 4.943057334 | 4.02728836  | 3.580972932 |
| ENSMUSG00000048000 | 21.22355554 | 29.91154148 | 36.71985448 | 95.04400531 | 68.75468029 |
| ENSMUSG00000048003 | 8.489422215 | 7.651789682 | 5.649208382 | 8.054576721 | 3.580972932 |
| ENSMUSG00000048004 | 9.196874066 | 3.478086219 | 6.35535943  | 6.443661377 | 4.297167518 |
| ENSMUSG00000048012 | 30.4204296  | 57.04061399 | 55.07978173 | 49.93837567 | 50.13362104 |
| ENSMUSG00000048022 | 7.781970364 | 4.869320706 | 4.943057334 | 4.02728836  | 7.161945863 |
| ENSMUSG00000048029 | 8.489422215 | 12.52111039 | 12.71071886 | 8.860034393 | 8.594335036 |
| ENSMUSG00000048058 | 15.56394073 | 21.56413456 | 18.35992724 | 6.443661377 | 11.45911338 |
| ENSMUSG00000048076 | 152.8095999 | 165.556904  | 155.3532305 | 321.3776112 | 228.466073  |
| ENSMUSG00000048078 | 6.367066661 | 5.56493795  | 6.35535943  | 9.665492065 | 6.445751277 |
| ENSMUSG00000048100 | 20.51610369 | 41.04141738 | 46.60596915 | 29.80193387 | 35.80972932 |
| ENSMUSG00000048106 | 21.22355554 | 25.04222078 | 26.83373982 | 41.88379895 | 32.94495097 |
| ENSMUSG00000048108 | 3.537259256 | 8.347406925 | 9.179963621 | 5.638203705 | 9.310529622 |
| ENSMUSG00000048109 | 104.702874  | 118.2549314 | 113.6903187 | 271.4392355 | 205.5478463 |
| ENSMUSG00000048118 | 82.7718666  | 124.5154866 | 108.7472614 | 230.3608942 | 186.926787  |
| ENSMUSG00000048120 | 4.952162959 | 7.651789682 | 9.179963621 | 7.249119049 | 12.17530797 |
| ENSMUSG00000048126 | 9.196874066 | 6.260555194 | 4.236906287 | 6.443661377 | 8.594335036 |
| ENSMUSG00000048148 | 7.781970364 | 4.173703463 | 5.649208382 | 1.610915344 | 7.87814045  |
| ENSMUSG00000048154 | 203.7461332 | 230.2493077 | 230.9113926 | 401.9233784 | 285.76164   |
| ENSMUSG00000048163 | 38.90985182 | 50.7800588  | 52.25517753 | 202.1698757 | 147.5360848 |
| ENSMUSG00000048170 | 87.72402956 | 137.7322143 | 108.0411103 | 208.6135371 | 173.3190899 |
| ENSMUSG00000048175 | 7.074518513 | 9.738641413 | 12.71071886 | 8.054576721 | 11.45911338 |
| ENSMUSG00000048186 | 6.367066661 | 4.869320706 | 5.649208382 | 2.416373016 | 5.013362104 |
| ENSMUSG00000048191 | 4.244711108 | 3.478086219 | 7.061510478 | 8.054576721 | 10.02672421 |
| ENSMUSG00000048200 | 7.074518513 | 10.43425866 | 12.71071886 | 9.665492065 | 15.04008631 |
| ENSMUSG00000048216 | 4.952162959 | 6.956172438 | 7.767661525 | 11.27640741 | 5.729556691 |
| ENSMUSG00000048217 | 9.196874066 | 7.651789682 | 8.473812573 | 8.860034393 | 4.297167518 |
| ENSMUSG00000048231 | 9.196874066 | 6.956172438 | 9.179963621 | 7.249119049 | 6.445751277 |
| ENSMUSG00000048232 | 7.781970364 | 16.69481385 | 14.829172   | 11.27640741 | 12.17530797 |
| ENSMUSG00000048234 | 12.73413332 | 24.34660353 | 26.12758877 | 46.71654498 | 36.5259239  |
| ENSMUSG00000048240 | 10.61177777 | 6.260555194 | 7.061510478 | 8.054576721 | 5.013362104 |
| ENSMUSG00000048249 | 38.90985182 | 66.7792554  | 53.66747963 | 29.80193387 | 31.5125618  |
| ENSMUSG00000048251 | 7.074518513 | 4.869320706 | 7.061510478 | 5.638203705 | 5.013362104 |
| ENSMUSG00000048264 | 8.489422215 | 9.738641413 | 7.061510478 | 10.47094974 | 10.02672421 |
| ENSMUSG00000048271 | 140.0754665 | 164.8612868 | 147.585569  | 188.4770953 | 152.5494469 |
| ENSMUSG00000048277 | 0           | 0           | 0           | 0           | 0           |
| ENSMUSG00000048279 | 9.196874066 | 5.56493795  | 9.179963621 | 4.832746033 | 5.729556691 |
| ENSMUSG00000048280 | 7.781970364 | 11.1298759  | 9.179963621 | 12.88732275 | 9.310529622 |
| ENSMUSG00000048330 | 9.904325918 | 7.651789682 | 8.473812573 | 4.832746033 | 8.594335036 |
| ENSMUSG00000048332 | 4.244711108 | 5.56493795  | 7.767661525 | 4.02728836  | 7.87814045  |
| ENSMUSG00000048351 | 29.71297775 | 39.6501829  | 42.36906287 | 59.60386773 | 51.56601022 |
| ENSMUSG00000048400 | 9.196874066 | 4.869320706 | 11.29841676 | 4.02728836  | 7.161945863 |
| ENSMUSG00000048402 | 10.61177777 | 6.956172438 | 9.179963621 | 8.860034393 | 7.87814045  |

|                    |             |             |             |             |             |
|--------------------|-------------|-------------|-------------|-------------|-------------|
| ENSMUSG00000048410 | 25.46826665 | 52.17129328 | 47.3121202  | 71.68573282 | 76.63282074 |
| ENSMUSG00000048416 | 9.196874066 | 11.1298759  | 7.767661525 | 3.221830688 | 5.729556691 |
| ENSMUSG00000048429 | 28.29807405 | 46.60635533 | 40.25060972 | 70.07481747 | 74.48423698 |
| ENSMUSG00000048439 | 7.781970364 | 17.39043109 | 14.829172   | 27.38556085 | 25.06681052 |
| ENSMUSG00000048440 | 13.44158517 | 10.43425866 | 11.29841676 | 8.860034393 | 13.60769714 |
| ENSMUSG00000048442 | 12.73413332 | 22.95536904 | 25.42143772 | 13.69278043 | 17.90486466 |
| ENSMUSG00000048450 | 4.952162959 | 5.56493795  | 6.35535943  | 4.02728836  | 5.729556691 |
| ENSMUSG00000048473 | 12.02668147 | 8.347406925 | 7.767661525 | 6.443661377 | 6.445751277 |
| ENSMUSG00000048481 | 4.244711108 | 9.738641413 | 6.35535943  | 8.054576721 | 5.729556691 |
| ENSMUSG00000048482 | 4.244711108 | 1.391234488 | 3.530755239 | 0.805457672 | 1.432389173 |
| ENSMUSG00000048484 | 4.244711108 | 6.956172438 | 9.886114669 | 6.443661377 | 5.013362104 |
| ENSMUSG00000048485 | 7.074518513 | 13.21672763 | 6.35535943  | 11.27640741 | 10.02672421 |
| ENSMUSG00000048489 | 18.39374813 | 15.99919661 | 28.95219296 | 5.638203705 | 10.02672421 |
| ENSMUSG00000048490 | 12.02668147 | 18.08604834 | 24.00913562 | 21.74735715 | 27.93158887 |
| ENSMUSG00000048495 | 62.25576291 | 111.298759  | 95.33039145 | 132.0950582 | 111.0101609 |
| ENSMUSG00000048497 | 33.25023701 | 47.99758982 | 33.18909925 | 32.21830688 | 40.82309142 |
| ENSMUSG00000048502 | 10.61177777 | 4.869320706 | 9.179963621 | 8.054576721 | 6.445751277 |
| ENSMUSG00000048520 | 17.68629628 | 18.08604834 | 22.59683353 | 24.96918783 | 36.5259239  |
| ENSMUSG00000048537 | 1.414903703 | 1.391234488 | 3.530755239 | 2.416373016 | 4.297167518 |
| ENSMUSG00000048544 | 8.489422215 | 5.56493795  | 6.35535943  | 4.832746033 | 6.445751277 |
| ENSMUSG00000048550 | 11.31922962 | 18.08604834 | 16.94762515 | 4.832746033 | 13.60769714 |
| ENSMUSG00000048578 | 43.86201478 | 57.04061399 | 57.19823487 | 132.0950582 | 116.7397176 |
| ENSMUSG00000048581 | 5.65961481  | 13.21672763 | 6.35535943  | 6.443661377 | 6.445751277 |
| ENSMUSG00000048583 | 7.074518513 | 2.086851731 | 2.824604191 | 4.832746033 | 6.445751277 |
| ENSMUSG00000048612 | 8.489422215 | 16.69481385 | 10.59226572 | 5.638203705 | 10.7429188  |
| ENSMUSG00000048617 | 5.65961481  | 4.869320706 | 7.767661525 | 5.638203705 | 5.013362104 |
| ENSMUSG00000048652 | 6.367066661 | 5.56493795  | 5.649208382 | 6.443661377 | 4.297167518 |
| ENSMUSG00000048655 | 10.61177777 | 8.347406925 | 6.35535943  | 7.249119049 | 5.013362104 |
| ENSMUSG00000048661 | 65.08557032 | 88.34338996 | 65.67204744 | 83.7675979  | 99.5510475  |
| ENSMUSG00000048668 | 57.30359995 | 69.56172438 | 55.78593277 | 117.5968201 | 96.68626916 |
| ENSMUSG00000048696 | 14.14903703 | 29.91154148 | 34.60140134 | 18.52552646 | 31.5125618  |
| ENSMUSG00000048701 | 84.1867703  | 111.298759  | 100.2734488 | 157.0642461 | 128.9150255 |
| ENSMUSG00000048728 | 7.074518513 | 5.56493795  | 5.649208382 | 4.832746033 | 2.864778345 |
| ENSMUSG00000048731 | 0.707451851 | 2.086851731 | 2.118453143 | 1.610915344 | 0           |
| ENSMUSG00000048747 | 4.952162959 | 11.82549314 | 4.943057334 | 6.443661377 | 9.310529622 |
| ENSMUSG00000048756 | 32.54278516 | 61.21431745 | 45.8998181  | 25.77464551 | 32.94495097 |
| ENSMUSG00000048758 | 12.02668147 | 20.17290007 | 23.30298458 | 188.4770953 | 113.1587446 |
| ENSMUSG00000048763 | 9.904325918 | 2.086851731 | 9.886114669 | 6.443661377 | 4.297167518 |
| ENSMUSG00000048764 | 7.781970364 | 6.260555194 | 13.41686991 | 2.416373016 | 7.161945863 |
| ENSMUSG00000048772 | 5.65961481  | 4.173703463 | 9.179963621 | 8.860034393 | 5.729556691 |
| ENSMUSG00000048775 | 10.61177777 | 6.260555194 | 7.767661525 | 6.443661377 | 3.580972932 |
| ENSMUSG00000048782 | 5.65961481  | 6.260555194 | 4.236906287 | 8.054576721 | 9.310529622 |
| ENSMUSG00000048787 | 29.0055259  | 37.56333116 | 41.66291182 | 33.82922223 | 30.79636721 |

|                    |             |             |             |             |             |
|--------------------|-------------|-------------|-------------|-------------|-------------|
| ENSMUSG00000048794 | 5.65961481  | 6.260555194 | 7.767661525 | 4.832746033 | 4.297167518 |
| ENSMUSG00000048814 | 7.074518513 | 6.956172438 | 8.473812573 | 8.054576721 | 2.864778345 |
| ENSMUSG00000048834 | 4.244711108 | 7.651789682 | 6.35535943  | 4.02728836  | 4.297167518 |
| ENSMUSG00000048852 | 0           | 1.391234488 | 0           | 0.805457672 | 0.716194586 |
| ENSMUSG00000048865 | 0           | 0           | 0           | 0           | 0           |
| ENSMUSG00000048874 | 36.78749627 | 61.9099347  | 48.01827125 | 86.18397091 | 78.7814045  |
| ENSMUSG00000048895 | 8.489422215 | 22.95536904 | 12.71071886 | 95.04400531 | 75.91662615 |
| ENSMUSG00000048897 | 16.97884443 | 14.60796212 | 17.65377619 | 24.16373016 | 29.36397804 |
| ENSMUSG00000048911 | 6.367066661 | 20.17290007 | 16.2414741  | 24.96918783 | 26.49919969 |
| ENSMUSG00000048915 | 3.537259256 | 5.56493795  | 10.59226572 | 2.416373016 | 8.594335036 |
| ENSMUSG00000048921 | 31.83533331 | 72.34419335 | 62.1412922  | 142.566008  | 101.6996313 |
| ENSMUSG00000048922 | 36.78749627 | 54.95376226 | 46.60596915 | 124.8459392 | 103.1320204 |
| ENSMUSG00000048924 | 19.10119998 | 38.25894841 | 45.19366706 | 20.1364418  | 24.35061594 |
| ENSMUSG00000048930 | 79.23460734 | 95.2995624  | 103.804204  | 222.3063175 | 163.2923657 |
| ENSMUSG00000048938 | 2.122355554 | 9.738641413 | 9.886114669 | 2.416373016 | 7.161945863 |
| ENSMUSG00000048939 | 7.074518513 | 3.478086219 | 7.767661525 | 3.221830688 | 6.445751277 |
| ENSMUSG00000048960 | 8.489422215 | 8.347406925 | 6.35535943  | 6.443661377 | 5.729556691 |
| ENSMUSG00000048978 | 4.952162959 | 8.347406925 | 4.943057334 | 7.249119049 | 1.432389173 |
| ENSMUSG00000048997 | 16.97884443 | 34.08524495 | 31.0706461  | 22.55281482 | 23.63442135 |
| ENSMUSG00000049044 | 7.074518513 | 4.173703463 | 6.35535943  | 8.860034393 | 5.013362104 |
| ENSMUSG00000049047 | 0.707451851 | 2.086851731 | 1.412302096 | 1.610915344 | 0           |
| ENSMUSG00000049100 | 6.367066661 | 8.347406925 | 4.943057334 | 3.221830688 | 5.729556691 |
| ENSMUSG00000049103 | 7.074518513 | 6.956172438 | 10.59226572 | 9.665492065 | 10.02672421 |
| ENSMUSG00000049107 | 6.367066661 | 4.173703463 | 6.35535943  | 4.02728836  | 6.445751277 |
| ENSMUSG00000049109 | 10.61177777 | 4.869320706 | 4.943057334 | 3.221830688 | 5.013362104 |
| ENSMUSG00000049115 | 10.61177777 | 7.651789682 | 7.061510478 | 8.054576721 | 5.729556691 |
| ENSMUSG00000049119 | 7.781970364 | 8.347406925 | 5.649208382 | 3.221830688 | 5.013362104 |
| ENSMUSG00000049122 | 7.781970364 | 9.738641413 | 9.886114669 | 1.610915344 | 2.864778345 |
| ENSMUSG00000049123 | 4.952162959 | 9.043024169 | 6.35535943  | 5.638203705 | 6.445751277 |
| ENSMUSG00000049124 | 6.367066661 | 2.086851731 | 7.061510478 | 9.665492065 | 5.013362104 |
| ENSMUSG00000049134 | 5.65961481  | 5.56493795  | 2.824604191 | 5.638203705 | 5.013362104 |
| ENSMUSG00000049152 | 3.537259256 | 11.82549314 | 9.886114669 | 7.249119049 | 6.445751277 |
| ENSMUSG00000049154 | 4.952162959 | 6.260555194 | 7.767661525 | 4.02728836  | 2.148583759 |
| ENSMUSG00000049176 | 7.074518513 | 1.391234488 | 4.236906287 | 5.638203705 | 2.148583759 |
| ENSMUSG00000049191 | 8.489422215 | 5.56493795  | 4.236906287 | 4.832746033 | 4.297167518 |
| ENSMUSG00000049214 | 7.074518513 | 6.956172438 | 8.473812573 | 6.443661377 | 5.729556691 |
| ENSMUSG00000049225 | 14.14903703 | 22.95536904 | 17.65377619 | 16.10915344 | 19.33725383 |
| ENSMUSG00000049252 | 8.489422215 | 6.260555194 | 5.649208382 | 4.832746033 | 8.594335036 |
| ENSMUSG00000049281 | 7.781970364 | 5.56493795  | 7.061510478 | 4.832746033 | 5.729556691 |
| ENSMUSG00000049295 | 13.44158517 | 17.39043109 | 15.53532305 | 14.4982381  | 15.04008631 |
| ENSMUSG00000049299 | 10.61177777 | 11.1298759  | 16.94762515 | 14.4982381  | 16.47247549 |
| ENSMUSG00000049300 | 24.05336294 | 49.38882431 | 46.60596915 | 103.098582  | 92.38910164 |
| ENSMUSG00000049303 | 6.367066661 | 6.260555194 | 7.767661525 | 3.221830688 | 10.7429188  |

|                    |             |             |             |             |             |
|--------------------|-------------|-------------|-------------|-------------|-------------|
| ENSMUSG00000049314 | 4.244711108 | 11.82549314 | 7.767661525 | 8.054576721 | 12.89150255 |
| ENSMUSG00000049321 | 11.31922962 | 27.12907251 | 13.41686991 | 12.08186508 | 10.02672421 |
| ENSMUSG00000049327 | 30.4204296  | 41.73703463 | 38.13215658 | 63.6311561  | 49.41742646 |
| ENSMUSG00000049336 | 13.44158517 | 8.347406925 | 7.061510478 | 4.832746033 | 6.445751277 |
| ENSMUSG00000049339 | 28.29807405 | 35.47647943 | 47.3121202  | 69.2693598  | 60.16034525 |
| ENSMUSG00000049353 | 7.781970364 | 3.478086219 | 9.886114669 | 4.02728836  | 5.013362104 |
| ENSMUSG00000049357 | 9.196874066 | 6.956172438 | 5.649208382 | 7.249119049 | 7.161945863 |
| ENSMUSG00000049387 | 9.904325918 | 6.956172438 | 8.473812573 | 1.610915344 | 5.729556691 |
| ENSMUSG00000049401 | 62.25576291 | 75.82227957 | 82.61967259 | 219.0844868 | 138.9417498 |
| ENSMUSG00000049404 | 9.904325918 | 4.869320706 | 5.649208382 | 1.610915344 | 2.864778345 |
| ENSMUSG00000049410 | 7.074518513 | 9.043024169 | 4.943057334 | 8.054576721 | 5.729556691 |
| ENSMUSG00000049411 | 32.54278516 | 47.99758982 | 34.60140134 | 26.58010318 | 31.5125618  |
| ENSMUSG00000049421 | 41.03220737 | 62.60555194 | 66.37819849 | 47.52200265 | 47.2688427  |
| ENSMUSG00000049427 | 4.952162959 | 4.173703463 | 3.530755239 | 4.832746033 | 5.013362104 |
| ENSMUSG00000049439 | 18.39374813 | 30.60715873 | 22.59683353 | 30.60739154 | 22.91822676 |
| ENSMUSG00000049470 | 74.98989623 | 102.2557348 | 113.6903187 | 135.3168889 | 109.5777717 |
| ENSMUSG00000049482 | 54.47379255 | 84.86530374 | 69.20280268 | 110.3477011 | 96.68626916 |
| ENSMUSG00000049488 | 96.21345177 | 148.1664729 | 124.2825844 | 156.2587884 | 141.8065281 |
| ENSMUSG00000049491 | 9.904325918 | 5.56493795  | 6.35535943  | 5.638203705 | 19.33725383 |
| ENSMUSG00000049493 | 10.61177777 | 10.43425866 | 7.767661525 | 8.054576721 | 10.7429188  |
| ENSMUSG00000049502 | 35.37259256 | 71.64857611 | 53.66747963 | 231.1663519 | 153.9818361 |
| ENSMUSG00000049504 | 125.9264295 | 158.6007316 | 153.9409284 | 160.2860767 | 134.6445822 |
| ENSMUSG00000049515 | 14.14903703 | 4.869320706 | 5.649208382 | 8.054576721 | 9.310529622 |
| ENSMUSG00000049532 | 9.196874066 | 6.260555194 | 12.00456781 | 10.47094974 | 6.445751277 |
| ENSMUSG00000049537 | 7.781970364 | 8.347406925 | 4.236906287 | 4.02728836  | 7.87814045  |
| ENSMUSG00000049538 | 6.367066661 | 11.1298759  | 6.35535943  | 2.416373016 | 6.445751277 |
| ENSMUSG00000049550 | 16.27139258 | 20.86851731 | 16.2414741  | 46.71654498 | 43.68786977 |
| ENSMUSG00000049553 | 80.64951104 | 125.2111039 | 109.4534124 | 281.1047276 | 201.2506788 |
| ENSMUSG00000049555 | 5.65961481  | 6.956172438 | 7.061510478 | 4.832746033 | 7.161945863 |
| ENSMUSG00000049565 | 7.781970364 | 13.91234488 | 12.00456781 | 4.832746033 | 8.594335036 |
| ENSMUSG00000049571 | 10.61177777 | 6.956172438 | 7.061510478 | 8.860034393 | 11.45911338 |
| ENSMUSG00000049577 | 27.5906222  | 23.65098629 | 24.71528667 | 53.96566403 | 32.22875639 |
| ENSMUSG00000049580 | 7.074518513 | 4.173703463 | 7.061510478 | 9.665492065 | 5.013362104 |
| ENSMUSG00000049588 | 37.49494812 | 52.86691053 | 39.54445867 | 17.72006879 | 37.95831308 |
| ENSMUSG00000049606 | 1.414903703 | 1.391234488 | 2.118453143 | 0           | 0           |
| ENSMUSG00000049612 | 14.14903703 | 15.30357936 | 5.649208382 | 11.27640741 | 17.18867007 |
| ENSMUSG00000049624 | 13.44158517 | 16.69481385 | 21.89068248 | 27.38556085 | 36.5259239  |
| ENSMUSG00000049641 | 10.61177777 | 8.347406925 | 5.649208382 | 7.249119049 | 5.729556691 |
| ENSMUSG00000049643 | 32.54278516 | 48.69320706 | 49.43057334 | 103.9040397 | 62.30892901 |
| ENSMUSG00000049658 | 89.13893326 | 141.9059177 | 107.3349593 | 153.8424154 | 128.9150255 |
| ENSMUSG00000049659 | 76.40479994 | 106.4294383 | 75.55816211 | 141.7605503 | 123.1854689 |
| ENSMUSG00000049672 | 12.73413332 | 13.21672763 | 9.886114669 | 38.66196826 | 25.06681052 |
| ENSMUSG00000049676 | 7.781970364 | 8.347406925 | 8.473812573 | 4.02728836  | 5.729556691 |



|                    |             |             |             |             |             |
|--------------------|-------------|-------------|-------------|-------------|-------------|
| ENSMUSG00000049680 | 46.69182218 | 66.08363816 | 53.66747963 | 66.04752911 | 61.59273443 |
| ENSMUSG00000049686 | 38.20239997 | 62.60555194 | 54.37363068 | 78.93485187 | 72.33565322 |
| ENSMUSG00000049690 | 9.904325918 | 10.43425866 | 4.236906287 | 7.249119049 | 6.445751277 |
| ENSMUSG00000049694 | 9.904325918 | 4.869320706 | 7.767661525 | 6.443661377 | 7.161945863 |
| ENSMUSG00000049708 | 11.31922962 | 6.260555194 | 9.886114669 | 2.416373016 | 5.729556691 |
| ENSMUSG00000049719 | 13.44158517 | 8.347406925 | 7.061510478 | 6.443661377 | 10.7429188  |
| ENSMUSG00000049721 | 9.196874066 | 4.173703463 | 9.886114669 | 4.02728836  | 4.297167518 |
| ENSMUSG00000049723 | 5.65961481  | 9.043024169 | 6.35535943  | 4.02728836  | 4.297167518 |
| ENSMUSG00000049728 | 51.64398514 | 73.0398106  | 72.73355792 | 131.2896006 | 130.3474147 |
| ENSMUSG00000049739 | 52.35143699 | 72.34419335 | 72.02740687 | 155.4533307 | 107.429188  |
| ENSMUSG00000049740 | 27.5906222  | 55.6493795  | 35.30755239 | 29.80193387 | 32.22875639 |
| ENSMUSG00000049744 | 103.9954221 | 136.3409798 | 112.9841676 | 129.6786852 | 92.38910164 |
| ENSMUSG00000049755 | 87.01657771 | 148.8620902 | 134.8748501 | 129.6786852 | 118.1721067 |
| ENSMUSG00000049775 | 54.47379255 | 54.95376226 | 60.02283906 | 128.0677699 | 85.94335036 |
| ENSMUSG00000049799 | 11.31922962 | 3.478086219 | 4.943057334 | 4.02728836  | 4.297167518 |
| ENSMUSG00000049800 | 13.44158517 | 22.95536904 | 13.41686991 | 16.10915344 | 19.33725383 |
| ENSMUSG00000049807 | 7.074518513 | 6.956172438 | 7.767661525 | 7.249119049 | 9.310529622 |
| ENSMUSG00000049811 | 9.196874066 | 4.869320706 | 9.886114669 | 7.249119049 | 7.87814045  |
| ENSMUSG00000049866 | 14.85648888 | 15.99919661 | 9.886114669 | 13.69278043 | 15.7562809  |
| ENSMUSG00000049871 | 36.78749627 | 47.30197258 | 53.66747963 | 36.24559524 | 30.08017263 |
| ENSMUSG00000049878 | 183.9374813 | 220.5106663 | 207.608408  | 238.4154709 | 180.4810358 |
| ENSMUSG00000049897 | 24.05336294 | 25.73783802 | 27.53989086 | 62.02024075 | 60.87653984 |
| ENSMUSG00000049916 | 0.707451851 | 1.391234488 | 0           | 0.805457672 | 2.864778345 |
| ENSMUSG00000049926 | 9.196874066 | 7.651789682 | 7.061510478 | 6.443661377 | 3.580972932 |
| ENSMUSG00000049928 | 8.489422215 | 5.56493795  | 7.061510478 | 8.054576721 | 3.580972932 |
| ENSMUSG00000049957 | 51.64398514 | 70.95295887 | 62.84744325 | 122.4295662 | 94.5376854  |
| ENSMUSG00000049971 | 9.904325918 | 20.17290007 | 24.00913562 | 7.249119049 | 15.04008631 |
| ENSMUSG00000049985 | 1.414903703 | 4.869320706 | 6.35535943  | 2.416373016 | 5.013362104 |
| ENSMUSG00000050002 | 30.4204296  | 38.25894841 | 28.24604191 | 47.52200265 | 40.82309142 |
| ENSMUSG00000050017 | 87.72402956 | 146.0796212 | 118.633376  | 179.6170609 | 141.0903335 |
| ENSMUSG00000050022 | 5.65961481  | 4.869320706 | 9.179963621 | 4.02728836  | 5.013362104 |
| ENSMUSG00000050043 | 12.73413332 | 29.21592424 | 15.53532305 | 17.72006879 | 20.769643   |
| ENSMUSG00000050050 | 6.367066661 | 7.651789682 | 4.943057334 | 4.02728836  | 2.148583759 |
| ENSMUSG00000050052 | 8.489422215 | 8.347406925 | 4.943057334 | 4.02728836  | 5.729556691 |
| ENSMUSG00000050063 | 6.367066661 | 3.478086219 | 9.886114669 | 7.249119049 | 5.729556691 |
| ENSMUSG00000050064 | 9.904325918 | 4.869320706 | 6.35535943  | 4.832746033 | 2.864778345 |
| ENSMUSG00000050074 | 10.61177777 | 6.956172438 | 12.71071886 | 6.443661377 | 11.45911338 |
| ENSMUSG00000050079 | 140.0754665 | 198.2509145 | 183.5992724 | 158.6751614 | 138.9417498 |
| ENSMUSG00000050087 | 9.904325918 | 11.82549314 | 12.71071886 | 9.665492065 | 7.161945863 |
| ENSMUSG00000050089 | 5.65961481  | 2.086851731 | 4.236906287 | 3.221830688 | 1.432389173 |
| ENSMUSG00000050100 | 7.074518513 | 6.956172438 | 10.59226572 | 5.638203705 | 7.161945863 |
| ENSMUSG00000050103 | 9.904325918 | 6.956172438 | 2.824604191 | 4.02728836  | 3.580972932 |
| ENSMUSG00000050106 | 16.27139258 | 26.43345526 | 38.13215658 | 106.3204127 | 75.91662615 |

|                    |             |             |             |             |             |
|--------------------|-------------|-------------|-------------|-------------|-------------|
| ENSMUSG00000050108 | 9.196874066 | 4.869320706 | 9.179963621 | 2.416373016 | 8.594335036 |
| ENSMUSG00000050122 | 11.31922962 | 7.651789682 | 8.473812573 | 4.832746033 | 7.87814045  |
| ENSMUSG00000050132 | 7.074518513 | 7.651789682 | 10.59226572 | 7.249119049 | 5.013362104 |
| ENSMUSG00000050141 | 12.02668147 | 6.260555194 | 9.886114669 | 7.249119049 | 8.594335036 |
| ENSMUSG00000050144 | 26.88317035 | 43.82388636 | 56.49208382 | 59.60386773 | 55.86317773 |
| ENSMUSG00000050150 | 4.952162959 | 8.347406925 | 9.886114669 | 7.249119049 | 7.87814045  |
| ENSMUSG00000050164 | 6.367066661 | 3.478086219 | 7.767661525 | 7.249119049 | 4.297167518 |
| ENSMUSG00000050174 | 25.46826665 | 32.69401046 | 28.24604191 | 89.4058016  | 82.36237743 |
| ENSMUSG00000050199 | 7.781970364 | 10.43425866 | 9.179963621 | 6.443661377 | 1.432389173 |
| ENSMUSG00000050211 | 0           | 0           | 0.706151048 | 0           | 2.148583759 |
| ENSMUSG00000050217 | 7.781970364 | 7.651789682 | 10.59226572 | 8.054576721 | 8.594335036 |
| ENSMUSG00000050222 | 5.65961481  | 6.260555194 | 4.943057334 | 8.054576721 | 5.729556691 |
| ENSMUSG00000050240 | 16.97884443 | 25.73783802 | 14.12302096 | 23.35827249 | 26.49919969 |
| ENSMUSG00000050248 | 7.074518513 | 3.478086219 | 12.71071886 | 7.249119049 | 5.013362104 |
| ENSMUSG00000050270 | 8.489422215 | 5.56493795  | 7.061510478 | 6.443661377 | 6.445751277 |
| ENSMUSG00000050271 | 43.15456293 | 57.73623123 | 55.07978173 | 188.4770953 | 142.5227227 |
| ENSMUSG00000050296 | 13.44158517 | 4.173703463 | 12.00456781 | 4.832746033 | 4.297167518 |
| ENSMUSG00000050299 | 14.85648888 | 10.43425866 | 19.77222934 | 22.55281482 | 20.05344842 |
| ENSMUSG00000050312 | 33.25023701 | 63.99678643 | 55.78593277 | 82.96214023 | 57.29556691 |
| ENSMUSG00000050315 | 9.196874066 | 6.956172438 | 7.061510478 | 6.443661377 | 8.594335036 |
| ENSMUSG00000050323 | 39.61730367 | 63.99678643 | 36.71985448 | 65.24207144 | 80.21379367 |
| ENSMUSG00000050335 | 8.489422215 | 4.869320706 | 9.179963621 | 9.665492065 | 6.445751277 |
| ENSMUSG00000050373 | 9.196874066 | 9.738641413 | 13.41686991 | 4.02728836  | 7.87814045  |
| ENSMUSG00000050379 | 3.537259256 | 8.347406925 | 9.179963621 | 9.665492065 | 7.87814045  |
| ENSMUSG00000050382 | 10.61177777 | 4.869320706 | 7.767661525 | 4.02728836  | 1.432389173 |
| ENSMUSG00000050390 | 7.781970364 | 6.260555194 | 11.29841676 | 6.443661377 | 8.594335036 |
| ENSMUSG00000050394 | 2.122355554 | 4.173703463 | 2.824604191 | 2.416373016 | 2.864778345 |
| ENSMUSG00000050410 | 10.61177777 | 17.39043109 | 15.53532305 | 22.55281482 | 15.7562809  |
| ENSMUSG00000050423 | 10.61177777 | 4.173703463 | 4.236906287 | 7.249119049 | 10.7429188  |
| ENSMUSG00000050447 | 10.61177777 | 4.173703463 | 3.530755239 | 4.02728836  | 5.729556691 |
| ENSMUSG00000050468 | 23.34591109 | 25.04222078 | 23.30298458 | 62.82569842 | 47.2688427  |
| ENSMUSG00000050471 | 47.39927403 | 93.21271067 | 76.26431316 | 73.29664816 | 78.7814045  |
| ENSMUSG00000050490 | 8.489422215 | 6.260555194 | 9.179963621 | 6.443661377 | 6.445751277 |
| ENSMUSG00000050530 | 9.904325918 | 9.738641413 | 5.649208382 | 3.221830688 | 5.013362104 |
| ENSMUSG00000050533 | 16.27139258 | 22.2597518  | 22.59683353 | 73.29664816 | 40.10689684 |
| ENSMUSG00000050541 | 8.489422215 | 7.651789682 | 5.649208382 | 5.638203705 | 4.297167518 |
| ENSMUSG00000050545 | 4.952162959 | 6.956172438 | 12.00456781 | 7.249119049 | 9.310529622 |
| ENSMUSG00000050558 | 14.85648888 | 5.56493795  | 7.767661525 | 5.638203705 | 2.864778345 |
| ENSMUSG00000050565 | 71.45263698 | 116.863697  | 108.7472614 | 256.9409974 | 166.157144  |
| ENSMUSG00000050567 | 104.702874  | 150.2533247 | 121.4579802 | 91.01671695 | 90.95671247 |
| ENSMUSG00000050578 | 10.61177777 | 8.347406925 | 7.061510478 | 3.221830688 | 4.297167518 |
| ENSMUSG00000050587 | 7.074518513 | 7.651789682 | 4.236906287 | 6.443661377 | 3.580972932 |
| ENSMUSG00000050604 | 19.10119998 | 17.39043109 | 14.12302096 | 8.860034393 | 20.769643   |

|                    |             |             |             |             |             |
|--------------------|-------------|-------------|-------------|-------------|-------------|
| ENSMUSG00000050605 | 4.952162959 | 16.69481385 | 14.12302096 | 13.69278043 | 14.32389173 |
| ENSMUSG00000050608 | 109.6550369 | 139.819066  | 108.0411103 | 178.0061455 | 153.9818361 |
| ENSMUSG00000050619 | 66.50047402 | 80.69160028 | 80.50121945 | 111.9586164 | 94.5376854  |
| ENSMUSG00000050627 | 86.30912585 | 94.60394515 | 74.85201106 | 52.35474869 | 65.17370736 |
| ENSMUSG00000050640 | 8.489422215 | 8.347406925 | 7.767661525 | 4.832746033 | 6.445751277 |
| ENSMUSG00000050666 | 9.196874066 | 8.347406925 | 4.236906287 | 8.054576721 | 7.87814045  |
| ENSMUSG00000050700 | 7.074518513 | 8.347406925 | 7.061510478 | 8.860034393 | 6.445751277 |
| ENSMUSG00000050705 | 21.93100739 | 27.12907251 | 35.30755239 | 74.9075635  | 52.99839939 |
| ENSMUSG00000050708 | 7.074518513 | 15.99919661 | 9.886114669 | 14.4982381  | 10.7429188  |
| ENSMUSG00000050730 | 4.244711108 | 10.43425866 | 11.29841676 | 12.08186508 | 8.594335036 |
| ENSMUSG00000050737 | 9.196874066 | 9.043024169 | 5.649208382 | 3.221830688 | 7.87814045  |
| ENSMUSG00000050747 | 8.489422215 | 9.738641413 | 5.649208382 | 9.665492065 | 2.864778345 |
| ENSMUSG00000050751 | 9.196874066 | 6.260555194 | 4.943057334 | 4.02728836  | 4.297167518 |
| ENSMUSG00000050765 | 5.65961481  | 5.56493795  | 7.767661525 | 10.47094974 | 7.161945863 |
| ENSMUSG00000050808 | 10.61177777 | 7.651789682 | 11.29841676 | 6.443661377 | 7.87814045  |
| ENSMUSG00000050812 | 57.30359995 | 73.0398106  | 74.14586002 | 153.8424154 | 146.8198902 |
| ENSMUSG00000050821 | 14.85648888 | 4.173703463 | 9.886114669 | 7.249119049 | 7.87814045  |
| ENSMUSG00000050822 | 12.02668147 | 7.651789682 | 9.179963621 | 6.443661377 | 7.161945863 |
| ENSMUSG00000050824 | 5.65961481  | 2.782468975 | 6.35535943  | 8.054576721 | 7.87814045  |
| ENSMUSG00000050830 | 4.244711108 | 2.782468975 | 7.061510478 | 5.638203705 | 5.729556691 |
| ENSMUSG00000050855 | 7.074518513 | 8.347406925 | 7.061510478 | 15.30369577 | 17.18867007 |
| ENSMUSG00000050856 | 29.0055259  | 46.60635533 | 42.36906287 | 63.6311561  | 53.71459398 |
| ENSMUSG00000050875 | 6.367066661 | 7.651789682 | 8.473812573 | 3.221830688 | 6.445751277 |
| ENSMUSG00000050890 | 29.71297775 | 38.25894841 | 40.25060972 | 53.16020636 | 58.01176149 |
| ENSMUSG00000050908 | 11.31922962 | 11.82549314 | 8.473812573 | 9.665492065 | 11.45911338 |
| ENSMUSG00000050912 | 135.8307554 | 158.6007316 | 149.7040221 | 261.7737434 | 192.6563437 |
| ENSMUSG00000050914 | 13.44158517 | 25.04222078 | 20.47838039 | 18.52552646 | 18.62105924 |
| ENSMUSG00000050921 | 37.49494812 | 59.12746572 | 43.78136496 | 70.07481747 | 60.87653984 |
| ENSMUSG00000050936 | 5.65961481  | 4.173703463 | 4.943057334 | 1.610915344 | 2.864778345 |
| ENSMUSG00000050944 | 7.781970364 | 6.956172438 | 8.473812573 | 4.02728836  | 9.310529622 |
| ENSMUSG00000050953 | 10.61177777 | 8.347406925 | 9.886114669 | 4.02728836  | 9.310529622 |
| ENSMUSG00000050954 | 69.33028142 | 95.99517964 | 99.56729774 | 59.60386773 | 65.17370736 |
| ENSMUSG00000050965 | 21.93100739 | 36.17209668 | 35.30755239 | 60.40932541 | 57.29556691 |
| ENSMUSG00000050973 | 101.1656147 | 161.3832006 | 139.8179075 | 99.87675134 | 110.2939663 |
| ENSMUSG00000050982 | 6.367066661 | 7.651789682 | 7.061510478 | 8.860034393 | 10.7429188  |
| ENSMUSG00000050994 | 8.489422215 | 4.173703463 | 12.00456781 | 6.443661377 | 5.013362104 |
| ENSMUSG00000051000 | 10.61177777 | 4.869320706 | 11.29841676 | 5.638203705 | 8.594335036 |
| ENSMUSG00000051007 | 35.37259256 | 72.34419335 | 51.54902649 | 34.6346799  | 36.5259239  |
| ENSMUSG00000051036 | 8.489422215 | 6.956172438 | 9.179963621 | 6.443661377 | 7.161945863 |
| ENSMUSG00000051037 | 15.56394073 | 23.65098629 | 21.18453143 | 11.27640741 | 14.32389173 |
| ENSMUSG00000051038 | 6.367066661 | 3.478086219 | 4.236906287 | 0.805457672 | 2.864778345 |
| ENSMUSG00000051043 | 5.65961481  | 2.782468975 | 7.767661525 | 7.249119049 | 5.013362104 |
| ENSMUSG00000051048 | 10.61177777 | 7.651789682 | 9.179963621 | 9.665492065 | 12.17530797 |

|                    |             |             |             |             |             |
|--------------------|-------------|-------------|-------------|-------------|-------------|
| ENSMUSG00000051107 | 17.68629628 | 24.34660353 | 24.00913562 | 9.665492065 | 21.48583759 |
| ENSMUSG00000051111 | 9.196874066 | 2.086851731 | 7.061510478 | 4.832746033 | 7.87814045  |
| ENSMUSG00000051147 | 41.03220737 | 51.47567604 | 51.54902649 | 22.55281482 | 33.66114556 |
| ENSMUSG00000051149 | 106.1177777 | 134.254128  | 116.5149229 | 213.4462831 | 159.7113928 |
| ENSMUSG00000051154 | 16.97884443 | 34.78086219 | 26.12758877 | 28.19101852 | 33.66114556 |
| ENSMUSG00000051159 | 2.829807405 | 3.478086219 | 4.236906287 | 3.221830688 | 3.580972932 |
| ENSMUSG00000051166 | 3.537259256 | 10.43425866 | 7.767661525 | 12.88732275 | 15.04008631 |
| ENSMUSG00000051169 | 12.02668147 | 21.56413456 | 19.06607829 | 20.1364418  | 22.20203218 |
| ENSMUSG00000051177 | 7.781970364 | 8.347406925 | 9.179963621 | 4.832746033 | 4.297167518 |
| ENSMUSG00000051219 | 9.904325918 | 4.869320706 | 9.886114669 | 6.443661377 | 5.013362104 |
| ENSMUSG00000051223 | 69.33028142 | 93.90832791 | 77.67661525 | 206.1971641 | 159.7113928 |
| ENSMUSG00000051224 | 2.122355554 | 5.56493795  | 4.236906287 | 4.832746033 | 2.864778345 |
| ENSMUSG00000051232 | 22.63845924 | 37.56333116 | 42.36906287 | 78.93485187 | 58.01176149 |
| ENSMUSG00000051235 | 86.30912585 | 104.3425866 | 97.44884459 | 157.8697037 | 138.9417498 |
| ENSMUSG00000051236 | 9.196874066 | 4.173703463 | 9.886114669 | 10.47094974 | 7.161945863 |
| ENSMUSG00000051237 | 2.122355554 | 6.260555194 | 9.886114669 | 6.443661377 | 8.594335036 |
| ENSMUSG00000051243 | 5.65961481  | 10.43425866 | 9.886114669 | 4.832746033 | 11.45911338 |
| ENSMUSG00000051255 | 8.489422215 | 8.347406925 | 2.824604191 | 4.832746033 | 7.87814045  |
| ENSMUSG00000051256 | 39.61730367 | 68.17048989 | 50.84287544 | 91.01671695 | 84.51096119 |
| ENSMUSG00000051278 | 45.98437033 | 56.34499675 | 58.61053696 | 106.3204127 | 84.51096119 |
| ENSMUSG00000051285 | 52.35143699 | 98.77764862 | 82.61967259 | 68.46390213 | 78.7814045  |
| ENSMUSG00000051297 | 9.196874066 | 4.869320706 | 4.236906287 | 3.221830688 | 9.310529622 |
| ENSMUSG00000051313 | 11.31922962 | 6.260555194 | 9.179963621 | 4.02728836  | 7.161945863 |
| ENSMUSG00000051314 | 6.367066661 | 8.347406925 | 9.179963621 | 9.665492065 | 8.594335036 |
| ENSMUSG00000051323 | 1.414903703 | 4.173703463 | 3.530755239 | 2.416373016 | 3.580972932 |
| ENSMUSG00000051329 | 20.51610369 | 35.47647943 | 28.95219296 | 25.77464551 | 20.05344842 |
| ENSMUSG00000051331 | 7.781970364 | 8.347406925 | 13.41686991 | 9.665492065 | 15.7562809  |
| ENSMUSG00000051339 | 9.904325918 | 3.478086219 | 9.886114669 | 5.638203705 | 5.729556691 |
| ENSMUSG00000051343 | 3.537259256 | 9.738641413 | 5.649208382 | 5.638203705 | 9.310529622 |
| ENSMUSG00000051344 | 18.39374813 | 34.78086219 | 24.71528667 | 35.44013757 | 41.53928601 |
| ENSMUSG00000051351 | 20.51610369 | 15.99919661 | 17.65377619 | 21.74735715 | 18.62105924 |
| ENSMUSG00000051354 | 9.904325918 | 9.043024169 | 9.886114669 | 4.02728836  | 8.594335036 |
| ENSMUSG00000051355 | 0.707451851 | 0           | 2.118453143 | 0           | 0.716194586 |
| ENSMUSG00000051359 | 4.952162959 | 5.56493795  | 5.649208382 | 7.249119049 | 8.594335036 |
| ENSMUSG00000051375 | 10.61177777 | 7.651789682 | 4.236906287 | 4.02728836  | 7.87814045  |
| ENSMUSG00000051378 | 74.28244438 | 66.7792554  | 80.50121945 | 109.5422434 | 78.7814045  |
| ENSMUSG00000051379 | 9.904325918 | 7.651789682 | 11.29841676 | 4.832746033 | 9.310529622 |
| ENSMUSG00000051396 | 65.08557032 | 93.21271067 | 63.5535943  | 120.8186508 | 108.1453825 |
| ENSMUSG00000051413 | 58.71850365 | 74.43104508 | 69.20280268 | 227.9445212 | 178.332452  |
| ENSMUSG00000051427 | 50.22908144 | 74.43104508 | 75.55816211 | 145.7878386 | 94.5376854  |
| ENSMUSG00000051435 | 9.904325918 | 5.56493795  | 10.59226572 | 5.638203705 | 7.161945863 |
| ENSMUSG00000051455 | 7.781970364 | 5.56493795  | 7.061510478 | 10.47094974 | 7.87814045  |
| ENSMUSG00000051469 | 48.10672589 | 68.86610713 | 64.96589639 | 90.21125927 | 83.07857202 |

|                    |             |             |             |             |             |
|--------------------|-------------|-------------|-------------|-------------|-------------|
| ENSMUSG00000051497 | 10.61177777 | 6.260555194 | 6.35535943  | 8.860034393 | 7.87814045  |
| ENSMUSG00000051504 | 6.367066661 | 7.651789682 | 13.41686991 | 6.443661377 | 9.310529622 |
| ENSMUSG00000051506 | 182.5225776 | 173.2086937 | 167.3577983 | 214.2517408 | 154.6980307 |
| ENSMUSG00000051510 | 14.14903703 | 18.78166558 | 23.30298458 | 53.16020636 | 65.88990194 |
| ENSMUSG00000051517 | 5.65961481  | 11.82549314 | 9.886114669 | 8.860034393 | 11.45911338 |
| ENSMUSG00000051550 | 5.65961481  | 14.60796212 | 7.061510478 | 9.665492065 | 7.161945863 |
| ENSMUSG00000051557 | 19.10119998 | 24.34660353 | 33.89525029 | 47.52200265 | 56.57937232 |
| ENSMUSG00000051579 | 2.829807405 | 3.478086219 | 7.061510478 | 4.02728836  | 2.864778345 |
| ENSMUSG00000051586 | 11.31922962 | 8.347406925 | 11.29841676 | 5.638203705 | 10.02672421 |
| ENSMUSG00000051592 | 2.122355554 | 2.782468975 | 4.236906287 | 0           | 2.864778345 |
| ENSMUSG00000051596 | 4.952162959 | 8.347406925 | 5.649208382 | 1.610915344 | 7.87814045  |
| ENSMUSG00000051615 | 4.244711108 | 10.43425866 | 9.886114669 | 8.860034393 | 9.310529622 |
| ENSMUSG00000051648 | 9.196874066 | 13.21672763 | 8.473812573 | 10.47094974 | 7.161945863 |
| ENSMUSG00000051650 | 15.56394073 | 11.82549314 | 14.829172   | 7.249119049 | 11.45911338 |
| ENSMUSG00000051674 | 10.61177777 | 7.651789682 | 5.649208382 | 7.249119049 | 13.60769714 |
| ENSMUSG00000051675 | 18.39374813 | 24.34660353 | 21.89068248 | 34.6346799  | 30.08017263 |
| ENSMUSG00000051682 | 6.367066661 | 9.043024169 | 6.35535943  | 8.054576721 | 3.580972932 |
| ENSMUSG00000051703 | 5.65961481  | 8.347406925 | 11.29841676 | 7.249119049 | 7.87814045  |
| ENSMUSG00000051705 | 12.73413332 | 28.52030699 | 26.12758877 | 15.30369577 | 27.93158887 |
| ENSMUSG00000051727 | 18.39374813 | 28.52030699 | 21.18453143 | 62.82569842 | 57.29556691 |
| ENSMUSG00000051729 | 4.952162959 | 7.651789682 | 8.473812573 | 6.443661377 | 7.87814045  |
| ENSMUSG00000051730 | 34.66514071 | 38.25894841 | 31.77679715 | 40.2728836  | 42.97167518 |
| ENSMUSG00000051747 | 12.02668147 | 6.260555194 | 9.886114669 | 4.832746033 | 8.594335036 |
| ENSMUSG00000051786 | 83.47931845 | 111.298759  | 112.2780166 | 124.8459392 | 111.7263555 |
| ENSMUSG00000051790 | 7.781970364 | 8.347406925 | 10.59226572 | 16.10915344 | 8.594335036 |
| ENSMUSG00000051811 | 4.952162959 | 9.043024169 | 4.236906287 | 5.638203705 | 9.310529622 |
| ENSMUSG00000051827 | 4.244711108 | 3.478086219 | 7.061510478 | 7.249119049 | 6.445751277 |
| ENSMUSG00000051855 | 5.65961481  | 4.173703463 | 5.649208382 | 12.08186508 | 7.161945863 |
| ENSMUSG00000051860 | 5.65961481  | 6.260555194 | 9.886114669 | 5.638203705 | 6.445751277 |
| ENSMUSG00000051890 | 8.489422215 | 16.69481385 | 14.829172   | 33.82922223 | 24.35061594 |
| ENSMUSG00000051900 | 10.61177777 | 4.173703463 | 5.649208382 | 5.638203705 | 7.161945863 |
| ENSMUSG00000051906 | 10.61177777 | 3.478086219 | 4.943057334 | 2.416373016 | 5.013362104 |
| ENSMUSG00000051910 | 7.781970364 | 8.347406925 | 9.886114669 | 4.02728836  | 4.297167518 |
| ENSMUSG00000051950 | 10.61177777 | 10.43425866 | 9.179963621 | 8.054576721 | 9.310529622 |
| ENSMUSG00000051977 | 8.489422215 | 9.738641413 | 14.12302096 | 4.832746033 | 17.18867007 |
| ENSMUSG00000051980 | 6.367066661 | 4.869320706 | 4.236906287 | 6.443661377 | 3.580972932 |
| ENSMUSG00000051984 | 4.244711108 | 9.043024169 | 7.767661525 | 5.638203705 | 10.02672421 |
| ENSMUSG00000051989 | 45.98437033 | 65.38802092 | 69.90895373 | 24.16373016 | 31.5125618  |
| ENSMUSG00000051998 | 94.09109622 | 126.6023384 | 97.44884459 | 102.2931244 | 100.9834367 |
| ENSMUSG00000052013 | 154.9319554 | 160.6875833 | 132.0502459 | 136.1223466 | 110.2939663 |
| ENSMUSG00000052033 | 7.074518513 | 4.869320706 | 8.473812573 | 2.416373016 | 11.45911338 |
| ENSMUSG00000052040 | 43.86201478 | 50.7800588  | 55.78593277 | 93.43308996 | 101.6996313 |
| ENSMUSG00000052056 | 7.074518513 | 7.651789682 | 13.41686991 | 7.249119049 | 7.161945863 |

|                    |             |             |             |             |             |
|--------------------|-------------|-------------|-------------|-------------|-------------|
| ENSMUSG00000052062 | 9.904325918 | 9.043024169 | 10.59226572 | 15.30369577 | 10.7429188  |
| ENSMUSG00000052087 | 125.2189777 | 167.6437558 | 165.2393452 | 89.4058016  | 80.21379367 |
| ENSMUSG00000052099 | 9.904325918 | 11.1298759  | 4.943057334 | 4.832746033 | 7.161945863 |
| ENSMUSG00000052102 | 17.68629628 | 20.17290007 | 28.24604191 | 17.72006879 | 25.06681052 |
| ENSMUSG00000052105 | 8.489422215 | 6.260555194 | 12.00456781 | 2.416373016 | 4.297167518 |
| ENSMUSG00000052133 | 7.781970364 | 0.695617244 | 6.35535943  | 3.221830688 | 2.864778345 |
| ENSMUSG00000052137 | 87.72402956 | 108.51629   | 112.2780166 | 136.1223466 | 105.9967988 |
| ENSMUSG00000052139 | 21.22355554 | 50.08444155 | 34.60140134 | 41.88379895 | 49.41742646 |
| ENSMUSG00000052142 | 79.94205919 | 102.2557348 | 93.91808935 | 121.6241085 | 103.848215  |
| ENSMUSG00000052146 | 24.76081479 | 45.91073809 | 41.66291182 | 115.1804471 | 74.48423698 |
| ENSMUSG00000052151 | 4.952162959 | 6.956172438 | 4.236906287 | 3.221830688 | 5.729556691 |
| ENSMUSG00000052180 | 6.367066661 | 7.651789682 | 5.649208382 | 9.665492065 | 3.580972932 |
| ENSMUSG00000052293 | 9.196874066 | 15.30357936 | 8.473812573 | 21.74735715 | 21.48583759 |
| ENSMUSG00000052298 | 84.1867703  | 115.4724625 | 108.0411103 | 187.6716376 | 133.9283876 |
| ENSMUSG00000052301 | 8.489422215 | 6.260555194 | 5.649208382 | 7.249119049 | 5.013362104 |
| ENSMUSG00000052331 | 106.8252295 | 125.2111039 | 118.633376  | 121.6241085 | 108.1453825 |
| ENSMUSG00000052334 | 14.14903703 | 9.043024169 | 10.59226572 | 3.221830688 | 7.87814045  |
| ENSMUSG00000052337 | 47.39927403 | 81.38721752 | 50.84287544 | 117.5968201 | 94.5376854  |
| ENSMUSG00000052353 | 7.781970364 | 6.956172438 | 6.35535943  | 7.249119049 | 4.297167518 |
| ENSMUSG00000052372 | 3.537259256 | 7.651789682 | 4.236906287 | 3.221830688 | 0.716194586 |
| ENSMUSG00000052373 | 10.61177777 | 6.956172438 | 12.00456781 | 6.443661377 | 5.013362104 |
| ENSMUSG00000052374 | 10.61177777 | 9.738641413 | 9.886114669 | 6.443661377 | 10.02672421 |
| ENSMUSG00000052376 | 9.904325918 | 9.043024169 | 7.061510478 | 2.416373016 | 8.594335036 |
| ENSMUSG00000052384 | 86.30912585 | 118.2549314 | 117.927225  | 237.6100133 | 176.1838682 |
| ENSMUSG00000052387 | 7.781970364 | 3.478086219 | 7.061510478 | 5.638203705 | 8.594335036 |
| ENSMUSG00000052389 | 7.781970364 | 9.043024169 | 12.71071886 | 4.832746033 | 7.87814045  |
| ENSMUSG00000052395 | 30.4204296  | 51.47567604 | 42.36906287 | 35.44013757 | 43.68786977 |
| ENSMUSG00000052406 | 53.05888884 | 77.21351406 | 76.97046421 | 178.0061455 | 125.3340526 |
| ENSMUSG00000052407 | 12.73413332 | 28.52030699 | 14.12302096 | 19.33098413 | 17.18867007 |
| ENSMUSG00000052414 | 12.02668147 | 20.17290007 | 8.473812573 | 16.10915344 | 12.89150255 |
| ENSMUSG00000052419 | 9.196874066 | 20.17290007 | 27.53989086 | 24.16373016 | 22.20203218 |
| ENSMUSG00000052423 | 10.61177777 | 32.69401046 | 26.83373982 | 24.96918783 | 29.36397804 |
| ENSMUSG00000052428 | 16.97884443 | 31.30277597 | 30.36449505 | 62.02024075 | 50.13362104 |
| ENSMUSG00000052429 | 26.1757185  | 43.12826911 | 38.13215658 | 227.9445212 | 161.8599765 |
| ENSMUSG00000052430 | 12.02668147 | 6.956172438 | 6.35535943  | 3.221830688 | 10.7429188  |
| ENSMUSG00000052446 | 67.91537772 | 118.2549314 | 84.03197468 | 97.46037832 | 84.51096119 |
| ENSMUSG00000052459 | 52.35143699 | 77.21351406 | 81.91352154 | 179.6170609 | 165.4409494 |
| ENSMUSG00000052477 | 45.27691848 | 60.51870021 | 50.13672439 | 92.62763229 | 55.86317773 |
| ENSMUSG00000052479 | 9.196874066 | 9.043024169 | 7.061510478 | 7.249119049 | 6.445751277 |
| ENSMUSG00000052508 | 12.02668147 | 4.869320706 | 7.767661525 | 9.665492065 | 4.297167518 |
| ENSMUSG00000052512 | 7.781970364 | 4.869320706 | 6.35535943  | 1.610915344 | 5.729556691 |
| ENSMUSG00000052516 | 7.781970364 | 3.478086219 | 7.061510478 | 6.443661377 | 7.87814045  |
| ENSMUSG00000052525 | 8.489422215 | 6.956172438 | 5.649208382 | 6.443661377 | 10.02672421 |

|                    |             |             |             |             |             |
|--------------------|-------------|-------------|-------------|-------------|-------------|
| ENSMUSG00000052533 | 84.1867703  | 113.3856107 | 98.15499564 | 125.6513968 | 113.8749392 |
| ENSMUSG00000052534 | 5.65961481  | 9.043024169 | 7.767661525 | 4.02728836  | 8.594335036 |
| ENSMUSG00000052539 | 9.904325918 | 17.39043109 | 15.53532305 | 7.249119049 | 12.89150255 |
| ENSMUSG00000052551 | 4.244711108 | 3.478086219 | 7.767661525 | 3.221830688 | 10.02672421 |
| ENSMUSG00000052560 | 8.489422215 | 8.347406925 | 6.35535943  | 6.443661377 | 5.013362104 |
| ENSMUSG00000052562 | 7.074518513 | 6.260555194 | 9.179963621 | 6.443661377 | 4.297167518 |
| ENSMUSG00000052563 | 72.86754068 | 77.21351406 | 86.85657888 | 44.30017197 | 51.56601022 |
| ENSMUSG00000052572 | 7.074518513 | 4.173703463 | 11.29841676 | 5.638203705 | 12.89150255 |
| ENSMUSG00000052581 | 4.952162959 | 9.043024169 | 9.886114669 | 3.221830688 | 10.02672421 |
| ENSMUSG00000052593 | 126.6338814 | 194.077211  | 139.1117564 | 164.3133651 | 128.198831  |
| ENSMUSG00000052605 | 9.904325918 | 18.08604834 | 16.94762515 | 14.4982381  | 13.60769714 |
| ENSMUSG00000052613 | 7.781970364 | 5.56493795  | 4.943057334 | 7.249119049 | 4.297167518 |
| ENSMUSG00000052616 | 7.074518513 | 19.47728283 | 16.2414741  | 8.860034393 | 9.310529622 |
| ENSMUSG00000052631 | 9.904325918 | 9.738641413 | 8.473812573 | 14.4982381  | 6.445751277 |
| ENSMUSG00000052632 | 10.61177777 | 14.60796212 | 20.47838039 | 8.860034393 | 8.594335036 |
| ENSMUSG00000052656 | 23.34591109 | 41.04141738 | 32.4829482  | 24.16373016 | 42.25548059 |
| ENSMUSG00000052658 | 9.196874066 | 14.60796212 | 12.71071886 | 18.52552646 | 22.91822676 |
| ENSMUSG00000052675 | 10.61177777 | 7.651789682 | 6.35535943  | 3.221830688 | 7.161945863 |
| ENSMUSG00000052676 | 14.14903703 | 31.99839321 | 28.24604191 | 25.77464551 | 22.20203218 |
| ENSMUSG00000052688 | 7.781970364 | 5.56493795  | 7.061510478 | 7.249119049 | 6.445751277 |
| ENSMUSG00000052698 | 7.781970364 | 6.956172438 | 7.061510478 | 12.08186508 | 9.310529622 |
| ENSMUSG00000052712 | 52.35143699 | 76.51789682 | 84.03197468 | 85.37851324 | 73.05184781 |
| ENSMUSG00000052726 | 8.489422215 | 9.738641413 | 9.179963621 | 2.416373016 | 7.161945863 |
| ENSMUSG00000052736 | 9.904325918 | 10.43425866 | 7.061510478 | 4.02728836  | 4.297167518 |
| ENSMUSG00000052738 | 84.89422215 | 119.6461659 | 101.6857509 | 99.87675134 | 87.37573953 |
| ENSMUSG00000052748 | 94.79854807 | 149.5577074 | 139.8179075 | 153.0369577 | 128.198831  |
| ENSMUSG00000052751 | 16.97884443 | 27.82468975 | 28.24604191 | 33.82922223 | 27.21539428 |
| ENSMUSG00000052752 | 113.8997481 | 139.1234488 | 147.585569  | 272.2446932 | 204.1154571 |
| ENSMUSG00000052760 | 8.489422215 | 9.043024169 | 4.943057334 | 1.610915344 | 10.02672421 |
| ENSMUSG00000052776 | 15.56394073 | 16.69481385 | 16.94762515 | 29.80193387 | 15.7562809  |
| ENSMUSG00000052783 | 25.46826665 | 43.12826911 | 38.83830763 | 133.7059736 | 99.5510475  |
| ENSMUSG00000052794 | 19.80865184 | 31.30277597 | 21.18453143 | 39.46742593 | 28.64778345 |
| ENSMUSG00000052798 | 72.86754068 | 117.5593142 | 84.73812573 | 181.2279762 | 132.4959985 |
| ENSMUSG00000052848 | 2.122355554 | 4.869320706 | 4.943057334 | 6.443661377 | 7.161945863 |
| ENSMUSG00000052854 | 5.65961481  | 4.869320706 | 1.412302096 | 0.805457672 | 2.864778345 |
| ENSMUSG00000052861 | 7.781970364 | 3.478086219 | 5.649208382 | 6.443661377 | 2.148583759 |
| ENSMUSG00000052889 | 108.9475851 | 117.5593142 | 123.5764334 | 93.43308996 | 87.37573953 |
| ENSMUSG00000052915 | 54.47379255 | 64.69240367 | 60.02283906 | 165.1188228 | 148.2522794 |
| ENSMUSG00000052917 | 73.57499253 | 102.9513521 | 89.68118307 | 56.38203705 | 62.30892901 |
| ENSMUSG00000052920 | 7.074518513 | 11.1298759  | 9.179963621 | 8.054576721 | 8.594335036 |
| ENSMUSG00000052921 | 11.31922962 | 9.738641413 | 4.943057334 | 7.249119049 | 10.02672421 |
| ENSMUSG00000052926 | 12.02668147 | 27.12907251 | 17.65377619 | 52.35474869 | 47.98503729 |
| ENSMUSG00000052934 | 13.44158517 | 20.17290007 | 19.77222934 | 46.71654498 | 40.82309142 |

|                    |             |             |             |             |             |
|--------------------|-------------|-------------|-------------|-------------|-------------|
| ENSMUSG00000052942 | 4.952162959 | 6.260555194 | 6.35535943  | 0.805457672 | 3.580972932 |
| ENSMUSG00000052949 | 54.47379255 | 82.77845201 | 79.7950684  | 206.1971641 | 148.968474  |
| ENSMUSG00000052997 | 73.57499253 | 95.2995624  | 84.03197468 | 106.3204127 | 95.97007457 |
| ENSMUSG00000053012 | 4.952162959 | 6.956172438 | 3.530755239 | 6.443661377 | 4.297167518 |
| ENSMUSG00000053024 | 9.904325918 | 4.869320706 | 6.35535943  | 6.443661377 | 3.580972932 |
| ENSMUSG00000053025 | 9.904325918 | 2.086851731 | 3.530755239 | 8.860034393 | 4.297167518 |
| ENSMUSG00000053030 | 7.074518513 | 6.956172438 | 6.35535943  | 6.443661377 | 5.013362104 |
| ENSMUSG00000053040 | 5.65961481  | 7.651789682 | 4.943057334 | 6.443661377 | 5.729556691 |
| ENSMUSG00000053046 | 4.952162959 | 4.173703463 | 7.061510478 | 2.416373016 | 7.161945863 |
| ENSMUSG00000053054 | 12.02668147 | 8.347406925 | 9.886114669 | 12.88732275 | 7.87814045  |
| ENSMUSG00000053062 | 4.244711108 | 6.260555194 | 5.649208382 | 8.860034393 | 7.161945863 |
| ENSMUSG00000053063 | 9.904325918 | 7.651789682 | 9.179963621 | 7.249119049 | 10.7429188  |
| ENSMUSG00000053080 | 19.80865184 | 23.65098629 | 16.2414741  | 14.4982381  | 15.7562809  |
| ENSMUSG00000053091 | 21.93100739 | 45.91073809 | 31.0706461  | 46.71654498 | 43.68786977 |
| ENSMUSG00000053093 | 7.074518513 | 3.478086219 | 4.943057334 | 6.443661377 | 8.594335036 |
| ENSMUSG00000053094 | 16.27139258 | 14.60796212 | 16.2414741  | 12.08186508 | 4.297167518 |
| ENSMUSG00000053110 | 4.952162959 | 5.56493795  | 4.943057334 | 4.832746033 | 9.310529622 |
| ENSMUSG00000053111 | 36.08004441 | 35.47647943 | 36.71985448 | 28.19101852 | 29.36397804 |
| ENSMUSG00000053119 | 55.88869625 | 93.90832791 | 76.26431316 | 47.52200265 | 43.68786977 |
| ENSMUSG00000053128 | 48.81417774 | 38.25894841 | 44.48751601 | 66.85298678 | 63.74131818 |
| ENSMUSG00000053134 | 60.13340736 | 90.43024169 | 82.61967259 | 114.3749894 | 100.9834367 |
| ENSMUSG00000053141 | 6.367066661 | 4.173703463 | 4.943057334 | 6.443661377 | 5.729556691 |
| ENSMUSG00000053153 | 9.904325918 | 6.260555194 | 8.473812573 | 6.443661377 | 3.580972932 |
| ENSMUSG00000053158 | 4.952162959 | 4.869320706 | 6.35535943  | 5.638203705 | 9.310529622 |
| ENSMUSG00000053161 | 4.952162959 | 2.086851731 | 0.706151048 | 3.221830688 | 4.297167518 |
| ENSMUSG00000053166 | 9.196874066 | 6.956172438 | 9.886114669 | 4.832746033 | 4.297167518 |
| ENSMUSG00000053175 | 31.12788146 | 49.38882431 | 60.02283906 | 166.7297381 | 138.2255552 |
| ENSMUSG00000053182 | 8.489422215 | 3.478086219 | 4.236906287 | 4.832746033 | 6.445751277 |
| ENSMUSG00000053184 | 12.02668147 | 8.347406925 | 9.179963621 | 2.416373016 | 4.297167518 |
| ENSMUSG00000053198 | 9.196874066 | 4.173703463 | 9.179963621 | 8.054576721 | 8.594335036 |
| ENSMUSG00000053199 | 9.904325918 | 4.173703463 | 8.473812573 | 2.416373016 | 5.729556691 |
| ENSMUSG00000053211 | 5.65961481  | 2.782468975 | 3.530755239 | 2.416373016 | 2.148583759 |
| ENSMUSG00000053216 | 8.489422215 | 6.260555194 | 4.236906287 | 0.805457672 | 8.594335036 |
| ENSMUSG00000053219 | 0           | 0           | 0           | 0           | 0           |
| ENSMUSG00000053228 | 9.904325918 | 5.56493795  | 5.649208382 | 4.832746033 | 12.17530797 |
| ENSMUSG00000053253 | 29.71297775 | 50.7800588  | 52.96132858 | 35.44013757 | 49.41742646 |
| ENSMUSG00000053286 | 72.86754068 | 134.254128  | 112.9841676 | 159.4806191 | 136.793166  |
| ENSMUSG00000053291 | 7.074518513 | 10.43425866 | 8.473812573 | 7.249119049 | 8.594335036 |
| ENSMUSG00000053303 | 10.61177777 | 9.738641413 | 3.530755239 | 6.443661377 | 4.297167518 |
| ENSMUSG00000053310 | 8.489422215 | 9.043024169 | 12.71071886 | 8.054576721 | 6.445751277 |
| ENSMUSG00000053317 | 62.25576291 | 97.38641413 | 72.73355792 | 169.9515688 | 127.4826364 |
| ENSMUSG00000053333 | 16.27139258 | 36.86771392 | 28.24604191 | 34.6346799  | 34.37734014 |
| ENSMUSG00000053347 | 143.6127258 | 205.2070869 | 204.7838039 | 150.6205847 | 132.4959985 |



|                    |             |             |             |             |             |
|--------------------|-------------|-------------|-------------|-------------|-------------|
| ENSMUSG00000053358 | 34.66514071 | 56.34499675 | 43.78136496 | 67.65844446 | 75.91662615 |
| ENSMUSG00000053367 | 7.074518513 | 6.956172438 | 6.35535943  | 9.665492065 | 10.02672421 |
| ENSMUSG00000053368 | 9.196874066 | 5.56493795  | 12.71071886 | 11.27640741 | 7.161945863 |
| ENSMUSG00000053388 | 9.196874066 | 4.173703463 | 9.179963621 | 4.832746033 | 9.310529622 |
| ENSMUSG00000053390 | 43.86201478 | 55.6493795  | 52.25517753 | 53.16020636 | 56.57937232 |
| ENSMUSG00000053395 | 7.781970364 | 5.56493795  | 4.943057334 | 4.02728836  | 8.594335036 |
| ENSMUSG00000053398 | 21.93100739 | 32.69401046 | 31.77679715 | 139.3441773 | 110.2939663 |
| ENSMUSG00000053411 | 16.97884443 | 6.260555194 | 6.35535943  | 8.054576721 | 9.310529622 |
| ENSMUSG00000053436 | 48.10672589 | 68.86610713 | 69.20280268 | 67.65844446 | 81.64618284 |
| ENSMUSG00000053442 | 11.31922962 | 13.21672763 | 11.29841676 | 31.41284921 | 25.06681052 |
| ENSMUSG00000053469 | 11.31922962 | 6.956172438 | 5.649208382 | 9.665492065 | 7.87814045  |
| ENSMUSG00000053470 | 26.88317035 | 43.82388636 | 44.48751601 | 44.30017197 | 45.83645353 |
| ENSMUSG00000053477 | 4.952162959 | 4.869320706 | 9.886114669 | 4.02728836  | 10.02672421 |
| ENSMUSG00000053483 | 38.20239997 | 48.69320706 | 39.54445867 | 25.77464551 | 32.94495097 |
| ENSMUSG00000053499 | 7.074518513 | 9.043024169 | 9.886114669 | 8.860034393 | 6.445751277 |
| ENSMUSG00000053510 | 91.26128881 | 118.9505487 | 106.6288082 | 144.1769233 | 122.4692743 |
| ENSMUSG00000053519 | 8.489422215 | 9.738641413 | 7.061510478 | 3.221830688 | 5.013362104 |
| ENSMUSG00000053522 | 7.074518513 | 6.956172438 | 4.943057334 | 4.832746033 | 6.445751277 |
| ENSMUSG00000053550 | 0           | 0           | 0           | 0           | 0           |
| ENSMUSG00000053552 | 6.367066661 | 9.043024169 | 7.767661525 | 6.443661377 | 7.87814045  |
| ENSMUSG00000053553 | 7.074518513 | 8.347406925 | 9.179963621 | 34.6346799  | 30.79636721 |
| ENSMUSG00000053559 | 10.61177777 | 17.39043109 | 13.41686991 | 12.88732275 | 22.91822676 |
| ENSMUSG00000053565 | 76.40479994 | 134.254128  | 99.56729774 | 212.6408254 | 173.3190899 |
| ENSMUSG00000053580 | 2.829807405 | 4.173703463 | 7.061510478 | 9.665492065 | 5.729556691 |
| ENSMUSG00000053581 | 34.66514071 | 42.43265187 | 33.89525029 | 73.29664816 | 63.74131818 |
| ENSMUSG00000053593 | 5.65961481  | 5.56493795  | 4.943057334 | 1.610915344 | 3.580972932 |
| ENSMUSG00000053603 | 52.35143699 | 90.43024169 | 82.61967259 | 61.21478308 | 65.88990194 |
| ENSMUSG00000053615 | 13.44158517 | 5.56493795  | 9.886114669 | 3.221830688 | 5.013362104 |
| ENSMUSG00000053617 | 61.54831106 | 75.12666233 | 56.49208382 | 31.41284921 | 35.80972932 |
| ENSMUSG00000053644 | 41.03220737 | 55.6493795  | 58.61053696 | 123.2350238 | 90.24051788 |
| ENSMUSG00000053646 | 7.074518513 | 4.869320706 | 7.061510478 | 8.054576721 | 5.729556691 |
| ENSMUSG00000053687 | 16.97884443 | 18.78166558 | 19.77222934 | 15.30369577 | 12.89150255 |
| ENSMUSG00000053693 | 2.829807405 | 8.347406925 | 7.061510478 | 8.054576721 | 9.310529622 |
| ENSMUSG00000053702 | 11.31922962 | 4.869320706 | 8.473812573 | 2.416373016 | 3.580972932 |
| ENSMUSG00000053706 | 31.83533331 | 27.82468975 | 35.30755239 | 41.07834128 | 38.67450766 |
| ENSMUSG00000053719 | 9.904325918 | 4.173703463 | 7.061510478 | 7.249119049 | 8.594335036 |
| ENSMUSG00000053730 | 27.5906222  | 42.43265187 | 37.42600553 | 53.16020636 | 41.53928601 |
| ENSMUSG00000053749 | 5.65961481  | 9.738641413 | 5.649208382 | 4.832746033 | 1.432389173 |
| ENSMUSG00000053768 | 55.88869625 | 95.2995624  | 64.25974535 | 88.60034393 | 101.6996313 |
| ENSMUSG00000053797 | 9.196874066 | 6.956172438 | 9.886114669 | 4.02728836  | 10.02672421 |
| ENSMUSG00000053801 | 20.51610369 | 24.34660353 | 23.30298458 | 95.84946298 | 70.18706946 |
| ENSMUSG00000053819 | 18.39374813 | 33.3896277  | 32.4829482  | 133.7059736 | 106.7129934 |
| ENSMUSG00000053825 | 13.44158517 | 7.651789682 | 11.29841676 | 8.860034393 | 10.02672421 |

|                    |             |             |             |             |             |
|--------------------|-------------|-------------|-------------|-------------|-------------|
| ENSMUSG00000053830 | 11.31922962 | 23.65098629 | 24.00913562 | 20.94189947 | 15.04008631 |
| ENSMUSG00000053835 | 99.04325918 | 153.0357936 | 117.2210739 | 189.2825529 | 122.4692743 |
| ENSMUSG00000053838 | 100.4581629 | 137.7322143 | 105.9226572 | 137.7332619 | 111.7263555 |
| ENSMUSG00000053841 | 24.05336294 | 35.47647943 | 31.0706461  | 109.5422434 | 89.52432329 |
| ENSMUSG00000053852 | 2.829807405 | 7.651789682 | 3.530755239 | 3.221830688 | 0           |
| ENSMUSG00000053877 | 21.22355554 | 30.60715873 | 32.4829482  | 132.9005159 | 118.8883013 |
| ENSMUSG00000053896 | 11.31922962 | 11.1298759  | 6.35535943  | 8.054576721 | 5.729556691 |
| ENSMUSG00000053897 | 5.65961481  | 4.869320706 | 2.824604191 | 5.638203705 | 5.729556691 |
| ENSMUSG00000053898 | 22.63845924 | 29.21592424 | 27.53989086 | 23.35827249 | 21.48583759 |
| ENSMUSG00000053907 | 30.4204296  | 53.56252777 | 64.96589639 | 300.4357117 | 211.277403  |
| ENSMUSG00000053929 | 13.44158517 | 19.47728283 | 14.829172   | 9.665492065 | 10.7429188  |
| ENSMUSG00000053931 | 81.3569629  | 111.9943762 | 98.86114669 | 60.40932541 | 65.88990194 |
| ENSMUSG00000053950 | 12.02668147 | 13.21672763 | 21.18453143 | 64.43661377 | 41.53928601 |
| ENSMUSG00000053964 | 14.14903703 | 9.738641413 | 9.179963621 | 7.249119049 | 7.161945863 |
| ENSMUSG00000053965 | 7.074518513 | 9.738641413 | 8.473812573 | 6.443661377 | 5.013362104 |
| ENSMUSG00000053977 | 4.244711108 | 4.869320706 | 4.236906287 | 4.832746033 | 5.729556691 |
| ENSMUSG00000053979 | 7.074518513 | 5.56493795  | 8.473812573 | 7.249119049 | 1.432389173 |
| ENSMUSG00000053980 | 5.65961481  | 2.782468975 | 5.649208382 | 5.638203705 | 7.87814045  |
| ENSMUSG00000054003 | 9.904325918 | 6.956172438 | 12.71071886 | 8.860034393 | 9.310529622 |
| ENSMUSG00000054034 | 2.122355554 | 4.869320706 | 4.943057334 | 3.221830688 | 2.864778345 |
| ENSMUSG00000054065 | 9.196874066 | 2.782468975 | 9.179963621 | 7.249119049 | 10.7429188  |
| ENSMUSG00000054072 | 8.489422215 | 6.260555194 | 5.649208382 | 26.58010318 | 10.02672421 |
| ENSMUSG00000054079 | 55.1812444  | 68.17048989 | 56.49208382 | 182.8388916 | 136.0769714 |
| ENSMUSG00000054099 | 26.1757185  | 33.3896277  | 37.42600553 | 71.68573282 | 58.72795608 |
| ENSMUSG00000054102 | 6.367066661 | 4.869320706 | 6.35535943  | 8.860034393 | 6.445751277 |
| ENSMUSG00000054115 | 7.781970364 | 9.043024169 | 12.00456781 | 8.054576721 | 11.45911338 |
| ENSMUSG00000054128 | 7.781970364 | 9.738641413 | 9.179963621 | 2.416373016 | 9.310529622 |
| ENSMUSG00000054134 | 6.367066661 | 6.956172438 | 4.943057334 | 7.249119049 | 4.297167518 |
| ENSMUSG00000054150 | 37.49494812 | 50.7800588  | 48.7244223  | 62.82569842 | 56.57937232 |
| ENSMUSG00000054161 | 21.22355554 | 10.43425866 | 10.59226572 | 166.7297381 | 111.7263555 |
| ENSMUSG00000054162 | 8.489422215 | 8.347406925 | 7.061510478 | 4.832746033 | 5.013362104 |
| ENSMUSG00000054178 | 10.61177777 | 11.1298759  | 9.886114669 | 6.443661377 | 17.18867007 |
| ENSMUSG00000054199 | 38.20239997 | 65.38802092 | 71.32125582 | 99.07129367 | 76.63282074 |
| ENSMUSG00000054226 | 43.86201478 | 73.0398106  | 73.43970897 | 57.18749472 | 57.29556691 |
| ENSMUSG00000054252 | 3.537259256 | 5.56493795  | 10.59226572 | 8.054576721 | 7.161945863 |
| ENSMUSG00000054256 | 4.952162959 | 8.347406925 | 7.061510478 | 4.832746033 | 5.729556691 |
| ENSMUSG00000054258 | 7.781970364 | 9.043024169 | 8.473812573 | 5.638203705 | 5.729556691 |
| ENSMUSG00000054263 | 8.489422215 | 10.43425866 | 9.179963621 | 8.054576721 | 10.02672421 |
| ENSMUSG00000054280 | 159.1766665 | 194.077211  | 179.3623661 | 177.2006879 | 159.7113928 |
| ENSMUSG00000054293 | 9.196874066 | 11.82549314 | 9.179963621 | 11.27640741 | 13.60769714 |
| ENSMUSG00000054302 | 48.81417774 | 64.69240367 | 57.19823487 | 64.43661377 | 69.47087488 |
| ENSMUSG00000054310 | 0.707451851 | 0.695617244 | 1.412302096 | 0           | 0           |
| ENSMUSG00000054320 | 5.65961481  | 6.956172438 | 9.886114669 | 9.665492065 | 4.297167518 |

|                    |             |             |             |             |             |
|--------------------|-------------|-------------|-------------|-------------|-------------|
| ENSMUSG00000054385 | 13.44158517 | 9.738641413 | 9.179963621 | 7.249119049 | 14.32389173 |
| ENSMUSG00000054387 | 16.27139258 | 21.56413456 | 15.53532305 | 11.27640741 | 22.91822676 |
| ENSMUSG00000054400 | 41.73965922 | 75.12666233 | 48.7244223  | 47.52200265 | 51.56601022 |
| ENSMUSG00000054404 | 14.14903703 | 11.1298759  | 12.00456781 | 14.4982381  | 12.17530797 |
| ENSMUSG00000054405 | 129.4636888 | 172.5130765 | 149.7040221 | 272.2446932 | 196.9535112 |
| ENSMUSG00000054423 | 8.489422215 | 4.173703463 | 10.59226572 | 4.02728836  | 7.87814045  |
| ENSMUSG00000054428 | 31.83533331 | 44.5195036  | 44.48751601 | 46.71654498 | 44.40406435 |
| ENSMUSG00000054434 | 8.489422215 | 18.08604834 | 12.71071886 | 15.30369577 | 26.49919969 |
| ENSMUSG00000054435 | 125.9264295 | 175.2955454 | 139.8179075 | 314.1284921 | 244.9385485 |
| ENSMUSG00000054450 | 8.489422215 | 9.738641413 | 5.649208382 | 4.02728836  | 5.729556691 |
| ENSMUSG00000054452 | 56.5961481  | 85.56092098 | 81.20737049 | 71.68573282 | 57.29556691 |
| ENSMUSG00000054453 | 3.537259256 | 3.478086219 | 1.412302096 | 3.221830688 | 3.580972932 |
| ENSMUSG00000054469 | 31.83533331 | 53.56252777 | 49.43057334 | 33.82922223 | 44.40406435 |
| ENSMUSG00000054474 | 12.73413332 | 5.56493795  | 7.767661525 | 9.665492065 | 7.161945863 |
| ENSMUSG00000054477 | 5.65961481  | 6.956172438 | 12.00456781 | 4.832746033 | 7.87814045  |
| ENSMUSG00000054484 | 10.61177777 | 8.347406925 | 17.65377619 | 22.55281482 | 18.62105924 |
| ENSMUSG00000054520 | 168.3735406 | 160.6875833 | 164.5331941 | 155.4533307 | 137.5093606 |
| ENSMUSG00000054523 | 11.31922962 | 7.651789682 | 9.179963621 | 6.443661377 | 7.161945863 |
| ENSMUSG00000054545 | 9.904325918 | 5.56493795  | 4.236906287 | 4.832746033 | 7.161945863 |
| ENSMUSG00000054555 | 4.244711108 | 2.782468975 | 2.118453143 | 2.416373016 | 5.013362104 |
| ENSMUSG00000054580 | 8.489422215 | 5.56493795  | 9.179963621 | 7.249119049 | 2.864778345 |
| ENSMUSG00000054594 | 21.93100739 | 27.12907251 | 26.12758877 | 24.96918783 | 25.78300511 |
| ENSMUSG00000054598 | 7.074518513 | 6.260555194 | 7.767661525 | 7.249119049 | 7.87814045  |
| ENSMUSG00000054611 | 19.10119998 | 28.52030699 | 24.00913562 | 40.2728836  | 35.80972932 |
| ENSMUSG00000054626 | 3.537259256 | 5.56493795  | 4.943057334 | 7.249119049 | 11.45911338 |
| ENSMUSG00000054641 | 8.489422215 | 4.869320706 | 8.473812573 | 4.832746033 | 8.594335036 |
| ENSMUSG00000054659 | 7.074518513 | 9.043024169 | 4.943057334 | 3.221830688 | 5.013362104 |
| ENSMUSG00000054672 | 14.14903703 | 7.651789682 | 7.061510478 | 4.832746033 | 6.445751277 |
| ENSMUSG00000054676 | 17.68629628 | 20.86851731 | 16.94762515 | 37.85651059 | 27.93158887 |
| ENSMUSG00000054690 | 6.367066661 | 7.651789682 | 3.530755239 | 8.054576721 | 7.87814045  |
| ENSMUSG00000054693 | 60.13340736 | 81.38721752 | 74.14586002 | 99.87675134 | 94.5376854  |
| ENSMUSG00000054702 | 54.47379255 | 93.90832791 | 88.26888097 | 132.9005159 | 105.2806042 |
| ENSMUSG00000054708 | 6.367066661 | 11.82549314 | 7.061510478 | 17.72006879 | 15.04008631 |
| ENSMUSG00000054715 | 26.88317035 | 54.25814501 | 47.3121202  | 49.132918   | 52.99839939 |
| ENSMUSG00000054720 | 50.22908144 | 79.99598303 | 52.96132858 | 63.6311561  | 66.60609653 |
| ENSMUSG00000054728 | 4.952162959 | 4.173703463 | 3.530755239 | 4.832746033 | 5.729556691 |
| ENSMUSG00000054737 | 10.61177777 | 25.04222078 | 21.89068248 | 14.4982381  | 17.90486466 |
| ENSMUSG00000054746 | 10.61177777 | 6.956172438 | 8.473812573 | 7.249119049 | 9.310529622 |
| ENSMUSG00000054752 | 5.65961481  | 6.260555194 | 6.35535943  | 3.221830688 | 3.580972932 |
| ENSMUSG00000054757 | 13.44158517 | 7.651789682 | 7.061510478 | 8.054576721 | 5.729556691 |
| ENSMUSG00000054758 | 9.196874066 | 12.52111039 | 9.179963621 | 3.221830688 | 3.580972932 |
| ENSMUSG00000054766 | 4.952162959 | 10.43425866 | 7.767661525 | 4.02728836  | 7.161945863 |
| ENSMUSG00000054770 | 19.10119998 | 20.86851731 | 20.47838039 | 8.860034393 | 14.32389173 |

|                    |             |             |             |             |             |
|--------------------|-------------|-------------|-------------|-------------|-------------|
| ENSMUSG00000054792 | 59.42595551 | 86.95215547 | 76.97046421 | 69.2693598  | 70.18706946 |
| ENSMUSG00000054808 | 145.0276295 | 150.9489419 | 153.9409284 | 229.5554365 | 156.1304198 |
| ENSMUSG00000054814 | 17.68629628 | 22.2597518  | 31.0706461  | 27.38556085 | 27.93158887 |
| ENSMUSG00000054823 | 80.64951104 | 112.6899935 | 96.0365425  | 168.3406535 | 143.9551119 |
| ENSMUSG00000054827 | 12.73413332 | 6.260555194 | 10.59226572 | 4.02728836  | 4.297167518 |
| ENSMUSG00000054836 | 20.51610369 | 39.6501829  | 39.54445867 | 40.2728836  | 28.64778345 |
| ENSMUSG00000054855 | 8.489422215 | 8.347406925 | 6.35535943  | 2.416373016 | 5.729556691 |
| ENSMUSG00000054874 | 60.13340736 | 79.30036579 | 60.02283906 | 131.2896006 | 111.0101609 |
| ENSMUSG00000054885 | 2.122355554 | 1.391234488 | 0.706151048 | 0.805457672 | 0           |
| ENSMUSG00000054889 | 7.781970364 | 2.086851731 | 5.649208382 | 4.832746033 | 7.87814045  |
| ENSMUSG00000054892 | 12.02668147 | 29.91154148 | 14.829172   | 12.08186508 | 16.47247549 |
| ENSMUSG00000054893 | 18.39374813 | 23.65098629 | 24.00913562 | 16.10915344 | 20.05344842 |
| ENSMUSG00000054920 | 13.44158517 | 19.47728283 | 18.35992724 | 20.94189947 | 21.48583759 |
| ENSMUSG00000054934 | 7.074518513 | 10.43425866 | 12.00456781 | 10.47094974 | 7.87814045  |
| ENSMUSG00000054942 | 32.54278516 | 38.25894841 | 26.83373982 | 50.74383334 | 42.25548059 |
| ENSMUSG00000054966 | 6.367066661 | 8.347406925 | 9.886114669 | 9.665492065 | 10.02672421 |
| ENSMUSG00000054976 | 10.61177777 | 10.43425866 | 7.767661525 | 8.054576721 | 8.594335036 |
| ENSMUSG00000054986 | 7.781970364 | 4.173703463 | 8.473812573 | 4.02728836  | 9.310529622 |
| ENSMUSG00000055003 | 6.367066661 | 6.260555194 | 2.824604191 | 8.860034393 | 8.594335036 |
| ENSMUSG00000055010 | 19.80865184 | 33.3896277  | 41.66291182 | 64.43661377 | 51.56601022 |
| ENSMUSG00000055013 | 8.489422215 | 4.869320706 | 9.886114669 | 1.610915344 | 6.445751277 |
| ENSMUSG00000055022 | 9.196874066 | 7.651789682 | 2.118453143 | 8.054576721 | 5.729556691 |
| ENSMUSG00000055024 | 3.537259256 | 4.869320706 | 4.236906287 | 6.443661377 | 6.445751277 |
| ENSMUSG00000055026 | 8.489422215 | 6.956172438 | 7.061510478 | 2.416373016 | 7.161945863 |
| ENSMUSG00000055027 | 5.65961481  | 7.651789682 | 5.649208382 | 10.47094974 | 5.729556691 |
| ENSMUSG00000055044 | 16.27139258 | 16.69481385 | 14.829172   | 12.08186508 | 20.05344842 |
| ENSMUSG00000055053 | 2.829807405 | 9.043024169 | 15.53532305 | 8.054576721 | 6.445751277 |
| ENSMUSG00000055067 | 21.93100739 | 50.08444155 | 30.36449505 | 37.85651059 | 27.21539428 |
| ENSMUSG00000055072 | 8.489422215 | 11.1298759  | 9.179963621 | 3.221830688 | 8.594335036 |
| ENSMUSG00000055099 | 6.367066661 | 9.043024169 | 8.473812573 | 4.02728836  | 5.729556691 |
| ENSMUSG00000055102 | 7.781970364 | 6.260555194 | 2.824604191 | 4.832746033 | 7.87814045  |
| ENSMUSG00000055108 | 16.97884443 | 27.12907251 | 16.2414741  | 18.52552646 | 15.04008631 |
| ENSMUSG00000055109 | 0.707451851 | 2.782468975 | 2.118453143 | 0           | 1.432389173 |
| ENSMUSG00000055125 | 7.781970364 | 6.956172438 | 9.179963621 | 8.054576721 | 11.45911338 |
| ENSMUSG00000055128 | 24.05336294 | 49.38882431 | 46.60596915 | 45.10562964 | 51.56601022 |
| ENSMUSG00000055172 | 5.65961481  | 6.956172438 | 7.767661525 | 1.610915344 | 2.864778345 |
| ENSMUSG00000055177 | 7.781970364 | 6.260555194 | 6.35535943  | 6.443661377 | 10.02672421 |
| ENSMUSG00000055204 | 84.89422215 | 126.6023384 | 102.3919019 | 226.3336059 | 185.4943979 |
| ENSMUSG00000055214 | 5.65961481  | 4.869320706 | 4.236906287 | 7.249119049 | 5.013362104 |
| ENSMUSG00000055235 | 3.537259256 | 13.21672763 | 10.59226572 | 9.665492065 | 7.87814045  |
| ENSMUSG00000055239 | 81.3569629  | 111.298759  | 90.38733411 | 169.9515688 | 159.7113928 |
| ENSMUSG00000055240 | 63.67066661 | 113.3856107 | 103.804204  | 107.1258704 | 85.94335036 |
| ENSMUSG00000055254 | 8.489422215 | 5.56493795  | 12.00456781 | 4.832746033 | 5.013362104 |

|                    |             |             |             |             |             |
|--------------------|-------------|-------------|-------------|-------------|-------------|
| ENSMUSG00000055271 | 21.22355554 | 14.60796212 | 21.18453143 | 33.02376456 | 20.05344842 |
| ENSMUSG00000055296 | 32.54278516 | 66.08363816 | 52.25517753 | 55.57657937 | 75.20043157 |
| ENSMUSG00000055305 | 7.781970364 | 9.738641413 | 6.35535943  | 7.249119049 | 2.864778345 |
| ENSMUSG00000055313 | 8.489422215 | 10.43425866 | 11.29841676 | 7.249119049 | 5.729556691 |
| ENSMUSG00000055320 | 12.02668147 | 4.173703463 | 7.767661525 | 4.02728836  | 2.864778345 |
| ENSMUSG00000055322 | 7.781970364 | 9.043024169 | 8.473812573 | 5.638203705 | 6.445751277 |
| ENSMUSG00000055323 | 87.72402956 | 105.0382038 | 100.9795998 | 51.54929101 | 43.68786977 |
| ENSMUSG00000055333 | 13.44158517 | 4.173703463 | 4.943057334 | 5.638203705 | 8.594335036 |
| ENSMUSG00000055341 | 16.27139258 | 25.04222078 | 21.89068248 | 16.91461111 | 21.48583759 |
| ENSMUSG00000055360 | 12.73413332 | 10.43425866 | 9.886114669 | 7.249119049 | 5.013362104 |
| ENSMUSG00000055368 | 7.074518513 | 2.782468975 | 5.649208382 | 6.443661377 | 10.7429188  |
| ENSMUSG00000055371 | 25.46826665 | 48.69320706 | 33.89525029 | 33.82922223 | 30.08017263 |
| ENSMUSG00000055401 | 6.367066661 | 2.782468975 | 6.35535943  | 5.638203705 | 10.02672421 |
| ENSMUSG00000055403 | 7.074518513 | 2.782468975 | 7.061510478 | 6.443661377 | 7.87814045  |
| ENSMUSG00000055407 | 8.489422215 | 6.956172438 | 7.061510478 | 5.638203705 | 9.310529622 |
| ENSMUSG00000055409 | 7.074518513 | 5.56493795  | 7.061510478 | 7.249119049 | 6.445751277 |
| ENSMUSG00000055436 | 146.4425332 | 209.3807904 | 166.6516473 | 299.630254  | 219.871738  |
| ENSMUSG00000055446 | 5.65961481  | 5.56493795  | 9.886114669 | 6.443661377 | 5.729556691 |
| ENSMUSG00000055447 | 121.6817184 | 144.6883867 | 122.1641313 | 248.080963  | 149.6846685 |
| ENSMUSG00000055456 | 8.489422215 | 6.956172438 | 4.943057334 | 5.638203705 | 6.445751277 |
| ENSMUSG00000055491 | 65.79302217 | 84.86530374 | 78.3827663  | 237.6100133 | 186.926787  |
| ENSMUSG00000055531 | 7.074518513 | 13.21672763 | 12.71071886 | 8.054576721 | 7.87814045  |
| ENSMUSG00000055540 | 10.61177777 | 12.52111039 | 9.886114669 | 3.221830688 | 12.89150255 |
| ENSMUSG00000055541 | 7.781970364 | 11.1298759  | 12.00456781 | 4.02728836  | 7.87814045  |
| ENSMUSG00000055553 | 75.69734809 | 107.8206728 | 97.44884459 | 93.43308996 | 83.7947666  |
| ENSMUSG00000055567 | 6.367066661 | 6.956172438 | 7.767661525 | 4.02728836  | 3.580972932 |
| ENSMUSG00000055602 | 10.61177777 | 11.1298759  | 11.29841676 | 6.443661377 | 11.45911338 |
| ENSMUSG00000055612 | 32.54278516 | 44.5195036  | 40.25060972 | 131.2896006 | 100.2672421 |
| ENSMUSG00000055639 | 9.196874066 | 8.347406925 | 5.649208382 | 4.832746033 | 2.864778345 |
| ENSMUSG00000055652 | 36.08004441 | 51.47567604 | 44.48751601 | 42.68925662 | 42.97167518 |
| ENSMUSG00000055653 | 0.707451851 | 2.086851731 | 4.236906287 | 1.610915344 | 3.580972932 |
| ENSMUSG00000055670 | 70.74518513 | 129.3848073 | 105.2165061 | 86.18397091 | 93.82149081 |
| ENSMUSG00000055676 | 45.98437033 | 68.17048989 | 73.43970897 | 111.9586164 | 100.2672421 |
| ENSMUSG00000055681 | 84.1867703  | 86.25653823 | 90.38733411 | 168.3406535 | 139.6579443 |
| ENSMUSG00000055692 | 6.367066661 | 8.347406925 | 12.00456781 | 7.249119049 | 12.17530797 |
| ENSMUSG00000055694 | 7.781970364 | 11.82549314 | 6.35535943  | 12.88732275 | 13.60769714 |
| ENSMUSG00000055704 | 7.074518513 | 4.869320706 | 4.943057334 | 8.054576721 | 7.161945863 |
| ENSMUSG00000055707 | 23.34591109 | 28.52030699 | 37.42600553 | 45.91108731 | 32.22875639 |
| ENSMUSG00000055717 | 10.61177777 | 31.99839321 | 20.47838039 | 22.55281482 | 30.08017263 |
| ENSMUSG00000055720 | 19.80865184 | 43.82388636 | 47.3121202  | 39.46742593 | 49.41742646 |
| ENSMUSG00000055725 | 7.781970364 | 7.651789682 | 4.943057334 | 4.832746033 | 12.89150255 |
| ENSMUSG00000055730 | 8.489422215 | 2.782468975 | 9.179963621 | 5.638203705 | 7.87814045  |
| ENSMUSG00000055732 | 7.074518513 | 4.869320706 | 6.35535943  | 2.416373016 | 7.87814045  |

|                    |             |             |             |             |             |
|--------------------|-------------|-------------|-------------|-------------|-------------|
| ENSMUSG00000055737 | 10.61177777 | 6.260555194 | 7.061510478 | 7.249119049 | 4.297167518 |
| ENSMUSG00000055748 | 11.31922962 | 5.56493795  | 12.00456781 | 7.249119049 | 8.594335036 |
| ENSMUSG00000055760 | 8.489422215 | 20.86851731 | 20.47838039 | 39.46742593 | 24.35061594 |
| ENSMUSG00000055761 | 7.074518513 | 11.1298759  | 6.35535943  | 8.860034393 | 5.013362104 |
| ENSMUSG00000055762 | 82.06441475 | 149.5577074 | 127.1071886 | 214.2517408 | 173.3190899 |
| ENSMUSG00000055775 | 7.781970364 | 7.651789682 | 8.473812573 | 6.443661377 | 5.729556691 |
| ENSMUSG00000055780 | 3.537259256 | 5.56493795  | 7.061510478 | 3.221830688 | 4.297167518 |
| ENSMUSG00000055799 | 9.196874066 | 4.869320706 | 8.473812573 | 4.02728836  | 10.02672421 |
| ENSMUSG00000055805 | 198.0865184 | 189.2078903 | 202.6653507 | 198.1425873 | 170.4543116 |
| ENSMUSG00000055817 | 33.25023701 | 66.7792554  | 62.1412922  | 64.43661377 | 55.86317773 |
| ENSMUSG00000055818 | 13.44158517 | 17.39043109 | 24.00913562 | 17.72006879 | 12.89150255 |
| ENSMUSG00000055827 | 8.489422215 | 5.56493795  | 9.179963621 | 6.443661377 | 7.161945863 |
| ENSMUSG00000055831 | 7.781970364 | 4.173703463 | 6.35535943  | 5.638203705 | 7.87814045  |
| ENSMUSG00000055835 | 14.14903703 | 19.47728283 | 14.12302096 | 37.85651059 | 35.80972932 |
| ENSMUSG00000055850 | 61.54831106 | 89.73462445 | 88.26888097 | 88.60034393 | 76.63282074 |
| ENSMUSG00000055900 | 23.34591109 | 20.17290007 | 30.36449505 | 52.35474869 | 44.40406435 |
| ENSMUSG00000055917 | 31.83533331 | 68.17048989 | 58.61053696 | 49.132918   | 49.41742646 |
| ENSMUSG00000055923 | 14.85648888 | 16.69481385 | 19.06607829 | 24.96918783 | 22.20203218 |
| ENSMUSG00000055932 | 47.39927403 | 103.6469693 | 84.03197468 | 80.54576721 | 79.49759908 |
| ENSMUSG00000055933 | 2.829807405 | 2.782468975 | 2.824604191 | 4.02728836  | 2.864778345 |
| ENSMUSG00000055942 | 5.65961481  | 5.56493795  | 8.473812573 | 8.860034393 | 7.87814045  |
| ENSMUSG00000055960 | 3.537259256 | 5.56493795  | 8.473812573 | 3.221830688 | 7.87814045  |
| ENSMUSG00000055961 | 8.489422215 | 7.651789682 | 7.061510478 | 2.416373016 | 9.310529622 |
| ENSMUSG00000055963 | 10.61177777 | 6.956172438 | 7.061510478 | 1.610915344 | 3.580972932 |
| ENSMUSG00000055971 | 7.074518513 | 11.1298759  | 4.236906287 | 5.638203705 | 11.45911338 |
| ENSMUSG00000055991 | 20.51610369 | 29.91154148 | 25.42143772 | 18.52552646 | 26.49919969 |
| ENSMUSG00000055994 | 8.489422215 | 10.43425866 | 11.29841676 | 14.4982381  | 10.02672421 |
| ENSMUSG00000056004 | 9.196874066 | 7.651789682 | 10.59226572 | 6.443661377 | 7.87814045  |
| ENSMUSG00000056014 | 45.98437033 | 78.60474855 | 67.08434954 | 56.38203705 | 54.43078856 |
| ENSMUSG00000056018 | 9.196874066 | 9.043024169 | 7.061510478 | 4.02728836  | 4.297167518 |
| ENSMUSG00000056019 | 17.68629628 | 24.34660353 | 20.47838039 | 38.66196826 | 32.22875639 |
| ENSMUSG00000056023 | 8.489422215 | 11.82549314 | 9.179963621 | 10.47094974 | 6.445751277 |
| ENSMUSG00000056025 | 12.73413332 | 4.869320706 | 9.179963621 | 4.832746033 | 4.297167518 |
| ENSMUSG00000056055 | 6.367066661 | 11.1298759  | 10.59226572 | 7.249119049 | 9.310529622 |
| ENSMUSG00000056071 | 9.196874066 | 5.56493795  | 7.767661525 | 6.443661377 | 7.87814045  |
| ENSMUSG00000056073 | 9.904325918 | 9.043024169 | 9.179963621 | 4.832746033 | 4.297167518 |
| ENSMUSG00000056076 | 163.4213776 | 189.9035076 | 160.2962878 | 351.9850027 | 262.8434132 |
| ENSMUSG00000056089 | 6.367066661 | 6.260555194 | 2.118453143 | 3.221830688 | 8.594335036 |
| ENSMUSG00000056091 | 5.65961481  | 18.78166558 | 24.71528667 | 19.33098413 | 10.7429188  |
| ENSMUSG00000056106 | 9.904325918 | 16.69481385 | 9.179963621 | 10.47094974 | 15.7562809  |
| ENSMUSG00000056116 | 137.2456591 | 191.9903593 | 170.1824025 | 276.2719815 | 179.7648412 |
| ENSMUSG00000056121 | 35.37259256 | 43.12826911 | 38.83830763 | 21.74735715 | 25.78300511 |
| ENSMUSG00000056131 | 8.489422215 | 18.78166558 | 19.77222934 | 16.10915344 | 23.63442135 |

|                    |             |             |             |             |             |
|--------------------|-------------|-------------|-------------|-------------|-------------|
| ENSMUSG00000056144 | 135.8307554 | 167.6437558 | 128.5194907 | 155.4533307 | 137.5093606 |
| ENSMUSG00000056153 | 6.367066661 | 8.347406925 | 3.530755239 | 4.832746033 | 7.87814045  |
| ENSMUSG00000056158 | 4.244711108 | 6.956172438 | 13.41686991 | 6.443661377 | 5.729556691 |
| ENSMUSG00000056162 | 9.196874066 | 6.956172438 | 10.59226572 | 3.221830688 | 7.161945863 |
| ENSMUSG00000056211 | 70.03773327 | 98.77764862 | 96.74269354 | 145.7878386 | 116.7397176 |
| ENSMUSG00000056215 | 4.952162959 | 4.869320706 | 3.530755239 | 4.832746033 | 3.580972932 |
| ENSMUSG00000056220 | 6.367066661 | 9.043024169 | 7.767661525 | 2.416373016 | 7.87814045  |
| ENSMUSG00000056222 | 9.904325918 | 3.478086219 | 7.061510478 | 6.443661377 | 7.87814045  |
| ENSMUSG00000056228 | 24.05336294 | 25.73783802 | 33.89525029 | 32.21830688 | 28.64778345 |
| ENSMUSG00000056234 | 79.94205919 | 139.819066  | 114.3964697 | 133.7059736 | 116.023523  |
| ENSMUSG00000056257 | 28.29807405 | 38.95456565 | 28.95219296 | 33.82922223 | 25.78300511 |
| ENSMUSG00000056260 | 7.074518513 | 11.82549314 | 5.649208382 | 9.665492065 | 10.02672421 |
| ENSMUSG00000056267 | 19.80865184 | 22.95536904 | 26.12758877 | 15.30369577 | 15.04008631 |
| ENSMUSG00000056268 | 34.66514071 | 63.30116918 | 53.66747963 | 103.098582  | 70.18706946 |
| ENSMUSG00000056271 | 12.02668147 | 15.99919661 | 12.00456781 | 13.69278043 | 19.33725383 |
| ENSMUSG00000056290 | 14.85648888 | 13.21672763 | 19.06607829 | 16.10915344 | 10.7429188  |
| ENSMUSG00000056293 | 12.02668147 | 7.651789682 | 7.767661525 | 4.02728836  | 5.013362104 |
| ENSMUSG00000056296 | 14.85648888 | 5.56493795  | 9.886114669 | 4.832746033 | 5.013362104 |
| ENSMUSG00000056300 | 24.05336294 | 17.39043109 | 30.36449505 | 16.10915344 | 20.05344842 |
| ENSMUSG00000056310 | 93.38364437 | 141.9059177 | 105.2165061 | 173.9788572 | 136.0769714 |
| ENSMUSG00000056316 | 3.537259256 | 4.173703463 | 9.179963621 | 4.02728836  | 3.580972932 |
| ENSMUSG00000056328 | 7.781970364 | 9.738641413 | 8.473812573 | 4.832746033 | 5.729556691 |
| ENSMUSG00000056342 | 101.8730666 | 126.6023384 | 115.8087718 | 242.4427593 | 161.8599765 |
| ENSMUSG00000056366 | 9.196874066 | 6.260555194 | 9.886114669 | 10.47094974 | 9.310529622 |
| ENSMUSG00000056367 | 10.61177777 | 13.91234488 | 13.41686991 | 7.249119049 | 12.17530797 |
| ENSMUSG00000056370 | 7.781970364 | 7.651789682 | 6.35535943  | 12.08186508 | 7.87814045  |
| ENSMUSG00000056380 | 2.829807405 | 5.56493795  | 4.236906287 | 2.416373016 | 3.580972932 |
| ENSMUSG00000056383 | 38.90985182 | 70.95295887 | 63.5535943  | 53.96566403 | 45.12025894 |
| ENSMUSG00000056394 | 11.31922962 | 27.82468975 | 16.2414741  | 28.9964762  | 25.78300511 |
| ENSMUSG00000056413 | 19.10119998 | 27.12907251 | 31.0706461  | 38.66196826 | 35.80972932 |
| ENSMUSG00000056427 | 4.952162959 | 4.173703463 | 5.649208382 | 8.860034393 | 5.013362104 |
| ENSMUSG00000056458 | 8.489422215 | 8.347406925 | 12.00456781 | 6.443661377 | 7.87814045  |
| ENSMUSG00000056459 | 53.05888884 | 95.99517964 | 70.61510478 | 185.2552646 | 138.9417498 |
| ENSMUSG00000056476 | 7.074518513 | 7.651789682 | 4.943057334 | 8.860034393 | 5.013362104 |
| ENSMUSG00000056486 | 9.196874066 | 9.043024169 | 4.236906287 | 3.221830688 | 5.729556691 |
| ENSMUSG00000056498 | 29.71297775 | 45.91073809 | 30.36449505 | 99.07129367 | 85.22715578 |
| ENSMUSG00000056531 | 40.32475552 | 68.17048989 | 55.78593277 | 127.2623122 | 89.52432329 |
| ENSMUSG00000056536 | 107.5326814 | 163.4700523 | 141.9363606 | 183.6443492 | 177.6162574 |
| ENSMUSG00000056537 | 60.84085921 | 91.82147618 | 73.43970897 | 138.5387196 | 98.11865833 |
| ENSMUSG00000056553 | 9.904325918 | 6.956172438 | 3.530755239 | 5.638203705 | 8.594335036 |
| ENSMUSG00000056569 | 38.20239997 | 55.6493795  | 58.61053696 | 42.68925662 | 47.98503729 |
| ENSMUSG00000056592 | 5.65961481  | 8.347406925 | 16.2414741  | 8.860034393 | 7.161945863 |
| ENSMUSG00000056598 | 10.61177777 | 22.2597518  | 18.35992724 | 20.1364418  | 13.60769714 |

|                    |             |             |             |             |             |
|--------------------|-------------|-------------|-------------|-------------|-------------|
| ENSMUSG00000056602 | 17.68629628 | 36.86771392 | 32.4829482  | 16.91461111 | 16.47247549 |
| ENSMUSG00000056606 | 9.904325918 | 4.869320706 | 7.061510478 | 5.638203705 | 5.729556691 |
| ENSMUSG00000056608 | 14.14903703 | 28.52030699 | 23.30298458 | 19.33098413 | 18.62105924 |
| ENSMUSG00000056617 | 7.074518513 | 10.43425866 | 12.00456781 | 5.638203705 | 6.445751277 |
| ENSMUSG00000056629 | 41.73965922 | 53.56252777 | 34.60140134 | 103.098582  | 81.64618284 |
| ENSMUSG00000056666 | 15.56394073 | 22.2597518  | 26.83373982 | 19.33098413 | 16.47247549 |
| ENSMUSG00000056673 | 24.76081479 | 36.86771392 | 28.24604191 | 41.88379895 | 35.80972932 |
| ENSMUSG00000056679 | 5.65961481  | 1.391234488 | 4.943057334 | 3.221830688 | 2.148583759 |
| ENSMUSG00000056692 | 94.79854807 | 130.7760418 | 112.2780166 | 202.1698757 | 158.9951982 |
| ENSMUSG00000056698 | 14.14903703 | 29.91154148 | 19.77222934 | 20.94189947 | 21.48583759 |
| ENSMUSG00000056718 | 12.02668147 | 11.82549314 | 14.12302096 | 12.88732275 | 11.45911338 |
| ENSMUSG00000056724 | 20.51610369 | 29.21592424 | 22.59683353 | 25.77464551 | 35.09353473 |
| ENSMUSG00000056737 | 43.15456293 | 61.9099347  | 57.19823487 | 49.132918   | 45.12025894 |
| ENSMUSG00000056752 | 10.61177777 | 6.260555194 | 7.061510478 | 4.832746033 | 6.445751277 |
| ENSMUSG00000056753 | 52.35143699 | 83.47406925 | 73.43970897 | 61.21478308 | 56.57937232 |
| ENSMUSG00000056755 | 8.489422215 | 4.869320706 | 4.236906287 | 4.02728836  | 6.445751277 |
| ENSMUSG00000056758 | 4.952162959 | 9.043024169 | 7.061510478 | 3.221830688 | 5.729556691 |
| ENSMUSG00000056763 | 55.1812444  | 112.6899935 | 81.20737049 | 161.8969921 | 138.2255552 |
| ENSMUSG00000056770 | 98.33580733 | 143.2971522 | 132.0502459 | 202.1698757 | 158.2790036 |
| ENSMUSG00000056812 | 6.367066661 | 6.956172438 | 7.767661525 | 4.832746033 | 2.864778345 |
| ENSMUSG00000056824 | 5.65961481  | 7.651789682 | 7.061510478 | 8.054576721 | 7.87814045  |
| ENSMUSG00000056832 | 7.781970364 | 11.82549314 | 9.179963621 | 8.860034393 | 8.594335036 |
| ENSMUSG00000056851 | 84.89422215 | 116.1680797 | 74.14586002 | 281.9101852 | 206.2640409 |
| ENSMUSG00000056856 | 3.537259256 | 6.260555194 | 4.943057334 | 4.832746033 | 2.864778345 |
| ENSMUSG00000056880 | 9.196874066 | 3.478086219 | 7.061510478 | 5.638203705 | 6.445751277 |
| ENSMUSG00000056888 | 10.61177777 | 6.956172438 | 5.649208382 | 11.27640741 | 7.161945863 |
| ENSMUSG00000056899 | 16.97884443 | 29.21592424 | 18.35992724 | 23.35827249 | 27.93158887 |
| ENSMUSG00000056900 | 7.781970364 | 8.347406925 | 8.473812573 | 6.443661377 | 8.594335036 |
| ENSMUSG00000056912 | 6.367066661 | 15.30357936 | 6.35535943  | 4.02728836  | 4.297167518 |
| ENSMUSG00000056917 | 56.5961481  | 72.34419335 | 72.02740687 | 101.4876667 | 97.40246374 |
| ENSMUSG00000056938 | 12.02668147 | 24.34660353 | 28.24604191 | 17.72006879 | 21.48583759 |
| ENSMUSG00000056941 | 45.98437033 | 69.56172438 | 63.5535943  | 59.60386773 | 61.59273443 |
| ENSMUSG00000056952 | 74.28244438 | 107.8206728 | 90.38733411 | 222.3063175 | 168.3057278 |
| ENSMUSG00000056962 | 43.15456293 | 77.21351406 | 84.73812573 | 203.780791  | 152.5494469 |
| ENSMUSG00000057000 | 9.196874066 | 2.086851731 | 2.824604191 | 4.02728836  | 3.580972932 |
| ENSMUSG00000057003 | 8.489422215 | 2.782468975 | 5.649208382 | 4.02728836  | 6.445751277 |
| ENSMUSG00000057036 | 9.196874066 | 11.1298759  | 16.94762515 | 18.52552646 | 11.45911338 |
| ENSMUSG00000057054 | 29.0055259  | 52.86691053 | 31.77679715 | 35.44013757 | 32.22875639 |
| ENSMUSG00000057058 | 7.781970364 | 6.956172438 | 6.35535943  | 10.47094974 | 4.297167518 |
| ENSMUSG00000057068 | 14.14903703 | 8.347406925 | 6.35535943  | 8.054576721 | 5.729556691 |
| ENSMUSG00000057072 | 3.537259256 | 8.347406925 | 4.943057334 | 9.665492065 | 5.729556691 |
| ENSMUSG00000057092 | 6.367066661 | 4.869320706 | 5.649208382 | 8.054576721 | 9.310529622 |
| ENSMUSG00000057093 | 6.367066661 | 10.43425866 | 8.473812573 | 9.665492065 | 5.013362104 |



|                    |             |             |             |             |             |
|--------------------|-------------|-------------|-------------|-------------|-------------|
| ENSMUSG00000057098 | 100.4581629 | 128.6891901 | 108.7472614 | 168.3406535 | 136.0769714 |
| ENSMUSG00000057103 | 30.4204296  | 61.9099347  | 53.66747963 | 46.71654498 | 55.86317773 |
| ENSMUSG00000057110 | 47.39927403 | 50.7800588  | 45.8998181  | 79.74030954 | 63.74131818 |
| ENSMUSG00000057113 | 55.1812444  | 91.82147618 | 74.14586002 | 242.4427593 | 147.5360848 |
| ENSMUSG00000057123 | 7.074518513 | 6.956172438 | 5.649208382 | 6.443661377 | 10.7429188  |
| ENSMUSG00000057130 | 0           | 0           | 0.706151048 | 0           | 0           |
| ENSMUSG00000057132 | 15.56394073 | 11.1298759  | 9.886114669 | 11.27640741 | 14.32389173 |
| ENSMUSG00000057133 | 79.94205919 | 89.0390072  | 81.20737049 | 73.29664816 | 68.75468029 |
| ENSMUSG00000057135 | 38.90985182 | 54.25814501 | 45.8998181  | 22.55281482 | 29.36397804 |
| ENSMUSG00000057143 | 36.78749627 | 74.43104508 | 45.8998181  | 62.82569842 | 61.59273443 |
| ENSMUSG00000057147 | 16.97884443 | 31.99839321 | 30.36449505 | 21.74735715 | 21.48583759 |
| ENSMUSG00000057156 | 11.31922962 | 11.82549314 | 9.886114669 | 6.443661377 | 10.7429188  |
| ENSMUSG00000057177 | 70.74518513 | 100.8645003 | 91.09348516 | 89.4058016  | 83.07857202 |
| ENSMUSG00000057181 | 21.93100739 | 44.5195036  | 29.65834401 | 33.02376456 | 30.08017263 |
| ENSMUSG00000057182 | 6.367066661 | 9.043024169 | 9.886114669 | 7.249119049 | 7.161945863 |
| ENSMUSG00000057191 | 44.56946663 | 60.51870021 | 70.61510478 | 35.44013757 | 36.5259239  |
| ENSMUSG00000057195 | 9.904325918 | 6.260555194 | 4.943057334 | 1.610915344 | 8.594335036 |
| ENSMUSG00000057219 | 12.73413332 | 20.86851731 | 24.71528667 | 35.44013757 | 27.93158887 |
| ENSMUSG00000057229 | 18.39374813 | 34.08524495 | 32.4829482  | 12.88732275 | 30.08017263 |
| ENSMUSG00000057230 | 40.32475552 | 66.7792554  | 65.67204744 | 53.96566403 | 61.59273443 |
| ENSMUSG00000057236 | 71.45263698 | 118.9505487 | 104.5103551 | 170.7570265 | 158.2790036 |
| ENSMUSG00000057240 | 4.952162959 | 4.869320706 | 6.35535943  | 1.610915344 | 7.161945863 |
| ENSMUSG00000057246 | 7.074518513 | 16.69481385 | 15.53532305 | 15.30369577 | 14.32389173 |
| ENSMUSG00000057265 | 11.31922962 | 22.95536904 | 25.42143772 | 15.30369577 | 12.17530797 |
| ENSMUSG00000057280 | 9.904325918 | 6.956172438 | 6.35535943  | 6.443661377 | 5.013362104 |
| ENSMUSG00000057315 | 45.98437033 | 75.12666233 | 57.19823487 | 55.57657937 | 61.59273443 |
| ENSMUSG00000057322 | 55.88869625 | 83.47406925 | 71.32125582 | 242.4427593 | 170.4543116 |
| ENSMUSG00000057335 | 136.5382073 | 173.9043109 | 177.950064  | 100.682209  | 78.06520991 |
| ENSMUSG00000057337 | 239.8261776 | 217.7281973 | 237.9729031 | 387.4251403 | 296.5045587 |
| ENSMUSG00000057342 | 53.05888884 | 86.25653823 | 85.44427678 | 295.6029657 | 224.1689055 |
| ENSMUSG00000057346 | 7.074518513 | 6.956172438 | 7.767661525 | 8.860034393 | 10.02672421 |
| ENSMUSG00000057363 | 27.5906222  | 36.17209668 | 44.48751601 | 45.10562964 | 42.25548059 |
| ENSMUSG00000057367 | 25.46826665 | 61.21431745 | 43.07521391 | 99.87675134 | 65.88990194 |
| ENSMUSG00000057375 | 33.95768886 | 47.30197258 | 54.37363068 | 24.16373016 | 43.68786977 |
| ENSMUSG00000057378 | 8.489422215 | 3.478086219 | 7.061510478 | 6.443661377 | 5.013362104 |
| ENSMUSG00000057400 | 9.196874066 | 6.956172438 | 9.179963621 | 3.221830688 | 5.729556691 |
| ENSMUSG00000057406 | 43.15456293 | 39.6501829  | 43.07521391 | 117.5968201 | 88.80812871 |
| ENSMUSG00000057421 | 19.10119998 | 40.34580014 | 34.60140134 | 79.74030954 | 52.99839939 |
| ENSMUSG00000057439 | 6.367066661 | 4.869320706 | 3.530755239 | 4.832746033 | 5.013362104 |
| ENSMUSG00000057443 | 8.489422215 | 6.956172438 | 7.767661525 | 4.832746033 | 9.310529622 |
| ENSMUSG00000057444 | 4.952162959 | 4.173703463 | 7.061510478 | 2.416373016 | 8.594335036 |
| ENSMUSG00000057455 | 7.074518513 | 4.173703463 | 5.649208382 | 6.443661377 | 15.04008631 |
| ENSMUSG00000057457 | 3.537259256 | 2.782468975 | 3.530755239 | 1.610915344 | 5.013362104 |

|                    |             |             |             |             |             |
|--------------------|-------------|-------------|-------------|-------------|-------------|
| ENSMUSG00000057522 | 12.02668147 | 26.43345526 | 23.30298458 | 37.85651059 | 41.53928601 |
| ENSMUSG00000057530 | 33.95768886 | 55.6493795  | 59.31668801 | 49.132918   | 30.79636721 |
| ENSMUSG00000057531 | 52.35143699 | 88.34338996 | 67.08434954 | 127.2623122 | 100.9834367 |
| ENSMUSG00000057534 | 39.61730367 | 26.43345526 | 33.18909925 | 22.55281482 | 23.63442135 |
| ENSMUSG00000057541 | 19.10119998 | 41.04141738 | 43.78136496 | 106.3204127 | 78.7814045  |
| ENSMUSG00000057554 | 7.074518513 | 17.39043109 | 9.886114669 | 3.221830688 | 5.729556691 |
| ENSMUSG00000057564 | 7.074518513 | 2.782468975 | 6.35535943  | 9.665492065 | 7.161945863 |
| ENSMUSG00000057572 | 73.57499253 | 114.081228  | 89.68118307 | 165.9242805 | 131.0636093 |
| ENSMUSG00000057594 | 55.88869625 | 107.8206728 | 102.3919019 | 97.46037832 | 85.22715578 |
| ENSMUSG00000057596 | 50.22908144 | 102.2557348 | 76.97046421 | 127.2623122 | 90.95671247 |
| ENSMUSG00000057606 | 7.781970364 | 7.651789682 | 7.061510478 | 4.02728836  | 2.148583759 |
| ENSMUSG00000057637 | 31.83533331 | 64.69240367 | 45.19366706 | 49.93837567 | 46.55264811 |
| ENSMUSG00000057666 | 35.37259256 | 47.30197258 | 50.84287544 | 198.948045  | 129.6312201 |
| ENSMUSG00000057672 | 82.7718666  | 116.863697  | 115.1026208 | 193.3098413 | 139.6579443 |
| ENSMUSG00000057710 | 9.196874066 | 6.260555194 | 11.29841676 | 5.638203705 | 6.445751277 |
| ENSMUSG00000057715 | 7.781970364 | 6.260555194 | 4.236906287 | 4.832746033 | 10.7429188  |
| ENSMUSG00000057719 | 7.781970364 | 7.651789682 | 5.649208382 | 4.02728836  | 5.729556691 |
| ENSMUSG00000057722 | 9.196874066 | 3.478086219 | 9.179963621 | 7.249119049 | 5.729556691 |
| ENSMUSG00000057729 | 6.367066661 | 9.043024169 | 7.061510478 | 7.249119049 | 10.7429188  |
| ENSMUSG00000057738 | 44.56946663 | 66.08363816 | 45.19366706 | 59.60386773 | 60.16034525 |
| ENSMUSG00000057751 | 4.244711108 | 3.478086219 | 4.943057334 | 4.832746033 | 5.013362104 |
| ENSMUSG00000057762 | 11.31922962 | 6.260555194 | 7.061510478 | 8.054576721 | 15.04008631 |
| ENSMUSG00000057766 | 7.781970364 | 6.956172438 | 2.824604191 | 3.221830688 | 10.7429188  |
| ENSMUSG00000057778 | 53.05888884 | 100.1688831 | 103.804204  | 70.07481747 | 85.22715578 |
| ENSMUSG00000057788 | 72.16008883 | 106.4294383 | 104.5103551 | 164.3133651 | 136.0769714 |
| ENSMUSG00000057789 | 18.39374813 | 33.3896277  | 35.30755239 | 86.18397091 | 63.0251236  |
| ENSMUSG00000057836 | 5.65961481  | 4.869320706 | 2.118453143 | 2.416373016 | 7.87814045  |
| ENSMUSG00000057842 | 37.49494812 | 67.47487265 | 56.49208382 | 28.19101852 | 41.53928601 |
| ENSMUSG00000057855 | 4.244711108 | 11.1298759  | 7.061510478 | 5.638203705 | 3.580972932 |
| ENSMUSG00000057880 | 8.489422215 | 7.651789682 | 8.473812573 | 6.443661377 | 8.594335036 |
| ENSMUSG00000057894 | 48.10672589 | 74.43104508 | 60.72899011 | 49.132918   | 51.56601022 |
| ENSMUSG00000057895 | 7.074518513 | 7.651789682 | 5.649208382 | 3.221830688 | 10.02672421 |
| ENSMUSG00000057897 | 9.904325918 | 4.869320706 | 2.118453143 | 5.638203705 | 3.580972932 |
| ENSMUSG00000057913 | 12.02668147 | 6.956172438 | 7.767661525 | 8.054576721 | 5.013362104 |
| ENSMUSG00000057914 | 5.65961481  | 6.956172438 | 7.767661525 | 6.443661377 | 6.445751277 |
| ENSMUSG00000057933 | 10.61177777 | 4.869320706 | 9.179963621 | 5.638203705 | 6.445751277 |
| ENSMUSG00000057948 | 23.34591109 | 28.52030699 | 28.95219296 | 49.93837567 | 36.5259239  |
| ENSMUSG00000057967 | 1.414903703 | 9.043024169 | 7.767661525 | 3.221830688 | 6.445751277 |
| ENSMUSG00000057969 | 1.414903703 | 2.086851731 | 4.236906287 | 5.638203705 | 5.013362104 |
| ENSMUSG00000057977 | 5.65961481  | 5.56493795  | 5.649208382 | 3.221830688 | 5.729556691 |
| ENSMUSG00000058006 | 64.37811846 | 91.12585893 | 84.03197468 | 153.0369577 | 119.6044959 |
| ENSMUSG00000058013 | 58.71850365 | 89.73462445 | 91.09348516 | 101.4876667 | 78.7814045  |
| ENSMUSG00000058019 | 14.14903703 | 5.56493795  | 4.943057334 | 3.221830688 | 7.161945863 |

|                    |             |             |             |             |             |
|--------------------|-------------|-------------|-------------|-------------|-------------|
| ENSMUSG00000058022 | 12.02668147 | 7.651789682 | 6.35535943  | 9.665492065 | 4.297167518 |
| ENSMUSG00000058028 | 8.489422215 | 4.869320706 | 6.35535943  | 5.638203705 | 4.297167518 |
| ENSMUSG00000058056 | 9.196874066 | 9.043024169 | 5.649208382 | 2.416373016 | 6.445751277 |
| ENSMUSG00000058070 | 8.489422215 | 6.260555194 | 4.236906287 | 3.221830688 | 8.594335036 |
| ENSMUSG00000058076 | 37.49494812 | 69.56172438 | 59.31668801 | 41.07834128 | 57.29556691 |
| ENSMUSG00000058093 | 50.93653329 | 75.12666233 | 64.96589639 | 49.132918   | 58.72795608 |
| ENSMUSG00000058099 | 34.66514071 | 43.82388636 | 41.66291182 | 17.72006879 | 22.91822676 |
| ENSMUSG00000058126 | 16.97884443 | 11.82549314 | 14.829172   | 24.16373016 | 12.17530797 |
| ENSMUSG00000058135 | 8.489422215 | 5.56493795  | 8.473812573 | 7.249119049 | 5.729556691 |
| ENSMUSG00000058145 | 8.489422215 | 2.782468975 | 9.886114669 | 6.443661377 | 2.148583759 |
| ENSMUSG00000058153 | 4.244711108 | 4.869320706 | 6.35535943  | 11.27640741 | 5.729556691 |
| ENSMUSG00000058163 | 23.34591109 | 25.73783802 | 30.36449505 | 36.24559524 | 22.20203218 |
| ENSMUSG00000058173 | 8.489422215 | 8.347406925 | 14.829172   | 20.94189947 | 12.89150255 |
| ENSMUSG00000058183 | 8.489422215 | 7.651789682 | 9.886114669 | 6.443661377 | 7.87814045  |
| ENSMUSG00000058186 | 21.22355554 | 20.17290007 | 21.89068248 | 13.69278043 | 15.7562809  |
| ENSMUSG00000058192 | 29.0055259  | 28.52030699 | 33.18909925 | 18.52552646 | 27.93158887 |
| ENSMUSG00000058216 | 3.537259256 | 2.782468975 | 6.35535943  | 11.27640741 | 6.445751277 |
| ENSMUSG00000058230 | 19.80865184 | 43.12826911 | 45.19366706 | 58.79841006 | 52.2822048  |
| ENSMUSG00000058239 | 33.25023701 | 49.38882431 | 64.96589639 | 98.265836   | 105.2806042 |
| ENSMUSG00000058240 | 29.0055259  | 54.25814501 | 49.43057334 | 42.68925662 | 39.39070225 |
| ENSMUSG00000058248 | 7.074518513 | 4.869320706 | 6.35535943  | 6.443661377 | 4.297167518 |
| ENSMUSG00000058258 | 14.85648888 | 27.12907251 | 20.47838039 | 101.4876667 | 98.11865833 |
| ENSMUSG00000058267 | 19.10119998 | 45.91073809 | 31.0706461  | 73.29664816 | 58.01176149 |
| ENSMUSG00000058291 | 70.74518513 | 104.3425866 | 86.85657888 | 107.9313281 | 99.5510475  |
| ENSMUSG00000058297 | 4.952162959 | 6.956172438 | 8.473812573 | 3.221830688 | 9.310529622 |
| ENSMUSG00000058317 | 6.367066661 | 4.173703463 | 4.236906287 | 8.860034393 | 4.297167518 |
| ENSMUSG00000058318 | 13.44158517 | 10.43425866 | 9.886114669 | 8.860034393 | 10.02672421 |
| ENSMUSG00000058328 | 0           | 0           | 0           | 0           | 0           |
| ENSMUSG00000058331 | 31.12788146 | 70.25734162 | 60.72899011 | 27.38556085 | 34.37734014 |
| ENSMUSG00000058351 | 34.66514071 | 50.08444155 | 40.95676077 | 64.43661377 | 56.57937232 |
| ENSMUSG00000058388 | 35.37259256 | 56.34499675 | 52.96132858 | 89.4058016  | 86.65954495 |
| ENSMUSG00000058392 | 38.90985182 | 47.30197258 | 46.60596915 | 232.7772672 | 136.793166  |
| ENSMUSG00000058400 | 9.196874066 | 8.347406925 | 7.767661525 | 4.832746033 | 6.445751277 |
| ENSMUSG00000058402 | 19.10119998 | 37.56333116 | 19.06607829 | 26.58010318 | 24.35061594 |
| ENSMUSG00000058407 | 65.08557032 | 84.1696865  | 107.3349593 | 181.2279762 | 143.9551119 |
| ENSMUSG00000058427 | 9.196874066 | 6.956172438 | 6.35535943  | 4.832746033 | 6.445751277 |
| ENSMUSG00000058440 | 45.27691848 | 61.9099347  | 63.5535943  | 176.3952302 | 132.4959985 |
| ENSMUSG00000058444 | 17.68629628 | 30.60715873 | 28.95219296 | 36.24559524 | 42.25548059 |
| ENSMUSG00000058446 | 19.80865184 | 45.91073809 | 39.54445867 | 78.12939419 | 55.86317773 |
| ENSMUSG00000058447 | 0           | 3.478086219 | 2.824604191 | 2.416373016 | 1.432389173 |
| ENSMUSG00000058454 | 26.88317035 | 48.69320706 | 38.13215658 | 22.55281482 | 31.5125618  |
| ENSMUSG00000058470 | 80.64951104 | 109.2119073 | 118.633376  | 163.5079074 | 123.1854689 |
| ENSMUSG00000058486 | 29.0055259  | 41.73703463 | 48.01827125 | 38.66196826 | 27.21539428 |

|                    |             |             |             |             |             |
|--------------------|-------------|-------------|-------------|-------------|-------------|
| ENSMUSG00000058498 | 13.44158517 | 7.651789682 | 12.71071886 | 5.638203705 | 9.310529622 |
| ENSMUSG00000058503 | 119.5593629 | 143.9927695 | 125.6948865 | 186.8661799 | 143.2389173 |
| ENSMUSG00000058550 | 7.074518513 | 7.651789682 | 9.886114669 | 4.832746033 | 7.87814045  |
| ENSMUSG00000058558 | 73.57499253 | 88.34338996 | 86.85657888 | 240.831844  | 226.3174893 |
| ENSMUSG00000058571 | 12.73413332 | 6.260555194 | 6.35535943  | 4.02728836  | 7.87814045  |
| ENSMUSG00000058586 | 12.02668147 | 11.1298759  | 4.236906287 | 6.443661377 | 6.445751277 |
| ENSMUSG00000058589 | 15.56394073 | 3.478086219 | 4.236906287 | 4.832746033 | 7.161945863 |
| ENSMUSG00000058594 | 46.69182218 | 87.64777272 | 74.85201106 | 74.9075635  | 59.44415067 |
| ENSMUSG00000058600 | 6.367066661 | 17.39043109 | 9.886114669 | 37.05105292 | 20.769643   |
| ENSMUSG00000058624 | 7.781970364 | 2.782468975 | 6.35535943  | 6.443661377 | 3.580972932 |
| ENSMUSG00000058626 | 9.196874066 | 3.478086219 | 6.35535943  | 7.249119049 | 7.87814045  |
| ENSMUSG00000058638 | 36.78749627 | 76.51789682 | 64.96589639 | 54.7711217  | 56.57937232 |
| ENSMUSG00000058656 | 8.489422215 | 9.738641413 | 7.767661525 | 6.443661377 | 6.445751277 |
| ENSMUSG00000058659 | 8.489422215 | 8.347406925 | 6.35535943  | 4.02728836  | 7.87814045  |
| ENSMUSG00000058690 | 79.94205919 | 116.863697  | 98.86114669 | 63.6311561  | 56.57937232 |
| ENSMUSG00000058709 | 79.94205919 | 97.38641413 | 82.61967259 | 138.5387196 | 121.7530797 |
| ENSMUSG00000058715 | 12.02668147 | 9.738641413 | 9.179963621 | 10.47094974 | 8.594335036 |
| ENSMUSG00000058729 | 45.98437033 | 64.69240367 | 73.43970897 | 84.57305557 | 88.09193412 |
| ENSMUSG00000058740 | 4.244711108 | 6.260555194 | 5.649208382 | 4.02728836  | 7.87814045  |
| ENSMUSG00000058756 | 11.31922962 | 13.21672763 | 19.77222934 | 7.249119049 | 16.47247549 |
| ENSMUSG00000058793 | 79.23460734 | 87.64777272 | 79.08891735 | 130.4841429 | 113.8749392 |
| ENSMUSG00000058794 | 6.367066661 | 9.043024169 | 5.649208382 | 4.832746033 | 8.594335036 |
| ENSMUSG00000058799 | 147.1499851 | 194.077211  | 174.4193088 | 262.5792011 | 189.7915654 |
| ENSMUSG00000058806 | 6.367066661 | 2.782468975 | 2.824604191 | 4.832746033 | 7.161945863 |
| ENSMUSG00000058818 | 19.80865184 | 22.95536904 | 10.59226572 | 9.665492065 | 10.02672421 |
| ENSMUSG00000058831 | 8.489422215 | 9.043024169 | 6.35535943  | 4.832746033 | 8.594335036 |
| ENSMUSG00000058833 | 17.68629628 | 36.86771392 | 32.4829482  | 86.18397091 | 48.70123187 |
| ENSMUSG00000058835 | 111.0699406 | 137.7322143 | 103.804204  | 182.8388916 | 162.5761711 |
| ENSMUSG00000058881 | 4.952162959 | 11.82549314 | 9.886114669 | 7.249119049 | 6.445751277 |
| ENSMUSG00000058883 | 16.27139258 | 31.99839321 | 25.42143772 | 25.77464551 | 20.05344842 |
| ENSMUSG00000058897 | 9.196874066 | 4.869320706 | 3.530755239 | 8.860034393 | 4.297167518 |
| ENSMUSG00000058908 | 11.31922962 | 7.651789682 | 3.530755239 | 10.47094974 | 5.729556691 |
| ENSMUSG00000058914 | 14.14903703 | 7.651789682 | 7.061510478 | 8.054576721 | 5.013362104 |
| ENSMUSG00000058925 | 10.61177777 | 1.391234488 | 7.767661525 | 5.638203705 | 5.729556691 |
| ENSMUSG00000058927 | 6.367066661 | 6.260555194 | 8.473812573 | 16.10915344 | 17.90486466 |
| ENSMUSG00000058935 | 10.61177777 | 10.43425866 | 7.061510478 | 6.443661377 | 3.580972932 |
| ENSMUSG00000058952 | 11.31922962 | 6.956172438 | 4.236906287 | 8.054576721 | 10.7429188  |
| ENSMUSG00000058966 | 9.196874066 | 6.956172438 | 4.236906287 | 7.249119049 | 4.297167518 |
| ENSMUSG00000059003 | 5.65961481  | 1.391234488 | 4.943057334 | 5.638203705 | 6.445751277 |
| ENSMUSG00000059005 | 1.414903703 | 0.695617244 | 1.412302096 | 4.832746033 | 2.148583759 |
| ENSMUSG00000059013 | 72.86754068 | 76.51789682 | 76.26431316 | 86.98942859 | 61.59273443 |
| ENSMUSG00000059022 | 8.489422215 | 9.738641413 | 7.061510478 | 8.054576721 | 10.02672421 |
| ENSMUSG00000059049 | 7.781970364 | 4.869320706 | 7.061510478 | 5.638203705 | 5.013362104 |

|                    |             |             |             |             |             |
|--------------------|-------------|-------------|-------------|-------------|-------------|
| ENSMUSG00000059060 | 17.68629628 | 25.73783802 | 21.18453143 | 24.96918783 | 22.20203218 |
| ENSMUSG00000059070 | 66.50047402 | 119.6461659 | 95.33039145 | 137.7332619 | 107.429188  |
| ENSMUSG00000059142 | 13.44158517 | 13.91234488 | 19.77222934 | 12.08186508 | 10.02672421 |
| ENSMUSG00000059146 | 4.244711108 | 4.869320706 | 7.767661525 | 4.02728836  | 6.445751277 |
| ENSMUSG00000059149 | 6.367066661 | 7.651789682 | 9.886114669 | 9.665492065 | 7.161945863 |
| ENSMUSG00000059173 | 9.196874066 | 6.260555194 | 6.35535943  | 3.221830688 | 5.729556691 |
| ENSMUSG00000059183 | 42.44711108 | 55.6493795  | 67.79050059 | 76.51847885 | 64.45751277 |
| ENSMUSG00000059187 | 7.074518513 | 5.56493795  | 9.886114669 | 5.638203705 | 11.45911338 |
| ENSMUSG00000059201 | 10.61177777 | 6.260555194 | 4.943057334 | 2.416373016 | 4.297167518 |
| ENSMUSG00000059203 | 4.244711108 | 4.173703463 | 1.412302096 | 0.805457672 | 1.432389173 |
| ENSMUSG00000059208 | 31.83533331 | 46.60635533 | 48.7244223  | 51.54929101 | 41.53928601 |
| ENSMUSG00000059218 | 7.074518513 | 9.043024169 | 5.649208382 | 8.054576721 | 5.729556691 |
| ENSMUSG00000059248 | 10.61177777 | 5.56493795  | 4.943057334 | 4.832746033 | 5.729556691 |
| ENSMUSG00000059288 | 3.537259256 | 3.478086219 | 2.824604191 | 3.221830688 | 3.580972932 |
| ENSMUSG00000059291 | 50.93653329 | 89.0390072  | 82.61967259 | 339.9031376 | 220.5879326 |
| ENSMUSG00000059305 | 18.39374813 | 26.43345526 | 20.47838039 | 24.96918783 | 15.04008631 |
| ENSMUSG00000059323 | 7.074518513 | 12.52111039 | 9.179963621 | 28.9964762  | 15.7562809  |
| ENSMUSG00000059325 | 10.61177777 | 8.347406925 | 7.767661525 | 4.02728836  | 10.7429188  |
| ENSMUSG00000059336 | 151.3946962 | 130.7760418 | 137.6994543 | 134.5114312 | 105.2806042 |
| ENSMUSG00000059355 | 24.05336294 | 27.12907251 | 39.54445867 | 41.07834128 | 34.37734014 |
| ENSMUSG00000059363 | 15.56394073 | 27.12907251 | 23.30298458 | 16.91461111 | 25.06681052 |
| ENSMUSG00000059383 | 6.367066661 | 5.56493795  | 11.29841676 | 1.610915344 | 5.013362104 |
| ENSMUSG00000059401 | 3.537259256 | 2.782468975 | 1.412302096 | 1.610915344 | 5.729556691 |
| ENSMUSG00000059423 | 43.15456293 | 81.38721752 | 62.1412922  | 62.82569842 | 68.0384857  |
| ENSMUSG00000059430 | 7.781970364 | 7.651789682 | 6.35535943  | 5.638203705 | 9.310529622 |
| ENSMUSG00000059436 | 55.1812444  | 71.64857611 | 71.32125582 | 190.8934683 | 133.9283876 |
| ENSMUSG00000059439 | 20.51610369 | 33.3896277  | 27.53989086 | 20.1364418  | 15.04008631 |
| ENSMUSG00000059447 | 96.21345177 | 168.339373  | 134.1686991 | 169.1461111 | 143.9551119 |
| ENSMUSG00000059456 | 178.9853184 | 193.3815938 | 206.902257  | 177.2006879 | 157.562809  |
| ENSMUSG00000059474 | 45.98437033 | 72.34419335 | 67.79050059 | 203.780791  | 127.4826364 |
| ENSMUSG00000059475 | 41.73965922 | 65.38802092 | 58.61053696 | 53.16020636 | 72.33565322 |
| ENSMUSG00000059482 | 3.537259256 | 10.43425866 | 12.00456781 | 8.860034393 | 14.32389173 |
| ENSMUSG00000059486 | 91.96874066 | 123.8198694 | 110.1595635 | 197.3371297 | 148.2522794 |
| ENSMUSG00000059493 | 1.414903703 | 3.478086219 | 3.530755239 | 0.805457672 | 1.432389173 |
| ENSMUSG00000059495 | 16.27139258 | 21.56413456 | 13.41686991 | 23.35827249 | 26.49919969 |
| ENSMUSG00000059498 | 2.829807405 | 1.391234488 | 1.412302096 | 0.805457672 | 2.864778345 |
| ENSMUSG00000059518 | 8.489422215 | 11.1298759  | 19.06607829 | 16.91461111 | 15.04008631 |
| ENSMUSG00000059540 | 6.367066661 | 14.60796212 | 15.53532305 | 11.27640741 | 15.7562809  |
| ENSMUSG00000059552 | 104.702874  | 123.1242521 | 118.633376  | 205.3917064 | 187.6429816 |
| ENSMUSG00000059554 | 11.31922962 | 15.99919661 | 9.179963621 | 9.665492065 | 11.45911338 |
| ENSMUSG00000059562 | 8.489422215 | 7.651789682 | 9.179963621 | 8.054576721 | 7.161945863 |
| ENSMUSG00000059588 | 41.73965922 | 59.82308296 | 65.67204744 | 22.55281482 | 20.769643   |
| ENSMUSG00000059602 | 7.781970364 | 8.347406925 | 8.473812573 | 6.443661377 | 10.7429188  |

|                    |             |             |             |             |             |
|--------------------|-------------|-------------|-------------|-------------|-------------|
| ENSMUSG00000059626 | 6.367066661 | 3.478086219 | 3.530755239 | 3.221830688 | 2.148583759 |
| ENSMUSG00000059631 | 11.31922962 | 7.651789682 | 7.767661525 | 5.638203705 | 5.729556691 |
| ENSMUSG00000059689 | 16.27139258 | 32.69401046 | 26.12758877 | 26.58010318 | 22.91822676 |
| ENSMUSG00000059708 | 5.65961481  | 11.1298759  | 7.061510478 | 8.860034393 | 8.594335036 |
| ENSMUSG00000059713 | 9.196874066 | 11.82549314 | 12.00456781 | 6.443661377 | 9.310529622 |
| ENSMUSG00000059714 | 2.829807405 | 2.086851731 | 2.118453143 | 3.221830688 | 4.297167518 |
| ENSMUSG00000059741 | 5.65961481  | 5.56493795  | 5.649208382 | 12.88732275 | 7.87814045  |
| ENSMUSG00000059742 | 9.196874066 | 6.956172438 | 7.061510478 | 6.443661377 | 9.310529622 |
| ENSMUSG00000059743 | 12.73413332 | 22.2597518  | 13.41686991 | 80.54576721 | 74.48423698 |
| ENSMUSG00000059772 | 19.10119998 | 29.91154148 | 25.42143772 | 119.2077355 | 90.95671247 |
| ENSMUSG00000059775 | 97.62835547 | 122.4286349 | 112.2780166 | 85.37851324 | 96.68626916 |
| ENSMUSG00000059791 | 32.54278516 | 36.86771392 | 43.07521391 | 40.2728836  | 33.66114556 |
| ENSMUSG00000059796 | 9.904325918 | 19.47728283 | 14.829172   | 89.4058016  | 73.05184781 |
| ENSMUSG00000059810 | 9.196874066 | 4.869320706 | 10.59226572 | 6.443661377 | 10.02672421 |
| ENSMUSG00000059811 | 80.64951104 | 111.298759  | 92.50578726 | 139.3441773 | 127.4826364 |
| ENSMUSG00000059820 | 45.98437033 | 70.25734162 | 55.78593277 | 97.46037832 | 80.21379367 |
| ENSMUSG00000059824 | 10.61177777 | 15.30357936 | 13.41686991 | 10.47094974 | 7.87814045  |
| ENSMUSG00000059834 | 18.39374813 | 35.47647943 | 21.18453143 | 28.19101852 | 21.48583759 |
| ENSMUSG00000059842 | 7.781970364 | 20.86851731 | 16.94762515 | 12.08186508 | 15.04008631 |
| ENSMUSG00000059851 | 5.65961481  | 8.347406925 | 13.41686991 | 8.054576721 | 8.594335036 |
| ENSMUSG00000059857 | 7.074518513 | 7.651789682 | 7.767661525 | 4.02728836  | 7.87814045  |
| ENSMUSG00000059866 | 40.32475552 | 85.56092098 | 63.5535943  | 57.99295239 | 57.29556691 |
| ENSMUSG00000059878 | 23.34591109 | 47.30197258 | 33.89525029 | 30.60739154 | 32.22875639 |
| ENSMUSG00000059883 | 24.05336294 | 35.47647943 | 39.54445867 | 38.66196826 | 26.49919969 |
| ENSMUSG00000059890 | 50.93653329 | 91.82147618 | 75.55816211 | 94.23854763 | 83.7947666  |
| ENSMUSG00000059891 | 10.61177777 | 4.173703463 | 8.473812573 | 8.054576721 | 7.87814045  |
| ENSMUSG00000059895 | 28.29807405 | 41.04141738 | 37.42600553 | 17.72006879 | 27.93158887 |
| ENSMUSG00000059900 | 4.244711108 | 6.956172438 | 8.473812573 | 4.02728836  | 6.445751277 |
| ENSMUSG00000059901 | 4.952162959 | 6.956172438 | 9.886114669 | 7.249119049 | 7.87814045  |
| ENSMUSG00000059921 | 5.65961481  | 5.56493795  | 9.179963621 | 4.02728836  | 2.864778345 |
| ENSMUSG00000059923 | 178.9853184 | 207.9895559 | 159.5901368 | 375.3432752 | 292.9235858 |
| ENSMUSG00000059934 | 10.61177777 | 5.56493795  | 9.886114669 | 7.249119049 | 6.445751277 |
| ENSMUSG00000059939 | 9.196874066 | 21.56413456 | 17.65377619 | 48.32746033 | 40.10689684 |
| ENSMUSG00000059956 | 4.952162959 | 4.173703463 | 7.767661525 | 4.832746033 | 7.87814045  |
| ENSMUSG00000059974 | 12.73413332 | 5.56493795  | 9.886114669 | 6.443661377 | 7.87814045  |
| ENSMUSG00000059975 | 12.02668147 | 28.52030699 | 24.00913562 | 13.69278043 | 15.7562809  |
| ENSMUSG00000059981 | 97.62835547 | 125.2111039 | 130.6379438 | 132.0950582 | 108.1453825 |
| ENSMUSG00000059994 | 108.9475851 | 169.0349902 | 119.3395271 | 97.46037832 | 88.80812871 |
| ENSMUSG00000059995 | 16.97884443 | 22.2597518  | 28.95219296 | 122.4295662 | 76.63282074 |
| ENSMUSG00000059996 | 9.196874066 | 7.651789682 | 9.179963621 | 3.221830688 | 1.432389173 |
| ENSMUSG00000060002 | 7.781970364 | 15.30357936 | 12.71071886 | 9.665492065 | 10.02672421 |
| ENSMUSG00000060019 | 6.367066661 | 13.21672763 | 12.71071886 | 14.4982381  | 12.89150255 |
| ENSMUSG00000060036 | 5.65961481  | 6.260555194 | 7.061510478 | 1.610915344 | 3.580972932 |

|                    |             |             |             |             |             |
|--------------------|-------------|-------------|-------------|-------------|-------------|
| ENSMUSG00000060038 | 62.25576291 | 87.64777272 | 74.14586002 | 115.1804471 | 94.5376854  |
| ENSMUSG00000060090 | 51.64398514 | 69.56172438 | 48.7244223  | 68.46390213 | 51.56601022 |
| ENSMUSG00000060098 | 27.5906222  | 61.9099347  | 53.66747963 | 131.2896006 | 116.7397176 |
| ENSMUSG00000060121 | 13.44158517 | 29.91154148 | 26.12758877 | 48.32746033 | 32.22875639 |
| ENSMUSG00000060126 | 6.367066661 | 6.260555194 | 14.12302096 | 33.02376456 | 35.09353473 |
| ENSMUSG00000060131 | 7.074518513 | 9.043024169 | 11.29841676 | 6.443661377 | 5.729556691 |
| ENSMUSG00000060143 | 8.489422215 | 6.260555194 | 7.061510478 | 6.443661377 | 13.60769714 |
| ENSMUSG00000060147 | 54.47379255 | 91.82147618 | 66.37819849 | 113.5695318 | 86.65954495 |
| ENSMUSG00000060152 | 7.074518513 | 9.738641413 | 6.35535943  | 10.47094974 | 9.310529622 |
| ENSMUSG00000060180 | 9.904325918 | 8.347406925 | 8.473812573 | 6.443661377 | 7.161945863 |
| ENSMUSG00000060206 | 11.31922962 | 2.086851731 | 9.179963621 | 4.832746033 | 5.729556691 |
| ENSMUSG00000060212 | 10.61177777 | 6.956172438 | 7.767661525 | 6.443661377 | 5.729556691 |
| ENSMUSG00000060216 | 19.10119998 | 29.21592424 | 19.77222934 | 23.35827249 | 30.08017263 |
| ENSMUSG00000060227 | 9.196874066 | 9.738641413 | 9.179963621 | 15.30369577 | 15.7562809  |
| ENSMUSG00000060240 | 3.537259256 | 10.43425866 | 6.35535943  | 11.27640741 | 6.445751277 |
| ENSMUSG00000060260 | 7.074518513 | 5.56493795  | 3.530755239 | 8.054576721 | 8.594335036 |
| ENSMUSG00000060261 | 29.71297775 | 44.5195036  | 45.19366706 | 82.15668255 | 75.20043157 |
| ENSMUSG00000060268 | 8.489422215 | 6.956172438 | 5.649208382 | 4.832746033 | 11.45911338 |
| ENSMUSG00000060275 | 5.65961481  | 4.869320706 | 9.179963621 | 8.860034393 | 10.7429188  |
| ENSMUSG00000060279 | 53.7663407  | 91.12585893 | 76.26431316 | 84.57305557 | 78.7814045  |
| ENSMUSG00000060288 | 9.196874066 | 18.78166558 | 27.53989086 | 62.02024075 | 49.41742646 |
| ENSMUSG00000060314 | 8.489422215 | 9.043024169 | 8.473812573 | 4.02728836  | 7.161945863 |
| ENSMUSG00000060371 | 7.074518513 | 4.869320706 | 7.061510478 | 9.665492065 | 7.87814045  |
| ENSMUSG00000060373 | 166.251185  | 184.3385696 | 138.4056054 | 341.514053  | 248.5195215 |
| ENSMUSG00000060375 | 14.14903703 | 6.956172438 | 6.35535943  | 4.02728836  | 5.013362104 |
| ENSMUSG00000060416 | 9.196874066 | 5.56493795  | 4.236906287 | 6.443661377 | 3.580972932 |
| ENSMUSG00000060427 | 67.91537772 | 107.1250555 | 90.38733411 | 82.96214023 | 75.91662615 |
| ENSMUSG00000060429 | 7.781970364 | 2.086851731 | 7.767661525 | 4.832746033 | 6.445751277 |
| ENSMUSG00000060441 | 33.95768886 | 54.25814501 | 51.54902649 | 58.79841006 | 58.01176149 |
| ENSMUSG00000060445 | 9.904325918 | 7.651789682 | 3.530755239 | 5.638203705 | 5.013362104 |
| ENSMUSG00000060450 | 4.244711108 | 0.695617244 | 4.236906287 | 0.805457672 | 0.716194586 |
| ENSMUSG00000060459 | 11.31922962 | 6.260555194 | 7.061510478 | 7.249119049 | 5.729556691 |
| ENSMUSG00000060475 | 35.37259256 | 68.86610713 | 58.61053696 | 161.8969921 | 105.2806042 |
| ENSMUSG00000060477 | 192.4269035 | 186.4254213 | 181.4808193 | 137.7332619 | 110.2939663 |
| ENSMUSG00000060491 | 9.196874066 | 6.956172438 | 6.35535943  | 6.443661377 | 3.580972932 |
| ENSMUSG00000060508 | 12.73413332 | 6.260555194 | 5.649208382 | 0.805457672 | 2.864778345 |
| ENSMUSG00000060510 | 57.30359995 | 84.1696865  | 82.61967259 | 72.49119049 | 84.51096119 |
| ENSMUSG00000060519 | 35.37259256 | 47.99758982 | 42.36906287 | 190.8934683 | 123.9016634 |
| ENSMUSG00000060534 | 10.61177777 | 9.043024169 | 7.767661525 | 4.832746033 | 5.013362104 |
| ENSMUSG00000060538 | 10.61177777 | 4.173703463 | 5.649208382 | 7.249119049 | 10.02672421 |
| ENSMUSG00000060548 | 9.196874066 | 8.347406925 | 12.71071886 | 8.860034393 | 5.729556691 |
| ENSMUSG00000060550 | 49.52162959 | 86.25653823 | 88.26888097 | 211.0299101 | 122.4692743 |
| ENSMUSG00000060568 | 7.074518513 | 4.173703463 | 2.824604191 | 2.416373016 | 7.161945863 |

|                    |             |             |             |             |             |
|--------------------|-------------|-------------|-------------|-------------|-------------|
| ENSMUSG00000060572 | 7.074518513 | 7.651789682 | 5.649208382 | 7.249119049 | 8.594335036 |
| ENSMUSG00000060579 | 6.367066661 | 7.651789682 | 7.767661525 | 5.638203705 | 4.297167518 |
| ENSMUSG00000060586 | 174.7406073 | 197.5552972 | 166.6516473 | 376.9541905 | 232.047046  |
| ENSMUSG00000060600 | 27.5906222  | 34.78086219 | 32.4829482  | 35.44013757 | 25.06681052 |
| ENSMUSG00000060601 | 34.66514071 | 29.21592424 | 43.78136496 | 50.74383334 | 42.97167518 |
| ENSMUSG00000060613 | 7.781970364 | 3.478086219 | 7.767661525 | 7.249119049 | 5.013362104 |
| ENSMUSG00000060636 | 45.27691848 | 78.60474855 | 64.25974535 | 225.5281482 | 169.738117  |
| ENSMUSG00000060671 | 21.93100739 | 38.95456565 | 32.4829482  | 54.7711217  | 52.99839939 |
| ENSMUSG00000060675 | 14.85648888 | 25.04222078 | 19.77222934 | 26.58010318 | 29.36397804 |
| ENSMUSG00000060679 | 74.98989623 | 112.6899935 | 101.6857509 | 96.65492065 | 83.07857202 |
| ENSMUSG00000060681 | 10.61177777 | 27.12907251 | 16.2414741  | 13.69278043 | 17.18867007 |
| ENSMUSG00000060703 | 12.73413332 | 8.347406925 | 8.473812573 | 8.054576721 | 6.445751277 |
| ENSMUSG00000060726 | 4.952162959 | 4.869320706 | 4.236906287 | 1.610915344 | 2.864778345 |
| ENSMUSG00000060733 | 64.37811846 | 86.25653823 | 90.38733411 | 68.46390213 | 58.72795608 |
| ENSMUSG00000060743 | 107.5326814 | 127.2979556 | 133.462548  | 157.0642461 | 127.4826364 |
| ENSMUSG00000060771 | 9.196874066 | 11.1298759  | 12.71071886 | 7.249119049 | 8.594335036 |
| ENSMUSG00000060791 | 29.71297775 | 37.56333116 | 40.95676077 | 34.6346799  | 40.10689684 |
| ENSMUSG00000060843 | 4.952162959 | 4.869320706 | 9.886114669 | 4.832746033 | 8.594335036 |
| ENSMUSG00000060862 | 22.63845924 | 25.73783802 | 31.0706461  | 52.35474869 | 28.64778345 |
| ENSMUSG00000060863 | 10.61177777 | 5.56493795  | 4.943057334 | 3.221830688 | 5.729556691 |
| ENSMUSG00000060890 | 4.244711108 | 2.782468975 | 4.236906287 | 2.416373016 | 2.864778345 |
| ENSMUSG00000060904 | 66.50047402 | 77.9091313  | 62.1412922  | 83.7675979  | 68.75468029 |
| ENSMUSG00000060924 | 7.074518513 | 7.651789682 | 7.061510478 | 0.805457672 | 6.445751277 |
| ENSMUSG00000060938 | 38.20239997 | 45.91073809 | 34.60140134 | 212.6408254 | 144.6713064 |
| ENSMUSG00000060950 | 29.71297775 | 35.47647943 | 40.25060972 | 150.6205847 | 101.6996313 |
| ENSMUSG00000060961 | 5.65961481  | 7.651789682 | 9.179963621 | 8.860034393 | 3.580972932 |
| ENSMUSG00000060962 | 4.952162959 | 4.869320706 | 8.473812573 | 3.221830688 | 9.310529622 |
| ENSMUSG00000060985 | 8.489422215 | 6.956172438 | 4.236906287 | 4.02728836  | 6.445751277 |
| ENSMUSG00000060988 | 7.074518513 | 9.043024169 | 9.179963621 | 2.416373016 | 5.729556691 |
| ENSMUSG00000061032 | 74.98989623 | 96.69079689 | 86.15042783 | 183.6443492 | 145.387501  |
| ENSMUSG00000061062 | 11.31922962 | 12.52111039 | 8.473812573 | 8.860034393 | 8.594335036 |
| ENSMUSG00000061079 | 54.47379255 | 73.0398106  | 66.37819849 | 98.265836   | 85.22715578 |
| ENSMUSG00000061080 | 5.65961481  | 4.869320706 | 5.649208382 | 4.832746033 | 5.013362104 |
| ENSMUSG00000061082 | 4.952162959 | 2.782468975 | 2.824604191 | 3.221830688 | 2.148583759 |
| ENSMUSG00000061086 | 100.4581629 | 130.0804246 | 122.1641313 | 190.0880106 | 136.0769714 |
| ENSMUSG00000061099 | 13.44158517 | 4.869320706 | 7.767661525 | 9.665492065 | 11.45911338 |
| ENSMUSG00000061130 | 39.61730367 | 43.12826911 | 50.13672439 | 53.16020636 | 50.13362104 |
| ENSMUSG00000061132 | 181.8151258 | 167.6437558 | 185.7177256 | 294.797508  | 201.9668733 |
| ENSMUSG00000061136 | 105.4103258 | 141.9059177 | 124.9887355 | 239.2209286 | 182.6296195 |
| ENSMUSG00000061143 | 11.31922962 | 17.39043109 | 8.473812573 | 8.860034393 | 12.17530797 |
| ENSMUSG00000061171 | 1.414903703 | 0           | 0           | 0           | 0           |
| ENSMUSG00000061175 | 7.074518513 | 7.651789682 | 3.530755239 | 8.054576721 | 2.864778345 |
| ENSMUSG00000061186 | 8.489422215 | 2.086851731 | 5.649208382 | 4.02728836  | 7.161945863 |



|                    |             |             |             |             |             |
|--------------------|-------------|-------------|-------------|-------------|-------------|
| ENSMUSG00000061207 | 38.90985182 | 60.51870021 | 44.48751601 | 65.24207144 | 63.74131818 |
| ENSMUSG00000061232 | 129.4636888 | 157.2094971 | 134.8748501 | 292.381135  | 217.7231542 |
| ENSMUSG00000061244 | 72.16008883 | 115.4724625 | 98.15499564 | 132.0950582 | 111.0101609 |
| ENSMUSG00000061259 | 9.904325918 | 8.347406925 | 5.649208382 | 4.02728836  | 6.445751277 |
| ENSMUSG00000061288 | 25.46826665 | 24.34660353 | 22.59683353 | 26.58010318 | 25.06681052 |
| ENSMUSG00000061292 | 9.196874066 | 1.391234488 | 12.00456781 | 4.832746033 | 1.432389173 |
| ENSMUSG00000061298 | 12.02668147 | 10.43425866 | 4.236906287 | 4.02728836  | 3.580972932 |
| ENSMUSG00000061306 | 78.52715549 | 78.60474855 | 90.38733411 | 85.37851324 | 63.0251236  |
| ENSMUSG00000061315 | 140.0754665 | 130.7760418 | 161.7085899 | 268.2174048 | 227.7498785 |
| ENSMUSG00000061322 | 7.781970364 | 6.260555194 | 11.29841676 | 11.27640741 | 13.60769714 |
| ENSMUSG00000061353 | 3.537259256 | 7.651789682 | 5.649208382 | 3.221830688 | 2.148583759 |
| ENSMUSG00000061356 | 8.489422215 | 16.69481385 | 9.886114669 | 12.08186508 | 5.729556691 |
| ENSMUSG00000061374 | 23.34591109 | 27.12907251 | 30.36449505 | 62.82569842 | 47.98503729 |
| ENSMUSG00000061388 | 7.781970364 | 9.738641413 | 7.061510478 | 2.416373016 | 3.580972932 |
| ENSMUSG00000061393 | 4.244711108 | 7.651789682 | 2.824604191 | 7.249119049 | 11.45911338 |
| ENSMUSG00000061411 | 8.489422215 | 10.43425866 | 9.886114669 | 9.665492065 | 6.445751277 |
| ENSMUSG00000061436 | 16.97884443 | 12.52111039 | 24.71528667 | 67.65844446 | 60.87653984 |
| ENSMUSG00000061451 | 7.074518513 | 6.956172438 | 8.473812573 | 4.02728836  | 4.297167518 |
| ENSMUSG00000061455 | 34.66514071 | 69.56172438 | 54.37363068 | 27.38556085 | 42.25548059 |
| ENSMUSG00000061458 | 38.20239997 | 65.38802092 | 52.96132858 | 134.5114312 | 103.848215  |
| ENSMUSG00000061461 | 60.84085921 | 95.99517964 | 86.15042783 | 63.6311561  | 58.72795608 |
| ENSMUSG00000061462 | 12.02668147 | 2.086851731 | 7.061510478 | 3.221830688 | 10.02672421 |
| ENSMUSG00000061474 | 50.93653329 | 74.43104508 | 74.14586002 | 91.01671695 | 60.16034525 |
| ENSMUSG00000061479 | 31.83533331 | 61.9099347  | 45.8998181  | 153.8424154 | 116.023523  |
| ENSMUSG00000061518 | 29.0055259  | 44.5195036  | 41.66291182 | 88.60034393 | 86.65954495 |
| ENSMUSG00000061533 | 38.20239997 | 31.99839321 | 40.95676077 | 28.19101852 | 30.79636721 |
| ENSMUSG00000061535 | 11.31922962 | 6.956172438 | 8.473812573 | 8.054576721 | 2.864778345 |
| ENSMUSG00000061536 | 14.85648888 | 21.56413456 | 21.89068248 | 8.054576721 | 20.769643   |
| ENSMUSG00000061544 | 9.196874066 | 6.956172438 | 5.649208382 | 4.832746033 | 7.87814045  |
| ENSMUSG00000061559 | 29.71297775 | 42.43265187 | 33.18909925 | 84.57305557 | 86.65954495 |
| ENSMUSG00000061576 | 7.781970364 | 8.347406925 | 5.649208382 | 2.416373016 | 5.729556691 |
| ENSMUSG00000061577 | 7.781970364 | 6.260555194 | 7.061510478 | 8.054576721 | 7.161945863 |
| ENSMUSG00000061589 | 147.8574369 | 162.774435  | 164.5331941 | 271.4392355 | 209.8450138 |
| ENSMUSG00000061601 | 11.31922962 | 4.869320706 | 7.767661525 | 2.416373016 | 4.297167518 |
| ENSMUSG00000061607 | 36.78749627 | 58.43184848 | 48.7244223  | 57.18749472 | 55.14698315 |
| ENSMUSG00000061613 | 112.4848444 | 168.339373  | 134.1686991 | 316.5448651 | 236.3442135 |
| ENSMUSG00000061689 | 5.65961481  | 4.869320706 | 8.473812573 | 8.860034393 | 7.87814045  |
| ENSMUSG00000061701 | 8.489422215 | 5.56493795  | 7.061510478 | 3.221830688 | 8.594335036 |
| ENSMUSG00000061702 | 13.44158517 | 14.60796212 | 15.53532305 | 11.27640741 | 11.45911338 |
| ENSMUSG00000061718 | 9.196874066 | 7.651789682 | 6.35535943  | 7.249119049 | 5.013362104 |
| ENSMUSG00000061723 | 9.196874066 | 6.956172438 | 14.829172   | 4.832746033 | 10.02672421 |
| ENSMUSG00000061742 | 6.367066661 | 4.173703463 | 2.824604191 | 3.221830688 | 3.580972932 |
| ENSMUSG00000061751 | 7.781970364 | 5.56493795  | 9.179963621 | 2.416373016 | 5.013362104 |

|                    |             |             |             |             |             |
|--------------------|-------------|-------------|-------------|-------------|-------------|
| ENSMUSG00000061758 | 16.27139258 | 23.65098629 | 21.18453143 | 15.30369577 | 15.7562809  |
| ENSMUSG00000061759 | 40.32475552 | 66.08363816 | 57.19823487 | 101.4876667 | 90.24051788 |
| ENSMUSG00000061762 | 6.367066661 | 6.956172438 | 8.473812573 | 4.832746033 | 5.729556691 |
| ENSMUSG00000061778 | 5.65961481  | 15.99919661 | 19.77222934 | 31.41284921 | 35.80972932 |
| ENSMUSG00000061787 | 54.47379255 | 86.25653823 | 64.96589639 | 269.0228625 | 179.0486466 |
| ENSMUSG00000061815 | 8.489422215 | 6.260555194 | 7.061510478 | 4.832746033 | 4.297167518 |
| ENSMUSG00000061816 | 9.196874066 | 7.651789682 | 7.061510478 | 3.221830688 | 7.87814045  |
| ENSMUSG00000061825 | 7.781970364 | 5.56493795  | 6.35535943  | 9.665492065 | 2.148583759 |
| ENSMUSG00000061859 | 7.781970364 | 13.91234488 | 9.179963621 | 6.443661377 | 14.32389173 |
| ENSMUSG00000061877 | 8.489422215 | 6.956172438 | 5.649208382 | 9.665492065 | 9.310529622 |
| ENSMUSG00000061878 | 8.489422215 | 4.869320706 | 6.35535943  | 3.221830688 | 9.310529622 |
| ENSMUSG00000061882 | 13.44158517 | 31.30277597 | 21.18453143 | 17.72006879 | 20.05344842 |
| ENSMUSG00000061887 | 20.51610369 | 29.21592424 | 30.36449505 | 42.68925662 | 36.5259239  |
| ENSMUSG00000061894 | 26.88317035 | 41.04141738 | 33.18909925 | 28.19101852 | 32.22875639 |
| ENSMUSG00000061898 | 16.97884443 | 20.17290007 | 26.12758877 | 20.94189947 | 24.35061594 |
| ENSMUSG00000061904 | 61.54831106 | 93.21271067 | 67.08434954 | 220.6954022 | 176.9000628 |
| ENSMUSG00000061911 | 9.196874066 | 10.43425866 | 5.649208382 | 2.416373016 | 4.297167518 |
| ENSMUSG00000061947 | 7.781970364 | 6.260555194 | 7.767661525 | 10.47094974 | 7.161945863 |
| ENSMUSG00000061950 | 36.78749627 | 43.12826911 | 45.8998181  | 74.9075635  | 80.92998826 |
| ENSMUSG00000061959 | 7.074518513 | 4.869320706 | 10.59226572 | 8.054576721 | 3.580972932 |
| ENSMUSG00000061969 | 4.952162959 | 5.56493795  | 9.179963621 | 1.610915344 | 6.445751277 |
| ENSMUSG00000061981 | 8.489422215 | 15.30357936 | 10.59226572 | 12.08186508 | 13.60769714 |
| ENSMUSG00000062006 | 21.93100739 | 52.86691053 | 48.7244223  | 202.1698757 | 162.5761711 |
| ENSMUSG00000062007 | 38.20239997 | 65.38802092 | 43.07521391 | 84.57305557 | 73.76804239 |
| ENSMUSG00000062012 | 7.074518513 | 7.651789682 | 7.767661525 | 4.02728836  | 3.580972932 |
| ENSMUSG00000062014 | 123.0966221 | 172.5130765 | 136.9933033 | 171.5624842 | 143.9551119 |
| ENSMUSG00000062017 | 6.367066661 | 6.260555194 | 9.179963621 | 4.832746033 | 9.310529622 |
| ENSMUSG00000062031 | 9.904325918 | 11.1298759  | 8.473812573 | 8.054576721 | 5.729556691 |
| ENSMUSG00000062040 | 14.14903703 | 31.99839321 | 20.47838039 | 29.80193387 | 29.36397804 |
| ENSMUSG00000062044 | 4.952162959 | 5.56493795  | 7.767661525 | 8.054576721 | 10.02672421 |
| ENSMUSG00000062046 | 3.537259256 | 6.260555194 | 10.59226572 | 6.443661377 | 5.013362104 |
| ENSMUSG00000062070 | 33.95768886 | 41.04141738 | 28.95219296 | 114.3749894 | 91.67290705 |
| ENSMUSG00000062075 | 22.63845924 | 18.78166558 | 28.24604191 | 35.44013757 | 42.97167518 |
| ENSMUSG00000062077 | 9.904325918 | 2.782468975 | 12.71071886 | 2.416373016 | 6.445751277 |
| ENSMUSG00000062078 | 6.367066661 | 9.738641413 | 19.77222934 | 40.2728836  | 35.80972932 |
| ENSMUSG00000062082 | 12.02668147 | 4.869320706 | 9.179963621 | 9.665492065 | 11.45911338 |
| ENSMUSG00000062098 | 9.904325918 | 7.651789682 | 12.71071886 | 5.638203705 | 4.297167518 |
| ENSMUSG00000062101 | 12.73413332 | 7.651789682 | 4.236906287 | 12.88732275 | 8.594335036 |
| ENSMUSG00000062110 | 26.1757185  | 51.47567604 | 33.89525029 | 35.44013757 | 32.22875639 |
| ENSMUSG00000062115 | 80.64951104 | 103.6469693 | 76.26431316 | 128.0677699 | 111.7263555 |
| ENSMUSG00000062116 | 19.80865184 | 27.82468975 | 31.0706461  | 36.24559524 | 42.97167518 |
| ENSMUSG00000062127 | 9.196874066 | 5.56493795  | 12.00456781 | 5.638203705 | 6.445751277 |
| ENSMUSG00000062151 | 7.074518513 | 4.869320706 | 7.061510478 | 4.832746033 | 9.310529622 |

|                    |             |             |             |             |             |
|--------------------|-------------|-------------|-------------|-------------|-------------|
| ENSMUSG00000062154 | 14.85648888 | 6.956172438 | 4.236906287 | 6.443661377 | 7.161945863 |
| ENSMUSG00000062168 | 4.952162959 | 4.869320706 | 2.118453143 | 1.610915344 | 4.297167518 |
| ENSMUSG00000062169 | 45.98437033 | 77.9091313  | 61.43514116 | 82.15668255 | 67.32229112 |
| ENSMUSG00000062170 | 6.367066661 | 8.347406925 | 6.35535943  | 4.02728836  | 4.297167518 |
| ENSMUSG00000062175 | 19.80865184 | 29.21592424 | 28.95219296 | 37.05105292 | 32.22875639 |
| ENSMUSG00000062181 | 8.489422215 | 8.347406925 | 3.530755239 | 5.638203705 | 8.594335036 |
| ENSMUSG00000062184 | 6.367066661 | 1.391234488 | 3.530755239 | 0           | 0.716194586 |
| ENSMUSG00000062190 | 36.08004441 | 36.86771392 | 34.60140134 | 38.66196826 | 32.94495097 |
| ENSMUSG00000062200 | 0           | 0.695617244 | 0           | 0           | 0           |
| ENSMUSG00000062202 | 45.98437033 | 83.47406925 | 63.5535943  | 43.49471429 | 52.99839939 |
| ENSMUSG00000062203 | 9.904325918 | 11.82549314 | 10.59226572 | 31.41284921 | 17.90486466 |
| ENSMUSG00000062209 | 1.414903703 | 0.695617244 | 6.35535943  | 0           | 0.716194586 |
| ENSMUSG00000062210 | 64.37811846 | 84.1696865  | 72.73355792 | 117.5968201 | 93.82149081 |
| ENSMUSG00000062224 | 11.31922962 | 7.651789682 | 7.061510478 | 4.02728836  | 5.729556691 |
| ENSMUSG00000062232 | 12.73413332 | 19.47728283 | 19.06607829 | 12.08186508 | 10.7429188  |
| ENSMUSG00000062234 | 116.7295555 | 171.121842  | 147.585569  | 161.0915344 | 147.5360848 |
| ENSMUSG00000062257 | 9.904325918 | 6.260555194 | 4.943057334 | 4.02728836  | 3.580972932 |
| ENSMUSG00000062270 | 62.25576291 | 132.1672763 | 86.85657888 | 221.5008598 | 169.0219224 |
| ENSMUSG00000062282 | 12.02668147 | 11.82549314 | 5.649208382 | 4.02728836  | 9.310529622 |
| ENSMUSG00000062300 | 5.65961481  | 8.347406925 | 8.473812573 | 4.02728836  | 3.580972932 |
| ENSMUSG00000062327 | 6.367066661 | 6.260555194 | 6.35535943  | 4.832746033 | 4.297167518 |
| ENSMUSG00000062345 | 10.61177777 | 6.260555194 | 9.179963621 | 3.221830688 | 2.864778345 |
| ENSMUSG00000062352 | 40.32475552 | 74.43104508 | 67.08434954 | 107.1258704 | 81.64618284 |
| ENSMUSG00000062372 | 5.65961481  | 4.869320706 | 5.649208382 | 7.249119049 | 7.87814045  |
| ENSMUSG00000062382 | 2.829807405 | 0.695617244 | 0.706151048 | 0           | 0.716194586 |
| ENSMUSG00000062393 | 2.829807405 | 1.391234488 | 2.824604191 | 3.221830688 | 5.013362104 |
| ENSMUSG00000062410 | 11.31922962 | 6.260555194 | 14.12302096 | 7.249119049 | 10.7429188  |
| ENSMUSG00000062421 | 16.27139258 | 27.12907251 | 19.77222934 | 28.9964762  | 29.36397804 |
| ENSMUSG00000062444 | 12.02668147 | 9.043024169 | 8.473812573 | 4.02728836  | 6.445751277 |
| ENSMUSG00000062456 | 10.61177777 | 7.651789682 | 9.179963621 | 9.665492065 | 5.013362104 |
| ENSMUSG00000062478 | 12.73413332 | 5.56493795  | 10.59226572 | 7.249119049 | 7.87814045  |
| ENSMUSG00000062480 | 9.196874066 | 14.60796212 | 9.179963621 | 16.10915344 | 7.87814045  |
| ENSMUSG00000062510 | 36.78749627 | 34.08524495 | 28.24604191 | 86.18397091 | 75.91662615 |
| ENSMUSG00000062519 | 27.5906222  | 31.30277597 | 24.00913562 | 47.52200265 | 55.14698315 |
| ENSMUSG00000062542 | 7.781970364 | 1.391234488 | 5.649208382 | 5.638203705 | 5.729556691 |
| ENSMUSG00000062551 | 4.244711108 | 7.651789682 | 7.061510478 | 4.02728836  | 8.594335036 |
| ENSMUSG00000062561 | 9.904325918 | 11.1298759  | 7.061510478 | 3.221830688 | 4.297167518 |
| ENSMUSG00000062563 | 11.31922962 | 2.086851731 | 4.943057334 | 4.02728836  | 7.161945863 |
| ENSMUSG00000062564 | 4.244711108 | 4.173703463 | 4.236906287 | 4.832746033 | 5.013362104 |
| ENSMUSG00000062585 | 118.1444592 | 163.4700523 | 186.4238766 | 209.4189947 | 154.6980307 |
| ENSMUSG00000062588 | 55.88869625 | 80.69160028 | 69.90895373 | 66.85298678 | 47.98503729 |
| ENSMUSG00000062590 | 9.196874066 | 15.30357936 | 14.829172   | 6.443661377 | 18.62105924 |
| ENSMUSG00000062593 | 0           | 0           | 0           | 0           | 0           |

|                    |             |             |             |             |             |
|--------------------|-------------|-------------|-------------|-------------|-------------|
| ENSMUSG00000062604 | 46.69182218 | 58.43184848 | 50.84287544 | 52.35474869 | 45.12025894 |
| ENSMUSG00000062609 | 6.367066661 | 6.956172438 | 3.530755239 | 4.832746033 | 5.013362104 |
| ENSMUSG00000062638 | 18.39374813 | 15.30357936 | 16.2414741  | 20.1364418  | 17.90486466 |
| ENSMUSG00000062646 | 68.62282957 | 108.51629   | 96.0365425  | 86.98942859 | 98.83485292 |
| ENSMUSG00000062647 | 9.904325918 | 9.043024169 | 9.886114669 | 24.96918783 | 16.47247549 |
| ENSMUSG00000062683 | 0           | 0           | 2.118453143 | 0           | 0.716194586 |
| ENSMUSG00000062691 | 5.65961481  | 13.91234488 | 9.179963621 | 14.4982381  | 12.17530797 |
| ENSMUSG00000062729 | 16.27139258 | 20.17290007 | 11.29841676 | 16.10915344 | 20.769643   |
| ENSMUSG00000062732 | 9.196874066 | 6.260555194 | 5.649208382 | 4.832746033 | 5.729556691 |
| ENSMUSG00000062737 | 7.781970364 | 9.043024169 | 5.649208382 | 8.860034393 | 6.445751277 |
| ENSMUSG00000062753 | 24.76081479 | 30.60715873 | 32.4829482  | 38.66196826 | 40.82309142 |
| ENSMUSG00000062760 | 9.196874066 | 4.869320706 | 4.943057334 | 5.638203705 | 2.864778345 |
| ENSMUSG00000062762 | 30.4204296  | 56.34499675 | 46.60596915 | 53.96566403 | 50.84981563 |
| ENSMUSG00000062778 | 12.73413332 | 8.347406925 | 10.59226572 | 5.638203705 | 4.297167518 |
| ENSMUSG00000062785 | 11.31922962 | 22.95536904 | 18.35992724 | 16.91461111 | 17.18867007 |
| ENSMUSG00000062797 | 60.84085921 | 89.0390072  | 75.55816211 | 83.7675979  | 88.09193412 |
| ENSMUSG00000062814 | 4.244711108 | 3.478086219 | 2.824604191 | 2.416373016 | 4.297167518 |
| ENSMUSG00000062825 | 1.414903703 | 5.56493795  | 4.236906287 | 16.91461111 | 10.02672421 |
| ENSMUSG00000062859 | 9.904325918 | 5.56493795  | 4.236906287 | 4.02728836  | 6.445751277 |
| ENSMUSG00000062866 | 7.074518513 | 8.347406925 | 12.71071886 | 7.249119049 | 10.7429188  |
| ENSMUSG00000062906 | 38.90985182 | 47.30197258 | 48.7244223  | 30.60739154 | 40.10689684 |
| ENSMUSG00000062908 | 21.22355554 | 29.91154148 | 33.18909925 | 41.88379895 | 33.66114556 |
| ENSMUSG00000062931 | 43.15456293 | 66.08363816 | 49.43057334 | 59.60386773 | 58.01176149 |
| ENSMUSG00000062939 | 7.074518513 | 5.56493795  | 4.236906287 | 4.832746033 | 7.87814045  |
| ENSMUSG00000062949 | 2.829807405 | 2.782468975 | 4.943057334 | 0.805457672 | 2.148583759 |
| ENSMUSG00000062960 | 4.952162959 | 4.173703463 | 11.29841676 | 4.832746033 | 10.02672421 |
| ENSMUSG00000062963 | 34.66514071 | 42.43265187 | 40.25060972 | 42.68925662 | 40.10689684 |
| ENSMUSG00000062980 | 8.489422215 | 4.869320706 | 4.943057334 | 7.249119049 | 5.729556691 |
| ENSMUSG00000062995 | 9.904325918 | 6.956172438 | 7.061510478 | 7.249119049 | 7.161945863 |
| ENSMUSG00000063015 | 87.01657771 | 123.1242521 | 91.09348516 | 134.5114312 | 120.3206905 |
| ENSMUSG00000063063 | 7.074518513 | 7.651789682 | 6.35535943  | 4.832746033 | 5.013362104 |
| ENSMUSG00000063065 | 10.61177777 | 14.60796212 | 19.06607829 | 19.33098413 | 22.20203218 |
| ENSMUSG00000063077 | 12.02668147 | 28.52030699 | 13.41686991 | 18.52552646 | 19.33725383 |
| ENSMUSG00000063108 | 31.12788146 | 44.5195036  | 36.01370344 | 89.4058016  | 80.92998826 |
| ENSMUSG00000063142 | 7.781970364 | 4.173703463 | 5.649208382 | 7.249119049 | 5.729556691 |
| ENSMUSG00000063145 | 9.196874066 | 11.82549314 | 6.35535943  | 8.860034393 | 5.013362104 |
| ENSMUSG00000063146 | 9.904325918 | 18.78166558 | 21.89068248 | 12.08186508 | 17.90486466 |
| ENSMUSG00000063160 | 5.65961481  | 6.956172438 | 9.179963621 | 5.638203705 | 6.445751277 |
| ENSMUSG00000063163 | 14.14903703 | 5.56493795  | 4.236906287 | 7.249119049 | 5.729556691 |
| ENSMUSG00000063172 | 17.68629628 | 32.69401046 | 33.89525029 | 33.02376456 | 30.08017263 |
| ENSMUSG00000063179 | 12.02668147 | 20.17290007 | 16.2414741  | 20.1364418  | 15.04008631 |
| ENSMUSG00000063229 | 5.65961481  | 4.173703463 | 4.236906287 | 7.249119049 | 7.161945863 |
| ENSMUSG00000063232 | 4.244711108 | 9.043024169 | 10.59226572 | 3.221830688 | 7.161945863 |

|                    |             |             |             |             |             |
|--------------------|-------------|-------------|-------------|-------------|-------------|
| ENSMUSG00000063239 | 5.65961481  | 3.478086219 | 3.530755239 | 6.443661377 | 5.729556691 |
| ENSMUSG00000063245 | 33.25023701 | 52.86691053 | 52.96132858 | 54.7711217  | 50.84981563 |
| ENSMUSG00000063252 | 13.44158517 | 4.869320706 | 4.236906287 | 7.249119049 | 7.87814045  |
| ENSMUSG00000063253 | 12.73413332 | 4.173703463 | 10.59226572 | 4.832746033 | 8.594335036 |
| ENSMUSG00000063254 | 21.93100739 | 41.04141738 | 28.95219296 | 45.10562964 | 58.72795608 |
| ENSMUSG00000063268 | 29.71297775 | 33.3896277  | 36.01370344 | 58.79841006 | 45.83645353 |
| ENSMUSG00000063273 | 79.94205919 | 125.2111039 | 97.44884459 | 282.7156429 | 228.466073  |
| ENSMUSG00000063275 | 12.02668147 | 6.956172438 | 7.061510478 | 8.054576721 | 7.161945863 |
| ENSMUSG00000063305 | 9.904325918 | 4.869320706 | 8.473812573 | 3.221830688 | 5.729556691 |
| ENSMUSG00000063316 | 50.22908144 | 63.30116918 | 53.66747963 | 263.3846588 | 168.3057278 |
| ENSMUSG00000063320 | 19.80865184 | 36.86771392 | 28.24604191 | 53.16020636 | 45.12025894 |
| ENSMUSG00000063328 | 12.73413332 | 10.43425866 | 9.179963621 | 11.27640741 | 8.594335036 |
| ENSMUSG00000063334 | 62.96321476 | 98.77764862 | 90.38733411 | 154.647873  | 125.3340526 |
| ENSMUSG00000063358 | 120.9742666 | 146.0796212 | 154.6470795 | 181.2279762 | 149.6846685 |
| ENSMUSG00000063362 | 21.93100739 | 49.38882431 | 31.0706461  | 54.7711217  | 58.01176149 |
| ENSMUSG00000063364 | 53.7663407  | 58.43184848 | 64.96589639 | 50.74383334 | 54.43078856 |
| ENSMUSG00000063406 | 41.03220737 | 70.25734162 | 57.90438592 | 150.6205847 | 117.4559122 |
| ENSMUSG00000063409 | 9.904325918 | 6.260555194 | 3.530755239 | 3.221830688 | 5.013362104 |
| ENSMUSG00000063415 | 7.781970364 | 7.651789682 | 7.767661525 | 6.443661377 | 4.297167518 |
| ENSMUSG00000063445 | 23.34591109 | 36.17209668 | 24.71528667 | 35.44013757 | 30.08017263 |
| ENSMUSG00000063450 | 6.367066661 | 10.43425866 | 7.767661525 | 3.221830688 | 9.310529622 |
| ENSMUSG00000063455 | 6.367066661 | 9.738641413 | 7.061510478 | 6.443661377 | 7.161945863 |
| ENSMUSG00000063457 | 31.83533331 | 41.73703463 | 40.25060972 | 175.5897725 | 137.5093606 |
| ENSMUSG00000063458 | 7.074518513 | 4.869320706 | 7.061510478 | 2.416373016 | 5.729556691 |
| ENSMUSG00000063506 | 7.074518513 | 4.869320706 | 7.767661525 | 5.638203705 | 5.729556691 |
| ENSMUSG00000063511 | 129.4636888 | 153.7314109 | 137.6994543 | 323.7939842 | 242.0737702 |
| ENSMUSG00000063524 | 59.42595551 | 79.30036579 | 53.66747963 | 157.0642461 | 128.9150255 |
| ENSMUSG00000063564 | 5.65961481  | 11.1298759  | 10.59226572 | 4.02728836  | 7.87814045  |
| ENSMUSG00000063568 | 6.367066661 | 5.56493795  | 7.767661525 | 6.443661377 | 7.161945863 |
| ENSMUSG00000063576 | 50.93653329 | 81.38721752 | 75.55816211 | 100.682209  | 100.2672421 |
| ENSMUSG00000063600 | 12.02668147 | 2.782468975 | 9.179963621 | 3.221830688 | 7.161945863 |
| ENSMUSG00000063623 | 19.10119998 | 28.52030699 | 21.18453143 | 13.69278043 | 13.60769714 |
| ENSMUSG00000063646 | 6.367066661 | 6.956172438 | 12.00456781 | 4.832746033 | 5.729556691 |
| ENSMUSG00000063651 | 8.489422215 | 3.478086219 | 7.767661525 | 5.638203705 | 12.89150255 |
| ENSMUSG00000063652 | 2.122355554 | 9.738641413 | 5.649208382 | 5.638203705 | 7.87814045  |
| ENSMUSG00000063659 | 100.4581629 | 123.8198694 | 94.6242404  | 251.3027937 | 212.7097921 |
| ENSMUSG00000063663 | 15.56394073 | 26.43345526 | 21.89068248 | 45.10562964 | 33.66114556 |
| ENSMUSG00000063681 | 12.73413332 | 4.869320706 | 7.767661525 | 8.054576721 | 5.013362104 |
| ENSMUSG00000063683 | 14.85648888 | 6.956172438 | 7.061510478 | 8.054576721 | 6.445751277 |
| ENSMUSG00000063696 | 8.489422215 | 11.82549314 | 12.00456781 | 15.30369577 | 9.310529622 |
| ENSMUSG00000063704 | 5.65961481  | 4.869320706 | 7.061510478 | 3.221830688 | 7.161945863 |
| ENSMUSG00000063728 | 6.367066661 | 6.260555194 | 4.943057334 | 1.610915344 | 2.148583759 |
| ENSMUSG00000063730 | 14.85648888 | 4.173703463 | 4.236906287 | 7.249119049 | 7.161945863 |

|                    |             |             |             |             |             |
|--------------------|-------------|-------------|-------------|-------------|-------------|
| ENSMUSG00000063757 | 16.27139258 | 20.86851731 | 16.94762515 | 12.88732275 | 15.04008631 |
| ENSMUSG00000063765 | 7.074518513 | 9.043024169 | 6.35535943  | 9.665492065 | 10.7429188  |
| ENSMUSG00000063785 | 21.22355554 | 32.69401046 | 21.89068248 | 57.99295239 | 38.67450766 |
| ENSMUSG00000063808 | 35.37259256 | 72.34419335 | 40.95676077 | 39.46742593 | 49.41742646 |
| ENSMUSG00000063851 | 5.65961481  | 6.956172438 | 8.473812573 | 8.860034393 | 4.297167518 |
| ENSMUSG00000063870 | 2.122355554 | 2.782468975 | 0.706151048 | 0.805457672 | 2.148583759 |
| ENSMUSG00000063873 | 7.781970364 | 3.478086219 | 2.824604191 | 3.221830688 | 5.729556691 |
| ENSMUSG00000063881 | 7.074518513 | 6.956172438 | 7.767661525 | 5.638203705 | 5.013362104 |
| ENSMUSG00000063882 | 109.6550369 | 125.2111039 | 116.5149229 | 194.115299  | 159.7113928 |
| ENSMUSG00000063889 | 16.27139258 | 34.08524495 | 20.47838039 | 31.41284921 | 33.66114556 |
| ENSMUSG00000063894 | 17.68629628 | 26.43345526 | 17.65377619 | 22.55281482 | 28.64778345 |
| ENSMUSG00000063919 | 7.074518513 | 4.869320706 | 4.943057334 | 3.221830688 | 4.297167518 |
| ENSMUSG00000063931 | 21.93100739 | 37.56333116 | 38.13215658 | 18.52552646 | 30.79636721 |
| ENSMUSG00000063952 | 33.25023701 | 51.47567604 | 36.01370344 | 40.2728836  | 42.25548059 |
| ENSMUSG00000063972 | 9.196874066 | 11.1298759  | 8.473812573 | 12.08186508 | 15.7562809  |
| ENSMUSG00000063975 | 12.02668147 | 6.956172438 | 9.886114669 | 2.416373016 | 10.02672421 |
| ENSMUSG00000064010 | 8.489422215 | 6.956172438 | 4.943057334 | 8.860034393 | 4.297167518 |
| ENSMUSG00000064030 | 144.3201777 | 171.8174592 | 157.4716837 | 205.3917064 | 166.8733386 |
| ENSMUSG00000064036 | 4.952162959 | 4.869320706 | 10.59226572 | 4.02728836  | 8.594335036 |
| ENSMUSG00000064037 | 18.39374813 | 25.04222078 | 24.00913562 | 52.35474869 | 43.68786977 |
| ENSMUSG00000064057 | 5.65961481  | 8.347406925 | 9.886114669 | 7.249119049 | 7.87814045  |
| ENSMUSG00000064061 | 59.42595551 | 83.47406925 | 64.96589639 | 165.9242805 | 117.4559122 |
| ENSMUSG00000064065 | 16.97884443 | 14.60796212 | 12.00456781 | 9.665492065 | 7.161945863 |
| ENSMUSG00000064068 | 0           | 1.391234488 | 0.706151048 | 0           | 0           |
| ENSMUSG00000064080 | 11.31922962 | 4.173703463 | 6.35535943  | 8.054576721 | 10.02672421 |
| ENSMUSG00000064090 | 26.88317035 | 43.82388636 | 30.36449505 | 36.24559524 | 47.98503729 |
| ENSMUSG00000064105 | 8.489422215 | 13.21672763 | 14.12302096 | 8.054576721 | 14.32389173 |
| ENSMUSG00000064115 | 10.61177777 | 6.260555194 | 5.649208382 | 4.832746033 | 8.594335036 |
| ENSMUSG00000064120 | 16.97884443 | 49.38882431 | 38.83830763 | 24.16373016 | 22.91822676 |
| ENSMUSG00000064125 | 7.074518513 | 10.43425866 | 6.35535943  | 6.443661377 | 5.729556691 |
| ENSMUSG00000064127 | 48.81417774 | 50.7800588  | 40.25060972 | 63.6311561  | 53.71459398 |
| ENSMUSG00000064138 | 67.20792587 | 116.1680797 | 93.91808935 | 63.6311561  | 55.14698315 |
| ENSMUSG00000064141 | 17.68629628 | 23.65098629 | 24.71528667 | 18.52552646 | 26.49919969 |
| ENSMUSG00000064145 | 87.72402956 | 127.9935729 | 120.7518292 | 93.43308996 | 93.10529622 |
| ENSMUSG00000064179 | 7.074518513 | 5.56493795  | 7.767661525 | 4.832746033 | 4.297167518 |
| ENSMUSG00000064202 | 15.56394073 | 20.86851731 | 20.47838039 | 10.47094974 | 17.90486466 |
| ENSMUSG00000064215 | 15.56394073 | 22.2597518  | 17.65377619 | 28.9964762  | 25.06681052 |
| ENSMUSG00000064224 | 14.14903703 | 14.60796212 | 15.53532305 | 20.1364418  | 9.310529622 |
| ENSMUSG00000064246 | 3.537259256 | 3.478086219 | 4.943057334 | 4.832746033 | 7.161945863 |
| ENSMUSG00000064247 | 10.61177777 | 4.173703463 | 6.35535943  | 7.249119049 | 7.87814045  |
| ENSMUSG00000064264 | 12.73413332 | 10.43425866 | 16.2414741  | 23.35827249 | 27.93158887 |
| ENSMUSG00000064267 | 81.3569629  | 84.86530374 | 81.20737049 | 55.57657937 | 35.80972932 |
| ENSMUSG00000064280 | 27.5906222  | 21.56413456 | 28.95219296 | 35.44013757 | 25.78300511 |

|                    |             |             |             |             |             |
|--------------------|-------------|-------------|-------------|-------------|-------------|
| ENSMUSG00000064284 | 9.904325918 | 14.60796212 | 16.2414741  | 14.4982381  | 16.47247549 |
| ENSMUSG00000064289 | 90.55383696 | 130.0804246 | 101.6857509 | 165.1188228 | 119.6044959 |
| ENSMUSG00000064293 | 5.65961481  | 6.956172438 | 6.35535943  | 5.638203705 | 8.594335036 |
| ENSMUSG00000064294 | 9.904325918 | 3.478086219 | 5.649208382 | 6.443661377 | 5.729556691 |
| ENSMUSG00000064299 | 10.61177777 | 6.956172438 | 7.767661525 | 6.443661377 | 5.013362104 |
| ENSMUSG00000064302 | 70.74518513 | 93.21271067 | 91.79963621 | 153.8424154 | 128.198831  |
| ENSMUSG00000064307 | 75.69734809 | 103.6469693 | 100.9795998 | 120.0131931 | 94.5376854  |
| ENSMUSG00000064308 | 11.31922962 | 4.173703463 | 9.886114669 | 4.02728836  | 5.729556691 |
| ENSMUSG00000064310 | 6.367066661 | 6.956172438 | 9.886114669 | 8.860034393 | 7.87814045  |
| ENSMUSG00000064317 | 4.244711108 | 4.173703463 | 7.061510478 | 7.249119049 | 7.161945863 |
| ENSMUSG00000064326 | 25.46826665 | 39.6501829  | 34.60140134 | 44.30017197 | 55.86317773 |
| ENSMUSG00000064329 | 9.904325918 | 4.869320706 | 7.061510478 | 5.638203705 | 6.445751277 |
| ENSMUSG00000064373 | 7.781970364 | 6.260555194 | 7.061510478 | 4.832746033 | 9.310529622 |
| ENSMUSG00000065952 | 10.61177777 | 3.478086219 | 7.767661525 | 7.249119049 | 10.02672421 |
| ENSMUSG00000065954 | 48.10672589 | 77.21351406 | 53.66747963 | 106.3204127 | 96.68626916 |
| ENSMUSG00000065979 | 14.85648888 | 20.86851731 | 24.00913562 | 26.58010318 | 20.05344842 |
| ENSMUSG00000065987 | 14.14903703 | 8.347406925 | 7.061510478 | 7.249119049 | 4.297167518 |
| ENSMUSG00000065990 | 21.22355554 | 29.91154148 | 40.95676077 | 95.84946298 | 76.63282074 |
| ENSMUSG00000065999 | 25.46826665 | 22.95536904 | 23.30298458 | 12.88732275 | 17.18867007 |
| ENSMUSG00000066000 | 32.54278516 | 38.95456565 | 26.83373982 | 23.35827249 | 29.36397804 |
| ENSMUSG00000066007 | 26.1757185  | 27.82468975 | 24.71528667 | 21.74735715 | 17.18867007 |
| ENSMUSG00000066026 | 6.367066661 | 9.043024169 | 7.767661525 | 27.38556085 | 37.24211849 |
| ENSMUSG00000066031 | 8.489422215 | 6.956172438 | 7.767661525 | 6.443661377 | 8.594335036 |
| ENSMUSG00000066036 | 0           | 0.695617244 | 0           | 0           | 0           |
| ENSMUSG00000066037 | 122.3891703 | 128.6891901 | 115.8087718 | 188.4770953 | 148.2522794 |
| ENSMUSG00000066043 | 42.44711108 | 58.43184848 | 62.1412922  | 39.46742593 | 37.95831308 |
| ENSMUSG00000066058 | 4.244711108 | 6.956172438 | 7.767661525 | 7.249119049 | 9.310529622 |
| ENSMUSG00000066072 | 5.65961481  | 6.260555194 | 5.649208382 | 4.02728836  | 5.729556691 |
| ENSMUSG00000066113 | 4.952162959 | 8.347406925 | 4.236906287 | 4.832746033 | 4.297167518 |
| ENSMUSG00000066129 | 8.489422215 | 4.173703463 | 9.179963621 | 2.416373016 | 7.87814045  |
| ENSMUSG00000066137 | 4.244711108 | 5.56493795  | 9.179963621 | 6.443661377 | 3.580972932 |
| ENSMUSG00000066149 | 62.25576291 | 92.51709342 | 73.43970897 | 185.2552646 | 176.1838682 |
| ENSMUSG00000066150 | 101.1656147 | 126.6023384 | 126.4010376 | 211.8353678 | 172.6028953 |
| ENSMUSG00000066151 | 92.67619252 | 139.1234488 | 118.633376  | 190.0880106 | 168.3057278 |
| ENSMUSG00000066152 | 2.829807405 | 4.869320706 | 3.530755239 | 4.832746033 | 6.445751277 |
| ENSMUSG00000066154 | 4.952162959 | 9.043024169 | 5.649208382 | 7.249119049 | 8.594335036 |
| ENSMUSG00000066178 | 7.781970364 | 6.956172438 | 5.649208382 | 8.054576721 | 8.594335036 |
| ENSMUSG00000066191 | 7.074518513 | 9.738641413 | 3.530755239 | 3.221830688 | 7.161945863 |
| ENSMUSG00000066196 | 4.952162959 | 4.869320706 | 5.649208382 | 5.638203705 | 2.864778345 |
| ENSMUSG00000066224 | 6.367066661 | 10.43425866 | 5.649208382 | 6.443661377 | 4.297167518 |
| ENSMUSG00000066258 | 65.08557032 | 91.82147618 | 69.90895373 | 69.2693598  | 63.74131818 |
| ENSMUSG00000066306 | 43.15456293 | 62.60555194 | 60.72899011 | 100.682209  | 87.37573953 |
| ENSMUSG00000066363 | 9.196874066 | 19.47728283 | 16.94762515 | 41.07834128 | 25.06681052 |

|                    |             |             |             |             |             |
|--------------------|-------------|-------------|-------------|-------------|-------------|
| ENSMUSG00000066366 | 7.781970364 | 8.347406925 | 4.943057334 | 9.665492065 | 2.864778345 |
| ENSMUSG00000066392 | 12.73413332 | 5.56493795  | 3.530755239 | 3.221830688 | 12.89150255 |
| ENSMUSG00000066406 | 43.15456293 | 81.38721752 | 78.3827663  | 60.40932541 | 44.40406435 |
| ENSMUSG00000066407 | 11.31922962 | 11.1298759  | 13.41686991 | 12.88732275 | 15.7562809  |
| ENSMUSG00000066441 | 23.34591109 | 30.60715873 | 36.01370344 | 51.54929101 | 45.83645353 |
| ENSMUSG00000066442 | 25.46826665 | 51.47567604 | 48.01827125 | 95.04400531 | 93.10529622 |
| ENSMUSG00000066456 | 10.61177777 | 11.1298759  | 18.35992724 | 40.2728836  | 34.37734014 |
| ENSMUSG00000066463 | 8.489422215 | 7.651789682 | 10.59226572 | 5.638203705 | 9.310529622 |
| ENSMUSG00000066551 | 26.1757185  | 40.34580014 | 31.0706461  | 147.398754  | 118.1721067 |
| ENSMUSG00000066568 | 70.03773327 | 98.08203137 | 91.79963621 | 220.6954022 | 187.6429816 |
| ENSMUSG00000066571 | 37.49494812 | 83.47406925 | 67.79050059 | 41.88379895 | 49.41742646 |
| ENSMUSG00000066584 | 4.952162959 | 6.260555194 | 7.767661525 | 5.638203705 | 7.161945863 |
| ENSMUSG00000066613 | 71.45263698 | 97.38641413 | 93.91808935 | 107.9313281 | 83.7947666  |
| ENSMUSG00000066621 | 24.05336294 | 38.95456565 | 35.30755239 | 11.27640741 | 26.49919969 |
| ENSMUSG00000066629 | 10.61177777 | 6.260555194 | 9.179963621 | 11.27640741 | 5.729556691 |
| ENSMUSG00000066632 | 9.196874066 | 6.260555194 | 10.59226572 | 8.054576721 | 7.161945863 |
| ENSMUSG00000066640 | 38.90985182 | 50.08444155 | 57.19823487 | 47.52200265 | 44.40406435 |
| ENSMUSG00000066643 | 10.61177777 | 8.347406925 | 6.35535943  | 6.443661377 | 7.87814045  |
| ENSMUSG00000066677 | 12.02668147 | 20.17290007 | 26.83373982 | 10.47094974 | 7.87814045  |
| ENSMUSG00000066682 | 8.489422215 | 2.782468975 | 4.236906287 | 8.860034393 | 7.161945863 |
| ENSMUSG00000066684 | 13.44158517 | 7.651789682 | 3.530755239 | 12.88732275 | 6.445751277 |
| ENSMUSG00000066724 | 16.27139258 | 11.82549314 | 8.473812573 | 5.638203705 | 7.161945863 |
| ENSMUSG00000066760 | 5.65961481  | 8.347406925 | 7.767661525 | 6.443661377 | 7.161945863 |
| ENSMUSG00000066772 | 9.904325918 | 6.260555194 | 9.179963621 | 7.249119049 | 7.161945863 |
| ENSMUSG00000066800 | 1.414903703 | 4.869320706 | 3.530755239 | 1.610915344 | 1.432389173 |
| ENSMUSG00000066839 | 31.83533331 | 66.7792554  | 53.66747963 | 30.60739154 | 50.84981563 |
| ENSMUSG00000066861 | 7.781970364 | 8.347406925 | 5.649208382 | 10.47094974 | 9.310529622 |
| ENSMUSG00000066877 | 10.61177777 | 5.56493795  | 10.59226572 | 9.665492065 | 7.87814045  |
| ENSMUSG00000066878 | 12.73413332 | 11.82549314 | 12.00456781 | 20.94189947 | 15.7562809  |
| ENSMUSG00000066880 | 0           | 0           | 0.706151048 | 0           | 0           |
| ENSMUSG00000066892 | 154.9319554 | 181.5561006 | 175.1254598 | 183.6443492 | 157.562809  |
| ENSMUSG00000066894 | 9.196874066 | 5.56493795  | 8.473812573 | 4.832746033 | 5.729556691 |
| ENSMUSG00000066900 | 51.64398514 | 83.47406925 | 70.61510478 | 85.37851324 | 66.60609653 |
| ENSMUSG00000066936 | 7.074518513 | 4.869320706 | 9.179963621 | 7.249119049 | 5.013362104 |
| ENSMUSG00000066944 | 10.61177777 | 5.56493795  | 7.061510478 | 6.443661377 | 5.013362104 |
| ENSMUSG00000066975 | 10.61177777 | 7.651789682 | 5.649208382 | 8.860034393 | 7.87814045  |
| ENSMUSG00000067001 | 7.074518513 | 5.56493795  | 7.061510478 | 4.832746033 | 8.594335036 |
| ENSMUSG00000067006 | 7.781970364 | 8.347406925 | 6.35535943  | 4.02728836  | 9.310529622 |
| ENSMUSG00000067038 | 74.98989623 | 102.2557348 | 100.2734488 | 87.79488626 | 90.95671247 |
| ENSMUSG00000067081 | 7.781970364 | 4.173703463 | 9.179963621 | 5.638203705 | 6.445751277 |
| ENSMUSG00000067148 | 70.74518513 | 79.99598303 | 76.26431316 | 149.815127  | 117.4559122 |
| ENSMUSG00000067201 | 9.196874066 | 4.869320706 | 4.943057334 | 3.221830688 | 4.297167518 |
| ENSMUSG00000067220 | 8.489422215 | 6.956172438 | 6.35535943  | 4.02728836  | 5.729556691 |



|                    |             |             |             |             |             |
|--------------------|-------------|-------------|-------------|-------------|-------------|
| ENSMUSG00000067235 | 16.97884443 | 19.47728283 | 16.2414741  | 34.6346799  | 32.94495097 |
| ENSMUSG00000067242 | 10.61177777 | 5.56493795  | 5.649208382 | 8.860034393 | 5.729556691 |
| ENSMUSG00000067274 | 48.81417774 | 61.9099347  | 74.14586002 | 280.2992699 | 199.8182896 |
| ENSMUSG00000067288 | 60.13340736 | 85.56092098 | 71.32125582 | 273.8556085 | 182.6296195 |
| ENSMUSG00000067299 | 9.904325918 | 8.347406925 | 7.061510478 | 3.221830688 | 9.310529622 |
| ENSMUSG00000067356 | 7.781970364 | 5.56493795  | 9.886114669 | 8.054576721 | 7.87814045  |
| ENSMUSG00000067360 | 7.074518513 | 4.173703463 | 5.649208382 | 4.02728836  | 5.729556691 |
| ENSMUSG00000067365 | 24.05336294 | 43.12826911 | 48.7244223  | 61.21478308 | 48.70123187 |
| ENSMUSG00000067369 | 33.25023701 | 53.56252777 | 49.43057334 | 30.60739154 | 39.39070225 |
| ENSMUSG00000067377 | 4.244711108 | 1.391234488 | 0.706151048 | 1.610915344 | 0           |
| ENSMUSG00000067399 | 12.73413332 | 6.260555194 | 7.767661525 | 2.416373016 | 9.310529622 |
| ENSMUSG00000067424 | 9.196874066 | 9.043024169 | 10.59226572 | 6.443661377 | 8.594335036 |
| ENSMUSG00000067561 | 2.122355554 | 0           | 1.412302096 | 0           | 0           |
| ENSMUSG00000067562 | 0.707451851 | 1.391234488 | 1.412302096 | 1.610915344 | 0.716194586 |
| ENSMUSG00000067567 | 25.46826665 | 31.30277597 | 30.36449505 | 12.88732275 | 17.18867007 |
| ENSMUSG00000067577 | 5.65961481  | 9.043024169 | 7.061510478 | 8.054576721 | 5.729556691 |
| ENSMUSG00000067591 | 7.074518513 | 7.651789682 | 6.35535943  | 4.832746033 | 7.161945863 |
| ENSMUSG00000067599 | 6.367066661 | 5.56493795  | 10.59226572 | 2.416373016 | 5.729556691 |
| ENSMUSG00000067608 | 5.65961481  | 10.43425866 | 14.12302096 | 20.94189947 | 21.48583759 |
| ENSMUSG00000067616 | 9.904325918 | 3.478086219 | 6.35535943  | 4.832746033 | 5.013362104 |
| ENSMUSG00000067642 | 7.074518513 | 6.956172438 | 3.530755239 | 6.443661377 | 5.729556691 |
| ENSMUSG00000067653 | 8.489422215 | 9.738641413 | 7.767661525 | 10.47094974 | 9.310529622 |
| ENSMUSG00000067656 | 11.31922962 | 6.260555194 | 6.35535943  | 7.249119049 | 2.864778345 |
| ENSMUSG00000067714 | 8.489422215 | 8.347406925 | 10.59226572 | 10.47094974 | 15.7562809  |
| ENSMUSG00000067719 | 5.65961481  | 15.99919661 | 14.829172   | 13.69278043 | 8.594335036 |
| ENSMUSG00000067764 | 0           | 0           | 0           | 0           | 0           |
| ENSMUSG00000067768 | 6.367066661 | 9.043024169 | 9.179963621 | 13.69278043 | 9.310529622 |
| ENSMUSG00000067786 | 50.22908144 | 81.38721752 | 74.14586002 | 43.49471429 | 47.98503729 |
| ENSMUSG00000067787 | 7.781970364 | 5.56493795  | 5.649208382 | 4.832746033 | 9.310529622 |
| ENSMUSG00000067795 | 11.31922962 | 9.738641413 | 8.473812573 | 12.08186508 | 4.297167518 |
| ENSMUSG00000067825 | 16.27139258 | 18.08604834 | 11.29841676 | 10.47094974 | 13.60769714 |
| ENSMUSG00000067847 | 30.4204296  | 47.30197258 | 40.25060972 | 60.40932541 | 56.57937232 |
| ENSMUSG00000067848 | 12.73413332 | 6.956172438 | 7.061510478 | 5.638203705 | 5.729556691 |
| ENSMUSG00000067851 | 72.16008883 | 124.5154866 | 96.0365425  | 169.9515688 | 157.562809  |
| ENSMUSG00000067860 | 2.829807405 | 2.782468975 | 3.530755239 | 1.610915344 | 6.445751277 |
| ENSMUSG00000067873 | 7.074518513 | 8.347406925 | 8.473812573 | 22.55281482 | 21.48583759 |
| ENSMUSG00000067878 | 2.122355554 | 2.782468975 | 3.530755239 | 7.249119049 | 1.432389173 |
| ENSMUSG00000067882 | 10.61177777 | 10.43425866 | 7.767661525 | 14.4982381  | 10.02672421 |
| ENSMUSG00000067973 | 12.73413332 | 9.738641413 | 11.29841676 | 5.638203705 | 4.297167518 |
| ENSMUSG00000067998 | 11.31922962 | 8.347406925 | 8.473812573 | 6.443661377 | 7.161945863 |
| ENSMUSG00000068009 | 11.31922962 | 4.869320706 | 7.767661525 | 7.249119049 | 4.297167518 |
| ENSMUSG00000068036 | 5.65961481  | 7.651789682 | 4.236906287 | 3.221830688 | 3.580972932 |
| ENSMUSG00000068037 | 9.904325918 | 4.173703463 | 6.35535943  | 2.416373016 | 5.013362104 |

|                    |             |             |             |             |             |
|--------------------|-------------|-------------|-------------|-------------|-------------|
| ENSMUSG00000068039 | 54.47379255 | 88.34338996 | 60.72899011 | 222.3063175 | 161.1437819 |
| ENSMUSG00000068040 | 51.64398514 | 83.47406925 | 76.97046421 | 88.60034393 | 80.92998826 |
| ENSMUSG00000068082 | 4.952162959 | 6.260555194 | 7.061510478 | 8.860034393 | 4.297167518 |
| ENSMUSG00000068101 | 14.85648888 | 11.1298759  | 12.71071886 | 26.58010318 | 29.36397804 |
| ENSMUSG00000068105 | 121.6817184 | 135.6453625 | 136.2871522 | 304.4630001 | 224.1689055 |
| ENSMUSG00000068115 | 0           | 0.695617244 | 0           | 0           | 1.432389173 |
| ENSMUSG00000068122 | 4.952162959 | 1.391234488 | 2.824604191 | 0           | 2.148583759 |
| ENSMUSG00000068130 | 25.46826665 | 27.12907251 | 29.65834401 | 28.19101852 | 31.5125618  |
| ENSMUSG00000068134 | 71.45263698 | 111.9943762 | 81.91352154 | 78.12939419 | 71.61945863 |
| ENSMUSG00000068173 | 2.829807405 | 4.869320706 | 3.530755239 | 0.805457672 | 3.580972932 |
| ENSMUSG00000068205 | 9.196874066 | 2.782468975 | 9.886114669 | 4.02728836  | 5.013362104 |
| ENSMUSG00000068206 | 7.781970364 | 16.69481385 | 14.829172   | 14.4982381  | 20.05344842 |
| ENSMUSG00000068245 | 9.196874066 | 11.1298759  | 10.59226572 | 12.08186508 | 5.013362104 |
| ENSMUSG00000068250 | 74.28244438 | 139.1234488 | 112.2780166 | 94.23854763 | 77.34901533 |
| ENSMUSG00000068263 | 3.537259256 | 4.173703463 | 7.767661525 | 5.638203705 | 3.580972932 |
| ENSMUSG00000068264 | 10.61177777 | 8.347406925 | 9.886114669 | 8.054576721 | 7.87814045  |
| ENSMUSG00000068270 | 4.244711108 | 2.782468975 | 2.118453143 | 0.805457672 | 2.864778345 |
| ENSMUSG00000068284 | 88.43148141 | 120.3417832 | 119.3395271 | 85.37851324 | 81.64618284 |
| ENSMUSG00000068290 | 16.27139258 | 29.91154148 | 28.95219296 | 25.77464551 | 30.79636721 |
| ENSMUSG00000068299 | 10.61177777 | 9.043024169 | 9.179963621 | 11.27640741 | 6.445751277 |
| ENSMUSG00000068314 | 26.88317035 | 46.60635533 | 39.54445867 | 70.07481747 | 53.71459398 |
| ENSMUSG00000068323 | 10.61177777 | 8.347406925 | 9.886114669 | 6.443661377 | 7.161945863 |
| ENSMUSG00000068329 | 52.35143699 | 77.9091313  | 76.97046421 | 231.9718096 | 148.968474  |
| ENSMUSG00000068349 | 7.074518513 | 7.651789682 | 7.767661525 | 12.08186508 | 12.89150255 |
| ENSMUSG00000068373 | 4.244711108 | 4.869320706 | 3.530755239 | 9.665492065 | 3.580972932 |
| ENSMUSG00000068399 | 5.65961481  | 9.043024169 | 6.35535943  | 4.832746033 | 5.729556691 |
| ENSMUSG00000068457 | 12.73413332 | 20.86851731 | 21.89068248 | 32.21830688 | 27.21539428 |
| ENSMUSG00000068523 | 62.25576291 | 91.12585893 | 83.32582364 | 184.4498069 | 134.6445822 |
| ENSMUSG00000068536 | 8.489422215 | 4.869320706 | 7.767661525 | 4.832746033 | 3.580972932 |
| ENSMUSG00000068551 | 5.65961481  | 2.782468975 | 7.767661525 | 5.638203705 | 6.445751277 |
| ENSMUSG00000068566 | 12.02668147 | 23.65098629 | 18.35992724 | 9.665492065 | 7.161945863 |
| ENSMUSG00000068580 | 32.54278516 | 50.7800588  | 60.02283906 | 53.96566403 | 48.70123187 |
| ENSMUSG00000068600 | 9.196874066 | 10.43425866 | 9.179963621 | 8.054576721 | 9.310529622 |
| ENSMUSG00000068601 | 37.49494812 | 47.99758982 | 45.19366706 | 37.05105292 | 52.99839939 |
| ENSMUSG00000068663 | 38.20239997 | 70.25734162 | 51.54902649 | 53.96566403 | 62.30892901 |
| ENSMUSG00000068686 | 5.65961481  | 11.82549314 | 4.236906287 | 9.665492065 | 6.445751277 |
| ENSMUSG00000068699 | 10.61177777 | 7.651789682 | 8.473812573 | 6.443661377 | 5.013362104 |
| ENSMUSG00000068706 | 21.22355554 | 38.95456565 | 37.42600553 | 84.57305557 | 60.87653984 |
| ENSMUSG00000068735 | 80.64951104 | 96.69079689 | 93.21193831 | 34.6346799  | 45.12025894 |
| ENSMUSG00000068739 | 69.33028142 | 98.77764862 | 96.74269354 | 178.0061455 | 131.7798039 |
| ENSMUSG00000068740 | 6.367066661 | 15.99919661 | 11.29841676 | 7.249119049 | 7.87814045  |
| ENSMUSG00000068742 | 35.37259256 | 49.38882431 | 50.84287544 | 35.44013757 | 33.66114556 |
| ENSMUSG00000068744 | 9.196874066 | 4.869320706 | 8.473812573 | 32.21830688 | 17.18867007 |

|                    |             |             |             |             |             |
|--------------------|-------------|-------------|-------------|-------------|-------------|
| ENSMUSG00000068747 | 7.074518513 | 8.347406925 | 8.473812573 | 1.610915344 | 5.013362104 |
| ENSMUSG00000068762 | 11.31922962 | 8.347406925 | 2.824604191 | 6.443661377 | 7.161945863 |
| ENSMUSG00000068798 | 133.7083999 | 166.9481385 | 129.9317928 | 256.9409974 | 194.8049275 |
| ENSMUSG00000068823 | 169.7884443 | 194.077211  | 171.5947046 | 255.3300821 | 191.2239546 |
| ENSMUSG00000068874 | 8.489422215 | 6.956172438 | 4.943057334 | 2.416373016 | 6.445751277 |
| ENSMUSG00000068876 | 2.122355554 | 4.869320706 | 7.767661525 | 3.221830688 | 5.729556691 |
| ENSMUSG00000068877 | 9.196874066 | 9.043024169 | 4.943057334 | 12.88732275 | 7.161945863 |
| ENSMUSG00000068879 | 10.61177777 | 7.651789682 | 8.473812573 | 4.02728836  | 4.297167518 |
| ENSMUSG00000068882 | 101.8730666 | 161.3832006 | 117.927225  | 266.6064895 | 197.6697058 |
| ENSMUSG00000068917 | 34.66514071 | 68.17048989 | 61.43514116 | 122.4295662 | 90.24051788 |
| ENSMUSG00000068921 | 104.702874  | 131.4716591 | 124.9887355 | 276.2719815 | 213.4259867 |
| ENSMUSG00000068922 | 12.73413332 | 27.12907251 | 23.30298458 | 62.02024075 | 49.41742646 |
| ENSMUSG00000068923 | 34.66514071 | 45.91073809 | 46.60596915 | 81.35122488 | 52.99839939 |
| ENSMUSG00000068957 | 2.829807405 | 6.956172438 | 4.943057334 | 7.249119049 | 3.580972932 |
| ENSMUSG00000068966 | 19.10119998 | 31.30277597 | 22.59683353 | 27.38556085 | 30.79636721 |
| ENSMUSG00000068999 | 5.65961481  | 9.043024169 | 7.061510478 | 4.832746033 | 7.87814045  |
| ENSMUSG00000069014 | 24.76081479 | 13.91234488 | 19.06607829 | 28.9964762  | 31.5125618  |
| ENSMUSG00000069045 | 37.49494812 | 55.6493795  | 50.84287544 | 86.98942859 | 55.14698315 |
| ENSMUSG00000069049 | 20.51610369 | 45.91073809 | 39.54445867 | 41.07834128 | 49.41742646 |
| ENSMUSG00000069053 | 2.829807405 | 0.695617244 | 5.649208382 | 0.805457672 | 5.729556691 |
| ENSMUSG00000069094 | 104.702874  | 131.4716591 | 117.927225  | 114.3749894 | 111.0101609 |
| ENSMUSG00000069135 | 65.79302217 | 98.08203137 | 59.31668801 | 128.0677699 | 94.5376854  |
| ENSMUSG00000069170 | 7.781970364 | 6.956172438 | 7.061510478 | 6.443661377 | 9.310529622 |
| ENSMUSG00000069171 | 9.904325918 | 4.173703463 | 7.061510478 | 2.416373016 | 6.445751277 |
| ENSMUSG00000069206 | 17.68629628 | 41.73703463 | 33.18909925 | 18.52552646 | 29.36397804 |
| ENSMUSG00000069248 | 10.61177777 | 7.651789682 | 5.649208382 | 5.638203705 | 9.310529622 |
| ENSMUSG00000069255 | 43.86201478 | 67.47487265 | 56.49208382 | 43.49471429 | 53.71459398 |
| ENSMUSG00000069258 | 12.73413332 | 6.956172438 | 6.35535943  | 2.416373016 | 4.297167518 |
| ENSMUSG00000069259 | 3.537259256 | 2.782468975 | 1.412302096 | 2.416373016 | 0           |
| ENSMUSG00000069307 | 6.367066661 | 7.651789682 | 8.473812573 | 8.860034393 | 8.594335036 |
| ENSMUSG00000069324 | 5.65961481  | 4.869320706 | 6.35535943  | 5.638203705 | 3.580972932 |
| ENSMUSG00000069378 | 7.074518513 | 4.173703463 | 5.649208382 | 2.416373016 | 4.297167518 |
| ENSMUSG00000069476 | 7.781970364 | 9.043024169 | 10.59226572 | 5.638203705 | 6.445751277 |
| ENSMUSG00000069495 | 44.56946663 | 63.99678643 | 47.3121202  | 93.43308996 | 71.61945863 |
| ENSMUSG00000069539 | 100.4581629 | 129.3848073 | 108.7472614 | 81.35122488 | 79.49759908 |
| ENSMUSG00000069565 | 8.489422215 | 13.91234488 | 11.29841676 | 14.4982381  | 17.18867007 |
| ENSMUSG00000069581 | 10.61177777 | 4.173703463 | 6.35535943  | 5.638203705 | 10.02672421 |
| ENSMUSG00000069601 | 3.537259256 | 9.043024169 | 8.473812573 | 5.638203705 | 7.161945863 |
| ENSMUSG00000069622 | 8.489422215 | 13.21672763 | 10.59226572 | 12.88732275 | 10.02672421 |
| ENSMUSG00000069631 | 15.56394073 | 45.91073809 | 29.65834401 | 54.7711217  | 51.56601022 |
| ENSMUSG00000069633 | 8.489422215 | 10.43425866 | 8.473812573 | 5.638203705 | 9.310529622 |
| ENSMUSG00000069678 | 9.904325918 | 21.56413456 | 12.00456781 | 16.91461111 | 15.04008631 |
| ENSMUSG00000069713 | 65.08557032 | 87.64777272 | 84.73812573 | 202.1698757 | 152.5494469 |

|                    |             |             |             |             |             |
|--------------------|-------------|-------------|-------------|-------------|-------------|
| ENSMUSG00000069729 | 42.44711108 | 57.04061399 | 51.54902649 | 160.2860767 | 137.5093606 |
| ENSMUSG00000069733 | 12.73413332 | 5.56493795  | 12.71071886 | 0.805457672 | 10.02672421 |
| ENSMUSG00000069769 | 23.34591109 | 31.99839321 | 33.18909925 | 45.10562964 | 40.82309142 |
| ENSMUSG00000069793 | 11.31922962 | 18.78166558 | 19.77222934 | 16.91461111 | 15.04008631 |
| ENSMUSG00000069804 | 8.489422215 | 7.651789682 | 4.943057334 | 7.249119049 | 9.310529622 |
| ENSMUSG00000069805 | 9.196874066 | 5.56493795  | 8.473812573 | 2.416373016 | 6.445751277 |
| ENSMUSG00000069808 | 47.39927403 | 67.47487265 | 66.37819849 | 98.265836   | 87.37573953 |
| ENSMUSG00000069823 | 9.196874066 | 7.651789682 | 7.061510478 | 7.249119049 | 5.013362104 |
| ENSMUSG00000069825 | 8.489422215 | 8.347406925 | 4.943057334 | 7.249119049 | 6.445751277 |
| ENSMUSG00000069830 | 7.074518513 | 4.173703463 | 12.00456781 | 7.249119049 | 7.161945863 |
| ENSMUSG00000069833 | 10.61177777 | 23.65098629 | 29.65834401 | 12.88732275 | 14.32389173 |
| ENSMUSG00000069835 | 7.781970364 | 5.56493795  | 3.530755239 | 6.443661377 | 5.013362104 |
| ENSMUSG00000069844 | 45.98437033 | 68.86610713 | 55.78593277 | 180.4225185 | 135.3607768 |
| ENSMUSG00000069893 | 44.56946663 | 59.82308296 | 62.84744325 | 86.98942859 | 50.13362104 |
| ENSMUSG00000069899 | 12.73413332 | 19.47728283 | 11.29841676 | 16.10915344 | 10.02672421 |
| ENSMUSG00000069911 | 10.61177777 | 16.69481385 | 18.35992724 | 15.30369577 | 20.05344842 |
| ENSMUSG00000069920 | 9.196874066 | 9.043024169 | 10.59226572 | 5.638203705 | 12.89150255 |
| ENSMUSG00000069922 | 12.73413332 | 2.782468975 | 9.886114669 | 4.832746033 | 6.445751277 |
| ENSMUSG00000070000 | 55.88869625 | 71.64857611 | 57.19823487 | 41.88379895 | 30.79636721 |
| ENSMUSG00000070003 | 14.14903703 | 15.99919661 | 11.29841676 | 39.46742593 | 36.5259239  |
| ENSMUSG00000070031 | 59.42595551 | 54.95376226 | 50.13672439 | 103.098582  | 70.90326405 |
| ENSMUSG00000070034 | 164.1288295 | 187.1210386 | 172.3008557 | 301.2411694 | 215.5745705 |
| ENSMUSG00000070044 | 7.074518513 | 6.956172438 | 9.179963621 | 4.832746033 | 5.013362104 |
| ENSMUSG00000070047 | 11.31922962 | 4.173703463 | 7.061510478 | 4.02728836  | 2.148583759 |
| ENSMUSG00000070280 | 9.904325918 | 7.651789682 | 9.179963621 | 4.832746033 | 10.02672421 |
| ENSMUSG00000070284 | 14.85648888 | 13.91234488 | 18.35992724 | 20.94189947 | 20.769643   |
| ENSMUSG00000070304 | 8.489422215 | 6.260555194 | 4.943057334 | 4.832746033 | 7.87814045  |
| ENSMUSG00000070305 | 10.61177777 | 8.347406925 | 7.767661525 | 5.638203705 | 5.729556691 |
| ENSMUSG00000070323 | 0.707451851 | 0           | 0.706151048 | 0           | 0           |
| ENSMUSG00000070327 | 9.904325918 | 13.91234488 | 11.29841676 | 13.69278043 | 15.04008631 |
| ENSMUSG00000070331 | 7.781970364 | 5.56493795  | 7.061510478 | 4.832746033 | 3.580972932 |
| ENSMUSG00000070354 | 0           | 0           | 0           | 0.805457672 | 0           |
| ENSMUSG00000070357 | 12.02668147 | 6.260555194 | 4.236906287 | 6.443661377 | 7.87814045  |
| ENSMUSG00000070369 | 7.074518513 | 6.260555194 | 7.061510478 | 8.054576721 | 6.445751277 |
| ENSMUSG00000070371 | 9.196874066 | 6.956172438 | 10.59226572 | 5.638203705 | 5.729556691 |
| ENSMUSG00000070372 | 128.7562369 | 153.0357936 | 139.1117564 | 265.8010318 | 190.50776   |
| ENSMUSG00000070385 | 9.904325918 | 9.738641413 | 8.473812573 | 8.054576721 | 6.445751277 |
| ENSMUSG00000070390 | 9.904325918 | 4.173703463 | 5.649208382 | 5.638203705 | 6.445751277 |
| ENSMUSG00000070394 | 7.781970364 | 8.347406925 | 9.886114669 | 10.47094974 | 12.89150255 |
| ENSMUSG00000070419 | 10.61177777 | 4.173703463 | 6.35535943  | 4.832746033 | 7.87814045  |
| ENSMUSG00000070424 | 10.61177777 | 7.651789682 | 10.59226572 | 9.665492065 | 7.87814045  |
| ENSMUSG00000070425 | 1.414903703 | 2.086851731 | 3.530755239 | 0.805457672 | 2.864778345 |
| ENSMUSG00000070426 | 87.01657771 | 105.0382038 | 108.0411103 | 116.7913625 | 93.82149081 |

|                    |             |             |             |             |             |
|--------------------|-------------|-------------|-------------|-------------|-------------|
| ENSMUSG00000070436 | 8.489422215 | 4.869320706 | 8.473812573 | 3.221830688 | 4.297167518 |
| ENSMUSG00000070448 | 17.68629628 | 10.43425866 | 7.061510478 | 4.832746033 | 7.87814045  |
| ENSMUSG00000070460 | 5.65961481  | 6.956172438 | 7.767661525 | 4.832746033 | 3.580972932 |
| ENSMUSG00000070469 | 9.196874066 | 4.173703463 | 6.35535943  | 4.832746033 | 6.445751277 |
| ENSMUSG00000070476 | 4.244711108 | 4.869320706 | 8.473812573 | 5.638203705 | 7.87814045  |
| ENSMUSG00000070495 | 7.074518513 | 3.478086219 | 5.649208382 | 2.416373016 | 9.310529622 |
| ENSMUSG00000070501 | 92.67619252 | 121.0374004 | 88.26888097 | 91.01671695 | 77.34901533 |
| ENSMUSG00000070509 | 7.074518513 | 5.56493795  | 8.473812573 | 4.02728836  | 13.60769714 |
| ENSMUSG00000070511 | 10.61177777 | 6.260555194 | 5.649208382 | 8.054576721 | 4.297167518 |
| ENSMUSG00000070522 | 10.61177777 | 9.738641413 | 13.41686991 | 3.221830688 | 2.864778345 |
| ENSMUSG00000070533 | 7.074518513 | 5.56493795  | 6.35535943  | 6.443661377 | 8.594335036 |
| ENSMUSG00000070564 | 6.367066661 | 3.478086219 | 3.530755239 | 7.249119049 | 5.013362104 |
| ENSMUSG00000070565 | 5.65961481  | 9.043024169 | 9.179963621 | 5.638203705 | 5.729556691 |
| ENSMUSG00000070568 | 9.904325918 | 7.651789682 | 6.35535943  | 7.249119049 | 5.729556691 |
| ENSMUSG00000070574 | 7.781970364 | 8.347406925 | 7.061510478 | 8.054576721 | 10.7429188  |
| ENSMUSG00000070594 | 5.65961481  | 5.56493795  | 7.767661525 | 2.416373016 | 6.445751277 |
| ENSMUSG00000070616 | 7.781970364 | 4.869320706 | 5.649208382 | 5.638203705 | 2.864778345 |
| ENSMUSG00000070618 | 0           | 0           | 0           | 0           | 0           |
| ENSMUSG00000070643 | 9.904325918 | 5.56493795  | 7.061510478 | 4.02728836  | 2.864778345 |
| ENSMUSG00000070644 | 2.829807405 | 5.56493795  | 7.767661525 | 6.443661377 | 5.729556691 |
| ENSMUSG00000070686 | 14.85648888 | 10.43425866 | 5.649208382 | 8.054576721 | 5.013362104 |
| ENSMUSG00000070687 | 4.244711108 | 6.260555194 | 7.767661525 | 4.832746033 | 4.297167518 |
| ENSMUSG00000070691 | 8.489422215 | 6.956172438 | 12.00456781 | 12.08186508 | 12.89150255 |
| ENSMUSG00000070704 | 7.074518513 | 7.651789682 | 7.061510478 | 6.443661377 | 9.310529622 |
| ENSMUSG00000070709 | 16.97884443 | 34.78086219 | 36.71985448 | 23.35827249 | 23.63442135 |
| ENSMUSG00000070713 | 11.31922962 | 22.95536904 | 24.71528667 | 17.72006879 | 20.769643   |
| ENSMUSG00000070730 | 34.66514071 | 57.04061399 | 53.66747963 | 66.04752911 | 67.32229112 |
| ENSMUSG00000070733 | 87.01657771 | 91.82147618 | 80.50121945 | 115.9859048 | 126.0502472 |
| ENSMUSG00000070737 | 7.074518513 | 7.651789682 | 6.35535943  | 8.860034393 | 5.013362104 |
| ENSMUSG00000070738 | 186.7672887 | 169.7306075 | 164.5331941 | 219.0844868 | 169.738117  |
| ENSMUSG00000070780 | 6.367066661 | 11.82549314 | 11.29841676 | 4.832746033 | 5.729556691 |
| ENSMUSG00000070796 | 6.367066661 | 6.260555194 | 9.179963621 | 8.054576721 | 5.013362104 |
| ENSMUSG00000070810 | 10.61177777 | 6.956172438 | 6.35535943  | 8.860034393 | 7.161945863 |
| ENSMUSG00000070814 | 24.05336294 | 27.82468975 | 30.36449505 | 72.49119049 | 55.86317773 |
| ENSMUSG00000070844 | 16.97884443 | 9.738641413 | 10.59226572 | 8.054576721 | 10.7429188  |
| ENSMUSG00000070847 | 14.14903703 | 5.56493795  | 14.829172   | 4.832746033 | 7.87814045  |
| ENSMUSG00000070858 | 7.074518513 | 8.347406925 | 6.35535943  | 6.443661377 | 10.02672421 |
| ENSMUSG00000070868 | 10.61177777 | 7.651789682 | 8.473812573 | 4.02728836  | 4.297167518 |
| ENSMUSG00000070871 | 4.952162959 | 15.30357936 | 9.179963621 | 9.665492065 | 12.89150255 |
| ENSMUSG00000070880 | 10.61177777 | 14.60796212 | 14.12302096 | 11.27640741 | 7.87814045  |
| ENSMUSG00000070891 | 9.196874066 | 6.956172438 | 6.35535943  | 9.665492065 | 7.161945863 |
| ENSMUSG00000070933 | 44.56946663 | 10.43425866 | 16.94762515 | 22.55281482 | 10.02672421 |
| ENSMUSG00000070953 | 28.29807405 | 45.21512085 | 43.78136496 | 36.24559524 | 33.66114556 |

|                    |             |             |             |             |             |
|--------------------|-------------|-------------|-------------|-------------|-------------|
| ENSMUSG00000070972 | 9.196874066 | 7.651789682 | 5.649208382 | 6.443661377 | 7.87814045  |
| ENSMUSG00000071014 | 38.20239997 | 60.51870021 | 55.07978173 | 71.68573282 | 63.74131818 |
| ENSMUSG00000071019 | 11.31922962 | 6.260555194 | 6.35535943  | 0.805457672 | 7.87814045  |
| ENSMUSG00000071033 | 9.196874066 | 9.043024169 | 7.767661525 | 3.221830688 | 4.297167518 |
| ENSMUSG00000071036 | 12.73413332 | 17.39043109 | 14.12302096 | 10.47094974 | 13.60769714 |
| ENSMUSG00000071042 | 12.02668147 | 13.91234488 | 13.41686991 | 2.416373016 | 13.60769714 |
| ENSMUSG00000071054 | 148.5648888 | 193.3815938 | 172.3008557 | 443.8071773 | 340.1924285 |
| ENSMUSG00000071064 | 15.56394073 | 13.91234488 | 16.94762515 | 45.10562964 | 46.55264811 |
| ENSMUSG00000071072 | 80.64951104 | 118.2549314 | 96.0365425  | 263.3846588 | 212.7097921 |
| ENSMUSG00000071104 | 9.196874066 | 6.956172438 | 2.824604191 | 4.832746033 | 7.161945863 |
| ENSMUSG00000071112 | 10.61177777 | 8.347406925 | 7.767661525 | 4.832746033 | 5.729556691 |
| ENSMUSG00000071172 | 205.8684887 | 188.5122731 | 166.6516473 | 383.3978519 | 283.6130562 |
| ENSMUSG00000071176 | 7.074518513 | 7.651789682 | 7.061510478 | 7.249119049 | 7.161945863 |
| ENSMUSG00000071178 | 8.489422215 | 6.956172438 | 4.943057334 | 8.860034393 | 9.310529622 |
| ENSMUSG00000071181 | 14.14903703 | 5.56493795  | 9.886114669 | 8.860034393 | 5.729556691 |
| ENSMUSG00000071226 | 50.22908144 | 50.7800588  | 43.78136496 | 37.85651059 | 29.36397804 |
| ENSMUSG00000071235 | 7.781970364 | 6.260555194 | 2.118453143 | 12.08186508 | 10.02672421 |
| ENSMUSG00000071266 | 7.781970364 | 14.60796212 | 11.29841676 | 6.443661377 | 10.7429188  |
| ENSMUSG00000071267 | 69.33028142 | 109.9075245 | 99.56729774 | 70.88027514 | 65.88990194 |
| ENSMUSG00000071281 | 12.73413332 | 33.3896277  | 30.36449505 | 13.69278043 | 16.47247549 |
| ENSMUSG00000071291 | 41.73965922 | 64.69240367 | 51.54902649 | 30.60739154 | 42.97167518 |
| ENSMUSG00000071302 | 39.61730367 | 64.69240367 | 43.07521391 | 47.52200265 | 40.82309142 |
| ENSMUSG00000071322 | 10.61177777 | 6.956172438 | 8.473812573 | 10.47094974 | 9.310529622 |
| ENSMUSG00000071324 | 9.196874066 | 6.260555194 | 8.473812573 | 9.665492065 | 2.148583759 |
| ENSMUSG00000071337 | 67.91537772 | 92.51709342 | 79.08891735 | 167.5351958 | 133.2121931 |
| ENSMUSG00000071350 | 58.0110518  | 82.77845201 | 74.85201106 | 134.5114312 | 112.4425501 |
| ENSMUSG00000071359 | 14.85648888 | 21.56413456 | 10.59226572 | 10.47094974 | 10.7429188  |
| ENSMUSG00000071362 | 9.904325918 | 9.738641413 | 9.886114669 | 8.860034393 | 10.7429188  |
| ENSMUSG00000071369 | 37.49494812 | 54.95376226 | 50.84287544 | 82.96214023 | 65.17370736 |
| ENSMUSG00000071424 | 13.44158517 | 7.651789682 | 7.061510478 | 2.416373016 | 5.013362104 |
| ENSMUSG00000071434 | 8.489422215 | 3.478086219 | 4.236906287 | 5.638203705 | 6.445751277 |
| ENSMUSG00000071451 | 29.71297775 | 59.82308296 | 60.02283906 | 52.35474869 | 53.71459398 |
| ENSMUSG00000071454 | 12.73413332 | 16.69481385 | 22.59683353 | 14.4982381  | 20.05344842 |
| ENSMUSG00000071456 | 73.57499253 | 120.3417832 | 95.33039145 | 219.0844868 | 170.4543116 |
| ENSMUSG00000071477 | 15.56394073 | 25.04222078 | 20.47838039 | 34.6346799  | 32.94495097 |
| ENSMUSG00000071533 | 140.0754665 | 173.2086937 | 151.1163242 | 260.1628281 | 197.6697058 |
| ENSMUSG00000071550 | 8.489422215 | 9.738641413 | 9.886114669 | 7.249119049 | 6.445751277 |
| ENSMUSG00000071551 | 8.489422215 | 10.43425866 | 9.179963621 | 8.054576721 | 8.594335036 |
| ENSMUSG00000071553 | 8.489422215 | 8.347406925 | 7.061510478 | 8.860034393 | 5.729556691 |
| ENSMUSG00000071573 | 12.02668147 | 18.08604834 | 14.829172   | 20.94189947 | 22.20203218 |
| ENSMUSG00000071591 | 12.02668147 | 2.782468975 | 6.35535943  | 4.02728836  | 5.013362104 |
| ENSMUSG00000071613 | 11.31922962 | 9.738641413 | 9.179963621 | 7.249119049 | 5.729556691 |
| ENSMUSG00000071632 | 0           | 0           | 0           | 0           | 0           |

|                    |             |             |             |             |             |
|--------------------|-------------|-------------|-------------|-------------|-------------|
| ENSMUSG00000071633 | 4.952162959 | 4.173703463 | 7.767661525 | 6.443661377 | 5.729556691 |
| ENSMUSG00000071640 | 6.367066661 | 14.60796212 | 7.767661525 | 5.638203705 | 7.87814045  |
| ENSMUSG00000071644 | 47.39927403 | 77.21351406 | 63.5535943  | 282.7156429 | 191.9401491 |
| ENSMUSG00000071655 | 39.61730367 | 61.21431745 | 62.1412922  | 86.98942859 | 76.63282074 |
| ENSMUSG00000071657 | 7.074518513 | 13.91234488 | 17.65377619 | 14.4982381  | 13.60769714 |
| ENSMUSG00000071660 | 39.61730367 | 67.47487265 | 62.1412922  | 219.8899445 | 169.738117  |
| ENSMUSG00000071665 | 3.537259256 | 3.478086219 | 4.236906287 | 1.610915344 | 3.580972932 |
| ENSMUSG00000071669 | 38.90985182 | 65.38802092 | 48.7244223  | 113.5695318 | 86.65954495 |
| ENSMUSG00000071691 | 6.367066661 | 10.43425866 | 7.767661525 | 4.02728836  | 4.297167518 |
| ENSMUSG00000071708 | 24.76081479 | 27.82468975 | 29.65834401 | 63.6311561  | 51.56601022 |
| ENSMUSG00000071711 | 9.196874066 | 22.2597518  | 13.41686991 | 14.4982381  | 14.32389173 |
| ENSMUSG00000071715 | 82.06441475 | 89.73462445 | 93.91808935 | 116.7913625 | 103.848215  |
| ENSMUSG00000071721 | 7.074518513 | 0.695617244 | 4.236906287 | 2.416373016 | 4.297167518 |
| ENSMUSG00000071748 | 3.537259256 | 6.260555194 | 6.35535943  | 4.02728836  | 5.013362104 |
| ENSMUSG00000071757 | 14.14903703 | 22.95536904 | 28.95219296 | 23.35827249 | 24.35061594 |
| ENSMUSG00000071766 | 5.65961481  | 1.391234488 | 5.649208382 | 2.416373016 | 4.297167518 |
| ENSMUSG00000071769 | 0.707451851 | 0.695617244 | 1.412302096 | 2.416373016 | 0           |
| ENSMUSG00000071772 | 7.781970364 | 4.173703463 | 5.649208382 | 4.832746033 | 2.864778345 |
| ENSMUSG00000071847 | 9.196874066 | 1.391234488 | 7.061510478 | 5.638203705 | 2.864778345 |
| ENSMUSG00000071856 | 5.65961481  | 6.260555194 | 9.179963621 | 5.638203705 | 4.297167518 |
| ENSMUSG00000071866 | 79.94205919 | 95.2995624  | 83.32582364 | 249.6918783 | 173.3190899 |
| ENSMUSG00000071952 | 7.781970364 | 9.043024169 | 8.473812573 | 6.443661377 | 8.594335036 |
| ENSMUSG00000071984 | 12.02668147 | 4.173703463 | 4.236906287 | 7.249119049 | 6.445751277 |
| ENSMUSG00000072115 | 0           | 0           | 0           | 0           | 0           |
| ENSMUSG00000072244 | 6.367066661 | 11.82549314 | 5.649208382 | 9.665492065 | 10.02672421 |
| ENSMUSG00000072258 | 45.27691848 | 50.08444155 | 42.36906287 | 103.098582  | 71.61945863 |
| ENSMUSG00000072479 | 3.537259256 | 2.782468975 | 4.943057334 | 1.610915344 | 4.297167518 |
| ENSMUSG00000072487 | 6.367066661 | 2.086851731 | 7.767661525 | 6.443661377 | 7.87814045  |
| ENSMUSG00000072553 | 7.781970364 | 9.043024169 | 7.061510478 | 8.860034393 | 10.02672421 |
| ENSMUSG00000072573 | 6.367066661 | 13.91234488 | 15.53532305 | 12.08186508 | 21.48583759 |
| ENSMUSG00000072584 | 9.904325918 | 6.956172438 | 11.29841676 | 4.832746033 | 2.148583759 |
| ENSMUSG00000072605 | 16.97884443 | 10.43425866 | 13.41686991 | 8.860034393 | 6.445751277 |
| ENSMUSG00000072640 | 10.61177777 | 26.43345526 | 17.65377619 | 17.72006879 | 14.32389173 |
| ENSMUSG00000072663 | 7.074518513 | 8.347406925 | 7.767661525 | 4.832746033 | 4.297167518 |
| ENSMUSG00000072664 | 9.904325918 | 8.347406925 | 7.061510478 | 8.860034393 | 7.87814045  |
| ENSMUSG00000072672 | 14.85648888 | 2.782468975 | 6.35535943  | 3.221830688 | 5.729556691 |
| ENSMUSG00000072673 | 8.489422215 | 16.69481385 | 11.29841676 | 4.832746033 | 7.161945863 |
| ENSMUSG00000072674 | 9.904325918 | 4.869320706 | 10.59226572 | 5.638203705 | 7.87814045  |
| ENSMUSG00000072675 | 10.61177777 | 3.478086219 | 7.061510478 | 4.02728836  | 7.161945863 |
| ENSMUSG00000072676 | 11.31922962 | 7.651789682 | 14.12302096 | 14.4982381  | 12.89150255 |
| ENSMUSG00000072680 | 12.73413332 | 4.869320706 | 11.29841676 | 14.4982381  | 10.7429188  |
| ENSMUSG00000072693 | 9.196874066 | 8.347406925 | 16.2414741  | 13.69278043 | 12.89150255 |
| ENSMUSG00000072720 | 5.65961481  | 6.260555194 | 3.530755239 | 8.054576721 | 9.310529622 |

|                    |             |             |             |             |             |
|--------------------|-------------|-------------|-------------|-------------|-------------|
| ENSMUSG00000072738 | 12.02668147 | 7.651789682 | 4.236906287 | 4.832746033 | 6.445751277 |
| ENSMUSG00000072763 | 23.34591109 | 43.82388636 | 31.77679715 | 24.16373016 | 32.94495097 |
| ENSMUSG00000072769 | 6.367066661 | 8.347406925 | 10.59226572 | 7.249119049 | 7.161945863 |
| ENSMUSG00000072774 | 31.83533331 | 31.99839321 | 19.77222934 | 38.66196826 | 32.94495097 |
| ENSMUSG00000072791 | 9.904325918 | 11.82549314 | 6.35535943  | 8.054576721 | 5.729556691 |
| ENSMUSG00000072812 | 4.244711108 | 4.869320706 | 4.943057334 | 6.443661377 | 7.161945863 |
| ENSMUSG00000072814 | 9.904325918 | 10.43425866 | 4.943057334 | 6.443661377 | 3.580972932 |
| ENSMUSG00000072825 | 9.196874066 | 4.173703463 | 8.473812573 | 7.249119049 | 5.729556691 |
| ENSMUSG00000072849 | 7.781970364 | 7.651789682 | 7.061510478 | 7.249119049 | 5.729556691 |
| ENSMUSG00000072944 | 2.829807405 | 2.086851731 | 7.061510478 | 1.610915344 | 1.432389173 |
| ENSMUSG00000072946 | 30.4204296  | 47.99758982 | 49.43057334 | 39.46742593 | 43.68786977 |
| ENSMUSG00000072955 | 0           | 0           | 0           | 0           | 0           |
| ENSMUSG00000072962 | 6.367066661 | 6.260555194 | 7.767661525 | 6.443661377 | 12.17530797 |
| ENSMUSG00000072963 | 7.074518513 | 4.869320706 | 7.061510478 | 8.054576721 | 6.445751277 |
| ENSMUSG00000072964 | 4.952162959 | 5.56493795  | 9.179963621 | 17.72006879 | 15.04008631 |
| ENSMUSG00000072966 | 4.952162959 | 0.695617244 | 4.943057334 | 2.416373016 | 3.580972932 |
| ENSMUSG00000072999 | 9.904325918 | 7.651789682 | 4.943057334 | 4.832746033 | 3.580972932 |
| ENSMUSG00000073000 | 12.73413332 | 18.08604834 | 7.767661525 | 10.47094974 | 22.20203218 |
| ENSMUSG00000073007 | 2.829807405 | 5.56493795  | 6.35535943  | 6.443661377 | 3.580972932 |
| ENSMUSG00000073008 | 48.81417774 | 71.64857611 | 42.36906287 | 67.65844446 | 64.45751277 |
| ENSMUSG00000073018 | 7.074518513 | 9.043024169 | 8.473812573 | 7.249119049 | 5.729556691 |
| ENSMUSG00000073027 | 4.244711108 | 4.869320706 | 2.118453143 | 0           | 1.432389173 |
| ENSMUSG00000073052 | 7.781970364 | 5.56493795  | 7.767661525 | 6.443661377 | 8.594335036 |
| ENSMUSG00000073072 | 12.02668147 | 8.347406925 | 4.943057334 | 4.832746033 | 10.7429188  |
| ENSMUSG00000073096 | 17.68629628 | 20.86851731 | 25.42143772 | 10.47094974 | 20.05344842 |
| ENSMUSG00000073125 | 0.707451851 | 4.869320706 | 4.236906287 | 4.832746033 | 2.148583759 |
| ENSMUSG00000073131 | 13.44158517 | 25.04222078 | 26.83373982 | 53.16020636 | 30.08017263 |
| ENSMUSG00000073208 | 30.4204296  | 13.91234488 | 13.41686991 | 21.74735715 | 11.45911338 |
| ENSMUSG00000073245 | 4.244711108 | 3.478086219 | 4.943057334 | 0.805457672 | 2.148583759 |
| ENSMUSG00000073255 | 6.367066661 | 2.086851731 | 3.530755239 | 1.610915344 | 2.864778345 |
| ENSMUSG00000073377 | 4.952162959 | 7.651789682 | 4.943057334 | 8.054576721 | 4.297167518 |
| ENSMUSG00000073388 | 68.62282957 | 91.12585893 | 81.20737049 | 97.46037832 | 109.5777717 |
| ENSMUSG00000073400 | 7.781970364 | 6.260555194 | 4.236906287 | 6.443661377 | 7.161945863 |
| ENSMUSG00000073402 | 9.196874066 | 6.956172438 | 10.59226572 | 14.4982381  | 17.90486466 |
| ENSMUSG00000073406 | 12.73413332 | 9.043024169 | 12.71071886 | 14.4982381  | 15.04008631 |
| ENSMUSG00000073409 | 117.4370073 | 158.6007316 | 147.585569  | 354.4013757 | 240.641381  |
| ENSMUSG00000073411 | 191.7194517 | 187.1210386 | 185.7177256 | 292.381135  | 220.5879326 |
| ENSMUSG00000073422 | 6.367066661 | 8.347406925 | 10.59226572 | 33.02376456 | 20.05344842 |
| ENSMUSG00000073433 | 6.367066661 | 4.869320706 | 2.118453143 | 0.805457672 | 3.580972932 |
| ENSMUSG00000073434 | 5.65961481  | 13.21672763 | 8.473812573 | 9.665492065 | 10.02672421 |
| ENSMUSG00000073435 | 10.61177777 | 18.08604834 | 10.59226572 | 12.08186508 | 13.60769714 |
| ENSMUSG00000073436 | 28.29807405 | 42.43265187 | 36.01370344 | 137.7332619 | 111.7263555 |
| ENSMUSG00000073448 | 2.122355554 | 3.478086219 | 0.706151048 | 3.221830688 | 5.013362104 |



|                    |             |             |             |             |             |
|--------------------|-------------|-------------|-------------|-------------|-------------|
| ENSMUSG00000073468 | 159.1766665 | 197.5552972 | 156.7655326 | 177.2006879 | 134.6445822 |
| ENSMUSG00000073486 | 45.98437033 | 67.47487265 | 60.02283906 | 227.9445212 | 180.4810358 |
| ENSMUSG00000073490 | 7.781970364 | 7.651789682 | 12.00456781 | 11.27640741 | 10.02672421 |
| ENSMUSG00000073491 | 28.29807405 | 47.30197258 | 38.13215658 | 55.57657937 | 32.94495097 |
| ENSMUSG00000073492 | 10.61177777 | 7.651789682 | 12.00456781 | 9.665492065 | 10.02672421 |
| ENSMUSG00000073528 | 9.904325918 | 5.56493795  | 8.473812573 | 4.02728836  | 7.87814045  |
| ENSMUSG00000073530 | 8.489422215 | 5.56493795  | 9.179963621 | 6.443661377 | 8.594335036 |
| ENSMUSG00000073557 | 23.34591109 | 43.12826911 | 28.95219296 | 24.96918783 | 32.22875639 |
| ENSMUSG00000073590 | 8.489422215 | 11.1298759  | 3.530755239 | 4.832746033 | 8.594335036 |
| ENSMUSG00000073594 | 12.02668147 | 10.43425866 | 7.767661525 | 5.638203705 | 5.729556691 |
| ENSMUSG00000073602 | 0           | 0           | 0           | 0           | 0.716194586 |
| ENSMUSG00000073616 | 48.81417774 | 68.17048989 | 74.14586002 | 59.60386773 | 63.74131818 |
| ENSMUSG00000073643 | 36.08004441 | 36.86771392 | 36.71985448 | 57.99295239 | 68.0384857  |
| ENSMUSG00000073664 | 22.63845924 | 30.60715873 | 20.47838039 | 16.91461111 | 16.47247549 |
| ENSMUSG00000073684 | 16.27139258 | 26.43345526 | 21.18453143 | 20.1364418  | 11.45911338 |
| ENSMUSG00000073702 | 48.81417774 | 60.51870021 | 55.07978173 | 263.3846588 | 171.1705061 |
| ENSMUSG00000073705 | 19.10119998 | 29.21592424 | 18.35992724 | 46.71654498 | 29.36397804 |
| ENSMUSG00000073724 | 13.44158517 | 6.260555194 | 7.767661525 | 6.443661377 | 6.445751277 |
| ENSMUSG00000073758 | 8.489422215 | 6.260555194 | 9.179963621 | 17.72006879 | 8.594335036 |
| ENSMUSG00000073761 | 12.02668147 | 6.956172438 | 7.767661525 | 5.638203705 | 5.013362104 |
| ENSMUSG00000073771 | 4.952162959 | 9.738641413 | 4.943057334 | 21.74735715 | 15.7562809  |
| ENSMUSG00000073781 | 9.196874066 | 7.651789682 | 11.29841676 | 4.832746033 | 5.013362104 |
| ENSMUSG00000073791 | 14.85648888 | 36.17209668 | 26.83373982 | 27.38556085 | 25.06681052 |
| ENSMUSG00000073792 | 10.61177777 | 12.52111039 | 12.71071886 | 14.4982381  | 22.20203218 |
| ENSMUSG00000073795 | 5.65961481  | 8.347406925 | 4.943057334 | 8.860034393 | 6.445751277 |
| ENSMUSG00000073803 | 9.904325918 | 4.173703463 | 7.061510478 | 4.02728836  | 7.161945863 |
| ENSMUSG00000073830 | 11.31922962 | 6.956172438 | 9.886114669 | 9.665492065 | 7.87814045  |
| ENSMUSG00000073834 | 16.97884443 | 9.738641413 | 6.35535943  | 5.638203705 | 4.297167518 |
| ENSMUSG00000073838 | 20.51610369 | 18.78166558 | 19.77222934 | 115.9859048 | 88.80812871 |
| ENSMUSG00000073842 | 7.781970364 | 7.651789682 | 8.473812573 | 11.27640741 | 7.87814045  |
| ENSMUSG00000073867 | 40.32475552 | 58.43184848 | 59.31668801 | 104.7094974 | 80.92998826 |
| ENSMUSG00000073877 | 4.244711108 | 2.782468975 | 5.649208382 | 1.610915344 | 2.864778345 |
| ENSMUSG00000073888 | 5.65961481  | 3.478086219 | 5.649208382 | 8.054576721 | 3.580972932 |
| ENSMUSG00000073889 | 1.414903703 | 0.695617244 | 7.061510478 | 4.832746033 | 1.432389173 |
| ENSMUSG00000073893 | 11.31922962 | 11.1298759  | 8.473812573 | 3.221830688 | 6.445751277 |
| ENSMUSG00000073910 | 9.196874066 | 12.52111039 | 14.12302096 | 13.69278043 | 10.7429188  |
| ENSMUSG00000073982 | 129.4636888 | 160.6875833 | 118.633376  | 225.5281482 | 157.562809  |
| ENSMUSG00000073988 | 4.952162959 | 4.173703463 | 8.473812573 | 4.832746033 | 10.02672421 |
| ENSMUSG00000073991 | 11.31922962 | 9.043024169 | 8.473812573 | 6.443661377 | 9.310529622 |
| ENSMUSG00000073995 | 10.61177777 | 7.651789682 | 13.41686991 | 4.832746033 | 7.161945863 |
| ENSMUSG00000074029 | 4.952162959 | 5.56493795  | 13.41686991 | 5.638203705 | 8.594335036 |
| ENSMUSG00000074056 | 36.08004441 | 68.17048989 | 55.78593277 | 103.098582  | 78.06520991 |
| ENSMUSG00000074060 | 12.02668147 | 8.347406925 | 9.179963621 | 4.832746033 | 7.161945863 |

|                    |             |             |             |             |             |
|--------------------|-------------|-------------|-------------|-------------|-------------|
| ENSMUSG00000074063 | 7.781970364 | 6.956172438 | 10.59226572 | 5.638203705 | 9.310529622 |
| ENSMUSG00000074075 | 113.8997481 | 161.3832006 | 137.6994543 | 123.2350238 | 111.0101609 |
| ENSMUSG00000074129 | 0           | 4.869320706 | 1.412302096 | 1.610915344 | 1.432389173 |
| ENSMUSG00000074140 | 12.73413332 | 22.2597518  | 21.18453143 | 12.08186508 | 12.89150255 |
| ENSMUSG00000074141 | 11.31922962 | 13.21672763 | 14.829172   | 26.58010318 | 25.78300511 |
| ENSMUSG00000074151 | 12.02668147 | 7.651789682 | 9.886114669 | 6.443661377 | 10.02672421 |
| ENSMUSG00000074165 | 16.97884443 | 26.43345526 | 33.89525029 | 28.9964762  | 22.91822676 |
| ENSMUSG00000074178 | 101.8730666 | 125.2111039 | 108.7472614 | 120.0131931 | 101.6996313 |
| ENSMUSG00000074179 | 8.489422215 | 13.21672763 | 5.649208382 | 5.638203705 | 13.60769714 |
| ENSMUSG00000074196 | 9.196874066 | 9.738641413 | 9.179963621 | 4.832746033 | 7.161945863 |
| ENSMUSG00000074203 | 8.489422215 | 9.043024169 | 5.649208382 | 5.638203705 | 8.594335036 |
| ENSMUSG00000074207 | 11.31922962 | 6.956172438 | 4.236906287 | 4.02728836  | 3.580972932 |
| ENSMUSG00000074210 | 14.14903703 | 19.47728283 | 22.59683353 | 33.82922223 | 45.12025894 |
| ENSMUSG00000074213 | 104.702874  | 134.9497453 | 127.8133396 | 111.9586164 | 93.82149081 |
| ENSMUSG00000074215 | 2.829807405 | 6.260555194 | 7.061510478 | 8.054576721 | 5.729556691 |
| ENSMUSG00000074219 | 19.80865184 | 18.08604834 | 24.00913562 | 50.74383334 | 40.82309142 |
| ENSMUSG00000074220 | 41.73965922 | 36.86771392 | 37.42600553 | 42.68925662 | 32.94495097 |
| ENSMUSG00000074221 | 12.02668147 | 21.56413456 | 17.65377619 | 35.44013757 | 43.68786977 |
| ENSMUSG00000074227 | 17.68629628 | 16.69481385 | 21.18453143 | 10.47094974 | 17.18867007 |
| ENSMUSG00000074228 | 11.31922962 | 15.30357936 | 12.00456781 | 40.2728836  | 37.95831308 |
| ENSMUSG00000074232 | 5.65961481  | 9.738641413 | 5.649208382 | 3.221830688 | 7.161945863 |
| ENSMUSG00000074237 | 9.904325918 | 4.869320706 | 6.35535943  | 10.47094974 | 4.297167518 |
| ENSMUSG00000074247 | 82.7718666  | 111.298759  | 118.633376  | 160.2860767 | 118.1721067 |
| ENSMUSG00000074252 | 5.65961481  | 7.651789682 | 9.179963621 | 7.249119049 | 5.013362104 |
| ENSMUSG00000074259 | 6.367066661 | 6.956172438 | 7.767661525 | 6.443661377 | 2.864778345 |
| ENSMUSG00000074264 | 7.074518513 | 9.738641413 | 14.12302096 | 12.88732275 | 11.45911338 |
| ENSMUSG00000074269 | 9.904325918 | 6.956172438 | 7.767661525 | 7.249119049 | 6.445751277 |
| ENSMUSG00000074272 | 31.12788146 | 31.99839321 | 38.13215658 | 21.74735715 | 30.79636721 |
| ENSMUSG00000074282 | 10.61177777 | 20.86851731 | 16.2414741  | 27.38556085 | 23.63442135 |
| ENSMUSG00000074355 | 7.074518513 | 13.91234488 | 9.886114669 | 8.860034393 | 5.013362104 |
| ENSMUSG00000074357 | 23.34591109 | 36.86771392 | 31.77679715 | 84.57305557 | 76.63282074 |
| ENSMUSG00000074361 | 7.781970364 | 9.043024169 | 7.767661525 | 9.665492065 | 7.87814045  |
| ENSMUSG00000074365 | 7.781970364 | 2.782468975 | 7.061510478 | 10.47094974 | 8.594335036 |
| ENSMUSG00000074369 | 1.414903703 | 0           | 0.706151048 | 0.805457672 | 0.716194586 |
| ENSMUSG00000074377 | 10.61177777 | 3.478086219 | 4.236906287 | 5.638203705 | 4.297167518 |
| ENSMUSG00000074385 | 6.367066661 | 10.43425866 | 2.118453143 | 2.416373016 | 7.161945863 |
| ENSMUSG00000074419 | 7.781970364 | 11.1298759  | 6.35535943  | 5.638203705 | 10.7429188  |
| ENSMUSG00000074435 | 7.781970364 | 6.956172438 | 9.179963621 | 8.860034393 | 2.864778345 |
| ENSMUSG00000074452 | 14.85648888 | 26.43345526 | 36.71985448 | 49.93837567 | 45.83645353 |
| ENSMUSG00000074457 | 6.367066661 | 9.738641413 | 3.530755239 | 6.443661377 | 10.7429188  |
| ENSMUSG00000074461 | 18.39374813 | 20.86851731 | 18.35992724 | 14.4982381  | 17.90486466 |
| ENSMUSG00000074472 | 10.61177777 | 6.956172438 | 7.061510478 | 6.443661377 | 6.445751277 |
| ENSMUSG00000074473 | 11.31922962 | 2.086851731 | 2.824604191 | 5.638203705 | 5.729556691 |

|                    |             |             |             |             |             |
|--------------------|-------------|-------------|-------------|-------------|-------------|
| ENSMUSG00000074479 | 12.02668147 | 12.52111039 | 12.00456781 | 12.88732275 | 12.17530797 |
| ENSMUSG00000074500 | 4.244711108 | 6.956172438 | 6.35535943  | 4.02728836  | 10.7429188  |
| ENSMUSG00000074516 | 12.73413332 | 13.21672763 | 19.06607829 | 11.27640741 | 15.7562809  |
| ENSMUSG00000074519 | 46.69182218 | 70.25734162 | 58.61053696 | 49.132918   | 47.98503729 |
| ENSMUSG00000074521 | 13.44158517 | 24.34660353 | 20.47838039 | 27.38556085 | 22.20203218 |
| ENSMUSG00000074527 | 13.44158517 | 10.43425866 | 10.59226572 | 17.72006879 | 17.90486466 |
| ENSMUSG00000074529 | 12.73413332 | 9.043024169 | 10.59226572 | 12.08186508 | 10.7429188  |
| ENSMUSG00000074570 | 7.781970364 | 5.56493795  | 14.12302096 | 6.443661377 | 10.02672421 |
| ENSMUSG00000074578 | 0           | 0           | 0           | 5.638203705 | 2.148583759 |
| ENSMUSG00000074579 | 9.196874066 | 8.347406925 | 4.236906287 | 10.47094974 | 10.02672421 |
| ENSMUSG00000074580 | 35.37259256 | 73.0398106  | 76.26431316 | 350.3740874 | 275.7349157 |
| ENSMUSG00000074582 | 72.16008883 | 116.1680797 | 100.9795998 | 108.7367857 | 113.8749392 |
| ENSMUSG00000074593 | 7.781970364 | 4.869320706 | 4.236906287 | 8.054576721 | 8.594335036 |
| ENSMUSG00000074603 | 7.781970364 | 7.651789682 | 9.179963621 | 8.860034393 | 12.17530797 |
| ENSMUSG00000074607 | 9.196874066 | 4.869320706 | 4.236906287 | 5.638203705 | 2.864778345 |
| ENSMUSG00000074625 | 6.367066661 | 3.478086219 | 4.943057334 | 7.249119049 | 7.87814045  |
| ENSMUSG00000074627 | 45.98437033 | 63.30116918 | 65.67204744 | 164.3133651 | 135.3607768 |
| ENSMUSG00000074629 | 22.63845924 | 48.69320706 | 39.54445867 | 96.65492065 | 75.20043157 |
| ENSMUSG00000074634 | 16.97884443 | 21.56413456 | 19.77222934 | 15.30369577 | 20.05344842 |
| ENSMUSG00000074643 | 0           | 0           | 0           | 0           | 0           |
| ENSMUSG00000074646 | 7.781970364 | 14.60796212 | 19.06607829 | 20.1364418  | 20.05344842 |
| ENSMUSG00000074650 | 8.489422215 | 4.869320706 | 4.943057334 | 5.638203705 | 5.729556691 |
| ENSMUSG00000074653 | 11.31922962 | 6.956172438 | 7.767661525 | 5.638203705 | 9.310529622 |
| ENSMUSG00000074656 | 89.13893326 | 123.1242521 | 100.2734488 | 284.3265582 | 205.5478463 |
| ENSMUSG00000074661 | 10.61177777 | 6.956172438 | 10.59226572 | 6.443661377 | 9.310529622 |
| ENSMUSG00000074664 | 8.489422215 | 7.651789682 | 7.767661525 | 7.249119049 | 7.161945863 |
| ENSMUSG00000074665 | 6.367066661 | 4.173703463 | 5.649208382 | 5.638203705 | 7.161945863 |
| ENSMUSG00000074673 | 8.489422215 | 11.1298759  | 14.12302096 | 8.860034393 | 10.7429188  |
| ENSMUSG00000074674 | 14.85648888 | 10.43425866 | 7.767661525 | 3.221830688 | 5.729556691 |
| ENSMUSG00000074677 | 11.31922962 | 11.1298759  | 14.12302096 | 4.02728836  | 5.729556691 |
| ENSMUSG00000074698 | 103.9954221 | 132.8628936 | 103.804204  | 211.0299101 | 164.7247549 |
| ENSMUSG00000074736 | 9.904325918 | 6.260555194 | 4.943057334 | 5.638203705 | 5.013362104 |
| ENSMUSG00000074739 | 7.781970364 | 6.956172438 | 4.943057334 | 5.638203705 | 3.580972932 |
| ENSMUSG00000074749 | 10.61177777 | 23.65098629 | 16.94762515 | 13.69278043 | 13.60769714 |
| ENSMUSG00000074764 | 9.904325918 | 7.651789682 | 4.236906287 | 5.638203705 | 2.148583759 |
| ENSMUSG00000074766 | 11.31922962 | 4.173703463 | 6.35535943  | 4.02728836  | 6.445751277 |
| ENSMUSG00000074771 | 12.02668147 | 8.347406925 | 8.473812573 | 5.638203705 | 5.013362104 |
| ENSMUSG00000074793 | 4.244711108 | 4.173703463 | 2.824604191 | 10.47094974 | 10.02672421 |
| ENSMUSG00000074794 | 13.44158517 | 15.30357936 | 16.2414741  | 40.2728836  | 20.769643   |
| ENSMUSG00000074796 | 4.952162959 | 4.173703463 | 10.59226572 | 10.47094974 | 7.161945863 |
| ENSMUSG00000074797 | 55.88869625 | 85.56092098 | 91.09348516 | 138.5387196 | 95.97007457 |
| ENSMUSG00000074802 | 33.25023701 | 31.30277597 | 26.83373982 | 28.9964762  | 30.79636721 |
| ENSMUSG00000074807 | 16.97884443 | 29.21592424 | 26.12758877 | 35.44013757 | 34.37734014 |

|                    |             |             |             |             |             |
|--------------------|-------------|-------------|-------------|-------------|-------------|
| ENSMUSG00000074812 | 11.31922962 | 4.869320706 | 4.236906287 | 5.638203705 | 7.87814045  |
| ENSMUSG00000074818 | 4.952162959 | 11.82549314 | 11.29841676 | 9.665492065 | 12.89150255 |
| ENSMUSG00000074826 | 32.54278516 | 55.6493795  | 57.90438592 | 95.04400531 | 86.65954495 |
| ENSMUSG00000074829 | 46.69182218 | 61.9099347  | 60.02283906 | 37.85651059 | 41.53928601 |
| ENSMUSG00000074832 | 8.489422215 | 4.869320706 | 9.886114669 | 3.221830688 | 2.864778345 |
| ENSMUSG00000074847 | 5.65961481  | 8.347406925 | 8.473812573 | 12.88732275 | 10.7429188  |
| ENSMUSG00000074862 | 4.952162959 | 8.347406925 | 8.473812573 | 8.054576721 | 10.02672421 |
| ENSMUSG00000074873 | 14.14903703 | 11.82549314 | 15.53532305 | 5.638203705 | 12.17530797 |
| ENSMUSG00000074874 | 13.44158517 | 13.91234488 | 8.473812573 | 4.02728836  | 4.297167518 |
| ENSMUSG00000074884 | 36.08004441 | 52.86691053 | 50.84287544 | 128.8732275 | 95.97007457 |
| ENSMUSG00000074886 | 128.7562369 | 121.0374004 | 129.9317928 | 194.115299  | 147.5360848 |
| ENSMUSG00000074895 | 7.781970364 | 5.56493795  | 4.943057334 | 10.47094974 | 9.310529622 |
| ENSMUSG00000074919 | 9.196874066 | 5.56493795  | 7.061510478 | 7.249119049 | 6.445751277 |
| ENSMUSG00000074923 | 6.367066661 | 11.1298759  | 7.061510478 | 6.443661377 | 12.89150255 |
| ENSMUSG00000074968 | 5.65961481  | 6.956172438 | 7.061510478 | 4.02728836  | 4.297167518 |
| ENSMUSG00000074999 | 12.02668147 | 7.651789682 | 10.59226572 | 6.443661377 | 4.297167518 |
| ENSMUSG00000075000 | 114.6071999 | 150.2533247 | 142.6425116 | 131.2896006 | 123.1854689 |
| ENSMUSG00000075010 | 18.39374813 | 31.99839321 | 24.00913562 | 43.49471429 | 35.09353473 |
| ENSMUSG00000075023 | 7.074518513 | 4.869320706 | 4.943057334 | 5.638203705 | 4.297167518 |
| ENSMUSG00000075024 | 12.02668147 | 6.956172438 | 5.649208382 | 7.249119049 | 7.87814045  |
| ENSMUSG00000075028 | 29.0055259  | 46.60635533 | 48.01827125 | 24.96918783 | 35.09353473 |
| ENSMUSG00000075044 | 9.904325918 | 7.651789682 | 5.649208382 | 3.221830688 | 7.87814045  |
| ENSMUSG00000075053 | 10.61177777 | 6.260555194 | 6.35535943  | 4.832746033 | 8.594335036 |
| ENSMUSG00000075064 | 2.829807405 | 4.869320706 | 2.824604191 | 5.638203705 | 5.729556691 |
| ENSMUSG00000075101 | 14.85648888 | 6.956172438 | 7.767661525 | 5.638203705 | 5.013362104 |
| ENSMUSG00000075111 | 17.68629628 | 7.651789682 | 6.35535943  | 2.416373016 | 3.580972932 |
| ENSMUSG00000075180 | 7.074518513 | 6.260555194 | 6.35535943  | 4.02728836  | 5.729556691 |
| ENSMUSG00000075184 | 9.196874066 | 9.738641413 | 9.179963621 | 7.249119049 | 6.445751277 |
| ENSMUSG00000075211 | 10.61177777 | 8.347406925 | 8.473812573 | 3.221830688 | 5.729556691 |
| ENSMUSG00000075225 | 12.73413332 | 8.347406925 | 11.29841676 | 9.665492065 | 12.17530797 |
| ENSMUSG00000075229 | 35.37259256 | 51.47567604 | 55.78593277 | 106.3204127 | 91.67290705 |
| ENSMUSG00000075249 | 9.196874066 | 8.347406925 | 8.473812573 | 3.221830688 | 4.297167518 |
| ENSMUSG00000075254 | 47.39927403 | 66.7792554  | 68.49665163 | 114.3749894 | 94.5376854  |
| ENSMUSG00000075270 | 10.61177777 | 9.043024169 | 7.061510478 | 3.221830688 | 6.445751277 |
| ENSMUSG00000075284 | 5.65961481  | 8.347406925 | 14.12302096 | 4.02728836  | 9.310529622 |
| ENSMUSG00000075297 | 0           | 0           | 0           | 0           | 0           |
| ENSMUSG00000075302 | 6.367066661 | 11.82549314 | 8.473812573 | 4.832746033 | 7.87814045  |
| ENSMUSG00000075316 | 10.61177777 | 6.956172438 | 7.061510478 | 3.221830688 | 4.297167518 |
| ENSMUSG00000075318 | 9.196874066 | 4.869320706 | 4.943057334 | 5.638203705 | 2.864778345 |
| ENSMUSG00000075324 | 8.489422215 | 6.260555194 | 7.061510478 | 3.221830688 | 4.297167518 |
| ENSMUSG00000075327 | 123.804074  | 173.9043109 | 153.2347774 | 235.1936403 | 192.6563437 |
| ENSMUSG00000075330 | 0           | 0           | 0           | 0           | 0           |
| ENSMUSG00000075370 | 19.80865184 | 17.39043109 | 16.2414741  | 9.665492065 | 10.7429188  |

|                    |             |             |             |             |             |
|--------------------|-------------|-------------|-------------|-------------|-------------|
| ENSMUSG00000075376 | 76.40479994 | 106.4294383 | 103.804204  | 132.9005159 | 106.7129934 |
| ENSMUSG00000075395 | 9.904325918 | 5.56493795  | 6.35535943  | 6.443661377 | 12.89150255 |
| ENSMUSG00000075405 | 9.904325918 | 14.60796212 | 14.12302096 | 6.443661377 | 7.87814045  |
| ENSMUSG00000075410 | 9.196874066 | 4.173703463 | 4.943057334 | 7.249119049 | 5.729556691 |
| ENSMUSG00000075415 | 103.2879703 | 124.5154866 | 144.0548137 | 322.9885265 | 244.2223539 |
| ENSMUSG00000075425 | 15.56394073 | 10.43425866 | 6.35535943  | 6.443661377 | 17.18867007 |
| ENSMUSG00000075427 | 9.196874066 | 9.738641413 | 10.59226572 | 4.832746033 | 8.594335036 |
| ENSMUSG00000075465 | 9.904325918 | 14.60796212 | 8.473812573 | 5.638203705 | 9.310529622 |
| ENSMUSG00000075517 | 7.074518513 | 6.260555194 | 7.061510478 | 5.638203705 | 6.445751277 |
| ENSMUSG00000075528 | 5.65961481  | 18.78166558 | 14.829172   | 33.82922223 | 36.5259239  |
| ENSMUSG00000075549 | 12.73413332 | 11.1298759  | 11.29841676 | 6.443661377 | 4.297167518 |
| ENSMUSG00000075569 | 5.65961481  | 11.1298759  | 6.35535943  | 8.860034393 | 10.7429188  |
| ENSMUSG00000075591 | 7.074518513 | 13.21672763 | 9.179963621 | 6.443661377 | 8.594335036 |
| ENSMUSG00000075593 | 4.952162959 | 11.1298759  | 5.649208382 | 9.665492065 | 5.013362104 |
| ENSMUSG00000075602 | 70.03773327 | 90.43024169 | 71.32125582 | 330.2376456 | 187.6429816 |
| ENSMUSG00000075703 | 40.32475552 | 77.21351406 | 61.43514116 | 125.6513968 | 116.7397176 |
| ENSMUSG00000075704 | 20.51610369 | 20.86851731 | 22.59683353 | 42.68925662 | 59.44415067 |
| ENSMUSG00000075705 | 16.97884443 | 27.82468975 | 25.42143772 | 28.9964762  | 25.06681052 |
| ENSMUSG00000075706 | 26.88317035 | 41.04141738 | 39.54445867 | 43.49471429 | 50.84981563 |
| ENSMUSG00000076432 | 70.03773327 | 82.77845201 | 76.97046421 | 166.7297381 | 134.6445822 |
| ENSMUSG00000076437 | 21.22355554 | 36.86771392 | 36.71985448 | 77.32393652 | 64.45751277 |
| ENSMUSG00000076439 | 3.537259256 | 6.956172438 | 7.061510478 | 6.443661377 | 11.45911338 |
| ENSMUSG00000076758 | 8.489422215 | 6.956172438 | 4.236906287 | 4.832746033 | 7.87814045  |
| ENSMUSG00000076770 | 11.31922962 | 4.869320706 | 4.236906287 | 8.054576721 | 7.87814045  |
| ENSMUSG00000076776 | 12.73413332 | 4.173703463 | 7.767661525 | 6.443661377 | 6.445751277 |
| ENSMUSG00000076778 | 7.781970364 | 8.347406925 | 4.943057334 | 1.610915344 | 4.297167518 |
| ENSMUSG00000076826 | 12.02668147 | 9.043024169 | 4.236906287 | 4.832746033 | 7.161945863 |
| ENSMUSG00000076846 | 13.44158517 | 6.260555194 | 10.59226572 | 2.416373016 | 5.013362104 |
| ENSMUSG00000076848 | 12.73413332 | 6.260555194 | 10.59226572 | 5.638203705 | 7.161945863 |
| ENSMUSG00000076855 | 7.781970364 | 5.56493795  | 12.71071886 | 6.443661377 | 3.580972932 |
| ENSMUSG00000076858 | 9.904325918 | 2.782468975 | 7.061510478 | 4.832746033 | 7.87814045  |
| ENSMUSG00000076862 | 13.44158517 | 2.782468975 | 3.530755239 | 7.249119049 | 10.7429188  |
| ENSMUSG00000076863 | 7.074518513 | 6.956172438 | 6.35535943  | 5.638203705 | 6.445751277 |
| ENSMUSG00000076864 | 7.781970364 | 3.478086219 | 7.061510478 | 6.443661377 | 3.580972932 |
| ENSMUSG00000076937 | 183.9374813 | 239.2923319 | 183.5992724 | 277.0774392 | 191.9401491 |
| ENSMUSG00000077450 | 84.1867703  | 118.2549314 | 94.6242404  | 99.87675134 | 82.36237743 |
| ENSMUSG00000078091 | 8.489422215 | 7.651789682 | 6.35535943  | 5.638203705 | 7.161945863 |
| ENSMUSG00000078117 | 9.196874066 | 6.956172438 | 7.061510478 | 7.249119049 | 8.594335036 |
| ENSMUSG00000078134 | 9.904325918 | 15.99919661 | 9.179963621 | 16.10915344 | 20.05344842 |
| ENSMUSG00000078139 | 0           | 0           | 0           | 0           | 0           |
| ENSMUSG00000078154 | 10.61177777 | 11.1298759  | 8.473812573 | 16.10915344 | 17.90486466 |
| ENSMUSG00000078160 | 29.71297775 | 17.39043109 | 14.12302096 | 8.860034393 | 15.7562809  |
| ENSMUSG00000078161 | 7.781970364 | 5.56493795  | 7.767661525 | 7.249119049 | 10.02672421 |

|                    |             |             |             |             |             |
|--------------------|-------------|-------------|-------------|-------------|-------------|
| ENSMUSG00000078184 | 7.074518513 | 4.869320706 | 5.649208382 | 5.638203705 | 5.013362104 |
| ENSMUSG00000078186 | 7.074518513 | 3.478086219 | 7.061510478 | 9.665492065 | 9.310529622 |
| ENSMUSG00000078193 | 13.44158517 | 11.1298759  | 9.886114669 | 15.30369577 | 15.7562809  |
| ENSMUSG00000078240 | 13.44158517 | 9.738641413 | 10.59226572 | 6.443661377 | 9.310529622 |
| ENSMUSG00000078308 | 13.44158517 | 9.043024169 | 12.00456781 | 4.832746033 | 6.445751277 |
| ENSMUSG00000078349 | 19.80865184 | 38.95456565 | 34.60140134 | 37.85651059 | 40.10689684 |
| ENSMUSG00000078350 | 4.952162959 | 6.956172438 | 9.886114669 | 7.249119049 | 5.013362104 |
| ENSMUSG00000078384 | 7.074518513 | 4.869320706 | 3.530755239 | 4.832746033 | 6.445751277 |
| ENSMUSG00000078440 | 9.904325918 | 11.82549314 | 16.2414741  | 11.27640741 | 9.310529622 |
| ENSMUSG00000078444 | 21.22355554 | 31.99839321 | 33.18909925 | 37.05105292 | 27.93158887 |
| ENSMUSG00000078452 | 6.367066661 | 6.260555194 | 5.649208382 | 3.221830688 | 8.594335036 |
| ENSMUSG00000078485 | 1.414903703 | 1.391234488 | 2.118453143 | 2.416373016 | 3.580972932 |
| ENSMUSG00000078495 | 0.707451851 | 2.086851731 | 2.824604191 | 3.221830688 | 2.148583759 |
| ENSMUSG00000078497 | 25.46826665 | 26.43345526 | 34.60140134 | 24.16373016 | 21.48583759 |
| ENSMUSG00000078498 | 33.95768886 | 18.08604834 | 18.35992724 | 17.72006879 | 14.32389173 |
| ENSMUSG00000078500 | 24.05336294 | 15.99919661 | 23.30298458 | 12.08186508 | 12.89150255 |
| ENSMUSG00000078502 | 39.61730367 | 61.21431745 | 45.8998181  | 76.51847885 | 52.99839939 |
| ENSMUSG00000078510 | 8.489422215 | 6.956172438 | 5.649208382 | 7.249119049 | 7.87814045  |
| ENSMUSG00000078517 | 0           | 0           | 0.706151048 | 2.416373016 | 0.716194586 |
| ENSMUSG00000078570 | 65.79302217 | 99.47326586 | 90.38733411 | 253.7191667 | 207.69643   |
| ENSMUSG00000078588 | 3.537259256 | 3.478086219 | 5.649208382 | 2.416373016 | 5.013362104 |
| ENSMUSG00000078598 | 3.537259256 | 6.956172438 | 10.59226572 | 5.638203705 | 2.148583759 |
| ENSMUSG00000078619 | 120.9742666 | 139.1234488 | 122.8702823 | 205.3917064 | 155.4142252 |
| ENSMUSG00000078625 | 9.196874066 | 11.1298759  | 9.179963621 | 7.249119049 | 10.02672421 |
| ENSMUSG00000078626 | 15.56394073 | 9.043024169 | 8.473812573 | 8.054576721 | 7.161945863 |
| ENSMUSG00000078656 | 16.27139258 | 22.2597518  | 31.0706461  | 35.44013757 | 20.769643   |
| ENSMUSG00000078671 | 180.4002221 | 223.9887525 | 191.3669339 | 311.7121191 | 244.2223539 |
| ENSMUSG00000078673 | 17.68629628 | 13.21672763 | 7.767661525 | 6.443661377 | 8.594335036 |
| ENSMUSG00000078681 | 5.65961481  | 9.738641413 | 6.35535943  | 8.860034393 | 5.013362104 |
| ENSMUSG00000078686 | 14.85648888 | 15.30357936 | 16.2414741  | 5.638203705 | 8.594335036 |
| ENSMUSG00000078688 | 7.781970364 | 6.260555194 | 6.35535943  | 6.443661377 | 7.161945863 |
| ENSMUSG00000078706 | 5.65961481  | 4.869320706 | 3.530755239 | 3.221830688 | 2.864778345 |
| ENSMUSG00000078722 | 6.367066661 | 4.869320706 | 4.943057334 | 4.02728836  | 4.297167518 |
| ENSMUSG00000078762 | 0           | 0           | 0           | 0           | 0           |
| ENSMUSG00000078765 | 49.52162959 | 61.9099347  | 54.37363068 | 57.18749472 | 54.43078856 |
| ENSMUSG00000078771 | 0           | 0           | 0           | 0           | 0           |
| ENSMUSG00000078772 | 14.85648888 | 12.52111039 | 9.179963621 | 8.054576721 | 3.580972932 |
| ENSMUSG00000078773 | 30.4204296  | 25.04222078 | 28.95219296 | 50.74383334 | 42.97167518 |
| ENSMUSG00000078812 | 43.86201478 | 43.12826911 | 50.84287544 | 178.8116032 | 144.6713064 |
| ENSMUSG00000078815 | 9.196874066 | 6.956172438 | 7.061510478 | 7.249119049 | 9.310529622 |
| ENSMUSG00000078862 | 26.1757185  | 45.91073809 | 40.95676077 | 50.74383334 | 34.37734014 |
| ENSMUSG00000078865 | 12.02668147 | 5.56493795  | 7.767661525 | 5.638203705 | 7.87814045  |
| ENSMUSG00000078866 | 13.44158517 | 18.78166558 | 21.89068248 | 12.88732275 | 24.35061594 |

|                    |             |             |             |             |             |
|--------------------|-------------|-------------|-------------|-------------|-------------|
| ENSMUSG00000078867 | 12.02668147 | 10.43425866 | 9.179963621 | 12.88732275 | 15.7562809  |
| ENSMUSG00000078870 | 24.76081479 | 31.30277597 | 24.00913562 | 27.38556085 | 27.21539428 |
| ENSMUSG00000078872 | 19.10119998 | 11.82549314 | 17.65377619 | 11.27640741 | 9.310529622 |
| ENSMUSG00000078875 | 13.44158517 | 20.17290007 | 14.12302096 | 24.16373016 | 17.18867007 |
| ENSMUSG00000078877 | 15.56394073 | 21.56413456 | 20.47838039 | 28.9964762  | 25.06681052 |
| ENSMUSG00000078879 | 18.39374813 | 18.08604834 | 17.65377619 | 24.16373016 | 30.08017263 |
| ENSMUSG00000078880 | 21.22355554 | 25.73783802 | 21.18453143 | 24.96918783 | 15.7562809  |
| ENSMUSG00000078881 | 19.10119998 | 17.39043109 | 22.59683353 | 19.33098413 | 25.78300511 |
| ENSMUSG00000078886 | 14.85648888 | 19.47728283 | 16.2414741  | 19.33098413 | 20.769643   |
| ENSMUSG00000078887 | 12.02668147 | 22.95536904 | 26.83373982 | 26.58010318 | 22.91822676 |
| ENSMUSG00000078889 | 12.02668147 | 11.82549314 | 20.47838039 | 18.52552646 | 5.729556691 |
| ENSMUSG00000078896 | 15.56394073 | 20.86851731 | 19.06607829 | 24.96918783 | 21.48583759 |
| ENSMUSG00000078897 | 12.73413332 | 25.73783802 | 24.71528667 | 24.16373016 | 18.62105924 |
| ENSMUSG00000078902 | 7.074518513 | 8.347406925 | 11.29841676 | 5.638203705 | 5.013362104 |
| ENSMUSG00000078903 | 16.97884443 | 29.91154148 | 28.24604191 | 30.60739154 | 27.21539428 |
| ENSMUSG00000078906 | 6.367066661 | 5.56493795  | 10.59226572 | 7.249119049 | 8.594335036 |
| ENSMUSG00000078908 | 38.90985182 | 50.7800588  | 45.8998181  | 73.29664816 | 50.84981563 |
| ENSMUSG00000078919 | 2.122355554 | 4.869320706 | 4.943057334 | 6.443661377 | 8.594335036 |
| ENSMUSG00000078923 | 159.1766665 | 194.077211  | 175.8316109 | 226.3336059 | 190.50776   |
| ENSMUSG00000078932 | 7.074518513 | 10.43425866 | 6.35535943  | 5.638203705 | 7.87814045  |
| ENSMUSG00000078942 | 9.904325918 | 19.47728283 | 14.829172   | 7.249119049 | 13.60769714 |
| ENSMUSG00000078945 | 18.39374813 | 25.73783802 | 10.59226572 | 14.4982381  | 15.04008631 |
| ENSMUSG00000078956 | 5.65961481  | 4.869320706 | 8.473812573 | 4.02728836  | 7.161945863 |
| ENSMUSG00000078960 | 0           | 2.086851731 | 2.118453143 | 0.805457672 | 2.864778345 |
| ENSMUSG00000078972 | 6.367066661 | 8.347406925 | 8.473812573 | 8.860034393 | 10.7429188  |
| ENSMUSG00000078974 | 59.42595551 | 86.95215547 | 88.26888097 | 120.0131931 | 100.2672421 |
| ENSMUSG00000078995 | 0.707451851 | 0           | 0           | 0           | 0.716194586 |
| ENSMUSG00000079001 | 7.074518513 | 7.651789682 | 6.35535943  | 7.249119049 | 7.161945863 |
| ENSMUSG00000079012 | 0           | 0           | 0           | 0           | 0           |
| ENSMUSG00000079018 | 7.781970364 | 13.21672763 | 10.59226572 | 34.6346799  | 30.08017263 |
| ENSMUSG00000079036 | 115.3146518 | 186.4254213 | 140.5240585 | 318.1557805 | 269.2891645 |
| ENSMUSG00000079037 | 0           | 0           | 0           | 0           | 0           |
| ENSMUSG00000079049 | 7.074518513 | 8.347406925 | 7.061510478 | 4.02728836  | 11.45911338 |
| ENSMUSG00000079055 | 8.489422215 | 2.782468975 | 7.767661525 | 3.221830688 | 7.87814045  |
| ENSMUSG00000079056 | 8.489422215 | 3.478086219 | 4.943057334 | 4.02728836  | 5.013362104 |
| ENSMUSG00000079069 | 7.074518513 | 7.651789682 | 5.649208382 | 8.860034393 | 9.310529622 |
| ENSMUSG00000079084 | 27.5906222  | 68.17048989 | 43.78136496 | 58.79841006 | 54.43078856 |
| ENSMUSG00000079109 | 81.3569629  | 119.6461659 | 88.97503202 | 224.7226905 | 174.7514791 |
| ENSMUSG00000079110 | 6.367066661 | 6.956172438 | 9.179963621 | 5.638203705 | 7.87814045  |
| ENSMUSG00000079156 | 0           | 0           | 0           | 0           | 0           |
| ENSMUSG00000079165 | 9.904325918 | 18.08604834 | 9.179963621 | 16.91461111 | 15.04008631 |
| ENSMUSG00000079173 | 9.196874066 | 6.260555194 | 9.886114669 | 6.443661377 | 7.161945863 |
| ENSMUSG00000079183 | 8.489422215 | 11.1298759  | 7.767661525 | 8.054576721 | 9.310529622 |

|                    |             |             |             |             |             |
|--------------------|-------------|-------------|-------------|-------------|-------------|
| ENSMUSG00000079184 | 79.94205919 | 127.9935729 | 107.3349593 | 117.5968201 | 98.83485292 |
| ENSMUSG00000079197 | 32.54278516 | 52.86691053 | 54.37363068 | 203.780791  | 146.8198902 |
| ENSMUSG00000079227 | 9.196874066 | 10.43425866 | 7.061510478 | 12.08186508 | 10.7429188  |
| ENSMUSG00000079235 | 6.367066661 | 6.956172438 | 6.35535943  | 3.221830688 | 5.013362104 |
| ENSMUSG00000079242 | 11.31922962 | 20.86851731 | 21.89068248 | 38.66196826 | 32.22875639 |
| ENSMUSG00000079265 | 11.31922962 | 9.738641413 | 10.59226572 | 8.054576721 | 12.17530797 |
| ENSMUSG00000079267 | 14.14903703 | 5.56493795  | 6.35535943  | 4.02728836  | 10.02672421 |
| ENSMUSG00000079269 | 12.73413332 | 12.52111039 | 19.77222934 | 8.860034393 | 10.7429188  |
| ENSMUSG00000079271 | 8.489422215 | 8.347406925 | 7.767661525 | 4.832746033 | 8.594335036 |
| ENSMUSG00000079293 | 1.414903703 | 0.695617244 | 0           | 1.610915344 | 0           |
| ENSMUSG00000079316 | 37.49494812 | 48.69320706 | 40.25060972 | 55.57657937 | 51.56601022 |
| ENSMUSG00000079317 | 36.78749627 | 56.34499675 | 46.60596915 | 24.16373016 | 42.97167518 |
| ENSMUSG00000079324 | 11.31922962 | 10.43425866 | 9.179963621 | 6.443661377 | 6.445751277 |
| ENSMUSG00000079387 | 7.074518513 | 3.478086219 | 10.59226572 | 2.416373016 | 5.013362104 |
| ENSMUSG00000079389 | 3.537259256 | 6.956172438 | 7.767661525 | 7.249119049 | 6.445751277 |
| ENSMUSG00000079391 | 7.781970364 | 7.651789682 | 7.767661525 | 4.02728836  | 2.864778345 |
| ENSMUSG00000079402 | 9.196874066 | 8.347406925 | 3.530755239 | 5.638203705 | 9.310529622 |
| ENSMUSG00000079426 | 68.62282957 | 118.9505487 | 97.44884459 | 235.1936403 | 173.3190899 |
| ENSMUSG00000079427 | 26.88317035 | 48.69320706 | 56.49208382 | 101.4876667 | 67.32229112 |
| ENSMUSG00000079442 | 44.56946663 | 43.82388636 | 43.07521391 | 209.4189947 | 128.198831  |
| ENSMUSG00000079444 | 0.707451851 | 0.695617244 | 2.824604191 | 0           | 1.432389173 |
| ENSMUSG00000079450 | 8.489422215 | 11.1298759  | 6.35535943  | 4.02728836  | 5.729556691 |
| ENSMUSG00000079460 | 4.952162959 | 3.478086219 | 3.530755239 | 1.610915344 | 4.297167518 |
| ENSMUSG00000079462 | 4.952162959 | 6.956172438 | 9.886114669 | 4.02728836  | 4.297167518 |
| ENSMUSG00000079469 | 36.78749627 | 56.34499675 | 57.19823487 | 69.2693598  | 59.44415067 |
| ENSMUSG00000079481 | 6.367066661 | 2.782468975 | 5.649208382 | 6.443661377 | 3.580972932 |
| ENSMUSG00000079484 | 9.196874066 | 7.651789682 | 14.12302096 | 7.249119049 | 9.310529622 |
| ENSMUSG00000079487 | 16.97884443 | 30.60715873 | 26.83373982 | 20.1364418  | 38.67450766 |
| ENSMUSG00000079507 | 9.196874066 | 6.260555194 | 7.767661525 | 13.69278043 | 6.445751277 |
| ENSMUSG00000079509 | 7.074518513 | 15.99919661 | 17.65377619 | 63.6311561  | 45.12025894 |
| ENSMUSG00000079553 | 43.86201478 | 47.30197258 | 57.19823487 | 110.3477011 | 64.45751277 |
| ENSMUSG00000079557 | 16.27139258 | 34.08524495 | 40.95676077 | 30.60739154 | 30.79636721 |
| ENSMUSG00000079560 | 0           | 0           | 0.706151048 | 0.805457672 | 0           |
| ENSMUSG00000079564 | 7.074518513 | 6.260555194 | 4.943057334 | 6.443661377 | 7.161945863 |
| ENSMUSG00000079608 | 8.489422215 | 11.1298759  | 9.886114669 | 23.35827249 | 29.36397804 |
| ENSMUSG00000079610 | 22.63845924 | 29.21592424 | 34.60140134 | 27.38556085 | 28.64778345 |
| ENSMUSG00000079620 | 8.489422215 | 3.478086219 | 4.943057334 | 10.47094974 | 10.02672421 |
| ENSMUSG00000079626 | 4.952162959 | 2.086851731 | 6.35535943  | 2.416373016 | 4.297167518 |
| ENSMUSG00000079636 | 7.781970364 | 4.173703463 | 3.530755239 | 0.805457672 | 1.432389173 |
| ENSMUSG00000079637 | 1.414903703 | 3.478086219 | 4.236906287 | 4.02728836  | 4.297167518 |
| ENSMUSG00000079642 | 6.367066661 | 2.782468975 | 4.236906287 | 3.221830688 | 2.148583759 |
| ENSMUSG00000079657 | 4.952162959 | 9.043024169 | 16.2414741  | 9.665492065 | 10.02672421 |
| ENSMUSG00000079662 | 7.074518513 | 2.086851731 | 9.886114669 | 11.27640741 | 2.864778345 |



|                    |             |             |             |             |             |
|--------------------|-------------|-------------|-------------|-------------|-------------|
| ENSMUSG00000079685 | 40.32475552 | 42.43265187 | 26.83373982 | 122.4295662 | 87.37573953 |
| ENSMUSG00000079694 | 2.122355554 | 1.391234488 | 2.118453143 | 1.610915344 | 2.864778345 |
| ENSMUSG00000079703 | 3.537259256 | 4.869320706 | 5.649208382 | 3.221830688 | 3.580972932 |
| ENSMUSG00000079716 | 7.074518513 | 4.173703463 | 6.35535943  | 4.02728836  | 10.02672421 |
| ENSMUSG00000079806 | 1.414903703 | 6.956172438 | 2.824604191 | 3.221830688 | 2.148583759 |
| ENSMUSG00000080316 | 2.829807405 | 2.782468975 | 0.706151048 | 0.805457672 | 1.432389173 |
| ENSMUSG00000080717 | 108.2401332 | 148.1664729 | 129.9317928 | 134.5114312 | 108.1453825 |
| ENSMUSG00000080727 | 75.69734809 | 126.6023384 | 101.6857509 | 162.7024498 | 145.387501  |
| ENSMUSG00000081512 | 27.5906222  | 45.91073809 | 39.54445867 | 41.07834128 | 44.40406435 |
| ENSMUSG00000081650 | 22.63845924 | 36.86771392 | 28.24604191 | 36.24559524 | 23.63442135 |
| ENSMUSG00000081724 | 9.196874066 | 8.347406925 | 5.649208382 | 3.221830688 | 7.161945863 |
| ENSMUSG00000082766 | 2.829807405 | 5.56493795  | 4.943057334 | 4.832746033 | 8.594335036 |
| ENSMUSG00000082976 | 8.489422215 | 2.782468975 | 9.179963621 | 7.249119049 | 5.729556691 |
| ENSMUSG00000083361 | 9.196874066 | 6.956172438 | 9.886114669 | 6.443661377 | 10.02672421 |
| ENSMUSG00000083929 | 0           | 0           | 1.412302096 | 0.805457672 | 1.432389173 |
| ENSMUSG00000084128 | 6.367066661 | 7.651789682 | 7.061510478 | 6.443661377 | 7.87814045  |
| ENSMUSG00000084945 | 10.61177777 | 8.347406925 | 9.179963621 | 1.610915344 | 4.297167518 |
| ENSMUSG00000085858 | 11.31922962 | 6.260555194 | 6.35535943  | 7.249119049 | 7.87814045  |
| ENSMUSG00000086112 | 5.65961481  | 5.56493795  | 6.35535943  | 8.054576721 | 6.445751277 |
| ENSMUSG00000086147 | 29.0055259  | 26.43345526 | 21.18453143 | 10.47094974 | 20.769643   |
| ENSMUSG00000086361 | 8.489422215 | 6.260555194 | 9.179963621 | 6.443661377 | 3.580972932 |
| ENSMUSG00000086938 | 26.88317035 | 22.2597518  | 33.89525029 | 27.38556085 | 27.93158887 |
| ENSMUSG00000086965 | 0           | 2.086851731 | 0           | 0.805457672 | 2.864778345 |
| ENSMUSG00000087153 | 89.13893326 | 125.2111039 | 134.8748501 | 114.3749894 | 128.198831  |
| ENSMUSG00000087182 | 4.244711108 | 14.60796212 | 3.530755239 | 4.832746033 | 7.161945863 |
| ENSMUSG00000087230 | 5.65961481  | 6.956172438 | 5.649208382 | 6.443661377 | 8.594335036 |
| ENSMUSG00000087279 | 6.367066661 | 8.347406925 | 9.179963621 | 6.443661377 | 8.594335036 |
| ENSMUSG00000087385 | 33.25023701 | 38.25894841 | 46.60596915 | 73.29664816 | 64.45751277 |
| ENSMUSG00000087408 | 8.489422215 | 6.956172438 | 9.886114669 | 6.443661377 | 7.87814045  |
| ENSMUSG00000087610 | 11.31922962 | 15.99919661 | 21.89068248 | 14.4982381  | 17.18867007 |
| ENSMUSG00000087666 | 6.367066661 | 6.956172438 | 6.35535943  | 7.249119049 | 5.729556691 |
| ENSMUSG00000089675 | 6.367066661 | 3.478086219 | 7.767661525 | 8.054576721 | 5.729556691 |
| ENSMUSG00000089696 | 7.781970364 | 4.173703463 | 7.767661525 | 11.27640741 | 6.445751277 |
| ENSMUSG00000089715 | 1.414903703 | 0.695617244 | 2.118453143 | 3.221830688 | 1.432389173 |
| ENSMUSG00000089783 | 8.489422215 | 5.56493795  | 7.767661525 | 7.249119049 | 6.445751277 |
| ENSMUSG00000089824 | 0           | 0           | 0           | 0           | 0           |
| ENSMUSG00000089840 | 8.489422215 | 4.869320706 | 9.886114669 | 7.249119049 | 10.02672421 |
| ENSMUSG00000089859 | 5.65961481  | 3.478086219 | 9.179963621 | 8.054576721 | 5.013362104 |
| ENSMUSG00000089865 | 0           | 0           | 0           | 0           | 0           |
| ENSMUSG00000089872 | 9.904325918 | 13.21672763 | 8.473812573 | 11.27640741 | 15.7562809  |
| ENSMUSG00000089901 | 9.904325918 | 4.173703463 | 14.12302096 | 8.860034393 | 4.297167518 |
| ENSMUSG00000089922 | 4.244711108 | 2.086851731 | 2.118453143 | 1.610915344 | 3.580972932 |
| ENSMUSG00000089945 | 0           | 0           | 0           | 0           | 0           |

|                    |             |             |             |             |             |
|--------------------|-------------|-------------|-------------|-------------|-------------|
| ENSMUSG00000089951 | 9.904325918 | 15.30357936 | 17.65377619 | 18.52552646 | 13.60769714 |
| ENSMUSG00000090018 | 4.244711108 | 4.173703463 | 3.530755239 | 1.610915344 | 4.297167518 |
| ENSMUSG00000090083 | 0           | 0           | 0           | 0           | 0           |
| ENSMUSG00000090107 | 7.074518513 | 3.478086219 | 2.118453143 | 1.610915344 | 5.013362104 |
| ENSMUSG00000090121 | 7.781970364 | 6.260555194 | 12.71071886 | 7.249119049 | 6.445751277 |
| ENSMUSG00000090137 | 67.20792587 | 111.298759  | 103.098053  | 348.763172  | 239.2089918 |
| ENSMUSG00000090150 | 36.78749627 | 75.82227957 | 58.61053696 | 83.7675979  | 60.16034525 |
| ENSMUSG00000090231 | 14.14903703 | 7.651789682 | 7.061510478 | 2.416373016 | 7.87814045  |
| ENSMUSG00000090254 | 9.904325918 | 4.173703463 | 7.061510478 | 4.832746033 | 10.7429188  |
| ENSMUSG00000090266 | 60.84085921 | 94.60394515 | 74.14586002 | 263.3846588 | 189.0753708 |
| ENSMUSG00000090268 | 8.489422215 | 6.956172438 | 7.767661525 | 1.610915344 | 4.297167518 |
| ENSMUSG00000090286 | 11.31922962 | 5.56493795  | 4.236906287 | 4.02728836  | 7.87814045  |
| ENSMUSG00000090317 | 20.51610369 | 42.43265187 | 41.66291182 | 51.54929101 | 47.2688427  |
| ENSMUSG00000090363 | 10.61177777 | 7.651789682 | 4.943057334 | 4.02728836  | 4.297167518 |
| ENSMUSG00000090404 | 11.31922962 | 8.347406925 | 13.41686991 | 4.832746033 | 7.87814045  |
| ENSMUSG00000090451 | 11.31922962 | 6.956172438 | 12.00456781 | 2.416373016 | 7.161945863 |
| ENSMUSG00000090457 | 4.952162959 | 6.260555194 | 3.530755239 | 9.665492065 | 6.445751277 |
| ENSMUSG00000090472 | 12.02668147 | 9.043024169 | 9.179963621 | 9.665492065 | 9.310529622 |
| ENSMUSG00000090486 | 12.02668147 | 2.782468975 | 9.179963621 | 6.443661377 | 5.729556691 |
| ENSMUSG00000090551 | 44.56946663 | 59.12746572 | 60.02283906 | 111.9586164 | 123.1854689 |
| ENSMUSG00000090625 | 36.08004441 | 57.73623123 | 54.37363068 | 38.66196826 | 35.09353473 |
| ENSMUSG00000090634 | 21.22355554 | 16.69481385 | 25.42143772 | 12.88732275 | 14.32389173 |
| ENSMUSG00000090639 | 0           | 0           | 0           | 0           | 0.716194586 |
| ENSMUSG00000090643 | 9.196874066 | 9.738641413 | 7.767661525 | 4.02728836  | 6.445751277 |
| ENSMUSG00000090665 | 4.952162959 | 8.347406925 | 5.649208382 | 3.221830688 | 3.580972932 |
| ENSMUSG00000090691 | 10.61177777 | 11.1298759  | 7.767661525 | 4.832746033 | 6.445751277 |
| ENSMUSG00000090707 | 12.02668147 | 8.347406925 | 8.473812573 | 5.638203705 | 7.161945863 |
| ENSMUSG00000090713 | 19.80865184 | 15.30357936 | 16.2414741  | 11.27640741 | 9.310529622 |
| ENSMUSG00000090714 | 11.31922962 | 10.43425866 | 9.886114669 | 4.02728836  | 7.161945863 |
| ENSMUSG00000090827 | 8.489422215 | 6.260555194 | 4.236906287 | 5.638203705 | 7.161945863 |
| ENSMUSG00000090843 | 7.781970364 | 6.260555194 | 7.061510478 | 1.610915344 | 2.864778345 |
| ENSMUSG00000090861 | 87.72402956 | 107.8206728 | 93.91808935 | 218.2790291 | 159.7113928 |
| ENSMUSG00000090863 | 7.074518513 | 6.956172438 | 6.35535943  | 7.249119049 | 5.013362104 |
| ENSMUSG00000090864 | 10.61177777 | 11.82549314 | 9.179963621 | 9.665492065 | 10.7429188  |
| ENSMUSG00000090872 | 7.781970364 | 6.260555194 | 11.29841676 | 4.02728836  | 7.161945863 |
| ENSMUSG00000090935 | 0           | 0           | 0           | 0           | 0           |
| ENSMUSG00000090996 | 23.34591109 | 53.56252777 | 32.4829482  | 62.82569842 | 54.43078856 |
| ENSMUSG00000091007 | 4.952162959 | 9.043024169 | 6.35535943  | 8.054576721 | 5.013362104 |
| ENSMUSG00000091089 | 5.65961481  | 6.260555194 | 7.061510478 | 8.054576721 | 7.161945863 |
| ENSMUSG00000091102 | 8.489422215 | 11.1298759  | 10.59226572 | 16.91461111 | 8.594335036 |
| ENSMUSG00000091114 | 11.31922962 | 7.651789682 | 7.061510478 | 3.221830688 | 5.013362104 |
| ENSMUSG00000091191 | 92.67619252 | 152.3401764 | 120.0456781 | 484.8855186 | 305.8150884 |
| ENSMUSG00000091228 | 4.244711108 | 9.738641413 | 9.179963621 | 14.4982381  | 18.62105924 |

|                    |             |             |             |             |             |
|--------------------|-------------|-------------|-------------|-------------|-------------|
| ENSMUSG00000091272 | 4.244711108 | 6.260555194 | 2.824604191 | 58.79841006 | 25.06681052 |
| ENSMUSG00000091275 | 6.367066661 | 5.56493795  | 7.767661525 | 2.416373016 | 3.580972932 |
| ENSMUSG00000091277 | 12.73413332 | 11.82549314 | 9.886114669 | 7.249119049 | 7.87814045  |
| ENSMUSG00000091296 | 7.781970364 | 9.738641413 | 8.473812573 | 4.02728836  | 6.445751277 |
| ENSMUSG00000091393 | 11.31922962 | 6.956172438 | 9.179963621 | 4.832746033 | 11.45911338 |
| ENSMUSG00000091400 | 11.31922962 | 4.869320706 | 2.824604191 | 7.249119049 | 5.729556691 |
| ENSMUSG00000091415 | 23.34591109 | 43.12826911 | 31.77679715 | 41.07834128 | 37.95831308 |
| ENSMUSG00000091418 | 7.074518513 | 4.869320706 | 9.179963621 | 2.416373016 | 4.297167518 |
| ENSMUSG00000091422 | 14.14903703 | 10.43425866 | 4.943057334 | 4.02728836  | 3.580972932 |
| ENSMUSG00000091423 | 7.074518513 | 9.738641413 | 7.767661525 | 15.30369577 | 21.48583759 |
| ENSMUSG00000091472 | 7.781970364 | 4.869320706 | 9.886114669 | 5.638203705 | 5.013362104 |
| ENSMUSG00000091494 | 11.31922962 | 11.82549314 | 7.767661525 | 7.249119049 | 5.729556691 |
| ENSMUSG00000091514 | 9.196874066 | 24.34660353 | 21.89068248 | 52.35474869 | 38.67450766 |
| ENSMUSG00000091558 | 105.4103258 | 137.7322143 | 132.756397  | 82.96214023 | 83.7947666  |
| ENSMUSG00000091563 | 7.074518513 | 5.56493795  | 7.767661525 | 6.443661377 | 4.297167518 |
| ENSMUSG00000091568 | 8.489422215 | 6.956172438 | 7.061510478 | 3.221830688 | 9.310529622 |
| ENSMUSG00000091584 | 7.074518513 | 3.478086219 | 10.59226572 | 4.02728836  | 5.729556691 |
| ENSMUSG00000091617 | 11.31922962 | 12.52111039 | 12.00456781 | 4.832746033 | 8.594335036 |
| ENSMUSG00000091698 | 4.952162959 | 11.1298759  | 10.59226572 | 4.832746033 | 6.445751277 |
| ENSMUSG00000091705 | 9.904325918 | 15.30357936 | 12.71071886 | 17.72006879 | 20.769643   |
| ENSMUSG00000091733 | 14.85648888 | 14.60796212 | 15.53532305 | 8.054576721 | 11.45911338 |
| ENSMUSG00000091744 | 9.904325918 | 9.043024169 | 7.061510478 | 6.443661377 | 8.594335036 |
| ENSMUSG00000091756 | 7.781970364 | 5.56493795  | 10.59226572 | 7.249119049 | 11.45911338 |
| ENSMUSG00000091792 | 21.22355554 | 13.21672763 | 11.29841676 | 7.249119049 | 7.161945863 |
| ENSMUSG00000091831 | 120.2668147 | 173.9043109 | 136.9933033 | 172.3679418 | 149.6846685 |
| ENSMUSG00000091890 | 7.781970364 | 2.086851731 | 5.649208382 | 8.860034393 | 6.445751277 |
| ENSMUSG00000091900 | 12.02668147 | 13.91234488 | 12.00456781 | 8.054576721 | 8.594335036 |
| ENSMUSG00000091908 | 8.489422215 | 13.21672763 | 7.767661525 | 15.30369577 | 7.161945863 |
| ENSMUSG00000091922 | 7.074518513 | 4.869320706 | 8.473812573 | 4.832746033 | 6.445751277 |
| ENSMUSG00000091938 | 5.65961481  | 2.782468975 | 4.236906287 | 4.832746033 | 3.580972932 |
| ENSMUSG00000091955 | 0           | 0           | 0           | 0.805457672 | 0           |
| ENSMUSG00000091964 | 0           | 0           | 0           | 0           | 0           |
| ENSMUSG00000092021 | 4.952162959 | 4.869320706 | 10.59226572 | 6.443661377 | 9.310529622 |
| ENSMUSG00000092071 | 9.196874066 | 6.956172438 | 8.473812573 | 8.054576721 | 4.297167518 |
| ENSMUSG00000092072 | 9.196874066 | 10.43425866 | 8.473812573 | 2.416373016 | 10.7429188  |
| ENSMUSG00000092073 | 15.56394073 | 12.52111039 | 4.236906287 | 8.054576721 | 9.310529622 |
| ENSMUSG00000092124 | 53.05888884 | 63.99678643 | 64.96589639 | 73.29664816 | 69.47087488 |
| ENSMUSG00000092130 | 5.65961481  | 3.478086219 | 6.35535943  | 7.249119049 | 9.310529622 |
| ENSMUSG00000092137 | 0           | 0           | 0.706151048 | 1.610915344 | 0           |
| ENSMUSG00000092232 | 0           | 0           | 0           | 0.805457672 | 0           |
| ENSMUSG00000092251 | 2.829807405 | 6.260555194 | 5.649208382 | 4.832746033 | 6.445751277 |
| ENSMUSG00000092252 | 0           | 0.695617244 | 0           | 0           | 0           |
| ENSMUSG00000092277 | 126.6338814 | 167.6437558 | 153.9409284 | 222.3063175 | 186.926787  |

|                    |             |             |             |             |             |
|--------------------|-------------|-------------|-------------|-------------|-------------|
| ENSMUSG00000092310 | 3.537259256 | 1.391234488 | 0           | 0.805457672 | 2.148583759 |
| ENSMUSG00000092329 | 28.29807405 | 27.82468975 | 30.36449505 | 42.68925662 | 34.37734014 |
| ENSMUSG00000092335 | 10.61177777 | 7.651789682 | 10.59226572 | 8.054576721 | 6.445751277 |
| ENSMUSG00000092345 | 43.15456293 | 71.64857611 | 67.79050059 | 69.2693598  | 70.18706946 |
| ENSMUSG00000092356 | 5.65961481  | 10.43425866 | 5.649208382 | 8.054576721 | 3.580972932 |
| ENSMUSG00000092413 | 2.829807405 | 4.173703463 | 2.824604191 | 2.416373016 | 2.864778345 |
| ENSMUSG00000092443 | 7.781970364 | 10.43425866 | 6.35535943  | 8.860034393 | 7.161945863 |
| ENSMUSG00000092470 | 2.829807405 | 2.086851731 | 2.824604191 | 1.610915344 | 1.432389173 |
| ENSMUSG00000092511 | 1.414903703 | 4.173703463 | 7.061510478 | 8.860034393 | 2.148583759 |
| ENSMUSG00000092544 | 82.7718666  | 133.5585108 | 86.15042783 | 149.0096693 | 119.6044959 |
| ENSMUSG00000092592 | 9.196874066 | 17.39043109 | 14.829172   | 4.832746033 | 11.45911338 |
| ENSMUSG00000092609 | 4.244711108 | 6.260555194 | 9.886114669 | 4.832746033 | 8.594335036 |
| ENSMUSG00000093390 | 108.2401332 | 116.1680797 | 131.3440949 | 139.3441773 | 123.1854689 |
| ENSMUSG00000093485 | 0           | 0           | 0           | 0           | 0           |
| ENSMUSG00000093575 | 148.5648888 | 210.0764076 | 178.6562151 | 133.7059736 | 135.3607768 |
| ENSMUSG00000093639 | 0           | 0           | 0           | 0           | 0           |
| ENSMUSG00000093752 | 8.489422215 | 20.86851731 | 12.00456781 | 24.16373016 | 14.32389173 |
| ENSMUSG00000093812 | 9.196874066 | 2.782468975 | 6.35535943  | 4.832746033 | 5.013362104 |
| ENSMUSG00000093898 | 9.904325918 | 10.43425866 | 10.59226572 | 6.443661377 | 7.161945863 |
| ENSMUSG00000093908 | 5.65961481  | 11.82549314 | 16.94762515 | 10.47094974 | 7.87814045  |
| ENSMUSG00000093945 | 15.56394073 | 9.043024169 | 9.179963621 | 8.054576721 | 7.87814045  |
| ENSMUSG00000093954 | 48.10672589 | 65.38802092 | 72.02740687 | 67.65844446 | 69.47087488 |
| ENSMUSG00000094023 | 9.904325918 | 8.347406925 | 6.35535943  | 6.443661377 | 9.310529622 |
| ENSMUSG00000094025 | 11.31922962 | 6.260555194 | 15.53532305 | 6.443661377 | 7.161945863 |
| ENSMUSG00000094083 | 12.73413332 | 6.956172438 | 6.35535943  | 3.221830688 | 7.161945863 |
| ENSMUSG00000094135 | 3.537259256 | 5.56493795  | 2.824604191 | 2.416373016 | 1.432389173 |
| ENSMUSG00000094176 | 4.244711108 | 6.260555194 | 4.236906287 | 3.221830688 | 4.297167518 |
| ENSMUSG00000094181 | 4.244711108 | 7.651789682 | 3.530755239 | 2.416373016 | 5.013362104 |
| ENSMUSG00000094212 | 8.489422215 | 11.1298759  | 12.71071886 | 5.638203705 | 9.310529622 |
| ENSMUSG00000094220 | 9.196874066 | 6.260555194 | 3.530755239 | 1.610915344 | 5.729556691 |
| ENSMUSG00000094258 | 14.14903703 | 9.738641413 | 9.886114669 | 5.638203705 | 11.45911338 |
| ENSMUSG00000094370 | 5.65961481  | 8.347406925 | 8.473812573 | 2.416373016 | 5.729556691 |
| ENSMUSG00000094410 | 0           | 2.782468975 | 0           | 0.805457672 | 0.716194586 |
| ENSMUSG00000094421 | 37.49494812 | 31.30277597 | 33.89525029 | 22.55281482 | 22.91822676 |
| ENSMUSG00000094429 | 5.65961481  | 6.260555194 | 4.943057334 | 1.610915344 | 6.445751277 |
| ENSMUSG00000094439 | 7.074518513 | 4.173703463 | 7.767661525 | 5.638203705 | 6.445751277 |
| ENSMUSG00000094468 | 5.65961481  | 6.260555194 | 6.35535943  | 4.02728836  | 8.594335036 |
| ENSMUSG00000094487 | 19.10119998 | 29.91154148 | 28.95219296 | 23.35827249 | 26.49919969 |
| ENSMUSG00000094556 | 3.537259256 | 5.56493795  | 4.236906287 | 4.02728836  | 3.580972932 |
| ENSMUSG00000094562 | 12.02668147 | 6.260555194 | 8.473812573 | 5.638203705 | 9.310529622 |
| ENSMUSG00000094628 | 7.781970364 | 7.651789682 | 5.649208382 | 7.249119049 | 5.729556691 |
| ENSMUSG00000094634 | 9.904325918 | 6.956172438 | 5.649208382 | 4.832746033 | 4.297167518 |
| ENSMUSG00000094679 | 4.952162959 | 8.347406925 | 9.179963621 | 3.221830688 | 6.445751277 |

|                    |             |             |             |             |             |
|--------------------|-------------|-------------|-------------|-------------|-------------|
| ENSMUSG00000094685 | 6.367066661 | 6.956172438 | 10.59226572 | 7.249119049 | 7.161945863 |
| ENSMUSG00000094706 | 6.367066661 | 9.738641413 | 7.061510478 | 10.47094974 | 10.02672421 |
| ENSMUSG00000094715 | 13.44158517 | 8.347406925 | 11.29841676 | 7.249119049 | 5.013362104 |
| ENSMUSG00000094763 | 7.074518513 | 18.78166558 | 9.179963621 | 13.69278043 | 10.7429188  |
| ENSMUSG00000094766 | 10.61177777 | 8.347406925 | 5.649208382 | 5.638203705 | 9.310529622 |
| ENSMUSG00000094773 | 6.367066661 | 5.56493795  | 4.943057334 | 1.610915344 | 2.148583759 |
| ENSMUSG00000094782 | 9.904325918 | 4.869320706 | 4.236906287 | 2.416373016 | 2.148583759 |
| ENSMUSG00000094789 | 7.781970364 | 4.869320706 | 4.943057334 | 2.416373016 | 2.148583759 |
| ENSMUSG00000094792 | 9.196874066 | 5.56493795  | 12.00456781 | 4.832746033 | 6.445751277 |
| ENSMUSG00000094828 | 9.196874066 | 5.56493795  | 7.767661525 | 2.416373016 | 6.445751277 |
| ENSMUSG00000094841 | 7.074518513 | 6.260555194 | 10.59226572 | 3.221830688 | 6.445751277 |
| ENSMUSG00000094913 | 6.367066661 | 6.260555194 | 10.59226572 | 4.832746033 | 7.87814045  |
| ENSMUSG00000094929 | 8.489422215 | 6.260555194 | 5.649208382 | 3.221830688 | 5.729556691 |
| ENSMUSG00000094935 | 30.4204296  | 36.17209668 | 34.60140134 | 28.19101852 | 22.20203218 |
| ENSMUSG00000094958 | 9.904325918 | 6.956172438 | 9.179963621 | 9.665492065 | 8.594335036 |
| ENSMUSG00000094992 | 7.074518513 | 2.782468975 | 7.767661525 | 6.443661377 | 8.594335036 |
| ENSMUSG00000095011 | 5.65961481  | 4.173703463 | 7.767661525 | 3.221830688 | 3.580972932 |
| ENSMUSG00000095024 | 11.31922962 | 7.651789682 | 13.41686991 | 7.249119049 | 3.580972932 |
| ENSMUSG00000095088 | 3.537259256 | 4.869320706 | 6.35535943  | 2.416373016 | 2.148583759 |
| ENSMUSG00000095110 | 7.074518513 | 2.086851731 | 4.943057334 | 6.443661377 | 3.580972932 |
| ENSMUSG00000095126 | 5.65961481  | 9.738641413 | 5.649208382 | 2.416373016 | 5.013362104 |
| ENSMUSG00000095135 | 7.074518513 | 4.869320706 | 7.767661525 | 3.221830688 | 0.716194586 |
| ENSMUSG00000095141 | 4.244711108 | 6.260555194 | 2.118453143 | 2.416373016 | 2.148583759 |
| ENSMUSG00000095195 | 9.196874066 | 8.347406925 | 7.061510478 | 4.02728836  | 0           |
| ENSMUSG00000095224 | 9.904325918 | 4.173703463 | 4.943057334 | 4.02728836  | 1.432389173 |
| ENSMUSG00000095263 | 12.73413332 | 4.869320706 | 7.061510478 | 3.221830688 | 4.297167518 |
| ENSMUSG00000095293 | 4.952162959 | 4.869320706 | 6.35535943  | 0.805457672 | 4.297167518 |
| ENSMUSG00000095318 | 9.196874066 | 4.869320706 | 10.59226572 | 10.47094974 | 7.87814045  |
| ENSMUSG00000095332 | 166.251185  | 185.0341868 | 163.120892  | 95.84946298 | 108.1453825 |
| ENSMUSG00000095385 | 9.196874066 | 5.56493795  | 9.179963621 | 6.443661377 | 13.60769714 |
| ENSMUSG00000095387 | 13.44158517 | 6.956172438 | 9.886114669 | 4.832746033 | 5.729556691 |
| ENSMUSG00000095403 | 128.7562369 | 194.7728283 | 179.3623661 | 260.1628281 | 228.466073  |
| ENSMUSG00000095412 | 7.074518513 | 6.260555194 | 6.35535943  | 4.02728836  | 4.297167518 |
| ENSMUSG00000095415 | 8.489422215 | 4.869320706 | 9.886114669 | 6.443661377 | 3.580972932 |
| ENSMUSG00000095426 | 11.31922962 | 4.173703463 | 9.886114669 | 1.610915344 | 4.297167518 |
| ENSMUSG00000095439 | 5.65961481  | 7.651789682 | 6.35535943  | 4.832746033 | 2.148583759 |
| ENSMUSG00000095464 | 0.707451851 | 0.695617244 | 0           | 3.221830688 | 0           |
| ENSMUSG00000095538 | 0           | 0           | 0           | 0           | 0           |
| ENSMUSG00000095578 | 5.65961481  | 3.478086219 | 2.118453143 | 3.221830688 | 5.013362104 |
| ENSMUSG00000095640 | 3.537259256 | 6.956172438 | 2.824604191 | 5.638203705 | 3.580972932 |
| ENSMUSG00000095642 | 7.074518513 | 3.478086219 | 0.706151048 | 4.832746033 | 1.432389173 |
| ENSMUSG00000095673 | 4.952162959 | 5.56493795  | 2.118453143 | 0.805457672 | 4.297167518 |
| ENSMUSG00000095681 | 7.781970364 | 5.56493795  | 7.767661525 | 4.02728836  | 7.161945863 |

|                    |             |             |             |             |             |
|--------------------|-------------|-------------|-------------|-------------|-------------|
| ENSMUSG00000095686 | 16.27139258 | 9.738641413 | 7.061510478 | 4.832746033 | 5.013362104 |
| ENSMUSG00000095689 | 14.85648888 | 4.173703463 | 6.35535943  | 5.638203705 | 5.013362104 |
| ENSMUSG00000095711 | 12.02668147 | 7.651789682 | 6.35535943  | 6.443661377 | 7.87814045  |
| ENSMUSG00000095832 | 2.122355554 | 0.695617244 | 2.118453143 | 0           | 0.716194586 |
| ENSMUSG00000095854 | 10.61177777 | 8.347406925 | 6.35535943  | 9.665492065 | 7.87814045  |
| ENSMUSG00000095936 | 4.244711108 | 5.56493795  | 7.767661525 | 6.443661377 | 2.148583759 |
| ENSMUSG00000095958 | 4.952162959 | 5.56493795  | 2.824604191 | 4.832746033 | 15.7562809  |
| ENSMUSG00000096023 | 10.61177777 | 11.1298759  | 8.473812573 | 7.249119049 | 12.17530797 |
| ENSMUSG00000096024 | 6.367066661 | 6.956172438 | 9.179963621 | 7.249119049 | 8.594335036 |
| ENSMUSG00000096096 | 5.65961481  | 5.56493795  | 6.35535943  | 4.02728836  | 9.310529622 |
| ENSMUSG00000096138 | 7.074518513 | 6.260555194 | 4.943057334 | 5.638203705 | 5.013362104 |
| ENSMUSG00000096149 | 7.074518513 | 5.56493795  | 3.530755239 | 4.832746033 | 2.148583759 |
| ENSMUSG00000096153 | 2.122355554 | 3.478086219 | 2.824604191 | 2.416373016 | 2.864778345 |
| ENSMUSG00000096178 | 5.65961481  | 4.173703463 | 2.824604191 | 0.805457672 | 3.580972932 |
| ENSMUSG00000096218 | 9.904325918 | 9.043024169 | 13.41686991 | 3.221830688 | 2.864778345 |
| ENSMUSG00000096221 | 17.68629628 | 12.52111039 | 16.94762515 | 11.27640741 | 13.60769714 |
| ENSMUSG00000096223 | 4.952162959 | 4.869320706 | 3.530755239 | 4.02728836  | 4.297167518 |
| ENSMUSG00000096294 | 7.074518513 | 6.956172438 | 9.886114669 | 2.416373016 | 3.580972932 |
| ENSMUSG00000096397 | 10.61177777 | 9.043024169 | 6.35535943  | 2.416373016 | 7.161945863 |
| ENSMUSG00000096403 | 12.73413332 | 7.651789682 | 9.179963621 | 12.08186508 | 14.32389173 |
| ENSMUSG00000096417 | 9.196874066 | 3.478086219 | 9.179963621 | 4.832746033 | 7.161945863 |
| ENSMUSG00000096426 | 6.367066661 | 5.56493795  | 3.530755239 | 3.221830688 | 3.580972932 |
| ENSMUSG00000096457 | 3.537259256 | 2.782468975 | 1.412302096 | 0.805457672 | 3.580972932 |
| ENSMUSG00000096470 | 11.31922962 | 5.56493795  | 10.59226572 | 4.02728836  | 10.02672421 |
| ENSMUSG00000096478 | 4.244711108 | 5.56493795  | 7.061510478 | 5.638203705 | 5.013362104 |
| ENSMUSG00000096528 | 9.196874066 | 7.651789682 | 8.473812573 | 7.249119049 | 7.87814045  |
| ENSMUSG00000096553 | 9.196874066 | 9.043024169 | 9.179963621 | 4.02728836  | 5.729556691 |
| ENSMUSG00000096573 | 4.244711108 | 6.260555194 | 9.179963621 | 7.249119049 | 7.161945863 |
| ENSMUSG00000096574 | 4.244711108 | 6.260555194 | 9.886114669 | 8.860034393 | 10.02672421 |
| ENSMUSG00000096600 | 9.196874066 | 10.43425866 | 8.473812573 | 6.443661377 | 6.445751277 |
| ENSMUSG00000096611 | 10.61177777 | 4.869320706 | 4.943057334 | 7.249119049 | 5.729556691 |
| ENSMUSG00000096626 | 7.781970364 | 4.869320706 | 7.767661525 | 3.221830688 | 8.594335036 |
| ENSMUSG00000096653 | 10.61177777 | 7.651789682 | 8.473812573 | 7.249119049 | 7.161945863 |
| ENSMUSG00000096656 | 9.904325918 | 11.1298759  | 9.886114669 | 10.47094974 | 2.864778345 |
| ENSMUSG00000096678 | 17.68629628 | 9.043024169 | 7.767661525 | 1.610915344 | 7.161945863 |
| ENSMUSG00000096687 | 6.367066661 | 4.173703463 | 5.649208382 | 8.860034393 | 7.161945863 |
| ENSMUSG00000096706 | 3.537259256 | 4.173703463 | 1.412302096 | 1.610915344 | 1.432389173 |
| ENSMUSG00000096746 | 12.73413332 | 7.651789682 | 8.473812573 | 5.638203705 | 8.594335036 |
| ENSMUSG00000096793 | 6.367066661 | 5.56493795  | 5.649208382 | 4.832746033 | 2.864778345 |
| ENSMUSG00000096796 | 4.952162959 | 5.56493795  | 7.061510478 | 5.638203705 | 6.445751277 |
| ENSMUSG00000096839 | 9.904325918 | 7.651789682 | 9.886114669 | 6.443661377 | 12.17530797 |
| ENSMUSG00000096846 | 9.196874066 | 8.347406925 | 7.061510478 | 9.665492065 | 7.161945863 |
| ENSMUSG00000096900 | 11.31922962 | 3.478086219 | 4.943057334 | 5.638203705 | 2.148583759 |

|                    |             |             |             |             |             |
|--------------------|-------------|-------------|-------------|-------------|-------------|
| ENSMUSG00000096901 | 10.61177777 | 6.956172438 | 11.29841676 | 9.665492065 | 3.580972932 |
| ENSMUSG00000096908 | 8.489422215 | 10.43425866 | 6.35535943  | 6.443661377 | 3.580972932 |
| ENSMUSG00000096930 | 6.367066661 | 4.869320706 | 4.236906287 | 4.832746033 | 7.161945863 |
| ENSMUSG00000096968 | 40.32475552 | 59.82308296 | 54.37363068 | 125.6513968 | 107.429188  |
| ENSMUSG00000097061 | 36.08004441 | 58.43184848 | 47.3121202  | 168.3406535 | 129.6312201 |
| ENSMUSG00000097078 | 69.33028142 | 101.5601176 | 70.61510478 | 91.01671695 | 81.64618284 |
| ENSMUSG00000097148 | 8.489422215 | 4.173703463 | 4.236906287 | 9.665492065 | 6.445751277 |
| ENSMUSG00000097185 | 77.81970364 | 96.69079689 | 93.91808935 | 114.3749894 | 98.11865833 |
| ENSMUSG00000097187 | 6.367066661 | 3.478086219 | 4.236906287 | 6.443661377 | 4.297167518 |
| ENSMUSG00000097198 | 9.196874066 | 4.173703463 | 9.886114669 | 6.443661377 | 5.013362104 |
| ENSMUSG00000097239 | 1.414903703 | 0           | 0.706151048 | 0           | 0           |
| ENSMUSG00000097293 | 7.074518513 | 7.651789682 | 8.473812573 | 4.02728836  | 5.013362104 |
| ENSMUSG00000097386 | 4.952162959 | 9.043024169 | 5.649208382 | 4.02728836  | 4.297167518 |
| ENSMUSG00000097405 | 10.61177777 | 6.260555194 | 7.767661525 | 8.054576721 | 5.729556691 |
| ENSMUSG00000097407 | 70.74518513 | 116.1680797 | 78.3827663  | 198.1425873 | 172.6028953 |
| ENSMUSG00000097411 | 34.66514071 | 50.08444155 | 50.84287544 | 99.07129367 | 78.06520991 |
| ENSMUSG00000097421 | 7.781970364 | 3.478086219 | 6.35535943  | 8.054576721 | 4.297167518 |
| ENSMUSG00000097481 | 4.244711108 | 8.347406925 | 10.59226572 | 8.860034393 | 4.297167518 |
| ENSMUSG00000097565 | 0           | 0           | 0           | 0           | 0           |
| ENSMUSG00000097581 | 10.61177777 | 9.043024169 | 7.061510478 | 4.832746033 | 10.7429188  |
| ENSMUSG00000097643 | 53.05888884 | 64.69240367 | 71.32125582 | 50.74383334 | 52.2822048  |
| ENSMUSG00000097706 | 39.61730367 | 63.99678643 | 54.37363068 | 53.16020636 | 68.75468029 |
| ENSMUSG00000097821 | 8.489422215 | 4.869320706 | 11.29841676 | 9.665492065 | 8.594335036 |
| ENSMUSG00000097871 | 7.074518513 | 5.56493795  | 11.29841676 | 4.02728836  | 12.17530797 |
| ENSMUSG00000098140 | 2.122355554 | 2.782468975 | 4.943057334 | 4.832746033 | 2.864778345 |
| ENSMUSG00000098164 | 14.85648888 | 29.91154148 | 24.00913562 | 22.55281482 | 30.79636721 |
| ENSMUSG00000098374 | 5.65961481  | 6.260555194 | 2.118453143 | 4.02728836  | 3.580972932 |
| ENSMUSG00000098530 | 1.414903703 | 1.391234488 | 2.118453143 | 2.416373016 | 1.432389173 |
| ENSMUSG00000098692 | 2.122355554 | 2.086851731 | 1.412302096 | 0           | 0           |
| ENSMUSG00000098715 | 0           | 0.695617244 | 0           | 0           | 0           |
| ENSMUSG00000098773 | 9.196874066 | 7.651789682 | 8.473812573 | 11.27640741 | 6.445751277 |
| ENSMUSG00000098781 | 3.537259256 | 3.478086219 | 2.824604191 | 0           | 0           |
| ENSMUSG00000098847 | 0           | 0           | 0           | 0           | 0           |
| ENSMUSG00000098950 | 0.707451851 | 3.478086219 | 1.412302096 | 0.805457672 | 0.716194586 |
| ENSMUSG00000099009 | 0           | 0.695617244 | 0           | 0           | 0           |
| ENSMUSG00000099041 | 52.35143699 | 82.08283477 | 86.85657888 | 39.46742593 | 40.10689684 |
| ENSMUSG00000099216 | 9.196874066 | 9.738641413 | 8.473812573 | 5.638203705 | 9.310529622 |
| ENSMUSG00000099515 | 69.33028142 | 114.7768452 | 93.21193831 | 70.88027514 | 77.34901533 |
| ENSMUSG00000099530 | 0.707451851 | 0.695617244 | 0           | 0           | 0           |
| ENSMUSG00000099550 | 4.952162959 | 5.56493795  | 2.118453143 | 3.221830688 | 4.297167518 |
| ENSMUSG00000099703 | 0           | 0           | 0           | 0           | 0           |
| ENSMUSG00000099740 | 7.074518513 | 4.173703463 | 6.35535943  | 2.416373016 | 2.148583759 |
| ENSMUSG00000099792 | 11.31922962 | 6.956172438 | 0.706151048 | 5.638203705 | 4.297167518 |

|                    |             |             |             |             |             |
|--------------------|-------------|-------------|-------------|-------------|-------------|
| ENSMUSG0000099861  | 4.952162959 | 4.869320706 | 7.061510478 | 4.832746033 | 3.580972932 |
| ENSMUSG0000099908  | 0           | 0           | 0           | 0           | 0           |
| ENSMUSG0000099913  | 0           | 4.173703463 | 0.706151048 | 2.416373016 | 0.716194586 |
| ENSMUSG0000099925  | 5.65961481  | 5.56493795  | 5.649208382 | 4.02728836  | 1.432389173 |
| ENSMUSG00000100010 | 12.73413332 | 5.56493795  | 7.061510478 | 4.02728836  | 7.161945863 |
| ENSMUSG00000100032 | 7.074518513 | 5.56493795  | 5.649208382 | 0.805457672 | 5.013362104 |
| ENSMUSG00000100231 | 3.537259256 | 1.391234488 | 8.473812573 | 3.221830688 | 7.161945863 |
| ENSMUSG00000100235 | 12.02668147 | 29.91154148 | 21.89068248 | 16.10915344 | 21.48583759 |
| ENSMUSG00000100265 | 9.904325918 | 11.82549314 | 9.179963621 | 4.02728836  | 3.580972932 |
| ENSMUSG00000100305 | 9.196874066 | 10.43425866 | 6.35535943  | 5.638203705 | 7.87814045  |
| ENSMUSG00000100327 | 0.707451851 | 0           | 1.412302096 | 0.805457672 | 0           |
| ENSMUSG00000100467 | 8.489422215 | 9.738641413 | 6.35535943  | 7.249119049 | 6.445751277 |
| ENSMUSG00000100608 | 5.65961481  | 5.56493795  | 2.824604191 | 4.02728836  | 2.148583759 |
| ENSMUSG00000100617 | 10.61177777 | 9.043024169 | 4.943057334 | 2.416373016 | 10.02672421 |
| ENSMUSG00000100634 | 4.244711108 | 4.173703463 | 4.943057334 | 0           | 5.013362104 |
| ENSMUSG00000100642 | 3.537259256 | 0.695617244 | 0.706151048 | 0           | 0.716194586 |
| ENSMUSG00000100667 | 5.65961481  | 6.260555194 | 7.061510478 | 2.416373016 | 5.013362104 |
| ENSMUSG00000100679 | 0           | 1.391234488 | 0           | 0           | 0           |
| ENSMUSG00000100704 | 0.707451851 | 0           | 0           | 0           | 0           |
| ENSMUSG00000100708 | 6.367066661 | 8.347406925 | 8.473812573 | 3.221830688 | 3.580972932 |
| ENSMUSG00000100725 | 2.122355554 | 2.086851731 | 4.943057334 | 8.860034393 | 6.445751277 |
| ENSMUSG00000100726 | 6.367066661 | 1.391234488 | 7.061510478 | 3.221830688 | 2.864778345 |
| ENSMUSG00000100963 | 0           | 0           | 0           | 0           | 0           |
| ENSMUSG00000100967 | 24.05336294 | 31.30277597 | 25.42143772 | 44.30017197 | 45.83645353 |
| ENSMUSG00000101243 | 4.244711108 | 3.478086219 | 4.236906287 | 2.416373016 | 5.013362104 |
| ENSMUSG00000101298 | 0           | 0.695617244 | 0.706151048 | 0.805457672 | 0.716194586 |
| ENSMUSG00000101303 | 13.44158517 | 4.869320706 | 3.530755239 | 2.416373016 | 5.013362104 |
| ENSMUSG00000101373 | 12.73413332 | 7.651789682 | 9.886114669 | 5.638203705 | 5.729556691 |
| ENSMUSG00000101384 | 13.44158517 | 6.260555194 | 9.886114669 | 4.02728836  | 11.45911338 |
| ENSMUSG00000101396 | 5.65961481  | 4.173703463 | 4.236906287 | 1.610915344 | 5.013362104 |
| ENSMUSG00000101399 | 6.367066661 | 3.478086219 | 8.473812573 | 2.416373016 | 5.729556691 |
| ENSMUSG00000101415 | 9.196874066 | 11.1298759  | 10.59226572 | 4.832746033 | 10.7429188  |
| ENSMUSG00000101471 | 7.781970364 | 0.695617244 | 7.767661525 | 4.832746033 | 3.580972932 |
| ENSMUSG00000101523 | 0           | 0           | 0           | 0           | 0           |
| ENSMUSG00000101528 | 6.367066661 | 4.869320706 | 5.649208382 | 1.610915344 | 7.87814045  |
| ENSMUSG00000101554 | 11.31922962 | 8.347406925 | 7.061510478 | 8.860034393 | 4.297167518 |
| ENSMUSG00000101638 | 8.489422215 | 9.043024169 | 4.943057334 | 6.443661377 | 8.594335036 |
| ENSMUSG00000101641 | 8.489422215 | 5.56493795  | 7.767661525 | 6.443661377 | 7.87814045  |
| ENSMUSG00000101653 | 7.074518513 | 3.478086219 | 6.35535943  | 4.832746033 | 2.148583759 |
| ENSMUSG00000101667 | 7.781970364 | 4.173703463 | 7.061510478 | 3.221830688 | 5.013362104 |
| ENSMUSG00000101678 | 14.14903703 | 11.82549314 | 11.29841676 | 13.69278043 | 15.7562809  |
| ENSMUSG00000101725 | 0           | 0           | 0           | 0           | 0           |
| ENSMUSG00000101894 | 9.196874066 | 12.52111039 | 9.179963621 | 4.02728836  | 4.297167518 |



|                    |             |             |             |             |             |
|--------------------|-------------|-------------|-------------|-------------|-------------|
| ENSMUSG00000101904 | 19.80865184 | 12.52111039 | 21.89068248 | 24.16373016 | 32.94495097 |
| ENSMUSG00000101915 | 4.952162959 | 4.173703463 | 4.236906287 | 3.221830688 | 2.148583759 |
| ENSMUSG00000102030 | 7.781970364 | 6.260555194 | 4.236906287 | 4.02728836  | 2.864778345 |
| ENSMUSG00000102045 | 3.537259256 | 1.391234488 | 5.649208382 | 0.805457672 | 7.161945863 |
| ENSMUSG00000000031 | 0.707451851 | 0.695617244 | 1.412302096 | 0.805457672 | 2.864778345 |
| ENSMUSG00000000606 | 9.904325918 | 11.82549314 | 9.179963621 | 3.221830688 | 7.161945863 |
| ENSMUSG00000001027 | 8.489422215 | 7.651789682 | 5.649208382 | 5.638203705 | 8.594335036 |
| ENSMUSG00000001819 | 5.65961481  | 4.869320706 | 6.35535943  | 3.221830688 | 9.310529622 |
| ENSMUSG00000002791 | 7.074518513 | 4.869320706 | 12.71071886 | 4.02728836  | 7.87814045  |
| ENSMUSG00000005533 | 4.244711108 | 6.260555194 | 10.59226572 | 5.638203705 | 4.297167518 |
| ENSMUSG00000006462 | 2.829807405 | 5.56493795  | 4.236906287 | 15.30369577 | 10.7429188  |
| ENSMUSG00000006638 | 12.02668147 | 29.91154148 | 21.18453143 | 20.94189947 | 17.18867007 |
| ENSMUSG00000007440 | 4.244711108 | 6.260555194 | 4.236906287 | 8.860034393 | 9.310529622 |
| ENSMUSG00000008874 | 7.781970364 | 6.260555194 | 5.649208382 | 7.249119049 | 9.310529622 |
| ENSMUSG00000009047 | 9.196874066 | 6.260555194 | 7.767661525 | 4.832746033 | 5.013362104 |
| ENSMUSG00000010492 | 133.000948  | 172.5130765 | 148.29172   | 86.18397091 | 97.40246374 |
| ENSMUSG00000011052 | 33.25023701 | 48.69320706 | 50.84287544 | 56.38203705 | 61.59273443 |
| ENSMUSG00000011350 | 4.952162959 | 7.651789682 | 5.649208382 | 6.443661377 | 5.729556691 |
| ENSMUSG00000013083 | 9.196874066 | 6.260555194 | 4.236906287 | 8.860034393 | 8.594335036 |
| ENSMUSG00000013338 | 8.489422215 | 6.956172438 | 6.35535943  | 3.221830688 | 5.729556691 |
| ENSMUSG00000014245 | 60.13340736 | 88.34338996 | 84.03197468 | 172.3679418 | 156.1304198 |
| ENSMUSG00000015451 | 4.952162959 | 8.347406925 | 4.236906287 | 6.443661377 | 9.310529622 |
| ENSMUSG00000016356 | 7.781970364 | 4.869320706 | 4.943057334 | 3.221830688 | 5.013362104 |
| ENSMUSG00000018451 | 9.196874066 | 9.043024169 | 5.649208382 | 7.249119049 | 5.729556691 |
| ENSMUSG00000019836 | 12.02668147 | 7.651789682 | 14.12302096 | 17.72006879 | 14.32389173 |
| ENSMUSG00000019856 | 7.074518513 | 7.651789682 | 6.35535943  | 6.443661377 | 10.02672421 |
| ENSMUSG00000019907 | 104.702874  | 127.9935729 | 132.0502459 | 178.8116032 | 156.1304198 |
| ENSMUSG00000019933 | 8.489422215 | 6.260555194 | 7.061510478 | 6.443661377 | 8.594335036 |
| ENSMUSG00000020033 | 7.781970364 | 8.347406925 | 7.061510478 | 4.832746033 | 9.310529622 |
| ENSMUSG00000020090 | 6.367066661 | 11.1298759  | 8.473812573 | 4.02728836  | 4.297167518 |
| ENSMUSG00000020164 | 12.02668147 | 4.173703463 | 7.061510478 | 6.443661377 | 5.729556691 |
| ENSMUSG00000020168 | 12.02668147 | 6.260555194 | 4.943057334 | 6.443661377 | 6.445751277 |
| ENSMUSG00000020181 | 9.904325918 | 6.260555194 | 8.473812573 | 4.832746033 | 10.7429188  |
| ENSMUSG00000020308 | 25.46826665 | 39.6501829  | 35.30755239 | 33.82922223 | 30.08017263 |
| ENSMUSG00000020327 | 8.489422215 | 11.1298759  | 12.71071886 | 17.72006879 | 8.594335036 |
| ENSMUSG00000020420 | 52.35143699 | 67.47487265 | 54.37363068 | 53.96566403 | 54.43078856 |
| ENSMUSG00000020624 | 13.44158517 | 3.478086219 | 6.35535943  | 5.638203705 | 5.013362104 |
| ENSMUSG00000020992 | 6.367066661 | 13.91234488 | 17.65377619 | 9.665492065 | 8.594335036 |
| ENSMUSG00000021010 | 8.489422215 | 8.347406925 | 4.236906287 | 5.638203705 | 5.013362104 |
| ENSMUSG00000021101 | 9.196874066 | 4.173703463 | 4.943057334 | 8.054576721 | 7.161945863 |
| ENSMUSG00000021268 | 0.707451851 | 1.391234488 | 0           | 0           | 0.716194586 |
| ENSMUSG00000021448 | 10.61177777 | 4.869320706 | 11.29841676 | 7.249119049 | 6.445751277 |
| ENSMUSG00000021466 | 16.97884443 | 20.17290007 | 26.12758877 | 291.5756773 | 214.1421813 |

|                    |             |             |             |             |             |
|--------------------|-------------|-------------|-------------|-------------|-------------|
| ENSMUSG00000021566 | 2.122355554 | 14.60796212 | 8.473812573 | 4.832746033 | 9.310529622 |
| ENSMUSG00000021631 | 11.31922962 | 4.869320706 | 8.473812573 | 8.054576721 | 5.013362104 |
| ENSMUSG00000021679 | 9.196874066 | 4.869320706 | 5.649208382 | 8.054576721 | 8.594335036 |
| ENSMUSG00000021704 | 5.65961481  | 10.43425866 | 14.12302096 | 15.30369577 | 20.769643   |
| ENSMUSG00000021720 | 9.196874066 | 13.21672763 | 7.061510478 | 4.02728836  | 6.445751277 |
| ENSMUSG00000021741 | 4.952162959 | 6.956172438 | 7.061510478 | 6.443661377 | 3.580972932 |
| ENSMUSG00000021874 | 13.44158517 | 7.651789682 | 10.59226572 | 5.638203705 | 7.161945863 |
| ENSMUSG00000021927 | 9.196874066 | 9.043024169 | 13.41686991 | 13.69278043 | 11.45911338 |
| ENSMUSG00000021982 | 43.15456293 | 65.38802092 | 47.3121202  | 41.07834128 | 59.44415067 |
| ENSMUSG00000022116 | 9.904325918 | 9.738641413 | 7.061510478 | 4.02728836  | 5.729556691 |
| ENSMUSG00000022187 | 7.074518513 | 5.56493795  | 7.767661525 | 4.832746033 | 9.310529622 |
| ENSMUSG00000022494 | 9.196874066 | 3.478086219 | 9.179963621 | 4.832746033 | 7.161945863 |
| ENSMUSG00000022639 | 21.93100739 | 40.34580014 | 43.78136496 | 18.52552646 | 20.769643   |
| ENSMUSG00000022672 | 38.20239997 | 58.43184848 | 40.95676077 | 77.32393652 | 83.7947666  |
| ENSMUSG00000022915 | 53.05888884 | 65.38802092 | 67.79050059 | 23.35827249 | 33.66114556 |
| ENSMUSG00000023093 | 7.781970364 | 12.52111039 | 7.767661525 | 4.832746033 | 5.013362104 |
| ENSMUSG00000023387 | 13.44158517 | 6.260555194 | 9.886114669 | 5.638203705 | 5.729556691 |
| ENSMUSG00000023473 | 8.489422215 | 5.56493795  | 6.35535943  | 5.638203705 | 4.297167518 |
| ENSMUSG00000023737 | 14.14903703 | 17.39043109 | 16.2414741  | 53.96566403 | 35.80972932 |
| ENSMUSG00000023795 | 29.71297775 | 28.52030699 | 21.18453143 | 30.60739154 | 30.08017263 |
| ENSMUSG00000024205 | 12.02668147 | 6.260555194 | 11.29841676 | 13.69278043 | 9.310529622 |
| ENSMUSG00000024295 | 5.65961481  | 4.869320706 | 4.236906287 | 7.249119049 | 4.297167518 |
| ENSMUSG00000024437 | 9.196874066 | 9.043024169 | 16.94762515 | 7.249119049 | 12.17530797 |
| ENSMUSG00000024459 | 8.489422215 | 6.260555194 | 6.35535943  | 6.443661377 | 9.310529622 |
| ENSMUSG00000024546 | 10.61177777 | 8.347406925 | 8.473812573 | 4.02728836  | 2.864778345 |
| ENSMUSG00000024658 | 15.56394073 | 18.08604834 | 17.65377619 | 31.41284921 | 28.64778345 |
| ENSMUSG00000024761 | 11.31922962 | 5.56493795  | 8.473812573 | 4.832746033 | 5.013362104 |
| ENSMUSG00000024790 | 14.85648888 | 22.2597518  | 24.71528667 | 61.21478308 | 47.98503729 |
| ENSMUSG00000024845 | 116.7295555 | 141.2103005 | 147.585569  | 151.4260424 | 109.5777717 |
| ENSMUSG00000024889 | 7.781970364 | 9.738641413 | 7.061510478 | 13.69278043 | 10.02672421 |
| ENSMUSG00000025006 | 12.02668147 | 5.56493795  | 9.179963621 | 4.02728836  | 5.729556691 |
| ENSMUSG00000025201 | 14.85648888 | 9.043024169 | 8.473812573 | 11.27640741 | 4.297167518 |
| ENSMUSG00000025370 | 8.489422215 | 7.651789682 | 7.767661525 | 3.221830688 | 3.580972932 |
| ENSMUSG00000025450 | 12.02668147 | 19.47728283 | 24.00913562 | 16.91461111 | 14.32389173 |
| ENSMUSG00000025644 | 6.367066661 | 6.260555194 | 8.473812573 | 4.832746033 | 10.7429188  |
| ENSMUSG00000025839 | 8.489422215 | 10.43425866 | 9.179963621 | 3.221830688 | 10.02672421 |
| ENSMUSG00000025922 | 9.904325918 | 7.651789682 | 7.061510478 | 5.638203705 | 13.60769714 |
| ENSMUSG00000025936 | 7.781970364 | 8.347406925 | 6.35535943  | 5.638203705 | 6.445751277 |
| ENSMUSG00000026162 | 5.65961481  | 9.738641413 | 11.29841676 | 7.249119049 | 5.729556691 |
| ENSMUSG00000026527 | 9.196874066 | 8.347406925 | 1.412302096 | 7.249119049 | 5.013362104 |
| ENSMUSG00000026574 | 8.489422215 | 7.651789682 | 7.061510478 | 4.832746033 | 5.013362104 |
| ENSMUSG00000026575 | 12.02668147 | 20.17290007 | 11.29841676 | 6.443661377 | 6.445751277 |
| ENSMUSG00000026609 | 4.244711108 | 7.651789682 | 6.35535943  | 8.054576721 | 5.729556691 |

|                    |             |             |             |             |             |
|--------------------|-------------|-------------|-------------|-------------|-------------|
| ENSMUSG00000026818 | 7.074518513 | 4.869320706 | 4.943057334 | 4.832746033 | 13.60769714 |
| ENSMUSG00000027196 | 11.31922962 | 6.260555194 | 10.59226572 | 6.443661377 | 4.297167518 |
| ENSMUSG00000027304 | 72.86754068 | 109.2119073 | 74.85201106 | 89.4058016  | 75.91662615 |
| ENSMUSG00000027316 | 7.074518513 | 4.869320706 | 2.824604191 | 4.02728836  | 2.864778345 |
| ENSMUSG00000027345 | 10.61177777 | 8.347406925 | 5.649208382 | 11.27640741 | 7.161945863 |
| ENSMUSG00000027667 | 43.86201478 | 69.56172438 | 65.67204744 | 70.07481747 | 66.60609653 |
| ENSMUSG00000027694 | 12.02668147 | 12.52111039 | 11.29841676 | 7.249119049 | 9.310529622 |
| ENSMUSG00000027806 | 65.08557032 | 93.21271067 | 115.1026208 | 264.1901164 | 236.3442135 |
| ENSMUSG00000027824 | 9.904325918 | 10.43425866 | 6.35535943  | 6.443661377 | 7.161945863 |
| ENSMUSG00000028009 | 9.196874066 | 4.173703463 | 7.061510478 | 4.832746033 | 5.729556691 |
| ENSMUSG00000028174 | 14.14903703 | 7.651789682 | 8.473812573 | 4.832746033 | 8.594335036 |
| ENSMUSG00000028177 | 3.537259256 | 11.1298759  | 8.473812573 | 8.860034393 | 7.87814045  |
| ENSMUSG00000028244 | 7.781970364 | 13.91234488 | 4.943057334 | 6.443661377 | 5.013362104 |
| ENSMUSG00000028407 | 67.91537772 | 93.21271067 | 90.38733411 | 161.0915344 | 142.5227227 |
| ENSMUSG00000028475 | 4.244711108 | 3.478086219 | 2.824604191 | 3.221830688 | 5.729556691 |
| ENSMUSG00000028590 | 5.65961481  | 8.347406925 | 3.530755239 | 6.443661377 | 7.87814045  |
| ENSMUSG00000028612 | 7.074518513 | 4.869320706 | 5.649208382 | 16.91461111 | 12.17530797 |
| ENSMUSG00000028804 | 6.367066661 | 5.56493795  | 7.061510478 | 6.443661377 | 3.580972932 |
| ENSMUSG00000029092 | 9.904325918 | 4.869320706 | 8.473812573 | 7.249119049 | 7.87814045  |
| ENSMUSG00000029112 | 9.196874066 | 5.56493795  | 4.943057334 | 3.221830688 | 4.297167518 |
| ENSMUSG00000029156 | 9.904325918 | 13.91234488 | 12.00456781 | 13.69278043 | 12.89150255 |
| ENSMUSG00000029184 | 7.781970364 | 8.347406925 | 9.886114669 | 2.416373016 | 6.445751277 |
| ENSMUSG00000029331 | 0           | 0.695617244 | 0.706151048 | 0.805457672 | 0.716194586 |
| ENSMUSG00000029386 | 12.02668147 | 4.869320706 | 5.649208382 | 5.638203705 | 7.161945863 |
| ENSMUSG00000029410 | 8.489422215 | 13.91234488 | 6.35535943  | 7.249119049 | 1.432389173 |
| ENSMUSG00000029447 | 7.781970364 | 16.69481385 | 15.53532305 | 26.58010318 | 22.20203218 |
| ENSMUSG00000029633 | 13.44158517 | 4.173703463 | 10.59226572 | 4.832746033 | 6.445751277 |
| ENSMUSG00000029675 | 12.73413332 | 2.086851731 | 6.35535943  | 3.221830688 | 9.310529622 |
| ENSMUSG00000029797 | 9.904325918 | 6.956172438 | 4.236906287 | 6.443661377 | 8.594335036 |
| ENSMUSG00000029837 | 9.196874066 | 7.651789682 | 8.473812573 | 8.860034393 | 2.864778345 |
| ENSMUSG00000029885 | 12.02668147 | 7.651789682 | 12.00456781 | 4.02728836  | 8.594335036 |
| ENSMUSG00000030178 | 7.074518513 | 5.56493795  | 5.649208382 | 4.02728836  | 6.445751277 |
| ENSMUSG00000030194 | 12.73413332 | 13.21672763 | 7.061510478 | 4.02728836  | 2.864778345 |
| ENSMUSG00000030196 | 4.952162959 | 9.043024169 | 9.886114669 | 3.221830688 | 5.729556691 |
| ENSMUSG00000030363 | 10.61177777 | 9.043024169 | 9.886114669 | 12.88732275 | 8.594335036 |
| ENSMUSG00000030397 | 60.84085921 | 84.1696865  | 84.03197468 | 45.10562964 | 52.2822048  |
| ENSMUSG00000030424 | 9.196874066 | 27.12907251 | 24.00913562 | 16.91461111 | 20.769643   |
| ENSMUSG00000030486 | 11.31922962 | 3.478086219 | 12.71071886 | 1.610915344 | 9.310529622 |
| ENSMUSG00000030604 | 23.34591109 | 32.69401046 | 37.42600553 | 17.72006879 | 19.33725383 |
| ENSMUSG00000030623 | 14.85648888 | 3.478086219 | 9.886114669 | 6.443661377 | 7.87814045  |
| ENSMUSG00000030651 | 2.829807405 | 3.478086219 | 10.59226572 | 2.416373016 | 6.445751277 |
| ENSMUSG00000030664 | 9.196874066 | 4.869320706 | 5.649208382 | 6.443661377 | 5.013362104 |
| ENSMUSG00000030804 | 0.707451851 | 0.695617244 | 0           | 0.805457672 | 0           |

|                    |              |             |             |             |             |
|--------------------|--------------|-------------|-------------|-------------|-------------|
| ENSMUSG00000031016 | 22.63845924  | 38.25894841 | 30.36449505 | 201.364418  | 150.4008631 |
| ENSMUSG00000031085 | 6.367066661  | 6.260555194 | 9.179963621 | 4.832746033 | 7.161945863 |
| ENSMUSG00000031138 | 5.65961481   | 6.956172438 | 2.824604191 | 1.610915344 | 4.297167518 |
| ENSMUSG00000031290 | 2.829807405  | 4.173703463 | 4.943057334 | 0           | 2.864778345 |
| ENSMUSG00000031294 | 9.904325918  | 3.478086219 | 7.767661525 | 6.443661377 | 11.45911338 |
| ENSMUSG00000031303 | 3.537259256  | 4.869320706 | 5.649208382 | 2.416373016 | 1.432389173 |
| ENSMUSG00000031325 | 4.952162959  | 4.869320706 | 7.061510478 | 4.832746033 | 7.87814045  |
| ENSMUSG00000031497 | 9.904325918  | 5.56493795  | 7.767661525 | 8.054576721 | 10.7429188  |
| ENSMUSG00000031510 | 8.489422215  | 5.56493795  | 6.35535943  | 3.221830688 | 6.445751277 |
| ENSMUSG00000031736 | 5.65961481   | 6.956172438 | 7.767661525 | 7.249119049 | 2.148583759 |
| ENSMUSG00000031884 | 12.02668147  | 6.956172438 | 4.943057334 | 7.249119049 | 6.445751277 |
| ENSMUSG00000032048 | 10.61177777  | 5.56493795  | 9.886114669 | 10.47094974 | 8.594335036 |
| ENSMUSG00000032087 | 9.196874066  | 4.869320706 | 3.530755239 | 8.860034393 | 6.445751277 |
| ENSMUSG00000032192 | 7.781970364  | 6.260555194 | 8.473812573 | 4.832746033 | 8.594335036 |
| ENSMUSG00000032212 | 42.447111108 | 72.34419335 | 61.43514116 | 99.87675134 | 80.92998826 |
| ENSMUSG00000032338 | 5.65961481   | 4.173703463 | 6.35535943  | 7.249119049 | 3.580972932 |
| ENSMUSG00000032443 | 21.22355554  | 32.69401046 | 30.36449505 | 41.88379895 | 41.53928601 |
| ENSMUSG00000032937 | 13.44158517  | 4.869320706 | 7.061510478 | 4.832746033 | 5.013362104 |
| ENSMUSG00000032987 | 7.781970364  | 9.043024169 | 6.35535943  | 7.249119049 | 3.580972932 |
| ENSMUSG00000033015 | 8.489422215  | 12.52111039 | 4.943057334 | 6.443661377 | 6.445751277 |
| ENSMUSG00000033036 | 11.31922962  | 12.52111039 | 19.06607829 | 13.69278043 | 9.310529622 |
| ENSMUSG00000033327 | 9.904325918  | 8.347406925 | 6.35535943  | 7.249119049 | 10.02672421 |
| ENSMUSG00000033343 | 4.952162959  | 6.260555194 | 2.824604191 | 3.221830688 | 7.161945863 |
| ENSMUSG00000033508 | 9.904325918  | 8.347406925 | 4.943057334 | 8.860034393 | 5.013362104 |
| ENSMUSG00000033618 | 6.367066661  | 7.651789682 | 6.35535943  | 5.638203705 | 6.445751277 |
| ENSMUSG00000033730 | 26.88317035  | 52.86691053 | 45.8998181  | 70.07481747 | 65.88990194 |
| ENSMUSG00000033731 | 84.1867703   | 125.9067211 | 117.2210739 | 74.10210583 | 77.34901533 |
| ENSMUSG00000033850 | 7.781970364  | 6.260555194 | 9.179963621 | 3.221830688 | 2.148583759 |
| ENSMUSG00000033872 | 6.367066661  | 4.869320706 | 8.473812573 | 2.416373016 | 5.013362104 |
| ENSMUSG00000033883 | 9.904325918  | 13.91234488 | 15.53532305 | 20.1364418  | 19.33725383 |
| ENSMUSG00000034063 | 6.367066661  | 7.651789682 | 5.649208382 | 6.443661377 | 8.594335036 |
| ENSMUSG00000034122 | 9.196874066  | 11.1298759  | 12.00456781 | 7.249119049 | 7.87814045  |
| ENSMUSG00000034185 | 10.61177777  | 4.869320706 | 6.35535943  | 12.08186508 | 6.445751277 |
| ENSMUSG00000034339 | 10.61177777  | 5.56493795  | 6.35535943  | 4.02728836  | 7.87814045  |
| ENSMUSG00000034391 | 11.31922962  | 3.478086219 | 7.061510478 | 9.665492065 | 7.87814045  |
| ENSMUSG00000034416 | 7.074518513  | 9.043024169 | 5.649208382 | 6.443661377 | 10.7429188  |
| ENSMUSG00000034437 | 21.93100739  | 13.91234488 | 19.06607829 | 23.35827249 | 17.18867007 |
| ENSMUSG00000034587 | 73.57499253  | 95.2995624  | 84.73812573 | 94.23854763 | 78.7814045  |
| ENSMUSG00000034677 | 4.952162959  | 6.956172438 | 6.35535943  | 7.249119049 | 5.729556691 |
| ENSMUSG00000034731 | 8.489422215  | 9.043024169 | 17.65377619 | 8.860034393 | 8.594335036 |
| ENSMUSG00000034764 | 7.074518513  | 8.347406925 | 3.530755239 | 5.638203705 | 7.87814045  |
| ENSMUSG00000035129 | 8.489422215  | 6.956172438 | 7.061510478 | 4.02728836  | 7.161945863 |
| ENSMUSG00000035164 | 21.22355554  | 32.69401046 | 30.36449505 | 100.682209  | 86.65954495 |

|                    |             |             |             |             |             |
|--------------------|-------------|-------------|-------------|-------------|-------------|
| ENSMUSG00000035226 | 3.537259256 | 9.043024169 | 7.767661525 | 4.832746033 | 8.594335036 |
| ENSMUSG00000035262 | 9.196874066 | 12.52111039 | 22.59683353 | 19.33098413 | 15.7562809  |
| ENSMUSG00000035283 | 7.074518513 | 6.260555194 | 9.886114669 | 5.638203705 | 4.297167518 |
| ENSMUSG00000035364 | 4.952162959 | 17.39043109 | 3.530755239 | 6.443661377 | 10.02672421 |
| ENSMUSG00000035868 | 14.14903703 | 14.60796212 | 26.83373982 | 17.72006879 | 18.62105924 |
| ENSMUSG00000036045 | 9.904325918 | 3.478086219 | 7.061510478 | 3.221830688 | 8.594335036 |
| ENSMUSG00000036123 | 7.781970364 | 5.56493795  | 10.59226572 | 9.665492065 | 7.87814045  |
| ENSMUSG00000036131 | 4.952162959 | 4.173703463 | 2.824604191 | 1.610915344 | 1.432389173 |
| ENSMUSG00000036162 | 9.196874066 | 5.56493795  | 3.530755239 | 3.221830688 | 4.297167518 |
| ENSMUSG00000036305 | 13.44158517 | 10.43425866 | 9.179963621 | 6.443661377 | 12.17530797 |
| ENSMUSG00000036322 | 31.83533331 | 70.25734162 | 49.43057334 | 27.38556085 | 20.769643   |
| ENSMUSG00000036500 | 10.61177777 | 6.260555194 | 5.649208382 | 6.443661377 | 4.297167518 |
| ENSMUSG00000036561 | 14.14903703 | 16.69481385 | 14.12302096 | 8.860034393 | 11.45911338 |
| ENSMUSG00000036647 | 12.73413332 | 6.260555194 | 7.767661525 | 7.249119049 | 4.297167518 |
| ENSMUSG00000036658 | 8.489422215 | 6.956172438 | 9.886114669 | 8.054576721 | 5.729556691 |
| ENSMUSG00000036760 | 6.367066661 | 7.651789682 | 8.473812573 | 5.638203705 | 5.729556691 |
| ENSMUSG00000036816 | 4.952162959 | 5.56493795  | 7.061510478 | 4.832746033 | 6.445751277 |
| ENSMUSG00000036882 | 14.14903703 | 11.1298759  | 19.77222934 | 15.30369577 | 12.17530797 |
| ENSMUSG00000036902 | 9.904325918 | 7.651789682 | 8.473812573 | 8.860034393 | 9.310529622 |
| ENSMUSG00000036983 | 13.44158517 | 11.82549314 | 14.829172   | 18.52552646 | 12.17530797 |
| ENSMUSG00000037028 | 12.73413332 | 4.869320706 | 10.59226572 | 8.054576721 | 7.161945863 |
| ENSMUSG00000037064 | 7.781970364 | 5.56493795  | 9.886114669 | 4.02728836  | 8.594335036 |
| ENSMUSG00000037096 | 15.56394073 | 11.1298759  | 10.59226572 | 19.33098413 | 20.05344842 |
| ENSMUSG00000037140 | 4.244711108 | 2.086851731 | 5.649208382 | 4.02728836  | 2.148583759 |
| ENSMUSG00000037246 | 8.489422215 | 4.173703463 | 7.061510478 | 3.221830688 | 3.580972932 |
| ENSMUSG00000037247 | 3.537259256 | 3.478086219 | 5.649208382 | 4.832746033 | 7.87814045  |
| ENSMUSG00000037253 | 20.51610369 | 44.5195036  | 33.18909925 | 132.9005159 | 87.37573953 |
| ENSMUSG00000037390 | 9.196874066 | 8.347406925 | 10.59226572 | 8.054576721 | 7.87814045  |
| ENSMUSG00000037424 | 9.904325918 | 6.260555194 | 9.886114669 | 4.832746033 | 11.45911338 |
| ENSMUSG00000037432 | 8.489422215 | 6.260555194 | 5.649208382 | 9.665492065 | 8.594335036 |
| ENSMUSG00000037438 | 7.074518513 | 7.651789682 | 7.061510478 | 7.249119049 | 10.7429188  |
| ENSMUSG00000037535 | 5.65961481  | 4.869320706 | 4.943057334 | 11.27640741 | 7.161945863 |
| ENSMUSG00000037537 | 10.61177777 | 5.56493795  | 11.29841676 | 3.221830688 | 8.594335036 |
| ENSMUSG00000037579 | 11.31922962 | 9.043024169 | 9.179963621 | 6.443661377 | 6.445751277 |
| ENSMUSG00000037603 | 9.904325918 | 4.173703463 | 11.29841676 | 10.47094974 | 5.729556691 |
| ENSMUSG00000037735 | 9.196874066 | 8.347406925 | 4.943057334 | 6.443661377 | 7.161945863 |
| ENSMUSG00000037884 | 7.781970364 | 4.869320706 | 5.649208382 | 5.638203705 | 4.297167518 |
| ENSMUSG00000037982 | 162.0064739 | 214.2501111 | 180.7746682 | 405.9506667 | 267.1405807 |
| ENSMUSG00000038010 | 14.85648888 | 15.30357936 | 19.77222934 | 14.4982381  | 20.769643   |
| ENSMUSG00000038048 | 7.074518513 | 6.956172438 | 8.473812573 | 7.249119049 | 8.594335036 |
| ENSMUSG00000038152 | 9.904325918 | 22.95536904 | 19.77222934 | 71.68573282 | 59.44415067 |
| ENSMUSG00000038165 | 7.074518513 | 9.738641413 | 9.179963621 | 6.443661377 | 6.445751277 |
| ENSMUSG00000038194 | 4.952162959 | 4.173703463 | 2.824604191 | 4.832746033 | 4.297167518 |

|                    |              |             |             |             |             |
|--------------------|--------------|-------------|-------------|-------------|-------------|
| ENSMUSG00000038218 | 5.65961481   | 4.173703463 | 6.35535943  | 7.249119049 | 7.161945863 |
| ENSMUSG00000038311 | 7.074518513  | 8.347406925 | 7.767661525 | 16.10915344 | 12.89150255 |
| ENSMUSG00000038408 | 9.904325918  | 6.956172438 | 6.35535943  | 4.832746033 | 3.580972932 |
| ENSMUSG00000038491 | 60.84085921  | 82.77845201 | 69.90895373 | 75.71302118 | 70.90326405 |
| ENSMUSG00000038498 | 7.781970364  | 9.043024169 | 7.061510478 | 8.054576721 | 6.445751277 |
| ENSMUSG00000038725 | 7.074518513  | 8.347406925 | 8.473812573 | 8.054576721 | 5.729556691 |
| ENSMUSG00000038765 | 3.537259256  | 4.869320706 | 5.649208382 | 5.638203705 | 3.580972932 |
| ENSMUSG00000038792 | 8.489422215  | 2.782468975 | 6.35535943  | 9.665492065 | 3.580972932 |
| ENSMUSG00000038917 | 7.781970364  | 8.347406925 | 7.767661525 | 4.832746033 | 7.87814045  |
| ENSMUSG00000039057 | 8.489422215  | 4.869320706 | 6.35535943  | 2.416373016 | 7.161945863 |
| ENSMUSG00000039117 | 42.447111108 | 50.08444155 | 64.25974535 | 70.07481747 | 59.44415067 |
| ENSMUSG00000039138 | 13.44158517  | 7.651789682 | 7.061510478 | 3.221830688 | 4.297167518 |
| ENSMUSG00000039146 | 8.489422215  | 6.260555194 | 4.236906287 | 7.249119049 | 12.17530797 |
| ENSMUSG00000039217 | 9.904325918  | 6.956172438 | 8.473812573 | 4.832746033 | 2.148583759 |
| ENSMUSG00000039264 | 77.11225179  | 97.38641413 | 77.67661525 | 136.1223466 | 136.793166  |
| ENSMUSG00000039330 | 12.73413332  | 9.043024169 | 14.12302096 | 8.860034393 | 7.161945863 |
| ENSMUSG00000039545 | 15.56394073  | 20.86851731 | 19.77222934 | 28.19101852 | 28.64778345 |
| ENSMUSG00000039563 | 79.94205919  | 118.9505487 | 98.15499564 | 147.398754  | 111.7263555 |
| ENSMUSG00000039617 | 12.02668147  | 13.91234488 | 14.829172   | 8.054576721 | 12.17530797 |
| ENSMUSG00000039798 | 11.31922962  | 9.043024169 | 7.767661525 | 12.08186508 | 6.445751277 |
| ENSMUSG00000039962 | 11.31922962  | 8.347406925 | 7.767661525 | 5.638203705 | 4.297167518 |
| ENSMUSG00000040013 | 17.68629628  | 8.347406925 | 7.061510478 | 10.47094974 | 10.02672421 |
| ENSMUSG00000040078 | 8.489422215  | 9.043024169 | 7.061510478 | 9.665492065 | 7.87814045  |
| ENSMUSG00000040217 | 7.074518513  | 8.347406925 | 7.767661525 | 5.638203705 | 6.445751277 |
| ENSMUSG00000040323 | 16.97884443  | 18.08604834 | 24.00913562 | 19.33098413 | 17.90486466 |
| ENSMUSG00000040495 | 9.196874066  | 7.651789682 | 8.473812573 | 5.638203705 | 5.013362104 |
| ENSMUSG00000040540 | 20.51610369  | 13.21672763 | 18.35992724 | 9.665492065 | 11.45911338 |
| ENSMUSG00000040715 | 7.781970364  | 15.99919661 | 21.89068248 | 33.02376456 | 25.06681052 |
| ENSMUSG00000040775 | 8.489422215  | 8.347406925 | 9.179963621 | 4.02728836  | 5.013362104 |
| ENSMUSG00000040840 | 65.08557032  | 84.86530374 | 90.38733411 | 269.0228625 | 196.9535112 |
| ENSMUSG00000041144 | 7.074518513  | 10.43425866 | 8.473812573 | 2.416373016 | 7.161945863 |
| ENSMUSG00000041372 | 10.61177777  | 6.956172438 | 8.473812573 | 1.610915344 | 8.594335036 |
| ENSMUSG00000041449 | 12.02668147  | 9.738641413 | 7.061510478 | 6.443661377 | 8.594335036 |
| ENSMUSG00000041505 | 7.074518513  | 9.043024169 | 7.767661525 | 5.638203705 | 10.02672421 |
| ENSMUSG00000041596 | 6.367066661  | 11.82549314 | 5.649208382 | 4.02728836  | 2.864778345 |
| ENSMUSG00000041674 | 7.781970364  | 4.173703463 | 6.35535943  | 2.416373016 | 7.161945863 |
| ENSMUSG00000041735 | 9.196874066  | 10.43425866 | 9.886114669 | 6.443661377 | 6.445751277 |
| ENSMUSG00000041789 | 7.781970364  | 6.260555194 | 10.59226572 | 4.832746033 | 6.445751277 |
| ENSMUSG00000041878 | 40.32475552  | 56.34499675 | 41.66291182 | 39.46742593 | 38.67450766 |
| ENSMUSG00000041885 | 9.196874066  | 9.738641413 | 6.35535943  | 4.02728836  | 6.445751277 |
| ENSMUSG00000041886 | 11.31922962  | 6.956172438 | 6.35535943  | 4.832746033 | 5.013362104 |
| ENSMUSG00000042087 | 195.9641628  | 206.5983214 | 160.2962878 | 418.0325318 | 330.8818989 |
| ENSMUSG00000042219 | 7.781970364  | 6.260555194 | 6.35535943  | 4.02728836  | 6.445751277 |

|                    |             |             |             |             |             |
|--------------------|-------------|-------------|-------------|-------------|-------------|
| ENSMUSG00000042353 | 7.781970364 | 7.651789682 | 9.886114669 | 8.054576721 | 7.161945863 |
| ENSMUSG00000042360 | 12.02668147 | 5.56493795  | 7.767661525 | 3.221830688 | 7.87814045  |
| ENSMUSG00000042402 | 12.02668147 | 2.782468975 | 4.236906287 | 4.02728836  | 5.013362104 |
| ENSMUSG00000042549 | 41.03220737 | 63.30116918 | 48.7244223  | 65.24207144 | 63.0251236  |
| ENSMUSG00000042796 | 7.074518513 | 7.651789682 | 7.767661525 | 7.249119049 | 2.148583759 |
| ENSMUSG00000042848 | 9.904325918 | 6.260555194 | 7.061510478 | 8.860034393 | 3.580972932 |
| ENSMUSG00000042863 | 12.02668147 | 6.956172438 | 4.943057334 | 3.221830688 | 4.297167518 |
| ENSMUSG00000042869 | 14.85648888 | 9.043024169 | 9.886114669 | 4.02728836  | 10.7429188  |
| ENSMUSG00000042874 | 40.32475552 | 79.99598303 | 63.5535943  | 73.29664816 | 84.51096119 |
| ENSMUSG00000042909 | 6.367066661 | 6.956172438 | 5.649208382 | 3.221830688 | 8.594335036 |
| ENSMUSG00000042938 | 7.781970364 | 9.043024169 | 6.35535943  | 7.249119049 | 15.04008631 |
| ENSMUSG00000042962 | 11.31922962 | 8.347406925 | 9.179963621 | 6.443661377 | 8.594335036 |
| ENSMUSG00000042976 | 9.904325918 | 6.956172438 | 4.236906287 | 6.443661377 | 7.161945863 |
| ENSMUSG00000043024 | 9.904325918 | 14.60796212 | 4.236906287 | 14.4982381  | 8.594335036 |
| ENSMUSG00000043068 | 10.61177777 | 6.260555194 | 9.886114669 | 3.221830688 | 6.445751277 |
| ENSMUSG00000043073 | 7.074518513 | 6.956172438 | 8.473812573 | 8.054576721 | 9.310529622 |
| ENSMUSG00000043099 | 3.537259256 | 11.1298759  | 10.59226572 | 4.02728836  | 10.02672421 |
| ENSMUSG00000043119 | 13.44158517 | 4.869320706 | 6.35535943  | 5.638203705 | 5.729556691 |
| ENSMUSG00000043145 | 5.65961481  | 7.651789682 | 5.649208382 | 7.249119049 | 7.161945863 |
| ENSMUSG00000043168 | 79.94205919 | 84.86530374 | 108.7472614 | 52.35474869 | 67.32229112 |
| ENSMUSG00000043192 | 6.367066661 | 6.956172438 | 8.473812573 | 4.832746033 | 6.445751277 |
| ENSMUSG00000043223 | 6.367066661 | 15.99919661 | 13.41686991 | 8.054576721 | 5.729556691 |
| ENSMUSG00000043226 | 9.196874066 | 8.347406925 | 11.29841676 | 2.416373016 | 6.445751277 |
| ENSMUSG00000043267 | 7.781970364 | 4.869320706 | 9.886114669 | 4.832746033 | 9.310529622 |
| ENSMUSG00000043274 | 12.02668147 | 6.956172438 | 4.236906287 | 6.443661377 | 2.148583759 |
| ENSMUSG00000043295 | 4.244711108 | 4.173703463 | 5.649208382 | 0.805457672 | 3.580972932 |
| ENSMUSG00000043308 | 5.65961481  | 5.56493795  | 7.061510478 | 6.443661377 | 3.580972932 |
| ENSMUSG00000043310 | 10.61177777 | 9.043024169 | 11.29841676 | 3.221830688 | 8.594335036 |
| ENSMUSG00000043314 | 6.367066661 | 4.173703463 | 4.236906287 | 6.443661377 | 6.445751277 |
| ENSMUSG00000043329 | 9.904325918 | 9.043024169 | 5.649208382 | 7.249119049 | 6.445751277 |
| ENSMUSG00000043331 | 13.44158517 | 5.56493795  | 5.649208382 | 5.638203705 | 4.297167518 |
| ENSMUSG00000043354 | 7.074518513 | 9.738641413 | 4.943057334 | 6.443661377 | 5.013362104 |
| ENSMUSG00000043383 | 9.904325918 | 3.478086219 | 8.473812573 | 6.443661377 | 7.87814045  |
| ENSMUSG00000043385 | 8.489422215 | 3.478086219 | 5.649208382 | 8.860034393 | 9.310529622 |
| ENSMUSG00000043398 | 2.829807405 | 7.651789682 | 9.179963621 | 5.638203705 | 5.013362104 |
| ENSMUSG00000043419 | 12.02668147 | 7.651789682 | 9.886114669 | 4.832746033 | 5.013362104 |
| ENSMUSG00000043483 | 10.61177777 | 6.260555194 | 7.061510478 | 6.443661377 | 7.87814045  |
| ENSMUSG00000043484 | 9.196874066 | 6.260555194 | 4.943057334 | 4.832746033 | 4.297167518 |
| ENSMUSG00000043488 | 98.33580733 | 109.9075245 | 99.56729774 | 193.3098413 | 131.0636093 |
| ENSMUSG00000043498 | 6.367066661 | 4.173703463 | 7.767661525 | 1.610915344 | 2.864778345 |
| ENSMUSG00000043522 | 7.781970364 | 5.56493795  | 5.649208382 | 3.221830688 | 10.02672421 |
| ENSMUSG00000043537 | 9.196874066 | 10.43425866 | 7.767661525 | 1.610915344 | 8.594335036 |
| ENSMUSG00000043556 | 3.537259256 | 8.347406925 | 7.767661525 | 4.02728836  | 9.310529622 |

|                    |             |             |             |             |             |
|--------------------|-------------|-------------|-------------|-------------|-------------|
| ENSMUSG00000043618 | 12.02668147 | 11.82549314 | 9.179963621 | 7.249119049 | 7.87814045  |
| ENSMUSG00000043623 | 79.94205919 | 106.4294383 | 86.15042783 | 90.21125927 | 90.95671247 |
| ENSMUSG00000043644 | 53.7663407  | 84.86530374 | 92.50578726 | 239.2209286 | 153.2656415 |
| ENSMUSG00000043661 | 3.537259256 | 4.173703463 | 4.236906287 | 1.610915344 | 5.729556691 |
| ENSMUSG00000043692 | 3.537259256 | 4.869320706 | 5.649208382 | 4.02728836  | 4.297167518 |
| ENSMUSG00000043698 | 17.68629628 | 10.43425866 | 7.767661525 | 2.416373016 | 3.580972932 |
| ENSMUSG00000043715 | 5.65961481  | 7.651789682 | 3.530755239 | 1.610915344 | 3.580972932 |
| ENSMUSG00000043747 | 9.196874066 | 6.956172438 | 9.179963621 | 3.221830688 | 5.729556691 |
| ENSMUSG00000043770 | 12.02668147 | 9.043024169 | 16.94762515 | 15.30369577 | 17.18867007 |
| ENSMUSG00000043794 | 12.02668147 | 24.34660353 | 14.829172   | 12.08186508 | 5.729556691 |
| ENSMUSG00000043800 | 0           | 1.391234488 | 2.824604191 | 0           | 0           |
| ENSMUSG00000043801 | 24.76081479 | 25.73783802 | 28.95219296 | 28.9964762  | 28.64778345 |
| ENSMUSG00000043833 | 10.61177777 | 11.1298759  | 5.649208382 | 4.02728836  | 4.297167518 |
| ENSMUSG00000043859 | 7.781970364 | 6.260555194 | 5.649208382 | 4.832746033 | 8.594335036 |
| ENSMUSG00000043865 | 9.904325918 | 8.347406925 | 11.29841676 | 1.610915344 | 4.297167518 |
| ENSMUSG00000043870 | 11.31922962 | 9.043024169 | 9.886114669 | 12.08186508 | 9.310529622 |
| ENSMUSG00000043880 | 5.65961481  | 5.56493795  | 5.649208382 | 6.443661377 | 5.729556691 |
| ENSMUSG00000043889 | 2.122355554 | 1.391234488 | 2.118453143 | 0.805457672 | 2.148583759 |
| ENSMUSG00000043892 | 9.904325918 | 4.173703463 | 8.473812573 | 6.443661377 | 2.148583759 |
| ENSMUSG00000043903 | 3.537259256 | 5.56493795  | 4.943057334 | 5.638203705 | 7.87814045  |
| ENSMUSG00000043948 | 8.489422215 | 4.173703463 | 2.824604191 | 7.249119049 | 6.445751277 |
| ENSMUSG00000043993 | 2.122355554 | 8.347406925 | 12.00456781 | 5.638203705 | 4.297167518 |
| ENSMUSG00000044029 | 12.02668147 | 9.043024169 | 3.530755239 | 2.416373016 | 7.161945863 |
| ENSMUSG00000044039 | 6.367066661 | 3.478086219 | 4.236906287 | 4.02728836  | 2.148583759 |
| ENSMUSG00000044040 | 5.65961481  | 4.173703463 | 5.649208382 | 2.416373016 | 5.013362104 |
| ENSMUSG00000044058 | 5.65961481  | 6.956172438 | 9.886114669 | 4.02728836  | 5.013362104 |
| ENSMUSG00000044061 | 7.781970364 | 9.043024169 | 8.473812573 | 5.638203705 | 7.87814045  |
| ENSMUSG00000044062 | 8.489422215 | 4.869320706 | 6.35535943  | 4.832746033 | 7.161945863 |
| ENSMUSG00000044065 | 13.44158517 | 6.956172438 | 10.59226572 | 9.665492065 | 5.729556691 |
| ENSMUSG00000044081 | 16.27139258 | 21.56413456 | 32.4829482  | 17.72006879 | 15.04008631 |
| ENSMUSG00000044107 | 7.781970364 | 6.956172438 | 8.473812573 | 2.416373016 | 6.445751277 |
| ENSMUSG00000044120 | 11.31922962 | 4.869320706 | 10.59226572 | 8.054576721 | 7.161945863 |
| ENSMUSG00000044125 | 14.85648888 | 30.60715873 | 16.2414741  | 25.77464551 | 17.18867007 |
| ENSMUSG00000044141 | 9.196874066 | 10.43425866 | 7.767661525 | 5.638203705 | 4.297167518 |
| ENSMUSG00000044170 | 7.074518513 | 6.956172438 | 4.943057334 | 8.054576721 | 7.87814045  |
| ENSMUSG00000044186 | 2.122355554 | 4.869320706 | 6.35535943  | 7.249119049 | 7.161945863 |
| ENSMUSG00000044211 | 12.02668147 | 15.99919661 | 13.41686991 | 20.94189947 | 20.05344842 |
| ENSMUSG00000044213 | 12.02668147 | 6.956172438 | 7.061510478 | 4.832746033 | 7.87814045  |
| ENSMUSG00000044268 | 6.367066661 | 6.260555194 | 8.473812573 | 4.832746033 | 7.161945863 |
| ENSMUSG00000044276 | 14.85648888 | 24.34660353 | 19.77222934 | 40.2728836  | 49.41742646 |
| ENSMUSG00000044285 | 39.61730367 | 47.30197258 | 38.13215658 | 75.71302118 | 40.82309142 |
| ENSMUSG00000044292 | 12.73413332 | 7.651789682 | 9.179963621 | 9.665492065 | 3.580972932 |
| ENSMUSG00000044293 | 4.244711108 | 6.956172438 | 11.29841676 | 5.638203705 | 4.297167518 |



|                    |             |             |             |             |             |
|--------------------|-------------|-------------|-------------|-------------|-------------|
| ENSMUSG00000044306 | 61.54831106 | 105.0382038 | 91.79963621 | 197.3371297 | 152.5494469 |
| ENSMUSG00000044330 | 9.904325918 | 12.52111039 | 10.59226572 | 9.665492065 | 5.729556691 |
| ENSMUSG00000044341 | 0           | 0.695617244 | 0           | 0           | 0.716194586 |
| ENSMUSG00000044377 | 12.02668147 | 11.82549314 | 7.061510478 | 8.054576721 | 10.7429188  |
| ENSMUSG00000044387 | 4.952162959 | 9.738641413 | 9.179963621 | 8.054576721 | 7.161945863 |
| ENSMUSG00000044407 | 4.244711108 | 6.260555194 | 4.943057334 | 4.02728836  | 9.310529622 |
| ENSMUSG00000044424 | 8.489422215 | 9.738641413 | 9.179963621 | 10.47094974 | 12.17530797 |
| ENSMUSG00000044434 | 12.02668147 | 6.260555194 | 7.767661525 | 6.443661377 | 5.729556691 |
| ENSMUSG00000044444 | 7.781970364 | 11.1298759  | 15.53532305 | 8.054576721 | 10.02672421 |
| ENSMUSG00000044454 | 7.074518513 | 5.56493795  | 7.061510478 | 6.443661377 | 3.580972932 |
| ENSMUSG00000044457 | 12.73413332 | 9.043024169 | 7.061510478 | 8.054576721 | 5.729556691 |
| ENSMUSG00000044471 | 32.54278516 | 54.25814501 | 41.66291182 | 42.68925662 | 45.83645353 |
| ENSMUSG00000044487 | 12.02668147 | 7.651789682 | 11.29841676 | 5.638203705 | 4.297167518 |
| ENSMUSG00000044515 | 10.61177777 | 8.347406925 | 8.473812573 | 7.249119049 | 5.013362104 |
| ENSMUSG00000044518 | 6.367066661 | 6.260555194 | 7.767661525 | 4.02728836  | 6.445751277 |
| ENSMUSG00000044537 | 7.781970364 | 11.1298759  | 9.179963621 | 5.638203705 | 5.729556691 |
| ENSMUSG00000044538 | 7.074518513 | 9.043024169 | 4.236906287 | 4.02728836  | 7.87814045  |
| ENSMUSG00000044560 | 7.074518513 | 11.1298759  | 2.824604191 | 3.221830688 | 2.148583759 |
| ENSMUSG00000044574 | 7.074518513 | 4.869320706 | 4.943057334 | 5.638203705 | 7.87814045  |
| ENSMUSG00000044609 | 10.61177777 | 5.56493795  | 7.061510478 | 9.665492065 | 7.161945863 |
| ENSMUSG00000044633 | 7.074518513 | 6.260555194 | 9.886114669 | 8.054576721 | 7.87814045  |
| ENSMUSG00000044639 | 14.14903703 | 11.1298759  | 7.767661525 | 4.02728836  | 4.297167518 |
| ENSMUSG00000044689 | 8.489422215 | 6.260555194 | 11.29841676 | 9.665492065 | 7.87814045  |
| ENSMUSG00000044694 | 11.31922962 | 15.30357936 | 9.886114669 | 8.054576721 | 12.89150255 |
| ENSMUSG00000044697 | 14.85648888 | 9.043024169 | 10.59226572 | 4.832746033 | 5.013362104 |
| ENSMUSG00000044705 | 9.196874066 | 5.56493795  | 7.061510478 | 8.054576721 | 7.161945863 |
| ENSMUSG00000044730 | 69.33028142 | 73.73542784 | 65.67204744 | 153.0369577 | 108.8615771 |
| ENSMUSG00000044751 | 11.31922962 | 12.52111039 | 13.41686991 | 16.10915344 | 7.87814045  |
| ENSMUSG00000044757 | 11.31922962 | 22.2597518  | 15.53532305 | 16.10915344 | 15.04008631 |
| ENSMUSG00000044801 | 8.489422215 | 5.56493795  | 6.35535943  | 4.832746033 | 3.580972932 |
| ENSMUSG00000044824 | 9.904325918 | 6.956172438 | 6.35535943  | 3.221830688 | 5.729556691 |
| ENSMUSG00000044867 | 159.1766665 | 206.5983214 | 164.5331941 | 367.2886985 | 256.3976619 |
| ENSMUSG00000044897 | 8.489422215 | 9.043024169 | 6.35535943  | 10.47094974 | 9.310529622 |
| ENSMUSG00000044923 | 6.367066661 | 6.956172438 | 8.473812573 | 3.221830688 | 3.580972932 |
| ENSMUSG00000044997 | 45.98437033 | 82.08283477 | 48.01827125 | 81.35122488 | 73.76804239 |
| ENSMUSG00000045010 | 4.952162959 | 4.173703463 | 2.824604191 | 1.610915344 | 4.297167518 |
| ENSMUSG00000045048 | 9.196874066 | 8.347406925 | 4.943057334 | 4.832746033 | 2.148583759 |
| ENSMUSG00000045055 | 12.73413332 | 12.52111039 | 15.53532305 | 8.054576721 | 12.89150255 |
| ENSMUSG00000045075 | 7.074518513 | 7.651789682 | 7.061510478 | 10.47094974 | 7.87814045  |
| ENSMUSG00000045104 | 7.781970364 | 9.043024169 | 7.767661525 | 4.02728836  | 6.445751277 |
| ENSMUSG00000045111 | 9.196874066 | 7.651789682 | 7.061510478 | 5.638203705 | 8.594335036 |
| ENSMUSG00000045132 | 9.196874066 | 7.651789682 | 4.943057334 | 7.249119049 | 8.594335036 |
| ENSMUSG00000045148 | 10.61177777 | 6.260555194 | 3.530755239 | 5.638203705 | 10.02672421 |

|                    |             |             |             |             |             |
|--------------------|-------------|-------------|-------------|-------------|-------------|
| ENSMUSG00000045149 | 0.707451851 | 0.695617244 | 0           | 0           | 0.716194586 |
| ENSMUSG00000045150 | 9.196874066 | 8.347406925 | 5.649208382 | 4.832746033 | 6.445751277 |
| ENSMUSG00000045178 | 5.65961481  | 6.260555194 | 11.29841676 | 5.638203705 | 5.013362104 |
| ENSMUSG00000045179 | 2.122355554 | 4.173703463 | 4.236906287 | 1.610915344 | 2.864778345 |
| ENSMUSG00000045204 | 9.196874066 | 9.738641413 | 4.236906287 | 1.610915344 | 5.013362104 |
| ENSMUSG00000045217 | 3.537259256 | 3.478086219 | 3.530755239 | 2.416373016 | 0           |
| ENSMUSG00000045225 | 9.904325918 | 4.173703463 | 7.061510478 | 4.832746033 | 6.445751277 |
| ENSMUSG00000045238 | 4.244711108 | 5.56493795  | 7.061510478 | 1.610915344 | 4.297167518 |
| ENSMUSG00000045291 | 8.489422215 | 5.56493795  | 11.29841676 | 7.249119049 | 7.87814045  |
| ENSMUSG00000045327 | 38.20239997 | 74.43104508 | 57.19823487 | 107.9313281 | 87.37573953 |
| ENSMUSG00000045339 | 6.367066661 | 8.347406925 | 4.943057334 | 7.249119049 | 7.161945863 |
| ENSMUSG00000045340 | 9.904325918 | 9.738641413 | 9.179963621 | 8.860034393 | 7.161945863 |
| ENSMUSG00000045341 | 9.196874066 | 6.260555194 | 4.236906287 | 4.02728836  | 6.445751277 |
| ENSMUSG00000045345 | 9.904325918 | 13.21672763 | 14.829172   | 8.860034393 | 13.60769714 |
| ENSMUSG00000045391 | 106.1177777 | 155.8182626 | 153.2347774 | 146.5932963 | 114.5911338 |
| ENSMUSG00000045392 | 5.65961481  | 6.260555194 | 4.943057334 | 2.416373016 | 5.729556691 |
| ENSMUSG00000045417 | 8.489422215 | 6.260555194 | 6.35535943  | 7.249119049 | 5.013362104 |
| ENSMUSG00000045421 | 9.904325918 | 9.043024169 | 10.59226572 | 4.832746033 | 8.594335036 |
| ENSMUSG00000045464 | 60.84085921 | 89.0390072  | 89.68118307 | 85.37851324 | 83.07857202 |
| ENSMUSG00000045506 | 7.781970364 | 6.260555194 | 5.649208382 | 4.02728836  | 4.297167518 |
| ENSMUSG00000045508 | 7.074518513 | 4.869320706 | 10.59226572 | 10.47094974 | 5.729556691 |
| ENSMUSG00000045528 | 7.781970364 | 11.1298759  | 9.179963621 | 4.02728836  | 7.161945863 |
| ENSMUSG00000045540 | 12.02668147 | 8.347406925 | 7.767661525 | 6.443661377 | 10.02672421 |
| ENSMUSG00000045566 | 10.61177777 | 10.43425866 | 9.179963621 | 9.665492065 | 7.87814045  |
| ENSMUSG00000045575 | 9.196874066 | 6.260555194 | 9.179963621 | 9.665492065 | 7.161945863 |
| ENSMUSG00000045584 | 7.074518513 | 7.651789682 | 7.767661525 | 4.832746033 | 6.445751277 |
| ENSMUSG00000045609 | 10.61177777 | 8.347406925 | 12.00456781 | 6.443661377 | 5.013362104 |
| ENSMUSG00000045678 | 9.196874066 | 1.391234488 | 10.59226572 | 5.638203705 | 7.87814045  |
| ENSMUSG00000045694 | 2.829807405 | 2.086851731 | 2.118453143 | 0.805457672 | 4.297167518 |
| ENSMUSG00000045708 | 7.781970364 | 5.56493795  | 6.35535943  | 7.249119049 | 3.580972932 |
| ENSMUSG00000045709 | 4.952162959 | 4.869320706 | 4.943057334 | 5.638203705 | 5.729556691 |
| ENSMUSG00000045713 | 7.781970364 | 8.347406925 | 4.943057334 | 4.02728836  | 4.297167518 |
| ENSMUSG00000045746 | 28.29807405 | 41.04141738 | 48.7244223  | 136.9278043 | 108.8615771 |
| ENSMUSG00000045780 | 9.196874066 | 6.260555194 | 7.061510478 | 6.443661377 | 5.729556691 |
| ENSMUSG00000045792 | 11.31922962 | 9.043024169 | 7.061510478 | 7.249119049 | 6.445751277 |
| ENSMUSG00000045799 | 19.10119998 | 24.34660353 | 10.59226572 | 35.44013757 | 24.35061594 |
| ENSMUSG00000045812 | 6.367066661 | 6.260555194 | 7.767661525 | 7.249119049 | 5.013362104 |
| ENSMUSG00000045813 | 7.781970364 | 7.651789682 | 8.473812573 | 2.416373016 | 5.729556691 |
| ENSMUSG00000045815 | 4.952162959 | 6.260555194 | 9.179963621 | 5.638203705 | 6.445751277 |
| ENSMUSG00000045824 | 12.73413332 | 7.651789682 | 7.767661525 | 4.832746033 | 7.161945863 |
| ENSMUSG00000045842 | 7.074518513 | 14.60796212 | 12.00456781 | 15.30369577 | 12.89150255 |
| ENSMUSG00000045876 | 9.904325918 | 9.738641413 | 4.943057334 | 6.443661377 | 5.729556691 |
| ENSMUSG00000045883 | 12.73413332 | 9.043024169 | 10.59226572 | 4.02728836  | 7.161945863 |

|                    |             |             |             |             |             |
|--------------------|-------------|-------------|-------------|-------------|-------------|
| ENSMUSG00000045946 | 9.196874066 | 6.260555194 | 3.530755239 | 5.638203705 | 7.161945863 |
| ENSMUSG00000045952 | 7.781970364 | 5.56493795  | 7.061510478 | 7.249119049 | 6.445751277 |
| ENSMUSG00000045999 | 320.4756886 | 343.6349184 | 243.6221115 | 288.3538466 | 297.2207533 |
| ENSMUSG00000046005 | 9.196874066 | 4.869320706 | 8.473812573 | 12.88732275 | 5.013362104 |
| ENSMUSG00000046016 | 9.196874066 | 3.478086219 | 7.767661525 | 9.665492065 | 3.580972932 |
| ENSMUSG00000046041 | 7.074518513 | 9.738641413 | 8.473812573 | 3.221830688 | 9.310529622 |
| ENSMUSG00000046057 | 13.44158517 | 9.738641413 | 12.71071886 | 7.249119049 | 13.60769714 |
| ENSMUSG00000046088 | 11.31922962 | 9.043024169 | 4.943057334 | 5.638203705 | 5.013362104 |
| ENSMUSG00000046095 | 9.904325918 | 4.173703463 | 7.767661525 | 8.860034393 | 6.445751277 |
| ENSMUSG00000046119 | 9.196874066 | 9.043024169 | 7.767661525 | 10.47094974 | 2.864778345 |
| ENSMUSG00000046130 | 4.952162959 | 5.56493795  | 7.767661525 | 6.443661377 | 7.161945863 |
| ENSMUSG00000046145 | 101.1656147 | 138.4278315 | 120.0456781 | 215.0571984 | 164.7247549 |
| ENSMUSG00000046150 | 7.781970364 | 6.260555194 | 4.943057334 | 6.443661377 | 5.013362104 |
| ENSMUSG00000046210 | 7.781970364 | 6.260555194 | 7.767661525 | 2.416373016 | 10.7429188  |
| ENSMUSG00000046219 | 11.31922962 | 9.043024169 | 4.943057334 | 2.416373016 | 8.594335036 |
| ENSMUSG00000046242 | 8.489422215 | 9.738641413 | 9.886114669 | 7.249119049 | 10.02672421 |
| ENSMUSG00000046334 | 165.5437332 | 217.7281973 | 204.0776528 | 275.4665239 | 196.9535112 |
| ENSMUSG00000046341 | 6.367066661 | 7.651789682 | 9.886114669 | 4.02728836  | 4.297167518 |
| ENSMUSG00000046354 | 7.781970364 | 4.869320706 | 5.649208382 | 4.832746033 | 8.594335036 |
| ENSMUSG00000046372 | 15.56394073 | 22.2597518  | 21.18453143 | 15.30369577 | 17.90486466 |
| ENSMUSG00000046388 | 72.16008883 | 107.8206728 | 112.9841676 | 90.21125927 | 90.24051788 |
| ENSMUSG00000046396 | 7.074518513 | 4.869320706 | 6.35535943  | 1.610915344 | 5.013362104 |
| ENSMUSG00000046411 | 5.65961481  | 3.478086219 | 9.886114669 | 7.249119049 | 5.013362104 |
| ENSMUSG00000046413 | 6.367066661 | 5.56493795  | 7.061510478 | 3.221830688 | 8.594335036 |
| ENSMUSG00000046415 | 6.367066661 | 2.782468975 | 8.473812573 | 3.221830688 | 5.013362104 |
| ENSMUSG00000046431 | 7.781970364 | 6.260555194 | 7.767661525 | 5.638203705 | 7.161945863 |
| ENSMUSG00000046440 | 12.02668147 | 17.39043109 | 26.83373982 | 12.08186508 | 22.20203218 |
| ENSMUSG00000046463 | 23.34591109 | 36.86771392 | 34.60140134 | 85.37851324 | 65.17370736 |
| ENSMUSG00000046486 | 10.61177777 | 8.347406925 | 5.649208382 | 4.02728836  | 8.594335036 |
| ENSMUSG00000046487 | 9.904325918 | 11.1298759  | 4.236906287 | 4.02728836  | 8.594335036 |
| ENSMUSG00000046574 | 36.08004441 | 50.7800588  | 53.66747963 | 62.82569842 | 53.71459398 |
| ENSMUSG00000046580 | 8.489422215 | 4.869320706 | 8.473812573 | 3.221830688 | 7.161945863 |
| ENSMUSG00000046590 | 9.196874066 | 5.56493795  | 7.061510478 | 4.832746033 | 7.161945863 |
| ENSMUSG00000046620 | 5.65961481  | 8.347406925 | 9.886114669 | 8.054576721 | 7.87814045  |
| ENSMUSG00000046634 | 14.85648888 | 5.56493795  | 7.767661525 | 6.443661377 | 5.013362104 |
| ENSMUSG00000046636 | 13.44158517 | 13.21672763 | 13.41686991 | 14.4982381  | 16.47247549 |
| ENSMUSG00000046643 | 10.61177777 | 8.347406925 | 8.473812573 | 4.832746033 | 9.310529622 |
| ENSMUSG00000046650 | 7.781970364 | 7.651789682 | 6.35535943  | 4.832746033 | 9.310529622 |
| ENSMUSG00000046652 | 4.952162959 | 5.56493795  | 4.943057334 | 8.054576721 | 3.580972932 |
| ENSMUSG00000046683 | 12.02668147 | 4.173703463 | 6.35535943  | 4.02728836  | 6.445751277 |
| ENSMUSG00000046717 | 7.781970364 | 8.347406925 | 12.00456781 | 3.221830688 | 5.729556691 |
| ENSMUSG00000046721 | 9.904325918 | 7.651789682 | 11.29841676 | 16.91461111 | 10.02672421 |
| ENSMUSG00000046747 | 34.66514071 | 49.38882431 | 35.30755239 | 63.6311561  | 57.29556691 |

|                    |             |             |             |             |             |
|--------------------|-------------|-------------|-------------|-------------|-------------|
| ENSMUSG00000046790 | 8.489422215 | 6.956172438 | 4.943057334 | 6.443661377 | 11.45911338 |
| ENSMUSG00000046808 | 103.9954221 | 130.0804246 | 110.8657145 | 84.57305557 | 83.07857202 |
| ENSMUSG00000046840 | 12.02668147 | 4.869320706 | 9.179963621 | 3.221830688 | 7.161945863 |
| ENSMUSG00000046913 | 12.73413332 | 6.260555194 | 3.530755239 | 3.221830688 | 3.580972932 |
| ENSMUSG00000046924 | 8.489422215 | 10.43425866 | 7.061510478 | 4.832746033 | 8.594335036 |
| ENSMUSG00000046932 | 7.781970364 | 7.651789682 | 4.236906287 | 12.08186508 | 5.729556691 |
| ENSMUSG00000046952 | 9.904325918 | 11.82549314 | 9.886114669 | 3.221830688 | 7.161945863 |
| ENSMUSG00000046958 | 5.65961481  | 7.651789682 | 9.179963621 | 8.054576721 | 2.864778345 |
| ENSMUSG00000046975 | 10.61177777 | 7.651789682 | 9.179963621 | 1.610915344 | 5.013362104 |
| ENSMUSG00000046991 | 7.074518513 | 6.260555194 | 9.886114669 | 8.860034393 | 7.87814045  |
| ENSMUSG00000046993 | 4.244711108 | 4.173703463 | 2.824604191 | 4.02728836  | 5.013362104 |
| ENSMUSG00000046995 | 14.14903703 | 6.260555194 | 4.943057334 | 4.02728836  | 8.594335036 |
| ENSMUSG00000047002 | 7.074518513 | 7.651789682 | 8.473812573 | 5.638203705 | 6.445751277 |
| ENSMUSG00000047031 | 9.904325918 | 5.56493795  | 7.061510478 | 7.249119049 | 5.729556691 |
| ENSMUSG00000047036 | 74.28244438 | 114.081228  | 88.97503202 | 146.5932963 | 113.8749392 |
| ENSMUSG00000047039 | 10.61177777 | 6.260555194 | 8.473812573 | 0           | 2.864778345 |
| ENSMUSG00000047046 | 10.61177777 | 5.56493795  | 5.649208382 | 5.638203705 | 5.013362104 |
| ENSMUSG00000047048 | 9.904325918 | 6.260555194 | 10.59226572 | 7.249119049 | 7.161945863 |
| ENSMUSG00000047050 | 11.31922962 | 5.56493795  | 8.473812573 | 8.054576721 | 5.729556691 |
| ENSMUSG00000047102 | 9.904325918 | 6.260555194 | 8.473812573 | 4.02728836  | 5.013362104 |
| ENSMUSG00000047104 | 14.14903703 | 6.956172438 | 5.649208382 | 6.443661377 | 4.297167518 |
| ENSMUSG00000047116 | 1.414903703 | 0           | 1.412302096 | 0           | 0.716194586 |
| ENSMUSG00000047149 | 7.074518513 | 6.260555194 | 7.061510478 | 4.02728836  | 6.445751277 |
| ENSMUSG00000047166 | 92.67619252 | 95.2995624  | 81.91352154 | 201.364418  | 131.7798039 |
| ENSMUSG00000047168 | 4.952162959 | 4.869320706 | 4.943057334 | 3.221830688 | 5.729556691 |
| ENSMUSG00000047189 | 15.56394073 | 9.738641413 | 9.886114669 | 10.47094974 | 7.161945863 |
| ENSMUSG00000047197 | 3.537259256 | 8.347406925 | 10.59226572 | 8.860034393 | 5.729556691 |
| ENSMUSG00000047203 | 15.56394073 | 6.956172438 | 5.649208382 | 8.860034393 | 6.445751277 |
| ENSMUSG00000047225 | 7.074518513 | 7.651789682 | 4.943057334 | 3.221830688 | 6.445751277 |
| ENSMUSG00000047293 | 6.367066661 | 3.478086219 | 11.29841676 | 151.4260424 | 99.5510475  |
| ENSMUSG00000047324 | 12.73413332 | 2.086851731 | 10.59226572 | 4.832746033 | 1.432389173 |
| ENSMUSG00000047347 | 10.61177777 | 8.347406925 | 4.236906287 | 6.443661377 | 7.161945863 |
| ENSMUSG00000047383 | 3.537259256 | 13.91234488 | 12.71071886 | 6.443661377 | 11.45911338 |
| ENSMUSG00000047444 | 9.904325918 | 6.956172438 | 7.767661525 | 3.221830688 | 5.013362104 |
| ENSMUSG00000047485 | 0.707451851 | 3.478086219 | 3.530755239 | 0.805457672 | 5.013362104 |
| ENSMUSG00000047509 | 10.61177777 | 7.651789682 | 5.649208382 | 10.47094974 | 7.161945863 |
| ENSMUSG00000047535 | 8.489422215 | 6.260555194 | 3.530755239 | 6.443661377 | 6.445751277 |
| ENSMUSG00000047544 | 6.367066661 | 5.56493795  | 14.12302096 | 6.443661377 | 5.013362104 |
| ENSMUSG00000047545 | 6.367066661 | 7.651789682 | 2.824604191 | 3.221830688 | 8.594335036 |
| ENSMUSG00000047591 | 8.489422215 | 4.869320706 | 7.061510478 | 3.221830688 | 4.297167518 |
| ENSMUSG00000047594 | 12.02668147 | 9.738641413 | 8.473812573 | 3.221830688 | 5.013362104 |
| ENSMUSG00000047626 | 8.489422215 | 11.1298759  | 7.767661525 | 5.638203705 | 2.864778345 |
| ENSMUSG00000047643 | 12.73413332 | 6.260555194 | 7.061510478 | 3.221830688 | 4.297167518 |

|                    |             |             |             |             |             |
|--------------------|-------------|-------------|-------------|-------------|-------------|
| ENSMUSG00000047652 | 8.489422215 | 4.869320706 | 4.943057334 | 4.02728836  | 5.013362104 |
| ENSMUSG00000047655 | 12.73413332 | 9.738641413 | 4.943057334 | 7.249119049 | 5.729556691 |
| ENSMUSG00000047657 | 14.14903703 | 3.478086219 | 12.00456781 | 8.860034393 | 5.729556691 |
| ENSMUSG00000047702 | 9.196874066 | 5.56493795  | 9.179963621 | 3.221830688 | 4.297167518 |
| ENSMUSG00000047716 | 8.489422215 | 5.56493795  | 8.473812573 | 4.02728836  | 8.594335036 |
| ENSMUSG00000047773 | 7.074518513 | 6.260555194 | 7.767661525 | 7.249119049 | 8.594335036 |
| ENSMUSG00000047807 | 58.0110518  | 79.30036579 | 91.09348516 | 40.2728836  | 43.68786977 |
| ENSMUSG00000047868 | 9.904325918 | 7.651789682 | 7.061510478 | 4.832746033 | 7.87814045  |
| ENSMUSG00000047894 | 9.904325918 | 3.478086219 | 4.236906287 | 6.443661377 | 7.161945863 |
| ENSMUSG00000047905 | 8.489422215 | 8.347406925 | 9.886114669 | 13.69278043 | 6.445751277 |
| ENSMUSG00000047935 | 6.367066661 | 5.56493795  | 9.179963621 | 4.832746033 | 4.297167518 |
| ENSMUSG00000047938 | 39.61730367 | 52.86691053 | 48.7244223  | 39.46742593 | 45.12025894 |
| ENSMUSG00000047965 | 9.196874066 | 6.956172438 | 10.59226572 | 7.249119049 | 8.594335036 |
| ENSMUSG00000047969 | 6.367066661 | 4.173703463 | 9.886114669 | 5.638203705 | 5.729556691 |
| ENSMUSG00000048031 | 29.0055259  | 57.04061399 | 43.07521391 | 171.5624842 | 126.0502472 |
| ENSMUSG00000048062 | 9.904325918 | 5.56493795  | 1.412302096 | 5.638203705 | 5.013362104 |
| ENSMUSG00000048080 | 7.781970364 | 4.869320706 | 5.649208382 | 4.832746033 | 10.7429188  |
| ENSMUSG00000048149 | 0           | 0.695617244 | 0           | 0           | 0           |
| ENSMUSG00000048164 | 9.904325918 | 6.956172438 | 7.061510478 | 6.443661377 | 7.161945863 |
| ENSMUSG00000048173 | 2.829807405 | 4.869320706 | 2.824604191 | 4.02728836  | 2.864778345 |
| ENSMUSG00000048185 | 13.44158517 | 5.56493795  | 9.179963621 | 4.02728836  | 12.89150255 |
| ENSMUSG00000048188 | 12.02668147 | 8.347406925 | 8.473812573 | 5.638203705 | 4.297167518 |
| ENSMUSG00000048197 | 6.367066661 | 5.56493795  | 5.649208382 | 4.02728836  | 2.864778345 |
| ENSMUSG00000048215 | 12.02668147 | 8.347406925 | 10.59226572 | 4.832746033 | 8.594335036 |
| ENSMUSG00000048226 | 6.367066661 | 7.651789682 | 5.649208382 | 3.221830688 | 5.013362104 |
| ENSMUSG00000048248 | 14.85648888 | 32.69401046 | 23.30298458 | 38.66196826 | 33.66114556 |
| ENSMUSG00000048261 | 2.122355554 | 3.478086219 | 2.824604191 | 1.610915344 | 4.297167518 |
| ENSMUSG00000048284 | 9.196874066 | 7.651789682 | 8.473812573 | 4.02728836  | 7.161945863 |
| ENSMUSG00000048292 | 9.196874066 | 8.347406925 | 8.473812573 | 8.054576721 | 8.594335036 |
| ENSMUSG00000048316 | 9.904325918 | 9.738641413 | 14.12302096 | 8.054576721 | 12.89150255 |
| ENSMUSG00000048334 | 8.489422215 | 9.043024169 | 5.649208382 | 7.249119049 | 7.87814045  |
| ENSMUSG00000048378 | 7.781970364 | 6.260555194 | 9.179963621 | 9.665492065 | 5.013362104 |
| ENSMUSG00000048406 | 7.074518513 | 9.738641413 | 7.767661525 | 23.35827249 | 14.32389173 |
| ENSMUSG00000048424 | 6.367066661 | 8.347406925 | 9.179963621 | 4.832746033 | 7.161945863 |
| ENSMUSG00000048456 | 4.952162959 | 7.651789682 | 6.35535943  | 11.27640741 | 4.297167518 |
| ENSMUSG00000048469 | 11.31922962 | 8.347406925 | 9.886114669 | 4.832746033 | 5.013362104 |
| ENSMUSG00000048483 | 7.781970364 | 7.651789682 | 7.767661525 | 10.47094974 | 6.445751277 |
| ENSMUSG00000048538 | 4.244711108 | 4.869320706 | 8.473812573 | 6.443661377 | 4.297167518 |
| ENSMUSG00000048559 | 5.65961481  | 7.651789682 | 7.767661525 | 7.249119049 | 4.297167518 |
| ENSMUSG00000048574 | 0           | 0           | 0           | 0           | 0           |
| ENSMUSG00000048592 | 7.074518513 | 1.391234488 | 2.118453143 | 1.610915344 | 3.580972932 |
| ENSMUSG00000048600 | 9.196874066 | 7.651789682 | 7.767661525 | 5.638203705 | 6.445751277 |
| ENSMUSG00000048603 | 111.0699406 | 172.5130765 | 134.8748501 | 328.6267302 | 237.7766027 |

|                    |             |             |             |             |             |
|--------------------|-------------|-------------|-------------|-------------|-------------|
| ENSMUSG00000048620 | 7.781970364 | 4.173703463 | 10.59226572 | 5.638203705 | 7.161945863 |
| ENSMUSG00000048628 | 8.489422215 | 3.478086219 | 4.943057334 | 9.665492065 | 6.445751277 |
| ENSMUSG00000048643 | 14.14903703 | 2.782468975 | 7.767661525 | 5.638203705 | 7.87814045  |
| ENSMUSG00000048665 | 7.781970364 | 6.260555194 | 4.943057334 | 4.02728836  | 7.87814045  |
| ENSMUSG00000048693 | 12.73413332 | 3.478086219 | 12.71071886 | 5.638203705 | 5.729556691 |
| ENSMUSG00000048697 | 7.781970364 | 6.260555194 | 8.473812573 | 2.416373016 | 4.297167518 |
| ENSMUSG00000048709 | 6.367066661 | 2.782468975 | 5.649208382 | 6.443661377 | 6.445751277 |
| ENSMUSG00000048806 | 10.61177777 | 5.56493795  | 7.767661525 | 4.832746033 | 7.161945863 |
| ENSMUSG00000048810 | 8.489422215 | 3.478086219 | 8.473812573 | 7.249119049 | 12.89150255 |
| ENSMUSG00000048824 | 13.44158517 | 18.08604834 | 20.47838039 | 12.08186508 | 12.17530797 |
| ENSMUSG00000048827 | 10.61177777 | 12.52111039 | 10.59226572 | 18.52552646 | 18.62105924 |
| ENSMUSG00000048916 | 48.81417774 | 52.17129328 | 53.66747963 | 100.682209  | 89.52432329 |
| ENSMUSG00000048919 | 11.31922962 | 11.1298759  | 9.179963621 | 6.443661377 | 3.580972932 |
| ENSMUSG00000048949 | 16.27139258 | 14.60796212 | 11.29841676 | 14.4982381  | 20.05344842 |
| ENSMUSG00000048967 | 0.707451851 | 1.391234488 | 0           | 0           | 0           |
| ENSMUSG00000049010 | 12.73413332 | 3.478086219 | 5.649208382 | 0.805457672 | 2.864778345 |
| ENSMUSG00000049011 | 9.196874066 | 6.956172438 | 9.886114669 | 4.832746033 | 8.594335036 |
| ENSMUSG00000049013 | 9.904325918 | 6.956172438 | 7.767661525 | 7.249119049 | 7.161945863 |
| ENSMUSG00000049015 | 5.65961481  | 5.56493795  | 6.35535943  | 5.638203705 | 5.729556691 |
| ENSMUSG00000049018 | 12.02668147 | 6.956172438 | 7.767661525 | 8.054576721 | 10.7429188  |
| ENSMUSG00000049062 | 11.31922962 | 9.043024169 | 6.35535943  | 4.832746033 | 10.7429188  |
| ENSMUSG00000049091 | 48.10672589 | 73.73542784 | 67.79050059 | 142.566008  | 115.3073284 |
| ENSMUSG00000049092 | 24.05336294 | 34.78086219 | 45.8998181  | 48.32746033 | 55.86317773 |
| ENSMUSG00000049094 | 7.781970364 | 11.82549314 | 6.35535943  | 6.443661377 | 12.89150255 |
| ENSMUSG00000049133 | 9.904325918 | 6.260555194 | 10.59226572 | 4.832746033 | 5.729556691 |
| ENSMUSG00000049160 | 9.904325918 | 11.82549314 | 8.473812573 | 7.249119049 | 9.310529622 |
| ENSMUSG00000049202 | 10.61177777 | 5.56493795  | 8.473812573 | 8.054576721 | 11.45911338 |
| ENSMUSG00000049217 | 4.952162959 | 5.56493795  | 7.061510478 | 7.249119049 | 7.161945863 |
| ENSMUSG00000049229 | 4.244711108 | 5.56493795  | 8.473812573 | 7.249119049 | 7.161945863 |
| ENSMUSG00000049230 | 13.44158517 | 15.30357936 | 17.65377619 | 12.88732275 | 12.89150255 |
| ENSMUSG00000049231 | 8.489422215 | 5.56493795  | 5.649208382 | 4.832746033 | 5.729556691 |
| ENSMUSG00000049235 | 1.414903703 | 0           | 0.706151048 | 0           | 0.716194586 |
| ENSMUSG00000049246 | 9.196874066 | 5.56493795  | 11.29841676 | 8.054576721 | 8.594335036 |
| ENSMUSG00000049249 | 9.904325918 | 11.1298759  | 4.943057334 | 1.610915344 | 9.310529622 |
| ENSMUSG00000049372 | 8.489422215 | 10.43425866 | 3.530755239 | 3.221830688 | 5.013362104 |
| ENSMUSG00000049414 | 74.28244438 | 97.38641413 | 87.56272992 | 66.85298678 | 78.06520991 |
| ENSMUSG00000049460 | 10.61177777 | 7.651789682 | 11.29841676 | 5.638203705 | 10.7429188  |
| ENSMUSG00000049476 | 23.34591109 | 43.12826911 | 27.53989086 | 51.54929101 | 50.84981563 |
| ENSMUSG00000049477 | 9.904325918 | 10.43425866 | 9.886114669 | 8.860034393 | 10.02672421 |
| ENSMUSG00000049494 | 0           | 0           | 0           | 0           | 0           |
| ENSMUSG00000049539 | 9.904325918 | 11.1298759  | 12.00456781 | 6.443661377 | 8.594335036 |
| ENSMUSG00000049576 | 11.31922962 | 6.260555194 | 10.59226572 | 5.638203705 | 12.17530797 |
| ENSMUSG00000049583 | 8.489422215 | 11.1298759  | 8.473812573 | 4.832746033 | 7.161945863 |

|                    |             |             |             |             |             |
|--------------------|-------------|-------------|-------------|-------------|-------------|
| ENSMUSG00000049661 | 0.707451851 | 3.478086219 | 0.706151048 | 0.805457672 | 0.716194586 |
| ENSMUSG00000049674 | 8.489422215 | 10.43425866 | 10.59226572 | 2.416373016 | 5.729556691 |
| ENSMUSG00000049685 | 13.44158517 | 6.956172438 | 9.179963621 | 2.416373016 | 5.013362104 |
| ENSMUSG00000049737 | 10.61177777 | 4.869320706 | 9.179963621 | 3.221830688 | 7.161945863 |
| ENSMUSG00000049741 | 6.367066661 | 10.43425866 | 11.29841676 | 8.054576721 | 10.7429188  |
| ENSMUSG00000049758 | 9.904325918 | 4.869320706 | 7.767661525 | 6.443661377 | 7.161945863 |
| ENSMUSG00000049761 | 5.65961481  | 6.956172438 | 6.35535943  | 6.443661377 | 7.161945863 |
| ENSMUSG00000049797 | 9.196874066 | 4.173703463 | 12.00456781 | 5.638203705 | 6.445751277 |
| ENSMUSG00000049806 | 9.904325918 | 11.1298759  | 9.179963621 | 3.221830688 | 7.87814045  |
| ENSMUSG00000049832 | 7.781970364 | 9.738641413 | 7.767661525 | 11.27640741 | 12.89150255 |
| ENSMUSG00000049843 | 6.367066661 | 6.260555194 | 7.767661525 | 0.805457672 | 5.013362104 |
| ENSMUSG00000049864 | 11.31922962 | 5.56493795  | 5.649208382 | 8.054576721 | 8.594335036 |
| ENSMUSG00000049881 | 7.074518513 | 7.651789682 | 7.061510478 | 3.221830688 | 6.445751277 |
| ENSMUSG00000049891 | 7.781970364 | 11.1298759  | 8.473812573 | 5.638203705 | 13.60769714 |
| ENSMUSG00000049894 | 7.781970364 | 6.956172438 | 9.886114669 | 2.416373016 | 6.445751277 |
| ENSMUSG00000050015 | 7.074518513 | 6.260555194 | 9.886114669 | 4.02728836  | 6.445751277 |
| ENSMUSG00000050023 | 8.489422215 | 6.260555194 | 7.061510478 | 4.02728836  | 7.161945863 |
| ENSMUSG00000050030 | 9.904325918 | 6.260555194 | 5.649208382 | 4.02728836  | 5.013362104 |
| ENSMUSG00000050066 | 3.537259256 | 3.478086219 | 1.412302096 | 0.805457672 | 2.148583759 |
| ENSMUSG00000050085 | 14.85648888 | 5.56493795  | 4.943057334 | 4.832746033 | 5.013362104 |
| ENSMUSG00000050128 | 10.61177777 | 9.738641413 | 5.649208382 | 4.02728836  | 4.297167518 |
| ENSMUSG00000050134 | 9.196874066 | 11.82549314 | 4.943057334 | 8.860034393 | 7.161945863 |
| ENSMUSG00000050157 | 24.05336294 | 27.82468975 | 38.13215658 | 21.74735715 | 14.32389173 |
| ENSMUSG00000050179 | 3.537259256 | 10.43425866 | 9.886114669 | 8.860034393 | 2.864778345 |
| ENSMUSG00000050189 | 2.122355554 | 6.956172438 | 9.886114669 | 12.88732275 | 6.445751277 |
| ENSMUSG00000050198 | 9.904325918 | 4.869320706 | 7.767661525 | 7.249119049 | 10.7429188  |
| ENSMUSG00000050243 | 15.56394073 | 26.43345526 | 19.06607829 | 35.44013757 | 25.06681052 |
| ENSMUSG00000050334 | 4.952162959 | 3.478086219 | 4.236906287 | 6.443661377 | 4.297167518 |
| ENSMUSG00000050343 | 14.14903703 | 2.782468975 | 9.886114669 | 4.832746033 | 11.45911338 |
| ENSMUSG00000050347 | 0           | 0           | 0.706151048 | 0           | 0.716194586 |
| ENSMUSG00000050431 | 9.196874066 | 9.043024169 | 7.767661525 | 5.638203705 | 7.161945863 |
| ENSMUSG00000050504 | 6.367066661 | 2.782468975 | 7.061510478 | 4.832746033 | 4.297167518 |
| ENSMUSG00000050538 | 15.56394073 | 9.738641413 | 12.71071886 | 6.443661377 | 9.310529622 |
| ENSMUSG00000050550 | 10.61177777 | 11.1298759  | 11.29841676 | 9.665492065 | 3.580972932 |
| ENSMUSG00000050577 | 10.61177777 | 4.869320706 | 9.179963621 | 6.443661377 | 7.87814045  |
| ENSMUSG00000050600 | 34.66514071 | 71.64857611 | 73.43970897 | 25.77464551 | 28.64778345 |
| ENSMUSG00000050603 | 9.196874066 | 9.043024169 | 7.061510478 | 3.221830688 | 9.310529622 |
| ENSMUSG00000050633 | 0           | 0           | 0           | 0           | 0           |
| ENSMUSG00000050671 | 9.196874066 | 8.347406925 | 9.179963621 | 7.249119049 | 9.310529622 |
| ENSMUSG00000050763 | 14.85648888 | 5.56493795  | 7.767661525 | 6.443661377 | 4.297167518 |
| ENSMUSG00000050766 | 11.31922962 | 4.869320706 | 9.179963621 | 1.610915344 | 10.7429188  |
| ENSMUSG00000050772 | 10.61177777 | 9.043024169 | 7.061510478 | 3.221830688 | 5.729556691 |
| ENSMUSG00000050776 | 7.781970364 | 9.043024169 | 4.943057334 | 3.221830688 | 6.445751277 |

|                    |             |             |             |             |             |
|--------------------|-------------|-------------|-------------|-------------|-------------|
| ENSMUSG00000050781 | 2.829807405 | 5.56493795  | 7.767661525 | 4.02728836  | 5.013362104 |
| ENSMUSG00000050799 | 7.074518513 | 5.56493795  | 10.59226572 | 10.47094974 | 7.161945863 |
| ENSMUSG00000050818 | 4.244711108 | 5.56493795  | 5.649208382 | 1.610915344 | 5.013362104 |
| ENSMUSG00000050853 | 9.196874066 | 11.1298759  | 7.061510478 | 5.638203705 | 3.580972932 |
| ENSMUSG00000050865 | 10.61177777 | 2.782468975 | 8.473812573 | 3.221830688 | 6.445751277 |
| ENSMUSG00000050896 | 6.367066661 | 4.173703463 | 10.59226572 | 5.638203705 | 5.013362104 |
| ENSMUSG00000050900 | 7.781970364 | 6.260555194 | 4.943057334 | 4.02728836  | 8.594335036 |
| ENSMUSG00000050933 | 11.31922962 | 4.869320706 | 9.179963621 | 3.221830688 | 4.297167518 |
| ENSMUSG00000050961 | 9.904325918 | 9.043024169 | 4.236906287 | 7.249119049 | 7.161945863 |
| ENSMUSG00000050974 | 9.904325918 | 8.347406925 | 8.473812573 | 11.27640741 | 7.161945863 |
| ENSMUSG00000050978 | 9.904325918 | 6.956172438 | 10.59226572 | 2.416373016 | 7.87814045  |
| ENSMUSG00000051002 | 8.489422215 | 4.173703463 | 6.35535943  | 4.832746033 | 7.161945863 |
| ENSMUSG00000051003 | 7.781970364 | 4.173703463 | 4.943057334 | 8.860034393 | 9.310529622 |
| ENSMUSG00000051008 | 63.67066661 | 79.99598303 | 72.73355792 | 99.07129367 | 94.5376854  |
| ENSMUSG00000051052 | 8.489422215 | 6.260555194 | 7.767661525 | 8.054576721 | 6.445751277 |
| ENSMUSG00000051074 | 77.11225179 | 112.6899935 | 108.0411103 | 126.4568545 | 99.5510475  |
| ENSMUSG00000051116 | 9.904325918 | 9.043024169 | 9.886114669 | 6.443661377 | 5.013362104 |
| ENSMUSG00000051133 | 14.85648888 | 21.56413456 | 31.77679715 | 8.054576721 | 10.02672421 |
| ENSMUSG00000051156 | 7.781970364 | 8.347406925 | 4.236906287 | 4.832746033 | 4.297167518 |
| ENSMUSG00000051160 | 8.489422215 | 10.43425866 | 8.473812573 | 4.832746033 | 6.445751277 |
| ENSMUSG00000051172 | 8.489422215 | 5.56493795  | 4.236906287 | 4.832746033 | 7.161945863 |
| ENSMUSG00000051182 | 9.904325918 | 9.043024169 | 2.118453143 | 7.249119049 | 7.161945863 |
| ENSMUSG00000051190 | 12.02668147 | 9.738641413 | 6.35535943  | 1.610915344 | 11.45911338 |
| ENSMUSG00000051198 | 7.074518513 | 11.82549314 | 11.29841676 | 3.221830688 | 3.580972932 |
| ENSMUSG00000051200 | 10.61177777 | 6.956172438 | 7.061510478 | 3.221830688 | 4.297167518 |
| ENSMUSG00000051258 | 10.61177777 | 6.956172438 | 7.061510478 | 4.02728836  | 5.013362104 |
| ENSMUSG00000051295 | 13.44158517 | 2.782468975 | 7.767661525 | 9.665492065 | 6.445751277 |
| ENSMUSG00000051340 | 6.367066661 | 6.260555194 | 6.35535943  | 4.02728836  | 9.310529622 |
| ENSMUSG00000051341 | 21.22355554 | 58.43184848 | 51.54902649 | 39.46742593 | 44.40406435 |
| ENSMUSG00000051362 | 11.31922962 | 4.869320706 | 11.29841676 | 2.416373016 | 6.445751277 |
| ENSMUSG00000051392 | 12.73413332 | 7.651789682 | 5.649208382 | 8.860034393 | 6.445751277 |
| ENSMUSG00000051401 | 5.65961481  | 2.782468975 | 3.530755239 | 0.805457672 | 2.864778345 |
| ENSMUSG00000051414 | 9.196874066 | 6.956172438 | 7.061510478 | 4.832746033 | 7.161945863 |
| ENSMUSG00000051424 | 8.489422215 | 2.782468975 | 7.767661525 | 7.249119049 | 3.580972932 |
| ENSMUSG00000051431 | 8.489422215 | 7.651789682 | 7.061510478 | 4.832746033 | 5.729556691 |
| ENSMUSG00000051509 | 8.489422215 | 6.260555194 | 7.061510478 | 5.638203705 | 5.729556691 |
| ENSMUSG00000051515 | 9.196874066 | 2.086851731 | 7.767661525 | 6.443661377 | 8.594335036 |
| ENSMUSG00000051527 | 10.61177777 | 7.651789682 | 9.179963621 | 4.02728836  | 7.161945863 |
| ENSMUSG00000051528 | 7.781970364 | 10.43425866 | 8.473812573 | 7.249119049 | 6.445751277 |
| ENSMUSG00000051537 | 7.074518513 | 4.173703463 | 7.767661525 | 2.416373016 | 0.716194586 |
| ENSMUSG00000051548 | 9.904325918 | 6.956172438 | 5.649208382 | 10.47094974 | 8.594335036 |
| ENSMUSG00000051582 | 7.074518513 | 8.347406925 | 3.530755239 | 4.832746033 | 3.580972932 |
| ENSMUSG00000051606 | 4.952162959 | 4.869320706 | 9.179963621 | 2.416373016 | 5.013362104 |



|                    |             |             |             |             |             |
|--------------------|-------------|-------------|-------------|-------------|-------------|
| ENSMUSG00000051616 | 11.31922962 | 8.347406925 | 8.473812573 | 3.221830688 | 7.87814045  |
| ENSMUSG00000051638 | 5.65961481  | 5.56493795  | 4.236906287 | 4.02728836  | 2.864778345 |
| ENSMUSG00000051639 | 23.34591109 | 29.91154148 | 42.36906287 | 23.35827249 | 31.5125618  |
| ENSMUSG00000051663 | 8.489422215 | 6.956172438 | 8.473812573 | 4.832746033 | 5.013362104 |
| ENSMUSG00000051687 | 7.074518513 | 7.651789682 | 7.767661525 | 7.249119049 | 5.729556691 |
| ENSMUSG00000051706 | 4.244711108 | 2.782468975 | 2.118453143 | 2.416373016 | 5.013362104 |
| ENSMUSG00000051723 | 12.73413332 | 8.347406925 | 7.061510478 | 9.665492065 | 12.17530797 |
| ENSMUSG00000051758 | 9.196874066 | 5.56493795  | 8.473812573 | 5.638203705 | 3.580972932 |
| ENSMUSG00000051793 | 6.367066661 | 9.043024169 | 6.35535943  | 6.443661377 | 7.161945863 |
| ENSMUSG00000051805 | 4.952162959 | 7.651789682 | 4.943057334 | 8.860034393 | 7.87814045  |
| ENSMUSG00000051832 | 7.074518513 | 6.956172438 | 7.061510478 | 6.443661377 | 7.161945863 |
| ENSMUSG00000051844 | 79.94205919 | 97.38641413 | 91.09348516 | 78.93485187 | 73.76804239 |
| ENSMUSG00000051877 | 9.196874066 | 8.347406925 | 4.943057334 | 4.02728836  | 7.161945863 |
| ENSMUSG00000051885 | 9.904325918 | 13.21672763 | 7.767661525 | 4.832746033 | 7.161945863 |
| ENSMUSG00000051917 | 8.489422215 | 7.651789682 | 6.35535943  | 8.860034393 | 3.580972932 |
| ENSMUSG00000051952 | 9.196874066 | 5.56493795  | 6.35535943  | 8.054576721 | 6.445751277 |
| ENSMUSG00000051985 | 7.781970364 | 9.043024169 | 9.886114669 | 6.443661377 | 7.87814045  |
| ENSMUSG00000051986 | 7.074518513 | 14.60796212 | 8.473812573 | 3.221830688 | 8.594335036 |
| ENSMUSG00000052005 | 9.904325918 | 6.956172438 | 9.179963621 | 8.054576721 | 7.87814045  |
| ENSMUSG00000052012 | 10.61177777 | 10.43425866 | 11.29841676 | 2.416373016 | 7.161945863 |
| ENSMUSG00000052025 | 2.122355554 | 4.869320706 | 4.943057334 | 1.610915344 | 2.864778345 |
| ENSMUSG00000052058 | 12.73413332 | 9.738641413 | 7.061510478 | 4.02728836  | 4.297167518 |
| ENSMUSG00000052125 | 31.12788146 | 46.60635533 | 35.30755239 | 33.02376456 | 46.55264811 |
| ENSMUSG00000052143 | 9.196874066 | 4.173703463 | 5.649208382 | 9.665492065 | 11.45911338 |
| ENSMUSG00000052154 | 84.89422215 | 116.1680797 | 85.44427678 | 113.5695318 | 97.40246374 |
| ENSMUSG00000052157 | 7.781970364 | 6.260555194 | 2.824604191 | 1.610915344 | 2.864778345 |
| ENSMUSG00000052182 | 10.61177777 | 7.651789682 | 1.412302096 | 3.221830688 | 5.729556691 |
| ENSMUSG00000052188 | 11.31922962 | 13.21672763 | 7.061510478 | 5.638203705 | 9.310529622 |
| ENSMUSG00000052192 | 3.537259256 | 3.478086219 | 8.473812573 | 5.638203705 | 6.445751277 |
| ENSMUSG00000052222 | 0           | 0           | 0           | 0           | 0           |
| ENSMUSG00000052236 | 5.65961481  | 6.260555194 | 6.35535943  | 4.02728836  | 5.729556691 |
| ENSMUSG00000052241 | 41.03220737 | 48.69320706 | 47.3121202  | 158.6751614 | 99.5510475  |
| ENSMUSG00000052248 | 0           | 0.695617244 | 0.706151048 | 1.610915344 | 1.432389173 |
| ENSMUSG00000052273 | 9.196874066 | 6.956172438 | 4.236906287 | 5.638203705 | 6.445751277 |
| ENSMUSG00000052281 | 70.03773327 | 100.1688831 | 103.098053  | 157.0642461 | 139.6579443 |
| ENSMUSG00000052291 | 101.1656147 | 124.5154866 | 105.2165061 | 241.6373016 | 176.9000628 |
| ENSMUSG00000052295 | 12.02668147 | 6.956172438 | 5.649208382 | 7.249119049 | 8.594335036 |
| ENSMUSG00000052368 | 8.489422215 | 4.869320706 | 6.35535943  | 5.638203705 | 7.161945863 |
| ENSMUSG00000052371 | 7.074518513 | 12.52111039 | 3.530755239 | 9.665492065 | 5.729556691 |
| ENSMUSG00000052403 | 55.1812444  | 103.6469693 | 91.79963621 | 111.1531587 | 101.6996313 |
| ENSMUSG00000052415 | 7.074518513 | 4.869320706 | 7.061510478 | 5.638203705 | 5.729556691 |
| ENSMUSG00000052426 | 5.65961481  | 5.56493795  | 5.649208382 | 4.02728836  | 1.432389173 |
| ENSMUSG00000052482 | 7.074518513 | 1.391234488 | 5.649208382 | 5.638203705 | 5.729556691 |

|                    |             |             |             |             |             |
|--------------------|-------------|-------------|-------------|-------------|-------------|
| ENSMUSG00000052496 | 7.781970364 | 6.260555194 | 1.412302096 | 1.610915344 | 3.580972932 |
| ENSMUSG00000052544 | 29.0055259  | 52.86691053 | 41.66291182 | 23.35827249 | 20.769643   |
| ENSMUSG00000052554 | 15.56394073 | 8.347406925 | 9.886114669 | 8.860034393 | 7.87814045  |
| ENSMUSG00000052557 | 53.05888884 | 95.2995624  | 95.33039145 | 67.65844446 | 83.07857202 |
| ENSMUSG00000052625 | 4.952162959 | 9.043024169 | 6.35535943  | 3.221830688 | 2.148583759 |
| ENSMUSG00000052629 | 6.367066661 | 5.56493795  | 4.236906287 | 4.832746033 | 4.297167518 |
| ENSMUSG00000052673 | 130.1711406 | 147.4708557 | 137.6994543 | 341.514053  | 256.3976619 |
| ENSMUSG00000052724 | 145.7350814 | 162.0788178 | 146.8794179 | 132.9005159 | 124.617858  |
| ENSMUSG00000052759 | 8.489422215 | 3.478086219 | 4.943057334 | 7.249119049 | 7.161945863 |
| ENSMUSG00000052767 | 7.074518513 | 10.43425866 | 4.943057334 | 33.82922223 | 28.64778345 |
| ENSMUSG00000052769 | 46.69182218 | 56.34499675 | 62.1412922  | 47.52200265 | 44.40406435 |
| ENSMUSG00000052779 | 6.367066661 | 9.043024169 | 7.061510478 | 3.221830688 | 5.729556691 |
| ENSMUSG00000052785 | 6.367066661 | 9.043024169 | 9.886114669 | 7.249119049 | 4.297167518 |
| ENSMUSG00000052790 | 14.85648888 | 9.738641413 | 9.179963621 | 4.832746033 | 3.580972932 |
| ENSMUSG00000052818 | 7.074518513 | 6.956172438 | 7.767661525 | 7.249119049 | 3.580972932 |
| ENSMUSG00000052825 | 5.65961481  | 9.043024169 | 11.29841676 | 14.4982381  | 16.47247549 |
| ENSMUSG00000052850 | 7.074518513 | 2.782468975 | 5.649208382 | 5.638203705 | 4.297167518 |
| ENSMUSG00000052865 | 8.489422215 | 6.956172438 | 8.473812573 | 8.054576721 | 6.445751277 |
| ENSMUSG00000052909 | 9.196874066 | 6.956172438 | 11.29841676 | 4.832746033 | 5.013362104 |
| ENSMUSG00000052912 | 22.63845924 | 9.043024169 | 14.829172   | 8.054576721 | 11.45911338 |
| ENSMUSG00000052951 | 3.537259256 | 6.260555194 | 7.061510478 | 4.02728836  | 7.87814045  |
| ENSMUSG00000053038 | 13.44158517 | 14.60796212 | 15.53532305 | 16.91461111 | 15.04008631 |
| ENSMUSG00000053049 | 12.02668147 | 6.260555194 | 4.236906287 | 5.638203705 | 5.013362104 |
| ENSMUSG00000053081 | 18.39374813 | 36.86771392 | 26.12758877 | 54.7711217  | 50.84981563 |
| ENSMUSG00000053117 | 7.074518513 | 8.347406925 | 6.35535943  | 7.249119049 | 2.148583759 |
| ENSMUSG00000053121 | 152.8095999 | 166.9481385 | 168.7701004 | 190.8934683 | 176.9000628 |
| ENSMUSG00000053146 | 8.489422215 | 8.347406925 | 4.943057334 | 7.249119049 | 5.729556691 |
| ENSMUSG00000053168 | 5.65961481  | 3.478086219 | 4.943057334 | 1.610915344 | 6.445751277 |
| ENSMUSG00000053173 | 9.196874066 | 6.956172438 | 10.59226572 | 10.47094974 | 6.445751277 |
| ENSMUSG00000053185 | 6.367066661 | 7.651789682 | 8.473812573 | 2.416373016 | 6.445751277 |
| ENSMUSG00000053205 | 29.0055259  | 59.82308296 | 53.66747963 | 73.29664816 | 55.14698315 |
| ENSMUSG00000053208 | 10.61177777 | 6.260555194 | 5.649208382 | 9.665492065 | 6.445751277 |
| ENSMUSG00000053214 | 5.65961481  | 6.260555194 | 7.061510478 | 4.02728836  | 4.297167518 |
| ENSMUSG00000053217 | 12.73413332 | 9.738641413 | 8.473812573 | 8.054576721 | 7.161945863 |
| ENSMUSG00000053263 | 13.44158517 | 22.2597518  | 17.65377619 | 12.88732275 | 17.18867007 |
| ENSMUSG00000053287 | 8.489422215 | 6.956172438 | 7.767661525 | 8.054576721 | 5.729556691 |
| ENSMUSG00000053297 | 8.489422215 | 6.260555194 | 5.649208382 | 6.443661377 | 7.87814045  |
| ENSMUSG00000053332 | 3.537259256 | 6.956172438 | 3.530755239 | 5.638203705 | 10.02672421 |
| ENSMUSG00000053338 | 10.61177777 | 12.52111039 | 7.767661525 | 4.832746033 | 5.013362104 |
| ENSMUSG00000053353 | 17.68629628 | 18.78166558 | 19.77222934 | 38.66196826 | 22.91822676 |
| ENSMUSG00000053360 | 6.367066661 | 5.56493795  | 9.886114669 | 6.443661377 | 3.580972932 |
| ENSMUSG00000053391 | 14.85648888 | 9.043024169 | 9.179963621 | 5.638203705 | 7.87814045  |
| ENSMUSG00000053465 | 9.904325918 | 4.173703463 | 4.943057334 | 4.832746033 | 9.310529622 |

|                    |             |             |             |             |             |
|--------------------|-------------|-------------|-------------|-------------|-------------|
| ENSMUSG00000053472 | 14.14903703 | 11.82549314 | 13.41686991 | 9.665492065 | 11.45911338 |
| ENSMUSG00000053528 | 7.074518513 | 8.347406925 | 10.59226572 | 7.249119049 | 6.445751277 |
| ENSMUSG00000053541 | 23.34591109 | 45.21512085 | 52.96132858 | 27.38556085 | 37.95831308 |
| ENSMUSG00000053545 | 7.074518513 | 2.782468975 | 6.35535943  | 5.638203705 | 2.864778345 |
| ENSMUSG00000053574 | 11.31922962 | 13.91234488 | 18.35992724 | 24.16373016 | 19.33725383 |
| ENSMUSG00000053588 | 53.7663407  | 65.38802092 | 63.5535943  | 64.43661377 | 53.71459398 |
| ENSMUSG00000053613 | 7.781970364 | 5.56493795  | 5.649208382 | 8.860034393 | 5.013362104 |
| ENSMUSG00000053640 | 4.244711108 | 5.56493795  | 6.35535943  | 4.832746033 | 9.310529622 |
| ENSMUSG00000053654 | 7.781970364 | 6.260555194 | 5.649208382 | 8.054576721 | 6.445751277 |
| ENSMUSG00000053656 | 2.122355554 | 2.086851731 | 0           | 0           | 0.716194586 |
| ENSMUSG00000053664 | 7.074518513 | 7.651789682 | 12.71071886 | 8.860034393 | 6.445751277 |
| ENSMUSG00000053714 | 14.85648888 | 20.86851731 | 18.35992724 | 16.10915344 | 15.7562809  |
| ENSMUSG00000053740 | 10.61177777 | 5.56493795  | 9.886114669 | 8.054576721 | 10.7429188  |
| ENSMUSG00000053754 | 103.9954221 | 156.5138799 | 151.1163242 | 149.0096693 | 131.0636093 |
| ENSMUSG00000053773 | 11.31922962 | 4.173703463 | 9.179963621 | 6.443661377 | 9.310529622 |
| ENSMUSG00000053821 | 7.781970364 | 9.043024169 | 4.943057334 | 8.054576721 | 12.17530797 |
| ENSMUSG00000053861 | 7.074518513 | 3.478086219 | 7.061510478 | 2.416373016 | 5.013362104 |
| ENSMUSG00000053889 | 12.02668147 | 6.260555194 | 7.767661525 | 7.249119049 | 8.594335036 |
| ENSMUSG00000053925 | 45.98437033 | 73.0398106  | 71.32125582 | 105.514955  | 85.22715578 |
| ENSMUSG00000053930 | 4.952162959 | 4.869320706 | 7.767661525 | 3.221830688 | 2.148583759 |
| ENSMUSG00000053957 | 7.074518513 | 4.173703463 | 10.59226572 | 66.04752911 | 45.12025894 |
| ENSMUSG00000053985 | 7.781970364 | 14.60796212 | 9.179963621 | 12.08186508 | 8.594335036 |
| ENSMUSG00000054006 | 14.85648888 | 21.56413456 | 30.36449505 | 11.27640741 | 17.18867007 |
| ENSMUSG00000054031 | 10.61177777 | 6.956172438 | 9.886114669 | 6.443661377 | 3.580972932 |
| ENSMUSG00000054036 | 9.904325918 | 4.869320706 | 10.59226572 | 6.443661377 | 10.7429188  |
| ENSMUSG00000054061 | 7.781970364 | 6.956172438 | 4.943057334 | 7.249119049 | 5.729556691 |
| ENSMUSG00000054069 | 4.244711108 | 6.956172438 | 2.118453143 | 8.054576721 | 5.729556691 |
| ENSMUSG00000054116 | 42.44711108 | 59.82308296 | 60.02283906 | 57.18749472 | 42.97167518 |
| ENSMUSG00000054135 | 13.44158517 | 18.78166558 | 12.00456781 | 20.94189947 | 17.18867007 |
| ENSMUSG00000054156 | 12.73413332 | 8.347406925 | 4.236906287 | 2.416373016 | 4.297167518 |
| ENSMUSG00000054181 | 33.95768886 | 65.38802092 | 50.84287544 | 46.71654498 | 41.53928601 |
| ENSMUSG00000054236 | 8.489422215 | 9.043024169 | 4.943057334 | 7.249119049 | 7.87814045  |
| ENSMUSG00000054247 | 48.81417774 | 90.43024169 | 66.37819849 | 88.60034393 | 98.11865833 |
| ENSMUSG00000054304 | 6.367066661 | 2.782468975 | 6.35535943  | 2.416373016 | 7.87814045  |
| ENSMUSG00000054351 | 2.122355554 | 5.56493795  | 7.767661525 | 6.443661377 | 5.013362104 |
| ENSMUSG00000054379 | 9.196874066 | 4.173703463 | 10.59226572 | 10.47094974 | 8.594335036 |
| ENSMUSG00000054391 | 18.39374813 | 15.99919661 | 16.94762515 | 15.30369577 | 21.48583759 |
| ENSMUSG00000054406 | 7.781970364 | 5.56493795  | 4.236906287 | 3.221830688 | 10.7429188  |
| ENSMUSG00000054412 | 7.781970364 | 5.56493795  | 4.943057334 | 5.638203705 | 7.87814045  |
| ENSMUSG00000054418 | 6.367066661 | 5.56493795  | 4.236906287 | 6.443661377 | 2.864778345 |
| ENSMUSG00000054426 | 61.54831106 | 107.8206728 | 96.74269354 | 99.87675134 | 88.80812871 |
| ENSMUSG00000054431 | 1.414903703 | 9.043024169 | 6.35535943  | 3.221830688 | 4.297167518 |
| ENSMUSG00000054457 | 7.781970364 | 6.260555194 | 4.943057334 | 3.221830688 | 4.297167518 |

|                    |             |             |             |             |             |
|--------------------|-------------|-------------|-------------|-------------|-------------|
| ENSMUSG00000054488 | 8.489422215 | 5.56493795  | 7.767661525 | 4.832746033 | 8.594335036 |
| ENSMUSG00000054493 | 7.781970364 | 9.738641413 | 6.35535943  | 1.610915344 | 8.594335036 |
| ENSMUSG00000054510 | 8.489422215 | 4.869320706 | 14.12302096 | 5.638203705 | 6.445751277 |
| ENSMUSG00000054514 | 48.81417774 | 88.34338996 | 70.61510478 | 166.7297381 | 141.0903335 |
| ENSMUSG00000054556 | 8.489422215 | 4.173703463 | 7.061510478 | 8.054576721 | 9.310529622 |
| ENSMUSG00000054618 | 5.65961481  | 9.043024169 | 9.179963621 | 6.443661377 | 7.161945863 |
| ENSMUSG00000054622 | 9.196874066 | 2.782468975 | 4.236906287 | 8.054576721 | 9.310529622 |
| ENSMUSG00000054640 | 7.074518513 | 4.173703463 | 7.061510478 | 4.02728836  | 9.310529622 |
| ENSMUSG00000054648 | 38.20239997 | 49.38882431 | 49.43057334 | 91.82217462 | 71.61945863 |
| ENSMUSG00000054714 | 7.074518513 | 9.043024169 | 11.29841676 | 8.054576721 | 6.445751277 |
| ENSMUSG00000054745 | 7.074518513 | 7.651789682 | 6.35535943  | 4.02728836  | 4.297167518 |
| ENSMUSG00000054779 | 7.074518513 | 5.56493795  | 9.886114669 | 11.27640741 | 11.45911338 |
| ENSMUSG00000054822 | 15.56394073 | 27.82468975 | 28.24604191 | 19.33098413 | 14.32389173 |
| ENSMUSG00000054890 | 7.781970364 | 5.56493795  | 7.061510478 | 8.860034393 | 5.013362104 |
| ENSMUSG00000054909 | 7.074518513 | 7.651789682 | 11.29841676 | 9.665492065 | 4.297167518 |
| ENSMUSG00000054910 | 93.38364437 | 146.0796212 | 103.098053  | 124.8459392 | 96.68626916 |
| ENSMUSG00000054944 | 8.489422215 | 6.956172438 | 8.473812573 | 5.638203705 | 5.013362104 |
| ENSMUSG00000054957 | 7.781970364 | 20.86851731 | 19.77222934 | 12.08186508 | 16.47247549 |
| ENSMUSG00000054967 | 14.85648888 | 10.43425866 | 8.473812573 | 6.443661377 | 6.445751277 |
| ENSMUSG00000054978 | 9.196874066 | 3.478086219 | 5.649208382 | 12.08186508 | 5.013362104 |
| ENSMUSG00000055045 | 10.61177777 | 4.173703463 | 5.649208382 | 4.832746033 | 5.013362104 |
| ENSMUSG00000055048 | 7.074518513 | 6.956172438 | 7.061510478 | 4.832746033 | 8.594335036 |
| ENSMUSG00000055061 | 57.30359995 | 86.25653823 | 86.15042783 | 39.46742593 | 37.95831308 |
| ENSMUSG00000055088 | 4.952162959 | 2.086851731 | 6.35535943  | 4.832746033 | 4.297167518 |
| ENSMUSG00000055093 | 7.781970364 | 13.21672763 | 9.886114669 | 9.665492065 | 17.18867007 |
| ENSMUSG00000055110 | 2.829807405 | 3.478086219 | 4.236906287 | 4.832746033 | 2.864778345 |
| ENSMUSG00000055114 | 9.196874066 | 6.956172438 | 5.649208382 | 6.443661377 | 9.310529622 |
| ENSMUSG00000055134 | 5.65961481  | 5.56493795  | 4.943057334 | 6.443661377 | 6.445751277 |
| ENSMUSG00000055137 | 24.05336294 | 59.12746572 | 31.77679715 | 91.82217462 | 73.05184781 |
| ENSMUSG00000055150 | 11.31922962 | 9.043024169 | 9.179963621 | 7.249119049 | 8.594335036 |
| ENSMUSG00000055159 | 86.30912585 | 107.1250555 | 90.38733411 | 183.6443492 | 138.2255552 |
| ENSMUSG00000055188 | 32.54278516 | 54.95376226 | 45.19366706 | 148.2042117 | 83.07857202 |
| ENSMUSG00000055193 | 6.367066661 | 4.173703463 | 5.649208382 | 1.610915344 | 7.87814045  |
| ENSMUSG00000055198 | 9.196874066 | 7.651789682 | 3.530755239 | 3.221830688 | 7.87814045  |
| ENSMUSG00000055202 | 0           | 0           | 0           | 0           | 0           |
| ENSMUSG00000055216 | 11.31922962 | 18.78166558 | 14.12302096 | 6.443661377 | 10.7429188  |
| ENSMUSG00000055228 | 58.71850365 | 77.9091313  | 62.84744325 | 45.91108731 | 63.0251236  |
| ENSMUSG00000055370 | 7.074518513 | 14.60796212 | 12.00456781 | 6.443661377 | 9.310529622 |
| ENSMUSG00000055385 | 8.489422215 | 6.956172438 | 2.824604191 | 8.860034393 | 5.729556691 |
| ENSMUSG00000055408 | 0           | 0           | 0           | 0           | 0           |
| ENSMUSG00000055413 | 89.84638511 | 131.4716591 | 113.6903187 | 221.5008598 | 178.332452  |
| ENSMUSG00000055416 | 9.196874066 | 9.738641413 | 7.767661525 | 5.638203705 | 7.87814045  |
| ENSMUSG00000055421 | 11.31922962 | 6.260555194 | 7.767661525 | 4.02728836  | 2.864778345 |

|                    |             |             |             |             |             |
|--------------------|-------------|-------------|-------------|-------------|-------------|
| ENSMUSG00000055424 | 95.50599992 | 140.5146832 | 111.5718655 | 108.7367857 | 93.10529622 |
| ENSMUSG00000055452 | 19.10119998 | 13.91234488 | 14.12302096 | 18.52552646 | 23.63442135 |
| ENSMUSG00000055471 | 9.196874066 | 6.260555194 | 4.943057334 | 3.221830688 | 7.87814045  |
| ENSMUSG00000055494 | 14.85648888 | 6.260555194 | 9.179963621 | 8.054576721 | 5.729556691 |
| ENSMUSG00000055497 | 8.489422215 | 4.173703463 | 5.649208382 | 6.443661377 | 8.594335036 |
| ENSMUSG00000055523 | 9.904325918 | 10.43425866 | 8.473812573 | 12.08186508 | 7.161945863 |
| ENSMUSG00000055571 | 4.952162959 | 9.043024169 | 7.767661525 | 2.416373016 | 9.310529622 |
| ENSMUSG00000055621 | 4.244711108 | 3.478086219 | 7.061510478 | 8.054576721 | 2.864778345 |
| ENSMUSG00000055629 | 7.781970364 | 9.738641413 | 5.649208382 | 5.638203705 | 5.013362104 |
| ENSMUSG00000055632 | 6.367066661 | 4.173703463 | 7.767661525 | 3.221830688 | 10.02672421 |
| ENSMUSG00000055700 | 8.489422215 | 2.086851731 | 4.236906287 | 4.02728836  | 2.864778345 |
| ENSMUSG00000055763 | 9.904325918 | 7.651789682 | 9.179963621 | 4.02728836  | 7.161945863 |
| ENSMUSG00000055771 | 7.074518513 | 8.347406925 | 2.824604191 | 6.443661377 | 5.729556691 |
| ENSMUSG00000055795 | 4.952162959 | 4.869320706 | 7.061510478 | 3.221830688 | 5.729556691 |
| ENSMUSG00000055820 | 4.952162959 | 6.260555194 | 7.061510478 | 2.416373016 | 10.7429188  |
| ENSMUSG00000055833 | 30.4204296  | 52.17129328 | 44.48751601 | 45.10562964 | 50.13362104 |
| ENSMUSG00000055838 | 6.367066661 | 6.956172438 | 9.886114669 | 5.638203705 | 6.445751277 |
| ENSMUSG00000055872 | 14.85648888 | 18.78166558 | 19.77222934 | 12.08186508 | 17.18867007 |
| ENSMUSG00000055897 | 58.0110518  | 79.99598303 | 93.91808935 | 86.18397091 | 88.09193412 |
| ENSMUSG00000055944 | 4.244711108 | 2.782468975 | 7.061510478 | 4.832746033 | 7.161945863 |
| ENSMUSG00000055958 | 7.074518513 | 6.956172438 | 4.943057334 | 6.443661377 | 4.297167518 |
| ENSMUSG00000055968 | 16.27139258 | 26.43345526 | 24.00913562 | 92.62763229 | 63.0251236  |
| ENSMUSG00000055972 | 9.196874066 | 6.956172438 | 8.473812573 | 7.249119049 | 7.161945863 |
| ENSMUSG00000056031 | 9.904325918 | 4.173703463 | 4.943057334 | 4.832746033 | 5.729556691 |
| ENSMUSG00000056032 | 9.904325918 | 7.651789682 | 5.649208382 | 7.249119049 | 4.297167518 |
| ENSMUSG00000056050 | 33.95768886 | 60.51870021 | 55.07978173 | 57.18749472 | 55.14698315 |
| ENSMUSG00000056061 | 9.196874066 | 6.260555194 | 8.473812573 | 2.416373016 | 5.729556691 |
| ENSMUSG00000056115 | 12.02668147 | 11.82549314 | 13.41686991 | 7.249119049 | 14.32389173 |
| ENSMUSG00000056128 | 9.904325918 | 5.56493795  | 6.35535943  | 7.249119049 | 12.17530797 |
| ENSMUSG00000056145 | 100.4581629 | 134.9497453 | 107.3349593 | 102.2931244 | 88.09193412 |
| ENSMUSG00000056219 | 11.31922962 | 12.52111039 | 9.886114669 | 10.47094974 | 7.161945863 |
| ENSMUSG00000056258 | 9.904325918 | 6.260555194 | 5.649208382 | 8.860034393 | 5.729556691 |
| ENSMUSG00000056281 | 2.829807405 | 4.869320706 | 6.35535943  | 4.832746033 | 3.580972932 |
| ENSMUSG00000056288 | 9.904325918 | 12.52111039 | 13.41686991 | 5.638203705 | 7.161945863 |
| ENSMUSG00000056329 | 12.02668147 | 4.173703463 | 10.59226572 | 4.02728836  | 5.013362104 |
| ENSMUSG00000056332 | 9.904325918 | 11.1298759  | 10.59226572 | 4.832746033 | 5.013362104 |
| ENSMUSG00000056359 | 9.904325918 | 6.260555194 | 6.35535943  | 4.832746033 | 10.7429188  |
| ENSMUSG00000056411 | 28.29807405 | 45.91073809 | 38.13215658 | 121.6241085 | 85.94335036 |
| ENSMUSG00000056412 | 16.27139258 | 16.69481385 | 13.41686991 | 20.1364418  | 19.33725383 |
| ENSMUSG00000056418 | 14.85648888 | 14.60796212 | 15.53532305 | 8.860034393 | 10.7429188  |
| ENSMUSG00000056445 | 5.65961481  | 3.478086219 | 7.767661525 | 4.832746033 | 8.594335036 |
| ENSMUSG00000056509 | 12.02668147 | 8.347406925 | 9.886114669 | 10.47094974 | 5.729556691 |
| ENSMUSG00000056564 | 7.781970364 | 3.478086219 | 8.473812573 | 5.638203705 | 7.161945863 |

|                    |             |             |             |             |             |
|--------------------|-------------|-------------|-------------|-------------|-------------|
| ENSMUSG00000056579 | 19.10119998 | 27.82468975 | 16.2414741  | 32.21830688 | 32.22875639 |
| ENSMUSG00000056590 | 0           | 0           | 0           | 0           | 0           |
| ENSMUSG00000056605 | 6.367066661 | 3.478086219 | 8.473812573 | 8.054576721 | 5.013362104 |
| ENSMUSG00000056682 | 91.96874066 | 122.4286349 | 103.804204  | 130.4841429 | 89.52432329 |
| ENSMUSG00000056687 | 101.8730666 | 116.863697  | 110.8657145 | 212.6408254 | 161.8599765 |
| ENSMUSG00000056696 | 10.61177777 | 6.260555194 | 7.061510478 | 6.443661377 | 2.864778345 |
| ENSMUSG00000056699 | 20.51610369 | 15.30357936 | 19.77222934 | 9.665492065 | 14.32389173 |
| ENSMUSG00000056716 | 6.367066661 | 4.869320706 | 9.179963621 | 9.665492065 | 9.310529622 |
| ENSMUSG00000056735 | 13.44158517 | 30.60715873 | 28.24604191 | 22.55281482 | 23.63442135 |
| ENSMUSG00000056738 | 8.489422215 | 6.956172438 | 7.061510478 | 4.832746033 | 10.02672421 |
| ENSMUSG00000056771 | 3.537259256 | 4.173703463 | 5.649208382 | 3.221830688 | 7.161945863 |
| ENSMUSG00000056772 | 11.31922962 | 9.738641413 | 7.767661525 | 5.638203705 | 5.013362104 |
| ENSMUSG00000056777 | 16.97884443 | 6.260555194 | 9.179963621 | 3.221830688 | 8.594335036 |
| ENSMUSG00000056782 | 7.074518513 | 5.56493795  | 4.943057334 | 1.610915344 | 11.45911338 |
| ENSMUSG00000056797 | 7.781970364 | 6.260555194 | 7.061510478 | 7.249119049 | 4.297167518 |
| ENSMUSG00000056821 | 4.244711108 | 9.738641413 | 7.061510478 | 5.638203705 | 7.161945863 |
| ENSMUSG00000056836 | 15.56394073 | 8.347406925 | 6.35535943  | 8.860034393 | 5.729556691 |
| ENSMUSG00000056849 | 9.904325918 | 6.956172438 | 11.29841676 | 8.054576721 | 12.89150255 |
| ENSMUSG00000056853 | 7.781970364 | 7.651789682 | 9.179963621 | 6.443661377 | 7.161945863 |
| ENSMUSG00000056858 | 13.44158517 | 9.043024169 | 8.473812573 | 5.638203705 | 2.864778345 |
| ENSMUSG00000056872 | 10.61177777 | 16.69481385 | 14.12302096 | 11.27640741 | 18.62105924 |
| ENSMUSG00000056877 | 10.61177777 | 6.956172438 | 14.12302096 | 5.638203705 | 12.89150255 |
| ENSMUSG00000056885 | 11.31922962 | 2.086851731 | 7.767661525 | 8.860034393 | 6.445751277 |
| ENSMUSG00000056901 | 7.074518513 | 5.56493795  | 12.00456781 | 3.221830688 | 5.013362104 |
| ENSMUSG00000056904 | 9.904325918 | 6.260555194 | 13.41686991 | 15.30369577 | 13.60769714 |
| ENSMUSG00000056910 | 7.781970364 | 10.43425866 | 4.236906287 | 9.665492065 | 6.445751277 |
| ENSMUSG00000056921 | 6.367066661 | 3.478086219 | 5.649208382 | 5.638203705 | 10.02672421 |
| ENSMUSG00000056926 | 7.074518513 | 5.56493795  | 9.886114669 | 7.249119049 | 5.729556691 |
| ENSMUSG00000056943 | 6.367066661 | 8.347406925 | 9.886114669 | 5.638203705 | 7.161945863 |
| ENSMUSG00000056959 | 9.904325918 | 4.173703463 | 4.236906287 | 5.638203705 | 8.594335036 |
| ENSMUSG00000056961 | 7.074518513 | 6.956172438 | 5.649208382 | 4.832746033 | 5.013362104 |
| ENSMUSG00000056995 | 6.367066661 | 10.43425866 | 7.061510478 | 4.832746033 | 7.161945863 |
| ENSMUSG00000056999 | 77.11225179 | 95.99517964 | 72.02740687 | 107.9313281 | 95.97007457 |
| ENSMUSG00000057021 | 15.56394073 | 13.91234488 | 12.71071886 | 8.054576721 | 12.17530797 |
| ENSMUSG00000057050 | 9.904325918 | 6.956172438 | 8.473812573 | 3.221830688 | 5.013362104 |
| ENSMUSG00000057067 | 5.65961481  | 6.260555194 | 7.061510478 | 2.416373016 | 6.445751277 |
| ENSMUSG00000057116 | 12.02668147 | 6.260555194 | 12.00456781 | 7.249119049 | 7.161945863 |
| ENSMUSG00000057149 | 7.074518513 | 7.651789682 | 4.943057334 | 4.832746033 | 5.729556691 |
| ENSMUSG00000057157 | 5.65961481  | 10.43425866 | 8.473812573 | 7.249119049 | 7.87814045  |
| ENSMUSG00000057160 | 7.074518513 | 5.56493795  | 7.767661525 | 10.47094974 | 12.89150255 |
| ENSMUSG00000057161 | 6.367066661 | 9.043024169 | 9.179963621 | 3.221830688 | 5.729556691 |
| ENSMUSG00000057203 | 11.31922962 | 8.347406925 | 8.473812573 | 8.860034393 | 2.864778345 |
| ENSMUSG00000057207 | 12.02668147 | 9.043024169 | 8.473812573 | 7.249119049 | 4.297167518 |

|                    |             |             |             |             |             |
|--------------------|-------------|-------------|-------------|-------------|-------------|
| ENSMUSG00000057215 | 11.31922962 | 7.651789682 | 7.767661525 | 5.638203705 | 4.297167518 |
| ENSMUSG00000057216 | 54.47379255 | 42.43265187 | 58.61053696 | 44.30017197 | 42.97167518 |
| ENSMUSG00000057244 | 10.61177777 | 11.1298759  | 7.767661525 | 12.88732275 | 15.7562809  |
| ENSMUSG00000057262 | 12.02668147 | 13.91234488 | 12.71071886 | 16.10915344 | 15.04008631 |
| ENSMUSG00000057270 | 9.904325918 | 10.43425866 | 8.473812573 | 7.249119049 | 8.594335036 |
| ENSMUSG00000057278 | 84.89422215 | 132.8628936 | 97.44884459 | 249.6918783 | 197.6697058 |
| ENSMUSG00000057290 | 9.904325918 | 11.1298759  | 7.061510478 | 8.054576721 | 10.02672421 |
| ENSMUSG00000057321 | 5.65961481  | 6.956172438 | 7.061510478 | 5.638203705 | 5.729556691 |
| ENSMUSG00000057349 | 8.489422215 | 6.260555194 | 9.886114669 | 5.638203705 | 10.02672421 |
| ENSMUSG00000057351 | 10.61177777 | 8.347406925 | 2.118453143 | 4.02728836  | 6.445751277 |
| ENSMUSG00000057359 | 0           | 0           | 0           | 0.805457672 | 0           |
| ENSMUSG00000057370 | 8.489422215 | 9.738641413 | 4.943057334 | 6.443661377 | 5.013362104 |
| ENSMUSG00000057381 | 12.73413332 | 9.738641413 | 6.35535943  | 4.832746033 | 2.148583759 |
| ENSMUSG00000057409 | 63.67066661 | 89.0390072  | 81.20737049 | 89.4058016  | 103.1320204 |
| ENSMUSG00000057424 | 10.61177777 | 7.651789682 | 7.061510478 | 5.638203705 | 5.013362104 |
| ENSMUSG00000057447 | 10.61177777 | 6.956172438 | 5.649208382 | 4.02728836  | 6.445751277 |
| ENSMUSG00000057461 | 8.489422215 | 7.651789682 | 6.35535943  | 3.221830688 | 9.310529622 |
| ENSMUSG00000057464 | 7.074518513 | 6.956172438 | 5.649208382 | 5.638203705 | 3.580972932 |
| ENSMUSG00000057499 | 9.904325918 | 11.1298759  | 9.179963621 | 7.249119049 | 7.161945863 |
| ENSMUSG00000057513 | 7.074518513 | 6.260555194 | 7.061510478 | 4.02728836  | 7.87814045  |
| ENSMUSG00000057551 | 12.02668147 | 28.52030699 | 21.89068248 | 19.33098413 | 14.32389173 |
| ENSMUSG00000057577 | 10.61177777 | 9.738641413 | 6.35535943  | 6.443661377 | 7.161945863 |
| ENSMUSG00000057580 | 50.93653329 | 82.08283477 | 73.43970897 | 57.18749472 | 73.76804239 |
| ENSMUSG00000057592 | 13.44158517 | 7.651789682 | 9.886114669 | 6.443661377 | 8.594335036 |
| ENSMUSG00000057605 | 21.93100739 | 36.17209668 | 15.53532305 | 16.91461111 | 34.37734014 |
| ENSMUSG00000057610 | 7.781970364 | 5.56493795  | 7.767661525 | 5.638203705 | 7.161945863 |
| ENSMUSG00000057612 | 7.781970364 | 4.869320706 | 4.236906287 | 7.249119049 | 6.445751277 |
| ENSMUSG00000057626 | 13.44158517 | 6.260555194 | 7.061510478 | 8.054576721 | 6.445751277 |
| ENSMUSG00000057657 | 6.367066661 | 5.56493795  | 10.59226572 | 7.249119049 | 12.89150255 |
| ENSMUSG00000057685 | 5.65961481  | 8.347406925 | 7.767661525 | 4.02728836  | 5.729556691 |
| ENSMUSG00000057696 | 7.074518513 | 11.82549314 | 9.179963621 | 11.27640741 | 7.87814045  |
| ENSMUSG00000057735 | 11.31922962 | 8.347406925 | 8.473812573 | 2.416373016 | 4.297167518 |
| ENSMUSG00000057754 | 13.44158517 | 5.56493795  | 4.236906287 | 2.416373016 | 7.161945863 |
| ENSMUSG00000057761 | 9.196874066 | 6.260555194 | 5.649208382 | 6.443661377 | 4.297167518 |
| ENSMUSG00000057770 | 12.73413332 | 6.260555194 | 4.943057334 | 4.02728836  | 5.013362104 |
| ENSMUSG00000057799 | 2.829807405 | 4.869320706 | 4.943057334 | 7.249119049 | 3.580972932 |
| ENSMUSG00000057802 | 6.367066661 | 6.260555194 | 9.886114669 | 5.638203705 | 6.445751277 |
| ENSMUSG00000057816 | 8.489422215 | 6.260555194 | 8.473812573 | 8.860034393 | 5.013362104 |
| ENSMUSG00000057818 | 9.904325918 | 6.260555194 | 10.59226572 | 7.249119049 | 4.297167518 |
| ENSMUSG00000057829 | 0           | 0.695617244 | 0           | 0.805457672 | 1.432389173 |
| ENSMUSG00000057886 | 9.196874066 | 6.956172438 | 8.473812573 | 9.665492065 | 11.45911338 |
| ENSMUSG00000057890 | 7.781970364 | 7.651789682 | 9.179963621 | 1.610915344 | 5.729556691 |
| ENSMUSG00000057903 | 10.61177777 | 9.738641413 | 5.649208382 | 7.249119049 | 5.729556691 |

|                    |             |             |             |             |             |
|--------------------|-------------|-------------|-------------|-------------|-------------|
| ENSMUSG00000057924 | 0.707451851 | 1.391234488 | 2.118453143 | 0           | 0           |
| ENSMUSG00000057945 | 147.1499851 | 187.8166558 | 177.243913  | 252.913709  | 214.8583759 |
| ENSMUSG00000057981 | 7.074518513 | 4.173703463 | 9.886114669 | 7.249119049 | 5.729556691 |
| ENSMUSG00000057990 | 36.78749627 | 53.56252777 | 51.54902649 | 33.82922223 | 39.39070225 |
| ENSMUSG00000058005 | 10.61177777 | 8.347406925 | 12.71071886 | 9.665492065 | 8.594335036 |
| ENSMUSG00000058050 | 12.02668147 | 7.651789682 | 2.824604191 | 11.27640741 | 12.17530797 |
| ENSMUSG00000058052 | 8.489422215 | 7.651789682 | 10.59226572 | 10.47094974 | 10.02672421 |
| ENSMUSG00000058064 | 12.73413332 | 10.43425866 | 9.886114669 | 19.33098413 | 14.32389173 |
| ENSMUSG00000058071 | 5.65961481  | 8.347406925 | 14.829172   | 1.610915344 | 8.594335036 |
| ENSMUSG00000058073 | 8.489422215 | 11.1298759  | 5.649208382 | 9.665492065 | 7.161945863 |
| ENSMUSG00000058078 | 8.489422215 | 2.782468975 | 4.236906287 | 6.443661377 | 9.310529622 |
| ENSMUSG00000058084 | 7.074518513 | 7.651789682 | 6.35535943  | 5.638203705 | 7.87814045  |
| ENSMUSG00000058101 | 9.904325918 | 5.56493795  | 7.061510478 | 7.249119049 | 7.87814045  |
| ENSMUSG00000058132 | 7.074518513 | 5.56493795  | 5.649208382 | 4.02728836  | 6.445751277 |
| ENSMUSG00000058159 | 10.61177777 | 4.869320706 | 5.649208382 | 4.832746033 | 3.580972932 |
| ENSMUSG00000058176 | 9.196874066 | 8.347406925 | 11.29841676 | 5.638203705 | 7.161945863 |
| ENSMUSG00000058188 | 10.61177777 | 7.651789682 | 2.118453143 | 2.416373016 | 9.310529622 |
| ENSMUSG00000058194 | 12.02668147 | 9.043024169 | 2.824604191 | 2.416373016 | 5.013362104 |
| ENSMUSG00000058200 | 4.952162959 | 1.391234488 | 2.824604191 | 2.416373016 | 2.148583759 |
| ENSMUSG00000058246 | 7.781970364 | 4.869320706 | 8.473812573 | 5.638203705 | 5.013362104 |
| ENSMUSG00000058250 | 4.952162959 | 9.043024169 | 7.767661525 | 8.860034393 | 5.013362104 |
| ENSMUSG00000058254 | 7.074518513 | 4.173703463 | 5.649208382 | 1.610915344 | 2.864778345 |
| ENSMUSG00000058275 | 9.904325918 | 9.043024169 | 5.649208382 | 7.249119049 | 7.87814045  |
| ENSMUSG00000058281 | 4.244711108 | 5.56493795  | 9.179963621 | 4.02728836  | 6.445751277 |
| ENSMUSG00000058298 | 27.5906222  | 39.6501829  | 45.8998181  | 51.54929101 | 53.71459398 |
| ENSMUSG00000058357 | 51.64398514 | 95.2995624  | 84.03197468 | 200.5589604 | 150.4008631 |
| ENSMUSG00000058360 | 12.02668147 | 6.956172438 | 12.00456781 | 9.665492065 | 8.594335036 |
| ENSMUSG00000058399 | 9.904325918 | 6.260555194 | 7.061510478 | 6.443661377 | 7.161945863 |
| ENSMUSG00000058430 | 10.61177777 | 11.1298759  | 7.061510478 | 8.860034393 | 8.594335036 |
| ENSMUSG00000058435 | 2.122355554 | 8.347406925 | 3.530755239 | 8.860034393 | 8.594335036 |
| ENSMUSG00000058463 | 7.781970364 | 9.738641413 | 4.236906287 | 6.443661377 | 1.432389173 |
| ENSMUSG00000058492 | 7.074518513 | 5.56493795  | 8.473812573 | 7.249119049 | 7.87814045  |
| ENSMUSG00000058508 | 8.489422215 | 10.43425866 | 6.35535943  | 2.416373016 | 7.87814045  |
| ENSMUSG00000058513 | 6.367066661 | 11.1298759  | 7.061510478 | 8.054576721 | 4.297167518 |
| ENSMUSG00000058521 | 11.31922962 | 6.260555194 | 8.473812573 | 10.47094974 | 4.297167518 |
| ENSMUSG00000058542 | 1.414903703 | 2.782468975 | 1.412302096 | 0.805457672 | 2.148583759 |
| ENSMUSG00000058567 | 44.56946663 | 79.99598303 | 71.32125582 | 53.16020636 | 50.84981563 |
| ENSMUSG00000058581 | 11.31922962 | 8.347406925 | 12.00456781 | 7.249119049 | 8.594335036 |
| ENSMUSG00000058590 | 9.904325918 | 8.347406925 | 5.649208382 | 2.416373016 | 6.445751277 |
| ENSMUSG00000058603 | 11.31922962 | 12.52111039 | 8.473812573 | 13.69278043 | 12.89150255 |
| ENSMUSG00000058607 | 6.367066661 | 8.347406925 | 5.649208382 | 9.665492065 | 3.580972932 |
| ENSMUSG00000058613 | 0           | 0           | 0           | 0           | 0           |
| ENSMUSG00000058622 | 9.904325918 | 8.347406925 | 7.061510478 | 8.860034393 | 5.013362104 |



|                    |             |             |             |             |             |
|--------------------|-------------|-------------|-------------|-------------|-------------|
| ENSMUSG00000058625 | 9.904325918 | 9.043024169 | 8.473812573 | 11.27640741 | 19.33725383 |
| ENSMUSG00000058661 | 9.196874066 | 11.1298759  | 7.767661525 | 8.054576721 | 10.7429188  |
| ENSMUSG00000058662 | 7.074518513 | 4.173703463 | 5.649208382 | 3.221830688 | 8.594335036 |
| ENSMUSG00000058685 | 8.489422215 | 6.260555194 | 8.473812573 | 4.02728836  | 7.161945863 |
| ENSMUSG00000058700 | 7.781970364 | 7.651789682 | 12.71071886 | 9.665492065 | 9.310529622 |
| ENSMUSG00000058717 | 9.904325918 | 5.56493795  | 7.767661525 | 4.832746033 | 8.594335036 |
| ENSMUSG00000058725 | 7.781970364 | 7.651789682 | 5.649208382 | 4.832746033 | 7.87814045  |
| ENSMUSG00000058728 | 12.02668147 | 7.651789682 | 5.649208382 | 5.638203705 | 10.02672421 |
| ENSMUSG00000058731 | 9.196874066 | 6.956172438 | 9.886114669 | 1.610915344 | 5.013362104 |
| ENSMUSG00000058745 | 14.85648888 | 12.52111039 | 9.179963621 | 10.47094974 | 14.32389173 |
| ENSMUSG00000058748 | 36.78749627 | 57.04061399 | 57.19823487 | 57.99295239 | 65.88990194 |
| ENSMUSG00000058807 | 12.02668147 | 4.869320706 | 7.767661525 | 3.221830688 | 8.594335036 |
| ENSMUSG00000058809 | 15.56394073 | 9.738641413 | 10.59226572 | 20.1364418  | 12.89150255 |
| ENSMUSG00000058812 | 89.13893326 | 135.6453625 | 98.86114669 | 202.1698757 | 139.6579443 |
| ENSMUSG00000058816 | 9.196874066 | 11.1298759  | 8.473812573 | 4.02728836  | 4.297167518 |
| ENSMUSG00000058838 | 14.14903703 | 15.30357936 | 12.71071886 | 11.27640741 | 13.60769714 |
| ENSMUSG00000058869 | 13.44158517 | 9.043024169 | 4.943057334 | 8.054576721 | 14.32389173 |
| ENSMUSG00000058873 | 15.56394073 | 11.82549314 | 12.00456781 | 7.249119049 | 6.445751277 |
| ENSMUSG00000058884 | 9.196874066 | 2.782468975 | 6.35535943  | 4.832746033 | 6.445751277 |
| ENSMUSG00000058905 | 6.367066661 | 9.043024169 | 9.886114669 | 11.27640741 | 9.310529622 |
| ENSMUSG00000058922 | 0           | 0           | 0           | 0           | 0           |
| ENSMUSG00000058932 | 4.244711108 | 4.173703463 | 5.649208382 | 8.054576721 | 6.445751277 |
| ENSMUSG00000058933 | 11.31922962 | 4.869320706 | 9.886114669 | 4.832746033 | 10.7429188  |
| ENSMUSG00000058934 | 6.367066661 | 8.347406925 | 7.767661525 | 7.249119049 | 9.310529622 |
| ENSMUSG00000058953 | 8.489422215 | 6.956172438 | 9.179963621 | 5.638203705 | 5.013362104 |
| ENSMUSG00000059014 | 10.61177777 | 6.260555194 | 7.061510478 | 4.832746033 | 6.445751277 |
| ENSMUSG00000059023 | 7.781970364 | 11.82549314 | 7.767661525 | 1.610915344 | 5.013362104 |
| ENSMUSG00000059027 | 16.27139258 | 17.39043109 | 18.35992724 | 15.30369577 | 11.45911338 |
| ENSMUSG00000059031 | 10.61177777 | 11.1298759  | 9.886114669 | 5.638203705 | 6.445751277 |
| ENSMUSG00000059033 | 11.31922962 | 12.52111039 | 14.829172   | 20.94189947 | 14.32389173 |
| ENSMUSG00000059041 | 5.65961481  | 9.043024169 | 7.061510478 | 8.054576721 | 4.297167518 |
| ENSMUSG00000059043 | 8.489422215 | 5.56493795  | 9.179963621 | 3.221830688 | 9.310529622 |
| ENSMUSG00000059058 | 7.781970364 | 13.21672763 | 16.94762515 | 7.249119049 | 9.310529622 |
| ENSMUSG00000059064 | 7.781970364 | 12.52111039 | 8.473812573 | 13.69278043 | 15.7562809  |
| ENSMUSG00000059087 | 9.904325918 | 6.956172438 | 5.649208382 | 10.47094974 | 8.594335036 |
| ENSMUSG00000059101 | 9.196874066 | 6.260555194 | 7.767661525 | 8.054576721 | 12.17530797 |
| ENSMUSG00000059112 | 7.781970364 | 3.478086219 | 7.061510478 | 3.221830688 | 5.729556691 |
| ENSMUSG00000059134 | 9.904325918 | 5.56493795  | 4.943057334 | 1.610915344 | 5.013362104 |
| ENSMUSG00000059136 | 6.367066661 | 5.56493795  | 7.061510478 | 7.249119049 | 10.7429188  |
| ENSMUSG00000059150 | 189.5970961 | 241.3791836 | 253.5082261 | 215.8626561 | 192.6563437 |
| ENSMUSG00000059159 | 5.65961481  | 7.651789682 | 10.59226572 | 5.638203705 | 9.310529622 |
| ENSMUSG00000059169 | 9.904325918 | 6.260555194 | 7.061510478 | 8.860034393 | 5.013362104 |
| ENSMUSG00000059179 | 24.76081479 | 21.56413456 | 17.65377619 | 23.35827249 | 16.47247549 |

|                    |             |             |             |             |             |
|--------------------|-------------|-------------|-------------|-------------|-------------|
| ENSMUSG00000059195 | 23.34591109 | 27.12907251 | 23.30298458 | 68.46390213 | 44.40406435 |
| ENSMUSG00000059205 | 5.65961481  | 3.478086219 | 4.943057334 | 4.02728836  | 6.445751277 |
| ENSMUSG00000059229 | 7.074518513 | 6.260555194 | 7.767661525 | 8.054576721 | 10.7429188  |
| ENSMUSG00000059237 | 1.414903703 | 3.478086219 | 2.118453143 | 1.610915344 | 2.864778345 |
| ENSMUSG00000059244 | 10.61177777 | 7.651789682 | 9.886114669 | 4.02728836  | 8.594335036 |
| ENSMUSG00000059251 | 9.196874066 | 7.651789682 | 3.530755239 | 2.416373016 | 3.580972932 |
| ENSMUSG00000059252 | 12.73413332 | 6.956172438 | 8.473812573 | 4.832746033 | 6.445751277 |
| ENSMUSG00000059277 | 145.7350814 | 163.4700523 | 179.3623661 | 178.8116032 | 142.5227227 |
| ENSMUSG00000059280 | 9.196874066 | 6.260555194 | 8.473812573 | 5.638203705 | 5.729556691 |
| ENSMUSG00000059303 | 9.196874066 | 8.347406925 | 9.179963621 | 4.02728836  | 7.161945863 |
| ENSMUSG00000059352 | 7.781970364 | 8.347406925 | 7.061510478 | 4.832746033 | 7.87814045  |
| ENSMUSG00000059371 | 7.074518513 | 6.260555194 | 7.767661525 | 8.054576721 | 6.445751277 |
| ENSMUSG00000059379 | 6.367066661 | 11.82549314 | 7.061510478 | 5.638203705 | 5.013362104 |
| ENSMUSG00000059382 | 9.196874066 | 8.347406925 | 5.649208382 | 4.02728836  | 4.297167518 |
| ENSMUSG00000059397 | 8.489422215 | 6.260555194 | 4.943057334 | 4.02728836  | 10.7429188  |
| ENSMUSG00000059410 | 7.074518513 | 8.347406925 | 9.179963621 | 2.416373016 | 6.445751277 |
| ENSMUSG00000059422 | 12.02668147 | 12.52111039 | 15.53532305 | 9.665492065 | 13.60769714 |
| ENSMUSG00000059429 | 12.02668147 | 6.260555194 | 11.29841676 | 7.249119049 | 4.297167518 |
| ENSMUSG00000059448 | 10.61177777 | 8.347406925 | 6.35535943  | 11.27640741 | 9.310529622 |
| ENSMUSG00000059459 | 9.904325918 | 9.043024169 | 9.179963621 | 7.249119049 | 4.297167518 |
| ENSMUSG00000059460 | 10.61177777 | 6.260555194 | 12.00456781 | 6.443661377 | 4.297167518 |
| ENSMUSG00000059461 | 2.122355554 | 3.478086219 | 4.236906287 | 10.47094974 | 10.02672421 |
| ENSMUSG00000059483 | 7.781970364 | 9.738641413 | 8.473812573 | 1.610915344 | 7.87814045  |
| ENSMUSG00000059504 | 9.196874066 | 7.651789682 | 7.767661525 | 6.443661377 | 10.02672421 |
| ENSMUSG00000059511 | 11.31922962 | 6.260555194 | 9.179963621 | 4.832746033 | 7.161945863 |
| ENSMUSG00000059565 | 10.61177777 | 14.60796212 | 14.829172   | 6.443661377 | 9.310529622 |
| ENSMUSG00000059571 | 80.64951104 | 132.8628936 | 113.6903187 | 82.15668255 | 95.97007457 |
| ENSMUSG00000059585 | 9.196874066 | 11.1298759  | 8.473812573 | 6.443661377 | 5.729556691 |
| ENSMUSG00000059595 | 4.952162959 | 9.043024169 | 10.59226572 | 7.249119049 | 7.161945863 |
| ENSMUSG00000059610 | 7.781970364 | 6.260555194 | 5.649208382 | 2.416373016 | 5.013362104 |
| ENSMUSG00000059639 | 6.367066661 | 9.738641413 | 10.59226572 | 5.638203705 | 5.013362104 |
| ENSMUSG00000059647 | 9.196874066 | 9.043024169 | 4.943057334 | 7.249119049 | 13.60769714 |
| ENSMUSG00000059658 | 9.904325918 | 4.173703463 | 10.59226572 | 4.832746033 | 10.02672421 |
| ENSMUSG00000059659 | 38.90985182 | 57.04061399 | 57.19823487 | 111.1531587 | 98.11865833 |
| ENSMUSG00000059695 | 4.244711108 | 4.173703463 | 8.473812573 | 3.221830688 | 5.729556691 |
| ENSMUSG00000059706 | 80.64951104 | 95.2995624  | 101.6857509 | 84.57305557 | 70.18706946 |
| ENSMUSG00000059729 | 9.904325918 | 8.347406925 | 9.179963621 | 4.02728836  | 9.310529622 |
| ENSMUSG00000059731 | 9.904325918 | 3.478086219 | 8.473812573 | 3.221830688 | 3.580972932 |
| ENSMUSG00000059751 | 9.904325918 | 9.738641413 | 5.649208382 | 8.054576721 | 8.594335036 |
| ENSMUSG00000059763 | 8.489422215 | 9.043024169 | 6.35535943  | 4.832746033 | 9.310529622 |
| ENSMUSG00000059768 | 12.02668147 | 7.651789682 | 7.061510478 | 7.249119049 | 2.148583759 |
| ENSMUSG00000059776 | 20.51610369 | 19.47728283 | 16.2414741  | 19.33098413 | 17.90486466 |
| ENSMUSG00000059821 | 9.196874066 | 6.260555194 | 7.767661525 | 3.221830688 | 10.7429188  |

|                    |             |             |             |             |             |
|--------------------|-------------|-------------|-------------|-------------|-------------|
| ENSMUSG00000059827 | 6.367066661 | 4.173703463 | 6.35535943  | 7.249119049 | 2.864778345 |
| ENSMUSG00000059830 | 15.56394073 | 6.260555194 | 8.473812573 | 8.860034393 | 7.161945863 |
| ENSMUSG00000059835 | 12.73413332 | 11.1298759  | 12.00456781 | 14.4982381  | 11.45911338 |
| ENSMUSG00000059862 | 7.781970364 | 4.869320706 | 7.767661525 | 8.860034393 | 5.729556691 |
| ENSMUSG00000059864 | 7.074518513 | 9.738641413 | 7.767661525 | 3.221830688 | 8.594335036 |
| ENSMUSG00000059873 | 10.61177777 | 4.173703463 | 6.35535943  | 4.832746033 | 5.013362104 |
| ENSMUSG00000059874 | 9.196874066 | 8.347406925 | 2.824604191 | 5.638203705 | 5.013362104 |
| ENSMUSG00000059877 | 10.61177777 | 11.1298759  | 8.473812573 | 6.443661377 | 3.580972932 |
| ENSMUSG00000059897 | 26.88317035 | 35.47647943 | 31.0706461  | 31.41284921 | 35.09353473 |
| ENSMUSG00000059910 | 10.61177777 | 14.60796212 | 6.35535943  | 4.02728836  | 8.594335036 |
| ENSMUSG00000059912 | 9.196874066 | 9.043024169 | 7.767661525 | 12.88732275 | 5.729556691 |
| ENSMUSG00000059972 | 7.074518513 | 6.956172438 | 7.767661525 | 2.416373016 | 5.729556691 |
| ENSMUSG00000060024 | 5.65961481  | 5.56493795  | 9.179963621 | 6.443661377 | 5.013362104 |
| ENSMUSG00000060029 | 42.44711108 | 50.7800588  | 49.43057334 | 70.88027514 | 73.76804239 |
| ENSMUSG00000060030 | 9.196874066 | 4.173703463 | 3.530755239 | 10.47094974 | 6.445751277 |
| ENSMUSG00000060068 | 7.781970364 | 10.43425866 | 7.061510478 | 4.02728836  | 4.297167518 |
| ENSMUSG00000060070 | 8.489422215 | 7.651789682 | 9.886114669 | 6.443661377 | 6.445751277 |
| ENSMUSG00000060081 | 7.074518513 | 11.1298759  | 5.649208382 | 8.860034393 | 7.87814045  |
| ENSMUSG00000060084 | 12.02668147 | 5.56493795  | 4.943057334 | 6.443661377 | 4.297167518 |
| ENSMUSG00000060096 | 19.10119998 | 12.52111039 | 17.65377619 | 13.69278043 | 14.32389173 |
| ENSMUSG00000060105 | 9.196874066 | 5.56493795  | 7.767661525 | 4.832746033 | 5.013362104 |
| ENSMUSG00000060112 | 9.196874066 | 2.782468975 | 9.179963621 | 10.47094974 | 6.445751277 |
| ENSMUSG00000060128 | 0           | 0           | 0           | 0           | 0           |
| ENSMUSG00000060149 | 72.16008883 | 104.3425866 | 79.08891735 | 105.514955  | 83.7947666  |
| ENSMUSG00000060161 | 12.73413332 | 2.782468975 | 9.886114669 | 9.665492065 | 5.729556691 |
| ENSMUSG00000060170 | 8.489422215 | 4.869320706 | 7.767661525 | 6.443661377 | 7.87814045  |
| ENSMUSG00000060176 | 6.367066661 | 8.347406925 | 10.59226572 | 5.638203705 | 7.161945863 |
| ENSMUSG00000060198 | 11.31922962 | 11.82549314 | 10.59226572 | 12.88732275 | 14.32389173 |
| ENSMUSG00000060201 | 7.781970364 | 9.738641413 | 11.29841676 | 2.416373016 | 5.013362104 |
| ENSMUSG00000060209 | 18.39374813 | 18.08604834 | 22.59683353 | 18.52552646 | 17.18867007 |
| ENSMUSG00000060214 | 4.244711108 | 1.391234488 | 1.412302096 | 0           | 1.432389173 |
| ENSMUSG00000060254 | 9.196874066 | 5.56493795  | 7.061510478 | 4.832746033 | 5.729556691 |
| ENSMUSG00000060256 | 11.31922962 | 7.651789682 | 12.00456781 | 6.443661377 | 4.297167518 |
| ENSMUSG00000060311 | 7.074518513 | 10.43425866 | 4.943057334 | 4.832746033 | 7.161945863 |
| ENSMUSG00000060335 | 7.781970364 | 7.651789682 | 2.824604191 | 2.416373016 | 6.445751277 |
| ENSMUSG00000060377 | 6.367066661 | 4.869320706 | 5.649208382 | 13.69278043 | 9.310529622 |
| ENSMUSG00000060380 | 14.14903703 | 18.08604834 | 16.2414741  | 10.47094974 | 10.7429188  |
| ENSMUSG00000060393 | 12.73413332 | 9.738641413 | 5.649208382 | 4.832746033 | 5.013362104 |
| ENSMUSG00000060404 | 9.904325918 | 6.260555194 | 4.236906287 | 8.860034393 | 8.594335036 |
| ENSMUSG00000060411 | 9.196874066 | 7.651789682 | 3.530755239 | 5.638203705 | 8.594335036 |
| ENSMUSG00000060412 | 13.44158517 | 8.347406925 | 9.179963621 | 4.02728836  | 5.729556691 |
| ENSMUSG00000060417 | 10.61177777 | 9.738641413 | 12.00456781 | 8.054576721 | 10.7429188  |
| ENSMUSG00000060419 | 12.02668147 | 11.1298759  | 7.061510478 | 15.30369577 | 16.47247549 |

|                    |             |             |             |             |             |
|--------------------|-------------|-------------|-------------|-------------|-------------|
| ENSMUSG00000060424 | 7.074518513 | 5.56493795  | 4.943057334 | 3.221830688 | 2.864778345 |
| ENSMUSG00000060438 | 9.196874066 | 10.43425866 | 8.473812573 | 12.08186508 | 10.7429188  |
| ENSMUSG00000060467 | 11.31922962 | 11.1298759  | 17.65377619 | 13.69278043 | 10.02672421 |
| ENSMUSG00000060480 | 6.367066661 | 9.043024169 | 4.943057334 | 5.638203705 | 9.310529622 |
| ENSMUSG00000060490 | 12.02668147 | 10.43425866 | 12.71071886 | 4.832746033 | 7.161945863 |
| ENSMUSG00000060523 | 7.074518513 | 5.56493795  | 9.179963621 | 5.638203705 | 4.297167518 |
| ENSMUSG00000060530 | 6.367066661 | 7.651789682 | 7.061510478 | 4.02728836  | 7.161945863 |
| ENSMUSG00000060559 | 9.196874066 | 6.956172438 | 5.649208382 | 6.443661377 | 5.729556691 |
| ENSMUSG00000060566 | 8.489422215 | 8.347406925 | 7.767661525 | 4.02728836  | 12.17530797 |
| ENSMUSG00000060621 | 12.02668147 | 5.56493795  | 12.00456781 | 7.249119049 | 2.864778345 |
| ENSMUSG00000060647 | 12.02668147 | 9.043024169 | 14.829172   | 6.443661377 | 5.013362104 |
| ENSMUSG00000060680 | 11.31922962 | 7.651789682 | 6.35535943  | 11.27640741 | 11.45911338 |
| ENSMUSG00000060699 | 7.781970364 | 11.1298759  | 4.943057334 | 3.221830688 | 5.729556691 |
| ENSMUSG00000060701 | 8.489422215 | 6.956172438 | 8.473812573 | 4.832746033 | 3.580972932 |
| ENSMUSG00000060724 | 7.074518513 | 7.651789682 | 5.649208382 | 8.860034393 | 5.729556691 |
| ENSMUSG00000060727 | 14.14903703 | 26.43345526 | 23.30298458 | 16.91461111 | 15.7562809  |
| ENSMUSG00000060730 | 8.489422215 | 4.869320706 | 10.59226572 | 9.665492065 | 11.45911338 |
| ENSMUSG00000060742 | 9.904325918 | 5.56493795  | 4.943057334 | 2.416373016 | 1.432389173 |
| ENSMUSG00000060747 | 4.244711108 | 7.651789682 | 5.649208382 | 5.638203705 | 7.87814045  |
| ENSMUSG00000060759 | 11.31922962 | 9.738641413 | 6.35535943  | 7.249119049 | 3.580972932 |
| ENSMUSG00000060765 | 10.61177777 | 9.738641413 | 7.061510478 | 6.443661377 | 6.445751277 |
| ENSMUSG00000060777 | 9.904325918 | 13.91234488 | 15.53532305 | 10.47094974 | 8.594335036 |
| ENSMUSG00000060787 | 9.196874066 | 2.086851731 | 8.473812573 | 8.054576721 | 7.87814045  |
| ENSMUSG00000060795 | 11.31922962 | 10.43425866 | 13.41686991 | 16.10915344 | 7.161945863 |
| ENSMUSG00000060808 | 7.074518513 | 9.043024169 | 5.649208382 | 5.638203705 | 10.02672421 |
| ENSMUSG00000060811 | 14.85648888 | 12.52111039 | 11.29841676 | 35.44013757 | 22.91822676 |
| ENSMUSG00000060816 | 6.367066661 | 9.043024169 | 9.179963621 | 6.443661377 | 5.729556691 |
| ENSMUSG00000060827 | 6.367066661 | 6.956172438 | 6.35535943  | 3.221830688 | 4.297167518 |
| ENSMUSG00000060879 | 8.489422215 | 8.347406925 | 9.886114669 | 7.249119049 | 5.013362104 |
| ENSMUSG00000060888 | 8.489422215 | 9.043024169 | 6.35535943  | 4.832746033 | 6.445751277 |
| ENSMUSG00000060899 | 11.31922962 | 11.1298759  | 9.179963621 | 8.860034393 | 5.729556691 |
| ENSMUSG00000060918 | 10.61177777 | 8.347406925 | 9.179963621 | 7.249119049 | 7.87814045  |
| ENSMUSG00000060956 | 7.781970364 | 7.651789682 | 3.530755239 | 6.443661377 | 6.445751277 |
| ENSMUSG00000060989 | 19.80865184 | 19.47728283 | 30.36449505 | 34.6346799  | 27.93158887 |
| ENSMUSG00000061000 | 9.196874066 | 2.086851731 | 7.767661525 | 1.610915344 | 3.580972932 |
| ENSMUSG00000061022 | 7.781970364 | 9.043024169 | 7.061510478 | 6.443661377 | 5.729556691 |
| ENSMUSG00000061075 | 10.61177777 | 5.56493795  | 5.649208382 | 0           | 10.02672421 |
| ENSMUSG00000061115 | 9.196874066 | 6.956172438 | 9.886114669 | 11.27640741 | 9.310529622 |
| ENSMUSG00000061126 | 8.489422215 | 8.347406925 | 7.767661525 | 8.860034393 | 5.729556691 |
| ENSMUSG00000061150 | 7.074518513 | 6.260555194 | 5.649208382 | 5.638203705 | 2.864778345 |
| ENSMUSG00000061165 | 12.02668147 | 6.260555194 | 8.473812573 | 4.02728836  | 6.445751277 |
| ENSMUSG00000061167 | 12.73413332 | 12.52111039 | 10.59226572 | 16.10915344 | 16.47247549 |
| ENSMUSG00000061195 | 7.781970364 | 8.347406925 | 8.473812573 | 3.221830688 | 7.87814045  |

|                    |             |             |             |             |             |
|--------------------|-------------|-------------|-------------|-------------|-------------|
| ENSMUSG00000061242 | 10.61177777 | 6.956172438 | 7.767661525 | 8.860034393 | 6.445751277 |
| ENSMUSG00000061246 | 14.85648888 | 6.260555194 | 5.649208382 | 5.638203705 | 6.445751277 |
| ENSMUSG00000061272 | 0.707451851 | 0.695617244 | 0           | 0           | 0           |
| ENSMUSG00000061296 | 10.61177777 | 6.956172438 | 7.767661525 | 4.832746033 | 2.864778345 |
| ENSMUSG00000061305 | 11.31922962 | 11.82549314 | 4.236906287 | 4.832746033 | 7.161945863 |
| ENSMUSG00000061330 | 5.65961481  | 7.651789682 | 3.530755239 | 8.054576721 | 9.310529622 |
| ENSMUSG00000061331 | 6.367066661 | 4.173703463 | 4.943057334 | 2.416373016 | 2.864778345 |
| ENSMUSG00000061336 | 9.904325918 | 1.391234488 | 2.824604191 | 1.610915344 | 3.580972932 |
| ENSMUSG00000061342 | 5.65961481  | 4.869320706 | 5.649208382 | 2.416373016 | 4.297167518 |
| ENSMUSG00000061361 | 7.781970364 | 9.043024169 | 7.767661525 | 5.638203705 | 7.161945863 |
| ENSMUSG00000061367 | 9.196874066 | 4.173703463 | 12.00456781 | 7.249119049 | 9.310529622 |
| ENSMUSG00000061371 | 21.93100739 | 32.69401046 | 38.13215658 | 16.91461111 | 32.94495097 |
| ENSMUSG00000061376 | 9.196874066 | 9.738641413 | 10.59226572 | 5.638203705 | 7.161945863 |
| ENSMUSG00000061387 | 12.73413332 | 5.56493795  | 5.649208382 | 8.054576721 | 4.297167518 |
| ENSMUSG00000061390 | 7.781970364 | 4.869320706 | 7.061510478 | 8.054576721 | 10.02672421 |
| ENSMUSG00000061469 | 8.489422215 | 4.869320706 | 8.473812573 | 4.02728836  | 7.87814045  |
| ENSMUSG00000061486 | 10.61177777 | 5.56493795  | 7.767661525 | 8.054576721 | 9.310529622 |
| ENSMUSG00000061488 | 12.02668147 | 4.173703463 | 6.35535943  | 8.860034393 | 7.161945863 |
| ENSMUSG00000061490 | 7.074518513 | 6.260555194 | 2.824604191 | 5.638203705 | 4.297167518 |
| ENSMUSG00000061501 | 12.73413332 | 5.56493795  | 4.236906287 | 6.443661377 | 6.445751277 |
| ENSMUSG00000061510 | 33.25023701 | 50.08444155 | 48.7244223  | 41.88379895 | 47.2688427  |
| ENSMUSG00000061520 | 7.074518513 | 6.260555194 | 4.236906287 | 5.638203705 | 5.013362104 |
| ENSMUSG00000061561 | 13.44158517 | 9.738641413 | 7.767661525 | 4.832746033 | 9.310529622 |
| ENSMUSG00000061602 | 7.074518513 | 6.260555194 | 8.473812573 | 7.249119049 | 7.161945863 |
| ENSMUSG00000061619 | 8.489422215 | 10.43425866 | 9.179963621 | 7.249119049 | 7.161945863 |
| ENSMUSG00000061626 | 7.781970364 | 5.56493795  | 7.767661525 | 6.443661377 | 8.594335036 |
| ENSMUSG00000061637 | 4.952162959 | 8.347406925 | 9.179963621 | 7.249119049 | 5.013362104 |
| ENSMUSG00000061653 | 12.02668147 | 8.347406925 | 6.35535943  | 1.610915344 | 6.445751277 |
| ENSMUSG00000061669 | 12.02668147 | 9.043024169 | 4.236906287 | 5.638203705 | 5.729556691 |
| ENSMUSG00000061684 | 9.904325918 | 22.2597518  | 14.12302096 | 19.33098413 | 17.90486466 |
| ENSMUSG00000061724 | 12.02668147 | 11.1298759  | 9.179963621 | 16.91461111 | 19.33725383 |
| ENSMUSG00000061728 | 12.02668147 | 7.651789682 | 12.00456781 | 7.249119049 | 8.594335036 |
| ENSMUSG00000061755 | 41.73965922 | 78.60474855 | 73.43970897 | 78.12939419 | 70.90326405 |
| ENSMUSG00000061777 | 9.196874066 | 2.086851731 | 4.236906287 | 4.02728836  | 7.161945863 |
| ENSMUSG00000061798 | 9.196874066 | 8.347406925 | 6.35535943  | 11.27640741 | 4.297167518 |
| ENSMUSG00000061829 | 9.904325918 | 9.738641413 | 11.29841676 | 7.249119049 | 7.87814045  |
| ENSMUSG00000061833 | 8.489422215 | 9.043024169 | 8.473812573 | 8.054576721 | 7.161945863 |
| ENSMUSG00000061843 | 5.65961481  | 9.043024169 | 11.29841676 | 3.221830688 | 7.87814045  |
| ENSMUSG00000061847 | 7.781970364 | 8.347406925 | 7.767661525 | 4.02728836  | 8.594335036 |
| ENSMUSG00000061848 | 7.781970364 | 9.043024169 | 8.473812573 | 14.4982381  | 7.87814045  |
| ENSMUSG00000061852 | 36.08004441 | 29.21592424 | 31.77679715 | 40.2728836  | 23.63442135 |
| ENSMUSG00000061863 | 10.61177777 | 9.738641413 | 9.179963621 | 6.443661377 | 10.02672421 |
| ENSMUSG00000061875 | 6.367066661 | 6.260555194 | 9.179963621 | 5.638203705 | 4.297167518 |

|                    |             |             |             |             |             |
|--------------------|-------------|-------------|-------------|-------------|-------------|
| ENSMUSG00000061897 | 12.02668147 | 24.34660353 | 21.89068248 | 14.4982381  | 14.32389173 |
| ENSMUSG00000061952 | 11.31922962 | 6.260555194 | 9.179963621 | 6.443661377 | 7.87814045  |
| ENSMUSG00000061958 | 0           | 0.695617244 | 0.706151048 | 0.805457672 | 0           |
| ENSMUSG00000061961 | 7.781970364 | 6.260555194 | 7.061510478 | 2.416373016 | 2.864778345 |
| ENSMUSG00000061972 | 10.61177777 | 13.21672763 | 10.59226572 | 7.249119049 | 8.594335036 |
| ENSMUSG00000061974 | 4.244711108 | 4.173703463 | 4.943057334 | 4.02728836  | 4.297167518 |
| ENSMUSG00000061975 | 9.196874066 | 9.738641413 | 5.649208382 | 4.02728836  | 7.161945863 |
| ENSMUSG00000061977 | 4.244711108 | 1.391234488 | 2.824604191 | 4.02728836  | 5.729556691 |
| ENSMUSG00000061988 | 14.14903703 | 3.478086219 | 8.473812573 | 6.443661377 | 15.7562809  |
| ENSMUSG00000061992 | 8.489422215 | 6.260555194 | 4.943057334 | 9.665492065 | 5.729556691 |
| ENSMUSG00000062036 | 10.61177777 | 10.43425866 | 6.35535943  | 2.416373016 | 7.161945863 |
| ENSMUSG00000062037 | 8.489422215 | 4.869320706 | 4.943057334 | 8.860034393 | 6.445751277 |
| ENSMUSG00000062038 | 7.074518513 | 7.651789682 | 10.59226572 | 12.08186508 | 20.05344842 |
| ENSMUSG00000062042 | 12.73413332 | 4.869320706 | 4.943057334 | 5.638203705 | 9.310529622 |
| ENSMUSG00000062064 | 9.196874066 | 6.260555194 | 7.767661525 | 4.832746033 | 10.02672421 |
| ENSMUSG00000062081 | 8.489422215 | 9.043024169 | 11.29841676 | 9.665492065 | 12.17530797 |
| ENSMUSG00000062083 | 7.074518513 | 6.956172438 | 2.118453143 | 4.02728836  | 4.297167518 |
| ENSMUSG00000062093 | 18.39374813 | 15.30357936 | 18.35992724 | 50.74383334 | 32.94495097 |
| ENSMUSG00000062103 | 8.489422215 | 8.347406925 | 3.530755239 | 6.443661377 | 2.864778345 |
| ENSMUSG00000062132 | 6.367066661 | 7.651789682 | 4.236906287 | 4.832746033 | 8.594335036 |
| ENSMUSG00000062142 | 7.074518513 | 10.43425866 | 6.35535943  | 4.02728836  | 4.297167518 |
| ENSMUSG00000062152 | 7.781970364 | 9.043024169 | 9.886114669 | 2.416373016 | 9.310529622 |
| ENSMUSG00000062162 | 2.829807405 | 7.651789682 | 3.530755239 | 2.416373016 | 2.864778345 |
| ENSMUSG00000062186 | 9.904325918 | 6.260555194 | 9.886114669 | 5.638203705 | 5.013362104 |
| ENSMUSG00000062199 | 5.65961481  | 9.043024169 | 7.061510478 | 6.443661377 | 6.445751277 |
| ENSMUSG00000062204 | 10.61177777 | 6.956172438 | 14.12302096 | 6.443661377 | 5.729556691 |
| ENSMUSG00000062226 | 6.367066661 | 4.173703463 | 5.649208382 | 3.221830688 | 4.297167518 |
| ENSMUSG00000062235 | 7.074518513 | 8.347406925 | 6.35535943  | 4.832746033 | 8.594335036 |
| ENSMUSG00000062272 | 10.61177777 | 7.651789682 | 3.530755239 | 6.443661377 | 5.013362104 |
| ENSMUSG00000062279 | 6.367066661 | 6.956172438 | 7.767661525 | 12.88732275 | 8.594335036 |
| ENSMUSG00000062280 | 7.074518513 | 9.738641413 | 4.943057334 | 5.638203705 | 7.87814045  |
| ENSMUSG00000062284 | 9.196874066 | 13.21672763 | 10.59226572 | 5.638203705 | 6.445751277 |
| ENSMUSG00000062319 | 9.904325918 | 8.347406925 | 11.29841676 | 11.27640741 | 8.594335036 |
| ENSMUSG00000062353 | 7.781970364 | 14.60796212 | 13.41686991 | 9.665492065 | 14.32389173 |
| ENSMUSG00000062365 | 10.61177777 | 9.738641413 | 10.59226572 | 11.27640741 | 13.60769714 |
| ENSMUSG00000062391 | 7.781970364 | 8.347406925 | 9.179963621 | 8.054576721 | 3.580972932 |
| ENSMUSG00000062426 | 8.489422215 | 8.347406925 | 6.35535943  | 2.416373016 | 7.87814045  |
| ENSMUSG00000062434 | 9.904325918 | 11.82549314 | 4.943057334 | 8.054576721 | 10.02672421 |
| ENSMUSG00000062458 | 9.196874066 | 8.347406925 | 3.530755239 | 12.88732275 | 12.89150255 |
| ENSMUSG00000062461 | 212.2355554 | 246.2485043 | 217.4945227 | 169.1461111 | 158.9951982 |
| ENSMUSG00000062470 | 14.14903703 | 20.86851731 | 17.65377619 | 15.30369577 | 20.769643   |
| ENSMUSG00000062472 | 13.44158517 | 8.347406925 | 5.649208382 | 4.832746033 | 12.17530797 |
| ENSMUSG00000062477 | 5.65961481  | 6.956172438 | 8.473812573 | 5.638203705 | 12.17530797 |

|                    |             |             |             |             |             |
|--------------------|-------------|-------------|-------------|-------------|-------------|
| ENSMUSG00000062496 | 12.02668147 | 5.56493795  | 6.35535943  | 11.27640741 | 7.87814045  |
| ENSMUSG00000062528 | 14.85648888 | 7.651789682 | 7.061510478 | 5.638203705 | 7.87814045  |
| ENSMUSG00000062543 | 7.074518513 | 5.56493795  | 8.473812573 | 5.638203705 | 10.7429188  |
| ENSMUSG00000062553 | 8.489422215 | 6.260555194 | 6.35535943  | 9.665492065 | 5.729556691 |
| ENSMUSG00000062554 | 12.02668147 | 10.43425866 | 9.179963621 | 8.860034393 | 12.89150255 |
| ENSMUSG00000062582 | 12.73413332 | 8.347406925 | 14.12302096 | 12.88732275 | 13.60769714 |
| ENSMUSG00000062598 | 10.61177777 | 2.782468975 | 7.061510478 | 4.832746033 | 7.87814045  |
| ENSMUSG00000062611 | 10.61177777 | 9.738641413 | 9.179963621 | 14.4982381  | 5.729556691 |
| ENSMUSG00000062704 | 10.61177777 | 7.651789682 | 6.35535943  | 5.638203705 | 5.013362104 |
| ENSMUSG00000062712 | 14.14903703 | 11.1298759  | 4.943057334 | 4.832746033 | 5.013362104 |
| ENSMUSG00000062742 | 9.196874066 | 8.347406925 | 7.061510478 | 6.443661377 | 9.310529622 |
| ENSMUSG00000062757 | 8.489422215 | 5.56493795  | 8.473812573 | 2.416373016 | 5.013362104 |
| ENSMUSG00000062758 | 12.02668147 | 9.043024169 | 9.179963621 | 8.054576721 | 13.60769714 |
| ENSMUSG00000062793 | 7.074518513 | 8.347406925 | 12.71071886 | 4.832746033 | 7.161945863 |
| ENSMUSG00000062833 | 13.44158517 | 8.347406925 | 7.061510478 | 10.47094974 | 7.87814045  |
| ENSMUSG00000062844 | 12.73413332 | 6.260555194 | 8.473812573 | 4.02728836  | 7.161945863 |
| ENSMUSG00000062846 | 9.904325918 | 5.56493795  | 8.473812573 | 11.27640741 | 8.594335036 |
| ENSMUSG00000062867 | 39.61730367 | 53.56252777 | 58.61053696 | 163.5079074 | 135.3607768 |
| ENSMUSG00000062868 | 10.61177777 | 5.56493795  | 7.061510478 | 1.610915344 | 2.148583759 |
| ENSMUSG00000062874 | 5.65961481  | 13.21672763 | 5.649208382 | 8.054576721 | 4.297167518 |
| ENSMUSG00000062878 | 9.196874066 | 5.56493795  | 4.943057334 | 2.416373016 | 3.580972932 |
| ENSMUSG00000062892 | 8.489422215 | 4.869320706 | 8.473812573 | 6.443661377 | 3.580972932 |
| ENSMUSG00000062896 | 14.14903703 | 4.173703463 | 4.943057334 | 10.47094974 | 8.594335036 |
| ENSMUSG00000062914 | 11.31922962 | 7.651789682 | 4.236906287 | 4.832746033 | 5.729556691 |
| ENSMUSG00000062933 | 10.61177777 | 13.91234488 | 12.71071886 | 12.08186508 | 10.02672421 |
| ENSMUSG00000062952 | 4.244711108 | 4.869320706 | 3.530755239 | 2.416373016 | 1.432389173 |
| ENSMUSG00000062962 | 9.904325918 | 11.82549314 | 7.061510478 | 4.02728836  | 7.87814045  |
| ENSMUSG00000062987 | 6.367066661 | 4.869320706 | 10.59226572 | 6.443661377 | 7.161945863 |
| ENSMUSG00000062991 | 10.61177777 | 9.738641413 | 6.35535943  | 4.832746033 | 5.013362104 |
| ENSMUSG00000063001 | 0           | 0           | 0           | 0           | 0           |
| ENSMUSG00000063018 | 2.829807405 | 2.086851731 | 4.236906287 | 1.610915344 | 8.594335036 |
| ENSMUSG00000063020 | 7.074518513 | 7.651789682 | 11.29841676 | 7.249119049 | 6.445751277 |
| ENSMUSG00000063021 | 5.65961481  | 14.60796212 | 7.061510478 | 7.249119049 | 5.729556691 |
| ENSMUSG00000063087 | 87.72402956 | 134.9497453 | 122.1641313 | 173.1733995 | 146.8198902 |
| ENSMUSG00000063109 | 6.367066661 | 6.956172438 | 9.179963621 | 5.638203705 | 8.594335036 |
| ENSMUSG00000063116 | 11.31922962 | 9.043024169 | 5.649208382 | 8.054576721 | 10.7429188  |
| ENSMUSG00000063120 | 7.074518513 | 8.347406925 | 14.12302096 | 4.02728836  | 5.729556691 |
| ENSMUSG00000063137 | 4.952162959 | 8.347406925 | 9.179963621 | 6.443661377 | 3.580972932 |
| ENSMUSG00000063166 | 10.61177777 | 11.82549314 | 7.061510478 | 7.249119049 | 10.02672421 |
| ENSMUSG00000063173 | 14.14903703 | 4.173703463 | 3.530755239 | 2.416373016 | 7.87814045  |
| ENSMUSG00000063176 | 11.31922962 | 9.738641413 | 6.35535943  | 5.638203705 | 5.729556691 |
| ENSMUSG00000063180 | 9.196874066 | 6.260555194 | 4.943057334 | 5.638203705 | 7.161945863 |
| ENSMUSG00000063206 | 10.61177777 | 7.651789682 | 7.767661525 | 2.416373016 | 6.445751277 |

|                    |             |             |             |             |             |
|--------------------|-------------|-------------|-------------|-------------|-------------|
| ENSMUSG00000063216 | 11.31922962 | 11.1298759  | 5.649208382 | 5.638203705 | 2.864778345 |
| ENSMUSG00000063221 | 12.02668147 | 9.043024169 | 4.236906287 | 10.47094974 | 4.297167518 |
| ENSMUSG00000063225 | 9.196874066 | 9.043024169 | 9.886114669 | 7.249119049 | 9.310529622 |
| ENSMUSG00000063235 | 21.22355554 | 38.25894841 | 34.60140134 | 62.02024075 | 52.2822048  |
| ENSMUSG00000063236 | 12.73413332 | 21.56413456 | 20.47838039 | 41.07834128 | 40.82309142 |
| ENSMUSG00000063277 | 13.44158517 | 6.260555194 | 11.29841676 | 6.443661377 | 7.87814045  |
| ENSMUSG00000063286 | 0           | 0           | 0           | 0           | 0           |
| ENSMUSG00000063297 | 9.196874066 | 5.56493795  | 8.473812573 | 4.832746033 | 2.864778345 |
| ENSMUSG00000063314 | 128.7562369 | 199.642149  | 168.0639494 | 234.3881826 | 174.7514791 |
| ENSMUSG00000063317 | 21.22355554 | 34.08524495 | 31.77679715 | 58.79841006 | 47.2688427  |
| ENSMUSG00000063350 | 10.61177777 | 7.651789682 | 6.35535943  | 5.638203705 | 7.161945863 |
| ENSMUSG00000063386 | 7.074518513 | 8.347406925 | 12.00456781 | 4.02728836  | 5.729556691 |
| ENSMUSG00000063388 | 12.73413332 | 7.651789682 | 7.767661525 | 8.860034393 | 7.161945863 |
| ENSMUSG00000063394 | 12.73413332 | 9.043024169 | 4.943057334 | 6.443661377 | 8.594335036 |
| ENSMUSG00000063412 | 2.829807405 | 6.260555194 | 6.35535943  | 6.443661377 | 5.729556691 |
| ENSMUSG00000063442 | 2.829807405 | 6.956172438 | 4.236906287 | 1.610915344 | 5.013362104 |
| ENSMUSG00000063478 | 6.367066661 | 2.782468975 | 7.061510478 | 4.02728836  | 0.716194586 |
| ENSMUSG00000063507 | 6.367066661 | 9.043024169 | 9.179963621 | 4.832746033 | 10.7429188  |
| ENSMUSG00000063514 | 12.02668147 | 6.260555194 | 4.236906287 | 4.832746033 | 6.445751277 |
| ENSMUSG00000063543 | 9.196874066 | 7.651789682 | 19.06607829 | 8.054576721 | 13.60769714 |
| ENSMUSG00000063548 | 7.781970364 | 5.56493795  | 12.00456781 | 6.443661377 | 5.729556691 |
| ENSMUSG00000063549 | 9.904325918 | 10.43425866 | 7.061510478 | 4.02728836  | 10.7429188  |
| ENSMUSG00000063556 | 7.781970364 | 9.043024169 | 5.649208382 | 11.27640741 | 7.161945863 |
| ENSMUSG00000063582 | 7.781970364 | 7.651789682 | 5.649208382 | 4.02728836  | 2.864778345 |
| ENSMUSG00000063583 | 10.61177777 | 8.347406925 | 6.35535943  | 5.638203705 | 10.02672421 |
| ENSMUSG00000063586 | 6.367066661 | 9.738641413 | 10.59226572 | 11.27640741 | 6.445751277 |
| ENSMUSG00000063611 | 12.02668147 | 5.56493795  | 4.236906287 | 9.665492065 | 5.729556691 |
| ENSMUSG00000063615 | 7.074518513 | 9.738641413 | 4.943057334 | 8.054576721 | 6.445751277 |
| ENSMUSG00000063626 | 7.781970364 | 6.956172438 | 6.35535943  | 4.832746033 | 7.87814045  |
| ENSMUSG00000063628 | 8.489422215 | 6.956172438 | 6.35535943  | 2.416373016 | 5.729556691 |
| ENSMUSG00000063656 | 4.952162959 | 7.651789682 | 10.59226572 | 8.054576721 | 11.45911338 |
| ENSMUSG00000063684 | 7.074518513 | 12.52111039 | 12.71071886 | 4.832746033 | 9.310529622 |
| ENSMUSG00000063714 | 51.64398514 | 63.99678643 | 70.61510478 | 165.9242805 | 131.0636093 |
| ENSMUSG00000063715 | 8.489422215 | 7.651789682 | 5.649208382 | 4.832746033 | 7.161945863 |
| ENSMUSG00000063732 | 4.952162959 | 6.260555194 | 7.061510478 | 3.221830688 | 8.594335036 |
| ENSMUSG00000063739 | 9.904325918 | 5.56493795  | 9.886114669 | 7.249119049 | 5.013362104 |
| ENSMUSG00000063751 | 9.904325918 | 2.782468975 | 8.473812573 | 3.221830688 | 5.729556691 |
| ENSMUSG00000063754 | 44.56946663 | 81.38721752 | 69.20280268 | 74.10210583 | 56.57937232 |
| ENSMUSG00000063760 | 9.196874066 | 9.043024169 | 9.179963621 | 6.443661377 | 4.297167518 |
| ENSMUSG00000063762 | 8.489422215 | 7.651789682 | 9.886114669 | 5.638203705 | 7.161945863 |
| ENSMUSG00000063764 | 6.367066661 | 6.260555194 | 6.35535943  | 4.832746033 | 4.297167518 |
| ENSMUSG00000063777 | 7.074518513 | 8.347406925 | 10.59226572 | 3.221830688 | 5.729556691 |
| ENSMUSG00000063816 | 7.074518513 | 5.56493795  | 4.943057334 | 3.221830688 | 4.297167518 |



|                    |             |             |             |             |             |
|--------------------|-------------|-------------|-------------|-------------|-------------|
| ENSMUSG00000063820 | 5.65961481  | 9.043024169 | 7.767661525 | 8.054576721 | 7.87814045  |
| ENSMUSG00000063823 | 7.781970364 | 6.260555194 | 12.00456781 | 5.638203705 | 4.297167518 |
| ENSMUSG00000063827 | 9.196874066 | 9.043024169 | 9.179963621 | 4.832746033 | 9.310529622 |
| ENSMUSG00000063830 | 12.73413332 | 12.52111039 | 6.35535943  | 4.02728836  | 7.161945863 |
| ENSMUSG00000063844 | 6.367066661 | 2.782468975 | 7.767661525 | 4.02728836  | 4.297167518 |
| ENSMUSG00000063846 | 4.244711108 | 7.651789682 | 4.236906287 | 8.054576721 | 5.013362104 |
| ENSMUSG00000063867 | 4.952162959 | 4.173703463 | 9.886114669 | 5.638203705 | 7.161945863 |
| ENSMUSG00000063875 | 12.73413332 | 12.52111039 | 9.179963621 | 12.88732275 | 15.7562809  |
| ENSMUSG00000063885 | 9.196874066 | 8.347406925 | 6.35535943  | 3.221830688 | 4.297167518 |
| ENSMUSG00000063886 | 2.122355554 | 7.651789682 | 4.236906287 | 4.02728836  | 5.729556691 |
| ENSMUSG00000063887 | 7.781970364 | 5.56493795  | 11.29841676 | 7.249119049 | 9.310529622 |
| ENSMUSG00000063902 | 8.489422215 | 11.82549314 | 12.00456781 | 18.52552646 | 14.32389173 |
| ENSMUSG00000063905 | 8.489422215 | 3.478086219 | 7.061510478 | 4.02728836  | 3.580972932 |
| ENSMUSG00000063911 | 13.44158517 | 14.60796212 | 13.41686991 | 18.52552646 | 15.7562809  |
| ENSMUSG00000063929 | 10.61177777 | 7.651789682 | 2.824604191 | 8.054576721 | 5.729556691 |
| ENSMUSG00000063994 | 9.196874066 | 4.173703463 | 4.236906287 | 5.638203705 | 8.594335036 |
| ENSMUSG00000064006 | 5.65961481  | 8.347406925 | 7.767661525 | 5.638203705 | 3.580972932 |
| ENSMUSG00000064032 | 14.85648888 | 15.30357936 | 21.89068248 | 47.52200265 | 30.08017263 |
| ENSMUSG00000064039 | 7.074518513 | 9.738641413 | 8.473812573 | 3.221830688 | 7.87814045  |
| ENSMUSG00000064043 | 7.781970364 | 4.869320706 | 3.530755239 | 5.638203705 | 3.580972932 |
| ENSMUSG00000064044 | 6.367066661 | 5.56493795  | 9.886114669 | 8.054576721 | 12.17530797 |
| ENSMUSG00000064081 | 7.074518513 | 13.91234488 | 7.767661525 | 5.638203705 | 7.161945863 |
| ENSMUSG00000064084 | 11.31922962 | 5.56493795  | 7.767661525 | 4.02728836  | 3.580972932 |
| ENSMUSG00000064110 | 7.781970364 | 4.869320706 | 9.179963621 | 4.832746033 | 7.161945863 |
| ENSMUSG00000064140 | 7.781970364 | 9.043024169 | 7.061510478 | 5.638203705 | 5.013362104 |
| ENSMUSG00000064193 | 10.61177777 | 6.260555194 | 6.35535943  | 6.443661377 | 3.580972932 |
| ENSMUSG00000064194 | 16.97884443 | 13.91234488 | 12.71071886 | 5.638203705 | 15.7562809  |
| ENSMUSG00000064208 | 12.73413332 | 9.738641413 | 4.236906287 | 10.47094974 | 10.7429188  |
| ENSMUSG00000064223 | 11.31922962 | 9.043024169 | 9.179963621 | 4.832746033 | 8.594335036 |
| ENSMUSG00000064231 | 7.074518513 | 7.651789682 | 5.649208382 | 5.638203705 | 9.310529622 |
| ENSMUSG00000064232 | 14.85648888 | 8.347406925 | 3.530755239 | 5.638203705 | 7.161945863 |
| ENSMUSG00000064252 | 7.074518513 | 8.347406925 | 4.943057334 | 8.054576721 | 9.310529622 |
| ENSMUSG00000064259 | 10.61177777 | 7.651789682 | 6.35535943  | 3.221830688 | 5.729556691 |
| ENSMUSG00000064263 | 8.489422215 | 7.651789682 | 6.35535943  | 4.832746033 | 7.87814045  |
| ENSMUSG00000064281 | 6.367066661 | 2.086851731 | 0.706151048 | 1.610915344 | 0.716194586 |
| ENSMUSG00000064288 | 12.73413332 | 15.30357936 | 16.2414741  | 11.27640741 | 5.013362104 |
| ENSMUSG00000064315 | 7.074518513 | 4.869320706 | 4.943057334 | 4.02728836  | 8.594335036 |
| ENSMUSG00000064336 | 0           | 0           | 0           | 0           | 0           |
| ENSMUSG00000064337 | 0           | 0           | 0           | 0           | 0           |
| ENSMUSG00000064338 | 0           | 0           | 0           | 0           | 0           |
| ENSMUSG00000064339 | 0           | 0           | 0           | 0           | 0           |
| ENSMUSG00000064340 | 0           | 0           | 0           | 0           | 0           |
| ENSMUSG00000064341 | 0           | 0           | 0           | 0           | 0           |

|                    |             |             |             |             |             |
|--------------------|-------------|-------------|-------------|-------------|-------------|
| ENSMUSG00000064342 | 0           | 0           | 0           | 0           | 0           |
| ENSMUSG00000064343 | 12.02668147 | 18.78166558 | 22.59683353 | 57.99295239 | 28.64778345 |
| ENSMUSG00000064344 | 0           | 0           | 0           | 0           | 0           |
| ENSMUSG00000064345 | 0           | 0           | 0           | 0           | 0           |
| ENSMUSG00000064346 | 0           | 0           | 0           | 0           | 0           |
| ENSMUSG00000064347 | 0           | 0           | 0           | 0           | 0           |
| ENSMUSG00000064348 | 0           | 0           | 0           | 0           | 0           |
| ENSMUSG00000064349 | 0           | 0           | 0           | 0           | 0           |
| ENSMUSG00000064350 | 0           | 0           | 0           | 0           | 0           |
| ENSMUSG00000064351 | 0           | 0           | 0           | 0           | 0           |
| ENSMUSG00000064352 | 3.537259256 | 6.956172438 | 12.71071886 | 34.6346799  | 6.445751277 |
| ENSMUSG00000064353 | 0           | 0           | 0           | 0           | 0           |
| ENSMUSG00000064354 | 0           | 0           | 0           | 0           | 0           |
| ENSMUSG00000064355 | 0           | 0           | 0           | 0           | 0           |
| ENSMUSG00000064356 | 0           | 0           | 0           | 0           | 0           |
| ENSMUSG00000064357 | 0           | 0           | 0           | 0           | 0           |
| ENSMUSG00000064358 | 0           | 0           | 0           | 0           | 0           |
| ENSMUSG00000064359 | 0           | 0           | 0           | 0           | 0           |
| ENSMUSG00000064360 | 0           | 0           | 0           | 0           | 0           |
| ENSMUSG00000064361 | 0           | 0           | 0           | 0           | 0           |
| ENSMUSG00000064363 | 0           | 0           | 0           | 0           | 0           |
| ENSMUSG00000064364 | 0           | 0           | 0           | 0           | 0           |
| ENSMUSG00000064365 | 0           | 0           | 0           | 0           | 0           |
| ENSMUSG00000064366 | 0           | 0           | 0           | 0           | 0           |
| ENSMUSG00000064367 | 0           | 0           | 0           | 0           | 0           |
| ENSMUSG00000064368 | 0           | 0.695617244 | 0.706151048 | 2.416373016 | 0           |
| ENSMUSG00000064369 | 0           | 0           | 0           | 0           | 0           |
| ENSMUSG00000064370 | 0           | 0           | 0           | 0           | 0           |
| ENSMUSG00000064371 | 0           | 0           | 0.706151048 | 3.221830688 | 2.148583759 |
| ENSMUSG00000064372 | 0           | 0           | 1.412302096 | 4.832746033 | 2.864778345 |
| ENSMUSG00000064377 | 5.65961481  | 2.086851731 | 2.824604191 | 0           | 0.716194586 |
| ENSMUSG00000064380 | 0           | 0           | 0           | 0           | 0           |
| ENSMUSG00000064382 | 0           | 0           | 0           | 0           | 0           |
| ENSMUSG00000064386 | 5.65961481  | 9.043024169 | 6.35535943  | 3.221830688 | 7.161945863 |
| ENSMUSG00000064387 | 0           | 0           | 0           | 0           | 0           |
| ENSMUSG00000064389 | 14.14903703 | 6.956172438 | 9.886114669 | 9.665492065 | 12.17530797 |
| ENSMUSG00000064390 | 0           | 0           | 0           | 0           | 0           |
| ENSMUSG00000064391 | 13.44158517 | 3.478086219 | 10.59226572 | 4.832746033 | 4.297167518 |
| ENSMUSG00000064392 | 9.904325918 | 6.956172438 | 6.35535943  | 5.638203705 | 7.87814045  |
| ENSMUSG00000064393 | 9.196874066 | 4.173703463 | 8.473812573 | 6.443661377 | 5.729556691 |
| ENSMUSG00000064394 | 5.65961481  | 9.043024169 | 7.061510478 | 5.638203705 | 8.594335036 |
| ENSMUSG00000064395 | 7.074518513 | 9.738641413 | 6.35535943  | 6.443661377 | 5.729556691 |
| ENSMUSG00000064397 | 12.02668147 | 5.56493795  | 4.236906287 | 8.054576721 | 7.87814045  |

|                    |             |             |             |             |             |
|--------------------|-------------|-------------|-------------|-------------|-------------|
| ENSMUSG00000064398 | 7.074518513 | 9.043024169 | 8.473812573 | 12.08186508 | 11.45911338 |
| ENSMUSG00000064399 | 12.02668147 | 4.869320706 | 12.00456781 | 10.47094974 | 11.45911338 |
| ENSMUSG00000064400 | 9.904325918 | 8.347406925 | 4.943057334 | 8.054576721 | 7.87814045  |
| ENSMUSG00000064403 | 7.781970364 | 7.651789682 | 6.35535943  | 6.443661377 | 6.445751277 |
| ENSMUSG00000064405 | 0           | 0           | 0           | 0           | 0           |
| ENSMUSG00000064407 | 7.074518513 | 4.869320706 | 6.35535943  | 2.416373016 | 10.7429188  |
| ENSMUSG00000064408 | 9.196874066 | 5.56493795  | 6.35535943  | 2.416373016 | 4.297167518 |
| ENSMUSG00000064409 | 34.66514071 | 50.7800588  | 50.84287544 | 56.38203705 | 52.2822048  |
| ENSMUSG00000064410 | 21.93100739 | 30.60715873 | 28.95219296 | 36.24559524 | 27.93158887 |
| ENSMUSG00000064412 | 6.367066661 | 5.56493795  | 6.35535943  | 3.221830688 | 7.87814045  |
| ENSMUSG00000064413 | 9.196874066 | 18.08604834 | 13.41686991 | 13.69278043 | 15.7562809  |
| ENSMUSG00000064414 | 30.4204296  | 48.69320706 | 36.01370344 | 31.41284921 | 26.49919969 |
| ENSMUSG00000064416 | 5.65961481  | 3.478086219 | 4.943057334 | 4.832746033 | 7.161945863 |
| ENSMUSG00000064417 | 0           | 0           | 0           | 0           | 0           |
| ENSMUSG00000064419 | 58.71850365 | 91.12585893 | 89.68118307 | 70.88027514 | 52.99839939 |
| ENSMUSG00000064422 | 351.6035701 | 346.4173874 | 301.5264974 | 534.0184366 | 382.4479091 |
| ENSMUSG00000064424 | 10.61177777 | 6.260555194 | 6.35535943  | 8.054576721 | 6.445751277 |
| ENSMUSG00000064427 | 2.829807405 | 5.56493795  | 4.943057334 | 28.9964762  | 15.7562809  |
| ENSMUSG00000064428 | 2.122355554 | 4.173703463 | 3.530755239 | 6.443661377 | 2.864778345 |
| ENSMUSG00000064429 | 8.489422215 | 9.738641413 | 13.41686991 | 8.054576721 | 7.87814045  |
| ENSMUSG00000064432 | 5.65961481  | 6.956172438 | 14.12302096 | 6.443661377 | 5.013362104 |
| ENSMUSG00000064433 | 11.31922962 | 6.956172438 | 9.886114669 | 6.443661377 | 7.87814045  |
| ENSMUSG00000064435 | 16.97884443 | 7.651789682 | 9.179963621 | 7.249119049 | 12.17530797 |
| ENSMUSG00000064436 | 11.31922962 | 6.260555194 | 7.767661525 | 4.02728836  | 10.02672421 |
| ENSMUSG00000064437 | 0           | 0           | 0           | 0           | 0           |
| ENSMUSG00000064440 | 0           | 0           | 0           | 0           | 0           |
| ENSMUSG00000064441 | 46.69182218 | 76.51789682 | 72.73355792 | 178.8116032 | 132.4959985 |
| ENSMUSG00000064442 | 6.367066661 | 6.260555194 | 7.767661525 | 8.054576721 | 7.161945863 |
| ENSMUSG00000064443 | 10.61177777 | 9.043024169 | 7.767661525 | 7.249119049 | 7.161945863 |
| ENSMUSG00000064444 | 9.196874066 | 6.260555194 | 9.886114669 | 4.832746033 | 5.729556691 |
| ENSMUSG00000064446 | 8.489422215 | 4.869320706 | 9.179963621 | 4.02728836  | 6.445751277 |
| ENSMUSG00000064450 | 0           | 0           | 0           | 0           | 0           |
| ENSMUSG00000064451 | 12.73413332 | 22.2597518  | 14.829172   | 48.32746033 | 31.5125618  |
| ENSMUSG00000064452 | 7.781970364 | 4.869320706 | 4.236906287 | 4.02728836  | 3.580972932 |
| ENSMUSG00000064453 | 11.31922962 | 16.69481385 | 14.829172   | 70.07481747 | 43.68786977 |
| ENSMUSG00000064455 | 2.829807405 | 1.391234488 | 0.706151048 | 1.610915344 | 0.716194586 |
| ENSMUSG00000064460 | 15.56394073 | 6.260555194 | 4.236906287 | 5.638203705 | 5.729556691 |
| ENSMUSG00000064463 | 7.074518513 | 5.56493795  | 5.649208382 | 4.832746033 | 5.729556691 |
| ENSMUSG00000064464 | 2.829807405 | 6.956172438 | 2.824604191 | 4.832746033 | 2.864778345 |
| ENSMUSG00000064467 | 11.31922962 | 5.56493795  | 6.35535943  | 8.860034393 | 7.87814045  |
| ENSMUSG00000064468 | 12.02668147 | 5.56493795  | 7.061510478 | 3.221830688 | 10.7429188  |
| ENSMUSG00000064471 | 7.074518513 | 6.956172438 | 12.00456781 | 2.416373016 | 6.445751277 |
| ENSMUSG00000064472 | 12.73413332 | 8.347406925 | 12.00456781 | 8.860034393 | 5.729556691 |

|                    |             |             |             |             |             |
|--------------------|-------------|-------------|-------------|-------------|-------------|
| ENSMUSG00000064476 | 6.367066661 | 9.738641413 | 7.061510478 | 4.832746033 | 11.45911338 |
| ENSMUSG00000064477 | 2.829807405 | 5.56493795  | 1.412302096 | 3.221830688 | 4.297167518 |
| ENSMUSG00000064481 | 12.73413332 | 9.043024169 | 5.649208382 | 9.665492065 | 8.594335036 |
| ENSMUSG00000064485 | 8.489422215 | 9.738641413 | 8.473812573 | 8.054576721 | 4.297167518 |
| ENSMUSG00000064486 | 5.65961481  | 4.173703463 | 7.767661525 | 5.638203705 | 11.45911338 |
| ENSMUSG00000064487 | 0           | 0           | 0           | 0           | 0           |
| ENSMUSG00000064489 | 2.122355554 | 2.086851731 | 3.530755239 | 4.832746033 | 4.297167518 |
| ENSMUSG00000064490 | 7.781970364 | 6.956172438 | 9.179963621 | 6.443661377 | 2.864778345 |
| ENSMUSG00000064491 | 133.7083999 | 167.6437558 | 148.9978711 | 335.8758493 | 228.466073  |
| ENSMUSG00000064492 | 36.08004441 | 49.38882431 | 52.96132858 | 53.16020636 | 38.67450766 |
| ENSMUSG00000064493 | 31.83533331 | 47.99758982 | 47.3121202  | 92.62763229 | 94.5376854  |
| ENSMUSG00000064494 | 105.4103258 | 130.7760418 | 103.804204  | 153.8424154 | 119.6044959 |
| ENSMUSG00000064495 | 3.537259256 | 3.478086219 | 4.943057334 | 6.443661377 | 2.148583759 |
| ENSMUSG00000064496 | 0           | 0           | 0           | 0           | 0           |
| ENSMUSG00000064497 | 7.074518513 | 1.391234488 | 5.649208382 | 4.02728836  | 4.297167518 |
| ENSMUSG00000064500 | 0           | 0           | 0           | 0           | 0           |
| ENSMUSG00000064507 | 5.65961481  | 8.347406925 | 4.236906287 | 4.02728836  | 5.729556691 |
| ENSMUSG00000064508 | 12.73413332 | 10.43425866 | 11.29841676 | 3.221830688 | 7.161945863 |
| ENSMUSG00000064510 | 7.781970364 | 9.738641413 | 7.767661525 | 5.638203705 | 7.161945863 |
| ENSMUSG00000064511 | 6.367066661 | 11.1298759  | 11.29841676 | 4.02728836  | 7.87814045  |
| ENSMUSG00000064512 | 7.781970364 | 5.56493795  | 7.061510478 | 8.054576721 | 7.161945863 |
| ENSMUSG00000064513 | 2.122355554 | 7.651789682 | 15.53532305 | 73.29664816 | 42.97167518 |
| ENSMUSG00000064514 | 0           | 0           | 0           | 0           | 0           |
| ENSMUSG00000064515 | 3.537259256 | 9.043024169 | 4.943057334 | 8.054576721 | 6.445751277 |
| ENSMUSG00000064517 | 11.31922962 | 6.956172438 | 5.649208382 | 8.054576721 | 7.161945863 |
| ENSMUSG00000064519 | 9.196874066 | 10.43425866 | 7.767661525 | 3.221830688 | 8.594335036 |
| ENSMUSG00000064522 | 9.904325918 | 9.738641413 | 7.061510478 | 5.638203705 | 9.310529622 |
| ENSMUSG00000064524 | 4.244711108 | 6.260555194 | 3.530755239 | 3.221830688 | 3.580972932 |
| ENSMUSG00000064525 | 0.707451851 | 2.782468975 | 2.118453143 | 0           | 0.716194586 |
| ENSMUSG00000064526 | 10.61177777 | 22.2597518  | 20.47838039 | 8.860034393 | 11.45911338 |
| ENSMUSG00000064527 | 8.489422215 | 11.1298759  | 11.29841676 | 7.249119049 | 11.45911338 |
| ENSMUSG00000064529 | 2.829807405 | 4.869320706 | 2.824604191 | 2.416373016 | 5.013362104 |
| ENSMUSG00000064530 | 7.074518513 | 3.478086219 | 4.943057334 | 0.805457672 | 7.161945863 |
| ENSMUSG00000064532 | 7.074518513 | 7.651789682 | 5.649208382 | 7.249119049 | 7.87814045  |
| ENSMUSG00000064536 | 4.244711108 | 2.782468975 | 2.118453143 | 5.638203705 | 6.445751277 |
| ENSMUSG00000064540 | 0           | 0           | 0           | 5.638203705 | 4.297167518 |
| ENSMUSG00000064541 | 9.904325918 | 7.651789682 | 8.473812573 | 3.221830688 | 5.013362104 |
| ENSMUSG00000064542 | 2.122355554 | 2.782468975 | 2.824604191 | 15.30369577 | 7.161945863 |
| ENSMUSG00000064543 | 9.904325918 | 6.260555194 | 9.886114669 | 8.054576721 | 10.02672421 |
| ENSMUSG00000064545 | 0           | 0           | 0           | 0           | 0           |
| ENSMUSG00000064547 | 7.781970364 | 7.651789682 | 10.59226572 | 8.054576721 | 10.7429188  |
| ENSMUSG00000064548 | 8.489422215 | 7.651789682 | 11.29841676 | 5.638203705 | 7.87814045  |
| ENSMUSG00000064549 | 12.73413332 | 8.347406925 | 8.473812573 | 6.443661377 | 7.87814045  |

|                    |             |             |             |             |             |
|--------------------|-------------|-------------|-------------|-------------|-------------|
| ENSMUSG00000064550 | 13.44158517 | 13.91234488 | 19.77222934 | 4.832746033 | 13.60769714 |
| ENSMUSG00000064551 | 4.952162959 | 4.173703463 | 3.530755239 | 3.221830688 | 1.432389173 |
| ENSMUSG00000064553 | 4.244711108 | 4.173703463 | 5.649208382 | 2.416373016 | 2.864778345 |
| ENSMUSG00000064554 | 1.414903703 | 4.173703463 | 4.236906287 | 3.221830688 | 2.864778345 |
| ENSMUSG00000064555 | 10.61177777 | 9.043024169 | 6.35535943  | 4.832746033 | 10.02672421 |
| ENSMUSG00000064556 | 7.781970364 | 4.869320706 | 5.649208382 | 6.443661377 | 2.148583759 |
| ENSMUSG00000064558 | 4.952162959 | 2.086851731 | 7.061510478 | 7.249119049 | 7.87814045  |
| ENSMUSG00000064563 | 6.367066661 | 11.1298759  | 7.767661525 | 90.21125927 | 51.56601022 |
| ENSMUSG00000064565 | 215.7728146 | 273.3775768 | 254.9205282 | 310.1012038 | 259.9786348 |
| ENSMUSG00000064566 | 7.781970364 | 9.043024169 | 7.767661525 | 7.249119049 | 5.013362104 |
| ENSMUSG00000064567 | 176.8629628 | 215.6413456 | 230.2052416 | 222.3063175 | 223.4527109 |
| ENSMUSG00000064569 | 6.367066661 | 7.651789682 | 7.061510478 | 5.638203705 | 5.729556691 |
| ENSMUSG00000064570 | 7.074518513 | 6.260555194 | 9.886114669 | 3.221830688 | 7.87814045  |
| ENSMUSG00000064572 | 7.074518513 | 11.1298759  | 4.236906287 | 7.249119049 | 9.310529622 |
| ENSMUSG00000064573 | 11.31922962 | 9.738641413 | 7.061510478 | 8.054576721 | 7.161945863 |
| ENSMUSG00000064574 | 4.244711108 | 4.173703463 | 4.943057334 | 2.416373016 | 4.297167518 |
| ENSMUSG00000064575 | 6.367066661 | 7.651789682 | 9.179963621 | 3.221830688 | 8.594335036 |
| ENSMUSG00000064577 | 9.904325918 | 4.869320706 | 7.767661525 | 6.443661377 | 6.445751277 |
| ENSMUSG00000064579 | 7.781970364 | 11.1298759  | 7.061510478 | 5.638203705 | 5.729556691 |
| ENSMUSG00000064580 | 56.5961481  | 93.90832791 | 81.20737049 | 104.7094974 | 90.24051788 |
| ENSMUSG00000064581 | 10.61177777 | 7.651789682 | 5.649208382 | 4.832746033 | 6.445751277 |
| ENSMUSG00000064582 | 9.904325918 | 5.56493795  | 4.943057334 | 3.221830688 | 7.87814045  |
| ENSMUSG00000064584 | 17.68629628 | 9.043024169 | 8.473812573 | 6.443661377 | 5.729556691 |
| ENSMUSG00000064585 | 2.829807405 | 0           | 3.530755239 | 0.805457672 | 2.864778345 |
| ENSMUSG00000064586 | 7.781970364 | 6.956172438 | 9.886114669 | 10.47094974 | 7.161945863 |
| ENSMUSG00000064587 | 236.2889183 | 253.900294  | 213.9637675 | 157.0642461 | 157.562809  |
| ENSMUSG00000064588 | 9.196874066 | 6.956172438 | 5.649208382 | 8.860034393 | 7.161945863 |
| ENSMUSG00000064590 | 102.5805184 | 153.7314109 | 144.7609648 | 132.0950582 | 123.9016634 |
| ENSMUSG00000064591 | 6.367066661 | 7.651789682 | 7.767661525 | 6.443661377 | 9.310529622 |
| ENSMUSG00000064595 | 17.68629628 | 34.08524495 | 27.53989086 | 15.30369577 | 20.05344842 |
| ENSMUSG00000064596 | 9.904325918 | 7.651789682 | 6.35535943  | 6.443661377 | 7.87814045  |
| ENSMUSG00000064597 | 12.73413332 | 18.78166558 | 9.179963621 | 7.249119049 | 17.18867007 |
| ENSMUSG00000064600 | 268.1242516 | 312.3321425 | 271.1620023 | 583.9568123 | 445.4730327 |
| ENSMUSG00000064601 | 16.97884443 | 5.56493795  | 10.59226572 | 8.054576721 | 10.02672421 |
| ENSMUSG00000064602 | 0.707451851 | 0.695617244 | 0.706151048 | 2.416373016 | 1.432389173 |
| ENSMUSG00000064604 | 0           | 0           | 0           | 0           | 0           |
| ENSMUSG00000064605 | 7.074518513 | 4.869320706 | 7.767661525 | 4.02728836  | 7.161945863 |
| ENSMUSG00000064606 | 18.39374813 | 27.82468975 | 26.12758877 | 16.10915344 | 23.63442135 |
| ENSMUSG00000064609 | 16.97884443 | 13.21672763 | 14.829172   | 12.88732275 | 10.02672421 |
| ENSMUSG00000064612 | 0           | 0           | 0           | 0           | 0           |
| ENSMUSG00000064613 | 8.489422215 | 11.1298759  | 7.767661525 | 9.665492065 | 9.310529622 |
| ENSMUSG00000064616 | 9.196874066 | 8.347406925 | 7.767661525 | 7.249119049 | 5.013362104 |
| ENSMUSG00000064617 | 7.074518513 | 6.956172438 | 7.061510478 | 10.47094974 | 4.297167518 |

|                    |             |             |             |             |             |
|--------------------|-------------|-------------|-------------|-------------|-------------|
| ENSMUSG00000064618 | 11.31922962 | 10.43425866 | 9.179963621 | 4.02728836  | 9.310529622 |
| ENSMUSG00000064619 | 14.85648888 | 6.956172438 | 11.29841676 | 6.443661377 | 3.580972932 |
| ENSMUSG00000064620 | 38.20239997 | 54.95376226 | 40.95676077 | 49.93837567 | 55.14698315 |
| ENSMUSG00000064621 | 0           | 0           | 0           | 0           | 0           |
| ENSMUSG00000064622 | 14.85648888 | 18.08604834 | 11.29841676 | 13.69278043 | 20.05344842 |
| ENSMUSG00000064624 | 10.61177777 | 18.78166558 | 8.473812573 | 10.47094974 | 16.47247549 |
| ENSMUSG00000064626 | 9.196874066 | 9.043024169 | 5.649208382 | 6.443661377 | 9.310529622 |
| ENSMUSG00000064630 | 8.489422215 | 7.651789682 | 9.886114669 | 6.443661377 | 7.87814045  |
| ENSMUSG00000064631 | 12.02668147 | 11.82549314 | 7.061510478 | 2.416373016 | 9.310529622 |
| ENSMUSG00000064632 | 35.37259256 | 48.69320706 | 50.84287544 | 28.19101852 | 33.66114556 |
| ENSMUSG00000064634 | 0           | 0           | 0           | 0           | 0           |
| ENSMUSG00000064637 | 16.27139258 | 22.95536904 | 25.42143772 | 39.46742593 | 38.67450766 |
| ENSMUSG00000064642 | 12.02668147 | 4.173703463 | 9.179963621 | 7.249119049 | 7.161945863 |
| ENSMUSG00000064644 | 5.65961481  | 9.043024169 | 7.767661525 | 6.443661377 | 5.729556691 |
| ENSMUSG00000064646 | 9.196874066 | 6.956172438 | 11.29841676 | 8.054576721 | 10.02672421 |
| ENSMUSG00000064647 | 0           | 0           | 0           | 0           | 0           |
| ENSMUSG00000064648 | 9.904325918 | 17.39043109 | 16.94762515 | 26.58010318 | 20.769643   |
| ENSMUSG00000064652 | 14.14903703 | 13.21672763 | 10.59226572 | 9.665492065 | 12.89150255 |
| ENSMUSG00000064653 | 191.7194517 | 280.3337492 | 213.9637675 | 178.0061455 | 156.1304198 |
| ENSMUSG00000064655 | 9.904325918 | 14.60796212 | 14.12302096 | 50.74383334 | 31.5125618  |
| ENSMUSG00000064658 | 4.244711108 | 4.869320706 | 4.943057334 | 5.638203705 | 2.864778345 |
| ENSMUSG00000064659 | 4.244711108 | 4.173703463 | 2.118453143 | 3.221830688 | 2.148583759 |
| ENSMUSG00000064663 | 4.244711108 | 6.956172438 | 6.35535943  | 2.416373016 | 3.580972932 |
| ENSMUSG00000064664 | 7.074518513 | 4.173703463 | 8.473812573 | 5.638203705 | 5.729556691 |
| ENSMUSG00000064665 | 32.54278516 | 36.17209668 | 45.8998181  | 28.9964762  | 32.22875639 |
| ENSMUSG00000064666 | 7.074518513 | 15.99919661 | 13.41686991 | 62.02024075 | 43.68786977 |
| ENSMUSG00000064669 | 11.31922962 | 11.82549314 | 9.179963621 | 4.02728836  | 5.013362104 |
| ENSMUSG00000064670 | 9.196874066 | 11.1298759  | 7.767661525 | 4.832746033 | 6.445751277 |
| ENSMUSG00000064671 | 1.414903703 | 0           | 1.412302096 | 0           | 0.716194586 |
| ENSMUSG00000064672 | 99.75071103 | 102.2557348 | 110.1595635 | 294.797508  | 199.102095  |
| ENSMUSG00000064673 | 9.904325918 | 4.869320706 | 7.767661525 | 1.610915344 | 10.02672421 |
| ENSMUSG00000064675 | 14.14903703 | 6.956172438 | 8.473812573 | 5.638203705 | 3.580972932 |
| ENSMUSG00000064677 | 5.65961481  | 7.651789682 | 9.886114669 | 6.443661377 | 7.161945863 |
| ENSMUSG00000064679 | 0           | 0           | 0           | 0           | 0           |
| ENSMUSG00000064682 | 8.489422215 | 7.651789682 | 7.767661525 | 3.221830688 | 4.297167518 |
| ENSMUSG00000064685 | 6.367066661 | 2.782468975 | 3.530755239 | 4.02728836  | 0.716194586 |
| ENSMUSG00000064686 | 14.85648888 | 9.738641413 | 6.35535943  | 5.638203705 | 13.60769714 |
| ENSMUSG00000064687 | 12.02668147 | 4.173703463 | 5.649208382 | 8.054576721 | 6.445751277 |
| ENSMUSG00000064688 | 12.73413332 | 6.260555194 | 8.473812573 | 1.610915344 | 7.87814045  |
| ENSMUSG00000064689 | 9.904325918 | 8.347406925 | 5.649208382 | 8.054576721 | 7.161945863 |
| ENSMUSG00000064691 | 7.781970364 | 6.260555194 | 9.179963621 | 5.638203705 | 10.7429188  |
| ENSMUSG00000064692 | 13.44158517 | 9.738641413 | 9.179963621 | 8.860034393 | 7.87814045  |
| ENSMUSG00000064693 | 15.56394073 | 27.12907251 | 16.94762515 | 17.72006879 | 17.18867007 |

|                    |             |             |             |             |             |
|--------------------|-------------|-------------|-------------|-------------|-------------|
| ENSMUSG00000064694 | 9.196874066 | 7.651789682 | 4.943057334 | 6.443661377 | 9.310529622 |
| ENSMUSG00000064696 | 5.65961481  | 5.56493795  | 9.179963621 | 19.33098413 | 21.48583759 |
| ENSMUSG00000064697 | 2.122355554 | 2.086851731 | 1.412302096 | 0.805457672 | 1.432389173 |
| ENSMUSG00000064698 | 9.196874066 | 9.738641413 | 9.886114669 | 5.638203705 | 8.594335036 |
| ENSMUSG00000064702 | 2.829807405 | 12.52111039 | 5.649208382 | 7.249119049 | 4.297167518 |
| ENSMUSG00000064704 | 10.61177777 | 9.043024169 | 12.00456781 | 8.860034393 | 7.87814045  |
| ENSMUSG00000064706 | 12.02668147 | 6.260555194 | 7.767661525 | 8.860034393 | 7.87814045  |
| ENSMUSG00000064707 | 3.537259256 | 5.56493795  | 2.824604191 | 2.416373016 | 5.013362104 |
| ENSMUSG00000064709 | 5.65961481  | 7.651789682 | 8.473812573 | 8.860034393 | 6.445751277 |
| ENSMUSG00000064714 | 8.489422215 | 9.043024169 | 7.767661525 | 8.860034393 | 15.04008631 |
| ENSMUSG00000064715 | 74.28244438 | 109.9075245 | 93.21193831 | 86.98942859 | 67.32229112 |
| ENSMUSG00000064717 | 7.781970364 | 8.347406925 | 6.35535943  | 3.221830688 | 10.7429188  |
| ENSMUSG00000064718 | 11.31922962 | 6.956172438 | 4.943057334 | 3.221830688 | 7.87814045  |
| ENSMUSG00000064719 | 41.73965922 | 68.86610713 | 64.25974535 | 43.49471429 | 41.53928601 |
| ENSMUSG00000064720 | 0           | 0           | 0           | 0           | 0           |
| ENSMUSG00000064721 | 0           | 0           | 0           | 0           | 0           |
| ENSMUSG00000064722 | 7.074518513 | 10.43425866 | 7.767661525 | 7.249119049 | 7.87814045  |
| ENSMUSG00000064724 | 12.73413332 | 8.347406925 | 6.35535943  | 12.08186508 | 7.161945863 |
| ENSMUSG00000064725 | 0           | 0           | 0           | 0           | 0           |
| ENSMUSG00000064726 | 0           | 0           | 0           | 0           | 0           |
| ENSMUSG00000064727 | 9.904325918 | 6.260555194 | 7.767661525 | 3.221830688 | 2.864778345 |
| ENSMUSG00000064728 | 6.367066661 | 4.869320706 | 4.943057334 | 4.02728836  | 4.297167518 |
| ENSMUSG00000064731 | 9.196874066 | 12.52111039 | 10.59226572 | 66.85298678 | 64.45751277 |
| ENSMUSG00000064732 | 5.65961481  | 8.347406925 | 7.767661525 | 3.221830688 | 5.013362104 |
| ENSMUSG00000064734 | 9.196874066 | 6.956172438 | 10.59226572 | 6.443661377 | 7.161945863 |
| ENSMUSG00000064735 | 8.489422215 | 13.91234488 | 9.179963621 | 4.02728836  | 5.729556691 |
| ENSMUSG00000064737 | 12.02668147 | 7.651789682 | 7.767661525 | 4.832746033 | 9.310529622 |
| ENSMUSG00000064738 | 14.14903703 | 15.99919661 | 18.35992724 | 14.4982381  | 17.18867007 |
| ENSMUSG00000064739 | 5.65961481  | 6.260555194 | 8.473812573 | 10.47094974 | 6.445751277 |
| ENSMUSG00000064740 | 0           | 0           | 0           | 0           | 0           |
| ENSMUSG00000064741 | 4.952162959 | 6.956172438 | 6.35535943  | 32.21830688 | 23.63442135 |
| ENSMUSG00000064742 | 5.65961481  | 6.260555194 | 6.35535943  | 7.249119049 | 10.7429188  |
| ENSMUSG00000064743 | 9.196874066 | 9.043024169 | 12.71071886 | 4.832746033 | 4.297167518 |
| ENSMUSG00000064745 | 7.074518513 | 5.56493795  | 2.824604191 | 7.249119049 | 7.161945863 |
| ENSMUSG00000064746 | 9.196874066 | 10.43425866 | 4.943057334 | 1.610915344 | 6.445751277 |
| ENSMUSG00000064748 | 11.31922962 | 6.956172438 | 4.236906287 | 5.638203705 | 3.580972932 |
| ENSMUSG00000064751 | 0           | 0           | 0           | 0           | 0           |
| ENSMUSG00000064755 | 4.952162959 | 10.43425866 | 6.35535943  | 8.054576721 | 5.013362104 |
| ENSMUSG00000064758 | 8.489422215 | 6.260555194 | 4.943057334 | 8.054576721 | 10.7429188  |
| ENSMUSG00000064759 | 9.196874066 | 5.56493795  | 6.35535943  | 6.443661377 | 7.161945863 |
| ENSMUSG00000064761 | 9.196874066 | 5.56493795  | 8.473812573 | 5.638203705 | 9.310529622 |
| ENSMUSG00000064762 | 4.952162959 | 7.651789682 | 7.061510478 | 3.221830688 | 2.148583759 |
| ENSMUSG00000064763 | 7.781970364 | 6.956172438 | 6.35535943  | 4.832746033 | 7.87814045  |

|                    |             |             |             |             |             |
|--------------------|-------------|-------------|-------------|-------------|-------------|
| ENSMUSG00000064764 | 56.5961481  | 88.34338996 | 62.84744325 | 75.71302118 | 75.91662615 |
| ENSMUSG00000064765 | 5.65961481  | 0           | 3.530755239 | 0           | 0.716194586 |
| ENSMUSG00000064766 | 8.489422215 | 12.52111039 | 7.767661525 | 8.054576721 | 7.87814045  |
| ENSMUSG00000064767 | 7.781970364 | 13.91234488 | 13.41686991 | 37.85651059 | 26.49919969 |
| ENSMUSG00000064768 | 2.122355554 | 1.391234488 | 4.943057334 | 7.249119049 | 6.445751277 |
| ENSMUSG00000064769 | 6.367066661 | 4.173703463 | 4.943057334 | 1.610915344 | 5.013362104 |
| ENSMUSG00000064770 | 12.02668147 | 9.043024169 | 11.29841676 | 12.08186508 | 16.47247549 |
| ENSMUSG00000064772 | 4.244711108 | 4.173703463 | 4.236906287 | 1.610915344 | 5.013362104 |
| ENSMUSG00000064775 | 7.074518513 | 9.738641413 | 8.473812573 | 4.02728836  | 4.297167518 |
| ENSMUSG00000064776 | 6.367066661 | 4.173703463 | 8.473812573 | 7.249119049 | 5.013362104 |
| ENSMUSG00000064777 | 11.31922962 | 6.260555194 | 7.061510478 | 3.221830688 | 5.729556691 |
| ENSMUSG00000064778 | 0           | 0           | 0           | 0           | 0           |
| ENSMUSG00000064779 | 7.781970364 | 5.56493795  | 7.767661525 | 8.860034393 | 8.594335036 |
| ENSMUSG00000064780 | 6.367066661 | 13.91234488 | 10.59226572 | 29.80193387 | 28.64778345 |
| ENSMUSG00000064781 | 2.829807405 | 4.869320706 | 4.236906287 | 1.610915344 | 2.148583759 |
| ENSMUSG00000064782 | 4.952162959 | 9.043024169 | 8.473812573 | 8.860034393 | 8.594335036 |
| ENSMUSG00000064783 | 9.196874066 | 2.782468975 | 7.767661525 | 4.832746033 | 5.013362104 |
| ENSMUSG00000064788 | 5.65961481  | 6.260555194 | 7.767661525 | 4.832746033 | 10.02672421 |
| ENSMUSG00000064791 | 2.122355554 | 2.782468975 | 2.824604191 | 4.832746033 | 3.580972932 |
| ENSMUSG00000064792 | 24.05336294 | 46.60635533 | 35.30755239 | 22.55281482 | 27.21539428 |
| ENSMUSG00000064793 | 11.31922962 | 2.782468975 | 4.236906287 | 5.638203705 | 7.161945863 |
| ENSMUSG00000064795 | 5.65961481  | 9.738641413 | 9.179963621 | 5.638203705 | 12.89150255 |
| ENSMUSG00000064796 | 2.829807405 | 3.478086219 | 2.118453143 | 1.610915344 | 2.864778345 |
| ENSMUSG00000064797 | 0           | 0           | 0           | 0           | 0           |
| ENSMUSG00000064798 | 12.02668147 | 4.869320706 | 8.473812573 | 4.832746033 | 10.7429188  |
| ENSMUSG00000064800 | 12.73413332 | 6.260555194 | 8.473812573 | 5.638203705 | 2.148583759 |
| ENSMUSG00000064801 | 8.489422215 | 5.56493795  | 12.00456781 | 1.610915344 | 4.297167518 |
| ENSMUSG00000064802 | 7.781970364 | 4.869320706 | 8.473812573 | 5.638203705 | 5.729556691 |
| ENSMUSG00000064805 | 9.196874066 | 8.347406925 | 4.236906287 | 3.221830688 | 9.310529622 |
| ENSMUSG00000064806 | 7.074518513 | 9.738641413 | 8.473812573 | 4.02728836  | 5.729556691 |
| ENSMUSG00000064811 | 27.5906222  | 45.91073809 | 40.95676077 | 57.99295239 | 51.56601022 |
| ENSMUSG00000064814 | 9.196874066 | 13.91234488 | 13.41686991 | 9.665492065 | 11.45911338 |
| ENSMUSG00000064816 | 0           | 0           | 0           | 0           | 0           |
| ENSMUSG00000064818 | 7.781970364 | 2.782468975 | 2.824604191 | 3.221830688 | 0.716194586 |
| ENSMUSG00000064822 | 4.244711108 | 6.956172438 | 7.767661525 | 8.054576721 | 5.013362104 |
| ENSMUSG00000064823 | 23.34591109 | 51.47567604 | 47.3121202  | 216.6681138 | 154.6980307 |
| ENSMUSG00000064824 | 10.61177777 | 10.43425866 | 6.35535943  | 6.443661377 | 7.161945863 |
| ENSMUSG00000064829 | 0           | 0           | 0           | 0           | 0           |
| ENSMUSG00000064830 | 3.537259256 | 6.260555194 | 5.649208382 | 4.02728836  | 5.013362104 |
| ENSMUSG00000064831 | 5.65961481  | 6.956172438 | 9.886114669 | 4.832746033 | 5.729556691 |
| ENSMUSG00000064833 | 11.31922962 | 9.043024169 | 11.29841676 | 8.054576721 | 9.310529622 |
| ENSMUSG00000064834 | 9.196874066 | 6.260555194 | 4.943057334 | 4.832746033 | 6.445751277 |
| ENSMUSG00000064836 | 13.44158517 | 18.08604834 | 14.829172   | 8.860034393 | 13.60769714 |



|                    |             |             |             |             |             |
|--------------------|-------------|-------------|-------------|-------------|-------------|
| ENSMUSG00000064837 | 4.244711108 | 2.086851731 | 2.118453143 | 11.27640741 | 4.297167518 |
| ENSMUSG00000064840 | 11.31922962 | 6.956172438 | 6.35535943  | 8.054576721 | 6.445751277 |
| ENSMUSG00000064841 | 0.707451851 | 6.260555194 | 9.886114669 | 58.79841006 | 38.67450766 |
| ENSMUSG00000064842 | 7.074518513 | 6.956172438 | 9.886114669 | 4.832746033 | 2.148583759 |
| ENSMUSG00000064843 | 4.952162959 | 6.260555194 | 4.236906287 | 4.832746033 | 7.161945863 |
| ENSMUSG00000064844 | 1.414903703 | 2.782468975 | 0.706151048 | 9.665492065 | 5.729556691 |
| ENSMUSG00000064845 | 24.05336294 | 38.95456565 | 31.0706461  | 29.80193387 | 30.79636721 |
| ENSMUSG00000064850 | 10.61177777 | 9.043024169 | 4.943057334 | 5.638203705 | 6.445751277 |
| ENSMUSG00000064851 | 10.61177777 | 16.69481385 | 11.29841676 | 14.4982381  | 9.310529622 |
| ENSMUSG00000064853 | 97.62835547 | 105.0382038 | 122.8702823 | 252.913709  | 177.6162574 |
| ENSMUSG00000064854 | 9.196874066 | 6.260555194 | 7.061510478 | 4.832746033 | 5.729556691 |
| ENSMUSG00000064855 | 9.196874066 | 7.651789682 | 9.179963621 | 4.832746033 | 6.445751277 |
| ENSMUSG00000064856 | 4.244711108 | 12.52111039 | 5.649208382 | 4.832746033 | 3.580972932 |
| ENSMUSG00000064857 | 78.52715549 | 98.08203137 | 117.2210739 | 145.7878386 | 112.4425501 |
| ENSMUSG00000064858 | 3.537259256 | 4.869320706 | 4.943057334 | 4.832746033 | 12.17530797 |
| ENSMUSG00000064859 | 102.5805184 | 146.0796212 | 123.5764334 | 89.4058016  | 73.05184781 |
| ENSMUSG00000064860 | 9.904325918 | 4.869320706 | 9.179963621 | 3.221830688 | 10.02672421 |
| ENSMUSG00000064862 | 6.367066661 | 2.086851731 | 5.649208382 | 5.638203705 | 10.7429188  |
| ENSMUSG00000064867 | 8.489422215 | 9.043024169 | 5.649208382 | 8.054576721 | 9.310529622 |
| ENSMUSG00000064871 | 0           | 0           | 0           | 0           | 0           |
| ENSMUSG00000064872 | 11.31922962 | 9.043024169 | 9.179963621 | 4.02728836  | 7.87814045  |
| ENSMUSG00000064876 | 0           | 0           | 0           | 0           | 0           |
| ENSMUSG00000064877 | 22.63845924 | 24.34660353 | 19.06607829 | 23.35827249 | 15.04008631 |
| ENSMUSG00000064880 | 0           | 0           | 0           | 0           | 0           |
| ENSMUSG00000064882 | 11.31922962 | 10.43425866 | 7.061510478 | 6.443661377 | 7.87814045  |
| ENSMUSG00000064883 | 9.904325918 | 2.782468975 | 7.061510478 | 7.249119049 | 10.7429188  |
| ENSMUSG00000064884 | 7.781970364 | 6.260555194 | 8.473812573 | 7.249119049 | 7.161945863 |
| ENSMUSG00000064887 | 3.537259256 | 9.738641413 | 4.943057334 | 3.221830688 | 7.87814045  |
| ENSMUSG00000064889 | 4.952162959 | 6.260555194 | 11.29841676 | 4.832746033 | 4.297167518 |
| ENSMUSG00000064890 | 11.31922962 | 10.43425866 | 8.473812573 | 4.02728836  | 9.310529622 |
| ENSMUSG00000064897 | 16.97884443 | 21.56413456 | 22.59683353 | 17.72006879 | 17.90486466 |
| ENSMUSG00000064899 | 0           | 0           | 0           | 0           | 0           |
| ENSMUSG00000064900 | 4.952162959 | 2.782468975 | 2.824604191 | 1.610915344 | 5.013362104 |
| ENSMUSG00000064901 | 0           | 0           | 0           | 0           | 0           |
| ENSMUSG00000064904 | 13.44158517 | 4.869320706 | 12.71071886 | 9.665492065 | 5.013362104 |
| ENSMUSG00000064905 | 7.074518513 | 5.56493795  | 4.943057334 | 6.443661377 | 5.013362104 |
| ENSMUSG00000064906 | 16.97884443 | 13.91234488 | 16.94762515 | 12.08186508 | 20.05344842 |
| ENSMUSG00000064907 | 19.80865184 | 29.91154148 | 23.30298458 | 33.82922223 | 22.91822676 |
| ENSMUSG00000064909 | 7.781970364 | 5.56493795  | 11.29841676 | 3.221830688 | 9.310529622 |
| ENSMUSG00000064915 | 7.074518513 | 9.043024169 | 5.649208382 | 5.638203705 | 4.297167518 |
| ENSMUSG00000064916 | 24.05336294 | 29.91154148 | 21.18453143 | 25.77464551 | 29.36397804 |
| ENSMUSG00000064917 | 4.244711108 | 6.956172438 | 6.35535943  | 21.74735715 | 10.7429188  |
| ENSMUSG00000064918 | 0           | 0           | 0           | 0           | 0           |

|                    |             |             |             |             |             |
|--------------------|-------------|-------------|-------------|-------------|-------------|
| ENSMUSG00000064919 | 141.4903703 | 148.8620902 | 176.5377619 | 158.6751614 | 158.9951982 |
| ENSMUSG00000064921 | 5.65961481  | 8.347406925 | 13.41686991 | 10.47094974 | 6.445751277 |
| ENSMUSG00000064923 | 4.244711108 | 9.738641413 | 9.179963621 | 9.665492065 | 2.148583759 |
| ENSMUSG00000064925 | 0.707451851 | 3.478086219 | 0.706151048 | 14.4982381  | 5.013362104 |
| ENSMUSG00000064926 | 12.02668147 | 4.869320706 | 12.71071886 | 8.860034393 | 7.87814045  |
| ENSMUSG00000064927 | 5.65961481  | 6.260555194 | 8.473812573 | 4.02728836  | 3.580972932 |
| ENSMUSG00000064928 | 11.31922962 | 5.56493795  | 4.943057334 | 9.665492065 | 5.729556691 |
| ENSMUSG00000064930 | 12.73413332 | 10.43425866 | 7.061510478 | 8.054576721 | 12.89150255 |
| ENSMUSG00000064932 | 7.074518513 | 10.43425866 | 10.59226572 | 6.443661377 | 5.013362104 |
| ENSMUSG00000064936 | 44.56946663 | 88.34338996 | 71.32125582 | 92.62763229 | 94.5376854  |
| ENSMUSG00000064938 | 0           | 0           | 0           | 0           | 0           |
| ENSMUSG00000064939 | 4.952162959 | 4.869320706 | 6.35535943  | 4.02728836  | 9.310529622 |
| ENSMUSG00000064940 | 7.074518513 | 4.869320706 | 4.943057334 | 5.638203705 | 8.594335036 |
| ENSMUSG00000064941 | 6.367066661 | 6.260555194 | 4.943057334 | 9.665492065 | 8.594335036 |
| ENSMUSG00000064943 | 13.44158517 | 9.738641413 | 5.649208382 | 5.638203705 | 7.161945863 |
| ENSMUSG00000064945 | 7.074518513 | 13.21672763 | 9.886114669 | 12.88732275 | 10.02672421 |
| ENSMUSG00000064948 | 1.414903703 | 2.782468975 | 0.706151048 | 1.610915344 | 2.864778345 |
| ENSMUSG00000064949 | 0           | 0           | 0           | 0           | 0           |
| ENSMUSG00000064952 | 39.61730367 | 73.73542784 | 65.67204744 | 74.9075635  | 52.2822048  |
| ENSMUSG00000064954 | 9.196874066 | 4.869320706 | 6.35535943  | 4.832746033 | 9.310529622 |
| ENSMUSG00000064956 | 10.61177777 | 13.21672763 | 12.00456781 | 6.443661377 | 12.17530797 |
| ENSMUSG00000064958 | 9.196874066 | 5.56493795  | 6.35535943  | 5.638203705 | 9.310529622 |
| ENSMUSG00000064959 | 1.414903703 | 2.086851731 | 2.824604191 | 3.221830688 | 1.432389173 |
| ENSMUSG00000064960 | 39.61730367 | 74.43104508 | 72.02740687 | 89.4058016  | 82.36237743 |
| ENSMUSG00000064961 | 7.781970364 | 3.478086219 | 7.767661525 | 5.638203705 | 4.297167518 |
| ENSMUSG00000064964 | 31.83533331 | 47.99758982 | 43.78136496 | 34.6346799  | 35.09353473 |
| ENSMUSG00000064966 | 29.71297775 | 56.34499675 | 39.54445867 | 193.3098413 | 123.9016634 |
| ENSMUSG00000064967 | 10.61177777 | 9.043024169 | 4.943057334 | 4.02728836  | 9.310529622 |
| ENSMUSG00000064968 | 0           | 0           | 0           | 0           | 0           |
| ENSMUSG00000064970 | 9.196874066 | 6.956172438 | 12.71071886 | 10.47094974 | 9.310529622 |
| ENSMUSG00000064971 | 5.65961481  | 9.043024169 | 9.886114669 | 8.054576721 | 7.161945863 |
| ENSMUSG00000064972 | 5.65961481  | 4.173703463 | 7.061510478 | 3.221830688 | 1.432389173 |
| ENSMUSG00000064977 | 2.122355554 | 2.086851731 | 0.706151048 | 0.805457672 | 1.432389173 |
| ENSMUSG00000064981 | 6.367066661 | 4.173703463 | 5.649208382 | 8.860034393 | 8.594335036 |
| ENSMUSG00000064982 | 7.074518513 | 2.782468975 | 0           | 4.832746033 | 10.02672421 |
| ENSMUSG00000064983 | 11.31922962 | 4.869320706 | 10.59226572 | 5.638203705 | 4.297167518 |
| ENSMUSG00000064984 | 6.367066661 | 6.956172438 | 4.943057334 | 15.30369577 | 20.05344842 |
| ENSMUSG00000064987 | 9.904325918 | 9.738641413 | 6.35535943  | 3.221830688 | 10.02672421 |
| ENSMUSG00000064992 | 7.074518513 | 8.347406925 | 7.767661525 | 6.443661377 | 8.594335036 |
| ENSMUSG00000064994 | 29.0055259  | 46.60635533 | 36.01370344 | 116.7913625 | 90.95671247 |
| ENSMUSG00000064995 | 0           | 0           | 0           | 0           | 0           |
| ENSMUSG00000064999 | 4.244711108 | 6.956172438 | 7.767661525 | 1.610915344 | 3.580972932 |
| ENSMUSG00000065004 | 8.489422215 | 11.82549314 | 8.473812573 | 3.221830688 | 5.729556691 |

|                    |             |             |             |             |             |
|--------------------|-------------|-------------|-------------|-------------|-------------|
| ENSMUSG00000065005 | 7.074518513 | 2.782468975 | 5.649208382 | 3.221830688 | 5.729556691 |
| ENSMUSG00000065006 | 7.074518513 | 4.869320706 | 5.649208382 | 6.443661377 | 7.87814045  |
| ENSMUSG00000065007 | 1.414903703 | 2.086851731 | 2.118453143 | 0.805457672 | 3.580972932 |
| ENSMUSG00000065011 | 7.074518513 | 9.738641413 | 7.061510478 | 4.02728836  | 11.45911338 |
| ENSMUSG00000065012 | 1.414903703 | 0.695617244 | 1.412302096 | 1.610915344 | 2.864778345 |
| ENSMUSG00000065013 | 0           | 0           | 0           | 0           | 0           |
| ENSMUSG00000065014 | 4.952162959 | 6.956172438 | 4.943057334 | 3.221830688 | 6.445751277 |
| ENSMUSG00000065016 | 0           | 0           | 0           | 0           | 0           |
| ENSMUSG00000065017 | 4.244711108 | 6.956172438 | 15.53532305 | 2.416373016 | 8.594335036 |
| ENSMUSG00000065018 | 8.489422215 | 7.651789682 | 7.767661525 | 7.249119049 | 5.013362104 |
| ENSMUSG00000065022 | 0           | 0           | 0           | 0           | 0           |
| ENSMUSG00000065027 | 7.074518513 | 4.869320706 | 7.061510478 | 8.860034393 | 5.013362104 |
| ENSMUSG00000065028 | 11.31922962 | 5.56493795  | 4.943057334 | 7.249119049 | 8.594335036 |
| ENSMUSG00000065029 | 7.781970364 | 5.56493795  | 5.649208382 | 8.054576721 | 2.148583759 |
| ENSMUSG00000065030 | 4.244711108 | 7.651789682 | 7.061510478 | 6.443661377 | 5.729556691 |
| ENSMUSG00000065031 | 3.537259256 | 3.478086219 | 4.236906287 | 4.02728836  | 4.297167518 |
| ENSMUSG00000065034 | 4.244711108 | 9.043024169 | 7.767661525 | 4.832746033 | 11.45911338 |
| ENSMUSG00000065036 | 38.20239997 | 31.99839321 | 41.66291182 | 127.2623122 | 83.07857202 |
| ENSMUSG00000065037 | 5.65961481  | 7.651789682 | 9.179963621 | 5.638203705 | 7.87814045  |
| ENSMUSG00000065040 | 8.489422215 | 6.260555194 | 10.59226572 | 4.02728836  | 5.013362104 |
| ENSMUSG00000065041 | 0           | 0           | 0           | 0           | 0           |
| ENSMUSG00000065042 | 14.14903703 | 8.347406925 | 7.061510478 | 0           | 2.864778345 |
| ENSMUSG00000065044 | 20.51610369 | 15.99919661 | 19.06607829 | 15.30369577 | 27.21539428 |
| ENSMUSG00000065045 | 9.904325918 | 14.60796212 | 9.179963621 | 8.860034393 | 11.45911338 |
| ENSMUSG00000065047 | 14.14903703 | 16.69481385 | 20.47838039 | 28.9964762  | 23.63442135 |
| ENSMUSG00000065048 | 6.367066661 | 5.56493795  | 7.767661525 | 4.02728836  | 1.432389173 |
| ENSMUSG00000065049 | 39.61730367 | 69.56172438 | 56.49208382 | 39.46742593 | 43.68786977 |
| ENSMUSG00000065050 | 10.61177777 | 9.738641413 | 6.35535943  | 8.054576721 | 8.594335036 |
| ENSMUSG00000065053 | 8.489422215 | 6.260555194 | 4.943057334 | 4.02728836  | 5.013362104 |
| ENSMUSG00000065055 | 7.781970364 | 4.869320706 | 10.59226572 | 6.443661377 | 12.17530797 |
| ENSMUSG00000065057 | 9.904325918 | 7.651789682 | 7.767661525 | 5.638203705 | 4.297167518 |
| ENSMUSG00000065061 | 0           | 0           | 0           | 0.805457672 | 0           |
| ENSMUSG00000065068 | 5.65961481  | 7.651789682 | 3.530755239 | 3.221830688 | 2.148583759 |
| ENSMUSG00000065070 | 5.65961481  | 10.43425866 | 7.061510478 | 2.416373016 | 9.310529622 |
| ENSMUSG00000065072 | 9.196874066 | 6.956172438 | 4.943057334 | 7.249119049 | 10.02672421 |
| ENSMUSG00000065074 | 4.952162959 | 2.782468975 | 4.943057334 | 3.221830688 | 5.729556691 |
| ENSMUSG00000065078 | 0           | 0           | 0           | 0           | 0           |
| ENSMUSG00000065079 | 7.781970364 | 6.260555194 | 7.767661525 | 6.443661377 | 7.161945863 |
| ENSMUSG00000065080 | 103.2879703 | 125.9067211 | 113.6903187 | 94.23854763 | 92.38910164 |
| ENSMUSG00000065083 | 10.61177777 | 8.347406925 | 10.59226572 | 15.30369577 | 5.729556691 |
| ENSMUSG00000065084 | 7.074518513 | 12.52111039 | 11.29841676 | 4.02728836  | 5.729556691 |
| ENSMUSG00000065086 | 9.196874066 | 5.56493795  | 11.29841676 | 7.249119049 | 3.580972932 |
| ENSMUSG00000065087 | 0.707451851 | 0           | 1.412302096 | 0           | 0.716194586 |

|                    |             |             |             |             |             |
|--------------------|-------------|-------------|-------------|-------------|-------------|
| ENSMUSG00000065088 | 6.367066661 | 2.086851731 | 7.061510478 | 0.805457672 | 5.729556691 |
| ENSMUSG00000065089 | 23.34591109 | 31.99839321 | 22.59683353 | 27.38556085 | 27.93158887 |
| ENSMUSG00000065090 | 9.196874066 | 4.869320706 | 5.649208382 | 2.416373016 | 11.45911338 |
| ENSMUSG00000065091 | 1.414903703 | 0           | 1.412302096 | 2.416373016 | 0.716194586 |
| ENSMUSG00000065094 | 0.707451851 | 3.478086219 | 2.118453143 | 9.665492065 | 2.148583759 |
| ENSMUSG00000065095 | 4.244711108 | 4.869320706 | 2.824604191 | 2.416373016 | 3.580972932 |
| ENSMUSG00000065096 | 6.367066661 | 5.56493795  | 8.473812573 | 6.443661377 | 5.729556691 |
| ENSMUSG00000065097 | 0           | 0           | 0           | 0           | 0           |
| ENSMUSG00000065100 | 33.25023701 | 50.7800588  | 48.7244223  | 42.68925662 | 46.55264811 |
| ENSMUSG00000065102 | 9.904325918 | 9.738641413 | 8.473812573 | 4.02728836  | 6.445751277 |
| ENSMUSG00000065104 | 9.904325918 | 4.869320706 | 4.236906287 | 2.416373016 | 5.013362104 |
| ENSMUSG00000065105 | 26.1757185  | 43.12826911 | 37.42600553 | 115.1804471 | 98.83485292 |
| ENSMUSG00000065107 | 5.65961481  | 7.651789682 | 6.35535943  | 3.221830688 | 8.594335036 |
| ENSMUSG00000065110 | 14.14903703 | 26.43345526 | 24.00913562 | 25.77464551 | 22.91822676 |
| ENSMUSG00000065111 | 6.367066661 | 5.56493795  | 11.29841676 | 5.638203705 | 7.87814045  |
| ENSMUSG00000065115 | 10.61177777 | 11.1298759  | 8.473812573 | 7.249119049 | 6.445751277 |
| ENSMUSG00000065118 | 31.83533331 | 52.86691053 | 46.60596915 | 53.96566403 | 45.83645353 |
| ENSMUSG00000065122 | 9.904325918 | 6.956172438 | 9.886114669 | 8.860034393 | 5.013362104 |
| ENSMUSG00000065124 | 7.074518513 | 21.56413456 | 21.18453143 | 99.07129367 | 49.41742646 |
| ENSMUSG00000065126 | 1.414903703 | 0           | 0.706151048 | 0           | 0.716194586 |
| ENSMUSG00000065127 | 16.27139258 | 22.2597518  | 19.06607829 | 9.665492065 | 19.33725383 |
| ENSMUSG00000065130 | 91.26128881 | 141.9059177 | 139.1117564 | 109.5422434 | 91.67290705 |
| ENSMUSG00000065132 | 13.44158517 | 9.043024169 | 2.824604191 | 6.443661377 | 10.7429188  |
| ENSMUSG00000065138 | 14.14903703 | 5.56493795  | 8.473812573 | 9.665492065 | 5.013362104 |
| ENSMUSG00000065141 | 7.074518513 | 4.869320706 | 11.29841676 | 1.610915344 | 8.594335036 |
| ENSMUSG00000065143 | 9.904325918 | 8.347406925 | 10.59226572 | 7.249119049 | 5.013362104 |
| ENSMUSG00000065145 | 4.244711108 | 5.56493795  | 5.649208382 | 8.054576721 | 3.580972932 |
| ENSMUSG00000065147 | 11.31922962 | 20.17290007 | 11.29841676 | 56.38203705 | 36.5259239  |
| ENSMUSG00000065151 | 7.074518513 | 11.1298759  | 7.061510478 | 4.02728836  | 7.87814045  |
| ENSMUSG00000065155 | 2.829807405 | 5.56493795  | 3.530755239 | 5.638203705 | 6.445751277 |
| ENSMUSG00000065158 | 25.46826665 | 48.69320706 | 36.01370344 | 22.55281482 | 25.78300511 |
| ENSMUSG00000065159 | 46.69182218 | 77.9091313  | 72.73355792 | 63.6311561  | 65.88990194 |
| ENSMUSG00000065160 | 0           | 0           | 0           | 0           | 0           |
| ENSMUSG00000065162 | 49.52162959 | 57.73623123 | 57.90438592 | 120.0131931 | 108.8615771 |
| ENSMUSG00000065164 | 10.61177777 | 9.738641413 | 10.59226572 | 4.02728836  | 5.013362104 |
| ENSMUSG00000065165 | 9.196874066 | 13.21672763 | 5.649208382 | 4.832746033 | 9.310529622 |
| ENSMUSG00000065173 | 7.781970364 | 7.651789682 | 6.35535943  | 2.416373016 | 5.013362104 |
| ENSMUSG00000065176 | 100.4581629 | 119.6461659 | 99.56729774 | 190.8934683 | 128.198831  |
| ENSMUSG00000065178 | 3.537259256 | 4.173703463 | 4.236906287 | 2.416373016 | 3.580972932 |
| ENSMUSG00000065181 | 5.65961481  | 10.43425866 | 7.767661525 | 4.832746033 | 9.310529622 |
| ENSMUSG00000065182 | 11.31922962 | 9.738641413 | 7.767661525 | 4.832746033 | 5.729556691 |
| ENSMUSG00000065185 | 11.31922962 | 13.21672763 | 12.00456781 | 5.638203705 | 6.445751277 |
| ENSMUSG00000065187 | 10.61177777 | 8.347406925 | 8.473812573 | 7.249119049 | 6.445751277 |

|                    |             |             |             |             |             |
|--------------------|-------------|-------------|-------------|-------------|-------------|
| ENSMUSG00000065188 | 8.489422215 | 2.782468975 | 7.767661525 | 8.860034393 | 5.013362104 |
| ENSMUSG00000065191 | 50.22908144 | 59.82308296 | 43.78136496 | 17.72006879 | 22.20203218 |
| ENSMUSG00000065192 | 9.196874066 | 4.173703463 | 4.943057334 | 8.860034393 | 7.161945863 |
| ENSMUSG00000065193 | 6.367066661 | 7.651789682 | 8.473812573 | 7.249119049 | 5.729556691 |
| ENSMUSG00000065195 | 13.44158517 | 10.43425866 | 5.649208382 | 5.638203705 | 5.729556691 |
| ENSMUSG00000065196 | 43.86201478 | 79.99598303 | 61.43514116 | 78.12939419 | 65.17370736 |
| ENSMUSG00000065198 | 28.29807405 | 75.82227957 | 43.78136496 | 23.35827249 | 32.94495097 |
| ENSMUSG00000065199 | 7.781970364 | 6.260555194 | 2.824604191 | 4.02728836  | 7.161945863 |
| ENSMUSG00000065200 | 8.489422215 | 6.956172438 | 7.767661525 | 4.832746033 | 7.161945863 |
| ENSMUSG00000065201 | 7.781970364 | 9.738641413 | 7.061510478 | 4.02728836  | 12.17530797 |
| ENSMUSG00000065202 | 139.3680147 | 203.1202352 | 170.8885536 | 158.6751614 | 141.8065281 |
| ENSMUSG00000065203 | 7.781970364 | 13.21672763 | 9.886114669 | 3.221830688 | 7.161945863 |
| ENSMUSG00000065204 | 9.196874066 | 8.347406925 | 8.473812573 | 15.30369577 | 9.310529622 |
| ENSMUSG00000065206 | 9.904325918 | 9.043024169 | 8.473812573 | 7.249119049 | 5.013362104 |
| ENSMUSG00000065208 | 0.707451851 | 0           | 1.412302096 | 6.443661377 | 2.148583759 |
| ENSMUSG00000065211 | 23.34591109 | 41.73703463 | 33.18909925 | 28.9964762  | 37.95831308 |
| ENSMUSG00000065212 | 8.489422215 | 8.347406925 | 10.59226572 | 7.249119049 | 7.161945863 |
| ENSMUSG00000065215 | 10.61177777 | 6.956172438 | 10.59226572 | 8.860034393 | 4.297167518 |
| ENSMUSG00000065219 | 1.414903703 | 0           | 0           | 8.860034393 | 4.297167518 |
| ENSMUSG00000065220 | 50.22908144 | 62.60555194 | 72.73355792 | 100.682209  | 76.63282074 |
| ENSMUSG00000065221 | 6.367066661 | 6.260555194 | 5.649208382 | 1.610915344 | 1.432389173 |
| ENSMUSG00000065223 | 12.02668147 | 6.956172438 | 5.649208382 | 4.832746033 | 5.013362104 |
| ENSMUSG00000065226 | 0           | 0           | 0           | 0           | 0           |
| ENSMUSG00000065227 | 9.904325918 | 4.173703463 | 6.35535943  | 6.443661377 | 6.445751277 |
| ENSMUSG00000065228 | 0           | 0           | 0           | 0.805457672 | 0.716194586 |
| ENSMUSG00000065231 | 9.904325918 | 11.1298759  | 9.179963621 | 9.665492065 | 12.17530797 |
| ENSMUSG00000065232 | 9.904325918 | 14.60796212 | 14.829172   | 6.443661377 | 14.32389173 |
| ENSMUSG00000065233 | 7.781970364 | 6.956172438 | 7.767661525 | 4.02728836  | 4.297167518 |
| ENSMUSG00000065235 | 5.65961481  | 6.260555194 | 7.767661525 | 2.416373016 | 2.864778345 |
| ENSMUSG00000065236 | 12.73413332 | 18.08604834 | 15.53532305 | 15.30369577 | 18.62105924 |
| ENSMUSG00000065237 | 9.904325918 | 3.478086219 | 8.473812573 | 7.249119049 | 9.310529622 |
| ENSMUSG00000065238 | 9.904325918 | 4.173703463 | 5.649208382 | 6.443661377 | 5.013362104 |
| ENSMUSG00000065239 | 12.02668147 | 4.869320706 | 5.649208382 | 0.805457672 | 10.7429188  |
| ENSMUSG00000065242 | 3.537259256 | 4.173703463 | 4.236906287 | 5.638203705 | 5.729556691 |
| ENSMUSG00000065244 | 11.31922962 | 2.782468975 | 7.767661525 | 4.832746033 | 8.594335036 |
| ENSMUSG00000065245 | 8.489422215 | 9.043024169 | 14.829172   | 6.443661377 | 10.02672421 |
| ENSMUSG00000065246 | 13.44158517 | 16.69481385 | 14.12302096 | 15.30369577 | 20.769643   |
| ENSMUSG00000065248 | 9.904325918 | 4.869320706 | 7.767661525 | 2.416373016 | 5.729556691 |
| ENSMUSG00000065251 | 7.074518513 | 13.91234488 | 7.061510478 | 5.638203705 | 7.87814045  |
| ENSMUSG00000065253 | 8.489422215 | 8.347406925 | 5.649208382 | 6.443661377 | 6.445751277 |
| ENSMUSG00000065254 | 8.489422215 | 7.651789682 | 9.886114669 | 3.221830688 | 7.87814045  |
| ENSMUSG00000065255 | 6.367066661 | 6.956172438 | 4.943057334 | 8.054576721 | 1.432389173 |
| ENSMUSG00000065256 | 8.489422215 | 6.956172438 | 13.41686991 | 1.610915344 | 7.161945863 |

|                    |             |             |             |             |             |
|--------------------|-------------|-------------|-------------|-------------|-------------|
| ENSMUSG00000065258 | 0           | 0           | 0           | 0           | 0           |
| ENSMUSG00000065259 | 45.98437033 | 49.38882431 | 59.31668801 | 66.04752911 | 52.2822048  |
| ENSMUSG00000065260 | 9.196874066 | 6.956172438 | 6.35535943  | 3.221830688 | 6.445751277 |
| ENSMUSG00000065261 | 12.02668147 | 9.043024169 | 5.649208382 | 2.416373016 | 2.864778345 |
| ENSMUSG00000065262 | 29.71297775 | 34.08524495 | 29.65834401 | 71.68573282 | 46.55264811 |
| ENSMUSG00000065265 | 0           | 0           | 0           | 0           | 0           |
| ENSMUSG00000065266 | 4.952162959 | 2.782468975 | 4.943057334 | 3.221830688 | 3.580972932 |
| ENSMUSG00000065269 | 7.781970364 | 6.260555194 | 4.943057334 | 2.416373016 | 2.148583759 |
| ENSMUSG00000065270 | 6.367066661 | 11.1298759  | 5.649208382 | 6.443661377 | 6.445751277 |
| ENSMUSG00000065272 | 1.414903703 | 0.695617244 | 0.706151048 | 4.02728836  | 0.716194586 |
| ENSMUSG00000065273 | 87.72402956 | 112.6899935 | 97.44884459 | 186.0607223 | 158.2790036 |
| ENSMUSG00000065274 | 4.244711108 | 9.043024169 | 2.824604191 | 5.638203705 | 3.580972932 |
| ENSMUSG00000065275 | 2.829807405 | 3.478086219 | 2.824604191 | 3.221830688 | 1.432389173 |
| ENSMUSG00000065277 | 8.489422215 | 6.260555194 | 8.473812573 | 5.638203705 | 2.148583759 |
| ENSMUSG00000065279 | 7.074518513 | 12.52111039 | 15.53532305 | 6.443661377 | 7.87814045  |
| ENSMUSG00000065280 | 0           | 0           | 0           | 0           | 0           |
| ENSMUSG00000065281 | 0           | 0           | 0           | 0           | 0           |
| ENSMUSG00000065282 | 0           | 0           | 0           | 0           | 0           |
| ENSMUSG00000065283 | 6.367066661 | 5.56493795  | 4.943057334 | 7.249119049 | 7.87814045  |
| ENSMUSG00000065287 | 0           | 0           | 0           | 0           | 0           |
| ENSMUSG00000065289 | 0           | 0           | 0           | 0           | 0           |
| ENSMUSG00000065291 | 9.904325918 | 13.21672763 | 15.53532305 | 13.69278043 | 5.729556691 |
| ENSMUSG00000065293 | 12.73413332 | 8.347406925 | 4.943057334 | 3.221830688 | 6.445751277 |
| ENSMUSG00000065295 | 0.707451851 | 2.782468975 | 0           | 6.443661377 | 0.716194586 |
| ENSMUSG00000065296 | 10.61177777 | 5.56493795  | 16.2414741  | 13.69278043 | 13.60769714 |
| ENSMUSG00000065297 | 7.074518513 | 6.260555194 | 4.236906287 | 6.443661377 | 8.594335036 |
| ENSMUSG00000065298 | 12.02668147 | 15.99919661 | 15.53532305 | 12.88732275 | 13.60769714 |
| ENSMUSG00000065299 | 49.52162959 | 70.25734162 | 60.72899011 | 29.80193387 | 44.40406435 |
| ENSMUSG00000065301 | 46.69182218 | 47.99758982 | 44.48751601 | 62.02024075 | 58.72795608 |
| ENSMUSG00000065303 | 5.65961481  | 9.738641413 | 8.473812573 | 2.416373016 | 6.445751277 |
| ENSMUSG00000065304 | 14.85648888 | 29.91154148 | 27.53989086 | 89.4058016  | 64.45751277 |
| ENSMUSG00000065305 | 0           | 0           | 0           | 0           | 0           |
| ENSMUSG00000065307 | 9.904325918 | 4.173703463 | 8.473812573 | 12.08186508 | 12.17530797 |
| ENSMUSG00000065309 | 7.074518513 | 7.651789682 | 7.767661525 | 8.054576721 | 9.310529622 |
| ENSMUSG00000065311 | 7.781970364 | 4.869320706 | 7.061510478 | 9.665492065 | 5.729556691 |
| ENSMUSG00000065312 | 9.196874066 | 9.043024169 | 7.061510478 | 4.832746033 | 5.729556691 |
| ENSMUSG00000065313 | 7.781970364 | 11.1298759  | 4.943057334 | 8.054576721 | 6.445751277 |
| ENSMUSG00000065314 | 3.537259256 | 2.782468975 | 2.824604191 | 4.02728836  | 3.580972932 |
| ENSMUSG00000065315 | 24.05336294 | 56.34499675 | 59.31668801 | 57.18749472 | 44.40406435 |
| ENSMUSG00000065319 | 4.244711108 | 4.173703463 | 2.118453143 | 3.221830688 | 5.013362104 |
| ENSMUSG00000065320 | 7.074518513 | 4.869320706 | 5.649208382 | 4.832746033 | 7.87814045  |
| ENSMUSG00000065321 | 4.952162959 | 5.56493795  | 4.236906287 | 1.610915344 | 5.013362104 |
| ENSMUSG00000065322 | 2.829807405 | 4.869320706 | 1.412302096 | 1.610915344 | 1.432389173 |

|                    |             |             |             |             |             |
|--------------------|-------------|-------------|-------------|-------------|-------------|
| ENSMUSG00000065327 | 9.904325918 | 9.738641413 | 6.35535943  | 5.638203705 | 9.310529622 |
| ENSMUSG00000065328 | 12.73413332 | 9.738641413 | 6.35535943  | 2.416373016 | 7.87814045  |
| ENSMUSG00000065329 | 9.196874066 | 9.738641413 | 15.53532305 | 4.832746033 | 7.87814045  |
| ENSMUSG00000065330 | 15.56394073 | 11.1298759  | 5.649208382 | 4.02728836  | 6.445751277 |
| ENSMUSG00000065331 | 12.02668147 | 10.43425866 | 9.886114669 | 4.832746033 | 11.45911338 |
| ENSMUSG00000065333 | 6.367066661 | 9.043024169 | 6.35535943  | 0.805457672 | 4.297167518 |
| ENSMUSG00000065336 | 16.27139258 | 16.69481385 | 23.30298458 | 32.21830688 | 26.49919969 |
| ENSMUSG00000065337 | 9.196874066 | 11.82549314 | 9.886114669 | 5.638203705 | 7.87814045  |
| ENSMUSG00000065340 | 6.367066661 | 6.956172438 | 9.886114669 | 4.832746033 | 7.87814045  |
| ENSMUSG00000065341 | 1.414903703 | 4.869320706 | 0           | 1.610915344 | 0.716194586 |
| ENSMUSG00000065343 | 13.44158517 | 19.47728283 | 17.65377619 | 9.665492065 | 12.89150255 |
| ENSMUSG00000065344 | 11.31922962 | 10.43425866 | 9.179963621 | 4.02728836  | 9.310529622 |
| ENSMUSG00000065346 | 9.904325918 | 11.82549314 | 7.767661525 | 5.638203705 | 7.161945863 |
| ENSMUSG00000065347 | 12.73413332 | 9.043024169 | 8.473812573 | 4.02728836  | 4.297167518 |
| ENSMUSG00000065348 | 10.61177777 | 9.738641413 | 8.473812573 | 8.054576721 | 7.161945863 |
| ENSMUSG00000065353 | 1.414903703 | 2.086851731 | 4.236906287 | 10.47094974 | 5.729556691 |
| ENSMUSG00000065360 | 15.56394073 | 18.78166558 | 26.12758877 | 22.55281482 | 30.79636721 |
| ENSMUSG00000065361 | 5.65961481  | 6.260555194 | 7.061510478 | 8.054576721 | 5.013362104 |
| ENSMUSG00000065362 | 4.952162959 | 3.478086219 | 7.767661525 | 12.88732275 | 7.87814045  |
| ENSMUSG00000065367 | 10.61177777 | 11.82549314 | 7.061510478 | 10.47094974 | 7.87814045  |
| ENSMUSG00000065368 | 2.122355554 | 1.391234488 | 2.118453143 | 0.805457672 | 0.716194586 |
| ENSMUSG00000065371 | 2.122355554 | 2.782468975 | 5.649208382 | 2.416373016 | 2.148583759 |
| ENSMUSG00000065372 | 7.781970364 | 6.956172438 | 4.943057334 | 6.443661377 | 8.594335036 |
| ENSMUSG00000065373 | 9.904325918 | 9.043024169 | 6.35535943  | 8.054576721 | 8.594335036 |
| ENSMUSG00000065374 | 14.85648888 | 15.30357936 | 14.12302096 | 14.4982381  | 12.89150255 |
| ENSMUSG00000065378 | 0           | 0           | 0           | 0           | 0           |
| ENSMUSG00000065379 | 7.781970364 | 9.043024169 | 3.530755239 | 4.02728836  | 5.013362104 |
| ENSMUSG00000065380 | 8.489422215 | 6.260555194 | 6.35535943  | 6.443661377 | 12.17530797 |
| ENSMUSG00000065381 | 9.196874066 | 9.738641413 | 4.943057334 | 7.249119049 | 4.297167518 |
| ENSMUSG00000065382 | 7.781970364 | 8.347406925 | 12.00456781 | 6.443661377 | 8.594335036 |
| ENSMUSG00000065384 | 7.074518513 | 2.086851731 | 7.767661525 | 8.860034393 | 8.594335036 |
| ENSMUSG00000065385 | 9.196874066 | 7.651789682 | 8.473812573 | 5.638203705 | 8.594335036 |
| ENSMUSG00000065387 | 6.367066661 | 5.56493795  | 4.236906287 | 4.832746033 | 3.580972932 |
| ENSMUSG00000065388 | 4.244711108 | 4.173703463 | 7.767661525 | 7.249119049 | 5.729556691 |
| ENSMUSG00000065389 | 9.196874066 | 9.043024169 | 7.061510478 | 7.249119049 | 6.445751277 |
| ENSMUSG00000065392 | 0           | 0           | 0           | 0           | 0           |
| ENSMUSG00000065394 | 3.537259256 | 0.695617244 | 3.530755239 | 0           | 5.013362104 |
| ENSMUSG00000065395 | 3.537259256 | 4.869320706 | 7.061510478 | 8.054576721 | 6.445751277 |
| ENSMUSG00000065396 | 2.122355554 | 1.391234488 | 0.706151048 | 0           | 2.148583759 |
| ENSMUSG00000065397 | 16.97884443 | 18.08604834 | 17.65377619 | 166.7297381 | 110.2939663 |
| ENSMUSG00000065398 | 1.414903703 | 3.478086219 | 1.412302096 | 2.416373016 | 0           |
| ENSMUSG00000065399 | 8.489422215 | 5.56493795  | 4.236906287 | 5.638203705 | 5.013362104 |
| ENSMUSG00000065400 | 0           | 0           | 0           | 0           | 0           |

|                    |             |             |             |             |             |
|--------------------|-------------|-------------|-------------|-------------|-------------|
| ENSMUSG00000065401 | 0           | 0.695617244 | 0           | 0           | 0           |
| ENSMUSG00000065402 | 9.904325918 | 9.043024169 | 7.767661525 | 5.638203705 | 8.594335036 |
| ENSMUSG00000065403 | 0           | 0           | 0           | 0           | 0           |
| ENSMUSG00000065404 | 0           | 0           | 0.706151048 | 0           | 0           |
| ENSMUSG00000065405 | 9.904325918 | 9.043024169 | 8.473812573 | 4.832746033 | 3.580972932 |
| ENSMUSG00000065406 | 30.4204296  | 45.21512085 | 41.66291182 | 112.7640741 | 84.51096119 |
| ENSMUSG00000065407 | 12.02668147 | 7.651789682 | 9.179963621 | 9.665492065 | 5.013362104 |
| ENSMUSG00000065408 | 10.61177777 | 6.956172438 | 10.59226572 | 4.832746033 | 6.445751277 |
| ENSMUSG00000065409 | 12.73413332 | 16.69481385 | 21.89068248 | 11.27640741 | 8.594335036 |
| ENSMUSG00000065410 | 0.707451851 | 2.086851731 | 2.118453143 | 0.805457672 | 0.716194586 |
| ENSMUSG00000065411 | 8.489422215 | 15.30357936 | 13.41686991 | 13.69278043 | 21.48583759 |
| ENSMUSG00000065412 | 0           | 2.086851731 | 0.706151048 | 1.610915344 | 0           |
| ENSMUSG00000065413 | 0           | 0.695617244 | 0.706151048 | 0           | 0.716194586 |
| ENSMUSG00000065414 | 9.196874066 | 4.869320706 | 9.886114669 | 4.832746033 | 5.013362104 |
| ENSMUSG00000065415 | 9.904325918 | 6.956172438 | 5.649208382 | 2.416373016 | 2.864778345 |
| ENSMUSG00000065416 | 0           | 0           | 0           | 0           | 0           |
| ENSMUSG00000065417 | 47.39927403 | 64.69240367 | 60.02283906 | 29.80193387 | 39.39070225 |
| ENSMUSG00000065418 | 0           | 0           | 0           | 0           | 0           |
| ENSMUSG00000065420 | 113.8997481 | 150.9489419 | 134.8748501 | 306.8793731 | 203.3992625 |
| ENSMUSG00000065421 | 19.80865184 | 29.21592424 | 26.83373982 | 50.74383334 | 26.49919969 |
| ENSMUSG00000065422 | 0           | 0           | 0.706151048 | 0           | 0.716194586 |
| ENSMUSG00000065423 | 2.829807405 | 2.782468975 | 5.649208382 | 0           | 3.580972932 |
| ENSMUSG00000065424 | 4.952162959 | 6.260555194 | 2.824604191 | 9.665492065 | 9.310529622 |
| ENSMUSG00000065425 | 4.952162959 | 1.391234488 | 3.530755239 | 3.221830688 | 3.580972932 |
| ENSMUSG00000065426 | 0           | 0           | 0           | 0           | 0           |
| ENSMUSG00000065427 | 0.707451851 | 0.695617244 | 0.706151048 | 0.805457672 | 0           |
| ENSMUSG00000065428 | 0.707451851 | 0           | 1.412302096 | 0           | 0           |
| ENSMUSG00000065429 | 14.85648888 | 22.95536904 | 21.18453143 | 23.35827249 | 25.06681052 |
| ENSMUSG00000065430 | 0           | 2.086851731 | 0           | 0.805457672 | 0           |
| ENSMUSG00000065431 | 12.02668147 | 13.21672763 | 6.35535943  | 28.19101852 | 22.20203218 |
| ENSMUSG00000065432 | 12.73413332 | 9.043024169 | 10.59226572 | 8.054576721 | 5.013362104 |
| ENSMUSG00000065433 | 0           | 0.695617244 | 0           | 1.610915344 | 0           |
| ENSMUSG00000065434 | 14.85648888 | 29.21592424 | 24.00913562 | 57.99295239 | 52.2822048  |
| ENSMUSG00000065435 | 7.781970364 | 5.56493795  | 7.061510478 | 4.02728836  | 3.580972932 |
| ENSMUSG00000065436 | 106.8252295 | 152.3401764 | 141.9363606 | 99.87675134 | 93.10529622 |
| ENSMUSG00000065437 | 24.76081479 | 38.95456565 | 35.30755239 | 26.58010318 | 22.91822676 |
| ENSMUSG00000065438 | 0           | 0           | 0           | 0           | 0           |
| ENSMUSG00000065439 | 9.196874066 | 10.43425866 | 16.2414741  | 6.443661377 | 8.594335036 |
| ENSMUSG00000065440 | 118.851911  | 165.556904  | 143.3486627 | 220.6954022 | 164.0085603 |
| ENSMUSG00000065441 | 13.44158517 | 6.260555194 | 4.943057334 | 4.02728836  | 5.013362104 |
| ENSMUSG00000065442 | 0           | 0           | 0           | 0           | 0           |
| ENSMUSG00000065443 | 2.829807405 | 2.086851731 | 4.236906287 | 4.02728836  | 3.580972932 |
| ENSMUSG00000065444 | 0           | 0           | 0           | 0           | 0           |



|                    |             |             |             |             |             |
|--------------------|-------------|-------------|-------------|-------------|-------------|
| ENSMUSG00000065445 | 0.707451851 | 1.391234488 | 2.118453143 | 3.221830688 | 1.432389173 |
| ENSMUSG00000065446 | 19.10119998 | 27.12907251 | 31.0706461  | 12.08186508 | 20.05344842 |
| ENSMUSG00000065447 | 0           | 0           | 0           | 0           | 0           |
| ENSMUSG00000065448 | 0           | 0           | 0           | 0           | 0           |
| ENSMUSG00000065449 | 7.781970364 | 7.651789682 | 6.35535943  | 4.832746033 | 6.445751277 |
| ENSMUSG00000065450 | 4.244711108 | 1.391234488 | 0.706151048 | 4.02728836  | 5.729556691 |
| ENSMUSG00000065451 | 30.4204296  | 68.86610713 | 48.7244223  | 22.55281482 | 30.08017263 |
| ENSMUSG00000065452 | 19.80865184 | 24.34660353 | 17.65377619 | 37.05105292 | 40.82309142 |
| ENSMUSG00000065453 | 9.196874066 | 17.39043109 | 14.12302096 | 19.33098413 | 25.78300511 |
| ENSMUSG00000065454 | 0           | 0           | 0           | 0           | 0           |
| ENSMUSG00000065455 | 46.69182218 | 66.08363816 | 54.37363068 | 306.0739154 | 224.8851001 |
| ENSMUSG00000065456 | 0           | 0           | 0           | 0           | 0           |
| ENSMUSG00000065457 | 8.489422215 | 5.56493795  | 6.35535943  | 1.610915344 | 9.310529622 |
| ENSMUSG00000065458 | 0.707451851 | 0           | 0.706151048 | 0           | 0           |
| ENSMUSG00000065460 | 8.489422215 | 6.260555194 | 7.767661525 | 4.832746033 | 8.594335036 |
| ENSMUSG00000065462 | 0           | 0           | 0           | 0           | 0           |
| ENSMUSG00000065463 | 0           | 0           | 0           | 0           | 0           |
| ENSMUSG00000065464 | 15.56394073 | 27.12907251 | 24.71528667 | 10.47094974 | 17.18867007 |
| ENSMUSG00000065465 | 24.76081479 | 35.47647943 | 31.77679715 | 29.80193387 | 35.80972932 |
| ENSMUSG00000065466 | 7.781970364 | 6.956172438 | 9.886114669 | 5.638203705 | 8.594335036 |
| ENSMUSG00000065468 | 19.10119998 | 26.43345526 | 26.83373982 | 28.19101852 | 27.21539428 |
| ENSMUSG00000065469 | 7.074518513 | 6.260555194 | 8.473812573 | 4.02728836  | 3.580972932 |
| ENSMUSG00000065470 | 5.65961481  | 2.782468975 | 3.530755239 | 6.443661377 | 9.310529622 |
| ENSMUSG00000065471 | 0.707451851 | 0.695617244 | 0.706151048 | 2.416373016 | 4.297167518 |
| ENSMUSG00000065472 | 9.904325918 | 6.260555194 | 4.943057334 | 0.805457672 | 7.161945863 |
| ENSMUSG00000065473 | 0           | 0           | 0           | 0           | 0           |
| ENSMUSG00000065474 | 0           | 0           | 0           | 0           | 0           |
| ENSMUSG00000065475 | 0           | 0           | 0           | 0           | 0.716194586 |
| ENSMUSG00000065476 | 0           | 0           | 0           | 0           | 0           |
| ENSMUSG00000065477 | 0           | 0           | 0           | 0           | 0           |
| ENSMUSG00000065479 | 0           | 0           | 0           | 0           | 0           |
| ENSMUSG00000065480 | 9.196874066 | 8.347406925 | 7.767661525 | 6.443661377 | 4.297167518 |
| ENSMUSG00000065481 | 5.65961481  | 3.478086219 | 7.061510478 | 3.221830688 | 10.02672421 |
| ENSMUSG00000065482 | 0           | 0           | 0           | 0           | 0           |
| ENSMUSG00000065483 | 0           | 0.695617244 | 0           | 0           | 0.716194586 |
| ENSMUSG00000065484 | 7.074518513 | 2.782468975 | 6.35535943  | 3.221830688 | 4.297167518 |
| ENSMUSG00000065485 | 11.31922962 | 9.738641413 | 10.59226572 | 16.91461111 | 8.594335036 |
| ENSMUSG00000065486 | 0           | 0           | 0           | 0           | 0           |
| ENSMUSG00000065488 | 10.61177777 | 6.260555194 | 7.767661525 | 7.249119049 | 6.445751277 |
| ENSMUSG00000065489 | 7.074518513 | 5.56493795  | 7.767661525 | 9.665492065 | 5.013362104 |
| ENSMUSG00000065490 | 8.489422215 | 11.82549314 | 13.41686991 | 12.08186508 | 14.32389173 |
| ENSMUSG00000065491 | 9.196874066 | 8.347406925 | 13.41686991 | 8.860034393 | 5.013362104 |
| ENSMUSG00000065492 | 0.707451851 | 1.391234488 | 0           | 0           | 0.716194586 |

|                    |             |             |             |             |             |
|--------------------|-------------|-------------|-------------|-------------|-------------|
| ENSMUSG00000065493 | 7.074518513 | 7.651789682 | 5.649208382 | 28.19101852 | 16.47247549 |
| ENSMUSG00000065494 | 6.367066661 | 9.738641413 | 9.886114669 | 11.27640741 | 13.60769714 |
| ENSMUSG00000065495 | 54.47379255 | 77.9091313  | 89.68118307 | 230.3608942 | 170.4543116 |
| ENSMUSG00000065497 | 0           | 1.391234488 | 0.706151048 | 0           | 0.716194586 |
| ENSMUSG00000065498 | 0.707451851 | 0.695617244 | 1.412302096 | 0.805457672 | 1.432389173 |
| ENSMUSG00000065499 | 8.489422215 | 5.56493795  | 4.943057334 | 1.610915344 | 5.729556691 |
| ENSMUSG00000065500 | 1.414903703 | 2.086851731 | 1.412302096 | 0           | 0.716194586 |
| ENSMUSG00000065501 | 6.367066661 | 10.43425866 | 7.767661525 | 8.860034393 | 7.161945863 |
| ENSMUSG00000065502 | 1.414903703 | 1.391234488 | 2.118453143 | 2.416373016 | 1.432389173 |
| ENSMUSG00000065503 | 0           | 0           | 0           | 0           | 0           |
| ENSMUSG00000065505 | 7.781970364 | 3.478086219 | 12.71071886 | 24.96918783 | 15.7562809  |
| ENSMUSG00000065507 | 9.904325918 | 5.56493795  | 4.943057334 | 7.249119049 | 5.013362104 |
| ENSMUSG00000065508 | 0           | 0           | 0           | 0           | 0           |
| ENSMUSG00000065509 | 1.414903703 | 2.086851731 | 1.412302096 | 0           | 0           |
| ENSMUSG00000065510 | 4.952162959 | 4.869320706 | 4.943057334 | 6.443661377 | 12.17530797 |
| ENSMUSG00000065511 | 4.952162959 | 9.043024169 | 9.179963621 | 2.416373016 | 5.729556691 |
| ENSMUSG00000065512 | 7.781970364 | 5.56493795  | 7.061510478 | 10.47094974 | 8.594335036 |
| ENSMUSG00000065513 | 7.074518513 | 3.478086219 | 9.179963621 | 9.665492065 | 6.445751277 |
| ENSMUSG00000065514 | 1.414903703 | 2.086851731 | 1.412302096 | 2.416373016 | 1.432389173 |
| ENSMUSG00000065515 | 2.122355554 | 0.695617244 | 0.706151048 | 0           | 4.297167518 |
| ENSMUSG00000065516 | 8.489422215 | 9.043024169 | 10.59226572 | 7.249119049 | 8.594335036 |
| ENSMUSG00000065518 | 0.707451851 | 7.651789682 | 6.35535943  | 4.832746033 | 7.161945863 |
| ENSMUSG00000065519 | 1.414903703 | 4.173703463 | 1.412302096 | 2.416373016 | 5.013362104 |
| ENSMUSG00000065520 | 16.97884443 | 11.1298759  | 8.473812573 | 11.27640741 | 13.60769714 |
| ENSMUSG00000065521 | 1.414903703 | 0.695617244 | 0           | 2.416373016 | 1.432389173 |
| ENSMUSG00000065523 | 0.707451851 | 0.695617244 | 0           | 0.805457672 | 1.432389173 |
| ENSMUSG00000065524 | 0           | 0           | 0           | 0           | 0           |
| ENSMUSG00000065526 | 1.414903703 | 0           | 0.706151048 | 0           | 0           |
| ENSMUSG00000065527 | 0           | 0           | 0           | 0           | 0           |
| ENSMUSG00000065528 | 8.489422215 | 13.21672763 | 9.886114669 | 41.88379895 | 21.48583759 |
| ENSMUSG00000065529 | 9.196874066 | 11.1298759  | 12.71071886 | 9.665492065 | 17.90486466 |
| ENSMUSG00000065530 | 1.414903703 | 0.695617244 | 1.412302096 | 0.805457672 | 0           |
| ENSMUSG00000065532 | 8.489422215 | 5.56493795  | 7.767661525 | 2.416373016 | 5.013362104 |
| ENSMUSG00000065533 | 3.537259256 | 5.56493795  | 2.824604191 | 2.416373016 | 5.013362104 |
| ENSMUSG00000065534 | 19.10119998 | 22.2597518  | 14.12302096 | 19.33098413 | 20.769643   |
| ENSMUSG00000065536 | 0           | 0.695617244 | 2.118453143 | 0           | 0.716194586 |
| ENSMUSG00000065537 | 1.414903703 | 0           | 1.412302096 | 0           | 0           |
| ENSMUSG00000065538 | 12.02668147 | 4.869320706 | 6.35535943  | 3.221830688 | 12.17530797 |
| ENSMUSG00000065539 | 7.781970364 | 6.956172438 | 4.943057334 | 4.02728836  | 7.87814045  |
| ENSMUSG00000065540 | 4.952162959 | 7.651789682 | 7.061510478 | 7.249119049 | 8.594335036 |
| ENSMUSG00000065541 | 0           | 0           | 0           | 0           | 0           |
| ENSMUSG00000065542 | 2.122355554 | 0.695617244 | 0           | 0.805457672 | 1.432389173 |
| ENSMUSG00000065543 | 8.489422215 | 15.99919661 | 16.2414741  | 6.443661377 | 11.45911338 |

|                    |             |             |             |             |             |
|--------------------|-------------|-------------|-------------|-------------|-------------|
| ENSMUSG00000065544 | 11.31922962 | 16.69481385 | 12.71071886 | 13.69278043 | 7.161945863 |
| ENSMUSG00000065546 | 8.489422215 | 6.956172438 | 6.35535943  | 7.249119049 | 6.445751277 |
| ENSMUSG00000065547 | 12.02668147 | 17.39043109 | 20.47838039 | 15.30369577 | 20.05344842 |
| ENSMUSG00000065548 | 0.707451851 | 0           | 0.706151048 | 0.805457672 | 0           |
| ENSMUSG00000065549 | 1.414903703 | 0           | 0           | 0.805457672 | 0.716194586 |
| ENSMUSG00000065551 | 2.829807405 | 11.82549314 | 9.179963621 | 4.832746033 | 7.161945863 |
| ENSMUSG00000065552 | 0           | 0           | 0           | 0           | 0           |
| ENSMUSG00000065553 | 23.34591109 | 43.82388636 | 29.65834401 | 43.49471429 | 40.82309142 |
| ENSMUSG00000065555 | 0           | 0           | 0           | 0           | 0           |
| ENSMUSG00000065556 | 7.781970364 | 11.1298759  | 5.649208382 | 15.30369577 | 11.45911338 |
| ENSMUSG00000065557 | 2.122355554 | 2.086851731 | 0.706151048 | 0.805457672 | 0.716194586 |
| ENSMUSG00000065559 | 0           | 0           | 0           | 0           | 0           |
| ENSMUSG00000065560 | 71.45263698 | 107.1250555 | 99.56729774 | 98.265836   | 92.38910164 |
| ENSMUSG00000065561 | 0           | 0           | 0           | 0           | 0           |
| ENSMUSG00000065562 | 3.537259256 | 1.391234488 | 0.706151048 | 4.832746033 | 2.864778345 |
| ENSMUSG00000065563 | 24.05336294 | 32.69401046 | 42.36906287 | 27.38556085 | 30.08017263 |
| ENSMUSG00000065564 | 0.707451851 | 1.391234488 | 0           | 0.805457672 | 0.716194586 |
| ENSMUSG00000065565 | 0.707451851 | 0           | 0.706151048 | 0           | 0           |
| ENSMUSG00000065567 | 0           | 0           | 0           | 0           | 0           |
| ENSMUSG00000065568 | 9.196874066 | 6.260555194 | 10.59226572 | 5.638203705 | 11.45911338 |
| ENSMUSG00000065569 | 0.707451851 | 0           | 1.412302096 | 0.805457672 | 0           |
| ENSMUSG00000065570 | 0           | 0           | 0           | 0           | 0           |
| ENSMUSG00000065571 | 16.27139258 | 25.04222078 | 35.30755239 | 8.860034393 | 14.32389173 |
| ENSMUSG00000065572 | 0.707451851 | 0.695617244 | 3.530755239 | 2.416373016 | 0.716194586 |
| ENSMUSG00000065573 | 16.27139258 | 26.43345526 | 26.12758877 | 12.08186508 | 15.7562809  |
| ENSMUSG00000065574 | 5.65961481  | 7.651789682 | 7.767661525 | 5.638203705 | 6.445751277 |
| ENSMUSG00000065575 | 0.707451851 | 0           | 0           | 0           | 0           |
| ENSMUSG00000065577 | 0           | 0           | 0           | 0           | 0           |
| ENSMUSG00000065578 | 3.537259256 | 6.260555194 | 1.412302096 | 2.416373016 | 1.432389173 |
| ENSMUSG00000065579 | 8.489422215 | 6.260555194 | 9.886114669 | 24.16373016 | 17.18867007 |
| ENSMUSG00000065580 | 3.537259256 | 4.173703463 | 4.236906287 | 16.10915344 | 7.161945863 |
| ENSMUSG00000065581 | 2.122355554 | 2.086851731 | 1.412302096 | 0           | 1.432389173 |
| ENSMUSG00000065582 | 1.414903703 | 0           | 0           | 1.610915344 | 0.716194586 |
| ENSMUSG00000065583 | 6.367066661 | 4.173703463 | 4.943057334 | 9.665492065 | 4.297167518 |
| ENSMUSG00000065585 | 4.952162959 | 9.043024169 | 4.943057334 | 6.443661377 | 7.87814045  |
| ENSMUSG00000065586 | 0           | 0           | 0           | 0           | 0           |
| ENSMUSG00000065587 | 0           | 0           | 0           | 0           | 0           |
| ENSMUSG00000065589 | 74.28244438 | 79.99598303 | 76.97046421 | 117.5968201 | 93.82149081 |
| ENSMUSG00000065590 | 0           | 0           | 0           | 0           | 0           |
| ENSMUSG00000065591 | 12.73413332 | 11.1298759  | 12.71071886 | 13.69278043 | 10.02672421 |
| ENSMUSG00000065592 | 2.829807405 | 0           | 5.649208382 | 2.416373016 | 2.148583759 |
| ENSMUSG00000065593 | 55.88869625 | 84.86530374 | 67.79050059 | 42.68925662 | 47.2688427  |
| ENSMUSG00000065594 | 8.489422215 | 6.956172438 | 9.886114669 | 8.860034393 | 8.594335036 |

|                    |             |             |             |             |             |
|--------------------|-------------|-------------|-------------|-------------|-------------|
| ENSMUSG00000065596 | 6.367066661 | 5.56493795  | 8.473812573 | 7.249119049 | 4.297167518 |
| ENSMUSG00000065597 | 0           | 0           | 0           | 0           | 0           |
| ENSMUSG00000065599 | 0.707451851 | 0.695617244 | 0           | 0.805457672 | 0.716194586 |
| ENSMUSG00000065600 | 5.65961481  | 2.782468975 | 2.824604191 | 4.02728836  | 6.445751277 |
| ENSMUSG00000065601 | 14.14903703 | 21.56413456 | 17.65377619 | 99.07129367 | 66.60609653 |
| ENSMUSG00000065602 | 3.537259256 | 1.391234488 | 2.118453143 | 8.054576721 | 2.864778345 |
| ENSMUSG00000065603 | 10.61177777 | 6.956172438 | 9.179963621 | 0.805457672 | 5.013362104 |
| ENSMUSG00000065604 | 0           | 0           | 0           | 0           | 0           |
| ENSMUSG00000065606 | 5.65961481  | 10.43425866 | 3.530755239 | 8.860034393 | 5.729556691 |
| ENSMUSG00000065607 | 9.196874066 | 7.651789682 | 8.473812573 | 7.249119049 | 5.013362104 |
| ENSMUSG00000065608 | 3.537259256 | 0.695617244 | 1.412302096 | 0.805457672 | 2.148583759 |
| ENSMUSG00000065609 | 7.781970364 | 10.43425866 | 5.649208382 | 3.221830688 | 3.580972932 |
| ENSMUSG00000065610 | 0.707451851 | 2.086851731 | 1.412302096 | 1.610915344 | 1.432389173 |
| ENSMUSG00000065611 | 0.707451851 | 0.695617244 | 0           | 1.610915344 | 2.148583759 |
| ENSMUSG00000065612 | 5.65961481  | 6.956172438 | 7.767661525 | 7.249119049 | 8.594335036 |
| ENSMUSG00000065613 | 0           | 0           | 0           | 0           | 0           |
| ENSMUSG00000065616 | 7.074518513 | 5.56493795  | 5.649208382 | 6.443661377 | 4.297167518 |
| ENSMUSG00000065617 | 0           | 0           | 0           | 0           | 0           |
| ENSMUSG00000065619 | 0           | 1.391234488 | 0           | 0           | 0           |
| ENSMUSG00000065620 | 13.44158517 | 6.260555194 | 6.35535943  | 6.443661377 | 9.310529622 |
| ENSMUSG00000065622 | 4.244711108 | 3.478086219 | 2.824604191 | 3.221830688 | 3.580972932 |
| ENSMUSG00000065623 | 22.63845924 | 39.6501829  | 33.18909925 | 40.2728836  | 38.67450766 |
| ENSMUSG00000065625 | 3.537259256 | 3.478086219 | 6.35535943  | 4.02728836  | 7.87814045  |
| ENSMUSG00000065627 | 7.074518513 | 4.173703463 | 11.29841676 | 6.443661377 | 6.445751277 |
| ENSMUSG00000065628 | 0           | 0           | 0           | 0           | 0           |
| ENSMUSG00000065629 | 7.781970364 | 9.043024169 | 9.179963621 | 8.860034393 | 7.87814045  |
| ENSMUSG00000065630 | 9.904325918 | 9.043024169 | 7.061510478 | 4.832746033 | 2.864778345 |
| ENSMUSG00000065634 | 12.73413332 | 27.12907251 | 16.94762515 | 16.10915344 | 17.90486466 |
| ENSMUSG00000065635 | 0           | 0           | 0           | 0.805457672 | 0           |
| ENSMUSG00000065636 | 12.73413332 | 7.651789682 | 11.29841676 | 7.249119049 | 6.445751277 |
| ENSMUSG00000065637 | 40.32475552 | 60.51870021 | 51.54902649 | 115.9859048 | 92.38910164 |
| ENSMUSG00000065640 | 0           | 0           | 0           | 0           | 0           |
| ENSMUSG00000065642 | 4.952162959 | 9.043024169 | 14.829172   | 52.35474869 | 40.82309142 |
| ENSMUSG00000065643 | 3.537259256 | 6.956172438 | 6.35535943  | 4.02728836  | 5.729556691 |
| ENSMUSG00000065644 | 10.61177777 | 13.91234488 | 7.767661525 | 2.416373016 | 9.310529622 |
| ENSMUSG00000065645 | 4.952162959 | 5.56493795  | 6.35535943  | 7.249119049 | 8.594335036 |
| ENSMUSG00000065647 | 14.14903703 | 23.65098629 | 16.2414741  | 16.10915344 | 16.47247549 |
| ENSMUSG00000065648 | 1.414903703 | 3.478086219 | 0.706151048 | 4.832746033 | 1.432389173 |
| ENSMUSG00000065649 | 10.61177777 | 21.56413456 | 19.77222934 | 113.5695318 | 80.21379367 |
| ENSMUSG00000065651 | 91.26128881 | 113.3856107 | 112.2780166 | 95.04400531 | 95.25387998 |
| ENSMUSG00000065653 | 12.02668147 | 6.956172438 | 9.179963621 | 4.02728836  | 2.864778345 |
| ENSMUSG00000065656 | 7.781970364 | 6.956172438 | 9.886114669 | 7.249119049 | 7.161945863 |
| ENSMUSG00000065657 | 208.6982961 | 282.420601  | 246.4467157 | 187.6716376 | 184.0620087 |

|                    |             |             |             |             |             |
|--------------------|-------------|-------------|-------------|-------------|-------------|
| ENSMUSG00000065658 | 24.05336294 | 46.60635533 | 33.18909925 | 39.46742593 | 42.97167518 |
| ENSMUSG00000065659 | 10.61177777 | 11.82549314 | 10.59226572 | 6.443661377 | 10.02672421 |
| ENSMUSG00000065660 | 9.904325918 | 10.43425866 | 9.179963621 | 4.832746033 | 7.161945863 |
| ENSMUSG00000065661 | 6.367066661 | 3.478086219 | 7.061510478 | 2.416373016 | 7.161945863 |
| ENSMUSG00000065662 | 9.196874066 | 19.47728283 | 16.2414741  | 18.52552646 | 25.78300511 |
| ENSMUSG00000065663 | 0.707451851 | 2.782468975 | 0.706151048 | 1.610915344 | 0.716194586 |
| ENSMUSG00000065664 | 29.0055259  | 84.86530374 | 62.1412922  | 33.02376456 | 38.67450766 |
| ENSMUSG00000065665 | 8.489422215 | 6.260555194 | 12.71071886 | 4.02728836  | 7.161945863 |
| ENSMUSG00000065667 | 5.65961481  | 6.260555194 | 7.061510478 | 3.221830688 | 5.013362104 |
| ENSMUSG00000065669 | 19.80865184 | 33.3896277  | 23.30298458 | 39.46742593 | 45.83645353 |
| ENSMUSG00000065673 | 9.196874066 | 8.347406925 | 7.767661525 | 6.443661377 | 2.864778345 |
| ENSMUSG00000065674 | 8.489422215 | 9.738641413 | 6.35535943  | 6.443661377 | 9.310529622 |
| ENSMUSG00000065675 | 3.537259256 | 8.347406925 | 9.179963621 | 4.832746033 | 11.45911338 |
| ENSMUSG00000065676 | 0           | 0           | 0           | 0           | 0           |
| ENSMUSG00000065678 | 11.31922962 | 12.52111039 | 12.71071886 | 11.27640741 | 14.32389173 |
| ENSMUSG00000065680 | 0           | 0           | 0           | 0           | 0           |
| ENSMUSG00000065683 | 120.2668147 | 155.8182626 | 138.4056054 | 438.1689736 | 310.1122559 |
| ENSMUSG00000065684 | 13.44158517 | 11.1298759  | 9.179963621 | 8.054576721 | 8.594335036 |
| ENSMUSG00000065685 | 14.14903703 | 6.260555194 | 6.35535943  | 6.443661377 | 5.729556691 |
| ENSMUSG00000065686 | 6.367066661 | 9.043024169 | 16.2414741  | 31.41284921 | 14.32389173 |
| ENSMUSG00000065687 | 11.31922962 | 6.956172438 | 7.767661525 | 10.47094974 | 9.310529622 |
| ENSMUSG00000065689 | 9.196874066 | 4.869320706 | 1.412302096 | 0           | 2.864778345 |
| ENSMUSG00000065691 | 16.97884443 | 22.95536904 | 18.35992724 | 24.96918783 | 20.769643   |
| ENSMUSG00000065692 | 8.489422215 | 5.56493795  | 7.061510478 | 6.443661377 | 8.594335036 |
| ENSMUSG00000065694 | 7.781970364 | 5.56493795  | 9.886114669 | 6.443661377 | 3.580972932 |
| ENSMUSG00000065698 | 12.02668147 | 5.56493795  | 6.35535943  | 8.054576721 | 7.161945863 |
| ENSMUSG00000065700 | 6.367066661 | 5.56493795  | 9.179963621 | 1.610915344 | 7.161945863 |
| ENSMUSG00000065701 | 3.537259256 | 4.869320706 | 5.649208382 | 4.02728836  | 1.432389173 |
| ENSMUSG00000065702 | 10.61177777 | 7.651789682 | 7.767661525 | 6.443661377 | 5.013362104 |
| ENSMUSG00000065705 | 12.73413332 | 8.347406925 | 4.943057334 | 4.02728836  | 5.013362104 |
| ENSMUSG00000065706 | 8.489422215 | 7.651789682 | 7.767661525 | 8.054576721 | 8.594335036 |
| ENSMUSG00000065708 | 9.904325918 | 7.651789682 | 9.886114669 | 3.221830688 | 4.297167518 |
| ENSMUSG00000065709 | 9.904325918 | 6.260555194 | 7.767661525 | 5.638203705 | 9.310529622 |
| ENSMUSG00000065714 | 9.196874066 | 9.043024169 | 6.35535943  | 7.249119049 | 6.445751277 |
| ENSMUSG00000065715 | 21.22355554 | 27.12907251 | 31.0706461  | 117.5968201 | 77.34901533 |
| ENSMUSG00000065716 | 4.244711108 | 4.173703463 | 2.824604191 | 4.02728836  | 2.148583759 |
| ENSMUSG00000065718 | 16.27139258 | 6.956172438 | 9.179963621 | 4.832746033 | 5.729556691 |
| ENSMUSG00000065719 | 4.952162959 | 3.478086219 | 2.824604191 | 2.416373016 | 3.580972932 |
| ENSMUSG00000065721 | 4.244711108 | 4.869320706 | 10.59226572 | 9.665492065 | 4.297167518 |
| ENSMUSG00000065722 | 6.367066661 | 11.82549314 | 9.179963621 | 6.443661377 | 7.87814045  |
| ENSMUSG00000065725 | 23.34591109 | 18.78166558 | 15.53532305 | 35.44013757 | 22.20203218 |
| ENSMUSG00000065726 | 7.781970364 | 9.043024169 | 8.473812573 | 8.860034393 | 5.729556691 |
| ENSMUSG00000065727 | 6.367066661 | 9.043024169 | 12.71071886 | 4.02728836  | 5.013362104 |

|                    |             |             |             |             |             |
|--------------------|-------------|-------------|-------------|-------------|-------------|
| ENSMUSG00000065728 | 19.80865184 | 50.08444155 | 48.7244223  | 38.66196826 | 39.39070225 |
| ENSMUSG00000065729 | 8.489422215 | 7.651789682 | 6.35535943  | 8.054576721 | 12.17530797 |
| ENSMUSG00000065732 | 8.489422215 | 13.91234488 | 9.886114669 | 5.638203705 | 15.04008631 |
| ENSMUSG00000065733 | 3.537259256 | 6.260555194 | 3.530755239 | 2.416373016 | 1.432389173 |
| ENSMUSG00000065734 | 0           | 0           | 0           | 0           | 0           |
| ENSMUSG00000065735 | 0           | 0           | 0           | 0           | 0           |
| ENSMUSG00000065737 | 7.781970364 | 6.956172438 | 7.061510478 | 4.832746033 | 6.445751277 |
| ENSMUSG00000065738 | 0           | 0           | 0           | 0           | 0           |
| ENSMUSG00000065739 | 4.244711108 | 3.478086219 | 4.236906287 | 0.805457672 | 2.148583759 |
| ENSMUSG00000065742 | 7.781970364 | 3.478086219 | 9.886114669 | 5.638203705 | 6.445751277 |
| ENSMUSG00000065743 | 7.074518513 | 11.1298759  | 9.886114669 | 6.443661377 | 8.594335036 |
| ENSMUSG00000065745 | 7.074518513 | 4.869320706 | 7.767661525 | 2.416373016 | 7.161945863 |
| ENSMUSG00000065746 | 7.074518513 | 8.347406925 | 6.35535943  | 8.054576721 | 7.161945863 |
| ENSMUSG00000065747 | 2.829807405 | 3.478086219 | 2.824604191 | 7.249119049 | 4.297167518 |
| ENSMUSG00000065749 | 2.122355554 | 1.391234488 | 3.530755239 | 0.805457672 | 1.432389173 |
| ENSMUSG00000065750 | 162.7139258 | 204.5114697 | 206.902257  | 161.0915344 | 146.8198902 |
| ENSMUSG00000065751 | 8.489422215 | 9.043024169 | 10.59226572 | 3.221830688 | 7.87814045  |
| ENSMUSG00000065752 | 0           | 0           | 0           | 0           | 0           |
| ENSMUSG00000065757 | 12.02668147 | 6.956172438 | 9.179963621 | 3.221830688 | 6.445751277 |
| ENSMUSG00000065758 | 4.244711108 | 4.173703463 | 3.530755239 | 3.221830688 | 2.148583759 |
| ENSMUSG00000065760 | 10.61177777 | 3.478086219 | 5.649208382 | 4.02728836  | 5.729556691 |
| ENSMUSG00000065763 | 5.65961481  | 6.260555194 | 2.824604191 | 5.638203705 | 7.161945863 |
| ENSMUSG00000065764 | 12.02668147 | 13.21672763 | 19.77222934 | 16.10915344 | 8.594335036 |
| ENSMUSG00000065765 | 21.22355554 | 42.43265187 | 35.30755239 | 93.43308996 | 75.20043157 |
| ENSMUSG00000065767 | 2.122355554 | 2.086851731 | 2.824604191 | 0           | 0.716194586 |
| ENSMUSG00000065768 | 7.781970364 | 9.043024169 | 10.59226572 | 8.054576721 | 7.161945863 |
| ENSMUSG00000065769 | 8.489422215 | 6.260555194 | 6.35535943  | 3.221830688 | 6.445751277 |
| ENSMUSG00000065770 | 12.02668147 | 6.260555194 | 7.767661525 | 8.860034393 | 4.297167518 |
| ENSMUSG00000065771 | 6.367066661 | 6.956172438 | 7.061510478 | 58.79841006 | 47.98503729 |
| ENSMUSG00000065773 | 6.367066661 | 6.956172438 | 6.35535943  | 6.443661377 | 2.864778345 |
| ENSMUSG00000065778 | 10.61177777 | 6.260555194 | 12.00456781 | 22.55281482 | 16.47247549 |
| ENSMUSG00000065782 | 0           | 0           | 0           | 0           | 0           |
| ENSMUSG00000065787 | 7.781970364 | 4.173703463 | 8.473812573 | 1.610915344 | 2.864778345 |
| ENSMUSG00000065788 | 9.904325918 | 6.260555194 | 6.35535943  | 6.443661377 | 5.013362104 |
| ENSMUSG00000065789 | 11.31922962 | 11.1298759  | 7.061510478 | 4.02728836  | 8.594335036 |
| ENSMUSG00000065791 | 8.489422215 | 7.651789682 | 9.886114669 | 5.638203705 | 8.594335036 |
| ENSMUSG00000065792 | 9.904325918 | 8.347406925 | 10.59226572 | 4.832746033 | 11.45911338 |
| ENSMUSG00000065794 | 14.85648888 | 11.1298759  | 8.473812573 | 4.832746033 | 2.864778345 |
| ENSMUSG00000065795 | 10.61177777 | 5.56493795  | 7.061510478 | 6.443661377 | 6.445751277 |
| ENSMUSG00000065797 | 7.074518513 | 12.52111039 | 9.179963621 | 7.249119049 | 9.310529622 |
| ENSMUSG00000065798 | 8.489422215 | 13.21672763 | 7.061510478 | 13.69278043 | 7.87814045  |
| ENSMUSG00000065799 | 29.0055259  | 45.91073809 | 49.43057334 | 62.82569842 | 52.2822048  |
| ENSMUSG00000065800 | 89.84638511 | 134.9497453 | 127.8133396 | 107.9313281 | 103.848215  |

|                    |             |             |             |             |             |
|--------------------|-------------|-------------|-------------|-------------|-------------|
| ENSMUSG00000065802 | 7.781970364 | 8.347406925 | 7.767661525 | 3.221830688 | 8.594335036 |
| ENSMUSG00000065803 | 5.65961481  | 4.173703463 | 4.236906287 | 1.610915344 | 9.310529622 |
| ENSMUSG00000065804 | 7.781970364 | 13.21672763 | 11.29841676 | 6.443661377 | 7.161945863 |
| ENSMUSG00000065806 | 7.781970364 | 11.82549314 | 10.59226572 | 2.416373016 | 10.02672421 |
| ENSMUSG00000065807 | 11.31922962 | 6.956172438 | 7.767661525 | 0.805457672 | 5.729556691 |
| ENSMUSG00000065808 | 29.0055259  | 52.86691053 | 35.30755239 | 20.1364418  | 42.25548059 |
| ENSMUSG00000065811 | 2.829807405 | 11.82549314 | 2.824604191 | 7.249119049 | 5.013362104 |
| ENSMUSG00000065812 | 6.367066661 | 5.56493795  | 5.649208382 | 4.832746033 | 1.432389173 |
| ENSMUSG00000065813 | 4.244711108 | 5.56493795  | 3.530755239 | 4.02728836  | 6.445751277 |
| ENSMUSG00000065815 | 5.65961481  | 8.347406925 | 6.35535943  | 4.832746033 | 9.310529622 |
| ENSMUSG00000065817 | 44.56946663 | 74.43104508 | 79.7950684  | 116.7913625 | 108.8615771 |
| ENSMUSG00000065818 | 0           | 0           | 0           | 0           | 0           |
| ENSMUSG00000065819 | 3.537259256 | 7.651789682 | 12.71071886 | 4.02728836  | 7.87814045  |
| ENSMUSG00000065820 | 5.65961481  | 7.651789682 | 10.59226572 | 8.054576721 | 8.594335036 |
| ENSMUSG00000065822 | 0           | 0           | 0           | 0           | 0           |
| ENSMUSG00000065823 | 13.44158517 | 3.478086219 | 7.767661525 | 4.02728836  | 5.013362104 |
| ENSMUSG00000065824 | 14.14903703 | 12.52111039 | 3.530755239 | 6.443661377 | 7.161945863 |
| ENSMUSG00000065825 | 4.244711108 | 2.782468975 | 5.649208382 | 6.443661377 | 1.432389173 |
| ENSMUSG00000065828 | 9.196874066 | 5.56493795  | 9.179963621 | 3.221830688 | 3.580972932 |
| ENSMUSG00000065836 | 10.61177777 | 5.56493795  | 14.829172   | 8.054576721 | 7.161945863 |
| ENSMUSG00000065837 | 11.31922962 | 6.956172438 | 4.236906287 | 4.02728836  | 5.013362104 |
| ENSMUSG00000065840 | 0           | 0           | 0           | 0           | 0           |
| ENSMUSG00000065843 | 7.781970364 | 8.347406925 | 5.649208382 | 4.832746033 | 3.580972932 |
| ENSMUSG00000065845 | 2.122355554 | 2.086851731 | 0           | 4.02728836  | 2.864778345 |
| ENSMUSG00000065847 | 9.196874066 | 7.651789682 | 6.35535943  | 4.02728836  | 4.297167518 |
| ENSMUSG00000065851 | 21.93100739 | 27.82468975 | 25.42143772 | 25.77464551 | 22.91822676 |
| ENSMUSG00000065852 | 133.000948  | 189.9035076 | 177.950064  | 234.3881826 | 227.7498785 |
| ENSMUSG00000065853 | 18.39374813 | 15.30357936 | 12.00456781 | 14.4982381  | 9.310529622 |
| ENSMUSG00000065858 | 6.367066661 | 6.956172438 | 6.35535943  | 4.832746033 | 4.297167518 |
| ENSMUSG00000065859 | 0           | 0           | 0           | 0.805457672 | 0           |
| ENSMUSG00000065862 | 0           | 0           | 0           | 0           | 0           |
| ENSMUSG00000065864 | 64.37811846 | 125.2111039 | 113.6903187 | 89.4058016  | 65.88990194 |
| ENSMUSG00000065865 | 8.489422215 | 9.043024169 | 7.061510478 | 4.832746033 | 2.864778345 |
| ENSMUSG00000065866 | 8.489422215 | 7.651789682 | 6.35535943  | 7.249119049 | 8.594335036 |
| ENSMUSG00000065869 | 9.904325918 | 22.2597518  | 25.42143772 | 12.88732275 | 16.47247549 |
| ENSMUSG00000065870 | 17.68629628 | 15.30357936 | 16.2414741  | 21.74735715 | 15.7562809  |
| ENSMUSG00000065872 | 7.781970364 | 8.347406925 | 7.061510478 | 5.638203705 | 7.87814045  |
| ENSMUSG00000065873 | 87.72402956 | 122.4286349 | 100.2734488 | 45.91108731 | 55.14698315 |
| ENSMUSG00000065874 | 20.51610369 | 31.99839321 | 24.00913562 | 24.16373016 | 19.33725383 |
| ENSMUSG00000065875 | 12.73413332 | 5.56493795  | 4.236906287 | 1.610915344 | 8.594335036 |
| ENSMUSG00000065876 | 14.14903703 | 10.43425866 | 11.29841676 | 7.249119049 | 7.161945863 |
| ENSMUSG00000065878 | 0           | 0           | 0           | 0           | 0           |
| ENSMUSG00000065881 | 7.781970364 | 6.260555194 | 7.061510478 | 12.08186508 | 5.729556691 |

|                    |             |             |             |             |             |
|--------------------|-------------|-------------|-------------|-------------|-------------|
| ENSMUSG00000065882 | 7.781970364 | 4.869320706 | 7.767661525 | 5.638203705 | 9.310529622 |
| ENSMUSG00000065883 | 9.196874066 | 9.738641413 | 11.29841676 | 6.443661377 | 8.594335036 |
| ENSMUSG00000065884 | 4.952162959 | 6.956172438 | 4.236906287 | 1.610915344 | 5.013362104 |
| ENSMUSG00000065887 | 7.781970364 | 9.738641413 | 2.824604191 | 7.249119049 | 4.297167518 |
| ENSMUSG00000065889 | 9.904325918 | 8.347406925 | 5.649208382 | 4.832746033 | 3.580972932 |
| ENSMUSG00000065892 | 4.952162959 | 9.738641413 | 9.179963621 | 5.638203705 | 5.013362104 |
| ENSMUSG00000065893 | 8.489422215 | 8.347406925 | 5.649208382 | 6.443661377 | 4.297167518 |
| ENSMUSG00000065894 | 8.489422215 | 15.99919661 | 9.179963621 | 4.02728836  | 7.87814045  |
| ENSMUSG00000065898 | 4.952162959 | 2.086851731 | 4.943057334 | 1.610915344 | 5.013362104 |
| ENSMUSG00000065899 | 21.22355554 | 38.25894841 | 28.24604191 | 117.5968201 | 83.7947666  |
| ENSMUSG00000065903 | 6.367066661 | 4.173703463 | 3.530755239 | 3.221830688 | 1.432389173 |
| ENSMUSG00000065904 | 12.02668147 | 13.91234488 | 12.00456781 | 31.41284921 | 31.5125618  |
| ENSMUSG00000065905 | 10.61177777 | 4.869320706 | 7.767661525 | 6.443661377 | 9.310529622 |
| ENSMUSG00000065906 | 7.781970364 | 7.651789682 | 7.767661525 | 9.665492065 | 5.729556691 |
| ENSMUSG00000065907 | 4.244711108 | 4.869320706 | 4.943057334 | 2.416373016 | 3.580972932 |
| ENSMUSG00000065911 | 13.44158517 | 10.43425866 | 7.767661525 | 4.832746033 | 10.02672421 |
| ENSMUSG00000065913 | 0           | 0           | 0           | 0           | 0           |
| ENSMUSG00000065915 | 289.3478072 | 283.8118355 | 246.4467157 | 345.5413413 | 269.2891645 |
| ENSMUSG00000065916 | 13.44158517 | 6.260555194 | 6.35535943  | 4.832746033 | 7.161945863 |
| ENSMUSG00000065919 | 7.074518513 | 13.21672763 | 12.00456781 | 8.860034393 | 6.445751277 |
| ENSMUSG00000065922 | 19.10119998 | 18.08604834 | 9.886114669 | 10.47094974 | 11.45911338 |
| ENSMUSG00000065924 | 12.02668147 | 6.956172438 | 7.061510478 | 4.832746033 | 5.729556691 |
| ENSMUSG00000065926 | 10.61177777 | 4.173703463 | 4.236906287 | 9.665492065 | 10.7429188  |
| ENSMUSG00000065934 | 11.31922962 | 3.478086219 | 11.29841676 | 9.665492065 | 5.013362104 |
| ENSMUSG00000065935 | 3.537259256 | 4.869320706 | 2.118453143 | 4.02728836  | 2.148583759 |
| ENSMUSG00000065936 | 259.6348294 | 260.8564664 | 239.3852052 | 274.6610662 | 182.6296195 |
| ENSMUSG00000065937 | 6.367066661 | 5.56493795  | 7.767661525 | 5.638203705 | 5.729556691 |
| ENSMUSG00000065939 | 54.47379255 | 98.08203137 | 74.85201106 | 109.5422434 | 93.10529622 |
| ENSMUSG00000065940 | 7.074518513 | 4.173703463 | 6.35535943  | 3.221830688 | 7.161945863 |
| ENSMUSG00000065943 | 7.781970364 | 4.173703463 | 2.824604191 | 2.416373016 | 4.297167518 |
| ENSMUSG00000065944 | 7.074518513 | 11.82549314 | 6.35535943  | 6.443661377 | 3.580972932 |
| ENSMUSG00000065945 | 10.61177777 | 8.347406925 | 11.29841676 | 3.221830688 | 7.161945863 |
| ENSMUSG00000065947 | 0           | 0           | 0           | 0           | 0           |
| ENSMUSG00000065950 | 8.489422215 | 6.260555194 | 13.41686991 | 7.249119049 | 6.445751277 |
| ENSMUSG00000066057 | 31.83533331 | 42.43265187 | 37.42600553 | 66.85298678 | 60.87653984 |
| ENSMUSG00000066060 | 9.904325918 | 6.956172438 | 7.061510478 | 7.249119049 | 7.161945863 |
| ENSMUSG00000066068 | 13.44158517 | 7.651789682 | 10.59226572 | 11.27640741 | 7.87814045  |
| ENSMUSG00000066101 | 7.074518513 | 2.086851731 | 3.530755239 | 7.249119049 | 7.87814045  |
| ENSMUSG00000066107 | 9.196874066 | 7.651789682 | 7.767661525 | 8.054576721 | 4.297167518 |
| ENSMUSG00000066116 | 5.65961481  | 9.738641413 | 7.061510478 | 7.249119049 | 6.445751277 |
| ENSMUSG00000066158 | 6.367066661 | 6.260555194 | 6.35535943  | 6.443661377 | 7.87814045  |
| ENSMUSG00000066170 | 16.27139258 | 21.56413456 | 14.829172   | 8.860034393 | 15.04008631 |
| ENSMUSG00000066175 | 34.66514071 | 47.99758982 | 41.66291182 | 70.07481747 | 52.2822048  |



|                    |             |             |             |             |             |
|--------------------|-------------|-------------|-------------|-------------|-------------|
| ENSMUSG00000066176 | 6.367066661 | 7.651789682 | 8.473812573 | 8.054576721 | 7.161945863 |
| ENSMUSG00000066180 | 19.10119998 | 15.99919661 | 19.06607829 | 9.665492065 | 16.47247549 |
| ENSMUSG00000066197 | 9.196874066 | 6.956172438 | 9.886114669 | 5.638203705 | 11.45911338 |
| ENSMUSG00000066232 | 133.000948  | 187.1210386 | 144.7609648 | 328.6267302 | 249.9519106 |
| ENSMUSG00000066239 | 7.074518513 | 4.869320706 | 12.71071886 | 4.832746033 | 5.729556691 |
| ENSMUSG00000066241 | 7.781970364 | 6.260555194 | 7.767661525 | 7.249119049 | 4.297167518 |
| ENSMUSG00000066242 | 6.367066661 | 7.651789682 | 9.179963621 | 6.443661377 | 6.445751277 |
| ENSMUSG00000066245 | 14.85648888 | 10.43425866 | 13.41686991 | 8.860034393 | 10.7429188  |
| ENSMUSG00000066262 | 9.904325918 | 7.651789682 | 6.35535943  | 2.416373016 | 9.310529622 |
| ENSMUSG00000066263 | 9.196874066 | 6.956172438 | 12.00456781 | 7.249119049 | 10.7429188  |
| ENSMUSG00000066268 | 8.489422215 | 9.043024169 | 9.179963621 | 2.416373016 | 4.297167518 |
| ENSMUSG00000066269 | 8.489422215 | 9.043024169 | 9.886114669 | 2.416373016 | 8.594335036 |
| ENSMUSG00000066270 | 12.73413332 | 8.347406925 | 8.473812573 | 7.249119049 | 14.32389173 |
| ENSMUSG00000066273 | 7.781970364 | 6.260555194 | 4.943057334 | 4.832746033 | 6.445751277 |
| ENSMUSG00000066315 | 24.76081479 | 18.08604834 | 24.71528667 | 30.60739154 | 22.20203218 |
| ENSMUSG00000066319 | 11.31922962 | 5.56493795  | 14.12302096 | 6.443661377 | 4.297167518 |
| ENSMUSG00000066362 | 13.44158517 | 7.651789682 | 9.886114669 | 10.47094974 | 12.89150255 |
| ENSMUSG00000066372 | 13.44158517 | 8.347406925 | 4.943057334 | 6.443661377 | 9.310529622 |
| ENSMUSG00000066378 | 6.367066661 | 9.738641413 | 9.886114669 | 8.860034393 | 9.310529622 |
| ENSMUSG00000066389 | 5.65961481  | 6.260555194 | 4.236906287 | 5.638203705 | 9.310529622 |
| ENSMUSG00000066443 | 7.074518513 | 9.738641413 | 11.29841676 | 6.443661377 | 5.013362104 |
| ENSMUSG00000066457 | 8.489422215 | 10.43425866 | 8.473812573 | 4.832746033 | 11.45911338 |
| ENSMUSG00000066475 | 21.93100739 | 16.69481385 | 18.35992724 | 25.77464551 | 20.05344842 |
| ENSMUSG00000066477 | 1.414903703 | 0.695617244 | 2.118453143 | 1.610915344 | 0.716194586 |
| ENSMUSG00000066478 | 6.367066661 | 4.173703463 | 8.473812573 | 8.860034393 | 5.013362104 |
| ENSMUSG00000066487 | 9.196874066 | 17.39043109 | 13.41686991 | 15.30369577 | 10.7429188  |
| ENSMUSG00000066489 | 9.904325918 | 6.956172438 | 10.59226572 | 1.610915344 | 8.594335036 |
| ENSMUSG00000066491 | 10.61177777 | 7.651789682 | 11.29841676 | 5.638203705 | 3.580972932 |
| ENSMUSG00000066500 | 9.904325918 | 6.956172438 | 4.943057334 | 12.88732275 | 7.87814045  |
| ENSMUSG00000066510 | 10.61177777 | 7.651789682 | 6.35535943  | 2.416373016 | 7.161945863 |
| ENSMUSG00000066537 | 6.367066661 | 9.738641413 | 7.767661525 | 3.221830688 | 10.7429188  |
| ENSMUSG00000066538 | 237.703822  | 243.4660353 | 217.4945227 | 310.9066614 | 211.9935976 |
| ENSMUSG00000066543 | 10.61177777 | 4.869320706 | 4.943057334 | 7.249119049 | 9.310529622 |
| ENSMUSG00000066553 | 9.196874066 | 9.738641413 | 9.179963621 | 12.88732275 | 12.17530797 |
| ENSMUSG00000066554 | 12.02668147 | 6.260555194 | 7.767661525 | 11.27640741 | 9.310529622 |
| ENSMUSG00000066592 | 8.489422215 | 6.260555194 | 9.179963621 | 13.69278043 | 10.02672421 |
| ENSMUSG00000066620 | 2.122355554 | 7.651789682 | 4.236906287 | 2.416373016 | 2.148583759 |
| ENSMUSG00000066626 | 7.781970364 | 6.260555194 | 7.061510478 | 14.4982381  | 12.89150255 |
| ENSMUSG00000066671 | 7.781970364 | 4.869320706 | 4.943057334 | 7.249119049 | 7.161945863 |
| ENSMUSG00000066672 | 6.367066661 | 9.043024169 | 4.236906287 | 2.416373016 | 9.310529622 |
| ENSMUSG00000066680 | 8.489422215 | 6.956172438 | 9.886114669 | 4.02728836  | 6.445751277 |
| ENSMUSG00000066688 | 4.244711108 | 6.260555194 | 5.649208382 | 2.416373016 | 8.594335036 |
| ENSMUSG00000066693 | 7.074518513 | 9.043024169 | 6.35535943  | 12.08186508 | 8.594335036 |

|                    |             |             |             |             |             |
|--------------------|-------------|-------------|-------------|-------------|-------------|
| ENSMUSG00000066697 | 8.489422215 | 5.56493795  | 6.35535943  | 4.02728836  | 5.013362104 |
| ENSMUSG00000066714 | 6.367066661 | 6.260555194 | 7.061510478 | 4.02728836  | 7.87814045  |
| ENSMUSG00000066723 | 9.196874066 | 7.651789682 | 4.236906287 | 5.638203705 | 6.445751277 |
| ENSMUSG00000066749 | 12.73413332 | 4.869320706 | 8.473812573 | 8.860034393 | 9.310529622 |
| ENSMUSG00000066752 | 6.367066661 | 4.173703463 | 7.767661525 | 3.221830688 | 3.580972932 |
| ENSMUSG00000066767 | 12.73413332 | 7.651789682 | 5.649208382 | 5.638203705 | 6.445751277 |
| ENSMUSG00000066771 | 9.196874066 | 6.260555194 | 6.35535943  | 10.47094974 | 8.594335036 |
| ENSMUSG00000066803 | 11.31922962 | 8.347406925 | 7.061510478 | 5.638203705 | 5.729556691 |
| ENSMUSG00000066807 | 12.02668147 | 9.043024169 | 9.886114669 | 8.054576721 | 5.013362104 |
| ENSMUSG00000066809 | 9.904325918 | 6.956172438 | 7.767661525 | 10.47094974 | 9.310529622 |
| ENSMUSG00000066810 | 7.781970364 | 3.478086219 | 12.71071886 | 3.221830688 | 3.580972932 |
| ENSMUSG00000066820 | 11.31922962 | 7.651789682 | 7.061510478 | 5.638203705 | 6.445751277 |
| ENSMUSG00000066842 | 4.952162959 | 3.478086219 | 7.061510478 | 7.249119049 | 4.297167518 |
| ENSMUSG00000066899 | 9.196874066 | 8.347406925 | 3.530755239 | 6.443661377 | 5.013362104 |
| ENSMUSG00000066902 | 5.65961481  | 8.347406925 | 8.473812573 | 12.08186508 | 10.7429188  |
| ENSMUSG00000066912 | 11.31922962 | 6.956172438 | 9.179963621 | 6.443661377 | 5.013362104 |
| ENSMUSG00000066914 | 8.489422215 | 6.260555194 | 4.943057334 | 5.638203705 | 7.161945863 |
| ENSMUSG00000066938 | 6.367066661 | 8.347406925 | 8.473812573 | 4.02728836  | 6.445751277 |
| ENSMUSG00000066952 | 6.367066661 | 7.651789682 | 3.530755239 | 4.832746033 | 5.013362104 |
| ENSMUSG00000066958 | 10.61177777 | 6.956172438 | 9.886114669 | 5.638203705 | 7.87814045  |
| ENSMUSG00000066983 | 9.196874066 | 12.52111039 | 6.35535943  | 11.27640741 | 5.013362104 |
| ENSMUSG00000066990 | 8.489422215 | 6.260555194 | 4.943057334 | 2.416373016 | 4.297167518 |
| ENSMUSG00000067017 | 12.02668147 | 13.21672763 | 12.00456781 | 11.27640741 | 10.7429188  |
| ENSMUSG00000067028 | 14.85648888 | 7.651789682 | 7.767661525 | 8.054576721 | 5.729556691 |
| ENSMUSG00000067047 | 5.65961481  | 9.043024169 | 7.767661525 | 5.638203705 | 6.445751277 |
| ENSMUSG00000067058 | 74.98989623 | 100.1688831 | 116.5149229 | 70.07481747 | 85.22715578 |
| ENSMUSG00000067063 | 8.489422215 | 6.260555194 | 7.767661525 | 6.443661377 | 10.02672421 |
| ENSMUSG00000067064 | 7.781970364 | 7.651789682 | 7.767661525 | 9.665492065 | 7.87814045  |
| ENSMUSG00000067085 | 10.61177777 | 12.52111039 | 15.53532305 | 6.443661377 | 10.7429188  |
| ENSMUSG00000067101 | 11.31922962 | 4.173703463 | 5.649208382 | 6.443661377 | 5.013362104 |
| ENSMUSG00000067103 | 6.367066661 | 5.56493795  | 4.236906287 | 4.02728836  | 9.310529622 |
| ENSMUSG00000067106 | 7.781970364 | 11.82549314 | 13.41686991 | 6.443661377 | 9.310529622 |
| ENSMUSG00000067121 | 10.61177777 | 4.869320706 | 9.179963621 | 8.054576721 | 9.310529622 |
| ENSMUSG00000067122 | 7.781970364 | 6.260555194 | 5.649208382 | 9.665492065 | 12.89150255 |
| ENSMUSG00000067147 | 8.489422215 | 7.651789682 | 7.061510478 | 12.88732275 | 5.729556691 |
| ENSMUSG00000067156 | 9.904325918 | 6.956172438 | 4.236906287 | 4.02728836  | 7.87814045  |
| ENSMUSG00000067161 | 12.02668147 | 8.347406925 | 5.649208382 | 8.860034393 | 9.310529622 |
| ENSMUSG00000067186 | 10.61177777 | 13.21672763 | 9.886114669 | 7.249119049 | 7.87814045  |
| ENSMUSG00000067189 | 9.904325918 | 4.869320706 | 12.00456781 | 8.860034393 | 5.729556691 |
| ENSMUSG00000067199 | 24.05336294 | 48.69320706 | 63.5535943  | 37.85651059 | 40.82309142 |
| ENSMUSG00000067203 | 29.0055259  | 62.60555194 | 50.13672439 | 53.16020636 | 54.43078856 |
| ENSMUSG00000067224 | 12.73413332 | 9.738641413 | 9.886114669 | 6.443661377 | 7.161945863 |
| ENSMUSG00000067225 | 8.489422215 | 9.738641413 | 10.59226572 | 5.638203705 | 6.445751277 |

|                    |             |             |             |             |             |
|--------------------|-------------|-------------|-------------|-------------|-------------|
| ENSMUSG00000067262 | 3.537259256 | 4.869320706 | 6.35535943  | 1.610915344 | 2.864778345 |
| ENSMUSG00000067285 | 8.489422215 | 8.347406925 | 6.35535943  | 8.054576721 | 6.445751277 |
| ENSMUSG00000067292 | 10.61177777 | 4.869320706 | 7.767661525 | 4.02728836  | 10.02672421 |
| ENSMUSG00000067321 | 11.31922962 | 4.869320706 | 10.59226572 | 6.443661377 | 2.864778345 |
| ENSMUSG00000067331 | 12.73413332 | 6.956172438 | 3.530755239 | 6.443661377 | 7.87814045  |
| ENSMUSG00000067344 | 6.367066661 | 11.1298759  | 7.061510478 | 7.249119049 | 10.7429188  |
| ENSMUSG00000067351 | 9.904325918 | 8.347406925 | 5.649208382 | 8.860034393 | 12.17530797 |
| ENSMUSG00000067352 | 9.196874066 | 7.651789682 | 12.00456781 | 8.860034393 | 7.87814045  |
| ENSMUSG00000067389 | 7.074518513 | 4.173703463 | 6.35535943  | 6.443661377 | 7.87814045  |
| ENSMUSG00000067441 | 5.65961481  | 4.173703463 | 2.824604191 | 3.221830688 | 1.432389173 |
| ENSMUSG00000067482 | 13.44158517 | 4.869320706 | 8.473812573 | 7.249119049 | 5.013362104 |
| ENSMUSG00000067513 | 9.196874066 | 8.347406925 | 6.35535943  | 4.832746033 | 7.161945863 |
| ENSMUSG00000067519 | 12.02668147 | 6.260555194 | 6.35535943  | 4.832746033 | 5.013362104 |
| ENSMUSG00000067520 | 5.65961481  | 9.043024169 | 7.061510478 | 4.832746033 | 5.729556691 |
| ENSMUSG00000067524 | 9.196874066 | 9.043024169 | 14.12302096 | 4.02728836  | 8.594335036 |
| ENSMUSG00000067526 | 12.73413332 | 7.651789682 | 4.236906287 | 8.054576721 | 6.445751277 |
| ENSMUSG00000067528 | 7.781970364 | 7.651789682 | 7.767661525 | 5.638203705 | 9.310529622 |
| ENSMUSG00000067529 | 7.781970364 | 13.21672763 | 7.767661525 | 9.665492065 | 10.7429188  |
| ENSMUSG00000067547 | 14.14903703 | 6.956172438 | 13.41686991 | 11.27640741 | 6.445751277 |
| ENSMUSG00000067555 | 6.367066661 | 7.651789682 | 7.767661525 | 7.249119049 | 8.594335036 |
| ENSMUSG00000067575 | 6.367066661 | 6.260555194 | 7.767661525 | 6.443661377 | 9.310529622 |
| ENSMUSG00000067627 | 9.196874066 | 4.869320706 | 7.061510478 | 2.416373016 | 5.729556691 |
| ENSMUSG00000067629 | 5.65961481  | 6.260555194 | 11.29841676 | 8.054576721 | 5.013362104 |
| ENSMUSG00000067716 | 5.65961481  | 7.651789682 | 12.71071886 | 6.443661377 | 5.729556691 |
| ENSMUSG00000067736 | 0           | 0           | 0           | 0           | 0           |
| ENSMUSG00000067745 | 6.367066661 | 10.43425866 | 9.886114669 | 5.638203705 | 8.594335036 |
| ENSMUSG00000067798 | 6.367066661 | 4.869320706 | 4.236906287 | 2.416373016 | 10.02672421 |
| ENSMUSG00000067835 | 5.65961481  | 2.086851731 | 6.35535943  | 2.416373016 | 4.297167518 |
| ENSMUSG00000067869 | 9.904325918 | 6.956172438 | 13.41686991 | 8.860034393 | 8.594335036 |
| ENSMUSG00000067870 | 13.44158517 | 11.1298759  | 11.29841676 | 10.47094974 | 8.594335036 |
| ENSMUSG00000067929 | 3.537259256 | 6.260555194 | 2.118453143 | 1.610915344 | 2.864778345 |
| ENSMUSG00000067941 | 10.61177777 | 8.347406925 | 7.061510478 | 4.02728836  | 9.310529622 |
| ENSMUSG00000067949 | 0           | 0           | 0           | 0           | 0           |
| ENSMUSG00000067951 | 0           | 0           | 0           | 0           | 0           |
| ENSMUSG00000067971 | 7.074518513 | 3.478086219 | 2.118453143 | 3.221830688 | 3.580972932 |
| ENSMUSG00000068014 | 6.367066661 | 5.56493795  | 3.530755239 | 6.443661377 | 3.580972932 |
| ENSMUSG00000068062 | 8.489422215 | 5.56493795  | 4.236906287 | 7.249119049 | 7.87814045  |
| ENSMUSG00000068068 | 7.074518513 | 6.260555194 | 9.886114669 | 3.221830688 | 6.445751277 |
| ENSMUSG00000068120 | 14.14903703 | 15.30357936 | 16.2414741  | 11.27640741 | 8.594335036 |
| ENSMUSG00000068141 | 10.61177777 | 6.956172438 | 9.886114669 | 12.08186508 | 10.02672421 |
| ENSMUSG00000068151 | 9.904325918 | 4.173703463 | 5.649208382 | 6.443661377 | 6.445751277 |
| ENSMUSG00000068165 | 9.196874066 | 9.738641413 | 6.35535943  | 9.665492065 | 11.45911338 |
| ENSMUSG00000068180 | 10.61177777 | 5.56493795  | 7.061510478 | 7.249119049 | 5.013362104 |

|                    |             |             |             |             |             |
|--------------------|-------------|-------------|-------------|-------------|-------------|
| ENSMUSG00000068181 | 9.196874066 | 4.869320706 | 4.236906287 | 4.832746033 | 7.161945863 |
| ENSMUSG00000068182 | 11.31922962 | 5.56493795  | 6.35535943  | 4.832746033 | 11.45911338 |
| ENSMUSG00000068200 | 5.65961481  | 6.260555194 | 9.886114669 | 11.27640741 | 6.445751277 |
| ENSMUSG00000068226 | 5.65961481  | 7.651789682 | 8.473812573 | 4.02728836  | 12.89150255 |
| ENSMUSG00000068231 | 11.31922962 | 11.1298759  | 11.29841676 | 2.416373016 | 5.729556691 |
| ENSMUSG00000068243 | 4.952162959 | 6.260555194 | 7.061510478 | 5.638203705 | 10.7429188  |
| ENSMUSG00000068259 | 10.61177777 | 6.260555194 | 9.886114669 | 4.832746033 | 7.87814045  |
| ENSMUSG00000068262 | 11.31922962 | 13.91234488 | 7.061510478 | 17.72006879 | 15.7562809  |
| ENSMUSG00000068303 | 4.244711108 | 4.869320706 | 3.530755239 | 7.249119049 | 4.297167518 |
| ENSMUSG00000068324 | 9.196874066 | 6.956172438 | 7.767661525 | 8.860034393 | 9.310529622 |
| ENSMUSG00000068348 | 6.367066661 | 6.956172438 | 6.35535943  | 8.054576721 | 12.89150255 |
| ENSMUSG00000068396 | 7.781970364 | 6.956172438 | 5.649208382 | 5.638203705 | 8.594335036 |
| ENSMUSG00000068397 | 9.904325918 | 11.82549314 | 9.179963621 | 9.665492065 | 7.87814045  |
| ENSMUSG00000068452 | 6.367066661 | 4.173703463 | 6.35535943  | 7.249119049 | 7.161945863 |
| ENSMUSG00000068463 | 8.489422215 | 4.869320706 | 7.767661525 | 6.443661377 | 9.310529622 |
| ENSMUSG00000068466 | 14.14903703 | 9.043024169 | 11.29841676 | 14.4982381  | 10.02672421 |
| ENSMUSG00000068480 | 18.39374813 | 14.60796212 | 14.12302096 | 15.30369577 | 17.90486466 |
| ENSMUSG00000068487 | 9.196874066 | 9.738641413 | 7.767661525 | 5.638203705 | 4.297167518 |
| ENSMUSG00000068535 | 12.73413332 | 8.347406925 | 9.886114669 | 3.221830688 | 7.161945863 |
| ENSMUSG00000068537 | 9.196874066 | 7.651789682 | 6.35535943  | 5.638203705 | 8.594335036 |
| ENSMUSG00000068574 | 14.14903703 | 4.173703463 | 5.649208382 | 6.443661377 | 7.161945863 |
| ENSMUSG00000068579 | 16.97884443 | 13.91234488 | 13.41686991 | 11.27640741 | 15.7562809  |
| ENSMUSG00000068604 | 18.39374813 | 9.738641413 | 9.179963621 | 11.27640741 | 9.310529622 |
| ENSMUSG00000068629 | 9.196874066 | 5.56493795  | 6.35535943  | 4.832746033 | 6.445751277 |
| ENSMUSG00000068631 | 10.61177777 | 11.82549314 | 13.41686991 | 4.832746033 | 7.161945863 |
| ENSMUSG00000068638 | 4.952162959 | 13.21672763 | 8.473812573 | 9.665492065 | 9.310529622 |
| ENSMUSG00000068646 | 10.61177777 | 8.347406925 | 8.473812573 | 3.221830688 | 5.729556691 |
| ENSMUSG00000068647 | 12.02668147 | 6.956172438 | 7.767661525 | 1.610915344 | 4.297167518 |
| ENSMUSG00000068674 | 7.074518513 | 6.956172438 | 6.35535943  | 8.860034393 | 12.89150255 |
| ENSMUSG00000068680 | 7.781970364 | 7.651789682 | 9.179963621 | 8.054576721 | 4.297167518 |
| ENSMUSG00000068689 | 9.196874066 | 8.347406925 | 8.473812573 | 4.832746033 | 7.87814045  |
| ENSMUSG00000068776 | 4.244711108 | 2.782468975 | 4.943057334 | 1.610915344 | 5.729556691 |
| ENSMUSG00000068806 | 10.61177777 | 13.21672763 | 8.473812573 | 6.443661377 | 7.161945863 |
| ENSMUSG00000068808 | 4.952162959 | 8.347406925 | 7.767661525 | 6.443661377 | 4.297167518 |
| ENSMUSG00000068809 | 12.73413332 | 6.260555194 | 9.886114669 | 5.638203705 | 6.445751277 |
| ENSMUSG00000068810 | 4.952162959 | 5.56493795  | 4.236906287 | 3.221830688 | 7.161945863 |
| ENSMUSG00000068814 | 9.904325918 | 8.347406925 | 4.236906287 | 4.02728836  | 4.297167518 |
| ENSMUSG00000068815 | 10.61177777 | 9.043024169 | 5.649208382 | 2.416373016 | 5.729556691 |
| ENSMUSG00000068816 | 11.31922962 | 9.043024169 | 4.943057334 | 3.221830688 | 5.013362104 |
| ENSMUSG00000068817 | 9.196874066 | 6.260555194 | 7.061510478 | 1.610915344 | 6.445751277 |
| ENSMUSG00000068818 | 8.489422215 | 11.82549314 | 9.886114669 | 3.221830688 | 4.297167518 |
| ENSMUSG00000068819 | 5.65961481  | 9.738641413 | 10.59226572 | 6.443661377 | 2.864778345 |
| ENSMUSG00000068824 | 12.02668147 | 7.651789682 | 6.35535943  | 4.02728836  | 5.729556691 |

|                    |             |             |             |             |             |
|--------------------|-------------|-------------|-------------|-------------|-------------|
| ENSMUSG00000068947 | 6.367066661 | 5.56493795  | 7.767661525 | 5.638203705 | 5.729556691 |
| ENSMUSG00000068948 | 1.414903703 | 0.695617244 | 2.824604191 | 2.416373016 | 2.148583759 |
| ENSMUSG00000068950 | 9.904325918 | 9.043024169 | 11.29841676 | 4.832746033 | 5.013362104 |
| ENSMUSG00000068962 | 5.65961481  | 7.651789682 | 4.943057334 | 5.638203705 | 8.594335036 |
| ENSMUSG00000068964 | 11.31922962 | 6.956172438 | 13.41686991 | 10.47094974 | 8.594335036 |
| ENSMUSG00000068969 | 10.61177777 | 11.82549314 | 9.179963621 | 4.02728836  | 10.02672421 |
| ENSMUSG00000069008 | 7.074518513 | 4.869320706 | 7.767661525 | 9.665492065 | 10.02672421 |
| ENSMUSG00000069011 | 16.27139258 | 17.39043109 | 14.12302096 | 22.55281482 | 17.18867007 |
| ENSMUSG00000069036 | 2.829807405 | 4.173703463 | 3.530755239 | 3.221830688 | 2.864778345 |
| ENSMUSG00000069038 | 2.829807405 | 2.782468975 | 2.824604191 | 1.610915344 | 2.864778345 |
| ENSMUSG00000069074 | 7.074518513 | 8.347406925 | 7.767661525 | 8.860034393 | 5.013362104 |
| ENSMUSG00000069083 | 11.31922962 | 10.43425866 | 11.29841676 | 14.4982381  | 16.47247549 |
| ENSMUSG00000069117 | 10.61177777 | 3.478086219 | 11.29841676 | 4.832746033 | 6.445751277 |
| ENSMUSG00000069125 | 12.02668147 | 7.651789682 | 4.943057334 | 12.88732275 | 4.297167518 |
| ENSMUSG00000069136 | 24.05336294 | 42.43265187 | 37.42600553 | 76.51847885 | 77.34901533 |
| ENSMUSG00000069188 | 7.781970364 | 5.56493795  | 5.649208382 | 7.249119049 | 12.89150255 |
| ENSMUSG00000069196 | 7.074518513 | 7.651789682 | 4.943057334 | 4.832746033 | 7.161945863 |
| ENSMUSG00000069208 | 20.51610369 | 27.12907251 | 24.71528667 | 15.30369577 | 19.33725383 |
| ENSMUSG00000069223 | 8.489422215 | 6.260555194 | 7.061510478 | 3.221830688 | 7.161945863 |
| ENSMUSG00000069236 | 11.31922962 | 4.869320706 | 8.473812573 | 6.443661377 | 5.013362104 |
| ENSMUSG00000069276 | 12.02668147 | 8.347406925 | 8.473812573 | 1.610915344 | 6.445751277 |
| ENSMUSG00000069280 | 14.14903703 | 11.82549314 | 8.473812573 | 6.443661377 | 3.580972932 |
| ENSMUSG00000069289 | 6.367066661 | 7.651789682 | 7.767661525 | 4.02728836  | 2.864778345 |
| ENSMUSG00000069292 | 10.61177777 | 6.956172438 | 11.29841676 | 5.638203705 | 5.729556691 |
| ENSMUSG00000069294 | 10.61177777 | 3.478086219 | 5.649208382 | 4.832746033 | 7.161945863 |
| ENSMUSG00000069295 | 18.39374813 | 5.56493795  | 6.35535943  | 4.832746033 | 5.013362104 |
| ENSMUSG00000069296 | 12.02668147 | 9.043024169 | 9.179963621 | 4.02728836  | 6.445751277 |
| ENSMUSG00000069297 | 11.31922962 | 9.738641413 | 7.767661525 | 5.638203705 | 5.729556691 |
| ENSMUSG00000069299 | 13.44158517 | 11.1298759  | 4.236906287 | 4.02728836  | 10.02672421 |
| ENSMUSG00000069309 | 4.244711108 | 6.260555194 | 9.886114669 | 7.249119049 | 5.729556691 |
| ENSMUSG00000069315 | 13.44158517 | 6.260555194 | 5.649208382 | 5.638203705 | 3.580972932 |
| ENSMUSG00000069355 | 12.73413332 | 9.043024169 | 2.824604191 | 7.249119049 | 8.594335036 |
| ENSMUSG00000069376 | 8.489422215 | 6.956172438 | 5.649208382 | 3.221830688 | 9.310529622 |
| ENSMUSG00000069379 | 9.904325918 | 9.738641413 | 5.649208382 | 4.832746033 | 5.729556691 |
| ENSMUSG00000069390 | 15.56394073 | 9.043024169 | 9.886114669 | 7.249119049 | 5.729556691 |
| ENSMUSG00000069439 | 7.074518513 | 8.347406925 | 10.59226572 | 5.638203705 | 11.45911338 |
| ENSMUSG00000069475 | 5.65961481  | 6.956172438 | 3.530755239 | 5.638203705 | 7.87814045  |
| ENSMUSG00000069518 | 8.489422215 | 7.651789682 | 9.179963621 | 4.832746033 | 6.445751277 |
| ENSMUSG00000069540 | 56.5961481  | 94.60394515 | 67.08434954 | 83.7675979  | 88.80812871 |
| ENSMUSG00000069554 | 14.85648888 | 17.39043109 | 19.06607829 | 58.79841006 | 43.68786977 |
| ENSMUSG00000069584 | 7.781970364 | 6.956172438 | 4.943057334 | 4.02728836  | 8.594335036 |
| ENSMUSG00000069620 | 5.65961481  | 7.651789682 | 7.767661525 | 4.02728836  | 7.161945863 |
| ENSMUSG00000069682 | 9.904325918 | 12.52111039 | 9.179963621 | 15.30369577 | 17.18867007 |

|                    |             |             |             |             |             |
|--------------------|-------------|-------------|-------------|-------------|-------------|
| ENSMUSG00000069706 | 7.074518513 | 6.956172438 | 7.767661525 | 4.02728836  | 7.161945863 |
| ENSMUSG00000069707 | 9.904325918 | 5.56493795  | 9.179963621 | 8.054576721 | 5.729556691 |
| ENSMUSG00000069708 | 6.367066661 | 11.1298759  | 3.530755239 | 3.221830688 | 10.7429188  |
| ENSMUSG00000069712 | 8.489422215 | 6.956172438 | 10.59226572 | 8.054576721 | 8.594335036 |
| ENSMUSG00000069755 | 7.781970364 | 8.347406925 | 10.59226572 | 4.02728836  | 2.864778345 |
| ENSMUSG00000069785 | 9.904325918 | 4.869320706 | 13.41686991 | 8.054576721 | 6.445751277 |
| ENSMUSG00000069796 | 7.781970364 | 5.56493795  | 5.649208382 | 9.665492065 | 7.161945863 |
| ENSMUSG00000069816 | 10.61177777 | 6.956172438 | 7.061510478 | 6.443661377 | 8.594335036 |
| ENSMUSG00000069824 | 8.489422215 | 6.956172438 | 9.179963621 | 5.638203705 | 2.148583759 |
| ENSMUSG00000069862 | 19.10119998 | 13.21672763 | 13.41686991 | 14.4982381  | 15.7562809  |
| ENSMUSG00000069890 | 4.952162959 | 4.869320706 | 2.118453143 | 4.832746033 | 8.594335036 |
| ENSMUSG00000069913 | 7.074518513 | 6.260555194 | 8.473812573 | 10.47094974 | 7.87814045  |
| ENSMUSG00000069925 | 9.196874066 | 4.173703463 | 6.35535943  | 5.638203705 | 4.297167518 |
| ENSMUSG00000069939 | 9.196874066 | 11.1298759  | 11.29841676 | 8.054576721 | 6.445751277 |
| ENSMUSG00000069962 | 17.68629628 | 5.56493795  | 7.061510478 | 9.665492065 | 7.161945863 |
| ENSMUSG00000069972 | 7.781970364 | 11.1298759  | 10.59226572 | 8.054576721 | 14.32389173 |
| ENSMUSG00000069986 | 10.61177777 | 6.956172438 | 13.41686991 | 8.054576721 | 6.445751277 |
| ENSMUSG00000069996 | 8.489422215 | 7.651789682 | 18.35992724 | 6.443661377 | 6.445751277 |
| ENSMUSG00000070023 | 7.074518513 | 6.956172438 | 5.649208382 | 7.249119049 | 5.013362104 |
| ENSMUSG00000070025 | 0           | 2.086851731 | 1.412302096 | 0.805457672 | 1.432389173 |
| ENSMUSG00000070063 | 2.122355554 | 0.695617244 | 2.118453143 | 4.02728836  | 3.580972932 |
| ENSMUSG00000070065 | 0           | 0           | 0           | 0.805457672 | 0.716194586 |
| ENSMUSG00000070071 | 3.537259256 | 4.173703463 | 2.824604191 | 0.805457672 | 1.432389173 |
| ENSMUSG00000070072 | 0           | 0           | 0           | 0           | 0           |
| ENSMUSG00000070073 | 4.952162959 | 2.086851731 | 1.412302096 | 1.610915344 | 2.148583759 |
| ENSMUSG00000070074 | 58.71850365 | 93.21271067 | 77.67661525 | 122.4295662 | 92.38910164 |
| ENSMUSG00000070075 | 4.952162959 | 9.738641413 | 7.767661525 | 4.832746033 | 3.580972932 |
| ENSMUSG00000070076 | 0           | 0           | 0           | 0           | 0           |
| ENSMUSG00000070077 | 11.31922962 | 10.43425866 | 2.824604191 | 19.33098413 | 22.20203218 |
| ENSMUSG00000070078 | 0           | 0           | 0           | 0           | 0           |
| ENSMUSG00000070080 | 0           | 0           | 0           | 0           | 0           |
| ENSMUSG00000070081 | 61.54831106 | 79.99598303 | 80.50121945 | 56.38203705 | 48.70123187 |
| ENSMUSG00000070084 | 4.952162959 | 4.173703463 | 4.943057334 | 3.221830688 | 5.013362104 |
| ENSMUSG00000070099 | 0           | 0           | 0           | 0           | 0           |
| ENSMUSG00000070100 | 1.414903703 | 1.391234488 | 2.118453143 | 1.610915344 | 1.432389173 |
| ENSMUSG00000070101 | 0.707451851 | 0           | 0           | 0           | 0.716194586 |
| ENSMUSG00000070102 | 12.73413332 | 2.782468975 | 7.061510478 | 4.02728836  | 7.87814045  |
| ENSMUSG00000070103 | 7.781970364 | 4.869320706 | 7.061510478 | 4.832746033 | 7.87814045  |
| ENSMUSG00000070104 | 3.537259256 | 2.782468975 | 2.118453143 | 0.805457672 | 2.148583759 |
| ENSMUSG00000070105 | 0           | 0           | 0           | 0           | 0           |
| ENSMUSG00000070106 | 0           | 0           | 0           | 0           | 0           |
| ENSMUSG00000070107 | 0.707451851 | 1.391234488 | 0.706151048 | 0.805457672 | 0.716194586 |
| ENSMUSG00000070108 | 9.196874066 | 7.651789682 | 7.061510478 | 7.249119049 | 5.729556691 |

|                    |             |             |             |             |             |
|--------------------|-------------|-------------|-------------|-------------|-------------|
| ENSMUSG00000070109 | 7.074518513 | 5.56493795  | 5.649208382 | 12.88732275 | 11.45911338 |
| ENSMUSG00000070110 | 2.829807405 | 4.869320706 | 2.824604191 | 3.221830688 | 2.864778345 |
| ENSMUSG00000070111 | 13.44158517 | 6.260555194 | 7.767661525 | 4.02728836  | 7.87814045  |
| ENSMUSG00000070126 | 0           | 0           | 0.706151048 | 0.805457672 | 0           |
| ENSMUSG00000070127 | 2.829807405 | 1.391234488 | 0.706151048 | 2.416373016 | 3.580972932 |
| ENSMUSG00000070128 | 0           | 0           | 0           | 0           | 0           |
| ENSMUSG00000070129 | 0.707451851 | 0           | 0.706151048 | 0.805457672 | 0.716194586 |
| ENSMUSG00000070130 | 2.122355554 | 2.782468975 | 1.412302096 | 1.610915344 | 0.716194586 |
| ENSMUSG00000070133 | 0           | 0           | 0           | 0           | 0           |
| ENSMUSG00000070136 | 0           | 0           | 0           | 0           | 0           |
| ENSMUSG00000070138 | 0.707451851 | 1.391234488 | 0.706151048 | 3.221830688 | 1.432389173 |
| ENSMUSG00000070139 | 0.707451851 | 4.173703463 | 0.706151048 | 0.805457672 | 0.716194586 |
| ENSMUSG00000070140 | 6.367066661 | 3.478086219 | 7.061510478 | 8.054576721 | 3.580972932 |
| ENSMUSG00000070141 | 0           | 0           | 0           | 0           | 0           |
| ENSMUSG00000070144 | 7.074518513 | 6.956172438 | 4.943057334 | 4.832746033 | 5.013362104 |
| ENSMUSG00000070150 | 6.367066661 | 6.956172438 | 7.061510478 | 2.416373016 | 7.161945863 |
| ENSMUSG00000070166 | 44.56946663 | 57.73623123 | 50.84287544 | 52.35474869 | 49.41742646 |
| ENSMUSG00000070167 | 0           | 1.391234488 | 0           | 0           | 1.432389173 |
| ENSMUSG00000070170 | 5.65961481  | 12.52111039 | 4.943057334 | 6.443661377 | 5.013362104 |
| ENSMUSG00000070173 | 10.61177777 | 10.43425866 | 7.061510478 | 5.638203705 | 8.594335036 |
| ENSMUSG00000070175 | 0           | 0.695617244 | 0.706151048 | 0           | 0.716194586 |
| ENSMUSG00000070178 | 4.952162959 | 4.173703463 | 3.530755239 | 3.221830688 | 5.013362104 |
| ENSMUSG00000070182 | 9.196874066 | 6.956172438 | 4.943057334 | 5.638203705 | 7.87814045  |
| ENSMUSG00000070192 | 12.02668147 | 9.043024169 | 7.061510478 | 1.610915344 | 7.161945863 |
| ENSMUSG00000070203 | 5.65961481  | 4.173703463 | 3.530755239 | 5.638203705 | 9.310529622 |
| ENSMUSG00000070209 | 2.829807405 | 4.869320706 | 7.767661525 | 8.860034393 | 3.580972932 |
| ENSMUSG00000070214 | 36.78749627 | 60.51870021 | 49.43057334 | 54.7711217  | 52.99839939 |
| ENSMUSG00000070219 | 7.074518513 | 2.782468975 | 3.530755239 | 5.638203705 | 2.864778345 |
| ENSMUSG00000070225 | 7.074518513 | 9.738641413 | 13.41686991 | 5.638203705 | 14.32389173 |
| ENSMUSG00000070227 | 10.61177777 | 13.91234488 | 6.35535943  | 1.610915344 | 4.297167518 |
| ENSMUSG00000070235 | 8.489422215 | 6.956172438 | 9.179963621 | 6.443661377 | 8.594335036 |
| ENSMUSG00000070236 | 9.904325918 | 4.869320706 | 7.061510478 | 7.249119049 | 5.013362104 |
| ENSMUSG00000070240 | 7.074518513 | 6.260555194 | 1.412302096 | 3.221830688 | 3.580972932 |
| ENSMUSG00000070249 | 9.196874066 | 10.43425866 | 7.767661525 | 3.221830688 | 4.297167518 |
| ENSMUSG00000070258 | 4.952162959 | 2.782468975 | 7.767661525 | 4.02728836  | 1.432389173 |
| ENSMUSG00000070263 | 23.34591109 | 43.82388636 | 31.0706461  | 22.55281482 | 22.91822676 |
| ENSMUSG00000070271 | 10.61177777 | 9.043024169 | 8.473812573 | 4.02728836  | 7.161945863 |
| ENSMUSG00000070282 | 2.829807405 | 19.47728283 | 14.829172   | 41.88379895 | 25.78300511 |
| ENSMUSG00000070315 | 10.61177777 | 18.78166558 | 17.65377619 | 18.52552646 | 10.02672421 |
| ENSMUSG00000070330 | 2.829807405 | 9.043024169 | 9.886114669 | 12.88732275 | 11.45911338 |
| ENSMUSG00000070337 | 9.196874066 | 4.869320706 | 9.179963621 | 9.665492065 | 6.445751277 |
| ENSMUSG00000070342 | 7.781970364 | 6.260555194 | 6.35535943  | 6.443661377 | 4.297167518 |
| ENSMUSG00000070343 | 10.61177777 | 6.956172438 | 9.179963621 | 13.69278043 | 8.594335036 |

|                    |             |             |             |             |             |
|--------------------|-------------|-------------|-------------|-------------|-------------|
| ENSMUSG00000070377 | 9.904325918 | 6.260555194 | 7.061510478 | 8.860034393 | 5.729556691 |
| ENSMUSG00000070378 | 7.074518513 | 9.043024169 | 6.35535943  | 7.249119049 | 5.013362104 |
| ENSMUSG00000070379 | 11.31922962 | 6.260555194 | 2.824604191 | 8.054576721 | 5.729556691 |
| ENSMUSG00000070380 | 3.537259256 | 4.869320706 | 8.473812573 | 6.443661377 | 10.7429188  |
| ENSMUSG00000070382 | 12.73413332 | 6.260555194 | 3.530755239 | 4.832746033 | 12.89150255 |
| ENSMUSG00000070392 | 0           | 0           | 0           | 0           | 0           |
| ENSMUSG00000070402 | 3.537259256 | 4.869320706 | 7.061510478 | 8.054576721 | 4.297167518 |
| ENSMUSG00000070411 | 9.904325918 | 7.651789682 | 10.59226572 | 3.221830688 | 6.445751277 |
| ENSMUSG00000070438 | 10.61177777 | 9.738641413 | 7.767661525 | 8.054576721 | 5.729556691 |
| ENSMUSG00000070443 | 11.31922962 | 8.347406925 | 9.179963621 | 8.860034393 | 7.87814045  |
| ENSMUSG00000070458 | 8.489422215 | 4.173703463 | 11.29841676 | 2.416373016 | 9.310529622 |
| ENSMUSG00000070459 | 7.074518513 | 6.956172438 | 4.236906287 | 2.416373016 | 11.45911338 |
| ENSMUSG00000070461 | 9.904325918 | 4.173703463 | 4.943057334 | 6.443661377 | 7.161945863 |
| ENSMUSG00000070464 | 12.02668147 | 4.869320706 | 4.236906287 | 8.860034393 | 7.161945863 |
| ENSMUSG00000070465 | 10.61177777 | 6.956172438 | 9.886114669 | 0.805457672 | 7.87814045  |
| ENSMUSG00000070489 | 7.074518513 | 5.56493795  | 10.59226572 | 2.416373016 | 8.594335036 |
| ENSMUSG00000070490 | 10.61177777 | 11.82549314 | 10.59226572 | 8.860034393 | 9.310529622 |
| ENSMUSG00000070524 | 11.31922962 | 9.043024169 | 7.767661525 | 4.832746033 | 10.02672421 |
| ENSMUSG00000070572 | 7.781970364 | 6.260555194 | 12.71071886 | 8.054576721 | 14.32389173 |
| ENSMUSG00000070583 | 58.71850365 | 73.73542784 | 81.91352154 | 78.12939419 | 72.33565322 |
| ENSMUSG00000070601 | 8.489422215 | 9.738641413 | 7.061510478 | 4.832746033 | 7.161945863 |
| ENSMUSG00000070606 | 4.952162959 | 6.956172438 | 8.473812573 | 0.805457672 | 10.02672421 |
| ENSMUSG00000070609 | 12.73413332 | 7.651789682 | 7.061510478 | 4.02728836  | 9.310529622 |
| ENSMUSG00000070610 | 13.44158517 | 11.82549314 | 24.00913562 | 12.88732275 | 12.89150255 |
| ENSMUSG00000070621 | 7.074518513 | 6.956172438 | 6.35535943  | 6.443661377 | 6.445751277 |
| ENSMUSG00000070632 | 9.904325918 | 16.69481385 | 15.53532305 | 11.27640741 | 16.47247549 |
| ENSMUSG00000070641 | 2.829807405 | 3.478086219 | 4.236906287 | 7.249119049 | 2.148583759 |
| ENSMUSG00000070667 | 13.44158517 | 9.738641413 | 14.829172   | 13.69278043 | 12.17530797 |
| ENSMUSG00000070692 | 7.074518513 | 6.260555194 | 4.943057334 | 4.02728836  | 10.02672421 |
| ENSMUSG00000070717 | 22.63845924 | 36.86771392 | 31.0706461  | 26.58010318 | 32.94495097 |
| ENSMUSG00000070720 | 10.61177777 | 9.043024169 | 7.767661525 | 7.249119049 | 7.161945863 |
| ENSMUSG00000070729 | 16.27139258 | 10.43425866 | 20.47838039 | 16.10915344 | 20.05344842 |
| ENSMUSG00000070778 | 8.489422215 | 4.869320706 | 7.767661525 | 7.249119049 | 5.729556691 |
| ENSMUSG00000070794 | 5.65961481  | 6.956172438 | 7.061510478 | 4.832746033 | 12.17530797 |
| ENSMUSG00000070815 | 7.781970364 | 4.869320706 | 7.767661525 | 5.638203705 | 10.02672421 |
| ENSMUSG00000070816 | 11.31922962 | 13.21672763 | 4.943057334 | 5.638203705 | 8.594335036 |
| ENSMUSG00000070817 | 8.489422215 | 9.043024169 | 4.943057334 | 5.638203705 | 3.580972932 |
| ENSMUSG00000070820 | 9.904325918 | 6.956172438 | 9.179963621 | 6.443661377 | 4.297167518 |
| ENSMUSG00000070821 | 7.781970364 | 8.347406925 | 8.473812573 | 8.054576721 | 6.445751277 |
| ENSMUSG00000070834 | 12.73413332 | 11.82549314 | 9.179963621 | 12.88732275 | 15.7562809  |
| ENSMUSG00000070837 | 9.904325918 | 7.651789682 | 7.061510478 | 5.638203705 | 10.02672421 |
| ENSMUSG00000070852 | 7.781970364 | 4.869320706 | 4.943057334 | 4.832746033 | 4.297167518 |
| ENSMUSG00000070853 | 6.367066661 | 9.043024169 | 6.35535943  | 5.638203705 | 6.445751277 |



|                    |             |             |             |             |             |
|--------------------|-------------|-------------|-------------|-------------|-------------|
| ENSMUSG00000070855 | 7.781970364 | 5.56493795  | 9.179963621 | 5.638203705 | 4.297167518 |
| ENSMUSG00000070856 | 13.44158517 | 12.52111039 | 7.767661525 | 3.221830688 | 7.87814045  |
| ENSMUSG00000070857 | 10.61177777 | 14.60796212 | 9.179963621 | 4.02728836  | 2.148583759 |
| ENSMUSG00000070875 | 13.44158517 | 10.43425866 | 4.236906287 | 3.221830688 | 2.148583759 |
| ENSMUSG00000070890 | 7.781970364 | 4.869320706 | 9.886114669 | 8.860034393 | 7.87814045  |
| ENSMUSG00000070896 | 9.196874066 | 6.956172438 | 4.236906287 | 3.221830688 | 5.729556691 |
| ENSMUSG00000070900 | 55.88869625 | 80.69160028 | 69.20280268 | 65.24207144 | 56.57937232 |
| ENSMUSG00000070904 | 15.56394073 | 11.82549314 | 7.767661525 | 4.832746033 | 7.87814045  |
| ENSMUSG00000070943 | 10.61177777 | 5.56493795  | 7.767661525 | 5.638203705 | 7.161945863 |
| ENSMUSG00000070960 | 11.31922962 | 13.91234488 | 12.00456781 | 10.47094974 | 4.297167518 |
| ENSMUSG00000070977 | 11.31922962 | 9.043024169 | 13.41686991 | 4.02728836  | 7.87814045  |
| ENSMUSG00000070983 | 9.904325918 | 4.173703463 | 7.767661525 | 4.832746033 | 5.729556691 |
| ENSMUSG00000070984 | 9.904325918 | 8.347406925 | 6.35535943  | 9.665492065 | 4.297167518 |
| ENSMUSG00000070995 | 10.61177777 | 10.43425866 | 10.59226572 | 5.638203705 | 10.02672421 |
| ENSMUSG00000070997 | 78.52715549 | 114.7768452 | 98.86114669 | 173.1733995 | 158.9951982 |
| ENSMUSG00000071035 | 7.074518513 | 4.173703463 | 8.473812573 | 8.860034393 | 14.32389173 |
| ENSMUSG00000071037 | 41.73965922 | 64.69240367 | 60.02283906 | 21.74735715 | 40.10689684 |
| ENSMUSG00000071040 | 7.074518513 | 6.956172438 | 8.473812573 | 8.054576721 | 4.297167518 |
| ENSMUSG00000071041 | 8.489422215 | 8.347406925 | 13.41686991 | 16.91461111 | 15.04008631 |
| ENSMUSG00000071052 | 12.02668147 | 10.43425866 | 9.886114669 | 12.88732275 | 13.60769714 |
| ENSMUSG00000071065 | 10.61177777 | 8.347406925 | 7.061510478 | 4.832746033 | 9.310529622 |
| ENSMUSG00000071083 | 1.414903703 | 1.391234488 | 0           | 0           | 1.432389173 |
| ENSMUSG00000071084 | 8.489422215 | 7.651789682 | 10.59226572 | 4.832746033 | 5.013362104 |
| ENSMUSG00000071102 | 7.781970364 | 2.782468975 | 7.061510478 | 5.638203705 | 17.18867007 |
| ENSMUSG00000071141 | 9.196874066 | 14.60796212 | 14.12302096 | 13.69278043 | 16.47247549 |
| ENSMUSG00000071150 | 11.31922962 | 7.651789682 | 2.118453143 | 4.832746033 | 7.161945863 |
| ENSMUSG00000071151 | 7.074518513 | 5.56493795  | 11.29841676 | 9.665492065 | 9.310529622 |
| ENSMUSG00000071169 | 12.73413332 | 11.1298759  | 8.473812573 | 6.443661377 | 3.580972932 |
| ENSMUSG00000071193 | 8.489422215 | 10.43425866 | 5.649208382 | 4.02728836  | 7.87814045  |
| ENSMUSG00000071195 | 16.97884443 | 2.782468975 | 5.649208382 | 8.860034393 | 5.013362104 |
| ENSMUSG00000071204 | 7.781970364 | 5.56493795  | 7.061510478 | 3.221830688 | 2.864778345 |
| ENSMUSG00000071207 | 9.904325918 | 8.347406925 | 7.767661525 | 5.638203705 | 7.161945863 |
| ENSMUSG00000071217 | 14.14903703 | 15.99919661 | 8.473812573 | 5.638203705 | 7.161945863 |
| ENSMUSG00000071237 | 8.489422215 | 5.56493795  | 4.943057334 | 3.221830688 | 5.729556691 |
| ENSMUSG00000071265 | 9.196874066 | 10.43425866 | 5.649208382 | 4.832746033 | 8.594335036 |
| ENSMUSG00000071273 | 7.781970364 | 6.260555194 | 4.236906287 | 7.249119049 | 5.013362104 |
| ENSMUSG00000071275 | 6.367066661 | 9.043024169 | 5.649208382 | 12.08186508 | 6.445751277 |
| ENSMUSG00000071276 | 6.367066661 | 9.738641413 | 6.35535943  | 2.416373016 | 2.864778345 |
| ENSMUSG00000071280 | 33.25023701 | 62.60555194 | 48.01827125 | 50.74383334 | 46.55264811 |
| ENSMUSG00000071294 | 9.196874066 | 8.347406925 | 5.649208382 | 5.638203705 | 10.7429188  |
| ENSMUSG00000071295 | 6.367066661 | 3.478086219 | 2.824604191 | 5.638203705 | 2.864778345 |
| ENSMUSG00000071303 | 12.73413332 | 9.738641413 | 3.530755239 | 7.249119049 | 7.87814045  |
| ENSMUSG00000071311 | 13.44158517 | 11.1298759  | 16.94762515 | 8.860034393 | 12.17530797 |

|                    |             |             |             |             |             |
|--------------------|-------------|-------------|-------------|-------------|-------------|
| ENSMUSG00000071332 | 16.97884443 | 14.60796212 | 21.89068248 | 21.74735715 | 20.05344842 |
| ENSMUSG00000071343 | 11.31922962 | 6.260555194 | 5.649208382 | 7.249119049 | 10.7429188  |
| ENSMUSG00000071414 | 9.904325918 | 7.651789682 | 7.061510478 | 7.249119049 | 10.02672421 |
| ENSMUSG00000071419 | 15.56394073 | 8.347406925 | 7.061510478 | 8.054576721 | 10.7429188  |
| ENSMUSG00000071428 | 6.367066661 | 9.738641413 | 6.35535943  | 2.416373016 | 4.297167518 |
| ENSMUSG00000071466 | 9.904325918 | 6.260555194 | 7.061510478 | 7.249119049 | 7.161945863 |
| ENSMUSG00000071475 | 12.73413332 | 8.347406925 | 13.41686991 | 5.638203705 | 9.310529622 |
| ENSMUSG00000071490 | 8.489422215 | 7.651789682 | 7.061510478 | 4.832746033 | 5.729556691 |
| ENSMUSG00000071491 | 10.61177777 | 6.956172438 | 6.35535943  | 2.416373016 | 2.864778345 |
| ENSMUSG00000071493 | 9.196874066 | 4.173703463 | 13.41686991 | 5.638203705 | 7.87814045  |
| ENSMUSG00000071494 | 9.904325918 | 7.651789682 | 7.767661525 | 2.416373016 | 7.161945863 |
| ENSMUSG00000071516 | 0           | 5.56493795  | 0.706151048 | 0           | 2.148583759 |
| ENSMUSG00000071532 | 10.61177777 | 8.347406925 | 8.473812573 | 11.27640741 | 16.47247549 |
| ENSMUSG00000071567 | 13.44158517 | 9.043024169 | 9.886114669 | 6.443661377 | 5.729556691 |
| ENSMUSG00000071568 | 9.196874066 | 9.043024169 | 8.473812573 | 4.832746033 | 3.580972932 |
| ENSMUSG00000071586 | 13.44158517 | 13.91234488 | 11.29841676 | 16.91461111 | 9.310529622 |
| ENSMUSG00000071637 | 2.829807405 | 6.260555194 | 7.767661525 | 4.832746033 | 8.594335036 |
| ENSMUSG00000071671 | 8.489422215 | 11.1298759  | 6.35535943  | 11.27640741 | 5.729556691 |
| ENSMUSG00000071680 | 4.952162959 | 2.782468975 | 5.649208382 | 3.221830688 | 2.148583759 |
| ENSMUSG00000071724 | 12.02668147 | 8.347406925 | 5.649208382 | 4.832746033 | 8.594335036 |
| ENSMUSG00000071735 | 3.537259256 | 4.173703463 | 4.943057334 | 4.02728836  | 6.445751277 |
| ENSMUSG00000071750 | 9.196874066 | 4.869320706 | 7.767661525 | 7.249119049 | 10.02672421 |
| ENSMUSG00000071753 | 4.952162959 | 4.869320706 | 5.649208382 | 2.416373016 | 2.148583759 |
| ENSMUSG00000071763 | 8.489422215 | 2.086851731 | 3.530755239 | 1.610915344 | 4.297167518 |
| ENSMUSG00000071764 | 6.367066661 | 6.260555194 | 4.943057334 | 3.221830688 | 4.297167518 |
| ENSMUSG00000071793 | 164.8362813 | 209.3807904 | 222.43758   | 285.9374736 | 240.641381  |
| ENSMUSG00000071796 | 4.952162959 | 11.82549314 | 7.061510478 | 8.054576721 | 5.729556691 |
| ENSMUSG00000071818 | 9.196874066 | 9.738641413 | 11.29841676 | 3.221830688 | 3.580972932 |
| ENSMUSG00000071867 | 14.14903703 | 20.17290007 | 16.94762515 | 16.10915344 | 20.05344842 |
| ENSMUSG00000072066 | 14.14903703 | 11.1298759  | 12.00456781 | 10.47094974 | 10.02672421 |
| ENSMUSG00000072068 | 9.904325918 | 6.260555194 | 7.767661525 | 8.860034393 | 8.594335036 |
| ENSMUSG00000072109 | 76.40479994 | 122.4286349 | 92.50578726 | 232.7772672 | 175.4676737 |
| ENSMUSG00000072255 | 7.781970364 | 11.1298759  | 4.943057334 | 6.443661377 | 7.161945863 |
| ENSMUSG00000072294 | 8.489422215 | 5.56493795  | 7.061510478 | 8.054576721 | 15.7562809  |
| ENSMUSG00000072324 | 7.074518513 | 3.478086219 | 5.649208382 | 5.638203705 | 3.580972932 |
| ENSMUSG00000072381 | 9.904325918 | 5.56493795  | 9.886114669 | 3.221830688 | 5.013362104 |
| ENSMUSG00000072387 | 12.73413332 | 5.56493795  | 9.179963621 | 5.638203705 | 11.45911338 |
| ENSMUSG00000072407 | 11.31922962 | 9.043024169 | 11.29841676 | 4.832746033 | 5.013362104 |
| ENSMUSG00000072421 | 10.61177777 | 9.043024169 | 7.061510478 | 12.88732275 | 7.87814045  |
| ENSMUSG00000072432 | 12.02668147 | 7.651789682 | 6.35535943  | 9.665492065 | 6.445751277 |
| ENSMUSG00000072460 | 6.367066661 | 8.347406925 | 7.061510478 | 2.416373016 | 7.87814045  |
| ENSMUSG00000072476 | 13.44158517 | 16.69481385 | 16.2414741  | 28.19101852 | 20.05344842 |
| ENSMUSG00000072477 | 12.73413332 | 5.56493795  | 9.886114669 | 5.638203705 | 6.445751277 |

|                    |             |             |             |             |             |
|--------------------|-------------|-------------|-------------|-------------|-------------|
| ENSMUSG00000072492 | 10.61177777 | 9.043024169 | 8.473812573 | 4.832746033 | 11.45911338 |
| ENSMUSG00000072541 | 7.074518513 | 5.56493795  | 4.943057334 | 3.221830688 | 2.864778345 |
| ENSMUSG00000072574 | 9.196874066 | 6.956172438 | 9.886114669 | 6.443661377 | 10.02672421 |
| ENSMUSG00000072576 | 9.904325918 | 9.738641413 | 10.59226572 | 7.249119049 | 10.7429188  |
| ENSMUSG00000072589 | 13.44158517 | 3.478086219 | 6.35535943  | 8.054576721 | 5.729556691 |
| ENSMUSG00000072591 | 4.952162959 | 5.56493795  | 7.061510478 | 4.02728836  | 7.161945863 |
| ENSMUSG00000072592 | 41.03220737 | 73.73542784 | 58.61053696 | 42.68925662 | 49.41742646 |
| ENSMUSG00000072594 | 8.489422215 | 9.738641413 | 12.00456781 | 3.221830688 | 7.161945863 |
| ENSMUSG00000072599 | 5.65961481  | 4.869320706 | 10.59226572 | 4.832746033 | 8.594335036 |
| ENSMUSG00000072600 | 9.904325918 | 4.173703463 | 8.473812573 | 5.638203705 | 9.310529622 |
| ENSMUSG00000072612 | 145.0276295 | 182.2517179 | 158.8839857 | 438.9744313 | 332.3142881 |
| ENSMUSG00000072613 | 5.65961481  | 9.043024169 | 9.886114669 | 6.443661377 | 10.7429188  |
| ENSMUSG00000072616 | 10.61177777 | 4.869320706 | 6.35535943  | 6.443661377 | 11.45911338 |
| ENSMUSG00000072621 | 7.074518513 | 10.43425866 | 10.59226572 | 9.665492065 | 12.89150255 |
| ENSMUSG00000072653 | 12.73413332 | 13.21672763 | 10.59226572 | 16.91461111 | 10.7429188  |
| ENSMUSG00000072660 | 9.196874066 | 21.56413456 | 12.71071886 | 10.47094974 | 12.89150255 |
| ENSMUSG00000072677 | 9.904325918 | 11.1298759  | 7.061510478 | 2.416373016 | 5.013362104 |
| ENSMUSG00000072679 | 14.14903703 | 6.956172438 | 9.886114669 | 6.443661377 | 7.161945863 |
| ENSMUSG00000072683 | 7.074518513 | 6.956172438 | 1.412302096 | 4.832746033 | 7.87814045  |
| ENSMUSG00000072686 | 12.73413332 | 11.1298759  | 3.530755239 | 6.443661377 | 6.445751277 |
| ENSMUSG00000072688 | 7.074518513 | 5.56493795  | 5.649208382 | 4.832746033 | 7.87814045  |
| ENSMUSG00000072692 | 9.196874066 | 13.21672763 | 9.179963621 | 6.443661377 | 12.17530797 |
| ENSMUSG00000072707 | 4.244711108 | 10.43425866 | 4.236906287 | 5.638203705 | 6.445751277 |
| ENSMUSG00000072714 | 12.73413332 | 9.738641413 | 5.649208382 | 5.638203705 | 9.310529622 |
| ENSMUSG00000072717 | 9.196874066 | 12.52111039 | 7.061510478 | 4.832746033 | 3.580972932 |
| ENSMUSG00000072721 | 5.65961481  | 6.260555194 | 11.29841676 | 7.249119049 | 4.297167518 |
| ENSMUSG00000072723 | 5.65961481  | 6.956172438 | 6.35535943  | 3.221830688 | 8.594335036 |
| ENSMUSG00000072731 | 13.44158517 | 12.52111039 | 8.473812573 | 5.638203705 | 7.161945863 |
| ENSMUSG00000072753 | 8.489422215 | 5.56493795  | 8.473812573 | 6.443661377 | 12.89150255 |
| ENSMUSG00000072761 | 60.84085921 | 100.1688831 | 86.15042783 | 86.18397091 | 90.95671247 |
| ENSMUSG00000072768 | 7.074518513 | 4.173703463 | 7.061510478 | 9.665492065 | 6.445751277 |
| ENSMUSG00000072778 | 9.196874066 | 4.869320706 | 8.473812573 | 6.443661377 | 7.87814045  |
| ENSMUSG00000072780 | 12.73413332 | 4.869320706 | 6.35535943  | 3.221830688 | 6.445751277 |
| ENSMUSG00000072789 | 13.44158517 | 9.738641413 | 6.35535943  | 10.47094974 | 10.02672421 |
| ENSMUSG00000072809 | 43.86201478 | 60.51870021 | 53.66747963 | 34.6346799  | 42.97167518 |
| ENSMUSG00000072834 | 10.61177777 | 8.347406925 | 7.767661525 | 6.443661377 | 7.161945863 |
| ENSMUSG00000072837 | 3.537259256 | 4.869320706 | 4.236906287 | 2.416373016 | 3.580972932 |
| ENSMUSG00000072844 | 5.65961481  | 0.695617244 | 56.49208382 | 2.416373016 | 2.148583759 |
| ENSMUSG00000072847 | 8.489422215 | 13.91234488 | 9.179963621 | 12.88732275 | 13.60769714 |
| ENSMUSG00000072852 | 48.81417774 | 51.47567604 | 61.43514116 | 127.2623122 | 103.1320204 |
| ENSMUSG00000072874 | 11.31922962 | 7.651789682 | 7.767661525 | 4.02728836  | 5.729556691 |
| ENSMUSG00000072875 | 7.074518513 | 6.956172438 | 4.943057334 | 4.832746033 | 6.445751277 |
| ENSMUSG00000072884 | 14.14903703 | 18.08604834 | 27.53989086 | 18.52552646 | 11.45911338 |

|                    |             |             |             |             |             |
|--------------------|-------------|-------------|-------------|-------------|-------------|
| ENSMUSG00000072893 | 13.44158517 | 17.39043109 | 19.06607829 | 15.30369577 | 20.05344842 |
| ENSMUSG00000072894 | 0           | 0           | 0           | 0           | 0           |
| ENSMUSG00000072898 | 29.0055259  | 63.99678643 | 48.01827125 | 75.71302118 | 63.74131818 |
| ENSMUSG00000072900 | 0           | 0           | 0           | 0           | 0           |
| ENSMUSG00000072902 | 9.196874066 | 6.260555194 | 5.649208382 | 5.638203705 | 7.87814045  |
| ENSMUSG00000072918 | 29.0055259  | 41.73703463 | 35.30755239 | 28.9964762  | 28.64778345 |
| ENSMUSG00000072919 | 10.61177777 | 18.08604834 | 9.179963621 | 10.47094974 | 10.02672421 |
| ENSMUSG00000072929 | 5.65961481  | 5.56493795  | 4.236906287 | 2.416373016 | 1.432389173 |
| ENSMUSG00000072934 | 1.414903703 | 5.56493795  | 5.649208382 | 0.805457672 | 4.297167518 |
| ENSMUSG00000072940 | 7.074518513 | 6.260555194 | 7.061510478 | 15.30369577 | 8.594335036 |
| ENSMUSG00000072950 | 10.61177777 | 7.651789682 | 8.473812573 | 7.249119049 | 8.594335036 |
| ENSMUSG00000072968 | 5.65961481  | 8.347406925 | 6.35535943  | 3.221830688 | 8.594335036 |
| ENSMUSG00000072978 | 12.73413332 | 4.869320706 | 8.473812573 | 5.638203705 | 10.02672421 |
| ENSMUSG00000072982 | 6.367066661 | 3.478086219 | 4.236906287 | 5.638203705 | 10.7429188  |
| ENSMUSG00000073001 | 1.414903703 | 4.173703463 | 3.530755239 | 2.416373016 | 1.432389173 |
| ENSMUSG00000073028 | 4.952162959 | 11.1298759  | 4.236906287 | 4.02728836  | 2.864778345 |
| ENSMUSG00000073045 | 9.904325918 | 5.56493795  | 7.767661525 | 4.02728836  | 9.310529622 |
| ENSMUSG00000073051 | 1.414903703 | 2.782468975 | 2.118453143 | 0.805457672 | 4.297167518 |
| ENSMUSG00000073060 | 16.97884443 | 29.21592424 | 24.71528667 | 47.52200265 | 51.56601022 |
| ENSMUSG00000073067 | 10.61177777 | 4.869320706 | 8.473812573 | 3.221830688 | 7.87814045  |
| ENSMUSG00000073069 | 4.952162959 | 4.173703463 | 6.35535943  | 6.443661377 | 2.148583759 |
| ENSMUSG00000073073 | 8.489422215 | 11.1298759  | 9.179963621 | 5.638203705 | 4.297167518 |
| ENSMUSG00000073077 | 4.952162959 | 3.478086219 | 3.530755239 | 3.221830688 | 2.148583759 |
| ENSMUSG00000073079 | 36.78749627 | 89.0390072  | 61.43514116 | 85.37851324 | 86.65954495 |
| ENSMUSG00000073090 | 12.02668147 | 8.347406925 | 4.943057334 | 7.249119049 | 7.87814045  |
| ENSMUSG00000073103 | 12.73413332 | 5.56493795  | 5.649208382 | 5.638203705 | 2.864778345 |
| ENSMUSG00000073111 | 9.196874066 | 5.56493795  | 8.473812573 | 4.832746033 | 6.445751277 |
| ENSMUSG00000073144 | 7.074518513 | 4.869320706 | 5.649208382 | 7.249119049 | 8.594335036 |
| ENSMUSG00000073145 | 369.2898664 | 359.634115  | 337.5402008 | 611.3423731 | 437.5948923 |
| ENSMUSG00000073147 | 129.4636888 | 152.3401764 | 118.633376  | 309.2957461 | 216.2907651 |
| ENSMUSG00000073152 | 11.31922962 | 11.1298759  | 4.943057334 | 4.02728836  | 11.45911338 |
| ENSMUSG00000073154 | 7.074518513 | 8.347406925 | 7.061510478 | 4.832746033 | 5.729556691 |
| ENSMUSG00000073155 | 35.37259256 | 55.6493795  | 45.19366706 | 51.54929101 | 50.13362104 |
| ENSMUSG00000073158 | 9.904325918 | 3.478086219 | 9.886114669 | 4.832746033 | 8.594335036 |
| ENSMUSG00000073164 | 13.44158517 | 6.260555194 | 10.59226572 | 11.27640741 | 12.17530797 |
| ENSMUSG00000073173 | 6.367066661 | 2.782468975 | 4.236906287 | 4.02728836  | 2.864778345 |
| ENSMUSG00000073174 | 7.781970364 | 5.56493795  | 9.179963621 | 5.638203705 | 10.02672421 |
| ENSMUSG00000073179 | 19.10119998 | 10.43425866 | 4.943057334 | 7.249119049 | 12.89150255 |
| ENSMUSG00000073184 | 9.196874066 | 6.260555194 | 7.767661525 | 6.443661377 | 9.310529622 |
| ENSMUSG00000073197 | 16.97884443 | 11.1298759  | 10.59226572 | 7.249119049 | 7.161945863 |
| ENSMUSG00000073198 | 6.367066661 | 5.56493795  | 8.473812573 | 9.665492065 | 6.445751277 |
| ENSMUSG00000073226 | 14.14903703 | 6.956172438 | 9.179963621 | 8.860034393 | 6.445751277 |
| ENSMUSG00000073233 | 9.904325918 | 6.956172438 | 7.061510478 | 8.054576721 | 7.87814045  |

|                    |             |             |             |             |             |
|--------------------|-------------|-------------|-------------|-------------|-------------|
| ENSMUSG00000073236 | 48.10672589 | 64.69240367 | 50.84287544 | 169.1461111 | 141.0903335 |
| ENSMUSG00000073242 | 15.56394073 | 24.34660353 | 24.71528667 | 24.96918783 | 25.06681052 |
| ENSMUSG00000073274 | 2.829807405 | 9.738641413 | 14.12302096 | 25.77464551 | 28.64778345 |
| ENSMUSG00000073290 | 5.65961481  | 6.260555194 | 9.179963621 | 9.665492065 | 3.580972932 |
| ENSMUSG00000073291 | 11.31922962 | 11.82549314 | 8.473812573 | 8.860034393 | 13.60769714 |
| ENSMUSG00000073367 | 9.196874066 | 12.52111039 | 9.886114669 | 5.638203705 | 9.310529622 |
| ENSMUSG00000073371 | 7.781970364 | 15.99919661 | 8.473812573 | 4.02728836  | 7.87814045  |
| ENSMUSG00000073374 | 22.63845924 | 49.38882431 | 44.48751601 | 62.82569842 | 52.2822048  |
| ENSMUSG00000073394 | 5.65961481  | 6.956172438 | 8.473812573 | 6.443661377 | 6.445751277 |
| ENSMUSG00000073403 | 6.367066661 | 9.738641413 | 11.29841676 | 4.832746033 | 11.45911338 |
| ENSMUSG00000073405 | 24.76081479 | 35.47647943 | 29.65834401 | 33.02376456 | 24.35061594 |
| ENSMUSG00000073415 | 47.39927403 | 63.99678643 | 64.96589639 | 165.9242805 | 121.0368851 |
| ENSMUSG00000073420 | 7.781970364 | 9.043024169 | 11.29841676 | 9.665492065 | 10.02672421 |
| ENSMUSG00000073427 | 9.904325918 | 6.260555194 | 4.236906287 | 8.860034393 | 7.161945863 |
| ENSMUSG00000073430 | 12.02668147 | 14.60796212 | 19.77222934 | 19.33098413 | 19.33725383 |
| ENSMUSG00000073437 | 94.09109622 | 129.3848073 | 123.5764334 | 273.8556085 | 219.871738  |
| ENSMUSG00000073478 | 14.85648888 | 21.56413456 | 14.829172   | 41.07834128 | 41.53928601 |
| ENSMUSG00000073482 | 47.39927403 | 78.60474855 | 76.97046421 | 33.02376456 | 52.99839939 |
| ENSMUSG00000073485 | 115.3146518 | 148.1664729 | 120.7518292 | 169.1461111 | 143.2389173 |
| ENSMUSG00000073510 | 13.44158517 | 5.56493795  | 12.00456781 | 8.054576721 | 8.594335036 |
| ENSMUSG00000073529 | 7.074518513 | 12.52111039 | 6.35535943  | 6.443661377 | 7.87814045  |
| ENSMUSG00000073535 | 9.196874066 | 4.869320706 | 7.061510478 | 7.249119049 | 7.87814045  |
| ENSMUSG00000073538 | 50.22908144 | 93.90832791 | 74.14586002 | 185.2552646 | 138.2255552 |
| ENSMUSG00000073554 | 7.781970364 | 7.651789682 | 12.71071886 | 5.638203705 | 4.297167518 |
| ENSMUSG00000073559 | 4.244711108 | 4.869320706 | 5.649208382 | 4.02728836  | 4.297167518 |
| ENSMUSG00000073569 | 7.781970364 | 10.43425866 | 9.886114669 | 4.02728836  | 8.594335036 |
| ENSMUSG00000073572 | 8.489422215 | 5.56493795  | 8.473812573 | 8.054576721 | 7.161945863 |
| ENSMUSG00000073573 | 15.56394073 | 8.347406925 | 7.767661525 | 6.443661377 | 2.864778345 |
| ENSMUSG00000073586 | 9.904325918 | 6.260555194 | 10.59226572 | 3.221830688 | 11.45911338 |
| ENSMUSG00000073607 | 72.86754068 | 114.7768452 | 90.38733411 | 135.3168889 | 112.4425501 |
| ENSMUSG00000073610 | 11.31922962 | 9.738641413 | 6.35535943  | 6.443661377 | 4.297167518 |
| ENSMUSG00000073627 | 50.93653329 | 85.56092098 | 70.61510478 | 329.4321879 | 257.8300511 |
| ENSMUSG00000073628 | 50.93653329 | 57.04061399 | 53.66747963 | 123.2350238 | 107.429188  |
| ENSMUSG00000073631 | 33.25023701 | 42.43265187 | 43.78136496 | 113.5695318 | 87.37573953 |
| ENSMUSG00000073647 | 29.71297775 | 22.95536904 | 35.30755239 | 26.58010318 | 32.94495097 |
| ENSMUSG00000073652 | 9.904325918 | 7.651789682 | 7.767661525 | 7.249119049 | 4.297167518 |
| ENSMUSG00000073656 | 7.781970364 | 9.043024169 | 9.179963621 | 4.832746033 | 5.013362104 |
| ENSMUSG00000073672 | 16.27139258 | 4.869320706 | 6.35535943  | 5.638203705 | 7.87814045  |
| ENSMUSG00000073674 | 1.414903703 | 0           | 0           | 0           | 0           |
| ENSMUSG00000073679 | 9.196874066 | 6.260555194 | 11.29841676 | 17.72006879 | 8.594335036 |
| ENSMUSG00000073682 | 9.904325918 | 11.1298759  | 16.94762515 | 22.55281482 | 19.33725383 |
| ENSMUSG00000073686 | 7.074518513 | 4.173703463 | 3.530755239 | 8.860034393 | 5.729556691 |
| ENSMUSG00000073699 | 12.73413332 | 5.56493795  | 7.767661525 | 5.638203705 | 5.729556691 |

|                    |             |             |             |             |             |
|--------------------|-------------|-------------|-------------|-------------|-------------|
| ENSMUSG00000073716 | 29.71297775 | 32.69401046 | 37.42600553 | 28.9964762  | 35.09353473 |
| ENSMUSG00000073721 | 11.31922962 | 11.82549314 | 4.943057334 | 9.665492065 | 10.02672421 |
| ENSMUSG00000073723 | 12.73413332 | 3.478086219 | 9.179963621 | 8.860034393 | 5.729556691 |
| ENSMUSG00000073728 | 7.074518513 | 8.347406925 | 6.35535943  | 4.832746033 | 6.445751277 |
| ENSMUSG00000073731 | 7.781970364 | 5.56493795  | 2.824604191 | 8.860034393 | 7.161945863 |
| ENSMUSG00000073735 | 8.489422215 | 6.260555194 | 7.061510478 | 3.221830688 | 5.729556691 |
| ENSMUSG00000073737 | 9.196874066 | 8.347406925 | 6.35535943  | 4.02728836  | 7.161945863 |
| ENSMUSG00000073739 | 9.904325918 | 10.43425866 | 9.179963621 | 8.860034393 | 12.89150255 |
| ENSMUSG00000073741 | 53.05888884 | 66.08363816 | 45.8998181  | 45.91108731 | 33.66114556 |
| ENSMUSG00000073752 | 8.489422215 | 9.043024169 | 8.473812573 | 6.443661377 | 7.87814045  |
| ENSMUSG00000073753 | 22.63845924 | 36.86771392 | 32.4829482  | 10.47094974 | 24.35061594 |
| ENSMUSG00000073759 | 4.244711108 | 7.651789682 | 6.35535943  | 7.249119049 | 8.594335036 |
| ENSMUSG00000073765 | 14.85648888 | 9.043024169 | 5.649208382 | 3.221830688 | 5.729556691 |
| ENSMUSG00000073768 | 12.02668147 | 7.651789682 | 8.473812573 | 5.638203705 | 2.864778345 |
| ENSMUSG00000073778 | 3.537259256 | 5.56493795  | 9.179963621 | 5.638203705 | 5.729556691 |
| ENSMUSG00000073779 | 11.31922962 | 8.347406925 | 5.649208382 | 21.74735715 | 16.47247549 |
| ENSMUSG00000073786 | 7.074518513 | 4.173703463 | 2.824604191 | 9.665492065 | 10.02672421 |
| ENSMUSG00000073787 | 19.10119998 | 38.95456565 | 35.30755239 | 20.94189947 | 21.48583759 |
| ENSMUSG00000073789 | 7.781970364 | 4.869320706 | 2.824604191 | 10.47094974 | 3.580972932 |
| ENSMUSG00000073797 | 13.44158517 | 10.43425866 | 11.29841676 | 3.221830688 | 10.7429188  |
| ENSMUSG00000073804 | 9.196874066 | 5.56493795  | 5.649208382 | 8.054576721 | 6.445751277 |
| ENSMUSG00000073807 | 7.781970364 | 6.956172438 | 6.35535943  | 4.02728836  | 4.297167518 |
| ENSMUSG00000073809 | 2.829807405 | 2.782468975 | 0.706151048 | 6.443661377 | 2.864778345 |
| ENSMUSG00000073821 | 8.489422215 | 8.347406925 | 7.061510478 | 11.27640741 | 10.7429188  |
| ENSMUSG00000073823 | 5.65961481  | 5.56493795  | 6.35535943  | 7.249119049 | 8.594335036 |
| ENSMUSG00000073835 | 21.22355554 | 14.60796212 | 10.59226572 | 7.249119049 | 8.594335036 |
| ENSMUSG00000073840 | 14.85648888 | 8.347406925 | 9.179963621 | 12.08186508 | 7.161945863 |
| ENSMUSG00000073843 | 24.05336294 | 25.73783802 | 36.01370344 | 17.72006879 | 10.7429188  |
| ENSMUSG00000073844 | 6.367066661 | 6.260555194 | 8.473812573 | 5.638203705 | 10.02672421 |
| ENSMUSG00000073846 | 14.14903703 | 7.651789682 | 9.886114669 | 9.665492065 | 6.445751277 |
| ENSMUSG00000073856 | 45.27691848 | 66.08363816 | 64.96589639 | 90.21125927 | 74.48423698 |
| ENSMUSG00000073860 | 2.122355554 | 6.260555194 | 8.473812573 | 3.221830688 | 9.310529622 |
| ENSMUSG00000073862 | 9.196874066 | 3.478086219 | 6.35535943  | 8.054576721 | 7.161945863 |
| ENSMUSG00000073879 | 4.244711108 | 1.391234488 | 3.530755239 | 2.416373016 | 1.432389173 |
| ENSMUSG00000073897 | 5.65961481  | 11.1298759  | 7.061510478 | 4.02728836  | 7.161945863 |
| ENSMUSG00000073898 | 12.02668147 | 9.043024169 | 12.71071886 | 1.610915344 | 6.445751277 |
| ENSMUSG00000073899 | 7.781970364 | 6.956172438 | 4.943057334 | 4.02728836  | 8.594335036 |
| ENSMUSG00000073900 | 9.904325918 | 11.82549314 | 4.943057334 | 5.638203705 | 7.161945863 |
| ENSMUSG00000073901 | 9.904325918 | 5.56493795  | 7.061510478 | 4.02728836  | 6.445751277 |
| ENSMUSG00000073902 | 24.76081479 | 38.95456565 | 28.95219296 | 26.58010318 | 33.66114556 |
| ENSMUSG00000073908 | 5.65961481  | 5.56493795  | 8.473812573 | 3.221830688 | 9.310529622 |
| ENSMUSG00000073909 | 9.904325918 | 4.869320706 | 9.179963621 | 8.054576721 | 7.87814045  |
| ENSMUSG00000073913 | 8.489422215 | 7.651789682 | 5.649208382 | 4.832746033 | 6.445751277 |

|                    |             |             |             |             |             |
|--------------------|-------------|-------------|-------------|-------------|-------------|
| ENSMUSG00000073914 | 5.65961481  | 6.260555194 | 6.35535943  | 6.443661377 | 7.161945863 |
| ENSMUSG00000073915 | 9.196874066 | 13.21672763 | 5.649208382 | 2.416373016 | 3.580972932 |
| ENSMUSG00000073916 | 7.781970364 | 8.347406925 | 5.649208382 | 4.832746033 | 5.729556691 |
| ENSMUSG00000073917 | 9.196874066 | 6.260555194 | 7.767661525 | 3.221830688 | 7.87814045  |
| ENSMUSG00000073919 | 6.367066661 | 6.260555194 | 10.59226572 | 5.638203705 | 9.310529622 |
| ENSMUSG00000073922 | 10.61177777 | 7.651789682 | 3.530755239 | 7.249119049 | 6.445751277 |
| ENSMUSG00000073923 | 7.074518513 | 5.56493795  | 10.59226572 | 4.832746033 | 6.445751277 |
| ENSMUSG00000073924 | 7.074518513 | 14.60796212 | 8.473812573 | 6.443661377 | 2.864778345 |
| ENSMUSG00000073925 | 10.61177777 | 12.52111039 | 5.649208382 | 8.054576721 | 5.729556691 |
| ENSMUSG00000073928 | 4.244711108 | 6.260555194 | 9.179963621 | 7.249119049 | 5.729556691 |
| ENSMUSG00000073929 | 7.074518513 | 8.347406925 | 6.35535943  | 4.832746033 | 9.310529622 |
| ENSMUSG00000073931 | 4.244711108 | 6.260555194 | 7.061510478 | 1.610915344 | 8.594335036 |
| ENSMUSG00000073932 | 12.02668147 | 4.173703463 | 4.236906287 | 5.638203705 | 1.432389173 |
| ENSMUSG00000073937 | 12.02668147 | 8.347406925 | 9.886114669 | 2.416373016 | 5.013362104 |
| ENSMUSG00000073938 | 8.489422215 | 9.043024169 | 7.767661525 | 8.054576721 | 3.580972932 |
| ENSMUSG00000073943 | 12.02668147 | 6.260555194 | 7.061510478 | 4.02728836  | 4.297167518 |
| ENSMUSG00000073944 | 7.074518513 | 4.869320706 | 8.473812573 | 5.638203705 | 5.729556691 |
| ENSMUSG00000073945 | 12.73413332 | 7.651789682 | 6.35535943  | 8.860034393 | 7.161945863 |
| ENSMUSG00000073946 | 10.61177777 | 4.173703463 | 7.767661525 | 1.610915344 | 5.729556691 |
| ENSMUSG00000073947 | 4.244711108 | 9.738641413 | 9.886114669 | 4.832746033 | 3.580972932 |
| ENSMUSG00000073948 | 6.367066661 | 10.43425866 | 7.061510478 | 3.221830688 | 6.445751277 |
| ENSMUSG00000073949 | 3.537259256 | 9.043024169 | 10.59226572 | 5.638203705 | 3.580972932 |
| ENSMUSG00000073950 | 8.489422215 | 12.52111039 | 5.649208382 | 4.832746033 | 2.864778345 |
| ENSMUSG00000073951 | 6.367066661 | 9.043024169 | 9.179963621 | 3.221830688 | 5.729556691 |
| ENSMUSG00000073952 | 11.31922962 | 6.956172438 | 12.00456781 | 5.638203705 | 6.445751277 |
| ENSMUSG00000073953 | 10.61177777 | 4.173703463 | 7.767661525 | 0.805457672 | 5.729556691 |
| ENSMUSG00000073954 | 7.074518513 | 6.956172438 | 7.767661525 | 2.416373016 | 6.445751277 |
| ENSMUSG00000073955 | 9.196874066 | 4.173703463 | 10.59226572 | 10.47094974 | 12.17530797 |
| ENSMUSG00000073959 | 9.196874066 | 11.1298759  | 9.179963621 | 4.02728836  | 5.013362104 |
| ENSMUSG00000073960 | 7.781970364 | 8.347406925 | 4.236906287 | 4.832746033 | 5.013362104 |
| ENSMUSG00000073961 | 13.44158517 | 6.956172438 | 4.943057334 | 5.638203705 | 7.87814045  |
| ENSMUSG00000073962 | 7.781970364 | 11.1298759  | 7.767661525 | 3.221830688 | 4.297167518 |
| ENSMUSG00000073963 | 13.44158517 | 4.869320706 | 7.061510478 | 8.054576721 | 5.013362104 |
| ENSMUSG00000073965 | 10.61177777 | 8.347406925 | 4.943057334 | 4.832746033 | 5.013362104 |
| ENSMUSG00000073970 | 12.73413332 | 9.738641413 | 6.35535943  | 6.443661377 | 10.7429188  |
| ENSMUSG00000073971 | 11.31922962 | 9.738641413 | 7.767661525 | 6.443661377 | 9.310529622 |
| ENSMUSG00000073972 | 4.244711108 | 10.43425866 | 7.767661525 | 8.054576721 | 5.013362104 |
| ENSMUSG00000073973 | 9.904325918 | 6.260555194 | 8.473812573 | 6.443661377 | 9.310529622 |
| ENSMUSG00000073976 | 11.31922962 | 6.260555194 | 12.71071886 | 4.832746033 | 2.864778345 |
| ENSMUSG00000073977 | 10.61177777 | 6.956172438 | 8.473812573 | 5.638203705 | 10.02672421 |
| ENSMUSG00000073978 | 9.904325918 | 10.43425866 | 4.943057334 | 6.443661377 | 12.17530797 |
| ENSMUSG00000073979 | 11.31922962 | 8.347406925 | 7.767661525 | 6.443661377 | 8.594335036 |
| ENSMUSG00000073980 | 11.31922962 | 11.1298759  | 10.59226572 | 19.33098413 | 10.02672421 |

|                    |             |             |             |             |             |
|--------------------|-------------|-------------|-------------|-------------|-------------|
| ENSMUSG00000073985 | 15.56394073 | 20.17290007 | 16.2414741  | 13.69278043 | 17.18867007 |
| ENSMUSG00000073997 | 9.196874066 | 4.869320706 | 5.649208382 | 6.443661377 | 8.594335036 |
| ENSMUSG00000073998 | 10.61177777 | 4.869320706 | 9.179963621 | 8.054576721 | 3.580972932 |
| ENSMUSG00000074003 | 6.367066661 | 4.173703463 | 2.824604191 | 3.221830688 | 8.594335036 |
| ENSMUSG00000074011 | 10.61177777 | 4.869320706 | 7.061510478 | 5.638203705 | 5.013362104 |
| ENSMUSG00000074024 | 46.69182218 | 89.73462445 | 79.08891735 | 98.265836   | 93.82149081 |
| ENSMUSG00000074026 | 2.829807405 | 1.391234488 | 2.118453143 | 2.416373016 | 2.148583759 |
| ENSMUSG00000074034 | 7.781970364 | 11.82549314 | 8.473812573 | 12.88732275 | 8.594335036 |
| ENSMUSG00000074039 | 8.489422215 | 6.260555194 | 6.35535943  | 3.221830688 | 5.729556691 |
| ENSMUSG00000074052 | 19.80865184 | 30.60715873 | 20.47838039 | 204.5862487 | 165.4409494 |
| ENSMUSG00000074065 | 28.29807405 | 41.04141738 | 44.48751601 | 102.2931244 | 74.48423698 |
| ENSMUSG00000074067 | 10.61177777 | 2.086851731 | 6.35535943  | 4.02728836  | 5.013362104 |
| ENSMUSG00000074071 | 70.03773327 | 105.0382038 | 84.73812573 | 47.52200265 | 52.2822048  |
| ENSMUSG00000074072 | 7.781970364 | 5.56493795  | 4.943057334 | 4.832746033 | 9.310529622 |
| ENSMUSG00000074092 | 9.904325918 | 6.956172438 | 7.061510478 | 3.221830688 | 8.594335036 |
| ENSMUSG00000074108 | 12.02668147 | 9.738641413 | 12.71071886 | 7.249119049 | 8.594335036 |
| ENSMUSG00000074113 | 9.904325918 | 11.1298759  | 4.236906287 | 9.665492065 | 9.310529622 |
| ENSMUSG00000074128 | 11.31922962 | 6.260555194 | 5.649208382 | 5.638203705 | 7.161945863 |
| ENSMUSG00000074136 | 192.4269035 | 201.0333835 | 194.8976892 | 352.7904604 | 252.816689  |
| ENSMUSG00000074146 | 7.074518513 | 6.956172438 | 5.649208382 | 12.88732275 | 12.89150255 |
| ENSMUSG00000074149 | 29.0055259  | 49.38882431 | 50.13672439 | 102.2931244 | 92.38910164 |
| ENSMUSG00000074164 | 7.074518513 | 6.260555194 | 9.179963621 | 2.416373016 | 5.729556691 |
| ENSMUSG00000074171 | 14.14903703 | 15.30357936 | 16.2414741  | 40.2728836  | 47.98503729 |
| ENSMUSG00000074184 | 11.31922962 | 8.347406925 | 12.71071886 | 7.249119049 | 8.594335036 |
| ENSMUSG00000074194 | 9.196874066 | 10.43425866 | 7.061510478 | 8.860034393 | 11.45911338 |
| ENSMUSG00000074206 | 11.31922962 | 9.043024169 | 7.767661525 | 12.08186508 | 5.013362104 |
| ENSMUSG00000074235 | 12.02668147 | 10.43425866 | 7.767661525 | 4.02728836  | 7.161945863 |
| ENSMUSG00000074236 | 11.31922962 | 4.173703463 | 11.29841676 | 8.054576721 | 3.580972932 |
| ENSMUSG00000074243 | 9.196874066 | 7.651789682 | 12.00456781 | 10.47094974 | 10.02672421 |
| ENSMUSG00000074248 | 9.196874066 | 2.086851731 | 10.59226572 | 4.02728836  | 5.013362104 |
| ENSMUSG00000074250 | 13.44158517 | 9.738641413 | 12.00456781 | 12.88732275 | 10.7429188  |
| ENSMUSG00000074256 | 50.22908144 | 86.25653823 | 84.73812573 | 70.88027514 | 52.99839939 |
| ENSMUSG00000074274 | 9.196874066 | 7.651789682 | 11.29841676 | 12.08186508 | 9.310529622 |
| ENSMUSG00000074280 | 4.244711108 | 4.173703463 | 4.236906287 | 5.638203705 | 8.594335036 |
| ENSMUSG00000074281 | 9.196874066 | 6.260555194 | 7.767661525 | 20.94189947 | 18.62105924 |
| ENSMUSG00000074283 | 13.44158517 | 7.651789682 | 7.767661525 | 11.27640741 | 6.445751277 |
| ENSMUSG00000074284 | 13.44158517 | 17.39043109 | 24.00913562 | 19.33098413 | 17.90486466 |
| ENSMUSG00000074289 | 12.02668147 | 6.260555194 | 5.649208382 | 4.832746033 | 8.594335036 |
| ENSMUSG00000074291 | 9.196874066 | 2.782468975 | 9.179963621 | 7.249119049 | 6.445751277 |
| ENSMUSG00000074292 | 9.904325918 | 9.043024169 | 13.41686991 | 5.638203705 | 5.013362104 |
| ENSMUSG00000074300 | 9.196874066 | 6.260555194 | 11.29841676 | 4.832746033 | 7.161945863 |
| ENSMUSG00000074302 | 12.02668147 | 11.1298759  | 7.767661525 | 6.443661377 | 7.161945863 |
| ENSMUSG00000074322 | 8.489422215 | 6.260555194 | 6.35535943  | 14.4982381  | 4.297167518 |



|                    |             |             |             |             |             |
|--------------------|-------------|-------------|-------------|-------------|-------------|
| ENSMUSG00000074343 | 9.196874066 | 4.173703463 | 6.35535943  | 8.054576721 | 5.729556691 |
| ENSMUSG00000074346 | 10.61177777 | 4.173703463 | 3.530755239 | 6.443661377 | 6.445751277 |
| ENSMUSG00000074354 | 9.196874066 | 3.478086219 | 8.473812573 | 6.443661377 | 5.013362104 |
| ENSMUSG00000074373 | 4.244711108 | 6.956172438 | 9.179963621 | 4.02728836  | 8.594335036 |
| ENSMUSG00000074388 | 24.05336294 | 52.86691053 | 31.77679715 | 22.55281482 | 19.33725383 |
| ENSMUSG00000074398 | 26.88317035 | 31.99839321 | 23.30298458 | 15.30369577 | 17.90486466 |
| ENSMUSG00000074404 | 11.31922962 | 8.347406925 | 9.886114669 | 6.443661377 | 6.445751277 |
| ENSMUSG00000074412 | 8.489422215 | 2.782468975 | 4.943057334 | 7.249119049 | 4.297167518 |
| ENSMUSG00000074415 | 13.44158517 | 6.956172438 | 3.530755239 | 4.02728836  | 6.445751277 |
| ENSMUSG00000074418 | 12.02668147 | 11.1298759  | 7.061510478 | 7.249119049 | 10.7429188  |
| ENSMUSG00000074420 | 7.781970364 | 6.956172438 | 3.530755239 | 5.638203705 | 6.445751277 |
| ENSMUSG00000074429 | 7.074518513 | 6.956172438 | 6.35535943  | 8.054576721 | 7.161945863 |
| ENSMUSG00000074434 | 10.61177777 | 6.260555194 | 9.886114669 | 3.221830688 | 7.161945863 |
| ENSMUSG00000074436 | 13.44158517 | 7.651789682 | 4.943057334 | 3.221830688 | 3.580972932 |
| ENSMUSG00000074439 | 16.27139258 | 6.260555194 | 14.829172   | 4.02728836  | 7.161945863 |
| ENSMUSG00000074442 | 9.904325918 | 5.56493795  | 2.824604191 | 1.610915344 | 7.87814045  |
| ENSMUSG00000074465 | 7.074518513 | 5.56493795  | 9.179963621 | 3.221830688 | 10.02672421 |
| ENSMUSG00000074466 | 30.4204296  | 43.12826911 | 46.60596915 | 34.6346799  | 29.36397804 |
| ENSMUSG00000074467 | 6.367066661 | 6.260555194 | 4.943057334 | 9.665492065 | 10.02672421 |
| ENSMUSG00000074469 | 9.196874066 | 5.56493795  | 6.35535943  | 8.860034393 | 5.729556691 |
| ENSMUSG00000074480 | 8.489422215 | 16.69481385 | 13.41686991 | 8.860034393 | 10.02672421 |
| ENSMUSG00000074482 | 11.31922962 | 9.738641413 | 9.886114669 | 5.638203705 | 9.310529622 |
| ENSMUSG00000074485 | 4.952162959 | 8.347406925 | 9.179963621 | 4.02728836  | 10.7429188  |
| ENSMUSG00000074501 | 8.489422215 | 5.56493795  | 9.179963621 | 4.02728836  | 7.87814045  |
| ENSMUSG00000074506 | 18.39374813 | 10.43425866 | 7.061510478 | 8.860034393 | 4.297167518 |
| ENSMUSG00000074507 | 16.27139258 | 7.651789682 | 4.943057334 | 8.860034393 | 7.87814045  |
| ENSMUSG00000074508 | 6.367066661 | 6.956172438 | 7.061510478 | 4.832746033 | 5.013362104 |
| ENSMUSG00000074517 | 6.367066661 | 2.782468975 | 6.35535943  | 7.249119049 | 5.729556691 |
| ENSMUSG00000074547 | 7.074518513 | 7.651789682 | 9.886114669 | 11.27640741 | 12.17530797 |
| ENSMUSG00000074553 | 9.196874066 | 4.869320706 | 8.473812573 | 11.27640741 | 7.161945863 |
| ENSMUSG00000074555 | 7.781970364 | 3.478086219 | 5.649208382 | 7.249119049 | 8.594335036 |
| ENSMUSG00000074564 | 87.01657771 | 95.99517964 | 90.38733411 | 77.32393652 | 87.37573953 |
| ENSMUSG00000074589 | 11.31922962 | 6.260555194 | 9.886114669 | 4.832746033 | 6.445751277 |
| ENSMUSG00000074592 | 9.904325918 | 4.173703463 | 7.767661525 | 2.416373016 | 7.87814045  |
| ENSMUSG00000074620 | 6.367066661 | 11.1298759  | 14.12302096 | 8.860034393 | 9.310529622 |
| ENSMUSG00000074649 | 30.4204296  | 46.60635533 | 58.61053696 | 96.65492065 | 85.94335036 |
| ENSMUSG00000074680 | 13.44158517 | 4.173703463 | 7.061510478 | 9.665492065 | 9.310529622 |
| ENSMUSG00000074704 | 7.074518513 | 9.738641413 | 7.767661525 | 3.221830688 | 9.310529622 |
| ENSMUSG00000074733 | 61.54831106 | 89.73462445 | 79.7950684  | 80.54576721 | 63.0251236  |
| ENSMUSG00000074735 | 9.904325918 | 7.651789682 | 5.649208382 | 6.443661377 | 3.580972932 |
| ENSMUSG00000074737 | 7.781970364 | 4.869320706 | 7.767661525 | 2.416373016 | 7.161945863 |
| ENSMUSG00000074753 | 8.489422215 | 4.869320706 | 8.473812573 | 3.221830688 | 7.161945863 |
| ENSMUSG00000074758 | 10.61177777 | 9.043024169 | 8.473812573 | 14.4982381  | 10.02672421 |

|                    |             |             |             |             |             |
|--------------------|-------------|-------------|-------------|-------------|-------------|
| ENSMUSG00000074763 | 14.85648888 | 9.738641413 | 8.473812573 | 3.221830688 | 6.445751277 |
| ENSMUSG00000074776 | 12.73413332 | 9.738641413 | 9.179963621 | 6.443661377 | 5.013362104 |
| ENSMUSG00000074780 | 12.02668147 | 4.173703463 | 7.061510478 | 4.832746033 | 7.87814045  |
| ENSMUSG00000074782 | 3.537259256 | 5.56493795  | 4.236906287 | 3.221830688 | 5.013362104 |
| ENSMUSG00000074783 | 7.074518513 | 17.39043109 | 21.89068248 | 15.30369577 | 10.7429188  |
| ENSMUSG00000074785 | 10.61177777 | 26.43345526 | 16.94762515 | 68.46390213 | 45.12025894 |
| ENSMUSG00000074800 | 0           | 0.695617244 | 0           | 0           | 0.716194586 |
| ENSMUSG00000074804 | 9.196874066 | 6.956172438 | 8.473812573 | 8.860034393 | 7.161945863 |
| ENSMUSG00000074805 | 8.489422215 | 9.738641413 | 4.236906287 | 7.249119049 | 7.161945863 |
| ENSMUSG00000074813 | 8.489422215 | 10.43425866 | 7.061510478 | 23.35827249 | 17.18867007 |
| ENSMUSG00000074830 | 9.196874066 | 4.869320706 | 6.35535943  | 1.610915344 | 3.580972932 |
| ENSMUSG00000074837 | 12.02668147 | 6.956172438 | 8.473812573 | 7.249119049 | 2.148583759 |
| ENSMUSG00000074841 | 9.196874066 | 9.043024169 | 12.00456781 | 7.249119049 | 3.580972932 |
| ENSMUSG00000074846 | 89.13893326 | 130.0804246 | 108.0411103 | 133.7059736 | 120.3206905 |
| ENSMUSG00000074852 | 10.61177777 | 5.56493795  | 5.649208382 | 5.638203705 | 7.87814045  |
| ENSMUSG00000074863 | 11.31922962 | 11.82549314 | 11.29841676 | 10.47094974 | 5.729556691 |
| ENSMUSG00000074865 | 11.31922962 | 8.347406925 | 13.41686991 | 8.860034393 | 11.45911338 |
| ENSMUSG00000074868 | 14.85648888 | 13.91234488 | 14.12302096 | 18.52552646 | 21.48583759 |
| ENSMUSG00000074876 | 31.12788146 | 47.30197258 | 55.78593277 | 86.18397091 | 90.95671247 |
| ENSMUSG00000074877 | 8.489422215 | 4.173703463 | 2.824604191 | 7.249119049 | 3.580972932 |
| ENSMUSG00000074885 | 7.781970364 | 11.82549314 | 4.943057334 | 4.02728836  | 12.17530797 |
| ENSMUSG00000074887 | 12.73413332 | 7.651789682 | 10.59226572 | 7.249119049 | 3.580972932 |
| ENSMUSG00000074899 | 7.781970364 | 6.956172438 | 9.179963621 | 4.832746033 | 7.87814045  |
| ENSMUSG00000074903 | 12.02668147 | 9.043024169 | 10.59226572 | 8.860034393 | 11.45911338 |
| ENSMUSG00000074912 | 7.074518513 | 8.347406925 | 6.35535943  | 7.249119049 | 7.161945863 |
| ENSMUSG00000074918 | 24.05336294 | 21.56413456 | 36.71985448 | 17.72006879 | 23.63442135 |
| ENSMUSG00000074922 | 29.0055259  | 57.04061399 | 50.84287544 | 87.79488626 | 71.61945863 |
| ENSMUSG00000074930 | 9.904325918 | 7.651789682 | 8.473812573 | 4.832746033 | 11.45911338 |
| ENSMUSG00000074939 | 4.952162959 | 11.82549314 | 5.649208382 | 8.860034393 | 5.729556691 |
| ENSMUSG00000074943 | 9.196874066 | 4.869320706 | 5.649208382 | 3.221830688 | 11.45911338 |
| ENSMUSG00000074945 | 9.904325918 | 6.260555194 | 9.179963621 | 10.47094974 | 8.594335036 |
| ENSMUSG00000074946 | 5.65961481  | 7.651789682 | 3.530755239 | 4.832746033 | 5.729556691 |
| ENSMUSG00000074947 | 9.904325918 | 11.1298759  | 6.35535943  | 4.832746033 | 6.445751277 |
| ENSMUSG00000074951 | 7.074518513 | 11.82549314 | 8.473812573 | 3.221830688 | 10.02672421 |
| ENSMUSG00000074952 | 11.31922962 | 4.869320706 | 12.71071886 | 4.02728836  | 5.013362104 |
| ENSMUSG00000074955 | 11.31922962 | 10.43425866 | 11.29841676 | 1.610915344 | 8.594335036 |
| ENSMUSG00000074957 | 6.367066661 | 9.738641413 | 6.35535943  | 1.610915344 | 9.310529622 |
| ENSMUSG00000074965 | 9.196874066 | 9.738641413 | 7.767661525 | 5.638203705 | 7.87814045  |
| ENSMUSG00000074966 | 2.122355554 | 1.391234488 | 1.412302096 | 0.805457672 | 1.432389173 |
| ENSMUSG00000074970 | 4.952162959 | 8.347406925 | 8.473812573 | 3.221830688 | 5.013362104 |
| ENSMUSG00000074973 | 9.196874066 | 8.347406925 | 10.59226572 | 6.443661377 | 5.013362104 |
| ENSMUSG00000074978 | 0           | 0.695617244 | 0           | 0.805457672 | 0           |
| ENSMUSG00000074981 | 16.27139258 | 25.04222078 | 24.00913562 | 24.16373016 | 30.08017263 |

|                    |             |             |             |             |             |
|--------------------|-------------|-------------|-------------|-------------|-------------|
| ENSMUSG00000074985 | 13.44158517 | 8.347406925 | 10.59226572 | 2.416373016 | 9.310529622 |
| ENSMUSG00000074987 | 2.829807405 | 2.086851731 | 1.412302096 | 0.805457672 | 1.432389173 |
| ENSMUSG00000074995 | 11.31922962 | 10.43425866 | 6.35535943  | 4.02728836  | 5.729556691 |
| ENSMUSG00000075006 | 9.196874066 | 13.91234488 | 7.061510478 | 4.02728836  | 5.729556691 |
| ENSMUSG00000075014 | 688.3506513 | 686.5742196 | 694.852631  | 747.4647197 | 690.4115812 |
| ENSMUSG00000075015 | 681.9835846 | 686.5742196 | 680.023459  | 707.9972938 | 681.8172462 |
| ENSMUSG00000075020 | 4.952162959 | 4.173703463 | 8.473812573 | 3.221830688 | 6.445751277 |
| ENSMUSG00000075025 | 193.8418072 | 238.5967146 | 225.9683353 | 244.0536746 | 200.5344842 |
| ENSMUSG00000075027 | 55.88869625 | 59.82308296 | 69.90895373 | 39.46742593 | 37.24211849 |
| ENSMUSG00000075029 | 5.65961481  | 5.56493795  | 7.061510478 | 3.221830688 | 9.310529622 |
| ENSMUSG00000075036 | 9.904325918 | 3.478086219 | 11.29841676 | 8.054576721 | 9.310529622 |
| ENSMUSG00000075042 | 9.904325918 | 11.1298759  | 8.473812573 | 8.054576721 | 7.161945863 |
| ENSMUSG00000075046 | 92.67619252 | 61.21431745 | 66.37819849 | 62.82569842 | 73.05184781 |
| ENSMUSG00000075061 | 10.61177777 | 6.260555194 | 7.061510478 | 4.832746033 | 8.594335036 |
| ENSMUSG00000075062 | 12.02668147 | 7.651789682 | 9.886114669 | 4.832746033 | 4.297167518 |
| ENSMUSG00000075063 | 7.781970364 | 12.52111039 | 8.473812573 | 8.860034393 | 5.729556691 |
| ENSMUSG00000075065 | 12.73413332 | 6.260555194 | 6.35535943  | 2.416373016 | 7.161945863 |
| ENSMUSG00000075066 | 6.367066661 | 7.651789682 | 9.886114669 | 1.610915344 | 7.161945863 |
| ENSMUSG00000075067 | 9.196874066 | 6.956172438 | 9.886114669 | 8.054576721 | 5.013362104 |
| ENSMUSG00000075069 | 13.44158517 | 8.347406925 | 5.649208382 | 8.054576721 | 5.013362104 |
| ENSMUSG00000075070 | 9.904325918 | 13.91234488 | 14.829172   | 12.88732275 | 16.47247549 |
| ENSMUSG00000075072 | 7.074518513 | 4.173703463 | 5.649208382 | 6.443661377 | 2.864778345 |
| ENSMUSG00000075075 | 12.02668147 | 9.043024169 | 10.59226572 | 4.832746033 | 7.87814045  |
| ENSMUSG00000075079 | 7.074518513 | 5.56493795  | 6.35535943  | 5.638203705 | 7.161945863 |
| ENSMUSG00000075084 | 9.904325918 | 7.651789682 | 6.35535943  | 6.443661377 | 7.161945863 |
| ENSMUSG00000075086 | 9.196874066 | 9.043024169 | 2.824604191 | 5.638203705 | 4.297167518 |
| ENSMUSG00000075088 | 2.829807405 | 11.82549314 | 5.649208382 | 5.638203705 | 8.594335036 |
| ENSMUSG00000075089 | 14.85648888 | 5.56493795  | 10.59226572 | 6.443661377 | 7.87814045  |
| ENSMUSG00000075091 | 10.61177777 | 7.651789682 | 4.236906287 | 3.221830688 | 4.297167518 |
| ENSMUSG00000075092 | 7.781970364 | 7.651789682 | 7.061510478 | 2.416373016 | 5.729556691 |
| ENSMUSG00000075093 | 9.904325918 | 8.347406925 | 4.236906287 | 3.221830688 | 2.864778345 |
| ENSMUSG00000075094 | 12.73413332 | 9.738641413 | 4.236906287 | 5.638203705 | 10.02672421 |
| ENSMUSG00000075097 | 9.196874066 | 9.738641413 | 9.179963621 | 4.02728836  | 6.445751277 |
| ENSMUSG00000075099 | 9.196874066 | 4.173703463 | 7.767661525 | 1.610915344 | 3.580972932 |
| ENSMUSG00000075100 | 7.781970364 | 6.956172438 | 4.236906287 | 2.416373016 | 9.310529622 |
| ENSMUSG00000075102 | 4.244711108 | 8.347406925 | 7.061510478 | 3.221830688 | 6.445751277 |
| ENSMUSG00000075104 | 9.904325918 | 6.956172438 | 8.473812573 | 1.610915344 | 4.297167518 |
| ENSMUSG00000075105 | 7.074518513 | 9.738641413 | 7.767661525 | 4.832746033 | 3.580972932 |
| ENSMUSG00000075107 | 10.61177777 | 7.651789682 | 4.236906287 | 3.221830688 | 7.87814045  |
| ENSMUSG00000075110 | 10.61177777 | 10.43425866 | 5.649208382 | 8.054576721 | 8.594335036 |
| ENSMUSG00000075112 | 6.367066661 | 9.738641413 | 7.767661525 | 3.221830688 | 2.864778345 |
| ENSMUSG00000075113 | 6.367066661 | 3.478086219 | 7.767661525 | 5.638203705 | 5.013362104 |
| ENSMUSG00000075114 | 9.904325918 | 9.043024169 | 4.943057334 | 2.416373016 | 2.864778345 |

|                    |             |             |             |             |             |
|--------------------|-------------|-------------|-------------|-------------|-------------|
| ENSMUSG00000075115 | 7.781970364 | 7.651789682 | 7.061510478 | 3.221830688 | 3.580972932 |
| ENSMUSG00000075116 | 5.65961481  | 1.391234488 | 4.943057334 | 5.638203705 | 2.864778345 |
| ENSMUSG00000075117 | 8.489422215 | 7.651789682 | 8.473812573 | 2.416373016 | 4.297167518 |
| ENSMUSG00000075119 | 4.952162959 | 7.651789682 | 7.767661525 | 1.610915344 | 5.729556691 |
| ENSMUSG00000075120 | 10.61177777 | 2.086851731 | 9.179963621 | 6.443661377 | 7.161945863 |
| ENSMUSG00000075121 | 12.73413332 | 6.260555194 | 6.35535943  | 4.832746033 | 5.729556691 |
| ENSMUSG00000075124 | 4.952162959 | 4.173703463 | 6.35535943  | 2.416373016 | 5.729556691 |
| ENSMUSG00000075125 | 10.61177777 | 5.56493795  | 7.061510478 | 4.832746033 | 4.297167518 |
| ENSMUSG00000075126 | 9.904325918 | 6.956172438 | 7.061510478 | 8.860034393 | 5.013362104 |
| ENSMUSG00000075127 | 5.65961481  | 6.956172438 | 4.943057334 | 5.638203705 | 10.02672421 |
| ENSMUSG00000075128 | 8.489422215 | 5.56493795  | 4.943057334 | 4.02728836  | 5.729556691 |
| ENSMUSG00000075132 | 7.074518513 | 6.260555194 | 9.886114669 | 4.832746033 | 2.148583759 |
| ENSMUSG00000075133 | 10.61177777 | 6.956172438 | 4.236906287 | 4.832746033 | 5.729556691 |
| ENSMUSG00000075136 | 11.31922962 | 9.738641413 | 4.943057334 | 4.832746033 | 7.87814045  |
| ENSMUSG00000075137 | 9.904325918 | 6.260555194 | 10.59226572 | 4.02728836  | 7.161945863 |
| ENSMUSG00000075140 | 7.074518513 | 2.086851731 | 1.412302096 | 4.02728836  | 4.297167518 |
| ENSMUSG00000075141 | 9.904325918 | 13.21672763 | 3.530755239 | 1.610915344 | 5.013362104 |
| ENSMUSG00000075142 | 7.781970364 | 9.043024169 | 10.59226572 | 0.805457672 | 5.729556691 |
| ENSMUSG00000075143 | 8.489422215 | 4.869320706 | 2.824604191 | 6.443661377 | 7.87814045  |
| ENSMUSG00000075144 | 9.904325918 | 10.43425866 | 7.767661525 | 8.054576721 | 6.445751277 |
| ENSMUSG00000075145 | 7.074518513 | 9.738641413 | 2.824604191 | 0.805457672 | 8.594335036 |
| ENSMUSG00000075146 | 9.196874066 | 5.56493795  | 5.649208382 | 2.416373016 | 3.580972932 |
| ENSMUSG00000075148 | 7.781970364 | 3.478086219 | 2.824604191 | 4.02728836  | 5.729556691 |
| ENSMUSG00000075149 | 12.02668147 | 11.82549314 | 9.179963621 | 3.221830688 | 3.580972932 |
| ENSMUSG00000075150 | 6.367066661 | 9.043024169 | 8.473812573 | 4.832746033 | 7.87814045  |
| ENSMUSG00000075151 | 8.489422215 | 11.1298759  | 4.236906287 | 4.02728836  | 2.864778345 |
| ENSMUSG00000075153 | 9.196874066 | 9.043024169 | 7.767661525 | 4.02728836  | 9.310529622 |
| ENSMUSG00000075154 | 2.829807405 | 2.782468975 | 1.412302096 | 0.805457672 | 3.580972932 |
| ENSMUSG00000075155 | 6.367066661 | 7.651789682 | 7.767661525 | 1.610915344 | 3.580972932 |
| ENSMUSG00000075156 | 1.414903703 | 0.695617244 | 3.530755239 | 1.610915344 | 2.864778345 |
| ENSMUSG00000075158 | 8.489422215 | 6.956172438 | 6.35535943  | 0.805457672 | 5.729556691 |
| ENSMUSG00000075159 | 11.31922962 | 5.56493795  | 6.35535943  | 2.416373016 | 6.445751277 |
| ENSMUSG00000075160 | 10.61177777 | 9.043024169 | 9.179963621 | 4.02728836  | 7.161945863 |
| ENSMUSG00000075161 | 7.074518513 | 6.260555194 | 10.59226572 | 5.638203705 | 6.445751277 |
| ENSMUSG00000075162 | 29.71297775 | 54.95376226 | 49.43057334 | 20.94189947 | 35.09353473 |
| ENSMUSG00000075163 | 10.61177777 | 11.82549314 | 7.767661525 | 4.832746033 | 5.729556691 |
| ENSMUSG00000075164 | 6.367066661 | 5.56493795  | 7.767661525 | 3.221830688 | 4.297167518 |
| ENSMUSG00000075165 | 6.367066661 | 6.956172438 | 9.886114669 | 5.638203705 | 5.729556691 |
| ENSMUSG00000075166 | 7.074518513 | 5.56493795  | 9.886114669 | 11.27640741 | 10.7429188  |
| ENSMUSG00000075167 | 6.367066661 | 6.260555194 | 5.649208382 | 4.832746033 | 6.445751277 |
| ENSMUSG00000075168 | 7.074518513 | 11.1298759  | 11.29841676 | 3.221830688 | 7.161945863 |
| ENSMUSG00000075171 | 8.489422215 | 6.956172438 | 7.061510478 | 3.221830688 | 3.580972932 |
| ENSMUSG00000075172 | 7.781970364 | 8.347406925 | 3.530755239 | 1.610915344 | 5.729556691 |

|                    |             |             |             |             |             |
|--------------------|-------------|-------------|-------------|-------------|-------------|
| ENSMUSG00000075173 | 11.31922962 | 8.347406925 | 4.943057334 | 6.443661377 | 5.013362104 |
| ENSMUSG00000075174 | 13.44158517 | 9.738641413 | 6.35535943  | 6.443661377 | 5.013362104 |
| ENSMUSG00000075175 | 7.074518513 | 6.956172438 | 2.824604191 | 4.02728836  | 6.445751277 |
| ENSMUSG00000075176 | 9.196874066 | 6.260555194 | 2.824604191 | 4.832746033 | 7.161945863 |
| ENSMUSG00000075177 | 10.61177777 | 2.782468975 | 11.29841676 | 3.221830688 | 7.161945863 |
| ENSMUSG00000075178 | 7.074518513 | 10.43425866 | 9.886114669 | 4.02728836  | 8.594335036 |
| ENSMUSG00000075181 | 13.44158517 | 5.56493795  | 8.473812573 | 2.416373016 | 10.02672421 |
| ENSMUSG00000075182 | 3.537259256 | 6.956172438 | 6.35535943  | 2.416373016 | 4.297167518 |
| ENSMUSG00000075185 | 7.074518513 | 6.260555194 | 9.886114669 | 4.02728836  | 5.013362104 |
| ENSMUSG00000075186 | 7.781970364 | 8.347406925 | 11.29841676 | 10.47094974 | 7.161945863 |
| ENSMUSG00000075187 | 8.489422215 | 9.043024169 | 5.649208382 | 4.02728836  | 7.87814045  |
| ENSMUSG00000075188 | 7.074518513 | 6.956172438 | 5.649208382 | 5.638203705 | 2.864778345 |
| ENSMUSG00000075189 | 7.781970364 | 8.347406925 | 8.473812573 | 7.249119049 | 10.7429188  |
| ENSMUSG00000075190 | 7.781970364 | 6.260555194 | 7.767661525 | 0           | 5.729556691 |
| ENSMUSG00000075192 | 8.489422215 | 5.56493795  | 4.943057334 | 1.610915344 | 2.864778345 |
| ENSMUSG00000075193 | 9.904325918 | 6.260555194 | 5.649208382 | 5.638203705 | 6.445751277 |
| ENSMUSG00000075194 | 7.781970364 | 8.347406925 | 4.236906287 | 6.443661377 | 3.580972932 |
| ENSMUSG00000075195 | 9.904325918 | 8.347406925 | 7.767661525 | 5.638203705 | 5.729556691 |
| ENSMUSG00000075196 | 7.781970364 | 4.173703463 | 5.649208382 | 5.638203705 | 3.580972932 |
| ENSMUSG00000075197 | 9.904325918 | 11.1298759  | 9.886114669 | 7.249119049 | 7.161945863 |
| ENSMUSG00000075198 | 4.244711108 | 6.956172438 | 8.473812573 | 5.638203705 | 3.580972932 |
| ENSMUSG00000075199 | 11.31922962 | 5.56493795  | 12.71071886 | 6.443661377 | 8.594335036 |
| ENSMUSG00000075200 | 4.244711108 | 4.869320706 | 7.061510478 | 2.416373016 | 7.161945863 |
| ENSMUSG00000075201 | 4.244711108 | 5.56493795  | 2.824604191 | 2.416373016 | 2.148583759 |
| ENSMUSG00000075202 | 6.367066661 | 4.173703463 | 4.943057334 | 2.416373016 | 2.148583759 |
| ENSMUSG00000075203 | 8.489422215 | 4.869320706 | 7.767661525 | 7.249119049 | 5.013362104 |
| ENSMUSG00000075204 | 8.489422215 | 10.43425866 | 6.35535943  | 4.02728836  | 6.445751277 |
| ENSMUSG00000075205 | 5.65961481  | 7.651789682 | 11.29841676 | 1.610915344 | 10.02672421 |
| ENSMUSG00000075206 | 8.489422215 | 11.1298759  | 7.767661525 | 3.221830688 | 2.864778345 |
| ENSMUSG00000075208 | 8.489422215 | 6.956172438 | 8.473812573 | 4.832746033 | 4.297167518 |
| ENSMUSG00000075209 | 9.196874066 | 6.260555194 | 8.473812573 | 4.02728836  | 7.161945863 |
| ENSMUSG00000075210 | 11.31922962 | 5.56493795  | 8.473812573 | 7.249119049 | 5.729556691 |
| ENSMUSG00000075212 | 12.73413332 | 2.086851731 | 6.35535943  | 4.832746033 | 7.161945863 |
| ENSMUSG00000075214 | 9.196874066 | 11.82549314 | 6.35535943  | 6.443661377 | 4.297167518 |
| ENSMUSG00000075215 | 6.367066661 | 11.1298759  | 7.061510478 | 1.610915344 | 7.161945863 |
| ENSMUSG00000075219 | 7.781970364 | 9.738641413 | 5.649208382 | 3.221830688 | 3.580972932 |
| ENSMUSG00000075220 | 6.367066661 | 7.651789682 | 4.236906287 | 5.638203705 | 9.310529622 |
| ENSMUSG00000075221 | 14.14903703 | 8.347406925 | 11.29841676 | 8.054576721 | 6.445751277 |
| ENSMUSG00000075228 | 7.074518513 | 7.651789682 | 5.649208382 | 8.860034393 | 10.7429188  |
| ENSMUSG00000075245 | 12.02668147 | 5.56493795  | 8.473812573 | 7.249119049 | 5.729556691 |
| ENSMUSG00000075256 | 0           | 0.695617244 | 0           | 0           | 0           |
| ENSMUSG00000075265 | 13.44158517 | 29.91154148 | 28.95219296 | 13.69278043 | 20.05344842 |
| ENSMUSG00000075268 | 21.93100739 | 27.82468975 | 26.83373982 | 30.60739154 | 37.95831308 |

|                    |             |             |             |             |             |
|--------------------|-------------|-------------|-------------|-------------|-------------|
| ENSMUSG00000075276 | 7.781970364 | 13.21672763 | 4.943057334 | 19.33098413 | 22.20203218 |
| ENSMUSG00000075277 | 5.65961481  | 6.956172438 | 8.473812573 | 5.638203705 | 6.445751277 |
| ENSMUSG00000075279 | 9.196874066 | 6.260555194 | 4.236906287 | 5.638203705 | 4.297167518 |
| ENSMUSG00000075286 | 7.074518513 | 6.956172438 | 7.061510478 | 8.860034393 | 10.02672421 |
| ENSMUSG00000075288 | 7.781970364 | 7.651789682 | 6.35535943  | 8.054576721 | 10.02672421 |
| ENSMUSG00000075312 | 9.904325918 | 6.956172438 | 7.767661525 | 6.443661377 | 11.45911338 |
| ENSMUSG00000075314 | 11.31922962 | 8.347406925 | 8.473812573 | 4.832746033 | 5.013362104 |
| ENSMUSG00000075325 | 6.367066661 | 7.651789682 | 5.649208382 | 7.249119049 | 9.310529622 |
| ENSMUSG00000075335 | 4.244711108 | 6.956172438 | 6.35535943  | 2.416373016 | 7.161945863 |
| ENSMUSG00000075359 | 14.85648888 | 18.78166558 | 20.47838039 | 18.52552646 | 20.769643   |
| ENSMUSG00000075377 | 2.122355554 | 3.478086219 | 3.530755239 | 2.416373016 | 0           |
| ENSMUSG00000075378 | 6.367066661 | 5.56493795  | 4.236906287 | 4.02728836  | 7.87814045  |
| ENSMUSG00000075379 | 12.73413332 | 11.1298759  | 10.59226572 | 5.638203705 | 12.17530797 |
| ENSMUSG00000075380 | 8.489422215 | 4.869320706 | 4.236906287 | 4.02728836  | 10.7429188  |
| ENSMUSG00000075382 | 8.489422215 | 9.738641413 | 8.473812573 | 4.832746033 | 4.297167518 |
| ENSMUSG00000075383 | 7.074518513 | 6.260555194 | 8.473812573 | 4.02728836  | 6.445751277 |
| ENSMUSG00000075384 | 5.65961481  | 7.651789682 | 5.649208382 | 4.02728836  | 8.594335036 |
| ENSMUSG00000075387 | 8.489422215 | 10.43425866 | 14.829172   | 9.665492065 | 7.87814045  |
| ENSMUSG00000075389 | 3.537259256 | 5.56493795  | 5.649208382 | 8.860034393 | 4.297167518 |
| ENSMUSG00000075390 | 12.73413332 | 3.478086219 | 9.179963621 | 6.443661377 | 5.729556691 |
| ENSMUSG00000075391 | 9.904325918 | 10.43425866 | 5.649208382 | 12.88732275 | 8.594335036 |
| ENSMUSG00000075408 | 14.14903703 | 13.91234488 | 17.65377619 | 5.638203705 | 11.45911338 |
| ENSMUSG00000075416 | 7.781970364 | 6.956172438 | 8.473812573 | 3.221830688 | 1.432389173 |
| ENSMUSG00000075431 | 6.367066661 | 10.43425866 | 5.649208382 | 4.02728836  | 6.445751277 |
| ENSMUSG00000075437 | 4.952162959 | 7.651789682 | 6.35535943  | 8.054576721 | 7.87814045  |
| ENSMUSG00000075463 | 16.97884443 | 27.82468975 | 20.47838039 | 28.9964762  | 21.48583759 |
| ENSMUSG00000075469 | 4.244711108 | 7.651789682 | 5.649208382 | 4.832746033 | 3.580972932 |
| ENSMUSG00000075480 | 19.80865184 | 36.17209668 | 32.4829482  | 54.7711217  | 55.14698315 |
| ENSMUSG00000075485 | 7.781970364 | 7.651789682 | 8.473812573 | 7.249119049 | 12.17530797 |
| ENSMUSG00000075511 | 6.367066661 | 10.43425866 | 10.59226572 | 5.638203705 | 7.161945863 |
| ENSMUSG00000075512 | 10.61177777 | 5.56493795  | 10.59226572 | 5.638203705 | 5.729556691 |
| ENSMUSG00000075514 | 7.074518513 | 20.86851731 | 20.47838039 | 37.05105292 | 22.91822676 |
| ENSMUSG00000075520 | 8.489422215 | 5.56493795  | 7.061510478 | 4.832746033 | 2.864778345 |
| ENSMUSG00000075525 | 9.904325918 | 7.651789682 | 4.943057334 | 4.02728836  | 7.161945863 |
| ENSMUSG00000075529 | 2.122355554 | 1.391234488 | 2.824604191 | 0           | 1.432389173 |
| ENSMUSG00000075534 | 4.244711108 | 5.56493795  | 6.35535943  | 2.416373016 | 5.013362104 |
| ENSMUSG00000075538 | 7.074518513 | 6.260555194 | 6.35535943  | 8.054576721 | 9.310529622 |
| ENSMUSG00000075555 | 10.61177777 | 4.869320706 | 4.943057334 | 3.221830688 | 5.013362104 |
| ENSMUSG00000075558 | 37.49494812 | 22.95536904 | 29.65834401 | 64.43661377 | 34.37734014 |
| ENSMUSG00000075573 | 8.489422215 | 6.956172438 | 8.473812573 | 6.443661377 | 6.445751277 |
| ENSMUSG00000075576 | 51.64398514 | 76.51789682 | 75.55816211 | 167.5351958 | 133.2121931 |
| ENSMUSG00000075581 | 5.65961481  | 6.956172438 | 7.767661525 | 5.638203705 | 10.02672421 |
| ENSMUSG00000075585 | 7.074518513 | 2.086851731 | 4.236906287 | 4.02728836  | 5.013362104 |

|                    |             |             |             |             |             |
|--------------------|-------------|-------------|-------------|-------------|-------------|
| ENSMUSG00000075586 | 8.489422215 | 11.1298759  | 10.59226572 | 6.443661377 | 7.87814045  |
| ENSMUSG00000075587 | 12.73413332 | 7.651789682 | 7.061510478 | 8.054576721 | 3.580972932 |
| ENSMUSG00000075589 | 6.367066661 | 4.869320706 | 8.473812573 | 8.054576721 | 7.161945863 |
| ENSMUSG00000075609 | 19.80865184 | 16.69481385 | 15.53532305 | 48.32746033 | 30.08017263 |
| ENSMUSG00000075611 | 7.074518513 | 6.260555194 | 9.179963621 | 2.416373016 | 7.87814045  |
| ENSMUSG00000075719 | 5.65961481  | 4.869320706 | 9.179963621 | 5.638203705 | 7.161945863 |
| ENSMUSG00000075726 | 0           | 0           | 0           | 0           | 0           |
| ENSMUSG00000075760 | 6.367066661 | 6.260555194 | 4.943057334 | 7.249119049 | 5.729556691 |
| ENSMUSG00000075770 | 0           | 0           | 0           | 0           | 0           |
| ENSMUSG00000075826 | 12.02668147 | 6.260555194 | 7.767661525 | 7.249119049 | 5.013362104 |
| ENSMUSG00000075829 | 7.781970364 | 15.99919661 | 8.473812573 | 5.638203705 | 8.594335036 |
| ENSMUSG00000075832 | 9.196874066 | 4.869320706 | 4.943057334 | 7.249119049 | 2.148583759 |
| ENSMUSG00000075833 | 12.73413332 | 5.56493795  | 7.767661525 | 4.832746033 | 7.87814045  |
| ENSMUSG00000075837 | 65.79302217 | 163.4700523 | 129.9317928 | 91.01671695 | 95.25387998 |
| ENSMUSG00000075864 | 4.952162959 | 6.956172438 | 7.767661525 | 10.47094974 | 5.013362104 |
| ENSMUSG00000075874 | 6.367066661 | 1.391234488 | 4.236906287 | 2.416373016 | 4.297167518 |
| ENSMUSG00000075893 | 9.196874066 | 7.651789682 | 12.00456781 | 4.832746033 | 5.013362104 |
| ENSMUSG00000075903 | 7.074518513 | 9.738641413 | 3.530755239 | 5.638203705 | 6.445751277 |
| ENSMUSG00000075906 | 12.73413332 | 11.1298759  | 7.767661525 | 6.443661377 | 7.87814045  |
| ENSMUSG00000075908 | 20.51610369 | 38.95456565 | 28.95219296 | 14.4982381  | 20.769643   |
| ENSMUSG00000075918 | 4.244711108 | 4.173703463 | 4.943057334 | 1.610915344 | 2.864778345 |
| ENSMUSG00000075934 | 12.02668147 | 9.738641413 | 9.886114669 | 2.416373016 | 5.013362104 |
| ENSMUSG00000075952 | 14.85648888 | 9.043024169 | 3.530755239 | 4.832746033 | 5.013362104 |
| ENSMUSG00000075958 | 9.196874066 | 7.651789682 | 12.00456781 | 6.443661377 | 8.594335036 |
| ENSMUSG00000075968 | 0           | 0           | 0           | 0           | 0           |
| ENSMUSG00000075973 | 8.489422215 | 10.43425866 | 7.061510478 | 5.638203705 | 5.729556691 |
| ENSMUSG00000075983 | 3.537259256 | 2.086851731 | 3.530755239 | 4.02728836  | 1.432389173 |
| ENSMUSG00000076005 | 0           | 0           | 0.706151048 | 0           | 0           |
| ENSMUSG00000076006 | 0           | 0           | 0           | 0           | 0           |
| ENSMUSG00000076009 | 8.489422215 | 9.738641413 | 12.00456781 | 22.55281482 | 25.78300511 |
| ENSMUSG00000076010 | 4.952162959 | 1.391234488 | 1.412302096 | 0.805457672 | 2.148583759 |
| ENSMUSG00000076011 | 8.489422215 | 5.56493795  | 12.71071886 | 9.665492065 | 7.87814045  |
| ENSMUSG00000076012 | 4.244711108 | 4.869320706 | 8.473812573 | 4.832746033 | 8.594335036 |
| ENSMUSG00000076014 | 0           | 0           | 0           | 0           | 0           |
| ENSMUSG00000076028 | 0           | 0           | 0           | 0           | 0           |
| ENSMUSG00000076030 | 11.31922962 | 9.043024169 | 4.943057334 | 2.416373016 | 4.297167518 |
| ENSMUSG00000076031 | 1.414903703 | 1.391234488 | 0.706151048 | 1.610915344 | 1.432389173 |
| ENSMUSG00000076033 | 1.414903703 | 0           | 1.412302096 | 2.416373016 | 2.148583759 |
| ENSMUSG00000076036 | 7.781970364 | 13.21672763 | 11.29841676 | 12.08186508 | 8.594335036 |
| ENSMUSG00000076037 | 1.414903703 | 0           | 0           | 0           | 0.716194586 |
| ENSMUSG00000076038 | 1.414903703 | 3.478086219 | 3.530755239 | 0.805457672 | 0           |
| ENSMUSG00000076039 | 0.707451851 | 0.695617244 | 0.706151048 | 0           | 0.716194586 |
| ENSMUSG00000076041 | 0           | 0           | 0           | 0           | 0           |

|                    |             |             |             |             |             |
|--------------------|-------------|-------------|-------------|-------------|-------------|
| ENSMUSG00000076042 | 11.31922962 | 7.651789682 | 6.35535943  | 6.443661377 | 11.45911338 |
| ENSMUSG00000076049 | 7.074518513 | 5.56493795  | 4.943057334 | 3.221830688 | 2.864778345 |
| ENSMUSG00000076050 | 0           | 0           | 0           | 0           | 0           |
| ENSMUSG00000076051 | 10.61177777 | 15.99919661 | 16.2414741  | 28.9964762  | 28.64778345 |
| ENSMUSG00000076052 | 0           | 0           | 0           | 0           | 0           |
| ENSMUSG00000076060 | 55.88869625 | 92.51709342 | 83.32582364 | 224.7226905 | 191.9401491 |
| ENSMUSG00000076062 | 0           | 0.695617244 | 0.706151048 | 0.805457672 | 1.432389173 |
| ENSMUSG00000076063 | 0           | 0           | 0           | 0           | 0           |
| ENSMUSG00000076064 | 9.196874066 | 4.173703463 | 7.061510478 | 4.832746033 | 8.594335036 |
| ENSMUSG00000076065 | 12.73413332 | 13.21672763 | 10.59226572 | 7.249119049 | 10.7429188  |
| ENSMUSG00000076066 | 0           | 4.173703463 | 7.767661525 | 4.02728836  | 5.013362104 |
| ENSMUSG00000076067 | 7.781970364 | 4.869320706 | 9.886114669 | 2.416373016 | 5.729556691 |
| ENSMUSG00000076068 | 6.367066661 | 8.347406925 | 4.943057334 | 8.054576721 | 7.161945863 |
| ENSMUSG00000076117 | 8.489422215 | 2.782468975 | 6.35535943  | 7.249119049 | 7.87814045  |
| ENSMUSG00000076118 | 0           | 0           | 0           | 0           | 0           |
| ENSMUSG00000076119 | 4.952162959 | 5.56493795  | 7.767661525 | 6.443661377 | 3.580972932 |
| ENSMUSG00000076120 | 14.14903703 | 5.56493795  | 5.649208382 | 4.832746033 | 3.580972932 |
| ENSMUSG00000076121 | 7.781970364 | 20.17290007 | 17.65377619 | 13.69278043 | 17.18867007 |
| ENSMUSG00000076122 | 0           | 0           | 0           | 0           | 0           |
| ENSMUSG00000076123 | 13.44158517 | 8.347406925 | 4.236906287 | 7.249119049 | 7.87814045  |
| ENSMUSG00000076126 | 0           | 0           | 0           | 0           | 0           |
| ENSMUSG00000076127 | 0           | 0           | 0           | 0           | 0           |
| ENSMUSG00000076128 | 4.244711108 | 9.738641413 | 6.35535943  | 26.58010318 | 22.20203218 |
| ENSMUSG00000076129 | 0.707451851 | 0           | 0           | 0.805457672 | 0.716194586 |
| ENSMUSG00000076135 | 12.73413332 | 9.043024169 | 8.473812573 | 8.860034393 | 4.297167518 |
| ENSMUSG00000076136 | 7.074518513 | 7.651789682 | 5.649208382 | 9.665492065 | 8.594335036 |
| ENSMUSG00000076137 | 12.73413332 | 10.43425866 | 9.886114669 | 13.69278043 | 10.02672421 |
| ENSMUSG00000076138 | 15.56394073 | 33.3896277  | 28.24604191 | 214.2517408 | 150.4008631 |
| ENSMUSG00000076140 | 1.414903703 | 2.086851731 | 0.706151048 | 0           | 0.716194586 |
| ENSMUSG00000076141 | 16.97884443 | 18.78166558 | 21.89068248 | 32.21830688 | 26.49919969 |
| ENSMUSG00000076142 | 7.781970364 | 3.478086219 | 5.649208382 | 11.27640741 | 3.580972932 |
| ENSMUSG00000076143 | 7.781970364 | 6.956172438 | 4.943057334 | 4.832746033 | 8.594335036 |
| ENSMUSG00000076144 | 12.02668147 | 11.82549314 | 12.71071886 | 10.47094974 | 10.02672421 |
| ENSMUSG00000076145 | 0           | 0           | 0           | 0           | 0           |
| ENSMUSG00000076146 | 0           | 0           | 0           | 0           | 0           |
| ENSMUSG00000076147 | 14.85648888 | 6.260555194 | 6.35535943  | 6.443661377 | 7.87814045  |
| ENSMUSG00000076163 | 19.80865184 | 40.34580014 | 22.59683353 | 11.27640741 | 17.18867007 |
| ENSMUSG00000076180 | 10.61177777 | 4.173703463 | 4.943057334 | 5.638203705 | 4.297167518 |
| ENSMUSG00000076190 | 9.904325918 | 8.347406925 | 4.943057334 | 4.832746033 | 6.445751277 |
| ENSMUSG00000076199 | 7.781970364 | 4.869320706 | 7.767661525 | 5.638203705 | 4.297167518 |
| ENSMUSG00000076212 | 5.65961481  | 9.738641413 | 9.886114669 | 8.054576721 | 6.445751277 |
| ENSMUSG00000076214 | 2.122355554 | 2.086851731 | 2.118453143 | 4.02728836  | 2.864778345 |
| ENSMUSG00000076216 | 65.08557032 | 100.8645003 | 80.50121945 | 110.3477011 | 88.80812871 |



|                    |             |             |             |             |             |
|--------------------|-------------|-------------|-------------|-------------|-------------|
| ENSMUSG00000076217 | 113.1922962 | 137.036597  | 105.2165061 | 240.0263863 | 189.7915654 |
| ENSMUSG00000076218 | 12.73413332 | 8.347406925 | 14.12302096 | 8.860034393 | 7.161945863 |
| ENSMUSG00000076219 | 0           | 0           | 0           | 0           | 0           |
| ENSMUSG00000076222 | 0           | 0           | 0           | 0           | 0           |
| ENSMUSG00000076227 | 0.707451851 | 0.695617244 | 0.706151048 | 0           | 0           |
| ENSMUSG00000076228 | 0           | 0.695617244 | 1.412302096 | 0           | 0.716194586 |
| ENSMUSG00000076229 | 5.65961481  | 6.260555194 | 8.473812573 | 5.638203705 | 7.161945863 |
| ENSMUSG00000076230 | 0           | 0           | 0           | 0           | 0           |
| ENSMUSG00000076231 | 0.707451851 | 0.695617244 | 2.118453143 | 0           | 0           |
| ENSMUSG00000076232 | 0           | 0           | 0.706151048 | 0           | 0           |
| ENSMUSG00000076233 | 0           | 0           | 0           | 0           | 0           |
| ENSMUSG00000076234 | 1.414903703 | 0           | 0           | 0           | 0.716194586 |
| ENSMUSG00000076236 | 0           | 0.695617244 | 0.706151048 | 0           | 0.716194586 |
| ENSMUSG00000076237 | 1.414903703 | 0           | 0           | 0           | 0           |
| ENSMUSG00000076238 | 7.074518513 | 5.56493795  | 7.767661525 | 5.638203705 | 2.864778345 |
| ENSMUSG00000076240 | 5.65961481  | 3.478086219 | 7.061510478 | 7.249119049 | 10.02672421 |
| ENSMUSG00000076241 | 0           | 0           | 0           | 0           | 0           |
| ENSMUSG00000076246 | 41.03220737 | 64.69240367 | 66.37819849 | 49.132918   | 54.43078856 |
| ENSMUSG00000076251 | 0           | 0.695617244 | 0           | 1.610915344 | 0.716194586 |
| ENSMUSG00000076252 | 2.122355554 | 0           | 0           | 0           | 0           |
| ENSMUSG00000076253 | 7.074518513 | 5.56493795  | 4.943057334 | 4.832746033 | 5.013362104 |
| ENSMUSG00000076255 | 0           | 0           | 0.706151048 | 0           | 0           |
| ENSMUSG00000076256 | 0           | 0           | 0           | 0           | 0           |
| ENSMUSG00000076258 | 53.05888884 | 74.43104508 | 54.37363068 | 53.16020636 | 47.2688427  |
| ENSMUSG00000076269 | 0           | 0.695617244 | 0.706151048 | 0           | 1.432389173 |
| ENSMUSG00000076270 | 29.71297775 | 45.21512085 | 36.71985448 | 35.44013757 | 21.48583759 |
| ENSMUSG00000076271 | 13.44158517 | 6.260555194 | 10.59226572 | 8.860034393 | 6.445751277 |
| ENSMUSG00000076272 | 0           | 0           | 0           | 0           | 0           |
| ENSMUSG00000076274 | 7.781970364 | 6.260555194 | 7.061510478 | 10.47094974 | 4.297167518 |
| ENSMUSG00000076275 | 2.829807405 | 1.391234488 | 1.412302096 | 1.610915344 | 0.716194586 |
| ENSMUSG00000076281 | 31.12788146 | 39.6501829  | 28.24604191 | 24.16373016 | 28.64778345 |
| ENSMUSG00000076282 | 12.73413332 | 9.738641413 | 7.767661525 | 5.638203705 | 5.729556691 |
| ENSMUSG00000076284 | 9.904325918 | 11.1298759  | 12.00456781 | 4.832746033 | 5.729556691 |
| ENSMUSG00000076286 | 3.537259256 | 4.173703463 | 7.061510478 | 5.638203705 | 2.148583759 |
| ENSMUSG00000076287 | 17.68629628 | 29.21592424 | 25.42143772 | 48.32746033 | 44.40406435 |
| ENSMUSG00000076288 | 0           | 0           | 0           | 0           | 0           |
| ENSMUSG00000076294 | 7.074518513 | 5.56493795  | 4.943057334 | 6.443661377 | 6.445751277 |
| ENSMUSG00000076300 | 7.781970364 | 6.956172438 | 4.943057334 | 7.249119049 | 6.445751277 |
| ENSMUSG00000076303 | 9.904325918 | 6.956172438 | 9.179963621 | 6.443661377 | 12.17530797 |
| ENSMUSG00000076304 | 9.904325918 | 18.78166558 | 11.29841676 | 8.860034393 | 7.87814045  |
| ENSMUSG00000076305 | 8.489422215 | 8.347406925 | 11.29841676 | 4.02728836  | 6.445751277 |
| ENSMUSG00000076309 | 4.952162959 | 7.651789682 | 7.767661525 | 6.443661377 | 8.594335036 |
| ENSMUSG00000076312 | 10.61177777 | 7.651789682 | 7.767661525 | 8.054576721 | 3.580972932 |

|                    |             |             |             |             |             |
|--------------------|-------------|-------------|-------------|-------------|-------------|
| ENSMUSG00000076313 | 0           | 0           | 0           | 0           | 0           |
| ENSMUSG00000076315 | 15.56394073 | 26.43345526 | 38.83830763 | 27.38556085 | 25.78300511 |
| ENSMUSG00000076316 | 4.952162959 | 4.173703463 | 6.35535943  | 2.416373016 | 7.161945863 |
| ENSMUSG00000076318 | 6.367066661 | 6.956172438 | 7.767661525 | 4.832746033 | 11.45911338 |
| ENSMUSG00000076320 | 11.31922962 | 11.1298759  | 11.29841676 | 7.249119049 | 4.297167518 |
| ENSMUSG00000076323 | 9.904325918 | 8.347406925 | 12.00456781 | 7.249119049 | 4.297167518 |
| ENSMUSG00000076327 | 7.781970364 | 2.782468975 | 6.35535943  | 4.02728836  | 6.445751277 |
| ENSMUSG00000076332 | 8.489422215 | 9.738641413 | 14.12302096 | 4.02728836  | 4.297167518 |
| ENSMUSG00000076333 | 0.707451851 | 0           | 0           | 0           | 0.716194586 |
| ENSMUSG00000076335 | 10.61177777 | 3.478086219 | 7.061510478 | 7.249119049 | 3.580972932 |
| ENSMUSG00000076337 | 2.829807405 | 1.391234488 | 0.706151048 | 0.805457672 | 3.580972932 |
| ENSMUSG00000076338 | 0           | 0           | 0           | 0           | 0           |
| ENSMUSG00000076343 | 12.73413332 | 11.82549314 | 9.886114669 | 7.249119049 | 9.310529622 |
| ENSMUSG00000076355 | 11.31922962 | 5.56493795  | 8.473812573 | 0.805457672 | 7.161945863 |
| ENSMUSG00000076357 | 3.537259256 | 0.695617244 | 0           | 2.416373016 | 0.716194586 |
| ENSMUSG00000076360 | 9.904325918 | 14.60796212 | 16.2414741  | 13.69278043 | 13.60769714 |
| ENSMUSG00000076361 | 6.367066661 | 6.260555194 | 5.649208382 | 4.02728836  | 10.02672421 |
| ENSMUSG00000076364 | 220.0175257 | 295.6373286 | 269.7497002 | 500.994672  | 360.9620715 |
| ENSMUSG00000076366 | 12.02668147 | 6.260555194 | 9.886114669 | 6.443661377 | 6.445751277 |
| ENSMUSG00000076370 | 7.781970364 | 4.869320706 | 3.530755239 | 11.27640741 | 8.594335036 |
| ENSMUSG00000076371 | 0           | 0.695617244 | 0.706151048 | 0           | 0           |
| ENSMUSG00000076372 | 12.02668147 | 7.651789682 | 11.29841676 | 9.665492065 | 8.594335036 |
| ENSMUSG00000076376 | 11.31922962 | 9.738641413 | 11.29841676 | 7.249119049 | 10.02672421 |
| ENSMUSG00000076377 | 12.73413332 | 9.043024169 | 7.061510478 | 9.665492065 | 5.729556691 |
| ENSMUSG00000076379 | 10.61177777 | 9.043024169 | 7.767661525 | 4.02728836  | 6.445751277 |
| ENSMUSG00000076382 | 13.44158517 | 18.08604834 | 24.71528667 | 16.91461111 | 13.60769714 |
| ENSMUSG00000076385 | 7.074518513 | 6.956172438 | 6.35535943  | 8.054576721 | 5.729556691 |
| ENSMUSG00000076387 | 15.56394073 | 13.21672763 | 24.00913562 | 16.10915344 | 20.05344842 |
| ENSMUSG00000076389 | 0           | 0           | 0           | 0           | 0           |
| ENSMUSG00000076392 | 145.7350814 | 192.6859765 | 204.7838039 | 94.23854763 | 105.2806042 |
| ENSMUSG00000076394 | 12.02668147 | 5.56493795  | 4.236906287 | 4.02728836  | 6.445751277 |
| ENSMUSG00000076395 | 6.367066661 | 6.956172438 | 12.00456781 | 5.638203705 | 9.310529622 |
| ENSMUSG00000076396 | 0           | 1.391234488 | 0           | 0           | 0.716194586 |
| ENSMUSG00000076398 | 5.65961481  | 2.782468975 | 6.35535943  | 0.805457672 | 4.297167518 |
| ENSMUSG00000076399 | 0           | 0           | 0           | 0           | 0           |
| ENSMUSG00000076407 | 9.196874066 | 6.260555194 | 8.473812573 | 2.416373016 | 5.013362104 |
| ENSMUSG00000076424 | 7.074518513 | 13.91234488 | 8.473812573 | 8.860034393 | 6.445751277 |
| ENSMUSG00000076444 | 29.0055259  | 48.69320706 | 34.60140134 | 26.58010318 | 45.12025894 |
| ENSMUSG00000076445 | 0           | 1.391234488 | 1.412302096 | 0           | 0           |
| ENSMUSG00000076448 | 4.952162959 | 6.956172438 | 7.061510478 | 7.249119049 | 5.013362104 |
| ENSMUSG00000076450 | 11.31922962 | 9.738641413 | 8.473812573 | 10.47094974 | 7.87814045  |
| ENSMUSG00000076451 | 7.781970364 | 6.956172438 | 6.35535943  | 6.443661377 | 7.161945863 |
| ENSMUSG00000076453 | 10.61177777 | 6.260555194 | 7.061510478 | 4.02728836  | 9.310529622 |

|                    |             |             |             |             |             |
|--------------------|-------------|-------------|-------------|-------------|-------------|
| ENSMUSG00000076454 | 9.904325918 | 9.738641413 | 15.53532305 | 15.30369577 | 22.20203218 |
| ENSMUSG00000076455 | 5.65961481  | 5.56493795  | 3.530755239 | 7.249119049 | 3.580972932 |
| ENSMUSG00000076456 | 0.707451851 | 0           | 1.412302096 | 0.805457672 | 0           |
| ENSMUSG00000076457 | 8.489422215 | 5.56493795  | 7.061510478 | 6.443661377 | 5.013362104 |
| ENSMUSG00000076458 | 5.65961481  | 2.782468975 | 2.118453143 | 0.805457672 | 1.432389173 |
| ENSMUSG00000076459 | 0           | 0           | 0           | 0           | 0           |
| ENSMUSG00000076460 | 21.22355554 | 28.52030699 | 26.12758877 | 18.52552646 | 26.49919969 |
| ENSMUSG00000076461 | 9.904325918 | 4.173703463 | 10.59226572 | 6.443661377 | 5.013362104 |
| ENSMUSG00000076462 | 1.414903703 | 0.695617244 | 0           | 2.416373016 | 0           |
| ENSMUSG00000076463 | 1.414903703 | 0.695617244 | 2.118453143 | 0.805457672 | 1.432389173 |
| ENSMUSG00000076464 | 6.367066661 | 7.651789682 | 7.061510478 | 1.610915344 | 7.161945863 |
| ENSMUSG00000076465 | 7.074518513 | 6.956172438 | 5.649208382 | 3.221830688 | 2.864778345 |
| ENSMUSG00000076467 | 3.537259256 | 0.695617244 | 2.118453143 | 2.416373016 | 2.148583759 |
| ENSMUSG00000076469 | 6.367066661 | 6.956172438 | 5.649208382 | 4.02728836  | 2.148583759 |
| ENSMUSG00000076470 | 12.02668147 | 6.260555194 | 5.649208382 | 6.443661377 | 10.02672421 |
| ENSMUSG00000076471 | 6.367066661 | 6.956172438 | 6.35535943  | 8.054576721 | 3.580972932 |
| ENSMUSG00000076472 | 9.196874066 | 8.347406925 | 4.943057334 | 6.443661377 | 7.87814045  |
| ENSMUSG00000076473 | 9.196874066 | 5.56493795  | 4.943057334 | 5.638203705 | 7.161945863 |
| ENSMUSG00000076474 | 11.31922962 | 5.56493795  | 7.767661525 | 8.054576721 | 3.580972932 |
| ENSMUSG00000076475 | 7.781970364 | 4.173703463 | 5.649208382 | 6.443661377 | 5.729556691 |
| ENSMUSG00000076476 | 11.31922962 | 4.869320706 | 9.179963621 | 1.610915344 | 5.013362104 |
| ENSMUSG00000076477 | 11.31922962 | 7.651789682 | 7.061510478 | 4.02728836  | 6.445751277 |
| ENSMUSG00000076478 | 8.489422215 | 10.43425866 | 6.35535943  | 5.638203705 | 3.580972932 |
| ENSMUSG00000076479 | 10.61177777 | 6.260555194 | 3.530755239 | 2.416373016 | 3.580972932 |
| ENSMUSG00000076480 | 10.61177777 | 9.043024169 | 7.767661525 | 6.443661377 | 3.580972932 |
| ENSMUSG00000076481 | 7.074518513 | 6.260555194 | 5.649208382 | 3.221830688 | 4.297167518 |
| ENSMUSG00000076483 | 0           | 0           | 0           | 0           | 0           |
| ENSMUSG00000076484 | 0           | 0           | 0           | 0           | 0           |
| ENSMUSG00000076485 | 0           | 0           | 0           | 0           | 0           |
| ENSMUSG00000076486 | 0           | 0           | 0           | 0           | 0           |
| ENSMUSG00000076487 | 0           | 0           | 0           | 0           | 0           |
| ENSMUSG00000076488 | 0           | 0           | 0           | 0           | 0           |
| ENSMUSG00000076489 | 0           | 0           | 0           | 0           | 0           |
| ENSMUSG00000076490 | 2.829807405 | 4.173703463 | 3.530755239 | 4.02728836  | 5.013362104 |
| ENSMUSG00000076492 | 0           | 0           | 0           | 0           | 0           |
| ENSMUSG00000076493 | 0           | 0           | 0           | 0           | 0           |
| ENSMUSG00000076494 | 0           | 0           | 0           | 0           | 0           |
| ENSMUSG00000076495 | 0           | 0           | 0           | 0           | 0           |
| ENSMUSG00000076496 | 0           | 0           | 0           | 0           | 0           |
| ENSMUSG00000076497 | 0           | 0           | 0           | 0           | 0           |
| ENSMUSG00000076498 | 5.65961481  | 8.347406925 | 5.649208382 | 3.221830688 | 6.445751277 |
| ENSMUSG00000076499 | 5.65961481  | 10.43425866 | 2.824604191 | 4.832746033 | 3.580972932 |
| ENSMUSG00000076500 | 10.61177777 | 5.56493795  | 12.00456781 | 3.221830688 | 10.02672421 |

|                    |             |             |             |             |             |
|--------------------|-------------|-------------|-------------|-------------|-------------|
| ENSMUSG00000076501 | 9.196874066 | 15.30357936 | 9.886114669 | 8.054576721 | 11.45911338 |
| ENSMUSG00000076505 | 11.31922962 | 5.56493795  | 4.943057334 | 4.02728836  | 7.87814045  |
| ENSMUSG00000076508 | 9.196874066 | 6.956172438 | 10.59226572 | 7.249119049 | 10.02672421 |
| ENSMUSG00000076512 | 12.73413332 | 8.347406925 | 8.473812573 | 4.832746033 | 7.161945863 |
| ENSMUSG00000076514 | 12.73413332 | 17.39043109 | 9.886114669 | 12.88732275 | 9.310529622 |
| ENSMUSG00000076518 | 8.489422215 | 11.1298759  | 7.061510478 | 2.416373016 | 5.013362104 |
| ENSMUSG00000076522 | 4.244711108 | 10.43425866 | 9.886114669 | 4.832746033 | 6.445751277 |
| ENSMUSG00000076523 | 9.904325918 | 5.56493795  | 7.061510478 | 4.02728836  | 5.729556691 |
| ENSMUSG00000076525 | 6.367066661 | 7.651789682 | 7.061510478 | 4.832746033 | 4.297167518 |
| ENSMUSG00000076526 | 14.14903703 | 6.260555194 | 12.00456781 | 2.416373016 | 6.445751277 |
| ENSMUSG00000076530 | 2.829807405 | 0.695617244 | 0.706151048 | 0.805457672 | 0           |
| ENSMUSG00000076531 | 8.489422215 | 5.56493795  | 4.236906287 | 4.02728836  | 10.02672421 |
| ENSMUSG00000076532 | 8.489422215 | 4.173703463 | 7.767661525 | 3.221830688 | 5.013362104 |
| ENSMUSG00000076533 | 4.952162959 | 10.43425866 | 6.35535943  | 4.832746033 | 10.7429188  |
| ENSMUSG00000076534 | 10.61177777 | 8.347406925 | 7.061510478 | 4.02728836  | 8.594335036 |
| ENSMUSG00000076535 | 17.68629628 | 11.82549314 | 12.00456781 | 6.443661377 | 3.580972932 |
| ENSMUSG00000076536 | 9.196874066 | 6.956172438 | 9.179963621 | 8.054576721 | 10.02672421 |
| ENSMUSG00000076538 | 4.952162959 | 15.30357936 | 12.00456781 | 6.443661377 | 5.729556691 |
| ENSMUSG00000076539 | 17.68629628 | 23.65098629 | 22.59683353 | 8.860034393 | 7.87814045  |
| ENSMUSG00000076540 | 10.61177777 | 9.043024169 | 7.061510478 | 4.832746033 | 6.445751277 |
| ENSMUSG00000076541 | 9.196874066 | 10.43425866 | 12.00456781 | 6.443661377 | 10.7429188  |
| ENSMUSG00000076543 | 12.73413332 | 4.869320706 | 6.35535943  | 7.249119049 | 2.148583759 |
| ENSMUSG00000076545 | 6.367066661 | 7.651789682 | 8.473812573 | 5.638203705 | 6.445751277 |
| ENSMUSG00000076547 | 4.244711108 | 7.651789682 | 4.943057334 | 5.638203705 | 5.013362104 |
| ENSMUSG00000076548 | 9.196874066 | 8.347406925 | 7.061510478 | 2.416373016 | 2.864778345 |
| ENSMUSG00000076549 | 6.367066661 | 7.651789682 | 5.649208382 | 6.443661377 | 2.864778345 |
| ENSMUSG00000076550 | 9.904325918 | 11.82549314 | 6.35535943  | 4.832746033 | 5.013362104 |
| ENSMUSG00000076552 | 4.244711108 | 6.956172438 | 6.35535943  | 4.02728836  | 12.17530797 |
| ENSMUSG00000076555 | 8.489422215 | 6.260555194 | 5.649208382 | 2.416373016 | 7.161945863 |
| ENSMUSG00000076556 | 7.074518513 | 10.43425866 | 11.29841676 | 5.638203705 | 9.310529622 |
| ENSMUSG00000076557 | 2.829807405 | 5.56493795  | 3.530755239 | 4.02728836  | 5.729556691 |
| ENSMUSG00000076562 | 9.196874066 | 9.043024169 | 12.00456781 | 3.221830688 | 11.45911338 |
| ENSMUSG00000076563 | 7.781970364 | 14.60796212 | 9.886114669 | 4.832746033 | 12.89150255 |
| ENSMUSG00000076564 | 11.31922962 | 9.738641413 | 16.94762515 | 9.665492065 | 8.594335036 |
| ENSMUSG00000076569 | 11.31922962 | 7.651789682 | 10.59226572 | 3.221830688 | 3.580972932 |
| ENSMUSG00000076570 | 7.781970364 | 9.043024169 | 7.767661525 | 3.221830688 | 7.161945863 |
| ENSMUSG00000076571 | 7.074518513 | 6.956172438 | 6.35535943  | 4.832746033 | 2.864778345 |
| ENSMUSG00000076572 | 7.781970364 | 10.43425866 | 8.473812573 | 4.832746033 | 7.87814045  |
| ENSMUSG00000076573 | 7.781970364 | 7.651789682 | 7.061510478 | 4.832746033 | 7.87814045  |
| ENSMUSG00000076575 | 7.074518513 | 6.956172438 | 4.236906287 | 8.054576721 | 6.445751277 |
| ENSMUSG00000076576 | 3.537259256 | 9.043024169 | 13.41686991 | 7.249119049 | 3.580972932 |
| ENSMUSG00000076577 | 4.244711108 | 4.869320706 | 5.649208382 | 3.221830688 | 8.594335036 |
| ENSMUSG00000076578 | 9.904325918 | 7.651789682 | 7.061510478 | 7.249119049 | 6.445751277 |

|                    |             |             |             |             |             |
|--------------------|-------------|-------------|-------------|-------------|-------------|
| ENSMUSG00000076580 | 9.904325918 | 13.21672763 | 4.236906287 | 10.47094974 | 2.148583759 |
| ENSMUSG00000076581 | 10.61177777 | 9.043024169 | 4.236906287 | 6.443661377 | 2.148583759 |
| ENSMUSG00000076583 | 7.781970364 | 7.651789682 | 3.530755239 | 4.02728836  | 8.594335036 |
| ENSMUSG00000076586 | 13.44158517 | 8.347406925 | 8.473812573 | 6.443661377 | 7.161945863 |
| ENSMUSG00000076587 | 7.781970364 | 4.869320706 | 6.35535943  | 6.443661377 | 4.297167518 |
| ENSMUSG00000076589 | 9.196874066 | 9.738641413 | 6.35535943  | 7.249119049 | 3.580972932 |
| ENSMUSG00000076591 | 4.244711108 | 11.82549314 | 9.886114669 | 6.443661377 | 3.580972932 |
| ENSMUSG00000076594 | 10.61177777 | 5.56493795  | 4.943057334 | 4.832746033 | 4.297167518 |
| ENSMUSG00000076596 | 9.904325918 | 7.651789682 | 7.767661525 | 6.443661377 | 5.013362104 |
| ENSMUSG00000076598 | 11.31922962 | 9.043024169 | 4.943057334 | 4.832746033 | 6.445751277 |
| ENSMUSG00000076604 | 14.85648888 | 11.1298759  | 11.29841676 | 8.054576721 | 5.013362104 |
| ENSMUSG00000076605 | 0           | 0           | 0           | 0           | 0           |
| ENSMUSG00000076606 | 0           | 0           | 0           | 0           | 0           |
| ENSMUSG00000076607 | 0           | 0           | 0           | 0           | 0           |
| ENSMUSG00000076608 | 0           | 0           | 0           | 0           | 0           |
| ENSMUSG00000076609 | 53.7663407  | 94.60394515 | 65.67204744 | 135.3168889 | 98.83485292 |
| ENSMUSG00000076612 | 9.196874066 | 7.651789682 | 7.767661525 | 7.249119049 | 10.02672421 |
| ENSMUSG00000076613 | 9.904325918 | 10.43425866 | 10.59226572 | 7.249119049 | 10.7429188  |
| ENSMUSG00000076614 | 7.074518513 | 7.651789682 | 9.179963621 | 134.5114312 | 83.07857202 |
| ENSMUSG00000076615 | 18.39374813 | 26.43345526 | 14.829172   | 51.54929101 | 42.25548059 |
| ENSMUSG00000076617 | 50.22908144 | 71.64857611 | 52.25517753 | 191.698926  | 149.6846685 |
| ENSMUSG00000076618 | 0           | 0           | 0           | 0           | 0           |
| ENSMUSG00000076619 | 0           | 0           | 0           | 0           | 0           |
| ENSMUSG00000076620 | 0           | 0           | 0           | 0           | 0           |
| ENSMUSG00000076621 | 0           | 0           | 0           | 0           | 0           |
| ENSMUSG00000076630 | 25.46826665 | 20.17290007 | 12.71071886 | 42.68925662 | 33.66114556 |
| ENSMUSG00000076632 | 1.414903703 | 0.695617244 | 0.706151048 | 2.416373016 | 0.716194586 |
| ENSMUSG00000076633 | 6.367066661 | 13.21672763 | 9.179963621 | 5.638203705 | 5.013362104 |
| ENSMUSG00000076646 | 2.122355554 | 6.956172438 | 3.530755239 | 4.02728836  | 0           |
| ENSMUSG00000076652 | 2.122355554 | 5.56493795  | 4.236906287 | 6.443661377 | 5.013362104 |
| ENSMUSG00000076653 | 4.952162959 | 2.086851731 | 1.412302096 | 2.416373016 | 0.716194586 |
| ENSMUSG00000076655 | 4.244711108 | 2.782468975 | 2.118453143 | 4.832746033 | 1.432389173 |
| ENSMUSG00000076661 | 1.414903703 | 4.173703463 | 2.824604191 | 0.805457672 | 4.297167518 |
| ENSMUSG00000076665 | 3.537259256 | 4.173703463 | 8.473812573 | 5.638203705 | 2.864778345 |
| ENSMUSG00000076666 | 4.244711108 | 2.782468975 | 2.824604191 | 4.02728836  | 3.580972932 |
| ENSMUSG00000076668 | 7.074518513 | 4.173703463 | 6.35535943  | 4.02728836  | 2.148583759 |
| ENSMUSG00000076670 | 4.244711108 | 2.782468975 | 3.530755239 | 2.416373016 | 4.297167518 |
| ENSMUSG00000076671 | 6.367066661 | 2.086851731 | 5.649208382 | 4.832746033 | 6.445751277 |
| ENSMUSG00000076672 | 7.074518513 | 9.043024169 | 5.649208382 | 10.47094974 | 2.864778345 |
| ENSMUSG00000076674 | 7.074518513 | 11.1298759  | 4.236906287 | 4.832746033 | 4.297167518 |
| ENSMUSG00000076676 | 7.074518513 | 4.173703463 | 3.530755239 | 2.416373016 | 1.432389173 |
| ENSMUSG00000076677 | 2.122355554 | 6.956172438 | 3.530755239 | 6.443661377 | 7.87814045  |
| ENSMUSG00000076680 | 7.074518513 | 3.478086219 | 5.649208382 | 8.860034393 | 4.297167518 |

|                    |             |             |             |             |             |
|--------------------|-------------|-------------|-------------|-------------|-------------|
| ENSMUSG00000076688 | 2.122355554 | 6.956172438 | 1.412302096 | 2.416373016 | 5.729556691 |
| ENSMUSG00000076694 | 4.244711108 | 4.869320706 | 9.179963621 | 3.221830688 | 6.445751277 |
| ENSMUSG00000076695 | 5.65961481  | 6.260555194 | 7.061510478 | 4.02728836  | 7.87814045  |
| ENSMUSG00000076709 | 7.781970364 | 5.56493795  | 7.767661525 | 4.02728836  | 4.297167518 |
| ENSMUSG00000076710 | 6.367066661 | 4.869320706 | 4.943057334 | 2.416373016 | 6.445751277 |
| ENSMUSG00000076731 | 8.489422215 | 4.173703463 | 4.943057334 | 7.249119049 | 2.148583759 |
| ENSMUSG00000076733 | 7.781970364 | 4.869320706 | 4.943057334 | 6.443661377 | 6.445751277 |
| ENSMUSG00000076744 | 11.31922962 | 5.56493795  | 6.35535943  | 4.02728836  | 6.445751277 |
| ENSMUSG00000076745 | 6.367066661 | 6.956172438 | 6.35535943  | 3.221830688 | 5.729556691 |
| ENSMUSG00000076746 | 3.537259256 | 4.869320706 | 5.649208382 | 4.832746033 | 2.864778345 |
| ENSMUSG00000076747 | 2.829807405 | 4.173703463 | 2.824604191 | 3.221830688 | 5.013362104 |
| ENSMUSG00000076749 | 7.074518513 | 4.869320706 | 7.061510478 | 2.416373016 | 5.729556691 |
| ENSMUSG00000076750 | 6.367066661 | 7.651789682 | 9.886114669 | 4.02728836  | 7.161945863 |
| ENSMUSG00000076752 | 3.537259256 | 6.956172438 | 7.767661525 | 5.638203705 | 7.161945863 |
| ENSMUSG00000076754 | 14.85648888 | 4.173703463 | 9.179963621 | 7.249119049 | 12.17530797 |
| ENSMUSG00000076755 | 3.537259256 | 3.478086219 | 4.943057334 | 4.02728836  | 4.297167518 |
| ENSMUSG00000076757 | 0           | 0           | 0           | 0           | 0           |
| ENSMUSG00000076759 | 10.61177777 | 6.956172438 | 7.061510478 | 0.805457672 | 6.445751277 |
| ENSMUSG00000076760 | 12.02668147 | 7.651789682 | 5.649208382 | 6.443661377 | 7.161945863 |
| ENSMUSG00000076761 | 8.489422215 | 5.56493795  | 5.649208382 | 8.860034393 | 3.580972932 |
| ENSMUSG00000076762 | 12.02668147 | 6.260555194 | 6.35535943  | 7.249119049 | 8.594335036 |
| ENSMUSG00000076764 | 8.489422215 | 7.651789682 | 7.061510478 | 1.610915344 | 7.87814045  |
| ENSMUSG00000076795 | 6.367066661 | 10.43425866 | 9.886114669 | 4.02728836  | 10.02672421 |
| ENSMUSG00000076796 | 9.196874066 | 4.869320706 | 8.473812573 | 3.221830688 | 6.445751277 |
| ENSMUSG00000076800 | 8.489422215 | 4.869320706 | 6.35535943  | 5.638203705 | 5.013362104 |
| ENSMUSG00000076802 | 12.73413332 | 11.82549314 | 11.29841676 | 8.860034393 | 7.161945863 |
| ENSMUSG00000076821 | 9.196874066 | 7.651789682 | 7.767661525 | 3.221830688 | 1.432389173 |
| ENSMUSG00000076822 | 9.196874066 | 4.869320706 | 7.061510478 | 4.02728836  | 6.445751277 |
| ENSMUSG00000076823 | 12.02668147 | 4.869320706 | 8.473812573 | 7.249119049 | 6.445751277 |
| ENSMUSG00000076824 | 10.61177777 | 9.043024169 | 9.886114669 | 6.443661377 | 5.729556691 |
| ENSMUSG00000076831 | 8.489422215 | 6.956172438 | 11.29841676 | 8.054576721 | 8.594335036 |
| ENSMUSG00000076839 | 7.781970364 | 7.651789682 | 6.35535943  | 3.221830688 | 4.297167518 |
| ENSMUSG00000076840 | 11.31922962 | 11.82549314 | 4.236906287 | 5.638203705 | 6.445751277 |
| ENSMUSG00000076861 | 10.61177777 | 4.869320706 | 9.886114669 | 7.249119049 | 6.445751277 |
| ENSMUSG00000076865 | 8.489422215 | 6.260555194 | 10.59226572 | 6.443661377 | 5.729556691 |
| ENSMUSG00000076866 | 9.904325918 | 6.260555194 | 7.767661525 | 5.638203705 | 8.594335036 |
| ENSMUSG00000076867 | 11.31922962 | 4.869320706 | 4.236906287 | 3.221830688 | 3.580972932 |
| ENSMUSG00000076870 | 2.122355554 | 4.173703463 | 2.824604191 | 1.610915344 | 0.716194586 |
| ENSMUSG00000076871 | 7.781970364 | 11.82549314 | 10.59226572 | 6.443661377 | 7.161945863 |
| ENSMUSG00000076873 | 7.781970364 | 6.956172438 | 8.473812573 | 8.054576721 | 4.297167518 |
| ENSMUSG00000076874 | 0           | 0           | 0           | 0           | 0           |
| ENSMUSG00000076875 | 0           | 0           | 0           | 0           | 0           |
| ENSMUSG00000076876 | 0           | 0           | 0           | 0           | 0           |

|                    |   |   |   |   |   |
|--------------------|---|---|---|---|---|
| ENSMUSG00000076877 | 0 | 0 | 0 | 0 | 0 |
| ENSMUSG00000076878 | 0 | 0 | 0 | 0 | 0 |
| ENSMUSG00000076879 | 0 | 0 | 0 | 0 | 0 |
| ENSMUSG00000076880 | 0 | 0 | 0 | 0 | 0 |
| ENSMUSG00000076881 | 0 | 0 | 0 | 0 | 0 |
| ENSMUSG00000076882 | 0 | 0 | 0 | 0 | 0 |
| ENSMUSG00000076883 | 0 | 0 | 0 | 0 | 0 |
| ENSMUSG00000076884 | 0 | 0 | 0 | 0 | 0 |
| ENSMUSG00000076885 | 0 | 0 | 0 | 0 | 0 |
| ENSMUSG00000076886 | 0 | 0 | 0 | 0 | 0 |
| ENSMUSG00000076887 | 0 | 0 | 0 | 0 | 0 |
| ENSMUSG00000076888 | 0 | 0 | 0 | 0 | 0 |
| ENSMUSG00000076889 | 0 | 0 | 0 | 0 | 0 |
| ENSMUSG00000076890 | 0 | 0 | 0 | 0 | 0 |
| ENSMUSG00000076891 | 0 | 0 | 0 | 0 | 0 |
| ENSMUSG00000076892 | 0 | 0 | 0 | 0 | 0 |
| ENSMUSG00000076893 | 0 | 0 | 0 | 0 | 0 |
| ENSMUSG00000076894 | 0 | 0 | 0 | 0 | 0 |
| ENSMUSG00000076895 | 0 | 0 | 0 | 0 | 0 |
| ENSMUSG00000076896 | 0 | 0 | 0 | 0 | 0 |
| ENSMUSG00000076897 | 0 | 0 | 0 | 0 | 0 |
| ENSMUSG00000076898 | 0 | 0 | 0 | 0 | 0 |
| ENSMUSG00000076899 | 0 | 0 | 0 | 0 | 0 |
| ENSMUSG00000076900 | 0 | 0 | 0 | 0 | 0 |
| ENSMUSG00000076901 | 0 | 0 | 0 | 0 | 0 |
| ENSMUSG00000076902 | 0 | 0 | 0 | 0 | 0 |
| ENSMUSG00000076903 | 0 | 0 | 0 | 0 | 0 |
| ENSMUSG00000076904 | 0 | 0 | 0 | 0 | 0 |
| ENSMUSG00000076905 | 0 | 0 | 0 | 0 | 0 |
| ENSMUSG00000076906 | 0 | 0 | 0 | 0 | 0 |
| ENSMUSG00000076907 | 0 | 0 | 0 | 0 | 0 |
| ENSMUSG00000076908 | 0 | 0 | 0 | 0 | 0 |
| ENSMUSG00000076909 | 0 | 0 | 0 | 0 | 0 |
| ENSMUSG00000076910 | 0 | 0 | 0 | 0 | 0 |
| ENSMUSG00000076911 | 0 | 0 | 0 | 0 | 0 |
| ENSMUSG00000076912 | 0 | 0 | 0 | 0 | 0 |
| ENSMUSG00000076913 | 0 | 0 | 0 | 0 | 0 |
| ENSMUSG00000076914 | 0 | 0 | 0 | 0 | 0 |
| ENSMUSG00000076915 | 0 | 0 | 0 | 0 | 0 |
| ENSMUSG00000076916 | 0 | 0 | 0 | 0 | 0 |
| ENSMUSG00000076917 | 0 | 0 | 0 | 0 | 0 |
| ENSMUSG00000076918 | 0 | 0 | 0 | 0 | 0 |
| ENSMUSG00000076919 | 0 | 0 | 0 | 0 | 0 |

|                    |             |             |             |             |             |
|--------------------|-------------|-------------|-------------|-------------|-------------|
| ENSMUSG00000076920 | 0           | 0           | 0           | 0           | 0           |
| ENSMUSG00000076921 | 0           | 0           | 0           | 0           | 0           |
| ENSMUSG00000076922 | 0           | 0           | 0           | 0           | 0           |
| ENSMUSG00000076923 | 0           | 0           | 0           | 0           | 0           |
| ENSMUSG00000076924 | 0           | 0           | 0           | 0           | 0           |
| ENSMUSG00000076925 | 0           | 0           | 0           | 0           | 0           |
| ENSMUSG00000076926 | 0           | 0           | 0           | 0           | 0           |
| ENSMUSG00000076927 | 0           | 0           | 0           | 0           | 0           |
| ENSMUSG00000076928 | 2.122355554 | 0.695617244 | 2.118453143 | 0           | 2.864778345 |
| ENSMUSG00000076934 | 99.04325918 | 155.8182626 | 122.1641313 | 79.74030954 | 68.0384857  |
| ENSMUSG00000076939 | 124.5115258 | 167.6437558 | 129.2256417 | 159.4806191 | 124.617858  |
| ENSMUSG00000076940 | 38.90985182 | 70.25734162 | 59.31668801 | 34.6346799  | 41.53928601 |
| ENSMUSG00000076941 | 11.31922962 | 11.82549314 | 5.649208382 | 3.221830688 | 3.580972932 |
| ENSMUSG00000076944 | 17.68629628 | 16.69481385 | 24.71528667 | 12.88732275 | 14.32389173 |
| ENSMUSG00000076946 | 7.781970364 | 8.347406925 | 7.767661525 | 3.221830688 | 5.729556691 |
| ENSMUSG00000076948 | 0           | 0           | 0           | 0           | 0           |
| ENSMUSG00000076949 | 9.904325918 | 6.956172438 | 6.35535943  | 7.249119049 | 6.445751277 |
| ENSMUSG00000076950 | 7.781970364 | 9.738641413 | 8.473812573 | 5.638203705 | 6.445751277 |
| ENSMUSG00000076951 | 11.31922962 | 10.43425866 | 5.649208382 | 3.221830688 | 2.864778345 |
| ENSMUSG00000076952 | 7.781970364 | 7.651789682 | 7.061510478 | 4.832746033 | 9.310529622 |
| ENSMUSG00000076956 | 0           | 0           | 0           | 0           | 0           |
| ENSMUSG00000076958 | 9.196874066 | 7.651789682 | 9.179963621 | 6.443661377 | 6.445751277 |
| ENSMUSG00000076959 | 0           | 0           | 0           | 0           | 0           |
| ENSMUSG00000076961 | 8.489422215 | 12.52111039 | 17.65377619 | 11.27640741 | 13.60769714 |
| ENSMUSG00000076964 | 9.904325918 | 11.1298759  | 9.179963621 | 8.860034393 | 5.013362104 |
| ENSMUSG00000076966 | 0           | 0           | 0           | 0           | 0           |
| ENSMUSG00000076972 | 4.952162959 | 8.347406925 | 6.35535943  | 2.416373016 | 6.445751277 |
| ENSMUSG00000076976 | 0           | 0           | 0           | 0           | 0           |
| ENSMUSG00000076977 | 4.244711108 | 8.347406925 | 8.473812573 | 3.221830688 | 6.445751277 |
| ENSMUSG00000076983 | 0           | 0           | 0           | 0           | 0           |
| ENSMUSG00000076987 | 11.31922962 | 6.956172438 | 5.649208382 | 4.832746033 | 7.87814045  |
| ENSMUSG00000076994 | 0           | 0           | 0           | 0           | 0           |
| ENSMUSG00000076999 | 0           | 0           | 0           | 0.805457672 | 0           |
| ENSMUSG00000077001 | 0           | 0           | 0           | 0           | 0           |
| ENSMUSG00000077004 | 12.02668147 | 12.52111039 | 14.829172   | 6.443661377 | 10.02672421 |
| ENSMUSG00000077010 | 9.904325918 | 8.347406925 | 7.767661525 | 6.443661377 | 5.729556691 |
| ENSMUSG00000077015 | 5.65961481  | 6.956172438 | 7.767661525 | 5.638203705 | 6.445751277 |
| ENSMUSG00000077019 | 9.196874066 | 5.56493795  | 12.00456781 | 0.805457672 | 4.297167518 |
| ENSMUSG00000077021 | 0           | 0           | 0           | 0           | 0           |
| ENSMUSG00000077022 | 19.10119998 | 12.52111039 | 14.12302096 | 11.27640741 | 15.7562809  |
| ENSMUSG00000077025 | 5.65961481  | 6.260555194 | 7.767661525 | 2.416373016 | 9.310529622 |
| ENSMUSG00000077038 | 0           | 0           | 0           | 0           | 0           |
| ENSMUSG00000077039 | 15.56394073 | 9.738641413 | 5.649208382 | 5.638203705 | 9.310529622 |



|                    |             |             |             |             |             |
|--------------------|-------------|-------------|-------------|-------------|-------------|
| ENSMUSG00000077040 | 2.122355554 | 1.391234488 | 2.824604191 | 2.416373016 | 3.580972932 |
| ENSMUSG00000077042 | 0           | 0           | 0           | 0.805457672 | 0           |
| ENSMUSG00000077049 | 0           | 0           | 0           | 0           | 0           |
| ENSMUSG00000077050 | 9.196874066 | 8.347406925 | 3.530755239 | 4.02728836  | 5.013362104 |
| ENSMUSG00000077055 | 4.952162959 | 9.043024169 | 4.236906287 | 6.443661377 | 7.161945863 |
| ENSMUSG00000077058 | 13.44158517 | 6.956172438 | 9.179963621 | 9.665492065 | 6.445751277 |
| ENSMUSG00000077059 | 12.02668147 | 12.52111039 | 10.59226572 | 11.27640741 | 9.310529622 |
| ENSMUSG00000077065 | 7.781970364 | 8.347406925 | 7.061510478 | 7.249119049 | 2.864778345 |
| ENSMUSG00000077081 | 7.781970364 | 7.651789682 | 11.29841676 | 5.638203705 | 7.87814045  |
| ENSMUSG00000077082 | 24.05336294 | 34.78086219 | 22.59683353 | 17.72006879 | 25.78300511 |
| ENSMUSG00000077085 | 7.781970364 | 8.347406925 | 9.886114669 | 6.443661377 | 3.580972932 |
| ENSMUSG00000077086 | 0           | 0           | 0           | 0           | 0           |
| ENSMUSG00000077090 | 382.0239997 | 313.7233769 | 307.8818568 | 298.0193387 | 224.1689055 |
| ENSMUSG00000077092 | 0           | 0           | 0           | 0           | 0           |
| ENSMUSG00000077095 | 0           | 0           | 0           | 0           | 0           |
| ENSMUSG00000077096 | 3.537259256 | 9.738641413 | 7.061510478 | 8.860034393 | 6.445751277 |
| ENSMUSG00000077104 | 0           | 0           | 0           | 0           | 0           |
| ENSMUSG00000077107 | 8.489422215 | 12.52111039 | 7.767661525 | 3.221830688 | 3.580972932 |
| ENSMUSG00000077110 | 11.31922962 | 8.347406925 | 7.767661525 | 4.02728836  | 3.580972932 |
| ENSMUSG00000077111 | 0           | 0           | 0           | 0           | 0           |
| ENSMUSG00000077113 | 0           | 0           | 0           | 0           | 0           |
| ENSMUSG00000077119 | 2.829807405 | 2.782468975 | 3.530755239 | 0.805457672 | 0.716194586 |
| ENSMUSG00000077125 | 5.65961481  | 6.956172438 | 7.767661525 | 8.860034393 | 8.594335036 |
| ENSMUSG00000077127 | 0.707451851 | 0           | 0           | 0           | 0           |
| ENSMUSG00000077131 | 0           | 0           | 0           | 0           | 0           |
| ENSMUSG00000077138 | 11.31922962 | 6.260555194 | 10.59226572 | 5.638203705 | 7.161945863 |
| ENSMUSG00000077142 | 7.781970364 | 5.56493795  | 8.473812573 | 1.610915344 | 5.729556691 |
| ENSMUSG00000077143 | 11.31922962 | 5.56493795  | 3.530755239 | 4.832746033 | 5.729556691 |
| ENSMUSG00000077144 | 12.73413332 | 5.56493795  | 7.767661525 | 3.221830688 | 9.310529622 |
| ENSMUSG00000077146 | 11.31922962 | 3.478086219 | 9.179963621 | 5.638203705 | 9.310529622 |
| ENSMUSG00000077148 | 15.56394073 | 12.52111039 | 12.71071886 | 34.6346799  | 40.10689684 |
| ENSMUSG00000077149 | 10.61177777 | 7.651789682 | 10.59226572 | 7.249119049 | 12.17530797 |
| ENSMUSG00000077150 | 13.44158517 | 5.56493795  | 7.061510478 | 2.416373016 | 5.729556691 |
| ENSMUSG00000077152 | 11.31922962 | 6.260555194 | 7.767661525 | 7.249119049 | 10.02672421 |
| ENSMUSG00000077153 | 11.31922962 | 6.956172438 | 7.061510478 | 4.832746033 | 5.729556691 |
| ENSMUSG00000077155 | 7.781970364 | 6.956172438 | 4.236906287 | 6.443661377 | 8.594335036 |
| ENSMUSG00000077156 | 6.367066661 | 2.086851731 | 9.886114669 | 8.860034393 | 8.594335036 |
| ENSMUSG00000077158 | 12.02668147 | 6.260555194 | 4.236906287 | 5.638203705 | 2.148583759 |
| ENSMUSG00000077160 | 12.02668147 | 5.56493795  | 3.530755239 | 4.02728836  | 10.7429188  |
| ENSMUSG00000077161 | 8.489422215 | 8.347406925 | 8.473812573 | 4.832746033 | 8.594335036 |
| ENSMUSG00000077163 | 7.781970364 | 4.173703463 | 4.943057334 | 2.416373016 | 9.310529622 |
| ENSMUSG00000077166 | 7.781970364 | 7.651789682 | 7.061510478 | 1.610915344 | 7.87814045  |
| ENSMUSG00000077167 | 18.39374813 | 27.82468975 | 27.53989086 | 44.30017197 | 50.84981563 |

|                    |             |             |             |             |             |
|--------------------|-------------|-------------|-------------|-------------|-------------|
| ENSMUSG00000077169 | 8.489422215 | 7.651789682 | 7.767661525 | 8.054576721 | 7.161945863 |
| ENSMUSG00000077171 | 10.61177777 | 8.347406925 | 4.236906287 | 4.02728836  | 7.87814045  |
| ENSMUSG00000077172 | 3.537259256 | 9.043024169 | 4.943057334 | 10.47094974 | 5.013362104 |
| ENSMUSG00000077174 | 10.61177777 | 6.956172438 | 9.179963621 | 6.443661377 | 5.013362104 |
| ENSMUSG00000077175 | 9.196874066 | 6.260555194 | 4.236906287 | 6.443661377 | 6.445751277 |
| ENSMUSG00000077176 | 7.074518513 | 4.869320706 | 4.943057334 | 7.249119049 | 6.445751277 |
| ENSMUSG00000077177 | 7.074518513 | 2.086851731 | 10.59226572 | 8.860034393 | 5.013362104 |
| ENSMUSG00000077178 | 9.196874066 | 7.651789682 | 9.179963621 | 5.638203705 | 3.580972932 |
| ENSMUSG00000077180 | 8.489422215 | 11.1298759  | 4.236906287 | 2.416373016 | 4.297167518 |
| ENSMUSG00000077181 | 9.904325918 | 6.260555194 | 2.824604191 | 6.443661377 | 7.161945863 |
| ENSMUSG00000077184 | 6.367066661 | 4.173703463 | 5.649208382 | 8.054576721 | 9.310529622 |
| ENSMUSG00000077185 | 0           | 0           | 0           | 0           | 0           |
| ENSMUSG00000077188 | 9.196874066 | 6.260555194 | 9.886114669 | 7.249119049 | 7.87814045  |
| ENSMUSG00000077190 | 11.31922962 | 7.651789682 | 9.886114669 | 3.221830688 | 5.729556691 |
| ENSMUSG00000077191 | 2.829807405 | 2.086851731 | 0           | 2.416373016 | 0.716194586 |
| ENSMUSG00000077192 | 0           | 0           | 0           | 0           | 0           |
| ENSMUSG00000077194 | 4.244711108 | 5.56493795  | 5.649208382 | 2.416373016 | 4.297167518 |
| ENSMUSG00000077196 | 9.904325918 | 8.347406925 | 7.061510478 | 4.832746033 | 4.297167518 |
| ENSMUSG00000077197 | 6.367066661 | 5.56493795  | 7.767661525 | 5.638203705 | 7.87814045  |
| ENSMUSG00000077199 | 4.244711108 | 2.086851731 | 4.236906287 | 2.416373016 | 1.432389173 |
| ENSMUSG00000077200 | 12.02668147 | 21.56413456 | 18.35992724 | 19.33098413 | 22.20203218 |
| ENSMUSG00000077201 | 6.367066661 | 6.260555194 | 4.943057334 | 8.054576721 | 7.87814045  |
| ENSMUSG00000077202 | 32.54278516 | 53.56252777 | 67.79050059 | 47.52200265 | 45.12025894 |
| ENSMUSG00000077204 | 7.074518513 | 9.738641413 | 14.829172   | 4.02728836  | 8.594335036 |
| ENSMUSG00000077205 | 8.489422215 | 9.043024169 | 11.29841676 | 7.249119049 | 8.594335036 |
| ENSMUSG00000077207 | 14.14903703 | 5.56493795  | 9.179963621 | 7.249119049 | 6.445751277 |
| ENSMUSG00000077208 | 9.904325918 | 4.173703463 | 12.00456781 | 4.02728836  | 5.729556691 |
| ENSMUSG00000077209 | 8.489422215 | 10.43425866 | 10.59226572 | 4.02728836  | 8.594335036 |
| ENSMUSG00000077212 | 3.537259256 | 2.782468975 | 1.412302096 | 5.638203705 | 8.594335036 |
| ENSMUSG00000077214 | 9.196874066 | 9.043024169 | 9.886114669 | 8.054576721 | 8.594335036 |
| ENSMUSG00000077215 | 7.074518513 | 4.173703463 | 7.767661525 | 5.638203705 | 6.445751277 |
| ENSMUSG00000077217 | 14.14903703 | 22.95536904 | 19.77222934 | 10.47094974 | 12.17530797 |
| ENSMUSG00000077218 | 7.781970364 | 9.738641413 | 5.649208382 | 4.832746033 | 7.161945863 |
| ENSMUSG00000077220 | 0           | 0           | 0           | 0           | 0           |
| ENSMUSG00000077221 | 4.952162959 | 13.21672763 | 8.473812573 | 10.47094974 | 12.89150255 |
| ENSMUSG00000077222 | 0           | 0           | 0           | 0           | 0           |
| ENSMUSG00000077223 | 8.489422215 | 3.478086219 | 4.236906287 | 9.665492065 | 5.013362104 |
| ENSMUSG00000077224 | 4.952162959 | 9.043024169 | 4.236906287 | 5.638203705 | 6.445751277 |
| ENSMUSG00000077227 | 16.97884443 | 19.47728283 | 24.00913562 | 16.91461111 | 15.7562809  |
| ENSMUSG00000077228 | 14.85648888 | 3.478086219 | 9.886114669 | 4.832746033 | 5.729556691 |
| ENSMUSG00000077230 | 3.537259256 | 6.956172438 | 3.530755239 | 3.221830688 | 4.297167518 |
| ENSMUSG00000077231 | 10.61177777 | 12.52111039 | 6.35535943  | 8.860034393 | 8.594335036 |
| ENSMUSG00000077235 | 13.44158517 | 4.173703463 | 7.061510478 | 7.249119049 | 5.013362104 |

|                    |             |             |             |             |             |
|--------------------|-------------|-------------|-------------|-------------|-------------|
| ENSMUSG00000077236 | 11.31922962 | 7.651789682 | 10.59226572 | 7.249119049 | 6.445751277 |
| ENSMUSG00000077237 | 14.14903703 | 6.260555194 | 1.412302096 | 5.638203705 | 5.013362104 |
| ENSMUSG00000077239 | 14.85648888 | 18.08604834 | 14.829172   | 33.82922223 | 25.06681052 |
| ENSMUSG00000077240 | 12.73413332 | 9.738641413 | 3.530755239 | 7.249119049 | 8.594335036 |
| ENSMUSG00000077241 | 7.074518513 | 10.43425866 | 8.473812573 | 4.832746033 | 11.45911338 |
| ENSMUSG00000077243 | 7.781970364 | 4.173703463 | 10.59226572 | 4.832746033 | 3.580972932 |
| ENSMUSG00000077244 | 7.781970364 | 6.956172438 | 7.767661525 | 7.249119049 | 5.013362104 |
| ENSMUSG00000077246 | 14.14903703 | 11.1298759  | 4.236906287 | 9.665492065 | 8.594335036 |
| ENSMUSG00000077248 | 9.196874066 | 5.56493795  | 7.061510478 | 11.27640741 | 6.445751277 |
| ENSMUSG00000077250 | 15.56394073 | 26.43345526 | 24.00913562 | 9.665492065 | 7.161945863 |
| ENSMUSG00000077251 | 12.02668147 | 13.21672763 | 10.59226572 | 9.665492065 | 5.013362104 |
| ENSMUSG00000077252 | 9.196874066 | 2.782468975 | 4.943057334 | 3.221830688 | 12.17530797 |
| ENSMUSG00000077253 | 9.904325918 | 6.260555194 | 8.473812573 | 4.832746033 | 7.161945863 |
| ENSMUSG00000077254 | 7.074518513 | 15.30357936 | 14.12302096 | 13.69278043 | 15.7562809  |
| ENSMUSG00000077255 | 9.196874066 | 6.956172438 | 10.59226572 | 6.443661377 | 8.594335036 |
| ENSMUSG00000077256 | 12.73413332 | 9.043024169 | 8.473812573 | 10.47094974 | 7.161945863 |
| ENSMUSG00000077257 | 63.67066661 | 79.30036579 | 69.20280268 | 176.3952302 | 144.6713064 |
| ENSMUSG00000077258 | 9.904325918 | 5.56493795  | 6.35535943  | 10.47094974 | 6.445751277 |
| ENSMUSG00000077259 | 13.44158517 | 7.651789682 | 12.71071886 | 4.832746033 | 2.864778345 |
| ENSMUSG00000077260 | 7.781970364 | 5.56493795  | 12.00456781 | 5.638203705 | 5.013362104 |
| ENSMUSG00000077261 | 13.44158517 | 23.65098629 | 20.47838039 | 20.1364418  | 20.05344842 |
| ENSMUSG00000077262 | 9.196874066 | 4.869320706 | 7.061510478 | 6.443661377 | 6.445751277 |
| ENSMUSG00000077263 | 9.196874066 | 6.956172438 | 7.767661525 | 6.443661377 | 7.87814045  |
| ENSMUSG00000077264 | 7.074518513 | 11.1298759  | 7.767661525 | 4.02728836  | 2.864778345 |
| ENSMUSG00000077265 | 17.68629628 | 34.08524495 | 28.24604191 | 10.47094974 | 18.62105924 |
| ENSMUSG00000077268 | 9.904325918 | 4.173703463 | 5.649208382 | 6.443661377 | 9.310529622 |
| ENSMUSG00000077269 | 4.952162959 | 13.21672763 | 3.530755239 | 3.221830688 | 10.02672421 |
| ENSMUSG00000077270 | 9.196874066 | 9.043024169 | 12.00456781 | 4.02728836  | 3.580972932 |
| ENSMUSG00000077271 | 24.76081479 | 22.2597518  | 31.0706461  | 12.88732275 | 20.05344842 |
| ENSMUSG00000077272 | 11.31922962 | 11.1298759  | 9.179963621 | 9.665492065 | 11.45911338 |
| ENSMUSG00000077273 | 12.02668147 | 4.173703463 | 7.767661525 | 8.054576721 | 8.594335036 |
| ENSMUSG00000077274 | 8.489422215 | 8.347406925 | 11.29841676 | 20.94189947 | 13.60769714 |
| ENSMUSG00000077275 | 6.367066661 | 4.173703463 | 4.236906287 | 6.443661377 | 0.716194586 |
| ENSMUSG00000077276 | 5.65961481  | 6.260555194 | 8.473812573 | 8.054576721 | 5.729556691 |
| ENSMUSG00000077277 | 2.829807405 | 6.260555194 | 5.649208382 | 4.02728836  | 7.161945863 |
| ENSMUSG00000077278 | 5.65961481  | 7.651789682 | 4.236906287 | 5.638203705 | 3.580972932 |
| ENSMUSG00000077279 | 7.074518513 | 5.56493795  | 9.886114669 | 6.443661377 | 9.310529622 |
| ENSMUSG00000077280 | 10.61177777 | 10.43425866 | 6.35535943  | 11.27640741 | 5.013362104 |
| ENSMUSG00000077281 | 8.489422215 | 8.347406925 | 7.061510478 | 7.249119049 | 6.445751277 |
| ENSMUSG00000077282 | 7.781970364 | 8.347406925 | 7.061510478 | 6.443661377 | 6.445751277 |
| ENSMUSG00000077283 | 10.61177777 | 9.738641413 | 12.71071886 | 10.47094974 | 9.310529622 |
| ENSMUSG00000077285 | 25.46826665 | 20.17290007 | 14.829172   | 43.49471429 | 28.64778345 |
| ENSMUSG00000077287 | 17.68629628 | 20.17290007 | 26.12758877 | 39.46742593 | 32.22875639 |

|                    |             |             |             |             |             |
|--------------------|-------------|-------------|-------------|-------------|-------------|
| ENSMUSG00000077288 | 7.781970364 | 7.651789682 | 7.767661525 | 4.832746033 | 7.161945863 |
| ENSMUSG00000077289 | 10.61177777 | 7.651789682 | 7.767661525 | 1.610915344 | 8.594335036 |
| ENSMUSG00000077290 | 4.244711108 | 9.738641413 | 8.473812573 | 8.054576721 | 5.729556691 |
| ENSMUSG00000077291 | 10.61177777 | 7.651789682 | 7.767661525 | 4.832746033 | 4.297167518 |
| ENSMUSG00000077292 | 12.73413332 | 4.869320706 | 3.530755239 | 8.860034393 | 7.161945863 |
| ENSMUSG00000077293 | 9.196874066 | 7.651789682 | 7.767661525 | 4.832746033 | 12.17530797 |
| ENSMUSG00000077294 | 4.244711108 | 8.347406925 | 7.767661525 | 4.02728836  | 4.297167518 |
| ENSMUSG00000077295 | 12.02668147 | 6.260555194 | 10.59226572 | 3.221830688 | 8.594335036 |
| ENSMUSG00000077298 | 9.904325918 | 5.56493795  | 8.473812573 | 3.221830688 | 3.580972932 |
| ENSMUSG00000077299 | 9.904325918 | 9.043024169 | 7.061510478 | 5.638203705 | 9.310529622 |
| ENSMUSG00000077302 | 6.367066661 | 6.956172438 | 6.35535943  | 3.221830688 | 5.013362104 |
| ENSMUSG00000077303 | 3.537259256 | 4.173703463 | 4.943057334 | 3.221830688 | 3.580972932 |
| ENSMUSG00000077304 | 14.14903703 | 2.782468975 | 2.824604191 | 8.860034393 | 5.729556691 |
| ENSMUSG00000077305 | 12.02668147 | 6.260555194 | 9.179963621 | 4.832746033 | 8.594335036 |
| ENSMUSG00000077306 | 8.489422215 | 6.956172438 | 7.767661525 | 7.249119049 | 6.445751277 |
| ENSMUSG00000077309 | 8.489422215 | 4.869320706 | 7.061510478 | 2.416373016 | 5.013362104 |
| ENSMUSG00000077312 | 14.85648888 | 9.043024169 | 4.943057334 | 5.638203705 | 5.729556691 |
| ENSMUSG00000077314 | 13.44158517 | 9.043024169 | 9.886114669 | 6.443661377 | 7.87814045  |
| ENSMUSG00000077315 | 8.489422215 | 8.347406925 | 11.29841676 | 4.02728836  | 6.445751277 |
| ENSMUSG00000077316 | 6.367066661 | 9.043024169 | 3.530755239 | 6.443661377 | 7.87814045  |
| ENSMUSG00000077317 | 12.73413332 | 8.347406925 | 7.767661525 | 5.638203705 | 4.297167518 |
| ENSMUSG00000077318 | 7.074518513 | 9.043024169 | 8.473812573 | 5.638203705 | 15.04008631 |
| ENSMUSG00000077320 | 4.952162959 | 9.043024169 | 4.236906287 | 8.054576721 | 7.161945863 |
| ENSMUSG00000077323 | 12.73413332 | 16.69481385 | 8.473812573 | 5.638203705 | 10.02672421 |
| ENSMUSG00000077325 | 9.904325918 | 6.956172438 | 4.943057334 | 5.638203705 | 10.02672421 |
| ENSMUSG00000077327 | 8.489422215 | 6.260555194 | 4.943057334 | 8.054576721 | 6.445751277 |
| ENSMUSG00000077328 | 9.196874066 | 9.043024169 | 12.71071886 | 7.249119049 | 5.729556691 |
| ENSMUSG00000077332 | 8.489422215 | 9.738641413 | 9.886114669 | 5.638203705 | 10.7429188  |
| ENSMUSG00000077333 | 13.44158517 | 3.478086219 | 4.943057334 | 2.416373016 | 5.729556691 |
| ENSMUSG00000077334 | 8.489422215 | 5.56493795  | 4.236906287 | 3.221830688 | 5.729556691 |
| ENSMUSG00000077336 | 7.781970364 | 8.347406925 | 5.649208382 | 8.054576721 | 6.445751277 |
| ENSMUSG00000077337 | 8.489422215 | 6.260555194 | 10.59226572 | 8.860034393 | 5.729556691 |
| ENSMUSG00000077338 | 0.707451851 | 0           | 0           | 0           | 0.716194586 |
| ENSMUSG00000077339 | 9.904325918 | 4.869320706 | 9.886114669 | 5.638203705 | 9.310529622 |
| ENSMUSG00000077342 | 10.61177777 | 9.043024169 | 4.236906287 | 6.443661377 | 11.45911338 |
| ENSMUSG00000077344 | 7.074518513 | 7.651789682 | 7.061510478 | 3.221830688 | 7.161945863 |
| ENSMUSG00000077345 | 8.489422215 | 18.08604834 | 12.71071886 | 60.40932541 | 42.25548059 |
| ENSMUSG00000077347 | 12.02668147 | 8.347406925 | 7.061510478 | 8.860034393 | 8.594335036 |
| ENSMUSG00000077348 | 11.31922962 | 5.56493795  | 4.943057334 | 5.638203705 | 7.161945863 |
| ENSMUSG00000077349 | 9.196874066 | 11.1298759  | 7.767661525 | 4.832746033 | 9.310529622 |
| ENSMUSG00000077350 | 9.904325918 | 2.086851731 | 7.767661525 | 10.47094974 | 6.445751277 |
| ENSMUSG00000077351 | 8.489422215 | 6.956172438 | 7.767661525 | 8.860034393 | 5.013362104 |
| ENSMUSG00000077354 | 12.73413332 | 8.347406925 | 9.179963621 | 2.416373016 | 9.310529622 |

|                    |             |             |             |             |             |
|--------------------|-------------|-------------|-------------|-------------|-------------|
| ENSMUSG00000077356 | 12.02668147 | 11.1298759  | 12.00456781 | 6.443661377 | 7.87814045  |
| ENSMUSG00000077357 | 4.952162959 | 4.869320706 | 7.767661525 | 7.249119049 | 7.161945863 |
| ENSMUSG00000077358 | 3.537259256 | 9.043024169 | 8.473812573 | 34.6346799  | 19.33725383 |
| ENSMUSG00000077359 | 8.489422215 | 6.956172438 | 8.473812573 | 6.443661377 | 5.013362104 |
| ENSMUSG00000077360 | 12.02668147 | 9.738641413 | 10.59226572 | 26.58010318 | 17.90486466 |
| ENSMUSG00000077361 | 8.489422215 | 6.956172438 | 4.943057334 | 5.638203705 | 5.729556691 |
| ENSMUSG00000077366 | 7.074518513 | 7.651789682 | 6.35535943  | 3.221830688 | 4.297167518 |
| ENSMUSG00000077367 | 51.64398514 | 75.82227957 | 58.61053696 | 48.32746033 | 40.82309142 |
| ENSMUSG00000077368 | 12.02668147 | 6.260555194 | 8.473812573 | 4.832746033 | 8.594335036 |
| ENSMUSG00000077369 | 8.489422215 | 9.738641413 | 12.71071886 | 5.638203705 | 9.310529622 |
| ENSMUSG00000077376 | 11.31922962 | 5.56493795  | 7.767661525 | 7.249119049 | 5.013362104 |
| ENSMUSG00000077377 | 4.952162959 | 6.956172438 | 4.943057334 | 0.805457672 | 5.013362104 |
| ENSMUSG00000077378 | 12.02668147 | 8.347406925 | 6.35535943  | 6.443661377 | 4.297167518 |
| ENSMUSG00000077379 | 6.367066661 | 4.173703463 | 4.236906287 | 3.221830688 | 6.445751277 |
| ENSMUSG00000077380 | 29.71297775 | 39.6501829  | 37.42600553 | 59.60386773 | 41.53928601 |
| ENSMUSG00000077381 | 9.196874066 | 3.478086219 | 4.236906287 | 6.443661377 | 6.445751277 |
| ENSMUSG00000077382 | 25.46826665 | 51.47567604 | 40.25060972 | 49.132918   | 37.24211849 |
| ENSMUSG00000077383 | 5.65961481  | 5.56493795  | 1.412302096 | 12.88732275 | 7.161945863 |
| ENSMUSG00000077384 | 10.61177777 | 6.956172438 | 10.59226572 | 4.02728836  | 6.445751277 |
| ENSMUSG00000077385 | 23.34591109 | 40.34580014 | 40.95676077 | 22.55281482 | 25.06681052 |
| ENSMUSG00000077387 | 8.489422215 | 11.82549314 | 7.767661525 | 5.638203705 | 5.013362104 |
| ENSMUSG00000077391 | 16.27139258 | 20.17290007 | 12.71071886 | 12.88732275 | 17.90486466 |
| ENSMUSG00000077392 | 7.074518513 | 3.478086219 | 7.767661525 | 4.832746033 | 5.729556691 |
| ENSMUSG00000077393 | 9.904325918 | 6.260555194 | 9.886114669 | 6.443661377 | 4.297167518 |
| ENSMUSG00000077394 | 0           | 2.086851731 | 0.706151048 | 0.805457672 | 0.716194586 |
| ENSMUSG00000077396 | 10.61177777 | 7.651789682 | 8.473812573 | 8.860034393 | 9.310529622 |
| ENSMUSG00000077397 | 9.904325918 | 8.347406925 | 6.35535943  | 7.249119049 | 9.310529622 |
| ENSMUSG00000077398 | 12.73413332 | 4.869320706 | 7.767661525 | 4.832746033 | 5.013362104 |
| ENSMUSG00000077399 | 10.61177777 | 7.651789682 | 7.767661525 | 3.221830688 | 6.445751277 |
| ENSMUSG00000077400 | 12.73413332 | 6.956172438 | 10.59226572 | 8.054576721 | 7.161945863 |
| ENSMUSG00000077401 | 7.074518513 | 6.260555194 | 4.943057334 | 7.249119049 | 5.013362104 |
| ENSMUSG00000077402 | 16.27139258 | 23.65098629 | 14.12302096 | 11.27640741 | 8.594335036 |
| ENSMUSG00000077403 | 12.73413332 | 6.260555194 | 8.473812573 | 3.221830688 | 10.02672421 |
| ENSMUSG00000077404 | 10.61177777 | 4.869320706 | 5.649208382 | 6.443661377 | 5.013362104 |
| ENSMUSG00000077406 | 0           | 1.391234488 | 2.118453143 | 0.805457672 | 0.716194586 |
| ENSMUSG00000077407 | 9.196874066 | 5.56493795  | 6.35535943  | 3.221830688 | 7.161945863 |
| ENSMUSG00000077408 | 6.367066661 | 10.43425866 | 7.767661525 | 3.221830688 | 8.594335036 |
| ENSMUSG00000077409 | 10.61177777 | 4.869320706 | 6.35535943  | 3.221830688 | 5.729556691 |
| ENSMUSG00000077410 | 10.61177777 | 10.43425866 | 8.473812573 | 8.860034393 | 5.013362104 |
| ENSMUSG00000077411 | 15.56394073 | 13.21672763 | 10.59226572 | 5.638203705 | 10.7429188  |
| ENSMUSG00000077413 | 5.65961481  | 6.956172438 | 9.886114669 | 3.221830688 | 4.297167518 |
| ENSMUSG00000077415 | 6.367066661 | 5.56493795  | 2.824604191 | 8.054576721 | 3.580972932 |
| ENSMUSG00000077416 | 7.074518513 | 7.651789682 | 12.00456781 | 7.249119049 | 12.17530797 |

|                    |             |             |             |             |             |
|--------------------|-------------|-------------|-------------|-------------|-------------|
| ENSMUSG00000077417 | 4.952162959 | 3.478086219 | 4.943057334 | 1.610915344 | 2.148583759 |
| ENSMUSG00000077418 | 7.074518513 | 8.347406925 | 9.886114669 | 10.47094974 | 12.17530797 |
| ENSMUSG00000077419 | 19.10119998 | 28.52030699 | 27.53989086 | 24.96918783 | 29.36397804 |
| ENSMUSG00000077420 | 45.98437033 | 41.73703463 | 49.43057334 | 28.9964762  | 30.08017263 |
| ENSMUSG00000077421 | 67.91537772 | 89.0390072  | 94.6242404  | 122.4295662 | 104.5644096 |
| ENSMUSG00000077422 | 2.122355554 | 1.391234488 | 1.412302096 | 1.610915344 | 0.716194586 |
| ENSMUSG00000077424 | 7.074518513 | 6.260555194 | 6.35535943  | 5.638203705 | 4.297167518 |
| ENSMUSG00000077425 | 8.489422215 | 9.043024169 | 6.35535943  | 5.638203705 | 9.310529622 |
| ENSMUSG00000077426 | 7.074518513 | 17.39043109 | 13.41686991 | 16.91461111 | 14.32389173 |
| ENSMUSG00000077427 | 11.31922962 | 4.869320706 | 12.00456781 | 8.054576721 | 4.297167518 |
| ENSMUSG00000077428 | 16.97884443 | 6.260555194 | 9.179963621 | 8.860034393 | 9.310529622 |
| ENSMUSG00000077430 | 4.244711108 | 2.782468975 | 11.29841676 | 3.221830688 | 3.580972932 |
| ENSMUSG00000077431 | 38.20239997 | 66.08363816 | 48.7244223  | 62.82569842 | 52.2822048  |
| ENSMUSG00000077433 | 10.61177777 | 7.651789682 | 7.061510478 | 8.860034393 | 7.87814045  |
| ENSMUSG00000077435 | 5.65961481  | 2.782468975 | 0.706151048 | 2.416373016 | 4.297167518 |
| ENSMUSG00000077437 | 12.73413332 | 5.56493795  | 6.35535943  | 8.054576721 | 12.17530797 |
| ENSMUSG00000077438 | 12.02668147 | 3.478086219 | 7.767661525 | 5.638203705 | 5.013362104 |
| ENSMUSG00000077439 | 6.367066661 | 5.56493795  | 9.179963621 | 4.832746033 | 8.594335036 |
| ENSMUSG00000077440 | 0           | 0           | 0           | 0           | 0           |
| ENSMUSG00000077441 | 11.31922962 | 3.478086219 | 5.649208382 | 5.638203705 | 4.297167518 |
| ENSMUSG00000077442 | 7.781970364 | 6.260555194 | 7.061510478 | 8.054576721 | 6.445751277 |
| ENSMUSG00000077443 | 12.73413332 | 6.260555194 | 9.179963621 | 10.47094974 | 5.729556691 |
| ENSMUSG00000077445 | 6.367066661 | 5.56493795  | 9.179963621 | 8.860034393 | 6.445751277 |
| ENSMUSG00000077447 | 8.489422215 | 7.651789682 | 4.236906287 | 4.832746033 | 7.161945863 |
| ENSMUSG00000077448 | 42.44711108 | 66.7792554  | 51.54902649 | 57.18749472 | 62.30892901 |
| ENSMUSG00000077449 | 8.489422215 | 6.956172438 | 9.179963621 | 15.30369577 | 15.7562809  |
| ENSMUSG00000077451 | 7.074518513 | 7.651789682 | 12.00456781 | 9.665492065 | 7.161945863 |
| ENSMUSG00000077453 | 2.122355554 | 0.695617244 | 2.824604191 | 5.638203705 | 3.580972932 |
| ENSMUSG00000077454 | 42.44711108 | 57.04061399 | 51.54902649 | 78.12939419 | 75.91662615 |
| ENSMUSG00000077455 | 9.196874066 | 9.738641413 | 11.29841676 | 9.665492065 | 5.013362104 |
| ENSMUSG00000077456 | 9.904325918 | 8.347406925 | 9.179963621 | 1.610915344 | 7.161945863 |
| ENSMUSG00000077457 | 0           | 0           | 0           | 0           | 0           |
| ENSMUSG00000077459 | 4.244711108 | 5.56493795  | 5.649208382 | 7.249119049 | 5.013362104 |
| ENSMUSG00000077460 | 338.8694368 | 332.5050425 | 336.1278987 | 460.7217884 | 294.355975  |
| ENSMUSG00000077461 | 8.489422215 | 9.738641413 | 7.061510478 | 7.249119049 | 3.580972932 |
| ENSMUSG00000077462 | 8.489422215 | 1.391234488 | 4.943057334 | 4.02728836  | 6.445751277 |
| ENSMUSG00000077463 | 7.074518513 | 6.260555194 | 9.179963621 | 4.832746033 | 6.445751277 |
| ENSMUSG00000077464 | 6.367066661 | 6.260555194 | 9.179963621 | 5.638203705 | 7.87814045  |
| ENSMUSG00000077465 | 12.73413332 | 8.347406925 | 14.12302096 | 6.443661377 | 5.013362104 |
| ENSMUSG00000077467 | 9.196874066 | 6.956172438 | 9.179963621 | 7.249119049 | 5.729556691 |
| ENSMUSG00000077468 | 4.244711108 | 8.347406925 | 9.886114669 | 6.443661377 | 10.02672421 |
| ENSMUSG00000077469 | 9.196874066 | 4.173703463 | 6.35535943  | 2.416373016 | 7.87814045  |
| ENSMUSG00000077470 | 6.367066661 | 4.869320706 | 5.649208382 | 4.832746033 | 6.445751277 |

|                    |             |             |             |             |             |
|--------------------|-------------|-------------|-------------|-------------|-------------|
| ENSMUSG00000077471 | 7.781970364 | 10.43425866 | 7.061510478 | 5.638203705 | 7.87814045  |
| ENSMUSG00000077472 | 8.489422215 | 6.956172438 | 7.061510478 | 2.416373016 | 6.445751277 |
| ENSMUSG00000077473 | 10.61177777 | 5.56493795  | 8.473812573 | 8.860034393 | 8.594335036 |
| ENSMUSG00000077474 | 10.61177777 | 7.651789682 | 11.29841676 | 7.249119049 | 7.161945863 |
| ENSMUSG00000077476 | 69.33028142 | 94.60394515 | 80.50121945 | 46.71654498 | 51.56601022 |
| ENSMUSG00000077477 | 9.196874066 | 7.651789682 | 4.236906287 | 7.249119049 | 7.161945863 |
| ENSMUSG00000077480 | 12.02668147 | 8.347406925 | 8.473812573 | 2.416373016 | 5.729556691 |
| ENSMUSG00000077481 | 6.367066661 | 7.651789682 | 5.649208382 | 3.221830688 | 8.594335036 |
| ENSMUSG00000077483 | 6.367066661 | 5.56493795  | 5.649208382 | 8.054576721 | 10.7429188  |
| ENSMUSG00000077484 | 9.904325918 | 6.956172438 | 6.35535943  | 5.638203705 | 9.310529622 |
| ENSMUSG00000077485 | 9.196874066 | 8.347406925 | 7.767661525 | 6.443661377 | 1.432389173 |
| ENSMUSG00000077487 | 8.489422215 | 7.651789682 | 7.061510478 | 8.054576721 | 7.87814045  |
| ENSMUSG00000077488 | 12.02668147 | 4.869320706 | 9.179963621 | 2.416373016 | 8.594335036 |
| ENSMUSG00000077492 | 7.781970364 | 9.043024169 | 5.649208382 | 4.832746033 | 6.445751277 |
| ENSMUSG00000077493 | 2.122355554 | 4.173703463 | 4.236906287 | 15.30369577 | 5.729556691 |
| ENSMUSG00000077494 | 10.61177777 | 5.56493795  | 8.473812573 | 3.221830688 | 6.445751277 |
| ENSMUSG00000077495 | 7.781970364 | 5.56493795  | 4.943057334 | 8.860034393 | 7.87814045  |
| ENSMUSG00000077497 | 4.952162959 | 9.738641413 | 5.649208382 | 4.832746033 | 7.87814045  |
| ENSMUSG00000077499 | 6.367066661 | 7.651789682 | 8.473812573 | 8.054576721 | 8.594335036 |
| ENSMUSG00000077501 | 9.904325918 | 15.30357936 | 10.59226572 | 4.02728836  | 12.89150255 |
| ENSMUSG00000077502 | 9.904325918 | 6.260555194 | 6.35535943  | 3.221830688 | 5.013362104 |
| ENSMUSG00000077503 | 12.02668147 | 4.173703463 | 7.061510478 | 8.860034393 | 4.297167518 |
| ENSMUSG00000077504 | 12.73413332 | 6.260555194 | 4.236906287 | 5.638203705 | 7.161945863 |
| ENSMUSG00000077505 | 174.0331554 | 223.9887525 | 190.6607829 | 371.3159868 | 251.3842998 |
| ENSMUSG00000077506 | 0           | 1.391234488 | 0           | 0.805457672 | 1.432389173 |
| ENSMUSG00000077507 | 10.61177777 | 4.869320706 | 9.886114669 | 7.249119049 | 5.013362104 |
| ENSMUSG00000077511 | 9.904325918 | 9.738641413 | 16.2414741  | 10.47094974 | 12.17530797 |
| ENSMUSG00000077514 | 5.65961481  | 6.956172438 | 4.236906287 | 3.221830688 | 3.580972932 |
| ENSMUSG00000077515 | 0           | 0           | 0           | 0           | 0           |
| ENSMUSG00000077516 | 7.781970364 | 9.043024169 | 12.71071886 | 6.443661377 | 4.297167518 |
| ENSMUSG00000077517 | 7.074518513 | 8.347406925 | 7.061510478 | 8.054576721 | 7.161945863 |
| ENSMUSG00000077518 | 7.781970364 | 8.347406925 | 5.649208382 | 8.860034393 | 5.013362104 |
| ENSMUSG00000077519 | 10.61177777 | 6.260555194 | 8.473812573 | 5.638203705 | 10.02672421 |
| ENSMUSG00000077521 | 9.196874066 | 5.56493795  | 8.473812573 | 8.054576721 | 8.594335036 |
| ENSMUSG00000077522 | 5.65961481  | 6.260555194 | 8.473812573 | 4.832746033 | 5.013362104 |
| ENSMUSG00000077524 | 31.83533331 | 43.12826911 | 42.36906287 | 50.74383334 | 47.98503729 |
| ENSMUSG00000077526 | 1.414903703 | 0.695617244 | 2.824604191 | 0           | 2.148583759 |
| ENSMUSG00000077527 | 9.196874066 | 18.78166558 | 21.18453143 | 25.77464551 | 28.64778345 |
| ENSMUSG00000077528 | 9.904325918 | 3.478086219 | 7.767661525 | 2.416373016 | 10.7429188  |
| ENSMUSG00000077535 | 8.489422215 | 10.43425866 | 6.35535943  | 8.860034393 | 2.864778345 |
| ENSMUSG00000077537 | 7.074518513 | 4.869320706 | 5.649208382 | 6.443661377 | 1.432389173 |
| ENSMUSG00000077538 | 7.781970364 | 9.043024169 | 5.649208382 | 2.416373016 | 7.161945863 |
| ENSMUSG00000077539 | 8.489422215 | 7.651789682 | 7.061510478 | 7.249119049 | 5.013362104 |

|                    |             |             |             |             |             |
|--------------------|-------------|-------------|-------------|-------------|-------------|
| ENSMUSG00000077541 | 12.02668147 | 3.478086219 | 7.767661525 | 6.443661377 | 7.161945863 |
| ENSMUSG00000077542 | 1.414903703 | 6.260555194 | 0.706151048 | 3.221830688 | 3.580972932 |
| ENSMUSG00000077543 | 7.074518513 | 2.086851731 | 6.35535943  | 7.249119049 | 6.445751277 |
| ENSMUSG00000077545 | 17.68629628 | 36.17209668 | 32.4829482  | 8.054576721 | 13.60769714 |
| ENSMUSG00000077546 | 9.196874066 | 9.738641413 | 9.886114669 | 3.221830688 | 7.161945863 |
| ENSMUSG00000077547 | 11.31922962 | 5.56493795  | 14.12302096 | 11.27640741 | 10.7429188  |
| ENSMUSG00000077549 | 16.97884443 | 25.73783802 | 16.94762515 | 27.38556085 | 23.63442135 |
| ENSMUSG00000077552 | 14.14903703 | 5.56493795  | 6.35535943  | 4.832746033 | 9.310529622 |
| ENSMUSG00000077553 | 9.196874066 | 7.651789682 | 6.35535943  | 4.02728836  | 5.729556691 |
| ENSMUSG00000077554 | 12.02668147 | 4.869320706 | 9.179963621 | 8.860034393 | 8.594335036 |
| ENSMUSG00000077555 | 11.31922962 | 12.52111039 | 9.886114669 | 3.221830688 | 7.87814045  |
| ENSMUSG00000077557 | 10.61177777 | 9.043024169 | 7.767661525 | 12.08186508 | 11.45911338 |
| ENSMUSG00000077558 | 5.65961481  | 3.478086219 | 3.530755239 | 3.221830688 | 2.864778345 |
| ENSMUSG00000077559 | 8.489422215 | 9.043024169 | 4.943057334 | 3.221830688 | 7.161945863 |
| ENSMUSG00000077561 | 14.85648888 | 31.30277597 | 23.30298458 | 15.30369577 | 15.7562809  |
| ENSMUSG00000077562 | 7.074518513 | 6.956172438 | 9.886114669 | 6.443661377 | 10.02672421 |
| ENSMUSG00000077563 | 0           | 0           | 0           | 0           | 0           |
| ENSMUSG00000077564 | 0.707451851 | 3.478086219 | 0.706151048 | 4.02728836  | 2.864778345 |
| ENSMUSG00000077565 | 0           | 0           | 0           | 0           | 0           |
| ENSMUSG00000077567 | 9.196874066 | 5.56493795  | 9.179963621 | 7.249119049 | 4.297167518 |
| ENSMUSG00000077569 | 2.122355554 | 3.478086219 | 2.824604191 | 2.416373016 | 2.864778345 |
| ENSMUSG00000077571 | 9.196874066 | 10.43425866 | 7.767661525 | 16.10915344 | 15.7562809  |
| ENSMUSG00000077572 | 6.367066661 | 7.651789682 | 5.649208382 | 9.665492065 | 9.310529622 |
| ENSMUSG00000077574 | 7.074518513 | 3.478086219 | 7.767661525 | 2.416373016 | 7.87814045  |
| ENSMUSG00000077575 | 1.414903703 | 2.086851731 | 2.824604191 | 26.58010318 | 15.7562809  |
| ENSMUSG00000077576 | 10.61177777 | 4.869320706 | 8.473812573 | 4.02728836  | 3.580972932 |
| ENSMUSG00000077577 | 0           | 2.086851731 | 3.530755239 | 0           | 1.432389173 |
| ENSMUSG00000077578 | 7.781970364 | 8.347406925 | 5.649208382 | 5.638203705 | 4.297167518 |
| ENSMUSG00000077579 | 5.65961481  | 2.086851731 | 7.767661525 | 6.443661377 | 5.013362104 |
| ENSMUSG00000077581 | 12.02668147 | 9.043024169 | 10.59226572 | 4.832746033 | 8.594335036 |
| ENSMUSG00000077582 | 12.02668147 | 9.043024169 | 6.35535943  | 7.249119049 | 7.161945863 |
| ENSMUSG00000077585 | 5.65961481  | 9.043024169 | 9.179963621 | 8.860034393 | 5.729556691 |
| ENSMUSG00000077586 | 9.196874066 | 9.043024169 | 7.061510478 | 7.249119049 | 3.580972932 |
| ENSMUSG00000077587 | 9.196874066 | 4.173703463 | 5.649208382 | 7.249119049 | 7.87814045  |
| ENSMUSG00000077588 | 10.61177777 | 5.56493795  | 6.35535943  | 5.638203705 | 8.594335036 |
| ENSMUSG00000077590 | 10.61177777 | 10.43425866 | 11.29841676 | 8.054576721 | 12.17530797 |
| ENSMUSG00000077591 | 7.781970364 | 4.869320706 | 8.473812573 | 2.416373016 | 7.161945863 |
| ENSMUSG00000077592 | 142.905274  | 195.4684455 | 197.7222934 | 141.7605503 | 121.0368851 |
| ENSMUSG00000077593 | 128.0487851 | 166.9481385 | 145.4671158 | 150.6205847 | 118.8883013 |
| ENSMUSG00000077594 | 16.27139258 | 5.56493795  | 9.179963621 | 6.443661377 | 5.013362104 |
| ENSMUSG00000077595 | 4.952162959 | 6.260555194 | 2.824604191 | 4.832746033 | 5.729556691 |
| ENSMUSG00000077597 | 9.196874066 | 5.56493795  | 4.236906287 | 3.221830688 | 9.310529622 |
| ENSMUSG00000077598 | 9.196874066 | 4.869320706 | 10.59226572 | 7.249119049 | 10.02672421 |



|                    |             |             |             |             |             |
|--------------------|-------------|-------------|-------------|-------------|-------------|
| ENSMUSG00000077599 | 14.85648888 | 4.869320706 | 12.00456781 | 6.443661377 | 5.729556691 |
| ENSMUSG00000077601 | 5.65961481  | 9.043024169 | 6.35535943  | 6.443661377 | 5.729556691 |
| ENSMUSG00000077602 | 7.781970364 | 11.82549314 | 10.59226572 | 15.30369577 | 10.7429188  |
| ENSMUSG00000077603 | 8.489422215 | 6.260555194 | 9.179963621 | 5.638203705 | 3.580972932 |
| ENSMUSG00000077604 | 0           | 0           | 0           | 0           | 0           |
| ENSMUSG00000077607 | 4.952162959 | 12.52111039 | 8.473812573 | 8.054576721 | 7.161945863 |
| ENSMUSG00000077608 | 7.074518513 | 10.43425866 | 9.886114669 | 0.805457672 | 6.445751277 |
| ENSMUSG00000077609 | 4.952162959 | 4.869320706 | 2.824604191 | 0.805457672 | 1.432389173 |
| ENSMUSG00000077611 | 21.22355554 | 50.7800588  | 48.01827125 | 94.23854763 | 70.90326405 |
| ENSMUSG00000077612 | 16.97884443 | 20.17290007 | 15.53532305 | 11.27640741 | 19.33725383 |
| ENSMUSG00000077613 | 11.31922962 | 10.43425866 | 9.886114669 | 10.47094974 | 10.7429188  |
| ENSMUSG00000077614 | 7.074518513 | 9.738641413 | 12.71071886 | 53.96566403 | 37.95831308 |
| ENSMUSG00000077615 | 2.122355554 | 1.391234488 | 2.824604191 | 5.638203705 | 2.864778345 |
| ENSMUSG00000077616 | 7.074518513 | 7.651789682 | 7.061510478 | 8.860034393 | 5.013362104 |
| ENSMUSG00000077617 | 11.31922962 | 3.478086219 | 4.236906287 | 7.249119049 | 11.45911338 |
| ENSMUSG00000077618 | 9.196874066 | 9.043024169 | 6.35535943  | 4.02728836  | 4.297167518 |
| ENSMUSG00000077619 | 10.61177777 | 5.56493795  | 9.886114669 | 3.221830688 | 5.013362104 |
| ENSMUSG00000077620 | 2.829807405 | 2.782468975 | 3.530755239 | 2.416373016 | 2.148583759 |
| ENSMUSG00000077621 | 285.1030961 | 283.1162182 | 255.6266793 | 320.5721535 | 227.0336839 |
| ENSMUSG00000077622 | 9.904325918 | 8.347406925 | 9.886114669 | 6.443661377 | 7.161945863 |
| ENSMUSG00000077624 | 41.73965922 | 52.17129328 | 55.07978173 | 45.91108731 | 57.29556691 |
| ENSMUSG00000077625 | 0           | 0           | 0           | 0           | 0           |
| ENSMUSG00000077627 | 11.31922962 | 9.738641413 | 7.061510478 | 8.054576721 | 7.87814045  |
| ENSMUSG00000077628 | 5.65961481  | 2.782468975 | 3.530755239 | 3.221830688 | 2.148583759 |
| ENSMUSG00000077629 | 10.61177777 | 4.869320706 | 4.943057334 | 6.443661377 | 5.729556691 |
| ENSMUSG00000077630 | 7.781970364 | 5.56493795  | 5.649208382 | 5.638203705 | 3.580972932 |
| ENSMUSG00000077633 | 13.44158517 | 13.91234488 | 21.89068248 | 8.054576721 | 12.17530797 |
| ENSMUSG00000077635 | 4.244711108 | 2.782468975 | 6.35535943  | 6.443661377 | 5.013362104 |
| ENSMUSG00000077637 | 1.414903703 | 2.782468975 | 4.236906287 | 3.221830688 | 2.864778345 |
| ENSMUSG00000077639 | 26.1757185  | 42.43265187 | 33.89525029 | 35.44013757 | 32.94495097 |
| ENSMUSG00000077640 | 7.074518513 | 8.347406925 | 2.118453143 | 6.443661377 | 5.729556691 |
| ENSMUSG00000077641 | 11.31922962 | 11.1298759  | 7.061510478 | 7.249119049 | 5.729556691 |
| ENSMUSG00000077642 | 9.196874066 | 9.043024169 | 10.59226572 | 7.249119049 | 8.594335036 |
| ENSMUSG00000077643 | 7.781970364 | 8.347406925 | 7.061510478 | 7.249119049 | 6.445751277 |
| ENSMUSG00000077644 | 6.367066661 | 6.956172438 | 2.118453143 | 4.02728836  | 4.297167518 |
| ENSMUSG00000077645 | 2.122355554 | 4.173703463 | 5.649208382 | 2.416373016 | 7.161945863 |
| ENSMUSG00000077647 | 7.074518513 | 8.347406925 | 13.41686991 | 5.638203705 | 10.02672421 |
| ENSMUSG00000077648 | 10.61177777 | 7.651789682 | 9.179963621 | 5.638203705 | 7.161945863 |
| ENSMUSG00000077649 | 31.83533331 | 61.9099347  | 46.60596915 | 67.65844446 | 74.48423698 |
| ENSMUSG00000077650 | 4.244711108 | 4.869320706 | 7.061510478 | 0.805457672 | 3.580972932 |
| ENSMUSG00000077652 | 11.31922962 | 10.43425866 | 7.061510478 | 8.054576721 | 10.02672421 |
| ENSMUSG00000077653 | 10.61177777 | 5.56493795  | 7.767661525 | 8.054576721 | 5.729556691 |
| ENSMUSG00000077655 | 7.074518513 | 6.956172438 | 8.473812573 | 7.249119049 | 12.17530797 |

|                    |             |             |             |             |             |
|--------------------|-------------|-------------|-------------|-------------|-------------|
| ENSMUSG00000077659 | 4.244711108 | 1.391234488 | 4.943057334 | 4.832746033 | 8.594335036 |
| ENSMUSG00000077660 | 9.904325918 | 6.956172438 | 8.473812573 | 5.638203705 | 7.87814045  |
| ENSMUSG00000077661 | 10.61177777 | 4.173703463 | 7.061510478 | 3.221830688 | 6.445751277 |
| ENSMUSG00000077663 | 6.367066661 | 4.869320706 | 6.35535943  | 7.249119049 | 5.729556691 |
| ENSMUSG00000077664 | 7.074518513 | 4.173703463 | 9.179963621 | 8.054576721 | 7.161945863 |
| ENSMUSG00000077666 | 12.73413332 | 4.173703463 | 8.473812573 | 3.221830688 | 8.594335036 |
| ENSMUSG00000077667 | 7.074518513 | 3.478086219 | 7.767661525 | 12.08186508 | 6.445751277 |
| ENSMUSG00000077668 | 11.31922962 | 4.869320706 | 6.35535943  | 7.249119049 | 7.87814045  |
| ENSMUSG00000077669 | 7.074518513 | 6.260555194 | 14.829172   | 5.638203705 | 4.297167518 |
| ENSMUSG00000077671 | 6.367066661 | 5.56493795  | 6.35535943  | 8.054576721 | 4.297167518 |
| ENSMUSG00000077672 | 9.196874066 | 3.478086219 | 7.061510478 | 8.054576721 | 4.297167518 |
| ENSMUSG00000077673 | 7.074518513 | 13.21672763 | 6.35535943  | 6.443661377 | 8.594335036 |
| ENSMUSG00000077674 | 4.952162959 | 2.086851731 | 3.530755239 | 2.416373016 | 4.297167518 |
| ENSMUSG00000077675 | 10.61177777 | 7.651789682 | 7.061510478 | 10.47094974 | 5.729556691 |
| ENSMUSG00000077677 | 29.71297775 | 57.04061399 | 62.1412922  | 38.66196826 | 50.13362104 |
| ENSMUSG00000077678 | 13.44158517 | 5.56493795  | 9.886114669 | 0.805457672 | 8.594335036 |
| ENSMUSG00000077680 | 7.074518513 | 7.651789682 | 4.943057334 | 1.610915344 | 5.013362104 |
| ENSMUSG00000077681 | 0           | 0           | 0           | 0           | 0           |
| ENSMUSG00000077682 | 8.489422215 | 6.956172438 | 7.061510478 | 7.249119049 | 9.310529622 |
| ENSMUSG00000077683 | 8.489422215 | 7.651789682 | 5.649208382 | 6.443661377 | 7.161945863 |
| ENSMUSG00000077685 | 9.196874066 | 6.956172438 | 7.767661525 | 11.27640741 | 7.161945863 |
| ENSMUSG00000077687 | 9.196874066 | 9.738641413 | 8.473812573 | 12.08186508 | 7.87814045  |
| ENSMUSG00000077689 | 12.73413332 | 4.173703463 | 11.29841676 | 3.221830688 | 7.87814045  |
| ENSMUSG00000077691 | 12.02668147 | 9.738641413 | 7.767661525 | 2.416373016 | 6.445751277 |
| ENSMUSG00000077693 | 6.367066661 | 9.738641413 | 8.473812573 | 4.832746033 | 7.87814045  |
| ENSMUSG00000077696 | 8.489422215 | 4.869320706 | 7.061510478 | 4.832746033 | 8.594335036 |
| ENSMUSG00000077697 | 7.781970364 | 4.173703463 | 10.59226572 | 5.638203705 | 11.45911338 |
| ENSMUSG00000077698 | 0.707451851 | 1.391234488 | 0           | 1.610915344 | 0           |
| ENSMUSG00000077700 | 12.73413332 | 6.260555194 | 10.59226572 | 5.638203705 | 4.297167518 |
| ENSMUSG00000077701 | 7.781970364 | 5.56493795  | 9.886114669 | 2.416373016 | 12.89150255 |
| ENSMUSG00000077702 | 0           | 0           | 0           | 0           | 0           |
| ENSMUSG00000077703 | 9.196874066 | 8.347406925 | 8.473812573 | 6.443661377 | 8.594335036 |
| ENSMUSG00000077704 | 3.537259256 | 4.173703463 | 4.943057334 | 7.249119049 | 4.297167518 |
| ENSMUSG00000077705 | 4.952162959 | 8.347406925 | 11.29841676 | 10.47094974 | 12.89150255 |
| ENSMUSG00000077706 | 6.367066661 | 5.56493795  | 9.886114669 | 5.638203705 | 7.161945863 |
| ENSMUSG00000077707 | 10.61177777 | 2.782468975 | 4.236906287 | 7.249119049 | 6.445751277 |
| ENSMUSG00000077708 | 8.489422215 | 3.478086219 | 7.061510478 | 8.860034393 | 5.013362104 |
| ENSMUSG00000077709 | 22.63845924 | 29.91154148 | 39.54445867 | 245.66459   | 185.4943979 |
| ENSMUSG00000077710 | 11.31922962 | 7.651789682 | 7.061510478 | 2.416373016 | 5.013362104 |
| ENSMUSG00000077711 | 1.414903703 | 6.260555194 | 4.943057334 | 24.96918783 | 17.90486466 |
| ENSMUSG00000077713 | 1.414903703 | 4.173703463 | 4.236906287 | 4.832746033 | 2.148583759 |
| ENSMUSG00000077714 | 244.7783405 | 242.0748008 | 242.9159604 | 637.1170186 | 459.0807298 |
| ENSMUSG00000077716 | 6.367066661 | 11.1298759  | 8.473812573 | 9.665492065 | 6.445751277 |

|                    |             |             |             |             |             |
|--------------------|-------------|-------------|-------------|-------------|-------------|
| ENSMUSG00000077717 | 7.781970364 | 7.651789682 | 6.35535943  | 4.832746033 | 5.729556691 |
| ENSMUSG00000077718 | 12.73413332 | 9.738641413 | 6.35535943  | 6.443661377 | 5.013362104 |
| ENSMUSG00000077719 | 9.904325918 | 6.956172438 | 11.29841676 | 8.054576721 | 6.445751277 |
| ENSMUSG00000077726 | 10.61177777 | 10.43425866 | 9.179963621 | 8.860034393 | 4.297167518 |
| ENSMUSG00000077728 | 8.489422215 | 6.260555194 | 4.943057334 | 9.665492065 | 7.161945863 |
| ENSMUSG00000077730 | 9.904325918 | 6.956172438 | 7.767661525 | 4.02728836  | 5.013362104 |
| ENSMUSG00000077733 | 302.0819405 | 348.5042391 | 323.4171799 | 465.5545345 | 334.4628718 |
| ENSMUSG00000077734 | 7.781970364 | 3.478086219 | 2.118453143 | 8.860034393 | 2.864778345 |
| ENSMUSG00000077735 | 9.196874066 | 6.956172438 | 9.179963621 | 8.860034393 | 7.87814045  |
| ENSMUSG00000077736 | 8.489422215 | 6.260555194 | 9.886114669 | 7.249119049 | 8.594335036 |
| ENSMUSG00000077737 | 12.73413332 | 20.86851731 | 21.89068248 | 74.9075635  | 62.30892901 |
| ENSMUSG00000077738 | 9.904325918 | 6.956172438 | 3.530755239 | 2.416373016 | 4.297167518 |
| ENSMUSG00000077741 | 7.074518513 | 7.651789682 | 9.886114669 | 4.02728836  | 5.729556691 |
| ENSMUSG00000077743 | 2.829807405 | 4.869320706 | 4.236906287 | 0.805457672 | 5.729556691 |
| ENSMUSG00000077744 | 65.79302217 | 100.8645003 | 81.20737049 | 57.99295239 | 65.88990194 |
| ENSMUSG00000077745 | 7.074518513 | 9.043024169 | 7.061510478 | 7.249119049 | 11.45911338 |
| ENSMUSG00000077749 | 10.61177777 | 6.956172438 | 4.236906287 | 4.832746033 | 7.161945863 |
| ENSMUSG00000077750 | 8.489422215 | 2.782468975 | 6.35535943  | 7.249119049 | 6.445751277 |
| ENSMUSG00000077752 | 9.904325918 | 12.52111039 | 12.71071886 | 4.02728836  | 7.161945863 |
| ENSMUSG00000077755 | 7.781970364 | 12.52111039 | 8.473812573 | 8.860034393 | 7.87814045  |
| ENSMUSG00000077756 | 15.56394073 | 22.95536904 | 12.00456781 | 12.88732275 | 12.89150255 |
| ENSMUSG00000077757 | 9.904325918 | 7.651789682 | 3.530755239 | 7.249119049 | 8.594335036 |
| ENSMUSG00000077758 | 7.074518513 | 7.651789682 | 12.00456781 | 6.443661377 | 15.7562809  |
| ENSMUSG00000077759 | 10.61177777 | 18.08604834 | 9.179963621 | 12.88732275 | 16.47247549 |
| ENSMUSG00000077761 | 8.489422215 | 6.260555194 | 3.530755239 | 3.221830688 | 9.310529622 |
| ENSMUSG00000077767 | 3.537259256 | 1.391234488 | 1.412302096 | 3.221830688 | 5.013362104 |
| ENSMUSG00000077768 | 9.196874066 | 1.391234488 | 7.767661525 | 4.02728836  | 11.45911338 |
| ENSMUSG00000077769 | 7.074518513 | 11.1298759  | 5.649208382 | 4.02728836  | 9.310529622 |
| ENSMUSG00000077771 | 9.196874066 | 8.347406925 | 5.649208382 | 3.221830688 | 0.716194586 |
| ENSMUSG00000077772 | 9.904325918 | 7.651789682 | 9.886114669 | 4.832746033 | 7.87814045  |
| ENSMUSG00000077776 | 12.02668147 | 4.173703463 | 7.767661525 | 4.832746033 | 4.297167518 |
| ENSMUSG00000077777 | 76.40479994 | 133.5585108 | 108.7472614 | 78.12939419 | 78.06520991 |
| ENSMUSG00000077780 | 14.14903703 | 14.60796212 | 16.94762515 | 7.249119049 | 10.02672421 |
| ENSMUSG00000077782 | 9.904325918 | 8.347406925 | 8.473812573 | 2.416373016 | 6.445751277 |
| ENSMUSG00000077783 | 10.61177777 | 9.043024169 | 9.886114669 | 2.416373016 | 5.013362104 |
| ENSMUSG00000077784 | 9.196874066 | 5.56493795  | 11.29841676 | 9.665492065 | 5.729556691 |
| ENSMUSG00000077785 | 19.10119998 | 45.91073809 | 36.01370344 | 24.96918783 | 42.97167518 |
| ENSMUSG00000077786 | 7.781970364 | 7.651789682 | 6.35535943  | 12.08186508 | 6.445751277 |
| ENSMUSG00000077787 | 4.952162959 | 6.956172438 | 12.71071886 | 9.665492065 | 11.45911338 |
| ENSMUSG00000077789 | 11.31922962 | 27.12907251 | 15.53532305 | 8.860034393 | 15.7562809  |
| ENSMUSG00000077791 | 10.61177777 | 6.260555194 | 4.943057334 | 7.249119049 | 8.594335036 |
| ENSMUSG00000077792 | 13.44158517 | 4.869320706 | 7.767661525 | 5.638203705 | 7.161945863 |
| ENSMUSG00000077793 | 2.829807405 | 2.782468975 | 2.824604191 | 2.416373016 | 3.580972932 |

|                    |             |             |             |             |             |
|--------------------|-------------|-------------|-------------|-------------|-------------|
| ENSMUSG00000077794 | 8.489422215 | 3.478086219 | 11.29841676 | 3.221830688 | 4.297167518 |
| ENSMUSG00000077795 | 14.85648888 | 15.30357936 | 14.12302096 | 6.443661377 | 10.7429188  |
| ENSMUSG00000077796 | 9.904325918 | 12.52111039 | 8.473812573 | 9.665492065 | 10.7429188  |
| ENSMUSG00000077797 | 0           | 0           | 0           | 0           | 0           |
| ENSMUSG00000077799 | 9.904325918 | 13.21672763 | 4.943057334 | 7.249119049 | 11.45911338 |
| ENSMUSG00000077802 | 109.6550369 | 198.2509145 | 163.8270431 | 121.6241085 | 100.9834367 |
| ENSMUSG00000077804 | 14.85648888 | 18.08604834 | 21.18453143 | 16.91461111 | 20.05344842 |
| ENSMUSG00000077807 | 7.781970364 | 4.173703463 | 5.649208382 | 5.638203705 | 5.729556691 |
| ENSMUSG00000077812 | 8.489422215 | 9.043024169 | 6.35535943  | 8.054576721 | 4.297167518 |
| ENSMUSG00000077815 | 1.414903703 | 0.695617244 | 0.706151048 | 0           | 1.432389173 |
| ENSMUSG00000077816 | 7.074518513 | 4.173703463 | 7.061510478 | 5.638203705 | 3.580972932 |
| ENSMUSG00000077821 | 12.73413332 | 7.651789682 | 4.236906287 | 8.054576721 | 6.445751277 |
| ENSMUSG00000077829 | 7.074518513 | 7.651789682 | 4.236906287 | 4.832746033 | 6.445751277 |
| ENSMUSG00000077830 | 9.196874066 | 8.347406925 | 7.061510478 | 10.47094974 | 7.87814045  |
| ENSMUSG00000077832 | 6.367066661 | 9.738641413 | 4.943057334 | 3.221830688 | 6.445751277 |
| ENSMUSG00000077834 | 0           | 0           | 0           | 0           | 0           |
| ENSMUSG00000077836 | 9.196874066 | 7.651789682 | 7.061510478 | 7.249119049 | 14.32389173 |
| ENSMUSG00000077839 | 5.65961481  | 4.869320706 | 3.530755239 | 8.054576721 | 9.310529622 |
| ENSMUSG00000077841 | 10.61177777 | 6.260555194 | 4.943057334 | 4.02728836  | 6.445751277 |
| ENSMUSG00000077844 | 9.904325918 | 11.82549314 | 6.35535943  | 5.638203705 | 9.310529622 |
| ENSMUSG00000077846 | 9.196874066 | 9.738641413 | 7.061510478 | 3.221830688 | 7.161945863 |
| ENSMUSG00000077847 | 1.414903703 | 2.086851731 | 2.118453143 | 0           | 1.432389173 |
| ENSMUSG00000077851 | 5.65961481  | 8.347406925 | 7.767661525 | 7.249119049 | 8.594335036 |
| ENSMUSG00000077852 | 10.61177777 | 9.043024169 | 9.179963621 | 4.02728836  | 5.013362104 |
| ENSMUSG00000077857 | 5.65961481  | 3.478086219 | 4.943057334 | 0.805457672 | 2.148583759 |
| ENSMUSG00000077858 | 6.367066661 | 4.173703463 | 2.118453143 | 5.638203705 | 2.864778345 |
| ENSMUSG00000077860 | 7.074518513 | 6.260555194 | 5.649208382 | 7.249119049 | 8.594335036 |
| ENSMUSG00000077863 | 9.904325918 | 4.173703463 | 7.767661525 | 1.610915344 | 5.013362104 |
| ENSMUSG00000077869 | 4.952162959 | 4.869320706 | 2.824604191 | 0           | 1.432389173 |
| ENSMUSG00000077870 | 12.02668147 | 20.86851731 | 12.71071886 | 16.91461111 | 20.05344842 |
| ENSMUSG00000077872 | 0           | 0           | 0           | 0           | 0           |
| ENSMUSG00000077876 | 9.904325918 | 8.347406925 | 11.29841676 | 6.443661377 | 10.02672421 |
| ENSMUSG00000077879 | 0           | 0           | 0           | 0           | 0           |
| ENSMUSG00000077881 | 0           | 0           | 0           | 0           | 0           |
| ENSMUSG00000077884 | 9.196874066 | 6.260555194 | 6.35535943  | 3.221830688 | 5.013362104 |
| ENSMUSG00000077886 | 0           | 0.695617244 | 0.706151048 | 0           | 0           |
| ENSMUSG00000077890 | 0           | 0           | 0.706151048 | 0           | 0.716194586 |
| ENSMUSG00000077892 | 7.074518513 | 6.260555194 | 9.179963621 | 10.47094974 | 7.87814045  |
| ENSMUSG00000077896 | 11.31922962 | 4.173703463 | 6.35535943  | 4.832746033 | 5.729556691 |
| ENSMUSG00000077897 | 7.074518513 | 4.173703463 | 7.767661525 | 1.610915344 | 6.445751277 |
| ENSMUSG00000077902 | 4.952162959 | 6.956172438 | 8.473812573 | 6.443661377 | 7.87814045  |
| ENSMUSG00000077903 | 0           | 0           | 0           | 0           | 0           |
| ENSMUSG00000077921 | 9.904325918 | 7.651789682 | 6.35535943  | 3.221830688 | 3.580972932 |

|                    |             |             |             |             |             |
|--------------------|-------------|-------------|-------------|-------------|-------------|
| ENSMUSG00000077923 | 13.44158517 | 22.2597518  | 17.65377619 | 15.30369577 | 17.18867007 |
| ENSMUSG00000077925 | 0           | 0           | 0           | 0           | 0           |
| ENSMUSG00000077928 | 11.31922962 | 3.478086219 | 4.236906287 | 7.249119049 | 9.310529622 |
| ENSMUSG00000077931 | 9.904325918 | 12.52111039 | 14.12302096 | 24.96918783 | 13.60769714 |
| ENSMUSG00000077938 | 7.074518513 | 4.869320706 | 7.767661525 | 6.443661377 | 7.161945863 |
| ENSMUSG00000077939 | 10.61177777 | 4.173703463 | 7.767661525 | 5.638203705 | 8.594335036 |
| ENSMUSG00000077941 | 0           | 0           | 0           | 0           | 0           |
| ENSMUSG00000077948 | 7.074518513 | 10.43425866 | 9.179963621 | 8.054576721 | 2.864778345 |
| ENSMUSG00000077954 | 0           | 0           | 0           | 0           | 0           |
| ENSMUSG00000077962 | 7.074518513 | 7.651789682 | 10.59226572 | 5.638203705 | 7.161945863 |
| ENSMUSG00000077964 | 9.196874066 | 9.043024169 | 5.649208382 | 4.832746033 | 4.297167518 |
| ENSMUSG00000077965 | 8.489422215 | 10.43425866 | 16.94762515 | 15.30369577 | 18.62105924 |
| ENSMUSG00000077966 | 9.904325918 | 9.043024169 | 9.179963621 | 2.416373016 | 8.594335036 |
| ENSMUSG00000077967 | 66.50047402 | 99.47326586 | 86.85657888 | 90.21125927 | 80.21379367 |
| ENSMUSG00000077971 | 7.781970364 | 10.43425866 | 6.35535943  | 4.832746033 | 5.729556691 |
| ENSMUSG00000077972 | 0           | 0           | 0           | 0           | 0           |
| ENSMUSG00000077973 | 7.781970364 | 9.738641413 | 3.530755239 | 6.443661377 | 6.445751277 |
| ENSMUSG00000077976 | 37.49494812 | 48.69320706 | 33.89525029 | 20.94189947 | 32.94495097 |
| ENSMUSG00000077980 | 0           | 0           | 0           | 0           | 0           |
| ENSMUSG00000077981 | 0           | 0           | 0           | 0           | 0           |
| ENSMUSG00000077990 | 43.86201478 | 66.08363816 | 79.7950684  | 43.49471429 | 58.01176149 |
| ENSMUSG00000077991 | 0           | 0           | 0           | 0           | 0           |
| ENSMUSG00000077995 | 4.952162959 | 5.56493795  | 5.649208382 | 9.665492065 | 3.580972932 |
| ENSMUSG00000077996 | 5.65961481  | 3.478086219 | 9.886114669 | 6.443661377 | 6.445751277 |
| ENSMUSG00000077998 | 0           | 0           | 0           | 0           | 0           |
| ENSMUSG00000077999 | 296.4223257 | 296.3329458 | 300.8203463 | 347.9577143 | 282.180667  |
| ENSMUSG00000078002 | 0           | 0           | 0           | 0           | 0           |
| ENSMUSG00000078006 | 10.61177777 | 12.52111039 | 9.886114669 | 3.221830688 | 5.013362104 |
| ENSMUSG00000078008 | 0           | 0           | 0           | 0           | 0           |
| ENSMUSG00000078010 | 13.44158517 | 20.86851731 | 24.71528667 | 11.27640741 | 12.17530797 |
| ENSMUSG00000078012 | 10.61177777 | 3.478086219 | 10.59226572 | 8.860034393 | 7.161945863 |
| ENSMUSG00000078017 | 0           | 0           | 0           | 0           | 0           |
| ENSMUSG00000078020 | 2.122355554 | 6.260555194 | 3.530755239 | 4.02728836  | 5.013362104 |
| ENSMUSG00000078024 | 2.122355554 | 1.391234488 | 4.236906287 | 0.805457672 | 1.432389173 |
| ENSMUSG00000078025 | 0           | 0           | 0           | 0           | 0           |
| ENSMUSG00000078026 | 0           | 0           | 0           | 0           | 0           |
| ENSMUSG00000078027 | 0           | 0           | 0           | 0           | 0           |
| ENSMUSG00000078031 | 0           | 0           | 0           | 0           | 0           |
| ENSMUSG00000078032 | 0           | 0           | 0           | 0           | 0           |
| ENSMUSG00000078034 | 4.952162959 | 4.869320706 | 3.530755239 | 1.610915344 | 2.148583759 |
| ENSMUSG00000078035 | 0           | 0           | 0           | 0           | 0           |
| ENSMUSG00000078036 | 12.73413332 | 6.956172438 | 12.00456781 | 9.665492065 | 15.7562809  |
| ENSMUSG00000078038 | 0           | 0           | 0           | 0.805457672 | 0.716194586 |

|                    |             |             |             |             |             |
|--------------------|-------------|-------------|-------------|-------------|-------------|
| ENSMUSG00000078041 | 0           | 0           | 0           | 0           | 0           |
| ENSMUSG00000078042 | 7.074518513 | 3.478086219 | 7.767661525 | 4.832746033 | 7.161945863 |
| ENSMUSG00000078057 | 3.537259256 | 6.956172438 | 2.824604191 | 5.638203705 | 6.445751277 |
| ENSMUSG00000078060 | 0           | 0           | 0           | 0           | 0           |
| ENSMUSG00000078061 | 9.196874066 | 12.52111039 | 5.649208382 | 7.249119049 | 8.594335036 |
| ENSMUSG00000078062 | 292.8850664 | 284.5074527 | 268.3373982 | 284.3265582 | 237.0604081 |
| ENSMUSG00000078080 | 10.61177777 | 6.260555194 | 10.59226572 | 8.054576721 | 6.445751277 |
| ENSMUSG00000078087 | 9.904325918 | 7.651789682 | 12.71071886 | 10.47094974 | 7.87814045  |
| ENSMUSG00000078097 | 3.537259256 | 0.695617244 | 2.118453143 | 2.416373016 | 3.580972932 |
| ENSMUSG00000078116 | 11.31922962 | 6.260555194 | 7.061510478 | 5.638203705 | 5.013362104 |
| ENSMUSG00000078122 | 1.414903703 | 5.56493795  | 5.649208382 | 3.221830688 | 4.297167518 |
| ENSMUSG00000078123 | 7.074518513 | 6.260555194 | 2.824604191 | 1.610915344 | 6.445751277 |
| ENSMUSG00000078125 | 11.31922962 | 21.56413456 | 26.12758877 | 13.69278043 | 17.90486466 |
| ENSMUSG00000078126 | 9.196874066 | 6.956172438 | 13.41686991 | 9.665492065 | 10.7429188  |
| ENSMUSG00000078128 | 103.2879703 | 140.5146832 | 128.5194907 | 143.3714656 | 116.7397176 |
| ENSMUSG00000078132 | 1.414903703 | 3.478086219 | 1.412302096 | 6.443661377 | 5.013362104 |
| ENSMUSG00000078141 | 16.97884443 | 11.1298759  | 12.71071886 | 7.249119049 | 12.17530797 |
| ENSMUSG00000078143 | 40.32475552 | 75.12666233 | 75.55816211 | 48.32746033 | 55.86317773 |
| ENSMUSG00000078151 | 14.85648888 | 17.39043109 | 16.94762515 | 14.4982381  | 10.7429188  |
| ENSMUSG00000078162 | 7.781970364 | 7.651789682 | 8.473812573 | 4.02728836  | 7.161945863 |
| ENSMUSG00000078169 | 7.781970364 | 5.56493795  | 2.824604191 | 5.638203705 | 9.310529622 |
| ENSMUSG00000078177 | 4.244711108 | 6.260555194 | 8.473812573 | 3.221830688 | 7.161945863 |
| ENSMUSG00000078180 | 23.34591109 | 36.17209668 | 22.59683353 | 22.55281482 | 20.769643   |
| ENSMUSG00000078182 | 10.61177777 | 7.651789682 | 11.29841676 | 8.054576721 | 7.161945863 |
| ENSMUSG00000078183 | 8.489422215 | 14.60796212 | 10.59226572 | 8.860034393 | 9.310529622 |
| ENSMUSG00000078185 | 31.12788146 | 40.34580014 | 45.19366706 | 31.41284921 | 42.25548059 |
| ENSMUSG00000078187 | 8.489422215 | 7.651789682 | 5.649208382 | 12.08186508 | 11.45911338 |
| ENSMUSG00000078190 | 1.414903703 | 0.695617244 | 1.412302096 | 0           | 0           |
| ENSMUSG00000078192 | 5.65961481  | 7.651789682 | 9.179963621 | 4.02728836  | 9.310529622 |
| ENSMUSG00000078197 | 9.904325918 | 15.30357936 | 14.829172   | 16.10915344 | 19.33725383 |
| ENSMUSG00000078198 | 8.489422215 | 6.956172438 | 9.886114669 | 11.27640741 | 5.729556691 |
| ENSMUSG00000078210 | 6.367066661 | 6.260555194 | 3.530755239 | 3.221830688 | 6.445751277 |
| ENSMUSG00000078212 | 9.904325918 | 6.260555194 | 4.943057334 | 1.610915344 | 0.716194586 |
| ENSMUSG00000078213 | 4.952162959 | 1.391234488 | 2.824604191 | 1.610915344 | 2.148583759 |
| ENSMUSG00000078214 | 6.367066661 | 1.391234488 | 2.118453143 | 3.221830688 | 3.580972932 |
| ENSMUSG00000078238 | 13.44158517 | 18.08604834 | 18.35992724 | 20.94189947 | 27.21539428 |
| ENSMUSG00000078247 | 11.31922962 | 10.43425866 | 13.41686991 | 7.249119049 | 8.594335036 |
| ENSMUSG00000078251 | 9.196874066 | 4.173703463 | 8.473812573 | 8.860034393 | 8.594335036 |
| ENSMUSG00000078254 | 7.074518513 | 8.347406925 | 6.35535943  | 5.638203705 | 7.87814045  |
| ENSMUSG00000078255 | 7.074518513 | 8.347406925 | 9.179963621 | 4.832746033 | 9.310529622 |
| ENSMUSG00000078263 | 12.02668147 | 4.869320706 | 4.236906287 | 6.443661377 | 5.013362104 |
| ENSMUSG00000078269 | 10.61177777 | 8.347406925 | 14.12302096 | 8.860034393 | 10.02672421 |
| ENSMUSG00000078270 | 7.074518513 | 6.260555194 | 7.061510478 | 3.221830688 | 7.161945863 |

|                    |             |             |             |             |             |
|--------------------|-------------|-------------|-------------|-------------|-------------|
| ENSMUSG00000078276 | 10.61177777 | 6.956172438 | 9.179963621 | 4.02728836  | 10.02672421 |
| ENSMUSG00000078280 | 9.196874066 | 9.043024169 | 5.649208382 | 4.832746033 | 4.297167518 |
| ENSMUSG00000078289 | 6.367066661 | 6.260555194 | 9.886114669 | 4.02728836  | 10.02672421 |
| ENSMUSG00000078291 | 8.489422215 | 7.651789682 | 11.29841676 | 5.638203705 | 9.310529622 |
| ENSMUSG00000078300 | 17.68629628 | 13.91234488 | 16.94762515 | 8.860034393 | 13.60769714 |
| ENSMUSG00000078314 | 2.829807405 | 3.478086219 | 3.530755239 | 0.805457672 | 2.148583759 |
| ENSMUSG00000078370 | 4.952162959 | 9.738641413 | 12.71071886 | 6.443661377 | 10.7429188  |
| ENSMUSG00000078377 | 15.56394073 | 11.1298759  | 14.12302096 | 15.30369577 | 20.05344842 |
| ENSMUSG00000078380 | 9.904325918 | 11.82549314 | 15.53532305 | 6.443661377 | 15.7562809  |
| ENSMUSG00000078420 | 7.074518513 | 6.956172438 | 4.236906287 | 5.638203705 | 5.013362104 |
| ENSMUSG00000078430 | 7.781970364 | 6.260555194 | 9.886114669 | 6.443661377 | 5.013362104 |
| ENSMUSG00000078435 | 41.03220737 | 78.60474855 | 62.1412922  | 49.132918   | 55.14698315 |
| ENSMUSG00000078480 | 8.489422215 | 11.1298759  | 5.649208382 | 4.832746033 | 5.013362104 |
| ENSMUSG00000078481 | 10.61177777 | 13.21672763 | 7.767661525 | 3.221830688 | 2.864778345 |
| ENSMUSG00000078488 | 7.781970364 | 7.651789682 | 12.00456781 | 7.249119049 | 9.310529622 |
| ENSMUSG00000078489 | 11.31922962 | 6.956172438 | 7.061510478 | 8.860034393 | 7.161945863 |
| ENSMUSG00000078492 | 4.952162959 | 12.52111039 | 9.886114669 | 5.638203705 | 11.45911338 |
| ENSMUSG00000078494 | 7.074518513 | 4.869320706 | 4.943057334 | 5.638203705 | 6.445751277 |
| ENSMUSG00000078505 | 8.489422215 | 6.260555194 | 9.179963621 | 8.054576721 | 8.594335036 |
| ENSMUSG00000078506 | 9.904325918 | 5.56493795  | 4.943057334 | 4.02728836  | 8.594335036 |
| ENSMUSG00000078508 | 7.781970364 | 6.260555194 | 2.824604191 | 1.610915344 | 3.580972932 |
| ENSMUSG00000078509 | 6.367066661 | 6.260555194 | 7.061510478 | 4.832746033 | 5.729556691 |
| ENSMUSG00000078519 | 1.414903703 | 2.782468975 | 1.412302096 | 1.610915344 | 0.716194586 |
| ENSMUSG00000078525 | 0           | 0           | 0           | 0           | 0           |
| ENSMUSG00000078528 | 16.97884443 | 29.21592424 | 36.01370344 | 22.55281482 | 34.37734014 |
| ENSMUSG00000078531 | 7.781970364 | 5.56493795  | 5.649208382 | 9.665492065 | 5.729556691 |
| ENSMUSG00000078552 | 15.56394073 | 10.43425866 | 18.35992724 | 9.665492065 | 17.18867007 |
| ENSMUSG00000078575 | 8.489422215 | 9.043024169 | 4.236906287 | 4.02728836  | 7.161945863 |
| ENSMUSG00000078586 | 8.489422215 | 6.956172438 | 2.824604191 | 8.860034393 | 7.161945863 |
| ENSMUSG00000078590 | 12.73413332 | 6.260555194 | 9.179963621 | 8.054576721 | 7.87814045  |
| ENSMUSG00000078592 | 6.367066661 | 5.56493795  | 3.530755239 | 2.416373016 | 2.864778345 |
| ENSMUSG00000078600 | 12.02668147 | 7.651789682 | 7.061510478 | 7.249119049 | 5.729556691 |
| ENSMUSG00000078601 | 7.074518513 | 4.173703463 | 4.236906287 | 3.221830688 | 5.729556691 |
| ENSMUSG00000078604 | 26.88317035 | 42.43265187 | 41.66291182 | 37.05105292 | 32.94495097 |
| ENSMUSG00000078607 | 4.952162959 | 6.260555194 | 5.649208382 | 4.832746033 | 1.432389173 |
| ENSMUSG00000078611 | 8.489422215 | 9.738641413 | 9.886114669 | 4.02728836  | 7.87814045  |
| ENSMUSG00000078616 | 8.489422215 | 13.21672763 | 10.59226572 | 7.249119049 | 10.7429188  |
| ENSMUSG00000078618 | 9.904325918 | 2.782468975 | 6.35535943  | 4.832746033 | 6.445751277 |
| ENSMUSG00000078620 | 16.97884443 | 27.12907251 | 25.42143772 | 18.52552646 | 15.04008631 |
| ENSMUSG00000078621 | 7.074518513 | 7.651789682 | 4.236906287 | 4.02728836  | 3.580972932 |
| ENSMUSG00000078632 | 7.074518513 | 2.086851731 | 7.061510478 | 2.416373016 | 8.594335036 |
| ENSMUSG00000078635 | 1.414903703 | 0.695617244 | 1.412302096 | 2.416373016 | 1.432389173 |
| ENSMUSG00000078636 | 13.44158517 | 9.043024169 | 12.00456781 | 11.27640741 | 5.729556691 |

|                    |             |             |             |             |             |
|--------------------|-------------|-------------|-------------|-------------|-------------|
| ENSMUSG00000078655 | 9.904325918 | 11.82549314 | 9.886114669 | 7.249119049 | 10.7429188  |
| ENSMUSG00000078677 | 36.08004441 | 43.12826911 | 44.48751601 | 53.96566403 | 40.82309142 |
| ENSMUSG00000078684 | 41.73965922 | 61.9099347  | 60.02283906 | 81.35122488 | 84.51096119 |
| ENSMUSG00000078685 | 10.61177777 | 4.869320706 | 9.886114669 | 4.832746033 | 3.580972932 |
| ENSMUSG00000078691 | 8.489422215 | 7.651789682 | 12.71071886 | 12.08186508 | 5.013362104 |
| ENSMUSG00000078700 | 18.39374813 | 29.91154148 | 26.83373982 | 28.9964762  | 32.22875639 |
| ENSMUSG00000078735 | 2.829807405 | 0.695617244 | 4.943057334 | 6.443661377 | 1.432389173 |
| ENSMUSG00000078737 | 11.31922962 | 8.347406925 | 12.00456781 | 8.860034393 | 7.87814045  |
| ENSMUSG00000078742 | 2.829807405 | 3.478086219 | 4.236906287 | 3.221830688 | 1.432389173 |
| ENSMUSG00000078753 | 8.489422215 | 6.956172438 | 8.473812573 | 6.443661377 | 4.297167518 |
| ENSMUSG00000078754 | 7.781970364 | 6.956172438 | 4.943057334 | 7.249119049 | 9.310529622 |
| ENSMUSG00000078757 | 5.65961481  | 3.478086219 | 8.473812573 | 6.443661377 | 7.87814045  |
| ENSMUSG00000078779 | 24.05336294 | 25.73783802 | 28.95219296 | 27.38556085 | 30.08017263 |
| ENSMUSG00000078796 | 11.31922962 | 13.21672763 | 7.767661525 | 10.47094974 | 9.310529622 |
| ENSMUSG00000078838 | 16.97884443 | 22.2597518  | 20.47838039 | 31.41284921 | 34.37734014 |
| ENSMUSG00000078840 | 7.074518513 | 4.173703463 | 7.061510478 | 4.832746033 | 5.729556691 |
| ENSMUSG00000078847 | 7.781970364 | 10.43425866 | 9.179963621 | 4.02728836  | 2.864778345 |
| ENSMUSG00000078850 | 6.367066661 | 5.56493795  | 9.886114669 | 4.02728836  | 5.729556691 |
| ENSMUSG00000078864 | 12.73413332 | 15.30357936 | 14.829172   | 19.33098413 | 14.32389173 |
| ENSMUSG00000078868 | 14.14903703 | 8.347406925 | 12.71071886 | 10.47094974 | 11.45911338 |
| ENSMUSG00000078869 | 12.73413332 | 7.651789682 | 9.886114669 | 8.860034393 | 8.594335036 |
| ENSMUSG00000078876 | 5.65961481  | 5.56493795  | 9.886114669 | 4.02728836  | 9.310529622 |
| ENSMUSG00000078891 | 10.61177777 | 7.651789682 | 8.473812573 | 5.638203705 | 7.87814045  |
| ENSMUSG00000078895 | 4.244711108 | 2.782468975 | 2.118453143 | 3.221830688 | 3.580972932 |
| ENSMUSG00000078912 | 8.489422215 | 5.56493795  | 5.649208382 | 8.860034393 | 5.729556691 |
| ENSMUSG00000078915 | 7.781970364 | 7.651789682 | 2.824604191 | 5.638203705 | 8.594335036 |
| ENSMUSG00000078917 | 7.074518513 | 6.956172438 | 7.767661525 | 6.443661377 | 15.7562809  |
| ENSMUSG00000078925 | 7.781970364 | 7.651789682 | 9.179963621 | 3.221830688 | 5.013362104 |
| ENSMUSG00000078926 | 2.829807405 | 2.086851731 | 0.706151048 | 0.805457672 | 1.432389173 |
| ENSMUSG00000078934 | 11.31922962 | 8.347406925 | 5.649208382 | 3.221830688 | 3.580972932 |
| ENSMUSG00000078952 | 10.61177777 | 4.869320706 | 4.236906287 | 1.610915344 | 5.013362104 |
| ENSMUSG00000078953 | 3.537259256 | 0.695617244 | 1.412302096 | 0           | 0           |
| ENSMUSG00000078955 | 6.367066661 | 9.738641413 | 4.943057334 | 5.638203705 | 3.580972932 |
| ENSMUSG00000078957 | 10.61177777 | 4.869320706 | 5.649208382 | 8.860034393 | 7.87814045  |
| ENSMUSG00000078962 | 9.904325918 | 8.347406925 | 9.179963621 | 4.832746033 | 5.729556691 |
| ENSMUSG00000078965 | 11.31922962 | 8.347406925 | 4.943057334 | 8.054576721 | 5.013362104 |
| ENSMUSG00000078967 | 5.65961481  | 6.956172438 | 11.29841676 | 6.443661377 | 8.594335036 |
| ENSMUSG00000078982 | 11.31922962 | 15.30357936 | 16.94762515 | 14.4982381  | 9.310529622 |
| ENSMUSG00000078984 | 13.44158517 | 9.738641413 | 10.59226572 | 8.054576721 | 5.729556691 |
| ENSMUSG00000078991 | 7.074518513 | 4.869320706 | 7.767661525 | 2.416373016 | 8.594335036 |
| ENSMUSG00000079000 | 7.074518513 | 16.69481385 | 16.2414741  | 8.054576721 | 17.18867007 |
| ENSMUSG00000079003 | 7.781970364 | 5.56493795  | 8.473812573 | 29.80193387 | 16.47247549 |
| ENSMUSG00000079010 | 7.781970364 | 13.21672763 | 11.29841676 | 7.249119049 | 9.310529622 |



|                    |             |             |             |             |             |
|--------------------|-------------|-------------|-------------|-------------|-------------|
| ENSMUSG00000079011 | 5.65961481  | 5.56493795  | 7.061510478 | 9.665492065 | 7.161945863 |
| ENSMUSG00000079016 | 3.537259256 | 4.173703463 | 4.943057334 | 0           | 2.864778345 |
| ENSMUSG00000079024 | 7.074518513 | 4.869320706 | 10.59226572 | 4.02728836  | 5.013362104 |
| ENSMUSG00000079030 | 9.196874066 | 11.1298759  | 7.767661525 | 5.638203705 | 9.310529622 |
| ENSMUSG00000079038 | 14.14903703 | 6.956172438 | 14.829172   | 4.832746033 | 5.729556691 |
| ENSMUSG00000079039 | 9.196874066 | 6.260555194 | 7.061510478 | 4.02728836  | 7.87814045  |
| ENSMUSG00000079045 | 4.244711108 | 2.086851731 | 3.530755239 | 2.416373016 | 2.864778345 |
| ENSMUSG00000079048 | 7.074518513 | 11.1298759  | 6.35535943  | 5.638203705 | 2.864778345 |
| ENSMUSG00000079051 | 3.537259256 | 10.43425866 | 8.473812573 | 5.638203705 | 8.594335036 |
| ENSMUSG00000079053 | 6.367066661 | 4.869320706 | 4.236906287 | 44.30017197 | 38.67450766 |
| ENSMUSG00000079061 | 9.904325918 | 3.478086219 | 4.943057334 | 4.832746033 | 5.013362104 |
| ENSMUSG00000079064 | 8.489422215 | 5.56493795  | 4.236906287 | 4.832746033 | 6.445751277 |
| ENSMUSG00000079067 | 8.489422215 | 13.21672763 | 7.767661525 | 5.638203705 | 6.445751277 |
| ENSMUSG00000079070 | 7.781970364 | 9.043024169 | 2.824604191 | 8.860034393 | 7.87814045  |
| ENSMUSG00000079093 | 12.02668147 | 8.347406925 | 4.236906287 | 4.832746033 | 5.729556691 |
| ENSMUSG00000079101 | 14.85648888 | 9.043024169 | 9.179963621 | 1.610915344 | 5.729556691 |
| ENSMUSG00000079137 | 12.02668147 | 6.956172438 | 14.829172   | 6.443661377 | 13.60769714 |
| ENSMUSG00000079138 | 16.97884443 | 23.65098629 | 28.24604191 | 57.99295239 | 65.88990194 |
| ENSMUSG00000079139 | 12.73413332 | 7.651789682 | 14.12302096 | 9.665492065 | 12.17530797 |
| ENSMUSG00000079140 | 10.61177777 | 4.869320706 | 9.886114669 | 5.638203705 | 4.297167518 |
| ENSMUSG00000079143 | 11.31922962 | 15.99919661 | 12.71071886 | 8.860034393 | 12.17530797 |
| ENSMUSG00000079146 | 9.904325918 | 13.91234488 | 8.473812573 | 8.054576721 | 4.297167518 |
| ENSMUSG00000079157 | 9.904325918 | 9.043024169 | 3.530755239 | 3.221830688 | 7.161945863 |
| ENSMUSG00000079163 | 3.537259256 | 13.21672763 | 6.35535943  | 5.638203705 | 11.45911338 |
| ENSMUSG00000079169 | 9.196874066 | 4.173703463 | 7.767661525 | 4.02728836  | 4.297167518 |
| ENSMUSG00000079170 | 10.61177777 | 7.651789682 | 4.943057334 | 3.221830688 | 5.729556691 |
| ENSMUSG00000079171 | 7.781970364 | 6.260555194 | 7.767661525 | 7.249119049 | 5.013362104 |
| ENSMUSG00000079174 | 5.65961481  | 2.782468975 | 4.236906287 | 8.860034393 | 7.87814045  |
| ENSMUSG00000079175 | 12.02668147 | 11.1298759  | 4.236906287 | 5.638203705 | 8.594335036 |
| ENSMUSG00000079179 | 12.02668147 | 18.78166558 | 18.35992724 | 35.44013757 | 35.80972932 |
| ENSMUSG00000079223 | 17.68629628 | 11.82549314 | 12.71071886 | 12.88732275 | 16.47247549 |
| ENSMUSG00000079224 | 7.781970364 | 14.60796212 | 8.473812573 | 12.88732275 | 9.310529622 |
| ENSMUSG00000079225 | 15.56394073 | 13.21672763 | 12.71071886 | 15.30369577 | 12.17530797 |
| ENSMUSG00000079230 | 9.196874066 | 6.260555194 | 5.649208382 | 8.860034393 | 8.594335036 |
| ENSMUSG00000079239 | 7.781970364 | 11.1298759  | 4.943057334 | 5.638203705 | 6.445751277 |
| ENSMUSG00000079247 | 12.73413332 | 7.651789682 | 9.179963621 | 6.443661377 | 12.89150255 |
| ENSMUSG00000079258 | 4.952162959 | 9.043024169 | 12.71071886 | 7.249119049 | 3.580972932 |
| ENSMUSG00000079261 | 8.489422215 | 8.347406925 | 7.767661525 | 8.054576721 | 7.87814045  |
| ENSMUSG00000079264 | 7.781970364 | 6.956172438 | 6.35535943  | 4.832746033 | 5.729556691 |
| ENSMUSG00000079266 | 16.27139258 | 13.21672763 | 23.30298458 | 6.443661377 | 10.7429188  |
| ENSMUSG00000079272 | 14.14903703 | 7.651789682 | 14.829172   | 10.47094974 | 12.17530797 |
| ENSMUSG00000079273 | 10.61177777 | 6.260555194 | 9.886114669 | 8.054576721 | 4.297167518 |
| ENSMUSG00000079276 | 10.61177777 | 8.347406925 | 2.824604191 | 4.832746033 | 4.297167518 |

|                    |             |             |             |             |             |
|--------------------|-------------|-------------|-------------|-------------|-------------|
| ENSMUSG00000079286 | 14.14903703 | 34.78086219 | 28.24604191 | 17.72006879 | 10.02672421 |
| ENSMUSG00000079295 | 8.489422215 | 4.173703463 | 7.767661525 | 9.665492065 | 11.45911338 |
| ENSMUSG00000079297 | 11.31922962 | 6.260555194 | 6.35535943  | 8.054576721 | 7.161945863 |
| ENSMUSG00000079299 | 6.367066661 | 9.738641413 | 5.649208382 | 4.02728836  | 5.729556691 |
| ENSMUSG00000079311 | 9.196874066 | 6.956172438 | 7.061510478 | 6.443661377 | 4.297167518 |
| ENSMUSG00000079323 | 14.14903703 | 25.04222078 | 18.35992724 | 76.51847885 | 49.41742646 |
| ENSMUSG00000079326 | 3.537259256 | 3.478086219 | 3.530755239 | 4.832746033 | 3.580972932 |
| ENSMUSG00000079333 | 7.074518513 | 9.738641413 | 6.35535943  | 8.860034393 | 10.02672421 |
| ENSMUSG00000079342 | 8.489422215 | 10.43425866 | 6.35535943  | 5.638203705 | 5.013362104 |
| ENSMUSG00000079344 | 10.61177777 | 8.347406925 | 5.649208382 | 10.47094974 | 5.729556691 |
| ENSMUSG00000079353 | 7.074518513 | 5.56493795  | 5.649208382 | 5.638203705 | 2.148583759 |
| ENSMUSG00000079356 | 65.08557032 | 75.12666233 | 50.84287544 | 84.57305557 | 63.74131818 |
| ENSMUSG00000079357 | 11.31922962 | 6.956172438 | 9.179963621 | 8.860034393 | 10.02672421 |
| ENSMUSG00000079359 | 6.367066661 | 7.651789682 | 8.473812573 | 6.443661377 | 5.013362104 |
| ENSMUSG00000079360 | 11.31922962 | 9.043024169 | 7.061510478 | 6.443661377 | 4.297167518 |
| ENSMUSG00000079374 | 6.367066661 | 4.173703463 | 2.118453143 | 4.02728836  | 2.148583759 |
| ENSMUSG00000079379 | 7.074518513 | 4.173703463 | 7.767661525 | 7.249119049 | 5.013362104 |
| ENSMUSG00000079380 | 9.904325918 | 5.56493795  | 14.12302096 | 4.02728836  | 7.161945863 |
| ENSMUSG00000079382 | 7.781970364 | 9.043024169 | 10.59226572 | 6.443661377 | 5.013362104 |
| ENSMUSG00000079383 | 9.196874066 | 11.82549314 | 12.71071886 | 9.665492065 | 7.161945863 |
| ENSMUSG00000079386 | 12.73413332 | 9.043024169 | 9.179963621 | 8.054576721 | 7.161945863 |
| ENSMUSG00000079392 | 8.489422215 | 9.043024169 | 7.767661525 | 8.054576721 | 7.87814045  |
| ENSMUSG00000079407 | 9.196874066 | 5.56493795  | 9.179963621 | 3.221830688 | 3.580972932 |
| ENSMUSG00000079416 | 7.781970364 | 6.956172438 | 6.35535943  | 1.610915344 | 8.594335036 |
| ENSMUSG00000079433 | 6.367066661 | 8.347406925 | 9.179963621 | 8.054576721 | 10.7429188  |
| ENSMUSG00000079438 | 9.904325918 | 9.043024169 | 7.767661525 | 6.443661377 | 9.310529622 |
| ENSMUSG00000079439 | 7.074518513 | 9.738641413 | 9.886114669 | 7.249119049 | 6.445751277 |
| ENSMUSG00000079455 | 36.78749627 | 34.08524495 | 31.77679715 | 52.35474869 | 32.22875639 |
| ENSMUSG00000079457 | 49.52162959 | 60.51870021 | 50.84287544 | 67.65844446 | 66.60609653 |
| ENSMUSG00000079467 | 91.26128881 | 118.2549314 | 100.9795998 | 244.8591323 | 171.1705061 |
| ENSMUSG00000079489 | 57.30359995 | 82.08283477 | 65.67204744 | 81.35122488 | 59.44415067 |
| ENSMUSG00000079497 | 9.904325918 | 6.956172438 | 6.35535943  | 6.443661377 | 6.445751277 |
| ENSMUSG00000079499 | 0           | 0           | 0           | 0           | 0           |
| ENSMUSG00000079501 | 12.02668147 | 7.651789682 | 10.59226572 | 16.10915344 | 10.02672421 |
| ENSMUSG00000079505 | 51.64398514 | 87.64777272 | 59.31668801 | 203.780791  | 141.8065281 |
| ENSMUSG00000079524 | 12.02668147 | 9.043024169 | 7.061510478 | 11.27640741 | 7.87814045  |
| ENSMUSG00000079528 | 13.44158517 | 6.956172438 | 7.061510478 | 1.610915344 | 7.87814045  |
| ENSMUSG00000079532 | 0           | 4.173703463 | 3.530755239 | 4.02728836  | 6.445751277 |
| ENSMUSG00000079536 | 5.65961481  | 5.56493795  | 2.118453143 | 2.416373016 | 2.148583759 |
| ENSMUSG00000079537 | 10.61177777 | 8.347406925 | 7.061510478 | 4.832746033 | 5.729556691 |
| ENSMUSG00000079542 | 3.537259256 | 12.52111039 | 5.649208382 | 4.832746033 | 6.445751277 |
| ENSMUSG00000079543 | 9.196874066 | 12.52111039 | 9.179963621 | 5.638203705 | 10.02672421 |
| ENSMUSG00000079544 | 5.65961481  | 6.956172438 | 10.59226572 | 9.665492065 | 3.580972932 |

|                    |             |             |             |             |             |
|--------------------|-------------|-------------|-------------|-------------|-------------|
| ENSMUSG00000079546 | 13.44158517 | 7.651789682 | 11.29841676 | 5.638203705 | 4.297167518 |
| ENSMUSG00000079575 | 8.489422215 | 9.738641413 | 8.473812573 | 5.638203705 | 10.02672421 |
| ENSMUSG00000079577 | 4.244711108 | 3.478086219 | 5.649208382 | 1.610915344 | 3.580972932 |
| ENSMUSG00000079578 | 1.414903703 | 7.651789682 | 2.118453143 | 0.805457672 | 2.864778345 |
| ENSMUSG00000079595 | 9.904325918 | 7.651789682 | 8.473812573 | 5.638203705 | 11.45911338 |
| ENSMUSG00000079600 | 4.244711108 | 2.782468975 | 2.824604191 | 4.02728836  | 2.148583759 |
| ENSMUSG00000079603 | 7.781970364 | 6.956172438 | 7.767661525 | 6.443661377 | 7.161945863 |
| ENSMUSG00000079604 | 8.489422215 | 6.956172438 | 7.767661525 | 2.416373016 | 6.445751277 |
| ENSMUSG00000079645 | 14.14903703 | 11.1298759  | 11.29841676 | 11.27640741 | 7.87814045  |
| ENSMUSG00000079649 | 4.244711108 | 4.869320706 | 6.35535943  | 4.02728836  | 2.148583759 |
| ENSMUSG00000079669 | 6.367066661 | 4.173703463 | 5.649208382 | 7.249119049 | 5.729556691 |
| ENSMUSG00000079671 | 14.14903703 | 4.173703463 | 5.649208382 | 11.27640741 | 7.87814045  |
| ENSMUSG00000079693 | 12.02668147 | 7.651789682 | 7.061510478 | 12.08186508 | 7.87814045  |
| ENSMUSG00000079697 | 5.65961481  | 1.391234488 | 4.236906287 | 2.416373016 | 5.013362104 |
| ENSMUSG00000079698 | 7.781970364 | 9.738641413 | 8.473812573 | 4.02728836  | 7.161945863 |
| ENSMUSG00000079699 | 7.074518513 | 6.956172438 | 4.236906287 | 3.221830688 | 3.580972932 |
| ENSMUSG00000079704 | 4.244711108 | 3.478086219 | 3.530755239 | 0.805457672 | 2.148583759 |
| ENSMUSG00000079711 | 9.904325918 | 7.651789682 | 8.473812573 | 5.638203705 | 10.7429188  |
| ENSMUSG00000079722 | 12.73413332 | 7.651789682 | 7.767661525 | 7.249119049 | 12.17530797 |
| ENSMUSG00000079740 | 15.56394073 | 10.43425866 | 11.29841676 | 9.665492065 | 9.310529622 |
| ENSMUSG00000079741 | 10.61177777 | 6.260555194 | 4.943057334 | 1.610915344 | 3.580972932 |
| ENSMUSG00000079797 | 0           | 0           | 0           | 0           | 0           |
| ENSMUSG00000079871 | 9.904325918 | 7.651789682 | 8.473812573 | 6.443661377 | 9.310529622 |
| ENSMUSG00000079875 | 7.074518513 | 9.738641413 | 14.12302096 | 4.02728836  | 5.013362104 |
| ENSMUSG00000079884 | 9.196874066 | 13.91234488 | 17.65377619 | 17.72006879 | 18.62105924 |
| ENSMUSG00000079889 | 14.85648888 | 7.651789682 | 7.767661525 | 8.860034393 | 10.7429188  |
| ENSMUSG00000079890 | 3.537259256 | 4.173703463 | 1.412302096 | 3.221830688 | 4.297167518 |
| ENSMUSG00000079892 | 7.781970364 | 9.043024169 | 7.061510478 | 3.221830688 | 7.161945863 |
| ENSMUSG00000079893 | 6.367066661 | 5.56493795  | 7.061510478 | 4.02728836  | 6.445751277 |
| ENSMUSG00000079906 | 14.14903703 | 21.56413456 | 13.41686991 | 11.27640741 | 17.90486466 |
| ENSMUSG00000079915 | 6.367066661 | 4.173703463 | 5.649208382 | 5.638203705 | 6.445751277 |
| ENSMUSG00000079941 | 7.781970364 | 5.56493795  | 7.767661525 | 7.249119049 | 7.161945863 |
| ENSMUSG00000079942 | 14.14903703 | 7.651789682 | 7.767661525 | 13.69278043 | 6.445751277 |
| ENSMUSG00000079962 | 7.074518513 | 7.651789682 | 7.767661525 | 4.832746033 | 10.02672421 |
| ENSMUSG00000079963 | 4.244711108 | 1.391234488 | 2.118453143 | 1.610915344 | 2.864778345 |
| ENSMUSG00000079965 | 12.73413332 | 11.82549314 | 15.53532305 | 10.47094974 | 10.7429188  |
| ENSMUSG00000079966 | 12.73413332 | 11.82549314 | 10.59226572 | 7.249119049 | 9.310529622 |
| ENSMUSG00000079988 | 12.73413332 | 14.60796212 | 22.59683353 | 15.30369577 | 7.87814045  |
| ENSMUSG00000079993 | 7.781970364 | 6.956172438 | 9.179963621 | 6.443661377 | 4.297167518 |
| ENSMUSG00000079998 | 9.904325918 | 8.347406925 | 7.061510478 | 4.02728836  | 3.580972932 |
| ENSMUSG00000080002 | 4.244711108 | 4.869320706 | 4.236906287 | 1.610915344 | 6.445751277 |
| ENSMUSG00000080006 | 10.61177777 | 4.173703463 | 9.179963621 | 4.02728836  | 5.013362104 |
| ENSMUSG00000080021 | 148.5648888 | 201.7290007 | 177.950064  | 209.4189947 | 178.332452  |

|                    |             |             |             |             |             |
|--------------------|-------------|-------------|-------------|-------------|-------------|
| ENSMUSG00000080046 | 4.952162959 | 5.56493795  | 7.061510478 | 4.02728836  | 6.445751277 |
| ENSMUSG00000080050 | 2.829807405 | 1.391234488 | 2.824604191 | 3.221830688 | 2.864778345 |
| ENSMUSG00000080051 | 4.244711108 | 1.391234488 | 4.236906287 | 3.221830688 | 0           |
| ENSMUSG00000080054 | 8.489422215 | 10.43425866 | 10.59226572 | 8.054576721 | 5.729556691 |
| ENSMUSG00000080057 | 9.904325918 | 11.1298759  | 5.649208382 | 5.638203705 | 8.594335036 |
| ENSMUSG00000080058 | 41.03220737 | 71.64857611 | 67.79050059 | 334.2649339 | 224.1689055 |
| ENSMUSG00000080059 | 19.10119998 | 9.043024169 | 9.179963621 | 9.665492065 | 11.45911338 |
| ENSMUSG00000080065 | 10.61177777 | 5.56493795  | 7.061510478 | 4.02728836  | 7.161945863 |
| ENSMUSG00000080069 | 1.414903703 | 4.173703463 | 3.530755239 | 4.02728836  | 4.297167518 |
| ENSMUSG00000080071 | 5.65961481  | 5.56493795  | 2.824604191 | 1.610915344 | 1.432389173 |
| ENSMUSG00000080072 | 6.367066661 | 3.478086219 | 4.943057334 | 3.221830688 | 1.432389173 |
| ENSMUSG00000080073 | 9.904325918 | 2.782468975 | 7.061510478 | 5.638203705 | 2.864778345 |
| ENSMUSG00000080076 | 8.489422215 | 11.1298759  | 4.236906287 | 9.665492065 | 5.013362104 |
| ENSMUSG00000080078 | 18.39374813 | 12.52111039 | 5.649208382 | 9.665492065 | 5.729556691 |
| ENSMUSG00000080142 | 10.61177777 | 9.043024169 | 6.35535943  | 5.638203705 | 5.013362104 |
| ENSMUSG00000080152 | 9.904325918 | 16.69481385 | 12.00456781 | 4.832746033 | 6.445751277 |
| ENSMUSG00000080155 | 4.244711108 | 2.086851731 | 4.943057334 | 4.02728836  | 2.864778345 |
| ENSMUSG00000080158 | 6.367066661 | 12.52111039 | 9.886114669 | 4.02728836  | 5.729556691 |
| ENSMUSG00000080175 | 10.61177777 | 10.43425866 | 7.061510478 | 6.443661377 | 7.87814045  |
| ENSMUSG00000080180 | 16.97884443 | 11.1298759  | 10.59226572 | 11.27640741 | 7.87814045  |
| ENSMUSG00000080186 | 13.44158517 | 4.173703463 | 3.530755239 | 5.638203705 | 4.297167518 |
| ENSMUSG00000080193 | 10.61177777 | 9.043024169 | 13.41686991 | 5.638203705 | 8.594335036 |
| ENSMUSG00000080198 | 12.73413332 | 7.651789682 | 12.71071886 | 10.47094974 | 7.87814045  |
| ENSMUSG00000080205 | 9.904325918 | 9.738641413 | 4.236906287 | 4.02728836  | 7.161945863 |
| ENSMUSG00000080222 | 10.61177777 | 7.651789682 | 9.179963621 | 4.832746033 | 6.445751277 |
| ENSMUSG00000080223 | 9.196874066 | 4.869320706 | 7.767661525 | 4.832746033 | 9.310529622 |
| ENSMUSG00000080227 | 6.367066661 | 12.52111039 | 11.29841676 | 5.638203705 | 13.60769714 |
| ENSMUSG00000080237 | 84.1867703  | 137.7322143 | 114.3964697 | 103.098582  | 83.7947666  |
| ENSMUSG00000080241 | 2.122355554 | 2.782468975 | 2.824604191 | 3.221830688 | 2.148583759 |
| ENSMUSG00000080242 | 7.781970364 | 11.1298759  | 11.29841676 | 8.860034393 | 15.04008631 |
| ENSMUSG00000080250 | 4.952162959 | 6.260555194 | 5.649208382 | 1.610915344 | 2.864778345 |
| ENSMUSG00000080254 | 0           | 0           | 0           | 0           | 0.716194586 |
| ENSMUSG00000080266 | 4.244711108 | 3.478086219 | 4.943057334 | 4.02728836  | 3.580972932 |
| ENSMUSG00000080283 | 7.781970364 | 5.56493795  | 5.649208382 | 7.249119049 | 2.148583759 |
| ENSMUSG00000080298 | 5.65961481  | 4.869320706 | 3.530755239 | 0.805457672 | 5.729556691 |
| ENSMUSG00000080299 | 2.829807405 | 3.478086219 | 2.118453143 | 0           | 3.580972932 |
| ENSMUSG00000080300 | 2.829807405 | 5.56493795  | 4.943057334 | 3.221830688 | 0.716194586 |
| ENSMUSG00000080303 | 14.14903703 | 11.82549314 | 6.35535943  | 6.443661377 | 12.17530797 |
| ENSMUSG00000080317 | 2.122355554 | 9.043024169 | 7.061510478 | 5.638203705 | 5.013362104 |
| ENSMUSG00000080321 | 4.952162959 | 2.782468975 | 3.530755239 | 4.02728836  | 0.716194586 |
| ENSMUSG00000080326 | 14.14903703 | 8.347406925 | 9.179963621 | 3.221830688 | 7.87814045  |
| ENSMUSG00000080330 | 1.414903703 | 3.478086219 | 3.530755239 | 4.02728836  | 2.864778345 |
| ENSMUSG00000080331 | 6.367066661 | 3.478086219 | 4.236906287 | 2.416373016 | 0           |

|                    |             |             |             |             |             |
|--------------------|-------------|-------------|-------------|-------------|-------------|
| ENSMUSG00000080334 | 11.31922962 | 6.260555194 | 15.53532305 | 7.249119049 | 10.02672421 |
| ENSMUSG00000080336 | 8.489422215 | 11.1298759  | 7.767661525 | 4.02728836  | 7.87814045  |
| ENSMUSG00000080342 | 3.537259256 | 6.956172438 | 7.767661525 | 12.08186508 | 7.87814045  |
| ENSMUSG00000080345 | 9.904325918 | 10.43425866 | 10.59226572 | 6.443661377 | 4.297167518 |
| ENSMUSG00000080346 | 8.489422215 | 9.043024169 | 7.767661525 | 4.02728836  | 4.297167518 |
| ENSMUSG00000080347 | 9.196874066 | 7.651789682 | 7.061510478 | 7.249119049 | 8.594335036 |
| ENSMUSG00000080348 | 9.196874066 | 6.260555194 | 7.767661525 | 4.832746033 | 7.87814045  |
| ENSMUSG00000080349 | 9.196874066 | 6.956172438 | 9.179963621 | 5.638203705 | 4.297167518 |
| ENSMUSG00000080350 | 4.952162959 | 5.56493795  | 10.59226572 | 4.832746033 | 7.161945863 |
| ENSMUSG00000080352 | 0           | 0           | 0           | 0           | 0           |
| ENSMUSG00000080356 | 0           | 0           | 0           | 0.805457672 | 0.716194586 |
| ENSMUSG00000080358 | 15.56394073 | 11.1298759  | 11.29841676 | 9.665492065 | 9.310529622 |
| ENSMUSG00000080359 | 7.074518513 | 6.956172438 | 7.061510478 | 3.221830688 | 5.013362104 |
| ENSMUSG00000080360 | 12.73413332 | 9.738641413 | 10.59226572 | 4.02728836  | 11.45911338 |
| ENSMUSG00000080363 | 7.074518513 | 7.651789682 | 9.179963621 | 5.638203705 | 5.013362104 |
| ENSMUSG00000080364 | 12.73413332 | 15.30357936 | 9.886114669 | 49.93837567 | 34.37734014 |
| ENSMUSG00000080365 | 34.66514071 | 43.82388636 | 36.71985448 | 27.38556085 | 36.5259239  |
| ENSMUSG00000080366 | 8.489422215 | 5.56493795  | 4.943057334 | 4.02728836  | 7.87814045  |
| ENSMUSG00000080367 | 4.244711108 | 2.086851731 | 3.530755239 | 0           | 0.716194586 |
| ENSMUSG00000080368 | 4.952162959 | 6.956172438 | 9.886114669 | 5.638203705 | 4.297167518 |
| ENSMUSG00000080370 | 9.904325918 | 11.1298759  | 7.061510478 | 11.27640741 | 11.45911338 |
| ENSMUSG00000080374 | 55.88869625 | 70.25734162 | 84.03197468 | 149.815127  | 126.0502472 |
| ENSMUSG00000080378 | 6.367066661 | 5.56493795  | 4.236906287 | 6.443661377 | 3.580972932 |
| ENSMUSG00000080380 | 2.829807405 | 6.260555194 | 7.061510478 | 3.221830688 | 2.864778345 |
| ENSMUSG00000080383 | 12.73413332 | 6.260555194 | 5.649208382 | 4.832746033 | 6.445751277 |
| ENSMUSG00000080384 | 61.54831106 | 96.69079689 | 80.50121945 | 53.96566403 | 78.7814045  |
| ENSMUSG00000080385 | 10.61177777 | 7.651789682 | 3.530755239 | 8.860034393 | 7.161945863 |
| ENSMUSG00000080390 | 9.904325918 | 11.1298759  | 7.767661525 | 6.443661377 | 9.310529622 |
| ENSMUSG00000080391 | 11.31922962 | 10.43425866 | 5.649208382 | 4.02728836  | 5.013362104 |
| ENSMUSG00000080394 | 2.829807405 | 4.869320706 | 4.236906287 | 8.860034393 | 4.297167518 |
| ENSMUSG00000080396 | 77.11225179 | 102.9513521 | 83.32582364 | 167.5351958 | 123.9016634 |
| ENSMUSG00000080401 | 7.074518513 | 11.1298759  | 7.767661525 | 4.832746033 | 2.148583759 |
| ENSMUSG00000080402 | 10.61177777 | 3.478086219 | 7.767661525 | 3.221830688 | 5.729556691 |
| ENSMUSG00000080405 | 0           | 0           | 0           | 0           | 0           |
| ENSMUSG00000080406 | 0           | 0           | 0.706151048 | 0           | 0.716194586 |
| ENSMUSG00000080408 | 9.196874066 | 6.956172438 | 4.943057334 | 5.638203705 | 7.161945863 |
| ENSMUSG00000080409 | 0.707451851 | 0           | 0.706151048 | 0           | 0           |
| ENSMUSG00000080410 | 17.68629628 | 21.56413456 | 19.06607829 | 12.08186508 | 18.62105924 |
| ENSMUSG00000080411 | 0           | 0           | 0           | 0           | 0           |
| ENSMUSG00000080412 | 10.61177777 | 4.173703463 | 7.767661525 | 1.610915344 | 4.297167518 |
| ENSMUSG00000080413 | 7.781970364 | 9.043024169 | 9.886114669 | 12.08186508 | 6.445751277 |
| ENSMUSG00000080415 | 9.904325918 | 9.043024169 | 8.473812573 | 4.832746033 | 7.87814045  |
| ENSMUSG00000080419 | 3.537259256 | 5.56493795  | 4.943057334 | 4.832746033 | 4.297167518 |

|                    |             |             |             |             |             |
|--------------------|-------------|-------------|-------------|-------------|-------------|
| ENSMUSG00000080424 | 8.489422215 | 6.956172438 | 9.886114669 | 7.249119049 | 10.02672421 |
| ENSMUSG00000080425 | 9.904325918 | 4.869320706 | 7.767661525 | 3.221830688 | 5.729556691 |
| ENSMUSG00000080426 | 10.61177777 | 6.260555194 | 9.179963621 | 7.249119049 | 3.580972932 |
| ENSMUSG00000080427 | 2.829807405 | 2.782468975 | 3.530755239 | 4.832746033 | 3.580972932 |
| ENSMUSG00000080428 | 2.122355554 | 4.173703463 | 4.943057334 | 0.805457672 | 2.864778345 |
| ENSMUSG00000080430 | 9.904325918 | 6.260555194 | 4.236906287 | 7.249119049 | 5.729556691 |
| ENSMUSG00000080432 | 9.904325918 | 5.56493795  | 9.179963621 | 6.443661377 | 10.7429188  |
| ENSMUSG00000080434 | 12.02668147 | 4.869320706 | 7.061510478 | 1.610915344 | 5.729556691 |
| ENSMUSG00000080437 | 6.367066661 | 9.738641413 | 4.236906287 | 4.02728836  | 2.864778345 |
| ENSMUSG00000080440 | 71.45263698 | 103.6469693 | 105.2165061 | 116.7913625 | 110.2939663 |
| ENSMUSG00000080441 | 19.80865184 | 20.17290007 | 32.4829482  | 12.88732275 | 12.17530797 |
| ENSMUSG00000080443 | 9.904325918 | 7.651789682 | 4.943057334 | 7.249119049 | 5.729556691 |
| ENSMUSG00000080445 | 6.367066661 | 4.173703463 | 6.35535943  | 2.416373016 | 10.02672421 |
| ENSMUSG00000080451 | 10.61177777 | 26.43345526 | 19.06607829 | 12.08186508 | 17.90486466 |
| ENSMUSG00000080452 | 2.122355554 | 3.478086219 | 3.530755239 | 8.860034393 | 9.310529622 |
| ENSMUSG00000080454 | 13.44158517 | 15.99919661 | 15.53532305 | 7.249119049 | 6.445751277 |
| ENSMUSG00000080455 | 37.49494812 | 70.25734162 | 48.7244223  | 32.21830688 | 42.25548059 |
| ENSMUSG00000080459 | 0           | 0           | 0           | 0           | 0           |
| ENSMUSG00000080461 | 75.69734809 | 116.863697  | 107.3349593 | 98.265836   | 88.09193412 |
| ENSMUSG00000080463 | 0           | 0           | 0           | 0           | 0           |
| ENSMUSG00000080465 | 7.781970364 | 8.347406925 | 10.59226572 | 15.30369577 | 12.17530797 |
| ENSMUSG00000080467 | 3.537259256 | 1.391234488 | 0.706151048 | 2.416373016 | 4.297167518 |
| ENSMUSG00000080468 | 14.14903703 | 12.52111039 | 12.00456781 | 26.58010318 | 23.63442135 |
| ENSMUSG00000080469 | 11.31922962 | 45.21512085 | 20.47838039 | 33.82922223 | 38.67450766 |
| ENSMUSG00000080473 | 38.90985182 | 81.38721752 | 69.90895373 | 77.32393652 | 70.90326405 |
| ENSMUSG00000080474 | 4.952162959 | 6.956172438 | 4.943057334 | 7.249119049 | 10.02672421 |
| ENSMUSG00000080476 | 0           | 0           | 0           | 0           | 0           |
| ENSMUSG00000080478 | 11.31922962 | 14.60796212 | 16.2414741  | 33.82922223 | 19.33725383 |
| ENSMUSG00000080480 | 4.952162959 | 4.173703463 | 2.824604191 | 3.221830688 | 5.013362104 |
| ENSMUSG00000080485 | 0           | 0           | 0           | 0           | 0           |
| ENSMUSG00000080486 | 0           | 0           | 0           | 0           | 0           |
| ENSMUSG00000080487 | 11.31922962 | 4.869320706 | 6.35535943  | 7.249119049 | 4.297167518 |
| ENSMUSG00000080495 | 0           | 0           | 0           | 0           | 0           |
| ENSMUSG00000080498 | 7.074518513 | 3.478086219 | 3.530755239 | 3.221830688 | 2.864778345 |
| ENSMUSG00000080499 | 5.65961481  | 7.651789682 | 9.886114669 | 9.665492065 | 7.161945863 |
| ENSMUSG00000080500 | 0.707451851 | 0.695617244 | 0           | 0           | 0           |
| ENSMUSG00000080504 | 0           | 0           | 0           | 0           | 0           |
| ENSMUSG00000080506 | 6.367066661 | 9.043024169 | 10.59226572 | 8.054576721 | 7.161945863 |
| ENSMUSG00000080507 | 4.952162959 | 6.260555194 | 3.530755239 | 7.249119049 | 8.594335036 |
| ENSMUSG00000080508 | 7.074518513 | 13.21672763 | 5.649208382 | 3.221830688 | 6.445751277 |
| ENSMUSG00000080511 | 8.489422215 | 6.956172438 | 7.061510478 | 3.221830688 | 7.161945863 |
| ENSMUSG00000080515 | 10.61177777 | 8.347406925 | 6.35535943  | 5.638203705 | 6.445751277 |
| ENSMUSG00000080516 | 10.61177777 | 6.956172438 | 7.767661525 | 4.02728836  | 13.60769714 |

|                    |             |             |             |             |             |
|--------------------|-------------|-------------|-------------|-------------|-------------|
| ENSMUSG00000080517 | 9.904325918 | 9.043024169 | 7.061510478 | 6.443661377 | 2.864778345 |
| ENSMUSG00000080518 | 65.08557032 | 99.47326586 | 110.8657145 | 232.7772672 | 160.4275873 |
| ENSMUSG00000080519 | 6.367066661 | 9.043024169 | 5.649208382 | 7.249119049 | 6.445751277 |
| ENSMUSG00000080522 | 12.02668147 | 11.1298759  | 8.473812573 | 5.638203705 | 7.87814045  |
| ENSMUSG00000080524 | 6.367066661 | 8.347406925 | 7.061510478 | 7.249119049 | 3.580972932 |
| ENSMUSG00000080526 | 9.196874066 | 6.956172438 | 6.35535943  | 7.249119049 | 9.310529622 |
| ENSMUSG00000080527 | 0.707451851 | 0           | 0.706151048 | 0           | 0.716194586 |
| ENSMUSG00000080529 | 9.904325918 | 13.21672763 | 11.29841676 | 12.88732275 | 8.594335036 |
| ENSMUSG00000080530 | 87.01657771 | 128.6891901 | 96.74269354 | 103.9040397 | 86.65954495 |
| ENSMUSG00000080533 | 12.02668147 | 8.347406925 | 13.41686991 | 12.08186508 | 12.17530797 |
| ENSMUSG00000080536 | 9.196874066 | 9.738641413 | 8.473812573 | 7.249119049 | 5.729556691 |
| ENSMUSG00000080538 | 4.952162959 | 8.347406925 | 7.767661525 | 6.443661377 | 7.87814045  |
| ENSMUSG00000080539 | 7.781970364 | 11.82549314 | 9.886114669 | 7.249119049 | 8.594335036 |
| ENSMUSG00000080540 | 0           | 1.391234488 | 0           | 0           | 0.716194586 |
| ENSMUSG00000080542 | 64.37811846 | 90.43024169 | 87.56272992 | 143.3714656 | 121.7530797 |
| ENSMUSG00000080543 | 165.5437332 | 232.3361594 | 194.8976892 | 157.8697037 | 158.2790036 |
| ENSMUSG00000080544 | 15.56394073 | 4.869320706 | 6.35535943  | 8.860034393 | 8.594335036 |
| ENSMUSG00000080545 | 12.73413332 | 9.043024169 | 4.943057334 | 7.249119049 | 7.161945863 |
| ENSMUSG00000080547 | 9.904325918 | 7.651789682 | 6.35535943  | 3.221830688 | 9.310529622 |
| ENSMUSG00000080549 | 9.904325918 | 6.260555194 | 9.886114669 | 5.638203705 | 1.432389173 |
| ENSMUSG00000080555 | 12.73413332 | 5.56493795  | 8.473812573 | 3.221830688 | 9.310529622 |
| ENSMUSG00000080556 | 8.489422215 | 8.347406925 | 4.943057334 | 9.665492065 | 5.729556691 |
| ENSMUSG00000080557 | 7.074518513 | 6.260555194 | 10.59226572 | 5.638203705 | 5.729556691 |
| ENSMUSG00000080558 | 0           | 0           | 0           | 0           | 0           |
| ENSMUSG00000080561 | 7.074518513 | 6.260555194 | 7.767661525 | 6.443661377 | 8.594335036 |
| ENSMUSG00000080562 | 6.367066661 | 9.043024169 | 5.649208382 | 5.638203705 | 9.310529622 |
| ENSMUSG00000080566 | 7.781970364 | 5.56493795  | 7.061510478 | 2.416373016 | 6.445751277 |
| ENSMUSG00000080573 | 77.11225179 | 113.3856107 | 110.1595635 | 178.8116032 | 153.2656415 |
| ENSMUSG00000080574 | 25.46826665 | 42.43265187 | 33.89525029 | 27.38556085 | 35.80972932 |
| ENSMUSG00000080575 | 167.6660887 | 185.7298041 | 210.4330122 | 234.3881826 | 198.3859004 |
| ENSMUSG00000080577 | 7.074518513 | 6.260555194 | 9.179963621 | 4.832746033 | 8.594335036 |
| ENSMUSG00000080580 | 7.781970364 | 9.738641413 | 10.59226572 | 6.443661377 | 7.161945863 |
| ENSMUSG00000080582 | 2.829807405 | 0.695617244 | 4.236906287 | 1.610915344 | 4.297167518 |
| ENSMUSG00000080586 | 11.31922962 | 5.56493795  | 5.649208382 | 4.02728836  | 2.864778345 |
| ENSMUSG00000080590 | 7.074518513 | 7.651789682 | 4.943057334 | 5.638203705 | 7.87814045  |
| ENSMUSG00000080592 | 6.367066661 | 7.651789682 | 6.35535943  | 4.832746033 | 7.161945863 |
| ENSMUSG00000080594 | 0.707451851 | 0           | 1.412302096 | 3.221830688 | 0.716194586 |
| ENSMUSG00000080595 | 10.61177777 | 4.173703463 | 6.35535943  | 2.416373016 | 6.445751277 |
| ENSMUSG00000080596 | 9.904325918 | 3.478086219 | 2.824604191 | 2.416373016 | 5.013362104 |
| ENSMUSG00000080597 | 4.244711108 | 15.30357936 | 14.12302096 | 7.249119049 | 8.594335036 |
| ENSMUSG00000080600 | 8.489422215 | 7.651789682 | 6.35535943  | 8.054576721 | 8.594335036 |
| ENSMUSG00000080601 | 8.489422215 | 13.21672763 | 4.236906287 | 3.221830688 | 3.580972932 |
| ENSMUSG00000080602 | 6.367066661 | 6.956172438 | 7.767661525 | 4.832746033 | 7.161945863 |

|                    |             |             |             |             |             |
|--------------------|-------------|-------------|-------------|-------------|-------------|
| ENSMUSG00000080607 | 10.61177777 | 5.56493795  | 10.59226572 | 5.638203705 | 5.013362104 |
| ENSMUSG00000080609 | 8.489422215 | 6.260555194 | 9.886114669 | 8.860034393 | 7.87814045  |
| ENSMUSG00000080610 | 0           | 0           | 0           | 0           | 0           |
| ENSMUSG00000080613 | 7.781970364 | 9.738641413 | 9.179963621 | 5.638203705 | 5.729556691 |
| ENSMUSG00000080615 | 0.707451851 | 0.695617244 | 2.824604191 | 2.416373016 | 1.432389173 |
| ENSMUSG00000080616 | 2.829807405 | 1.391234488 | 2.118453143 | 4.832746033 | 3.580972932 |
| ENSMUSG00000080622 | 27.5906222  | 49.38882431 | 43.07521391 | 41.07834128 | 44.40406435 |
| ENSMUSG00000080624 | 0           | 0           | 0           | 0           | 0           |
| ENSMUSG00000080625 | 11.31922962 | 6.260555194 | 7.767661525 | 4.832746033 | 7.161945863 |
| ENSMUSG00000080626 | 18.39374813 | 22.2597518  | 24.71528667 | 16.10915344 | 17.90486466 |
| ENSMUSG00000080627 | 0           | 0           | 0           | 0           | 0           |
| ENSMUSG00000080631 | 9.904325918 | 7.651789682 | 4.236906287 | 5.638203705 | 5.729556691 |
| ENSMUSG00000080632 | 16.97884443 | 22.2597518  | 17.65377619 | 16.10915344 | 23.63442135 |
| ENSMUSG00000080635 | 8.489422215 | 11.82549314 | 6.35535943  | 4.02728836  | 6.445751277 |
| ENSMUSG00000080636 | 0           | 0           | 0.706151048 | 0           | 0           |
| ENSMUSG00000080645 | 12.73413332 | 14.60796212 | 15.53532305 | 10.47094974 | 13.60769714 |
| ENSMUSG00000080649 | 0           | 0           | 0           | 0           | 0           |
| ENSMUSG00000080651 | 12.73413332 | 6.260555194 | 4.943057334 | 4.02728836  | 6.445751277 |
| ENSMUSG00000080653 | 0           | 0           | 0           | 0           | 0           |
| ENSMUSG00000080655 | 14.85648888 | 8.347406925 | 6.35535943  | 4.02728836  | 3.580972932 |
| ENSMUSG00000080657 | 0           | 0           | 0           | 0           | 0           |
| ENSMUSG00000080659 | 9.904325918 | 11.82549314 | 10.59226572 | 10.47094974 | 6.445751277 |
| ENSMUSG00000080661 | 4.952162959 | 6.956172438 | 7.767661525 | 7.249119049 | 6.445751277 |
| ENSMUSG00000080662 | 10.61177777 | 8.347406925 | 8.473812573 | 4.832746033 | 8.594335036 |
| ENSMUSG00000080663 | 7.074518513 | 6.956172438 | 6.35535943  | 4.832746033 | 5.729556691 |
| ENSMUSG00000080665 | 0.707451851 | 1.391234488 | 0           | 0           | 1.432389173 |
| ENSMUSG00000080666 | 10.61177777 | 4.869320706 | 3.530755239 | 6.443661377 | 10.02672421 |
| ENSMUSG00000080668 | 12.73413332 | 3.478086219 | 5.649208382 | 5.638203705 | 9.310529622 |
| ENSMUSG00000080669 | 13.44158517 | 8.347406925 | 9.179963621 | 7.249119049 | 13.60769714 |
| ENSMUSG00000080671 | 7.781970364 | 13.91234488 | 4.236906287 | 4.832746033 | 10.02672421 |
| ENSMUSG00000080673 | 10.61177777 | 6.956172438 | 7.767661525 | 6.443661377 | 7.87814045  |
| ENSMUSG00000080676 | 12.02668147 | 9.043024169 | 11.29841676 | 11.27640741 | 8.594335036 |
| ENSMUSG00000080678 | 3.537259256 | 0.695617244 | 0.706151048 | 1.610915344 | 1.432389173 |
| ENSMUSG00000080680 | 6.367066661 | 5.56493795  | 7.061510478 | 4.02728836  | 6.445751277 |
| ENSMUSG00000080681 | 8.489422215 | 11.1298759  | 5.649208382 | 12.08186508 | 22.20203218 |
| ENSMUSG00000080683 | 1.414903703 | 0.695617244 | 0.706151048 | 0.805457672 | 2.864778345 |
| ENSMUSG00000080684 | 0           | 0           | 0           | 0           | 0           |
| ENSMUSG00000080686 | 0           | 0           | 0           | 0           | 0           |
| ENSMUSG00000080687 | 0           | 0           | 0           | 0           | 0           |
| ENSMUSG00000080689 | 6.367066661 | 6.956172438 | 9.886114669 | 6.443661377 | 7.87814045  |
| ENSMUSG00000080694 | 4.952162959 | 11.1298759  | 6.35535943  | 7.249119049 | 5.729556691 |
| ENSMUSG00000080695 | 3.537259256 | 2.086851731 | 4.943057334 | 1.610915344 | 1.432389173 |
| ENSMUSG00000080696 | 7.781970364 | 4.173703463 | 5.649208382 | 2.416373016 | 7.161945863 |



|                    |             |             |             |             |             |
|--------------------|-------------|-------------|-------------|-------------|-------------|
| ENSMUSG00000080697 | 7.781970364 | 7.651789682 | 7.061510478 | 2.416373016 | 7.161945863 |
| ENSMUSG00000080698 | 9.196874066 | 9.043024169 | 6.35535943  | 2.416373016 | 5.013362104 |
| ENSMUSG00000080700 | 8.489422215 | 5.56493795  | 7.061510478 | 9.665492065 | 4.297167518 |
| ENSMUSG00000080701 | 19.10119998 | 32.69401046 | 31.77679715 | 27.38556085 | 32.94495097 |
| ENSMUSG00000080703 | 7.781970364 | 7.651789682 | 14.829172   | 6.443661377 | 10.02672421 |
| ENSMUSG00000080704 | 12.02668147 | 8.347406925 | 7.767661525 | 10.47094974 | 5.013362104 |
| ENSMUSG00000080705 | 5.65961481  | 5.56493795  | 7.767661525 | 1.610915344 | 12.17530797 |
| ENSMUSG00000080706 | 7.781970364 | 9.738641413 | 12.71071886 | 7.249119049 | 6.445751277 |
| ENSMUSG00000080707 | 7.781970364 | 4.173703463 | 7.061510478 | 7.249119049 | 7.87814045  |
| ENSMUSG00000080708 | 18.39374813 | 8.347406925 | 12.00456781 | 16.91461111 | 16.47247549 |
| ENSMUSG00000080709 | 8.489422215 | 8.347406925 | 9.886114669 | 5.638203705 | 7.87814045  |
| ENSMUSG00000080710 | 3.537259256 | 4.869320706 | 4.236906287 | 2.416373016 | 4.297167518 |
| ENSMUSG00000080711 | 3.537259256 | 4.869320706 | 4.236906287 | 4.02728836  | 9.310529622 |
| ENSMUSG00000080712 | 29.71297775 | 46.60635533 | 36.71985448 | 46.71654498 | 40.82309142 |
| ENSMUSG00000080713 | 6.367066661 | 4.173703463 | 7.767661525 | 4.02728836  | 5.729556691 |
| ENSMUSG00000080714 | 4.244711108 | 6.956172438 | 6.35535943  | 4.02728836  | 4.297167518 |
| ENSMUSG00000080715 | 16.27139258 | 20.17290007 | 9.886114669 | 7.249119049 | 5.729556691 |
| ENSMUSG00000080716 | 7.781970364 | 6.956172438 | 6.35535943  | 4.832746033 | 5.013362104 |
| ENSMUSG00000080718 | 7.074518513 | 2.086851731 | 1.412302096 | 2.416373016 | 0.716194586 |
| ENSMUSG00000080719 | 10.61177777 | 6.260555194 | 7.061510478 | 5.638203705 | 6.445751277 |
| ENSMUSG00000080720 | 10.61177777 | 11.1298759  | 17.65377619 | 6.443661377 | 7.161945863 |
| ENSMUSG00000080721 | 10.61177777 | 7.651789682 | 9.179963621 | 1.610915344 | 8.594335036 |
| ENSMUSG00000080722 | 6.367066661 | 7.651789682 | 11.29841676 | 5.638203705 | 10.02672421 |
| ENSMUSG00000080723 | 14.85648888 | 17.39043109 | 16.2414741  | 14.4982381  | 19.33725383 |
| ENSMUSG00000080726 | 9.904325918 | 6.260555194 | 13.41686991 | 4.832746033 | 9.310529622 |
| ENSMUSG00000080728 | 11.31922962 | 8.347406925 | 8.473812573 | 7.249119049 | 7.161945863 |
| ENSMUSG00000080729 | 9.904325918 | 8.347406925 | 7.767661525 | 2.416373016 | 6.445751277 |
| ENSMUSG00000080730 | 7.781970364 | 11.82549314 | 7.061510478 | 3.221830688 | 7.161945863 |
| ENSMUSG00000080731 | 36.78749627 | 55.6493795  | 46.60596915 | 53.96566403 | 52.99839939 |
| ENSMUSG00000080732 | 16.27139258 | 11.1298759  | 9.886114669 | 14.4982381  | 7.87814045  |
| ENSMUSG00000080733 | 2.122355554 | 4.173703463 | 4.236906287 | 1.610915344 | 3.580972932 |
| ENSMUSG00000080734 | 11.31922962 | 11.82549314 | 6.35535943  | 6.443661377 | 9.310529622 |
| ENSMUSG00000080735 | 7.074518513 | 8.347406925 | 7.061510478 | 5.638203705 | 8.594335036 |
| ENSMUSG00000080736 | 7.781970364 | 10.43425866 | 11.29841676 | 4.832746033 | 5.013362104 |
| ENSMUSG00000080737 | 3.537259256 | 2.782468975 | 2.824604191 | 3.221830688 | 0           |
| ENSMUSG00000080738 | 8.489422215 | 9.738641413 | 9.179963621 | 5.638203705 | 7.161945863 |
| ENSMUSG00000080739 | 8.489422215 | 11.1298759  | 8.473812573 | 2.416373016 | 10.7429188  |
| ENSMUSG00000080741 | 0           | 1.391234488 | 0           | 0           | 0.716194586 |
| ENSMUSG00000080742 | 11.31922962 | 6.260555194 | 9.179963621 | 5.638203705 | 7.161945863 |
| ENSMUSG00000080743 | 4.244711108 | 2.086851731 | 4.943057334 | 3.221830688 | 4.297167518 |
| ENSMUSG00000080744 | 12.73413332 | 13.91234488 | 9.179963621 | 4.832746033 | 5.013362104 |
| ENSMUSG00000080746 | 11.31922962 | 6.260555194 | 9.179963621 | 8.860034393 | 10.02672421 |
| ENSMUSG00000080747 | 9.196874066 | 9.043024169 | 10.59226572 | 7.249119049 | 10.02672421 |

|                    |             |             |             |             |             |
|--------------------|-------------|-------------|-------------|-------------|-------------|
| ENSMUSG00000080748 | 4.244711108 | 10.43425866 | 8.473812573 | 4.02728836  | 7.161945863 |
| ENSMUSG00000080749 | 8.489422215 | 9.738641413 | 9.179963621 | 6.443661377 | 2.864778345 |
| ENSMUSG00000080750 | 11.31922962 | 8.347406925 | 8.473812573 | 4.832746033 | 4.297167518 |
| ENSMUSG00000080751 | 5.65961481  | 8.347406925 | 4.943057334 | 4.832746033 | 8.594335036 |
| ENSMUSG00000080752 | 6.367066661 | 8.347406925 | 6.35535943  | 1.610915344 | 5.013362104 |
| ENSMUSG00000080753 | 68.62282957 | 110.6031418 | 105.9226572 | 92.62763229 | 89.52432329 |
| ENSMUSG00000080754 | 12.02668147 | 4.173703463 | 5.649208382 | 7.249119049 | 5.729556691 |
| ENSMUSG00000080755 | 4.244711108 | 5.56493795  | 2.118453143 | 0           | 4.297167518 |
| ENSMUSG00000080756 | 4.952162959 | 5.56493795  | 5.649208382 | 3.221830688 | 10.02672421 |
| ENSMUSG00000080757 | 2.829807405 | 6.956172438 | 4.236906287 | 1.610915344 | 2.864778345 |
| ENSMUSG00000080758 | 4.244711108 | 2.782468975 | 2.824604191 | 0.805457672 | 8.594335036 |
| ENSMUSG00000080759 | 8.489422215 | 10.43425866 | 8.473812573 | 5.638203705 | 7.87814045  |
| ENSMUSG00000080760 | 9.196874066 | 3.478086219 | 5.649208382 | 5.638203705 | 6.445751277 |
| ENSMUSG00000080762 | 7.074518513 | 10.43425866 | 6.35535943  | 8.860034393 | 5.013362104 |
| ENSMUSG00000080763 | 6.367066661 | 4.869320706 | 4.943057334 | 9.665492065 | 10.02672421 |
| ENSMUSG00000080764 | 7.074518513 | 5.56493795  | 7.061510478 | 3.221830688 | 4.297167518 |
| ENSMUSG00000080765 | 1.414903703 | 6.260555194 | 1.412302096 | 0.805457672 | 2.148583759 |
| ENSMUSG00000080766 | 6.367066661 | 6.260555194 | 6.35535943  | 5.638203705 | 5.729556691 |
| ENSMUSG00000080767 | 9.196874066 | 8.347406925 | 4.943057334 | 6.443661377 | 8.594335036 |
| ENSMUSG00000080768 | 9.196874066 | 6.956172438 | 11.29841676 | 8.054576721 | 5.013362104 |
| ENSMUSG00000080770 | 4.244711108 | 6.260555194 | 9.886114669 | 5.638203705 | 5.729556691 |
| ENSMUSG00000080771 | 13.44158517 | 4.869320706 | 7.061510478 | 6.443661377 | 2.864778345 |
| ENSMUSG00000080772 | 163.4213776 | 230.2493077 | 199.1345955 | 168.3406535 | 133.9283876 |
| ENSMUSG00000080773 | 12.73413332 | 4.869320706 | 4.236906287 | 5.638203705 | 6.445751277 |
| ENSMUSG00000080774 | 5.65961481  | 6.260555194 | 12.00456781 | 5.638203705 | 3.580972932 |
| ENSMUSG00000080775 | 4.244711108 | 5.56493795  | 1.412302096 | 4.02728836  | 4.297167518 |
| ENSMUSG00000080776 | 14.85648888 | 4.173703463 | 12.71071886 | 14.4982381  | 11.45911338 |
| ENSMUSG00000080777 | 0           | 0           | 0           | 0           | 0           |
| ENSMUSG00000080778 | 7.074518513 | 4.869320706 | 1.412302096 | 3.221830688 | 2.148583759 |
| ENSMUSG00000080779 | 19.10119998 | 22.95536904 | 26.83373982 | 92.62763229 | 63.74131818 |
| ENSMUSG00000080780 | 9.196874066 | 4.869320706 | 7.767661525 | 6.443661377 | 6.445751277 |
| ENSMUSG00000080781 | 16.97884443 | 11.82549314 | 8.473812573 | 3.221830688 | 13.60769714 |
| ENSMUSG00000080782 | 8.489422215 | 6.956172438 | 7.061510478 | 4.832746033 | 5.729556691 |
| ENSMUSG00000080783 | 10.61177777 | 15.99919661 | 14.12302096 | 9.665492065 | 10.02672421 |
| ENSMUSG00000080784 | 7.781970364 | 7.651789682 | 7.061510478 | 7.249119049 | 7.87814045  |
| ENSMUSG00000080785 | 9.196874066 | 9.043024169 | 9.886114669 | 5.638203705 | 5.013362104 |
| ENSMUSG00000080788 | 4.952162959 | 2.782468975 | 4.236906287 | 3.221830688 | 4.297167518 |
| ENSMUSG00000080789 | 7.074518513 | 6.260555194 | 7.061510478 | 4.832746033 | 6.445751277 |
| ENSMUSG00000080790 | 11.31922962 | 11.82549314 | 7.767661525 | 7.249119049 | 9.310529622 |
| ENSMUSG00000080791 | 68.62282957 | 118.2549314 | 100.2734488 | 118.4022778 | 109.5777717 |
| ENSMUSG00000080792 | 5.65961481  | 5.56493795  | 7.767661525 | 6.443661377 | 1.432389173 |
| ENSMUSG00000080793 | 10.61177777 | 9.043024169 | 9.886114669 | 8.054576721 | 5.729556691 |
| ENSMUSG00000080794 | 8.489422215 | 10.43425866 | 4.943057334 | 5.638203705 | 2.148583759 |

|                    |             |             |             |             |             |
|--------------------|-------------|-------------|-------------|-------------|-------------|
| ENSMUSG00000080795 | 9.196874066 | 2.086851731 | 7.061510478 | 1.610915344 | 5.729556691 |
| ENSMUSG00000080796 | 36.78749627 | 38.25894841 | 47.3121202  | 23.35827249 | 18.62105924 |
| ENSMUSG00000080797 | 8.489422215 | 13.91234488 | 15.53532305 | 15.30369577 | 14.32389173 |
| ENSMUSG00000080798 | 5.65961481  | 4.173703463 | 6.35535943  | 0.805457672 | 2.148583759 |
| ENSMUSG00000080799 | 5.65961481  | 1.391234488 | 7.061510478 | 2.416373016 | 4.297167518 |
| ENSMUSG00000080800 | 2.829807405 | 5.56493795  | 9.179963621 | 4.02728836  | 9.310529622 |
| ENSMUSG00000080801 | 5.65961481  | 4.173703463 | 4.236906287 | 8.054576721 | 8.594335036 |
| ENSMUSG00000080802 | 7.781970364 | 6.956172438 | 5.649208382 | 4.832746033 | 3.580972932 |
| ENSMUSG00000080803 | 7.074518513 | 4.869320706 | 8.473812573 | 7.249119049 | 5.729556691 |
| ENSMUSG00000080805 | 6.367066661 | 7.651789682 | 10.59226572 | 4.02728836  | 7.161945863 |
| ENSMUSG00000080806 | 4.952162959 | 3.478086219 | 5.649208382 | 4.832746033 | 2.864778345 |
| ENSMUSG00000080807 | 4.952162959 | 0           | 1.412302096 | 0.805457672 | 2.148583759 |
| ENSMUSG00000080808 | 7.781970364 | 6.260555194 | 4.236906287 | 4.832746033 | 9.310529622 |
| ENSMUSG00000080809 | 9.904325918 | 5.56493795  | 4.236906287 | 8.860034393 | 7.87814045  |
| ENSMUSG00000080810 | 335.3321775 | 342.2436839 | 295.171138  | 372.9269022 | 244.2223539 |
| ENSMUSG00000080811 | 3.537259256 | 1.391234488 | 4.943057334 | 19.33098413 | 12.17530797 |
| ENSMUSG00000080812 | 8.489422215 | 11.1298759  | 9.179963621 | 9.665492065 | 12.89150255 |
| ENSMUSG00000080813 | 4.244711108 | 3.478086219 | 4.236906287 | 2.416373016 | 4.297167518 |
| ENSMUSG00000080814 | 11.31922962 | 9.043024169 | 6.35535943  | 3.221830688 | 11.45911338 |
| ENSMUSG00000080815 | 13.44158517 | 7.651789682 | 3.530755239 | 8.054576721 | 6.445751277 |
| ENSMUSG00000080816 | 9.904325918 | 6.956172438 | 7.767661525 | 5.638203705 | 8.594335036 |
| ENSMUSG00000080817 | 7.074518513 | 9.738641413 | 7.767661525 | 4.832746033 | 7.161945863 |
| ENSMUSG00000080818 | 6.367066661 | 5.56493795  | 6.35535943  | 2.416373016 | 5.729556691 |
| ENSMUSG00000080819 | 5.65961481  | 2.782468975 | 4.236906287 | 4.832746033 | 4.297167518 |
| ENSMUSG00000080820 | 9.196874066 | 11.82549314 | 5.649208382 | 8.860034393 | 7.161945863 |
| ENSMUSG00000080822 | 5.65961481  | 6.260555194 | 4.236906287 | 1.610915344 | 1.432389173 |
| ENSMUSG00000080823 | 11.31922962 | 7.651789682 | 12.00456781 | 6.443661377 | 12.89150255 |
| ENSMUSG00000080824 | 4.952162959 | 10.43425866 | 7.767661525 | 2.416373016 | 4.297167518 |
| ENSMUSG00000080825 | 0           | 0           | 0           | 0           | 0           |
| ENSMUSG00000080826 | 9.904325918 | 9.738641413 | 10.59226572 | 6.443661377 | 7.161945863 |
| ENSMUSG00000080827 | 11.31922962 | 9.738641413 | 4.943057334 | 8.860034393 | 7.87814045  |
| ENSMUSG00000080828 | 2.829807405 | 4.869320706 | 2.824604191 | 1.610915344 | 2.864778345 |
| ENSMUSG00000080829 | 4.952162959 | 2.086851731 | 7.767661525 | 4.832746033 | 5.729556691 |
| ENSMUSG00000080831 | 270.2466072 | 292.1592424 | 260.5697366 | 353.595918  | 248.5195215 |
| ENSMUSG00000080832 | 9.904325918 | 11.1298759  | 9.886114669 | 8.054576721 | 6.445751277 |
| ENSMUSG00000080833 | 0           | 0.695617244 | 0           | 2.416373016 | 0           |
| ENSMUSG00000080834 | 6.367066661 | 6.956172438 | 4.943057334 | 7.249119049 | 4.297167518 |
| ENSMUSG00000080835 | 11.31922962 | 11.1298759  | 8.473812573 | 4.02728836  | 7.87814045  |
| ENSMUSG00000080836 | 11.31922962 | 13.21672763 | 14.12302096 | 8.860034393 | 7.87814045  |
| ENSMUSG00000080839 | 14.14903703 | 6.260555194 | 7.061510478 | 5.638203705 | 8.594335036 |
| ENSMUSG00000080840 | 9.196874066 | 9.738641413 | 4.236906287 | 6.443661377 | 4.297167518 |
| ENSMUSG00000080841 | 7.074518513 | 2.086851731 | 7.061510478 | 2.416373016 | 2.864778345 |
| ENSMUSG00000080842 | 10.61177777 | 9.738641413 | 7.061510478 | 5.638203705 | 8.594335036 |

|                    |             |             |             |             |             |
|--------------------|-------------|-------------|-------------|-------------|-------------|
| ENSMUSG00000080843 | 4.952162959 | 2.086851731 | 7.767661525 | 2.416373016 | 3.580972932 |
| ENSMUSG00000080844 | 13.44158517 | 7.651789682 | 10.59226572 | 0.805457672 | 5.729556691 |
| ENSMUSG00000080845 | 9.196874066 | 6.260555194 | 9.886114669 | 5.638203705 | 10.7429188  |
| ENSMUSG00000080846 | 12.02668147 | 7.651789682 | 6.35535943  | 4.02728836  | 8.594335036 |
| ENSMUSG00000080847 | 5.65961481  | 0.695617244 | 6.35535943  | 4.02728836  | 1.432389173 |
| ENSMUSG00000080848 | 11.31922962 | 9.043024169 | 5.649208382 | 16.10915344 | 13.60769714 |
| ENSMUSG00000080849 | 8.489422215 | 8.347406925 | 4.236906287 | 4.832746033 | 6.445751277 |
| ENSMUSG00000080850 | 9.196874066 | 10.43425866 | 7.767661525 | 5.638203705 | 6.445751277 |
| ENSMUSG00000080851 | 9.904325918 | 6.260555194 | 7.767661525 | 7.249119049 | 7.87814045  |
| ENSMUSG00000080852 | 7.074518513 | 1.391234488 | 4.236906287 | 0           | 2.148583759 |
| ENSMUSG00000080855 | 9.904325918 | 7.651789682 | 10.59226572 | 4.02728836  | 7.87814045  |
| ENSMUSG00000080857 | 13.44158517 | 7.651789682 | 10.59226572 | 8.054576721 | 10.7429188  |
| ENSMUSG00000080859 | 12.73413332 | 12.52111039 | 5.649208382 | 15.30369577 | 10.7429188  |
| ENSMUSG00000080860 | 7.074518513 | 5.56493795  | 10.59226572 | 6.443661377 | 7.87814045  |
| ENSMUSG00000080861 | 1.414903703 | 2.086851731 | 1.412302096 | 0           | 2.864778345 |
| ENSMUSG00000080862 | 0           | 0           | 0           | 0           | 0           |
| ENSMUSG00000080863 | 4.952162959 | 3.478086219 | 2.824604191 | 1.610915344 | 1.432389173 |
| ENSMUSG00000080865 | 15.56394073 | 5.56493795  | 5.649208382 | 4.832746033 | 7.161945863 |
| ENSMUSG00000080866 | 7.074518513 | 6.956172438 | 9.886114669 | 10.47094974 | 11.45911338 |
| ENSMUSG00000080867 | 10.61177777 | 9.738641413 | 9.886114669 | 8.054576721 | 9.310529622 |
| ENSMUSG00000080868 | 4.952162959 | 6.260555194 | 4.236906287 | 5.638203705 | 7.161945863 |
| ENSMUSG00000080869 | 6.367066661 | 5.56493795  | 9.886114669 | 11.27640741 | 8.594335036 |
| ENSMUSG00000080870 | 12.73413332 | 6.260555194 | 4.943057334 | 8.860034393 | 9.310529622 |
| ENSMUSG00000080871 | 12.02668147 | 6.956172438 | 7.061510478 | 0.805457672 | 5.729556691 |
| ENSMUSG00000080872 | 11.31922962 | 5.56493795  | 5.649208382 | 6.443661377 | 12.17530797 |
| ENSMUSG00000080873 | 165.5437332 | 233.7273939 | 199.1345955 | 535.6293519 | 381.0155199 |
| ENSMUSG00000080874 | 2.829807405 | 3.478086219 | 4.943057334 | 4.832746033 | 5.013362104 |
| ENSMUSG00000080875 | 7.781970364 | 6.260555194 | 10.59226572 | 16.91461111 | 13.60769714 |
| ENSMUSG00000080876 | 4.952162959 | 8.347406925 | 4.236906287 | 2.416373016 | 5.729556691 |
| ENSMUSG00000080877 | 8.489422215 | 5.56493795  | 6.35535943  | 5.638203705 | 7.161945863 |
| ENSMUSG00000080878 | 12.73413332 | 9.043024169 | 6.35535943  | 2.416373016 | 7.161945863 |
| ENSMUSG00000080880 | 9.196874066 | 7.651789682 | 5.649208382 | 5.638203705 | 3.580972932 |
| ENSMUSG00000080884 | 16.27139258 | 9.043024169 | 9.179963621 | 4.832746033 | 5.729556691 |
| ENSMUSG00000080885 | 17.68629628 | 19.47728283 | 12.00456781 | 16.91461111 | 20.769643   |
| ENSMUSG00000080886 | 7.781970364 | 4.869320706 | 3.530755239 | 1.610915344 | 4.297167518 |
| ENSMUSG00000080887 | 3.537259256 | 2.782468975 | 4.943057334 | 1.610915344 | 2.864778345 |
| ENSMUSG00000080888 | 4.952162959 | 11.82549314 | 7.061510478 | 4.02728836  | 11.45911338 |
| ENSMUSG00000080889 | 2.122355554 | 2.086851731 | 4.236906287 | 1.610915344 | 2.864778345 |
| ENSMUSG00000080890 | 2.829807405 | 3.478086219 | 2.118453143 | 1.610915344 | 1.432389173 |
| ENSMUSG00000080891 | 2.829807405 | 2.782468975 | 2.824604191 | 4.832746033 | 1.432389173 |
| ENSMUSG00000080892 | 9.196874066 | 9.738641413 | 4.236906287 | 8.054576721 | 7.87814045  |
| ENSMUSG00000080893 | 72.86754068 | 95.99517964 | 88.26888097 | 70.88027514 | 57.29556691 |
| ENSMUSG00000080894 | 14.85648888 | 9.043024169 | 6.35535943  | 5.638203705 | 7.161945863 |

|                    |             |             |             |             |             |
|--------------------|-------------|-------------|-------------|-------------|-------------|
| ENSMUSG00000080895 | 9.196874066 | 7.651789682 | 8.473812573 | 4.832746033 | 7.161945863 |
| ENSMUSG00000080896 | 2.829807405 | 4.869320706 | 4.943057334 | 4.02728836  | 5.729556691 |
| ENSMUSG00000080897 | 5.65961481  | 2.086851731 | 1.412302096 | 3.221830688 | 2.864778345 |
| ENSMUSG00000080898 | 9.904325918 | 11.82549314 | 10.59226572 | 4.832746033 | 7.87814045  |
| ENSMUSG00000080899 | 2.122355554 | 5.56493795  | 4.236906287 | 2.416373016 | 3.580972932 |
| ENSMUSG00000080902 | 12.02668147 | 10.43425866 | 9.179963621 | 16.10915344 | 18.62105924 |
| ENSMUSG00000080903 | 2.122355554 | 4.173703463 | 2.824604191 | 2.416373016 | 3.580972932 |
| ENSMUSG00000080904 | 9.904325918 | 6.260555194 | 7.061510478 | 4.832746033 | 8.594335036 |
| ENSMUSG00000080905 | 5.65961481  | 6.956172438 | 7.061510478 | 4.02728836  | 11.45911338 |
| ENSMUSG00000080906 | 8.489422215 | 9.738641413 | 7.061510478 | 4.832746033 | 6.445751277 |
| ENSMUSG00000080909 | 9.904325918 | 4.173703463 | 9.886114669 | 2.416373016 | 7.87814045  |
| ENSMUSG00000080910 | 2.122355554 | 2.782468975 | 7.767661525 | 0           | 0.716194586 |
| ENSMUSG00000080911 | 11.31922962 | 7.651789682 | 8.473812573 | 4.832746033 | 8.594335036 |
| ENSMUSG00000080912 | 61.54831106 | 107.8206728 | 97.44884459 | 343.1249683 | 258.5462457 |
| ENSMUSG00000080913 | 7.781970364 | 5.56493795  | 7.767661525 | 3.221830688 | 5.013362104 |
| ENSMUSG00000080914 | 3.537259256 | 4.869320706 | 3.530755239 | 8.054576721 | 3.580972932 |
| ENSMUSG00000080915 | 0.707451851 | 4.173703463 | 0.706151048 | 2.416373016 | 2.148583759 |
| ENSMUSG00000080916 | 21.22355554 | 25.04222078 | 25.42143772 | 13.69278043 | 20.05344842 |
| ENSMUSG00000080917 | 7.781970364 | 2.782468975 | 2.118453143 | 4.832746033 | 6.445751277 |
| ENSMUSG00000080918 | 7.074518513 | 4.869320706 | 9.886114669 | 3.221830688 | 9.310529622 |
| ENSMUSG00000080919 | 4.952162959 | 4.869320706 | 9.886114669 | 5.638203705 | 5.013362104 |
| ENSMUSG00000080921 | 6.367066661 | 8.347406925 | 7.767661525 | 4.832746033 | 10.02672421 |
| ENSMUSG00000080922 | 8.489422215 | 9.043024169 | 5.649208382 | 2.416373016 | 12.17530797 |
| ENSMUSG00000080923 | 4.244711108 | 1.391234488 | 4.943057334 | 3.221830688 | 3.580972932 |
| ENSMUSG00000080924 | 11.31922962 | 6.260555194 | 6.35535943  | 3.221830688 | 5.729556691 |
| ENSMUSG00000080925 | 7.074518513 | 4.869320706 | 4.943057334 | 4.832746033 | 5.013362104 |
| ENSMUSG00000080927 | 5.65961481  | 6.956172438 | 6.35535943  | 7.249119049 | 9.310529622 |
| ENSMUSG00000080928 | 36.08004441 | 48.69320706 | 52.96132858 | 57.99295239 | 47.2688427  |
| ENSMUSG00000080929 | 9.904325918 | 15.30357936 | 12.71071886 | 12.08186508 | 16.47247549 |
| ENSMUSG00000080930 | 10.61177777 | 8.347406925 | 9.179963621 | 6.443661377 | 2.148583759 |
| ENSMUSG00000080932 | 16.97884443 | 11.1298759  | 12.00456781 | 9.665492065 | 12.17530797 |
| ENSMUSG00000080934 | 5.65961481  | 6.956172438 | 5.649208382 | 3.221830688 | 5.729556691 |
| ENSMUSG00000080935 | 8.489422215 | 4.869320706 | 8.473812573 | 6.443661377 | 12.17530797 |
| ENSMUSG00000080936 | 9.904325918 | 6.260555194 | 8.473812573 | 4.832746033 | 2.864778345 |
| ENSMUSG00000080937 | 9.904325918 | 15.99919661 | 16.2414741  | 12.08186508 | 14.32389173 |
| ENSMUSG00000080938 | 3.537259256 | 3.478086219 | 2.824604191 | 5.638203705 | 2.864778345 |
| ENSMUSG00000080939 | 38.20239997 | 84.86530374 | 79.7950684  | 78.12939419 | 82.36237743 |
| ENSMUSG00000080940 | 4.244711108 | 6.260555194 | 7.061510478 | 4.02728836  | 9.310529622 |
| ENSMUSG00000080941 | 7.781970364 | 9.043024169 | 4.943057334 | 4.832746033 | 9.310529622 |
| ENSMUSG00000080942 | 9.904325918 | 12.52111039 | 8.473812573 | 12.08186508 | 10.7429188  |
| ENSMUSG00000080943 | 7.074518513 | 9.738641413 | 7.061510478 | 6.443661377 | 10.7429188  |
| ENSMUSG00000080944 | 2.122355554 | 2.086851731 | 0.706151048 | 2.416373016 | 2.864778345 |
| ENSMUSG00000080946 | 1.414903703 | 0.695617244 | 2.118453143 | 1.610915344 | 1.432389173 |

|                    |             |             |             |             |             |
|--------------------|-------------|-------------|-------------|-------------|-------------|
| ENSMUSG00000080947 | 13.44158517 | 7.651789682 | 12.71071886 | 6.443661377 | 12.17530797 |
| ENSMUSG00000080948 | 3.537259256 | 4.173703463 | 4.943057334 | 7.249119049 | 2.864778345 |
| ENSMUSG00000080949 | 2.829807405 | 6.260555194 | 12.00456781 | 2.416373016 | 5.013362104 |
| ENSMUSG00000080950 | 14.14903703 | 13.21672763 | 11.29841676 | 11.27640741 | 12.89150255 |
| ENSMUSG00000080951 | 24.76081479 | 39.6501829  | 32.4829482  | 24.96918783 | 30.79636721 |
| ENSMUSG00000080952 | 2.829807405 | 0           | 1.412302096 | 4.02728836  | 2.148583759 |
| ENSMUSG00000080953 | 7.074518513 | 3.478086219 | 4.943057334 | 4.02728836  | 6.445751277 |
| ENSMUSG00000080954 | 4.952162959 | 4.173703463 | 4.943057334 | 1.610915344 | 2.864778345 |
| ENSMUSG00000080955 | 18.39374813 | 4.173703463 | 6.35535943  | 9.665492065 | 10.02672421 |
| ENSMUSG00000080956 | 12.02668147 | 6.260555194 | 9.886114669 | 6.443661377 | 5.013362104 |
| ENSMUSG00000080957 | 76.40479994 | 113.3856107 | 91.09348516 | 115.9859048 | 106.7129934 |
| ENSMUSG00000080958 | 4.244711108 | 12.52111039 | 9.886114669 | 8.860034393 | 5.013362104 |
| ENSMUSG00000080959 | 7.781970364 | 2.086851731 | 4.236906287 | 5.638203705 | 0.716194586 |
| ENSMUSG00000080960 | 14.85648888 | 9.043024169 | 8.473812573 | 7.249119049 | 10.7429188  |
| ENSMUSG00000080961 | 5.65961481  | 6.956172438 | 9.179963621 | 8.054576721 | 9.310529622 |
| ENSMUSG00000080962 | 4.952162959 | 9.738641413 | 7.061510478 | 4.02728836  | 7.161945863 |
| ENSMUSG00000080964 | 4.952162959 | 13.91234488 | 4.943057334 | 4.832746033 | 2.864778345 |
| ENSMUSG00000080965 | 4.244711108 | 6.260555194 | 2.824604191 | 1.610915344 | 1.432389173 |
| ENSMUSG00000080966 | 9.196874066 | 7.651789682 | 7.061510478 | 7.249119049 | 7.87814045  |
| ENSMUSG00000080967 | 8.489422215 | 8.347406925 | 14.12302096 | 8.054576721 | 8.594335036 |
| ENSMUSG00000080968 | 3.537259256 | 4.173703463 | 2.118453143 | 4.832746033 | 2.148583759 |
| ENSMUSG00000080969 | 14.14903703 | 11.82549314 | 9.179963621 | 11.27640741 | 12.89150255 |
| ENSMUSG00000080970 | 4.244711108 | 4.869320706 | 2.824604191 | 3.221830688 | 5.013362104 |
| ENSMUSG00000080971 | 9.196874066 | 15.99919661 | 12.00456781 | 9.665492065 | 15.7562809  |
| ENSMUSG00000080972 | 33.25023701 | 68.86610713 | 63.5535943  | 52.35474869 | 46.55264811 |
| ENSMUSG00000080974 | 7.074518513 | 6.260555194 | 7.061510478 | 3.221830688 | 3.580972932 |
| ENSMUSG00000080976 | 32.54278516 | 49.38882431 | 51.54902649 | 19.33098413 | 18.62105924 |
| ENSMUSG00000080977 | 14.85648888 | 8.347406925 | 8.473812573 | 14.4982381  | 10.7429188  |
| ENSMUSG00000080978 | 12.02668147 | 9.043024169 | 10.59226572 | 8.860034393 | 5.729556691 |
| ENSMUSG00000080979 | 11.31922962 | 15.30357936 | 8.473812573 | 5.638203705 | 8.594335036 |
| ENSMUSG00000080980 | 10.61177777 | 8.347406925 | 7.767661525 | 4.832746033 | 4.297167518 |
| ENSMUSG00000080981 | 6.367066661 | 15.99919661 | 7.061510478 | 8.054576721 | 7.161945863 |
| ENSMUSG00000080982 | 9.196874066 | 6.956172438 | 5.649208382 | 5.638203705 | 9.310529622 |
| ENSMUSG00000080983 | 2.122355554 | 0.695617244 | 3.530755239 | 4.02728836  | 2.148583759 |
| ENSMUSG00000080984 | 7.074518513 | 9.043024169 | 9.886114669 | 12.88732275 | 3.580972932 |
| ENSMUSG00000080985 | 7.781970364 | 9.738641413 | 9.179963621 | 2.416373016 | 5.013362104 |
| ENSMUSG00000080986 | 10.61177777 | 10.43425866 | 12.00456781 | 4.02728836  | 6.445751277 |
| ENSMUSG00000080987 | 7.781970364 | 9.043024169 | 7.767661525 | 8.860034393 | 5.729556691 |
| ENSMUSG00000080989 | 8.489422215 | 4.869320706 | 7.767661525 | 10.47094974 | 12.17530797 |
| ENSMUSG00000080990 | 7.074518513 | 8.347406925 | 8.473812573 | 5.638203705 | 5.729556691 |
| ENSMUSG00000080992 | 0.707451851 | 0           | 0           | 0.805457672 | 0           |
| ENSMUSG00000080993 | 4.952162959 | 4.869320706 | 8.473812573 | 4.832746033 | 5.013362104 |
| ENSMUSG00000080994 | 7.781970364 | 6.260555194 | 7.061510478 | 5.638203705 | 8.594335036 |

|                    |             |             |             |             |             |
|--------------------|-------------|-------------|-------------|-------------|-------------|
| ENSMUSG00000080995 | 3.537259256 | 3.478086219 | 5.649208382 | 4.02728836  | 3.580972932 |
| ENSMUSG00000080996 | 4.952162959 | 4.173703463 | 3.530755239 | 2.416373016 | 2.864778345 |
| ENSMUSG00000080997 | 12.73413332 | 5.56493795  | 7.061510478 | 8.860034393 | 6.445751277 |
| ENSMUSG00000080998 | 5.65961481  | 4.173703463 | 6.35535943  | 6.443661377 | 6.445751277 |
| ENSMUSG00000080999 | 0.707451851 | 0.695617244 | 1.412302096 | 0           | 2.864778345 |
| ENSMUSG00000081000 | 9.196874066 | 6.956172438 | 7.061510478 | 6.443661377 | 9.310529622 |
| ENSMUSG00000081001 | 8.489422215 | 9.043024169 | 6.35535943  | 1.610915344 | 2.864778345 |
| ENSMUSG00000081002 | 7.781970364 | 15.30357936 | 5.649208382 | 11.27640741 | 10.02672421 |
| ENSMUSG00000081003 | 12.73413332 | 4.173703463 | 3.530755239 | 4.832746033 | 5.013362104 |
| ENSMUSG00000081004 | 2.829807405 | 4.869320706 | 4.236906287 | 3.221830688 | 1.432389173 |
| ENSMUSG00000081005 | 7.074518513 | 8.347406925 | 9.179963621 | 2.416373016 | 7.161945863 |
| ENSMUSG00000081006 | 5.65961481  | 9.043024169 | 8.473812573 | 7.249119049 | 5.013362104 |
| ENSMUSG00000081007 | 9.196874066 | 7.651789682 | 5.649208382 | 8.054576721 | 10.02672421 |
| ENSMUSG00000081008 | 1.414903703 | 3.478086219 | 0.706151048 | 3.221830688 | 4.297167518 |
| ENSMUSG00000081009 | 6.367066661 | 7.651789682 | 3.530755239 | 4.832746033 | 7.161945863 |
| ENSMUSG00000081010 | 4.952162959 | 5.56493795  | 7.767661525 | 12.08186508 | 7.87814045  |
| ENSMUSG00000081011 | 7.781970364 | 7.651789682 | 4.236906287 | 6.443661377 | 5.013362104 |
| ENSMUSG00000081012 | 3.537259256 | 4.173703463 | 5.649208382 | 2.416373016 | 4.297167518 |
| ENSMUSG00000081013 | 7.781970364 | 9.043024169 | 7.767661525 | 7.249119049 | 5.013362104 |
| ENSMUSG00000081014 | 5.65961481  | 6.956172438 | 7.767661525 | 5.638203705 | 5.729556691 |
| ENSMUSG00000081015 | 7.074518513 | 7.651789682 | 14.12302096 | 1.610915344 | 5.729556691 |
| ENSMUSG00000081016 | 12.73413332 | 9.043024169 | 5.649208382 | 8.860034393 | 12.89150255 |
| ENSMUSG00000081017 | 4.952162959 | 1.391234488 | 3.530755239 | 0.805457672 | 2.148583759 |
| ENSMUSG00000081018 | 7.781970364 | 0.695617244 | 5.649208382 | 4.832746033 | 0           |
| ENSMUSG00000081020 | 4.952162959 | 2.782468975 | 2.824604191 | 4.02728836  | 6.445751277 |
| ENSMUSG00000081021 | 8.489422215 | 6.956172438 | 12.00456781 | 8.860034393 | 7.87814045  |
| ENSMUSG00000081022 | 4.952162959 | 8.347406925 | 9.179963621 | 5.638203705 | 6.445751277 |
| ENSMUSG00000081023 | 9.904325918 | 8.347406925 | 5.649208382 | 3.221830688 | 10.02672421 |
| ENSMUSG00000081024 | 2.122355554 | 4.869320706 | 4.943057334 | 2.416373016 | 4.297167518 |
| ENSMUSG00000081025 | 12.02668147 | 9.043024169 | 5.649208382 | 5.638203705 | 7.161945863 |
| ENSMUSG00000081026 | 7.781970364 | 7.651789682 | 5.649208382 | 8.054576721 | 6.445751277 |
| ENSMUSG00000081027 | 7.781970364 | 8.347406925 | 6.35535943  | 2.416373016 | 7.161945863 |
| ENSMUSG00000081029 | 6.367066661 | 6.956172438 | 4.943057334 | 1.610915344 | 2.148583759 |
| ENSMUSG00000081030 | 9.904325918 | 5.56493795  | 3.530755239 | 2.416373016 | 10.7429188  |
| ENSMUSG00000081033 | 2.829807405 | 2.086851731 | 2.118453143 | 2.416373016 | 4.297167518 |
| ENSMUSG00000081034 | 4.244711108 | 6.956172438 | 3.530755239 | 3.221830688 | 6.445751277 |
| ENSMUSG00000081035 | 9.904325918 | 11.1298759  | 10.59226572 | 2.416373016 | 5.013362104 |
| ENSMUSG00000081036 | 4.952162959 | 3.478086219 | 4.236906287 | 2.416373016 | 2.864778345 |
| ENSMUSG00000081037 | 8.489422215 | 6.956172438 | 6.35535943  | 3.221830688 | 7.87814045  |
| ENSMUSG00000081038 | 14.14903703 | 7.651789682 | 7.767661525 | 9.665492065 | 5.729556691 |
| ENSMUSG00000081041 | 9.196874066 | 4.173703463 | 7.061510478 | 6.443661377 | 4.297167518 |
| ENSMUSG00000081042 | 2.829807405 | 5.56493795  | 4.236906287 | 0.805457672 | 4.297167518 |
| ENSMUSG00000081043 | 9.904325918 | 11.82549314 | 7.061510478 | 8.054576721 | 5.013362104 |

|                    |              |             |             |             |             |
|--------------------|--------------|-------------|-------------|-------------|-------------|
| ENSMUSG00000081045 | 12.02668147  | 6.260555194 | 7.767661525 | 5.638203705 | 7.161945863 |
| ENSMUSG00000081046 | 7.074518513  | 8.347406925 | 4.236906287 | 7.249119049 | 5.013362104 |
| ENSMUSG00000081047 | 4.952162959  | 8.347406925 | 2.824604191 | 4.832746033 | 10.7429188  |
| ENSMUSG00000081048 | 6.367066661  | 8.347406925 | 7.767661525 | 12.88732275 | 4.297167518 |
| ENSMUSG00000081049 | 7.074518513  | 5.56493795  | 5.649208382 | 8.054576721 | 1.432389173 |
| ENSMUSG00000081050 | 7.781970364  | 5.56493795  | 10.59226572 | 7.249119049 | 10.7429188  |
| ENSMUSG00000081051 | 5.65961481   | 11.1298759  | 12.00456781 | 12.88732275 | 14.32389173 |
| ENSMUSG00000081052 | 14.14903703  | 15.99919661 | 14.12302096 | 16.10915344 | 15.7562809  |
| ENSMUSG00000081053 | 2.122355554  | 2.086851731 | 0           | 3.221830688 | 0.716194586 |
| ENSMUSG00000081054 | 9.196874066  | 9.043024169 | 8.473812573 | 7.249119049 | 5.013362104 |
| ENSMUSG00000081055 | 4.952162959  | 4.173703463 | 4.943057334 | 5.638203705 | 1.432389173 |
| ENSMUSG00000081056 | 26.1757185   | 40.34580014 | 43.07521391 | 49.132918   | 41.53928601 |
| ENSMUSG00000081057 | 12.02668147  | 4.869320706 | 9.886114669 | 6.443661377 | 7.161945863 |
| ENSMUSG00000081059 | 4.952162959  | 3.478086219 | 3.530755239 | 6.443661377 | 2.864778345 |
| ENSMUSG00000081060 | 11.31922962  | 4.869320706 | 12.00456781 | 3.221830688 | 5.013362104 |
| ENSMUSG00000081061 | 3.537259256  | 5.56493795  | 2.824604191 | 2.416373016 | 2.864778345 |
| ENSMUSG00000081062 | 7.781970364  | 8.347406925 | 8.473812573 | 9.665492065 | 7.87814045  |
| ENSMUSG00000081063 | 7.781970364  | 4.173703463 | 7.767661525 | 7.249119049 | 8.594335036 |
| ENSMUSG00000081064 | 9.196874066  | 3.478086219 | 3.530755239 | 1.610915344 | 4.297167518 |
| ENSMUSG00000081065 | 9.904325918  | 4.869320706 | 10.59226572 | 6.443661377 | 5.729556691 |
| ENSMUSG00000081066 | 11.31922962  | 9.043024169 | 7.767661525 | 4.02728836  | 2.864778345 |
| ENSMUSG00000081067 | 8.489422215  | 6.956172438 | 8.473812573 | 8.860034393 | 12.17530797 |
| ENSMUSG00000081068 | 6.367066661  | 11.1298759  | 9.886114669 | 6.443661377 | 3.580972932 |
| ENSMUSG00000081069 | 11.31922962  | 9.043024169 | 12.71071886 | 8.054576721 | 5.013362104 |
| ENSMUSG00000081070 | 9.196874066  | 9.043024169 | 9.179963621 | 5.638203705 | 12.89150255 |
| ENSMUSG00000081071 | 10.61177777  | 11.82549314 | 12.00456781 | 7.249119049 | 14.32389173 |
| ENSMUSG00000081072 | 2.122355554  | 3.478086219 | 4.236906287 | 1.610915344 | 5.013362104 |
| ENSMUSG00000081073 | 9.196874066  | 6.956172438 | 10.59226572 | 6.443661377 | 2.864778345 |
| ENSMUSG00000081076 | 11.31922962  | 4.173703463 | 4.943057334 | 5.638203705 | 4.297167518 |
| ENSMUSG00000081077 | 6.367066661  | 2.782468975 | 7.767661525 | 27.38556085 | 20.769643   |
| ENSMUSG00000081078 | 42.447111108 | 36.86771392 | 38.13215658 | 22.55281482 | 29.36397804 |
| ENSMUSG00000081079 | 11.31922962  | 4.869320706 | 7.767661525 | 10.47094974 | 5.729556691 |
| ENSMUSG00000081080 | 5.65961481   | 6.956172438 | 4.236906287 | 7.249119049 | 6.445751277 |
| ENSMUSG00000081081 | 0.707451851  | 6.260555194 | 5.649208382 | 1.610915344 | 5.729556691 |
| ENSMUSG00000081082 | 10.61177777  | 5.56493795  | 9.886114669 | 4.02728836  | 5.729556691 |
| ENSMUSG00000081083 | 2.829807405  | 2.782468975 | 4.236906287 | 2.416373016 | 5.729556691 |
| ENSMUSG00000081084 | 2.829807405  | 3.478086219 | 4.943057334 | 2.416373016 | 4.297167518 |
| ENSMUSG00000081085 | 9.196874066  | 7.651789682 | 7.061510478 | 5.638203705 | 4.297167518 |
| ENSMUSG00000081086 | 77.81970364  | 126.6023384 | 108.0411103 | 135.3168889 | 111.0101609 |
| ENSMUSG00000081087 | 14.14903703  | 13.91234488 | 11.29841676 | 8.860034393 | 10.02672421 |
| ENSMUSG00000081088 | 7.074518513  | 7.651789682 | 7.767661525 | 8.054576721 | 7.87814045  |
| ENSMUSG00000081089 | 6.367066661  | 9.043024169 | 4.236906287 | 2.416373016 | 5.013362104 |
| ENSMUSG00000081092 | 6.367066661  | 9.043024169 | 11.29841676 | 5.638203705 | 9.310529622 |



|                   |             |             |             |             |             |
|-------------------|-------------|-------------|-------------|-------------|-------------|
| ENSMUSG0000081093 | 7.781970364 | 8.347406925 | 8.473812573 | 7.249119049 | 5.729556691 |
| ENSMUSG0000081094 | 0           | 1.391234488 | 0.706151048 | 1.610915344 | 0.716194586 |
| ENSMUSG0000081095 | 2.829807405 | 3.478086219 | 4.943057334 | 1.610915344 | 4.297167518 |
| ENSMUSG0000081096 | 12.02668147 | 9.738641413 | 6.35535943  | 7.249119049 | 3.580972932 |
| ENSMUSG0000081097 | 9.196874066 | 4.173703463 | 7.061510478 | 5.638203705 | 6.445751277 |
| ENSMUSG0000081098 | 12.73413332 | 11.1298759  | 6.35535943  | 5.638203705 | 6.445751277 |
| ENSMUSG0000081099 | 14.14903703 | 5.56493795  | 11.29841676 | 8.860034393 | 8.594335036 |
| ENSMUSG0000081100 | 4.244711108 | 4.173703463 | 7.061510478 | 1.610915344 | 4.297167518 |
| ENSMUSG0000081101 | 6.367066661 | 6.260555194 | 11.29841676 | 3.221830688 | 7.161945863 |
| ENSMUSG0000081103 | 13.44158517 | 18.78166558 | 19.06607829 | 24.96918783 | 23.63442135 |
| ENSMUSG0000081104 | 11.31922962 | 2.782468975 | 5.649208382 | 8.054576721 | 9.310529622 |
| ENSMUSG0000081105 | 26.88317035 | 38.95456565 | 28.24604191 | 24.96918783 | 32.94495097 |
| ENSMUSG0000081106 | 3.537259256 | 1.391234488 | 4.236906287 | 0.805457672 | 4.297167518 |
| ENSMUSG0000081107 | 7.074518513 | 9.738641413 | 3.530755239 | 6.443661377 | 8.594335036 |
| ENSMUSG0000081108 | 4.244711108 | 2.086851731 | 4.943057334 | 3.221830688 | 5.013362104 |
| ENSMUSG0000081110 | 7.781970364 | 8.347406925 | 13.41686991 | 15.30369577 | 5.013362104 |
| ENSMUSG0000081111 | 9.904325918 | 6.260555194 | 9.886114669 | 12.08186508 | 7.161945863 |
| ENSMUSG0000081112 | 12.73413332 | 10.43425866 | 4.236906287 | 8.860034393 | 9.310529622 |
| ENSMUSG0000081113 | 5.65961481  | 8.347406925 | 10.59226572 | 7.249119049 | 7.87814045  |
| ENSMUSG0000081114 | 10.61177777 | 6.956172438 | 10.59226572 | 8.860034393 | 4.297167518 |
| ENSMUSG0000081115 | 9.904325918 | 6.260555194 | 3.530755239 | 4.02728836  | 8.594335036 |
| ENSMUSG0000081116 | 3.537259256 | 2.782468975 | 2.118453143 | 2.416373016 | 0           |
| ENSMUSG0000081117 | 14.14903703 | 4.869320706 | 5.649208382 | 4.832746033 | 5.729556691 |
| ENSMUSG0000081118 | 0           | 1.391234488 | 0           | 0.805457672 | 1.432389173 |
| ENSMUSG0000081119 | 0.707451851 | 0           | 0.706151048 | 0           | 0.716194586 |
| ENSMUSG0000081120 | 12.73413332 | 11.1298759  | 12.00456781 | 4.832746033 | 9.310529622 |
| ENSMUSG0000081121 | 13.44158517 | 7.651789682 | 9.886114669 | 12.88732275 | 7.87814045  |
| ENSMUSG0000081122 | 8.489422215 | 8.347406925 | 9.886114669 | 8.054576721 | 6.445751277 |
| ENSMUSG0000081123 | 7.074518513 | 8.347406925 | 7.767661525 | 8.860034393 | 5.013362104 |
| ENSMUSG0000081124 | 4.952162959 | 1.391234488 | 4.943057334 | 3.221830688 | 2.148583759 |
| ENSMUSG0000081125 | 7.074518513 | 6.956172438 | 9.179963621 | 4.832746033 | 5.013362104 |
| ENSMUSG0000081126 | 10.61177777 | 13.91234488 | 14.12302096 | 7.249119049 | 10.7429188  |
| ENSMUSG0000081127 | 6.367066661 | 11.1298759  | 12.00456781 | 12.08186508 | 17.18867007 |
| ENSMUSG0000081128 | 8.489422215 | 6.956172438 | 4.943057334 | 4.832746033 | 5.729556691 |
| ENSMUSG0000081129 | 6.367066661 | 2.782468975 | 3.530755239 | 2.416373016 | 3.580972932 |
| ENSMUSG0000081130 | 5.65961481  | 4.173703463 | 2.118453143 | 3.221830688 | 11.45911338 |
| ENSMUSG0000081131 | 3.537259256 | 4.869320706 | 2.118453143 | 1.610915344 | 4.297167518 |
| ENSMUSG0000081132 | 4.952162959 | 4.869320706 | 4.943057334 | 3.221830688 | 3.580972932 |
| ENSMUSG0000081133 | 4.952162959 | 2.782468975 | 2.824604191 | 8.054576721 | 3.580972932 |
| ENSMUSG0000081134 | 2.122355554 | 4.173703463 | 4.236906287 | 1.610915344 | 5.013362104 |
| ENSMUSG0000081135 | 7.781970364 | 3.478086219 | 4.943057334 | 2.416373016 | 5.729556691 |
| ENSMUSG0000081136 | 11.31922962 | 9.738641413 | 6.35535943  | 6.443661377 | 10.7429188  |
| ENSMUSG0000081137 | 6.367066661 | 5.56493795  | 5.649208382 | 2.416373016 | 5.729556691 |

|                    |             |             |             |             |             |
|--------------------|-------------|-------------|-------------|-------------|-------------|
| ENSMUSG00000081138 | 9.904325918 | 9.738641413 | 5.649208382 | 8.860034393 | 7.161945863 |
| ENSMUSG00000081139 | 9.904325918 | 9.043024169 | 3.530755239 | 4.02728836  | 3.580972932 |
| ENSMUSG00000081141 | 16.27139258 | 13.91234488 | 7.061510478 | 4.832746033 | 5.013362104 |
| ENSMUSG00000081142 | 14.14903703 | 21.56413456 | 21.89068248 | 16.10915344 | 19.33725383 |
| ENSMUSG00000081143 | 135.1233036 | 179.4692489 | 180.0685172 | 124.0404815 | 112.4425501 |
| ENSMUSG00000081144 | 13.44158517 | 4.869320706 | 7.061510478 | 5.638203705 | 5.729556691 |
| ENSMUSG00000081145 | 4.244711108 | 3.478086219 | 4.236906287 | 0.805457672 | 2.864778345 |
| ENSMUSG00000081146 | 6.367066661 | 4.173703463 | 5.649208382 | 2.416373016 | 1.432389173 |
| ENSMUSG00000081147 | 2.122355554 | 1.391234488 | 2.824604191 | 1.610915344 | 1.432389173 |
| ENSMUSG00000081148 | 14.85648888 | 6.260555194 | 7.767661525 | 6.443661377 | 5.013362104 |
| ENSMUSG00000081150 | 9.904325918 | 5.56493795  | 4.943057334 | 3.221830688 | 4.297167518 |
| ENSMUSG00000081151 | 5.65961481  | 9.738641413 | 7.061510478 | 1.610915344 | 6.445751277 |
| ENSMUSG00000081152 | 7.781970364 | 8.347406925 | 11.29841676 | 12.08186508 | 8.594335036 |
| ENSMUSG00000081153 | 5.65961481  | 4.173703463 | 2.824604191 | 6.443661377 | 5.013362104 |
| ENSMUSG00000081154 | 7.781970364 | 9.043024169 | 8.473812573 | 4.02728836  | 7.161945863 |
| ENSMUSG00000081155 | 7.781970364 | 6.260555194 | 4.943057334 | 5.638203705 | 5.013362104 |
| ENSMUSG00000081156 | 9.904325918 | 16.69481385 | 15.53532305 | 14.4982381  | 12.17530797 |
| ENSMUSG00000081157 | 10.61177777 | 8.347406925 | 8.473812573 | 9.665492065 | 13.60769714 |
| ENSMUSG00000081158 | 8.489422215 | 8.347406925 | 2.824604191 | 5.638203705 | 4.297167518 |
| ENSMUSG00000081159 | 0.707451851 | 1.391234488 | 1.412302096 | 1.610915344 | 0.716194586 |
| ENSMUSG00000081160 | 7.781970364 | 4.173703463 | 3.530755239 | 3.221830688 | 0.716194586 |
| ENSMUSG00000081161 | 0.707451851 | 0.695617244 | 2.118453143 | 0.805457672 | 1.432389173 |
| ENSMUSG00000081162 | 2.829807405 | 9.738641413 | 7.767661525 | 4.832746033 | 4.297167518 |
| ENSMUSG00000081163 | 9.196874066 | 5.56493795  | 9.886114669 | 4.832746033 | 5.729556691 |
| ENSMUSG00000081164 | 4.244711108 | 2.782468975 | 4.943057334 | 1.610915344 | 5.013362104 |
| ENSMUSG00000081165 | 12.73413332 | 14.60796212 | 19.77222934 | 8.054576721 | 15.04008631 |
| ENSMUSG00000081166 | 4.952162959 | 9.738641413 | 6.35535943  | 4.02728836  | 7.161945863 |
| ENSMUSG00000081167 | 11.31922962 | 4.869320706 | 3.530755239 | 5.638203705 | 7.87814045  |
| ENSMUSG00000081168 | 10.61177777 | 4.173703463 | 8.473812573 | 4.02728836  | 5.013362104 |
| ENSMUSG00000081169 | 10.61177777 | 6.956172438 | 9.179963621 | 5.638203705 | 8.594335036 |
| ENSMUSG00000081170 | 9.196874066 | 7.651789682 | 8.473812573 | 12.08186508 | 8.594335036 |
| ENSMUSG00000081171 | 3.537259256 | 2.086851731 | 4.943057334 | 0           | 2.148583759 |
| ENSMUSG00000081172 | 12.73413332 | 7.651789682 | 3.530755239 | 6.443661377 | 9.310529622 |
| ENSMUSG00000081173 | 5.65961481  | 8.347406925 | 16.2414741  | 2.416373016 | 5.729556691 |
| ENSMUSG00000081174 | 9.904325918 | 4.869320706 | 8.473812573 | 5.638203705 | 5.729556691 |
| ENSMUSG00000081175 | 4.952162959 | 6.260555194 | 3.530755239 | 0.805457672 | 1.432389173 |
| ENSMUSG00000081176 | 15.56394073 | 11.82549314 | 12.71071886 | 15.30369577 | 12.89150255 |
| ENSMUSG00000081177 | 8.489422215 | 4.869320706 | 10.59226572 | 6.443661377 | 5.729556691 |
| ENSMUSG00000081179 | 18.39374813 | 16.69481385 | 20.47838039 | 12.88732275 | 17.18867007 |
| ENSMUSG00000081180 | 7.781970364 | 9.043024169 | 11.29841676 | 6.443661377 | 5.729556691 |
| ENSMUSG00000081181 | 16.27139258 | 3.478086219 | 6.35535943  | 4.832746033 | 7.87814045  |
| ENSMUSG00000081182 | 3.537259256 | 2.086851731 | 2.118453143 | 2.416373016 | 0.716194586 |
| ENSMUSG00000081183 | 9.196874066 | 6.956172438 | 13.41686991 | 2.416373016 | 5.013362104 |

|                    |             |             |             |             |             |
|--------------------|-------------|-------------|-------------|-------------|-------------|
| ENSMUSG00000081184 | 12.02668147 | 7.651789682 | 6.35535943  | 6.443661377 | 3.580972932 |
| ENSMUSG00000081185 | 5.65961481  | 11.1298759  | 7.767661525 | 5.638203705 | 5.013362104 |
| ENSMUSG00000081186 | 9.904325918 | 6.956172438 | 4.943057334 | 2.416373016 | 5.729556691 |
| ENSMUSG00000081187 | 1.414903703 | 4.173703463 | 4.943057334 | 4.02728836  | 4.297167518 |
| ENSMUSG00000081188 | 6.367066661 | 4.869320706 | 4.943057334 | 4.02728836  | 1.432389173 |
| ENSMUSG00000081189 | 9.196874066 | 4.173703463 | 7.061510478 | 8.054576721 | 7.87814045  |
| ENSMUSG00000081191 | 9.904325918 | 9.738641413 | 9.179963621 | 8.860034393 | 5.013362104 |
| ENSMUSG00000081194 | 4.244711108 | 2.086851731 | 3.530755239 | 1.610915344 | 5.013362104 |
| ENSMUSG00000081195 | 2.829807405 | 2.782468975 | 3.530755239 | 6.443661377 | 3.580972932 |
| ENSMUSG00000081196 | 0.707451851 | 0.695617244 | 0.706151048 | 1.610915344 | 0.716194586 |
| ENSMUSG00000081197 | 7.074518513 | 2.086851731 | 3.530755239 | 3.221830688 | 1.432389173 |
| ENSMUSG00000081199 | 2.829807405 | 3.478086219 | 4.236906287 | 2.416373016 | 2.148583759 |
| ENSMUSG00000081200 | 6.367066661 | 6.956172438 | 10.59226572 | 8.054576721 | 6.445751277 |
| ENSMUSG00000081201 | 7.074518513 | 6.956172438 | 11.29841676 | 9.665492065 | 11.45911338 |
| ENSMUSG00000081202 | 8.489422215 | 6.956172438 | 7.767661525 | 10.47094974 | 4.297167518 |
| ENSMUSG00000081205 | 17.68629628 | 15.99919661 | 21.89068248 | 22.55281482 | 24.35061594 |
| ENSMUSG00000081206 | 14.14903703 | 6.260555194 | 19.06607829 | 10.47094974 | 9.310529622 |
| ENSMUSG00000081207 | 14.14903703 | 13.21672763 | 14.12302096 | 12.08186508 | 10.02672421 |
| ENSMUSG00000081208 | 70.03773327 | 43.12826911 | 48.7244223  | 49.93837567 | 55.14698315 |
| ENSMUSG00000081209 | 3.537259256 | 4.869320706 | 4.943057334 | 1.610915344 | 2.148583759 |
| ENSMUSG00000081210 | 7.781970364 | 9.043024169 | 10.59226572 | 4.832746033 | 13.60769714 |
| ENSMUSG00000081211 | 6.367066661 | 2.086851731 | 2.118453143 | 0           | 2.148583759 |
| ENSMUSG00000081212 | 5.65961481  | 11.1298759  | 9.179963621 | 4.832746033 | 7.87814045  |
| ENSMUSG00000081214 | 10.61177777 | 11.82549314 | 11.29841676 | 10.47094974 | 8.594335036 |
| ENSMUSG00000081215 | 7.781970364 | 7.651789682 | 5.649208382 | 3.221830688 | 4.297167518 |
| ENSMUSG00000081216 | 5.65961481  | 3.478086219 | 4.943057334 | 2.416373016 | 3.580972932 |
| ENSMUSG00000081217 | 2.829807405 | 8.347406925 | 6.35535943  | 1.610915344 | 1.432389173 |
| ENSMUSG00000081219 | 5.65961481  | 4.173703463 | 9.179963621 | 4.832746033 | 3.580972932 |
| ENSMUSG00000081220 | 4.244711108 | 3.478086219 | 5.649208382 | 1.610915344 | 5.013362104 |
| ENSMUSG00000081221 | 4.952162959 | 5.56493795  | 4.236906287 | 7.249119049 | 2.864778345 |
| ENSMUSG00000081222 | 4.244711108 | 4.173703463 | 3.530755239 | 6.443661377 | 3.580972932 |
| ENSMUSG00000081223 | 11.31922962 | 9.043024169 | 8.473812573 | 8.860034393 | 11.45911338 |
| ENSMUSG00000081224 | 4.244711108 | 6.260555194 | 5.649208382 | 5.638203705 | 2.148583759 |
| ENSMUSG00000081226 | 9.196874066 | 6.956172438 | 7.767661525 | 2.416373016 | 7.87814045  |
| ENSMUSG00000081227 | 6.367066661 | 5.56493795  | 5.649208382 | 4.832746033 | 7.87814045  |
| ENSMUSG00000081228 | 7.781970364 | 6.956172438 | 9.179963621 | 10.47094974 | 13.60769714 |
| ENSMUSG00000081229 | 9.196874066 | 9.738641413 | 7.767661525 | 5.638203705 | 7.87814045  |
| ENSMUSG00000081230 | 5.65961481  | 4.869320706 | 3.530755239 | 4.02728836  | 4.297167518 |
| ENSMUSG00000081231 | 13.44158517 | 7.651789682 | 5.649208382 | 4.832746033 | 7.87814045  |
| ENSMUSG00000081232 | 7.074518513 | 2.782468975 | 4.943057334 | 2.416373016 | 3.580972932 |
| ENSMUSG00000081233 | 7.781970364 | 9.738641413 | 7.767661525 | 5.638203705 | 5.013362104 |
| ENSMUSG00000081234 | 9.196874066 | 7.651789682 | 9.179963621 | 5.638203705 | 2.864778345 |
| ENSMUSG00000081235 | 4.244711108 | 5.56493795  | 1.412302096 | 2.416373016 | 2.148583759 |

|                    |             |             |             |             |             |
|--------------------|-------------|-------------|-------------|-------------|-------------|
| ENSMUSG00000081236 | 43.86201478 | 63.30116918 | 69.90895373 | 26.58010318 | 40.10689684 |
| ENSMUSG00000081237 | 8.489422215 | 2.782468975 | 9.886114669 | 4.832746033 | 3.580972932 |
| ENSMUSG00000081238 | 9.196874066 | 11.1298759  | 10.59226572 | 9.665492065 | 3.580972932 |
| ENSMUSG00000081239 | 11.31922962 | 9.738641413 | 10.59226572 | 8.054576721 | 10.02672421 |
| ENSMUSG00000081240 | 4.244711108 | 5.56493795  | 0.706151048 | 6.443661377 | 3.580972932 |
| ENSMUSG00000081241 | 9.904325918 | 6.956172438 | 7.061510478 | 1.610915344 | 5.013362104 |
| ENSMUSG00000081242 | 13.44158517 | 18.08604834 | 14.12302096 | 11.27640741 | 15.04008631 |
| ENSMUSG00000081243 | 12.02668147 | 8.347406925 | 4.943057334 | 5.638203705 | 7.161945863 |
| ENSMUSG00000081244 | 7.074518513 | 6.956172438 | 2.824604191 | 5.638203705 | 8.594335036 |
| ENSMUSG00000081245 | 16.97884443 | 8.347406925 | 7.061510478 | 1.610915344 | 5.013362104 |
| ENSMUSG00000081248 | 4.952162959 | 9.738641413 | 7.767661525 | 8.860034393 | 9.310529622 |
| ENSMUSG00000081249 | 143.6127258 | 182.2517179 | 164.5331941 | 192.5043836 | 174.0352845 |
| ENSMUSG00000081250 | 8.489422215 | 11.82549314 | 9.179963621 | 6.443661377 | 13.60769714 |
| ENSMUSG00000081251 | 1.414903703 | 1.391234488 | 0.706151048 | 0           | 0.716194586 |
| ENSMUSG00000081252 | 16.97884443 | 4.173703463 | 9.179963621 | 9.665492065 | 8.594335036 |
| ENSMUSG00000081253 | 2.829807405 | 4.869320706 | 6.35535943  | 3.221830688 | 1.432389173 |
| ENSMUSG00000081254 | 14.85648888 | 8.347406925 | 6.35535943  | 7.249119049 | 5.013362104 |
| ENSMUSG00000081255 | 2.122355554 | 6.260555194 | 4.943057334 | 4.832746033 | 5.013362104 |
| ENSMUSG00000081256 | 0.707451851 | 0.695617244 | 0.706151048 | 0           | 0.716194586 |
| ENSMUSG00000081257 | 6.367066661 | 4.173703463 | 8.473812573 | 3.221830688 | 6.445751277 |
| ENSMUSG00000081258 | 7.781970364 | 7.651789682 | 10.59226572 | 2.416373016 | 10.7429188  |
| ENSMUSG00000081259 | 5.65961481  | 6.260555194 | 6.35535943  | 8.054576721 | 6.445751277 |
| ENSMUSG00000081260 | 13.44158517 | 13.91234488 | 10.59226572 | 9.665492065 | 16.47247549 |
| ENSMUSG00000081261 | 9.196874066 | 7.651789682 | 3.530755239 | 8.054576721 | 5.729556691 |
| ENSMUSG00000081262 | 9.904325918 | 8.347406925 | 5.649208382 | 7.249119049 | 12.17530797 |
| ENSMUSG00000081263 | 7.074518513 | 2.086851731 | 5.649208382 | 3.221830688 | 3.580972932 |
| ENSMUSG00000081264 | 10.61177777 | 6.260555194 | 5.649208382 | 5.638203705 | 8.594335036 |
| ENSMUSG00000081265 | 5.65961481  | 10.43425866 | 9.179963621 | 6.443661377 | 4.297167518 |
| ENSMUSG00000081266 | 24.05336294 | 53.56252777 | 33.18909925 | 20.1364418  | 31.5125618  |
| ENSMUSG00000081268 | 4.244711108 | 2.782468975 | 5.649208382 | 2.416373016 | 4.297167518 |
| ENSMUSG00000081269 | 4.244711108 | 4.869320706 | 2.824604191 | 0.805457672 | 3.580972932 |
| ENSMUSG00000081270 | 12.02668147 | 9.738641413 | 7.061510478 | 8.860034393 | 3.580972932 |
| ENSMUSG00000081271 | 4.244711108 | 4.173703463 | 4.236906287 | 1.610915344 | 2.148583759 |
| ENSMUSG00000081272 | 12.02668147 | 13.21672763 | 12.00456781 | 16.91461111 | 12.17530797 |
| ENSMUSG00000081273 | 9.904325918 | 5.56493795  | 8.473812573 | 5.638203705 | 1.432389173 |
| ENSMUSG00000081274 | 10.61177777 | 2.782468975 | 7.767661525 | 6.443661377 | 5.729556691 |
| ENSMUSG00000081275 | 0           | 0           | 0.706151048 | 0           | 0           |
| ENSMUSG00000081276 | 4.244711108 | 2.086851731 | 10.59226572 | 10.47094974 | 11.45911338 |
| ENSMUSG00000081277 | 9.904325918 | 8.347406925 | 5.649208382 | 6.443661377 | 5.013362104 |
| ENSMUSG00000081278 | 12.73413332 | 7.651789682 | 6.35535943  | 5.638203705 | 5.013362104 |
| ENSMUSG00000081279 | 9.904325918 | 6.260555194 | 10.59226572 | 7.249119049 | 6.445751277 |
| ENSMUSG00000081280 | 4.244711108 | 2.782468975 | 8.473812573 | 4.02728836  | 7.161945863 |
| ENSMUSG00000081281 | 8.489422215 | 4.173703463 | 6.35535943  | 4.832746033 | 4.297167518 |

|                    |             |             |             |             |             |
|--------------------|-------------|-------------|-------------|-------------|-------------|
| ENSMUSG00000081282 | 7.781970364 | 10.43425866 | 7.061510478 | 11.27640741 | 7.87814045  |
| ENSMUSG00000081283 | 12.02668147 | 9.738641413 | 12.00456781 | 4.02728836  | 8.594335036 |
| ENSMUSG00000081284 | 10.61177777 | 8.347406925 | 9.886114669 | 6.443661377 | 5.729556691 |
| ENSMUSG00000081285 | 17.68629628 | 15.99919661 | 13.41686991 | 8.860034393 | 10.7429188  |
| ENSMUSG00000081286 | 2.829807405 | 2.086851731 | 2.824604191 | 1.610915344 | 7.161945863 |
| ENSMUSG00000081287 | 7.781970364 | 4.869320706 | 8.473812573 | 9.665492065 | 14.32389173 |
| ENSMUSG00000081288 | 11.31922962 | 5.56493795  | 6.35535943  | 4.832746033 | 4.297167518 |
| ENSMUSG00000081289 | 6.367066661 | 3.478086219 | 3.530755239 | 4.02728836  | 3.580972932 |
| ENSMUSG00000081290 | 6.367066661 | 7.651789682 | 7.061510478 | 6.443661377 | 8.594335036 |
| ENSMUSG00000081291 | 10.61177777 | 2.086851731 | 4.236906287 | 5.638203705 | 8.594335036 |
| ENSMUSG00000081292 | 2.829807405 | 5.56493795  | 4.943057334 | 2.416373016 | 3.580972932 |
| ENSMUSG00000081293 | 5.65961481  | 6.260555194 | 3.530755239 | 7.249119049 | 4.297167518 |
| ENSMUSG00000081295 | 1.414903703 | 2.086851731 | 1.412302096 | 4.02728836  | 1.432389173 |
| ENSMUSG00000081296 | 4.952162959 | 4.173703463 | 8.473812573 | 7.249119049 | 3.580972932 |
| ENSMUSG00000081297 | 9.904325918 | 4.869320706 | 4.943057334 | 5.638203705 | 7.161945863 |
| ENSMUSG00000081298 | 4.952162959 | 2.086851731 | 4.236906287 | 4.02728836  | 1.432389173 |
| ENSMUSG00000081299 | 9.904325918 | 8.347406925 | 5.649208382 | 2.416373016 | 6.445751277 |
| ENSMUSG00000081300 | 2.829807405 | 3.478086219 | 2.824604191 | 4.02728836  | 4.297167518 |
| ENSMUSG00000081301 | 53.7663407  | 54.25814501 | 45.8998181  | 43.49471429 | 28.64778345 |
| ENSMUSG00000081302 | 6.367066661 | 5.56493795  | 7.767661525 | 5.638203705 | 8.594335036 |
| ENSMUSG00000081303 | 6.367066661 | 6.260555194 | 8.473812573 | 4.832746033 | 11.45911338 |
| ENSMUSG00000081304 | 9.904325918 | 4.869320706 | 5.649208382 | 6.443661377 | 5.013362104 |
| ENSMUSG00000081305 | 4.952162959 | 6.260555194 | 9.179963621 | 5.638203705 | 3.580972932 |
| ENSMUSG00000081306 | 4.244711108 | 4.173703463 | 4.236906287 | 6.443661377 | 5.729556691 |
| ENSMUSG00000081307 | 9.904325918 | 9.738641413 | 5.649208382 | 6.443661377 | 8.594335036 |
| ENSMUSG00000081308 | 4.952162959 | 4.173703463 | 4.236906287 | 2.416373016 | 7.161945863 |
| ENSMUSG00000081309 | 14.85648888 | 6.956172438 | 9.179963621 | 5.638203705 | 10.02672421 |
| ENSMUSG00000081310 | 7.074518513 | 9.738641413 | 11.29841676 | 3.221830688 | 8.594335036 |
| ENSMUSG00000081311 | 9.196874066 | 9.043024169 | 9.886114669 | 9.665492065 | 5.729556691 |
| ENSMUSG00000081312 | 3.537259256 | 5.56493795  | 4.236906287 | 2.416373016 | 5.013362104 |
| ENSMUSG00000081313 | 7.074518513 | 4.173703463 | 7.767661525 | 6.443661377 | 9.310529622 |
| ENSMUSG00000081314 | 11.31922962 | 7.651789682 | 6.35535943  | 5.638203705 | 7.87814045  |
| ENSMUSG00000081315 | 11.31922962 | 6.260555194 | 7.061510478 | 4.832746033 | 6.445751277 |
| ENSMUSG00000081316 | 6.367066661 | 4.173703463 | 10.59226572 | 2.416373016 | 2.864778345 |
| ENSMUSG00000081317 | 7.781970364 | 8.347406925 | 2.824604191 | 5.638203705 | 5.729556691 |
| ENSMUSG00000081318 | 7.781970364 | 9.043024169 | 12.00456781 | 8.054576721 | 12.89150255 |
| ENSMUSG00000081319 | 12.02668147 | 12.52111039 | 14.829172   | 16.91461111 | 20.05344842 |
| ENSMUSG00000081320 | 7.074518513 | 9.738641413 | 6.35535943  | 3.221830688 | 2.864778345 |
| ENSMUSG00000081321 | 6.367066661 | 7.651789682 | 7.767661525 | 4.832746033 | 7.161945863 |
| ENSMUSG00000081323 | 4.244711108 | 5.56493795  | 3.530755239 | 3.221830688 | 3.580972932 |
| ENSMUSG00000081324 | 8.489422215 | 4.173703463 | 4.236906287 | 2.416373016 | 2.864778345 |
| ENSMUSG00000081325 | 19.10119998 | 26.43345526 | 17.65377619 | 12.08186508 | 12.89150255 |
| ENSMUSG00000081326 | 8.489422215 | 3.478086219 | 6.35535943  | 4.832746033 | 4.297167518 |

|                    |             |             |             |             |             |
|--------------------|-------------|-------------|-------------|-------------|-------------|
| ENSMUSG00000081327 | 8.489422215 | 4.173703463 | 7.061510478 | 4.832746033 | 5.729556691 |
| ENSMUSG00000081328 | 12.02668147 | 5.56493795  | 9.179963621 | 8.860034393 | 4.297167518 |
| ENSMUSG00000081329 | 5.65961481  | 9.043024169 | 7.061510478 | 5.638203705 | 9.310529622 |
| ENSMUSG00000081330 | 9.904325918 | 13.21672763 | 15.53532305 | 9.665492065 | 11.45911338 |
| ENSMUSG00000081331 | 4.952162959 | 6.956172438 | 2.824604191 | 4.832746033 | 1.432389173 |
| ENSMUSG00000081332 | 2.122355554 | 2.782468975 | 1.412302096 | 0           | 3.580972932 |
| ENSMUSG00000081333 | 7.074518513 | 8.347406925 | 5.649208382 | 5.638203705 | 11.45911338 |
| ENSMUSG00000081334 | 10.61177777 | 4.869320706 | 7.767661525 | 8.054576721 | 5.013362104 |
| ENSMUSG00000081335 | 8.489422215 | 5.56493795  | 10.59226572 | 6.443661377 | 5.729556691 |
| ENSMUSG00000081336 | 3.537259256 | 3.478086219 | 2.118453143 | 1.610915344 | 0.716194586 |
| ENSMUSG00000081339 | 10.61177777 | 15.30357936 | 13.41686991 | 4.832746033 | 7.161945863 |
| ENSMUSG00000081340 | 17.68629628 | 9.043024169 | 16.94762515 | 8.054576721 | 7.87814045  |
| ENSMUSG00000081341 | 7.074518513 | 3.478086219 | 1.412302096 | 2.416373016 | 2.148583759 |
| ENSMUSG00000081342 | 6.367066661 | 5.56493795  | 7.061510478 | 4.02728836  | 5.013362104 |
| ENSMUSG00000081343 | 6.367066661 | 8.347406925 | 8.473812573 | 11.27640741 | 10.02672421 |
| ENSMUSG00000081344 | 14.85648888 | 6.956172438 | 6.35535943  | 13.69278043 | 12.17530797 |
| ENSMUSG00000081345 | 7.074518513 | 7.651789682 | 11.29841676 | 3.221830688 | 5.013362104 |
| ENSMUSG00000081346 | 7.781970364 | 11.82549314 | 8.473812573 | 6.443661377 | 12.17530797 |
| ENSMUSG00000081347 | 8.489422215 | 5.56493795  | 5.649208382 | 7.249119049 | 7.87814045  |
| ENSMUSG00000081348 | 1.414903703 | 2.086851731 | 3.530755239 | 3.221830688 | 3.580972932 |
| ENSMUSG00000081349 | 2.829807405 | 4.869320706 | 2.824604191 | 2.416373016 | 8.594335036 |
| ENSMUSG00000081350 | 0           | 0           | 0.706151048 | 0           | 0.716194586 |
| ENSMUSG00000081352 | 9.196874066 | 4.869320706 | 6.35535943  | 7.249119049 | 6.445751277 |
| ENSMUSG00000081353 | 3.537259256 | 4.173703463 | 7.061510478 | 7.249119049 | 5.729556691 |
| ENSMUSG00000081354 | 7.781970364 | 4.173703463 | 5.649208382 | 6.443661377 | 3.580972932 |
| ENSMUSG00000081355 | 9.196874066 | 9.043024169 | 13.41686991 | 12.08186508 | 10.02672421 |
| ENSMUSG00000081357 | 6.367066661 | 2.086851731 | 8.473812573 | 4.02728836  | 5.729556691 |
| ENSMUSG00000081358 | 3.537259256 | 3.478086219 | 4.943057334 | 3.221830688 | 5.013362104 |
| ENSMUSG00000081359 | 29.71297775 | 35.47647943 | 40.25060972 | 28.9964762  | 30.79636721 |
| ENSMUSG00000081360 | 7.074518513 | 12.52111039 | 12.71071886 | 8.860034393 | 15.04008631 |
| ENSMUSG00000081361 | 7.781970364 | 9.738641413 | 12.00456781 | 4.02728836  | 5.013362104 |
| ENSMUSG00000081362 | 7.074518513 | 6.956172438 | 2.824604191 | 4.02728836  | 10.02672421 |
| ENSMUSG00000081363 | 8.489422215 | 6.260555194 | 5.649208382 | 7.249119049 | 4.297167518 |
| ENSMUSG00000081364 | 2.829807405 | 3.478086219 | 6.35535943  | 3.221830688 | 5.013362104 |
| ENSMUSG00000081365 | 2.829807405 | 4.869320706 | 1.412302096 | 2.416373016 | 4.297167518 |
| ENSMUSG00000081367 | 7.781970364 | 9.043024169 | 10.59226572 | 4.832746033 | 7.161945863 |
| ENSMUSG00000081369 | 6.367066661 | 8.347406925 | 7.061510478 | 8.054576721 | 6.445751277 |
| ENSMUSG00000081370 | 4.952162959 | 9.043024169 | 11.29841676 | 4.832746033 | 4.297167518 |
| ENSMUSG00000081372 | 18.39374813 | 18.08604834 | 14.829172   | 15.30369577 | 11.45911338 |
| ENSMUSG00000081373 | 2.122355554 | 0.695617244 | 1.412302096 | 0           | 0.716194586 |
| ENSMUSG00000081374 | 4.244711108 | 2.086851731 | 1.412302096 | 0.805457672 | 4.297167518 |
| ENSMUSG00000081375 | 9.904325918 | 14.60796212 | 10.59226572 | 16.91461111 | 13.60769714 |
| ENSMUSG00000081376 | 21.22355554 | 52.17129328 | 36.01370344 | 28.19101852 | 40.82309142 |

|                    |             |             |             |             |             |
|--------------------|-------------|-------------|-------------|-------------|-------------|
| ENSMUSG00000081377 | 7.074518513 | 13.21672763 | 7.767661525 | 8.054576721 | 5.729556691 |
| ENSMUSG00000081378 | 8.489422215 | 12.52111039 | 16.2414741  | 21.74735715 | 10.02672421 |
| ENSMUSG00000081379 | 6.367066661 | 4.869320706 | 5.649208382 | 2.416373016 | 3.580972932 |
| ENSMUSG00000081381 | 8.489422215 | 4.869320706 | 4.943057334 | 7.249119049 | 3.580972932 |
| ENSMUSG00000081382 | 7.074518513 | 7.651789682 | 3.530755239 | 11.27640741 | 7.87814045  |
| ENSMUSG00000081383 | 8.489422215 | 4.869320706 | 4.236906287 | 2.416373016 | 5.013362104 |
| ENSMUSG00000081384 | 7.074518513 | 4.869320706 | 4.943057334 | 7.249119049 | 5.729556691 |
| ENSMUSG00000081386 | 7.074518513 | 4.173703463 | 4.943057334 | 4.832746033 | 2.148583759 |
| ENSMUSG00000081388 | 10.61177777 | 9.738641413 | 7.767661525 | 4.832746033 | 7.161945863 |
| ENSMUSG00000081389 | 7.781970364 | 6.260555194 | 12.00456781 | 2.416373016 | 5.729556691 |
| ENSMUSG00000081390 | 4.952162959 | 5.56493795  | 3.530755239 | 4.02728836  | 5.013362104 |
| ENSMUSG00000081391 | 12.73413332 | 10.43425866 | 10.59226572 | 7.249119049 | 5.729556691 |
| ENSMUSG00000081392 | 9.196874066 | 11.82549314 | 9.886114669 | 3.221830688 | 6.445751277 |
| ENSMUSG00000081394 | 7.781970364 | 8.347406925 | 10.59226572 | 6.443661377 | 6.445751277 |
| ENSMUSG00000081395 | 1.414903703 | 3.478086219 | 3.530755239 | 4.02728836  | 0           |
| ENSMUSG00000081396 | 7.074518513 | 6.260555194 | 4.236906287 | 3.221830688 | 3.580972932 |
| ENSMUSG00000081397 | 5.65961481  | 1.391234488 | 3.530755239 | 3.221830688 | 4.297167518 |
| ENSMUSG00000081398 | 4.952162959 | 3.478086219 | 4.943057334 | 2.416373016 | 4.297167518 |
| ENSMUSG00000081399 | 6.367066661 | 2.782468975 | 6.35535943  | 3.221830688 | 2.864778345 |
| ENSMUSG00000081400 | 9.904325918 | 7.651789682 | 5.649208382 | 9.665492065 | 7.87814045  |
| ENSMUSG00000081401 | 9.904325918 | 4.869320706 | 2.118453143 | 5.638203705 | 6.445751277 |
| ENSMUSG00000081402 | 11.31922962 | 6.956172438 | 14.12302096 | 7.249119049 | 9.310529622 |
| ENSMUSG00000081403 | 7.074518513 | 2.782468975 | 5.649208382 | 4.02728836  | 5.013362104 |
| ENSMUSG00000081404 | 31.83533331 | 59.82308296 | 58.61053696 | 58.79841006 | 61.59273443 |
| ENSMUSG00000081405 | 12.73413332 | 6.260555194 | 9.886114669 | 8.054576721 | 8.594335036 |
| ENSMUSG00000081406 | 10.61177777 | 12.52111039 | 8.473812573 | 19.33098413 | 16.47247549 |
| ENSMUSG00000081407 | 3.537259256 | 2.782468975 | 4.236906287 | 0.805457672 | 3.580972932 |
| ENSMUSG00000081408 | 5.65961481  | 4.173703463 | 3.530755239 | 2.416373016 | 6.445751277 |
| ENSMUSG00000081409 | 3.537259256 | 6.260555194 | 2.824604191 | 2.416373016 | 2.864778345 |
| ENSMUSG00000081410 | 4.244711108 | 4.869320706 | 2.118453143 | 2.416373016 | 2.864778345 |
| ENSMUSG00000081412 | 13.44158517 | 10.43425866 | 7.767661525 | 8.860034393 | 9.310529622 |
| ENSMUSG00000081413 | 9.904325918 | 4.869320706 | 4.236906287 | 8.860034393 | 9.310529622 |
| ENSMUSG00000081414 | 4.244711108 | 2.782468975 | 1.412302096 | 3.221830688 | 2.864778345 |
| ENSMUSG00000081415 | 8.489422215 | 6.956172438 | 11.29841676 | 3.221830688 | 3.580972932 |
| ENSMUSG00000081416 | 7.781970364 | 14.60796212 | 7.061510478 | 6.443661377 | 9.310529622 |
| ENSMUSG00000081417 | 11.31922962 | 8.347406925 | 6.35535943  | 7.249119049 | 9.310529622 |
| ENSMUSG00000081418 | 1.414903703 | 0.695617244 | 2.118453143 | 0           | 1.432389173 |
| ENSMUSG00000081420 | 4.952162959 | 9.043024169 | 7.061510478 | 8.860034393 | 14.32389173 |
| ENSMUSG00000081421 | 7.074518513 | 12.52111039 | 14.829172   | 11.27640741 | 14.32389173 |
| ENSMUSG00000081422 | 8.489422215 | 3.478086219 | 1.412302096 | 4.02728836  | 1.432389173 |
| ENSMUSG00000081423 | 10.61177777 | 11.82549314 | 9.179963621 | 3.221830688 | 10.02672421 |
| ENSMUSG00000081424 | 5.65961481  | 2.086851731 | 4.943057334 | 2.416373016 | 1.432389173 |
| ENSMUSG00000081426 | 12.02668147 | 8.347406925 | 11.29841676 | 6.443661377 | 9.310529622 |

|                    |             |             |             |             |             |
|--------------------|-------------|-------------|-------------|-------------|-------------|
| ENSMUSG00000081427 | 7.781970364 | 7.651789682 | 7.767661525 | 2.416373016 | 3.580972932 |
| ENSMUSG00000081428 | 7.781970364 | 8.347406925 | 2.824604191 | 5.638203705 | 2.148583759 |
| ENSMUSG00000081429 | 33.25023701 | 36.86771392 | 41.66291182 | 17.72006879 | 24.35061594 |
| ENSMUSG00000081431 | 4.952162959 | 6.260555194 | 12.00456781 | 7.249119049 | 12.17530797 |
| ENSMUSG00000081432 | 7.074518513 | 9.043024169 | 9.179963621 | 4.832746033 | 9.310529622 |
| ENSMUSG00000081433 | 9.196874066 | 7.651789682 | 5.649208382 | 11.27640741 | 7.87814045  |
| ENSMUSG00000081434 | 13.44158517 | 12.52111039 | 7.767661525 | 7.249119049 | 10.7429188  |
| ENSMUSG00000081435 | 3.537259256 | 11.1298759  | 7.061510478 | 6.443661377 | 7.161945863 |
| ENSMUSG00000081436 | 4.244711108 | 4.869320706 | 4.236906287 | 3.221830688 | 7.161945863 |
| ENSMUSG00000081437 | 14.14903703 | 18.08604834 | 9.179963621 | 13.69278043 | 9.310529622 |
| ENSMUSG00000081438 | 9.904325918 | 9.043024169 | 10.59226572 | 3.221830688 | 7.87814045  |
| ENSMUSG00000081439 | 7.074518513 | 6.956172438 | 4.236906287 | 5.638203705 | 9.310529622 |
| ENSMUSG00000081440 | 12.73413332 | 7.651789682 | 5.649208382 | 10.47094974 | 5.013362104 |
| ENSMUSG00000081441 | 19.10119998 | 25.73783802 | 19.77222934 | 7.249119049 | 18.62105924 |
| ENSMUSG00000081442 | 6.367066661 | 4.869320706 | 5.649208382 | 3.221830688 | 3.580972932 |
| ENSMUSG00000081443 | 4.244711108 | 3.478086219 | 5.649208382 | 4.02728836  | 3.580972932 |
| ENSMUSG00000081444 | 7.074518513 | 5.56493795  | 7.767661525 | 8.860034393 | 4.297167518 |
| ENSMUSG00000081445 | 12.02668147 | 9.043024169 | 11.29841676 | 7.249119049 | 9.310529622 |
| ENSMUSG00000081446 | 8.489422215 | 8.347406925 | 10.59226572 | 4.02728836  | 5.729556691 |
| ENSMUSG00000081447 | 14.85648888 | 5.56493795  | 8.473812573 | 9.665492065 | 7.87814045  |
| ENSMUSG00000081448 | 11.31922962 | 7.651789682 | 4.236906287 | 5.638203705 | 8.594335036 |
| ENSMUSG00000081449 | 8.489422215 | 3.478086219 | 4.943057334 | 8.054576721 | 5.729556691 |
| ENSMUSG00000081450 | 7.074518513 | 9.043024169 | 12.00456781 | 6.443661377 | 8.594335036 |
| ENSMUSG00000081451 | 11.31922962 | 23.65098629 | 13.41686991 | 9.665492065 | 12.89150255 |
| ENSMUSG00000081452 | 2.122355554 | 2.782468975 | 5.649208382 | 0.805457672 | 2.864778345 |
| ENSMUSG00000081453 | 11.31922962 | 6.260555194 | 18.35992724 | 12.08186508 | 7.87814045  |
| ENSMUSG00000081455 | 14.85648888 | 8.347406925 | 12.71071886 | 8.860034393 | 7.87814045  |
| ENSMUSG00000081456 | 8.489422215 | 2.086851731 | 1.412302096 | 3.221830688 | 3.580972932 |
| ENSMUSG00000081457 | 2.829807405 | 4.173703463 | 2.824604191 | 2.416373016 | 0           |
| ENSMUSG00000081458 | 3.537259256 | 2.086851731 | 5.649208382 | 1.610915344 | 0.716194586 |
| ENSMUSG00000081459 | 9.904325918 | 10.43425866 | 10.59226572 | 9.665492065 | 16.47247549 |
| ENSMUSG00000081460 | 7.074518513 | 6.260555194 | 9.886114669 | 5.638203705 | 2.864778345 |
| ENSMUSG00000081461 | 3.537259256 | 2.782468975 | 2.824604191 | 3.221830688 | 0.716194586 |
| ENSMUSG00000081463 | 7.781970364 | 6.260555194 | 5.649208382 | 3.221830688 | 7.161945863 |
| ENSMUSG00000081464 | 3.537259256 | 4.869320706 | 2.824604191 | 4.02728836  | 0           |
| ENSMUSG00000081465 | 3.537259256 | 3.478086219 | 2.118453143 | 1.610915344 | 2.148583759 |
| ENSMUSG00000081466 | 2.122355554 | 8.347406925 | 2.824604191 | 0           | 1.432389173 |
| ENSMUSG00000081467 | 11.31922962 | 6.260555194 | 8.473812573 | 4.02728836  | 8.594335036 |
| ENSMUSG00000081469 | 13.44158517 | 8.347406925 | 12.71071886 | 4.832746033 | 7.87814045  |
| ENSMUSG00000081470 | 14.14903703 | 6.956172438 | 9.886114669 | 8.860034393 | 6.445751277 |
| ENSMUSG00000081471 | 6.367066661 | 5.56493795  | 4.236906287 | 5.638203705 | 2.864778345 |
| ENSMUSG00000081473 | 1.414903703 | 4.869320706 | 4.236906287 | 6.443661377 | 5.013362104 |
| ENSMUSG00000081474 | 5.65961481  | 4.173703463 | 7.767661525 | 8.860034393 | 7.161945863 |



|                    |             |             |             |             |             |
|--------------------|-------------|-------------|-------------|-------------|-------------|
| ENSMUSG00000081475 | 2.829807405 | 4.869320706 | 5.649208382 | 4.02728836  | 3.580972932 |
| ENSMUSG00000081476 | 18.39374813 | 21.56413456 | 29.65834401 | 18.52552646 | 18.62105924 |
| ENSMUSG00000081477 | 1.414903703 | 6.260555194 | 2.118453143 | 1.610915344 | 2.148583759 |
| ENSMUSG00000081478 | 10.61177777 | 4.869320706 | 4.943057334 | 6.443661377 | 6.445751277 |
| ENSMUSG00000081480 | 15.56394073 | 18.78166558 | 28.95219296 | 30.60739154 | 27.93158887 |
| ENSMUSG00000081481 | 4.244711108 | 9.043024169 | 6.35535943  | 4.02728836  | 6.445751277 |
| ENSMUSG00000081483 | 12.02668147 | 5.56493795  | 7.767661525 | 3.221830688 | 8.594335036 |
| ENSMUSG00000081484 | 12.73413332 | 4.173703463 | 6.35535943  | 6.443661377 | 6.445751277 |
| ENSMUSG00000081485 | 65.08557032 | 95.2995624  | 101.6857509 | 47.52200265 | 58.72795608 |
| ENSMUSG00000081486 | 2.829807405 | 2.086851731 | 2.824604191 | 2.416373016 | 4.297167518 |
| ENSMUSG00000081487 | 8.489422215 | 2.782468975 | 8.473812573 | 11.27640741 | 3.580972932 |
| ENSMUSG00000081488 | 6.367066661 | 7.651789682 | 8.473812573 | 4.832746033 | 5.729556691 |
| ENSMUSG00000081489 | 5.65961481  | 4.173703463 | 8.473812573 | 4.832746033 | 1.432389173 |
| ENSMUSG00000081490 | 11.31922962 | 13.91234488 | 9.886114669 | 9.665492065 | 11.45911338 |
| ENSMUSG00000081491 | 2.829807405 | 0.695617244 | 2.824604191 | 0.805457672 | 3.580972932 |
| ENSMUSG00000081492 | 11.31922962 | 16.69481385 | 16.94762515 | 10.47094974 | 12.17530797 |
| ENSMUSG00000081494 | 10.61177777 | 4.869320706 | 7.767661525 | 4.02728836  | 6.445751277 |
| ENSMUSG00000081495 | 8.489422215 | 7.651789682 | 3.530755239 | 5.638203705 | 7.161945863 |
| ENSMUSG00000081496 | 4.244711108 | 9.043024169 | 4.943057334 | 12.88732275 | 10.7429188  |
| ENSMUSG00000081497 | 20.51610369 | 34.78086219 | 18.35992724 | 23.35827249 | 39.39070225 |
| ENSMUSG00000081498 | 6.367066661 | 9.738641413 | 4.943057334 | 5.638203705 | 5.013362104 |
| ENSMUSG00000081499 | 31.83533331 | 40.34580014 | 36.01370344 | 16.91461111 | 25.78300511 |
| ENSMUSG00000081500 | 3.537259256 | 7.651789682 | 4.943057334 | 2.416373016 | 1.432389173 |
| ENSMUSG00000081501 | 2.829807405 | 2.782468975 | 1.412302096 | 0.805457672 | 2.148583759 |
| ENSMUSG00000081502 | 4.244711108 | 6.260555194 | 1.412302096 | 1.610915344 | 3.580972932 |
| ENSMUSG00000081504 | 7.074518513 | 6.260555194 | 6.35535943  | 4.832746033 | 10.02672421 |
| ENSMUSG00000081505 | 3.537259256 | 3.478086219 | 4.236906287 | 0.805457672 | 5.729556691 |
| ENSMUSG00000081506 | 10.61177777 | 11.82549314 | 7.061510478 | 4.832746033 | 10.02672421 |
| ENSMUSG00000081507 | 7.781970364 | 4.869320706 | 6.35535943  | 8.054576721 | 2.864778345 |
| ENSMUSG00000081508 | 9.196874066 | 8.347406925 | 8.473812573 | 3.221830688 | 9.310529622 |
| ENSMUSG00000081510 | 8.489422215 | 9.738641413 | 7.767661525 | 0.805457672 | 2.864778345 |
| ENSMUSG00000081511 | 7.074518513 | 9.043024169 | 9.886114669 | 8.054576721 | 5.729556691 |
| ENSMUSG00000081513 | 2.829807405 | 7.651789682 | 8.473812573 | 5.638203705 | 8.594335036 |
| ENSMUSG00000081514 | 4.244711108 | 2.086851731 | 2.118453143 | 2.416373016 | 4.297167518 |
| ENSMUSG00000081515 | 8.489422215 | 9.043024169 | 4.236906287 | 6.443661377 | 5.013362104 |
| ENSMUSG00000081516 | 9.196874066 | 11.1298759  | 5.649208382 | 5.638203705 | 9.310529622 |
| ENSMUSG00000081517 | 8.489422215 | 7.651789682 | 9.179963621 | 1.610915344 | 5.729556691 |
| ENSMUSG00000081518 | 16.97884443 | 8.347406925 | 9.886114669 | 5.638203705 | 6.445751277 |
| ENSMUSG00000081519 | 8.489422215 | 17.39043109 | 12.00456781 | 5.638203705 | 9.310529622 |
| ENSMUSG00000081520 | 5.65961481  | 6.260555194 | 8.473812573 | 8.860034393 | 8.594335036 |
| ENSMUSG00000081522 | 32.54278516 | 25.04222078 | 31.77679715 | 16.91461111 | 25.06681052 |
| ENSMUSG00000081523 | 9.196874066 | 6.260555194 | 7.061510478 | 5.638203705 | 8.594335036 |
| ENSMUSG00000081524 | 6.367066661 | 6.260555194 | 4.943057334 | 8.860034393 | 4.297167518 |

|                    |             |             |             |             |             |
|--------------------|-------------|-------------|-------------|-------------|-------------|
| ENSMUSG00000081525 | 10.61177777 | 9.043024169 | 9.179963621 | 7.249119049 | 8.594335036 |
| ENSMUSG00000081526 | 2.122355554 | 3.478086219 | 4.943057334 | 3.221830688 | 2.148583759 |
| ENSMUSG00000081528 | 19.80865184 | 42.43265187 | 30.36449505 | 18.52552646 | 27.93158887 |
| ENSMUSG00000081529 | 4.244711108 | 6.956172438 | 7.767661525 | 8.860034393 | 11.45911338 |
| ENSMUSG00000081530 | 8.489422215 | 8.347406925 | 12.00456781 | 12.08186508 | 7.87814045  |
| ENSMUSG00000081531 | 7.781970364 | 10.43425866 | 12.71071886 | 3.221830688 | 7.87814045  |
| ENSMUSG00000081532 | 16.27139258 | 34.78086219 | 30.36449505 | 21.74735715 | 16.47247549 |
| ENSMUSG00000081533 | 3.537259256 | 2.086851731 | 4.943057334 | 3.221830688 | 2.864778345 |
| ENSMUSG00000081535 | 0           | 0           | 0           | 0           | 0           |
| ENSMUSG00000081536 | 4.952162959 | 5.56493795  | 5.649208382 | 1.610915344 | 2.148583759 |
| ENSMUSG00000081537 | 5.65961481  | 6.260555194 | 12.71071886 | 10.47094974 | 7.161945863 |
| ENSMUSG00000081538 | 8.489422215 | 6.956172438 | 8.473812573 | 12.08186508 | 9.310529622 |
| ENSMUSG00000081539 | 9.196874066 | 6.956172438 | 6.35535943  | 2.416373016 | 5.013362104 |
| ENSMUSG00000081540 | 7.074518513 | 4.173703463 | 5.649208382 | 4.832746033 | 3.580972932 |
| ENSMUSG00000081541 | 154.9319554 | 217.0325801 | 199.8407465 | 196.531672  | 184.0620087 |
| ENSMUSG00000081542 | 2.122355554 | 5.56493795  | 2.824604191 | 4.02728836  | 5.729556691 |
| ENSMUSG00000081543 | 2.829807405 | 9.043024169 | 11.29841676 | 1.610915344 | 9.310529622 |
| ENSMUSG00000081544 | 9.196874066 | 10.43425866 | 13.41686991 | 18.52552646 | 10.02672421 |
| ENSMUSG00000081546 | 3.537259256 | 4.173703463 | 0.706151048 | 2.416373016 | 4.297167518 |
| ENSMUSG00000081547 | 10.61177777 | 7.651789682 | 8.473812573 | 3.221830688 | 5.729556691 |
| ENSMUSG00000081548 | 12.73413332 | 5.56493795  | 6.35535943  | 4.02728836  | 10.7429188  |
| ENSMUSG00000081550 | 9.904325918 | 9.043024169 | 5.649208382 | 5.638203705 | 5.729556691 |
| ENSMUSG00000081551 | 9.904325918 | 3.478086219 | 9.179963621 | 5.638203705 | 7.161945863 |
| ENSMUSG00000081552 | 7.781970364 | 6.956172438 | 9.179963621 | 4.832746033 | 10.7429188  |
| ENSMUSG00000081553 | 9.196874066 | 9.043024169 | 5.649208382 | 5.638203705 | 7.161945863 |
| ENSMUSG00000081555 | 4.952162959 | 2.782468975 | 5.649208382 | 2.416373016 | 2.864778345 |
| ENSMUSG00000081556 | 6.367066661 | 6.956172438 | 7.061510478 | 4.832746033 | 11.45911338 |
| ENSMUSG00000081557 | 5.65961481  | 10.43425866 | 5.649208382 | 4.02728836  | 7.161945863 |
| ENSMUSG00000081559 | 2.122355554 | 0           | 0.706151048 | 0           | 2.864778345 |
| ENSMUSG00000081560 | 6.367066661 | 6.956172438 | 0.706151048 | 5.638203705 | 2.148583759 |
| ENSMUSG00000081561 | 8.489422215 | 5.56493795  | 4.943057334 | 3.221830688 | 8.594335036 |
| ENSMUSG00000081562 | 7.781970364 | 11.82549314 | 7.767661525 | 6.443661377 | 5.013362104 |
| ENSMUSG00000081563 | 10.61177777 | 6.956172438 | 4.943057334 | 4.02728836  | 5.729556691 |
| ENSMUSG00000081564 | 35.37259256 | 20.86851731 | 35.30755239 | 26.58010318 | 34.37734014 |
| ENSMUSG00000081565 | 6.367066661 | 4.869320706 | 6.35535943  | 8.054576721 | 12.17530797 |
| ENSMUSG00000081566 | 8.489422215 | 6.260555194 | 4.236906287 | 8.054576721 | 5.729556691 |
| ENSMUSG00000081567 | 4.244711108 | 2.086851731 | 3.530755239 | 4.02728836  | 0.716194586 |
| ENSMUSG00000081568 | 4.244711108 | 0.695617244 | 3.530755239 | 4.02728836  | 3.580972932 |
| ENSMUSG00000081569 | 5.65961481  | 11.82549314 | 9.179963621 | 8.054576721 | 6.445751277 |
| ENSMUSG00000081570 | 72.86754068 | 118.2549314 | 99.56729774 | 120.8186508 | 113.1587446 |
| ENSMUSG00000081571 | 10.61177777 | 6.956172438 | 6.35535943  | 8.860034393 | 7.87814045  |
| ENSMUSG00000081572 | 25.46826665 | 38.25894841 | 40.25060972 | 24.96918783 | 32.22875639 |
| ENSMUSG00000081573 | 4.244711108 | 3.478086219 | 3.530755239 | 3.221830688 | 1.432389173 |

|                    |             |             |             |             |             |
|--------------------|-------------|-------------|-------------|-------------|-------------|
| ENSMUSG00000081574 | 8.489422215 | 6.956172438 | 8.473812573 | 8.054576721 | 6.445751277 |
| ENSMUSG00000081575 | 4.952162959 | 9.043024169 | 9.179963621 | 8.860034393 | 11.45911338 |
| ENSMUSG00000081576 | 12.02668147 | 11.1298759  | 9.886114669 | 15.30369577 | 10.7429188  |
| ENSMUSG00000081577 | 7.074518513 | 7.651789682 | 8.473812573 | 7.249119049 | 5.013362104 |
| ENSMUSG00000081578 | 11.31922962 | 8.347406925 | 6.35535943  | 8.860034393 | 9.310529622 |
| ENSMUSG00000081579 | 12.02668147 | 7.651789682 | 7.061510478 | 4.02728836  | 4.297167518 |
| ENSMUSG00000081580 | 7.074518513 | 2.782468975 | 4.943057334 | 7.249119049 | 7.87814045  |
| ENSMUSG00000081581 | 9.196874066 | 10.43425866 | 14.12302096 | 8.054576721 | 1.432389173 |
| ENSMUSG00000081583 | 2.829807405 | 1.391234488 | 11.29841676 | 4.02728836  | 4.297167518 |
| ENSMUSG00000081584 | 7.781970364 | 5.56493795  | 5.649208382 | 3.221830688 | 6.445751277 |
| ENSMUSG00000081585 | 12.02668147 | 11.1298759  | 9.886114669 | 8.860034393 | 10.7429188  |
| ENSMUSG00000081586 | 5.65961481  | 4.173703463 | 7.061510478 | 6.443661377 | 4.297167518 |
| ENSMUSG00000081587 | 6.367066661 | 2.782468975 | 4.236906287 | 4.832746033 | 5.729556691 |
| ENSMUSG00000081588 | 3.537259256 | 0.695617244 | 1.412302096 | 1.610915344 | 1.432389173 |
| ENSMUSG00000081589 | 4.244711108 | 2.782468975 | 3.530755239 | 1.610915344 | 3.580972932 |
| ENSMUSG00000081590 | 11.31922962 | 9.738641413 | 7.767661525 | 6.443661377 | 7.161945863 |
| ENSMUSG00000081591 | 8.489422215 | 3.478086219 | 6.35535943  | 4.02728836  | 5.729556691 |
| ENSMUSG00000081592 | 36.08004441 | 50.08444155 | 41.66291182 | 63.6311561  | 46.55264811 |
| ENSMUSG00000081593 | 7.781970364 | 5.56493795  | 7.061510478 | 4.02728836  | 10.02672421 |
| ENSMUSG00000081594 | 25.46826665 | 32.69401046 | 26.83373982 | 26.58010318 | 38.67450766 |
| ENSMUSG00000081595 | 24.05336294 | 18.08604834 | 18.35992724 | 16.10915344 | 10.7429188  |
| ENSMUSG00000081596 | 6.367066661 | 10.43425866 | 7.061510478 | 9.665492065 | 8.594335036 |
| ENSMUSG00000081597 | 2.829807405 | 4.869320706 | 0.706151048 | 4.02728836  | 2.864778345 |
| ENSMUSG00000081598 | 6.367066661 | 5.56493795  | 0.706151048 | 3.221830688 | 2.148583759 |
| ENSMUSG00000081599 | 12.73413332 | 5.56493795  | 11.29841676 | 4.02728836  | 10.02672421 |
| ENSMUSG00000081600 | 5.65961481  | 9.043024169 | 8.473812573 | 7.249119049 | 2.864778345 |
| ENSMUSG00000081601 | 4.952162959 | 5.56493795  | 7.767661525 | 11.27640741 | 5.013362104 |
| ENSMUSG00000081602 | 7.781970364 | 3.478086219 | 9.886114669 | 6.443661377 | 8.594335036 |
| ENSMUSG00000081603 | 0           | 0           | 0           | 0           | 0           |
| ENSMUSG00000081604 | 60.84085921 | 103.6469693 | 93.91808935 | 68.46390213 | 63.0251236  |
| ENSMUSG00000081605 | 14.85648888 | 18.78166558 | 10.59226572 | 11.27640741 | 13.60769714 |
| ENSMUSG00000081606 | 8.489422215 | 5.56493795  | 5.649208382 | 1.610915344 | 2.148583759 |
| ENSMUSG00000081607 | 6.367066661 | 2.782468975 | 2.824604191 | 2.416373016 | 4.297167518 |
| ENSMUSG00000081608 | 68.62282957 | 102.9513521 | 102.3919019 | 99.87675134 | 69.47087488 |
| ENSMUSG00000081609 | 7.074518513 | 8.347406925 | 8.473812573 | 10.47094974 | 8.594335036 |
| ENSMUSG00000081610 | 5.65961481  | 10.43425866 | 6.35535943  | 3.221830688 | 4.297167518 |
| ENSMUSG00000081611 | 8.489422215 | 8.347406925 | 8.473812573 | 2.416373016 | 7.87814045  |
| ENSMUSG00000081612 | 4.952162959 | 1.391234488 | 2.824604191 | 4.02728836  | 3.580972932 |
| ENSMUSG00000081613 | 7.074518513 | 5.56493795  | 5.649208382 | 8.054576721 | 10.02672421 |
| ENSMUSG00000081614 | 4.244711108 | 2.782468975 | 6.35535943  | 1.610915344 | 4.297167518 |
| ENSMUSG00000081615 | 14.14903703 | 6.260555194 | 4.943057334 | 4.02728836  | 5.013362104 |
| ENSMUSG00000081616 | 7.781970364 | 6.956172438 | 9.886114669 | 7.249119049 | 11.45911338 |
| ENSMUSG00000081617 | 7.074518513 | 6.260555194 | 6.35535943  | 0.805457672 | 5.013362104 |

|                    |             |             |             |             |             |
|--------------------|-------------|-------------|-------------|-------------|-------------|
| ENSMUSG00000081618 | 5.65961481  | 7.651789682 | 4.943057334 | 2.416373016 | 5.013362104 |
| ENSMUSG00000081619 | 31.83533331 | 40.34580014 | 36.01370344 | 18.52552646 | 34.37734014 |
| ENSMUSG00000081620 | 9.196874066 | 3.478086219 | 9.179963621 | 3.221830688 | 5.729556691 |
| ENSMUSG00000081621 | 13.44158517 | 17.39043109 | 15.53532305 | 11.27640741 | 13.60769714 |
| ENSMUSG00000081622 | 4.244711108 | 5.56493795  | 6.35535943  | 3.221830688 | 8.594335036 |
| ENSMUSG00000081623 | 4.244711108 | 7.651789682 | 8.473812573 | 4.02728836  | 7.161945863 |
| ENSMUSG00000081624 | 12.02668147 | 11.1298759  | 10.59226572 | 5.638203705 | 2.864778345 |
| ENSMUSG00000081625 | 2.122355554 | 2.782468975 | 4.943057334 | 1.610915344 | 4.297167518 |
| ENSMUSG00000081626 | 8.489422215 | 6.260555194 | 7.767661525 | 7.249119049 | 5.013362104 |
| ENSMUSG00000081627 | 24.76081479 | 21.56413456 | 26.83373982 | 29.80193387 | 17.90486466 |
| ENSMUSG00000081628 | 1.414903703 | 3.478086219 | 4.943057334 | 2.416373016 | 5.013362104 |
| ENSMUSG00000081629 | 5.65961481  | 6.956172438 | 7.061510478 | 6.443661377 | 2.864778345 |
| ENSMUSG00000081630 | 12.73413332 | 9.043024169 | 7.767661525 | 8.054576721 | 2.148583759 |
| ENSMUSG00000081631 | 7.074518513 | 7.651789682 | 3.530755239 | 8.054576721 | 2.148583759 |
| ENSMUSG00000081632 | 11.31922962 | 4.173703463 | 9.179963621 | 8.054576721 | 6.445751277 |
| ENSMUSG00000081633 | 5.65961481  | 9.043024169 | 3.530755239 | 2.416373016 | 3.580972932 |
| ENSMUSG00000081634 | 4.952162959 | 6.260555194 | 7.767661525 | 6.443661377 | 5.729556691 |
| ENSMUSG00000081635 | 2.122355554 | 3.478086219 | 7.061510478 | 0           | 3.580972932 |
| ENSMUSG00000081636 | 9.196874066 | 5.56493795  | 4.236906287 | 5.638203705 | 7.161945863 |
| ENSMUSG00000081638 | 4.244711108 | 3.478086219 | 2.824604191 | 6.443661377 | 2.864778345 |
| ENSMUSG00000081639 | 4.952162959 | 1.391234488 | 2.118453143 | 2.416373016 | 2.148583759 |
| ENSMUSG00000081640 | 9.904325918 | 6.260555194 | 5.649208382 | 10.47094974 | 7.87814045  |
| ENSMUSG00000081641 | 9.904325918 | 4.869320706 | 4.236906287 | 0.805457672 | 6.445751277 |
| ENSMUSG00000081642 | 41.03220737 | 30.60715873 | 33.18909925 | 32.21830688 | 37.24211849 |
| ENSMUSG00000081643 | 12.02668147 | 11.1298759  | 12.00456781 | 10.47094974 | 5.013362104 |
| ENSMUSG00000081646 | 5.65961481  | 3.478086219 | 2.118453143 | 2.416373016 | 2.864778345 |
| ENSMUSG00000081647 | 15.56394073 | 25.04222078 | 28.24604191 | 15.30369577 | 17.18867007 |
| ENSMUSG00000081648 | 12.73413332 | 11.1298759  | 9.886114669 | 8.054576721 | 11.45911338 |
| ENSMUSG00000081649 | 11.31922962 | 6.260555194 | 4.943057334 | 4.832746033 | 5.013362104 |
| ENSMUSG00000081651 | 10.61177777 | 4.173703463 | 8.473812573 | 4.02728836  | 10.02672421 |
| ENSMUSG00000081652 | 1.414903703 | 2.782468975 | 0.706151048 | 1.610915344 | 0           |
| ENSMUSG00000081653 | 7.074518513 | 10.43425866 | 8.473812573 | 4.02728836  | 3.580972932 |
| ENSMUSG00000081654 | 6.367066661 | 3.478086219 | 3.530755239 | 4.832746033 | 2.148583759 |
| ENSMUSG00000081656 | 7.781970364 | 11.1298759  | 7.061510478 | 11.27640741 | 5.729556691 |
| ENSMUSG00000081657 | 26.88317035 | 33.3896277  | 27.53989086 | 28.9964762  | 36.5259239  |
| ENSMUSG00000081658 | 9.196874066 | 4.869320706 | 6.35535943  | 4.02728836  | 5.013362104 |
| ENSMUSG00000081659 | 4.244711108 | 3.478086219 | 3.530755239 | 4.02728836  | 2.864778345 |
| ENSMUSG00000081660 | 42.44711108 | 43.82388636 | 52.96132858 | 28.19101852 | 30.08017263 |
| ENSMUSG00000081661 | 6.367066661 | 5.56493795  | 4.236906287 | 0.805457672 | 2.148583759 |
| ENSMUSG00000081662 | 11.31922962 | 9.043024169 | 6.35535943  | 9.665492065 | 5.013362104 |
| ENSMUSG00000081663 | 6.367066661 | 6.956172438 | 6.35535943  | 4.02728836  | 4.297167518 |
| ENSMUSG00000081664 | 11.31922962 | 3.478086219 | 4.943057334 | 7.249119049 | 9.310529622 |
| ENSMUSG00000081665 | 5.65961481  | 15.99919661 | 5.649208382 | 5.638203705 | 7.87814045  |

|                    |             |             |             |             |             |
|--------------------|-------------|-------------|-------------|-------------|-------------|
| ENSMUSG00000081666 | 11.31922962 | 7.651789682 | 6.35535943  | 7.249119049 | 7.87814045  |
| ENSMUSG00000081667 | 11.31922962 | 4.173703463 | 7.061510478 | 8.054576721 | 9.310529622 |
| ENSMUSG00000081668 | 7.074518513 | 10.43425866 | 9.886114669 | 6.443661377 | 5.013362104 |
| ENSMUSG00000081669 | 10.61177777 | 11.82549314 | 7.767661525 | 8.054576721 | 8.594335036 |
| ENSMUSG00000081670 | 14.85648888 | 29.21592424 | 17.65377619 | 10.47094974 | 15.7562809  |
| ENSMUSG00000081671 | 18.39374813 | 16.69481385 | 17.65377619 | 14.4982381  | 13.60769714 |
| ENSMUSG00000081672 | 4.952162959 | 6.956172438 | 9.886114669 | 8.860034393 | 2.864778345 |
| ENSMUSG00000081673 | 7.074518513 | 4.869320706 | 7.061510478 | 3.221830688 | 1.432389173 |
| ENSMUSG00000081674 | 4.244711108 | 2.086851731 | 4.236906287 | 2.416373016 | 2.864778345 |
| ENSMUSG00000081675 | 12.73413332 | 16.69481385 | 12.71071886 | 17.72006879 | 12.89150255 |
| ENSMUSG00000081676 | 14.14903703 | 5.56493795  | 7.767661525 | 7.249119049 | 6.445751277 |
| ENSMUSG00000081677 | 251.852859  | 281.0293665 | 280.341966  | 214.2517408 | 189.0753708 |
| ENSMUSG00000081678 | 178.2778665 | 255.9871457 | 207.608408  | 207.0026217 | 186.2105924 |
| ENSMUSG00000081679 | 7.074518513 | 2.086851731 | 9.886114669 | 10.47094974 | 6.445751277 |
| ENSMUSG00000081680 | 3.537259256 | 3.478086219 | 4.236906287 | 2.416373016 | 3.580972932 |
| ENSMUSG00000081681 | 6.367066661 | 9.043024169 | 7.061510478 | 4.832746033 | 5.013362104 |
| ENSMUSG00000081684 | 9.904325918 | 3.478086219 | 9.179963621 | 13.69278043 | 5.013362104 |
| ENSMUSG00000081685 | 16.97884443 | 8.347406925 | 7.767661525 | 5.638203705 | 5.729556691 |
| ENSMUSG00000081686 | 11.31922962 | 7.651789682 | 12.71071886 | 4.832746033 | 5.729556691 |
| ENSMUSG00000081687 | 8.489422215 | 7.651789682 | 10.59226572 | 5.638203705 | 10.02672421 |
| ENSMUSG00000081688 | 5.65961481  | 2.086851731 | 3.530755239 | 6.443661377 | 10.02672421 |
| ENSMUSG00000081689 | 4.244711108 | 2.782468975 | 4.943057334 | 4.832746033 | 2.148583759 |
| ENSMUSG00000081690 | 5.65961481  | 9.043024169 | 7.061510478 | 2.416373016 | 6.445751277 |
| ENSMUSG00000081691 | 6.367066661 | 12.52111039 | 7.767661525 | 8.860034393 | 6.445751277 |
| ENSMUSG00000081692 | 213.6504591 | 283.8118355 | 247.1528667 | 228.7499789 | 206.9802355 |
| ENSMUSG00000081693 | 10.61177777 | 6.260555194 | 10.59226572 | 5.638203705 | 5.013362104 |
| ENSMUSG00000081694 | 7.074518513 | 4.869320706 | 10.59226572 | 1.610915344 | 7.87814045  |
| ENSMUSG00000081695 | 12.73413332 | 6.956172438 | 8.473812573 | 8.054576721 | 15.04008631 |
| ENSMUSG00000081696 | 14.85648888 | 5.56493795  | 6.35535943  | 6.443661377 | 13.60769714 |
| ENSMUSG00000081697 | 9.196874066 | 5.56493795  | 6.35535943  | 4.832746033 | 2.148583759 |
| ENSMUSG00000081698 | 9.196874066 | 4.869320706 | 4.943057334 | 6.443661377 | 7.161945863 |
| ENSMUSG00000081699 | 4.952162959 | 1.391234488 | 4.236906287 | 4.832746033 | 2.148583759 |
| ENSMUSG00000081700 | 8.489422215 | 6.260555194 | 7.061510478 | 8.860034393 | 10.02672421 |
| ENSMUSG00000081701 | 9.196874066 | 5.56493795  | 7.767661525 | 10.47094974 | 4.297167518 |
| ENSMUSG00000081703 | 3.537259256 | 6.260555194 | 3.530755239 | 3.221830688 | 5.013362104 |
| ENSMUSG00000081704 | 3.537259256 | 4.869320706 | 0.706151048 | 0.805457672 | 0           |
| ENSMUSG00000081705 | 8.489422215 | 6.956172438 | 8.473812573 | 7.249119049 | 5.013362104 |
| ENSMUSG00000081706 | 4.244711108 | 4.869320706 | 3.530755239 | 4.02728836  | 3.580972932 |
| ENSMUSG00000081707 | 68.62282957 | 99.47326586 | 85.44427678 | 62.02024075 | 49.41742646 |
| ENSMUSG00000081709 | 2.122355554 | 4.173703463 | 6.35535943  | 1.610915344 | 3.580972932 |
| ENSMUSG00000081711 | 9.904325918 | 8.347406925 | 5.649208382 | 13.69278043 | 9.310529622 |
| ENSMUSG00000081712 | 7.781970364 | 7.651789682 | 10.59226572 | 6.443661377 | 3.580972932 |
| ENSMUSG00000081713 | 16.27139258 | 4.173703463 | 9.179963621 | 3.221830688 | 7.161945863 |

|                    |             |             |             |             |             |
|--------------------|-------------|-------------|-------------|-------------|-------------|
| ENSMUSG00000081714 | 13.44158517 | 3.478086219 | 7.061510478 | 7.249119049 | 8.594335036 |
| ENSMUSG00000081715 | 6.367066661 | 8.347406925 | 9.179963621 | 5.638203705 | 9.310529622 |
| ENSMUSG00000081716 | 5.65961481  | 1.391234488 | 5.649208382 | 4.02728836  | 3.580972932 |
| ENSMUSG00000081717 | 4.244711108 | 7.651789682 | 4.943057334 | 4.832746033 | 5.013362104 |
| ENSMUSG00000081718 | 9.196874066 | 6.260555194 | 0.706151048 | 0.805457672 | 2.148583759 |
| ENSMUSG00000081719 | 12.02668147 | 9.738641413 | 5.649208382 | 7.249119049 | 5.013362104 |
| ENSMUSG00000081720 | 6.367066661 | 11.1298759  | 7.767661525 | 4.02728836  | 7.87814045  |
| ENSMUSG00000081721 | 2.829807405 | 1.391234488 | 3.530755239 | 2.416373016 | 2.864778345 |
| ENSMUSG00000081722 | 7.781970364 | 6.260555194 | 9.179963621 | 5.638203705 | 12.89150255 |
| ENSMUSG00000081723 | 13.44158517 | 9.738641413 | 7.061510478 | 6.443661377 | 12.89150255 |
| ENSMUSG00000081728 | 4.952162959 | 3.478086219 | 5.649208382 | 4.02728836  | 2.864778345 |
| ENSMUSG00000081729 | 7.781970364 | 1.391234488 | 2.824604191 | 4.02728836  | 2.864778345 |
| ENSMUSG00000081730 | 26.1757185  | 44.5195036  | 41.66291182 | 17.72006879 | 22.20203218 |
| ENSMUSG00000081731 | 7.781970364 | 6.260555194 | 7.767661525 | 4.832746033 | 7.87814045  |
| ENSMUSG00000081732 | 7.074518513 | 9.738641413 | 5.649208382 | 6.443661377 | 7.161945863 |
| ENSMUSG00000081733 | 7.781970364 | 6.260555194 | 9.886114669 | 4.02728836  | 5.729556691 |
| ENSMUSG00000081734 | 12.02668147 | 7.651789682 | 7.767661525 | 8.860034393 | 8.594335036 |
| ENSMUSG00000081735 | 0.707451851 | 0           | 0.706151048 | 0           | 0.716194586 |
| ENSMUSG00000081736 | 4.244711108 | 3.478086219 | 4.236906287 | 3.221830688 | 5.013362104 |
| ENSMUSG00000081737 | 9.904325918 | 6.956172438 | 14.12302096 | 3.221830688 | 7.161945863 |
| ENSMUSG00000081738 | 6.367066661 | 6.956172438 | 7.061510478 | 4.832746033 | 7.161945863 |
| ENSMUSG00000081739 | 4.244711108 | 4.173703463 | 5.649208382 | 3.221830688 | 2.864778345 |
| ENSMUSG00000081740 | 9.196874066 | 11.1298759  | 6.35535943  | 9.665492065 | 6.445751277 |
| ENSMUSG00000081741 | 7.781970364 | 5.56493795  | 5.649208382 | 1.610915344 | 2.864778345 |
| ENSMUSG00000081742 | 4.244711108 | 3.478086219 | 2.824604191 | 4.02728836  | 1.432389173 |
| ENSMUSG00000081743 | 2.829807405 | 4.173703463 | 4.943057334 | 4.832746033 | 3.580972932 |
| ENSMUSG00000081744 | 9.196874066 | 6.260555194 | 9.886114669 | 7.249119049 | 8.594335036 |
| ENSMUSG00000081745 | 10.61177777 | 15.30357936 | 16.94762515 | 13.69278043 | 7.161945863 |
| ENSMUSG00000081746 | 13.44158517 | 7.651789682 | 7.767661525 | 7.249119049 | 5.013362104 |
| ENSMUSG00000081747 | 9.196874066 | 6.956172438 | 7.767661525 | 8.054576721 | 7.87814045  |
| ENSMUSG00000081748 | 2.829807405 | 6.260555194 | 9.179963621 | 4.02728836  | 5.729556691 |
| ENSMUSG00000081749 | 12.02668147 | 6.956172438 | 8.473812573 | 6.443661377 | 9.310529622 |
| ENSMUSG00000081750 | 3.537259256 | 4.173703463 | 5.649208382 | 1.610915344 | 3.580972932 |
| ENSMUSG00000081751 | 2.829807405 | 1.391234488 | 0.706151048 | 0.805457672 | 0.716194586 |
| ENSMUSG00000081752 | 7.074518513 | 4.173703463 | 7.061510478 | 3.221830688 | 5.729556691 |
| ENSMUSG00000081755 | 7.074518513 | 5.56493795  | 4.236906287 | 1.610915344 | 2.864778345 |
| ENSMUSG00000081756 | 18.39374813 | 15.99919661 | 17.65377619 | 5.638203705 | 8.594335036 |
| ENSMUSG00000081757 | 5.65961481  | 9.043024169 | 8.473812573 | 3.221830688 | 4.297167518 |
| ENSMUSG00000081758 | 7.781970364 | 5.56493795  | 7.767661525 | 8.860034393 | 7.87814045  |
| ENSMUSG00000081761 | 4.952162959 | 2.782468975 | 0.706151048 | 2.416373016 | 0.716194586 |
| ENSMUSG00000081762 | 11.31922962 | 10.43425866 | 7.767661525 | 8.860034393 | 5.013362104 |
| ENSMUSG00000081763 | 9.196874066 | 4.869320706 | 4.236906287 | 2.416373016 | 2.864778345 |
| ENSMUSG00000081765 | 4.244711108 | 8.347406925 | 6.35535943  | 7.249119049 | 4.297167518 |

|                    |             |             |             |             |             |
|--------------------|-------------|-------------|-------------|-------------|-------------|
| ENSMUSG00000081766 | 7.074518513 | 18.08604834 | 10.59226572 | 16.10915344 | 15.04008631 |
| ENSMUSG00000081767 | 0           | 0           | 0           | 0           | 0           |
| ENSMUSG00000081768 | 0.707451851 | 3.478086219 | 2.118453143 | 0.805457672 | 3.580972932 |
| ENSMUSG00000081770 | 10.61177777 | 5.56493795  | 12.71071886 | 7.249119049 | 9.310529622 |
| ENSMUSG00000081771 | 8.489422215 | 4.173703463 | 3.530755239 | 4.02728836  | 5.729556691 |
| ENSMUSG00000081772 | 7.074518513 | 6.956172438 | 3.530755239 | 8.054576721 | 2.864778345 |
| ENSMUSG00000081773 | 14.14903703 | 6.956172438 | 5.649208382 | 7.249119049 | 12.89150255 |
| ENSMUSG00000081774 | 7.074518513 | 11.1298759  | 7.061510478 | 5.638203705 | 6.445751277 |
| ENSMUSG00000081775 | 6.367066661 | 4.869320706 | 7.767661525 | 3.221830688 | 6.445751277 |
| ENSMUSG00000081777 | 6.367066661 | 6.956172438 | 4.236906287 | 5.638203705 | 6.445751277 |
| ENSMUSG00000081778 | 3.537259256 | 4.869320706 | 4.943057334 | 2.416373016 | 5.729556691 |
| ENSMUSG00000081779 | 6.367066661 | 2.086851731 | 8.473812573 | 3.221830688 | 3.580972932 |
| ENSMUSG00000081781 | 4.952162959 | 4.173703463 | 4.236906287 | 4.02728836  | 6.445751277 |
| ENSMUSG00000081782 | 20.51610369 | 27.12907251 | 30.36449505 | 26.58010318 | 28.64778345 |
| ENSMUSG00000081783 | 139.3680147 | 162.774435  | 161.7085899 | 95.04400531 | 101.6996313 |
| ENSMUSG00000081784 | 8.489422215 | 9.043024169 | 4.943057334 | 4.832746033 | 9.310529622 |
| ENSMUSG00000081786 | 10.61177777 | 5.56493795  | 12.00456781 | 7.249119049 | 5.729556691 |
| ENSMUSG00000081787 | 12.73413332 | 9.738641413 | 8.473812573 | 8.860034393 | 7.161945863 |
| ENSMUSG00000081788 | 14.14903703 | 13.21672763 | 15.53532305 | 20.1364418  | 15.04008631 |
| ENSMUSG00000081789 | 11.31922962 | 6.956172438 | 9.886114669 | 8.054576721 | 8.594335036 |
| ENSMUSG00000081791 | 13.44158517 | 7.651789682 | 7.767661525 | 2.416373016 | 7.161945863 |
| ENSMUSG00000081792 | 13.44158517 | 11.1298759  | 6.35535943  | 8.860034393 | 11.45911338 |
| ENSMUSG00000081793 | 2.829807405 | 6.260555194 | 3.530755239 | 3.221830688 | 1.432389173 |
| ENSMUSG00000081796 | 2.829807405 | 2.782468975 | 4.943057334 | 1.610915344 | 5.013362104 |
| ENSMUSG00000081797 | 4.244711108 | 4.173703463 | 4.943057334 | 1.610915344 | 2.148583759 |
| ENSMUSG00000081798 | 8.489422215 | 8.347406925 | 8.473812573 | 11.27640741 | 5.729556691 |
| ENSMUSG00000081799 | 12.73413332 | 4.869320706 | 7.767661525 | 12.88732275 | 7.87814045  |
| ENSMUSG00000081800 | 11.31922962 | 9.043024169 | 4.236906287 | 7.249119049 | 10.7429188  |
| ENSMUSG00000081801 | 43.15456293 | 57.04061399 | 49.43057334 | 46.71654498 | 51.56601022 |
| ENSMUSG00000081803 | 3.537259256 | 3.478086219 | 1.412302096 | 2.416373016 | 2.864778345 |
| ENSMUSG00000081804 | 5.65961481  | 4.173703463 | 2.118453143 | 0.805457672 | 2.864778345 |
| ENSMUSG00000081805 | 39.61730367 | 47.99758982 | 63.5535943  | 36.24559524 | 39.39070225 |
| ENSMUSG00000081806 | 1.414903703 | 2.782468975 | 2.118453143 | 4.832746033 | 3.580972932 |
| ENSMUSG00000081807 | 9.904325918 | 2.782468975 | 6.35535943  | 2.416373016 | 2.148583759 |
| ENSMUSG00000081809 | 1.414903703 | 1.391234488 | 0.706151048 | 0           | 1.432389173 |
| ENSMUSG00000081810 | 13.44158517 | 9.738641413 | 5.649208382 | 11.27640741 | 9.310529622 |
| ENSMUSG00000081811 | 12.02668147 | 20.86851731 | 10.59226572 | 7.249119049 | 12.17530797 |
| ENSMUSG00000081812 | 4.244711108 | 5.56493795  | 2.824604191 | 4.832746033 | 4.297167518 |
| ENSMUSG00000081813 | 4.952162959 | 3.478086219 | 7.767661525 | 5.638203705 | 5.013362104 |
| ENSMUSG00000081814 | 5.65961481  | 2.086851731 | 3.530755239 | 4.02728836  | 6.445751277 |
| ENSMUSG00000081816 | 5.65961481  | 6.260555194 | 9.179963621 | 8.054576721 | 5.013362104 |
| ENSMUSG00000081817 | 15.56394073 | 8.347406925 | 12.00456781 | 16.10915344 | 7.87814045  |
| ENSMUSG00000081818 | 9.196874066 | 11.1298759  | 9.179963621 | 6.443661377 | 9.310529622 |

|                    |             |             |             |             |             |
|--------------------|-------------|-------------|-------------|-------------|-------------|
| ENSMUSG00000081819 | 7.781970364 | 6.956172438 | 7.061510478 | 9.665492065 | 4.297167518 |
| ENSMUSG00000081820 | 8.489422215 | 4.869320706 | 10.59226572 | 5.638203705 | 6.445751277 |
| ENSMUSG00000081821 | 5.65961481  | 4.869320706 | 3.530755239 | 1.610915344 | 3.580972932 |
| ENSMUSG00000081822 | 6.367066661 | 4.173703463 | 9.886114669 | 5.638203705 | 4.297167518 |
| ENSMUSG00000081823 | 7.781970364 | 10.43425866 | 7.061510478 | 5.638203705 | 6.445751277 |
| ENSMUSG00000081824 | 12.02668147 | 34.08524495 | 21.18453143 | 15.30369577 | 12.89150255 |
| ENSMUSG00000081827 | 4.952162959 | 6.956172438 | 3.530755239 | 3.221830688 | 6.445751277 |
| ENSMUSG00000081828 | 7.074518513 | 4.869320706 | 8.473812573 | 5.638203705 | 9.310529622 |
| ENSMUSG00000081829 | 10.61177777 | 6.260555194 | 9.886114669 | 12.08186508 | 10.7429188  |
| ENSMUSG00000081830 | 10.61177777 | 9.043024169 | 7.061510478 | 7.249119049 | 5.013362104 |
| ENSMUSG00000081831 | 2.122355554 | 4.869320706 | 3.530755239 | 7.249119049 | 4.297167518 |
| ENSMUSG00000081832 | 2.829807405 | 3.478086219 | 5.649208382 | 0.805457672 | 4.297167518 |
| ENSMUSG00000081833 | 10.61177777 | 4.869320706 | 7.061510478 | 11.27640741 | 11.45911338 |
| ENSMUSG00000081834 | 11.31922962 | 7.651789682 | 9.886114669 | 6.443661377 | 10.7429188  |
| ENSMUSG00000081835 | 11.31922962 | 11.1298759  | 8.473812573 | 5.638203705 | 9.310529622 |
| ENSMUSG00000081836 | 4.952162959 | 3.478086219 | 3.530755239 | 4.02728836  | 8.594335036 |
| ENSMUSG00000081837 | 2.122355554 | 4.869320706 | 4.236906287 | 1.610915344 | 5.729556691 |
| ENSMUSG00000081838 | 304.204296  | 331.113808  | 298.7018932 | 390.646971  | 293.6397804 |
| ENSMUSG00000081839 | 6.367066661 | 8.347406925 | 6.35535943  | 5.638203705 | 6.445751277 |
| ENSMUSG00000081840 | 7.781970364 | 8.347406925 | 6.35535943  | 1.610915344 | 6.445751277 |
| ENSMUSG00000081841 | 7.074518513 | 10.43425866 | 7.061510478 | 5.638203705 | 10.02672421 |
| ENSMUSG00000081842 | 10.61177777 | 8.347406925 | 4.943057334 | 8.860034393 | 6.445751277 |
| ENSMUSG00000081843 | 7.074518513 | 1.391234488 | 3.530755239 | 4.832746033 | 5.729556691 |
| ENSMUSG00000081844 | 12.73413332 | 7.651789682 | 6.35535943  | 9.665492065 | 7.87814045  |
| ENSMUSG00000081845 | 7.074518513 | 6.260555194 | 2.824604191 | 0.805457672 | 1.432389173 |
| ENSMUSG00000081847 | 7.781970364 | 9.738641413 | 9.179963621 | 7.249119049 | 6.445751277 |
| ENSMUSG00000081848 | 9.196874066 | 11.82549314 | 4.943057334 | 7.249119049 | 5.729556691 |
| ENSMUSG00000081849 | 11.31922962 | 5.56493795  | 4.943057334 | 6.443661377 | 9.310529622 |
| ENSMUSG00000081850 | 10.61177777 | 14.60796212 | 11.29841676 | 6.443661377 | 8.594335036 |
| ENSMUSG00000081851 | 4.952162959 | 6.956172438 | 6.35535943  | 6.443661377 | 11.45911338 |
| ENSMUSG00000081852 | 5.65961481  | 10.43425866 | 4.236906287 | 9.665492065 | 7.87814045  |
| ENSMUSG00000081853 | 10.61177777 | 5.56493795  | 8.473812573 | 2.416373016 | 7.161945863 |
| ENSMUSG00000081854 | 14.85648888 | 11.82549314 | 15.53532305 | 8.054576721 | 15.04008631 |
| ENSMUSG00000081855 | 7.781970364 | 7.651789682 | 10.59226572 | 12.08186508 | 10.02672421 |
| ENSMUSG00000081856 | 5.65961481  | 2.086851731 | 3.530755239 | 3.221830688 | 4.297167518 |
| ENSMUSG00000081857 | 7.781970364 | 11.1298759  | 10.59226572 | 7.249119049 | 4.297167518 |
| ENSMUSG00000081858 | 5.65961481  | 2.782468975 | 4.236906287 | 0.805457672 | 1.432389173 |
| ENSMUSG00000081859 | 4.952162959 | 7.651789682 | 9.179963621 | 5.638203705 | 10.7429188  |
| ENSMUSG00000081860 | 7.781970364 | 9.738641413 | 7.767661525 | 6.443661377 | 8.594335036 |
| ENSMUSG00000081861 | 12.02668147 | 13.21672763 | 12.00456781 | 19.33098413 | 23.63442135 |
| ENSMUSG00000081862 | 9.196874066 | 8.347406925 | 9.179963621 | 6.443661377 | 4.297167518 |
| ENSMUSG00000081863 | 14.14903703 | 9.738641413 | 2.824604191 | 4.832746033 | 7.87814045  |
| ENSMUSG00000081864 | 6.367066661 | 2.086851731 | 9.886114669 | 5.638203705 | 8.594335036 |



|                    |             |             |             |             |             |
|--------------------|-------------|-------------|-------------|-------------|-------------|
| ENSMUSG00000081865 | 11.31922962 | 25.73783802 | 20.47838039 | 17.72006879 | 21.48583759 |
| ENSMUSG00000081866 | 67.20792587 | 95.99517964 | 98.15499564 | 155.4533307 | 131.0636093 |
| ENSMUSG00000081868 | 36.78749627 | 50.7800588  | 45.8998181  | 41.88379895 | 45.12025894 |
| ENSMUSG00000081869 | 4.244711108 | 6.260555194 | 4.236906287 | 3.221830688 | 2.864778345 |
| ENSMUSG00000081870 | 2.829807405 | 2.086851731 | 4.236906287 | 1.610915344 | 0.716194586 |
| ENSMUSG00000081871 | 9.904325918 | 9.738641413 | 9.886114669 | 5.638203705 | 10.02672421 |
| ENSMUSG00000081872 | 12.02668147 | 6.260555194 | 4.236906287 | 4.02728836  | 2.864778345 |
| ENSMUSG00000081873 | 9.196874066 | 7.651789682 | 8.473812573 | 8.860034393 | 8.594335036 |
| ENSMUSG00000081874 | 4.244711108 | 6.260555194 | 4.236906287 | 2.416373016 | 2.148583759 |
| ENSMUSG00000081875 | 5.65961481  | 4.173703463 | 7.061510478 | 4.02728836  | 2.148583759 |
| ENSMUSG00000081876 | 16.27139258 | 9.043024169 | 11.29841676 | 4.02728836  | 2.148583759 |
| ENSMUSG00000081877 | 8.489422215 | 4.173703463 | 4.943057334 | 1.610915344 | 2.148583759 |
| ENSMUSG00000081878 | 12.02668147 | 5.56493795  | 6.35535943  | 3.221830688 | 8.594335036 |
| ENSMUSG00000081879 | 7.781970364 | 8.347406925 | 11.29841676 | 8.054576721 | 8.594335036 |
| ENSMUSG00000081880 | 3.537259256 | 4.173703463 | 6.35535943  | 2.416373016 | 2.864778345 |
| ENSMUSG00000081881 | 6.367066661 | 3.478086219 | 4.943057334 | 4.02728836  | 2.864778345 |
| ENSMUSG00000081882 | 12.02668147 | 3.478086219 | 9.179963621 | 8.860034393 | 4.297167518 |
| ENSMUSG00000081883 | 7.781970364 | 6.956172438 | 7.061510478 | 4.02728836  | 10.7429188  |
| ENSMUSG00000081884 | 9.904325918 | 9.738641413 | 5.649208382 | 9.665492065 | 12.17530797 |
| ENSMUSG00000081885 | 19.10119998 | 9.738641413 | 11.29841676 | 16.10915344 | 14.32389173 |
| ENSMUSG00000081886 | 2.122355554 | 2.782468975 | 3.530755239 | 2.416373016 | 4.297167518 |
| ENSMUSG00000081887 | 7.074518513 | 6.260555194 | 7.061510478 | 7.249119049 | 6.445751277 |
| ENSMUSG00000081888 | 4.244711108 | 10.43425866 | 9.886114669 | 4.02728836  | 5.729556691 |
| ENSMUSG00000081889 | 4.952162959 | 3.478086219 | 5.649208382 | 6.443661377 | 7.161945863 |
| ENSMUSG00000081890 | 9.904325918 | 8.347406925 | 7.061510478 | 8.860034393 | 8.594335036 |
| ENSMUSG00000081891 | 4.244711108 | 6.956172438 | 6.35535943  | 4.02728836  | 2.148583759 |
| ENSMUSG00000081892 | 4.244711108 | 0.695617244 | 3.530755239 | 0.805457672 | 2.148583759 |
| ENSMUSG00000081893 | 9.196874066 | 5.56493795  | 11.29841676 | 6.443661377 | 5.013362104 |
| ENSMUSG00000081894 | 166.251185  | 212.8588766 | 197.0161423 | 174.7843148 | 151.1170577 |
| ENSMUSG00000081895 | 8.489422215 | 6.260555194 | 14.12302096 | 9.665492065 | 12.89150255 |
| ENSMUSG00000081896 | 14.14903703 | 4.173703463 | 4.943057334 | 0.805457672 | 5.729556691 |
| ENSMUSG00000081897 | 4.244711108 | 6.260555194 | 5.649208382 | 5.638203705 | 6.445751277 |
| ENSMUSG00000081898 | 7.074518513 | 2.086851731 | 3.530755239 | 2.416373016 | 4.297167518 |
| ENSMUSG00000081899 | 10.61177777 | 6.956172438 | 7.061510478 | 4.02728836  | 3.580972932 |
| ENSMUSG00000081900 | 3.537259256 | 4.173703463 | 4.236906287 | 2.416373016 | 3.580972932 |
| ENSMUSG00000081901 | 11.31922962 | 4.869320706 | 9.179963621 | 5.638203705 | 5.013362104 |
| ENSMUSG00000081903 | 9.196874066 | 5.56493795  | 9.886114669 | 7.249119049 | 7.161945863 |
| ENSMUSG00000081904 | 9.196874066 | 10.43425866 | 10.59226572 | 6.443661377 | 10.02672421 |
| ENSMUSG00000081905 | 7.074518513 | 12.52111039 | 10.59226572 | 17.72006879 | 8.594335036 |
| ENSMUSG00000081906 | 6.367066661 | 4.173703463 | 7.767661525 | 11.27640741 | 7.87814045  |
| ENSMUSG00000081907 | 9.196874066 | 9.738641413 | 7.767661525 | 5.638203705 | 6.445751277 |
| ENSMUSG00000081908 | 8.489422215 | 7.651789682 | 7.767661525 | 3.221830688 | 3.580972932 |
| ENSMUSG00000081909 | 4.244711108 | 9.738641413 | 8.473812573 | 5.638203705 | 7.161945863 |

|                    |             |             |             |             |             |
|--------------------|-------------|-------------|-------------|-------------|-------------|
| ENSMUSG00000081910 | 8.489422215 | 8.347406925 | 5.649208382 | 7.249119049 | 7.87814045  |
| ENSMUSG00000081911 | 7.781970364 | 9.043024169 | 8.473812573 | 5.638203705 | 12.89150255 |
| ENSMUSG00000081912 | 0.707451851 | 0.695617244 | 1.412302096 | 0           | 1.432389173 |
| ENSMUSG00000081913 | 7.781970364 | 6.956172438 | 9.886114669 | 7.249119049 | 12.17530797 |
| ENSMUSG00000081914 | 8.489422215 | 6.260555194 | 4.943057334 | 4.02728836  | 1.432389173 |
| ENSMUSG00000081915 | 7.074518513 | 4.173703463 | 4.236906287 | 1.610915344 | 4.297167518 |
| ENSMUSG00000081916 | 3.537259256 | 3.478086219 | 1.412302096 | 1.610915344 | 1.432389173 |
| ENSMUSG00000081917 | 5.65961481  | 9.043024169 | 7.767661525 | 8.054576721 | 5.013362104 |
| ENSMUSG00000081918 | 4.244711108 | 4.173703463 | 2.118453143 | 4.832746033 | 5.013362104 |
| ENSMUSG00000081919 | 12.73413332 | 4.173703463 | 6.35535943  | 3.221830688 | 9.310529622 |
| ENSMUSG00000081920 | 7.074518513 | 9.738641413 | 9.179963621 | 8.860034393 | 9.310529622 |
| ENSMUSG00000081921 | 7.781970364 | 7.651789682 | 3.530755239 | 6.443661377 | 9.310529622 |
| ENSMUSG00000081922 | 7.781970364 | 2.086851731 | 4.943057334 | 7.249119049 | 3.580972932 |
| ENSMUSG00000081923 | 2.122355554 | 6.260555194 | 7.061510478 | 3.221830688 | 2.148583759 |
| ENSMUSG00000081924 | 8.489422215 | 9.738641413 | 7.767661525 | 9.665492065 | 12.17530797 |
| ENSMUSG00000081925 | 9.196874066 | 9.043024169 | 7.767661525 | 6.443661377 | 12.17530797 |
| ENSMUSG00000081926 | 10.61177777 | 15.99919661 | 13.41686991 | 8.054576721 | 8.594335036 |
| ENSMUSG00000081928 | 5.65961481  | 5.56493795  | 4.236906287 | 1.610915344 | 2.864778345 |
| ENSMUSG00000081929 | 24.76081479 | 61.9099347  | 55.07978173 | 38.66196826 | 50.84981563 |
| ENSMUSG00000081931 | 4.244711108 | 2.782468975 | 3.530755239 | 8.860034393 | 5.013362104 |
| ENSMUSG00000081932 | 7.074518513 | 4.869320706 | 8.473812573 | 5.638203705 | 5.729556691 |
| ENSMUSG00000081933 | 2.122355554 | 2.086851731 | 5.649208382 | 4.02728836  | 8.594335036 |
| ENSMUSG00000081934 | 7.781970364 | 7.651789682 | 6.35535943  | 9.665492065 | 3.580972932 |
| ENSMUSG00000081935 | 7.781970364 | 18.08604834 | 12.00456781 | 13.69278043 | 16.47247549 |
| ENSMUSG00000081936 | 11.31922962 | 7.651789682 | 10.59226572 | 5.638203705 | 2.864778345 |
| ENSMUSG00000081937 | 7.074518513 | 2.782468975 | 5.649208382 | 1.610915344 | 4.297167518 |
| ENSMUSG00000081938 | 0.707451851 | 0.695617244 | 2.824604191 | 0           | 0.716194586 |
| ENSMUSG00000081939 | 8.489422215 | 5.56493795  | 8.473812573 | 4.832746033 | 2.864778345 |
| ENSMUSG00000081940 | 3.537259256 | 2.086851731 | 4.236906287 | 5.638203705 | 4.297167518 |
| ENSMUSG00000081941 | 11.31922962 | 2.782468975 | 7.061510478 | 5.638203705 | 3.580972932 |
| ENSMUSG00000081942 | 4.952162959 | 4.869320706 | 0.706151048 | 4.02728836  | 4.297167518 |
| ENSMUSG00000081943 | 4.952162959 | 4.869320706 | 5.649208382 | 3.221830688 | 4.297167518 |
| ENSMUSG00000081944 | 18.39374813 | 23.65098629 | 19.06607829 | 13.69278043 | 21.48583759 |
| ENSMUSG00000081945 | 13.44158517 | 7.651789682 | 6.35535943  | 5.638203705 | 5.013362104 |
| ENSMUSG00000081946 | 12.02668147 | 6.260555194 | 7.767661525 | 7.249119049 | 6.445751277 |
| ENSMUSG00000081947 | 6.367066661 | 2.782468975 | 5.649208382 | 4.02728836  | 2.148583759 |
| ENSMUSG00000081948 | 6.367066661 | 6.956172438 | 8.473812573 | 4.832746033 | 9.310529622 |
| ENSMUSG00000081949 | 14.85648888 | 12.52111039 | 12.71071886 | 7.249119049 | 7.87814045  |
| ENSMUSG00000081950 | 8.489422215 | 6.260555194 | 8.473812573 | 6.443661377 | 4.297167518 |
| ENSMUSG00000081951 | 12.73413332 | 7.651789682 | 12.71071886 | 5.638203705 | 6.445751277 |
| ENSMUSG00000081952 | 12.02668147 | 6.260555194 | 2.824604191 | 6.443661377 | 4.297167518 |
| ENSMUSG00000081953 | 12.02668147 | 15.30357936 | 19.06607829 | 20.1364418  | 26.49919969 |
| ENSMUSG00000081954 | 13.44158517 | 6.956172438 | 7.767661525 | 5.638203705 | 7.161945863 |

|                    |             |             |             |             |             |
|--------------------|-------------|-------------|-------------|-------------|-------------|
| ENSMUSG00000081955 | 8.489422215 | 7.651789682 | 9.179963621 | 4.02728836  | 5.729556691 |
| ENSMUSG00000081957 | 2.829807405 | 1.391234488 | 2.118453143 | 1.610915344 | 3.580972932 |
| ENSMUSG00000081958 | 20.51610369 | 20.17290007 | 24.00913562 | 39.46742593 | 16.47247549 |
| ENSMUSG00000081959 | 3.537259256 | 2.782468975 | 4.943057334 | 0.805457672 | 1.432389173 |
| ENSMUSG00000081960 | 6.367066661 | 3.478086219 | 0.706151048 | 0.805457672 | 3.580972932 |
| ENSMUSG00000081961 | 7.074518513 | 6.956172438 | 6.35535943  | 3.221830688 | 5.013362104 |
| ENSMUSG00000081962 | 3.537259256 | 2.086851731 | 1.412302096 | 1.610915344 | 1.432389173 |
| ENSMUSG00000081964 | 9.904325918 | 3.478086219 | 6.35535943  | 5.638203705 | 6.445751277 |
| ENSMUSG00000081965 | 7.781970364 | 6.956172438 | 3.530755239 | 10.47094974 | 10.02672421 |
| ENSMUSG00000081966 | 10.61177777 | 9.043024169 | 9.179963621 | 4.832746033 | 4.297167518 |
| ENSMUSG00000081967 | 9.196874066 | 7.651789682 | 13.41686991 | 12.08186508 | 14.32389173 |
| ENSMUSG00000081968 | 34.66514071 | 66.7792554  | 52.25517753 | 41.07834128 | 44.40406435 |
| ENSMUSG00000081969 | 5.65961481  | 4.173703463 | 9.886114669 | 5.638203705 | 5.013362104 |
| ENSMUSG00000081970 | 4.952162959 | 9.738641413 | 12.71071886 | 2.416373016 | 1.432389173 |
| ENSMUSG00000081971 | 7.781970364 | 4.869320706 | 4.943057334 | 8.860034393 | 8.594335036 |
| ENSMUSG00000081972 | 6.367066661 | 5.56493795  | 3.530755239 | 3.221830688 | 2.148583759 |
| ENSMUSG00000081973 | 13.44158517 | 5.56493795  | 10.59226572 | 4.02728836  | 7.87814045  |
| ENSMUSG00000081974 | 205.8684887 | 235.1186284 | 206.1961059 | 207.8080794 | 158.9951982 |
| ENSMUSG00000081975 | 7.074518513 | 3.478086219 | 9.179963621 | 3.221830688 | 2.864778345 |
| ENSMUSG00000081976 | 2.122355554 | 1.391234488 | 4.236906287 | 1.610915344 | 1.432389173 |
| ENSMUSG00000081977 | 10.61177777 | 9.043024169 | 7.767661525 | 4.832746033 | 9.310529622 |
| ENSMUSG00000081978 | 4.244711108 | 4.869320706 | 6.35535943  | 4.02728836  | 2.148583759 |
| ENSMUSG00000081979 | 9.904325918 | 6.956172438 | 4.943057334 | 6.443661377 | 7.161945863 |
| ENSMUSG00000081980 | 12.02668147 | 6.956172438 | 8.473812573 | 3.221830688 | 9.310529622 |
| ENSMUSG00000081982 | 7.781970364 | 6.260555194 | 1.412302096 | 2.416373016 | 5.013362104 |
| ENSMUSG00000081985 | 7.781970364 | 6.260555194 | 7.767661525 | 4.832746033 | 3.580972932 |
| ENSMUSG00000081986 | 4.952162959 | 3.478086219 | 5.649208382 | 4.832746033 | 4.297167518 |
| ENSMUSG00000081987 | 7.074518513 | 9.738641413 | 9.179963621 | 8.860034393 | 6.445751277 |
| ENSMUSG00000081988 | 10.61177777 | 6.956172438 | 8.473812573 | 4.02728836  | 8.594335036 |
| ENSMUSG00000081990 | 11.31922962 | 7.651789682 | 9.886114669 | 7.249119049 | 2.864778345 |
| ENSMUSG00000081991 | 0           | 0.695617244 | 1.412302096 | 0.805457672 | 0.716194586 |
| ENSMUSG00000081992 | 9.904325918 | 9.043024169 | 8.473812573 | 8.054576721 | 6.445751277 |
| ENSMUSG00000081993 | 1.414903703 | 0.695617244 | 4.236906287 | 1.610915344 | 2.864778345 |
| ENSMUSG00000081994 | 10.61177777 | 3.478086219 | 3.530755239 | 0           | 3.580972932 |
| ENSMUSG00000081995 | 12.73413332 | 15.99919661 | 13.41686991 | 12.08186508 | 14.32389173 |
| ENSMUSG00000081996 | 7.781970364 | 8.347406925 | 4.236906287 | 6.443661377 | 7.161945863 |
| ENSMUSG00000081997 | 12.02668147 | 4.173703463 | 9.179963621 | 7.249119049 | 7.87814045  |
| ENSMUSG00000081998 | 55.88869625 | 52.17129328 | 30.36449505 | 33.02376456 | 32.22875639 |
| ENSMUSG00000081999 | 15.56394073 | 15.99919661 | 14.829172   | 17.72006879 | 14.32389173 |
| ENSMUSG00000082000 | 4.952162959 | 10.43425866 | 9.179963621 | 12.08186508 | 7.87814045  |
| ENSMUSG00000082001 | 13.44158517 | 17.39043109 | 21.89068248 | 16.10915344 | 16.47247549 |
| ENSMUSG00000082002 | 2.829807405 | 2.086851731 | 7.061510478 | 4.832746033 | 7.87814045  |
| ENSMUSG00000082004 | 15.56394073 | 7.651789682 | 7.767661525 | 3.221830688 | 5.013362104 |

|                   |             |             |             |             |             |
|-------------------|-------------|-------------|-------------|-------------|-------------|
| ENSMUSG0000082005 | 5.65961481  | 2.086851731 | 4.236906287 | 3.221830688 | 2.864778345 |
| ENSMUSG0000082006 | 7.074518513 | 4.173703463 | 5.649208382 | 4.02728836  | 10.02672421 |
| ENSMUSG0000082007 | 2.829807405 | 3.478086219 | 6.35535943  | 4.02728836  | 4.297167518 |
| ENSMUSG0000082008 | 7.781970364 | 20.86851731 | 15.53532305 | 11.27640741 | 12.89150255 |
| ENSMUSG0000082009 | 7.074518513 | 8.347406925 | 7.767661525 | 7.249119049 | 8.594335036 |
| ENSMUSG0000082010 | 10.61177777 | 8.347406925 | 6.35535943  | 3.221830688 | 5.729556691 |
| ENSMUSG0000082011 | 0           | 0           | 0           | 0           | 0           |
| ENSMUSG0000082012 | 14.14903703 | 4.869320706 | 5.649208382 | 5.638203705 | 6.445751277 |
| ENSMUSG0000082013 | 67.20792587 | 98.08203137 | 98.86114669 | 35.44013757 | 45.83645353 |
| ENSMUSG0000082014 | 14.85648888 | 9.738641413 | 4.943057334 | 4.832746033 | 5.013362104 |
| ENSMUSG0000082015 | 8.489422215 | 6.260555194 | 8.473812573 | 7.249119049 | 5.729556691 |
| ENSMUSG0000082016 | 9.904325918 | 23.65098629 | 17.65377619 | 24.96918783 | 25.06681052 |
| ENSMUSG0000082017 | 5.65961481  | 11.1298759  | 4.236906287 | 2.416373016 | 5.013362104 |
| ENSMUSG0000082018 | 2.122355554 | 3.478086219 | 3.530755239 | 3.221830688 | 6.445751277 |
| ENSMUSG0000082019 | 4.244711108 | 3.478086219 | 2.824604191 | 2.416373016 | 2.864778345 |
| ENSMUSG0000082020 | 7.074518513 | 4.173703463 | 5.649208382 | 8.054576721 | 5.013362104 |
| ENSMUSG0000082021 | 5.65961481  | 2.782468975 | 2.118453143 | 0.805457672 | 2.148583759 |
| ENSMUSG0000082022 | 7.074518513 | 2.782468975 | 6.35535943  | 3.221830688 | 5.729556691 |
| ENSMUSG0000082023 | 10.61177777 | 11.1298759  | 6.35535943  | 3.221830688 | 6.445751277 |
| ENSMUSG0000082024 | 7.781970364 | 4.173703463 | 7.767661525 | 6.443661377 | 4.297167518 |
| ENSMUSG0000082025 | 6.367066661 | 8.347406925 | 14.12302096 | 1.610915344 | 9.310529622 |
| ENSMUSG0000082026 | 7.781970364 | 5.56493795  | 5.649208382 | 4.832746033 | 10.7429188  |
| ENSMUSG0000082027 | 12.02668147 | 9.043024169 | 7.061510478 | 3.221830688 | 6.445751277 |
| ENSMUSG0000082028 | 9.196874066 | 10.43425866 | 10.59226572 | 7.249119049 | 4.297167518 |
| ENSMUSG0000082029 | 11.31922962 | 9.043024169 | 10.59226572 | 10.47094974 | 12.17530797 |
| ENSMUSG0000082030 | 7.781970364 | 7.651789682 | 7.061510478 | 4.832746033 | 9.310529622 |
| ENSMUSG0000082031 | 7.074518513 | 7.651789682 | 4.943057334 | 3.221830688 | 7.87814045  |
| ENSMUSG0000082032 | 7.074518513 | 7.651789682 | 4.943057334 | 5.638203705 | 5.729556691 |
| ENSMUSG0000082033 | 2.829807405 | 1.391234488 | 3.530755239 | 4.02728836  | 0.716194586 |
| ENSMUSG0000082035 | 7.074518513 | 3.478086219 | 7.061510478 | 4.02728836  | 10.02672421 |
| ENSMUSG0000082036 | 4.244711108 | 1.391234488 | 4.236906287 | 4.02728836  | 5.013362104 |
| ENSMUSG0000082037 | 10.61177777 | 6.260555194 | 9.886114669 | 4.02728836  | 3.580972932 |
| ENSMUSG0000082038 | 9.196874066 | 9.738641413 | 7.767661525 | 9.665492065 | 6.445751277 |
| ENSMUSG0000082039 | 8.489422215 | 6.956172438 | 9.886114669 | 6.443661377 | 7.87814045  |
| ENSMUSG0000082040 | 5.65961481  | 6.956172438 | 9.179963621 | 7.249119049 | 3.580972932 |
| ENSMUSG0000082042 | 9.196874066 | 6.956172438 | 8.473812573 | 2.416373016 | 5.013362104 |
| ENSMUSG0000082043 | 4.952162959 | 11.1298759  | 7.767661525 | 3.221830688 | 4.297167518 |
| ENSMUSG0000082044 | 10.61177777 | 11.1298759  | 11.29841676 | 13.69278043 | 17.18867007 |
| ENSMUSG0000082045 | 9.196874066 | 6.956172438 | 9.179963621 | 8.860034393 | 9.310529622 |
| ENSMUSG0000082046 | 8.489422215 | 6.260555194 | 7.767661525 | 6.443661377 | 5.729556691 |
| ENSMUSG0000082047 | 9.196874066 | 6.260555194 | 9.886114669 | 2.416373016 | 7.87814045  |
| ENSMUSG0000082048 | 0           | 0           | 0           | 0           | 0           |
| ENSMUSG0000082049 | 7.781970364 | 5.56493795  | 6.35535943  | 4.02728836  | 9.310529622 |

|                    |             |             |             |             |             |
|--------------------|-------------|-------------|-------------|-------------|-------------|
| ENSMUSG00000082050 | 2.122355554 | 0           | 1.412302096 | 0.805457672 | 1.432389173 |
| ENSMUSG00000082051 | 9.196874066 | 7.651789682 | 10.59226572 | 4.02728836  | 6.445751277 |
| ENSMUSG00000082052 | 7.074518513 | 3.478086219 | 5.649208382 | 4.02728836  | 12.17530797 |
| ENSMUSG00000082053 | 4.952162959 | 8.347406925 | 8.473812573 | 8.054576721 | 9.310529622 |
| ENSMUSG00000082054 | 4.244711108 | 1.391234488 | 4.236906287 | 1.610915344 | 2.148583759 |
| ENSMUSG00000082055 | 11.31922962 | 9.738641413 | 9.179963621 | 10.47094974 | 6.445751277 |
| ENSMUSG00000082056 | 7.781970364 | 12.52111039 | 4.943057334 | 3.221830688 | 2.864778345 |
| ENSMUSG00000082057 | 55.88869625 | 61.21431745 | 76.26431316 | 19.33098413 | 31.5125618  |
| ENSMUSG00000082058 | 8.489422215 | 7.651789682 | 3.530755239 | 5.638203705 | 2.864778345 |
| ENSMUSG00000082059 | 10.61177777 | 8.347406925 | 5.649208382 | 3.221830688 | 14.32389173 |
| ENSMUSG00000082060 | 4.244711108 | 2.086851731 | 4.236906287 | 2.416373016 | 3.580972932 |
| ENSMUSG00000082061 | 10.61177777 | 5.56493795  | 7.061510478 | 4.832746033 | 8.594335036 |
| ENSMUSG00000082062 | 1.414903703 | 0.695617244 | 0           | 0           | 1.432389173 |
| ENSMUSG00000082063 | 9.196874066 | 4.173703463 | 8.473812573 | 4.832746033 | 10.7429188  |
| ENSMUSG00000082064 | 15.56394073 | 9.043024169 | 9.886114669 | 8.054576721 | 12.89150255 |
| ENSMUSG00000082065 | 13.44158517 | 6.956172438 | 12.00456781 | 7.249119049 | 6.445751277 |
| ENSMUSG00000082066 | 8.489422215 | 5.56493795  | 9.886114669 | 6.443661377 | 6.445751277 |
| ENSMUSG00000082068 | 8.489422215 | 6.956172438 | 9.886114669 | 10.47094974 | 9.310529622 |
| ENSMUSG00000082069 | 11.31922962 | 6.260555194 | 4.943057334 | 4.832746033 | 4.297167518 |
| ENSMUSG00000082070 | 7.074518513 | 6.260555194 | 4.236906287 | 3.221830688 | 3.580972932 |
| ENSMUSG00000082071 | 5.65961481  | 4.173703463 | 3.530755239 | 1.610915344 | 5.013362104 |
| ENSMUSG00000082072 | 8.489422215 | 7.651789682 | 8.473812573 | 6.443661377 | 4.297167518 |
| ENSMUSG00000082073 | 7.074518513 | 7.651789682 | 8.473812573 | 8.054576721 | 5.013362104 |
| ENSMUSG00000082074 | 7.074518513 | 7.651789682 | 7.767661525 | 7.249119049 | 6.445751277 |
| ENSMUSG00000082076 | 2.122355554 | 3.478086219 | 4.943057334 | 4.02728836  | 1.432389173 |
| ENSMUSG00000082077 | 10.61177777 | 4.173703463 | 7.061510478 | 9.665492065 | 7.161945863 |
| ENSMUSG00000082078 | 7.781970364 | 11.82549314 | 8.473812573 | 5.638203705 | 10.02672421 |
| ENSMUSG00000082079 | 6.367066661 | 4.869320706 | 4.943057334 | 2.416373016 | 7.87814045  |
| ENSMUSG00000082080 | 14.14903703 | 6.956172438 | 6.35535943  | 5.638203705 | 7.161945863 |
| ENSMUSG00000082081 | 7.074518513 | 2.782468975 | 3.530755239 | 4.02728836  | 4.297167518 |
| ENSMUSG00000082082 | 19.10119998 | 15.99919661 | 16.2414741  | 10.47094974 | 20.05344842 |
| ENSMUSG00000082083 | 4.952162959 | 2.782468975 | 2.824604191 | 3.221830688 | 2.864778345 |
| ENSMUSG00000082084 | 9.196874066 | 6.260555194 | 7.061510478 | 7.249119049 | 7.161945863 |
| ENSMUSG00000082085 | 4.952162959 | 2.086851731 | 7.061510478 | 0           | 5.013362104 |
| ENSMUSG00000082087 | 7.074518513 | 9.738641413 | 11.29841676 | 8.860034393 | 10.02672421 |
| ENSMUSG00000082088 | 12.73413332 | 13.91234488 | 9.886114669 | 15.30369577 | 7.87814045  |
| ENSMUSG00000082089 | 5.65961481  | 2.086851731 | 7.061510478 | 4.832746033 | 5.729556691 |
| ENSMUSG00000082090 | 4.952162959 | 5.56493795  | 6.35535943  | 4.02728836  | 1.432389173 |
| ENSMUSG00000082091 | 4.244711108 | 9.738641413 | 7.061510478 | 4.832746033 | 9.310529622 |
| ENSMUSG00000082092 | 3.537259256 | 4.869320706 | 1.412302096 | 1.610915344 | 2.864778345 |
| ENSMUSG00000082093 | 6.367066661 | 5.56493795  | 7.767661525 | 5.638203705 | 5.013362104 |
| ENSMUSG00000082095 | 21.93100739 | 15.99919661 | 10.59226572 | 20.1364418  | 13.60769714 |
| ENSMUSG00000082096 | 12.02668147 | 9.043024169 | 11.29841676 | 1.610915344 | 5.013362104 |

|                   |             |             |             |             |             |
|-------------------|-------------|-------------|-------------|-------------|-------------|
| ENSMUSG0000082097 | 7.781970364 | 3.478086219 | 5.649208382 | 4.02728836  | 10.02672421 |
| ENSMUSG0000082098 | 12.73413332 | 11.1298759  | 8.473812573 | 9.665492065 | 7.161945863 |
| ENSMUSG0000082099 | 10.61177777 | 6.956172438 | 7.767661525 | 4.02728836  | 6.445751277 |
| ENSMUSG0000082100 | 9.196874066 | 5.56493795  | 6.35535943  | 5.638203705 | 4.297167518 |
| ENSMUSG0000082102 | 6.367066661 | 2.086851731 | 4.236906287 | 4.02728836  | 3.580972932 |
| ENSMUSG0000082103 | 10.61177777 | 11.1298759  | 6.35535943  | 9.665492065 | 11.45911338 |
| ENSMUSG0000082104 | 10.61177777 | 7.651789682 | 8.473812573 | 7.249119049 | 7.87814045  |
| ENSMUSG0000082106 | 5.65961481  | 6.260555194 | 1.412302096 | 3.221830688 | 6.445751277 |
| ENSMUSG0000082107 | 13.44158517 | 13.91234488 | 9.179963621 | 12.08186508 | 16.47247549 |
| ENSMUSG0000082108 | 4.244711108 | 6.956172438 | 10.59226572 | 4.02728836  | 10.02672421 |
| ENSMUSG0000082109 | 0           | 0           | 0.706151048 | 0           | 0           |
| ENSMUSG0000082110 | 7.781970364 | 12.52111039 | 7.061510478 | 5.638203705 | 12.17530797 |
| ENSMUSG0000082111 | 5.65961481  | 8.347406925 | 5.649208382 | 4.02728836  | 6.445751277 |
| ENSMUSG0000082112 | 4.244711108 | 9.738641413 | 11.29841676 | 5.638203705 | 5.013362104 |
| ENSMUSG0000082113 | 9.904325918 | 6.956172438 | 6.35535943  | 4.02728836  | 4.297167518 |
| ENSMUSG0000082114 | 13.44158517 | 9.738641413 | 2.824604191 | 8.860034393 | 6.445751277 |
| ENSMUSG0000082115 | 5.65961481  | 5.56493795  | 8.473812573 | 6.443661377 | 4.297167518 |
| ENSMUSG0000082116 | 120.9742666 | 166.2525213 | 134.1686991 | 393.8688017 | 257.8300511 |
| ENSMUSG0000082117 | 7.074518513 | 3.478086219 | 3.530755239 | 3.221830688 | 4.297167518 |
| ENSMUSG0000082118 | 6.367066661 | 6.956172438 | 4.236906287 | 4.02728836  | 5.013362104 |
| ENSMUSG0000082119 | 8.489422215 | 9.043024169 | 7.061510478 | 4.832746033 | 8.594335036 |
| ENSMUSG0000082120 | 53.05888884 | 74.43104508 | 78.3827663  | 35.44013757 | 57.29556691 |
| ENSMUSG0000082121 | 3.537259256 | 6.260555194 | 6.35535943  | 2.416373016 | 1.432389173 |
| ENSMUSG0000082122 | 8.489422215 | 4.869320706 | 7.061510478 | 5.638203705 | 4.297167518 |
| ENSMUSG0000082123 | 6.367066661 | 8.347406925 | 7.061510478 | 8.054576721 | 7.161945863 |
| ENSMUSG0000082125 | 4.244711108 | 3.478086219 | 4.943057334 | 2.416373016 | 3.580972932 |
| ENSMUSG0000082126 | 4.952162959 | 3.478086219 | 2.118453143 | 3.221830688 | 0.716194586 |
| ENSMUSG0000082127 | 12.02668147 | 6.956172438 | 12.00456781 | 5.638203705 | 6.445751277 |
| ENSMUSG0000082128 | 9.196874066 | 6.956172438 | 4.943057334 | 7.249119049 | 11.45911338 |
| ENSMUSG0000082129 | 4.244711108 | 4.173703463 | 4.236906287 | 6.443661377 | 3.580972932 |
| ENSMUSG0000082130 | 14.14903703 | 18.78166558 | 19.06607829 | 17.72006879 | 10.7429188  |
| ENSMUSG0000082132 | 8.489422215 | 5.56493795  | 8.473812573 | 4.832746033 | 7.87814045  |
| ENSMUSG0000082134 | 4.244711108 | 3.478086219 | 3.530755239 | 2.416373016 | 6.445751277 |
| ENSMUSG0000082135 | 12.73413332 | 5.56493795  | 3.530755239 | 2.416373016 | 5.729556691 |
| ENSMUSG0000082136 | 7.074518513 | 5.56493795  | 2.824604191 | 4.832746033 | 6.445751277 |
| ENSMUSG0000082138 | 7.781970364 | 10.43425866 | 7.061510478 | 3.221830688 | 5.729556691 |
| ENSMUSG0000082139 | 3.537259256 | 6.956172438 | 3.530755239 | 5.638203705 | 7.161945863 |
| ENSMUSG0000082140 | 8.489422215 | 3.478086219 | 12.00456781 | 6.443661377 | 12.17530797 |
| ENSMUSG0000082141 | 9.196874066 | 6.260555194 | 10.59226572 | 5.638203705 | 5.729556691 |
| ENSMUSG0000082142 | 14.14903703 | 8.347406925 | 4.943057334 | 3.221830688 | 6.445751277 |
| ENSMUSG0000082143 | 9.196874066 | 9.043024169 | 10.59226572 | 5.638203705 | 5.013362104 |
| ENSMUSG0000082144 | 6.367066661 | 6.260555194 | 11.29841676 | 6.443661377 | 4.297167518 |
| ENSMUSG0000082145 | 9.904325918 | 11.1298759  | 7.767661525 | 7.249119049 | 8.594335036 |

|                   |             |             |             |             |             |
|-------------------|-------------|-------------|-------------|-------------|-------------|
| ENSMUSG0000082146 | 1.414903703 | 7.651789682 | 4.236906287 | 4.02728836  | 9.310529622 |
| ENSMUSG0000082147 | 4.244711108 | 2.782468975 | 1.412302096 | 1.610915344 | 5.729556691 |
| ENSMUSG0000082148 | 39.61730367 | 70.95295887 | 48.7244223  | 26.58010318 | 31.5125618  |
| ENSMUSG0000082149 | 2.829807405 | 4.869320706 | 4.943057334 | 0.805457672 | 4.297167518 |
| ENSMUSG0000082151 | 14.85648888 | 6.956172438 | 4.236906287 | 8.054576721 | 5.729556691 |
| ENSMUSG0000082152 | 9.196874066 | 9.043024169 | 6.35535943  | 6.443661377 | 6.445751277 |
| ENSMUSG0000082154 | 19.10119998 | 36.86771392 | 38.13215658 | 47.52200265 | 43.68786977 |
| ENSMUSG0000082155 | 8.489422215 | 4.173703463 | 3.530755239 | 2.416373016 | 1.432389173 |
| ENSMUSG0000082156 | 5.65961481  | 4.869320706 | 9.179963621 | 2.416373016 | 5.729556691 |
| ENSMUSG0000082157 | 0           | 0.695617244 | 0.706151048 | 0           | 0           |
| ENSMUSG0000082158 | 8.489422215 | 7.651789682 | 7.767661525 | 4.02728836  | 6.445751277 |
| ENSMUSG0000082159 | 13.44158517 | 4.869320706 | 6.35535943  | 5.638203705 | 9.310529622 |
| ENSMUSG0000082160 | 7.074518513 | 3.478086219 | 9.179963621 | 8.054576721 | 4.297167518 |
| ENSMUSG0000082161 | 7.781970364 | 7.651789682 | 5.649208382 | 2.416373016 | 5.013362104 |
| ENSMUSG0000082162 | 4.952162959 | 4.173703463 | 2.824604191 | 1.610915344 | 4.297167518 |
| ENSMUSG0000082163 | 12.73413332 | 11.1298759  | 5.649208382 | 5.638203705 | 6.445751277 |
| ENSMUSG0000082164 | 11.31922962 | 2.782468975 | 11.29841676 | 10.47094974 | 7.87814045  |
| ENSMUSG0000082165 | 4.952162959 | 4.173703463 | 3.530755239 | 2.416373016 | 2.864778345 |
| ENSMUSG0000082167 | 7.074518513 | 7.651789682 | 7.061510478 | 2.416373016 | 2.864778345 |
| ENSMUSG0000082168 | 2.829807405 | 4.173703463 | 2.118453143 | 3.221830688 | 0.716194586 |
| ENSMUSG0000082169 | 13.44158517 | 7.651789682 | 8.473812573 | 11.27640741 | 2.864778345 |
| ENSMUSG0000082170 | 2.829807405 | 2.782468975 | 2.824604191 | 0.805457672 | 5.013362104 |
| ENSMUSG0000082171 | 9.196874066 | 7.651789682 | 12.00456781 | 2.416373016 | 7.161945863 |
| ENSMUSG0000082172 | 2.829807405 | 2.086851731 | 2.118453143 | 1.610915344 | 1.432389173 |
| ENSMUSG0000082173 | 11.31922962 | 2.086851731 | 7.767661525 | 7.249119049 | 6.445751277 |
| ENSMUSG0000082174 | 1.414903703 | 0           | 0           | 0           | 0           |
| ENSMUSG0000082175 | 4.244711108 | 4.869320706 | 5.649208382 | 5.638203705 | 3.580972932 |
| ENSMUSG0000082176 | 42.44711108 | 30.60715873 | 34.60140134 | 21.74735715 | 35.09353473 |
| ENSMUSG0000082177 | 4.244711108 | 6.956172438 | 6.35535943  | 7.249119049 | 8.594335036 |
| ENSMUSG0000082178 | 6.367066661 | 10.43425866 | 9.179963621 | 5.638203705 | 8.594335036 |
| ENSMUSG0000082179 | 3.537259256 | 3.478086219 | 2.824604191 | 3.221830688 | 1.432389173 |
| ENSMUSG0000082180 | 220.7249776 | 288.6811562 | 249.2713199 | 209.4189947 | 185.4943979 |
| ENSMUSG0000082181 | 4.244711108 | 4.869320706 | 5.649208382 | 1.610915344 | 4.297167518 |
| ENSMUSG0000082183 | 7.781970364 | 11.82549314 | 13.41686991 | 4.02728836  | 6.445751277 |
| ENSMUSG0000082185 | 16.27139258 | 13.21672763 | 12.00456781 | 17.72006879 | 12.89150255 |
| ENSMUSG0000082186 | 106.1177777 | 163.4700523 | 125.6948865 | 74.9075635  | 90.95671247 |
| ENSMUSG0000082187 | 6.367066661 | 9.043024169 | 7.767661525 | 10.47094974 | 6.445751277 |
| ENSMUSG0000082188 | 3.537259256 | 5.56493795  | 4.943057334 | 4.02728836  | 0.716194586 |
| ENSMUSG0000082189 | 7.074518513 | 4.869320706 | 4.236906287 | 1.610915344 | 4.297167518 |
| ENSMUSG0000082190 | 11.31922962 | 13.91234488 | 9.886114669 | 18.52552646 | 13.60769714 |
| ENSMUSG0000082191 | 6.367066661 | 1.391234488 | 7.061510478 | 6.443661377 | 5.013362104 |
| ENSMUSG0000082192 | 4.952162959 | 5.56493795  | 9.886114669 | 7.249119049 | 5.013362104 |
| ENSMUSG0000082193 | 16.27139258 | 11.82549314 | 10.59226572 | 18.52552646 | 12.89150255 |

|                   |             |             |             |             |             |
|-------------------|-------------|-------------|-------------|-------------|-------------|
| ENSMUSG0000082194 | 10.61177777 | 13.91234488 | 9.179963621 | 5.638203705 | 5.013362104 |
| ENSMUSG0000082195 | 22.63845924 | 20.17290007 | 16.2414741  | 12.08186508 | 15.04008631 |
| ENSMUSG0000082196 | 4.244711108 | 8.347406925 | 13.41686991 | 11.27640741 | 3.580972932 |
| ENSMUSG0000082197 | 6.367066661 | 3.478086219 | 0.706151048 | 2.416373016 | 4.297167518 |
| ENSMUSG0000082198 | 2.829807405 | 2.782468975 | 0           | 3.221830688 | 4.297167518 |
| ENSMUSG0000082199 | 12.02668147 | 11.1298759  | 7.767661525 | 5.638203705 | 5.013362104 |
| ENSMUSG0000082200 | 3.537259256 | 3.478086219 | 7.061510478 | 4.02728836  | 2.148583759 |
| ENSMUSG0000082202 | 2.122355554 | 5.56493795  | 2.118453143 | 2.416373016 | 3.580972932 |
| ENSMUSG0000082203 | 12.73413332 | 6.956172438 | 7.767661525 | 5.638203705 | 10.7429188  |
| ENSMUSG0000082204 | 8.489422215 | 4.173703463 | 3.530755239 | 5.638203705 | 3.580972932 |
| ENSMUSG0000082205 | 4.244711108 | 4.869320706 | 7.061510478 | 3.221830688 | 0.716194586 |
| ENSMUSG0000082207 | 8.489422215 | 6.956172438 | 7.061510478 | 6.443661377 | 5.013362104 |
| ENSMUSG0000082208 | 1.414903703 | 0.695617244 | 0           | 1.610915344 | 2.148583759 |
| ENSMUSG0000082209 | 0           | 0           | 0           | 0           | 0           |
| ENSMUSG0000082210 | 77.11225179 | 139.819066  | 112.9841676 | 95.84946298 | 80.92998826 |
| ENSMUSG0000082212 | 7.781970364 | 5.56493795  | 6.35535943  | 2.416373016 | 5.013362104 |
| ENSMUSG0000082213 | 20.51610369 | 30.60715873 | 27.53989086 | 16.10915344 | 17.90486466 |
| ENSMUSG0000082214 | 1.414903703 | 0           | 2.118453143 | 3.221830688 | 1.432389173 |
| ENSMUSG0000082215 | 8.489422215 | 9.043024169 | 7.061510478 | 7.249119049 | 10.02672421 |
| ENSMUSG0000082216 | 4.244711108 | 7.651789682 | 14.12302096 | 7.249119049 | 7.87814045  |
| ENSMUSG0000082217 | 39.61730367 | 41.04141738 | 28.24604191 | 42.68925662 | 30.08017263 |
| ENSMUSG0000082218 | 10.61177777 | 10.43425866 | 7.767661525 | 8.054576721 | 4.297167518 |
| ENSMUSG0000082220 | 10.61177777 | 6.260555194 | 4.943057334 | 4.02728836  | 7.161945863 |
| ENSMUSG0000082222 | 6.367066661 | 2.086851731 | 3.530755239 | 3.221830688 | 5.013362104 |
| ENSMUSG0000082223 | 5.65961481  | 6.260555194 | 2.118453143 | 3.221830688 | 5.013362104 |
| ENSMUSG0000082225 | 9.196874066 | 9.738641413 | 6.35535943  | 4.832746033 | 5.013362104 |
| ENSMUSG0000082226 | 2.122355554 | 2.782468975 | 1.412302096 | 2.416373016 | 1.432389173 |
| ENSMUSG0000082227 | 0           | 0           | 0           | 0           | 0           |
| ENSMUSG0000082228 | 3.537259256 | 4.173703463 | 2.118453143 | 3.221830688 | 1.432389173 |
| ENSMUSG0000082233 | 9.904325918 | 8.347406925 | 9.886114669 | 4.832746033 | 4.297167518 |
| ENSMUSG0000082234 | 17.68629628 | 11.82549314 | 11.29841676 | 11.27640741 | 11.45911338 |
| ENSMUSG0000082235 | 10.61177777 | 7.651789682 | 8.473812573 | 1.610915344 | 7.161945863 |
| ENSMUSG0000082236 | 7.074518513 | 6.956172438 | 9.886114669 | 4.832746033 | 5.729556691 |
| ENSMUSG0000082237 | 7.074518513 | 9.043024169 | 9.886114669 | 1.610915344 | 5.729556691 |
| ENSMUSG0000082238 | 8.489422215 | 6.956172438 | 6.35535943  | 4.832746033 | 2.864778345 |
| ENSMUSG0000082239 | 4.952162959 | 7.651789682 | 3.530755239 | 8.054576721 | 7.87814045  |
| ENSMUSG0000082240 | 2.829807405 | 2.086851731 | 4.943057334 | 3.221830688 | 3.580972932 |
| ENSMUSG0000082241 | 9.904325918 | 14.60796212 | 5.649208382 | 12.88732275 | 5.013362104 |
| ENSMUSG0000082242 | 12.73413332 | 4.869320706 | 4.236906287 | 8.860034393 | 9.310529622 |
| ENSMUSG0000082243 | 8.489422215 | 7.651789682 | 12.00456781 | 7.249119049 | 5.729556691 |
| ENSMUSG0000082244 | 7.074518513 | 4.173703463 | 4.943057334 | 8.860034393 | 2.148583759 |
| ENSMUSG0000082245 | 4.244711108 | 2.782468975 | 4.236906287 | 1.610915344 | 2.864778345 |
| ENSMUSG0000082246 | 6.367066661 | 4.173703463 | 4.943057334 | 6.443661377 | 7.87814045  |



|                   |             |             |             |             |             |
|-------------------|-------------|-------------|-------------|-------------|-------------|
| ENSMUSG0000082247 | 13.44158517 | 18.78166558 | 14.12302096 | 25.77464551 | 21.48583759 |
| ENSMUSG0000082248 | 4.244711108 | 6.260555194 | 9.179963621 | 2.416373016 | 2.864778345 |
| ENSMUSG0000082249 | 5.65961481  | 6.956172438 | 10.59226572 | 9.665492065 | 5.729556691 |
| ENSMUSG0000082250 | 9.904325918 | 9.043024169 | 9.179963621 | 1.610915344 | 7.161945863 |
| ENSMUSG0000082251 | 13.44158517 | 4.869320706 | 9.886114669 | 4.832746033 | 1.432389173 |
| ENSMUSG0000082252 | 7.074518513 | 6.956172438 | 7.767661525 | 8.860034393 | 10.02672421 |
| ENSMUSG0000082253 | 3.537259256 | 6.260555194 | 5.649208382 | 4.02728836  | 4.297167518 |
| ENSMUSG0000082254 | 4.952162959 | 5.56493795  | 3.530755239 | 5.638203705 | 4.297167518 |
| ENSMUSG0000082255 | 7.781970364 | 6.260555194 | 7.767661525 | 4.832746033 | 7.161945863 |
| ENSMUSG0000082256 | 5.65961481  | 9.043024169 | 7.767661525 | 5.638203705 | 11.45911338 |
| ENSMUSG0000082257 | 6.367066661 | 6.956172438 | 7.061510478 | 7.249119049 | 10.02672421 |
| ENSMUSG0000082258 | 7.781970364 | 6.260555194 | 5.649208382 | 9.665492065 | 5.013362104 |
| ENSMUSG0000082259 | 4.244711108 | 6.956172438 | 8.473812573 | 4.02728836  | 2.148583759 |
| ENSMUSG0000082260 | 2.122355554 | 2.086851731 | 3.530755239 | 6.443661377 | 3.580972932 |
| ENSMUSG0000082261 | 4.952162959 | 2.086851731 | 2.824604191 | 2.416373016 | 3.580972932 |
| ENSMUSG0000082262 | 7.074518513 | 14.60796212 | 10.59226572 | 8.054576721 | 10.7429188  |
| ENSMUSG0000082263 | 12.73413332 | 31.30277597 | 18.35992724 | 15.30369577 | 14.32389173 |
| ENSMUSG0000082264 | 7.074518513 | 4.869320706 | 8.473812573 | 3.221830688 | 10.7429188  |
| ENSMUSG0000082265 | 9.904325918 | 15.30357936 | 18.35992724 | 16.91461111 | 19.33725383 |
| ENSMUSG0000082266 | 12.73413332 | 18.08604834 | 14.829172   | 11.27640741 | 10.02672421 |
| ENSMUSG0000082267 | 2.829807405 | 1.391234488 | 0.706151048 | 1.610915344 | 1.432389173 |
| ENSMUSG0000082268 | 16.27139258 | 8.347406925 | 7.061510478 | 3.221830688 | 10.02672421 |
| ENSMUSG0000082269 | 5.65961481  | 2.782468975 | 1.412302096 | 1.610915344 | 2.864778345 |
| ENSMUSG0000082270 | 6.367066661 | 4.869320706 | 4.943057334 | 1.610915344 | 1.432389173 |
| ENSMUSG0000082271 | 6.367066661 | 4.869320706 | 7.061510478 | 6.443661377 | 5.729556691 |
| ENSMUSG0000082272 | 12.73413332 | 5.56493795  | 12.00456781 | 4.02728836  | 2.864778345 |
| ENSMUSG0000082273 | 12.02668147 | 6.956172438 | 6.35535943  | 7.249119049 | 4.297167518 |
| ENSMUSG0000082274 | 10.61177777 | 2.782468975 | 6.35535943  | 9.665492065 | 6.445751277 |
| ENSMUSG0000082275 | 4.952162959 | 1.391234488 | 5.649208382 | 3.221830688 | 5.013362104 |
| ENSMUSG0000082276 | 9.904325918 | 15.30357936 | 14.829172   | 8.860034393 | 12.89150255 |
| ENSMUSG0000082277 | 7.074518513 | 9.043024169 | 9.886114669 | 6.443661377 | 6.445751277 |
| ENSMUSG0000082278 | 12.02668147 | 2.782468975 | 7.767661525 | 2.416373016 | 2.148583759 |
| ENSMUSG0000082279 | 27.5906222  | 56.34499675 | 58.61053696 | 17.72006879 | 30.79636721 |
| ENSMUSG0000082280 | 0           | 0.695617244 | 0           | 0           | 0           |
| ENSMUSG0000082281 | 9.196874066 | 5.56493795  | 3.530755239 | 4.832746033 | 10.02672421 |
| ENSMUSG0000082283 | 13.44158517 | 3.478086219 | 7.767661525 | 3.221830688 | 5.013362104 |
| ENSMUSG0000082284 | 7.781970364 | 9.738641413 | 2.118453143 | 7.249119049 | 2.864778345 |
| ENSMUSG0000082285 | 9.904325918 | 6.956172438 | 7.767661525 | 8.860034393 | 3.580972932 |
| ENSMUSG0000082286 | 82.7718666  | 82.08283477 | 85.44427678 | 100.682209  | 90.95671247 |
| ENSMUSG0000082287 | 19.10119998 | 33.3896277  | 14.12302096 | 16.10915344 | 11.45911338 |
| ENSMUSG0000082288 | 9.196874066 | 3.478086219 | 0.706151048 | 2.416373016 | 5.013362104 |
| ENSMUSG0000082289 | 12.73413332 | 5.56493795  | 13.41686991 | 7.249119049 | 5.013362104 |
| ENSMUSG0000082291 | 3.537259256 | 4.173703463 | 2.118453143 | 1.610915344 | 0.716194586 |

|                    |             |             |             |             |             |
|--------------------|-------------|-------------|-------------|-------------|-------------|
| ENSMUSG00000082292 | 24.76081479 | 58.43184848 | 55.78593277 | 155.4533307 | 106.7129934 |
| ENSMUSG00000082294 | 13.44158517 | 8.347406925 | 7.061510478 | 5.638203705 | 6.445751277 |
| ENSMUSG00000082295 | 4.952162959 | 6.956172438 | 7.061510478 | 6.443661377 | 6.445751277 |
| ENSMUSG00000082296 | 9.196874066 | 8.347406925 | 9.886114669 | 4.02728836  | 5.013362104 |
| ENSMUSG00000082297 | 3.537259256 | 4.173703463 | 5.649208382 | 2.416373016 | 5.013362104 |
| ENSMUSG00000082301 | 9.904325918 | 7.651789682 | 8.473812573 | 5.638203705 | 7.161945863 |
| ENSMUSG00000082302 | 11.31922962 | 7.651789682 | 5.649208382 | 8.054576721 | 4.297167518 |
| ENSMUSG00000082303 | 10.61177777 | 6.956172438 | 9.179963621 | 5.638203705 | 8.594335036 |
| ENSMUSG00000082304 | 24.05336294 | 29.91154148 | 24.00913562 | 15.30369577 | 25.78300511 |
| ENSMUSG00000082305 | 18.39374813 | 17.39043109 | 13.41686991 | 9.665492065 | 15.04008631 |
| ENSMUSG00000082306 | 9.196874066 | 6.260555194 | 8.473812573 | 2.416373016 | 7.87814045  |
| ENSMUSG00000082307 | 9.904325918 | 6.260555194 | 7.767661525 | 5.638203705 | 6.445751277 |
| ENSMUSG00000082308 | 11.31922962 | 6.956172438 | 12.00456781 | 8.054576721 | 7.161945863 |
| ENSMUSG00000082309 | 9.196874066 | 9.043024169 | 13.41686991 | 6.443661377 | 10.02672421 |
| ENSMUSG00000082310 | 10.61177777 | 8.347406925 | 5.649208382 | 3.221830688 | 5.013362104 |
| ENSMUSG00000082311 | 4.952162959 | 5.56493795  | 2.118453143 | 1.610915344 | 2.148583759 |
| ENSMUSG00000082312 | 10.61177777 | 11.1298759  | 6.35535943  | 5.638203705 | 2.864778345 |
| ENSMUSG00000082313 | 6.367066661 | 12.52111039 | 7.061510478 | 12.88732275 | 13.60769714 |
| ENSMUSG00000082314 | 12.73413332 | 6.260555194 | 9.886114669 | 6.443661377 | 2.864778345 |
| ENSMUSG00000082315 | 31.83533331 | 42.43265187 | 43.07521391 | 32.21830688 | 30.08017263 |
| ENSMUSG00000082316 | 11.31922962 | 6.956172438 | 9.886114669 | 4.02728836  | 7.87814045  |
| ENSMUSG00000082317 | 6.367066661 | 4.869320706 | 8.473812573 | 1.610915344 | 2.148583759 |
| ENSMUSG00000082318 | 13.44158517 | 9.043024169 | 10.59226572 | 7.249119049 | 9.310529622 |
| ENSMUSG00000082319 | 12.02668147 | 11.1298759  | 12.00456781 | 10.47094974 | 8.594335036 |
| ENSMUSG00000082320 | 9.904325918 | 9.738641413 | 4.236906287 | 4.832746033 | 6.445751277 |
| ENSMUSG00000082321 | 9.904325918 | 13.21672763 | 8.473812573 | 4.02728836  | 12.17530797 |
| ENSMUSG00000082322 | 6.367066661 | 5.56493795  | 3.530755239 | 3.221830688 | 5.729556691 |
| ENSMUSG00000082323 | 9.904325918 | 6.956172438 | 7.767661525 | 4.832746033 | 10.02672421 |
| ENSMUSG00000082324 | 4.952162959 | 2.782468975 | 1.412302096 | 7.249119049 | 2.148583759 |
| ENSMUSG00000082325 | 7.074518513 | 5.56493795  | 8.473812573 | 6.443661377 | 3.580972932 |
| ENSMUSG00000082326 | 7.781970364 | 2.782468975 | 0.706151048 | 7.249119049 | 2.864778345 |
| ENSMUSG00000082327 | 7.074518513 | 9.043024169 | 7.061510478 | 9.665492065 | 5.729556691 |
| ENSMUSG00000082328 | 24.76081479 | 25.04222078 | 20.47838039 | 9.665492065 | 8.594335036 |
| ENSMUSG00000082329 | 11.31922962 | 7.651789682 | 16.2414741  | 12.08186508 | 10.7429188  |
| ENSMUSG00000082330 | 11.31922962 | 16.69481385 | 19.77222934 | 9.665492065 | 11.45911338 |
| ENSMUSG00000082331 | 8.489422215 | 6.260555194 | 5.649208382 | 8.054576721 | 8.594335036 |
| ENSMUSG00000082332 | 7.074518513 | 4.173703463 | 9.179963621 | 8.860034393 | 7.87814045  |
| ENSMUSG00000082333 | 6.367066661 | 2.782468975 | 3.530755239 | 3.221830688 | 3.580972932 |
| ENSMUSG00000082334 | 16.97884443 | 18.08604834 | 12.00456781 | 10.47094974 | 12.17530797 |
| ENSMUSG00000082336 | 14.85648888 | 6.956172438 | 5.649208382 | 6.443661377 | 10.02672421 |
| ENSMUSG00000082337 | 3.537259256 | 4.869320706 | 2.824604191 | 3.221830688 | 5.013362104 |
| ENSMUSG00000082338 | 11.31922962 | 4.869320706 | 2.824604191 | 6.443661377 | 7.87814045  |
| ENSMUSG00000082339 | 9.904325918 | 8.347406925 | 6.35535943  | 5.638203705 | 9.310529622 |

|                   |             |             |             |             |             |
|-------------------|-------------|-------------|-------------|-------------|-------------|
| ENSMUSG0000082340 | 15.56394073 | 6.260555194 | 7.061510478 | 3.221830688 | 5.013362104 |
| ENSMUSG0000082341 | 7.781970364 | 9.738641413 | 9.886114669 | 4.02728836  | 7.161945863 |
| ENSMUSG0000082342 | 4.952162959 | 5.56493795  | 1.412302096 | 3.221830688 | 4.297167518 |
| ENSMUSG0000082343 | 7.074518513 | 7.651789682 | 6.35535943  | 4.02728836  | 6.445751277 |
| ENSMUSG0000082344 | 7.781970364 | 8.347406925 | 8.473812573 | 5.638203705 | 7.161945863 |
| ENSMUSG0000082345 | 12.73413332 | 15.99919661 | 16.2414741  | 20.1364418  | 17.18867007 |
| ENSMUSG0000082346 | 3.537259256 | 2.782468975 | 2.118453143 | 0.805457672 | 1.432389173 |
| ENSMUSG0000082347 | 5.65961481  | 8.347406925 | 6.35535943  | 2.416373016 | 4.297167518 |
| ENSMUSG0000082348 | 9.196874066 | 8.347406925 | 10.59226572 | 4.832746033 | 6.445751277 |
| ENSMUSG0000082349 | 10.61177777 | 3.478086219 | 4.236906287 | 4.02728836  | 10.02672421 |
| ENSMUSG0000082350 | 4.952162959 | 5.56493795  | 7.061510478 | 6.443661377 | 10.7429188  |
| ENSMUSG0000082351 | 12.02668147 | 6.956172438 | 7.767661525 | 1.610915344 | 1.432389173 |
| ENSMUSG0000082352 | 13.44158517 | 8.347406925 | 11.29841676 | 5.638203705 | 15.7562809  |
| ENSMUSG0000082353 | 8.489422215 | 6.956172438 | 12.00456781 | 4.832746033 | 4.297167518 |
| ENSMUSG0000082354 | 8.489422215 | 4.173703463 | 8.473812573 | 1.610915344 | 3.580972932 |
| ENSMUSG0000082356 | 5.65961481  | 5.56493795  | 9.886114669 | 4.02728836  | 6.445751277 |
| ENSMUSG0000082357 | 7.074518513 | 11.1298759  | 4.943057334 | 4.832746033 | 10.7429188  |
| ENSMUSG0000082358 | 3.537259256 | 3.478086219 | 3.530755239 | 2.416373016 | 1.432389173 |
| ENSMUSG0000082359 | 7.781970364 | 6.260555194 | 5.649208382 | 2.416373016 | 7.87814045  |
| ENSMUSG0000082360 | 0           | 1.391234488 | 0           | 0           | 0           |
| ENSMUSG0000082362 | 8.489422215 | 6.260555194 | 9.179963621 | 6.443661377 | 5.729556691 |
| ENSMUSG0000082363 | 15.56394073 | 7.651789682 | 7.061510478 | 8.860034393 | 5.729556691 |
| ENSMUSG0000082364 | 6.367066661 | 6.260555194 | 9.886114669 | 8.860034393 | 13.60769714 |
| ENSMUSG0000082365 | 7.074518513 | 7.651789682 | 7.767661525 | 4.832746033 | 5.729556691 |
| ENSMUSG0000082367 | 270.954059  | 289.3767734 | 281.7542681 | 264.1901164 | 199.8182896 |
| ENSMUSG0000082368 | 8.489422215 | 12.52111039 | 5.649208382 | 4.02728836  | 4.297167518 |
| ENSMUSG0000082369 | 8.489422215 | 9.738641413 | 10.59226572 | 8.054576721 | 12.17530797 |
| ENSMUSG0000082370 | 13.44158517 | 13.21672763 | 8.473812573 | 7.249119049 | 7.161945863 |
| ENSMUSG0000082371 | 12.73413332 | 9.738641413 | 7.767661525 | 4.02728836  | 1.432389173 |
| ENSMUSG0000082372 | 7.781970364 | 2.782468975 | 4.236906287 | 3.221830688 | 2.864778345 |
| ENSMUSG0000082373 | 4.952162959 | 6.260555194 | 3.530755239 | 8.054576721 | 5.729556691 |
| ENSMUSG0000082374 | 7.781970364 | 7.651789682 | 5.649208382 | 6.443661377 | 7.161945863 |
| ENSMUSG0000082375 | 14.85648888 | 5.56493795  | 9.179963621 | 6.443661377 | 5.013362104 |
| ENSMUSG0000082376 | 5.65961481  | 3.478086219 | 6.35535943  | 4.02728836  | 7.87814045  |
| ENSMUSG0000082377 | 4.952162959 | 6.956172438 | 11.29841676 | 12.08186508 | 3.580972932 |
| ENSMUSG0000082378 | 8.489422215 | 9.738641413 | 7.061510478 | 4.02728836  | 9.310529622 |
| ENSMUSG0000082379 | 7.074518513 | 4.869320706 | 2.824604191 | 4.02728836  | 5.013362104 |
| ENSMUSG0000082380 | 6.367066661 | 8.347406925 | 10.59226572 | 5.638203705 | 7.161945863 |
| ENSMUSG0000082381 | 0           | 1.391234488 | 0           | 0           | 0.716194586 |
| ENSMUSG0000082382 | 4.244711108 | 4.869320706 | 6.35535943  | 5.638203705 | 8.594335036 |
| ENSMUSG0000082383 | 7.074518513 | 11.82549314 | 14.12302096 | 15.30369577 | 14.32389173 |
| ENSMUSG0000082384 | 9.196874066 | 9.738641413 | 8.473812573 | 3.221830688 | 10.02672421 |
| ENSMUSG0000082387 | 9.196874066 | 9.043024169 | 9.886114669 | 8.860034393 | 8.594335036 |

|                    |             |             |             |             |             |
|--------------------|-------------|-------------|-------------|-------------|-------------|
| ENSMUSG00000082388 | 9.904325918 | 7.651789682 | 5.649208382 | 8.054576721 | 5.729556691 |
| ENSMUSG00000082389 | 7.074518513 | 9.043024169 | 7.061510478 | 8.860034393 | 6.445751277 |
| ENSMUSG00000082390 | 11.31922962 | 5.56493795  | 9.886114669 | 5.638203705 | 9.310529622 |
| ENSMUSG00000082392 | 4.244711108 | 2.086851731 | 4.943057334 | 1.610915344 | 3.580972932 |
| ENSMUSG00000082393 | 4.952162959 | 5.56493795  | 2.824604191 | 0.805457672 | 5.729556691 |
| ENSMUSG00000082394 | 15.56394073 | 11.82549314 | 16.2414741  | 12.88732275 | 13.60769714 |
| ENSMUSG00000082395 | 27.5906222  | 75.12666233 | 41.66291182 | 40.2728836  | 46.55264811 |
| ENSMUSG00000082396 | 7.074518513 | 6.260555194 | 7.767661525 | 4.02728836  | 6.445751277 |
| ENSMUSG00000082397 | 3.537259256 | 4.173703463 | 7.061510478 | 3.221830688 | 5.013362104 |
| ENSMUSG00000082398 | 10.61177777 | 5.56493795  | 7.061510478 | 11.27640741 | 9.310529622 |
| ENSMUSG00000082399 | 7.781970364 | 9.738641413 | 8.473812573 | 9.665492065 | 8.594335036 |
| ENSMUSG00000082400 | 8.489422215 | 10.43425866 | 7.061510478 | 6.443661377 | 5.013362104 |
| ENSMUSG00000082402 | 89.13893326 | 150.9489419 | 120.0456781 | 332.6540186 | 277.1673049 |
| ENSMUSG00000082403 | 0           | 0           | 0           | 0           | 0           |
| ENSMUSG00000082404 | 4.244711108 | 3.478086219 | 4.236906287 | 3.221830688 | 3.580972932 |
| ENSMUSG00000082405 | 11.31922962 | 4.869320706 | 9.886114669 | 4.832746033 | 6.445751277 |
| ENSMUSG00000082406 | 3.537259256 | 2.086851731 | 1.412302096 | 2.416373016 | 3.580972932 |
| ENSMUSG00000082407 | 7.074518513 | 9.738641413 | 9.886114669 | 2.416373016 | 8.594335036 |
| ENSMUSG00000082408 | 9.196874066 | 10.43425866 | 4.236906287 | 6.443661377 | 6.445751277 |
| ENSMUSG00000082410 | 4.952162959 | 4.869320706 | 8.473812573 | 5.638203705 | 7.87814045  |
| ENSMUSG00000082411 | 10.61177777 | 10.43425866 | 6.35535943  | 8.054576721 | 7.161945863 |
| ENSMUSG00000082412 | 9.196874066 | 9.043024169 | 5.649208382 | 3.221830688 | 7.161945863 |
| ENSMUSG00000082413 | 9.196874066 | 6.956172438 | 7.767661525 | 7.249119049 | 6.445751277 |
| ENSMUSG00000082414 | 5.65961481  | 1.391234488 | 4.943057334 | 7.249119049 | 2.864778345 |
| ENSMUSG00000082415 | 8.489422215 | 6.956172438 | 3.530755239 | 8.054576721 | 6.445751277 |
| ENSMUSG00000082416 | 7.074518513 | 5.56493795  | 7.061510478 | 5.638203705 | 8.594335036 |
| ENSMUSG00000082417 | 2.829807405 | 3.478086219 | 2.824604191 | 1.610915344 | 0.716194586 |
| ENSMUSG00000082418 | 10.61177777 | 11.1298759  | 10.59226572 | 5.638203705 | 11.45911338 |
| ENSMUSG00000082419 | 9.196874066 | 9.043024169 | 9.886114669 | 12.08186508 | 15.7562809  |
| ENSMUSG00000082420 | 12.73413332 | 7.651789682 | 8.473812573 | 11.27640741 | 8.594335036 |
| ENSMUSG00000082421 | 6.367066661 | 5.56493795  | 7.767661525 | 4.832746033 | 4.297167518 |
| ENSMUSG00000082422 | 3.537259256 | 3.478086219 | 4.943057334 | 2.416373016 | 3.580972932 |
| ENSMUSG00000082423 | 3.537259256 | 4.869320706 | 4.943057334 | 7.249119049 | 4.297167518 |
| ENSMUSG00000082424 | 7.074518513 | 6.260555194 | 9.886114669 | 4.02728836  | 5.013362104 |
| ENSMUSG00000082426 | 4.244711108 | 1.391234488 | 4.943057334 | 3.221830688 | 2.864778345 |
| ENSMUSG00000082427 | 3.537259256 | 2.086851731 | 2.824604191 | 0.805457672 | 5.013362104 |
| ENSMUSG00000082428 | 6.367066661 | 6.956172438 | 7.767661525 | 7.249119049 | 10.7429188  |
| ENSMUSG00000082429 | 348.0663108 | 332.5050425 | 322.7110288 | 409.1724974 | 292.9235858 |
| ENSMUSG00000082430 | 12.02668147 | 2.782468975 | 7.061510478 | 7.249119049 | 7.87814045  |
| ENSMUSG00000082431 | 7.074518513 | 10.43425866 | 8.473812573 | 5.638203705 | 5.013362104 |
| ENSMUSG00000082432 | 9.196874066 | 6.956172438 | 8.473812573 | 9.665492065 | 9.310529622 |
| ENSMUSG00000082433 | 11.31922962 | 15.30357936 | 9.886114669 | 9.665492065 | 13.60769714 |
| ENSMUSG00000082435 | 7.074518513 | 6.260555194 | 4.943057334 | 6.443661377 | 6.445751277 |

|                   |             |             |             |             |             |
|-------------------|-------------|-------------|-------------|-------------|-------------|
| ENSMUSG0000082436 | 9.904325918 | 12.52111039 | 6.35535943  | 20.94189947 | 8.594335036 |
| ENSMUSG0000082437 | 8.489422215 | 6.956172438 | 9.179963621 | 4.02728836  | 6.445751277 |
| ENSMUSG0000082440 | 1.414903703 | 2.782468975 | 2.118453143 | 1.610915344 | 1.432389173 |
| ENSMUSG0000082442 | 10.61177777 | 4.173703463 | 2.118453143 | 3.221830688 | 12.89150255 |
| ENSMUSG0000082443 | 10.61177777 | 9.043024169 | 9.886114669 | 8.860034393 | 8.594335036 |
| ENSMUSG0000082444 | 4.244711108 | 4.869320706 | 5.649208382 | 4.02728836  | 5.013362104 |
| ENSMUSG0000082446 | 8.489422215 | 9.043024169 | 9.179963621 | 4.02728836  | 5.729556691 |
| ENSMUSG0000082447 | 7.074518513 | 6.260555194 | 5.649208382 | 1.610915344 | 3.580972932 |
| ENSMUSG0000082448 | 9.904325918 | 4.173703463 | 6.35535943  | 4.832746033 | 7.87814045  |
| ENSMUSG0000082449 | 7.781970364 | 2.086851731 | 5.649208382 | 3.221830688 | 5.729556691 |
| ENSMUSG0000082450 | 5.65961481  | 6.260555194 | 2.824604191 | 0.805457672 | 3.580972932 |
| ENSMUSG0000082451 | 8.489422215 | 11.1298759  | 7.061510478 | 10.47094974 | 8.594335036 |
| ENSMUSG0000082453 | 12.73413332 | 7.651789682 | 8.473812573 | 8.054576721 | 7.87814045  |
| ENSMUSG0000082454 | 10.61177777 | 13.91234488 | 19.06607829 | 28.9964762  | 18.62105924 |
| ENSMUSG0000082455 | 6.367066661 | 16.69481385 | 10.59226572 | 13.69278043 | 16.47247549 |
| ENSMUSG0000082456 | 12.73413332 | 9.043024169 | 7.767661525 | 6.443661377 | 3.580972932 |
| ENSMUSG0000082457 | 13.44158517 | 27.82468975 | 28.24604191 | 17.72006879 | 17.18867007 |
| ENSMUSG0000082458 | 7.074518513 | 2.086851731 | 3.530755239 | 3.221830688 | 2.148583759 |
| ENSMUSG0000082459 | 9.904325918 | 5.56493795  | 4.236906287 | 6.443661377 | 4.297167518 |
| ENSMUSG0000082460 | 9.196874066 | 6.260555194 | 9.886114669 | 4.832746033 | 7.161945863 |
| ENSMUSG0000082461 | 2.829807405 | 5.56493795  | 1.412302096 | 0.805457672 | 5.729556691 |
| ENSMUSG0000082462 | 2.122355554 | 5.56493795  | 4.943057334 | 4.02728836  | 1.432389173 |
| ENSMUSG0000082463 | 135.8307554 | 187.8166558 | 136.2871522 | 68.46390213 | 66.60609653 |
| ENSMUSG0000082464 | 3.537259256 | 3.478086219 | 4.236906287 | 4.832746033 | 4.297167518 |
| ENSMUSG0000082465 | 21.93100739 | 40.34580014 | 28.24604191 | 20.1364418  | 10.7429188  |
| ENSMUSG0000082466 | 14.14903703 | 9.043024169 | 9.179963621 | 7.249119049 | 3.580972932 |
| ENSMUSG0000082467 | 7.781970364 | 1.391234488 | 2.118453143 | 1.610915344 | 4.297167518 |
| ENSMUSG0000082468 | 6.367066661 | 6.956172438 | 7.061510478 | 5.638203705 | 3.580972932 |
| ENSMUSG0000082469 | 4.244711108 | 9.043024169 | 8.473812573 | 2.416373016 | 5.013362104 |
| ENSMUSG0000082472 | 12.02668147 | 5.56493795  | 8.473812573 | 3.221830688 | 5.729556691 |
| ENSMUSG0000082473 | 9.196874066 | 13.21672763 | 4.943057334 | 7.249119049 | 7.87814045  |
| ENSMUSG0000082474 | 7.074518513 | 6.956172438 | 5.649208382 | 6.443661377 | 5.013362104 |
| ENSMUSG0000082475 | 7.781970364 | 6.260555194 | 5.649208382 | 5.638203705 | 7.161945863 |
| ENSMUSG0000082476 | 9.196874066 | 6.956172438 | 5.649208382 | 12.08186508 | 5.013362104 |
| ENSMUSG0000082478 | 0           | 0           | 0.706151048 | 0           | 0           |
| ENSMUSG0000082479 | 2.829807405 | 11.1298759  | 2.824604191 | 0           | 3.580972932 |
| ENSMUSG0000082480 | 10.61177777 | 10.43425866 | 4.943057334 | 7.249119049 | 11.45911338 |
| ENSMUSG0000082481 | 12.02668147 | 31.30277597 | 28.24604191 | 10.47094974 | 24.35061594 |
| ENSMUSG0000082482 | 2.829807405 | 4.869320706 | 4.943057334 | 0.805457672 | 1.432389173 |
| ENSMUSG0000082483 | 9.196874066 | 11.1298759  | 4.236906287 | 7.249119049 | 7.161945863 |
| ENSMUSG0000082484 | 23.34591109 | 34.78086219 | 30.36449505 | 11.27640741 | 28.64778345 |
| ENSMUSG0000082485 | 6.367066661 | 5.56493795  | 2.118453143 | 3.221830688 | 8.594335036 |
| ENSMUSG0000082486 | 4.244711108 | 8.347406925 | 14.829172   | 4.832746033 | 10.7429188  |

|                    |             |             |             |             |             |
|--------------------|-------------|-------------|-------------|-------------|-------------|
| ENSMUSG00000082487 | 17.68629628 | 25.73783802 | 26.83373982 | 20.94189947 | 20.769643   |
| ENSMUSG00000082488 | 6.367066661 | 5.56493795  | 8.473812573 | 11.27640741 | 7.87814045  |
| ENSMUSG00000082489 | 7.781970364 | 2.782468975 | 4.236906287 | 4.02728836  | 2.864778345 |
| ENSMUSG00000082490 | 10.61177777 | 6.260555194 | 4.236906287 | 4.832746033 | 7.161945863 |
| ENSMUSG00000082491 | 9.904325918 | 8.347406925 | 9.886114669 | 6.443661377 | 6.445751277 |
| ENSMUSG00000082492 | 4.952162959 | 6.956172438 | 4.943057334 | 9.665492065 | 7.161945863 |
| ENSMUSG00000082494 | 6.367066661 | 6.956172438 | 2.118453143 | 6.443661377 | 6.445751277 |
| ENSMUSG00000082495 | 9.196874066 | 4.869320706 | 7.767661525 | 5.638203705 | 8.594335036 |
| ENSMUSG00000082496 | 4.244711108 | 5.56493795  | 5.649208382 | 1.610915344 | 5.013362104 |
| ENSMUSG00000082497 | 2.829807405 | 4.173703463 | 4.236906287 | 6.443661377 | 4.297167518 |
| ENSMUSG00000082498 | 9.904325918 | 14.60796212 | 15.53532305 | 16.91461111 | 12.17530797 |
| ENSMUSG00000082499 | 6.367066661 | 8.347406925 | 7.767661525 | 0.805457672 | 5.729556691 |
| ENSMUSG00000082500 | 4.952162959 | 4.869320706 | 1.412302096 | 5.638203705 | 3.580972932 |
| ENSMUSG00000082501 | 2.829807405 | 2.086851731 | 2.118453143 | 0           | 4.297167518 |
| ENSMUSG00000082502 | 5.65961481  | 4.869320706 | 7.767661525 | 4.832746033 | 5.013362104 |
| ENSMUSG00000082503 | 84.1867703  | 150.2533247 | 117.927225  | 124.0404815 | 119.6044959 |
| ENSMUSG00000082504 | 7.074518513 | 2.782468975 | 3.530755239 | 4.02728836  | 2.148583759 |
| ENSMUSG00000082505 | 5.65961481  | 2.782468975 | 1.412302096 | 1.610915344 | 5.729556691 |
| ENSMUSG00000082507 | 16.97884443 | 25.73783802 | 23.30298458 | 29.80193387 | 43.68786977 |
| ENSMUSG00000082508 | 7.074518513 | 8.347406925 | 5.649208382 | 5.638203705 | 12.17530797 |
| ENSMUSG00000082509 | 50.22908144 | 97.38641413 | 81.91352154 | 46.71654498 | 66.60609653 |
| ENSMUSG00000082510 | 8.489422215 | 8.347406925 | 11.29841676 | 12.08186508 | 8.594335036 |
| ENSMUSG00000082511 | 4.244711108 | 2.086851731 | 2.118453143 | 3.221830688 | 5.013362104 |
| ENSMUSG00000082512 | 7.074518513 | 4.869320706 | 7.061510478 | 8.054576721 | 5.729556691 |
| ENSMUSG00000082513 | 8.489422215 | 3.478086219 | 5.649208382 | 2.416373016 | 2.148583759 |
| ENSMUSG00000082514 | 13.44158517 | 5.56493795  | 5.649208382 | 4.02728836  | 7.161945863 |
| ENSMUSG00000082515 | 18.39374813 | 43.12826911 | 16.2414741  | 27.38556085 | 27.93158887 |
| ENSMUSG00000082516 | 9.904325918 | 9.738641413 | 4.943057334 | 4.832746033 | 12.17530797 |
| ENSMUSG00000082517 | 5.65961481  | 5.56493795  | 2.824604191 | 4.02728836  | 4.297167518 |
| ENSMUSG00000082519 | 12.02668147 | 11.1298759  | 7.767661525 | 6.443661377 | 5.729556691 |
| ENSMUSG00000082520 | 29.71297775 | 37.56333116 | 29.65834401 | 29.80193387 | 31.5125618  |
| ENSMUSG00000082523 | 13.44158517 | 9.043024169 | 4.943057334 | 3.221830688 | 2.864778345 |
| ENSMUSG00000082524 | 11.31922962 | 4.173703463 | 9.179963621 | 5.638203705 | 11.45911338 |
| ENSMUSG00000082526 | 11.31922962 | 7.651789682 | 9.179963621 | 8.860034393 | 3.580972932 |
| ENSMUSG00000082527 | 14.85648888 | 11.1298759  | 10.59226572 | 8.860034393 | 10.7429188  |
| ENSMUSG00000082528 | 10.61177777 | 5.56493795  | 7.061510478 | 11.27640741 | 5.013362104 |
| ENSMUSG00000082529 | 9.196874066 | 7.651789682 | 7.767661525 | 6.443661377 | 7.87814045  |
| ENSMUSG00000082530 | 12.02668147 | 14.60796212 | 9.179963621 | 10.47094974 | 10.02672421 |
| ENSMUSG00000082531 | 4.244711108 | 4.173703463 | 4.943057334 | 4.832746033 | 1.432389173 |
| ENSMUSG00000082532 | 5.65961481  | 8.347406925 | 10.59226572 | 8.860034393 | 3.580972932 |
| ENSMUSG00000082533 | 4.244711108 | 8.347406925 | 9.179963621 | 5.638203705 | 7.161945863 |
| ENSMUSG00000082534 | 9.196874066 | 9.738641413 | 5.649208382 | 6.443661377 | 3.580972932 |
| ENSMUSG00000082535 | 12.73413332 | 16.69481385 | 16.94762515 | 16.91461111 | 11.45911338 |

|                   |             |             |             |             |             |
|-------------------|-------------|-------------|-------------|-------------|-------------|
| ENSMUSG0000082536 | 11.31922962 | 13.91234488 | 12.71071886 | 27.38556085 | 18.62105924 |
| ENSMUSG0000082537 | 3.537259256 | 3.478086219 | 1.412302096 | 3.221830688 | 5.013362104 |
| ENSMUSG0000082538 | 8.489422215 | 5.56493795  | 4.943057334 | 2.416373016 | 2.148583759 |
| ENSMUSG0000082539 | 2.122355554 | 4.869320706 | 5.649208382 | 4.832746033 | 5.013362104 |
| ENSMUSG0000082540 | 11.31922962 | 13.21672763 | 9.886114669 | 4.02728836  | 6.445751277 |
| ENSMUSG0000082541 | 2.122355554 | 3.478086219 | 0.706151048 | 4.832746033 | 1.432389173 |
| ENSMUSG0000082542 | 2.122355554 | 1.391234488 | 0.706151048 | 2.416373016 | 1.432389173 |
| ENSMUSG0000082543 | 14.85648888 | 8.347406925 | 18.35992724 | 9.665492065 | 12.89150255 |
| ENSMUSG0000082544 | 2.829807405 | 2.782468975 | 4.943057334 | 1.610915344 | 3.580972932 |
| ENSMUSG0000082545 | 8.489422215 | 9.043024169 | 7.767661525 | 8.860034393 | 9.310529622 |
| ENSMUSG0000082546 | 4.244711108 | 7.651789682 | 2.118453143 | 1.610915344 | 5.013362104 |
| ENSMUSG0000082547 | 8.489422215 | 8.347406925 | 6.35535943  | 2.416373016 | 5.013362104 |
| ENSMUSG0000082548 | 7.781970364 | 6.260555194 | 9.179963621 | 3.221830688 | 5.013362104 |
| ENSMUSG0000082549 | 6.367066661 | 4.173703463 | 6.35535943  | 2.416373016 | 2.864778345 |
| ENSMUSG0000082550 | 7.074518513 | 7.651789682 | 5.649208382 | 10.47094974 | 8.594335036 |
| ENSMUSG0000082551 | 4.244711108 | 2.086851731 | 2.118453143 | 7.249119049 | 2.864778345 |
| ENSMUSG0000082552 | 4.952162959 | 6.260555194 | 6.35535943  | 6.443661377 | 5.013362104 |
| ENSMUSG0000082553 | 9.904325918 | 6.260555194 | 6.35535943  | 0.805457672 | 5.013362104 |
| ENSMUSG0000082554 | 9.196874066 | 8.347406925 | 7.061510478 | 5.638203705 | 6.445751277 |
| ENSMUSG0000082555 | 7.074518513 | 6.260555194 | 10.59226572 | 7.249119049 | 3.580972932 |
| ENSMUSG0000082556 | 3.537259256 | 4.173703463 | 4.943057334 | 5.638203705 | 4.297167518 |
| ENSMUSG0000082557 | 4.952162959 | 9.043024169 | 9.179963621 | 7.249119049 | 7.87814045  |
| ENSMUSG0000082558 | 4.952162959 | 4.173703463 | 9.886114669 | 5.638203705 | 7.161945863 |
| ENSMUSG0000082559 | 13.44158517 | 5.56493795  | 7.061510478 | 4.02728836  | 10.02672421 |
| ENSMUSG0000082560 | 2.122355554 | 5.56493795  | 4.236906287 | 0.805457672 | 1.432389173 |
| ENSMUSG0000082561 | 43.15456293 | 75.82227957 | 61.43514116 | 150.6205847 | 101.6996313 |
| ENSMUSG0000082562 | 9.904325918 | 4.869320706 | 5.649208382 | 6.443661377 | 7.161945863 |
| ENSMUSG0000082563 | 4.244711108 | 3.478086219 | 1.412302096 | 4.832746033 | 4.297167518 |
| ENSMUSG0000082564 | 9.196874066 | 6.260555194 | 4.236906287 | 4.02728836  | 7.161945863 |
| ENSMUSG0000082565 | 3.537259256 | 6.956172438 | 7.061510478 | 2.416373016 | 8.594335036 |
| ENSMUSG0000082566 | 12.02668147 | 6.956172438 | 9.886114669 | 4.832746033 | 5.729556691 |
| ENSMUSG0000082567 | 9.196874066 | 2.086851731 | 7.767661525 | 5.638203705 | 4.297167518 |
| ENSMUSG0000082568 | 4.244711108 | 2.782468975 | 4.943057334 | 0.805457672 | 1.432389173 |
| ENSMUSG0000082569 | 9.904325918 | 5.56493795  | 8.473812573 | 5.638203705 | 6.445751277 |
| ENSMUSG0000082570 | 9.196874066 | 13.21672763 | 9.886114669 | 6.443661377 | 6.445751277 |
| ENSMUSG0000082571 | 7.781970364 | 6.956172438 | 4.943057334 | 3.221830688 | 7.87814045  |
| ENSMUSG0000082573 | 7.781970364 | 6.956172438 | 9.179963621 | 3.221830688 | 6.445751277 |
| ENSMUSG0000082574 | 12.02668147 | 6.260555194 | 7.061510478 | 5.638203705 | 9.310529622 |
| ENSMUSG0000082575 | 9.196874066 | 6.956172438 | 7.767661525 | 16.91461111 | 16.47247549 |
| ENSMUSG0000082576 | 15.56394073 | 17.39043109 | 18.35992724 | 9.665492065 | 14.32389173 |
| ENSMUSG0000082577 | 10.61177777 | 10.43425866 | 7.061510478 | 4.832746033 | 4.297167518 |
| ENSMUSG0000082578 | 12.02668147 | 7.651789682 | 7.061510478 | 5.638203705 | 10.02672421 |
| ENSMUSG0000082579 | 4.952162959 | 9.738641413 | 4.236906287 | 11.27640741 | 9.310529622 |

|                    |             |             |             |             |             |
|--------------------|-------------|-------------|-------------|-------------|-------------|
| ENSMUSG00000082580 | 7.074518513 | 9.043024169 | 9.886114669 | 8.860034393 | 8.594335036 |
| ENSMUSG00000082581 | 12.73413332 | 9.043024169 | 6.35535943  | 5.638203705 | 5.729556691 |
| ENSMUSG00000082583 | 9.196874066 | 11.1298759  | 5.649208382 | 6.443661377 | 5.729556691 |
| ENSMUSG00000082584 | 3.537259256 | 9.043024169 | 4.236906287 | 2.416373016 | 6.445751277 |
| ENSMUSG00000082585 | 7.074518513 | 11.82549314 | 11.29841676 | 13.69278043 | 10.02672421 |
| ENSMUSG00000082586 | 6.367066661 | 6.260555194 | 2.824604191 | 0.805457672 | 3.580972932 |
| ENSMUSG00000082587 | 10.61177777 | 13.21672763 | 12.00456781 | 1.610915344 | 5.013362104 |
| ENSMUSG00000082588 | 9.904325918 | 10.43425866 | 8.473812573 | 2.416373016 | 11.45911338 |
| ENSMUSG00000082589 | 9.196874066 | 8.347406925 | 2.118453143 | 4.832746033 | 10.7429188  |
| ENSMUSG00000082590 | 5.65961481  | 2.086851731 | 2.824604191 | 1.610915344 | 2.148583759 |
| ENSMUSG00000082591 | 5.65961481  | 4.173703463 | 1.412302096 | 4.832746033 | 2.148583759 |
| ENSMUSG00000082592 | 33.25023701 | 37.56333116 | 40.25060972 | 36.24559524 | 42.97167518 |
| ENSMUSG00000082593 | 8.489422215 | 6.260555194 | 4.236906287 | 4.02728836  | 2.148583759 |
| ENSMUSG00000082594 | 5.65961481  | 2.086851731 | 4.236906287 | 3.221830688 | 5.013362104 |
| ENSMUSG00000082595 | 9.196874066 | 3.478086219 | 4.236906287 | 4.02728836  | 5.013362104 |
| ENSMUSG00000082596 | 20.51610369 | 25.04222078 | 21.89068248 | 11.27640741 | 8.594335036 |
| ENSMUSG00000082597 | 7.074518513 | 11.1298759  | 12.00456781 | 8.860034393 | 15.7562809  |
| ENSMUSG00000082598 | 2.829807405 | 2.086851731 | 3.530755239 | 4.02728836  | 2.864778345 |
| ENSMUSG00000082599 | 28.29807405 | 26.43345526 | 23.30298458 | 18.52552646 | 24.35061594 |
| ENSMUSG00000082600 | 4.952162959 | 4.869320706 | 7.767661525 | 2.416373016 | 6.445751277 |
| ENSMUSG00000082601 | 16.97884443 | 16.69481385 | 10.59226572 | 10.47094974 | 10.02672421 |
| ENSMUSG00000082602 | 4.244711108 | 4.173703463 | 4.943057334 | 2.416373016 | 3.580972932 |
| ENSMUSG00000082604 | 13.44158517 | 9.043024169 | 8.473812573 | 4.832746033 | 5.013362104 |
| ENSMUSG00000082605 | 9.196874066 | 7.651789682 | 6.35535943  | 4.832746033 | 5.729556691 |
| ENSMUSG00000082606 | 3.537259256 | 2.086851731 | 3.530755239 | 1.610915344 | 4.297167518 |
| ENSMUSG00000082607 | 10.61177777 | 8.347406925 | 10.59226572 | 4.02728836  | 7.87814045  |
| ENSMUSG00000082608 | 7.781970364 | 6.956172438 | 7.061510478 | 4.02728836  | 5.013362104 |
| ENSMUSG00000082609 | 6.367066661 | 13.21672763 | 11.29841676 | 13.69278043 | 5.729556691 |
| ENSMUSG00000082610 | 9.196874066 | 15.30357936 | 15.53532305 | 10.47094974 | 20.769643   |
| ENSMUSG00000082611 | 2.122355554 | 4.869320706 | 3.530755239 | 3.221830688 | 3.580972932 |
| ENSMUSG00000082612 | 6.367066661 | 3.478086219 | 6.35535943  | 4.02728836  | 4.297167518 |
| ENSMUSG00000082613 | 8.489422215 | 7.651789682 | 8.473812573 | 6.443661377 | 7.87814045  |
| ENSMUSG00000082614 | 6.367066661 | 4.869320706 | 9.179963621 | 6.443661377 | 5.729556691 |
| ENSMUSG00000082615 | 36.08004441 | 27.12907251 | 34.60140134 | 17.72006879 | 20.05344842 |
| ENSMUSG00000082616 | 1.414903703 | 3.478086219 | 3.530755239 | 1.610915344 | 1.432389173 |
| ENSMUSG00000082617 | 5.65961481  | 8.347406925 | 4.943057334 | 2.416373016 | 6.445751277 |
| ENSMUSG00000082618 | 4.952162959 | 6.956172438 | 7.767661525 | 3.221830688 | 2.148583759 |
| ENSMUSG00000082619 | 9.196874066 | 6.260555194 | 7.061510478 | 12.88732275 | 10.7429188  |
| ENSMUSG00000082620 | 7.074518513 | 5.56493795  | 1.412302096 | 3.221830688 | 2.148583759 |
| ENSMUSG00000082621 | 4.244711108 | 4.869320706 | 3.530755239 | 0.805457672 | 5.013362104 |
| ENSMUSG00000082622 | 7.781970364 | 10.43425866 | 4.236906287 | 1.610915344 | 8.594335036 |
| ENSMUSG00000082623 | 9.196874066 | 6.260555194 | 9.179963621 | 7.249119049 | 5.013362104 |
| ENSMUSG00000082624 | 10.61177777 | 9.043024169 | 9.179963621 | 6.443661377 | 1.432389173 |



|                    |             |             |             |             |             |
|--------------------|-------------|-------------|-------------|-------------|-------------|
| ENSMUSG00000082625 | 8.489422215 | 3.478086219 | 4.943057334 | 11.27640741 | 10.7429188  |
| ENSMUSG00000082626 | 10.61177777 | 6.956172438 | 6.35535943  | 7.249119049 | 11.45911338 |
| ENSMUSG00000082628 | 7.781970364 | 5.56493795  | 9.179963621 | 8.860034393 | 6.445751277 |
| ENSMUSG00000082629 | 4.244711108 | 2.086851731 | 7.061510478 | 0.805457672 | 2.864778345 |
| ENSMUSG00000082630 | 20.51610369 | 21.56413456 | 26.12758877 | 12.08186508 | 9.310529622 |
| ENSMUSG00000082632 | 11.31922962 | 13.21672763 | 12.71071886 | 8.054576721 | 5.729556691 |
| ENSMUSG00000082633 | 9.196874066 | 12.52111039 | 15.53532305 | 12.08186508 | 10.02672421 |
| ENSMUSG00000082634 | 7.074518513 | 6.956172438 | 5.649208382 | 10.47094974 | 5.013362104 |
| ENSMUSG00000082635 | 4.244711108 | 5.56493795  | 3.530755239 | 2.416373016 | 2.864778345 |
| ENSMUSG00000082636 | 4.952162959 | 5.56493795  | 3.530755239 | 2.416373016 | 2.148583759 |
| ENSMUSG00000082637 | 14.14903703 | 10.43425866 | 7.767661525 | 6.443661377 | 5.729556691 |
| ENSMUSG00000082638 | 9.196874066 | 6.956172438 | 4.236906287 | 2.416373016 | 2.864778345 |
| ENSMUSG00000082640 | 5.65961481  | 4.173703463 | 7.767661525 | 5.638203705 | 4.297167518 |
| ENSMUSG00000082641 | 10.61177777 | 11.1298759  | 11.29841676 | 7.249119049 | 7.87814045  |
| ENSMUSG00000082644 | 7.781970364 | 9.738641413 | 7.061510478 | 5.638203705 | 6.445751277 |
| ENSMUSG00000082645 | 29.71297775 | 38.25894841 | 37.42600553 | 18.52552646 | 20.05344842 |
| ENSMUSG00000082646 | 7.074518513 | 8.347406925 | 11.29841676 | 11.27640741 | 7.161945863 |
| ENSMUSG00000082647 | 9.904325918 | 6.956172438 | 6.35535943  | 4.02728836  | 4.297167518 |
| ENSMUSG00000082648 | 4.952162959 | 4.869320706 | 10.59226572 | 4.02728836  | 7.161945863 |
| ENSMUSG00000082649 | 14.14903703 | 10.43425866 | 6.35535943  | 2.416373016 | 7.87814045  |
| ENSMUSG00000082650 | 12.02668147 | 2.086851731 | 4.236906287 | 7.249119049 | 7.87814045  |
| ENSMUSG00000082651 | 7.074518513 | 9.738641413 | 10.59226572 | 4.832746033 | 10.7429188  |
| ENSMUSG00000082652 | 4.952162959 | 2.782468975 | 3.530755239 | 2.416373016 | 2.864778345 |
| ENSMUSG00000082653 | 24.76081479 | 30.60715873 | 41.66291182 | 52.35474869 | 58.01176149 |
| ENSMUSG00000082655 | 5.65961481  | 2.782468975 | 7.767661525 | 4.832746033 | 6.445751277 |
| ENSMUSG00000082656 | 10.61177777 | 12.52111039 | 7.061510478 | 4.832746033 | 5.729556691 |
| ENSMUSG00000082657 | 4.244711108 | 4.173703463 | 6.35535943  | 1.610915344 | 3.580972932 |
| ENSMUSG00000082658 | 278.7360294 | 280.3337492 | 249.2713199 | 228.7499789 | 220.5879326 |
| ENSMUSG00000082660 | 4.952162959 | 4.173703463 | 2.824604191 | 0.805457672 | 5.013362104 |
| ENSMUSG00000082661 | 13.44158517 | 7.651789682 | 5.649208382 | 7.249119049 | 9.310529622 |
| ENSMUSG00000082662 | 11.31922962 | 5.56493795  | 7.061510478 | 9.665492065 | 13.60769714 |
| ENSMUSG00000082663 | 11.31922962 | 6.260555194 | 7.061510478 | 4.02728836  | 7.161945863 |
| ENSMUSG00000082664 | 5.65961481  | 4.869320706 | 4.943057334 | 5.638203705 | 1.432389173 |
| ENSMUSG00000082665 | 12.73413332 | 9.738641413 | 9.886114669 | 8.860034393 | 5.729556691 |
| ENSMUSG00000082666 | 7.781970364 | 6.956172438 | 7.767661525 | 3.221830688 | 5.013362104 |
| ENSMUSG00000082667 | 14.14903703 | 11.82549314 | 2.824604191 | 8.054576721 | 7.161945863 |
| ENSMUSG00000082668 | 4.952162959 | 7.651789682 | 4.236906287 | 4.02728836  | 5.013362104 |
| ENSMUSG00000082669 | 5.65961481  | 4.869320706 | 4.236906287 | 2.416373016 | 0.716194586 |
| ENSMUSG00000082670 | 4.244711108 | 9.738641413 | 6.35535943  | 4.02728836  | 12.17530797 |
| ENSMUSG00000082671 | 11.31922962 | 6.956172438 | 7.061510478 | 6.443661377 | 6.445751277 |
| ENSMUSG00000082672 | 9.904325918 | 7.651789682 | 7.767661525 | 2.416373016 | 8.594335036 |
| ENSMUSG00000082673 | 12.02668147 | 8.347406925 | 7.767661525 | 6.443661377 | 2.864778345 |
| ENSMUSG00000082674 | 10.61177777 | 8.347406925 | 10.59226572 | 6.443661377 | 5.013362104 |

|                    |             |             |             |             |             |
|--------------------|-------------|-------------|-------------|-------------|-------------|
| ENSMUSG00000082675 | 8.489422215 | 4.173703463 | 2.824604191 | 5.638203705 | 7.161945863 |
| ENSMUSG00000082676 | 7.074518513 | 8.347406925 | 10.59226572 | 3.221830688 | 8.594335036 |
| ENSMUSG00000082677 | 9.196874066 | 3.478086219 | 4.943057334 | 0.805457672 | 3.580972932 |
| ENSMUSG00000082678 | 2.829807405 | 4.869320706 | 5.649208382 | 8.054576721 | 11.45911338 |
| ENSMUSG00000082679 | 5.65961481  | 9.738641413 | 8.473812573 | 4.832746033 | 6.445751277 |
| ENSMUSG00000082680 | 3.537259256 | 2.086851731 | 3.530755239 | 2.416373016 | 3.580972932 |
| ENSMUSG00000082681 | 9.904325918 | 9.043024169 | 7.061510478 | 4.832746033 | 7.87814045  |
| ENSMUSG00000082682 | 14.85648888 | 6.260555194 | 9.179963621 | 9.665492065 | 9.310529622 |
| ENSMUSG00000082683 | 11.31922962 | 5.56493795  | 5.649208382 | 5.638203705 | 8.594335036 |
| ENSMUSG00000082684 | 347.358859  | 334.5918943 | 315.6495184 | 494.5510107 | 328.7333151 |
| ENSMUSG00000082685 | 8.489422215 | 9.043024169 | 7.767661525 | 4.02728836  | 5.729556691 |
| ENSMUSG00000082686 | 7.074518513 | 5.56493795  | 9.179963621 | 6.443661377 | 8.594335036 |
| ENSMUSG00000082687 | 9.196874066 | 15.30357936 | 9.179963621 | 11.27640741 | 10.7429188  |
| ENSMUSG00000082688 | 7.781970364 | 9.043024169 | 10.59226572 | 12.88732275 | 9.310529622 |
| ENSMUSG00000082689 | 8.489422215 | 3.478086219 | 7.061510478 | 8.860034393 | 10.7429188  |
| ENSMUSG00000082690 | 6.367066661 | 4.869320706 | 3.530755239 | 2.416373016 | 2.864778345 |
| ENSMUSG00000082691 | 5.65961481  | 3.478086219 | 6.35535943  | 5.638203705 | 9.310529622 |
| ENSMUSG00000082692 | 12.73413332 | 12.52111039 | 11.29841676 | 8.860034393 | 10.7429188  |
| ENSMUSG00000082693 | 10.61177777 | 10.43425866 | 12.00456781 | 10.47094974 | 11.45911338 |
| ENSMUSG00000082694 | 22.63845924 | 21.56413456 | 30.36449505 | 12.08186508 | 14.32389173 |
| ENSMUSG00000082696 | 0.707451851 | 2.086851731 | 3.530755239 | 0.805457672 | 2.148583759 |
| ENSMUSG00000082697 | 9.196874066 | 8.347406925 | 7.061510478 | 7.249119049 | 8.594335036 |
| ENSMUSG00000082698 | 14.85648888 | 8.347406925 | 11.29841676 | 6.443661377 | 6.445751277 |
| ENSMUSG00000082699 | 8.489422215 | 8.347406925 | 7.061510478 | 5.638203705 | 5.729556691 |
| ENSMUSG00000082700 | 9.904325918 | 6.260555194 | 12.00456781 | 4.832746033 | 7.161945863 |
| ENSMUSG00000082701 | 8.489422215 | 10.43425866 | 11.29841676 | 6.443661377 | 5.729556691 |
| ENSMUSG00000082703 | 10.61177777 | 8.347406925 | 6.35535943  | 5.638203705 | 5.013362104 |
| ENSMUSG00000082704 | 4.952162959 | 4.173703463 | 6.35535943  | 6.443661377 | 10.02672421 |
| ENSMUSG00000082705 | 10.61177777 | 7.651789682 | 9.179963621 | 10.47094974 | 5.013362104 |
| ENSMUSG00000082706 | 10.61177777 | 11.1298759  | 14.12302096 | 8.054576721 | 10.02672421 |
| ENSMUSG00000082707 | 8.489422215 | 5.56493795  | 2.118453143 | 5.638203705 | 5.729556691 |
| ENSMUSG00000082708 | 4.952162959 | 6.956172438 | 4.943057334 | 3.221830688 | 5.729556691 |
| ENSMUSG00000082709 | 7.781970364 | 9.043024169 | 9.886114669 | 5.638203705 | 10.7429188  |
| ENSMUSG00000082710 | 10.61177777 | 3.478086219 | 9.179963621 | 5.638203705 | 8.594335036 |
| ENSMUSG00000082711 | 121.6817184 | 165.556904  | 175.8316109 | 145.7878386 | 146.1036956 |
| ENSMUSG00000082712 | 16.27139258 | 9.043024169 | 9.886114669 | 7.249119049 | 10.02672421 |
| ENSMUSG00000082713 | 4.244711108 | 3.478086219 | 3.530755239 | 0.805457672 | 4.297167518 |
| ENSMUSG00000082714 | 2.829807405 | 0.695617244 | 0           | 0.805457672 | 2.148583759 |
| ENSMUSG00000082715 | 10.61177777 | 6.956172438 | 4.943057334 | 14.4982381  | 6.445751277 |
| ENSMUSG00000082716 | 28.29807405 | 48.69320706 | 33.18909925 | 24.96918783 | 33.66114556 |
| ENSMUSG00000082717 | 12.73413332 | 6.956172438 | 9.179963621 | 4.832746033 | 7.161945863 |
| ENSMUSG00000082718 | 7.074518513 | 3.478086219 | 7.767661525 | 4.02728836  | 4.297167518 |
| ENSMUSG00000082720 | 6.367066661 | 9.738641413 | 11.29841676 | 5.638203705 | 8.594335036 |

|                    |             |             |             |             |             |
|--------------------|-------------|-------------|-------------|-------------|-------------|
| ENSMUSG00000082721 | 13.44158517 | 4.869320706 | 9.886114669 | 8.860034393 | 10.7429188  |
| ENSMUSG00000082722 | 11.31922962 | 11.1298759  | 9.179963621 | 9.665492065 | 4.297167518 |
| ENSMUSG00000082723 | 4.952162959 | 4.869320706 | 7.767661525 | 4.832746033 | 5.729556691 |
| ENSMUSG00000082724 | 5.65961481  | 8.347406925 | 5.649208382 | 8.054576721 | 5.013362104 |
| ENSMUSG00000082725 | 6.367066661 | 4.869320706 | 6.35535943  | 4.832746033 | 7.87814045  |
| ENSMUSG00000082726 | 9.904325918 | 15.30357936 | 5.649208382 | 5.638203705 | 6.445751277 |
| ENSMUSG00000082727 | 9.904325918 | 10.43425866 | 9.886114669 | 4.832746033 | 9.310529622 |
| ENSMUSG00000082728 | 3.537259256 | 2.086851731 | 4.943057334 | 0.805457672 | 3.580972932 |
| ENSMUSG00000082729 | 2.122355554 | 2.782468975 | 7.061510478 | 5.638203705 | 5.729556691 |
| ENSMUSG00000082730 | 12.02668147 | 4.869320706 | 7.061510478 | 11.27640741 | 11.45911338 |
| ENSMUSG00000082731 | 6.367066661 | 6.260555194 | 9.179963621 | 9.665492065 | 7.87814045  |
| ENSMUSG00000082732 | 7.781970364 | 10.43425866 | 10.59226572 | 4.832746033 | 4.297167518 |
| ENSMUSG00000082733 | 6.367066661 | 7.651789682 | 5.649208382 | 1.610915344 | 2.864778345 |
| ENSMUSG00000082734 | 2.122355554 | 1.391234488 | 3.530755239 | 4.02728836  | 3.580972932 |
| ENSMUSG00000082735 | 4.952162959 | 4.173703463 | 6.35535943  | 1.610915344 | 6.445751277 |
| ENSMUSG00000082736 | 5.65961481  | 5.56493795  | 5.649208382 | 3.221830688 | 4.297167518 |
| ENSMUSG00000082737 | 7.781970364 | 4.869320706 | 4.236906287 | 4.832746033 | 5.013362104 |
| ENSMUSG00000082738 | 8.489422215 | 8.347406925 | 7.061510478 | 5.638203705 | 7.87814045  |
| ENSMUSG00000082739 | 7.074518513 | 9.738641413 | 9.179963621 | 5.638203705 | 6.445751277 |
| ENSMUSG00000082740 | 11.31922962 | 9.043024169 | 7.767661525 | 17.72006879 | 5.729556691 |
| ENSMUSG00000082741 | 12.02668147 | 11.1298759  | 8.473812573 | 5.638203705 | 8.594335036 |
| ENSMUSG00000082742 | 11.31922962 | 10.43425866 | 5.649208382 | 8.054576721 | 7.161945863 |
| ENSMUSG00000082743 | 9.196874066 | 6.956172438 | 6.35535943  | 8.054576721 | 7.87814045  |
| ENSMUSG00000082744 | 8.489422215 | 7.651789682 | 4.236906287 | 5.638203705 | 5.013362104 |
| ENSMUSG00000082745 | 9.196874066 | 7.651789682 | 7.767661525 | 5.638203705 | 6.445751277 |
| ENSMUSG00000082746 | 3.537259256 | 4.173703463 | 2.824604191 | 8.054576721 | 3.580972932 |
| ENSMUSG00000082747 | 13.44158517 | 13.21672763 | 14.12302096 | 12.08186508 | 5.729556691 |
| ENSMUSG00000082749 | 7.074518513 | 9.738641413 | 5.649208382 | 10.47094974 | 6.445751277 |
| ENSMUSG00000082750 | 9.904325918 | 11.82549314 | 10.59226572 | 16.91461111 | 10.02672421 |
| ENSMUSG00000082751 | 6.367066661 | 4.173703463 | 8.473812573 | 4.832746033 | 1.432389173 |
| ENSMUSG00000082752 | 3.537259256 | 2.782468975 | 3.530755239 | 3.221830688 | 3.580972932 |
| ENSMUSG00000082754 | 2.122355554 | 6.956172438 | 5.649208382 | 4.832746033 | 7.87814045  |
| ENSMUSG00000082755 | 4.952162959 | 0           | 4.943057334 | 4.02728836  | 5.013362104 |
| ENSMUSG00000082756 | 9.196874066 | 10.43425866 | 9.179963621 | 3.221830688 | 2.864778345 |
| ENSMUSG00000082757 | 4.952162959 | 3.478086219 | 4.236906287 | 1.610915344 | 4.297167518 |
| ENSMUSG00000082758 | 10.61177777 | 7.651789682 | 12.71071886 | 9.665492065 | 7.161945863 |
| ENSMUSG00000082759 | 4.952162959 | 4.869320706 | 2.824604191 | 2.416373016 | 5.013362104 |
| ENSMUSG00000082760 | 9.904325918 | 10.43425866 | 4.943057334 | 8.860034393 | 4.297167518 |
| ENSMUSG00000082762 | 16.97884443 | 16.69481385 | 14.12302096 | 20.94189947 | 15.04008631 |
| ENSMUSG00000082763 | 9.196874066 | 3.478086219 | 5.649208382 | 4.02728836  | 7.87814045  |
| ENSMUSG00000082765 | 12.73413332 | 6.260555194 | 7.767661525 | 5.638203705 | 3.580972932 |
| ENSMUSG00000082767 | 5.65961481  | 8.347406925 | 7.061510478 | 1.610915344 | 13.60769714 |
| ENSMUSG00000082768 | 9.196874066 | 6.956172438 | 8.473812573 | 4.02728836  | 9.310529622 |

|                    |             |             |             |             |             |
|--------------------|-------------|-------------|-------------|-------------|-------------|
| ENSMUSG00000082769 | 12.02668147 | 18.78166558 | 21.18453143 | 20.94189947 | 18.62105924 |
| ENSMUSG00000082770 | 2.122355554 | 2.086851731 | 5.649208382 | 2.416373016 | 2.864778345 |
| ENSMUSG00000082771 | 7.781970364 | 6.260555194 | 4.236906287 | 2.416373016 | 4.297167518 |
| ENSMUSG00000082772 | 4.244711108 | 2.782468975 | 2.824604191 | 2.416373016 | 2.148583759 |
| ENSMUSG00000082773 | 7.781970364 | 4.869320706 | 1.412302096 | 3.221830688 | 4.297167518 |
| ENSMUSG00000082774 | 10.61177777 | 6.956172438 | 5.649208382 | 7.249119049 | 7.161945863 |
| ENSMUSG00000082775 | 4.244711108 | 6.260555194 | 2.824604191 | 5.638203705 | 3.580972932 |
| ENSMUSG00000082776 | 2.829807405 | 1.391234488 | 2.118453143 | 3.221830688 | 1.432389173 |
| ENSMUSG00000082777 | 11.31922962 | 7.651789682 | 5.649208382 | 6.443661377 | 7.161945863 |
| ENSMUSG00000082778 | 8.489422215 | 5.56493795  | 4.236906287 | 5.638203705 | 4.297167518 |
| ENSMUSG00000082779 | 9.196874066 | 11.1298759  | 7.767661525 | 6.443661377 | 7.161945863 |
| ENSMUSG00000082780 | 8.489422215 | 1.391234488 | 6.35535943  | 4.02728836  | 8.594335036 |
| ENSMUSG00000082781 | 4.244711108 | 9.043024169 | 7.061510478 | 4.832746033 | 8.594335036 |
| ENSMUSG00000082782 | 8.489422215 | 4.869320706 | 8.473812573 | 7.249119049 | 3.580972932 |
| ENSMUSG00000082783 | 3.537259256 | 3.478086219 | 2.824604191 | 2.416373016 | 2.864778345 |
| ENSMUSG00000082784 | 9.904325918 | 6.956172438 | 4.943057334 | 7.249119049 | 7.161945863 |
| ENSMUSG00000082785 | 0.707451851 | 1.391234488 | 1.412302096 | 0.805457672 | 0.716194586 |
| ENSMUSG00000082786 | 10.61177777 | 9.738641413 | 4.943057334 | 4.832746033 | 10.7429188  |
| ENSMUSG00000082788 | 14.14903703 | 7.651789682 | 9.886114669 | 5.638203705 | 9.310529622 |
| ENSMUSG00000082789 | 14.14903703 | 4.869320706 | 11.29841676 | 4.02728836  | 10.02672421 |
| ENSMUSG00000082790 | 9.904325918 | 7.651789682 | 12.71071886 | 8.860034393 | 10.7429188  |
| ENSMUSG00000082791 | 15.56394073 | 6.956172438 | 4.943057334 | 6.443661377 | 8.594335036 |
| ENSMUSG00000082792 | 12.02668147 | 9.738641413 | 7.767661525 | 3.221830688 | 4.297167518 |
| ENSMUSG00000082793 | 10.61177777 | 6.956172438 | 6.35535943  | 1.610915344 | 6.445751277 |
| ENSMUSG00000082794 | 2.829807405 | 6.260555194 | 4.236906287 | 1.610915344 | 1.432389173 |
| ENSMUSG00000082795 | 9.196874066 | 4.869320706 | 8.473812573 | 5.638203705 | 7.161945863 |
| ENSMUSG00000082796 | 9.196874066 | 5.56493795  | 9.886114669 | 8.054576721 | 9.310529622 |
| ENSMUSG00000082797 | 11.31922962 | 5.56493795  | 4.943057334 | 10.47094974 | 7.87814045  |
| ENSMUSG00000082798 | 15.56394073 | 12.52111039 | 6.35535943  | 4.02728836  | 6.445751277 |
| ENSMUSG00000082799 | 4.244711108 | 4.173703463 | 4.236906287 | 1.610915344 | 4.297167518 |
| ENSMUSG00000082800 | 13.44158517 | 9.043024169 | 13.41686991 | 4.832746033 | 3.580972932 |
| ENSMUSG00000082802 | 12.73413332 | 4.173703463 | 4.943057334 | 5.638203705 | 10.7429188  |
| ENSMUSG00000082803 | 21.22355554 | 50.08444155 | 39.54445867 | 14.4982381  | 18.62105924 |
| ENSMUSG00000082804 | 5.65961481  | 8.347406925 | 9.886114669 | 9.665492065 | 7.87814045  |
| ENSMUSG00000082806 | 29.0055259  | 52.86691053 | 48.01827125 | 25.77464551 | 30.79636721 |
| ENSMUSG00000082807 | 6.367066661 | 6.956172438 | 4.943057334 | 0.805457672 | 2.864778345 |
| ENSMUSG00000082809 | 12.73413332 | 11.1298759  | 11.29841676 | 17.72006879 | 17.18867007 |
| ENSMUSG00000082810 | 2.829807405 | 6.260555194 | 2.824604191 | 3.221830688 | 4.297167518 |
| ENSMUSG00000082812 | 5.65961481  | 7.651789682 | 5.649208382 | 3.221830688 | 8.594335036 |
| ENSMUSG00000082814 | 12.02668147 | 9.738641413 | 5.649208382 | 4.832746033 | 10.02672421 |
| ENSMUSG00000082815 | 12.02668147 | 5.56493795  | 9.179963621 | 8.054576721 | 7.87814045  |
| ENSMUSG00000082816 | 5.65961481  | 4.869320706 | 7.767661525 | 4.832746033 | 8.594335036 |
| ENSMUSG00000082817 | 4.952162959 | 4.173703463 | 2.118453143 | 1.610915344 | 2.864778345 |

|                    |             |             |             |             |             |
|--------------------|-------------|-------------|-------------|-------------|-------------|
| ENSMUSG00000082818 | 8.489422215 | 4.869320706 | 9.179963621 | 5.638203705 | 5.729556691 |
| ENSMUSG00000082819 | 5.65961481  | 9.043024169 | 7.061510478 | 7.249119049 | 5.729556691 |
| ENSMUSG00000082820 | 16.97884443 | 5.56493795  | 6.35535943  | 5.638203705 | 4.297167518 |
| ENSMUSG00000082821 | 8.489422215 | 0           | 6.35535943  | 5.638203705 | 13.60769714 |
| ENSMUSG00000082822 | 4.952162959 | 7.651789682 | 4.943057334 | 5.638203705 | 2.864778345 |
| ENSMUSG00000082823 | 6.367066661 | 6.260555194 | 7.767661525 | 4.02728836  | 4.297167518 |
| ENSMUSG00000082824 | 3.537259256 | 4.173703463 | 4.943057334 | 2.416373016 | 1.432389173 |
| ENSMUSG00000082825 | 11.31922962 | 5.56493795  | 4.236906287 | 5.638203705 | 2.864778345 |
| ENSMUSG00000082826 | 7.781970364 | 7.651789682 | 9.886114669 | 4.02728836  | 6.445751277 |
| ENSMUSG00000082827 | 4.244711108 | 2.086851731 | 2.824604191 | 1.610915344 | 2.148583759 |
| ENSMUSG00000082828 | 0           | 4.173703463 | 1.412302096 | 2.416373016 | 1.432389173 |
| ENSMUSG00000082829 | 43.86201478 | 58.43184848 | 58.61053696 | 28.9964762  | 27.93158887 |
| ENSMUSG00000082831 | 9.196874066 | 4.173703463 | 7.767661525 | 4.02728836  | 4.297167518 |
| ENSMUSG00000082832 | 4.244711108 | 6.260555194 | 3.530755239 | 3.221830688 | 2.864778345 |
| ENSMUSG00000082833 | 7.781970364 | 6.956172438 | 12.00456781 | 7.249119049 | 5.013362104 |
| ENSMUSG00000082835 | 9.196874066 | 8.347406925 | 9.886114669 | 4.832746033 | 6.445751277 |
| ENSMUSG00000082836 | 9.904325918 | 9.043024169 | 4.943057334 | 8.860034393 | 8.594335036 |
| ENSMUSG00000082837 | 9.904325918 | 7.651789682 | 8.473812573 | 7.249119049 | 8.594335036 |
| ENSMUSG00000082838 | 21.93100739 | 20.86851731 | 24.71528667 | 23.35827249 | 17.90486466 |
| ENSMUSG00000082839 | 8.489422215 | 6.260555194 | 4.236906287 | 4.02728836  | 5.013362104 |
| ENSMUSG00000082840 | 2.829807405 | 7.651789682 | 4.236906287 | 1.610915344 | 7.161945863 |
| ENSMUSG00000082841 | 9.196874066 | 13.21672763 | 11.29841676 | 12.08186508 | 10.02672421 |
| ENSMUSG00000082842 | 4.244711108 | 5.56493795  | 4.236906287 | 4.02728836  | 5.729556691 |
| ENSMUSG00000082843 | 11.31922962 | 7.651789682 | 5.649208382 | 5.638203705 | 8.594335036 |
| ENSMUSG00000082844 | 4.952162959 | 3.478086219 | 10.59226572 | 4.02728836  | 6.445751277 |
| ENSMUSG00000082845 | 0.707451851 | 0           | 0           | 0           | 0           |
| ENSMUSG00000082846 | 11.31922962 | 10.43425866 | 9.886114669 | 5.638203705 | 8.594335036 |
| ENSMUSG00000082847 | 4.244711108 | 4.173703463 | 4.943057334 | 5.638203705 | 2.148583759 |
| ENSMUSG00000082848 | 24.76081479 | 55.6493795  | 46.60596915 | 53.16020636 | 53.71459398 |
| ENSMUSG00000082849 | 7.074518513 | 8.347406925 | 4.236906287 | 2.416373016 | 6.445751277 |
| ENSMUSG00000082850 | 9.904325918 | 8.347406925 | 7.061510478 | 4.02728836  | 7.161945863 |
| ENSMUSG00000082851 | 6.367066661 | 4.173703463 | 12.00456781 | 14.4982381  | 8.594335036 |
| ENSMUSG00000082852 | 11.31922962 | 8.347406925 | 8.473812573 | 7.249119049 | 5.729556691 |
| ENSMUSG00000082853 | 6.367066661 | 4.869320706 | 2.824604191 | 3.221830688 | 5.013362104 |
| ENSMUSG00000082855 | 14.85648888 | 21.56413456 | 23.30298458 | 16.10915344 | 18.62105924 |
| ENSMUSG00000082856 | 7.781970364 | 2.782468975 | 2.824604191 | 0.805457672 | 2.148583759 |
| ENSMUSG00000082857 | 11.31922962 | 11.1298759  | 6.35535943  | 7.249119049 | 3.580972932 |
| ENSMUSG00000082858 | 9.196874066 | 7.651789682 | 10.59226572 | 10.47094974 | 4.297167518 |
| ENSMUSG00000082859 | 6.367066661 | 13.91234488 | 6.35535943  | 6.443661377 | 7.161945863 |
| ENSMUSG00000082860 | 18.39374813 | 17.39043109 | 20.47838039 | 26.58010318 | 20.05344842 |
| ENSMUSG00000082861 | 17.68629628 | 22.95536904 | 23.30298458 | 8.054576721 | 14.32389173 |
| ENSMUSG00000082862 | 8.489422215 | 6.260555194 | 7.767661525 | 3.221830688 | 5.729556691 |
| ENSMUSG00000082863 | 4.952162959 | 1.391234488 | 1.412302096 | 1.610915344 | 2.864778345 |

|                    |             |             |             |             |             |
|--------------------|-------------|-------------|-------------|-------------|-------------|
| ENSMUSG00000082864 | 10.61177777 | 11.82549314 | 5.649208382 | 9.665492065 | 7.161945863 |
| ENSMUSG00000082865 | 7.781970364 | 2.782468975 | 4.943057334 | 4.02728836  | 3.580972932 |
| ENSMUSG00000082867 | 28.29807405 | 43.82388636 | 56.49208382 | 41.07834128 | 37.24211849 |
| ENSMUSG00000082868 | 14.14903703 | 6.956172438 | 9.179963621 | 10.47094974 | 5.729556691 |
| ENSMUSG00000082869 | 10.61177777 | 6.956172438 | 9.886114669 | 7.249119049 | 7.87814045  |
| ENSMUSG00000082870 | 9.196874066 | 9.043024169 | 6.35535943  | 7.249119049 | 5.013362104 |
| ENSMUSG00000082871 | 12.02668147 | 4.173703463 | 3.530755239 | 5.638203705 | 10.02672421 |
| ENSMUSG00000082872 | 13.44158517 | 8.347406925 | 9.886114669 | 8.054576721 | 5.729556691 |
| ENSMUSG00000082873 | 4.952162959 | 5.56493795  | 7.767661525 | 4.832746033 | 5.729556691 |
| ENSMUSG00000082874 | 9.904325918 | 7.651789682 | 7.061510478 | 6.443661377 | 7.87814045  |
| ENSMUSG00000082875 | 6.367066661 | 5.56493795  | 2.824604191 | 4.832746033 | 4.297167518 |
| ENSMUSG00000082876 | 14.85648888 | 11.82549314 | 8.473812573 | 5.638203705 | 13.60769714 |
| ENSMUSG00000082877 | 13.44158517 | 13.21672763 | 12.00456781 | 10.47094974 | 7.87814045  |
| ENSMUSG00000082878 | 7.781970364 | 7.651789682 | 10.59226572 | 5.638203705 | 2.864778345 |
| ENSMUSG00000082879 | 10.61177777 | 4.869320706 | 9.886114669 | 8.860034393 | 9.310529622 |
| ENSMUSG00000082880 | 12.73413332 | 3.478086219 | 4.943057334 | 8.860034393 | 4.297167518 |
| ENSMUSG00000082882 | 7.781970364 | 5.56493795  | 8.473812573 | 5.638203705 | 5.729556691 |
| ENSMUSG00000082883 | 12.73413332 | 6.260555194 | 4.943057334 | 4.832746033 | 3.580972932 |
| ENSMUSG00000082884 | 1.414903703 | 1.391234488 | 0           | 0.805457672 | 2.864778345 |
| ENSMUSG00000082885 | 6.367066661 | 6.956172438 | 7.061510478 | 7.249119049 | 7.161945863 |
| ENSMUSG00000082886 | 4.244711108 | 4.173703463 | 3.530755239 | 3.221830688 | 3.580972932 |
| ENSMUSG00000082887 | 0.707451851 | 0.695617244 | 0           | 0.805457672 | 0.716194586 |
| ENSMUSG00000082888 | 9.904325918 | 15.99919661 | 15.53532305 | 8.054576721 | 12.17530797 |
| ENSMUSG00000082889 | 10.61177777 | 6.260555194 | 5.649208382 | 4.832746033 | 7.87814045  |
| ENSMUSG00000082890 | 3.537259256 | 3.478086219 | 5.649208382 | 4.02728836  | 3.580972932 |
| ENSMUSG00000082891 | 11.31922962 | 6.956172438 | 12.71071886 | 10.47094974 | 9.310529622 |
| ENSMUSG00000082892 | 9.196874066 | 12.52111039 | 6.35535943  | 2.416373016 | 5.729556691 |
| ENSMUSG00000082893 | 7.781970364 | 3.478086219 | 3.530755239 | 9.665492065 | 7.87814045  |
| ENSMUSG00000082894 | 9.196874066 | 2.782468975 | 3.530755239 | 6.443661377 | 0.716194586 |
| ENSMUSG00000082895 | 11.31922962 | 6.956172438 | 13.41686991 | 16.10915344 | 7.87814045  |
| ENSMUSG00000082896 | 9.196874066 | 9.043024169 | 7.767661525 | 20.1364418  | 21.48583759 |
| ENSMUSG00000082897 | 3.537259256 | 6.956172438 | 4.943057334 | 6.443661377 | 5.013362104 |
| ENSMUSG00000082898 | 9.904325918 | 11.82549314 | 13.41686991 | 7.249119049 | 10.7429188  |
| ENSMUSG00000082899 | 15.56394073 | 4.869320706 | 7.061510478 | 4.832746033 | 5.729556691 |
| ENSMUSG00000082900 | 6.367066661 | 9.043024169 | 8.473812573 | 3.221830688 | 7.161945863 |
| ENSMUSG00000082901 | 9.196874066 | 6.956172438 | 12.71071886 | 9.665492065 | 7.87814045  |
| ENSMUSG00000082902 | 4.244711108 | 2.086851731 | 2.118453143 | 4.832746033 | 2.148583759 |
| ENSMUSG00000082903 | 10.61177777 | 11.1298759  | 11.29841676 | 5.638203705 | 4.297167518 |
| ENSMUSG00000082905 | 4.244711108 | 5.56493795  | 7.767661525 | 3.221830688 | 5.729556691 |
| ENSMUSG00000082906 | 8.489422215 | 2.782468975 | 2.118453143 | 2.416373016 | 4.297167518 |
| ENSMUSG00000082907 | 3.537259256 | 4.173703463 | 6.35535943  | 7.249119049 | 2.148583759 |
| ENSMUSG00000082908 | 7.074518513 | 7.651789682 | 7.061510478 | 4.832746033 | 5.013362104 |
| ENSMUSG00000082909 | 12.02668147 | 11.1298759  | 4.943057334 | 5.638203705 | 3.580972932 |

|                   |             |             |             |             |             |
|-------------------|-------------|-------------|-------------|-------------|-------------|
| ENSMUSG0000082910 | 4.244711108 | 0.695617244 | 4.236906287 | 2.416373016 | 2.148583759 |
| ENSMUSG0000082911 | 7.074518513 | 4.173703463 | 10.59226572 | 4.02728836  | 5.729556691 |
| ENSMUSG0000082912 | 6.367066661 | 4.173703463 | 4.236906287 | 2.416373016 | 3.580972932 |
| ENSMUSG0000082913 | 6.367066661 | 4.173703463 | 2.118453143 | 3.221830688 | 5.013362104 |
| ENSMUSG0000082915 | 5.65961481  | 4.173703463 | 4.236906287 | 0           | 2.148583759 |
| ENSMUSG0000082917 | 20.51610369 | 17.39043109 | 16.94762515 | 12.08186508 | 16.47247549 |
| ENSMUSG0000082918 | 0           | 0           | 0           | 0           | 0           |
| ENSMUSG0000082919 | 12.02668147 | 9.043024169 | 9.886114669 | 0.805457672 | 7.87814045  |
| ENSMUSG0000082920 | 12.73413332 | 11.82549314 | 14.12302096 | 10.47094974 | 7.161945863 |
| ENSMUSG0000082922 | 10.61177777 | 11.1298759  | 11.29841676 | 14.4982381  | 8.594335036 |
| ENSMUSG0000082924 | 7.074518513 | 11.1298759  | 9.886114669 | 13.69278043 | 11.45911338 |
| ENSMUSG0000082925 | 24.05336294 | 18.78166558 | 23.30298458 | 17.72006879 | 12.89150255 |
| ENSMUSG0000082926 | 2.829807405 | 8.347406925 | 6.35535943  | 13.69278043 | 11.45911338 |
| ENSMUSG0000082927 | 2.122355554 | 0.695617244 | 4.943057334 | 1.610915344 | 2.148583759 |
| ENSMUSG0000082928 | 204.453585  | 271.9863423 | 242.2098094 | 173.9788572 | 164.7247549 |
| ENSMUSG0000082929 | 7.781970364 | 3.478086219 | 3.530755239 | 5.638203705 | 2.148583759 |
| ENSMUSG0000082930 | 6.367066661 | 6.260555194 | 6.35535943  | 7.249119049 | 6.445751277 |
| ENSMUSG0000082931 | 76.40479994 | 112.6899935 | 95.33039145 | 137.7332619 | 117.4559122 |
| ENSMUSG0000082932 | 9.196874066 | 8.347406925 | 9.886114669 | 10.47094974 | 5.013362104 |
| ENSMUSG0000082933 | 7.074518513 | 4.173703463 | 7.767661525 | 9.665492065 | 5.013362104 |
| ENSMUSG0000082934 | 12.73413332 | 6.260555194 | 7.061510478 | 6.443661377 | 4.297167518 |
| ENSMUSG0000082935 | 8.489422215 | 13.21672763 | 8.473812573 | 9.665492065 | 7.87814045  |
| ENSMUSG0000082936 | 26.88317035 | 28.52030699 | 20.47838039 | 16.10915344 | 20.05344842 |
| ENSMUSG0000082937 | 3.537259256 | 2.782468975 | 1.412302096 | 2.416373016 | 3.580972932 |
| ENSMUSG0000082938 | 6.367066661 | 4.869320706 | 9.886114669 | 6.443661377 | 10.7429188  |
| ENSMUSG0000082939 | 0.707451851 | 0           | 0           | 0           | 1.432389173 |
| ENSMUSG0000082940 | 8.489422215 | 4.869320706 | 5.649208382 | 8.054576721 | 9.310529622 |
| ENSMUSG0000082941 | 9.904325918 | 11.1298759  | 8.473812573 | 4.02728836  | 7.161945863 |
| ENSMUSG0000082943 | 4.952162959 | 9.738641413 | 7.767661525 | 6.443661377 | 7.161945863 |
| ENSMUSG0000082945 | 10.61177777 | 11.1298759  | 13.41686991 | 9.665492065 | 15.04008631 |
| ENSMUSG0000082946 | 9.196874066 | 9.043024169 | 7.061510478 | 7.249119049 | 7.161945863 |
| ENSMUSG0000082947 | 2.829807405 | 6.260555194 | 5.649208382 | 4.832746033 | 5.729556691 |
| ENSMUSG0000082949 | 0.707451851 | 0.695617244 | 2.118453143 | 0.805457672 | 0.716194586 |
| ENSMUSG0000082950 | 2.829807405 | 4.173703463 | 4.236906287 | 4.832746033 | 3.580972932 |
| ENSMUSG0000082951 | 8.489422215 | 11.1298759  | 6.35535943  | 7.249119049 | 2.864778345 |
| ENSMUSG0000082952 | 9.196874066 | 2.782468975 | 7.767661525 | 4.02728836  | 9.310529622 |
| ENSMUSG0000082953 | 7.781970364 | 15.30357936 | 6.35535943  | 7.249119049 | 7.161945863 |
| ENSMUSG0000082954 | 56.5961481  | 83.47406925 | 88.97503202 | 39.46742593 | 60.16034525 |
| ENSMUSG0000082955 | 8.489422215 | 4.869320706 | 3.530755239 | 7.249119049 | 5.013362104 |
| ENSMUSG0000082956 | 9.196874066 | 10.43425866 | 4.943057334 | 5.638203705 | 4.297167518 |
| ENSMUSG0000082957 | 7.074518513 | 8.347406925 | 9.179963621 | 8.054576721 | 7.161945863 |
| ENSMUSG0000082958 | 9.904325918 | 4.173703463 | 15.53532305 | 2.416373016 | 3.580972932 |
| ENSMUSG0000082959 | 8.489422215 | 4.869320706 | 9.179963621 | 5.638203705 | 6.445751277 |

|                    |             |             |             |             |             |
|--------------------|-------------|-------------|-------------|-------------|-------------|
| ENSMUSG00000082960 | 6.367066661 | 7.651789682 | 9.179963621 | 5.638203705 | 4.297167518 |
| ENSMUSG00000082961 | 4.952162959 | 2.086851731 | 1.412302096 | 1.610915344 | 2.864778345 |
| ENSMUSG00000082962 | 2.122355554 | 4.173703463 | 1.412302096 | 4.02728836  | 6.445751277 |
| ENSMUSG00000082963 | 10.61177777 | 7.651789682 | 9.179963621 | 2.416373016 | 2.864778345 |
| ENSMUSG00000082964 | 16.27139258 | 31.99839321 | 21.18453143 | 9.665492065 | 22.20203218 |
| ENSMUSG00000082965 | 7.781970364 | 4.869320706 | 3.530755239 | 2.416373016 | 1.432389173 |
| ENSMUSG00000082966 | 0.707451851 | 4.173703463 | 5.649208382 | 5.638203705 | 3.580972932 |
| ENSMUSG00000082967 | 7.781970364 | 6.260555194 | 7.767661525 | 3.221830688 | 5.013362104 |
| ENSMUSG00000082968 | 2.829807405 | 5.56493795  | 4.236906287 | 4.832746033 | 5.013362104 |
| ENSMUSG00000082969 | 8.489422215 | 11.82549314 | 8.473812573 | 6.443661377 | 8.594335036 |
| ENSMUSG00000082970 | 7.781970364 | 2.782468975 | 2.118453143 | 0           | 4.297167518 |
| ENSMUSG00000082971 | 10.61177777 | 6.260555194 | 5.649208382 | 8.054576721 | 8.594335036 |
| ENSMUSG00000082973 | 7.781970364 | 12.52111039 | 7.061510478 | 8.860034393 | 5.729556691 |
| ENSMUSG00000082974 | 8.489422215 | 15.30357936 | 19.06607829 | 14.4982381  | 13.60769714 |
| ENSMUSG00000082975 | 4.952162959 | 7.651789682 | 10.59226572 | 3.221830688 | 5.013362104 |
| ENSMUSG00000082977 | 12.02668147 | 7.651789682 | 4.943057334 | 2.416373016 | 7.161945863 |
| ENSMUSG00000082978 | 6.367066661 | 8.347406925 | 12.71071886 | 4.832746033 | 7.161945863 |
| ENSMUSG00000082980 | 7.781970364 | 9.043024169 | 5.649208382 | 4.832746033 | 6.445751277 |
| ENSMUSG00000082981 | 15.56394073 | 25.73783802 | 33.89525029 | 22.55281482 | 22.20203218 |
| ENSMUSG00000082982 | 7.074518513 | 4.869320706 | 4.943057334 | 3.221830688 | 5.729556691 |
| ENSMUSG00000082983 | 0.707451851 | 0           | 0.706151048 | 0           | 0           |
| ENSMUSG00000082985 | 7.074518513 | 5.56493795  | 7.767661525 | 7.249119049 | 10.02672421 |
| ENSMUSG00000082986 | 7.781970364 | 7.651789682 | 10.59226572 | 3.221830688 | 7.161945863 |
| ENSMUSG00000082987 | 7.781970364 | 9.738641413 | 7.061510478 | 8.054576721 | 7.87814045  |
| ENSMUSG00000082988 | 17.68629628 | 18.08604834 | 23.30298458 | 35.44013757 | 22.91822676 |
| ENSMUSG00000082989 | 9.904325918 | 5.56493795  | 12.71071886 | 2.416373016 | 5.729556691 |
| ENSMUSG00000082990 | 17.68629628 | 27.82468975 | 28.24604191 | 56.38203705 | 50.13362104 |
| ENSMUSG00000082991 | 12.73413332 | 9.043024169 | 12.71071886 | 5.638203705 | 5.729556691 |
| ENSMUSG00000082993 | 11.31922962 | 7.651789682 | 11.29841676 | 5.638203705 | 10.7429188  |
| ENSMUSG00000082994 | 9.196874066 | 8.347406925 | 9.179963621 | 5.638203705 | 7.161945863 |
| ENSMUSG00000082995 | 8.489422215 | 4.173703463 | 6.35535943  | 6.443661377 | 3.580972932 |
| ENSMUSG00000082996 | 39.61730367 | 61.21431745 | 58.61053696 | 49.132918   | 42.97167518 |
| ENSMUSG00000082997 | 9.196874066 | 4.869320706 | 4.236906287 | 2.416373016 | 7.161945863 |
| ENSMUSG00000082998 | 4.244711108 | 4.173703463 | 7.061510478 | 4.02728836  | 7.87814045  |
| ENSMUSG00000083000 | 8.489422215 | 4.869320706 | 7.061510478 | 4.832746033 | 8.594335036 |
| ENSMUSG00000083001 | 7.781970364 | 7.651789682 | 9.886114669 | 6.443661377 | 6.445751277 |
| ENSMUSG00000083004 | 14.85648888 | 8.347406925 | 7.767661525 | 6.443661377 | 12.89150255 |
| ENSMUSG00000083005 | 7.781970364 | 4.869320706 | 6.35535943  | 5.638203705 | 7.161945863 |
| ENSMUSG00000083006 | 18.39374813 | 15.99919661 | 19.77222934 | 17.72006879 | 17.18867007 |
| ENSMUSG00000083007 | 10.61177777 | 8.347406925 | 16.2414741  | 4.832746033 | 5.013362104 |
| ENSMUSG00000083008 | 7.074518513 | 8.347406925 | 10.59226572 | 4.832746033 | 7.161945863 |
| ENSMUSG00000083009 | 4.244711108 | 5.56493795  | 7.061510478 | 10.47094974 | 7.161945863 |
| ENSMUSG00000083010 | 4.952162959 | 3.478086219 | 2.824604191 | 1.610915344 | 2.864778345 |



|                   |             |             |             |             |             |
|-------------------|-------------|-------------|-------------|-------------|-------------|
| ENSMUSG0000083011 | 7.781970364 | 6.260555194 | 8.473812573 | 5.638203705 | 11.45911338 |
| ENSMUSG0000083013 | 12.02668147 | 11.82549314 | 12.00456781 | 15.30369577 | 12.89150255 |
| ENSMUSG0000083014 | 7.781970364 | 5.56493795  | 12.71071886 | 4.02728836  | 6.445751277 |
| ENSMUSG0000083015 | 8.489422215 | 6.956172438 | 7.767661525 | 9.665492065 | 6.445751277 |
| ENSMUSG0000083016 | 11.31922962 | 9.043024169 | 7.767661525 | 6.443661377 | 9.310529622 |
| ENSMUSG0000083017 | 16.97884443 | 7.651789682 | 10.59226572 | 5.638203705 | 6.445751277 |
| ENSMUSG0000083018 | 12.02668147 | 6.956172438 | 9.179963621 | 8.860034393 | 8.594335036 |
| ENSMUSG0000083019 | 6.367066661 | 2.086851731 | 7.767661525 | 8.054576721 | 7.161945863 |
| ENSMUSG0000083020 | 14.14903703 | 6.956172438 | 3.530755239 | 4.02728836  | 8.594335036 |
| ENSMUSG0000083022 | 137.2456591 | 206.5983214 | 171.5947046 | 174.7843148 | 152.5494469 |
| ENSMUSG0000083023 | 8.489422215 | 4.869320706 | 8.473812573 | 4.832746033 | 5.013362104 |
| ENSMUSG0000083024 | 3.537259256 | 2.782468975 | 5.649208382 | 3.221830688 | 2.148583759 |
| ENSMUSG0000083025 | 7.074518513 | 11.1298759  | 7.767661525 | 16.10915344 | 4.297167518 |
| ENSMUSG0000083026 | 4.952162959 | 4.173703463 | 2.824604191 | 0.805457672 | 2.864778345 |
| ENSMUSG0000083027 | 14.85648888 | 10.43425866 | 9.886114669 | 8.860034393 | 4.297167518 |
| ENSMUSG0000083028 | 9.904325918 | 9.043024169 | 9.886114669 | 4.02728836  | 9.310529622 |
| ENSMUSG0000083029 | 7.781970364 | 6.956172438 | 8.473812573 | 3.221830688 | 4.297167518 |
| ENSMUSG0000083030 | 6.367066661 | 3.478086219 | 2.824604191 | 0           | 2.148583759 |
| ENSMUSG0000083031 | 7.074518513 | 2.086851731 | 5.649208382 | 2.416373016 | 3.580972932 |
| ENSMUSG0000083032 | 7.781970364 | 9.043024169 | 4.943057334 | 12.08186508 | 7.87814045  |
| ENSMUSG0000083033 | 116.7295555 | 117.5593142 | 119.3395271 | 120.0131931 | 83.7947666  |
| ENSMUSG0000083034 | 8.489422215 | 13.21672763 | 7.061510478 | 4.02728836  | 8.594335036 |
| ENSMUSG0000083036 | 16.97884443 | 29.21592424 | 32.4829482  | 27.38556085 | 24.35061594 |
| ENSMUSG0000083037 | 4.244711108 | 1.391234488 | 1.412302096 | 1.610915344 | 2.864778345 |
| ENSMUSG0000083038 | 30.4204296  | 7.651789682 | 14.12302096 | 12.88732275 | 12.89150255 |
| ENSMUSG0000083039 | 12.02668147 | 10.43425866 | 4.943057334 | 6.443661377 | 4.297167518 |
| ENSMUSG0000083041 | 7.781970364 | 6.956172438 | 6.35535943  | 8.054576721 | 5.013362104 |
| ENSMUSG0000083042 | 9.196874066 | 4.173703463 | 9.179963621 | 2.416373016 | 10.7429188  |
| ENSMUSG0000083043 | 319.0607849 | 354.0691771 | 317.7679715 | 419.6434472 | 327.300926  |
| ENSMUSG0000083044 | 14.85648888 | 5.56493795  | 4.236906287 | 5.638203705 | 7.161945863 |
| ENSMUSG0000083045 | 38.20239997 | 60.51870021 | 55.07978173 | 22.55281482 | 30.08017263 |
| ENSMUSG0000083046 | 4.244711108 | 6.260555194 | 4.236906287 | 4.02728836  | 2.148583759 |
| ENSMUSG0000083047 | 7.074518513 | 6.260555194 | 9.886114669 | 7.249119049 | 6.445751277 |
| ENSMUSG0000083049 | 7.781970364 | 2.782468975 | 3.530755239 | 1.610915344 | 2.148583759 |
| ENSMUSG0000083050 | 11.31922962 | 9.738641413 | 9.179963621 | 5.638203705 | 2.864778345 |
| ENSMUSG0000083052 | 14.14903703 | 13.91234488 | 8.473812573 | 6.443661377 | 7.161945863 |
| ENSMUSG0000083053 | 3.537259256 | 4.173703463 | 6.35535943  | 0           | 1.432389173 |
| ENSMUSG0000083054 | 0           | 0           | 0           | 0           | 0           |
| ENSMUSG0000083055 | 9.904325918 | 11.82549314 | 10.59226572 | 4.02728836  | 5.013362104 |
| ENSMUSG0000083057 | 11.31922962 | 16.69481385 | 12.71071886 | 6.443661377 | 9.310529622 |
| ENSMUSG0000083058 | 5.65961481  | 4.869320706 | 6.35535943  | 1.610915344 | 6.445751277 |
| ENSMUSG0000083059 | 9.904325918 | 4.869320706 | 7.767661525 | 1.610915344 | 8.594335036 |
| ENSMUSG0000083060 | 7.074518513 | 4.869320706 | 4.943057334 | 4.832746033 | 2.148583759 |

|                   |             |             |             |             |             |
|-------------------|-------------|-------------|-------------|-------------|-------------|
| ENSMUSG0000083061 | 19.80865184 | 29.91154148 | 25.42143772 | 28.19101852 | 25.06681052 |
| ENSMUSG0000083062 | 1.414903703 | 3.478086219 | 2.118453143 | 1.610915344 | 3.580972932 |
| ENSMUSG0000083063 | 0           | 0.695617244 | 1.412302096 | 0           | 0           |
| ENSMUSG0000083064 | 7.781970364 | 3.478086219 | 9.179963621 | 7.249119049 | 6.445751277 |
| ENSMUSG0000083065 | 7.781970364 | 11.1298759  | 9.179963621 | 8.054576721 | 7.87814045  |
| ENSMUSG0000083066 | 8.489422215 | 6.260555194 | 10.59226572 | 5.638203705 | 10.02672421 |
| ENSMUSG0000083067 | 8.489422215 | 4.869320706 | 2.824604191 | 3.221830688 | 2.864778345 |
| ENSMUSG0000083068 | 6.367066661 | 12.52111039 | 9.179963621 | 8.860034393 | 7.87814045  |
| ENSMUSG0000083069 | 2.122355554 | 3.478086219 | 0.706151048 | 2.416373016 | 1.432389173 |
| ENSMUSG0000083070 | 9.904325918 | 11.82549314 | 9.886114669 | 9.665492065 | 6.445751277 |
| ENSMUSG0000083072 | 7.781970364 | 4.869320706 | 9.886114669 | 4.832746033 | 4.297167518 |
| ENSMUSG0000083073 | 8.489422215 | 9.738641413 | 4.943057334 | 6.443661377 | 7.161945863 |
| ENSMUSG0000083074 | 7.074518513 | 2.782468975 | 4.236906287 | 7.249119049 | 4.297167518 |
| ENSMUSG0000083075 | 14.14903703 | 4.869320706 | 8.473812573 | 7.249119049 | 4.297167518 |
| ENSMUSG0000083076 | 4.952162959 | 11.82549314 | 7.767661525 | 8.860034393 | 7.87814045  |
| ENSMUSG0000083077 | 9.904325918 | 4.869320706 | 5.649208382 | 7.249119049 | 5.013362104 |
| ENSMUSG0000083078 | 8.489422215 | 9.043024169 | 7.767661525 | 5.638203705 | 6.445751277 |
| ENSMUSG0000083079 | 12.02668147 | 6.956172438 | 9.886114669 | 4.832746033 | 6.445751277 |
| ENSMUSG0000083080 | 11.31922962 | 9.043024169 | 7.767661525 | 8.860034393 | 9.310529622 |
| ENSMUSG0000083081 | 12.02668147 | 9.043024169 | 9.179963621 | 9.665492065 | 13.60769714 |
| ENSMUSG0000083083 | 7.074518513 | 10.43425866 | 9.179963621 | 2.416373016 | 5.729556691 |
| ENSMUSG0000083084 | 5.65961481  | 3.478086219 | 8.473812573 | 1.610915344 | 3.580972932 |
| ENSMUSG0000083085 | 7.074518513 | 4.173703463 | 5.649208382 | 4.832746033 | 7.161945863 |
| ENSMUSG0000083086 | 12.73413332 | 12.52111039 | 7.061510478 | 4.02728836  | 7.161945863 |
| ENSMUSG0000083087 | 11.31922962 | 8.347406925 | 8.473812573 | 4.832746033 | 5.013362104 |
| ENSMUSG0000083088 | 9.196874066 | 9.043024169 | 6.35535943  | 7.249119049 | 3.580972932 |
| ENSMUSG0000083089 | 4.244711108 | 2.086851731 | 2.824604191 | 2.416373016 | 2.864778345 |
| ENSMUSG0000083090 | 7.781970364 | 5.56493795  | 4.943057334 | 8.860034393 | 8.594335036 |
| ENSMUSG0000083091 | 10.61177777 | 6.260555194 | 7.767661525 | 4.02728836  | 9.310529622 |
| ENSMUSG0000083093 | 0.707451851 | 2.086851731 | 0.706151048 | 0           | 1.432389173 |
| ENSMUSG0000083094 | 4.952162959 | 2.086851731 | 2.118453143 | 2.416373016 | 5.013362104 |
| ENSMUSG0000083095 | 8.489422215 | 9.043024169 | 9.179963621 | 8.054576721 | 7.87814045  |
| ENSMUSG0000083096 | 7.074518513 | 5.56493795  | 4.943057334 | 5.638203705 | 6.445751277 |
| ENSMUSG0000083097 | 9.904325918 | 14.60796212 | 14.829172   | 11.27640741 | 16.47247549 |
| ENSMUSG0000083098 | 1.414903703 | 7.651789682 | 3.530755239 | 0.805457672 | 2.148583759 |
| ENSMUSG0000083099 | 3.537259256 | 2.782468975 | 3.530755239 | 5.638203705 | 4.297167518 |
| ENSMUSG0000083100 | 16.27139258 | 20.17290007 | 22.59683353 | 11.27640741 | 15.7562809  |
| ENSMUSG0000083101 | 11.31922962 | 9.043024169 | 8.473812573 | 8.054576721 | 13.60769714 |
| ENSMUSG0000083103 | 6.367066661 | 5.56493795  | 2.118453143 | 4.02728836  | 2.148583759 |
| ENSMUSG0000083104 | 20.51610369 | 33.3896277  | 30.36449505 | 52.35474869 | 40.82309142 |
| ENSMUSG0000083105 | 11.31922962 | 9.738641413 | 9.886114669 | 7.249119049 | 5.729556691 |
| ENSMUSG0000083106 | 6.367066661 | 7.651789682 | 7.767661525 | 2.416373016 | 2.864778345 |
| ENSMUSG0000083107 | 7.781970364 | 6.260555194 | 12.71071886 | 7.249119049 | 8.594335036 |

|                   |             |             |             |             |             |
|-------------------|-------------|-------------|-------------|-------------|-------------|
| ENSMUSG0000083109 | 8.489422215 | 5.56493795  | 7.767661525 | 7.249119049 | 5.729556691 |
| ENSMUSG0000083110 | 11.31922962 | 7.651789682 | 9.886114669 | 6.443661377 | 4.297167518 |
| ENSMUSG0000083111 | 6.367066661 | 12.52111039 | 4.943057334 | 8.860034393 | 6.445751277 |
| ENSMUSG0000083112 | 16.27139258 | 27.82468975 | 24.71528667 | 34.6346799  | 24.35061594 |
| ENSMUSG0000083113 | 0.707451851 | 0.695617244 | 0           | 0           | 0.716194586 |
| ENSMUSG0000083114 | 3.537259256 | 4.869320706 | 2.118453143 | 4.832746033 | 7.161945863 |
| ENSMUSG0000083115 | 12.73413332 | 7.651789682 | 4.943057334 | 8.054576721 | 6.445751277 |
| ENSMUSG0000083116 | 26.1757185  | 16.69481385 | 17.65377619 | 14.4982381  | 13.60769714 |
| ENSMUSG0000083117 | 2.122355554 | 5.56493795  | 3.530755239 | 0.805457672 | 2.148583759 |
| ENSMUSG0000083118 | 7.781970364 | 6.260555194 | 8.473812573 | 7.249119049 | 5.729556691 |
| ENSMUSG0000083119 | 7.781970364 | 2.086851731 | 2.118453143 | 3.221830688 | 3.580972932 |
| ENSMUSG0000083120 | 8.489422215 | 9.043024169 | 8.473812573 | 7.249119049 | 3.580972932 |
| ENSMUSG0000083121 | 164.8362813 | 222.597518  | 172.3008557 | 191.698926  | 179.0486466 |
| ENSMUSG0000083122 | 8.489422215 | 8.347406925 | 9.886114669 | 4.832746033 | 7.87814045  |
| ENSMUSG0000083123 | 6.367066661 | 2.782468975 | 3.530755239 | 2.416373016 | 5.013362104 |
| ENSMUSG0000083124 | 9.196874066 | 3.478086219 | 7.061510478 | 3.221830688 | 7.87814045  |
| ENSMUSG0000083125 | 10.61177777 | 4.869320706 | 12.00456781 | 5.638203705 | 10.02672421 |
| ENSMUSG0000083126 | 7.074518513 | 10.43425866 | 5.649208382 | 5.638203705 | 9.310529622 |
| ENSMUSG0000083127 | 6.367066661 | 2.782468975 | 4.236906287 | 4.02728836  | 3.580972932 |
| ENSMUSG0000083128 | 5.65961481  | 2.086851731 | 4.943057334 | 6.443661377 | 5.013362104 |
| ENSMUSG0000083129 | 16.27139258 | 2.782468975 | 1.412302096 | 11.27640741 | 9.310529622 |
| ENSMUSG0000083130 | 0.707451851 | 2.086851731 | 0           | 2.416373016 | 2.864778345 |
| ENSMUSG0000083132 | 18.39374813 | 18.08604834 | 20.47838039 | 12.88732275 | 12.89150255 |
| ENSMUSG0000083133 | 3.537259256 | 4.869320706 | 2.118453143 | 2.416373016 | 1.432389173 |
| ENSMUSG0000083135 | 7.781970364 | 6.956172438 | 6.35535943  | 7.249119049 | 10.7429188  |
| ENSMUSG0000083136 | 3.537259256 | 2.782468975 | 2.118453143 | 4.02728836  | 4.297167518 |
| ENSMUSG0000083137 | 7.074518513 | 6.956172438 | 4.943057334 | 7.249119049 | 7.161945863 |
| ENSMUSG0000083138 | 7.074518513 | 10.43425866 | 9.179963621 | 6.443661377 | 5.729556691 |
| ENSMUSG0000083139 | 12.02668147 | 15.30357936 | 10.59226572 | 9.665492065 | 10.7429188  |
| ENSMUSG0000083140 | 2.122355554 | 2.086851731 | 2.824604191 | 4.832746033 | 6.445751277 |
| ENSMUSG0000083141 | 16.27139258 | 9.738641413 | 7.767661525 | 5.638203705 | 5.013362104 |
| ENSMUSG0000083142 | 4.952162959 | 6.260555194 | 7.767661525 | 5.638203705 | 10.7429188  |
| ENSMUSG0000083143 | 7.074518513 | 4.173703463 | 8.473812573 | 5.638203705 | 5.729556691 |
| ENSMUSG0000083144 | 11.31922962 | 4.173703463 | 2.824604191 | 1.610915344 | 2.864778345 |
| ENSMUSG0000083145 | 7.074518513 | 4.869320706 | 9.179963621 | 5.638203705 | 7.161945863 |
| ENSMUSG0000083147 | 14.85648888 | 4.173703463 | 7.767661525 | 4.02728836  | 6.445751277 |
| ENSMUSG0000083149 | 17.68629628 | 6.956172438 | 7.767661525 | 7.249119049 | 7.161945863 |
| ENSMUSG0000083150 | 11.31922962 | 10.43425866 | 9.179963621 | 4.832746033 | 6.445751277 |
| ENSMUSG0000083151 | 4.244711108 | 2.782468975 | 1.412302096 | 4.02728836  | 4.297167518 |
| ENSMUSG0000083152 | 60.84085921 | 85.56092098 | 81.91352154 | 83.7675979  | 75.91662615 |
| ENSMUSG0000083153 | 4.952162959 | 7.651789682 | 9.886114669 | 6.443661377 | 10.02672421 |
| ENSMUSG0000083154 | 5.65961481  | 6.956172438 | 4.236906287 | 4.832746033 | 7.161945863 |
| ENSMUSG0000083155 | 7.781970364 | 7.651789682 | 8.473812573 | 8.054576721 | 4.297167518 |

|                   |             |             |             |             |             |
|-------------------|-------------|-------------|-------------|-------------|-------------|
| ENSMUSG0000083156 | 5.65961481  | 3.478086219 | 7.767661525 | 2.416373016 | 2.864778345 |
| ENSMUSG0000083157 | 201.6237776 | 282.420601  | 249.9774709 | 223.1117752 | 172.6028953 |
| ENSMUSG0000083158 | 4.952162959 | 4.869320706 | 6.35535943  | 1.610915344 | 3.580972932 |
| ENSMUSG0000083159 | 10.61177777 | 5.56493795  | 4.943057334 | 6.443661377 | 10.7429188  |
| ENSMUSG0000083160 | 7.781970364 | 6.956172438 | 7.061510478 | 2.416373016 | 12.89150255 |
| ENSMUSG0000083161 | 12.02668147 | 10.43425866 | 14.12302096 | 16.10915344 | 16.47247549 |
| ENSMUSG0000083162 | 2.122355554 | 0.695617244 | 1.412302096 | 0           | 2.148583759 |
| ENSMUSG0000083163 | 3.537259256 | 8.347406925 | 2.824604191 | 4.02728836  | 1.432389173 |
| ENSMUSG0000083165 | 88.43148141 | 136.3409798 | 121.4579802 | 38.66196826 | 37.24211849 |
| ENSMUSG0000083166 | 4.952162959 | 2.782468975 | 5.649208382 | 6.443661377 | 4.297167518 |
| ENSMUSG0000083167 | 11.31922962 | 9.738641413 | 8.473812573 | 2.416373016 | 8.594335036 |
| ENSMUSG0000083168 | 9.904325918 | 6.260555194 | 8.473812573 | 6.443661377 | 7.161945863 |
| ENSMUSG0000083169 | 11.31922962 | 5.56493795  | 7.767661525 | 11.27640741 | 8.594335036 |
| ENSMUSG0000083170 | 9.904325918 | 6.260555194 | 5.649208382 | 8.860034393 | 11.45911338 |
| ENSMUSG0000083171 | 10.61177777 | 9.043024169 | 3.530755239 | 6.443661377 | 7.161945863 |
| ENSMUSG0000083172 | 9.196874066 | 14.60796212 | 4.943057334 | 11.27640741 | 7.161945863 |
| ENSMUSG0000083173 | 7.781970364 | 9.738641413 | 7.061510478 | 7.249119049 | 12.17530797 |
| ENSMUSG0000083174 | 4.952162959 | 4.869320706 | 2.118453143 | 1.610915344 | 2.864778345 |
| ENSMUSG0000083175 | 10.61177777 | 7.651789682 | 7.061510478 | 4.832746033 | 7.87814045  |
| ENSMUSG0000083176 | 0           | 0           | 0           | 1.610915344 | 0           |
| ENSMUSG0000083177 | 7.781970364 | 3.478086219 | 3.530755239 | 0           | 3.580972932 |
| ENSMUSG0000083178 | 16.97884443 | 21.56413456 | 16.94762515 | 16.10915344 | 11.45911338 |
| ENSMUSG0000083179 | 13.44158517 | 6.956172438 | 5.649208382 | 4.832746033 | 8.594335036 |
| ENSMUSG0000083180 | 6.367066661 | 4.869320706 | 7.767661525 | 4.02728836  | 2.864778345 |
| ENSMUSG0000083181 | 6.367066661 | 6.956172438 | 9.886114669 | 6.443661377 | 6.445751277 |
| ENSMUSG0000083182 | 9.904325918 | 9.738641413 | 7.767661525 | 11.27640741 | 10.02672421 |
| ENSMUSG0000083183 | 6.367066661 | 4.173703463 | 12.00456781 | 4.832746033 | 7.161945863 |
| ENSMUSG0000083184 | 13.44158517 | 10.43425866 | 9.886114669 | 7.249119049 | 10.02672421 |
| ENSMUSG0000083185 | 8.489422215 | 8.347406925 | 9.179963621 | 3.221830688 | 1.432389173 |
| ENSMUSG0000083186 | 333.9172738 | 379.8070151 | 285.9911743 | 248.8864207 | 164.7247549 |
| ENSMUSG0000083188 | 9.196874066 | 6.956172438 | 4.943057334 | 6.443661377 | 3.580972932 |
| ENSMUSG0000083190 | 14.85648888 | 10.43425866 | 9.886114669 | 7.249119049 | 11.45911338 |
| ENSMUSG0000083191 | 9.904325918 | 6.956172438 | 5.649208382 | 9.665492065 | 10.7429188  |
| ENSMUSG0000083192 | 11.31922962 | 9.738641413 | 5.649208382 | 9.665492065 | 7.87814045  |
| ENSMUSG0000083195 | 11.31922962 | 9.043024169 | 7.061510478 | 6.443661377 | 6.445751277 |
| ENSMUSG0000083196 | 14.85648888 | 9.043024169 | 9.179963621 | 5.638203705 | 5.729556691 |
| ENSMUSG0000083197 | 9.904325918 | 5.56493795  | 7.061510478 | 4.832746033 | 4.297167518 |
| ENSMUSG0000083199 | 9.196874066 | 5.56493795  | 3.530755239 | 5.638203705 | 6.445751277 |
| ENSMUSG0000083200 | 4.244711108 | 6.956172438 | 11.29841676 | 7.249119049 | 3.580972932 |
| ENSMUSG0000083201 | 9.196874066 | 4.869320706 | 11.29841676 | 4.832746033 | 7.87814045  |
| ENSMUSG0000083202 | 12.73413332 | 9.738641413 | 5.649208382 | 7.249119049 | 7.161945863 |
| ENSMUSG0000083203 | 8.489422215 | 2.782468975 | 3.530755239 | 8.054576721 | 6.445751277 |
| ENSMUSG0000083204 | 10.61177777 | 5.56493795  | 7.767661525 | 9.665492065 | 11.45911338 |

|                   |             |             |             |             |             |
|-------------------|-------------|-------------|-------------|-------------|-------------|
| ENSMUSG0000083205 | 7.074518513 | 4.173703463 | 2.824604191 | 3.221830688 | 5.013362104 |
| ENSMUSG0000083206 | 7.781970364 | 6.956172438 | 8.473812573 | 6.443661377 | 10.7429188  |
| ENSMUSG0000083207 | 4.952162959 | 9.043024169 | 13.41686991 | 12.88732275 | 10.02672421 |
| ENSMUSG0000083208 | 72.86754068 | 135.6453625 | 115.8087718 | 85.37851324 | 85.22715578 |
| ENSMUSG0000083209 | 137.2456591 | 202.4246179 | 170.8885536 | 200.5589604 | 141.0903335 |
| ENSMUSG0000083210 | 60.13340736 | 68.86610713 | 58.61053696 | 32.21830688 | 45.12025894 |
| ENSMUSG0000083211 | 9.196874066 | 7.651789682 | 9.886114669 | 7.249119049 | 7.161945863 |
| ENSMUSG0000083212 | 10.61177777 | 7.651789682 | 7.061510478 | 9.665492065 | 9.310529622 |
| ENSMUSG0000083213 | 8.489422215 | 4.173703463 | 4.943057334 | 1.610915344 | 6.445751277 |
| ENSMUSG0000083214 | 8.489422215 | 7.651789682 | 9.179963621 | 6.443661377 | 2.148583759 |
| ENSMUSG0000083215 | 0           | 0           | 0           | 0           | 0           |
| ENSMUSG0000083216 | 7.781970364 | 9.043024169 | 8.473812573 | 4.832746033 | 5.729556691 |
| ENSMUSG0000083218 | 7.074518513 | 6.260555194 | 4.236906287 | 4.832746033 | 7.87814045  |
| ENSMUSG0000083219 | 4.244711108 | 2.086851731 | 2.824604191 | 4.02728836  | 1.432389173 |
| ENSMUSG0000083220 | 8.489422215 | 6.956172438 | 5.649208382 | 8.054576721 | 8.594335036 |
| ENSMUSG0000083221 | 8.489422215 | 8.347406925 | 6.35535943  | 6.443661377 | 6.445751277 |
| ENSMUSG0000083222 | 12.73413332 | 11.1298759  | 14.829172   | 11.27640741 | 10.02672421 |
| ENSMUSG0000083223 | 6.367066661 | 5.56493795  | 3.530755239 | 4.02728836  | 2.864778345 |
| ENSMUSG0000083224 | 7.781970364 | 7.651789682 | 7.061510478 | 4.02728836  | 2.864778345 |
| ENSMUSG0000083225 | 4.952162959 | 3.478086219 | 2.824604191 | 1.610915344 | 0           |
| ENSMUSG0000083226 | 7.781970364 | 6.260555194 | 7.061510478 | 10.47094974 | 7.87814045  |
| ENSMUSG0000083227 | 9.904325918 | 6.260555194 | 7.061510478 | 6.443661377 | 10.7429188  |
| ENSMUSG0000083228 | 9.196874066 | 4.869320706 | 6.35535943  | 4.02728836  | 6.445751277 |
| ENSMUSG0000083229 | 3.537259256 | 7.651789682 | 6.35535943  | 4.02728836  | 6.445751277 |
| ENSMUSG0000083230 | 9.904325918 | 4.869320706 | 5.649208382 | 5.638203705 | 8.594335036 |
| ENSMUSG0000083231 | 3.537259256 | 9.043024169 | 5.649208382 | 3.221830688 | 6.445751277 |
| ENSMUSG0000083232 | 12.73413332 | 7.651789682 | 6.35535943  | 4.832746033 | 5.013362104 |
| ENSMUSG0000083233 | 13.44158517 | 17.39043109 | 14.12302096 | 16.10915344 | 13.60769714 |
| ENSMUSG0000083234 | 7.781970364 | 6.956172438 | 7.061510478 | 8.860034393 | 8.594335036 |
| ENSMUSG0000083235 | 31.83533331 | 27.12907251 | 28.95219296 | 20.94189947 | 28.64778345 |
| ENSMUSG0000083236 | 4.952162959 | 1.391234488 | 2.824604191 | 3.221830688 | 4.297167518 |
| ENSMUSG0000083237 | 10.61177777 | 10.43425866 | 10.59226572 | 7.249119049 | 6.445751277 |
| ENSMUSG0000083238 | 6.367066661 | 9.738641413 | 7.061510478 | 7.249119049 | 5.729556691 |
| ENSMUSG0000083239 | 9.196874066 | 6.260555194 | 5.649208382 | 6.443661377 | 5.013362104 |
| ENSMUSG0000083240 | 5.65961481  | 4.869320706 | 9.179963621 | 7.249119049 | 5.729556691 |
| ENSMUSG0000083241 | 8.489422215 | 5.56493795  | 9.179963621 | 5.638203705 | 11.45911338 |
| ENSMUSG0000083242 | 9.904325918 | 4.869320706 | 7.767661525 | 4.832746033 | 7.87814045  |
| ENSMUSG0000083243 | 2.122355554 | 6.956172438 | 5.649208382 | 3.221830688 | 0.716194586 |
| ENSMUSG0000083244 | 18.39374813 | 34.08524495 | 26.12758877 | 11.27640741 | 14.32389173 |
| ENSMUSG0000083245 | 7.074518513 | 8.347406925 | 8.473812573 | 9.665492065 | 7.87814045  |
| ENSMUSG0000083246 | 7.781970364 | 7.651789682 | 10.59226572 | 10.47094974 | 13.60769714 |
| ENSMUSG0000083248 | 7.074518513 | 7.651789682 | 7.061510478 | 5.638203705 | 10.02672421 |
| ENSMUSG0000083249 | 7.781970364 | 4.869320706 | 8.473812573 | 4.02728836  | 4.297167518 |

|                   |             |             |             |             |             |
|-------------------|-------------|-------------|-------------|-------------|-------------|
| ENSMUSG0000083250 | 5.65961481  | 5.56493795  | 4.943057334 | 0.805457672 | 2.864778345 |
| ENSMUSG0000083251 | 8.489422215 | 4.869320706 | 7.061510478 | 7.249119049 | 10.02672421 |
| ENSMUSG0000083252 | 7.074518513 | 7.651789682 | 10.59226572 | 8.860034393 | 5.013362104 |
| ENSMUSG0000083253 | 2.122355554 | 4.173703463 | 1.412302096 | 4.02728836  | 1.432389173 |
| ENSMUSG0000083254 | 11.31922962 | 9.738641413 | 9.179963621 | 6.443661377 | 6.445751277 |
| ENSMUSG0000083255 | 8.489422215 | 10.43425866 | 12.00456781 | 3.221830688 | 12.89150255 |
| ENSMUSG0000083256 | 4.952162959 | 2.782468975 | 3.530755239 | 1.610915344 | 5.013362104 |
| ENSMUSG0000083257 | 11.31922962 | 7.651789682 | 7.767661525 | 2.416373016 | 5.013362104 |
| ENSMUSG0000083258 | 4.244711108 | 9.043024169 | 4.943057334 | 5.638203705 | 5.013362104 |
| ENSMUSG0000083260 | 10.61177777 | 5.56493795  | 9.179963621 | 3.221830688 | 2.864778345 |
| ENSMUSG0000083261 | 18.39374813 | 12.52111039 | 13.41686991 | 21.74735715 | 25.06681052 |
| ENSMUSG0000083262 | 3.537259256 | 3.478086219 | 1.412302096 | 3.221830688 | 0.716194586 |
| ENSMUSG0000083263 | 2.829807405 | 3.478086219 | 7.061510478 | 1.610915344 | 4.297167518 |
| ENSMUSG0000083264 | 13.44158517 | 18.78166558 | 12.71071886 | 12.88732275 | 23.63442135 |
| ENSMUSG0000083266 | 16.97884443 | 15.30357936 | 14.12302096 | 6.443661377 | 17.18867007 |
| ENSMUSG0000083267 | 10.61177777 | 4.869320706 | 5.649208382 | 5.638203705 | 5.729556691 |
| ENSMUSG0000083268 | 6.367066661 | 11.82549314 | 12.71071886 | 6.443661377 | 11.45911338 |
| ENSMUSG0000083269 | 9.196874066 | 9.043024169 | 4.943057334 | 5.638203705 | 5.013362104 |
| ENSMUSG0000083270 | 8.489422215 | 6.956172438 | 7.767661525 | 4.02728836  | 7.87814045  |
| ENSMUSG0000083271 | 10.61177777 | 5.56493795  | 7.061510478 | 4.02728836  | 5.013362104 |
| ENSMUSG0000083272 | 7.781970364 | 5.56493795  | 8.473812573 | 8.860034393 | 4.297167518 |
| ENSMUSG0000083274 | 7.074518513 | 4.869320706 | 8.473812573 | 4.02728836  | 8.594335036 |
| ENSMUSG0000083275 | 4.952162959 | 3.478086219 | 4.943057334 | 0.805457672 | 2.864778345 |
| ENSMUSG0000083276 | 9.904325918 | 10.43425866 | 8.473812573 | 4.832746033 | 9.310529622 |
| ENSMUSG0000083277 | 12.02668147 | 9.043024169 | 5.649208382 | 8.860034393 | 15.04008631 |
| ENSMUSG0000083278 | 5.65961481  | 5.56493795  | 4.236906287 | 3.221830688 | 5.013362104 |
| ENSMUSG0000083279 | 2.122355554 | 3.478086219 | 3.530755239 | 1.610915344 | 0.716194586 |
| ENSMUSG0000083280 | 12.73413332 | 9.043024169 | 6.35535943  | 8.054576721 | 7.161945863 |
| ENSMUSG0000083281 | 4.244711108 | 6.956172438 | 7.061510478 | 3.221830688 | 7.161945863 |
| ENSMUSG0000083283 | 2.829807405 | 4.869320706 | 7.767661525 | 5.638203705 | 5.013362104 |
| ENSMUSG0000083284 | 15.56394073 | 9.043024169 | 8.473812573 | 5.638203705 | 5.013362104 |
| ENSMUSG0000083285 | 8.489422215 | 4.869320706 | 6.35535943  | 8.054576721 | 6.445751277 |
| ENSMUSG0000083287 | 7.074518513 | 9.738641413 | 7.767661525 | 13.69278043 | 9.310529622 |
| ENSMUSG0000083288 | 4.952162959 | 4.173703463 | 7.767661525 | 3.221830688 | 5.013362104 |
| ENSMUSG0000083289 | 8.489422215 | 8.347406925 | 10.59226572 | 2.416373016 | 4.297167518 |
| ENSMUSG0000083290 | 4.244711108 | 2.782468975 | 4.943057334 | 4.832746033 | 4.297167518 |
| ENSMUSG0000083291 | 7.781970364 | 6.260555194 | 9.179963621 | 5.638203705 | 7.87814045  |
| ENSMUSG0000083292 | 7.074518513 | 6.956172438 | 7.767661525 | 10.47094974 | 4.297167518 |
| ENSMUSG0000083293 | 11.31922962 | 8.347406925 | 11.29841676 | 8.054576721 | 8.594335036 |
| ENSMUSG0000083294 | 3.537259256 | 3.478086219 | 3.530755239 | 3.221830688 | 2.148583759 |
| ENSMUSG0000083296 | 11.31922962 | 8.347406925 | 10.59226572 | 4.02728836  | 7.87814045  |
| ENSMUSG0000083297 | 7.781970364 | 4.173703463 | 7.061510478 | 4.02728836  | 5.013362104 |
| ENSMUSG0000083298 | 9.904325918 | 9.043024169 | 4.943057334 | 4.832746033 | 4.297167518 |

|                   |             |             |             |             |             |
|-------------------|-------------|-------------|-------------|-------------|-------------|
| ENSMUSG0000083299 | 5.65961481  | 4.173703463 | 6.35535943  | 3.221830688 | 7.87814045  |
| ENSMUSG0000083300 | 4.244711108 | 6.260555194 | 2.824604191 | 4.832746033 | 7.87814045  |
| ENSMUSG0000083303 | 4.244711108 | 8.347406925 | 5.649208382 | 5.638203705 | 12.89150255 |
| ENSMUSG0000083304 | 18.39374813 | 10.43425866 | 12.00456781 | 7.249119049 | 11.45911338 |
| ENSMUSG0000083305 | 8.489422215 | 4.173703463 | 11.29841676 | 7.249119049 | 5.013362104 |
| ENSMUSG0000083306 | 34.66514071 | 54.95376226 | 37.42600553 | 45.91108731 | 50.84981563 |
| ENSMUSG0000083307 | 6.367066661 | 6.260555194 | 5.649208382 | 5.638203705 | 5.013362104 |
| ENSMUSG0000083309 | 6.367066661 | 6.956172438 | 9.179963621 | 10.47094974 | 5.729556691 |
| ENSMUSG0000083310 | 3.537259256 | 6.260555194 | 4.236906287 | 2.416373016 | 4.297167518 |
| ENSMUSG0000083311 | 8.489422215 | 11.1298759  | 13.41686991 | 18.52552646 | 12.89150255 |
| ENSMUSG0000083312 | 9.904325918 | 11.1298759  | 9.179963621 | 6.443661377 | 5.013362104 |
| ENSMUSG0000083314 | 49.52162959 | 54.25814501 | 57.19823487 | 45.10562964 | 55.86317773 |
| ENSMUSG0000083315 | 9.904325918 | 11.1298759  | 11.29841676 | 2.416373016 | 5.729556691 |
| ENSMUSG0000083316 | 6.367066661 | 2.086851731 | 7.061510478 | 8.054576721 | 5.013362104 |
| ENSMUSG0000083317 | 9.904325918 | 6.956172438 | 9.886114669 | 5.638203705 | 7.87814045  |
| ENSMUSG0000083318 | 7.781970364 | 4.173703463 | 3.530755239 | 2.416373016 | 5.013362104 |
| ENSMUSG0000083319 | 12.73413332 | 6.260555194 | 7.767661525 | 7.249119049 | 6.445751277 |
| ENSMUSG0000083320 | 9.196874066 | 5.56493795  | 7.061510478 | 3.221830688 | 10.02672421 |
| ENSMUSG0000083321 | 2.829807405 | 6.260555194 | 3.530755239 | 1.610915344 | 5.013362104 |
| ENSMUSG0000083324 | 6.367066661 | 2.782468975 | 3.530755239 | 3.221830688 | 3.580972932 |
| ENSMUSG0000083325 | 11.31922962 | 11.1298759  | 15.53532305 | 8.054576721 | 8.594335036 |
| ENSMUSG0000083326 | 7.781970364 | 4.869320706 | 4.236906287 | 7.249119049 | 10.7429188  |
| ENSMUSG0000083327 | 38.90985182 | 73.0398106  | 69.90895373 | 48.32746033 | 63.0251236  |
| ENSMUSG0000083328 | 11.31922962 | 10.43425866 | 9.886114669 | 5.638203705 | 10.7429188  |
| ENSMUSG0000083329 | 8.489422215 | 8.347406925 | 4.943057334 | 5.638203705 | 6.445751277 |
| ENSMUSG0000083330 | 9.904325918 | 4.173703463 | 4.943057334 | 4.832746033 | 8.594335036 |
| ENSMUSG0000083331 | 9.904325918 | 4.869320706 | 12.00456781 | 9.665492065 | 5.013362104 |
| ENSMUSG0000083332 | 4.244711108 | 7.651789682 | 9.179963621 | 2.416373016 | 7.87814045  |
| ENSMUSG0000083333 | 4.952162959 | 4.173703463 | 3.530755239 | 3.221830688 | 2.864778345 |
| ENSMUSG0000083334 | 9.196874066 | 2.086851731 | 8.473812573 | 4.02728836  | 3.580972932 |
| ENSMUSG0000083335 | 2.829807405 | 3.478086219 | 3.530755239 | 4.02728836  | 4.297167518 |
| ENSMUSG0000083336 | 7.074518513 | 11.1298759  | 4.943057334 | 6.443661377 | 8.594335036 |
| ENSMUSG0000083337 | 4.952162959 | 4.869320706 | 6.35535943  | 8.054576721 | 7.87814045  |
| ENSMUSG0000083338 | 10.61177777 | 6.260555194 | 7.767661525 | 4.02728836  | 9.310529622 |
| ENSMUSG0000083339 | 154.9319554 | 207.9895559 | 204.7838039 | 248.8864207 | 210.5612084 |
| ENSMUSG0000083340 | 14.85648888 | 22.2597518  | 30.36449505 | 28.19101852 | 24.35061594 |
| ENSMUSG0000083341 | 7.781970364 | 10.43425866 | 4.236906287 | 4.832746033 | 10.02672421 |
| ENSMUSG0000083342 | 9.904325918 | 9.043024169 | 5.649208382 | 10.47094974 | 7.87814045  |
| ENSMUSG0000083343 | 5.65961481  | 2.086851731 | 2.824604191 | 6.443661377 | 0.716194586 |
| ENSMUSG0000083344 | 11.31922962 | 5.56493795  | 7.061510478 | 8.054576721 | 13.60769714 |
| ENSMUSG0000083345 | 4.952162959 | 4.173703463 | 2.824604191 | 1.610915344 | 1.432389173 |
| ENSMUSG0000083346 | 3.537259256 | 1.391234488 | 7.061510478 | 2.416373016 | 3.580972932 |
| ENSMUSG0000083347 | 9.196874066 | 10.43425866 | 8.473812573 | 4.832746033 | 7.161945863 |

|                   |             |             |             |             |             |
|-------------------|-------------|-------------|-------------|-------------|-------------|
| ENSMUSG0000083348 | 7.781970364 | 8.347406925 | 7.061510478 | 5.638203705 | 7.87814045  |
| ENSMUSG0000083350 | 4.952162959 | 6.260555194 | 4.943057334 | 3.221830688 | 4.297167518 |
| ENSMUSG0000083351 | 5.65961481  | 3.478086219 | 7.061510478 | 4.02728836  | 4.297167518 |
| ENSMUSG0000083352 | 4.244711108 | 1.391234488 | 2.824604191 | 1.610915344 | 2.148583759 |
| ENSMUSG0000083353 | 14.14903703 | 9.043024169 | 6.35535943  | 6.443661377 | 12.17530797 |
| ENSMUSG0000083355 | 8.489422215 | 6.260555194 | 9.179963621 | 2.416373016 | 8.594335036 |
| ENSMUSG0000083356 | 8.489422215 | 9.738641413 | 7.061510478 | 4.832746033 | 8.594335036 |
| ENSMUSG0000083358 | 9.196874066 | 6.956172438 | 7.061510478 | 3.221830688 | 6.445751277 |
| ENSMUSG0000083359 | 12.02668147 | 12.52111039 | 10.59226572 | 8.054576721 | 13.60769714 |
| ENSMUSG0000083360 | 12.73413332 | 6.956172438 | 10.59226572 | 5.638203705 | 8.594335036 |
| ENSMUSG0000083362 | 6.367066661 | 6.956172438 | 9.179963621 | 4.832746033 | 5.013362104 |
| ENSMUSG0000083363 | 13.44158517 | 7.651789682 | 9.886114669 | 7.249119049 | 8.594335036 |
| ENSMUSG0000083364 | 4.244711108 | 4.173703463 | 5.649208382 | 11.27640741 | 9.310529622 |
| ENSMUSG0000083365 | 22.63845924 | 12.52111039 | 9.886114669 | 12.08186508 | 15.04008631 |
| ENSMUSG0000083366 | 2.122355554 | 1.391234488 | 2.824604191 | 0.805457672 | 6.445751277 |
| ENSMUSG0000083367 | 4.952162959 | 4.173703463 | 2.824604191 | 1.610915344 | 4.297167518 |
| ENSMUSG0000083368 | 5.65961481  | 9.738641413 | 8.473812573 | 8.054576721 | 7.161945863 |
| ENSMUSG0000083369 | 11.31922962 | 9.738641413 | 7.061510478 | 7.249119049 | 8.594335036 |
| ENSMUSG0000083371 | 7.781970364 | 10.43425866 | 3.530755239 | 4.832746033 | 4.297167518 |
| ENSMUSG0000083372 | 10.61177777 | 7.651789682 | 10.59226572 | 6.443661377 | 7.161945863 |
| ENSMUSG0000083373 | 9.904325918 | 8.347406925 | 10.59226572 | 6.443661377 | 7.87814045  |
| ENSMUSG0000083374 | 9.904325918 | 10.43425866 | 10.59226572 | 4.02728836  | 8.594335036 |
| ENSMUSG0000083375 | 5.65961481  | 4.173703463 | 2.118453143 | 0.805457672 | 3.580972932 |
| ENSMUSG0000083376 | 6.367066661 | 4.173703463 | 9.886114669 | 2.416373016 | 8.594335036 |
| ENSMUSG0000083377 | 13.44158517 | 6.956172438 | 4.943057334 | 6.443661377 | 5.013362104 |
| ENSMUSG0000083378 | 10.61177777 | 8.347406925 | 6.35535943  | 4.832746033 | 5.013362104 |
| ENSMUSG0000083379 | 4.952162959 | 8.347406925 | 3.530755239 | 4.02728836  | 2.864778345 |
| ENSMUSG0000083380 | 12.02668147 | 7.651789682 | 7.061510478 | 7.249119049 | 6.445751277 |
| ENSMUSG0000083381 | 7.781970364 | 9.738641413 | 10.59226572 | 6.443661377 | 6.445751277 |
| ENSMUSG0000083382 | 8.489422215 | 4.173703463 | 8.473812573 | 6.443661377 | 14.32389173 |
| ENSMUSG0000083383 | 5.65961481  | 6.956172438 | 8.473812573 | 4.832746033 | 7.87814045  |
| ENSMUSG0000083384 | 7.074518513 | 7.651789682 | 9.179963621 | 4.832746033 | 3.580972932 |
| ENSMUSG0000083385 | 9.904325918 | 8.347406925 | 8.473812573 | 3.221830688 | 2.864778345 |
| ENSMUSG0000083386 | 16.27139258 | 6.956172438 | 3.530755239 | 4.02728836  | 5.729556691 |
| ENSMUSG0000083387 | 8.489422215 | 7.651789682 | 9.886114669 | 5.638203705 | 5.729556691 |
| ENSMUSG0000083388 | 10.61177777 | 2.782468975 | 11.29841676 | 4.02728836  | 7.87814045  |
| ENSMUSG0000083389 | 3.537259256 | 6.956172438 | 7.767661525 | 7.249119049 | 10.02672421 |
| ENSMUSG0000083390 | 12.02668147 | 7.651789682 | 6.35535943  | 5.638203705 | 5.729556691 |
| ENSMUSG0000083391 | 7.781970364 | 9.738641413 | 11.29841676 | 8.054576721 | 6.445751277 |
| ENSMUSG0000083392 | 7.074518513 | 4.869320706 | 12.00456781 | 12.88732275 | 3.580972932 |
| ENSMUSG0000083393 | 3.537259256 | 4.173703463 | 3.530755239 | 2.416373016 | 5.013362104 |
| ENSMUSG0000083394 | 12.73413332 | 13.91234488 | 11.29841676 | 9.665492065 | 15.7562809  |
| ENSMUSG0000083395 | 9.904325918 | 11.1298759  | 9.179963621 | 7.249119049 | 7.161945863 |



|                   |             |             |             |             |             |
|-------------------|-------------|-------------|-------------|-------------|-------------|
| ENSMUSG0000083396 | 21.22355554 | 27.82468975 | 18.35992724 | 33.02376456 | 31.5125618  |
| ENSMUSG0000083397 | 7.074518513 | 6.260555194 | 7.061510478 | 7.249119049 | 12.89150255 |
| ENSMUSG0000083398 | 8.489422215 | 4.173703463 | 9.886114669 | 3.221830688 | 5.013362104 |
| ENSMUSG0000083399 | 5.65961481  | 3.478086219 | 4.943057334 | 2.416373016 | 2.864778345 |
| ENSMUSG0000083400 | 13.44158517 | 6.260555194 | 13.41686991 | 9.665492065 | 5.729556691 |
| ENSMUSG0000083401 | 3.537259256 | 6.956172438 | 6.35535943  | 7.249119049 | 8.594335036 |
| ENSMUSG0000083402 | 0           | 0           | 0           | 0           | 0           |
| ENSMUSG0000083403 | 12.02668147 | 3.478086219 | 7.061510478 | 5.638203705 | 7.161945863 |
| ENSMUSG0000083404 | 14.85648888 | 7.651789682 | 10.59226572 | 9.665492065 | 7.87814045  |
| ENSMUSG0000083405 | 18.39374813 | 32.69401046 | 31.77679715 | 45.10562964 | 42.97167518 |
| ENSMUSG0000083406 | 7.781970364 | 0           | 2.118453143 | 0           | 2.864778345 |
| ENSMUSG0000083407 | 9.904325918 | 7.651789682 | 7.767661525 | 6.443661377 | 7.87814045  |
| ENSMUSG0000083409 | 5.65961481  | 7.651789682 | 8.473812573 | 4.02728836  | 5.013362104 |
| ENSMUSG0000083410 | 11.31922962 | 13.21672763 | 18.35992724 | 12.08186508 | 14.32389173 |
| ENSMUSG0000083411 | 13.44158517 | 6.260555194 | 8.473812573 | 5.638203705 | 7.161945863 |
| ENSMUSG0000083412 | 8.489422215 | 4.869320706 | 9.179963621 | 4.02728836  | 8.594335036 |
| ENSMUSG0000083413 | 6.367066661 | 4.173703463 | 5.649208382 | 2.416373016 | 8.594335036 |
| ENSMUSG0000083414 | 2.829807405 | 3.478086219 | 3.530755239 | 1.610915344 | 4.297167518 |
| ENSMUSG0000083415 | 5.65961481  | 3.478086219 | 0.706151048 | 1.610915344 | 5.013362104 |
| ENSMUSG0000083416 | 0           | 0.695617244 | 0           | 0.805457672 | 0.716194586 |
| ENSMUSG0000083417 | 11.31922962 | 7.651789682 | 9.179963621 | 4.832746033 | 8.594335036 |
| ENSMUSG0000083418 | 11.31922962 | 13.21672763 | 9.886114669 | 5.638203705 | 7.87814045  |
| ENSMUSG0000083419 | 4.952162959 | 2.782468975 | 3.530755239 | 2.416373016 | 4.297167518 |
| ENSMUSG0000083420 | 9.196874066 | 4.869320706 | 4.943057334 | 7.249119049 | 7.87814045  |
| ENSMUSG0000083421 | 3.537259256 | 10.43425866 | 6.35535943  | 5.638203705 | 4.297167518 |
| ENSMUSG0000083422 | 0           | 0           | 0           | 0           | 0.716194586 |
| ENSMUSG0000083423 | 7.781970364 | 8.347406925 | 5.649208382 | 3.221830688 | 6.445751277 |
| ENSMUSG0000083424 | 7.074518513 | 7.651789682 | 10.59226572 | 9.665492065 | 7.161945863 |
| ENSMUSG0000083425 | 8.489422215 | 5.56493795  | 10.59226572 | 2.416373016 | 7.87814045  |
| ENSMUSG0000083427 | 8.489422215 | 4.173703463 | 8.473812573 | 7.249119049 | 6.445751277 |
| ENSMUSG0000083428 | 2.122355554 | 4.173703463 | 4.236906287 | 2.416373016 | 2.148583759 |
| ENSMUSG0000083429 | 7.074518513 | 15.99919661 | 10.59226572 | 9.665492065 | 12.89150255 |
| ENSMUSG0000083430 | 54.47379255 | 75.82227957 | 60.02283906 | 19.33098413 | 35.09353473 |
| ENSMUSG0000083431 | 6.367066661 | 7.651789682 | 4.236906287 | 5.638203705 | 5.013362104 |
| ENSMUSG0000083432 | 0           | 0.695617244 | 0           | 0           | 0           |
| ENSMUSG0000083433 | 7.781970364 | 5.56493795  | 6.35535943  | 8.054576721 | 5.729556691 |
| ENSMUSG0000083434 | 13.44158517 | 6.260555194 | 9.179963621 | 11.27640741 | 9.310529622 |
| ENSMUSG0000083435 | 77.81970364 | 116.863697  | 105.2165061 | 69.2693598  | 85.94335036 |
| ENSMUSG0000083436 | 7.781970364 | 6.956172438 | 9.886114669 | 8.860034393 | 9.310529622 |
| ENSMUSG0000083437 | 11.31922962 | 8.347406925 | 6.35535943  | 3.221830688 | 2.148583759 |
| ENSMUSG0000083438 | 6.367066661 | 3.478086219 | 4.236906287 | 4.02728836  | 3.580972932 |
| ENSMUSG0000083439 | 3.537259256 | 3.478086219 | 6.35535943  | 0.805457672 | 3.580972932 |
| ENSMUSG0000083440 | 0.707451851 | 0           | 0           | 0           | 0.716194586 |

|                   |             |             |             |             |             |
|-------------------|-------------|-------------|-------------|-------------|-------------|
| ENSMUSG0000083441 | 4.244711108 | 5.56493795  | 8.473812573 | 8.054576721 | 7.161945863 |
| ENSMUSG0000083442 | 6.367066661 | 7.651789682 | 6.35535943  | 9.665492065 | 6.445751277 |
| ENSMUSG0000083443 | 8.489422215 | 11.82549314 | 5.649208382 | 9.665492065 | 10.02672421 |
| ENSMUSG0000083444 | 4.244711108 | 4.173703463 | 6.35535943  | 1.610915344 | 3.580972932 |
| ENSMUSG0000083445 | 8.489422215 | 12.52111039 | 11.29841676 | 12.88732275 | 11.45911338 |
| ENSMUSG0000083446 | 7.074518513 | 6.260555194 | 6.35535943  | 2.416373016 | 8.594335036 |
| ENSMUSG0000083447 | 9.196874066 | 4.869320706 | 5.649208382 | 4.02728836  | 4.297167518 |
| ENSMUSG0000083448 | 3.537259256 | 4.173703463 | 2.118453143 | 1.610915344 | 2.864778345 |
| ENSMUSG0000083449 | 0           | 2.086851731 | 3.530755239 | 0.805457672 | 2.864778345 |
| ENSMUSG0000083450 | 6.367066661 | 6.956172438 | 4.236906287 | 1.610915344 | 5.729556691 |
| ENSMUSG0000083451 | 11.31922962 | 2.086851731 | 3.530755239 | 6.443661377 | 5.729556691 |
| ENSMUSG0000083452 | 4.244711108 | 1.391234488 | 2.824604191 | 0           | 1.432389173 |
| ENSMUSG0000083453 | 2.829807405 | 6.260555194 | 7.061510478 | 7.249119049 | 7.87814045  |
| ENSMUSG0000083454 | 12.73413332 | 11.82549314 | 12.71071886 | 8.860034393 | 9.310529622 |
| ENSMUSG0000083455 | 4.244711108 | 9.043024169 | 9.179963621 | 5.638203705 | 4.297167518 |
| ENSMUSG0000083456 | 13.44158517 | 9.738641413 | 4.943057334 | 4.832746033 | 7.161945863 |
| ENSMUSG0000083457 | 15.56394073 | 2.782468975 | 7.767661525 | 7.249119049 | 5.013362104 |
| ENSMUSG0000083458 | 7.074518513 | 7.651789682 | 9.886114669 | 9.665492065 | 7.161945863 |
| ENSMUSG0000083460 | 12.02668147 | 2.782468975 | 3.530755239 | 4.832746033 | 9.310529622 |
| ENSMUSG0000083461 | 5.65961481  | 14.60796212 | 8.473812573 | 5.638203705 | 6.445751277 |
| ENSMUSG0000083462 | 5.65961481  | 7.651789682 | 7.767661525 | 4.02728836  | 10.7429188  |
| ENSMUSG0000083463 | 5.65961481  | 2.782468975 | 4.236906287 | 2.416373016 | 2.864778345 |
| ENSMUSG0000083465 | 5.65961481  | 4.869320706 | 6.35535943  | 6.443661377 | 6.445751277 |
| ENSMUSG0000083466 | 4.952162959 | 2.086851731 | 9.886114669 | 6.443661377 | 6.445751277 |
| ENSMUSG0000083467 | 9.196874066 | 15.30357936 | 4.236906287 | 8.054576721 | 3.580972932 |
| ENSMUSG0000083468 | 5.65961481  | 4.869320706 | 7.061510478 | 5.638203705 | 5.013362104 |
| ENSMUSG0000083469 | 8.489422215 | 10.43425866 | 5.649208382 | 2.416373016 | 4.297167518 |
| ENSMUSG0000083470 | 6.367066661 | 4.173703463 | 4.943057334 | 0.805457672 | 4.297167518 |
| ENSMUSG0000083471 | 8.489422215 | 6.956172438 | 4.943057334 | 5.638203705 | 5.013362104 |
| ENSMUSG0000083472 | 9.196874066 | 5.56493795  | 4.943057334 | 8.860034393 | 10.02672421 |
| ENSMUSG0000083473 | 30.4204296  | 47.99758982 | 38.13215658 | 35.44013757 | 42.97167518 |
| ENSMUSG0000083474 | 11.31922962 | 13.21672763 | 12.00456781 | 16.91461111 | 12.17530797 |
| ENSMUSG0000083475 | 7.781970364 | 6.260555194 | 4.943057334 | 4.02728836  | 3.580972932 |
| ENSMUSG0000083477 | 7.781970364 | 6.956172438 | 9.886114669 | 8.860034393 | 12.17530797 |
| ENSMUSG0000083478 | 4.952162959 | 5.56493795  | 4.943057334 | 2.416373016 | 4.297167518 |
| ENSMUSG0000083479 | 5.65961481  | 7.651789682 | 9.886114669 | 8.054576721 | 2.864778345 |
| ENSMUSG0000083481 | 6.367066661 | 4.869320706 | 9.179963621 | 6.443661377 | 5.013362104 |
| ENSMUSG0000083482 | 3.537259256 | 4.869320706 | 2.824604191 | 1.610915344 | 4.297167518 |
| ENSMUSG0000083483 | 9.904325918 | 6.956172438 | 6.35535943  | 6.443661377 | 7.161945863 |
| ENSMUSG0000083484 | 3.537259256 | 4.173703463 | 4.943057334 | 5.638203705 | 7.87814045  |
| ENSMUSG0000083485 | 0.707451851 | 0.695617244 | 0.706151048 | 2.416373016 | 0.716194586 |
| ENSMUSG0000083486 | 4.244711108 | 3.478086219 | 2.118453143 | 4.832746033 | 2.148583759 |
| ENSMUSG0000083487 | 8.489422215 | 3.478086219 | 6.35535943  | 7.249119049 | 9.310529622 |

|                   |             |             |             |             |             |
|-------------------|-------------|-------------|-------------|-------------|-------------|
| ENSMUSG0000083488 | 6.367066661 | 5.56493795  | 0.706151048 | 1.610915344 | 5.013362104 |
| ENSMUSG0000083489 | 8.489422215 | 8.347406925 | 9.886114669 | 5.638203705 | 5.013362104 |
| ENSMUSG0000083490 | 2.122355554 | 0.695617244 | 3.530755239 | 3.221830688 | 2.148583759 |
| ENSMUSG0000083491 | 7.781970364 | 3.478086219 | 7.061510478 | 4.02728836  | 10.02672421 |
| ENSMUSG0000083492 | 3.537259256 | 2.086851731 | 2.118453143 | 4.02728836  | 2.864778345 |
| ENSMUSG0000083493 | 2.829807405 | 2.086851731 | 2.824604191 | 1.610915344 | 1.432389173 |
| ENSMUSG0000083494 | 14.85648888 | 5.56493795  | 5.649208382 | 6.443661377 | 7.87814045  |
| ENSMUSG0000083495 | 10.61177777 | 8.347406925 | 8.473812573 | 4.02728836  | 7.87814045  |
| ENSMUSG0000083496 | 8.489422215 | 14.60796212 | 14.829172   | 9.665492065 | 10.7429188  |
| ENSMUSG0000083498 | 9.904325918 | 7.651789682 | 4.236906287 | 10.47094974 | 7.161945863 |
| ENSMUSG0000083499 | 8.489422215 | 5.56493795  | 3.530755239 | 2.416373016 | 4.297167518 |
| ENSMUSG0000083500 | 25.46826665 | 38.25894841 | 32.4829482  | 20.94189947 | 27.21539428 |
| ENSMUSG0000083501 | 4.952162959 | 6.260555194 | 3.530755239 | 6.443661377 | 4.297167518 |
| ENSMUSG0000083502 | 4.952162959 | 1.391234488 | 4.236906287 | 0.805457672 | 2.148583759 |
| ENSMUSG0000083503 | 61.54831106 | 86.25653823 | 79.7950684  | 65.24207144 | 88.80812871 |
| ENSMUSG0000083504 | 5.65961481  | 5.56493795  | 9.179963621 | 1.610915344 | 4.297167518 |
| ENSMUSG0000083505 | 0.707451851 | 0           | 1.412302096 | 0.805457672 | 0           |
| ENSMUSG0000083507 | 9.196874066 | 4.173703463 | 6.35535943  | 4.832746033 | 9.310529622 |
| ENSMUSG0000083508 | 1.414903703 | 4.173703463 | 9.886114669 | 4.02728836  | 2.148583759 |
| ENSMUSG0000083509 | 8.489422215 | 6.956172438 | 7.061510478 | 4.02728836  | 7.161945863 |
| ENSMUSG0000083510 | 7.781970364 | 11.82549314 | 5.649208382 | 6.443661377 | 9.310529622 |
| ENSMUSG0000083512 | 9.904325918 | 12.52111039 | 10.59226572 | 7.249119049 | 13.60769714 |
| ENSMUSG0000083513 | 7.074518513 | 8.347406925 | 4.943057334 | 7.249119049 | 5.013362104 |
| ENSMUSG0000083514 | 5.65961481  | 3.478086219 | 9.179963621 | 5.638203705 | 7.87814045  |
| ENSMUSG0000083515 | 2.829807405 | 3.478086219 | 4.236906287 | 3.221830688 | 5.013362104 |
| ENSMUSG0000083516 | 7.781970364 | 2.086851731 | 6.35535943  | 0.805457672 | 2.148583759 |
| ENSMUSG0000083517 | 3.537259256 | 3.478086219 | 5.649208382 | 4.832746033 | 5.013362104 |
| ENSMUSG0000083518 | 2.122355554 | 4.869320706 | 3.530755239 | 4.02728836  | 6.445751277 |
| ENSMUSG0000083519 | 12.02668147 | 11.1298759  | 6.35535943  | 3.221830688 | 3.580972932 |
| ENSMUSG0000083520 | 3.537259256 | 4.173703463 | 2.118453143 | 1.610915344 | 3.580972932 |
| ENSMUSG0000083521 | 7.781970364 | 8.347406925 | 9.179963621 | 4.832746033 | 7.87814045  |
| ENSMUSG0000083522 | 4.952162959 | 6.260555194 | 11.29841676 | 10.47094974 | 7.87814045  |
| ENSMUSG0000083524 | 12.73413332 | 6.260555194 | 8.473812573 | 8.860034393 | 10.02672421 |
| ENSMUSG0000083527 | 14.14903703 | 7.651789682 | 8.473812573 | 3.221830688 | 9.310529622 |
| ENSMUSG0000083528 | 18.39374813 | 24.34660353 | 16.2414741  | 12.08186508 | 11.45911338 |
| ENSMUSG0000083529 | 6.367066661 | 5.56493795  | 4.236906287 | 6.443661377 | 7.161945863 |
| ENSMUSG0000083530 | 10.61177777 | 6.260555194 | 7.061510478 | 4.02728836  | 9.310529622 |
| ENSMUSG0000083533 | 12.02668147 | 17.39043109 | 13.41686991 | 41.07834128 | 40.10689684 |
| ENSMUSG0000083534 | 9.196874066 | 6.260555194 | 4.236906287 | 4.832746033 | 7.161945863 |
| ENSMUSG0000083535 | 9.196874066 | 2.086851731 | 4.943057334 | 1.610915344 | 3.580972932 |
| ENSMUSG0000083536 | 10.61177777 | 5.56493795  | 9.886114669 | 5.638203705 | 6.445751277 |
| ENSMUSG0000083537 | 10.61177777 | 5.56493795  | 3.530755239 | 2.416373016 | 6.445751277 |
| ENSMUSG0000083538 | 6.367066661 | 6.956172438 | 10.59226572 | 9.665492065 | 11.45911338 |

|                   |             |             |             |             |             |
|-------------------|-------------|-------------|-------------|-------------|-------------|
| ENSMUSG0000083539 | 1.414903703 | 0.695617244 | 2.118453143 | 0           | 0.716194586 |
| ENSMUSG0000083541 | 8.489422215 | 10.43425866 | 7.767661525 | 4.832746033 | 8.594335036 |
| ENSMUSG0000083542 | 8.489422215 | 4.869320706 | 9.179963621 | 5.638203705 | 10.02672421 |
| ENSMUSG0000083543 | 1.414903703 | 4.173703463 | 6.35535943  | 4.02728836  | 2.864778345 |
| ENSMUSG0000083544 | 2.829807405 | 4.173703463 | 2.118453143 | 4.832746033 | 2.148583759 |
| ENSMUSG0000083545 | 6.367066661 | 8.347406925 | 12.71071886 | 8.054576721 | 6.445751277 |
| ENSMUSG0000083546 | 8.489422215 | 7.651789682 | 6.35535943  | 4.832746033 | 10.02672421 |
| ENSMUSG0000083547 | 4.244711108 | 6.260555194 | 4.943057334 | 7.249119049 | 5.013362104 |
| ENSMUSG0000083548 | 16.97884443 | 13.21672763 | 9.179963621 | 13.69278043 | 12.89150255 |
| ENSMUSG0000083549 | 9.904325918 | 8.347406925 | 7.767661525 | 5.638203705 | 7.161945863 |
| ENSMUSG0000083550 | 9.196874066 | 10.43425866 | 4.943057334 | 6.443661377 | 7.161945863 |
| ENSMUSG0000083551 | 0.707451851 | 1.391234488 | 4.236906287 | 4.02728836  | 4.297167518 |
| ENSMUSG0000083552 | 9.196874066 | 4.869320706 | 7.767661525 | 4.832746033 | 5.013362104 |
| ENSMUSG0000083553 | 13.44158517 | 6.260555194 | 12.00456781 | 9.665492065 | 4.297167518 |
| ENSMUSG0000083554 | 3.537259256 | 4.173703463 | 5.649208382 | 3.221830688 | 4.297167518 |
| ENSMUSG0000083555 | 20.51610369 | 29.21592424 | 16.2414741  | 17.72006879 | 14.32389173 |
| ENSMUSG0000083556 | 7.781970364 | 4.869320706 | 1.412302096 | 3.221830688 | 2.864778345 |
| ENSMUSG0000083557 | 9.904325918 | 8.347406925 | 7.767661525 | 6.443661377 | 9.310529622 |
| ENSMUSG0000083558 | 14.14903703 | 10.43425866 | 14.12302096 | 9.665492065 | 10.02672421 |
| ENSMUSG0000083560 | 6.367066661 | 2.086851731 | 2.824604191 | 6.443661377 | 1.432389173 |
| ENSMUSG0000083561 | 9.196874066 | 10.43425866 | 5.649208382 | 5.638203705 | 5.013362104 |
| ENSMUSG0000083562 | 19.10119998 | 19.47728283 | 10.59226572 | 12.08186508 | 11.45911338 |
| ENSMUSG0000083563 | 0           | 0           | 0           | 0           | 0           |
| ENSMUSG0000083564 | 11.31922962 | 11.82549314 | 10.59226572 | 13.69278043 | 14.32389173 |
| ENSMUSG0000083565 | 9.196874066 | 2.782468975 | 4.943057334 | 3.221830688 | 7.161945863 |
| ENSMUSG0000083566 | 2.122355554 | 6.956172438 | 5.649208382 | 2.416373016 | 7.161945863 |
| ENSMUSG0000083567 | 11.31922962 | 6.956172438 | 7.767661525 | 8.054576721 | 7.161945863 |
| ENSMUSG0000083568 | 9.904325918 | 6.956172438 | 5.649208382 | 5.638203705 | 10.02672421 |
| ENSMUSG0000083569 | 7.781970364 | 9.738641413 | 7.061510478 | 5.638203705 | 13.60769714 |
| ENSMUSG0000083570 | 1.414903703 | 1.391234488 | 2.118453143 | 0.805457672 | 2.148583759 |
| ENSMUSG0000083572 | 8.489422215 | 8.347406925 | 3.530755239 | 4.832746033 | 5.013362104 |
| ENSMUSG0000083573 | 4.244711108 | 6.260555194 | 8.473812573 | 4.02728836  | 2.864778345 |
| ENSMUSG0000083574 | 9.904325918 | 4.173703463 | 12.71071886 | 8.054576721 | 5.729556691 |
| ENSMUSG0000083576 | 5.65961481  | 2.086851731 | 5.649208382 | 4.02728836  | 0           |
| ENSMUSG0000083577 | 4.952162959 | 2.086851731 | 5.649208382 | 4.832746033 | 4.297167518 |
| ENSMUSG0000083578 | 14.14903703 | 8.347406925 | 9.179963621 | 4.02728836  | 6.445751277 |
| ENSMUSG0000083579 | 0.707451851 | 1.391234488 | 1.412302096 | 0.805457672 | 4.297167518 |
| ENSMUSG0000083580 | 7.074518513 | 4.869320706 | 4.943057334 | 8.860034393 | 4.297167518 |
| ENSMUSG0000083581 | 10.61177777 | 8.347406925 | 8.473812573 | 3.221830688 | 10.7429188  |
| ENSMUSG0000083582 | 5.65961481  | 8.347406925 | 9.179963621 | 10.47094974 | 5.013362104 |
| ENSMUSG0000083584 | 9.196874066 | 6.956172438 | 9.886114669 | 4.832746033 | 7.87814045  |
| ENSMUSG0000083585 | 14.85648888 | 12.52111039 | 10.59226572 | 16.10915344 | 15.7562809  |
| ENSMUSG0000083586 | 8.489422215 | 8.347406925 | 6.35535943  | 3.221830688 | 5.729556691 |

|                    |             |             |             |             |             |
|--------------------|-------------|-------------|-------------|-------------|-------------|
| ENSMUSG00000083587 | 4.244711108 | 6.260555194 | 5.649208382 | 2.416373016 | 2.148583759 |
| ENSMUSG00000083588 | 5.65961481  | 8.347406925 | 9.886114669 | 8.860034393 | 4.297167518 |
| ENSMUSG00000083589 | 7.781970364 | 7.651789682 | 12.00456781 | 4.832746033 | 5.013362104 |
| ENSMUSG00000083590 | 4.952162959 | 7.651789682 | 14.12302096 | 4.02728836  | 4.297167518 |
| ENSMUSG00000083592 | 16.27139258 | 3.478086219 | 6.35535943  | 6.443661377 | 7.161945863 |
| ENSMUSG00000083594 | 12.02668147 | 4.173703463 | 9.886114669 | 6.443661377 | 6.445751277 |
| ENSMUSG00000083595 | 4.952162959 | 4.173703463 | 4.236906287 | 1.610915344 | 5.729556691 |
| ENSMUSG00000083596 | 9.196874066 | 6.956172438 | 13.41686991 | 4.02728836  | 5.013362104 |
| ENSMUSG00000083597 | 6.367066661 | 5.56493795  | 2.118453143 | 3.221830688 | 5.013362104 |
| ENSMUSG00000083598 | 5.65961481  | 4.869320706 | 4.943057334 | 1.610915344 | 3.580972932 |
| ENSMUSG00000083599 | 13.44158517 | 4.869320706 | 5.649208382 | 4.02728836  | 7.87814045  |
| ENSMUSG00000083601 | 8.489422215 | 6.260555194 | 4.943057334 | 6.443661377 | 2.864778345 |
| ENSMUSG00000083602 | 3.537259256 | 5.56493795  | 3.530755239 | 2.416373016 | 2.148583759 |
| ENSMUSG00000083603 | 3.537259256 | 3.478086219 | 6.35535943  | 5.638203705 | 2.148583759 |
| ENSMUSG00000083605 | 5.65961481  | 4.869320706 | 2.118453143 | 2.416373016 | 2.864778345 |
| ENSMUSG00000083606 | 7.781970364 | 9.043024169 | 9.179963621 | 8.054576721 | 8.594335036 |
| ENSMUSG00000083607 | 3.537259256 | 2.782468975 | 1.412302096 | 4.02728836  | 2.864778345 |
| ENSMUSG00000083608 | 2.122355554 | 4.173703463 | 5.649208382 | 2.416373016 | 1.432389173 |
| ENSMUSG00000083609 | 29.71297775 | 42.43265187 | 43.07521391 | 14.4982381  | 32.94495097 |
| ENSMUSG00000083610 | 11.31922962 | 14.60796212 | 12.00456781 | 13.69278043 | 11.45911338 |
| ENSMUSG00000083611 | 5.65961481  | 5.56493795  | 4.236906287 | 3.221830688 | 4.297167518 |
| ENSMUSG00000083613 | 3.537259256 | 6.260555194 | 5.649208382 | 4.832746033 | 7.87814045  |
| ENSMUSG00000083614 | 10.61177777 | 16.69481385 | 12.00456781 | 8.054576721 | 10.7429188  |
| ENSMUSG00000083615 | 9.904325918 | 7.651789682 | 10.59226572 | 7.249119049 | 8.594335036 |
| ENSMUSG00000083616 | 4.244711108 | 2.782468975 | 6.35535943  | 3.221830688 | 3.580972932 |
| ENSMUSG00000083617 | 2.122355554 | 4.869320706 | 4.236906287 | 3.221830688 | 5.729556691 |
| ENSMUSG00000083618 | 6.367066661 | 4.173703463 | 3.530755239 | 4.02728836  | 7.161945863 |
| ENSMUSG00000083619 | 13.44158517 | 8.347406925 | 8.473812573 | 7.249119049 | 6.445751277 |
| ENSMUSG00000083620 | 10.61177777 | 10.43425866 | 6.35535943  | 4.02728836  | 5.729556691 |
| ENSMUSG00000083621 | 2.829807405 | 9.738641413 | 9.886114669 | 11.27640741 | 10.02672421 |
| ENSMUSG00000083622 | 4.952162959 | 7.651789682 | 2.118453143 | 8.054576721 | 7.161945863 |
| ENSMUSG00000083623 | 8.489422215 | 7.651789682 | 7.061510478 | 8.860034393 | 7.87814045  |
| ENSMUSG00000083624 | 5.65961481  | 5.56493795  | 8.473812573 | 4.832746033 | 7.87814045  |
| ENSMUSG00000083625 | 2.122355554 | 4.173703463 | 5.649208382 | 5.638203705 | 1.432389173 |
| ENSMUSG00000083626 | 11.31922962 | 10.43425866 | 12.71071886 | 12.08186508 | 7.87814045  |
| ENSMUSG00000083627 | 4.952162959 | 7.651789682 | 8.473812573 | 4.832746033 | 4.297167518 |
| ENSMUSG00000083629 | 10.61177777 | 8.347406925 | 6.35535943  | 4.02728836  | 6.445751277 |
| ENSMUSG00000083630 | 10.61177777 | 13.91234488 | 14.829172   | 10.47094974 | 9.310529622 |
| ENSMUSG00000083631 | 9.196874066 | 9.043024169 | 4.943057334 | 4.832746033 | 5.729556691 |
| ENSMUSG00000083632 | 8.489422215 | 6.260555194 | 10.59226572 | 4.02728836  | 6.445751277 |
| ENSMUSG00000083633 | 7.781970364 | 8.347406925 | 7.061510478 | 4.832746033 | 7.161945863 |
| ENSMUSG00000083635 | 0.707451851 | 1.391234488 | 0           | 0           | 0.716194586 |
| ENSMUSG00000083636 | 6.367066661 | 9.043024169 | 7.061510478 | 4.832746033 | 4.297167518 |

|                   |             |             |             |             |             |
|-------------------|-------------|-------------|-------------|-------------|-------------|
| ENSMUSG0000083637 | 4.244711108 | 4.173703463 | 4.943057334 | 0           | 2.864778345 |
| ENSMUSG0000083640 | 2.122355554 | 2.086851731 | 1.412302096 | 5.638203705 | 2.148583759 |
| ENSMUSG0000083641 | 6.367066661 | 4.869320706 | 6.35535943  | 4.02728836  | 3.580972932 |
| ENSMUSG0000083642 | 17.68629628 | 16.69481385 | 19.06607829 | 13.69278043 | 17.90486466 |
| ENSMUSG0000083643 | 8.489422215 | 8.347406925 | 15.53532305 | 13.69278043 | 6.445751277 |
| ENSMUSG0000083644 | 9.196874066 | 6.260555194 | 6.35535943  | 4.832746033 | 5.729556691 |
| ENSMUSG0000083645 | 5.65961481  | 9.043024169 | 8.473812573 | 4.02728836  | 3.580972932 |
| ENSMUSG0000083646 | 6.367066661 | 2.782468975 | 4.943057334 | 4.02728836  | 6.445751277 |
| ENSMUSG0000083648 | 16.97884443 | 9.043024169 | 4.236906287 | 7.249119049 | 11.45911338 |
| ENSMUSG0000083650 | 312.6937183 | 346.4173874 | 277.5173618 | 275.4665239 | 218.4393488 |
| ENSMUSG0000083651 | 5.65961481  | 4.869320706 | 9.179963621 | 10.47094974 | 10.02672421 |
| ENSMUSG0000083653 | 10.61177777 | 6.956172438 | 4.943057334 | 6.443661377 | 5.729556691 |
| ENSMUSG0000083654 | 9.196874066 | 5.56493795  | 9.179963621 | 12.88732275 | 6.445751277 |
| ENSMUSG0000083655 | 11.31922962 | 8.347406925 | 6.35535943  | 4.02728836  | 6.445751277 |
| ENSMUSG0000083657 | 12.73413332 | 9.043024169 | 4.236906287 | 6.443661377 | 11.45911338 |
| ENSMUSG0000083658 | 18.39374813 | 13.91234488 | 14.829172   | 7.249119049 | 17.18867007 |
| ENSMUSG0000083659 | 9.904325918 | 8.347406925 | 5.649208382 | 2.416373016 | 6.445751277 |
| ENSMUSG0000083660 | 8.489422215 | 7.651789682 | 5.649208382 | 5.638203705 | 3.580972932 |
| ENSMUSG0000083661 | 7.781970364 | 9.043024169 | 7.767661525 | 7.249119049 | 15.04008631 |
| ENSMUSG0000083662 | 4.952162959 | 6.260555194 | 6.35535943  | 8.054576721 | 6.445751277 |
| ENSMUSG0000083663 | 9.904325918 | 6.260555194 | 8.473812573 | 4.832746033 | 3.580972932 |
| ENSMUSG0000083664 | 12.02668147 | 6.956172438 | 4.943057334 | 8.054576721 | 2.864778345 |
| ENSMUSG0000083665 | 7.074518513 | 3.478086219 | 6.35535943  | 2.416373016 | 5.013362104 |
| ENSMUSG0000083666 | 7.781970364 | 4.869320706 | 7.061510478 | 4.832746033 | 8.594335036 |
| ENSMUSG0000083667 | 8.489422215 | 4.173703463 | 7.767661525 | 4.02728836  | 10.7429188  |
| ENSMUSG0000083668 | 3.537259256 | 6.260555194 | 7.061510478 | 2.416373016 | 2.148583759 |
| ENSMUSG0000083669 | 12.02668147 | 9.738641413 | 7.061510478 | 12.88732275 | 15.04008631 |
| ENSMUSG0000083670 | 6.367066661 | 6.260555194 | 9.886114669 | 8.054576721 | 10.02672421 |
| ENSMUSG0000083671 | 9.196874066 | 2.782468975 | 8.473812573 | 4.02728836  | 9.310529622 |
| ENSMUSG0000083672 | 46.69182218 | 62.60555194 | 57.90438592 | 61.21478308 | 43.68786977 |
| ENSMUSG0000083673 | 0           | 0           | 0           | 0           | 0           |
| ENSMUSG0000083674 | 12.02668147 | 9.043024169 | 10.59226572 | 8.054576721 | 7.161945863 |
| ENSMUSG0000083676 | 10.61177777 | 8.347406925 | 9.179963621 | 8.054576721 | 7.161945863 |
| ENSMUSG0000083677 | 9.904325918 | 4.173703463 | 6.35535943  | 5.638203705 | 10.7429188  |
| ENSMUSG0000083678 | 12.02668147 | 6.956172438 | 10.59226572 | 9.665492065 | 9.310529622 |
| ENSMUSG0000083679 | 19.10119998 | 11.1298759  | 12.00456781 | 20.1364418  | 7.87814045  |
| ENSMUSG0000083680 | 5.65961481  | 4.173703463 | 2.118453143 | 2.416373016 | 1.432389173 |
| ENSMUSG0000083681 | 8.489422215 | 6.956172438 | 5.649208382 | 5.638203705 | 6.445751277 |
| ENSMUSG0000083682 | 2.829807405 | 4.173703463 | 5.649208382 | 0.805457672 | 4.297167518 |
| ENSMUSG0000083683 | 0           | 0.695617244 | 1.412302096 | 0           | 0.716194586 |
| ENSMUSG0000083684 | 7.074518513 | 6.260555194 | 6.35535943  | 4.02728836  | 5.729556691 |
| ENSMUSG0000083685 | 7.781970364 | 5.56493795  | 9.179963621 | 4.02728836  | 6.445751277 |
| ENSMUSG0000083686 | 12.02668147 | 7.651789682 | 7.061510478 | 8.860034393 | 9.310529622 |

|                   |             |             |             |             |             |
|-------------------|-------------|-------------|-------------|-------------|-------------|
| ENSMUSG0000083687 | 18.39374813 | 27.12907251 | 28.95219296 | 12.08186508 | 27.93158887 |
| ENSMUSG0000083688 | 6.367066661 | 6.260555194 | 8.473812573 | 4.832746033 | 5.729556691 |
| ENSMUSG0000083689 | 7.781970364 | 5.56493795  | 6.35535943  | 8.860034393 | 12.17530797 |
| ENSMUSG0000083691 | 4.244711108 | 6.260555194 | 3.530755239 | 4.832746033 | 3.580972932 |
| ENSMUSG0000083692 | 9.904325918 | 4.869320706 | 4.943057334 | 5.638203705 | 9.310529622 |
| ENSMUSG0000083693 | 12.73413332 | 11.1298759  | 12.00456781 | 10.47094974 | 5.013362104 |
| ENSMUSG0000083697 | 10.61177777 | 10.43425866 | 7.061510478 | 8.054576721 | 8.594335036 |
| ENSMUSG0000083698 | 7.781970364 | 4.173703463 | 6.35535943  | 6.443661377 | 6.445751277 |
| ENSMUSG0000083699 | 2.829807405 | 5.56493795  | 2.118453143 | 1.610915344 | 1.432389173 |
| ENSMUSG0000083700 | 120.2668147 | 162.774435  | 159.5901368 | 111.1531587 | 95.97007457 |
| ENSMUSG0000083701 | 2.829807405 | 2.782468975 | 3.530755239 | 2.416373016 | 2.148583759 |
| ENSMUSG0000083702 | 9.196874066 | 9.043024169 | 7.767661525 | 8.860034393 | 5.729556691 |
| ENSMUSG0000083704 | 36.08004441 | 24.34660353 | 28.24604191 | 26.58010318 | 21.48583759 |
| ENSMUSG0000083705 | 8.489422215 | 7.651789682 | 6.35535943  | 5.638203705 | 5.013362104 |
| ENSMUSG0000083706 | 7.781970364 | 5.56493795  | 10.59226572 | 3.221830688 | 5.729556691 |
| ENSMUSG0000083707 | 4.244711108 | 6.956172438 | 13.41686991 | 11.27640741 | 6.445751277 |
| ENSMUSG0000083708 | 4.952162959 | 4.173703463 | 6.35535943  | 8.860034393 | 7.161945863 |
| ENSMUSG0000083709 | 2.122355554 | 0.695617244 | 3.530755239 | 3.221830688 | 5.013362104 |
| ENSMUSG0000083710 | 4.244711108 | 2.086851731 | 2.824604191 | 1.610915344 | 4.297167518 |
| ENSMUSG0000083711 | 3.537259256 | 2.086851731 | 2.824604191 | 2.416373016 | 3.580972932 |
| ENSMUSG0000083713 | 12.02668147 | 8.347406925 | 9.179963621 | 6.443661377 | 6.445751277 |
| ENSMUSG0000083714 | 5.65961481  | 4.869320706 | 4.236906287 | 4.02728836  | 1.432389173 |
| ENSMUSG0000083715 | 7.074518513 | 8.347406925 | 9.179963621 | 10.47094974 | 7.87814045  |
| ENSMUSG0000083716 | 7.074518513 | 4.173703463 | 5.649208382 | 10.47094974 | 9.310529622 |
| ENSMUSG0000083717 | 7.074518513 | 10.43425866 | 9.179963621 | 7.249119049 | 10.7429188  |
| ENSMUSG0000083718 | 9.196874066 | 20.86851731 | 14.829172   | 8.054576721 | 13.60769714 |
| ENSMUSG0000083719 | 7.074518513 | 4.173703463 | 4.236906287 | 107.1258704 | 86.65954495 |
| ENSMUSG0000083720 | 8.489422215 | 5.56493795  | 3.530755239 | 8.054576721 | 8.594335036 |
| ENSMUSG0000083721 | 4.952162959 | 4.173703463 | 4.236906287 | 1.610915344 | 7.87814045  |
| ENSMUSG0000083722 | 1.414903703 | 2.086851731 | 2.118453143 | 0.805457672 | 3.580972932 |
| ENSMUSG0000083723 | 10.61177777 | 6.956172438 | 6.35535943  | 6.443661377 | 5.013362104 |
| ENSMUSG0000083725 | 10.61177777 | 4.869320706 | 6.35535943  | 2.416373016 | 6.445751277 |
| ENSMUSG0000083727 | 8.489422215 | 9.043024169 | 8.473812573 | 8.054576721 | 12.17530797 |
| ENSMUSG0000083728 | 9.904325918 | 17.39043109 | 14.829172   | 11.27640741 | 15.04008631 |
| ENSMUSG0000083729 | 10.61177777 | 6.956172438 | 9.179963621 | 6.443661377 | 7.87814045  |
| ENSMUSG0000083731 | 5.65961481  | 7.651789682 | 7.767661525 | 8.054576721 | 5.013362104 |
| ENSMUSG0000083732 | 11.31922962 | 7.651789682 | 4.943057334 | 4.832746033 | 7.161945863 |
| ENSMUSG0000083733 | 19.80865184 | 17.39043109 | 15.53532305 | 12.08186508 | 22.20203218 |
| ENSMUSG0000083734 | 25.46826665 | 46.60635533 | 36.01370344 | 24.16373016 | 24.35061594 |
| ENSMUSG0000083735 | 10.61177777 | 9.738641413 | 9.886114669 | 3.221830688 | 6.445751277 |
| ENSMUSG0000083736 | 4.244711108 | 9.738641413 | 8.473812573 | 4.832746033 | 8.594335036 |
| ENSMUSG0000083737 | 9.904325918 | 4.869320706 | 9.886114669 | 4.02728836  | 5.729556691 |
| ENSMUSG0000083738 | 5.65961481  | 6.260555194 | 3.530755239 | 1.610915344 | 3.580972932 |

|                   |             |             |             |             |             |
|-------------------|-------------|-------------|-------------|-------------|-------------|
| ENSMUSG0000083739 | 8.489422215 | 6.956172438 | 11.29841676 | 7.249119049 | 5.729556691 |
| ENSMUSG0000083740 | 12.73413332 | 10.43425866 | 7.767661525 | 15.30369577 | 14.32389173 |
| ENSMUSG0000083741 | 6.367066661 | 6.260555194 | 4.943057334 | 0.805457672 | 3.580972932 |
| ENSMUSG0000083742 | 6.367066661 | 10.43425866 | 6.35535943  | 5.638203705 | 2.864778345 |
| ENSMUSG0000083743 | 10.61177777 | 10.43425866 | 14.12302096 | 3.221830688 | 6.445751277 |
| ENSMUSG0000083744 | 3.537259256 | 2.086851731 | 3.530755239 | 1.610915344 | 4.297167518 |
| ENSMUSG0000083745 | 169.0809925 | 195.4684455 | 191.3669339 | 113.5695318 | 81.64618284 |
| ENSMUSG0000083747 | 3.537259256 | 3.478086219 | 2.824604191 | 0.805457672 | 1.432389173 |
| ENSMUSG0000083748 | 9.904325918 | 9.043024169 | 13.41686991 | 5.638203705 | 6.445751277 |
| ENSMUSG0000083749 | 14.14903703 | 8.347406925 | 10.59226572 | 6.443661377 | 4.297167518 |
| ENSMUSG0000083750 | 7.781970364 | 9.043024169 | 4.943057334 | 7.249119049 | 5.729556691 |
| ENSMUSG0000083751 | 1.414903703 | 5.56493795  | 0.706151048 | 1.610915344 | 2.864778345 |
| ENSMUSG0000083752 | 5.65961481  | 7.651789682 | 9.179963621 | 8.054576721 | 7.161945863 |
| ENSMUSG0000083753 | 9.196874066 | 8.347406925 | 9.179963621 | 4.02728836  | 7.87814045  |
| ENSMUSG0000083754 | 9.904325918 | 6.956172438 | 7.767661525 | 11.27640741 | 6.445751277 |
| ENSMUSG0000083755 | 4.244711108 | 2.782468975 | 2.118453143 | 3.221830688 | 2.864778345 |
| ENSMUSG0000083756 | 7.781970364 | 6.956172438 | 11.29841676 | 8.860034393 | 7.161945863 |
| ENSMUSG0000083757 | 15.56394073 | 15.99919661 | 10.59226572 | 11.27640741 | 10.02672421 |
| ENSMUSG0000083760 | 3.537259256 | 2.782468975 | 4.236906287 | 2.416373016 | 3.580972932 |
| ENSMUSG0000083761 | 9.904325918 | 10.43425866 | 5.649208382 | 8.054576721 | 5.729556691 |
| ENSMUSG0000083763 | 5.65961481  | 4.173703463 | 2.824604191 | 6.443661377 | 3.580972932 |
| ENSMUSG0000083764 | 12.73413332 | 6.260555194 | 5.649208382 | 4.832746033 | 7.161945863 |
| ENSMUSG0000083766 | 11.31922962 | 11.1298759  | 2.824604191 | 8.860034393 | 7.161945863 |
| ENSMUSG0000083767 | 7.074518513 | 8.347406925 | 8.473812573 | 10.47094974 | 8.594335036 |
| ENSMUSG0000083768 | 6.367066661 | 4.869320706 | 2.824604191 | 4.832746033 | 4.297167518 |
| ENSMUSG0000083769 | 9.904325918 | 3.478086219 | 9.886114669 | 3.221830688 | 5.013362104 |
| ENSMUSG0000083771 | 27.5906222  | 44.5195036  | 35.30755239 | 10.47094974 | 20.05344842 |
| ENSMUSG0000083772 | 4.952162959 | 8.347406925 | 10.59226572 | 14.4982381  | 3.580972932 |
| ENSMUSG0000083773 | 10.61177777 | 7.651789682 | 8.473812573 | 6.443661377 | 7.161945863 |
| ENSMUSG0000083774 | 23.34591109 | 28.52030699 | 31.0706461  | 19.33098413 | 28.64778345 |
| ENSMUSG0000083775 | 4.244711108 | 3.478086219 | 4.236906287 | 3.221830688 | 3.580972932 |
| ENSMUSG0000083776 | 9.196874066 | 9.043024169 | 12.00456781 | 9.665492065 | 11.45911338 |
| ENSMUSG0000083777 | 7.074518513 | 4.173703463 | 9.886114669 | 4.02728836  | 6.445751277 |
| ENSMUSG0000083778 | 5.65961481  | 6.260555194 | 7.767661525 | 2.416373016 | 5.013362104 |
| ENSMUSG0000083779 | 3.537259256 | 1.391234488 | 4.236906287 | 3.221830688 | 1.432389173 |
| ENSMUSG0000083780 | 8.489422215 | 8.347406925 | 9.886114669 | 3.221830688 | 7.161945863 |
| ENSMUSG0000083781 | 5.65961481  | 5.56493795  | 4.236906287 | 6.443661377 | 4.297167518 |
| ENSMUSG0000083782 | 12.02668147 | 8.347406925 | 7.767661525 | 5.638203705 | 9.310529622 |
| ENSMUSG0000083783 | 157.7617628 | 184.3385696 | 166.6516473 | 148.2042117 | 134.6445822 |
| ENSMUSG0000083784 | 4.952162959 | 4.173703463 | 1.412302096 | 0.805457672 | 3.580972932 |
| ENSMUSG0000083785 | 8.489422215 | 4.173703463 | 11.29841676 | 4.02728836  | 4.297167518 |
| ENSMUSG0000083786 | 12.02668147 | 13.21672763 | 7.767661525 | 6.443661377 | 13.60769714 |
| ENSMUSG0000083787 | 9.904325918 | 6.956172438 | 9.179963621 | 3.221830688 | 6.445751277 |



|                   |             |             |             |             |             |
|-------------------|-------------|-------------|-------------|-------------|-------------|
| ENSMUSG0000083788 | 10.61177777 | 7.651789682 | 9.886114669 | 7.249119049 | 5.729556691 |
| ENSMUSG0000083789 | 6.367066661 | 4.173703463 | 4.236906287 | 3.221830688 | 4.297167518 |
| ENSMUSG0000083791 | 7.074518513 | 6.260555194 | 4.943057334 | 8.054576721 | 5.729556691 |
| ENSMUSG0000083792 | 12.02668147 | 9.738641413 | 5.649208382 | 6.443661377 | 7.87814045  |
| ENSMUSG0000083793 | 10.61177777 | 4.173703463 | 4.943057334 | 11.27640741 | 9.310529622 |
| ENSMUSG0000083794 | 11.31922962 | 5.56493795  | 5.649208382 | 6.443661377 | 5.729556691 |
| ENSMUSG0000083795 | 9.196874066 | 9.738641413 | 5.649208382 | 2.416373016 | 10.02672421 |
| ENSMUSG0000083796 | 12.02668147 | 13.91234488 | 11.29841676 | 14.4982381  | 12.89150255 |
| ENSMUSG0000083797 | 12.73413332 | 6.956172438 | 9.179963621 | 5.638203705 | 7.161945863 |
| ENSMUSG0000083798 | 14.85648888 | 10.43425866 | 12.00456781 | 8.860034393 | 10.02672421 |
| ENSMUSG0000083801 | 7.074518513 | 5.56493795  | 10.59226572 | 5.638203705 | 5.013362104 |
| ENSMUSG0000083803 | 9.904325918 | 4.869320706 | 5.649208382 | 5.638203705 | 7.87814045  |
| ENSMUSG0000083804 | 11.31922962 | 8.347406925 | 7.061510478 | 5.638203705 | 5.013362104 |
| ENSMUSG0000083805 | 5.65961481  | 3.478086219 | 2.824604191 | 3.221830688 | 2.148583759 |
| ENSMUSG0000083806 | 7.781970364 | 7.651789682 | 5.649208382 | 5.638203705 | 5.729556691 |
| ENSMUSG0000083807 | 9.904325918 | 9.738641413 | 5.649208382 | 7.249119049 | 3.580972932 |
| ENSMUSG0000083808 | 6.367066661 | 4.869320706 | 4.943057334 | 5.638203705 | 5.729556691 |
| ENSMUSG0000083809 | 5.65961481  | 4.173703463 | 6.35535943  | 0.805457672 | 5.013362104 |
| ENSMUSG0000083810 | 9.904325918 | 9.738641413 | 2.824604191 | 3.221830688 | 4.297167518 |
| ENSMUSG0000083811 | 8.489422215 | 9.738641413 | 11.29841676 | 12.08186508 | 9.310529622 |
| ENSMUSG0000083812 | 7.781970364 | 6.956172438 | 9.886114669 | 4.02728836  | 10.7429188  |
| ENSMUSG0000083813 | 6.367066661 | 8.347406925 | 4.943057334 | 7.249119049 | 5.013362104 |
| ENSMUSG0000083814 | 4.244711108 | 2.782468975 | 5.649208382 | 3.221830688 | 4.297167518 |
| ENSMUSG0000083815 | 10.61177777 | 7.651789682 | 10.59226572 | 8.860034393 | 9.310529622 |
| ENSMUSG0000083816 | 27.5906222  | 56.34499675 | 45.19366706 | 65.24207144 | 66.60609653 |
| ENSMUSG0000083817 | 9.904325918 | 8.347406925 | 14.829172   | 8.860034393 | 7.161945863 |
| ENSMUSG0000083818 | 6.367066661 | 4.173703463 | 1.412302096 | 2.416373016 | 3.580972932 |
| ENSMUSG0000083819 | 4.952162959 | 6.260555194 | 6.35535943  | 5.638203705 | 5.013362104 |
| ENSMUSG0000083820 | 5.65961481  | 9.738641413 | 6.35535943  | 8.054576721 | 5.013362104 |
| ENSMUSG0000083821 | 4.244711108 | 6.956172438 | 7.061510478 | 3.221830688 | 3.580972932 |
| ENSMUSG0000083822 | 164.1288295 | 175.2955454 | 168.7701004 | 198.948045  | 133.2121931 |
| ENSMUSG0000083823 | 7.074518513 | 2.782468975 | 4.236906287 | 8.054576721 | 4.297167518 |
| ENSMUSG0000083825 | 9.196874066 | 8.347406925 | 9.179963621 | 4.832746033 | 5.013362104 |
| ENSMUSG0000083826 | 38.20239997 | 55.6493795  | 42.36906287 | 24.16373016 | 35.80972932 |
| ENSMUSG0000083827 | 9.904325918 | 11.1298759  | 9.179963621 | 5.638203705 | 7.161945863 |
| ENSMUSG0000083828 | 4.952162959 | 3.478086219 | 3.530755239 | 4.832746033 | 2.864778345 |
| ENSMUSG0000083829 | 7.074518513 | 6.956172438 | 14.12302096 | 5.638203705 | 7.161945863 |
| ENSMUSG0000083830 | 4.952162959 | 6.260555194 | 4.943057334 | 2.416373016 | 6.445751277 |
| ENSMUSG0000083831 | 12.73413332 | 9.043024169 | 9.886114669 | 8.054576721 | 11.45911338 |
| ENSMUSG0000083832 | 14.14903703 | 9.738641413 | 10.59226572 | 10.47094974 | 10.7429188  |
| ENSMUSG0000083833 | 6.367066661 | 9.738641413 | 7.767661525 | 4.832746033 | 9.310529622 |
| ENSMUSG0000083834 | 9.904325918 | 10.43425866 | 7.767661525 | 7.249119049 | 7.161945863 |
| ENSMUSG0000083835 | 12.02668147 | 13.21672763 | 9.886114669 | 2.416373016 | 7.161945863 |

|                    |             |             |             |             |             |
|--------------------|-------------|-------------|-------------|-------------|-------------|
| ENSMUSG00000083836 | 11.31922962 | 8.347406925 | 5.649208382 | 9.665492065 | 12.89150255 |
| ENSMUSG00000083837 | 10.61177777 | 11.82549314 | 9.179963621 | 7.249119049 | 7.87814045  |
| ENSMUSG00000083838 | 12.02668147 | 11.82549314 | 13.41686991 | 7.249119049 | 7.161945863 |
| ENSMUSG00000083839 | 4.952162959 | 4.869320706 | 5.649208382 | 3.221830688 | 7.161945863 |
| ENSMUSG00000083841 | 2.829807405 | 2.086851731 | 0.706151048 | 0           | 0.716194586 |
| ENSMUSG00000083842 | 186.0598369 | 233.0317767 | 222.43758   | 288.3538466 | 232.7632406 |
| ENSMUSG00000083843 | 3.537259256 | 5.56493795  | 4.943057334 | 2.416373016 | 4.297167518 |
| ENSMUSG00000083844 | 36.78749627 | 67.47487265 | 67.08434954 | 65.24207144 | 58.72795608 |
| ENSMUSG00000083845 | 5.65961481  | 4.173703463 | 4.943057334 | 4.02728836  | 2.864778345 |
| ENSMUSG00000083846 | 10.61177777 | 9.738641413 | 4.943057334 | 7.249119049 | 5.729556691 |
| ENSMUSG00000083847 | 6.367066661 | 3.478086219 | 4.236906287 | 8.054576721 | 5.729556691 |
| ENSMUSG00000083848 | 12.73413332 | 11.1298759  | 9.179963621 | 4.832746033 | 7.87814045  |
| ENSMUSG00000083849 | 9.196874066 | 13.21672763 | 14.12302096 | 6.443661377 | 7.87814045  |
| ENSMUSG00000083851 | 7.074518513 | 10.43425866 | 9.179963621 | 5.638203705 | 8.594335036 |
| ENSMUSG00000083852 | 9.904325918 | 17.39043109 | 10.59226572 | 9.665492065 | 5.013362104 |
| ENSMUSG00000083853 | 12.02668147 | 9.738641413 | 9.179963621 | 11.27640741 | 12.17530797 |
| ENSMUSG00000083854 | 0           | 2.782468975 | 1.412302096 | 0.805457672 | 2.148583759 |
| ENSMUSG00000083855 | 8.489422215 | 7.651789682 | 9.886114669 | 4.832746033 | 6.445751277 |
| ENSMUSG00000083856 | 12.73413332 | 15.30357936 | 9.886114669 | 6.443661377 | 15.7562809  |
| ENSMUSG00000083857 | 6.367066661 | 8.347406925 | 5.649208382 | 5.638203705 | 3.580972932 |
| ENSMUSG00000083858 | 4.244711108 | 4.173703463 | 3.530755239 | 2.416373016 | 2.864778345 |
| ENSMUSG00000083859 | 1.414903703 | 1.391234488 | 1.412302096 | 0.805457672 | 0           |
| ENSMUSG00000083860 | 7.781970364 | 11.1298759  | 9.886114669 | 4.832746033 | 8.594335036 |
| ENSMUSG00000083861 | 7.781970364 | 6.956172438 | 5.649208382 | 4.832746033 | 4.297167518 |
| ENSMUSG00000083863 | 4.244711108 | 1.391234488 | 0.706151048 | 2.416373016 | 3.580972932 |
| ENSMUSG00000083864 | 7.074518513 | 9.738641413 | 4.236906287 | 5.638203705 | 5.013362104 |
| ENSMUSG00000083866 | 14.14903703 | 9.738641413 | 8.473812573 | 4.02728836  | 6.445751277 |
| ENSMUSG00000083867 | 7.074518513 | 6.260555194 | 9.886114669 | 2.416373016 | 3.580972932 |
| ENSMUSG00000083868 | 7.074518513 | 10.43425866 | 12.71071886 | 8.860034393 | 8.594335036 |
| ENSMUSG00000083869 | 9.904325918 | 9.043024169 | 5.649208382 | 2.416373016 | 5.013362104 |
| ENSMUSG00000083870 | 53.05888884 | 86.95215547 | 88.97503202 | 68.46390213 | 78.06520991 |
| ENSMUSG00000083871 | 3.537259256 | 2.086851731 | 2.118453143 | 3.221830688 | 0.716194586 |
| ENSMUSG00000083872 | 21.22355554 | 36.17209668 | 33.18909925 | 20.94189947 | 17.18867007 |
| ENSMUSG00000083873 | 8.489422215 | 9.043024169 | 4.943057334 | 4.02728836  | 4.297167518 |
| ENSMUSG00000083874 | 10.61177777 | 6.956172438 | 7.061510478 | 3.221830688 | 3.580972932 |
| ENSMUSG00000083875 | 178.9853184 | 208.6851731 | 237.9729031 | 229.5554365 | 171.8867007 |
| ENSMUSG00000083876 | 14.85648888 | 31.99839321 | 28.24604191 | 21.74735715 | 25.06681052 |
| ENSMUSG00000083877 | 5.65961481  | 1.391234488 | 4.236906287 | 3.221830688 | 3.580972932 |
| ENSMUSG00000083878 | 4.952162959 | 7.651789682 | 9.886114669 | 6.443661377 | 10.7429188  |
| ENSMUSG00000083879 | 12.02668147 | 7.651789682 | 9.179963621 | 12.88732275 | 7.161945863 |
| ENSMUSG00000083880 | 5.65961481  | 6.956172438 | 8.473812573 | 8.054576721 | 9.310529622 |
| ENSMUSG00000083881 | 11.31922962 | 6.956172438 | 10.59226572 | 8.054576721 | 3.580972932 |
| ENSMUSG00000083882 | 10.61177777 | 5.56493795  | 7.767661525 | 8.860034393 | 6.445751277 |

|                    |             |             |             |             |             |
|--------------------|-------------|-------------|-------------|-------------|-------------|
| ENSMUSG00000083883 | 5.65961481  | 5.56493795  | 9.179963621 | 4.832746033 | 11.45911338 |
| ENSMUSG00000083884 | 9.196874066 | 4.869320706 | 5.649208382 | 4.02728836  | 5.013362104 |
| ENSMUSG00000083885 | 10.61177777 | 18.08604834 | 19.06607829 | 8.860034393 | 16.47247549 |
| ENSMUSG00000083886 | 3.537259256 | 5.56493795  | 7.767661525 | 10.47094974 | 5.729556691 |
| ENSMUSG00000083887 | 7.781970364 | 6.260555194 | 7.061510478 | 4.832746033 | 9.310529622 |
| ENSMUSG00000083888 | 10.61177777 | 10.43425866 | 11.29841676 | 3.221830688 | 6.445751277 |
| ENSMUSG00000083889 | 7.074518513 | 0.695617244 | 3.530755239 | 6.443661377 | 2.148583759 |
| ENSMUSG00000083890 | 14.14903703 | 4.869320706 | 4.236906287 | 7.249119049 | 9.310529622 |
| ENSMUSG00000083892 | 4.952162959 | 2.782468975 | 9.886114669 | 8.054576721 | 5.013362104 |
| ENSMUSG00000083893 | 4.952162959 | 6.260555194 | 16.94762515 | 8.054576721 | 6.445751277 |
| ENSMUSG00000083894 | 12.02668147 | 6.956172438 | 4.943057334 | 10.47094974 | 10.02672421 |
| ENSMUSG00000083895 | 6.367066661 | 6.956172438 | 7.061510478 | 5.638203705 | 3.580972932 |
| ENSMUSG00000083896 | 7.781970364 | 5.56493795  | 2.118453143 | 3.221830688 | 4.297167518 |
| ENSMUSG00000083897 | 4.952162959 | 6.260555194 | 5.649208382 | 7.249119049 | 7.161945863 |
| ENSMUSG00000083898 | 2.829807405 | 3.478086219 | 3.530755239 | 2.416373016 | 4.297167518 |
| ENSMUSG00000083899 | 20.51610369 | 34.08524495 | 31.0706461  | 41.88379895 | 39.39070225 |
| ENSMUSG00000083900 | 10.61177777 | 6.956172438 | 9.179963621 | 9.665492065 | 6.445751277 |
| ENSMUSG00000083901 | 0           | 0           | 0           | 0           | 0           |
| ENSMUSG00000083902 | 7.074518513 | 13.91234488 | 21.18453143 | 3.221830688 | 7.161945863 |
| ENSMUSG00000083903 | 6.367066661 | 4.173703463 | 11.29841676 | 8.860034393 | 8.594335036 |
| ENSMUSG00000083904 | 7.781970364 | 8.347406925 | 9.886114669 | 2.416373016 | 4.297167518 |
| ENSMUSG00000083905 | 6.367066661 | 6.956172438 | 5.649208382 | 0.805457672 | 5.729556691 |
| ENSMUSG00000083906 | 5.65961481  | 9.043024169 | 8.473812573 | 9.665492065 | 5.729556691 |
| ENSMUSG00000083907 | 10.61177777 | 5.56493795  | 5.649208382 | 12.08186508 | 7.87814045  |
| ENSMUSG00000083908 | 7.074518513 | 2.782468975 | 7.767661525 | 1.610915344 | 2.148583759 |
| ENSMUSG00000083909 | 216.4802665 | 242.0748008 | 237.9729031 | 306.0739154 | 247.0871323 |
| ENSMUSG00000083910 | 7.781970364 | 4.869320706 | 10.59226572 | 4.832746033 | 9.310529622 |
| ENSMUSG00000083911 | 64.37811846 | 82.77845201 | 74.85201106 | 62.82569842 | 60.16034525 |
| ENSMUSG00000083912 | 7.074518513 | 3.478086219 | 2.118453143 | 1.610915344 | 2.148583759 |
| ENSMUSG00000083913 | 15.56394073 | 6.260555194 | 5.649208382 | 7.249119049 | 10.02672421 |
| ENSMUSG00000083914 | 8.489422215 | 6.260555194 | 7.061510478 | 7.249119049 | 8.594335036 |
| ENSMUSG00000083915 | 8.489422215 | 4.869320706 | 9.886114669 | 8.860034393 | 10.02672421 |
| ENSMUSG00000083916 | 8.489422215 | 6.956172438 | 5.649208382 | 7.249119049 | 5.729556691 |
| ENSMUSG00000083917 | 9.196874066 | 10.43425866 | 9.886114669 | 6.443661377 | 10.02672421 |
| ENSMUSG00000083918 | 8.489422215 | 4.869320706 | 4.943057334 | 6.443661377 | 5.729556691 |
| ENSMUSG00000083919 | 8.489422215 | 6.956172438 | 6.35535943  | 5.638203705 | 6.445751277 |
| ENSMUSG00000083920 | 4.244711108 | 3.478086219 | 5.649208382 | 0.805457672 | 4.297167518 |
| ENSMUSG00000083921 | 10.61177777 | 4.869320706 | 7.061510478 | 9.665492065 | 7.87814045  |
| ENSMUSG00000083922 | 12.02668147 | 13.91234488 | 13.41686991 | 9.665492065 | 10.02672421 |
| ENSMUSG00000083923 | 6.367066661 | 6.260555194 | 2.118453143 | 4.02728836  | 2.864778345 |
| ENSMUSG00000083924 | 12.73413332 | 21.56413456 | 14.12302096 | 9.665492065 | 21.48583759 |
| ENSMUSG00000083925 | 8.489422215 | 3.478086219 | 8.473812573 | 4.832746033 | 5.729556691 |
| ENSMUSG00000083926 | 4.244711108 | 5.56493795  | 4.943057334 | 2.416373016 | 2.864778345 |

|                    |             |             |             |             |             |
|--------------------|-------------|-------------|-------------|-------------|-------------|
| ENSMUSG00000083927 | 7.074518513 | 4.869320706 | 9.179963621 | 8.860034393 | 7.87814045  |
| ENSMUSG00000083928 | 2.829807405 | 2.086851731 | 4.236906287 | 5.638203705 | 3.580972932 |
| ENSMUSG00000083930 | 8.489422215 | 2.782468975 | 7.061510478 | 8.860034393 | 7.87814045  |
| ENSMUSG00000083931 | 7.074518513 | 2.782468975 | 4.236906287 | 1.610915344 | 2.148583759 |
| ENSMUSG00000083932 | 11.31922962 | 3.478086219 | 7.061510478 | 6.443661377 | 5.013362104 |
| ENSMUSG00000083933 | 8.489422215 | 7.651789682 | 9.886114669 | 3.221830688 | 5.729556691 |
| ENSMUSG00000083934 | 5.65961481  | 6.260555194 | 4.236906287 | 10.47094974 | 5.013362104 |
| ENSMUSG00000083935 | 12.02668147 | 4.869320706 | 4.943057334 | 3.221830688 | 10.02672421 |
| ENSMUSG00000083936 | 9.196874066 | 6.260555194 | 1.412302096 | 4.832746033 | 2.148583759 |
| ENSMUSG00000083937 | 11.31922962 | 7.651789682 | 6.35535943  | 2.416373016 | 4.297167518 |
| ENSMUSG00000083938 | 10.61177777 | 8.347406925 | 8.473812573 | 3.221830688 | 5.013362104 |
| ENSMUSG00000083939 | 4.952162959 | 3.478086219 | 6.35535943  | 0.805457672 | 0.716194586 |
| ENSMUSG00000083940 | 13.44158517 | 5.56493795  | 7.061510478 | 7.249119049 | 7.161945863 |
| ENSMUSG00000083941 | 3.537259256 | 0.695617244 | 1.412302096 | 0.805457672 | 2.148583759 |
| ENSMUSG00000083942 | 10.61177777 | 9.043024169 | 5.649208382 | 3.221830688 | 11.45911338 |
| ENSMUSG00000083943 | 0.707451851 | 0           | 1.412302096 | 0           | 0           |
| ENSMUSG00000083944 | 4.244711108 | 3.478086219 | 1.412302096 | 1.610915344 | 0.716194586 |
| ENSMUSG00000083945 | 7.781970364 | 4.869320706 | 2.118453143 | 4.02728836  | 2.864778345 |
| ENSMUSG00000083946 | 12.73413332 | 6.956172438 | 5.649208382 | 2.416373016 | 5.729556691 |
| ENSMUSG00000083948 | 8.489422215 | 2.086851731 | 3.530755239 | 5.638203705 | 4.297167518 |
| ENSMUSG00000083949 | 11.31922962 | 6.956172438 | 12.71071886 | 6.443661377 | 8.594335036 |
| ENSMUSG00000083950 | 5.65961481  | 11.1298759  | 10.59226572 | 6.443661377 | 8.594335036 |
| ENSMUSG00000083951 | 23.34591109 | 37.56333116 | 26.12758877 | 18.52552646 | 20.769643   |
| ENSMUSG00000083953 | 8.489422215 | 13.91234488 | 9.886114669 | 5.638203705 | 8.594335036 |
| ENSMUSG00000083954 | 6.367066661 | 6.956172438 | 7.767661525 | 5.638203705 | 7.161945863 |
| ENSMUSG00000083955 | 4.952162959 | 5.56493795  | 5.649208382 | 4.02728836  | 4.297167518 |
| ENSMUSG00000083956 | 11.31922962 | 2.782468975 | 7.767661525 | 8.054576721 | 8.594335036 |
| ENSMUSG00000083957 | 12.02668147 | 7.651789682 | 9.179963621 | 5.638203705 | 11.45911338 |
| ENSMUSG00000083958 | 9.904325918 | 8.347406925 | 7.061510478 | 3.221830688 | 3.580972932 |
| ENSMUSG00000083960 | 6.367066661 | 2.782468975 | 3.530755239 | 2.416373016 | 4.297167518 |
| ENSMUSG00000083961 | 0.707451851 | 0           | 1.412302096 | 0.805457672 | 0.716194586 |
| ENSMUSG00000083962 | 6.367066661 | 10.43425866 | 6.35535943  | 9.665492065 | 12.89150255 |
| ENSMUSG00000083963 | 7.074518513 | 1.391234488 | 3.530755239 | 3.221830688 | 0           |
| ENSMUSG00000083964 | 11.31922962 | 13.91234488 | 13.41686991 | 6.443661377 | 9.310529622 |
| ENSMUSG00000083966 | 9.196874066 | 4.869320706 | 4.943057334 | 2.416373016 | 4.297167518 |
| ENSMUSG00000083967 | 4.244711108 | 7.651789682 | 9.886114669 | 8.860034393 | 7.87814045  |
| ENSMUSG00000083969 | 9.196874066 | 9.738641413 | 8.473812573 | 4.02728836  | 5.729556691 |
| ENSMUSG00000083970 | 4.952162959 | 4.869320706 | 7.061510478 | 3.221830688 | 5.729556691 |
| ENSMUSG00000083971 | 5.65961481  | 4.869320706 | 4.943057334 | 2.416373016 | 1.432389173 |
| ENSMUSG00000083972 | 7.074518513 | 2.782468975 | 2.824604191 | 1.610915344 | 3.580972932 |
| ENSMUSG00000083973 | 8.489422215 | 8.347406925 | 8.473812573 | 4.02728836  | 7.87814045  |
| ENSMUSG00000083974 | 45.98437033 | 73.73542784 | 76.26431316 | 116.7913625 | 101.6996313 |
| ENSMUSG00000083975 | 12.73413332 | 8.347406925 | 9.179963621 | 8.860034393 | 5.013362104 |

|                   |             |             |             |             |             |
|-------------------|-------------|-------------|-------------|-------------|-------------|
| ENSMUSG0000083976 | 15.56394073 | 41.04141738 | 36.71985448 | 48.32746033 | 46.55264811 |
| ENSMUSG0000083977 | 1.414903703 | 2.782468975 | 0.706151048 | 3.221830688 | 4.297167518 |
| ENSMUSG0000083978 | 6.367066661 | 4.173703463 | 6.35535943  | 1.610915344 | 5.013362104 |
| ENSMUSG0000083979 | 17.68629628 | 27.82468975 | 24.00913562 | 10.47094974 | 17.18867007 |
| ENSMUSG0000083981 | 4.244711108 | 4.173703463 | 2.118453143 | 3.221830688 | 4.297167518 |
| ENSMUSG0000083982 | 0           | 0.695617244 | 0.706151048 | 0           | 0.716194586 |
| ENSMUSG0000083983 | 10.61177777 | 5.56493795  | 8.473812573 | 4.02728836  | 5.013362104 |
| ENSMUSG0000083985 | 9.904325918 | 9.043024169 | 9.886114669 | 9.665492065 | 7.161945863 |
| ENSMUSG0000083986 | 15.56394073 | 9.043024169 | 5.649208382 | 8.054576721 | 5.013362104 |
| ENSMUSG0000083987 | 8.489422215 | 8.347406925 | 4.236906287 | 14.4982381  | 5.729556691 |
| ENSMUSG0000083988 | 33.25023701 | 44.5195036  | 38.83830763 | 53.16020636 | 56.57937232 |
| ENSMUSG0000083989 | 20.51610369 | 27.82468975 | 31.0706461  | 67.65844446 | 43.68786977 |
| ENSMUSG0000083990 | 9.904325918 | 8.347406925 | 10.59226572 | 5.638203705 | 9.310529622 |
| ENSMUSG0000083991 | 12.73413332 | 9.043024169 | 7.767661525 | 4.832746033 | 8.594335036 |
| ENSMUSG0000083992 | 14.85648888 | 21.56413456 | 16.2414741  | 29.80193387 | 33.66114556 |
| ENSMUSG0000083993 | 12.73413332 | 14.60796212 | 11.29841676 | 9.665492065 | 6.445751277 |
| ENSMUSG0000083994 | 7.074518513 | 4.869320706 | 4.236906287 | 2.416373016 | 0.716194586 |
| ENSMUSG0000083995 | 9.196874066 | 15.30357936 | 15.53532305 | 12.08186508 | 12.17530797 |
| ENSMUSG0000083996 | 9.196874066 | 11.1298759  | 9.179963621 | 5.638203705 | 13.60769714 |
| ENSMUSG0000083997 | 5.65961481  | 7.651789682 | 8.473812573 | 9.665492065 | 6.445751277 |
| ENSMUSG0000083998 | 12.02668147 | 4.869320706 | 7.061510478 | 4.832746033 | 5.013362104 |
| ENSMUSG0000083999 | 5.65961481  | 2.086851731 | 2.118453143 | 2.416373016 | 2.148583759 |
| ENSMUSG0000084000 | 2.829807405 | 2.782468975 | 2.824604191 | 2.416373016 | 1.432389173 |
| ENSMUSG0000084001 | 3.537259256 | 3.478086219 | 8.473812573 | 2.416373016 | 4.297167518 |
| ENSMUSG0000084003 | 3.537259256 | 10.43425866 | 3.530755239 | 2.416373016 | 1.432389173 |
| ENSMUSG0000084004 | 3.537259256 | 8.347406925 | 7.061510478 | 3.221830688 | 5.729556691 |
| ENSMUSG0000084005 | 13.44158517 | 9.043024169 | 12.71071886 | 8.860034393 | 7.87814045  |
| ENSMUSG0000084006 | 6.367066661 | 2.086851731 | 7.061510478 | 1.610915344 | 7.161945863 |
| ENSMUSG0000084007 | 4.244711108 | 2.086851731 | 2.118453143 | 4.832746033 | 2.148583759 |
| ENSMUSG0000084009 | 5.65961481  | 1.391234488 | 3.530755239 | 4.832746033 | 4.297167518 |
| ENSMUSG0000084010 | 3.537259256 | 2.086851731 | 2.824604191 | 4.832746033 | 4.297167518 |
| ENSMUSG0000084011 | 4.952162959 | 4.173703463 | 7.767661525 | 12.08186508 | 10.02672421 |
| ENSMUSG0000084012 | 5.65961481  | 3.478086219 | 5.649208382 | 8.860034393 | 12.17530797 |
| ENSMUSG0000084013 | 12.73413332 | 8.347406925 | 9.886114669 | 20.94189947 | 15.04008631 |
| ENSMUSG0000084014 | 2.829807405 | 4.173703463 | 4.943057334 | 3.221830688 | 2.864778345 |
| ENSMUSG0000084015 | 6.367066661 | 8.347406925 | 7.061510478 | 6.443661377 | 10.7429188  |
| ENSMUSG0000084016 | 1.414903703 | 4.173703463 | 0           | 0           | 0           |
| ENSMUSG0000084017 | 0           | 1.391234488 | 2.824604191 | 8.054576721 | 7.87814045  |
| ENSMUSG0000084018 | 12.73413332 | 7.651789682 | 10.59226572 | 3.221830688 | 2.148583759 |
| ENSMUSG0000084019 | 4.952162959 | 4.173703463 | 2.824604191 | 1.610915344 | 7.161945863 |
| ENSMUSG0000084020 | 7.781970364 | 5.56493795  | 8.473812573 | 5.638203705 | 10.7429188  |
| ENSMUSG0000084021 | 9.196874066 | 6.956172438 | 5.649208382 | 6.443661377 | 3.580972932 |
| ENSMUSG0000084022 | 9.904325918 | 4.173703463 | 6.35535943  | 4.832746033 | 5.729556691 |

|                   |             |             |             |             |             |
|-------------------|-------------|-------------|-------------|-------------|-------------|
| ENSMUSG0000084024 | 27.5906222  | 50.7800588  | 45.8998181  | 24.16373016 | 27.21539428 |
| ENSMUSG0000084025 | 13.44158517 | 8.347406925 | 8.473812573 | 4.832746033 | 4.297167518 |
| ENSMUSG0000084026 | 9.904325918 | 4.869320706 | 6.35535943  | 3.221830688 | 5.013362104 |
| ENSMUSG0000084027 | 9.196874066 | 6.956172438 | 12.00456781 | 8.860034393 | 6.445751277 |
| ENSMUSG0000084028 | 9.196874066 | 6.956172438 | 12.00456781 | 8.860034393 | 6.445751277 |
| ENSMUSG0000084029 | 4.244711108 | 6.260555194 | 1.412302096 | 1.610915344 | 5.013362104 |
| ENSMUSG0000084030 | 7.781970364 | 4.869320706 | 6.35535943  | 0.805457672 | 3.580972932 |
| ENSMUSG0000084031 | 8.489422215 | 2.782468975 | 1.412302096 | 3.221830688 | 2.864778345 |
| ENSMUSG0000084032 | 12.73413332 | 6.260555194 | 13.41686991 | 8.054576721 | 2.864778345 |
| ENSMUSG0000084033 | 105.4103258 | 166.2525213 | 151.1163242 | 144.982381  | 123.9016634 |
| ENSMUSG0000084034 | 10.61177777 | 9.738641413 | 7.767661525 | 8.054576721 | 9.310529622 |
| ENSMUSG0000084038 | 11.31922962 | 7.651789682 | 8.473812573 | 2.416373016 | 5.013362104 |
| ENSMUSG0000084039 | 2.122355554 | 2.782468975 | 6.35535943  | 4.02728836  | 5.013362104 |
| ENSMUSG0000084040 | 8.489422215 | 6.260555194 | 6.35535943  | 3.221830688 | 6.445751277 |
| ENSMUSG0000084041 | 9.196874066 | 9.043024169 | 7.061510478 | 4.832746033 | 5.729556691 |
| ENSMUSG0000084043 | 9.196874066 | 9.043024169 | 5.649208382 | 6.443661377 | 6.445751277 |
| ENSMUSG0000084044 | 6.367066661 | 3.478086219 | 4.236906287 | 2.416373016 | 2.864778345 |
| ENSMUSG0000084045 | 6.367066661 | 7.651789682 | 6.35535943  | 4.02728836  | 6.445751277 |
| ENSMUSG0000084046 | 4.952162959 | 6.956172438 | 4.943057334 | 3.221830688 | 9.310529622 |
| ENSMUSG0000084047 | 2.829807405 | 2.086851731 | 3.530755239 | 3.221830688 | 2.864778345 |
| ENSMUSG0000084048 | 21.22355554 | 27.82468975 | 21.89068248 | 22.55281482 | 25.06681052 |
| ENSMUSG0000084050 | 4.952162959 | 6.260555194 | 10.59226572 | 5.638203705 | 5.729556691 |
| ENSMUSG0000084051 | 9.196874066 | 3.478086219 | 4.943057334 | 6.443661377 | 7.161945863 |
| ENSMUSG0000084052 | 14.85648888 | 22.2597518  | 17.65377619 | 13.69278043 | 8.594335036 |
| ENSMUSG0000084053 | 4.244711108 | 4.869320706 | 5.649208382 | 4.02728836  | 3.580972932 |
| ENSMUSG0000084054 | 5.65961481  | 3.478086219 | 3.530755239 | 4.832746033 | 5.729556691 |
| ENSMUSG0000084055 | 9.196874066 | 9.043024169 | 6.35535943  | 4.832746033 | 4.297167518 |
| ENSMUSG0000084056 | 4.952162959 | 3.478086219 | 4.236906287 | 3.221830688 | 1.432389173 |
| ENSMUSG0000084057 | 5.65961481  | 0           | 0           | 0           | 0.716194586 |
| ENSMUSG0000084058 | 5.65961481  | 13.91234488 | 3.530755239 | 8.860034393 | 4.297167518 |
| ENSMUSG0000084059 | 6.367066661 | 9.738641413 | 7.767661525 | 4.832746033 | 5.729556691 |
| ENSMUSG0000084060 | 2.122355554 | 3.478086219 | 2.118453143 | 4.02728836  | 7.161945863 |
| ENSMUSG0000084061 | 7.781970364 | 6.956172438 | 6.35535943  | 1.610915344 | 3.580972932 |
| ENSMUSG0000084062 | 3.537259256 | 4.173703463 | 7.061510478 | 0.805457672 | 9.310529622 |
| ENSMUSG0000084064 | 15.56394073 | 6.956172438 | 8.473812573 | 8.054576721 | 5.729556691 |
| ENSMUSG0000084065 | 5.65961481  | 4.869320706 | 4.943057334 | 4.832746033 | 7.161945863 |
| ENSMUSG0000084066 | 4.244711108 | 2.086851731 | 3.530755239 | 5.638203705 | 0.716194586 |
| ENSMUSG0000084067 | 10.61177777 | 7.651789682 | 8.473812573 | 8.054576721 | 6.445751277 |
| ENSMUSG0000084068 | 12.73413332 | 8.347406925 | 4.236906287 | 8.860034393 | 14.32389173 |
| ENSMUSG0000084069 | 0           | 0           | 0           | 0           | 0           |
| ENSMUSG0000084070 | 2.829807405 | 3.478086219 | 3.530755239 | 2.416373016 | 0.716194586 |
| ENSMUSG0000084071 | 7.781970364 | 11.1298759  | 9.886114669 | 5.638203705 | 8.594335036 |
| ENSMUSG0000084072 | 1.414903703 | 0           | 0           | 0.805457672 | 0           |

|                   |             |             |             |             |             |
|-------------------|-------------|-------------|-------------|-------------|-------------|
| ENSMUSG0000084073 | 11.31922962 | 5.56493795  | 7.061510478 | 6.443661377 | 3.580972932 |
| ENSMUSG0000084074 | 8.489422215 | 6.260555194 | 4.943057334 | 5.638203705 | 5.729556691 |
| ENSMUSG0000084075 | 9.196874066 | 6.260555194 | 10.59226572 | 4.832746033 | 5.013362104 |
| ENSMUSG0000084076 | 4.952162959 | 4.173703463 | 6.35535943  | 3.221830688 | 3.580972932 |
| ENSMUSG0000084077 | 4.244711108 | 5.56493795  | 5.649208382 | 4.02728836  | 10.02672421 |
| ENSMUSG0000084078 | 9.904325918 | 9.043024169 | 12.00456781 | 3.221830688 | 5.013362104 |
| ENSMUSG0000084079 | 7.074518513 | 10.43425866 | 9.179963621 | 4.832746033 | 9.310529622 |
| ENSMUSG0000084080 | 3.537259256 | 2.782468975 | 2.824604191 | 1.610915344 | 3.580972932 |
| ENSMUSG0000084081 | 11.31922962 | 11.1298759  | 12.71071886 | 11.27640741 | 11.45911338 |
| ENSMUSG0000084082 | 12.73413332 | 13.21672763 | 10.59226572 | 8.860034393 | 5.013362104 |
| ENSMUSG0000084083 | 11.31922962 | 8.347406925 | 9.886114669 | 8.054576721 | 7.161945863 |
| ENSMUSG0000084085 | 8.489422215 | 8.347406925 | 7.767661525 | 4.832746033 | 10.02672421 |
| ENSMUSG0000084086 | 2.122355554 | 1.391234488 | 4.943057334 | 2.416373016 | 3.580972932 |
| ENSMUSG0000084087 | 9.904325918 | 4.869320706 | 8.473812573 | 8.054576721 | 12.17530797 |
| ENSMUSG0000084088 | 14.85648888 | 25.04222078 | 26.83373982 | 19.33098413 | 24.35061594 |
| ENSMUSG0000084089 | 8.489422215 | 4.173703463 | 9.886114669 | 8.054576721 | 11.45911338 |
| ENSMUSG0000084090 | 12.02668147 | 8.347406925 | 7.061510478 | 4.02728836  | 6.445751277 |
| ENSMUSG0000084091 | 7.074518513 | 8.347406925 | 14.12302096 | 8.054576721 | 5.013362104 |
| ENSMUSG0000084092 | 11.31922962 | 10.43425866 | 11.29841676 | 4.832746033 | 6.445751277 |
| ENSMUSG0000084093 | 7.781970364 | 14.60796212 | 7.767661525 | 5.638203705 | 7.161945863 |
| ENSMUSG0000084094 | 8.489422215 | 14.60796212 | 6.35535943  | 7.249119049 | 7.87814045  |
| ENSMUSG0000084095 | 5.65961481  | 2.086851731 | 0.706151048 | 1.610915344 | 0           |
| ENSMUSG0000084096 | 4.952162959 | 3.478086219 | 2.118453143 | 2.416373016 | 6.445751277 |
| ENSMUSG0000084097 | 4.952162959 | 4.173703463 | 2.118453143 | 6.443661377 | 4.297167518 |
| ENSMUSG0000084098 | 9.904325918 | 12.52111039 | 13.41686991 | 16.91461111 | 15.04008631 |
| ENSMUSG0000084099 | 0.707451851 | 1.391234488 | 0           | 1.610915344 | 2.148583759 |
| ENSMUSG0000084101 | 10.61177777 | 9.043024169 | 7.061510478 | 3.221830688 | 8.594335036 |
| ENSMUSG0000084102 | 7.781970364 | 7.651789682 | 2.824604191 | 1.610915344 | 5.729556691 |
| ENSMUSG0000084103 | 3.537259256 | 4.869320706 | 5.649208382 | 3.221830688 | 5.013362104 |
| ENSMUSG0000084104 | 11.31922962 | 9.738641413 | 12.71071886 | 7.249119049 | 12.17530797 |
| ENSMUSG0000084105 | 12.02668147 | 30.60715873 | 31.77679715 | 20.1364418  | 26.49919969 |
| ENSMUSG0000084106 | 11.31922962 | 11.1298759  | 14.12302096 | 23.35827249 | 15.04008631 |
| ENSMUSG0000084107 | 12.02668147 | 7.651789682 | 6.35535943  | 4.832746033 | 7.161945863 |
| ENSMUSG0000084108 | 8.489422215 | 6.260555194 | 6.35535943  | 6.443661377 | 7.161945863 |
| ENSMUSG0000084110 | 1.414903703 | 0           | 0           | 1.610915344 | 4.297167518 |
| ENSMUSG0000084111 | 142.1978221 | 175.9911627 | 171.5947046 | 174.7843148 | 158.9951982 |
| ENSMUSG0000084112 | 4.952162959 | 4.173703463 | 3.530755239 | 4.832746033 | 5.013362104 |
| ENSMUSG0000084113 | 14.85648888 | 13.91234488 | 20.47838039 | 9.665492065 | 12.89150255 |
| ENSMUSG0000084114 | 2.829807405 | 6.260555194 | 2.118453143 | 5.638203705 | 5.013362104 |
| ENSMUSG0000084115 | 7.074518513 | 7.651789682 | 7.767661525 | 8.054576721 | 12.17530797 |
| ENSMUSG0000084116 | 7.781970364 | 6.260555194 | 11.29841676 | 3.221830688 | 4.297167518 |
| ENSMUSG0000084117 | 6.367066661 | 6.956172438 | 11.29841676 | 3.221830688 | 5.729556691 |
| ENSMUSG0000084118 | 6.367066661 | 6.260555194 | 3.530755239 | 3.221830688 | 2.148583759 |

|                   |             |             |             |             |             |
|-------------------|-------------|-------------|-------------|-------------|-------------|
| ENSMUSG0000084119 | 6.367066661 | 7.651789682 | 4.943057334 | 4.832746033 | 5.729556691 |
| ENSMUSG0000084120 | 7.074518513 | 6.956172438 | 6.35535943  | 5.638203705 | 6.445751277 |
| ENSMUSG0000084123 | 7.781970364 | 6.260555194 | 5.649208382 | 5.638203705 | 1.432389173 |
| ENSMUSG0000084124 | 12.02668147 | 11.1298759  | 4.236906287 | 8.860034393 | 5.013362104 |
| ENSMUSG0000084125 | 2.122355554 | 3.478086219 | 3.530755239 | 4.02728836  | 5.013362104 |
| ENSMUSG0000084126 | 11.31922962 | 12.52111039 | 6.35535943  | 10.47094974 | 8.594335036 |
| ENSMUSG0000084127 | 22.63845924 | 11.1298759  | 18.35992724 | 13.69278043 | 15.04008631 |
| ENSMUSG0000084129 | 9.196874066 | 12.52111039 | 11.29841676 | 8.860034393 | 8.594335036 |
| ENSMUSG0000084130 | 4.952162959 | 7.651789682 | 4.236906287 | 0.805457672 | 5.013362104 |
| ENSMUSG0000084131 | 2.122355554 | 6.956172438 | 4.236906287 | 8.054576721 | 15.04008631 |
| ENSMUSG0000084132 | 9.904325918 | 7.651789682 | 12.00456781 | 9.665492065 | 5.729556691 |
| ENSMUSG0000084133 | 10.61177777 | 6.260555194 | 9.886114669 | 4.832746033 | 7.87814045  |
| ENSMUSG0000084134 | 13.44158517 | 7.651789682 | 10.59226572 | 3.221830688 | 7.161945863 |
| ENSMUSG0000084135 | 10.61177777 | 6.956172438 | 10.59226572 | 6.443661377 | 3.580972932 |
| ENSMUSG0000084136 | 11.31922962 | 6.956172438 | 7.767661525 | 5.638203705 | 9.310529622 |
| ENSMUSG0000084137 | 28.29807405 | 52.17129328 | 45.19366706 | 27.38556085 | 32.22875639 |
| ENSMUSG0000084138 | 4.952162959 | 3.478086219 | 4.943057334 | 3.221830688 | 2.864778345 |
| ENSMUSG0000084139 | 16.27139258 | 26.43345526 | 21.89068248 | 17.72006879 | 18.62105924 |
| ENSMUSG0000084140 | 10.61177777 | 12.52111039 | 9.179963621 | 12.08186508 | 14.32389173 |
| ENSMUSG0000084141 | 13.44158517 | 9.738641413 | 7.061510478 | 6.443661377 | 5.013362104 |
| ENSMUSG0000084142 | 4.244711108 | 4.173703463 | 4.236906287 | 5.638203705 | 11.45911338 |
| ENSMUSG0000084143 | 7.074518513 | 8.347406925 | 7.767661525 | 4.832746033 | 6.445751277 |
| ENSMUSG0000084144 | 10.61177777 | 8.347406925 | 9.886114669 | 12.88732275 | 5.729556691 |
| ENSMUSG0000084145 | 8.489422215 | 6.956172438 | 7.061510478 | 8.860034393 | 5.013362104 |
| ENSMUSG0000084146 | 9.196874066 | 6.956172438 | 6.35535943  | 4.832746033 | 7.161945863 |
| ENSMUSG0000084147 | 3.537259256 | 4.173703463 | 4.943057334 | 3.221830688 | 2.864778345 |
| ENSMUSG0000084148 | 6.367066661 | 8.347406925 | 3.530755239 | 6.443661377 | 4.297167518 |
| ENSMUSG0000084149 | 56.5961481  | 86.95215547 | 86.15042783 | 74.9075635  | 81.64618284 |
| ENSMUSG0000084150 | 3.537259256 | 2.782468975 | 3.530755239 | 5.638203705 | 4.297167518 |
| ENSMUSG0000084151 | 6.367066661 | 5.56493795  | 7.767661525 | 5.638203705 | 3.580972932 |
| ENSMUSG0000084152 | 7.781970364 | 7.651789682 | 10.59226572 | 10.47094974 | 10.02672421 |
| ENSMUSG0000084153 | 21.22355554 | 15.99919661 | 15.53532305 | 5.638203705 | 10.02672421 |
| ENSMUSG0000084154 | 10.61177777 | 9.738641413 | 12.71071886 | 20.1364418  | 22.91822676 |
| ENSMUSG0000084155 | 4.244711108 | 2.086851731 | 6.35535943  | 1.610915344 | 2.864778345 |
| ENSMUSG0000084156 | 9.904325918 | 9.738641413 | 7.061510478 | 3.221830688 | 11.45911338 |
| ENSMUSG0000084157 | 7.781970364 | 4.869320706 | 6.35535943  | 10.47094974 | 9.310529622 |
| ENSMUSG0000084158 | 4.244711108 | 4.173703463 | 0.706151048 | 4.832746033 | 3.580972932 |
| ENSMUSG0000084159 | 25.46826665 | 30.60715873 | 26.12758877 | 47.52200265 | 40.10689684 |
| ENSMUSG0000084160 | 14.85648888 | 11.1298759  | 15.53532305 | 12.08186508 | 14.32389173 |
| ENSMUSG0000084161 | 4.244711108 | 4.869320706 | 2.824604191 | 0.805457672 | 2.148583759 |
| ENSMUSG0000084162 | 8.489422215 | 6.260555194 | 5.649208382 | 8.054576721 | 5.729556691 |
| ENSMUSG0000084163 | 10.61177777 | 6.956172438 | 6.35535943  | 6.443661377 | 5.013362104 |
| ENSMUSG0000084164 | 10.61177777 | 10.43425866 | 7.767661525 | 8.054576721 | 8.594335036 |



|                    |             |             |             |             |             |
|--------------------|-------------|-------------|-------------|-------------|-------------|
| ENSMUSG00000084166 | 5.65961481  | 4.869320706 | 4.943057334 | 4.832746033 | 2.864778345 |
| ENSMUSG00000084167 | 7.074518513 | 9.043024169 | 7.061510478 | 5.638203705 | 7.87814045  |
| ENSMUSG00000084168 | 33.95768886 | 59.12746572 | 43.07521391 | 54.7711217  | 47.98503729 |
| ENSMUSG00000084169 | 0.707451851 | 0.695617244 | 0           | 0           | 0           |
| ENSMUSG00000084170 | 9.904325918 | 8.347406925 | 12.71071886 | 7.249119049 | 9.310529622 |
| ENSMUSG00000084171 | 11.31922962 | 6.956172438 | 11.29841676 | 4.02728836  | 5.013362104 |
| ENSMUSG00000084172 | 1.414903703 | 0.695617244 | 2.118453143 | 2.416373016 | 4.297167518 |
| ENSMUSG00000084173 | 7.074518513 | 10.43425866 | 8.473812573 | 8.860034393 | 5.013362104 |
| ENSMUSG00000084175 | 10.61177777 | 9.738641413 | 9.179963621 | 4.02728836  | 10.02672421 |
| ENSMUSG00000084177 | 7.074518513 | 9.738641413 | 6.35535943  | 10.47094974 | 9.310529622 |
| ENSMUSG00000084178 | 7.781970364 | 4.173703463 | 2.824604191 | 2.416373016 | 5.729556691 |
| ENSMUSG00000084179 | 7.074518513 | 9.738641413 | 6.35535943  | 5.638203705 | 5.729556691 |
| ENSMUSG00000084180 | 2.829807405 | 3.478086219 | 4.236906287 | 3.221830688 | 3.580972932 |
| ENSMUSG00000084181 | 8.489422215 | 6.956172438 | 8.473812573 | 2.416373016 | 6.445751277 |
| ENSMUSG00000084182 | 14.85648888 | 5.56493795  | 10.59226572 | 5.638203705 | 7.161945863 |
| ENSMUSG00000084183 | 8.489422215 | 4.173703463 | 5.649208382 | 3.221830688 | 6.445751277 |
| ENSMUSG00000084184 | 7.074518513 | 6.260555194 | 6.35535943  | 3.221830688 | 5.729556691 |
| ENSMUSG00000084185 | 7.074518513 | 7.651789682 | 2.824604191 | 2.416373016 | 7.161945863 |
| ENSMUSG00000084186 | 7.074518513 | 6.260555194 | 6.35535943  | 2.416373016 | 2.864778345 |
| ENSMUSG00000084188 | 8.489422215 | 9.738641413 | 7.061510478 | 6.443661377 | 8.594335036 |
| ENSMUSG00000084189 | 3.537259256 | 6.956172438 | 6.35535943  | 4.02728836  | 7.87814045  |
| ENSMUSG00000084190 | 12.02668147 | 12.52111039 | 9.886114669 | 19.33098413 | 15.7562809  |
| ENSMUSG00000084191 | 4.244711108 | 6.260555194 | 4.236906287 | 2.416373016 | 2.864778345 |
| ENSMUSG00000084192 | 14.85648888 | 6.260555194 | 10.59226572 | 9.665492065 | 5.729556691 |
| ENSMUSG00000084193 | 9.904325918 | 8.347406925 | 8.473812573 | 12.08186508 | 9.310529622 |
| ENSMUSG00000084195 | 2.122355554 | 4.869320706 | 5.649208382 | 6.443661377 | 1.432389173 |
| ENSMUSG00000084196 | 2.829807405 | 4.173703463 | 7.767661525 | 5.638203705 | 2.864778345 |
| ENSMUSG00000084197 | 9.904325918 | 9.043024169 | 7.767661525 | 8.054576721 | 6.445751277 |
| ENSMUSG00000084198 | 8.489422215 | 8.347406925 | 9.886114669 | 6.443661377 | 5.013362104 |
| ENSMUSG00000084199 | 8.489422215 | 6.260555194 | 8.473812573 | 5.638203705 | 4.297167518 |
| ENSMUSG00000084200 | 14.14903703 | 6.260555194 | 9.886114669 | 3.221830688 | 7.161945863 |
| ENSMUSG00000084201 | 14.14903703 | 8.347406925 | 12.00456781 | 11.27640741 | 12.17530797 |
| ENSMUSG00000084202 | 4.952162959 | 3.478086219 | 4.236906287 | 4.832746033 | 5.013362104 |
| ENSMUSG00000084203 | 9.904325918 | 4.869320706 | 4.236906287 | 5.638203705 | 4.297167518 |
| ENSMUSG00000084204 | 9.904325918 | 9.738641413 | 7.061510478 | 7.249119049 | 4.297167518 |
| ENSMUSG00000084205 | 3.537259256 | 6.260555194 | 4.943057334 | 4.832746033 | 4.297167518 |
| ENSMUSG00000084206 | 9.196874066 | 9.738641413 | 11.29841676 | 4.02728836  | 6.445751277 |
| ENSMUSG00000084207 | 8.489422215 | 6.260555194 | 9.179963621 | 4.832746033 | 9.310529622 |
| ENSMUSG00000084208 | 9.904325918 | 8.347406925 | 6.35535943  | 12.88732275 | 10.02672421 |
| ENSMUSG00000084209 | 9.904325918 | 7.651789682 | 4.943057334 | 4.02728836  | 4.297167518 |
| ENSMUSG00000084210 | 4.244711108 | 3.478086219 | 4.943057334 | 5.638203705 | 0.716194586 |
| ENSMUSG00000084211 | 8.489422215 | 6.260555194 | 9.179963621 | 3.221830688 | 6.445751277 |
| ENSMUSG00000084212 | 7.781970364 | 4.869320706 | 6.35535943  | 7.249119049 | 5.729556691 |

|                    |             |             |             |             |             |
|--------------------|-------------|-------------|-------------|-------------|-------------|
| ENSMUSG00000084213 | 233.4591109 | 259.4652319 | 239.3852052 | 313.3230344 | 241.3575756 |
| ENSMUSG00000084214 | 4.952162959 | 2.782468975 | 2.118453143 | 2.416373016 | 5.013362104 |
| ENSMUSG00000084215 | 7.074518513 | 6.956172438 | 4.943057334 | 4.02728836  | 5.013362104 |
| ENSMUSG00000084216 | 2.829807405 | 2.086851731 | 4.943057334 | 2.416373016 | 2.864778345 |
| ENSMUSG00000084217 | 7.781970364 | 10.43425866 | 6.35535943  | 8.054576721 | 8.594335036 |
| ENSMUSG00000084218 | 9.196874066 | 5.56493795  | 4.943057334 | 4.02728836  | 5.013362104 |
| ENSMUSG00000084219 | 3.537259256 | 5.56493795  | 2.824604191 | 4.02728836  | 6.445751277 |
| ENSMUSG00000084220 | 7.781970364 | 11.1298759  | 6.35535943  | 4.832746033 | 9.310529622 |
| ENSMUSG00000084221 | 6.367066661 | 7.651789682 | 8.473812573 | 9.665492065 | 10.02672421 |
| ENSMUSG00000084222 | 9.196874066 | 6.260555194 | 7.767661525 | 7.249119049 | 6.445751277 |
| ENSMUSG00000084223 | 6.367066661 | 10.43425866 | 8.473812573 | 10.47094974 | 7.161945863 |
| ENSMUSG00000084224 | 12.02668147 | 8.347406925 | 8.473812573 | 5.638203705 | 7.87814045  |
| ENSMUSG00000084226 | 10.61177777 | 11.1298759  | 10.59226572 | 9.665492065 | 9.310529622 |
| ENSMUSG00000084228 | 4.952162959 | 8.347406925 | 4.236906287 | 3.221830688 | 10.7429188  |
| ENSMUSG00000084230 | 35.37259256 | 50.08444155 | 50.84287544 | 23.35827249 | 23.63442135 |
| ENSMUSG00000084231 | 273.7838664 | 294.2460941 | 280.341966  | 291.5756773 | 239.9251864 |
| ENSMUSG00000084235 | 13.44158517 | 17.39043109 | 19.06607829 | 16.10915344 | 14.32389173 |
| ENSMUSG00000084236 | 4.952162959 | 8.347406925 | 9.179963621 | 4.02728836  | 6.445751277 |
| ENSMUSG00000084237 | 9.904325918 | 5.56493795  | 7.061510478 | 3.221830688 | 7.161945863 |
| ENSMUSG00000084238 | 2.122355554 | 2.782468975 | 16.2414741  | 6.443661377 | 2.148583759 |
| ENSMUSG00000084239 | 13.44158517 | 7.651789682 | 4.236906287 | 8.054576721 | 7.161945863 |
| ENSMUSG00000084240 | 5.65961481  | 5.56493795  | 8.473812573 | 8.054576721 | 7.161945863 |
| ENSMUSG00000084241 | 7.074518513 | 8.347406925 | 11.29841676 | 8.054576721 | 9.310529622 |
| ENSMUSG00000084243 | 9.196874066 | 9.738641413 | 5.649208382 | 9.665492065 | 7.87814045  |
| ENSMUSG00000084244 | 6.367066661 | 2.086851731 | 8.473812573 | 9.665492065 | 6.445751277 |
| ENSMUSG00000084245 | 2.122355554 | 3.478086219 | 3.530755239 | 3.221830688 | 3.580972932 |
| ENSMUSG00000084246 | 5.65961481  | 4.869320706 | 3.530755239 | 3.221830688 | 4.297167518 |
| ENSMUSG00000084247 | 8.489422215 | 0           | 3.530755239 | 2.416373016 | 4.297167518 |
| ENSMUSG00000084248 | 7.781970364 | 11.82549314 | 8.473812573 | 3.221830688 | 5.013362104 |
| ENSMUSG00000084249 | 10.61177777 | 6.956172438 | 13.41686991 | 4.832746033 | 11.45911338 |
| ENSMUSG00000084250 | 7.781970364 | 9.043024169 | 7.061510478 | 0.805457672 | 5.013362104 |
| ENSMUSG00000084251 | 9.196874066 | 7.651789682 | 5.649208382 | 4.832746033 | 7.87814045  |
| ENSMUSG00000084252 | 103.2879703 | 159.2963488 | 145.4671158 | 152.2315    | 121.0368851 |
| ENSMUSG00000084253 | 14.14903703 | 8.347406925 | 4.943057334 | 3.221830688 | 5.013362104 |
| ENSMUSG00000084254 | 13.44158517 | 8.347406925 | 11.29841676 | 9.665492065 | 3.580972932 |
| ENSMUSG00000084256 | 4.952162959 | 4.869320706 | 0.706151048 | 3.221830688 | 3.580972932 |
| ENSMUSG00000084257 | 6.367066661 | 4.173703463 | 6.35535943  | 6.443661377 | 5.729556691 |
| ENSMUSG00000084258 | 7.781970364 | 18.78166558 | 15.53532305 | 11.27640741 | 9.310529622 |
| ENSMUSG00000084259 | 9.196874066 | 7.651789682 | 9.886114669 | 10.47094974 | 5.729556691 |
| ENSMUSG00000084260 | 16.97884443 | 14.60796212 | 16.2414741  | 10.47094974 | 15.04008631 |
| ENSMUSG00000084261 | 12.02668147 | 10.43425866 | 6.35535943  | 9.665492065 | 14.32389173 |
| ENSMUSG00000084262 | 8.489422215 | 3.478086219 | 9.886114669 | 4.02728836  | 5.729556691 |
| ENSMUSG00000084264 | 12.02668147 | 5.56493795  | 7.767661525 | 8.054576721 | 12.89150255 |

|                    |             |             |             |             |             |
|--------------------|-------------|-------------|-------------|-------------|-------------|
| ENSMUSG00000084265 | 6.367066661 | 6.260555194 | 9.886114669 | 11.27640741 | 7.161945863 |
| ENSMUSG00000084267 | 7.781970364 | 6.956172438 | 7.767661525 | 8.860034393 | 5.729556691 |
| ENSMUSG00000084268 | 4.244711108 | 8.347406925 | 11.29841676 | 6.443661377 | 3.580972932 |
| ENSMUSG00000084269 | 4.244711108 | 5.56493795  | 4.236906287 | 1.610915344 | 3.580972932 |
| ENSMUSG00000084270 | 5.65961481  | 3.478086219 | 4.943057334 | 0.805457672 | 2.864778345 |
| ENSMUSG00000084271 | 9.904325918 | 9.738641413 | 13.41686991 | 13.69278043 | 10.7429188  |
| ENSMUSG00000084272 | 16.27139258 | 16.69481385 | 14.829172   | 10.47094974 | 8.594335036 |
| ENSMUSG00000084273 | 9.196874066 | 2.782468975 | 4.943057334 | 2.416373016 | 5.729556691 |
| ENSMUSG00000084274 | 8.489422215 | 11.82549314 | 11.29841676 | 4.832746033 | 4.297167518 |
| ENSMUSG00000084275 | 4.244711108 | 1.391234488 | 2.118453143 | 0.805457672 | 5.729556691 |
| ENSMUSG00000084276 | 14.85648888 | 6.956172438 | 9.886114669 | 6.443661377 | 10.7429188  |
| ENSMUSG00000084277 | 264.5869924 | 253.2046767 | 281.7542681 | 449.445381  | 283.6130562 |
| ENSMUSG00000084278 | 9.196874066 | 8.347406925 | 7.061510478 | 4.832746033 | 12.17530797 |
| ENSMUSG00000084279 | 16.97884443 | 13.21672763 | 10.59226572 | 16.10915344 | 12.89150255 |
| ENSMUSG00000084280 | 11.31922962 | 5.56493795  | 10.59226572 | 11.27640741 | 12.17530797 |
| ENSMUSG00000084281 | 3.537259256 | 7.651789682 | 5.649208382 | 4.02728836  | 4.297167518 |
| ENSMUSG00000084282 | 11.31922962 | 6.956172438 | 7.767661525 | 5.638203705 | 7.161945863 |
| ENSMUSG00000084283 | 3.537259256 | 2.086851731 | 5.649208382 | 0.805457672 | 2.148583759 |
| ENSMUSG00000084284 | 4.952162959 | 6.956172438 | 4.943057334 | 5.638203705 | 3.580972932 |
| ENSMUSG00000084285 | 9.196874066 | 7.651789682 | 4.943057334 | 3.221830688 | 7.161945863 |
| ENSMUSG00000084286 | 8.489422215 | 4.869320706 | 5.649208382 | 10.47094974 | 6.445751277 |
| ENSMUSG00000084287 | 4.952162959 | 5.56493795  | 4.236906287 | 2.416373016 | 2.148583759 |
| ENSMUSG00000084288 | 27.5906222  | 34.08524495 | 21.18453143 | 14.4982381  | 17.18867007 |
| ENSMUSG00000084289 | 4.952162959 | 2.782468975 | 1.412302096 | 5.638203705 | 2.148583759 |
| ENSMUSG00000084291 | 59.42595551 | 88.34338996 | 82.61967259 | 62.02024075 | 71.61945863 |
| ENSMUSG00000084292 | 34.66514071 | 76.51789682 | 62.1412922  | 37.05105292 | 33.66114556 |
| ENSMUSG00000084293 | 7.074518513 | 8.347406925 | 14.829172   | 7.249119049 | 7.161945863 |
| ENSMUSG00000084294 | 9.904325918 | 3.478086219 | 9.179963621 | 8.054576721 | 5.729556691 |
| ENSMUSG00000084295 | 8.489422215 | 6.956172438 | 6.35535943  | 5.638203705 | 3.580972932 |
| ENSMUSG00000084296 | 4.952162959 | 3.478086219 | 5.649208382 | 5.638203705 | 7.161945863 |
| ENSMUSG00000084297 | 10.61177777 | 13.21672763 | 6.35535943  | 7.249119049 | 7.87814045  |
| ENSMUSG00000084298 | 7.074518513 | 8.347406925 | 6.35535943  | 3.221830688 | 5.013362104 |
| ENSMUSG00000084299 | 9.196874066 | 6.956172438 | 9.179963621 | 4.02728836  | 10.7429188  |
| ENSMUSG00000084300 | 5.65961481  | 5.56493795  | 2.118453143 | 0.805457672 | 4.297167518 |
| ENSMUSG00000084301 | 14.85648888 | 18.78166558 | 21.18453143 | 24.16373016 | 19.33725383 |
| ENSMUSG00000084302 | 5.65961481  | 10.43425866 | 9.886114669 | 6.443661377 | 12.17530797 |
| ENSMUSG00000084303 | 4.244711108 | 1.391234488 | 2.824604191 | 3.221830688 | 4.297167518 |
| ENSMUSG00000084304 | 9.196874066 | 6.260555194 | 12.00456781 | 9.665492065 | 11.45911338 |
| ENSMUSG00000084305 | 5.65961481  | 5.56493795  | 2.824604191 | 2.416373016 | 2.864778345 |
| ENSMUSG00000084306 | 8.489422215 | 10.43425866 | 12.00456781 | 6.443661377 | 7.87814045  |
| ENSMUSG00000084307 | 11.31922962 | 9.043024169 | 9.179963621 | 8.054576721 | 8.594335036 |
| ENSMUSG00000084308 | 5.65961481  | 2.086851731 | 5.649208382 | 3.221830688 | 4.297167518 |
| ENSMUSG00000084309 | 12.02668147 | 7.651789682 | 7.061510478 | 4.02728836  | 10.02672421 |

|                    |             |             |             |             |             |
|--------------------|-------------|-------------|-------------|-------------|-------------|
| ENSMUSG00000084310 | 8.489422215 | 6.956172438 | 12.71071886 | 7.249119049 | 7.161945863 |
| ENSMUSG00000084311 | 9.904325918 | 6.956172438 | 4.943057334 | 1.610915344 | 7.161945863 |
| ENSMUSG00000084312 | 8.489422215 | 11.1298759  | 10.59226572 | 6.443661377 | 10.7429188  |
| ENSMUSG00000084313 | 9.196874066 | 5.56493795  | 9.179963621 | 1.610915344 | 2.864778345 |
| ENSMUSG00000084314 | 7.781970364 | 7.651789682 | 9.179963621 | 7.249119049 | 5.013362104 |
| ENSMUSG00000084315 | 7.781970364 | 11.82549314 | 7.061510478 | 11.27640741 | 4.297167518 |
| ENSMUSG00000084316 | 13.44158517 | 4.869320706 | 3.530755239 | 5.638203705 | 10.02672421 |
| ENSMUSG00000084318 | 9.904325918 | 4.173703463 | 7.767661525 | 6.443661377 | 5.013362104 |
| ENSMUSG00000084319 | 12.02668147 | 8.347406925 | 8.473812573 | 12.08186508 | 17.90486466 |
| ENSMUSG00000084320 | 5.65961481  | 11.1298759  | 13.41686991 | 9.665492065 | 10.7429188  |
| ENSMUSG00000084322 | 9.196874066 | 9.043024169 | 6.35535943  | 6.443661377 | 5.013362104 |
| ENSMUSG00000084323 | 9.196874066 | 8.347406925 | 8.473812573 | 8.860034393 | 4.297167518 |
| ENSMUSG00000084324 | 2.122355554 | 0.695617244 | 0           | 0           | 0           |
| ENSMUSG00000084325 | 5.65961481  | 6.260555194 | 4.943057334 | 8.860034393 | 6.445751277 |
| ENSMUSG00000084326 | 12.73413332 | 9.043024169 | 8.473812573 | 2.416373016 | 5.013362104 |
| ENSMUSG00000084327 | 3.537259256 | 4.869320706 | 4.943057334 | 2.416373016 | 2.864778345 |
| ENSMUSG00000084328 | 9.904325918 | 11.1298759  | 8.473812573 | 3.221830688 | 5.729556691 |
| ENSMUSG00000084329 | 13.44158517 | 13.21672763 | 12.00456781 | 15.30369577 | 12.17530797 |
| ENSMUSG00000084330 | 4.952162959 | 2.782468975 | 3.530755239 | 2.416373016 | 2.864778345 |
| ENSMUSG00000084331 | 2.829807405 | 2.086851731 | 1.412302096 | 4.02728836  | 3.580972932 |
| ENSMUSG00000084332 | 9.196874066 | 6.956172438 | 2.824604191 | 3.221830688 | 10.02672421 |
| ENSMUSG00000084333 | 9.196874066 | 6.260555194 | 4.236906287 | 10.47094974 | 4.297167518 |
| ENSMUSG00000084334 | 3.537259256 | 4.869320706 | 8.473812573 | 4.02728836  | 3.580972932 |
| ENSMUSG00000084335 | 7.781970364 | 8.347406925 | 13.41686991 | 8.860034393 | 10.02672421 |
| ENSMUSG00000084336 | 8.489422215 | 5.56493795  | 11.29841676 | 6.443661377 | 10.02672421 |
| ENSMUSG00000084337 | 4.244711108 | 4.869320706 | 2.824604191 | 2.416373016 | 3.580972932 |
| ENSMUSG00000084338 | 7.074518513 | 8.347406925 | 4.943057334 | 12.08186508 | 6.445751277 |
| ENSMUSG00000084339 | 9.904325918 | 10.43425866 | 8.473812573 | 4.02728836  | 7.161945863 |
| ENSMUSG00000084340 | 10.61177777 | 14.60796212 | 12.00456781 | 7.249119049 | 8.594335036 |
| ENSMUSG00000084341 | 5.65961481  | 0.695617244 | 5.649208382 | 2.416373016 | 3.580972932 |
| ENSMUSG00000084342 | 12.73413332 | 11.1298759  | 6.35535943  | 7.249119049 | 5.013362104 |
| ENSMUSG00000084343 | 6.367066661 | 6.956172438 | 4.943057334 | 6.443661377 | 5.729556691 |
| ENSMUSG00000084344 | 14.85648888 | 10.43425866 | 9.179963621 | 10.47094974 | 8.594335036 |
| ENSMUSG00000084345 | 7.781970364 | 2.782468975 | 9.886114669 | 4.02728836  | 12.17530797 |
| ENSMUSG00000084346 | 16.27139258 | 4.869320706 | 9.179963621 | 4.02728836  | 5.729556691 |
| ENSMUSG00000084347 | 10.61177777 | 4.173703463 | 7.767661525 | 7.249119049 | 10.02672421 |
| ENSMUSG00000084348 | 4.952162959 | 6.956172438 | 7.767661525 | 4.832746033 | 9.310529622 |
| ENSMUSG00000084349 | 7.781970364 | 9.043024169 | 5.649208382 | 17.72006879 | 17.18867007 |
| ENSMUSG00000084350 | 28.29807405 | 23.65098629 | 28.24604191 | 19.33098413 | 18.62105924 |
| ENSMUSG00000084351 | 8.489422215 | 6.956172438 | 7.061510478 | 4.02728836  | 7.87814045  |
| ENSMUSG00000084352 | 8.489422215 | 9.043024169 | 6.35535943  | 4.02728836  | 5.013362104 |
| ENSMUSG00000084353 | 7.074518513 | 8.347406925 | 12.00456781 | 8.860034393 | 9.310529622 |
| ENSMUSG00000084354 | 12.02668147 | 4.869320706 | 6.35535943  | 5.638203705 | 5.729556691 |

|                    |             |             |             |             |             |
|--------------------|-------------|-------------|-------------|-------------|-------------|
| ENSMUSG00000084355 | 4.244711108 | 1.391234488 | 7.061510478 | 3.221830688 | 6.445751277 |
| ENSMUSG00000084356 | 10.61177777 | 11.1298759  | 5.649208382 | 5.638203705 | 5.729556691 |
| ENSMUSG00000084357 | 9.196874066 | 7.651789682 | 4.943057334 | 2.416373016 | 11.45911338 |
| ENSMUSG00000084358 | 16.97884443 | 5.56493795  | 9.179963621 | 6.443661377 | 8.594335036 |
| ENSMUSG00000084359 | 4.244711108 | 6.260555194 | 7.061510478 | 4.02728836  | 5.729556691 |
| ENSMUSG00000084360 | 9.196874066 | 5.56493795  | 5.649208382 | 4.832746033 | 5.729556691 |
| ENSMUSG00000084361 | 4.952162959 | 3.478086219 | 2.118453143 | 2.416373016 | 2.148583759 |
| ENSMUSG00000084362 | 309.156459  | 329.0269563 | 297.2895911 | 420.4489048 | 340.9086231 |
| ENSMUSG00000084363 | 4.952162959 | 6.956172438 | 4.943057334 | 5.638203705 | 2.148583759 |
| ENSMUSG00000084366 | 9.904325918 | 7.651789682 | 12.00456781 | 4.02728836  | 7.161945863 |
| ENSMUSG00000084367 | 4.244711108 | 2.086851731 | 5.649208382 | 0           | 0.716194586 |
| ENSMUSG00000084368 | 3.537259256 | 2.086851731 | 2.824604191 | 2.416373016 | 2.148583759 |
| ENSMUSG00000084369 | 2.122355554 | 3.478086219 | 3.530755239 | 0           | 1.432389173 |
| ENSMUSG00000084370 | 9.904325918 | 7.651789682 | 10.59226572 | 9.665492065 | 7.87814045  |
| ENSMUSG00000084371 | 15.56394073 | 5.56493795  | 7.061510478 | 8.860034393 | 5.013362104 |
| ENSMUSG00000084372 | 0.707451851 | 2.782468975 | 2.118453143 | 2.416373016 | 0.716194586 |
| ENSMUSG00000084373 | 8.489422215 | 7.651789682 | 5.649208382 | 3.221830688 | 6.445751277 |
| ENSMUSG00000084374 | 9.904325918 | 2.782468975 | 7.061510478 | 6.443661377 | 10.02672421 |
| ENSMUSG00000084375 | 6.367066661 | 5.56493795  | 6.35535943  | 4.832746033 | 5.013362104 |
| ENSMUSG00000084376 | 4.952162959 | 3.478086219 | 4.236906287 | 3.221830688 | 5.013362104 |
| ENSMUSG00000084377 | 7.781970364 | 9.043024169 | 4.943057334 | 8.054576721 | 7.87814045  |
| ENSMUSG00000084378 | 5.65961481  | 3.478086219 | 3.530755239 | 0.805457672 | 4.297167518 |
| ENSMUSG00000084379 | 6.367066661 | 10.43425866 | 8.473812573 | 8.054576721 | 7.161945863 |
| ENSMUSG00000084380 | 23.34591109 | 34.08524495 | 34.60140134 | 43.49471429 | 45.83645353 |
| ENSMUSG00000084381 | 9.196874066 | 13.21672763 | 13.41686991 | 10.47094974 | 7.87814045  |
| ENSMUSG00000084382 | 7.781970364 | 3.478086219 | 7.767661525 | 3.221830688 | 10.02672421 |
| ENSMUSG00000084383 | 7.074518513 | 17.39043109 | 14.829172   | 12.08186508 | 12.89150255 |
| ENSMUSG00000084384 | 7.074518513 | 6.260555194 | 3.530755239 | 4.02728836  | 10.7429188  |
| ENSMUSG00000084385 | 9.196874066 | 3.478086219 | 7.061510478 | 5.638203705 | 5.013362104 |
| ENSMUSG00000084386 | 11.31922962 | 4.173703463 | 5.649208382 | 4.832746033 | 7.161945863 |
| ENSMUSG00000084387 | 7.781970364 | 6.260555194 | 7.767661525 | 3.221830688 | 6.445751277 |
| ENSMUSG00000084390 | 4.952162959 | 4.173703463 | 4.943057334 | 2.416373016 | 3.580972932 |
| ENSMUSG00000084391 | 8.489422215 | 6.956172438 | 3.530755239 | 2.416373016 | 12.17530797 |
| ENSMUSG00000084392 | 1.414903703 | 2.782468975 | 7.061510478 | 8.054576721 | 2.864778345 |
| ENSMUSG00000084393 | 17.68629628 | 9.738641413 | 9.179963621 | 9.665492065 | 6.445751277 |
| ENSMUSG00000084394 | 5.65961481  | 2.782468975 | 4.236906287 | 1.610915344 | 6.445751277 |
| ENSMUSG00000084395 | 5.65961481  | 5.56493795  | 6.35535943  | 5.638203705 | 4.297167518 |
| ENSMUSG00000084396 | 2.829807405 | 3.478086219 | 1.412302096 | 0.805457672 | 4.297167518 |
| ENSMUSG00000084397 | 6.367066661 | 2.782468975 | 4.943057334 | 3.221830688 | 5.729556691 |
| ENSMUSG00000084399 | 14.14903703 | 2.782468975 | 8.473812573 | 4.02728836  | 7.161945863 |
| ENSMUSG00000084400 | 5.65961481  | 6.260555194 | 5.649208382 | 9.665492065 | 8.594335036 |
| ENSMUSG00000084401 | 6.367066661 | 9.043024169 | 7.061510478 | 4.832746033 | 10.7429188  |
| ENSMUSG00000084402 | 9.904325918 | 2.782468975 | 5.649208382 | 4.832746033 | 4.297167518 |

|                    |             |             |             |             |             |
|--------------------|-------------|-------------|-------------|-------------|-------------|
| ENSMUSG00000084403 | 4.952162959 | 11.1298759  | 9.179963621 | 4.02728836  | 7.87814045  |
| ENSMUSG00000084404 | 11.31922962 | 9.043024169 | 7.061510478 | 7.249119049 | 10.02672421 |
| ENSMUSG00000084405 | 9.196874066 | 6.260555194 | 7.061510478 | 3.221830688 | 3.580972932 |
| ENSMUSG00000084407 | 16.97884443 | 7.651789682 | 10.59226572 | 12.08186508 | 18.62105924 |
| ENSMUSG00000084408 | 26.88317035 | 40.34580014 | 38.83830763 | 41.07834128 | 27.93158887 |
| ENSMUSG00000084411 | 23.34591109 | 26.43345526 | 28.24604191 | 18.52552646 | 17.18867007 |
| ENSMUSG00000084412 | 11.31922962 | 6.956172438 | 10.59226572 | 6.443661377 | 7.161945863 |
| ENSMUSG00000084413 | 7.781970364 | 7.651789682 | 16.94762515 | 4.02728836  | 8.594335036 |
| ENSMUSG00000084414 | 4.952162959 | 4.869320706 | 11.29841676 | 3.221830688 | 10.02672421 |
| ENSMUSG00000084415 | 15.56394073 | 5.56493795  | 9.179963621 | 5.638203705 | 5.013362104 |
| ENSMUSG00000084416 | 8.489422215 | 10.43425866 | 7.061510478 | 21.74735715 | 15.7562809  |
| ENSMUSG00000084417 | 10.61177777 | 6.260555194 | 4.943057334 | 3.221830688 | 10.7429188  |
| ENSMUSG00000084418 | 7.074518513 | 11.1298759  | 7.767661525 | 5.638203705 | 9.310529622 |
| ENSMUSG00000084419 | 23.34591109 | 43.12826911 | 46.60596915 | 36.24559524 | 34.37734014 |
| ENSMUSG00000084421 | 7.074518513 | 6.956172438 | 8.473812573 | 3.221830688 | 2.864778345 |
| ENSMUSG00000084422 | 29.0055259  | 34.08524495 | 31.0706461  | 24.16373016 | 29.36397804 |
| ENSMUSG00000084423 | 8.489422215 | 16.69481385 | 15.53532305 | 15.30369577 | 7.161945863 |
| ENSMUSG00000084425 | 4.952162959 | 8.347406925 | 13.41686991 | 4.02728836  | 6.445751277 |
| ENSMUSG00000084426 | 7.781970364 | 6.260555194 | 9.886114669 | 5.638203705 | 5.013362104 |
| ENSMUSG00000084428 | 6.367066661 | 0.695617244 | 7.767661525 | 4.832746033 | 6.445751277 |
| ENSMUSG00000084431 | 10.61177777 | 8.347406925 | 5.649208382 | 2.416373016 | 10.02672421 |
| ENSMUSG00000084432 | 6.367066661 | 5.56493795  | 9.179963621 | 4.02728836  | 5.013362104 |
| ENSMUSG00000084433 | 24.05336294 | 45.91073809 | 38.13215658 | 70.88027514 | 47.2688427  |
| ENSMUSG00000084435 | 13.44158517 | 6.956172438 | 7.061510478 | 10.47094974 | 3.580972932 |
| ENSMUSG00000084437 | 122.3891703 | 199.642149  | 181.4808193 | 199.7535027 | 193.3725383 |
| ENSMUSG00000084439 | 4.952162959 | 7.651789682 | 9.886114669 | 7.249119049 | 5.729556691 |
| ENSMUSG00000084440 | 17.68629628 | 21.56413456 | 22.59683353 | 9.665492065 | 14.32389173 |
| ENSMUSG00000084441 | 7.781970364 | 6.260555194 | 12.71071886 | 6.443661377 | 5.013362104 |
| ENSMUSG00000084442 | 8.489422215 | 11.82549314 | 12.71071886 | 13.69278043 | 7.87814045  |
| ENSMUSG00000084443 | 12.73413332 | 9.738641413 | 7.767661525 | 6.443661377 | 6.445751277 |
| ENSMUSG00000084444 | 4.244711108 | 7.651789682 | 7.767661525 | 4.832746033 | 10.02672421 |
| ENSMUSG00000084445 | 10.61177777 | 6.956172438 | 4.943057334 | 4.832746033 | 3.580972932 |
| ENSMUSG00000084446 | 4.952162959 | 13.91234488 | 13.41686991 | 8.054576721 | 10.02672421 |
| ENSMUSG00000084447 | 7.074518513 | 4.869320706 | 8.473812573 | 4.832746033 | 10.02672421 |
| ENSMUSG00000084448 | 7.074518513 | 7.651789682 | 9.886114669 | 4.832746033 | 3.580972932 |
| ENSMUSG00000084449 | 14.14903703 | 8.347406925 | 7.767661525 | 4.02728836  | 10.7429188  |
| ENSMUSG00000084450 | 2.829807405 | 2.782468975 | 6.35535943  | 4.02728836  | 6.445751277 |
| ENSMUSG00000084451 | 6.367066661 | 6.956172438 | 5.649208382 | 3.221830688 | 6.445751277 |
| ENSMUSG00000084452 | 5.65961481  | 3.478086219 | 2.118453143 | 7.249119049 | 4.297167518 |
| ENSMUSG00000084453 | 26.1757185  | 36.17209668 | 40.95676077 | 41.88379895 | 55.14698315 |
| ENSMUSG00000084454 | 51.64398514 | 101.5601176 | 79.7950684  | 53.16020636 | 61.59273443 |
| ENSMUSG00000084456 | 9.196874066 | 6.260555194 | 6.35535943  | 2.416373016 | 6.445751277 |
| ENSMUSG00000084457 | 11.31922962 | 13.91234488 | 12.00456781 | 12.08186508 | 7.161945863 |

|                    |             |             |             |             |             |
|--------------------|-------------|-------------|-------------|-------------|-------------|
| ENSMUSG00000084458 | 9.196874066 | 13.21672763 | 9.886114669 | 1.610915344 | 2.864778345 |
| ENSMUSG00000084459 | 10.61177777 | 4.869320706 | 7.061510478 | 4.832746033 | 4.297167518 |
| ENSMUSG00000084460 | 10.61177777 | 11.1298759  | 10.59226572 | 2.416373016 | 7.161945863 |
| ENSMUSG00000084461 | 15.56394073 | 10.43425866 | 8.473812573 | 8.860034393 | 5.729556691 |
| ENSMUSG00000084462 | 1.414903703 | 1.391234488 | 1.412302096 | 1.610915344 | 0           |
| ENSMUSG00000084463 | 9.904325918 | 5.56493795  | 7.767661525 | 4.02728836  | 5.013362104 |
| ENSMUSG00000084465 | 70.03773327 | 137.7322143 | 108.0411103 | 117.5968201 | 103.1320204 |
| ENSMUSG00000084466 | 10.61177777 | 11.82549314 | 10.59226572 | 4.832746033 | 10.7429188  |
| ENSMUSG00000084467 | 9.196874066 | 9.043024169 | 11.29841676 | 12.88732275 | 9.310529622 |
| ENSMUSG00000084468 | 12.02668147 | 5.56493795  | 9.886114669 | 7.249119049 | 12.89150255 |
| ENSMUSG00000084469 | 7.781970364 | 6.260555194 | 4.943057334 | 3.221830688 | 5.013362104 |
| ENSMUSG00000084472 | 9.196874066 | 11.82549314 | 7.767661525 | 4.832746033 | 6.445751277 |
| ENSMUSG00000084473 | 8.489422215 | 5.56493795  | 6.35535943  | 4.832746033 | 11.45911338 |
| ENSMUSG00000084474 | 4.952162959 | 6.260555194 | 12.00456781 | 8.054576721 | 9.310529622 |
| ENSMUSG00000084475 | 10.61177777 | 8.347406925 | 9.179963621 | 9.665492065 | 7.87814045  |
| ENSMUSG00000084476 | 9.904325918 | 7.651789682 | 6.35535943  | 8.860034393 | 11.45911338 |
| ENSMUSG00000084477 | 13.44158517 | 9.738641413 | 11.29841676 | 1.610915344 | 11.45911338 |
| ENSMUSG00000084478 | 6.367066661 | 4.173703463 | 6.35535943  | 2.416373016 | 4.297167518 |
| ENSMUSG00000084479 | 10.61177777 | 4.173703463 | 9.179963621 | 4.832746033 | 5.729556691 |
| ENSMUSG00000084480 | 8.489422215 | 7.651789682 | 7.767661525 | 9.665492065 | 8.594335036 |
| ENSMUSG00000084484 | 7.781970364 | 7.651789682 | 10.59226572 | 8.860034393 | 10.7429188  |
| ENSMUSG00000084485 | 11.31922962 | 9.738641413 | 2.824604191 | 6.443661377 | 6.445751277 |
| ENSMUSG00000084487 | 0           | 0           | 0           | 0           | 0           |
| ENSMUSG00000084492 | 6.367066661 | 6.956172438 | 7.767661525 | 5.638203705 | 4.297167518 |
| ENSMUSG00000084493 | 155.6394073 | 160.6875833 | 175.1254598 | 128.8732275 | 136.0769714 |
| ENSMUSG00000084496 | 12.02668147 | 11.1298759  | 12.71071886 | 11.27640741 | 7.87814045  |
| ENSMUSG00000084497 | 85.601674   | 86.25653823 | 98.15499564 | 175.5897725 | 141.0903335 |
| ENSMUSG00000084498 | 14.14903703 | 8.347406925 | 5.649208382 | 4.02728836  | 7.161945863 |
| ENSMUSG00000084500 | 7.074518513 | 5.56493795  | 7.061510478 | 3.221830688 | 3.580972932 |
| ENSMUSG00000084501 | 8.489422215 | 6.260555194 | 7.061510478 | 5.638203705 | 12.17530797 |
| ENSMUSG00000084502 | 9.196874066 | 7.651789682 | 7.767661525 | 7.249119049 | 7.87814045  |
| ENSMUSG00000084503 | 7.074518513 | 4.173703463 | 5.649208382 | 5.638203705 | 6.445751277 |
| ENSMUSG00000084504 | 149.9797925 | 141.2103005 | 127.1071886 | 277.8828969 | 178.332452  |
| ENSMUSG00000084505 | 13.44158517 | 6.260555194 | 9.886114669 | 12.08186508 | 7.87814045  |
| ENSMUSG00000084506 | 8.489422215 | 6.956172438 | 3.530755239 | 4.832746033 | 8.594335036 |
| ENSMUSG00000084507 | 22.63845924 | 27.82468975 | 26.83373982 | 19.33098413 | 22.20203218 |
| ENSMUSG00000084508 | 7.781970364 | 4.869320706 | 7.061510478 | 3.221830688 | 7.161945863 |
| ENSMUSG00000084511 | 7.781970364 | 6.260555194 | 5.649208382 | 2.416373016 | 8.594335036 |
| ENSMUSG00000084512 | 7.074518513 | 7.651789682 | 4.236906287 | 12.08186508 | 6.445751277 |
| ENSMUSG00000084513 | 8.489422215 | 8.347406925 | 8.473812573 | 4.832746033 | 3.580972932 |
| ENSMUSG00000084514 | 101.1656147 | 155.8182626 | 135.5810012 | 154.647873  | 118.1721067 |
| ENSMUSG00000084515 | 13.44158517 | 5.56493795  | 8.473812573 | 6.443661377 | 2.864778345 |
| ENSMUSG00000084516 | 3.537259256 | 9.043024169 | 5.649208382 | 8.860034393 | 7.161945863 |

|                    |             |             |             |             |             |
|--------------------|-------------|-------------|-------------|-------------|-------------|
| ENSMUSG00000084517 | 7.781970364 | 9.738641413 | 3.530755239 | 5.638203705 | 3.580972932 |
| ENSMUSG00000084518 | 4.244711108 | 4.173703463 | 7.767661525 | 8.054576721 | 3.580972932 |
| ENSMUSG00000084519 | 46.69182218 | 50.08444155 | 47.3121202  | 122.4295662 | 95.97007457 |
| ENSMUSG00000084521 | 9.196874066 | 12.52111039 | 5.649208382 | 8.860034393 | 3.580972932 |
| ENSMUSG00000084522 | 10.61177777 | 9.738641413 | 9.179963621 | 14.4982381  | 18.62105924 |
| ENSMUSG00000084523 | 0           | 0           | 0           | 0           | 1.432389173 |
| ENSMUSG00000084524 | 9.196874066 | 10.43425866 | 4.236906287 | 2.416373016 | 10.02672421 |
| ENSMUSG00000084526 | 27.5906222  | 36.17209668 | 43.07521391 | 53.96566403 | 48.70123187 |
| ENSMUSG00000084527 | 9.196874066 | 11.82549314 | 12.00456781 | 11.27640741 | 8.594335036 |
| ENSMUSG00000084530 | 11.31922962 | 9.043024169 | 4.943057334 | 4.832746033 | 7.87814045  |
| ENSMUSG00000084531 | 8.489422215 | 8.347406925 | 7.767661525 | 4.832746033 | 5.013362104 |
| ENSMUSG00000084532 | 10.61177777 | 9.043024169 | 9.886114669 | 3.221830688 | 5.729556691 |
| ENSMUSG00000084535 | 0.707451851 | 0           | 0.706151048 | 0           | 0           |
| ENSMUSG00000084536 | 4.952162959 | 6.260555194 | 9.886114669 | 4.02728836  | 8.594335036 |
| ENSMUSG00000084537 | 8.489422215 | 10.43425866 | 7.061510478 | 8.054576721 | 10.7429188  |
| ENSMUSG00000084539 | 4.952162959 | 4.173703463 | 7.767661525 | 2.416373016 | 5.013362104 |
| ENSMUSG00000084540 | 8.489422215 | 7.651789682 | 5.649208382 | 5.638203705 | 5.729556691 |
| ENSMUSG00000084541 | 6.367066661 | 9.043024169 | 9.886114669 | 8.860034393 | 6.445751277 |
| ENSMUSG00000084543 | 184.6449332 | 244.8572698 | 212.5514654 | 329.4321879 | 254.9652727 |
| ENSMUSG00000084544 | 10.61177777 | 4.869320706 | 4.943057334 | 4.02728836  | 2.864778345 |
| ENSMUSG00000084545 | 8.489422215 | 8.347406925 | 9.179963621 | 5.638203705 | 12.17530797 |
| ENSMUSG00000084546 | 9.196874066 | 8.347406925 | 9.179963621 | 1.610915344 | 6.445751277 |
| ENSMUSG00000084547 | 12.73413332 | 6.260555194 | 5.649208382 | 9.665492065 | 8.594335036 |
| ENSMUSG00000084548 | 9.196874066 | 5.56493795  | 4.236906287 | 5.638203705 | 4.297167518 |
| ENSMUSG00000084549 | 1.414903703 | 0.695617244 | 1.412302096 | 1.610915344 | 2.864778345 |
| ENSMUSG00000084550 | 9.904325918 | 4.869320706 | 4.943057334 | 4.832746033 | 3.580972932 |
| ENSMUSG00000084551 | 7.781970364 | 9.738641413 | 6.35535943  | 9.665492065 | 5.013362104 |
| ENSMUSG00000084552 | 7.074518513 | 9.043024169 | 6.35535943  | 3.221830688 | 7.87814045  |
| ENSMUSG00000084555 | 12.73413332 | 9.738641413 | 15.53532305 | 11.27640741 | 12.17530797 |
| ENSMUSG00000084557 | 3.537259256 | 4.173703463 | 2.824604191 | 7.249119049 | 4.297167518 |
| ENSMUSG00000084558 | 19.10119998 | 25.04222078 | 23.30298458 | 12.88732275 | 12.89150255 |
| ENSMUSG00000084559 | 0           | 0           | 0           | 0           | 0           |
| ENSMUSG00000084560 | 9.196874066 | 8.347406925 | 7.767661525 | 4.832746033 | 5.729556691 |
| ENSMUSG00000084562 | 11.31922962 | 15.30357936 | 5.649208382 | 17.72006879 | 12.89150255 |
| ENSMUSG00000084564 | 0           | 0           | 0           | 0           | 0           |
| ENSMUSG00000084565 | 0.707451851 | 1.391234488 | 2.118453143 | 3.221830688 | 2.148583759 |
| ENSMUSG00000084566 | 9.904325918 | 6.260555194 | 9.886114669 | 5.638203705 | 7.161945863 |
| ENSMUSG00000084567 | 8.489422215 | 7.651789682 | 9.179963621 | 5.638203705 | 8.594335036 |
| ENSMUSG00000084568 | 14.14903703 | 9.043024169 | 6.35535943  | 4.832746033 | 5.013362104 |
| ENSMUSG00000084569 | 18.39374813 | 17.39043109 | 14.12302096 | 13.69278043 | 9.310529622 |
| ENSMUSG00000084571 | 37.49494812 | 47.30197258 | 36.71985448 | 33.82922223 | 45.12025894 |
| ENSMUSG00000084572 | 47.39927403 | 70.95295887 | 51.54902649 | 69.2693598  | 55.86317773 |
| ENSMUSG00000084573 | 9.904325918 | 6.260555194 | 7.061510478 | 3.221830688 | 7.161945863 |



|                    |             |             |             |             |             |
|--------------------|-------------|-------------|-------------|-------------|-------------|
| ENSMUSG00000084574 | 8.489422215 | 4.173703463 | 4.943057334 | 8.054576721 | 9.310529622 |
| ENSMUSG00000084575 | 16.27139258 | 27.12907251 | 26.12758877 | 24.96918783 | 22.91822676 |
| ENSMUSG00000084576 | 16.97884443 | 6.260555194 | 9.179963621 | 4.02728836  | 7.87814045  |
| ENSMUSG00000084579 | 14.14903703 | 6.260555194 | 7.061510478 | 4.02728836  | 8.594335036 |
| ENSMUSG00000084581 | 9.904325918 | 5.56493795  | 7.061510478 | 6.443661377 | 12.17530797 |
| ENSMUSG00000084582 | 33.95768886 | 44.5195036  | 42.36906287 | 44.30017197 | 47.2688427  |
| ENSMUSG00000084583 | 9.904325918 | 16.69481385 | 9.179963621 | 6.443661377 | 8.594335036 |
| ENSMUSG00000084584 | 5.65961481  | 18.78166558 | 11.29841676 | 4.832746033 | 12.89150255 |
| ENSMUSG00000084587 | 26.1757185  | 44.5195036  | 42.36906287 | 25.77464551 | 31.5125618  |
| ENSMUSG00000084588 | 7.074518513 | 9.738641413 | 7.061510478 | 5.638203705 | 4.297167518 |
| ENSMUSG00000084589 | 6.367066661 | 6.260555194 | 9.179963621 | 0.805457672 | 4.297167518 |
| ENSMUSG00000084590 | 9.904325918 | 20.86851731 | 16.94762515 | 17.72006879 | 16.47247549 |
| ENSMUSG00000084591 | 16.97884443 | 11.82549314 | 13.41686991 | 5.638203705 | 11.45911338 |
| ENSMUSG00000084592 | 14.14903703 | 22.2597518  | 19.06607829 | 19.33098413 | 18.62105924 |
| ENSMUSG00000084593 | 35.37259256 | 77.9091313  | 57.19823487 | 42.68925662 | 51.56601022 |
| ENSMUSG00000084595 | 14.14903703 | 5.56493795  | 10.59226572 | 5.638203705 | 5.013362104 |
| ENSMUSG00000084596 | 12.73413332 | 9.043024169 | 4.943057334 | 4.832746033 | 7.87814045  |
| ENSMUSG00000084597 | 19.10119998 | 34.78086219 | 41.66291182 | 20.1364418  | 17.18867007 |
| ENSMUSG00000084598 | 4.244711108 | 3.478086219 | 4.943057334 | 0.805457672 | 5.013362104 |
| ENSMUSG00000084599 | 9.196874066 | 9.738641413 | 10.59226572 | 8.860034393 | 10.7429188  |
| ENSMUSG00000084600 | 13.44158517 | 7.651789682 | 12.71071886 | 13.69278043 | 5.013362104 |
| ENSMUSG00000084601 | 22.63845924 | 34.78086219 | 34.60140134 | 28.19101852 | 35.80972932 |
| ENSMUSG00000084602 | 8.489422215 | 7.651789682 | 9.179963621 | 8.054576721 | 7.161945863 |
| ENSMUSG00000084603 | 18.39374813 | 20.86851731 | 25.42143772 | 26.58010318 | 30.79636721 |
| ENSMUSG00000084604 | 0           | 0           | 0           | 0           | 0           |
| ENSMUSG00000084605 | 10.61177777 | 9.043024169 | 7.767661525 | 5.638203705 | 4.297167518 |
| ENSMUSG00000084606 | 7.074518513 | 8.347406925 | 4.236906287 | 4.02728836  | 9.310529622 |
| ENSMUSG00000084607 | 11.31922962 | 7.651789682 | 13.41686991 | 6.443661377 | 10.02672421 |
| ENSMUSG00000084608 | 7.074518513 | 8.347406925 | 6.35535943  | 0.805457672 | 9.310529622 |
| ENSMUSG00000084609 | 12.02668147 | 4.173703463 | 9.886114669 | 5.638203705 | 6.445751277 |
| ENSMUSG00000084610 | 6.367066661 | 11.1298759  | 7.061510478 | 4.832746033 | 10.7429188  |
| ENSMUSG00000084611 | 127.3413332 | 160.6875833 | 184.3054235 | 107.9313281 | 98.83485292 |
| ENSMUSG00000084612 | 4.244711108 | 2.782468975 | 4.236906287 | 2.416373016 | 3.580972932 |
| ENSMUSG00000084613 | 8.489422215 | 4.173703463 | 5.649208382 | 4.832746033 | 10.02672421 |
| ENSMUSG00000084616 | 4.952162959 | 2.782468975 | 4.236906287 | 3.221830688 | 1.432389173 |
| ENSMUSG00000084617 | 6.367066661 | 7.651789682 | 4.943057334 | 8.860034393 | 8.594335036 |
| ENSMUSG00000084619 | 12.02668147 | 9.043024169 | 7.061510478 | 6.443661377 | 2.148583759 |
| ENSMUSG00000084620 | 11.31922962 | 4.173703463 | 7.767661525 | 4.832746033 | 6.445751277 |
| ENSMUSG00000084621 | 64.37811846 | 128.6891901 | 124.2825844 | 265.8010318 | 196.2373167 |
| ENSMUSG00000084622 | 11.31922962 | 11.1298759  | 7.061510478 | 8.054576721 | 9.310529622 |
| ENSMUSG00000084624 | 13.44158517 | 6.956172438 | 11.29841676 | 8.054576721 | 6.445751277 |
| ENSMUSG00000084625 | 19.80865184 | 24.34660353 | 22.59683353 | 28.19101852 | 30.79636721 |
| ENSMUSG00000084627 | 8.489422215 | 10.43425866 | 4.236906287 | 7.249119049 | 11.45911338 |

|                    |             |             |             |             |             |
|--------------------|-------------|-------------|-------------|-------------|-------------|
| ENSMUSG00000084628 | 11.31922962 | 5.56493795  | 7.767661525 | 7.249119049 | 10.7429188  |
| ENSMUSG00000084629 | 1.414903703 | 2.782468975 | 3.530755239 | 3.221830688 | 2.864778345 |
| ENSMUSG00000084630 | 11.31922962 | 6.260555194 | 10.59226572 | 6.443661377 | 5.013362104 |
| ENSMUSG00000084631 | 4.952162959 | 6.956172438 | 5.649208382 | 0.805457672 | 3.580972932 |
| ENSMUSG00000084632 | 14.85648888 | 24.34660353 | 21.18453143 | 16.10915344 | 20.769643   |
| ENSMUSG00000084633 | 11.31922962 | 8.347406925 | 7.767661525 | 11.27640741 | 5.013362104 |
| ENSMUSG00000084635 | 12.02668147 | 9.738641413 | 10.59226572 | 6.443661377 | 4.297167518 |
| ENSMUSG00000084636 | 10.61177777 | 9.043024169 | 5.649208382 | 3.221830688 | 5.729556691 |
| ENSMUSG00000084637 | 4.952162959 | 4.173703463 | 4.236906287 | 2.416373016 | 3.580972932 |
| ENSMUSG00000084638 | 7.074518513 | 9.043024169 | 12.71071886 | 4.02728836  | 8.594335036 |
| ENSMUSG00000084639 | 7.781970364 | 5.56493795  | 7.767661525 | 8.054576721 | 4.297167518 |
| ENSMUSG00000084640 | 7.781970364 | 6.260555194 | 7.061510478 | 6.443661377 | 10.02672421 |
| ENSMUSG00000084641 | 26.1757185  | 79.30036579 | 56.49208382 | 20.94189947 | 36.5259239  |
| ENSMUSG00000084642 | 7.074518513 | 9.738641413 | 8.473812573 | 5.638203705 | 9.310529622 |
| ENSMUSG00000084643 | 8.489422215 | 4.869320706 | 7.767661525 | 7.249119049 | 5.013362104 |
| ENSMUSG00000084644 | 10.61177777 | 9.043024169 | 9.886114669 | 10.47094974 | 10.02672421 |
| ENSMUSG00000084645 | 5.65961481  | 2.782468975 | 2.824604191 | 4.832746033 | 6.445751277 |
| ENSMUSG00000084646 | 5.65961481  | 9.738641413 | 12.71071886 | 4.832746033 | 4.297167518 |
| ENSMUSG00000084647 | 12.02668147 | 5.56493795  | 13.41686991 | 5.638203705 | 7.161945863 |
| ENSMUSG00000084648 | 15.56394073 | 19.47728283 | 21.18453143 | 27.38556085 | 29.36397804 |
| ENSMUSG00000084649 | 16.27139258 | 18.08604834 | 12.71071886 | 8.860034393 | 10.02672421 |
| ENSMUSG00000084650 | 11.31922962 | 5.56493795  | 4.236906287 | 7.249119049 | 2.864778345 |
| ENSMUSG00000084651 | 21.93100739 | 28.52030699 | 20.47838039 | 18.52552646 | 14.32389173 |
| ENSMUSG00000084652 | 9.904325918 | 8.347406925 | 9.179963621 | 12.08186508 | 3.580972932 |
| ENSMUSG00000084653 | 8.489422215 | 6.260555194 | 6.35535943  | 5.638203705 | 10.7429188  |
| ENSMUSG00000084654 | 8.489422215 | 11.1298759  | 3.530755239 | 6.443661377 | 9.310529622 |
| ENSMUSG00000084658 | 18.39374813 | 15.30357936 | 19.06607829 | 16.10915344 | 20.769643   |
| ENSMUSG00000084659 | 24.76081479 | 34.08524495 | 37.42600553 | 13.69278043 | 21.48583759 |
| ENSMUSG00000084660 | 14.85648888 | 5.56493795  | 8.473812573 | 7.249119049 | 6.445751277 |
| ENSMUSG00000084661 | 11.31922962 | 6.956172438 | 8.473812573 | 4.02728836  | 2.864778345 |
| ENSMUSG00000084663 | 0           | 0.695617244 | 0           | 0           | 0           |
| ENSMUSG00000084664 | 3.537259256 | 5.56493795  | 7.767661525 | 3.221830688 | 3.580972932 |
| ENSMUSG00000084665 | 12.73413332 | 10.43425866 | 6.35535943  | 7.249119049 | 6.445751277 |
| ENSMUSG00000084666 | 9.196874066 | 2.086851731 | 7.767661525 | 8.054576721 | 7.161945863 |
| ENSMUSG00000084667 | 0           | 0           | 0           | 0           | 0           |
| ENSMUSG00000084668 | 7.781970364 | 9.043024169 | 8.473812573 | 6.443661377 | 10.02672421 |
| ENSMUSG00000084669 | 8.489422215 | 2.086851731 | 8.473812573 | 3.221830688 | 5.013362104 |
| ENSMUSG00000084671 | 10.61177777 | 6.260555194 | 5.649208382 | 4.02728836  | 3.580972932 |
| ENSMUSG00000084673 | 122.3891703 | 173.2086937 | 167.3577983 | 170.7570265 | 130.3474147 |
| ENSMUSG00000084674 | 9.904325918 | 20.86851731 | 21.89068248 | 8.860034393 | 14.32389173 |
| ENSMUSG00000084675 | 14.14903703 | 8.347406925 | 4.236906287 | 5.638203705 | 6.445751277 |
| ENSMUSG00000084678 | 7.074518513 | 10.43425866 | 13.41686991 | 6.443661377 | 7.161945863 |
| ENSMUSG00000084682 | 9.196874066 | 9.043024169 | 14.829172   | 7.249119049 | 9.310529622 |

|                    |             |             |             |             |             |
|--------------------|-------------|-------------|-------------|-------------|-------------|
| ENSMUSG00000084683 | 6.367066661 | 1.391234488 | 2.824604191 | 1.610915344 | 2.864778345 |
| ENSMUSG00000084684 | 8.489422215 | 8.347406925 | 7.767661525 | 3.221830688 | 7.161945863 |
| ENSMUSG00000084686 | 36.08004441 | 45.91073809 | 36.71985448 | 118.4022778 | 90.95671247 |
| ENSMUSG00000084688 | 7.074518513 | 9.043024169 | 5.649208382 | 9.665492065 | 6.445751277 |
| ENSMUSG00000084689 | 5.65961481  | 1.391234488 | 2.824604191 | 8.054576721 | 2.148583759 |
| ENSMUSG00000084690 | 8.489422215 | 6.260555194 | 9.886114669 | 2.416373016 | 5.013362104 |
| ENSMUSG00000084691 | 6.367066661 | 6.956172438 | 2.824604191 | 1.610915344 | 5.013362104 |
| ENSMUSG00000084693 | 15.56394073 | 12.52111039 | 9.179963621 | 8.054576721 | 9.310529622 |
| ENSMUSG00000084694 | 9.196874066 | 7.651789682 | 8.473812573 | 5.638203705 | 5.729556691 |
| ENSMUSG00000084696 | 7.074518513 | 3.478086219 | 8.473812573 | 7.249119049 | 6.445751277 |
| ENSMUSG00000084700 | 4.952162959 | 5.56493795  | 7.061510478 | 5.638203705 | 7.87814045  |
| ENSMUSG00000084701 | 7.074518513 | 13.91234488 | 20.47838039 | 14.4982381  | 12.17530797 |
| ENSMUSG00000084702 | 9.904325918 | 4.869320706 | 7.061510478 | 1.610915344 | 4.297167518 |
| ENSMUSG00000084703 | 2.829807405 | 11.82549314 | 8.473812573 | 9.665492065 | 5.729556691 |
| ENSMUSG00000084704 | 12.73413332 | 7.651789682 | 6.35535943  | 7.249119049 | 4.297167518 |
| ENSMUSG00000084705 | 6.367066661 | 10.43425866 | 6.35535943  | 2.416373016 | 6.445751277 |
| ENSMUSG00000084706 | 10.61177777 | 4.869320706 | 7.061510478 | 8.054576721 | 2.864778345 |
| ENSMUSG00000084708 | 0           | 0           | 0           | 0           | 0           |
| ENSMUSG00000084710 | 5.65961481  | 6.956172438 | 7.061510478 | 4.02728836  | 5.729556691 |
| ENSMUSG00000084711 | 36.08004441 | 63.99678643 | 37.42600553 | 37.85651059 | 39.39070225 |
| ENSMUSG00000084713 | 7.781970364 | 5.56493795  | 5.649208382 | 3.221830688 | 3.580972932 |
| ENSMUSG00000084714 | 11.31922962 | 7.651789682 | 3.530755239 | 6.443661377 | 7.161945863 |
| ENSMUSG00000084717 | 128.0487851 | 188.5122731 | 191.3669339 | 140.1496349 | 118.1721067 |
| ENSMUSG00000084718 | 11.31922962 | 5.56493795  | 4.943057334 | 5.638203705 | 7.87814045  |
| ENSMUSG00000084719 | 11.31922962 | 4.869320706 | 9.179963621 | 4.832746033 | 7.87814045  |
| ENSMUSG00000084722 | 7.074518513 | 7.651789682 | 7.767661525 | 7.249119049 | 4.297167518 |
| ENSMUSG00000084725 | 6.367066661 | 4.869320706 | 8.473812573 | 5.638203705 | 8.594335036 |
| ENSMUSG00000084728 | 10.61177777 | 7.651789682 | 6.35535943  | 10.47094974 | 2.864778345 |
| ENSMUSG00000084729 | 11.31922962 | 9.043024169 | 7.061510478 | 9.665492065 | 5.013362104 |
| ENSMUSG00000084731 | 8.489422215 | 6.260555194 | 6.35535943  | 4.02728836  | 3.580972932 |
| ENSMUSG00000084732 | 7.781970364 | 2.782468975 | 7.767661525 | 5.638203705 | 4.297167518 |
| ENSMUSG00000084733 | 6.367066661 | 6.260555194 | 11.29841676 | 6.443661377 | 5.729556691 |
| ENSMUSG00000084734 | 20.51610369 | 22.2597518  | 25.42143772 | 16.91461111 | 13.60769714 |
| ENSMUSG00000084737 | 12.02668147 | 4.869320706 | 10.59226572 | 10.47094974 | 7.87814045  |
| ENSMUSG00000084738 | 9.904325918 | 4.173703463 | 10.59226572 | 2.416373016 | 6.445751277 |
| ENSMUSG00000084739 | 193.8418072 | 249.0309733 | 206.1961059 | 251.3027937 | 222.7365164 |
| ENSMUSG00000084740 | 7.781970364 | 8.347406925 | 5.649208382 | 2.416373016 | 5.013362104 |
| ENSMUSG00000084741 | 6.367066661 | 6.956172438 | 7.061510478 | 3.221830688 | 3.580972932 |
| ENSMUSG00000084742 | 10.61177777 | 10.43425866 | 6.35535943  | 5.638203705 | 6.445751277 |
| ENSMUSG00000084743 | 9.904325918 | 11.82549314 | 11.29841676 | 4.832746033 | 0.716194586 |
| ENSMUSG00000084744 | 24.76081479 | 52.86691053 | 39.54445867 | 50.74383334 | 71.61945863 |
| ENSMUSG00000084745 | 11.31922962 | 14.60796212 | 15.53532305 | 8.054576721 | 7.161945863 |
| ENSMUSG00000084746 | 5.65961481  | 6.956172438 | 6.35535943  | 28.9964762  | 18.62105924 |

|                    |             |             |             |             |             |
|--------------------|-------------|-------------|-------------|-------------|-------------|
| ENSMUSG00000084747 | 8.489422215 | 12.52111039 | 9.179963621 | 4.832746033 | 8.594335036 |
| ENSMUSG00000084748 | 10.61177777 | 8.347406925 | 9.179963621 | 5.638203705 | 5.013362104 |
| ENSMUSG00000084749 | 46.69182218 | 73.73542784 | 55.07978173 | 36.24559524 | 42.97167518 |
| ENSMUSG00000084750 | 9.904325918 | 6.956172438 | 9.886114669 | 6.443661377 | 9.310529622 |
| ENSMUSG00000084751 | 9.196874066 | 14.60796212 | 8.473812573 | 53.96566403 | 37.24211849 |
| ENSMUSG00000084752 | 6.367066661 | 3.478086219 | 5.649208382 | 4.02728836  | 3.580972932 |
| ENSMUSG00000084753 | 5.65961481  | 4.869320706 | 8.473812573 | 8.054576721 | 7.87814045  |
| ENSMUSG00000084754 | 7.781970364 | 6.956172438 | 3.530755239 | 10.47094974 | 4.297167518 |
| ENSMUSG00000084755 | 29.71297775 | 29.91154148 | 36.01370344 | 23.35827249 | 26.49919969 |
| ENSMUSG00000084756 | 7.781970364 | 9.043024169 | 9.179963621 | 3.221830688 | 7.161945863 |
| ENSMUSG00000084757 | 4.952162959 | 6.956172438 | 5.649208382 | 8.860034393 | 5.729556691 |
| ENSMUSG00000084758 | 5.65961481  | 6.956172438 | 10.59226572 | 8.054576721 | 11.45911338 |
| ENSMUSG00000084760 | 58.71850365 | 85.56092098 | 42.36906287 | 119.2077355 | 118.8883013 |
| ENSMUSG00000084761 | 2.829807405 | 4.869320706 | 2.824604191 | 1.610915344 | 7.161945863 |
| ENSMUSG00000084762 | 8.489422215 | 6.956172438 | 7.061510478 | 8.054576721 | 5.729556691 |
| ENSMUSG00000084764 | 11.31922962 | 9.738641413 | 5.649208382 | 3.221830688 | 6.445751277 |
| ENSMUSG00000084766 | 7.781970364 | 3.478086219 | 5.649208382 | 14.4982381  | 7.161945863 |
| ENSMUSG00000084768 | 7.781970364 | 8.347406925 | 13.41686991 | 8.054576721 | 8.594335036 |
| ENSMUSG00000084769 | 38.90985182 | 61.9099347  | 59.31668801 | 74.10210583 | 63.0251236  |
| ENSMUSG00000084771 | 24.76081479 | 50.08444155 | 36.01370344 | 81.35122488 | 53.71459398 |
| ENSMUSG00000084772 | 21.22355554 | 20.86851731 | 18.35992724 | 46.71654498 | 40.82309142 |
| ENSMUSG00000084773 | 7.074518513 | 9.043024169 | 5.649208382 | 4.02728836  | 5.729556691 |
| ENSMUSG00000084774 | 14.85648888 | 13.91234488 | 10.59226572 | 4.832746033 | 7.87814045  |
| ENSMUSG00000084775 | 3.537259256 | 9.738641413 | 10.59226572 | 6.443661377 | 5.729556691 |
| ENSMUSG00000084776 | 4.952162959 | 9.043024169 | 6.35535943  | 4.02728836  | 6.445751277 |
| ENSMUSG00000084780 | 12.02668147 | 6.956172438 | 7.061510478 | 5.638203705 | 5.013362104 |
| ENSMUSG00000084781 | 6.367066661 | 6.956172438 | 11.29841676 | 4.02728836  | 6.445751277 |
| ENSMUSG00000084782 | 8.489422215 | 6.260555194 | 3.530755239 | 6.443661377 | 5.013362104 |
| ENSMUSG00000084783 | 5.65961481  | 6.956172438 | 4.943057334 | 4.832746033 | 7.161945863 |
| ENSMUSG00000084785 | 23.34591109 | 37.56333116 | 31.0706461  | 28.9964762  | 22.91822676 |
| ENSMUSG00000084787 | 2.829807405 | 6.260555194 | 3.530755239 | 3.221830688 | 2.864778345 |
| ENSMUSG00000084788 | 12.02668147 | 17.39043109 | 14.829172   | 8.054576721 | 7.87814045  |
| ENSMUSG00000084789 | 7.074518513 | 23.65098629 | 16.2414741  | 12.88732275 | 15.7562809  |
| ENSMUSG00000084790 | 8.489422215 | 9.043024169 | 9.886114669 | 4.832746033 | 9.310529622 |
| ENSMUSG00000084791 | 9.904325918 | 5.56493795  | 9.179963621 | 4.832746033 | 5.729556691 |
| ENSMUSG00000084792 | 12.73413332 | 21.56413456 | 16.2414741  | 12.88732275 | 18.62105924 |
| ENSMUSG00000084793 | 7.074518513 | 6.260555194 | 8.473812573 | 5.638203705 | 6.445751277 |
| ENSMUSG00000084794 | 3.537259256 | 5.56493795  | 4.236906287 | 1.610915344 | 5.013362104 |
| ENSMUSG00000084795 | 9.196874066 | 7.651789682 | 7.767661525 | 6.443661377 | 8.594335036 |
| ENSMUSG00000084796 | 175.4480591 | 167.6437558 | 174.4193088 | 318.1557805 | 215.5745705 |
| ENSMUSG00000084797 | 7.074518513 | 17.39043109 | 20.47838039 | 26.58010318 | 25.06681052 |
| ENSMUSG00000084798 | 12.02668147 | 8.347406925 | 7.767661525 | 5.638203705 | 4.297167518 |
| ENSMUSG00000084799 | 119.5593629 | 159.2963488 | 136.2871522 | 254.5246244 | 219.871738  |

|                    |             |             |             |             |             |
|--------------------|-------------|-------------|-------------|-------------|-------------|
| ENSMUSG00000084800 | 13.44158517 | 8.347406925 | 8.473812573 | 7.249119049 | 11.45911338 |
| ENSMUSG00000084802 | 10.61177777 | 5.56493795  | 6.35535943  | 6.443661377 | 6.445751277 |
| ENSMUSG00000084803 | 19.80865184 | 13.91234488 | 26.12758877 | 20.94189947 | 15.04008631 |
| ENSMUSG00000084804 | 70.03773327 | 95.99517964 | 86.85657888 | 58.79841006 | 66.60609653 |
| ENSMUSG00000084805 | 2.829807405 | 8.347406925 | 12.71071886 | 7.249119049 | 8.594335036 |
| ENSMUSG00000084806 | 29.0055259  | 41.73703463 | 34.60140134 | 25.77464551 | 32.22875639 |
| ENSMUSG00000084807 | 7.074518513 | 5.56493795  | 9.179963621 | 8.054576721 | 6.445751277 |
| ENSMUSG00000084808 | 41.73965922 | 71.64857611 | 63.5535943  | 48.32746033 | 46.55264811 |
| ENSMUSG00000084809 | 4.244711108 | 9.043024169 | 11.29841676 | 37.85651059 | 24.35061594 |
| ENSMUSG00000084811 | 7.781970364 | 6.260555194 | 7.767661525 | 5.638203705 | 5.729556691 |
| ENSMUSG00000084815 | 0           | 0           | 0           | 0           | 0           |
| ENSMUSG00000084816 | 15.56394073 | 16.69481385 | 14.12302096 | 22.55281482 | 18.62105924 |
| ENSMUSG00000084817 | 14.85648888 | 11.82549314 | 9.179963621 | 8.860034393 | 11.45911338 |
| ENSMUSG00000084818 | 5.65961481  | 5.56493795  | 9.886114669 | 8.054576721 | 7.161945863 |
| ENSMUSG00000084819 | 8.489422215 | 7.651789682 | 6.35535943  | 6.443661377 | 7.161945863 |
| ENSMUSG00000084821 | 50.93653329 | 77.21351406 | 55.78593277 | 38.66196826 | 44.40406435 |
| ENSMUSG00000084822 | 4.244711108 | 9.043024169 | 12.71071886 | 5.638203705 | 8.594335036 |
| ENSMUSG00000084823 | 12.02668147 | 20.86851731 | 21.18453143 | 14.4982381  | 10.02672421 |
| ENSMUSG00000084824 | 5.65961481  | 3.478086219 | 4.943057334 | 4.832746033 | 10.02672421 |
| ENSMUSG00000084825 | 14.85648888 | 4.173703463 | 5.649208382 | 6.443661377 | 10.7429188  |
| ENSMUSG00000084826 | 4.952162959 | 10.43425866 | 7.061510478 | 5.638203705 | 7.161945863 |
| ENSMUSG00000084828 | 19.10119998 | 43.82388636 | 39.54445867 | 47.52200265 | 50.84981563 |
| ENSMUSG00000084829 | 5.65961481  | 10.43425866 | 8.473812573 | 4.02728836  | 6.445751277 |
| ENSMUSG00000084830 | 5.65961481  | 7.651789682 | 6.35535943  | 5.638203705 | 2.864778345 |
| ENSMUSG00000084831 | 3.537259256 | 2.782468975 | 3.530755239 | 2.416373016 | 2.864778345 |
| ENSMUSG00000084833 | 7.074518513 | 11.1298759  | 9.886114669 | 5.638203705 | 4.297167518 |
| ENSMUSG00000084834 | 12.73413332 | 6.260555194 | 12.71071886 | 9.665492065 | 13.60769714 |
| ENSMUSG00000084835 | 7.781970364 | 14.60796212 | 12.00456781 | 16.10915344 | 14.32389173 |
| ENSMUSG00000084836 | 164.8362813 | 224.6843697 | 162.414741  | 101.4876667 | 110.2939663 |
| ENSMUSG00000084837 | 9.196874066 | 3.478086219 | 5.649208382 | 2.416373016 | 7.87814045  |
| ENSMUSG00000084838 | 8.489422215 | 13.91234488 | 15.53532305 | 20.1364418  | 15.04008631 |
| ENSMUSG00000084839 | 9.196874066 | 11.1298759  | 12.71071886 | 8.860034393 | 15.04008631 |
| ENSMUSG00000084840 | 7.781970364 | 6.956172438 | 9.179963621 | 4.02728836  | 8.594335036 |
| ENSMUSG00000084842 | 7.074518513 | 1.391234488 | 7.061510478 | 1.610915344 | 3.580972932 |
| ENSMUSG00000084843 | 9.196874066 | 4.173703463 | 7.767661525 | 5.638203705 | 6.445751277 |
| ENSMUSG00000084844 | 12.02668147 | 6.260555194 | 4.236906287 | 4.832746033 | 5.013362104 |
| ENSMUSG00000084846 | 19.80865184 | 29.21592424 | 21.89068248 | 18.52552646 | 12.17530797 |
| ENSMUSG00000084847 | 3.537259256 | 4.173703463 | 2.824604191 | 3.221830688 | 10.02672421 |
| ENSMUSG00000084848 | 12.02668147 | 3.478086219 | 7.767661525 | 6.443661377 | 6.445751277 |
| ENSMUSG00000084849 | 9.196874066 | 7.651789682 | 6.35535943  | 4.832746033 | 8.594335036 |
| ENSMUSG00000084850 | 13.44158517 | 9.043024169 | 7.767661525 | 8.054576721 | 6.445751277 |
| ENSMUSG00000084851 | 10.61177777 | 4.869320706 | 4.943057334 | 5.638203705 | 5.729556691 |
| ENSMUSG00000084852 | 3.537259256 | 4.173703463 | 2.824604191 | 4.832746033 | 2.864778345 |

|                    |             |             |             |             |             |
|--------------------|-------------|-------------|-------------|-------------|-------------|
| ENSMUSG00000084853 | 4.952162959 | 4.173703463 | 4.236906287 | 8.860034393 | 5.729556691 |
| ENSMUSG00000084854 | 19.80865184 | 22.95536904 | 18.35992724 | 49.132918   | 35.09353473 |
| ENSMUSG00000084855 | 7.074518513 | 11.82549314 | 9.886114669 | 8.860034393 | 9.310529622 |
| ENSMUSG00000084856 | 7.781970364 | 4.869320706 | 4.943057334 | 5.638203705 | 8.594335036 |
| ENSMUSG00000084858 | 5.65961481  | 6.956172438 | 9.179963621 | 8.860034393 | 13.60769714 |
| ENSMUSG00000084859 | 9.196874066 | 4.173703463 | 4.236906287 | 4.832746033 | 6.445751277 |
| ENSMUSG00000084860 | 4.244711108 | 6.956172438 | 6.35535943  | 5.638203705 | 5.013362104 |
| ENSMUSG00000084861 | 59.42595551 | 71.64857611 | 67.79050059 | 74.10210583 | 61.59273443 |
| ENSMUSG00000084862 | 98.33580733 | 116.863697  | 121.4579802 | 87.79488626 | 103.1320204 |
| ENSMUSG00000084863 | 2.829807405 | 8.347406925 | 11.29841676 | 2.416373016 | 10.02672421 |
| ENSMUSG00000084864 | 10.61177777 | 17.39043109 | 18.35992724 | 14.4982381  | 15.7562809  |
| ENSMUSG00000084865 | 7.074518513 | 3.478086219 | 6.35535943  | 4.02728836  | 5.729556691 |
| ENSMUSG00000084866 | 16.27139258 | 29.21592424 | 22.59683353 | 31.41284921 | 18.62105924 |
| ENSMUSG00000084869 | 48.10672589 | 87.64777272 | 64.25974535 | 49.132918   | 49.41742646 |
| ENSMUSG00000084870 | 10.61177777 | 8.347406925 | 4.943057334 | 8.054576721 | 5.729556691 |
| ENSMUSG00000084871 | 9.196874066 | 1.391234488 | 7.061510478 | 5.638203705 | 5.729556691 |
| ENSMUSG00000084873 | 6.367066661 | 5.56493795  | 5.649208382 | 4.832746033 | 3.580972932 |
| ENSMUSG00000084874 | 8.489422215 | 5.56493795  | 9.886114669 | 4.02728836  | 10.7429188  |
| ENSMUSG00000084875 | 4.952162959 | 1.391234488 | 2.118453143 | 0           | 5.013362104 |
| ENSMUSG00000084876 | 9.904325918 | 2.782468975 | 9.886114669 | 4.832746033 | 10.7429188  |
| ENSMUSG00000084878 | 9.904325918 | 10.43425866 | 15.53532305 | 10.47094974 | 12.89150255 |
| ENSMUSG00000084880 | 4.244711108 | 9.738641413 | 9.886114669 | 30.60739154 | 15.7562809  |
| ENSMUSG00000084881 | 11.31922962 | 10.43425866 | 14.12302096 | 16.91461111 | 10.7429188  |
| ENSMUSG00000084882 | 8.489422215 | 4.869320706 | 4.236906287 | 8.054576721 | 8.594335036 |
| ENSMUSG00000084884 | 17.68629628 | 18.78166558 | 22.59683353 | 30.60739154 | 23.63442135 |
| ENSMUSG00000084885 | 4.244711108 | 1.391234488 | 3.530755239 | 4.02728836  | 3.580972932 |
| ENSMUSG00000084887 | 6.367066661 | 1.391234488 | 9.179963621 | 6.443661377 | 5.013362104 |
| ENSMUSG00000084889 | 53.7663407  | 91.82147618 | 64.25974535 | 260.1628281 | 171.1705061 |
| ENSMUSG00000084890 | 11.31922962 | 4.869320706 | 9.179963621 | 2.416373016 | 11.45911338 |
| ENSMUSG00000084891 | 7.781970364 | 13.21672763 | 7.061510478 | 7.249119049 | 7.161945863 |
| ENSMUSG00000084892 | 10.61177777 | 12.52111039 | 7.767661525 | 9.665492065 | 10.7429188  |
| ENSMUSG00000084893 | 8.489422215 | 11.82549314 | 15.53532305 | 20.94189947 | 10.7429188  |
| ENSMUSG00000084894 | 30.4204296  | 72.34419335 | 66.37819849 | 92.62763229 | 72.33565322 |
| ENSMUSG00000084895 | 9.196874066 | 6.956172438 | 5.649208382 | 6.443661377 | 5.729556691 |
| ENSMUSG00000084896 | 7.781970364 | 4.869320706 | 8.473812573 | 5.638203705 | 14.32389173 |
| ENSMUSG00000084898 | 9.904325918 | 6.260555194 | 8.473812573 | 5.638203705 | 7.161945863 |
| ENSMUSG00000084899 | 12.73413332 | 20.86851731 | 24.00913562 | 29.80193387 | 33.66114556 |
| ENSMUSG00000084901 | 7.074518513 | 5.56493795  | 15.53532305 | 4.02728836  | 7.161945863 |
| ENSMUSG00000084904 | 4.244711108 | 4.869320706 | 4.943057334 | 4.832746033 | 2.148583759 |
| ENSMUSG00000084905 | 9.904325918 | 13.91234488 | 8.473812573 | 3.221830688 | 6.445751277 |
| ENSMUSG00000084906 | 12.02668147 | 11.82549314 | 11.29841676 | 4.02728836  | 4.297167518 |
| ENSMUSG00000084907 | 4.952162959 | 1.391234488 | 4.943057334 | 4.832746033 | 2.864778345 |
| ENSMUSG00000084908 | 5.65961481  | 8.347406925 | 9.886114669 | 5.638203705 | 7.161945863 |

|                    |             |             |             |             |             |
|--------------------|-------------|-------------|-------------|-------------|-------------|
| ENSMUSG00000084909 | 9.904325918 | 4.869320706 | 6.35535943  | 5.638203705 | 8.594335036 |
| ENSMUSG00000084910 | 6.367066661 | 9.043024169 | 9.886114669 | 11.27640741 | 11.45911338 |
| ENSMUSG00000084911 | 14.85648888 | 9.043024169 | 13.41686991 | 10.47094974 | 12.89150255 |
| ENSMUSG00000084912 | 9.904325918 | 4.869320706 | 4.943057334 | 8.860034393 | 6.445751277 |
| ENSMUSG00000084913 | 7.074518513 | 8.347406925 | 9.179963621 | 8.054576721 | 5.729556691 |
| ENSMUSG00000084915 | 12.02668147 | 20.86851731 | 14.829172   | 15.30369577 | 17.18867007 |
| ENSMUSG00000084916 | 5.65961481  | 7.651789682 | 7.767661525 | 3.221830688 | 5.013362104 |
| ENSMUSG00000084917 | 9.196874066 | 20.17290007 | 14.12302096 | 16.91461111 | 19.33725383 |
| ENSMUSG00000084918 | 6.367066661 | 11.82549314 | 12.71071886 | 9.665492065 | 6.445751277 |
| ENSMUSG00000084919 | 11.31922962 | 4.869320706 | 10.59226572 | 4.832746033 | 8.594335036 |
| ENSMUSG00000084920 | 7.074518513 | 2.782468975 | 2.824604191 | 1.610915344 | 4.297167518 |
| ENSMUSG00000084921 | 8.489422215 | 6.260555194 | 6.35535943  | 4.832746033 | 7.161945863 |
| ENSMUSG00000084923 | 3.537259256 | 6.260555194 | 4.236906287 | 4.02728836  | 6.445751277 |
| ENSMUSG00000084924 | 7.074518513 | 6.956172438 | 8.473812573 | 4.832746033 | 6.445751277 |
| ENSMUSG00000084925 | 94.09109622 | 132.8628936 | 105.2165061 | 193.3098413 | 147.5360848 |
| ENSMUSG00000084929 | 10.61177777 | 7.651789682 | 7.061510478 | 5.638203705 | 3.580972932 |
| ENSMUSG00000084930 | 10.61177777 | 11.1298759  | 17.65377619 | 11.27640741 | 12.89150255 |
| ENSMUSG00000084932 | 3.537259256 | 1.391234488 | 0.706151048 | 0           | 0.716194586 |
| ENSMUSG00000084933 | 6.367066661 | 15.30357936 | 9.886114669 | 4.02728836  | 7.161945863 |
| ENSMUSG00000084934 | 11.31922962 | 4.173703463 | 5.649208382 | 8.860034393 | 7.87814045  |
| ENSMUSG00000084935 | 7.074518513 | 6.260555194 | 3.530755239 | 4.02728836  | 8.594335036 |
| ENSMUSG00000084936 | 12.02668147 | 13.21672763 | 11.29841676 | 35.44013757 | 28.64778345 |
| ENSMUSG00000084937 | 12.73413332 | 6.956172438 | 8.473812573 | 4.02728836  | 2.864778345 |
| ENSMUSG00000084938 | 5.65961481  | 7.651789682 | 9.886114669 | 7.249119049 | 5.013362104 |
| ENSMUSG00000084939 | 10.61177777 | 6.956172438 | 3.530755239 | 4.832746033 | 3.580972932 |
| ENSMUSG00000084940 | 7.781970364 | 2.782468975 | 7.061510478 | 8.860034393 | 6.445751277 |
| ENSMUSG00000084941 | 16.97884443 | 16.69481385 | 22.59683353 | 18.52552646 | 13.60769714 |
| ENSMUSG00000084942 | 12.02668147 | 10.43425866 | 9.179963621 | 4.02728836  | 9.310529622 |
| ENSMUSG00000084944 | 6.367066661 | 2.086851731 | 7.061510478 | 1.610915344 | 5.729556691 |
| ENSMUSG00000084946 | 7.074518513 | 3.478086219 | 4.943057334 | 6.443661377 | 5.013362104 |
| ENSMUSG00000084947 | 7.781970364 | 10.43425866 | 9.179963621 | 5.638203705 | 8.594335036 |
| ENSMUSG00000084948 | 6.367066661 | 8.347406925 | 6.35535943  | 5.638203705 | 7.87814045  |
| ENSMUSG00000084949 | 7.781970364 | 6.260555194 | 9.886114669 | 4.832746033 | 7.87814045  |
| ENSMUSG00000084950 | 7.074518513 | 4.869320706 | 7.767661525 | 8.054576721 | 7.161945863 |
| ENSMUSG00000084951 | 14.85648888 | 24.34660353 | 17.65377619 | 26.58010318 | 20.05344842 |
| ENSMUSG00000084954 | 5.65961481  | 7.651789682 | 9.886114669 | 4.02728836  | 6.445751277 |
| ENSMUSG00000084955 | 12.73413332 | 6.260555194 | 4.236906287 | 6.443661377 | 7.87814045  |
| ENSMUSG00000084956 | 9.196874066 | 8.347406925 | 11.29841676 | 8.054576721 | 3.580972932 |
| ENSMUSG00000084959 | 13.44158517 | 6.956172438 | 9.886114669 | 4.832746033 | 5.729556691 |
| ENSMUSG00000084960 | 11.31922962 | 4.173703463 | 9.886114669 | 5.638203705 | 5.729556691 |
| ENSMUSG00000084962 | 12.02668147 | 6.956172438 | 4.943057334 | 12.08186508 | 10.02672421 |
| ENSMUSG00000084963 | 3.537259256 | 2.782468975 | 7.767661525 | 3.221830688 | 4.297167518 |
| ENSMUSG00000084964 | 19.10119998 | 13.91234488 | 17.65377619 | 14.4982381  | 20.769643   |

|                    |             |             |             |             |             |
|--------------------|-------------|-------------|-------------|-------------|-------------|
| ENSMUSG00000084965 | 10.61177777 | 6.260555194 | 7.061510478 | 11.27640741 | 5.729556691 |
| ENSMUSG00000084966 | 15.56394073 | 5.56493795  | 12.00456781 | 4.02728836  | 5.013362104 |
| ENSMUSG00000084967 | 4.244711108 | 6.956172438 | 4.943057334 | 8.054576721 | 5.013362104 |
| ENSMUSG00000084968 | 43.86201478 | 65.38802092 | 63.5535943  | 62.82569842 | 67.32229112 |
| ENSMUSG00000084969 | 16.97884443 | 31.30277597 | 25.42143772 | 26.58010318 | 28.64778345 |
| ENSMUSG00000084970 | 7.074518513 | 3.478086219 | 6.35535943  | 3.221830688 | 5.013362104 |
| ENSMUSG00000084971 | 7.781970364 | 2.782468975 | 6.35535943  | 6.443661377 | 7.87814045  |
| ENSMUSG00000084973 | 4.952162959 | 2.782468975 | 7.061510478 | 8.860034393 | 5.729556691 |
| ENSMUSG00000084974 | 12.02668147 | 3.478086219 | 9.179963621 | 6.443661377 | 6.445751277 |
| ENSMUSG00000084978 | 12.02668147 | 18.08604834 | 22.59683353 | 23.35827249 | 21.48583759 |
| ENSMUSG00000084979 | 12.02668147 | 6.260555194 | 8.473812573 | 6.443661377 | 4.297167518 |
| ENSMUSG00000084980 | 4.952162959 | 2.086851731 | 9.179963621 | 3.221830688 | 6.445751277 |
| ENSMUSG00000084981 | 7.781970364 | 6.956172438 | 7.061510478 | 5.638203705 | 4.297167518 |
| ENSMUSG00000084982 | 4.952162959 | 10.43425866 | 5.649208382 | 4.832746033 | 5.013362104 |
| ENSMUSG00000084983 | 9.904325918 | 9.043024169 | 9.179963621 | 8.860034393 | 8.594335036 |
| ENSMUSG00000084984 | 19.10119998 | 24.34660353 | 29.65834401 | 19.33098413 | 23.63442135 |
| ENSMUSG00000084985 | 12.02668147 | 12.52111039 | 10.59226572 | 12.08186508 | 12.17530797 |
| ENSMUSG00000084986 | 11.31922962 | 6.956172438 | 5.649208382 | 9.665492065 | 9.310529622 |
| ENSMUSG00000084987 | 9.196874066 | 5.56493795  | 6.35535943  | 5.638203705 | 7.161945863 |
| ENSMUSG00000084989 | 4.952162959 | 6.260555194 | 13.41686991 | 7.249119049 | 7.87814045  |
| ENSMUSG00000084990 | 5.65961481  | 7.651789682 | 3.530755239 | 4.832746033 | 7.161945863 |
| ENSMUSG00000084991 | 15.56394073 | 13.91234488 | 11.29841676 | 12.08186508 | 9.310529622 |
| ENSMUSG00000084992 | 5.65961481  | 8.347406925 | 9.179963621 | 7.249119049 | 5.729556691 |
| ENSMUSG00000084993 | 7.781970364 | 3.478086219 | 7.061510478 | 5.638203705 | 4.297167518 |
| ENSMUSG00000084994 | 7.781970364 | 6.260555194 | 5.649208382 | 3.221830688 | 6.445751277 |
| ENSMUSG00000084995 | 5.65961481  | 6.956172438 | 5.649208382 | 7.249119049 | 9.310529622 |
| ENSMUSG00000084996 | 9.904325918 | 2.782468975 | 4.943057334 | 3.221830688 | 7.87814045  |
| ENSMUSG00000084997 | 16.27139258 | 29.21592424 | 21.89068248 | 34.6346799  | 23.63442135 |
| ENSMUSG00000084998 | 28.29807405 | 29.91154148 | 31.0706461  | 70.88027514 | 47.2688427  |
| ENSMUSG00000084999 | 7.781970364 | 6.260555194 | 7.061510478 | 16.10915344 | 7.87814045  |
| ENSMUSG00000085000 | 4.244711108 | 4.173703463 | 5.649208382 | 4.832746033 | 6.445751277 |
| ENSMUSG00000085001 | 7.074518513 | 9.043024169 | 8.473812573 | 9.665492065 | 7.161945863 |
| ENSMUSG00000085002 | 9.904325918 | 2.782468975 | 11.29841676 | 6.443661377 | 9.310529622 |
| ENSMUSG00000085003 | 14.14903703 | 18.08604834 | 15.53532305 | 6.443661377 | 13.60769714 |
| ENSMUSG00000085004 | 9.904325918 | 8.347406925 | 8.473812573 | 5.638203705 | 7.161945863 |
| ENSMUSG00000085006 | 8.489422215 | 8.347406925 | 12.00456781 | 8.860034393 | 12.89150255 |
| ENSMUSG00000085007 | 5.65961481  | 7.651789682 | 5.649208382 | 8.054576721 | 5.013362104 |
| ENSMUSG00000085008 | 7.781970364 | 5.56493795  | 7.767661525 | 8.054576721 | 12.17530797 |
| ENSMUSG00000085009 | 41.03220737 | 52.17129328 | 52.25517753 | 85.37851324 | 58.72795608 |
| ENSMUSG00000085010 | 2.122355554 | 0.695617244 | 3.530755239 | 5.638203705 | 5.013362104 |
| ENSMUSG00000085012 | 17.68629628 | 23.65098629 | 23.30298458 | 42.68925662 | 42.25548059 |
| ENSMUSG00000085014 | 5.65961481  | 5.56493795  | 7.061510478 | 6.443661377 | 7.87814045  |
| ENSMUSG00000085015 | 2.122355554 | 1.391234488 | 1.412302096 | 3.221830688 | 5.013362104 |



|                   |             |             |             |             |             |
|-------------------|-------------|-------------|-------------|-------------|-------------|
| ENSMUSG0000085016 | 4.952162959 | 6.956172438 | 9.886114669 | 7.249119049 | 7.161945863 |
| ENSMUSG0000085017 | 8.489422215 | 7.651789682 | 7.061510478 | 6.443661377 | 9.310529622 |
| ENSMUSG0000085019 | 12.02668147 | 5.56493795  | 9.886114669 | 8.054576721 | 5.013362104 |
| ENSMUSG0000085020 | 8.489422215 | 4.869320706 | 7.767661525 | 4.832746033 | 7.161945863 |
| ENSMUSG0000085021 | 12.73413332 | 7.651789682 | 9.179963621 | 3.221830688 | 7.87814045  |
| ENSMUSG0000085022 | 9.904325918 | 9.738641413 | 5.649208382 | 6.443661377 | 5.013362104 |
| ENSMUSG0000085023 | 10.61177777 | 4.173703463 | 9.179963621 | 8.054576721 | 12.17530797 |
| ENSMUSG0000085024 | 4.952162959 | 5.56493795  | 7.061510478 | 6.443661377 | 5.729556691 |
| ENSMUSG0000085025 | 9.904325918 | 4.869320706 | 4.943057334 | 8.054576721 | 8.594335036 |
| ENSMUSG0000085026 | 12.02668147 | 6.956172438 | 12.71071886 | 8.860034393 | 5.013362104 |
| ENSMUSG0000085027 | 4.952162959 | 6.260555194 | 6.35535943  | 4.832746033 | 3.580972932 |
| ENSMUSG0000085028 | 6.367066661 | 11.1298759  | 10.59226572 | 8.860034393 | 12.17530797 |
| ENSMUSG0000085029 | 9.904325918 | 7.651789682 | 5.649208382 | 3.221830688 | 3.580972932 |
| ENSMUSG0000085030 | 14.14903703 | 6.260555194 | 8.473812573 | 9.665492065 | 9.310529622 |
| ENSMUSG0000085032 | 9.196874066 | 4.173703463 | 9.179963621 | 13.69278043 | 12.17530797 |
| ENSMUSG0000085033 | 21.22355554 | 29.21592424 | 28.24604191 | 13.69278043 | 21.48583759 |
| ENSMUSG0000085034 | 6.367066661 | 3.478086219 | 9.179963621 | 4.832746033 | 1.432389173 |
| ENSMUSG0000085035 | 7.074518513 | 6.956172438 | 5.649208382 | 9.665492065 | 6.445751277 |
| ENSMUSG0000085036 | 9.904325918 | 5.56493795  | 9.179963621 | 6.443661377 | 10.02672421 |
| ENSMUSG0000085037 | 35.37259256 | 70.25734162 | 56.49208382 | 77.32393652 | 85.94335036 |
| ENSMUSG0000085039 | 84.1867703  | 97.38641413 | 102.3919019 | 188.4770953 | 136.0769714 |
| ENSMUSG0000085041 | 4.952162959 | 6.956172438 | 8.473812573 | 6.443661377 | 6.445751277 |
| ENSMUSG0000085042 | 14.14903703 | 17.39043109 | 26.83373982 | 12.88732275 | 11.45911338 |
| ENSMUSG0000085043 | 24.76081479 | 18.78166558 | 16.94762515 | 49.93837567 | 40.82309142 |
| ENSMUSG0000085044 | 9.196874066 | 6.956172438 | 7.767661525 | 4.02728836  | 5.729556691 |
| ENSMUSG0000085045 | 7.074518513 | 6.956172438 | 11.29841676 | 5.638203705 | 10.02672421 |
| ENSMUSG0000085046 | 10.61177777 | 7.651789682 | 2.824604191 | 6.443661377 | 11.45911338 |
| ENSMUSG0000085047 | 7.781970364 | 11.1298759  | 4.943057334 | 7.249119049 | 6.445751277 |
| ENSMUSG0000085048 | 16.97884443 | 11.1298759  | 9.886114669 | 12.08186508 | 10.7429188  |
| ENSMUSG0000085049 | 5.65961481  | 8.347406925 | 5.649208382 | 8.860034393 | 2.148583759 |
| ENSMUSG0000085051 | 23.34591109 | 50.7800588  | 43.78136496 | 19.33098413 | 29.36397804 |
| ENSMUSG0000085053 | 2.122355554 | 1.391234488 | 1.412302096 | 2.416373016 | 5.729556691 |
| ENSMUSG0000085054 | 38.90985182 | 73.0398106  | 56.49208382 | 132.0950582 | 84.51096119 |
| ENSMUSG0000085055 | 9.904325918 | 7.651789682 | 7.061510478 | 12.08186508 | 4.297167518 |
| ENSMUSG0000085057 | 14.14903703 | 7.651789682 | 4.943057334 | 7.249119049 | 9.310529622 |
| ENSMUSG0000085058 | 9.196874066 | 9.043024169 | 7.767661525 | 6.443661377 | 11.45911338 |
| ENSMUSG0000085059 | 9.904325918 | 6.956172438 | 4.236906287 | 4.832746033 | 7.87814045  |
| ENSMUSG0000085060 | 4.244711108 | 4.869320706 | 5.649208382 | 5.638203705 | 4.297167518 |
| ENSMUSG0000085063 | 23.34591109 | 25.04222078 | 24.71528667 | 20.94189947 | 24.35061594 |
| ENSMUSG0000085066 | 6.367066661 | 4.869320706 | 4.943057334 | 4.02728836  | 2.864778345 |
| ENSMUSG0000085067 | 9.904325918 | 7.651789682 | 8.473812573 | 4.832746033 | 4.297167518 |
| ENSMUSG0000085068 | 6.367066661 | 5.56493795  | 11.29841676 | 6.443661377 | 10.02672421 |
| ENSMUSG0000085069 | 8.489422215 | 4.869320706 | 6.35535943  | 4.02728836  | 7.87814045  |

|                   |             |             |             |             |             |
|-------------------|-------------|-------------|-------------|-------------|-------------|
| ENSMUSG0000085070 | 7.074518513 | 5.56493795  | 5.649208382 | 4.832746033 | 7.87814045  |
| ENSMUSG0000085071 | 11.31922962 | 7.651789682 | 3.530755239 | 3.221830688 | 8.594335036 |
| ENSMUSG0000085072 | 24.05336294 | 47.30197258 | 42.36906287 | 20.1364418  | 22.91822676 |
| ENSMUSG0000085073 | 5.65961481  | 6.956172438 | 1.412302096 | 4.832746033 | 0           |
| ENSMUSG0000085074 | 6.367066661 | 5.56493795  | 12.00456781 | 8.860034393 | 8.594335036 |
| ENSMUSG0000085075 | 7.781970364 | 2.086851731 | 8.473812573 | 4.832746033 | 5.013362104 |
| ENSMUSG0000085077 | 12.02668147 | 4.173703463 | 4.943057334 | 4.832746033 | 4.297167518 |
| ENSMUSG0000085078 | 24.76081479 | 54.95376226 | 50.84287544 | 28.19101852 | 26.49919969 |
| ENSMUSG0000085080 | 21.93100739 | 23.65098629 | 29.65834401 | 31.41284921 | 20.769643   |
| ENSMUSG0000085081 | 9.904325918 | 8.347406925 | 7.061510478 | 8.860034393 | 10.7429188  |
| ENSMUSG0000085082 | 9.904325918 | 10.43425866 | 7.061510478 | 9.665492065 | 1.432389173 |
| ENSMUSG0000085083 | 8.489422215 | 7.651789682 | 9.179963621 | 6.443661377 | 11.45911338 |
| ENSMUSG0000085084 | 8.489422215 | 4.173703463 | 4.236906287 | 6.443661377 | 5.013362104 |
| ENSMUSG0000085085 | 46.69182218 | 63.30116918 | 60.02283906 | 305.2684577 | 244.2223539 |
| ENSMUSG0000085087 | 9.196874066 | 11.1298759  | 9.179963621 | 4.02728836  | 12.17530797 |
| ENSMUSG0000085088 | 43.15456293 | 66.08363816 | 60.02283906 | 81.35122488 | 70.90326405 |
| ENSMUSG0000085089 | 11.31922962 | 13.21672763 | 11.29841676 | 9.665492065 | 5.729556691 |
| ENSMUSG0000085090 | 13.44158517 | 7.651789682 | 5.649208382 | 6.443661377 | 7.161945863 |
| ENSMUSG0000085091 | 6.367066661 | 7.651789682 | 5.649208382 | 3.221830688 | 7.161945863 |
| ENSMUSG0000085093 | 59.42595551 | 93.90832791 | 88.26888097 | 50.74383334 | 59.44415067 |
| ENSMUSG0000085094 | 13.44158517 | 8.347406925 | 9.886114669 | 2.416373016 | 7.161945863 |
| ENSMUSG0000085095 | 8.489422215 | 5.56493795  | 7.061510478 | 6.443661377 | 7.87814045  |
| ENSMUSG0000085097 | 9.904325918 | 5.56493795  | 10.59226572 | 5.638203705 | 6.445751277 |
| ENSMUSG0000085099 | 82.7718666  | 120.3417832 | 129.2256417 | 170.7570265 | 162.5761711 |
| ENSMUSG0000085100 | 12.02668147 | 7.651789682 | 7.767661525 | 8.054576721 | 7.87814045  |
| ENSMUSG0000085101 | 16.27139258 | 13.91234488 | 12.00456781 | 12.08186508 | 18.62105924 |
| ENSMUSG0000085102 | 73.57499253 | 116.1680797 | 108.7472614 | 197.3371297 | 146.1036956 |
| ENSMUSG0000085103 | 6.367066661 | 5.56493795  | 4.943057334 | 4.832746033 | 5.013362104 |
| ENSMUSG0000085104 | 8.489422215 | 9.738641413 | 9.179963621 | 7.249119049 | 5.729556691 |
| ENSMUSG0000085105 | 9.196874066 | 9.738641413 | 6.35535943  | 10.47094974 | 12.89150255 |
| ENSMUSG0000085106 | 5.65961481  | 10.43425866 | 6.35535943  | 4.02728836  | 4.297167518 |
| ENSMUSG0000085107 | 6.367066661 | 0.695617244 | 4.943057334 | 1.610915344 | 1.432389173 |
| ENSMUSG0000085108 | 8.489422215 | 4.869320706 | 10.59226572 | 7.249119049 | 7.87814045  |
| ENSMUSG0000085109 | 86.30912585 | 130.0804246 | 112.2780166 | 42.68925662 | 47.98503729 |
| ENSMUSG0000085110 | 15.56394073 | 8.347406925 | 11.29841676 | 4.832746033 | 7.161945863 |
| ENSMUSG0000085112 | 50.93653329 | 72.34419335 | 59.31668801 | 82.15668255 | 58.72795608 |
| ENSMUSG0000085113 | 8.489422215 | 9.738641413 | 12.71071886 | 7.249119049 | 5.729556691 |
| ENSMUSG0000085114 | 3.537259256 | 1.391234488 | 4.236906287 | 2.416373016 | 5.729556691 |
| ENSMUSG0000085115 | 6.367066661 | 8.347406925 | 9.886114669 | 8.054576721 | 6.445751277 |
| ENSMUSG0000085116 | 6.367066661 | 6.956172438 | 3.530755239 | 6.443661377 | 7.87814045  |
| ENSMUSG0000085118 | 19.10119998 | 17.39043109 | 19.06607829 | 5.638203705 | 10.7429188  |
| ENSMUSG0000085120 | 12.73413332 | 11.1298759  | 7.767661525 | 5.638203705 | 5.729556691 |
| ENSMUSG0000085121 | 12.73413332 | 7.651789682 | 6.35535943  | 5.638203705 | 5.729556691 |

|                   |             |             |             |             |             |
|-------------------|-------------|-------------|-------------|-------------|-------------|
| ENSMUSG0000085122 | 9.196874066 | 3.478086219 | 10.59226572 | 7.249119049 | 8.594335036 |
| ENSMUSG0000085123 | 8.489422215 | 9.043024169 | 2.824604191 | 5.638203705 | 8.594335036 |
| ENSMUSG0000085124 | 8.489422215 | 10.43425866 | 11.29841676 | 5.638203705 | 10.7429188  |
| ENSMUSG0000085125 | 4.244711108 | 12.52111039 | 2.824604191 | 3.221830688 | 6.445751277 |
| ENSMUSG0000085126 | 3.537259256 | 8.347406925 | 4.236906287 | 7.249119049 | 8.594335036 |
| ENSMUSG0000085127 | 8.489422215 | 15.99919661 | 18.35992724 | 12.88732275 | 14.32389173 |
| ENSMUSG0000085129 | 7.781970364 | 3.478086219 | 8.473812573 | 8.860034393 | 5.013362104 |
| ENSMUSG0000085130 | 7.074518513 | 8.347406925 | 7.767661525 | 8.054576721 | 4.297167518 |
| ENSMUSG0000085132 | 4.952162959 | 11.1298759  | 9.179963621 | 3.221830688 | 10.02672421 |
| ENSMUSG0000085133 | 4.952162959 | 6.260555194 | 4.943057334 | 3.221830688 | 9.310529622 |
| ENSMUSG0000085134 | 7.074518513 | 5.56493795  | 8.473812573 | 4.02728836  | 5.013362104 |
| ENSMUSG0000085135 | 8.489422215 | 9.738641413 | 5.649208382 | 4.832746033 | 4.297167518 |
| ENSMUSG0000085139 | 5.65961481  | 4.869320706 | 3.530755239 | 0.805457672 | 1.432389173 |
| ENSMUSG0000085141 | 1.414903703 | 8.347406925 | 4.236906287 | 3.221830688 | 3.580972932 |
| ENSMUSG0000085142 | 4.244711108 | 7.651789682 | 10.59226572 | 4.02728836  | 5.729556691 |
| ENSMUSG0000085143 | 72.86754068 | 95.99517964 | 86.15042783 | 178.0061455 | 141.0903335 |
| ENSMUSG0000085145 | 17.68629628 | 21.56413456 | 14.829172   | 13.69278043 | 10.02672421 |
| ENSMUSG0000085146 | 5.65961481  | 3.478086219 | 2.118453143 | 6.443661377 | 2.148583759 |
| ENSMUSG0000085147 | 9.904325918 | 9.738641413 | 8.473812573 | 2.416373016 | 5.729556691 |
| ENSMUSG0000085148 | 1.414903703 | 3.478086219 | 2.118453143 | 5.638203705 | 2.864778345 |
| ENSMUSG0000085150 | 12.02668147 | 9.738641413 | 9.886114669 | 7.249119049 | 5.729556691 |
| ENSMUSG0000085151 | 7.781970364 | 10.43425866 | 7.767661525 | 8.054576721 | 12.17530797 |
| ENSMUSG0000085152 | 9.904325918 | 20.17290007 | 24.00913562 | 13.69278043 | 18.62105924 |
| ENSMUSG0000085154 | 47.39927403 | 75.12666233 | 57.90438592 | 97.46037832 | 78.7814045  |
| ENSMUSG0000085155 | 13.44158517 | 10.43425866 | 10.59226572 | 6.443661377 | 9.310529622 |
| ENSMUSG0000085156 | 4.244711108 | 2.782468975 | 4.236906287 | 3.221830688 | 2.148583759 |
| ENSMUSG0000085157 | 3.537259256 | 0.695617244 | 1.412302096 | 0           | 5.013362104 |
| ENSMUSG0000085158 | 9.904325918 | 5.56493795  | 7.061510478 | 5.638203705 | 7.87814045  |
| ENSMUSG0000085160 | 12.73413332 | 8.347406925 | 7.767661525 | 6.443661377 | 4.297167518 |
| ENSMUSG0000085161 | 10.61177777 | 5.56493795  | 7.061510478 | 9.665492065 | 12.17530797 |
| ENSMUSG0000085162 | 7.781970364 | 6.956172438 | 8.473812573 | 6.443661377 | 7.161945863 |
| ENSMUSG0000085165 | 19.10119998 | 32.69401046 | 27.53989086 | 47.52200265 | 42.25548059 |
| ENSMUSG0000085166 | 16.97884443 | 17.39043109 | 16.94762515 | 19.33098413 | 17.90486466 |
| ENSMUSG0000085167 | 9.196874066 | 20.86851731 | 19.77222934 | 33.02376456 | 17.90486466 |
| ENSMUSG0000085168 | 11.31922962 | 6.956172438 | 13.41686991 | 10.47094974 | 8.594335036 |
| ENSMUSG0000085169 | 37.49494812 | 82.08283477 | 57.90438592 | 64.43661377 | 71.61945863 |
| ENSMUSG0000085170 | 19.10119998 | 34.78086219 | 19.77222934 | 20.1364418  | 19.33725383 |
| ENSMUSG0000085171 | 12.02668147 | 8.347406925 | 5.649208382 | 8.860034393 | 10.02672421 |
| ENSMUSG0000085172 | 12.73413332 | 13.91234488 | 10.59226572 | 12.88732275 | 12.17530797 |
| ENSMUSG0000085173 | 7.781970364 | 4.869320706 | 6.35535943  | 7.249119049 | 7.161945863 |
| ENSMUSG0000085174 | 19.80865184 | 19.47728283 | 16.94762515 | 12.88732275 | 22.20203218 |
| ENSMUSG0000085175 | 39.61730367 | 67.47487265 | 47.3121202  | 76.51847885 | 85.94335036 |
| ENSMUSG0000085176 | 9.196874066 | 11.82549314 | 7.061510478 | 4.832746033 | 5.729556691 |

|                   |             |             |             |             |             |
|-------------------|-------------|-------------|-------------|-------------|-------------|
| ENSMUSG0000085177 | 22.63845924 | 31.30277597 | 28.95219296 | 22.55281482 | 21.48583759 |
| ENSMUSG0000085178 | 13.44158517 | 18.08604834 | 16.2414741  | 24.96918783 | 22.20203218 |
| ENSMUSG0000085179 | 7.781970364 | 3.478086219 | 8.473812573 | 8.054576721 | 11.45911338 |
| ENSMUSG0000085180 | 20.51610369 | 26.43345526 | 16.2414741  | 14.4982381  | 14.32389173 |
| ENSMUSG0000085181 | 9.196874066 | 9.043024169 | 5.649208382 | 5.638203705 | 5.013362104 |
| ENSMUSG0000085182 | 7.074518513 | 6.956172438 | 5.649208382 | 3.221830688 | 7.87814045  |
| ENSMUSG0000085183 | 7.074518513 | 4.173703463 | 4.943057334 | 3.221830688 | 5.013362104 |
| ENSMUSG0000085184 | 6.367066661 | 7.651789682 | 5.649208382 | 1.610915344 | 5.729556691 |
| ENSMUSG0000085185 | 12.02668147 | 4.869320706 | 7.767661525 | 6.443661377 | 9.310529622 |
| ENSMUSG0000085186 | 10.61177777 | 4.869320706 | 12.00456781 | 5.638203705 | 7.161945863 |
| ENSMUSG0000085187 | 5.65961481  | 4.173703463 | 9.179963621 | 0.805457672 | 15.7562809  |
| ENSMUSG0000085188 | 4.952162959 | 9.043024169 | 4.236906287 | 7.249119049 | 11.45911338 |
| ENSMUSG0000085189 | 6.367066661 | 19.47728283 | 12.71071886 | 17.72006879 | 10.7429188  |
| ENSMUSG0000085192 | 18.39374813 | 31.99839321 | 22.59683353 | 22.55281482 | 25.78300511 |
| ENSMUSG0000085193 | 8.489422215 | 7.651789682 | 9.886114669 | 4.832746033 | 4.297167518 |
| ENSMUSG0000085194 | 4.244711108 | 0.695617244 | 0.706151048 | 5.638203705 | 2.148583759 |
| ENSMUSG0000085196 | 20.51610369 | 37.56333116 | 29.65834401 | 60.40932541 | 51.56601022 |
| ENSMUSG0000085197 | 7.781970364 | 6.956172438 | 9.886114669 | 2.416373016 | 5.729556691 |
| ENSMUSG0000085198 | 6.367066661 | 5.56493795  | 9.179963621 | 7.249119049 | 2.864778345 |
| ENSMUSG0000085199 | 36.78749627 | 49.38882431 | 45.8998181  | 20.1364418  | 31.5125618  |
| ENSMUSG0000085201 | 7.074518513 | 11.1298759  | 6.35535943  | 12.88732275 | 9.310529622 |
| ENSMUSG0000085202 | 7.074518513 | 11.82549314 | 6.35535943  | 3.221830688 | 6.445751277 |
| ENSMUSG0000085203 | 6.367066661 | 4.173703463 | 2.118453143 | 9.665492065 | 7.87814045  |
| ENSMUSG0000085204 | 79.94205919 | 111.298759  | 99.56729774 | 159.4806191 | 139.6579443 |
| ENSMUSG0000085205 | 285.1030961 | 267.8126389 | 269.7497002 | 205.3917064 | 167.5895332 |
| ENSMUSG0000085206 | 16.97884443 | 29.91154148 | 31.0706461  | 26.58010318 | 32.94495097 |
| ENSMUSG0000085207 | 15.56394073 | 27.82468975 | 26.83373982 | 44.30017197 | 39.39070225 |
| ENSMUSG0000085208 | 77.11225179 | 98.08203137 | 77.67661525 | 132.9005159 | 105.2806042 |
| ENSMUSG0000085209 | 9.196874066 | 12.52111039 | 4.236906287 | 3.221830688 | 2.864778345 |
| ENSMUSG0000085211 | 16.27139258 | 30.60715873 | 31.77679715 | 28.19101852 | 27.93158887 |
| ENSMUSG0000085213 | 154.2245036 | 164.8612868 | 176.5377619 | 128.0677699 | 104.5644096 |
| ENSMUSG0000085214 | 24.76081479 | 31.99839321 | 28.24604191 | 21.74735715 | 28.64778345 |
| ENSMUSG0000085217 | 9.904325918 | 9.043024169 | 7.767661525 | 5.638203705 | 5.013362104 |
| ENSMUSG0000085218 | 5.65961481  | 6.260555194 | 6.35535943  | 1.610915344 | 3.580972932 |
| ENSMUSG0000085220 | 7.074518513 | 2.782468975 | 7.061510478 | 2.416373016 | 6.445751277 |
| ENSMUSG0000085221 | 12.02668147 | 3.478086219 | 5.649208382 | 3.221830688 | 5.729556691 |
| ENSMUSG0000085222 | 10.61177777 | 9.043024169 | 6.35535943  | 7.249119049 | 3.580972932 |
| ENSMUSG0000085223 | 8.489422215 | 4.869320706 | 9.886114669 | 9.665492065 | 7.87814045  |
| ENSMUSG0000085224 | 4.952162959 | 5.56493795  | 5.649208382 | 4.02728836  | 5.729556691 |
| ENSMUSG0000085225 | 10.61177777 | 9.738641413 | 9.886114669 | 5.638203705 | 10.7429188  |
| ENSMUSG0000085226 | 5.65961481  | 6.260555194 | 4.943057334 | 3.221830688 | 6.445751277 |
| ENSMUSG0000085227 | 43.86201478 | 80.69160028 | 59.31668801 | 67.65844446 | 60.16034525 |
| ENSMUSG0000085228 | 2.829807405 | 4.173703463 | 0.706151048 | 0.805457672 | 2.148583759 |

|                   |             |             |             |             |             |
|-------------------|-------------|-------------|-------------|-------------|-------------|
| ENSMUSG0000085229 | 37.49494812 | 71.64857611 | 64.25974535 | 36.24559524 | 32.94495097 |
| ENSMUSG0000085230 | 3.537259256 | 6.260555194 | 4.943057334 | 8.054576721 | 10.02672421 |
| ENSMUSG0000085232 | 10.61177777 | 11.82549314 | 9.179963621 | 7.249119049 | 7.161945863 |
| ENSMUSG0000085234 | 8.489422215 | 8.347406925 | 9.179963621 | 4.832746033 | 9.310529622 |
| ENSMUSG0000085235 | 3.537259256 | 8.347406925 | 4.943057334 | 17.72006879 | 21.48583759 |
| ENSMUSG0000085236 | 75.69734809 | 94.60394515 | 96.74269354 | 84.57305557 | 79.49759908 |
| ENSMUSG0000085237 | 2.829807405 | 2.086851731 | 3.530755239 | 3.221830688 | 3.580972932 |
| ENSMUSG0000085238 | 5.65961481  | 11.1298759  | 9.886114669 | 7.249119049 | 8.594335036 |
| ENSMUSG0000085239 | 10.61177777 | 11.1298759  | 11.29841676 | 4.02728836  | 7.161945863 |
| ENSMUSG0000085240 | 9.904325918 | 6.260555194 | 6.35535943  | 1.610915344 | 6.445751277 |
| ENSMUSG0000085241 | 0           | 0           | 1.412302096 | 1.610915344 | 0.716194586 |
| ENSMUSG0000085242 | 11.31922962 | 13.91234488 | 10.59226572 | 14.4982381  | 13.60769714 |
| ENSMUSG0000085244 | 8.489422215 | 9.043024169 | 7.061510478 | 5.638203705 | 8.594335036 |
| ENSMUSG0000085245 | 38.90985182 | 61.21431745 | 69.90895373 | 16.91461111 | 20.05344842 |
| ENSMUSG0000085246 | 7.781970364 | 10.43425866 | 12.00456781 | 4.832746033 | 10.02672421 |
| ENSMUSG0000085247 | 10.61177777 | 6.956172438 | 7.061510478 | 7.249119049 | 5.729556691 |
| ENSMUSG0000085248 | 11.31922962 | 7.651789682 | 4.943057334 | 4.02728836  | 1.432389173 |
| ENSMUSG0000085249 | 7.781970364 | 6.956172438 | 8.473812573 | 10.47094974 | 5.729556691 |
| ENSMUSG0000085250 | 8.489422215 | 9.043024169 | 7.061510478 | 9.665492065 | 12.17530797 |
| ENSMUSG0000085251 | 11.31922962 | 7.651789682 | 7.767661525 | 4.832746033 | 7.87814045  |
| ENSMUSG0000085252 | 9.904325918 | 4.173703463 | 8.473812573 | 8.054576721 | 5.729556691 |
| ENSMUSG0000085253 | 4.952162959 | 11.1298759  | 10.59226572 | 5.638203705 | 6.445751277 |
| ENSMUSG0000085254 | 7.074518513 | 7.651789682 | 8.473812573 | 2.416373016 | 9.310529622 |
| ENSMUSG0000085255 | 19.10119998 | 39.6501829  | 29.65834401 | 39.46742593 | 36.5259239  |
| ENSMUSG0000085256 | 7.781970364 | 7.651789682 | 4.943057334 | 5.638203705 | 5.013362104 |
| ENSMUSG0000085257 | 18.39374813 | 9.738641413 | 9.886114669 | 4.832746033 | 4.297167518 |
| ENSMUSG0000085260 | 36.78749627 | 45.21512085 | 26.12758877 | 52.35474869 | 46.55264811 |
| ENSMUSG0000085261 | 5.65961481  | 9.738641413 | 6.35535943  | 6.443661377 | 10.7429188  |
| ENSMUSG0000085262 | 42.44711108 | 50.08444155 | 47.3121202  | 57.18749472 | 52.99839939 |
| ENSMUSG0000085263 | 4.244711108 | 4.173703463 | 6.35535943  | 4.02728836  | 7.161945863 |
| ENSMUSG0000085264 | 12.02668147 | 10.43425866 | 9.886114669 | 4.02728836  | 2.864778345 |
| ENSMUSG0000085265 | 9.904325918 | 5.56493795  | 6.35535943  | 4.02728836  | 12.17530797 |
| ENSMUSG0000085267 | 4.952162959 | 0.695617244 | 2.118453143 | 1.610915344 | 3.580972932 |
| ENSMUSG0000085269 | 85.601674   | 108.51629   | 103.098053  | 99.87675134 | 98.11865833 |
| ENSMUSG0000085271 | 8.489422215 | 3.478086219 | 8.473812573 | 7.249119049 | 7.161945863 |
| ENSMUSG0000085274 | 203.7461332 | 224.6843697 | 254.9205282 | 302.8520847 | 250.6681052 |
| ENSMUSG0000085275 | 9.904325918 | 6.260555194 | 7.061510478 | 6.443661377 | 8.594335036 |
| ENSMUSG0000085276 | 7.781970364 | 6.956172438 | 8.473812573 | 6.443661377 | 3.580972932 |
| ENSMUSG0000085277 | 4.952162959 | 8.347406925 | 6.35535943  | 6.443661377 | 7.161945863 |
| ENSMUSG0000085278 | 8.489422215 | 11.82549314 | 7.061510478 | 8.860034393 | 10.7429188  |
| ENSMUSG0000085279 | 16.97884443 | 22.2597518  | 19.06607829 | 16.10915344 | 15.04008631 |
| ENSMUSG0000085280 | 23.34591109 | 29.91154148 | 42.36906287 | 22.55281482 | 24.35061594 |
| ENSMUSG0000085281 | 14.85648888 | 9.738641413 | 10.59226572 | 7.249119049 | 10.02672421 |

|                    |             |             |             |             |             |
|--------------------|-------------|-------------|-------------|-------------|-------------|
| ENSMUSG00000085282 | 2.829807405 | 7.651789682 | 8.473812573 | 4.02728836  | 3.580972932 |
| ENSMUSG00000085284 | 2.122355554 | 5.56493795  | 3.530755239 | 3.221830688 | 1.432389173 |
| ENSMUSG00000085285 | 9.196874066 | 6.956172438 | 10.59226572 | 6.443661377 | 5.013362104 |
| ENSMUSG00000085286 | 5.65961481  | 6.260555194 | 7.767661525 | 5.638203705 | 5.013362104 |
| ENSMUSG00000085287 | 46.69182218 | 57.73623123 | 61.43514116 | 46.71654498 | 49.41742646 |
| ENSMUSG00000085288 | 2.122355554 | 2.086851731 | 2.824604191 | 1.610915344 | 4.297167518 |
| ENSMUSG00000085289 | 10.61177777 | 7.651789682 | 9.886114669 | 13.69278043 | 10.7429188  |
| ENSMUSG00000085290 | 13.44158517 | 7.651789682 | 8.473812573 | 4.02728836  | 9.310529622 |
| ENSMUSG00000085292 | 7.074518513 | 8.347406925 | 5.649208382 | 4.02728836  | 5.729556691 |
| ENSMUSG00000085293 | 8.489422215 | 2.086851731 | 4.943057334 | 4.02728836  | 7.161945863 |
| ENSMUSG00000085295 | 10.61177777 | 12.52111039 | 9.179963621 | 4.832746033 | 5.729556691 |
| ENSMUSG00000085297 | 7.781970364 | 4.869320706 | 4.236906287 | 4.832746033 | 9.310529622 |
| ENSMUSG00000085298 | 4.952162959 | 7.651789682 | 10.59226572 | 4.02728836  | 5.013362104 |
| ENSMUSG00000085300 | 8.489422215 | 8.347406925 | 6.35535943  | 7.249119049 | 6.445751277 |
| ENSMUSG00000085301 | 9.196874066 | 4.869320706 | 7.767661525 | 10.47094974 | 5.729556691 |
| ENSMUSG00000085302 | 12.02668147 | 5.56493795  | 7.767661525 | 4.02728836  | 8.594335036 |
| ENSMUSG00000085303 | 13.44158517 | 6.956172438 | 5.649208382 | 4.02728836  | 6.445751277 |
| ENSMUSG00000085304 | 8.489422215 | 6.260555194 | 3.530755239 | 6.443661377 | 7.161945863 |
| ENSMUSG00000085305 | 9.196874066 | 4.173703463 | 2.824604191 | 10.47094974 | 7.87814045  |
| ENSMUSG00000085307 | 12.73413332 | 6.260555194 | 9.179963621 | 7.249119049 | 10.7429188  |
| ENSMUSG00000085310 | 4.952162959 | 18.08604834 | 13.41686991 | 45.91108731 | 41.53928601 |
| ENSMUSG00000085311 | 50.93653329 | 67.47487265 | 61.43514116 | 42.68925662 | 44.40406435 |
| ENSMUSG00000085312 | 6.367066661 | 6.956172438 | 6.35535943  | 7.249119049 | 3.580972932 |
| ENSMUSG00000085314 | 3.537259256 | 4.173703463 | 4.236906287 | 0.805457672 | 2.864778345 |
| ENSMUSG00000085315 | 74.28244438 | 93.21271067 | 94.6242404  | 96.65492065 | 105.2806042 |
| ENSMUSG00000085316 | 11.31922962 | 4.173703463 | 7.061510478 | 4.832746033 | 5.729556691 |
| ENSMUSG00000085317 | 2.829807405 | 2.086851731 | 2.824604191 | 4.02728836  | 2.864778345 |
| ENSMUSG00000085318 | 8.489422215 | 4.869320706 | 7.061510478 | 5.638203705 | 5.013362104 |
| ENSMUSG00000085319 | 5.65961481  | 8.347406925 | 3.530755239 | 3.221830688 | 6.445751277 |
| ENSMUSG00000085320 | 11.31922962 | 11.1298759  | 9.886114669 | 4.832746033 | 9.310529622 |
| ENSMUSG00000085321 | 18.39374813 | 31.99839321 | 22.59683353 | 14.4982381  | 17.18867007 |
| ENSMUSG00000085322 | 4.952162959 | 6.956172438 | 9.886114669 | 4.832746033 | 2.864778345 |
| ENSMUSG00000085323 | 7.074518513 | 6.956172438 | 4.236906287 | 4.02728836  | 4.297167518 |
| ENSMUSG00000085324 | 7.074518513 | 6.956172438 | 13.41686991 | 6.443661377 | 6.445751277 |
| ENSMUSG00000085325 | 4.952162959 | 7.651789682 | 4.943057334 | 3.221830688 | 3.580972932 |
| ENSMUSG00000085326 | 17.68629628 | 21.56413456 | 30.36449505 | 13.69278043 | 12.17530797 |
| ENSMUSG00000085327 | 6.367066661 | 10.43425866 | 12.00456781 | 6.443661377 | 12.17530797 |
| ENSMUSG00000085328 | 1.414903703 | 0           | 3.530755239 | 0.805457672 | 0.716194586 |
| ENSMUSG00000085329 | 11.31922962 | 5.56493795  | 5.649208382 | 8.054576721 | 4.297167518 |
| ENSMUSG00000085330 | 5.65961481  | 7.651789682 | 12.00456781 | 7.249119049 | 5.013362104 |
| ENSMUSG00000085331 | 13.44158517 | 4.173703463 | 9.886114669 | 6.443661377 | 3.580972932 |
| ENSMUSG00000085333 | 12.73413332 | 10.43425866 | 12.00456781 | 6.443661377 | 10.02672421 |
| ENSMUSG00000085334 | 82.7718666  | 121.7330177 | 103.098053  | 193.3098413 | 160.4275873 |

|                   |             |             |             |             |             |
|-------------------|-------------|-------------|-------------|-------------|-------------|
| ENSMUSG0000085335 | 15.56394073 | 41.04141738 | 29.65834401 | 20.94189947 | 26.49919969 |
| ENSMUSG0000085336 | 7.781970364 | 7.651789682 | 2.824604191 | 6.443661377 | 6.445751277 |
| ENSMUSG0000085337 | 14.14903703 | 13.21672763 | 7.767661525 | 8.054576721 | 10.02672421 |
| ENSMUSG0000085338 | 8.489422215 | 5.56493795  | 10.59226572 | 9.665492065 | 9.310529622 |
| ENSMUSG0000085340 | 14.14903703 | 9.738641413 | 7.767661525 | 12.88732275 | 9.310529622 |
| ENSMUSG0000085341 | 13.44158517 | 7.651789682 | 11.29841676 | 4.832746033 | 7.161945863 |
| ENSMUSG0000085342 | 10.61177777 | 6.260555194 | 10.59226572 | 16.10915344 | 12.89150255 |
| ENSMUSG0000085345 | 16.97884443 | 9.043024169 | 4.943057334 | 4.832746033 | 4.297167518 |
| ENSMUSG0000085347 | 39.61730367 | 61.21431745 | 48.7244223  | 41.88379895 | 42.25548059 |
| ENSMUSG0000085348 | 9.904325918 | 9.043024169 | 6.35535943  | 4.02728836  | 10.02672421 |
| ENSMUSG0000085350 | 8.489422215 | 4.869320706 | 5.649208382 | 8.860034393 | 10.7429188  |
| ENSMUSG0000085351 | 11.31922962 | 6.260555194 | 5.649208382 | 10.47094974 | 5.729556691 |
| ENSMUSG0000085352 | 10.61177777 | 9.043024169 | 8.473812573 | 5.638203705 | 10.7429188  |
| ENSMUSG0000085353 | 4.952162959 | 9.043024169 | 7.767661525 | 13.69278043 | 10.7429188  |
| ENSMUSG0000085354 | 0           | 0           | 0           | 0           | 0           |
| ENSMUSG0000085355 | 60.84085921 | 97.38641413 | 79.7950684  | 207.0026217 | 180.4810358 |
| ENSMUSG0000085357 | 7.074518513 | 4.173703463 | 11.29841676 | 4.832746033 | 2.148583759 |
| ENSMUSG0000085358 | 2.829807405 | 6.260555194 | 7.767661525 | 8.860034393 | 10.7429188  |
| ENSMUSG0000085359 | 2.122355554 | 0.695617244 | 0           | 0           | 3.580972932 |
| ENSMUSG0000085360 | 12.73413332 | 23.65098629 | 16.94762515 | 9.665492065 | 9.310529622 |
| ENSMUSG0000085361 | 125.2189777 | 179.4692489 | 158.1778347 | 157.8697037 | 134.6445822 |
| ENSMUSG0000085363 | 7.781970364 | 9.738641413 | 13.41686991 | 6.443661377 | 5.013362104 |
| ENSMUSG0000085366 | 4.952162959 | 6.260555194 | 3.530755239 | 2.416373016 | 2.148583759 |
| ENSMUSG0000085368 | 5.65961481  | 11.1298759  | 8.473812573 | 5.638203705 | 17.18867007 |
| ENSMUSG0000085369 | 10.61177777 | 7.651789682 | 10.59226572 | 8.860034393 | 7.87814045  |
| ENSMUSG0000085371 | 9.904325918 | 10.43425866 | 6.35535943  | 4.02728836  | 12.17530797 |
| ENSMUSG0000085372 | 7.781970364 | 9.738641413 | 9.179963621 | 4.02728836  | 12.89150255 |
| ENSMUSG0000085375 | 8.489422215 | 6.956172438 | 3.530755239 | 7.249119049 | 12.17530797 |
| ENSMUSG0000085376 | 7.781970364 | 6.956172438 | 9.179963621 | 7.249119049 | 2.148583759 |
| ENSMUSG0000085377 | 8.489422215 | 6.260555194 | 9.886114669 | 12.08186508 | 5.013362104 |
| ENSMUSG0000085378 | 7.074518513 | 7.651789682 | 6.35535943  | 4.02728836  | 7.87814045  |
| ENSMUSG0000085379 | 193.1343554 | 239.2923319 | 243.6221115 | 267.4119471 | 208.4126246 |
| ENSMUSG0000085380 | 6.367066661 | 9.738641413 | 10.59226572 | 8.054576721 | 5.729556691 |
| ENSMUSG0000085382 | 12.73413332 | 8.347406925 | 8.473812573 | 8.860034393 | 6.445751277 |
| ENSMUSG0000085383 | 7.781970364 | 9.043024169 | 6.35535943  | 5.638203705 | 5.013362104 |
| ENSMUSG0000085385 | 7.074518513 | 6.956172438 | 7.767661525 | 11.27640741 | 7.161945863 |
| ENSMUSG0000085386 | 6.367066661 | 3.478086219 | 7.767661525 | 4.832746033 | 2.148583759 |
| ENSMUSG0000085387 | 7.781970364 | 6.956172438 | 5.649208382 | 7.249119049 | 6.445751277 |
| ENSMUSG0000085388 | 12.73413332 | 6.260555194 | 7.061510478 | 4.832746033 | 5.729556691 |
| ENSMUSG0000085389 | 8.489422215 | 11.82549314 | 8.473812573 | 4.02728836  | 9.310529622 |
| ENSMUSG0000085390 | 7.074518513 | 8.347406925 | 4.943057334 | 10.47094974 | 8.594335036 |
| ENSMUSG0000085391 | 32.54278516 | 39.6501829  | 34.60140134 | 16.10915344 | 22.20203218 |
| ENSMUSG0000085393 | 8.489422215 | 4.173703463 | 7.767661525 | 6.443661377 | 6.445751277 |

|                   |             |             |             |             |             |
|-------------------|-------------|-------------|-------------|-------------|-------------|
| ENSMUSG0000085394 | 24.76081479 | 47.30197258 | 37.42600553 | 18.52552646 | 20.05344842 |
| ENSMUSG0000085395 | 5.65961481  | 9.738641413 | 12.71071886 | 6.443661377 | 9.310529622 |
| ENSMUSG0000085396 | 8.489422215 | 4.173703463 | 2.824604191 | 5.638203705 | 2.864778345 |
| ENSMUSG0000085397 | 9.904325918 | 11.82549314 | 8.473812573 | 9.665492065 | 10.7429188  |
| ENSMUSG0000085398 | 35.37259256 | 84.86530374 | 65.67204744 | 98.265836   | 96.68626916 |
| ENSMUSG0000085399 | 5.65961481  | 11.82549314 | 16.2414741  | 8.054576721 | 7.161945863 |
| ENSMUSG0000085400 | 9.196874066 | 3.478086219 | 7.767661525 | 1.610915344 | 7.161945863 |
| ENSMUSG0000085401 | 8.489422215 | 12.52111039 | 11.29841676 | 15.30369577 | 12.89150255 |
| ENSMUSG0000085402 | 10.61177777 | 5.56493795  | 7.767661525 | 5.638203705 | 7.87814045  |
| ENSMUSG0000085403 | 11.31922962 | 11.82549314 | 7.061510478 | 15.30369577 | 7.161945863 |
| ENSMUSG0000085404 | 9.904325918 | 11.1298759  | 9.179963621 | 6.443661377 | 5.729556691 |
| ENSMUSG0000085405 | 12.02668147 | 6.260555194 | 9.179963621 | 2.416373016 | 8.594335036 |
| ENSMUSG0000085407 | 6.367066661 | 6.260555194 | 7.061510478 | 5.638203705 | 10.02672421 |
| ENSMUSG0000085408 | 15.56394073 | 26.43345526 | 26.83373982 | 33.82922223 | 27.93158887 |
| ENSMUSG0000085409 | 16.97884443 | 25.04222078 | 26.83373982 | 14.4982381  | 20.05344842 |
| ENSMUSG0000085411 | 9.904325918 | 11.1298759  | 6.35535943  | 6.443661377 | 4.297167518 |
| ENSMUSG0000085412 | 13.44158517 | 6.956172438 | 3.530755239 | 12.08186508 | 8.594335036 |
| ENSMUSG0000085413 | 7.781970364 | 23.65098629 | 15.53532305 | 36.24559524 | 35.80972932 |
| ENSMUSG0000085414 | 12.02668147 | 6.260555194 | 4.236906287 | 5.638203705 | 5.013362104 |
| ENSMUSG0000085415 | 7.781970364 | 6.956172438 | 9.179963621 | 5.638203705 | 11.45911338 |
| ENSMUSG0000085416 | 14.14903703 | 4.869320706 | 5.649208382 | 4.832746033 | 8.594335036 |
| ENSMUSG0000085417 | 27.5906222  | 31.99839321 | 43.78136496 | 17.72006879 | 13.60769714 |
| ENSMUSG0000085418 | 7.781970364 | 5.56493795  | 8.473812573 | 6.443661377 | 5.729556691 |
| ENSMUSG0000085419 | 5.65961481  | 8.347406925 | 6.35535943  | 5.638203705 | 5.729556691 |
| ENSMUSG0000085420 | 6.367066661 | 4.173703463 | 7.767661525 | 5.638203705 | 7.87814045  |
| ENSMUSG0000085421 | 12.73413332 | 13.21672763 | 13.41686991 | 7.249119049 | 5.013362104 |
| ENSMUSG0000085423 | 14.14903703 | 4.173703463 | 7.767661525 | 8.054576721 | 5.729556691 |
| ENSMUSG0000085424 | 6.367066661 | 8.347406925 | 2.824604191 | 3.221830688 | 9.310529622 |
| ENSMUSG0000085425 | 8.489422215 | 10.43425866 | 7.061510478 | 9.665492065 | 16.47247549 |
| ENSMUSG0000085426 | 11.31922962 | 6.260555194 | 6.35535943  | 3.221830688 | 6.445751277 |
| ENSMUSG0000085427 | 7.074518513 | 3.478086219 | 9.179963621 | 11.27640741 | 15.04008631 |
| ENSMUSG0000085428 | 4.952162959 | 2.782468975 | 2.118453143 | 4.02728836  | 2.864778345 |
| ENSMUSG0000085429 | 5.65961481  | 8.347406925 | 9.179963621 | 4.832746033 | 7.87814045  |
| ENSMUSG0000085430 | 10.61177777 | 6.956172438 | 8.473812573 | 4.832746033 | 7.161945863 |
| ENSMUSG0000085431 | 8.489422215 | 9.738641413 | 6.35535943  | 2.416373016 | 2.148583759 |
| ENSMUSG0000085433 | 19.10119998 | 28.52030699 | 20.47838039 | 22.55281482 | 21.48583759 |
| ENSMUSG0000085434 | 14.14903703 | 9.738641413 | 12.71071886 | 13.69278043 | 7.87814045  |
| ENSMUSG0000085435 | 11.31922962 | 7.651789682 | 5.649208382 | 6.443661377 | 10.7429188  |
| ENSMUSG0000085436 | 38.90985182 | 73.0398106  | 58.61053696 | 111.1531587 | 101.6996313 |
| ENSMUSG0000085437 | 15.56394073 | 17.39043109 | 11.29841676 | 12.88732275 | 14.32389173 |
| ENSMUSG0000085438 | 103.9954221 | 123.1242521 | 113.6903187 | 160.2860767 | 129.6312201 |
| ENSMUSG0000085439 | 51.64398514 | 77.21351406 | 57.90438592 | 23.35827249 | 28.64778345 |
| ENSMUSG0000085440 | 7.781970364 | 4.173703463 | 4.943057334 | 4.832746033 | 5.729556691 |



|                   |             |             |             |             |             |
|-------------------|-------------|-------------|-------------|-------------|-------------|
| ENSMUSG0000085441 | 0.707451851 | 4.173703463 | 7.061510478 | 3.221830688 | 3.580972932 |
| ENSMUSG0000085442 | 31.83533331 | 41.04141738 | 41.66291182 | 28.19101852 | 21.48583759 |
| ENSMUSG0000085443 | 11.31922962 | 11.1298759  | 3.530755239 | 4.02728836  | 8.594335036 |
| ENSMUSG0000085444 | 9.196874066 | 6.260555194 | 6.35535943  | 5.638203705 | 7.161945863 |
| ENSMUSG0000085445 | 9.904325918 | 7.651789682 | 9.886114669 | 8.054576721 | 10.7429188  |
| ENSMUSG0000085447 | 7.074518513 | 5.56493795  | 9.179963621 | 3.221830688 | 5.729556691 |
| ENSMUSG0000085448 | 5.65961481  | 1.391234488 | 0.706151048 | 0.805457672 | 2.148583759 |
| ENSMUSG0000085449 | 11.31922962 | 6.260555194 | 7.767661525 | 4.832746033 | 5.729556691 |
| ENSMUSG0000085450 | 7.074518513 | 7.651789682 | 8.473812573 | 9.665492065 | 11.45911338 |
| ENSMUSG0000085451 | 9.904325918 | 6.956172438 | 4.943057334 | 6.443661377 | 6.445751277 |
| ENSMUSG0000085452 | 10.61177777 | 3.478086219 | 7.767661525 | 1.610915344 | 6.445751277 |
| ENSMUSG0000085453 | 7.781970364 | 6.260555194 | 12.71071886 | 8.054576721 | 5.013362104 |
| ENSMUSG0000085454 | 4.952162959 | 6.956172438 | 7.061510478 | 4.02728836  | 6.445751277 |
| ENSMUSG0000085455 | 9.904325918 | 7.651789682 | 6.35535943  | 5.638203705 | 7.161945863 |
| ENSMUSG0000085456 | 8.489422215 | 8.347406925 | 11.29841676 | 6.443661377 | 4.297167518 |
| ENSMUSG0000085457 | 10.61177777 | 13.91234488 | 14.12302096 | 6.443661377 | 7.87814045  |
| ENSMUSG0000085459 | 7.074518513 | 6.260555194 | 8.473812573 | 4.832746033 | 7.161945863 |
| ENSMUSG0000085463 | 12.02668147 | 6.260555194 | 7.767661525 | 8.054576721 | 10.7429188  |
| ENSMUSG0000085464 | 19.80865184 | 22.95536904 | 15.53532305 | 40.2728836  | 32.22875639 |
| ENSMUSG0000085465 | 9.196874066 | 4.173703463 | 6.35535943  | 4.02728836  | 5.013362104 |
| ENSMUSG0000085466 | 4.952162959 | 5.56493795  | 4.236906287 | 4.02728836  | 2.864778345 |
| ENSMUSG0000085467 | 7.074518513 | 4.869320706 | 7.767661525 | 4.832746033 | 6.445751277 |
| ENSMUSG0000085468 | 10.61177777 | 1.391234488 | 7.767661525 | 5.638203705 | 3.580972932 |
| ENSMUSG0000085469 | 13.44158517 | 9.043024169 | 4.236906287 | 2.416373016 | 5.729556691 |
| ENSMUSG0000085470 | 5.65961481  | 6.956172438 | 7.767661525 | 6.443661377 | 4.297167518 |
| ENSMUSG0000085471 | 226.3845924 | 244.8572698 | 261.2758877 | 134.5114312 | 122.4692743 |
| ENSMUSG0000085472 | 9.196874066 | 9.043024169 | 9.179963621 | 12.08186508 | 10.7429188  |
| ENSMUSG0000085473 | 7.074518513 | 9.738641413 | 7.061510478 | 4.832746033 | 6.445751277 |
| ENSMUSG0000085476 | 6.367066661 | 7.651789682 | 10.59226572 | 2.416373016 | 2.148583759 |
| ENSMUSG0000085477 | 10.61177777 | 8.347406925 | 9.886114669 | 16.10915344 | 10.02672421 |
| ENSMUSG0000085478 | 16.97884443 | 7.651789682 | 9.179963621 | 5.638203705 | 10.7429188  |
| ENSMUSG0000085479 | 9.196874066 | 5.56493795  | 9.179963621 | 6.443661377 | 2.148583759 |
| ENSMUSG0000085481 | 18.39374813 | 34.78086219 | 29.65834401 | 16.10915344 | 26.49919969 |
| ENSMUSG0000085482 | 85.601674   | 99.47326586 | 108.7472614 | 95.04400531 | 73.76804239 |
| ENSMUSG0000085483 | 12.02668147 | 11.1298759  | 9.179963621 | 5.638203705 | 8.594335036 |
| ENSMUSG0000085484 | 9.904325918 | 4.869320706 | 4.236906287 | 11.27640741 | 7.87814045  |
| ENSMUSG0000085485 | 7.074518513 | 4.173703463 | 9.179963621 | 8.054576721 | 5.729556691 |
| ENSMUSG0000085486 | 10.61177777 | 4.173703463 | 6.35535943  | 7.249119049 | 10.02672421 |
| ENSMUSG0000085487 | 7.781970364 | 9.043024169 | 3.530755239 | 2.416373016 | 5.013362104 |
| ENSMUSG0000085488 | 8.489422215 | 6.260555194 | 10.59226572 | 2.416373016 | 5.729556691 |
| ENSMUSG0000085489 | 7.781970364 | 4.173703463 | 4.943057334 | 4.832746033 | 2.148583759 |
| ENSMUSG0000085491 | 9.196874066 | 7.651789682 | 12.00456781 | 5.638203705 | 6.445751277 |
| ENSMUSG0000085492 | 60.13340736 | 82.08283477 | 74.14586002 | 106.3204127 | 87.37573953 |

|                   |             |             |             |             |             |
|-------------------|-------------|-------------|-------------|-------------|-------------|
| ENSMUSG0000085493 | 2.122355554 | 1.391234488 | 5.649208382 | 2.416373016 | 0.716194586 |
| ENSMUSG0000085495 | 73.57499253 | 100.1688831 | 101.6857509 | 127.2623122 | 105.2806042 |
| ENSMUSG0000085496 | 7.781970364 | 1.391234488 | 5.649208382 | 5.638203705 | 4.297167518 |
| ENSMUSG0000085497 | 10.61177777 | 10.43425866 | 3.530755239 | 8.860034393 | 7.87814045  |
| ENSMUSG0000085498 | 39.61730367 | 36.17209668 | 25.42143772 | 50.74383334 | 50.13362104 |
| ENSMUSG0000085499 | 12.73413332 | 15.99919661 | 9.886114669 | 5.638203705 | 5.729556691 |
| ENSMUSG0000085500 | 8.489422215 | 4.869320706 | 6.35535943  | 8.860034393 | 5.729556691 |
| ENSMUSG0000085501 | 4.952162959 | 8.347406925 | 5.649208382 | 4.832746033 | 5.729556691 |
| ENSMUSG0000085502 | 8.489422215 | 11.82549314 | 6.35535943  | 6.443661377 | 6.445751277 |
| ENSMUSG0000085504 | 9.904325918 | 7.651789682 | 5.649208382 | 6.443661377 | 4.297167518 |
| ENSMUSG0000085505 | 12.02668147 | 6.956172438 | 12.00456781 | 8.860034393 | 7.87814045  |
| ENSMUSG0000085507 | 9.904325918 | 6.260555194 | 5.649208382 | 3.221830688 | 4.297167518 |
| ENSMUSG0000085508 | 14.85648888 | 6.956172438 | 7.061510478 | 8.054576721 | 7.87814045  |
| ENSMUSG0000085509 | 67.20792587 | 89.73462445 | 81.91352154 | 44.30017197 | 55.86317773 |
| ENSMUSG0000085510 | 9.196874066 | 7.651789682 | 4.943057334 | 4.832746033 | 4.297167518 |
| ENSMUSG0000085511 | 9.196874066 | 6.260555194 | 6.35535943  | 10.47094974 | 11.45911338 |
| ENSMUSG0000085512 | 6.367066661 | 5.56493795  | 4.943057334 | 5.638203705 | 3.580972932 |
| ENSMUSG0000085513 | 7.074518513 | 4.869320706 | 7.061510478 | 6.443661377 | 5.729556691 |
| ENSMUSG0000085514 | 9.904325918 | 4.869320706 | 7.061510478 | 11.27640741 | 7.161945863 |
| ENSMUSG0000085515 | 10.61177777 | 4.869320706 | 11.29841676 | 6.443661377 | 8.594335036 |
| ENSMUSG0000085516 | 22.63845924 | 32.69401046 | 33.89525029 | 68.46390213 | 50.84981563 |
| ENSMUSG0000085517 | 7.781970364 | 4.173703463 | 7.061510478 | 8.054576721 | 2.864778345 |
| ENSMUSG0000085519 | 12.73413332 | 16.69481385 | 16.2414741  | 6.443661377 | 8.594335036 |
| ENSMUSG0000085521 | 8.489422215 | 5.56493795  | 6.35535943  | 8.054576721 | 12.17530797 |
| ENSMUSG0000085522 | 9.196874066 | 10.43425866 | 3.530755239 | 3.221830688 | 5.729556691 |
| ENSMUSG0000085523 | 9.904325918 | 2.782468975 | 7.767661525 | 7.249119049 | 5.013362104 |
| ENSMUSG0000085524 | 7.074518513 | 4.869320706 | 4.943057334 | 4.02728836  | 5.729556691 |
| ENSMUSG0000085525 | 21.22355554 | 12.52111039 | 13.41686991 | 11.27640741 | 12.17530797 |
| ENSMUSG0000085526 | 79.23460734 | 80.69160028 | 76.26431316 | 43.49471429 | 39.39070225 |
| ENSMUSG0000085527 | 7.074518513 | 15.30357936 | 9.886114669 | 9.665492065 | 12.17530797 |
| ENSMUSG0000085528 | 9.904325918 | 5.56493795  | 6.35535943  | 5.638203705 | 3.580972932 |
| ENSMUSG0000085529 | 7.074518513 | 6.260555194 | 4.943057334 | 3.221830688 | 7.161945863 |
| ENSMUSG0000085530 | 12.02668147 | 5.56493795  | 11.29841676 | 6.443661377 | 9.310529622 |
| ENSMUSG0000085531 | 10.61177777 | 15.30357936 | 25.42143772 | 12.88732275 | 17.18867007 |
| ENSMUSG0000085532 | 12.02668147 | 7.651789682 | 6.35535943  | 4.02728836  | 7.87814045  |
| ENSMUSG0000085533 | 9.196874066 | 8.347406925 | 7.767661525 | 7.249119049 | 4.297167518 |
| ENSMUSG0000085534 | 8.489422215 | 6.956172438 | 4.236906287 | 3.221830688 | 6.445751277 |
| ENSMUSG0000085536 | 9.196874066 | 6.260555194 | 3.530755239 | 4.02728836  | 3.580972932 |
| ENSMUSG0000085538 | 191.0119998 | 209.3807904 | 201.2530486 | 112.7640741 | 110.2939663 |
| ENSMUSG0000085539 | 11.31922962 | 11.1298759  | 6.35535943  | 10.47094974 | 10.02672421 |
| ENSMUSG0000085540 | 12.02668147 | 6.260555194 | 6.35535943  | 6.443661377 | 11.45911338 |
| ENSMUSG0000085541 | 6.367066661 | 6.956172438 | 7.767661525 | 4.832746033 | 5.013362104 |
| ENSMUSG0000085542 | 0.707451851 | 1.391234488 | 0.706151048 | 3.221830688 | 2.148583759 |

|                   |             |             |             |             |             |
|-------------------|-------------|-------------|-------------|-------------|-------------|
| ENSMUSG0000085543 | 9.196874066 | 7.651789682 | 9.886114669 | 12.88732275 | 6.445751277 |
| ENSMUSG0000085545 | 7.074518513 | 7.651789682 | 6.35535943  | 5.638203705 | 6.445751277 |
| ENSMUSG0000085546 | 5.65961481  | 8.347406925 | 9.886114669 | 14.4982381  | 10.7429188  |
| ENSMUSG0000085547 | 7.074518513 | 2.782468975 | 5.649208382 | 3.221830688 | 8.594335036 |
| ENSMUSG0000085548 | 7.781970364 | 6.260555194 | 5.649208382 | 9.665492065 | 5.013362104 |
| ENSMUSG0000085549 | 4.952162959 | 1.391234488 | 2.824604191 | 0           | 3.580972932 |
| ENSMUSG0000085550 | 10.61177777 | 8.347406925 | 4.943057334 | 4.832746033 | 10.02672421 |
| ENSMUSG0000085551 | 11.31922962 | 6.956172438 | 5.649208382 | 6.443661377 | 7.87814045  |
| ENSMUSG0000085552 | 4.952162959 | 2.782468975 | 7.061510478 | 4.832746033 | 9.310529622 |
| ENSMUSG0000085553 | 7.074518513 | 0.695617244 | 2.118453143 | 0           | 3.580972932 |
| ENSMUSG0000085555 | 1.414903703 | 4.173703463 | 3.530755239 | 3.221830688 | 1.432389173 |
| ENSMUSG0000085556 | 7.781970364 | 4.869320706 | 2.118453143 | 4.02728836  | 4.297167518 |
| ENSMUSG0000085558 | 7.074518513 | 7.651789682 | 6.35535943  | 12.88732275 | 4.297167518 |
| ENSMUSG0000085559 | 7.074518513 | 8.347406925 | 8.473812573 | 9.665492065 | 8.594335036 |
| ENSMUSG0000085560 | 16.27139258 | 27.82468975 | 29.65834401 | 45.10562964 | 33.66114556 |
| ENSMUSG0000085561 | 9.904325918 | 6.956172438 | 5.649208382 | 3.221830688 | 5.729556691 |
| ENSMUSG0000085562 | 8.489422215 | 4.869320706 | 9.179963621 | 8.054576721 | 9.310529622 |
| ENSMUSG0000085563 | 9.196874066 | 7.651789682 | 9.179963621 | 4.832746033 | 10.02672421 |
| ENSMUSG0000085564 | 7.074518513 | 5.56493795  | 4.943057334 | 4.02728836  | 7.87814045  |
| ENSMUSG0000085565 | 6.367066661 | 4.869320706 | 7.061510478 | 5.638203705 | 6.445751277 |
| ENSMUSG0000085566 | 0           | 0           | 0.706151048 | 0           | 0           |
| ENSMUSG0000085568 | 3.537259256 | 2.782468975 | 0.706151048 | 1.610915344 | 3.580972932 |
| ENSMUSG0000085569 | 4.244711108 | 9.043024169 | 7.767661525 | 4.832746033 | 3.580972932 |
| ENSMUSG0000085572 | 23.34591109 | 20.86851731 | 18.35992724 | 14.4982381  | 15.7562809  |
| ENSMUSG0000085573 | 7.781970364 | 3.478086219 | 7.767661525 | 4.832746033 | 9.310529622 |
| ENSMUSG0000085574 | 6.367066661 | 6.956172438 | 9.179963621 | 7.249119049 | 9.310529622 |
| ENSMUSG0000085575 | 6.367066661 | 6.956172438 | 3.530755239 | 4.832746033 | 3.580972932 |
| ENSMUSG0000085577 | 2.122355554 | 4.173703463 | 5.649208382 | 4.02728836  | 1.432389173 |
| ENSMUSG0000085578 | 9.904325918 | 11.82549314 | 9.179963621 | 8.860034393 | 14.32389173 |
| ENSMUSG0000085579 | 12.73413332 | 13.91234488 | 12.00456781 | 57.99295239 | 40.82309142 |
| ENSMUSG0000085580 | 9.904325918 | 10.43425866 | 2.824604191 | 5.638203705 | 3.580972932 |
| ENSMUSG0000085581 | 16.27139258 | 18.08604834 | 11.29841676 | 12.08186508 | 17.90486466 |
| ENSMUSG0000085582 | 7.781970364 | 4.869320706 | 10.59226572 | 8.054576721 | 6.445751277 |
| ENSMUSG0000085583 | 11.31922962 | 14.60796212 | 9.179963621 | 8.054576721 | 7.161945863 |
| ENSMUSG0000085584 | 4.244711108 | 1.391234488 | 2.824604191 | 1.610915344 | 1.432389173 |
| ENSMUSG0000085585 | 9.196874066 | 8.347406925 | 8.473812573 | 4.02728836  | 3.580972932 |
| ENSMUSG0000085586 | 0           | 0           | 0           | 0           | 0           |
| ENSMUSG0000085587 | 3.537259256 | 6.260555194 | 4.236906287 | 20.1364418  | 17.18867007 |
| ENSMUSG0000085588 | 10.61177777 | 11.1298759  | 7.061510478 | 4.02728836  | 7.87814045  |
| ENSMUSG0000085589 | 4.952162959 | 4.869320706 | 6.35535943  | 7.249119049 | 9.310529622 |
| ENSMUSG0000085590 | 16.27139258 | 15.99919661 | 19.06607829 | 17.72006879 | 18.62105924 |
| ENSMUSG0000085591 | 7.074518513 | 6.260555194 | 8.473812573 | 8.054576721 | 5.013362104 |
| ENSMUSG0000085592 | 7.781970364 | 4.173703463 | 7.061510478 | 4.02728836  | 7.161945863 |

|                    |             |             |             |             |             |
|--------------------|-------------|-------------|-------------|-------------|-------------|
| ENSMUSG00000085593 | 5.65961481  | 6.260555194 | 5.649208382 | 7.249119049 | 6.445751277 |
| ENSMUSG00000085594 | 4.952162959 | 4.869320706 | 2.824604191 | 7.249119049 | 5.013362104 |
| ENSMUSG00000085595 | 4.244711108 | 6.260555194 | 8.473812573 | 4.832746033 | 8.594335036 |
| ENSMUSG00000085596 | 12.02668147 | 7.651789682 | 9.179963621 | 7.249119049 | 9.310529622 |
| ENSMUSG00000085598 | 2.829807405 | 2.086851731 | 4.943057334 | 4.832746033 | 0.716194586 |
| ENSMUSG00000085599 | 7.074518513 | 6.260555194 | 8.473812573 | 7.249119049 | 8.594335036 |
| ENSMUSG00000085600 | 9.196874066 | 7.651789682 | 4.236906287 | 7.249119049 | 7.87814045  |
| ENSMUSG00000085603 | 72.86754068 | 102.9513521 | 79.7950684  | 45.10562964 | 48.70123187 |
| ENSMUSG00000085604 | 7.074518513 | 4.173703463 | 7.767661525 | 6.443661377 | 10.02672421 |
| ENSMUSG00000085606 | 2.122355554 | 5.56493795  | 5.649208382 | 9.665492065 | 8.594335036 |
| ENSMUSG00000085608 | 7.074518513 | 13.91234488 | 9.886114669 | 6.443661377 | 12.17530797 |
| ENSMUSG00000085609 | 0.707451851 | 1.391234488 | 0.706151048 | 0.805457672 | 3.580972932 |
| ENSMUSG00000085610 | 4.244711108 | 3.478086219 | 6.35535943  | 4.832746033 | 2.864778345 |
| ENSMUSG00000085611 | 9.196874066 | 6.260555194 | 7.767661525 | 4.02728836  | 4.297167518 |
| ENSMUSG00000085612 | 41.03220737 | 67.47487265 | 57.90438592 | 38.66196826 | 44.40406435 |
| ENSMUSG00000085614 | 16.97884443 | 25.73783802 | 16.94762515 | 17.72006879 | 12.89150255 |
| ENSMUSG00000085615 | 120.9742666 | 142.601535  | 112.2780166 | 227.1390635 | 175.4676737 |
| ENSMUSG00000085616 | 9.904325918 | 6.956172438 | 6.35535943  | 4.832746033 | 7.87814045  |
| ENSMUSG00000085618 | 8.489422215 | 5.56493795  | 2.118453143 | 8.054576721 | 6.445751277 |
| ENSMUSG00000085619 | 3.537259256 | 4.173703463 | 7.061510478 | 2.416373016 | 5.013362104 |
| ENSMUSG00000085620 | 6.367066661 | 4.869320706 | 8.473812573 | 8.054576721 | 6.445751277 |
| ENSMUSG00000085622 | 90.55383696 | 127.2979556 | 107.3349593 | 229.5554365 | 192.6563437 |
| ENSMUSG00000085623 | 13.44158517 | 4.173703463 | 8.473812573 | 8.860034393 | 5.729556691 |
| ENSMUSG00000085624 | 9.904325918 | 11.1298759  | 7.767661525 | 6.443661377 | 10.7429188  |
| ENSMUSG00000085625 | 54.47379255 | 89.0390072  | 73.43970897 | 41.88379895 | 58.01176149 |
| ENSMUSG00000085626 | 9.904325918 | 10.43425866 | 9.886114669 | 4.02728836  | 12.89150255 |
| ENSMUSG00000085627 | 11.31922962 | 6.260555194 | 7.767661525 | 8.054576721 | 6.445751277 |
| ENSMUSG00000085628 | 2.829807405 | 4.173703463 | 1.412302096 | 2.416373016 | 1.432389173 |
| ENSMUSG00000085629 | 11.31922962 | 6.956172438 | 12.71071886 | 3.221830688 | 1.432389173 |
| ENSMUSG00000085630 | 7.781970364 | 6.260555194 | 4.943057334 | 5.638203705 | 5.013362104 |
| ENSMUSG00000085631 | 11.31922962 | 11.1298759  | 4.943057334 | 2.416373016 | 7.87814045  |
| ENSMUSG00000085632 | 7.781970364 | 6.260555194 | 10.59226572 | 5.638203705 | 5.013362104 |
| ENSMUSG00000085633 | 20.51610369 | 25.73783802 | 28.95219296 | 33.02376456 | 42.25548059 |
| ENSMUSG00000085634 | 7.781970364 | 4.869320706 | 4.236906287 | 3.221830688 | 7.161945863 |
| ENSMUSG00000085635 | 5.65961481  | 6.956172438 | 6.35535943  | 4.02728836  | 1.432389173 |
| ENSMUSG00000085636 | 103.9954221 | 138.4278315 | 116.5149229 | 104.7094974 | 98.11865833 |
| ENSMUSG00000085637 | 14.14903703 | 11.82549314 | 9.179963621 | 8.860034393 | 13.60769714 |
| ENSMUSG00000085638 | 9.904325918 | 3.478086219 | 9.179963621 | 4.832746033 | 5.013362104 |
| ENSMUSG00000085639 | 9.904325918 | 8.347406925 | 7.767661525 | 8.054576721 | 5.013362104 |
| ENSMUSG00000085640 | 11.31922962 | 9.043024169 | 7.767661525 | 6.443661377 | 10.02672421 |
| ENSMUSG00000085641 | 7.074518513 | 4.869320706 | 7.061510478 | 4.832746033 | 8.594335036 |
| ENSMUSG00000085642 | 53.05888884 | 67.47487265 | 59.31668801 | 54.7711217  | 58.01176149 |
| ENSMUSG00000085643 | 7.074518513 | 9.043024169 | 9.179963621 | 4.832746033 | 1.432389173 |

|                    |             |             |             |             |             |
|--------------------|-------------|-------------|-------------|-------------|-------------|
| ENSMUSG00000085645 | 9.196874066 | 9.738641413 | 5.649208382 | 8.054576721 | 7.87814045  |
| ENSMUSG00000085646 | 9.904325918 | 6.260555194 | 9.179963621 | 8.860034393 | 2.148583759 |
| ENSMUSG00000085648 | 8.489422215 | 7.651789682 | 10.59226572 | 4.02728836  | 9.310529622 |
| ENSMUSG00000085649 | 7.074518513 | 10.43425866 | 6.35535943  | 6.443661377 | 7.87814045  |
| ENSMUSG00000085651 | 5.65961481  | 8.347406925 | 7.061510478 | 9.665492065 | 5.013362104 |
| ENSMUSG00000085652 | 14.14903703 | 26.43345526 | 27.53989086 | 95.04400531 | 78.06520991 |
| ENSMUSG00000085653 | 6.367066661 | 8.347406925 | 7.061510478 | 5.638203705 | 5.013362104 |
| ENSMUSG00000085654 | 5.65961481  | 6.956172438 | 4.236906287 | 3.221830688 | 7.161945863 |
| ENSMUSG00000085655 | 79.23460734 | 105.0382038 | 109.4534124 | 173.1733995 | 160.4275873 |
| ENSMUSG00000085656 | 10.61177777 | 6.956172438 | 7.767661525 | 4.02728836  | 5.013362104 |
| ENSMUSG00000085657 | 12.02668147 | 4.173703463 | 7.061510478 | 4.832746033 | 5.013362104 |
| ENSMUSG00000085658 | 2.829807405 | 9.043024169 | 7.061510478 | 2.416373016 | 6.445751277 |
| ENSMUSG00000085659 | 11.31922962 | 4.173703463 | 6.35535943  | 8.054576721 | 7.161945863 |
| ENSMUSG00000085660 | 8.489422215 | 4.869320706 | 5.649208382 | 5.638203705 | 12.17530797 |
| ENSMUSG00000085662 | 6.367066661 | 4.869320706 | 9.179963621 | 6.443661377 | 10.02672421 |
| ENSMUSG00000085663 | 5.65961481  | 11.82549314 | 9.886114669 | 10.47094974 | 11.45911338 |
| ENSMUSG00000085664 | 9.196874066 | 6.956172438 | 10.59226572 | 4.02728836  | 6.445751277 |
| ENSMUSG00000085665 | 7.074518513 | 15.30357936 | 9.179963621 | 6.443661377 | 10.02672421 |
| ENSMUSG00000085666 | 9.904325918 | 8.347406925 | 9.179963621 | 12.08186508 | 10.02672421 |
| ENSMUSG00000085667 | 7.074518513 | 6.260555194 | 7.767661525 | 4.02728836  | 7.161945863 |
| ENSMUSG00000085668 | 9.904325918 | 13.91234488 | 17.65377619 | 7.249119049 | 10.02672421 |
| ENSMUSG00000085669 | 5.65961481  | 2.782468975 | 6.35535943  | 1.610915344 | 6.445751277 |
| ENSMUSG00000085672 | 9.196874066 | 11.1298759  | 7.061510478 | 3.221830688 | 8.594335036 |
| ENSMUSG00000085673 | 6.367066661 | 13.21672763 | 11.29841676 | 10.47094974 | 14.32389173 |
| ENSMUSG00000085674 | 5.65961481  | 5.56493795  | 2.118453143 | 4.832746033 | 4.297167518 |
| ENSMUSG00000085675 | 9.196874066 | 6.260555194 | 7.061510478 | 4.832746033 | 5.013362104 |
| ENSMUSG00000085676 | 7.074518513 | 9.043024169 | 7.061510478 | 4.02728836  | 2.864778345 |
| ENSMUSG00000085677 | 7.781970364 | 6.260555194 | 4.943057334 | 8.054576721 | 9.310529622 |
| ENSMUSG00000085678 | 9.196874066 | 6.260555194 | 13.41686991 | 7.249119049 | 10.7429188  |
| ENSMUSG00000085679 | 16.97884443 | 4.173703463 | 11.29841676 | 4.832746033 | 3.580972932 |
| ENSMUSG00000085680 | 9.904325918 | 4.869320706 | 7.061510478 | 4.02728836  | 5.013362104 |
| ENSMUSG00000085681 | 8.489422215 | 9.043024169 | 10.59226572 | 8.054576721 | 6.445751277 |
| ENSMUSG00000085682 | 9.904325918 | 4.173703463 | 5.649208382 | 6.443661377 | 5.013362104 |
| ENSMUSG00000085683 | 8.489422215 | 4.869320706 | 4.236906287 | 5.638203705 | 11.45911338 |
| ENSMUSG00000085684 | 9.196874066 | 7.651789682 | 4.943057334 | 5.638203705 | 5.729556691 |
| ENSMUSG00000085685 | 8.489422215 | 6.260555194 | 4.236906287 | 4.02728836  | 3.580972932 |
| ENSMUSG00000085686 | 5.65961481  | 3.478086219 | 4.236906287 | 1.610915344 | 2.148583759 |
| ENSMUSG00000085687 | 12.73413332 | 19.47728283 | 15.53532305 | 12.08186508 | 12.89150255 |
| ENSMUSG00000085688 | 10.61177777 | 3.478086219 | 6.35535943  | 3.221830688 | 7.87814045  |
| ENSMUSG00000085689 | 9.196874066 | 6.956172438 | 7.767661525 | 8.054576721 | 7.161945863 |
| ENSMUSG00000085690 | 8.489422215 | 5.56493795  | 5.649208382 | 4.02728836  | 10.02672421 |
| ENSMUSG00000085691 | 4.952162959 | 3.478086219 | 4.236906287 | 7.249119049 | 6.445751277 |
| ENSMUSG00000085693 | 4.952162959 | 6.260555194 | 7.767661525 | 7.249119049 | 8.594335036 |

|                    |             |             |             |             |             |
|--------------------|-------------|-------------|-------------|-------------|-------------|
| ENSMUSG00000085694 | 3.537259256 | 4.173703463 | 1.412302096 | 1.610915344 | 1.432389173 |
| ENSMUSG00000085695 | 4.244711108 | 6.260555194 | 5.649208382 | 7.249119049 | 5.013362104 |
| ENSMUSG00000085696 | 2.122355554 | 0.695617244 | 0           | 2.416373016 | 2.148583759 |
| ENSMUSG00000085698 | 6.367066661 | 5.56493795  | 9.886114669 | 4.832746033 | 5.013362104 |
| ENSMUSG00000085699 | 4.952162959 | 2.782468975 | 3.530755239 | 2.416373016 | 2.148583759 |
| ENSMUSG00000085700 | 4.244711108 | 5.56493795  | 6.35535943  | 3.221830688 | 5.013362104 |
| ENSMUSG00000085701 | 10.61177777 | 9.738641413 | 16.94762515 | 7.249119049 | 9.310529622 |
| ENSMUSG00000085702 | 6.367066661 | 6.956172438 | 4.943057334 | 8.054576721 | 7.161945863 |
| ENSMUSG00000085704 | 68.62282957 | 64.69240367 | 82.61967259 | 78.93485187 | 78.7814045  |
| ENSMUSG00000085705 | 9.196874066 | 11.1298759  | 9.886114669 | 24.96918783 | 16.47247549 |
| ENSMUSG00000085706 | 5.65961481  | 2.086851731 | 6.35535943  | 1.610915344 | 3.580972932 |
| ENSMUSG00000085707 | 5.65961481  | 4.173703463 | 7.061510478 | 4.02728836  | 5.729556691 |
| ENSMUSG00000085708 | 9.196874066 | 6.956172438 | 4.943057334 | 8.054576721 | 5.729556691 |
| ENSMUSG00000085709 | 9.196874066 | 9.043024169 | 4.943057334 | 4.02728836  | 6.445751277 |
| ENSMUSG00000085710 | 3.537259256 | 9.738641413 | 4.236906287 | 6.443661377 | 4.297167518 |
| ENSMUSG00000085711 | 7.781970364 | 6.260555194 | 7.767661525 | 0.805457672 | 2.864778345 |
| ENSMUSG00000085712 | 0           | 0           | 0           | 0           | 0           |
| ENSMUSG00000085713 | 7.074518513 | 8.347406925 | 4.236906287 | 10.47094974 | 8.594335036 |
| ENSMUSG00000085714 | 9.196874066 | 13.91234488 | 12.00456781 | 10.47094974 | 16.47247549 |
| ENSMUSG00000085715 | 6.367066661 | 8.347406925 | 3.530755239 | 2.416373016 | 7.161945863 |
| ENSMUSG00000085716 | 32.54278516 | 36.86771392 | 32.4829482  | 18.52552646 | 22.20203218 |
| ENSMUSG00000085717 | 9.196874066 | 8.347406925 | 6.35535943  | 1.610915344 | 2.864778345 |
| ENSMUSG00000085718 | 7.074518513 | 9.043024169 | 2.824604191 | 2.416373016 | 12.17530797 |
| ENSMUSG00000085719 | 76.40479994 | 88.34338996 | 92.50578726 | 32.21830688 | 48.70123187 |
| ENSMUSG00000085720 | 16.97884443 | 35.47647943 | 28.95219296 | 78.12939419 | 58.01176149 |
| ENSMUSG00000085721 | 13.44158517 | 19.47728283 | 7.061510478 | 9.665492065 | 9.310529622 |
| ENSMUSG00000085722 | 4.244711108 | 4.173703463 | 2.824604191 | 0           | 3.580972932 |
| ENSMUSG00000085723 | 12.73413332 | 8.347406925 | 10.59226572 | 3.221830688 | 8.594335036 |
| ENSMUSG00000085724 | 12.73413332 | 12.52111039 | 12.71071886 | 38.66196826 | 15.04008631 |
| ENSMUSG00000085725 | 5.65961481  | 6.956172438 | 12.71071886 | 8.054576721 | 6.445751277 |
| ENSMUSG00000085728 | 9.196874066 | 7.651789682 | 8.473812573 | 6.443661377 | 7.161945863 |
| ENSMUSG00000085730 | 4.952162959 | 2.782468975 | 2.118453143 | 1.610915344 | 2.864778345 |
| ENSMUSG00000085731 | 12.02668147 | 19.47728283 | 25.42143772 | 31.41284921 | 35.80972932 |
| ENSMUSG00000085732 | 11.31922962 | 36.17209668 | 31.0706461  | 16.10915344 | 22.91822676 |
| ENSMUSG00000085733 | 12.02668147 | 13.21672763 | 16.94762515 | 4.832746033 | 7.161945863 |
| ENSMUSG00000085734 | 9.196874066 | 9.738641413 | 8.473812573 | 7.249119049 | 8.594335036 |
| ENSMUSG00000085735 | 31.83533331 | 36.86771392 | 28.24604191 | 40.2728836  | 27.93158887 |
| ENSMUSG00000085737 | 11.31922962 | 10.43425866 | 7.767661525 | 6.443661377 | 4.297167518 |
| ENSMUSG00000085738 | 12.73413332 | 20.86851731 | 18.35992724 | 10.47094974 | 13.60769714 |
| ENSMUSG00000085739 | 9.904325918 | 9.738641413 | 6.35535943  | 6.443661377 | 6.445751277 |
| ENSMUSG00000085740 | 8.489422215 | 9.043024169 | 8.473812573 | 11.27640741 | 7.87814045  |
| ENSMUSG00000085741 | 82.06441475 | 124.5154866 | 127.8133396 | 263.3846588 | 174.0352845 |
| ENSMUSG00000085742 | 4.244711108 | 5.56493795  | 8.473812573 | 6.443661377 | 12.89150255 |

|                    |             |             |             |             |             |
|--------------------|-------------|-------------|-------------|-------------|-------------|
| ENSMUSG00000085743 | 7.781970364 | 5.56493795  | 7.061510478 | 5.638203705 | 5.013362104 |
| ENSMUSG00000085744 | 2.122355554 | 2.782468975 | 3.530755239 | 2.416373016 | 0.716194586 |
| ENSMUSG00000085745 | 10.61177777 | 4.869320706 | 7.061510478 | 5.638203705 | 7.87814045  |
| ENSMUSG00000085747 | 7.074518513 | 6.956172438 | 7.767661525 | 7.249119049 | 8.594335036 |
| ENSMUSG00000085748 | 9.196874066 | 11.1298759  | 9.886114669 | 13.69278043 | 12.89150255 |
| ENSMUSG00000085749 | 12.02668147 | 4.173703463 | 5.649208382 | 8.054576721 | 6.445751277 |
| ENSMUSG00000085750 | 2.829807405 | 3.478086219 | 7.767661525 | 5.638203705 | 4.297167518 |
| ENSMUSG00000085751 | 8.489422215 | 4.869320706 | 8.473812573 | 4.832746033 | 7.87814045  |
| ENSMUSG00000085753 | 5.65961481  | 4.173703463 | 8.473812573 | 5.638203705 | 10.02672421 |
| ENSMUSG00000085754 | 94.09109622 | 144.6883867 | 109.4534124 | 165.9242805 | 144.6713064 |
| ENSMUSG00000085755 | 12.73413332 | 12.52111039 | 6.35535943  | 20.94189947 | 18.62105924 |
| ENSMUSG00000085756 | 5.65961481  | 4.869320706 | 4.943057334 | 5.638203705 | 7.87814045  |
| ENSMUSG00000085757 | 4.952162959 | 1.391234488 | 5.649208382 | 3.221830688 | 2.864778345 |
| ENSMUSG00000085759 | 7.781970364 | 13.21672763 | 11.29841676 | 9.665492065 | 8.594335036 |
| ENSMUSG00000085760 | 19.10119998 | 45.91073809 | 43.78136496 | 53.96566403 | 65.88990194 |
| ENSMUSG00000085761 | 5.65961481  | 6.260555194 | 6.35535943  | 8.054576721 | 4.297167518 |
| ENSMUSG00000085762 | 6.367066661 | 5.56493795  | 6.35535943  | 9.665492065 | 7.87814045  |
| ENSMUSG00000085763 | 36.78749627 | 47.30197258 | 39.54445867 | 96.65492065 | 73.76804239 |
| ENSMUSG00000085765 | 7.781970364 | 18.78166558 | 18.35992724 | 10.47094974 | 10.7429188  |
| ENSMUSG00000085766 | 7.074518513 | 4.869320706 | 5.649208382 | 2.416373016 | 3.580972932 |
| ENSMUSG00000085767 | 19.80865184 | 27.82468975 | 34.60140134 | 53.16020636 | 47.2688427  |
| ENSMUSG00000085768 | 9.196874066 | 7.651789682 | 11.29841676 | 12.08186508 | 7.161945863 |
| ENSMUSG00000085770 | 9.196874066 | 6.956172438 | 8.473812573 | 7.249119049 | 6.445751277 |
| ENSMUSG00000085771 | 20.51610369 | 27.82468975 | 34.60140134 | 17.72006879 | 22.20203218 |
| ENSMUSG00000085772 | 6.367066661 | 11.1298759  | 10.59226572 | 5.638203705 | 5.729556691 |
| ENSMUSG00000085773 | 7.074518513 | 7.651789682 | 6.35535943  | 4.02728836  | 7.87814045  |
| ENSMUSG00000085774 | 12.02668147 | 6.956172438 | 10.59226572 | 3.221830688 | 5.013362104 |
| ENSMUSG00000085775 | 5.65961481  | 6.956172438 | 5.649208382 | 4.02728836  | 4.297167518 |
| ENSMUSG00000085776 | 25.46826665 | 25.04222078 | 30.36449505 | 103.9040397 | 82.36237743 |
| ENSMUSG00000085779 | 9.196874066 | 12.52111039 | 15.53532305 | 10.47094974 | 7.87814045  |
| ENSMUSG00000085781 | 8.489422215 | 8.347406925 | 4.943057334 | 4.832746033 | 1.432389173 |
| ENSMUSG00000085782 | 55.88869625 | 92.51709342 | 88.97503202 | 53.96566403 | 57.29556691 |
| ENSMUSG00000085783 | 13.44158517 | 5.56493795  | 13.41686991 | 13.69278043 | 13.60769714 |
| ENSMUSG00000085784 | 219.3100739 | 265.7257871 | 234.4421479 | 161.0915344 | 131.0636093 |
| ENSMUSG00000085785 | 5.65961481  | 6.956172438 | 8.473812573 | 6.443661377 | 8.594335036 |
| ENSMUSG00000085786 | 0           | 0           | 0           | 0           | 0           |
| ENSMUSG00000085787 | 37.49494812 | 70.25734162 | 54.37363068 | 47.52200265 | 63.0251236  |
| ENSMUSG00000085788 | 12.02668147 | 7.651789682 | 7.767661525 | 5.638203705 | 5.729556691 |
| ENSMUSG00000085790 | 12.73413332 | 5.56493795  | 5.649208382 | 7.249119049 | 5.013362104 |
| ENSMUSG00000085791 | 8.489422215 | 3.478086219 | 4.236906287 | 2.416373016 | 8.594335036 |
| ENSMUSG00000085792 | 4.952162959 | 6.260555194 | 7.767661525 | 4.832746033 | 7.161945863 |
| ENSMUSG00000085794 | 8.489422215 | 7.651789682 | 3.530755239 | 8.054576721 | 5.729556691 |
| ENSMUSG00000085796 | 10.61177777 | 14.60796212 | 5.649208382 | 5.638203705 | 5.729556691 |

|                    |             |             |             |             |             |
|--------------------|-------------|-------------|-------------|-------------|-------------|
| ENSMUSG00000085797 | 4.952162959 | 9.043024169 | 8.473812573 | 1.610915344 | 5.013362104 |
| ENSMUSG00000085798 | 2.829807405 | 6.956172438 | 5.649208382 | 9.665492065 | 3.580972932 |
| ENSMUSG00000085799 | 21.93100739 | 36.17209668 | 34.60140134 | 33.02376456 | 25.06681052 |
| ENSMUSG00000085800 | 9.196874066 | 5.56493795  | 4.236906287 | 4.832746033 | 5.729556691 |
| ENSMUSG00000085801 | 9.904325918 | 6.956172438 | 4.943057334 | 7.249119049 | 5.013362104 |
| ENSMUSG00000085802 | 9.196874066 | 13.91234488 | 10.59226572 | 9.665492065 | 6.445751277 |
| ENSMUSG00000085803 | 7.074518513 | 7.651789682 | 9.179963621 | 6.443661377 | 7.161945863 |
| ENSMUSG00000085804 | 7.781970364 | 8.347406925 | 9.179963621 | 7.249119049 | 7.161945863 |
| ENSMUSG00000085805 | 7.781970364 | 6.956172438 | 5.649208382 | 4.02728836  | 5.729556691 |
| ENSMUSG00000085806 | 6.367066661 | 4.869320706 | 5.649208382 | 5.638203705 | 6.445751277 |
| ENSMUSG00000085807 | 6.367066661 | 4.869320706 | 12.00456781 | 7.249119049 | 11.45911338 |
| ENSMUSG00000085808 | 4.952162959 | 2.782468975 | 2.824604191 | 3.221830688 | 5.729556691 |
| ENSMUSG00000085810 | 6.367066661 | 13.21672763 | 11.29841676 | 3.221830688 | 5.729556691 |
| ENSMUSG00000085811 | 14.14903703 | 8.347406925 | 11.29841676 | 5.638203705 | 6.445751277 |
| ENSMUSG00000085812 | 7.781970364 | 5.56493795  | 10.59226572 | 5.638203705 | 8.594335036 |
| ENSMUSG00000085813 | 7.781970364 | 4.173703463 | 5.649208382 | 4.832746033 | 4.297167518 |
| ENSMUSG00000085815 | 100.4581629 | 121.0374004 | 109.4534124 | 83.7675979  | 68.75468029 |
| ENSMUSG00000085816 | 8.489422215 | 4.869320706 | 6.35535943  | 5.638203705 | 6.445751277 |
| ENSMUSG00000085817 | 12.02668147 | 2.782468975 | 7.767661525 | 5.638203705 | 2.148583759 |
| ENSMUSG00000085818 | 16.97884443 | 24.34660353 | 23.30298458 | 36.24559524 | 35.09353473 |
| ENSMUSG00000085819 | 10.61177777 | 8.347406925 | 6.35535943  | 11.27640741 | 10.7429188  |
| ENSMUSG00000085820 | 8.489422215 | 6.956172438 | 4.236906287 | 8.860034393 | 6.445751277 |
| ENSMUSG00000085822 | 6.367066661 | 6.956172438 | 11.29841676 | 4.02728836  | 2.864778345 |
| ENSMUSG00000085823 | 19.80865184 | 36.17209668 | 31.0706461  | 33.82922223 | 28.64778345 |
| ENSMUSG00000085824 | 14.14903703 | 8.347406925 | 12.00456781 | 4.02728836  | 7.161945863 |
| ENSMUSG00000085826 | 9.196874066 | 8.347406925 | 9.886114669 | 9.665492065 | 8.594335036 |
| ENSMUSG00000085827 | 2.122355554 | 5.56493795  | 5.649208382 | 0.805457672 | 5.013362104 |
| ENSMUSG00000085828 | 11.31922962 | 9.043024169 | 7.767661525 | 7.249119049 | 14.32389173 |
| ENSMUSG00000085829 | 9.904325918 | 21.56413456 | 19.06607829 | 91.82217462 | 76.63282074 |
| ENSMUSG00000085830 | 2.122355554 | 3.478086219 | 3.530755239 | 0           | 3.580972932 |
| ENSMUSG00000085831 | 4.952162959 | 6.956172438 | 9.179963621 | 12.08186508 | 5.729556691 |
| ENSMUSG00000085833 | 7.781970364 | 3.478086219 | 2.118453143 | 6.443661377 | 8.594335036 |
| ENSMUSG00000085834 | 8.489422215 | 9.043024169 | 9.179963621 | 6.443661377 | 6.445751277 |
| ENSMUSG00000085835 | 9.196874066 | 7.651789682 | 4.236906287 | 2.416373016 | 5.729556691 |
| ENSMUSG00000085836 | 1.414903703 | 1.391234488 | 1.412302096 | 2.416373016 | 3.580972932 |
| ENSMUSG00000085837 | 9.196874066 | 13.91234488 | 13.41686991 | 8.054576721 | 11.45911338 |
| ENSMUSG00000085838 | 9.196874066 | 4.173703463 | 7.767661525 | 8.054576721 | 10.02672421 |
| ENSMUSG00000085839 | 12.73413332 | 7.651789682 | 9.179963621 | 5.638203705 | 7.161945863 |
| ENSMUSG00000085840 | 6.367066661 | 7.651789682 | 8.473812573 | 4.02728836  | 5.013362104 |
| ENSMUSG00000085841 | 11.31922962 | 6.956172438 | 12.00456781 | 10.47094974 | 4.297167518 |
| ENSMUSG00000085842 | 7.781970364 | 9.043024169 | 8.473812573 | 4.02728836  | 7.87814045  |
| ENSMUSG00000085843 | 9.904325918 | 8.347406925 | 9.179963621 | 4.832746033 | 8.594335036 |
| ENSMUSG00000085844 | 9.904325918 | 16.69481385 | 21.18453143 | 4.02728836  | 7.161945863 |



|                    |             |             |             |             |             |
|--------------------|-------------|-------------|-------------|-------------|-------------|
| ENSMUSG00000085845 | 5.65961481  | 8.347406925 | 5.649208382 | 2.416373016 | 3.580972932 |
| ENSMUSG00000085846 | 58.0110518  | 74.43104508 | 75.55816211 | 35.44013757 | 46.55264811 |
| ENSMUSG00000085847 | 16.97884443 | 38.25894841 | 38.13215658 | 32.21830688 | 32.22875639 |
| ENSMUSG00000085851 | 12.02668147 | 4.869320706 | 7.061510478 | 2.416373016 | 5.729556691 |
| ENSMUSG00000085852 | 10.61177777 | 4.869320706 | 7.767661525 | 5.638203705 | 5.729556691 |
| ENSMUSG00000085853 | 7.781970364 | 5.56493795  | 7.767661525 | 9.665492065 | 10.02672421 |
| ENSMUSG00000085856 | 12.73413332 | 5.56493795  | 9.886114669 | 3.221830688 | 10.7429188  |
| ENSMUSG00000085857 | 9.904325918 | 8.347406925 | 9.179963621 | 6.443661377 | 4.297167518 |
| ENSMUSG00000085860 | 6.367066661 | 5.56493795  | 4.943057334 | 4.02728836  | 7.161945863 |
| ENSMUSG00000085861 | 4.244711108 | 8.347406925 | 12.00456781 | 11.27640741 | 5.013362104 |
| ENSMUSG00000085862 | 43.86201478 | 77.9091313  | 67.79050059 | 65.24207144 | 73.05184781 |
| ENSMUSG00000085863 | 12.02668147 | 11.82549314 | 12.00456781 | 12.08186508 | 14.32389173 |
| ENSMUSG00000085864 | 12.73413332 | 6.260555194 | 8.473812573 | 12.88732275 | 15.04008631 |
| ENSMUSG00000085865 | 7.781970364 | 6.956172438 | 6.35535943  | 12.08186508 | 7.87814045  |
| ENSMUSG00000085866 | 11.31922962 | 8.347406925 | 7.767661525 | 8.054576721 | 9.310529622 |
| ENSMUSG00000085867 | 8.489422215 | 6.956172438 | 8.473812573 | 3.221830688 | 5.729556691 |
| ENSMUSG00000085868 | 15.56394073 | 10.43425866 | 7.061510478 | 5.638203705 | 8.594335036 |
| ENSMUSG00000085869 | 6.367066661 | 6.956172438 | 6.35535943  | 7.249119049 | 5.729556691 |
| ENSMUSG00000085870 | 8.489422215 | 3.478086219 | 5.649208382 | 4.02728836  | 7.87814045  |
| ENSMUSG00000085871 | 9.904325918 | 6.956172438 | 4.943057334 | 4.02728836  | 9.310529622 |
| ENSMUSG00000085872 | 7.074518513 | 4.173703463 | 5.649208382 | 6.443661377 | 5.729556691 |
| ENSMUSG00000085873 | 12.73413332 | 6.956172438 | 6.35535943  | 3.221830688 | 7.87814045  |
| ENSMUSG00000085875 | 9.904325918 | 15.30357936 | 14.829172   | 19.33098413 | 16.47247549 |
| ENSMUSG00000085876 | 8.489422215 | 10.43425866 | 7.061510478 | 6.443661377 | 10.7429188  |
| ENSMUSG00000085877 | 8.489422215 | 6.260555194 | 4.943057334 | 3.221830688 | 5.013362104 |
| ENSMUSG00000085878 | 9.904325918 | 6.956172438 | 9.179963621 | 10.47094974 | 7.161945863 |
| ENSMUSG00000085880 | 6.367066661 | 8.347406925 | 7.061510478 | 0.805457672 | 2.864778345 |
| ENSMUSG00000085881 | 13.44158517 | 11.1298759  | 3.530755239 | 7.249119049 | 5.729556691 |
| ENSMUSG00000085882 | 29.71297775 | 45.91073809 | 48.7244223  | 54.7711217  | 44.40406435 |
| ENSMUSG00000085883 | 7.781970364 | 9.043024169 | 4.236906287 | 3.221830688 | 5.013362104 |
| ENSMUSG00000085884 | 24.76081479 | 36.17209668 | 31.77679715 | 12.08186508 | 17.18867007 |
| ENSMUSG00000085885 | 9.196874066 | 8.347406925 | 6.35535943  | 4.02728836  | 8.594335036 |
| ENSMUSG00000085886 | 84.1867703  | 131.4716591 | 118.633376  | 192.5043836 | 132.4959985 |
| ENSMUSG00000085887 | 174.0331554 | 182.9473351 | 186.4238766 | 223.1117752 | 178.332452  |
| ENSMUSG00000085888 | 7.074518513 | 6.956172438 | 11.29841676 | 4.832746033 | 6.445751277 |
| ENSMUSG00000085889 | 6.367066661 | 4.869320706 | 8.473812573 | 6.443661377 | 4.297167518 |
| ENSMUSG00000085890 | 27.5906222  | 50.7800588  | 54.37363068 | 136.9278043 | 97.40246374 |
| ENSMUSG00000085891 | 38.90985182 | 45.91073809 | 42.36906287 | 52.35474869 | 42.25548059 |
| ENSMUSG00000085892 | 7.074518513 | 6.260555194 | 6.35535943  | 11.27640741 | 9.310529622 |
| ENSMUSG00000085893 | 12.73413332 | 9.738641413 | 5.649208382 | 14.4982381  | 7.161945863 |
| ENSMUSG00000085894 | 4.244711108 | 1.391234488 | 8.473812573 | 9.665492065 | 10.7429188  |
| ENSMUSG00000085895 | 9.904325918 | 3.478086219 | 6.35535943  | 1.610915344 | 4.297167518 |
| ENSMUSG00000085896 | 9.196874066 | 8.347406925 | 7.061510478 | 9.665492065 | 2.864778345 |

|                    |             |             |             |             |             |
|--------------------|-------------|-------------|-------------|-------------|-------------|
| ENSMUSG00000085897 | 87.72402956 | 111.9943762 | 103.804204  | 127.2623122 | 108.1453825 |
| ENSMUSG00000085898 | 7.074518513 | 6.956172438 | 9.886114669 | 6.443661377 | 5.013362104 |
| ENSMUSG00000085899 | 11.31922962 | 6.260555194 | 8.473812573 | 6.443661377 | 5.013362104 |
| ENSMUSG00000085900 | 11.31922962 | 9.738641413 | 12.71071886 | 9.665492065 | 12.89150255 |
| ENSMUSG00000085902 | 9.904325918 | 9.043024169 | 4.943057334 | 8.054576721 | 10.02672421 |
| ENSMUSG00000085903 | 7.074518513 | 5.56493795  | 5.649208382 | 4.02728836  | 6.445751277 |
| ENSMUSG00000085905 | 8.489422215 | 5.56493795  | 6.35535943  | 2.416373016 | 7.87814045  |
| ENSMUSG00000085908 | 7.074518513 | 6.260555194 | 7.061510478 | 4.832746033 | 7.161945863 |
| ENSMUSG00000085909 | 12.02668147 | 9.043024169 | 6.35535943  | 8.860034393 | 5.013362104 |
| ENSMUSG00000085910 | 0           | 0.695617244 | 0.706151048 | 1.610915344 | 0           |
| ENSMUSG00000085911 | 15.56394073 | 4.869320706 | 6.35535943  | 6.443661377 | 4.297167518 |
| ENSMUSG00000085912 | 8.489422215 | 12.52111039 | 6.35535943  | 12.88732275 | 12.17530797 |
| ENSMUSG00000085913 | 6.367066661 | 7.651789682 | 12.71071886 | 7.249119049 | 5.729556691 |
| ENSMUSG00000085914 | 96.92090362 | 113.3856107 | 96.0365425  | 119.2077355 | 109.5777717 |
| ENSMUSG00000085915 | 13.44158517 | 6.956172438 | 9.886114669 | 5.638203705 | 8.594335036 |
| ENSMUSG00000085917 | 75.69734809 | 95.2995624  | 103.804204  | 46.71654498 | 48.70123187 |
| ENSMUSG00000085918 | 6.367066661 | 4.173703463 | 4.943057334 | 11.27640741 | 7.161945863 |
| ENSMUSG00000085919 | 5.65961481  | 4.173703463 | 4.943057334 | 8.054576721 | 4.297167518 |
| ENSMUSG00000085920 | 2.122355554 | 4.173703463 | 7.061510478 | 4.02728836  | 6.445751277 |
| ENSMUSG00000085921 | 7.074518513 | 13.91234488 | 12.00456781 | 7.249119049 | 5.013362104 |
| ENSMUSG00000085922 | 4.244711108 | 6.260555194 | 7.061510478 | 12.08186508 | 10.02672421 |
| ENSMUSG00000085923 | 12.02668147 | 5.56493795  | 4.943057334 | 8.054576721 | 7.161945863 |
| ENSMUSG00000085924 | 11.31922962 | 6.260555194 | 8.473812573 | 5.638203705 | 7.161945863 |
| ENSMUSG00000085926 | 7.781970364 | 5.56493795  | 9.886114669 | 5.638203705 | 15.04008631 |
| ENSMUSG00000085927 | 5.65961481  | 10.43425866 | 6.35535943  | 4.832746033 | 10.7429188  |
| ENSMUSG00000085928 | 11.31922962 | 6.956172438 | 9.179963621 | 9.665492065 | 6.445751277 |
| ENSMUSG00000085929 | 7.074518513 | 8.347406925 | 8.473812573 | 9.665492065 | 7.161945863 |
| ENSMUSG00000085931 | 7.781970364 | 9.043024169 | 8.473812573 | 5.638203705 | 5.729556691 |
| ENSMUSG00000085932 | 84.89422215 | 126.6023384 | 115.8087718 | 91.01671695 | 112.4425501 |
| ENSMUSG00000085933 | 8.489422215 | 6.260555194 | 5.649208382 | 7.249119049 | 7.87814045  |
| ENSMUSG00000085934 | 9.196874066 | 6.956172438 | 11.29841676 | 4.832746033 | 11.45911338 |
| ENSMUSG00000085936 | 9.196874066 | 15.30357936 | 20.47838039 | 5.638203705 | 8.594335036 |
| ENSMUSG00000085937 | 9.196874066 | 5.56493795  | 3.530755239 | 6.443661377 | 2.864778345 |
| ENSMUSG00000085938 | 8.489422215 | 5.56493795  | 8.473812573 | 5.638203705 | 6.445751277 |
| ENSMUSG00000085939 | 25.46826665 | 20.17290007 | 21.18453143 | 16.91461111 | 22.91822676 |
| ENSMUSG00000085940 | 5.65961481  | 11.1298759  | 6.35535943  | 5.638203705 | 7.87814045  |
| ENSMUSG00000085941 | 12.02668147 | 17.39043109 | 17.65377619 | 19.33098413 | 17.18867007 |
| ENSMUSG00000085942 | 10.61177777 | 8.347406925 | 8.473812573 | 3.221830688 | 7.161945863 |
| ENSMUSG00000085944 | 62.25576291 | 76.51789682 | 72.73355792 | 34.6346799  | 62.30892901 |
| ENSMUSG00000085945 | 5.65961481  | 4.173703463 | 3.530755239 | 4.832746033 | 6.445751277 |
| ENSMUSG00000085946 | 9.196874066 | 6.956172438 | 8.473812573 | 4.02728836  | 7.161945863 |
| ENSMUSG00000085949 | 14.14903703 | 7.651789682 | 8.473812573 | 3.221830688 | 9.310529622 |
| ENSMUSG00000085950 | 9.196874066 | 4.173703463 | 14.829172   | 6.443661377 | 6.445751277 |

|                    |             |             |             |             |             |
|--------------------|-------------|-------------|-------------|-------------|-------------|
| ENSMUSG00000085951 | 14.14903703 | 9.738641413 | 3.530755239 | 2.416373016 | 7.161945863 |
| ENSMUSG00000085952 | 5.65961481  | 6.956172438 | 2.824604191 | 8.054576721 | 5.729556691 |
| ENSMUSG00000085953 | 8.489422215 | 6.260555194 | 5.649208382 | 7.249119049 | 7.161945863 |
| ENSMUSG00000085955 | 61.54831106 | 93.21271067 | 87.56272992 | 219.0844868 | 169.738117  |
| ENSMUSG00000085956 | 36.78749627 | 52.86691053 | 48.7244223  | 56.38203705 | 51.56601022 |
| ENSMUSG00000085958 | 5.65961481  | 5.56493795  | 9.179963621 | 8.054576721 | 12.17530797 |
| ENSMUSG00000085961 | 11.31922962 | 8.347406925 | 6.35535943  | 15.30369577 | 5.729556691 |
| ENSMUSG00000085962 | 10.61177777 | 4.869320706 | 2.824604191 | 3.221830688 | 5.729556691 |
| ENSMUSG00000085963 | 4.244711108 | 7.651789682 | 7.061510478 | 0.805457672 | 3.580972932 |
| ENSMUSG00000085965 | 9.196874066 | 5.56493795  | 11.29841676 | 4.832746033 | 7.161945863 |
| ENSMUSG00000085966 | 2.122355554 | 6.260555194 | 5.649208382 | 3.221830688 | 5.013362104 |
| ENSMUSG00000085967 | 9.196874066 | 4.173703463 | 9.886114669 | 6.443661377 | 6.445751277 |
| ENSMUSG00000085968 | 9.904325918 | 6.260555194 | 6.35535943  | 8.860034393 | 10.02672421 |
| ENSMUSG00000085969 | 7.781970364 | 6.956172438 | 6.35535943  | 4.832746033 | 7.87814045  |
| ENSMUSG00000085970 | 12.73413332 | 9.043024169 | 12.00456781 | 4.02728836  | 7.87814045  |
| ENSMUSG00000085971 | 37.49494812 | 57.73623123 | 57.19823487 | 20.1364418  | 28.64778345 |
| ENSMUSG00000085972 | 12.02668147 | 14.60796212 | 5.649208382 | 10.47094974 | 12.89150255 |
| ENSMUSG00000085973 | 7.781970364 | 6.260555194 | 5.649208382 | 3.221830688 | 2.864778345 |
| ENSMUSG00000085975 | 45.27691848 | 85.56092098 | 68.49665163 | 40.2728836  | 48.70123187 |
| ENSMUSG00000085976 | 7.781970364 | 5.56493795  | 6.35535943  | 4.832746033 | 8.594335036 |
| ENSMUSG00000085977 | 10.61177777 | 9.043024169 | 9.179963621 | 4.832746033 | 6.445751277 |
| ENSMUSG00000085978 | 2.829807405 | 0.695617244 | 1.412302096 | 1.610915344 | 1.432389173 |
| ENSMUSG00000085979 | 6.367066661 | 10.43425866 | 9.179963621 | 5.638203705 | 10.02672421 |
| ENSMUSG00000085980 | 9.196874066 | 4.173703463 | 2.118453143 | 4.832746033 | 5.729556691 |
| ENSMUSG00000085981 | 12.02668147 | 5.56493795  | 7.061510478 | 4.832746033 | 5.013362104 |
| ENSMUSG00000085982 | 6.367066661 | 5.56493795  | 5.649208382 | 2.416373016 | 2.864778345 |
| ENSMUSG00000085984 | 35.37259256 | 43.12826911 | 46.60596915 | 127.2623122 | 100.2672421 |
| ENSMUSG00000085985 | 8.489422215 | 11.82549314 | 4.236906287 | 5.638203705 | 8.594335036 |
| ENSMUSG00000085987 | 7.781970364 | 4.869320706 | 5.649208382 | 4.832746033 | 7.161945863 |
| ENSMUSG00000085989 | 7.074518513 | 6.956172438 | 6.35535943  | 2.416373016 | 7.161945863 |
| ENSMUSG00000085990 | 33.25023701 | 52.17129328 | 43.78136496 | 103.098582  | 83.07857202 |
| ENSMUSG00000085991 | 1.414903703 | 0.695617244 | 2.824604191 | 4.02728836  | 5.013362104 |
| ENSMUSG00000085992 | 7.781970364 | 9.738641413 | 4.236906287 | 5.638203705 | 7.87814045  |
| ENSMUSG00000085993 | 10.61177777 | 6.260555194 | 9.179963621 | 10.47094974 | 7.161945863 |
| ENSMUSG00000085995 | 36.78749627 | 37.56333116 | 31.77679715 | 49.132918   | 34.37734014 |
| ENSMUSG00000085996 | 7.074518513 | 6.260555194 | 5.649208382 | 6.443661377 | 6.445751277 |
| ENSMUSG00000085998 | 2.829807405 | 5.56493795  | 2.118453143 | 2.416373016 | 0.716194586 |
| ENSMUSG00000085999 | 9.904325918 | 7.651789682 | 7.061510478 | 3.221830688 | 9.310529622 |
| ENSMUSG00000086000 | 21.93100739 | 35.47647943 | 44.48751601 | 198.1425873 | 143.2389173 |
| ENSMUSG00000086001 | 8.489422215 | 4.869320706 | 11.29841676 | 29.80193387 | 27.21539428 |
| ENSMUSG00000086003 | 5.65961481  | 9.043024169 | 6.35535943  | 9.665492065 | 2.864778345 |
| ENSMUSG00000086004 | 42.44711108 | 75.82227957 | 62.84744325 | 33.82922223 | 40.82309142 |
| ENSMUSG00000086006 | 9.196874066 | 6.260555194 | 9.179963621 | 5.638203705 | 7.87814045  |

|                   |             |             |             |             |             |
|-------------------|-------------|-------------|-------------|-------------|-------------|
| ENSMUSG0000086007 | 10.61177777 | 4.869320706 | 3.530755239 | 7.249119049 | 5.013362104 |
| ENSMUSG0000086008 | 3.537259256 | 2.782468975 | 2.824604191 | 3.221830688 | 2.864778345 |
| ENSMUSG0000086009 | 3.537259256 | 8.347406925 | 4.943057334 | 3.221830688 | 8.594335036 |
| ENSMUSG0000086010 | 8.489422215 | 6.956172438 | 6.35535943  | 9.665492065 | 6.445751277 |
| ENSMUSG0000086011 | 10.61177777 | 6.956172438 | 4.943057334 | 4.832746033 | 2.864778345 |
| ENSMUSG0000086012 | 9.904325918 | 8.347406925 | 6.35535943  | 3.221830688 | 3.580972932 |
| ENSMUSG0000086013 | 16.27139258 | 28.52030699 | 18.35992724 | 75.71302118 | 68.0384857  |
| ENSMUSG0000086014 | 9.196874066 | 4.869320706 | 8.473812573 | 5.638203705 | 9.310529622 |
| ENSMUSG0000086015 | 7.781970364 | 8.347406925 | 9.179963621 | 14.4982381  | 10.7429188  |
| ENSMUSG0000086016 | 83.47931845 | 93.21271067 | 108.7472614 | 241.6373016 | 190.50776   |
| ENSMUSG0000086017 | 7.074518513 | 8.347406925 | 8.473812573 | 6.443661377 | 4.297167518 |
| ENSMUSG0000086018 | 5.65961481  | 11.82549314 | 7.061510478 | 4.832746033 | 4.297167518 |
| ENSMUSG0000086019 | 10.61177777 | 2.782468975 | 10.59226572 | 6.443661377 | 6.445751277 |
| ENSMUSG0000086020 | 7.781970364 | 4.869320706 | 5.649208382 | 3.221830688 | 14.32389173 |
| ENSMUSG0000086021 | 8.489422215 | 6.260555194 | 4.943057334 | 8.054576721 | 6.445751277 |
| ENSMUSG0000086022 | 5.65961481  | 7.651789682 | 3.530755239 | 2.416373016 | 8.594335036 |
| ENSMUSG0000086025 | 11.31922962 | 8.347406925 | 7.767661525 | 4.832746033 | 5.729556691 |
| ENSMUSG0000086026 | 9.196874066 | 8.347406925 | 4.943057334 | 4.832746033 | 7.87814045  |
| ENSMUSG0000086027 | 10.61177777 | 11.82549314 | 9.179963621 | 12.08186508 | 9.310529622 |
| ENSMUSG0000086028 | 8.489422215 | 4.869320706 | 8.473812573 | 6.443661377 | 8.594335036 |
| ENSMUSG0000086029 | 4.952162959 | 6.260555194 | 8.473812573 | 6.443661377 | 5.013362104 |
| ENSMUSG0000086030 | 11.31922962 | 5.56493795  | 7.061510478 | 8.860034393 | 7.161945863 |
| ENSMUSG0000086031 | 6.367066661 | 2.086851731 | 5.649208382 | 8.054576721 | 9.310529622 |
| ENSMUSG0000086032 | 29.71297775 | 31.99839321 | 48.7244223  | 44.30017197 | 44.40406435 |
| ENSMUSG0000086034 | 2.122355554 | 4.869320706 | 3.530755239 | 1.610915344 | 4.297167518 |
| ENSMUSG0000086035 | 7.074518513 | 5.56493795  | 8.473812573 | 8.860034393 | 10.02672421 |
| ENSMUSG0000086036 | 8.489422215 | 9.043024169 | 7.767661525 | 8.054576721 | 8.594335036 |
| ENSMUSG0000086037 | 12.02668147 | 2.782468975 | 7.767661525 | 4.02728836  | 8.594335036 |
| ENSMUSG0000086039 | 65.79302217 | 107.8206728 | 77.67661525 | 104.7094974 | 96.68626916 |
| ENSMUSG0000086041 | 13.44158517 | 9.043024169 | 13.41686991 | 5.638203705 | 8.594335036 |
| ENSMUSG0000086042 | 4.244711108 | 6.956172438 | 10.59226572 | 6.443661377 | 10.02672421 |
| ENSMUSG0000086043 | 10.61177777 | 6.956172438 | 8.473812573 | 5.638203705 | 7.161945863 |
| ENSMUSG0000086044 | 15.56394073 | 11.1298759  | 1.412302096 | 8.054576721 | 8.594335036 |
| ENSMUSG0000086046 | 19.80865184 | 15.30357936 | 14.829172   | 14.4982381  | 23.63442135 |
| ENSMUSG0000086047 | 60.84085921 | 92.51709342 | 88.26888097 | 112.7640741 | 89.52432329 |
| ENSMUSG0000086048 | 13.44158517 | 9.043024169 | 16.94762515 | 9.665492065 | 6.445751277 |
| ENSMUSG0000086049 | 0           | 0           | 0           | 0           | 0           |
| ENSMUSG0000086050 | 7.074518513 | 6.260555194 | 7.767661525 | 9.665492065 | 7.161945863 |
| ENSMUSG0000086052 | 7.781970364 | 8.347406925 | 7.767661525 | 5.638203705 | 3.580972932 |
| ENSMUSG0000086053 | 4.244711108 | 7.651789682 | 9.886114669 | 5.638203705 | 4.297167518 |
| ENSMUSG0000086054 | 0           | 0           | 0.706151048 | 0           | 0           |
| ENSMUSG0000086055 | 9.196874066 | 2.782468975 | 8.473812573 | 3.221830688 | 7.161945863 |
| ENSMUSG0000086057 | 6.367066661 | 12.52111039 | 9.179963621 | 5.638203705 | 7.87814045  |

|                   |             |             |             |             |             |
|-------------------|-------------|-------------|-------------|-------------|-------------|
| ENSMUSG0000086058 | 7.074518513 | 7.651789682 | 5.649208382 | 4.832746033 | 6.445751277 |
| ENSMUSG0000086060 | 9.904325918 | 8.347406925 | 2.824604191 | 4.02728836  | 5.729556691 |
| ENSMUSG0000086061 | 7.781970364 | 6.956172438 | 7.767661525 | 8.054576721 | 2.864778345 |
| ENSMUSG0000086063 | 34.66514071 | 48.69320706 | 45.8998181  | 49.132918   | 52.2822048  |
| ENSMUSG0000086064 | 33.95768886 | 46.60635533 | 36.71985448 | 23.35827249 | 25.78300511 |
| ENSMUSG0000086065 | 36.08004441 | 43.82388636 | 40.95676077 | 22.55281482 | 26.49919969 |
| ENSMUSG0000086066 | 9.196874066 | 5.56493795  | 4.236906287 | 2.416373016 | 7.161945863 |
| ENSMUSG0000086067 | 7.781970364 | 7.651789682 | 7.061510478 | 12.88732275 | 12.17530797 |
| ENSMUSG0000086068 | 8.489422215 | 7.651789682 | 9.179963621 | 3.221830688 | 3.580972932 |
| ENSMUSG0000086069 | 206.5759406 | 266.4214044 | 209.0207101 | 144.1769233 | 141.0903335 |
| ENSMUSG0000086070 | 9.196874066 | 4.869320706 | 7.061510478 | 4.832746033 | 5.013362104 |
| ENSMUSG0000086071 | 9.196874066 | 9.043024169 | 10.59226572 | 2.416373016 | 4.297167518 |
| ENSMUSG0000086072 | 8.489422215 | 11.1298759  | 3.530755239 | 3.221830688 | 7.87814045  |
| ENSMUSG0000086074 | 9.904325918 | 4.173703463 | 8.473812573 | 3.221830688 | 4.297167518 |
| ENSMUSG0000086075 | 12.02668147 | 22.95536904 | 21.89068248 | 49.93837567 | 38.67450766 |
| ENSMUSG0000086076 | 36.08004441 | 43.82388636 | 45.8998181  | 16.10915344 | 20.769643   |
| ENSMUSG0000086077 | 3.537259256 | 4.173703463 | 1.412302096 | 2.416373016 | 3.580972932 |
| ENSMUSG0000086078 | 4.952162959 | 6.260555194 | 8.473812573 | 2.416373016 | 2.148583759 |
| ENSMUSG0000086080 | 15.56394073 | 5.56493795  | 7.767661525 | 5.638203705 | 10.02672421 |
| ENSMUSG0000086081 | 7.781970364 | 4.173703463 | 3.530755239 | 4.02728836  | 2.864778345 |
| ENSMUSG0000086083 | 62.25576291 | 82.77845201 | 74.14586002 | 186.8661799 | 130.3474147 |
| ENSMUSG0000086087 | 9.196874066 | 6.260555194 | 4.943057334 | 5.638203705 | 5.013362104 |
| ENSMUSG0000086089 | 14.85648888 | 13.91234488 | 10.59226572 | 6.443661377 | 5.013362104 |
| ENSMUSG0000086090 | 6.367066661 | 4.173703463 | 5.649208382 | 8.860034393 | 9.310529622 |
| ENSMUSG0000086092 | 10.61177777 | 13.91234488 | 13.41686991 | 8.860034393 | 8.594335036 |
| ENSMUSG0000086093 | 5.65961481  | 13.21672763 | 7.767661525 | 10.47094974 | 8.594335036 |
| ENSMUSG0000086095 | 11.31922962 | 8.347406925 | 4.236906287 | 4.02728836  | 3.580972932 |
| ENSMUSG0000086096 | 2.122355554 | 6.260555194 | 9.179963621 | 1.610915344 | 4.297167518 |
| ENSMUSG0000086097 | 6.367066661 | 9.738641413 | 6.35535943  | 6.443661377 | 8.594335036 |
| ENSMUSG0000086098 | 9.196874066 | 4.173703463 | 4.236906287 | 9.665492065 | 7.161945863 |
| ENSMUSG0000086103 | 8.489422215 | 6.260555194 | 7.061510478 | 8.054576721 | 4.297167518 |
| ENSMUSG0000086104 | 2.122355554 | 4.173703463 | 4.236906287 | 3.221830688 | 4.297167518 |
| ENSMUSG0000086105 | 8.489422215 | 8.347406925 | 8.473812573 | 4.832746033 | 6.445751277 |
| ENSMUSG0000086107 | 12.02668147 | 16.69481385 | 16.2414741  | 10.47094974 | 13.60769714 |
| ENSMUSG0000086108 | 44.56946663 | 61.21431745 | 60.02283906 | 33.82922223 | 30.79636721 |
| ENSMUSG0000086109 | 9.196874066 | 3.478086219 | 6.35535943  | 8.054576721 | 5.013362104 |
| ENSMUSG0000086111 | 21.93100739 | 31.30277597 | 19.06607829 | 16.10915344 | 20.769643   |
| ENSMUSG0000086113 | 112.4848444 | 163.4700523 | 148.29172   | 234.3881826 | 191.9401491 |
| ENSMUSG0000086114 | 7.074518513 | 11.82549314 | 8.473812573 | 8.860034393 | 9.310529622 |
| ENSMUSG0000086115 | 8.489422215 | 7.651789682 | 3.530755239 | 6.443661377 | 4.297167518 |
| ENSMUSG0000086117 | 9.196874066 | 15.99919661 | 11.29841676 | 49.93837567 | 37.24211849 |
| ENSMUSG0000086118 | 5.65961481  | 3.478086219 | 2.118453143 | 3.221830688 | 2.864778345 |
| ENSMUSG0000086119 | 10.61177777 | 5.56493795  | 4.943057334 | 5.638203705 | 2.864778345 |

|                   |             |             |             |             |             |
|-------------------|-------------|-------------|-------------|-------------|-------------|
| ENSMUSG0000086121 | 7.074518513 | 13.21672763 | 13.41686991 | 12.08186508 | 7.87814045  |
| ENSMUSG0000086122 | 9.904325918 | 6.956172438 | 8.473812573 | 5.638203705 | 3.580972932 |
| ENSMUSG0000086123 | 27.5906222  | 31.99839321 | 43.07521391 | 29.80193387 | 25.06681052 |
| ENSMUSG0000086124 | 7.781970364 | 11.1298759  | 7.061510478 | 4.02728836  | 5.013362104 |
| ENSMUSG0000086125 | 10.61177777 | 4.869320706 | 4.943057334 | 12.08186508 | 2.864778345 |
| ENSMUSG0000086126 | 4.952162959 | 4.173703463 | 7.767661525 | 4.832746033 | 7.87814045  |
| ENSMUSG0000086127 | 47.39927403 | 62.60555194 | 67.08434954 | 66.85298678 | 72.33565322 |
| ENSMUSG0000086128 | 15.56394073 | 8.347406925 | 4.236906287 | 5.638203705 | 7.161945863 |
| ENSMUSG0000086129 | 10.61177777 | 4.173703463 | 6.35535943  | 12.08186508 | 7.161945863 |
| ENSMUSG0000086130 | 19.80865184 | 16.69481385 | 19.06607829 | 10.47094974 | 9.310529622 |
| ENSMUSG0000086132 | 0.707451851 | 0.695617244 | 0.706151048 | 0           | 0           |
| ENSMUSG0000086133 | 7.074518513 | 8.347406925 | 7.061510478 | 2.416373016 | 5.013362104 |
| ENSMUSG0000086134 | 10.61177777 | 7.651789682 | 12.71071886 | 4.02728836  | 8.594335036 |
| ENSMUSG0000086135 | 5.65961481  | 7.651789682 | 8.473812573 | 8.054576721 | 6.445751277 |
| ENSMUSG0000086136 | 6.367066661 | 9.043024169 | 6.35535943  | 9.665492065 | 8.594335036 |
| ENSMUSG0000086137 | 12.02668147 | 8.347406925 | 14.12302096 | 4.832746033 | 6.445751277 |
| ENSMUSG0000086138 | 9.904325918 | 9.738641413 | 5.649208382 | 4.02728836  | 6.445751277 |
| ENSMUSG0000086139 | 3.537259256 | 6.260555194 | 5.649208382 | 4.832746033 | 7.87814045  |
| ENSMUSG0000086140 | 0.707451851 | 0           | 0           | 0           | 0           |
| ENSMUSG0000086141 | 9.196874066 | 2.086851731 | 5.649208382 | 4.02728836  | 7.161945863 |
| ENSMUSG0000086142 | 2.122355554 | 4.173703463 | 2.118453143 | 1.610915344 | 2.148583759 |
| ENSMUSG0000086144 | 7.074518513 | 7.651789682 | 2.118453143 | 2.416373016 | 5.729556691 |
| ENSMUSG0000086145 | 3.537259256 | 9.043024169 | 4.943057334 | 4.832746033 | 6.445751277 |
| ENSMUSG0000086146 | 9.196874066 | 22.95536904 | 16.2414741  | 12.88732275 | 15.04008631 |
| ENSMUSG0000086148 | 10.61177777 | 5.56493795  | 7.767661525 | 2.416373016 | 7.161945863 |
| ENSMUSG0000086149 | 23.34591109 | 26.43345526 | 26.83373982 | 14.4982381  | 13.60769714 |
| ENSMUSG0000086150 | 94.09109622 | 127.2979556 | 136.9933033 | 104.7094974 | 105.9967988 |
| ENSMUSG0000086151 | 9.196874066 | 9.738641413 | 7.061510478 | 3.221830688 | 7.161945863 |
| ENSMUSG0000086152 | 9.904325918 | 7.651789682 | 9.886114669 | 4.02728836  | 7.161945863 |
| ENSMUSG0000086153 | 12.73413332 | 7.651789682 | 12.71071886 | 4.832746033 | 11.45911338 |
| ENSMUSG0000086154 | 11.31922962 | 16.69481385 | 8.473812573 | 8.860034393 | 7.87814045  |
| ENSMUSG0000086155 | 1.414903703 | 0           | 0.706151048 | 0.805457672 | 0           |
| ENSMUSG0000086156 | 157.054311  | 173.2086937 | 164.5331941 | 105.514955  | 83.7947666  |
| ENSMUSG0000086157 | 4.244711108 | 4.173703463 | 2.118453143 | 4.02728836  | 2.864778345 |
| ENSMUSG0000086159 | 6.367066661 | 6.956172438 | 7.767661525 | 8.054576721 | 9.310529622 |
| ENSMUSG0000086160 | 7.074518513 | 6.956172438 | 7.061510478 | 11.27640741 | 8.594335036 |
| ENSMUSG0000086161 | 6.367066661 | 8.347406925 | 7.767661525 | 7.249119049 | 10.7429188  |
| ENSMUSG0000086162 | 12.02668147 | 4.869320706 | 7.061510478 | 7.249119049 | 3.580972932 |
| ENSMUSG0000086163 | 2.829807405 | 6.260555194 | 4.236906287 | 5.638203705 | 5.013362104 |
| ENSMUSG0000086164 | 5.65961481  | 3.478086219 | 6.35535943  | 12.08186508 | 3.580972932 |
| ENSMUSG0000086165 | 9.904325918 | 6.956172438 | 7.767661525 | 4.832746033 | 7.161945863 |
| ENSMUSG0000086166 | 2.122355554 | 7.651789682 | 4.943057334 | 3.221830688 | 10.7429188  |
| ENSMUSG0000086167 | 203.0386813 | 230.2493077 | 212.5514654 | 169.9515688 | 160.4275873 |

|                   |             |             |             |             |             |
|-------------------|-------------|-------------|-------------|-------------|-------------|
| ENSMUSG0000086168 | 14.14903703 | 6.956172438 | 13.41686991 | 7.249119049 | 3.580972932 |
| ENSMUSG0000086170 | 7.074518513 | 5.56493795  | 12.00456781 | 5.638203705 | 7.161945863 |
| ENSMUSG0000086171 | 5.65961481  | 11.1298759  | 6.35535943  | 5.638203705 | 11.45911338 |
| ENSMUSG0000086172 | 9.904325918 | 9.043024169 | 2.824604191 | 9.665492065 | 10.7429188  |
| ENSMUSG0000086173 | 4.244711108 | 4.173703463 | 3.530755239 | 0.805457672 | 1.432389173 |
| ENSMUSG0000086174 | 7.781970364 | 6.260555194 | 6.35535943  | 8.054576721 | 7.161945863 |
| ENSMUSG0000086175 | 7.074518513 | 8.347406925 | 7.061510478 | 4.832746033 | 6.445751277 |
| ENSMUSG0000086176 | 11.31922962 | 6.260555194 | 8.473812573 | 9.665492065 | 7.161945863 |
| ENSMUSG0000086177 | 7.781970364 | 5.56493795  | 5.649208382 | 7.249119049 | 7.161945863 |
| ENSMUSG0000086179 | 9.904325918 | 5.56493795  | 9.886114669 | 6.443661377 | 10.7429188  |
| ENSMUSG0000086181 | 9.196874066 | 5.56493795  | 7.061510478 | 3.221830688 | 4.297167518 |
| ENSMUSG0000086184 | 94.09109622 | 138.4278315 | 116.5149229 | 345.5413413 | 229.8984622 |
| ENSMUSG0000086185 | 3.537259256 | 4.173703463 | 8.473812573 | 3.221830688 | 3.580972932 |
| ENSMUSG0000086186 | 7.781970364 | 10.43425866 | 4.236906287 | 6.443661377 | 5.729556691 |
| ENSMUSG0000086187 | 11.31922962 | 3.478086219 | 4.943057334 | 7.249119049 | 3.580972932 |
| ENSMUSG0000086188 | 9.196874066 | 1.391234488 | 0.706151048 | 4.832746033 | 2.148583759 |
| ENSMUSG0000086189 | 8.489422215 | 9.738641413 | 8.473812573 | 5.638203705 | 5.729556691 |
| ENSMUSG0000086190 | 7.074518513 | 2.086851731 | 6.35535943  | 4.832746033 | 9.310529622 |
| ENSMUSG0000086191 | 43.86201478 | 68.17048989 | 63.5535943  | 60.40932541 | 55.86317773 |
| ENSMUSG0000086192 | 12.02668147 | 9.738641413 | 14.12302096 | 8.054576721 | 10.02672421 |
| ENSMUSG0000086193 | 15.56394073 | 31.99839321 | 16.2414741  | 67.65844446 | 43.68786977 |
| ENSMUSG0000086194 | 10.61177777 | 8.347406925 | 3.530755239 | 4.832746033 | 3.580972932 |
| ENSMUSG0000086195 | 13.44158517 | 6.956172438 | 13.41686991 | 2.416373016 | 5.729556691 |
| ENSMUSG0000086196 | 6.367066661 | 6.260555194 | 7.767661525 | 9.665492065 | 10.02672421 |
| ENSMUSG0000086197 | 8.489422215 | 10.43425866 | 10.59226572 | 8.860034393 | 0.716194586 |
| ENSMUSG0000086199 | 9.904325918 | 5.56493795  | 4.236906287 | 8.860034393 | 8.594335036 |
| ENSMUSG0000086201 | 4.952162959 | 6.260555194 | 5.649208382 | 6.443661377 | 5.729556691 |
| ENSMUSG0000086202 | 11.31922962 | 11.1298759  | 8.473812573 | 8.860034393 | 2.864778345 |
| ENSMUSG0000086203 | 10.61177777 | 7.651789682 | 7.061510478 | 7.249119049 | 3.580972932 |
| ENSMUSG0000086204 | 5.65961481  | 6.260555194 | 11.29841676 | 2.416373016 | 5.729556691 |
| ENSMUSG0000086205 | 11.31922962 | 15.30357936 | 20.47838039 | 13.69278043 | 14.32389173 |
| ENSMUSG0000086206 | 20.51610369 | 25.04222078 | 23.30298458 | 20.1364418  | 22.20203218 |
| ENSMUSG0000086207 | 4.952162959 | 2.782468975 | 4.236906287 | 3.221830688 | 3.580972932 |
| ENSMUSG0000086209 | 6.367066661 | 7.651789682 | 6.35535943  | 7.249119049 | 5.729556691 |
| ENSMUSG0000086211 | 272.3689627 | 304.6803528 | 289.5219296 | 302.8520847 | 244.9385485 |
| ENSMUSG0000086212 | 119.5593629 | 176.6867799 | 159.5901368 | 138.5387196 | 108.8615771 |
| ENSMUSG0000086213 | 9.904325918 | 12.52111039 | 13.41686991 | 16.10915344 | 12.17530797 |
| ENSMUSG0000086214 | 7.781970364 | 9.738641413 | 14.829172   | 7.249119049 | 5.729556691 |
| ENSMUSG0000086216 | 17.68629628 | 27.82468975 | 16.2414741  | 28.9964762  | 38.67450766 |
| ENSMUSG0000086219 | 7.074518513 | 5.56493795  | 7.061510478 | 6.443661377 | 5.729556691 |
| ENSMUSG0000086220 | 12.73413332 | 19.47728283 | 25.42143772 | 12.88732275 | 12.17530797 |
| ENSMUSG0000086221 | 7.074518513 | 11.82549314 | 9.179963621 | 4.02728836  | 4.297167518 |
| ENSMUSG0000086222 | 9.196874066 | 8.347406925 | 10.59226572 | 10.47094974 | 10.02672421 |

|                   |             |             |             |             |             |
|-------------------|-------------|-------------|-------------|-------------|-------------|
| ENSMUSG0000086224 | 11.31922962 | 11.82549314 | 8.473812573 | 5.638203705 | 6.445751277 |
| ENSMUSG0000086225 | 9.904325918 | 10.43425866 | 5.649208382 | 7.249119049 | 8.594335036 |
| ENSMUSG0000086226 | 5.65961481  | 6.956172438 | 9.886114669 | 56.38203705 | 34.37734014 |
| ENSMUSG0000086227 | 9.196874066 | 8.347406925 | 9.179963621 | 6.443661377 | 6.445751277 |
| ENSMUSG0000086229 | 7.781970364 | 4.869320706 | 12.71071886 | 10.47094974 | 9.310529622 |
| ENSMUSG0000086230 | 3.537259256 | 4.869320706 | 4.943057334 | 2.416373016 | 4.297167518 |
| ENSMUSG0000086231 | 7.781970364 | 3.478086219 | 7.767661525 | 4.832746033 | 7.87814045  |
| ENSMUSG0000086232 | 10.61177777 | 4.173703463 | 4.236906287 | 5.638203705 | 9.310529622 |
| ENSMUSG0000086233 | 9.904325918 | 9.043024169 | 8.473812573 | 4.832746033 | 7.161945863 |
| ENSMUSG0000086234 | 12.02668147 | 11.82549314 | 7.061510478 | 15.30369577 | 9.310529622 |
| ENSMUSG0000086235 | 8.489422215 | 5.56493795  | 5.649208382 | 11.27640741 | 10.02672421 |
| ENSMUSG0000086236 | 8.489422215 | 10.43425866 | 8.473812573 | 9.665492065 | 10.02672421 |
| ENSMUSG0000086237 | 12.02668147 | 25.73783802 | 21.89068248 | 38.66196826 | 22.91822676 |
| ENSMUSG0000086238 | 7.781970364 | 6.956172438 | 4.236906287 | 5.638203705 | 8.594335036 |
| ENSMUSG0000086239 | 10.61177777 | 6.956172438 | 10.59226572 | 1.610915344 | 4.297167518 |
| ENSMUSG0000086240 | 10.61177777 | 9.043024169 | 5.649208382 | 4.832746033 | 2.148583759 |
| ENSMUSG0000086241 | 12.73413332 | 7.651789682 | 8.473812573 | 8.054576721 | 10.02672421 |
| ENSMUSG0000086243 | 9.904325918 | 6.260555194 | 7.767661525 | 2.416373016 | 5.729556691 |
| ENSMUSG0000086244 | 4.244711108 | 6.260555194 | 3.530755239 | 2.416373016 | 2.148583759 |
| ENSMUSG0000086245 | 9.904325918 | 9.738641413 | 5.649208382 | 5.638203705 | 9.310529622 |
| ENSMUSG0000086246 | 7.781970364 | 4.869320706 | 4.236906287 | 0.805457672 | 5.013362104 |
| ENSMUSG0000086247 | 46.69182218 | 75.12666233 | 62.1412922  | 62.02024075 | 53.71459398 |
| ENSMUSG0000086248 | 11.31922962 | 5.56493795  | 7.061510478 | 8.054576721 | 4.297167518 |
| ENSMUSG0000086249 | 14.14903703 | 18.08604834 | 9.886114669 | 8.860034393 | 13.60769714 |
| ENSMUSG0000086250 | 7.781970364 | 6.260555194 | 2.824604191 | 6.443661377 | 10.02672421 |
| ENSMUSG0000086251 | 89.13893326 | 119.6461659 | 102.3919019 | 144.982381  | 124.617858  |
| ENSMUSG0000086253 | 12.73413332 | 6.956172438 | 11.29841676 | 6.443661377 | 7.87814045  |
| ENSMUSG0000086254 | 9.196874066 | 3.478086219 | 7.061510478 | 5.638203705 | 7.87814045  |
| ENSMUSG0000086255 | 9.196874066 | 16.69481385 | 16.94762515 | 8.054576721 | 6.445751277 |
| ENSMUSG0000086256 | 4.952162959 | 9.043024169 | 5.649208382 | 9.665492065 | 7.161945863 |
| ENSMUSG0000086257 | 9.196874066 | 8.347406925 | 9.886114669 | 9.665492065 | 6.445751277 |
| ENSMUSG0000086258 | 5.65961481  | 9.043024169 | 13.41686991 | 5.638203705 | 11.45911338 |
| ENSMUSG0000086259 | 12.02668147 | 5.56493795  | 7.061510478 | 4.02728836  | 7.161945863 |
| ENSMUSG0000086260 | 9.904325918 | 11.1298759  | 16.2414741  | 4.02728836  | 10.02672421 |
| ENSMUSG0000086261 | 12.73413332 | 3.478086219 | 12.00456781 | 8.054576721 | 10.7429188  |
| ENSMUSG0000086262 | 5.65961481  | 7.651789682 | 5.649208382 | 5.638203705 | 7.161945863 |
| ENSMUSG0000086263 | 5.65961481  | 9.043024169 | 10.59226572 | 6.443661377 | 10.02672421 |
| ENSMUSG0000086264 | 114.6071999 | 137.7322143 | 132.0502459 | 70.07481747 | 76.63282074 |
| ENSMUSG0000086265 | 14.85648888 | 4.869320706 | 7.767661525 | 4.832746033 | 5.013362104 |
| ENSMUSG0000086266 | 9.904325918 | 3.478086219 | 4.943057334 | 1.610915344 | 7.87814045  |
| ENSMUSG0000086267 | 9.904325918 | 6.956172438 | 10.59226572 | 7.249119049 | 7.161945863 |
| ENSMUSG0000086268 | 9.196874066 | 3.478086219 | 2.824604191 | 4.832746033 | 5.013362104 |
| ENSMUSG0000086269 | 9.904325918 | 9.043024169 | 4.236906287 | 12.08186508 | 7.161945863 |



|                    |             |             |             |             |             |
|--------------------|-------------|-------------|-------------|-------------|-------------|
| ENSMUSG00000086272 | 5.65961481  | 8.347406925 | 7.767661525 | 9.665492065 | 10.7429188  |
| ENSMUSG00000086273 | 8.489422215 | 5.56493795  | 10.59226572 | 6.443661377 | 7.161945863 |
| ENSMUSG00000086275 | 7.781970364 | 5.56493795  | 7.061510478 | 4.832746033 | 7.161945863 |
| ENSMUSG00000086278 | 6.367066661 | 9.043024169 | 6.35535943  | 6.443661377 | 5.729556691 |
| ENSMUSG00000086279 | 5.65961481  | 3.478086219 | 4.943057334 | 2.416373016 | 1.432389173 |
| ENSMUSG00000086282 | 5.65961481  | 9.043024169 | 4.943057334 | 8.054576721 | 7.87814045  |
| ENSMUSG00000086283 | 6.367066661 | 9.043024169 | 6.35535943  | 16.91461111 | 12.89150255 |
| ENSMUSG00000086284 | 6.367066661 | 6.956172438 | 8.473812573 | 2.416373016 | 7.87814045  |
| ENSMUSG00000086286 | 4.244711108 | 2.782468975 | 4.236906287 | 3.221830688 | 2.864778345 |
| ENSMUSG00000086287 | 4.952162959 | 6.260555194 | 5.649208382 | 7.249119049 | 2.864778345 |
| ENSMUSG00000086288 | 15.56394073 | 17.39043109 | 14.829172   | 12.88732275 | 13.60769714 |
| ENSMUSG00000086289 | 20.51610369 | 16.69481385 | 19.77222934 | 17.72006879 | 14.32389173 |
| ENSMUSG00000086290 | 2.122355554 | 0           | 2.118453143 | 2.416373016 | 0.716194586 |
| ENSMUSG00000086291 | 10.61177777 | 11.82549314 | 5.649208382 | 6.443661377 | 7.161945863 |
| ENSMUSG00000086292 | 1.414903703 | 1.391234488 | 0           | 0           | 0.716194586 |
| ENSMUSG00000086293 | 12.73413332 | 5.56493795  | 5.649208382 | 4.832746033 | 5.013362104 |
| ENSMUSG00000086296 | 7.074518513 | 6.260555194 | 7.767661525 | 6.443661377 | 10.02672421 |
| ENSMUSG00000086297 | 6.367066661 | 13.91234488 | 14.12302096 | 8.860034393 | 10.7429188  |
| ENSMUSG00000086298 | 20.51610369 | 31.30277597 | 31.77679715 | 5.638203705 | 10.02672421 |
| ENSMUSG00000086302 | 7.781970364 | 1.391234488 | 8.473812573 | 6.443661377 | 9.310529622 |
| ENSMUSG00000086306 | 7.074518513 | 9.738641413 | 5.649208382 | 10.47094974 | 8.594335036 |
| ENSMUSG00000086308 | 3.537259256 | 8.347406925 | 5.649208382 | 4.02728836  | 6.445751277 |
| ENSMUSG00000086310 | 17.68629628 | 14.60796212 | 16.94762515 | 20.1364418  | 17.18867007 |
| ENSMUSG00000086311 | 7.781970364 | 6.260555194 | 7.767661525 | 9.665492065 | 6.445751277 |
| ENSMUSG00000086312 | 16.27139258 | 23.65098629 | 24.71528667 | 14.4982381  | 14.32389173 |
| ENSMUSG00000086313 | 9.196874066 | 6.260555194 | 6.35535943  | 7.249119049 | 5.729556691 |
| ENSMUSG00000086315 | 12.73413332 | 43.12826911 | 25.42143772 | 37.05105292 | 26.49919969 |
| ENSMUSG00000086316 | 7.074518513 | 6.956172438 | 5.649208382 | 5.638203705 | 7.161945863 |
| ENSMUSG00000086319 | 12.02668147 | 2.782468975 | 9.179963621 | 9.665492065 | 5.729556691 |
| ENSMUSG00000086320 | 11.31922962 | 9.043024169 | 11.29841676 | 5.638203705 | 10.02672421 |
| ENSMUSG00000086321 | 6.367066661 | 7.651789682 | 5.649208382 | 3.221830688 | 4.297167518 |
| ENSMUSG00000086322 | 16.97884443 | 23.65098629 | 16.94762515 | 68.46390213 | 46.55264811 |
| ENSMUSG00000086324 | 59.42595551 | 75.12666233 | 73.43970897 | 144.1769233 | 137.5093606 |
| ENSMUSG00000086326 | 7.781970364 | 9.043024169 | 6.35535943  | 2.416373016 | 5.013362104 |
| ENSMUSG00000086327 | 9.196874066 | 17.39043109 | 10.59226572 | 8.054576721 | 10.7429188  |
| ENSMUSG00000086328 | 1.414903703 | 5.56493795  | 1.412302096 | 0.805457672 | 0           |
| ENSMUSG00000086329 | 14.85648888 | 7.651789682 | 5.649208382 | 8.860034393 | 8.594335036 |
| ENSMUSG00000086330 | 10.61177777 | 11.82549314 | 19.77222934 | 4.832746033 | 9.310529622 |
| ENSMUSG00000086331 | 13.44158517 | 15.30357936 | 19.77222934 | 17.72006879 | 20.769643   |
| ENSMUSG00000086332 | 5.65961481  | 9.738641413 | 11.29841676 | 4.832746033 | 7.87814045  |
| ENSMUSG00000086333 | 10.61177777 | 5.56493795  | 12.00456781 | 3.221830688 | 5.013362104 |
| ENSMUSG00000086335 | 9.196874066 | 7.651789682 | 9.179963621 | 8.860034393 | 6.445751277 |
| ENSMUSG00000086336 | 9.196874066 | 9.738641413 | 12.71071886 | 6.443661377 | 10.7429188  |

|                    |             |             |             |             |             |
|--------------------|-------------|-------------|-------------|-------------|-------------|
| ENSMUSG00000086337 | 7.781970364 | 11.82549314 | 9.886114669 | 7.249119049 | 8.594335036 |
| ENSMUSG00000086338 | 3.537259256 | 3.478086219 | 2.118453143 | 2.416373016 | 3.580972932 |
| ENSMUSG00000086339 | 11.31922962 | 6.956172438 | 7.767661525 | 7.249119049 | 5.729556691 |
| ENSMUSG00000086340 | 9.196874066 | 12.52111039 | 9.886114669 | 16.10915344 | 16.47247549 |
| ENSMUSG00000086341 | 16.97884443 | 7.651789682 | 10.59226572 | 9.665492065 | 6.445751277 |
| ENSMUSG00000086342 | 48.10672589 | 50.08444155 | 46.60596915 | 53.96566403 | 45.83645353 |
| ENSMUSG00000086344 | 7.074518513 | 12.52111039 | 10.59226572 | 11.27640741 | 10.7429188  |
| ENSMUSG00000086346 | 4.244711108 | 4.173703463 | 7.061510478 | 3.221830688 | 6.445751277 |
| ENSMUSG00000086347 | 27.5906222  | 27.12907251 | 23.30298458 | 55.57657937 | 38.67450766 |
| ENSMUSG00000086348 | 4.952162959 | 4.869320706 | 5.649208382 | 0.805457672 | 9.310529622 |
| ENSMUSG00000086349 | 9.196874066 | 10.43425866 | 10.59226572 | 3.221830688 | 4.297167518 |
| ENSMUSG00000086350 | 35.37259256 | 62.60555194 | 57.90438592 | 53.96566403 | 49.41742646 |
| ENSMUSG00000086352 | 9.196874066 | 7.651789682 | 7.767661525 | 4.832746033 | 11.45911338 |
| ENSMUSG00000086353 | 12.02668147 | 9.738641413 | 13.41686991 | 3.221830688 | 4.297167518 |
| ENSMUSG00000086354 | 8.489422215 | 9.738641413 | 10.59226572 | 12.88732275 | 8.594335036 |
| ENSMUSG00000086355 | 8.489422215 | 4.869320706 | 6.35535943  | 11.27640741 | 7.87814045  |
| ENSMUSG00000086356 | 7.781970364 | 9.043024169 | 4.236906287 | 8.860034393 | 7.161945863 |
| ENSMUSG00000086358 | 15.56394073 | 32.69401046 | 27.53989086 | 21.74735715 | 25.78300511 |
| ENSMUSG00000086359 | 5.65961481  | 3.478086219 | 5.649208382 | 5.638203705 | 8.594335036 |
| ENSMUSG00000086360 | 16.97884443 | 35.47647943 | 43.78136496 | 20.1364418  | 22.20203218 |
| ENSMUSG00000086363 | 6.367066661 | 5.56493795  | 7.061510478 | 7.249119049 | 7.161945863 |
| ENSMUSG00000086364 | 9.196874066 | 7.651789682 | 5.649208382 | 3.221830688 | 6.445751277 |
| ENSMUSG00000086365 | 7.781970364 | 13.91234488 | 13.41686991 | 11.27640741 | 7.87814045  |
| ENSMUSG00000086366 | 8.489422215 | 6.956172438 | 4.236906287 | 8.054576721 | 7.87814045  |
| ENSMUSG00000086367 | 2.122355554 | 3.478086219 | 2.824604191 | 4.832746033 | 4.297167518 |
| ENSMUSG00000086368 | 48.81417774 | 72.34419335 | 58.61053696 | 167.5351958 | 112.4425501 |
| ENSMUSG00000086369 | 9.904325918 | 19.47728283 | 12.00456781 | 6.443661377 | 9.310529622 |
| ENSMUSG00000086370 | 3.537259256 | 9.738641413 | 3.530755239 | 6.443661377 | 11.45911338 |
| ENSMUSG00000086371 | 11.31922962 | 3.478086219 | 8.473812573 | 2.416373016 | 6.445751277 |
| ENSMUSG00000086372 | 11.31922962 | 10.43425866 | 4.943057334 | 4.832746033 | 7.87814045  |
| ENSMUSG00000086373 | 7.074518513 | 4.869320706 | 9.886114669 | 4.02728836  | 7.161945863 |
| ENSMUSG00000086375 | 10.61177777 | 3.478086219 | 5.649208382 | 4.02728836  | 7.161945863 |
| ENSMUSG00000086376 | 108.9475851 | 143.9927695 | 139.1117564 | 93.43308996 | 83.7947666  |
| ENSMUSG00000086377 | 12.73413332 | 6.956172438 | 9.179963621 | 4.832746033 | 5.013362104 |
| ENSMUSG00000086378 | 9.904325918 | 6.956172438 | 5.649208382 | 2.416373016 | 7.87814045  |
| ENSMUSG00000086379 | 9.904325918 | 6.260555194 | 6.35535943  | 5.638203705 | 7.87814045  |
| ENSMUSG00000086380 | 7.781970364 | 9.738641413 | 6.35535943  | 4.832746033 | 7.87814045  |
| ENSMUSG00000086381 | 12.73413332 | 9.738641413 | 7.767661525 | 8.860034393 | 4.297167518 |
| ENSMUSG00000086382 | 4.952162959 | 3.478086219 | 5.649208382 | 4.832746033 | 6.445751277 |
| ENSMUSG00000086384 | 3.537259256 | 9.043024169 | 7.061510478 | 8.860034393 | 11.45911338 |
| ENSMUSG00000086385 | 10.61177777 | 4.173703463 | 8.473812573 | 4.02728836  | 5.729556691 |
| ENSMUSG00000086386 | 10.61177777 | 6.956172438 | 11.29841676 | 10.47094974 | 9.310529622 |
| ENSMUSG00000086387 | 142.905274  | 198.2509145 | 163.120892  | 143.3714656 | 101.6996313 |

|                    |             |             |             |             |             |
|--------------------|-------------|-------------|-------------|-------------|-------------|
| ENSMUSG00000086389 | 5.65961481  | 11.1298759  | 7.767661525 | 4.832746033 | 5.013362104 |
| ENSMUSG00000086390 | 9.196874066 | 12.52111039 | 9.886114669 | 4.02728836  | 10.02672421 |
| ENSMUSG00000086391 | 7.781970364 | 6.956172438 | 8.473812573 | 8.860034393 | 10.02672421 |
| ENSMUSG00000086392 | 20.51610369 | 38.25894841 | 37.42600553 | 22.55281482 | 21.48583759 |
| ENSMUSG00000086394 | 8.489422215 | 4.173703463 | 8.473812573 | 9.665492065 | 5.729556691 |
| ENSMUSG00000086395 | 10.61177777 | 3.478086219 | 4.943057334 | 11.27640741 | 8.594335036 |
| ENSMUSG00000086396 | 5.65961481  | 6.260555194 | 4.943057334 | 8.054576721 | 10.7429188  |
| ENSMUSG00000086399 | 6.367066661 | 4.869320706 | 9.886114669 | 12.08186508 | 2.864778345 |
| ENSMUSG00000086401 | 63.67066661 | 89.73462445 | 95.33039145 | 227.1390635 | 155.4142252 |
| ENSMUSG00000086402 | 11.31922962 | 5.56493795  | 10.59226572 | 8.054576721 | 5.013362104 |
| ENSMUSG00000086404 | 4.952162959 | 11.82549314 | 8.473812573 | 10.47094974 | 12.17530797 |
| ENSMUSG00000086405 | 7.074518513 | 6.260555194 | 7.061510478 | 10.47094974 | 6.445751277 |
| ENSMUSG00000086407 | 45.98437033 | 69.56172438 | 72.02740687 | 87.79488626 | 80.92998826 |
| ENSMUSG00000086408 | 9.904325918 | 4.173703463 | 4.943057334 | 3.221830688 | 12.17530797 |
| ENSMUSG00000086409 | 5.65961481  | 11.82549314 | 10.59226572 | 38.66196826 | 37.95831308 |
| ENSMUSG00000086410 | 25.46826665 | 31.30277597 | 31.0706461  | 25.77464551 | 40.82309142 |
| ENSMUSG00000086411 | 9.196874066 | 6.260555194 | 6.35535943  | 5.638203705 | 10.02672421 |
| ENSMUSG00000086413 | 6.367066661 | 8.347406925 | 9.886114669 | 4.02728836  | 7.161945863 |
| ENSMUSG00000086414 | 12.02668147 | 8.347406925 | 7.767661525 | 10.47094974 | 7.87814045  |
| ENSMUSG00000086415 | 7.781970364 | 6.956172438 | 6.35535943  | 9.665492065 | 5.729556691 |
| ENSMUSG00000086416 | 5.65961481  | 6.956172438 | 6.35535943  | 6.443661377 | 5.013362104 |
| ENSMUSG00000086417 | 6.367066661 | 9.738641413 | 1.412302096 | 5.638203705 | 4.297167518 |
| ENSMUSG00000086418 | 8.489422215 | 8.347406925 | 5.649208382 | 6.443661377 | 7.87814045  |
| ENSMUSG00000086420 | 8.489422215 | 7.651789682 | 5.649208382 | 6.443661377 | 6.445751277 |
| ENSMUSG00000086421 | 8.489422215 | 5.56493795  | 7.767661525 | 10.47094974 | 9.310529622 |
| ENSMUSG00000086422 | 10.61177777 | 6.956172438 | 6.35535943  | 7.249119049 | 7.161945863 |
| ENSMUSG00000086423 | 12.02668147 | 4.869320706 | 9.886114669 | 7.249119049 | 8.594335036 |
| ENSMUSG00000086424 | 263.1720887 | 245.5528871 | 260.5697366 | 126.4568545 | 131.7798039 |
| ENSMUSG00000086425 | 8.489422215 | 3.478086219 | 6.35535943  | 7.249119049 | 8.594335036 |
| ENSMUSG00000086426 | 2.829807405 | 4.869320706 | 6.35535943  | 0           | 2.864778345 |
| ENSMUSG00000086427 | 0           | 0.695617244 | 2.824604191 | 3.221830688 | 4.297167518 |
| ENSMUSG00000086428 | 9.196874066 | 12.52111039 | 9.886114669 | 8.054576721 | 11.45911338 |
| ENSMUSG00000086429 | 145.0276295 | 206.5983214 | 170.1824025 | 346.346799  | 244.9385485 |
| ENSMUSG00000086430 | 11.31922962 | 5.56493795  | 6.35535943  | 7.249119049 | 6.445751277 |
| ENSMUSG00000086431 | 4.952162959 | 6.260555194 | 2.824604191 | 4.832746033 | 4.297167518 |
| ENSMUSG00000086432 | 7.074518513 | 12.52111039 | 9.179963621 | 3.221830688 | 9.310529622 |
| ENSMUSG00000086433 | 35.37259256 | 68.86610713 | 57.90438592 | 41.88379895 | 40.10689684 |
| ENSMUSG00000086434 | 7.781970364 | 14.60796212 | 10.59226572 | 10.47094974 | 10.7429188  |
| ENSMUSG00000086436 | 8.489422215 | 8.347406925 | 9.886114669 | 6.443661377 | 10.02672421 |
| ENSMUSG00000086437 | 10.61177777 | 5.56493795  | 8.473812573 | 4.02728836  | 7.87814045  |
| ENSMUSG00000086438 | 7.074518513 | 9.043024169 | 11.29841676 | 3.221830688 | 8.594335036 |
| ENSMUSG00000086439 | 6.367066661 | 9.043024169 | 7.767661525 | 6.443661377 | 10.02672421 |
| ENSMUSG00000086441 | 7.781970364 | 2.086851731 | 0.706151048 | 2.416373016 | 3.580972932 |

|                    |             |             |             |             |             |
|--------------------|-------------|-------------|-------------|-------------|-------------|
| ENSMUSG00000086442 | 122.3891703 | 164.8612868 | 139.8179075 | 255.3300821 | 206.9802355 |
| ENSMUSG00000086443 | 9.904325918 | 10.43425866 | 9.179963621 | 132.0950582 | 78.7814045  |
| ENSMUSG00000086444 | 10.61177777 | 2.782468975 | 7.061510478 | 4.02728836  | 5.013362104 |
| ENSMUSG00000086445 | 7.781970364 | 3.478086219 | 4.236906287 | 4.02728836  | 8.594335036 |
| ENSMUSG00000086446 | 33.25023701 | 58.43184848 | 52.25517753 | 25.77464551 | 24.35061594 |
| ENSMUSG00000086447 | 10.61177777 | 11.82549314 | 8.473812573 | 8.054576721 | 5.729556691 |
| ENSMUSG00000086448 | 7.074518513 | 9.738641413 | 7.061510478 | 6.443661377 | 6.445751277 |
| ENSMUSG00000086449 | 5.65961481  | 6.956172438 | 8.473812573 | 6.443661377 | 5.729556691 |
| ENSMUSG00000086450 | 7.781970364 | 7.651789682 | 16.94762515 | 6.443661377 | 5.729556691 |
| ENSMUSG00000086451 | 18.39374813 | 43.12826911 | 30.36449505 | 33.02376456 | 42.25548059 |
| ENSMUSG00000086452 | 4.952162959 | 0.695617244 | 6.35535943  | 1.610915344 | 0.716194586 |
| ENSMUSG00000086453 | 30.4204296  | 25.73783802 | 33.18909925 | 78.93485187 | 67.32229112 |
| ENSMUSG00000086454 | 4.952162959 | 4.173703463 | 2.824604191 | 6.443661377 | 2.864778345 |
| ENSMUSG00000086455 | 7.781970364 | 7.651789682 | 5.649208382 | 6.443661377 | 10.7429188  |
| ENSMUSG00000086458 | 11.31922962 | 4.173703463 | 5.649208382 | 4.832746033 | 8.594335036 |
| ENSMUSG00000086459 | 21.22355554 | 26.43345526 | 36.71985448 | 45.91108731 | 35.09353473 |
| ENSMUSG00000086460 | 11.31922962 | 6.956172438 | 9.179963621 | 11.27640741 | 7.87814045  |
| ENSMUSG00000086462 | 8.489422215 | 9.043024169 | 2.824604191 | 2.416373016 | 3.580972932 |
| ENSMUSG00000086464 | 101.1656147 | 136.3409798 | 119.3395271 | 89.4058016  | 84.51096119 |
| ENSMUSG00000086465 | 0           | 0           | 0           | 0           | 0           |
| ENSMUSG00000086467 | 9.904325918 | 4.173703463 | 5.649208382 | 8.054576721 | 4.297167518 |
| ENSMUSG00000086468 | 23.34591109 | 57.04061399 | 42.36906287 | 63.6311561  | 67.32229112 |
| ENSMUSG00000086470 | 5.65961481  | 3.478086219 | 7.061510478 | 5.638203705 | 2.864778345 |
| ENSMUSG00000086472 | 7.781970364 | 6.260555194 | 8.473812573 | 6.443661377 | 9.310529622 |
| ENSMUSG00000086473 | 19.10119998 | 34.78086219 | 31.77679715 | 29.80193387 | 17.90486466 |
| ENSMUSG00000086474 | 9.196874066 | 6.260555194 | 7.061510478 | 4.02728836  | 8.594335036 |
| ENSMUSG00000086475 | 7.781970364 | 5.56493795  | 7.767661525 | 5.638203705 | 6.445751277 |
| ENSMUSG00000086477 | 42.44711108 | 66.08363816 | 55.78593277 | 108.7367857 | 97.40246374 |
| ENSMUSG00000086478 | 10.61177777 | 4.869320706 | 9.886114669 | 4.832746033 | 4.297167518 |
| ENSMUSG00000086479 | 197.3790665 | 232.3361594 | 185.0115745 | 101.4876667 | 87.37573953 |
| ENSMUSG00000086480 | 6.367066661 | 7.651789682 | 7.767661525 | 4.02728836  | 8.594335036 |
| ENSMUSG00000086481 | 12.73413332 | 20.17290007 | 21.18453143 | 18.52552646 | 16.47247549 |
| ENSMUSG00000086482 | 9.196874066 | 4.173703463 | 4.943057334 | 11.27640741 | 7.161945863 |
| ENSMUSG00000086483 | 12.73413332 | 8.347406925 | 7.061510478 | 7.249119049 | 8.594335036 |
| ENSMUSG00000086484 | 3.537259256 | 3.478086219 | 4.943057334 | 4.832746033 | 6.445751277 |
| ENSMUSG00000086485 | 9.196874066 | 6.956172438 | 8.473812573 | 10.47094974 | 7.87814045  |
| ENSMUSG00000086486 | 4.952162959 | 4.173703463 | 8.473812573 | 4.832746033 | 10.02672421 |
| ENSMUSG00000086487 | 7.074518513 | 9.738641413 | 7.767661525 | 4.832746033 | 5.013362104 |
| ENSMUSG00000086489 | 2.829807405 | 1.391234488 | 4.943057334 | 0.805457672 | 4.297167518 |
| ENSMUSG00000086490 | 10.61177777 | 6.956172438 | 7.767661525 | 5.638203705 | 4.297167518 |
| ENSMUSG00000086491 | 7.074518513 | 3.478086219 | 9.886114669 | 7.249119049 | 7.87814045  |
| ENSMUSG00000086493 | 135.8307554 | 133.5585108 | 147.585569  | 141.7605503 | 131.0636093 |
| ENSMUSG00000086494 | 8.489422215 | 4.173703463 | 10.59226572 | 7.249119049 | 4.297167518 |

|                    |             |             |             |             |             |
|--------------------|-------------|-------------|-------------|-------------|-------------|
| ENSMUSG00000086495 | 31.12788146 | 47.99758982 | 50.84287544 | 86.18397091 | 64.45751277 |
| ENSMUSG00000086496 | 3.537259256 | 0           | 0.706151048 | 2.416373016 | 5.013362104 |
| ENSMUSG00000086497 | 9.196874066 | 2.782468975 | 4.236906287 | 4.02728836  | 2.148583759 |
| ENSMUSG00000086498 | 7.781970364 | 9.738641413 | 7.061510478 | 4.02728836  | 7.161945863 |
| ENSMUSG00000086499 | 14.14903703 | 6.956172438 | 7.767661525 | 6.443661377 | 7.161945863 |
| ENSMUSG00000086500 | 8.489422215 | 4.869320706 | 9.179963621 | 3.221830688 | 5.729556691 |
| ENSMUSG00000086501 | 10.61177777 | 4.869320706 | 9.886114669 | 8.860034393 | 7.161945863 |
| ENSMUSG00000086502 | 43.15456293 | 84.1696865  | 62.1412922  | 127.2623122 | 100.2672421 |
| ENSMUSG00000086503 | 2.829807405 | 6.260555194 | 1.412302096 | 3.221830688 | 1.432389173 |
| ENSMUSG00000086504 | 8.489422215 | 16.69481385 | 16.94762515 | 8.054576721 | 9.310529622 |
| ENSMUSG00000086505 | 10.61177777 | 9.738641413 | 8.473812573 | 8.054576721 | 5.013362104 |
| ENSMUSG00000086506 | 45.27691848 | 68.17048989 | 69.20280268 | 46.71654498 | 48.70123187 |
| ENSMUSG00000086507 | 9.196874066 | 6.956172438 | 7.767661525 | 6.443661377 | 7.87814045  |
| ENSMUSG00000086508 | 4.244711108 | 2.782468975 | 2.824604191 | 3.221830688 | 2.864778345 |
| ENSMUSG00000086509 | 7.074518513 | 5.56493795  | 5.649208382 | 3.221830688 | 6.445751277 |
| ENSMUSG00000086512 | 7.781970364 | 8.347406925 | 9.886114669 | 9.665492065 | 7.161945863 |
| ENSMUSG00000086513 | 12.73413332 | 5.56493795  | 7.061510478 | 8.860034393 | 7.161945863 |
| ENSMUSG00000086514 | 7.781970364 | 5.56493795  | 3.530755239 | 9.665492065 | 5.013362104 |
| ENSMUSG00000086515 | 6.367066661 | 7.651789682 | 9.886114669 | 8.054576721 | 5.013362104 |
| ENSMUSG00000086517 | 8.489422215 | 6.260555194 | 0.706151048 | 4.832746033 | 8.594335036 |
| ENSMUSG00000086518 | 11.31922962 | 3.478086219 | 9.886114669 | 6.443661377 | 4.297167518 |
| ENSMUSG00000086519 | 9.196874066 | 6.260555194 | 10.59226572 | 8.054576721 | 9.310529622 |
| ENSMUSG00000086521 | 11.31922962 | 6.260555194 | 9.886114669 | 5.638203705 | 7.161945863 |
| ENSMUSG00000086522 | 6.367066661 | 8.347406925 | 9.886114669 | 1.610915344 | 3.580972932 |
| ENSMUSG00000086523 | 7.781970364 | 6.956172438 | 5.649208382 | 4.832746033 | 8.594335036 |
| ENSMUSG00000086524 | 2.829807405 | 2.782468975 | 4.236906287 | 3.221830688 | 2.148583759 |
| ENSMUSG00000086525 | 8.489422215 | 4.869320706 | 3.530755239 | 1.610915344 | 6.445751277 |
| ENSMUSG00000086526 | 9.196874066 | 9.738641413 | 9.886114669 | 15.30369577 | 8.594335036 |
| ENSMUSG00000086527 | 7.074518513 | 7.651789682 | 8.473812573 | 4.02728836  | 12.89150255 |
| ENSMUSG00000086528 | 8.489422215 | 6.956172438 | 4.236906287 | 4.832746033 | 10.02672421 |
| ENSMUSG00000086529 | 12.73413332 | 7.651789682 | 7.767661525 | 4.02728836  | 3.580972932 |
| ENSMUSG00000086530 | 8.489422215 | 8.347406925 | 8.473812573 | 6.443661377 | 8.594335036 |
| ENSMUSG00000086531 | 9.196874066 | 9.738641413 | 8.473812573 | 9.665492065 | 6.445751277 |
| ENSMUSG00000086533 | 49.52162959 | 63.30116918 | 65.67204744 | 73.29664816 | 65.88990194 |
| ENSMUSG00000086534 | 6.367066661 | 3.478086219 | 6.35535943  | 7.249119049 | 5.729556691 |
| ENSMUSG00000086536 | 9.196874066 | 9.738641413 | 6.35535943  | 5.638203705 | 6.445751277 |
| ENSMUSG00000086537 | 19.10119998 | 22.95536904 | 16.2414741  | 42.68925662 | 37.24211849 |
| ENSMUSG00000086539 | 31.83533331 | 75.12666233 | 62.1412922  | 108.7367857 | 89.52432329 |
| ENSMUSG00000086540 | 2.829807405 | 5.56493795  | 2.118453143 | 3.221830688 | 1.432389173 |
| ENSMUSG00000086541 | 9.196874066 | 4.869320706 | 9.886114669 | 5.638203705 | 4.297167518 |
| ENSMUSG00000086542 | 5.65961481  | 12.52111039 | 12.71071886 | 7.249119049 | 12.17530797 |
| ENSMUSG00000086544 | 10.61177777 | 5.56493795  | 9.179963621 | 4.832746033 | 6.445751277 |
| ENSMUSG00000086545 | 9.904325918 | 20.17290007 | 18.35992724 | 8.054576721 | 11.45911338 |

|                    |             |             |             |             |             |
|--------------------|-------------|-------------|-------------|-------------|-------------|
| ENSMUSG00000086546 | 7.781970364 | 19.47728283 | 13.41686991 | 9.665492065 | 12.89150255 |
| ENSMUSG00000086547 | 7.781970364 | 7.651789682 | 4.236906287 | 6.443661377 | 7.87814045  |
| ENSMUSG00000086548 | 10.61177777 | 8.347406925 | 4.236906287 | 6.443661377 | 5.013362104 |
| ENSMUSG00000086549 | 1.414903703 | 0.695617244 | 0.706151048 | 0           | 0           |
| ENSMUSG00000086550 | 7.781970364 | 4.173703463 | 3.530755239 | 4.02728836  | 7.161945863 |
| ENSMUSG00000086552 | 3.537259256 | 6.260555194 | 7.767661525 | 7.249119049 | 10.02672421 |
| ENSMUSG00000086554 | 12.02668147 | 6.956172438 | 5.649208382 | 10.47094974 | 9.310529622 |
| ENSMUSG00000086555 | 6.367066661 | 4.869320706 | 3.530755239 | 4.02728836  | 7.87814045  |
| ENSMUSG00000086556 | 0           | 0           | 0           | 0           | 0           |
| ENSMUSG00000086557 | 98.33580733 | 121.7330177 | 105.9226572 | 158.6751614 | 123.9016634 |
| ENSMUSG00000086558 | 7.781970364 | 8.347406925 | 4.943057334 | 4.832746033 | 6.445751277 |
| ENSMUSG00000086559 | 1.414903703 | 4.173703463 | 2.118453143 | 1.610915344 | 5.729556691 |
| ENSMUSG00000086560 | 7.781970364 | 4.869320706 | 6.35535943  | 8.054576721 | 5.013362104 |
| ENSMUSG00000086561 | 4.244711108 | 7.651789682 | 7.061510478 | 4.832746033 | 7.161945863 |
| ENSMUSG00000086562 | 5.65961481  | 4.869320706 | 6.35535943  | 1.610915344 | 2.148583759 |
| ENSMUSG00000086563 | 12.73413332 | 8.347406925 | 4.943057334 | 6.443661377 | 7.161945863 |
| ENSMUSG00000086565 | 7.074518513 | 5.56493795  | 5.649208382 | 4.832746033 | 10.02672421 |
| ENSMUSG00000086567 | 4.952162959 | 11.1298759  | 6.35535943  | 2.416373016 | 6.445751277 |
| ENSMUSG00000086568 | 12.02668147 | 11.82549314 | 14.829172   | 20.94189947 | 15.7562809  |
| ENSMUSG00000086569 | 9.196874066 | 9.043024169 | 7.061510478 | 6.443661377 | 7.87814045  |
| ENSMUSG00000086573 | 11.31922962 | 11.82549314 | 4.943057334 | 1.610915344 | 5.013362104 |
| ENSMUSG00000086575 | 35.37259256 | 53.56252777 | 48.01827125 | 66.85298678 | 73.05184781 |
| ENSMUSG00000086576 | 12.73413332 | 8.347406925 | 9.179963621 | 5.638203705 | 10.02672421 |
| ENSMUSG00000086577 | 5.65961481  | 3.478086219 | 7.061510478 | 4.02728836  | 2.148583759 |
| ENSMUSG00000086578 | 9.196874066 | 10.43425866 | 6.35535943  | 7.249119049 | 7.161945863 |
| ENSMUSG00000086580 | 4.244711108 | 7.651789682 | 7.061510478 | 4.832746033 | 2.148583759 |
| ENSMUSG00000086582 | 34.66514071 | 62.60555194 | 61.43514116 | 64.43661377 | 55.14698315 |
| ENSMUSG00000086583 | 13.44158517 | 11.82549314 | 8.473812573 | 20.94189947 | 12.89150255 |
| ENSMUSG00000086584 | 12.02668147 | 3.478086219 | 9.179963621 | 3.221830688 | 7.161945863 |
| ENSMUSG00000086585 | 9.196874066 | 6.956172438 | 9.179963621 | 9.665492065 | 5.013362104 |
| ENSMUSG00000086586 | 13.44158517 | 28.52030699 | 26.12758877 | 24.16373016 | 17.18867007 |
| ENSMUSG00000086587 | 7.781970364 | 6.956172438 | 6.35535943  | 3.221830688 | 5.013362104 |
| ENSMUSG00000086588 | 7.074518513 | 6.260555194 | 5.649208382 | 4.832746033 | 4.297167518 |
| ENSMUSG00000086589 | 18.39374813 | 47.99758982 | 41.66291182 | 30.60739154 | 36.5259239  |
| ENSMUSG00000086591 | 9.904325918 | 2.782468975 | 7.061510478 | 4.832746033 | 7.87814045  |
| ENSMUSG00000086592 | 9.196874066 | 4.869320706 | 8.473812573 | 4.02728836  | 5.729556691 |
| ENSMUSG00000086593 | 11.31922962 | 9.738641413 | 9.179963621 | 9.665492065 | 8.594335036 |
| ENSMUSG00000086594 | 7.781970364 | 6.956172438 | 5.649208382 | 4.832746033 | 4.297167518 |
| ENSMUSG00000086595 | 6.367066661 | 5.56493795  | 12.00456781 | 4.832746033 | 7.87814045  |
| ENSMUSG00000086598 | 9.196874066 | 9.043024169 | 9.886114669 | 7.249119049 | 7.161945863 |
| ENSMUSG00000086600 | 123.0966221 | 155.8182626 | 161.7085899 | 221.5008598 | 157.562809  |
| ENSMUSG00000086601 | 7.074518513 | 8.347406925 | 10.59226572 | 9.665492065 | 8.594335036 |
| ENSMUSG00000086602 | 4.952162959 | 2.782468975 | 5.649208382 | 1.610915344 | 7.161945863 |

|                    |             |             |             |             |             |
|--------------------|-------------|-------------|-------------|-------------|-------------|
| ENSMUSG00000086603 | 104.702874  | 143.9927695 | 118.633376  | 108.7367857 | 102.4158258 |
| ENSMUSG00000086604 | 3.537259256 | 11.82549314 | 9.179963621 | 5.638203705 | 5.013362104 |
| ENSMUSG00000086605 | 16.97884443 | 22.2597518  | 12.71071886 | 15.30369577 | 15.7562809  |
| ENSMUSG00000086606 | 4.244711108 | 5.56493795  | 6.35535943  | 4.832746033 | 6.445751277 |
| ENSMUSG00000086607 | 7.781970364 | 6.956172438 | 3.530755239 | 4.02728836  | 4.297167518 |
| ENSMUSG00000086608 | 12.02668147 | 6.956172438 | 2.824604191 | 6.443661377 | 10.7429188  |
| ENSMUSG00000086610 | 18.39374813 | 21.56413456 | 31.0706461  | 8.860034393 | 17.90486466 |
| ENSMUSG00000086612 | 223.554785  | 260.8564664 | 229.4990905 | 410.7834128 | 284.3292508 |
| ENSMUSG00000086613 | 8.489422215 | 5.56493795  | 5.649208382 | 5.638203705 | 10.02672421 |
| ENSMUSG00000086614 | 7.074518513 | 6.956172438 | 8.473812573 | 7.249119049 | 5.013362104 |
| ENSMUSG00000086617 | 14.14903703 | 11.1298759  | 11.29841676 | 2.416373016 | 7.161945863 |
| ENSMUSG00000086618 | 4.952162959 | 6.956172438 | 2.118453143 | 4.02728836  | 11.45911338 |
| ENSMUSG00000086620 | 9.904325918 | 2.782468975 | 7.061510478 | 7.249119049 | 8.594335036 |
| ENSMUSG00000086621 | 6.367066661 | 4.173703463 | 9.886114669 | 4.832746033 | 6.445751277 |
| ENSMUSG00000086624 | 11.31922962 | 6.260555194 | 4.943057334 | 4.832746033 | 9.310529622 |
| ENSMUSG00000086625 | 10.61177777 | 33.3896277  | 24.00913562 | 16.10915344 | 20.769643   |
| ENSMUSG00000086628 | 133.000948  | 198.9465317 | 177.950064  | 263.3846588 | 197.6697058 |
| ENSMUSG00000086629 | 12.73413332 | 18.08604834 | 19.06607829 | 33.02376456 | 25.78300511 |
| ENSMUSG00000086630 | 11.31922962 | 9.738641413 | 3.530755239 | 7.249119049 | 8.594335036 |
| ENSMUSG00000086631 | 7.074518513 | 9.043024169 | 4.943057334 | 7.249119049 | 4.297167518 |
| ENSMUSG00000086632 | 16.27139258 | 6.956172438 | 9.886114669 | 8.054576721 | 8.594335036 |
| ENSMUSG00000086633 | 12.02668147 | 8.347406925 | 5.649208382 | 8.054576721 | 8.594335036 |
| ENSMUSG00000086636 | 10.61177777 | 8.347406925 | 7.061510478 | 9.665492065 | 8.594335036 |
| ENSMUSG00000086637 | 5.65961481  | 4.173703463 | 10.59226572 | 2.416373016 | 12.89150255 |
| ENSMUSG00000086638 | 9.196874066 | 33.3896277  | 36.71985448 | 20.1364418  | 17.90486466 |
| ENSMUSG00000086641 | 3.537259256 | 2.782468975 | 4.236906287 | 7.249119049 | 2.864778345 |
| ENSMUSG00000086643 | 15.56394073 | 9.738641413 | 12.71071886 | 28.9964762  | 23.63442135 |
| ENSMUSG00000086644 | 11.31922962 | 10.43425866 | 8.473812573 | 4.832746033 | 10.7429188  |
| ENSMUSG00000086645 | 8.489422215 | 16.69481385 | 22.59683353 | 23.35827249 | 19.33725383 |
| ENSMUSG00000086646 | 7.781970364 | 5.56493795  | 4.943057334 | 5.638203705 | 7.161945863 |
| ENSMUSG00000086648 | 7.781970364 | 4.173703463 | 8.473812573 | 5.638203705 | 3.580972932 |
| ENSMUSG00000086649 | 11.31922962 | 7.651789682 | 8.473812573 | 6.443661377 | 7.87814045  |
| ENSMUSG00000086650 | 10.61177777 | 7.651789682 | 6.35535943  | 5.638203705 | 5.729556691 |
| ENSMUSG00000086652 | 4.244711108 | 2.086851731 | 9.179963621 | 3.221830688 | 5.729556691 |
| ENSMUSG00000086653 | 9.904325918 | 4.173703463 | 5.649208382 | 2.416373016 | 9.310529622 |
| ENSMUSG00000086654 | 10.61177777 | 9.738641413 | 14.829172   | 12.08186508 | 9.310529622 |
| ENSMUSG00000086655 | 10.61177777 | 6.260555194 | 8.473812573 | 6.443661377 | 6.445751277 |
| ENSMUSG00000086656 | 14.14903703 | 7.651789682 | 7.061510478 | 13.69278043 | 11.45911338 |
| ENSMUSG00000086657 | 62.96321476 | 111.298759  | 89.68118307 | 71.68573282 | 59.44415067 |
| ENSMUSG00000086658 | 12.02668147 | 6.260555194 | 11.29841676 | 4.832746033 | 5.729556691 |
| ENSMUSG00000086659 | 6.367066661 | 4.869320706 | 9.886114669 | 4.832746033 | 4.297167518 |
| ENSMUSG00000086660 | 2.122355554 | 3.478086219 | 4.236906287 | 1.610915344 | 5.013362104 |
| ENSMUSG00000086662 | 9.904325918 | 3.478086219 | 7.061510478 | 1.610915344 | 10.7429188  |

|                    |             |             |             |             |             |
|--------------------|-------------|-------------|-------------|-------------|-------------|
| ENSMUSG00000086665 | 12.02668147 | 10.43425866 | 12.00456781 | 151.4260424 | 90.95671247 |
| ENSMUSG00000086666 | 6.367066661 | 6.956172438 | 8.473812573 | 4.02728836  | 8.594335036 |
| ENSMUSG00000086667 | 9.196874066 | 4.869320706 | 4.236906287 | 2.416373016 | 2.864778345 |
| ENSMUSG00000086668 | 4.952162959 | 4.869320706 | 9.886114669 | 1.610915344 | 2.148583759 |
| ENSMUSG00000086669 | 154.2245036 | 169.7306075 | 187.8361787 | 219.0844868 | 174.0352845 |
| ENSMUSG00000086670 | 11.31922962 | 8.347406925 | 9.886114669 | 9.665492065 | 6.445751277 |
| ENSMUSG00000086671 | 2.829807405 | 9.043024169 | 3.530755239 | 6.443661377 | 6.445751277 |
| ENSMUSG00000086674 | 8.489422215 | 6.260555194 | 9.886114669 | 8.860034393 | 7.87814045  |
| ENSMUSG00000086675 | 9.904325918 | 9.043024169 | 3.530755239 | 5.638203705 | 5.013362104 |
| ENSMUSG00000086676 | 1.414903703 | 1.391234488 | 5.649208382 | 4.02728836  | 2.148583759 |
| ENSMUSG00000086677 | 7.781970364 | 5.56493795  | 7.061510478 | 6.443661377 | 3.580972932 |
| ENSMUSG00000086679 | 141.4903703 | 211.4676421 | 204.0776528 | 169.1461111 | 141.0903335 |
| ENSMUSG00000086680 | 64.37811846 | 88.34338996 | 101.6857509 | 118.4022778 | 103.1320204 |
| ENSMUSG00000086681 | 12.73413332 | 6.956172438 | 5.649208382 | 6.443661377 | 7.161945863 |
| ENSMUSG00000086682 | 34.66514071 | 63.99678643 | 56.49208382 | 127.2623122 | 93.10529622 |
| ENSMUSG00000086683 | 43.15456293 | 66.08363816 | 56.49208382 | 50.74383334 | 39.39070225 |
| ENSMUSG00000086684 | 7.781970364 | 4.869320706 | 5.649208382 | 4.832746033 | 7.161945863 |
| ENSMUSG00000086685 | 3.537259256 | 6.956172438 | 3.530755239 | 3.221830688 | 3.580972932 |
| ENSMUSG00000086686 | 4.952162959 | 6.956172438 | 5.649208382 | 8.054576721 | 7.87814045  |
| ENSMUSG00000086687 | 0.707451851 | 2.782468975 | 1.412302096 | 0.805457672 | 0           |
| ENSMUSG00000086688 | 7.781970364 | 13.21672763 | 9.886114669 | 6.443661377 | 8.594335036 |
| ENSMUSG00000086689 | 8.489422215 | 11.1298759  | 7.767661525 | 3.221830688 | 6.445751277 |
| ENSMUSG00000086690 | 0           | 0.695617244 | 2.824604191 | 0.805457672 | 2.148583759 |
| ENSMUSG00000086691 | 4.244711108 | 3.478086219 | 7.767661525 | 6.443661377 | 7.87814045  |
| ENSMUSG00000086693 | 89.13893326 | 123.8198694 | 122.1641313 | 167.5351958 | 126.7664418 |
| ENSMUSG00000086694 | 6.367066661 | 8.347406925 | 7.061510478 | 7.249119049 | 7.87814045  |
| ENSMUSG00000086695 | 4.244711108 | 2.086851731 | 25.42143772 | 0.805457672 | 2.148583759 |
| ENSMUSG00000086696 | 6.367066661 | 8.347406925 | 13.41686991 | 7.249119049 | 2.148583759 |
| ENSMUSG00000086697 | 11.31922962 | 6.956172438 | 7.767661525 | 12.88732275 | 7.161945863 |
| ENSMUSG00000086698 | 7.781970364 | 6.260555194 | 8.473812573 | 4.832746033 | 10.02672421 |
| ENSMUSG00000086699 | 11.31922962 | 15.99919661 | 15.53532305 | 7.249119049 | 7.161945863 |
| ENSMUSG00000086700 | 94.09109622 | 153.7314109 | 106.6288082 | 231.1663519 | 184.0620087 |
| ENSMUSG00000086701 | 16.97884443 | 6.260555194 | 4.236906287 | 6.443661377 | 7.87814045  |
| ENSMUSG00000086702 | 7.781970364 | 6.260555194 | 9.179963621 | 4.02728836  | 7.87814045  |
| ENSMUSG00000086703 | 7.781970364 | 9.738641413 | 3.530755239 | 4.832746033 | 5.013362104 |
| ENSMUSG00000086704 | 7.781970364 | 9.043024169 | 6.35535943  | 3.221830688 | 5.729556691 |
| ENSMUSG00000086706 | 12.02668147 | 15.99919661 | 18.35992724 | 8.860034393 | 8.594335036 |
| ENSMUSG00000086707 | 2.122355554 | 7.651789682 | 9.886114669 | 5.638203705 | 11.45911338 |
| ENSMUSG00000086708 | 12.73413332 | 9.043024169 | 2.824604191 | 8.054576721 | 6.445751277 |
| ENSMUSG00000086709 | 3.537259256 | 7.651789682 | 4.943057334 | 5.638203705 | 6.445751277 |
| ENSMUSG00000086710 | 5.65961481  | 6.260555194 | 5.649208382 | 4.832746033 | 10.7429188  |
| ENSMUSG00000086711 | 0           | 0           | 0           | 0           | 0.716194586 |
| ENSMUSG00000086712 | 8.489422215 | 7.651789682 | 9.179963621 | 8.860034393 | 3.580972932 |



|                    |             |             |             |             |             |
|--------------------|-------------|-------------|-------------|-------------|-------------|
| ENSMUSG00000086713 | 9.904325918 | 9.043024169 | 7.061510478 | 5.638203705 | 5.729556691 |
| ENSMUSG00000086714 | 35.37259256 | 54.25814501 | 43.07521391 | 99.87675134 | 68.75468029 |
| ENSMUSG00000086715 | 11.31922962 | 9.738641413 | 7.767661525 | 6.443661377 | 7.87814045  |
| ENSMUSG00000086716 | 11.31922962 | 17.39043109 | 16.2414741  | 11.27640741 | 12.89150255 |
| ENSMUSG00000086717 | 4.952162959 | 8.347406925 | 11.29841676 | 6.443661377 | 9.310529622 |
| ENSMUSG00000086718 | 7.074518513 | 18.08604834 | 14.12302096 | 14.4982381  | 15.7562809  |
| ENSMUSG00000086719 | 19.80865184 | 27.12907251 | 21.89068248 | 42.68925662 | 37.24211849 |
| ENSMUSG00000086720 | 12.02668147 | 2.782468975 | 3.530755239 | 6.443661377 | 4.297167518 |
| ENSMUSG00000086721 | 9.196874066 | 6.260555194 | 7.767661525 | 3.221830688 | 4.297167518 |
| ENSMUSG00000086722 | 8.489422215 | 4.173703463 | 7.767661525 | 5.638203705 | 5.729556691 |
| ENSMUSG00000086724 | 10.61177777 | 4.869320706 | 5.649208382 | 4.02728836  | 5.729556691 |
| ENSMUSG00000086725 | 131.5860443 | 161.3832006 | 149.7040221 | 242.4427593 | 196.9535112 |
| ENSMUSG00000086726 | 10.61177777 | 6.260555194 | 7.061510478 | 4.832746033 | 6.445751277 |
| ENSMUSG00000086728 | 19.80865184 | 29.21592424 | 32.4829482  | 37.05105292 | 37.24211849 |
| ENSMUSG00000086729 | 5.65961481  | 3.478086219 | 4.943057334 | 5.638203705 | 7.87814045  |
| ENSMUSG00000086730 | 4.952162959 | 2.086851731 | 2.824604191 | 4.832746033 | 4.297167518 |
| ENSMUSG00000086731 | 5.65961481  | 4.869320706 | 7.061510478 | 4.832746033 | 2.148583759 |
| ENSMUSG00000086732 | 5.65961481  | 8.347406925 | 5.649208382 | 4.02728836  | 3.580972932 |
| ENSMUSG00000086733 | 6.367066661 | 7.651789682 | 10.59226572 | 6.443661377 | 7.161945863 |
| ENSMUSG00000086735 | 12.02668147 | 29.21592424 | 26.83373982 | 20.94189947 | 23.63442135 |
| ENSMUSG00000086736 | 3.537259256 | 2.782468975 | 2.824604191 | 1.610915344 | 2.148583759 |
| ENSMUSG00000086737 | 6.367066661 | 6.956172438 | 6.35535943  | 4.02728836  | 9.310529622 |
| ENSMUSG00000086738 | 8.489422215 | 4.173703463 | 3.530755239 | 7.249119049 | 7.87814045  |
| ENSMUSG00000086739 | 6.367066661 | 4.173703463 | 8.473812573 | 1.610915344 | 7.161945863 |
| ENSMUSG00000086740 | 9.904325918 | 6.260555194 | 7.767661525 | 9.665492065 | 9.310529622 |
| ENSMUSG00000086741 | 7.074518513 | 4.173703463 | 6.35535943  | 4.02728836  | 7.161945863 |
| ENSMUSG00000086742 | 12.73413332 | 19.47728283 | 16.94762515 | 12.08186508 | 10.02672421 |
| ENSMUSG00000086743 | 9.904325918 | 11.1298759  | 9.886114669 | 8.054576721 | 11.45911338 |
| ENSMUSG00000086744 | 7.074518513 | 6.260555194 | 4.236906287 | 7.249119049 | 11.45911338 |
| ENSMUSG00000086745 | 23.34591109 | 38.95456565 | 40.95676077 | 28.19101852 | 19.33725383 |
| ENSMUSG00000086746 | 6.367066661 | 2.782468975 | 4.943057334 | 3.221830688 | 9.310529622 |
| ENSMUSG00000086748 | 4.952162959 | 4.869320706 | 7.767661525 | 4.02728836  | 3.580972932 |
| ENSMUSG00000086749 | 1.414903703 | 0.695617244 | 0           | 2.416373016 | 1.432389173 |
| ENSMUSG00000086750 | 9.904325918 | 4.173703463 | 9.886114669 | 11.27640741 | 6.445751277 |
| ENSMUSG00000086752 | 7.074518513 | 9.738641413 | 10.59226572 | 4.02728836  | 5.729556691 |
| ENSMUSG00000086753 | 1.414903703 | 3.478086219 | 2.824604191 | 0           | 3.580972932 |
| ENSMUSG00000086754 | 23.34591109 | 45.21512085 | 43.07521391 | 117.5968201 | 85.94335036 |
| ENSMUSG00000086755 | 5.65961481  | 9.738641413 | 9.886114669 | 7.249119049 | 2.864778345 |
| ENSMUSG00000086756 | 36.08004441 | 56.34499675 | 57.19823487 | 60.40932541 | 67.32229112 |
| ENSMUSG00000086757 | 7.074518513 | 1.391234488 | 4.236906287 | 7.249119049 | 4.297167518 |
| ENSMUSG00000086758 | 7.781970364 | 9.043024169 | 7.061510478 | 5.638203705 | 7.87814045  |
| ENSMUSG00000086760 | 9.904325918 | 6.956172438 | 7.061510478 | 1.610915344 | 5.729556691 |
| ENSMUSG00000086761 | 10.61177777 | 9.043024169 | 8.473812573 | 2.416373016 | 4.297167518 |

|                    |             |             |             |             |             |
|--------------------|-------------|-------------|-------------|-------------|-------------|
| ENSMUSG00000086762 | 5.65961481  | 6.260555194 | 6.35535943  | 5.638203705 | 5.729556691 |
| ENSMUSG00000086763 | 9.904325918 | 9.738641413 | 7.767661525 | 7.249119049 | 2.864778345 |
| ENSMUSG00000086764 | 9.196874066 | 3.478086219 | 5.649208382 | 8.054576721 | 5.013362104 |
| ENSMUSG00000086765 | 14.85648888 | 8.347406925 | 8.473812573 | 4.02728836  | 10.7429188  |
| ENSMUSG00000086766 | 48.81417774 | 89.73462445 | 79.7950684  | 40.2728836  | 40.82309142 |
| ENSMUSG00000086767 | 8.489422215 | 11.1298759  | 8.473812573 | 16.10915344 | 12.17530797 |
| ENSMUSG00000086769 | 9.196874066 | 6.260555194 | 4.943057334 | 4.832746033 | 7.87814045  |
| ENSMUSG00000086770 | 5.65961481  | 4.869320706 | 7.767661525 | 1.610915344 | 11.45911338 |
| ENSMUSG00000086771 | 14.14903703 | 4.173703463 | 4.236906287 | 4.832746033 | 8.594335036 |
| ENSMUSG00000086772 | 4.952162959 | 5.56493795  | 3.530755239 | 4.02728836  | 6.445751277 |
| ENSMUSG00000086773 | 12.73413332 | 1.391234488 | 9.886114669 | 5.638203705 | 7.87814045  |
| ENSMUSG00000086774 | 4.952162959 | 6.956172438 | 7.061510478 | 4.02728836  | 5.013362104 |
| ENSMUSG00000086775 | 26.1757185  | 34.78086219 | 25.42143772 | 126.4568545 | 109.5777717 |
| ENSMUSG00000086777 | 8.489422215 | 4.173703463 | 6.35535943  | 8.054576721 | 7.87814045  |
| ENSMUSG00000086779 | 14.14903703 | 26.43345526 | 23.30298458 | 41.88379895 | 24.35061594 |
| ENSMUSG00000086781 | 7.781970364 | 4.869320706 | 3.530755239 | 5.638203705 | 7.87814045  |
| ENSMUSG00000086782 | 23.34591109 | 35.47647943 | 43.07521391 | 30.60739154 | 32.22875639 |
| ENSMUSG00000086783 | 7.781970364 | 9.043024169 | 9.179963621 | 3.221830688 | 7.161945863 |
| ENSMUSG00000086785 | 12.02668147 | 7.651789682 | 7.061510478 | 4.832746033 | 5.013362104 |
| ENSMUSG00000086786 | 103.9954221 | 110.6031418 | 100.2734488 | 49.93837567 | 50.13362104 |
| ENSMUSG00000086788 | 10.61177777 | 2.086851731 | 7.767661525 | 8.860034393 | 5.013362104 |
| ENSMUSG00000086789 | 12.02668147 | 15.30357936 | 7.767661525 | 9.665492065 | 6.445751277 |
| ENSMUSG00000086790 | 9.196874066 | 11.82549314 | 4.943057334 | 5.638203705 | 7.87814045  |
| ENSMUSG00000086791 | 12.02668147 | 4.869320706 | 7.767661525 | 7.249119049 | 5.013362104 |
| ENSMUSG00000086792 | 10.61177777 | 13.91234488 | 9.179963621 | 10.47094974 | 11.45911338 |
| ENSMUSG00000086793 | 12.02668147 | 6.260555194 | 8.473812573 | 4.02728836  | 8.594335036 |
| ENSMUSG00000086794 | 10.61177777 | 6.260555194 | 2.824604191 | 8.054576721 | 10.7429188  |
| ENSMUSG00000086795 | 10.61177777 | 9.043024169 | 10.59226572 | 12.08186508 | 7.161945863 |
| ENSMUSG00000086796 | 12.02668147 | 4.173703463 | 3.530755239 | 7.249119049 | 7.161945863 |
| ENSMUSG00000086798 | 14.85648888 | 11.82549314 | 8.473812573 | 5.638203705 | 7.87814045  |
| ENSMUSG00000086799 | 18.39374813 | 26.43345526 | 22.59683353 | 43.49471429 | 33.66114556 |
| ENSMUSG00000086800 | 3.537259256 | 6.956172438 | 7.767661525 | 7.249119049 | 7.161945863 |
| ENSMUSG00000086801 | 21.22355554 | 41.73703463 | 48.01827125 | 12.88732275 | 20.769643   |
| ENSMUSG00000086804 | 7.074518513 | 7.651789682 | 7.767661525 | 8.860034393 | 5.729556691 |
| ENSMUSG00000086805 | 10.61177777 | 4.173703463 | 4.943057334 | 4.832746033 | 4.297167518 |
| ENSMUSG00000086806 | 9.196874066 | 5.56493795  | 4.943057334 | 11.27640741 | 4.297167518 |
| ENSMUSG00000086807 | 5.65961481  | 6.260555194 | 4.236906287 | 1.610915344 | 2.148583759 |
| ENSMUSG00000086808 | 2.122355554 | 0.695617244 | 1.412302096 | 0           | 1.432389173 |
| ENSMUSG00000086810 | 9.904325918 | 5.56493795  | 8.473812573 | 3.221830688 | 5.013362104 |
| ENSMUSG00000086812 | 6.367066661 | 4.173703463 | 5.649208382 | 4.832746033 | 2.864778345 |
| ENSMUSG00000086813 | 12.02668147 | 11.82549314 | 7.767661525 | 7.249119049 | 7.87814045  |
| ENSMUSG00000086814 | 5.65961481  | 7.651789682 | 7.767661525 | 4.02728836  | 5.729556691 |
| ENSMUSG00000086815 | 4.244711108 | 6.260555194 | 7.767661525 | 8.054576721 | 6.445751277 |

|                    |             |             |             |             |             |
|--------------------|-------------|-------------|-------------|-------------|-------------|
| ENSMUSG00000086816 | 7.074518513 | 6.956172438 | 5.649208382 | 6.443661377 | 7.161945863 |
| ENSMUSG00000086817 | 8.489422215 | 6.956172438 | 4.943057334 | 4.832746033 | 4.297167518 |
| ENSMUSG00000086818 | 5.65961481  | 3.478086219 | 7.061510478 | 1.610915344 | 7.161945863 |
| ENSMUSG00000086819 | 9.196874066 | 5.56493795  | 9.179963621 | 3.221830688 | 5.013362104 |
| ENSMUSG00000086820 | 142.1978221 | 171.121842  | 166.6516473 | 200.5589604 | 184.7782033 |
| ENSMUSG00000086821 | 7.074518513 | 4.869320706 | 4.943057334 | 9.665492065 | 7.87814045  |
| ENSMUSG00000086822 | 2.122355554 | 2.782468975 | 4.236906287 | 3.221830688 | 2.864778345 |
| ENSMUSG00000086823 | 11.31922962 | 8.347406925 | 8.473812573 | 6.443661377 | 6.445751277 |
| ENSMUSG00000086824 | 12.02668147 | 8.347406925 | 9.886114669 | 4.02728836  | 8.594335036 |
| ENSMUSG00000086825 | 19.10119998 | 27.82468975 | 26.12758877 | 13.69278043 | 20.05344842 |
| ENSMUSG00000086826 | 4.952162959 | 7.651789682 | 6.35535943  | 8.054576721 | 6.445751277 |
| ENSMUSG00000086827 | 2.829807405 | 6.260555194 | 9.179963621 | 4.832746033 | 5.729556691 |
| ENSMUSG00000086828 | 43.86201478 | 56.34499675 | 54.37363068 | 105.514955  | 88.80812871 |
| ENSMUSG00000086830 | 8.489422215 | 7.651789682 | 10.59226572 | 4.02728836  | 5.013362104 |
| ENSMUSG00000086831 | 10.61177777 | 9.738641413 | 8.473812573 | 8.860034393 | 9.310529622 |
| ENSMUSG00000086833 | 16.97884443 | 4.869320706 | 5.649208382 | 6.443661377 | 10.7429188  |
| ENSMUSG00000086834 | 9.904325918 | 8.347406925 | 4.943057334 | 10.47094974 | 8.594335036 |
| ENSMUSG00000086835 | 3.537259256 | 3.478086219 | 0.706151048 | 0           | 5.729556691 |
| ENSMUSG00000086836 | 11.31922962 | 22.95536904 | 28.95219296 | 16.10915344 | 29.36397804 |
| ENSMUSG00000086837 | 40.32475552 | 54.25814501 | 55.78593277 | 62.02024075 | 55.86317773 |
| ENSMUSG00000086838 | 9.904325918 | 11.82549314 | 7.767661525 | 5.638203705 | 7.161945863 |
| ENSMUSG00000086839 | 79.94205919 | 123.8198694 | 120.7518292 | 324.5994419 | 247.0871323 |
| ENSMUSG00000086840 | 14.85648888 | 4.869320706 | 8.473812573 | 3.221830688 | 7.161945863 |
| ENSMUSG00000086841 | 0.707451851 | 2.086851731 | 0.706151048 | 0.805457672 | 2.864778345 |
| ENSMUSG00000086842 | 7.781970364 | 8.347406925 | 7.061510478 | 2.416373016 | 5.729556691 |
| ENSMUSG00000086843 | 7.074518513 | 8.347406925 | 4.943057334 | 4.832746033 | 10.02672421 |
| ENSMUSG00000086844 | 8.489422215 | 7.651789682 | 10.59226572 | 6.443661377 | 7.161945863 |
| ENSMUSG00000086845 | 9.196874066 | 7.651789682 | 11.29841676 | 9.665492065 | 7.161945863 |
| ENSMUSG00000086846 | 16.97884443 | 21.56413456 | 31.0706461  | 12.88732275 | 26.49919969 |
| ENSMUSG00000086847 | 7.074518513 | 2.782468975 | 2.824604191 | 7.249119049 | 9.310529622 |
| ENSMUSG00000086849 | 38.20239997 | 57.73623123 | 61.43514116 | 139.3441773 | 127.4826364 |
| ENSMUSG00000086850 | 5.65961481  | 7.651789682 | 5.649208382 | 12.08186508 | 10.7429188  |
| ENSMUSG00000086851 | 6.367066661 | 11.1298759  | 8.473812573 | 4.832746033 | 7.87814045  |
| ENSMUSG00000086852 | 13.44158517 | 5.56493795  | 6.35535943  | 2.416373016 | 5.013362104 |
| ENSMUSG00000086853 | 8.489422215 | 9.043024169 | 8.473812573 | 9.665492065 | 7.161945863 |
| ENSMUSG00000086854 | 8.489422215 | 6.260555194 | 4.943057334 | 5.638203705 | 7.161945863 |
| ENSMUSG00000086855 | 16.97884443 | 6.956172438 | 9.886114669 | 4.02728836  | 8.594335036 |
| ENSMUSG00000086856 | 13.44158517 | 4.173703463 | 7.767661525 | 5.638203705 | 7.87814045  |
| ENSMUSG00000086858 | 12.02668147 | 6.260555194 | 6.35535943  | 4.832746033 | 5.729556691 |
| ENSMUSG00000086859 | 1.414903703 | 1.391234488 | 0           | 2.416373016 | 2.148583759 |
| ENSMUSG00000086860 | 3.537259256 | 4.173703463 | 2.824604191 | 4.02728836  | 2.148583759 |
| ENSMUSG00000086861 | 14.85648888 | 9.738641413 | 6.35535943  | 10.47094974 | 7.87814045  |
| ENSMUSG00000086862 | 21.22355554 | 18.08604834 | 9.886114669 | 13.69278043 | 9.310529622 |

|                    |             |             |             |             |             |
|--------------------|-------------|-------------|-------------|-------------|-------------|
| ENSMUSG00000086863 | 7.781970364 | 11.1298759  | 12.00456781 | 8.860034393 | 11.45911338 |
| ENSMUSG00000086864 | 12.02668147 | 4.869320706 | 4.943057334 | 7.249119049 | 5.013362104 |
| ENSMUSG00000086866 | 8.489422215 | 9.043024169 | 8.473812573 | 4.832746033 | 7.87814045  |
| ENSMUSG00000086867 | 7.781970364 | 6.260555194 | 7.061510478 | 4.832746033 | 7.161945863 |
| ENSMUSG00000086868 | 6.367066661 | 9.043024169 | 7.061510478 | 5.638203705 | 11.45911338 |
| ENSMUSG00000086869 | 0.707451851 | 0.695617244 | 0.706151048 | 0           | 0.716194586 |
| ENSMUSG00000086870 | 7.781970364 | 7.651789682 | 10.59226572 | 4.02728836  | 9.310529622 |
| ENSMUSG00000086872 | 6.367066661 | 9.738641413 | 5.649208382 | 9.665492065 | 8.594335036 |
| ENSMUSG00000086873 | 5.65961481  | 7.651789682 | 6.35535943  | 4.832746033 | 3.580972932 |
| ENSMUSG00000086874 | 9.904325918 | 4.173703463 | 6.35535943  | 4.832746033 | 4.297167518 |
| ENSMUSG00000086875 | 11.31922962 | 5.56493795  | 9.886114669 | 5.638203705 | 7.161945863 |
| ENSMUSG00000086876 | 11.31922962 | 9.043024169 | 9.179963621 | 5.638203705 | 5.013362104 |
| ENSMUSG00000086877 | 8.489422215 | 13.91234488 | 11.29841676 | 33.82922223 | 32.94495097 |
| ENSMUSG00000086879 | 8.489422215 | 5.56493795  | 4.236906287 | 7.249119049 | 7.87814045  |
| ENSMUSG00000086881 | 25.46826665 | 43.12826911 | 36.01370344 | 37.85651059 | 41.53928601 |
| ENSMUSG00000086882 | 6.367066661 | 8.347406925 | 7.767661525 | 10.47094974 | 11.45911338 |
| ENSMUSG00000086883 | 9.196874066 | 7.651789682 | 10.59226572 | 4.02728836  | 10.7429188  |
| ENSMUSG00000086884 | 7.781970364 | 5.56493795  | 7.061510478 | 12.88732275 | 9.310529622 |
| ENSMUSG00000086885 | 12.73413332 | 5.56493795  | 9.179963621 | 3.221830688 | 7.161945863 |
| ENSMUSG00000086886 | 8.489422215 | 16.69481385 | 15.53532305 | 8.054576721 | 10.02672421 |
| ENSMUSG00000086887 | 11.31922962 | 5.56493795  | 9.179963621 | 4.02728836  | 5.729556691 |
| ENSMUSG00000086889 | 118.1444592 | 131.4716591 | 137.6994543 | 133.7059736 | 118.1721067 |
| ENSMUSG00000086890 | 7.781970364 | 7.651789682 | 5.649208382 | 12.08186508 | 10.7429188  |
| ENSMUSG00000086891 | 8.489422215 | 8.347406925 | 6.35535943  | 12.08186508 | 7.161945863 |
| ENSMUSG00000086892 | 7.074518513 | 9.738641413 | 8.473812573 | 4.832746033 | 7.87814045  |
| ENSMUSG00000086893 | 89.84638511 | 120.3417832 | 111.5718655 | 136.9278043 | 127.4826364 |
| ENSMUSG00000086894 | 7.074518513 | 14.60796212 | 10.59226572 | 9.665492065 | 14.32389173 |
| ENSMUSG00000086896 | 11.31922962 | 3.478086219 | 4.943057334 | 1.610915344 | 10.02672421 |
| ENSMUSG00000086898 | 16.27139258 | 25.04222078 | 19.77222934 | 8.860034393 | 20.05344842 |
| ENSMUSG00000086899 | 12.02668147 | 1.391234488 | 5.649208382 | 12.08186508 | 5.013362104 |
| ENSMUSG00000086900 | 8.489422215 | 6.260555194 | 12.00456781 | 4.02728836  | 7.161945863 |
| ENSMUSG00000086902 | 8.489422215 | 6.956172438 | 4.943057334 | 4.832746033 | 7.87814045  |
| ENSMUSG00000086903 | 3.537259256 | 5.56493795  | 4.943057334 | 7.249119049 | 2.864778345 |
| ENSMUSG00000086904 | 6.367066661 | 5.56493795  | 9.179963621 | 3.221830688 | 4.297167518 |
| ENSMUSG00000086905 | 10.61177777 | 5.56493795  | 10.59226572 | 0.805457672 | 3.580972932 |
| ENSMUSG00000086906 | 4.244711108 | 4.173703463 | 5.649208382 | 0.805457672 | 2.148583759 |
| ENSMUSG00000086907 | 11.31922962 | 9.738641413 | 7.767661525 | 5.638203705 | 6.445751277 |
| ENSMUSG00000086908 | 11.31922962 | 9.738641413 | 11.29841676 | 5.638203705 | 9.310529622 |
| ENSMUSG00000086909 | 5.65961481  | 2.782468975 | 2.824604191 | 0.805457672 | 5.013362104 |
| ENSMUSG00000086910 | 6.367066661 | 9.043024169 | 7.767661525 | 9.665492065 | 5.729556691 |
| ENSMUSG00000086911 | 8.489422215 | 5.56493795  | 5.649208382 | 5.638203705 | 2.864778345 |
| ENSMUSG00000086912 | 9.904325918 | 7.651789682 | 3.530755239 | 4.02728836  | 8.594335036 |
| ENSMUSG00000086913 | 8.489422215 | 6.260555194 | 10.59226572 | 10.47094974 | 14.32389173 |

|                    |             |             |             |             |             |
|--------------------|-------------|-------------|-------------|-------------|-------------|
| ENSMUSG00000086914 | 91.26128881 | 122.4286349 | 125.6948865 | 127.2623122 | 106.7129934 |
| ENSMUSG00000086915 | 91.96874066 | 121.7330177 | 101.6857509 | 146.5932963 | 131.7798039 |
| ENSMUSG00000086916 | 16.27139258 | 36.86771392 | 28.95219296 | 21.74735715 | 16.47247549 |
| ENSMUSG00000086917 | 12.73413332 | 8.347406925 | 9.179963621 | 17.72006879 | 13.60769714 |
| ENSMUSG00000086918 | 60.84085921 | 98.77764862 | 81.91352154 | 124.0404815 | 93.82149081 |
| ENSMUSG00000086919 | 5.65961481  | 4.869320706 | 6.35535943  | 4.02728836  | 7.87814045  |
| ENSMUSG00000086920 | 103.9954221 | 116.1680797 | 100.9795998 | 144.1769233 | 123.9016634 |
| ENSMUSG00000086921 | 7.074518513 | 6.260555194 | 4.236906287 | 5.638203705 | 4.297167518 |
| ENSMUSG00000086922 | 51.64398514 | 74.43104508 | 71.32125582 | 39.46742593 | 42.97167518 |
| ENSMUSG00000086923 | 5.65961481  | 6.260555194 | 8.473812573 | 4.02728836  | 12.17530797 |
| ENSMUSG00000086924 | 6.367066661 | 9.043024169 | 5.649208382 | 11.27640741 | 9.310529622 |
| ENSMUSG00000086925 | 16.27139258 | 13.21672763 | 8.473812573 | 8.860034393 | 10.7429188  |
| ENSMUSG00000086926 | 7.074518513 | 7.651789682 | 3.530755239 | 8.054576721 | 5.013362104 |
| ENSMUSG00000086927 | 9.196874066 | 5.56493795  | 7.061510478 | 1.610915344 | 5.729556691 |
| ENSMUSG00000086928 | 10.61177777 | 7.651789682 | 7.061510478 | 4.832746033 | 6.445751277 |
| ENSMUSG00000086929 | 16.97884443 | 22.95536904 | 13.41686991 | 33.82922223 | 18.62105924 |
| ENSMUSG00000086930 | 2.829807405 | 2.086851731 | 8.473812573 | 5.638203705 | 10.02672421 |
| ENSMUSG00000086931 | 9.196874066 | 4.173703463 | 9.179963621 | 4.02728836  | 6.445751277 |
| ENSMUSG00000086932 | 0.707451851 | 2.086851731 | 2.118453143 | 2.416373016 | 1.432389173 |
| ENSMUSG00000086933 | 77.11225179 | 98.77764862 | 130.6379438 | 33.82922223 | 60.16034525 |
| ENSMUSG00000086935 | 4.244711108 | 8.347406925 | 12.71071886 | 8.860034393 | 10.7429188  |
| ENSMUSG00000086936 | 6.367066661 | 5.56493795  | 5.649208382 | 5.638203705 | 4.297167518 |
| ENSMUSG00000086937 | 3.537259256 | 2.782468975 | 2.118453143 | 4.832746033 | 1.432389173 |
| ENSMUSG00000086939 | 9.904325918 | 2.782468975 | 8.473812573 | 5.638203705 | 12.17530797 |
| ENSMUSG00000086940 | 9.904325918 | 8.347406925 | 6.35535943  | 8.860034393 | 11.45911338 |
| ENSMUSG00000086941 | 7.074518513 | 0.695617244 | 9.179963621 | 4.02728836  | 5.729556691 |
| ENSMUSG00000086942 | 62.25576291 | 63.30116918 | 56.49208382 | 142.566008  | 84.51096119 |
| ENSMUSG00000086943 | 9.196874066 | 6.260555194 | 13.41686991 | 9.665492065 | 8.594335036 |
| ENSMUSG00000086944 | 203.7461332 | 254.5959112 | 214.6699185 | 173.1733995 | 156.1304198 |
| ENSMUSG00000086945 | 5.65961481  | 6.260555194 | 4.236906287 | 7.249119049 | 5.013362104 |
| ENSMUSG00000086946 | 10.61177777 | 9.043024169 | 11.29841676 | 10.47094974 | 6.445751277 |
| ENSMUSG00000086947 | 12.02668147 | 3.478086219 | 5.649208382 | 3.221830688 | 5.013362104 |
| ENSMUSG00000086948 | 2.829807405 | 6.260555194 | 6.35535943  | 0.805457672 | 3.580972932 |
| ENSMUSG00000086949 | 7.781970364 | 7.651789682 | 7.061510478 | 8.054576721 | 6.445751277 |
| ENSMUSG00000086951 | 7.074518513 | 3.478086219 | 7.767661525 | 4.832746033 | 9.310529622 |
| ENSMUSG00000086952 | 9.196874066 | 9.043024169 | 5.649208382 | 8.054576721 | 7.161945863 |
| ENSMUSG00000086953 | 56.5961481  | 76.51789682 | 75.55816211 | 65.24207144 | 58.72795608 |
| ENSMUSG00000086954 | 8.489422215 | 6.260555194 | 7.767661525 | 7.249119049 | 10.02672421 |
| ENSMUSG00000086955 | 6.367066661 | 4.173703463 | 3.530755239 | 5.638203705 | 9.310529622 |
| ENSMUSG00000086957 | 2.829807405 | 3.478086219 | 4.943057334 | 7.249119049 | 8.594335036 |
| ENSMUSG00000086959 | 2.122355554 | 3.478086219 | 4.236906287 | 1.610915344 | 4.297167518 |
| ENSMUSG00000086960 | 5.65961481  | 5.56493795  | 8.473812573 | 8.860034393 | 7.161945863 |
| ENSMUSG00000086961 | 1.414903703 | 2.086851731 | 1.412302096 | 4.832746033 | 2.148583759 |

|                    |             |             |             |             |             |
|--------------------|-------------|-------------|-------------|-------------|-------------|
| ENSMUSG00000086962 | 9.196874066 | 9.738641413 | 4.943057334 | 8.860034393 | 9.310529622 |
| ENSMUSG00000086963 | 10.61177777 | 11.82549314 | 14.12302096 | 4.832746033 | 7.87814045  |
| ENSMUSG00000086964 | 5.65961481  | 5.56493795  | 4.943057334 | 5.638203705 | 5.013362104 |
| ENSMUSG00000086967 | 18.39374813 | 38.25894841 | 21.18453143 | 54.7711217  | 40.82309142 |
| ENSMUSG00000086968 | 4.244711108 | 10.43425866 | 3.530755239 | 8.054576721 | 5.729556691 |
| ENSMUSG00000086969 | 9.904325918 | 8.347406925 | 7.767661525 | 4.02728836  | 12.89150255 |
| ENSMUSG00000086970 | 7.074518513 | 7.651789682 | 7.767661525 | 6.443661377 | 4.297167518 |
| ENSMUSG00000086971 | 9.904325918 | 6.956172438 | 4.943057334 | 4.832746033 | 8.594335036 |
| ENSMUSG00000086974 | 4.952162959 | 6.260555194 | 2.118453143 | 3.221830688 | 5.729556691 |
| ENSMUSG00000086975 | 11.31922962 | 7.651789682 | 7.061510478 | 8.054576721 | 7.87814045  |
| ENSMUSG00000086976 | 5.65961481  | 9.738641413 | 7.061510478 | 6.443661377 | 8.594335036 |
| ENSMUSG00000086978 | 8.489422215 | 4.869320706 | 5.649208382 | 4.832746033 | 4.297167518 |
| ENSMUSG00000086980 | 6.367066661 | 3.478086219 | 7.061510478 | 7.249119049 | 8.594335036 |
| ENSMUSG00000086981 | 9.904325918 | 4.869320706 | 7.061510478 | 8.054576721 | 5.729556691 |
| ENSMUSG00000086984 | 7.781970364 | 7.651789682 | 7.061510478 | 8.054576721 | 10.7429188  |
| ENSMUSG00000086986 | 8.489422215 | 13.91234488 | 21.89068248 | 5.638203705 | 7.161945863 |
| ENSMUSG00000086987 | 7.781970364 | 6.260555194 | 4.943057334 | 2.416373016 | 5.013362104 |
| ENSMUSG00000086989 | 7.074518513 | 2.782468975 | 7.061510478 | 0.805457672 | 7.87814045  |
| ENSMUSG00000086991 | 101.8730666 | 120.3417832 | 124.9887355 | 115.1804471 | 103.1320204 |
| ENSMUSG00000086992 | 9.196874066 | 2.086851731 | 9.179963621 | 3.221830688 | 7.87814045  |
| ENSMUSG00000086993 | 72.86754068 | 96.69079689 | 84.03197468 | 136.9278043 | 121.0368851 |
| ENSMUSG00000086994 | 48.10672589 | 45.21512085 | 52.96132858 | 56.38203705 | 49.41742646 |
| ENSMUSG00000086995 | 5.65961481  | 6.260555194 | 7.061510478 | 8.054576721 | 7.161945863 |
| ENSMUSG00000086996 | 9.904325918 | 4.173703463 | 9.886114669 | 4.02728836  | 0.716194586 |
| ENSMUSG00000086997 | 3.537259256 | 6.956172438 | 6.35535943  | 12.88732275 | 12.89150255 |
| ENSMUSG00000086998 | 3.537259256 | 2.782468975 | 2.824604191 | 0.805457672 | 3.580972932 |
| ENSMUSG00000086999 | 5.65961481  | 6.260555194 | 9.886114669 | 8.054576721 | 5.013362104 |
| ENSMUSG00000087001 | 4.952162959 | 6.956172438 | 4.236906287 | 4.02728836  | 6.445751277 |
| ENSMUSG00000087002 | 7.074518513 | 8.347406925 | 4.943057334 | 4.02728836  | 6.445751277 |
| ENSMUSG00000087003 | 8.489422215 | 6.260555194 | 7.061510478 | 8.054576721 | 7.161945863 |
| ENSMUSG00000087004 | 10.61177777 | 6.260555194 | 9.179963621 | 9.665492065 | 6.445751277 |
| ENSMUSG00000087007 | 4.952162959 | 4.869320706 | 7.767661525 | 4.832746033 | 5.013362104 |
| ENSMUSG00000087008 | 7.074518513 | 6.260555194 | 6.35535943  | 7.249119049 | 7.87814045  |
| ENSMUSG00000087009 | 8.489422215 | 3.478086219 | 7.061510478 | 8.054576721 | 7.87814045  |
| ENSMUSG00000087010 | 11.31922962 | 11.82549314 | 5.649208382 | 4.02728836  | 6.445751277 |
| ENSMUSG00000087011 | 7.781970364 | 2.782468975 | 4.943057334 | 6.443661377 | 4.297167518 |
| ENSMUSG00000087012 | 10.61177777 | 7.651789682 | 6.35535943  | 8.860034393 | 5.729556691 |
| ENSMUSG00000087013 | 6.367066661 | 3.478086219 | 7.061510478 | 9.665492065 | 6.445751277 |
| ENSMUSG00000087014 | 11.31922962 | 7.651789682 | 9.179963621 | 7.249119049 | 11.45911338 |
| ENSMUSG00000087015 | 7.781970364 | 2.782468975 | 8.473812573 | 6.443661377 | 11.45911338 |
| ENSMUSG00000087016 | 7.781970364 | 15.30357936 | 8.473812573 | 8.054576721 | 5.729556691 |
| ENSMUSG00000087017 | 26.1757185  | 47.30197258 | 38.13215658 | 62.02024075 | 42.97167518 |
| ENSMUSG00000087018 | 7.074518513 | 6.956172438 | 10.59226572 | 7.249119049 | 9.310529622 |

|                    |             |             |             |             |             |
|--------------------|-------------|-------------|-------------|-------------|-------------|
| ENSMUSG00000087020 | 16.97884443 | 31.30277597 | 23.30298458 | 36.24559524 | 36.5259239  |
| ENSMUSG00000087021 | 4.244711108 | 4.869320706 | 2.118453143 | 0.805457672 | 5.013362104 |
| ENSMUSG00000087022 | 7.074518513 | 5.56493795  | 5.649208382 | 3.221830688 | 5.729556691 |
| ENSMUSG00000087024 | 5.65961481  | 4.173703463 | 2.118453143 | 1.610915344 | 1.432389173 |
| ENSMUSG00000087026 | 12.73413332 | 13.91234488 | 13.41686991 | 8.054576721 | 13.60769714 |
| ENSMUSG00000087027 | 8.489422215 | 4.173703463 | 6.35535943  | 3.221830688 | 5.729556691 |
| ENSMUSG00000087028 | 8.489422215 | 1.391234488 | 4.943057334 | 5.638203705 | 7.161945863 |
| ENSMUSG00000087029 | 5.65961481  | 3.478086219 | 7.767661525 | 11.27640741 | 7.87814045  |
| ENSMUSG00000087030 | 9.196874066 | 7.651789682 | 7.061510478 | 6.443661377 | 7.87814045  |
| ENSMUSG00000087031 | 6.367066661 | 17.39043109 | 14.12302096 | 2.416373016 | 10.02672421 |
| ENSMUSG00000087032 | 9.196874066 | 11.1298759  | 9.179963621 | 4.02728836  | 7.87814045  |
| ENSMUSG00000087033 | 4.952162959 | 5.56493795  | 18.35992724 | 5.638203705 | 8.594335036 |
| ENSMUSG00000087034 | 12.02668147 | 8.347406925 | 7.767661525 | 6.443661377 | 6.445751277 |
| ENSMUSG00000087035 | 6.367066661 | 5.56493795  | 7.061510478 | 3.221830688 | 7.87814045  |
| ENSMUSG00000087036 | 17.68629628 | 16.69481385 | 16.94762515 | 12.08186508 | 17.18867007 |
| ENSMUSG00000087037 | 11.31922962 | 3.478086219 | 5.649208382 | 5.638203705 | 9.310529622 |
| ENSMUSG00000087038 | 9.196874066 | 9.043024169 | 12.00456781 | 4.832746033 | 10.7429188  |
| ENSMUSG00000087039 | 12.02668147 | 6.956172438 | 7.767661525 | 7.249119049 | 5.729556691 |
| ENSMUSG00000087040 | 7.074518513 | 9.043024169 | 9.179963621 | 6.443661377 | 2.148583759 |
| ENSMUSG00000087041 | 0           | 2.782468975 | 1.412302096 | 3.221830688 | 1.432389173 |
| ENSMUSG00000087042 | 6.367066661 | 7.651789682 | 4.943057334 | 8.054576721 | 10.02672421 |
| ENSMUSG00000087043 | 9.196874066 | 6.956172438 | 7.061510478 | 3.221830688 | 6.445751277 |
| ENSMUSG00000087044 | 7.781970364 | 5.56493795  | 9.886114669 | 6.443661377 | 4.297167518 |
| ENSMUSG00000087045 | 3.537259256 | 2.782468975 | 5.649208382 | 6.443661377 | 10.02672421 |
| ENSMUSG00000087047 | 10.61177777 | 8.347406925 | 8.473812573 | 12.08186508 | 8.594335036 |
| ENSMUSG00000087049 | 240.5336294 | 249.7265905 | 283.8727212 | 129.6786852 | 100.9834367 |
| ENSMUSG00000087050 | 8.489422215 | 14.60796212 | 12.71071886 | 17.72006879 | 7.87814045  |
| ENSMUSG00000087051 | 7.781970364 | 13.21672763 | 8.473812573 | 7.249119049 | 7.161945863 |
| ENSMUSG00000087052 | 7.074518513 | 8.347406925 | 7.767661525 | 5.638203705 | 10.02672421 |
| ENSMUSG00000087053 | 4.244711108 | 3.478086219 | 5.649208382 | 4.832746033 | 4.297167518 |
| ENSMUSG00000087054 | 7.074518513 | 4.173703463 | 3.530755239 | 4.02728836  | 5.013362104 |
| ENSMUSG00000087055 | 11.31922962 | 12.52111039 | 9.886114669 | 7.249119049 | 8.594335036 |
| ENSMUSG00000087056 | 14.14903703 | 11.82549314 | 4.943057334 | 6.443661377 | 5.013362104 |
| ENSMUSG00000087057 | 7.074518513 | 4.869320706 | 7.767661525 | 6.443661377 | 7.87814045  |
| ENSMUSG00000087058 | 9.196874066 | 11.82549314 | 7.767661525 | 12.88732275 | 6.445751277 |
| ENSMUSG00000087059 | 8.489422215 | 3.478086219 | 4.943057334 | 8.054576721 | 10.7429188  |
| ENSMUSG00000087060 | 21.22355554 | 27.82468975 | 19.77222934 | 28.19101852 | 26.49919969 |
| ENSMUSG00000087061 | 7.074518513 | 7.651789682 | 9.886114669 | 5.638203705 | 5.729556691 |
| ENSMUSG00000087062 | 4.952162959 | 3.478086219 | 0.706151048 | 2.416373016 | 4.297167518 |
| ENSMUSG00000087063 | 9.196874066 | 11.82549314 | 8.473812573 | 9.665492065 | 7.161945863 |
| ENSMUSG00000087064 | 42.44711108 | 68.17048989 | 54.37363068 | 28.9964762  | 44.40406435 |
| ENSMUSG00000087066 | 7.781970364 | 17.39043109 | 14.12302096 | 10.47094974 | 7.161945863 |
| ENSMUSG00000087067 | 7.074518513 | 8.347406925 | 8.473812573 | 3.221830688 | 10.7429188  |

|                   |             |             |             |             |             |
|-------------------|-------------|-------------|-------------|-------------|-------------|
| ENSMUSG0000087069 | 7.781970364 | 6.956172438 | 7.061510478 | 1.610915344 | 7.161945863 |
| ENSMUSG0000087070 | 7.074518513 | 6.956172438 | 4.943057334 | 3.221830688 | 7.161945863 |
| ENSMUSG0000087071 | 5.65961481  | 2.086851731 | 4.943057334 | 8.054576721 | 5.013362104 |
| ENSMUSG0000087072 | 52.35143699 | 72.34419335 | 67.79050059 | 40.2728836  | 50.13362104 |
| ENSMUSG0000087074 | 4.952162959 | 2.782468975 | 3.530755239 | 6.443661377 | 6.445751277 |
| ENSMUSG0000087076 | 13.44158517 | 10.43425866 | 16.2414741  | 5.638203705 | 11.45911338 |
| ENSMUSG0000087077 | 13.44158517 | 6.260555194 | 6.35535943  | 8.054576721 | 4.297167518 |
| ENSMUSG0000087079 | 8.489422215 | 4.869320706 | 12.00456781 | 6.443661377 | 9.310529622 |
| ENSMUSG0000087080 | 7.074518513 | 1.391234488 | 4.943057334 | 6.443661377 | 2.864778345 |
| ENSMUSG0000087082 | 14.85648888 | 11.82549314 | 9.886114669 | 9.665492065 | 11.45911338 |
| ENSMUSG0000087083 | 9.196874066 | 4.173703463 | 6.35535943  | 10.47094974 | 4.297167518 |
| ENSMUSG0000087084 | 10.61177777 | 4.869320706 | 7.767661525 | 3.221830688 | 5.729556691 |
| ENSMUSG0000087085 | 8.489422215 | 6.260555194 | 4.943057334 | 7.249119049 | 12.17530797 |
| ENSMUSG0000087086 | 7.781970364 | 9.043024169 | 5.649208382 | 4.02728836  | 10.02672421 |
| ENSMUSG0000087088 | 55.88869625 | 88.34338996 | 73.43970897 | 64.43661377 | 74.48423698 |
| ENSMUSG0000087089 | 12.73413332 | 8.347406925 | 7.061510478 | 6.443661377 | 5.729556691 |
| ENSMUSG0000087090 | 7.781970364 | 6.260555194 | 5.649208382 | 7.249119049 | 6.445751277 |
| ENSMUSG0000087093 | 6.367066661 | 8.347406925 | 7.061510478 | 6.443661377 | 7.161945863 |
| ENSMUSG0000087094 | 3.537259256 | 5.56493795  | 8.473812573 | 5.638203705 | 11.45911338 |
| ENSMUSG0000087095 | 10.61177777 | 4.869320706 | 6.35535943  | 4.02728836  | 8.594335036 |
| ENSMUSG0000087097 | 6.367066661 | 4.173703463 | 4.236906287 | 4.02728836  | 9.310529622 |
| ENSMUSG0000087098 | 11.31922962 | 6.956172438 | 4.943057334 | 1.610915344 | 7.87814045  |
| ENSMUSG0000087099 | 12.02668147 | 5.56493795  | 6.35535943  | 7.249119049 | 9.310529622 |
| ENSMUSG0000087100 | 9.196874066 | 8.347406925 | 5.649208382 | 7.249119049 | 6.445751277 |
| ENSMUSG0000087102 | 11.31922962 | 5.56493795  | 7.061510478 | 4.832746033 | 3.580972932 |
| ENSMUSG0000087103 | 9.196874066 | 6.956172438 | 9.179963621 | 4.02728836  | 7.87814045  |
| ENSMUSG0000087104 | 10.61177777 | 6.956172438 | 12.71071886 | 4.02728836  | 11.45911338 |
| ENSMUSG0000087106 | 5.65961481  | 13.21672763 | 7.061510478 | 4.832746033 | 3.580972932 |
| ENSMUSG0000087107 | 41.03220737 | 57.73623123 | 48.01827125 | 220.6954022 | 151.8332523 |
| ENSMUSG0000087108 | 18.39374813 | 26.43345526 | 27.53989086 | 13.69278043 | 20.05344842 |
| ENSMUSG0000087109 | 9.196874066 | 8.347406925 | 9.179963621 | 6.443661377 | 7.161945863 |
| ENSMUSG0000087110 | 13.44158517 | 8.347406925 | 8.473812573 | 6.443661377 | 6.445751277 |
| ENSMUSG0000087111 | 157.7617628 | 112.6899935 | 122.8702823 | 93.43308996 | 105.2806042 |
| ENSMUSG0000087112 | 10.61177777 | 8.347406925 | 8.473812573 | 2.416373016 | 8.594335036 |
| ENSMUSG0000087113 | 41.73965922 | 79.99598303 | 58.61053696 | 24.16373016 | 30.79636721 |
| ENSMUSG0000087114 | 12.02668147 | 5.56493795  | 4.943057334 | 5.638203705 | 4.297167518 |
| ENSMUSG0000087115 | 11.31922962 | 3.478086219 | 2.824604191 | 6.443661377 | 5.013362104 |
| ENSMUSG0000087116 | 7.074518513 | 6.260555194 | 8.473812573 | 5.638203705 | 8.594335036 |
| ENSMUSG0000087117 | 7.781970364 | 6.260555194 | 13.41686991 | 8.860034393 | 7.87814045  |
| ENSMUSG0000087119 | 7.781970364 | 7.651789682 | 4.943057334 | 4.02728836  | 9.310529622 |
| ENSMUSG0000087120 | 96.92090362 | 123.8198694 | 91.09348516 | 190.8934683 | 149.6846685 |
| ENSMUSG0000087121 | 7.781970364 | 9.043024169 | 6.35535943  | 3.221830688 | 8.594335036 |
| ENSMUSG0000087122 | 12.73413332 | 15.99919661 | 20.47838039 | 8.860034393 | 12.89150255 |



|                    |             |             |             |             |             |
|--------------------|-------------|-------------|-------------|-------------|-------------|
| ENSMUSG00000087123 | 12.73413332 | 8.347406925 | 6.35535943  | 8.054576721 | 8.594335036 |
| ENSMUSG00000087124 | 6.367066661 | 9.043024169 | 7.061510478 | 8.054576721 | 7.87814045  |
| ENSMUSG00000087125 | 4.952162959 | 10.43425866 | 10.59226572 | 12.08186508 | 5.729556691 |
| ENSMUSG00000087127 | 13.44158517 | 4.869320706 | 5.649208382 | 6.443661377 | 4.297167518 |
| ENSMUSG00000087128 | 7.781970364 | 9.738641413 | 11.29841676 | 10.47094974 | 11.45911338 |
| ENSMUSG00000087129 | 325.4278516 | 319.2883149 | 320.5925757 | 269.0228625 | 203.3992625 |
| ENSMUSG00000087131 | 89.84638511 | 118.2549314 | 110.8657145 | 60.40932541 | 65.17370736 |
| ENSMUSG00000087132 | 7.781970364 | 6.956172438 | 3.530755239 | 8.860034393 | 7.87814045  |
| ENSMUSG00000087133 | 3.537259256 | 0.695617244 | 2.118453143 | 0           | 0           |
| ENSMUSG00000087135 | 5.65961481  | 13.91234488 | 5.649208382 | 5.638203705 | 9.310529622 |
| ENSMUSG00000087136 | 9.196874066 | 6.956172438 | 1.412302096 | 5.638203705 | 7.161945863 |
| ENSMUSG00000087137 | 6.367066661 | 4.173703463 | 5.649208382 | 5.638203705 | 4.297167518 |
| ENSMUSG00000087138 | 24.76081479 | 41.73703463 | 42.36906287 | 176.3952302 | 137.5093606 |
| ENSMUSG00000087139 | 7.781970364 | 2.782468975 | 7.061510478 | 7.249119049 | 9.310529622 |
| ENSMUSG00000087140 | 10.61177777 | 7.651789682 | 9.886114669 | 7.249119049 | 5.729556691 |
| ENSMUSG00000087142 | 9.196874066 | 10.43425866 | 6.35535943  | 7.249119049 | 7.87814045  |
| ENSMUSG00000087143 | 12.73413332 | 4.173703463 | 5.649208382 | 4.02728836  | 3.580972932 |
| ENSMUSG00000087144 | 9.904325918 | 6.956172438 | 4.943057334 | 5.638203705 | 4.297167518 |
| ENSMUSG00000087145 | 5.65961481  | 10.43425866 | 11.29841676 | 6.443661377 | 6.445751277 |
| ENSMUSG00000087146 | 4.952162959 | 5.56493795  | 6.35535943  | 0.805457672 | 5.729556691 |
| ENSMUSG00000087147 | 9.196874066 | 7.651789682 | 7.767661525 | 5.638203705 | 9.310529622 |
| ENSMUSG00000087148 | 12.73413332 | 6.260555194 | 9.886114669 | 8.054576721 | 5.013362104 |
| ENSMUSG00000087149 | 2.122355554 | 1.391234488 | 5.649208382 | 2.416373016 | 3.580972932 |
| ENSMUSG00000087150 | 16.97884443 | 48.69320706 | 29.65834401 | 23.35827249 | 25.06681052 |
| ENSMUSG00000087151 | 11.31922962 | 18.78166558 | 13.41686991 | 4.832746033 | 13.60769714 |
| ENSMUSG00000087152 | 4.952162959 | 4.173703463 | 3.530755239 | 4.02728836  | 4.297167518 |
| ENSMUSG00000087155 | 4.244711108 | 4.869320706 | 2.824604191 | 3.221830688 | 7.87814045  |
| ENSMUSG00000087157 | 9.196874066 | 5.56493795  | 5.649208382 | 7.249119049 | 6.445751277 |
| ENSMUSG00000087158 | 11.31922962 | 6.260555194 | 8.473812573 | 4.02728836  | 7.161945863 |
| ENSMUSG00000087159 | 7.074518513 | 15.99919661 | 15.53532305 | 28.9964762  | 28.64778345 |
| ENSMUSG00000087160 | 7.781970364 | 13.21672763 | 6.35535943  | 12.08186508 | 9.310529622 |
| ENSMUSG00000087162 | 6.367066661 | 3.478086219 | 9.179963621 | 4.02728836  | 4.297167518 |
| ENSMUSG00000087163 | 16.97884443 | 25.04222078 | 23.30298458 | 20.1364418  | 22.91822676 |
| ENSMUSG00000087164 | 9.904325918 | 5.56493795  | 4.236906287 | 8.860034393 | 7.161945863 |
| ENSMUSG00000087165 | 32.54278516 | 52.86691053 | 46.60596915 | 51.54929101 | 56.57937232 |
| ENSMUSG00000087167 | 9.904325918 | 6.956172438 | 4.943057334 | 3.221830688 | 7.87814045  |
| ENSMUSG00000087168 | 14.85648888 | 30.60715873 | 22.59683353 | 28.9964762  | 25.78300511 |
| ENSMUSG00000087170 | 10.61177777 | 3.478086219 | 8.473812573 | 4.832746033 | 10.02672421 |
| ENSMUSG00000087171 | 9.904325918 | 8.347406925 | 6.35535943  | 5.638203705 | 2.864778345 |
| ENSMUSG00000087172 | 9.196874066 | 9.043024169 | 9.179963621 | 6.443661377 | 10.02672421 |
| ENSMUSG00000087173 | 12.02668147 | 4.869320706 | 9.886114669 | 7.249119049 | 7.87814045  |
| ENSMUSG00000087174 | 10.61177777 | 19.47728283 | 14.829172   | 52.35474869 | 38.67450766 |
| ENSMUSG00000087175 | 79.94205919 | 113.3856107 | 87.56272992 | 117.5968201 | 85.22715578 |

|                    |             |             |             |             |             |
|--------------------|-------------|-------------|-------------|-------------|-------------|
| ENSMUSG00000087176 | 19.80865184 | 26.43345526 | 20.47838039 | 16.91461111 | 15.7562809  |
| ENSMUSG00000087177 | 24.05336294 | 37.56333116 | 33.89525029 | 72.49119049 | 60.87653984 |
| ENSMUSG00000087178 | 57.30359995 | 72.34419335 | 68.49665163 | 131.2896006 | 116.7397176 |
| ENSMUSG00000087179 | 19.10119998 | 27.82468975 | 21.18453143 | 29.80193387 | 27.93158887 |
| ENSMUSG00000087180 | 10.61177777 | 7.651789682 | 13.41686991 | 4.02728836  | 6.445751277 |
| ENSMUSG00000087181 | 182.5225776 | 255.2915285 | 185.7177256 | 113.5695318 | 105.9967988 |
| ENSMUSG00000087184 | 5.65961481  | 7.651789682 | 7.767661525 | 5.638203705 | 10.02672421 |
| ENSMUSG00000087185 | 5.65961481  | 5.56493795  | 6.35535943  | 4.02728836  | 7.161945863 |
| ENSMUSG00000087187 | 4.952162959 | 4.173703463 | 4.236906287 | 8.054576721 | 2.864778345 |
| ENSMUSG00000087190 | 67.91537772 | 91.82147618 | 83.32582364 | 139.3441773 | 103.848215  |
| ENSMUSG00000087192 | 12.02668147 | 9.043024169 | 4.236906287 | 8.054576721 | 6.445751277 |
| ENSMUSG00000087193 | 6.367066661 | 2.086851731 | 3.530755239 | 4.02728836  | 4.297167518 |
| ENSMUSG00000087195 | 10.61177777 | 11.1298759  | 3.530755239 | 13.69278043 | 6.445751277 |
| ENSMUSG00000087196 | 7.781970364 | 2.782468975 | 12.00456781 | 3.221830688 | 5.013362104 |
| ENSMUSG00000087197 | 6.367066661 | 3.478086219 | 7.767661525 | 8.054576721 | 7.161945863 |
| ENSMUSG00000087198 | 12.02668147 | 13.21672763 | 14.12302096 | 12.08186508 | 12.17530797 |
| ENSMUSG00000087199 | 14.14903703 | 11.1298759  | 10.59226572 | 7.249119049 | 8.594335036 |
| ENSMUSG00000087200 | 11.31922962 | 6.956172438 | 11.29841676 | 12.08186508 | 9.310529622 |
| ENSMUSG00000087201 | 4.244711108 | 9.043024169 | 3.530755239 | 4.832746033 | 5.013362104 |
| ENSMUSG00000087202 | 7.781970364 | 8.347406925 | 11.29841676 | 7.249119049 | 6.445751277 |
| ENSMUSG00000087203 | 7.781970364 | 8.347406925 | 8.473812573 | 5.638203705 | 7.161945863 |
| ENSMUSG00000087204 | 8.489422215 | 3.478086219 | 10.59226572 | 5.638203705 | 7.87814045  |
| ENSMUSG00000087205 | 28.29807405 | 45.21512085 | 56.49208382 | 85.37851324 | 72.33565322 |
| ENSMUSG00000087206 | 35.37259256 | 48.69320706 | 38.13215658 | 22.55281482 | 23.63442135 |
| ENSMUSG00000087207 | 30.4204296  | 21.56413456 | 24.71528667 | 22.55281482 | 20.769643   |
| ENSMUSG00000087208 | 5.65961481  | 2.086851731 | 4.943057334 | 1.610915344 | 5.013362104 |
| ENSMUSG00000087210 | 5.65961481  | 4.173703463 | 7.061510478 | 5.638203705 | 7.161945863 |
| ENSMUSG00000087211 | 4.952162959 | 2.782468975 | 7.061510478 | 14.4982381  | 7.161945863 |
| ENSMUSG00000087213 | 6.367066661 | 14.60796212 | 10.59226572 | 18.52552646 | 17.90486466 |
| ENSMUSG00000087214 | 11.31922962 | 8.347406925 | 9.886114669 | 6.443661377 | 7.87814045  |
| ENSMUSG00000087215 | 4.952162959 | 6.260555194 | 8.473812573 | 5.638203705 | 10.02672421 |
| ENSMUSG00000087216 | 10.61177777 | 8.347406925 | 8.473812573 | 6.443661377 | 7.161945863 |
| ENSMUSG00000087217 | 7.781970364 | 8.347406925 | 9.179963621 | 8.054576721 | 9.310529622 |
| ENSMUSG00000087219 | 9.196874066 | 10.43425866 | 5.649208382 | 8.054576721 | 7.161945863 |
| ENSMUSG00000087220 | 12.02668147 | 6.956172438 | 6.35535943  | 2.416373016 | 12.17530797 |
| ENSMUSG00000087221 | 22.63845924 | 33.3896277  | 26.83373982 | 61.21478308 | 45.12025894 |
| ENSMUSG00000087222 | 24.76081479 | 39.6501829  | 32.4829482  | 116.7913625 | 103.848215  |
| ENSMUSG00000087223 | 4.244711108 | 5.56493795  | 4.236906287 | 6.443661377 | 5.729556691 |
| ENSMUSG00000087224 | 11.31922962 | 8.347406925 | 7.767661525 | 4.832746033 | 2.864778345 |
| ENSMUSG00000087225 | 9.196874066 | 6.956172438 | 3.530755239 | 9.665492065 | 5.729556691 |
| ENSMUSG00000087226 | 9.196874066 | 9.043024169 | 5.649208382 | 3.221830688 | 5.013362104 |
| ENSMUSG00000087228 | 7.781970364 | 6.260555194 | 6.35535943  | 6.443661377 | 7.161945863 |
| ENSMUSG00000087231 | 12.02668147 | 20.86851731 | 21.18453143 | 8.860034393 | 13.60769714 |

|                   |             |             |             |             |             |
|-------------------|-------------|-------------|-------------|-------------|-------------|
| ENSMUSG0000087232 | 8.489422215 | 9.738641413 | 6.35535943  | 4.02728836  | 5.729556691 |
| ENSMUSG0000087233 | 36.78749627 | 87.64777272 | 67.08434954 | 41.07834128 | 35.09353473 |
| ENSMUSG0000087234 | 9.196874066 | 6.260555194 | 4.943057334 | 7.249119049 | 5.013362104 |
| ENSMUSG0000087235 | 4.952162959 | 0.695617244 | 3.530755239 | 3.221830688 | 2.148583759 |
| ENSMUSG0000087238 | 6.367066661 | 6.260555194 | 4.236906287 | 3.221830688 | 5.729556691 |
| ENSMUSG0000087239 | 14.85648888 | 27.12907251 | 28.95219296 | 14.4982381  | 23.63442135 |
| ENSMUSG0000087240 | 7.781970364 | 9.738641413 | 8.473812573 | 8.860034393 | 11.45911338 |
| ENSMUSG0000087241 | 8.489422215 | 8.347406925 | 8.473812573 | 4.02728836  | 7.161945863 |
| ENSMUSG0000087242 | 16.27139258 | 17.39043109 | 9.179963621 | 7.249119049 | 6.445751277 |
| ENSMUSG0000087244 | 11.31922962 | 3.478086219 | 9.886114669 | 7.249119049 | 10.7429188  |
| ENSMUSG0000087245 | 11.31922962 | 5.56493795  | 10.59226572 | 4.832746033 | 7.87814045  |
| ENSMUSG0000087246 | 7.074518513 | 4.869320706 | 5.649208382 | 7.249119049 | 11.45911338 |
| ENSMUSG0000087247 | 19.80865184 | 6.260555194 | 9.886114669 | 4.02728836  | 9.310529622 |
| ENSMUSG0000087248 | 15.56394073 | 15.99919661 | 13.41686991 | 9.665492065 | 17.18867007 |
| ENSMUSG0000087249 | 22.63845924 | 31.99839321 | 40.95676077 | 57.18749472 | 65.17370736 |
| ENSMUSG0000087250 | 9.904325918 | 9.738641413 | 9.179963621 | 4.02728836  | 7.87814045  |
| ENSMUSG0000087252 | 5.65961481  | 3.478086219 | 7.061510478 | 7.249119049 | 4.297167518 |
| ENSMUSG0000087253 | 40.32475552 | 54.25814501 | 67.08434954 | 44.30017197 | 53.71459398 |
| ENSMUSG0000087254 | 10.61177777 | 10.43425866 | 7.061510478 | 4.832746033 | 7.161945863 |
| ENSMUSG0000087255 | 5.65961481  | 3.478086219 | 5.649208382 | 3.221830688 | 1.432389173 |
| ENSMUSG0000087256 | 9.196874066 | 4.869320706 | 9.179963621 | 5.638203705 | 12.89150255 |
| ENSMUSG0000087258 | 8.489422215 | 12.52111039 | 12.71071886 | 4.832746033 | 7.161945863 |
| ENSMUSG0000087259 | 45.27691848 | 50.7800588  | 57.19823487 | 26.58010318 | 22.91822676 |
| ENSMUSG0000087261 | 77.81970364 | 89.0390072  | 84.73812573 | 52.35474869 | 58.72795608 |
| ENSMUSG0000087262 | 6.367066661 | 4.173703463 | 3.530755239 | 0.805457672 | 1.432389173 |
| ENSMUSG0000087263 | 0.707451851 | 0.695617244 | 19.77222934 | 2.416373016 | 0.716194586 |
| ENSMUSG0000087264 | 12.02668147 | 10.43425866 | 21.89068248 | 8.860034393 | 10.02672421 |
| ENSMUSG0000087265 | 7.781970364 | 2.086851731 | 8.473812573 | 4.02728836  | 7.161945863 |
| ENSMUSG0000087266 | 29.0055259  | 57.04061399 | 53.66747963 | 20.1364418  | 37.95831308 |
| ENSMUSG0000087267 | 9.904325918 | 10.43425866 | 12.71071886 | 4.832746033 | 7.161945863 |
| ENSMUSG0000087268 | 7.781970364 | 6.956172438 | 7.061510478 | 7.249119049 | 6.445751277 |
| ENSMUSG0000087269 | 111.0699406 | 182.9473351 | 132.0502459 | 124.8459392 | 114.5911338 |
| ENSMUSG0000087270 | 4.244711108 | 6.956172438 | 6.35535943  | 10.47094974 | 9.310529622 |
| ENSMUSG0000087272 | 39.61730367 | 28.52030699 | 35.30755239 | 13.69278043 | 18.62105924 |
| ENSMUSG0000087273 | 12.73413332 | 4.869320706 | 7.061510478 | 3.221830688 | 5.729556691 |
| ENSMUSG0000087276 | 11.31922962 | 6.956172438 | 6.35535943  | 3.221830688 | 3.580972932 |
| ENSMUSG0000087277 | 7.781970364 | 18.08604834 | 16.94762515 | 6.443661377 | 11.45911338 |
| ENSMUSG0000087278 | 7.781970364 | 6.956172438 | 7.767661525 | 12.08186508 | 9.310529622 |
| ENSMUSG0000087281 | 9.904325918 | 15.30357936 | 16.2414741  | 8.054576721 | 10.02672421 |
| ENSMUSG0000087282 | 34.66514071 | 47.99758982 | 43.07521391 | 42.68925662 | 47.98503729 |
| ENSMUSG0000087283 | 13.44158517 | 4.173703463 | 5.649208382 | 5.638203705 | 5.729556691 |
| ENSMUSG0000087286 | 9.196874066 | 6.956172438 | 7.767661525 | 4.832746033 | 5.729556691 |
| ENSMUSG0000087288 | 9.196874066 | 6.260555194 | 6.35535943  | 13.69278043 | 7.87814045  |

|                    |             |             |             |             |             |
|--------------------|-------------|-------------|-------------|-------------|-------------|
| ENSMUSG00000087289 | 11.31922962 | 11.1298759  | 8.473812573 | 8.054576721 | 12.17530797 |
| ENSMUSG00000087290 | 5.65961481  | 6.260555194 | 4.236906287 | 4.832746033 | 7.161945863 |
| ENSMUSG00000087291 | 9.196874066 | 2.782468975 | 8.473812573 | 4.02728836  | 5.729556691 |
| ENSMUSG00000087292 | 9.196874066 | 9.738641413 | 9.886114669 | 10.47094974 | 13.60769714 |
| ENSMUSG00000087293 | 5.65961481  | 4.869320706 | 2.824604191 | 8.054576721 | 2.864778345 |
| ENSMUSG00000087294 | 30.4204296  | 48.69320706 | 50.13672439 | 44.30017197 | 58.01176149 |
| ENSMUSG00000087295 | 6.367066661 | 6.956172438 | 9.886114669 | 4.832746033 | 9.310529622 |
| ENSMUSG00000087296 | 7.074518513 | 6.260555194 | 5.649208382 | 1.610915344 | 2.864778345 |
| ENSMUSG00000087297 | 0           | 0           | 0           | 0           | 0           |
| ENSMUSG00000087298 | 12.73413332 | 16.69481385 | 9.179963621 | 9.665492065 | 11.45911338 |
| ENSMUSG00000087299 | 10.61177777 | 16.69481385 | 13.41686991 | 12.08186508 | 16.47247549 |
| ENSMUSG00000087300 | 9.196874066 | 9.043024169 | 9.886114669 | 9.665492065 | 10.02672421 |
| ENSMUSG00000087301 | 9.196874066 | 6.956172438 | 11.29841676 | 2.416373016 | 8.594335036 |
| ENSMUSG00000087302 | 4.244711108 | 9.043024169 | 6.35535943  | 9.665492065 | 5.729556691 |
| ENSMUSG00000087304 | 9.196874066 | 5.56493795  | 10.59226572 | 2.416373016 | 11.45911338 |
| ENSMUSG00000087305 | 152.8095999 | 192.6859765 | 170.1824025 | 202.1698757 | 144.6713064 |
| ENSMUSG00000087306 | 11.31922962 | 6.956172438 | 4.943057334 | 7.249119049 | 6.445751277 |
| ENSMUSG00000087307 | 11.31922962 | 10.43425866 | 9.886114669 | 9.665492065 | 7.87814045  |
| ENSMUSG00000087308 | 18.39374813 | 20.17290007 | 12.71071886 | 12.88732275 | 16.47247549 |
| ENSMUSG00000087309 | 10.61177777 | 9.043024169 | 3.530755239 | 4.832746033 | 6.445751277 |
| ENSMUSG00000087312 | 164.8362813 | 221.2062835 | 216.0822206 | 242.4427593 | 184.7782033 |
| ENSMUSG00000087314 | 7.074518513 | 6.956172438 | 4.943057334 | 6.443661377 | 12.17530797 |
| ENSMUSG00000087316 | 11.31922962 | 5.56493795  | 8.473812573 | 3.221830688 | 5.013362104 |
| ENSMUSG00000087317 | 9.904325918 | 9.043024169 | 4.943057334 | 4.832746033 | 5.013362104 |
| ENSMUSG00000087318 | 10.61177777 | 6.260555194 | 9.886114669 | 12.88732275 | 5.729556691 |
| ENSMUSG00000087319 | 10.61177777 | 2.782468975 | 4.236906287 | 5.638203705 | 7.87814045  |
| ENSMUSG00000087321 | 8.489422215 | 2.782468975 | 7.767661525 | 4.02728836  | 6.445751277 |
| ENSMUSG00000087322 | 9.904325918 | 9.043024169 | 7.061510478 | 9.665492065 | 7.161945863 |
| ENSMUSG00000087323 | 9.196874066 | 4.173703463 | 9.179963621 | 6.443661377 | 7.87814045  |
| ENSMUSG00000087324 | 7.074518513 | 5.56493795  | 4.943057334 | 2.416373016 | 1.432389173 |
| ENSMUSG00000087325 | 8.489422215 | 1.391234488 | 4.236906287 | 3.221830688 | 4.297167518 |
| ENSMUSG00000087326 | 9.196874066 | 9.738641413 | 7.061510478 | 8.054576721 | 8.594335036 |
| ENSMUSG00000087327 | 2.829807405 | 4.869320706 | 6.35535943  | 7.249119049 | 2.864778345 |
| ENSMUSG00000087328 | 9.904325918 | 5.56493795  | 4.943057334 | 8.054576721 | 5.729556691 |
| ENSMUSG00000087329 | 12.02668147 | 5.56493795  | 8.473812573 | 1.610915344 | 4.297167518 |
| ENSMUSG00000087330 | 7.074518513 | 6.260555194 | 7.767661525 | 8.860034393 | 10.02672421 |
| ENSMUSG00000087331 | 58.0110518  | 66.08363816 | 81.91352154 | 125.6513968 | 98.11865833 |
| ENSMUSG00000087332 | 9.904325918 | 9.043024169 | 3.530755239 | 4.832746033 | 7.161945863 |
| ENSMUSG00000087333 | 7.074518513 | 7.651789682 | 8.473812573 | 4.02728836  | 5.729556691 |
| ENSMUSG00000087334 | 5.65961481  | 9.043024169 | 10.59226572 | 8.054576721 | 5.729556691 |
| ENSMUSG00000087335 | 6.367066661 | 11.82549314 | 5.649208382 | 12.08186508 | 15.7562809  |
| ENSMUSG00000087336 | 48.81417774 | 66.08363816 | 69.20280268 | 45.10562964 | 57.29556691 |
| ENSMUSG00000087337 | 12.02668147 | 6.956172438 | 9.886114669 | 4.832746033 | 8.594335036 |

|                   |             |             |             |             |             |
|-------------------|-------------|-------------|-------------|-------------|-------------|
| ENSMUSG0000087338 | 1.414903703 | 0.695617244 | 1.412302096 | 1.610915344 | 1.432389173 |
| ENSMUSG0000087339 | 7.074518513 | 4.173703463 | 5.649208382 | 10.47094974 | 5.013362104 |
| ENSMUSG0000087340 | 2.829807405 | 11.1298759  | 7.767661525 | 3.221830688 | 5.729556691 |
| ENSMUSG0000087341 | 13.44158517 | 19.47728283 | 24.71528667 | 70.88027514 | 53.71459398 |
| ENSMUSG0000087342 | 0           | 2.086851731 | 0           | 3.221830688 | 0.716194586 |
| ENSMUSG0000087343 | 4.244711108 | 7.651789682 | 5.649208382 | 5.638203705 | 5.729556691 |
| ENSMUSG0000087344 | 7.781970364 | 13.91234488 | 10.59226572 | 8.054576721 | 7.161945863 |
| ENSMUSG0000087345 | 7.074518513 | 6.956172438 | 3.530755239 | 5.638203705 | 7.161945863 |
| ENSMUSG0000087346 | 6.367066661 | 8.347406925 | 7.767661525 | 5.638203705 | 6.445751277 |
| ENSMUSG0000087347 | 20.51610369 | 33.3896277  | 40.25060972 | 49.93837567 | 45.12025894 |
| ENSMUSG0000087348 | 13.44158517 | 9.043024169 | 16.2414741  | 6.443661377 | 9.310529622 |
| ENSMUSG0000087349 | 8.489422215 | 6.260555194 | 4.236906287 | 6.443661377 | 4.297167518 |
| ENSMUSG0000087350 | 12.73413332 | 12.52111039 | 4.943057334 | 5.638203705 | 6.445751277 |
| ENSMUSG0000087351 | 92.67619252 | 141.9059177 | 125.6948865 | 275.4665239 | 227.7498785 |
| ENSMUSG0000087352 | 18.39374813 | 22.95536904 | 21.18453143 | 45.91108731 | 22.91822676 |
| ENSMUSG0000087353 | 14.14903703 | 4.869320706 | 9.886114669 | 7.249119049 | 3.580972932 |
| ENSMUSG0000087354 | 22.63845924 | 23.65098629 | 31.0706461  | 21.74735715 | 25.78300511 |
| ENSMUSG0000087355 | 9.904325918 | 6.260555194 | 6.35535943  | 4.832746033 | 5.013362104 |
| ENSMUSG0000087356 | 9.904325918 | 6.260555194 | 4.943057334 | 3.221830688 | 8.594335036 |
| ENSMUSG0000087357 | 7.074518513 | 8.347406925 | 9.179963621 | 5.638203705 | 5.729556691 |
| ENSMUSG0000087358 | 4.244711108 | 3.478086219 | 4.236906287 | 2.416373016 | 2.148583759 |
| ENSMUSG0000087360 | 2.122355554 | 4.173703463 | 4.943057334 | 2.416373016 | 2.864778345 |
| ENSMUSG0000087361 | 24.05336294 | 44.5195036  | 38.13215658 | 31.41284921 | 29.36397804 |
| ENSMUSG0000087362 | 8.489422215 | 10.43425866 | 9.179963621 | 4.02728836  | 5.013362104 |
| ENSMUSG0000087363 | 7.074518513 | 9.043024169 | 7.061510478 | 2.416373016 | 5.013362104 |
| ENSMUSG0000087364 | 4.244711108 | 3.478086219 | 5.649208382 | 5.638203705 | 4.297167518 |
| ENSMUSG0000087365 | 5.65961481  | 4.869320706 | 4.943057334 | 0           | 2.864778345 |
| ENSMUSG0000087366 | 10.61177777 | 19.47728283 | 16.94762515 | 136.9278043 | 101.6996313 |
| ENSMUSG0000087367 | 29.0055259  | 45.91073809 | 47.3121202  | 60.40932541 | 45.83645353 |
| ENSMUSG0000087368 | 16.27139258 | 38.95456565 | 26.83373982 | 74.10210583 | 59.44415067 |
| ENSMUSG0000087369 | 5.65961481  | 2.782468975 | 0.706151048 | 3.221830688 | 3.580972932 |
| ENSMUSG0000087370 | 28.29807405 | 57.73623123 | 43.78136496 | 66.85298678 | 50.13362104 |
| ENSMUSG0000087371 | 4.952162959 | 8.347406925 | 5.649208382 | 7.249119049 | 5.729556691 |
| ENSMUSG0000087373 | 12.73413332 | 16.69481385 | 11.29841676 | 13.69278043 | 11.45911338 |
| ENSMUSG0000087374 | 8.489422215 | 6.260555194 | 15.53532305 | 8.054576721 | 5.729556691 |
| ENSMUSG0000087376 | 6.367066661 | 6.956172438 | 4.943057334 | 4.02728836  | 7.87814045  |
| ENSMUSG0000087377 | 50.93653329 | 93.21271067 | 70.61510478 | 157.8697037 | 135.3607768 |
| ENSMUSG0000087378 | 8.489422215 | 6.260555194 | 7.767661525 | 1.610915344 | 10.02672421 |
| ENSMUSG0000087379 | 9.196874066 | 4.173703463 | 7.767661525 | 5.638203705 | 6.445751277 |
| ENSMUSG0000087380 | 16.97884443 | 27.12907251 | 12.00456781 | 12.88732275 | 17.90486466 |
| ENSMUSG0000087381 | 9.904325918 | 11.82549314 | 9.179963621 | 13.69278043 | 16.47247549 |
| ENSMUSG0000087382 | 4.952162959 | 9.043024169 | 3.530755239 | 2.416373016 | 8.594335036 |
| ENSMUSG0000087383 | 2.829807405 | 4.173703463 | 6.35535943  | 8.054576721 | 9.310529622 |

|                    |             |             |             |             |             |
|--------------------|-------------|-------------|-------------|-------------|-------------|
| ENSMUSG00000087384 | 15.56394073 | 5.56493795  | 7.061510478 | 6.443661377 | 9.310529622 |
| ENSMUSG00000087386 | 7.781970364 | 6.260555194 | 5.649208382 | 6.443661377 | 9.310529622 |
| ENSMUSG00000087387 | 41.73965922 | 66.7792554  | 76.26431316 | 304.4630001 | 238.4927973 |
| ENSMUSG00000087388 | 7.781970364 | 7.651789682 | 5.649208382 | 3.221830688 | 5.013362104 |
| ENSMUSG00000087389 | 7.074518513 | 13.21672763 | 9.886114669 | 6.443661377 | 11.45911338 |
| ENSMUSG00000087390 | 10.61177777 | 6.260555194 | 11.29841676 | 8.054576721 | 7.161945863 |
| ENSMUSG00000087393 | 7.781970364 | 4.173703463 | 5.649208382 | 4.02728836  | 8.594335036 |
| ENSMUSG00000087394 | 14.85648888 | 11.1298759  | 14.829172   | 11.27640741 | 13.60769714 |
| ENSMUSG00000087395 | 11.31922962 | 9.738641413 | 16.94762515 | 6.443661377 | 8.594335036 |
| ENSMUSG00000087396 | 21.22355554 | 29.21592424 | 19.77222934 | 30.60739154 | 27.21539428 |
| ENSMUSG00000087397 | 6.367066661 | 11.82549314 | 9.886114669 | 15.30369577 | 5.013362104 |
| ENSMUSG00000087398 | 6.367066661 | 10.43425866 | 11.29841676 | 8.054576721 | 7.161945863 |
| ENSMUSG00000087399 | 12.02668147 | 11.82549314 | 4.236906287 | 4.02728836  | 4.297167518 |
| ENSMUSG00000087400 | 6.367066661 | 6.956172438 | 3.530755239 | 5.638203705 | 6.445751277 |
| ENSMUSG00000087401 | 6.367066661 | 4.869320706 | 4.236906287 | 2.416373016 | 4.297167518 |
| ENSMUSG00000087402 | 4.952162959 | 8.347406925 | 12.71071886 | 5.638203705 | 0.716194586 |
| ENSMUSG00000087403 | 8.489422215 | 13.21672763 | 16.2414741  | 23.35827249 | 16.47247549 |
| ENSMUSG00000087404 | 9.196874066 | 8.347406925 | 5.649208382 | 7.249119049 | 7.161945863 |
| ENSMUSG00000087405 | 16.27139258 | 19.47728283 | 19.77222934 | 20.1364418  | 21.48583759 |
| ENSMUSG00000087406 | 35.37259256 | 52.17129328 | 50.84287544 | 22.55281482 | 22.91822676 |
| ENSMUSG00000087407 | 7.074518513 | 13.91234488 | 6.35535943  | 12.08186508 | 10.02672421 |
| ENSMUSG00000087409 | 5.65961481  | 4.869320706 | 4.943057334 | 4.02728836  | 8.594335036 |
| ENSMUSG00000087410 | 8.489422215 | 5.56493795  | 7.061510478 | 6.443661377 | 9.310529622 |
| ENSMUSG00000087411 | 11.31922962 | 8.347406925 | 12.71071886 | 16.10915344 | 15.7562809  |
| ENSMUSG00000087412 | 9.904325918 | 9.738641413 | 7.767661525 | 18.52552646 | 12.89150255 |
| ENSMUSG00000087413 | 7.074518513 | 2.782468975 | 7.061510478 | 4.02728836  | 6.445751277 |
| ENSMUSG00000087415 | 6.367066661 | 9.043024169 | 9.886114669 | 8.860034393 | 5.729556691 |
| ENSMUSG00000087416 | 2.829807405 | 1.391234488 | 3.530755239 | 2.416373016 | 3.580972932 |
| ENSMUSG00000087417 | 0.707451851 | 1.391234488 | 1.412302096 | 0           | 0.716194586 |
| ENSMUSG00000087422 | 7.781970364 | 7.651789682 | 9.886114669 | 5.638203705 | 7.161945863 |
| ENSMUSG00000087424 | 7.074518513 | 8.347406925 | 11.29841676 | 21.74735715 | 17.90486466 |
| ENSMUSG00000087425 | 11.31922962 | 8.347406925 | 10.59226572 | 1.610915344 | 5.013362104 |
| ENSMUSG00000087428 | 2.122355554 | 1.391234488 | 6.35535943  | 2.416373016 | 2.148583759 |
| ENSMUSG00000087429 | 7.074518513 | 6.956172438 | 9.179963621 | 3.221830688 | 8.594335036 |
| ENSMUSG00000087430 | 6.367066661 | 4.173703463 | 7.061510478 | 8.054576721 | 8.594335036 |
| ENSMUSG00000087431 | 4.244711108 | 9.738641413 | 9.886114669 | 1.610915344 | 2.864778345 |
| ENSMUSG00000087432 | 0           | 0           | 0           | 0           | 0           |
| ENSMUSG00000087433 | 31.83533331 | 63.99678643 | 39.54445867 | 92.62763229 | 63.0251236  |
| ENSMUSG00000087434 | 12.73413332 | 6.956172438 | 7.767661525 | 20.1364418  | 12.89150255 |
| ENSMUSG00000087435 | 7.074518513 | 9.043024169 | 11.29841676 | 3.221830688 | 7.161945863 |
| ENSMUSG00000087436 | 8.489422215 | 17.39043109 | 11.29841676 | 15.30369577 | 16.47247549 |
| ENSMUSG00000087437 | 5.65961481  | 6.956172438 | 12.00456781 | 6.443661377 | 9.310529622 |
| ENSMUSG00000087439 | 9.904325918 | 20.86851731 | 10.59226572 | 23.35827249 | 14.32389173 |

|                    |             |             |             |             |             |
|--------------------|-------------|-------------|-------------|-------------|-------------|
| ENSMUSG00000087440 | 29.0055259  | 33.3896277  | 41.66291182 | 89.4058016  | 78.06520991 |
| ENSMUSG00000087441 | 9.196874066 | 4.869320706 | 4.943057334 | 9.665492065 | 7.87814045  |
| ENSMUSG00000087442 | 50.22908144 | 52.86691053 | 47.3121202  | 62.02024075 | 52.99839939 |
| ENSMUSG00000087443 | 12.02668147 | 6.260555194 | 17.65377619 | 13.69278043 | 13.60769714 |
| ENSMUSG00000087445 | 7.074518513 | 6.260555194 | 11.29841676 | 8.054576721 | 4.297167518 |
| ENSMUSG00000087449 | 48.81417774 | 84.86530374 | 67.08434954 | 86.98942859 | 75.20043157 |
| ENSMUSG00000087450 | 9.904325918 | 6.260555194 | 4.236906287 | 47.52200265 | 19.33725383 |
| ENSMUSG00000087451 | 7.074518513 | 6.956172438 | 9.886114669 | 19.33098413 | 11.45911338 |
| ENSMUSG00000087452 | 49.52162959 | 87.64777272 | 62.1412922  | 56.38203705 | 55.86317773 |
| ENSMUSG00000087454 | 7.074518513 | 5.56493795  | 5.649208382 | 5.638203705 | 8.594335036 |
| ENSMUSG00000087455 | 6.367066661 | 3.478086219 | 7.767661525 | 6.443661377 | 5.013362104 |
| ENSMUSG00000087456 | 12.73413332 | 16.69481385 | 12.00456781 | 3.221830688 | 8.594335036 |
| ENSMUSG00000087457 | 10.61177777 | 11.82549314 | 8.473812573 | 12.08186508 | 7.87814045  |
| ENSMUSG00000087458 | 19.80865184 | 28.52030699 | 24.00913562 | 20.1364418  | 19.33725383 |
| ENSMUSG00000087459 | 12.02668147 | 6.956172438 | 4.236906287 | 10.47094974 | 10.7429188  |
| ENSMUSG00000087460 | 11.31922962 | 7.651789682 | 10.59226572 | 5.638203705 | 7.87814045  |
| ENSMUSG00000087461 | 10.61177777 | 2.782468975 | 9.886114669 | 4.832746033 | 5.013362104 |
| ENSMUSG00000087462 | 4.244711108 | 4.173703463 | 5.649208382 | 5.638203705 | 6.445751277 |
| ENSMUSG00000087464 | 5.65961481  | 6.260555194 | 5.649208382 | 6.443661377 | 5.013362104 |
| ENSMUSG00000087465 | 11.31922962 | 6.956172438 | 14.829172   | 4.02728836  | 5.729556691 |
| ENSMUSG00000087466 | 9.196874066 | 2.782468975 | 10.59226572 | 5.638203705 | 10.7429188  |
| ENSMUSG00000087467 | 12.73413332 | 9.738641413 | 11.29841676 | 5.638203705 | 7.87814045  |
| ENSMUSG00000087468 | 4.244711108 | 4.869320706 | 2.824604191 | 4.02728836  | 5.013362104 |
| ENSMUSG00000087469 | 6.367066661 | 8.347406925 | 9.179963621 | 4.832746033 | 5.729556691 |
| ENSMUSG00000087470 | 11.31922962 | 8.347406925 | 4.943057334 | 6.443661377 | 7.161945863 |
| ENSMUSG00000087473 | 7.781970364 | 8.347406925 | 2.824604191 | 4.832746033 | 7.161945863 |
| ENSMUSG00000087474 | 9.196874066 | 8.347406925 | 7.767661525 | 8.054576721 | 2.864778345 |
| ENSMUSG00000087475 | 18.39374813 | 31.30277597 | 31.77679715 | 65.24207144 | 82.36237743 |
| ENSMUSG00000087476 | 9.904325918 | 11.1298759  | 7.767661525 | 8.054576721 | 10.02672421 |
| ENSMUSG00000087477 | 35.37259256 | 42.43265187 | 42.36906287 | 258.5519127 | 175.4676737 |
| ENSMUSG00000087478 | 144.3201777 | 182.9473351 | 141.2302096 | 187.6716376 | 138.2255552 |
| ENSMUSG00000087479 | 7.781970364 | 6.956172438 | 4.236906287 | 1.610915344 | 5.013362104 |
| ENSMUSG00000087480 | 7.074518513 | 7.651789682 | 9.886114669 | 6.443661377 | 6.445751277 |
| ENSMUSG00000087481 | 4.244711108 | 6.260555194 | 5.649208382 | 5.638203705 | 10.7429188  |
| ENSMUSG00000087482 | 12.73413332 | 9.043024169 | 5.649208382 | 2.416373016 | 7.87814045  |
| ENSMUSG00000087484 | 74.28244438 | 106.4294383 | 120.7518292 | 62.82569842 | 83.07857202 |
| ENSMUSG00000087485 | 8.489422215 | 18.08604834 | 15.53532305 | 8.860034393 | 11.45911338 |
| ENSMUSG00000087486 | 12.73413332 | 25.04222078 | 24.71528667 | 57.18749472 | 47.2688427  |
| ENSMUSG00000087487 | 6.367066661 | 4.869320706 | 4.236906287 | 4.832746033 | 10.02672421 |
| ENSMUSG00000087489 | 8.489422215 | 7.651789682 | 8.473812573 | 6.443661377 | 7.87814045  |
| ENSMUSG00000087491 | 6.367066661 | 6.956172438 | 6.35535943  | 4.832746033 | 1.432389173 |
| ENSMUSG00000087492 | 8.489422215 | 19.47728283 | 17.65377619 | 13.69278043 | 15.7562809  |
| ENSMUSG00000087495 | 11.31922962 | 4.869320706 | 10.59226572 | 4.02728836  | 7.161945863 |

|                    |             |             |             |             |             |
|--------------------|-------------|-------------|-------------|-------------|-------------|
| ENSMUSG00000087496 | 9.904325918 | 6.956172438 | 9.179963621 | 8.054576721 | 12.89150255 |
| ENSMUSG00000087497 | 33.95768886 | 57.73623123 | 65.67204744 | 70.07481747 | 71.61945863 |
| ENSMUSG00000087500 | 9.196874066 | 4.869320706 | 4.943057334 | 5.638203705 | 6.445751277 |
| ENSMUSG00000087501 | 4.244711108 | 4.869320706 | 6.35535943  | 6.443661377 | 6.445751277 |
| ENSMUSG00000087502 | 140.0754665 | 201.7290007 | 168.0639494 | 283.5211006 | 222.0203218 |
| ENSMUSG00000087503 | 0           | 0           | 0           | 0           | 0           |
| ENSMUSG00000087504 | 13.44158517 | 9.043024169 | 5.649208382 | 3.221830688 | 7.87814045  |
| ENSMUSG00000087505 | 2.829807405 | 2.782468975 | 2.118453143 | 0.805457672 | 3.580972932 |
| ENSMUSG00000087507 | 5.65961481  | 6.260555194 | 8.473812573 | 3.221830688 | 7.161945863 |
| ENSMUSG00000087508 | 7.074518513 | 1.391234488 | 2.824604191 | 4.02728836  | 5.013362104 |
| ENSMUSG00000087510 | 12.73413332 | 9.738641413 | 8.473812573 | 5.638203705 | 5.729556691 |
| ENSMUSG00000087512 | 9.904325918 | 3.478086219 | 9.179963621 | 6.443661377 | 8.594335036 |
| ENSMUSG00000087513 | 17.68629628 | 13.91234488 | 10.59226572 | 8.054576721 | 12.17530797 |
| ENSMUSG00000087514 | 4.244711108 | 1.391234488 | 4.236906287 | 2.416373016 | 0           |
| ENSMUSG00000087515 | 11.31922962 | 7.651789682 | 6.35535943  | 7.249119049 | 8.594335036 |
| ENSMUSG00000087516 | 5.65961481  | 7.651789682 | 2.824604191 | 6.443661377 | 5.013362104 |
| ENSMUSG00000087517 | 8.489422215 | 11.1298759  | 6.35535943  | 9.665492065 | 5.013362104 |
| ENSMUSG00000087518 | 10.61177777 | 11.1298759  | 14.829172   | 12.88732275 | 9.310529622 |
| ENSMUSG00000087519 | 12.73413332 | 16.69481385 | 9.179963621 | 12.08186508 | 15.04008631 |
| ENSMUSG00000087520 | 42.44711108 | 74.43104508 | 88.97503202 | 37.85651059 | 40.10689684 |
| ENSMUSG00000087521 | 12.02668147 | 3.478086219 | 7.767661525 | 1.610915344 | 8.594335036 |
| ENSMUSG00000087522 | 5.65961481  | 4.173703463 | 6.35535943  | 1.610915344 | 5.729556691 |
| ENSMUSG00000087523 | 13.44158517 | 16.69481385 | 17.65377619 | 14.4982381  | 12.89150255 |
| ENSMUSG00000087524 | 7.074518513 | 4.173703463 | 6.35535943  | 4.02728836  | 7.161945863 |
| ENSMUSG00000087525 | 6.367066661 | 3.478086219 | 3.530755239 | 8.054576721 | 7.161945863 |
| ENSMUSG00000087526 | 7.074518513 | 6.260555194 | 7.061510478 | 4.02728836  | 7.161945863 |
| ENSMUSG00000087527 | 9.196874066 | 5.56493795  | 11.29841676 | 8.054576721 | 6.445751277 |
| ENSMUSG00000087528 | 8.489422215 | 6.260555194 | 5.649208382 | 5.638203705 | 5.013362104 |
| ENSMUSG00000087530 | 7.074518513 | 4.869320706 | 6.35535943  | 10.47094974 | 9.310529622 |
| ENSMUSG00000087531 | 10.61177777 | 6.260555194 | 11.29841676 | 3.221830688 | 5.013362104 |
| ENSMUSG00000087532 | 40.32475552 | 55.6493795  | 54.37363068 | 36.24559524 | 44.40406435 |
| ENSMUSG00000087534 | 6.367066661 | 6.260555194 | 6.35535943  | 4.832746033 | 5.013362104 |
| ENSMUSG00000087535 | 116.0221036 | 124.5154866 | 128.5194907 | 82.15668255 | 83.07857202 |
| ENSMUSG00000087536 | 9.904325918 | 7.651789682 | 8.473812573 | 3.221830688 | 7.161945863 |
| ENSMUSG00000087537 | 9.904325918 | 6.260555194 | 8.473812573 | 3.221830688 | 6.445751277 |
| ENSMUSG00000087538 | 37.49494812 | 64.69240367 | 72.02740687 | 75.71302118 | 64.45751277 |
| ENSMUSG00000087539 | 8.489422215 | 5.56493795  | 6.35535943  | 5.638203705 | 8.594335036 |
| ENSMUSG00000087540 | 7.781970364 | 2.782468975 | 7.767661525 | 4.02728836  | 3.580972932 |
| ENSMUSG00000087541 | 6.367066661 | 13.21672763 | 20.47838039 | 6.443661377 | 15.04008631 |
| ENSMUSG00000087542 | 9.196874066 | 6.260555194 | 9.886114669 | 8.054576721 | 12.17530797 |
| ENSMUSG00000087543 | 37.49494812 | 49.38882431 | 49.43057334 | 37.05105292 | 31.5125618  |
| ENSMUSG00000087544 | 7.781970364 | 6.260555194 | 7.061510478 | 1.610915344 | 5.729556691 |
| ENSMUSG00000087545 | 2.122355554 | 0.695617244 | 2.824604191 | 0.805457672 | 1.432389173 |



|                    |             |             |             |             |             |
|--------------------|-------------|-------------|-------------|-------------|-------------|
| ENSMUSG00000087547 | 7.074518513 | 11.82549314 | 8.473812573 | 13.69278043 | 6.445751277 |
| ENSMUSG00000087549 | 22.63845924 | 41.73703463 | 36.01370344 | 32.21830688 | 37.95831308 |
| ENSMUSG00000087550 | 4.952162959 | 2.782468975 | 2.824604191 | 3.221830688 | 2.864778345 |
| ENSMUSG00000087552 | 12.02668147 | 10.43425866 | 12.71071886 | 5.638203705 | 4.297167518 |
| ENSMUSG00000087553 | 7.781970364 | 3.478086219 | 3.530755239 | 0           | 0.716194586 |
| ENSMUSG00000087554 | 10.61177777 | 7.651789682 | 6.35535943  | 10.47094974 | 4.297167518 |
| ENSMUSG00000087555 | 0.707451851 | 2.086851731 | 0.706151048 | 0           | 0.716194586 |
| ENSMUSG00000087556 | 19.80865184 | 28.52030699 | 31.0706461  | 20.94189947 | 21.48583759 |
| ENSMUSG00000087557 | 0.707451851 | 0.695617244 | 1.412302096 | 1.610915344 | 0.716194586 |
| ENSMUSG00000087559 | 8.489422215 | 4.173703463 | 7.061510478 | 7.249119049 | 3.580972932 |
| ENSMUSG00000087560 | 3.537259256 | 11.1298759  | 21.18453143 | 17.72006879 | 17.90486466 |
| ENSMUSG00000087561 | 0           | 0           | 0           | 0.805457672 | 0           |
| ENSMUSG00000087563 | 0.707451851 | 1.391234488 | 0.706151048 | 1.610915344 | 2.864778345 |
| ENSMUSG00000087564 | 7.074518513 | 6.956172438 | 6.35535943  | 6.443661377 | 2.864778345 |
| ENSMUSG00000087565 | 3.537259256 | 1.391234488 | 4.236906287 | 2.416373016 | 1.432389173 |
| ENSMUSG00000087568 | 11.31922962 | 4.869320706 | 5.649208382 | 5.638203705 | 8.594335036 |
| ENSMUSG00000087569 | 6.367066661 | 2.782468975 | 4.236906287 | 3.221830688 | 9.310529622 |
| ENSMUSG00000087570 | 9.196874066 | 4.869320706 | 6.35535943  | 6.443661377 | 5.013362104 |
| ENSMUSG00000087571 | 7.781970364 | 3.478086219 | 9.179963621 | 1.610915344 | 4.297167518 |
| ENSMUSG00000087574 | 17.68629628 | 29.21592424 | 34.60140134 | 34.6346799  | 32.22875639 |
| ENSMUSG00000087575 | 9.904325918 | 7.651789682 | 9.886114669 | 8.860034393 | 7.161945863 |
| ENSMUSG00000087577 | 4.244711108 | 4.173703463 | 5.649208382 | 0           | 0.716194586 |
| ENSMUSG00000087578 | 28.29807405 | 46.60635533 | 39.54445867 | 65.24207144 | 52.2822048  |
| ENSMUSG00000087579 | 4.952162959 | 6.260555194 | 9.179963621 | 4.02728836  | 6.445751277 |
| ENSMUSG00000087581 | 11.31922962 | 4.869320706 | 2.118453143 | 10.47094974 | 2.864778345 |
| ENSMUSG00000087582 | 4.244711108 | 5.56493795  | 2.824604191 | 3.221830688 | 4.297167518 |
| ENSMUSG00000087584 | 7.781970364 | 2.782468975 | 7.767661525 | 7.249119049 | 5.013362104 |
| ENSMUSG00000087585 | 5.65961481  | 9.043024169 | 7.767661525 | 4.832746033 | 7.87814045  |
| ENSMUSG00000087586 | 6.367066661 | 4.869320706 | 4.236906287 | 4.832746033 | 0.716194586 |
| ENSMUSG00000087587 | 4.244711108 | 2.782468975 | 5.649208382 | 4.832746033 | 5.013362104 |
| ENSMUSG00000087588 | 8.489422215 | 7.651789682 | 14.12302096 | 5.638203705 | 4.297167518 |
| ENSMUSG00000087589 | 4.244711108 | 7.651789682 | 6.35535943  | 7.249119049 | 3.580972932 |
| ENSMUSG00000087590 | 0           | 0           | 0           | 0           | 0.716194586 |
| ENSMUSG00000087591 | 5.65961481  | 2.086851731 | 3.530755239 | 2.416373016 | 5.013362104 |
| ENSMUSG00000087592 | 9.196874066 | 6.956172438 | 7.061510478 | 5.638203705 | 11.45911338 |
| ENSMUSG00000087593 | 15.56394073 | 29.91154148 | 40.95676077 | 77.32393652 | 72.33565322 |
| ENSMUSG00000087594 | 5.65961481  | 6.260555194 | 10.59226572 | 5.638203705 | 2.148583759 |
| ENSMUSG00000087595 | 24.05336294 | 31.99839321 | 36.71985448 | 41.88379895 | 30.79636721 |
| ENSMUSG00000087596 | 13.44158517 | 11.82549314 | 13.41686991 | 9.665492065 | 7.87814045  |
| ENSMUSG00000087597 | 7.781970364 | 6.260555194 | 9.886114669 | 8.054576721 | 8.594335036 |
| ENSMUSG00000087600 | 16.97884443 | 20.17290007 | 19.06607829 | 191.698926  | 161.1437819 |
| ENSMUSG00000087601 | 4.952162959 | 6.260555194 | 4.236906287 | 4.02728836  | 7.161945863 |
| ENSMUSG00000087602 | 10.61177777 | 5.56493795  | 8.473812573 | 5.638203705 | 3.580972932 |

|                    |             |             |             |             |             |
|--------------------|-------------|-------------|-------------|-------------|-------------|
| ENSMUSG00000087603 | 7.074518513 | 8.347406925 | 4.943057334 | 7.249119049 | 5.729556691 |
| ENSMUSG00000087604 | 7.074518513 | 5.56493795  | 7.767661525 | 4.02728836  | 7.161945863 |
| ENSMUSG00000087605 | 12.73413332 | 15.30357936 | 13.41686991 | 17.72006879 | 23.63442135 |
| ENSMUSG00000087606 | 9.196874066 | 6.956172438 | 6.35535943  | 9.665492065 | 7.87814045  |
| ENSMUSG00000087607 | 2.122355554 | 4.173703463 | 2.824604191 | 5.638203705 | 2.864778345 |
| ENSMUSG00000087608 | 4.952162959 | 10.43425866 | 10.59226572 | 7.249119049 | 6.445751277 |
| ENSMUSG00000087609 | 2.122355554 | 2.086851731 | 0           | 1.610915344 | 2.864778345 |
| ENSMUSG00000087611 | 35.37259256 | 37.56333116 | 50.84287544 | 14.4982381  | 20.769643   |
| ENSMUSG00000087612 | 33.95768886 | 50.7800588  | 48.01827125 | 29.80193387 | 35.09353473 |
| ENSMUSG00000087613 | 7.074518513 | 6.956172438 | 6.35535943  | 4.02728836  | 5.013362104 |
| ENSMUSG00000087614 | 4.244711108 | 2.086851731 | 4.236906287 | 1.610915344 | 5.729556691 |
| ENSMUSG00000087615 | 7.781970364 | 3.478086219 | 3.530755239 | 7.249119049 | 14.32389173 |
| ENSMUSG00000087616 | 3.537259256 | 2.086851731 | 3.530755239 | 4.832746033 | 2.148583759 |
| ENSMUSG00000087617 | 5.65961481  | 8.347406925 | 6.35535943  | 3.221830688 | 10.7429188  |
| ENSMUSG00000087618 | 7.074518513 | 7.651789682 | 5.649208382 | 5.638203705 | 8.594335036 |
| ENSMUSG00000087620 | 4.952162959 | 2.782468975 | 2.824604191 | 1.610915344 | 3.580972932 |
| ENSMUSG00000087621 | 89.84638511 | 120.3417832 | 90.38733411 | 119.2077355 | 97.40246374 |
| ENSMUSG00000087622 | 10.61177777 | 7.651789682 | 8.473812573 | 4.02728836  | 2.864778345 |
| ENSMUSG00000087623 | 7.781970364 | 6.260555194 | 6.35535943  | 3.221830688 | 2.864778345 |
| ENSMUSG00000087624 | 7.074518513 | 8.347406925 | 11.29841676 | 12.08186508 | 15.7562809  |
| ENSMUSG00000087625 | 6.367066661 | 8.347406925 | 4.236906287 | 2.416373016 | 3.580972932 |
| ENSMUSG00000087626 | 4.244711108 | 2.782468975 | 3.530755239 | 1.610915344 | 4.297167518 |
| ENSMUSG00000087627 | 14.14903703 | 22.95536904 | 7.767661525 | 11.27640741 | 15.04008631 |
| ENSMUSG00000087628 | 5.65961481  | 9.043024169 | 4.943057334 | 5.638203705 | 6.445751277 |
| ENSMUSG00000087629 | 10.61177777 | 13.21672763 | 9.886114669 | 13.69278043 | 15.7562809  |
| ENSMUSG00000087630 | 14.14903703 | 7.651789682 | 6.35535943  | 4.02728836  | 7.161945863 |
| ENSMUSG00000087632 | 8.489422215 | 9.738641413 | 6.35535943  | 8.860034393 | 2.864778345 |
| ENSMUSG00000087633 | 126.6338814 | 161.3832006 | 156.0593816 | 159.4806191 | 158.2790036 |
| ENSMUSG00000087635 | 13.44158517 | 7.651789682 | 11.29841676 | 9.665492065 | 13.60769714 |
| ENSMUSG00000087636 | 11.31922962 | 5.56493795  | 8.473812573 | 8.054576721 | 9.310529622 |
| ENSMUSG00000087637 | 13.44158517 | 14.60796212 | 7.061510478 | 4.02728836  | 5.013362104 |
| ENSMUSG00000087638 | 9.904325918 | 9.043024169 | 10.59226572 | 8.860034393 | 5.729556691 |
| ENSMUSG00000087639 | 5.65961481  | 4.869320706 | 6.35535943  | 4.832746033 | 11.45911338 |
| ENSMUSG00000087640 | 3.537259256 | 4.869320706 | 3.530755239 | 0.805457672 | 2.148583759 |
| ENSMUSG00000087641 | 13.44158517 | 6.260555194 | 6.35535943  | 7.249119049 | 10.02672421 |
| ENSMUSG00000087642 | 11.31922962 | 5.56493795  | 15.53532305 | 16.10915344 | 11.45911338 |
| ENSMUSG00000087643 | 5.65961481  | 9.738641413 | 14.12302096 | 4.832746033 | 5.013362104 |
| ENSMUSG00000087644 | 12.02668147 | 24.34660353 | 17.65377619 | 16.91461111 | 20.769643   |
| ENSMUSG00000087646 | 7.781970364 | 3.478086219 | 6.35535943  | 4.832746033 | 7.87814045  |
| ENSMUSG00000087647 | 5.65961481  | 9.738641413 | 4.943057334 | 6.443661377 | 3.580972932 |
| ENSMUSG00000087648 | 2.122355554 | 3.478086219 | 2.118453143 | 2.416373016 | 0.716194586 |
| ENSMUSG00000087649 | 4.952162959 | 2.086851731 | 5.649208382 | 3.221830688 | 1.432389173 |
| ENSMUSG00000087652 | 6.367066661 | 4.869320706 | 5.649208382 | 6.443661377 | 7.87814045  |

|                    |             |             |             |             |             |
|--------------------|-------------|-------------|-------------|-------------|-------------|
| ENSMUSG00000087653 | 11.31922962 | 11.82549314 | 19.77222934 | 11.27640741 | 12.17530797 |
| ENSMUSG00000087654 | 5.65961481  | 13.91234488 | 9.179963621 | 10.47094974 | 8.594335036 |
| ENSMUSG00000087657 | 9.196874066 | 4.869320706 | 5.649208382 | 2.416373016 | 3.580972932 |
| ENSMUSG00000087658 | 2.829807405 | 4.173703463 | 1.412302096 | 2.416373016 | 2.148583759 |
| ENSMUSG00000087659 | 7.074518513 | 4.173703463 | 2.824604191 | 8.860034393 | 7.87814045  |
| ENSMUSG00000087660 | 10.61177777 | 32.69401046 | 21.89068248 | 17.72006879 | 22.91822676 |
| ENSMUSG00000087662 | 10.61177777 | 9.043024169 | 7.767661525 | 6.443661377 | 4.297167518 |
| ENSMUSG00000087663 | 12.02668147 | 5.56493795  | 7.061510478 | 3.221830688 | 2.864778345 |
| ENSMUSG00000087667 | 10.61177777 | 4.173703463 | 9.179963621 | 8.054576721 | 5.729556691 |
| ENSMUSG00000087668 | 7.074518513 | 4.173703463 | 4.943057334 | 8.054576721 | 8.594335036 |
| ENSMUSG00000087669 | 15.56394073 | 9.738641413 | 12.71071886 | 28.19101852 | 34.37734014 |
| ENSMUSG00000087670 | 8.489422215 | 8.347406925 | 8.473812573 | 8.054576721 | 1.432389173 |
| ENSMUSG00000087672 | 22.63845924 | 29.21592424 | 33.89525029 | 28.9964762  | 38.67450766 |
| ENSMUSG00000087674 | 7.074518513 | 6.260555194 | 8.473812573 | 6.443661377 | 3.580972932 |
| ENSMUSG00000087675 | 8.489422215 | 6.956172438 | 6.35535943  | 7.249119049 | 9.310529622 |
| ENSMUSG00000087677 | 2.829807405 | 3.478086219 | 4.943057334 | 2.416373016 | 7.161945863 |
| ENSMUSG00000087678 | 9.196874066 | 11.1298759  | 6.35535943  | 4.832746033 | 4.297167518 |
| ENSMUSG00000087679 | 18.39374813 | 26.43345526 | 31.0706461  | 21.74735715 | 25.06681052 |
| ENSMUSG00000087681 | 7.781970364 | 8.347406925 | 7.061510478 | 6.443661377 | 7.87814045  |
| ENSMUSG00000087682 | 6.367066661 | 8.347406925 | 7.061510478 | 3.221830688 | 7.87814045  |
| ENSMUSG00000087683 | 28.29807405 | 35.47647943 | 42.36906287 | 12.08186508 | 15.7562809  |
| ENSMUSG00000087684 | 9.196874066 | 5.56493795  | 9.179963621 | 7.249119049 | 10.02672421 |
| ENSMUSG00000087685 | 35.37259256 | 64.69240367 | 52.96132858 | 221.5008598 | 156.1304198 |
| ENSMUSG00000087688 | 8.489422215 | 4.173703463 | 5.649208382 | 4.02728836  | 5.013362104 |
| ENSMUSG00000087689 | 10.61177777 | 10.43425866 | 5.649208382 | 4.02728836  | 7.161945863 |
| ENSMUSG00000087690 | 9.904325918 | 4.869320706 | 5.649208382 | 4.02728836  | 7.87814045  |
| ENSMUSG00000087691 | 31.12788146 | 26.43345526 | 23.30298458 | 26.58010318 | 18.62105924 |
| ENSMUSG00000087692 | 9.196874066 | 12.52111039 | 9.179963621 | 2.416373016 | 6.445751277 |
| ENSMUSG00000087693 | 9.196874066 | 5.56493795  | 9.179963621 | 7.249119049 | 11.45911338 |
| ENSMUSG00000087694 | 0           | 0           | 0           | 0           | 0           |
| ENSMUSG00000087695 | 9.196874066 | 9.043024169 | 9.179963621 | 5.638203705 | 5.729556691 |
| ENSMUSG00000087698 | 11.31922962 | 15.30357936 | 13.41686991 | 3.221830688 | 8.594335036 |
| ENSMUSG00000087700 | 7.781970364 | 6.260555194 | 9.179963621 | 7.249119049 | 7.161945863 |
| ENSMUSG00000087701 | 9.196874066 | 6.956172438 | 4.236906287 | 12.08186508 | 5.013362104 |
| ENSMUSG00000087702 | 11.31922962 | 8.347406925 | 12.71071886 | 6.443661377 | 7.87814045  |
| ENSMUSG00000087703 | 21.22355554 | 36.17209668 | 21.89068248 | 18.52552646 | 19.33725383 |
| ENSMUSG00000087704 | 4.244711108 | 6.260555194 | 6.35535943  | 5.638203705 | 6.445751277 |
| ENSMUSG00000087707 | 7.074518513 | 4.869320706 | 7.061510478 | 7.249119049 | 6.445751277 |
| ENSMUSG00000087708 | 7.074518513 | 7.651789682 | 4.943057334 | 4.02728836  | 5.013362104 |
| ENSMUSG00000087710 | 7.074518513 | 7.651789682 | 7.061510478 | 7.249119049 | 7.161945863 |
| ENSMUSG00000087712 | 7.781970364 | 7.651789682 | 4.236906287 | 2.416373016 | 2.148583759 |
| ENSMUSG00000087714 | 29.0055259  | 62.60555194 | 39.54445867 | 27.38556085 | 22.91822676 |
| ENSMUSG00000087715 | 12.73413332 | 9.043024169 | 8.473812573 | 11.27640741 | 5.013362104 |

|                    |             |             |             |             |             |
|--------------------|-------------|-------------|-------------|-------------|-------------|
| ENSMUSG00000087716 | 4.244711108 | 2.086851731 | 1.412302096 | 1.610915344 | 2.864778345 |
| ENSMUSG00000087717 | 11.31922962 | 4.869320706 | 4.943057334 | 2.416373016 | 5.729556691 |
| ENSMUSG00000087718 | 9.196874066 | 7.651789682 | 9.179963621 | 5.638203705 | 10.7429188  |
| ENSMUSG00000087719 | 16.97884443 | 20.17290007 | 17.65377619 | 8.860034393 | 15.04008631 |
| ENSMUSG00000087720 | 8.489422215 | 1.391234488 | 9.886114669 | 6.443661377 | 6.445751277 |
| ENSMUSG00000087721 | 89.13893326 | 117.5593142 | 143.3486627 | 70.88027514 | 85.94335036 |
| ENSMUSG00000087722 | 0.707451851 | 0           | 0           | 0           | 1.432389173 |
| ENSMUSG00000087723 | 10.61177777 | 9.738641413 | 8.473812573 | 5.638203705 | 5.729556691 |
| ENSMUSG00000087724 | 8.489422215 | 0.695617244 | 4.943057334 | 3.221830688 | 3.580972932 |
| ENSMUSG00000087726 | 7.781970364 | 8.347406925 | 4.943057334 | 3.221830688 | 6.445751277 |
| ENSMUSG00000087728 | 9.196874066 | 7.651789682 | 6.35535943  | 4.02728836  | 8.594335036 |
| ENSMUSG00000087730 | 63.67066661 | 91.12585893 | 72.73355792 | 47.52200265 | 39.39070225 |
| ENSMUSG00000087731 | 5.65961481  | 9.043024169 | 5.649208382 | 3.221830688 | 5.729556691 |
| ENSMUSG00000087732 | 9.904325918 | 11.82549314 | 6.35535943  | 8.054576721 | 4.297167518 |
| ENSMUSG00000087734 | 12.02668147 | 16.69481385 | 13.41686991 | 10.47094974 | 10.02672421 |
| ENSMUSG00000087736 | 9.196874066 | 7.651789682 | 3.530755239 | 3.221830688 | 2.148583759 |
| ENSMUSG00000087737 | 3.537259256 | 2.782468975 | 3.530755239 | 1.610915344 | 3.580972932 |
| ENSMUSG00000087739 | 42.44711108 | 53.56252777 | 43.78136496 | 26.58010318 | 40.82309142 |
| ENSMUSG00000087741 | 14.85648888 | 26.43345526 | 16.2414741  | 18.52552646 | 22.91822676 |
| ENSMUSG00000087742 | 13.44158517 | 9.043024169 | 14.829172   | 20.94189947 | 19.33725383 |
| ENSMUSG00000087743 | 99.04325918 | 173.9043109 | 132.756397  | 495.3564683 | 378.1507416 |
| ENSMUSG00000087744 | 7.781970364 | 9.043024169 | 7.767661525 | 10.47094974 | 6.445751277 |
| ENSMUSG00000087746 | 9.904325918 | 5.56493795  | 7.061510478 | 4.02728836  | 5.729556691 |
| ENSMUSG00000087747 | 11.31922962 | 8.347406925 | 9.179963621 | 7.249119049 | 11.45911338 |
| ENSMUSG00000087748 | 24.05336294 | 25.73783802 | 36.01370344 | 24.16373016 | 27.21539428 |
| ENSMUSG00000087750 | 24.05336294 | 25.04222078 | 23.30298458 | 12.08186508 | 16.47247549 |
| ENSMUSG00000087752 | 8.489422215 | 5.56493795  | 4.943057334 | 8.054576721 | 10.7429188  |
| ENSMUSG00000087754 | 13.44158517 | 8.347406925 | 12.00456781 | 5.638203705 | 8.594335036 |
| ENSMUSG00000087756 | 6.367066661 | 4.173703463 | 2.118453143 | 10.47094974 | 10.02672421 |
| ENSMUSG00000087758 | 8.489422215 | 5.56493795  | 8.473812573 | 5.638203705 | 12.89150255 |
| ENSMUSG00000087759 | 6.367066661 | 6.260555194 | 8.473812573 | 7.249119049 | 10.02672421 |
| ENSMUSG00000087760 | 14.85648888 | 9.738641413 | 3.530755239 | 5.638203705 | 5.729556691 |
| ENSMUSG00000087761 | 10.61177777 | 9.738641413 | 11.29841676 | 8.860034393 | 10.02672421 |
| ENSMUSG00000087764 | 11.31922962 | 6.260555194 | 4.236906287 | 4.02728836  | 7.87814045  |
| ENSMUSG00000087765 | 2.122355554 | 1.391234488 | 0.706151048 | 4.02728836  | 1.432389173 |
| ENSMUSG00000087766 | 6.367066661 | 2.086851731 | 7.767661525 | 5.638203705 | 8.594335036 |
| ENSMUSG00000087767 | 14.85648888 | 20.86851731 | 23.30298458 | 12.08186508 | 15.04008631 |
| ENSMUSG00000087768 | 9.196874066 | 9.043024169 | 5.649208382 | 6.443661377 | 5.013362104 |
| ENSMUSG00000087769 | 12.02668147 | 4.869320706 | 7.061510478 | 4.832746033 | 2.148583759 |
| ENSMUSG00000087772 | 7.074518513 | 2.782468975 | 11.29841676 | 5.638203705 | 6.445751277 |
| ENSMUSG00000087774 | 3.537259256 | 9.738641413 | 7.061510478 | 2.416373016 | 6.445751277 |
| ENSMUSG00000087775 | 12.02668147 | 5.56493795  | 8.473812573 | 6.443661377 | 6.445751277 |
| ENSMUSG00000087776 | 12.02668147 | 16.69481385 | 9.886114669 | 9.665492065 | 7.161945863 |

|                    |             |             |             |             |             |
|--------------------|-------------|-------------|-------------|-------------|-------------|
| ENSMUSG00000087777 | 9.904325918 | 6.260555194 | 5.649208382 | 8.054576721 | 6.445751277 |
| ENSMUSG00000087779 | 9.904325918 | 11.1298759  | 8.473812573 | 1.610915344 | 6.445751277 |
| ENSMUSG00000087780 | 18.39374813 | 38.95456565 | 38.13215658 | 28.9964762  | 27.93158887 |
| ENSMUSG00000087781 | 12.02668147 | 7.651789682 | 8.473812573 | 8.860034393 | 4.297167518 |
| ENSMUSG00000087782 | 154.2245036 | 182.2517179 | 181.4808193 | 97.46037832 | 102.4158258 |
| ENSMUSG00000087783 | 12.73413332 | 15.30357936 | 17.65377619 | 37.85651059 | 22.91822676 |
| ENSMUSG00000087784 | 10.61177777 | 13.21672763 | 12.00456781 | 8.054576721 | 5.729556691 |
| ENSMUSG00000087785 | 11.31922962 | 3.478086219 | 5.649208382 | 1.610915344 | 5.729556691 |
| ENSMUSG00000087786 | 49.52162959 | 57.04061399 | 57.19823487 | 57.99295239 | 47.2688427  |
| ENSMUSG00000087789 | 8.489422215 | 10.43425866 | 7.061510478 | 3.221830688 | 7.87814045  |
| ENSMUSG00000087790 | 16.97884443 | 38.95456565 | 22.59683353 | 28.9964762  | 38.67450766 |
| ENSMUSG00000087791 | 8.489422215 | 2.782468975 | 4.943057334 | 2.416373016 | 8.594335036 |
| ENSMUSG00000087792 | 6.367066661 | 13.91234488 | 19.77222934 | 8.860034393 | 13.60769714 |
| ENSMUSG00000087793 | 5.65961481  | 7.651789682 | 7.061510478 | 4.02728836  | 6.445751277 |
| ENSMUSG00000087794 | 4.952162959 | 12.52111039 | 7.061510478 | 11.27640741 | 10.7429188  |
| ENSMUSG00000087795 | 12.02668147 | 11.82549314 | 14.12302096 | 8.860034393 | 5.013362104 |
| ENSMUSG00000087796 | 11.31922962 | 9.738641413 | 7.767661525 | 11.27640741 | 7.161945863 |
| ENSMUSG00000087798 | 5.65961481  | 6.260555194 | 6.35535943  | 5.638203705 | 7.161945863 |
| ENSMUSG00000087799 | 9.904325918 | 4.173703463 | 9.886114669 | 8.860034393 | 7.161945863 |
| ENSMUSG00000087800 | 9.196874066 | 11.1298759  | 8.473812573 | 6.443661377 | 4.297167518 |
| ENSMUSG00000087801 | 4.244711108 | 2.782468975 | 3.530755239 | 5.638203705 | 2.148583759 |
| ENSMUSG00000087802 | 6.367066661 | 3.478086219 | 8.473812573 | 6.443661377 | 6.445751277 |
| ENSMUSG00000087804 | 7.074518513 | 6.260555194 | 8.473812573 | 8.860034393 | 2.864778345 |
| ENSMUSG00000087805 | 7.781970364 | 5.56493795  | 7.767661525 | 7.249119049 | 6.445751277 |
| ENSMUSG00000087806 | 8.489422215 | 5.56493795  | 3.530755239 | 8.054576721 | 4.297167518 |
| ENSMUSG00000087807 | 23.34591109 | 25.04222078 | 31.77679715 | 19.33098413 | 22.91822676 |
| ENSMUSG00000087808 | 12.02668147 | 11.82549314 | 11.29841676 | 11.27640741 | 13.60769714 |
| ENSMUSG00000087810 | 10.61177777 | 7.651789682 | 8.473812573 | 3.221830688 | 7.87814045  |
| ENSMUSG00000087812 | 6.367066661 | 8.347406925 | 5.649208382 | 4.02728836  | 2.864778345 |
| ENSMUSG00000087813 | 2.829807405 | 2.086851731 | 5.649208382 | 2.416373016 | 4.297167518 |
| ENSMUSG00000087815 | 9.904325918 | 9.043024169 | 9.886114669 | 7.249119049 | 6.445751277 |
| ENSMUSG00000087816 | 6.367066661 | 12.52111039 | 7.767661525 | 4.832746033 | 12.17530797 |
| ENSMUSG00000087817 | 9.196874066 | 4.869320706 | 7.061510478 | 4.02728836  | 5.013362104 |
| ENSMUSG00000087819 | 142.905274  | 188.5122731 | 194.1915381 | 373.7323599 | 243.5061594 |
| ENSMUSG00000087820 | 5.65961481  | 7.651789682 | 4.943057334 | 5.638203705 | 7.87814045  |
| ENSMUSG00000087823 | 12.02668147 | 6.260555194 | 9.886114669 | 5.638203705 | 7.161945863 |
| ENSMUSG00000087825 | 7.074518513 | 11.1298759  | 9.179963621 | 11.27640741 | 7.161945863 |
| ENSMUSG00000087829 | 7.781970364 | 5.56493795  | 9.179963621 | 3.221830688 | 6.445751277 |
| ENSMUSG00000087830 | 6.367066661 | 4.869320706 | 9.179963621 | 8.860034393 | 9.310529622 |
| ENSMUSG00000087831 | 10.61177777 | 4.173703463 | 4.943057334 | 3.221830688 | 3.580972932 |
| ENSMUSG00000087832 | 4.952162959 | 2.086851731 | 5.649208382 | 2.416373016 | 2.148583759 |
| ENSMUSG00000087833 | 9.904325918 | 6.260555194 | 7.767661525 | 3.221830688 | 5.013362104 |
| ENSMUSG00000087834 | 42.44711108 | 83.47406925 | 58.61053696 | 38.66196826 | 49.41742646 |

|                    |             |             |             |             |             |
|--------------------|-------------|-------------|-------------|-------------|-------------|
| ENSMUSG00000087835 | 7.074518513 | 8.347406925 | 5.649208382 | 4.02728836  | 7.161945863 |
| ENSMUSG00000087836 | 7.781970364 | 8.347406925 | 7.061510478 | 1.610915344 | 10.02672421 |
| ENSMUSG00000087838 | 8.489422215 | 10.43425866 | 11.29841676 | 4.832746033 | 4.297167518 |
| ENSMUSG00000087839 | 7.781970364 | 3.478086219 | 7.767661525 | 1.610915344 | 10.7429188  |
| ENSMUSG00000087841 | 3.537259256 | 4.173703463 | 6.35535943  | 3.221830688 | 6.445751277 |
| ENSMUSG00000087842 | 7.781970364 | 8.347406925 | 9.179963621 | 8.054576721 | 8.594335036 |
| ENSMUSG00000087843 | 7.074518513 | 9.738641413 | 9.886114669 | 1.610915344 | 7.161945863 |
| ENSMUSG00000087844 | 26.1757185  | 38.95456565 | 27.53989086 | 36.24559524 | 37.24211849 |
| ENSMUSG00000087845 | 6.367066661 | 6.260555194 | 7.767661525 | 8.054576721 | 5.013362104 |
| ENSMUSG00000087846 | 9.196874066 | 8.347406925 | 7.061510478 | 8.860034393 | 10.02672421 |
| ENSMUSG00000087847 | 10.61177777 | 3.478086219 | 5.649208382 | 4.02728836  | 5.013362104 |
| ENSMUSG00000087848 | 14.14903703 | 5.56493795  | 7.061510478 | 5.638203705 | 6.445751277 |
| ENSMUSG00000087850 | 5.65961481  | 4.869320706 | 2.824604191 | 7.249119049 | 5.013362104 |
| ENSMUSG00000087852 | 7.781970364 | 10.43425866 | 9.179963621 | 3.221830688 | 8.594335036 |
| ENSMUSG00000087853 | 9.196874066 | 10.43425866 | 8.473812573 | 5.638203705 | 7.87814045  |
| ENSMUSG00000087854 | 12.02668147 | 9.043024169 | 12.00456781 | 6.443661377 | 11.45911338 |
| ENSMUSG00000087855 | 0           | 0           | 0           | 0           | 0           |
| ENSMUSG00000087857 | 11.31922962 | 11.1298759  | 14.829172   | 8.054576721 | 12.89150255 |
| ENSMUSG00000087858 | 10.61177777 | 7.651789682 | 10.59226572 | 2.416373016 | 8.594335036 |
| ENSMUSG00000087859 | 7.781970364 | 6.260555194 | 8.473812573 | 7.249119049 | 7.87814045  |
| ENSMUSG00000087860 | 14.14903703 | 11.82549314 | 5.649208382 | 9.665492065 | 7.161945863 |
| ENSMUSG00000087861 | 24.05336294 | 45.21512085 | 43.78136496 | 39.46742593 | 48.70123187 |
| ENSMUSG00000087862 | 10.61177777 | 7.651789682 | 8.473812573 | 2.416373016 | 8.594335036 |
| ENSMUSG00000087863 | 8.489422215 | 6.260555194 | 9.179963621 | 4.832746033 | 6.445751277 |
| ENSMUSG00000087867 | 8.489422215 | 6.260555194 | 7.767661525 | 5.638203705 | 5.013362104 |
| ENSMUSG00000087869 | 9.196874066 | 6.260555194 | 10.59226572 | 4.832746033 | 12.17530797 |
| ENSMUSG00000087870 | 9.196874066 | 8.347406925 | 5.649208382 | 5.638203705 | 7.161945863 |
| ENSMUSG00000087871 | 16.97884443 | 9.738641413 | 9.179963621 | 4.02728836  | 3.580972932 |
| ENSMUSG00000087872 | 7.781970364 | 9.738641413 | 11.29841676 | 4.02728836  | 6.445751277 |
| ENSMUSG00000087873 | 4.244711108 | 5.56493795  | 6.35535943  | 3.221830688 | 5.729556691 |
| ENSMUSG00000087875 | 9.196874066 | 7.651789682 | 7.767661525 | 8.054576721 | 11.45911338 |
| ENSMUSG00000087876 | 32.54278516 | 38.25894841 | 43.07521391 | 91.82217462 | 74.48423698 |
| ENSMUSG00000087877 | 5.65961481  | 6.956172438 | 6.35535943  | 5.638203705 | 8.594335036 |
| ENSMUSG00000087878 | 4.952162959 | 6.260555194 | 4.943057334 | 4.832746033 | 2.864778345 |
| ENSMUSG00000087879 | 7.781970364 | 6.260555194 | 9.886114669 | 2.416373016 | 4.297167518 |
| ENSMUSG00000087880 | 7.074518513 | 6.260555194 | 7.061510478 | 3.221830688 | 9.310529622 |
| ENSMUSG00000087881 | 9.904325918 | 13.21672763 | 8.473812573 | 10.47094974 | 10.02672421 |
| ENSMUSG00000087883 | 7.781970364 | 9.738641413 | 7.767661525 | 5.638203705 | 7.161945863 |
| ENSMUSG00000087884 | 9.196874066 | 11.1298759  | 6.35535943  | 6.443661377 | 5.013362104 |
| ENSMUSG00000087885 | 2.122355554 | 0.695617244 | 4.943057334 | 1.610915344 | 1.432389173 |
| ENSMUSG00000087886 | 7.074518513 | 4.173703463 | 5.649208382 | 5.638203705 | 7.161945863 |
| ENSMUSG00000087887 | 73.57499253 | 82.08283477 | 86.85657888 | 62.82569842 | 60.16034525 |
| ENSMUSG00000087890 | 5.65961481  | 6.956172438 | 7.767661525 | 5.638203705 | 9.310529622 |

|                    |             |             |             |             |             |
|--------------------|-------------|-------------|-------------|-------------|-------------|
| ENSMUSG00000087891 | 10.61177777 | 11.82549314 | 15.53532305 | 7.249119049 | 10.7429188  |
| ENSMUSG00000087892 | 8.489422215 | 6.260555194 | 7.061510478 | 5.638203705 | 3.580972932 |
| ENSMUSG00000087893 | 12.02668147 | 6.260555194 | 4.943057334 | 4.832746033 | 8.594335036 |
| ENSMUSG00000087894 | 5.65961481  | 6.260555194 | 9.179963621 | 7.249119049 | 5.729556691 |
| ENSMUSG00000087895 | 14.14903703 | 5.56493795  | 9.179963621 | 5.638203705 | 11.45911338 |
| ENSMUSG00000087896 | 46.69182218 | 83.47406925 | 65.67204744 | 25.77464551 | 42.25548059 |
| ENSMUSG00000087897 | 13.44158517 | 22.95536904 | 16.94762515 | 19.33098413 | 15.04008631 |
| ENSMUSG00000087898 | 8.489422215 | 4.869320706 | 9.179963621 | 4.02728836  | 6.445751277 |
| ENSMUSG00000087899 | 7.074518513 | 15.30357936 | 7.061510478 | 3.221830688 | 5.729556691 |
| ENSMUSG00000087902 | 9.904325918 | 8.347406925 | 7.767661525 | 5.638203705 | 4.297167518 |
| ENSMUSG00000087903 | 188.8896443 | 275.4644285 | 233.7359968 | 178.8116032 | 158.9951982 |
| ENSMUSG00000087904 | 6.367066661 | 6.956172438 | 4.943057334 | 3.221830688 | 4.297167518 |
| ENSMUSG00000087905 | 6.367066661 | 4.869320706 | 4.236906287 | 4.832746033 | 10.7429188  |
| ENSMUSG00000087908 | 8.489422215 | 6.956172438 | 5.649208382 | 4.02728836  | 7.161945863 |
| ENSMUSG00000087909 | 7.074518513 | 6.260555194 | 7.061510478 | 1.610915344 | 10.02672421 |
| ENSMUSG00000087910 | 10.61177777 | 4.869320706 | 7.061510478 | 2.416373016 | 6.445751277 |
| ENSMUSG00000087911 | 8.489422215 | 9.043024169 | 10.59226572 | 8.054576721 | 5.729556691 |
| ENSMUSG00000087912 | 0           | 0           | 0           | 0           | 0           |
| ENSMUSG00000087913 | 8.489422215 | 8.347406925 | 4.236906287 | 7.249119049 | 2.864778345 |
| ENSMUSG00000087914 | 9.196874066 | 9.738641413 | 5.649208382 | 0.805457672 | 5.013362104 |
| ENSMUSG00000087915 | 12.02668147 | 6.260555194 | 4.236906287 | 8.054576721 | 5.729556691 |
| ENSMUSG00000087916 | 9.904325918 | 9.043024169 | 7.061510478 | 7.249119049 | 10.02672421 |
| ENSMUSG00000087917 | 5.65961481  | 5.56493795  | 13.41686991 | 2.416373016 | 4.297167518 |
| ENSMUSG00000087919 | 8.489422215 | 9.738641413 | 4.943057334 | 4.02728836  | 7.87814045  |
| ENSMUSG00000087921 | 7.074518513 | 5.56493795  | 7.767661525 | 4.832746033 | 9.310529622 |
| ENSMUSG00000087922 | 8.489422215 | 15.99919661 | 16.2414741  | 9.665492065 | 14.32389173 |
| ENSMUSG00000087923 | 7.074518513 | 6.956172438 | 6.35535943  | 4.02728836  | 5.013362104 |
| ENSMUSG00000087924 | 12.02668147 | 8.347406925 | 9.886114669 | 8.860034393 | 6.445751277 |
| ENSMUSG00000087925 | 10.61177777 | 10.43425866 | 9.179963621 | 12.08186508 | 9.310529622 |
| ENSMUSG00000087926 | 19.80865184 | 29.21592424 | 25.42143772 | 15.30369577 | 23.63442135 |
| ENSMUSG00000087929 | 7.781970364 | 6.956172438 | 9.886114669 | 4.832746033 | 9.310529622 |
| ENSMUSG00000087930 | 11.31922962 | 9.043024169 | 7.767661525 | 5.638203705 | 5.013362104 |
| ENSMUSG00000087932 | 6.367066661 | 9.738641413 | 10.59226572 | 4.02728836  | 7.161945863 |
| ENSMUSG00000087933 | 12.73413332 | 4.173703463 | 8.473812573 | 4.832746033 | 6.445751277 |
| ENSMUSG00000087935 | 0           | 0           | 0           | 0           | 0           |
| ENSMUSG00000087936 | 9.196874066 | 4.173703463 | 7.767661525 | 5.638203705 | 11.45911338 |
| ENSMUSG00000087937 | 5.65961481  | 2.086851731 | 4.943057334 | 7.249119049 | 7.161945863 |
| ENSMUSG00000087938 | 14.14903703 | 22.95536904 | 28.24604191 | 16.10915344 | 27.21539428 |
| ENSMUSG00000087939 | 9.196874066 | 5.56493795  | 2.118453143 | 4.02728836  | 9.310529622 |
| ENSMUSG00000087940 | 14.14903703 | 9.043024169 | 8.473812573 | 4.832746033 | 4.297167518 |
| ENSMUSG00000087941 | 0           | 0           | 0.706151048 | 0           | 0           |
| ENSMUSG00000087942 | 4.244711108 | 5.56493795  | 9.179963621 | 8.054576721 | 5.729556691 |
| ENSMUSG00000087943 | 0           | 0           | 0           | 0           | 0           |

|                    |             |             |             |             |             |
|--------------------|-------------|-------------|-------------|-------------|-------------|
| ENSMUSG00000087945 | 7.074518513 | 8.347406925 | 6.35535943  | 6.443661377 | 5.013362104 |
| ENSMUSG00000087946 | 7.781970364 | 6.956172438 | 4.943057334 | 3.221830688 | 7.87814045  |
| ENSMUSG00000087947 | 9.196874066 | 4.173703463 | 9.179963621 | 9.665492065 | 5.013362104 |
| ENSMUSG00000087949 | 30.4204296  | 72.34419335 | 45.8998181  | 24.16373016 | 24.35061594 |
| ENSMUSG00000087950 | 12.02668147 | 6.956172438 | 8.473812573 | 4.832746033 | 4.297167518 |
| ENSMUSG00000087951 | 234.8740146 | 289.3767734 | 234.4421479 | 270.6337778 | 212.7097921 |
| ENSMUSG00000087954 | 8.489422215 | 7.651789682 | 10.59226572 | 8.054576721 | 7.87814045  |
| ENSMUSG00000087956 | 7.781970364 | 2.782468975 | 4.943057334 | 4.832746033 | 7.87814045  |
| ENSMUSG00000087957 | 2.829807405 | 6.956172438 | 1.412302096 | 2.416373016 | 3.580972932 |
| ENSMUSG00000087958 | 12.02668147 | 6.956172438 | 5.649208382 | 3.221830688 | 8.594335036 |
| ENSMUSG00000087959 | 9.904325918 | 9.043024169 | 11.29841676 | 6.443661377 | 7.161945863 |
| ENSMUSG00000087960 | 10.61177777 | 13.91234488 | 9.179963621 | 8.054576721 | 5.729556691 |
| ENSMUSG00000087961 | 12.73413332 | 4.173703463 | 1.412302096 | 3.221830688 | 5.013362104 |
| ENSMUSG00000087963 | 94.79854807 | 128.6891901 | 105.2165061 | 225.5281482 | 158.9951982 |
| ENSMUSG00000087964 | 10.61177777 | 4.869320706 | 5.649208382 | 5.638203705 | 5.013362104 |
| ENSMUSG00000087965 | 7.074518513 | 6.956172438 | 6.35535943  | 7.249119049 | 10.02672421 |
| ENSMUSG00000087966 | 9.196874066 | 9.738641413 | 12.71071886 | 12.08186508 | 10.02672421 |
| ENSMUSG00000087967 | 0           | 0           | 1.412302096 | 0.805457672 | 0           |
| ENSMUSG00000087968 | 19.80865184 | 24.34660353 | 40.25060972 | 18.52552646 | 25.78300511 |
| ENSMUSG00000087973 | 7.781970364 | 4.869320706 | 6.35535943  | 3.221830688 | 8.594335036 |
| ENSMUSG00000087975 | 4.952162959 | 3.478086219 | 4.236906287 | 4.02728836  | 5.013362104 |
| ENSMUSG00000087979 | 9.196874066 | 11.1298759  | 4.236906287 | 4.02728836  | 8.594335036 |
| ENSMUSG00000087980 | 10.61177777 | 7.651789682 | 7.061510478 | 4.832746033 | 7.87814045  |
| ENSMUSG00000087981 | 9.196874066 | 4.173703463 | 9.179963621 | 8.054576721 | 7.161945863 |
| ENSMUSG00000087982 | 9.904325918 | 8.347406925 | 9.179963621 | 9.665492065 | 7.87814045  |
| ENSMUSG00000087983 | 3.537259256 | 2.782468975 | 2.118453143 | 2.416373016 | 3.580972932 |
| ENSMUSG00000087985 | 12.73413332 | 4.173703463 | 8.473812573 | 8.860034393 | 9.310529622 |
| ENSMUSG00000087987 | 4.952162959 | 4.869320706 | 5.649208382 | 7.249119049 | 7.87814045  |
| ENSMUSG00000087989 | 8.489422215 | 11.1298759  | 9.179963621 | 4.832746033 | 2.148583759 |
| ENSMUSG00000087990 | 12.02668147 | 5.56493795  | 4.236906287 | 7.249119049 | 9.310529622 |
| ENSMUSG00000087991 | 10.61177777 | 4.869320706 | 7.767661525 | 4.02728836  | 7.87814045  |
| ENSMUSG00000087992 | 18.39374813 | 22.2597518  | 16.2414741  | 16.10915344 | 16.47247549 |
| ENSMUSG00000087993 | 7.074518513 | 18.78166558 | 15.53532305 | 41.88379895 | 20.769643   |
| ENSMUSG00000087994 | 10.61177777 | 8.347406925 | 8.473812573 | 3.221830688 | 5.729556691 |
| ENSMUSG00000087995 | 9.904325918 | 10.43425866 | 7.061510478 | 5.638203705 | 9.310529622 |
| ENSMUSG00000087997 | 9.904325918 | 8.347406925 | 4.236906287 | 8.054576721 | 9.310529622 |
| ENSMUSG00000087999 | 7.074518513 | 4.869320706 | 6.35535943  | 5.638203705 | 7.161945863 |
| ENSMUSG00000088000 | 15.56394073 | 11.82549314 | 14.12302096 | 11.27640741 | 5.729556691 |
| ENSMUSG00000088001 | 43.15456293 | 48.69320706 | 36.71985448 | 21.74735715 | 25.78300511 |
| ENSMUSG00000088002 | 11.31922962 | 8.347406925 | 9.886114669 | 8.054576721 | 6.445751277 |
| ENSMUSG00000088004 | 188.1821924 | 231.6405422 | 221.731429  | 214.2517408 | 171.8867007 |
| ENSMUSG00000088005 | 10.61177777 | 13.91234488 | 7.767661525 | 8.054576721 | 10.7429188  |
| ENSMUSG00000088008 | 8.489422215 | 9.738641413 | 10.59226572 | 10.47094974 | 7.161945863 |



|                   |             |             |             |             |             |
|-------------------|-------------|-------------|-------------|-------------|-------------|
| ENSMUSG0000088009 | 10.61177777 | 4.869320706 | 8.473812573 | 4.832746033 | 7.87814045  |
| ENSMUSG0000088010 | 5.65961481  | 9.043024169 | 7.061510478 | 6.443661377 | 7.87814045  |
| ENSMUSG0000088014 | 15.56394073 | 25.04222078 | 19.77222934 | 10.47094974 | 16.47247549 |
| ENSMUSG0000088015 | 11.31922962 | 15.30357936 | 9.886114669 | 11.27640741 | 18.62105924 |
| ENSMUSG0000088016 | 14.85648888 | 15.30357936 | 8.473812573 | 5.638203705 | 8.594335036 |
| ENSMUSG0000088017 | 4.952162959 | 4.173703463 | 4.943057334 | 3.221830688 | 2.864778345 |
| ENSMUSG0000088018 | 4.952162959 | 9.738641413 | 7.061510478 | 9.665492065 | 8.594335036 |
| ENSMUSG0000088019 | 7.781970364 | 6.260555194 | 6.35535943  | 5.638203705 | 4.297167518 |
| ENSMUSG0000088020 | 7.074518513 | 4.869320706 | 4.943057334 | 3.221830688 | 5.013362104 |
| ENSMUSG0000088021 | 6.367066661 | 8.347406925 | 7.061510478 | 4.832746033 | 9.310529622 |
| ENSMUSG0000088022 | 40.32475552 | 63.30116918 | 69.90895373 | 45.10562964 | 59.44415067 |
| ENSMUSG0000088025 | 12.02668147 | 6.260555194 | 9.179963621 | 6.443661377 | 10.02672421 |
| ENSMUSG0000088026 | 4.244711108 | 6.260555194 | 3.530755239 | 0.805457672 | 3.580972932 |
| ENSMUSG0000088027 | 11.31922962 | 4.869320706 | 4.236906287 | 4.832746033 | 3.580972932 |
| ENSMUSG0000088028 | 9.904325918 | 13.21672763 | 12.00456781 | 13.69278043 | 13.60769714 |
| ENSMUSG0000088030 | 1.414903703 | 5.56493795  | 1.412302096 | 0           | 5.729556691 |
| ENSMUSG0000088031 | 7.074518513 | 5.56493795  | 8.473812573 | 4.832746033 | 7.87814045  |
| ENSMUSG0000088036 | 7.781970364 | 2.086851731 | 4.236906287 | 3.221830688 | 4.297167518 |
| ENSMUSG0000088037 | 164.1288295 | 216.3369628 | 180.7746682 | 163.5079074 | 161.8599765 |
| ENSMUSG0000088039 | 1.414903703 | 4.869320706 | 7.767661525 | 2.416373016 | 7.161945863 |
| ENSMUSG0000088040 | 12.02668147 | 9.738641413 | 12.71071886 | 5.638203705 | 7.161945863 |
| ENSMUSG0000088041 | 9.904325918 | 6.956172438 | 7.767661525 | 5.638203705 | 7.87814045  |
| ENSMUSG0000088043 | 12.02668147 | 7.651789682 | 9.886114669 | 3.221830688 | 4.297167518 |
| ENSMUSG0000088044 | 6.367066661 | 8.347406925 | 4.943057334 | 10.47094974 | 14.32389173 |
| ENSMUSG0000088045 | 0           | 0.695617244 | 0           | 0           | 0           |
| ENSMUSG0000088046 | 9.196874066 | 9.738641413 | 6.35535943  | 4.832746033 | 7.161945863 |
| ENSMUSG0000088047 | 4.952162959 | 6.956172438 | 2.118453143 | 2.416373016 | 5.013362104 |
| ENSMUSG0000088048 | 6.367066661 | 6.260555194 | 7.061510478 | 5.638203705 | 5.013362104 |
| ENSMUSG0000088049 | 9.196874066 | 6.956172438 | 8.473812573 | 5.638203705 | 9.310529622 |
| ENSMUSG0000088050 | 2.829807405 | 3.478086219 | 5.649208382 | 5.638203705 | 3.580972932 |
| ENSMUSG0000088051 | 12.02668147 | 8.347406925 | 10.59226572 | 5.638203705 | 7.161945863 |
| ENSMUSG0000088052 | 1.414903703 | 0           | 0.706151048 | 1.610915344 | 0.716194586 |
| ENSMUSG0000088054 | 7.781970364 | 5.56493795  | 7.767661525 | 4.02728836  | 17.90486466 |
| ENSMUSG0000088055 | 9.196874066 | 8.347406925 | 11.29841676 | 6.443661377 | 10.02672421 |
| ENSMUSG0000088056 | 22.63845924 | 22.2597518  | 29.65834401 | 22.55281482 | 22.20203218 |
| ENSMUSG0000088057 | 17.68629628 | 6.956172438 | 6.35535943  | 8.054576721 | 6.445751277 |
| ENSMUSG0000088058 | 9.196874066 | 9.043024169 | 14.12302096 | 14.4982381  | 9.310529622 |
| ENSMUSG0000088059 | 0           | 0           | 0           | 0           | 0           |
| ENSMUSG0000088060 | 13.44158517 | 9.043024169 | 9.886114669 | 5.638203705 | 2.148583759 |
| ENSMUSG0000088062 | 9.196874066 | 6.260555194 | 7.061510478 | 6.443661377 | 3.580972932 |
| ENSMUSG0000088063 | 9.196874066 | 8.347406925 | 7.061510478 | 7.249119049 | 9.310529622 |
| ENSMUSG0000088064 | 14.14903703 | 4.869320706 | 12.71071886 | 6.443661377 | 7.161945863 |
| ENSMUSG0000088066 | 7.781970364 | 20.17290007 | 13.41686991 | 12.88732275 | 12.17530797 |

|                   |             |             |             |             |             |
|-------------------|-------------|-------------|-------------|-------------|-------------|
| ENSMUSG0000088067 | 7.781970364 | 13.21672763 | 12.71071886 | 16.91461111 | 27.21539428 |
| ENSMUSG0000088068 | 9.904325918 | 6.956172438 | 6.35535943  | 4.02728836  | 7.161945863 |
| ENSMUSG0000088069 | 7.781970364 | 2.782468975 | 9.179963621 | 9.665492065 | 8.594335036 |
| ENSMUSG0000088070 | 5.65961481  | 3.478086219 | 8.473812573 | 1.610915344 | 3.580972932 |
| ENSMUSG0000088071 | 77.81970364 | 134.9497453 | 124.2825844 | 151.4260424 | 123.9016634 |
| ENSMUSG0000088073 | 6.367066661 | 7.651789682 | 7.061510478 | 8.054576721 | 5.013362104 |
| ENSMUSG0000088075 | 3.537259256 | 3.478086219 | 4.236906287 | 5.638203705 | 3.580972932 |
| ENSMUSG0000088076 | 9.196874066 | 6.260555194 | 8.473812573 | 7.249119049 | 5.013362104 |
| ENSMUSG0000088077 | 5.65961481  | 7.651789682 | 7.061510478 | 7.249119049 | 5.013362104 |
| ENSMUSG0000088078 | 12.73413332 | 8.347406925 | 7.061510478 | 3.221830688 | 3.580972932 |
| ENSMUSG0000088083 | 12.73413332 | 6.956172438 | 11.29841676 | 8.054576721 | 1.432389173 |
| ENSMUSG0000088084 | 9.904325918 | 7.651789682 | 4.236906287 | 3.221830688 | 8.594335036 |
| ENSMUSG0000088085 | 16.27139258 | 31.99839321 | 34.60140134 | 35.44013757 | 34.37734014 |
| ENSMUSG0000088086 | 12.73413332 | 23.65098629 | 19.77222934 | 4.832746033 | 15.7562809  |
| ENSMUSG0000088088 | 9.904325918 | 9.738641413 | 9.179963621 | 16.91461111 | 16.47247549 |
| ENSMUSG0000088090 | 12.02668147 | 6.260555194 | 9.886114669 | 8.054576721 | 7.87814045  |
| ENSMUSG0000088091 | 10.61177777 | 25.04222078 | 19.06607829 | 11.27640741 | 8.594335036 |
| ENSMUSG0000088093 | 8.489422215 | 7.651789682 | 10.59226572 | 4.832746033 | 7.87814045  |
| ENSMUSG0000088094 | 6.367066661 | 6.260555194 | 3.530755239 | 4.832746033 | 4.297167518 |
| ENSMUSG0000088095 | 9.196874066 | 4.869320706 | 8.473812573 | 3.221830688 | 4.297167518 |
| ENSMUSG0000088096 | 9.196874066 | 8.347406925 | 9.886114669 | 7.249119049 | 5.013362104 |
| ENSMUSG0000088097 | 3.537259256 | 5.56493795  | 5.649208382 | 2.416373016 | 3.580972932 |
| ENSMUSG0000088098 | 13.44158517 | 9.043024169 | 11.29841676 | 5.638203705 | 7.161945863 |
| ENSMUSG0000088099 | 10.61177777 | 7.651789682 | 6.35535943  | 4.832746033 | 4.297167518 |
| ENSMUSG0000088102 | 10.61177777 | 4.869320706 | 10.59226572 | 8.054576721 | 6.445751277 |
| ENSMUSG0000088103 | 5.65961481  | 6.260555194 | 7.767661525 | 5.638203705 | 7.87814045  |
| ENSMUSG0000088104 | 6.367066661 | 6.260555194 | 6.35535943  | 4.832746033 | 8.594335036 |
| ENSMUSG0000088105 | 11.31922962 | 4.869320706 | 5.649208382 | 7.249119049 | 7.87814045  |
| ENSMUSG0000088106 | 16.27139258 | 17.39043109 | 14.829172   | 14.4982381  | 12.89150255 |
| ENSMUSG0000088108 | 43.15456293 | 41.04141738 | 49.43057334 | 65.24207144 | 68.0384857  |
| ENSMUSG0000088111 | 7.781970364 | 8.347406925 | 9.886114669 | 4.832746033 | 10.7429188  |
| ENSMUSG0000088112 | 9.904325918 | 5.56493795  | 5.649208382 | 4.832746033 | 5.013362104 |
| ENSMUSG0000088113 | 26.88317035 | 23.65098629 | 27.53989086 | 16.10915344 | 23.63442135 |
| ENSMUSG0000088114 | 5.65961481  | 6.260555194 | 4.236906287 | 5.638203705 | 7.161945863 |
| ENSMUSG0000088115 | 4.244711108 | 9.738641413 | 14.829172   | 10.47094974 | 5.729556691 |
| ENSMUSG0000088116 | 4.244711108 | 6.260555194 | 7.767661525 | 5.638203705 | 11.45911338 |
| ENSMUSG0000088118 | 8.489422215 | 12.52111039 | 9.886114669 | 6.443661377 | 9.310529622 |
| ENSMUSG0000088119 | 53.05888884 | 74.43104508 | 84.03197468 | 60.40932541 | 57.29556691 |
| ENSMUSG0000088121 | 7.781970364 | 5.56493795  | 4.943057334 | 2.416373016 | 6.445751277 |
| ENSMUSG0000088122 | 12.02668147 | 8.347406925 | 7.061510478 | 3.221830688 | 5.013362104 |
| ENSMUSG0000088123 | 10.61177777 | 5.56493795  | 4.236906287 | 4.832746033 | 5.013362104 |
| ENSMUSG0000088124 | 13.44158517 | 8.347406925 | 9.179963621 | 4.02728836  | 10.02672421 |
| ENSMUSG0000088125 | 8.489422215 | 9.043024169 | 9.886114669 | 6.443661377 | 7.161945863 |

|                   |             |             |             |             |             |
|-------------------|-------------|-------------|-------------|-------------|-------------|
| ENSMUSG0000088126 | 11.31922962 | 6.956172438 | 3.530755239 | 6.443661377 | 7.161945863 |
| ENSMUSG0000088128 | 4.952162959 | 5.56493795  | 7.767661525 | 4.02728836  | 7.87814045  |
| ENSMUSG0000088131 | 12.73413332 | 9.738641413 | 8.473812573 | 2.416373016 | 6.445751277 |
| ENSMUSG0000088132 | 12.73413332 | 11.1298759  | 7.061510478 | 7.249119049 | 4.297167518 |
| ENSMUSG0000088133 | 8.489422215 | 8.347406925 | 10.59226572 | 3.221830688 | 3.580972932 |
| ENSMUSG0000088134 | 12.73413332 | 16.69481385 | 12.00456781 | 10.47094974 | 7.161945863 |
| ENSMUSG0000088135 | 7.781970364 | 9.738641413 | 9.179963621 | 5.638203705 | 6.445751277 |
| ENSMUSG0000088136 | 9.196874066 | 8.347406925 | 7.767661525 | 7.249119049 | 6.445751277 |
| ENSMUSG0000088138 | 12.02668147 | 5.56493795  | 6.35535943  | 7.249119049 | 7.161945863 |
| ENSMUSG0000088139 | 2.122355554 | 4.869320706 | 2.118453143 | 3.221830688 | 2.148583759 |
| ENSMUSG0000088141 | 14.14903703 | 7.651789682 | 6.35535943  | 5.638203705 | 4.297167518 |
| ENSMUSG0000088143 | 5.65961481  | 3.478086219 | 4.943057334 | 5.638203705 | 4.297167518 |
| ENSMUSG0000088144 | 16.97884443 | 8.347406925 | 14.12302096 | 16.91461111 | 17.18867007 |
| ENSMUSG0000088145 | 18.39374813 | 22.2597518  | 18.35992724 | 11.27640741 | 12.89150255 |
| ENSMUSG0000088146 | 106.1177777 | 142.601535  | 103.098053  | 102.2931244 | 88.09193412 |
| ENSMUSG0000088147 | 6.367066661 | 9.738641413 | 15.53532305 | 3.221830688 | 5.729556691 |
| ENSMUSG0000088148 | 7.781970364 | 9.738641413 | 4.236906287 | 7.249119049 | 4.297167518 |
| ENSMUSG0000088149 | 10.61177777 | 9.043024169 | 2.824604191 | 5.638203705 | 12.17530797 |
| ENSMUSG0000088150 | 10.61177777 | 7.651789682 | 6.35535943  | 8.054576721 | 7.161945863 |
| ENSMUSG0000088151 | 18.39374813 | 36.86771392 | 35.30755239 | 48.32746033 | 45.12025894 |
| ENSMUSG0000088152 | 10.61177777 | 8.347406925 | 9.886114669 | 4.02728836  | 7.161945863 |
| ENSMUSG0000088153 | 7.074518513 | 11.82549314 | 13.41686991 | 6.443661377 | 9.310529622 |
| ENSMUSG0000088154 | 4.952162959 | 11.1298759  | 7.061510478 | 4.832746033 | 7.87814045  |
| ENSMUSG0000088155 | 8.489422215 | 9.043024169 | 4.236906287 | 4.02728836  | 7.87814045  |
| ENSMUSG0000088156 | 8.489422215 | 6.956172438 | 5.649208382 | 4.832746033 | 4.297167518 |
| ENSMUSG0000088157 | 4.244711108 | 7.651789682 | 4.943057334 | 1.610915344 | 5.729556691 |
| ENSMUSG0000088158 | 19.10119998 | 31.99839321 | 33.89525029 | 9.665492065 | 22.20203218 |
| ENSMUSG0000088159 | 11.31922962 | 6.956172438 | 7.061510478 | 1.610915344 | 7.87814045  |
| ENSMUSG0000088160 | 9.196874066 | 8.347406925 | 8.473812573 | 4.832746033 | 6.445751277 |
| ENSMUSG0000088161 | 5.65961481  | 8.347406925 | 7.767661525 | 4.832746033 | 5.729556691 |
| ENSMUSG0000088162 | 11.31922962 | 8.347406925 | 12.71071886 | 7.249119049 | 4.297167518 |
| ENSMUSG0000088164 | 8.489422215 | 3.478086219 | 9.886114669 | 3.221830688 | 6.445751277 |
| ENSMUSG0000088165 | 9.196874066 | 6.260555194 | 10.59226572 | 2.416373016 | 9.310529622 |
| ENSMUSG0000088166 | 8.489422215 | 11.82549314 | 4.943057334 | 0.805457672 | 7.161945863 |
| ENSMUSG0000088167 | 9.196874066 | 9.738641413 | 6.35535943  | 6.443661377 | 5.729556691 |
| ENSMUSG0000088168 | 15.56394073 | 27.12907251 | 17.65377619 | 16.10915344 | 17.90486466 |
| ENSMUSG0000088169 | 7.074518513 | 15.99919661 | 12.71071886 | 8.860034393 | 7.87814045  |
| ENSMUSG0000088170 | 30.4204296  | 54.25814501 | 39.54445867 | 37.85651059 | 38.67450766 |
| ENSMUSG0000088171 | 12.02668147 | 18.08604834 | 19.77222934 | 19.33098413 | 20.05344842 |
| ENSMUSG0000088172 | 5.65961481  | 6.260555194 | 7.767661525 | 6.443661377 | 3.580972932 |
| ENSMUSG0000088175 | 6.367066661 | 4.869320706 | 7.061510478 | 8.054576721 | 4.297167518 |
| ENSMUSG0000088176 | 19.80865184 | 18.08604834 | 16.94762515 | 16.10915344 | 29.36397804 |
| ENSMUSG0000088177 | 11.31922962 | 4.869320706 | 9.886114669 | 3.221830688 | 7.161945863 |

|                   |             |             |             |             |             |
|-------------------|-------------|-------------|-------------|-------------|-------------|
| ENSMUSG0000088179 | 4.952162959 | 5.56493795  | 7.767661525 | 6.443661377 | 7.161945863 |
| ENSMUSG0000088180 | 0           | 0           | 0           | 0           | 0           |
| ENSMUSG0000088181 | 7.074518513 | 9.738641413 | 8.473812573 | 3.221830688 | 7.161945863 |
| ENSMUSG0000088182 | 9.196874066 | 6.956172438 | 4.236906287 | 4.832746033 | 5.013362104 |
| ENSMUSG0000088183 | 12.02668147 | 11.1298759  | 2.824604191 | 8.860034393 | 10.7429188  |
| ENSMUSG0000088184 | 5.65961481  | 4.869320706 | 4.943057334 | 4.02728836  | 5.729556691 |
| ENSMUSG0000088185 | 7.781970364 | 16.69481385 | 11.29841676 | 16.91461111 | 7.161945863 |
| ENSMUSG0000088187 | 6.367066661 | 8.347406925 | 10.59226572 | 3.221830688 | 8.594335036 |
| ENSMUSG0000088188 | 4.244711108 | 6.956172438 | 7.061510478 | 15.30369577 | 4.297167518 |
| ENSMUSG0000088189 | 125.9264295 | 164.8612868 | 165.9454962 | 101.4876667 | 90.24051788 |
| ENSMUSG0000088191 | 9.196874066 | 7.651789682 | 7.061510478 | 5.638203705 | 7.87814045  |
| ENSMUSG0000088192 | 11.31922962 | 3.478086219 | 4.943057334 | 8.054576721 | 8.594335036 |
| ENSMUSG0000088193 | 5.65961481  | 4.869320706 | 7.767661525 | 5.638203705 | 6.445751277 |
| ENSMUSG0000088194 | 5.65961481  | 5.56493795  | 12.71071886 | 6.443661377 | 9.310529622 |
| ENSMUSG0000088195 | 4.952162959 | 4.173703463 | 5.649208382 | 4.832746033 | 3.580972932 |
| ENSMUSG0000088196 | 9.196874066 | 9.738641413 | 4.943057334 | 9.665492065 | 8.594335036 |
| ENSMUSG0000088197 | 11.31922962 | 6.260555194 | 9.886114669 | 6.443661377 | 5.729556691 |
| ENSMUSG0000088198 | 10.61177777 | 9.043024169 | 12.71071886 | 1.610915344 | 10.02672421 |
| ENSMUSG0000088200 | 8.489422215 | 10.43425866 | 12.00456781 | 14.4982381  | 14.32389173 |
| ENSMUSG0000088201 | 11.31922962 | 11.82549314 | 7.767661525 | 7.249119049 | 10.02672421 |
| ENSMUSG0000088203 | 3.537259256 | 5.56493795  | 8.473812573 | 6.443661377 | 7.87814045  |
| ENSMUSG0000088204 | 9.904325918 | 2.086851731 | 12.00456781 | 4.02728836  | 7.87814045  |
| ENSMUSG0000088205 | 9.196874066 | 7.651789682 | 9.886114669 | 7.249119049 | 7.87814045  |
| ENSMUSG0000088207 | 19.10119998 | 32.69401046 | 33.18909925 | 14.4982381  | 20.769643   |
| ENSMUSG0000088208 | 24.76081479 | 29.91154148 | 40.25060972 | 24.16373016 | 31.5125618  |
| ENSMUSG0000088209 | 9.196874066 | 9.043024169 | 9.179963621 | 8.860034393 | 5.729556691 |
| ENSMUSG0000088210 | 9.904325918 | 11.1298759  | 7.767661525 | 5.638203705 | 11.45911338 |
| ENSMUSG0000088211 | 8.489422215 | 9.738641413 | 15.53532305 | 14.4982381  | 15.7562809  |
| ENSMUSG0000088212 | 8.489422215 | 7.651789682 | 7.767661525 | 8.860034393 | 8.594335036 |
| ENSMUSG0000088213 | 10.61177777 | 4.869320706 | 7.061510478 | 4.02728836  | 7.87814045  |
| ENSMUSG0000088216 | 6.367066661 | 9.738641413 | 8.473812573 | 2.416373016 | 4.297167518 |
| ENSMUSG0000088217 | 9.904325918 | 13.21672763 | 7.767661525 | 5.638203705 | 5.729556691 |
| ENSMUSG0000088218 | 10.61177777 | 7.651789682 | 6.35535943  | 5.638203705 | 5.013362104 |
| ENSMUSG0000088219 | 11.31922962 | 19.47728283 | 23.30298458 | 201.364418  | 128.9150255 |
| ENSMUSG0000088220 | 4.952162959 | 4.173703463 | 4.236906287 | 6.443661377 | 5.729556691 |
| ENSMUSG0000088221 | 9.904325918 | 9.043024169 | 9.886114669 | 8.054576721 | 5.729556691 |
| ENSMUSG0000088222 | 7.781970364 | 6.260555194 | 2.824604191 | 6.443661377 | 4.297167518 |
| ENSMUSG0000088223 | 4.952162959 | 9.043024169 | 12.00456781 | 3.221830688 | 7.161945863 |
| ENSMUSG0000088224 | 14.14903703 | 10.43425866 | 9.179963621 | 13.69278043 | 12.89150255 |
| ENSMUSG0000088225 | 10.61177777 | 9.043024169 | 7.061510478 | 4.02728836  | 8.594335036 |
| ENSMUSG0000088226 | 9.196874066 | 9.043024169 | 12.71071886 | 7.249119049 | 11.45911338 |
| ENSMUSG0000088227 | 4.952162959 | 7.651789682 | 7.767661525 | 2.416373016 | 12.89150255 |
| ENSMUSG0000088228 | 10.61177777 | 4.869320706 | 17.65377619 | 6.443661377 | 7.161945863 |

|                   |             |             |             |             |             |
|-------------------|-------------|-------------|-------------|-------------|-------------|
| ENSMUSG0000088229 | 0.707451851 | 1.391234488 | 0           | 0.805457672 | 0.716194586 |
| ENSMUSG0000088230 | 160.5915702 | 219.815049  | 164.5331941 | 198.1425873 | 179.7648412 |
| ENSMUSG0000088231 | 5.65961481  | 8.347406925 | 15.53532305 | 8.054576721 | 9.310529622 |
| ENSMUSG0000088232 | 9.904325918 | 3.478086219 | 4.236906287 | 2.416373016 | 5.013362104 |
| ENSMUSG0000088233 | 9.904325918 | 10.43425866 | 7.061510478 | 4.832746033 | 9.310529622 |
| ENSMUSG0000088234 | 7.781970364 | 7.651789682 | 4.236906287 | 4.02728836  | 5.729556691 |
| ENSMUSG0000088236 | 7.781970364 | 3.478086219 | 7.767661525 | 5.638203705 | 5.729556691 |
| ENSMUSG0000088237 | 14.85648888 | 6.956172438 | 7.767661525 | 1.610915344 | 9.310529622 |
| ENSMUSG0000088239 | 9.196874066 | 2.782468975 | 6.35535943  | 9.665492065 | 5.013362104 |
| ENSMUSG0000088240 | 7.074518513 | 6.956172438 | 5.649208382 | 4.02728836  | 4.297167518 |
| ENSMUSG0000088241 | 11.31922962 | 6.956172438 | 9.179963621 | 6.443661377 | 7.87814045  |
| ENSMUSG0000088242 | 7.781970364 | 6.260555194 | 11.29841676 | 8.860034393 | 10.02672421 |
| ENSMUSG0000088243 | 4.952162959 | 7.651789682 | 4.236906287 | 3.221830688 | 5.013362104 |
| ENSMUSG0000088244 | 11.31922962 | 10.43425866 | 4.236906287 | 8.054576721 | 9.310529622 |
| ENSMUSG0000088245 | 9.904325918 | 3.478086219 | 7.061510478 | 4.02728836  | 5.729556691 |
| ENSMUSG0000088246 | 8.489422215 | 13.91234488 | 5.649208382 | 7.249119049 | 10.7429188  |
| ENSMUSG0000088248 | 9.196874066 | 6.956172438 | 7.767661525 | 7.249119049 | 6.445751277 |
| ENSMUSG0000088249 | 10.61177777 | 13.21672763 | 3.530755239 | 10.47094974 | 7.161945863 |
| ENSMUSG0000088250 | 21.93100739 | 30.60715873 | 28.24604191 | 41.88379895 | 43.68786977 |
| ENSMUSG0000088252 | 29.71297775 | 75.82227957 | 51.54902649 | 82.96214023 | 47.2688427  |
| ENSMUSG0000088253 | 9.196874066 | 4.869320706 | 7.061510478 | 4.02728836  | 5.729556691 |
| ENSMUSG0000088254 | 17.68629628 | 20.86851731 | 14.12302096 | 41.88379895 | 32.22875639 |
| ENSMUSG0000088255 | 9.196874066 | 9.043024169 | 7.767661525 | 6.443661377 | 5.729556691 |
| ENSMUSG0000088257 | 7.781970364 | 5.56493795  | 11.29841676 | 9.665492065 | 7.87814045  |
| ENSMUSG0000088258 | 3.537259256 | 10.43425866 | 5.649208382 | 5.638203705 | 5.013362104 |
| ENSMUSG0000088259 | 5.65961481  | 3.478086219 | 7.767661525 | 8.860034393 | 7.87814045  |
| ENSMUSG0000088260 | 10.61177777 | 6.260555194 | 12.71071886 | 3.221830688 | 8.594335036 |
| ENSMUSG0000088261 | 13.44158517 | 2.782468975 | 7.767661525 | 8.860034393 | 7.87814045  |
| ENSMUSG0000088264 | 2.829807405 | 1.391234488 | 2.118453143 | 0.805457672 | 1.432389173 |
| ENSMUSG0000088265 | 12.02668147 | 5.56493795  | 8.473812573 | 5.638203705 | 10.02672421 |
| ENSMUSG0000088266 | 10.61177777 | 5.56493795  | 4.236906287 | 5.638203705 | 6.445751277 |
| ENSMUSG0000088268 | 18.39374813 | 22.95536904 | 12.71071886 | 7.249119049 | 10.7429188  |
| ENSMUSG0000088269 | 10.61177777 | 9.738641413 | 9.886114669 | 4.02728836  | 6.445751277 |
| ENSMUSG0000088270 | 16.27139258 | 20.17290007 | 16.2414741  | 13.69278043 | 13.60769714 |
| ENSMUSG0000088273 | 8.489422215 | 4.869320706 | 12.71071886 | 6.443661377 | 12.17530797 |
| ENSMUSG0000088275 | 7.074518513 | 4.869320706 | 4.943057334 | 4.02728836  | 7.161945863 |
| ENSMUSG0000088276 | 8.489422215 | 11.1298759  | 10.59226572 | 4.02728836  | 2.864778345 |
| ENSMUSG0000088278 | 36.78749627 | 41.04141738 | 34.60140134 | 45.91108731 | 39.39070225 |
| ENSMUSG0000088279 | 11.31922962 | 3.478086219 | 7.061510478 | 4.832746033 | 5.729556691 |
| ENSMUSG0000088280 | 7.781970364 | 5.56493795  | 4.236906287 | 5.638203705 | 7.161945863 |
| ENSMUSG0000088281 | 4.244711108 | 7.651789682 | 6.35535943  | 10.47094974 | 4.297167518 |
| ENSMUSG0000088282 | 6.367066661 | 3.478086219 | 6.35535943  | 3.221830688 | 5.013362104 |
| ENSMUSG0000088283 | 6.367066661 | 2.782468975 | 4.943057334 | 2.416373016 | 2.148583759 |

|                   |             |             |             |             |             |
|-------------------|-------------|-------------|-------------|-------------|-------------|
| ENSMUSG0000088284 | 8.489422215 | 9.738641413 | 12.00456781 | 0           | 7.87814045  |
| ENSMUSG0000088285 | 7.781970364 | 18.08604834 | 13.41686991 | 10.47094974 | 15.7562809  |
| ENSMUSG0000088286 | 6.367066661 | 3.478086219 | 6.35535943  | 7.249119049 | 5.013362104 |
| ENSMUSG0000088288 | 8.489422215 | 3.478086219 | 7.767661525 | 2.416373016 | 2.148583759 |
| ENSMUSG0000088290 | 13.44158517 | 8.347406925 | 9.179963621 | 8.860034393 | 15.7562809  |
| ENSMUSG0000088291 | 2.122355554 | 3.478086219 | 1.412302096 | 2.416373016 | 4.297167518 |
| ENSMUSG0000088293 | 52.35143699 | 70.25734162 | 65.67204744 | 64.43661377 | 73.76804239 |
| ENSMUSG0000088294 | 6.367066661 | 4.173703463 | 2.824604191 | 3.221830688 | 3.580972932 |
| ENSMUSG0000088295 | 5.65961481  | 6.260555194 | 8.473812573 | 5.638203705 | 3.580972932 |
| ENSMUSG0000088296 | 7.781970364 | 6.260555194 | 11.29841676 | 10.47094974 | 10.7429188  |
| ENSMUSG0000088297 | 8.489422215 | 8.347406925 | 5.649208382 | 4.832746033 | 5.013362104 |
| ENSMUSG0000088298 | 62.25576291 | 100.8645003 | 103.804204  | 62.02024075 | 66.60609653 |
| ENSMUSG0000088299 | 68.62282957 | 89.73462445 | 83.32582364 | 44.30017197 | 37.24211849 |
| ENSMUSG0000088301 | 5.65961481  | 3.478086219 | 5.649208382 | 3.221830688 | 0.716194586 |
| ENSMUSG0000088302 | 4.952162959 | 6.260555194 | 11.29841676 | 18.52552646 | 9.310529622 |
| ENSMUSG0000088303 | 29.71297775 | 45.21512085 | 38.13215658 | 20.1364418  | 25.78300511 |
| ENSMUSG0000088304 | 9.904325918 | 9.043024169 | 16.2414741  | 8.054576721 | 3.580972932 |
| ENSMUSG0000088307 | 7.781970364 | 4.173703463 | 4.943057334 | 4.832746033 | 4.297167518 |
| ENSMUSG0000088308 | 34.66514071 | 59.82308296 | 69.20280268 | 74.9075635  | 77.34901533 |
| ENSMUSG0000088310 | 0           | 0.695617244 | 0.706151048 | 0.805457672 | 0           |
| ENSMUSG0000088311 | 5.65961481  | 4.173703463 | 14.12302096 | 4.832746033 | 7.161945863 |
| ENSMUSG0000088312 | 9.904325918 | 8.347406925 | 6.35535943  | 4.832746033 | 6.445751277 |
| ENSMUSG0000088313 | 7.074518513 | 4.173703463 | 9.179963621 | 1.610915344 | 3.580972932 |
| ENSMUSG0000088314 | 17.68629628 | 14.60796212 | 21.18453143 | 13.69278043 | 7.87814045  |
| ENSMUSG0000088317 | 8.489422215 | 6.956172438 | 7.061510478 | 4.832746033 | 9.310529622 |
| ENSMUSG0000088318 | 6.367066661 | 5.56493795  | 5.649208382 | 6.443661377 | 8.594335036 |
| ENSMUSG0000088320 | 9.196874066 | 11.1298759  | 9.886114669 | 4.02728836  | 5.729556691 |
| ENSMUSG0000088322 | 11.31922962 | 5.56493795  | 11.29841676 | 5.638203705 | 8.594335036 |
| ENSMUSG0000088323 | 21.93100739 | 34.08524495 | 26.12758877 | 66.04752911 | 51.56601022 |
| ENSMUSG0000088324 | 3.537259256 | 10.43425866 | 5.649208382 | 2.416373016 | 4.297167518 |
| ENSMUSG0000088325 | 94.09109622 | 132.8628936 | 109.4534124 | 65.24207144 | 63.0251236  |
| ENSMUSG0000088326 | 7.074518513 | 4.869320706 | 2.824604191 | 0.805457672 | 4.297167518 |
| ENSMUSG0000088327 | 11.31922962 | 6.260555194 | 7.767661525 | 5.638203705 | 7.87814045  |
| ENSMUSG0000088329 | 6.367066661 | 7.651789682 | 5.649208382 | 8.054576721 | 5.013362104 |
| ENSMUSG0000088331 | 2.122355554 | 6.956172438 | 7.061510478 | 2.416373016 | 3.580972932 |
| ENSMUSG0000088332 | 178.2778665 | 212.8588766 | 204.0776528 | 190.0880106 | 166.157144  |
| ENSMUSG0000088333 | 11.31922962 | 13.21672763 | 7.767661525 | 6.443661377 | 8.594335036 |
| ENSMUSG0000088334 | 0.707451851 | 1.391234488 | 0           | 2.416373016 | 2.864778345 |
| ENSMUSG0000088335 | 4.952162959 | 4.173703463 | 0.706151048 | 3.221830688 | 2.864778345 |
| ENSMUSG0000088337 | 13.44158517 | 6.260555194 | 6.35535943  | 2.416373016 | 5.729556691 |
| ENSMUSG0000088338 | 19.10119998 | 26.43345526 | 24.71528667 | 24.16373016 | 19.33725383 |
| ENSMUSG0000088339 | 4.952162959 | 4.173703463 | 6.35535943  | 5.638203705 | 6.445751277 |
| ENSMUSG0000088340 | 7.074518513 | 11.82549314 | 7.061510478 | 4.832746033 | 7.161945863 |

|                   |             |             |             |             |             |
|-------------------|-------------|-------------|-------------|-------------|-------------|
| ENSMUSG0000088342 | 7.781970364 | 4.173703463 | 3.530755239 | 4.02728836  | 11.45911338 |
| ENSMUSG0000088343 | 10.61177777 | 8.347406925 | 4.943057334 | 1.610915344 | 2.148583759 |
| ENSMUSG0000088344 | 9.904325918 | 6.260555194 | 9.886114669 | 5.638203705 | 10.7429188  |
| ENSMUSG0000088346 | 13.44158517 | 7.651789682 | 10.59226572 | 6.443661377 | 7.87814045  |
| ENSMUSG0000088348 | 10.61177777 | 9.043024169 | 13.41686991 | 8.054576721 | 6.445751277 |
| ENSMUSG0000088349 | 21.22355554 | 31.30277597 | 28.95219296 | 43.49471429 | 38.67450766 |
| ENSMUSG0000088350 | 9.196874066 | 3.478086219 | 8.473812573 | 0.805457672 | 7.161945863 |
| ENSMUSG0000088351 | 8.489422215 | 10.43425866 | 9.886114669 | 34.6346799  | 20.769643   |
| ENSMUSG0000088352 | 12.02668147 | 11.1298759  | 2.824604191 | 8.860034393 | 5.729556691 |
| ENSMUSG0000088353 | 8.489422215 | 6.956172438 | 4.943057334 | 3.221830688 | 9.310529622 |
| ENSMUSG0000088354 | 4.244711108 | 5.56493795  | 2.824604191 | 8.054576721 | 3.580972932 |
| ENSMUSG0000088356 | 7.781970364 | 5.56493795  | 7.061510478 | 3.221830688 | 7.87814045  |
| ENSMUSG0000088357 | 29.71297775 | 45.91073809 | 52.25517753 | 16.91461111 | 25.06681052 |
| ENSMUSG0000088358 | 6.367066661 | 7.651789682 | 10.59226572 | 8.054576721 | 7.87814045  |
| ENSMUSG0000088359 | 8.489422215 | 4.869320706 | 12.00456781 | 8.860034393 | 9.310529622 |
| ENSMUSG0000088360 | 11.31922962 | 7.651789682 | 6.35535943  | 4.02728836  | 6.445751277 |
| ENSMUSG0000088361 | 9.904325918 | 9.738641413 | 6.35535943  | 4.832746033 | 5.729556691 |
| ENSMUSG0000088362 | 7.781970364 | 5.56493795  | 10.59226572 | 7.249119049 | 7.87814045  |
| ENSMUSG0000088363 | 9.196874066 | 4.869320706 | 6.35535943  | 8.860034393 | 3.580972932 |
| ENSMUSG0000088364 | 9.196874066 | 13.21672763 | 11.29841676 | 9.665492065 | 11.45911338 |
| ENSMUSG0000088365 | 10.61177777 | 9.738641413 | 7.061510478 | 5.638203705 | 8.594335036 |
| ENSMUSG0000088366 | 7.781970364 | 8.347406925 | 9.886114669 | 4.02728836  | 5.729556691 |
| ENSMUSG0000088367 | 4.952162959 | 3.478086219 | 5.649208382 | 3.221830688 | 2.864778345 |
| ENSMUSG0000088368 | 9.196874066 | 9.738641413 | 6.35535943  | 7.249119049 | 7.161945863 |
| ENSMUSG0000088369 | 7.074518513 | 4.173703463 | 4.236906287 | 4.832746033 | 6.445751277 |
| ENSMUSG0000088370 | 7.781970364 | 7.651789682 | 4.236906287 | 3.221830688 | 6.445751277 |
| ENSMUSG0000088371 | 11.31922962 | 6.260555194 | 3.530755239 | 9.665492065 | 7.161945863 |
| ENSMUSG0000088372 | 7.781970364 | 6.956172438 | 7.061510478 | 4.832746033 | 10.7429188  |
| ENSMUSG0000088373 | 7.074518513 | 13.91234488 | 11.29841676 | 20.94189947 | 17.18867007 |
| ENSMUSG0000088374 | 7.074518513 | 6.956172438 | 2.824604191 | 6.443661377 | 6.445751277 |
| ENSMUSG0000088377 | 10.61177777 | 3.478086219 | 7.767661525 | 4.02728836  | 7.161945863 |
| ENSMUSG0000088378 | 26.1757185  | 23.65098629 | 33.18909925 | 20.1364418  | 17.90486466 |
| ENSMUSG0000088379 | 7.781970364 | 5.56493795  | 7.767661525 | 8.054576721 | 12.17530797 |
| ENSMUSG0000088380 | 4.952162959 | 5.56493795  | 4.943057334 | 5.638203705 | 7.161945863 |
| ENSMUSG0000088383 | 1.414903703 | 0.695617244 | 3.530755239 | 4.832746033 | 3.580972932 |
| ENSMUSG0000088384 | 7.074518513 | 3.478086219 | 10.59226572 | 7.249119049 | 10.7429188  |
| ENSMUSG0000088385 | 31.83533331 | 50.08444155 | 48.01827125 | 26.58010318 | 25.78300511 |
| ENSMUSG0000088386 | 8.489422215 | 9.043024169 | 7.061510478 | 8.054576721 | 5.013362104 |
| ENSMUSG0000088387 | 9.904325918 | 6.956172438 | 7.767661525 | 6.443661377 | 10.02672421 |
| ENSMUSG0000088389 | 7.781970364 | 6.260555194 | 9.179963621 | 4.02728836  | 5.729556691 |
| ENSMUSG0000088391 | 8.489422215 | 6.260555194 | 7.767661525 | 5.638203705 | 7.161945863 |
| ENSMUSG0000088392 | 11.31922962 | 7.651789682 | 10.59226572 | 2.416373016 | 6.445751277 |
| ENSMUSG0000088393 | 43.86201478 | 65.38802092 | 67.08434954 | 91.82217462 | 67.32229112 |

|                   |             |             |             |             |             |
|-------------------|-------------|-------------|-------------|-------------|-------------|
| ENSMUSG0000088394 | 2.829807405 | 5.56493795  | 7.767661525 | 4.02728836  | 3.580972932 |
| ENSMUSG0000088395 | 9.904325918 | 7.651789682 | 8.473812573 | 1.610915344 | 9.310529622 |
| ENSMUSG0000088397 | 9.904325918 | 12.52111039 | 7.061510478 | 6.443661377 | 11.45911338 |
| ENSMUSG0000088398 | 11.31922962 | 6.956172438 | 14.829172   | 8.860034393 | 12.89150255 |
| ENSMUSG0000088400 | 41.73965922 | 72.34419335 | 62.1412922  | 43.49471429 | 41.53928601 |
| ENSMUSG0000088402 | 4.952162959 | 6.956172438 | 2.118453143 | 2.416373016 | 3.580972932 |
| ENSMUSG0000088403 | 7.781970364 | 13.21672763 | 11.29841676 | 9.665492065 | 8.594335036 |
| ENSMUSG0000088404 | 5.65961481  | 4.173703463 | 2.118453143 | 0.805457672 | 2.148583759 |
| ENSMUSG0000088405 | 5.65961481  | 4.869320706 | 7.767661525 | 2.416373016 | 4.297167518 |
| ENSMUSG0000088406 | 6.367066661 | 5.56493795  | 10.59226572 | 14.4982381  | 12.89150255 |
| ENSMUSG0000088407 | 16.27139258 | 4.173703463 | 6.35535943  | 3.221830688 | 7.161945863 |
| ENSMUSG0000088408 | 8.489422215 | 5.56493795  | 5.649208382 | 8.860034393 | 7.87814045  |
| ENSMUSG0000088409 | 12.02668147 | 11.1298759  | 8.473812573 | 4.02728836  | 7.87814045  |
| ENSMUSG0000088410 | 14.14903703 | 25.73783802 | 24.71528667 | 20.1364418  | 20.05344842 |
| ENSMUSG0000088412 | 9.904325918 | 6.260555194 | 7.767661525 | 6.443661377 | 7.161945863 |
| ENSMUSG0000088414 | 12.02668147 | 10.43425866 | 16.94762515 | 18.52552646 | 17.90486466 |
| ENSMUSG0000088415 | 12.02668147 | 7.651789682 | 10.59226572 | 5.638203705 | 8.594335036 |
| ENSMUSG0000088416 | 14.14903703 | 15.30357936 | 11.29841676 | 13.69278043 | 11.45911338 |
| ENSMUSG0000088417 | 7.781970364 | 6.956172438 | 10.59226572 | 7.249119049 | 5.729556691 |
| ENSMUSG0000088418 | 5.65961481  | 5.56493795  | 7.061510478 | 6.443661377 | 6.445751277 |
| ENSMUSG0000088419 | 6.367066661 | 4.173703463 | 4.236906287 | 9.665492065 | 10.02672421 |
| ENSMUSG0000088420 | 10.61177777 | 6.260555194 | 9.886114669 | 3.221830688 | 5.729556691 |
| ENSMUSG0000088421 | 8.489422215 | 3.478086219 | 4.943057334 | 4.02728836  | 3.580972932 |
| ENSMUSG0000088422 | 9.196874066 | 6.956172438 | 11.29841676 | 3.221830688 | 7.161945863 |
| ENSMUSG0000088423 | 9.196874066 | 11.1298759  | 9.886114669 | 6.443661377 | 7.161945863 |
| ENSMUSG0000088425 | 12.02668147 | 6.260555194 | 4.943057334 | 6.443661377 | 3.580972932 |
| ENSMUSG0000088426 | 5.65961481  | 6.956172438 | 8.473812573 | 4.02728836  | 6.445751277 |
| ENSMUSG0000088428 | 7.074518513 | 8.347406925 | 4.943057334 | 8.054576721 | 7.87814045  |
| ENSMUSG0000088429 | 9.196874066 | 8.347406925 | 4.943057334 | 7.249119049 | 5.013362104 |
| ENSMUSG0000088432 | 0           | 0           | 0           | 0.805457672 | 0.716194586 |
| ENSMUSG0000088433 | 6.367066661 | 7.651789682 | 7.061510478 | 8.860034393 | 5.013362104 |
| ENSMUSG0000088435 | 12.73413332 | 9.738641413 | 4.236906287 | 6.443661377 | 7.87814045  |
| ENSMUSG0000088436 | 7.074518513 | 11.1298759  | 9.179963621 | 5.638203705 | 8.594335036 |
| ENSMUSG0000088437 | 112.4848444 | 164.1656695 | 161.0024389 | 142.566008  | 126.0502472 |
| ENSMUSG0000088438 | 13.44158517 | 3.478086219 | 10.59226572 | 10.47094974 | 7.161945863 |
| ENSMUSG0000088439 | 12.02668147 | 4.173703463 | 7.061510478 | 8.054576721 | 5.729556691 |
| ENSMUSG0000088440 | 7.781970364 | 5.56493795  | 4.236906287 | 4.832746033 | 6.445751277 |
| ENSMUSG0000088441 | 10.61177777 | 6.956172438 | 4.943057334 | 2.416373016 | 7.87814045  |
| ENSMUSG0000088442 | 102.5805184 | 184.3385696 | 153.2347774 | 208.6135371 | 158.9951982 |
| ENSMUSG0000088443 | 7.074518513 | 6.956172438 | 2.118453143 | 5.638203705 | 3.580972932 |
| ENSMUSG0000088444 | 10.61177777 | 8.347406925 | 9.886114669 | 5.638203705 | 4.297167518 |
| ENSMUSG0000088445 | 3.537259256 | 3.478086219 | 7.061510478 | 8.860034393 | 5.729556691 |
| ENSMUSG0000088446 | 4.244711108 | 2.086851731 | 4.943057334 | 2.416373016 | 2.864778345 |



|                   |              |             |             |             |             |
|-------------------|--------------|-------------|-------------|-------------|-------------|
| ENSMUSG0000088447 | 2.829807405  | 4.173703463 | 4.236906287 | 8.054576721 | 4.297167518 |
| ENSMUSG0000088448 | 12.02668147  | 3.478086219 | 12.71071886 | 7.249119049 | 5.013362104 |
| ENSMUSG0000088449 | 42.447111108 | 67.47487265 | 64.96589639 | 44.30017197 | 46.55264811 |
| ENSMUSG0000088450 | 9.196874066  | 9.043024169 | 7.767661525 | 5.638203705 | 6.445751277 |
| ENSMUSG0000088451 | 10.61177777  | 13.91234488 | 14.12302096 | 11.27640741 | 11.45911338 |
| ENSMUSG0000088453 | 14.14903703  | 18.08604834 | 21.89068248 | 16.10915344 | 12.89150255 |
| ENSMUSG0000088454 | 10.61177777  | 7.651789682 | 5.649208382 | 6.443661377 | 7.87814045  |
| ENSMUSG0000088456 | 12.73413332  | 8.347406925 | 8.473812573 | 5.638203705 | 10.02672421 |
| ENSMUSG0000088458 | 7.074518513  | 9.738641413 | 11.29841676 | 1.610915344 | 5.729556691 |
| ENSMUSG0000088459 | 6.367066661  | 6.260555194 | 4.943057334 | 8.860034393 | 8.594335036 |
| ENSMUSG0000088460 | 8.489422215  | 10.43425866 | 12.00456781 | 8.054576721 | 7.161945863 |
| ENSMUSG0000088461 | 4.952162959  | 4.869320706 | 14.12302096 | 7.249119049 | 7.87814045  |
| ENSMUSG0000088463 | 14.14903703  | 7.651789682 | 4.943057334 | 6.443661377 | 2.148583759 |
| ENSMUSG0000088464 | 4.244711108  | 5.56493795  | 2.824604191 | 1.610915344 | 0.716194586 |
| ENSMUSG0000088465 | 10.61177777  | 9.738641413 | 8.473812573 | 9.665492065 | 12.17530797 |
| ENSMUSG0000088468 | 10.61177777  | 6.956172438 | 6.35535943  | 4.832746033 | 4.297167518 |
| ENSMUSG0000088469 | 4.952162959  | 4.869320706 | 9.886114669 | 6.443661377 | 5.729556691 |
| ENSMUSG0000088470 | 7.074518513  | 4.869320706 | 4.943057334 | 8.860034393 | 8.594335036 |
| ENSMUSG0000088471 | 11.31922962  | 10.43425866 | 7.767661525 | 8.054576721 | 9.310529622 |
| ENSMUSG0000088472 | 11.31922962  | 4.869320706 | 9.886114669 | 6.443661377 | 10.7429188  |
| ENSMUSG0000088473 | 4.952162959  | 9.043024169 | 0.706151048 | 3.221830688 | 5.729556691 |
| ENSMUSG0000088474 | 9.196874066  | 5.56493795  | 4.943057334 | 8.054576721 | 9.310529622 |
| ENSMUSG0000088475 | 11.31922962  | 21.56413456 | 19.77222934 | 14.4982381  | 12.89150255 |
| ENSMUSG0000088476 | 9.196874066  | 8.347406925 | 6.35535943  | 9.665492065 | 8.594335036 |
| ENSMUSG0000088477 | 0            | 0           | 0.706151048 | 0           | 0           |
| ENSMUSG0000088478 | 29.0055259   | 36.86771392 | 35.30755239 | 19.33098413 | 29.36397804 |
| ENSMUSG0000088479 | 26.88317035  | 36.86771392 | 24.00913562 | 16.10915344 | 12.17530797 |
| ENSMUSG0000088480 | 3.537259256  | 10.43425866 | 9.886114669 | 5.638203705 | 10.02672421 |
| ENSMUSG0000088481 | 9.904325918  | 5.56493795  | 8.473812573 | 6.443661377 | 7.87814045  |
| ENSMUSG0000088482 | 10.61177777  | 10.43425866 | 8.473812573 | 8.054576721 | 13.60769714 |
| ENSMUSG0000088483 | 10.61177777  | 9.043024169 | 3.530755239 | 5.638203705 | 9.310529622 |
| ENSMUSG0000088484 | 9.196874066  | 7.651789682 | 7.767661525 | 6.443661377 | 6.445751277 |
| ENSMUSG0000088485 | 121.6817184  | 174.5999282 | 170.8885536 | 103.9040397 | 110.2939663 |
| ENSMUSG0000088487 | 7.781970364  | 3.478086219 | 10.59226572 | 9.665492065 | 6.445751277 |
| ENSMUSG0000088490 | 7.074518513  | 11.1298759  | 4.236906287 | 9.665492065 | 7.87814045  |
| ENSMUSG0000088491 | 21.22355554  | 22.95536904 | 16.94762515 | 13.69278043 | 16.47247549 |
| ENSMUSG0000088493 | 9.196874066  | 6.260555194 | 10.59226572 | 2.416373016 | 3.580972932 |
| ENSMUSG0000088494 | 45.27691848  | 58.43184848 | 58.61053696 | 83.7675979  | 64.45751277 |
| ENSMUSG0000088495 | 7.074518513  | 5.56493795  | 7.061510478 | 7.249119049 | 6.445751277 |
| ENSMUSG0000088497 | 8.489422215  | 3.478086219 | 6.35535943  | 8.054576721 | 6.445751277 |
| ENSMUSG0000088498 | 8.489422215  | 7.651789682 | 5.649208382 | 9.665492065 | 7.161945863 |
| ENSMUSG0000088499 | 9.904325918  | 4.869320706 | 7.767661525 | 4.02728836  | 6.445751277 |
| ENSMUSG0000088500 | 6.367066661  | 10.43425866 | 4.943057334 | 4.832746033 | 7.161945863 |

|                   |             |             |             |             |             |
|-------------------|-------------|-------------|-------------|-------------|-------------|
| ENSMUSG0000088501 | 11.31922962 | 11.1298759  | 10.59226572 | 4.02728836  | 8.594335036 |
| ENSMUSG0000088502 | 0           | 0           | 0           | 0           | 0           |
| ENSMUSG0000088504 | 7.074518513 | 6.956172438 | 9.886114669 | 8.054576721 | 4.297167518 |
| ENSMUSG0000088505 | 14.14903703 | 10.43425866 | 4.943057334 | 5.638203705 | 5.013362104 |
| ENSMUSG0000088506 | 7.781970364 | 6.956172438 | 5.649208382 | 6.443661377 | 12.17530797 |
| ENSMUSG0000088509 | 12.02668147 | 6.260555194 | 9.886114669 | 3.221830688 | 5.729556691 |
| ENSMUSG0000088510 | 11.31922962 | 7.651789682 | 5.649208382 | 2.416373016 | 5.729556691 |
| ENSMUSG0000088511 | 9.904325918 | 9.043024169 | 5.649208382 | 4.02728836  | 9.310529622 |
| ENSMUSG0000088512 | 6.367066661 | 6.260555194 | 10.59226572 | 7.249119049 | 5.013362104 |
| ENSMUSG0000088514 | 12.02668147 | 7.651789682 | 9.886114669 | 10.47094974 | 12.89150255 |
| ENSMUSG0000088515 | 10.61177777 | 6.956172438 | 4.236906287 | 6.443661377 | 7.87814045  |
| ENSMUSG0000088516 | 26.88317035 | 51.47567604 | 55.78593277 | 17.72006879 | 20.769643   |
| ENSMUSG0000088517 | 7.074518513 | 3.478086219 | 7.767661525 | 8.054576721 | 3.580972932 |
| ENSMUSG0000088518 | 3.537259256 | 2.782468975 | 4.943057334 | 2.416373016 | 5.729556691 |
| ENSMUSG0000088519 | 6.367066661 | 6.956172438 | 4.943057334 | 4.02728836  | 5.013362104 |
| ENSMUSG0000088521 | 8.489422215 | 6.956172438 | 5.649208382 | 9.665492065 | 5.729556691 |
| ENSMUSG0000088522 | 6.367066661 | 4.869320706 | 4.943057334 | 10.47094974 | 6.445751277 |
| ENSMUSG0000088523 | 5.65961481  | 4.869320706 | 7.061510478 | 3.221830688 | 4.297167518 |
| ENSMUSG0000088524 | 0           | 0           | 0           | 0           | 0           |
| ENSMUSG0000088525 | 10.61177777 | 4.173703463 | 9.179963621 | 7.249119049 | 7.161945863 |
| ENSMUSG0000088526 | 11.31922962 | 9.043024169 | 9.179963621 | 5.638203705 | 10.7429188  |
| ENSMUSG0000088527 | 9.196874066 | 5.56493795  | 7.061510478 | 8.054576721 | 6.445751277 |
| ENSMUSG0000088528 | 10.61177777 | 20.17290007 | 16.2414741  | 17.72006879 | 12.17530797 |
| ENSMUSG0000088529 | 3.537259256 | 5.56493795  | 3.530755239 | 7.249119049 | 10.02672421 |
| ENSMUSG0000088530 | 7.781970364 | 3.478086219 | 3.530755239 | 0.805457672 | 2.864778345 |
| ENSMUSG0000088532 | 5.65961481  | 6.956172438 | 4.236906287 | 8.860034393 | 7.161945863 |
| ENSMUSG0000088533 | 8.489422215 | 9.738641413 | 1.412302096 | 8.054576721 | 6.445751277 |
| ENSMUSG0000088535 | 7.781970364 | 8.347406925 | 4.943057334 | 5.638203705 | 7.161945863 |
| ENSMUSG0000088536 | 10.61177777 | 4.869320706 | 14.12302096 | 7.249119049 | 5.013362104 |
| ENSMUSG0000088537 | 14.85648888 | 9.043024169 | 9.179963621 | 8.054576721 | 8.594335036 |
| ENSMUSG0000088538 | 6.367066661 | 5.56493795  | 11.29841676 | 7.249119049 | 12.89150255 |
| ENSMUSG0000088539 | 6.367066661 | 1.391234488 | 4.236906287 | 0           | 1.432389173 |
| ENSMUSG0000088541 | 12.02668147 | 4.869320706 | 9.179963621 | 2.416373016 | 7.87814045  |
| ENSMUSG0000088542 | 10.61177777 | 6.260555194 | 9.179963621 | 5.638203705 | 12.17530797 |
| ENSMUSG0000088543 | 14.85648888 | 18.08604834 | 16.94762515 | 19.33098413 | 25.06681052 |
| ENSMUSG0000088544 | 0           | 0           | 1.412302096 | 1.610915344 | 0           |
| ENSMUSG0000088545 | 12.02668147 | 5.56493795  | 12.00456781 | 3.221830688 | 9.310529622 |
| ENSMUSG0000088546 | 8.489422215 | 6.260555194 | 7.061510478 | 4.832746033 | 5.013362104 |
| ENSMUSG0000088547 | 12.02668147 | 5.56493795  | 8.473812573 | 4.02728836  | 7.161945863 |
| ENSMUSG0000088548 | 1.414903703 | 1.391234488 | 0           | 0           | 0           |
| ENSMUSG0000088549 | 14.14903703 | 18.08604834 | 18.35992724 | 8.860034393 | 22.91822676 |
| ENSMUSG0000088550 | 8.489422215 | 8.347406925 | 3.530755239 | 5.638203705 | 5.729556691 |
| ENSMUSG0000088551 | 7.074518513 | 9.738641413 | 6.35535943  | 4.832746033 | 5.013362104 |

|                   |             |             |             |             |             |
|-------------------|-------------|-------------|-------------|-------------|-------------|
| ENSMUSG0000088552 | 42.44711108 | 67.47487265 | 67.08434954 | 72.49119049 | 61.59273443 |
| ENSMUSG0000088553 | 11.31922962 | 6.260555194 | 14.12302096 | 8.054576721 | 8.594335036 |
| ENSMUSG0000088554 | 9.196874066 | 6.956172438 | 9.886114669 | 5.638203705 | 7.161945863 |
| ENSMUSG0000088555 | 64.37811846 | 93.21271067 | 74.85201106 | 80.54576721 | 84.51096119 |
| ENSMUSG0000088558 | 14.85648888 | 6.260555194 | 9.179963621 | 6.443661377 | 7.161945863 |
| ENSMUSG0000088559 | 29.0055259  | 47.30197258 | 57.19823487 | 31.41284921 | 30.79636721 |
| ENSMUSG0000088562 | 11.31922962 | 8.347406925 | 10.59226572 | 4.02728836  | 7.87814045  |
| ENSMUSG0000088563 | 9.196874066 | 7.651789682 | 7.767661525 | 4.832746033 | 7.87814045  |
| ENSMUSG0000088564 | 9.904325918 | 4.869320706 | 5.649208382 | 8.054576721 | 10.02672421 |
| ENSMUSG0000088565 | 11.31922962 | 5.56493795  | 9.886114669 | 6.443661377 | 7.161945863 |
| ENSMUSG0000088566 | 278.0285775 | 326.9401046 | 295.171138  | 351.179545  | 312.9770342 |
| ENSMUSG0000088570 | 6.367066661 | 6.260555194 | 9.179963621 | 8.054576721 | 7.161945863 |
| ENSMUSG0000088571 | 11.31922962 | 7.651789682 | 4.943057334 | 8.054576721 | 5.013362104 |
| ENSMUSG0000088572 | 5.65961481  | 6.956172438 | 10.59226572 | 6.443661377 | 7.161945863 |
| ENSMUSG0000088573 | 8.489422215 | 6.956172438 | 11.29841676 | 4.832746033 | 8.594335036 |
| ENSMUSG0000088574 | 9.196874066 | 12.52111039 | 4.943057334 | 6.443661377 | 10.02672421 |
| ENSMUSG0000088575 | 4.244711108 | 2.086851731 | 4.236906287 | 4.02728836  | 2.864778345 |
| ENSMUSG0000088576 | 9.904325918 | 8.347406925 | 2.824604191 | 8.054576721 | 4.297167518 |
| ENSMUSG0000088577 | 4.952162959 | 4.869320706 | 2.118453143 | 2.416373016 | 1.432389173 |
| ENSMUSG0000088578 | 8.489422215 | 4.869320706 | 8.473812573 | 8.054576721 | 7.161945863 |
| ENSMUSG0000088579 | 9.196874066 | 9.738641413 | 12.71071886 | 2.416373016 | 2.148583759 |
| ENSMUSG0000088580 | 6.367066661 | 5.56493795  | 11.29841676 | 7.249119049 | 8.594335036 |
| ENSMUSG0000088581 | 8.489422215 | 9.738641413 | 14.12302096 | 6.443661377 | 6.445751277 |
| ENSMUSG0000088582 | 8.489422215 | 4.869320706 | 5.649208382 | 3.221830688 | 6.445751277 |
| ENSMUSG0000088583 | 7.074518513 | 9.738641413 | 8.473812573 | 6.443661377 | 11.45911338 |
| ENSMUSG0000088585 | 11.31922962 | 6.956172438 | 12.71071886 | 10.47094974 | 2.148583759 |
| ENSMUSG0000088587 | 7.074518513 | 6.956172438 | 7.061510478 | 4.832746033 | 3.580972932 |
| ENSMUSG0000088589 | 7.781970364 | 6.260555194 | 7.767661525 | 6.443661377 | 6.445751277 |
| ENSMUSG0000088591 | 7.781970364 | 6.956172438 | 5.649208382 | 11.27640741 | 9.310529622 |
| ENSMUSG0000088594 | 9.904325918 | 7.651789682 | 11.29841676 | 2.416373016 | 3.580972932 |
| ENSMUSG0000088595 | 7.074518513 | 6.956172438 | 8.473812573 | 8.054576721 | 8.594335036 |
| ENSMUSG0000088596 | 7.074518513 | 7.651789682 | 3.530755239 | 4.02728836  | 3.580972932 |
| ENSMUSG0000088597 | 7.074518513 | 9.043024169 | 12.00456781 | 7.249119049 | 5.013362104 |
| ENSMUSG0000088598 | 4.952162959 | 6.260555194 | 5.649208382 | 7.249119049 | 3.580972932 |
| ENSMUSG0000088600 | 16.27139258 | 6.260555194 | 8.473812573 | 7.249119049 | 4.297167518 |
| ENSMUSG0000088601 | 8.489422215 | 6.956172438 | 4.943057334 | 6.443661377 | 7.87814045  |
| ENSMUSG0000088602 | 133.000948  | 173.2086937 | 145.4671158 | 114.3749894 | 105.2806042 |
| ENSMUSG0000088603 | 8.489422215 | 6.260555194 | 8.473812573 | 2.416373016 | 6.445751277 |
| ENSMUSG0000088604 | 24.76081479 | 43.12826911 | 40.25060972 | 53.96566403 | 40.10689684 |
| ENSMUSG0000088605 | 9.904325918 | 5.56493795  | 8.473812573 | 6.443661377 | 8.594335036 |
| ENSMUSG0000088606 | 10.61177777 | 6.956172438 | 12.00456781 | 3.221830688 | 2.864778345 |
| ENSMUSG0000088608 | 48.10672589 | 96.69079689 | 72.02740687 | 37.85651059 | 40.10689684 |
| ENSMUSG0000088609 | 13.44158517 | 15.30357936 | 13.41686991 | 16.91461111 | 15.04008631 |

|                   |             |             |             |             |             |
|-------------------|-------------|-------------|-------------|-------------|-------------|
| ENSMUSG0000088611 | 8.489422215 | 9.738641413 | 4.943057334 | 2.416373016 | 5.729556691 |
| ENSMUSG0000088614 | 15.56394073 | 5.56493795  | 7.767661525 | 8.860034393 | 7.161945863 |
| ENSMUSG0000088615 | 12.73413332 | 17.39043109 | 9.886114669 | 12.08186508 | 8.594335036 |
| ENSMUSG0000088616 | 7.074518513 | 3.478086219 | 3.530755239 | 0.805457672 | 2.148583759 |
| ENSMUSG0000088617 | 9.904325918 | 6.956172438 | 10.59226572 | 7.249119049 | 2.864778345 |
| ENSMUSG0000088618 | 9.904325918 | 8.347406925 | 5.649208382 | 5.638203705 | 7.87814045  |
| ENSMUSG0000088620 | 7.074518513 | 11.82549314 | 4.943057334 | 4.832746033 | 7.161945863 |
| ENSMUSG0000088621 | 14.14903703 | 8.347406925 | 16.94762515 | 8.054576721 | 12.17530797 |
| ENSMUSG0000088622 | 19.80865184 | 27.82468975 | 23.30298458 | 13.69278043 | 11.45911338 |
| ENSMUSG0000088623 | 11.31922962 | 9.043024169 | 14.829172   | 9.665492065 | 15.04008631 |
| ENSMUSG0000088624 | 7.781970364 | 9.043024169 | 9.179963621 | 4.02728836  | 7.87814045  |
| ENSMUSG0000088625 | 4.952162959 | 9.738641413 | 4.236906287 | 4.832746033 | 4.297167518 |
| ENSMUSG0000088626 | 212.2355554 | 243.4660353 | 222.43758   | 150.6205847 | 153.2656415 |
| ENSMUSG0000088627 | 5.65961481  | 4.869320706 | 9.179963621 | 7.249119049 | 6.445751277 |
| ENSMUSG0000088628 | 6.367066661 | 8.347406925 | 6.35535943  | 7.249119049 | 5.729556691 |
| ENSMUSG0000088629 | 12.02668147 | 15.99919661 | 20.47838039 | 12.08186508 | 11.45911338 |
| ENSMUSG0000088630 | 8.489422215 | 6.956172438 | 9.179963621 | 8.054576721 | 7.161945863 |
| ENSMUSG0000088631 | 10.61177777 | 21.56413456 | 16.2414741  | 14.4982381  | 18.62105924 |
| ENSMUSG0000088632 | 9.196874066 | 5.56493795  | 11.29841676 | 8.860034393 | 12.89150255 |
| ENSMUSG0000088633 | 9.196874066 | 8.347406925 | 11.29841676 | 4.832746033 | 5.013362104 |
| ENSMUSG0000088634 | 8.489422215 | 6.260555194 | 8.473812573 | 7.249119049 | 10.7429188  |
| ENSMUSG0000088635 | 7.781970364 | 9.043024169 | 10.59226572 | 5.638203705 | 9.310529622 |
| ENSMUSG0000088637 | 1.414903703 | 0           | 2.118453143 | 1.610915344 | 0.716194586 |
| ENSMUSG0000088638 | 5.65961481  | 6.956172438 | 2.824604191 | 5.638203705 | 5.729556691 |
| ENSMUSG0000088639 | 80.64951104 | 157.9051143 | 120.7518292 | 60.40932541 | 66.60609653 |
| ENSMUSG0000088640 | 7.781970364 | 6.956172438 | 4.943057334 | 8.860034393 | 5.013362104 |
| ENSMUSG0000088641 | 148.5648888 | 185.7298041 | 189.2484808 | 192.5043836 | 190.50776   |
| ENSMUSG0000088643 | 7.781970364 | 4.173703463 | 7.061510478 | 4.832746033 | 7.87814045  |
| ENSMUSG0000088644 | 9.196874066 | 7.651789682 | 8.473812573 | 2.416373016 | 5.013362104 |
| ENSMUSG0000088646 | 10.61177777 | 4.869320706 | 7.767661525 | 8.860034393 | 2.148583759 |
| ENSMUSG0000088647 | 3.537259256 | 0.695617244 | 3.530755239 | 3.221830688 | 4.297167518 |
| ENSMUSG0000088649 | 9.196874066 | 6.260555194 | 7.767661525 | 4.832746033 | 10.7429188  |
| ENSMUSG0000088650 | 10.61177777 | 18.78166558 | 9.179963621 | 14.4982381  | 10.7429188  |
| ENSMUSG0000088651 | 7.074518513 | 9.043024169 | 8.473812573 | 3.221830688 | 12.17530797 |
| ENSMUSG0000088653 | 2.122355554 | 2.086851731 | 4.236906287 | 1.610915344 | 2.864778345 |
| ENSMUSG0000088654 | 9.904325918 | 6.260555194 | 5.649208382 | 10.47094974 | 7.161945863 |
| ENSMUSG0000088656 | 9.904325918 | 6.956172438 | 8.473812573 | 4.832746033 | 6.445751277 |
| ENSMUSG0000088657 | 12.73413332 | 8.347406925 | 5.649208382 | 3.221830688 | 7.87814045  |
| ENSMUSG0000088658 | 6.367066661 | 13.91234488 | 12.71071886 | 3.221830688 | 11.45911338 |
| ENSMUSG0000088659 | 11.31922962 | 12.52111039 | 9.179963621 | 6.443661377 | 10.02672421 |
| ENSMUSG0000088660 | 12.02668147 | 6.956172438 | 12.00456781 | 8.860034393 | 7.87814045  |
| ENSMUSG0000088661 | 7.074518513 | 8.347406925 | 12.00456781 | 5.638203705 | 7.87814045  |
| ENSMUSG0000088663 | 2.122355554 | 2.086851731 | 2.824604191 | 5.638203705 | 4.297167518 |

|                   |             |             |             |             |             |
|-------------------|-------------|-------------|-------------|-------------|-------------|
| ENSMUSG0000088666 | 9.904325918 | 8.347406925 | 7.767661525 | 9.665492065 | 7.87814045  |
| ENSMUSG0000088668 | 14.85648888 | 9.738641413 | 9.179963621 | 1.610915344 | 3.580972932 |
| ENSMUSG0000088669 | 10.61177777 | 7.651789682 | 4.236906287 | 3.221830688 | 7.87814045  |
| ENSMUSG0000088670 | 12.02668147 | 15.99919661 | 14.829172   | 12.08186508 | 16.47247549 |
| ENSMUSG0000088671 | 7.781970364 | 7.651789682 | 7.767661525 | 3.221830688 | 6.445751277 |
| ENSMUSG0000088672 | 9.196874066 | 10.43425866 | 13.41686991 | 7.249119049 | 11.45911338 |
| ENSMUSG0000088674 | 2.122355554 | 1.391234488 | 2.824604191 | 1.610915344 | 2.148583759 |
| ENSMUSG0000088675 | 11.31922962 | 6.260555194 | 9.179963621 | 4.832746033 | 4.297167518 |
| ENSMUSG0000088677 | 11.31922962 | 16.69481385 | 11.29841676 | 6.443661377 | 12.17530797 |
| ENSMUSG0000088678 | 10.61177777 | 8.347406925 | 9.179963621 | 6.443661377 | 5.729556691 |
| ENSMUSG0000088679 | 7.781970364 | 4.869320706 | 4.236906287 | 2.416373016 | 1.432389173 |
| ENSMUSG0000088680 | 6.367066661 | 6.956172438 | 4.943057334 | 8.054576721 | 6.445751277 |
| ENSMUSG0000088682 | 9.196874066 | 4.173703463 | 6.35535943  | 8.054576721 | 11.45911338 |
| ENSMUSG0000088683 | 8.489422215 | 6.260555194 | 8.473812573 | 4.02728836  | 6.445751277 |
| ENSMUSG0000088684 | 8.489422215 | 7.651789682 | 9.886114669 | 5.638203705 | 7.161945863 |
| ENSMUSG0000088685 | 39.61730367 | 64.69240367 | 72.73355792 | 49.132918   | 63.0251236  |
| ENSMUSG0000088686 | 6.367066661 | 5.56493795  | 3.530755239 | 8.860034393 | 5.729556691 |
| ENSMUSG0000088687 | 10.61177777 | 6.260555194 | 8.473812573 | 5.638203705 | 8.594335036 |
| ENSMUSG0000088688 | 69.33028142 | 82.77845201 | 80.50121945 | 140.9550926 | 110.2939663 |
| ENSMUSG0000088689 | 0           | 2.086851731 | 0.706151048 | 0           | 0           |
| ENSMUSG0000088691 | 11.31922962 | 5.56493795  | 6.35535943  | 2.416373016 | 7.161945863 |
| ENSMUSG0000088692 | 9.196874066 | 6.956172438 | 2.824604191 | 4.02728836  | 3.580972932 |
| ENSMUSG0000088693 | 9.904325918 | 6.260555194 | 5.649208382 | 3.221830688 | 2.148583759 |
| ENSMUSG0000088695 | 17.68629628 | 22.2597518  | 30.36449505 | 19.33098413 | 17.18867007 |
| ENSMUSG0000088696 | 9.904325918 | 11.1298759  | 16.94762515 | 8.054576721 | 10.02672421 |
| ENSMUSG0000088697 | 6.367066661 | 4.869320706 | 4.943057334 | 0.805457672 | 2.864778345 |
| ENSMUSG0000088699 | 22.63845924 | 17.39043109 | 15.53532305 | 12.08186508 | 10.02672421 |
| ENSMUSG0000088700 | 6.367066661 | 3.478086219 | 1.412302096 | 2.416373016 | 5.013362104 |
| ENSMUSG0000088701 | 0.707451851 | 1.391234488 | 0.706151048 | 0.805457672 | 0           |
| ENSMUSG0000088702 | 60.13340736 | 95.99517964 | 65.67204744 | 45.10562964 | 46.55264811 |
| ENSMUSG0000088703 | 5.65961481  | 2.782468975 | 4.943057334 | 4.02728836  | 5.729556691 |
| ENSMUSG0000088704 | 8.489422215 | 5.56493795  | 4.943057334 | 3.221830688 | 12.17530797 |
| ENSMUSG0000088705 | 159.8841184 | 221.9019008 | 216.0822206 | 187.6716376 | 157.562809  |
| ENSMUSG0000088706 | 3.537259256 | 2.086851731 | 4.236906287 | 4.832746033 | 4.297167518 |
| ENSMUSG0000088707 | 53.05888884 | 66.08363816 | 74.85201106 | 26.58010318 | 35.09353473 |
| ENSMUSG0000088708 | 13.44158517 | 9.043024169 | 9.179963621 | 11.27640741 | 6.445751277 |
| ENSMUSG0000088709 | 6.367066661 | 3.478086219 | 5.649208382 | 5.638203705 | 5.729556691 |
| ENSMUSG0000088710 | 9.196874066 | 5.56493795  | 9.886114669 | 3.221830688 | 5.013362104 |
| ENSMUSG0000088711 | 11.31922962 | 7.651789682 | 6.35535943  | 6.443661377 | 7.161945863 |
| ENSMUSG0000088712 | 9.196874066 | 27.12907251 | 21.89068248 | 17.72006879 | 17.90486466 |
| ENSMUSG0000088713 | 86.30912585 | 119.6461659 | 124.2825844 | 112.7640741 | 102.4158258 |
| ENSMUSG0000088714 | 8.489422215 | 4.869320706 | 8.473812573 | 2.416373016 | 5.729556691 |
| ENSMUSG0000088715 | 11.31922962 | 6.260555194 | 9.179963621 | 8.054576721 | 5.013362104 |

|                   |             |             |             |             |             |
|-------------------|-------------|-------------|-------------|-------------|-------------|
| ENSMUSG0000088716 | 11.31922962 | 6.260555194 | 10.59226572 | 8.054576721 | 7.161945863 |
| ENSMUSG0000088717 | 7.781970364 | 5.56493795  | 10.59226572 | 8.054576721 | 9.310529622 |
| ENSMUSG0000088718 | 10.61177777 | 10.43425866 | 7.061510478 | 5.638203705 | 6.445751277 |
| ENSMUSG0000088719 | 21.93100739 | 22.95536904 | 19.06607829 | 12.88732275 | 12.89150255 |
| ENSMUSG0000088721 | 10.61177777 | 7.651789682 | 9.179963621 | 3.221830688 | 7.87814045  |
| ENSMUSG0000088722 | 12.73413332 | 4.869320706 | 11.29841676 | 5.638203705 | 7.87814045  |
| ENSMUSG0000088726 | 6.367066661 | 9.738641413 | 9.886114669 | 9.665492065 | 6.445751277 |
| ENSMUSG0000088730 | 9.904325918 | 7.651789682 | 12.00456781 | 4.02728836  | 5.729556691 |
| ENSMUSG0000088731 | 12.73413332 | 6.956172438 | 5.649208382 | 4.832746033 | 11.45911338 |
| ENSMUSG0000088732 | 13.44158517 | 9.738641413 | 2.118453143 | 1.610915344 | 2.864778345 |
| ENSMUSG0000088733 | 11.31922962 | 4.173703463 | 6.35535943  | 4.832746033 | 7.87814045  |
| ENSMUSG0000088734 | 8.489422215 | 5.56493795  | 3.530755239 | 0.805457672 | 6.445751277 |
| ENSMUSG0000088735 | 11.31922962 | 11.82549314 | 14.829172   | 5.638203705 | 5.729556691 |
| ENSMUSG0000088736 | 8.489422215 | 6.260555194 | 9.886114669 | 4.02728836  | 5.729556691 |
| ENSMUSG0000088737 | 6.367066661 | 6.956172438 | 3.530755239 | 6.443661377 | 8.594335036 |
| ENSMUSG0000088738 | 0           | 0           | 0           | 0           | 0           |
| ENSMUSG0000088739 | 9.196874066 | 7.651789682 | 14.829172   | 6.443661377 | 8.594335036 |
| ENSMUSG0000088740 | 4.952162959 | 6.956172438 | 4.943057334 | 4.832746033 | 8.594335036 |
| ENSMUSG0000088742 | 2.122355554 | 1.391234488 | 2.824604191 | 12.88732275 | 10.02672421 |
| ENSMUSG0000088743 | 7.781970364 | 7.651789682 | 4.943057334 | 7.249119049 | 6.445751277 |
| ENSMUSG0000088744 | 11.31922962 | 8.347406925 | 12.71071886 | 8.054576721 | 8.594335036 |
| ENSMUSG0000088746 | 5.65961481  | 10.43425866 | 4.236906287 | 4.02728836  | 4.297167518 |
| ENSMUSG0000088747 | 6.367066661 | 4.869320706 | 5.649208382 | 4.832746033 | 7.161945863 |
| ENSMUSG0000088748 | 8.489422215 | 3.478086219 | 2.118453143 | 0.805457672 | 3.580972932 |
| ENSMUSG0000088749 | 11.31922962 | 6.260555194 | 4.943057334 | 4.02728836  | 2.864778345 |
| ENSMUSG0000088750 | 7.074518513 | 7.651789682 | 8.473812573 | 4.02728836  | 3.580972932 |
| ENSMUSG0000088751 | 7.781970364 | 4.173703463 | 4.236906287 | 6.443661377 | 5.729556691 |
| ENSMUSG0000088752 | 31.83533331 | 57.73623123 | 53.66747963 | 74.10210583 | 68.0384857  |
| ENSMUSG0000088753 | 2.829807405 | 2.782468975 | 2.824604191 | 3.221830688 | 5.013362104 |
| ENSMUSG0000088754 | 7.074518513 | 4.869320706 | 7.061510478 | 9.665492065 | 9.310529622 |
| ENSMUSG0000088756 | 9.196874066 | 5.56493795  | 9.179963621 | 5.638203705 | 8.594335036 |
| ENSMUSG0000088758 | 9.904325918 | 8.347406925 | 7.767661525 | 8.860034393 | 11.45911338 |
| ENSMUSG0000088760 | 9.904325918 | 8.347406925 | 8.473812573 | 1.610915344 | 11.45911338 |
| ENSMUSG0000088761 | 10.61177777 | 7.651789682 | 7.061510478 | 4.02728836  | 4.297167518 |
| ENSMUSG0000088763 | 45.98437033 | 77.9091313  | 64.25974535 | 49.93837567 | 55.14698315 |
| ENSMUSG0000088764 | 5.65961481  | 4.869320706 | 7.061510478 | 1.610915344 | 3.580972932 |
| ENSMUSG0000088766 | 6.367066661 | 9.043024169 | 5.649208382 | 1.610915344 | 5.729556691 |
| ENSMUSG0000088767 | 3.537259256 | 2.782468975 | 5.649208382 | 0           | 2.148583759 |
| ENSMUSG0000088768 | 6.367066661 | 6.956172438 | 12.00456781 | 5.638203705 | 7.87814045  |
| ENSMUSG0000088769 | 7.781970364 | 5.56493795  | 4.236906287 | 8.054576721 | 7.87814045  |
| ENSMUSG0000088772 | 9.904325918 | 13.91234488 | 6.35535943  | 8.054576721 | 5.729556691 |
| ENSMUSG0000088773 | 4.952162959 | 2.086851731 | 5.649208382 | 0.805457672 | 4.297167518 |
| ENSMUSG0000088774 | 7.781970364 | 10.43425866 | 8.473812573 | 19.33098413 | 10.7429188  |

|                   |             |             |             |             |             |
|-------------------|-------------|-------------|-------------|-------------|-------------|
| ENSMUSG0000088775 | 10.61177777 | 6.260555194 | 4.943057334 | 7.249119049 | 5.729556691 |
| ENSMUSG0000088776 | 5.65961481  | 6.956172438 | 11.29841676 | 4.02728836  | 8.594335036 |
| ENSMUSG0000088777 | 48.81417774 | 95.2995624  | 78.3827663  | 103.9040397 | 87.37573953 |
| ENSMUSG0000088779 | 9.196874066 | 10.43425866 | 11.29841676 | 8.054576721 | 4.297167518 |
| ENSMUSG0000088781 | 7.781970364 | 9.043024169 | 6.35535943  | 8.860034393 | 7.87814045  |
| ENSMUSG0000088782 | 7.781970364 | 2.086851731 | 7.767661525 | 7.249119049 | 6.445751277 |
| ENSMUSG0000088783 | 7.781970364 | 7.651789682 | 8.473812573 | 1.610915344 | 6.445751277 |
| ENSMUSG0000088784 | 5.65961481  | 5.56493795  | 7.767661525 | 4.832746033 | 7.87814045  |
| ENSMUSG0000088786 | 6.367066661 | 5.56493795  | 10.59226572 | 5.638203705 | 10.7429188  |
| ENSMUSG0000088787 | 0           | 0.695617244 | 1.412302096 | 0           | 0.716194586 |
| ENSMUSG0000088789 | 45.98437033 | 57.73623123 | 58.61053696 | 158.6751614 | 116.7397176 |
| ENSMUSG0000088790 | 18.39374813 | 12.52111039 | 6.35535943  | 7.249119049 | 12.89150255 |
| ENSMUSG0000088791 | 3.537259256 | 5.56493795  | 8.473812573 | 6.443661377 | 9.310529622 |
| ENSMUSG0000088792 | 6.367066661 | 1.391234488 | 5.649208382 | 2.416373016 | 1.432389173 |
| ENSMUSG0000088793 | 7.781970364 | 20.17290007 | 12.00456781 | 7.249119049 | 9.310529622 |
| ENSMUSG0000088794 | 2.829807405 | 9.043024169 | 9.886114669 | 6.443661377 | 2.864778345 |
| ENSMUSG0000088796 | 9.904325918 | 5.56493795  | 7.767661525 | 4.02728836  | 7.87814045  |
| ENSMUSG0000088797 | 5.65961481  | 4.869320706 | 9.179963621 | 5.638203705 | 5.729556691 |
| ENSMUSG0000088798 | 13.44158517 | 9.043024169 | 5.649208382 | 5.638203705 | 8.594335036 |
| ENSMUSG0000088799 | 7.074518513 | 7.651789682 | 10.59226572 | 7.249119049 | 9.310529622 |
| ENSMUSG0000088800 | 12.02668147 | 4.173703463 | 7.767661525 | 4.832746033 | 5.729556691 |
| ENSMUSG0000088802 | 7.074518513 | 6.956172438 | 4.943057334 | 10.47094974 | 6.445751277 |
| ENSMUSG0000088803 | 4.952162959 | 2.086851731 | 2.118453143 | 0           | 2.864778345 |
| ENSMUSG0000088804 | 8.489422215 | 6.260555194 | 9.886114669 | 12.08186508 | 7.161945863 |
| ENSMUSG0000088808 | 1.414903703 | 1.391234488 | 0.706151048 | 0.805457672 | 2.864778345 |
| ENSMUSG0000088809 | 12.02668147 | 6.956172438 | 8.473812573 | 4.02728836  | 5.013362104 |
| ENSMUSG0000088810 | 11.31922962 | 4.869320706 | 7.767661525 | 10.47094974 | 5.013362104 |
| ENSMUSG0000088811 | 7.074518513 | 9.738641413 | 7.061510478 | 5.638203705 | 4.297167518 |
| ENSMUSG0000088812 | 7.074518513 | 5.56493795  | 9.179963621 | 7.249119049 | 5.013362104 |
| ENSMUSG0000088813 | 5.65961481  | 2.782468975 | 7.767661525 | 4.832746033 | 9.310529622 |
| ENSMUSG0000088814 | 7.781970364 | 9.043024169 | 2.118453143 | 7.249119049 | 7.161945863 |
| ENSMUSG0000088816 | 10.61177777 | 4.173703463 | 7.061510478 | 4.02728836  | 8.594335036 |
| ENSMUSG0000088817 | 6.367066661 | 7.651789682 | 7.061510478 | 3.221830688 | 7.87814045  |
| ENSMUSG0000088818 | 5.65961481  | 6.956172438 | 7.767661525 | 2.416373016 | 5.013362104 |
| ENSMUSG0000088819 | 7.781970364 | 6.260555194 | 4.943057334 | 4.02728836  | 9.310529622 |
| ENSMUSG0000088820 | 0.707451851 | 2.086851731 | 4.943057334 | 1.610915344 | 0           |
| ENSMUSG0000088822 | 43.15456293 | 58.43184848 | 48.7244223  | 37.05105292 | 39.39070225 |
| ENSMUSG0000088823 | 5.65961481  | 3.478086219 | 5.649208382 | 4.832746033 | 2.864778345 |
| ENSMUSG0000088824 | 12.73413332 | 5.56493795  | 9.179963621 | 8.054576721 | 5.729556691 |
| ENSMUSG0000088825 | 10.61177777 | 4.869320706 | 3.530755239 | 5.638203705 | 7.87814045  |
| ENSMUSG0000088829 | 7.781970364 | 6.956172438 | 10.59226572 | 6.443661377 | 9.310529622 |
| ENSMUSG0000088830 | 3.537259256 | 5.56493795  | 4.943057334 | 4.02728836  | 5.729556691 |
| ENSMUSG0000088832 | 7.781970364 | 5.56493795  | 6.35535943  | 4.02728836  | 3.580972932 |

|                    |             |             |             |             |             |
|--------------------|-------------|-------------|-------------|-------------|-------------|
| ENSMUSG00000088833 | 0           | 0           | 0           | 0           | 0           |
| ENSMUSG00000088835 | 19.80865184 | 34.78086219 | 35.30755239 | 42.68925662 | 40.10689684 |
| ENSMUSG00000088836 | 11.31922962 | 9.043024169 | 11.29841676 | 9.665492065 | 5.729556691 |
| ENSMUSG00000088839 | 0           | 0.695617244 | 0           | 0           | 0           |
| ENSMUSG00000088840 | 5.65961481  | 6.956172438 | 4.236906287 | 8.054576721 | 3.580972932 |
| ENSMUSG00000088842 | 8.489422215 | 6.956172438 | 7.061510478 | 8.860034393 | 9.310529622 |
| ENSMUSG00000088843 | 13.44158517 | 13.91234488 | 9.179963621 | 8.860034393 | 10.7429188  |
| ENSMUSG00000088845 | 7.781970364 | 6.956172438 | 6.35535943  | 5.638203705 | 7.87814045  |
| ENSMUSG00000088846 | 7.781970364 | 4.869320706 | 7.767661525 | 8.860034393 | 4.297167518 |
| ENSMUSG00000088848 | 8.489422215 | 9.043024169 | 9.886114669 | 5.638203705 | 8.594335036 |
| ENSMUSG00000088849 | 22.63845924 | 32.69401046 | 25.42143772 | 20.94189947 | 21.48583759 |
| ENSMUSG00000088850 | 9.904325918 | 8.347406925 | 5.649208382 | 4.832746033 | 5.013362104 |
| ENSMUSG00000088851 | 4.952162959 | 4.173703463 | 5.649208382 | 5.638203705 | 5.729556691 |
| ENSMUSG00000088852 | 14.14903703 | 7.651789682 | 10.59226572 | 4.832746033 | 8.594335036 |
| ENSMUSG00000088853 | 13.44158517 | 11.82549314 | 15.53532305 | 8.054576721 | 7.161945863 |
| ENSMUSG00000088854 | 7.074518513 | 3.478086219 | 7.767661525 | 9.665492065 | 6.445751277 |
| ENSMUSG00000088855 | 177.5704147 | 226.0756042 | 204.0776528 | 111.9586164 | 102.4158258 |
| ENSMUSG00000088856 | 9.904325918 | 5.56493795  | 9.179963621 | 6.443661377 | 2.864778345 |
| ENSMUSG00000088857 | 128.7562369 | 184.3385696 | 178.6562151 | 125.6513968 | 126.0502472 |
| ENSMUSG00000088858 | 7.074518513 | 4.173703463 | 5.649208382 | 6.443661377 | 3.580972932 |
| ENSMUSG00000088860 | 16.27139258 | 5.56493795  | 6.35535943  | 8.860034393 | 5.013362104 |
| ENSMUSG00000088861 | 12.02668147 | 9.738641413 | 14.12302096 | 4.02728836  | 6.445751277 |
| ENSMUSG00000088862 | 7.781970364 | 4.869320706 | 7.767661525 | 4.832746033 | 8.594335036 |
| ENSMUSG00000088863 | 11.31922962 | 8.347406925 | 7.767661525 | 1.610915344 | 3.580972932 |
| ENSMUSG00000088864 | 6.367066661 | 4.173703463 | 5.649208382 | 4.832746033 | 4.297167518 |
| ENSMUSG00000088865 | 9.196874066 | 4.173703463 | 9.179963621 | 3.221830688 | 2.864778345 |
| ENSMUSG00000088867 | 11.31922962 | 6.260555194 | 9.886114669 | 21.74735715 | 12.89150255 |
| ENSMUSG00000088868 | 8.489422215 | 8.347406925 | 13.41686991 | 2.416373016 | 10.02672421 |
| ENSMUSG00000088870 | 7.074518513 | 9.043024169 | 9.886114669 | 6.443661377 | 5.729556691 |
| ENSMUSG00000088872 | 7.074518513 | 5.56493795  | 11.29841676 | 8.054576721 | 2.864778345 |
| ENSMUSG00000088873 | 6.367066661 | 4.869320706 | 7.767661525 | 8.860034393 | 10.02672421 |
| ENSMUSG00000088874 | 7.781970364 | 8.347406925 | 9.179963621 | 6.443661377 | 3.580972932 |
| ENSMUSG00000088875 | 77.11225179 | 101.5601176 | 100.2734488 | 74.10210583 | 75.91662615 |
| ENSMUSG00000088876 | 9.196874066 | 8.347406925 | 7.061510478 | 7.249119049 | 7.87814045  |
| ENSMUSG00000088877 | 9.196874066 | 4.869320706 | 7.767661525 | 6.443661377 | 7.161945863 |
| ENSMUSG00000088878 | 4.952162959 | 3.478086219 | 2.118453143 | 3.221830688 | 3.580972932 |
| ENSMUSG00000088879 | 4.952162959 | 4.173703463 | 5.649208382 | 4.02728836  | 7.87814045  |
| ENSMUSG00000088880 | 9.904325918 | 7.651789682 | 12.00456781 | 7.249119049 | 4.297167518 |
| ENSMUSG00000088883 | 7.074518513 | 6.260555194 | 4.236906287 | 5.638203705 | 5.729556691 |
| ENSMUSG00000088884 | 12.02668147 | 6.260555194 | 11.29841676 | 5.638203705 | 7.161945863 |
| ENSMUSG00000088885 | 8.489422215 | 11.82549314 | 7.061510478 | 0.805457672 | 6.445751277 |
| ENSMUSG00000088888 | 9.904325918 | 6.260555194 | 9.179963621 | 4.832746033 | 5.729556691 |
| ENSMUSG00000088889 | 13.44158517 | 15.30357936 | 16.2414741  | 9.665492065 | 10.7429188  |



|                   |             |             |             |             |             |
|-------------------|-------------|-------------|-------------|-------------|-------------|
| ENSMUSG0000088890 | 12.02668147 | 4.869320706 | 7.767661525 | 7.249119049 | 6.445751277 |
| ENSMUSG0000088891 | 9.904325918 | 11.82549314 | 9.886114669 | 11.27640741 | 6.445751277 |
| ENSMUSG0000088892 | 3.537259256 | 5.56493795  | 4.943057334 | 5.638203705 | 7.161945863 |
| ENSMUSG0000088894 | 8.489422215 | 14.60796212 | 10.59226572 | 11.27640741 | 5.013362104 |
| ENSMUSG0000088895 | 13.44158517 | 8.347406925 | 5.649208382 | 20.1364418  | 15.04008631 |
| ENSMUSG0000088896 | 4.244711108 | 2.782468975 | 4.943057334 | 2.416373016 | 0.716194586 |
| ENSMUSG0000088897 | 9.196874066 | 2.086851731 | 7.767661525 | 8.860034393 | 10.7429188  |
| ENSMUSG0000088898 | 6.367066661 | 6.956172438 | 6.35535943  | 6.443661377 | 6.445751277 |
| ENSMUSG0000088900 | 14.85648888 | 22.95536904 | 17.65377619 | 16.10915344 | 15.04008631 |
| ENSMUSG0000088901 | 11.31922962 | 10.43425866 | 8.473812573 | 8.054576721 | 8.594335036 |
| ENSMUSG0000088902 | 8.489422215 | 6.260555194 | 6.35535943  | 5.638203705 | 4.297167518 |
| ENSMUSG0000088903 | 13.44158517 | 9.043024169 | 11.29841676 | 4.02728836  | 7.161945863 |
| ENSMUSG0000088904 | 8.489422215 | 7.651789682 | 7.061510478 | 3.221830688 | 7.87814045  |
| ENSMUSG0000088905 | 9.196874066 | 7.651789682 | 6.35535943  | 4.02728836  | 6.445751277 |
| ENSMUSG0000088906 | 7.074518513 | 6.956172438 | 5.649208382 | 12.08186508 | 9.310529622 |
| ENSMUSG0000088907 | 9.904325918 | 6.260555194 | 10.59226572 | 1.610915344 | 5.729556691 |
| ENSMUSG0000088908 | 9.196874066 | 7.651789682 | 10.59226572 | 6.443661377 | 10.02672421 |
| ENSMUSG0000088909 | 8.489422215 | 4.869320706 | 9.886114669 | 9.665492065 | 9.310529622 |
| ENSMUSG0000088910 | 4.952162959 | 9.043024169 | 12.71071886 | 12.08186508 | 7.161945863 |
| ENSMUSG0000088911 | 8.489422215 | 3.478086219 | 7.767661525 | 4.832746033 | 7.87814045  |
| ENSMUSG0000088912 | 14.14903703 | 7.651789682 | 5.649208382 | 4.02728836  | 6.445751277 |
| ENSMUSG0000088913 | 17.68629628 | 11.1298759  | 14.12302096 | 16.91461111 | 17.18867007 |
| ENSMUSG0000088914 | 7.074518513 | 6.956172438 | 7.767661525 | 5.638203705 | 5.013362104 |
| ENSMUSG0000088915 | 8.489422215 | 11.1298759  | 8.473812573 | 12.08186508 | 9.310529622 |
| ENSMUSG0000088916 | 38.90985182 | 72.34419335 | 67.08434954 | 57.99295239 | 63.0251236  |
| ENSMUSG0000088918 | 2.829807405 | 3.478086219 | 2.118453143 | 4.832746033 | 3.580972932 |
| ENSMUSG0000088920 | 7.074518513 | 7.651789682 | 10.59226572 | 8.054576721 | 7.87814045  |
| ENSMUSG0000088922 | 9.196874066 | 19.47728283 | 15.53532305 | 15.30369577 | 13.60769714 |
| ENSMUSG0000088923 | 12.02668147 | 4.173703463 | 7.767661525 | 8.860034393 | 6.445751277 |
| ENSMUSG0000088924 | 12.02668147 | 4.869320706 | 5.649208382 | 8.860034393 | 7.87814045  |
| ENSMUSG0000088925 | 10.61177777 | 5.56493795  | 4.943057334 | 4.02728836  | 6.445751277 |
| ENSMUSG0000088926 | 10.61177777 | 11.82549314 | 2.118453143 | 7.249119049 | 7.161945863 |
| ENSMUSG0000088928 | 9.904325918 | 9.738641413 | 8.473812573 | 6.443661377 | 5.729556691 |
| ENSMUSG0000088929 | 0           | 0           | 0           | 0           | 0           |
| ENSMUSG0000088930 | 4.952162959 | 4.869320706 | 4.236906287 | 1.610915344 | 5.729556691 |
| ENSMUSG0000088932 | 8.489422215 | 12.52111039 | 9.886114669 | 9.665492065 | 8.594335036 |
| ENSMUSG0000088933 | 12.02668147 | 4.869320706 | 7.767661525 | 7.249119049 | 5.013362104 |
| ENSMUSG0000088935 | 8.489422215 | 6.956172438 | 9.179963621 | 4.832746033 | 7.87814045  |
| ENSMUSG0000088937 | 9.904325918 | 4.869320706 | 12.71071886 | 5.638203705 | 7.87814045  |
| ENSMUSG0000088938 | 11.31922962 | 4.869320706 | 7.767661525 | 1.610915344 | 9.310529622 |
| ENSMUSG0000088939 | 7.781970364 | 4.173703463 | 5.649208382 | 5.638203705 | 5.729556691 |
| ENSMUSG0000088940 | 7.781970364 | 5.56493795  | 6.35535943  | 4.832746033 | 9.310529622 |
| ENSMUSG0000088941 | 14.85648888 | 4.869320706 | 6.35535943  | 8.054576721 | 7.161945863 |

|                   |             |             |             |             |             |
|-------------------|-------------|-------------|-------------|-------------|-------------|
| ENSMUSG0000088942 | 6.367066661 | 13.21672763 | 3.530755239 | 5.638203705 | 7.87814045  |
| ENSMUSG0000088943 | 12.73413332 | 4.869320706 | 12.71071886 | 8.054576721 | 5.729556691 |
| ENSMUSG0000088944 | 1.414903703 | 2.782468975 | 5.649208382 | 2.416373016 | 2.864778345 |
| ENSMUSG0000088947 | 12.73413332 | 3.478086219 | 4.943057334 | 6.443661377 | 8.594335036 |
| ENSMUSG0000088948 | 18.39374813 | 37.56333116 | 32.4829482  | 79.74030954 | 68.0384857  |
| ENSMUSG0000088949 | 9.904325918 | 15.30357936 | 9.886114669 | 16.10915344 | 11.45911338 |
| ENSMUSG0000088950 | 12.02668147 | 11.82549314 | 10.59226572 | 8.860034393 | 10.7429188  |
| ENSMUSG0000088951 | 76.40479994 | 136.3409798 | 108.7472614 | 107.1258704 | 109.5777717 |
| ENSMUSG0000088953 | 9.904325918 | 8.347406925 | 11.29841676 | 8.054576721 | 7.87814045  |
| ENSMUSG0000088954 | 11.31922962 | 8.347406925 | 6.35535943  | 2.416373016 | 12.17530797 |
| ENSMUSG0000088955 | 11.31922962 | 13.21672763 | 7.767661525 | 18.52552646 | 20.769643   |
| ENSMUSG0000088956 | 16.27139258 | 15.99919661 | 15.53532305 | 64.43661377 | 45.83645353 |
| ENSMUSG0000088957 | 7.074518513 | 2.086851731 | 9.179963621 | 4.02728836  | 3.580972932 |
| ENSMUSG0000088958 | 8.489422215 | 27.12907251 | 15.53532305 | 24.96918783 | 18.62105924 |
| ENSMUSG0000088959 | 17.68629628 | 5.56493795  | 9.179963621 | 4.02728836  | 7.161945863 |
| ENSMUSG0000088960 | 5.65961481  | 4.869320706 | 4.236906287 | 8.054576721 | 2.864778345 |
| ENSMUSG0000088961 | 29.0055259  | 56.34499675 | 51.54902649 | 41.07834128 | 39.39070225 |
| ENSMUSG0000088964 | 6.367066661 | 6.260555194 | 5.649208382 | 2.416373016 | 9.310529622 |
| ENSMUSG0000088966 | 10.61177777 | 8.347406925 | 7.767661525 | 0.805457672 | 10.7429188  |
| ENSMUSG0000088969 | 12.73413332 | 9.043024169 | 10.59226572 | 4.832746033 | 7.161945863 |
| ENSMUSG0000088970 | 10.61177777 | 6.956172438 | 9.179963621 | 4.832746033 | 10.02672421 |
| ENSMUSG0000088971 | 7.781970364 | 4.869320706 | 5.649208382 | 8.054576721 | 4.297167518 |
| ENSMUSG0000088972 | 5.65961481  | 5.56493795  | 6.35535943  | 9.665492065 | 7.161945863 |
| ENSMUSG0000088973 | 9.904325918 | 9.043024169 | 5.649208382 | 7.249119049 | 7.87814045  |
| ENSMUSG0000088975 | 7.781970364 | 6.260555194 | 4.236906287 | 4.02728836  | 7.87814045  |
| ENSMUSG0000088976 | 7.781970364 | 2.782468975 | 2.118453143 | 0.805457672 | 5.013362104 |
| ENSMUSG0000088978 | 80.64951104 | 114.7768452 | 94.6242404  | 49.93837567 | 55.86317773 |
| ENSMUSG0000088979 | 14.14903703 | 36.86771392 | 29.65834401 | 11.27640741 | 17.90486466 |
| ENSMUSG0000088980 | 0           | 0           | 0           | 0           | 0           |
| ENSMUSG0000088981 | 4.952162959 | 4.173703463 | 9.179963621 | 6.443661377 | 4.297167518 |
| ENSMUSG0000088982 | 10.61177777 | 5.56493795  | 7.061510478 | 8.054576721 | 7.161945863 |
| ENSMUSG0000088983 | 7.781970364 | 9.043024169 | 6.35535943  | 3.221830688 | 7.161945863 |
| ENSMUSG0000088984 | 12.73413332 | 11.1298759  | 6.35535943  | 10.47094974 | 7.161945863 |
| ENSMUSG0000088985 | 9.196874066 | 11.82549314 | 8.473812573 | 12.08186508 | 8.594335036 |
| ENSMUSG0000088986 | 7.781970364 | 4.173703463 | 5.649208382 | 8.860034393 | 5.729556691 |
| ENSMUSG0000088987 | 4.952162959 | 7.651789682 | 7.767661525 | 4.832746033 | 7.161945863 |
| ENSMUSG0000088988 | 2.122355554 | 4.173703463 | 1.412302096 | 1.610915344 | 0.716194586 |
| ENSMUSG0000088989 | 12.73413332 | 6.956172438 | 8.473812573 | 6.443661377 | 12.17530797 |
| ENSMUSG0000088990 | 81.3569629  | 118.9505487 | 102.3919019 | 190.8934683 | 148.2522794 |
| ENSMUSG0000088991 | 4.244711108 | 6.260555194 | 11.29841676 | 5.638203705 | 10.7429188  |
| ENSMUSG0000088992 | 5.65961481  | 6.260555194 | 7.061510478 | 5.638203705 | 9.310529622 |
| ENSMUSG0000088993 | 65.08557032 | 67.47487265 | 78.3827663  | 100.682209  | 72.33565322 |
| ENSMUSG0000088994 | 8.489422215 | 5.56493795  | 8.473812573 | 5.638203705 | 5.729556691 |

|                   |             |             |             |             |             |
|-------------------|-------------|-------------|-------------|-------------|-------------|
| ENSMUSG0000088995 | 10.61177777 | 7.651789682 | 11.29841676 | 7.249119049 | 7.87814045  |
| ENSMUSG0000088996 | 13.44158517 | 8.347406925 | 5.649208382 | 6.443661377 | 4.297167518 |
| ENSMUSG0000088997 | 42.44711108 | 79.30036579 | 76.97046421 | 45.91108731 | 51.56601022 |
| ENSMUSG0000088999 | 7.074518513 | 6.260555194 | 6.35535943  | 5.638203705 | 6.445751277 |
| ENSMUSG0000089000 | 7.781970364 | 9.043024169 | 11.29841676 | 5.638203705 | 9.310529622 |
| ENSMUSG0000089001 | 7.781970364 | 12.52111039 | 7.767661525 | 2.416373016 | 5.013362104 |
| ENSMUSG0000089002 | 6.367066661 | 4.173703463 | 4.236906287 | 3.221830688 | 2.148583759 |
| ENSMUSG0000089003 | 9.196874066 | 10.43425866 | 10.59226572 | 8.860034393 | 6.445751277 |
| ENSMUSG0000089004 | 6.367066661 | 4.869320706 | 4.236906287 | 8.054576721 | 7.87814045  |
| ENSMUSG0000089005 | 4.244711108 | 3.478086219 | 4.236906287 | 4.02728836  | 2.864778345 |
| ENSMUSG0000089007 | 9.196874066 | 9.043024169 | 9.886114669 | 5.638203705 | 9.310529622 |
| ENSMUSG0000089008 | 4.952162959 | 9.738641413 | 7.767661525 | 5.638203705 | 5.013362104 |
| ENSMUSG0000089009 | 16.27139258 | 27.82468975 | 21.18453143 | 10.47094974 | 15.04008631 |
| ENSMUSG0000089011 | 67.91537772 | 114.7768452 | 88.26888097 | 62.82569842 | 51.56601022 |
| ENSMUSG0000089014 | 21.93100739 | 35.47647943 | 28.95219296 | 83.7675979  | 72.33565322 |
| ENSMUSG0000089015 | 154.9319554 | 203.8158524 | 195.6038402 | 195.7262143 | 171.1705061 |
| ENSMUSG0000089016 | 4.952162959 | 9.738641413 | 7.767661525 | 4.02728836  | 4.297167518 |
| ENSMUSG0000089017 | 13.44158517 | 6.956172438 | 7.767661525 | 4.02728836  | 5.729556691 |
| ENSMUSG0000089018 | 9.904325918 | 6.956172438 | 4.943057334 | 4.02728836  | 10.7429188  |
| ENSMUSG0000089019 | 5.65961481  | 8.347406925 | 7.061510478 | 4.832746033 | 7.161945863 |
| ENSMUSG0000089021 | 8.489422215 | 3.478086219 | 7.061510478 | 4.02728836  | 4.297167518 |
| ENSMUSG0000089023 | 4.952162959 | 9.043024169 | 7.767661525 | 5.638203705 | 8.594335036 |
| ENSMUSG0000089024 | 9.196874066 | 8.347406925 | 7.767661525 | 4.832746033 | 9.310529622 |
| ENSMUSG0000089025 | 6.367066661 | 3.478086219 | 9.179963621 | 3.221830688 | 4.297167518 |
| ENSMUSG0000089026 | 57.30359995 | 71.64857611 | 66.37819849 | 56.38203705 | 61.59273443 |
| ENSMUSG0000089027 | 6.367066661 | 5.56493795  | 4.943057334 | 4.832746033 | 9.310529622 |
| ENSMUSG0000089028 | 7.781970364 | 6.956172438 | 9.179963621 | 8.860034393 | 8.594335036 |
| ENSMUSG0000089029 | 7.074518513 | 7.651789682 | 8.473812573 | 4.832746033 | 5.013362104 |
| ENSMUSG0000089030 | 7.074518513 | 3.478086219 | 5.649208382 | 1.610915344 | 2.148583759 |
| ENSMUSG0000089033 | 9.904325918 | 4.869320706 | 10.59226572 | 7.249119049 | 8.594335036 |
| ENSMUSG0000089034 | 7.781970364 | 5.56493795  | 5.649208382 | 2.416373016 | 9.310529622 |
| ENSMUSG0000089035 | 10.61177777 | 6.260555194 | 3.530755239 | 4.02728836  | 7.161945863 |
| ENSMUSG0000089036 | 7.074518513 | 6.260555194 | 4.943057334 | 10.47094974 | 12.17530797 |
| ENSMUSG0000089037 | 4.244711108 | 6.956172438 | 7.767661525 | 3.221830688 | 5.013362104 |
| ENSMUSG0000089038 | 5.65961481  | 5.56493795  | 3.530755239 | 3.221830688 | 2.864778345 |
| ENSMUSG0000089039 | 12.02668147 | 4.869320706 | 12.00456781 | 5.638203705 | 5.729556691 |
| ENSMUSG0000089040 | 7.074518513 | 2.782468975 | 2.824604191 | 2.416373016 | 3.580972932 |
| ENSMUSG0000089041 | 10.61177777 | 4.173703463 | 9.886114669 | 2.416373016 | 6.445751277 |
| ENSMUSG0000089043 | 9.904325918 | 4.173703463 | 6.35535943  | 4.02728836  | 9.310529622 |
| ENSMUSG0000089044 | 10.61177777 | 9.043024169 | 7.061510478 | 5.638203705 | 5.013362104 |
| ENSMUSG0000089045 | 8.489422215 | 7.651789682 | 6.35535943  | 5.638203705 | 4.297167518 |
| ENSMUSG0000089046 | 12.73413332 | 7.651789682 | 5.649208382 | 4.832746033 | 3.580972932 |
| ENSMUSG0000089047 | 8.489422215 | 9.043024169 | 7.767661525 | 5.638203705 | 6.445751277 |

|                   |             |             |             |             |             |
|-------------------|-------------|-------------|-------------|-------------|-------------|
| ENSMUSG0000089048 | 7.781970364 | 11.1298759  | 9.179963621 | 4.832746033 | 5.013362104 |
| ENSMUSG0000089049 | 6.367066661 | 11.1298759  | 10.59226572 | 8.860034393 | 14.32389173 |
| ENSMUSG0000089050 | 9.904325918 | 6.956172438 | 9.886114669 | 9.665492065 | 7.161945863 |
| ENSMUSG0000089051 | 11.31922962 | 6.260555194 | 11.29841676 | 7.249119049 | 6.445751277 |
| ENSMUSG0000089052 | 14.14903703 | 8.347406925 | 6.35535943  | 6.443661377 | 6.445751277 |
| ENSMUSG0000089053 | 9.196874066 | 7.651789682 | 9.886114669 | 5.638203705 | 2.148583759 |
| ENSMUSG0000089054 | 8.489422215 | 8.347406925 | 10.59226572 | 2.416373016 | 3.580972932 |
| ENSMUSG0000089055 | 7.074518513 | 3.478086219 | 14.12302096 | 4.02728836  | 9.310529622 |
| ENSMUSG0000089057 | 10.61177777 | 5.56493795  | 4.236906287 | 5.638203705 | 11.45911338 |
| ENSMUSG0000089060 | 8.489422215 | 11.1298759  | 8.473812573 | 6.443661377 | 9.310529622 |
| ENSMUSG0000089061 | 12.02668147 | 9.043024169 | 9.886114669 | 5.638203705 | 5.729556691 |
| ENSMUSG0000089062 | 9.904325918 | 11.1298759  | 7.767661525 | 9.665492065 | 7.87814045  |
| ENSMUSG0000089065 | 9.196874066 | 6.260555194 | 6.35535943  | 8.860034393 | 7.87814045  |
| ENSMUSG0000089066 | 9.904325918 | 4.869320706 | 9.179963621 | 3.221830688 | 7.87814045  |
| ENSMUSG0000089068 | 0           | 0.695617244 | 1.412302096 | 0           | 0           |
| ENSMUSG0000089069 | 8.489422215 | 5.56493795  | 5.649208382 | 5.638203705 | 2.864778345 |
| ENSMUSG0000089070 | 4.244711108 | 6.260555194 | 5.649208382 | 7.249119049 | 6.445751277 |
| ENSMUSG0000089071 | 7.074518513 | 13.21672763 | 9.886114669 | 8.054576721 | 5.013362104 |
| ENSMUSG0000089072 | 17.68629628 | 26.43345526 | 16.94762515 | 41.88379895 | 30.08017263 |
| ENSMUSG0000089073 | 10.61177777 | 2.782468975 | 3.530755239 | 7.249119049 | 10.02672421 |
| ENSMUSG0000089074 | 7.781970364 | 9.043024169 | 6.35535943  | 9.665492065 | 5.729556691 |
| ENSMUSG0000089075 | 8.489422215 | 7.651789682 | 7.061510478 | 7.249119049 | 7.161945863 |
| ENSMUSG0000089077 | 0           | 0           | 0.706151048 | 0           | 0           |
| ENSMUSG0000089078 | 3.537259256 | 5.56493795  | 7.767661525 | 6.443661377 | 10.7429188  |
| ENSMUSG0000089079 | 7.781970364 | 13.91234488 | 7.061510478 | 4.02728836  | 2.148583759 |
| ENSMUSG0000089080 | 11.31922962 | 15.99919661 | 14.12302096 | 11.27640741 | 12.17530797 |
| ENSMUSG0000089081 | 17.68629628 | 6.956172438 | 11.29841676 | 11.27640741 | 5.729556691 |
| ENSMUSG0000089082 | 12.02668147 | 12.52111039 | 9.886114669 | 11.27640741 | 13.60769714 |
| ENSMUSG0000089083 | 0           | 0           | 0           | 0           | 0           |
| ENSMUSG0000089084 | 9.904325918 | 3.478086219 | 7.767661525 | 6.443661377 | 3.580972932 |
| ENSMUSG0000089085 | 10.61177777 | 10.43425866 | 10.59226572 | 4.832746033 | 5.729556691 |
| ENSMUSG0000089087 | 12.73413332 | 5.56493795  | 6.35535943  | 5.638203705 | 6.445751277 |
| ENSMUSG0000089088 | 9.904325918 | 4.173703463 | 7.767661525 | 7.249119049 | 9.310529622 |
| ENSMUSG0000089090 | 8.489422215 | 7.651789682 | 12.71071886 | 4.832746033 | 3.580972932 |
| ENSMUSG0000089091 | 9.196874066 | 9.738641413 | 9.886114669 | 4.02728836  | 7.161945863 |
| ENSMUSG0000089092 | 8.489422215 | 6.956172438 | 11.29841676 | 8.054576721 | 11.45911338 |
| ENSMUSG0000089093 | 1.414903703 | 3.478086219 | 1.412302096 | 9.665492065 | 4.297167518 |
| ENSMUSG0000089094 | 4.952162959 | 7.651789682 | 7.061510478 | 9.665492065 | 3.580972932 |
| ENSMUSG0000089095 | 6.367066661 | 3.478086219 | 7.061510478 | 5.638203705 | 5.013362104 |
| ENSMUSG0000089096 | 10.61177777 | 11.82549314 | 13.41686991 | 7.249119049 | 6.445751277 |
| ENSMUSG0000089097 | 11.31922962 | 6.260555194 | 9.886114669 | 7.249119049 | 6.445751277 |
| ENSMUSG0000089098 | 10.61177777 | 9.738641413 | 9.886114669 | 7.249119049 | 11.45911338 |
| ENSMUSG0000089102 | 137.2456591 | 189.2078903 | 192.779236  | 159.4806191 | 158.9951982 |

|                   |             |             |             |             |             |
|-------------------|-------------|-------------|-------------|-------------|-------------|
| ENSMUSG0000089103 | 10.61177777 | 9.043024169 | 7.061510478 | 4.02728836  | 7.161945863 |
| ENSMUSG0000089105 | 12.02668147 | 18.08604834 | 14.12302096 | 8.860034393 | 13.60769714 |
| ENSMUSG0000089106 | 40.32475552 | 69.56172438 | 79.7950684  | 107.9313281 | 113.1587446 |
| ENSMUSG0000089107 | 9.904325918 | 4.869320706 | 11.29841676 | 7.249119049 | 6.445751277 |
| ENSMUSG0000089109 | 8.489422215 | 8.347406925 | 8.473812573 | 1.610915344 | 10.02672421 |
| ENSMUSG0000089111 | 7.074518513 | 8.347406925 | 10.59226572 | 4.832746033 | 7.161945863 |
| ENSMUSG0000089113 | 1.414903703 | 1.391234488 | 4.236906287 | 3.221830688 | 2.864778345 |
| ENSMUSG0000089114 | 4.952162959 | 4.173703463 | 4.236906287 | 1.610915344 | 1.432389173 |
| ENSMUSG0000089115 | 13.44158517 | 6.260555194 | 4.943057334 | 4.832746033 | 7.87814045  |
| ENSMUSG0000089116 | 6.367066661 | 8.347406925 | 4.943057334 | 2.416373016 | 6.445751277 |
| ENSMUSG0000089117 | 11.31922962 | 8.347406925 | 7.061510478 | 4.02728836  | 8.594335036 |
| ENSMUSG0000089118 | 14.85648888 | 10.43425866 | 12.00456781 | 4.02728836  | 7.161945863 |
| ENSMUSG0000089119 | 12.02668147 | 6.956172438 | 8.473812573 | 4.832746033 | 7.87814045  |
| ENSMUSG0000089120 | 6.367066661 | 4.869320706 | 12.00456781 | 4.832746033 | 6.445751277 |
| ENSMUSG0000089123 | 7.074518513 | 6.956172438 | 5.649208382 | 5.638203705 | 8.594335036 |
| ENSMUSG0000089124 | 9.904325918 | 2.086851731 | 7.061510478 | 4.832746033 | 4.297167518 |
| ENSMUSG0000089125 | 7.781970364 | 13.91234488 | 16.2414741  | 16.91461111 | 22.91822676 |
| ENSMUSG0000089127 | 4.952162959 | 11.1298759  | 7.061510478 | 12.88732275 | 10.02672421 |
| ENSMUSG0000089128 | 8.489422215 | 2.782468975 | 2.118453143 | 2.416373016 | 3.580972932 |
| ENSMUSG0000089129 | 14.14903703 | 20.86851731 | 28.24604191 | 16.91461111 | 25.78300511 |
| ENSMUSG0000089130 | 10.61177777 | 5.56493795  | 12.71071886 | 7.249119049 | 5.729556691 |
| ENSMUSG0000089131 | 9.196874066 | 3.478086219 | 9.886114669 | 10.47094974 | 7.161945863 |
| ENSMUSG0000089132 | 5.65961481  | 3.478086219 | 3.530755239 | 2.416373016 | 4.297167518 |
| ENSMUSG0000089133 | 22.63845924 | 25.04222078 | 26.12758877 | 11.27640741 | 12.89150255 |
| ENSMUSG0000089134 | 7.074518513 | 9.738641413 | 6.35535943  | 4.832746033 | 5.013362104 |
| ENSMUSG0000089136 | 7.781970364 | 8.347406925 | 8.473812573 | 11.27640741 | 15.7562809  |
| ENSMUSG0000089137 | 6.367066661 | 5.56493795  | 5.649208382 | 3.221830688 | 7.161945863 |
| ENSMUSG0000089138 | 7.781970364 | 6.956172438 | 5.649208382 | 8.054576721 | 7.87814045  |
| ENSMUSG0000089139 | 54.47379255 | 68.17048989 | 67.08434954 | 70.07481747 | 75.91662615 |
| ENSMUSG0000089141 | 14.14903703 | 5.56493795  | 8.473812573 | 8.054576721 | 7.161945863 |
| ENSMUSG0000089143 | 12.73413332 | 4.869320706 | 7.061510478 | 4.02728836  | 7.87814045  |
| ENSMUSG0000089144 | 8.489422215 | 4.869320706 | 8.473812573 | 5.638203705 | 6.445751277 |
| ENSMUSG0000089145 | 155.6394073 | 185.0341868 | 179.3623661 | 117.5968201 | 123.1854689 |
| ENSMUSG0000089146 | 10.61177777 | 11.82549314 | 4.236906287 | 10.47094974 | 11.45911338 |
| ENSMUSG0000089147 | 10.61177777 | 6.260555194 | 7.767661525 | 6.443661377 | 7.87814045  |
| ENSMUSG0000089148 | 9.196874066 | 3.478086219 | 5.649208382 | 4.832746033 | 8.594335036 |
| ENSMUSG0000089149 | 12.73413332 | 20.17290007 | 14.829172   | 9.665492065 | 7.161945863 |
| ENSMUSG0000089151 | 10.61177777 | 15.30357936 | 14.829172   | 21.74735715 | 19.33725383 |
| ENSMUSG0000089152 | 5.65961481  | 4.173703463 | 5.649208382 | 4.832746033 | 6.445751277 |
| ENSMUSG0000089153 | 4.244711108 | 8.347406925 | 8.473812573 | 4.02728836  | 6.445751277 |
| ENSMUSG0000089155 | 188.8896443 | 226.0756042 | 230.9113926 | 298.0193387 | 196.9535112 |
| ENSMUSG0000089156 | 6.367066661 | 2.782468975 | 1.412302096 | 0.805457672 | 2.148583759 |
| ENSMUSG0000089157 | 9.196874066 | 4.173703463 | 4.236906287 | 5.638203705 | 7.87814045  |

|                    |             |             |             |             |             |
|--------------------|-------------|-------------|-------------|-------------|-------------|
| ENSMUSG00000089158 | 9.904325918 | 11.82549314 | 4.943057334 | 9.665492065 | 10.7429188  |
| ENSMUSG00000089161 | 9.904325918 | 11.1298759  | 7.061510478 | 8.860034393 | 3.580972932 |
| ENSMUSG00000089162 | 9.196874066 | 6.260555194 | 7.767661525 | 3.221830688 | 7.87814045  |
| ENSMUSG00000089164 | 7.781970364 | 7.651789682 | 9.179963621 | 4.02728836  | 8.594335036 |
| ENSMUSG00000089168 | 10.61177777 | 14.60796212 | 7.767661525 | 11.27640741 | 7.87814045  |
| ENSMUSG00000089169 | 11.31922962 | 10.43425866 | 7.767661525 | 8.054576721 | 7.161945863 |
| ENSMUSG00000089170 | 7.074518513 | 13.91234488 | 9.886114669 | 11.27640741 | 15.7562809  |
| ENSMUSG00000089171 | 4.952162959 | 5.56493795  | 2.118453143 | 4.832746033 | 4.297167518 |
| ENSMUSG00000089174 | 7.781970364 | 4.869320706 | 8.473812573 | 4.832746033 | 9.310529622 |
| ENSMUSG00000089175 | 9.904325918 | 3.478086219 | 4.236906287 | 4.832746033 | 5.013362104 |
| ENSMUSG00000089177 | 69.33028142 | 105.0382038 | 84.03197468 | 102.2931244 | 92.38910164 |
| ENSMUSG00000089178 | 9.196874066 | 5.56493795  | 7.061510478 | 4.832746033 | 2.864778345 |
| ENSMUSG00000089179 | 9.196874066 | 11.82549314 | 9.179963621 | 5.638203705 | 10.7429188  |
| ENSMUSG00000089182 | 6.367066661 | 9.043024169 | 9.886114669 | 3.221830688 | 7.161945863 |
| ENSMUSG00000089183 | 3.537259256 | 6.956172438 | 7.767661525 | 9.665492065 | 5.729556691 |
| ENSMUSG00000089184 | 0           | 0           | 0           | 0           | 0           |
| ENSMUSG00000089185 | 5.65961481  | 10.43425866 | 7.061510478 | 8.860034393 | 12.17530797 |
| ENSMUSG00000089186 | 205.1610369 | 248.335356  | 244.3282625 | 158.6751614 | 148.2522794 |
| ENSMUSG00000089187 | 7.781970364 | 9.738641413 | 5.649208382 | 4.02728836  | 6.445751277 |
| ENSMUSG00000089188 | 150.6872443 | 233.7273939 | 203.3715018 | 290.7702196 | 273.586332  |
| ENSMUSG00000089189 | 9.196874066 | 7.651789682 | 7.767661525 | 4.02728836  | 14.32389173 |
| ENSMUSG00000089190 | 12.73413332 | 6.260555194 | 9.179963621 | 7.249119049 | 7.161945863 |
| ENSMUSG00000089191 | 4.952162959 | 4.173703463 | 7.767661525 | 2.416373016 | 2.148583759 |
| ENSMUSG00000089194 | 12.73413332 | 4.869320706 | 4.236906287 | 3.221830688 | 3.580972932 |
| ENSMUSG00000089195 | 12.02668147 | 9.738641413 | 9.179963621 | 5.638203705 | 10.7429188  |
| ENSMUSG00000089197 | 19.10119998 | 25.73783802 | 22.59683353 | 22.55281482 | 18.62105924 |
| ENSMUSG00000089199 | 102.5805184 | 135.6453625 | 140.5240585 | 117.5968201 | 122.4692743 |
| ENSMUSG00000089203 | 13.44158517 | 9.043024169 | 4.943057334 | 9.665492065 | 7.161945863 |
| ENSMUSG00000089204 | 39.61730367 | 70.25734162 | 52.25517753 | 19.33098413 | 30.08017263 |
| ENSMUSG00000089205 | 0           | 0           | 0           | 1.610915344 | 0           |
| ENSMUSG00000089206 | 12.73413332 | 4.173703463 | 9.886114669 | 12.08186508 | 8.594335036 |
| ENSMUSG00000089207 | 4.952162959 | 6.956172438 | 6.35535943  | 3.221830688 | 12.17530797 |
| ENSMUSG00000089208 | 8.489422215 | 5.56493795  | 6.35535943  | 10.47094974 | 7.87814045  |
| ENSMUSG00000089209 | 6.367066661 | 7.651789682 | 9.886114669 | 5.638203705 | 15.7562809  |
| ENSMUSG00000089210 | 6.367066661 | 8.347406925 | 9.179963621 | 4.832746033 | 6.445751277 |
| ENSMUSG00000089211 | 4.952162959 | 3.478086219 | 3.530755239 | 4.832746033 | 7.87814045  |
| ENSMUSG00000089213 | 11.31922962 | 6.260555194 | 14.12302096 | 12.08186508 | 9.310529622 |
| ENSMUSG00000089214 | 106.1177777 | 131.4716591 | 114.3964697 | 145.7878386 | 123.1854689 |
| ENSMUSG00000089217 | 5.65961481  | 2.782468975 | 4.236906287 | 6.443661377 | 4.297167518 |
| ENSMUSG00000089218 | 4.952162959 | 8.347406925 | 3.530755239 | 8.054576721 | 5.013362104 |
| ENSMUSG00000089219 | 3.537259256 | 4.869320706 | 7.767661525 | 7.249119049 | 8.594335036 |
| ENSMUSG00000089220 | 9.196874066 | 6.260555194 | 4.943057334 | 7.249119049 | 6.445751277 |
| ENSMUSG00000089222 | 10.61177777 | 10.43425866 | 14.829172   | 10.47094974 | 15.04008631 |

|                   |             |             |             |             |             |
|-------------------|-------------|-------------|-------------|-------------|-------------|
| ENSMUSG0000089223 | 10.61177777 | 4.173703463 | 10.59226572 | 4.832746033 | 7.161945863 |
| ENSMUSG0000089224 | 127.3413332 | 178.7736317 | 177.243913  | 111.9586164 | 112.4425501 |
| ENSMUSG0000089226 | 9.196874066 | 4.173703463 | 3.530755239 | 2.416373016 | 5.013362104 |
| ENSMUSG0000089227 | 9.904325918 | 5.56493795  | 9.179963621 | 4.02728836  | 5.013362104 |
| ENSMUSG0000089228 | 10.61177777 | 10.43425866 | 7.061510478 | 6.443661377 | 4.297167518 |
| ENSMUSG0000089229 | 9.904325918 | 7.651789682 | 4.236906287 | 4.02728836  | 3.580972932 |
| ENSMUSG0000089230 | 9.904325918 | 4.173703463 | 12.00456781 | 7.249119049 | 8.594335036 |
| ENSMUSG0000089231 | 13.44158517 | 8.347406925 | 6.35535943  | 3.221830688 | 5.729556691 |
| ENSMUSG0000089233 | 9.904325918 | 5.56493795  | 2.118453143 | 10.47094974 | 10.02672421 |
| ENSMUSG0000089234 | 11.31922962 | 2.086851731 | 5.649208382 | 4.832746033 | 5.729556691 |
| ENSMUSG0000089235 | 2.122355554 | 1.391234488 | 2.118453143 | 1.610915344 | 0.716194586 |
| ENSMUSG0000089237 | 54.47379255 | 78.60474855 | 67.08434954 | 21.74735715 | 30.79636721 |
| ENSMUSG0000089239 | 13.44158517 | 15.30357936 | 15.53532305 | 24.96918783 | 22.91822676 |
| ENSMUSG0000089241 | 8.489422215 | 5.56493795  | 11.29841676 | 4.02728836  | 7.161945863 |
| ENSMUSG0000089242 | 12.02668147 | 4.869320706 | 4.943057334 | 7.249119049 | 7.87814045  |
| ENSMUSG0000089244 | 7.074518513 | 4.869320706 | 5.649208382 | 4.02728836  | 2.864778345 |
| ENSMUSG0000089245 | 62.25576291 | 79.30036579 | 88.97503202 | 34.6346799  | 49.41742646 |
| ENSMUSG0000089247 | 12.02668147 | 9.738641413 | 4.943057334 | 4.02728836  | 8.594335036 |
| ENSMUSG0000089248 | 5.65961481  | 6.956172438 | 5.649208382 | 4.02728836  | 13.60769714 |
| ENSMUSG0000089250 | 19.10119998 | 25.73783802 | 20.47838039 | 22.55281482 | 25.78300511 |
| ENSMUSG0000089251 | 7.074518513 | 3.478086219 | 7.767661525 | 5.638203705 | 3.580972932 |
| ENSMUSG0000089252 | 12.73413332 | 10.43425866 | 6.35535943  | 2.416373016 | 6.445751277 |
| ENSMUSG0000089253 | 14.14903703 | 11.82549314 | 11.29841676 | 4.832746033 | 7.161945863 |
| ENSMUSG0000089255 | 0           | 0           | 0           | 0           | 0           |
| ENSMUSG0000089256 | 8.489422215 | 13.21672763 | 10.59226572 | 3.221830688 | 6.445751277 |
| ENSMUSG0000089257 | 9.196874066 | 3.478086219 | 4.943057334 | 8.054576721 | 11.45911338 |
| ENSMUSG0000089258 | 4.952162959 | 8.347406925 | 5.649208382 | 11.27640741 | 5.013362104 |
| ENSMUSG0000089259 | 8.489422215 | 6.956172438 | 6.35535943  | 4.02728836  | 5.729556691 |
| ENSMUSG0000089260 | 18.39374813 | 34.08524495 | 31.0706461  | 19.33098413 | 27.21539428 |
| ENSMUSG0000089261 | 9.196874066 | 17.39043109 | 12.00456781 | 15.30369577 | 11.45911338 |
| ENSMUSG0000089262 | 4.952162959 | 3.478086219 | 0.706151048 | 3.221830688 | 5.013362104 |
| ENSMUSG0000089263 | 7.781970364 | 7.651789682 | 4.236906287 | 4.02728836  | 2.148583759 |
| ENSMUSG0000089264 | 8.489422215 | 7.651789682 | 7.767661525 | 6.443661377 | 8.594335036 |
| ENSMUSG0000089265 | 10.61177777 | 13.91234488 | 14.829172   | 19.33098413 | 18.62105924 |
| ENSMUSG0000089266 | 7.781970364 | 5.56493795  | 7.767661525 | 4.832746033 | 4.297167518 |
| ENSMUSG0000089267 | 19.80865184 | 23.65098629 | 23.30298458 | 21.74735715 | 34.37734014 |
| ENSMUSG0000089268 | 12.02668147 | 6.956172438 | 9.179963621 | 7.249119049 | 4.297167518 |
| ENSMUSG0000089269 | 6.367066661 | 9.738641413 | 7.767661525 | 2.416373016 | 7.87814045  |
| ENSMUSG0000089270 | 9.904325918 | 9.043024169 | 8.473812573 | 5.638203705 | 7.161945863 |
| ENSMUSG0000089271 | 7.781970364 | 7.651789682 | 7.061510478 | 5.638203705 | 7.87814045  |
| ENSMUSG0000089272 | 4.952162959 | 3.478086219 | 10.59226572 | 4.832746033 | 6.445751277 |
| ENSMUSG0000089273 | 9.196874066 | 3.478086219 | 5.649208382 | 4.832746033 | 8.594335036 |
| ENSMUSG0000089274 | 2.829807405 | 6.260555194 | 10.59226572 | 5.638203705 | 6.445751277 |

|                   |             |             |             |             |             |
|-------------------|-------------|-------------|-------------|-------------|-------------|
| ENSMUSG0000089275 | 7.781970364 | 4.869320706 | 5.649208382 | 8.860034393 | 8.594335036 |
| ENSMUSG0000089276 | 6.367066661 | 11.1298759  | 8.473812573 | 6.443661377 | 9.310529622 |
| ENSMUSG0000089277 | 6.367066661 | 7.651789682 | 7.767661525 | 4.02728836  | 1.432389173 |
| ENSMUSG0000089278 | 10.61177777 | 11.1298759  | 11.29841676 | 7.249119049 | 9.310529622 |
| ENSMUSG0000089279 | 0.707451851 | 0.695617244 | 0.706151048 | 0.805457672 | 0           |
| ENSMUSG0000089280 | 7.781970364 | 7.651789682 | 10.59226572 | 4.832746033 | 7.161945863 |
| ENSMUSG0000089281 | 26.1757185  | 22.95536904 | 24.00913562 | 18.52552646 | 16.47247549 |
| ENSMUSG0000089282 | 7.074518513 | 6.260555194 | 4.236906287 | 3.221830688 | 5.013362104 |
| ENSMUSG0000089284 | 4.244711108 | 2.086851731 | 2.118453143 | 3.221830688 | 2.864778345 |
| ENSMUSG0000089285 | 11.31922962 | 9.738641413 | 6.35535943  | 1.610915344 | 12.17530797 |
| ENSMUSG0000089286 | 12.73413332 | 6.260555194 | 9.179963621 | 4.832746033 | 6.445751277 |
| ENSMUSG0000089287 | 8.489422215 | 7.651789682 | 9.179963621 | 5.638203705 | 2.864778345 |
| ENSMUSG0000089288 | 12.73413332 | 5.56493795  | 8.473812573 | 1.610915344 | 6.445751277 |
| ENSMUSG0000089289 | 7.074518513 | 8.347406925 | 12.00456781 | 12.08186508 | 8.594335036 |
| ENSMUSG0000089290 | 123.804074  | 145.3840039 | 142.6425116 | 215.8626561 | 190.50776   |
| ENSMUSG0000089291 | 5.65961481  | 11.1298759  | 10.59226572 | 8.860034393 | 5.729556691 |
| ENSMUSG0000089292 | 36.78749627 | 73.0398106  | 57.90438592 | 22.55281482 | 52.2822048  |
| ENSMUSG0000089293 | 5.65961481  | 10.43425866 | 8.473812573 | 7.249119049 | 4.297167518 |
| ENSMUSG0000089294 | 0.707451851 | 0           | 0.706151048 | 0.805457672 | 0           |
| ENSMUSG0000089296 | 34.66514071 | 50.7800588  | 37.42600553 | 37.85651059 | 35.80972932 |
| ENSMUSG0000089297 | 8.489422215 | 6.260555194 | 6.35535943  | 3.221830688 | 5.013362104 |
| ENSMUSG0000089298 | 185.352385  | 211.4676421 | 180.0685172 | 294.797508  | 234.1956297 |
| ENSMUSG0000089299 | 39.61730367 | 63.99678643 | 65.67204744 | 33.02376456 | 37.24211849 |
| ENSMUSG0000089301 | 6.367066661 | 5.56493795  | 11.29841676 | 9.665492065 | 7.161945863 |
| ENSMUSG0000089302 | 7.781970364 | 5.56493795  | 6.35535943  | 8.054576721 | 6.445751277 |
| ENSMUSG0000089304 | 12.02668147 | 5.56493795  | 6.35535943  | 7.249119049 | 6.445751277 |
| ENSMUSG0000089305 | 7.074518513 | 7.651789682 | 5.649208382 | 2.416373016 | 7.87814045  |
| ENSMUSG0000089306 | 14.14903703 | 9.043024169 | 7.767661525 | 10.47094974 | 7.161945863 |
| ENSMUSG0000089307 | 9.196874066 | 6.956172438 | 9.179963621 | 7.249119049 | 5.729556691 |
| ENSMUSG0000089308 | 7.781970364 | 11.1298759  | 9.179963621 | 11.27640741 | 9.310529622 |
| ENSMUSG0000089309 | 9.904325918 | 9.043024169 | 9.179963621 | 5.638203705 | 9.310529622 |
| ENSMUSG0000089310 | 12.73413332 | 4.869320706 | 8.473812573 | 5.638203705 | 9.310529622 |
| ENSMUSG0000089311 | 12.73413332 | 2.782468975 | 4.236906287 | 4.02728836  | 5.013362104 |
| ENSMUSG0000089312 | 3.537259256 | 3.478086219 | 4.943057334 | 4.02728836  | 9.310529622 |
| ENSMUSG0000089313 | 112.4848444 | 153.0357936 | 146.1732669 | 227.1390635 | 190.50776   |
| ENSMUSG0000089314 | 7.074518513 | 5.56493795  | 10.59226572 | 5.638203705 | 8.594335036 |
| ENSMUSG0000089316 | 9.904325918 | 8.347406925 | 4.943057334 | 5.638203705 | 7.87814045  |
| ENSMUSG0000089317 | 6.367066661 | 5.56493795  | 5.649208382 | 1.610915344 | 4.297167518 |
| ENSMUSG0000089318 | 12.73413332 | 12.52111039 | 8.473812573 | 4.02728836  | 8.594335036 |
| ENSMUSG0000089320 | 11.31922962 | 7.651789682 | 7.061510478 | 7.249119049 | 3.580972932 |
| ENSMUSG0000089321 | 1.414903703 | 2.086851731 | 2.118453143 | 1.610915344 | 1.432389173 |
| ENSMUSG0000089322 | 9.196874066 | 6.260555194 | 4.943057334 | 2.416373016 | 7.161945863 |
| ENSMUSG0000089323 | 10.61177777 | 11.1298759  | 7.061510478 | 4.02728836  | 5.013362104 |



|                    |             |             |             |             |             |
|--------------------|-------------|-------------|-------------|-------------|-------------|
| ENSMUSG00000089324 | 88.43148141 | 102.2557348 | 117.2210739 | 70.88027514 | 73.76804239 |
| ENSMUSG00000089326 | 9.196874066 | 3.478086219 | 10.59226572 | 3.221830688 | 4.297167518 |
| ENSMUSG00000089327 | 7.074518513 | 5.56493795  | 8.473812573 | 5.638203705 | 7.87814045  |
| ENSMUSG00000089331 | 9.196874066 | 6.956172438 | 9.179963621 | 6.443661377 | 5.729556691 |
| ENSMUSG00000089333 | 6.367066661 | 5.56493795  | 4.943057334 | 8.054576721 | 7.87814045  |
| ENSMUSG00000089334 | 12.02668147 | 6.956172438 | 9.179963621 | 4.02728836  | 8.594335036 |
| ENSMUSG00000089335 | 9.904325918 | 5.56493795  | 7.061510478 | 11.27640741 | 7.87814045  |
| ENSMUSG00000089336 | 28.29807405 | 44.5195036  | 29.65834401 | 42.68925662 | 49.41742646 |
| ENSMUSG00000089337 | 21.93100739 | 52.86691053 | 45.8998181  | 17.72006879 | 22.20203218 |
| ENSMUSG00000089338 | 6.367066661 | 9.738641413 | 7.767661525 | 5.638203705 | 5.013362104 |
| ENSMUSG00000089341 | 9.196874066 | 9.043024169 | 7.061510478 | 2.416373016 | 6.445751277 |
| ENSMUSG00000089342 | 8.489422215 | 4.869320706 | 2.118453143 | 0.805457672 | 3.580972932 |
| ENSMUSG00000089343 | 9.196874066 | 18.08604834 | 17.65377619 | 5.638203705 | 5.729556691 |
| ENSMUSG00000089344 | 8.489422215 | 6.260555194 | 6.35535943  | 5.638203705 | 7.87814045  |
| ENSMUSG00000089345 | 8.489422215 | 9.043024169 | 9.179963621 | 4.832746033 | 6.445751277 |
| ENSMUSG00000089346 | 7.074518513 | 9.738641413 | 14.829172   | 12.08186508 | 12.17530797 |
| ENSMUSG00000089348 | 9.904325918 | 6.956172438 | 4.236906287 | 6.443661377 | 3.580972932 |
| ENSMUSG00000089349 | 8.489422215 | 5.56493795  | 9.179963621 | 6.443661377 | 7.161945863 |
| ENSMUSG00000089350 | 11.31922962 | 6.956172438 | 4.943057334 | 5.638203705 | 6.445751277 |
| ENSMUSG00000089351 | 4.952162959 | 4.173703463 | 7.767661525 | 5.638203705 | 7.87814045  |
| ENSMUSG00000089352 | 9.196874066 | 6.260555194 | 9.886114669 | 4.02728836  | 6.445751277 |
| ENSMUSG00000089353 | 9.904325918 | 1.391234488 | 7.061510478 | 4.832746033 | 5.013362104 |
| ENSMUSG00000089357 | 3.537259256 | 2.086851731 | 3.530755239 | 1.610915344 | 5.013362104 |
| ENSMUSG00000089358 | 8.489422215 | 9.043024169 | 10.59226572 | 9.665492065 | 2.864778345 |
| ENSMUSG00000089359 | 12.02668147 | 7.651789682 | 10.59226572 | 7.249119049 | 7.161945863 |
| ENSMUSG00000089363 | 7.074518513 | 6.956172438 | 7.061510478 | 5.638203705 | 6.445751277 |
| ENSMUSG00000089364 | 9.196874066 | 8.347406925 | 8.473812573 | 4.02728836  | 6.445751277 |
| ENSMUSG00000089365 | 7.074518513 | 11.82549314 | 9.179963621 | 7.249119049 | 10.7429188  |
| ENSMUSG00000089366 | 13.44158517 | 5.56493795  | 7.767661525 | 4.832746033 | 7.161945863 |
| ENSMUSG00000089369 | 40.32475552 | 58.43184848 | 60.02283906 | 29.80193387 | 45.83645353 |
| ENSMUSG00000089370 | 16.27139258 | 5.56493795  | 6.35535943  | 2.416373016 | 4.297167518 |
| ENSMUSG00000089371 | 63.67066661 | 114.7768452 | 93.91808935 | 254.5246244 | 183.3458141 |
| ENSMUSG00000089372 | 4.244711108 | 5.56493795  | 5.649208382 | 3.221830688 | 2.864778345 |
| ENSMUSG00000089373 | 7.781970364 | 7.651789682 | 12.71071886 | 7.249119049 | 7.161945863 |
| ENSMUSG00000089375 | 2.122355554 | 0.695617244 | 2.118453143 | 3.221830688 | 0.716194586 |
| ENSMUSG00000089376 | 21.93100739 | 35.47647943 | 26.83373982 | 15.30369577 | 19.33725383 |
| ENSMUSG00000089377 | 8.489422215 | 9.043024169 | 8.473812573 | 4.832746033 | 5.729556691 |
| ENSMUSG00000089380 | 10.61177777 | 6.260555194 | 7.767661525 | 4.02728836  | 7.87814045  |
| ENSMUSG00000089381 | 4.244711108 | 6.956172438 | 2.824604191 | 8.860034393 | 7.161945863 |
| ENSMUSG00000089382 | 7.074518513 | 2.086851731 | 2.824604191 | 0.805457672 | 3.580972932 |
| ENSMUSG00000089383 | 3.537259256 | 8.347406925 | 5.649208382 | 6.443661377 | 4.297167518 |
| ENSMUSG00000089384 | 12.73413332 | 10.43425866 | 8.473812573 | 4.02728836  | 8.594335036 |
| ENSMUSG00000089385 | 9.196874066 | 6.260555194 | 3.530755239 | 4.02728836  | 6.445751277 |

|                    |             |             |             |             |             |
|--------------------|-------------|-------------|-------------|-------------|-------------|
| ENSMUSG00000089387 | 10.61177777 | 11.1298759  | 9.886114669 | 9.665492065 | 5.729556691 |
| ENSMUSG00000089389 | 23.34591109 | 20.17290007 | 20.47838039 | 20.1364418  | 21.48583759 |
| ENSMUSG00000089390 | 7.074518513 | 6.956172438 | 6.35535943  | 6.443661377 | 5.013362104 |
| ENSMUSG00000089391 | 5.65961481  | 5.56493795  | 6.35535943  | 8.054576721 | 11.45911338 |
| ENSMUSG00000089392 | 11.31922962 | 6.260555194 | 7.061510478 | 6.443661377 | 7.87814045  |
| ENSMUSG00000089393 | 7.074518513 | 5.56493795  | 8.473812573 | 6.443661377 | 6.445751277 |
| ENSMUSG00000089394 | 8.489422215 | 4.173703463 | 10.59226572 | 4.832746033 | 8.594335036 |
| ENSMUSG00000089395 | 8.489422215 | 6.956172438 | 7.767661525 | 6.443661377 | 5.013362104 |
| ENSMUSG00000089396 | 5.65961481  | 3.478086219 | 2.118453143 | 8.054576721 | 7.161945863 |
| ENSMUSG00000089397 | 4.952162959 | 11.1298759  | 11.29841676 | 7.249119049 | 12.89150255 |
| ENSMUSG00000089398 | 5.65961481  | 2.782468975 | 3.530755239 | 3.221830688 | 2.148583759 |
| ENSMUSG00000089399 | 9.904325918 | 8.347406925 | 5.649208382 | 5.638203705 | 4.297167518 |
| ENSMUSG00000089401 | 7.074518513 | 7.651789682 | 9.179963621 | 4.832746033 | 7.87814045  |
| ENSMUSG00000089404 | 7.074518513 | 4.173703463 | 9.179963621 | 8.054576721 | 10.7429188  |
| ENSMUSG00000089405 | 38.20239997 | 60.51870021 | 57.90438592 | 50.74383334 | 70.18706946 |
| ENSMUSG00000089406 | 8.489422215 | 6.956172438 | 6.35535943  | 4.832746033 | 10.02672421 |
| ENSMUSG00000089407 | 19.10119998 | 22.2597518  | 18.35992724 | 16.91461111 | 15.04008631 |
| ENSMUSG00000089408 | 10.61177777 | 9.738641413 | 9.179963621 | 9.665492065 | 2.864778345 |
| ENSMUSG00000089409 | 12.02668147 | 5.56493795  | 4.943057334 | 5.638203705 | 8.594335036 |
| ENSMUSG00000089410 | 7.781970364 | 7.651789682 | 6.35535943  | 6.443661377 | 7.87814045  |
| ENSMUSG00000089413 | 7.074518513 | 15.30357936 | 13.41686991 | 12.88732275 | 7.161945863 |
| ENSMUSG00000089414 | 6.367066661 | 6.260555194 | 7.767661525 | 0.805457672 | 7.161945863 |
| ENSMUSG00000089415 | 4.244711108 | 7.651789682 | 5.649208382 | 6.443661377 | 7.161945863 |
| ENSMUSG00000089416 | 10.61177777 | 6.956172438 | 7.061510478 | 4.02728836  | 5.013362104 |
| ENSMUSG00000089417 | 21.93100739 | 34.78086219 | 24.00913562 | 29.80193387 | 25.06681052 |
| ENSMUSG00000089418 | 10.61177777 | 4.869320706 | 9.179963621 | 5.638203705 | 10.02672421 |
| ENSMUSG00000089420 | 36.78749627 | 83.47406925 | 67.08434954 | 33.02376456 | 38.67450766 |
| ENSMUSG00000089422 | 11.31922962 | 12.52111039 | 9.179963621 | 5.638203705 | 8.594335036 |
| ENSMUSG00000089423 | 4.952162959 | 2.782468975 | 3.530755239 | 2.416373016 | 2.148583759 |
| ENSMUSG00000089424 | 45.27691848 | 54.25814501 | 48.7244223  | 78.93485187 | 58.01176149 |
| ENSMUSG00000089425 | 11.31922962 | 5.56493795  | 4.943057334 | 5.638203705 | 4.297167518 |
| ENSMUSG00000089427 | 6.367066661 | 8.347406925 | 5.649208382 | 7.249119049 | 10.02672421 |
| ENSMUSG00000089429 | 97.62835547 | 134.254128  | 121.4579802 | 208.6135371 | 169.0219224 |
| ENSMUSG00000089431 | 9.196874066 | 6.260555194 | 6.35535943  | 4.02728836  | 10.7429188  |
| ENSMUSG00000089432 | 36.08004441 | 50.08444155 | 52.25517753 | 44.30017197 | 42.25548059 |
| ENSMUSG00000089434 | 4.952162959 | 3.478086219 | 4.943057334 | 1.610915344 | 4.297167518 |
| ENSMUSG00000089436 | 6.367066661 | 6.956172438 | 9.179963621 | 4.832746033 | 7.161945863 |
| ENSMUSG00000089437 | 4.244711108 | 4.173703463 | 3.530755239 | 7.249119049 | 1.432389173 |
| ENSMUSG00000089438 | 5.65961481  | 9.043024169 | 8.473812573 | 7.249119049 | 12.17530797 |
| ENSMUSG00000089439 | 8.489422215 | 6.260555194 | 9.179963621 | 7.249119049 | 3.580972932 |
| ENSMUSG00000089441 | 7.074518513 | 6.956172438 | 8.473812573 | 3.221830688 | 7.87814045  |
| ENSMUSG00000089442 | 7.074518513 | 7.651789682 | 7.767661525 | 4.832746033 | 5.729556691 |
| ENSMUSG00000089443 | 6.367066661 | 2.782468975 | 4.943057334 | 0.805457672 | 5.013362104 |

|                   |             |             |             |             |             |
|-------------------|-------------|-------------|-------------|-------------|-------------|
| ENSMUSG0000089444 | 9.196874066 | 7.651789682 | 7.061510478 | 4.832746033 | 5.729556691 |
| ENSMUSG0000089445 | 9.904325918 | 4.173703463 | 10.59226572 | 4.02728836  | 6.445751277 |
| ENSMUSG0000089446 | 8.489422215 | 3.478086219 | 4.943057334 | 8.054576721 | 11.45911338 |
| ENSMUSG0000089447 | 10.61177777 | 9.043024169 | 7.061510478 | 8.860034393 | 7.161945863 |
| ENSMUSG0000089450 | 14.14903703 | 12.52111039 | 4.236906287 | 6.443661377 | 8.594335036 |
| ENSMUSG0000089451 | 8.489422215 | 6.956172438 | 6.35535943  | 9.665492065 | 9.310529622 |
| ENSMUSG0000089452 | 9.904325918 | 5.56493795  | 5.649208382 | 6.443661377 | 7.161945863 |
| ENSMUSG0000089453 | 7.074518513 | 9.738641413 | 11.29841676 | 8.860034393 | 8.594335036 |
| ENSMUSG0000089454 | 9.904325918 | 11.82549314 | 7.061510478 | 9.665492065 | 5.729556691 |
| ENSMUSG0000089455 | 7.074518513 | 6.260555194 | 8.473812573 | 4.832746033 | 5.013362104 |
| ENSMUSG0000089458 | 10.61177777 | 6.260555194 | 7.767661525 | 2.416373016 | 8.594335036 |
| ENSMUSG0000089459 | 4.244711108 | 2.782468975 | 2.824604191 | 2.416373016 | 2.864778345 |
| ENSMUSG0000089460 | 6.367066661 | 4.869320706 | 4.943057334 | 3.221830688 | 2.864778345 |
| ENSMUSG0000089461 | 4.244711108 | 6.956172438 | 7.061510478 | 3.221830688 | 5.729556691 |
| ENSMUSG0000089462 | 5.65961481  | 5.56493795  | 4.943057334 | 4.02728836  | 7.161945863 |
| ENSMUSG0000089464 | 9.196874066 | 3.478086219 | 5.649208382 | 5.638203705 | 6.445751277 |
| ENSMUSG0000089465 | 11.31922962 | 3.478086219 | 4.943057334 | 9.665492065 | 0.716194586 |
| ENSMUSG0000089467 | 8.489422215 | 6.260555194 | 14.12302096 | 5.638203705 | 6.445751277 |
| ENSMUSG0000089468 | 2.122355554 | 4.869320706 | 2.118453143 | 4.832746033 | 5.013362104 |
| ENSMUSG0000089469 | 7.781970364 | 6.260555194 | 4.236906287 | 3.221830688 | 6.445751277 |
| ENSMUSG0000089470 | 5.65961481  | 1.391234488 | 4.943057334 | 2.416373016 | 2.864778345 |
| ENSMUSG0000089471 | 3.537259256 | 3.478086219 | 0.706151048 | 1.610915344 | 2.864778345 |
| ENSMUSG0000089472 | 7.074518513 | 8.347406925 | 8.473812573 | 6.443661377 | 8.594335036 |
| ENSMUSG0000089473 | 15.56394073 | 25.04222078 | 24.00913562 | 21.74735715 | 20.769643   |
| ENSMUSG0000089475 | 149.9797925 | 178.7736317 | 157.4716837 | 248.080963  | 172.6028953 |
| ENSMUSG0000089476 | 52.35143699 | 73.0398106  | 72.73355792 | 134.5114312 | 108.8615771 |
| ENSMUSG0000089477 | 7.781970364 | 9.738641413 | 7.061510478 | 4.832746033 | 7.87814045  |
| ENSMUSG0000089479 | 2.829807405 | 9.738641413 | 7.767661525 | 7.249119049 | 5.013362104 |
| ENSMUSG0000089480 | 4.952162959 | 9.043024169 | 8.473812573 | 1.610915344 | 5.729556691 |
| ENSMUSG0000089481 | 13.44158517 | 5.56493795  | 9.886114669 | 4.02728836  | 7.87814045  |
| ENSMUSG0000089482 | 41.03220737 | 66.08363816 | 48.01827125 | 112.7640741 | 110.2939663 |
| ENSMUSG0000089484 | 8.489422215 | 6.956172438 | 9.886114669 | 3.221830688 | 7.87814045  |
| ENSMUSG0000089485 | 14.14903703 | 13.21672763 | 10.59226572 | 10.47094974 | 9.310529622 |
| ENSMUSG0000089486 | 11.31922962 | 4.869320706 | 7.767661525 | 4.02728836  | 9.310529622 |
| ENSMUSG0000089487 | 10.61177777 | 5.56493795  | 10.59226572 | 4.02728836  | 8.594335036 |
| ENSMUSG0000089488 | 2.829807405 | 8.347406925 | 9.886114669 | 5.638203705 | 10.02672421 |
| ENSMUSG0000089489 | 6.367066661 | 4.869320706 | 5.649208382 | 5.638203705 | 6.445751277 |
| ENSMUSG0000089490 | 11.31922962 | 11.1298759  | 4.943057334 | 3.221830688 | 5.729556691 |
| ENSMUSG0000089491 | 41.73965922 | 60.51870021 | 64.25974535 | 96.65492065 | 83.07857202 |
| ENSMUSG0000089493 | 171.9107999 | 228.162456  | 193.4853871 | 163.5079074 | 157.562809  |
| ENSMUSG0000089497 | 9.904325918 | 11.82549314 | 12.00456781 | 9.665492065 | 7.87814045  |
| ENSMUSG0000089498 | 29.71297775 | 72.34419335 | 55.07978173 | 38.66196826 | 43.68786977 |
| ENSMUSG0000089499 | 10.61177777 | 11.82549314 | 7.061510478 | 6.443661377 | 7.87814045  |

|                    |             |             |             |             |             |
|--------------------|-------------|-------------|-------------|-------------|-------------|
| ENSMUSG00000089501 | 34.66514071 | 66.7792554  | 60.72899011 | 35.44013757 | 42.25548059 |
| ENSMUSG00000089504 | 116.7295555 | 166.9481385 | 156.0593816 | 123.2350238 | 125.3340526 |
| ENSMUSG00000089506 | 7.074518513 | 6.956172438 | 6.35535943  | 4.02728836  | 11.45911338 |
| ENSMUSG00000089507 | 9.904325918 | 6.956172438 | 7.767661525 | 4.832746033 | 5.729556691 |
| ENSMUSG00000089508 | 7.781970364 | 9.043024169 | 4.943057334 | 4.02728836  | 10.02672421 |
| ENSMUSG00000089509 | 2.122355554 | 0.695617244 | 2.118453143 | 0.805457672 | 1.432389173 |
| ENSMUSG00000089510 | 6.367066661 | 4.869320706 | 7.061510478 | 3.221830688 | 4.297167518 |
| ENSMUSG00000089512 | 0.707451851 | 3.478086219 | 2.824604191 | 12.88732275 | 7.161945863 |
| ENSMUSG00000089513 | 9.196874066 | 11.82549314 | 14.12302096 | 4.832746033 | 9.310529622 |
| ENSMUSG00000089514 | 9.904325918 | 6.956172438 | 4.236906287 | 7.249119049 | 6.445751277 |
| ENSMUSG00000089516 | 5.65961481  | 5.56493795  | 5.649208382 | 4.02728836  | 6.445751277 |
| ENSMUSG00000089517 | 0           | 0           | 0           | 0           | 0           |
| ENSMUSG00000089520 | 10.61177777 | 7.651789682 | 10.59226572 | 5.638203705 | 4.297167518 |
| ENSMUSG00000089522 | 7.781970364 | 3.478086219 | 5.649208382 | 10.47094974 | 5.013362104 |
| ENSMUSG00000089524 | 4.952162959 | 11.82549314 | 3.530755239 | 3.221830688 | 12.17530797 |
| ENSMUSG00000089525 | 9.904325918 | 9.738641413 | 7.767661525 | 12.88732275 | 21.48583759 |
| ENSMUSG00000089528 | 10.61177777 | 6.956172438 | 8.473812573 | 11.27640741 | 7.87814045  |
| ENSMUSG00000089529 | 5.65961481  | 9.738641413 | 9.179963621 | 7.249119049 | 7.87814045  |
| ENSMUSG00000089530 | 13.44158517 | 13.21672763 | 5.649208382 | 2.416373016 | 3.580972932 |
| ENSMUSG00000089531 | 11.31922962 | 6.260555194 | 10.59226572 | 9.665492065 | 8.594335036 |
| ENSMUSG00000089533 | 5.65961481  | 6.260555194 | 3.530755239 | 5.638203705 | 3.580972932 |
| ENSMUSG00000089534 | 6.367066661 | 4.869320706 | 6.35535943  | 2.416373016 | 7.161945863 |
| ENSMUSG00000089536 | 14.14903703 | 16.69481385 | 20.47838039 | 12.08186508 | 12.17530797 |
| ENSMUSG00000089538 | 10.61177777 | 9.043024169 | 5.649208382 | 5.638203705 | 7.87814045  |
| ENSMUSG00000089539 | 7.074518513 | 7.651789682 | 7.061510478 | 4.832746033 | 7.87814045  |
| ENSMUSG00000089541 | 10.61177777 | 6.260555194 | 7.767661525 | 8.054576721 | 8.594335036 |
| ENSMUSG00000089542 | 0           | 0           | 0           | 0           | 0           |
| ENSMUSG00000089543 | 4.952162959 | 6.260555194 | 3.530755239 | 3.221830688 | 7.161945863 |
| ENSMUSG00000089544 | 7.074518513 | 8.347406925 | 4.943057334 | 8.860034393 | 5.729556691 |
| ENSMUSG00000089545 | 12.73413332 | 8.347406925 | 8.473812573 | 6.443661377 | 6.445751277 |
| ENSMUSG00000089546 | 9.196874066 | 5.56493795  | 7.061510478 | 5.638203705 | 7.161945863 |
| ENSMUSG00000089548 | 11.31922962 | 6.260555194 | 9.886114669 | 8.860034393 | 6.445751277 |
| ENSMUSG00000089549 | 10.61177777 | 11.1298759  | 9.179963621 | 2.416373016 | 5.729556691 |
| ENSMUSG00000089550 | 13.44158517 | 6.956172438 | 10.59226572 | 4.832746033 | 6.445751277 |
| ENSMUSG00000089551 | 9.904325918 | 8.347406925 | 12.00456781 | 9.665492065 | 10.02672421 |
| ENSMUSG00000089552 | 12.73413332 | 9.043024169 | 7.767661525 | 3.221830688 | 7.87814045  |
| ENSMUSG00000089553 | 14.85648888 | 7.651789682 | 10.59226572 | 1.610915344 | 9.310529622 |
| ENSMUSG00000089555 | 13.44158517 | 24.34660353 | 21.18453143 | 15.30369577 | 13.60769714 |
| ENSMUSG00000089556 | 12.73413332 | 5.56493795  | 8.473812573 | 7.249119049 | 11.45911338 |
| ENSMUSG00000089558 | 8.489422215 | 7.651789682 | 6.35535943  | 5.638203705 | 6.445751277 |
| ENSMUSG00000089560 | 5.65961481  | 6.956172438 | 7.767661525 | 9.665492065 | 10.02672421 |
| ENSMUSG00000089561 | 8.489422215 | 6.956172438 | 7.767661525 | 6.443661377 | 6.445751277 |
| ENSMUSG00000089562 | 10.61177777 | 8.347406925 | 8.473812573 | 8.054576721 | 2.864778345 |

|                    |             |             |             |             |             |
|--------------------|-------------|-------------|-------------|-------------|-------------|
| ENSMUSG00000089563 | 5.65961481  | 7.651789682 | 7.767661525 | 4.832746033 | 5.729556691 |
| ENSMUSG00000089564 | 9.196874066 | 6.260555194 | 8.473812573 | 7.249119049 | 7.87814045  |
| ENSMUSG00000089570 | 0           | 0           | 0           | 0           | 0           |
| ENSMUSG00000089571 | 2.829807405 | 5.56493795  | 3.530755239 | 17.72006879 | 12.17530797 |
| ENSMUSG00000089575 | 11.31922962 | 6.956172438 | 8.473812573 | 4.832746033 | 7.87814045  |
| ENSMUSG00000089576 | 7.074518513 | 9.738641413 | 6.35535943  | 11.27640741 | 7.161945863 |
| ENSMUSG00000089578 | 7.781970364 | 5.56493795  | 12.00456781 | 6.443661377 | 7.161945863 |
| ENSMUSG00000089580 | 9.196874066 | 9.043024169 | 5.649208382 | 5.638203705 | 2.148583759 |
| ENSMUSG00000089581 | 11.31922962 | 13.91234488 | 12.71071886 | 12.88732275 | 17.18867007 |
| ENSMUSG00000089583 | 9.904325918 | 8.347406925 | 7.767661525 | 4.832746033 | 9.310529622 |
| ENSMUSG00000089584 | 7.781970364 | 9.043024169 | 3.530755239 | 4.832746033 | 3.580972932 |
| ENSMUSG00000089585 | 9.904325918 | 6.260555194 | 6.35535943  | 9.665492065 | 6.445751277 |
| ENSMUSG00000089586 | 9.196874066 | 9.043024169 | 12.00456781 | 8.860034393 | 10.7429188  |
| ENSMUSG00000089587 | 13.44158517 | 5.56493795  | 4.236906287 | 7.249119049 | 3.580972932 |
| ENSMUSG00000089588 | 12.02668147 | 20.86851731 | 28.95219296 | 12.88732275 | 19.33725383 |
| ENSMUSG00000089589 | 10.61177777 | 7.651789682 | 7.767661525 | 8.054576721 | 11.45911338 |
| ENSMUSG00000089590 | 3.537259256 | 12.52111039 | 6.35535943  | 11.27640741 | 4.297167518 |
| ENSMUSG00000089591 | 7.074518513 | 5.56493795  | 8.473812573 | 7.249119049 | 12.17530797 |
| ENSMUSG00000089593 | 7.074518513 | 6.956172438 | 12.71071886 | 4.02728836  | 10.02672421 |
| ENSMUSG00000089596 | 7.074518513 | 8.347406925 | 4.943057334 | 6.443661377 | 8.594335036 |
| ENSMUSG00000089597 | 17.68629628 | 16.69481385 | 16.94762515 | 21.74735715 | 22.20203218 |
| ENSMUSG00000089598 | 11.31922962 | 20.86851731 | 22.59683353 | 39.46742593 | 31.5125618  |
| ENSMUSG00000089599 | 8.489422215 | 11.1298759  | 9.886114669 | 8.860034393 | 15.04008631 |
| ENSMUSG00000089601 | 14.14903703 | 4.869320706 | 5.649208382 | 4.832746033 | 9.310529622 |
| ENSMUSG00000089603 | 10.61177777 | 5.56493795  | 4.236906287 | 2.416373016 | 4.297167518 |
| ENSMUSG00000089605 | 5.65961481  | 5.56493795  | 10.59226572 | 6.443661377 | 7.161945863 |
| ENSMUSG00000089606 | 12.02668147 | 10.43425866 | 6.35535943  | 7.249119049 | 5.729556691 |
| ENSMUSG00000089607 | 9.904325918 | 2.086851731 | 2.824604191 | 5.638203705 | 6.445751277 |
| ENSMUSG00000089608 | 9.904325918 | 11.82549314 | 7.061510478 | 10.47094974 | 8.594335036 |
| ENSMUSG00000089609 | 11.31922962 | 7.651789682 | 13.41686991 | 7.249119049 | 3.580972932 |
| ENSMUSG00000089610 | 7.781970364 | 6.956172438 | 3.530755239 | 4.02728836  | 5.729556691 |
| ENSMUSG00000089612 | 7.781970364 | 6.956172438 | 6.35535943  | 9.665492065 | 7.161945863 |
| ENSMUSG00000089613 | 9.196874066 | 21.56413456 | 18.35992724 | 14.4982381  | 19.33725383 |
| ENSMUSG00000089614 | 3.537259256 | 6.956172438 | 4.943057334 | 4.832746033 | 5.013362104 |
| ENSMUSG00000089615 | 11.31922962 | 10.43425866 | 6.35535943  | 8.860034393 | 5.013362104 |
| ENSMUSG00000089616 | 9.196874066 | 6.260555194 | 7.061510478 | 2.416373016 | 9.310529622 |
| ENSMUSG00000089617 | 0           | 0.695617244 | 1.412302096 | 0           | 0.716194586 |
| ENSMUSG00000089618 | 4.952162959 | 9.738641413 | 4.943057334 | 9.665492065 | 10.02672421 |
| ENSMUSG00000089619 | 6.367066661 | 9.043024169 | 6.35535943  | 6.443661377 | 7.87814045  |
| ENSMUSG00000089621 | 7.074518513 | 14.60796212 | 9.886114669 | 6.443661377 | 10.7429188  |
| ENSMUSG00000089622 | 38.90985182 | 52.86691053 | 43.07521391 | 21.74735715 | 30.79636721 |
| ENSMUSG00000089624 | 12.02668147 | 24.34660353 | 16.2414741  | 26.58010318 | 19.33725383 |
| ENSMUSG00000089625 | 0           | 0           | 0           | 0           | 0           |

|                    |             |             |             |             |             |
|--------------------|-------------|-------------|-------------|-------------|-------------|
| ENSMUSG00000089627 | 9.904325918 | 4.173703463 | 5.649208382 | 7.249119049 | 6.445751277 |
| ENSMUSG00000089628 | 9.196874066 | 9.043024169 | 7.061510478 | 9.665492065 | 12.89150255 |
| ENSMUSG00000089630 | 8.489422215 | 4.173703463 | 4.236906287 | 4.832746033 | 6.445751277 |
| ENSMUSG00000089631 | 9.196874066 | 27.82468975 | 11.29841676 | 35.44013757 | 21.48583759 |
| ENSMUSG00000089633 | 5.65961481  | 7.651789682 | 7.767661525 | 4.02728836  | 7.161945863 |
| ENSMUSG00000089634 | 6.367066661 | 6.260555194 | 7.061510478 | 11.27640741 | 7.87814045  |
| ENSMUSG00000089635 | 5.65961481  | 5.56493795  | 6.35535943  | 8.860034393 | 8.594335036 |
| ENSMUSG00000089636 | 11.31922962 | 18.78166558 | 16.2414741  | 16.10915344 | 21.48583759 |
| ENSMUSG00000089639 | 9.196874066 | 9.738641413 | 11.29841676 | 7.249119049 | 10.7429188  |
| ENSMUSG00000089640 | 25.46826665 | 41.73703463 | 31.0706461  | 47.52200265 | 41.53928601 |
| ENSMUSG00000089642 | 11.31922962 | 4.869320706 | 6.35535943  | 1.610915344 | 5.013362104 |
| ENSMUSG00000089643 | 7.781970364 | 20.17290007 | 10.59226572 | 12.88732275 | 9.310529622 |
| ENSMUSG00000089645 | 13.44158517 | 6.260555194 | 9.886114669 | 7.249119049 | 3.580972932 |
| ENSMUSG00000089646 | 12.02668147 | 6.956172438 | 6.35535943  | 4.02728836  | 6.445751277 |
| ENSMUSG00000089647 | 7.074518513 | 9.043024169 | 6.35535943  | 8.860034393 | 14.32389173 |
| ENSMUSG00000089648 | 4.952162959 | 4.173703463 | 6.35535943  | 5.638203705 | 7.161945863 |
| ENSMUSG00000089651 | 13.44158517 | 20.17290007 | 19.06607829 | 15.30369577 | 17.90486466 |
| ENSMUSG00000089652 | 46.69182218 | 50.08444155 | 38.13215658 | 74.9075635  | 47.98503729 |
| ENSMUSG00000089653 | 6.367066661 | 4.869320706 | 9.886114669 | 4.832746033 | 5.729556691 |
| ENSMUSG00000089654 | 15.56394073 | 5.56493795  | 8.473812573 | 3.221830688 | 5.729556691 |
| ENSMUSG00000089655 | 7.781970364 | 6.956172438 | 9.179963621 | 4.832746033 | 10.02672421 |
| ENSMUSG00000089656 | 9.196874066 | 9.738641413 | 7.061510478 | 6.443661377 | 7.87814045  |
| ENSMUSG00000089657 | 183.2300295 | 212.8588766 | 204.0776528 | 254.5246244 | 237.7766027 |
| ENSMUSG00000089659 | 5.65961481  | 5.56493795  | 7.061510478 | 4.832746033 | 5.729556691 |
| ENSMUSG00000089662 | 9.196874066 | 8.347406925 | 9.886114669 | 10.47094974 | 5.013362104 |
| ENSMUSG00000089663 | 7.781970364 | 6.956172438 | 7.767661525 | 4.02728836  | 6.445751277 |
| ENSMUSG00000089664 | 9.196874066 | 5.56493795  | 8.473812573 | 4.02728836  | 6.445751277 |
| ENSMUSG00000089665 | 8.489422215 | 18.78166558 | 21.18453143 | 4.02728836  | 10.02672421 |
| ENSMUSG00000089666 | 6.367066661 | 7.651789682 | 5.649208382 | 5.638203705 | 5.729556691 |
| ENSMUSG00000089667 | 6.367066661 | 5.56493795  | 7.767661525 | 8.054576721 | 10.02672421 |
| ENSMUSG00000089670 | 14.14903703 | 11.82549314 | 9.179963621 | 6.443661377 | 10.02672421 |
| ENSMUSG00000089671 | 9.196874066 | 8.347406925 | 9.179963621 | 24.16373016 | 20.769643   |
| ENSMUSG00000089673 | 14.14903703 | 18.78166558 | 25.42143772 | 18.52552646 | 20.769643   |
| ENSMUSG00000089679 | 12.73413332 | 18.78166558 | 16.2414741  | 14.4982381  | 13.60769714 |
| ENSMUSG00000089680 | 108.2401332 | 118.2549314 | 125.6948865 | 105.514955  | 103.1320204 |
| ENSMUSG00000089683 | 14.14903703 | 17.39043109 | 22.59683353 | 41.07834128 | 40.82309142 |
| ENSMUSG00000089684 | 11.31922962 | 4.173703463 | 5.649208382 | 7.249119049 | 8.594335036 |
| ENSMUSG00000089685 | 11.31922962 | 11.1298759  | 4.236906287 | 3.221830688 | 7.161945863 |
| ENSMUSG00000089686 | 13.44158517 | 7.651789682 | 12.00456781 | 4.832746033 | 5.013362104 |
| ENSMUSG00000089688 | 100.4581629 | 156.5138799 | 105.2165061 | 80.54576721 | 72.33565322 |
| ENSMUSG00000089689 | 7.074518513 | 5.56493795  | 11.29841676 | 4.832746033 | 7.161945863 |
| ENSMUSG00000089690 | 9.196874066 | 4.173703463 | 7.767661525 | 7.249119049 | 3.580972932 |
| ENSMUSG00000089695 | 12.02668147 | 13.21672763 | 17.65377619 | 16.10915344 | 10.7429188  |

|                    |             |             |             |             |             |
|--------------------|-------------|-------------|-------------|-------------|-------------|
| ENSMUSG00000089697 | 9.904325918 | 4.173703463 | 8.473812573 | 5.638203705 | 6.445751277 |
| ENSMUSG00000089698 | 6.367066661 | 6.956172438 | 4.943057334 | 4.832746033 | 5.013362104 |
| ENSMUSG00000089699 | 6.367066661 | 10.43425866 | 7.061510478 | 6.443661377 | 9.310529622 |
| ENSMUSG00000089700 | 5.65961481  | 9.043024169 | 5.649208382 | 8.860034393 | 5.729556691 |
| ENSMUSG00000089701 | 20.51610369 | 30.60715873 | 34.60140134 | 16.10915344 | 20.769643   |
| ENSMUSG00000089702 | 7.074518513 | 15.99919661 | 13.41686991 | 24.16373016 | 17.90486466 |
| ENSMUSG00000089703 | 6.367066661 | 6.956172438 | 7.061510478 | 7.249119049 | 12.17530797 |
| ENSMUSG00000089705 | 7.781970364 | 10.43425866 | 7.767661525 | 8.860034393 | 6.445751277 |
| ENSMUSG00000089706 | 8.489422215 | 6.260555194 | 7.767661525 | 4.832746033 | 4.297167518 |
| ENSMUSG00000089707 | 16.27139258 | 19.47728283 | 14.12302096 | 5.638203705 | 10.7429188  |
| ENSMUSG00000089708 | 9.904325918 | 4.869320706 | 8.473812573 | 6.443661377 | 9.310529622 |
| ENSMUSG00000089709 | 12.02668147 | 9.738641413 | 12.71071886 | 5.638203705 | 10.7429188  |
| ENSMUSG00000089710 | 12.73413332 | 6.260555194 | 6.35535943  | 6.443661377 | 8.594335036 |
| ENSMUSG00000089711 | 9.904325918 | 4.869320706 | 5.649208382 | 8.054576721 | 5.729556691 |
| ENSMUSG00000089712 | 11.31922962 | 26.43345526 | 18.35992724 | 16.91461111 | 18.62105924 |
| ENSMUSG00000089713 | 8.489422215 | 5.56493795  | 4.943057334 | 5.638203705 | 9.310529622 |
| ENSMUSG00000089714 | 57.30359995 | 54.25814501 | 48.01827125 | 72.49119049 | 54.43078856 |
| ENSMUSG00000089716 | 16.97884443 | 17.39043109 | 8.473812573 | 20.94189947 | 11.45911338 |
| ENSMUSG00000089717 | 6.367066661 | 5.56493795  | 12.00456781 | 9.665492065 | 7.161945863 |
| ENSMUSG00000089718 | 14.85648888 | 11.1298759  | 10.59226572 | 3.221830688 | 5.013362104 |
| ENSMUSG00000089719 | 12.02668147 | 11.82549314 | 11.29841676 | 4.832746033 | 9.310529622 |
| ENSMUSG00000089720 | 9.904325918 | 6.260555194 | 6.35535943  | 4.02728836  | 7.161945863 |
| ENSMUSG00000089723 | 9.904325918 | 11.82549314 | 6.35535943  | 3.221830688 | 10.02672421 |
| ENSMUSG00000089726 | 0.707451851 | 5.56493795  | 7.061510478 | 37.05105292 | 35.80972932 |
| ENSMUSG00000089728 | 7.074518513 | 14.60796212 | 12.71071886 | 8.054576721 | 7.87814045  |
| ENSMUSG00000089729 | 68.62282957 | 114.7768452 | 100.2734488 | 59.60386773 | 60.16034525 |
| ENSMUSG00000089730 | 7.781970364 | 7.651789682 | 7.061510478 | 4.02728836  | 9.310529622 |
| ENSMUSG00000089731 | 9.196874066 | 3.478086219 | 7.767661525 | 5.638203705 | 2.864778345 |
| ENSMUSG00000089732 | 11.31922962 | 7.651789682 | 4.943057334 | 0.805457672 | 2.148583759 |
| ENSMUSG00000089733 | 24.76081479 | 24.34660353 | 27.53989086 | 12.08186508 | 25.78300511 |
| ENSMUSG00000089734 | 10.61177777 | 5.56493795  | 9.179963621 | 3.221830688 | 4.297167518 |
| ENSMUSG00000089735 | 12.73413332 | 17.39043109 | 12.71071886 | 7.249119049 | 15.7562809  |
| ENSMUSG00000089737 | 9.904325918 | 4.869320706 | 9.179963621 | 5.638203705 | 7.161945863 |
| ENSMUSG00000089739 | 3.537259256 | 2.086851731 | 3.530755239 | 4.02728836  | 2.148583759 |
| ENSMUSG00000089742 | 97.62835547 | 118.2549314 | 132.0502459 | 105.514955  | 76.63282074 |
| ENSMUSG00000089743 | 1.414903703 | 0.695617244 | 1.412302096 | 0.805457672 | 1.432389173 |
| ENSMUSG00000089744 | 101.1656147 | 130.0804246 | 115.8087718 | 49.93837567 | 72.33565322 |
| ENSMUSG00000089745 | 19.10119998 | 20.86851731 | 24.00913562 | 12.88732275 | 17.18867007 |
| ENSMUSG00000089746 | 7.781970364 | 7.651789682 | 4.236906287 | 4.02728836  | 7.161945863 |
| ENSMUSG00000089748 | 10.61177777 | 7.651789682 | 9.886114669 | 6.443661377 | 8.594335036 |
| ENSMUSG00000089749 | 2.122355554 | 2.086851731 | 4.236906287 | 0.805457672 | 2.148583759 |
| ENSMUSG00000089751 | 6.367066661 | 9.043024169 | 12.00456781 | 4.832746033 | 5.013362104 |
| ENSMUSG00000089753 | 7.074518513 | 6.956172438 | 6.35535943  | 8.860034393 | 10.7429188  |

|                    |             |             |             |             |             |
|--------------------|-------------|-------------|-------------|-------------|-------------|
| ENSMUSG00000089754 | 8.489422215 | 6.956172438 | 8.473812573 | 8.860034393 | 5.729556691 |
| ENSMUSG00000089755 | 14.14903703 | 13.21672763 | 21.18453143 | 6.443661377 | 13.60769714 |
| ENSMUSG00000089757 | 26.88317035 | 38.95456565 | 57.90438592 | 23.35827249 | 32.22875639 |
| ENSMUSG00000089759 | 4.952162959 | 2.086851731 | 4.943057334 | 5.638203705 | 3.580972932 |
| ENSMUSG00000089760 | 6.367066661 | 7.651789682 | 7.767661525 | 8.054576721 | 8.594335036 |
| ENSMUSG00000089761 | 10.61177777 | 4.869320706 | 5.649208382 | 9.665492065 | 5.729556691 |
| ENSMUSG00000089763 | 22.63845924 | 20.86851731 | 24.71528667 | 13.69278043 | 22.20203218 |
| ENSMUSG00000089764 | 30.4204296  | 57.04061399 | 42.36906287 | 58.79841006 | 50.13362104 |
| ENSMUSG00000089766 | 44.56946663 | 66.7792554  | 70.61510478 | 71.68573282 | 80.21379367 |
| ENSMUSG00000089767 | 8.489422215 | 4.869320706 | 6.35535943  | 8.860034393 | 9.310529622 |
| ENSMUSG00000089769 | 6.367066661 | 8.347406925 | 6.35535943  | 4.832746033 | 8.594335036 |
| ENSMUSG00000089771 | 5.65961481  | 6.260555194 | 5.649208382 | 5.638203705 | 7.161945863 |
| ENSMUSG00000089775 | 0.707451851 | 1.391234488 | 1.412302096 | 0           | 1.432389173 |
| ENSMUSG00000089776 | 6.367066661 | 13.91234488 | 3.530755239 | 9.665492065 | 8.594335036 |
| ENSMUSG00000089779 | 12.73413332 | 6.260555194 | 5.649208382 | 7.249119049 | 6.445751277 |
| ENSMUSG00000089780 | 9.904325918 | 8.347406925 | 10.59226572 | 4.832746033 | 5.013362104 |
| ENSMUSG00000089781 | 11.31922962 | 6.956172438 | 9.179963621 | 8.054576721 | 12.17530797 |
| ENSMUSG00000089782 | 9.196874066 | 8.347406925 | 9.886114669 | 13.69278043 | 11.45911338 |
| ENSMUSG00000089785 | 14.14903703 | 8.347406925 | 5.649208382 | 4.832746033 | 1.432389173 |
| ENSMUSG00000089787 | 11.31922962 | 7.651789682 | 8.473812573 | 4.832746033 | 12.89150255 |
| ENSMUSG00000089788 | 32.54278516 | 66.08363816 | 55.78593277 | 78.93485187 | 71.61945863 |
| ENSMUSG00000089790 | 7.781970364 | 8.347406925 | 6.35535943  | 5.638203705 | 8.594335036 |
| ENSMUSG00000089791 | 9.904325918 | 7.651789682 | 12.00456781 | 8.860034393 | 10.02672421 |
| ENSMUSG00000089792 | 8.489422215 | 11.1298759  | 7.767661525 | 4.02728836  | 5.729556691 |
| ENSMUSG00000089793 | 10.61177777 | 6.956172438 | 4.943057334 | 6.443661377 | 5.729556691 |
| ENSMUSG00000089794 | 82.7718666  | 165.556904  | 173.7131578 | 74.9075635  | 105.9967988 |
| ENSMUSG00000089795 | 11.31922962 | 6.260555194 | 4.943057334 | 2.416373016 | 7.161945863 |
| ENSMUSG00000089796 | 50.93653329 | 87.64777272 | 80.50121945 | 45.91108731 | 53.71459398 |
| ENSMUSG00000089797 | 12.73413332 | 6.956172438 | 2.824604191 | 8.860034393 | 7.161945863 |
| ENSMUSG00000089800 | 9.196874066 | 9.043024169 | 5.649208382 | 1.610915344 | 7.161945863 |
| ENSMUSG00000089802 | 2.829807405 | 5.56493795  | 9.179963621 | 6.443661377 | 6.445751277 |
| ENSMUSG00000089803 | 7.781970364 | 18.78166558 | 11.29841676 | 9.665492065 | 11.45911338 |
| ENSMUSG00000089804 | 10.61177777 | 8.347406925 | 7.767661525 | 4.832746033 | 6.445751277 |
| ENSMUSG00000089806 | 19.80865184 | 35.47647943 | 34.60140134 | 44.30017197 | 45.12025894 |
| ENSMUSG00000089807 | 7.074518513 | 8.347406925 | 7.767661525 | 4.832746033 | 5.013362104 |
| ENSMUSG00000089808 | 8.489422215 | 6.956172438 | 11.29841676 | 9.665492065 | 7.87814045  |
| ENSMUSG00000089810 | 11.31922962 | 11.82549314 | 8.473812573 | 9.665492065 | 5.729556691 |
| ENSMUSG00000089811 | 8.489422215 | 6.260555194 | 9.886114669 | 4.832746033 | 9.310529622 |
| ENSMUSG00000089812 | 11.31922962 | 5.56493795  | 10.59226572 | 4.02728836  | 5.729556691 |
| ENSMUSG00000089814 | 4.244711108 | 4.869320706 | 7.767661525 | 9.665492065 | 6.445751277 |
| ENSMUSG00000089815 | 12.02668147 | 7.651789682 | 7.767661525 | 6.443661377 | 8.594335036 |
| ENSMUSG00000089816 | 7.074518513 | 9.043024169 | 7.061510478 | 8.054576721 | 7.161945863 |
| ENSMUSG00000089817 | 7.074518513 | 5.56493795  | 5.649208382 | 5.638203705 | 5.013362104 |



|                    |             |             |             |             |             |
|--------------------|-------------|-------------|-------------|-------------|-------------|
| ENSMUSG00000089818 | 7.074518513 | 6.956172438 | 9.179963621 | 8.054576721 | 7.161945863 |
| ENSMUSG00000089819 | 10.61177777 | 9.738641413 | 8.473812573 | 6.443661377 | 7.161945863 |
| ENSMUSG00000089820 | 3.537259256 | 8.347406925 | 7.767661525 | 6.443661377 | 10.02672421 |
| ENSMUSG00000089821 | 7.781970364 | 7.651789682 | 10.59226572 | 5.638203705 | 3.580972932 |
| ENSMUSG00000089822 | 8.489422215 | 4.173703463 | 8.473812573 | 12.88732275 | 2.864778345 |
| ENSMUSG00000089826 | 9.196874066 | 9.043024169 | 7.767661525 | 7.249119049 | 5.013362104 |
| ENSMUSG00000089827 | 16.97884443 | 37.56333116 | 28.24604191 | 57.99295239 | 52.2822048  |
| ENSMUSG00000089828 | 7.781970364 | 6.956172438 | 6.35535943  | 4.832746033 | 7.87814045  |
| ENSMUSG00000089829 | 8.489422215 | 6.956172438 | 8.473812573 | 8.860034393 | 5.013362104 |
| ENSMUSG00000089830 | 0.707451851 | 3.478086219 | 0.706151048 | 0           | 1.432389173 |
| ENSMUSG00000089831 | 9.904325918 | 10.43425866 | 11.29841676 | 4.02728836  | 5.013362104 |
| ENSMUSG00000089833 | 6.367066661 | 9.043024169 | 2.824604191 | 3.221830688 | 7.161945863 |
| ENSMUSG00000089834 | 8.489422215 | 8.347406925 | 7.767661525 | 4.02728836  | 10.7429188  |
| ENSMUSG00000089835 | 11.31922962 | 6.956172438 | 5.649208382 | 7.249119049 | 5.729556691 |
| ENSMUSG00000089836 | 9.196874066 | 5.56493795  | 9.886114669 | 11.27640741 | 8.594335036 |
| ENSMUSG00000089838 | 77.11225179 | 95.2995624  | 93.21193831 | 32.21830688 | 36.5259239  |
| ENSMUSG00000089839 | 6.367066661 | 12.52111039 | 7.767661525 | 10.47094974 | 10.02672421 |
| ENSMUSG00000089842 | 33.95768886 | 67.47487265 | 60.72899011 | 44.30017197 | 50.13362104 |
| ENSMUSG00000089849 | 7.781970364 | 8.347406925 | 11.29841676 | 8.054576721 | 7.87814045  |
| ENSMUSG00000089851 | 11.31922962 | 2.782468975 | 4.236906287 | 5.638203705 | 3.580972932 |
| ENSMUSG00000089853 | 32.54278516 | 35.47647943 | 42.36906287 | 82.96214023 | 70.90326405 |
| ENSMUSG00000089854 | 7.074518513 | 5.56493795  | 4.943057334 | 7.249119049 | 6.445751277 |
| ENSMUSG00000089855 | 10.61177777 | 9.043024169 | 12.71071886 | 3.221830688 | 6.445751277 |
| ENSMUSG00000089861 | 10.61177777 | 7.651789682 | 5.649208382 | 6.443661377 | 7.161945863 |
| ENSMUSG00000089866 | 7.074518513 | 8.347406925 | 9.886114669 | 5.638203705 | 6.445751277 |
| ENSMUSG00000089868 | 7.781970364 | 7.651789682 | 9.886114669 | 3.221830688 | 5.729556691 |
| ENSMUSG00000089870 | 7.781970364 | 3.478086219 | 5.649208382 | 3.221830688 | 5.729556691 |
| ENSMUSG00000089871 | 58.71850365 | 22.2597518  | 22.59683353 | 49.93837567 | 24.35061594 |
| ENSMUSG00000089874 | 4.952162959 | 3.478086219 | 5.649208382 | 5.638203705 | 5.013362104 |
| ENSMUSG00000089875 | 69.33028142 | 91.82147618 | 91.79963621 | 64.43661377 | 68.75468029 |
| ENSMUSG00000089877 | 9.904325918 | 6.956172438 | 8.473812573 | 9.665492065 | 8.594335036 |
| ENSMUSG00000089879 | 8.489422215 | 8.347406925 | 4.943057334 | 7.249119049 | 5.013362104 |
| ENSMUSG00000089881 | 0           | 1.391234488 | 2.824604191 | 1.610915344 | 1.432389173 |
| ENSMUSG00000089883 | 14.85648888 | 8.347406925 | 4.236906287 | 8.054576721 | 5.013362104 |
| ENSMUSG00000089884 | 7.781970364 | 5.56493795  | 2.824604191 | 1.610915344 | 4.297167518 |
| ENSMUSG00000089885 | 9.196874066 | 11.1298759  | 8.473812573 | 5.638203705 | 5.013362104 |
| ENSMUSG00000089886 | 12.02668147 | 7.651789682 | 10.59226572 | 8.054576721 | 10.7429188  |
| ENSMUSG00000089887 | 8.489422215 | 6.956172438 | 1.412302096 | 1.610915344 | 6.445751277 |
| ENSMUSG00000089888 | 7.074518513 | 4.869320706 | 7.061510478 | 7.249119049 | 5.729556691 |
| ENSMUSG00000089889 | 31.12788146 | 41.73703463 | 46.60596915 | 78.12939419 | 64.45751277 |
| ENSMUSG00000089890 | 21.22355554 | 36.17209668 | 37.42600553 | 10.47094974 | 15.7562809  |
| ENSMUSG00000089891 | 8.489422215 | 5.56493795  | 7.767661525 | 8.860034393 | 8.594335036 |
| ENSMUSG00000089892 | 7.781970364 | 10.43425866 | 4.943057334 | 3.221830688 | 3.580972932 |

|                    |             |             |             |             |             |
|--------------------|-------------|-------------|-------------|-------------|-------------|
| ENSMUSG00000089893 | 6.367066661 | 15.30357936 | 9.179963621 | 8.860034393 | 8.594335036 |
| ENSMUSG00000089894 | 7.074518513 | 4.173703463 | 8.473812573 | 6.443661377 | 5.729556691 |
| ENSMUSG00000089898 | 6.367066661 | 7.651789682 | 8.473812573 | 6.443661377 | 5.013362104 |
| ENSMUSG00000089900 | 7.781970364 | 4.869320706 | 4.943057334 | 8.054576721 | 8.594335036 |
| ENSMUSG00000089902 | 30.4204296  | 34.08524495 | 29.65834401 | 49.93837567 | 40.82309142 |
| ENSMUSG00000089904 | 7.781970364 | 8.347406925 | 6.35535943  | 4.832746033 | 10.7429188  |
| ENSMUSG00000089905 | 12.02668147 | 9.738641413 | 7.061510478 | 5.638203705 | 10.02672421 |
| ENSMUSG00000089906 | 5.65961481  | 11.1298759  | 11.29841676 | 12.08186508 | 11.45911338 |
| ENSMUSG00000089907 | 7.074518513 | 8.347406925 | 5.649208382 | 3.221830688 | 5.013362104 |
| ENSMUSG00000089908 | 3.537259256 | 12.52111039 | 9.179963621 | 4.02728836  | 8.594335036 |
| ENSMUSG00000089909 | 8.489422215 | 16.69481385 | 16.2414741  | 12.88732275 | 13.60769714 |
| ENSMUSG00000089910 | 12.73413332 | 4.173703463 | 5.649208382 | 11.27640741 | 8.594335036 |
| ENSMUSG00000089914 | 8.489422215 | 10.43425866 | 4.943057334 | 3.221830688 | 9.310529622 |
| ENSMUSG00000089916 | 7.781970364 | 6.260555194 | 6.35535943  | 7.249119049 | 4.297167518 |
| ENSMUSG00000089924 | 6.367066661 | 5.56493795  | 9.179963621 | 2.416373016 | 6.445751277 |
| ENSMUSG00000089926 | 7.074518513 | 4.869320706 | 4.943057334 | 8.860034393 | 3.580972932 |
| ENSMUSG00000089927 | 9.196874066 | 6.956172438 | 7.061510478 | 6.443661377 | 9.310529622 |
| ENSMUSG00000089931 | 3.537259256 | 6.260555194 | 8.473812573 | 8.054576721 | 2.148583759 |
| ENSMUSG00000089932 | 14.85648888 | 11.82549314 | 4.943057334 | 3.221830688 | 2.148583759 |
| ENSMUSG00000089933 | 6.367066661 | 8.347406925 | 7.061510478 | 6.443661377 | 7.161945863 |
| ENSMUSG00000089934 | 6.367066661 | 8.347406925 | 6.35535943  | 9.665492065 | 5.729556691 |
| ENSMUSG00000089935 | 19.80865184 | 35.47647943 | 30.36449505 | 88.60034393 | 69.47087488 |
| ENSMUSG00000089936 | 96.92090362 | 150.2533247 | 158.1778347 | 246.4700477 | 202.6830679 |
| ENSMUSG00000089937 | 36.08004441 | 26.43345526 | 31.0706461  | 28.19101852 | 31.5125618  |
| ENSMUSG00000089938 | 8.489422215 | 5.56493795  | 8.473812573 | 8.054576721 | 8.594335036 |
| ENSMUSG00000089940 | 8.489422215 | 4.869320706 | 9.179963621 | 0.805457672 | 5.013362104 |
| ENSMUSG00000089941 | 7.781970364 | 9.043024169 | 7.061510478 | 9.665492065 | 4.297167518 |
| ENSMUSG00000089944 | 0           | 0           | 0           | 0           | 0           |
| ENSMUSG00000089947 | 13.44158517 | 5.56493795  | 8.473812573 | 4.02728836  | 10.7429188  |
| ENSMUSG00000089948 | 9.196874066 | 10.43425866 | 9.886114669 | 7.249119049 | 7.87814045  |
| ENSMUSG00000089949 | 7.781970364 | 6.260555194 | 12.00456781 | 6.443661377 | 5.729556691 |
| ENSMUSG00000089950 | 15.56394073 | 11.82549314 | 8.473812573 | 4.02728836  | 7.87814045  |
| ENSMUSG00000089952 | 5.65961481  | 8.347406925 | 3.530755239 | 4.02728836  | 5.013362104 |
| ENSMUSG00000089956 | 11.31922962 | 17.39043109 | 12.00456781 | 18.52552646 | 14.32389173 |
| ENSMUSG00000089957 | 7.781970364 | 6.956172438 | 12.00456781 | 7.249119049 | 11.45911338 |
| ENSMUSG00000089958 | 24.76081479 | 23.65098629 | 23.30298458 | 12.08186508 | 9.310529622 |
| ENSMUSG00000089959 | 6.367066661 | 6.260555194 | 12.00456781 | 10.47094974 | 10.02672421 |
| ENSMUSG00000089961 | 8.489422215 | 8.347406925 | 9.179963621 | 6.443661377 | 6.445751277 |
| ENSMUSG00000089962 | 7.074518513 | 7.651789682 | 4.236906287 | 9.665492065 | 10.02672421 |
| ENSMUSG00000089963 | 2.829807405 | 2.782468975 | 7.767661525 | 2.416373016 | 2.148583759 |
| ENSMUSG00000089964 | 10.61177777 | 5.56493795  | 4.236906287 | 5.638203705 | 8.594335036 |
| ENSMUSG00000089965 | 7.781970364 | 7.651789682 | 7.767661525 | 14.4982381  | 10.7429188  |
| ENSMUSG00000089966 | 7.781970364 | 11.82549314 | 7.061510478 | 5.638203705 | 2.864778345 |

|                    |             |             |             |             |             |
|--------------------|-------------|-------------|-------------|-------------|-------------|
| ENSMUSG00000089967 | 12.73413332 | 14.60796212 | 9.179963621 | 12.88732275 | 9.310529622 |
| ENSMUSG00000089968 | 7.781970364 | 4.869320706 | 4.943057334 | 3.221830688 | 7.161945863 |
| ENSMUSG00000089972 | 6.367066661 | 11.1298759  | 8.473812573 | 7.249119049 | 5.729556691 |
| ENSMUSG00000089973 | 6.367066661 | 7.651789682 | 4.943057334 | 5.638203705 | 7.87814045  |
| ENSMUSG00000089975 | 9.904325918 | 3.478086219 | 8.473812573 | 3.221830688 | 4.297167518 |
| ENSMUSG00000089976 | 12.02668147 | 11.82549314 | 10.59226572 | 13.69278043 | 11.45911338 |
| ENSMUSG00000089978 | 6.367066661 | 6.260555194 | 8.473812573 | 4.832746033 | 7.87814045  |
| ENSMUSG00000089979 | 12.73413332 | 11.1298759  | 17.65377619 | 16.10915344 | 18.62105924 |
| ENSMUSG00000089982 | 8.489422215 | 6.956172438 | 9.179963621 | 5.638203705 | 6.445751277 |
| ENSMUSG00000089983 | 8.489422215 | 4.869320706 | 5.649208382 | 8.054576721 | 11.45911338 |
| ENSMUSG00000089987 | 7.781970364 | 5.56493795  | 9.179963621 | 5.638203705 | 8.594335036 |
| ENSMUSG00000089988 | 8.489422215 | 4.869320706 | 9.179963621 | 3.221830688 | 10.02672421 |
| ENSMUSG00000089990 | 11.31922962 | 4.869320706 | 5.649208382 | 2.416373016 | 5.729556691 |
| ENSMUSG00000089991 | 12.73413332 | 6.956172438 | 4.943057334 | 6.443661377 | 5.729556691 |
| ENSMUSG00000089992 | 12.02668147 | 7.651789682 | 7.061510478 | 4.02728836  | 4.297167518 |
| ENSMUSG00000089993 | 9.196874066 | 3.478086219 | 14.829172   | 11.27640741 | 10.7429188  |
| ENSMUSG00000089994 | 12.73413332 | 14.60796212 | 9.886114669 | 12.08186508 | 8.594335036 |
| ENSMUSG00000089995 | 12.02668147 | 8.347406925 | 7.767661525 | 4.832746033 | 3.580972932 |
| ENSMUSG00000089997 | 11.31922962 | 12.52111039 | 7.061510478 | 7.249119049 | 7.161945863 |
| ENSMUSG00000089998 | 37.49494812 | 51.47567604 | 52.25517753 | 81.35122488 | 81.64618284 |
| ENSMUSG00000089999 | 7.781970364 | 17.39043109 | 11.29841676 | 16.10915344 | 15.7562809  |
| ENSMUSG00000090001 | 74.28244438 | 159.9919661 | 123.5764334 | 101.4876667 | 87.37573953 |
| ENSMUSG00000090002 | 118.851911  | 169.7306075 | 158.1778347 | 62.02024075 | 89.52432329 |
| ENSMUSG00000090003 | 9.196874066 | 12.52111039 | 7.767661525 | 4.832746033 | 5.729556691 |
| ENSMUSG00000090004 | 14.85648888 | 22.95536904 | 38.83830763 | 20.1364418  | 22.91822676 |
| ENSMUSG00000090005 | 45.27691848 | 70.95295887 | 69.20280268 | 81.35122488 | 64.45751277 |
| ENSMUSG00000090006 | 7.074518513 | 13.21672763 | 10.59226572 | 8.054576721 | 6.445751277 |
| ENSMUSG00000090007 | 11.31922962 | 7.651789682 | 9.886114669 | 3.221830688 | 8.594335036 |
| ENSMUSG00000090008 | 13.44158517 | 6.956172438 | 9.886114669 | 9.665492065 | 12.17530797 |
| ENSMUSG00000090009 | 7.781970364 | 7.651789682 | 14.12302096 | 10.47094974 | 10.02672421 |
| ENSMUSG00000090012 | 7.781970364 | 6.260555194 | 6.35535943  | 5.638203705 | 9.310529622 |
| ENSMUSG00000090013 | 9.904325918 | 7.651789682 | 7.061510478 | 4.832746033 | 7.87814045  |
| ENSMUSG00000090016 | 12.73413332 | 9.043024169 | 13.41686991 | 19.33098413 | 19.33725383 |
| ENSMUSG00000090017 | 8.489422215 | 7.651789682 | 9.886114669 | 4.02728836  | 4.297167518 |
| ENSMUSG00000090021 | 15.56394073 | 10.43425866 | 6.35535943  | 13.69278043 | 7.87814045  |
| ENSMUSG00000090023 | 11.31922962 | 4.173703463 | 9.886114669 | 5.638203705 | 3.580972932 |
| ENSMUSG00000090024 | 4.952162959 | 6.956172438 | 8.473812573 | 7.249119049 | 7.87814045  |
| ENSMUSG00000090025 | 14.85648888 | 6.260555194 | 5.649208382 | 12.88732275 | 3.580972932 |
| ENSMUSG00000090026 | 8.489422215 | 11.82549314 | 7.767661525 | 8.054576721 | 17.90486466 |
| ENSMUSG00000090027 | 3.537259256 | 6.260555194 | 5.649208382 | 3.221830688 | 7.87814045  |
| ENSMUSG00000090030 | 19.80865184 | 17.39043109 | 24.71528667 | 20.94189947 | 13.60769714 |
| ENSMUSG00000090031 | 22.63845924 | 30.60715873 | 28.24604191 | 15.30369577 | 13.60769714 |
| ENSMUSG00000090033 | 10.61177777 | 9.738641413 | 10.59226572 | 5.638203705 | 7.87814045  |

|                    |             |             |             |             |             |
|--------------------|-------------|-------------|-------------|-------------|-------------|
| ENSMUSG00000090034 | 10.61177777 | 8.347406925 | 11.29841676 | 10.47094974 | 4.297167518 |
| ENSMUSG00000090036 | 4.952162959 | 2.782468975 | 5.649208382 | 6.443661377 | 6.445751277 |
| ENSMUSG00000090038 | 13.44158517 | 18.78166558 | 11.29841676 | 12.88732275 | 14.32389173 |
| ENSMUSG00000090039 | 12.02668147 | 8.347406925 | 7.061510478 | 3.221830688 | 12.89150255 |
| ENSMUSG00000090040 | 11.31922962 | 3.478086219 | 7.061510478 | 4.02728836  | 9.310529622 |
| ENSMUSG00000090041 | 12.02668147 | 6.956172438 | 9.179963621 | 8.860034393 | 9.310529622 |
| ENSMUSG00000090042 | 9.904325918 | 7.651789682 | 8.473812573 | 4.832746033 | 7.161945863 |
| ENSMUSG00000090043 | 16.27139258 | 30.60715873 | 19.77222934 | 19.33098413 | 23.63442135 |
| ENSMUSG00000090044 | 5.65961481  | 5.56493795  | 4.943057334 | 11.27640741 | 11.45911338 |
| ENSMUSG00000090047 | 7.781970364 | 11.82549314 | 4.236906287 | 6.443661377 | 5.729556691 |
| ENSMUSG00000090048 | 12.02668147 | 4.869320706 | 4.943057334 | 9.665492065 | 5.729556691 |
| ENSMUSG00000090050 | 5.65961481  | 6.260555194 | 5.649208382 | 3.221830688 | 2.864778345 |
| ENSMUSG00000090051 | 9.196874066 | 4.869320706 | 7.767661525 | 3.221830688 | 7.87814045  |
| ENSMUSG00000090054 | 123.0966221 | 180.8604834 | 175.1254598 | 145.7878386 | 147.5360848 |
| ENSMUSG00000090057 | 13.44158517 | 8.347406925 | 16.2414741  | 14.4982381  | 15.7562809  |
| ENSMUSG00000090059 | 7.781970364 | 3.478086219 | 9.179963621 | 2.416373016 | 6.445751277 |
| ENSMUSG00000090062 | 11.31922962 | 6.260555194 | 12.00456781 | 9.665492065 | 13.60769714 |
| ENSMUSG00000090063 | 4.244711108 | 2.086851731 | 2.118453143 | 3.221830688 | 1.432389173 |
| ENSMUSG00000090066 | 12.73413332 | 9.738641413 | 7.061510478 | 10.47094974 | 12.17530797 |
| ENSMUSG00000090067 | 16.97884443 | 32.69401046 | 26.83373982 | 16.10915344 | 26.49919969 |
| ENSMUSG00000090069 | 12.02668147 | 14.60796212 | 20.47838039 | 34.6346799  | 35.80972932 |
| ENSMUSG00000090070 | 7.074518513 | 7.651789682 | 9.179963621 | 7.249119049 | 7.161945863 |
| ENSMUSG00000090073 | 5.65961481  | 6.956172438 | 8.473812573 | 5.638203705 | 4.297167518 |
| ENSMUSG00000090074 | 9.904325918 | 7.651789682 | 9.886114669 | 6.443661377 | 5.013362104 |
| ENSMUSG00000090075 | 12.73413332 | 15.99919661 | 18.35992724 | 36.24559524 | 22.91822676 |
| ENSMUSG00000090078 | 110.3624888 | 187.8166558 | 143.3486627 | 144.982381  | 137.5093606 |
| ENSMUSG00000090079 | 7.781970364 | 4.869320706 | 3.530755239 | 10.47094974 | 6.445751277 |
| ENSMUSG00000090080 | 81.3569629  | 119.6461659 | 98.15499564 | 68.46390213 | 70.18706946 |
| ENSMUSG00000090081 | 7.074518513 | 9.043024169 | 9.886114669 | 7.249119049 | 5.729556691 |
| ENSMUSG00000090086 | 66.50047402 | 88.34338996 | 79.08891735 | 192.5043836 | 164.7247549 |
| ENSMUSG00000090087 | 15.56394073 | 5.56493795  | 7.061510478 | 5.638203705 | 7.161945863 |
| ENSMUSG00000090088 | 7.074518513 | 7.651789682 | 12.00456781 | 4.02728836  | 7.161945863 |
| ENSMUSG00000090089 | 4.952162959 | 0.695617244 | 3.530755239 | 3.221830688 | 4.297167518 |
| ENSMUSG00000090090 | 16.97884443 | 12.52111039 | 13.41686991 | 16.10915344 | 12.89150255 |
| ENSMUSG00000090095 | 12.73413332 | 20.17290007 | 12.00456781 | 11.27640741 | 12.17530797 |
| ENSMUSG00000090098 | 4.952162959 | 11.1298759  | 7.767661525 | 4.02728836  | 5.013362104 |
| ENSMUSG00000090099 | 14.14903703 | 6.956172438 | 5.649208382 | 8.054576721 | 5.729556691 |
| ENSMUSG00000090101 | 0.707451851 | 0.695617244 | 0           | 7.249119049 | 7.87814045  |
| ENSMUSG00000090102 | 7.074518513 | 2.782468975 | 5.649208382 | 3.221830688 | 2.864778345 |
| ENSMUSG00000090103 | 58.0110518  | 56.34499675 | 63.5535943  | 91.82217462 | 63.0251236  |
| ENSMUSG00000090104 | 7.074518513 | 4.869320706 | 4.943057334 | 8.054576721 | 5.729556691 |
| ENSMUSG00000090105 | 130.8785925 | 171.121842  | 122.8702823 | 320.5721535 | 217.0069597 |
| ENSMUSG00000090106 | 2.829807405 | 1.391234488 | 2.118453143 | 2.416373016 | 2.148583759 |

|                    |             |             |             |             |             |
|--------------------|-------------|-------------|-------------|-------------|-------------|
| ENSMUSG00000090108 | 10.61177777 | 17.39043109 | 13.41686991 | 14.4982381  | 14.32389173 |
| ENSMUSG00000090109 | 6.367066661 | 11.1298759  | 9.179963621 | 8.860034393 | 6.445751277 |
| ENSMUSG00000090111 | 7.074518513 | 6.956172438 | 8.473812573 | 6.443661377 | 12.17530797 |
| ENSMUSG00000090114 | 9.196874066 | 4.869320706 | 12.00456781 | 9.665492065 | 7.161945863 |
| ENSMUSG00000090116 | 5.65961481  | 9.043024169 | 9.886114669 | 1.610915344 | 6.445751277 |
| ENSMUSG00000090117 | 33.95768886 | 89.0390072  | 72.73355792 | 49.93837567 | 44.40406435 |
| ENSMUSG00000090118 | 6.367066661 | 5.56493795  | 10.59226572 | 5.638203705 | 8.594335036 |
| ENSMUSG00000090119 | 10.61177777 | 4.173703463 | 8.473812573 | 8.054576721 | 4.297167518 |
| ENSMUSG00000090120 | 4.244711108 | 5.56493795  | 4.943057334 | 7.249119049 | 10.02672421 |
| ENSMUSG00000090126 | 7.781970364 | 7.651789682 | 9.179963621 | 3.221830688 | 5.729556691 |
| ENSMUSG00000090128 | 33.25023701 | 40.34580014 | 36.71985448 | 81.35122488 | 60.16034525 |
| ENSMUSG00000090131 | 9.904325918 | 4.173703463 | 12.00456781 | 8.054576721 | 10.02672421 |
| ENSMUSG00000090135 | 10.61177777 | 6.956172438 | 9.179963621 | 9.665492065 | 6.445751277 |
| ENSMUSG00000090136 | 53.05888884 | 83.47406925 | 77.67661525 | 44.30017197 | 59.44415067 |
| ENSMUSG00000090138 | 12.73413332 | 7.651789682 | 10.59226572 | 5.638203705 | 7.87814045  |
| ENSMUSG00000090142 | 0           | 0           | 0           | 0.805457672 | 0           |
| ENSMUSG00000090146 | 10.61177777 | 9.738641413 | 5.649208382 | 7.249119049 | 5.013362104 |
| ENSMUSG00000090147 | 7.074518513 | 8.347406925 | 9.179963621 | 8.860034393 | 6.445751277 |
| ENSMUSG00000090151 | 9.904325918 | 13.91234488 | 10.59226572 | 4.02728836  | 9.310529622 |
| ENSMUSG00000090152 | 5.65961481  | 9.043024169 | 4.943057334 | 1.610915344 | 2.148583759 |
| ENSMUSG00000090157 | 12.02668147 | 20.17290007 | 18.35992724 | 14.4982381  | 12.17530797 |
| ENSMUSG00000090159 | 8.489422215 | 6.260555194 | 9.886114669 | 4.832746033 | 5.729556691 |
| ENSMUSG00000090160 | 8.489422215 | 6.260555194 | 6.35535943  | 8.860034393 | 6.445751277 |
| ENSMUSG00000090162 | 8.489422215 | 6.956172438 | 3.530755239 | 3.221830688 | 8.594335036 |
| ENSMUSG00000090163 | 8.489422215 | 6.956172438 | 5.649208382 | 5.638203705 | 2.864778345 |
| ENSMUSG00000090168 | 5.65961481  | 6.956172438 | 9.179963621 | 8.054576721 | 5.013362104 |
| ENSMUSG00000090174 | 121.6817184 | 125.9067211 | 132.0502459 | 91.82217462 | 90.24051788 |
| ENSMUSG00000090179 | 10.61177777 | 10.43425866 | 3.530755239 | 5.638203705 | 5.013362104 |
| ENSMUSG00000090180 | 10.61177777 | 4.869320706 | 12.71071886 | 5.638203705 | 7.87814045  |
| ENSMUSG00000090185 | 14.85648888 | 23.65098629 | 18.35992724 | 46.71654498 | 49.41742646 |
| ENSMUSG00000090186 | 50.93653329 | 56.34499675 | 50.13672439 | 68.46390213 | 61.59273443 |
| ENSMUSG00000090187 | 0           | 0           | 0           | 0           | 0           |
| ENSMUSG00000090188 | 83.47931845 | 116.863697  | 99.56729774 | 136.1223466 | 106.7129934 |
| ENSMUSG00000090191 | 7.781970364 | 7.651789682 | 7.767661525 | 8.860034393 | 7.87814045  |
| ENSMUSG00000090192 | 4.952162959 | 4.869320706 | 7.061510478 | 4.832746033 | 5.013362104 |
| ENSMUSG00000090193 | 14.14903703 | 15.99919661 | 16.94762515 | 9.665492065 | 16.47247549 |
| ENSMUSG00000090194 | 12.02668147 | 6.956172438 | 14.829172   | 10.47094974 | 10.02672421 |
| ENSMUSG00000090197 | 13.44158517 | 5.56493795  | 10.59226572 | 7.249119049 | 7.87814045  |
| ENSMUSG00000090199 | 7.781970364 | 4.869320706 | 5.649208382 | 5.638203705 | 5.013362104 |
| ENSMUSG00000090200 | 11.31922962 | 14.60796212 | 9.179963621 | 5.638203705 | 12.17530797 |
| ENSMUSG00000090203 | 10.61177777 | 9.738641413 | 6.35535943  | 9.665492065 | 7.87814045  |
| ENSMUSG00000090207 | 23.34591109 | 36.17209668 | 31.0706461  | 223.1117752 | 153.2656415 |
| ENSMUSG00000090208 | 7.781970364 | 5.56493795  | 3.530755239 | 6.443661377 | 7.161945863 |

|                    |             |             |             |             |             |
|--------------------|-------------|-------------|-------------|-------------|-------------|
| ENSMUSG00000090211 | 12.73413332 | 10.43425866 | 12.71071886 | 13.69278043 | 7.87814045  |
| ENSMUSG00000090212 | 10.61177777 | 7.651789682 | 7.061510478 | 8.054576721 | 6.445751277 |
| ENSMUSG00000090214 | 6.367066661 | 6.260555194 | 4.236906287 | 4.02728836  | 9.310529622 |
| ENSMUSG00000090216 | 26.1757185  | 42.43265187 | 31.77679715 | 41.88379895 | 37.24211849 |
| ENSMUSG00000090217 | 6.367066661 | 4.869320706 | 8.473812573 | 3.221830688 | 5.729556691 |
| ENSMUSG00000090220 | 46.69182218 | 81.38721752 | 79.08891735 | 53.96566403 | 38.67450766 |
| ENSMUSG00000090222 | 19.10119998 | 34.08524495 | 25.42143772 | 20.1364418  | 17.90486466 |
| ENSMUSG00000090224 | 9.196874066 | 5.56493795  | 5.649208382 | 4.832746033 | 7.87814045  |
| ENSMUSG00000090226 | 9.196874066 | 7.651789682 | 8.473812573 | 4.832746033 | 5.013362104 |
| ENSMUSG00000090227 | 9.904325918 | 5.56493795  | 9.886114669 | 4.02728836  | 10.02672421 |
| ENSMUSG00000090228 | 8.489422215 | 10.43425866 | 7.061510478 | 4.832746033 | 10.7429188  |
| ENSMUSG00000090230 | 227.7994961 | 249.7265905 | 245.0344136 | 360.0395794 | 285.76164   |
| ENSMUSG00000090232 | 10.61177777 | 12.52111039 | 17.65377619 | 14.4982381  | 15.04008631 |
| ENSMUSG00000090234 | 0           | 0           | 0           | 0           | 0           |
| ENSMUSG00000090235 | 8.489422215 | 18.78166558 | 14.12302096 | 14.4982381  | 20.05344842 |
| ENSMUSG00000090237 | 11.31922962 | 5.56493795  | 11.29841676 | 5.638203705 | 8.594335036 |
| ENSMUSG00000090242 | 5.65961481  | 6.260555194 | 6.35535943  | 8.054576721 | 6.445751277 |
| ENSMUSG00000090243 | 9.196874066 | 15.30357936 | 14.12302096 | 16.10915344 | 13.60769714 |
| ENSMUSG00000090244 | 14.14903703 | 18.78166558 | 17.65377619 | 15.30369577 | 17.18867007 |
| ENSMUSG00000090246 | 151.3946962 | 139.819066  | 127.1071886 | 272.2446932 | 164.7247549 |
| ENSMUSG00000090248 | 13.44158517 | 9.043024169 | 9.886114669 | 5.638203705 | 7.87814045  |
| ENSMUSG00000090249 | 10.61177777 | 9.043024169 | 9.886114669 | 9.665492065 | 6.445751277 |
| ENSMUSG00000090252 | 38.20239997 | 24.34660353 | 37.42600553 | 33.02376456 | 32.22875639 |
| ENSMUSG00000090255 | 7.781970364 | 8.347406925 | 4.943057334 | 4.832746033 | 6.445751277 |
| ENSMUSG00000090256 | 13.44158517 | 6.260555194 | 7.061510478 | 6.443661377 | 5.729556691 |
| ENSMUSG00000090257 | 9.904325918 | 12.52111039 | 9.179963621 | 3.221830688 | 5.013362104 |
| ENSMUSG00000090259 | 9.196874066 | 6.956172438 | 10.59226572 | 4.832746033 | 6.445751277 |
| ENSMUSG00000090260 | 6.367066661 | 6.260555194 | 4.943057334 | 4.832746033 | 5.729556691 |
| ENSMUSG00000090263 | 12.73413332 | 8.347406925 | 7.767661525 | 6.443661377 | 10.02672421 |
| ENSMUSG00000090265 | 14.14903703 | 4.869320706 | 4.943057334 | 4.832746033 | 12.89150255 |
| ENSMUSG00000090270 | 3.537259256 | 12.52111039 | 7.767661525 | 7.249119049 | 10.02672421 |
| ENSMUSG00000090277 | 49.52162959 | 92.51709342 | 82.61967259 | 68.46390213 | 60.87653984 |
| ENSMUSG00000090284 | 6.367066661 | 8.347406925 | 7.767661525 | 2.416373016 | 7.161945863 |
| ENSMUSG00000090290 | 21.93100739 | 18.08604834 | 18.35992724 | 39.46742593 | 25.78300511 |
| ENSMUSG00000090292 | 13.44158517 | 8.347406925 | 8.473812573 | 8.054576721 | 6.445751277 |
| ENSMUSG00000090293 | 15.56394073 | 18.78166558 | 26.83373982 | 169.1461111 | 121.0368851 |
| ENSMUSG00000090298 | 4.244711108 | 7.651789682 | 9.179963621 | 6.443661377 | 8.594335036 |
| ENSMUSG00000090300 | 7.074518513 | 9.738641413 | 7.061510478 | 8.860034393 | 7.161945863 |
| ENSMUSG00000090303 | 11.31922962 | 6.260555194 | 7.061510478 | 8.054576721 | 5.729556691 |
| ENSMUSG00000090304 | 7.074518513 | 4.173703463 | 7.767661525 | 2.416373016 | 5.729556691 |
| ENSMUSG00000090305 | 31.83533331 | 43.12826911 | 45.8998181  | 34.6346799  | 32.94495097 |
| ENSMUSG00000090307 | 7.781970364 | 11.1298759  | 5.649208382 | 5.638203705 | 5.013362104 |
| ENSMUSG00000090308 | 7.074518513 | 4.173703463 | 2.824604191 | 9.665492065 | 7.87814045  |

|                    |             |             |             |             |             |
|--------------------|-------------|-------------|-------------|-------------|-------------|
| ENSMUSG00000090315 | 5.65961481  | 4.869320706 | 13.41686991 | 4.02728836  | 5.729556691 |
| ENSMUSG00000090318 | 16.97884443 | 9.043024169 | 11.29841676 | 8.054576721 | 7.161945863 |
| ENSMUSG00000090319 | 12.02668147 | 8.347406925 | 10.59226572 | 11.27640741 | 15.04008631 |
| ENSMUSG00000090322 | 6.367066661 | 6.956172438 | 9.179963621 | 8.054576721 | 5.729556691 |
| ENSMUSG00000090323 | 7.074518513 | 7.651789682 | 9.179963621 | 4.02728836  | 5.729556691 |
| ENSMUSG00000090327 | 9.904325918 | 8.347406925 | 8.473812573 | 6.443661377 | 15.7562809  |
| ENSMUSG00000090328 | 8.489422215 | 6.956172438 | 7.061510478 | 8.860034393 | 8.594335036 |
| ENSMUSG00000090329 | 4.952162959 | 10.43425866 | 7.767661525 | 6.443661377 | 8.594335036 |
| ENSMUSG00000090330 | 45.98437033 | 59.12746572 | 54.37363068 | 70.07481747 | 49.41742646 |
| ENSMUSG00000090331 | 4.244711108 | 4.869320706 | 4.943057334 | 4.832746033 | 5.013362104 |
| ENSMUSG00000090332 | 8.489422215 | 7.651789682 | 9.886114669 | 8.054576721 | 4.297167518 |
| ENSMUSG00000090333 | 16.97884443 | 11.1298759  | 16.2414741  | 13.69278043 | 9.310529622 |
| ENSMUSG00000090334 | 13.44158517 | 8.347406925 | 10.59226572 | 4.02728836  | 12.89150255 |
| ENSMUSG00000090338 | 0           | 0           | 0           | 0           | 0           |
| ENSMUSG00000090341 | 7.074518513 | 10.43425866 | 7.061510478 | 4.832746033 | 7.87814045  |
| ENSMUSG00000090342 | 7.781970364 | 4.173703463 | 6.35535943  | 4.02728836  | 6.445751277 |
| ENSMUSG00000090350 | 58.0110518  | 107.8206728 | 86.85657888 | 52.35474869 | 57.29556691 |
| ENSMUSG00000090351 | 8.489422215 | 9.738641413 | 19.77222934 | 7.249119049 | 5.013362104 |
| ENSMUSG00000090352 | 7.074518513 | 6.260555194 | 6.35535943  | 4.832746033 | 3.580972932 |
| ENSMUSG00000090353 | 7.074518513 | 6.956172438 | 7.061510478 | 4.832746033 | 3.580972932 |
| ENSMUSG00000090355 | 8.489422215 | 6.260555194 | 7.061510478 | 4.02728836  | 10.02672421 |
| ENSMUSG00000090357 | 19.80865184 | 35.47647943 | 29.65834401 | 32.21830688 | 35.80972932 |
| ENSMUSG00000090358 | 14.14903703 | 17.39043109 | 12.71071886 | 12.08186508 | 14.32389173 |
| ENSMUSG00000090362 | 4.244711108 | 6.260555194 | 7.061510478 | 6.443661377 | 5.013362104 |
| ENSMUSG00000090365 | 11.31922962 | 4.869320706 | 7.061510478 | 6.443661377 | 5.013362104 |
| ENSMUSG00000090370 | 14.14903703 | 9.043024169 | 17.65377619 | 11.27640741 | 12.17530797 |
| ENSMUSG00000090374 | 4.952162959 | 6.956172438 | 8.473812573 | 4.832746033 | 7.87814045  |
| ENSMUSG00000090379 | 8.489422215 | 5.56493795  | 8.473812573 | 6.443661377 | 7.161945863 |
| ENSMUSG00000090381 | 12.73413332 | 9.043024169 | 7.061510478 | 7.249119049 | 7.161945863 |
| ENSMUSG00000090383 | 18.39374813 | 3.478086219 | 7.767661525 | 2.416373016 | 6.445751277 |
| ENSMUSG00000090385 | 9.904325918 | 5.56493795  | 9.179963621 | 6.443661377 | 5.729556691 |
| ENSMUSG00000090386 | 5.65961481  | 8.347406925 | 13.41686991 | 4.832746033 | 2.864778345 |
| ENSMUSG00000090387 | 7.781970364 | 8.347406925 | 8.473812573 | 8.860034393 | 8.594335036 |
| ENSMUSG00000090389 | 12.02668147 | 15.99919661 | 10.59226572 | 26.58010318 | 15.04008631 |
| ENSMUSG00000090395 | 2.829807405 | 3.478086219 | 2.118453143 | 0.805457672 | 2.148583759 |
| ENSMUSG00000090396 | 14.14903703 | 8.347406925 | 7.767661525 | 4.832746033 | 3.580972932 |
| ENSMUSG00000090397 | 21.22355554 | 32.69401046 | 24.00913562 | 37.85651059 | 32.94495097 |
| ENSMUSG00000090399 | 7.781970364 | 2.782468975 | 6.35535943  | 6.443661377 | 8.594335036 |
| ENSMUSG00000090406 | 103.2879703 | 141.9059177 | 135.5810012 | 120.0131931 | 105.2806042 |
| ENSMUSG00000090407 | 0           | 0           | 0           | 0           | 0           |
| ENSMUSG00000090408 | 6.367066661 | 3.478086219 | 9.179963621 | 2.416373016 | 9.310529622 |
| ENSMUSG00000090411 | 9.904325918 | 12.52111039 | 6.35535943  | 3.221830688 | 8.594335036 |
| ENSMUSG00000090417 | 4.952162959 | 9.738641413 | 7.061510478 | 4.832746033 | 6.445751277 |

|                    |             |             |             |             |             |
|--------------------|-------------|-------------|-------------|-------------|-------------|
| ENSMUSG00000090427 | 11.31922962 | 6.956172438 | 4.943057334 | 6.443661377 | 7.161945863 |
| ENSMUSG00000090429 | 10.61177777 | 16.69481385 | 5.649208382 | 14.4982381  | 12.17530797 |
| ENSMUSG00000090436 | 4.952162959 | 7.651789682 | 5.649208382 | 2.416373016 | 2.864778345 |
| ENSMUSG00000090440 | 28.29807405 | 15.30357936 | 13.41686991 | 10.47094974 | 10.7429188  |
| ENSMUSG00000090441 | 9.904325918 | 7.651789682 | 9.886114669 | 8.054576721 | 8.594335036 |
| ENSMUSG00000090448 | 9.196874066 | 5.56493795  | 6.35535943  | 4.02728836  | 8.594335036 |
| ENSMUSG00000090449 | 14.85648888 | 9.043024169 | 7.061510478 | 5.638203705 | 5.013362104 |
| ENSMUSG00000090455 | 9.196874066 | 6.260555194 | 6.35535943  | 4.832746033 | 6.445751277 |
| ENSMUSG00000090458 | 12.02668147 | 6.956172438 | 8.473812573 | 19.33098413 | 12.89150255 |
| ENSMUSG00000090459 | 10.61177777 | 12.52111039 | 9.179963621 | 8.054576721 | 8.594335036 |
| ENSMUSG00000090460 | 9.196874066 | 13.21672763 | 11.29841676 | 10.47094974 | 14.32389173 |
| ENSMUSG00000090462 | 12.02668147 | 8.347406925 | 12.00456781 | 6.443661377 | 6.445751277 |
| ENSMUSG00000090464 | 9.196874066 | 6.260555194 | 8.473812573 | 8.860034393 | 7.87814045  |
| ENSMUSG00000090465 | 12.02668147 | 6.260555194 | 14.829172   | 4.832746033 | 9.310529622 |
| ENSMUSG00000090466 | 12.02668147 | 9.738641413 | 7.767661525 | 7.249119049 | 5.013362104 |
| ENSMUSG00000090467 | 0           | 0           | 0           | 0           | 0           |
| ENSMUSG00000090468 | 12.73413332 | 5.56493795  | 12.00456781 | 8.054576721 | 5.729556691 |
| ENSMUSG00000090471 | 14.14903703 | 7.651789682 | 7.767661525 | 4.832746033 | 7.161945863 |
| ENSMUSG00000090474 | 11.31922962 | 5.56493795  | 6.35535943  | 3.221830688 | 2.148583759 |
| ENSMUSG00000090475 | 9.904325918 | 8.347406925 | 9.179963621 | 10.47094974 | 12.17530797 |
| ENSMUSG00000090476 | 16.97884443 | 10.43425866 | 9.886114669 | 10.47094974 | 14.32389173 |
| ENSMUSG00000090478 | 4.952162959 | 3.478086219 | 4.943057334 | 6.443661377 | 5.729556691 |
| ENSMUSG00000090481 | 11.31922962 | 8.347406925 | 11.29841676 | 10.47094974 | 5.013362104 |
| ENSMUSG00000090482 | 8.489422215 | 6.260555194 | 9.179963621 | 4.832746033 | 7.161945863 |
| ENSMUSG00000090485 | 6.367066661 | 8.347406925 | 2.824604191 | 4.832746033 | 1.432389173 |
| ENSMUSG00000090489 | 8.489422215 | 14.60796212 | 9.179963621 | 16.91461111 | 16.47247549 |
| ENSMUSG00000090494 | 0           | 0           | 0           | 0           | 0           |
| ENSMUSG00000090497 | 7.781970364 | 10.43425866 | 7.767661525 | 7.249119049 | 5.013362104 |
| ENSMUSG00000090500 | 5.65961481  | 4.173703463 | 11.29841676 | 5.638203705 | 12.17530797 |
| ENSMUSG00000090505 | 16.27139258 | 13.91234488 | 13.41686991 | 8.860034393 | 13.60769714 |
| ENSMUSG00000090516 | 210.8206517 | 267.1170216 | 240.0913562 | 298.8247963 | 222.0203218 |
| ENSMUSG00000090519 | 10.61177777 | 8.347406925 | 7.767661525 | 4.832746033 | 5.013362104 |
| ENSMUSG00000090533 | 6.367066661 | 4.869320706 | 6.35535943  | 4.832746033 | 5.013362104 |
| ENSMUSG00000090534 | 7.074518513 | 5.56493795  | 7.767661525 | 3.221830688 | 5.013362104 |
| ENSMUSG00000090535 | 4.244711108 | 0.695617244 | 2.824604191 | 0.805457672 | 2.864778345 |
| ENSMUSG00000090538 | 13.44158517 | 8.347406925 | 4.236906287 | 8.054576721 | 5.013362104 |
| ENSMUSG00000090544 | 9.904325918 | 11.82549314 | 7.061510478 | 2.416373016 | 8.594335036 |
| ENSMUSG00000090546 | 2.829807405 | 2.086851731 | 2.824604191 | 1.610915344 | 2.148583759 |
| ENSMUSG00000090547 | 13.44158517 | 7.651789682 | 10.59226572 | 4.02728836  | 8.594335036 |
| ENSMUSG00000090549 | 10.61177777 | 6.260555194 | 8.473812573 | 8.054576721 | 10.02672421 |
| ENSMUSG00000090550 | 9.904325918 | 4.869320706 | 10.59226572 | 8.054576721 | 12.17530797 |
| ENSMUSG00000090552 | 9.196874066 | 8.347406925 | 8.473812573 | 4.02728836  | 6.445751277 |
| ENSMUSG00000090555 | 7.074518513 | 8.347406925 | 6.35535943  | 7.249119049 | 7.87814045  |



|                    |             |             |             |             |             |
|--------------------|-------------|-------------|-------------|-------------|-------------|
| ENSMUSG00000090556 | 5.65961481  | 4.869320706 | 5.649208382 | 1.610915344 | 7.161945863 |
| ENSMUSG00000090558 | 2.122355554 | 8.347406925 | 9.886114669 | 8.054576721 | 4.297167518 |
| ENSMUSG00000090559 | 37.49494812 | 57.73623123 | 57.19823487 | 43.49471429 | 52.99839939 |
| ENSMUSG00000090561 | 50.22908144 | 72.34419335 | 62.1412922  | 54.7711217  | 50.84981563 |
| ENSMUSG00000090564 | 14.85648888 | 11.1298759  | 14.12302096 | 33.02376456 | 30.79636721 |
| ENSMUSG00000090565 | 14.14903703 | 25.04222078 | 19.06607829 | 5.638203705 | 13.60769714 |
| ENSMUSG00000090570 | 7.781970364 | 5.56493795  | 7.767661525 | 395.479717  | 275.7349157 |
| ENSMUSG00000090572 | 7.074518513 | 5.56493795  | 9.179963621 | 4.02728836  | 2.148583759 |
| ENSMUSG00000090574 | 0.707451851 | 0           | 1.412302096 | 0           | 2.148583759 |
| ENSMUSG00000090576 | 7.781970364 | 5.56493795  | 5.649208382 | 6.443661377 | 10.7429188  |
| ENSMUSG00000090577 | 7.074518513 | 6.260555194 | 4.236906287 | 8.860034393 | 4.297167518 |
| ENSMUSG00000090578 | 9.904325918 | 5.56493795  | 8.473812573 | 4.832746033 | 4.297167518 |
| ENSMUSG00000090582 | 13.44158517 | 28.52030699 | 24.71528667 | 51.54929101 | 55.86317773 |
| ENSMUSG00000090584 | 8.489422215 | 9.043024169 | 3.530755239 | 12.08186508 | 12.17530797 |
| ENSMUSG00000090585 | 11.31922962 | 6.260555194 | 9.179963621 | 4.832746033 | 12.17530797 |
| ENSMUSG00000090589 | 12.73413332 | 7.651789682 | 7.767661525 | 4.02728836  | 10.02672421 |
| ENSMUSG00000090592 | 36.08004441 | 63.99678643 | 50.84287544 | 29.80193387 | 24.35061594 |
| ENSMUSG00000090594 | 6.367066661 | 9.043024169 | 9.179963621 | 3.221830688 | 6.445751277 |
| ENSMUSG00000090598 | 7.781970364 | 3.478086219 | 7.767661525 | 8.860034393 | 8.594335036 |
| ENSMUSG00000090602 | 10.61177777 | 10.43425866 | 9.886114669 | 8.054576721 | 11.45911338 |
| ENSMUSG00000090603 | 12.02668147 | 8.347406925 | 14.12302096 | 6.443661377 | 9.310529622 |
| ENSMUSG00000090607 | 10.61177777 | 6.956172438 | 11.29841676 | 4.02728836  | 7.161945863 |
| ENSMUSG00000090608 | 0.707451851 | 1.391234488 | 0           | 1.610915344 | 0           |
| ENSMUSG00000090610 | 10.61177777 | 8.347406925 | 9.179963621 | 12.08186508 | 10.7429188  |
| ENSMUSG00000090618 | 7.074518513 | 7.651789682 | 6.35535943  | 4.832746033 | 6.445751277 |
| ENSMUSG00000090619 | 7.781970364 | 8.347406925 | 8.473812573 | 7.249119049 | 7.87814045  |
| ENSMUSG00000090623 | 7.781970364 | 9.043024169 | 7.767661525 | 7.249119049 | 9.310529622 |
| ENSMUSG00000090624 | 13.44158517 | 9.043024169 | 9.179963621 | 6.443661377 | 2.148583759 |
| ENSMUSG00000090628 | 55.1812444  | 84.86530374 | 89.68118307 | 77.32393652 | 78.06520991 |
| ENSMUSG00000090631 | 12.02668147 | 3.478086219 | 4.236906287 | 4.832746033 | 8.594335036 |
| ENSMUSG00000090635 | 10.61177777 | 6.956172438 | 12.00456781 | 6.443661377 | 6.445751277 |
| ENSMUSG00000090636 | 9.904325918 | 6.956172438 | 9.886114669 | 8.054576721 | 6.445751277 |
| ENSMUSG00000090637 | 9.904325918 | 12.52111039 | 10.59226572 | 5.638203705 | 10.02672421 |
| ENSMUSG00000090638 | 3.537259256 | 1.391234488 | 4.236906287 | 0.805457672 | 0.716194586 |
| ENSMUSG00000090642 | 9.196874066 | 7.651789682 | 7.061510478 | 4.832746033 | 4.297167518 |
| ENSMUSG00000090655 | 10.61177777 | 4.173703463 | 9.179963621 | 4.02728836  | 5.729556691 |
| ENSMUSG00000090657 | 14.85648888 | 4.173703463 | 9.886114669 | 7.249119049 | 7.87814045  |
| ENSMUSG00000090658 | 8.489422215 | 7.651789682 | 4.236906287 | 9.665492065 | 7.161945863 |
| ENSMUSG00000090660 | 4.244711108 | 9.043024169 | 10.59226572 | 4.832746033 | 6.445751277 |
| ENSMUSG00000090666 | 9.904325918 | 13.21672763 | 12.71071886 | 4.02728836  | 15.04008631 |
| ENSMUSG00000090671 | 16.97884443 | 19.47728283 | 17.65377619 | 12.88732275 | 19.33725383 |
| ENSMUSG00000090673 | 9.196874066 | 5.56493795  | 10.59226572 | 14.4982381  | 5.013362104 |
| ENSMUSG00000090674 | 178.9853184 | 243.4660353 | 228.7929395 | 297.213881  | 222.7365164 |

|                    |             |             |             |             |             |
|--------------------|-------------|-------------|-------------|-------------|-------------|
| ENSMUSG00000090681 | 12.02668147 | 10.43425866 | 10.59226572 | 7.249119049 | 7.161945863 |
| ENSMUSG00000090682 | 12.02668147 | 9.043024169 | 10.59226572 | 5.638203705 | 8.594335036 |
| ENSMUSG00000090684 | 11.31922962 | 3.478086219 | 5.649208382 | 5.638203705 | 6.445751277 |
| ENSMUSG00000090688 | 12.73413332 | 9.738641413 | 10.59226572 | 4.832746033 | 5.729556691 |
| ENSMUSG00000090690 | 10.61177777 | 8.347406925 | 9.886114669 | 8.860034393 | 6.445751277 |
| ENSMUSG00000090692 | 7.074518513 | 4.869320706 | 7.767661525 | 8.860034393 | 9.310529622 |
| ENSMUSG00000090699 | 16.27139258 | 6.956172438 | 4.943057334 | 4.832746033 | 9.310529622 |
| ENSMUSG00000090701 | 9.196874066 | 10.43425866 | 3.530755239 | 10.47094974 | 4.297167518 |
| ENSMUSG00000090704 | 9.196874066 | 7.651789682 | 9.886114669 | 4.02728836  | 8.594335036 |
| ENSMUSG00000090706 | 14.14903703 | 3.478086219 | 13.41686991 | 7.249119049 | 5.013362104 |
| ENSMUSG00000090708 | 5.65961481  | 8.347406925 | 8.473812573 | 8.054576721 | 7.161945863 |
| ENSMUSG00000090709 | 9.196874066 | 4.869320706 | 9.179963621 | 5.638203705 | 7.161945863 |
| ENSMUSG00000090710 | 4.952162959 | 10.43425866 | 9.179963621 | 4.832746033 | 7.87814045  |
| ENSMUSG00000090715 | 10.61177777 | 7.651789682 | 7.767661525 | 11.27640741 | 5.729556691 |
| ENSMUSG00000090716 | 7.074518513 | 6.260555194 | 11.29841676 | 5.638203705 | 7.87814045  |
| ENSMUSG00000090718 | 5.65961481  | 7.651789682 | 4.236906287 | 5.638203705 | 5.013362104 |
| ENSMUSG00000090722 | 12.02668147 | 9.738641413 | 7.767661525 | 5.638203705 | 5.729556691 |
| ENSMUSG00000090724 | 5.65961481  | 4.869320706 | 6.35535943  | 4.832746033 | 7.161945863 |
| ENSMUSG00000090726 | 34.66514071 | 37.56333116 | 21.18453143 | 143.3714656 | 102.4158258 |
| ENSMUSG00000090727 | 9.904325918 | 9.043024169 | 7.767661525 | 7.249119049 | 5.729556691 |
| ENSMUSG00000090728 | 8.489422215 | 4.173703463 | 6.35535943  | 7.249119049 | 4.297167518 |
| ENSMUSG00000090731 | 16.27139258 | 10.43425866 | 9.179963621 | 7.249119049 | 7.161945863 |
| ENSMUSG00000090732 | 21.22355554 | 24.34660353 | 33.18909925 | 9.665492065 | 7.161945863 |
| ENSMUSG00000090733 | 68.62282957 | 115.4724625 | 115.1026208 | 235.1936403 | 164.7247549 |
| ENSMUSG00000090736 | 12.02668147 | 9.738641413 | 7.767661525 | 5.638203705 | 4.297167518 |
| ENSMUSG00000090737 | 14.14903703 | 9.738641413 | 10.59226572 | 11.27640741 | 8.594335036 |
| ENSMUSG00000090740 | 11.31922962 | 4.173703463 | 10.59226572 | 7.249119049 | 7.161945863 |
| ENSMUSG00000090742 | 9.904325918 | 12.52111039 | 11.29841676 | 8.860034393 | 9.310529622 |
| ENSMUSG00000090743 | 11.31922962 | 15.30357936 | 23.30298458 | 12.08186508 | 18.62105924 |
| ENSMUSG00000090750 | 12.02668147 | 6.956172438 | 11.29841676 | 6.443661377 | 11.45911338 |
| ENSMUSG00000090751 | 6.367066661 | 5.56493795  | 4.236906287 | 4.02728836  | 7.87814045  |
| ENSMUSG00000090753 | 7.074518513 | 7.651789682 | 5.649208382 | 3.221830688 | 7.161945863 |
| ENSMUSG00000090758 | 7.781970364 | 9.738641413 | 9.179963621 | 14.4982381  | 7.87814045  |
| ENSMUSG00000090761 | 7.781970364 | 11.1298759  | 16.2414741  | 13.69278043 | 13.60769714 |
| ENSMUSG00000090762 | 10.61177777 | 7.651789682 | 7.767661525 | 6.443661377 | 5.013362104 |
| ENSMUSG00000090765 | 5.65961481  | 5.56493795  | 4.943057334 | 3.221830688 | 7.161945863 |
| ENSMUSG00000090772 | 7.781970364 | 13.21672763 | 9.179963621 | 4.02728836  | 9.310529622 |
| ENSMUSG00000090773 | 7.074518513 | 4.869320706 | 7.767661525 | 3.221830688 | 3.580972932 |
| ENSMUSG00000090774 | 7.781970364 | 11.82549314 | 5.649208382 | 6.443661377 | 2.864778345 |
| ENSMUSG00000090777 | 10.61177777 | 3.478086219 | 8.473812573 | 8.860034393 | 8.594335036 |
| ENSMUSG00000090778 | 9.904325918 | 12.52111039 | 14.12302096 | 7.249119049 | 5.729556691 |
| ENSMUSG00000090779 | 4.244711108 | 6.260555194 | 7.061510478 | 4.832746033 | 2.148583759 |
| ENSMUSG00000090781 | 7.781970364 | 2.782468975 | 6.35535943  | 6.443661377 | 7.161945863 |

|                    |             |             |             |             |             |
|--------------------|-------------|-------------|-------------|-------------|-------------|
| ENSMUSG00000090782 | 0           | 0           | 0           | 0           | 0           |
| ENSMUSG00000090785 | 9.904325918 | 6.956172438 | 9.179963621 | 4.832746033 | 4.297167518 |
| ENSMUSG00000090788 | 24.76081479 | 15.30357936 | 16.94762515 | 8.054576721 | 12.89150255 |
| ENSMUSG00000090790 | 7.781970364 | 8.347406925 | 10.59226572 | 4.832746033 | 6.445751277 |
| ENSMUSG00000090793 | 11.31922962 | 4.869320706 | 3.530755239 | 4.02728836  | 3.580972932 |
| ENSMUSG00000090794 | 9.904325918 | 10.43425866 | 5.649208382 | 4.832746033 | 7.87814045  |
| ENSMUSG00000090795 | 16.97884443 | 7.651789682 | 7.767661525 | 3.221830688 | 7.161945863 |
| ENSMUSG00000090796 | 13.44158517 | 8.347406925 | 6.35535943  | 10.47094974 | 6.445751277 |
| ENSMUSG00000090798 | 16.27139258 | 8.347406925 | 7.767661525 | 8.054576721 | 6.445751277 |
| ENSMUSG00000090799 | 5.65961481  | 6.956172438 | 7.767661525 | 4.02728836  | 3.580972932 |
| ENSMUSG00000090801 | 9.904325918 | 7.651789682 | 8.473812573 | 6.443661377 | 12.89150255 |
| ENSMUSG00000090802 | 9.196874066 | 6.956172438 | 8.473812573 | 12.08186508 | 5.729556691 |
| ENSMUSG00000090806 | 5.65961481  | 4.173703463 | 2.824604191 | 2.416373016 | 2.864778345 |
| ENSMUSG00000090808 | 8.489422215 | 8.347406925 | 7.767661525 | 4.02728836  | 10.02672421 |
| ENSMUSG00000090812 | 77.81970364 | 100.8645003 | 102.3919019 | 272.2446932 | 184.7782033 |
| ENSMUSG00000090816 | 4.952162959 | 4.173703463 | 5.649208382 | 5.638203705 | 7.161945863 |
| ENSMUSG00000090818 | 0           | 0           | 0           | 0           | 0           |
| ENSMUSG00000090821 | 9.196874066 | 9.738641413 | 4.943057334 | 4.02728836  | 7.161945863 |
| ENSMUSG00000090828 | 7.781970364 | 5.56493795  | 6.35535943  | 6.443661377 | 8.594335036 |
| ENSMUSG00000090839 | 8.489422215 | 5.56493795  | 5.649208382 | 5.638203705 | 11.45911338 |
| ENSMUSG00000090849 | 15.56394073 | 14.60796212 | 9.886114669 | 7.249119049 | 7.87814045  |
| ENSMUSG00000090853 | 12.73413332 | 8.347406925 | 12.00456781 | 7.249119049 | 10.02672421 |
| ENSMUSG00000090855 | 10.61177777 | 13.21672763 | 7.061510478 | 4.02728836  | 11.45911338 |
| ENSMUSG00000090860 | 11.31922962 | 18.78166558 | 12.71071886 | 30.60739154 | 25.78300511 |
| ENSMUSG00000090865 | 8.489422215 | 13.21672763 | 11.29841676 | 5.638203705 | 8.594335036 |
| ENSMUSG00000090868 | 12.02668147 | 11.1298759  | 7.767661525 | 5.638203705 | 4.297167518 |
| ENSMUSG00000090873 | 68.62282957 | 91.12585893 | 86.85657888 | 215.0571984 | 177.6162574 |
| ENSMUSG00000090882 | 10.61177777 | 5.56493795  | 5.649208382 | 4.832746033 | 10.7429188  |
| ENSMUSG00000090889 | 10.61177777 | 6.260555194 | 9.179963621 | 4.02728836  | 6.445751277 |
| ENSMUSG00000090891 | 6.367066661 | 10.43425866 | 7.061510478 | 9.665492065 | 7.87814045  |
| ENSMUSG00000090900 | 7.781970364 | 11.1298759  | 9.179963621 | 7.249119049 | 9.310529622 |
| ENSMUSG00000090907 | 5.65961481  | 4.869320706 | 4.236906287 | 3.221830688 | 7.87814045  |
| ENSMUSG00000090925 | 14.14903703 | 9.043024169 | 9.179963621 | 8.054576721 | 5.729556691 |
| ENSMUSG00000090927 | 7.781970364 | 3.478086219 | 6.35535943  | 4.832746033 | 7.161945863 |
| ENSMUSG00000090936 | 121.6817184 | 161.3832006 | 142.6425116 | 331.8485609 | 225.6012947 |
| ENSMUSG00000090939 | 9.904325918 | 4.173703463 | 2.824604191 | 7.249119049 | 10.7429188  |
| ENSMUSG00000090941 | 10.61177777 | 18.08604834 | 16.2414741  | 13.69278043 | 17.18867007 |
| ENSMUSG00000090947 | 9.904325918 | 9.738641413 | 9.886114669 | 7.249119049 | 11.45911338 |
| ENSMUSG00000090949 | 7.781970364 | 6.260555194 | 7.767661525 | 5.638203705 | 7.87814045  |
| ENSMUSG00000090952 | 95.50599992 | 134.9497453 | 128.5194907 | 112.7640741 | 95.97007457 |
| ENSMUSG00000090955 | 15.56394073 | 10.43425866 | 10.59226572 | 5.638203705 | 7.87814045  |
| ENSMUSG00000090957 | 9.196874066 | 4.869320706 | 9.179963621 | 6.443661377 | 10.7429188  |
| ENSMUSG00000090958 | 9.196874066 | 10.43425866 | 10.59226572 | 42.68925662 | 37.95831308 |

|                    |             |             |             |             |             |
|--------------------|-------------|-------------|-------------|-------------|-------------|
| ENSMUSG00000090959 | 4.952162959 | 2.086851731 | 7.061510478 | 8.054576721 | 5.013362104 |
| ENSMUSG00000090961 | 9.904325918 | 6.956172438 | 7.061510478 | 4.832746033 | 1.432389173 |
| ENSMUSG00000090963 | 9.904325918 | 12.52111039 | 8.473812573 | 9.665492065 | 7.161945863 |
| ENSMUSG00000090964 | 11.31922962 | 8.347406925 | 15.53532305 | 11.27640741 | 12.17530797 |
| ENSMUSG00000090965 | 4.244711108 | 5.56493795  | 9.179963621 | 8.054576721 | 7.87814045  |
| ENSMUSG00000090966 | 16.27139258 | 6.260555194 | 11.29841676 | 8.054576721 | 5.013362104 |
| ENSMUSG00000090967 | 9.904325918 | 6.260555194 | 5.649208382 | 3.221830688 | 11.45911338 |
| ENSMUSG00000090968 | 7.781970364 | 6.956172438 | 6.35535943  | 2.416373016 | 4.297167518 |
| ENSMUSG00000090975 | 12.73413332 | 8.347406925 | 7.767661525 | 6.443661377 | 7.161945863 |
| ENSMUSG00000090981 | 8.489422215 | 6.956172438 | 10.59226572 | 4.02728836  | 2.864778345 |
| ENSMUSG00000090987 | 9.904325918 | 11.1298759  | 7.767661525 | 3.221830688 | 6.445751277 |
| ENSMUSG00000090989 | 7.781970364 | 6.956172438 | 10.59226572 | 7.249119049 | 7.87814045  |
| ENSMUSG00000090990 | 11.31922962 | 4.869320706 | 7.061510478 | 8.054576721 | 8.594335036 |
| ENSMUSG00000090991 | 9.196874066 | 9.738641413 | 4.236906287 | 6.443661377 | 4.297167518 |
| ENSMUSG00000090994 | 11.31922962 | 10.43425866 | 9.179963621 | 10.47094974 | 8.594335036 |
| ENSMUSG00000091003 | 14.85648888 | 4.869320706 | 6.35535943  | 6.443661377 | 7.87814045  |
| ENSMUSG00000091004 | 1.414903703 | 0.695617244 | 2.824604191 | 1.610915344 | 3.580972932 |
| ENSMUSG00000091005 | 0           | 0           | 0           | 0           | 0           |
| ENSMUSG00000091006 | 6.367066661 | 9.043024169 | 7.061510478 | 4.02728836  | 3.580972932 |
| ENSMUSG00000091008 | 6.367066661 | 7.651789682 | 7.767661525 | 5.638203705 | 10.02672421 |
| ENSMUSG00000091010 | 9.904325918 | 6.956172438 | 7.767661525 | 8.860034393 | 7.161945863 |
| ENSMUSG00000091011 | 10.61177777 | 6.260555194 | 12.00456781 | 8.860034393 | 7.87814045  |
| ENSMUSG00000091012 | 8.489422215 | 7.651789682 | 7.061510478 | 2.416373016 | 6.445751277 |
| ENSMUSG00000091014 | 3.537259256 | 7.651789682 | 7.061510478 | 5.638203705 | 10.02672421 |
| ENSMUSG00000091016 | 14.85648888 | 10.43425866 | 13.41686991 | 9.665492065 | 15.04008631 |
| ENSMUSG00000091019 | 8.489422215 | 6.956172438 | 10.59226572 | 5.638203705 | 10.02672421 |
| ENSMUSG00000091020 | 9.904325918 | 5.56493795  | 5.649208382 | 6.443661377 | 10.02672421 |
| ENSMUSG00000091021 | 27.5906222  | 58.43184848 | 45.19366706 | 289.964762  | 192.6563437 |
| ENSMUSG00000091027 | 7.781970364 | 9.043024169 | 7.767661525 | 6.443661377 | 7.161945863 |
| ENSMUSG00000091028 | 690.4730068 | 692.8347748 | 699.7956883 | 691.8881403 | 668.2095491 |
| ENSMUSG00000091031 | 9.196874066 | 5.56493795  | 10.59226572 | 7.249119049 | 5.013362104 |
| ENSMUSG00000091037 | 18.39374813 | 48.69320706 | 33.18909925 | 77.32393652 | 47.2688427  |
| ENSMUSG00000091040 | 15.56394073 | 7.651789682 | 12.71071886 | 3.221830688 | 11.45911338 |
| ENSMUSG00000091041 | 7.074518513 | 5.56493795  | 7.061510478 | 6.443661377 | 8.594335036 |
| ENSMUSG00000091043 | 11.31922962 | 7.651789682 | 10.59226572 | 6.443661377 | 7.161945863 |
| ENSMUSG00000091044 | 8.489422215 | 6.956172438 | 7.767661525 | 3.221830688 | 5.729556691 |
| ENSMUSG00000091045 | 16.27139258 | 8.347406925 | 13.41686991 | 3.221830688 | 9.310529622 |
| ENSMUSG00000091048 | 10.61177777 | 6.260555194 | 6.35535943  | 8.860034393 | 6.445751277 |
| ENSMUSG00000091050 | 119.5593629 | 134.9497453 | 124.2825844 | 346.346799  | 252.1004944 |
| ENSMUSG00000091053 | 2.122355554 | 7.651789682 | 6.35535943  | 4.832746033 | 4.297167518 |
| ENSMUSG00000091058 | 7.781970364 | 7.651789682 | 7.767661525 | 4.02728836  | 4.297167518 |
| ENSMUSG00000091059 | 9.904325918 | 10.43425866 | 6.35535943  | 3.221830688 | 5.729556691 |
| ENSMUSG00000091061 | 12.73413332 | 7.651789682 | 7.061510478 | 8.860034393 | 8.594335036 |

|                    |             |             |             |             |             |
|--------------------|-------------|-------------|-------------|-------------|-------------|
| ENSMUSG00000091071 | 0           | 0           | 0           | 0           | 0           |
| ENSMUSG00000091076 | 11.31922962 | 13.91234488 | 14.12302096 | 6.443661377 | 8.594335036 |
| ENSMUSG00000091078 | 8.489422215 | 15.99919661 | 9.886114669 | 9.665492065 | 20.05344842 |
| ENSMUSG00000091079 | 4.952162959 | 2.086851731 | 5.649208382 | 5.638203705 | 4.297167518 |
| ENSMUSG00000091082 | 12.02668147 | 7.651789682 | 9.886114669 | 12.88732275 | 5.729556691 |
| ENSMUSG00000091083 | 12.02668147 | 15.30357936 | 12.71071886 | 8.860034393 | 11.45911338 |
| ENSMUSG00000091086 | 13.44158517 | 13.21672763 | 19.06607829 | 20.1364418  | 14.32389173 |
| ENSMUSG00000091087 | 5.65961481  | 7.651789682 | 7.767661525 | 6.443661377 | 5.729556691 |
| ENSMUSG00000091091 | 7.781970364 | 12.52111039 | 16.2414741  | 14.4982381  | 11.45911338 |
| ENSMUSG00000091095 | 13.44158517 | 15.99919661 | 18.35992724 | 24.16373016 | 19.33725383 |
| ENSMUSG00000091096 | 22.63845924 | 29.21592424 | 28.95219296 | 22.55281482 | 20.769643   |
| ENSMUSG00000091099 | 13.44158517 | 6.956172438 | 7.767661525 | 7.249119049 | 3.580972932 |
| ENSMUSG00000091105 | 9.196874066 | 5.56493795  | 6.35535943  | 5.638203705 | 15.04008631 |
| ENSMUSG00000091109 | 9.904325918 | 8.347406925 | 10.59226572 | 11.27640741 | 8.594335036 |
| ENSMUSG00000091110 | 16.27139258 | 7.651789682 | 11.29841676 | 8.054576721 | 7.161945863 |
| ENSMUSG00000091115 | 5.65961481  | 8.347406925 | 8.473812573 | 5.638203705 | 7.161945863 |
| ENSMUSG00000091116 | 13.44158517 | 6.956172438 | 9.179963621 | 8.860034393 | 8.594335036 |
| ENSMUSG00000091117 | 9.904325918 | 11.82549314 | 5.649208382 | 8.054576721 | 6.445751277 |
| ENSMUSG00000091122 | 8.489422215 | 4.173703463 | 5.649208382 | 4.832746033 | 6.445751277 |
| ENSMUSG00000091123 | 16.97884443 | 8.347406925 | 5.649208382 | 7.249119049 | 10.7429188  |
| ENSMUSG00000091129 | 9.904325918 | 4.173703463 | 8.473812573 | 6.443661377 | 8.594335036 |
| ENSMUSG00000091131 | 10.61177777 | 15.30357936 | 12.00456781 | 12.08186508 | 9.310529622 |
| ENSMUSG00000091132 | 8.489422215 | 8.347406925 | 5.649208382 | 4.832746033 | 5.013362104 |
| ENSMUSG00000091133 | 22.63845924 | 41.04141738 | 43.07521391 | 89.4058016  | 68.0384857  |
| ENSMUSG00000091135 | 8.489422215 | 6.260555194 | 7.061510478 | 8.860034393 | 8.594335036 |
| ENSMUSG00000091140 | 12.02668147 | 7.651789682 | 8.473812573 | 8.054576721 | 7.87814045  |
| ENSMUSG00000091146 | 7.074518513 | 11.82549314 | 19.77222934 | 9.665492065 | 8.594335036 |
| ENSMUSG00000091147 | 8.489422215 | 9.738641413 | 3.530755239 | 4.02728836  | 2.864778345 |
| ENSMUSG00000091149 | 17.68629628 | 29.21592424 | 30.36449505 | 13.69278043 | 17.18867007 |
| ENSMUSG00000091151 | 6.367066661 | 9.738641413 | 7.767661525 | 8.860034393 | 7.161945863 |
| ENSMUSG00000091154 | 24.76081479 | 31.99839321 | 29.65834401 | 54.7711217  | 43.68786977 |
| ENSMUSG00000091157 | 7.074518513 | 9.043024169 | 4.236906287 | 8.054576721 | 3.580972932 |
| ENSMUSG00000091159 | 24.76081479 | 54.95376226 | 46.60596915 | 16.91461111 | 24.35061594 |
| ENSMUSG00000091160 | 6.367066661 | 12.52111039 | 10.59226572 | 10.47094974 | 8.594335036 |
| ENSMUSG00000091163 | 9.904325918 | 3.478086219 | 5.649208382 | 3.221830688 | 4.297167518 |
| ENSMUSG00000091165 | 16.97884443 | 31.30277597 | 21.89068248 | 40.2728836  | 25.06681052 |
| ENSMUSG00000091172 | 2.122355554 | 8.347406925 | 7.767661525 | 1.610915344 | 5.729556691 |
| ENSMUSG00000091174 | 7.074518513 | 8.347406925 | 4.943057334 | 3.221830688 | 7.87814045  |
| ENSMUSG00000091177 | 0           | 0           | 0           | 0           | 0           |
| ENSMUSG00000091183 | 14.85648888 | 25.73783802 | 28.24604191 | 23.35827249 | 21.48583759 |
| ENSMUSG00000091184 | 8.489422215 | 6.260555194 | 7.061510478 | 8.054576721 | 6.445751277 |
| ENSMUSG00000091189 | 7.781970364 | 6.260555194 | 1.412302096 | 5.638203705 | 12.89150255 |
| ENSMUSG00000091192 | 8.489422215 | 7.651789682 | 8.473812573 | 5.638203705 | 2.864778345 |

|                    |             |             |             |             |             |
|--------------------|-------------|-------------|-------------|-------------|-------------|
| ENSMUSG00000091193 | 7.781970364 | 7.651789682 | 4.943057334 | 1.610915344 | 6.445751277 |
| ENSMUSG00000091194 | 10.61177777 | 9.738641413 | 2.824604191 | 7.249119049 | 8.594335036 |
| ENSMUSG00000091195 | 6.367066661 | 8.347406925 | 5.649208382 | 1.610915344 | 2.864778345 |
| ENSMUSG00000091198 | 4.244711108 | 6.956172438 | 7.061510478 | 12.88732275 | 7.87814045  |
| ENSMUSG00000091199 | 55.88869625 | 32.69401046 | 36.71985448 | 83.7675979  | 54.43078856 |
| ENSMUSG00000091204 | 9.196874066 | 5.56493795  | 5.649208382 | 6.443661377 | 5.013362104 |
| ENSMUSG00000091205 | 9.904325918 | 5.56493795  | 7.061510478 | 3.221830688 | 3.580972932 |
| ENSMUSG00000091206 | 10.61177777 | 7.651789682 | 9.179963621 | 5.638203705 | 5.013362104 |
| ENSMUSG00000091215 | 14.85648888 | 8.347406925 | 12.00456781 | 7.249119049 | 8.594335036 |
| ENSMUSG00000091216 | 0           | 0.695617244 | 0.706151048 | 0.805457672 | 0.716194586 |
| ENSMUSG00000091221 | 9.904325918 | 9.043024169 | 6.35535943  | 6.443661377 | 7.87814045  |
| ENSMUSG00000091223 | 9.904325918 | 15.99919661 | 9.886114669 | 16.91461111 | 10.7429188  |
| ENSMUSG00000091227 | 7.781970364 | 11.82549314 | 9.179963621 | 1.610915344 | 2.864778345 |
| ENSMUSG00000091230 | 5.65961481  | 6.956172438 | 5.649208382 | 9.665492065 | 11.45911338 |
| ENSMUSG00000091233 | 9.904325918 | 9.043024169 | 9.179963621 | 8.860034393 | 7.161945863 |
| ENSMUSG00000091237 | 6.367066661 | 6.260555194 | 6.35535943  | 5.638203705 | 8.594335036 |
| ENSMUSG00000091238 | 23.34591109 | 31.30277597 | 25.42143772 | 35.44013757 | 48.70123187 |
| ENSMUSG00000091239 | 12.02668147 | 7.651789682 | 7.061510478 | 5.638203705 | 7.87814045  |
| ENSMUSG00000091243 | 10.61177777 | 3.478086219 | 9.886114669 | 3.221830688 | 4.297167518 |
| ENSMUSG00000091248 | 7.781970364 | 9.043024169 | 7.061510478 | 2.416373016 | 5.729556691 |
| ENSMUSG00000091259 | 16.27139258 | 11.1298759  | 9.179963621 | 6.443661377 | 5.013362104 |
| ENSMUSG00000091260 | 7.781970364 | 12.52111039 | 10.59226572 | 7.249119049 | 3.580972932 |
| ENSMUSG00000091268 | 14.85648888 | 6.260555194 | 4.943057334 | 6.443661377 | 9.310529622 |
| ENSMUSG00000091269 | 9.196874066 | 7.651789682 | 9.886114669 | 16.91461111 | 14.32389173 |
| ENSMUSG00000091271 | 11.31922962 | 15.99919661 | 14.12302096 | 12.88732275 | 10.7429188  |
| ENSMUSG00000091273 | 13.44158517 | 10.43425866 | 7.767661525 | 9.665492065 | 6.445751277 |
| ENSMUSG00000091280 | 5.65961481  | 7.651789682 | 5.649208382 | 7.249119049 | 2.148583759 |
| ENSMUSG00000091281 | 14.85648888 | 10.43425866 | 13.41686991 | 8.860034393 | 7.161945863 |
| ENSMUSG00000091283 | 10.61177777 | 6.260555194 | 7.767661525 | 4.02728836  | 7.87814045  |
| ENSMUSG00000091285 | 9.196874066 | 9.043024169 | 4.236906287 | 9.665492065 | 5.013362104 |
| ENSMUSG00000091286 | 17.68629628 | 8.347406925 | 12.71071886 | 11.27640741 | 14.32389173 |
| ENSMUSG00000091288 | 8.489422215 | 7.651789682 | 10.59226572 | 7.249119049 | 5.729556691 |
| ENSMUSG00000091289 | 10.61177777 | 9.043024169 | 8.473812573 | 6.443661377 | 9.310529622 |
| ENSMUSG00000091290 | 14.14903703 | 6.260555194 | 6.35535943  | 8.054576721 | 4.297167518 |
| ENSMUSG00000091292 | 9.904325918 | 12.52111039 | 6.35535943  | 4.832746033 | 9.310529622 |
| ENSMUSG00000091293 | 7.781970364 | 4.869320706 | 11.29841676 | 4.832746033 | 6.445751277 |
| ENSMUSG00000091304 | 12.73413332 | 6.260555194 | 11.29841676 | 4.832746033 | 6.445751277 |
| ENSMUSG00000091305 | 7.781970364 | 5.56493795  | 10.59226572 | 3.221830688 | 7.87814045  |
| ENSMUSG00000091306 | 6.367066661 | 12.52111039 | 9.179963621 | 12.08186508 | 12.89150255 |
| ENSMUSG00000091307 | 5.65961481  | 6.956172438 | 11.29841676 | 6.443661377 | 5.729556691 |
| ENSMUSG00000091312 | 6.367066661 | 5.56493795  | 12.71071886 | 8.054576721 | 7.161945863 |
| ENSMUSG00000091313 | 8.489422215 | 12.52111039 | 9.886114669 | 10.47094974 | 5.013362104 |
| ENSMUSG00000091315 | 14.14903703 | 29.21592424 | 22.59683353 | 38.66196826 | 25.06681052 |

|                    |             |             |             |             |             |
|--------------------|-------------|-------------|-------------|-------------|-------------|
| ENSMUSG00000091325 | 10.61177777 | 8.347406925 | 10.59226572 | 4.832746033 | 2.864778345 |
| ENSMUSG00000091326 | 0           | 0           | 0           | 0           | 0           |
| ENSMUSG00000091329 | 10.61177777 | 6.956172438 | 5.649208382 | 5.638203705 | 8.594335036 |
| ENSMUSG00000091336 | 7.074518513 | 11.82549314 | 3.530755239 | 7.249119049 | 4.297167518 |
| ENSMUSG00000091347 | 8.489422215 | 6.260555194 | 4.943057334 | 5.638203705 | 5.729556691 |
| ENSMUSG00000091350 | 6.367066661 | 2.086851731 | 5.649208382 | 4.832746033 | 4.297167518 |
| ENSMUSG00000091351 | 9.196874066 | 11.1298759  | 5.649208382 | 4.02728836  | 8.594335036 |
| ENSMUSG00000091355 | 7.781970364 | 10.43425866 | 11.29841676 | 7.249119049 | 5.729556691 |
| ENSMUSG00000091358 | 8.489422215 | 7.651789682 | 7.767661525 | 8.054576721 | 6.445751277 |
| ENSMUSG00000091361 | 10.61177777 | 6.260555194 | 4.236906287 | 7.249119049 | 10.7429188  |
| ENSMUSG00000091363 | 28.29807405 | 34.08524495 | 25.42143772 | 19.33098413 | 20.05344842 |
| ENSMUSG00000091366 | 8.489422215 | 6.260555194 | 10.59226572 | 383.3978519 | 246.3709377 |
| ENSMUSG00000091367 | 14.14903703 | 25.04222078 | 34.60140134 | 26.58010318 | 30.08017263 |
| ENSMUSG00000091368 | 14.85648888 | 8.347406925 | 6.35535943  | 4.02728836  | 12.17530797 |
| ENSMUSG00000091370 | 16.97884443 | 6.956172438 | 7.767661525 | 1.610915344 | 7.87814045  |
| ENSMUSG00000091373 | 9.196874066 | 4.869320706 | 9.886114669 | 5.638203705 | 13.60769714 |
| ENSMUSG00000091375 | 9.196874066 | 5.56493795  | 7.061510478 | 9.665492065 | 5.013362104 |
| ENSMUSG00000091378 | 20.51610369 | 20.86851731 | 21.18453143 | 16.10915344 | 15.7562809  |
| ENSMUSG00000091383 | 9.904325918 | 7.651789682 | 6.35535943  | 4.02728836  | 10.7429188  |
| ENSMUSG00000091386 | 5.65961481  | 7.651789682 | 7.061510478 | 3.221830688 | 4.297167518 |
| ENSMUSG00000091388 | 9.196874066 | 13.91234488 | 7.061510478 | 4.832746033 | 6.445751277 |
| ENSMUSG00000091390 | 8.489422215 | 4.869320706 | 8.473812573 | 13.69278043 | 5.729556691 |
| ENSMUSG00000091396 | 12.73413332 | 11.82549314 | 3.530755239 | 3.221830688 | 3.580972932 |
| ENSMUSG00000091401 | 3.537259256 | 1.391234488 | 2.118453143 | 4.02728836  | 1.432389173 |
| ENSMUSG00000091404 | 7.074518513 | 12.52111039 | 14.829172   | 4.02728836  | 2.864778345 |
| ENSMUSG00000091407 | 22.63845924 | 15.99919661 | 16.2414741  | 8.054576721 | 17.18867007 |
| ENSMUSG00000091408 | 12.02668147 | 11.82549314 | 13.41686991 | 16.10915344 | 20.05344842 |
| ENSMUSG00000091410 | 9.196874066 | 4.173703463 | 12.00456781 | 2.416373016 | 7.161945863 |
| ENSMUSG00000091412 | 9.196874066 | 9.043024169 | 9.886114669 | 8.860034393 | 9.310529622 |
| ENSMUSG00000091416 | 11.31922962 | 13.91234488 | 7.061510478 | 5.638203705 | 7.87814045  |
| ENSMUSG00000091419 | 7.074518513 | 26.43345526 | 29.65834401 | 16.91461111 | 22.20203218 |
| ENSMUSG00000091421 | 23.34591109 | 24.34660353 | 26.83373982 | 31.41284921 | 21.48583759 |
| ENSMUSG00000091425 | 7.074518513 | 2.782468975 | 11.29841676 | 4.02728836  | 5.013362104 |
| ENSMUSG00000091426 | 17.68629628 | 17.39043109 | 26.83373982 | 11.27640741 | 14.32389173 |
| ENSMUSG00000091429 | 7.781970364 | 9.738641413 | 9.886114669 | 8.054576721 | 7.161945863 |
| ENSMUSG00000091430 | 13.44158517 | 4.173703463 | 5.649208382 | 4.02728836  | 4.297167518 |
| ENSMUSG00000091435 | 14.14903703 | 6.956172438 | 5.649208382 | 12.08186508 | 3.580972932 |
| ENSMUSG00000091438 | 19.80865184 | 43.82388636 | 37.42600553 | 43.49471429 | 35.09353473 |
| ENSMUSG00000091441 | 5.65961481  | 5.56493795  | 8.473812573 | 7.249119049 | 11.45911338 |
| ENSMUSG00000091442 | 7.781970364 | 4.869320706 | 4.236906287 | 4.832746033 | 9.310529622 |
| ENSMUSG00000091443 | 10.61177777 | 9.043024169 | 7.767661525 | 8.054576721 | 12.17530797 |
| ENSMUSG00000091449 | 4.952162959 | 6.956172438 | 9.886114669 | 18.52552646 | 10.02672421 |
| ENSMUSG00000091450 | 8.489422215 | 9.738641413 | 7.061510478 | 4.02728836  | 10.02672421 |

|                    |             |             |             |             |             |
|--------------------|-------------|-------------|-------------|-------------|-------------|
| ENSMUSG00000091453 | 9.196874066 | 5.56493795  | 10.59226572 | 8.054576721 | 6.445751277 |
| ENSMUSG00000091457 | 10.61177777 | 4.173703463 | 7.767661525 | 8.860034393 | 4.297167518 |
| ENSMUSG00000091459 | 9.196874066 | 9.043024169 | 9.179963621 | 1.610915344 | 7.161945863 |
| ENSMUSG00000091460 | 7.781970364 | 5.56493795  | 12.00456781 | 4.832746033 | 9.310529622 |
| ENSMUSG00000091462 | 4.952162959 | 9.738641413 | 7.061510478 | 6.443661377 | 10.7429188  |
| ENSMUSG00000091466 | 7.074518513 | 11.1298759  | 6.35535943  | 4.832746033 | 8.594335036 |
| ENSMUSG00000091470 | 23.34591109 | 9.043024169 | 12.00456781 | 7.249119049 | 9.310529622 |
| ENSMUSG00000091471 | 11.31922962 | 15.30357936 | 21.89068248 | 16.10915344 | 14.32389173 |
| ENSMUSG00000091475 | 3.537259256 | 4.869320706 | 9.179963621 | 11.27640741 | 6.445751277 |
| ENSMUSG00000091478 | 7.074518513 | 10.43425866 | 7.767661525 | 14.4982381  | 16.47247549 |
| ENSMUSG00000091479 | 6.367066661 | 6.956172438 | 9.179963621 | 6.443661377 | 6.445751277 |
| ENSMUSG00000091481 | 24.05336294 | 15.99919661 | 17.65377619 | 19.33098413 | 12.17530797 |
| ENSMUSG00000091483 | 15.56394073 | 4.869320706 | 8.473812573 | 5.638203705 | 8.594335036 |
| ENSMUSG00000091486 | 9.196874066 | 6.260555194 | 14.12302096 | 5.638203705 | 11.45911338 |
| ENSMUSG00000091487 | 9.196874066 | 4.173703463 | 9.886114669 | 7.249119049 | 6.445751277 |
| ENSMUSG00000091491 | 7.781970364 | 5.56493795  | 10.59226572 | 8.054576721 | 7.87814045  |
| ENSMUSG00000091492 | 19.80865184 | 49.38882431 | 28.95219296 | 16.91461111 | 25.06681052 |
| ENSMUSG00000091496 | 9.196874066 | 7.651789682 | 7.767661525 | 4.832746033 | 6.445751277 |
| ENSMUSG00000091497 | 4.244711108 | 5.56493795  | 2.118453143 | 3.221830688 | 0           |
| ENSMUSG00000091498 | 48.10672589 | 70.25734162 | 57.19823487 | 32.21830688 | 40.82309142 |
| ENSMUSG00000091504 | 16.97884443 | 6.956172438 | 9.886114669 | 4.02728836  | 4.297167518 |
| ENSMUSG00000091507 | 108.2401332 | 188.5122731 | 151.1163242 | 142.566008  | 116.7397176 |
| ENSMUSG00000091509 | 7.781970364 | 14.60796212 | 10.59226572 | 8.860034393 | 13.60769714 |
| ENSMUSG00000091510 | 2.122355554 | 1.391234488 | 2.824604191 | 0.805457672 | 3.580972932 |
| ENSMUSG00000091511 | 2.829807405 | 6.956172438 | 7.061510478 | 6.443661377 | 5.729556691 |
| ENSMUSG00000091515 | 11.31922962 | 13.21672763 | 12.00456781 | 6.443661377 | 11.45911338 |
| ENSMUSG00000091523 | 16.97884443 | 10.43425866 | 6.35535943  | 11.27640741 | 6.445751277 |
| ENSMUSG00000091526 | 11.31922962 | 6.260555194 | 8.473812573 | 4.832746033 | 6.445751277 |
| ENSMUSG00000091528 | 5.65961481  | 4.869320706 | 6.35535943  | 3.221830688 | 9.310529622 |
| ENSMUSG00000091530 | 9.196874066 | 9.738641413 | 5.649208382 | 3.221830688 | 7.87814045  |
| ENSMUSG00000091534 | 22.63845924 | 38.95456565 | 36.01370344 | 25.77464551 | 29.36397804 |
| ENSMUSG00000091539 | 15.56394073 | 13.91234488 | 9.886114669 | 7.249119049 | 8.594335036 |
| ENSMUSG00000091542 | 5.65961481  | 2.782468975 | 4.236906287 | 3.221830688 | 2.148583759 |
| ENSMUSG00000091548 | 8.489422215 | 6.260555194 | 12.71071886 | 5.638203705 | 5.013362104 |
| ENSMUSG00000091549 | 11.31922962 | 13.21672763 | 15.53532305 | 9.665492065 | 16.47247549 |
| ENSMUSG00000091550 | 2.122355554 | 2.782468975 | 7.061510478 | 1.610915344 | 4.297167518 |
| ENSMUSG00000091552 | 10.61177777 | 2.782468975 | 11.29841676 | 4.832746033 | 4.297167518 |
| ENSMUSG00000091553 | 11.31922962 | 6.956172438 | 5.649208382 | 7.249119049 | 7.161945863 |
| ENSMUSG00000091556 | 6.367066661 | 2.782468975 | 5.649208382 | 3.221830688 | 3.580972932 |
| ENSMUSG00000091557 | 7.781970364 | 6.956172438 | 4.943057334 | 6.443661377 | 2.864778345 |
| ENSMUSG00000091561 | 243.3634368 | 246.2485043 | 241.5036583 | 342.3195106 | 260.6948294 |
| ENSMUSG00000091562 | 15.56394073 | 20.86851731 | 23.30298458 | 24.16373016 | 27.93158887 |
| ENSMUSG00000091569 | 6.367066661 | 4.173703463 | 4.943057334 | 8.054576721 | 7.87814045  |



|                    |             |             |             |             |             |
|--------------------|-------------|-------------|-------------|-------------|-------------|
| ENSMUSG00000091570 | 15.56394073 | 13.91234488 | 16.2414741  | 8.054576721 | 12.89150255 |
| ENSMUSG00000091573 | 10.61177777 | 5.56493795  | 4.943057334 | 6.443661377 | 5.729556691 |
| ENSMUSG00000091575 | 11.31922962 | 41.73703463 | 26.12758877 | 10.47094974 | 21.48583759 |
| ENSMUSG00000091577 | 9.196874066 | 5.56493795  | 9.886114669 | 4.832746033 | 7.87814045  |
| ENSMUSG00000091580 | 13.44158517 | 6.260555194 | 5.649208382 | 6.443661377 | 10.02672421 |
| ENSMUSG00000091583 | 10.61177777 | 6.260555194 | 4.236906287 | 8.860034393 | 6.445751277 |
| ENSMUSG00000091587 | 1.414903703 | 2.782468975 | 2.118453143 | 0.805457672 | 0.716194586 |
| ENSMUSG00000091595 | 7.074518513 | 4.869320706 | 6.35535943  | 3.221830688 | 5.013362104 |
| ENSMUSG00000091604 | 20.51610369 | 21.56413456 | 30.36449505 | 27.38556085 | 24.35061594 |
| ENSMUSG00000091605 | 12.73413332 | 6.956172438 | 9.179963621 | 4.832746033 | 5.729556691 |
| ENSMUSG00000091606 | 3.537259256 | 4.869320706 | 3.530755239 | 1.610915344 | 5.013362104 |
| ENSMUSG00000091611 | 10.61177777 | 5.56493795  | 11.29841676 | 3.221830688 | 9.310529622 |
| ENSMUSG00000091613 | 6.367066661 | 5.56493795  | 9.886114669 | 7.249119049 | 6.445751277 |
| ENSMUSG00000091614 | 5.65961481  | 7.651789682 | 9.886114669 | 8.860034393 | 8.594335036 |
| ENSMUSG00000091615 | 5.65961481  | 8.347406925 | 7.061510478 | 6.443661377 | 5.013362104 |
| ENSMUSG00000091619 | 102.5805184 | 128.6891901 | 112.2780166 | 207.0026217 | 164.7247549 |
| ENSMUSG00000091620 | 11.31922962 | 9.738641413 | 6.35535943  | 4.832746033 | 9.310529622 |
| ENSMUSG00000091623 | 84.89422215 | 114.7768452 | 79.08891735 | 170.7570265 | 118.8883013 |
| ENSMUSG00000091624 | 10.61177777 | 9.043024169 | 7.061510478 | 7.249119049 | 7.161945863 |
| ENSMUSG00000091627 | 7.074518513 | 8.347406925 | 10.59226572 | 4.02728836  | 13.60769714 |
| ENSMUSG00000091631 | 4.244711108 | 6.956172438 | 7.061510478 | 6.443661377 | 5.729556691 |
| ENSMUSG00000091635 | 5.65961481  | 5.56493795  | 7.061510478 | 8.860034393 | 5.729556691 |
| ENSMUSG00000091638 | 10.61177777 | 3.478086219 | 2.118453143 | 6.443661377 | 4.297167518 |
| ENSMUSG00000091639 | 12.02668147 | 11.1298759  | 10.59226572 | 13.69278043 | 13.60769714 |
| ENSMUSG00000091644 | 19.10119998 | 15.30357936 | 21.89068248 | 16.91461111 | 20.769643   |
| ENSMUSG00000091651 | 7.074518513 | 9.738641413 | 7.767661525 | 4.832746033 | 3.580972932 |
| ENSMUSG00000091652 | 9.196874066 | 7.651789682 | 8.473812573 | 5.638203705 | 5.013362104 |
| ENSMUSG00000091655 | 14.14903703 | 13.91234488 | 8.473812573 | 13.69278043 | 11.45911338 |
| ENSMUSG00000091656 | 9.904325918 | 9.043024169 | 9.179963621 | 8.860034393 | 3.580972932 |
| ENSMUSG00000091657 | 10.61177777 | 7.651789682 | 11.29841676 | 6.443661377 | 9.310529622 |
| ENSMUSG00000091659 | 9.904325918 | 4.869320706 | 6.35535943  | 10.47094974 | 7.161945863 |
| ENSMUSG00000091661 | 8.489422215 | 9.043024169 | 6.35535943  | 7.249119049 | 8.594335036 |
| ENSMUSG00000091665 | 9.904325918 | 6.260555194 | 8.473812573 | 9.665492065 | 8.594335036 |
| ENSMUSG00000091668 | 9.904325918 | 8.347406925 | 12.00456781 | 6.443661377 | 10.02672421 |
| ENSMUSG00000091669 | 7.074518513 | 5.56493795  | 7.061510478 | 7.249119049 | 10.7429188  |
| ENSMUSG00000091670 | 9.196874066 | 9.738641413 | 6.35535943  | 0.805457672 | 5.013362104 |
| ENSMUSG00000091671 | 7.074518513 | 10.43425866 | 7.061510478 | 8.054576721 | 5.729556691 |
| ENSMUSG00000091672 | 13.44158517 | 8.347406925 | 4.236906287 | 3.221830688 | 5.013362104 |
| ENSMUSG00000091681 | 11.31922962 | 7.651789682 | 7.061510478 | 6.443661377 | 5.013362104 |
| ENSMUSG00000091682 | 8.489422215 | 6.260555194 | 7.061510478 | 3.221830688 | 5.729556691 |
| ENSMUSG00000091686 | 10.61177777 | 6.956172438 | 6.35535943  | 8.054576721 | 7.87814045  |
| ENSMUSG00000091695 | 7.074518513 | 4.173703463 | 8.473812573 | 12.88732275 | 12.17530797 |
| ENSMUSG00000091697 | 10.61177777 | 6.260555194 | 8.473812573 | 1.610915344 | 7.87814045  |

|                    |             |             |             |             |             |
|--------------------|-------------|-------------|-------------|-------------|-------------|
| ENSMUSG00000091703 | 9.196874066 | 7.651789682 | 5.649208382 | 5.638203705 | 7.87814045  |
| ENSMUSG00000091707 | 9.904325918 | 7.651789682 | 7.061510478 | 8.054576721 | 10.02672421 |
| ENSMUSG00000091709 | 14.85648888 | 9.043024169 | 12.71071886 | 8.054576721 | 8.594335036 |
| ENSMUSG00000091713 | 4.952162959 | 5.56493795  | 5.649208382 | 5.638203705 | 2.864778345 |
| ENSMUSG00000091718 | 10.61177777 | 3.478086219 | 7.061510478 | 5.638203705 | 7.161945863 |
| ENSMUSG00000091723 | 13.44158517 | 14.60796212 | 3.530755239 | 2.416373016 | 3.580972932 |
| ENSMUSG00000091725 | 9.904325918 | 6.260555194 | 7.767661525 | 8.054576721 | 9.310529622 |
| ENSMUSG00000091730 | 7.074518513 | 7.651789682 | 9.179963621 | 9.665492065 | 9.310529622 |
| ENSMUSG00000091731 | 4.244711108 | 6.956172438 | 10.59226572 | 4.832746033 | 6.445751277 |
| ENSMUSG00000091732 | 30.4204296  | 25.73783802 | 24.00913562 | 20.1364418  | 22.91822676 |
| ENSMUSG00000091740 | 14.85648888 | 10.43425866 | 7.767661525 | 4.832746033 | 5.729556691 |
| ENSMUSG00000091741 | 14.85648888 | 10.43425866 | 8.473812573 | 8.054576721 | 10.02672421 |
| ENSMUSG00000091742 | 2.829807405 | 2.086851731 | 1.412302096 | 3.221830688 | 1.432389173 |
| ENSMUSG00000091743 | 5.65961481  | 4.869320706 | 4.236906287 | 4.832746033 | 7.161945863 |
| ENSMUSG00000091745 | 6.367066661 | 11.1298759  | 2.824604191 | 3.221830688 | 6.445751277 |
| ENSMUSG00000091749 | 8.489422215 | 5.56493795  | 3.530755239 | 5.638203705 | 5.729556691 |
| ENSMUSG00000091752 | 9.904325918 | 9.043024169 | 7.767661525 | 7.249119049 | 10.02672421 |
| ENSMUSG00000091757 | 11.31922962 | 3.478086219 | 9.886114669 | 9.665492065 | 4.297167518 |
| ENSMUSG00000091762 | 10.61177777 | 4.869320706 | 4.943057334 | 5.638203705 | 5.729556691 |
| ENSMUSG00000091764 | 9.904325918 | 8.347406925 | 9.179963621 | 11.27640741 | 6.445751277 |
| ENSMUSG00000091768 | 7.781970364 | 9.738641413 | 14.829172   | 7.249119049 | 7.87814045  |
| ENSMUSG00000091771 | 7.781970364 | 9.043024169 | 7.061510478 | 7.249119049 | 5.729556691 |
| ENSMUSG00000091775 | 7.781970364 | 11.82549314 | 4.943057334 | 4.02728836  | 7.161945863 |
| ENSMUSG00000091776 | 11.31922962 | 6.956172438 | 4.943057334 | 2.416373016 | 5.013362104 |
| ENSMUSG00000091784 | 13.44158517 | 26.43345526 | 20.47838039 | 13.69278043 | 24.35061594 |
| ENSMUSG00000091785 | 8.489422215 | 10.43425866 | 10.59226572 | 8.054576721 | 5.729556691 |
| ENSMUSG00000091786 | 7.074518513 | 6.956172438 | 4.236906287 | 5.638203705 | 7.161945863 |
| ENSMUSG00000091788 | 11.31922962 | 7.651789682 | 12.00456781 | 5.638203705 | 12.89150255 |
| ENSMUSG00000091800 | 8.489422215 | 9.738641413 | 4.236906287 | 4.02728836  | 5.013362104 |
| ENSMUSG00000091805 | 8.489422215 | 6.260555194 | 4.943057334 | 1.610915344 | 3.580972932 |
| ENSMUSG00000091806 | 8.489422215 | 13.91234488 | 18.35992724 | 11.27640741 | 20.769643   |
| ENSMUSG00000091808 | 12.02668147 | 5.56493795  | 9.886114669 | 7.249119049 | 7.87814045  |
| ENSMUSG00000091809 | 11.31922962 | 4.869320706 | 7.061510478 | 9.665492065 | 8.594335036 |
| ENSMUSG00000091812 | 0.707451851 | 3.478086219 | 2.824604191 | 4.02728836  | 5.013362104 |
| ENSMUSG00000091813 | 9.904325918 | 8.347406925 | 4.943057334 | 4.832746033 | 11.45911338 |
| ENSMUSG00000091815 | 21.22355554 | 23.65098629 | 24.71528667 | 14.4982381  | 13.60769714 |
| ENSMUSG00000091816 | 5.65961481  | 6.260555194 | 2.824604191 | 5.638203705 | 8.594335036 |
| ENSMUSG00000091817 | 11.31922962 | 7.651789682 | 7.061510478 | 8.054576721 | 5.729556691 |
| ENSMUSG00000091818 | 0.707451851 | 0           | 0.706151048 | 0           | 0.716194586 |
| ENSMUSG00000091821 | 7.781970364 | 8.347406925 | 4.943057334 | 4.02728836  | 2.864778345 |
| ENSMUSG00000091825 | 7.074518513 | 5.56493795  | 4.236906287 | 4.832746033 | 5.729556691 |
| ENSMUSG00000091832 | 32.54278516 | 23.65098629 | 19.06607829 | 20.1364418  | 17.18867007 |
| ENSMUSG00000091834 | 16.27139258 | 6.260555194 | 5.649208382 | 6.443661377 | 6.445751277 |

|                    |             |             |             |             |             |
|--------------------|-------------|-------------|-------------|-------------|-------------|
| ENSMUSG00000091842 | 4.244711108 | 6.956172438 | 7.767661525 | 4.02728836  | 5.729556691 |
| ENSMUSG00000091844 | 7.781970364 | 11.1298759  | 8.473812573 | 8.860034393 | 5.729556691 |
| ENSMUSG00000091845 | 9.904325918 | 18.78166558 | 14.12302096 | 8.860034393 | 8.594335036 |
| ENSMUSG00000091847 | 8.489422215 | 13.21672763 | 9.886114669 | 12.88732275 | 12.89150255 |
| ENSMUSG00000091849 | 18.39374813 | 4.869320706 | 7.767661525 | 6.443661377 | 6.445751277 |
| ENSMUSG00000091859 | 10.61177777 | 8.347406925 | 9.886114669 | 8.054576721 | 7.161945863 |
| ENSMUSG00000091863 | 2.122355554 | 2.086851731 | 0.706151048 | 4.02728836  | 2.148583759 |
| ENSMUSG00000091864 | 45.98437033 | 53.56252777 | 55.07978173 | 31.41284921 | 42.25548059 |
| ENSMUSG00000091866 | 6.367066661 | 6.956172438 | 7.767661525 | 9.665492065 | 6.445751277 |
| ENSMUSG00000091876 | 26.88317035 | 39.6501829  | 30.36449505 | 28.19101852 | 30.79636721 |
| ENSMUSG00000091879 | 6.367066661 | 8.347406925 | 7.767661525 | 5.638203705 | 7.161945863 |
| ENSMUSG00000091881 | 21.93100739 | 23.65098629 | 26.83373982 | 15.30369577 | 17.90486466 |
| ENSMUSG00000091887 | 7.781970364 | 4.869320706 | 6.35535943  | 4.02728836  | 5.013362104 |
| ENSMUSG00000091894 | 10.61177777 | 6.956172438 | 5.649208382 | 5.638203705 | 6.445751277 |
| ENSMUSG00000091902 | 10.61177777 | 6.260555194 | 4.943057334 | 2.416373016 | 9.310529622 |
| ENSMUSG00000091905 | 6.367066661 | 9.043024169 | 10.59226572 | 10.47094974 | 5.729556691 |
| ENSMUSG00000091906 | 5.65961481  | 11.1298759  | 12.00456781 | 9.665492065 | 9.310529622 |
| ENSMUSG00000091911 | 7.781970364 | 9.738641413 | 6.35535943  | 6.443661377 | 5.729556691 |
| ENSMUSG00000091926 | 6.367066661 | 7.651789682 | 10.59226572 | 6.443661377 | 9.310529622 |
| ENSMUSG00000091929 | 4.952162959 | 5.56493795  | 7.767661525 | 2.416373016 | 8.594335036 |
| ENSMUSG00000091930 | 7.074518513 | 9.738641413 | 8.473812573 | 6.443661377 | 6.445751277 |
| ENSMUSG00000091933 | 0           | 0.695617244 | 0           | 0           | 0           |
| ENSMUSG00000091936 | 9.196874066 | 6.956172438 | 10.59226572 | 4.832746033 | 8.594335036 |
| ENSMUSG00000091941 | 12.02668147 | 24.34660353 | 13.41686991 | 12.08186508 | 20.769643   |
| ENSMUSG00000091942 | 4.952162959 | 10.43425866 | 11.29841676 | 4.02728836  | 8.594335036 |
| ENSMUSG00000091945 | 14.85648888 | 6.260555194 | 12.71071886 | 8.054576721 | 12.89150255 |
| ENSMUSG00000091947 | 44.56946663 | 74.43104508 | 60.02283906 | 62.82569842 | 59.44415067 |
| ENSMUSG00000091952 | 48.81417774 | 68.17048989 | 69.90895373 | 49.93837567 | 44.40406435 |
| ENSMUSG00000091954 | 7.074518513 | 7.651789682 | 11.29841676 | 11.27640741 | 7.161945863 |
| ENSMUSG00000091957 | 14.14903703 | 7.651789682 | 10.59226572 | 11.27640741 | 21.48583759 |
| ENSMUSG00000091960 | 12.02668147 | 9.738641413 | 20.47838039 | 7.249119049 | 4.297167518 |
| ENSMUSG00000091961 | 16.27139258 | 9.738641413 | 16.2414741  | 4.832746033 | 7.87814045  |
| ENSMUSG00000091967 | 11.31922962 | 3.478086219 | 5.649208382 | 4.02728836  | 5.013362104 |
| ENSMUSG00000091968 | 123.804074  | 142.601535  | 144.0548137 | 200.5589604 | 151.1170577 |
| ENSMUSG00000091970 | 12.02668147 | 5.56493795  | 5.649208382 | 8.054576721 | 10.7429188  |
| ENSMUSG00000091980 | 8.489422215 | 7.651789682 | 4.236906287 | 4.02728836  | 12.17530797 |
| ENSMUSG00000091981 | 9.904325918 | 4.869320706 | 8.473812573 | 9.665492065 | 13.60769714 |
| ENSMUSG00000091985 | 10.61177777 | 9.043024169 | 7.061510478 | 5.638203705 | 7.87814045  |
| ENSMUSG00000091989 | 13.44158517 | 20.86851731 | 14.12302096 | 16.91461111 | 19.33725383 |
| ENSMUSG00000091990 | 9.196874066 | 9.043024169 | 12.71071886 | 3.221830688 | 2.148583759 |
| ENSMUSG00000091993 | 2.122355554 | 7.651789682 | 2.118453143 | 2.416373016 | 3.580972932 |
| ENSMUSG00000091994 | 143.6127258 | 139.819066  | 129.9317928 | 473.6091112 | 315.8418126 |
| ENSMUSG00000091995 | 10.61177777 | 4.173703463 | 7.767661525 | 7.249119049 | 4.297167518 |

|                    |             |             |             |             |             |
|--------------------|-------------|-------------|-------------|-------------|-------------|
| ENSMUSG00000091997 | 70.74518513 | 88.34338996 | 86.15042783 | 64.43661377 | 80.92998826 |
| ENSMUSG00000091998 | 11.31922962 | 9.043024169 | 10.59226572 | 5.638203705 | 10.7429188  |
| ENSMUSG00000092004 | 7.781970364 | 10.43425866 | 5.649208382 | 7.249119049 | 5.729556691 |
| ENSMUSG00000092006 | 9.904325918 | 18.08604834 | 11.29841676 | 7.249119049 | 12.89150255 |
| ENSMUSG00000092009 | 7.781970364 | 4.869320706 | 5.649208382 | 5.638203705 | 3.580972932 |
| ENSMUSG00000092012 | 12.02668147 | 3.478086219 | 7.767661525 | 5.638203705 | 9.310529622 |
| ENSMUSG00000092014 | 7.781970364 | 7.651789682 | 5.649208382 | 8.054576721 | 10.02672421 |
| ENSMUSG00000092027 | 13.44158517 | 5.56493795  | 9.179963621 | 4.832746033 | 5.013362104 |
| ENSMUSG00000092029 | 6.367066661 | 9.738641413 | 4.943057334 | 5.638203705 | 7.161945863 |
| ENSMUSG00000092031 | 9.904325918 | 6.260555194 | 8.473812573 | 7.249119049 | 9.310529622 |
| ENSMUSG00000092032 | 9.196874066 | 11.1298759  | 8.473812573 | 7.249119049 | 5.729556691 |
| ENSMUSG00000092036 | 12.73413332 | 9.738641413 | 9.886114669 | 4.832746033 | 5.013362104 |
| ENSMUSG00000092039 | 13.44158517 | 8.347406925 | 8.473812573 | 4.832746033 | 5.729556691 |
| ENSMUSG00000092040 | 10.61177777 | 4.869320706 | 4.943057334 | 7.249119049 | 10.02672421 |
| ENSMUSG00000092042 | 7.781970364 | 6.260555194 | 2.824604191 | 5.638203705 | 9.310529622 |
| ENSMUSG00000092045 | 7.074518513 | 9.738641413 | 8.473812573 | 8.860034393 | 2.864778345 |
| ENSMUSG00000092047 | 9.196874066 | 9.043024169 | 9.179963621 | 9.665492065 | 7.87814045  |
| ENSMUSG00000092048 | 8.489422215 | 9.043024169 | 9.886114669 | 8.054576721 | 7.161945863 |
| ENSMUSG00000092051 | 3.537259256 | 3.478086219 | 7.061510478 | 3.221830688 | 1.432389173 |
| ENSMUSG00000092054 | 8.489422215 | 6.956172438 | 7.767661525 | 6.443661377 | 7.87814045  |
| ENSMUSG00000092055 | 7.781970364 | 13.21672763 | 12.71071886 | 1.610915344 | 8.594335036 |
| ENSMUSG00000092056 | 11.31922962 | 12.52111039 | 7.061510478 | 0.805457672 | 7.161945863 |
| ENSMUSG00000092062 | 7.781970364 | 14.60796212 | 12.00456781 | 9.665492065 | 13.60769714 |
| ENSMUSG00000092066 | 11.31922962 | 2.782468975 | 5.649208382 | 3.221830688 | 4.297167518 |
| ENSMUSG00000092075 | 9.904325918 | 5.56493795  | 0.706151048 | 5.638203705 | 7.161945863 |
| ENSMUSG00000092076 | 7.074518513 | 7.651789682 | 10.59226572 | 14.4982381  | 10.7429188  |
| ENSMUSG00000092080 | 9.904325918 | 6.956172438 | 8.473812573 | 4.02728836  | 4.297167518 |
| ENSMUSG00000092085 | 14.14903703 | 10.43425866 | 9.179963621 | 3.221830688 | 4.297167518 |
| ENSMUSG00000092090 | 11.31922962 | 6.956172438 | 5.649208382 | 5.638203705 | 5.729556691 |
| ENSMUSG00000092092 | 9.196874066 | 3.478086219 | 7.061510478 | 7.249119049 | 5.013362104 |
| ENSMUSG00000092093 | 23.34591109 | 17.39043109 | 25.42143772 | 9.665492065 | 12.89150255 |
| ENSMUSG00000092094 | 13.44158517 | 6.956172438 | 14.12302096 | 7.249119049 | 9.310529622 |
| ENSMUSG00000092097 | 12.73413332 | 7.651789682 | 7.767661525 | 8.860034393 | 11.45911338 |
| ENSMUSG00000092103 | 48.81417774 | 79.30036579 | 67.79050059 | 49.93837567 | 33.66114556 |
| ENSMUSG00000092107 | 7.074518513 | 9.043024169 | 9.886114669 | 4.832746033 | 2.148583759 |
| ENSMUSG00000092109 | 7.781970364 | 4.173703463 | 8.473812573 | 6.443661377 | 7.87814045  |
| ENSMUSG00000092111 | 9.196874066 | 6.260555194 | 9.179963621 | 5.638203705 | 5.729556691 |
| ENSMUSG00000092116 | 9.904325918 | 5.56493795  | 7.061510478 | 8.054576721 | 10.7429188  |
| ENSMUSG00000092120 | 8.489422215 | 7.651789682 | 7.061510478 | 8.054576721 | 6.445751277 |
| ENSMUSG00000092123 | 9.196874066 | 9.043024169 | 7.767661525 | 8.860034393 | 5.013362104 |
| ENSMUSG00000092125 | 11.31922962 | 11.82549314 | 9.886114669 | 2.416373016 | 7.161945863 |
| ENSMUSG00000092131 | 3.537259256 | 4.173703463 | 3.530755239 | 1.610915344 | 3.580972932 |
| ENSMUSG00000092134 | 14.14903703 | 16.69481385 | 18.35992724 | 16.10915344 | 21.48583759 |

|                    |             |             |             |             |             |
|--------------------|-------------|-------------|-------------|-------------|-------------|
| ENSMUSG00000092142 | 14.14903703 | 11.82549314 | 10.59226572 | 3.221830688 | 9.310529622 |
| ENSMUSG00000092144 | 10.61177777 | 10.43425866 | 11.29841676 | 8.054576721 | 3.580972932 |
| ENSMUSG00000092147 | 6.367066661 | 6.956172438 | 10.59226572 | 9.665492065 | 5.729556691 |
| ENSMUSG00000092148 | 13.44158517 | 7.651789682 | 8.473812573 | 6.443661377 | 5.729556691 |
| ENSMUSG00000092152 | 14.85648888 | 9.043024169 | 7.767661525 | 9.665492065 | 7.87814045  |
| ENSMUSG00000092157 | 7.781970364 | 5.56493795  | 5.649208382 | 5.638203705 | 8.594335036 |
| ENSMUSG00000092162 | 7.074518513 | 7.651789682 | 4.943057334 | 3.221830688 | 2.148583759 |
| ENSMUSG00000092165 | 12.73413332 | 9.043024169 | 9.179963621 | 7.249119049 | 5.013362104 |
| ENSMUSG00000092166 | 11.31922962 | 5.56493795  | 14.12302096 | 6.443661377 | 11.45911338 |
| ENSMUSG00000092168 | 10.61177777 | 11.82549314 | 9.886114669 | 8.860034393 | 5.013362104 |
| ENSMUSG00000092171 | 9.904325918 | 2.782468975 | 7.061510478 | 10.47094974 | 5.729556691 |
| ENSMUSG00000092172 | 7.781970364 | 9.043024169 | 7.767661525 | 4.832746033 | 8.594335036 |
| ENSMUSG00000092173 | 8.489422215 | 8.347406925 | 11.29841676 | 3.221830688 | 7.161945863 |
| ENSMUSG00000092174 | 12.02668147 | 12.52111039 | 15.53532305 | 8.860034393 | 9.310529622 |
| ENSMUSG00000092175 | 8.489422215 | 4.173703463 | 11.29841676 | 6.443661377 | 5.729556691 |
| ENSMUSG00000092176 | 4.952162959 | 3.478086219 | 3.530755239 | 0.805457672 | 2.148583759 |
| ENSMUSG00000092178 | 7.074518513 | 6.260555194 | 7.767661525 | 4.832746033 | 8.594335036 |
| ENSMUSG00000092179 | 9.904325918 | 9.043024169 | 4.943057334 | 1.610915344 | 2.148583759 |
| ENSMUSG00000092180 | 3.537259256 | 9.043024169 | 10.59226572 | 7.249119049 | 5.013362104 |
| ENSMUSG00000092181 | 60.13340736 | 103.6469693 | 76.26431316 | 45.91108731 | 51.56601022 |
| ENSMUSG00000092182 | 37.49494812 | 67.47487265 | 67.79050059 | 32.21830688 | 37.24211849 |
| ENSMUSG00000092183 | 26.1757185  | 30.60715873 | 37.42600553 | 34.6346799  | 22.91822676 |
| ENSMUSG00000092184 | 9.904325918 | 8.347406925 | 5.649208382 | 3.221830688 | 5.729556691 |
| ENSMUSG00000092185 | 8.489422215 | 9.043024169 | 3.530755239 | 4.832746033 | 5.729556691 |
| ENSMUSG00000092186 | 11.31922962 | 6.956172438 | 5.649208382 | 6.443661377 | 4.297167518 |
| ENSMUSG00000092187 | 24.76081479 | 27.82468975 | 26.83373982 | 25.77464551 | 27.93158887 |
| ENSMUSG00000092188 | 7.074518513 | 11.82549314 | 4.236906287 | 6.443661377 | 5.013362104 |
| ENSMUSG00000092189 | 12.02668147 | 11.1298759  | 12.00456781 | 10.47094974 | 10.02672421 |
| ENSMUSG00000092190 | 10.61177777 | 13.21672763 | 10.59226572 | 9.665492065 | 12.89150255 |
| ENSMUSG00000092191 | 7.074518513 | 7.651789682 | 7.061510478 | 5.638203705 | 10.02672421 |
| ENSMUSG00000092193 | 8.489422215 | 4.173703463 | 9.886114669 | 2.416373016 | 1.432389173 |
| ENSMUSG00000092195 | 5.65961481  | 6.956172438 | 8.473812573 | 5.638203705 | 3.580972932 |
| ENSMUSG00000092196 | 12.73413332 | 8.347406925 | 11.29841676 | 6.443661377 | 5.729556691 |
| ENSMUSG00000092197 | 0           | 0           | 0.706151048 | 0           | 0           |
| ENSMUSG00000092199 | 14.14903703 | 12.52111039 | 8.473812573 | 1.610915344 | 5.729556691 |
| ENSMUSG00000092200 | 6.367066661 | 4.173703463 | 4.943057334 | 8.860034393 | 8.594335036 |
| ENSMUSG00000092201 | 0           | 0           | 0           | 0           | 0           |
| ENSMUSG00000092202 | 9.196874066 | 5.56493795  | 6.35535943  | 5.638203705 | 9.310529622 |
| ENSMUSG00000092203 | 0           | 0           | 0           | 0           | 0           |
| ENSMUSG00000092204 | 11.31922962 | 6.956172438 | 8.473812573 | 3.221830688 | 5.729556691 |
| ENSMUSG00000092208 | 7.781970364 | 13.21672763 | 4.943057334 | 7.249119049 | 4.297167518 |
| ENSMUSG00000092211 | 11.31922962 | 6.260555194 | 9.886114669 | 2.416373016 | 3.580972932 |
| ENSMUSG00000092212 | 8.489422215 | 6.260555194 | 12.00456781 | 4.832746033 | 4.297167518 |

|                   |             |             |             |             |             |
|-------------------|-------------|-------------|-------------|-------------|-------------|
| ENSMUSG0000092213 | 15.56394073 | 6.260555194 | 6.35535943  | 6.443661377 | 10.02672421 |
| ENSMUSG0000092214 | 8.489422215 | 4.173703463 | 10.59226572 | 8.860034393 | 7.87814045  |
| ENSMUSG0000092217 | 7.074518513 | 10.43425866 | 5.649208382 | 4.02728836  | 5.013362104 |
| ENSMUSG0000092218 | 0           | 0           | 0           | 0           | 0           |
| ENSMUSG0000092219 | 7.074518513 | 3.478086219 | 7.061510478 | 9.665492065 | 5.729556691 |
| ENSMUSG0000092220 | 73.57499253 | 63.99678643 | 51.54902649 | 33.02376456 | 53.71459398 |
| ENSMUSG0000092221 | 12.73413332 | 4.173703463 | 7.767661525 | 6.443661377 | 3.580972932 |
| ENSMUSG0000092222 | 60.84085921 | 91.12585893 | 71.32125582 | 51.54929101 | 43.68786977 |
| ENSMUSG0000092223 | 11.31922962 | 7.651789682 | 6.35535943  | 3.221830688 | 4.297167518 |
| ENSMUSG0000092224 | 7.781970364 | 12.52111039 | 8.473812573 | 13.69278043 | 11.45911338 |
| ENSMUSG0000092227 | 11.31922962 | 6.260555194 | 8.473812573 | 2.416373016 | 10.02672421 |
| ENSMUSG0000092228 | 7.781970364 | 6.956172438 | 4.943057334 | 6.443661377 | 7.161945863 |
| ENSMUSG0000092229 | 19.10119998 | 4.173703463 | 9.179963621 | 8.860034393 | 8.594335036 |
| ENSMUSG0000092230 | 10.61177777 | 5.56493795  | 3.530755239 | 2.416373016 | 7.87814045  |
| ENSMUSG0000092231 | 7.074518513 | 7.651789682 | 6.35535943  | 9.665492065 | 8.594335036 |
| ENSMUSG0000092233 | 77.81970364 | 114.7768452 | 69.90895373 | 211.0299101 | 186.926787  |
| ENSMUSG0000092237 | 9.904325918 | 6.956172438 | 12.00456781 | 6.443661377 | 6.445751277 |
| ENSMUSG0000092238 | 9.904325918 | 9.043024169 | 7.061510478 | 5.638203705 | 8.594335036 |
| ENSMUSG0000092239 | 11.31922962 | 4.869320706 | 8.473812573 | 12.08186508 | 5.729556691 |
| ENSMUSG0000092240 | 7.074518513 | 5.56493795  | 9.886114669 | 3.221830688 | 7.161945863 |
| ENSMUSG0000092241 | 37.49494812 | 52.17129328 | 65.67204744 | 96.65492065 | 83.07857202 |
| ENSMUSG0000092242 | 12.02668147 | 9.043024169 | 5.649208382 | 5.638203705 | 8.594335036 |
| ENSMUSG0000092245 | 6.367066661 | 4.869320706 | 7.061510478 | 8.860034393 | 6.445751277 |
| ENSMUSG0000092246 | 31.83533331 | 48.69320706 | 59.31668801 | 26.58010318 | 35.80972932 |
| ENSMUSG0000092247 | 7.781970364 | 6.956172438 | 14.12302096 | 6.443661377 | 14.32389173 |
| ENSMUSG0000092248 | 8.489422215 | 9.043024169 | 5.649208382 | 5.638203705 | 5.729556691 |
| ENSMUSG0000092249 | 7.781970364 | 7.651789682 | 12.00456781 | 9.665492065 | 7.87814045  |
| ENSMUSG0000092250 | 4.952162959 | 6.260555194 | 7.767661525 | 6.443661377 | 7.87814045  |
| ENSMUSG0000092253 | 9.904325918 | 8.347406925 | 7.061510478 | 2.416373016 | 5.729556691 |
| ENSMUSG0000092255 | 6.367066661 | 4.173703463 | 2.824604191 | 3.221830688 | 2.864778345 |
| ENSMUSG0000092256 | 9.904325918 | 9.043024169 | 8.473812573 | 4.02728836  | 3.580972932 |
| ENSMUSG0000092257 | 7.781970364 | 6.956172438 | 7.767661525 | 6.443661377 | 7.161945863 |
| ENSMUSG0000092258 | 88.43148141 | 85.56092098 | 111.5718655 | 147.398754  | 133.9283876 |
| ENSMUSG0000092259 | 8.489422215 | 11.1298759  | 7.767661525 | 6.443661377 | 2.864778345 |
| ENSMUSG0000092261 | 26.1757185  | 44.5195036  | 41.66291182 | 24.16373016 | 25.78300511 |
| ENSMUSG0000092262 | 12.02668147 | 9.738641413 | 8.473812573 | 5.638203705 | 6.445751277 |
| ENSMUSG0000092263 | 7.781970364 | 5.56493795  | 4.236906287 | 4.832746033 | 6.445751277 |
| ENSMUSG0000092264 | 10.61177777 | 6.260555194 | 5.649208382 | 5.638203705 | 7.87814045  |
| ENSMUSG0000092265 | 8.489422215 | 7.651789682 | 10.59226572 | 7.249119049 | 7.87814045  |
| ENSMUSG0000092266 | 8.489422215 | 13.21672763 | 9.886114669 | 8.860034393 | 5.013362104 |
| ENSMUSG0000092267 | 141.4903703 | 187.8166558 | 177.243913  | 311.7121191 | 191.2239546 |
| ENSMUSG0000092268 | 31.83533331 | 58.43184848 | 48.01827125 | 28.19101852 | 27.21539428 |
| ENSMUSG0000092269 | 10.61177777 | 12.52111039 | 6.35535943  | 4.832746033 | 7.161945863 |

|                   |             |             |             |             |             |
|-------------------|-------------|-------------|-------------|-------------|-------------|
| ENSMUSG0000092270 | 10.61177777 | 9.043024169 | 7.767661525 | 4.832746033 | 3.580972932 |
| ENSMUSG0000092271 | 9.196874066 | 10.43425866 | 9.179963621 | 2.416373016 | 7.161945863 |
| ENSMUSG0000092272 | 13.44158517 | 7.651789682 | 8.473812573 | 4.02728836  | 5.013362104 |
| ENSMUSG0000092274 | 1.414903703 | 2.782468975 | 0.706151048 | 1.610915344 | 2.864778345 |
| ENSMUSG0000092275 | 7.074518513 | 7.651789682 | 9.179963621 | 9.665492065 | 9.310529622 |
| ENSMUSG0000092276 | 7.781970364 | 6.956172438 | 4.236906287 | 5.638203705 | 6.445751277 |
| ENSMUSG0000092278 | 19.10119998 | 21.56413456 | 14.829172   | 20.94189947 | 22.91822676 |
| ENSMUSG0000092280 | 12.73413332 | 5.56493795  | 4.943057334 | 6.443661377 | 6.445751277 |
| ENSMUSG0000092281 | 8.489422215 | 9.043024169 | 8.473812573 | 12.08186508 | 10.02672421 |
| ENSMUSG0000092283 | 6.367066661 | 2.086851731 | 5.649208382 | 6.443661377 | 8.594335036 |
| ENSMUSG0000092284 | 12.02668147 | 7.651789682 | 7.061510478 | 7.249119049 | 7.161945863 |
| ENSMUSG0000092285 | 9.904325918 | 8.347406925 | 5.649208382 | 6.443661377 | 7.87814045  |
| ENSMUSG0000092286 | 13.44158517 | 5.56493795  | 9.179963621 | 5.638203705 | 8.594335036 |
| ENSMUSG0000092287 | 6.367066661 | 11.1298759  | 9.886114669 | 3.221830688 | 2.148583759 |
| ENSMUSG0000092289 | 6.367066661 | 9.043024169 | 9.886114669 | 8.054576721 | 15.7562809  |
| ENSMUSG0000092290 | 4.244711108 | 8.347406925 | 8.473812573 | 5.638203705 | 4.297167518 |
| ENSMUSG0000092293 | 8.489422215 | 6.260555194 | 4.236906287 | 4.02728836  | 2.864778345 |
| ENSMUSG0000092294 | 8.489422215 | 8.347406925 | 4.236906287 | 8.054576721 | 3.580972932 |
| ENSMUSG0000092295 | 7.074518513 | 3.478086219 | 4.943057334 | 4.02728836  | 2.864778345 |
| ENSMUSG0000092296 | 16.27139258 | 6.956172438 | 9.886114669 | 3.221830688 | 7.161945863 |
| ENSMUSG0000092297 | 13.44158517 | 3.478086219 | 8.473812573 | 8.054576721 | 3.580972932 |
| ENSMUSG0000092298 | 5.65961481  | 7.651789682 | 7.061510478 | 5.638203705 | 2.148583759 |
| ENSMUSG0000092300 | 14.85648888 | 4.173703463 | 7.061510478 | 4.02728836  | 5.729556691 |
| ENSMUSG0000092301 | 9.196874066 | 6.260555194 | 8.473812573 | 5.638203705 | 6.445751277 |
| ENSMUSG0000092302 | 8.489422215 | 7.651789682 | 6.35535943  | 6.443661377 | 6.445751277 |
| ENSMUSG0000092303 | 9.196874066 | 9.738641413 | 12.00456781 | 7.249119049 | 2.148583759 |
| ENSMUSG0000092304 | 7.781970364 | 5.56493795  | 7.061510478 | 4.832746033 | 5.013362104 |
| ENSMUSG0000092306 | 5.65961481  | 4.173703463 | 4.943057334 | 6.443661377 | 3.580972932 |
| ENSMUSG0000092307 | 7.781970364 | 9.738641413 | 5.649208382 | 4.02728836  | 8.594335036 |
| ENSMUSG0000092308 | 11.31922962 | 9.738641413 | 9.179963621 | 4.832746033 | 7.87814045  |
| ENSMUSG0000092309 | 8.489422215 | 12.52111039 | 6.35535943  | 2.416373016 | 5.729556691 |
| ENSMUSG0000092311 | 11.31922962 | 9.043024169 | 11.29841676 | 4.832746033 | 8.594335036 |
| ENSMUSG0000092312 | 16.27139258 | 11.82549314 | 14.12302096 | 8.054576721 | 9.310529622 |
| ENSMUSG0000092313 | 5.65961481  | 8.347406925 | 4.943057334 | 4.832746033 | 6.445751277 |
| ENSMUSG0000092314 | 12.73413332 | 14.60796212 | 7.061510478 | 7.249119049 | 3.580972932 |
| ENSMUSG0000092316 | 9.196874066 | 7.651789682 | 7.061510478 | 5.638203705 | 5.013362104 |
| ENSMUSG0000092317 | 10.61177777 | 6.956172438 | 6.35535943  | 8.054576721 | 5.013362104 |
| ENSMUSG0000092318 | 8.489422215 | 4.869320706 | 12.71071886 | 4.832746033 | 2.864778345 |
| ENSMUSG0000092323 | 7.781970364 | 4.869320706 | 7.767661525 | 6.443661377 | 7.87814045  |
| ENSMUSG0000092325 | 8.489422215 | 13.91234488 | 11.29841676 | 17.72006879 | 23.63442135 |
| ENSMUSG0000092326 | 6.367066661 | 11.82549314 | 11.29841676 | 6.443661377 | 10.02672421 |
| ENSMUSG0000092327 | 2.829807405 | 0           | 2.118453143 | 1.610915344 | 0           |
| ENSMUSG0000092328 | 9.904325918 | 8.347406925 | 8.473812573 | 4.832746033 | 6.445751277 |

|                   |             |             |             |             |             |
|-------------------|-------------|-------------|-------------|-------------|-------------|
| ENSMUSG0000092330 | 8.489422215 | 7.651789682 | 5.649208382 | 5.638203705 | 7.87814045  |
| ENSMUSG0000092331 | 10.61177777 | 9.043024169 | 5.649208382 | 8.054576721 | 4.297167518 |
| ENSMUSG0000092332 | 8.489422215 | 7.651789682 | 4.943057334 | 4.832746033 | 8.594335036 |
| ENSMUSG0000092336 | 8.489422215 | 5.56493795  | 8.473812573 | 3.221830688 | 6.445751277 |
| ENSMUSG0000092338 | 0           | 0           | 0           | 0           | 0           |
| ENSMUSG0000092339 | 7.781970364 | 9.043024169 | 6.35535943  | 8.860034393 | 6.445751277 |
| ENSMUSG0000092340 | 7.781970364 | 9.738641413 | 12.00456781 | 8.054576721 | 10.7429188  |
| ENSMUSG0000092341 | 96.21345177 | 107.8206728 | 87.56272992 | 207.8080794 | 144.6713064 |
| ENSMUSG0000092343 | 4.952162959 | 0           | 1.412302096 | 2.416373016 | 0           |
| ENSMUSG0000092344 | 28.29807405 | 31.99839321 | 38.83830763 | 23.35827249 | 23.63442135 |
| ENSMUSG0000092346 | 11.31922962 | 5.56493795  | 4.943057334 | 4.832746033 | 3.580972932 |
| ENSMUSG0000092349 | 19.80865184 | 29.21592424 | 21.89068248 | 16.91461111 | 27.21539428 |
| ENSMUSG0000092350 | 11.31922962 | 6.260555194 | 7.767661525 | 8.860034393 | 5.729556691 |
| ENSMUSG0000092351 | 10.61177777 | 9.043024169 | 7.061510478 | 4.832746033 | 10.7429188  |
| ENSMUSG0000092352 | 9.196874066 | 5.56493795  | 10.59226572 | 4.02728836  | 6.445751277 |
| ENSMUSG0000092353 | 4.952162959 | 5.56493795  | 11.29841676 | 4.02728836  | 3.580972932 |
| ENSMUSG0000092354 | 10.61177777 | 5.56493795  | 7.061510478 | 4.832746033 | 9.310529622 |
| ENSMUSG0000092355 | 14.85648888 | 10.43425866 | 8.473812573 | 6.443661377 | 7.161945863 |
| ENSMUSG0000092357 | 7.074518513 | 6.956172438 | 6.35535943  | 5.638203705 | 7.161945863 |
| ENSMUSG0000092358 | 1.414903703 | 1.391234488 | 1.412302096 | 1.610915344 | 0           |
| ENSMUSG0000092359 | 7.074518513 | 4.869320706 | 13.41686991 | 9.665492065 | 7.161945863 |
| ENSMUSG0000092360 | 0.707451851 | 0           | 0           | 0.805457672 | 1.432389173 |
| ENSMUSG0000092361 | 11.31922962 | 5.56493795  | 10.59226572 | 6.443661377 | 7.161945863 |
| ENSMUSG0000092362 | 7.074518513 | 4.173703463 | 11.29841676 | 5.638203705 | 4.297167518 |
| ENSMUSG0000092363 | 7.781970364 | 9.738641413 | 5.649208382 | 6.443661377 | 6.445751277 |
| ENSMUSG0000092364 | 21.22355554 | 29.21592424 | 30.36449505 | 19.33098413 | 16.47247549 |
| ENSMUSG0000092365 | 17.68629628 | 25.73783802 | 28.24604191 | 37.85651059 | 26.49919969 |
| ENSMUSG0000092366 | 4.952162959 | 5.56493795  | 7.061510478 | 3.221830688 | 6.445751277 |
| ENSMUSG0000092367 | 1.414903703 | 3.478086219 | 6.35535943  | 2.416373016 | 0.716194586 |
| ENSMUSG0000092368 | 94.09109622 | 130.0804246 | 111.5718655 | 137.7332619 | 105.2806042 |
| ENSMUSG0000092369 | 5.65961481  | 4.173703463 | 7.767661525 | 2.416373016 | 9.310529622 |
| ENSMUSG0000092370 | 8.489422215 | 9.738641413 | 6.35535943  | 5.638203705 | 7.161945863 |
| ENSMUSG0000092371 | 20.51610369 | 27.82468975 | 31.77679715 | 20.94189947 | 18.62105924 |
| ENSMUSG0000092372 | 8.489422215 | 9.043024169 | 6.35535943  | 4.02728836  | 4.297167518 |
| ENSMUSG0000092373 | 12.73413332 | 6.956172438 | 12.71071886 | 7.249119049 | 4.297167518 |
| ENSMUSG0000092374 | 5.65961481  | 10.43425866 | 16.94762515 | 8.054576721 | 8.594335036 |
| ENSMUSG0000092375 | 7.074518513 | 4.869320706 | 7.767661525 | 4.02728836  | 6.445751277 |
| ENSMUSG0000092376 | 13.44158517 | 6.260555194 | 9.179963621 | 7.249119049 | 9.310529622 |
| ENSMUSG0000092377 | 8.489422215 | 13.91234488 | 7.061510478 | 7.249119049 | 5.729556691 |
| ENSMUSG0000092381 | 29.0055259  | 41.04141738 | 24.00913562 | 138.5387196 | 105.9967988 |
| ENSMUSG0000092382 | 10.61177777 | 4.173703463 | 9.179963621 | 5.638203705 | 7.87814045  |
| ENSMUSG0000092383 | 8.489422215 | 18.78166558 | 18.35992724 | 9.665492065 | 8.594335036 |
| ENSMUSG0000092384 | 45.27691848 | 53.56252777 | 54.37363068 | 107.1258704 | 85.94335036 |



|                    |             |             |             |             |             |
|--------------------|-------------|-------------|-------------|-------------|-------------|
| ENSMUSG00000092385 | 10.61177777 | 4.869320706 | 7.061510478 | 2.416373016 | 8.594335036 |
| ENSMUSG00000092386 | 19.10119998 | 46.60635533 | 42.36906287 | 37.05105292 | 35.80972932 |
| ENSMUSG00000092387 | 7.074518513 | 6.260555194 | 8.473812573 | 7.249119049 | 5.729556691 |
| ENSMUSG00000092388 | 11.31922962 | 8.347406925 | 8.473812573 | 4.02728836  | 12.17530797 |
| ENSMUSG00000092389 | 6.367066661 | 2.782468975 | 3.530755239 | 3.221830688 | 5.013362104 |
| ENSMUSG00000092390 | 9.904325918 | 8.347406925 | 10.59226572 | 8.054576721 | 5.013362104 |
| ENSMUSG00000092392 | 11.31922962 | 11.1298759  | 8.473812573 | 7.249119049 | 7.161945863 |
| ENSMUSG00000092393 | 5.65961481  | 11.1298759  | 7.767661525 | 3.221830688 | 6.445751277 |
| ENSMUSG00000092394 | 7.074518513 | 7.651789682 | 4.943057334 | 7.249119049 | 6.445751277 |
| ENSMUSG00000092395 | 12.73413332 | 25.73783802 | 17.65377619 | 15.30369577 | 21.48583759 |
| ENSMUSG00000092396 | 4.244711108 | 4.869320706 | 7.061510478 | 9.665492065 | 9.310529622 |
| ENSMUSG00000092397 | 8.489422215 | 4.173703463 | 7.767661525 | 6.443661377 | 7.87814045  |
| ENSMUSG00000092398 | 7.781970364 | 6.260555194 | 9.886114669 | 2.416373016 | 5.729556691 |
| ENSMUSG00000092399 | 9.904325918 | 11.82549314 | 8.473812573 | 41.88379895 | 17.18867007 |
| ENSMUSG00000092400 | 5.65961481  | 5.56493795  | 14.12302096 | 5.638203705 | 1.432389173 |
| ENSMUSG00000092401 | 9.904325918 | 6.956172438 | 9.179963621 | 3.221830688 | 5.729556691 |
| ENSMUSG00000092402 | 8.489422215 | 11.82549314 | 5.649208382 | 7.249119049 | 3.580972932 |
| ENSMUSG00000092403 | 9.196874066 | 6.956172438 | 8.473812573 | 11.27640741 | 8.594335036 |
| ENSMUSG00000092404 | 8.489422215 | 4.869320706 | 8.473812573 | 5.638203705 | 4.297167518 |
| ENSMUSG00000092405 | 227.0920443 | 222.597518  | 230.2052416 | 264.1901164 | 201.2506788 |
| ENSMUSG00000092406 | 16.27139258 | 5.56493795  | 5.649208382 | 4.02728836  | 5.013362104 |
| ENSMUSG00000092408 | 9.904325918 | 8.347406925 | 10.59226572 | 7.249119049 | 6.445751277 |
| ENSMUSG00000092409 | 10.61177777 | 7.651789682 | 3.530755239 | 6.443661377 | 9.310529622 |
| ENSMUSG00000092410 | 10.61177777 | 6.956172438 | 7.767661525 | 3.221830688 | 5.729556691 |
| ENSMUSG00000092411 | 7.074518513 | 9.738641413 | 9.886114669 | 4.02728836  | 8.594335036 |
| ENSMUSG00000092412 | 4.952162959 | 5.56493795  | 10.59226572 | 8.054576721 | 5.729556691 |
| ENSMUSG00000092414 | 9.196874066 | 4.869320706 | 9.886114669 | 4.832746033 | 8.594335036 |
| ENSMUSG00000092415 | 158.4692147 | 180.1648661 | 161.0024389 | 362.4559524 | 243.5061594 |
| ENSMUSG00000092418 | 10.61177777 | 17.39043109 | 20.47838039 | 31.41284921 | 22.91822676 |
| ENSMUSG00000092419 | 4.952162959 | 6.956172438 | 7.061510478 | 2.416373016 | 5.729556691 |
| ENSMUSG00000092422 | 12.02668147 | 8.347406925 | 5.649208382 | 2.416373016 | 7.161945863 |
| ENSMUSG00000092425 | 7.074518513 | 5.56493795  | 5.649208382 | 5.638203705 | 5.013362104 |
| ENSMUSG00000092426 | 12.02668147 | 6.260555194 | 8.473812573 | 4.02728836  | 5.013362104 |
| ENSMUSG00000092427 | 8.489422215 | 11.1298759  | 8.473812573 | 7.249119049 | 5.729556691 |
| ENSMUSG00000092428 | 4.244711108 | 8.347406925 | 7.061510478 | 2.416373016 | 8.594335036 |
| ENSMUSG00000092429 | 9.904325918 | 8.347406925 | 8.473812573 | 8.054576721 | 10.02672421 |
| ENSMUSG00000092431 | 7.074518513 | 6.260555194 | 7.061510478 | 3.221830688 | 5.013362104 |
| ENSMUSG00000092433 | 3.537259256 | 9.043024169 | 8.473812573 | 2.416373016 | 0           |
| ENSMUSG00000092435 | 0.707451851 | 1.391234488 | 0.706151048 | 0.805457672 | 1.432389173 |
| ENSMUSG00000092437 | 9.196874066 | 4.869320706 | 8.473812573 | 2.416373016 | 6.445751277 |
| ENSMUSG00000092438 | 8.489422215 | 7.651789682 | 5.649208382 | 9.665492065 | 3.580972932 |
| ENSMUSG00000092439 | 11.31922962 | 12.52111039 | 9.179963621 | 3.221830688 | 6.445751277 |
| ENSMUSG00000092440 | 10.61177777 | 9.043024169 | 4.943057334 | 3.221830688 | 6.445751277 |

|                    |             |             |             |             |             |
|--------------------|-------------|-------------|-------------|-------------|-------------|
| ENSMUSG00000092441 | 12.73413332 | 16.69481385 | 14.12302096 | 8.054576721 | 5.013362104 |
| ENSMUSG00000092444 | 12.02668147 | 7.651789682 | 12.00456781 | 11.27640741 | 8.594335036 |
| ENSMUSG00000092447 | 16.27139258 | 9.043024169 | 14.12302096 | 5.638203705 | 12.17530797 |
| ENSMUSG00000092448 | 9.904325918 | 5.56493795  | 11.29841676 | 3.221830688 | 7.87814045  |
| ENSMUSG00000092450 | 6.367066661 | 7.651789682 | 9.179963621 | 10.47094974 | 7.87814045  |
| ENSMUSG00000092451 | 10.61177777 | 5.56493795  | 6.35535943  | 2.416373016 | 7.161945863 |
| ENSMUSG00000092452 | 9.904325918 | 1.391234488 | 5.649208382 | 6.443661377 | 5.729556691 |
| ENSMUSG00000092454 | 9.196874066 | 8.347406925 | 7.767661525 | 1.610915344 | 7.161945863 |
| ENSMUSG00000092455 | 335.3321775 | 376.3289289 | 302.2326484 | 415.6161588 | 279.3158887 |
| ENSMUSG00000092457 | 11.31922962 | 9.043024169 | 11.29841676 | 7.249119049 | 7.87814045  |
| ENSMUSG00000092458 | 7.781970364 | 4.869320706 | 11.29841676 | 2.416373016 | 7.161945863 |
| ENSMUSG00000092459 | 12.73413332 | 6.260555194 | 2.824604191 | 8.054576721 | 7.87814045  |
| ENSMUSG00000092460 | 9.196874066 | 5.56493795  | 7.767661525 | 8.860034393 | 6.445751277 |
| ENSMUSG00000092461 | 6.367066661 | 7.651789682 | 4.236906287 | 3.221830688 | 10.02672421 |
| ENSMUSG00000092462 | 11.31922962 | 7.651789682 | 4.236906287 | 4.832746033 | 3.580972932 |
| ENSMUSG00000092463 | 1.414903703 | 3.478086219 | 2.824604191 | 3.221830688 | 2.864778345 |
| ENSMUSG00000092464 | 13.44158517 | 8.347406925 | 6.35535943  | 4.02728836  | 7.87814045  |
| ENSMUSG00000092465 | 7.781970364 | 4.173703463 | 9.886114669 | 7.249119049 | 9.310529622 |
| ENSMUSG00000092466 | 5.65961481  | 2.782468975 | 3.530755239 | 1.610915344 | 1.432389173 |
| ENSMUSG00000092467 | 7.781970364 | 6.956172438 | 7.767661525 | 4.02728836  | 5.013362104 |
| ENSMUSG00000092468 | 14.14903703 | 8.347406925 | 9.886114669 | 4.02728836  | 4.297167518 |
| ENSMUSG00000092469 | 6.367066661 | 7.651789682 | 6.35535943  | 3.221830688 | 5.729556691 |
| ENSMUSG00000092471 | 6.367066661 | 6.956172438 | 6.35535943  | 7.249119049 | 9.310529622 |
| ENSMUSG00000092472 | 8.489422215 | 5.56493795  | 8.473812573 | 6.443661377 | 9.310529622 |
| ENSMUSG00000092474 | 6.367066661 | 6.956172438 | 6.35535943  | 12.88732275 | 8.594335036 |
| ENSMUSG00000092476 | 8.489422215 | 10.43425866 | 8.473812573 | 4.02728836  | 5.013362104 |
| ENSMUSG00000092477 | 9.904325918 | 6.260555194 | 4.236906287 | 9.665492065 | 11.45911338 |
| ENSMUSG00000092480 | 4.244711108 | 9.738641413 | 12.00456781 | 8.860034393 | 10.02672421 |
| ENSMUSG00000092482 | 214.3579109 | 187.1210386 | 204.7838039 | 362.4559524 | 233.4794351 |
| ENSMUSG00000092483 | 37.49494812 | 49.38882431 | 67.08434954 | 82.15668255 | 68.0384857  |
| ENSMUSG00000092485 | 10.61177777 | 2.782468975 | 4.236906287 | 5.638203705 | 9.310529622 |
| ENSMUSG00000092487 | 11.31922962 | 2.782468975 | 9.886114669 | 10.47094974 | 3.580972932 |
| ENSMUSG00000092488 | 9.904325918 | 7.651789682 | 8.473812573 | 8.860034393 | 9.310529622 |
| ENSMUSG00000092489 | 7.074518513 | 11.1298759  | 9.886114669 | 2.416373016 | 5.729556691 |
| ENSMUSG00000092490 | 9.904325918 | 11.1298759  | 12.00456781 | 4.832746033 | 7.87814045  |
| ENSMUSG00000092492 | 6.367066661 | 6.260555194 | 7.061510478 | 3.221830688 | 4.297167518 |
| ENSMUSG00000092493 | 5.65961481  | 9.043024169 | 9.179963621 | 10.47094974 | 2.864778345 |
| ENSMUSG00000092494 | 8.489422215 | 15.30357936 | 13.41686991 | 12.08186508 | 11.45911338 |
| ENSMUSG00000092495 | 10.61177777 | 6.956172438 | 11.29841676 | 6.443661377 | 3.580972932 |
| ENSMUSG00000092496 | 8.489422215 | 8.347406925 | 6.35535943  | 4.02728836  | 6.445751277 |
| ENSMUSG00000092499 | 8.489422215 | 5.56493795  | 7.767661525 | 3.221830688 | 3.580972932 |
| ENSMUSG00000092500 | 6.367066661 | 8.347406925 | 9.179963621 | 7.249119049 | 2.864778345 |
| ENSMUSG00000092502 | 8.489422215 | 4.869320706 | 8.473812573 | 11.27640741 | 5.013362104 |

|                   |             |             |             |             |             |
|-------------------|-------------|-------------|-------------|-------------|-------------|
| ENSMUSG0000092503 | 4.244711108 | 12.52111039 | 4.943057334 | 2.416373016 | 7.87814045  |
| ENSMUSG0000092504 | 6.367066661 | 12.52111039 | 14.829172   | 5.638203705 | 8.594335036 |
| ENSMUSG0000092505 | 19.80865184 | 17.39043109 | 19.06607829 | 9.665492065 | 12.17530797 |
| ENSMUSG0000092506 | 10.61177777 | 4.173703463 | 0.706151048 | 5.638203705 | 2.864778345 |
| ENSMUSG0000092507 | 6.367066661 | 4.869320706 | 11.29841676 | 9.665492065 | 2.148583759 |
| ENSMUSG0000092508 | 12.02668147 | 6.956172438 | 4.943057334 | 5.638203705 | 5.729556691 |
| ENSMUSG0000092509 | 9.904325918 | 8.347406925 | 9.179963621 | 11.27640741 | 7.161945863 |
| ENSMUSG0000092510 | 155.6394073 | 214.9457283 | 166.6516473 | 101.4876667 | 108.1453825 |
| ENSMUSG0000092512 | 3.537259256 | 18.78166558 | 13.41686991 | 4.02728836  | 10.7429188  |
| ENSMUSG0000092513 | 7.781970364 | 4.173703463 | 6.35535943  | 2.416373016 | 2.864778345 |
| ENSMUSG0000092514 | 10.61177777 | 11.1298759  | 8.473812573 | 4.832746033 | 7.87814045  |
| ENSMUSG0000092515 | 11.31922962 | 4.869320706 | 11.29841676 | 3.221830688 | 5.729556691 |
| ENSMUSG0000092516 | 12.02668147 | 6.956172438 | 6.35535943  | 4.832746033 | 3.580972932 |
| ENSMUSG0000092520 | 8.489422215 | 2.086851731 | 6.35535943  | 8.860034393 | 5.013362104 |
| ENSMUSG0000092521 | 9.196874066 | 5.56493795  | 11.29841676 | 8.054576721 | 4.297167518 |
| ENSMUSG0000092522 | 9.196874066 | 9.043024169 | 7.767661525 | 4.02728836  | 2.864778345 |
| ENSMUSG0000092523 | 9.196874066 | 4.173703463 | 11.29841676 | 5.638203705 | 6.445751277 |
| ENSMUSG0000092524 | 8.489422215 | 10.43425866 | 9.179963621 | 4.02728836  | 8.594335036 |
| ENSMUSG0000092525 | 8.489422215 | 11.1298759  | 10.59226572 | 8.860034393 | 13.60769714 |
| ENSMUSG0000092526 | 12.02668147 | 12.52111039 | 11.29841676 | 6.443661377 | 8.594335036 |
| ENSMUSG0000092528 | 7.781970364 | 3.478086219 | 9.179963621 | 3.221830688 | 3.580972932 |
| ENSMUSG0000092529 | 6.367066661 | 9.043024169 | 9.886114669 | 1.610915344 | 6.445751277 |
| ENSMUSG0000092530 | 8.489422215 | 11.1298759  | 7.767661525 | 4.02728836  | 3.580972932 |
| ENSMUSG0000092532 | 9.904325918 | 8.347406925 | 9.886114669 | 5.638203705 | 8.594335036 |
| ENSMUSG0000092533 | 7.781970364 | 8.347406925 | 7.767661525 | 5.638203705 | 3.580972932 |
| ENSMUSG0000092534 | 7.781970364 | 12.52111039 | 14.829172   | 8.860034393 | 17.90486466 |
| ENSMUSG0000092535 | 11.31922962 | 4.869320706 | 6.35535943  | 3.221830688 | 5.729556691 |
| ENSMUSG0000092536 | 11.31922962 | 6.260555194 | 8.473812573 | 5.638203705 | 7.87814045  |
| ENSMUSG0000092538 | 9.196874066 | 6.956172438 | 6.35535943  | 4.02728836  | 11.45911338 |
| ENSMUSG0000092539 | 8.489422215 | 9.043024169 | 2.824604191 | 9.665492065 | 7.161945863 |
| ENSMUSG0000092540 | 14.14903703 | 18.08604834 | 17.65377619 | 8.860034393 | 16.47247549 |
| ENSMUSG0000092541 | 30.4204296  | 70.95295887 | 46.60596915 | 111.1531587 | 82.36237743 |
| ENSMUSG0000092542 | 5.65961481  | 6.260555194 | 9.886114669 | 7.249119049 | 9.310529622 |
| ENSMUSG0000092543 | 0           | 1.391234488 | 0.706151048 | 0.805457672 | 0.716194586 |
| ENSMUSG0000092545 | 6.367066661 | 8.347406925 | 6.35535943  | 9.665492065 | 8.594335036 |
| ENSMUSG0000092547 | 15.56394073 | 5.56493795  | 7.767661525 | 5.638203705 | 5.729556691 |
| ENSMUSG0000092548 | 10.61177777 | 8.347406925 | 12.00456781 | 7.249119049 | 5.729556691 |
| ENSMUSG0000092549 | 4.952162959 | 11.1298759  | 11.29841676 | 4.832746033 | 6.445751277 |
| ENSMUSG0000092550 | 71.45263698 | 126.6023384 | 107.3349593 | 243.248217  | 153.2656415 |
| ENSMUSG0000092551 | 8.489422215 | 6.260555194 | 7.061510478 | 4.02728836  | 5.013362104 |
| ENSMUSG0000092552 | 5.65961481  | 7.651789682 | 4.943057334 | 4.02728836  | 5.729556691 |
| ENSMUSG0000092553 | 9.196874066 | 3.478086219 | 4.943057334 | 4.832746033 | 9.310529622 |
| ENSMUSG0000092554 | 9.196874066 | 9.043024169 | 7.061510478 | 9.665492065 | 7.87814045  |

|                    |             |             |             |             |             |
|--------------------|-------------|-------------|-------------|-------------|-------------|
| ENSMUSG00000092555 | 7.074518513 | 6.260555194 | 7.767661525 | 6.443661377 | 7.87814045  |
| ENSMUSG00000092556 | 16.97884443 | 18.08604834 | 24.71528667 | 33.02376456 | 35.09353473 |
| ENSMUSG00000092557 | 2.829807405 | 5.56493795  | 8.473812573 | 3.221830688 | 9.310529622 |
| ENSMUSG00000092559 | 9.196874066 | 6.956172438 | 8.473812573 | 1.610915344 | 9.310529622 |
| ENSMUSG00000092560 | 16.97884443 | 15.30357936 | 12.71071886 | 18.52552646 | 17.90486466 |
| ENSMUSG00000092561 | 12.73413332 | 7.651789682 | 9.886114669 | 4.832746033 | 7.161945863 |
| ENSMUSG00000092562 | 9.904325918 | 11.1298759  | 7.061510478 | 3.221830688 | 10.02672421 |
| ENSMUSG00000092563 | 12.73413332 | 9.738641413 | 7.767661525 | 3.221830688 | 5.729556691 |
| ENSMUSG00000092564 | 37.49494812 | 47.99758982 | 52.25517753 | 124.8459392 | 93.82149081 |
| ENSMUSG00000092565 | 9.196874066 | 7.651789682 | 9.179963621 | 9.665492065 | 4.297167518 |
| ENSMUSG00000092566 | 9.904325918 | 12.52111039 | 8.473812573 | 8.860034393 | 8.594335036 |
| ENSMUSG00000092567 | 9.196874066 | 9.043024169 | 7.061510478 | 1.610915344 | 3.580972932 |
| ENSMUSG00000092568 | 9.904325918 | 11.82549314 | 9.179963621 | 6.443661377 | 7.161945863 |
| ENSMUSG00000092569 | 33.25023701 | 47.99758982 | 48.7244223  | 91.01671695 | 83.7947666  |
| ENSMUSG00000092570 | 7.074518513 | 11.82549314 | 7.767661525 | 5.638203705 | 13.60769714 |
| ENSMUSG00000092571 | 9.196874066 | 9.738641413 | 9.886114669 | 5.638203705 | 8.594335036 |
| ENSMUSG00000092573 | 17.68629628 | 13.91234488 | 10.59226572 | 7.249119049 | 15.04008631 |
| ENSMUSG00000092574 | 12.02668147 | 7.651789682 | 8.473812573 | 8.860034393 | 11.45911338 |
| ENSMUSG00000092575 | 9.196874066 | 8.347406925 | 8.473812573 | 7.249119049 | 7.87814045  |
| ENSMUSG00000092576 | 5.65961481  | 6.260555194 | 7.767661525 | 6.443661377 | 7.161945863 |
| ENSMUSG00000092577 | 14.85648888 | 9.043024169 | 9.179963621 | 12.88732275 | 7.161945863 |
| ENSMUSG00000092578 | 7.074518513 | 5.56493795  | 7.767661525 | 5.638203705 | 5.729556691 |
| ENSMUSG00000092580 | 4.244711108 | 6.956172438 | 7.767661525 | 7.249119049 | 7.161945863 |
| ENSMUSG00000092581 | 9.196874066 | 6.260555194 | 10.59226572 | 7.249119049 | 6.445751277 |
| ENSMUSG00000092583 | 12.02668147 | 12.52111039 | 6.35535943  | 7.249119049 | 3.580972932 |
| ENSMUSG00000092584 | 7.074518513 | 4.173703463 | 4.236906287 | 0           | 5.729556691 |
| ENSMUSG00000092587 | 5.65961481  | 6.260555194 | 2.824604191 | 3.221830688 | 1.432389173 |
| ENSMUSG00000092588 | 9.196874066 | 8.347406925 | 9.179963621 | 4.02728836  | 9.310529622 |
| ENSMUSG00000092591 | 7.781970364 | 20.86851731 | 4.943057334 | 4.832746033 | 6.445751277 |
| ENSMUSG00000092593 | 11.31922962 | 18.08604834 | 16.94762515 | 45.10562964 | 39.39070225 |
| ENSMUSG00000092595 | 0           | 0           | 0           | 0           | 0           |
| ENSMUSG00000092596 | 257.5124739 | 228.162456  | 225.9683353 | 380.9814789 | 293.6397804 |
| ENSMUSG00000092597 | 6.367066661 | 5.56493795  | 9.886114669 | 9.665492065 | 2.864778345 |
| ENSMUSG00000092599 | 7.074518513 | 6.956172438 | 9.179963621 | 1.610915344 | 6.445751277 |
| ENSMUSG00000092600 | 11.31922962 | 6.260555194 | 11.29841676 | 6.443661377 | 7.161945863 |
| ENSMUSG00000092601 | 9.904325918 | 6.260555194 | 7.061510478 | 4.02728836  | 5.729556691 |
| ENSMUSG00000092602 | 8.489422215 | 5.56493795  | 8.473812573 | 8.054576721 | 8.594335036 |
| ENSMUSG00000092603 | 9.904325918 | 8.347406925 | 5.649208382 | 7.249119049 | 12.17530797 |
| ENSMUSG00000092604 | 4.952162959 | 4.869320706 | 5.649208382 | 6.443661377 | 7.161945863 |
| ENSMUSG00000092606 | 8.489422215 | 6.260555194 | 7.061510478 | 8.054576721 | 8.594335036 |
| ENSMUSG00000092608 | 9.196874066 | 6.956172438 | 7.767661525 | 4.02728836  | 4.297167518 |
| ENSMUSG00000092610 | 7.781970364 | 3.478086219 | 8.473812573 | 6.443661377 | 8.594335036 |
| ENSMUSG00000092611 | 13.44158517 | 9.738641413 | 14.12302096 | 9.665492065 | 7.161945863 |

|                   |             |             |             |             |             |
|-------------------|-------------|-------------|-------------|-------------|-------------|
| ENSMUSG0000092612 | 16.27139258 | 11.82549314 | 14.12302096 | 14.4982381  | 17.90486466 |
| ENSMUSG0000092614 | 15.56394073 | 9.738641413 | 9.179963621 | 5.638203705 | 6.445751277 |
| ENSMUSG0000092615 | 4.952162959 | 8.347406925 | 5.649208382 | 7.249119049 | 8.594335036 |
| ENSMUSG0000092616 | 7.781970364 | 7.651789682 | 4.236906287 | 8.860034393 | 1.432389173 |
| ENSMUSG0000092617 | 9.904325918 | 18.78166558 | 12.71071886 | 5.638203705 | 17.18867007 |
| ENSMUSG0000092618 | 10.61177777 | 11.1298759  | 10.59226572 | 5.638203705 | 5.729556691 |
| ENSMUSG0000092619 | 9.904325918 | 4.173703463 | 3.530755239 | 6.443661377 | 4.297167518 |
| ENSMUSG0000092620 | 17.68629628 | 10.43425866 | 10.59226572 | 5.638203705 | 3.580972932 |
| ENSMUSG0000092621 | 13.44158517 | 7.651789682 | 6.35535943  | 8.860034393 | 7.161945863 |
| ENSMUSG0000092623 | 7.074518513 | 5.56493795  | 7.767661525 | 1.610915344 | 10.02672421 |
| ENSMUSG0000092624 | 7.781970364 | 7.651789682 | 9.179963621 | 6.443661377 | 5.013362104 |
| ENSMUSG0000092625 | 19.10119998 | 26.43345526 | 33.89525029 | 23.35827249 | 22.91822676 |
| ENSMUSG0000092626 | 174.7406073 | 197.5552972 | 179.3623661 | 275.4665239 | 204.8316517 |
| ENSMUSG0000092627 | 11.31922962 | 5.56493795  | 8.473812573 | 6.443661377 | 5.729556691 |
| ENSMUSG0000092628 | 6.367066661 | 8.347406925 | 5.649208382 | 4.832746033 | 3.580972932 |
| ENSMUSG0000092629 | 9.196874066 | 4.173703463 | 4.943057334 | 8.054576721 | 3.580972932 |
| ENSMUSG0000092631 | 6.367066661 | 10.43425866 | 7.061510478 | 5.638203705 | 5.013362104 |
| ENSMUSG0000092633 | 6.367066661 | 7.651789682 | 9.179963621 | 4.832746033 | 5.729556691 |
| ENSMUSG0000092636 | 6.367066661 | 11.82549314 | 8.473812573 | 5.638203705 | 7.87814045  |
| ENSMUSG0000092638 | 7.781970364 | 3.478086219 | 4.943057334 | 5.638203705 | 3.580972932 |
| ENSMUSG0000092639 | 9.196874066 | 9.043024169 | 9.886114669 | 1.610915344 | 6.445751277 |
| ENSMUSG0000092641 | 9.904325918 | 9.043024169 | 4.943057334 | 4.832746033 | 3.580972932 |
| ENSMUSG0000092643 | 7.781970364 | 6.260555194 | 7.767661525 | 4.02728836  | 5.729556691 |
| ENSMUSG0000092644 | 5.65961481  | 5.56493795  | 7.061510478 | 8.054576721 | 11.45911338 |
| ENSMUSG0000092647 | 2.122355554 | 1.391234488 | 0.706151048 | 1.610915344 | 2.864778345 |
| ENSMUSG0000092648 | 156.3468591 | 185.0341868 | 161.0024389 | 130.4841429 | 129.6312201 |
| ENSMUSG0000092650 | 0.707451851 | 0           | 2.118453143 | 1.610915344 | 2.148583759 |
| ENSMUSG0000092652 | 9.904325918 | 5.56493795  | 4.236906287 | 6.443661377 | 5.729556691 |
| ENSMUSG0000092653 | 7.074518513 | 8.347406925 | 7.061510478 | 2.416373016 | 6.445751277 |
| ENSMUSG0000092655 | 72.16008883 | 114.7768452 | 98.86114669 | 143.3714656 | 108.8615771 |
| ENSMUSG0000092656 | 2.829807405 | 1.391234488 | 1.412302096 | 0.805457672 | 0.716194586 |
| ENSMUSG0000092657 | 12.02668147 | 9.043024169 | 9.179963621 | 8.860034393 | 8.594335036 |
| ENSMUSG0000092659 | 5.65961481  | 4.173703463 | 5.649208382 | 5.638203705 | 5.013362104 |
| ENSMUSG0000092660 | 26.1757185  | 36.86771392 | 35.30755239 | 40.2728836  | 33.66114556 |
| ENSMUSG0000092661 | 9.196874066 | 5.56493795  | 5.649208382 | 4.832746033 | 2.864778345 |
| ENSMUSG0000092664 | 13.44158517 | 2.086851731 | 7.061510478 | 2.416373016 | 11.45911338 |
| ENSMUSG0000092666 | 11.31922962 | 5.56493795  | 3.530755239 | 4.02728836  | 8.594335036 |
| ENSMUSG0000092668 | 5.65961481  | 13.21672763 | 4.943057334 | 7.249119049 | 10.02672421 |
| ENSMUSG0000092671 | 10.61177777 | 21.56413456 | 14.829172   | 29.80193387 | 35.80972932 |
| ENSMUSG0000092673 | 9.196874066 | 7.651789682 | 7.767661525 | 4.02728836  | 6.445751277 |
| ENSMUSG0000092674 | 2.122355554 | 0           | 1.412302096 | 0           | 0.716194586 |
| ENSMUSG0000092675 | 1.414903703 | 0           | 1.412302096 | 0.805457672 | 2.148583759 |
| ENSMUSG0000092676 | 8.489422215 | 10.43425866 | 9.886114669 | 4.832746033 | 5.729556691 |

|                    |             |             |             |             |             |
|--------------------|-------------|-------------|-------------|-------------|-------------|
| ENSMUSG00000092677 | 24.76081479 | 31.30277597 | 32.4829482  | 23.35827249 | 28.64778345 |
| ENSMUSG00000092679 | 71.45263698 | 81.38721752 | 84.03197468 | 87.79488626 | 67.32229112 |
| ENSMUSG00000092680 | 0           | 0           | 0           | 0           | 0           |
| ENSMUSG00000092683 | 0           | 0           | 0           | 0           | 0           |
| ENSMUSG00000092685 | 9.196874066 | 9.738641413 | 10.59226572 | 6.443661377 | 5.729556691 |
| ENSMUSG00000092686 | 2.122355554 | 1.391234488 | 4.943057334 | 7.249119049 | 5.729556691 |
| ENSMUSG00000092687 | 0           | 0           | 0           | 0           | 0           |
| ENSMUSG00000092693 | 26.1757185  | 42.43265187 | 37.42600553 | 49.132918   | 50.13362104 |
| ENSMUSG00000092695 | 14.14903703 | 9.738641413 | 5.649208382 | 12.08186508 | 12.17530797 |
| ENSMUSG00000092696 | 0           | 0           | 1.412302096 | 0.805457672 | 0           |
| ENSMUSG00000092697 | 0           | 0           | 0           | 0           | 0           |
| ENSMUSG00000092698 | 11.31922962 | 11.1298759  | 11.29841676 | 11.27640741 | 16.47247549 |
| ENSMUSG00000092701 | 6.367066661 | 6.956172438 | 11.29841676 | 9.665492065 | 7.87814045  |
| ENSMUSG00000092702 | 26.88317035 | 25.73783802 | 17.65377619 | 14.4982381  | 26.49919969 |
| ENSMUSG00000092704 | 7.074518513 | 6.956172438 | 5.649208382 | 6.443661377 | 4.297167518 |
| ENSMUSG00000092705 | 0.707451851 | 0           | 1.412302096 | 0.805457672 | 0           |
| ENSMUSG00000092706 | 14.14903703 | 9.043024169 | 9.179963621 | 3.221830688 | 5.013362104 |
| ENSMUSG00000092710 | 6.367066661 | 6.956172438 | 8.473812573 | 5.638203705 | 5.013362104 |
| ENSMUSG00000092713 | 4.244711108 | 11.82549314 | 9.179963621 | 16.10915344 | 8.594335036 |
| ENSMUSG00000092714 | 8.489422215 | 9.043024169 | 11.29841676 | 5.638203705 | 2.864778345 |
| ENSMUSG00000092715 | 4.952162959 | 2.086851731 | 3.530755239 | 3.221830688 | 7.87814045  |
| ENSMUSG00000092718 | 8.489422215 | 5.56493795  | 13.41686991 | 12.08186508 | 9.310529622 |
| ENSMUSG00000092719 | 8.489422215 | 11.1298759  | 7.767661525 | 6.443661377 | 5.013362104 |
| ENSMUSG00000092720 | 7.074518513 | 6.260555194 | 12.71071886 | 2.416373016 | 12.89150255 |
| ENSMUSG00000092723 | 0           | 0           | 1.412302096 | 1.610915344 | 0           |
| ENSMUSG00000092724 | 9.196874066 | 6.260555194 | 9.179963621 | 8.054576721 | 2.864778345 |
| ENSMUSG00000092725 | 99.04325918 | 141.2103005 | 131.3440949 | 109.5422434 | 96.68626916 |
| ENSMUSG00000092727 | 9.196874066 | 9.043024169 | 14.829172   | 15.30369577 | 15.04008631 |
| ENSMUSG00000092730 | 41.73965922 | 70.25734162 | 56.49208382 | 142.566008  | 103.1320204 |
| ENSMUSG00000092731 | 6.367066661 | 6.956172438 | 4.943057334 | 3.221830688 | 5.013362104 |
| ENSMUSG00000092732 | 9.196874066 | 5.56493795  | 7.767661525 | 10.47094974 | 3.580972932 |
| ENSMUSG00000092734 | 2.829807405 | 2.086851731 | 1.412302096 | 0.805457672 | 1.432389173 |
| ENSMUSG00000092737 | 0           | 0           | 0           | 0           | 0           |
| ENSMUSG00000092738 | 24.05336294 | 23.65098629 | 29.65834401 | 16.10915344 | 15.04008631 |
| ENSMUSG00000092741 | 11.31922962 | 9.043024169 | 9.886114669 | 6.443661377 | 17.90486466 |
| ENSMUSG00000092743 | 10.61177777 | 11.1298759  | 6.35535943  | 6.443661377 | 7.87814045  |
| ENSMUSG00000092745 | 0.707451851 | 2.086851731 | 1.412302096 | 2.416373016 | 3.580972932 |
| ENSMUSG00000092746 | 26.88317035 | 36.86771392 | 30.36449505 | 28.9964762  | 26.49919969 |
| ENSMUSG00000092747 | 0           | 0           | 0.706151048 | 0           | 0           |
| ENSMUSG00000092748 | 0           | 0           | 0           | 0           | 0           |
| ENSMUSG00000092751 | 14.14903703 | 11.82549314 | 13.41686991 | 8.860034393 | 10.02672421 |
| ENSMUSG00000092752 | 4.952162959 | 11.1298759  | 7.061510478 | 9.665492065 | 7.87814045  |
| ENSMUSG00000092753 | 41.73965922 | 36.86771392 | 38.13215658 | 18.52552646 | 18.62105924 |

|                    |             |             |             |             |             |
|--------------------|-------------|-------------|-------------|-------------|-------------|
| ENSMUSG00000092758 | 4.952162959 | 6.260555194 | 8.473812573 | 6.443661377 | 5.013362104 |
| ENSMUSG00000092759 | 12.73413332 | 6.260555194 | 11.29841676 | 5.638203705 | 9.310529622 |
| ENSMUSG00000092760 | 79.94205919 | 118.9505487 | 115.1026208 | 94.23854763 | 103.848215  |
| ENSMUSG00000092761 | 116.7295555 | 139.819066  | 170.1824025 | 160.2860767 | 133.9283876 |
| ENSMUSG00000092762 | 11.31922962 | 7.651789682 | 8.473812573 | 7.249119049 | 12.17530797 |
| ENSMUSG00000092763 | 0.707451851 | 2.782468975 | 2.118453143 | 0           | 0           |
| ENSMUSG00000092764 | 11.31922962 | 10.43425866 | 7.767661525 | 8.054576721 | 7.161945863 |
| ENSMUSG00000092765 | 0           | 0           | 0           | 0.805457672 | 0           |
| ENSMUSG00000092767 | 6.367066661 | 4.869320706 | 4.236906287 | 4.832746033 | 5.013362104 |
| ENSMUSG00000092770 | 8.489422215 | 7.651789682 | 7.061510478 | 3.221830688 | 7.161945863 |
| ENSMUSG00000092774 | 7.781970364 | 5.56493795  | 7.767661525 | 5.638203705 | 7.161945863 |
| ENSMUSG00000092776 | 7.781970364 | 10.43425866 | 4.943057334 | 5.638203705 | 6.445751277 |
| ENSMUSG00000092777 | 2.829807405 | 5.56493795  | 4.236906287 | 2.416373016 | 3.580972932 |
| ENSMUSG00000092778 | 9.196874066 | 9.738641413 | 9.179963621 | 10.47094974 | 10.7429188  |
| ENSMUSG00000092781 | 9.196874066 | 11.1298759  | 7.767661525 | 8.860034393 | 15.7562809  |
| ENSMUSG00000092784 | 11.31922962 | 12.52111039 | 9.179963621 | 13.69278043 | 15.04008631 |
| ENSMUSG00000092787 | 6.367066661 | 10.43425866 | 15.53532305 | 9.665492065 | 17.90486466 |
| ENSMUSG00000092790 | 12.02668147 | 10.43425866 | 7.061510478 | 8.860034393 | 4.297167518 |
| ENSMUSG00000092792 | 11.31922962 | 8.347406925 | 9.179963621 | 4.832746033 | 3.580972932 |
| ENSMUSG00000092793 | 0           | 0           | 0           | 0           | 0           |
| ENSMUSG00000092794 | 10.61177777 | 6.956172438 | 4.236906287 | 7.249119049 | 7.161945863 |
| ENSMUSG00000092795 | 9.196874066 | 7.651789682 | 14.829172   | 12.08186508 | 20.769643   |
| ENSMUSG00000092796 | 14.85648888 | 9.738641413 | 14.12302096 | 11.27640741 | 12.17530797 |
| ENSMUSG00000092799 | 9.196874066 | 6.956172438 | 5.649208382 | 8.860034393 | 5.729556691 |
| ENSMUSG00000092802 | 8.489422215 | 5.56493795  | 11.29841676 | 9.665492065 | 5.729556691 |
| ENSMUSG00000092805 | 63.67066661 | 75.82227957 | 75.55816211 | 68.46390213 | 66.60609653 |
| ENSMUSG00000092806 | 3.537259256 | 4.869320706 | 3.530755239 | 6.443661377 | 6.445751277 |
| ENSMUSG00000092807 | 0           | 0           | 0           | 0           | 0.716194586 |
| ENSMUSG00000092811 | 13.44158517 | 11.1298759  | 7.767661525 | 11.27640741 | 5.013362104 |
| ENSMUSG00000092812 | 0           | 2.782468975 | 0           | 1.610915344 | 1.432389173 |
| ENSMUSG00000092813 | 7.781970364 | 7.651789682 | 4.943057334 | 4.02728836  | 6.445751277 |
| ENSMUSG00000092814 | 62.96321476 | 88.34338996 | 83.32582364 | 53.96566403 | 58.72795608 |
| ENSMUSG00000092815 | 7.781970364 | 4.869320706 | 4.943057334 | 3.221830688 | 4.297167518 |
| ENSMUSG00000092816 | 12.73413332 | 12.52111039 | 9.179963621 | 5.638203705 | 8.594335036 |
| ENSMUSG00000092818 | 208.6982961 | 249.0309733 | 240.0913562 | 195.7262143 | 203.3992625 |
| ENSMUSG00000092819 | 1.414903703 | 0           | 1.412302096 | 2.416373016 | 1.432389173 |
| ENSMUSG00000092821 | 9.904325918 | 8.347406925 | 6.35535943  | 5.638203705 | 4.297167518 |
| ENSMUSG00000092822 | 11.31922962 | 9.043024169 | 9.179963621 | 4.02728836  | 6.445751277 |
| ENSMUSG00000092825 | 10.61177777 | 6.260555194 | 10.59226572 | 6.443661377 | 5.729556691 |
| ENSMUSG00000092826 | 9.904325918 | 9.043024169 | 4.943057334 | 2.416373016 | 7.87814045  |
| ENSMUSG00000092827 | 0.707451851 | 0.695617244 | 0           | 2.416373016 | 3.580972932 |
| ENSMUSG00000092829 | 9.904325918 | 8.347406925 | 9.179963621 | 3.221830688 | 2.864778345 |
| ENSMUSG00000092830 | 7.781970364 | 7.651789682 | 4.943057334 | 7.249119049 | 5.729556691 |

|                   |             |             |             |             |             |
|-------------------|-------------|-------------|-------------|-------------|-------------|
| ENSMUSG0000092832 | 7.781970364 | 8.347406925 | 2.118453143 | 10.47094974 | 12.89150255 |
| ENSMUSG0000092833 | 6.367066661 | 9.738641413 | 11.29841676 | 12.08186508 | 15.04008631 |
| ENSMUSG0000092834 | 6.367066661 | 8.347406925 | 8.473812573 | 2.416373016 | 2.148583759 |
| ENSMUSG0000092835 | 12.02668147 | 13.21672763 | 12.00456781 | 5.638203705 | 7.87814045  |
| ENSMUSG0000092837 | 19.10119998 | 33.3896277  | 38.13215658 | 58.79841006 | 40.82309142 |
| ENSMUSG0000092838 | 5.65961481  | 5.56493795  | 2.118453143 | 6.443661377 | 5.729556691 |
| ENSMUSG0000092840 | 5.65961481  | 5.56493795  | 8.473812573 | 10.47094974 | 3.580972932 |
| ENSMUSG0000092841 | 12.73413332 | 15.99919661 | 16.94762515 | 26.58010318 | 35.09353473 |
| ENSMUSG0000092842 | 11.31922962 | 6.260555194 | 6.35535943  | 8.054576721 | 6.445751277 |
| ENSMUSG0000092843 | 9.904325918 | 10.43425866 | 11.29841676 | 8.054576721 | 8.594335036 |
| ENSMUSG0000092845 | 5.65961481  | 9.043024169 | 13.41686991 | 12.08186508 | 21.48583759 |
| ENSMUSG0000092847 | 0           | 0           | 0           | 0           | 0           |
| ENSMUSG0000092848 | 0           | 0           | 0           | 0.805457672 | 0           |
| ENSMUSG0000092849 | 7.074518513 | 9.738641413 | 12.00456781 | 9.665492065 | 7.161945863 |
| ENSMUSG0000092850 | 0           | 0           | 0           | 0           | 0           |
| ENSMUSG0000092851 | 213.6504591 | 248.335356  | 237.266752  | 291.5756773 | 232.047046  |
| ENSMUSG0000092852 | 4.244711108 | 0.695617244 | 7.061510478 | 6.443661377 | 8.594335036 |
| ENSMUSG0000092853 | 9.904325918 | 7.651789682 | 4.943057334 | 10.47094974 | 7.161945863 |
| ENSMUSG0000092855 | 4.952162959 | 6.260555194 | 9.886114669 | 8.860034393 | 3.580972932 |
| ENSMUSG0000092856 | 8.489422215 | 7.651789682 | 5.649208382 | 8.860034393 | 7.161945863 |
| ENSMUSG0000092862 | 20.51610369 | 33.3896277  | 25.42143772 | 30.60739154 | 25.78300511 |
| ENSMUSG0000092866 | 14.85648888 | 6.956172438 | 7.061510478 | 8.860034393 | 7.87814045  |
| ENSMUSG0000092867 | 74.28244438 | 97.38641413 | 105.2165061 | 92.62763229 | 102.4158258 |
| ENSMUSG0000092868 | 9.904325918 | 20.86851731 | 20.47838039 | 21.74735715 | 12.89150255 |
| ENSMUSG0000092870 | 8.489422215 | 12.52111039 | 12.00456781 | 10.47094974 | 15.7562809  |
| ENSMUSG0000092871 | 10.61177777 | 9.738641413 | 7.061510478 | 4.02728836  | 10.02672421 |
| ENSMUSG0000092875 | 9.904325918 | 9.043024169 | 4.236906287 | 3.221830688 | 8.594335036 |
| ENSMUSG0000092876 | 8.489422215 | 4.869320706 | 9.179963621 | 7.249119049 | 10.02672421 |
| ENSMUSG0000092878 | 4.952162959 | 4.869320706 | 3.530755239 | 5.638203705 | 3.580972932 |
| ENSMUSG0000092879 | 3.537259256 | 3.478086219 | 1.412302096 | 2.416373016 | 2.148583759 |
| ENSMUSG0000092880 | 9.904325918 | 7.651789682 | 10.59226572 | 4.02728836  | 7.161945863 |
| ENSMUSG0000092885 | 175.4480591 | 247.6397388 | 186.4238766 | 405.1452091 | 320.1389801 |
| ENSMUSG0000092887 | 7.074518513 | 6.956172438 | 7.061510478 | 19.33098413 | 16.47247549 |
| ENSMUSG0000092888 | 9.196874066 | 8.347406925 | 7.767661525 | 5.638203705 | 5.729556691 |
| ENSMUSG0000092889 | 21.22355554 | 45.21512085 | 33.89525029 | 24.96918783 | 29.36397804 |
| ENSMUSG0000092891 | 7.074518513 | 6.956172438 | 7.061510478 | 9.665492065 | 10.02672421 |
| ENSMUSG0000092894 | 8.489422215 | 6.260555194 | 7.061510478 | 5.638203705 | 2.864778345 |
| ENSMUSG0000092896 | 7.781970364 | 10.43425866 | 8.473812573 | 7.249119049 | 8.594335036 |
| ENSMUSG0000092897 | 0           | 0           | 0           | 0.805457672 | 0           |
| ENSMUSG0000092898 | 4.952162959 | 6.260555194 | 3.530755239 | 4.02728836  | 5.729556691 |
| ENSMUSG0000092901 | 0           | 0           | 0           | 0           | 0           |
| ENSMUSG0000092902 | 27.5906222  | 38.25894841 | 36.01370344 | 30.60739154 | 35.09353473 |
| ENSMUSG0000092903 | 3.537259256 | 7.651789682 | 13.41686991 | 8.054576721 | 5.729556691 |



|                    |             |             |             |             |             |
|--------------------|-------------|-------------|-------------|-------------|-------------|
| ENSMUSG00000092905 | 12.73413332 | 16.69481385 | 14.12302096 | 36.24559524 | 43.68786977 |
| ENSMUSG00000092906 | 9.904325918 | 7.651789682 | 3.530755239 | 5.638203705 | 6.445751277 |
| ENSMUSG00000092907 | 0           | 1.391234488 | 0.706151048 | 4.832746033 | 3.580972932 |
| ENSMUSG00000092908 | 9.196874066 | 5.56493795  | 9.886114669 | 13.69278043 | 6.445751277 |
| ENSMUSG00000092909 | 0           | 0           | 0.706151048 | 0           | 0           |
| ENSMUSG00000092912 | 2.829807405 | 0           | 2.118453143 | 0           | 2.148583759 |
| ENSMUSG00000092913 | 7.074518513 | 2.782468975 | 2.824604191 | 3.221830688 | 5.013362104 |
| ENSMUSG00000092914 | 10.61177777 | 7.651789682 | 10.59226572 | 8.860034393 | 4.297167518 |
| ENSMUSG00000092915 | 4.952162959 | 2.086851731 | 4.236906287 | 12.88732275 | 10.7429188  |
| ENSMUSG00000092916 | 6.367066661 | 14.60796212 | 7.767661525 | 8.054576721 | 9.310529622 |
| ENSMUSG00000092917 | 5.65961481  | 4.173703463 | 6.35535943  | 2.416373016 | 3.580972932 |
| ENSMUSG00000092918 | 14.14903703 | 22.2597518  | 16.94762515 | 6.443661377 | 16.47247549 |
| ENSMUSG00000092919 | 9.904325918 | 8.347406925 | 8.473812573 | 7.249119049 | 6.445751277 |
| ENSMUSG00000092920 | 12.02668147 | 7.651789682 | 2.118453143 | 10.47094974 | 3.580972932 |
| ENSMUSG00000092921 | 7.074518513 | 13.21672763 | 8.473812573 | 7.249119049 | 5.729556691 |
| ENSMUSG00000092922 | 10.61177777 | 9.043024169 | 8.473812573 | 5.638203705 | 5.729556691 |
| ENSMUSG00000092923 | 21.93100739 | 34.78086219 | 26.12758877 | 20.1364418  | 26.49919969 |
| ENSMUSG00000092924 | 8.489422215 | 12.52111039 | 13.41686991 | 12.08186508 | 11.45911338 |
| ENSMUSG00000092928 | 12.02668147 | 22.2597518  | 23.30298458 | 32.21830688 | 32.94495097 |
| ENSMUSG00000092931 | 4.952162959 | 4.869320706 | 4.943057334 | 3.221830688 | 6.445751277 |
| ENSMUSG00000092932 | 7.074518513 | 7.651789682 | 9.179963621 | 6.443661377 | 6.445751277 |
| ENSMUSG00000092933 | 0           | 0           | 0           | 0           | 0           |
| ENSMUSG00000092934 | 0.707451851 | 2.086851731 | 2.824604191 | 5.638203705 | 3.580972932 |
| ENSMUSG00000092935 | 14.85648888 | 27.82468975 | 24.71528667 | 22.55281482 | 25.78300511 |
| ENSMUSG00000092939 | 10.61177777 | 8.347406925 | 8.473812573 | 8.054576721 | 12.89150255 |
| ENSMUSG00000092948 | 7.781970364 | 5.56493795  | 9.886114669 | 4.02728836  | 7.161945863 |
| ENSMUSG00000092949 | 0           | 0.695617244 | 0           | 0           | 1.432389173 |
| ENSMUSG00000092952 | 9.904325918 | 8.347406925 | 4.236906287 | 4.832746033 | 8.594335036 |
| ENSMUSG00000092953 | 5.65961481  | 2.782468975 | 4.236906287 | 3.221830688 | 4.297167518 |
| ENSMUSG00000092956 | 0           | 0           | 0.706151048 | 0           | 0           |
| ENSMUSG00000092957 | 9.904325918 | 6.956172438 | 12.71071886 | 12.08186508 | 11.45911338 |
| ENSMUSG00000092958 | 200.2088739 | 246.9441215 | 208.3145591 | 139.3441773 | 125.3340526 |
| ENSMUSG00000092961 | 0           | 0           | 0           | 0           | 0           |
| ENSMUSG00000092963 | 0           | 0           | 0           | 0           | 0           |
| ENSMUSG00000092965 | 8.489422215 | 14.60796212 | 5.649208382 | 9.665492065 | 4.297167518 |
| ENSMUSG00000092966 | 2.122355554 | 3.478086219 | 1.412302096 | 0.805457672 | 2.148583759 |
| ENSMUSG00000092972 | 0.707451851 | 0           | 0           | 0.805457672 | 2.148583759 |
| ENSMUSG00000092973 | 61.54831106 | 89.0390072  | 88.26888097 | 85.37851324 | 100.2672421 |
| ENSMUSG00000092974 | 14.14903703 | 10.43425866 | 9.886114669 | 18.52552646 | 17.18867007 |
| ENSMUSG00000092978 | 31.83533331 | 38.95456565 | 40.95676077 | 14.4982381  | 17.18867007 |
| ENSMUSG00000092979 | 8.489422215 | 5.56493795  | 7.767661525 | 7.249119049 | 6.445751277 |
| ENSMUSG00000092981 | 25.46826665 | 43.82388636 | 42.36906287 | 82.15668255 | 57.29556691 |
| ENSMUSG00000092985 | 11.31922962 | 9.738641413 | 13.41686991 | 12.88732275 | 12.89150255 |

|                    |             |             |             |             |             |
|--------------------|-------------|-------------|-------------|-------------|-------------|
| ENSMUSG00000092986 | 9.904325918 | 7.651789682 | 7.767661525 | 4.02728836  | 6.445751277 |
| ENSMUSG00000092988 | 5.65961481  | 6.260555194 | 4.943057334 | 6.443661377 | 8.594335036 |
| ENSMUSG00000092990 | 9.196874066 | 12.52111039 | 9.886114669 | 10.47094974 | 12.89150255 |
| ENSMUSG00000092994 | 6.367066661 | 6.260555194 | 7.767661525 | 11.27640741 | 7.161945863 |
| ENSMUSG00000092995 | 0.707451851 | 0.695617244 | 0.706151048 | 0.805457672 | 1.432389173 |
| ENSMUSG00000092997 | 2.122355554 | 5.56493795  | 4.943057334 | 1.610915344 | 2.864778345 |
| ENSMUSG00000092998 | 12.02668147 | 6.956172438 | 9.179963621 | 3.221830688 | 6.445751277 |
| ENSMUSG00000092999 | 6.367066661 | 4.869320706 | 9.886114669 | 6.443661377 | 7.87814045  |
| ENSMUSG00000093000 | 0           | 3.478086219 | 4.943057334 | 0.805457672 | 0.716194586 |
| ENSMUSG00000093002 | 8.489422215 | 6.956172438 | 9.179963621 | 6.443661377 | 7.161945863 |
| ENSMUSG00000093003 | 13.44158517 | 14.60796212 | 17.65377619 | 8.054576721 | 15.04008631 |
| ENSMUSG00000093004 | 2.122355554 | 0.695617244 | 0.706151048 | 0.805457672 | 1.432389173 |
| ENSMUSG00000093005 | 15.56394073 | 5.56493795  | 8.473812573 | 4.02728836  | 6.445751277 |
| ENSMUSG00000093006 | 154.2245036 | 169.0349902 | 183.5992724 | 314.9339498 | 254.2490782 |
| ENSMUSG00000093007 | 0           | 2.782468975 | 1.412302096 | 2.416373016 | 2.864778345 |
| ENSMUSG00000093009 | 4.244711108 | 5.56493795  | 3.530755239 | 9.665492065 | 6.445751277 |
| ENSMUSG00000093010 | 4.952162959 | 9.043024169 | 10.59226572 | 4.832746033 | 5.013362104 |
| ENSMUSG00000093011 | 4.244711108 | 2.782468975 | 4.943057334 | 6.443661377 | 6.445751277 |
| ENSMUSG00000093013 | 4.244711108 | 9.043024169 | 9.179963621 | 3.221830688 | 8.594335036 |
| ENSMUSG00000093014 | 3.537259256 | 2.782468975 | 5.649208382 | 2.416373016 | 2.148583759 |
| ENSMUSG00000093015 | 5.65961481  | 6.260555194 | 9.886114669 | 4.02728836  | 5.013362104 |
| ENSMUSG00000093017 | 9.196874066 | 9.738641413 | 7.767661525 | 8.860034393 | 5.729556691 |
| ENSMUSG00000093019 | 7.074518513 | 4.173703463 | 5.649208382 | 1.610915344 | 4.297167518 |
| ENSMUSG00000093021 | 31.83533331 | 40.34580014 | 40.25060972 | 13.69278043 | 18.62105924 |
| ENSMUSG00000093023 | 4.952162959 | 6.956172438 | 6.35535943  | 8.054576721 | 7.161945863 |
| ENSMUSG00000093024 | 8.489422215 | 6.956172438 | 4.236906287 | 4.02728836  | 2.864778345 |
| ENSMUSG00000093025 | 6.367066661 | 4.173703463 | 12.00456781 | 6.443661377 | 3.580972932 |
| ENSMUSG00000093026 | 45.27691848 | 68.86610713 | 63.5535943  | 93.43308996 | 73.05184781 |
| ENSMUSG00000093029 | 12.73413332 | 6.956172438 | 11.29841676 | 7.249119049 | 7.87814045  |
| ENSMUSG00000093030 | 155.6394073 | 178.7736317 | 165.9454962 | 204.5862487 | 162.5761711 |
| ENSMUSG00000093031 | 14.85648888 | 18.78166558 | 14.12302096 | 8.860034393 | 11.45911338 |
| ENSMUSG00000093032 | 9.196874066 | 9.043024169 | 7.767661525 | 5.638203705 | 6.445751277 |
| ENSMUSG00000093033 | 7.074518513 | 11.1298759  | 7.061510478 | 3.221830688 | 7.87814045  |
| ENSMUSG00000093034 | 103.9954221 | 165.556904  | 148.29172   | 64.43661377 | 75.91662615 |
| ENSMUSG00000093036 | 12.02668147 | 4.869320706 | 8.473812573 | 4.832746033 | 7.161945863 |
| ENSMUSG00000093037 | 24.05336294 | 20.86851731 | 19.77222934 | 33.02376456 | 24.35061594 |
| ENSMUSG00000093039 | 0.707451851 | 2.086851731 | 1.412302096 | 0           | 0.716194586 |
| ENSMUSG00000093040 | 152.102148  | 182.9473351 | 155.3532305 | 173.1733995 | 137.5093606 |
| ENSMUSG00000093041 | 5.65961481  | 3.478086219 | 7.061510478 | 8.054576721 | 7.87814045  |
| ENSMUSG00000093042 | 9.196874066 | 8.347406925 | 7.767661525 | 7.249119049 | 5.729556691 |
| ENSMUSG00000093044 | 7.781970364 | 26.43345526 | 21.89068248 | 12.08186508 | 20.05344842 |
| ENSMUSG00000093046 | 2.122355554 | 0.695617244 | 1.412302096 | 0           | 0.716194586 |
| ENSMUSG00000093050 | 116.0221036 | 155.8182626 | 148.29172   | 311.7121191 | 246.3709377 |

|                   |             |             |             |             |             |
|-------------------|-------------|-------------|-------------|-------------|-------------|
| ENSMUSG0000093051 | 14.14903703 | 20.86851731 | 29.65834401 | 9.665492065 | 16.47247549 |
| ENSMUSG0000093052 | 42.44711108 | 40.34580014 | 58.61053696 | 50.74383334 | 50.13362104 |
| ENSMUSG0000093053 | 9.904325918 | 8.347406925 | 6.35535943  | 3.221830688 | 5.013362104 |
| ENSMUSG0000093054 | 11.31922962 | 6.956172438 | 6.35535943  | 4.832746033 | 6.445751277 |
| ENSMUSG0000093056 | 16.27139258 | 22.95536904 | 12.71071886 | 13.69278043 | 15.04008631 |
| ENSMUSG0000093058 | 8.489422215 | 8.347406925 | 9.179963621 | 5.638203705 | 7.161945863 |
| ENSMUSG0000093059 | 2.829807405 | 3.478086219 | 5.649208382 | 1.610915344 | 4.297167518 |
| ENSMUSG0000093060 | 149.9797925 | 201.7290007 | 195.6038402 | 144.982381  | 126.0502472 |
| ENSMUSG0000093061 | 130.8785925 | 187.8166558 | 164.5331941 | 165.9242805 | 153.9818361 |
| ENSMUSG0000093063 | 74.98989623 | 91.82147618 | 110.1595635 | 86.98942859 | 79.49759908 |
| ENSMUSG0000093064 | 14.14903703 | 19.47728283 | 14.829172   | 17.72006879 | 14.32389173 |
| ENSMUSG0000093065 | 9.196874066 | 5.56493795  | 12.00456781 | 11.27640741 | 4.297167518 |
| ENSMUSG0000093067 | 5.65961481  | 9.043024169 | 7.061510478 | 8.054576721 | 5.729556691 |
| ENSMUSG0000093070 | 9.196874066 | 6.956172438 | 2.824604191 | 4.832746033 | 5.729556691 |
| ENSMUSG0000093071 | 31.12788146 | 45.91073809 | 53.66747963 | 81.35122488 | 65.17370736 |
| ENSMUSG0000093072 | 9.904325918 | 6.956172438 | 9.179963621 | 4.832746033 | 6.445751277 |
| ENSMUSG0000093073 | 7.781970364 | 6.956172438 | 7.061510478 | 4.02728836  | 10.7429188  |
| ENSMUSG0000093074 | 9.196874066 | 4.869320706 | 4.943057334 | 1.610915344 | 4.297167518 |
| ENSMUSG0000093075 | 7.781970364 | 8.347406925 | 7.061510478 | 7.249119049 | 9.310529622 |
| ENSMUSG0000093076 | 18.39374813 | 27.82468975 | 25.42143772 | 24.96918783 | 34.37734014 |
| ENSMUSG0000093079 | 5.65961481  | 6.956172438 | 11.29841676 | 10.47094974 | 5.729556691 |
| ENSMUSG0000093080 | 10.61177777 | 9.738641413 | 14.12302096 | 12.08186508 | 16.47247549 |
| ENSMUSG0000093081 | 52.35143699 | 49.38882431 | 50.13672439 | 26.58010318 | 30.79636721 |
| ENSMUSG0000093082 | 4.952162959 | 6.956172438 | 6.35535943  | 5.638203705 | 5.013362104 |
| ENSMUSG0000093083 | 7.074518513 | 16.69481385 | 13.41686991 | 12.08186508 | 8.594335036 |
| ENSMUSG0000093085 | 5.65961481  | 4.869320706 | 8.473812573 | 4.02728836  | 7.161945863 |
| ENSMUSG0000093087 | 14.14903703 | 10.43425866 | 11.29841676 | 13.69278043 | 7.87814045  |
| ENSMUSG0000093089 | 7.074518513 | 7.651789682 | 7.767661525 | 5.638203705 | 7.87814045  |
| ENSMUSG0000093090 | 4.952162959 | 4.869320706 | 2.824604191 | 3.221830688 | 4.297167518 |
| ENSMUSG0000093091 | 5.65961481  | 4.173703463 | 6.35535943  | 4.02728836  | 7.161945863 |
| ENSMUSG0000093092 | 1.414903703 | 3.478086219 | 3.530755239 | 0.805457672 | 0           |
| ENSMUSG0000093093 | 4.244711108 | 2.782468975 | 5.649208382 | 3.221830688 | 6.445751277 |
| ENSMUSG0000093096 | 4.952162959 | 9.043024169 | 4.236906287 | 6.443661377 | 8.594335036 |
| ENSMUSG0000093097 | 7.074518513 | 4.869320706 | 7.767661525 | 3.221830688 | 7.87814045  |
| ENSMUSG0000093100 | 38.20239997 | 47.99758982 | 45.8998181  | 18.52552646 | 26.49919969 |
| ENSMUSG0000093101 | 8.489422215 | 4.173703463 | 7.767661525 | 3.221830688 | 5.729556691 |
| ENSMUSG0000093102 | 5.65961481  | 0.695617244 | 5.649208382 | 2.416373016 | 3.580972932 |
| ENSMUSG0000093105 | 6.367066661 | 10.43425866 | 9.179963621 | 3.221830688 | 7.87814045  |
| ENSMUSG0000093106 | 5.65961481  | 6.956172438 | 9.179963621 | 9.665492065 | 8.594335036 |
| ENSMUSG0000093107 | 31.12788146 | 45.21512085 | 51.54902649 | 41.88379895 | 47.2688427  |
| ENSMUSG0000093108 | 12.73413332 | 10.43425866 | 6.35535943  | 8.054576721 | 9.310529622 |
| ENSMUSG0000093112 | 10.61177777 | 18.08604834 | 8.473812573 | 8.860034393 | 14.32389173 |
| ENSMUSG0000093113 | 8.489422215 | 6.956172438 | 9.179963621 | 12.08186508 | 2.148583759 |

|                   |             |             |             |             |             |
|-------------------|-------------|-------------|-------------|-------------|-------------|
| ENSMUSG0000093114 | 9.904325918 | 9.043024169 | 9.886114669 | 3.221830688 | 7.161945863 |
| ENSMUSG0000093115 | 9.196874066 | 7.651789682 | 4.943057334 | 3.221830688 | 8.594335036 |
| ENSMUSG0000093116 | 8.489422215 | 7.651789682 | 5.649208382 | 5.638203705 | 4.297167518 |
| ENSMUSG0000093117 | 7.781970364 | 4.869320706 | 8.473812573 | 3.221830688 | 5.013362104 |
| ENSMUSG0000093118 | 10.61177777 | 10.43425866 | 7.767661525 | 2.416373016 | 5.729556691 |
| ENSMUSG0000093119 | 11.31922962 | 24.34660353 | 17.65377619 | 12.08186508 | 18.62105924 |
| ENSMUSG0000093120 | 18.39374813 | 12.52111039 | 16.2414741  | 17.72006879 | 20.769643   |
| ENSMUSG0000093122 | 0.707451851 | 1.391234488 | 2.118453143 | 0.805457672 | 1.432389173 |
| ENSMUSG0000093124 | 45.27691848 | 54.25814501 | 69.90895373 | 38.66196826 | 38.67450766 |
| ENSMUSG0000093125 | 4.952162959 | 8.347406925 | 4.236906287 | 8.860034393 | 3.580972932 |
| ENSMUSG0000093128 | 7.074518513 | 6.260555194 | 11.29841676 | 4.02728836  | 6.445751277 |
| ENSMUSG0000093129 | 7.074518513 | 8.347406925 | 5.649208382 | 6.443661377 | 6.445751277 |
| ENSMUSG0000093132 | 12.02668147 | 15.99919661 | 14.12302096 | 9.665492065 | 10.7429188  |
| ENSMUSG0000093133 | 12.73413332 | 20.17290007 | 18.35992724 | 28.19101852 | 21.48583759 |
| ENSMUSG0000093134 | 7.781970364 | 6.260555194 | 5.649208382 | 7.249119049 | 8.594335036 |
| ENSMUSG0000093135 | 16.27139258 | 12.52111039 | 12.71071886 | 11.27640741 | 10.02672421 |
| ENSMUSG0000093137 | 9.904325918 | 11.82549314 | 9.179963621 | 5.638203705 | 7.161945863 |
| ENSMUSG0000093138 | 47.39927403 | 54.95376226 | 66.37819849 | 28.19101852 | 30.79636721 |
| ENSMUSG0000093139 | 4.244711108 | 9.043024169 | 6.35535943  | 3.221830688 | 7.161945863 |
| ENSMUSG0000093140 | 9.196874066 | 11.82549314 | 8.473812573 | 7.249119049 | 2.864778345 |
| ENSMUSG0000093142 | 9.196874066 | 4.869320706 | 10.59226572 | 1.610915344 | 7.161945863 |
| ENSMUSG0000093146 | 15.56394073 | 23.65098629 | 24.71528667 | 26.58010318 | 29.36397804 |
| ENSMUSG0000093147 | 29.0055259  | 37.56333116 | 43.07521391 | 65.24207144 | 48.70123187 |
| ENSMUSG0000093148 | 8.489422215 | 11.1298759  | 11.29841676 | 15.30369577 | 12.17530797 |
| ENSMUSG0000093149 | 9.196874066 | 10.43425866 | 9.886114669 | 14.4982381  | 14.32389173 |
| ENSMUSG0000093152 | 15.56394073 | 8.347406925 | 7.767661525 | 8.054576721 | 7.87814045  |
| ENSMUSG0000093153 | 11.31922962 | 4.173703463 | 8.473812573 | 3.221830688 | 8.594335036 |
| ENSMUSG0000093155 | 23.34591109 | 27.12907251 | 32.4829482  | 45.10562964 | 32.94495097 |
| ENSMUSG0000093156 | 8.489422215 | 8.347406925 | 7.767661525 | 16.10915344 | 14.32389173 |
| ENSMUSG0000093157 | 14.14903703 | 20.86851731 | 19.06607829 | 16.10915344 | 20.05344842 |
| ENSMUSG0000093158 | 4.952162959 | 4.173703463 | 7.767661525 | 4.02728836  | 5.729556691 |
| ENSMUSG0000093159 | 9.904325918 | 12.52111039 | 6.35535943  | 1.610915344 | 6.445751277 |
| ENSMUSG0000093160 | 4.952162959 | 6.260555194 | 7.767661525 | 8.054576721 | 8.594335036 |
| ENSMUSG0000093161 | 7.781970364 | 6.956172438 | 8.473812573 | 5.638203705 | 4.297167518 |
| ENSMUSG0000093162 | 6.367066661 | 6.260555194 | 12.00456781 | 8.054576721 | 11.45911338 |
| ENSMUSG0000093163 | 9.196874066 | 10.43425866 | 12.71071886 | 15.30369577 | 4.297167518 |
| ENSMUSG0000093164 | 9.904325918 | 9.043024169 | 6.35535943  | 5.638203705 | 6.445751277 |
| ENSMUSG0000093165 | 7.781970364 | 6.956172438 | 8.473812573 | 9.665492065 | 7.161945863 |
| ENSMUSG0000093167 | 1.414903703 | 6.956172438 | 2.118453143 | 3.221830688 | 1.432389173 |
| ENSMUSG0000093168 | 30.4204296  | 50.7800588  | 41.66291182 | 47.52200265 | 32.94495097 |
| ENSMUSG0000093169 | 8.489422215 | 4.869320706 | 5.649208382 | 3.221830688 | 5.729556691 |
| ENSMUSG0000093170 | 8.489422215 | 7.651789682 | 5.649208382 | 5.638203705 | 5.013362104 |
| ENSMUSG0000093172 | 12.02668147 | 18.78166558 | 11.29841676 | 19.33098413 | 21.48583759 |

|                   |             |             |             |             |             |
|-------------------|-------------|-------------|-------------|-------------|-------------|
| ENSMUSG0000093173 | 4.952162959 | 8.347406925 | 4.236906287 | 7.249119049 | 9.310529622 |
| ENSMUSG0000093176 | 13.44158517 | 10.43425866 | 10.59226572 | 9.665492065 | 12.89150255 |
| ENSMUSG0000093177 | 7.074518513 | 4.869320706 | 4.943057334 | 8.860034393 | 7.161945863 |
| ENSMUSG0000093178 | 6.367066661 | 12.52111039 | 7.061510478 | 45.10562964 | 36.5259239  |
| ENSMUSG0000093180 | 3.537259256 | 2.086851731 | 2.118453143 | 4.02728836  | 1.432389173 |
| ENSMUSG0000093183 | 7.781970364 | 2.086851731 | 4.943057334 | 4.832746033 | 8.594335036 |
| ENSMUSG0000093184 | 10.61177777 | 9.738641413 | 8.473812573 | 1.610915344 | 4.297167518 |
| ENSMUSG0000093185 | 33.95768886 | 36.17209668 | 31.77679715 | 30.60739154 | 31.5125618  |
| ENSMUSG0000093187 | 10.61177777 | 7.651789682 | 4.236906287 | 6.443661377 | 6.445751277 |
| ENSMUSG0000093189 | 7.781970364 | 6.260555194 | 6.35535943  | 6.443661377 | 5.729556691 |
| ENSMUSG0000093190 | 11.31922962 | 23.65098629 | 12.71071886 | 11.27640741 | 15.04008631 |
| ENSMUSG0000093191 | 8.489422215 | 9.043024169 | 9.886114669 | 7.249119049 | 5.013362104 |
| ENSMUSG0000093192 | 8.489422215 | 30.60715873 | 28.95219296 | 24.96918783 | 32.22875639 |
| ENSMUSG0000093202 | 12.73413332 | 4.869320706 | 7.061510478 | 12.88732275 | 10.7429188  |
| ENSMUSG0000093203 | 6.367066661 | 11.1298759  | 5.649208382 | 4.02728836  | 4.297167518 |
| ENSMUSG0000093206 | 4.952162959 | 2.086851731 | 5.649208382 | 3.221830688 | 4.297167518 |
| ENSMUSG0000093207 | 10.61177777 | 5.56493795  | 7.061510478 | 4.832746033 | 8.594335036 |
| ENSMUSG0000093208 | 0           | 0           | 0           | 0           | 0           |
| ENSMUSG0000093211 | 7.074518513 | 6.260555194 | 4.236906287 | 5.638203705 | 7.161945863 |
| ENSMUSG0000093212 | 11.31922962 | 5.56493795  | 12.00456781 | 5.638203705 | 7.161945863 |
| ENSMUSG0000093214 | 12.73413332 | 8.347406925 | 7.767661525 | 6.443661377 | 7.87814045  |
| ENSMUSG0000093215 | 9.196874066 | 6.260555194 | 6.35535943  | 9.665492065 | 10.02672421 |
| ENSMUSG0000093216 | 12.02668147 | 3.478086219 | 7.767661525 | 7.249119049 | 5.729556691 |
| ENSMUSG0000093217 | 3.537259256 | 5.56493795  | 3.530755239 | 8.054576721 | 6.445751277 |
| ENSMUSG0000093218 | 7.781970364 | 5.56493795  | 7.767661525 | 4.832746033 | 7.161945863 |
| ENSMUSG0000093219 | 9.904325918 | 15.99919661 | 14.12302096 | 19.33098413 | 21.48583759 |
| ENSMUSG0000093221 | 19.10119998 | 4.869320706 | 5.649208382 | 7.249119049 | 9.310529622 |
| ENSMUSG0000093223 | 6.367066661 | 4.173703463 | 9.886114669 | 8.054576721 | 6.445751277 |
| ENSMUSG0000093224 | 1.414903703 | 4.173703463 | 2.824604191 | 1.610915344 | 2.148583759 |
| ENSMUSG0000093226 | 4.952162959 | 8.347406925 | 7.767661525 | 5.638203705 | 6.445751277 |
| ENSMUSG0000093227 | 2.122355554 | 2.086851731 | 2.118453143 | 2.416373016 | 2.148583759 |
| ENSMUSG0000093228 | 6.367066661 | 9.738641413 | 5.649208382 | 8.054576721 | 7.161945863 |
| ENSMUSG0000093230 | 0           | 0.695617244 | 0           | 0           | 0           |
| ENSMUSG0000093231 | 7.074518513 | 4.173703463 | 1.412302096 | 1.610915344 | 2.864778345 |
| ENSMUSG0000093232 | 111.0699406 | 183.6429524 | 148.29172   | 282.7156429 | 206.2640409 |
| ENSMUSG0000093234 | 8.489422215 | 6.260555194 | 12.00456781 | 5.638203705 | 5.013362104 |
| ENSMUSG0000093236 | 9.904325918 | 6.956172438 | 10.59226572 | 4.832746033 | 6.445751277 |
| ENSMUSG0000093238 | 7.781970364 | 4.173703463 | 3.530755239 | 8.054576721 | 5.013362104 |
| ENSMUSG0000093239 | 125.9264295 | 181.5561006 | 143.3486627 | 150.6205847 | 152.5494469 |
| ENSMUSG0000093240 | 15.56394073 | 8.347406925 | 3.530755239 | 7.249119049 | 7.161945863 |
| ENSMUSG0000093241 | 11.31922962 | 3.478086219 | 7.767661525 | 5.638203705 | 3.580972932 |
| ENSMUSG0000093242 | 0.707451851 | 0.695617244 | 0.706151048 | 0           | 0           |
| ENSMUSG0000093243 | 4.952162959 | 13.21672763 | 3.530755239 | 5.638203705 | 9.310529622 |

|                   |             |             |             |             |             |
|-------------------|-------------|-------------|-------------|-------------|-------------|
| ENSMUSG0000093245 | 9.904325918 | 20.86851731 | 20.47838039 | 57.18749472 | 45.83645353 |
| ENSMUSG0000093246 | 12.02668147 | 7.651789682 | 14.12302096 | 34.6346799  | 23.63442135 |
| ENSMUSG0000093249 | 46.69182218 | 57.04061399 | 51.54902649 | 133.7059736 | 99.5510475  |
| ENSMUSG0000093251 | 6.367066661 | 6.956172438 | 4.943057334 | 6.443661377 | 10.7429188  |
| ENSMUSG0000093253 | 2.122355554 | 2.086851731 | 3.530755239 | 2.416373016 | 1.432389173 |
| ENSMUSG0000093254 | 4.952162959 | 3.478086219 | 12.00456781 | 3.221830688 | 5.013362104 |
| ENSMUSG0000093256 | 4.952162959 | 7.651789682 | 7.061510478 | 4.02728836  | 11.45911338 |
| ENSMUSG0000093258 | 9.196874066 | 5.56493795  | 9.886114669 | 5.638203705 | 9.310529622 |
| ENSMUSG0000093260 | 10.61177777 | 9.043024169 | 7.061510478 | 7.249119049 | 10.02672421 |
| ENSMUSG0000093261 | 3.537259256 | 6.956172438 | 7.767661525 | 3.221830688 | 7.87814045  |
| ENSMUSG0000093262 | 15.56394073 | 13.91234488 | 14.12302096 | 13.69278043 | 18.62105924 |
| ENSMUSG0000093264 | 4.952162959 | 3.478086219 | 4.943057334 | 5.638203705 | 2.864778345 |
| ENSMUSG0000093266 | 1.414903703 | 1.391234488 | 0           | 0.805457672 | 0.716194586 |
| ENSMUSG0000093269 | 9.904325918 | 5.56493795  | 7.767661525 | 8.860034393 | 4.297167518 |
| ENSMUSG0000093270 | 15.56394073 | 18.08604834 | 16.94762515 | 25.77464551 | 25.78300511 |
| ENSMUSG0000093271 | 7.074518513 | 4.173703463 | 7.061510478 | 4.832746033 | 5.729556691 |
| ENSMUSG0000093273 | 0           | 0           | 0           | 0           | 0           |
| ENSMUSG0000093274 | 9.904325918 | 9.043024169 | 12.00456781 | 4.02728836  | 4.297167518 |
| ENSMUSG0000093276 | 13.44158517 | 2.086851731 | 8.473812573 | 5.638203705 | 7.161945863 |
| ENSMUSG0000093277 | 5.65961481  | 9.043024169 | 2.824604191 | 5.638203705 | 7.161945863 |
| ENSMUSG0000093278 | 6.367066661 | 15.99919661 | 11.29841676 | 6.443661377 | 11.45911338 |
| ENSMUSG0000093279 | 7.074518513 | 8.347406925 | 5.649208382 | 6.443661377 | 11.45911338 |
| ENSMUSG0000093280 | 5.65961481  | 1.391234488 | 4.236906287 | 8.860034393 | 10.02672421 |
| ENSMUSG0000093281 | 9.904325918 | 6.260555194 | 11.29841676 | 2.416373016 | 7.87814045  |
| ENSMUSG0000093282 | 12.73413332 | 5.56493795  | 4.943057334 | 6.443661377 | 6.445751277 |
| ENSMUSG0000093283 | 37.49494812 | 54.25814501 | 49.43057334 | 40.2728836  | 42.25548059 |
| ENSMUSG0000093286 | 9.196874066 | 13.21672763 | 10.59226572 | 8.860034393 | 12.89150255 |
| ENSMUSG0000093289 | 43.86201478 | 72.34419335 | 86.85657888 | 163.5079074 | 140.3741389 |
| ENSMUSG0000093290 | 19.10119998 | 24.34660353 | 24.00913562 | 32.21830688 | 39.39070225 |
| ENSMUSG0000093291 | 1.414903703 | 2.086851731 | 0.706151048 | 4.02728836  | 2.148583759 |
| ENSMUSG0000093292 | 12.02668147 | 4.173703463 | 10.59226572 | 4.832746033 | 4.297167518 |
| ENSMUSG0000093293 | 9.196874066 | 2.782468975 | 6.35535943  | 6.443661377 | 7.161945863 |
| ENSMUSG0000093294 | 0           | 0           | 0           | 0           | 0           |
| ENSMUSG0000093296 | 8.489422215 | 10.43425866 | 7.767661525 | 8.860034393 | 7.161945863 |
| ENSMUSG0000093298 | 9.904325918 | 9.738641413 | 9.886114669 | 4.02728836  | 7.161945863 |
| ENSMUSG0000093300 | 7.074518513 | 4.173703463 | 9.179963621 | 4.832746033 | 3.580972932 |
| ENSMUSG0000093301 | 9.196874066 | 6.956172438 | 3.530755239 | 4.02728836  | 4.297167518 |
| ENSMUSG0000093302 | 10.61177777 | 9.738641413 | 7.061510478 | 4.02728836  | 5.013362104 |
| ENSMUSG0000093303 | 4.952162959 | 6.260555194 | 9.179963621 | 4.832746033 | 8.594335036 |
| ENSMUSG0000093306 | 7.074518513 | 8.347406925 | 5.649208382 | 9.665492065 | 11.45911338 |
| ENSMUSG0000093311 | 10.61177777 | 10.43425866 | 9.179963621 | 8.054576721 | 10.7429188  |
| ENSMUSG0000093314 | 2.122355554 | 2.086851731 | 2.118453143 | 3.221830688 | 2.148583759 |
| ENSMUSG0000093315 | 44.56946663 | 59.12746572 | 62.84744325 | 82.15668255 | 74.48423698 |

|                   |             |             |             |             |             |
|-------------------|-------------|-------------|-------------|-------------|-------------|
| ENSMUSG0000093317 | 9.904325918 | 9.043024169 | 9.179963621 | 4.02728836  | 7.87814045  |
| ENSMUSG0000093319 | 7.074518513 | 6.956172438 | 6.35535943  | 11.27640741 | 5.729556691 |
| ENSMUSG0000093322 | 7.074518513 | 4.869320706 | 7.061510478 | 8.054576721 | 5.013362104 |
| ENSMUSG0000093323 | 45.27691848 | 53.56252777 | 61.43514116 | 73.29664816 | 74.48423698 |
| ENSMUSG0000093324 | 3.537259256 | 6.956172438 | 8.473812573 | 4.832746033 | 1.432389173 |
| ENSMUSG0000093325 | 7.074518513 | 10.43425866 | 8.473812573 | 3.221830688 | 7.87814045  |
| ENSMUSG0000093327 | 7.781970364 | 11.1298759  | 18.35992724 | 34.6346799  | 31.5125618  |
| ENSMUSG0000093329 | 7.074518513 | 8.347406925 | 9.886114669 | 2.416373016 | 7.87814045  |
| ENSMUSG0000093331 | 5.65961481  | 6.956172438 | 7.061510478 | 6.443661377 | 6.445751277 |
| ENSMUSG0000093334 | 62.96321476 | 101.5601176 | 77.67661525 | 40.2728836  | 45.12025894 |
| ENSMUSG0000093335 | 8.489422215 | 1.391234488 | 4.943057334 | 2.416373016 | 3.580972932 |
| ENSMUSG0000093336 | 6.367066661 | 4.869320706 | 7.061510478 | 7.249119049 | 5.729556691 |
| ENSMUSG0000093338 | 7.781970364 | 12.52111039 | 10.59226572 | 8.054576721 | 9.310529622 |
| ENSMUSG0000093340 | 3.537259256 | 6.956172438 | 4.236906287 | 0.805457672 | 7.87814045  |
| ENSMUSG0000093341 | 12.02668147 | 31.99839321 | 27.53989086 | 22.55281482 | 20.05344842 |
| ENSMUSG0000093342 | 12.02668147 | 9.043024169 | 10.59226572 | 6.443661377 | 14.32389173 |
| ENSMUSG0000093344 | 8.489422215 | 8.347406925 | 16.2414741  | 4.02728836  | 7.87814045  |
| ENSMUSG0000093345 | 319.7682368 | 329.7225736 | 305.7634037 | 388.2305979 | 254.2490782 |
| ENSMUSG0000093346 | 106.1177777 | 119.6461659 | 138.4056054 | 194.9207566 | 158.2790036 |
| ENSMUSG0000093348 | 39.61730367 | 52.17129328 | 50.84287544 | 30.60739154 | 37.95831308 |
| ENSMUSG0000093349 | 6.367066661 | 10.43425866 | 9.179963621 | 1.610915344 | 5.729556691 |
| ENSMUSG0000093351 | 4.952162959 | 6.956172438 | 4.236906287 | 5.638203705 | 6.445751277 |
| ENSMUSG0000093352 | 13.44158517 | 19.47728283 | 18.35992724 | 11.27640741 | 20.769643   |
| ENSMUSG0000093354 | 0           | 0           | 0           | 0.805457672 | 0           |
| ENSMUSG0000093355 | 1.414903703 | 1.391234488 | 0.706151048 | 8.054576721 | 2.148583759 |
| ENSMUSG0000093356 | 9.904325918 | 8.347406925 | 9.886114669 | 4.832746033 | 2.864778345 |
| ENSMUSG0000093358 | 8.489422215 | 6.956172438 | 8.473812573 | 5.638203705 | 9.310529622 |
| ENSMUSG0000093359 | 10.61177777 | 9.738641413 | 10.59226572 | 7.249119049 | 8.594335036 |
| ENSMUSG0000093362 | 4.952162959 | 5.56493795  | 6.35535943  | 4.832746033 | 2.864778345 |
| ENSMUSG0000093363 | 29.71297775 | 46.60635533 | 48.7244223  | 45.10562964 | 38.67450766 |
| ENSMUSG0000093365 | 2.122355554 | 0.695617244 | 1.412302096 | 0.805457672 | 0           |
| ENSMUSG0000093368 | 7.074518513 | 5.56493795  | 3.530755239 | 7.249119049 | 9.310529622 |
| ENSMUSG0000093373 | 12.02668147 | 8.347406925 | 9.179963621 | 9.665492065 | 6.445751277 |
| ENSMUSG0000093378 | 8.489422215 | 9.043024169 | 7.767661525 | 16.10915344 | 17.90486466 |
| ENSMUSG0000093380 | 5.65961481  | 6.956172438 | 7.767661525 | 1.610915344 | 5.729556691 |
| ENSMUSG0000093381 | 12.02668147 | 9.738641413 | 7.767661525 | 7.249119049 | 8.594335036 |
| ENSMUSG0000093382 | 5.65961481  | 6.956172438 | 3.530755239 | 7.249119049 | 5.729556691 |
| ENSMUSG0000093383 | 9.904325918 | 8.347406925 | 4.236906287 | 4.02728836  | 6.445751277 |
| ENSMUSG0000093384 | 6.367066661 | 6.260555194 | 1.412302096 | 2.416373016 | 6.445751277 |
| ENSMUSG0000093385 | 9.196874066 | 10.43425866 | 4.943057334 | 7.249119049 | 4.297167518 |
| ENSMUSG0000093386 | 9.904325918 | 7.651789682 | 7.061510478 | 6.443661377 | 8.594335036 |
| ENSMUSG0000093387 | 24.76081479 | 40.34580014 | 33.89525029 | 45.91108731 | 51.56601022 |
| ENSMUSG0000093388 | 0           | 0           | 0           | 0           | 0.716194586 |

|                   |             |             |             |             |             |
|-------------------|-------------|-------------|-------------|-------------|-------------|
| ENSMUSG0000093392 | 13.44158517 | 15.99919661 | 14.12302096 | 21.74735715 | 25.78300511 |
| ENSMUSG0000093394 | 12.02668147 | 5.56493795  | 9.886114669 | 3.221830688 | 4.297167518 |
| ENSMUSG0000093395 | 12.73413332 | 8.347406925 | 8.473812573 | 8.054576721 | 3.580972932 |
| ENSMUSG0000093397 | 16.97884443 | 12.52111039 | 20.47838039 | 12.08186508 | 19.33725383 |
| ENSMUSG0000093398 | 4.952162959 | 14.60796212 | 8.473812573 | 3.221830688 | 7.87814045  |
| ENSMUSG0000093400 | 14.14903703 | 8.347406925 | 7.061510478 | 4.832746033 | 7.161945863 |
| ENSMUSG0000093401 | 7.074518513 | 5.56493795  | 4.236906287 | 6.443661377 | 3.580972932 |
| ENSMUSG0000093402 | 0           | 0           | 0           | 0           | 0           |
| ENSMUSG0000093403 | 7.074518513 | 9.738641413 | 7.767661525 | 8.860034393 | 10.7429188  |
| ENSMUSG0000093404 | 142.1978221 | 180.1648661 | 170.1824025 | 120.0131931 | 121.0368851 |
| ENSMUSG0000093405 | 6.367066661 | 3.478086219 | 4.943057334 | 8.054576721 | 8.594335036 |
| ENSMUSG0000093406 | 8.489422215 | 8.347406925 | 4.236906287 | 4.02728836  | 8.594335036 |
| ENSMUSG0000093408 | 6.367066661 | 5.56493795  | 3.530755239 | 4.832746033 | 1.432389173 |
| ENSMUSG0000093409 | 20.51610369 | 16.69481385 | 19.77222934 | 20.94189947 | 20.769643   |
| ENSMUSG0000093410 | 4.244711108 | 2.782468975 | 2.118453143 | 0.805457672 | 4.297167518 |
| ENSMUSG0000093413 | 14.85648888 | 19.47728283 | 10.59226572 | 35.44013757 | 34.37734014 |
| ENSMUSG0000093414 | 7.074518513 | 7.651789682 | 5.649208382 | 1.610915344 | 5.013362104 |
| ENSMUSG0000093416 | 5.65961481  | 4.869320706 | 9.179963621 | 6.443661377 | 7.87814045  |
| ENSMUSG0000093418 | 10.61177777 | 7.651789682 | 4.236906287 | 5.638203705 | 7.87814045  |
| ENSMUSG0000093419 | 93.38364437 | 118.9505487 | 120.7518292 | 76.51847885 | 93.10529622 |
| ENSMUSG0000093420 | 9.904325918 | 6.260555194 | 7.061510478 | 6.443661377 | 10.7429188  |
| ENSMUSG0000093421 | 9.904325918 | 13.91234488 | 8.473812573 | 7.249119049 | 11.45911338 |
| ENSMUSG0000093424 | 48.10672589 | 91.12585893 | 72.02740687 | 117.5968201 | 113.1587446 |
| ENSMUSG0000093426 | 6.367066661 | 9.043024169 | 7.061510478 | 2.416373016 | 5.013362104 |
| ENSMUSG0000093427 | 9.196874066 | 10.43425866 | 5.649208382 | 5.638203705 | 9.310529622 |
| ENSMUSG0000093428 | 4.244711108 | 2.086851731 | 4.236906287 | 4.02728836  | 4.297167518 |
| ENSMUSG0000093429 | 19.80865184 | 14.60796212 | 16.94762515 | 18.52552646 | 14.32389173 |
| ENSMUSG0000093433 | 8.489422215 | 6.260555194 | 7.061510478 | 5.638203705 | 2.148583759 |
| ENSMUSG0000093434 | 8.489422215 | 5.56493795  | 7.061510478 | 5.638203705 | 13.60769714 |
| ENSMUSG0000093436 | 1.414903703 | 3.478086219 | 2.824604191 | 0           | 0           |
| ENSMUSG0000093437 | 45.98437033 | 78.60474855 | 74.14586002 | 49.93837567 | 57.29556691 |
| ENSMUSG0000093441 | 9.196874066 | 7.651789682 | 4.236906287 | 9.665492065 | 7.161945863 |
| ENSMUSG0000093443 | 2.829807405 | 0.695617244 | 2.118453143 | 0.805457672 | 1.432389173 |
| ENSMUSG0000093444 | 6.367066661 | 9.043024169 | 7.767661525 | 4.02728836  | 7.87814045  |
| ENSMUSG0000093446 | 12.73413332 | 6.956172438 | 12.00456781 | 8.860034393 | 7.87814045  |
| ENSMUSG0000093447 | 10.61177777 | 11.1298759  | 10.59226572 | 4.832746033 | 4.297167518 |
| ENSMUSG0000093449 | 9.904325918 | 3.478086219 | 4.236906287 | 8.054576721 | 6.445751277 |
| ENSMUSG0000093452 | 13.44158517 | 9.738641413 | 2.118453143 | 9.665492065 | 7.87814045  |
| ENSMUSG0000093453 | 4.244711108 | 6.260555194 | 4.236906287 | 4.02728836  | 5.013362104 |
| ENSMUSG0000093454 | 6.367066661 | 7.651789682 | 5.649208382 | 7.249119049 | 6.445751277 |
| ENSMUSG0000093456 | 12.02668147 | 12.52111039 | 12.71071886 | 8.054576721 | 10.02672421 |
| ENSMUSG0000093458 | 13.44158517 | 1.391234488 | 4.943057334 | 7.249119049 | 6.445751277 |
| ENSMUSG0000093459 | 4.952162959 | 11.1298759  | 9.179963621 | 6.443661377 | 5.729556691 |



|                   |             |             |             |             |             |
|-------------------|-------------|-------------|-------------|-------------|-------------|
| ENSMUSG0000093460 | 8.489422215 | 2.782468975 | 8.473812573 | 1.610915344 | 3.580972932 |
| ENSMUSG0000093461 | 7.074518513 | 8.347406925 | 12.71071886 | 8.054576721 | 3.580972932 |
| ENSMUSG0000093465 | 77.81970364 | 130.0804246 | 134.8748501 | 65.24207144 | 68.75468029 |
| ENSMUSG0000093467 | 7.074518513 | 12.52111039 | 7.061510478 | 12.08186508 | 5.013362104 |
| ENSMUSG0000093469 | 6.367066661 | 4.869320706 | 8.473812573 | 8.054576721 | 2.864778345 |
| ENSMUSG0000093470 | 38.20239997 | 71.64857611 | 55.78593277 | 61.21478308 | 45.12025894 |
| ENSMUSG0000093472 | 6.367066661 | 9.738641413 | 9.886114669 | 5.638203705 | 8.594335036 |
| ENSMUSG0000093473 | 20.51610369 | 13.91234488 | 12.00456781 | 5.638203705 | 11.45911338 |
| ENSMUSG0000093474 | 9.904325918 | 10.43425866 | 7.767661525 | 4.02728836  | 14.32389173 |
| ENSMUSG0000093476 | 29.0055259  | 45.91073809 | 49.43057334 | 17.72006879 | 27.21539428 |
| ENSMUSG0000093479 | 11.31922962 | 6.956172438 | 9.179963621 | 4.832746033 | 5.729556691 |
| ENSMUSG0000093480 | 10.61177777 | 7.651789682 | 8.473812573 | 8.054576721 | 8.594335036 |
| ENSMUSG0000093482 | 5.65961481  | 4.173703463 | 9.179963621 | 4.02728836  | 10.02672421 |
| ENSMUSG0000093483 | 26.88317035 | 44.5195036  | 28.24604191 | 80.54576721 | 58.72795608 |
| ENSMUSG0000093484 | 8.489422215 | 3.478086219 | 7.061510478 | 3.221830688 | 1.432389173 |
| ENSMUSG0000093487 | 7.074518513 | 6.956172438 | 7.767661525 | 4.832746033 | 7.161945863 |
| ENSMUSG0000093489 | 8.489422215 | 6.260555194 | 2.824604191 | 7.249119049 | 12.17530797 |
| ENSMUSG0000093490 | 9.904325918 | 7.651789682 | 10.59226572 | 5.638203705 | 8.594335036 |
| ENSMUSG0000093492 | 7.781970364 | 10.43425866 | 7.767661525 | 5.638203705 | 8.594335036 |
| ENSMUSG0000093493 | 8.489422215 | 9.738641413 | 5.649208382 | 7.249119049 | 9.310529622 |
| ENSMUSG0000093495 | 44.56946663 | 76.51789682 | 72.02740687 | 52.35474869 | 42.97167518 |
| ENSMUSG0000093497 | 9.196874066 | 6.260555194 | 4.943057334 | 4.832746033 | 8.594335036 |
| ENSMUSG0000093498 | 2.829807405 | 11.82549314 | 17.65377619 | 1.610915344 | 5.013362104 |
| ENSMUSG0000093499 | 9.904325918 | 9.043024169 | 9.179963621 | 4.02728836  | 4.297167518 |
| ENSMUSG0000093502 | 6.367066661 | 6.260555194 | 4.943057334 | 6.443661377 | 10.02672421 |
| ENSMUSG0000093503 | 15.56394073 | 11.82549314 | 11.29841676 | 6.443661377 | 7.161945863 |
| ENSMUSG0000093504 | 12.73413332 | 6.260555194 | 6.35535943  | 4.832746033 | 5.729556691 |
| ENSMUSG0000093505 | 5.65961481  | 5.56493795  | 3.530755239 | 2.416373016 | 2.864778345 |
| ENSMUSG0000093507 | 7.781970364 | 8.347406925 | 8.473812573 | 5.638203705 | 10.02672421 |
| ENSMUSG0000093508 | 7.074518513 | 10.43425866 | 7.767661525 | 4.02728836  | 5.729556691 |
| ENSMUSG0000093509 | 8.489422215 | 4.173703463 | 8.473812573 | 4.832746033 | 4.297167518 |
| ENSMUSG0000093510 | 9.904325918 | 6.956172438 | 7.767661525 | 7.249119049 | 7.161945863 |
| ENSMUSG0000093511 | 10.61177777 | 15.99919661 | 9.179963621 | 4.832746033 | 11.45911338 |
| ENSMUSG0000093513 | 8.489422215 | 10.43425866 | 7.061510478 | 7.249119049 | 5.729556691 |
| ENSMUSG0000093514 | 7.781970364 | 18.78166558 | 21.18453143 | 81.35122488 | 67.32229112 |
| ENSMUSG0000093515 | 3.537259256 | 5.56493795  | 7.061510478 | 8.054576721 | 7.87814045  |
| ENSMUSG0000093516 | 7.781970364 | 7.651789682 | 13.41686991 | 8.054576721 | 11.45911338 |
| ENSMUSG0000093518 | 12.73413332 | 10.43425866 | 12.71071886 | 5.638203705 | 1.432389173 |
| ENSMUSG0000093519 | 7.781970364 | 6.956172438 | 5.649208382 | 5.638203705 | 7.161945863 |
| ENSMUSG0000093520 | 10.61177777 | 7.651789682 | 7.061510478 | 4.832746033 | 3.580972932 |
| ENSMUSG0000093522 | 9.196874066 | 9.738641413 | 7.767661525 | 8.054576721 | 7.161945863 |
| ENSMUSG0000093525 | 21.93100739 | 44.5195036  | 41.66291182 | 30.60739154 | 30.79636721 |
| ENSMUSG0000093528 | 11.31922962 | 11.82549314 | 7.061510478 | 9.665492065 | 4.297167518 |

|                   |             |             |             |             |             |
|-------------------|-------------|-------------|-------------|-------------|-------------|
| ENSMUSG0000093529 | 17.68629628 | 18.08604834 | 9.886114669 | 8.054576721 | 17.18867007 |
| ENSMUSG0000093530 | 8.489422215 | 9.738641413 | 6.35535943  | 2.416373016 | 7.161945863 |
| ENSMUSG0000093531 | 5.65961481  | 8.347406925 | 6.35535943  | 1.610915344 | 5.013362104 |
| ENSMUSG0000093533 | 11.31922962 | 10.43425866 | 7.061510478 | 2.416373016 | 5.729556691 |
| ENSMUSG0000093534 | 7.781970364 | 8.347406925 | 9.886114669 | 9.665492065 | 7.87814045  |
| ENSMUSG0000093535 | 10.61177777 | 5.56493795  | 9.179963621 | 4.832746033 | 9.310529622 |
| ENSMUSG0000093537 | 10.61177777 | 6.260555194 | 9.886114669 | 3.221830688 | 5.729556691 |
| ENSMUSG0000093538 | 9.196874066 | 10.43425866 | 8.473812573 | 2.416373016 | 7.87814045  |
| ENSMUSG0000093539 | 7.074518513 | 7.651789682 | 9.179963621 | 4.832746033 | 7.161945863 |
| ENSMUSG0000093540 | 8.489422215 | 6.956172438 | 8.473812573 | 5.638203705 | 7.161945863 |
| ENSMUSG0000093541 | 7.781970364 | 11.1298759  | 7.767661525 | 8.860034393 | 6.445751277 |
| ENSMUSG0000093542 | 12.73413332 | 13.91234488 | 9.886114669 | 13.69278043 | 10.02672421 |
| ENSMUSG0000093543 | 7.074518513 | 6.956172438 | 7.767661525 | 4.02728836  | 4.297167518 |
| ENSMUSG0000093544 | 7.074518513 | 6.956172438 | 9.179963621 | 3.221830688 | 7.87814045  |
| ENSMUSG0000093545 | 9.904325918 | 11.82549314 | 8.473812573 | 7.249119049 | 2.864778345 |
| ENSMUSG0000093546 | 7.074518513 | 9.043024169 | 8.473812573 | 4.02728836  | 3.580972932 |
| ENSMUSG0000093547 | 10.61177777 | 10.43425866 | 6.35535943  | 3.221830688 | 10.02672421 |
| ENSMUSG0000093548 | 9.904325918 | 6.260555194 | 7.767661525 | 4.02728836  | 7.87814045  |
| ENSMUSG0000093549 | 10.61177777 | 12.52111039 | 9.179963621 | 6.443661377 | 7.87814045  |
| ENSMUSG0000093551 | 7.074518513 | 8.347406925 | 7.061510478 | 4.832746033 | 5.729556691 |
| ENSMUSG0000093552 | 7.074518513 | 4.173703463 | 2.118453143 | 3.221830688 | 6.445751277 |
| ENSMUSG0000093553 | 14.14903703 | 34.78086219 | 23.30298458 | 17.72006879 | 17.18867007 |
| ENSMUSG0000093554 | 14.14903703 | 7.651789682 | 16.94762515 | 7.249119049 | 12.17530797 |
| ENSMUSG0000093556 | 7.074518513 | 8.347406925 | 6.35535943  | 7.249119049 | 7.87814045  |
| ENSMUSG0000093557 | 9.904325918 | 6.260555194 | 7.061510478 | 5.638203705 | 8.594335036 |
| ENSMUSG0000093559 | 15.56394073 | 33.3896277  | 26.12758877 | 19.33098413 | 25.78300511 |
| ENSMUSG0000093560 | 6.367066661 | 6.956172438 | 8.473812573 | 4.02728836  | 9.310529622 |
| ENSMUSG0000093561 | 12.02668147 | 9.043024169 | 9.886114669 | 1.610915344 | 7.161945863 |
| ENSMUSG0000093562 | 7.781970364 | 13.21672763 | 9.179963621 | 15.30369577 | 19.33725383 |
| ENSMUSG0000093563 | 13.44158517 | 3.478086219 | 13.41686991 | 4.832746033 | 2.864778345 |
| ENSMUSG0000093564 | 11.31922962 | 6.956172438 | 7.061510478 | 4.02728836  | 4.297167518 |
| ENSMUSG0000093565 | 9.196874066 | 11.1298759  | 8.473812573 | 11.27640741 | 10.02672421 |
| ENSMUSG0000093567 | 9.904325918 | 9.738641413 | 2.824604191 | 3.221830688 | 7.87814045  |
| ENSMUSG0000093568 | 9.196874066 | 6.260555194 | 7.061510478 | 8.860034393 | 7.161945863 |
| ENSMUSG0000093570 | 16.27139258 | 9.738641413 | 9.179963621 | 4.832746033 | 7.161945863 |
| ENSMUSG0000093571 | 12.73413332 | 6.260555194 | 7.061510478 | 4.832746033 | 5.013362104 |
| ENSMUSG0000093572 | 5.65961481  | 6.956172438 | 4.943057334 | 8.860034393 | 7.161945863 |
| ENSMUSG0000093573 | 5.65961481  | 8.347406925 | 4.943057334 | 7.249119049 | 5.013362104 |
| ENSMUSG0000093574 | 47.39927403 | 77.9091313  | 68.49665163 | 62.82569842 | 66.60609653 |
| ENSMUSG0000093576 | 8.489422215 | 9.043024169 | 5.649208382 | 5.638203705 | 4.297167518 |
| ENSMUSG0000093577 | 22.63845924 | 26.43345526 | 24.00913562 | 14.4982381  | 20.769643   |
| ENSMUSG0000093579 | 42.44711108 | 68.17048989 | 64.96589639 | 74.9075635  | 70.90326405 |
| ENSMUSG0000093580 | 5.65961481  | 6.956172438 | 4.236906287 | 8.860034393 | 8.594335036 |

|                    |             |             |             |             |             |
|--------------------|-------------|-------------|-------------|-------------|-------------|
| ENSMUSG00000093581 | 7.074518513 | 7.651789682 | 8.473812573 | 2.416373016 | 5.729556691 |
| ENSMUSG00000093582 | 8.489422215 | 9.043024169 | 6.35535943  | 5.638203705 | 2.148583759 |
| ENSMUSG00000093584 | 7.781970364 | 7.651789682 | 7.061510478 | 2.416373016 | 7.161945863 |
| ENSMUSG00000093587 | 8.489422215 | 6.260555194 | 6.35535943  | 2.416373016 | 3.580972932 |
| ENSMUSG00000093588 | 9.196874066 | 9.043024169 | 8.473812573 | 3.221830688 | 5.729556691 |
| ENSMUSG00000093589 | 10.61177777 | 4.869320706 | 7.061510478 | 5.638203705 | 7.87814045  |
| ENSMUSG00000093590 | 12.02668147 | 7.651789682 | 9.179963621 | 12.88732275 | 10.7429188  |
| ENSMUSG00000093592 | 7.074518513 | 9.738641413 | 6.35535943  | 3.221830688 | 7.161945863 |
| ENSMUSG00000093593 | 19.10119998 | 25.73783802 | 20.47838039 | 16.10915344 | 20.05344842 |
| ENSMUSG00000093594 | 0           | 1.391234488 | 0           | 0           | 0           |
| ENSMUSG00000093595 | 8.489422215 | 8.347406925 | 5.649208382 | 4.02728836  | 7.87814045  |
| ENSMUSG00000093598 | 6.367066661 | 6.260555194 | 7.767661525 | 4.832746033 | 8.594335036 |
| ENSMUSG00000093599 | 12.02668147 | 24.34660353 | 21.89068248 | 22.55281482 | 20.05344842 |
| ENSMUSG00000093601 | 26.1757185  | 18.08604834 | 23.30298458 | 13.69278043 | 22.20203218 |
| ENSMUSG00000093602 | 8.489422215 | 8.347406925 | 8.473812573 | 8.860034393 | 5.729556691 |
| ENSMUSG00000093606 | 79.94205919 | 128.6891901 | 115.8087718 | 259.3573704 | 214.8583759 |
| ENSMUSG00000093607 | 7.074518513 | 4.173703463 | 7.767661525 | 4.02728836  | 5.729556691 |
| ENSMUSG00000093610 | 10.61177777 | 9.043024169 | 9.886114669 | 12.08186508 | 10.7429188  |
| ENSMUSG00000093614 | 12.02668147 | 6.956172438 | 3.530755239 | 4.02728836  | 8.594335036 |
| ENSMUSG00000093615 | 94.09109622 | 162.0788178 | 127.1071886 | 176.3952302 | 145.387501  |
| ENSMUSG00000093616 | 7.074518513 | 2.782468975 | 8.473812573 | 7.249119049 | 7.161945863 |
| ENSMUSG00000093617 | 9.904325918 | 12.52111039 | 13.41686991 | 7.249119049 | 10.02672421 |
| ENSMUSG00000093618 | 38.90985182 | 54.25814501 | 42.36906287 | 97.46037832 | 85.22715578 |
| ENSMUSG00000093619 | 117.4370073 | 130.0804246 | 137.6994543 | 143.3714656 | 111.0101609 |
| ENSMUSG00000093621 | 7.074518513 | 5.56493795  | 8.473812573 | 4.832746033 | 9.310529622 |
| ENSMUSG00000093622 | 11.31922962 | 9.738641413 | 14.12302096 | 16.10915344 | 10.02672421 |
| ENSMUSG00000093623 | 10.61177777 | 13.91234488 | 14.829172   | 8.054576721 | 12.89150255 |
| ENSMUSG00000093624 | 8.489422215 | 9.043024169 | 10.59226572 | 4.832746033 | 7.87814045  |
| ENSMUSG00000093625 | 6.367066661 | 5.56493795  | 7.767661525 | 4.02728836  | 5.013362104 |
| ENSMUSG00000093626 | 7.074518513 | 9.043024169 | 8.473812573 | 7.249119049 | 3.580972932 |
| ENSMUSG00000093627 | 7.781970364 | 9.738641413 | 6.35535943  | 8.054576721 | 4.297167518 |
| ENSMUSG00000093628 | 14.85648888 | 28.52030699 | 26.12758877 | 11.27640741 | 16.47247549 |
| ENSMUSG00000093629 | 4.244711108 | 7.651789682 | 9.886114669 | 4.832746033 | 5.013362104 |
| ENSMUSG00000093634 | 5.65961481  | 6.956172438 | 2.824604191 | 9.665492065 | 9.310529622 |
| ENSMUSG00000093637 | 8.489422215 | 2.782468975 | 7.061510478 | 8.860034393 | 7.161945863 |
| ENSMUSG00000093642 | 8.489422215 | 6.260555194 | 7.061510478 | 4.02728836  | 1.432389173 |
| ENSMUSG00000093644 | 10.61177777 | 9.738641413 | 7.767661525 | 13.69278043 | 7.87814045  |
| ENSMUSG00000093645 | 0           | 0           | 0           | 0           | 0           |
| ENSMUSG00000093648 | 7.781970364 | 8.347406925 | 9.886114669 | 6.443661377 | 10.02672421 |
| ENSMUSG00000093649 | 8.489422215 | 9.738641413 | 6.35535943  | 7.249119049 | 11.45911338 |
| ENSMUSG00000093650 | 9.904325918 | 6.956172438 | 11.29841676 | 8.054576721 | 10.02672421 |
| ENSMUSG00000093651 | 7.074518513 | 4.173703463 | 10.59226572 | 5.638203705 | 7.87814045  |
| ENSMUSG00000093652 | 6.367066661 | 8.347406925 | 9.179963621 | 6.443661377 | 2.864778345 |

|                    |             |             |             |             |             |
|--------------------|-------------|-------------|-------------|-------------|-------------|
| ENSMUSG00000093656 | 9.904325918 | 17.39043109 | 6.35535943  | 8.054576721 | 7.161945863 |
| ENSMUSG00000093658 | 14.14903703 | 8.347406925 | 6.35535943  | 2.416373016 | 6.445751277 |
| ENSMUSG00000093660 | 5.65961481  | 4.173703463 | 3.530755239 | 4.832746033 | 5.729556691 |
| ENSMUSG00000093662 | 0           | 0           | 0.706151048 | 0.805457672 | 0.716194586 |
| ENSMUSG00000093663 | 6.367066661 | 5.56493795  | 4.943057334 | 1.610915344 | 2.148583759 |
| ENSMUSG00000093664 | 2.122355554 | 2.086851731 | 0.706151048 | 3.221830688 | 1.432389173 |
| ENSMUSG00000093665 | 9.196874066 | 9.043024169 | 9.886114669 | 2.416373016 | 7.87814045  |
| ENSMUSG00000093666 | 9.904325918 | 9.738641413 | 6.35535943  | 6.443661377 | 3.580972932 |
| ENSMUSG00000093669 | 9.904325918 | 9.738641413 | 8.473812573 | 6.443661377 | 2.148583759 |
| ENSMUSG00000093671 | 2.829807405 | 4.869320706 | 7.767661525 | 9.665492065 | 7.161945863 |
| ENSMUSG00000093672 | 5.65961481  | 2.782468975 | 3.530755239 | 4.832746033 | 8.594335036 |
| ENSMUSG00000093673 | 8.489422215 | 11.82549314 | 8.473812573 | 8.860034393 | 9.310529622 |
| ENSMUSG00000093675 | 9.904325918 | 9.738641413 | 10.59226572 | 8.054576721 | 4.297167518 |
| ENSMUSG00000093677 | 12.02668147 | 8.347406925 | 9.886114669 | 4.832746033 | 9.310529622 |
| ENSMUSG00000093678 | 4.952162959 | 7.651789682 | 9.179963621 | 2.416373016 | 4.297167518 |
| ENSMUSG00000093681 | 6.367066661 | 2.782468975 | 7.767661525 | 7.249119049 | 7.161945863 |
| ENSMUSG00000093682 | 4.244711108 | 7.651789682 | 13.41686991 | 5.638203705 | 5.729556691 |
| ENSMUSG00000093683 | 12.02668147 | 6.956172438 | 7.767661525 | 5.638203705 | 4.297167518 |
| ENSMUSG00000093684 | 178.2778665 | 222.597518  | 198.4284444 | 202.1698757 | 169.0219224 |
| ENSMUSG00000093685 | 11.31922962 | 9.043024169 | 7.061510478 | 9.665492065 | 7.87814045  |
| ENSMUSG00000093686 | 9.196874066 | 7.651789682 | 8.473812573 | 8.054576721 | 5.729556691 |
| ENSMUSG00000093687 | 9.904325918 | 9.043024169 | 8.473812573 | 10.47094974 | 6.445751277 |
| ENSMUSG00000093688 | 8.489422215 | 11.82549314 | 11.29841676 | 9.665492065 | 3.580972932 |
| ENSMUSG00000093689 | 9.904325918 | 6.956172438 | 4.943057334 | 4.832746033 | 5.013362104 |
| ENSMUSG00000093690 | 15.56394073 | 27.82468975 | 21.89068248 | 17.72006879 | 32.94495097 |
| ENSMUSG00000093693 | 9.196874066 | 7.651789682 | 11.29841676 | 5.638203705 | 5.013362104 |
| ENSMUSG00000093695 | 21.93100739 | 44.5195036  | 37.42600553 | 17.72006879 | 28.64778345 |
| ENSMUSG00000093697 | 5.65961481  | 4.869320706 | 9.886114669 | 4.832746033 | 9.310529622 |
| ENSMUSG00000093699 | 9.196874066 | 4.173703463 | 8.473812573 | 4.02728836  | 5.013362104 |
| ENSMUSG00000093701 | 21.93100739 | 33.3896277  | 24.00913562 | 15.30369577 | 28.64778345 |
| ENSMUSG00000093702 | 10.61177777 | 5.56493795  | 9.179963621 | 6.443661377 | 6.445751277 |
| ENSMUSG00000093703 | 13.44158517 | 7.651789682 | 9.179963621 | 8.054576721 | 5.729556691 |
| ENSMUSG00000093705 | 9.196874066 | 7.651789682 | 7.767661525 | 8.054576721 | 5.013362104 |
| ENSMUSG00000093707 | 8.489422215 | 9.043024169 | 14.12302096 | 4.832746033 | 8.594335036 |
| ENSMUSG00000093708 | 4.952162959 | 6.956172438 | 11.29841676 | 1.610915344 | 4.297167518 |
| ENSMUSG00000093710 | 0           | 0           | 0           | 0           | 0           |
| ENSMUSG00000093711 | 6.367066661 | 6.956172438 | 7.061510478 | 2.416373016 | 5.729556691 |
| ENSMUSG00000093714 | 5.65961481  | 4.869320706 | 5.649208382 | 5.638203705 | 7.87814045  |
| ENSMUSG00000093716 | 10.61177777 | 10.43425866 | 4.236906287 | 4.832746033 | 8.594335036 |
| ENSMUSG00000093719 | 7.781970364 | 10.43425866 | 12.71071886 | 4.832746033 | 8.594335036 |
| ENSMUSG00000093720 | 62.25576291 | 95.2995624  | 87.56272992 | 158.6751614 | 118.1721067 |
| ENSMUSG00000093721 | 7.074518513 | 8.347406925 | 7.767661525 | 7.249119049 | 7.161945863 |
| ENSMUSG00000093722 | 82.7718666  | 123.8198694 | 116.5149229 | 53.16020636 | 59.44415067 |

|                   |             |             |             |             |             |
|-------------------|-------------|-------------|-------------|-------------|-------------|
| ENSMUSG0000093724 | 11.31922962 | 5.56493795  | 7.061510478 | 4.832746033 | 9.310529622 |
| ENSMUSG0000093725 | 10.61177777 | 7.651789682 | 10.59226572 | 4.832746033 | 5.729556691 |
| ENSMUSG0000093726 | 9.904325918 | 11.82549314 | 4.943057334 | 8.860034393 | 14.32389173 |
| ENSMUSG0000093727 | 14.14903703 | 9.738641413 | 10.59226572 | 4.02728836  | 12.89150255 |
| ENSMUSG0000093728 | 5.65961481  | 10.43425866 | 5.649208382 | 7.249119049 | 7.87814045  |
| ENSMUSG0000093729 | 8.489422215 | 4.869320706 | 7.061510478 | 7.249119049 | 6.445751277 |
| ENSMUSG0000093730 | 10.61177777 | 16.69481385 | 14.829172   | 6.443661377 | 14.32389173 |
| ENSMUSG0000093731 | 4.952162959 | 13.21672763 | 14.12302096 | 4.02728836  | 4.297167518 |
| ENSMUSG0000093732 | 9.196874066 | 10.43425866 | 7.061510478 | 8.054576721 | 6.445751277 |
| ENSMUSG0000093734 | 101.1656147 | 127.2979556 | 139.8179075 | 172.3679418 | 147.5360848 |
| ENSMUSG0000093736 | 9.196874066 | 15.30357936 | 8.473812573 | 6.443661377 | 8.594335036 |
| ENSMUSG0000093738 | 7.074518513 | 3.478086219 | 5.649208382 | 4.832746033 | 5.729556691 |
| ENSMUSG0000093739 | 15.56394073 | 13.21672763 | 13.41686991 | 11.27640741 | 13.60769714 |
| ENSMUSG0000093740 | 5.65961481  | 4.869320706 | 7.061510478 | 3.221830688 | 6.445751277 |
| ENSMUSG0000093741 | 12.73413332 | 11.1298759  | 6.35535943  | 1.610915344 | 9.310529622 |
| ENSMUSG0000093743 | 12.02668147 | 13.21672763 | 12.00456781 | 5.638203705 | 6.445751277 |
| ENSMUSG0000093744 | 11.31922962 | 6.956172438 | 8.473812573 | 1.610915344 | 4.297167518 |
| ENSMUSG0000093745 | 3.537259256 | 6.956172438 | 7.061510478 | 5.638203705 | 6.445751277 |
| ENSMUSG0000093746 | 35.37259256 | 25.73783802 | 31.0706461  | 81.35122488 | 50.13362104 |
| ENSMUSG0000093747 | 12.02668147 | 4.869320706 | 8.473812573 | 11.27640741 | 7.87814045  |
| ENSMUSG0000093748 | 9.904325918 | 10.43425866 | 9.179963621 | 3.221830688 | 2.864778345 |
| ENSMUSG0000093749 | 8.489422215 | 8.347406925 | 5.649208382 | 6.443661377 | 10.02672421 |
| ENSMUSG0000093751 | 8.489422215 | 8.347406925 | 9.886114669 | 6.443661377 | 6.445751277 |
| ENSMUSG0000093753 | 9.904325918 | 6.956172438 | 7.061510478 | 8.860034393 | 5.729556691 |
| ENSMUSG0000093756 | 7.781970364 | 6.260555194 | 9.179963621 | 5.638203705 | 5.729556691 |
| ENSMUSG0000093757 | 14.14903703 | 8.347406925 | 4.236906287 | 5.638203705 | 7.161945863 |
| ENSMUSG0000093758 | 16.27139258 | 36.17209668 | 33.89525029 | 17.72006879 | 22.20203218 |
| ENSMUSG0000093759 | 6.367066661 | 2.782468975 | 8.473812573 | 5.638203705 | 6.445751277 |
| ENSMUSG0000093760 | 16.97884443 | 6.956172438 | 9.886114669 | 4.02728836  | 10.02672421 |
| ENSMUSG0000093761 | 14.14903703 | 9.043024169 | 8.473812573 | 4.832746033 | 10.02672421 |
| ENSMUSG0000093762 | 4.952162959 | 2.086851731 | 9.886114669 | 7.249119049 | 7.161945863 |
| ENSMUSG0000093763 | 10.61177777 | 7.651789682 | 5.649208382 | 8.054576721 | 10.02672421 |
| ENSMUSG0000093765 | 8.489422215 | 9.043024169 | 7.767661525 | 4.832746033 | 4.297167518 |
| ENSMUSG0000093766 | 9.196874066 | 13.91234488 | 7.061510478 | 4.02728836  | 5.013362104 |
| ENSMUSG0000093767 | 9.904325918 | 8.347406925 | 7.061510478 | 7.249119049 | 7.87814045  |
| ENSMUSG0000093768 | 15.56394073 | 22.2597518  | 31.77679715 | 13.69278043 | 14.32389173 |
| ENSMUSG0000093770 | 10.61177777 | 5.56493795  | 4.943057334 | 7.249119049 | 5.729556691 |
| ENSMUSG0000093771 | 8.489422215 | 7.651789682 | 8.473812573 | 9.665492065 | 7.161945863 |
| ENSMUSG0000093772 | 5.65961481  | 3.478086219 | 6.35535943  | 7.249119049 | 7.87814045  |
| ENSMUSG0000093773 | 9.904325918 | 8.347406925 | 5.649208382 | 4.832746033 | 5.013362104 |
| ENSMUSG0000093774 | 10.61177777 | 10.43425866 | 6.35535943  | 4.832746033 | 7.87814045  |
| ENSMUSG0000093775 | 7.074518513 | 10.43425866 | 8.473812573 | 4.02728836  | 2.148583759 |
| ENSMUSG0000093776 | 11.31922962 | 9.738641413 | 7.061510478 | 9.665492065 | 5.013362104 |

|                    |             |             |             |             |             |
|--------------------|-------------|-------------|-------------|-------------|-------------|
| ENSMUSG00000093779 | 265.2944442 | 285.2030699 | 267.6312471 | 467.1654498 | 326.5847314 |
| ENSMUSG00000093780 | 9.904325918 | 6.260555194 | 6.35535943  | 8.054576721 | 7.87814045  |
| ENSMUSG00000093781 | 12.02668147 | 9.738641413 | 9.179963621 | 4.832746033 | 5.013362104 |
| ENSMUSG00000093782 | 0           | 0           | 0.706151048 | 0           | 0           |
| ENSMUSG00000093784 | 1.414903703 | 1.391234488 | 3.530755239 | 0           | 2.864778345 |
| ENSMUSG00000093787 | 9.904325918 | 6.260555194 | 3.530755239 | 8.054576721 | 6.445751277 |
| ENSMUSG00000093788 | 12.73413332 | 6.260555194 | 5.649208382 | 1.610915344 | 9.310529622 |
| ENSMUSG00000093791 | 5.65961481  | 10.43425866 | 8.473812573 | 5.638203705 | 4.297167518 |
| ENSMUSG00000093793 | 38.90985182 | 46.60635533 | 45.19366706 | 46.71654498 | 40.10689684 |
| ENSMUSG00000093795 | 5.65961481  | 5.56493795  | 6.35535943  | 3.221830688 | 7.87814045  |
| ENSMUSG00000093796 | 2.829807405 | 7.651789682 | 3.530755239 | 0.805457672 | 2.148583759 |
| ENSMUSG00000093798 | 17.68629628 | 7.651789682 | 12.00456781 | 31.41284921 | 30.08017263 |
| ENSMUSG00000093799 | 12.73413332 | 4.869320706 | 7.767661525 | 5.638203705 | 9.310529622 |
| ENSMUSG00000093800 | 16.27139258 | 11.82549314 | 13.41686991 | 7.249119049 | 10.02672421 |
| ENSMUSG00000093801 | 6.367066661 | 7.651789682 | 8.473812573 | 5.638203705 | 7.87814045  |
| ENSMUSG00000093802 | 7.074518513 | 2.086851731 | 1.412302096 | 0.805457672 | 2.864778345 |
| ENSMUSG00000093804 | 8.489422215 | 9.043024169 | 6.35535943  | 4.02728836  | 4.297167518 |
| ENSMUSG00000093807 | 9.904325918 | 11.1298759  | 10.59226572 | 12.08186508 | 10.02672421 |
| ENSMUSG00000093808 | 7.781970364 | 11.82549314 | 6.35535943  | 1.610915344 | 3.580972932 |
| ENSMUSG00000093813 | 13.44158517 | 7.651789682 | 8.473812573 | 6.443661377 | 10.02672421 |
| ENSMUSG00000093814 | 8.489422215 | 4.869320706 | 9.179963621 | 7.249119049 | 7.87814045  |
| ENSMUSG00000093815 | 7.781970364 | 9.043024169 | 10.59226572 | 8.054576721 | 6.445751277 |
| ENSMUSG00000093816 | 0           | 0           | 2.824604191 | 1.610915344 | 0           |
| ENSMUSG00000093817 | 2.122355554 | 3.478086219 | 1.412302096 | 2.416373016 | 2.864778345 |
| ENSMUSG00000093818 | 0.707451851 | 0.695617244 | 0           | 0.805457672 | 1.432389173 |
| ENSMUSG00000093820 | 9.904325918 | 10.43425866 | 10.59226572 | 1.610915344 | 5.013362104 |
| ENSMUSG00000093822 | 6.367066661 | 6.260555194 | 5.649208382 | 9.665492065 | 6.445751277 |
| ENSMUSG00000093823 | 16.97884443 | 13.91234488 | 6.35535943  | 9.665492065 | 5.729556691 |
| ENSMUSG00000093824 | 0           | 0           | 0           | 0           | 0           |
| ENSMUSG00000093826 | 8.489422215 | 11.82549314 | 9.886114669 | 8.860034393 | 10.7429188  |
| ENSMUSG00000093827 | 9.904325918 | 5.56493795  | 4.943057334 | 6.443661377 | 5.013362104 |
| ENSMUSG00000093829 | 9.196874066 | 4.869320706 | 7.767661525 | 4.02728836  | 5.729556691 |
| ENSMUSG00000093830 | 0           | 0           | 0           | 0           | 0           |
| ENSMUSG00000093831 | 6.367066661 | 8.347406925 | 7.061510478 | 6.443661377 | 8.594335036 |
| ENSMUSG00000093833 | 8.489422215 | 8.347406925 | 7.767661525 | 8.054576721 | 14.32389173 |
| ENSMUSG00000093834 | 7.074518513 | 7.651789682 | 4.236906287 | 5.638203705 | 5.729556691 |
| ENSMUSG00000093835 | 8.489422215 | 11.82549314 | 9.886114669 | 4.02728836  | 7.161945863 |
| ENSMUSG00000093838 | 4.952162959 | 3.478086219 | 1.412302096 | 2.416373016 | 2.864778345 |
| ENSMUSG00000093839 | 12.02668147 | 6.956172438 | 2.824604191 | 6.443661377 | 9.310529622 |
| ENSMUSG00000093841 | 8.489422215 | 9.043024169 | 6.35535943  | 5.638203705 | 7.161945863 |
| ENSMUSG00000093843 | 7.781970364 | 11.82549314 | 13.41686991 | 6.443661377 | 8.594335036 |
| ENSMUSG00000093844 | 8.489422215 | 8.347406925 | 9.886114669 | 5.638203705 | 5.729556691 |
| ENSMUSG00000093846 | 9.196874066 | 9.043024169 | 5.649208382 | 6.443661377 | 7.87814045  |

|                    |             |             |             |             |             |
|--------------------|-------------|-------------|-------------|-------------|-------------|
| ENSMUSG00000093847 | 9.904325918 | 4.869320706 | 7.767661525 | 8.054576721 | 5.729556691 |
| ENSMUSG00000093849 | 6.367066661 | 6.956172438 | 3.530755239 | 11.27640741 | 5.729556691 |
| ENSMUSG00000093851 | 4.952162959 | 3.478086219 | 8.473812573 | 2.416373016 | 1.432389173 |
| ENSMUSG00000093852 | 0           | 0           | 0           | 0           | 0           |
| ENSMUSG00000093853 | 15.56394073 | 9.738641413 | 7.061510478 | 2.416373016 | 5.013362104 |
| ENSMUSG00000093854 | 0           | 0           | 0           | 0           | 0           |
| ENSMUSG00000093856 | 40.32475552 | 77.21351406 | 67.79050059 | 99.07129367 | 88.09193412 |
| ENSMUSG00000093857 | 5.65961481  | 5.56493795  | 2.824604191 | 2.416373016 | 5.729556691 |
| ENSMUSG00000093858 | 144.3201777 | 207.9895559 | 206.902257  | 202.1698757 | 138.2255552 |
| ENSMUSG00000093859 | 12.02668147 | 11.82549314 | 9.179963621 | 7.249119049 | 10.7429188  |
| ENSMUSG00000093860 | 0           | 0           | 0           | 0           | 0           |
| ENSMUSG00000093861 | 15.56394073 | 18.78166558 | 15.53532305 | 10.47094974 | 11.45911338 |
| ENSMUSG00000093862 | 11.31922962 | 3.478086219 | 7.767661525 | 6.443661377 | 7.87814045  |
| ENSMUSG00000093863 | 16.97884443 | 12.52111039 | 15.53532305 | 9.665492065 | 10.02672421 |
| ENSMUSG00000093864 | 10.61177777 | 11.82549314 | 8.473812573 | 7.249119049 | 6.445751277 |
| ENSMUSG00000093865 | 12.73413332 | 7.651789682 | 7.061510478 | 1.610915344 | 8.594335036 |
| ENSMUSG00000093866 | 4.244711108 | 4.869320706 | 10.59226572 | 5.638203705 | 4.297167518 |
| ENSMUSG00000093867 | 13.44158517 | 5.56493795  | 10.59226572 | 8.860034393 | 8.594335036 |
| ENSMUSG00000093869 | 4.952162959 | 3.478086219 | 4.236906287 | 0.805457672 | 5.013362104 |
| ENSMUSG00000093870 | 0           | 0           | 0           | 0           | 0           |
| ENSMUSG00000093871 | 14.14903703 | 4.869320706 | 5.649208382 | 6.443661377 | 3.580972932 |
| ENSMUSG00000093873 | 12.02668147 | 9.043024169 | 8.473812573 | 8.054576721 | 10.7429188  |
| ENSMUSG00000093874 | 2.122355554 | 0.695617244 | 0           | 0           | 1.432389173 |
| ENSMUSG00000093875 | 7.781970364 | 3.478086219 | 1.412302096 | 5.638203705 | 6.445751277 |
| ENSMUSG00000093876 | 0           | 0           | 0           | 0           | 0           |
| ENSMUSG00000093877 | 14.14903703 | 11.1298759  | 9.179963621 | 5.638203705 | 12.89150255 |
| ENSMUSG00000093878 | 8.489422215 | 4.173703463 | 9.886114669 | 4.832746033 | 3.580972932 |
| ENSMUSG00000093879 | 13.44158517 | 8.347406925 | 7.061510478 | 5.638203705 | 6.445751277 |
| ENSMUSG00000093880 | 13.44158517 | 13.21672763 | 10.59226572 | 4.832746033 | 11.45911338 |
| ENSMUSG00000093883 | 4.952162959 | 6.260555194 | 3.530755239 | 0.805457672 | 3.580972932 |
| ENSMUSG00000093884 | 7.781970364 | 3.478086219 | 9.886114669 | 8.860034393 | 6.445751277 |
| ENSMUSG00000093885 | 9.904325918 | 10.43425866 | 9.886114669 | 10.47094974 | 5.729556691 |
| ENSMUSG00000093886 | 10.61177777 | 7.651789682 | 7.767661525 | 6.443661377 | 7.87814045  |
| ENSMUSG00000093887 | 14.14903703 | 8.347406925 | 7.061510478 | 4.832746033 | 3.580972932 |
| ENSMUSG00000093889 | 7.074518513 | 9.738641413 | 11.29841676 | 6.443661377 | 2.148583759 |
| ENSMUSG00000093890 | 8.489422215 | 2.782468975 | 4.236906287 | 7.249119049 | 4.297167518 |
| ENSMUSG00000093891 | 7.074518513 | 6.956172438 | 8.473812573 | 8.054576721 | 8.594335036 |
| ENSMUSG00000093892 | 7.074518513 | 7.651789682 | 9.886114669 | 10.47094974 | 9.310529622 |
| ENSMUSG00000093893 | 0           | 0           | 0           | 0           | 0           |
| ENSMUSG00000093894 | 7.074518513 | 3.478086219 | 4.943057334 | 8.860034393 | 2.148583759 |
| ENSMUSG00000093896 | 12.02668147 | 6.956172438 | 5.649208382 | 7.249119049 | 10.02672421 |
| ENSMUSG00000093897 | 18.39374813 | 30.60715873 | 19.06607829 | 24.16373016 | 21.48583759 |
| ENSMUSG00000093899 | 6.367066661 | 2.782468975 | 4.236906287 | 3.221830688 | 2.864778345 |

|                    |             |             |             |             |             |
|--------------------|-------------|-------------|-------------|-------------|-------------|
| ENSMUSG00000093900 | 0           | 0           | 0           | 0           | 0           |
| ENSMUSG00000093902 | 10.61177777 | 15.30357936 | 12.00456781 | 6.443661377 | 9.310529622 |
| ENSMUSG00000093905 | 4.244711108 | 4.173703463 | 3.530755239 | 2.416373016 | 3.580972932 |
| ENSMUSG00000093906 | 12.73413332 | 10.43425866 | 10.59226572 | 6.443661377 | 10.7429188  |
| ENSMUSG00000093907 | 0           | 0           | 0           | 0           | 0           |
| ENSMUSG00000093909 | 2.829807405 | 1.391234488 | 6.35535943  | 1.610915344 | 2.148583759 |
| ENSMUSG00000093910 | 10.61177777 | 6.260555194 | 5.649208382 | 8.054576721 | 6.445751277 |
| ENSMUSG00000093912 | 12.02668147 | 23.65098629 | 16.94762515 | 14.4982381  | 12.89150255 |
| ENSMUSG00000093913 | 15.56394073 | 8.347406925 | 11.29841676 | 16.91461111 | 11.45911338 |
| ENSMUSG00000093914 | 0           | 0           | 0           | 0           | 0           |
| ENSMUSG00000093915 | 2.122355554 | 4.173703463 | 3.530755239 | 0.805457672 | 2.864778345 |
| ENSMUSG00000093916 | 7.074518513 | 4.869320706 | 7.767661525 | 3.221830688 | 7.161945863 |
| ENSMUSG00000093917 | 17.68629628 | 2.782468975 | 6.35535943  | 2.416373016 | 2.864778345 |
| ENSMUSG00000093919 | 19.10119998 | 12.52111039 | 12.00456781 | 15.30369577 | 7.87814045  |
| ENSMUSG00000093920 | 12.02668147 | 6.956172438 | 7.767661525 | 0.805457672 | 8.594335036 |
| ENSMUSG00000093921 | 9.904325918 | 8.347406925 | 10.59226572 | 4.832746033 | 7.161945863 |
| ENSMUSG00000093922 | 7.074518513 | 6.956172438 | 6.35535943  | 7.249119049 | 13.60769714 |
| ENSMUSG00000093924 | 7.074518513 | 4.173703463 | 9.179963621 | 8.054576721 | 10.7429188  |
| ENSMUSG00000093925 | 4.244711108 | 8.347406925 | 9.179963621 | 3.221830688 | 4.297167518 |
| ENSMUSG00000093926 | 8.489422215 | 6.956172438 | 11.29841676 | 6.443661377 | 9.310529622 |
| ENSMUSG00000093928 | 8.489422215 | 7.651789682 | 5.649208382 | 4.02728836  | 6.445751277 |
| ENSMUSG00000093929 | 7.781970364 | 8.347406925 | 8.473812573 | 4.832746033 | 4.297167518 |
| ENSMUSG00000093932 | 5.65961481  | 9.738641413 | 11.29841676 | 5.638203705 | 6.445751277 |
| ENSMUSG00000093933 | 12.02668147 | 12.52111039 | 11.29841676 | 6.443661377 | 3.580972932 |
| ENSMUSG00000093934 | 11.31922962 | 3.478086219 | 6.35535943  | 6.443661377 | 5.013362104 |
| ENSMUSG00000093935 | 2.829807405 | 1.391234488 | 0.706151048 | 0.805457672 | 3.580972932 |
| ENSMUSG00000093937 | 7.781970364 | 5.56493795  | 7.767661525 | 7.249119049 | 8.594335036 |
| ENSMUSG00000093939 | 4.952162959 | 4.173703463 | 2.824604191 | 4.832746033 | 5.013362104 |
| ENSMUSG00000093940 | 15.56394073 | 9.738641413 | 13.41686991 | 11.27640741 | 12.89150255 |
| ENSMUSG00000093941 | 7.074518513 | 4.173703463 | 5.649208382 | 5.638203705 | 3.580972932 |
| ENSMUSG00000093942 | 4.952162959 | 9.043024169 | 7.767661525 | 5.638203705 | 6.445751277 |
| ENSMUSG00000093943 | 0           | 0           | 0           | 0           | 0           |
| ENSMUSG00000093944 | 7.074518513 | 9.738641413 | 10.59226572 | 5.638203705 | 7.87814045  |
| ENSMUSG00000093946 | 9.904325918 | 4.869320706 | 4.943057334 | 8.054576721 | 2.864778345 |
| ENSMUSG00000093947 | 0.707451851 | 0.695617244 | 0.706151048 | 0.805457672 | 0.716194586 |
| ENSMUSG00000093948 | 13.44158517 | 6.260555194 | 6.35535943  | 7.249119049 | 5.013362104 |
| ENSMUSG00000093949 | 8.489422215 | 4.869320706 | 5.649208382 | 4.832746033 | 7.87814045  |
| ENSMUSG00000093951 | 0           | 0           | 0           | 0           | 0           |
| ENSMUSG00000093952 | 8.489422215 | 8.347406925 | 7.061510478 | 1.610915344 | 5.729556691 |
| ENSMUSG00000093953 | 9.904325918 | 2.782468975 | 6.35535943  | 4.02728836  | 6.445751277 |
| ENSMUSG00000093955 | 7.074518513 | 6.956172438 | 6.35535943  | 5.638203705 | 2.864778345 |
| ENSMUSG00000093956 | 8.489422215 | 11.1298759  | 7.061510478 | 8.860034393 | 20.05344842 |
| ENSMUSG00000093958 | 4.952162959 | 2.782468975 | 3.530755239 | 1.610915344 | 2.864778345 |



|                    |             |             |             |             |             |
|--------------------|-------------|-------------|-------------|-------------|-------------|
| ENSMUSG00000093959 | 11.31922962 | 6.956172438 | 9.886114669 | 4.832746033 | 7.161945863 |
| ENSMUSG00000093960 | 0           | 0           | 0           | 0           | 0           |
| ENSMUSG00000093961 | 16.27139258 | 19.47728283 | 18.35992724 | 10.47094974 | 7.87814045  |
| ENSMUSG00000093963 | 12.02668147 | 7.651789682 | 5.649208382 | 4.02728836  | 5.729556691 |
| ENSMUSG00000093964 | 12.02668147 | 4.173703463 | 10.59226572 | 8.054576721 | 10.02672421 |
| ENSMUSG00000093965 | 9.196874066 | 8.347406925 | 16.2414741  | 10.47094974 | 7.161945863 |
| ENSMUSG00000093966 | 10.61177777 | 7.651789682 | 10.59226572 | 6.443661377 | 5.013362104 |
| ENSMUSG00000093967 | 7.781970364 | 4.869320706 | 12.71071886 | 7.249119049 | 9.310529622 |
| ENSMUSG00000093968 | 9.904325918 | 4.869320706 | 13.41686991 | 3.221830688 | 7.161945863 |
| ENSMUSG00000093969 | 8.489422215 | 9.738641413 | 4.943057334 | 5.638203705 | 7.87814045  |
| ENSMUSG00000093970 | 12.73413332 | 11.82549314 | 8.473812573 | 6.443661377 | 6.445751277 |
| ENSMUSG00000093971 | 2.122355554 | 4.869320706 | 3.530755239 | 4.02728836  | 0.716194586 |
| ENSMUSG00000093974 | 6.367066661 | 4.173703463 | 5.649208382 | 3.221830688 | 2.864778345 |
| ENSMUSG00000093975 | 6.367066661 | 7.651789682 | 4.236906287 | 5.638203705 | 6.445751277 |
| ENSMUSG00000093976 | 11.31922962 | 8.347406925 | 10.59226572 | 4.02728836  | 10.02672421 |
| ENSMUSG00000093977 | 12.02668147 | 2.782468975 | 11.29841676 | 6.443661377 | 6.445751277 |
| ENSMUSG00000093978 | 15.56394073 | 9.738641413 | 8.473812573 | 4.832746033 | 10.7429188  |
| ENSMUSG00000093980 | 8.489422215 | 4.869320706 | 4.236906287 | 4.02728836  | 6.445751277 |
| ENSMUSG00000093981 | 0           | 0           | 0           | 0           | 0           |
| ENSMUSG00000093983 | 10.61177777 | 9.738641413 | 5.649208382 | 11.27640741 | 4.297167518 |
| ENSMUSG00000093984 | 4.952162959 | 2.086851731 | 3.530755239 | 4.832746033 | 5.013362104 |
| ENSMUSG00000093986 | 8.489422215 | 6.956172438 | 7.061510478 | 4.832746033 | 5.013362104 |
| ENSMUSG00000093988 | 3.537259256 | 6.260555194 | 7.767661525 | 6.443661377 | 5.729556691 |
| ENSMUSG00000093990 | 2.122355554 | 4.173703463 | 3.530755239 | 0.805457672 | 2.864778345 |
| ENSMUSG00000093992 | 11.31922962 | 6.956172438 | 9.179963621 | 4.832746033 | 5.013362104 |
| ENSMUSG00000093994 | 2.122355554 | 1.391234488 | 4.943057334 | 4.02728836  | 5.013362104 |
| ENSMUSG00000093995 | 0           | 0           | 0           | 0           | 0           |
| ENSMUSG00000093996 | 6.367066661 | 4.869320706 | 1.412302096 | 6.443661377 | 2.864778345 |
| ENSMUSG00000093997 | 0           | 0           | 0           | 0           | 0           |
| ENSMUSG00000093998 | 25.46826665 | 15.30357936 | 14.829172   | 12.08186508 | 13.60769714 |
| ENSMUSG00000093999 | 5.65961481  | 8.347406925 | 5.649208382 | 6.443661377 | 5.729556691 |
| ENSMUSG00000094001 | 16.27139258 | 7.651789682 | 8.473812573 | 4.832746033 | 5.729556691 |
| ENSMUSG00000094002 | 9.904325918 | 5.56493795  | 7.061510478 | 1.610915344 | 7.161945863 |
| ENSMUSG00000094003 | 0           | 0           | 0           | 0           | 0           |
| ENSMUSG00000094005 | 9.904325918 | 7.651789682 | 6.35535943  | 11.27640741 | 4.297167518 |
| ENSMUSG00000094006 | 7.074518513 | 6.260555194 | 4.236906287 | 9.665492065 | 12.17530797 |
| ENSMUSG00000094007 | 12.02668147 | 5.56493795  | 4.943057334 | 8.054576721 | 8.594335036 |
| ENSMUSG00000094008 | 9.196874066 | 5.56493795  | 7.767661525 | 8.860034393 | 5.013362104 |
| ENSMUSG00000094009 | 0           | 0           | 0           | 0           | 0           |
| ENSMUSG00000094010 | 20.51610369 | 4.173703463 | 3.530755239 | 4.02728836  | 3.580972932 |
| ENSMUSG00000094011 | 9.196874066 | 5.56493795  | 2.824604191 | 6.443661377 | 4.297167518 |
| ENSMUSG00000094012 | 12.02668147 | 9.043024169 | 6.35535943  | 9.665492065 | 4.297167518 |
| ENSMUSG00000094013 | 9.196874066 | 6.956172438 | 9.179963621 | 1.610915344 | 4.297167518 |

|                   |             |             |             |             |             |
|-------------------|-------------|-------------|-------------|-------------|-------------|
| ENSMUSG0000094014 | 3.537259256 | 5.56493795  | 4.943057334 | 2.416373016 | 5.013362104 |
| ENSMUSG0000094015 | 4.244711108 | 5.56493795  | 2.118453143 | 1.610915344 | 5.013362104 |
| ENSMUSG0000094016 | 14.14903703 | 6.956172438 | 7.767661525 | 5.638203705 | 3.580972932 |
| ENSMUSG0000094017 | 17.68629628 | 13.91234488 | 12.71071886 | 12.08186508 | 7.161945863 |
| ENSMUSG0000094018 | 13.44158517 | 5.56493795  | 7.061510478 | 6.443661377 | 6.445751277 |
| ENSMUSG0000094019 | 0           | 0           | 0           | 0           | 0           |
| ENSMUSG0000094020 | 9.904325918 | 8.347406925 | 6.35535943  | 7.249119049 | 5.013362104 |
| ENSMUSG0000094022 | 3.537259256 | 2.086851731 | 4.236906287 | 3.221830688 | 6.445751277 |
| ENSMUSG0000094026 | 9.196874066 | 6.956172438 | 9.886114669 | 5.638203705 | 7.161945863 |
| ENSMUSG0000094027 | 6.367066661 | 8.347406925 | 8.473812573 | 4.02728836  | 6.445751277 |
| ENSMUSG0000094028 | 0.707451851 | 0           | 1.412302096 | 0.805457672 | 2.148583759 |
| ENSMUSG0000094029 | 7.074518513 | 3.478086219 | 4.943057334 | 7.249119049 | 6.445751277 |
| ENSMUSG0000094030 | 12.02668147 | 7.651789682 | 10.59226572 | 4.832746033 | 6.445751277 |
| ENSMUSG0000094031 | 8.489422215 | 6.956172438 | 3.530755239 | 2.416373016 | 4.297167518 |
| ENSMUSG0000094032 | 0           | 0           | 0           | 0           | 0           |
| ENSMUSG0000094033 | 12.02668147 | 17.39043109 | 2.118453143 | 7.249119049 | 5.013362104 |
| ENSMUSG0000094034 | 0           | 0           | 0           | 0           | 0           |
| ENSMUSG0000094035 | 6.367066661 | 4.869320706 | 4.943057334 | 8.860034393 | 5.013362104 |
| ENSMUSG0000094036 | 10.61177777 | 4.869320706 | 4.943057334 | 6.443661377 | 5.729556691 |
| ENSMUSG0000094037 | 0           | 0           | 0           | 0           | 0           |
| ENSMUSG0000094038 | 0           | 0           | 0           | 0           | 0           |
| ENSMUSG0000094039 | 2.829807405 | 3.478086219 | 3.530755239 | 6.443661377 | 4.297167518 |
| ENSMUSG0000094041 | 187.4747406 | 244.1616526 | 218.9068248 | 281.1047276 | 222.0203218 |
| ENSMUSG0000094043 | 10.61177777 | 4.173703463 | 9.179963621 | 8.054576721 | 8.594335036 |
| ENSMUSG0000094044 | 4.244711108 | 2.782468975 | 1.412302096 | 0.805457672 | 0.716194586 |
| ENSMUSG0000094046 | 7.074518513 | 8.347406925 | 4.236906287 | 1.610915344 | 5.729556691 |
| ENSMUSG0000094048 | 0           | 0           | 0           | 0           | 0           |
| ENSMUSG0000094049 | 0           | 0           | 0           | 0           | 0           |
| ENSMUSG0000094050 | 1.414903703 | 2.086851731 | 2.118453143 | 1.610915344 | 0.716194586 |
| ENSMUSG0000094051 | 6.367066661 | 4.869320706 | 6.35535943  | 5.638203705 | 5.729556691 |
| ENSMUSG0000094055 | 2.829807405 | 4.173703463 | 5.649208382 | 6.443661377 | 5.013362104 |
| ENSMUSG0000094057 | 0.707451851 | 0           | 0           | 0.805457672 | 0           |
| ENSMUSG0000094059 | 0           | 0           | 0           | 0           | 0           |
| ENSMUSG0000094060 | 4.952162959 | 4.869320706 | 5.649208382 | 8.054576721 | 6.445751277 |
| ENSMUSG0000094062 | 9.904325918 | 7.651789682 | 6.35535943  | 3.221830688 | 3.580972932 |
| ENSMUSG0000094063 | 7.781970364 | 9.043024169 | 12.00456781 | 4.832746033 | 10.7429188  |
| ENSMUSG0000094064 | 6.367066661 | 2.782468975 | 4.943057334 | 5.638203705 | 2.148583759 |
| ENSMUSG0000094066 | 2.829807405 | 0           | 3.530755239 | 4.832746033 | 2.864778345 |
| ENSMUSG0000094067 | 0           | 0           | 0           | 0           | 0           |
| ENSMUSG0000094068 | 0           | 0           | 0           | 0           | 0           |
| ENSMUSG0000094069 | 2.829807405 | 0.695617244 | 4.943057334 | 1.610915344 | 2.148583759 |
| ENSMUSG0000094070 | 0           | 0           | 0           | 0           | 0           |
| ENSMUSG0000094071 | 7.074518513 | 3.478086219 | 2.824604191 | 3.221830688 | 6.445751277 |

|                    |             |             |             |             |             |
|--------------------|-------------|-------------|-------------|-------------|-------------|
| ENSMUSG00000094072 | 9.196874066 | 9.738641413 | 8.473812573 | 8.860034393 | 9.310529622 |
| ENSMUSG00000094074 | 10.61177777 | 10.43425866 | 4.943057334 | 3.221830688 | 2.864778345 |
| ENSMUSG00000094075 | 13.44158517 | 9.738641413 | 8.473812573 | 9.665492065 | 10.7429188  |
| ENSMUSG00000094077 | 9.196874066 | 8.347406925 | 7.061510478 | 8.860034393 | 5.729556691 |
| ENSMUSG00000094078 | 9.196874066 | 6.260555194 | 9.886114669 | 4.02728836  | 6.445751277 |
| ENSMUSG00000094079 | 6.367066661 | 6.260555194 | 10.59226572 | 6.443661377 | 10.02672421 |
| ENSMUSG00000094080 | 4.244711108 | 5.56493795  | 6.35535943  | 4.832746033 | 8.594335036 |
| ENSMUSG00000094082 | 3.537259256 | 9.738641413 | 9.886114669 | 8.054576721 | 7.161945863 |
| ENSMUSG00000094085 | 12.02668147 | 8.347406925 | 4.236906287 | 5.638203705 | 5.729556691 |
| ENSMUSG00000094086 | 7.074518513 | 8.347406925 | 7.061510478 | 8.860034393 | 2.864778345 |
| ENSMUSG00000094087 | 6.367066661 | 5.56493795  | 4.236906287 | 8.860034393 | 2.864778345 |
| ENSMUSG00000094088 | 9.196874066 | 6.956172438 | 11.29841676 | 10.47094974 | 10.02672421 |
| ENSMUSG00000094090 | 13.44158517 | 11.82549314 | 13.41686991 | 10.47094974 | 7.87814045  |
| ENSMUSG00000094091 | 16.97884443 | 9.738641413 | 11.29841676 | 15.30369577 | 12.17530797 |
| ENSMUSG00000094092 | 14.85648888 | 21.56413456 | 19.77222934 | 11.27640741 | 23.63442135 |
| ENSMUSG00000094093 | 0           | 0           | 0           | 0           | 0           |
| ENSMUSG00000094094 | 7.074518513 | 13.21672763 | 14.12302096 | 4.02728836  | 10.7429188  |
| ENSMUSG00000094095 | 0           | 0           | 0           | 0           | 0           |
| ENSMUSG00000094096 | 8.489422215 | 5.56493795  | 9.886114669 | 5.638203705 | 10.02672421 |
| ENSMUSG00000094097 | 0           | 0           | 0           | 0           | 0           |
| ENSMUSG00000094098 | 15.56394073 | 9.043024169 | 7.061510478 | 8.860034393 | 5.013362104 |
| ENSMUSG00000094099 | 0           | 0           | 0           | 0           | 0           |
| ENSMUSG00000094101 | 0           | 0           | 0           | 0           | 0           |
| ENSMUSG00000094102 | 2.829807405 | 4.869320706 | 5.649208382 | 3.221830688 | 4.297167518 |
| ENSMUSG00000094104 | 8.489422215 | 6.260555194 | 5.649208382 | 4.02728836  | 6.445751277 |
| ENSMUSG00000094105 | 12.73413332 | 6.956172438 | 7.061510478 | 9.665492065 | 3.580972932 |
| ENSMUSG00000094107 | 9.196874066 | 6.956172438 | 2.824604191 | 4.02728836  | 8.594335036 |
| ENSMUSG00000094108 | 4.952162959 | 2.782468975 | 5.649208382 | 0.805457672 | 4.297167518 |
| ENSMUSG00000094109 | 7.074518513 | 4.869320706 | 7.061510478 | 1.610915344 | 2.864778345 |
| ENSMUSG00000094111 | 13.44158517 | 6.956172438 | 9.179963621 | 4.02728836  | 3.580972932 |
| ENSMUSG00000094112 | 7.074518513 | 9.738641413 | 8.473812573 | 8.054576721 | 5.729556691 |
| ENSMUSG00000094114 | 21.22355554 | 16.69481385 | 16.94762515 | 28.9964762  | 20.05344842 |
| ENSMUSG00000094115 | 4.244711108 | 3.478086219 | 7.767661525 | 7.249119049 | 4.297167518 |
| ENSMUSG00000094117 | 4.952162959 | 6.260555194 | 7.061510478 | 4.832746033 | 5.729556691 |
| ENSMUSG00000094118 | 2.829807405 | 6.260555194 | 5.649208382 | 3.221830688 | 7.161945863 |
| ENSMUSG00000094119 | 8.489422215 | 4.869320706 | 8.473812573 | 3.221830688 | 5.729556691 |
| ENSMUSG00000094120 | 8.489422215 | 6.260555194 | 6.35535943  | 8.860034393 | 9.310529622 |
| ENSMUSG00000094122 | 7.074518513 | 5.56493795  | 7.061510478 | 10.47094974 | 7.161945863 |
| ENSMUSG00000094123 | 1.414903703 | 0.695617244 | 3.530755239 | 0.805457672 | 4.297167518 |
| ENSMUSG00000094124 | 9.196874066 | 6.956172438 | 10.59226572 | 7.249119049 | 5.729556691 |
| ENSMUSG00000094125 | 12.73413332 | 6.956172438 | 11.29841676 | 13.69278043 | 13.60769714 |
| ENSMUSG00000094126 | 9.196874066 | 15.30357936 | 10.59226572 | 8.054576721 | 10.02672421 |
| ENSMUSG00000094127 | 29.0055259  | 20.17290007 | 22.59683353 | 23.35827249 | 16.47247549 |

|                    |             |             |             |             |             |
|--------------------|-------------|-------------|-------------|-------------|-------------|
| ENSMUSG00000094128 | 7.781970364 | 7.651789682 | 15.53532305 | 4.02728836  | 6.445751277 |
| ENSMUSG00000094129 | 0           | 0           | 0           | 0           | 0           |
| ENSMUSG00000094130 | 13.44158517 | 20.86851731 | 19.06607829 | 14.4982381  | 15.04008631 |
| ENSMUSG00000094131 | 9.196874066 | 13.91234488 | 9.886114669 | 7.249119049 | 10.02672421 |
| ENSMUSG00000094133 | 6.367066661 | 8.347406925 | 5.649208382 | 6.443661377 | 5.013362104 |
| ENSMUSG00000094134 | 2.829807405 | 4.173703463 | 3.530755239 | 0           | 2.864778345 |
| ENSMUSG00000094136 | 8.489422215 | 6.956172438 | 7.061510478 | 8.054576721 | 10.02672421 |
| ENSMUSG00000094137 | 14.14903703 | 9.738641413 | 7.061510478 | 5.638203705 | 5.729556691 |
| ENSMUSG00000094139 | 8.489422215 | 4.869320706 | 7.767661525 | 5.638203705 | 5.729556691 |
| ENSMUSG00000094140 | 10.61177777 | 3.478086219 | 7.061510478 | 4.02728836  | 11.45911338 |
| ENSMUSG00000094145 | 11.31922962 | 12.52111039 | 8.473812573 | 6.443661377 | 5.013362104 |
| ENSMUSG00000094146 | 8.489422215 | 9.738641413 | 8.473812573 | 4.832746033 | 8.594335036 |
| ENSMUSG00000094147 | 2.829807405 | 1.391234488 | 2.824604191 | 3.221830688 | 2.148583759 |
| ENSMUSG00000094148 | 0           | 0           | 0           | 0           | 0           |
| ENSMUSG00000094149 | 12.73413332 | 6.956172438 | 5.649208382 | 7.249119049 | 5.729556691 |
| ENSMUSG00000094150 | 5.65961481  | 2.086851731 | 2.118453143 | 7.249119049 | 7.161945863 |
| ENSMUSG00000094152 | 12.73413332 | 20.17290007 | 15.53532305 | 10.47094974 | 20.769643   |
| ENSMUSG00000094153 | 16.97884443 | 11.82549314 | 15.53532305 | 8.860034393 | 12.17530797 |
| ENSMUSG00000094154 | 5.65961481  | 4.173703463 | 4.236906287 | 8.054576721 | 7.161945863 |
| ENSMUSG00000094155 | 5.65961481  | 5.56493795  | 2.118453143 | 3.221830688 | 3.580972932 |
| ENSMUSG00000094156 | 12.02668147 | 4.173703463 | 6.35535943  | 6.443661377 | 5.013362104 |
| ENSMUSG00000094157 | 6.367066661 | 9.043024169 | 14.12302096 | 6.443661377 | 5.013362104 |
| ENSMUSG00000094158 | 29.0055259  | 45.21512085 | 40.95676077 | 37.05105292 | 41.53928601 |
| ENSMUSG00000094159 | 0           | 0           | 0           | 0           | 0           |
| ENSMUSG00000094160 | 13.44158517 | 6.260555194 | 3.530755239 | 8.860034393 | 5.013362104 |
| ENSMUSG00000094161 | 2.122355554 | 4.173703463 | 2.118453143 | 1.610915344 | 3.580972932 |
| ENSMUSG00000094162 | 2.122355554 | 2.086851731 | 2.118453143 | 4.02728836  | 2.864778345 |
| ENSMUSG00000094163 | 9.196874066 | 6.956172438 | 7.061510478 | 6.443661377 | 4.297167518 |
| ENSMUSG00000094164 | 4.244711108 | 4.173703463 | 3.530755239 | 1.610915344 | 3.580972932 |
| ENSMUSG00000094165 | 0           | 0           | 0           | 0           | 0           |
| ENSMUSG00000094166 | 5.65961481  | 4.869320706 | 4.236906287 | 2.416373016 | 2.864778345 |
| ENSMUSG00000094167 | 1.414903703 | 8.347406925 | 9.886114669 | 6.443661377 | 5.013362104 |
| ENSMUSG00000094168 | 12.73413332 | 5.56493795  | 7.061510478 | 4.02728836  | 5.013362104 |
| ENSMUSG00000094170 | 7.074518513 | 7.651789682 | 6.35535943  | 2.416373016 | 2.148583759 |
| ENSMUSG00000094173 | 4.244711108 | 4.173703463 | 3.530755239 | 4.02728836  | 4.297167518 |
| ENSMUSG00000094174 | 6.367066661 | 2.782468975 | 5.649208382 | 4.02728836  | 4.297167518 |
| ENSMUSG00000094175 | 6.367066661 | 14.60796212 | 7.767661525 | 6.443661377 | 7.87814045  |
| ENSMUSG00000094177 | 9.196874066 | 6.956172438 | 2.824604191 | 1.610915344 | 5.013362104 |
| ENSMUSG00000094178 | 0           | 0           | 0           | 0           | 0           |
| ENSMUSG00000094179 | 0           | 0           | 0           | 0           | 0           |
| ENSMUSG00000094180 | 9.904325918 | 8.347406925 | 7.767661525 | 8.054576721 | 7.161945863 |
| ENSMUSG00000094182 | 9.904325918 | 7.651789682 | 7.061510478 | 2.416373016 | 4.297167518 |
| ENSMUSG00000094183 | 5.65961481  | 6.260555194 | 9.886114669 | 6.443661377 | 6.445751277 |

|                    |             |             |             |             |             |
|--------------------|-------------|-------------|-------------|-------------|-------------|
| ENSMUSG00000094184 | 0           | 0           | 0           | 0           | 0           |
| ENSMUSG00000094185 | 6.367066661 | 9.738641413 | 1.412302096 | 7.249119049 | 7.87814045  |
| ENSMUSG00000094187 | 7.074518513 | 8.347406925 | 4.943057334 | 4.832746033 | 7.161945863 |
| ENSMUSG00000094188 | 7.781970364 | 6.956172438 | 9.886114669 | 4.832746033 | 4.297167518 |
| ENSMUSG00000094189 | 11.31922962 | 4.869320706 | 6.35535943  | 8.054576721 | 10.02672421 |
| ENSMUSG00000094190 | 0           | 0           | 0           | 0           | 0           |
| ENSMUSG00000094191 | 11.31922962 | 8.347406925 | 7.767661525 | 6.443661377 | 9.310529622 |
| ENSMUSG00000094194 | 1.414903703 | 2.782468975 | 4.943057334 | 8.860034393 | 3.580972932 |
| ENSMUSG00000094195 | 9.904325918 | 7.651789682 | 9.886114669 | 5.638203705 | 12.89150255 |
| ENSMUSG00000094196 | 4.244711108 | 1.391234488 | 2.118453143 | 2.416373016 | 2.148583759 |
| ENSMUSG00000094197 | 8.489422215 | 5.56493795  | 11.29841676 | 4.02728836  | 5.729556691 |
| ENSMUSG00000094198 | 5.65961481  | 8.347406925 | 6.35535943  | 8.860034393 | 5.013362104 |
| ENSMUSG00000094199 | 7.074518513 | 10.43425866 | 7.767661525 | 4.02728836  | 2.864778345 |
| ENSMUSG00000094201 | 4.952162959 | 12.52111039 | 9.179963621 | 5.638203705 | 6.445751277 |
| ENSMUSG00000094202 | 9.904325918 | 4.869320706 | 7.767661525 | 8.054576721 | 10.7429188  |
| ENSMUSG00000094203 | 4.244711108 | 4.173703463 | 2.118453143 | 3.221830688 | 2.864778345 |
| ENSMUSG00000094204 | 7.781970364 | 3.478086219 | 13.41686991 | 6.443661377 | 8.594335036 |
| ENSMUSG00000094205 | 11.31922962 | 6.260555194 | 8.473812573 | 6.443661377 | 9.310529622 |
| ENSMUSG00000094208 | 12.73413332 | 4.869320706 | 7.061510478 | 8.860034393 | 3.580972932 |
| ENSMUSG00000094210 | 7.074518513 | 9.043024169 | 6.35535943  | 5.638203705 | 6.445751277 |
| ENSMUSG00000094211 | 12.02668147 | 10.43425866 | 6.35535943  | 6.443661377 | 5.013362104 |
| ENSMUSG00000094213 | 0           | 0           | 0           | 0           | 0           |
| ENSMUSG00000094214 | 7.781970364 | 11.1298759  | 13.41686991 | 8.054576721 | 5.729556691 |
| ENSMUSG00000094215 | 7.781970364 | 8.347406925 | 4.943057334 | 8.054576721 | 7.87814045  |
| ENSMUSG00000094217 | 10.61177777 | 4.173703463 | 7.061510478 | 4.832746033 | 1.432389173 |
| ENSMUSG00000094218 | 6.367066661 | 6.956172438 | 4.236906287 | 4.02728836  | 6.445751277 |
| ENSMUSG00000094219 | 9.904325918 | 7.651789682 | 6.35535943  | 8.054576721 | 7.87814045  |
| ENSMUSG00000094221 | 9.196874066 | 4.173703463 | 2.824604191 | 4.02728836  | 5.013362104 |
| ENSMUSG00000094222 | 9.196874066 | 6.956172438 | 14.12302096 | 8.860034393 | 6.445751277 |
| ENSMUSG00000094223 | 4.952162959 | 4.869320706 | 6.35535943  | 4.832746033 | 5.729556691 |
| ENSMUSG00000094224 | 14.14903703 | 11.1298759  | 9.886114669 | 4.832746033 | 9.310529622 |
| ENSMUSG00000094226 | 10.61177777 | 6.260555194 | 7.061510478 | 4.832746033 | 6.445751277 |
| ENSMUSG00000094227 | 9.904325918 | 1.391234488 | 2.118453143 | 4.832746033 | 2.148583759 |
| ENSMUSG00000094228 | 3.537259256 | 3.478086219 | 4.943057334 | 5.638203705 | 4.297167518 |
| ENSMUSG00000094229 | 6.367066661 | 11.1298759  | 9.179963621 | 4.02728836  | 10.7429188  |
| ENSMUSG00000094230 | 38.90985182 | 14.60796212 | 12.71071886 | 15.30369577 | 10.02672421 |
| ENSMUSG00000094231 | 9.904325918 | 8.347406925 | 7.767661525 | 6.443661377 | 7.161945863 |
| ENSMUSG00000094232 | 5.65961481  | 4.173703463 | 2.824604191 | 3.221830688 | 1.432389173 |
| ENSMUSG00000094233 | 10.61177777 | 5.56493795  | 9.886114669 | 4.832746033 | 7.161945863 |
| ENSMUSG00000094234 | 15.56394073 | 11.82549314 | 9.179963621 | 17.72006879 | 15.7562809  |
| ENSMUSG00000094235 | 8.489422215 | 7.651789682 | 9.886114669 | 8.054576721 | 5.729556691 |
| ENSMUSG00000094236 | 2.122355554 | 2.782468975 | 3.530755239 | 1.610915344 | 4.297167518 |
| ENSMUSG00000094238 | 4.244711108 | 2.086851731 | 4.236906287 | 1.610915344 | 0.716194586 |

|                    |             |             |             |             |             |
|--------------------|-------------|-------------|-------------|-------------|-------------|
| ENSMUSG00000094239 | 7.781970364 | 7.651789682 | 4.943057334 | 7.249119049 | 7.161945863 |
| ENSMUSG00000094240 | 6.367066661 | 4.173703463 | 3.530755239 | 3.221830688 | 5.729556691 |
| ENSMUSG00000094241 | 12.73413332 | 10.43425866 | 6.35535943  | 6.443661377 | 10.02672421 |
| ENSMUSG00000094242 | 10.61177777 | 9.043024169 | 8.473812573 | 9.665492065 | 7.87814045  |
| ENSMUSG00000094243 | 22.63845924 | 12.52111039 | 10.59226572 | 12.88732275 | 7.87814045  |
| ENSMUSG00000094244 | 8.489422215 | 11.82549314 | 12.00456781 | 13.69278043 | 11.45911338 |
| ENSMUSG00000094245 | 12.02668147 | 11.82549314 | 9.179963621 | 12.88732275 | 17.18867007 |
| ENSMUSG00000094247 | 10.61177777 | 6.956172438 | 5.649208382 | 7.249119049 | 9.310529622 |
| ENSMUSG00000094249 | 9.196874066 | 11.1298759  | 14.829172   | 7.249119049 | 10.02672421 |
| ENSMUSG00000094250 | 12.73413332 | 9.738641413 | 12.00456781 | 11.27640741 | 12.89150255 |
| ENSMUSG00000094251 | 20.51610369 | 24.34660353 | 21.18453143 | 13.69278043 | 24.35061594 |
| ENSMUSG00000094252 | 2.829807405 | 1.391234488 | 1.412302096 | 1.610915344 | 4.297167518 |
| ENSMUSG00000094253 | 4.952162959 | 6.260555194 | 8.473812573 | 0.805457672 | 8.594335036 |
| ENSMUSG00000094254 | 4.952162959 | 4.173703463 | 7.061510478 | 5.638203705 | 3.580972932 |
| ENSMUSG00000094255 | 7.781970364 | 7.651789682 | 9.886114669 | 4.02728836  | 5.729556691 |
| ENSMUSG00000094256 | 10.61177777 | 11.82549314 | 11.29841676 | 8.054576721 | 12.17530797 |
| ENSMUSG00000094257 | 8.489422215 | 9.043024169 | 11.29841676 | 10.47094974 | 8.594335036 |
| ENSMUSG00000094259 | 5.65961481  | 2.782468975 | 6.35535943  | 2.416373016 | 5.013362104 |
| ENSMUSG00000094261 | 0           | 0           | 0           | 0           | 0           |
| ENSMUSG00000094262 | 13.44158517 | 6.956172438 | 10.59226572 | 2.416373016 | 7.161945863 |
| ENSMUSG00000094263 | 0.707451851 | 2.086851731 | 1.412302096 | 0           | 2.148583759 |
| ENSMUSG00000094264 | 12.02668147 | 6.956172438 | 9.179963621 | 2.416373016 | 2.864778345 |
| ENSMUSG00000094265 | 0           | 0           | 0           | 0           | 0           |
| ENSMUSG00000094266 | 5.65961481  | 9.043024169 | 5.649208382 | 6.443661377 | 8.594335036 |
| ENSMUSG00000094267 | 9.196874066 | 5.56493795  | 12.00456781 | 8.054576721 | 6.445751277 |
| ENSMUSG00000094268 | 0           | 0           | 0           | 0           | 0           |
| ENSMUSG00000094269 | 8.489422215 | 10.43425866 | 5.649208382 | 2.416373016 | 7.161945863 |
| ENSMUSG00000094270 | 0           | 0           | 0           | 0           | 0           |
| ENSMUSG00000094274 | 4.244711108 | 4.869320706 | 6.35535943  | 1.610915344 | 3.580972932 |
| ENSMUSG00000094275 | 7.074518513 | 6.260555194 | 6.35535943  | 6.443661377 | 5.013362104 |
| ENSMUSG00000094276 | 3.537259256 | 3.478086219 | 7.061510478 | 3.221830688 | 7.161945863 |
| ENSMUSG00000094277 | 9.904325918 | 4.173703463 | 5.649208382 | 2.416373016 | 3.580972932 |
| ENSMUSG00000094278 | 9.904325918 | 3.478086219 | 8.473812573 | 12.08186508 | 10.02672421 |
| ENSMUSG00000094280 | 21.22355554 | 11.1298759  | 12.71071886 | 11.27640741 | 10.7429188  |
| ENSMUSG00000094281 | 38.90985182 | 60.51870021 | 56.49208382 | 65.24207144 | 65.17370736 |
| ENSMUSG00000094282 | 11.31922962 | 13.21672763 | 9.886114669 | 4.832746033 | 5.013362104 |
| ENSMUSG00000094283 | 0           | 0           | 0           | 0           | 0           |
| ENSMUSG00000094284 | 9.904325918 | 4.869320706 | 7.767661525 | 12.88732275 | 0.716194586 |
| ENSMUSG00000094285 | 12.02668147 | 2.782468975 | 9.886114669 | 3.221830688 | 5.729556691 |
| ENSMUSG00000094286 | 13.44158517 | 18.78166558 | 10.59226572 | 13.69278043 | 15.7562809  |
| ENSMUSG00000094287 | 21.22355554 | 12.52111039 | 9.179963621 | 7.249119049 | 5.729556691 |
| ENSMUSG00000094288 | 3.537259256 | 5.56493795  | 2.824604191 | 0           | 0           |
| ENSMUSG00000094289 | 12.73413332 | 4.869320706 | 2.824604191 | 3.221830688 | 7.161945863 |

|                    |             |             |             |             |             |
|--------------------|-------------|-------------|-------------|-------------|-------------|
| ENSMUSG00000094290 | 5.65961481  | 3.478086219 | 2.118453143 | 5.638203705 | 3.580972932 |
| ENSMUSG00000094292 | 9.904325918 | 7.651789682 | 7.767661525 | 6.443661377 | 12.17530797 |
| ENSMUSG00000094293 | 3.537259256 | 2.782468975 | 2.824604191 | 4.832746033 | 4.297167518 |
| ENSMUSG00000094295 | 8.489422215 | 6.956172438 | 12.00456781 | 1.610915344 | 8.594335036 |
| ENSMUSG00000094296 | 8.489422215 | 5.56493795  | 7.767661525 | 4.02728836  | 7.87814045  |
| ENSMUSG00000094297 | 0           | 0           | 0           | 0           | 0           |
| ENSMUSG00000094298 | 16.27139258 | 5.56493795  | 5.649208382 | 12.88732275 | 5.013362104 |
| ENSMUSG00000094299 | 7.781970364 | 7.651789682 | 3.530755239 | 1.610915344 | 6.445751277 |
| ENSMUSG00000094300 | 8.489422215 | 2.086851731 | 13.41686991 | 4.832746033 | 6.445751277 |
| ENSMUSG00000094301 | 10.61177777 | 4.869320706 | 8.473812573 | 2.416373016 | 7.161945863 |
| ENSMUSG00000094302 | 9.904325918 | 6.260555194 | 8.473812573 | 4.832746033 | 7.161945863 |
| ENSMUSG00000094304 | 7.074518513 | 4.869320706 | 8.473812573 | 5.638203705 | 4.297167518 |
| ENSMUSG00000094306 | 39.61730367 | 68.86610713 | 67.79050059 | 45.10562964 | 43.68786977 |
| ENSMUSG00000094308 | 0           | 0           | 0           | 0           | 0           |
| ENSMUSG00000094310 | 9.904325918 | 3.478086219 | 12.00456781 | 4.02728836  | 3.580972932 |
| ENSMUSG00000094312 | 9.904325918 | 4.869320706 | 4.236906287 | 4.832746033 | 6.445751277 |
| ENSMUSG00000094313 | 8.489422215 | 4.173703463 | 5.649208382 | 6.443661377 | 6.445751277 |
| ENSMUSG00000094315 | 6.367066661 | 7.651789682 | 12.00456781 | 6.443661377 | 5.729556691 |
| ENSMUSG00000094316 | 12.02668147 | 4.869320706 | 2.118453143 | 0.805457672 | 8.594335036 |
| ENSMUSG00000094317 | 4.244711108 | 2.086851731 | 2.118453143 | 0.805457672 | 0.716194586 |
| ENSMUSG00000094318 | 29.71297775 | 21.56413456 | 16.2414741  | 17.72006879 | 21.48583759 |
| ENSMUSG00000094319 | 7.074518513 | 8.347406925 | 10.59226572 | 2.416373016 | 6.445751277 |
| ENSMUSG00000094320 | 6.367066661 | 8.347406925 | 9.886114669 | 13.69278043 | 15.04008631 |
| ENSMUSG00000094321 | 9.196874066 | 6.956172438 | 9.886114669 | 8.054576721 | 7.161945863 |
| ENSMUSG00000094322 | 4.244711108 | 7.651789682 | 7.767661525 | 5.638203705 | 2.864778345 |
| ENSMUSG00000094323 | 9.196874066 | 3.478086219 | 1.412302096 | 5.638203705 | 2.864778345 |
| ENSMUSG00000094324 | 13.44158517 | 9.043024169 | 14.829172   | 7.249119049 | 15.04008631 |
| ENSMUSG00000094326 | 10.61177777 | 15.99919661 | 12.00456781 | 11.27640741 | 10.02672421 |
| ENSMUSG00000094327 | 0           | 0           | 0           | 0           | 0           |
| ENSMUSG00000094329 | 4.244711108 | 1.391234488 | 2.118453143 | 1.610915344 | 0           |
| ENSMUSG00000094330 | 0           | 0           | 0           | 0           | 0           |
| ENSMUSG00000094334 | 7.074518513 | 9.043024169 | 11.29841676 | 6.443661377 | 10.7429188  |
| ENSMUSG00000094335 | 13.44158517 | 16.69481385 | 8.473812573 | 14.4982381  | 8.594335036 |
| ENSMUSG00000094336 | 15.56394073 | 11.82549314 | 12.71071886 | 12.08186508 | 6.445751277 |
| ENSMUSG00000094338 | 4.244711108 | 7.651789682 | 4.943057334 | 3.221830688 | 5.729556691 |
| ENSMUSG00000094340 | 8.489422215 | 10.43425866 | 3.530755239 | 5.638203705 | 6.445751277 |
| ENSMUSG00000094342 | 3.537259256 | 1.391234488 | 2.118453143 | 0.805457672 | 2.148583759 |
| ENSMUSG00000094344 | 4.244711108 | 4.869320706 | 4.236906287 | 9.665492065 | 10.02672421 |
| ENSMUSG00000094345 | 12.73413332 | 9.738641413 | 6.35535943  | 2.416373016 | 7.87814045  |
| ENSMUSG00000094346 | 6.367066661 | 5.56493795  | 4.943057334 | 0.805457672 | 3.580972932 |
| ENSMUSG00000094347 | 7.781970364 | 11.82549314 | 9.179963621 | 4.832746033 | 4.297167518 |
| ENSMUSG00000094349 | 14.85648888 | 9.043024169 | 11.29841676 | 5.638203705 | 7.161945863 |
| ENSMUSG00000094351 | 9.904325918 | 6.260555194 | 10.59226572 | 6.443661377 | 6.445751277 |

|                    |             |             |             |             |             |
|--------------------|-------------|-------------|-------------|-------------|-------------|
| ENSMUSG00000094353 | 7.781970364 | 7.651789682 | 8.473812573 | 4.02728836  | 8.594335036 |
| ENSMUSG00000094354 | 2.122355554 | 2.086851731 | 7.061510478 | 4.832746033 | 0.716194586 |
| ENSMUSG00000094356 | 2.829807405 | 10.43425866 | 10.59226572 | 4.02728836  | 3.580972932 |
| ENSMUSG00000094357 | 20.51610369 | 9.043024169 | 10.59226572 | 4.832746033 | 4.297167518 |
| ENSMUSG00000094358 | 7.074518513 | 2.086851731 | 7.061510478 | 4.02728836  | 2.864778345 |
| ENSMUSG00000094359 | 18.39374813 | 11.82549314 | 10.59226572 | 12.08186508 | 10.7429188  |
| ENSMUSG00000094360 | 4.952162959 | 4.869320706 | 3.530755239 | 1.610915344 | 3.580972932 |
| ENSMUSG00000094361 | 3.537259256 | 2.782468975 | 3.530755239 | 3.221830688 | 1.432389173 |
| ENSMUSG00000094363 | 0           | 0           | 0           | 0           | 0           |
| ENSMUSG00000094364 | 0           | 0           | 0           | 0           | 0           |
| ENSMUSG00000094365 | 0           | 0           | 0.706151048 | 0.805457672 | 0           |
| ENSMUSG00000094366 | 8.489422215 | 11.82549314 | 7.061510478 | 5.638203705 | 12.89150255 |
| ENSMUSG00000094367 | 7.074518513 | 6.956172438 | 7.767661525 | 4.832746033 | 6.445751277 |
| ENSMUSG00000094369 | 14.14903703 | 9.043024169 | 10.59226572 | 6.443661377 | 10.02672421 |
| ENSMUSG00000094371 | 7.781970364 | 6.956172438 | 5.649208382 | 0.805457672 | 3.580972932 |
| ENSMUSG00000094372 | 7.781970364 | 7.651789682 | 8.473812573 | 10.47094974 | 7.87814045  |
| ENSMUSG00000094374 | 12.73413332 | 5.56493795  | 13.41686991 | 12.08186508 | 10.7429188  |
| ENSMUSG00000094377 | 0           | 0           | 1.412302096 | 0           | 5.013362104 |
| ENSMUSG00000094379 | 4.244711108 | 8.347406925 | 10.59226572 | 4.832746033 | 2.864778345 |
| ENSMUSG00000094380 | 7.074518513 | 7.651789682 | 7.767661525 | 7.249119049 | 5.729556691 |
| ENSMUSG00000094381 | 5.65961481  | 6.956172438 | 7.061510478 | 4.02728836  | 6.445751277 |
| ENSMUSG00000094382 | 15.56394073 | 18.08604834 | 19.06607829 | 11.27640741 | 11.45911338 |
| ENSMUSG00000094384 | 8.489422215 | 6.260555194 | 4.236906287 | 4.832746033 | 5.013362104 |
| ENSMUSG00000094385 | 7.781970364 | 6.260555194 | 7.061510478 | 3.221830688 | 5.013362104 |
| ENSMUSG00000094386 | 7.074518513 | 4.869320706 | 6.35535943  | 4.02728836  | 9.310529622 |
| ENSMUSG00000094388 | 12.02668147 | 13.91234488 | 14.829172   | 9.665492065 | 12.17530797 |
| ENSMUSG00000094389 | 1.414903703 | 2.782468975 | 2.824604191 | 5.638203705 | 2.148583759 |
| ENSMUSG00000094390 | 5.65961481  | 7.651789682 | 7.061510478 | 4.832746033 | 7.87814045  |
| ENSMUSG00000094391 | 5.65961481  | 9.043024169 | 4.943057334 | 1.610915344 | 5.729556691 |
| ENSMUSG00000094392 | 11.31922962 | 12.52111039 | 10.59226572 | 8.860034393 | 14.32389173 |
| ENSMUSG00000094394 | 9.196874066 | 6.260555194 | 10.59226572 | 9.665492065 | 7.161945863 |
| ENSMUSG00000094395 | 12.73413332 | 9.043024169 | 10.59226572 | 7.249119049 | 11.45911338 |
| ENSMUSG00000094396 | 7.074518513 | 7.651789682 | 7.767661525 | 4.02728836  | 8.594335036 |
| ENSMUSG00000094397 | 10.61177777 | 4.173703463 | 8.473812573 | 6.443661377 | 9.310529622 |
| ENSMUSG00000094400 | 11.31922962 | 4.869320706 | 7.061510478 | 10.47094974 | 8.594335036 |
| ENSMUSG00000094401 | 7.781970364 | 6.956172438 | 2.118453143 | 5.638203705 | 9.310529622 |
| ENSMUSG00000094402 | 12.73413332 | 7.651789682 | 8.473812573 | 7.249119049 | 6.445751277 |
| ENSMUSG00000094403 | 1.414903703 | 0.695617244 | 0           | 0.805457672 | 1.432389173 |
| ENSMUSG00000094404 | 3.537259256 | 5.56493795  | 7.061510478 | 2.416373016 | 2.864778345 |
| ENSMUSG00000094405 | 10.61177777 | 6.260555194 | 8.473812573 | 8.860034393 | 9.310529622 |
| ENSMUSG00000094406 | 8.489422215 | 8.347406925 | 9.179963621 | 2.416373016 | 6.445751277 |
| ENSMUSG00000094407 | 2.122355554 | 2.086851731 | 2.824604191 | 2.416373016 | 3.580972932 |
| ENSMUSG00000094408 | 3.537259256 | 6.956172438 | 12.00456781 | 3.221830688 | 10.7429188  |



|                    |             |             |             |             |             |
|--------------------|-------------|-------------|-------------|-------------|-------------|
| ENSMUSG00000094409 | 6.367066661 | 4.869320706 | 6.35535943  | 6.443661377 | 7.161945863 |
| ENSMUSG00000094411 | 0           | 0           | 0           | 0           | 0           |
| ENSMUSG00000094412 | 14.85648888 | 12.52111039 | 9.886114669 | 8.860034393 | 15.7562809  |
| ENSMUSG00000094413 | 14.14903703 | 11.82549314 | 9.886114669 | 10.47094974 | 9.310529622 |
| ENSMUSG00000094415 | 9.196874066 | 6.956172438 | 6.35535943  | 4.832746033 | 7.161945863 |
| ENSMUSG00000094416 | 16.97884443 | 9.738641413 | 10.59226572 | 6.443661377 | 11.45911338 |
| ENSMUSG00000094417 | 13.44158517 | 4.869320706 | 6.35535943  | 5.638203705 | 3.580972932 |
| ENSMUSG00000094419 | 2.122355554 | 0.695617244 | 1.412302096 | 0.805457672 | 3.580972932 |
| ENSMUSG00000094420 | 7.074518513 | 11.82549314 | 13.41686991 | 12.88732275 | 9.310529622 |
| ENSMUSG00000094422 | 9.904325918 | 10.43425866 | 8.473812573 | 2.416373016 | 5.729556691 |
| ENSMUSG00000094423 | 6.367066661 | 7.651789682 | 2.118453143 | 2.416373016 | 4.297167518 |
| ENSMUSG00000094424 | 9.196874066 | 5.56493795  | 7.061510478 | 2.416373016 | 6.445751277 |
| ENSMUSG00000094426 | 7.781970364 | 6.260555194 | 6.35535943  | 4.02728836  | 5.013362104 |
| ENSMUSG00000094427 | 9.196874066 | 4.173703463 | 3.530755239 | 1.610915344 | 3.580972932 |
| ENSMUSG00000094428 | 6.367066661 | 6.956172438 | 9.886114669 | 5.638203705 | 5.729556691 |
| ENSMUSG00000094432 | 4.952162959 | 2.782468975 | 2.824604191 | 4.02728836  | 1.432389173 |
| ENSMUSG00000094433 | 12.02668147 | 12.52111039 | 7.767661525 | 5.638203705 | 8.594335036 |
| ENSMUSG00000094435 | 9.196874066 | 14.60796212 | 7.767661525 | 7.249119049 | 7.161945863 |
| ENSMUSG00000094436 | 7.074518513 | 7.651789682 | 7.061510478 | 4.02728836  | 2.148583759 |
| ENSMUSG00000094437 | 14.14903703 | 16.69481385 | 20.47838039 | 12.88732275 | 14.32389173 |
| ENSMUSG00000094438 | 0           | 0           | 0           | 0           | 0           |
| ENSMUSG00000094440 | 9.196874066 | 9.738641413 | 8.473812573 | 5.638203705 | 4.297167518 |
| ENSMUSG00000094441 | 56.5961481  | 70.95295887 | 61.43514116 | 88.60034393 | 86.65954495 |
| ENSMUSG00000094442 | 0           | 0           | 0           | 0           | 0           |
| ENSMUSG00000094444 | 4.952162959 | 4.869320706 | 2.824604191 | 1.610915344 | 3.580972932 |
| ENSMUSG00000094446 | 22.63845924 | 48.69320706 | 29.65834401 | 34.6346799  | 30.08017263 |
| ENSMUSG00000094447 | 8.489422215 | 11.1298759  | 6.35535943  | 8.860034393 | 5.729556691 |
| ENSMUSG00000094449 | 11.31922962 | 10.43425866 | 9.179963621 | 7.249119049 | 7.161945863 |
| ENSMUSG00000094452 | 9.904325918 | 6.260555194 | 7.767661525 | 5.638203705 | 5.729556691 |
| ENSMUSG00000094454 | 9.904325918 | 5.56493795  | 7.767661525 | 5.638203705 | 5.013362104 |
| ENSMUSG00000094455 | 0           | 0           | 0           | 0           | 0           |
| ENSMUSG00000094456 | 7.074518513 | 8.347406925 | 11.29841676 | 9.665492065 | 6.445751277 |
| ENSMUSG00000094457 | 0           | 0           | 0           | 0           | 0           |
| ENSMUSG00000094458 | 0           | 0           | 0           | 0           | 0           |
| ENSMUSG00000094461 | 9.196874066 | 8.347406925 | 7.061510478 | 3.221830688 | 7.87814045  |
| ENSMUSG00000094462 | 13.44158517 | 3.478086219 | 5.649208382 | 4.02728836  | 7.87814045  |
| ENSMUSG00000094463 | 15.56394073 | 10.43425866 | 6.35535943  | 3.221830688 | 3.580972932 |
| ENSMUSG00000094464 | 13.44158517 | 6.956172438 | 8.473812573 | 4.02728836  | 8.594335036 |
| ENSMUSG00000094465 | 0           | 0           | 0           | 0           | 0           |
| ENSMUSG00000094466 | 7.074518513 | 9.738641413 | 7.061510478 | 9.665492065 | 4.297167518 |
| ENSMUSG00000094467 | 4.952162959 | 7.651789682 | 9.179963621 | 6.443661377 | 9.310529622 |
| ENSMUSG00000094470 | 1.414903703 | 2.086851731 | 4.943057334 | 4.02728836  | 2.148583759 |
| ENSMUSG00000094471 | 11.31922962 | 7.651789682 | 8.473812573 | 3.221830688 | 4.297167518 |

|                    |             |             |             |             |             |
|--------------------|-------------|-------------|-------------|-------------|-------------|
| ENSMUSG00000094472 | 15.56394073 | 14.60796212 | 10.59226572 | 7.249119049 | 5.729556691 |
| ENSMUSG00000094473 | 4.952162959 | 4.173703463 | 9.886114669 | 5.638203705 | 5.013362104 |
| ENSMUSG00000094475 | 11.31922962 | 17.39043109 | 17.65377619 | 17.72006879 | 17.18867007 |
| ENSMUSG00000094476 | 0           | 0           | 0           | 0           | 0           |
| ENSMUSG00000094477 | 18.39374813 | 6.260555194 | 9.886114669 | 8.054576721 | 8.594335036 |
| ENSMUSG00000094478 | 4.952162959 | 8.347406925 | 12.00456781 | 4.02728836  | 8.594335036 |
| ENSMUSG00000094479 | 8.489422215 | 6.260555194 | 7.061510478 | 1.610915344 | 2.148583759 |
| ENSMUSG00000094481 | 7.074518513 | 5.56493795  | 4.236906287 | 5.638203705 | 2.864778345 |
| ENSMUSG00000094482 | 9.196874066 | 7.651789682 | 7.767661525 | 7.249119049 | 7.161945863 |
| ENSMUSG00000094485 | 12.02668147 | 6.956172438 | 9.179963621 | 8.860034393 | 5.729556691 |
| ENSMUSG00000094486 | 4.952162959 | 13.21672763 | 2.118453143 | 10.47094974 | 7.161945863 |
| ENSMUSG00000094488 | 14.14903703 | 10.43425866 | 7.767661525 | 6.443661377 | 5.013362104 |
| ENSMUSG00000094489 | 17.68629628 | 20.17290007 | 19.06607829 | 12.88732275 | 20.05344842 |
| ENSMUSG00000094491 | 10.61177777 | 6.956172438 | 10.59226572 | 4.02728836  | 7.161945863 |
| ENSMUSG00000094492 | 4.244711108 | 4.869320706 | 4.943057334 | 2.416373016 | 4.297167518 |
| ENSMUSG00000094493 | 11.31922962 | 7.651789682 | 9.179963621 | 5.638203705 | 7.161945863 |
| ENSMUSG00000094494 | 7.781970364 | 5.56493795  | 8.473812573 | 4.02728836  | 6.445751277 |
| ENSMUSG00000094496 | 11.31922962 | 9.738641413 | 7.767661525 | 4.832746033 | 4.297167518 |
| ENSMUSG00000094497 | 11.31922962 | 8.347406925 | 11.29841676 | 8.860034393 | 9.310529622 |
| ENSMUSG00000094498 | 4.952162959 | 2.782468975 | 5.649208382 | 1.610915344 | 7.161945863 |
| ENSMUSG00000094499 | 9.904325918 | 6.956172438 | 9.179963621 | 2.416373016 | 4.297167518 |
| ENSMUSG00000094501 | 15.56394073 | 2.782468975 | 2.824604191 | 7.249119049 | 8.594335036 |
| ENSMUSG00000094502 | 10.61177777 | 9.043024169 | 6.35535943  | 5.638203705 | 5.729556691 |
| ENSMUSG00000094503 | 8.489422215 | 4.173703463 | 9.179963621 | 8.860034393 | 6.445751277 |
| ENSMUSG00000094504 | 10.61177777 | 1.391234488 | 2.824604191 | 2.416373016 | 7.87814045  |
| ENSMUSG00000094505 | 12.73413332 | 11.82549314 | 5.649208382 | 2.416373016 | 11.45911338 |
| ENSMUSG00000094506 | 0           | 0           | 0           | 0           | 0           |
| ENSMUSG00000094507 | 4.952162959 | 5.56493795  | 11.29841676 | 5.638203705 | 3.580972932 |
| ENSMUSG00000094508 | 0           | 0           | 0           | 0           | 0           |
| ENSMUSG00000094509 | 4.952162959 | 3.478086219 | 2.824604191 | 1.610915344 | 4.297167518 |
| ENSMUSG00000094510 | 6.367066661 | 6.260555194 | 9.886114669 | 6.443661377 | 7.161945863 |
| ENSMUSG00000094513 | 0           | 0           | 0           | 0           | 0           |
| ENSMUSG00000094515 | 9.196874066 | 9.738641413 | 9.886114669 | 7.249119049 | 7.87814045  |
| ENSMUSG00000094516 | 0           | 0           | 1.412302096 | 0           | 0           |
| ENSMUSG00000094517 | 8.489422215 | 7.651789682 | 8.473812573 | 8.054576721 | 4.297167518 |
| ENSMUSG00000094518 | 14.85648888 | 13.91234488 | 13.41686991 | 11.27640741 | 11.45911338 |
| ENSMUSG00000094519 | 7.781970364 | 6.260555194 | 8.473812573 | 9.665492065 | 7.161945863 |
| ENSMUSG00000094520 | 12.73413332 | 4.173703463 | 7.767661525 | 3.221830688 | 6.445751277 |
| ENSMUSG00000094521 | 9.196874066 | 9.043024169 | 4.943057334 | 6.443661377 | 5.013362104 |
| ENSMUSG00000094522 | 0           | 0           | 0           | 0           | 0           |
| ENSMUSG00000094523 | 10.61177777 | 8.347406925 | 8.473812573 | 4.02728836  | 7.87814045  |
| ENSMUSG00000094524 | 0           | 0           | 0           | 0           | 0           |
| ENSMUSG00000094525 | 4.244711108 | 0.695617244 | 1.412302096 | 0.805457672 | 1.432389173 |

|                    |             |             |             |             |             |
|--------------------|-------------|-------------|-------------|-------------|-------------|
| ENSMUSG00000094526 | 10.61177777 | 6.956172438 | 9.179963621 | 8.860034393 | 14.32389173 |
| ENSMUSG00000094527 | 7.074518513 | 8.347406925 | 7.767661525 | 4.02728836  | 10.02672421 |
| ENSMUSG00000094528 | 8.489422215 | 7.651789682 | 4.943057334 | 8.054576721 | 7.161945863 |
| ENSMUSG00000094529 | 7.074518513 | 6.956172438 | 11.29841676 | 0.805457672 | 6.445751277 |
| ENSMUSG00000094530 | 7.781970364 | 6.260555194 | 8.473812573 | 8.054576721 | 8.594335036 |
| ENSMUSG00000094531 | 11.31922962 | 7.651789682 | 5.649208382 | 9.665492065 | 6.445751277 |
| ENSMUSG00000094532 | 12.73413332 | 2.782468975 | 5.649208382 | 4.832746033 | 3.580972932 |
| ENSMUSG00000094533 | 3.537259256 | 2.782468975 | 3.530755239 | 4.02728836  | 2.864778345 |
| ENSMUSG00000094534 | 7.781970364 | 5.56493795  | 9.179963621 | 1.610915344 | 6.445751277 |
| ENSMUSG00000094535 | 12.02668147 | 8.347406925 | 7.061510478 | 6.443661377 | 6.445751277 |
| ENSMUSG00000094537 | 0           | 0           | 0           | 0           | 0           |
| ENSMUSG00000094538 | 0           | 0           | 0           | 0           | 0           |
| ENSMUSG00000094539 | 14.14903703 | 9.738641413 | 7.767661525 | 1.610915344 | 5.013362104 |
| ENSMUSG00000094540 | 2.122355554 | 3.478086219 | 2.118453143 | 0.805457672 | 2.148583759 |
| ENSMUSG00000094541 | 0           | 0           | 0           | 0           | 0           |
| ENSMUSG00000094542 | 14.14903703 | 4.173703463 | 4.236906287 | 11.27640741 | 2.148583759 |
| ENSMUSG00000094543 | 6.367066661 | 8.347406925 | 8.473812573 | 10.47094974 | 7.87814045  |
| ENSMUSG00000094544 | 12.02668147 | 7.651789682 | 7.767661525 | 3.221830688 | 6.445751277 |
| ENSMUSG00000094545 | 21.93100739 | 4.869320706 | 8.473812573 | 12.08186508 | 2.864778345 |
| ENSMUSG00000094546 | 13.44158517 | 9.738641413 | 12.00456781 | 11.27640741 | 13.60769714 |
| ENSMUSG00000094547 | 0           | 0           | 0           | 0           | 0           |
| ENSMUSG00000094548 | 0           | 0           | 0           | 0           | 0           |
| ENSMUSG00000094550 | 0           | 0           | 0           | 0           | 0           |
| ENSMUSG00000094551 | 20.51610369 | 35.47647943 | 36.01370344 | 32.21830688 | 32.94495097 |
| ENSMUSG00000094552 | 0           | 0.695617244 | 0           | 0.805457672 | 0           |
| ENSMUSG00000094553 | 9.196874066 | 7.651789682 | 7.767661525 | 3.221830688 | 6.445751277 |
| ENSMUSG00000094554 | 0           | 0           | 0           | 0           | 0           |
| ENSMUSG00000094555 | 12.02668147 | 6.260555194 | 12.71071886 | 5.638203705 | 5.013362104 |
| ENSMUSG00000094557 | 4.952162959 | 6.956172438 | 7.061510478 | 7.249119049 | 7.87814045  |
| ENSMUSG00000094561 | 7.781970364 | 8.347406925 | 4.236906287 | 12.08186508 | 6.445751277 |
| ENSMUSG00000094563 | 9.904325918 | 9.738641413 | 8.473812573 | 13.69278043 | 6.445751277 |
| ENSMUSG00000094564 | 9.196874066 | 9.738641413 | 9.886114669 | 0.805457672 | 6.445751277 |
| ENSMUSG00000094565 | 0           | 0           | 0           | 0           | 0           |
| ENSMUSG00000094566 | 7.074518513 | 8.347406925 | 8.473812573 | 12.88732275 | 10.02672421 |
| ENSMUSG00000094567 | 0           | 0           | 0           | 0           | 0           |
| ENSMUSG00000094568 | 12.73413332 | 4.173703463 | 8.473812573 | 4.02728836  | 8.594335036 |
| ENSMUSG00000094569 | 0           | 1.391234488 | 1.412302096 | 0.805457672 | 1.432389173 |
| ENSMUSG00000094571 | 9.196874066 | 4.869320706 | 10.59226572 | 9.665492065 | 12.17530797 |
| ENSMUSG00000094572 | 10.61177777 | 2.782468975 | 6.35535943  | 6.443661377 | 8.594335036 |
| ENSMUSG00000094573 | 2.829807405 | 2.782468975 | 3.530755239 | 2.416373016 | 2.148583759 |
| ENSMUSG00000094574 | 6.367066661 | 4.869320706 | 3.530755239 | 2.416373016 | 3.580972932 |
| ENSMUSG00000094578 | 9.196874066 | 8.347406925 | 14.12302096 | 6.443661377 | 8.594335036 |
| ENSMUSG00000094579 | 9.904325918 | 3.478086219 | 7.061510478 | 5.638203705 | 10.02672421 |

|                    |             |             |             |             |             |
|--------------------|-------------|-------------|-------------|-------------|-------------|
| ENSMUSG00000094581 | 10.61177777 | 3.478086219 | 7.767661525 | 3.221830688 | 7.161945863 |
| ENSMUSG00000094582 | 4.952162959 | 4.869320706 | 6.35535943  | 5.638203705 | 5.013362104 |
| ENSMUSG00000094585 | 15.56394073 | 4.173703463 | 5.649208382 | 8.860034393 | 5.729556691 |
| ENSMUSG00000094586 | 12.02668147 | 6.956172438 | 4.943057334 | 4.832746033 | 2.148583759 |
| ENSMUSG00000094587 | 0           | 0           | 0           | 0           | 0           |
| ENSMUSG00000094588 | 7.781970364 | 7.651789682 | 6.35535943  | 5.638203705 | 2.148583759 |
| ENSMUSG00000094589 | 16.27139258 | 4.173703463 | 4.236906287 | 4.832746033 | 4.297167518 |
| ENSMUSG00000094593 | 14.85648888 | 9.043024169 | 9.179963621 | 7.249119049 | 4.297167518 |
| ENSMUSG00000094594 | 9.196874066 | 9.043024169 | 12.00456781 | 6.443661377 | 9.310529622 |
| ENSMUSG00000094597 | 11.31922962 | 6.956172438 | 7.767661525 | 8.860034393 | 9.310529622 |
| ENSMUSG00000094598 | 7.074518513 | 9.738641413 | 9.179963621 | 5.638203705 | 11.45911338 |
| ENSMUSG00000094599 | 4.244711108 | 4.173703463 | 5.649208382 | 1.610915344 | 2.864778345 |
| ENSMUSG00000094600 | 5.65961481  | 9.043024169 | 7.061510478 | 7.249119049 | 8.594335036 |
| ENSMUSG00000094601 | 3.537259256 | 3.478086219 | 4.943057334 | 2.416373016 | 3.580972932 |
| ENSMUSG00000094602 | 9.904325918 | 11.1298759  | 7.767661525 | 7.249119049 | 5.729556691 |
| ENSMUSG00000094603 | 11.31922962 | 5.56493795  | 6.35535943  | 7.249119049 | 12.17530797 |
| ENSMUSG00000094604 | 0           | 0           | 0           | 0           | 0           |
| ENSMUSG00000094605 | 10.61177777 | 15.30357936 | 16.2414741  | 6.443661377 | 7.161945863 |
| ENSMUSG00000094606 | 11.31922962 | 7.651789682 | 5.649208382 | 4.832746033 | 5.729556691 |
| ENSMUSG00000094607 | 2.122355554 | 2.086851731 | 1.412302096 | 1.610915344 | 3.580972932 |
| ENSMUSG00000094608 | 3.537259256 | 4.173703463 | 7.061510478 | 1.610915344 | 2.864778345 |
| ENSMUSG00000094609 | 2.122355554 | 1.391234488 | 2.118453143 | 0.805457672 | 2.148583759 |
| ENSMUSG00000094610 | 0           | 0           | 0           | 0           | 0           |
| ENSMUSG00000094611 | 2.829807405 | 4.173703463 | 6.35535943  | 6.443661377 | 5.013362104 |
| ENSMUSG00000094612 | 11.31922962 | 6.956172438 | 4.943057334 | 7.249119049 | 5.729556691 |
| ENSMUSG00000094614 | 147.1499851 | 228.8580732 | 189.2484808 | 281.9101852 | 262.1272186 |
| ENSMUSG00000094615 | 9.904325918 | 9.043024169 | 7.061510478 | 10.47094974 | 5.729556691 |
| ENSMUSG00000094617 | 7.074518513 | 4.869320706 | 7.061510478 | 0.805457672 | 1.432389173 |
| ENSMUSG00000094618 | 5.65961481  | 2.782468975 | 5.649208382 | 4.832746033 | 3.580972932 |
| ENSMUSG00000094619 | 6.367066661 | 6.260555194 | 5.649208382 | 8.860034393 | 4.297167518 |
| ENSMUSG00000094620 | 3.537259256 | 4.173703463 | 8.473812573 | 1.610915344 | 1.432389173 |
| ENSMUSG00000094622 | 12.73413332 | 23.65098629 | 14.829172   | 6.443661377 | 5.729556691 |
| ENSMUSG00000094623 | 3.537259256 | 2.086851731 | 4.236906287 | 4.832746033 | 5.729556691 |
| ENSMUSG00000094625 | 0           | 0           | 0           | 0           | 0           |
| ENSMUSG00000094627 | 8.489422215 | 10.43425866 | 7.767661525 | 8.054576721 | 12.17530797 |
| ENSMUSG00000094630 | 4.952162959 | 7.651789682 | 5.649208382 | 8.860034393 | 9.310529622 |
| ENSMUSG00000094631 | 0           | 0           | 0           | 0           | 0           |
| ENSMUSG00000094632 | 11.31922962 | 9.738641413 | 6.35535943  | 4.832746033 | 7.87814045  |
| ENSMUSG00000094635 | 9.904325918 | 6.260555194 | 10.59226572 | 5.638203705 | 5.729556691 |
| ENSMUSG00000094636 | 0           | 0           | 0           | 0           | 0           |
| ENSMUSG00000094637 | 6.367066661 | 9.043024169 | 11.29841676 | 3.221830688 | 7.87814045  |
| ENSMUSG00000094638 | 11.31922962 | 11.1298759  | 10.59226572 | 8.860034393 | 14.32389173 |
| ENSMUSG00000094639 | 6.367066661 | 9.043024169 | 9.179963621 | 6.443661377 | 5.013362104 |

|                    |             |             |             |             |             |
|--------------------|-------------|-------------|-------------|-------------|-------------|
| ENSMUSG00000094641 | 6.367066661 | 7.651789682 | 7.767661525 | 2.416373016 | 7.87814045  |
| ENSMUSG00000094642 | 3.537259256 | 0           | 2.824604191 | 4.02728836  | 2.864778345 |
| ENSMUSG00000094643 | 5.65961481  | 1.391234488 | 5.649208382 | 6.443661377 | 0.716194586 |
| ENSMUSG00000094648 | 2.122355554 | 1.391234488 | 0.706151048 | 6.443661377 | 0.716194586 |
| ENSMUSG00000094650 | 9.904325918 | 15.99919661 | 11.29841676 | 7.249119049 | 10.7429188  |
| ENSMUSG00000094652 | 4.952162959 | 4.173703463 | 6.35535943  | 1.610915344 | 5.013362104 |
| ENSMUSG00000094654 | 5.65961481  | 4.173703463 | 9.886114669 | 5.638203705 | 5.013362104 |
| ENSMUSG00000094655 | 5.65961481  | 9.738641413 | 6.35535943  | 5.638203705 | 5.013362104 |
| ENSMUSG00000094656 | 0           | 0.695617244 | 0.706151048 | 0.805457672 | 2.148583759 |
| ENSMUSG00000094657 | 0           | 0           | 0           | 0           | 0           |
| ENSMUSG00000094659 | 0           | 0           | 0           | 0           | 0           |
| ENSMUSG00000094662 | 11.31922962 | 6.260555194 | 12.00456781 | 6.443661377 | 3.580972932 |
| ENSMUSG00000094663 | 12.02668147 | 16.69481385 | 7.767661525 | 8.860034393 | 7.87814045  |
| ENSMUSG00000094664 | 9.904325918 | 8.347406925 | 7.061510478 | 12.08186508 | 13.60769714 |
| ENSMUSG00000094665 | 9.196874066 | 6.956172438 | 7.767661525 | 7.249119049 | 6.445751277 |
| ENSMUSG00000094667 | 0           | 0           | 0           | 0           | 0           |
| ENSMUSG00000094668 | 4.244711108 | 2.086851731 | 1.412302096 | 2.416373016 | 4.297167518 |
| ENSMUSG00000094669 | 14.14903703 | 3.478086219 | 7.061510478 | 4.832746033 | 5.729556691 |
| ENSMUSG00000094670 | 2.829807405 | 5.56493795  | 1.412302096 | 4.832746033 | 4.297167518 |
| ENSMUSG00000094672 | 7.781970364 | 6.260555194 | 9.886114669 | 5.638203705 | 5.729556691 |
| ENSMUSG00000094673 | 6.367066661 | 3.478086219 | 7.767661525 | 7.249119049 | 7.87814045  |
| ENSMUSG00000094674 | 9.904325918 | 5.56493795  | 10.59226572 | 8.860034393 | 6.445751277 |
| ENSMUSG00000094675 | 2.829807405 | 2.782468975 | 2.118453143 | 1.610915344 | 2.148583759 |
| ENSMUSG00000094676 | 6.367066661 | 5.56493795  | 7.061510478 | 8.054576721 | 3.580972932 |
| ENSMUSG00000094677 | 6.367066661 | 4.869320706 | 5.649208382 | 6.443661377 | 7.161945863 |
| ENSMUSG00000094678 | 10.61177777 | 6.260555194 | 5.649208382 | 4.832746033 | 3.580972932 |
| ENSMUSG00000094680 | 12.02668147 | 6.956172438 | 5.649208382 | 12.08186508 | 3.580972932 |
| ENSMUSG00000094681 | 11.31922962 | 7.651789682 | 10.59226572 | 7.249119049 | 6.445751277 |
| ENSMUSG00000094683 | 16.27139258 | 14.60796212 | 13.41686991 | 8.860034393 | 7.161945863 |
| ENSMUSG00000094684 | 6.367066661 | 8.347406925 | 2.824604191 | 7.249119049 | 2.148583759 |
| ENSMUSG00000094687 | 9.196874066 | 8.347406925 | 5.649208382 | 5.638203705 | 7.87814045  |
| ENSMUSG00000094688 | 0           | 0           | 0           | 0           | 0           |
| ENSMUSG00000094689 | 9.196874066 | 9.738641413 | 12.71071886 | 5.638203705 | 7.87814045  |
| ENSMUSG00000094691 | 4.952162959 | 5.56493795  | 10.59226572 | 4.832746033 | 8.594335036 |
| ENSMUSG00000094692 | 7.781970364 | 8.347406925 | 8.473812573 | 1.610915344 | 5.013362104 |
| ENSMUSG00000094693 | 9.196874066 | 6.956172438 | 6.35535943  | 0.805457672 | 2.864778345 |
| ENSMUSG00000094694 | 7.781970364 | 7.651789682 | 8.473812573 | 4.02728836  | 7.161945863 |
| ENSMUSG00000094695 | 3.537259256 | 2.086851731 | 4.236906287 | 4.02728836  | 2.148583759 |
| ENSMUSG00000094696 | 9.904325918 | 8.347406925 | 6.35535943  | 6.443661377 | 4.297167518 |
| ENSMUSG00000094697 | 4.952162959 | 9.043024169 | 4.943057334 | 5.638203705 | 7.161945863 |
| ENSMUSG00000094698 | 4.952162959 | 2.086851731 | 5.649208382 | 3.221830688 | 7.161945863 |
| ENSMUSG00000094699 | 4.952162959 | 4.173703463 | 2.118453143 | 2.416373016 | 4.297167518 |
| ENSMUSG00000094700 | 11.31922962 | 4.173703463 | 6.35535943  | 11.27640741 | 5.729556691 |

|                    |             |             |             |             |             |
|--------------------|-------------|-------------|-------------|-------------|-------------|
| ENSMUSG00000094701 | 9.196874066 | 7.651789682 | 7.767661525 | 4.832746033 | 5.729556691 |
| ENSMUSG00000094702 | 10.61177777 | 6.956172438 | 9.179963621 | 3.221830688 | 6.445751277 |
| ENSMUSG00000094703 | 12.02668147 | 4.869320706 | 7.061510478 | 10.47094974 | 6.445751277 |
| ENSMUSG00000094704 | 6.367066661 | 5.56493795  | 9.886114669 | 4.02728836  | 4.297167518 |
| ENSMUSG00000094707 | 15.56394073 | 5.56493795  | 6.35535943  | 2.416373016 | 7.161945863 |
| ENSMUSG00000094708 | 9.904325918 | 8.347406925 | 17.65377619 | 12.08186508 | 11.45911338 |
| ENSMUSG00000094709 | 0           | 0           | 0           | 0           | 0           |
| ENSMUSG00000094710 | 7.781970364 | 6.956172438 | 9.886114669 | 4.832746033 | 5.729556691 |
| ENSMUSG00000094712 | 4.952162959 | 5.56493795  | 7.061510478 | 0           | 3.580972932 |
| ENSMUSG00000094713 | 7.074518513 | 8.347406925 | 7.061510478 | 6.443661377 | 10.7429188  |
| ENSMUSG00000094717 | 13.44158517 | 10.43425866 | 10.59226572 | 5.638203705 | 6.445751277 |
| ENSMUSG00000094718 | 2.829807405 | 1.391234488 | 2.118453143 | 1.610915344 | 2.148583759 |
| ENSMUSG00000094720 | 4.244711108 | 3.478086219 | 5.649208382 | 0.805457672 | 4.297167518 |
| ENSMUSG00000094721 | 6.367066661 | 8.347406925 | 8.473812573 | 2.416373016 | 7.161945863 |
| ENSMUSG00000094723 | 0           | 0           | 0           | 0           | 0           |
| ENSMUSG00000094725 | 4.952162959 | 4.173703463 | 5.649208382 | 6.443661377 | 5.013362104 |
| ENSMUSG00000094726 | 12.73413332 | 6.956172438 | 4.943057334 | 4.832746033 | 2.864778345 |
| ENSMUSG00000094730 | 7.781970364 | 11.1298759  | 7.767661525 | 4.02728836  | 7.161945863 |
| ENSMUSG00000094732 | 8.489422215 | 9.738641413 | 10.59226572 | 7.249119049 | 6.445751277 |
| ENSMUSG00000094733 | 3.537259256 | 3.478086219 | 0.706151048 | 2.416373016 | 3.580972932 |
| ENSMUSG00000094734 | 5.65961481  | 9.043024169 | 5.649208382 | 4.02728836  | 5.729556691 |
| ENSMUSG00000094735 | 15.56394073 | 6.260555194 | 11.29841676 | 4.832746033 | 3.580972932 |
| ENSMUSG00000094736 | 11.31922962 | 5.56493795  | 6.35535943  | 4.832746033 | 5.013362104 |
| ENSMUSG00000094737 | 11.31922962 | 3.478086219 | 10.59226572 | 4.02728836  | 5.013362104 |
| ENSMUSG00000094738 | 13.44158517 | 6.956172438 | 7.061510478 | 7.249119049 | 3.580972932 |
| ENSMUSG00000094740 | 0           | 0           | 0           | 0           | 0           |
| ENSMUSG00000094743 | 9.196874066 | 9.043024169 | 8.473812573 | 4.02728836  | 5.013362104 |
| ENSMUSG00000094745 | 10.61177777 | 9.738641413 | 8.473812573 | 4.02728836  | 3.580972932 |
| ENSMUSG00000094747 | 12.02668147 | 6.260555194 | 4.943057334 | 6.443661377 | 10.02672421 |
| ENSMUSG00000094748 | 12.02668147 | 6.956172438 | 5.649208382 | 7.249119049 | 2.864778345 |
| ENSMUSG00000094749 | 15.56394073 | 20.17290007 | 18.35992724 | 14.4982381  | 12.17530797 |
| ENSMUSG00000094750 | 13.44158517 | 4.869320706 | 7.061510478 | 6.443661377 | 5.729556691 |
| ENSMUSG00000094751 | 0           | 0           | 0           | 0           | 0           |
| ENSMUSG00000094752 | 11.31922962 | 8.347406925 | 7.061510478 | 2.416373016 | 2.148583759 |
| ENSMUSG00000094753 | 0           | 0           | 0           | 0           | 0           |
| ENSMUSG00000094754 | 7.781970364 | 9.738641413 | 8.473812573 | 8.054576721 | 8.594335036 |
| ENSMUSG00000094755 | 12.02668147 | 4.869320706 | 9.179963621 | 3.221830688 | 6.445751277 |
| ENSMUSG00000094757 | 15.56394073 | 9.043024169 | 9.179963621 | 8.054576721 | 2.148583759 |
| ENSMUSG00000094758 | 5.65961481  | 6.956172438 | 5.649208382 | 12.08186508 | 3.580972932 |
| ENSMUSG00000094760 | 0           | 0           | 0           | 0           | 0           |
| ENSMUSG00000094762 | 14.85648888 | 6.956172438 | 4.236906287 | 7.249119049 | 6.445751277 |
| ENSMUSG00000094764 | 9.904325918 | 6.956172438 | 10.59226572 | 5.638203705 | 4.297167518 |
| ENSMUSG00000094765 | 0           | 0           | 0           | 0           | 0           |

|                    |             |             |             |             |             |
|--------------------|-------------|-------------|-------------|-------------|-------------|
| ENSMUSG00000094767 | 1.414903703 | 3.478086219 | 3.530755239 | 2.416373016 | 3.580972932 |
| ENSMUSG00000094768 | 7.074518513 | 6.956172438 | 10.59226572 | 8.860034393 | 6.445751277 |
| ENSMUSG00000094769 | 9.196874066 | 6.956172438 | 11.29841676 | 4.832746033 | 10.7429188  |
| ENSMUSG00000094770 | 9.904325918 | 8.347406925 | 4.943057334 | 4.832746033 | 7.161945863 |
| ENSMUSG00000094771 | 11.31922962 | 11.1298759  | 6.35535943  | 4.832746033 | 6.445751277 |
| ENSMUSG00000094772 | 7.781970364 | 15.30357936 | 14.12302096 | 4.02728836  | 2.148583759 |
| ENSMUSG00000094774 | 0           | 0           | 0           | 0           | 0           |
| ENSMUSG00000094775 | 9.196874066 | 4.869320706 | 7.061510478 | 0.805457672 | 2.148583759 |
| ENSMUSG00000094778 | 10.61177777 | 6.260555194 | 9.886114669 | 3.221830688 | 9.310529622 |
| ENSMUSG00000094779 | 4.952162959 | 7.651789682 | 4.236906287 | 3.221830688 | 5.729556691 |
| ENSMUSG00000094780 | 15.56394073 | 18.78166558 | 22.59683353 | 7.249119049 | 12.89150255 |
| ENSMUSG00000094784 | 13.44158517 | 15.99919661 | 12.00456781 | 10.47094974 | 10.02672421 |
| ENSMUSG00000094785 | 10.61177777 | 10.43425866 | 7.767661525 | 8.860034393 | 6.445751277 |
| ENSMUSG00000094786 | 11.31922962 | 27.12907251 | 16.94762515 | 14.4982381  | 20.769643   |
| ENSMUSG00000094787 | 4.952162959 | 5.56493795  | 6.35535943  | 8.860034393 | 5.729556691 |
| ENSMUSG00000094790 | 7.781970364 | 6.260555194 | 7.061510478 | 4.02728836  | 7.87814045  |
| ENSMUSG00000094794 | 10.61177777 | 10.43425866 | 4.236906287 | 1.610915344 | 4.297167518 |
| ENSMUSG00000094796 | 7.074518513 | 11.1298759  | 7.767661525 | 9.665492065 | 10.02672421 |
| ENSMUSG00000094797 | 10.61177777 | 6.956172438 | 12.00456781 | 5.638203705 | 7.161945863 |
| ENSMUSG00000094798 | 12.02668147 | 11.82549314 | 10.59226572 | 8.860034393 | 11.45911338 |
| ENSMUSG00000094800 | 8.489422215 | 3.478086219 | 4.236906287 | 3.221830688 | 9.310529622 |
| ENSMUSG00000094801 | 0           | 0           | 0           | 0           | 0           |
| ENSMUSG00000094803 | 7.074518513 | 8.347406925 | 9.886114669 | 1.610915344 | 4.297167518 |
| ENSMUSG00000094804 | 12.02668147 | 12.52111039 | 15.53532305 | 10.47094974 | 5.013362104 |
| ENSMUSG00000094805 | 10.61177777 | 9.738641413 | 7.767661525 | 6.443661377 | 5.729556691 |
| ENSMUSG00000094807 | 9.196874066 | 20.17290007 | 22.59683353 | 29.80193387 | 19.33725383 |
| ENSMUSG00000094809 | 6.367066661 | 11.82549314 | 4.943057334 | 8.860034393 | 2.148583759 |
| ENSMUSG00000094810 | 10.61177777 | 8.347406925 | 7.767661525 | 5.638203705 | 11.45911338 |
| ENSMUSG00000094812 | 1.414903703 | 4.869320706 | 5.649208382 | 4.832746033 | 6.445751277 |
| ENSMUSG00000094814 | 7.781970364 | 7.651789682 | 9.179963621 | 0.805457672 | 2.148583759 |
| ENSMUSG00000094815 | 1.414903703 | 1.391234488 | 0           | 0.805457672 | 0           |
| ENSMUSG00000094820 | 16.27139258 | 9.043024169 | 6.35535943  | 8.860034393 | 7.87814045  |
| ENSMUSG00000094822 | 9.904325918 | 4.173703463 | 1.412302096 | 9.665492065 | 2.148583759 |
| ENSMUSG00000094823 | 9.196874066 | 13.21672763 | 12.00456781 | 4.832746033 | 4.297167518 |
| ENSMUSG00000094824 | 10.61177777 | 8.347406925 | 7.061510478 | 6.443661377 | 9.310529622 |
| ENSMUSG00000094826 | 6.367066661 | 6.956172438 | 6.35535943  | 6.443661377 | 3.580972932 |
| ENSMUSG00000094827 | 9.196874066 | 4.869320706 | 5.649208382 | 7.249119049 | 2.864778345 |
| ENSMUSG00000094829 | 6.367066661 | 2.086851731 | 4.236906287 | 3.221830688 | 4.297167518 |
| ENSMUSG00000094830 | 9.904325918 | 3.478086219 | 7.061510478 | 4.02728836  | 6.445751277 |
| ENSMUSG00000094831 | 7.074518513 | 3.478086219 | 2.824604191 | 3.221830688 | 1.432389173 |
| ENSMUSG00000094832 | 6.367066661 | 6.260555194 | 8.473812573 | 5.638203705 | 5.729556691 |
| ENSMUSG00000094833 | 12.02668147 | 4.869320706 | 7.061510478 | 4.02728836  | 5.013362104 |
| ENSMUSG00000094834 | 7.781970364 | 5.56493795  | 11.29841676 | 12.08186508 | 7.87814045  |

|                    |             |             |             |             |             |
|--------------------|-------------|-------------|-------------|-------------|-------------|
| ENSMUSG00000094837 | 4.244711108 | 2.782468975 | 4.236906287 | 0.805457672 | 5.013362104 |
| ENSMUSG00000094840 | 7.074518513 | 4.173703463 | 6.35535943  | 4.832746033 | 4.297167518 |
| ENSMUSG00000094842 | 68.62282957 | 91.12585893 | 83.32582364 | 61.21478308 | 75.91662615 |
| ENSMUSG00000094843 | 7.781970364 | 9.738641413 | 11.29841676 | 5.638203705 | 12.89150255 |
| ENSMUSG00000094844 | 2.122355554 | 0.695617244 | 4.236906287 | 0.805457672 | 3.580972932 |
| ENSMUSG00000094845 | 3.537259256 | 5.56493795  | 10.59226572 | 4.832746033 | 6.445751277 |
| ENSMUSG00000094846 | 12.73413332 | 6.956172438 | 8.473812573 | 0.805457672 | 6.445751277 |
| ENSMUSG00000094847 | 0           | 0           | 0           | 0           | 0           |
| ENSMUSG00000094848 | 2.122355554 | 0.695617244 | 1.412302096 | 0.805457672 | 0.716194586 |
| ENSMUSG00000094849 | 7.074518513 | 1.391234488 | 8.473812573 | 3.221830688 | 5.013362104 |
| ENSMUSG00000094850 | 11.31922962 | 5.56493795  | 4.943057334 | 8.860034393 | 5.729556691 |
| ENSMUSG00000094852 | 7.781970364 | 30.60715873 | 15.53532305 | 8.860034393 | 10.02672421 |
| ENSMUSG00000094854 | 6.367066661 | 7.651789682 | 12.71071886 | 7.249119049 | 5.729556691 |
| ENSMUSG00000094856 | 17.68629628 | 4.173703463 | 7.061510478 | 8.054576721 | 8.594335036 |
| ENSMUSG00000094858 | 9.904325918 | 9.738641413 | 7.061510478 | 4.02728836  | 6.445751277 |
| ENSMUSG00000094861 | 4.244711108 | 5.56493795  | 1.412302096 | 4.02728836  | 5.013362104 |
| ENSMUSG00000094862 | 6.367066661 | 7.651789682 | 9.179963621 | 4.02728836  | 7.87814045  |
| ENSMUSG00000094864 | 7.074518513 | 4.869320706 | 5.649208382 | 4.832746033 | 8.594335036 |
| ENSMUSG00000094865 | 8.489422215 | 11.82549314 | 2.118453143 | 4.832746033 | 2.864778345 |
| ENSMUSG00000094866 | 12.73413332 | 5.56493795  | 7.767661525 | 4.832746033 | 6.445751277 |
| ENSMUSG00000094867 | 4.952162959 | 6.956172438 | 3.530755239 | 1.610915344 | 4.297167518 |
| ENSMUSG00000094868 | 9.196874066 | 4.869320706 | 2.824604191 | 6.443661377 | 5.729556691 |
| ENSMUSG00000094869 | 4.952162959 | 4.869320706 | 4.236906287 | 2.416373016 | 4.297167518 |
| ENSMUSG00000094872 | 9.196874066 | 10.43425866 | 7.061510478 | 9.665492065 | 10.7429188  |
| ENSMUSG00000094873 | 12.73413332 | 12.52111039 | 7.767661525 | 7.249119049 | 3.580972932 |
| ENSMUSG00000094875 | 10.61177777 | 11.82549314 | 5.649208382 | 8.054576721 | 7.87814045  |
| ENSMUSG00000094877 | 8.489422215 | 9.043024169 | 7.061510478 | 6.443661377 | 5.729556691 |
| ENSMUSG00000094878 | 7.074518513 | 4.869320706 | 7.767661525 | 6.443661377 | 5.013362104 |
| ENSMUSG00000094879 | 12.73413332 | 6.260555194 | 1.412302096 | 5.638203705 | 4.297167518 |
| ENSMUSG00000094880 | 9.196874066 | 6.956172438 | 7.061510478 | 2.416373016 | 7.161945863 |
| ENSMUSG00000094881 | 0           | 0.695617244 | 2.118453143 | 1.610915344 | 2.864778345 |
| ENSMUSG00000094883 | 0           | 0           | 0           | 0           | 0           |
| ENSMUSG00000094884 | 10.61177777 | 9.043024169 | 8.473812573 | 5.638203705 | 5.013362104 |
| ENSMUSG00000094886 | 4.952162959 | 6.260555194 | 8.473812573 | 8.054576721 | 6.445751277 |
| ENSMUSG00000094888 | 0           | 0           | 0           | 0           | 0           |
| ENSMUSG00000094889 | 10.61177777 | 12.52111039 | 9.179963621 | 6.443661377 | 7.161945863 |
| ENSMUSG00000094890 | 2.829807405 | 2.086851731 | 1.412302096 | 4.02728836  | 2.864778345 |
| ENSMUSG00000094891 | 7.781970364 | 4.173703463 | 5.649208382 | 11.27640741 | 5.729556691 |
| ENSMUSG00000094892 | 8.489422215 | 8.347406925 | 12.00456781 | 7.249119049 | 5.013362104 |
| ENSMUSG00000094893 | 6.367066661 | 6.956172438 | 7.767661525 | 6.443661377 | 7.87814045  |
| ENSMUSG00000094894 | 2.829807405 | 4.869320706 | 3.530755239 | 4.02728836  | 1.432389173 |
| ENSMUSG00000094895 | 11.31922962 | 4.869320706 | 5.649208382 | 4.832746033 | 10.02672421 |
| ENSMUSG00000094896 | 6.367066661 | 9.043024169 | 7.061510478 | 3.221830688 | 5.013362104 |



|                    |             |             |             |             |             |
|--------------------|-------------|-------------|-------------|-------------|-------------|
| ENSMUSG00000094897 | 3.537259256 | 7.651789682 | 4.943057334 | 2.416373016 | 2.864778345 |
| ENSMUSG00000094898 | 8.489422215 | 7.651789682 | 7.061510478 | 8.054576721 | 7.161945863 |
| ENSMUSG00000094899 | 0           | 0           | 0           | 0           | 0           |
| ENSMUSG00000094900 | 5.65961481  | 2.086851731 | 4.943057334 | 2.416373016 | 1.432389173 |
| ENSMUSG00000094901 | 9.904325918 | 6.956172438 | 8.473812573 | 7.249119049 | 5.013362104 |
| ENSMUSG00000094902 | 13.44158517 | 11.1298759  | 12.71071886 | 10.47094974 | 5.729556691 |
| ENSMUSG00000094903 | 0           | 0           | 0           | 0           | 0           |
| ENSMUSG00000094904 | 2.829807405 | 0           | 0.706151048 | 3.221830688 | 1.432389173 |
| ENSMUSG00000094905 | 14.14903703 | 6.260555194 | 7.061510478 | 7.249119049 | 5.013362104 |
| ENSMUSG00000094906 | 9.904325918 | 6.956172438 | 4.943057334 | 3.221830688 | 10.7429188  |
| ENSMUSG00000094911 | 7.074518513 | 4.869320706 | 4.943057334 | 5.638203705 | 5.013362104 |
| ENSMUSG00000094912 | 0           | 0           | 0           | 0           | 0           |
| ENSMUSG00000094914 | 8.489422215 | 9.043024169 | 10.59226572 | 4.832746033 | 11.45911338 |
| ENSMUSG00000094916 | 0           | 0           | 0           | 0           | 0           |
| ENSMUSG00000094917 | 0           | 0           | 0           | 0           | 0           |
| ENSMUSG00000094919 | 0           | 0           | 0           | 0           | 0           |
| ENSMUSG00000094920 | 14.85648888 | 11.82549314 | 12.00456781 | 8.054576721 | 14.32389173 |
| ENSMUSG00000094921 | 10.61177777 | 8.347406925 | 6.35535943  | 6.443661377 | 10.02672421 |
| ENSMUSG00000094922 | 0           | 0           | 0           | 0           | 0           |
| ENSMUSG00000094923 | 2.829807405 | 2.086851731 | 4.943057334 | 3.221830688 | 0.716194586 |
| ENSMUSG00000094924 | 142.1978221 | 203.8158524 | 152.5286263 | 69.2693598  | 75.20043157 |
| ENSMUSG00000094926 | 6.367066661 | 4.173703463 | 4.943057334 | 7.249119049 | 7.87814045  |
| ENSMUSG00000094927 | 0           | 0           | 0           | 0           | 0           |
| ENSMUSG00000094930 | 7.074518513 | 11.82549314 | 11.29841676 | 8.860034393 | 7.161945863 |
| ENSMUSG00000094931 | 12.02668147 | 7.651789682 | 4.943057334 | 8.860034393 | 4.297167518 |
| ENSMUSG00000094932 | 10.61177777 | 14.60796212 | 18.35992724 | 9.665492065 | 16.47247549 |
| ENSMUSG00000094933 | 13.44158517 | 9.043024169 | 2.118453143 | 6.443661377 | 7.161945863 |
| ENSMUSG00000094934 | 7.781970364 | 2.086851731 | 2.118453143 | 5.638203705 | 2.148583759 |
| ENSMUSG00000094937 | 13.44158517 | 8.347406925 | 9.179963621 | 5.638203705 | 2.148583759 |
| ENSMUSG00000094938 | 12.02668147 | 10.43425866 | 7.767661525 | 7.249119049 | 10.7429188  |
| ENSMUSG00000094939 | 6.367066661 | 3.478086219 | 3.530755239 | 1.610915344 | 4.297167518 |
| ENSMUSG00000094940 | 5.65961481  | 5.56493795  | 8.473812573 | 4.02728836  | 10.02672421 |
| ENSMUSG00000094943 | 0           | 0           | 0           | 0           | 0           |
| ENSMUSG00000094946 | 9.196874066 | 13.91234488 | 9.179963621 | 4.02728836  | 6.445751277 |
| ENSMUSG00000094947 | 7.781970364 | 4.869320706 | 8.473812573 | 4.832746033 | 7.161945863 |
| ENSMUSG00000094948 | 9.904325918 | 8.347406925 | 9.179963621 | 5.638203705 | 11.45911338 |
| ENSMUSG00000094949 | 10.61177777 | 8.347406925 | 4.943057334 | 4.832746033 | 7.161945863 |
| ENSMUSG00000094950 | 7.781970364 | 9.738641413 | 8.473812573 | 4.02728836  | 6.445751277 |
| ENSMUSG00000094951 | 2.829807405 | 3.478086219 | 3.530755239 | 4.02728836  | 5.013362104 |
| ENSMUSG00000094952 | 0           | 0           | 0           | 0           | 0           |
| ENSMUSG00000094954 | 16.97884443 | 11.1298759  | 12.71071886 | 8.054576721 | 8.594335036 |
| ENSMUSG00000094955 | 12.02668147 | 5.56493795  | 8.473812573 | 10.47094974 | 7.87814045  |
| ENSMUSG00000094956 | 0           | 0           | 0           | 0           | 0           |

|                    |             |             |             |             |             |
|--------------------|-------------|-------------|-------------|-------------|-------------|
| ENSMUSG00000094957 | 2.122355554 | 2.782468975 | 3.530755239 | 0           | 0           |
| ENSMUSG00000094959 | 0           | 0           | 0           | 0           | 0           |
| ENSMUSG00000094960 | 2.829807405 | 2.086851731 | 2.824604191 | 1.610915344 | 0           |
| ENSMUSG00000094962 | 7.074518513 | 10.43425866 | 6.35535943  | 8.860034393 | 9.310529622 |
| ENSMUSG00000094963 | 9.196874066 | 6.260555194 | 8.473812573 | 4.02728836  | 8.594335036 |
| ENSMUSG00000094964 | 2.829807405 | 3.478086219 | 1.412302096 | 1.610915344 | 1.432389173 |
| ENSMUSG00000094965 | 11.31922962 | 4.869320706 | 9.886114669 | 7.249119049 | 8.594335036 |
| ENSMUSG00000094966 | 14.85648888 | 7.651789682 | 7.061510478 | 4.02728836  | 6.445751277 |
| ENSMUSG00000094967 | 18.39374813 | 8.347406925 | 12.00456781 | 9.665492065 | 11.45911338 |
| ENSMUSG00000094968 | 4.952162959 | 4.173703463 | 4.943057334 | 0.805457672 | 2.148583759 |
| ENSMUSG00000094969 | 22.63845924 | 34.78086219 | 28.24604191 | 41.07834128 | 31.5125618  |
| ENSMUSG00000094971 | 11.31922962 | 10.43425866 | 10.59226572 | 8.860034393 | 4.297167518 |
| ENSMUSG00000094972 | 12.73413332 | 6.260555194 | 6.35535943  | 8.054576721 | 8.594335036 |
| ENSMUSG00000094973 | 9.196874066 | 7.651789682 | 3.530755239 | 7.249119049 | 7.161945863 |
| ENSMUSG00000094974 | 4.244711108 | 9.043024169 | 4.943057334 | 8.054576721 | 10.02672421 |
| ENSMUSG00000094975 | 4.952162959 | 4.869320706 | 7.767661525 | 4.832746033 | 4.297167518 |
| ENSMUSG00000094976 | 5.65961481  | 2.782468975 | 7.767661525 | 5.638203705 | 2.864778345 |
| ENSMUSG00000094977 | 6.367066661 | 9.738641413 | 5.649208382 | 4.02728836  | 10.7429188  |
| ENSMUSG00000094979 | 0.707451851 | 0.695617244 | 0.706151048 | 0           | 0           |
| ENSMUSG00000094980 | 11.31922962 | 7.651789682 | 7.061510478 | 4.832746033 | 7.161945863 |
| ENSMUSG00000094981 | 12.02668147 | 9.738641413 | 7.061510478 | 8.054576721 | 5.013362104 |
| ENSMUSG00000094982 | 5.65961481  | 6.260555194 | 7.767661525 | 4.832746033 | 6.445751277 |
| ENSMUSG00000094983 | 10.61177777 | 11.82549314 | 9.886114669 | 2.416373016 | 7.161945863 |
| ENSMUSG00000094985 | 5.65961481  | 8.347406925 | 7.061510478 | 4.832746033 | 7.161945863 |
| ENSMUSG00000094986 | 12.73413332 | 3.478086219 | 9.886114669 | 8.054576721 | 4.297167518 |
| ENSMUSG00000094987 | 3.537259256 | 2.782468975 | 6.35535943  | 1.610915344 | 3.580972932 |
| ENSMUSG00000094988 | 9.196874066 | 5.56493795  | 7.767661525 | 4.832746033 | 5.013362104 |
| ENSMUSG00000094989 | 6.367066661 | 6.260555194 | 8.473812573 | 10.47094974 | 8.594335036 |
| ENSMUSG00000094991 | 9.904325918 | 6.956172438 | 9.179963621 | 4.832746033 | 6.445751277 |
| ENSMUSG00000094993 | 7.074518513 | 17.39043109 | 22.59683353 | 7.249119049 | 7.161945863 |
| ENSMUSG00000094994 | 7.781970364 | 4.173703463 | 6.35535943  | 3.221830688 | 4.297167518 |
| ENSMUSG00000094996 | 14.14903703 | 4.869320706 | 6.35535943  | 3.221830688 | 4.297167518 |
| ENSMUSG00000094997 | 3.537259256 | 3.478086219 | 1.412302096 | 2.416373016 | 2.148583759 |
| ENSMUSG00000094998 | 0           | 0           | 0           | 0           | 0           |
| ENSMUSG00000094999 | 6.367066661 | 2.782468975 | 4.943057334 | 0.805457672 | 6.445751277 |
| ENSMUSG00000095000 | 7.074518513 | 13.21672763 | 9.886114669 | 8.860034393 | 7.87814045  |
| ENSMUSG00000095002 | 9.904325918 | 6.260555194 | 10.59226572 | 4.02728836  | 2.864778345 |
| ENSMUSG00000095003 | 9.904325918 | 9.738641413 | 7.767661525 | 4.832746033 | 5.013362104 |
| ENSMUSG00000095004 | 0           | 0           | 0           | 0           | 0           |
| ENSMUSG00000095005 | 4.952162959 | 2.782468975 | 5.649208382 | 3.221830688 | 5.729556691 |
| ENSMUSG00000095006 | 0.707451851 | 1.391234488 | 3.530755239 | 2.416373016 | 1.432389173 |
| ENSMUSG00000095007 | 10.61177777 | 5.56493795  | 9.886114669 | 0.805457672 | 4.297167518 |
| ENSMUSG00000095008 | 3.537259256 | 3.478086219 | 1.412302096 | 0.805457672 | 2.148583759 |

|                    |             |             |             |             |             |
|--------------------|-------------|-------------|-------------|-------------|-------------|
| ENSMUSG00000095009 | 0           | 0           | 0           | 0           | 0           |
| ENSMUSG00000095010 | 8.489422215 | 6.260555194 | 4.236906287 | 5.638203705 | 3.580972932 |
| ENSMUSG00000095012 | 16.27139258 | 17.39043109 | 12.71071886 | 13.69278043 | 11.45911338 |
| ENSMUSG00000095013 | 0           | 0           | 0           | 0           | 0           |
| ENSMUSG00000095016 | 14.14903703 | 12.52111039 | 16.2414741  | 33.82922223 | 32.94495097 |
| ENSMUSG00000095017 | 3.537259256 | 2.086851731 | 1.412302096 | 2.416373016 | 3.580972932 |
| ENSMUSG00000095020 | 10.61177777 | 14.60796212 | 9.886114669 | 9.665492065 | 15.7562809  |
| ENSMUSG00000095021 | 0           | 0           | 0           | 0           | 0           |
| ENSMUSG00000095023 | 10.61177777 | 17.39043109 | 22.59683353 | 28.19101852 | 18.62105924 |
| ENSMUSG00000095025 | 17.68629628 | 20.17290007 | 15.53532305 | 14.4982381  | 12.89150255 |
| ENSMUSG00000095027 | 7.074518513 | 9.043024169 | 7.061510478 | 4.02728836  | 7.87814045  |
| ENSMUSG00000095029 | 3.537259256 | 3.478086219 | 2.118453143 | 2.416373016 | 5.013362104 |
| ENSMUSG00000095030 | 9.904325918 | 7.651789682 | 8.473812573 | 4.832746033 | 14.32389173 |
| ENSMUSG00000095031 | 2.829807405 | 3.478086219 | 4.236906287 | 2.416373016 | 2.864778345 |
| ENSMUSG00000095033 | 9.904325918 | 9.738641413 | 6.35535943  | 2.416373016 | 5.013362104 |
| ENSMUSG00000095034 | 4.952162959 | 5.56493795  | 2.118453143 | 2.416373016 | 2.864778345 |
| ENSMUSG00000095035 | 6.367066661 | 4.173703463 | 8.473812573 | 5.638203705 | 7.87814045  |
| ENSMUSG00000095036 | 0           | 0           | 0           | 0           | 0           |
| ENSMUSG00000095037 | 26.1757185  | 29.91154148 | 28.95219296 | 28.19101852 | 24.35061594 |
| ENSMUSG00000095042 | 9.196874066 | 8.347406925 | 14.829172   | 12.08186508 | 9.310529622 |
| ENSMUSG00000095044 | 13.44158517 | 7.651789682 | 10.59226572 | 4.832746033 | 5.013362104 |
| ENSMUSG00000095045 | 4.952162959 | 6.260555194 | 3.530755239 | 3.221830688 | 2.148583759 |
| ENSMUSG00000095047 | 8.489422215 | 6.956172438 | 7.767661525 | 4.832746033 | 7.161945863 |
| ENSMUSG00000095049 | 6.367066661 | 0.695617244 | 1.412302096 | 4.02728836  | 5.013362104 |
| ENSMUSG00000095050 | 3.537259256 | 3.478086219 | 2.824604191 | 3.221830688 | 0.716194586 |
| ENSMUSG00000095051 | 0           | 0           | 0           | 0           | 0           |
| ENSMUSG00000095052 | 13.44158517 | 7.651789682 | 7.767661525 | 8.054576721 | 8.594335036 |
| ENSMUSG00000095053 | 10.61177777 | 9.043024169 | 9.886114669 | 6.443661377 | 5.729556691 |
| ENSMUSG00000095054 | 32.54278516 | 20.86851731 | 25.42143772 | 24.16373016 | 18.62105924 |
| ENSMUSG00000095057 | 7.074518513 | 2.782468975 | 7.767661525 | 3.221830688 | 3.580972932 |
| ENSMUSG00000095059 | 17.68629628 | 5.56493795  | 7.767661525 | 6.443661377 | 9.310529622 |
| ENSMUSG00000095060 | 4.952162959 | 2.782468975 | 2.118453143 | 1.610915344 | 3.580972932 |
| ENSMUSG00000095064 | 9.196874066 | 4.869320706 | 4.943057334 | 7.249119049 | 1.432389173 |
| ENSMUSG00000095065 | 3.537259256 | 3.478086219 | 4.943057334 | 4.02728836  | 0           |
| ENSMUSG00000095068 | 6.367066661 | 15.30357936 | 10.59226572 | 6.443661377 | 12.17530797 |
| ENSMUSG00000095069 | 12.02668147 | 12.52111039 | 6.35535943  | 4.832746033 | 7.87814045  |
| ENSMUSG00000095070 | 9.904325918 | 11.82549314 | 8.473812573 | 7.249119049 | 7.161945863 |
| ENSMUSG00000095072 | 5.65961481  | 5.56493795  | 4.236906287 | 1.610915344 | 6.445751277 |
| ENSMUSG00000095073 | 0           | 0           | 0           | 0           | 0           |
| ENSMUSG00000095074 | 13.44158517 | 6.260555194 | 7.061510478 | 2.416373016 | 5.729556691 |
| ENSMUSG00000095075 | 7.074518513 | 9.043024169 | 8.473812573 | 8.860034393 | 7.161945863 |
| ENSMUSG00000095078 | 7.074518513 | 13.21672763 | 9.179963621 | 9.665492065 | 12.17530797 |
| ENSMUSG00000095079 | 19.10119998 | 22.2597518  | 24.00913562 | 24.16373016 | 19.33725383 |

|                    |             |             |             |             |             |
|--------------------|-------------|-------------|-------------|-------------|-------------|
| ENSMUSG00000095081 | 15.56394073 | 8.347406925 | 9.886114669 | 10.47094974 | 4.297167518 |
| ENSMUSG00000095085 | 6.367066661 | 13.21672763 | 12.71071886 | 1.610915344 | 2.864778345 |
| ENSMUSG00000095086 | 8.489422215 | 9.043024169 | 7.061510478 | 9.665492065 | 13.60769714 |
| ENSMUSG00000095087 | 55.1812444  | 75.12666233 | 76.26431316 | 109.5422434 | 88.09193412 |
| ENSMUSG00000095089 | 8.489422215 | 2.086851731 | 4.236906287 | 2.416373016 | 5.729556691 |
| ENSMUSG00000095091 | 0           | 0           | 0           | 0           | 0           |
| ENSMUSG00000095093 | 9.196874066 | 5.56493795  | 9.179963621 | 5.638203705 | 7.87814045  |
| ENSMUSG00000095094 | 9.196874066 | 8.347406925 | 5.649208382 | 0.805457672 | 4.297167518 |
| ENSMUSG00000095095 | 7.781970364 | 10.43425866 | 7.061510478 | 4.832746033 | 9.310529622 |
| ENSMUSG00000095096 | 8.489422215 | 9.043024169 | 3.530755239 | 3.221830688 | 4.297167518 |
| ENSMUSG00000095097 | 13.44158517 | 10.43425866 | 6.35535943  | 8.860034393 | 10.7429188  |
| ENSMUSG00000095098 | 18.39374813 | 31.30277597 | 25.42143772 | 42.68925662 | 37.95831308 |
| ENSMUSG00000095100 | 9.196874066 | 8.347406925 | 13.41686991 | 5.638203705 | 5.013362104 |
| ENSMUSG00000095102 | 6.367066661 | 8.347406925 | 9.179963621 | 5.638203705 | 7.161945863 |
| ENSMUSG00000095103 | 8.489422215 | 4.173703463 | 4.236906287 | 1.610915344 | 4.297167518 |
| ENSMUSG00000095107 | 8.489422215 | 10.43425866 | 12.71071886 | 8.860034393 | 9.310529622 |
| ENSMUSG00000095108 | 4.244711108 | 2.782468975 | 4.943057334 | 2.416373016 | 0           |
| ENSMUSG00000095111 | 0.707451851 | 2.086851731 | 2.118453143 | 0           | 0.716194586 |
| ENSMUSG00000095112 | 5.65961481  | 6.956172438 | 5.649208382 | 4.832746033 | 6.445751277 |
| ENSMUSG00000095113 | 10.61177777 | 7.651789682 | 5.649208382 | 12.08186508 | 3.580972932 |
| ENSMUSG00000095116 | 6.367066661 | 10.43425866 | 4.236906287 | 2.416373016 | 5.013362104 |
| ENSMUSG00000095117 | 7.074518513 | 5.56493795  | 7.061510478 | 8.054576721 | 5.729556691 |
| ENSMUSG00000095118 | 0           | 0           | 0           | 0           | 0           |
| ENSMUSG00000095119 | 26.88317035 | 25.04222078 | 25.42143772 | 41.88379895 | 46.55264811 |
| ENSMUSG00000095120 | 5.65961481  | 1.391234488 | 8.473812573 | 4.832746033 | 7.161945863 |
| ENSMUSG00000095121 | 3.537259256 | 6.956172438 | 7.061510478 | 4.832746033 | 7.87814045  |
| ENSMUSG00000095122 | 23.34591109 | 22.95536904 | 26.83373982 | 20.94189947 | 17.18867007 |
| ENSMUSG00000095123 | 253.9752146 | 249.0309733 | 248.5651688 | 315.7394075 | 212.7097921 |
| ENSMUSG00000095124 | 7.074518513 | 6.260555194 | 10.59226572 | 6.443661377 | 2.148583759 |
| ENSMUSG00000095125 | 10.61177777 | 10.43425866 | 12.00456781 | 8.860034393 | 8.594335036 |
| ENSMUSG00000095127 | 13.44158517 | 11.1298759  | 13.41686991 | 6.443661377 | 7.87814045  |
| ENSMUSG00000095128 | 7.781970364 | 7.651789682 | 8.473812573 | 3.221830688 | 4.297167518 |
| ENSMUSG00000095129 | 14.14903703 | 7.651789682 | 7.061510478 | 6.443661377 | 6.445751277 |
| ENSMUSG00000095130 | 6.367066661 | 4.869320706 | 6.35535943  | 8.860034393 | 4.297167518 |
| ENSMUSG00000095131 | 0           | 0           | 0           | 0           | 0           |
| ENSMUSG00000095132 | 11.31922962 | 11.82549314 | 12.00456781 | 11.27640741 | 15.7562809  |
| ENSMUSG00000095133 | 10.61177777 | 13.21672763 | 9.886114669 | 8.860034393 | 10.02672421 |
| ENSMUSG00000095134 | 3.537259256 | 0.695617244 | 48.7244223  | 2.416373016 | 2.148583759 |
| ENSMUSG00000095136 | 8.489422215 | 7.651789682 | 4.943057334 | 4.02728836  | 3.580972932 |
| ENSMUSG00000095137 | 2.829807405 | 2.086851731 | 4.236906287 | 1.610915344 | 5.013362104 |
| ENSMUSG00000095138 | 5.65961481  | 6.260555194 | 7.061510478 | 5.638203705 | 5.729556691 |
| ENSMUSG00000095140 | 4.244711108 | 9.043024169 | 7.767661525 | 4.832746033 | 7.161945863 |
| ENSMUSG00000095142 | 12.73413332 | 10.43425866 | 9.886114669 | 6.443661377 | 5.013362104 |

|                    |             |             |             |             |             |
|--------------------|-------------|-------------|-------------|-------------|-------------|
| ENSMUSG00000095143 | 11.31922962 | 9.043024169 | 7.767661525 | 4.02728836  | 7.161945863 |
| ENSMUSG00000095146 | 9.196874066 | 8.347406925 | 7.061510478 | 4.832746033 | 5.729556691 |
| ENSMUSG00000095147 | 0           | 0           | 0           | 0           | 0           |
| ENSMUSG00000095149 | 11.31922962 | 10.43425866 | 6.35535943  | 3.221830688 | 6.445751277 |
| ENSMUSG00000095150 | 7.781970364 | 9.043024169 | 3.530755239 | 7.249119049 | 5.013362104 |
| ENSMUSG00000095151 | 0           | 0           | 0           | 0           | 0           |
| ENSMUSG00000095152 | 7.781970364 | 1.391234488 | 5.649208382 | 5.638203705 | 2.864778345 |
| ENSMUSG00000095154 | 7.781970364 | 11.1298759  | 6.35535943  | 8.860034393 | 4.297167518 |
| ENSMUSG00000095155 | 7.781970364 | 3.478086219 | 6.35535943  | 4.832746033 | 5.013362104 |
| ENSMUSG00000095156 | 6.367066661 | 4.869320706 | 5.649208382 | 4.832746033 | 4.297167518 |
| ENSMUSG00000095159 | 16.27139258 | 11.82549314 | 14.829172   | 24.16373016 | 16.47247549 |
| ENSMUSG00000095160 | 7.074518513 | 6.956172438 | 10.59226572 | 8.860034393 | 5.729556691 |
| ENSMUSG00000095161 | 4.244711108 | 5.56493795  | 6.35535943  | 4.832746033 | 5.729556691 |
| ENSMUSG00000095162 | 9.904325918 | 9.738641413 | 6.35535943  | 4.832746033 | 2.864778345 |
| ENSMUSG00000095163 | 9.904325918 | 9.043024169 | 4.236906287 | 6.443661377 | 3.580972932 |
| ENSMUSG00000095164 | 0           | 0           | 0           | 0           | 0           |
| ENSMUSG00000095165 | 10.61177777 | 6.956172438 | 9.886114669 | 7.249119049 | 7.87814045  |
| ENSMUSG00000095168 | 7.781970364 | 7.651789682 | 7.061510478 | 7.249119049 | 5.013362104 |
| ENSMUSG00000095169 | 8.489422215 | 8.347406925 | 9.886114669 | 3.221830688 | 2.148583759 |
| ENSMUSG00000095170 | 9.196874066 | 7.651789682 | 9.886114669 | 4.832746033 | 6.445751277 |
| ENSMUSG00000095171 | 9.196874066 | 6.260555194 | 8.473812573 | 5.638203705 | 7.87814045  |
| ENSMUSG00000095174 | 30.4204296  | 45.21512085 | 45.8998181  | 24.96918783 | 21.48583759 |
| ENSMUSG00000095175 | 7.781970364 | 5.56493795  | 7.767661525 | 4.832746033 | 7.161945863 |
| ENSMUSG00000095176 | 7.781970364 | 5.56493795  | 12.71071886 | 2.416373016 | 3.580972932 |
| ENSMUSG00000095178 | 9.196874066 | 13.91234488 | 14.12302096 | 12.08186508 | 22.20203218 |
| ENSMUSG00000095179 | 9.196874066 | 4.869320706 | 6.35535943  | 2.416373016 | 0.716194586 |
| ENSMUSG00000095180 | 2.829807405 | 0           | 2.118453143 | 2.416373016 | 1.432389173 |
| ENSMUSG00000095182 | 0           | 0           | 0           | 0           | 0           |
| ENSMUSG00000095183 | 0           | 0           | 0           | 0           | 0           |
| ENSMUSG00000095184 | 12.02668147 | 9.043024169 | 10.59226572 | 8.860034393 | 10.02672421 |
| ENSMUSG00000095185 | 8.489422215 | 5.56493795  | 3.530755239 | 8.054576721 | 5.013362104 |
| ENSMUSG00000095186 | 568.7912884 | 612.1431745 | 620.0006199 | 539.6566403 | 584.4147825 |
| ENSMUSG00000095187 | 15.56394073 | 9.043024169 | 9.179963621 | 3.221830688 | 9.310529622 |
| ENSMUSG00000095188 | 9.904325918 | 10.43425866 | 7.061510478 | 4.02728836  | 5.013362104 |
| ENSMUSG00000095189 | 11.31922962 | 9.738641413 | 5.649208382 | 2.416373016 | 7.87814045  |
| ENSMUSG00000095191 | 15.56394073 | 6.260555194 | 6.35535943  | 10.47094974 | 5.729556691 |
| ENSMUSG00000095192 | 5.65961481  | 6.956172438 | 3.530755239 | 3.221830688 | 1.432389173 |
| ENSMUSG00000095193 | 9.904325918 | 18.08604834 | 12.71071886 | 10.47094974 | 22.91822676 |
| ENSMUSG00000095196 | 10.61177777 | 7.651789682 | 8.473812573 | 4.02728836  | 5.729556691 |
| ENSMUSG00000095197 | 4.244711108 | 6.956172438 | 5.649208382 | 4.832746033 | 4.297167518 |
| ENSMUSG00000095198 | 0           | 0           | 0           | 0           | 0           |
| ENSMUSG00000095199 | 15.56394073 | 20.86851731 | 17.65377619 | 12.88732275 | 16.47247549 |
| ENSMUSG00000095200 | 3.537259256 | 2.782468975 | 3.530755239 | 7.249119049 | 5.013362104 |

|                    |             |             |             |             |             |
|--------------------|-------------|-------------|-------------|-------------|-------------|
| ENSMUSG00000095201 | 12.73413332 | 3.478086219 | 6.35535943  | 6.443661377 | 5.013362104 |
| ENSMUSG00000095202 | 7.074518513 | 6.956172438 | 7.061510478 | 8.054576721 | 7.87814045  |
| ENSMUSG00000095203 | 14.85648888 | 4.173703463 | 7.767661525 | 4.832746033 | 10.02672421 |
| ENSMUSG00000095204 | 6.367066661 | 4.869320706 | 6.35535943  | 3.221830688 | 6.445751277 |
| ENSMUSG00000095205 | 8.489422215 | 24.34660353 | 16.94762515 | 45.91108731 | 39.39070225 |
| ENSMUSG00000095206 | 0           | 0.695617244 | 0           | 2.416373016 | 0.716194586 |
| ENSMUSG00000095209 | 5.65961481  | 8.347406925 | 6.35535943  | 4.02728836  | 7.161945863 |
| ENSMUSG00000095210 | 3.537259256 | 3.478086219 | 2.824604191 | 4.02728836  | 3.580972932 |
| ENSMUSG00000095212 | 6.367066661 | 9.738641413 | 5.649208382 | 6.443661377 | 5.729556691 |
| ENSMUSG00000095213 | 7.781970364 | 9.738641413 | 6.35535943  | 7.249119049 | 6.445751277 |
| ENSMUSG00000095214 | 9.904325918 | 9.738641413 | 5.649208382 | 0.805457672 | 5.729556691 |
| ENSMUSG00000095216 | 8.489422215 | 11.1298759  | 7.061510478 | 6.443661377 | 7.161945863 |
| ENSMUSG00000095217 | 11.31922962 | 14.60796212 | 12.71071886 | 4.832746033 | 10.02672421 |
| ENSMUSG00000095218 | 7.074518513 | 10.43425866 | 9.886114669 | 3.221830688 | 10.7429188  |
| ENSMUSG00000095219 | 9.196874066 | 9.043024169 | 12.00456781 | 7.249119049 | 4.297167518 |
| ENSMUSG00000095220 | 0           | 0           | 0           | 0           | 0           |
| ENSMUSG00000095221 | 1.414903703 | 0.695617244 | 0.706151048 | 0.805457672 | 0           |
| ENSMUSG00000095222 | 0           | 0           | 0           | 0           | 0           |
| ENSMUSG00000095225 | 0           | 0           | 0           | 0           | 0           |
| ENSMUSG00000095228 | 6.367066661 | 4.173703463 | 0.706151048 | 5.638203705 | 1.432389173 |
| ENSMUSG00000095229 | 6.367066661 | 4.173703463 | 7.767661525 | 1.610915344 | 3.580972932 |
| ENSMUSG00000095231 | 2.829807405 | 1.391234488 | 1.412302096 | 0.805457672 | 5.013362104 |
| ENSMUSG00000095233 | 7.074518513 | 9.738641413 | 7.767661525 | 8.054576721 | 11.45911338 |
| ENSMUSG00000095234 | 3.537259256 | 2.086851731 | 2.824604191 | 3.221830688 | 2.864778345 |
| ENSMUSG00000095236 | 9.904325918 | 6.956172438 | 11.29841676 | 4.02728836  | 5.729556691 |
| ENSMUSG00000095237 | 7.781970364 | 5.56493795  | 2.824604191 | 3.221830688 | 5.013362104 |
| ENSMUSG00000095238 | 9.196874066 | 9.738641413 | 6.35535943  | 1.610915344 | 10.02672421 |
| ENSMUSG00000095239 | 8.489422215 | 5.56493795  | 7.061510478 | 4.02728836  | 7.161945863 |
| ENSMUSG00000095243 | 4.244711108 | 7.651789682 | 5.649208382 | 10.47094974 | 5.013362104 |
| ENSMUSG00000095245 | 6.367066661 | 6.260555194 | 4.943057334 | 4.832746033 | 9.310529622 |
| ENSMUSG00000095246 | 6.367066661 | 6.260555194 | 4.943057334 | 7.249119049 | 5.729556691 |
| ENSMUSG00000095248 | 9.196874066 | 8.347406925 | 6.35535943  | 8.054576721 | 5.729556691 |
| ENSMUSG00000095249 | 0           | 0           | 0           | 0           | 0           |
| ENSMUSG00000095251 | 7.781970364 | 6.956172438 | 7.061510478 | 4.02728836  | 7.161945863 |
| ENSMUSG00000095253 | 14.85648888 | 34.08524495 | 31.0706461  | 20.94189947 | 18.62105924 |
| ENSMUSG00000095254 | 6.367066661 | 9.738641413 | 8.473812573 | 4.02728836  | 7.161945863 |
| ENSMUSG00000095255 | 13.44158517 | 11.1298759  | 11.29841676 | 7.249119049 | 5.729556691 |
| ENSMUSG00000095256 | 7.781970364 | 9.043024169 | 7.061510478 | 3.221830688 | 4.297167518 |
| ENSMUSG00000095258 | 2.122355554 | 1.391234488 | 1.412302096 | 3.221830688 | 1.432389173 |
| ENSMUSG00000095259 | 3.537259256 | 4.869320706 | 4.236906287 | 1.610915344 | 3.580972932 |
| ENSMUSG00000095260 | 5.65961481  | 7.651789682 | 7.767661525 | 9.665492065 | 7.87814045  |
| ENSMUSG00000095261 | 9.904325918 | 7.651789682 | 7.061510478 | 4.832746033 | 8.594335036 |
| ENSMUSG00000095262 | 5.65961481  | 6.956172438 | 4.943057334 | 6.443661377 | 8.594335036 |

|                    |             |             |             |             |             |
|--------------------|-------------|-------------|-------------|-------------|-------------|
| ENSMUSG00000095264 | 3.537259256 | 4.173703463 | 2.824604191 | 4.832746033 | 3.580972932 |
| ENSMUSG00000095265 | 9.196874066 | 6.260555194 | 7.767661525 | 8.860034393 | 8.594335036 |
| ENSMUSG00000095266 | 8.489422215 | 9.738641413 | 8.473812573 | 3.221830688 | 11.45911338 |
| ENSMUSG00000095269 | 0           | 0           | 0           | 0           | 0           |
| ENSMUSG00000095270 | 7.074518513 | 6.956172438 | 9.179963621 | 8.860034393 | 8.594335036 |
| ENSMUSG00000095271 | 7.781970364 | 6.956172438 | 4.943057334 | 4.832746033 | 3.580972932 |
| ENSMUSG00000095272 | 6.367066661 | 1.391234488 | 2.118453143 | 3.221830688 | 2.148583759 |
| ENSMUSG00000095273 | 16.27139258 | 5.56493795  | 10.59226572 | 6.443661377 | 4.297167518 |
| ENSMUSG00000095274 | 11.31922962 | 12.52111039 | 6.35535943  | 5.638203705 | 11.45911338 |
| ENSMUSG00000095275 | 12.73413332 | 6.956172438 | 7.061510478 | 4.02728836  | 2.864778345 |
| ENSMUSG00000095277 | 3.537259256 | 6.260555194 | 4.236906287 | 3.221830688 | 2.148583759 |
| ENSMUSG00000095278 | 38.20239997 | 63.99678643 | 62.84744325 | 95.04400531 | 83.7947666  |
| ENSMUSG00000095279 | 6.367066661 | 8.347406925 | 6.35535943  | 4.02728836  | 5.013362104 |
| ENSMUSG00000095280 | 1111.406858 | 1160.98518  | 1099.477181 | 1066.425958 | 1092.196744 |
| ENSMUSG00000095281 | 79.23460734 | 125.9067211 | 100.9795998 | 103.098582  | 93.82149081 |
| ENSMUSG00000095282 | 5.65961481  | 13.91234488 | 4.236906287 | 2.416373016 | 4.297167518 |
| ENSMUSG00000095283 | 4.952162959 | 2.782468975 | 1.412302096 | 2.416373016 | 2.148583759 |
| ENSMUSG00000095284 | 6.367066661 | 4.869320706 | 2.824604191 | 4.02728836  | 2.148583759 |
| ENSMUSG00000095285 | 6.367066661 | 3.478086219 | 4.236906287 | 6.443661377 | 3.580972932 |
| ENSMUSG00000095286 | 12.02668147 | 6.956172438 | 8.473812573 | 3.221830688 | 6.445751277 |
| ENSMUSG00000095287 | 11.31922962 | 8.347406925 | 2.824604191 | 5.638203705 | 2.864778345 |
| ENSMUSG00000095288 | 11.31922962 | 7.651789682 | 9.886114669 | 5.638203705 | 9.310529622 |
| ENSMUSG00000095289 | 7.781970364 | 8.347406925 | 6.35535943  | 5.638203705 | 5.729556691 |
| ENSMUSG00000095290 | 5.65961481  | 6.956172438 | 5.649208382 | 4.832746033 | 10.02672421 |
| ENSMUSG00000095291 | 9.196874066 | 6.260555194 | 7.767661525 | 4.832746033 | 6.445751277 |
| ENSMUSG00000095292 | 9.196874066 | 6.260555194 | 5.649208382 | 6.443661377 | 4.297167518 |
| ENSMUSG00000095294 | 42.44711108 | 30.60715873 | 48.7244223  | 19.33098413 | 25.06681052 |
| ENSMUSG00000095296 | 13.44158517 | 4.173703463 | 5.649208382 | 7.249119049 | 6.445751277 |
| ENSMUSG00000095297 | 9.196874066 | 9.738641413 | 8.473812573 | 7.249119049 | 5.013362104 |
| ENSMUSG00000095298 | 4.244711108 | 2.782468975 | 4.943057334 | 3.221830688 | 2.864778345 |
| ENSMUSG00000095299 | 9.196874066 | 4.173703463 | 4.943057334 | 12.08186508 | 10.7429188  |
| ENSMUSG00000095301 | 7.781970364 | 9.043024169 | 5.649208382 | 1.610915344 | 10.7429188  |
| ENSMUSG00000095305 | 9.196874066 | 6.260555194 | 7.767661525 | 4.832746033 | 5.729556691 |
| ENSMUSG00000095306 | 7.781970364 | 10.43425866 | 8.473812573 | 8.054576721 | 5.729556691 |
| ENSMUSG00000095307 | 9.196874066 | 10.43425866 | 12.71071886 | 4.832746033 | 7.161945863 |
| ENSMUSG00000095309 | 12.02668147 | 2.086851731 | 6.35535943  | 6.443661377 | 2.148583759 |
| ENSMUSG00000095310 | 0           | 0           | 0           | 0           | 0           |
| ENSMUSG00000095311 | 9.196874066 | 7.651789682 | 5.649208382 | 8.860034393 | 6.445751277 |
| ENSMUSG00000095312 | 7.781970364 | 5.56493795  | 7.767661525 | 9.665492065 | 5.013362104 |
| ENSMUSG00000095313 | 14.14903703 | 9.738641413 | 5.649208382 | 8.054576721 | 15.04008631 |
| ENSMUSG00000095314 | 2.122355554 | 3.478086219 | 4.236906287 | 2.416373016 | 0           |
| ENSMUSG00000095315 | 55.88869625 | 118.9505487 | 85.44427678 | 81.35122488 | 86.65954495 |
| ENSMUSG00000095316 | 2.829807405 | 4.173703463 | 7.767661525 | 2.416373016 | 5.013362104 |

|                    |             |             |             |             |             |
|--------------------|-------------|-------------|-------------|-------------|-------------|
| ENSMUSG00000095319 | 10.61177777 | 6.260555194 | 4.236906287 | 6.443661377 | 5.729556691 |
| ENSMUSG00000095321 | 2.122355554 | 6.260555194 | 7.767661525 | 2.416373016 | 3.580972932 |
| ENSMUSG00000095322 | 7.074518513 | 6.260555194 | 6.35535943  | 5.638203705 | 10.02672421 |
| ENSMUSG00000095323 | 12.02668147 | 10.43425866 | 12.00456781 | 9.665492065 | 11.45911338 |
| ENSMUSG00000095325 | 17.68629628 | 20.86851731 | 24.71528667 | 21.74735715 | 22.20203218 |
| ENSMUSG00000095327 | 9.196874066 | 2.782468975 | 2.118453143 | 3.221830688 | 4.297167518 |
| ENSMUSG00000095328 | 12.02668147 | 11.1298759  | 8.473812573 | 5.638203705 | 11.45911338 |
| ENSMUSG00000095329 | 9.196874066 | 4.869320706 | 7.061510478 | 6.443661377 | 8.594335036 |
| ENSMUSG00000095330 | 8.489422215 | 11.82549314 | 5.649208382 | 6.443661377 | 4.297167518 |
| ENSMUSG00000095331 | 10.61177777 | 10.43425866 | 5.649208382 | 8.054576721 | 5.013362104 |
| ENSMUSG00000095333 | 13.44158517 | 11.82549314 | 8.473812573 | 2.416373016 | 7.161945863 |
| ENSMUSG00000095334 | 9.196874066 | 10.43425866 | 11.29841676 | 7.249119049 | 12.17530797 |
| ENSMUSG00000095335 | 5.65961481  | 6.260555194 | 9.886114669 | 4.02728836  | 5.013362104 |
| ENSMUSG00000095336 | 0           | 0           | 0           | 0           | 0           |
| ENSMUSG00000095338 | 4.952162959 | 8.347406925 | 6.35535943  | 5.638203705 | 5.729556691 |
| ENSMUSG00000095340 | 0           | 0           | 0           | 0           | 0           |
| ENSMUSG00000095342 | 0           | 0           | 0           | 0           | 0           |
| ENSMUSG00000095343 | 6.367066661 | 6.956172438 | 6.35535943  | 6.443661377 | 7.87814045  |
| ENSMUSG00000095344 | 12.02668147 | 7.651789682 | 8.473812573 | 4.832746033 | 8.594335036 |
| ENSMUSG00000095345 | 2.829807405 | 3.478086219 | 8.473812573 | 4.832746033 | 0.716194586 |
| ENSMUSG00000095346 | 6.367066661 | 7.651789682 | 5.649208382 | 7.249119049 | 7.161945863 |
| ENSMUSG00000095347 | 7.074518513 | 1.391234488 | 9.886114669 | 4.02728836  | 11.45911338 |
| ENSMUSG00000095348 | 4.244711108 | 0.695617244 | 5.649208382 | 2.416373016 | 2.864778345 |
| ENSMUSG00000095349 | 6.367066661 | 5.56493795  | 4.943057334 | 5.638203705 | 5.729556691 |
| ENSMUSG00000095350 | 0           | 0           | 0           | 0           | 0           |
| ENSMUSG00000095351 | 13.44158517 | 8.347406925 | 7.767661525 | 4.02728836  | 5.013362104 |
| ENSMUSG00000095353 | 2.829807405 | 4.173703463 | 4.943057334 | 1.610915344 | 2.864778345 |
| ENSMUSG00000095354 | 5.65961481  | 6.260555194 | 5.649208382 | 4.832746033 | 5.729556691 |
| ENSMUSG00000095356 | 5.65961481  | 7.651789682 | 8.473812573 | 6.443661377 | 4.297167518 |
| ENSMUSG00000095357 | 0           | 0           | 0           | 0           | 0           |
| ENSMUSG00000095358 | 7.781970364 | 5.56493795  | 2.824604191 | 7.249119049 | 5.729556691 |
| ENSMUSG00000095361 | 363.6302515 | 355.4604116 | 328.3602372 | 345.5413413 | 253.5328836 |
| ENSMUSG00000095366 | 2.829807405 | 2.782468975 | 48.7244223  | 4.02728836  | 3.580972932 |
| ENSMUSG00000095367 | 10.61177777 | 9.043024169 | 15.53532305 | 10.47094974 | 12.89150255 |
| ENSMUSG00000095368 | 12.02668147 | 12.52111039 | 7.767661525 | 6.443661377 | 8.594335036 |
| ENSMUSG00000095369 | 9.196874066 | 6.956172438 | 3.530755239 | 6.443661377 | 11.45911338 |
| ENSMUSG00000095370 | 12.02668147 | 7.651789682 | 6.35535943  | 6.443661377 | 8.594335036 |
| ENSMUSG00000095371 | 9.904325918 | 9.738641413 | 8.473812573 | 9.665492065 | 7.161945863 |
| ENSMUSG00000095372 | 0           | 0           | 0           | 0           | 0           |
| ENSMUSG00000095373 | 9.196874066 | 7.651789682 | 9.179963621 | 2.416373016 | 3.580972932 |
| ENSMUSG00000095374 | 9.196874066 | 0.695617244 | 6.35535943  | 0.805457672 | 4.297167518 |
| ENSMUSG00000095376 | 0           | 0           | 0           | 0           | 0           |
| ENSMUSG00000095377 | 6.367066661 | 4.869320706 | 7.061510478 | 4.832746033 | 5.729556691 |



|                    |             |             |             |             |             |
|--------------------|-------------|-------------|-------------|-------------|-------------|
| ENSMUSG00000095379 | 7.074518513 | 4.869320706 | 9.179963621 | 8.054576721 | 7.87814045  |
| ENSMUSG00000095380 | 6.367066661 | 4.869320706 | 11.29841676 | 3.221830688 | 5.013362104 |
| ENSMUSG00000095382 | 9.196874066 | 8.347406925 | 7.061510478 | 8.860034393 | 3.580972932 |
| ENSMUSG00000095383 | 12.02668147 | 8.347406925 | 8.473812573 | 7.249119049 | 5.013362104 |
| ENSMUSG00000095386 | 6.367066661 | 6.260555194 | 9.179963621 | 8.860034393 | 2.148583759 |
| ENSMUSG00000095389 | 9.904325918 | 5.56493795  | 11.29841676 | 8.860034393 | 11.45911338 |
| ENSMUSG00000095390 | 8.489422215 | 5.56493795  | 10.59226572 | 3.221830688 | 6.445751277 |
| ENSMUSG00000095392 | 6.367066661 | 2.782468975 | 6.35535943  | 3.221830688 | 4.297167518 |
| ENSMUSG00000095393 | 13.44158517 | 9.043024169 | 8.473812573 | 4.832746033 | 7.87814045  |
| ENSMUSG00000095394 | 8.489422215 | 6.260555194 | 5.649208382 | 4.832746033 | 8.594335036 |
| ENSMUSG00000095395 | 120.9742666 | 151.6445591 | 144.0548137 | 81.35122488 | 103.1320204 |
| ENSMUSG00000095396 | 40.32475552 | 76.51789682 | 44.48751601 | 30.60739154 | 37.95831308 |
| ENSMUSG00000095398 | 5.65961481  | 2.782468975 | 2.118453143 | 4.02728836  | 2.148583759 |
| ENSMUSG00000095399 | 5.65961481  | 9.738641413 | 5.649208382 | 7.249119049 | 0.716194586 |
| ENSMUSG00000095401 | 7.074518513 | 11.1298759  | 4.236906287 | 2.416373016 | 4.297167518 |
| ENSMUSG00000095402 | 0           | 0           | 0           | 0           | 0           |
| ENSMUSG00000095406 | 12.02668147 | 9.043024169 | 9.179963621 | 8.054576721 | 10.02672421 |
| ENSMUSG00000095408 | 4.244711108 | 4.869320706 | 4.236906287 | 6.443661377 | 2.864778345 |
| ENSMUSG00000095410 | 0           | 0           | 0           | 0           | 0           |
| ENSMUSG00000095411 | 4.244711108 | 5.56493795  | 4.236906287 | 2.416373016 | 5.013362104 |
| ENSMUSG00000095414 | 9.196874066 | 6.260555194 | 5.649208382 | 7.249119049 | 8.594335036 |
| ENSMUSG00000095416 | 5.65961481  | 7.651789682 | 2.118453143 | 9.665492065 | 5.729556691 |
| ENSMUSG00000095418 | 0           | 0           | 0           | 0           | 0           |
| ENSMUSG00000095419 | 5.65961481  | 5.56493795  | 7.061510478 | 8.054576721 | 7.87814045  |
| ENSMUSG00000095420 | 3.537259256 | 0           | 1.412302096 | 1.610915344 | 0           |
| ENSMUSG00000095421 | 7.781970364 | 4.173703463 | 4.236906287 | 1.610915344 | 2.864778345 |
| ENSMUSG00000095422 | 11.31922962 | 4.869320706 | 8.473812573 | 4.02728836  | 7.161945863 |
| ENSMUSG00000095423 | 7.074518513 | 6.956172438 | 9.179963621 | 5.638203705 | 5.013362104 |
| ENSMUSG00000095424 | 8.489422215 | 4.173703463 | 2.118453143 | 4.02728836  | 3.580972932 |
| ENSMUSG00000095425 | 0           | 0           | 0           | 0           | 0           |
| ENSMUSG00000095427 | 9.904325918 | 9.043024169 | 4.943057334 | 12.08186508 | 10.7429188  |
| ENSMUSG00000095428 | 0           | 0           | 0           | 0           | 0           |
| ENSMUSG00000095429 | 2.829807405 | 4.869320706 | 1.412302096 | 4.02728836  | 2.864778345 |
| ENSMUSG00000095430 | 9.196874066 | 6.956172438 | 9.886114669 | 8.860034393 | 2.864778345 |
| ENSMUSG00000095431 | 7.781970364 | 10.43425866 | 3.530755239 | 3.221830688 | 6.445751277 |
| ENSMUSG00000095433 | 2.829807405 | 3.478086219 | 4.943057334 | 0.805457672 | 5.729556691 |
| ENSMUSG00000095435 | 9.904325918 | 11.82549314 | 12.00456781 | 10.47094974 | 5.013362104 |
| ENSMUSG00000095436 | 6.367066661 | 5.56493795  | 1.412302096 | 5.638203705 | 7.161945863 |
| ENSMUSG00000095437 | 15.56394073 | 9.738641413 | 9.886114669 | 4.832746033 | 14.32389173 |
| ENSMUSG00000095438 | 3.537259256 | 2.782468975 | 4.236906287 | 6.443661377 | 6.445751277 |
| ENSMUSG00000095440 | 8.489422215 | 6.956172438 | 2.118453143 | 5.638203705 | 5.013362104 |
| ENSMUSG00000095442 | 6.367066661 | 4.869320706 | 4.236906287 | 4.832746033 | 3.580972932 |
| ENSMUSG00000095444 | 2.122355554 | 1.391234488 | 1.412302096 | 2.416373016 | 2.148583759 |

|                    |             |             |             |             |             |
|--------------------|-------------|-------------|-------------|-------------|-------------|
| ENSMUSG00000095445 | 2.122355554 | 1.391234488 | 2.118453143 | 2.416373016 | 0           |
| ENSMUSG00000095446 | 12.73413332 | 13.21672763 | 16.94762515 | 6.443661377 | 13.60769714 |
| ENSMUSG00000095447 | 9.904325918 | 6.956172438 | 7.061510478 | 6.443661377 | 5.013362104 |
| ENSMUSG00000095448 | 9.196874066 | 13.21672763 | 9.179963621 | 8.860034393 | 4.297167518 |
| ENSMUSG00000095449 | 0           | 0           | 0           | 0           | 0           |
| ENSMUSG00000095451 | 0           | 0           | 0           | 0           | 0           |
| ENSMUSG00000095453 | 0           | 0           | 0           | 0           | 0           |
| ENSMUSG00000095455 | 12.02668147 | 4.869320706 | 8.473812573 | 5.638203705 | 10.7429188  |
| ENSMUSG00000095457 | 8.489422215 | 5.56493795  | 3.530755239 | 6.443661377 | 7.87814045  |
| ENSMUSG00000095458 | 2.829807405 | 6.956172438 | 2.118453143 | 3.221830688 | 4.297167518 |
| ENSMUSG00000095460 | 11.31922962 | 7.651789682 | 3.530755239 | 4.02728836  | 7.87814045  |
| ENSMUSG00000095462 | 4.244711108 | 5.56493795  | 2.824604191 | 4.832746033 | 2.864778345 |
| ENSMUSG00000095465 | 6.367066661 | 4.173703463 | 9.886114669 | 4.832746033 | 4.297167518 |
| ENSMUSG00000095466 | 12.02668147 | 9.043024169 | 9.179963621 | 5.638203705 | 5.729556691 |
| ENSMUSG00000095467 | 11.31922962 | 7.651789682 | 6.35535943  | 8.054576721 | 5.013362104 |
| ENSMUSG00000095468 | 0.707451851 | 1.391234488 | 0           | 0           | 0           |
| ENSMUSG00000095469 | 6.367066661 | 5.56493795  | 10.59226572 | 5.638203705 | 6.445751277 |
| ENSMUSG00000095470 | 10.61177777 | 5.56493795  | 5.649208382 | 8.860034393 | 8.594335036 |
| ENSMUSG00000095472 | 0           | 0           | 0           | 0           | 0           |
| ENSMUSG00000095474 | 4.952162959 | 4.869320706 | 6.35535943  | 6.443661377 | 3.580972932 |
| ENSMUSG00000095476 | 0           | 0           | 0           | 0           | 0           |
| ENSMUSG00000095477 | 5.65961481  | 4.869320706 | 11.29841676 | 8.860034393 | 10.02672421 |
| ENSMUSG00000095478 | 6.367066661 | 11.82549314 | 12.00456781 | 5.638203705 | 5.729556691 |
| ENSMUSG00000095479 | 4.952162959 | 3.478086219 | 7.767661525 | 4.832746033 | 6.445751277 |
| ENSMUSG00000095480 | 7.074518513 | 2.086851731 | 9.886114669 | 2.416373016 | 3.580972932 |
| ENSMUSG00000095481 | 7.781970364 | 5.56493795  | 5.649208382 | 1.610915344 | 3.580972932 |
| ENSMUSG00000095482 | 11.31922962 | 9.738641413 | 10.59226572 | 3.221830688 | 6.445751277 |
| ENSMUSG00000095483 | 6.367066661 | 9.043024169 | 8.473812573 | 8.860034393 | 8.594335036 |
| ENSMUSG00000095484 | 9.196874066 | 9.738641413 | 5.649208382 | 4.02728836  | 5.013362104 |
| ENSMUSG00000095486 | 10.61177777 | 4.869320706 | 12.00456781 | 4.832746033 | 6.445751277 |
| ENSMUSG00000095487 | 12.73413332 | 3.478086219 | 12.71071886 | 2.416373016 | 8.594335036 |
| ENSMUSG00000095488 | 11.31922962 | 9.043024169 | 5.649208382 | 12.08186508 | 6.445751277 |
| ENSMUSG00000095489 | 9.196874066 | 4.869320706 | 10.59226572 | 6.443661377 | 3.580972932 |
| ENSMUSG00000095490 | 12.73413332 | 5.56493795  | 6.35535943  | 5.638203705 | 5.013362104 |
| ENSMUSG00000095491 | 0           | 0           | 0           | 0           | 0           |
| ENSMUSG00000095492 | 4.244711108 | 4.869320706 | 2.824604191 | 3.221830688 | 4.297167518 |
| ENSMUSG00000095494 | 7.074518513 | 2.086851731 | 5.649208382 | 3.221830688 | 4.297167518 |
| ENSMUSG00000095495 | 12.73413332 | 11.1298759  | 11.29841676 | 4.832746033 | 7.161945863 |
| ENSMUSG00000095497 | 11.31922962 | 6.956172438 | 11.29841676 | 6.443661377 | 5.013362104 |
| ENSMUSG00000095498 | 8.489422215 | 6.956172438 | 7.767661525 | 4.832746033 | 7.87814045  |
| ENSMUSG00000095499 | 2.122355554 | 4.869320706 | 2.118453143 | 3.221830688 | 1.432389173 |
| ENSMUSG00000095501 | 0           | 0           | 0           | 0           | 0           |
| ENSMUSG00000095502 | 10.61177777 | 6.260555194 | 14.12302096 | 12.08186508 | 12.17530797 |

|                    |             |             |             |             |             |
|--------------------|-------------|-------------|-------------|-------------|-------------|
| ENSMUSG00000095503 | 14.85648888 | 12.52111039 | 7.061510478 | 1.610915344 | 6.445751277 |
| ENSMUSG00000095504 | 38.90985182 | 74.43104508 | 53.66747963 | 45.10562964 | 48.70123187 |
| ENSMUSG00000095506 | 9.904325918 | 4.869320706 | 5.649208382 | 4.832746033 | 4.297167518 |
| ENSMUSG00000095507 | 2.122355554 | 0           | 0           | 1.610915344 | 0.716194586 |
| ENSMUSG00000095509 | 0           | 0           | 0           | 0           | 0           |
| ENSMUSG00000095511 | 0           | 0           | 0           | 0           | 0           |
| ENSMUSG00000095512 | 9.904325918 | 8.347406925 | 5.649208382 | 6.443661377 | 6.445751277 |
| ENSMUSG00000095513 | 6.367066661 | 9.738641413 | 2.824604191 | 5.638203705 | 7.87814045  |
| ENSMUSG00000095514 | 5.65961481  | 3.478086219 | 5.649208382 | 4.02728836  | 10.02672421 |
| ENSMUSG00000095516 | 17.68629628 | 16.69481385 | 15.53532305 | 10.47094974 | 13.60769714 |
| ENSMUSG00000095517 | 17.68629628 | 21.56413456 | 16.2414741  | 8.860034393 | 12.17530797 |
| ENSMUSG00000095518 | 14.85648888 | 11.82549314 | 12.71071886 | 8.054576721 | 9.310529622 |
| ENSMUSG00000095519 | 9.904325918 | 4.869320706 | 6.35535943  | 6.443661377 | 7.87814045  |
| ENSMUSG00000095521 | 2.829807405 | 2.086851731 | 8.473812573 | 2.416373016 | 2.148583759 |
| ENSMUSG00000095522 | 7.074518513 | 8.347406925 | 6.35535943  | 5.638203705 | 9.310529622 |
| ENSMUSG00000095524 | 105.4103258 | 168.339373  | 159.5901368 | 161.0915344 | 155.4142252 |
| ENSMUSG00000095525 | 11.31922962 | 9.043024169 | 7.767661525 | 5.638203705 | 8.594335036 |
| ENSMUSG00000095526 | 15.56394073 | 14.60796212 | 23.30298458 | 21.74735715 | 22.20203218 |
| ENSMUSG00000095527 | 13.44158517 | 6.956172438 | 7.767661525 | 5.638203705 | 10.7429188  |
| ENSMUSG00000095529 | 8.489422215 | 7.651789682 | 7.767661525 | 4.832746033 | 7.87814045  |
| ENSMUSG00000095530 | 7.781970364 | 7.651789682 | 13.41686991 | 13.69278043 | 17.18867007 |
| ENSMUSG00000095531 | 8.489422215 | 10.43425866 | 8.473812573 | 6.443661377 | 11.45911338 |
| ENSMUSG00000095532 | 10.61177777 | 9.738641413 | 12.71071886 | 4.832746033 | 3.580972932 |
| ENSMUSG00000095533 | 8.489422215 | 5.56493795  | 7.061510478 | 4.832746033 | 5.013362104 |
| ENSMUSG00000095534 | 7.781970364 | 4.173703463 | 4.236906287 | 3.221830688 | 5.013362104 |
| ENSMUSG00000095536 | 0           | 0           | 0           | 0           | 0           |
| ENSMUSG00000095537 | 12.02668147 | 4.173703463 | 7.767661525 | 6.443661377 | 10.02672421 |
| ENSMUSG00000095539 | 7.781970364 | 6.260555194 | 6.35535943  | 5.638203705 | 2.864778345 |
| ENSMUSG00000095541 | 8.489422215 | 4.869320706 | 8.473812573 | 4.832746033 | 5.729556691 |
| ENSMUSG00000095542 | 4.952162959 | 2.086851731 | 4.943057334 | 2.416373016 | 4.297167518 |
| ENSMUSG00000095543 | 18.39374813 | 6.956172438 | 6.35535943  | 9.665492065 | 2.148583759 |
| ENSMUSG00000095544 | 4.244711108 | 4.173703463 | 7.767661525 | 5.638203705 | 4.297167518 |
| ENSMUSG00000095545 | 15.56394073 | 20.86851731 | 21.89068248 | 12.88732275 | 24.35061594 |
| ENSMUSG00000095547 | 715.9412735 | 709.5295887 | 696.9710841 | 634.7006456 | 678.2362733 |
| ENSMUSG00000095549 | 0           | 0           | 0           | 0           | 0           |
| ENSMUSG00000095550 | 16.97884443 | 10.43425866 | 9.886114669 | 8.860034393 | 5.013362104 |
| ENSMUSG00000095551 | 10.61177777 | 5.56493795  | 13.41686991 | 9.665492065 | 5.729556691 |
| ENSMUSG00000095553 | 3.537259256 | 4.869320706 | 4.943057334 | 1.610915344 | 5.729556691 |
| ENSMUSG00000095554 | 2.829807405 | 2.782468975 | 7.061510478 | 0.805457672 | 2.864778345 |
| ENSMUSG00000095555 | 9.196874066 | 12.52111039 | 8.473812573 | 9.665492065 | 12.17530797 |
| ENSMUSG00000095557 | 10.61177777 | 4.173703463 | 9.179963621 | 8.054576721 | 9.310529622 |
| ENSMUSG00000095558 | 4.952162959 | 4.173703463 | 6.35535943  | 4.02728836  | 2.864778345 |
| ENSMUSG00000095559 | 7.074518513 | 7.651789682 | 2.824604191 | 5.638203705 | 4.297167518 |

|                    |             |             |             |             |             |
|--------------------|-------------|-------------|-------------|-------------|-------------|
| ENSMUSG00000095560 | 4.952162959 | 6.956172438 | 6.35535943  | 8.860034393 | 9.310529622 |
| ENSMUSG00000095561 | 6.367066661 | 2.782468975 | 4.236906287 | 1.610915344 | 5.013362104 |
| ENSMUSG00000095562 | 21.93100739 | 27.82468975 | 80.50121945 | 14.4982381  | 21.48583759 |
| ENSMUSG00000095563 | 7.074518513 | 3.478086219 | 2.118453143 | 4.02728836  | 0.716194586 |
| ENSMUSG00000095564 | 5.65961481  | 6.260555194 | 9.179963621 | 4.02728836  | 11.45911338 |
| ENSMUSG00000095565 | 2.122355554 | 3.478086219 | 4.236906287 | 7.249119049 | 7.87814045  |
| ENSMUSG00000095569 | 6.367066661 | 4.869320706 | 4.943057334 | 4.832746033 | 8.594335036 |
| ENSMUSG00000095571 | 7.074518513 | 6.956172438 | 7.061510478 | 3.221830688 | 5.729556691 |
| ENSMUSG00000095572 | 6.367066661 | 9.738641413 | 6.35535943  | 4.02728836  | 8.594335036 |
| ENSMUSG00000095573 | 0.707451851 | 0.695617244 | 2.118453143 | 0.805457672 | 0.716194586 |
| ENSMUSG00000095574 | 2.829807405 | 2.086851731 | 5.649208382 | 3.221830688 | 1.432389173 |
| ENSMUSG00000095575 | 0           | 0           | 0           | 0           | 0           |
| ENSMUSG00000095577 | 0           | 0           | 0           | 0           | 0           |
| ENSMUSG00000095579 | 7.781970364 | 6.260555194 | 4.943057334 | 6.443661377 | 7.161945863 |
| ENSMUSG00000095580 | 6.367066661 | 7.651789682 | 3.530755239 | 1.610915344 | 5.729556691 |
| ENSMUSG00000095581 | 0           | 0           | 0           | 0           | 0           |
| ENSMUSG00000095583 | 5.65961481  | 4.869320706 | 4.943057334 | 1.610915344 | 1.432389173 |
| ENSMUSG00000095584 | 12.73413332 | 7.651789682 | 7.061510478 | 8.054576721 | 6.445751277 |
| ENSMUSG00000095586 | 7.074518513 | 4.173703463 | 9.179963621 | 3.221830688 | 2.864778345 |
| ENSMUSG00000095587 | 0           | 0           | 0           | 0           | 0           |
| ENSMUSG00000095588 | 14.85648888 | 7.651789682 | 7.767661525 | 4.832746033 | 2.864778345 |
| ENSMUSG00000095589 | 12.02668147 | 5.56493795  | 9.179963621 | 6.443661377 | 5.729556691 |
| ENSMUSG00000095590 | 6.367066661 | 9.738641413 | 9.886114669 | 7.249119049 | 10.02672421 |
| ENSMUSG00000095591 | 0           | 0           | 0           | 0           | 0           |
| ENSMUSG00000095592 | 0           | 0           | 0           | 0           | 0           |
| ENSMUSG00000095593 | 8.489422215 | 6.956172438 | 3.530755239 | 6.443661377 | 5.013362104 |
| ENSMUSG00000095594 | 7.074518513 | 6.260555194 | 4.943057334 | 8.054576721 | 3.580972932 |
| ENSMUSG00000095596 | 11.31922962 | 9.043024169 | 9.179963621 | 12.88732275 | 9.310529622 |
| ENSMUSG00000095597 | 0           | 0           | 0           | 0           | 0.716194586 |
| ENSMUSG00000095599 | 5.65961481  | 2.782468975 | 7.061510478 | 4.02728836  | 2.148583759 |
| ENSMUSG00000095600 | 7.781970364 | 6.260555194 | 5.649208382 | 8.860034393 | 7.87814045  |
| ENSMUSG00000095602 | 6.367066661 | 3.478086219 | 3.530755239 | 2.416373016 | 4.297167518 |
| ENSMUSG00000095603 | 14.14903703 | 6.260555194 | 6.35535943  | 5.638203705 | 5.013362104 |
| ENSMUSG00000095604 | 11.31922962 | 3.478086219 | 14.829172   | 4.02728836  | 8.594335036 |
| ENSMUSG00000095605 | 13.44158517 | 7.651789682 | 9.179963621 | 1.610915344 | 10.02672421 |
| ENSMUSG00000095607 | 12.02668147 | 2.782468975 | 11.29841676 | 5.638203705 | 5.013362104 |
| ENSMUSG00000095608 | 11.31922962 | 4.869320706 | 7.061510478 | 4.832746033 | 8.594335036 |
| ENSMUSG00000095609 | 5.65961481  | 4.869320706 | 2.118453143 | 4.02728836  | 6.445751277 |
| ENSMUSG00000095610 | 12.73413332 | 4.173703463 | 10.59226572 | 5.638203705 | 9.310529622 |
| ENSMUSG00000095612 | 3.537259256 | 6.260555194 | 3.530755239 | 6.443661377 | 5.729556691 |
| ENSMUSG00000095614 | 8.489422215 | 9.043024169 | 13.41686991 | 4.832746033 | 5.013362104 |
| ENSMUSG00000095615 | 18.39374813 | 15.30357936 | 13.41686991 | 70.07481747 | 43.68786977 |
| ENSMUSG00000095616 | 89.84638511 | 174.5999282 | 138.4056054 | 94.23854763 | 103.848215  |

|                    |             |             |             |             |             |
|--------------------|-------------|-------------|-------------|-------------|-------------|
| ENSMUSG00000095618 | 4.244711108 | 1.391234488 | 2.824604191 | 2.416373016 | 2.864778345 |
| ENSMUSG00000095619 | 13.44158517 | 10.43425866 | 9.179963621 | 8.054576721 | 5.729556691 |
| ENSMUSG00000095622 | 8.489422215 | 2.782468975 | 7.061510478 | 5.638203705 | 2.148583759 |
| ENSMUSG00000095624 | 9.196874066 | 12.52111039 | 4.236906287 | 5.638203705 | 3.580972932 |
| ENSMUSG00000095625 | 6.367066661 | 4.173703463 | 7.061510478 | 6.443661377 | 5.729556691 |
| ENSMUSG00000095626 | 4.952162959 | 4.173703463 | 4.236906287 | 0.805457672 | 2.864778345 |
| ENSMUSG00000095627 | 7.781970364 | 1.391234488 | 4.943057334 | 2.416373016 | 2.148583759 |
| ENSMUSG00000095628 | 0           | 0           | 0           | 0           | 0           |
| ENSMUSG00000095629 | 12.02668147 | 5.56493795  | 12.00456781 | 1.610915344 | 3.580972932 |
| ENSMUSG00000095630 | 13.44158517 | 6.956172438 | 8.473812573 | 8.860034393 | 7.87814045  |
| ENSMUSG00000095631 | 9.196874066 | 7.651789682 | 8.473812573 | 4.02728836  | 4.297167518 |
| ENSMUSG00000095632 | 4.952162959 | 4.869320706 | 7.767661525 | 7.249119049 | 7.87814045  |
| ENSMUSG00000095633 | 4.952162959 | 6.260555194 | 10.59226572 | 4.02728836  | 1.432389173 |
| ENSMUSG00000095635 | 50.93653329 | 88.34338996 | 76.26431316 | 201.364418  | 156.1304198 |
| ENSMUSG00000095636 | 4.952162959 | 0.695617244 | 6.35535943  | 0.805457672 | 5.729556691 |
| ENSMUSG00000095637 | 6.367066661 | 9.738641413 | 9.179963621 | 3.221830688 | 5.729556691 |
| ENSMUSG00000095638 | 6.367066661 | 11.1298759  | 11.29841676 | 8.054576721 | 6.445751277 |
| ENSMUSG00000095639 | 7.781970364 | 4.869320706 | 2.824604191 | 0.805457672 | 4.297167518 |
| ENSMUSG00000095641 | 7.074518513 | 4.173703463 | 6.35535943  | 1.610915344 | 2.864778345 |
| ENSMUSG00000095643 | 12.02668147 | 6.260555194 | 4.236906287 | 9.665492065 | 8.594335036 |
| ENSMUSG00000095645 | 0           | 0           | 0           | 0           | 0           |
| ENSMUSG00000095646 | 12.73413332 | 10.43425866 | 7.767661525 | 9.665492065 | 8.594335036 |
| ENSMUSG00000095647 | 9.196874066 | 15.30357936 | 5.649208382 | 4.02728836  | 2.864778345 |
| ENSMUSG00000095648 | 6.367066661 | 16.69481385 | 16.2414741  | 19.33098413 | 12.17530797 |
| ENSMUSG00000095649 | 9.196874066 | 6.260555194 | 4.236906287 | 8.054576721 | 10.02672421 |
| ENSMUSG00000095651 | 4.952162959 | 9.738641413 | 6.35535943  | 4.832746033 | 5.729556691 |
| ENSMUSG00000095652 | 0           | 0           | 0           | 0           | 0           |
| ENSMUSG00000095653 | 4.952162959 | 6.956172438 | 7.767661525 | 7.249119049 | 7.161945863 |
| ENSMUSG00000095655 | 2.122355554 | 1.391234488 | 3.530755239 | 1.610915344 | 2.148583759 |
| ENSMUSG00000095656 | 1.414903703 | 2.086851731 | 0.706151048 | 2.416373016 | 0.716194586 |
| ENSMUSG00000095657 | 4.244711108 | 6.260555194 | 4.236906287 | 3.221830688 | 5.013362104 |
| ENSMUSG00000095658 | 7.781970364 | 10.43425866 | 5.649208382 | 1.610915344 | 2.148583759 |
| ENSMUSG00000095659 | 4.244711108 | 2.086851731 | 3.530755239 | 4.02728836  | 2.148583759 |
| ENSMUSG00000095660 | 0           | 0           | 0           | 0           | 0           |
| ENSMUSG00000095661 | 9.904325918 | 11.1298759  | 13.41686991 | 6.443661377 | 10.02672421 |
| ENSMUSG00000095663 | 9.196874066 | 7.651789682 | 7.767661525 | 9.665492065 | 8.594335036 |
| ENSMUSG00000095664 | 7.074518513 | 6.260555194 | 4.236906287 | 2.416373016 | 2.864778345 |
| ENSMUSG00000095667 | 12.02668147 | 11.82549314 | 7.767661525 | 6.443661377 | 8.594335036 |
| ENSMUSG00000095668 | 2.122355554 | 2.782468975 | 1.412302096 | 2.416373016 | 1.432389173 |
| ENSMUSG00000095671 | 0           | 0           | 0           | 0           | 0           |
| ENSMUSG00000095674 | 11.31922962 | 11.82549314 | 8.473812573 | 13.69278043 | 10.7429188  |
| ENSMUSG00000095675 | 4.244711108 | 2.782468975 | 4.943057334 | 1.610915344 | 2.864778345 |
| ENSMUSG00000095676 | 9.196874066 | 8.347406925 | 12.71071886 | 8.054576721 | 7.161945863 |

|                    |             |             |             |             |             |
|--------------------|-------------|-------------|-------------|-------------|-------------|
| ENSMUSG00000095678 | 14.85648888 | 18.08604834 | 14.12302096 | 10.47094974 | 10.02672421 |
| ENSMUSG00000095680 | 9.196874066 | 6.956172438 | 6.35535943  | 2.416373016 | 7.161945863 |
| ENSMUSG00000095682 | 12.73413332 | 18.08604834 | 16.2414741  | 11.27640741 | 6.445751277 |
| ENSMUSG00000095684 | 11.31922962 | 7.651789682 | 7.767661525 | 6.443661377 | 9.310529622 |
| ENSMUSG00000095685 | 8.489422215 | 4.173703463 | 5.649208382 | 2.416373016 | 8.594335036 |
| ENSMUSG00000095690 | 35.37259256 | 27.82468975 | 28.95219296 | 34.6346799  | 20.769643   |
| ENSMUSG00000095691 | 3.537259256 | 4.173703463 | 1.412302096 | 2.416373016 | 2.864778345 |
| ENSMUSG00000095692 | 7.074518513 | 9.043024169 | 6.35535943  | 5.638203705 | 5.729556691 |
| ENSMUSG00000095693 | 5.65961481  | 3.478086219 | 4.236906287 | 5.638203705 | 5.729556691 |
| ENSMUSG00000095696 | 8.489422215 | 7.651789682 | 7.061510478 | 4.02728836  | 7.87814045  |
| ENSMUSG00000095697 | 6.367066661 | 4.173703463 | 11.29841676 | 6.443661377 | 2.864778345 |
| ENSMUSG00000095699 | 0           | 0           | 0           | 0           | 0           |
| ENSMUSG00000095700 | 5.65961481  | 3.478086219 | 5.649208382 | 3.221830688 | 2.864778345 |
| ENSMUSG00000095701 | 4.952162959 | 8.347406925 | 3.530755239 | 4.832746033 | 5.013362104 |
| ENSMUSG00000095702 | 4.244711108 | 4.869320706 | 4.943057334 | 2.416373016 | 7.161945863 |
| ENSMUSG00000095703 | 0.707451851 | 0.695617244 | 0           | 0           | 1.432389173 |
| ENSMUSG00000095704 | 5.65961481  | 4.173703463 | 5.649208382 | 4.02728836  | 7.87814045  |
| ENSMUSG00000095705 | 9.196874066 | 5.56493795  | 6.35535943  | 6.443661377 | 5.013362104 |
| ENSMUSG00000095706 | 7.781970364 | 6.956172438 | 11.29841676 | 4.832746033 | 5.729556691 |
| ENSMUSG00000095709 | 11.31922962 | 8.347406925 | 4.943057334 | 10.47094974 | 6.445751277 |
| ENSMUSG00000095712 | 205.8684887 | 247.6397388 | 188.5423298 | 238.4154709 | 180.4810358 |
| ENSMUSG00000095713 | 0           | 0           | 0           | 0           | 0           |
| ENSMUSG00000095714 | 0           | 0           | 0           | 0           | 0           |
| ENSMUSG00000095717 | 7.781970364 | 6.260555194 | 6.35535943  | 3.221830688 | 2.864778345 |
| ENSMUSG00000095718 | 8.489422215 | 7.651789682 | 11.29841676 | 8.054576721 | 5.013362104 |
| ENSMUSG00000095720 | 13.44158517 | 7.651789682 | 4.236906287 | 7.249119049 | 7.161945863 |
| ENSMUSG00000095721 | 7.781970364 | 6.260555194 | 7.061510478 | 11.27640741 | 9.310529622 |
| ENSMUSG00000095722 | 14.14903703 | 11.1298759  | 8.473812573 | 7.249119049 | 10.02672421 |
| ENSMUSG00000095723 | 1.414903703 | 2.086851731 | 2.824604191 | 1.610915344 | 2.864778345 |
| ENSMUSG00000095725 | 8.489422215 | 4.869320706 | 5.649208382 | 2.416373016 | 3.580972932 |
| ENSMUSG00000095727 | 3.537259256 | 3.478086219 | 0.706151048 | 0           | 0.716194586 |
| ENSMUSG00000095729 | 11.31922962 | 9.738641413 | 6.35535943  | 7.249119049 | 11.45911338 |
| ENSMUSG00000095730 | 8.489422215 | 7.651789682 | 12.71071886 | 11.27640741 | 7.161945863 |
| ENSMUSG00000095731 | 6.367066661 | 11.82549314 | 8.473812573 | 4.02728836  | 10.02672421 |
| ENSMUSG00000095732 | 9.196874066 | 6.956172438 | 9.179963621 | 9.665492065 | 5.729556691 |
| ENSMUSG00000095733 | 9.904325918 | 6.956172438 | 5.649208382 | 2.416373016 | 4.297167518 |
| ENSMUSG00000095734 | 1.414903703 | 5.56493795  | 3.530755239 | 0           | 2.864778345 |
| ENSMUSG00000095736 | 9.904325918 | 6.260555194 | 4.943057334 | 6.443661377 | 10.7429188  |
| ENSMUSG00000095737 | 8.489422215 | 10.43425866 | 7.061510478 | 4.02728836  | 9.310529622 |
| ENSMUSG00000095738 | 8.489422215 | 9.043024169 | 8.473812573 | 4.832746033 | 10.02672421 |
| ENSMUSG00000095739 | 0           | 0           | 0           | 0           | 0           |
| ENSMUSG00000095740 | 11.31922962 | 18.08604834 | 19.06607829 | 28.9964762  | 17.18867007 |
| ENSMUSG00000095743 | 12.73413332 | 7.651789682 | 9.179963621 | 5.638203705 | 7.87814045  |

|                    |             |             |             |             |             |
|--------------------|-------------|-------------|-------------|-------------|-------------|
| ENSMUSG00000095744 | 10.61177777 | 3.478086219 | 9.179963621 | 8.054576721 | 7.87814045  |
| ENSMUSG00000095745 | 14.14903703 | 4.869320706 | 7.767661525 | 6.443661377 | 4.297167518 |
| ENSMUSG00000095747 | 14.85648888 | 24.34660353 | 28.24604191 | 16.91461111 | 25.78300511 |
| ENSMUSG00000095749 | 0           | 0           | 0           | 0           | 0           |
| ENSMUSG00000095752 | 2.829807405 | 3.478086219 | 3.530755239 | 0.805457672 | 2.148583759 |
| ENSMUSG00000095753 | 9.196874066 | 9.043024169 | 6.35535943  | 6.443661377 | 14.32389173 |
| ENSMUSG00000095754 | 4.244711108 | 6.956172438 | 12.00456781 | 3.221830688 | 3.580972932 |
| ENSMUSG00000095756 | 15.56394073 | 9.738641413 | 8.473812573 | 6.443661377 | 7.161945863 |
| ENSMUSG00000095757 | 6.367066661 | 8.347406925 | 2.824604191 | 8.860034393 | 3.580972932 |
| ENSMUSG00000095758 | 12.02668147 | 5.56493795  | 5.649208382 | 6.443661377 | 1.432389173 |
| ENSMUSG00000095759 | 6.367066661 | 0.695617244 | 4.236906287 | 1.610915344 | 4.297167518 |
| ENSMUSG00000095761 | 7.074518513 | 6.260555194 | 8.473812573 | 1.610915344 | 6.445751277 |
| ENSMUSG00000095762 | 8.489422215 | 11.1298759  | 9.179963621 | 16.10915344 | 13.60769714 |
| ENSMUSG00000095764 | 0           | 0           | 0           | 0           | 0           |
| ENSMUSG00000095765 | 10.61177777 | 10.43425866 | 6.35535943  | 3.221830688 | 4.297167518 |
| ENSMUSG00000095766 | 172.6182517 | 258.0739974 | 242.9159604 | 240.831844  | 237.7766027 |
| ENSMUSG00000095768 | 13.44158517 | 2.782468975 | 7.767661525 | 7.249119049 | 3.580972932 |
| ENSMUSG00000095769 | 8.489422215 | 5.56493795  | 3.530755239 | 2.416373016 | 4.297167518 |
| ENSMUSG00000095771 | 13.44158517 | 22.95536904 | 16.2414741  | 20.1364418  | 18.62105924 |
| ENSMUSG00000095772 | 1.414903703 | 0           | 2.118453143 | 0.805457672 | 2.864778345 |
| ENSMUSG00000095774 | 8.489422215 | 6.956172438 | 4.943057334 | 3.221830688 | 7.161945863 |
| ENSMUSG00000095775 | 7.781970364 | 4.869320706 | 3.530755239 | 6.443661377 | 4.297167518 |
| ENSMUSG00000095776 | 7.781970364 | 7.651789682 | 9.179963621 | 5.638203705 | 7.161945863 |
| ENSMUSG00000095777 | 4.952162959 | 6.956172438 | 9.179963621 | 4.832746033 | 2.864778345 |
| ENSMUSG00000095778 | 7.781970364 | 7.651789682 | 7.767661525 | 3.221830688 | 6.445751277 |
| ENSMUSG00000095780 | 0.707451851 | 2.086851731 | 2.824604191 | 1.610915344 | 1.432389173 |
| ENSMUSG00000095782 | 4.244711108 | 5.56493795  | 3.530755239 | 0.805457672 | 2.864778345 |
| ENSMUSG00000095786 | 0           | 0           | 0           | 0           | 0           |
| ENSMUSG00000095791 | 6.367066661 | 11.82549314 | 8.473812573 | 5.638203705 | 9.310529622 |
| ENSMUSG00000095792 | 9.196874066 | 4.869320706 | 7.767661525 | 4.02728836  | 10.7429188  |
| ENSMUSG00000095794 | 10.61177777 | 14.60796212 | 11.29841676 | 2.416373016 | 8.594335036 |
| ENSMUSG00000095796 | 7.074518513 | 4.869320706 | 4.236906287 | 4.832746033 | 7.161945863 |
| ENSMUSG00000095797 | 9.904325918 | 4.869320706 | 9.886114669 | 4.02728836  | 5.729556691 |
| ENSMUSG00000095798 | 8.489422215 | 5.56493795  | 14.829172   | 5.638203705 | 12.89150255 |
| ENSMUSG00000095799 | 14.14903703 | 10.43425866 | 11.29841676 | 5.638203705 | 8.594335036 |
| ENSMUSG00000095802 | 4.244711108 | 4.173703463 | 4.943057334 | 3.221830688 | 2.864778345 |
| ENSMUSG00000095803 | 0.707451851 | 4.173703463 | 3.530755239 | 2.416373016 | 1.432389173 |
| ENSMUSG00000095804 | 14.14903703 | 8.347406925 | 3.530755239 | 1.610915344 | 9.310529622 |
| ENSMUSG00000095805 | 9.904325918 | 4.869320706 | 12.71071886 | 3.221830688 | 11.45911338 |
| ENSMUSG00000095806 | 16.97884443 | 2.782468975 | 5.649208382 | 6.443661377 | 2.148583759 |
| ENSMUSG00000095807 | 2.829807405 | 6.956172438 | 8.473812573 | 4.02728836  | 4.297167518 |
| ENSMUSG00000095809 | 7.781970364 | 8.347406925 | 6.35535943  | 4.02728836  | 5.013362104 |
| ENSMUSG00000095812 | 8.489422215 | 9.738641413 | 8.473812573 | 9.665492065 | 5.729556691 |

|                    |             |             |             |             |             |
|--------------------|-------------|-------------|-------------|-------------|-------------|
| ENSMUSG00000095813 | 7.781970364 | 8.347406925 | 4.943057334 | 9.665492065 | 7.87814045  |
| ENSMUSG00000095816 | 15.56394073 | 6.956172438 | 4.943057334 | 8.054576721 | 4.297167518 |
| ENSMUSG00000095817 | 10.61177777 | 3.478086219 | 4.943057334 | 8.860034393 | 5.013362104 |
| ENSMUSG00000095818 | 12.02668147 | 6.260555194 | 7.767661525 | 8.860034393 | 5.729556691 |
| ENSMUSG00000095820 | 2.122355554 | 4.869320706 | 2.118453143 | 2.416373016 | 4.297167518 |
| ENSMUSG00000095821 | 12.73413332 | 6.956172438 | 5.649208382 | 4.02728836  | 5.729556691 |
| ENSMUSG00000095822 | 10.61177777 | 3.478086219 | 7.061510478 | 3.221830688 | 6.445751277 |
| ENSMUSG00000095824 | 12.73413332 | 12.52111039 | 13.41686991 | 10.47094974 | 7.87814045  |
| ENSMUSG00000095825 | 11.31922962 | 9.043024169 | 7.767661525 | 4.832746033 | 9.310529622 |
| ENSMUSG00000095826 | 9.904325918 | 6.956172438 | 14.12302096 | 5.638203705 | 12.89150255 |
| ENSMUSG00000095827 | 5.65961481  | 5.56493795  | 4.943057334 | 5.638203705 | 4.297167518 |
| ENSMUSG00000095828 | 0           | 0           | 0           | 0           | 0           |
| ENSMUSG00000095831 | 7.781970364 | 4.869320706 | 6.35535943  | 4.832746033 | 7.87814045  |
| ENSMUSG00000095834 | 13.44158517 | 4.173703463 | 8.473812573 | 6.443661377 | 10.7429188  |
| ENSMUSG00000095836 | 2.122355554 | 2.782468975 | 2.118453143 | 2.416373016 | 1.432389173 |
| ENSMUSG00000095837 | 18.39374813 | 9.738641413 | 4.236906287 | 5.638203705 | 7.161945863 |
| ENSMUSG00000095839 | 7.074518513 | 8.347406925 | 7.767661525 | 2.416373016 | 4.297167518 |
| ENSMUSG00000095841 | 9.196874066 | 10.43425866 | 6.35535943  | 11.27640741 | 10.7429188  |
| ENSMUSG00000095842 | 9.904325918 | 4.869320706 | 4.236906287 | 4.02728836  | 5.729556691 |
| ENSMUSG00000095843 | 0           | 0           | 0           | 0           | 0           |
| ENSMUSG00000095846 | 12.73413332 | 9.043024169 | 6.35535943  | 6.443661377 | 7.161945863 |
| ENSMUSG00000095847 | 12.73413332 | 13.21672763 | 9.179963621 | 8.054576721 | 5.729556691 |
| ENSMUSG00000095849 | 8.489422215 | 2.782468975 | 9.179963621 | 5.638203705 | 7.161945863 |
| ENSMUSG00000095850 | 1.414903703 | 2.782468975 | 1.412302096 | 2.416373016 | 0.716194586 |
| ENSMUSG00000095851 | 9.196874066 | 11.1298759  | 7.061510478 | 11.27640741 | 8.594335036 |
| ENSMUSG00000095853 | 12.02668147 | 10.43425866 | 9.179963621 | 6.443661377 | 5.729556691 |
| ENSMUSG00000095856 | 27.5906222  | 36.17209668 | 26.12758877 | 24.16373016 | 32.22875639 |
| ENSMUSG00000095857 | 13.44158517 | 6.956172438 | 5.649208382 | 1.610915344 | 6.445751277 |
| ENSMUSG00000095858 | 9.904325918 | 12.52111039 | 4.943057334 | 5.638203705 | 5.729556691 |
| ENSMUSG00000095859 | 6.367066661 | 4.173703463 | 4.236906287 | 6.443661377 | 5.729556691 |
| ENSMUSG00000095860 | 6.367066661 | 1.391234488 | 4.236906287 | 3.221830688 | 2.864778345 |
| ENSMUSG00000095862 | 4.244711108 | 2.086851731 | 2.824604191 | 3.221830688 | 6.445751277 |
| ENSMUSG00000095863 | 7.074518513 | 6.260555194 | 9.179963621 | 5.638203705 | 6.445751277 |
| ENSMUSG00000095864 | 7.781970364 | 4.869320706 | 9.179963621 | 5.638203705 | 1.432389173 |
| ENSMUSG00000095865 | 21.93100739 | 9.043024169 | 12.00456781 | 20.94189947 | 11.45911338 |
| ENSMUSG00000095866 | 2.122355554 | 4.869320706 | 6.35535943  | 3.221830688 | 4.297167518 |
| ENSMUSG00000095868 | 0           | 0           | 0           | 0           | 0           |
| ENSMUSG00000095869 | 9.196874066 | 7.651789682 | 12.00456781 | 8.054576721 | 10.7429188  |
| ENSMUSG00000095871 | 0           | 0           | 0           | 0           | 0           |
| ENSMUSG00000095873 | 9.196874066 | 4.869320706 | 7.061510478 | 8.860034393 | 3.580972932 |
| ENSMUSG00000095874 | 8.489422215 | 6.956172438 | 8.473812573 | 4.02728836  | 4.297167518 |
| ENSMUSG00000095876 | 12.02668147 | 18.78166558 | 14.12302096 | 17.72006879 | 13.60769714 |
| ENSMUSG00000095878 | 6.367066661 | 3.478086219 | 8.473812573 | 7.249119049 | 3.580972932 |



|                    |             |             |             |             |             |
|--------------------|-------------|-------------|-------------|-------------|-------------|
| ENSMUSG00000095879 | 4.244711108 | 3.478086219 | 2.118453143 | 1.610915344 | 5.729556691 |
| ENSMUSG00000095880 | 10.61177777 | 6.956172438 | 7.767661525 | 8.054576721 | 3.580972932 |
| ENSMUSG00000095883 | 8.489422215 | 5.56493795  | 8.473812573 | 6.443661377 | 7.161945863 |
| ENSMUSG00000095884 | 0           | 0           | 0           | 0           | 0           |
| ENSMUSG00000095885 | 0           | 0           | 0           | 0           | 0           |
| ENSMUSG00000095886 | 11.31922962 | 9.043024169 | 9.179963621 | 9.665492065 | 7.161945863 |
| ENSMUSG00000095889 | 8.489422215 | 8.347406925 | 7.061510478 | 5.638203705 | 2.864778345 |
| ENSMUSG00000095890 | 3.537259256 | 4.869320706 | 5.649208382 | 2.416373016 | 4.297167518 |
| ENSMUSG00000095891 | 674.2016143 | 687.2698369 | 685.6726674 | 592.8168467 | 645.2913223 |
| ENSMUSG00000095892 | 7.074518513 | 6.260555194 | 8.473812573 | 8.860034393 | 9.310529622 |
| ENSMUSG00000095894 | 10.61177777 | 8.347406925 | 9.179963621 | 5.638203705 | 6.445751277 |
| ENSMUSG00000095895 | 4.244711108 | 4.173703463 | 5.649208382 | 5.638203705 | 0.716194586 |
| ENSMUSG00000095896 | 14.14903703 | 4.869320706 | 7.767661525 | 3.221830688 | 6.445751277 |
| ENSMUSG00000095897 | 0           | 1.391234488 | 2.118453143 | 2.416373016 | 2.148583759 |
| ENSMUSG00000095898 | 4.244711108 | 4.173703463 | 4.943057334 | 1.610915344 | 2.864778345 |
| ENSMUSG00000095899 | 6.367066661 | 5.56493795  | 7.767661525 | 3.221830688 | 4.297167518 |
| ENSMUSG00000095900 | 7.781970364 | 0.695617244 | 5.649208382 | 4.02728836  | 4.297167518 |
| ENSMUSG00000095901 | 11.31922962 | 7.651789682 | 7.767661525 | 8.860034393 | 6.445751277 |
| ENSMUSG00000095902 | 0.707451851 | 1.391234488 | 3.530755239 | 0           | 2.148583759 |
| ENSMUSG00000095903 | 6.367066661 | 6.260555194 | 11.29841676 | 4.832746033 | 6.445751277 |
| ENSMUSG00000095905 | 7.074518513 | 4.173703463 | 10.59226572 | 1.610915344 | 5.729556691 |
| ENSMUSG00000095906 | 4.244711108 | 4.173703463 | 3.530755239 | 2.416373016 | 3.580972932 |
| ENSMUSG00000095907 | 6.367066661 | 6.956172438 | 7.061510478 | 3.221830688 | 8.594335036 |
| ENSMUSG00000095908 | 5.65961481  | 9.738641413 | 8.473812573 | 9.665492065 | 6.445751277 |
| ENSMUSG00000095909 | 4.952162959 | 2.782468975 | 8.473812573 | 8.054576721 | 5.729556691 |
| ENSMUSG00000095910 | 9.904325918 | 9.738641413 | 7.767661525 | 9.665492065 | 6.445751277 |
| ENSMUSG00000095911 | 0           | 0           | 0           | 0           | 0           |
| ENSMUSG00000095912 | 12.73413332 | 6.956172438 | 7.061510478 | 5.638203705 | 6.445751277 |
| ENSMUSG00000095913 | 228.506948  | 242.7704181 | 233.7359968 | 253.7191667 | 216.2907651 |
| ENSMUSG00000095914 | 16.27139258 | 15.30357936 | 4.236906287 | 5.638203705 | 6.445751277 |
| ENSMUSG00000095915 | 0           | 0           | 0           | 0           | 0           |
| ENSMUSG00000095916 | 14.14903703 | 5.56493795  | 7.061510478 | 4.02728836  | 9.310529622 |
| ENSMUSG00000095917 | 5.65961481  | 5.56493795  | 7.061510478 | 6.443661377 | 7.161945863 |
| ENSMUSG00000095918 | 9.196874066 | 6.956172438 | 7.061510478 | 8.054576721 | 5.729556691 |
| ENSMUSG00000095920 | 2.829807405 | 3.478086219 | 3.530755239 | 4.02728836  | 2.148583759 |
| ENSMUSG00000095922 | 11.31922962 | 11.82549314 | 15.53532305 | 7.249119049 | 11.45911338 |
| ENSMUSG00000095923 | 4.952162959 | 4.173703463 | 8.473812573 | 4.02728836  | 5.013362104 |
| ENSMUSG00000095924 | 0           | 0           | 0           | 0           | 0           |
| ENSMUSG00000095925 | 9.904325918 | 8.347406925 | 13.41686991 | 8.860034393 | 7.161945863 |
| ENSMUSG00000095926 | 8.489422215 | 5.56493795  | 3.530755239 | 4.832746033 | 7.161945863 |
| ENSMUSG00000095927 | 4.244711108 | 5.56493795  | 4.943057334 | 1.610915344 | 4.297167518 |
| ENSMUSG00000095928 | 9.904325918 | 8.347406925 | 7.767661525 | 5.638203705 | 5.013362104 |
| ENSMUSG00000095929 | 13.44158517 | 4.869320706 | 5.649208382 | 6.443661377 | 6.445751277 |

|                    |             |             |             |             |             |
|--------------------|-------------|-------------|-------------|-------------|-------------|
| ENSMUSG00000095931 | 18.39374813 | 7.651789682 | 4.943057334 | 5.638203705 | 8.594335036 |
| ENSMUSG00000095932 | 9.196874066 | 6.260555194 | 12.00456781 | 5.638203705 | 9.310529622 |
| ENSMUSG00000095933 | 7.074518513 | 8.347406925 | 7.061510478 | 4.02728836  | 5.729556691 |
| ENSMUSG00000095937 | 12.02668147 | 10.43425866 | 7.767661525 | 8.860034393 | 5.729556691 |
| ENSMUSG00000095938 | 0           | 0           | 0           | 0           | 0           |
| ENSMUSG00000095939 | 7.781970364 | 6.260555194 | 7.767661525 | 7.249119049 | 11.45911338 |
| ENSMUSG00000095940 | 0.707451851 | 2.782468975 | 0.706151048 | 0           | 2.148583759 |
| ENSMUSG00000095941 | 7.781970364 | 6.956172438 | 7.061510478 | 5.638203705 | 9.310529622 |
| ENSMUSG00000095942 | 9.196874066 | 8.347406925 | 2.824604191 | 7.249119049 | 7.87814045  |
| ENSMUSG00000095943 | 13.44158517 | 9.043024169 | 7.061510478 | 10.47094974 | 15.7562809  |
| ENSMUSG00000095944 | 12.73413332 | 8.347406925 | 6.35535943  | 7.249119049 | 8.594335036 |
| ENSMUSG00000095945 | 0           | 0           | 0           | 0           | 0           |
| ENSMUSG00000095946 | 6.367066661 | 7.651789682 | 7.061510478 | 5.638203705 | 6.445751277 |
| ENSMUSG00000095947 | 6.367066661 | 15.99919661 | 8.473812573 | 5.638203705 | 7.161945863 |
| ENSMUSG00000095951 | 16.97884443 | 6.956172438 | 8.473812573 | 6.443661377 | 4.297167518 |
| ENSMUSG00000095952 | 19.10119998 | 11.1298759  | 16.2414741  | 6.443661377 | 8.594335036 |
| ENSMUSG00000095953 | 8.489422215 | 9.043024169 | 8.473812573 | 7.249119049 | 7.161945863 |
| ENSMUSG00000095954 | 6.367066661 | 4.173703463 | 7.767661525 | 6.443661377 | 5.729556691 |
| ENSMUSG00000095955 | 23.34591109 | 13.21672763 | 21.18453143 | 10.47094974 | 14.32389173 |
| ENSMUSG00000095956 | 7.074518513 | 8.347406925 | 4.236906287 | 8.860034393 | 5.729556691 |
| ENSMUSG00000095957 | 8.489422215 | 3.478086219 | 4.236906287 | 4.832746033 | 4.297167518 |
| ENSMUSG00000095959 | 10.61177777 | 9.043024169 | 7.061510478 | 10.47094974 | 6.445751277 |
| ENSMUSG00000095960 | 12.02668147 | 2.086851731 | 4.943057334 | 4.832746033 | 5.013362104 |
| ENSMUSG00000095961 | 12.02668147 | 9.043024169 | 7.061510478 | 5.638203705 | 7.161945863 |
| ENSMUSG00000095962 | 13.44158517 | 2.086851731 | 5.649208382 | 6.443661377 | 4.297167518 |
| ENSMUSG00000095963 | 12.02668147 | 5.56493795  | 7.061510478 | 4.832746033 | 3.580972932 |
| ENSMUSG00000095964 | 6.367066661 | 6.260555194 | 4.943057334 | 4.832746033 | 2.148583759 |
| ENSMUSG00000095965 | 0.707451851 | 3.478086219 | 2.824604191 | 2.416373016 | 0.716194586 |
| ENSMUSG00000095966 | 0           | 0           | 0           | 0           | 0           |
| ENSMUSG00000095968 | 5.65961481  | 2.086851731 | 4.236906287 | 1.610915344 | 5.729556691 |
| ENSMUSG00000095969 | 3.537259256 | 5.56493795  | 8.473812573 | 7.249119049 | 4.297167518 |
| ENSMUSG00000095970 | 9.904325918 | 6.260555194 | 7.767661525 | 4.02728836  | 7.161945863 |
| ENSMUSG00000095971 | 5.65961481  | 5.56493795  | 11.29841676 | 4.832746033 | 1.432389173 |
| ENSMUSG00000095972 | 5.65961481  | 10.43425866 | 9.886114669 | 4.832746033 | 4.297167518 |
| ENSMUSG00000095973 | 6.367066661 | 3.478086219 | 6.35535943  | 6.443661377 | 3.580972932 |
| ENSMUSG00000095974 | 13.44158517 | 9.738641413 | 15.53532305 | 8.860034393 | 11.45911338 |
| ENSMUSG00000095977 | 100.4581629 | 157.9051143 | 144.7609648 | 52.35474869 | 55.86317773 |
| ENSMUSG00000095978 | 9.904325918 | 9.738641413 | 7.767661525 | 7.249119049 | 7.161945863 |
| ENSMUSG00000095980 | 14.14903703 | 4.869320706 | 12.00456781 | 7.249119049 | 6.445751277 |
| ENSMUSG00000095981 | 3.537259256 | 3.478086219 | 7.061510478 | 7.249119049 | 8.594335036 |
| ENSMUSG00000095982 | 15.56394073 | 15.99919661 | 16.2414741  | 10.47094974 | 10.02672421 |
| ENSMUSG00000095983 | 8.489422215 | 15.99919661 | 5.649208382 | 9.665492065 | 6.445751277 |
| ENSMUSG00000095984 | 13.44158517 | 4.173703463 | 2.824604191 | 2.416373016 | 4.297167518 |

|                    |             |             |             |             |             |
|--------------------|-------------|-------------|-------------|-------------|-------------|
| ENSMUSG00000095985 | 7.781970364 | 8.347406925 | 2.118453143 | 8.860034393 | 5.729556691 |
| ENSMUSG00000095986 | 196.6716147 | 277.5512803 | 246.4467157 | 261.7737434 | 187.6429816 |
| ENSMUSG00000095987 | 11.31922962 | 9.043024169 | 7.061510478 | 4.832746033 | 7.87814045  |
| ENSMUSG00000095988 | 0           | 0           | 0           | 0           | 0           |
| ENSMUSG00000095989 | 6.367066661 | 8.347406925 | 4.236906287 | 4.02728836  | 5.013362104 |
| ENSMUSG00000095991 | 11.31922962 | 6.260555194 | 4.236906287 | 7.249119049 | 5.013362104 |
| ENSMUSG00000095993 | 9.196874066 | 8.347406925 | 5.649208382 | 7.249119049 | 7.87814045  |
| ENSMUSG00000095994 | 2.829807405 | 4.173703463 | 2.118453143 | 2.416373016 | 5.013362104 |
| ENSMUSG00000095997 | 0           | 0           | 0           | 0           | 0           |
| ENSMUSG00000095998 | 5.65961481  | 5.56493795  | 7.767661525 | 7.249119049 | 4.297167518 |
| ENSMUSG00000096000 | 9.904325918 | 10.43425866 | 4.236906287 | 4.02728836  | 6.445751277 |
| ENSMUSG00000096002 | 9.904325918 | 6.956172438 | 6.35535943  | 4.02728836  | 8.594335036 |
| ENSMUSG00000096005 | 13.44158517 | 9.738641413 | 6.35535943  | 2.416373016 | 10.7429188  |
| ENSMUSG00000096006 | 12.02668147 | 10.43425866 | 6.35535943  | 11.27640741 | 9.310529622 |
| ENSMUSG00000096007 | 0           | 0           | 0           | 0           | 0           |
| ENSMUSG00000096008 | 5.65961481  | 4.173703463 | 2.118453143 | 2.416373016 | 3.580972932 |
| ENSMUSG00000096009 | 7.074518513 | 4.173703463 | 9.886114669 | 4.02728836  | 4.297167518 |
| ENSMUSG00000096011 | 9.904325918 | 0.695617244 | 9.179963621 | 4.02728836  | 5.013362104 |
| ENSMUSG00000096015 | 0           | 0           | 0           | 0           | 0           |
| ENSMUSG00000096017 | 8.489422215 | 4.173703463 | 4.236906287 | 4.832746033 | 6.445751277 |
| ENSMUSG00000096018 | 11.31922962 | 6.956172438 | 9.886114669 | 7.249119049 | 5.013362104 |
| ENSMUSG00000096019 | 3.537259256 | 0           | 0           | 3.221830688 | 2.864778345 |
| ENSMUSG00000096020 | 12.02668147 | 7.651789682 | 6.35535943  | 8.860034393 | 9.310529622 |
| ENSMUSG00000096021 | 4.952162959 | 10.43425866 | 3.530755239 | 5.638203705 | 7.161945863 |
| ENSMUSG00000096022 | 3.537259256 | 3.478086219 | 0           | 7.249119049 | 1.432389173 |
| ENSMUSG00000096025 | 7.074518513 | 6.260555194 | 7.767661525 | 2.416373016 | 7.87814045  |
| ENSMUSG00000096027 | 0           | 0           | 0           | 0           | 0           |
| ENSMUSG00000096028 | 0           | 0           | 0           | 0           | 0           |
| ENSMUSG00000096030 | 4.952162959 | 6.956172438 | 10.59226572 | 11.27640741 | 9.310529622 |
| ENSMUSG00000096031 | 12.73413332 | 7.651789682 | 7.767661525 | 4.832746033 | 3.580972932 |
| ENSMUSG00000096033 | 9.904325918 | 9.738641413 | 4.943057334 | 8.860034393 | 7.161945863 |
| ENSMUSG00000096037 | 0           | 0           | 0           | 0           | 0           |
| ENSMUSG00000096038 | 10.61177777 | 8.347406925 | 9.886114669 | 7.249119049 | 3.580972932 |
| ENSMUSG00000096039 | 4.952162959 | 11.82549314 | 7.767661525 | 12.88732275 | 5.729556691 |
| ENSMUSG00000096041 | 0           | 0           | 0           | 0           | 0           |
| ENSMUSG00000096042 | 9.196874066 | 9.738641413 | 9.886114669 | 4.832746033 | 4.297167518 |
| ENSMUSG00000096043 | 11.31922962 | 9.043024169 | 9.886114669 | 4.832746033 | 5.013362104 |
| ENSMUSG00000096044 | 10.61177777 | 8.347406925 | 4.943057334 | 3.221830688 | 7.87814045  |
| ENSMUSG00000096046 | 0           | 0           | 0           | 0           | 0           |
| ENSMUSG00000096047 | 11.31922962 | 8.347406925 | 7.767661525 | 8.054576721 | 5.729556691 |
| ENSMUSG00000096048 | 9.196874066 | 2.782468975 | 4.943057334 | 0.805457672 | 1.432389173 |
| ENSMUSG00000096049 | 12.73413332 | 9.738641413 | 7.767661525 | 6.443661377 | 7.87814045  |
| ENSMUSG00000096051 | 7.074518513 | 7.651789682 | 4.943057334 | 4.832746033 | 7.87814045  |

|                    |             |             |             |             |             |
|--------------------|-------------|-------------|-------------|-------------|-------------|
| ENSMUSG00000096052 | 28.29807405 | 39.6501829  | 28.24604191 | 118.4022778 | 120.3206905 |
| ENSMUSG00000096053 | 0           | 0           | 0           | 0           | 0           |
| ENSMUSG00000096055 | 10.61177777 | 8.347406925 | 4.943057334 | 5.638203705 | 5.013362104 |
| ENSMUSG00000096056 | 4.244711108 | 4.869320706 | 4.943057334 | 4.02728836  | 3.580972932 |
| ENSMUSG00000096057 | 8.489422215 | 4.869320706 | 5.649208382 | 2.416373016 | 2.864778345 |
| ENSMUSG00000096061 | 3.537259256 | 9.043024169 | 10.59226572 | 6.443661377 | 7.161945863 |
| ENSMUSG00000096065 | 29.0055259  | 38.95456565 | 35.30755239 | 19.33098413 | 32.22875639 |
| ENSMUSG00000096066 | 9.196874066 | 9.043024169 | 14.829172   | 3.221830688 | 8.594335036 |
| ENSMUSG00000096067 | 0           | 0           | 0           | 0           | 0           |
| ENSMUSG00000096068 | 8.489422215 | 7.651789682 | 2.824604191 | 6.443661377 | 2.148583759 |
| ENSMUSG00000096069 | 11.31922962 | 9.043024169 | 7.767661525 | 4.832746033 | 11.45911338 |
| ENSMUSG00000096070 | 5.65961481  | 4.173703463 | 4.943057334 | 5.638203705 | 8.594335036 |
| ENSMUSG00000096071 | 8.489422215 | 4.173703463 | 7.767661525 | 11.27640741 | 3.580972932 |
| ENSMUSG00000096072 | 2.122355554 | 7.651789682 | 4.943057334 | 4.832746033 | 2.864778345 |
| ENSMUSG00000096073 | 4.244711108 | 6.260555194 | 4.236906287 | 5.638203705 | 4.297167518 |
| ENSMUSG00000096074 | 8.489422215 | 6.956172438 | 9.886114669 | 8.054576721 | 7.161945863 |
| ENSMUSG00000096075 | 12.73413332 | 6.260555194 | 12.00456781 | 4.02728836  | 7.87814045  |
| ENSMUSG00000096076 | 9.196874066 | 4.869320706 | 6.35535943  | 2.416373016 | 2.864778345 |
| ENSMUSG00000096077 | 0           | 0           | 0           | 0           | 0           |
| ENSMUSG00000096078 | 7.074518513 | 6.956172438 | 9.179963621 | 4.832746033 | 2.864778345 |
| ENSMUSG00000096079 | 9.904325918 | 9.043024169 | 9.179963621 | 4.02728836  | 5.013362104 |
| ENSMUSG00000096080 | 7.781970364 | 6.260555194 | 9.886114669 | 6.443661377 | 6.445751277 |
| ENSMUSG00000096081 | 12.73413332 | 6.260555194 | 9.886114669 | 4.832746033 | 7.87814045  |
| ENSMUSG00000096082 | 4.952162959 | 1.391234488 | 2.824604191 | 1.610915344 | 2.148583759 |
| ENSMUSG00000096083 | 4.952162959 | 1.391234488 | 5.649208382 | 2.416373016 | 10.02672421 |
| ENSMUSG00000096084 | 9.196874066 | 8.347406925 | 6.35535943  | 5.638203705 | 10.02672421 |
| ENSMUSG00000096085 | 9.904325918 | 9.043024169 | 7.767661525 | 4.02728836  | 7.161945863 |
| ENSMUSG00000096086 | 9.196874066 | 8.347406925 | 6.35535943  | 7.249119049 | 4.297167518 |
| ENSMUSG00000096087 | 9.904325918 | 4.173703463 | 3.530755239 | 6.443661377 | 7.161945863 |
| ENSMUSG00000096088 | 9.196874066 | 8.347406925 | 2.824604191 | 4.832746033 | 5.013362104 |
| ENSMUSG00000096090 | 0           | 0           | 0           | 0           | 0           |
| ENSMUSG00000096091 | 8.489422215 | 8.347406925 | 2.824604191 | 8.054576721 | 10.7429188  |
| ENSMUSG00000096092 | 0           | 0           | 0           | 0           | 0           |
| ENSMUSG00000096095 | 3.537259256 | 2.782468975 | 5.649208382 | 4.02728836  | 6.445751277 |
| ENSMUSG00000096097 | 3.537259256 | 2.086851731 | 2.118453143 | 2.416373016 | 2.864778345 |
| ENSMUSG00000096098 | 8.489422215 | 12.52111039 | 9.179963621 | 6.443661377 | 8.594335036 |
| ENSMUSG00000096099 | 8.489422215 | 2.782468975 | 7.061510478 | 4.02728836  | 6.445751277 |
| ENSMUSG00000096102 | 9.196874066 | 6.260555194 | 13.41686991 | 4.02728836  | 10.02672421 |
| ENSMUSG00000096103 | 5.65961481  | 9.738641413 | 9.179963621 | 3.221830688 | 2.148583759 |
| ENSMUSG00000096105 | 7.074518513 | 4.869320706 | 4.236906287 | 7.249119049 | 6.445751277 |
| ENSMUSG00000096106 | 10.61177777 | 6.956172438 | 8.473812573 | 7.249119049 | 6.445751277 |
| ENSMUSG00000096107 | 10.61177777 | 5.56493795  | 6.35535943  | 8.054576721 | 10.02672421 |
| ENSMUSG00000096108 | 2.122355554 | 6.956172438 | 2.824604191 | 1.610915344 | 4.297167518 |

|                    |             |             |             |             |             |
|--------------------|-------------|-------------|-------------|-------------|-------------|
| ENSMUSG00000096109 | 9.196874066 | 6.956172438 | 12.71071886 | 4.832746033 | 6.445751277 |
| ENSMUSG00000096110 | 2.122355554 | 1.391234488 | 1.412302096 | 1.610915344 | 0.716194586 |
| ENSMUSG00000096111 | 4.952162959 | 6.956172438 | 2.824604191 | 4.832746033 | 6.445751277 |
| ENSMUSG00000096112 | 23.34591109 | 24.34660353 | 18.35992724 | 25.77464551 | 23.63442135 |
| ENSMUSG00000096113 | 0           | 0           | 0           | 0           | 0           |
| ENSMUSG00000096114 | 8.489422215 | 9.738641413 | 7.061510478 | 6.443661377 | 8.594335036 |
| ENSMUSG00000096116 | 9.196874066 | 6.260555194 | 5.649208382 | 5.638203705 | 5.013362104 |
| ENSMUSG00000096117 | 10.61177777 | 9.738641413 | 6.35535943  | 5.638203705 | 8.594335036 |
| ENSMUSG00000096119 | 4.952162959 | 5.56493795  | 4.943057334 | 3.221830688 | 0.716194586 |
| ENSMUSG00000096120 | 7.074518513 | 4.869320706 | 1.412302096 | 4.02728836  | 6.445751277 |
| ENSMUSG00000096124 | 14.85648888 | 6.956172438 | 9.886114669 | 6.443661377 | 5.013362104 |
| ENSMUSG00000096126 | 9.904325918 | 5.56493795  | 4.236906287 | 5.638203705 | 7.87814045  |
| ENSMUSG00000096127 | 8.489422215 | 4.173703463 | 2.824604191 | 0.805457672 | 2.148583759 |
| ENSMUSG00000096128 | 0           | 0           | 0           | 0           | 0           |
| ENSMUSG00000096129 | 8.489422215 | 6.956172438 | 7.061510478 | 5.638203705 | 6.445751277 |
| ENSMUSG00000096130 | 8.489422215 | 9.043024169 | 5.649208382 | 2.416373016 | 4.297167518 |
| ENSMUSG00000096131 | 9.196874066 | 2.782468975 | 8.473812573 | 5.638203705 | 5.729556691 |
| ENSMUSG00000096132 | 0           | 0           | 0           | 0           | 0           |
| ENSMUSG00000096133 | 8.489422215 | 6.260555194 | 7.061510478 | 4.02728836  | 6.445751277 |
| ENSMUSG00000096134 | 0           | 0           | 0           | 0           | 0           |
| ENSMUSG00000096135 | 2.122355554 | 1.391234488 | 4.236906287 | 1.610915344 | 2.148583759 |
| ENSMUSG00000096136 | 0           | 0           | 0           | 0           | 0           |
| ENSMUSG00000096137 | 2.122355554 | 2.782468975 | 4.943057334 | 0.805457672 | 3.580972932 |
| ENSMUSG00000096139 | 13.44158517 | 2.782468975 | 7.061510478 | 7.249119049 | 10.7429188  |
| ENSMUSG00000096140 | 4.952162959 | 4.869320706 | 6.35535943  | 6.443661377 | 5.729556691 |
| ENSMUSG00000096142 | 9.904325918 | 11.82549314 | 9.886114669 | 8.054576721 | 9.310529622 |
| ENSMUSG00000096146 | 5.65961481  | 9.043024169 | 9.179963621 | 4.832746033 | 5.729556691 |
| ENSMUSG00000096147 | 7.781970364 | 6.956172438 | 6.35535943  | 5.638203705 | 9.310529622 |
| ENSMUSG00000096148 | 3.537259256 | 2.086851731 | 3.530755239 | 0.805457672 | 5.013362104 |
| ENSMUSG00000096150 | 12.73413332 | 10.43425866 | 5.649208382 | 4.832746033 | 7.87814045  |
| ENSMUSG00000096151 | 9.904325918 | 9.738641413 | 9.179963621 | 4.02728836  | 2.864778345 |
| ENSMUSG00000096152 | 13.44158517 | 9.043024169 | 7.767661525 | 10.47094974 | 7.87814045  |
| ENSMUSG00000096156 | 16.27139258 | 29.21592424 | 22.59683353 | 25.77464551 | 24.35061594 |
| ENSMUSG00000096157 | 7.781970364 | 9.738641413 | 6.35535943  | 5.638203705 | 4.297167518 |
| ENSMUSG00000096158 | 9.196874066 | 8.347406925 | 6.35535943  | 1.610915344 | 7.161945863 |
| ENSMUSG00000096159 | 6.367066661 | 4.173703463 | 4.236906287 | 4.02728836  | 10.02672421 |
| ENSMUSG00000096160 | 9.196874066 | 8.347406925 | 4.943057334 | 7.249119049 | 11.45911338 |
| ENSMUSG00000096161 | 0           | 0           | 0           | 0           | 0           |
| ENSMUSG00000096163 | 12.73413332 | 6.956172438 | 8.473812573 | 10.47094974 | 5.729556691 |
| ENSMUSG00000096164 | 14.14903703 | 3.478086219 | 5.649208382 | 4.02728836  | 3.580972932 |
| ENSMUSG00000096166 | 7.781970364 | 9.043024169 | 9.179963621 | 6.443661377 | 5.729556691 |
| ENSMUSG00000096167 | 6.367066661 | 9.043024169 | 10.59226572 | 2.416373016 | 6.445751277 |
| ENSMUSG00000096168 | 13.44158517 | 11.82549314 | 7.767661525 | 4.02728836  | 6.445751277 |

|                    |             |             |             |             |             |
|--------------------|-------------|-------------|-------------|-------------|-------------|
| ENSMUSG00000096169 | 7.781970364 | 6.260555194 | 7.061510478 | 6.443661377 | 4.297167518 |
| ENSMUSG00000096170 | 0           | 0           | 0           | 0           | 0           |
| ENSMUSG00000096171 | 9.904325918 | 6.956172438 | 7.767661525 | 9.665492065 | 5.013362104 |
| ENSMUSG00000096172 | 12.02668147 | 9.043024169 | 9.179963621 | 8.860034393 | 12.17530797 |
| ENSMUSG00000096173 | 12.02668147 | 8.347406925 | 12.00456781 | 11.27640741 | 8.594335036 |
| ENSMUSG00000096174 | 8.489422215 | 8.347406925 | 10.59226572 | 8.054576721 | 11.45911338 |
| ENSMUSG00000096176 | 3.537259256 | 2.086851731 | 0.706151048 | 2.416373016 | 0.716194586 |
| ENSMUSG00000096177 | 11.31922962 | 11.82549314 | 13.41686991 | 8.860034393 | 12.89150255 |
| ENSMUSG00000096179 | 9.196874066 | 2.782468975 | 4.943057334 | 4.832746033 | 5.013362104 |
| ENSMUSG00000096180 | 14.85648888 | 8.347406925 | 14.829172   | 8.054576721 | 10.7429188  |
| ENSMUSG00000096181 | 8.489422215 | 7.651789682 | 7.767661525 | 5.638203705 | 7.87814045  |
| ENSMUSG00000096182 | 13.44158517 | 11.82549314 | 7.767661525 | 5.638203705 | 4.297167518 |
| ENSMUSG00000096184 | 9.196874066 | 6.260555194 | 14.12302096 | 7.249119049 | 9.310529622 |
| ENSMUSG00000096185 | 0           | 0           | 0           | 0           | 0           |
| ENSMUSG00000096186 | 7.781970364 | 10.43425866 | 5.649208382 | 2.416373016 | 5.013362104 |
| ENSMUSG00000096189 | 3.537259256 | 3.478086219 | 4.236906287 | 2.416373016 | 5.729556691 |
| ENSMUSG00000096190 | 4.244711108 | 3.478086219 | 5.649208382 | 3.221830688 | 3.580972932 |
| ENSMUSG00000096191 | 0.707451851 | 3.478086219 | 4.236906287 | 4.02728836  | 3.580972932 |
| ENSMUSG00000096192 | 31.12788146 | 60.51870021 | 63.5535943  | 53.96566403 | 47.98503729 |
| ENSMUSG00000096193 | 7.781970364 | 5.56493795  | 6.35535943  | 6.443661377 | 4.297167518 |
| ENSMUSG00000096195 | 18.39374813 | 34.78086219 | 16.94762515 | 24.16373016 | 30.08017263 |
| ENSMUSG00000096196 | 14.14903703 | 13.21672763 | 14.829172   | 8.054576721 | 10.02672421 |
| ENSMUSG00000096198 | 9.196874066 | 4.869320706 | 7.061510478 | 4.02728836  | 7.87814045  |
| ENSMUSG00000096199 | 53.05888884 | 75.12666233 | 61.43514116 | 91.01671695 | 74.48423698 |
| ENSMUSG00000096200 | 7.781970364 | 8.347406925 | 5.649208382 | 8.054576721 | 4.297167518 |
| ENSMUSG00000096201 | 589.3073921 | 614.2300263 | 591.754578  | 513.8819948 | 572.2394745 |
| ENSMUSG00000096202 | 7.074518513 | 4.869320706 | 7.767661525 | 8.860034393 | 8.594335036 |
| ENSMUSG00000096205 | 2.122355554 | 8.347406925 | 7.767661525 | 5.638203705 | 7.87814045  |
| ENSMUSG00000096206 | 4.952162959 | 10.43425866 | 5.649208382 | 7.249119049 | 4.297167518 |
| ENSMUSG00000096208 | 8.489422215 | 11.82549314 | 11.29841676 | 7.249119049 | 9.310529622 |
| ENSMUSG00000096209 | 7.781970364 | 7.651789682 | 6.35535943  | 7.249119049 | 5.729556691 |
| ENSMUSG00000096211 | 9.904325918 | 7.651789682 | 8.473812573 | 2.416373016 | 11.45911338 |
| ENSMUSG00000096212 | 19.80865184 | 36.17209668 | 20.47838039 | 24.16373016 | 27.21539428 |
| ENSMUSG00000096213 | 9.904325918 | 7.651789682 | 4.236906287 | 2.416373016 | 0.716194586 |
| ENSMUSG00000096214 | 7.074518513 | 8.347406925 | 7.061510478 | 10.47094974 | 4.297167518 |
| ENSMUSG00000096216 | 10.61177777 | 4.173703463 | 16.2414741  | 5.638203705 | 8.594335036 |
| ENSMUSG00000096217 | 14.14903703 | 4.173703463 | 6.35535943  | 5.638203705 | 7.87814045  |
| ENSMUSG00000096219 | 11.31922962 | 3.478086219 | 7.061510478 | 4.02728836  | 4.297167518 |
| ENSMUSG00000096220 | 12.02668147 | 8.347406925 | 7.061510478 | 1.610915344 | 8.594335036 |
| ENSMUSG00000096222 | 6.367066661 | 9.043024169 | 7.061510478 | 7.249119049 | 5.729556691 |
| ENSMUSG00000096229 | 9.196874066 | 4.869320706 | 7.767661525 | 5.638203705 | 7.87814045  |
| ENSMUSG00000096230 | 12.73413332 | 5.56493795  | 4.943057334 | 4.02728836  | 5.013362104 |
| ENSMUSG00000096231 | 2.122355554 | 2.782468975 | 4.236906287 | 4.832746033 | 2.864778345 |

|                    |             |             |             |             |             |
|--------------------|-------------|-------------|-------------|-------------|-------------|
| ENSMUSG00000096232 | 87.01657771 | 133.5585108 | 100.2734488 | 186.0607223 | 162.5761711 |
| ENSMUSG00000096233 | 40.32475552 | 20.86851731 | 26.83373982 | 16.91461111 | 22.20203218 |
| ENSMUSG00000096235 | 1.414903703 | 3.478086219 | 2.824604191 | 4.02728836  | 7.87814045  |
| ENSMUSG00000096238 | 241.9485331 | 300.5066493 | 274.6927576 | 381.7869366 | 275.7349157 |
| ENSMUSG00000096239 | 0           | 0           | 0           | 0           | 0           |
| ENSMUSG00000096240 | 11.31922962 | 9.738641413 | 5.649208382 | 4.832746033 | 2.864778345 |
| ENSMUSG00000096241 | 8.489422215 | 11.1298759  | 6.35535943  | 5.638203705 | 9.310529622 |
| ENSMUSG00000096243 | 1.414903703 | 1.391234488 | 0.706151048 | 3.221830688 | 4.297167518 |
| ENSMUSG00000096245 | 9.196874066 | 11.82549314 | 5.649208382 | 5.638203705 | 7.87814045  |
| ENSMUSG00000096247 | 4.952162959 | 4.869320706 | 9.179963621 | 5.638203705 | 6.445751277 |
| ENSMUSG00000096248 | 6.367066661 | 4.869320706 | 3.530755239 | 2.416373016 | 4.297167518 |
| ENSMUSG00000096249 | 10.61177777 | 4.173703463 | 14.12302096 | 5.638203705 | 5.013362104 |
| ENSMUSG00000096250 | 0           | 0.695617244 | 0           | 0.805457672 | 1.432389173 |
| ENSMUSG00000096252 | 9.904325918 | 13.91234488 | 12.00456781 | 11.27640741 | 8.594335036 |
| ENSMUSG00000096256 | 3.537259256 | 2.086851731 | 4.943057334 | 5.638203705 | 2.148583759 |
| ENSMUSG00000096258 | 9.196874066 | 6.956172438 | 5.649208382 | 6.443661377 | 7.161945863 |
| ENSMUSG00000096259 | 12.02668147 | 7.651789682 | 8.473812573 | 8.860034393 | 6.445751277 |
| ENSMUSG00000096263 | 0           | 0           | 0           | 0           | 0           |
| ENSMUSG00000096264 | 0           | 0           | 0           | 0           | 0           |
| ENSMUSG00000096265 | 48.81417774 | 30.60715873 | 41.66291182 | 24.96918783 | 25.78300511 |
| ENSMUSG00000096269 | 5.65961481  | 4.173703463 | 2.824604191 | 2.416373016 | 2.864778345 |
| ENSMUSG00000096270 | 14.14903703 | 8.347406925 | 10.59226572 | 8.054576721 | 10.02672421 |
| ENSMUSG00000096272 | 2.829807405 | 2.086851731 | 5.649208382 | 4.832746033 | 2.864778345 |
| ENSMUSG00000096273 | 5.65961481  | 11.1298759  | 4.236906287 | 4.02728836  | 2.864778345 |
| ENSMUSG00000096274 | 9.904325918 | 6.260555194 | 8.473812573 | 4.02728836  | 7.161945863 |
| ENSMUSG00000096275 | 5.65961481  | 7.651789682 | 2.824604191 | 3.221830688 | 4.297167518 |
| ENSMUSG00000096277 | 14.14903703 | 11.1298759  | 9.179963621 | 5.638203705 | 8.594335036 |
| ENSMUSG00000096279 | 15.56394073 | 9.043024169 | 9.179963621 | 11.27640741 | 7.87814045  |
| ENSMUSG00000096280 | 5.65961481  | 8.347406925 | 8.473812573 | 10.47094974 | 5.013362104 |
| ENSMUSG00000096281 | 0           | 0           | 0           | 0           | 0           |
| ENSMUSG00000096282 | 9.196874066 | 4.869320706 | 9.179963621 | 4.832746033 | 5.729556691 |
| ENSMUSG00000096283 | 9.196874066 | 6.956172438 | 8.473812573 | 8.054576721 | 4.297167518 |
| ENSMUSG00000096285 | 0           | 0           | 0           | 0           | 0           |
| ENSMUSG00000096286 | 10.61177777 | 7.651789682 | 5.649208382 | 4.02728836  | 6.445751277 |
| ENSMUSG00000096287 | 0           | 0           | 0           | 0           | 0           |
| ENSMUSG00000096288 | 9.196874066 | 7.651789682 | 8.473812573 | 8.054576721 | 8.594335036 |
| ENSMUSG00000096289 | 11.31922962 | 4.869320706 | 6.35535943  | 6.443661377 | 7.87814045  |
| ENSMUSG00000096290 | 16.27139258 | 8.347406925 | 5.649208382 | 5.638203705 | 5.729556691 |
| ENSMUSG00000096291 | 0           | 0           | 0           | 0           | 0           |
| ENSMUSG00000096292 | 29.0055259  | 20.17290007 | 23.30298458 | 21.74735715 | 20.769643   |
| ENSMUSG00000096293 | 4.952162959 | 7.651789682 | 7.061510478 | 1.610915344 | 3.580972932 |
| ENSMUSG00000096295 | 14.14903703 | 7.651789682 | 7.061510478 | 4.832746033 | 6.445751277 |
| ENSMUSG00000096296 | 0           | 0           | 0           | 0           | 0           |

|                    |             |             |             |             |             |
|--------------------|-------------|-------------|-------------|-------------|-------------|
| ENSMUSG00000096297 | 5.65961481  | 7.651789682 | 9.179963621 | 3.221830688 | 10.02672421 |
| ENSMUSG00000096298 | 8.489422215 | 12.52111039 | 8.473812573 | 4.832746033 | 5.729556691 |
| ENSMUSG00000096299 | 7.781970364 | 12.52111039 | 5.649208382 | 4.832746033 | 8.594335036 |
| ENSMUSG00000096300 | 0           | 0           | 0           | 0           | 0           |
| ENSMUSG00000096301 | 0.707451851 | 0.695617244 | 0           | 2.416373016 | 0.716194586 |
| ENSMUSG00000096302 | 8.489422215 | 6.956172438 | 11.29841676 | 4.02728836  | 11.45911338 |
| ENSMUSG00000096303 | 14.85648888 | 6.260555194 | 7.767661525 | 6.443661377 | 9.310529622 |
| ENSMUSG00000096304 | 14.14903703 | 6.260555194 | 12.00456781 | 8.054576721 | 7.87814045  |
| ENSMUSG00000096305 | 12.73413332 | 6.260555194 | 7.767661525 | 7.249119049 | 8.594335036 |
| ENSMUSG00000096306 | 0           | 0           | 0           | 0           | 0           |
| ENSMUSG00000096307 | 0           | 0           | 0           | 0           | 0           |
| ENSMUSG00000096308 | 4.952162959 | 2.782468975 | 5.649208382 | 0.805457672 | 5.013362104 |
| ENSMUSG00000096309 | 15.56394073 | 9.738641413 | 10.59226572 | 1.610915344 | 6.445751277 |
| ENSMUSG00000096310 | 31.83533331 | 50.08444155 | 52.25517753 | 33.82922223 | 33.66114556 |
| ENSMUSG00000096311 | 7.781970364 | 2.086851731 | 11.29841676 | 4.832746033 | 4.297167518 |
| ENSMUSG00000096312 | 7.781970364 | 2.086851731 | 4.943057334 | 4.02728836  | 8.594335036 |
| ENSMUSG00000096313 | 7.781970364 | 2.782468975 | 5.649208382 | 3.221830688 | 1.432389173 |
| ENSMUSG00000096314 | 9.196874066 | 5.56493795  | 13.41686991 | 4.832746033 | 8.594335036 |
| ENSMUSG00000096318 | 2.122355554 | 0.695617244 | 2.118453143 | 1.610915344 | 0.716194586 |
| ENSMUSG00000096320 | 7.074518513 | 6.260555194 | 4.943057334 | 1.610915344 | 5.729556691 |
| ENSMUSG00000096322 | 8.489422215 | 3.478086219 | 9.179963621 | 6.443661377 | 5.013362104 |
| ENSMUSG00000096323 | 9.904325918 | 11.1298759  | 10.59226572 | 12.08186508 | 5.729556691 |
| ENSMUSG00000096324 | 0           | 0           | 0           | 0           | 0           |
| ENSMUSG00000096326 | 9.904325918 | 3.478086219 | 3.530755239 | 7.249119049 | 4.297167518 |
| ENSMUSG00000096327 | 2.829807405 | 2.086851731 | 4.236906287 | 0.805457672 | 2.148583759 |
| ENSMUSG00000096328 | 0           | 0           | 0           | 0           | 0           |
| ENSMUSG00000096329 | 7.781970364 | 9.043024169 | 12.71071886 | 8.054576721 | 8.594335036 |
| ENSMUSG00000096331 | 13.44158517 | 3.478086219 | 8.473812573 | 2.416373016 | 8.594335036 |
| ENSMUSG00000096332 | 4.952162959 | 3.478086219 | 6.35535943  | 1.610915344 | 3.580972932 |
| ENSMUSG00000096335 | 0           | 0           | 0           | 0           | 0           |
| ENSMUSG00000096336 | 14.85648888 | 14.60796212 | 18.35992724 | 11.27640741 | 15.04008631 |
| ENSMUSG00000096337 | 16.97884443 | 9.043024169 | 14.12302096 | 4.832746033 | 9.310529622 |
| ENSMUSG00000096338 | 4.244711108 | 0.695617244 | 6.35535943  | 0.805457672 | 3.580972932 |
| ENSMUSG00000096339 | 13.44158517 | 6.956172438 | 6.35535943  | 2.416373016 | 5.013362104 |
| ENSMUSG00000096340 | 10.61177777 | 9.043024169 | 5.649208382 | 3.221830688 | 7.87814045  |
| ENSMUSG00000096341 | 12.02668147 | 6.956172438 | 5.649208382 | 8.860034393 | 10.7429188  |
| ENSMUSG00000096342 | 4.952162959 | 10.43425866 | 6.35535943  | 8.054576721 | 6.445751277 |
| ENSMUSG00000096343 | 0           | 0           | 0           | 0           | 0           |
| ENSMUSG00000096346 | 17.68629628 | 27.12907251 | 18.35992724 | 12.88732275 | 18.62105924 |
| ENSMUSG00000096347 | 9.904325918 | 10.43425866 | 9.179963621 | 8.860034393 | 10.02672421 |
| ENSMUSG00000096348 | 16.97884443 | 5.56493795  | 8.473812573 | 5.638203705 | 4.297167518 |
| ENSMUSG00000096349 | 21.93100739 | 35.47647943 | 28.24604191 | 36.24559524 | 40.10689684 |
| ENSMUSG00000096350 | 70.03773327 | 93.90832791 | 95.33039145 | 53.16020636 | 63.74131818 |



|                    |             |             |             |             |             |
|--------------------|-------------|-------------|-------------|-------------|-------------|
| ENSMUSG00000096352 | 9.904325918 | 6.260555194 | 4.943057334 | 7.249119049 | 6.445751277 |
| ENSMUSG00000096353 | 10.61177777 | 6.260555194 | 9.179963621 | 8.054576721 | 2.864778345 |
| ENSMUSG00000096354 | 37.49494812 | 20.17290007 | 21.89068248 | 21.74735715 | 20.05344842 |
| ENSMUSG00000096355 | 5.65961481  | 9.043024169 | 4.943057334 | 4.832746033 | 4.297167518 |
| ENSMUSG00000096356 | 8.489422215 | 11.1298759  | 13.41686991 | 6.443661377 | 3.580972932 |
| ENSMUSG00000096357 | 37.49494812 | 60.51870021 | 51.54902649 | 25.77464551 | 23.63442135 |
| ENSMUSG00000096358 | 0           | 0           | 0           | 0           | 0           |
| ENSMUSG00000096359 | 0           | 0           | 0           | 0           | 0           |
| ENSMUSG00000096360 | 0           | 0           | 0           | 0           | 0           |
| ENSMUSG00000096361 | 10.61177777 | 13.21672763 | 8.473812573 | 33.82922223 | 17.90486466 |
| ENSMUSG00000096362 | 2.829807405 | 6.956172438 | 4.236906287 | 4.02728836  | 4.297167518 |
| ENSMUSG00000096363 | 12.02668147 | 7.651789682 | 5.649208382 | 6.443661377 | 10.02672421 |
| ENSMUSG00000096365 | 9.196874066 | 11.1298759  | 4.236906287 | 4.832746033 | 2.864778345 |
| ENSMUSG00000096366 | 6.367066661 | 2.782468975 | 9.886114669 | 4.02728836  | 2.148583759 |
| ENSMUSG00000096367 | 0           | 0           | 0           | 0           | 0           |
| ENSMUSG00000096368 | 9.196874066 | 6.260555194 | 6.35535943  | 9.665492065 | 7.161945863 |
| ENSMUSG00000096371 | 7.781970364 | 4.869320706 | 7.767661525 | 1.610915344 | 4.297167518 |
| ENSMUSG00000096372 | 14.14903703 | 14.60796212 | 9.886114669 | 9.665492065 | 10.02672421 |
| ENSMUSG00000096373 | 10.61177777 | 6.956172438 | 9.179963621 | 7.249119049 | 9.310529622 |
| ENSMUSG00000096374 | 2.122355554 | 4.869320706 | 2.824604191 | 8.054576721 | 3.580972932 |
| ENSMUSG00000096375 | 5.65961481  | 8.347406925 | 2.118453143 | 4.02728836  | 7.161945863 |
| ENSMUSG00000096376 | 6.367066661 | 4.869320706 | 2.118453143 | 7.249119049 | 3.580972932 |
| ENSMUSG00000096377 | 7.781970364 | 2.782468975 | 6.35535943  | 11.27640741 | 9.310529622 |
| ENSMUSG00000096379 | 6.367066661 | 4.869320706 | 11.29841676 | 2.416373016 | 2.864778345 |
| ENSMUSG00000096380 | 13.44158517 | 9.043024169 | 10.59226572 | 6.443661377 | 0.716194586 |
| ENSMUSG00000096381 | 13.44158517 | 3.478086219 | 6.35535943  | 8.054576721 | 6.445751277 |
| ENSMUSG00000096383 | 9.904325918 | 4.869320706 | 4.236906287 | 6.443661377 | 9.310529622 |
| ENSMUSG00000096384 | 14.14903703 | 9.738641413 | 11.29841676 | 5.638203705 | 8.594335036 |
| ENSMUSG00000096385 | 918.2725029 | 985.6896344 | 932.1193831 | 851.3687594 | 939.6472973 |
| ENSMUSG00000096386 | 14.85648888 | 6.260555194 | 9.179963621 | 3.221830688 | 2.864778345 |
| ENSMUSG00000096387 | 0           | 0           | 0           | 0           | 0           |
| ENSMUSG00000096388 | 11.31922962 | 11.82549314 | 6.35535943  | 7.249119049 | 6.445751277 |
| ENSMUSG00000096390 | 0           | 0           | 0           | 0           | 0           |
| ENSMUSG00000096391 | 7.074518513 | 4.173703463 | 3.530755239 | 11.27640741 | 5.729556691 |
| ENSMUSG00000096392 | 0           | 0           | 0           | 0           | 0           |
| ENSMUSG00000096396 | 0           | 0           | 0           | 0           | 0           |
| ENSMUSG00000096398 | 12.02668147 | 8.347406925 | 8.473812573 | 4.02728836  | 12.89150255 |
| ENSMUSG00000096399 | 8.489422215 | 7.651789682 | 10.59226572 | 4.02728836  | 6.445751277 |
| ENSMUSG00000096400 | 8.489422215 | 4.869320706 | 6.35535943  | 9.665492065 | 5.729556691 |
| ENSMUSG00000096401 | 85.601674   | 144.6883867 | 148.29172   | 133.7059736 | 146.8198902 |
| ENSMUSG00000096402 | 12.02668147 | 5.56493795  | 9.886114669 | 4.832746033 | 6.445751277 |
| ENSMUSG00000096406 | 0           | 0           | 0           | 0           | 0           |
| ENSMUSG00000096407 | 5.65961481  | 2.782468975 | 4.236906287 | 3.221830688 | 5.729556691 |

|                    |             |             |             |             |             |
|--------------------|-------------|-------------|-------------|-------------|-------------|
| ENSMUSG00000096408 | 7.074518513 | 4.869320706 | 7.061510478 | 4.02728836  | 7.161945863 |
| ENSMUSG00000096409 | 5.65961481  | 11.82549314 | 6.35535943  | 4.832746033 | 6.445751277 |
| ENSMUSG00000096410 | 8.489422215 | 4.173703463 | 6.35535943  | 7.249119049 | 4.297167518 |
| ENSMUSG00000096411 | 13.44158517 | 5.56493795  | 3.530755239 | 5.638203705 | 8.594335036 |
| ENSMUSG00000096412 | 11.31922962 | 5.56493795  | 5.649208382 | 6.443661377 | 5.729556691 |
| ENSMUSG00000096413 | 5.65961481  | 6.260555194 | 5.649208382 | 4.02728836  | 2.148583759 |
| ENSMUSG00000096414 | 15.56394073 | 6.260555194 | 12.00456781 | 10.47094974 | 11.45911338 |
| ENSMUSG00000096415 | 4.952162959 | 9.043024169 | 7.061510478 | 12.88732275 | 8.594335036 |
| ENSMUSG00000096420 | 0           | 0           | 0           | 0           | 0           |
| ENSMUSG00000096421 | 7.074518513 | 4.869320706 | 4.943057334 | 9.665492065 | 5.729556691 |
| ENSMUSG00000096422 | 19.10119998 | 16.69481385 | 14.12302096 | 12.88732275 | 18.62105924 |
| ENSMUSG00000096423 | 5.65961481  | 5.56493795  | 4.236906287 | 8.860034393 | 5.729556691 |
| ENSMUSG00000096424 | 7.781970364 | 2.782468975 | 8.473812573 | 2.416373016 | 4.297167518 |
| ENSMUSG00000096425 | 6.367066661 | 8.347406925 | 8.473812573 | 7.249119049 | 5.729556691 |
| ENSMUSG00000096427 | 14.14903703 | 6.956172438 | 9.886114669 | 2.416373016 | 3.580972932 |
| ENSMUSG00000096429 | 11.31922962 | 11.82549314 | 4.943057334 | 7.249119049 | 5.013362104 |
| ENSMUSG00000096430 | 0           | 0           | 0           | 0           | 0           |
| ENSMUSG00000096431 | 5.65961481  | 2.086851731 | 3.530755239 | 0.805457672 | 2.864778345 |
| ENSMUSG00000096432 | 8.489422215 | 4.869320706 | 9.886114669 | 11.27640741 | 10.7429188  |
| ENSMUSG00000096434 | 5.65961481  | 7.651789682 | 14.829172   | 9.665492065 | 10.02672421 |
| ENSMUSG00000096435 | 8.489422215 | 6.956172438 | 13.41686991 | 4.02728836  | 10.7429188  |
| ENSMUSG00000096436 | 7.074518513 | 6.956172438 | 11.29841676 | 4.832746033 | 4.297167518 |
| ENSMUSG00000096437 | 3.537259256 | 1.391234488 | 2.118453143 | 2.416373016 | 1.432389173 |
| ENSMUSG00000096438 | 8.489422215 | 5.56493795  | 6.35535943  | 6.443661377 | 6.445751277 |
| ENSMUSG00000096439 | 17.68629628 | 12.52111039 | 8.473812573 | 8.860034393 | 10.7429188  |
| ENSMUSG00000096440 | 50.22908144 | 43.82388636 | 43.78136496 | 36.24559524 | 36.5259239  |
| ENSMUSG00000096441 | 9.904325918 | 7.651789682 | 8.473812573 | 8.860034393 | 5.013362104 |
| ENSMUSG00000096442 | 9.196874066 | 8.347406925 | 12.71071886 | 9.665492065 | 9.310529622 |
| ENSMUSG00000096443 | 4.952162959 | 3.478086219 | 3.530755239 | 8.860034393 | 5.013362104 |
| ENSMUSG00000096444 | 9.904325918 | 4.173703463 | 6.35535943  | 3.221830688 | 5.729556691 |
| ENSMUSG00000096447 | 0           | 0           | 0           | 0           | 0           |
| ENSMUSG00000096448 | 4.952162959 | 3.478086219 | 7.061510478 | 7.249119049 | 6.445751277 |
| ENSMUSG00000096449 | 10.61177777 | 9.738641413 | 7.061510478 | 6.443661377 | 5.013362104 |
| ENSMUSG00000096450 | 9.196874066 | 4.869320706 | 12.00456781 | 13.69278043 | 8.594335036 |
| ENSMUSG00000096451 | 6.367066661 | 9.043024169 | 6.35535943  | 6.443661377 | 6.445751277 |
| ENSMUSG00000096452 | 7.074518513 | 5.56493795  | 6.35535943  | 6.443661377 | 5.729556691 |
| ENSMUSG00000096453 | 8.489422215 | 3.478086219 | 3.530755239 | 2.416373016 | 2.864778345 |
| ENSMUSG00000096454 | 0           | 0           | 0           | 0           | 0           |
| ENSMUSG00000096455 | 5.65961481  | 4.869320706 | 5.649208382 | 4.02728836  | 5.729556691 |
| ENSMUSG00000096456 | 3.537259256 | 6.956172438 | 2.824604191 | 1.610915344 | 2.864778345 |
| ENSMUSG00000096459 | 7.781970364 | 6.956172438 | 8.473812573 | 4.832746033 | 3.580972932 |
| ENSMUSG00000096461 | 9.904325918 | 4.869320706 | 8.473812573 | 4.832746033 | 7.161945863 |
| ENSMUSG00000096462 | 2.122355554 | 2.086851731 | 2.824604191 | 4.832746033 | 2.148583759 |

|                    |             |             |             |             |             |
|--------------------|-------------|-------------|-------------|-------------|-------------|
| ENSMUSG00000096463 | 7.074518513 | 6.956172438 | 7.767661525 | 11.27640741 | 5.013362104 |
| ENSMUSG00000096464 | 8.489422215 | 13.91234488 | 7.767661525 | 16.10915344 | 7.87814045  |
| ENSMUSG00000096465 | 10.61177777 | 8.347406925 | 13.41686991 | 4.832746033 | 5.013362104 |
| ENSMUSG00000096466 | 12.73413332 | 9.738641413 | 6.35535943  | 10.47094974 | 8.594335036 |
| ENSMUSG00000096473 | 11.31922962 | 12.52111039 | 12.00456781 | 8.054576721 | 10.7429188  |
| ENSMUSG00000096474 | 5.65961481  | 4.869320706 | 4.236906287 | 4.02728836  | 7.87814045  |
| ENSMUSG00000096475 | 6.367066661 | 2.086851731 | 6.35535943  | 6.443661377 | 3.580972932 |
| ENSMUSG00000096476 | 16.27139258 | 6.260555194 | 5.649208382 | 7.249119049 | 6.445751277 |
| ENSMUSG00000096477 | 11.31922962 | 10.43425866 | 7.061510478 | 7.249119049 | 6.445751277 |
| ENSMUSG00000096479 | 7.781970364 | 6.956172438 | 9.179963621 | 6.443661377 | 7.87814045  |
| ENSMUSG00000096480 | 12.02668147 | 9.043024169 | 12.71071886 | 7.249119049 | 3.580972932 |
| ENSMUSG00000096481 | 12.02668147 | 6.956172438 | 9.179963621 | 4.832746033 | 7.161945863 |
| ENSMUSG00000096482 | 5.65961481  | 8.347406925 | 7.061510478 | 7.249119049 | 4.297167518 |
| ENSMUSG00000096483 | 6.367066661 | 5.56493795  | 10.59226572 | 8.860034393 | 7.87814045  |
| ENSMUSG00000096484 | 12.73413332 | 9.043024169 | 15.53532305 | 9.665492065 | 12.89150255 |
| ENSMUSG00000096485 | 10.61177777 | 6.260555194 | 7.061510478 | 2.416373016 | 4.297167518 |
| ENSMUSG00000096486 | 10.61177777 | 6.956172438 | 12.00456781 | 2.416373016 | 8.594335036 |
| ENSMUSG00000096487 | 4.244711108 | 9.043024169 | 9.179963621 | 9.665492065 | 10.02672421 |
| ENSMUSG00000096490 | 8.489422215 | 8.347406925 | 9.886114669 | 11.27640741 | 10.02672421 |
| ENSMUSG00000096492 | 0           | 0           | 0           | 0           | 0           |
| ENSMUSG00000096493 | 0           | 0           | 0           | 0           | 0           |
| ENSMUSG00000096496 | 4.244711108 | 2.086851731 | 4.236906287 | 0.805457672 | 3.580972932 |
| ENSMUSG00000096497 | 11.31922962 | 5.56493795  | 7.061510478 | 4.02728836  | 5.729556691 |
| ENSMUSG00000096498 | 4.244711108 | 3.478086219 | 4.943057334 | 4.02728836  | 5.013362104 |
| ENSMUSG00000096499 | 0           | 0.695617244 | 0           | 0           | 0           |
| ENSMUSG00000096500 | 5.65961481  | 8.347406925 | 4.943057334 | 3.221830688 | 9.310529622 |
| ENSMUSG00000096502 | 3.537259256 | 4.173703463 | 1.412302096 | 3.221830688 | 2.148583759 |
| ENSMUSG00000096504 | 2.829807405 | 0.695617244 | 4.943057334 | 0           | 0           |
| ENSMUSG00000096505 | 10.61177777 | 6.260555194 | 4.943057334 | 3.221830688 | 5.729556691 |
| ENSMUSG00000096507 | 7.781970364 | 9.738641413 | 9.886114669 | 10.47094974 | 6.445751277 |
| ENSMUSG00000096510 | 11.31922962 | 9.043024169 | 11.29841676 | 7.249119049 | 9.310529622 |
| ENSMUSG00000096512 | 0           | 0           | 0           | 0           | 0           |
| ENSMUSG00000096513 | 11.31922962 | 4.173703463 | 9.886114669 | 6.443661377 | 3.580972932 |
| ENSMUSG00000096514 | 7.074518513 | 5.56493795  | 4.943057334 | 7.249119049 | 7.161945863 |
| ENSMUSG00000096515 | 13.44158517 | 6.956172438 | 4.943057334 | 4.02728836  | 5.729556691 |
| ENSMUSG00000096516 | 8.489422215 | 7.651789682 | 9.886114669 | 4.02728836  | 7.161945863 |
| ENSMUSG00000096517 | 44.56946663 | 57.73623123 | 55.07978173 | 49.132918   | 42.25548059 |
| ENSMUSG00000096518 | 7.074518513 | 6.260555194 | 7.767661525 | 4.02728836  | 2.864778345 |
| ENSMUSG00000096519 | 818.5217919 | 852.1311236 | 833.2582364 | 754.7138388 | 790.6788233 |
| ENSMUSG00000096521 | 14.14903703 | 14.60796212 | 18.35992724 | 8.860034393 | 14.32389173 |
| ENSMUSG00000096522 | 9.196874066 | 6.260555194 | 4.943057334 | 5.638203705 | 3.580972932 |
| ENSMUSG00000096523 | 9.196874066 | 11.1298759  | 4.236906287 | 4.02728836  | 6.445751277 |
| ENSMUSG00000096524 | 9.904325918 | 4.869320706 | 5.649208382 | 3.221830688 | 5.729556691 |

|                    |             |             |             |             |             |
|--------------------|-------------|-------------|-------------|-------------|-------------|
| ENSMUSG00000096529 | 9.904325918 | 9.043024169 | 7.061510478 | 4.02728836  | 5.729556691 |
| ENSMUSG00000096531 | 9.196874066 | 11.82549314 | 9.179963621 | 7.249119049 | 6.445751277 |
| ENSMUSG00000096532 | 6.367066661 | 5.56493795  | 5.649208382 | 3.221830688 | 2.148583759 |
| ENSMUSG00000096533 | 3.537259256 | 3.478086219 | 2.824604191 | 2.416373016 | 6.445751277 |
| ENSMUSG00000096535 | 9.196874066 | 6.956172438 | 4.943057334 | 3.221830688 | 10.02672421 |
| ENSMUSG00000096536 | 7.781970364 | 8.347406925 | 7.061510478 | 2.416373016 | 6.445751277 |
| ENSMUSG00000096538 | 2.829807405 | 10.43425866 | 9.179963621 | 1.610915344 | 2.864778345 |
| ENSMUSG00000096539 | 4.244711108 | 2.782468975 | 6.35535943  | 3.221830688 | 1.432389173 |
| ENSMUSG00000096541 | 15.56394073 | 8.347406925 | 8.473812573 | 6.443661377 | 6.445751277 |
| ENSMUSG00000096544 | 12.73413332 | 12.52111039 | 16.94762515 | 22.55281482 | 16.47247549 |
| ENSMUSG00000096545 | 4.244711108 | 6.956172438 | 8.473812573 | 3.221830688 | 6.445751277 |
| ENSMUSG00000096547 | 62.96321476 | 90.43024169 | 89.68118307 | 70.07481747 | 53.71459398 |
| ENSMUSG00000096549 | 0           | 0           | 2.118453143 | 0           | 0.716194586 |
| ENSMUSG00000096551 | 8.489422215 | 4.173703463 | 12.71071886 | 11.27640741 | 9.310529622 |
| ENSMUSG00000096554 | 10.61177777 | 6.260555194 | 6.35535943  | 9.665492065 | 5.013362104 |
| ENSMUSG00000096555 | 7.781970364 | 6.260555194 | 7.767661525 | 9.665492065 | 7.161945863 |
| ENSMUSG00000096557 | 9.904325918 | 8.347406925 | 7.061510478 | 7.249119049 | 5.013362104 |
| ENSMUSG00000096558 | 2.122355554 | 0           | 0.706151048 | 0.805457672 | 2.148583759 |
| ENSMUSG00000096559 | 9.196874066 | 7.651789682 | 12.71071886 | 11.27640741 | 13.60769714 |
| ENSMUSG00000096560 | 7.781970364 | 7.651789682 | 7.061510478 | 7.249119049 | 8.594335036 |
| ENSMUSG00000096561 | 7.781970364 | 11.1298759  | 6.35535943  | 4.832746033 | 6.445751277 |
| ENSMUSG00000096563 | 1.414903703 | 1.391234488 | 0           | 0           | 0           |
| ENSMUSG00000096564 | 7.074518513 | 8.347406925 | 9.179963621 | 5.638203705 | 5.013362104 |
| ENSMUSG00000096565 | 0           | 0           | 0           | 0           | 0           |
| ENSMUSG00000096566 | 7.781970364 | 8.347406925 | 9.179963621 | 6.443661377 | 5.013362104 |
| ENSMUSG00000096567 | 6.367066661 | 9.738641413 | 12.00456781 | 8.054576721 | 11.45911338 |
| ENSMUSG00000096568 | 1.414903703 | 2.086851731 | 0.706151048 | 1.610915344 | 0.716194586 |
| ENSMUSG00000096577 | 5.65961481  | 10.43425866 | 5.649208382 | 2.416373016 | 2.148583759 |
| ENSMUSG00000096578 | 12.02668147 | 9.043024169 | 11.29841676 | 7.249119049 | 10.02672421 |
| ENSMUSG00000096579 | 9.904325918 | 9.738641413 | 10.59226572 | 5.638203705 | 3.580972932 |
| ENSMUSG00000096580 | 7.781970364 | 6.260555194 | 4.236906287 | 4.02728836  | 7.87814045  |
| ENSMUSG00000096582 | 2.829807405 | 1.391234488 | 2.118453143 | 2.416373016 | 2.864778345 |
| ENSMUSG00000096583 | 0           | 0           | 0           | 0           | 0           |
| ENSMUSG00000096584 | 13.44158517 | 10.43425866 | 4.236906287 | 5.638203705 | 6.445751277 |
| ENSMUSG00000096585 | 9.904325918 | 7.651789682 | 7.061510478 | 6.443661377 | 5.729556691 |
| ENSMUSG00000096586 | 11.31922962 | 7.651789682 | 12.00456781 | 7.249119049 | 7.161945863 |
| ENSMUSG00000096587 | 0           | 0           | 0           | 0           | 0           |
| ENSMUSG00000096589 | 7.074518513 | 2.782468975 | 0.706151048 | 5.638203705 | 2.864778345 |
| ENSMUSG00000096591 | 1.414903703 | 2.782468975 | 0           | 2.416373016 | 2.864778345 |
| ENSMUSG00000096592 | 12.73413332 | 11.1298759  | 12.00456781 | 21.74735715 | 10.7429188  |
| ENSMUSG00000096593 | 20.51610369 | 4.173703463 | 14.829172   | 8.054576721 | 7.87814045  |
| ENSMUSG00000096594 | 5.65961481  | 9.738641413 | 8.473812573 | 1.610915344 | 10.7429188  |
| ENSMUSG00000096595 | 0           | 0           | 0           | 0           | 0           |

|                    |             |             |             |             |             |
|--------------------|-------------|-------------|-------------|-------------|-------------|
| ENSMUSG00000096596 | 4.244711108 | 6.260555194 | 5.649208382 | 2.416373016 | 2.864778345 |
| ENSMUSG00000096597 | 9.904325918 | 4.869320706 | 9.886114669 | 6.443661377 | 10.02672421 |
| ENSMUSG00000096598 | 13.44158517 | 8.347406925 | 7.767661525 | 6.443661377 | 5.013362104 |
| ENSMUSG00000096599 | 0           | 0           | 0           | 0           | 0           |
| ENSMUSG00000096601 | 7.074518513 | 4.869320706 | 2.118453143 | 5.638203705 | 5.013362104 |
| ENSMUSG00000096602 | 0           | 0           | 0           | 0           | 0           |
| ENSMUSG00000096604 | 8.489422215 | 1.391234488 | 5.649208382 | 2.416373016 | 1.432389173 |
| ENSMUSG00000096605 | 0           | 0           | 0           | 0           | 0           |
| ENSMUSG00000096610 | 12.73413332 | 4.869320706 | 9.886114669 | 6.443661377 | 9.310529622 |
| ENSMUSG00000096612 | 12.73413332 | 9.738641413 | 4.943057334 | 6.443661377 | 3.580972932 |
| ENSMUSG00000096613 | 0           | 0           | 0           | 0           | 0           |
| ENSMUSG00000096614 | 5.65961481  | 4.173703463 | 8.473812573 | 4.832746033 | 5.013362104 |
| ENSMUSG00000096615 | 5.65961481  | 3.478086219 | 7.061510478 | 2.416373016 | 1.432389173 |
| ENSMUSG00000096617 | 0           | 0           | 0           | 0           | 0           |
| ENSMUSG00000096618 | 11.31922962 | 7.651789682 | 6.35535943  | 8.054576721 | 5.729556691 |
| ENSMUSG00000096619 | 7.074518513 | 9.738641413 | 7.767661525 | 8.860034393 | 7.161945863 |
| ENSMUSG00000096621 | 9.904325918 | 9.043024169 | 4.943057334 | 6.443661377 | 20.05344842 |
| ENSMUSG00000096623 | 9.196874066 | 15.99919661 | 14.12302096 | 12.08186508 | 12.17530797 |
| ENSMUSG00000096624 | 0           | 0           | 0           | 0           | 0           |
| ENSMUSG00000096627 | 9.196874066 | 8.347406925 | 6.35535943  | 3.221830688 | 7.161945863 |
| ENSMUSG00000096628 | 3.537259256 | 3.478086219 | 5.649208382 | 0.805457672 | 2.148583759 |
| ENSMUSG00000096630 | 13.44158517 | 7.651789682 | 6.35535943  | 4.02728836  | 5.729556691 |
| ENSMUSG00000096631 | 14.14903703 | 25.04222078 | 24.71528667 | 7.249119049 | 19.33725383 |
| ENSMUSG00000096632 | 8.489422215 | 6.956172438 | 9.886114669 | 5.638203705 | 10.02672421 |
| ENSMUSG00000096633 | 7.781970364 | 7.651789682 | 7.767661525 | 6.443661377 | 5.729556691 |
| ENSMUSG00000096634 | 2.122355554 | 1.391234488 | 4.236906287 | 4.02728836  | 1.432389173 |
| ENSMUSG00000096635 | 8.489422215 | 6.956172438 | 7.061510478 | 4.832746033 | 10.02672421 |
| ENSMUSG00000096638 | 3.537259256 | 4.173703463 | 3.530755239 | 0.805457672 | 2.864778345 |
| ENSMUSG00000096639 | 7.781970364 | 9.043024169 | 8.473812573 | 4.832746033 | 2.864778345 |
| ENSMUSG00000096642 | 15.56394073 | 13.21672763 | 7.061510478 | 8.054576721 | 4.297167518 |
| ENSMUSG00000096645 | 7.074518513 | 2.086851731 | 7.061510478 | 4.02728836  | 2.864778345 |
| ENSMUSG00000096647 | 11.31922962 | 21.56413456 | 9.179963621 | 9.665492065 | 11.45911338 |
| ENSMUSG00000096648 | 0           | 0           | 0           | 0           | 0           |
| ENSMUSG00000096649 | 5.65961481  | 6.260555194 | 6.35535943  | 3.221830688 | 3.580972932 |
| ENSMUSG00000096651 | 0           | 0           | 0           | 0           | 0           |
| ENSMUSG00000096652 | 8.489422215 | 7.651789682 | 8.473812573 | 7.249119049 | 7.161945863 |
| ENSMUSG00000096654 | 7.781970364 | 11.82549314 | 11.29841676 | 9.665492065 | 8.594335036 |
| ENSMUSG00000096655 | 18.39374813 | 39.6501829  | 26.12758877 | 52.35474869 | 34.37734014 |
| ENSMUSG00000096657 | 6.367066661 | 4.869320706 | 5.649208382 | 1.610915344 | 2.864778345 |
| ENSMUSG00000096659 | 9.904325918 | 10.43425866 | 7.061510478 | 2.416373016 | 6.445751277 |
| ENSMUSG00000096660 | 10.61177777 | 9.738641413 | 9.886114669 | 8.054576721 | 8.594335036 |
| ENSMUSG00000096661 | 4.244711108 | 5.56493795  | 7.767661525 | 2.416373016 | 5.013362104 |
| ENSMUSG00000096662 | 20.51610369 | 4.869320706 | 10.59226572 | 4.02728836  | 10.02672421 |

|                    |             |             |             |             |             |
|--------------------|-------------|-------------|-------------|-------------|-------------|
| ENSMUSG00000096663 | 16.97884443 | 4.173703463 | 7.767661525 | 6.443661377 | 2.864778345 |
| ENSMUSG00000096667 | 29.0055259  | 21.56413456 | 21.89068248 | 30.60739154 | 22.91822676 |
| ENSMUSG00000096668 | 16.27139258 | 9.043024169 | 9.179963621 | 10.47094974 | 10.7429188  |
| ENSMUSG00000096670 | 2.122355554 | 3.478086219 | 1.412302096 | 2.416373016 | 6.445751277 |
| ENSMUSG00000096672 | 10.61177777 | 4.869320706 | 4.236906287 | 4.02728836  | 2.864778345 |
| ENSMUSG00000096673 | 9.904325918 | 7.651789682 | 4.236906287 | 4.02728836  | 5.013362104 |
| ENSMUSG00000096675 | 7.781970364 | 12.52111039 | 5.649208382 | 5.638203705 | 8.594335036 |
| ENSMUSG00000096676 | 11.31922962 | 4.869320706 | 8.473812573 | 5.638203705 | 6.445751277 |
| ENSMUSG00000096677 | 4.952162959 | 2.086851731 | 5.649208382 | 4.832746033 | 3.580972932 |
| ENSMUSG00000096679 | 16.27139258 | 6.956172438 | 4.943057334 | 4.832746033 | 6.445751277 |
| ENSMUSG00000096681 | 12.73413332 | 8.347406925 | 7.767661525 | 9.665492065 | 5.013362104 |
| ENSMUSG00000096682 | 9.904325918 | 9.043024169 | 5.649208382 | 7.249119049 | 7.161945863 |
| ENSMUSG00000096683 | 0           | 0           | 0           | 0           | 0           |
| ENSMUSG00000096684 | 38.90985182 | 54.25814501 | 42.36906287 | 102.2931244 | 76.63282074 |
| ENSMUSG00000096689 | 4.244711108 | 10.43425866 | 3.530755239 | 8.054576721 | 4.297167518 |
| ENSMUSG00000096690 | 12.02668147 | 3.478086219 | 10.59226572 | 4.832746033 | 5.729556691 |
| ENSMUSG00000096691 | 14.14903703 | 9.043024169 | 10.59226572 | 6.443661377 | 6.445751277 |
| ENSMUSG00000096692 | 6.367066661 | 9.738641413 | 8.473812573 | 8.054576721 | 5.729556691 |
| ENSMUSG00000096694 | 7.781970364 | 4.173703463 | 6.35535943  | 6.443661377 | 3.580972932 |
| ENSMUSG00000096695 | 5.65961481  | 6.260555194 | 5.649208382 | 3.221830688 | 5.729556691 |
| ENSMUSG00000096698 | 4.952162959 | 6.260555194 | 4.943057334 | 0           | 3.580972932 |
| ENSMUSG00000096699 | 23.34591109 | 27.82468975 | 33.18909925 | 49.93837567 | 47.98503729 |
| ENSMUSG00000096701 | 8.489422215 | 6.260555194 | 9.886114669 | 8.054576721 | 7.161945863 |
| ENSMUSG00000096702 | 16.27139258 | 9.738641413 | 7.767661525 | 4.02728836  | 7.87814045  |
| ENSMUSG00000096703 | 14.14903703 | 9.738641413 | 7.061510478 | 3.221830688 | 10.7429188  |
| ENSMUSG00000096704 | 8.489422215 | 6.260555194 | 7.061510478 | 4.832746033 | 10.02672421 |
| ENSMUSG00000096705 | 7.781970364 | 2.086851731 | 9.886114669 | 5.638203705 | 3.580972932 |
| ENSMUSG00000096707 | 12.73413332 | 9.738641413 | 7.061510478 | 8.860034393 | 4.297167518 |
| ENSMUSG00000096708 | 6.367066661 | 12.52111039 | 9.886114669 | 3.221830688 | 2.864778345 |
| ENSMUSG00000096709 | 14.85648888 | 3.478086219 | 9.179963621 | 5.638203705 | 6.445751277 |
| ENSMUSG00000096710 | 0           | 0           | 0           | 0           | 0           |
| ENSMUSG00000096711 | 3.537259256 | 2.782468975 | 3.530755239 | 3.221830688 | 2.148583759 |
| ENSMUSG00000096712 | 2.122355554 | 1.391234488 | 4.236906287 | 3.221830688 | 5.729556691 |
| ENSMUSG00000096713 | 5.65961481  | 3.478086219 | 2.118453143 | 6.443661377 | 6.445751277 |
| ENSMUSG00000096714 | 7.781970364 | 11.82549314 | 9.886114669 | 8.054576721 | 5.013362104 |
| ENSMUSG00000096715 | 9.196874066 | 12.52111039 | 12.71071886 | 8.860034393 | 7.87814045  |
| ENSMUSG00000096716 | 2.122355554 | 2.086851731 | 3.530755239 | 8.054576721 | 3.580972932 |
| ENSMUSG00000096717 | 2.829807405 | 4.173703463 | 9.179963621 | 8.054576721 | 5.013362104 |
| ENSMUSG00000096718 | 24.76081479 | 37.56333116 | 26.83373982 | 24.16373016 | 22.20203218 |
| ENSMUSG00000096721 | 9.196874066 | 8.347406925 | 5.649208382 | 6.443661377 | 6.445751277 |
| ENSMUSG00000096722 | 7.074518513 | 9.738641413 | 8.473812573 | 5.638203705 | 7.161945863 |
| ENSMUSG00000096724 | 8.489422215 | 2.782468975 | 6.35535943  | 7.249119049 | 3.580972932 |
| ENSMUSG00000096726 | 12.73413332 | 6.260555194 | 11.29841676 | 6.443661377 | 10.7429188  |

|                    |             |             |             |             |             |
|--------------------|-------------|-------------|-------------|-------------|-------------|
| ENSMUSG00000096729 | 14.85648888 | 9.043024169 | 9.179963621 | 9.665492065 | 13.60769714 |
| ENSMUSG00000096731 | 9.196874066 | 7.651789682 | 7.061510478 | 5.638203705 | 8.594335036 |
| ENSMUSG00000096732 | 9.904325918 | 6.260555194 | 12.00456781 | 8.054576721 | 9.310529622 |
| ENSMUSG00000096733 | 6.367066661 | 4.173703463 | 8.473812573 | 1.610915344 | 3.580972932 |
| ENSMUSG00000096734 | 3.537259256 | 4.869320706 | 7.767661525 | 4.832746033 | 3.580972932 |
| ENSMUSG00000096735 | 10.61177777 | 11.82549314 | 9.886114669 | 8.054576721 | 10.02672421 |
| ENSMUSG00000096736 | 769.0001623 | 804.8291511 | 773.2353973 | 699.942717  | 771.3415695 |
| ENSMUSG00000096737 | 10.61177777 | 4.869320706 | 4.236906287 | 6.443661377 | 4.297167518 |
| ENSMUSG00000096738 | 10.61177777 | 8.347406925 | 8.473812573 | 7.249119049 | 5.013362104 |
| ENSMUSG00000096741 | 7.781970364 | 6.956172438 | 3.530755239 | 6.443661377 | 8.594335036 |
| ENSMUSG00000096743 | 12.02668147 | 6.260555194 | 12.00456781 | 5.638203705 | 7.87814045  |
| ENSMUSG00000096745 | 12.73413332 | 4.173703463 | 12.00456781 | 4.832746033 | 10.7429188  |
| ENSMUSG00000096747 | 14.14903703 | 9.043024169 | 6.35535943  | 5.638203705 | 7.161945863 |
| ENSMUSG00000096748 | 0           | 0           | 0           | 0           | 0           |
| ENSMUSG00000096749 | 8.489422215 | 4.173703463 | 3.530755239 | 7.249119049 | 5.729556691 |
| ENSMUSG00000096751 | 0           | 0           | 0           | 0           | 0           |
| ENSMUSG00000096755 | 4.244711108 | 4.869320706 | 5.649208382 | 2.416373016 | 2.864778345 |
| ENSMUSG00000096757 | 6.367066661 | 6.260555194 | 4.943057334 | 4.832746033 | 5.729556691 |
| ENSMUSG00000096758 | 7.074518513 | 9.043024169 | 9.886114669 | 4.832746033 | 10.02672421 |
| ENSMUSG00000096759 | 4.952162959 | 2.782468975 | 4.943057334 | 4.832746033 | 6.445751277 |
| ENSMUSG00000096760 | 11.31922962 | 5.56493795  | 4.943057334 | 5.638203705 | 5.013362104 |
| ENSMUSG00000096761 | 16.27139258 | 4.173703463 | 4.943057334 | 8.054576721 | 6.445751277 |
| ENSMUSG00000096763 | 5.65961481  | 1.391234488 | 2.824604191 | 0.805457672 | 1.432389173 |
| ENSMUSG00000096765 | 0           | 0           | 0           | 0           | 0           |
| ENSMUSG00000096766 | 23.34591109 | 34.08524495 | 28.24604191 | 45.10562964 | 42.97167518 |
| ENSMUSG00000096767 | 9.196874066 | 9.043024169 | 6.35535943  | 6.443661377 | 7.161945863 |
| ENSMUSG00000096771 | 7.074518513 | 2.782468975 | 2.118453143 | 3.221830688 | 4.297167518 |
| ENSMUSG00000096772 | 16.27139258 | 9.043024169 | 6.35535943  | 8.054576721 | 5.729556691 |
| ENSMUSG00000096773 | 8.489422215 | 7.651789682 | 6.35535943  | 4.02728836  | 4.297167518 |
| ENSMUSG00000096774 | 9.904325918 | 9.738641413 | 11.29841676 | 9.665492065 | 9.310529622 |
| ENSMUSG00000096777 | 7.781970364 | 3.478086219 | 2.824604191 | 0           | 4.297167518 |
| ENSMUSG00000096779 | 14.14903703 | 6.956172438 | 8.473812573 | 6.443661377 | 9.310529622 |
| ENSMUSG00000096780 | 35.37259256 | 29.21592424 | 39.54445867 | 17.72006879 | 15.04008631 |
| ENSMUSG00000096782 | 0           | 0           | 0           | 0           | 0           |
| ENSMUSG00000096784 | 7.074518513 | 4.173703463 | 6.35535943  | 3.221830688 | 5.729556691 |
| ENSMUSG00000096785 | 0           | 0           | 0           | 0           | 0           |
| ENSMUSG00000096786 | 9.196874066 | 5.56493795  | 3.530755239 | 6.443661377 | 5.013362104 |
| ENSMUSG00000096789 | 7.781970364 | 9.043024169 | 12.71071886 | 8.860034393 | 5.729556691 |
| ENSMUSG00000096790 | 6.367066661 | 6.260555194 | 7.767661525 | 4.02728836  | 0.716194586 |
| ENSMUSG00000096791 | 9.904325918 | 6.956172438 | 9.886114669 | 5.638203705 | 8.594335036 |
| ENSMUSG00000096792 | 7.074518513 | 6.260555194 | 10.59226572 | 6.443661377 | 9.310529622 |
| ENSMUSG00000096795 | 12.02668147 | 13.91234488 | 21.18453143 | 13.69278043 | 12.89150255 |
| ENSMUSG00000096797 | 14.14903703 | 9.738641413 | 11.29841676 | 11.27640741 | 15.7562809  |

|                    |             |             |             |             |             |
|--------------------|-------------|-------------|-------------|-------------|-------------|
| ENSMUSG00000096799 | 0           | 0           | 0           | 0           | 0           |
| ENSMUSG00000096800 | 17.68629628 | 5.56493795  | 7.767661525 | 3.221830688 | 5.013362104 |
| ENSMUSG00000096801 | 23.34591109 | 38.95456565 | 19.06607829 | 29.80193387 | 29.36397804 |
| ENSMUSG00000096802 | 26.88317035 | 24.34660353 | 26.12758877 | 22.55281482 | 30.79636721 |
| ENSMUSG00000096803 | 9.904325918 | 5.56493795  | 6.35535943  | 10.47094974 | 7.161945863 |
| ENSMUSG00000096804 | 7.074518513 | 9.738641413 | 9.179963621 | 4.02728836  | 5.729556691 |
| ENSMUSG00000096805 | 5.65961481  | 3.478086219 | 4.943057334 | 4.02728836  | 1.432389173 |
| ENSMUSG00000096806 | 11.31922962 | 9.738641413 | 5.649208382 | 6.443661377 | 5.729556691 |
| ENSMUSG00000096807 | 5.65961481  | 8.347406925 | 4.943057334 | 11.27640741 | 7.87814045  |
| ENSMUSG00000096809 | 20.51610369 | 23.65098629 | 15.53532305 | 14.4982381  | 20.769643   |
| ENSMUSG00000096810 | 13.44158517 | 6.956172438 | 8.473812573 | 8.054576721 | 5.729556691 |
| ENSMUSG00000096811 | 0           | 0           | 0           | 0           | 0           |
| ENSMUSG00000096812 | 0           | 0           | 0           | 0           | 0           |
| ENSMUSG00000096813 | 9.904325918 | 5.56493795  | 2.118453143 | 4.832746033 | 2.864778345 |
| ENSMUSG00000096814 | 0           | 0           | 0           | 0           | 0           |
| ENSMUSG00000096815 | 9.196874066 | 6.956172438 | 10.59226572 | 6.443661377 | 6.445751277 |
| ENSMUSG00000096817 | 9.904325918 | 11.1298759  | 14.829172   | 8.860034393 | 10.02672421 |
| ENSMUSG00000096818 | 0.707451851 | 2.782468975 | 5.649208382 | 1.610915344 | 1.432389173 |
| ENSMUSG00000096820 | 7.074518513 | 6.260555194 | 2.824604191 | 2.416373016 | 3.580972932 |
| ENSMUSG00000096821 | 0           | 0           | 0           | 0           | 0           |
| ENSMUSG00000096822 | 4.244711108 | 6.260555194 | 7.767661525 | 2.416373016 | 5.729556691 |
| ENSMUSG00000096823 | 7.074518513 | 4.869320706 | 9.886114669 | 4.02728836  | 4.297167518 |
| ENSMUSG00000096824 | 3.537259256 | 6.260555194 | 3.530755239 | 2.416373016 | 4.297167518 |
| ENSMUSG00000096825 | 12.73413332 | 7.651789682 | 5.649208382 | 4.02728836  | 7.161945863 |
| ENSMUSG00000096827 | 9.904325918 | 6.260555194 | 7.767661525 | 5.638203705 | 10.02672421 |
| ENSMUSG00000096828 | 13.44158517 | 6.260555194 | 4.236906287 | 12.08186508 | 4.297167518 |
| ENSMUSG00000096829 | 7.781970364 | 4.869320706 | 4.943057334 | 8.054576721 | 8.594335036 |
| ENSMUSG00000096830 | 7.781970364 | 10.43425866 | 6.35535943  | 5.638203705 | 5.729556691 |
| ENSMUSG00000096831 | 1.414903703 | 3.478086219 | 2.824604191 | 0.805457672 | 0           |
| ENSMUSG00000096832 | 9.196874066 | 18.08604834 | 12.71071886 | 146.5932963 | 74.48423698 |
| ENSMUSG00000096833 | 4.244711108 | 12.52111039 | 6.35535943  | 3.221830688 | 6.445751277 |
| ENSMUSG00000096835 | 0           | 0           | 0           | 0           | 0           |
| ENSMUSG00000096837 | 9.904325918 | 12.52111039 | 6.35535943  | 6.443661377 | 7.161945863 |
| ENSMUSG00000096838 | 7.074518513 | 4.173703463 | 8.473812573 | 4.832746033 | 2.148583759 |
| ENSMUSG00000096840 | 10.61177777 | 6.956172438 | 7.061510478 | 5.638203705 | 5.729556691 |
| ENSMUSG00000096841 | 63.67066661 | 98.08203137 | 88.26888097 | 63.6311561  | 56.57937232 |
| ENSMUSG00000096842 | 12.02668147 | 6.956172438 | 7.767661525 | 8.860034393 | 8.594335036 |
| ENSMUSG00000096844 | 9.904325918 | 4.173703463 | 7.061510478 | 6.443661377 | 6.445751277 |
| ENSMUSG00000096845 | 2.829807405 | 3.478086219 | 2.824604191 | 7.249119049 | 5.013362104 |
| ENSMUSG00000096848 | 7.074518513 | 7.651789682 | 9.886114669 | 7.249119049 | 10.02672421 |
| ENSMUSG00000096849 | 6.367066661 | 6.956172438 | 8.473812573 | 8.860034393 | 12.89150255 |
| ENSMUSG00000096850 | 0.707451851 | 6.260555194 | 52.96132858 | 4.02728836  | 2.864778345 |
| ENSMUSG00000096851 | 6.367066661 | 6.260555194 | 7.061510478 | 7.249119049 | 9.310529622 |



|                    |             |             |             |             |             |
|--------------------|-------------|-------------|-------------|-------------|-------------|
| ENSMUSG00000096853 | 7.781970364 | 11.1298759  | 3.530755239 | 4.02728836  | 3.580972932 |
| ENSMUSG00000096855 | 0           | 0           | 0           | 0           | 0           |
| ENSMUSG00000096857 | 13.44158517 | 5.56493795  | 5.649208382 | 4.832746033 | 9.310529622 |
| ENSMUSG00000096858 | 13.44158517 | 5.56493795  | 7.061510478 | 3.221830688 | 3.580972932 |
| ENSMUSG00000096859 | 14.14903703 | 9.738641413 | 10.59226572 | 4.832746033 | 6.445751277 |
| ENSMUSG00000096860 | 9.196874066 | 7.651789682 | 12.00456781 | 10.47094974 | 5.729556691 |
| ENSMUSG00000096861 | 4.244711108 | 4.173703463 | 3.530755239 | 1.610915344 | 3.580972932 |
| ENSMUSG00000096862 | 7.074518513 | 4.173703463 | 7.767661525 | 4.832746033 | 4.297167518 |
| ENSMUSG00000096863 | 6.367066661 | 7.651789682 | 8.473812573 | 6.443661377 | 5.013362104 |
| ENSMUSG00000096864 | 26.1757185  | 29.91154148 | 27.53989086 | 12.08186508 | 23.63442135 |
| ENSMUSG00000096865 | 4.952162959 | 0.695617244 | 3.530755239 | 0.805457672 | 2.148583759 |
| ENSMUSG00000096866 | 13.44158517 | 6.260555194 | 7.061510478 | 6.443661377 | 2.864778345 |
| ENSMUSG00000096868 | 6.367066661 | 3.478086219 | 9.179963621 | 3.221830688 | 4.297167518 |
| ENSMUSG00000096870 | 8.489422215 | 4.869320706 | 9.179963621 | 8.054576721 | 7.161945863 |
| ENSMUSG00000096871 | 16.97884443 | 4.869320706 | 4.943057334 | 5.638203705 | 8.594335036 |
| ENSMUSG00000096874 | 9.196874066 | 4.173703463 | 5.649208382 | 4.832746033 | 5.013362104 |
| ENSMUSG00000096875 | 11.31922962 | 4.869320706 | 8.473812573 | 2.416373016 | 3.580972932 |
| ENSMUSG00000096876 | 7.781970364 | 3.478086219 | 9.179963621 | 5.638203705 | 8.594335036 |
| ENSMUSG00000096877 | 2.829807405 | 4.173703463 | 1.412302096 | 0.805457672 | 0.716194586 |
| ENSMUSG00000096878 | 11.31922962 | 6.956172438 | 10.59226572 | 8.054576721 | 7.87814045  |
| ENSMUSG00000096879 | 8.489422215 | 6.260555194 | 3.530755239 | 10.47094974 | 9.310529622 |
| ENSMUSG00000096880 | 0           | 0           | 0           | 0           | 0           |
| ENSMUSG00000096881 | 4.952162959 | 10.43425866 | 7.767661525 | 2.416373016 | 6.445751277 |
| ENSMUSG00000096882 | 11.31922962 | 9.738641413 | 8.473812573 | 7.249119049 | 5.013362104 |
| ENSMUSG00000096884 | 0           | 0           | 0           | 0           | 0           |
| ENSMUSG00000096885 | 4.952162959 | 4.869320706 | 3.530755239 | 2.416373016 | 3.580972932 |
| ENSMUSG00000096889 | 0           | 0           | 0           | 0           | 0           |
| ENSMUSG00000096890 | 9.196874066 | 6.956172438 | 11.29841676 | 1.610915344 | 9.310529622 |
| ENSMUSG00000096891 | 10.61177777 | 10.43425866 | 5.649208382 | 8.054576721 | 6.445751277 |
| ENSMUSG00000096893 | 2.829807405 | 3.478086219 | 1.412302096 | 1.610915344 | 2.148583759 |
| ENSMUSG00000096894 | 0           | 0           | 0           | 0           | 0           |
| ENSMUSG00000096895 | 8.489422215 | 5.56493795  | 3.530755239 | 6.443661377 | 8.594335036 |
| ENSMUSG00000096896 | 11.31922962 | 8.347406925 | 12.00456781 | 8.860034393 | 7.87814045  |
| ENSMUSG00000096897 | 3.537259256 | 2.086851731 | 1.412302096 | 0           | 2.864778345 |
| ENSMUSG00000096899 | 2.122355554 | 6.260555194 | 4.236906287 | 4.02728836  | 5.729556691 |
| ENSMUSG00000096903 | 12.73413332 | 6.260555194 | 4.236906287 | 4.832746033 | 3.580972932 |
| ENSMUSG00000096905 | 9.904325918 | 7.651789682 | 8.473812573 | 6.443661377 | 5.013362104 |
| ENSMUSG00000096906 | 4.244711108 | 6.260555194 | 6.35535943  | 4.02728836  | 3.580972932 |
| ENSMUSG00000096907 | 4.952162959 | 2.086851731 | 6.35535943  | 2.416373016 | 3.580972932 |
| ENSMUSG00000096910 | 58.71850365 | 67.47487265 | 77.67661525 | 85.37851324 | 79.49759908 |
| ENSMUSG00000096911 | 3.537259256 | 2.782468975 | 7.767661525 | 5.638203705 | 2.148583759 |
| ENSMUSG00000096912 | 8.489422215 | 7.651789682 | 7.767661525 | 7.249119049 | 8.594335036 |
| ENSMUSG00000096913 | 3.537259256 | 6.956172438 | 4.236906287 | 4.02728836  | 5.729556691 |

|                    |             |             |             |             |             |
|--------------------|-------------|-------------|-------------|-------------|-------------|
| ENSMUSG00000096914 | 7.781970364 | 6.956172438 | 7.061510478 | 5.638203705 | 8.594335036 |
| ENSMUSG00000096915 | 3.537259256 | 5.56493795  | 3.530755239 | 4.832746033 | 1.432389173 |
| ENSMUSG00000096917 | 13.44158517 | 21.56413456 | 22.59683353 | 25.77464551 | 22.91822676 |
| ENSMUSG00000096918 | 9.196874066 | 5.56493795  | 7.061510478 | 7.249119049 | 6.445751277 |
| ENSMUSG00000096919 | 4.952162959 | 3.478086219 | 8.473812573 | 4.02728836  | 2.148583759 |
| ENSMUSG00000096920 | 12.02668147 | 5.56493795  | 11.29841676 | 10.47094974 | 10.02672421 |
| ENSMUSG00000096921 | 7.781970364 | 6.260555194 | 9.886114669 | 6.443661377 | 10.02672421 |
| ENSMUSG00000096922 | 6.367066661 | 11.1298759  | 8.473812573 | 3.221830688 | 5.013362104 |
| ENSMUSG00000096923 | 107.5326814 | 137.7322143 | 121.4579802 | 144.982381  | 141.8065281 |
| ENSMUSG00000096924 | 17.68629628 | 4.173703463 | 12.71071886 | 4.832746033 | 5.729556691 |
| ENSMUSG00000096926 | 12.73413332 | 15.99919661 | 21.18453143 | 18.52552646 | 17.90486466 |
| ENSMUSG00000096927 | 11.31922962 | 6.260555194 | 8.473812573 | 8.054576721 | 7.161945863 |
| ENSMUSG00000096929 | 31.12788146 | 51.47567604 | 48.7244223  | 39.46742593 | 33.66114556 |
| ENSMUSG00000096931 | 5.65961481  | 8.347406925 | 8.473812573 | 10.47094974 | 11.45911338 |
| ENSMUSG00000096932 | 77.11225179 | 100.8645003 | 88.97503202 | 101.4876667 | 87.37573953 |
| ENSMUSG00000096934 | 12.02668147 | 6.956172438 | 6.35535943  | 4.02728836  | 5.729556691 |
| ENSMUSG00000096935 | 11.31922962 | 9.738641413 | 8.473812573 | 16.10915344 | 11.45911338 |
| ENSMUSG00000096936 | 9.196874066 | 6.260555194 | 4.236906287 | 4.02728836  | 5.729556691 |
| ENSMUSG00000096937 | 9.904325918 | 11.1298759  | 9.886114669 | 8.860034393 | 12.17530797 |
| ENSMUSG00000096938 | 49.52162959 | 75.12666233 | 79.7950684  | 52.35474869 | 40.82309142 |
| ENSMUSG00000096939 | 4.952162959 | 8.347406925 | 5.649208382 | 8.860034393 | 6.445751277 |
| ENSMUSG00000096940 | 9.196874066 | 9.738641413 | 13.41686991 | 12.08186508 | 10.7429188  |
| ENSMUSG00000096941 | 9.196874066 | 11.1298759  | 9.886114669 | 5.638203705 | 8.594335036 |
| ENSMUSG00000096942 | 14.14903703 | 14.60796212 | 10.59226572 | 18.52552646 | 15.7562809  |
| ENSMUSG00000096943 | 6.367066661 | 5.56493795  | 6.35535943  | 6.443661377 | 5.013362104 |
| ENSMUSG00000096944 | 9.196874066 | 15.30357936 | 26.12758877 | 28.19101852 | 25.06681052 |
| ENSMUSG00000096945 | 193.1343554 | 233.0317767 | 202.6653507 | 179.6170609 | 165.4409494 |
| ENSMUSG00000096946 | 33.95768886 | 55.6493795  | 45.8998181  | 41.07834128 | 44.40406435 |
| ENSMUSG00000096947 | 13.44158517 | 22.2597518  | 22.59683353 | 20.1364418  | 25.06681052 |
| ENSMUSG00000096948 | 89.84638511 | 125.9067211 | 119.3395271 | 133.7059736 | 110.2939663 |
| ENSMUSG00000096949 | 10.61177777 | 6.260555194 | 5.649208382 | 4.832746033 | 10.7429188  |
| ENSMUSG00000096950 | 11.31922962 | 15.30357936 | 7.767661525 | 9.665492065 | 7.87814045  |
| ENSMUSG00000096952 | 4.244711108 | 6.956172438 | 2.824604191 | 9.665492065 | 5.729556691 |
| ENSMUSG00000096953 | 28.29807405 | 36.86771392 | 38.13215658 | 115.9859048 | 105.2806042 |
| ENSMUSG00000096954 | 31.83533331 | 61.21431745 | 57.90438592 | 148.2042117 | 116.7397176 |
| ENSMUSG00000096955 | 9.196874066 | 8.347406925 | 3.530755239 | 4.832746033 | 6.445751277 |
| ENSMUSG00000096956 | 6.367066661 | 9.043024169 | 5.649208382 | 2.416373016 | 6.445751277 |
| ENSMUSG00000096957 | 18.39374813 | 28.52030699 | 26.83373982 | 28.19101852 | 39.39070225 |
| ENSMUSG00000096958 | 26.88317035 | 18.78166558 | 22.59683353 | 12.88732275 | 22.20203218 |
| ENSMUSG00000096959 | 14.85648888 | 29.21592424 | 21.18453143 | 17.72006879 | 20.05344842 |
| ENSMUSG00000096960 | 10.61177777 | 13.21672763 | 9.179963621 | 4.832746033 | 2.864778345 |
| ENSMUSG00000096962 | 48.10672589 | 58.43184848 | 43.78136496 | 18.52552646 | 30.08017263 |
| ENSMUSG00000096963 | 7.781970364 | 6.260555194 | 8.473812573 | 1.610915344 | 2.864778345 |

|                    |              |             |             |             |             |
|--------------------|--------------|-------------|-------------|-------------|-------------|
| ENSMUSG00000096964 | 9.904325918  | 9.738641413 | 5.649208382 | 8.860034393 | 11.45911338 |
| ENSMUSG00000096965 | 11.31922962  | 27.82468975 | 27.53989086 | 25.77464551 | 28.64778345 |
| ENSMUSG00000096966 | 3.537259256  | 6.260555194 | 2.824604191 | 4.02728836  | 2.148583759 |
| ENSMUSG00000096967 | 0            | 0           | 0.706151048 | 0.805457672 | 0           |
| ENSMUSG00000096969 | 16.27139258  | 21.56413456 | 13.41686991 | 15.30369577 | 12.17530797 |
| ENSMUSG00000096970 | 8.489422215  | 7.651789682 | 9.886114669 | 5.638203705 | 7.161945863 |
| ENSMUSG00000096971 | 4.952162959  | 3.478086219 | 2.824604191 | 0.805457672 | 3.580972932 |
| ENSMUSG00000096972 | 10.61177777  | 4.869320706 | 4.943057334 | 8.054576721 | 6.445751277 |
| ENSMUSG00000096973 | 9.196874066  | 4.869320706 | 9.179963621 | 3.221830688 | 2.864778345 |
| ENSMUSG00000096974 | 4.952162959  | 8.347406925 | 8.473812573 | 10.47094974 | 15.04008631 |
| ENSMUSG00000096975 | 5.65961481   | 11.1298759  | 7.061510478 | 5.638203705 | 5.729556691 |
| ENSMUSG00000096976 | 21.93100739  | 37.56333116 | 21.89068248 | 36.24559524 | 28.64778345 |
| ENSMUSG00000096977 | 6.367066661  | 13.91234488 | 12.00456781 | 16.91461111 | 7.87814045  |
| ENSMUSG00000096978 | 4.244711108  | 2.782468975 | 5.649208382 | 4.832746033 | 3.580972932 |
| ENSMUSG00000096979 | 21.22355554  | 16.69481385 | 24.00913562 | 16.91461111 | 20.769643   |
| ENSMUSG00000096980 | 9.196874066  | 6.956172438 | 9.886114669 | 6.443661377 | 9.310529622 |
| ENSMUSG00000096981 | 15.56394073  | 28.52030699 | 29.65834401 | 24.16373016 | 23.63442135 |
| ENSMUSG00000096982 | 6.367066661  | 4.173703463 | 3.530755239 | 4.832746033 | 4.297167518 |
| ENSMUSG00000096983 | 12.02668147  | 13.21672763 | 11.29841676 | 20.94189947 | 17.18867007 |
| ENSMUSG00000096984 | 14.14903703  | 7.651789682 | 7.767661525 | 5.638203705 | 6.445751277 |
| ENSMUSG00000096986 | 42.447111108 | 66.08363816 | 60.72899011 | 141.7605503 | 117.4559122 |
| ENSMUSG00000096987 | 8.489422215  | 6.260555194 | 8.473812573 | 8.054576721 | 9.310529622 |
| ENSMUSG00000096988 | 6.367066661  | 2.782468975 | 5.649208382 | 6.443661377 | 5.729556691 |
| ENSMUSG00000096990 | 8.489422215  | 8.347406925 | 12.00456781 | 11.27640741 | 7.161945863 |
| ENSMUSG00000096991 | 22.63845924  | 29.21592424 | 38.83830763 | 20.1364418  | 18.62105924 |
| ENSMUSG00000096992 | 6.367066661  | 9.043024169 | 9.179963621 | 8.054576721 | 4.297167518 |
| ENSMUSG00000096993 | 79.23460734  | 115.4724625 | 98.15499564 | 157.8697037 | 136.793166  |
| ENSMUSG00000096995 | 92.67619252  | 115.4724625 | 121.4579802 | 149.0096693 | 126.0502472 |
| ENSMUSG00000096996 | 13.44158517  | 23.65098629 | 19.06607829 | 16.10915344 | 23.63442135 |
| ENSMUSG00000096997 | 6.367066661  | 3.478086219 | 4.236906287 | 1.610915344 | 4.297167518 |
| ENSMUSG00000096999 | 4.244711108  | 6.260555194 | 8.473812573 | 4.832746033 | 5.729556691 |
| ENSMUSG00000097000 | 48.10672589  | 73.0398106  | 74.14586002 | 176.3952302 | 153.2656415 |
| ENSMUSG00000097001 | 11.31922962  | 4.869320706 | 9.179963621 | 7.249119049 | 12.89150255 |
| ENSMUSG00000097002 | 9.904325918  | 4.173703463 | 9.179963621 | 3.221830688 | 4.297167518 |
| ENSMUSG00000097003 | 5.65961481   | 2.782468975 | 4.236906287 | 4.02728836  | 5.013362104 |
| ENSMUSG00000097004 | 8.489422215  | 6.260555194 | 6.35535943  | 8.054576721 | 5.729556691 |
| ENSMUSG00000097005 | 5.65961481   | 8.347406925 | 4.943057334 | 2.416373016 | 5.013362104 |
| ENSMUSG00000097006 | 7.074518513  | 7.651789682 | 8.473812573 | 2.416373016 | 8.594335036 |
| ENSMUSG00000097007 | 15.56394073  | 18.08604834 | 24.00913562 | 27.38556085 | 33.66114556 |
| ENSMUSG00000097008 | 171.9107999  | 231.6405422 | 221.025278  | 302.046627  | 224.8851001 |
| ENSMUSG00000097009 | 10.61177777  | 6.260555194 | 5.649208382 | 6.443661377 | 8.594335036 |
| ENSMUSG00000097010 | 9.196874066  | 6.956172438 | 5.649208382 | 7.249119049 | 5.013362104 |
| ENSMUSG00000097011 | 31.12788146  | 43.12826911 | 27.53989086 | 28.9964762  | 33.66114556 |

|                    |             |             |             |             |             |
|--------------------|-------------|-------------|-------------|-------------|-------------|
| ENSMUSG00000097012 | 10.61177777 | 11.82549314 | 14.829172   | 12.08186508 | 11.45911338 |
| ENSMUSG00000097013 | 29.0055259  | 31.99839321 | 32.4829482  | 29.80193387 | 32.22875639 |
| ENSMUSG00000097014 | 43.86201478 | 63.99678643 | 54.37363068 | 157.8697037 | 114.5911338 |
| ENSMUSG00000097015 | 6.367066661 | 6.260555194 | 7.767661525 | 5.638203705 | 4.297167518 |
| ENSMUSG00000097016 | 19.10119998 | 34.08524495 | 33.89525029 | 27.38556085 | 27.21539428 |
| ENSMUSG00000097017 | 9.904325918 | 5.56493795  | 4.236906287 | 7.249119049 | 8.594335036 |
| ENSMUSG00000097018 | 12.73413332 | 9.738641413 | 9.886114669 | 4.832746033 | 5.013362104 |
| ENSMUSG00000097019 | 15.56394073 | 29.91154148 | 26.83373982 | 23.35827249 | 21.48583759 |
| ENSMUSG00000097020 | 25.46826665 | 47.99758982 | 48.7244223  | 69.2693598  | 58.72795608 |
| ENSMUSG00000097021 | 58.0110518  | 80.69160028 | 67.08434954 | 131.2896006 | 97.40246374 |
| ENSMUSG00000097022 | 7.781970364 | 4.869320706 | 8.473812573 | 6.443661377 | 3.580972932 |
| ENSMUSG00000097023 | 7.074518513 | 7.651789682 | 4.943057334 | 8.860034393 | 4.297167518 |
| ENSMUSG00000097024 | 14.14903703 | 9.738641413 | 4.236906287 | 8.860034393 | 4.297167518 |
| ENSMUSG00000097025 | 114.6071999 | 143.2971522 | 141.2302096 | 154.647873  | 141.0903335 |
| ENSMUSG00000097026 | 9.196874066 | 4.869320706 | 6.35535943  | 11.27640741 | 7.87814045  |
| ENSMUSG00000097027 | 12.73413332 | 4.173703463 | 5.649208382 | 6.443661377 | 7.161945863 |
| ENSMUSG00000097028 | 4.952162959 | 7.651789682 | 5.649208382 | 5.638203705 | 7.161945863 |
| ENSMUSG00000097029 | 11.31922962 | 6.260555194 | 4.236906287 | 7.249119049 | 8.594335036 |
| ENSMUSG00000097030 | 8.489422215 | 7.651789682 | 8.473812573 | 8.054576721 | 5.729556691 |
| ENSMUSG00000097031 | 7.781970364 | 6.260555194 | 6.35535943  | 6.443661377 | 5.013362104 |
| ENSMUSG00000097032 | 47.39927403 | 82.77845201 | 78.3827663  | 240.831844  | 191.2239546 |
| ENSMUSG00000097033 | 7.781970364 | 7.651789682 | 14.12302096 | 4.832746033 | 8.594335036 |
| ENSMUSG00000097035 | 8.489422215 | 6.956172438 | 8.473812573 | 11.27640741 | 11.45911338 |
| ENSMUSG00000097036 | 3.537259256 | 2.782468975 | 1.412302096 | 0.805457672 | 2.148583759 |
| ENSMUSG00000097037 | 11.31922962 | 3.478086219 | 7.061510478 | 2.416373016 | 5.729556691 |
| ENSMUSG00000097038 | 11.31922962 | 6.260555194 | 7.061510478 | 4.02728836  | 2.148583759 |
| ENSMUSG00000097039 | 0           | 0           | 0           | 0           | 0           |
| ENSMUSG00000097040 | 10.61177777 | 4.869320706 | 6.35535943  | 0           | 1.432389173 |
| ENSMUSG00000097041 | 5.65961481  | 11.1298759  | 9.179963621 | 11.27640741 | 7.87814045  |
| ENSMUSG00000097042 | 89.13893326 | 107.1250555 | 105.9226572 | 125.6513968 | 108.1453825 |
| ENSMUSG00000097043 | 16.27139258 | 4.173703463 | 7.061510478 | 1.610915344 | 10.02672421 |
| ENSMUSG00000097044 | 4.244711108 | 7.651789682 | 10.59226572 | 4.02728836  | 2.864778345 |
| ENSMUSG00000097045 | 7.074518513 | 6.956172438 | 9.886114669 | 8.860034393 | 5.729556691 |
| ENSMUSG00000097047 | 82.06441475 | 109.9075245 | 97.44884459 | 116.7913625 | 103.1320204 |
| ENSMUSG00000097048 | 77.11225179 | 79.99598303 | 84.73812573 | 281.9101852 | 202.6830679 |
| ENSMUSG00000097049 | 6.367066661 | 4.173703463 | 5.649208382 | 6.443661377 | 3.580972932 |
| ENSMUSG00000097050 | 7.781970364 | 6.956172438 | 7.767661525 | 4.02728836  | 7.161945863 |
| ENSMUSG00000097051 | 161.2990221 | 196.1640627 | 175.8316109 | 315.7394075 | 249.9519106 |
| ENSMUSG00000097052 | 2.829807405 | 2.086851731 | 2.824604191 | 1.610915344 | 0.716194586 |
| ENSMUSG00000097053 | 13.44158517 | 15.99919661 | 19.06607829 | 6.443661377 | 14.32389173 |
| ENSMUSG00000097054 | 9.904325918 | 9.043024169 | 7.061510478 | 1.610915344 | 3.580972932 |
| ENSMUSG00000097055 | 52.35143699 | 49.38882431 | 53.66747963 | 126.4568545 | 98.83485292 |
| ENSMUSG00000097056 | 4.244711108 | 9.043024169 | 6.35535943  | 5.638203705 | 8.594335036 |

|                    |             |             |             |             |             |
|--------------------|-------------|-------------|-------------|-------------|-------------|
| ENSMUSG00000097057 | 14.14903703 | 15.99919661 | 23.30298458 | 44.30017197 | 30.08017263 |
| ENSMUSG00000097058 | 4.244711108 | 4.173703463 | 4.943057334 | 4.02728836  | 5.729556691 |
| ENSMUSG00000097059 | 49.52162959 | 53.56252777 | 52.25517753 | 233.5827249 | 171.8867007 |
| ENSMUSG00000097060 | 17.68629628 | 4.869320706 | 9.179963621 | 6.443661377 | 10.7429188  |
| ENSMUSG00000097062 | 10.61177777 | 27.12907251 | 26.12758877 | 57.18749472 | 53.71459398 |
| ENSMUSG00000097063 | 9.904325918 | 6.260555194 | 7.767661525 | 6.443661377 | 6.445751277 |
| ENSMUSG00000097065 | 9.904325918 | 9.043024169 | 7.061510478 | 5.638203705 | 3.580972932 |
| ENSMUSG00000097066 | 9.904325918 | 3.478086219 | 8.473812573 | 6.443661377 | 15.04008631 |
| ENSMUSG00000097067 | 9.196874066 | 8.347406925 | 7.767661525 | 5.638203705 | 5.729556691 |
| ENSMUSG00000097068 | 13.44158517 | 17.39043109 | 13.41686991 | 9.665492065 | 13.60769714 |
| ENSMUSG00000097069 | 156.3468591 | 169.7306075 | 149.7040221 | 294.797508  | 243.5061594 |
| ENSMUSG00000097071 | 10.61177777 | 6.956172438 | 12.00456781 | 5.638203705 | 7.87814045  |
| ENSMUSG00000097072 | 3.537259256 | 6.260555194 | 4.236906287 | 6.443661377 | 2.148583759 |
| ENSMUSG00000097073 | 0.707451851 | 1.391234488 | 1.412302096 | 0.805457672 | 1.432389173 |
| ENSMUSG00000097074 | 5.65961481  | 6.956172438 | 6.35535943  | 3.221830688 | 7.87814045  |
| ENSMUSG00000097075 | 48.10672589 | 83.47406925 | 75.55816211 | 95.04400531 | 70.90326405 |
| ENSMUSG00000097076 | 7.781970364 | 13.91234488 | 16.2414741  | 8.860034393 | 9.310529622 |
| ENSMUSG00000097077 | 20.51610369 | 34.08524495 | 34.60140134 | 64.43661377 | 54.43078856 |
| ENSMUSG00000097079 | 5.65961481  | 4.869320706 | 11.29841676 | 5.638203705 | 8.594335036 |
| ENSMUSG00000097080 | 16.97884443 | 36.17209668 | 37.42600553 | 41.07834128 | 49.41742646 |
| ENSMUSG00000097081 | 6.367066661 | 7.651789682 | 6.35535943  | 6.443661377 | 5.729556691 |
| ENSMUSG00000097082 | 9.904325918 | 11.1298759  | 4.943057334 | 4.02728836  | 9.310529622 |
| ENSMUSG00000097083 | 4.952162959 | 6.956172438 | 9.179963621 | 7.249119049 | 5.729556691 |
| ENSMUSG00000097085 | 7.074518513 | 6.260555194 | 9.179963621 | 6.443661377 | 8.594335036 |
| ENSMUSG00000097086 | 4.244711108 | 4.869320706 | 4.236906287 | 6.443661377 | 6.445751277 |
| ENSMUSG00000097087 | 7.781970364 | 6.956172438 | 3.530755239 | 3.221830688 | 11.45911338 |
| ENSMUSG00000097088 | 19.80865184 | 8.347406925 | 18.35992724 | 10.47094974 | 19.33725383 |
| ENSMUSG00000097089 | 56.5961481  | 105.0382038 | 87.56272992 | 92.62763229 | 66.60609653 |
| ENSMUSG00000097090 | 33.95768886 | 63.30116918 | 80.50121945 | 41.07834128 | 55.86317773 |
| ENSMUSG00000097091 | 5.65961481  | 8.347406925 | 10.59226572 | 7.249119049 | 7.87814045  |
| ENSMUSG00000097092 | 7.781970364 | 11.82549314 | 8.473812573 | 19.33098413 | 12.89150255 |
| ENSMUSG00000097093 | 42.44711108 | 66.08363816 | 59.31668801 | 88.60034393 | 65.88990194 |
| ENSMUSG00000097094 | 9.196874066 | 6.260555194 | 10.59226572 | 7.249119049 | 5.729556691 |
| ENSMUSG00000097095 | 16.27139258 | 4.869320706 | 11.29841676 | 7.249119049 | 9.310529622 |
| ENSMUSG00000097097 | 13.44158517 | 4.173703463 | 9.179963621 | 4.02728836  | 5.729556691 |
| ENSMUSG00000097098 | 8.489422215 | 10.43425866 | 8.473812573 | 6.443661377 | 5.729556691 |
| ENSMUSG00000097099 | 13.44158517 | 20.17290007 | 19.06607829 | 14.4982381  | 22.20203218 |
| ENSMUSG00000097100 | 94.79854807 | 137.036597  | 124.9887355 | 144.982381  | 121.0368851 |
| ENSMUSG00000097101 | 12.02668147 | 8.347406925 | 5.649208382 | 7.249119049 | 8.594335036 |
| ENSMUSG00000097102 | 12.73413332 | 4.869320706 | 8.473812573 | 4.02728836  | 5.729556691 |
| ENSMUSG00000097103 | 9.196874066 | 25.73783802 | 13.41686991 | 10.47094974 | 9.310529622 |
| ENSMUSG00000097104 | 8.489422215 | 4.173703463 | 8.473812573 | 6.443661377 | 0.716194586 |
| ENSMUSG00000097106 | 9.904325918 | 11.82549314 | 6.35535943  | 6.443661377 | 12.17530797 |

|                    |             |             |             |             |             |
|--------------------|-------------|-------------|-------------|-------------|-------------|
| ENSMUSG00000097107 | 9.196874066 | 4.869320706 | 4.236906287 | 4.832746033 | 5.013362104 |
| ENSMUSG00000097108 | 11.31922962 | 7.651789682 | 12.71071886 | 5.638203705 | 12.89150255 |
| ENSMUSG00000097109 | 40.32475552 | 47.99758982 | 49.43057334 | 71.68573282 | 68.0384857  |
| ENSMUSG00000097110 | 4.952162959 | 4.173703463 | 4.943057334 | 5.638203705 | 5.729556691 |
| ENSMUSG00000097111 | 7.781970364 | 16.69481385 | 9.886114669 | 4.832746033 | 10.02672421 |
| ENSMUSG00000097112 | 12.02668147 | 5.56493795  | 4.943057334 | 5.638203705 | 5.013362104 |
| ENSMUSG00000097113 | 5.65961481  | 4.869320706 | 4.236906287 | 4.832746033 | 9.310529622 |
| ENSMUSG00000097115 | 7.074518513 | 13.21672763 | 7.061510478 | 8.860034393 | 8.594335036 |
| ENSMUSG00000097116 | 21.22355554 | 29.91154148 | 28.95219296 | 45.91108731 | 39.39070225 |
| ENSMUSG00000097117 | 23.34591109 | 30.60715873 | 30.36449505 | 20.1364418  | 21.48583759 |
| ENSMUSG00000097118 | 11.31922962 | 11.82549314 | 12.71071886 | 5.638203705 | 10.7429188  |
| ENSMUSG00000097119 | 82.06441475 | 80.69160028 | 81.91352154 | 154.647873  | 106.7129934 |
| ENSMUSG00000097120 | 6.367066661 | 5.56493795  | 9.886114669 | 8.054576721 | 8.594335036 |
| ENSMUSG00000097121 | 203.7461332 | 239.9879491 | 230.2052416 | 459.1108731 | 334.4628718 |
| ENSMUSG00000097122 | 45.98437033 | 37.56333116 | 52.96132858 | 44.30017197 | 52.2822048  |
| ENSMUSG00000097123 | 45.27691848 | 91.12585893 | 76.26431316 | 226.3336059 | 156.1304198 |
| ENSMUSG00000097124 | 11.31922962 | 10.43425866 | 5.649208382 | 8.054576721 | 5.729556691 |
| ENSMUSG00000097125 | 82.7718666  | 100.1688831 | 103.804204  | 431.7253122 | 292.2073912 |
| ENSMUSG00000097127 | 8.489422215 | 9.043024169 | 8.473812573 | 4.832746033 | 7.161945863 |
| ENSMUSG00000097128 | 93.38364437 | 124.5154866 | 123.5764334 | 143.3714656 | 131.7798039 |
| ENSMUSG00000097130 | 7.781970364 | 5.56493795  | 6.35535943  | 1.610915344 | 7.87814045  |
| ENSMUSG00000097131 | 0.707451851 | 0.695617244 | 0           | 1.610915344 | 2.148583759 |
| ENSMUSG00000097133 | 13.44158517 | 5.56493795  | 6.35535943  | 12.08186508 | 10.02672421 |
| ENSMUSG00000097134 | 7.074518513 | 10.43425866 | 7.061510478 | 9.665492065 | 7.161945863 |
| ENSMUSG00000097135 | 11.31922962 | 4.869320706 | 4.236906287 | 3.221830688 | 8.594335036 |
| ENSMUSG00000097136 | 33.25023701 | 34.08524495 | 28.95219296 | 23.35827249 | 23.63442135 |
| ENSMUSG00000097137 | 7.074518513 | 8.347406925 | 9.179963621 | 7.249119049 | 4.297167518 |
| ENSMUSG00000097138 | 29.0055259  | 29.21592424 | 35.30755239 | 51.54929101 | 42.25548059 |
| ENSMUSG00000097139 | 19.80865184 | 38.95456565 | 29.65834401 | 16.91461111 | 24.35061594 |
| ENSMUSG00000097140 | 7.781970364 | 9.738641413 | 6.35535943  | 6.443661377 | 10.7429188  |
| ENSMUSG00000097141 | 40.32475552 | 56.34499675 | 46.60596915 | 79.74030954 | 61.59273443 |
| ENSMUSG00000097142 | 55.1812444  | 84.86530374 | 77.67661525 | 29.80193387 | 39.39070225 |
| ENSMUSG00000097143 | 19.10119998 | 20.86851731 | 19.77222934 | 11.27640741 | 10.7429188  |
| ENSMUSG00000097145 | 126.6338814 | 148.1664729 | 125.6948865 | 244.0536746 | 189.0753708 |
| ENSMUSG00000097146 | 6.367066661 | 8.347406925 | 12.00456781 | 4.02728836  | 5.013362104 |
| ENSMUSG00000097147 | 8.489422215 | 2.782468975 | 6.35535943  | 8.860034393 | 7.161945863 |
| ENSMUSG00000097149 | 128.0487851 | 149.5577074 | 141.2302096 | 275.4665239 | 201.9668733 |
| ENSMUSG00000097150 | 3.537259256 | 2.782468975 | 7.767661525 | 3.221830688 | 5.729556691 |
| ENSMUSG00000097151 | 33.25023701 | 50.7800588  | 46.60596915 | 27.38556085 | 27.93158887 |
| ENSMUSG00000097152 | 36.78749627 | 58.43184848 | 64.96589639 | 155.4533307 | 129.6312201 |
| ENSMUSG00000097154 | 86.30912585 | 147.4708557 | 127.1071886 | 107.9313281 | 95.25387998 |
| ENSMUSG00000097155 | 16.27139258 | 29.21592424 | 50.13672439 | 147.398754  | 98.11865833 |
| ENSMUSG00000097156 | 10.61177777 | 6.956172438 | 5.649208382 | 6.443661377 | 3.580972932 |

|                    |             |             |             |             |             |
|--------------------|-------------|-------------|-------------|-------------|-------------|
| ENSMUSG00000097157 | 4.244711108 | 4.869320706 | 6.35535943  | 4.02728836  | 7.161945863 |
| ENSMUSG00000097158 | 18.39374813 | 12.52111039 | 10.59226572 | 27.38556085 | 22.91822676 |
| ENSMUSG00000097159 | 16.27139258 | 20.86851731 | 21.18453143 | 10.47094974 | 14.32389173 |
| ENSMUSG00000097160 | 24.76081479 | 31.30277597 | 38.13215658 | 33.02376456 | 33.66114556 |
| ENSMUSG00000097162 | 125.9264295 | 142.601535  | 125.6948865 | 162.7024498 | 138.9417498 |
| ENSMUSG00000097163 | 9.196874066 | 4.869320706 | 3.530755239 | 7.249119049 | 7.87814045  |
| ENSMUSG00000097164 | 26.1757185  | 48.69320706 | 31.77679715 | 76.51847885 | 59.44415067 |
| ENSMUSG00000097165 | 10.61177777 | 12.52111039 | 10.59226572 | 8.054576721 | 5.013362104 |
| ENSMUSG00000097166 | 24.76081479 | 32.69401046 | 31.0706461  | 347.9577143 | 220.5879326 |
| ENSMUSG00000097167 | 50.22908144 | 68.86610713 | 63.5535943  | 101.4876667 | 73.05184781 |
| ENSMUSG00000097168 | 26.1757185  | 25.04222078 | 17.65377619 | 12.88732275 | 15.7562809  |
| ENSMUSG00000097169 | 8.489422215 | 13.21672763 | 8.473812573 | 8.860034393 | 9.310529622 |
| ENSMUSG00000097170 | 15.56394073 | 14.60796212 | 9.886114669 | 12.88732275 | 7.161945863 |
| ENSMUSG00000097171 | 2.829807405 | 4.869320706 | 12.71071886 | 8.860034393 | 5.729556691 |
| ENSMUSG00000097172 | 5.65961481  | 6.956172438 | 4.236906287 | 8.860034393 | 11.45911338 |
| ENSMUSG00000097173 | 9.196874066 | 9.043024169 | 8.473812573 | 0.805457672 | 12.17530797 |
| ENSMUSG00000097174 | 20.51610369 | 38.95456565 | 38.13215658 | 37.05105292 | 32.94495097 |
| ENSMUSG00000097175 | 0           | 1.391234488 | 0.706151048 | 0           | 0           |
| ENSMUSG00000097176 | 16.97884443 | 31.30277597 | 33.89525029 | 52.35474869 | 39.39070225 |
| ENSMUSG00000097177 | 2.829807405 | 4.173703463 | 0.706151048 | 0.805457672 | 1.432389173 |
| ENSMUSG00000097178 | 9.196874066 | 5.56493795  | 2.824604191 | 8.054576721 | 8.594335036 |
| ENSMUSG00000097180 | 9.196874066 | 9.043024169 | 16.94762515 | 7.249119049 | 4.297167518 |
| ENSMUSG00000097181 | 13.44158517 | 4.869320706 | 8.473812573 | 4.832746033 | 8.594335036 |
| ENSMUSG00000097182 | 9.196874066 | 6.260555194 | 6.35535943  | 6.443661377 | 7.161945863 |
| ENSMUSG00000097183 | 7.074518513 | 2.782468975 | 3.530755239 | 7.249119049 | 7.87814045  |
| ENSMUSG00000097184 | 11.31922962 | 8.347406925 | 13.41686991 | 8.054576721 | 10.7429188  |
| ENSMUSG00000097186 | 13.44158517 | 9.738641413 | 9.886114669 | 8.860034393 | 11.45911338 |
| ENSMUSG00000097188 | 9.196874066 | 6.956172438 | 7.061510478 | 4.832746033 | 10.02672421 |
| ENSMUSG00000097189 | 50.93653329 | 95.99517964 | 67.08434954 | 95.04400531 | 79.49759908 |
| ENSMUSG00000097190 | 16.27139258 | 8.347406925 | 7.061510478 | 7.249119049 | 5.729556691 |
| ENSMUSG00000097191 | 48.81417774 | 75.12666233 | 68.49665163 | 133.7059736 | 117.4559122 |
| ENSMUSG00000097193 | 24.05336294 | 36.86771392 | 24.71528667 | 50.74383334 | 39.39070225 |
| ENSMUSG00000097194 | 62.25576291 | 101.5601176 | 71.32125582 | 306.0739154 | 221.3041272 |
| ENSMUSG00000097195 | 1.414903703 | 0.695617244 | 0.706151048 | 8.054576721 | 4.297167518 |
| ENSMUSG00000097196 | 21.93100739 | 34.08524495 | 24.00913562 | 64.43661377 | 53.71459398 |
| ENSMUSG00000097197 | 2.829807405 | 4.173703463 | 4.943057334 | 7.249119049 | 0           |
| ENSMUSG00000097199 | 11.31922962 | 4.869320706 | 9.886114669 | 6.443661377 | 5.013362104 |
| ENSMUSG00000097201 | 14.14903703 | 5.56493795  | 10.59226572 | 7.249119049 | 3.580972932 |
| ENSMUSG00000097202 | 8.489422215 | 15.30357936 | 10.59226572 | 6.443661377 | 7.161945863 |
| ENSMUSG00000097203 | 12.73413332 | 5.56493795  | 3.530755239 | 6.443661377 | 5.729556691 |
| ENSMUSG00000097204 | 74.28244438 | 84.1696865  | 88.26888097 | 197.3371297 | 170.4543116 |
| ENSMUSG00000097205 | 7.781970364 | 4.173703463 | 3.530755239 | 3.221830688 | 6.445751277 |
| ENSMUSG00000097206 | 201.6237776 | 234.4230112 | 215.3760696 | 470.3872805 | 350.9353473 |

|                    |             |             |             |             |             |
|--------------------|-------------|-------------|-------------|-------------|-------------|
| ENSMUSG00000097207 | 19.80865184 | 38.95456565 | 45.19366706 | 37.05105292 | 30.79636721 |
| ENSMUSG00000097208 | 7.781970364 | 12.52111039 | 9.179963621 | 8.054576721 | 2.148583759 |
| ENSMUSG00000097209 | 4.244711108 | 2.782468975 | 4.236906287 | 3.221830688 | 3.580972932 |
| ENSMUSG00000097210 | 7.074518513 | 11.82549314 | 4.943057334 | 4.832746033 | 7.87814045  |
| ENSMUSG00000097211 | 8.489422215 | 9.043024169 | 7.061510478 | 5.638203705 | 5.013362104 |
| ENSMUSG00000097213 | 59.42595551 | 87.64777272 | 76.97046421 | 78.93485187 | 79.49759908 |
| ENSMUSG00000097214 | 8.489422215 | 9.043024169 | 2.824604191 | 7.249119049 | 4.297167518 |
| ENSMUSG00000097215 | 7.074518513 | 5.56493795  | 5.649208382 | 4.02728836  | 7.87814045  |
| ENSMUSG00000097216 | 7.074518513 | 6.956172438 | 7.061510478 | 4.02728836  | 4.297167518 |
| ENSMUSG00000097217 | 72.16008883 | 127.9935729 | 100.2734488 | 215.0571984 | 175.4676737 |
| ENSMUSG00000097218 | 14.14903703 | 6.956172438 | 7.767661525 | 8.054576721 | 6.445751277 |
| ENSMUSG00000097219 | 8.489422215 | 8.347406925 | 7.767661525 | 5.638203705 | 12.17530797 |
| ENSMUSG00000097220 | 7.781970364 | 8.347406925 | 6.35535943  | 7.249119049 | 8.594335036 |
| ENSMUSG00000097221 | 146.4425332 | 168.339373  | 172.3008557 | 182.8388916 | 161.1437819 |
| ENSMUSG00000097222 | 7.781970364 | 5.56493795  | 7.767661525 | 8.860034393 | 2.148583759 |
| ENSMUSG00000097223 | 69.33028142 | 87.64777272 | 79.08891735 | 80.54576721 | 75.20043157 |
| ENSMUSG00000097224 | 9.904325918 | 5.56493795  | 4.943057334 | 6.443661377 | 5.729556691 |
| ENSMUSG00000097225 | 0           | 0           | 0           | 0           | 0           |
| ENSMUSG00000097226 | 6.367066661 | 6.260555194 | 6.35535943  | 2.416373016 | 8.594335036 |
| ENSMUSG00000097227 | 12.73413332 | 9.738641413 | 19.77222934 | 16.10915344 | 13.60769714 |
| ENSMUSG00000097228 | 7.781970364 | 9.738641413 | 8.473812573 | 25.77464551 | 24.35061594 |
| ENSMUSG00000097229 | 40.32475552 | 57.04061399 | 64.25974535 | 82.96214023 | 78.06520991 |
| ENSMUSG00000097230 | 227.0920443 | 354.0691771 | 333.3032945 | 338.2922223 | 339.4762339 |
| ENSMUSG00000097231 | 12.02668147 | 19.47728283 | 19.06607829 | 12.88732275 | 9.310529622 |
| ENSMUSG00000097232 | 29.0055259  | 56.34499675 | 53.66747963 | 34.6346799  | 26.49919969 |
| ENSMUSG00000097233 | 19.10119998 | 36.17209668 | 31.77679715 | 20.94189947 | 17.90486466 |
| ENSMUSG00000097234 | 51.64398514 | 84.86530374 | 81.91352154 | 103.9040397 | 110.2939663 |
| ENSMUSG00000097235 | 10.61177777 | 10.43425866 | 9.886114669 | 4.832746033 | 9.310529622 |
| ENSMUSG00000097236 | 28.29807405 | 61.21431745 | 57.19823487 | 45.10562964 | 47.2688427  |
| ENSMUSG00000097237 | 2.122355554 | 4.869320706 | 7.767661525 | 2.416373016 | 5.013362104 |
| ENSMUSG00000097240 | 4.952162959 | 2.782468975 | 5.649208382 | 6.443661377 | 6.445751277 |
| ENSMUSG00000097241 | 9.196874066 | 9.738641413 | 12.71071886 | 2.416373016 | 2.864778345 |
| ENSMUSG00000097242 | 8.489422215 | 13.91234488 | 7.767661525 | 7.249119049 | 15.04008631 |
| ENSMUSG00000097243 | 4.952162959 | 9.738641413 | 5.649208382 | 11.27640741 | 10.7429188  |
| ENSMUSG00000097244 | 6.367066661 | 9.043024169 | 11.29841676 | 8.054576721 | 7.87814045  |
| ENSMUSG00000097245 | 12.02668147 | 9.043024169 | 10.59226572 | 4.832746033 | 10.7429188  |
| ENSMUSG00000097246 | 45.98437033 | 50.7800588  | 50.84287544 | 45.10562964 | 43.68786977 |
| ENSMUSG00000097247 | 6.367066661 | 7.651789682 | 4.236906287 | 11.27640741 | 7.87814045  |
| ENSMUSG00000097248 | 7.074518513 | 7.651789682 | 6.35535943  | 3.221830688 | 3.580972932 |
| ENSMUSG00000097249 | 13.44158517 | 9.043024169 | 3.530755239 | 8.054576721 | 16.47247549 |
| ENSMUSG00000097250 | 11.31922962 | 6.260555194 | 6.35535943  | 6.443661377 | 6.445751277 |
| ENSMUSG00000097251 | 60.84085921 | 86.25653823 | 84.73812573 | 81.35122488 | 73.05184781 |
| ENSMUSG00000097252 | 11.31922962 | 2.086851731 | 6.35535943  | 4.832746033 | 6.445751277 |



|                    |             |             |             |             |             |
|--------------------|-------------|-------------|-------------|-------------|-------------|
| ENSMUSG00000097253 | 10.61177777 | 16.69481385 | 24.71528667 | 20.1364418  | 20.05344842 |
| ENSMUSG00000097254 | 14.85648888 | 25.04222078 | 21.18453143 | 10.47094974 | 20.05344842 |
| ENSMUSG00000097255 | 3.537259256 | 6.260555194 | 2.824604191 | 5.638203705 | 2.864778345 |
| ENSMUSG00000097256 | 14.14903703 | 7.651789682 | 4.236906287 | 4.02728836  | 8.594335036 |
| ENSMUSG00000097257 | 4.244711108 | 10.43425866 | 13.41686991 | 9.665492065 | 12.17530797 |
| ENSMUSG00000097258 | 10.61177777 | 12.52111039 | 12.71071886 | 10.47094974 | 6.445751277 |
| ENSMUSG00000097259 | 41.03220737 | 86.95215547 | 60.02283906 | 185.2552646 | 139.6579443 |
| ENSMUSG00000097260 | 9.904325918 | 8.347406925 | 2.824604191 | 9.665492065 | 2.864778345 |
| ENSMUSG00000097261 | 38.90985182 | 89.0390072  | 62.84744325 | 141.7605503 | 110.2939663 |
| ENSMUSG00000097262 | 9.196874066 | 5.56493795  | 4.943057334 | 4.832746033 | 5.729556691 |
| ENSMUSG00000097263 | 220.7249776 | 345.7217702 | 326.2417841 | 358.4286641 | 306.531283  |
| ENSMUSG00000097264 | 24.05336294 | 30.60715873 | 30.36449505 | 20.1364418  | 24.35061594 |
| ENSMUSG00000097265 | 4.952162959 | 5.56493795  | 9.179963621 | 6.443661377 | 2.148583759 |
| ENSMUSG00000097266 | 4.244711108 | 10.43425866 | 2.824604191 | 4.832746033 | 7.161945863 |
| ENSMUSG00000097267 | 7.781970364 | 11.1298759  | 6.35535943  | 4.02728836  | 5.013362104 |
| ENSMUSG00000097268 | 7.781970364 | 10.43425866 | 8.473812573 | 5.638203705 | 5.729556691 |
| ENSMUSG00000097271 | 19.80865184 | 45.91073809 | 34.60140134 | 48.32746033 | 78.7814045  |
| ENSMUSG00000097272 | 6.367066661 | 3.478086219 | 6.35535943  | 6.443661377 | 9.310529622 |
| ENSMUSG00000097274 | 24.76081479 | 33.3896277  | 33.89525029 | 24.16373016 | 27.21539428 |
| ENSMUSG00000097275 | 18.39374813 | 18.08604834 | 20.47838039 | 16.10915344 | 12.17530797 |
| ENSMUSG00000097276 | 9.196874066 | 20.17290007 | 11.29841676 | 9.665492065 | 7.87814045  |
| ENSMUSG00000097277 | 53.05888884 | 93.90832791 | 64.96589639 | 68.46390213 | 70.18706946 |
| ENSMUSG00000097278 | 10.61177777 | 6.956172438 | 12.00456781 | 4.832746033 | 5.729556691 |
| ENSMUSG00000097279 | 4.952162959 | 9.043024169 | 10.59226572 | 53.16020636 | 41.53928601 |
| ENSMUSG00000097280 | 5.65961481  | 4.869320706 | 2.118453143 | 6.443661377 | 3.580972932 |
| ENSMUSG00000097281 | 4.952162959 | 7.651789682 | 12.71071886 | 7.249119049 | 3.580972932 |
| ENSMUSG00000097282 | 7.781970364 | 9.043024169 | 7.061510478 | 1.610915344 | 10.7429188  |
| ENSMUSG00000097283 | 7.074518513 | 8.347406925 | 13.41686991 | 4.832746033 | 5.729556691 |
| ENSMUSG00000097284 | 45.98437033 | 76.51789682 | 71.32125582 | 63.6311561  | 60.16034525 |
| ENSMUSG00000097285 | 16.97884443 | 17.39043109 | 19.06607829 | 12.08186508 | 15.7562809  |
| ENSMUSG00000097286 | 13.44158517 | 4.869320706 | 7.061510478 | 6.443661377 | 7.161945863 |
| ENSMUSG00000097287 | 7.074518513 | 15.30357936 | 12.71071886 | 9.665492065 | 8.594335036 |
| ENSMUSG00000097288 | 4.244711108 | 2.086851731 | 1.412302096 | 1.610915344 | 2.148583759 |
| ENSMUSG00000097289 | 4.244711108 | 9.043024169 | 3.530755239 | 13.69278043 | 7.161945863 |
| ENSMUSG00000097290 | 16.27139258 | 36.86771392 | 28.95219296 | 19.33098413 | 25.78300511 |
| ENSMUSG00000097291 | 7.781970364 | 9.738641413 | 9.179963621 | 5.638203705 | 8.594335036 |
| ENSMUSG00000097292 | 50.22908144 | 60.51870021 | 60.72899011 | 74.9075635  | 66.60609653 |
| ENSMUSG00000097294 | 7.781970364 | 9.043024169 | 9.179963621 | 7.249119049 | 5.013362104 |
| ENSMUSG00000097295 | 41.73965922 | 61.21431745 | 55.07978173 | 21.74735715 | 35.80972932 |
| ENSMUSG00000097296 | 0.707451851 | 0           | 0           | 0.805457672 | 0.716194586 |
| ENSMUSG00000097298 | 39.61730367 | 49.38882431 | 40.25060972 | 80.54576721 | 71.61945863 |
| ENSMUSG00000097299 | 6.367066661 | 5.56493795  | 9.886114669 | 6.443661377 | 7.87814045  |
| ENSMUSG00000097300 | 88.43148141 | 136.3409798 | 122.8702823 | 40.2728836  | 40.82309142 |

|                    |             |             |             |             |             |
|--------------------|-------------|-------------|-------------|-------------|-------------|
| ENSMUSG00000097301 | 5.65961481  | 14.60796212 | 14.829172   | 5.638203705 | 12.89150255 |
| ENSMUSG00000097302 | 9.904325918 | 6.956172438 | 7.061510478 | 6.443661377 | 5.729556691 |
| ENSMUSG00000097303 | 20.51610369 | 31.30277597 | 24.71528667 | 24.96918783 | 41.53928601 |
| ENSMUSG00000097304 | 7.074518513 | 7.651789682 | 4.943057334 | 4.02728836  | 13.60769714 |
| ENSMUSG00000097305 | 12.02668147 | 4.869320706 | 2.824604191 | 6.443661377 | 12.17530797 |
| ENSMUSG00000097307 | 6.367066661 | 6.956172438 | 6.35535943  | 5.638203705 | 5.729556691 |
| ENSMUSG00000097308 | 4.952162959 | 8.347406925 | 5.649208382 | 4.02728836  | 8.594335036 |
| ENSMUSG00000097309 | 14.14903703 | 27.82468975 | 26.12758877 | 76.51847885 | 55.86317773 |
| ENSMUSG00000097310 | 7.074518513 | 8.347406925 | 4.943057334 | 4.02728836  | 2.148583759 |
| ENSMUSG00000097311 | 14.85648888 | 6.260555194 | 5.649208382 | 8.054576721 | 12.17530797 |
| ENSMUSG00000097312 | 677.0314217 | 666.4013195 | 708.2695009 | 606.5096271 | 664.6285761 |
| ENSMUSG00000097313 | 6.367066661 | 4.869320706 | 4.943057334 | 2.416373016 | 2.864778345 |
| ENSMUSG00000097314 | 1.414903703 | 5.56493795  | 0.706151048 | 3.221830688 | 5.013362104 |
| ENSMUSG00000097315 | 7.781970364 | 4.869320706 | 7.767661525 | 11.27640741 | 7.87814045  |
| ENSMUSG00000097316 | 12.73413332 | 21.56413456 | 20.47838039 | 12.08186508 | 13.60769714 |
| ENSMUSG00000097317 | 6.367066661 | 6.956172438 | 9.886114669 | 7.249119049 | 9.310529622 |
| ENSMUSG00000097318 | 98.33580733 | 111.9943762 | 115.8087718 | 171.5624842 | 146.8198902 |
| ENSMUSG00000097320 | 27.5906222  | 43.82388636 | 58.61053696 | 69.2693598  | 58.72795608 |
| ENSMUSG00000097321 | 9.904325918 | 17.39043109 | 22.59683353 | 15.30369577 | 20.769643   |
| ENSMUSG00000097322 | 9.904325918 | 6.260555194 | 10.59226572 | 5.638203705 | 7.161945863 |
| ENSMUSG00000097323 | 14.14903703 | 15.30357936 | 12.71071886 | 10.47094974 | 10.7429188  |
| ENSMUSG00000097324 | 5.65961481  | 5.56493795  | 4.236906287 | 8.054576721 | 4.297167518 |
| ENSMUSG00000097325 | 43.86201478 | 67.47487265 | 60.02283906 | 26.58010318 | 47.98503729 |
| ENSMUSG00000097326 | 9.904325918 | 6.260555194 | 4.236906287 | 5.638203705 | 10.7429188  |
| ENSMUSG00000097329 | 16.27139258 | 14.60796212 | 18.35992724 | 8.054576721 | 13.60769714 |
| ENSMUSG00000097330 | 4.952162959 | 5.56493795  | 4.236906287 | 7.249119049 | 10.02672421 |
| ENSMUSG00000097331 | 9.904325918 | 6.260555194 | 9.886114669 | 9.665492065 | 11.45911338 |
| ENSMUSG00000097332 | 7.074518513 | 4.173703463 | 7.061510478 | 8.054576721 | 5.729556691 |
| ENSMUSG00000097334 | 19.80865184 | 33.3896277  | 32.4829482  | 89.4058016  | 83.7947666  |
| ENSMUSG00000097335 | 18.39374813 | 29.21592424 | 19.77222934 | 33.82922223 | 32.94495097 |
| ENSMUSG00000097336 | 2.122355554 | 2.782468975 | 2.824604191 | 1.610915344 | 2.148583759 |
| ENSMUSG00000097337 | 8.489422215 | 22.2597518  | 18.35992724 | 22.55281482 | 28.64778345 |
| ENSMUSG00000097338 | 9.904325918 | 8.347406925 | 6.35535943  | 4.02728836  | 7.161945863 |
| ENSMUSG00000097339 | 9.904325918 | 6.260555194 | 5.649208382 | 5.638203705 | 6.445751277 |
| ENSMUSG00000097340 | 29.0055259  | 52.17129328 | 38.83830763 | 32.21830688 | 45.83645353 |
| ENSMUSG00000097342 | 6.367066661 | 5.56493795  | 3.530755239 | 3.221830688 | 4.297167518 |
| ENSMUSG00000097343 | 49.52162959 | 95.99517964 | 80.50121945 | 93.43308996 | 75.91662615 |
| ENSMUSG00000097344 | 22.63845924 | 30.60715873 | 36.71985448 | 8.054576721 | 21.48583759 |
| ENSMUSG00000097345 | 38.90985182 | 49.38882431 | 56.49208382 | 83.7675979  | 66.60609653 |
| ENSMUSG00000097346 | 4.952162959 | 6.260555194 | 7.061510478 | 7.249119049 | 5.729556691 |
| ENSMUSG00000097347 | 58.71850365 | 61.9099347  | 61.43514116 | 49.132918   | 46.55264811 |
| ENSMUSG00000097348 | 4.244711108 | 6.260555194 | 3.530755239 | 2.416373016 | 7.161945863 |
| ENSMUSG00000097349 | 9.196874066 | 5.56493795  | 5.649208382 | 4.832746033 | 11.45911338 |

|                    |             |             |             |             |             |
|--------------------|-------------|-------------|-------------|-------------|-------------|
| ENSMUSG00000097350 | 42.44711108 | 76.51789682 | 56.49208382 | 24.96918783 | 43.68786977 |
| ENSMUSG00000097352 | 51.64398514 | 102.9513521 | 76.97046421 | 95.04400531 | 80.92998826 |
| ENSMUSG00000097353 | 21.93100739 | 37.56333116 | 31.77679715 | 24.16373016 | 21.48583759 |
| ENSMUSG00000097354 | 33.25023701 | 44.5195036  | 35.30755239 | 75.71302118 | 51.56601022 |
| ENSMUSG00000097355 | 8.489422215 | 2.782468975 | 9.179963621 | 5.638203705 | 8.594335036 |
| ENSMUSG00000097356 | 19.10119998 | 27.12907251 | 18.35992724 | 17.72006879 | 15.04008631 |
| ENSMUSG00000097357 | 33.25023701 | 48.69320706 | 55.07978173 | 110.3477011 | 101.6996313 |
| ENSMUSG00000097358 | 9.904325918 | 13.21672763 | 7.767661525 | 3.221830688 | 3.580972932 |
| ENSMUSG00000097360 | 100.4581629 | 116.863697  | 119.3395271 | 102.2931244 | 85.94335036 |
| ENSMUSG00000097361 | 11.31922962 | 4.173703463 | 9.886114669 | 6.443661377 | 5.013362104 |
| ENSMUSG00000097362 | 10.61177777 | 9.738641413 | 8.473812573 | 6.443661377 | 5.729556691 |
| ENSMUSG00000097363 | 4.952162959 | 14.60796212 | 7.061510478 | 5.638203705 | 5.013362104 |
| ENSMUSG00000097364 | 11.31922962 | 6.956172438 | 5.649208382 | 6.443661377 | 10.02672421 |
| ENSMUSG00000097365 | 1.414903703 | 1.391234488 | 1.412302096 | 0.805457672 | 0.716194586 |
| ENSMUSG00000097366 | 12.02668147 | 11.1298759  | 14.12302096 | 7.249119049 | 7.87814045  |
| ENSMUSG00000097367 | 18.39374813 | 13.91234488 | 15.53532305 | 12.88732275 | 18.62105924 |
| ENSMUSG00000097368 | 24.76081479 | 22.2597518  | 19.77222934 | 24.16373016 | 17.90486466 |
| ENSMUSG00000097369 | 4.952162959 | 8.347406925 | 14.829172   | 6.443661377 | 8.594335036 |
| ENSMUSG00000097370 | 7.781970364 | 12.52111039 | 12.71071886 | 26.58010318 | 27.21539428 |
| ENSMUSG00000097371 | 7.074518513 | 7.651789682 | 9.179963621 | 8.054576721 | 8.594335036 |
| ENSMUSG00000097372 | 10.61177777 | 7.651789682 | 10.59226572 | 6.443661377 | 7.161945863 |
| ENSMUSG00000097373 | 75.69734809 | 121.7330177 | 101.6857509 | 75.71302118 | 81.64618284 |
| ENSMUSG00000097374 | 21.22355554 | 19.47728283 | 20.47838039 | 22.55281482 | 22.20203218 |
| ENSMUSG00000097375 | 0           | 0           | 0           | 0           | 0           |
| ENSMUSG00000097376 | 8.489422215 | 6.260555194 | 7.061510478 | 8.860034393 | 5.013362104 |
| ENSMUSG00000097377 | 96.21345177 | 133.5585108 | 110.1595635 | 110.3477011 | 97.40246374 |
| ENSMUSG00000097378 | 8.489422215 | 8.347406925 | 6.35535943  | 6.443661377 | 6.445751277 |
| ENSMUSG00000097379 | 10.61177777 | 11.82549314 | 7.767661525 | 7.249119049 | 12.17530797 |
| ENSMUSG00000097380 | 19.80865184 | 30.60715873 | 24.00913562 | 33.82922223 | 34.37734014 |
| ENSMUSG00000097381 | 13.44158517 | 5.56493795  | 5.649208382 | 11.27640741 | 10.7429188  |
| ENSMUSG00000097382 | 8.489422215 | 5.56493795  | 8.473812573 | 7.249119049 | 4.297167518 |
| ENSMUSG00000097383 | 82.7718666  | 106.4294383 | 108.7472614 | 82.15668255 | 67.32229112 |
| ENSMUSG00000097384 | 7.781970364 | 4.173703463 | 9.179963621 | 8.054576721 | 7.161945863 |
| ENSMUSG00000097385 | 12.02668147 | 4.869320706 | 9.179963621 | 5.638203705 | 4.297167518 |
| ENSMUSG00000097387 | 7.074518513 | 10.43425866 | 6.35535943  | 5.638203705 | 2.864778345 |
| ENSMUSG00000097388 | 14.85648888 | 17.39043109 | 16.94762515 | 14.4982381  | 12.17530797 |
| ENSMUSG00000097390 | 61.54831106 | 95.99517964 | 87.56272992 | 70.07481747 | 71.61945863 |
| ENSMUSG00000097391 | 2.122355554 | 0           | 1.412302096 | 0.805457672 | 1.432389173 |
| ENSMUSG00000097392 | 8.489422215 | 9.043024169 | 12.71071886 | 4.832746033 | 7.161945863 |
| ENSMUSG00000097393 | 11.31922962 | 5.56493795  | 9.886114669 | 4.02728836  | 4.297167518 |
| ENSMUSG00000097396 | 7.781970364 | 3.478086219 | 7.061510478 | 3.221830688 | 6.445751277 |
| ENSMUSG00000097397 | 24.05336294 | 24.34660353 | 29.65834401 | 43.49471429 | 47.2688427  |
| ENSMUSG00000097398 | 7.781970364 | 5.56493795  | 8.473812573 | 3.221830688 | 4.297167518 |

|                    |             |             |             |             |             |
|--------------------|-------------|-------------|-------------|-------------|-------------|
| ENSMUSG00000097399 | 8.489422215 | 12.52111039 | 9.179963621 | 5.638203705 | 8.594335036 |
| ENSMUSG00000097401 | 7.781970364 | 6.260555194 | 4.943057334 | 5.638203705 | 6.445751277 |
| ENSMUSG00000097402 | 7.074518513 | 14.60796212 | 15.53532305 | 8.860034393 | 11.45911338 |
| ENSMUSG00000097403 | 16.27139258 | 22.2597518  | 23.30298458 | 14.4982381  | 17.90486466 |
| ENSMUSG00000097404 | 26.88317035 | 42.43265187 | 31.77679715 | 27.38556085 | 39.39070225 |
| ENSMUSG00000097406 | 7.781970364 | 6.260555194 | 6.35535943  | 5.638203705 | 5.013362104 |
| ENSMUSG00000097408 | 7.781970364 | 5.56493795  | 7.061510478 | 4.02728836  | 6.445751277 |
| ENSMUSG00000097409 | 4.952162959 | 3.478086219 | 4.943057334 | 6.443661377 | 5.729556691 |
| ENSMUSG00000097410 | 9.904325918 | 16.69481385 | 13.41686991 | 12.88732275 | 19.33725383 |
| ENSMUSG00000097412 | 15.56394073 | 19.47728283 | 16.94762515 | 17.72006879 | 23.63442135 |
| ENSMUSG00000097413 | 10.61177777 | 11.82549314 | 8.473812573 | 8.054576721 | 7.87814045  |
| ENSMUSG00000097414 | 7.074518513 | 6.260555194 | 11.29841676 | 8.054576721 | 7.87814045  |
| ENSMUSG00000097415 | 62.25576291 | 92.51709342 | 76.26431316 | 236.8045556 | 164.7247549 |
| ENSMUSG00000097416 | 12.73413332 | 6.260555194 | 3.530755239 | 6.443661377 | 11.45911338 |
| ENSMUSG00000097417 | 54.47379255 | 71.64857611 | 54.37363068 | 119.2077355 | 94.5376854  |
| ENSMUSG00000097418 | 23.34591109 | 36.86771392 | 26.12758877 | 365.6777831 | 229.8984622 |
| ENSMUSG00000097419 | 13.44158517 | 9.738641413 | 12.00456781 | 31.41284921 | 28.64778345 |
| ENSMUSG00000097420 | 9.196874066 | 2.782468975 | 4.943057334 | 7.249119049 | 10.02672421 |
| ENSMUSG00000097422 | 15.56394073 | 8.347406925 | 9.179963621 | 9.665492065 | 7.161945863 |
| ENSMUSG00000097423 | 142.905274  | 159.9919661 | 156.7655326 | 149.815127  | 124.617858  |
| ENSMUSG00000097424 | 7.781970364 | 1.391234488 | 4.943057334 | 3.221830688 | 5.013362104 |
| ENSMUSG00000097426 | 0.707451851 | 2.782468975 | 1.412302096 | 0.805457672 | 2.864778345 |
| ENSMUSG00000097428 | 4.952162959 | 2.782468975 | 3.530755239 | 8.054576721 | 7.87814045  |
| ENSMUSG00000097429 | 13.44158517 | 18.78166558 | 26.12758877 | 34.6346799  | 28.64778345 |
| ENSMUSG00000097430 | 8.489422215 | 7.651789682 | 5.649208382 | 4.02728836  | 3.580972932 |
| ENSMUSG00000097431 | 19.80865184 | 45.21512085 | 34.60140134 | 33.82922223 | 25.78300511 |
| ENSMUSG00000097432 | 0           | 0           | 0.706151048 | 0           | 0.716194586 |
| ENSMUSG00000097433 | 8.489422215 | 4.869320706 | 7.061510478 | 5.638203705 | 7.87814045  |
| ENSMUSG00000097434 | 9.196874066 | 11.82549314 | 18.35992724 | 8.860034393 | 12.17530797 |
| ENSMUSG00000097435 | 5.65961481  | 4.869320706 | 4.943057334 | 4.832746033 | 6.445751277 |
| ENSMUSG00000097438 | 7.074518513 | 5.56493795  | 7.767661525 | 7.249119049 | 9.310529622 |
| ENSMUSG00000097439 | 9.904325918 | 11.82549314 | 12.00456781 | 8.054576721 | 9.310529622 |
| ENSMUSG00000097440 | 1.414903703 | 1.391234488 | 4.943057334 | 0           | 2.148583759 |
| ENSMUSG00000097441 | 5.65961481  | 3.478086219 | 9.886114669 | 8.860034393 | 4.297167518 |
| ENSMUSG00000097442 | 10.61177777 | 15.30357936 | 11.29841676 | 8.054576721 | 12.89150255 |
| ENSMUSG00000097443 | 4.952162959 | 6.956172438 | 8.473812573 | 8.054576721 | 9.310529622 |
| ENSMUSG00000097444 | 2.829807405 | 0.695617244 | 2.118453143 | 5.638203705 | 9.310529622 |
| ENSMUSG00000097445 | 12.02668147 | 27.12907251 | 23.30298458 | 53.96566403 | 51.56601022 |
| ENSMUSG00000097446 | 12.02668147 | 7.651789682 | 6.35535943  | 6.443661377 | 8.594335036 |
| ENSMUSG00000097447 | 9.904325918 | 6.956172438 | 12.00456781 | 7.249119049 | 5.013362104 |
| ENSMUSG00000097448 | 5.65961481  | 0.695617244 | 0.706151048 | 4.02728836  | 1.432389173 |
| ENSMUSG00000097450 | 9.904325918 | 7.651789682 | 14.12302096 | 3.221830688 | 7.87814045  |
| ENSMUSG00000097451 | 0           | 0           | 0           | 0           | 0           |

|                    |             |             |             |             |             |
|--------------------|-------------|-------------|-------------|-------------|-------------|
| ENSMUSG00000097452 | 7.781970364 | 9.738641413 | 5.649208382 | 4.02728836  | 5.729556691 |
| ENSMUSG00000097453 | 12.02668147 | 7.651789682 | 4.943057334 | 2.416373016 | 6.445751277 |
| ENSMUSG00000097454 | 15.56394073 | 27.82468975 | 26.83373982 | 18.52552646 | 19.33725383 |
| ENSMUSG00000097455 | 21.22355554 | 31.30277597 | 30.36449505 | 32.21830688 | 22.20203218 |
| ENSMUSG00000097456 | 8.489422215 | 6.956172438 | 7.061510478 | 5.638203705 | 2.864778345 |
| ENSMUSG00000097457 | 18.39374813 | 20.86851731 | 14.12302096 | 15.30369577 | 16.47247549 |
| ENSMUSG00000097458 | 7.074518513 | 7.651789682 | 7.061510478 | 4.832746033 | 10.02672421 |
| ENSMUSG00000097459 | 7.074518513 | 8.347406925 | 12.00456781 | 9.665492065 | 6.445751277 |
| ENSMUSG00000097460 | 24.05336294 | 51.47567604 | 38.13215658 | 53.16020636 | 59.44415067 |
| ENSMUSG00000097461 | 9.904325918 | 9.738641413 | 7.061510478 | 8.860034393 | 7.87814045  |
| ENSMUSG00000097462 | 4.952162959 | 5.56493795  | 4.236906287 | 5.638203705 | 5.013362104 |
| ENSMUSG00000097463 | 10.61177777 | 4.869320706 | 8.473812573 | 8.054576721 | 7.87814045  |
| ENSMUSG00000097464 | 8.489422215 | 6.956172438 | 7.061510478 | 4.02728836  | 3.580972932 |
| ENSMUSG00000097465 | 17.68629628 | 27.12907251 | 19.77222934 | 9.665492065 | 12.17530797 |
| ENSMUSG00000097466 | 8.489422215 | 10.43425866 | 6.35535943  | 4.02728836  | 7.87814045  |
| ENSMUSG00000097467 | 46.69182218 | 44.5195036  | 50.13672439 | 82.15668255 | 67.32229112 |
| ENSMUSG00000097468 | 2.122355554 | 5.56493795  | 5.649208382 | 4.02728836  | 5.729556691 |
| ENSMUSG00000097469 | 8.489422215 | 6.956172438 | 9.886114669 | 8.054576721 | 10.7429188  |
| ENSMUSG00000097470 | 9.196874066 | 12.52111039 | 7.061510478 | 8.860034393 | 4.297167518 |
| ENSMUSG00000097471 | 34.66514071 | 54.25814501 | 40.95676077 | 20.94189947 | 26.49919969 |
| ENSMUSG00000097472 | 123.804074  | 182.9473351 | 173.7131578 | 151.4260424 | 125.3340526 |
| ENSMUSG00000097473 | 4.952162959 | 7.651789682 | 7.767661525 | 8.054576721 | 13.60769714 |
| ENSMUSG00000097474 | 9.904325918 | 8.347406925 | 5.649208382 | 6.443661377 | 5.013362104 |
| ENSMUSG00000097476 | 8.489422215 | 8.347406925 | 4.943057334 | 7.249119049 | 7.87814045  |
| ENSMUSG00000097479 | 14.85648888 | 12.52111039 | 14.12302096 | 7.249119049 | 9.310529622 |
| ENSMUSG00000097480 | 7.074518513 | 5.56493795  | 2.118453143 | 1.610915344 | 7.161945863 |
| ENSMUSG00000097482 | 6.367066661 | 5.56493795  | 7.767661525 | 4.832746033 | 3.580972932 |
| ENSMUSG00000097483 | 8.489422215 | 8.347406925 | 4.943057334 | 3.221830688 | 10.02672421 |
| ENSMUSG00000097484 | 10.61177777 | 9.738641413 | 7.061510478 | 6.443661377 | 5.729556691 |
| ENSMUSG00000097486 | 7.074518513 | 6.956172438 | 4.236906287 | 7.249119049 | 8.594335036 |
| ENSMUSG00000097488 | 1.414903703 | 4.869320706 | 6.35535943  | 5.638203705 | 6.445751277 |
| ENSMUSG00000097489 | 46.69182218 | 82.08283477 | 69.90895373 | 62.02024075 | 45.12025894 |
| ENSMUSG00000097491 | 9.196874066 | 3.478086219 | 2.824604191 | 1.610915344 | 7.161945863 |
| ENSMUSG00000097493 | 21.22355554 | 39.6501829  | 35.30755239 | 28.9964762  | 24.35061594 |
| ENSMUSG00000097494 | 36.78749627 | 62.60555194 | 55.07978173 | 95.84946298 | 77.34901533 |
| ENSMUSG00000097495 | 9.904325918 | 7.651789682 | 10.59226572 | 3.221830688 | 7.87814045  |
| ENSMUSG00000097496 | 8.489422215 | 8.347406925 | 5.649208382 | 11.27640741 | 4.297167518 |
| ENSMUSG00000097497 | 4.244711108 | 4.173703463 | 0.706151048 | 3.221830688 | 0.716194586 |
| ENSMUSG00000097500 | 7.781970364 | 8.347406925 | 7.061510478 | 4.02728836  | 8.594335036 |
| ENSMUSG00000097501 | 29.0055259  | 59.12746572 | 48.01827125 | 58.79841006 | 65.88990194 |
| ENSMUSG00000097502 | 5.65961481  | 7.651789682 | 10.59226572 | 6.443661377 | 13.60769714 |
| ENSMUSG00000097503 | 4.952162959 | 13.91234488 | 10.59226572 | 28.19101852 | 22.20203218 |
| ENSMUSG00000097504 | 11.31922962 | 13.21672763 | 18.35992724 | 32.21830688 | 32.22875639 |

|                    |             |             |             |             |             |
|--------------------|-------------|-------------|-------------|-------------|-------------|
| ENSMUSG00000097505 | 15.56394073 | 20.86851731 | 16.94762515 | 13.69278043 | 11.45911338 |
| ENSMUSG00000097507 | 24.05336294 | 30.60715873 | 34.60140134 | 26.58010318 | 22.20203218 |
| ENSMUSG00000097509 | 13.44158517 | 24.34660353 | 12.71071886 | 34.6346799  | 26.49919969 |
| ENSMUSG00000097511 | 18.39374813 | 25.73783802 | 17.65377619 | 13.69278043 | 15.04008631 |
| ENSMUSG00000097513 | 7.781970364 | 7.651789682 | 12.71071886 | 7.249119049 | 8.594335036 |
| ENSMUSG00000097514 | 6.367066661 | 4.173703463 | 6.35535943  | 11.27640741 | 5.729556691 |
| ENSMUSG00000097515 | 6.367066661 | 7.651789682 | 7.061510478 | 4.02728836  | 4.297167518 |
| ENSMUSG00000097516 | 9.196874066 | 12.52111039 | 6.35535943  | 7.249119049 | 7.161945863 |
| ENSMUSG00000097517 | 14.85648888 | 17.39043109 | 14.829172   | 12.08186508 | 17.90486466 |
| ENSMUSG00000097518 | 26.1757185  | 25.73783802 | 29.65834401 | 13.69278043 | 20.769643   |
| ENSMUSG00000097519 | 26.1757185  | 41.73703463 | 36.71985448 | 28.19101852 | 26.49919969 |
| ENSMUSG00000097520 | 9.904325918 | 7.651789682 | 6.35535943  | 3.221830688 | 7.161945863 |
| ENSMUSG00000097522 | 9.196874066 | 8.347406925 | 7.061510478 | 4.832746033 | 5.013362104 |
| ENSMUSG00000097523 | 33.25023701 | 59.82308296 | 52.25517753 | 53.96566403 | 64.45751277 |
| ENSMUSG00000097524 | 8.489422215 | 6.260555194 | 3.530755239 | 7.249119049 | 7.161945863 |
| ENSMUSG00000097525 | 43.86201478 | 59.82308296 | 69.20280268 | 90.21125927 | 78.06520991 |
| ENSMUSG00000097526 | 28.29807405 | 25.04222078 | 31.0706461  | 57.99295239 | 52.2822048  |
| ENSMUSG00000097527 | 10.61177777 | 26.43345526 | 16.2414741  | 17.72006879 | 14.32389173 |
| ENSMUSG00000097529 | 10.61177777 | 5.56493795  | 7.767661525 | 5.638203705 | 4.297167518 |
| ENSMUSG00000097530 | 16.97884443 | 20.17290007 | 24.00913562 | 33.02376456 | 25.06681052 |
| ENSMUSG00000097531 | 14.85648888 | 22.95536904 | 11.29841676 | 55.57657937 | 41.53928601 |
| ENSMUSG00000097532 | 16.27139258 | 16.69481385 | 22.59683353 | 29.80193387 | 30.08017263 |
| ENSMUSG00000097533 | 79.94205919 | 104.3425866 | 93.21193831 | 163.5079074 | 139.6579443 |
| ENSMUSG00000097534 | 207.9908443 | 217.0325801 | 219.6129759 | 378.5651059 | 282.8968616 |
| ENSMUSG00000097535 | 9.196874066 | 3.478086219 | 7.767661525 | 6.443661377 | 7.161945863 |
| ENSMUSG00000097536 | 103.9954221 | 166.2525213 | 126.4010376 | 194.115299  | 171.1705061 |
| ENSMUSG00000097537 | 65.79302217 | 88.34338996 | 86.15042783 | 227.1390635 | 174.0352845 |
| ENSMUSG00000097538 | 0           | 0           | 0           | 0           | 0.716194586 |
| ENSMUSG00000097539 | 5.65961481  | 6.956172438 | 8.473812573 | 6.443661377 | 4.297167518 |
| ENSMUSG00000097540 | 7.781970364 | 9.043024169 | 6.35535943  | 4.832746033 | 7.87814045  |
| ENSMUSG00000097541 | 12.73413332 | 4.173703463 | 9.886114669 | 4.832746033 | 5.729556691 |
| ENSMUSG00000097542 | 4.952162959 | 8.347406925 | 6.35535943  | 5.638203705 | 5.729556691 |
| ENSMUSG00000097543 | 9.196874066 | 5.56493795  | 2.118453143 | 5.638203705 | 11.45911338 |
| ENSMUSG00000097544 | 11.31922962 | 11.82549314 | 14.12302096 | 8.054576721 | 7.87814045  |
| ENSMUSG00000097545 | 4.952162959 | 6.260555194 | 5.649208382 | 4.02728836  | 3.580972932 |
| ENSMUSG00000097546 | 21.93100739 | 27.82468975 | 10.59226572 | 19.33098413 | 15.7562809  |
| ENSMUSG00000097547 | 9.904325918 | 3.478086219 | 4.943057334 | 5.638203705 | 10.02672421 |
| ENSMUSG00000097548 | 4.244711108 | 3.478086219 | 6.35535943  | 9.665492065 | 10.02672421 |
| ENSMUSG00000097551 | 11.31922962 | 9.043024169 | 9.886114669 | 5.638203705 | 7.87814045  |
| ENSMUSG00000097552 | 10.61177777 | 7.651789682 | 7.061510478 | 6.443661377 | 8.594335036 |
| ENSMUSG00000097553 | 26.88317035 | 59.82308296 | 48.7244223  | 122.4295662 | 76.63282074 |
| ENSMUSG00000097554 | 24.76081479 | 26.43345526 | 23.30298458 | 68.46390213 | 48.70123187 |
| ENSMUSG00000097557 | 16.97884443 | 30.60715873 | 19.77222934 | 26.58010318 | 21.48583759 |

|                    |             |             |             |             |             |
|--------------------|-------------|-------------|-------------|-------------|-------------|
| ENSMUSG00000097558 | 8.489422215 | 7.651789682 | 7.767661525 | 4.832746033 | 7.87814045  |
| ENSMUSG00000097559 | 19.80865184 | 18.08604834 | 21.18453143 | 21.74735715 | 21.48583759 |
| ENSMUSG00000097560 | 9.196874066 | 4.173703463 | 9.179963621 | 8.860034393 | 5.729556691 |
| ENSMUSG00000097561 | 7.781970364 | 4.869320706 | 9.179963621 | 6.443661377 | 7.161945863 |
| ENSMUSG00000097562 | 10.61177777 | 11.82549314 | 7.061510478 | 4.02728836  | 2.864778345 |
| ENSMUSG00000097563 | 12.02668147 | 6.260555194 | 6.35535943  | 2.416373016 | 6.445751277 |
| ENSMUSG00000097564 | 53.7663407  | 88.34338996 | 75.55816211 | 78.12939419 | 78.7814045  |
| ENSMUSG00000097566 | 5.65961481  | 5.56493795  | 9.886114669 | 8.860034393 | 5.013362104 |
| ENSMUSG00000097567 | 30.4204296  | 37.56333116 | 36.01370344 | 153.8424154 | 98.11865833 |
| ENSMUSG00000097569 | 13.44158517 | 11.82549314 | 12.00456781 | 8.860034393 | 11.45911338 |
| ENSMUSG00000097571 | 0           | 0           | 0           | 0           | 0           |
| ENSMUSG00000097572 | 8.489422215 | 7.651789682 | 3.530755239 | 8.054576721 | 5.729556691 |
| ENSMUSG00000097573 | 6.367066661 | 11.1298759  | 6.35535943  | 6.443661377 | 8.594335036 |
| ENSMUSG00000097574 | 3.537259256 | 11.1298759  | 5.649208382 | 8.860034393 | 7.87814045  |
| ENSMUSG00000097575 | 7.781970364 | 5.56493795  | 6.35535943  | 4.02728836  | 7.161945863 |
| ENSMUSG00000097576 | 29.71297775 | 34.78086219 | 36.71985448 | 45.91108731 | 49.41742646 |
| ENSMUSG00000097577 | 98.33580733 | 155.1226454 | 134.1686991 | 230.3608942 | 180.4810358 |
| ENSMUSG00000097578 | 48.81417774 | 63.30116918 | 67.08434954 | 54.7711217  | 50.84981563 |
| ENSMUSG00000097579 | 31.83533331 | 36.17209668 | 37.42600553 | 67.65844446 | 68.0384857  |
| ENSMUSG00000097580 | 25.46826665 | 39.6501829  | 38.13215658 | 20.1364418  | 16.47247549 |
| ENSMUSG00000097582 | 12.73413332 | 4.173703463 | 3.530755239 | 6.443661377 | 5.729556691 |
| ENSMUSG00000097583 | 26.1757185  | 57.73623123 | 37.42600553 | 39.46742593 | 34.37734014 |
| ENSMUSG00000097584 | 39.61730367 | 25.73783802 | 28.24604191 | 99.87675134 | 60.87653984 |
| ENSMUSG00000097585 | 60.13340736 | 90.43024169 | 67.79050059 | 188.4770953 | 141.8065281 |
| ENSMUSG00000097586 | 108.9475851 | 162.0788178 | 139.1117564 | 63.6311561  | 82.36237743 |
| ENSMUSG00000097587 | 9.904325918 | 6.260555194 | 9.179963621 | 10.47094974 | 5.013362104 |
| ENSMUSG00000097588 | 9.196874066 | 15.99919661 | 8.473812573 | 9.665492065 | 10.7429188  |
| ENSMUSG00000097589 | 31.12788146 | 50.08444155 | 33.89525029 | 40.2728836  | 24.35061594 |
| ENSMUSG00000097590 | 29.71297775 | 54.25814501 | 45.8998181  | 33.82922223 | 41.53928601 |
| ENSMUSG00000097591 | 4.244711108 | 4.869320706 | 12.00456781 | 19.33098413 | 14.32389173 |
| ENSMUSG00000097592 | 24.76081479 | 34.08524495 | 38.13215658 | 41.07834128 | 39.39070225 |
| ENSMUSG00000097593 | 9.904325918 | 4.173703463 | 7.767661525 | 5.638203705 | 6.445751277 |
| ENSMUSG00000097594 | 6.367066661 | 7.651789682 | 8.473812573 | 5.638203705 | 6.445751277 |
| ENSMUSG00000097595 | 59.42595551 | 95.99517964 | 83.32582364 | 120.0131931 | 91.67290705 |
| ENSMUSG00000097596 | 8.489422215 | 6.260555194 | 8.473812573 | 5.638203705 | 7.161945863 |
| ENSMUSG00000097597 | 7.781970364 | 9.738641413 | 12.71071886 | 5.638203705 | 3.580972932 |
| ENSMUSG00000097598 | 14.14903703 | 8.347406925 | 10.59226572 | 1.610915344 | 5.013362104 |
| ENSMUSG00000097599 | 6.367066661 | 4.173703463 | 4.943057334 | 4.02728836  | 11.45911338 |
| ENSMUSG00000097601 | 8.489422215 | 12.52111039 | 7.767661525 | 4.02728836  | 7.87814045  |
| ENSMUSG00000097602 | 14.85648888 | 14.60796212 | 10.59226572 | 12.08186508 | 13.60769714 |
| ENSMUSG00000097603 | 9.196874066 | 7.651789682 | 5.649208382 | 12.88732275 | 8.594335036 |
| ENSMUSG00000097604 | 4.952162959 | 15.30357936 | 10.59226572 | 16.91461111 | 9.310529622 |
| ENSMUSG00000097605 | 11.31922962 | 15.99919661 | 7.767661525 | 10.47094974 | 12.17530797 |

|                    |             |             |             |             |             |
|--------------------|-------------|-------------|-------------|-------------|-------------|
| ENSMUSG00000097608 | 7.074518513 | 9.043024169 | 12.00456781 | 2.416373016 | 4.297167518 |
| ENSMUSG00000097609 | 9.904325918 | 8.347406925 | 9.179963621 | 4.832746033 | 7.161945863 |
| ENSMUSG00000097610 | 7.781970364 | 9.738641413 | 5.649208382 | 4.832746033 | 6.445751277 |
| ENSMUSG00000097612 | 3.537259256 | 9.738641413 | 11.29841676 | 12.88732275 | 7.87814045  |
| ENSMUSG00000097613 | 9.904325918 | 6.956172438 | 10.59226572 | 8.054576721 | 7.87814045  |
| ENSMUSG00000097614 | 9.904325918 | 18.78166558 | 16.2414741  | 21.74735715 | 22.91822676 |
| ENSMUSG00000097615 | 4.952162959 | 4.173703463 | 7.767661525 | 5.638203705 | 5.729556691 |
| ENSMUSG00000097616 | 9.196874066 | 29.21592424 | 20.47838039 | 20.94189947 | 20.769643   |
| ENSMUSG00000097617 | 8.489422215 | 6.260555194 | 2.824604191 | 10.47094974 | 6.445751277 |
| ENSMUSG00000097618 | 6.367066661 | 8.347406925 | 8.473812573 | 4.02728836  | 7.161945863 |
| ENSMUSG00000097619 | 8.489422215 | 13.91234488 | 9.179963621 | 7.249119049 | 8.594335036 |
| ENSMUSG00000097620 | 31.12788146 | 42.43265187 | 33.89525029 | 68.46390213 | 57.29556691 |
| ENSMUSG00000097621 | 9.196874066 | 5.56493795  | 8.473812573 | 5.638203705 | 6.445751277 |
| ENSMUSG00000097622 | 7.781970364 | 7.651789682 | 9.179963621 | 3.221830688 | 5.013362104 |
| ENSMUSG00000097623 | 5.65961481  | 5.56493795  | 8.473812573 | 4.832746033 | 3.580972932 |
| ENSMUSG00000097624 | 12.02668147 | 6.956172438 | 4.236906287 | 6.443661377 | 5.013362104 |
| ENSMUSG00000097625 | 4.952162959 | 5.56493795  | 2.824604191 | 8.860034393 | 8.594335036 |
| ENSMUSG00000097626 | 9.196874066 | 5.56493795  | 5.649208382 | 3.221830688 | 3.580972932 |
| ENSMUSG00000097627 | 7.781970364 | 11.1298759  | 5.649208382 | 4.02728836  | 2.864778345 |
| ENSMUSG00000097628 | 9.904325918 | 6.260555194 | 4.236906287 | 4.02728836  | 7.87814045  |
| ENSMUSG00000097630 | 12.73413332 | 6.956172438 | 7.767661525 | 6.443661377 | 6.445751277 |
| ENSMUSG00000097631 | 29.0055259  | 54.25814501 | 44.48751601 | 64.43661377 | 55.86317773 |
| ENSMUSG00000097632 | 4.244711108 | 4.869320706 | 4.943057334 | 4.02728836  | 7.161945863 |
| ENSMUSG00000097633 | 9.904325918 | 8.347406925 | 9.179963621 | 4.832746033 | 3.580972932 |
| ENSMUSG00000097634 | 55.88869625 | 82.08283477 | 64.96589639 | 30.60739154 | 49.41742646 |
| ENSMUSG00000097635 | 56.5961481  | 86.25653823 | 72.73355792 | 69.2693598  | 86.65954495 |
| ENSMUSG00000097636 | 38.20239997 | 60.51870021 | 52.96132858 | 26.58010318 | 25.78300511 |
| ENSMUSG00000097637 | 12.02668147 | 23.65098629 | 17.65377619 | 12.88732275 | 16.47247549 |
| ENSMUSG00000097638 | 4.952162959 | 9.043024169 | 8.473812573 | 3.221830688 | 5.013362104 |
| ENSMUSG00000097639 | 2.829807405 | 5.56493795  | 7.767661525 | 3.221830688 | 5.013362104 |
| ENSMUSG00000097640 | 118.1444592 | 157.2094971 | 156.7655326 | 110.3477011 | 111.0101609 |
| ENSMUSG00000097641 | 69.33028142 | 90.43024169 | 98.86114669 | 168.3406535 | 132.4959985 |
| ENSMUSG00000097642 | 7.074518513 | 8.347406925 | 6.35535943  | 3.221830688 | 7.161945863 |
| ENSMUSG00000097644 | 9.904325918 | 5.56493795  | 8.473812573 | 6.443661377 | 4.297167518 |
| ENSMUSG00000097645 | 11.31922962 | 8.347406925 | 9.179963621 | 11.27640741 | 7.87814045  |
| ENSMUSG00000097646 | 9.196874066 | 6.260555194 | 12.00456781 | 5.638203705 | 7.87814045  |
| ENSMUSG00000097648 | 12.02668147 | 8.347406925 | 7.061510478 | 5.638203705 | 2.864778345 |
| ENSMUSG00000097649 | 21.93100739 | 25.04222078 | 28.24604191 | 9.665492065 | 14.32389173 |
| ENSMUSG00000097650 | 5.65961481  | 10.43425866 | 12.00456781 | 4.832746033 | 7.161945863 |
| ENSMUSG00000097651 | 9.196874066 | 4.173703463 | 4.943057334 | 8.054576721 | 5.729556691 |
| ENSMUSG00000097652 | 6.367066661 | 5.56493795  | 8.473812573 | 7.249119049 | 7.87814045  |
| ENSMUSG00000097653 | 11.31922962 | 13.21672763 | 9.179963621 | 4.832746033 | 7.161945863 |
| ENSMUSG00000097654 | 6.367066661 | 3.478086219 | 10.59226572 | 8.054576721 | 7.161945863 |



|                    |             |             |             |             |             |
|--------------------|-------------|-------------|-------------|-------------|-------------|
| ENSMUSG00000097655 | 9.904325918 | 6.260555194 | 2.824604191 | 4.832746033 | 10.7429188  |
| ENSMUSG00000097656 | 8.489422215 | 11.82549314 | 10.59226572 | 10.47094974 | 12.17530797 |
| ENSMUSG00000097657 | 9.904325918 | 13.91234488 | 8.473812573 | 3.221830688 | 10.02672421 |
| ENSMUSG00000097658 | 17.68629628 | 20.17290007 | 21.89068248 | 75.71302118 | 45.12025894 |
| ENSMUSG00000097659 | 9.196874066 | 11.1298759  | 9.179963621 | 12.08186508 | 6.445751277 |
| ENSMUSG00000097660 | 41.03220737 | 65.38802092 | 56.49208382 | 95.84946298 | 80.21379367 |
| ENSMUSG00000097661 | 19.10119998 | 18.08604834 | 21.89068248 | 16.91461111 | 10.7429188  |
| ENSMUSG00000097662 | 26.1757185  | 51.47567604 | 46.60596915 | 57.99295239 | 52.2822048  |
| ENSMUSG00000097664 | 10.61177777 | 25.73783802 | 20.47838039 | 35.44013757 | 32.22875639 |
| ENSMUSG00000097665 | 11.31922962 | 33.3896277  | 34.60140134 | 50.74383334 | 32.22875639 |
| ENSMUSG00000097666 | 10.61177777 | 7.651789682 | 8.473812573 | 3.221830688 | 10.02672421 |
| ENSMUSG00000097667 | 9.196874066 | 16.69481385 | 24.71528667 | 11.27640741 | 15.7562809  |
| ENSMUSG00000097668 | 3.537259256 | 5.56493795  | 5.649208382 | 7.249119049 | 5.013362104 |
| ENSMUSG00000097669 | 0.707451851 | 0           | 0.706151048 | 0.805457672 | 0.716194586 |
| ENSMUSG00000097670 | 9.904325918 | 9.043024169 | 13.41686991 | 4.832746033 | 8.594335036 |
| ENSMUSG00000097671 | 13.44158517 | 14.60796212 | 15.53532305 | 15.30369577 | 12.17530797 |
| ENSMUSG00000097672 | 136.5382073 | 186.4254213 | 180.7746682 | 261.7737434 | 198.3859004 |
| ENSMUSG00000097673 | 16.97884443 | 25.04222078 | 29.65834401 | 134.5114312 | 102.4158258 |
| ENSMUSG00000097674 | 43.15456293 | 55.6493795  | 52.96132858 | 64.43661377 | 52.2822048  |
| ENSMUSG00000097675 | 10.61177777 | 20.86851731 | 15.53532305 | 22.55281482 | 15.04008631 |
| ENSMUSG00000097676 | 9.904325918 | 7.651789682 | 3.530755239 | 9.665492065 | 7.161945863 |
| ENSMUSG00000097677 | 2.122355554 | 4.173703463 | 4.236906287 | 2.416373016 | 3.580972932 |
| ENSMUSG00000097679 | 9.904325918 | 8.347406925 | 5.649208382 | 7.249119049 | 5.013362104 |
| ENSMUSG00000097680 | 9.196874066 | 12.52111039 | 9.886114669 | 4.832746033 | 8.594335036 |
| ENSMUSG00000097681 | 12.02668147 | 27.12907251 | 23.30298458 | 57.99295239 | 47.2688427  |
| ENSMUSG00000097682 | 9.196874066 | 12.52111039 | 7.061510478 | 4.832746033 | 6.445751277 |
| ENSMUSG00000097683 | 12.73413332 | 8.347406925 | 8.473812573 | 4.832746033 | 7.87814045  |
| ENSMUSG00000097684 | 4.244711108 | 2.086851731 | 2.118453143 | 0.805457672 | 2.864778345 |
| ENSMUSG00000097685 | 53.7663407  | 55.6493795  | 67.08434954 | 53.96566403 | 45.83645353 |
| ENSMUSG00000097686 | 9.904325918 | 15.30357936 | 12.00456781 | 8.860034393 | 10.7429188  |
| ENSMUSG00000097689 | 5.65961481  | 9.043024169 | 12.71071886 | 8.860034393 | 2.864778345 |
| ENSMUSG00000097690 | 20.51610369 | 46.60635533 | 37.42600553 | 25.77464551 | 48.70123187 |
| ENSMUSG00000097691 | 11.31922962 | 6.260555194 | 3.530755239 | 6.443661377 | 6.445751277 |
| ENSMUSG00000097692 | 39.61730367 | 70.25734162 | 51.54902649 | 59.60386773 | 64.45751277 |
| ENSMUSG00000097693 | 7.074518513 | 7.651789682 | 7.767661525 | 8.054576721 | 5.729556691 |
| ENSMUSG00000097694 | 5.65961481  | 10.43425866 | 8.473812573 | 2.416373016 | 4.297167518 |
| ENSMUSG00000097695 | 14.14903703 | 4.869320706 | 7.767661525 | 4.02728836  | 10.7429188  |
| ENSMUSG00000097697 | 12.02668147 | 7.651789682 | 7.767661525 | 9.665492065 | 5.729556691 |
| ENSMUSG00000097698 | 6.367066661 | 5.56493795  | 7.767661525 | 6.443661377 | 5.013362104 |
| ENSMUSG00000097699 | 36.08004441 | 61.21431745 | 44.48751601 | 45.10562964 | 51.56601022 |
| ENSMUSG00000097700 | 9.904325918 | 11.82549314 | 6.35535943  | 37.05105292 | 40.10689684 |
| ENSMUSG00000097701 | 9.904325918 | 6.956172438 | 4.943057334 | 4.832746033 | 2.148583759 |
| ENSMUSG00000097702 | 3.537259256 | 9.738641413 | 8.473812573 | 5.638203705 | 7.87814045  |

|                    |             |             |             |             |             |
|--------------------|-------------|-------------|-------------|-------------|-------------|
| ENSMUSG00000097703 | 12.02668147 | 10.43425866 | 8.473812573 | 12.08186508 | 10.02672421 |
| ENSMUSG00000097704 | 30.4204296  | 60.51870021 | 59.31668801 | 38.66196826 | 37.24211849 |
| ENSMUSG00000097705 | 109.6550369 | 125.9067211 | 109.4534124 | 74.10210583 | 65.17370736 |
| ENSMUSG00000097707 | 157.054311  | 207.9895559 | 177.243913  | 241.6373016 | 179.0486466 |
| ENSMUSG00000097709 | 11.31922962 | 8.347406925 | 10.59226572 | 10.47094974 | 7.161945863 |
| ENSMUSG00000097710 | 7.074518513 | 4.869320706 | 4.236906287 | 4.832746033 | 7.161945863 |
| ENSMUSG00000097711 | 9.196874066 | 5.56493795  | 11.29841676 | 4.02728836  | 7.87814045  |
| ENSMUSG00000097712 | 4.952162959 | 6.260555194 | 10.59226572 | 9.665492065 | 6.445751277 |
| ENSMUSG00000097713 | 14.14903703 | 12.52111039 | 3.530755239 | 4.02728836  | 8.594335036 |
| ENSMUSG00000097714 | 14.14903703 | 23.65098629 | 20.47838039 | 20.1364418  | 25.78300511 |
| ENSMUSG00000097715 | 31.12788146 | 67.47487265 | 60.72899011 | 28.9964762  | 27.21539428 |
| ENSMUSG00000097716 | 7.074518513 | 9.043024169 | 7.061510478 | 4.02728836  | 9.310529622 |
| ENSMUSG00000097717 | 8.489422215 | 8.347406925 | 8.473812573 | 5.638203705 | 8.594335036 |
| ENSMUSG00000097718 | 4.244711108 | 12.52111039 | 8.473812573 | 8.054576721 | 10.7429188  |
| ENSMUSG00000097719 | 10.61177777 | 8.347406925 | 9.886114669 | 4.832746033 | 6.445751277 |
| ENSMUSG00000097720 | 11.31922962 | 11.1298759  | 14.829172   | 11.27640741 | 7.87814045  |
| ENSMUSG00000097722 | 23.34591109 | 32.69401046 | 31.0706461  | 33.82922223 | 39.39070225 |
| ENSMUSG00000097723 | 36.08004441 | 41.04141738 | 43.78136496 | 33.02376456 | 44.40406435 |
| ENSMUSG00000097724 | 25.46826665 | 54.25814501 | 48.01827125 | 83.7675979  | 75.20043157 |
| ENSMUSG00000097725 | 9.904325918 | 4.869320706 | 7.767661525 | 8.054576721 | 7.87814045  |
| ENSMUSG00000097726 | 11.31922962 | 4.869320706 | 6.35535943  | 4.02728836  | 6.445751277 |
| ENSMUSG00000097727 | 7.781970364 | 8.347406925 | 7.767661525 | 10.47094974 | 8.594335036 |
| ENSMUSG00000097728 | 11.31922962 | 8.347406925 | 4.943057334 | 9.665492065 | 7.161945863 |
| ENSMUSG00000097729 | 43.86201478 | 71.64857611 | 69.20280268 | 60.40932541 | 47.2688427  |
| ENSMUSG00000097730 | 4.952162959 | 4.173703463 | 6.35535943  | 7.249119049 | 9.310529622 |
| ENSMUSG00000097731 | 69.33028142 | 75.82227957 | 79.08891735 | 155.4533307 | 136.0769714 |
| ENSMUSG00000097732 | 0           | 1.391234488 | 0           | 0.805457672 | 0           |
| ENSMUSG00000097734 | 5.65961481  | 4.173703463 | 4.236906287 | 7.249119049 | 3.580972932 |
| ENSMUSG00000097735 | 9.904325918 | 6.260555194 | 7.767661525 | 6.443661377 | 7.87814045  |
| ENSMUSG00000097736 | 5.65961481  | 6.260555194 | 6.35535943  | 6.443661377 | 5.729556691 |
| ENSMUSG00000097737 | 13.44158517 | 11.82549314 | 15.53532305 | 11.27640741 | 14.32389173 |
| ENSMUSG00000097738 | 6.367066661 | 5.56493795  | 5.649208382 | 5.638203705 | 5.013362104 |
| ENSMUSG00000097739 | 10.61177777 | 7.651789682 | 5.649208382 | 6.443661377 | 8.594335036 |
| ENSMUSG00000097740 | 8.489422215 | 3.478086219 | 7.767661525 | 6.443661377 | 6.445751277 |
| ENSMUSG00000097742 | 6.367066661 | 13.21672763 | 9.886114669 | 6.443661377 | 5.013362104 |
| ENSMUSG00000097743 | 16.97884443 | 24.34660353 | 22.59683353 | 24.96918783 | 27.93158887 |
| ENSMUSG00000097744 | 33.95768886 | 54.95376226 | 41.66291182 | 125.6513968 | 83.7947666  |
| ENSMUSG00000097745 | 5.65961481  | 4.869320706 | 9.886114669 | 5.638203705 | 10.02672421 |
| ENSMUSG00000097746 | 14.14903703 | 26.43345526 | 17.65377619 | 25.77464551 | 28.64778345 |
| ENSMUSG00000097747 | 98.33580733 | 124.5154866 | 113.6903187 | 196.531672  | 144.6713064 |
| ENSMUSG00000097748 | 57.30359995 | 79.99598303 | 69.20280268 | 139.3441773 | 114.5911338 |
| ENSMUSG00000097749 | 13.44158517 | 24.34660353 | 19.77222934 | 10.47094974 | 14.32389173 |
| ENSMUSG00000097750 | 14.85648888 | 22.2597518  | 15.53532305 | 16.91461111 | 15.04008631 |

|                    |             |             |             |             |             |
|--------------------|-------------|-------------|-------------|-------------|-------------|
| ENSMUSG00000097751 | 33.25023701 | 45.91073809 | 47.3121202  | 60.40932541 | 51.56601022 |
| ENSMUSG00000097752 | 10.61177777 | 6.260555194 | 8.473812573 | 4.02728836  | 5.729556691 |
| ENSMUSG00000097753 | 4.244711108 | 4.869320706 | 2.824604191 | 8.054576721 | 3.580972932 |
| ENSMUSG00000097754 | 7.781970364 | 11.1298759  | 6.35535943  | 5.638203705 | 5.729556691 |
| ENSMUSG00000097755 | 23.34591109 | 27.82468975 | 25.42143772 | 35.44013757 | 30.79636721 |
| ENSMUSG00000097756 | 5.65961481  | 9.043024169 | 4.236906287 | 4.02728836  | 7.161945863 |
| ENSMUSG00000097757 | 20.51610369 | 22.95536904 | 36.71985448 | 35.44013757 | 36.5259239  |
| ENSMUSG00000097758 | 0           | 0           | 0           | 0           | 0           |
| ENSMUSG00000097759 | 26.1757185  | 60.51870021 | 40.95676077 | 66.85298678 | 63.74131818 |
| ENSMUSG00000097760 | 93.38364437 | 165.556904  | 142.6425116 | 154.647873  | 108.1453825 |
| ENSMUSG00000097761 | 7.781970364 | 8.347406925 | 5.649208382 | 4.02728836  | 7.161945863 |
| ENSMUSG00000097762 | 4.244711108 | 5.56493795  | 10.59226572 | 5.638203705 | 4.297167518 |
| ENSMUSG00000097763 | 12.02668147 | 20.17290007 | 24.00913562 | 16.91461111 | 17.90486466 |
| ENSMUSG00000097764 | 8.489422215 | 6.956172438 | 15.53532305 | 12.88732275 | 8.594335036 |
| ENSMUSG00000097766 | 6.367066661 | 4.173703463 | 4.236906287 | 19.33098413 | 14.32389173 |
| ENSMUSG00000097767 | 3.537259256 | 1.391234488 | 2.118453143 | 0.805457672 | 0.716194586 |
| ENSMUSG00000097768 | 9.904325918 | 11.82549314 | 9.886114669 | 4.832746033 | 7.87814045  |
| ENSMUSG00000097769 | 0           | 0.695617244 | 0           | 0           | 0           |
| ENSMUSG00000097770 | 9.196874066 | 6.956172438 | 6.35535943  | 5.638203705 | 8.594335036 |
| ENSMUSG00000097772 | 60.84085921 | 98.08203137 | 81.20737049 | 259.3573704 | 209.8450138 |
| ENSMUSG00000097773 | 11.31922962 | 14.60796212 | 13.41686991 | 29.80193387 | 20.05344842 |
| ENSMUSG00000097774 | 3.537259256 | 13.21672763 | 9.179963621 | 9.665492065 | 6.445751277 |
| ENSMUSG00000097775 | 19.80865184 | 31.99839321 | 36.01370344 | 98.265836   | 78.7814045  |
| ENSMUSG00000097776 | 3.537259256 | 3.478086219 | 7.061510478 | 8.054576721 | 8.594335036 |
| ENSMUSG00000097777 | 106.8252295 | 146.7752384 | 139.8179075 | 104.7094974 | 97.40246374 |
| ENSMUSG00000097779 | 49.52162959 | 68.17048989 | 64.96589639 | 25.77464551 | 35.09353473 |
| ENSMUSG00000097780 | 9.196874066 | 7.651789682 | 21.18453143 | 7.249119049 | 5.013362104 |
| ENSMUSG00000097781 | 14.14903703 | 51.47567604 | 40.95676077 | 83.7675979  | 75.91662615 |
| ENSMUSG00000097783 | 11.31922962 | 6.956172438 | 4.943057334 | 8.054576721 | 8.594335036 |
| ENSMUSG00000097784 | 36.78749627 | 56.34499675 | 57.90438592 | 106.3204127 | 116.023523  |
| ENSMUSG00000097785 | 87.72402956 | 133.5585108 | 124.9887355 | 128.0677699 | 129.6312201 |
| ENSMUSG00000097786 | 67.20792587 | 150.9489419 | 110.1595635 | 121.6241085 | 133.9283876 |
| ENSMUSG00000097787 | 7.781970364 | 11.82549314 | 9.886114669 | 7.249119049 | 9.310529622 |
| ENSMUSG00000097788 | 4.952162959 | 9.738641413 | 7.061510478 | 4.832746033 | 7.161945863 |
| ENSMUSG00000097789 | 7.074518513 | 5.56493795  | 6.35535943  | 4.02728836  | 3.580972932 |
| ENSMUSG00000097790 | 8.489422215 | 5.56493795  | 9.179963621 | 5.638203705 | 6.445751277 |
| ENSMUSG00000097791 | 33.25023701 | 33.3896277  | 43.78136496 | 19.33098413 | 18.62105924 |
| ENSMUSG00000097792 | 3.537259256 | 14.60796212 | 8.473812573 | 36.24559524 | 30.08017263 |
| ENSMUSG00000097793 | 18.39374813 | 30.60715873 | 24.00913562 | 59.60386773 | 48.70123187 |
| ENSMUSG00000097794 | 4.952162959 | 4.173703463 | 4.236906287 | 11.27640741 | 6.445751277 |
| ENSMUSG00000097795 | 9.196874066 | 8.347406925 | 6.35535943  | 7.249119049 | 6.445751277 |
| ENSMUSG00000097796 | 7.074518513 | 7.651789682 | 6.35535943  | 4.02728836  | 5.729556691 |
| ENSMUSG00000097797 | 6.367066661 | 6.260555194 | 6.35535943  | 8.054576721 | 8.594335036 |

|                    |             |             |             |             |             |
|--------------------|-------------|-------------|-------------|-------------|-------------|
| ENSMUSG00000097798 | 4.952162959 | 5.56493795  | 11.29841676 | 2.416373016 | 5.729556691 |
| ENSMUSG00000097799 | 26.1757185  | 52.17129328 | 40.25060972 | 40.2728836  | 45.83645353 |
| ENSMUSG00000097800 | 7.781970364 | 10.43425866 | 12.00456781 | 15.30369577 | 13.60769714 |
| ENSMUSG00000097801 | 6.367066661 | 4.869320706 | 10.59226572 | 5.638203705 | 8.594335036 |
| ENSMUSG00000097803 | 7.781970364 | 6.956172438 | 6.35535943  | 5.638203705 | 7.161945863 |
| ENSMUSG00000097804 | 7.781970364 | 9.043024169 | 10.59226572 | 0.805457672 | 3.580972932 |
| ENSMUSG00000097805 | 10.61177777 | 7.651789682 | 8.473812573 | 8.860034393 | 2.864778345 |
| ENSMUSG00000097806 | 2.122355554 | 4.173703463 | 3.530755239 | 2.416373016 | 1.432389173 |
| ENSMUSG00000097807 | 3.537259256 | 6.260555194 | 5.649208382 | 6.443661377 | 5.013362104 |
| ENSMUSG00000097809 | 15.56394073 | 20.86851731 | 21.18453143 | 12.08186508 | 17.90486466 |
| ENSMUSG00000097810 | 67.20792587 | 93.21271067 | 91.09348516 | 190.0880106 | 135.3607768 |
| ENSMUSG00000097811 | 8.489422215 | 4.869320706 | 14.12302096 | 10.47094974 | 10.02672421 |
| ENSMUSG00000097812 | 7.781970364 | 5.56493795  | 7.061510478 | 5.638203705 | 8.594335036 |
| ENSMUSG00000097814 | 5.65961481  | 12.52111039 | 11.29841676 | 5.638203705 | 7.161945863 |
| ENSMUSG00000097815 | 9.904325918 | 16.69481385 | 15.53532305 | 8.054576721 | 11.45911338 |
| ENSMUSG00000097816 | 11.31922962 | 7.651789682 | 9.179963621 | 6.443661377 | 4.297167518 |
| ENSMUSG00000097817 | 8.489422215 | 9.738641413 | 11.29841676 | 6.443661377 | 8.594335036 |
| ENSMUSG00000097818 | 47.39927403 | 65.38802092 | 68.49665163 | 66.04752911 | 45.83645353 |
| ENSMUSG00000097819 | 8.489422215 | 5.56493795  | 13.41686991 | 9.665492065 | 7.161945863 |
| ENSMUSG00000097820 | 9.196874066 | 3.478086219 | 8.473812573 | 7.249119049 | 5.013362104 |
| ENSMUSG00000097822 | 12.02668147 | 9.043024169 | 11.29841676 | 7.249119049 | 9.310529622 |
| ENSMUSG00000097823 | 8.489422215 | 9.738641413 | 2.118453143 | 4.832746033 | 6.445751277 |
| ENSMUSG00000097824 | 6.367066661 | 3.478086219 | 2.824604191 | 2.416373016 | 2.864778345 |
| ENSMUSG00000097825 | 7.074518513 | 6.260555194 | 12.71071886 | 5.638203705 | 4.297167518 |
| ENSMUSG00000097827 | 14.85648888 | 27.12907251 | 22.59683353 | 26.58010318 | 22.20203218 |
| ENSMUSG00000097828 | 7.074518513 | 4.869320706 | 4.236906287 | 6.443661377 | 7.87814045  |
| ENSMUSG00000097831 | 49.52162959 | 76.51789682 | 48.01827125 | 77.32393652 | 56.57937232 |
| ENSMUSG00000097832 | 6.367066661 | 6.260555194 | 11.29841676 | 4.832746033 | 4.297167518 |
| ENSMUSG00000097833 | 7.781970364 | 9.043024169 | 5.649208382 | 8.860034393 | 9.310529622 |
| ENSMUSG00000097834 | 7.074518513 | 4.869320706 | 9.886114669 | 6.443661377 | 2.864778345 |
| ENSMUSG00000097835 | 40.32475552 | 67.47487265 | 69.90895373 | 157.0642461 | 128.9150255 |
| ENSMUSG00000097836 | 15.56394073 | 15.30357936 | 21.18453143 | 4.832746033 | 15.04008631 |
| ENSMUSG00000097837 | 6.367066661 | 6.956172438 | 4.943057334 | 6.443661377 | 5.729556691 |
| ENSMUSG00000097838 | 219.3100739 | 222.597518  | 243.6221115 | 130.4841429 | 136.0769714 |
| ENSMUSG00000097839 | 9.904325918 | 20.17290007 | 11.29841676 | 8.054576721 | 18.62105924 |
| ENSMUSG00000097840 | 6.367066661 | 9.043024169 | 9.886114669 | 6.443661377 | 5.013362104 |
| ENSMUSG00000097841 | 7.781970364 | 7.651789682 | 4.236906287 | 4.02728836  | 5.729556691 |
| ENSMUSG00000097842 | 7.074518513 | 4.869320706 | 3.530755239 | 8.054576721 | 5.729556691 |
| ENSMUSG00000097843 | 8.489422215 | 9.738641413 | 7.767661525 | 3.221830688 | 5.729556691 |
| ENSMUSG00000097845 | 21.22355554 | 31.30277597 | 35.30755239 | 45.91108731 | 46.55264811 |
| ENSMUSG00000097847 | 11.31922962 | 4.869320706 | 2.824604191 | 5.638203705 | 8.594335036 |
| ENSMUSG00000097848 | 6.367066661 | 6.956172438 | 3.530755239 | 4.832746033 | 10.02672421 |
| ENSMUSG00000097849 | 7.781970364 | 6.956172438 | 14.12302096 | 4.02728836  | 7.161945863 |

|                    |             |             |             |             |             |
|--------------------|-------------|-------------|-------------|-------------|-------------|
| ENSMUSG00000097850 | 5.65961481  | 5.56493795  | 5.649208382 | 3.221830688 | 4.297167518 |
| ENSMUSG00000097851 | 4.952162959 | 5.56493795  | 1.412302096 | 10.47094974 | 3.580972932 |
| ENSMUSG00000097852 | 18.39374813 | 31.99839321 | 23.30298458 | 37.85651059 | 35.80972932 |
| ENSMUSG00000097853 | 11.31922962 | 8.347406925 | 7.767661525 | 6.443661377 | 5.729556691 |
| ENSMUSG00000097854 | 6.367066661 | 6.956172438 | 9.886114669 | 5.638203705 | 5.729556691 |
| ENSMUSG00000097855 | 91.26128881 | 143.2971522 | 132.756397  | 185.2552646 | 156.1304198 |
| ENSMUSG00000097857 | 11.31922962 | 9.043024169 | 8.473812573 | 22.55281482 | 25.78300511 |
| ENSMUSG00000097858 | 41.73965922 | 58.43184848 | 53.66747963 | 96.65492065 | 82.36237743 |
| ENSMUSG00000097859 | 9.196874066 | 9.738641413 | 13.41686991 | 5.638203705 | 5.729556691 |
| ENSMUSG00000097860 | 416.6891404 | 379.1113979 | 331.1848414 | 316.5448651 | 222.0203218 |
| ENSMUSG00000097861 | 11.31922962 | 13.91234488 | 9.886114669 | 44.30017197 | 21.48583759 |
| ENSMUSG00000097862 | 9.196874066 | 6.956172438 | 5.649208382 | 11.27640741 | 9.310529622 |
| ENSMUSG00000097863 | 64.37811846 | 84.86530374 | 76.97046421 | 84.57305557 | 83.7947666  |
| ENSMUSG00000097864 | 7.781970364 | 8.347406925 | 4.943057334 | 7.249119049 | 4.297167518 |
| ENSMUSG00000097867 | 31.83533331 | 41.73703463 | 41.66291182 | 55.57657937 | 47.98503729 |
| ENSMUSG00000097868 | 21.22355554 | 36.17209668 | 31.0706461  | 34.6346799  | 26.49919969 |
| ENSMUSG00000097869 | 10.61177777 | 4.869320706 | 9.179963621 | 2.416373016 | 6.445751277 |
| ENSMUSG00000097870 | 5.65961481  | 4.869320706 | 7.767661525 | 3.221830688 | 9.310529622 |
| ENSMUSG00000097872 | 13.44158517 | 15.30357936 | 14.829172   | 20.1364418  | 17.90486466 |
| ENSMUSG00000097873 | 7.074518513 | 6.260555194 | 9.886114669 | 8.860034393 | 5.729556691 |
| ENSMUSG00000097874 | 90.55383696 | 140.5146832 | 105.2165061 | 134.5114312 | 120.3206905 |
| ENSMUSG00000097875 | 9.196874066 | 2.782468975 | 9.179963621 | 4.02728836  | 5.013362104 |
| ENSMUSG00000097876 | 7.074518513 | 15.30357936 | 16.94762515 | 21.74735715 | 20.05344842 |
| ENSMUSG00000097877 | 6.367066661 | 6.260555194 | 5.649208382 | 10.47094974 | 10.7429188  |
| ENSMUSG00000097879 | 53.7663407  | 81.38721752 | 72.73355792 | 53.96566403 | 45.12025894 |
| ENSMUSG00000097881 | 7.781970364 | 11.1298759  | 8.473812573 | 4.02728836  | 5.729556691 |
| ENSMUSG00000097882 | 8.489422215 | 15.30357936 | 14.12302096 | 20.94189947 | 20.05344842 |
| ENSMUSG00000097883 | 17.68629628 | 19.47728283 | 16.94762515 | 12.88732275 | 20.769643   |
| ENSMUSG00000097884 | 12.02668147 | 4.869320706 | 11.29841676 | 4.832746033 | 5.013362104 |
| ENSMUSG00000097885 | 34.66514071 | 89.73462445 | 62.84744325 | 79.74030954 | 82.36237743 |
| ENSMUSG00000097886 | 7.074518513 | 8.347406925 | 5.649208382 | 8.054576721 | 8.594335036 |
| ENSMUSG00000097887 | 10.61177777 | 11.1298759  | 14.829172   | 9.665492065 | 8.594335036 |
| ENSMUSG00000097888 | 6.367066661 | 12.52111039 | 7.767661525 | 7.249119049 | 9.310529622 |
| ENSMUSG00000097889 | 9.904325918 | 26.43345526 | 16.2414741  | 24.16373016 | 26.49919969 |
| ENSMUSG00000097890 | 7.074518513 | 10.43425866 | 2.118453143 | 7.249119049 | 12.89150255 |
| ENSMUSG00000097891 | 10.61177777 | 8.347406925 | 4.236906287 | 11.27640741 | 12.89150255 |
| ENSMUSG00000097892 | 50.22908144 | 82.08283477 | 61.43514116 | 192.5043836 | 145.387501  |
| ENSMUSG00000097893 | 105.4103258 | 138.4278315 | 122.1641313 | 248.8864207 | 189.7915654 |
| ENSMUSG00000097895 | 13.44158517 | 19.47728283 | 19.06607829 | 24.16373016 | 20.05344842 |
| ENSMUSG00000097896 | 9.196874066 | 6.956172438 | 7.767661525 | 4.02728836  | 7.161945863 |
| ENSMUSG00000097897 | 8.489422215 | 4.173703463 | 6.35535943  | 4.832746033 | 6.445751277 |
| ENSMUSG00000097898 | 11.31922962 | 8.347406925 | 5.649208382 | 9.665492065 | 8.594335036 |
| ENSMUSG00000097899 | 7.074518513 | 9.738641413 | 6.35535943  | 15.30369577 | 9.310529622 |

|                    |             |             |             |             |             |
|--------------------|-------------|-------------|-------------|-------------|-------------|
| ENSMUSG00000097900 | 11.31922962 | 11.1298759  | 12.00456781 | 14.4982381  | 11.45911338 |
| ENSMUSG00000097901 | 12.73413332 | 6.956172438 | 7.767661525 | 8.860034393 | 10.02672421 |
| ENSMUSG00000097902 | 11.31922962 | 21.56413456 | 13.41686991 | 10.47094974 | 19.33725383 |
| ENSMUSG00000097903 | 8.489422215 | 22.95536904 | 26.12758877 | 16.10915344 | 19.33725383 |
| ENSMUSG00000097904 | 8.489422215 | 15.99919661 | 16.2414741  | 7.249119049 | 10.7429188  |
| ENSMUSG00000097906 | 9.196874066 | 13.21672763 | 11.29841676 | 20.94189947 | 11.45911338 |
| ENSMUSG00000097907 | 7.074518513 | 4.869320706 | 8.473812573 | 2.416373016 | 7.87814045  |
| ENSMUSG00000097908 | 9.196874066 | 10.43425866 | 7.061510478 | 4.832746033 | 6.445751277 |
| ENSMUSG00000097910 | 5.65961481  | 5.56493795  | 8.473812573 | 4.02728836  | 5.729556691 |
| ENSMUSG00000097911 | 0           | 0           | 0           | 0           | 0.716194586 |
| ENSMUSG00000097912 | 120.9742666 | 127.9935729 | 129.2256417 | 244.0536746 | 170.4543116 |
| ENSMUSG00000097913 | 12.02668147 | 6.956172438 | 8.473812573 | 4.02728836  | 7.87814045  |
| ENSMUSG00000097914 | 8.489422215 | 18.78166558 | 14.829172   | 7.249119049 | 12.89150255 |
| ENSMUSG00000097915 | 4.952162959 | 10.43425866 | 8.473812573 | 8.054576721 | 12.89150255 |
| ENSMUSG00000097917 | 38.90985182 | 57.04061399 | 65.67204744 | 78.93485187 | 80.21379367 |
| ENSMUSG00000097918 | 4.952162959 | 0.695617244 | 2.824604191 | 4.02728836  | 4.297167518 |
| ENSMUSG00000097920 | 12.02668147 | 5.56493795  | 9.886114669 | 8.860034393 | 5.013362104 |
| ENSMUSG00000097921 | 7.074518513 | 5.56493795  | 7.767661525 | 5.638203705 | 5.729556691 |
| ENSMUSG00000097922 | 12.73413332 | 3.478086219 | 5.649208382 | 3.221830688 | 5.729556691 |
| ENSMUSG00000097923 | 21.22355554 | 25.73783802 | 28.24604191 | 19.33098413 | 12.17530797 |
| ENSMUSG00000097924 | 9.196874066 | 6.956172438 | 4.943057334 | 6.443661377 | 4.297167518 |
| ENSMUSG00000097925 | 6.367066661 | 10.43425866 | 16.2414741  | 5.638203705 | 9.310529622 |
| ENSMUSG00000097926 | 8.489422215 | 10.43425866 | 7.767661525 | 4.832746033 | 6.445751277 |
| ENSMUSG00000097927 | 9.196874066 | 7.651789682 | 14.829172   | 10.47094974 | 13.60769714 |
| ENSMUSG00000097928 | 5.65961481  | 9.043024169 | 12.00456781 | 4.02728836  | 2.864778345 |
| ENSMUSG00000097929 | 4.244711108 | 4.869320706 | 4.943057334 | 8.054576721 | 5.729556691 |
| ENSMUSG00000097930 | 10.61177777 | 5.56493795  | 13.41686991 | 1.610915344 | 10.02672421 |
| ENSMUSG00000097931 | 9.904325918 | 4.173703463 | 2.824604191 | 8.054576721 | 9.310529622 |
| ENSMUSG00000097932 | 9.904325918 | 9.043024169 | 9.179963621 | 8.054576721 | 6.445751277 |
| ENSMUSG00000097933 | 12.02668147 | 17.39043109 | 17.65377619 | 21.74735715 | 22.91822676 |
| ENSMUSG00000097934 | 8.489422215 | 6.956172438 | 7.061510478 | 6.443661377 | 6.445751277 |
| ENSMUSG00000097935 | 9.904325918 | 11.1298759  | 9.886114669 | 8.860034393 | 2.148583759 |
| ENSMUSG00000097936 | 7.074518513 | 4.173703463 | 3.530755239 | 8.054576721 | 8.594335036 |
| ENSMUSG00000097937 | 5.65961481  | 3.478086219 | 7.061510478 | 2.416373016 | 4.297167518 |
| ENSMUSG00000097938 | 7.781970364 | 9.738641413 | 8.473812573 | 4.832746033 | 7.161945863 |
| ENSMUSG00000097939 | 4.952162959 | 5.56493795  | 7.767661525 | 9.665492065 | 5.013362104 |
| ENSMUSG00000097940 | 7.074518513 | 9.738641413 | 4.943057334 | 4.02728836  | 4.297167518 |
| ENSMUSG00000097941 | 8.489422215 | 7.651789682 | 8.473812573 | 8.054576721 | 6.445751277 |
| ENSMUSG00000097942 | 14.85648888 | 6.260555194 | 5.649208382 | 8.054576721 | 3.580972932 |
| ENSMUSG00000097943 | 4.952162959 | 6.260555194 | 7.061510478 | 1.610915344 | 4.297167518 |
| ENSMUSG00000097944 | 99.75071103 | 159.9919661 | 136.2871522 | 129.6786852 | 118.8883013 |
| ENSMUSG00000097945 | 17.68629628 | 18.78166558 | 17.65377619 | 7.249119049 | 8.594335036 |
| ENSMUSG00000097946 | 9.196874066 | 3.478086219 | 6.35535943  | 4.02728836  | 7.161945863 |

|                    |             |             |             |             |             |
|--------------------|-------------|-------------|-------------|-------------|-------------|
| ENSMUSG00000097947 | 3.537259256 | 9.043024169 | 9.179963621 | 7.249119049 | 6.445751277 |
| ENSMUSG00000097948 | 11.31922962 | 9.738641413 | 10.59226572 | 8.860034393 | 2.148583759 |
| ENSMUSG00000097949 | 6.367066661 | 13.21672763 | 7.767661525 | 4.02728836  | 3.580972932 |
| ENSMUSG00000097950 | 6.367066661 | 11.82549314 | 9.179963621 | 2.416373016 | 6.445751277 |
| ENSMUSG00000097951 | 7.074518513 | 5.56493795  | 7.767661525 | 6.443661377 | 3.580972932 |
| ENSMUSG00000097952 | 13.44158517 | 8.347406925 | 8.473812573 | 3.221830688 | 5.729556691 |
| ENSMUSG00000097953 | 2.122355554 | 4.869320706 | 6.35535943  | 2.416373016 | 3.580972932 |
| ENSMUSG00000097954 | 9.904325918 | 8.347406925 | 5.649208382 | 7.249119049 | 7.87814045  |
| ENSMUSG00000097955 | 9.904325918 | 6.956172438 | 7.061510478 | 7.249119049 | 9.310529622 |
| ENSMUSG00000097956 | 11.31922962 | 10.43425866 | 9.886114669 | 6.443661377 | 7.87814045  |
| ENSMUSG00000097957 | 12.02668147 | 5.56493795  | 3.530755239 | 4.832746033 | 6.445751277 |
| ENSMUSG00000097958 | 8.489422215 | 7.651789682 | 4.236906287 | 5.638203705 | 7.161945863 |
| ENSMUSG00000097959 | 9.196874066 | 7.651789682 | 5.649208382 | 2.416373016 | 5.729556691 |
| ENSMUSG00000097960 | 7.074518513 | 5.56493795  | 7.767661525 | 7.249119049 | 7.161945863 |
| ENSMUSG00000097961 | 0           | 0.695617244 | 1.412302096 | 0           | 0           |
| ENSMUSG00000097962 | 8.489422215 | 4.869320706 | 8.473812573 | 2.416373016 | 10.02672421 |
| ENSMUSG00000097963 | 13.44158517 | 11.1298759  | 8.473812573 | 6.443661377 | 6.445751277 |
| ENSMUSG00000097964 | 7.074518513 | 6.260555194 | 9.179963621 | 4.832746033 | 10.02672421 |
| ENSMUSG00000097965 | 9.196874066 | 6.956172438 | 9.179963621 | 8.054576721 | 7.161945863 |
| ENSMUSG00000097966 | 9.196874066 | 8.347406925 | 7.061510478 | 6.443661377 | 10.02672421 |
| ENSMUSG00000097967 | 8.489422215 | 5.56493795  | 6.35535943  | 5.638203705 | 7.87814045  |
| ENSMUSG00000097968 | 6.367066661 | 4.173703463 | 7.061510478 | 6.443661377 | 5.729556691 |
| ENSMUSG00000097969 | 11.31922962 | 6.260555194 | 8.473812573 | 4.832746033 | 8.594335036 |
| ENSMUSG00000097970 | 0.707451851 | 0           | 0.706151048 | 0           | 0           |
| ENSMUSG00000097971 | 280.858385  | 227.4668387 | 193.4853871 | 203.780791  | 212.7097921 |
| ENSMUSG00000097973 | 4.244711108 | 4.869320706 | 10.59226572 | 10.47094974 | 6.445751277 |
| ENSMUSG00000097974 | 4.952162959 | 9.738641413 | 7.061510478 | 4.832746033 | 10.02672421 |
| ENSMUSG00000097975 | 9.196874066 | 8.347406925 | 8.473812573 | 7.249119049 | 6.445751277 |
| ENSMUSG00000097976 | 7.781970364 | 9.043024169 | 12.00456781 | 2.416373016 | 7.161945863 |
| ENSMUSG00000097977 | 9.196874066 | 6.956172438 | 12.00456781 | 1.610915344 | 7.87814045  |
| ENSMUSG00000097978 | 7.781970364 | 7.651789682 | 9.886114669 | 8.054576721 | 7.87814045  |
| ENSMUSG00000097979 | 9.196874066 | 5.56493795  | 6.35535943  | 4.832746033 | 7.87814045  |
| ENSMUSG00000097980 | 9.196874066 | 2.782468975 | 4.236906287 | 6.443661377 | 11.45911338 |
| ENSMUSG00000097981 | 7.074518513 | 11.1298759  | 4.943057334 | 6.443661377 | 6.445751277 |
| ENSMUSG00000097983 | 140.0754665 | 189.9035076 | 197.0161423 | 76.51847885 | 89.52432329 |
| ENSMUSG00000097984 | 11.31922962 | 12.52111039 | 7.061510478 | 6.443661377 | 9.310529622 |
| ENSMUSG00000097985 | 10.61177777 | 6.260555194 | 6.35535943  | 3.221830688 | 5.013362104 |
| ENSMUSG00000097986 | 10.61177777 | 8.347406925 | 4.943057334 | 4.02728836  | 7.87814045  |
| ENSMUSG00000097987 | 7.074518513 | 9.043024169 | 12.71071886 | 11.27640741 | 6.445751277 |
| ENSMUSG00000097988 | 12.02668147 | 4.869320706 | 4.236906287 | 7.249119049 | 5.729556691 |
| ENSMUSG00000097989 | 11.31922962 | 7.651789682 | 7.767661525 | 6.443661377 | 3.580972932 |
| ENSMUSG00000097990 | 5.65961481  | 9.043024169 | 10.59226572 | 9.665492065 | 11.45911338 |
| ENSMUSG00000097991 | 7.781970364 | 6.260555194 | 4.236906287 | 5.638203705 | 4.297167518 |

|                    |             |             |             |             |             |
|--------------------|-------------|-------------|-------------|-------------|-------------|
| ENSMUSG00000097992 | 12.02668147 | 6.956172438 | 10.59226572 | 5.638203705 | 7.161945863 |
| ENSMUSG00000097993 | 12.73413332 | 34.08524495 | 28.24604191 | 26.58010318 | 40.10689684 |
| ENSMUSG00000097994 | 21.93100739 | 40.34580014 | 29.65834401 | 36.24559524 | 37.24211849 |
| ENSMUSG00000097995 | 162.7139258 | 210.7720249 | 204.7838039 | 389.0360556 | 283.6130562 |
| ENSMUSG00000097996 | 9.196874066 | 9.043024169 | 12.00456781 | 4.832746033 | 7.161945863 |
| ENSMUSG00000097997 | 1.414903703 | 2.782468975 | 2.824604191 | 0.805457672 | 2.864778345 |
| ENSMUSG00000097998 | 1.414903703 | 4.173703463 | 0           | 4.02728836  | 4.297167518 |
| ENSMUSG00000097999 | 9.196874066 | 6.956172438 | 7.061510478 | 9.665492065 | 10.02672421 |
| ENSMUSG00000098000 | 94.79854807 | 158.6007316 | 144.0548137 | 265.8010318 | 189.0753708 |
| ENSMUSG00000098001 | 9.196874066 | 8.347406925 | 6.35535943  | 6.443661377 | 10.7429188  |
| ENSMUSG00000098002 | 9.196874066 | 7.651789682 | 9.179963621 | 8.054576721 | 5.013362104 |
| ENSMUSG00000098003 | 6.367066661 | 6.260555194 | 8.473812573 | 6.443661377 | 7.87814045  |
| ENSMUSG00000098004 | 12.73413332 | 9.738641413 | 13.41686991 | 12.88732275 | 12.17530797 |
| ENSMUSG00000098005 | 7.074518513 | 6.956172438 | 4.236906287 | 5.638203705 | 5.729556691 |
| ENSMUSG00000098006 | 3.537259256 | 7.651789682 | 9.179963621 | 0.805457672 | 5.013362104 |
| ENSMUSG00000098007 | 6.367066661 | 4.173703463 | 11.29841676 | 5.638203705 | 5.729556691 |
| ENSMUSG00000098008 | 4.952162959 | 4.173703463 | 5.649208382 | 9.665492065 | 5.013362104 |
| ENSMUSG00000098009 | 15.56394073 | 13.91234488 | 9.886114669 | 17.72006879 | 15.04008631 |
| ENSMUSG00000098010 | 11.31922962 | 8.347406925 | 7.767661525 | 12.08186508 | 7.161945863 |
| ENSMUSG00000098011 | 9.904325918 | 5.56493795  | 4.943057334 | 4.832746033 | 5.729556691 |
| ENSMUSG00000098012 | 8.489422215 | 8.347406925 | 7.061510478 | 2.416373016 | 11.45911338 |
| ENSMUSG00000098013 | 7.781970364 | 6.260555194 | 7.061510478 | 4.02728836  | 7.161945863 |
| ENSMUSG00000098014 | 7.074518513 | 4.869320706 | 6.35535943  | 4.02728836  | 6.445751277 |
| ENSMUSG00000098015 | 7.781970364 | 7.651789682 | 9.886114669 | 4.832746033 | 5.729556691 |
| ENSMUSG00000098016 | 7.781970364 | 6.956172438 | 4.236906287 | 8.054576721 | 3.580972932 |
| ENSMUSG00000098017 | 12.02668147 | 6.260555194 | 4.943057334 | 3.221830688 | 6.445751277 |
| ENSMUSG00000098019 | 8.489422215 | 11.82549314 | 7.061510478 | 6.443661377 | 4.297167518 |
| ENSMUSG00000098020 | 4.952162959 | 4.869320706 | 2.118453143 | 3.221830688 | 4.297167518 |
| ENSMUSG00000098021 | 10.61177777 | 8.347406925 | 13.41686991 | 4.832746033 | 7.161945863 |
| ENSMUSG00000098023 | 2.829807405 | 2.782468975 | 4.236906287 | 2.416373016 | 5.729556691 |
| ENSMUSG00000098024 | 120.2668147 | 185.0341868 | 161.0024389 | 288.3538466 | 229.1822676 |
| ENSMUSG00000098025 | 7.074518513 | 9.738641413 | 7.061510478 | 5.638203705 | 5.013362104 |
| ENSMUSG00000098026 | 309.8639109 | 306.7672045 | 295.877289  | 356.8177487 | 296.5045587 |
| ENSMUSG00000098027 | 7.781970364 | 6.260555194 | 7.061510478 | 5.638203705 | 7.161945863 |
| ENSMUSG00000098028 | 11.31922962 | 6.956172438 | 3.530755239 | 4.832746033 | 9.310529622 |
| ENSMUSG00000098029 | 9.904325918 | 8.347406925 | 7.767661525 | 4.832746033 | 6.445751277 |
| ENSMUSG00000098030 | 6.367066661 | 6.260555194 | 6.35535943  | 5.638203705 | 6.445751277 |
| ENSMUSG00000098031 | 7.781970364 | 7.651789682 | 5.649208382 | 7.249119049 | 7.161945863 |
| ENSMUSG00000098033 | 5.65961481  | 8.347406925 | 7.767661525 | 2.416373016 | 2.864778345 |
| ENSMUSG00000098035 | 10.61177777 | 4.869320706 | 10.59226572 | 7.249119049 | 6.445751277 |
| ENSMUSG00000098036 | 7.781970364 | 9.738641413 | 7.061510478 | 5.638203705 | 5.013362104 |
| ENSMUSG00000098037 | 7.074518513 | 6.260555194 | 8.473812573 | 6.443661377 | 5.013362104 |
| ENSMUSG00000098038 | 6.367066661 | 4.173703463 | 10.59226572 | 3.221830688 | 3.580972932 |



|                   |             |             |             |             |             |
|-------------------|-------------|-------------|-------------|-------------|-------------|
| ENSMUSG0000098039 | 173.3257036 | 198.2509145 | 190.6607829 | 118.4022778 | 113.8749392 |
| ENSMUSG0000098040 | 14.85648888 | 3.478086219 | 8.473812573 | 7.249119049 | 7.161945863 |
| ENSMUSG0000098041 | 9.196874066 | 8.347406925 | 10.59226572 | 8.860034393 | 10.7429188  |
| ENSMUSG0000098042 | 6.367066661 | 9.043024169 | 5.649208382 | 5.638203705 | 5.729556691 |
| ENSMUSG0000098043 | 14.85648888 | 7.651789682 | 6.35535943  | 11.27640741 | 10.7429188  |
| ENSMUSG0000098044 | 8.489422215 | 8.347406925 | 7.061510478 | 3.221830688 | 8.594335036 |
| ENSMUSG0000098045 | 33.95768886 | 51.47567604 | 42.36906287 | 28.9964762  | 21.48583759 |
| ENSMUSG0000098046 | 10.61177777 | 4.173703463 | 11.29841676 | 8.054576721 | 4.297167518 |
| ENSMUSG0000098047 | 9.196874066 | 5.56493795  | 7.767661525 | 8.054576721 | 6.445751277 |
| ENSMUSG0000098048 | 2.122355554 | 6.956172438 | 4.943057334 | 3.221830688 | 6.445751277 |
| ENSMUSG0000098050 | 7.781970364 | 5.56493795  | 9.886114669 | 4.02728836  | 5.729556691 |
| ENSMUSG0000098051 | 0           | 0           | 0           | 0           | 0           |
| ENSMUSG0000098052 | 9.196874066 | 6.260555194 | 5.649208382 | 9.665492065 | 9.310529622 |
| ENSMUSG0000098053 | 2.122355554 | 4.869320706 | 5.649208382 | 8.860034393 | 7.161945863 |
| ENSMUSG0000098054 | 6.367066661 | 4.869320706 | 9.886114669 | 5.638203705 | 6.445751277 |
| ENSMUSG0000098055 | 7.074518513 | 7.651789682 | 7.061510478 | 6.443661377 | 8.594335036 |
| ENSMUSG0000098056 | 8.489422215 | 10.43425866 | 9.886114669 | 8.860034393 | 5.729556691 |
| ENSMUSG0000098057 | 14.14903703 | 23.65098629 | 16.2414741  | 16.91461111 | 20.05344842 |
| ENSMUSG0000098058 | 8.489422215 | 8.347406925 | 2.824604191 | 3.221830688 | 5.729556691 |
| ENSMUSG0000098059 | 5.65961481  | 6.956172438 | 5.649208382 | 6.443661377 | 5.729556691 |
| ENSMUSG0000098060 | 5.65961481  | 7.651789682 | 8.473812573 | 10.47094974 | 5.729556691 |
| ENSMUSG0000098061 | 1.414903703 | 0.695617244 | 0.706151048 | 0.805457672 | 0.716194586 |
| ENSMUSG0000098062 | 12.73413332 | 8.347406925 | 16.2414741  | 11.27640741 | 12.17530797 |
| ENSMUSG0000098064 | 12.73413332 | 5.56493795  | 7.767661525 | 5.638203705 | 6.445751277 |
| ENSMUSG0000098065 | 7.781970364 | 10.43425866 | 12.00456781 | 4.02728836  | 6.445751277 |
| ENSMUSG0000098066 | 23.34591109 | 31.99839321 | 39.54445867 | 48.32746033 | 40.10689684 |
| ENSMUSG0000098067 | 14.85648888 | 11.82549314 | 20.47838039 | 13.69278043 | 12.17530797 |
| ENSMUSG0000098068 | 6.367066661 | 2.086851731 | 8.473812573 | 4.02728836  | 4.297167518 |
| ENSMUSG0000098069 | 4.952162959 | 5.56493795  | 4.943057334 | 7.249119049 | 7.161945863 |
| ENSMUSG0000098070 | 4.244711108 | 7.651789682 | 10.59226572 | 3.221830688 | 5.729556691 |
| ENSMUSG0000098071 | 7.781970364 | 6.260555194 | 6.35535943  | 3.221830688 | 9.310529622 |
| ENSMUSG0000098072 | 9.904325918 | 6.260555194 | 7.767661525 | 3.221830688 | 5.729556691 |
| ENSMUSG0000098073 | 6.367066661 | 5.56493795  | 4.943057334 | 2.416373016 | 6.445751277 |
| ENSMUSG0000098074 | 9.196874066 | 6.956172438 | 7.061510478 | 5.638203705 | 6.445751277 |
| ENSMUSG0000098075 | 9.196874066 | 6.260555194 | 7.061510478 | 4.02728836  | 9.310529622 |
| ENSMUSG0000098076 | 4.952162959 | 7.651789682 | 8.473812573 | 3.221830688 | 5.013362104 |
| ENSMUSG0000098077 | 4.952162959 | 8.347406925 | 7.767661525 | 7.249119049 | 7.87814045  |
| ENSMUSG0000098078 | 4.952162959 | 5.56493795  | 3.530755239 | 2.416373016 | 2.148583759 |
| ENSMUSG0000098079 | 16.27139258 | 2.782468975 | 11.29841676 | 5.638203705 | 6.445751277 |
| ENSMUSG0000098080 | 7.781970364 | 5.56493795  | 13.41686991 | 8.054576721 | 6.445751277 |
| ENSMUSG0000098081 | 12.02668147 | 9.043024169 | 11.29841676 | 5.638203705 | 8.594335036 |
| ENSMUSG0000098082 | 10.61177777 | 3.478086219 | 10.59226572 | 5.638203705 | 8.594335036 |
| ENSMUSG0000098083 | 8.489422215 | 8.347406925 | 2.118453143 | 9.665492065 | 3.580972932 |

|                    |             |             |             |             |             |
|--------------------|-------------|-------------|-------------|-------------|-------------|
| ENSMUSG00000098084 | 12.02668147 | 11.82549314 | 9.179963621 | 5.638203705 | 7.87814045  |
| ENSMUSG00000098085 | 8.489422215 | 7.651789682 | 8.473812573 | 4.832746033 | 8.594335036 |
| ENSMUSG00000098086 | 4.244711108 | 8.347406925 | 3.530755239 | 7.249119049 | 9.310529622 |
| ENSMUSG00000098087 | 12.02668147 | 7.651789682 | 8.473812573 | 8.054576721 | 5.013362104 |
| ENSMUSG00000098088 | 0.707451851 | 5.56493795  | 2.824604191 | 1.610915344 | 3.580972932 |
| ENSMUSG00000098089 | 14.14903703 | 5.56493795  | 10.59226572 | 8.860034393 | 12.17530797 |
| ENSMUSG00000098090 | 30.4204296  | 54.25814501 | 38.83830763 | 78.93485187 | 63.0251236  |
| ENSMUSG00000098091 | 9.196874066 | 4.173703463 | 10.59226572 | 6.443661377 | 5.729556691 |
| ENSMUSG00000098092 | 7.781970364 | 11.82549314 | 9.179963621 | 7.249119049 | 7.87814045  |
| ENSMUSG00000098093 | 11.31922962 | 7.651789682 | 9.886114669 | 4.832746033 | 6.445751277 |
| ENSMUSG00000098095 | 10.61177777 | 5.56493795  | 8.473812573 | 5.638203705 | 5.729556691 |
| ENSMUSG00000098096 | 9.904325918 | 9.043024169 | 7.061510478 | 7.249119049 | 5.013362104 |
| ENSMUSG00000098097 | 7.074518513 | 6.956172438 | 10.59226572 | 4.832746033 | 6.445751277 |
| ENSMUSG00000098098 | 10.61177777 | 8.347406925 | 7.767661525 | 4.02728836  | 8.594335036 |
| ENSMUSG00000098099 | 7.781970364 | 4.869320706 | 7.767661525 | 6.443661377 | 4.297167518 |
| ENSMUSG00000098100 | 11.31922962 | 6.260555194 | 8.473812573 | 5.638203705 | 2.864778345 |
| ENSMUSG00000098101 | 36.78749627 | 45.21512085 | 50.13672439 | 74.9075635  | 59.44415067 |
| ENSMUSG00000098102 | 9.904325918 | 9.043024169 | 11.29841676 | 6.443661377 | 7.161945863 |
| ENSMUSG00000098103 | 7.781970364 | 9.738641413 | 5.649208382 | 6.443661377 | 4.297167518 |
| ENSMUSG00000098104 | 9.196874066 | 5.56493795  | 7.061510478 | 7.249119049 | 2.864778345 |
| ENSMUSG00000098105 | 9.904325918 | 9.043024169 | 5.649208382 | 5.638203705 | 9.310529622 |
| ENSMUSG00000098106 | 12.02668147 | 2.782468975 | 5.649208382 | 7.249119049 | 7.161945863 |
| ENSMUSG00000098107 | 10.61177777 | 4.869320706 | 4.943057334 | 8.054576721 | 7.161945863 |
| ENSMUSG00000098108 | 7.074518513 | 6.956172438 | 7.061510478 | 6.443661377 | 5.729556691 |
| ENSMUSG00000098109 | 7.781970364 | 5.56493795  | 9.886114669 | 2.416373016 | 13.60769714 |
| ENSMUSG00000098110 | 13.44158517 | 6.260555194 | 9.886114669 | 10.47094974 | 7.87814045  |
| ENSMUSG00000098111 | 10.61177777 | 9.043024169 | 11.29841676 | 7.249119049 | 8.594335036 |
| ENSMUSG00000098113 | 12.02668147 | 11.1298759  | 8.473812573 | 10.47094974 | 6.445751277 |
| ENSMUSG00000098114 | 12.02668147 | 13.21672763 | 7.061510478 | 5.638203705 | 7.87814045  |
| ENSMUSG00000098115 | 9.196874066 | 4.173703463 | 2.824604191 | 3.221830688 | 7.87814045  |
| ENSMUSG00000098116 | 11.31922962 | 11.1298759  | 9.179963621 | 6.443661377 | 7.161945863 |
| ENSMUSG00000098118 | 1.414903703 | 4.173703463 | 2.824604191 | 6.443661377 | 1.432389173 |
| ENSMUSG00000098119 | 8.489422215 | 4.869320706 | 6.35535943  | 7.249119049 | 8.594335036 |
| ENSMUSG00000098120 | 91.26128881 | 134.254128  | 112.2780166 | 324.5994419 | 266.4243861 |
| ENSMUSG00000098121 | 15.56394073 | 18.78166558 | 15.53532305 | 27.38556085 | 25.78300511 |
| ENSMUSG00000098122 | 5.65961481  | 6.260555194 | 7.061510478 | 5.638203705 | 4.297167518 |
| ENSMUSG00000098123 | 9.196874066 | 4.869320706 | 7.767661525 | 4.02728836  | 7.87814045  |
| ENSMUSG00000098124 | 9.196874066 | 8.347406925 | 9.886114669 | 4.832746033 | 5.013362104 |
| ENSMUSG00000098125 | 9.196874066 | 5.56493795  | 10.59226572 | 8.054576721 | 2.864778345 |
| ENSMUSG00000098126 | 7.781970364 | 11.1298759  | 10.59226572 | 4.832746033 | 5.729556691 |
| ENSMUSG00000098127 | 9.196874066 | 9.043024169 | 6.35535943  | 5.638203705 | 9.310529622 |
| ENSMUSG00000098128 | 9.196874066 | 6.260555194 | 4.236906287 | 5.638203705 | 8.594335036 |
| ENSMUSG00000098129 | 12.02668147 | 4.173703463 | 5.649208382 | 6.443661377 | 2.148583759 |

|                    |             |             |             |             |             |
|--------------------|-------------|-------------|-------------|-------------|-------------|
| ENSMUSG00000098130 | 14.85648888 | 11.1298759  | 7.767661525 | 4.832746033 | 5.729556691 |
| ENSMUSG00000098131 | 9.904325918 | 11.82549314 | 10.59226572 | 9.665492065 | 5.729556691 |
| ENSMUSG00000098135 | 10.61177777 | 5.56493795  | 9.886114669 | 4.02728836  | 6.445751277 |
| ENSMUSG00000098136 | 4.952162959 | 5.56493795  | 3.530755239 | 9.665492065 | 5.013362104 |
| ENSMUSG00000098137 | 4.244711108 | 5.56493795  | 6.35535943  | 2.416373016 | 2.148583759 |
| ENSMUSG00000098138 | 12.02668147 | 6.260555194 | 9.886114669 | 5.638203705 | 9.310529622 |
| ENSMUSG00000098139 | 9.196874066 | 3.478086219 | 3.530755239 | 7.249119049 | 4.297167518 |
| ENSMUSG00000098141 | 11.31922962 | 9.043024169 | 4.236906287 | 4.832746033 | 9.310529622 |
| ENSMUSG00000098142 | 7.781970364 | 6.956172438 | 7.061510478 | 4.02728836  | 5.729556691 |
| ENSMUSG00000098143 | 9.196874066 | 9.738641413 | 7.767661525 | 6.443661377 | 5.013362104 |
| ENSMUSG00000098144 | 9.196874066 | 9.738641413 | 7.767661525 | 8.860034393 | 5.729556691 |
| ENSMUSG00000098145 | 7.781970364 | 12.52111039 | 7.767661525 | 6.443661377 | 10.02672421 |
| ENSMUSG00000098146 | 7.781970364 | 12.52111039 | 12.00456781 | 16.10915344 | 7.161945863 |
| ENSMUSG00000098147 | 13.44158517 | 9.738641413 | 6.35535943  | 6.443661377 | 7.87814045  |
| ENSMUSG00000098148 | 12.02668147 | 18.78166558 | 15.53532305 | 8.860034393 | 17.90486466 |
| ENSMUSG00000098149 | 11.31922962 | 6.260555194 | 7.767661525 | 14.4982381  | 7.161945863 |
| ENSMUSG00000098150 | 6.367066661 | 7.651789682 | 6.35535943  | 4.02728836  | 7.161945863 |
| ENSMUSG00000098151 | 7.781970364 | 4.173703463 | 9.886114669 | 7.249119049 | 5.013362104 |
| ENSMUSG00000098152 | 12.73413332 | 7.651789682 | 7.767661525 | 4.02728836  | 12.17530797 |
| ENSMUSG00000098153 | 9.196874066 | 6.260555194 | 7.061510478 | 7.249119049 | 10.02672421 |
| ENSMUSG00000098154 | 9.904325918 | 9.738641413 | 9.179963621 | 6.443661377 | 7.87814045  |
| ENSMUSG00000098155 | 5.65961481  | 14.60796212 | 12.00456781 | 12.88732275 | 14.32389173 |
| ENSMUSG00000098156 | 12.02668147 | 4.869320706 | 6.35535943  | 4.832746033 | 8.594335036 |
| ENSMUSG00000098157 | 10.61177777 | 5.56493795  | 9.886114669 | 2.416373016 | 7.161945863 |
| ENSMUSG00000098158 | 5.65961481  | 9.043024169 | 7.061510478 | 4.832746033 | 5.729556691 |
| ENSMUSG00000098159 | 7.074518513 | 9.738641413 | 5.649208382 | 7.249119049 | 5.729556691 |
| ENSMUSG00000098160 | 14.85648888 | 11.82549314 | 6.35535943  | 7.249119049 | 5.729556691 |
| ENSMUSG00000098161 | 10.61177777 | 6.956172438 | 6.35535943  | 4.02728836  | 7.161945863 |
| ENSMUSG00000098162 | 11.31922962 | 12.52111039 | 5.649208382 | 3.221830688 | 5.013362104 |
| ENSMUSG00000098163 | 7.781970364 | 7.651789682 | 12.00456781 | 10.47094974 | 7.161945863 |
| ENSMUSG00000098165 | 10.61177777 | 9.738641413 | 9.179963621 | 5.638203705 | 8.594335036 |
| ENSMUSG00000098166 | 18.39374813 | 37.56333116 | 24.71528667 | 12.88732275 | 11.45911338 |
| ENSMUSG00000098167 | 11.31922962 | 5.56493795  | 9.179963621 | 5.638203705 | 8.594335036 |
| ENSMUSG00000098169 | 12.02668147 | 5.56493795  | 11.29841676 | 5.638203705 | 5.013362104 |
| ENSMUSG00000098170 | 4.952162959 | 5.56493795  | 9.179963621 | 7.249119049 | 7.161945863 |
| ENSMUSG00000098171 | 6.367066661 | 4.869320706 | 5.649208382 | 4.832746033 | 2.864778345 |
| ENSMUSG00000098172 | 9.904325918 | 8.347406925 | 4.943057334 | 6.443661377 | 6.445751277 |
| ENSMUSG00000098173 | 7.781970364 | 7.651789682 | 6.35535943  | 5.638203705 | 6.445751277 |
| ENSMUSG00000098174 | 7.074518513 | 7.651789682 | 9.886114669 | 5.638203705 | 8.594335036 |
| ENSMUSG00000098175 | 7.074518513 | 4.869320706 | 5.649208382 | 3.221830688 | 11.45911338 |
| ENSMUSG00000098177 | 5.65961481  | 6.956172438 | 3.530755239 | 2.416373016 | 7.87814045  |
| ENSMUSG00000098178 | 265.2944442 | 283.8118355 | 205.4899549 | 218.2790291 | 245.6547431 |
| ENSMUSG00000098179 | 6.367066661 | 6.956172438 | 11.29841676 | 5.638203705 | 7.161945863 |

|                    |             |             |             |             |             |
|--------------------|-------------|-------------|-------------|-------------|-------------|
| ENSMUSG00000098180 | 12.02668147 | 6.260555194 | 6.35535943  | 5.638203705 | 7.161945863 |
| ENSMUSG00000098181 | 9.904325918 | 9.043024169 | 7.061510478 | 2.416373016 | 6.445751277 |
| ENSMUSG00000098183 | 15.56394073 | 20.86851731 | 22.59683353 | 23.35827249 | 20.05344842 |
| ENSMUSG00000098184 | 65.79302217 | 80.69160028 | 76.26431316 | 167.5351958 | 114.5911338 |
| ENSMUSG00000098185 | 15.56394073 | 5.56493795  | 6.35535943  | 1.610915344 | 3.580972932 |
| ENSMUSG00000098186 | 9.196874066 | 6.260555194 | 7.061510478 | 4.832746033 | 6.445751277 |
| ENSMUSG00000098187 | 12.02668147 | 9.738641413 | 3.530755239 | 4.832746033 | 3.580972932 |
| ENSMUSG00000098189 | 11.31922962 | 7.651789682 | 9.886114669 | 4.02728836  | 6.445751277 |
| ENSMUSG00000098190 | 5.65961481  | 6.260555194 | 8.473812573 | 3.221830688 | 5.729556691 |
| ENSMUSG00000098191 | 4.952162959 | 6.956172438 | 9.179963621 | 7.249119049 | 6.445751277 |
| ENSMUSG00000098192 | 12.02668147 | 4.173703463 | 7.061510478 | 4.832746033 | 7.87814045  |
| ENSMUSG00000098193 | 6.367066661 | 3.478086219 | 7.061510478 | 1.610915344 | 3.580972932 |
| ENSMUSG00000098194 | 11.31922962 | 6.956172438 | 4.943057334 | 8.054576721 | 10.02672421 |
| ENSMUSG00000098195 | 12.73413332 | 6.260555194 | 7.061510478 | 3.221830688 | 4.297167518 |
| ENSMUSG00000098196 | 14.85648888 | 11.1298759  | 10.59226572 | 8.054576721 | 11.45911338 |
| ENSMUSG00000098197 | 113.1922962 | 124.5154866 | 117.2210739 | 83.7675979  | 79.49759908 |
| ENSMUSG00000098198 | 11.31922962 | 15.30357936 | 13.41686991 | 8.860034393 | 7.87814045  |
| ENSMUSG00000098199 | 11.31922962 | 9.043024169 | 9.179963621 | 6.443661377 | 10.7429188  |
| ENSMUSG00000098200 | 7.781970364 | 9.043024169 | 7.767661525 | 4.02728836  | 7.161945863 |
| ENSMUSG00000098201 | 33.25023701 | 62.60555194 | 55.78593277 | 30.60739154 | 35.80972932 |
| ENSMUSG00000098202 | 9.196874066 | 6.956172438 | 9.886114669 | 4.832746033 | 5.729556691 |
| ENSMUSG00000098203 | 4.952162959 | 6.956172438 | 6.35535943  | 8.860034393 | 5.729556691 |
| ENSMUSG00000098204 | 7.781970364 | 6.260555194 | 9.179963621 | 3.221830688 | 3.580972932 |
| ENSMUSG00000098205 | 10.61177777 | 9.738641413 | 8.473812573 | 8.860034393 | 8.594335036 |
| ENSMUSG00000098206 | 0           | 0           | 0           | 0           | 0           |
| ENSMUSG00000098208 | 12.02668147 | 7.651789682 | 10.59226572 | 7.249119049 | 7.87814045  |
| ENSMUSG00000098209 | 6.367066661 | 7.651789682 | 7.767661525 | 3.221830688 | 8.594335036 |
| ENSMUSG00000098210 | 32.54278516 | 34.78086219 | 26.12758877 | 32.21830688 | 49.41742646 |
| ENSMUSG00000098211 | 2.122355554 | 3.478086219 | 2.118453143 | 4.832746033 | 2.148583759 |
| ENSMUSG00000098212 | 4.244711108 | 8.347406925 | 7.061510478 | 3.221830688 | 6.445751277 |
| ENSMUSG00000098213 | 7.074518513 | 9.043024169 | 9.179963621 | 4.02728836  | 2.864778345 |
| ENSMUSG00000098214 | 6.367066661 | 8.347406925 | 3.530755239 | 4.832746033 | 5.013362104 |
| ENSMUSG00000098215 | 11.31922962 | 4.869320706 | 11.29841676 | 7.249119049 | 8.594335036 |
| ENSMUSG00000098216 | 7.074518513 | 9.738641413 | 8.473812573 | 4.02728836  | 10.02672421 |
| ENSMUSG00000098217 | 7.781970364 | 8.347406925 | 5.649208382 | 5.638203705 | 7.87814045  |
| ENSMUSG00000098218 | 9.196874066 | 4.173703463 | 4.943057334 | 10.47094974 | 4.297167518 |
| ENSMUSG00000098219 | 9.196874066 | 2.782468975 | 7.767661525 | 5.638203705 | 3.580972932 |
| ENSMUSG00000098220 | 7.074518513 | 8.347406925 | 4.236906287 | 10.47094974 | 6.445751277 |
| ENSMUSG00000098221 | 7.074518513 | 4.173703463 | 4.943057334 | 6.443661377 | 7.161945863 |
| ENSMUSG00000098222 | 9.904325918 | 5.56493795  | 8.473812573 | 2.416373016 | 5.013362104 |
| ENSMUSG00000098223 | 4.244711108 | 9.043024169 | 7.061510478 | 7.249119049 | 8.594335036 |
| ENSMUSG00000098224 | 11.31922962 | 14.60796212 | 12.71071886 | 11.27640741 | 12.17530797 |
| ENSMUSG00000098225 | 7.074518513 | 2.782468975 | 5.649208382 | 4.832746033 | 7.161945863 |

|                    |             |             |             |             |             |
|--------------------|-------------|-------------|-------------|-------------|-------------|
| ENSMUSG00000098226 | 12.73413332 | 9.043024169 | 8.473812573 | 7.249119049 | 5.729556691 |
| ENSMUSG00000098227 | 10.61177777 | 9.043024169 | 9.886114669 | 8.860034393 | 9.310529622 |
| ENSMUSG00000098228 | 13.44158517 | 6.260555194 | 6.35535943  | 6.443661377 | 7.87814045  |
| ENSMUSG00000098229 | 12.73413332 | 5.56493795  | 4.943057334 | 5.638203705 | 3.580972932 |
| ENSMUSG00000098230 | 6.367066661 | 4.173703463 | 7.767661525 | 4.02728836  | 7.87814045  |
| ENSMUSG00000098231 | 12.02668147 | 5.56493795  | 8.473812573 | 4.02728836  | 5.013362104 |
| ENSMUSG00000098232 | 11.31922962 | 5.56493795  | 5.649208382 | 9.665492065 | 10.02672421 |
| ENSMUSG00000098233 | 7.074518513 | 4.173703463 | 3.530755239 | 5.638203705 | 4.297167518 |
| ENSMUSG00000098234 | 5.65961481  | 4.869320706 | 7.061510478 | 10.47094974 | 6.445751277 |
| ENSMUSG00000098235 | 12.02668147 | 7.651789682 | 8.473812573 | 2.416373016 | 9.310529622 |
| ENSMUSG00000098236 | 10.61177777 | 2.782468975 | 4.236906287 | 7.249119049 | 5.013362104 |
| ENSMUSG00000098237 | 8.489422215 | 9.738641413 | 7.767661525 | 4.832746033 | 8.594335036 |
| ENSMUSG00000098238 | 7.781970364 | 5.56493795  | 7.061510478 | 8.860034393 | 6.445751277 |
| ENSMUSG00000098239 | 7.781970364 | 6.260555194 | 9.179963621 | 7.249119049 | 6.445751277 |
| ENSMUSG00000098240 | 10.61177777 | 7.651789682 | 7.061510478 | 8.054576721 | 5.729556691 |
| ENSMUSG00000098241 | 10.61177777 | 9.043024169 | 7.061510478 | 6.443661377 | 10.02672421 |
| ENSMUSG00000098242 | 7.074518513 | 5.56493795  | 9.886114669 | 4.02728836  | 14.32389173 |
| ENSMUSG00000098243 | 21.93100739 | 30.60715873 | 26.12758877 | 33.82922223 | 28.64778345 |
| ENSMUSG00000098244 | 7.781970364 | 9.043024169 | 7.767661525 | 4.02728836  | 6.445751277 |
| ENSMUSG00000098245 | 8.489422215 | 6.956172438 | 9.179963621 | 6.443661377 | 10.02672421 |
| ENSMUSG00000098246 | 6.367066661 | 8.347406925 | 7.061510478 | 4.832746033 | 3.580972932 |
| ENSMUSG00000098247 | 9.196874066 | 7.651789682 | 2.824604191 | 4.832746033 | 7.161945863 |
| ENSMUSG00000098248 | 120.2668147 | 163.4700523 | 146.8794179 | 63.6311561  | 67.32229112 |
| ENSMUSG00000098249 | 6.367066661 | 8.347406925 | 9.886114669 | 3.221830688 | 6.445751277 |
| ENSMUSG00000098251 | 7.781970364 | 5.56493795  | 7.061510478 | 1.610915344 | 6.445751277 |
| ENSMUSG00000098252 | 8.489422215 | 6.260555194 | 9.179963621 | 1.610915344 | 6.445751277 |
| ENSMUSG00000098253 | 9.904325918 | 4.869320706 | 10.59226572 | 8.054576721 | 14.32389173 |
| ENSMUSG00000098254 | 6.367066661 | 4.173703463 | 6.35535943  | 1.610915344 | 5.013362104 |
| ENSMUSG00000098255 | 55.1812444  | 74.43104508 | 90.38733411 | 68.46390213 | 75.20043157 |
| ENSMUSG00000098257 | 11.31922962 | 4.173703463 | 3.530755239 | 9.665492065 | 4.297167518 |
| ENSMUSG00000098258 | 10.61177777 | 5.56493795  | 9.179963621 | 10.47094974 | 7.161945863 |
| ENSMUSG00000098259 | 9.904325918 | 20.86851731 | 19.77222934 | 16.10915344 | 22.91822676 |
| ENSMUSG00000098260 | 2.829807405 | 3.478086219 | 3.530755239 | 4.02728836  | 7.87814045  |
| ENSMUSG00000098261 | 0           | 0           | 0           | 0.805457672 | 0           |
| ENSMUSG00000098262 | 4.244711108 | 6.260555194 | 2.824604191 | 4.02728836  | 1.432389173 |
| ENSMUSG00000098263 | 10.61177777 | 9.738641413 | 4.943057334 | 12.88732275 | 5.013362104 |
| ENSMUSG00000098264 | 10.61177777 | 6.260555194 | 9.179963621 | 7.249119049 | 4.297167518 |
| ENSMUSG00000098265 | 0           | 0           | 0           | 0           | 0           |
| ENSMUSG00000098266 | 5.65961481  | 4.869320706 | 7.061510478 | 6.443661377 | 5.729556691 |
| ENSMUSG00000098267 | 20.51610369 | 30.60715873 | 32.4829482  | 38.66196826 | 25.78300511 |
| ENSMUSG00000098268 | 15.56394073 | 20.17290007 | 21.18453143 | 30.60739154 | 23.63442135 |
| ENSMUSG00000098269 | 39.61730367 | 50.08444155 | 42.36906287 | 77.32393652 | 70.90326405 |
| ENSMUSG00000098270 | 11.31922962 | 9.738641413 | 11.29841676 | 8.054576721 | 10.02672421 |

|                   |             |             |             |             |             |
|-------------------|-------------|-------------|-------------|-------------|-------------|
| ENSMUSG0000098271 | 6.367066661 | 4.173703463 | 3.530755239 | 4.02728836  | 1.432389173 |
| ENSMUSG0000098272 | 8.489422215 | 5.56493795  | 4.236906287 | 4.832746033 | 3.580972932 |
| ENSMUSG0000098273 | 14.85648888 | 4.869320706 | 5.649208382 | 4.02728836  | 6.445751277 |
| ENSMUSG0000098275 | 14.85648888 | 20.86851731 | 16.94762515 | 22.55281482 | 16.47247549 |
| ENSMUSG0000098276 | 9.196874066 | 7.651789682 | 8.473812573 | 2.416373016 | 8.594335036 |
| ENSMUSG0000098278 | 16.27139258 | 9.043024169 | 8.473812573 | 7.249119049 | 11.45911338 |
| ENSMUSG0000098279 | 9.196874066 | 6.956172438 | 8.473812573 | 9.665492065 | 6.445751277 |
| ENSMUSG0000098280 | 70.74518513 | 77.9091313  | 80.50121945 | 70.88027514 | 79.49759908 |
| ENSMUSG0000098281 | 11.31922962 | 11.82549314 | 13.41686991 | 8.054576721 | 10.02672421 |
| ENSMUSG0000098282 | 4.244711108 | 2.086851731 | 2.118453143 | 4.832746033 | 6.445751277 |
| ENSMUSG0000098284 | 14.85648888 | 9.043024169 | 7.767661525 | 8.054576721 | 8.594335036 |
| ENSMUSG0000098285 | 14.14903703 | 13.91234488 | 11.29841676 | 6.443661377 | 12.17530797 |
| ENSMUSG0000098286 | 9.196874066 | 12.52111039 | 11.29841676 | 8.054576721 | 11.45911338 |
| ENSMUSG0000098287 | 7.781970364 | 7.651789682 | 5.649208382 | 8.054576721 | 5.729556691 |
| ENSMUSG0000098288 | 14.14903703 | 11.1298759  | 17.65377619 | 9.665492065 | 14.32389173 |
| ENSMUSG0000098289 | 7.781970364 | 4.869320706 | 10.59226572 | 4.832746033 | 8.594335036 |
| ENSMUSG0000098290 | 7.781970364 | 6.956172438 | 6.35535943  | 6.443661377 | 3.580972932 |
| ENSMUSG0000098291 | 9.196874066 | 13.21672763 | 8.473812573 | 11.27640741 | 6.445751277 |
| ENSMUSG0000098292 | 6.367066661 | 4.869320706 | 5.649208382 | 5.638203705 | 8.594335036 |
| ENSMUSG0000098293 | 16.97884443 | 14.60796212 | 16.94762515 | 13.69278043 | 15.04008631 |
| ENSMUSG0000098294 | 11.31922962 | 4.869320706 | 7.061510478 | 9.665492065 | 5.729556691 |
| ENSMUSG0000098295 | 4.244711108 | 2.086851731 | 3.530755239 | 3.221830688 | 7.161945863 |
| ENSMUSG0000098296 | 11.31922962 | 4.869320706 | 8.473812573 | 13.69278043 | 10.02672421 |
| ENSMUSG0000098297 | 7.781970364 | 7.651789682 | 4.236906287 | 8.860034393 | 9.310529622 |
| ENSMUSG0000098298 | 7.781970364 | 4.173703463 | 2.824604191 | 5.638203705 | 2.148583759 |
| ENSMUSG0000098299 | 8.489422215 | 11.82549314 | 2.824604191 | 2.416373016 | 6.445751277 |
| ENSMUSG0000098300 | 7.074518513 | 4.869320706 | 8.473812573 | 5.638203705 | 2.864778345 |
| ENSMUSG0000098302 | 2.122355554 | 6.956172438 | 6.35535943  | 9.665492065 | 7.161945863 |
| ENSMUSG0000098303 | 10.61177777 | 8.347406925 | 9.886114669 | 2.416373016 | 12.17530797 |
| ENSMUSG0000098304 | 9.904325918 | 3.478086219 | 9.179963621 | 3.221830688 | 7.161945863 |
| ENSMUSG0000098305 | 77.11225179 | 121.0374004 | 96.74269354 | 75.71302118 | 74.48423698 |
| ENSMUSG0000098307 | 21.22355554 | 15.99919661 | 14.12302096 | 10.47094974 | 14.32389173 |
| ENSMUSG0000098308 | 30.4204296  | 49.38882431 | 42.36906287 | 115.9859048 | 105.9967988 |
| ENSMUSG0000098309 | 10.61177777 | 9.738641413 | 6.35535943  | 3.221830688 | 7.87814045  |
| ENSMUSG0000098310 | 9.904325918 | 11.82549314 | 19.77222934 | 11.27640741 | 12.89150255 |
| ENSMUSG0000098311 | 1.414903703 | 2.086851731 | 0.706151048 | 1.610915344 | 6.445751277 |
| ENSMUSG0000098312 | 6.367066661 | 4.173703463 | 7.061510478 | 4.02728836  | 6.445751277 |
| ENSMUSG0000098313 | 7.781970364 | 6.260555194 | 7.061510478 | 8.054576721 | 4.297167518 |
| ENSMUSG0000098314 | 5.65961481  | 6.260555194 | 5.649208382 | 6.443661377 | 5.729556691 |
| ENSMUSG0000098315 | 8.489422215 | 6.260555194 | 7.767661525 | 8.054576721 | 4.297167518 |
| ENSMUSG0000098316 | 51.64398514 | 55.6493795  | 68.49665163 | 144.1769233 | 93.82149081 |
| ENSMUSG0000098317 | 4.952162959 | 8.347406925 | 7.767661525 | 8.860034393 | 9.310529622 |
| ENSMUSG0000098318 | 49.52162959 | 34.08524495 | 48.7244223  | 120.0131931 | 98.83485292 |

|                   |             |             |             |             |             |
|-------------------|-------------|-------------|-------------|-------------|-------------|
| ENSMUSG0000098319 | 62.25576291 | 58.43184848 | 100.2734488 | 175.5897725 | 132.4959985 |
| ENSMUSG0000098320 | 9.196874066 | 9.738641413 | 10.59226572 | 4.832746033 | 7.87814045  |
| ENSMUSG0000098322 | 8.489422215 | 5.56493795  | 7.767661525 | 8.054576721 | 4.297167518 |
| ENSMUSG0000098323 | 0           | 0           | 0           | 0           | 0           |
| ENSMUSG0000098325 | 41.03220737 | 53.56252777 | 54.37363068 | 20.1364418  | 22.91822676 |
| ENSMUSG0000098326 | 3.537259256 | 6.260555194 | 2.824604191 | 4.02728836  | 3.580972932 |
| ENSMUSG0000098327 | 9.196874066 | 7.651789682 | 14.12302096 | 5.638203705 | 7.161945863 |
| ENSMUSG0000098328 | 9.196874066 | 6.956172438 | 9.179963621 | 4.02728836  | 5.013362104 |
| ENSMUSG0000098329 | 8.489422215 | 6.956172438 | 12.71071886 | 8.860034393 | 12.89150255 |
| ENSMUSG0000098330 | 16.97884443 | 6.956172438 | 5.649208382 | 5.638203705 | 3.580972932 |
| ENSMUSG0000098331 | 14.14903703 | 6.956172438 | 11.29841676 | 14.4982381  | 15.04008631 |
| ENSMUSG0000098332 | 41.73965922 | 68.86610713 | 50.13672439 | 70.88027514 | 68.0384857  |
| ENSMUSG0000098333 | 7.074518513 | 5.56493795  | 7.767661525 | 8.054576721 | 5.729556691 |
| ENSMUSG0000098334 | 9.196874066 | 6.260555194 | 7.767661525 | 12.08186508 | 10.7429188  |
| ENSMUSG0000098335 | 12.02668147 | 15.30357936 | 7.061510478 | 5.638203705 | 5.729556691 |
| ENSMUSG0000098336 | 7.074518513 | 9.738641413 | 7.061510478 | 2.416373016 | 6.445751277 |
| ENSMUSG0000098338 | 9.904325918 | 3.478086219 | 4.943057334 | 6.443661377 | 5.729556691 |
| ENSMUSG0000098339 | 9.904325918 | 5.56493795  | 5.649208382 | 7.249119049 | 7.87814045  |
| ENSMUSG0000098340 | 72.16008883 | 86.95215547 | 77.67661525 | 118.4022778 | 129.6312201 |
| ENSMUSG0000098341 | 5.65961481  | 6.956172438 | 7.767661525 | 9.665492065 | 5.729556691 |
| ENSMUSG0000098342 | 0.707451851 | 1.391234488 | 0           | 0           | 0.716194586 |
| ENSMUSG0000098343 | 4.244711108 | 0           | 2.118453143 | 4.02728836  | 3.580972932 |
| ENSMUSG0000098344 | 26.88317035 | 36.17209668 | 45.19366706 | 30.60739154 | 27.93158887 |
| ENSMUSG0000098345 | 7.074518513 | 8.347406925 | 7.061510478 | 6.443661377 | 9.310529622 |
| ENSMUSG0000098346 | 6.367066661 | 2.086851731 | 3.530755239 | 3.221830688 | 4.297167518 |
| ENSMUSG0000098347 | 9.196874066 | 4.173703463 | 6.35535943  | 6.443661377 | 5.729556691 |
| ENSMUSG0000098349 | 13.44158517 | 31.30277597 | 26.83373982 | 18.52552646 | 20.769643   |
| ENSMUSG0000098350 | 80.64951104 | 95.99517964 | 107.3349593 | 152.2315    | 156.1304198 |
| ENSMUSG0000098351 | 7.074518513 | 7.651789682 | 7.767661525 | 11.27640741 | 9.310529622 |
| ENSMUSG0000098353 | 70.74518513 | 95.2995624  | 107.3349593 | 95.04400531 | 93.82149081 |
| ENSMUSG0000098354 | 9.904325918 | 7.651789682 | 7.061510478 | 6.443661377 | 10.02672421 |
| ENSMUSG0000098355 | 53.05888884 | 77.9091313  | 65.67204744 | 159.4806191 | 111.7263555 |
| ENSMUSG0000098356 | 16.27139258 | 20.17290007 | 24.00913562 | 11.27640741 | 12.17530797 |
| ENSMUSG0000098357 | 0           | 0           | 0           | 0           | 0           |
| ENSMUSG0000098358 | 9.196874066 | 2.086851731 | 6.35535943  | 4.02728836  | 6.445751277 |
| ENSMUSG0000098359 | 1.414903703 | 4.869320706 | 4.943057334 | 13.69278043 | 11.45911338 |
| ENSMUSG0000098360 | 1.414903703 | 1.391234488 | 4.943057334 | 0.805457672 | 2.864778345 |
| ENSMUSG0000098361 | 60.84085921 | 106.4294383 | 96.74269354 | 81.35122488 | 65.88990194 |
| ENSMUSG0000098362 | 4.952162959 | 7.651789682 | 12.71071886 | 6.443661377 | 3.580972932 |
| ENSMUSG0000098363 | 7.074518513 | 4.869320706 | 7.061510478 | 8.860034393 | 11.45911338 |
| ENSMUSG0000098364 | 5.65961481  | 1.391234488 | 5.649208382 | 0.805457672 | 1.432389173 |
| ENSMUSG0000098365 | 16.27139258 | 19.47728283 | 19.06607829 | 10.47094974 | 10.7429188  |
| ENSMUSG0000098366 | 13.44158517 | 4.173703463 | 6.35535943  | 4.832746033 | 8.594335036 |

|                   |             |             |             |             |             |
|-------------------|-------------|-------------|-------------|-------------|-------------|
| ENSMUSG0000098367 | 1.414903703 | 0.695617244 | 1.412302096 | 2.416373016 | 4.297167518 |
| ENSMUSG0000098368 | 10.61177777 | 8.347406925 | 6.35535943  | 9.665492065 | 5.013362104 |
| ENSMUSG0000098369 | 6.367066661 | 9.738641413 | 7.061510478 | 4.832746033 | 8.594335036 |
| ENSMUSG0000098370 | 7.781970364 | 6.956172438 | 9.179963621 | 5.638203705 | 5.729556691 |
| ENSMUSG0000098371 | 0.707451851 | 2.086851731 | 0.706151048 | 6.443661377 | 4.297167518 |
| ENSMUSG0000098373 | 9.196874066 | 6.260555194 | 4.943057334 | 6.443661377 | 7.87814045  |
| ENSMUSG0000098376 | 27.5906222  | 41.73703463 | 46.60596915 | 87.79488626 | 65.88990194 |
| ENSMUSG0000098378 | 9.904325918 | 4.173703463 | 6.35535943  | 2.416373016 | 5.729556691 |
| ENSMUSG0000098379 | 7.781970364 | 6.956172438 | 7.767661525 | 8.860034393 | 7.87814045  |
| ENSMUSG0000098380 | 17.68629628 | 27.12907251 | 24.71528667 | 15.30369577 | 20.05344842 |
| ENSMUSG0000098381 | 9.904325918 | 6.956172438 | 4.943057334 | 5.638203705 | 6.445751277 |
| ENSMUSG0000098382 | 12.73413332 | 8.347406925 | 6.35535943  | 1.610915344 | 4.297167518 |
| ENSMUSG0000098383 | 5.65961481  | 6.956172438 | 11.29841676 | 4.832746033 | 5.013362104 |
| ENSMUSG0000098385 | 9.904325918 | 9.043024169 | 12.71071886 | 36.24559524 | 22.91822676 |
| ENSMUSG0000098386 | 12.73413332 | 11.1298759  | 11.29841676 | 8.860034393 | 12.17530797 |
| ENSMUSG0000098388 | 4.952162959 | 6.956172438 | 6.35535943  | 7.249119049 | 6.445751277 |
| ENSMUSG0000098389 | 6.367066661 | 4.869320706 | 6.35535943  | 4.832746033 | 5.729556691 |
| ENSMUSG0000098390 | 11.31922962 | 2.782468975 | 7.767661525 | 5.638203705 | 5.013362104 |
| ENSMUSG0000098391 | 10.61177777 | 6.956172438 | 7.061510478 | 5.638203705 | 7.87814045  |
| ENSMUSG0000098392 | 7.074518513 | 6.956172438 | 9.886114669 | 5.638203705 | 2.864778345 |
| ENSMUSG0000098393 | 11.31922962 | 5.56493795  | 7.767661525 | 6.443661377 | 6.445751277 |
| ENSMUSG0000098394 | 0           | 0           | 0           | 0           | 0           |
| ENSMUSG0000098395 | 2.122355554 | 1.391234488 | 2.118453143 | 3.221830688 | 5.013362104 |
| ENSMUSG0000098396 | 49.52162959 | 73.73542784 | 73.43970897 | 186.8661799 | 126.7664418 |
| ENSMUSG0000098397 | 1.414903703 | 2.086851731 | 1.412302096 | 1.610915344 | 3.580972932 |
| ENSMUSG0000098399 | 12.02668147 | 13.91234488 | 20.47838039 | 11.27640741 | 7.87814045  |
| ENSMUSG0000098400 | 6.367066661 | 8.347406925 | 11.29841676 | 3.221830688 | 5.729556691 |
| ENSMUSG0000098401 | 10.61177777 | 6.956172438 | 10.59226572 | 8.054576721 | 8.594335036 |
| ENSMUSG0000098402 | 9.196874066 | 6.956172438 | 7.767661525 | 6.443661377 | 6.445751277 |
| ENSMUSG0000098403 | 26.1757185  | 47.99758982 | 38.83830763 | 27.38556085 | 41.53928601 |
| ENSMUSG0000098404 | 12.73413332 | 14.60796212 | 8.473812573 | 3.221830688 | 10.7429188  |
| ENSMUSG0000098405 | 2.122355554 | 4.173703463 | 5.649208382 | 2.416373016 | 4.297167518 |
| ENSMUSG0000098406 | 5.65961481  | 2.782468975 | 2.824604191 | 1.610915344 | 1.432389173 |
| ENSMUSG0000098407 | 14.14903703 | 4.173703463 | 6.35535943  | 6.443661377 | 7.87814045  |
| ENSMUSG0000098408 | 8.489422215 | 9.738641413 | 4.943057334 | 7.249119049 | 8.594335036 |
| ENSMUSG0000098409 | 15.56394073 | 9.738641413 | 9.886114669 | 6.443661377 | 7.161945863 |
| ENSMUSG0000098410 | 8.489422215 | 4.173703463 | 9.886114669 | 16.10915344 | 13.60769714 |
| ENSMUSG0000098412 | 9.196874066 | 12.52111039 | 5.649208382 | 8.860034393 | 5.729556691 |
| ENSMUSG0000098413 | 54.47379255 | 80.69160028 | 80.50121945 | 61.21478308 | 46.55264811 |
| ENSMUSG0000098414 | 3.537259256 | 4.869320706 | 7.061510478 | 5.638203705 | 4.297167518 |
| ENSMUSG0000098415 | 7.074518513 | 13.21672763 | 9.179963621 | 14.4982381  | 13.60769714 |
| ENSMUSG0000098416 | 11.31922962 | 11.1298759  | 12.00456781 | 8.054576721 | 6.445751277 |
| ENSMUSG0000098417 | 6.367066661 | 6.260555194 | 6.35535943  | 4.02728836  | 6.445751277 |



|                   |             |             |             |             |             |
|-------------------|-------------|-------------|-------------|-------------|-------------|
| ENSMUSG0000098418 | 6.367066661 | 9.043024169 | 7.767661525 | 10.47094974 | 8.594335036 |
| ENSMUSG0000098419 | 8.489422215 | 6.956172438 | 7.767661525 | 4.02728836  | 10.02672421 |
| ENSMUSG0000098420 | 7.074518513 | 6.260555194 | 10.59226572 | 4.832746033 | 4.297167518 |
| ENSMUSG0000098421 | 11.31922962 | 4.173703463 | 7.061510478 | 4.02728836  | 8.594335036 |
| ENSMUSG0000098422 | 11.31922962 | 13.21672763 | 16.2414741  | 10.47094974 | 10.7429188  |
| ENSMUSG0000098423 | 10.61177777 | 6.956172438 | 4.943057334 | 2.416373016 | 13.60769714 |
| ENSMUSG0000098424 | 4.952162959 | 8.347406925 | 4.943057334 | 5.638203705 | 5.013362104 |
| ENSMUSG0000098425 | 6.367066661 | 3.478086219 | 4.943057334 | 2.416373016 | 6.445751277 |
| ENSMUSG0000098426 | 14.14903703 | 9.043024169 | 7.767661525 | 5.638203705 | 8.594335036 |
| ENSMUSG0000098428 | 12.02668147 | 11.1298759  | 8.473812573 | 7.249119049 | 5.013362104 |
| ENSMUSG0000098429 | 8.489422215 | 7.651789682 | 11.29841676 | 4.832746033 | 7.87814045  |
| ENSMUSG0000098430 | 0           | 0           | 0           | 0           | 0           |
| ENSMUSG0000098431 | 0           | 1.391234488 | 0.706151048 | 0           | 0           |
| ENSMUSG0000098432 | 10.61177777 | 9.738641413 | 9.886114669 | 8.860034393 | 8.594335036 |
| ENSMUSG0000098433 | 9.196874066 | 6.260555194 | 5.649208382 | 3.221830688 | 4.297167518 |
| ENSMUSG0000098434 | 19.10119998 | 46.60635533 | 28.24604191 | 91.01671695 | 87.37573953 |
| ENSMUSG0000098435 | 0           | 0           | 0           | 0           | 0           |
| ENSMUSG0000098436 | 2.829807405 | 1.391234488 | 9.886114669 | 4.02728836  | 3.580972932 |
| ENSMUSG0000098437 | 7.074518513 | 7.651789682 | 9.886114669 | 2.416373016 | 5.729556691 |
| ENSMUSG0000098438 | 12.02668147 | 1.391234488 | 6.35535943  | 4.02728836  | 7.161945863 |
| ENSMUSG0000098439 | 9.904325918 | 8.347406925 | 12.71071886 | 7.249119049 | 7.87814045  |
| ENSMUSG0000098441 | 20.51610369 | 24.34660353 | 22.59683353 | 26.58010318 | 39.39070225 |
| ENSMUSG0000098442 | 101.1656147 | 153.7314109 | 141.9363606 | 75.71302118 | 104.5644096 |
| ENSMUSG0000098443 | 31.12788146 | 54.25814501 | 43.07521391 | 24.96918783 | 27.93158887 |
| ENSMUSG0000098444 | 0.707451851 | 0           | 0.706151048 | 0           | 0           |
| ENSMUSG0000098445 | 5.65961481  | 6.260555194 | 11.29841676 | 8.054576721 | 10.7429188  |
| ENSMUSG0000098446 | 5.65961481  | 3.478086219 | 3.530755239 | 4.832746033 | 3.580972932 |
| ENSMUSG0000098447 | 13.44158517 | 21.56413456 | 26.83373982 | 22.55281482 | 27.93158887 |
| ENSMUSG0000098448 | 7.074518513 | 6.956172438 | 3.530755239 | 3.221830688 | 6.445751277 |
| ENSMUSG0000098449 | 21.93100739 | 34.08524495 | 21.89068248 | 45.10562964 | 32.22875639 |
| ENSMUSG0000098451 | 7.074518513 | 16.69481385 | 18.35992724 | 19.33098413 | 17.18867007 |
| ENSMUSG0000098452 | 11.31922962 | 6.956172438 | 9.886114669 | 8.054576721 | 3.580972932 |
| ENSMUSG0000098453 | 13.44158517 | 10.43425866 | 11.29841676 | 12.88732275 | 13.60769714 |
| ENSMUSG0000098454 | 18.39374813 | 41.73703463 | 37.42600553 | 24.16373016 | 17.90486466 |
| ENSMUSG0000098455 | 5.65961481  | 4.869320706 | 2.118453143 | 4.02728836  | 2.148583759 |
| ENSMUSG0000098456 | 6.367066661 | 6.260555194 | 7.061510478 | 3.221830688 | 9.310529622 |
| ENSMUSG0000098457 | 9.904325918 | 11.1298759  | 7.767661525 | 8.054576721 | 13.60769714 |
| ENSMUSG0000098458 | 9.196874066 | 10.43425866 | 10.59226572 | 9.665492065 | 11.45911338 |
| ENSMUSG0000098459 | 0           | 0           | 0           | 0           | 0           |
| ENSMUSG0000098460 | 8.489422215 | 15.30357936 | 14.829172   | 12.08186508 | 12.17530797 |
| ENSMUSG0000098461 | 9.196874066 | 11.1298759  | 5.649208382 | 7.249119049 | 3.580972932 |
| ENSMUSG0000098462 | 193.1343554 | 208.6851731 | 199.8407465 | 382.5923942 | 286.4778345 |
| ENSMUSG0000098464 | 13.44158517 | 14.60796212 | 8.473812573 | 4.02728836  | 9.310529622 |

|                   |             |             |             |             |             |
|-------------------|-------------|-------------|-------------|-------------|-------------|
| ENSMUSG0000098465 | 31.83533331 | 46.60635533 | 37.42600553 | 31.41284921 | 37.95831308 |
| ENSMUSG0000098466 | 0           | 0           | 0           | 0           | 0           |
| ENSMUSG0000098467 | 8.489422215 | 6.260555194 | 7.767661525 | 3.221830688 | 9.310529622 |
| ENSMUSG0000098468 | 24.76081479 | 29.21592424 | 28.95219296 | 16.10915344 | 28.64778345 |
| ENSMUSG0000098469 | 4.952162959 | 9.043024169 | 9.886114669 | 4.832746033 | 5.729556691 |
| ENSMUSG0000098471 | 9.196874066 | 13.21672763 | 6.35535943  | 8.054576721 | 7.161945863 |
| ENSMUSG0000098472 | 10.61177777 | 11.1298759  | 7.061510478 | 2.416373016 | 4.297167518 |
| ENSMUSG0000098473 | 4.952162959 | 6.956172438 | 7.767661525 | 6.443661377 | 13.60769714 |
| ENSMUSG0000098474 | 15.56394073 | 13.21672763 | 7.767661525 | 7.249119049 | 7.161945863 |
| ENSMUSG0000098475 | 8.489422215 | 6.956172438 | 8.473812573 | 8.054576721 | 7.161945863 |
| ENSMUSG0000098476 | 5.65961481  | 4.869320706 | 8.473812573 | 5.638203705 | 7.161945863 |
| ENSMUSG0000098477 | 4.244711108 | 8.347406925 | 13.41686991 | 15.30369577 | 9.310529622 |
| ENSMUSG0000098478 | 9.904325918 | 4.869320706 | 5.649208382 | 4.832746033 | 7.161945863 |
| ENSMUSG0000098479 | 7.074518513 | 6.260555194 | 8.473812573 | 6.443661377 | 7.87814045  |
| ENSMUSG0000098480 | 62.25576291 | 72.34419335 | 77.67661525 | 36.24559524 | 39.39070225 |
| ENSMUSG0000098481 | 14.14903703 | 9.738641413 | 4.236906287 | 4.02728836  | 6.445751277 |
| ENSMUSG0000098482 | 12.02668147 | 18.08604834 | 17.65377619 | 11.27640741 | 9.310529622 |
| ENSMUSG0000098483 | 12.02668147 | 8.347406925 | 10.59226572 | 11.27640741 | 8.594335036 |
| ENSMUSG0000098484 | 0.707451851 | 1.391234488 | 2.824604191 | 3.221830688 | 2.148583759 |
| ENSMUSG0000098485 | 3.537259256 | 2.086851731 | 3.530755239 | 0           | 4.297167518 |
| ENSMUSG0000098486 | 5.65961481  | 6.260555194 | 7.061510478 | 1.610915344 | 4.297167518 |
| ENSMUSG0000098487 | 13.44158517 | 21.56413456 | 28.95219296 | 13.69278043 | 14.32389173 |
| ENSMUSG0000098489 | 11.31922962 | 4.869320706 | 11.29841676 | 4.832746033 | 12.17530797 |
| ENSMUSG0000098490 | 9.196874066 | 9.043024169 | 6.35535943  | 20.1364418  | 17.18867007 |
| ENSMUSG0000098491 | 43.15456293 | 75.82227957 | 83.32582364 | 42.68925662 | 40.10689684 |
| ENSMUSG0000098492 | 155.6394073 | 212.1632594 | 193.4853871 | 256.1355397 | 186.2105924 |
| ENSMUSG0000098493 | 7.074518513 | 2.782468975 | 4.236906287 | 3.221830688 | 2.148583759 |
| ENSMUSG0000098494 | 12.02668147 | 6.260555194 | 6.35535943  | 4.832746033 | 4.297167518 |
| ENSMUSG0000098496 | 0           | 0           | 0           | 0           | 0           |
| ENSMUSG0000098497 | 21.22355554 | 20.17290007 | 22.59683353 | 12.08186508 | 11.45911338 |
| ENSMUSG0000098498 | 62.96321476 | 86.25653823 | 77.67661525 | 33.82922223 | 46.55264811 |
| ENSMUSG0000098499 | 9.904325918 | 18.08604834 | 12.00456781 | 40.2728836  | 36.5259239  |
| ENSMUSG0000098500 | 2.122355554 | 0           | 2.118453143 | 0.805457672 | 0           |
| ENSMUSG0000098501 | 9.196874066 | 6.260555194 | 9.179963621 | 1.610915344 | 7.87814045  |
| ENSMUSG0000098502 | 13.44158517 | 12.52111039 | 18.35992724 | 6.443661377 | 4.297167518 |
| ENSMUSG0000098503 | 0           | 0           | 0           | 0           | 0           |
| ENSMUSG0000098504 | 9.196874066 | 6.956172438 | 9.886114669 | 12.88732275 | 7.87814045  |
| ENSMUSG0000098505 | 12.02668147 | 10.43425866 | 4.943057334 | 3.221830688 | 10.02672421 |
| ENSMUSG0000098506 | 14.85648888 | 9.738641413 | 12.00456781 | 7.249119049 | 6.445751277 |
| ENSMUSG0000098507 | 10.61177777 | 9.738641413 | 3.530755239 | 6.443661377 | 5.013362104 |
| ENSMUSG0000098508 | 10.61177777 | 5.56493795  | 5.649208382 | 4.832746033 | 3.580972932 |
| ENSMUSG0000098510 | 19.80865184 | 34.08524495 | 34.60140134 | 18.52552646 | 20.769643   |
| ENSMUSG0000098511 | 12.02668147 | 9.738641413 | 5.649208382 | 7.249119049 | 12.89150255 |

|                   |             |             |             |             |             |
|-------------------|-------------|-------------|-------------|-------------|-------------|
| ENSMUSG0000098513 | 14.85648888 | 27.12907251 | 26.12758877 | 19.33098413 | 20.05344842 |
| ENSMUSG0000098514 | 3.537259256 | 2.782468975 | 7.061510478 | 1.610915344 | 5.013362104 |
| ENSMUSG0000098515 | 7.074518513 | 5.56493795  | 4.943057334 | 6.443661377 | 8.594335036 |
| ENSMUSG0000098516 | 14.85648888 | 27.82468975 | 31.77679715 | 35.44013757 | 30.08017263 |
| ENSMUSG0000098518 | 7.781970364 | 6.260555194 | 8.473812573 | 4.02728836  | 5.013362104 |
| ENSMUSG0000098519 | 7.781970364 | 10.43425866 | 9.179963621 | 8.054576721 | 6.445751277 |
| ENSMUSG0000098520 | 11.31922962 | 7.651789682 | 5.649208382 | 6.443661377 | 7.87814045  |
| ENSMUSG0000098521 | 5.65961481  | 7.651789682 | 4.236906287 | 2.416373016 | 5.729556691 |
| ENSMUSG0000098522 | 5.65961481  | 3.478086219 | 9.886114669 | 6.443661377 | 7.87814045  |
| ENSMUSG0000098524 | 12.73413332 | 11.82549314 | 9.179963621 | 4.832746033 | 7.161945863 |
| ENSMUSG0000098525 | 0           | 0           | 0           | 0           | 0           |
| ENSMUSG0000098526 | 0           | 0           | 0           | 0           | 0           |
| ENSMUSG0000098527 | 25.46826665 | 25.04222078 | 23.30298458 | 14.4982381  | 15.7562809  |
| ENSMUSG0000098528 | 8.489422215 | 2.086851731 | 7.061510478 | 8.054576721 | 12.17530797 |
| ENSMUSG0000098529 | 8.489422215 | 9.043024169 | 2.118453143 | 8.860034393 | 9.310529622 |
| ENSMUSG0000098531 | 6.367066661 | 6.956172438 | 9.886114669 | 5.638203705 | 10.7429188  |
| ENSMUSG0000098532 | 6.367066661 | 10.43425866 | 9.886114669 | 5.638203705 | 8.594335036 |
| ENSMUSG0000098533 | 5.65961481  | 8.347406925 | 7.061510478 | 3.221830688 | 3.580972932 |
| ENSMUSG0000098534 | 4.952162959 | 6.260555194 | 7.061510478 | 4.02728836  | 7.87814045  |
| ENSMUSG0000098535 | 1.414903703 | 2.782468975 | 2.118453143 | 8.860034393 | 7.87814045  |
| ENSMUSG0000098536 | 0           | 0           | 0           | 0           | 0           |
| ENSMUSG0000098537 | 0.707451851 | 0           | 0.706151048 | 0           | 0.716194586 |
| ENSMUSG0000098538 | 3.537259256 | 4.869320706 | 4.943057334 | 5.638203705 | 3.580972932 |
| ENSMUSG0000098539 | 12.73413332 | 14.60796212 | 14.12302096 | 15.30369577 | 13.60769714 |
| ENSMUSG0000098540 | 11.31922962 | 13.21672763 | 12.00456781 | 5.638203705 | 14.32389173 |
| ENSMUSG0000098541 | 0.707451851 | 0           | 1.412302096 | 0           | 0.716194586 |
| ENSMUSG0000098542 | 4.952162959 | 6.956172438 | 7.767661525 | 8.860034393 | 7.161945863 |
| ENSMUSG0000098543 | 11.31922962 | 6.956172438 | 2.824604191 | 4.832746033 | 9.310529622 |
| ENSMUSG0000098544 | 7.781970364 | 4.869320706 | 7.767661525 | 10.47094974 | 5.729556691 |
| ENSMUSG0000098547 | 7.781970364 | 11.1298759  | 8.473812573 | 2.416373016 | 7.87814045  |
| ENSMUSG0000098548 | 9.196874066 | 11.1298759  | 9.886114669 | 13.69278043 | 15.7562809  |
| ENSMUSG0000098549 | 10.61177777 | 10.43425866 | 4.236906287 | 7.249119049 | 4.297167518 |
| ENSMUSG0000098550 | 7.074518513 | 9.738641413 | 8.473812573 | 20.94189947 | 13.60769714 |
| ENSMUSG0000098552 | 7.781970364 | 6.260555194 | 6.35535943  | 5.638203705 | 5.013362104 |
| ENSMUSG0000098553 | 41.73965922 | 56.34499675 | 52.25517753 | 286.7429313 | 211.277403  |
| ENSMUSG0000098555 | 11.31922962 | 9.043024169 | 11.29841676 | 4.832746033 | 10.02672421 |
| ENSMUSG0000098558 | 4.952162959 | 8.347406925 | 6.35535943  | 5.638203705 | 8.594335036 |
| ENSMUSG0000098559 | 3.537259256 | 6.260555194 | 5.649208382 | 4.02728836  | 5.013362104 |
| ENSMUSG0000098560 | 3.537259256 | 1.391234488 | 3.530755239 | 1.610915344 | 2.148583759 |
| ENSMUSG0000098561 | 11.31922962 | 16.69481385 | 10.59226572 | 2.416373016 | 7.87814045  |
| ENSMUSG0000098562 | 31.12788146 | 55.6493795  | 60.72899011 | 85.37851324 | 64.45751277 |
| ENSMUSG0000098563 | 9.904325918 | 7.651789682 | 2.824604191 | 4.832746033 | 9.310529622 |
| ENSMUSG0000098564 | 9.196874066 | 7.651789682 | 3.530755239 | 2.416373016 | 10.7429188  |

|                    |             |             |             |             |             |
|--------------------|-------------|-------------|-------------|-------------|-------------|
| ENSMUSG00000098565 | 11.31922962 | 6.260555194 | 8.473812573 | 6.443661377 | 6.445751277 |
| ENSMUSG00000098566 | 0           | 0           | 0           | 0           | 0           |
| ENSMUSG00000098567 | 0           | 0           | 0           | 0           | 0           |
| ENSMUSG00000098568 | 25.46826665 | 39.6501829  | 28.24604191 | 17.72006879 | 27.21539428 |
| ENSMUSG00000098569 | 7.781970364 | 6.956172438 | 4.943057334 | 8.054576721 | 3.580972932 |
| ENSMUSG00000098570 | 1.414903703 | 2.086851731 | 2.824604191 | 5.638203705 | 7.161945863 |
| ENSMUSG00000098572 | 0           | 0           | 0           | 0           | 0           |
| ENSMUSG00000098573 | 10.61177777 | 16.69481385 | 12.00456781 | 16.91461111 | 10.7429188  |
| ENSMUSG00000098574 | 8.489422215 | 14.60796212 | 14.12302096 | 14.4982381  | 8.594335036 |
| ENSMUSG00000098575 | 12.02668147 | 11.1298759  | 7.061510478 | 4.832746033 | 6.445751277 |
| ENSMUSG00000098577 | 6.367066661 | 9.738641413 | 14.12302096 | 9.665492065 | 9.310529622 |
| ENSMUSG00000098578 | 9.904325918 | 15.30357936 | 9.179963621 | 8.054576721 | 9.310529622 |
| ENSMUSG00000098579 | 24.05336294 | 31.99839321 | 40.25060972 | 25.77464551 | 17.90486466 |
| ENSMUSG00000098580 | 36.08004441 | 57.04061399 | 64.96589639 | 63.6311561  | 47.98503729 |
| ENSMUSG00000098582 | 9.196874066 | 4.173703463 | 4.943057334 | 6.443661377 | 7.161945863 |
| ENSMUSG00000098583 | 9.196874066 | 7.651789682 | 5.649208382 | 9.665492065 | 6.445751277 |
| ENSMUSG00000098585 | 0           | 0           | 0           | 0           | 0           |
| ENSMUSG00000098586 | 36.78749627 | 26.43345526 | 40.25060972 | 49.93837567 | 45.12025894 |
| ENSMUSG00000098588 | 11.31922962 | 13.21672763 | 8.473812573 | 12.08186508 | 15.7562809  |
| ENSMUSG00000098589 | 18.39374813 | 22.95536904 | 9.179963621 | 12.88732275 | 4.297167518 |
| ENSMUSG00000098590 | 7.781970364 | 6.260555194 | 10.59226572 | 8.860034393 | 4.297167518 |
| ENSMUSG00000098591 | 2.122355554 | 2.782468975 | 2.824604191 | 1.610915344 | 2.864778345 |
| ENSMUSG00000098592 | 7.781970364 | 6.260555194 | 9.179963621 | 6.443661377 | 12.17530797 |
| ENSMUSG00000098593 | 5.65961481  | 11.82549314 | 13.41686991 | 9.665492065 | 10.7429188  |
| ENSMUSG00000098594 | 9.196874066 | 11.82549314 | 10.59226572 | 6.443661377 | 10.7429188  |
| ENSMUSG00000098595 | 12.02668147 | 27.12907251 | 31.0706461  | 85.37851324 | 59.44415067 |
| ENSMUSG00000098596 | 9.196874066 | 6.260555194 | 7.061510478 | 6.443661377 | 6.445751277 |
| ENSMUSG00000098597 | 27.5906222  | 34.78086219 | 33.89525029 | 89.4058016  | 51.56601022 |
| ENSMUSG00000098598 | 7.781970364 | 6.260555194 | 8.473812573 | 11.27640741 | 4.297167518 |
| ENSMUSG00000098599 | 0.707451851 | 1.391234488 | 1.412302096 | 2.416373016 | 2.864778345 |
| ENSMUSG00000098600 | 4.952162959 | 4.173703463 | 2.118453143 | 3.221830688 | 5.013362104 |
| ENSMUSG00000098601 | 13.44158517 | 7.651789682 | 7.061510478 | 5.638203705 | 9.310529622 |
| ENSMUSG00000098602 | 24.05336294 | 29.21592424 | 33.18909925 | 25.77464551 | 27.21539428 |
| ENSMUSG00000098603 | 37.49494812 | 47.30197258 | 45.8998181  | 20.1364418  | 25.06681052 |
| ENSMUSG00000098604 | 12.02668147 | 8.347406925 | 13.41686991 | 8.860034393 | 5.729556691 |
| ENSMUSG00000098605 | 0           | 0           | 1.412302096 | 2.416373016 | 0.716194586 |
| ENSMUSG00000098606 | 8.489422215 | 6.956172438 | 5.649208382 | 8.860034393 | 9.310529622 |
| ENSMUSG00000098607 | 14.14903703 | 6.956172438 | 9.886114669 | 4.832746033 | 9.310529622 |
| ENSMUSG00000098608 | 9.904325918 | 5.56493795  | 11.29841676 | 6.443661377 | 5.729556691 |
| ENSMUSG00000098609 | 19.10119998 | 20.86851731 | 24.00913562 | 12.88732275 | 24.35061594 |
| ENSMUSG00000098611 | 9.904325918 | 7.651789682 | 8.473812573 | 5.638203705 | 5.013362104 |
| ENSMUSG00000098612 | 11.31922962 | 10.43425866 | 7.767661525 | 3.221830688 | 10.02672421 |
| ENSMUSG00000098613 | 16.27139258 | 18.08604834 | 24.00913562 | 20.1364418  | 26.49919969 |

|                    |             |             |             |             |             |
|--------------------|-------------|-------------|-------------|-------------|-------------|
| ENSMUSG00000098614 | 0           | 0           | 0           | 0           | 0           |
| ENSMUSG00000098617 | 0           | 0           | 0           | 0           | 0           |
| ENSMUSG00000098618 | 9.904325918 | 10.43425866 | 9.179963621 | 4.832746033 | 10.02672421 |
| ENSMUSG00000098619 | 4.952162959 | 5.56493795  | 9.179963621 | 7.249119049 | 8.594335036 |
| ENSMUSG00000098620 | 10.61177777 | 23.65098629 | 23.30298458 | 11.27640741 | 15.04008631 |
| ENSMUSG00000098621 | 50.22908144 | 51.47567604 | 39.54445867 | 92.62763229 | 76.63282074 |
| ENSMUSG00000098622 | 12.02668147 | 10.43425866 | 9.886114669 | 4.02728836  | 5.729556691 |
| ENSMUSG00000098623 | 1.414903703 | 1.391234488 | 0.706151048 | 1.610915344 | 1.432389173 |
| ENSMUSG00000098624 | 16.27139258 | 10.43425866 | 13.41686991 | 35.44013757 | 26.49919969 |
| ENSMUSG00000098625 | 2.829807405 | 2.086851731 | 1.412302096 | 5.638203705 | 3.580972932 |
| ENSMUSG00000098626 | 9.196874066 | 17.39043109 | 11.29841676 | 25.77464551 | 15.7562809  |
| ENSMUSG00000098627 | 7.074518513 | 8.347406925 | 9.179963621 | 2.416373016 | 6.445751277 |
| ENSMUSG00000098628 | 7.781970364 | 10.43425866 | 7.061510478 | 4.02728836  | 7.161945863 |
| ENSMUSG00000098629 | 7.781970364 | 4.173703463 | 4.943057334 | 6.443661377 | 7.87814045  |
| ENSMUSG00000098630 | 6.367066661 | 6.956172438 | 7.061510478 | 1.610915344 | 4.297167518 |
| ENSMUSG00000098631 | 5.65961481  | 13.91234488 | 15.53532305 | 7.249119049 | 7.87814045  |
| ENSMUSG00000098632 | 6.367066661 | 7.651789682 | 7.061510478 | 9.665492065 | 11.45911338 |
| ENSMUSG00000098634 | 9.196874066 | 11.1298759  | 9.886114669 | 15.30369577 | 12.17530797 |
| ENSMUSG00000098635 | 6.367066661 | 6.956172438 | 5.649208382 | 7.249119049 | 10.7429188  |
| ENSMUSG00000098636 | 12.02668147 | 5.56493795  | 11.29841676 | 4.832746033 | 5.013362104 |
| ENSMUSG00000098638 | 1.414903703 | 2.782468975 | 3.530755239 | 0.805457672 | 2.864778345 |
| ENSMUSG00000098640 | 13.44158517 | 6.260555194 | 10.59226572 | 5.638203705 | 8.594335036 |
| ENSMUSG00000098641 | 6.367066661 | 4.173703463 | 8.473812573 | 10.47094974 | 6.445751277 |
| ENSMUSG00000098642 | 9.904325918 | 11.1298759  | 5.649208382 | 2.416373016 | 5.729556691 |
| ENSMUSG00000098644 | 10.61177777 | 2.782468975 | 7.061510478 | 7.249119049 | 4.297167518 |
| ENSMUSG00000098645 | 91.26128881 | 106.4294383 | 129.2256417 | 331.0431032 | 257.8300511 |
| ENSMUSG00000098646 | 34.66514071 | 47.99758982 | 48.7244223  | 25.77464551 | 30.08017263 |
| ENSMUSG00000098648 | 11.31922962 | 4.869320706 | 6.35535943  | 4.02728836  | 7.161945863 |
| ENSMUSG00000098649 | 11.31922962 | 7.651789682 | 2.118453143 | 6.443661377 | 4.297167518 |
| ENSMUSG00000098650 | 4.952162959 | 10.43425866 | 12.71071886 | 7.249119049 | 12.17530797 |
| ENSMUSG00000098651 | 123.0966221 | 138.4278315 | 165.9454962 | 77.32393652 | 78.06520991 |
| ENSMUSG00000098652 | 16.97884443 | 16.69481385 | 14.829172   | 15.30369577 | 12.17530797 |
| ENSMUSG00000098653 | 7.781970364 | 4.173703463 | 4.943057334 | 2.416373016 | 5.729556691 |
| ENSMUSG00000098654 | 0           | 0           | 0           | 0           | 0           |
| ENSMUSG00000098655 | 7.074518513 | 4.869320706 | 4.943057334 | 6.443661377 | 6.445751277 |
| ENSMUSG00000098656 | 7.781970364 | 10.43425866 | 11.29841676 | 8.054576721 | 7.87814045  |
| ENSMUSG00000098657 | 11.31922962 | 4.869320706 | 2.824604191 | 5.638203705 | 4.297167518 |
| ENSMUSG00000098658 | 6.367066661 | 9.738641413 | 5.649208382 | 8.054576721 | 8.594335036 |
| ENSMUSG00000098659 | 10.61177777 | 6.260555194 | 12.00456781 | 6.443661377 | 5.013362104 |
| ENSMUSG00000098660 | 6.367066661 | 9.738641413 | 12.00456781 | 0.805457672 | 3.580972932 |
| ENSMUSG00000098661 | 4.244711108 | 5.56493795  | 5.649208382 | 4.02728836  | 5.013362104 |
| ENSMUSG00000098662 | 2.122355554 | 4.173703463 | 1.412302096 | 1.610915344 | 1.432389173 |
| ENSMUSG00000098663 | 8.489422215 | 6.260555194 | 7.767661525 | 4.02728836  | 10.02672421 |

|                    |             |             |             |             |             |
|--------------------|-------------|-------------|-------------|-------------|-------------|
| ENSMUSG00000098664 | 5.65961481  | 5.56493795  | 4.236906287 | 2.416373016 | 2.148583759 |
| ENSMUSG00000098665 | 13.44158517 | 8.347406925 | 10.59226572 | 8.054576721 | 4.297167518 |
| ENSMUSG00000098666 | 14.85648888 | 15.30357936 | 11.29841676 | 12.88732275 | 8.594335036 |
| ENSMUSG00000098667 | 9.904325918 | 4.869320706 | 7.061510478 | 5.638203705 | 2.148583759 |
| ENSMUSG00000098668 | 7.781970364 | 6.956172438 | 5.649208382 | 11.27640741 | 4.297167518 |
| ENSMUSG00000098669 | 14.85648888 | 11.82549314 | 11.29841676 | 6.443661377 | 5.729556691 |
| ENSMUSG00000098670 | 14.85648888 | 12.52111039 | 22.59683353 | 52.35474869 | 37.95831308 |
| ENSMUSG00000098671 | 7.074518513 | 12.52111039 | 12.00456781 | 16.91461111 | 16.47247549 |
| ENSMUSG00000098672 | 36.78749627 | 47.30197258 | 42.36906287 | 58.79841006 | 46.55264811 |
| ENSMUSG00000098674 | 21.93100739 | 32.69401046 | 36.71985448 | 29.80193387 | 25.78300511 |
| ENSMUSG00000098675 | 9.196874066 | 9.043024169 | 8.473812573 | 6.443661377 | 7.87814045  |
| ENSMUSG00000098676 | 0.707451851 | 2.086851731 | 0           | 0           | 0.716194586 |
| ENSMUSG00000098677 | 0           | 0           | 0.706151048 | 0           | 0           |
| ENSMUSG00000098679 | 4.244711108 | 6.956172438 | 14.12302096 | 8.860034393 | 7.161945863 |
| ENSMUSG00000098680 | 10.61177777 | 20.86851731 | 24.00913562 | 11.27640741 | 19.33725383 |
| ENSMUSG00000098682 | 7.074518513 | 6.956172438 | 13.41686991 | 3.221830688 | 3.580972932 |
| ENSMUSG00000098683 | 0           | 0           | 0           | 0           | 0           |
| ENSMUSG00000098684 | 9.904325918 | 5.56493795  | 5.649208382 | 6.443661377 | 7.161945863 |
| ENSMUSG00000098685 | 8.489422215 | 10.43425866 | 8.473812573 | 4.832746033 | 7.87814045  |
| ENSMUSG00000098686 | 4.952162959 | 2.086851731 | 6.35535943  | 6.443661377 | 2.864778345 |
| ENSMUSG00000098687 | 9.196874066 | 3.478086219 | 7.767661525 | 4.832746033 | 6.445751277 |
| ENSMUSG00000098688 | 5.65961481  | 7.651789682 | 7.061510478 | 4.832746033 | 5.729556691 |
| ENSMUSG00000098689 | 12.02668147 | 14.60796212 | 21.18453143 | 13.69278043 | 17.90486466 |
| ENSMUSG00000098690 | 42.44711108 | 50.08444155 | 56.49208382 | 52.35474869 | 57.29556691 |
| ENSMUSG00000098691 | 9.904325918 | 9.738641413 | 4.236906287 | 8.054576721 | 8.594335036 |
| ENSMUSG00000098693 | 33.95768886 | 37.56333116 | 40.25060972 | 47.52200265 | 43.68786977 |
| ENSMUSG00000098694 | 0.707451851 | 0.695617244 | 0           | 0           | 0.716194586 |
| ENSMUSG00000098695 | 0           | 0           | 0           | 0           | 0           |
| ENSMUSG00000098696 | 9.196874066 | 9.043024169 | 4.943057334 | 3.221830688 | 9.310529622 |
| ENSMUSG00000098697 | 7.074518513 | 5.56493795  | 9.886114669 | 6.443661377 | 6.445751277 |
| ENSMUSG00000098698 | 7.781970364 | 7.651789682 | 7.767661525 | 17.72006879 | 10.7429188  |
| ENSMUSG00000098699 | 6.367066661 | 4.173703463 | 5.649208382 | 2.416373016 | 2.148583759 |
| ENSMUSG00000098700 | 10.61177777 | 10.43425866 | 11.29841676 | 4.832746033 | 8.594335036 |
| ENSMUSG00000098701 | 24.76081479 | 25.04222078 | 32.4829482  | 28.19101852 | 22.20203218 |
| ENSMUSG00000098702 | 74.98989623 | 100.8645003 | 99.56729774 | 252.913709  | 186.926787  |
| ENSMUSG00000098703 | 12.02668147 | 9.043024169 | 8.473812573 | 8.054576721 | 5.729556691 |
| ENSMUSG00000098704 | 4.952162959 | 6.260555194 | 7.767661525 | 12.88732275 | 3.580972932 |
| ENSMUSG00000098705 | 12.02668147 | 7.651789682 | 9.179963621 | 5.638203705 | 3.580972932 |
| ENSMUSG00000098706 | 8.489422215 | 11.1298759  | 11.29841676 | 8.054576721 | 7.87814045  |
| ENSMUSG00000098707 | 10.61177777 | 9.043024169 | 4.236906287 | 8.054576721 | 12.17530797 |
| ENSMUSG00000098708 | 185.352385  | 237.2054801 | 218.9068248 | 163.5079074 | 149.6846685 |
| ENSMUSG00000098709 | 4.952162959 | 4.869320706 | 7.061510478 | 8.054576721 | 7.161945863 |
| ENSMUSG00000098710 | 0           | 0           | 0           | 0           | 0           |

|                    |             |             |             |             |             |
|--------------------|-------------|-------------|-------------|-------------|-------------|
| ENSMUSG00000098711 | 0           | 0           | 0           | 0           | 0           |
| ENSMUSG00000098712 | 9.196874066 | 4.173703463 | 5.649208382 | 1.610915344 | 7.87814045  |
| ENSMUSG00000098713 | 7.781970364 | 9.043024169 | 5.649208382 | 9.665492065 | 5.729556691 |
| ENSMUSG00000098714 | 122.3891703 | 173.9043109 | 143.3486627 | 125.6513968 | 111.7263555 |
| ENSMUSG00000098716 | 29.0055259  | 27.82468975 | 24.00913562 | 179.6170609 | 111.7263555 |
| ENSMUSG00000098717 | 0           | 0           | 0           | 0           | 0           |
| ENSMUSG00000098718 | 16.27139258 | 34.78086219 | 37.42600553 | 26.58010318 | 26.49919969 |
| ENSMUSG00000098719 | 198.7939702 | 242.0748008 | 242.2098094 | 99.07129367 | 122.4692743 |
| ENSMUSG00000098720 | 4.952162959 | 10.43425866 | 5.649208382 | 4.832746033 | 5.729556691 |
| ENSMUSG00000098721 | 15.56394073 | 18.78166558 | 14.829172   | 16.10915344 | 7.87814045  |
| ENSMUSG00000098722 | 0           | 1.391234488 | 0           | 0           | 0           |
| ENSMUSG00000098723 | 14.14903703 | 6.260555194 | 6.35535943  | 7.249119049 | 2.864778345 |
| ENSMUSG00000098725 | 0           | 0           | 0           | 0           | 0           |
| ENSMUSG00000098726 | 10.61177777 | 14.60796212 | 17.65377619 | 10.47094974 | 11.45911338 |
| ENSMUSG00000098727 | 12.02668147 | 6.956172438 | 8.473812573 | 6.443661377 | 7.87814045  |
| ENSMUSG00000098728 | 10.61177777 | 9.738641413 | 12.00456781 | 23.35827249 | 13.60769714 |
| ENSMUSG00000098729 | 17.68629628 | 7.651789682 | 13.41686991 | 8.054576721 | 6.445751277 |
| ENSMUSG00000098730 | 12.73413332 | 14.60796212 | 18.35992724 | 9.665492065 | 7.87814045  |
| ENSMUSG00000098731 | 9.904325918 | 12.52111039 | 14.12302096 | 10.47094974 | 12.17530797 |
| ENSMUSG00000098732 | 0           | 0           | 0           | 0           | 0           |
| ENSMUSG00000098733 | 27.5906222  | 49.38882431 | 30.36449505 | 7.249119049 | 26.49919969 |
| ENSMUSG00000098734 | 8.489422215 | 9.738641413 | 9.886114669 | 1.610915344 | 7.87814045  |
| ENSMUSG00000098735 | 7.074518513 | 4.869320706 | 8.473812573 | 4.02728836  | 7.161945863 |
| ENSMUSG00000098736 | 0           | 0           | 0           | 0           | 0           |
| ENSMUSG00000098737 | 13.44158517 | 9.738641413 | 14.12302096 | 8.860034393 | 10.02672421 |
| ENSMUSG00000098739 | 9.904325918 | 5.56493795  | 7.061510478 | 4.832746033 | 8.594335036 |
| ENSMUSG00000098740 | 8.489422215 | 10.43425866 | 12.00456781 | 3.221830688 | 4.297167518 |
| ENSMUSG00000098741 | 4.952162959 | 9.043024169 | 7.061510478 | 4.832746033 | 7.161945863 |
| ENSMUSG00000098742 | 4.244711108 | 7.651789682 | 9.886114669 | 5.638203705 | 2.864778345 |
| ENSMUSG00000098743 | 5.65961481  | 3.478086219 | 4.236906287 | 4.02728836  | 2.148583759 |
| ENSMUSG00000098744 | 11.31922962 | 12.52111039 | 14.12302096 | 4.02728836  | 9.310529622 |
| ENSMUSG00000098745 | 9.196874066 | 3.478086219 | 5.649208382 | 4.02728836  | 4.297167518 |
| ENSMUSG00000098747 | 12.02668147 | 4.173703463 | 3.530755239 | 5.638203705 | 10.02672421 |
| ENSMUSG00000098748 | 9.904325918 | 6.956172438 | 7.767661525 | 12.88732275 | 5.729556691 |
| ENSMUSG00000098749 | 0           | 0           | 0           | 0           | 0           |
| ENSMUSG00000098750 | 13.44158517 | 21.56413456 | 14.12302096 | 16.91461111 | 20.769643   |
| ENSMUSG00000098751 | 4.244711108 | 7.651789682 | 4.943057334 | 29.80193387 | 12.89150255 |
| ENSMUSG00000098752 | 7.781970364 | 7.651789682 | 12.71071886 | 6.443661377 | 10.7429188  |
| ENSMUSG00000098755 | 77.81970364 | 81.38721752 | 69.90895373 | 87.79488626 | 73.05184781 |
| ENSMUSG00000098756 | 8.489422215 | 7.651789682 | 8.473812573 | 2.416373016 | 10.02672421 |
| ENSMUSG00000098757 | 8.489422215 | 9.043024169 | 3.530755239 | 4.832746033 | 4.297167518 |
| ENSMUSG00000098758 | 12.73413332 | 9.043024169 | 4.943057334 | 5.638203705 | 5.729556691 |
| ENSMUSG00000098759 | 9.196874066 | 8.347406925 | 11.29841676 | 6.443661377 | 7.161945863 |

|                    |             |             |             |             |             |
|--------------------|-------------|-------------|-------------|-------------|-------------|
| ENSMUSG00000098760 | 8.489422215 | 5.56493795  | 4.943057334 | 5.638203705 | 2.864778345 |
| ENSMUSG00000098761 | 21.22355554 | 29.21592424 | 18.35992724 | 14.4982381  | 17.90486466 |
| ENSMUSG00000098762 | 70.03773327 | 66.7792554  | 55.07978173 | 115.1804471 | 85.94335036 |
| ENSMUSG00000098763 | 5.65961481  | 3.478086219 | 7.061510478 | 6.443661377 | 6.445751277 |
| ENSMUSG00000098764 | 4.244711108 | 12.52111039 | 7.767661525 | 8.054576721 | 6.445751277 |
| ENSMUSG00000098765 | 4.952162959 | 5.56493795  | 3.530755239 | 5.638203705 | 9.310529622 |
| ENSMUSG00000098766 | 10.61177777 | 12.52111039 | 8.473812573 | 19.33098413 | 15.7562809  |
| ENSMUSG00000098767 | 1.414903703 | 1.391234488 | 2.118453143 | 0           | 2.148583759 |
| ENSMUSG00000098768 | 7.074518513 | 14.60796212 | 6.35535943  | 4.832746033 | 7.161945863 |
| ENSMUSG00000098769 | 9.904325918 | 10.43425866 | 9.886114669 | 6.443661377 | 10.7429188  |
| ENSMUSG00000098770 | 10.61177777 | 7.651789682 | 5.649208382 | 5.638203705 | 7.161945863 |
| ENSMUSG00000098771 | 5.65961481  | 10.43425866 | 7.061510478 | 4.832746033 | 6.445751277 |
| ENSMUSG00000098772 | 9.904325918 | 9.043024169 | 4.943057334 | 8.860034393 | 8.594335036 |
| ENSMUSG00000098774 | 4.952162959 | 6.956172438 | 7.767661525 | 12.88732275 | 7.161945863 |
| ENSMUSG00000098775 | 2.829807405 | 0           | 2.118453143 | 3.221830688 | 0           |
| ENSMUSG00000098776 | 9.904325918 | 9.738641413 | 6.35535943  | 1.610915344 | 5.729556691 |
| ENSMUSG00000098777 | 7.074518513 | 11.82549314 | 8.473812573 | 4.02728836  | 5.013362104 |
| ENSMUSG00000098778 | 16.97884443 | 23.65098629 | 24.71528667 | 31.41284921 | 24.35061594 |
| ENSMUSG00000098779 | 7.781970364 | 6.260555194 | 4.943057334 | 5.638203705 | 5.729556691 |
| ENSMUSG00000098780 | 5.65961481  | 9.043024169 | 5.649208382 | 5.638203705 | 9.310529622 |
| ENSMUSG00000098782 | 14.85648888 | 5.56493795  | 8.473812573 | 5.638203705 | 6.445751277 |
| ENSMUSG00000098783 | 4.244711108 | 11.82549314 | 12.00456781 | 9.665492065 | 15.04008631 |
| ENSMUSG00000098784 | 14.14903703 | 21.56413456 | 16.94762515 | 14.4982381  | 15.04008631 |
| ENSMUSG00000098785 | 6.367066661 | 11.1298759  | 8.473812573 | 10.47094974 | 7.161945863 |
| ENSMUSG00000098786 | 4.952162959 | 8.347406925 | 12.00456781 | 8.860034393 | 12.89150255 |
| ENSMUSG00000098787 | 4.244711108 | 6.956172438 | 4.236906287 | 3.221830688 | 2.864778345 |
| ENSMUSG00000098788 | 8.489422215 | 7.651789682 | 9.886114669 | 4.02728836  | 8.594335036 |
| ENSMUSG00000098790 | 12.73413332 | 16.69481385 | 16.94762515 | 12.88732275 | 22.20203218 |
| ENSMUSG00000098791 | 3.537259256 | 1.391234488 | 4.236906287 | 4.02728836  | 2.148583759 |
| ENSMUSG00000098792 | 36.78749627 | 75.12666233 | 70.61510478 | 132.0950582 | 85.94335036 |
| ENSMUSG00000098793 | 2.122355554 | 1.391234488 | 1.412302096 | 2.416373016 | 1.432389173 |
| ENSMUSG00000098794 | 15.56394073 | 17.39043109 | 11.29841676 | 12.08186508 | 7.87814045  |
| ENSMUSG00000098795 | 0           | 1.391234488 | 0           | 0           | 0.716194586 |
| ENSMUSG00000098796 | 10.61177777 | 14.60796212 | 9.886114669 | 8.860034393 | 12.89150255 |
| ENSMUSG00000098797 | 13.44158517 | 7.651789682 | 4.943057334 | 7.249119049 | 5.729556691 |
| ENSMUSG00000098798 | 0           | 0           | 0           | 0           | 0           |
| ENSMUSG00000098799 | 0           | 0           | 0           | 0           | 0           |
| ENSMUSG00000098800 | 19.80865184 | 9.738641413 | 12.71071886 | 13.69278043 | 15.7562809  |
| ENSMUSG00000098801 | 13.44158517 | 8.347406925 | 6.35535943  | 3.221830688 | 2.864778345 |
| ENSMUSG00000098802 | 9.904325918 | 12.52111039 | 14.12302096 | 8.860034393 | 9.310529622 |
| ENSMUSG00000098803 | 24.76081479 | 50.08444155 | 41.66291182 | 26.58010318 | 29.36397804 |
| ENSMUSG00000098805 | 7.074518513 | 6.260555194 | 4.236906287 | 4.832746033 | 9.310529622 |
| ENSMUSG00000098807 | 0           | 0           | 0           | 0           | 0           |



|                   |             |             |             |             |             |
|-------------------|-------------|-------------|-------------|-------------|-------------|
| ENSMUSG0000098808 | 0           | 1.391234488 | 2.118453143 | 1.610915344 | 1.432389173 |
| ENSMUSG0000098809 | 0.707451851 | 0.695617244 | 2.824604191 | 2.416373016 | 2.148583759 |
| ENSMUSG0000098811 | 3.537259256 | 10.43425866 | 9.179963621 | 16.10915344 | 25.78300511 |
| ENSMUSG0000098812 | 14.85648888 | 13.21672763 | 16.94762515 | 8.054576721 | 12.89150255 |
| ENSMUSG0000098813 | 10.61177777 | 18.08604834 | 12.00456781 | 92.62763229 | 52.99839939 |
| ENSMUSG0000098814 | 0           | 0           | 0.706151048 | 0           | 0           |
| ENSMUSG0000098815 | 8.489422215 | 8.347406925 | 7.061510478 | 5.638203705 | 9.310529622 |
| ENSMUSG0000098816 | 1.414903703 | 2.086851731 | 0.706151048 | 0.805457672 | 0           |
| ENSMUSG0000098817 | 6.367066661 | 11.1298759  | 7.767661525 | 12.88732275 | 7.161945863 |
| ENSMUSG0000098818 | 8.489422215 | 9.043024169 | 5.649208382 | 4.832746033 | 7.87814045  |
| ENSMUSG0000098819 | 11.31922962 | 8.347406925 | 8.473812573 | 4.02728836  | 5.013362104 |
| ENSMUSG0000098820 | 7.074518513 | 4.173703463 | 7.767661525 | 4.02728836  | 6.445751277 |
| ENSMUSG0000098821 | 12.02668147 | 6.260555194 | 9.179963621 | 5.638203705 | 9.310529622 |
| ENSMUSG0000098822 | 13.44158517 | 7.651789682 | 7.767661525 | 6.443661377 | 8.594335036 |
| ENSMUSG0000098823 | 8.489422215 | 13.21672763 | 10.59226572 | 2.416373016 | 9.310529622 |
| ENSMUSG0000098824 | 14.85648888 | 13.21672763 | 18.35992724 | 14.4982381  | 9.310529622 |
| ENSMUSG0000098825 | 2.829807405 | 6.260555194 | 6.35535943  | 0.805457672 | 3.580972932 |
| ENSMUSG0000098826 | 33.25023701 | 26.43345526 | 40.25060972 | 16.10915344 | 20.769643   |
| ENSMUSG0000098827 | 13.44158517 | 24.34660353 | 16.94762515 | 30.60739154 | 23.63442135 |
| ENSMUSG0000098828 | 0           | 0           | 0           | 0           | 0           |
| ENSMUSG0000098829 | 12.02668147 | 2.782468975 | 8.473812573 | 1.610915344 | 7.161945863 |
| ENSMUSG0000098830 | 12.73413332 | 18.78166558 | 16.94762515 | 16.91461111 | 15.7562809  |
| ENSMUSG0000098831 | 21.22355554 | 18.78166558 | 29.65834401 | 23.35827249 | 25.06681052 |
| ENSMUSG0000098832 | 9.196874066 | 8.347406925 | 6.35535943  | 4.02728836  | 4.297167518 |
| ENSMUSG0000098833 | 10.61177777 | 9.738641413 | 8.473812573 | 7.249119049 | 8.594335036 |
| ENSMUSG0000098834 | 6.367066661 | 6.260555194 | 4.943057334 | 5.638203705 | 6.445751277 |
| ENSMUSG0000098836 | 0.707451851 | 0           | 0.706151048 | 0.805457672 | 0.716194586 |
| ENSMUSG0000098837 | 12.73413332 | 21.56413456 | 27.53989086 | 15.30369577 | 20.05344842 |
| ENSMUSG0000098838 | 0           | 0           | 0           | 0           | 0           |
| ENSMUSG0000098839 | 40.32475552 | 65.38802092 | 65.67204744 | 64.43661377 | 72.33565322 |
| ENSMUSG0000098840 | 15.56394073 | 9.043024169 | 8.473812573 | 14.4982381  | 10.7429188  |
| ENSMUSG0000098842 | 0           | 1.391234488 | 0.706151048 | 1.610915344 | 0           |
| ENSMUSG0000098843 | 360.0929923 | 347.8086219 | 297.9957422 | 284.3265582 | 201.9668733 |
| ENSMUSG0000098844 | 25.46826665 | 27.12907251 | 31.0706461  | 24.16373016 | 22.20203218 |
| ENSMUSG0000098845 | 4.952162959 | 9.043024169 | 7.767661525 | 3.221830688 | 6.445751277 |
| ENSMUSG0000098846 | 0.707451851 | 0           | 1.412302096 | 0           | 0           |
| ENSMUSG0000098848 | 0.707451851 | 0           | 0           | 0           | 1.432389173 |
| ENSMUSG0000098849 | 4.952162959 | 5.56493795  | 4.943057334 | 4.832746033 | 0.716194586 |
| ENSMUSG0000098850 | 0           | 0           | 0           | 0           | 0           |
| ENSMUSG0000098851 | 9.904325918 | 4.869320706 | 4.236906287 | 1.610915344 | 8.594335036 |
| ENSMUSG0000098852 | 6.367066661 | 6.260555194 | 8.473812573 | 2.416373016 | 7.161945863 |
| ENSMUSG0000098853 | 7.074518513 | 6.260555194 | 7.061510478 | 4.832746033 | 6.445751277 |
| ENSMUSG0000098854 | 16.97884443 | 6.260555194 | 11.29841676 | 8.054576721 | 21.48583759 |

|                   |             |             |             |             |             |
|-------------------|-------------|-------------|-------------|-------------|-------------|
| ENSMUSG0000098855 | 9.196874066 | 5.56493795  | 7.061510478 | 5.638203705 | 8.594335036 |
| ENSMUSG0000098856 | 2.122355554 | 6.260555194 | 7.061510478 | 4.832746033 | 9.310529622 |
| ENSMUSG0000098857 | 23.34591109 | 35.47647943 | 26.83373982 | 32.21830688 | 35.80972932 |
| ENSMUSG0000098858 | 30.4204296  | 60.51870021 | 45.8998181  | 68.46390213 | 65.17370736 |
| ENSMUSG0000098859 | 7.074518513 | 13.91234488 | 2.118453143 | 9.665492065 | 7.161945863 |
| ENSMUSG0000098860 | 13.44158517 | 5.56493795  | 4.943057334 | 3.221830688 | 7.87814045  |
| ENSMUSG0000098861 | 8.489422215 | 8.347406925 | 11.29841676 | 4.02728836  | 7.161945863 |
| ENSMUSG0000098862 | 7.781970364 | 5.56493795  | 6.35535943  | 5.638203705 | 7.161945863 |
| ENSMUSG0000098863 | 0           | 1.391234488 | 0.706151048 | 0.805457672 | 0           |
| ENSMUSG0000098864 | 7.781970364 | 13.21672763 | 14.829172   | 4.832746033 | 10.02672421 |
| ENSMUSG0000098865 | 17.68629628 | 13.91234488 | 18.35992724 | 15.30369577 | 12.17530797 |
| ENSMUSG0000098866 | 7.074518513 | 4.173703463 | 7.061510478 | 4.02728836  | 4.297167518 |
| ENSMUSG0000098867 | 7.781970364 | 2.782468975 | 7.767661525 | 5.638203705 | 6.445751277 |
| ENSMUSG0000098868 | 2.829807405 | 3.478086219 | 2.824604191 | 1.610915344 | 2.864778345 |
| ENSMUSG0000098869 | 8.489422215 | 9.043024169 | 15.53532305 | 6.443661377 | 4.297167518 |
| ENSMUSG0000098870 | 6.367066661 | 9.043024169 | 14.829172   | 6.443661377 | 7.161945863 |
| ENSMUSG0000098871 | 12.02668147 | 15.30357936 | 14.829172   | 141.7605503 | 69.47087488 |
| ENSMUSG0000098873 | 11.31922962 | 22.2597518  | 11.29841676 | 25.77464551 | 17.90486466 |
| ENSMUSG0000098874 | 0           | 0           | 0           | 0           | 0           |
| ENSMUSG0000098875 | 11.31922962 | 7.651789682 | 3.530755239 | 5.638203705 | 7.161945863 |
| ENSMUSG0000098876 | 18.39374813 | 7.651789682 | 7.767661525 | 5.638203705 | 2.864778345 |
| ENSMUSG0000098877 | 7.074518513 | 6.260555194 | 7.767661525 | 5.638203705 | 3.580972932 |
| ENSMUSG0000098878 | 0           | 0           | 0.706151048 | 0           | 0           |
| ENSMUSG0000098879 | 15.56394073 | 20.86851731 | 13.41686991 | 16.91461111 | 10.7429188  |
| ENSMUSG0000098880 | 1.414903703 | 4.869320706 | 0.706151048 | 1.610915344 | 2.148583759 |
| ENSMUSG0000098881 | 31.83533331 | 42.43265187 | 41.66291182 | 29.80193387 | 35.80972932 |
| ENSMUSG0000098882 | 1.414903703 | 2.086851731 | 2.118453143 | 2.416373016 | 0           |
| ENSMUSG0000098883 | 12.02668147 | 3.478086219 | 5.649208382 | 6.443661377 | 7.87814045  |
| ENSMUSG0000098884 | 13.44158517 | 16.69481385 | 13.41686991 | 9.665492065 | 12.17530797 |
| ENSMUSG0000098885 | 35.37259256 | 48.69320706 | 45.19366706 | 42.68925662 | 35.80972932 |
| ENSMUSG0000098886 | 14.14903703 | 25.04222078 | 15.53532305 | 28.19101852 | 18.62105924 |
| ENSMUSG0000098887 | 12.73413332 | 9.043024169 | 9.886114669 | 4.832746033 | 7.161945863 |
| ENSMUSG0000098888 | 8.489422215 | 6.260555194 | 5.649208382 | 4.832746033 | 9.310529622 |
| ENSMUSG0000098889 | 5.65961481  | 13.21672763 | 9.886114669 | 9.665492065 | 9.310529622 |
| ENSMUSG0000098890 | 9.904325918 | 11.1298759  | 7.061510478 | 8.860034393 | 8.594335036 |
| ENSMUSG0000098891 | 4.952162959 | 2.086851731 | 2.824604191 | 2.416373016 | 5.013362104 |
| ENSMUSG0000098893 | 112.4848444 | 204.5114697 | 155.3532305 | 166.7297381 | 163.2923657 |
| ENSMUSG0000098894 | 5.65961481  | 11.1298759  | 4.943057334 | 2.416373016 | 4.297167518 |
| ENSMUSG0000098895 | 5.65961481  | 4.173703463 | 9.179963621 | 9.665492065 | 6.445751277 |
| ENSMUSG0000098896 | 10.61177777 | 13.21672763 | 16.2414741  | 10.47094974 | 12.89150255 |
| ENSMUSG0000098897 | 12.73413332 | 6.260555194 | 6.35535943  | 7.249119049 | 5.729556691 |
| ENSMUSG0000098898 | 69.33028142 | 90.43024169 | 89.68118307 | 33.82922223 | 45.83645353 |
| ENSMUSG0000098899 | 0           | 0           | 0           | 0           | 0           |

|                    |             |             |             |             |             |
|--------------------|-------------|-------------|-------------|-------------|-------------|
| ENSMUSG00000098900 | 5.65961481  | 4.173703463 | 7.061510478 | 4.02728836  | 5.013362104 |
| ENSMUSG00000098901 | 6.367066661 | 10.43425866 | 6.35535943  | 8.054576721 | 5.729556691 |
| ENSMUSG00000098903 | 7.781970364 | 9.043024169 | 8.473812573 | 8.054576721 | 7.87814045  |
| ENSMUSG00000098904 | 9.196874066 | 4.173703463 | 7.767661525 | 8.860034393 | 3.580972932 |
| ENSMUSG00000098906 | 19.80865184 | 15.30357936 | 19.77222934 | 29.80193387 | 27.21539428 |
| ENSMUSG00000098907 | 5.65961481  | 11.1298759  | 9.886114669 | 12.88732275 | 11.45911338 |
| ENSMUSG00000098908 | 18.39374813 | 32.69401046 | 31.77679715 | 10.47094974 | 20.05344842 |
| ENSMUSG00000098909 | 6.367066661 | 4.869320706 | 9.886114669 | 7.249119049 | 7.87814045  |
| ENSMUSG00000098910 | 12.02668147 | 8.347406925 | 4.236906287 | 6.443661377 | 7.161945863 |
| ENSMUSG00000098911 | 8.489422215 | 7.651789682 | 12.00456781 | 4.832746033 | 10.02672421 |
| ENSMUSG00000098912 | 7.781970364 | 20.86851731 | 9.179963621 | 14.4982381  | 9.310529622 |
| ENSMUSG00000098914 | 82.06441475 | 134.9497453 | 113.6903187 | 215.0571984 | 186.2105924 |
| ENSMUSG00000098915 | 87.01657771 | 107.8206728 | 110.1595635 | 64.43661377 | 100.2672421 |
| ENSMUSG00000098916 | 5.65961481  | 8.347406925 | 11.29841676 | 4.832746033 | 2.864778345 |
| ENSMUSG00000098917 | 26.88317035 | 20.17290007 | 29.65834401 | 55.57657937 | 29.36397804 |
| ENSMUSG00000098918 | 9.904325918 | 6.956172438 | 7.767661525 | 5.638203705 | 2.864778345 |
| ENSMUSG00000098919 | 46.69182218 | 57.04061399 | 52.25517753 | 78.12939419 | 78.06520991 |
| ENSMUSG00000098920 | 0           | 2.782468975 | 2.118453143 | 1.610915344 | 3.580972932 |
| ENSMUSG00000098922 | 11.31922962 | 11.82549314 | 12.00456781 | 3.221830688 | 6.445751277 |
| ENSMUSG00000098924 | 8.489422215 | 9.043024169 | 9.179963621 | 8.860034393 | 5.013362104 |
| ENSMUSG00000098925 | 4.244711108 | 8.347406925 | 7.767661525 | 4.02728836  | 7.161945863 |
| ENSMUSG00000098926 | 13.44158517 | 17.39043109 | 24.71528667 | 19.33098413 | 24.35061594 |
| ENSMUSG00000098928 | 152.8095999 | 185.7298041 | 165.9454962 | 359.2341218 | 257.8300511 |
| ENSMUSG00000098929 | 6.367066661 | 11.1298759  | 12.00456781 | 5.638203705 | 13.60769714 |
| ENSMUSG00000098931 | 24.76081479 | 36.17209668 | 38.83830763 | 21.74735715 | 20.05344842 |
| ENSMUSG00000098932 | 7.074518513 | 6.956172438 | 7.767661525 | 10.47094974 | 12.89150255 |
| ENSMUSG00000098934 | 54.47379255 | 79.30036579 | 77.67661525 | 178.0061455 | 131.7798039 |
| ENSMUSG00000098935 | 12.02668147 | 11.82549314 | 9.179963621 | 4.02728836  | 7.161945863 |
| ENSMUSG00000098936 | 11.31922962 | 8.347406925 | 7.061510478 | 4.832746033 | 2.864778345 |
| ENSMUSG00000098937 | 2.122355554 | 0.695617244 | 2.824604191 | 1.610915344 | 1.432389173 |
| ENSMUSG00000098938 | 5.65961481  | 4.869320706 | 4.236906287 | 4.02728836  | 7.87814045  |
| ENSMUSG00000098939 | 7.781970364 | 4.173703463 | 7.767661525 | 8.860034393 | 6.445751277 |
| ENSMUSG00000098940 | 5.65961481  | 8.347406925 | 4.943057334 | 8.054576721 | 8.594335036 |
| ENSMUSG00000098941 | 10.61177777 | 7.651789682 | 7.061510478 | 8.860034393 | 5.013362104 |
| ENSMUSG00000098942 | 43.15456293 | 61.21431745 | 48.7244223  | 27.38556085 | 41.53928601 |
| ENSMUSG00000098943 | 4.244711108 | 8.347406925 | 7.061510478 | 5.638203705 | 4.297167518 |
| ENSMUSG00000098944 | 7.074518513 | 6.956172438 | 7.061510478 | 11.27640741 | 10.7429188  |
| ENSMUSG00000098945 | 7.074518513 | 7.651789682 | 9.886114669 | 8.054576721 | 6.445751277 |
| ENSMUSG00000098946 | 0           | 0           | 0           | 0           | 0           |
| ENSMUSG00000098947 | 7.781970364 | 6.956172438 | 4.943057334 | 4.832746033 | 5.013362104 |
| ENSMUSG00000098948 | 0           | 0           | 0           | 0           | 0           |
| ENSMUSG00000098949 | 12.73413332 | 10.43425866 | 8.473812573 | 4.02728836  | 5.013362104 |
| ENSMUSG00000098951 | 14.14903703 | 18.08604834 | 10.59226572 | 18.52552646 | 25.78300511 |

|                    |             |             |             |             |             |
|--------------------|-------------|-------------|-------------|-------------|-------------|
| ENSMUSG00000098952 | 10.61177777 | 9.738641413 | 8.473812573 | 9.665492065 | 5.013362104 |
| ENSMUSG00000098953 | 5.65961481  | 11.1298759  | 9.179963621 | 1.610915344 | 5.013362104 |
| ENSMUSG00000098954 | 2.829807405 | 2.782468975 | 2.118453143 | 2.416373016 | 4.297167518 |
| ENSMUSG00000098955 | 0           | 0           | 0           | 0           | 0           |
| ENSMUSG00000098956 | 22.63845924 | 29.21592424 | 24.71528667 | 18.52552646 | 20.05344842 |
| ENSMUSG00000098957 | 0.707451851 | 1.391234488 | 1.412302096 | 2.416373016 | 1.432389173 |
| ENSMUSG00000098958 | 18.39374813 | 22.95536904 | 24.71528667 | 34.6346799  | 44.40406435 |
| ENSMUSG00000098959 | 8.489422215 | 7.651789682 | 12.00456781 | 5.638203705 | 6.445751277 |
| ENSMUSG00000098960 | 6.367066661 | 5.56493795  | 7.061510478 | 8.054576721 | 7.161945863 |
| ENSMUSG00000098961 | 8.489422215 | 4.173703463 | 4.943057334 | 4.832746033 | 4.297167518 |
| ENSMUSG00000098962 | 8.489422215 | 6.956172438 | 4.236906287 | 4.832746033 | 3.580972932 |
| ENSMUSG00000098963 | 0           | 0.695617244 | 0           | 0           | 0           |
| ENSMUSG00000098964 | 9.196874066 | 8.347406925 | 5.649208382 | 12.08186508 | 9.310529622 |
| ENSMUSG00000098965 | 19.10119998 | 15.30357936 | 25.42143772 | 14.4982381  | 21.48583759 |
| ENSMUSG00000098966 | 4.952162959 | 5.56493795  | 8.473812573 | 3.221830688 | 2.148583759 |
| ENSMUSG00000098967 | 0           | 2.782468975 | 2.824604191 | 1.610915344 | 2.864778345 |
| ENSMUSG00000098968 | 3.537259256 | 4.173703463 | 6.35535943  | 3.221830688 | 2.864778345 |
| ENSMUSG00000098969 | 0           | 0           | 0           | 0           | 0           |
| ENSMUSG00000098970 | 8.489422215 | 8.347406925 | 7.767661525 | 2.416373016 | 7.161945863 |
| ENSMUSG00000098972 | 9.904325918 | 9.738641413 | 9.886114669 | 10.47094974 | 17.18867007 |
| ENSMUSG00000098973 | 23.34591109 | 19.47728283 | 18.35992724 | 18.52552646 | 18.62105924 |
| ENSMUSG00000098974 | 0           | 0           | 0           | 0           | 0           |
| ENSMUSG00000098975 | 57.30359995 | 68.86610713 | 82.61967259 | 41.07834128 | 34.37734014 |
| ENSMUSG00000098976 | 11.31922962 | 9.738641413 | 12.71071886 | 10.47094974 | 2.864778345 |
| ENSMUSG00000098977 | 6.367066661 | 8.347406925 | 4.236906287 | 1.610915344 | 5.013362104 |
| ENSMUSG00000098978 | 6.367066661 | 6.956172438 | 7.767661525 | 2.416373016 | 5.729556691 |
| ENSMUSG00000098979 | 2.829807405 | 2.086851731 | 1.412302096 | 0           | 0           |
| ENSMUSG00000098980 | 6.367066661 | 12.52111039 | 3.530755239 | 5.638203705 | 7.161945863 |
| ENSMUSG00000098981 | 1.414903703 | 3.478086219 | 1.412302096 | 1.610915344 | 2.148583759 |
| ENSMUSG00000098982 | 26.1757185  | 13.91234488 | 13.41686991 | 12.88732275 | 12.17530797 |
| ENSMUSG00000098983 | 7.074518513 | 9.043024169 | 10.59226572 | 7.249119049 | 7.161945863 |
| ENSMUSG00000098984 | 11.31922962 | 7.651789682 | 8.473812573 | 8.054576721 | 8.594335036 |
| ENSMUSG00000098985 | 9.904325918 | 6.956172438 | 9.886114669 | 8.860034393 | 11.45911338 |
| ENSMUSG00000098986 | 0           | 0           | 0           | 0           | 0           |
| ENSMUSG00000098987 | 13.44158517 | 9.738641413 | 10.59226572 | 8.054576721 | 9.310529622 |
| ENSMUSG00000098988 | 14.14903703 | 26.43345526 | 24.71528667 | 104.7094974 | 79.49759908 |
| ENSMUSG00000098989 | 6.367066661 | 3.478086219 | 5.649208382 | 8.054576721 | 2.148583759 |
| ENSMUSG00000098990 | 0           | 0           | 0           | 0           | 0           |
| ENSMUSG00000098991 | 12.73413332 | 5.56493795  | 11.29841676 | 7.249119049 | 10.02672421 |
| ENSMUSG00000098992 | 12.02668147 | 11.1298759  | 19.06607829 | 33.02376456 | 37.24211849 |
| ENSMUSG00000098993 | 5.65961481  | 9.738641413 | 7.061510478 | 5.638203705 | 5.013362104 |
| ENSMUSG00000098994 | 8.489422215 | 4.869320706 | 7.061510478 | 10.47094974 | 12.17530797 |
| ENSMUSG00000098995 | 9.904325918 | 13.91234488 | 9.886114669 | 11.27640741 | 13.60769714 |

|                   |             |             |             |             |             |
|-------------------|-------------|-------------|-------------|-------------|-------------|
| ENSMUSG0000098996 | 7.781970364 | 4.869320706 | 7.767661525 | 4.832746033 | 5.013362104 |
| ENSMUSG0000098997 | 9.196874066 | 9.043024169 | 6.35535943  | 4.02728836  | 7.87814045  |
| ENSMUSG0000098998 | 0           | 1.391234488 | 0           | 4.832746033 | 2.148583759 |
| ENSMUSG0000098999 | 9.196874066 | 6.260555194 | 7.061510478 | 5.638203705 | 6.445751277 |
| ENSMUSG0000099000 | 3.537259256 | 4.869320706 | 2.824604191 | 2.416373016 | 1.432389173 |
| ENSMUSG0000099001 | 8.489422215 | 9.738641413 | 7.061510478 | 7.249119049 | 4.297167518 |
| ENSMUSG0000099002 | 8.489422215 | 13.91234488 | 12.71071886 | 4.832746033 | 11.45911338 |
| ENSMUSG0000099003 | 7.074518513 | 6.956172438 | 8.473812573 | 8.054576721 | 9.310529622 |
| ENSMUSG0000099004 | 4.244711108 | 6.956172438 | 11.29841676 | 7.249119049 | 6.445751277 |
| ENSMUSG0000099005 | 9.904325918 | 9.043024169 | 8.473812573 | 12.88732275 | 12.17530797 |
| ENSMUSG0000099006 | 0           | 0           | 0           | 0           | 0           |
| ENSMUSG0000099008 | 77.11225179 | 139.1234488 | 130.6379438 | 72.49119049 | 81.64618284 |
| ENSMUSG0000099010 | 0.707451851 | 0.695617244 | 1.412302096 | 0.805457672 | 0.716194586 |
| ENSMUSG0000099011 | 4.952162959 | 5.56493795  | 4.943057334 | 8.054576721 | 4.297167518 |
| ENSMUSG0000099012 | 12.02668147 | 4.869320706 | 12.71071886 | 4.02728836  | 9.310529622 |
| ENSMUSG0000099013 | 12.73413332 | 5.56493795  | 5.649208382 | 8.054576721 | 5.729556691 |
| ENSMUSG0000099014 | 10.61177777 | 6.260555194 | 7.767661525 | 7.249119049 | 7.87814045  |
| ENSMUSG0000099015 | 9.196874066 | 6.260555194 | 6.35535943  | 4.832746033 | 12.17530797 |
| ENSMUSG0000099016 | 9.196874066 | 13.21672763 | 6.35535943  | 8.054576721 | 5.013362104 |
| ENSMUSG0000099017 | 0.707451851 | 2.086851731 | 4.943057334 | 2.416373016 | 3.580972932 |
| ENSMUSG0000099018 | 0           | 0           | 0           | 0.805457672 | 0           |
| ENSMUSG0000099019 | 12.73413332 | 11.82549314 | 6.35535943  | 3.221830688 | 9.310529622 |
| ENSMUSG0000099020 | 10.61177777 | 3.478086219 | 5.649208382 | 3.221830688 | 8.594335036 |
| ENSMUSG0000099021 | 79.23460734 | 100.8645003 | 76.97046421 | 189.2825529 | 145.387501  |
| ENSMUSG0000099022 | 0           | 0           | 0           | 0           | 0           |
| ENSMUSG0000099023 | 41.03220737 | 65.38802092 | 57.90438592 | 32.21830688 | 30.79636721 |
| ENSMUSG0000099024 | 8.489422215 | 9.043024169 | 10.59226572 | 20.94189947 | 11.45911338 |
| ENSMUSG0000099025 | 8.489422215 | 8.347406925 | 11.29841676 | 8.860034393 | 12.89150255 |
| ENSMUSG0000099027 | 7.074518513 | 6.260555194 | 9.886114669 | 8.860034393 | 6.445751277 |
| ENSMUSG0000099030 | 7.074518513 | 6.956172438 | 3.530755239 | 3.221830688 | 7.87814045  |
| ENSMUSG0000099031 | 18.39374813 | 22.95536904 | 31.77679715 | 18.52552646 | 22.20203218 |
| ENSMUSG0000099033 | 14.14903703 | 13.91234488 | 13.41686991 | 17.72006879 | 15.7562809  |
| ENSMUSG0000099034 | 3.537259256 | 2.086851731 | 4.236906287 | 5.638203705 | 7.87814045  |
| ENSMUSG0000099035 | 9.196874066 | 6.956172438 | 9.179963621 | 17.72006879 | 13.60769714 |
| ENSMUSG0000099036 | 6.367066661 | 7.651789682 | 5.649208382 | 8.860034393 | 5.013362104 |
| ENSMUSG0000099037 | 4.244711108 | 6.260555194 | 4.943057334 | 1.610915344 | 2.864778345 |
| ENSMUSG0000099039 | 77.11225179 | 129.3848073 | 113.6903187 | 57.18749472 | 55.14698315 |
| ENSMUSG0000099042 | 7.074518513 | 8.347406925 | 12.00456781 | 9.665492065 | 8.594335036 |
| ENSMUSG0000099043 | 9.196874066 | 16.69481385 | 11.29841676 | 12.88732275 | 10.02672421 |
| ENSMUSG0000099045 | 77.11225179 | 111.9943762 | 116.5149229 | 70.88027514 | 85.94335036 |
| ENSMUSG0000099047 | 16.97884443 | 22.95536904 | 12.00456781 | 26.58010318 | 22.91822676 |
| ENSMUSG0000099049 | 14.14903703 | 8.347406925 | 9.179963621 | 6.443661377 | 5.013362104 |
| ENSMUSG0000099050 | 15.56394073 | 20.17290007 | 18.35992724 | 12.08186508 | 22.91822676 |

|                   |             |             |             |             |             |
|-------------------|-------------|-------------|-------------|-------------|-------------|
| ENSMUSG0000099051 | 7.781970364 | 8.347406925 | 9.179963621 | 10.47094974 | 8.594335036 |
| ENSMUSG0000099052 | 9.196874066 | 4.869320706 | 7.767661525 | 2.416373016 | 4.297167518 |
| ENSMUSG0000099053 | 12.73413332 | 6.956172438 | 4.236906287 | 4.02728836  | 7.161945863 |
| ENSMUSG0000099054 | 6.367066661 | 2.782468975 | 8.473812573 | 3.221830688 | 9.310529622 |
| ENSMUSG0000099055 | 12.02668147 | 5.56493795  | 11.29841676 | 5.638203705 | 5.729556691 |
| ENSMUSG0000099056 | 12.02668147 | 6.956172438 | 9.179963621 | 5.638203705 | 9.310529622 |
| ENSMUSG0000099057 | 7.781970364 | 4.173703463 | 9.179963621 | 11.27640741 | 13.60769714 |
| ENSMUSG0000099058 | 82.7718666  | 114.7768452 | 127.1071886 | 77.32393652 | 73.05184781 |
| ENSMUSG0000099059 | 6.367066661 | 4.173703463 | 4.943057334 | 9.665492065 | 7.161945863 |
| ENSMUSG0000099060 | 5.65961481  | 6.956172438 | 6.35535943  | 5.638203705 | 6.445751277 |
| ENSMUSG0000099061 | 8.489422215 | 7.651789682 | 11.29841676 | 5.638203705 | 6.445751277 |
| ENSMUSG0000099062 | 12.02668147 | 11.82549314 | 9.886114669 | 10.47094974 | 12.89150255 |
| ENSMUSG0000099063 | 124.5115258 | 145.3840039 | 161.0024389 | 136.1223466 | 124.617858  |
| ENSMUSG0000099064 | 9.196874066 | 8.347406925 | 4.943057334 | 4.02728836  | 8.594335036 |
| ENSMUSG0000099065 | 14.14903703 | 20.86851731 | 17.65377619 | 26.58010318 | 21.48583759 |
| ENSMUSG0000099066 | 7.781970364 | 6.956172438 | 5.649208382 | 8.054576721 | 15.04008631 |
| ENSMUSG0000099068 | 0           | 0           | 0           | 0           | 0           |
| ENSMUSG0000099069 | 7.781970364 | 10.43425866 | 9.179963621 | 5.638203705 | 9.310529622 |
| ENSMUSG0000099070 | 12.02668147 | 16.69481385 | 20.47838039 | 24.16373016 | 21.48583759 |
| ENSMUSG0000099071 | 10.61177777 | 4.869320706 | 5.649208382 | 7.249119049 | 7.161945863 |
| ENSMUSG0000099072 | 4.244711108 | 8.347406925 | 6.35535943  | 4.02728836  | 1.432389173 |
| ENSMUSG0000099073 | 2.122355554 | 2.086851731 | 0           | 0           | 2.148583759 |
| ENSMUSG0000099074 | 3.537259256 | 5.56493795  | 2.824604191 | 7.249119049 | 5.729556691 |
| ENSMUSG0000099075 | 12.02668147 | 14.60796212 | 10.59226572 | 9.665492065 | 10.7429188  |
| ENSMUSG0000099076 | 1.414903703 | 1.391234488 | 4.236906287 | 3.221830688 | 6.445751277 |
| ENSMUSG0000099078 | 9.196874066 | 8.347406925 | 8.473812573 | 4.832746033 | 2.864778345 |
| ENSMUSG0000099079 | 35.37259256 | 61.9099347  | 63.5535943  | 87.79488626 | 58.01176149 |
| ENSMUSG0000099080 | 1.414903703 | 4.173703463 | 6.35535943  | 9.665492065 | 6.445751277 |
| ENSMUSG0000099081 | 3.537259256 | 9.738641413 | 7.061510478 | 4.02728836  | 6.445751277 |
| ENSMUSG0000099082 | 14.14903703 | 21.56413456 | 16.94762515 | 7.249119049 | 19.33725383 |
| ENSMUSG0000099085 | 6.367066661 | 9.738641413 | 8.473812573 | 5.638203705 | 6.445751277 |
| ENSMUSG0000099086 | 0           | 0           | 0           | 0           | 0           |
| ENSMUSG0000099087 | 12.02668147 | 7.651789682 | 3.530755239 | 11.27640741 | 5.013362104 |
| ENSMUSG0000099088 | 0.707451851 | 0           | 0           | 0           | 0.716194586 |
| ENSMUSG0000099089 | 12.73413332 | 4.869320706 | 8.473812573 | 3.221830688 | 3.580972932 |
| ENSMUSG0000099091 | 12.73413332 | 6.260555194 | 9.886114669 | 34.6346799  | 23.63442135 |
| ENSMUSG0000099092 | 10.61177777 | 4.173703463 | 4.943057334 | 4.02728836  | 7.161945863 |
| ENSMUSG0000099093 | 7.074518513 | 8.347406925 | 7.061510478 | 5.638203705 | 6.445751277 |
| ENSMUSG0000099094 | 12.73413332 | 12.52111039 | 25.42143772 | 41.88379895 | 32.94495097 |
| ENSMUSG0000099095 | 8.489422215 | 13.91234488 | 10.59226572 | 16.10915344 | 10.02672421 |
| ENSMUSG0000099096 | 20.51610369 | 22.95536904 | 15.53532305 | 11.27640741 | 15.04008631 |
| ENSMUSG0000099097 | 2.829807405 | 6.260555194 | 2.118453143 | 4.02728836  | 2.864778345 |
| ENSMUSG0000099098 | 0           | 0           | 0           | 0           | 0           |

|                   |             |             |             |             |             |
|-------------------|-------------|-------------|-------------|-------------|-------------|
| ENSMUSG0000099099 | 2.829807405 | 4.869320706 | 3.530755239 | 4.02728836  | 4.297167518 |
| ENSMUSG0000099101 | 7.074518513 | 5.56493795  | 5.649208382 | 48.32746033 | 40.10689684 |
| ENSMUSG0000099102 | 8.489422215 | 5.56493795  | 12.71071886 | 5.638203705 | 10.02672421 |
| ENSMUSG0000099103 | 7.074518513 | 6.956172438 | 3.530755239 | 8.860034393 | 7.161945863 |
| ENSMUSG0000099104 | 1.414903703 | 3.478086219 | 3.530755239 | 0.805457672 | 5.013362104 |
| ENSMUSG0000099105 | 7.781970364 | 11.82549314 | 6.35535943  | 8.860034393 | 6.445751277 |
| ENSMUSG0000099106 | 8.489422215 | 11.1298759  | 11.29841676 | 31.41284921 | 28.64778345 |
| ENSMUSG0000099107 | 1.414903703 | 0.695617244 | 0           | 0.805457672 | 0           |
| ENSMUSG0000099108 | 1.414903703 | 0.695617244 | 4.236906287 | 0           | 0.716194586 |
| ENSMUSG0000099109 | 12.73413332 | 11.82549314 | 12.71071886 | 9.665492065 | 8.594335036 |
| ENSMUSG0000099110 | 12.02668147 | 24.34660353 | 14.829172   | 23.35827249 | 13.60769714 |
| ENSMUSG0000099111 | 0           | 0           | 0.706151048 | 0           | 0           |
| ENSMUSG0000099112 | 54.47379255 | 71.64857611 | 67.08434954 | 111.9586164 | 65.88990194 |
| ENSMUSG0000099114 | 4.952162959 | 8.347406925 | 16.94762515 | 4.832746033 | 10.02672421 |
| ENSMUSG0000099115 | 7.074518513 | 9.043024169 | 7.061510478 | 8.054576721 | 6.445751277 |
| ENSMUSG0000099117 | 0           | 0           | 0           | 0           | 0           |
| ENSMUSG0000099118 | 0           | 0           | 0           | 0           | 0           |
| ENSMUSG0000099119 | 1.414903703 | 0.695617244 | 0           | 0           | 0           |
| ENSMUSG0000099120 | 7.074518513 | 7.651789682 | 7.767661525 | 4.832746033 | 5.729556691 |
| ENSMUSG0000099123 | 21.22355554 | 15.99919661 | 17.65377619 | 18.52552646 | 17.18867007 |
| ENSMUSG0000099124 | 9.196874066 | 9.738641413 | 12.71071886 | 7.249119049 | 7.161945863 |
| ENSMUSG0000099125 | 0.707451851 | 0           | 0           | 0           | 0           |
| ENSMUSG0000099126 | 5.65961481  | 5.56493795  | 3.530755239 | 8.054576721 | 12.89150255 |
| ENSMUSG0000099127 | 0           | 1.391234488 | 1.412302096 | 0           | 1.432389173 |
| ENSMUSG0000099128 | 2.829807405 | 4.869320706 | 2.824604191 | 2.416373016 | 2.864778345 |
| ENSMUSG0000099129 | 1.414903703 | 2.086851731 | 0.706151048 | 4.832746033 | 0.716194586 |
| ENSMUSG0000099130 | 7.074518513 | 6.260555194 | 3.530755239 | 4.832746033 | 10.02672421 |
| ENSMUSG0000099131 | 13.44158517 | 8.347406925 | 7.061510478 | 7.249119049 | 13.60769714 |
| ENSMUSG0000099132 | 3.537259256 | 2.782468975 | 0.706151048 | 1.610915344 | 2.148583759 |
| ENSMUSG0000099133 | 1.414903703 | 2.782468975 | 2.118453143 | 0.805457672 | 0           |
| ENSMUSG0000099134 | 8.489422215 | 1.391234488 | 6.35535943  | 8.054576721 | 8.594335036 |
| ENSMUSG0000099135 | 0           | 0           | 0           | 0           | 0           |
| ENSMUSG0000099136 | 1.414903703 | 0.695617244 | 2.118453143 | 1.610915344 | 0.716194586 |
| ENSMUSG0000099137 | 11.31922962 | 8.347406925 | 9.886114669 | 8.054576721 | 10.7429188  |
| ENSMUSG0000099138 | 6.367066661 | 9.043024169 | 7.061510478 | 4.832746033 | 8.594335036 |
| ENSMUSG0000099139 | 8.489422215 | 11.1298759  | 4.943057334 | 4.832746033 | 8.594335036 |
| ENSMUSG0000099140 | 32.54278516 | 45.91073809 | 37.42600553 | 18.52552646 | 33.66114556 |
| ENSMUSG0000099141 | 7.781970364 | 7.651789682 | 9.886114669 | 6.443661377 | 7.87814045  |
| ENSMUSG0000099142 | 14.14903703 | 11.82549314 | 16.2414741  | 12.88732275 | 13.60769714 |
| ENSMUSG0000099143 | 1.414903703 | 3.478086219 | 2.118453143 | 4.02728836  | 1.432389173 |
| ENSMUSG0000099144 | 11.31922962 | 21.56413456 | 18.35992724 | 28.9964762  | 21.48583759 |
| ENSMUSG0000099145 | 4.244711108 | 0           | 4.943057334 | 0.805457672 | 2.864778345 |
| ENSMUSG0000099146 | 15.56394073 | 6.260555194 | 4.236906287 | 3.221830688 | 5.729556691 |

|                   |             |             |             |             |             |
|-------------------|-------------|-------------|-------------|-------------|-------------|
| ENSMUSG0000099147 | 6.367066661 | 10.43425866 | 14.12302096 | 16.10915344 | 29.36397804 |
| ENSMUSG0000099148 | 7.781970364 | 15.99919661 | 12.00456781 | 12.88732275 | 10.02672421 |
| ENSMUSG0000099149 | 9.904325918 | 4.869320706 | 9.886114669 | 1.610915344 | 2.864778345 |
| ENSMUSG0000099150 | 12.73413332 | 7.651789682 | 11.29841676 | 9.665492065 | 2.864778345 |
| ENSMUSG0000099151 | 6.367066661 | 6.956172438 | 11.29841676 | 16.10915344 | 10.7429188  |
| ENSMUSG0000099152 | 2.122355554 | 4.173703463 | 2.824604191 | 3.221830688 | 2.864778345 |
| ENSMUSG0000099153 | 7.074518513 | 13.21672763 | 9.179963621 | 24.96918783 | 12.17530797 |
| ENSMUSG0000099154 | 12.02668147 | 8.347406925 | 14.829172   | 8.860034393 | 9.310529622 |
| ENSMUSG0000099155 | 298.5446812 | 310.940908  | 314.2372163 | 344.7358837 | 270.0053591 |
| ENSMUSG0000099157 | 0           | 0           | 0           | 0.805457672 | 0.716194586 |
| ENSMUSG0000099158 | 15.56394073 | 9.043024169 | 16.94762515 | 6.443661377 | 5.729556691 |
| ENSMUSG0000099159 | 0           | 0           | 0           | 0           | 0           |
| ENSMUSG0000099160 | 12.73413332 | 20.86851731 | 12.71071886 | 9.665492065 | 10.02672421 |
| ENSMUSG0000099161 | 11.31922962 | 13.21672763 | 9.886114669 | 3.221830688 | 10.7429188  |
| ENSMUSG0000099162 | 7.074518513 | 7.651789682 | 7.767661525 | 10.47094974 | 5.729556691 |
| ENSMUSG0000099163 | 2.829807405 | 3.478086219 | 3.530755239 | 7.249119049 | 2.148583759 |
| ENSMUSG0000099165 | 9.196874066 | 10.43425866 | 10.59226572 | 4.832746033 | 2.148583759 |
| ENSMUSG0000099166 | 2.122355554 | 1.391234488 | 0.706151048 | 0.805457672 | 0           |
| ENSMUSG0000099168 | 5.65961481  | 11.82549314 | 7.767661525 | 4.832746033 | 7.87814045  |
| ENSMUSG0000099169 | 16.97884443 | 12.52111039 | 8.473812573 | 3.221830688 | 7.87814045  |
| ENSMUSG0000099170 | 7.781970364 | 6.260555194 | 8.473812573 | 5.638203705 | 7.161945863 |
| ENSMUSG0000099172 | 5.65961481  | 2.782468975 | 2.118453143 | 5.638203705 | 2.148583759 |
| ENSMUSG0000099173 | 0           | 0           | 0           | 0           | 0           |
| ENSMUSG0000099174 | 6.367066661 | 4.173703463 | 5.649208382 | 4.832746033 | 8.594335036 |
| ENSMUSG0000099176 | 6.367066661 | 8.347406925 | 12.00456781 | 4.832746033 | 5.013362104 |
| ENSMUSG0000099177 | 43.15456293 | 47.30197258 | 58.61053696 | 88.60034393 | 69.47087488 |
| ENSMUSG0000099178 | 7.781970364 | 6.260555194 | 3.530755239 | 2.416373016 | 7.87814045  |
| ENSMUSG0000099179 | 4.952162959 | 4.869320706 | 6.35535943  | 1.610915344 | 5.013362104 |
| ENSMUSG0000099180 | 7.781970364 | 9.043024169 | 9.179963621 | 8.860034393 | 11.45911338 |
| ENSMUSG0000099181 | 7.074518513 | 13.21672763 | 9.179963621 | 12.88732275 | 14.32389173 |
| ENSMUSG0000099182 | 9.904325918 | 4.869320706 | 6.35535943  | 5.638203705 | 7.87814045  |
| ENSMUSG0000099183 | 56.5961481  | 86.25653823 | 74.14586002 | 34.6346799  | 42.25548059 |
| ENSMUSG0000099184 | 2.122355554 | 0.695617244 | 0           | 0           | 0           |
| ENSMUSG0000099185 | 10.61177777 | 5.56493795  | 4.236906287 | 9.665492065 | 7.161945863 |
| ENSMUSG0000099186 | 38.90985182 | 31.99839321 | 36.71985448 | 23.35827249 | 29.36397804 |
| ENSMUSG0000099187 | 10.61177777 | 15.30357936 | 12.71071886 | 13.69278043 | 11.45911338 |
| ENSMUSG0000099188 | 2.122355554 | 13.21672763 | 2.824604191 | 13.69278043 | 13.60769714 |
| ENSMUSG0000099189 | 0           | 0           | 0           | 0           | 0           |
| ENSMUSG0000099190 | 5.65961481  | 5.56493795  | 8.473812573 | 4.832746033 | 5.729556691 |
| ENSMUSG0000099191 | 2.122355554 | 4.173703463 | 4.236906287 | 4.02728836  | 3.580972932 |
| ENSMUSG0000099192 | 57.30359995 | 52.86691053 | 56.49208382 | 32.21830688 | 25.78300511 |
| ENSMUSG0000099193 | 1.414903703 | 0.695617244 | 0.706151048 | 0.805457672 | 3.580972932 |
| ENSMUSG0000099196 | 10.61177777 | 11.82549314 | 11.29841676 | 12.08186508 | 9.310529622 |



|                   |             |             |             |             |             |
|-------------------|-------------|-------------|-------------|-------------|-------------|
| ENSMUSG0000099197 | 5.65961481  | 4.173703463 | 11.29841676 | 8.054576721 | 3.580972932 |
| ENSMUSG0000099198 | 9.196874066 | 5.56493795  | 9.179963621 | 10.47094974 | 8.594335036 |
| ENSMUSG0000099199 | 102.5805184 | 125.9067211 | 119.3395271 | 164.3133651 | 103.1320204 |
| ENSMUSG0000099200 | 14.14903703 | 20.17290007 | 18.35992724 | 12.08186508 | 12.17530797 |
| ENSMUSG0000099201 | 9.904325918 | 9.738641413 | 6.35535943  | 2.416373016 | 6.445751277 |
| ENSMUSG0000099202 | 25.46826665 | 29.91154148 | 33.89525029 | 16.10915344 | 30.79636721 |
| ENSMUSG0000099203 | 7.074518513 | 2.782468975 | 9.179963621 | 4.02728836  | 5.013362104 |
| ENSMUSG0000099204 | 4.952162959 | 2.086851731 | 3.530755239 | 2.416373016 | 4.297167518 |
| ENSMUSG0000099205 | 5.65961481  | 8.347406925 | 9.179963621 | 4.832746033 | 6.445751277 |
| ENSMUSG0000099206 | 59.42595551 | 93.90832791 | 81.91352154 | 78.93485187 | 87.37573953 |
| ENSMUSG0000099207 | 8.489422215 | 5.56493795  | 4.236906287 | 7.249119049 | 5.013362104 |
| ENSMUSG0000099208 | 39.61730367 | 32.69401046 | 40.25060972 | 28.19101852 | 32.22875639 |
| ENSMUSG0000099209 | 0           | 0           | 0           | 0           | 0           |
| ENSMUSG0000099210 | 11.31922962 | 4.173703463 | 6.35535943  | 6.443661377 | 4.297167518 |
| ENSMUSG0000099211 | 6.367066661 | 9.043024169 | 4.943057334 | 4.02728836  | 6.445751277 |
| ENSMUSG0000099212 | 14.14903703 | 26.43345526 | 36.71985448 | 28.19101852 | 24.35061594 |
| ENSMUSG0000099213 | 10.61177777 | 5.56493795  | 11.29841676 | 4.02728836  | 7.161945863 |
| ENSMUSG0000099214 | 10.61177777 | 6.956172438 | 6.35535943  | 5.638203705 | 10.7429188  |
| ENSMUSG0000099215 | 4.244711108 | 9.043024169 | 7.767661525 | 5.638203705 | 4.297167518 |
| ENSMUSG0000099218 | 7.074518513 | 7.651789682 | 6.35535943  | 8.054576721 | 8.594335036 |
| ENSMUSG0000099219 | 84.89422215 | 100.8645003 | 81.20737049 | 166.7297381 | 114.5911338 |
| ENSMUSG0000099220 | 7.781970364 | 6.260555194 | 10.59226572 | 4.02728836  | 7.161945863 |
| ENSMUSG0000099221 | 8.489422215 | 3.478086219 | 10.59226572 | 3.221830688 | 8.594335036 |
| ENSMUSG0000099222 | 9.196874066 | 7.651789682 | 7.061510478 | 7.249119049 | 8.594335036 |
| ENSMUSG0000099223 | 4.244711108 | 2.782468975 | 1.412302096 | 3.221830688 | 2.864778345 |
| ENSMUSG0000099224 | 0           | 0           | 0           | 0           | 0           |
| ENSMUSG0000099225 | 0.707451851 | 0           | 2.118453143 | 1.610915344 | 0           |
| ENSMUSG0000099226 | 13.44158517 | 15.30357936 | 14.12302096 | 54.7711217  | 39.39070225 |
| ENSMUSG0000099227 | 0           | 0           | 0           | 0           | 0           |
| ENSMUSG0000099228 | 7.074518513 | 2.782468975 | 4.943057334 | 2.416373016 | 3.580972932 |
| ENSMUSG0000099229 | 0           | 0           | 0           | 0           | 0           |
| ENSMUSG0000099230 | 60.84085921 | 71.64857611 | 77.67661525 | 54.7711217  | 63.74131818 |
| ENSMUSG0000099232 | 9.904325918 | 9.043024169 | 11.29841676 | 7.249119049 | 10.7429188  |
| ENSMUSG0000099233 | 0           | 0           | 0           | 0           | 0           |
| ENSMUSG0000099235 | 0           | 0           | 0           | 0           | 0           |
| ENSMUSG0000099236 | 0           | 0           | 0           | 0           | 0           |
| ENSMUSG0000099237 | 8.489422215 | 4.869320706 | 9.179963621 | 10.47094974 | 11.45911338 |
| ENSMUSG0000099238 | 25.46826665 | 25.04222078 | 28.95219296 | 24.16373016 | 28.64778345 |
| ENSMUSG0000099239 | 8.489422215 | 6.956172438 | 15.53532305 | 4.02728836  | 4.297167518 |
| ENSMUSG0000099240 | 93.38364437 | 125.2111039 | 108.0411103 | 190.0880106 | 141.8065281 |
| ENSMUSG0000099241 | 52.35143699 | 79.30036579 | 65.67204744 | 173.1733995 | 143.9551119 |
| ENSMUSG0000099242 | 7.781970364 | 6.956172438 | 7.767661525 | 8.054576721 | 6.445751277 |
| ENSMUSG0000099243 | 0           | 0           | 0           | 0           | 0           |

|                   |             |             |             |             |             |
|-------------------|-------------|-------------|-------------|-------------|-------------|
| ENSMUSG0000099244 | 12.02668147 | 12.52111039 | 8.473812573 | 57.18749472 | 42.97167518 |
| ENSMUSG0000099245 | 0           | 0           | 0           | 0           | 0           |
| ENSMUSG0000099246 | 15.56394073 | 27.12907251 | 23.30298458 | 12.08186508 | 18.62105924 |
| ENSMUSG0000099247 | 6.367066661 | 13.91234488 | 5.649208382 | 9.665492065 | 2.864778345 |
| ENSMUSG0000099248 | 2.122355554 | 1.391234488 | 1.412302096 | 0           | 1.432389173 |
| ENSMUSG0000099250 | 53.05888884 | 69.56172438 | 61.43514116 | 66.85298678 | 62.30892901 |
| ENSMUSG0000099251 | 9.904325918 | 6.260555194 | 2.824604191 | 8.860034393 | 7.87814045  |
| ENSMUSG0000099252 | 9.904325918 | 4.173703463 | 9.886114669 | 6.443661377 | 8.594335036 |
| ENSMUSG0000099253 | 9.196874066 | 15.30357936 | 9.179963621 | 8.860034393 | 13.60769714 |
| ENSMUSG0000099254 | 14.85648888 | 15.99919661 | 21.89068248 | 69.2693598  | 69.47087488 |
| ENSMUSG0000099255 | 9.196874066 | 2.086851731 | 7.767661525 | 5.638203705 | 6.445751277 |
| ENSMUSG0000099256 | 7.781970364 | 9.043024169 | 5.649208382 | 3.221830688 | 3.580972932 |
| ENSMUSG0000099257 | 7.781970364 | 11.1298759  | 9.179963621 | 7.249119049 | 5.013362104 |
| ENSMUSG0000099258 | 7.781970364 | 9.738641413 | 5.649208382 | 6.443661377 | 5.729556691 |
| ENSMUSG0000099259 | 5.65961481  | 6.260555194 | 10.59226572 | 5.638203705 | 12.17530797 |
| ENSMUSG0000099260 | 7.074518513 | 7.651789682 | 7.061510478 | 8.054576721 | 5.729556691 |
| ENSMUSG0000099261 | 9.904325918 | 11.1298759  | 14.12302096 | 4.02728836  | 13.60769714 |
| ENSMUSG0000099263 | 2.829807405 | 1.391234488 | 2.118453143 | 0.805457672 | 2.864778345 |
| ENSMUSG0000099264 | 9.904325918 | 6.956172438 | 5.649208382 | 1.610915344 | 6.445751277 |
| ENSMUSG0000099265 | 134.4158517 | 158.6007316 | 140.5240585 | 296.4084233 | 221.3041272 |
| ENSMUSG0000099266 | 13.44158517 | 10.43425866 | 10.59226572 | 6.443661377 | 8.594335036 |
| ENSMUSG0000099267 | 15.56394073 | 18.78166558 | 19.06607829 | 8.860034393 | 17.90486466 |
| ENSMUSG0000099268 | 8.489422215 | 6.260555194 | 9.886114669 | 7.249119049 | 6.445751277 |
| ENSMUSG0000099270 | 0           | 0           | 0           | 0           | 0           |
| ENSMUSG0000099272 | 2.122355554 | 2.086851731 | 2.118453143 | 2.416373016 | 0           |
| ENSMUSG0000099273 | 8.489422215 | 9.043024169 | 9.886114669 | 6.443661377 | 10.7429188  |
| ENSMUSG0000099274 | 5.65961481  | 7.651789682 | 6.35535943  | 3.221830688 | 9.310529622 |
| ENSMUSG0000099275 | 10.61177777 | 9.738641413 | 12.71071886 | 15.30369577 | 13.60769714 |
| ENSMUSG0000099276 | 9.904325918 | 11.1298759  | 6.35535943  | 4.02728836  | 8.594335036 |
| ENSMUSG0000099279 | 9.196874066 | 3.478086219 | 6.35535943  | 12.88732275 | 12.17530797 |
| ENSMUSG0000099280 | 84.1867703  | 122.4286349 | 111.5718655 | 141.7605503 | 113.1587446 |
| ENSMUSG0000099283 | 87.01657771 | 116.863697  | 122.1641313 | 116.7913625 | 89.52432329 |
| ENSMUSG0000099284 | 12.02668147 | 9.738641413 | 14.829172   | 17.72006879 | 17.90486466 |
| ENSMUSG0000099285 | 11.31922962 | 6.956172438 | 6.35535943  | 3.221830688 | 8.594335036 |
| ENSMUSG0000099286 | 6.367066661 | 5.56493795  | 8.473812573 | 4.832746033 | 9.310529622 |
| ENSMUSG0000099287 | 29.71297775 | 48.69320706 | 42.36906287 | 16.10915344 | 14.32389173 |
| ENSMUSG0000099289 | 5.65961481  | 2.782468975 | 4.943057334 | 6.443661377 | 8.594335036 |
| ENSMUSG0000099290 | 14.14903703 | 15.99919661 | 14.12302096 | 21.74735715 | 15.04008631 |
| ENSMUSG0000099291 | 6.367066661 | 9.043024169 | 10.59226572 | 12.08186508 | 7.87814045  |
| ENSMUSG0000099292 | 12.02668147 | 13.21672763 | 19.77222934 | 16.10915344 | 11.45911338 |
| ENSMUSG0000099293 | 9.904325918 | 7.651789682 | 9.179963621 | 8.054576721 | 5.013362104 |
| ENSMUSG0000099294 | 4.952162959 | 2.782468975 | 7.767661525 | 6.443661377 | 5.013362104 |
| ENSMUSG0000099295 | 29.0055259  | 47.30197258 | 25.42143772 | 97.46037832 | 93.10529622 |

|                   |             |             |             |             |             |
|-------------------|-------------|-------------|-------------|-------------|-------------|
| ENSMUSG0000099296 | 8.489422215 | 10.43425866 | 9.886114669 | 4.832746033 | 7.161945863 |
| ENSMUSG0000099298 | 13.44158517 | 6.956172438 | 6.35535943  | 3.221830688 | 6.445751277 |
| ENSMUSG0000099299 | 2.829807405 | 4.173703463 | 3.530755239 | 2.416373016 | 4.297167518 |
| ENSMUSG0000099300 | 10.61177777 | 6.956172438 | 9.886114669 | 4.832746033 | 5.729556691 |
| ENSMUSG0000099301 | 9.904325918 | 6.956172438 | 9.179963621 | 5.638203705 | 8.594335036 |
| ENSMUSG0000099302 | 10.61177777 | 11.1298759  | 12.00456781 | 13.69278043 | 11.45911338 |
| ENSMUSG0000099303 | 8.489422215 | 6.260555194 | 11.29841676 | 8.860034393 | 7.87814045  |
| ENSMUSG0000099304 | 7.781970364 | 5.56493795  | 7.767661525 | 5.638203705 | 10.02672421 |
| ENSMUSG0000099307 | 0           | 0           | 0           | 0           | 0           |
| ENSMUSG0000099308 | 11.31922962 | 15.30357936 | 11.29841676 | 16.10915344 | 17.18867007 |
| ENSMUSG0000099309 | 12.02668147 | 18.78166558 | 19.06607829 | 12.88732275 | 10.02672421 |
| ENSMUSG0000099310 | 90.55383696 | 132.1672763 | 126.4010376 | 136.1223466 | 116.7397176 |
| ENSMUSG0000099311 | 12.73413332 | 17.39043109 | 13.41686991 | 14.4982381  | 25.06681052 |
| ENSMUSG0000099312 | 8.489422215 | 2.782468975 | 2.118453143 | 2.416373016 | 0.716194586 |
| ENSMUSG0000099313 | 50.22908144 | 82.77845201 | 72.02740687 | 53.96566403 | 52.99839939 |
| ENSMUSG0000099314 | 0           | 0           | 0           | 0           | 0           |
| ENSMUSG0000099315 | 53.05888884 | 89.73462445 | 89.68118307 | 67.65844446 | 65.17370736 |
| ENSMUSG0000099316 | 8.489422215 | 5.56493795  | 6.35535943  | 2.416373016 | 5.013362104 |
| ENSMUSG0000099317 | 0           | 0           | 0           | 0           | 0           |
| ENSMUSG0000099318 | 8.489422215 | 9.738641413 | 9.179963621 | 7.249119049 | 12.89150255 |
| ENSMUSG0000099319 | 0.707451851 | 0           | 0.706151048 | 0.805457672 | 0           |
| ENSMUSG0000099320 | 7.074518513 | 7.651789682 | 7.061510478 | 4.832746033 | 7.87814045  |
| ENSMUSG0000099321 | 11.31922962 | 10.43425866 | 2.824604191 | 6.443661377 | 10.7429188  |
| ENSMUSG0000099322 | 0.707451851 | 4.869320706 | 2.118453143 | 1.610915344 | 3.580972932 |
| ENSMUSG0000099323 | 0.707451851 | 2.782468975 | 0           | 0           | 0           |
| ENSMUSG0000099324 | 4.244711108 | 7.651789682 | 4.943057334 | 4.02728836  | 3.580972932 |
| ENSMUSG0000099325 | 9.904325918 | 6.260555194 | 8.473812573 | 8.054576721 | 7.87814045  |
| ENSMUSG0000099326 | 7.074518513 | 6.260555194 | 7.061510478 | 3.221830688 | 10.02672421 |
| ENSMUSG0000099328 | 0           | 0           | 0           | 0           | 0           |
| ENSMUSG0000099329 | 0           | 0.695617244 | 0           | 0           | 0           |
| ENSMUSG0000099330 | 29.71297775 | 39.6501829  | 45.8998181  | 23.35827249 | 39.39070225 |
| ENSMUSG0000099331 | 7.074518513 | 7.651789682 | 7.767661525 | 12.08186508 | 7.87814045  |
| ENSMUSG0000099332 | 0           | 0           | 0           | 0           | 0           |
| ENSMUSG0000099334 | 8.489422215 | 7.651789682 | 6.35535943  | 4.02728836  | 5.729556691 |
| ENSMUSG0000099335 | 8.489422215 | 5.56493795  | 2.118453143 | 1.610915344 | 5.013362104 |
| ENSMUSG0000099336 | 8.489422215 | 6.260555194 | 6.35535943  | 3.221830688 | 9.310529622 |
| ENSMUSG0000099337 | 9.904325918 | 10.43425866 | 7.767661525 | 13.69278043 | 7.161945863 |
| ENSMUSG0000099338 | 3.537259256 | 2.782468975 | 8.473812573 | 5.638203705 | 8.594335036 |
| ENSMUSG0000099339 | 4.952162959 | 4.173703463 | 6.35535943  | 1.610915344 | 3.580972932 |
| ENSMUSG0000099340 | 4.952162959 | 7.651789682 | 5.649208382 | 8.054576721 | 5.729556691 |
| ENSMUSG0000099341 | 3.537259256 | 7.651789682 | 2.118453143 | 5.638203705 | 5.013362104 |
| ENSMUSG0000099342 | 12.02668147 | 9.043024169 | 9.886114669 | 5.638203705 | 12.17530797 |
| ENSMUSG0000099343 | 12.02668147 | 5.56493795  | 5.649208382 | 8.054576721 | 4.297167518 |

|                   |             |             |             |             |             |
|-------------------|-------------|-------------|-------------|-------------|-------------|
| ENSMUSG0000099344 | 12.73413332 | 8.347406925 | 4.236906287 | 5.638203705 | 5.013362104 |
| ENSMUSG0000099345 | 0.707451851 | 0           | 1.412302096 | 0           | 1.432389173 |
| ENSMUSG0000099346 | 8.489422215 | 6.956172438 | 5.649208382 | 2.416373016 | 5.729556691 |
| ENSMUSG0000099347 | 4.952162959 | 4.869320706 | 4.943057334 | 2.416373016 | 4.297167518 |
| ENSMUSG0000099348 | 8.489422215 | 6.956172438 | 4.943057334 | 5.638203705 | 9.310529622 |
| ENSMUSG0000099349 | 5.65961481  | 3.478086219 | 1.412302096 | 2.416373016 | 2.148583759 |
| ENSMUSG0000099350 | 5.65961481  | 3.478086219 | 5.649208382 | 4.832746033 | 2.148583759 |
| ENSMUSG0000099351 | 3.537259256 | 4.869320706 | 5.649208382 | 2.416373016 | 3.580972932 |
| ENSMUSG0000099352 | 3.537259256 | 0.695617244 | 3.530755239 | 0           | 5.729556691 |
| ENSMUSG0000099354 | 7.781970364 | 6.956172438 | 8.473812573 | 6.443661377 | 7.161945863 |
| ENSMUSG0000099355 | 4.244711108 | 4.173703463 | 4.943057334 | 4.02728836  | 5.013362104 |
| ENSMUSG0000099356 | 12.02668147 | 9.043024169 | 9.886114669 | 4.02728836  | 7.87814045  |
| ENSMUSG0000099357 | 12.02668147 | 5.56493795  | 5.649208382 | 6.443661377 | 9.310529622 |
| ENSMUSG0000099358 | 6.367066661 | 6.956172438 | 4.943057334 | 2.416373016 | 7.87814045  |
| ENSMUSG0000099359 | 9.196874066 | 5.56493795  | 8.473812573 | 7.249119049 | 5.729556691 |
| ENSMUSG0000099360 | 5.65961481  | 2.086851731 | 5.649208382 | 4.832746033 | 5.013362104 |
| ENSMUSG0000099361 | 9.196874066 | 9.043024169 | 6.35535943  | 8.054576721 | 2.864778345 |
| ENSMUSG0000099362 | 5.65961481  | 4.173703463 | 2.118453143 | 4.832746033 | 1.432389173 |
| ENSMUSG0000099363 | 2.829807405 | 4.173703463 | 4.943057334 | 0.805457672 | 3.580972932 |
| ENSMUSG0000099364 | 4.244711108 | 4.869320706 | 1.412302096 | 0.805457672 | 7.87814045  |
| ENSMUSG0000099365 | 0           | 0           | 0           | 0           | 0           |
| ENSMUSG0000099366 | 1.414903703 | 2.782468975 | 2.824604191 | 0.805457672 | 0.716194586 |
| ENSMUSG0000099367 | 7.781970364 | 9.738641413 | 9.179963621 | 9.665492065 | 6.445751277 |
| ENSMUSG0000099368 | 7.074518513 | 4.869320706 | 4.943057334 | 4.02728836  | 5.729556691 |
| ENSMUSG0000099369 | 12.02668147 | 6.956172438 | 9.179963621 | 6.443661377 | 15.04008631 |
| ENSMUSG0000099370 | 11.31922962 | 15.99919661 | 12.71071886 | 7.249119049 | 7.87814045  |
| ENSMUSG0000099371 | 7.074518513 | 0.695617244 | 4.943057334 | 2.416373016 | 5.729556691 |
| ENSMUSG0000099372 | 2.829807405 | 6.956172438 | 4.236906287 | 1.610915344 | 3.580972932 |
| ENSMUSG0000099373 | 19.10119998 | 30.60715873 | 31.0706461  | 28.19101852 | 31.5125618  |
| ENSMUSG0000099374 | 8.489422215 | 6.956172438 | 2.824604191 | 1.610915344 | 2.864778345 |
| ENSMUSG0000099375 | 7.781970364 | 11.1298759  | 5.649208382 | 8.054576721 | 10.7429188  |
| ENSMUSG0000099376 | 6.367066661 | 9.043024169 | 5.649208382 | 5.638203705 | 7.161945863 |
| ENSMUSG0000099377 | 12.02668147 | 6.260555194 | 9.886114669 | 4.832746033 | 8.594335036 |
| ENSMUSG0000099378 | 9.196874066 | 3.478086219 | 7.767661525 | 3.221830688 | 4.297167518 |
| ENSMUSG0000099379 | 4.952162959 | 1.391234488 | 9.886114669 | 0.805457672 | 6.445751277 |
| ENSMUSG0000099380 | 6.367066661 | 5.56493795  | 5.649208382 | 5.638203705 | 2.148583759 |
| ENSMUSG0000099381 | 6.367066661 | 4.869320706 | 12.00456781 | 7.249119049 | 5.729556691 |
| ENSMUSG0000099382 | 10.61177777 | 3.478086219 | 7.767661525 | 11.27640741 | 7.161945863 |
| ENSMUSG0000099383 | 0           | 0           | 2.118453143 | 0           | 0           |
| ENSMUSG0000099384 | 30.4204296  | 36.86771392 | 40.25060972 | 20.1364418  | 27.93158887 |
| ENSMUSG0000099385 | 9.904325918 | 5.56493795  | 9.179963621 | 6.443661377 | 9.310529622 |
| ENSMUSG0000099386 | 6.367066661 | 4.869320706 | 6.35535943  | 4.832746033 | 2.864778345 |
| ENSMUSG0000099387 | 9.904325918 | 5.56493795  | 4.943057334 | 5.638203705 | 5.013362104 |

|                   |             |             |             |             |             |
|-------------------|-------------|-------------|-------------|-------------|-------------|
| ENSMUSG0000099388 | 5.65961481  | 6.956172438 | 4.236906287 | 7.249119049 | 5.729556691 |
| ENSMUSG0000099389 | 3.537259256 | 4.869320706 | 3.530755239 | 3.221830688 | 5.013362104 |
| ENSMUSG0000099390 | 7.781970364 | 6.260555194 | 2.118453143 | 0           | 2.148583759 |
| ENSMUSG0000099391 | 14.14903703 | 7.651789682 | 12.00456781 | 4.832746033 | 5.013362104 |
| ENSMUSG0000099392 | 6.367066661 | 7.651789682 | 7.061510478 | 5.638203705 | 4.297167518 |
| ENSMUSG0000099393 | 4.952162959 | 4.869320706 | 4.236906287 | 2.416373016 | 2.864778345 |
| ENSMUSG0000099394 | 7.781970364 | 9.043024169 | 4.236906287 | 7.249119049 | 6.445751277 |
| ENSMUSG0000099395 | 5.65961481  | 3.478086219 | 8.473812573 | 4.02728836  | 2.864778345 |
| ENSMUSG0000099396 | 10.61177777 | 4.869320706 | 9.886114669 | 5.638203705 | 2.864778345 |
| ENSMUSG0000099397 | 0           | 0           | 0           | 0           | 0           |
| ENSMUSG0000099399 | 7.074518513 | 2.086851731 | 7.061510478 | 3.221830688 | 1.432389173 |
| ENSMUSG0000099400 | 9.904325918 | 4.869320706 | 7.767661525 | 8.054576721 | 4.297167518 |
| ENSMUSG0000099401 | 14.14903703 | 3.478086219 | 10.59226572 | 2.416373016 | 4.297167518 |
| ENSMUSG0000099403 | 5.65961481  | 6.956172438 | 7.767661525 | 8.860034393 | 7.161945863 |
| ENSMUSG0000099404 | 4.244711108 | 2.086851731 | 2.118453143 | 1.610915344 | 0.716194586 |
| ENSMUSG0000099405 | 9.904325918 | 11.1298759  | 9.179963621 | 4.02728836  | 5.013362104 |
| ENSMUSG0000099406 | 7.781970364 | 6.260555194 | 7.061510478 | 9.665492065 | 6.445751277 |
| ENSMUSG0000099407 | 7.781970364 | 5.56493795  | 9.179963621 | 4.02728836  | 5.729556691 |
| ENSMUSG0000099408 | 4.244711108 | 6.956172438 | 4.943057334 | 0.805457672 | 5.013362104 |
| ENSMUSG0000099409 | 7.781970364 | 4.869320706 | 9.886114669 | 4.832746033 | 4.297167518 |
| ENSMUSG0000099410 | 6.367066661 | 7.651789682 | 7.061510478 | 3.221830688 | 3.580972932 |
| ENSMUSG0000099411 | 9.196874066 | 4.173703463 | 9.886114669 | 5.638203705 | 7.161945863 |
| ENSMUSG0000099412 | 7.074518513 | 4.869320706 | 6.35535943  | 5.638203705 | 2.148583759 |
| ENSMUSG0000099413 | 9.196874066 | 8.347406925 | 8.473812573 | 5.638203705 | 5.013362104 |
| ENSMUSG0000099414 | 10.61177777 | 5.56493795  | 14.12302096 | 6.443661377 | 5.729556691 |
| ENSMUSG0000099415 | 4.952162959 | 3.478086219 | 3.530755239 | 3.221830688 | 4.297167518 |
| ENSMUSG0000099416 | 6.367066661 | 1.391234488 | 5.649208382 | 2.416373016 | 4.297167518 |
| ENSMUSG0000099417 | 8.489422215 | 10.43425866 | 1.412302096 | 7.249119049 | 2.864778345 |
| ENSMUSG0000099418 | 12.02668147 | 9.043024169 | 10.59226572 | 8.054576721 | 6.445751277 |
| ENSMUSG0000099419 | 9.196874066 | 11.1298759  | 14.829172   | 12.88732275 | 12.17530797 |
| ENSMUSG0000099420 | 1.414903703 | 1.391234488 | 3.530755239 | 0.805457672 | 0.716194586 |
| ENSMUSG0000099421 | 7.074518513 | 8.347406925 | 6.35535943  | 11.27640741 | 7.161945863 |
| ENSMUSG0000099422 | 8.489422215 | 8.347406925 | 7.061510478 | 11.27640741 | 9.310529622 |
| ENSMUSG0000099423 | 15.56394073 | 4.173703463 | 13.41686991 | 8.054576721 | 12.17530797 |
| ENSMUSG0000099424 | 9.196874066 | 8.347406925 | 7.061510478 | 6.443661377 | 5.729556691 |
| ENSMUSG0000099425 | 9.196874066 | 7.651789682 | 6.35535943  | 1.610915344 | 6.445751277 |
| ENSMUSG0000099426 | 6.367066661 | 4.173703463 | 4.943057334 | 1.610915344 | 3.580972932 |
| ENSMUSG0000099427 | 7.074518513 | 8.347406925 | 8.473812573 | 1.610915344 | 7.161945863 |
| ENSMUSG0000099428 | 32.54278516 | 33.3896277  | 32.4829482  | 60.40932541 | 38.67450766 |
| ENSMUSG0000099429 | 9.196874066 | 6.956172438 | 9.886114669 | 8.860034393 | 10.02672421 |
| ENSMUSG0000099430 | 4.952162959 | 7.651789682 | 3.530755239 | 1.610915344 | 3.580972932 |
| ENSMUSG0000099431 | 9.196874066 | 4.173703463 | 3.530755239 | 1.610915344 | 5.013362104 |
| ENSMUSG0000099432 | 12.02668147 | 10.43425866 | 12.00456781 | 16.10915344 | 12.89150255 |

|                   |             |             |             |             |             |
|-------------------|-------------|-------------|-------------|-------------|-------------|
| ENSMUSG0000099433 | 7.074518513 | 6.956172438 | 8.473812573 | 5.638203705 | 2.148583759 |
| ENSMUSG0000099434 | 9.196874066 | 4.869320706 | 7.061510478 | 5.638203705 | 5.729556691 |
| ENSMUSG0000099435 | 9.196874066 | 6.260555194 | 9.179963621 | 8.054576721 | 8.594335036 |
| ENSMUSG0000099436 | 3.537259256 | 7.651789682 | 4.236906287 | 4.02728836  | 1.432389173 |
| ENSMUSG0000099437 | 10.61177777 | 6.956172438 | 4.236906287 | 5.638203705 | 7.87814045  |
| ENSMUSG0000099438 | 9.196874066 | 4.869320706 | 5.649208382 | 5.638203705 | 3.580972932 |
| ENSMUSG0000099439 | 4.952162959 | 1.391234488 | 6.35535943  | 1.610915344 | 1.432389173 |
| ENSMUSG0000099440 | 2.122355554 | 1.391234488 | 0           | 0.805457672 | 1.432389173 |
| ENSMUSG0000099441 | 5.65961481  | 2.782468975 | 7.767661525 | 5.638203705 | 5.013362104 |
| ENSMUSG0000099442 | 5.65961481  | 6.956172438 | 6.35535943  | 8.860034393 | 2.864778345 |
| ENSMUSG0000099443 | 1.414903703 | 1.391234488 | 1.412302096 | 2.416373016 | 1.432389173 |
| ENSMUSG0000099444 | 7.781970364 | 8.347406925 | 6.35535943  | 9.665492065 | 5.729556691 |
| ENSMUSG0000099445 | 2.122355554 | 0           | 0.706151048 | 0           | 1.432389173 |
| ENSMUSG0000099446 | 10.61177777 | 6.260555194 | 9.886114669 | 6.443661377 | 5.729556691 |
| ENSMUSG0000099447 | 12.73413332 | 6.260555194 | 8.473812573 | 5.638203705 | 6.445751277 |
| ENSMUSG0000099448 | 8.489422215 | 6.956172438 | 4.943057334 | 8.054576721 | 5.729556691 |
| ENSMUSG0000099449 | 8.489422215 | 3.478086219 | 8.473812573 | 4.02728836  | 5.013362104 |
| ENSMUSG0000099450 | 8.489422215 | 7.651789682 | 9.886114669 | 8.054576721 | 8.594335036 |
| ENSMUSG0000099451 | 5.65961481  | 9.043024169 | 7.767661525 | 4.02728836  | 9.310529622 |
| ENSMUSG0000099452 | 7.074518513 | 13.91234488 | 9.179963621 | 4.832746033 | 4.297167518 |
| ENSMUSG0000099453 | 12.02668147 | 10.43425866 | 9.179963621 | 8.054576721 | 5.013362104 |
| ENSMUSG0000099454 | 9.196874066 | 4.869320706 | 7.767661525 | 5.638203705 | 7.87814045  |
| ENSMUSG0000099455 | 4.952162959 | 12.52111039 | 4.236906287 | 4.832746033 | 5.013362104 |
| ENSMUSG0000099456 | 4.244711108 | 2.086851731 | 3.530755239 | 4.832746033 | 4.297167518 |
| ENSMUSG0000099457 | 7.074518513 | 3.478086219 | 9.179963621 | 4.02728836  | 3.580972932 |
| ENSMUSG0000099458 | 9.196874066 | 5.56493795  | 9.179963621 | 7.249119049 | 10.02672421 |
| ENSMUSG0000099459 | 19.80865184 | 25.04222078 | 28.95219296 | 17.72006879 | 20.769643   |
| ENSMUSG0000099460 | 2.122355554 | 4.173703463 | 4.236906287 | 4.832746033 | 3.580972932 |
| ENSMUSG0000099461 | 6.367066661 | 5.56493795  | 8.473812573 | 3.221830688 | 2.148583759 |
| ENSMUSG0000099462 | 6.367066661 | 3.478086219 | 7.767661525 | 0.805457672 | 5.729556691 |
| ENSMUSG0000099463 | 7.781970364 | 3.478086219 | 2.118453143 | 3.221830688 | 2.864778345 |
| ENSMUSG0000099464 | 9.904325918 | 5.56493795  | 8.473812573 | 6.443661377 | 5.729556691 |
| ENSMUSG0000099465 | 9.196874066 | 7.651789682 | 11.29841676 | 8.860034393 | 7.87814045  |
| ENSMUSG0000099466 | 5.65961481  | 6.260555194 | 4.943057334 | 1.610915344 | 2.864778345 |
| ENSMUSG0000099467 | 14.14903703 | 8.347406925 | 10.59226572 | 8.860034393 | 6.445751277 |
| ENSMUSG0000099468 | 1.414903703 | 2.086851731 | 0           | 0           | 0.716194586 |
| ENSMUSG0000099469 | 9.904325918 | 9.738641413 | 6.35535943  | 6.443661377 | 5.729556691 |
| ENSMUSG0000099470 | 4.244711108 | 9.043024169 | 7.767661525 | 7.249119049 | 7.87814045  |
| ENSMUSG0000099471 | 14.85648888 | 30.60715873 | 28.24604191 | 23.35827249 | 34.37734014 |
| ENSMUSG0000099472 | 4.952162959 | 3.478086219 | 4.943057334 | 4.832746033 | 5.729556691 |
| ENSMUSG0000099473 | 10.61177777 | 3.478086219 | 15.53532305 | 5.638203705 | 10.7429188  |
| ENSMUSG0000099474 | 29.0055259  | 17.39043109 | 24.00913562 | 19.33098413 | 14.32389173 |
| ENSMUSG0000099475 | 4.952162959 | 4.869320706 | 1.412302096 | 2.416373016 | 2.864778345 |

|                   |             |             |             |             |             |
|-------------------|-------------|-------------|-------------|-------------|-------------|
| ENSMUSG0000099476 | 9.196874066 | 7.651789682 | 8.473812573 | 3.221830688 | 5.729556691 |
| ENSMUSG0000099477 | 6.367066661 | 4.173703463 | 0           | 5.638203705 | 4.297167518 |
| ENSMUSG0000099478 | 11.31922962 | 11.1298759  | 9.179963621 | 8.054576721 | 10.7429188  |
| ENSMUSG0000099479 | 8.489422215 | 7.651789682 | 9.886114669 | 1.610915344 | 4.297167518 |
| ENSMUSG0000099480 | 7.074518513 | 5.56493795  | 2.824604191 | 3.221830688 | 4.297167518 |
| ENSMUSG0000099482 | 6.367066661 | 4.173703463 | 4.236906287 | 3.221830688 | 2.148583759 |
| ENSMUSG0000099483 | 2.122355554 | 5.56493795  | 8.473812573 | 2.416373016 | 5.013362104 |
| ENSMUSG0000099484 | 7.074518513 | 6.260555194 | 10.59226572 | 6.443661377 | 7.87814045  |
| ENSMUSG0000099485 | 9.904325918 | 7.651789682 | 8.473812573 | 4.832746033 | 6.445751277 |
| ENSMUSG0000099486 | 7.781970364 | 8.347406925 | 9.886114669 | 6.443661377 | 6.445751277 |
| ENSMUSG0000099487 | 3.537259256 | 3.478086219 | 3.530755239 | 4.832746033 | 3.580972932 |
| ENSMUSG0000099488 | 7.074518513 | 7.651789682 | 11.29841676 | 10.47094974 | 11.45911338 |
| ENSMUSG0000099489 | 4.244711108 | 6.956172438 | 4.236906287 | 0.805457672 | 3.580972932 |
| ENSMUSG0000099490 | 3.537259256 | 6.956172438 | 7.767661525 | 11.27640741 | 6.445751277 |
| ENSMUSG0000099491 | 12.02668147 | 5.56493795  | 6.35535943  | 5.638203705 | 5.729556691 |
| ENSMUSG0000099492 | 4.244711108 | 6.956172438 | 9.886114669 | 12.88732275 | 10.7429188  |
| ENSMUSG0000099493 | 7.074518513 | 8.347406925 | 6.35535943  | 2.416373016 | 0.716194586 |
| ENSMUSG0000099494 | 4.952162959 | 4.173703463 | 7.767661525 | 5.638203705 | 2.148583759 |
| ENSMUSG0000099495 | 5.65961481  | 4.869320706 | 5.649208382 | 1.610915344 | 2.864778345 |
| ENSMUSG0000099496 | 2.829807405 | 3.478086219 | 4.943057334 | 2.416373016 | 4.297167518 |
| ENSMUSG0000099497 | 7.781970364 | 8.347406925 | 2.824604191 | 2.416373016 | 6.445751277 |
| ENSMUSG0000099498 | 9.904325918 | 5.56493795  | 4.236906287 | 6.443661377 | 9.310529622 |
| ENSMUSG0000099499 | 4.952162959 | 6.956172438 | 7.061510478 | 0.805457672 | 2.148583759 |
| ENSMUSG0000099500 | 5.65961481  | 4.869320706 | 2.118453143 | 1.610915344 | 5.013362104 |
| ENSMUSG0000099501 | 7.074518513 | 6.260555194 | 3.530755239 | 3.221830688 | 3.580972932 |
| ENSMUSG0000099502 | 11.31922962 | 6.956172438 | 9.886114669 | 8.054576721 | 5.013362104 |
| ENSMUSG0000099503 | 9.196874066 | 8.347406925 | 11.29841676 | 5.638203705 | 11.45911338 |
| ENSMUSG0000099504 | 9.904325918 | 5.56493795  | 2.824604191 | 5.638203705 | 1.432389173 |
| ENSMUSG0000099505 | 7.781970364 | 5.56493795  | 7.061510478 | 4.02728836  | 7.87814045  |
| ENSMUSG0000099506 | 5.65961481  | 6.260555194 | 8.473812573 | 3.221830688 | 4.297167518 |
| ENSMUSG0000099507 | 10.61177777 | 9.043024169 | 9.886114669 | 4.02728836  | 9.310529622 |
| ENSMUSG0000099508 | 9.904325918 | 8.347406925 | 9.179963621 | 7.249119049 | 4.297167518 |
| ENSMUSG0000099509 | 5.65961481  | 6.956172438 | 7.061510478 | 2.416373016 | 4.297167518 |
| ENSMUSG0000099510 | 19.10119998 | 32.69401046 | 36.01370344 | 31.41284921 | 30.79636721 |
| ENSMUSG0000099511 | 6.367066661 | 6.956172438 | 7.061510478 | 7.249119049 | 10.02672421 |
| ENSMUSG0000099512 | 10.61177777 | 7.651789682 | 12.00456781 | 3.221830688 | 6.445751277 |
| ENSMUSG0000099513 | 7.781970364 | 9.043024169 | 4.943057334 | 4.832746033 | 6.445751277 |
| ENSMUSG0000099514 | 5.65961481  | 2.782468975 | 4.236906287 | 4.832746033 | 4.297167518 |
| ENSMUSG0000099516 | 7.781970364 | 7.651789682 | 9.179963621 | 6.443661377 | 7.161945863 |
| ENSMUSG0000099518 | 2.122355554 | 6.260555194 | 4.943057334 | 2.416373016 | 2.148583759 |
| ENSMUSG0000099519 | 7.074518513 | 13.21672763 | 14.829172   | 12.88732275 | 17.90486466 |
| ENSMUSG0000099520 | 4.952162959 | 2.782468975 | 4.236906287 | 0           | 2.864778345 |
| ENSMUSG0000099521 | 0           | 0.695617244 | 0.706151048 | 1.610915344 | 1.432389173 |

|                   |             |             |             |             |             |
|-------------------|-------------|-------------|-------------|-------------|-------------|
| ENSMUSG0000099522 | 2.829807405 | 2.782468975 | 2.118453143 | 3.221830688 | 7.161945863 |
| ENSMUSG0000099523 | 2.122355554 | 2.086851731 | 5.649208382 | 3.221830688 | 3.580972932 |
| ENSMUSG0000099524 | 3.537259256 | 8.347406925 | 4.943057334 | 0.805457672 | 5.729556691 |
| ENSMUSG0000099525 | 8.489422215 | 4.869320706 | 5.649208382 | 2.416373016 | 4.297167518 |
| ENSMUSG0000099526 | 4.952162959 | 2.782468975 | 5.649208382 | 2.416373016 | 4.297167518 |
| ENSMUSG0000099527 | 9.904325918 | 6.260555194 | 9.886114669 | 3.221830688 | 7.161945863 |
| ENSMUSG0000099528 | 7.781970364 | 6.956172438 | 7.061510478 | 7.249119049 | 8.594335036 |
| ENSMUSG0000099529 | 8.489422215 | 5.56493795  | 5.649208382 | 1.610915344 | 1.432389173 |
| ENSMUSG0000099532 | 8.489422215 | 8.347406925 | 4.943057334 | 2.416373016 | 4.297167518 |
| ENSMUSG0000099534 | 11.31922962 | 7.651789682 | 7.767661525 | 8.860034393 | 5.013362104 |
| ENSMUSG0000099535 | 6.367066661 | 4.173703463 | 12.71071886 | 0           | 2.864778345 |
| ENSMUSG0000099536 | 5.65961481  | 4.869320706 | 4.943057334 | 3.221830688 | 7.161945863 |
| ENSMUSG0000099537 | 3.537259256 | 8.347406925 | 6.35535943  | 5.638203705 | 5.013362104 |
| ENSMUSG0000099538 | 8.489422215 | 10.43425866 | 9.179963621 | 7.249119049 | 8.594335036 |
| ENSMUSG0000099539 | 6.367066661 | 5.56493795  | 7.767661525 | 8.054576721 | 4.297167518 |
| ENSMUSG0000099540 | 7.074518513 | 10.43425866 | 14.12302096 | 3.221830688 | 11.45911338 |
| ENSMUSG0000099542 | 9.196874066 | 6.260555194 | 7.061510478 | 1.610915344 | 3.580972932 |
| ENSMUSG0000099543 | 9.196874066 | 10.43425866 | 11.29841676 | 6.443661377 | 8.594335036 |
| ENSMUSG0000099544 | 8.489422215 | 6.956172438 | 4.236906287 | 6.443661377 | 7.161945863 |
| ENSMUSG0000099545 | 0.707451851 | 4.869320706 | 2.118453143 | 3.221830688 | 5.729556691 |
| ENSMUSG0000099546 | 4.952162959 | 6.260555194 | 6.35535943  | 0.805457672 | 2.148583759 |
| ENSMUSG0000099547 | 2.829807405 | 6.260555194 | 6.35535943  | 4.832746033 | 5.013362104 |
| ENSMUSG0000099548 | 4.952162959 | 6.260555194 | 4.236906287 | 6.443661377 | 4.297167518 |
| ENSMUSG0000099549 | 12.02668147 | 6.260555194 | 9.179963621 | 7.249119049 | 11.45911338 |
| ENSMUSG0000099551 | 6.367066661 | 3.478086219 | 5.649208382 | 1.610915344 | 2.864778345 |
| ENSMUSG0000099552 | 11.31922962 | 2.782468975 | 9.886114669 | 6.443661377 | 6.445751277 |
| ENSMUSG0000099553 | 7.074518513 | 5.56493795  | 4.943057334 | 6.443661377 | 3.580972932 |
| ENSMUSG0000099554 | 8.489422215 | 10.43425866 | 5.649208382 | 4.832746033 | 10.02672421 |
| ENSMUSG0000099555 | 5.65961481  | 5.56493795  | 4.943057334 | 3.221830688 | 5.013362104 |
| ENSMUSG0000099556 | 7.781970364 | 10.43425866 | 7.767661525 | 6.443661377 | 5.013362104 |
| ENSMUSG0000099558 | 9.196874066 | 2.086851731 | 6.35535943  | 6.443661377 | 5.729556691 |
| ENSMUSG0000099559 | 2.122355554 | 1.391234488 | 5.649208382 | 5.638203705 | 4.297167518 |
| ENSMUSG0000099560 | 5.65961481  | 7.651789682 | 5.649208382 | 8.054576721 | 7.161945863 |
| ENSMUSG0000099561 | 9.904325918 | 6.956172438 | 6.35535943  | 8.054576721 | 7.161945863 |
| ENSMUSG0000099562 | 10.61177777 | 6.260555194 | 6.35535943  | 12.08186508 | 4.297167518 |
| ENSMUSG0000099563 | 9.904325918 | 6.956172438 | 3.530755239 | 4.832746033 | 7.87814045  |
| ENSMUSG0000099564 | 9.196874066 | 9.043024169 | 8.473812573 | 11.27640741 | 11.45911338 |
| ENSMUSG0000099565 | 5.65961481  | 4.173703463 | 6.35535943  | 2.416373016 | 3.580972932 |
| ENSMUSG0000099566 | 3.537259256 | 6.260555194 | 4.236906287 | 4.02728836  | 2.864778345 |
| ENSMUSG0000099568 | 12.02668147 | 11.1298759  | 14.829172   | 8.054576721 | 10.02672421 |
| ENSMUSG0000099569 | 26.1757185  | 46.60635533 | 37.42600553 | 81.35122488 | 70.18706946 |
| ENSMUSG0000099570 | 2.829807405 | 6.260555194 | 7.061510478 | 4.02728836  | 5.013362104 |
| ENSMUSG0000099571 | 9.904325918 | 4.869320706 | 8.473812573 | 5.638203705 | 6.445751277 |



|                    |             |             |             |             |             |
|--------------------|-------------|-------------|-------------|-------------|-------------|
| ENSMUSG00000099572 | 9.196874066 | 4.869320706 | 9.886114669 | 3.221830688 | 4.297167518 |
| ENSMUSG00000099573 | 3.537259256 | 6.956172438 | 6.35535943  | 2.416373016 | 2.148583759 |
| ENSMUSG00000099574 | 12.73413332 | 9.738641413 | 6.35535943  | 3.221830688 | 8.594335036 |
| ENSMUSG00000099575 | 7.781970364 | 2.782468975 | 5.649208382 | 4.02728836  | 2.148583759 |
| ENSMUSG00000099576 | 7.781970364 | 9.043024169 | 4.943057334 | 6.443661377 | 5.729556691 |
| ENSMUSG00000099577 | 7.074518513 | 5.56493795  | 9.179963621 | 3.221830688 | 7.87814045  |
| ENSMUSG00000099578 | 8.489422215 | 6.260555194 | 7.061510478 | 4.832746033 | 3.580972932 |
| ENSMUSG00000099579 | 13.44158517 | 11.1298759  | 13.41686991 | 5.638203705 | 6.445751277 |
| ENSMUSG00000099580 | 0           | 0           | 0           | 0           | 0           |
| ENSMUSG00000099582 | 12.02668147 | 8.347406925 | 5.649208382 | 6.443661377 | 7.87814045  |
| ENSMUSG00000099584 | 9.904325918 | 6.956172438 | 7.767661525 | 5.638203705 | 6.445751277 |
| ENSMUSG00000099585 | 4.952162959 | 4.173703463 | 4.236906287 | 7.249119049 | 7.87814045  |
| ENSMUSG00000099586 | 7.074518513 | 6.260555194 | 4.236906287 | 2.416373016 | 2.864778345 |
| ENSMUSG00000099587 | 0           | 1.391234488 | 0.706151048 | 0           | 0.716194586 |
| ENSMUSG00000099588 | 9.904325918 | 6.956172438 | 3.530755239 | 1.610915344 | 1.432389173 |
| ENSMUSG00000099589 | 3.537259256 | 6.260555194 | 6.35535943  | 1.610915344 | 3.580972932 |
| ENSMUSG00000099590 | 6.367066661 | 6.956172438 | 7.767661525 | 4.832746033 | 5.013362104 |
| ENSMUSG00000099591 | 8.489422215 | 11.1298759  | 9.179963621 | 5.638203705 | 10.7429188  |
| ENSMUSG00000099592 | 4.244711108 | 6.260555194 | 6.35535943  | 3.221830688 | 5.013362104 |
| ENSMUSG00000099593 | 2.829807405 | 6.260555194 | 3.530755239 | 3.221830688 | 4.297167518 |
| ENSMUSG00000099594 | 5.65961481  | 2.086851731 | 7.767661525 | 4.832746033 | 5.013362104 |
| ENSMUSG00000099595 | 8.489422215 | 2.782468975 | 2.824604191 | 6.443661377 | 3.580972932 |
| ENSMUSG00000099596 | 9.196874066 | 4.869320706 | 4.943057334 | 3.221830688 | 6.445751277 |
| ENSMUSG00000099597 | 9.196874066 | 12.52111039 | 13.41686991 | 5.638203705 | 11.45911338 |
| ENSMUSG00000099598 | 7.074518513 | 4.869320706 | 6.35535943  | 5.638203705 | 6.445751277 |
| ENSMUSG00000099599 | 8.489422215 | 4.869320706 | 7.767661525 | 2.416373016 | 9.310529622 |
| ENSMUSG00000099600 | 43.15456293 | 45.91073809 | 53.66747963 | 87.79488626 | 69.47087488 |
| ENSMUSG00000099601 | 4.952162959 | 4.869320706 | 4.236906287 | 3.221830688 | 1.432389173 |
| ENSMUSG00000099602 | 11.31922962 | 9.738641413 | 4.943057334 | 6.443661377 | 5.013362104 |
| ENSMUSG00000099603 | 5.65961481  | 13.21672763 | 10.59226572 | 4.832746033 | 5.729556691 |
| ENSMUSG00000099604 | 4.244711108 | 9.043024169 | 9.179963621 | 2.416373016 | 7.161945863 |
| ENSMUSG00000099605 | 6.367066661 | 7.651789682 | 9.886114669 | 9.665492065 | 9.310529622 |
| ENSMUSG00000099606 | 1.414903703 | 3.478086219 | 7.767661525 | 1.610915344 | 3.580972932 |
| ENSMUSG00000099607 | 7.074518513 | 4.869320706 | 7.061510478 | 6.443661377 | 5.729556691 |
| ENSMUSG00000099608 | 8.489422215 | 6.956172438 | 9.886114669 | 6.443661377 | 6.445751277 |
| ENSMUSG00000099609 | 0           | 0           | 0.706151048 | 0           | 0           |
| ENSMUSG00000099610 | 12.02668147 | 6.956172438 | 2.824604191 | 4.02728836  | 7.161945863 |
| ENSMUSG00000099611 | 6.367066661 | 9.738641413 | 9.179963621 | 7.249119049 | 5.729556691 |
| ENSMUSG00000099612 | 8.489422215 | 8.347406925 | 6.35535943  | 3.221830688 | 8.594335036 |
| ENSMUSG00000099613 | 7.781970364 | 3.478086219 | 6.35535943  | 3.221830688 | 5.013362104 |
| ENSMUSG00000099614 | 4.952162959 | 2.782468975 | 4.236906287 | 2.416373016 | 5.013362104 |
| ENSMUSG00000099615 | 8.489422215 | 8.347406925 | 9.886114669 | 3.221830688 | 5.013362104 |
| ENSMUSG00000099616 | 12.02668147 | 10.43425866 | 13.41686991 | 6.443661377 | 10.02672421 |

|                    |             |             |             |             |             |
|--------------------|-------------|-------------|-------------|-------------|-------------|
| ENSMUSG00000099617 | 7.074518513 | 7.651789682 | 6.35535943  | 5.638203705 | 3.580972932 |
| ENSMUSG00000099618 | 2.829807405 | 7.651789682 | 6.35535943  | 4.02728836  | 4.297167518 |
| ENSMUSG00000099619 | 3.537259256 | 4.173703463 | 3.530755239 | 4.832746033 | 5.013362104 |
| ENSMUSG00000099620 | 7.781970364 | 9.043024169 | 2.824604191 | 4.02728836  | 9.310529622 |
| ENSMUSG00000099621 | 8.489422215 | 5.56493795  | 2.118453143 | 4.832746033 | 5.729556691 |
| ENSMUSG00000099622 | 10.61177777 | 4.869320706 | 6.35535943  | 8.054576721 | 4.297167518 |
| ENSMUSG00000099623 | 9.904325918 | 6.956172438 | 6.35535943  | 9.665492065 | 4.297167518 |
| ENSMUSG00000099624 | 12.73413332 | 5.56493795  | 12.71071886 | 4.02728836  | 7.87814045  |
| ENSMUSG00000099625 | 12.02668147 | 5.56493795  | 7.767661525 | 8.054576721 | 7.87814045  |
| ENSMUSG00000099626 | 7.781970364 | 5.56493795  | 7.061510478 | 4.832746033 | 3.580972932 |
| ENSMUSG00000099627 | 12.02668147 | 4.869320706 | 4.236906287 | 4.02728836  | 6.445751277 |
| ENSMUSG00000099628 | 4.952162959 | 4.869320706 | 4.236906287 | 4.02728836  | 5.013362104 |
| ENSMUSG00000099629 | 9.196874066 | 7.651789682 | 2.118453143 | 6.443661377 | 8.594335036 |
| ENSMUSG00000099630 | 12.02668147 | 5.56493795  | 5.649208382 | 13.69278043 | 10.7429188  |
| ENSMUSG00000099631 | 14.14903703 | 7.651789682 | 12.00456781 | 8.860034393 | 7.161945863 |
| ENSMUSG00000099632 | 82.7718666  | 114.7768452 | 120.7518292 | 185.2552646 | 140.3741389 |
| ENSMUSG00000099633 | 4.244711108 | 6.956172438 | 4.943057334 | 1.610915344 | 2.864778345 |
| ENSMUSG00000099634 | 8.489422215 | 9.043024169 | 7.767661525 | 4.832746033 | 5.013362104 |
| ENSMUSG00000099635 | 5.65961481  | 3.478086219 | 4.236906287 | 3.221830688 | 5.729556691 |
| ENSMUSG00000099636 | 3.537259256 | 5.56493795  | 2.824604191 | 4.02728836  | 3.580972932 |
| ENSMUSG00000099637 | 7.074518513 | 9.043024169 | 2.824604191 | 1.610915344 | 4.297167518 |
| ENSMUSG00000099638 | 4.244711108 | 5.56493795  | 6.35535943  | 0.805457672 | 2.864778345 |
| ENSMUSG00000099639 | 7.781970364 | 5.56493795  | 9.179963621 | 4.02728836  | 7.87814045  |
| ENSMUSG00000099640 | 5.65961481  | 5.56493795  | 7.061510478 | 4.02728836  | 6.445751277 |
| ENSMUSG00000099641 | 2.829807405 | 5.56493795  | 9.179963621 | 3.221830688 | 5.013362104 |
| ENSMUSG00000099642 | 4.952162959 | 5.56493795  | 7.767661525 | 0.805457672 | 5.729556691 |
| ENSMUSG00000099643 | 7.781970364 | 5.56493795  | 4.236906287 | 8.860034393 | 4.297167518 |
| ENSMUSG00000099644 | 9.196874066 | 9.738641413 | 6.35535943  | 39.46742593 | 45.12025894 |
| ENSMUSG00000099645 | 4.952162959 | 2.086851731 | 8.473812573 | 4.832746033 | 2.864778345 |
| ENSMUSG00000099646 | 3.537259256 | 2.782468975 | 3.530755239 | 4.832746033 | 3.580972932 |
| ENSMUSG00000099647 | 0           | 0           | 0           | 0           | 0           |
| ENSMUSG00000099648 | 9.196874066 | 6.260555194 | 6.35535943  | 7.249119049 | 5.013362104 |
| ENSMUSG00000099649 | 4.952162959 | 6.260555194 | 7.767661525 | 0.805457672 | 5.013362104 |
| ENSMUSG00000099650 | 8.489422215 | 3.478086219 | 7.767661525 | 2.416373016 | 2.148583759 |
| ENSMUSG00000099651 | 9.904325918 | 2.782468975 | 6.35535943  | 0.805457672 | 3.580972932 |
| ENSMUSG00000099652 | 6.367066661 | 6.956172438 | 4.236906287 | 0.805457672 | 4.297167518 |
| ENSMUSG00000099653 | 5.65961481  | 2.782468975 | 6.35535943  | 4.02728836  | 5.729556691 |
| ENSMUSG00000099654 | 8.489422215 | 6.260555194 | 4.943057334 | 0.805457672 | 3.580972932 |
| ENSMUSG00000099655 | 8.489422215 | 7.651789682 | 7.767661525 | 9.665492065 | 11.45911338 |
| ENSMUSG00000099656 | 6.367066661 | 23.65098629 | 14.829172   | 13.69278043 | 10.7429188  |
| ENSMUSG00000099657 | 9.904325918 | 4.173703463 | 9.886114669 | 8.860034393 | 5.013362104 |
| ENSMUSG00000099658 | 8.489422215 | 7.651789682 | 7.061510478 | 5.638203705 | 7.87814045  |
| ENSMUSG00000099659 | 9.196874066 | 6.260555194 | 9.179963621 | 3.221830688 | 7.161945863 |

|                    |             |             |             |             |             |
|--------------------|-------------|-------------|-------------|-------------|-------------|
| ENSMUSG00000099660 | 3.537259256 | 2.782468975 | 8.473812573 | 4.832746033 | 6.445751277 |
| ENSMUSG00000099661 | 6.367066661 | 6.956172438 | 4.236906287 | 4.02728836  | 6.445751277 |
| ENSMUSG00000099662 | 0           | 0           | 0           | 0           | 0           |
| ENSMUSG00000099663 | 6.367066661 | 4.173703463 | 9.886114669 | 6.443661377 | 3.580972932 |
| ENSMUSG00000099664 | 8.489422215 | 4.173703463 | 3.530755239 | 1.610915344 | 9.310529622 |
| ENSMUSG00000099665 | 5.65961481  | 6.260555194 | 5.649208382 | 4.02728836  | 8.594335036 |
| ENSMUSG00000099666 | 4.952162959 | 3.478086219 | 8.473812573 | 1.610915344 | 3.580972932 |
| ENSMUSG00000099667 | 5.65961481  | 4.173703463 | 5.649208382 | 0           | 0.716194586 |
| ENSMUSG00000099668 | 7.074518513 | 4.869320706 | 4.236906287 | 1.610915344 | 1.432389173 |
| ENSMUSG00000099669 | 9.196874066 | 4.869320706 | 6.35535943  | 2.416373016 | 4.297167518 |
| ENSMUSG00000099670 | 7.781970364 | 5.56493795  | 5.649208382 | 3.221830688 | 5.729556691 |
| ENSMUSG00000099671 | 13.44158517 | 9.043024169 | 7.061510478 | 5.638203705 | 6.445751277 |
| ENSMUSG00000099672 | 5.65961481  | 9.738641413 | 9.179963621 | 7.249119049 | 7.161945863 |
| ENSMUSG00000099673 | 12.73413332 | 7.651789682 | 4.943057334 | 9.665492065 | 5.013362104 |
| ENSMUSG00000099674 | 6.367066661 | 9.043024169 | 5.649208382 | 4.02728836  | 9.310529622 |
| ENSMUSG00000099675 | 5.65961481  | 4.173703463 | 3.530755239 | 2.416373016 | 1.432389173 |
| ENSMUSG00000099676 | 5.65961481  | 2.086851731 | 1.412302096 | 7.249119049 | 5.729556691 |
| ENSMUSG00000099677 | 9.196874066 | 5.56493795  | 8.473812573 | 3.221830688 | 5.013362104 |
| ENSMUSG00000099678 | 8.489422215 | 16.69481385 | 7.767661525 | 7.249119049 | 9.310529622 |
| ENSMUSG00000099679 | 7.074518513 | 11.1298759  | 8.473812573 | 4.02728836  | 5.729556691 |
| ENSMUSG00000099680 | 11.31922962 | 5.56493795  | 12.00456781 | 7.249119049 | 5.013362104 |
| ENSMUSG00000099681 | 32.54278516 | 49.38882431 | 46.60596915 | 185.2552646 | 151.8332523 |
| ENSMUSG00000099682 | 4.244711108 | 3.478086219 | 6.35535943  | 0           | 2.148583759 |
| ENSMUSG00000099683 | 7.781970364 | 9.043024169 | 8.473812573 | 4.832746033 | 6.445751277 |
| ENSMUSG00000099684 | 5.65961481  | 6.260555194 | 4.943057334 | 2.416373016 | 5.013362104 |
| ENSMUSG00000099685 | 5.65961481  | 4.869320706 | 4.943057334 | 3.221830688 | 3.580972932 |
| ENSMUSG00000099686 | 7.781970364 | 9.043024169 | 8.473812573 | 4.832746033 | 10.02672421 |
| ENSMUSG00000099687 | 8.489422215 | 3.478086219 | 7.767661525 | 5.638203705 | 7.161945863 |
| ENSMUSG00000099688 | 5.65961481  | 2.086851731 | 2.824604191 | 0.805457672 | 2.864778345 |
| ENSMUSG00000099690 | 8.489422215 | 6.260555194 | 10.59226572 | 12.08186508 | 12.89150255 |
| ENSMUSG00000099691 | 12.02668147 | 10.43425866 | 5.649208382 | 4.832746033 | 2.148583759 |
| ENSMUSG00000099692 | 5.65961481  | 6.956172438 | 10.59226572 | 2.416373016 | 7.87814045  |
| ENSMUSG00000099693 | 25.46826665 | 25.04222078 | 33.89525029 | 26.58010318 | 30.08017263 |
| ENSMUSG00000099694 | 4.244711108 | 9.738641413 | 7.767661525 | 4.832746033 | 11.45911338 |
| ENSMUSG00000099695 | 5.65961481  | 4.173703463 | 4.236906287 | 5.638203705 | 6.445751277 |
| ENSMUSG00000099696 | 5.65961481  | 12.52111039 | 7.767661525 | 7.249119049 | 8.594335036 |
| ENSMUSG00000099697 | 28.29807405 | 65.38802092 | 33.18909925 | 20.1364418  | 32.94495097 |
| ENSMUSG00000099698 | 9.196874066 | 9.738641413 | 6.35535943  | 4.832746033 | 7.161945863 |
| ENSMUSG00000099699 | 6.367066661 | 2.782468975 | 6.35535943  | 2.416373016 | 5.729556691 |
| ENSMUSG00000099700 | 7.074518513 | 5.56493795  | 5.649208382 | 5.638203705 | 5.729556691 |
| ENSMUSG00000099701 | 7.074518513 | 7.651789682 | 5.649208382 | 6.443661377 | 7.161945863 |
| ENSMUSG00000099702 | 9.196874066 | 6.260555194 | 5.649208382 | 12.08186508 | 8.594335036 |
| ENSMUSG00000099704 | 7.781970364 | 4.869320706 | 4.943057334 | 1.610915344 | 2.148583759 |

|                   |             |             |             |             |             |
|-------------------|-------------|-------------|-------------|-------------|-------------|
| ENSMUSG0000099705 | 10.61177777 | 9.043024169 | 9.179963621 | 4.832746033 | 10.7429188  |
| ENSMUSG0000099706 | 9.904325918 | 6.956172438 | 5.649208382 | 6.443661377 | 5.729556691 |
| ENSMUSG0000099707 | 7.074518513 | 5.56493795  | 4.943057334 | 4.832746033 | 9.310529622 |
| ENSMUSG0000099708 | 188.8896443 | 235.8142456 | 177.243913  | 424.4761932 | 336.6114556 |
| ENSMUSG0000099709 | 1.414903703 | 4.173703463 | 4.236906287 | 2.416373016 | 5.013362104 |
| ENSMUSG0000099710 | 5.65961481  | 4.869320706 | 7.061510478 | 4.02728836  | 2.864778345 |
| ENSMUSG0000099712 | 7.074518513 | 4.869320706 | 2.824604191 | 4.832746033 | 0.716194586 |
| ENSMUSG0000099713 | 2.829807405 | 2.086851731 | 5.649208382 | 1.610915344 | 4.297167518 |
| ENSMUSG0000099714 | 23.34591109 | 22.2597518  | 23.30298458 | 73.29664816 | 50.13362104 |
| ENSMUSG0000099715 | 7.781970364 | 4.173703463 | 4.943057334 | 5.638203705 | 5.013362104 |
| ENSMUSG0000099716 | 5.65961481  | 2.086851731 | 5.649208382 | 3.221830688 | 1.432389173 |
| ENSMUSG0000099717 | 7.781970364 | 4.173703463 | 6.35535943  | 5.638203705 | 12.17530797 |
| ENSMUSG0000099718 | 18.39374813 | 27.12907251 | 31.0706461  | 22.55281482 | 18.62105924 |
| ENSMUSG0000099719 | 9.904325918 | 12.52111039 | 7.767661525 | 9.665492065 | 9.310529622 |
| ENSMUSG0000099720 | 0           | 0           | 0           | 0           | 0           |
| ENSMUSG0000099721 | 5.65961481  | 3.478086219 | 2.824604191 | 0.805457672 | 6.445751277 |
| ENSMUSG0000099722 | 9.196874066 | 2.782468975 | 6.35535943  | 7.249119049 | 10.02672421 |
| ENSMUSG0000099723 | 2.122355554 | 2.086851731 | 4.236906287 | 3.221830688 | 4.297167518 |
| ENSMUSG0000099724 | 9.904325918 | 7.651789682 | 7.061510478 | 4.02728836  | 2.864778345 |
| ENSMUSG0000099725 | 3.537259256 | 3.478086219 | 6.35535943  | 6.443661377 | 4.297167518 |
| ENSMUSG0000099726 | 7.074518513 | 4.173703463 | 6.35535943  | 0.805457672 | 4.297167518 |
| ENSMUSG0000099727 | 3.537259256 | 2.086851731 | 4.236906287 | 3.221830688 | 2.148583759 |
| ENSMUSG0000099728 | 8.489422215 | 6.956172438 | 5.649208382 | 4.832746033 | 7.87814045  |
| ENSMUSG0000099730 | 4.952162959 | 7.651789682 | 6.35535943  | 2.416373016 | 1.432389173 |
| ENSMUSG0000099731 | 4.952162959 | 3.478086219 | 2.824604191 | 1.610915344 | 2.148583759 |
| ENSMUSG0000099732 | 9.196874066 | 4.869320706 | 5.649208382 | 6.443661377 | 3.580972932 |
| ENSMUSG0000099733 | 6.367066661 | 4.173703463 | 3.530755239 | 2.416373016 | 3.580972932 |
| ENSMUSG0000099734 | 5.65961481  | 4.173703463 | 3.530755239 | 4.832746033 | 0           |
| ENSMUSG0000099735 | 10.61177777 | 14.60796212 | 14.12302096 | 5.638203705 | 6.445751277 |
| ENSMUSG0000099736 | 9.904325918 | 9.043024169 | 6.35535943  | 2.416373016 | 6.445751277 |
| ENSMUSG0000099737 | 5.65961481  | 4.173703463 | 6.35535943  | 2.416373016 | 5.013362104 |
| ENSMUSG0000099738 | 7.781970364 | 6.260555194 | 4.236906287 | 6.443661377 | 4.297167518 |
| ENSMUSG0000099739 | 5.65961481  | 2.782468975 | 7.061510478 | 2.416373016 | 4.297167518 |
| ENSMUSG0000099741 | 9.196874066 | 4.869320706 | 12.00456781 | 4.832746033 | 5.729556691 |
| ENSMUSG0000099742 | 6.367066661 | 2.782468975 | 2.118453143 | 3.221830688 | 2.864778345 |
| ENSMUSG0000099743 | 4.952162959 | 10.43425866 | 9.179963621 | 7.249119049 | 6.445751277 |
| ENSMUSG0000099744 | 6.367066661 | 6.260555194 | 9.179963621 | 5.638203705 | 2.864778345 |
| ENSMUSG0000099745 | 9.196874066 | 4.173703463 | 4.236906287 | 4.02728836  | 3.580972932 |
| ENSMUSG0000099746 | 7.074518513 | 4.869320706 | 7.061510478 | 8.860034393 | 6.445751277 |
| ENSMUSG0000099747 | 9.904325918 | 6.956172438 | 4.236906287 | 4.832746033 | 5.729556691 |
| ENSMUSG0000099748 | 3.537259256 | 4.173703463 | 4.236906287 | 2.416373016 | 4.297167518 |
| ENSMUSG0000099749 | 9.904325918 | 8.347406925 | 11.29841676 | 1.610915344 | 5.013362104 |
| ENSMUSG0000099750 | 5.65961481  | 6.260555194 | 5.649208382 | 4.02728836  | 8.594335036 |

|                   |             |             |             |             |             |
|-------------------|-------------|-------------|-------------|-------------|-------------|
| ENSMUSG0000099751 | 8.489422215 | 9.043024169 | 4.943057334 | 4.832746033 | 7.87814045  |
| ENSMUSG0000099752 | 8.489422215 | 6.956172438 | 5.649208382 | 8.860034393 | 5.013362104 |
| ENSMUSG0000099753 | 9.196874066 | 8.347406925 | 9.179963621 | 8.054576721 | 10.02672421 |
| ENSMUSG0000099754 | 0           | 0           | 0           | 0           | 0           |
| ENSMUSG0000099755 | 6.367066661 | 4.173703463 | 4.943057334 | 4.832746033 | 2.148583759 |
| ENSMUSG0000099756 | 6.367066661 | 6.260555194 | 3.530755239 | 2.416373016 | 5.729556691 |
| ENSMUSG0000099757 | 110.3624888 | 143.9927695 | 115.8087718 | 133.7059736 | 100.9834367 |
| ENSMUSG0000099758 | 8.489422215 | 5.56493795  | 7.061510478 | 8.860034393 | 1.432389173 |
| ENSMUSG0000099759 | 0           | 0           | 0           | 0           | 0           |
| ENSMUSG0000099760 | 11.31922962 | 13.21672763 | 7.061510478 | 6.443661377 | 7.87814045  |
| ENSMUSG0000099761 | 7.074518513 | 3.478086219 | 7.767661525 | 3.221830688 | 0           |
| ENSMUSG0000099762 | 12.73413332 | 9.043024169 | 9.179963621 | 8.054576721 | 10.02672421 |
| ENSMUSG0000099763 | 7.074518513 | 10.43425866 | 7.061510478 | 5.638203705 | 3.580972932 |
| ENSMUSG0000099764 | 0           | 0.695617244 | 0           | 0           | 0           |
| ENSMUSG0000099765 | 7.074518513 | 4.173703463 | 9.179963621 | 10.47094974 | 7.161945863 |
| ENSMUSG0000099766 | 4.244711108 | 2.782468975 | 5.649208382 | 2.416373016 | 2.864778345 |
| ENSMUSG0000099767 | 9.904325918 | 8.347406925 | 5.649208382 | 17.72006879 | 7.161945863 |
| ENSMUSG0000099768 | 8.489422215 | 13.21672763 | 7.061510478 | 7.249119049 | 7.87814045  |
| ENSMUSG0000099769 | 0           | 0           | 0           | 0           | 0           |
| ENSMUSG0000099770 | 11.31922962 | 11.82549314 | 9.179963621 | 4.02728836  | 8.594335036 |
| ENSMUSG0000099771 | 7.781970364 | 10.43425866 | 6.35535943  | 7.249119049 | 5.013362104 |
| ENSMUSG0000099772 | 6.367066661 | 9.043024169 | 10.59226572 | 8.054576721 | 5.729556691 |
| ENSMUSG0000099773 | 7.781970364 | 9.738641413 | 9.179963621 | 12.88732275 | 15.04008631 |
| ENSMUSG0000099774 | 8.489422215 | 7.651789682 | 4.943057334 | 11.27640741 | 7.161945863 |
| ENSMUSG0000099775 | 9.196874066 | 5.56493795  | 6.35535943  | 9.665492065 | 6.445751277 |
| ENSMUSG0000099776 | 6.367066661 | 5.56493795  | 4.943057334 | 0.805457672 | 5.013362104 |
| ENSMUSG0000099777 | 2.829807405 | 5.56493795  | 9.179963621 | 4.832746033 | 5.729556691 |
| ENSMUSG0000099778 | 7.074518513 | 5.56493795  | 4.236906287 | 1.610915344 | 5.013362104 |
| ENSMUSG0000099779 | 11.31922962 | 16.69481385 | 6.35535943  | 11.27640741 | 9.310529622 |
| ENSMUSG0000099780 | 4.952162959 | 1.391234488 | 3.530755239 | 4.02728836  | 5.013362104 |
| ENSMUSG0000099781 | 13.44158517 | 8.347406925 | 12.00456781 | 15.30369577 | 9.310529622 |
| ENSMUSG0000099783 | 2.122355554 | 3.478086219 | 5.649208382 | 4.02728836  | 5.729556691 |
| ENSMUSG0000099784 | 9.196874066 | 6.956172438 | 6.35535943  | 3.221830688 | 7.87814045  |
| ENSMUSG0000099785 | 10.61177777 | 5.56493795  | 6.35535943  | 3.221830688 | 5.729556691 |
| ENSMUSG0000099786 | 5.65961481  | 2.086851731 | 4.943057334 | 2.416373016 | 1.432389173 |
| ENSMUSG0000099787 | 9.904325918 | 13.21672763 | 5.649208382 | 4.02728836  | 7.87814045  |
| ENSMUSG0000099788 | 14.14903703 | 7.651789682 | 4.943057334 | 3.221830688 | 7.87814045  |
| ENSMUSG0000099789 | 7.074518513 | 2.086851731 | 5.649208382 | 1.610915344 | 5.013362104 |
| ENSMUSG0000099790 | 3.537259256 | 4.869320706 | 9.179963621 | 3.221830688 | 2.864778345 |
| ENSMUSG0000099791 | 2.829807405 | 4.869320706 | 5.649208382 | 2.416373016 | 4.297167518 |
| ENSMUSG0000099793 | 10.61177777 | 5.56493795  | 9.886114669 | 0.805457672 | 7.87814045  |
| ENSMUSG0000099794 | 7.781970364 | 7.651789682 | 9.886114669 | 5.638203705 | 3.580972932 |
| ENSMUSG0000099795 | 9.904325918 | 4.869320706 | 8.473812573 | 4.02728836  | 5.013362104 |

|                    |             |             |             |             |             |
|--------------------|-------------|-------------|-------------|-------------|-------------|
| ENSMUSG00000099796 | 11.31922962 | 7.651789682 | 8.473812573 | 4.832746033 | 7.161945863 |
| ENSMUSG00000099797 | 16.27139258 | 7.651789682 | 9.886114669 | 6.443661377 | 10.02672421 |
| ENSMUSG00000099798 | 4.952162959 | 6.956172438 | 12.71071886 | 2.416373016 | 7.161945863 |
| ENSMUSG00000099799 | 7.781970364 | 5.56493795  | 0.706151048 | 3.221830688 | 5.013362104 |
| ENSMUSG00000099800 | 4.952162959 | 2.086851731 | 2.118453143 | 3.221830688 | 1.432389173 |
| ENSMUSG00000099801 | 9.904325918 | 5.56493795  | 4.236906287 | 5.638203705 | 2.864778345 |
| ENSMUSG00000099802 | 12.02668147 | 8.347406925 | 5.649208382 | 3.221830688 | 3.580972932 |
| ENSMUSG00000099803 | 2.829807405 | 3.478086219 | 5.649208382 | 4.832746033 | 8.594335036 |
| ENSMUSG00000099804 | 9.196874066 | 8.347406925 | 7.061510478 | 6.443661377 | 2.864778345 |
| ENSMUSG00000099805 | 7.781970364 | 5.56493795  | 7.767661525 | 4.02728836  | 7.161945863 |
| ENSMUSG00000099806 | 3.537259256 | 2.086851731 | 4.236906287 | 4.02728836  | 4.297167518 |
| ENSMUSG00000099807 | 4.244711108 | 1.391234488 | 7.061510478 | 2.416373016 | 5.729556691 |
| ENSMUSG00000099808 | 0.707451851 | 0.695617244 | 0           | 2.416373016 | 3.580972932 |
| ENSMUSG00000099809 | 45.27691848 | 64.69240367 | 50.13672439 | 50.74383334 | 50.84981563 |
| ENSMUSG00000099810 | 7.781970364 | 6.956172438 | 7.767661525 | 5.638203705 | 7.161945863 |
| ENSMUSG00000099811 | 6.367066661 | 7.651789682 | 3.530755239 | 7.249119049 | 4.297167518 |
| ENSMUSG00000099812 | 10.61177777 | 6.956172438 | 4.236906287 | 3.221830688 | 2.864778345 |
| ENSMUSG00000099813 | 11.31922962 | 2.782468975 | 2.824604191 | 7.249119049 | 4.297167518 |
| ENSMUSG00000099814 | 3.537259256 | 4.869320706 | 7.767661525 | 3.221830688 | 4.297167518 |
| ENSMUSG00000099815 | 4.244711108 | 3.478086219 | 8.473812573 | 2.416373016 | 2.864778345 |
| ENSMUSG00000099816 | 12.73413332 | 10.43425866 | 7.061510478 | 9.665492065 | 7.87814045  |
| ENSMUSG00000099817 | 7.781970364 | 2.782468975 | 4.943057334 | 1.610915344 | 2.148583759 |
| ENSMUSG00000099818 | 9.196874066 | 6.956172438 | 4.943057334 | 4.832746033 | 5.013362104 |
| ENSMUSG00000099819 | 6.367066661 | 6.260555194 | 8.473812573 | 7.249119049 | 6.445751277 |
| ENSMUSG00000099820 | 12.02668147 | 9.738641413 | 3.530755239 | 8.054576721 | 3.580972932 |
| ENSMUSG00000099821 | 11.31922962 | 8.347406925 | 6.35535943  | 5.638203705 | 7.161945863 |
| ENSMUSG00000099822 | 4.952162959 | 4.869320706 | 4.943057334 | 4.02728836  | 4.297167518 |
| ENSMUSG00000099823 | 9.904325918 | 8.347406925 | 6.35535943  | 4.832746033 | 4.297167518 |
| ENSMUSG00000099824 | 2.122355554 | 4.173703463 | 7.767661525 | 2.416373016 | 2.864778345 |
| ENSMUSG00000099825 | 7.781970364 | 13.21672763 | 14.12302096 | 25.77464551 | 20.05344842 |
| ENSMUSG00000099826 | 13.44158517 | 6.956172438 | 9.179963621 | 6.443661377 | 6.445751277 |
| ENSMUSG00000099827 | 8.489422215 | 4.173703463 | 6.35535943  | 4.02728836  | 5.729556691 |
| ENSMUSG00000099828 | 6.367066661 | 6.260555194 | 3.530755239 | 2.416373016 | 2.864778345 |
| ENSMUSG00000099829 | 5.65961481  | 6.956172438 | 6.35535943  | 4.832746033 | 2.148583759 |
| ENSMUSG00000099830 | 0           | 0           | 0           | 0           | 0           |
| ENSMUSG00000099831 | 4.952162959 | 4.173703463 | 8.473812573 | 4.02728836  | 5.729556691 |
| ENSMUSG00000099832 | 5.65961481  | 2.782468975 | 7.767661525 | 4.02728836  | 5.729556691 |
| ENSMUSG00000099833 | 6.367066661 | 6.956172438 | 9.886114669 | 0.805457672 | 6.445751277 |
| ENSMUSG00000099834 | 0           | 0           | 0           | 0           | 0           |
| ENSMUSG00000099835 | 9.196874066 | 10.43425866 | 7.767661525 | 6.443661377 | 9.310529622 |
| ENSMUSG00000099836 | 7.074518513 | 4.869320706 | 8.473812573 | 2.416373016 | 5.013362104 |
| ENSMUSG00000099838 | 4.244711108 | 4.173703463 | 2.824604191 | 3.221830688 | 7.161945863 |
| ENSMUSG00000099839 | 9.904325918 | 3.478086219 | 4.943057334 | 6.443661377 | 4.297167518 |

|                    |             |             |             |             |             |
|--------------------|-------------|-------------|-------------|-------------|-------------|
| ENSMUSG00000099841 | 4.952162959 | 6.956172438 | 7.061510478 | 4.832746033 | 2.864778345 |
| ENSMUSG00000099842 | 5.65961481  | 7.651789682 | 2.824604191 | 1.610915344 | 4.297167518 |
| ENSMUSG00000099843 | 38.90985182 | 68.17048989 | 61.43514116 | 186.8661799 | 140.3741389 |
| ENSMUSG00000099844 | 13.44158517 | 5.56493795  | 5.649208382 | 4.02728836  | 12.17530797 |
| ENSMUSG00000099845 | 9.904325918 | 11.82549314 | 7.061510478 | 4.02728836  | 6.445751277 |
| ENSMUSG00000099846 | 14.14903703 | 11.1298759  | 11.29841676 | 5.638203705 | 10.02672421 |
| ENSMUSG00000099847 | 2.122355554 | 4.869320706 | 2.824604191 | 2.416373016 | 6.445751277 |
| ENSMUSG00000099848 | 10.61177777 | 5.56493795  | 5.649208382 | 8.860034393 | 5.729556691 |
| ENSMUSG00000099849 | 2.829807405 | 3.478086219 | 8.473812573 | 7.249119049 | 1.432389173 |
| ENSMUSG00000099850 | 9.904325918 | 6.260555194 | 11.29841676 | 7.249119049 | 4.297167518 |
| ENSMUSG00000099851 | 15.56394073 | 18.08604834 | 12.71071886 | 20.1364418  | 25.06681052 |
| ENSMUSG00000099852 | 10.61177777 | 9.043024169 | 5.649208382 | 3.221830688 | 5.729556691 |
| ENSMUSG00000099853 | 10.61177777 | 4.869320706 | 11.29841676 | 3.221830688 | 5.013362104 |
| ENSMUSG00000099854 | 5.65961481  | 9.738641413 | 4.943057334 | 4.832746033 | 10.02672421 |
| ENSMUSG00000099855 | 3.537259256 | 2.086851731 | 6.35535943  | 3.221830688 | 2.864778345 |
| ENSMUSG00000099857 | 0           | 0           | 0           | 0           | 0           |
| ENSMUSG00000099858 | 8.489422215 | 8.347406925 | 12.71071886 | 8.054576721 | 10.7429188  |
| ENSMUSG00000099859 | 0           | 0           | 0           | 0           | 0           |
| ENSMUSG00000099860 | 9.904325918 | 8.347406925 | 6.35535943  | 12.08186508 | 7.87814045  |
| ENSMUSG00000099862 | 4.952162959 | 4.173703463 | 4.943057334 | 2.416373016 | 5.729556691 |
| ENSMUSG00000099863 | 7.074518513 | 6.956172438 | 5.649208382 | 7.249119049 | 5.729556691 |
| ENSMUSG00000099864 | 12.02668147 | 7.651789682 | 10.59226572 | 3.221830688 | 2.148583759 |
| ENSMUSG00000099865 | 7.074518513 | 4.869320706 | 7.061510478 | 0.805457672 | 5.729556691 |
| ENSMUSG00000099866 | 2.122355554 | 4.869320706 | 7.061510478 | 0.805457672 | 2.148583759 |
| ENSMUSG00000099867 | 7.074518513 | 2.782468975 | 2.824604191 | 2.416373016 | 5.729556691 |
| ENSMUSG00000099868 | 12.73413332 | 8.347406925 | 10.59226572 | 12.08186508 | 12.89150255 |
| ENSMUSG00000099869 | 9.904325918 | 13.21672763 | 7.767661525 | 5.638203705 | 7.87814045  |
| ENSMUSG00000099870 | 7.781970364 | 7.651789682 | 5.649208382 | 8.860034393 | 9.310529622 |
| ENSMUSG00000099871 | 2.122355554 | 4.869320706 | 48.01827125 | 0.805457672 | 2.148583759 |
| ENSMUSG00000099872 | 10.61177777 | 3.478086219 | 9.886114669 | 4.02728836  | 6.445751277 |
| ENSMUSG00000099873 | 9.196874066 | 9.043024169 | 5.649208382 | 2.416373016 | 4.297167518 |
| ENSMUSG00000099874 | 3.537259256 | 10.43425866 | 4.943057334 | 8.860034393 | 5.729556691 |
| ENSMUSG00000099875 | 0           | 0           | 0.706151048 | 0           | 0           |
| ENSMUSG00000099876 | 2.829807405 | 3.478086219 | 5.649208382 | 4.02728836  | 2.148583759 |
| ENSMUSG00000099877 | 11.31922962 | 9.043024169 | 8.473812573 | 5.638203705 | 3.580972932 |
| ENSMUSG00000099878 | 5.65961481  | 6.956172438 | 7.061510478 | 6.443661377 | 7.87814045  |
| ENSMUSG00000099879 | 6.367066661 | 9.043024169 | 7.061510478 | 11.27640741 | 9.310529622 |
| ENSMUSG00000099880 | 4.952162959 | 2.086851731 | 7.767661525 | 2.416373016 | 5.013362104 |
| ENSMUSG00000099881 | 130.8785925 | 154.4270281 | 137.6994543 | 258.5519127 | 228.466073  |
| ENSMUSG00000099882 | 9.904325918 | 7.651789682 | 7.767661525 | 9.665492065 | 5.013362104 |
| ENSMUSG00000099883 | 0           | 0           | 0           | 0           | 0           |
| ENSMUSG00000099884 | 7.781970364 | 8.347406925 | 7.767661525 | 11.27640741 | 5.013362104 |
| ENSMUSG00000099886 | 8.489422215 | 3.478086219 | 9.886114669 | 8.860034393 | 6.445751277 |

|                   |             |             |             |             |             |
|-------------------|-------------|-------------|-------------|-------------|-------------|
| ENSMUSG0000099887 | 9.196874066 | 10.43425866 | 4.943057334 | 6.443661377 | 4.297167518 |
| ENSMUSG0000099888 | 4.244711108 | 1.391234488 | 0.706151048 | 3.221830688 | 4.297167518 |
| ENSMUSG0000099889 | 7.781970364 | 6.956172438 | 7.767661525 | 4.832746033 | 3.580972932 |
| ENSMUSG0000099890 | 5.65961481  | 10.43425866 | 10.59226572 | 6.443661377 | 8.594335036 |
| ENSMUSG0000099891 | 12.02668147 | 9.043024169 | 6.35535943  | 9.665492065 | 9.310529622 |
| ENSMUSG0000099892 | 10.61177777 | 11.82549314 | 5.649208382 | 2.416373016 | 5.013362104 |
| ENSMUSG0000099893 | 8.489422215 | 5.56493795  | 8.473812573 | 10.47094974 | 3.580972932 |
| ENSMUSG0000099895 | 13.44158517 | 6.260555194 | 8.473812573 | 4.832746033 | 2.864778345 |
| ENSMUSG0000099896 | 3.537259256 | 3.478086219 | 7.767661525 | 4.832746033 | 5.013362104 |
| ENSMUSG0000099897 | 7.781970364 | 2.782468975 | 2.824604191 | 3.221830688 | 2.148583759 |
| ENSMUSG0000099899 | 8.489422215 | 11.1298759  | 5.649208382 | 5.638203705 | 8.594335036 |
| ENSMUSG0000099901 | 10.61177777 | 6.956172438 | 9.886114669 | 8.054576721 | 5.729556691 |
| ENSMUSG0000099902 | 0           | 0           | 0           | 0           | 0           |
| ENSMUSG0000099903 | 6.367066661 | 6.956172438 | 4.236906287 | 4.02728836  | 7.161945863 |
| ENSMUSG0000099904 | 4.952162959 | 6.260555194 | 1.412302096 | 1.610915344 | 5.013362104 |
| ENSMUSG0000099905 | 9.196874066 | 4.869320706 | 11.29841676 | 9.665492065 | 10.7429188  |
| ENSMUSG0000099906 | 0           | 0           | 0           | 0           | 0           |
| ENSMUSG0000099907 | 7.781970364 | 4.869320706 | 4.236906287 | 7.249119049 | 7.161945863 |
| ENSMUSG0000099909 | 7.781970364 | 9.738641413 | 4.236906287 | 3.221830688 | 2.864778345 |
| ENSMUSG0000099910 | 6.367066661 | 6.260555194 | 2.824604191 | 1.610915344 | 3.580972932 |
| ENSMUSG0000099911 | 2.829807405 | 2.782468975 | 0.706151048 | 1.610915344 | 2.148583759 |
| ENSMUSG0000099912 | 4.952162959 | 3.478086219 | 9.179963621 | 4.832746033 | 2.864778345 |
| ENSMUSG0000099914 | 5.65961481  | 4.173703463 | 4.943057334 | 2.416373016 | 5.013362104 |
| ENSMUSG0000099915 | 12.73413332 | 2.782468975 | 4.236906287 | 2.416373016 | 2.148583759 |
| ENSMUSG0000099916 | 10.61177777 | 6.260555194 | 4.236906287 | 2.416373016 | 4.297167518 |
| ENSMUSG0000099917 | 8.489422215 | 4.869320706 | 7.061510478 | 7.249119049 | 10.02672421 |
| ENSMUSG0000099918 | 9.904325918 | 6.956172438 | 9.886114669 | 7.249119049 | 4.297167518 |
| ENSMUSG0000099920 | 4.952162959 | 7.651789682 | 9.886114669 | 4.02728836  | 5.729556691 |
| ENSMUSG0000099921 | 7.074518513 | 4.869320706 | 4.236906287 | 3.221830688 | 4.297167518 |
| ENSMUSG0000099922 | 7.074518513 | 3.478086219 | 9.179963621 | 10.47094974 | 5.013362104 |
| ENSMUSG0000099923 | 19.10119998 | 23.65098629 | 28.95219296 | 29.80193387 | 27.21539428 |
| ENSMUSG0000099924 | 8.489422215 | 9.043024169 | 8.473812573 | 6.443661377 | 6.445751277 |
| ENSMUSG0000099926 | 5.65961481  | 7.651789682 | 9.886114669 | 7.249119049 | 2.148583759 |
| ENSMUSG0000099927 | 15.56394073 | 10.43425866 | 8.473812573 | 20.1364418  | 4.297167518 |
| ENSMUSG0000099928 | 4.244711108 | 5.56493795  | 8.473812573 | 2.416373016 | 6.445751277 |
| ENSMUSG0000099929 | 6.367066661 | 4.869320706 | 2.824604191 | 3.221830688 | 2.864778345 |
| ENSMUSG0000099930 | 9.196874066 | 6.260555194 | 7.061510478 | 8.054576721 | 8.594335036 |
| ENSMUSG0000099931 | 19.10119998 | 16.69481385 | 14.12302096 | 26.58010318 | 21.48583759 |
| ENSMUSG0000099932 | 7.781970364 | 9.043024169 | 5.649208382 | 5.638203705 | 11.45911338 |
| ENSMUSG0000099933 | 9.904325918 | 3.478086219 | 5.649208382 | 4.02728836  | 3.580972932 |
| ENSMUSG0000099934 | 7.781970364 | 8.347406925 | 7.061510478 | 5.638203705 | 4.297167518 |
| ENSMUSG0000099935 | 7.781970364 | 2.782468975 | 6.35535943  | 1.610915344 | 3.580972932 |
| ENSMUSG0000099936 | 8.489422215 | 6.956172438 | 8.473812573 | 5.638203705 | 6.445751277 |



|                   |             |             |             |             |             |
|-------------------|-------------|-------------|-------------|-------------|-------------|
| ENSMUSG0000099937 | 8.489422215 | 11.82549314 | 16.2414741  | 9.665492065 | 11.45911338 |
| ENSMUSG0000099938 | 4.952162959 | 7.651789682 | 5.649208382 | 8.860034393 | 6.445751277 |
| ENSMUSG0000099939 | 4.244711108 | 3.478086219 | 4.943057334 | 3.221830688 | 2.864778345 |
| ENSMUSG0000099940 | 4.244711108 | 4.869320706 | 6.35535943  | 4.832746033 | 2.864778345 |
| ENSMUSG0000099941 | 7.074518513 | 7.651789682 | 9.886114669 | 8.054576721 | 5.013362104 |
| ENSMUSG0000099942 | 5.65961481  | 2.782468975 | 2.824604191 | 3.221830688 | 6.445751277 |
| ENSMUSG0000099943 | 9.196874066 | 9.043024169 | 4.236906287 | 2.416373016 | 6.445751277 |
| ENSMUSG0000099944 | 4.244711108 | 9.738641413 | 8.473812573 | 1.610915344 | 4.297167518 |
| ENSMUSG0000099945 | 12.02668147 | 4.869320706 | 7.061510478 | 3.221830688 | 6.445751277 |
| ENSMUSG0000099946 | 13.44158517 | 8.347406925 | 4.236906287 | 7.249119049 | 6.445751277 |
| ENSMUSG0000099947 | 7.781970364 | 6.260555194 | 6.35535943  | 6.443661377 | 7.161945863 |
| ENSMUSG0000099948 | 7.781970364 | 4.173703463 | 5.649208382 | 1.610915344 | 4.297167518 |
| ENSMUSG0000099949 | 9.904325918 | 10.43425866 | 7.061510478 | 8.860034393 | 4.297167518 |
| ENSMUSG0000099950 | 4.952162959 | 5.56493795  | 8.473812573 | 4.02728836  | 6.445751277 |
| ENSMUSG0000099951 | 5.65961481  | 5.56493795  | 9.886114669 | 4.832746033 | 12.17530797 |
| ENSMUSG0000099952 | 7.781970364 | 8.347406925 | 7.767661525 | 7.249119049 | 6.445751277 |
| ENSMUSG0000099953 | 4.952162959 | 0.695617244 | 4.943057334 | 4.02728836  | 5.729556691 |
| ENSMUSG0000099954 | 9.196874066 | 6.956172438 | 7.767661525 | 5.638203705 | 6.445751277 |
| ENSMUSG0000099955 | 2.829807405 | 3.478086219 | 3.530755239 | 3.221830688 | 4.297167518 |
| ENSMUSG0000099956 | 3.537259256 | 2.782468975 | 5.649208382 | 2.416373016 | 5.729556691 |
| ENSMUSG0000099957 | 7.074518513 | 5.56493795  | 7.061510478 | 8.860034393 | 5.013362104 |
| ENSMUSG0000099958 | 18.39374813 | 22.2597518  | 25.42143772 | 16.10915344 | 20.05344842 |
| ENSMUSG0000099959 | 24.76081479 | 31.30277597 | 40.25060972 | 38.66196826 | 47.2688427  |
| ENSMUSG0000099960 | 9.196874066 | 6.260555194 | 11.29841676 | 3.221830688 | 4.297167518 |
| ENSMUSG0000099961 | 8.489422215 | 11.82549314 | 6.35535943  | 9.665492065 | 4.297167518 |
| ENSMUSG0000099962 | 4.952162959 | 6.956172438 | 2.118453143 | 4.02728836  | 5.013362104 |
| ENSMUSG0000099963 | 7.074518513 | 6.260555194 | 3.530755239 | 4.02728836  | 3.580972932 |
| ENSMUSG0000099964 | 8.489422215 | 6.260555194 | 7.061510478 | 3.221830688 | 3.580972932 |
| ENSMUSG0000099965 | 4.244711108 | 7.651789682 | 5.649208382 | 3.221830688 | 2.148583759 |
| ENSMUSG0000099966 | 13.44158517 | 16.69481385 | 19.77222934 | 46.71654498 | 38.67450766 |
| ENSMUSG0000099967 | 4.244711108 | 4.173703463 | 4.236906287 | 1.610915344 | 5.729556691 |
| ENSMUSG0000099968 | 9.196874066 | 4.173703463 | 8.473812573 | 5.638203705 | 7.87814045  |
| ENSMUSG0000099969 | 12.02668147 | 9.043024169 | 6.35535943  | 11.27640741 | 12.89150255 |
| ENSMUSG0000099970 | 2.122355554 | 6.956172438 | 2.118453143 | 3.221830688 | 4.297167518 |
| ENSMUSG0000099971 | 27.5906222  | 36.86771392 | 40.25060972 | 23.35827249 | 19.33725383 |
| ENSMUSG0000099972 | 9.196874066 | 6.956172438 | 6.35535943  | 3.221830688 | 4.297167518 |
| ENSMUSG0000099973 | 2.122355554 | 6.260555194 | 5.649208382 | 4.832746033 | 2.864778345 |
| ENSMUSG0000099975 | 3.537259256 | 4.173703463 | 7.767661525 | 2.416373016 | 3.580972932 |
| ENSMUSG0000099976 | 4.244711108 | 5.56493795  | 5.649208382 | 6.443661377 | 5.013362104 |
| ENSMUSG0000099977 | 5.65961481  | 1.391234488 | 7.061510478 | 5.638203705 | 4.297167518 |
| ENSMUSG0000099978 | 7.781970364 | 4.869320706 | 2.118453143 | 1.610915344 | 4.297167518 |
| ENSMUSG0000099979 | 9.904325918 | 9.043024169 | 16.2414741  | 9.665492065 | 12.17530797 |
| ENSMUSG0000099980 | 8.489422215 | 6.956172438 | 6.35535943  | 8.860034393 | 10.02672421 |

|                   |             |             |             |             |             |
|-------------------|-------------|-------------|-------------|-------------|-------------|
| ENSMUSG0000099981 | 7.781970364 | 7.651789682 | 10.59226572 | 5.638203705 | 14.32389173 |
| ENSMUSG0000099982 | 6.367066661 | 3.478086219 | 2.824604191 | 1.610915344 | 2.864778345 |
| ENSMUSG0000099983 | 6.367066661 | 6.260555194 | 3.530755239 | 8.860034393 | 11.45911338 |
| ENSMUSG0000099984 | 7.074518513 | 2.086851731 | 9.179963621 | 3.221830688 | 8.594335036 |
| ENSMUSG0000099985 | 4.244711108 | 7.651789682 | 4.943057334 | 4.832746033 | 1.432389173 |
| ENSMUSG0000099986 | 4.244711108 | 2.782468975 | 6.35535943  | 3.221830688 | 2.864778345 |
| ENSMUSG0000099987 | 0           | 0           | 0           | 0           | 0           |
| ENSMUSG0000099988 | 9.904325918 | 6.956172438 | 13.41686991 | 4.832746033 | 6.445751277 |
| ENSMUSG0000099989 | 11.31922962 | 9.043024169 | 8.473812573 | 3.221830688 | 7.161945863 |
| ENSMUSG0000099990 | 5.65961481  | 4.869320706 | 7.061510478 | 4.02728836  | 2.864778345 |
| ENSMUSG0000099991 | 2.829807405 | 8.347406925 | 0.706151048 | 8.860034393 | 3.580972932 |
| ENSMUSG0000099992 | 5.65961481  | 8.347406925 | 5.649208382 | 4.02728836  | 3.580972932 |
| ENSMUSG0000099993 | 5.65961481  | 6.260555194 | 7.767661525 | 2.416373016 | 3.580972932 |
| ENSMUSG0000099994 | 19.80865184 | 6.260555194 | 12.00456781 | 8.054576721 | 8.594335036 |
| ENSMUSG0000099995 | 9.904325918 | 6.956172438 | 11.29841676 | 3.221830688 | 2.864778345 |
| ENSMUSG0000099996 | 7.074518513 | 6.956172438 | 9.886114669 | 4.832746033 | 11.45911338 |
| ENSMUSG0000099997 | 16.27139258 | 9.738641413 | 7.061510478 | 11.27640741 | 11.45911338 |
| ENSMUSG0000099998 | 10.61177777 | 12.52111039 | 18.35992724 | 37.05105292 | 30.79636721 |
| ENSMUSG0000099999 | 5.65961481  | 9.043024169 | 9.179963621 | 1.610915344 | 5.729556691 |
| ENSMUSG0000010000 | 8.489422215 | 9.738641413 | 7.061510478 | 2.416373016 | 3.580972932 |
| ENSMUSG0000010001 | 8.489422215 | 7.651789682 | 8.473812573 | 2.416373016 | 6.445751277 |
| ENSMUSG0000010002 | 32.54278516 | 50.08444155 | 38.83830763 | 65.24207144 | 48.70123187 |
| ENSMUSG0000010003 | 4.244711108 | 2.086851731 | 4.236906287 | 3.221830688 | 7.161945863 |
| ENSMUSG0000010004 | 13.44158517 | 4.173703463 | 4.236906287 | 6.443661377 | 5.729556691 |
| ENSMUSG0000010005 | 9.196874066 | 8.347406925 | 12.00456781 | 6.443661377 | 4.297167518 |
| ENSMUSG0000010006 | 0           | 0           | 0           | 0           | 0           |
| ENSMUSG0000010007 | 19.10119998 | 10.43425866 | 7.061510478 | 12.08186508 | 7.161945863 |
| ENSMUSG0000010008 | 2.122355554 | 5.56493795  | 4.943057334 | 0           | 3.580972932 |
| ENSMUSG0000010009 | 4.952162959 | 8.347406925 | 12.00456781 | 12.88732275 | 6.445751277 |
| ENSMUSG0000010011 | 4.952162959 | 2.782468975 | 2.118453143 | 1.610915344 | 1.432389173 |
| ENSMUSG0000010012 | 7.781970364 | 7.651789682 | 2.824604191 | 4.832746033 | 4.297167518 |
| ENSMUSG0000010013 | 12.02668147 | 4.173703463 | 6.35535943  | 10.47094974 | 1.432389173 |
| ENSMUSG0000010014 | 9.904325918 | 6.260555194 | 3.530755239 | 7.249119049 | 7.87814045  |
| ENSMUSG0000010015 | 4.244711108 | 5.56493795  | 7.767661525 | 2.416373016 | 5.013362104 |
| ENSMUSG0000010016 | 7.074518513 | 11.1298759  | 6.35535943  | 5.638203705 | 4.297167518 |
| ENSMUSG0000010017 | 39.61730367 | 63.30116918 | 58.61053696 | 53.96566403 | 61.59273443 |
| ENSMUSG0000010018 | 6.367066661 | 6.956172438 | 7.061510478 | 8.054576721 | 7.87814045  |
| ENSMUSG0000010019 | 9.904325918 | 9.043024169 | 9.886114669 | 8.860034393 | 8.594335036 |
| ENSMUSG0000010020 | 12.73413332 | 4.869320706 | 7.767661525 | 4.02728836  | 5.729556691 |
| ENSMUSG0000010021 | 6.367066661 | 8.347406925 | 4.943057334 | 7.249119049 | 11.45911338 |
| ENSMUSG0000010022 | 12.02668147 | 10.43425866 | 6.35535943  | 11.27640741 | 6.445751277 |
| ENSMUSG0000010023 | 7.074518513 | 6.956172438 | 3.530755239 | 4.02728836  | 5.729556691 |
| ENSMUSG0000010024 | 9.196874066 | 6.260555194 | 4.236906287 | 2.416373016 | 4.297167518 |

|                    |             |             |             |             |             |
|--------------------|-------------|-------------|-------------|-------------|-------------|
| ENSMUSG00000100025 | 7.781970364 | 8.347406925 | 8.473812573 | 6.443661377 | 5.013362104 |
| ENSMUSG00000100026 | 9.196874066 | 5.56493795  | 7.061510478 | 4.832746033 | 5.729556691 |
| ENSMUSG00000100027 | 12.02668147 | 4.173703463 | 5.649208382 | 7.249119049 | 6.445751277 |
| ENSMUSG00000100028 | 4.244711108 | 1.391234488 | 5.649208382 | 1.610915344 | 2.148583759 |
| ENSMUSG00000100029 | 21.22355554 | 30.60715873 | 36.71985448 | 19.33098413 | 15.04008631 |
| ENSMUSG00000100030 | 9.196874066 | 3.478086219 | 7.767661525 | 5.638203705 | 7.161945863 |
| ENSMUSG00000100031 | 14.85648888 | 6.956172438 | 8.473812573 | 4.832746033 | 7.87814045  |
| ENSMUSG00000100033 | 10.61177777 | 9.043024169 | 6.35535943  | 9.665492065 | 5.729556691 |
| ENSMUSG00000100034 | 8.489422215 | 4.869320706 | 4.236906287 | 8.860034393 | 3.580972932 |
| ENSMUSG00000100035 | 7.074518513 | 4.869320706 | 4.236906287 | 4.832746033 | 2.864778345 |
| ENSMUSG00000100036 | 4.244711108 | 3.478086219 | 5.649208382 | 2.416373016 | 6.445751277 |
| ENSMUSG00000100037 | 0.707451851 | 0           | 0           | 0           | 0           |
| ENSMUSG00000100038 | 3.537259256 | 6.260555194 | 2.824604191 | 0.805457672 | 2.864778345 |
| ENSMUSG00000100039 | 8.489422215 | 14.60796212 | 13.41686991 | 8.054576721 | 11.45911338 |
| ENSMUSG00000100040 | 10.61177777 | 3.478086219 | 10.59226572 | 5.638203705 | 5.013362104 |
| ENSMUSG00000100041 | 7.074518513 | 8.347406925 | 9.179963621 | 4.832746033 | 5.013362104 |
| ENSMUSG00000100042 | 12.02668147 | 6.260555194 | 7.767661525 | 4.02728836  | 8.594335036 |
| ENSMUSG00000100043 | 4.952162959 | 2.086851731 | 6.35535943  | 2.416373016 | 2.148583759 |
| ENSMUSG00000100044 | 14.85648888 | 5.56493795  | 7.767661525 | 8.054576721 | 6.445751277 |
| ENSMUSG00000100046 | 6.367066661 | 8.347406925 | 7.061510478 | 0.805457672 | 8.594335036 |
| ENSMUSG00000100047 | 5.65961481  | 6.260555194 | 2.118453143 | 6.443661377 | 4.297167518 |
| ENSMUSG00000100048 | 7.781970364 | 4.869320706 | 5.649208382 | 4.832746033 | 7.87814045  |
| ENSMUSG00000100049 | 4.952162959 | 6.260555194 | 7.061510478 | 2.416373016 | 3.580972932 |
| ENSMUSG00000100050 | 4.952162959 | 5.56493795  | 2.118453143 | 1.610915344 | 3.580972932 |
| ENSMUSG00000100051 | 4.952162959 | 2.086851731 | 2.118453143 | 0.805457672 | 2.148583759 |
| ENSMUSG00000100052 | 6.367066661 | 6.956172438 | 3.530755239 | 4.02728836  | 5.729556691 |
| ENSMUSG00000100053 | 8.489422215 | 4.869320706 | 6.35535943  | 5.638203705 | 4.297167518 |
| ENSMUSG00000100054 | 2.829807405 | 9.738641413 | 4.943057334 | 3.221830688 | 0.716194586 |
| ENSMUSG00000100056 | 2.122355554 | 2.782468975 | 4.943057334 | 1.610915344 | 2.864778345 |
| ENSMUSG00000100057 | 3.537259256 | 3.478086219 | 4.943057334 | 2.416373016 | 5.729556691 |
| ENSMUSG00000100059 | 12.02668147 | 4.869320706 | 5.649208382 | 2.416373016 | 8.594335036 |
| ENSMUSG00000100060 | 9.196874066 | 3.478086219 | 5.649208382 | 4.02728836  | 2.864778345 |
| ENSMUSG00000100061 | 9.904325918 | 4.869320706 | 10.59226572 | 4.832746033 | 2.148583759 |
| ENSMUSG00000100062 | 11.31922962 | 6.956172438 | 6.35535943  | 4.832746033 | 2.864778345 |
| ENSMUSG00000100063 | 6.367066661 | 1.391234488 | 3.530755239 | 3.221830688 | 1.432389173 |
| ENSMUSG00000100064 | 3.537259256 | 4.869320706 | 4.236906287 | 2.416373016 | 6.445751277 |
| ENSMUSG00000100065 | 8.489422215 | 4.869320706 | 8.473812573 | 5.638203705 | 3.580972932 |
| ENSMUSG00000100066 | 6.367066661 | 2.086851731 | 4.943057334 | 2.416373016 | 6.445751277 |
| ENSMUSG00000100067 | 3.537259256 | 3.478086219 | 5.649208382 | 5.638203705 | 2.864778345 |
| ENSMUSG00000100068 | 12.02668147 | 2.782468975 | 7.767661525 | 8.054576721 | 8.594335036 |
| ENSMUSG00000100069 | 7.074518513 | 4.869320706 | 4.236906287 | 2.416373016 | 5.729556691 |
| ENSMUSG00000100070 | 7.074518513 | 3.478086219 | 6.35535943  | 3.221830688 | 2.864778345 |
| ENSMUSG00000100071 | 6.367066661 | 3.478086219 | 3.530755239 | 2.416373016 | 7.161945863 |

|                    |             |             |             |             |             |
|--------------------|-------------|-------------|-------------|-------------|-------------|
| ENSMUSG00000100072 | 8.489422215 | 2.782468975 | 2.824604191 | 0.805457672 | 2.148583759 |
| ENSMUSG00000100073 | 4.244711108 | 6.260555194 | 5.649208382 | 0.805457672 | 4.297167518 |
| ENSMUSG00000100074 | 3.537259256 | 2.782468975 | 1.412302096 | 0           | 3.580972932 |
| ENSMUSG00000100075 | 43.15456293 | 58.43184848 | 60.02283906 | 45.91108731 | 37.95831308 |
| ENSMUSG00000100076 | 7.074518513 | 4.869320706 | 5.649208382 | 3.221830688 | 4.297167518 |
| ENSMUSG00000100077 | 7.074518513 | 6.260555194 | 9.886114669 | 2.416373016 | 5.729556691 |
| ENSMUSG00000100078 | 4.952162959 | 11.1298759  | 7.767661525 | 13.69278043 | 14.32389173 |
| ENSMUSG00000100080 | 2.122355554 | 5.56493795  | 4.236906287 | 0.805457672 | 1.432389173 |
| ENSMUSG00000100081 | 8.489422215 | 5.56493795  | 7.767661525 | 10.47094974 | 11.45911338 |
| ENSMUSG00000100082 | 0.707451851 | 0           | 0           | 0           | 0.716194586 |
| ENSMUSG00000100083 | 2.122355554 | 4.173703463 | 4.236906287 | 1.610915344 | 2.148583759 |
| ENSMUSG00000100084 | 95.50599992 | 119.6461659 | 127.8133396 | 211.0299101 | 175.4676737 |
| ENSMUSG00000100085 | 3.537259256 | 5.56493795  | 3.530755239 | 0.805457672 | 5.729556691 |
| ENSMUSG00000100086 | 2.829807405 | 6.956172438 | 4.236906287 | 6.443661377 | 5.013362104 |
| ENSMUSG00000100087 | 3.537259256 | 7.651789682 | 1.412302096 | 0.805457672 | 5.729556691 |
| ENSMUSG00000100088 | 10.61177777 | 9.043024169 | 7.767661525 | 2.416373016 | 6.445751277 |
| ENSMUSG00000100089 | 7.781970364 | 4.173703463 | 4.943057334 | 1.610915344 | 3.580972932 |
| ENSMUSG00000100090 | 10.61177777 | 7.651789682 | 7.767661525 | 5.638203705 | 7.161945863 |
| ENSMUSG00000100091 | 4.244711108 | 4.173703463 | 3.530755239 | 3.221830688 | 2.864778345 |
| ENSMUSG00000100092 | 2.829807405 | 6.260555194 | 5.649208382 | 4.02728836  | 5.729556691 |
| ENSMUSG00000100093 | 7.781970364 | 9.043024169 | 7.061510478 | 12.08186508 | 6.445751277 |
| ENSMUSG00000100094 | 10.61177777 | 9.043024169 | 3.530755239 | 4.832746033 | 5.729556691 |
| ENSMUSG00000100095 | 4.952162959 | 3.478086219 | 4.943057334 | 6.443661377 | 4.297167518 |
| ENSMUSG00000100096 | 7.781970364 | 3.478086219 | 6.35535943  | 3.221830688 | 8.594335036 |
| ENSMUSG00000100097 | 4.952162959 | 5.56493795  | 4.943057334 | 2.416373016 | 4.297167518 |
| ENSMUSG00000100098 | 5.65961481  | 3.478086219 | 5.649208382 | 0.805457672 | 5.729556691 |
| ENSMUSG00000100099 | 3.537259256 | 6.260555194 | 4.236906287 | 1.610915344 | 2.148583759 |
| ENSMUSG00000100100 | 7.074518513 | 6.956172438 | 10.59226572 | 4.832746033 | 7.161945863 |
| ENSMUSG00000100101 | 7.781970364 | 8.347406925 | 9.179963621 | 5.638203705 | 4.297167518 |
| ENSMUSG00000100103 | 3.537259256 | 6.260555194 | 3.530755239 | 0.805457672 | 4.297167518 |
| ENSMUSG00000100104 | 0           | 0           | 0           | 0           | 0           |
| ENSMUSG00000100105 | 5.65961481  | 7.651789682 | 4.943057334 | 4.02728836  | 3.580972932 |
| ENSMUSG00000100106 | 9.904325918 | 6.260555194 | 4.943057334 | 8.860034393 | 6.445751277 |
| ENSMUSG00000100107 | 4.244711108 | 4.173703463 | 1.412302096 | 3.221830688 | 4.297167518 |
| ENSMUSG00000100108 | 9.904325918 | 8.347406925 | 9.179963621 | 11.27640741 | 8.594335036 |
| ENSMUSG00000100109 | 10.61177777 | 6.260555194 | 9.179963621 | 2.416373016 | 4.297167518 |
| ENSMUSG00000100110 | 9.904325918 | 11.82549314 | 6.35535943  | 7.249119049 | 2.864778345 |
| ENSMUSG00000100111 | 3.537259256 | 6.956172438 | 7.061510478 | 4.832746033 | 9.310529622 |
| ENSMUSG00000100112 | 17.68629628 | 13.21672763 | 11.29841676 | 8.860034393 | 8.594335036 |
| ENSMUSG00000100113 | 6.367066661 | 23.65098629 | 16.2414741  | 20.1364418  | 22.20203218 |
| ENSMUSG00000100114 | 0           | 0           | 0           | 0           | 0           |
| ENSMUSG00000100115 | 4.952162959 | 3.478086219 | 5.649208382 | 2.416373016 | 4.297167518 |
| ENSMUSG00000100116 | 9.904325918 | 5.56493795  | 3.530755239 | 1.610915344 | 5.013362104 |

|                    |             |             |             |             |             |
|--------------------|-------------|-------------|-------------|-------------|-------------|
| ENSMUSG00000100117 | 2.829807405 | 3.478086219 | 4.943057334 | 3.221830688 | 1.432389173 |
| ENSMUSG00000100118 | 3.537259256 | 2.782468975 | 5.649208382 | 4.832746033 | 2.864778345 |
| ENSMUSG00000100119 | 4.952162959 | 4.869320706 | 4.236906287 | 5.638203705 | 7.161945863 |
| ENSMUSG00000100120 | 1.414903703 | 0           | 0           | 1.610915344 | 0.716194586 |
| ENSMUSG00000100121 | 12.02668147 | 9.043024169 | 9.179963621 | 5.638203705 | 3.580972932 |
| ENSMUSG00000100122 | 7.781970364 | 9.738641413 | 7.767661525 | 1.610915344 | 5.729556691 |
| ENSMUSG00000100123 | 7.074518513 | 4.869320706 | 5.649208382 | 5.638203705 | 7.87814045  |
| ENSMUSG00000100124 | 5.65961481  | 2.782468975 | 6.35535943  | 4.02728836  | 2.864778345 |
| ENSMUSG00000100125 | 4.952162959 | 4.173703463 | 2.824604191 | 2.416373016 | 5.013362104 |
| ENSMUSG00000100126 | 2.122355554 | 4.173703463 | 4.943057334 | 1.610915344 | 2.864778345 |
| ENSMUSG00000100127 | 9.904325918 | 8.347406925 | 10.59226572 | 3.221830688 | 7.87814045  |
| ENSMUSG00000100128 | 0           | 0           | 0           | 0           | 0           |
| ENSMUSG00000100129 | 9.904325918 | 7.651789682 | 9.179963621 | 5.638203705 | 12.17530797 |
| ENSMUSG00000100130 | 7.781970364 | 13.21672763 | 14.829172   | 14.4982381  | 10.7429188  |
| ENSMUSG00000100131 | 0           | 0           | 0           | 0           | 0           |
| ENSMUSG00000100132 | 7.781970364 | 4.869320706 | 0.706151048 | 4.832746033 | 0.716194586 |
| ENSMUSG00000100134 | 5.65961481  | 9.043024169 | 9.886114669 | 5.638203705 | 3.580972932 |
| ENSMUSG00000100135 | 9.904325918 | 9.043024169 | 6.35535943  | 7.249119049 | 12.17530797 |
| ENSMUSG00000100136 | 9.196874066 | 4.869320706 | 4.943057334 | 5.638203705 | 5.013362104 |
| ENSMUSG00000100137 | 3.537259256 | 4.869320706 | 7.767661525 | 4.832746033 | 4.297167518 |
| ENSMUSG00000100138 | 12.73413332 | 6.260555194 | 4.943057334 | 6.443661377 | 2.148583759 |
| ENSMUSG00000100139 | 0           | 0           | 0           | 0           | 0           |
| ENSMUSG00000100140 | 5.65961481  | 7.651789682 | 4.236906287 | 4.832746033 | 5.013362104 |
| ENSMUSG00000100141 | 7.781970364 | 6.956172438 | 3.530755239 | 3.221830688 | 4.297167518 |
| ENSMUSG00000100142 | 6.367066661 | 11.1298759  | 7.767661525 | 4.02728836  | 6.445751277 |
| ENSMUSG00000100143 | 7.074518513 | 4.173703463 | 11.29841676 | 5.638203705 | 3.580972932 |
| ENSMUSG00000100144 | 7.781970364 | 4.869320706 | 6.35535943  | 4.832746033 | 4.297167518 |
| ENSMUSG00000100145 | 4.244711108 | 4.869320706 | 7.061510478 | 3.221830688 | 5.013362104 |
| ENSMUSG00000100146 | 5.65961481  | 6.956172438 | 7.061510478 | 6.443661377 | 7.87814045  |
| ENSMUSG00000100147 | 9.904325918 | 9.043024169 | 7.061510478 | 7.249119049 | 4.297167518 |
| ENSMUSG00000100148 | 11.31922962 | 4.869320706 | 7.767661525 | 3.221830688 | 5.729556691 |
| ENSMUSG00000100149 | 3.537259256 | 4.173703463 | 4.236906287 | 3.221830688 | 3.580972932 |
| ENSMUSG00000100150 | 15.56394073 | 27.12907251 | 17.65377619 | 15.30369577 | 17.18867007 |
| ENSMUSG00000100151 | 8.489422215 | 5.56493795  | 4.236906287 | 10.47094974 | 6.445751277 |
| ENSMUSG00000100152 | 9.196874066 | 6.260555194 | 4.943057334 | 6.443661377 | 5.729556691 |
| ENSMUSG00000100153 | 0.707451851 | 0.695617244 | 0.706151048 | 0.805457672 | 0.716194586 |
| ENSMUSG00000100154 | 19.10119998 | 5.56493795  | 5.649208382 | 7.249119049 | 5.729556691 |
| ENSMUSG00000100155 | 6.367066661 | 6.956172438 | 7.767661525 | 6.443661377 | 3.580972932 |
| ENSMUSG00000100156 | 9.196874066 | 10.43425866 | 5.649208382 | 10.47094974 | 6.445751277 |
| ENSMUSG00000100157 | 6.367066661 | 3.478086219 | 4.236906287 | 8.860034393 | 3.580972932 |
| ENSMUSG00000100158 | 0           | 0           | 0           | 0           | 0           |
| ENSMUSG00000100159 | 4.244711108 | 5.56493795  | 7.061510478 | 3.221830688 | 3.580972932 |
| ENSMUSG00000100160 | 7.781970364 | 10.43425866 | 5.649208382 | 6.443661377 | 7.161945863 |

|                    |             |             |             |             |             |
|--------------------|-------------|-------------|-------------|-------------|-------------|
| ENSMUSG00000100161 | 2.829807405 | 5.56493795  | 6.35535943  | 0.805457672 | 2.148583759 |
| ENSMUSG00000100162 | 0           | 0           | 0           | 0           | 0           |
| ENSMUSG00000100164 | 37.49494812 | 61.21431745 | 55.07978173 | 47.52200265 | 56.57937232 |
| ENSMUSG00000100165 | 8.489422215 | 2.782468975 | 4.943057334 | 4.02728836  | 4.297167518 |
| ENSMUSG00000100166 | 7.781970364 | 9.738641413 | 9.179963621 | 2.416373016 | 7.87814045  |
| ENSMUSG00000100167 | 4.952162959 | 6.260555194 | 11.29841676 | 5.638203705 | 3.580972932 |
| ENSMUSG00000100168 | 4.952162959 | 8.347406925 | 10.59226572 | 7.249119049 | 6.445751277 |
| ENSMUSG00000100169 | 13.44158517 | 7.651789682 | 12.71071886 | 11.27640741 | 7.87814045  |
| ENSMUSG00000100170 | 14.85648888 | 6.260555194 | 7.061510478 | 4.02728836  | 9.310529622 |
| ENSMUSG00000100171 | 4.244711108 | 2.782468975 | 7.767661525 | 6.443661377 | 2.864778345 |
| ENSMUSG00000100172 | 9.904325918 | 8.347406925 | 6.35535943  | 6.443661377 | 10.7429188  |
| ENSMUSG00000100173 | 0           | 0.695617244 | 0           | 0           | 0           |
| ENSMUSG00000100174 | 5.65961481  | 7.651789682 | 10.59226572 | 9.665492065 | 10.02672421 |
| ENSMUSG00000100175 | 10.61177777 | 9.043024169 | 7.767661525 | 5.638203705 | 7.161945863 |
| ENSMUSG00000100176 | 171.203348  | 226.0756042 | 175.8316109 | 149.815127  | 136.0769714 |
| ENSMUSG00000100177 | 8.489422215 | 4.869320706 | 6.35535943  | 4.02728836  | 4.297167518 |
| ENSMUSG00000100178 | 9.904325918 | 10.43425866 | 6.35535943  | 5.638203705 | 3.580972932 |
| ENSMUSG00000100179 | 7.781970364 | 5.56493795  | 7.767661525 | 1.610915344 | 2.864778345 |
| ENSMUSG00000100180 | 5.65961481  | 7.651789682 | 10.59226572 | 4.02728836  | 5.013362104 |
| ENSMUSG00000100181 | 8.489422215 | 6.956172438 | 4.943057334 | 6.443661377 | 7.161945863 |
| ENSMUSG00000100182 | 6.367066661 | 3.478086219 | 9.886114669 | 8.860034393 | 9.310529622 |
| ENSMUSG00000100183 | 7.074518513 | 7.651789682 | 9.886114669 | 4.02728836  | 2.148583759 |
| ENSMUSG00000100184 | 4.952162959 | 4.173703463 | 5.649208382 | 4.02728836  | 1.432389173 |
| ENSMUSG00000100185 | 12.02668147 | 6.260555194 | 8.473812573 | 9.665492065 | 5.013362104 |
| ENSMUSG00000100186 | 7.074518513 | 4.173703463 | 8.473812573 | 4.832746033 | 6.445751277 |
| ENSMUSG00000100187 | 6.367066661 | 4.869320706 | 4.236906287 | 2.416373016 | 7.161945863 |
| ENSMUSG00000100188 | 10.61177777 | 12.52111039 | 11.29841676 | 4.832746033 | 10.7429188  |
| ENSMUSG00000100189 | 7.781970364 | 4.869320706 | 3.530755239 | 7.249119049 | 3.580972932 |
| ENSMUSG00000100190 | 6.367066661 | 8.347406925 | 11.29841676 | 2.416373016 | 7.161945863 |
| ENSMUSG00000100191 | 12.73413332 | 6.260555194 | 6.35535943  | 4.02728836  | 5.729556691 |
| ENSMUSG00000100192 | 4.952162959 | 4.869320706 | 8.473812573 | 4.832746033 | 7.87814045  |
| ENSMUSG00000100193 | 9.904325918 | 5.56493795  | 7.767661525 | 5.638203705 | 3.580972932 |
| ENSMUSG00000100195 | 9.196874066 | 10.43425866 | 3.530755239 | 1.610915344 | 5.013362104 |
| ENSMUSG00000100196 | 2.829807405 | 3.478086219 | 2.118453143 | 6.443661377 | 2.864778345 |
| ENSMUSG00000100197 | 4.952162959 | 6.260555194 | 11.29841676 | 3.221830688 | 4.297167518 |
| ENSMUSG00000100198 | 9.196874066 | 8.347406925 | 4.236906287 | 4.832746033 | 10.02672421 |
| ENSMUSG00000100199 | 123.804074  | 161.3832006 | 118.633376  | 220.6954022 | 166.8733386 |
| ENSMUSG00000100201 | 29.0055259  | 30.60715873 | 31.0706461  | 37.85651059 | 20.05344842 |
| ENSMUSG00000100202 | 12.73413332 | 4.173703463 | 7.767661525 | 7.249119049 | 6.445751277 |
| ENSMUSG00000100203 | 5.65961481  | 4.173703463 | 5.649208382 | 1.610915344 | 4.297167518 |
| ENSMUSG00000100204 | 8.489422215 | 6.956172438 | 7.061510478 | 5.638203705 | 10.7429188  |
| ENSMUSG00000100205 | 9.904325918 | 7.651789682 | 8.473812573 | 4.02728836  | 7.87814045  |
| ENSMUSG00000100206 | 4.244711108 | 8.347406925 | 4.236906287 | 3.221830688 | 2.148583759 |

|                    |             |             |             |             |             |
|--------------------|-------------|-------------|-------------|-------------|-------------|
| ENSMUSG00000100207 | 8.489422215 | 11.82549314 | 9.179963621 | 1.610915344 | 7.161945863 |
| ENSMUSG00000100208 | 6.367066661 | 6.260555194 | 7.061510478 | 4.02728836  | 5.729556691 |
| ENSMUSG00000100209 | 7.781970364 | 3.478086219 | 4.236906287 | 8.054576721 | 5.729556691 |
| ENSMUSG00000100211 | 10.61177777 | 7.651789682 | 12.00456781 | 7.249119049 | 13.60769714 |
| ENSMUSG00000100212 | 5.65961481  | 4.869320706 | 12.71071886 | 6.443661377 | 8.594335036 |
| ENSMUSG00000100213 | 21.93100739 | 41.04141738 | 30.36449505 | 40.2728836  | 35.80972932 |
| ENSMUSG00000100214 | 10.61177777 | 9.043024169 | 12.71071886 | 5.638203705 | 5.729556691 |
| ENSMUSG00000100215 | 0.707451851 | 0.695617244 | 0           | 0           | 0           |
| ENSMUSG00000100216 | 7.074518513 | 4.869320706 | 7.767661525 | 8.054576721 | 2.864778345 |
| ENSMUSG00000100217 | 9.904325918 | 9.738641413 | 7.061510478 | 12.08186508 | 10.02672421 |
| ENSMUSG00000100218 | 9.196874066 | 11.1298759  | 9.179963621 | 8.054576721 | 6.445751277 |
| ENSMUSG00000100219 | 9.904325918 | 4.869320706 | 4.943057334 | 5.638203705 | 9.310529622 |
| ENSMUSG00000100220 | 9.196874066 | 5.56493795  | 7.767661525 | 8.054576721 | 9.310529622 |
| ENSMUSG00000100221 | 7.781970364 | 7.651789682 | 5.649208382 | 4.02728836  | 2.148583759 |
| ENSMUSG00000100222 | 5.65961481  | 6.956172438 | 8.473812573 | 4.832746033 | 10.02672421 |
| ENSMUSG00000100223 | 9.196874066 | 3.478086219 | 7.767661525 | 4.02728836  | 5.729556691 |
| ENSMUSG00000100224 | 7.074518513 | 9.738641413 | 6.35535943  | 2.416373016 | 4.297167518 |
| ENSMUSG00000100225 | 9.196874066 | 11.82549314 | 5.649208382 | 8.054576721 | 12.17530797 |
| ENSMUSG00000100226 | 7.074518513 | 6.956172438 | 9.886114669 | 0           | 3.580972932 |
| ENSMUSG00000100227 | 5.65961481  | 4.869320706 | 7.061510478 | 4.02728836  | 3.580972932 |
| ENSMUSG00000100228 | 137.2456591 | 187.8166558 | 140.5240585 | 228.7499789 | 176.9000628 |
| ENSMUSG00000100229 | 6.367066661 | 6.956172438 | 7.061510478 | 4.832746033 | 3.580972932 |
| ENSMUSG00000100230 | 9.904325918 | 6.956172438 | 7.061510478 | 5.638203705 | 7.161945863 |
| ENSMUSG00000100232 | 6.367066661 | 4.173703463 | 7.061510478 | 0.805457672 | 1.432389173 |
| ENSMUSG00000100233 | 3.537259256 | 3.478086219 | 2.118453143 | 2.416373016 | 2.864778345 |
| ENSMUSG00000100234 | 2.829807405 | 0.695617244 | 6.35535943  | 1.610915344 | 5.013362104 |
| ENSMUSG00000100236 | 4.244711108 | 12.52111039 | 7.061510478 | 9.665492065 | 7.161945863 |
| ENSMUSG00000100237 | 9.196874066 | 6.956172438 | 7.767661525 | 6.443661377 | 7.87814045  |
| ENSMUSG00000100238 | 4.952162959 | 3.478086219 | 7.767661525 | 3.221830688 | 2.864778345 |
| ENSMUSG00000100239 | 4.244711108 | 4.173703463 | 6.35535943  | 2.416373016 | 4.297167518 |
| ENSMUSG00000100242 | 5.65961481  | 3.478086219 | 5.649208382 | 4.832746033 | 6.445751277 |
| ENSMUSG00000100243 | 8.489422215 | 6.260555194 | 4.943057334 | 2.416373016 | 4.297167518 |
| ENSMUSG00000100244 | 8.489422215 | 3.478086219 | 9.179963621 | 2.416373016 | 2.864778345 |
| ENSMUSG00000100245 | 5.65961481  | 9.043024169 | 7.767661525 | 8.054576721 | 3.580972932 |
| ENSMUSG00000100246 | 4.952162959 | 2.086851731 | 3.530755239 | 2.416373016 | 3.580972932 |
| ENSMUSG00000100247 | 9.904325918 | 8.347406925 | 4.236906287 | 6.443661377 | 4.297167518 |
| ENSMUSG00000100248 | 5.65961481  | 2.782468975 | 5.649208382 | 1.610915344 | 2.864778345 |
| ENSMUSG00000100250 | 9.196874066 | 5.56493795  | 4.236906287 | 4.02728836  | 7.161945863 |
| ENSMUSG00000100251 | 6.367066661 | 2.782468975 | 6.35535943  | 2.416373016 | 4.297167518 |
| ENSMUSG00000100252 | 8.489422215 | 5.56493795  | 5.649208382 | 4.02728836  | 5.729556691 |
| ENSMUSG00000100253 | 11.31922962 | 4.869320706 | 16.2414741  | 4.02728836  | 10.7429188  |
| ENSMUSG00000100255 | 6.367066661 | 9.043024169 | 7.767661525 | 7.249119049 | 7.161945863 |
| ENSMUSG00000100256 | 6.367066661 | 3.478086219 | 3.530755239 | 3.221830688 | 5.729556691 |

|                    |             |             |             |             |             |
|--------------------|-------------|-------------|-------------|-------------|-------------|
| ENSMUSG00000100257 | 10.61177777 | 13.21672763 | 5.649208382 | 8.860034393 | 6.445751277 |
| ENSMUSG00000100258 | 8.489422215 | 6.956172438 | 2.824604191 | 4.02728836  | 2.864778345 |
| ENSMUSG00000100259 | 10.61177777 | 4.173703463 | 8.473812573 | 15.30369577 | 8.594335036 |
| ENSMUSG00000100260 | 7.074518513 | 3.478086219 | 3.530755239 | 7.249119049 | 7.87814045  |
| ENSMUSG00000100261 | 6.367066661 | 5.56493795  | 10.59226572 | 5.638203705 | 7.87814045  |
| ENSMUSG00000100262 | 5.65961481  | 4.869320706 | 5.649208382 | 4.832746033 | 5.013362104 |
| ENSMUSG00000100263 | 8.489422215 | 6.260555194 | 6.35535943  | 4.02728836  | 4.297167518 |
| ENSMUSG00000100264 | 2.829807405 | 3.478086219 | 7.767661525 | 2.416373016 | 4.297167518 |
| ENSMUSG00000100266 | 8.489422215 | 4.173703463 | 7.767661525 | 8.054576721 | 5.729556691 |
| ENSMUSG00000100267 | 7.781970364 | 6.956172438 | 6.35535943  | 8.054576721 | 8.594335036 |
| ENSMUSG00000100268 | 5.65961481  | 4.869320706 | 6.35535943  | 1.610915344 | 4.297167518 |
| ENSMUSG00000100269 | 4.244711108 | 5.56493795  | 7.061510478 | 8.054576721 | 6.445751277 |
| ENSMUSG00000100270 | 5.65961481  | 2.086851731 | 5.649208382 | 4.02728836  | 5.013362104 |
| ENSMUSG00000100271 | 2.122355554 | 4.173703463 | 5.649208382 | 3.221830688 | 2.148583759 |
| ENSMUSG00000100272 | 8.489422215 | 6.260555194 | 7.061510478 | 5.638203705 | 4.297167518 |
| ENSMUSG00000100273 | 7.074518513 | 7.651789682 | 2.824604191 | 4.02728836  | 2.864778345 |
| ENSMUSG00000100274 | 9.196874066 | 4.173703463 | 10.59226572 | 4.832746033 | 4.297167518 |
| ENSMUSG00000100275 | 3.537259256 | 2.782468975 | 6.35535943  | 3.221830688 | 4.297167518 |
| ENSMUSG00000100276 | 5.65961481  | 7.651789682 | 7.767661525 | 4.832746033 | 2.864778345 |
| ENSMUSG00000100277 | 12.73413332 | 6.260555194 | 7.767661525 | 7.249119049 | 7.161945863 |
| ENSMUSG00000100278 | 8.489422215 | 4.869320706 | 6.35535943  | 2.416373016 | 4.297167518 |
| ENSMUSG00000100279 | 7.781970364 | 4.173703463 | 4.236906287 | 2.416373016 | 3.580972932 |
| ENSMUSG00000100280 | 55.1812444  | 78.60474855 | 63.5535943  | 81.35122488 | 86.65954495 |
| ENSMUSG00000100281 | 11.31922962 | 6.956172438 | 7.061510478 | 6.443661377 | 6.445751277 |
| ENSMUSG00000100282 | 4.952162959 | 9.043024169 | 7.767661525 | 6.443661377 | 10.7429188  |
| ENSMUSG00000100283 | 6.367066661 | 6.260555194 | 4.943057334 | 3.221830688 | 5.013362104 |
| ENSMUSG00000100284 | 8.489422215 | 8.347406925 | 4.943057334 | 4.832746033 | 5.729556691 |
| ENSMUSG00000100285 | 7.781970364 | 8.347406925 | 10.59226572 | 2.416373016 | 7.161945863 |
| ENSMUSG00000100286 | 4.952162959 | 6.956172438 | 5.649208382 | 4.02728836  | 2.864778345 |
| ENSMUSG00000100287 | 8.489422215 | 7.651789682 | 14.12302096 | 8.054576721 | 6.445751277 |
| ENSMUSG00000100288 | 4.244711108 | 5.56493795  | 3.530755239 | 4.02728836  | 5.013362104 |
| ENSMUSG00000100289 | 7.781970364 | 2.782468975 | 4.236906287 | 4.832746033 | 4.297167518 |
| ENSMUSG00000100290 | 9.904325918 | 3.478086219 | 11.29841676 | 4.02728836  | 6.445751277 |
| ENSMUSG00000100291 | 6.367066661 | 2.782468975 | 7.061510478 | 4.832746033 | 5.729556691 |
| ENSMUSG00000100292 | 4.244711108 | 2.782468975 | 4.236906287 | 2.416373016 | 3.580972932 |
| ENSMUSG00000100293 | 0           | 0           | 0           | 0           | 0           |
| ENSMUSG00000100294 | 9.196874066 | 9.738641413 | 8.473812573 | 8.860034393 | 4.297167518 |
| ENSMUSG00000100295 | 9.196874066 | 5.56493795  | 4.943057334 | 3.221830688 | 2.148583759 |
| ENSMUSG00000100296 | 14.14903703 | 10.43425866 | 3.530755239 | 6.443661377 | 5.729556691 |
| ENSMUSG00000100297 | 8.489422215 | 5.56493795  | 9.179963621 | 7.249119049 | 4.297167518 |
| ENSMUSG00000100298 | 7.781970364 | 5.56493795  | 7.767661525 | 3.221830688 | 3.580972932 |
| ENSMUSG00000100299 | 9.196874066 | 7.651789682 | 2.118453143 | 0.805457672 | 3.580972932 |
| ENSMUSG00000100300 | 6.367066661 | 5.56493795  | 4.236906287 | 2.416373016 | 0.716194586 |



|                    |             |             |             |             |             |
|--------------------|-------------|-------------|-------------|-------------|-------------|
| ENSMUSG00000100301 | 6.367066661 | 4.173703463 | 8.473812573 | 3.221830688 | 2.864778345 |
| ENSMUSG00000100302 | 12.02668147 | 13.21672763 | 13.41686991 | 8.054576721 | 13.60769714 |
| ENSMUSG00000100303 | 9.904325918 | 4.173703463 | 7.061510478 | 5.638203705 | 7.87814045  |
| ENSMUSG00000100304 | 9.904325918 | 5.56493795  | 10.59226572 | 4.832746033 | 4.297167518 |
| ENSMUSG00000100306 | 0           | 0           | 0           | 0           | 0           |
| ENSMUSG00000100307 | 5.65961481  | 9.738641413 | 7.061510478 | 2.416373016 | 4.297167518 |
| ENSMUSG00000100308 | 5.65961481  | 4.869320706 | 7.767661525 | 2.416373016 | 3.580972932 |
| ENSMUSG00000100309 | 0           | 0           | 0           | 0           | 0           |
| ENSMUSG00000100310 | 7.074518513 | 2.086851731 | 4.236906287 | 4.832746033 | 4.297167518 |
| ENSMUSG00000100311 | 10.61177777 | 2.086851731 | 2.824604191 | 0.805457672 | 5.013362104 |
| ENSMUSG00000100312 | 3.537259256 | 3.478086219 | 6.35535943  | 4.832746033 | 5.729556691 |
| ENSMUSG00000100313 | 12.02668147 | 7.651789682 | 8.473812573 | 4.02728836  | 3.580972932 |
| ENSMUSG00000100314 | 7.074518513 | 8.347406925 | 4.236906287 | 8.860034393 | 7.87814045  |
| ENSMUSG00000100315 | 2.122355554 | 4.869320706 | 4.236906287 | 3.221830688 | 2.864778345 |
| ENSMUSG00000100316 | 10.61177777 | 4.173703463 | 6.35535943  | 6.443661377 | 4.297167518 |
| ENSMUSG00000100317 | 7.781970364 | 5.56493795  | 4.236906287 | 4.02728836  | 6.445751277 |
| ENSMUSG00000100318 | 10.61177777 | 6.260555194 | 11.29841676 | 4.832746033 | 5.729556691 |
| ENSMUSG00000100319 | 4.244711108 | 8.347406925 | 11.29841676 | 4.832746033 | 9.310529622 |
| ENSMUSG00000100320 | 128.0487851 | 166.9481385 | 159.5901368 | 83.7675979  | 67.32229112 |
| ENSMUSG00000100321 | 4.244711108 | 6.956172438 | 9.179963621 | 4.832746033 | 5.729556691 |
| ENSMUSG00000100322 | 3.537259256 | 2.782468975 | 5.649208382 | 1.610915344 | 5.729556691 |
| ENSMUSG00000100323 | 9.196874066 | 9.738641413 | 5.649208382 | 9.665492065 | 9.310529622 |
| ENSMUSG00000100324 | 8.489422215 | 4.869320706 | 10.59226572 | 4.02728836  | 8.594335036 |
| ENSMUSG00000100325 | 7.074518513 | 4.869320706 | 4.943057334 | 3.221830688 | 2.864778345 |
| ENSMUSG00000100326 | 2.829807405 | 3.478086219 | 1.412302096 | 3.221830688 | 0.716194586 |
| ENSMUSG00000100328 | 4.244711108 | 5.56493795  | 4.943057334 | 1.610915344 | 3.580972932 |
| ENSMUSG00000100329 | 4.244711108 | 6.260555194 | 2.118453143 | 3.221830688 | 2.148583759 |
| ENSMUSG00000100330 | 5.65961481  | 4.869320706 | 10.59226572 | 6.443661377 | 5.013362104 |
| ENSMUSG00000100331 | 4.952162959 | 4.173703463 | 7.061510478 | 3.221830688 | 5.013362104 |
| ENSMUSG00000100332 | 9.196874066 | 6.260555194 | 4.236906287 | 4.02728836  | 5.013362104 |
| ENSMUSG00000100333 | 5.65961481  | 4.173703463 | 5.649208382 | 0           | 4.297167518 |
| ENSMUSG00000100334 | 8.489422215 | 2.782468975 | 5.649208382 | 7.249119049 | 6.445751277 |
| ENSMUSG00000100335 | 4.952162959 | 5.56493795  | 9.179963621 | 10.47094974 | 3.580972932 |
| ENSMUSG00000100336 | 13.44158517 | 9.738641413 | 5.649208382 | 3.221830688 | 7.87814045  |
| ENSMUSG00000100337 | 12.02668147 | 10.43425866 | 7.767661525 | 4.832746033 | 5.013362104 |
| ENSMUSG00000100338 | 5.65961481  | 10.43425866 | 7.061510478 | 3.221830688 | 4.297167518 |
| ENSMUSG00000100339 | 4.952162959 | 5.56493795  | 3.530755239 | 3.221830688 | 2.864778345 |
| ENSMUSG00000100340 | 8.489422215 | 9.738641413 | 12.71071886 | 4.02728836  | 8.594335036 |
| ENSMUSG00000100341 | 7.781970364 | 3.478086219 | 6.35535943  | 6.443661377 | 5.013362104 |
| ENSMUSG00000100342 | 12.02668147 | 5.56493795  | 5.649208382 | 4.832746033 | 6.445751277 |
| ENSMUSG00000100343 | 6.367066661 | 4.173703463 | 3.530755239 | 3.221830688 | 2.864778345 |
| ENSMUSG00000100344 | 9.904325918 | 6.956172438 | 7.767661525 | 4.02728836  | 8.594335036 |
| ENSMUSG00000100345 | 12.73413332 | 2.086851731 | 9.179963621 | 10.47094974 | 7.87814045  |

|                    |             |             |             |             |             |
|--------------------|-------------|-------------|-------------|-------------|-------------|
| ENSMUSG00000100346 | 13.44158517 | 4.869320706 | 7.061510478 | 6.443661377 | 6.445751277 |
| ENSMUSG00000100347 | 10.61177777 | 14.60796212 | 21.18453143 | 10.47094974 | 12.17530797 |
| ENSMUSG00000100348 | 9.196874066 | 8.347406925 | 7.061510478 | 5.638203705 | 4.297167518 |
| ENSMUSG00000100349 | 5.65961481  | 1.391234488 | 6.35535943  | 4.832746033 | 7.161945863 |
| ENSMUSG00000100350 | 6.367066661 | 4.173703463 | 6.35535943  | 1.610915344 | 4.297167518 |
| ENSMUSG00000100351 | 1.414903703 | 0.695617244 | 4.236906287 | 0.805457672 | 0.716194586 |
| ENSMUSG00000100352 | 3.537259256 | 2.782468975 | 5.649208382 | 1.610915344 | 4.297167518 |
| ENSMUSG00000100353 | 7.781970364 | 8.347406925 | 5.649208382 | 4.02728836  | 7.161945863 |
| ENSMUSG00000100354 | 7.781970364 | 7.651789682 | 7.767661525 | 3.221830688 | 7.161945863 |
| ENSMUSG00000100355 | 4.244711108 | 6.260555194 | 8.473812573 | 0.805457672 | 5.729556691 |
| ENSMUSG00000100356 | 0.707451851 | 2.086851731 | 2.118453143 | 1.610915344 | 0.716194586 |
| ENSMUSG00000100357 | 7.781970364 | 9.043024169 | 7.767661525 | 5.638203705 | 4.297167518 |
| ENSMUSG00000100358 | 7.781970364 | 11.1298759  | 12.00456781 | 4.02728836  | 2.864778345 |
| ENSMUSG00000100359 | 8.489422215 | 3.478086219 | 9.179963621 | 0.805457672 | 2.864778345 |
| ENSMUSG00000100360 | 4.244711108 | 2.782468975 | 2.824604191 | 1.610915344 | 5.729556691 |
| ENSMUSG00000100361 | 7.781970364 | 13.21672763 | 7.061510478 | 3.221830688 | 6.445751277 |
| ENSMUSG00000100362 | 7.781970364 | 6.956172438 | 9.179963621 | 8.054576721 | 5.013362104 |
| ENSMUSG00000100363 | 9.904325918 | 6.260555194 | 7.061510478 | 4.832746033 | 2.148583759 |
| ENSMUSG00000100364 | 4.952162959 | 2.782468975 | 3.530755239 | 3.221830688 | 5.729556691 |
| ENSMUSG00000100365 | 5.65961481  | 6.260555194 | 6.35535943  | 4.832746033 | 4.297167518 |
| ENSMUSG00000100366 | 8.489422215 | 4.173703463 | 4.943057334 | 4.832746033 | 2.864778345 |
| ENSMUSG00000100367 | 7.781970364 | 8.347406925 | 6.35535943  | 3.221830688 | 9.310529622 |
| ENSMUSG00000100368 | 2.122355554 | 1.391234488 | 4.236906287 | 2.416373016 | 4.297167518 |
| ENSMUSG00000100369 | 2.122355554 | 0.695617244 | 4.236906287 | 2.416373016 | 3.580972932 |
| ENSMUSG00000100370 | 7.781970364 | 14.60796212 | 12.00456781 | 9.665492065 | 11.45911338 |
| ENSMUSG00000100371 | 7.781970364 | 9.043024169 | 9.179963621 | 6.443661377 | 5.729556691 |
| ENSMUSG00000100372 | 9.196874066 | 8.347406925 | 6.35535943  | 6.443661377 | 5.729556691 |
| ENSMUSG00000100373 | 7.781970364 | 4.173703463 | 10.59226572 | 4.02728836  | 4.297167518 |
| ENSMUSG00000100374 | 16.27139258 | 4.173703463 | 6.35535943  | 8.860034393 | 9.310529622 |
| ENSMUSG00000100375 | 5.65961481  | 7.651789682 | 6.35535943  | 9.665492065 | 11.45911338 |
| ENSMUSG00000100376 | 9.196874066 | 8.347406925 | 8.473812573 | 8.860034393 | 7.161945863 |
| ENSMUSG00000100377 | 5.65961481  | 4.869320706 | 3.530755239 | 1.610915344 | 4.297167518 |
| ENSMUSG00000100378 | 13.44158517 | 9.043024169 | 11.29841676 | 8.054576721 | 5.729556691 |
| ENSMUSG00000100379 | 7.781970364 | 6.260555194 | 8.473812573 | 2.416373016 | 4.297167518 |
| ENSMUSG00000100380 | 9.904325918 | 15.30357936 | 5.649208382 | 8.860034393 | 10.02672421 |
| ENSMUSG00000100381 | 7.074518513 | 6.956172438 | 7.767661525 | 5.638203705 | 6.445751277 |
| ENSMUSG00000100382 | 24.76081479 | 28.52030699 | 20.47838039 | 12.08186508 | 20.769643   |
| ENSMUSG00000100383 | 10.61177777 | 12.52111039 | 7.061510478 | 10.47094974 | 5.729556691 |
| ENSMUSG00000100384 | 2.122355554 | 3.478086219 | 4.943057334 | 1.610915344 | 3.580972932 |
| ENSMUSG00000100385 | 4.952162959 | 7.651789682 | 2.824604191 | 2.416373016 | 5.729556691 |
| ENSMUSG00000100386 | 7.781970364 | 9.043024169 | 9.886114669 | 8.860034393 | 5.013362104 |
| ENSMUSG00000100387 | 9.904325918 | 6.260555194 | 11.29841676 | 5.638203705 | 6.445751277 |
| ENSMUSG00000100388 | 7.074518513 | 4.869320706 | 7.767661525 | 4.832746033 | 4.297167518 |

|                    |             |             |             |             |             |
|--------------------|-------------|-------------|-------------|-------------|-------------|
| ENSMUSG00000100389 | 12.02668147 | 4.869320706 | 11.29841676 | 8.054576721 | 5.013362104 |
| ENSMUSG00000100390 | 7.781970364 | 2.086851731 | 7.061510478 | 2.416373016 | 2.148583759 |
| ENSMUSG00000100391 | 8.489422215 | 7.651789682 | 5.649208382 | 4.02728836  | 5.013362104 |
| ENSMUSG00000100392 | 7.074518513 | 13.21672763 | 10.59226572 | 12.08186508 | 20.769643   |
| ENSMUSG00000100393 | 7.074518513 | 5.56493795  | 12.00456781 | 6.443661377 | 4.297167518 |
| ENSMUSG00000100394 | 197.3790665 | 251.8134422 | 201.2530486 | 296.4084233 | 209.8450138 |
| ENSMUSG00000100395 | 9.904325918 | 6.956172438 | 8.473812573 | 4.832746033 | 5.729556691 |
| ENSMUSG00000100396 | 22.63845924 | 33.3896277  | 45.19366706 | 74.10210583 | 64.45751277 |
| ENSMUSG00000100397 | 10.61177777 | 5.56493795  | 6.35535943  | 7.249119049 | 9.310529622 |
| ENSMUSG00000100398 | 6.367066661 | 4.173703463 | 9.179963621 | 8.054576721 | 4.297167518 |
| ENSMUSG00000100399 | 4.244711108 | 5.56493795  | 9.886114669 | 3.221830688 | 2.148583759 |
| ENSMUSG00000100400 | 7.781970364 | 4.869320706 | 3.530755239 | 6.443661377 | 7.161945863 |
| ENSMUSG00000100401 | 9.904325918 | 0.695617244 | 4.943057334 | 4.02728836  | 5.013362104 |
| ENSMUSG00000100402 | 8.489422215 | 6.260555194 | 9.886114669 | 6.443661377 | 3.580972932 |
| ENSMUSG00000100403 | 6.367066661 | 5.56493795  | 4.943057334 | 3.221830688 | 2.148583759 |
| ENSMUSG00000100404 | 9.196874066 | 6.956172438 | 7.061510478 | 1.610915344 | 2.148583759 |
| ENSMUSG00000100405 | 7.781970364 | 6.260555194 | 9.886114669 | 12.08186508 | 9.310529622 |
| ENSMUSG00000100406 | 9.904325918 | 5.56493795  | 4.236906287 | 4.02728836  | 4.297167518 |
| ENSMUSG00000100407 | 4.244711108 | 5.56493795  | 6.35535943  | 1.610915344 | 2.148583759 |
| ENSMUSG00000100408 | 2.122355554 | 4.869320706 | 2.824604191 | 2.416373016 | 2.148583759 |
| ENSMUSG00000100409 | 9.196874066 | 3.478086219 | 8.473812573 | 4.832746033 | 8.594335036 |
| ENSMUSG00000100410 | 9.196874066 | 4.173703463 | 8.473812573 | 1.610915344 | 6.445751277 |
| ENSMUSG00000100411 | 5.65961481  | 4.173703463 | 8.473812573 | 1.610915344 | 2.148583759 |
| ENSMUSG00000100412 | 3.537259256 | 2.086851731 | 5.649208382 | 2.416373016 | 0.716194586 |
| ENSMUSG00000100413 | 9.904325918 | 4.869320706 | 5.649208382 | 1.610915344 | 5.013362104 |
| ENSMUSG00000100414 | 0           | 0           | 0           | 0           | 0           |
| ENSMUSG00000100415 | 8.489422215 | 4.173703463 | 4.236906287 | 6.443661377 | 5.729556691 |
| ENSMUSG00000100416 | 8.489422215 | 0.695617244 | 4.943057334 | 12.08186508 | 5.013362104 |
| ENSMUSG00000100417 | 10.61177777 | 3.478086219 | 8.473812573 | 7.249119049 | 7.87814045  |
| ENSMUSG00000100418 | 7.074518513 | 6.956172438 | 7.767661525 | 4.02728836  | 6.445751277 |
| ENSMUSG00000100419 | 7.781970364 | 4.869320706 | 8.473812573 | 4.02728836  | 9.310529622 |
| ENSMUSG00000100420 | 7.781970364 | 7.651789682 | 7.061510478 | 3.221830688 | 6.445751277 |
| ENSMUSG00000100421 | 2.122355554 | 6.260555194 | 4.943057334 | 4.02728836  | 3.580972932 |
| ENSMUSG00000100422 | 7.781970364 | 1.391234488 | 4.943057334 | 2.416373016 | 5.013362104 |
| ENSMUSG00000100423 | 7.781970364 | 9.738641413 | 5.649208382 | 6.443661377 | 3.580972932 |
| ENSMUSG00000100424 | 4.952162959 | 0           | 4.236906287 | 4.832746033 | 3.580972932 |
| ENSMUSG00000100425 | 9.196874066 | 7.651789682 | 10.59226572 | 2.416373016 | 5.013362104 |
| ENSMUSG00000100426 | 8.489422215 | 6.260555194 | 7.061510478 | 6.443661377 | 5.013362104 |
| ENSMUSG00000100427 | 5.65961481  | 7.651789682 | 7.767661525 | 6.443661377 | 6.445751277 |
| ENSMUSG00000100428 | 5.65961481  | 4.869320706 | 6.35535943  | 1.610915344 | 2.148583759 |
| ENSMUSG00000100429 | 11.31922962 | 4.173703463 | 10.59226572 | 7.249119049 | 10.02672421 |
| ENSMUSG00000100430 | 6.367066661 | 4.173703463 | 4.943057334 | 6.443661377 | 12.89150255 |
| ENSMUSG00000100431 | 9.196874066 | 7.651789682 | 7.061510478 | 6.443661377 | 2.864778345 |

|                    |             |             |             |             |             |
|--------------------|-------------|-------------|-------------|-------------|-------------|
| ENSMUSG00000100432 | 11.31922962 | 8.347406925 | 6.35535943  | 4.02728836  | 6.445751277 |
| ENSMUSG00000100433 | 4.244711108 | 1.391234488 | 9.179963621 | 0.805457672 | 5.013362104 |
| ENSMUSG00000100434 | 9.904325918 | 7.651789682 | 7.767661525 | 3.221830688 | 6.445751277 |
| ENSMUSG00000100435 | 11.31922962 | 7.651789682 | 6.35535943  | 8.860034393 | 11.45911338 |
| ENSMUSG00000100436 | 35.37259256 | 68.86610713 | 63.5535943  | 37.05105292 | 37.24211849 |
| ENSMUSG00000100437 | 13.44158517 | 6.956172438 | 4.236906287 | 8.054576721 | 5.013362104 |
| ENSMUSG00000100438 | 7.074518513 | 4.173703463 | 7.061510478 | 2.416373016 | 5.013362104 |
| ENSMUSG00000100439 | 8.489422215 | 4.869320706 | 7.767661525 | 8.054576721 | 9.310529622 |
| ENSMUSG00000100440 | 4.952162959 | 5.56493795  | 6.35535943  | 3.221830688 | 6.445751277 |
| ENSMUSG00000100441 | 5.65961481  | 9.738641413 | 4.236906287 | 4.832746033 | 5.013362104 |
| ENSMUSG00000100442 | 3.537259256 | 6.260555194 | 9.886114669 | 1.610915344 | 6.445751277 |
| ENSMUSG00000100443 | 10.61177777 | 10.43425866 | 9.179963621 | 6.443661377 | 3.580972932 |
| ENSMUSG00000100444 | 14.85648888 | 4.869320706 | 5.649208382 | 10.47094974 | 8.594335036 |
| ENSMUSG00000100445 | 2.122355554 | 1.391234488 | 2.824604191 | 1.610915344 | 2.148583759 |
| ENSMUSG00000100446 | 5.65961481  | 5.56493795  | 1.412302096 | 0.805457672 | 2.148583759 |
| ENSMUSG00000100447 | 4.952162959 | 5.56493795  | 5.649208382 | 1.610915344 | 5.729556691 |
| ENSMUSG00000100449 | 2.122355554 | 7.651789682 | 8.473812573 | 5.638203705 | 2.864778345 |
| ENSMUSG00000100450 | 7.074518513 | 6.956172438 | 13.41686991 | 4.02728836  | 9.310529622 |
| ENSMUSG00000100451 | 7.781970364 | 10.43425866 | 7.061510478 | 4.832746033 | 5.013362104 |
| ENSMUSG00000100452 | 7.781970364 | 5.56493795  | 3.530755239 | 3.221830688 | 5.013362104 |
| ENSMUSG00000100453 | 6.367066661 | 6.260555194 | 4.943057334 | 3.221830688 | 4.297167518 |
| ENSMUSG00000100454 | 16.27139258 | 16.69481385 | 17.65377619 | 16.10915344 | 14.32389173 |
| ENSMUSG00000100455 | 0           | 0           | 0           | 0           | 0           |
| ENSMUSG00000100456 | 9.196874066 | 3.478086219 | 8.473812573 | 8.054576721 | 6.445751277 |
| ENSMUSG00000100457 | 12.02668147 | 4.869320706 | 5.649208382 | 2.416373016 | 7.87814045  |
| ENSMUSG00000100458 | 0           | 0           | 0           | 0           | 0           |
| ENSMUSG00000100459 | 9.904325918 | 4.173703463 | 9.886114669 | 3.221830688 | 7.87814045  |
| ENSMUSG00000100460 | 7.074518513 | 4.173703463 | 3.530755239 | 1.610915344 | 4.297167518 |
| ENSMUSG00000100461 | 4.952162959 | 4.173703463 | 3.530755239 | 4.832746033 | 4.297167518 |
| ENSMUSG00000100462 | 8.489422215 | 8.347406925 | 7.061510478 | 5.638203705 | 8.594335036 |
| ENSMUSG00000100463 | 7.781970364 | 6.260555194 | 2.824604191 | 1.610915344 | 2.148583759 |
| ENSMUSG00000100464 | 4.952162959 | 3.478086219 | 4.943057334 | 3.221830688 | 2.864778345 |
| ENSMUSG00000100465 | 0.707451851 | 2.782468975 | 0           | 1.610915344 | 0           |
| ENSMUSG00000100466 | 7.074518513 | 5.56493795  | 7.061510478 | 9.665492065 | 8.594335036 |
| ENSMUSG00000100468 | 7.074518513 | 3.478086219 | 5.649208382 | 4.832746033 | 0           |
| ENSMUSG00000100469 | 5.65961481  | 5.56493795  | 9.179963621 | 3.221830688 | 2.864778345 |
| ENSMUSG00000100470 | 5.65961481  | 6.956172438 | 5.649208382 | 4.832746033 | 8.594335036 |
| ENSMUSG00000100471 | 12.73413332 | 4.173703463 | 6.35535943  | 2.416373016 | 5.729556691 |
| ENSMUSG00000100472 | 4.244711108 | 1.391234488 | 4.943057334 | 1.610915344 | 2.864778345 |
| ENSMUSG00000100473 | 5.65961481  | 5.56493795  | 9.179963621 | 2.416373016 | 3.580972932 |
| ENSMUSG00000100474 | 9.196874066 | 9.043024169 | 6.35535943  | 4.02728836  | 10.02672421 |
| ENSMUSG00000100475 | 5.65961481  | 6.956172438 | 9.179963621 | 4.832746033 | 7.161945863 |
| ENSMUSG00000100476 | 7.074518513 | 9.043024169 | 5.649208382 | 3.221830688 | 7.161945863 |

|                    |             |             |             |             |             |
|--------------------|-------------|-------------|-------------|-------------|-------------|
| ENSMUSG00000100477 | 2.829807405 | 5.56493795  | 3.530755239 | 2.416373016 | 2.864778345 |
| ENSMUSG00000100478 | 8.489422215 | 3.478086219 | 9.179963621 | 3.221830688 | 1.432389173 |
| ENSMUSG00000100479 | 4.952162959 | 2.782468975 | 2.118453143 | 2.416373016 | 2.864778345 |
| ENSMUSG00000100480 | 3.537259256 | 3.478086219 | 6.35535943  | 7.249119049 | 5.013362104 |
| ENSMUSG00000100481 | 7.074518513 | 7.651789682 | 4.236906287 | 5.638203705 | 7.161945863 |
| ENSMUSG00000100482 | 7.074518513 | 6.956172438 | 7.767661525 | 4.02728836  | 5.729556691 |
| ENSMUSG00000100483 | 10.61177777 | 9.738641413 | 8.473812573 | 5.638203705 | 6.445751277 |
| ENSMUSG00000100484 | 10.61177777 | 6.956172438 | 4.236906287 | 6.443661377 | 2.864778345 |
| ENSMUSG00000100486 | 12.73413332 | 0.695617244 | 9.179963621 | 5.638203705 | 5.013362104 |
| ENSMUSG00000100487 | 10.61177777 | 6.956172438 | 9.886114669 | 10.47094974 | 9.310529622 |
| ENSMUSG00000100488 | 3.537259256 | 9.043024169 | 9.179963621 | 3.221830688 | 3.580972932 |
| ENSMUSG00000100489 | 9.196874066 | 4.173703463 | 4.236906287 | 4.832746033 | 5.729556691 |
| ENSMUSG00000100490 | 4.952162959 | 8.347406925 | 9.886114669 | 7.249119049 | 2.864778345 |
| ENSMUSG00000100491 | 5.65961481  | 4.869320706 | 4.236906287 | 4.02728836  | 2.148583759 |
| ENSMUSG00000100492 | 4.952162959 | 9.738641413 | 6.35535943  | 3.221830688 | 7.161945863 |
| ENSMUSG00000100493 | 11.31922962 | 10.43425866 | 9.886114669 | 12.08186508 | 9.310529622 |
| ENSMUSG00000100494 | 4.244711108 | 10.43425866 | 8.473812573 | 4.02728836  | 3.580972932 |
| ENSMUSG00000100495 | 3.537259256 | 6.956172438 | 7.767661525 | 1.610915344 | 3.580972932 |
| ENSMUSG00000100496 | 7.781970364 | 5.56493795  | 12.00456781 | 5.638203705 | 6.445751277 |
| ENSMUSG00000100497 | 9.904325918 | 7.651789682 | 4.236906287 | 4.02728836  | 7.87814045  |
| ENSMUSG00000100498 | 0           | 0.695617244 | 0           | 0           | 0           |
| ENSMUSG00000100499 | 5.65961481  | 5.56493795  | 3.530755239 | 3.221830688 | 3.580972932 |
| ENSMUSG00000100500 | 6.367066661 | 4.869320706 | 7.767661525 | 1.610915344 | 5.729556691 |
| ENSMUSG00000100501 | 6.367066661 | 5.56493795  | 12.71071886 | 3.221830688 | 5.013362104 |
| ENSMUSG00000100502 | 11.31922962 | 7.651789682 | 9.179963621 | 4.02728836  | 4.297167518 |
| ENSMUSG00000100503 | 2.122355554 | 0.695617244 | 0.706151048 | 2.416373016 | 0           |
| ENSMUSG00000100504 | 0           | 0           | 0           | 0           | 0           |
| ENSMUSG00000100506 | 7.781970364 | 4.869320706 | 7.767661525 | 6.443661377 | 5.013362104 |
| ENSMUSG00000100507 | 5.65961481  | 5.56493795  | 3.530755239 | 3.221830688 | 5.013362104 |
| ENSMUSG00000100508 | 6.367066661 | 5.56493795  | 4.236906287 | 0.805457672 | 1.432389173 |
| ENSMUSG00000100509 | 9.196874066 | 7.651789682 | 3.530755239 | 4.02728836  | 3.580972932 |
| ENSMUSG00000100510 | 7.781970364 | 9.043024169 | 5.649208382 | 4.02728836  | 3.580972932 |
| ENSMUSG00000100511 | 4.952162959 | 4.869320706 | 2.118453143 | 3.221830688 | 2.864778345 |
| ENSMUSG00000100513 | 8.489422215 | 8.347406925 | 5.649208382 | 4.02728836  | 12.17530797 |
| ENSMUSG00000100514 | 0           | 0           | 0           | 0           | 0           |
| ENSMUSG00000100515 | 4.244711108 | 6.956172438 | 7.767661525 | 6.443661377 | 4.297167518 |
| ENSMUSG00000100516 | 11.31922962 | 9.738641413 | 7.061510478 | 5.638203705 | 4.297167518 |
| ENSMUSG00000100517 | 9.196874066 | 6.956172438 | 7.767661525 | 7.249119049 | 3.580972932 |
| ENSMUSG00000100518 | 11.31922962 | 8.347406925 | 9.179963621 | 4.02728836  | 3.580972932 |
| ENSMUSG00000100519 | 7.781970364 | 6.956172438 | 9.179963621 | 9.665492065 | 2.864778345 |
| ENSMUSG00000100520 | 4.952162959 | 5.56493795  | 3.530755239 | 4.02728836  | 1.432389173 |
| ENSMUSG00000100521 | 5.65961481  | 1.391234488 | 4.943057334 | 4.02728836  | 5.013362104 |
| ENSMUSG00000100522 | 14.85648888 | 25.73783802 | 26.12758877 | 28.19101852 | 37.24211849 |

|                    |             |             |             |             |             |
|--------------------|-------------|-------------|-------------|-------------|-------------|
| ENSMUSG00000100523 | 7.074518513 | 4.869320706 | 12.00456781 | 4.832746033 | 7.161945863 |
| ENSMUSG00000100524 | 8.489422215 | 6.956172438 | 9.179963621 | 10.47094974 | 5.729556691 |
| ENSMUSG00000100525 | 8.489422215 | 5.56493795  | 5.649208382 | 3.221830688 | 5.729556691 |
| ENSMUSG00000100526 | 6.367066661 | 6.260555194 | 6.35535943  | 1.610915344 | 6.445751277 |
| ENSMUSG00000100527 | 9.904325918 | 9.738641413 | 11.29841676 | 4.02728836  | 8.594335036 |
| ENSMUSG00000100528 | 9.904325918 | 9.738641413 | 9.179963621 | 4.02728836  | 5.729556691 |
| ENSMUSG00000100529 | 14.14903703 | 11.82549314 | 13.41686991 | 13.69278043 | 12.89150255 |
| ENSMUSG00000100530 | 10.61177777 | 5.56493795  | 5.649208382 | 6.443661377 | 6.445751277 |
| ENSMUSG00000100531 | 7.781970364 | 4.869320706 | 5.649208382 | 4.02728836  | 3.580972932 |
| ENSMUSG00000100532 | 4.952162959 | 5.56493795  | 7.061510478 | 0.805457672 | 3.580972932 |
| ENSMUSG00000100533 | 5.65961481  | 6.260555194 | 4.236906287 | 0.805457672 | 5.013362104 |
| ENSMUSG00000100534 | 7.781970364 | 9.738641413 | 7.767661525 | 4.02728836  | 10.7429188  |
| ENSMUSG00000100536 | 12.73413332 | 6.956172438 | 9.179963621 | 1.610915344 | 4.297167518 |
| ENSMUSG00000100537 | 7.781970364 | 6.260555194 | 7.767661525 | 1.610915344 | 2.864778345 |
| ENSMUSG00000100538 | 11.31922962 | 8.347406925 | 8.473812573 | 6.443661377 | 10.02672421 |
| ENSMUSG00000100539 | 9.196874066 | 4.869320706 | 4.236906287 | 5.638203705 | 5.729556691 |
| ENSMUSG00000100540 | 5.65961481  | 6.260555194 | 9.886114669 | 0           | 3.580972932 |
| ENSMUSG00000100541 | 7.074518513 | 3.478086219 | 6.35535943  | 0           | 5.729556691 |
| ENSMUSG00000100542 | 6.367066661 | 4.869320706 | 9.179963621 | 2.416373016 | 4.297167518 |
| ENSMUSG00000100543 | 10.61177777 | 8.347406925 | 7.061510478 | 8.054576721 | 6.445751277 |
| ENSMUSG00000100544 | 6.367066661 | 4.869320706 | 4.943057334 | 4.832746033 | 5.013362104 |
| ENSMUSG00000100545 | 0           | 0           | 0           | 0           | 0           |
| ENSMUSG00000100546 | 9.196874066 | 9.043024169 | 8.473812573 | 3.221830688 | 6.445751277 |
| ENSMUSG00000100547 | 5.65961481  | 4.869320706 | 9.179963621 | 4.832746033 | 2.148583759 |
| ENSMUSG00000100548 | 67.91537772 | 105.0382038 | 81.20737049 | 46.71654498 | 65.17370736 |
| ENSMUSG00000100549 | 7.074518513 | 4.869320706 | 5.649208382 | 4.832746033 | 5.013362104 |
| ENSMUSG00000100550 | 5.65961481  | 9.043024169 | 5.649208382 | 8.054576721 | 5.729556691 |
| ENSMUSG00000100551 | 10.61177777 | 6.260555194 | 12.00456781 | 8.860034393 | 8.594335036 |
| ENSMUSG00000100552 | 11.31922962 | 11.1298759  | 12.00456781 | 10.47094974 | 8.594335036 |
| ENSMUSG00000100553 | 2.829807405 | 4.869320706 | 5.649208382 | 5.638203705 | 4.297167518 |
| ENSMUSG00000100554 | 7.781970364 | 7.651789682 | 7.061510478 | 3.221830688 | 5.729556691 |
| ENSMUSG00000100555 | 7.781970364 | 9.043024169 | 8.473812573 | 9.665492065 | 4.297167518 |
| ENSMUSG00000100556 | 14.14903703 | 4.173703463 | 4.943057334 | 4.832746033 | 7.87814045  |
| ENSMUSG00000100557 | 10.61177777 | 9.043024169 | 7.767661525 | 4.832746033 | 5.729556691 |
| ENSMUSG00000100558 | 5.65961481  | 4.869320706 | 7.061510478 | 8.860034393 | 7.87814045  |
| ENSMUSG00000100559 | 7.074518513 | 6.260555194 | 5.649208382 | 4.02728836  | 5.729556691 |
| ENSMUSG00000100560 | 5.65961481  | 6.260555194 | 7.061510478 | 4.832746033 | 4.297167518 |
| ENSMUSG00000100561 | 14.14903703 | 6.260555194 | 11.29841676 | 4.02728836  | 5.013362104 |
| ENSMUSG00000100562 | 7.074518513 | 7.651789682 | 6.35535943  | 8.054576721 | 7.161945863 |
| ENSMUSG00000100563 | 7.074518513 | 10.43425866 | 7.061510478 | 9.665492065 | 10.7429188  |
| ENSMUSG00000100564 | 2.829807405 | 5.56493795  | 4.943057334 | 4.02728836  | 3.580972932 |
| ENSMUSG00000100565 | 5.65961481  | 2.782468975 | 4.236906287 | 4.02728836  | 4.297167518 |
| ENSMUSG00000100566 | 3.537259256 | 5.56493795  | 4.943057334 | 2.416373016 | 4.297167518 |

|                    |             |             |             |             |             |
|--------------------|-------------|-------------|-------------|-------------|-------------|
| ENSMUSG00000100567 | 4.244711108 | 3.478086219 | 0.706151048 | 1.610915344 | 4.297167518 |
| ENSMUSG00000100568 | 9.196874066 | 6.260555194 | 7.061510478 | 3.221830688 | 5.013362104 |
| ENSMUSG00000100569 | 6.367066661 | 2.782468975 | 8.473812573 | 4.02728836  | 5.013362104 |
| ENSMUSG00000100570 | 3.537259256 | 4.869320706 | 4.236906287 | 5.638203705 | 5.013362104 |
| ENSMUSG00000100571 | 7.074518513 | 4.173703463 | 2.824604191 | 1.610915344 | 3.580972932 |
| ENSMUSG00000100572 | 4.952162959 | 4.869320706 | 7.767661525 | 10.47094974 | 3.580972932 |
| ENSMUSG00000100573 | 10.61177777 | 4.173703463 | 6.35535943  | 6.443661377 | 5.013362104 |
| ENSMUSG00000100574 | 2.829807405 | 8.347406925 | 7.767661525 | 4.02728836  | 2.148583759 |
| ENSMUSG00000100575 | 10.61177777 | 2.086851731 | 7.767661525 | 0.805457672 | 4.297167518 |
| ENSMUSG00000100576 | 3.537259256 | 3.478086219 | 4.236906287 | 1.610915344 | 2.864778345 |
| ENSMUSG00000100577 | 10.61177777 | 6.260555194 | 9.179963621 | 4.832746033 | 4.297167518 |
| ENSMUSG00000100578 | 9.196874066 | 9.043024169 | 7.061510478 | 1.610915344 | 6.445751277 |
| ENSMUSG00000100579 | 3.537259256 | 10.43425866 | 4.236906287 | 3.221830688 | 5.013362104 |
| ENSMUSG00000100580 | 9.904325918 | 6.260555194 | 11.29841676 | 1.610915344 | 5.729556691 |
| ENSMUSG00000100581 | 5.65961481  | 4.173703463 | 2.824604191 | 4.832746033 | 2.148583759 |
| ENSMUSG00000100582 | 7.074518513 | 3.478086219 | 4.236906287 | 3.221830688 | 2.864778345 |
| ENSMUSG00000100583 | 31.12788146 | 65.38802092 | 60.02283906 | 71.68573282 | 73.05184781 |
| ENSMUSG00000100584 | 2.829807405 | 4.869320706 | 4.236906287 | 0.805457672 | 3.580972932 |
| ENSMUSG00000100585 | 9.904325918 | 11.82549314 | 9.886114669 | 9.665492065 | 10.02672421 |
| ENSMUSG00000100587 | 7.074518513 | 2.782468975 | 4.943057334 | 4.832746033 | 2.864778345 |
| ENSMUSG00000100588 | 4.244711108 | 7.651789682 | 2.824604191 | 3.221830688 | 0.716194586 |
| ENSMUSG00000100589 | 8.489422215 | 5.56493795  | 7.061510478 | 4.02728836  | 4.297167518 |
| ENSMUSG00000100590 | 7.781970364 | 6.260555194 | 7.061510478 | 2.416373016 | 2.148583759 |
| ENSMUSG00000100591 | 6.367066661 | 1.391234488 | 8.473812573 | 3.221830688 | 7.161945863 |
| ENSMUSG00000100592 | 10.61177777 | 4.869320706 | 7.061510478 | 4.832746033 | 5.729556691 |
| ENSMUSG00000100593 | 6.367066661 | 4.869320706 | 7.061510478 | 4.832746033 | 9.310529622 |
| ENSMUSG00000100594 | 43.86201478 | 61.21431745 | 50.84287544 | 70.07481747 | 63.74131818 |
| ENSMUSG00000100595 | 8.489422215 | 8.347406925 | 5.649208382 | 11.27640741 | 9.310529622 |
| ENSMUSG00000100596 | 9.904325918 | 8.347406925 | 7.767661525 | 6.443661377 | 5.729556691 |
| ENSMUSG00000100597 | 5.65961481  | 6.260555194 | 5.649208382 | 3.221830688 | 4.297167518 |
| ENSMUSG00000100598 | 6.367066661 | 7.651789682 | 6.35535943  | 8.054576721 | 2.864778345 |
| ENSMUSG00000100599 | 43.15456293 | 61.9099347  | 60.02283906 | 49.93837567 | 59.44415067 |
| ENSMUSG00000100600 | 9.196874066 | 9.738641413 | 9.886114669 | 5.638203705 | 8.594335036 |
| ENSMUSG00000100601 | 7.074518513 | 7.651789682 | 6.35535943  | 3.221830688 | 8.594335036 |
| ENSMUSG00000100602 | 8.489422215 | 13.91234488 | 4.236906287 | 12.08186508 | 10.7429188  |
| ENSMUSG00000100603 | 12.73413332 | 8.347406925 | 4.943057334 | 4.02728836  | 10.02672421 |
| ENSMUSG00000100604 | 8.489422215 | 6.260555194 | 7.767661525 | 1.610915344 | 6.445751277 |
| ENSMUSG00000100605 | 9.904325918 | 2.782468975 | 6.35535943  | 5.638203705 | 2.864778345 |
| ENSMUSG00000100606 | 6.367066661 | 6.260555194 | 5.649208382 | 4.832746033 | 1.432389173 |
| ENSMUSG00000100607 | 7.781970364 | 6.956172438 | 4.236906287 | 3.221830688 | 5.013362104 |
| ENSMUSG00000100609 | 6.367066661 | 3.478086219 | 6.35535943  | 3.221830688 | 3.580972932 |
| ENSMUSG00000100610 | 2.829807405 | 8.347406925 | 10.59226572 | 5.638203705 | 5.013362104 |
| ENSMUSG00000100611 | 6.367066661 | 9.738641413 | 4.236906287 | 2.416373016 | 6.445751277 |

|                    |             |             |             |             |             |
|--------------------|-------------|-------------|-------------|-------------|-------------|
| ENSMUSG00000100612 | 11.31922962 | 6.260555194 | 9.179963621 | 4.832746033 | 5.013362104 |
| ENSMUSG00000100613 | 12.73413332 | 4.869320706 | 9.886114669 | 6.443661377 | 5.013362104 |
| ENSMUSG00000100614 | 5.65961481  | 2.086851731 | 5.649208382 | 5.638203705 | 4.297167518 |
| ENSMUSG00000100615 | 7.781970364 | 6.956172438 | 7.767661525 | 8.054576721 | 8.594335036 |
| ENSMUSG00000100616 | 8.489422215 | 9.043024169 | 7.767661525 | 7.249119049 | 5.013362104 |
| ENSMUSG00000100618 | 3.537259256 | 4.173703463 | 2.824604191 | 7.249119049 | 2.148583759 |
| ENSMUSG00000100619 | 4.244711108 | 2.782468975 | 4.943057334 | 3.221830688 | 5.013362104 |
| ENSMUSG00000100620 | 19.10119998 | 19.47728283 | 23.30298458 | 33.82922223 | 25.78300511 |
| ENSMUSG00000100621 | 4.244711108 | 9.043024169 | 8.473812573 | 4.832746033 | 7.87814045  |
| ENSMUSG00000100622 | 0           | 0           | 0           | 0           | 0           |
| ENSMUSG00000100623 | 7.781970364 | 5.56493795  | 7.061510478 | 6.443661377 | 7.87814045  |
| ENSMUSG00000100624 | 6.367066661 | 6.260555194 | 7.061510478 | 4.832746033 | 6.445751277 |
| ENSMUSG00000100625 | 9.904325918 | 6.956172438 | 11.29841676 | 9.665492065 | 9.310529622 |
| ENSMUSG00000100627 | 4.952162959 | 6.260555194 | 5.649208382 | 4.832746033 | 5.013362104 |
| ENSMUSG00000100628 | 9.196874066 | 5.56493795  | 5.649208382 | 3.221830688 | 4.297167518 |
| ENSMUSG00000100629 | 12.73413332 | 26.43345526 | 32.4829482  | 37.85651059 | 27.21539428 |
| ENSMUSG00000100630 | 10.61177777 | 6.260555194 | 9.179963621 | 5.638203705 | 5.013362104 |
| ENSMUSG00000100631 | 9.196874066 | 7.651789682 | 6.35535943  | 6.443661377 | 7.87814045  |
| ENSMUSG00000100632 | 7.781970364 | 6.260555194 | 4.943057334 | 8.054576721 | 10.02672421 |
| ENSMUSG00000100633 | 0.707451851 | 0           | 0           | 0           | 0.716194586 |
| ENSMUSG00000100635 | 9.196874066 | 6.956172438 | 4.236906287 | 8.054576721 | 7.87814045  |
| ENSMUSG00000100636 | 9.904325918 | 4.869320706 | 4.236906287 | 9.665492065 | 7.161945863 |
| ENSMUSG00000100637 | 5.65961481  | 5.56493795  | 4.943057334 | 8.054576721 | 4.297167518 |
| ENSMUSG00000100638 | 10.61177777 | 5.56493795  | 10.59226572 | 5.638203705 | 6.445751277 |
| ENSMUSG00000100639 | 4.952162959 | 9.043024169 | 5.649208382 | 5.638203705 | 7.161945863 |
| ENSMUSG00000100640 | 6.367066661 | 8.347406925 | 3.530755239 | 0.805457672 | 6.445751277 |
| ENSMUSG00000100641 | 3.537259256 | 2.782468975 | 3.530755239 | 1.610915344 | 3.580972932 |
| ENSMUSG00000100643 | 8.489422215 | 6.956172438 | 7.061510478 | 1.610915344 | 2.864778345 |
| ENSMUSG00000100644 | 1.414903703 | 2.086851731 | 1.412302096 | 1.610915344 | 1.432389173 |
| ENSMUSG00000100646 | 3.537259256 | 4.173703463 | 7.767661525 | 4.02728836  | 2.864778345 |
| ENSMUSG00000100647 | 4.952162959 | 5.56493795  | 5.649208382 | 2.416373016 | 2.864778345 |
| ENSMUSG00000100648 | 6.367066661 | 5.56493795  | 11.29841676 | 7.249119049 | 7.87814045  |
| ENSMUSG00000100649 | 7.781970364 | 5.56493795  | 4.943057334 | 2.416373016 | 3.580972932 |
| ENSMUSG00000100650 | 12.02668147 | 10.43425866 | 7.767661525 | 2.416373016 | 2.864778345 |
| ENSMUSG00000100651 | 4.244711108 | 2.782468975 | 6.35535943  | 5.638203705 | 3.580972932 |
| ENSMUSG00000100652 | 9.904325918 | 6.260555194 | 8.473812573 | 4.832746033 | 8.594335036 |
| ENSMUSG00000100653 | 4.952162959 | 5.56493795  | 6.35535943  | 1.610915344 | 2.148583759 |
| ENSMUSG00000100654 | 0           | 0           | 0           | 0           | 0           |
| ENSMUSG00000100655 | 8.489422215 | 5.56493795  | 6.35535943  | 6.443661377 | 5.013362104 |
| ENSMUSG00000100656 | 0           | 0           | 0.706151048 | 0           | 0.716194586 |
| ENSMUSG00000100657 | 7.781970364 | 4.869320706 | 2.824604191 | 8.054576721 | 4.297167518 |
| ENSMUSG00000100658 | 37.49494812 | 59.12746572 | 62.84744325 | 36.24559524 | 34.37734014 |
| ENSMUSG00000100659 | 4.952162959 | 4.869320706 | 4.943057334 | 3.221830688 | 2.864778345 |



|                    |             |             |             |             |             |
|--------------------|-------------|-------------|-------------|-------------|-------------|
| ENSMUSG00000100660 | 12.73413332 | 6.260555194 | 4.943057334 | 6.443661377 | 8.594335036 |
| ENSMUSG00000100661 | 2.829807405 | 2.782468975 | 6.35535943  | 4.832746033 | 4.297167518 |
| ENSMUSG00000100662 | 8.489422215 | 6.260555194 | 7.061510478 | 4.832746033 | 4.297167518 |
| ENSMUSG00000100663 | 12.73413332 | 7.651789682 | 7.061510478 | 4.832746033 | 7.161945863 |
| ENSMUSG00000100664 | 7.781970364 | 6.956172438 | 8.473812573 | 5.638203705 | 5.729556691 |
| ENSMUSG00000100665 | 4.952162959 | 6.260555194 | 11.29841676 | 2.416373016 | 7.161945863 |
| ENSMUSG00000100666 | 9.904325918 | 3.478086219 | 12.71071886 | 3.221830688 | 7.161945863 |
| ENSMUSG00000100668 | 15.56394073 | 5.56493795  | 2.118453143 | 7.249119049 | 10.7429188  |
| ENSMUSG00000100669 | 6.367066661 | 7.651789682 | 3.530755239 | 4.832746033 | 7.161945863 |
| ENSMUSG00000100670 | 12.73413332 | 5.56493795  | 10.59226572 | 7.249119049 | 5.013362104 |
| ENSMUSG00000100671 | 8.489422215 | 4.869320706 | 7.767661525 | 3.221830688 | 6.445751277 |
| ENSMUSG00000100672 | 7.074518513 | 9.043024169 | 7.767661525 | 3.221830688 | 4.297167518 |
| ENSMUSG00000100673 | 7.074518513 | 3.478086219 | 7.061510478 | 2.416373016 | 1.432389173 |
| ENSMUSG00000100674 | 12.02668147 | 12.52111039 | 9.179963621 | 8.054576721 | 5.013362104 |
| ENSMUSG00000100675 | 9.904325918 | 6.260555194 | 9.179963621 | 5.638203705 | 2.148583759 |
| ENSMUSG00000100676 | 8.489422215 | 6.956172438 | 3.530755239 | 0.805457672 | 2.864778345 |
| ENSMUSG00000100677 | 9.196874066 | 4.869320706 | 7.767661525 | 4.02728836  | 2.148583759 |
| ENSMUSG00000100678 | 4.952162959 | 5.56493795  | 6.35535943  | 3.221830688 | 7.87814045  |
| ENSMUSG00000100680 | 8.489422215 | 7.651789682 | 6.35535943  | 8.860034393 | 13.60769714 |
| ENSMUSG00000100681 | 9.904325918 | 6.956172438 | 10.59226572 | 4.02728836  | 5.729556691 |
| ENSMUSG00000100682 | 3.537259256 | 6.956172438 | 7.767661525 | 1.610915344 | 6.445751277 |
| ENSMUSG00000100683 | 4.244711108 | 4.869320706 | 4.236906287 | 0.805457672 | 4.297167518 |
| ENSMUSG00000100684 | 7.074518513 | 6.956172438 | 8.473812573 | 2.416373016 | 5.729556691 |
| ENSMUSG00000100685 | 6.367066661 | 3.478086219 | 10.59226572 | 2.416373016 | 4.297167518 |
| ENSMUSG00000100686 | 0           | 0.695617244 | 0           | 0           | 0           |
| ENSMUSG00000100687 | 7.781970364 | 5.56493795  | 4.943057334 | 5.638203705 | 7.161945863 |
| ENSMUSG00000100688 | 9.196874066 | 5.56493795  | 7.767661525 | 4.832746033 | 9.310529622 |
| ENSMUSG00000100689 | 8.489422215 | 6.260555194 | 7.767661525 | 8.054576721 | 6.445751277 |
| ENSMUSG00000100690 | 8.489422215 | 6.260555194 | 9.886114669 | 7.249119049 | 5.729556691 |
| ENSMUSG00000100691 | 14.14903703 | 28.52030699 | 28.24604191 | 40.2728836  | 23.63442135 |
| ENSMUSG00000100692 | 3.537259256 | 4.173703463 | 8.473812573 | 2.416373016 | 3.580972932 |
| ENSMUSG00000100693 | 7.074518513 | 4.173703463 | 3.530755239 | 7.249119049 | 4.297167518 |
| ENSMUSG00000100694 | 7.781970364 | 4.869320706 | 4.943057334 | 3.221830688 | 4.297167518 |
| ENSMUSG00000100695 | 8.489422215 | 4.869320706 | 4.236906287 | 2.416373016 | 4.297167518 |
| ENSMUSG00000100696 | 0.707451851 | 0           | 2.118453143 | 0.805457672 | 0           |
| ENSMUSG00000100697 | 11.31922962 | 5.56493795  | 4.943057334 | 4.832746033 | 6.445751277 |
| ENSMUSG00000100698 | 9.904325918 | 10.43425866 | 7.061510478 | 3.221830688 | 4.297167518 |
| ENSMUSG00000100699 | 7.074518513 | 3.478086219 | 4.943057334 | 3.221830688 | 4.297167518 |
| ENSMUSG00000100700 | 3.537259256 | 3.478086219 | 4.236906287 | 2.416373016 | 5.729556691 |
| ENSMUSG00000100701 | 7.781970364 | 9.043024169 | 12.00456781 | 7.249119049 | 12.17530797 |
| ENSMUSG00000100702 | 13.44158517 | 7.651789682 | 3.530755239 | 8.054576721 | 8.594335036 |
| ENSMUSG00000100703 | 5.65961481  | 5.56493795  | 10.59226572 | 8.054576721 | 7.87814045  |
| ENSMUSG00000100705 | 9.904325918 | 4.173703463 | 5.649208382 | 4.832746033 | 5.729556691 |

|                    |             |             |             |             |             |
|--------------------|-------------|-------------|-------------|-------------|-------------|
| ENSMUSG00000100706 | 8.489422215 | 0.695617244 | 7.767661525 | 3.221830688 | 4.297167518 |
| ENSMUSG00000100707 | 1.414903703 | 0.695617244 | 0           | 0.805457672 | 1.432389173 |
| ENSMUSG00000100709 | 7.074518513 | 2.782468975 | 4.943057334 | 3.221830688 | 4.297167518 |
| ENSMUSG00000100710 | 4.952162959 | 5.56493795  | 2.824604191 | 3.221830688 | 7.161945863 |
| ENSMUSG00000100711 | 9.196874066 | 10.43425866 | 7.767661525 | 3.221830688 | 4.297167518 |
| ENSMUSG00000100712 | 5.65961481  | 4.869320706 | 3.530755239 | 3.221830688 | 3.580972932 |
| ENSMUSG00000100713 | 9.196874066 | 10.43425866 | 6.35535943  | 3.221830688 | 8.594335036 |
| ENSMUSG00000100714 | 5.65961481  | 6.956172438 | 5.649208382 | 6.443661377 | 5.729556691 |
| ENSMUSG00000100715 | 7.781970364 | 4.173703463 | 6.35535943  | 1.610915344 | 5.729556691 |
| ENSMUSG00000100716 | 10.61177777 | 3.478086219 | 4.236906287 | 3.221830688 | 5.013362104 |
| ENSMUSG00000100717 | 15.56394073 | 4.869320706 | 4.943057334 | 4.02728836  | 5.013362104 |
| ENSMUSG00000100718 | 5.65961481  | 3.478086219 | 4.943057334 | 0.805457672 | 5.013362104 |
| ENSMUSG00000100719 | 2.829807405 | 4.173703463 | 8.473812573 | 1.610915344 | 5.013362104 |
| ENSMUSG00000100720 | 0           | 0           | 0           | 0           | 0           |
| ENSMUSG00000100721 | 12.73413332 | 12.52111039 | 10.59226572 | 8.054576721 | 17.90486466 |
| ENSMUSG00000100722 | 4.952162959 | 3.478086219 | 7.061510478 | 1.610915344 | 6.445751277 |
| ENSMUSG00000100723 | 5.65961481  | 5.56493795  | 6.35535943  | 4.02728836  | 5.729556691 |
| ENSMUSG00000100724 | 1.414903703 | 9.043024169 | 2.824604191 | 2.416373016 | 7.161945863 |
| ENSMUSG00000100727 | 8.489422215 | 7.651789682 | 7.767661525 | 4.832746033 | 3.580972932 |
| ENSMUSG00000100728 | 8.489422215 | 2.086851731 | 7.767661525 | 6.443661377 | 9.310529622 |
| ENSMUSG00000100729 | 9.904325918 | 7.651789682 | 4.943057334 | 4.02728836  | 7.87814045  |
| ENSMUSG00000100730 | 3.537259256 | 4.173703463 | 4.943057334 | 1.610915344 | 2.148583759 |
| ENSMUSG00000100731 | 3.537259256 | 2.782468975 | 2.118453143 | 4.02728836  | 4.297167518 |
| ENSMUSG00000100732 | 7.074518513 | 4.869320706 | 11.29841676 | 4.02728836  | 10.02672421 |
| ENSMUSG00000100733 | 11.31922962 | 4.173703463 | 9.179963621 | 6.443661377 | 6.445751277 |
| ENSMUSG00000100734 | 8.489422215 | 5.56493795  | 10.59226572 | 6.443661377 | 7.87814045  |
| ENSMUSG00000100735 | 6.367066661 | 4.869320706 | 2.824604191 | 2.416373016 | 5.729556691 |
| ENSMUSG00000100736 | 6.367066661 | 9.738641413 | 16.2414741  | 10.47094974 | 11.45911338 |
| ENSMUSG00000100737 | 2.829807405 | 6.260555194 | 7.061510478 | 0.805457672 | 2.864778345 |
| ENSMUSG00000100738 | 73.57499253 | 91.12585893 | 92.50578726 | 42.68925662 | 55.86317773 |
| ENSMUSG00000100739 | 7.781970364 | 6.956172438 | 9.179963621 | 3.221830688 | 3.580972932 |
| ENSMUSG00000100740 | 5.65961481  | 5.56493795  | 6.35535943  | 4.832746033 | 10.7429188  |
| ENSMUSG00000100741 | 5.65961481  | 4.173703463 | 4.236906287 | 3.221830688 | 3.580972932 |
| ENSMUSG00000100742 | 2.829807405 | 4.173703463 | 3.530755239 | 4.02728836  | 2.148583759 |
| ENSMUSG00000100743 | 9.904325918 | 9.043024169 | 4.943057334 | 6.443661377 | 7.87814045  |
| ENSMUSG00000100744 | 8.489422215 | 4.869320706 | 10.59226572 | 5.638203705 | 8.594335036 |
| ENSMUSG00000100745 | 6.367066661 | 4.173703463 | 4.943057334 | 4.02728836  | 5.729556691 |
| ENSMUSG00000100746 | 4.244711108 | 3.478086219 | 5.649208382 | 4.02728836  | 4.297167518 |
| ENSMUSG00000100747 | 0           | 0           | 0           | 0           | 0           |
| ENSMUSG00000100748 | 12.02668147 | 6.260555194 | 10.59226572 | 4.02728836  | 10.7429188  |
| ENSMUSG00000100749 | 5.65961481  | 6.260555194 | 4.943057334 | 1.610915344 | 3.580972932 |
| ENSMUSG00000100750 | 12.73413332 | 7.651789682 | 16.94762515 | 7.249119049 | 14.32389173 |
| ENSMUSG00000100751 | 7.074518513 | 5.56493795  | 8.473812573 | 3.221830688 | 2.864778345 |

|                    |             |             |             |             |             |
|--------------------|-------------|-------------|-------------|-------------|-------------|
| ENSMUSG00000100752 | 7.074518513 | 4.869320706 | 2.118453143 | 0.805457672 | 3.580972932 |
| ENSMUSG00000100753 | 2.829807405 | 1.391234488 | 3.530755239 | 1.610915344 | 1.432389173 |
| ENSMUSG00000100754 | 11.31922962 | 7.651789682 | 8.473812573 | 12.88732275 | 8.594335036 |
| ENSMUSG00000100755 | 0           | 0           | 0           | 0           | 0           |
| ENSMUSG00000100756 | 7.781970364 | 4.869320706 | 9.886114669 | 4.832746033 | 7.161945863 |
| ENSMUSG00000100757 | 7.781970364 | 4.869320706 | 4.943057334 | 2.416373016 | 5.013362104 |
| ENSMUSG00000100758 | 5.65961481  | 7.651789682 | 13.41686991 | 2.416373016 | 5.729556691 |
| ENSMUSG00000100759 | 5.65961481  | 3.478086219 | 8.473812573 | 8.860034393 | 5.729556691 |
| ENSMUSG00000100760 | 14.14903703 | 13.21672763 | 7.767661525 | 10.47094974 | 10.02672421 |
| ENSMUSG00000100761 | 4.952162959 | 4.173703463 | 9.886114669 | 5.638203705 | 5.729556691 |
| ENSMUSG00000100762 | 13.44158517 | 8.347406925 | 5.649208382 | 4.02728836  | 8.594335036 |
| ENSMUSG00000100763 | 8.489422215 | 4.869320706 | 9.179963621 | 4.832746033 | 4.297167518 |
| ENSMUSG00000100764 | 9.196874066 | 4.173703463 | 4.943057334 | 4.02728836  | 5.013362104 |
| ENSMUSG00000100765 | 7.074518513 | 6.956172438 | 2.824604191 | 4.02728836  | 3.580972932 |
| ENSMUSG00000100766 | 6.367066661 | 6.260555194 | 10.59226572 | 6.443661377 | 5.729556691 |
| ENSMUSG00000100767 | 7.781970364 | 3.478086219 | 4.943057334 | 5.638203705 | 2.148583759 |
| ENSMUSG00000100768 | 8.489422215 | 9.738641413 | 6.35535943  | 7.249119049 | 13.60769714 |
| ENSMUSG00000100769 | 7.781970364 | 4.173703463 | 7.767661525 | 7.249119049 | 9.310529622 |
| ENSMUSG00000100770 | 39.61730367 | 75.82227957 | 67.08434954 | 49.93837567 | 39.39070225 |
| ENSMUSG00000100771 | 2.829807405 | 4.173703463 | 2.824604191 | 2.416373016 | 2.148583759 |
| ENSMUSG00000100772 | 4.952162959 | 9.043024169 | 2.824604191 | 1.610915344 | 7.87814045  |
| ENSMUSG00000100773 | 7.781970364 | 8.347406925 | 6.35535943  | 5.638203705 | 2.864778345 |
| ENSMUSG00000100774 | 8.489422215 | 11.82549314 | 7.767661525 | 7.249119049 | 5.013362104 |
| ENSMUSG00000100775 | 2.829807405 | 2.086851731 | 2.118453143 | 3.221830688 | 1.432389173 |
| ENSMUSG00000100776 | 7.074518513 | 6.260555194 | 12.71071886 | 4.832746033 | 8.594335036 |
| ENSMUSG00000100777 | 7.781970364 | 11.1298759  | 9.179963621 | 4.832746033 | 6.445751277 |
| ENSMUSG00000100778 | 6.367066661 | 5.56493795  | 4.236906287 | 2.416373016 | 0.716194586 |
| ENSMUSG00000100779 | 9.196874066 | 6.260555194 | 9.179963621 | 8.860034393 | 7.87814045  |
| ENSMUSG00000100780 | 6.367066661 | 8.347406925 | 4.236906287 | 4.02728836  | 2.864778345 |
| ENSMUSG00000100781 | 9.196874066 | 6.260555194 | 6.35535943  | 4.832746033 | 12.17530797 |
| ENSMUSG00000100782 | 8.489422215 | 4.869320706 | 5.649208382 | 4.02728836  | 7.87814045  |
| ENSMUSG00000100783 | 5.65961481  | 8.347406925 | 7.061510478 | 5.638203705 | 5.013362104 |
| ENSMUSG00000100784 | 8.489422215 | 3.478086219 | 9.179963621 | 2.416373016 | 12.17530797 |
| ENSMUSG00000100785 | 4.952162959 | 4.173703463 | 3.530755239 | 4.832746033 | 5.729556691 |
| ENSMUSG00000100786 | 13.44158517 | 15.99919661 | 12.00456781 | 16.10915344 | 11.45911338 |
| ENSMUSG00000100787 | 7.781970364 | 5.56493795  | 4.943057334 | 4.832746033 | 1.432389173 |
| ENSMUSG00000100788 | 9.196874066 | 9.738641413 | 12.00456781 | 8.054576721 | 10.02672421 |
| ENSMUSG00000100789 | 8.489422215 | 6.260555194 | 4.943057334 | 5.638203705 | 7.161945863 |
| ENSMUSG00000100790 | 4.952162959 | 4.173703463 | 11.29841676 | 5.638203705 | 5.729556691 |
| ENSMUSG00000100791 | 12.02668147 | 4.173703463 | 7.767661525 | 4.02728836  | 7.87814045  |
| ENSMUSG00000100792 | 3.537259256 | 6.260555194 | 3.530755239 | 1.610915344 | 5.729556691 |
| ENSMUSG00000100793 | 7.074518513 | 5.56493795  | 7.061510478 | 5.638203705 | 5.729556691 |
| ENSMUSG00000100794 | 10.61177777 | 6.956172438 | 6.35535943  | 8.054576721 | 11.45911338 |

|                    |             |             |             |             |             |
|--------------------|-------------|-------------|-------------|-------------|-------------|
| ENSMUSG00000100795 | 8.489422215 | 5.56493795  | 6.35535943  | 4.832746033 | 10.02672421 |
| ENSMUSG00000100796 | 7.074518513 | 5.56493795  | 6.35535943  | 8.054576721 | 6.445751277 |
| ENSMUSG00000100797 | 4.244711108 | 2.782468975 | 2.118453143 | 1.610915344 | 2.864778345 |
| ENSMUSG00000100798 | 4.952162959 | 4.173703463 | 8.473812573 | 8.054576721 | 8.594335036 |
| ENSMUSG00000100799 | 8.489422215 | 7.651789682 | 12.00456781 | 8.860034393 | 5.013362104 |
| ENSMUSG00000100800 | 2.829807405 | 6.260555194 | 1.412302096 | 0           | 2.148583759 |
| ENSMUSG00000100801 | 0           | 0           | 0           | 0.805457672 | 0           |
| ENSMUSG00000100802 | 7.781970364 | 4.173703463 | 7.767661525 | 4.02728836  | 3.580972932 |
| ENSMUSG00000100803 | 5.65961481  | 3.478086219 | 7.061510478 | 4.02728836  | 3.580972932 |
| ENSMUSG00000100804 | 4.244711108 | 6.260555194 | 2.824604191 | 0.805457672 | 3.580972932 |
| ENSMUSG00000100805 | 8.489422215 | 6.260555194 | 8.473812573 | 6.443661377 | 5.729556691 |
| ENSMUSG00000100806 | 5.65961481  | 4.173703463 | 4.943057334 | 2.416373016 | 2.864778345 |
| ENSMUSG00000100807 | 12.02668147 | 6.260555194 | 5.649208382 | 8.860034393 | 5.729556691 |
| ENSMUSG00000100808 | 9.904325918 | 9.043024169 | 7.767661525 | 4.832746033 | 4.297167518 |
| ENSMUSG00000100809 | 2.829807405 | 7.651789682 | 6.35535943  | 1.610915344 | 8.594335036 |
| ENSMUSG00000100810 | 9.904325918 | 6.956172438 | 8.473812573 | 8.054576721 | 4.297167518 |
| ENSMUSG00000100811 | 11.31922962 | 12.52111039 | 12.00456781 | 33.82922223 | 25.78300511 |
| ENSMUSG00000100812 | 9.196874066 | 7.651789682 | 2.824604191 | 7.249119049 | 7.161945863 |
| ENSMUSG00000100813 | 9.196874066 | 21.56413456 | 16.94762515 | 17.72006879 | 15.04008631 |
| ENSMUSG00000100814 | 4.952162959 | 5.56493795  | 4.236906287 | 3.221830688 | 4.297167518 |
| ENSMUSG00000100815 | 11.31922962 | 6.956172438 | 4.236906287 | 6.443661377 | 4.297167518 |
| ENSMUSG00000100816 | 7.781970364 | 4.173703463 | 7.767661525 | 4.832746033 | 6.445751277 |
| ENSMUSG00000100817 | 1.414903703 | 5.56493795  | 3.530755239 | 1.610915344 | 2.864778345 |
| ENSMUSG00000100818 | 5.65961481  | 1.391234488 | 2.824604191 | 4.832746033 | 3.580972932 |
| ENSMUSG00000100819 | 9.904325918 | 4.869320706 | 8.473812573 | 5.638203705 | 5.013362104 |
| ENSMUSG00000100820 | 6.367066661 | 4.869320706 | 2.118453143 | 2.416373016 | 4.297167518 |
| ENSMUSG00000100821 | 5.65961481  | 2.086851731 | 4.236906287 | 2.416373016 | 0.716194586 |
| ENSMUSG00000100822 | 4.952162959 | 6.260555194 | 7.767661525 | 3.221830688 | 4.297167518 |
| ENSMUSG00000100823 | 4.952162959 | 2.086851731 | 4.943057334 | 1.610915344 | 5.013362104 |
| ENSMUSG00000100824 | 12.02668147 | 12.52111039 | 15.53532305 | 10.47094974 | 7.161945863 |
| ENSMUSG00000100825 | 9.196874066 | 6.956172438 | 9.886114669 | 5.638203705 | 6.445751277 |
| ENSMUSG00000100826 | 5.65961481  | 5.56493795  | 4.236906287 | 0.805457672 | 1.432389173 |
| ENSMUSG00000100827 | 8.489422215 | 9.738641413 | 9.179963621 | 3.221830688 | 7.87814045  |
| ENSMUSG00000100828 | 7.781970364 | 1.391234488 | 3.530755239 | 9.665492065 | 5.729556691 |
| ENSMUSG00000100829 | 3.537259256 | 3.478086219 | 7.767661525 | 3.221830688 | 5.729556691 |
| ENSMUSG00000100830 | 8.489422215 | 9.738641413 | 6.35535943  | 10.47094974 | 8.594335036 |
| ENSMUSG00000100831 | 11.31922962 | 4.173703463 | 6.35535943  | 7.249119049 | 5.729556691 |
| ENSMUSG00000100832 | 7.074518513 | 3.478086219 | 4.943057334 | 5.638203705 | 5.013362104 |
| ENSMUSG00000100833 | 7.781970364 | 11.82549314 | 10.59226572 | 8.860034393 | 13.60769714 |
| ENSMUSG00000100834 | 7.074518513 | 7.651789682 | 4.943057334 | 4.02728836  | 4.297167518 |
| ENSMUSG00000100835 | 7.781970364 | 6.260555194 | 8.473812573 | 2.416373016 | 6.445751277 |
| ENSMUSG00000100836 | 4.952162959 | 6.956172438 | 8.473812573 | 3.221830688 | 5.729556691 |
| ENSMUSG00000100837 | 5.65961481  | 6.956172438 | 9.179963621 | 8.054576721 | 4.297167518 |

|                    |             |             |             |             |             |
|--------------------|-------------|-------------|-------------|-------------|-------------|
| ENSMUSG00000100838 | 2.122355554 | 2.086851731 | 3.530755239 | 12.08186508 | 9.310529622 |
| ENSMUSG00000100839 | 11.31922962 | 7.651789682 | 7.767661525 | 5.638203705 | 2.864778345 |
| ENSMUSG00000100840 | 7.074518513 | 4.869320706 | 7.061510478 | 4.832746033 | 9.310529622 |
| ENSMUSG00000100841 | 14.14903703 | 2.782468975 | 8.473812573 | 6.443661377 | 7.87814045  |
| ENSMUSG00000100842 | 6.367066661 | 8.347406925 | 5.649208382 | 1.610915344 | 4.297167518 |
| ENSMUSG00000100843 | 8.489422215 | 4.173703463 | 13.41686991 | 9.665492065 | 2.864778345 |
| ENSMUSG00000100844 | 9.904325918 | 9.738641413 | 9.179963621 | 4.02728836  | 7.87814045  |
| ENSMUSG00000100845 | 8.489422215 | 6.260555194 | 5.649208382 | 0.805457672 | 5.013362104 |
| ENSMUSG00000100846 | 8.489422215 | 4.869320706 | 8.473812573 | 7.249119049 | 5.013362104 |
| ENSMUSG00000100847 | 9.196874066 | 6.956172438 | 6.35535943  | 5.638203705 | 8.594335036 |
| ENSMUSG00000100848 | 6.367066661 | 5.56493795  | 4.943057334 | 1.610915344 | 3.580972932 |
| ENSMUSG00000100849 | 5.65961481  | 6.956172438 | 5.649208382 | 6.443661377 | 2.148583759 |
| ENSMUSG00000100850 | 9.196874066 | 7.651789682 | 1.412302096 | 6.443661377 | 4.297167518 |
| ENSMUSG00000100851 | 12.02668147 | 4.173703463 | 8.473812573 | 1.610915344 | 4.297167518 |
| ENSMUSG00000100852 | 11.31922962 | 6.260555194 | 7.061510478 | 5.638203705 | 5.013362104 |
| ENSMUSG00000100853 | 4.244711108 | 6.260555194 | 7.061510478 | 4.02728836  | 7.161945863 |
| ENSMUSG00000100854 | 7.781970364 | 1.391234488 | 3.530755239 | 4.832746033 | 2.148583759 |
| ENSMUSG00000100855 | 7.781970364 | 11.1298759  | 7.061510478 | 8.054576721 | 10.02672421 |
| ENSMUSG00000100857 | 10.61177777 | 11.1298759  | 7.767661525 | 4.832746033 | 3.580972932 |
| ENSMUSG00000100858 | 5.65961481  | 7.651789682 | 2.118453143 | 4.832746033 | 2.864778345 |
| ENSMUSG00000100859 | 4.952162959 | 1.391234488 | 3.530755239 | 4.832746033 | 4.297167518 |
| ENSMUSG00000100860 | 7.074518513 | 8.347406925 | 7.767661525 | 11.27640741 | 12.89150255 |
| ENSMUSG00000100861 | 7.074518513 | 5.56493795  | 8.473812573 | 2.416373016 | 6.445751277 |
| ENSMUSG00000100862 | 0           | 0           | 0           | 0           | 0           |
| ENSMUSG00000100863 | 0           | 0           | 0           | 0           | 0           |
| ENSMUSG00000100864 | 9.904325918 | 9.043024169 | 4.236906287 | 6.443661377 | 3.580972932 |
| ENSMUSG00000100865 | 7.074518513 | 4.173703463 | 7.061510478 | 8.860034393 | 4.297167518 |
| ENSMUSG00000100866 | 10.61177777 | 9.738641413 | 8.473812573 | 5.638203705 | 9.310529622 |
| ENSMUSG00000100867 | 9.904325918 | 4.869320706 | 9.179963621 | 11.27640741 | 5.729556691 |
| ENSMUSG00000100868 | 4.952162959 | 4.869320706 | 8.473812573 | 4.832746033 | 4.297167518 |
| ENSMUSG00000100869 | 3.537259256 | 4.869320706 | 5.649208382 | 5.638203705 | 5.013362104 |
| ENSMUSG00000100870 | 7.781970364 | 11.82549314 | 5.649208382 | 1.610915344 | 3.580972932 |
| ENSMUSG00000100871 | 7.074518513 | 4.869320706 | 2.118453143 | 2.416373016 | 5.729556691 |
| ENSMUSG00000100872 | 7.781970364 | 12.52111039 | 12.71071886 | 6.443661377 | 10.02672421 |
| ENSMUSG00000100873 | 3.537259256 | 4.869320706 | 6.35535943  | 2.416373016 | 2.864778345 |
| ENSMUSG00000100874 | 7.781970364 | 4.869320706 | 4.943057334 | 4.02728836  | 2.864778345 |
| ENSMUSG00000100875 | 6.367066661 | 9.043024169 | 7.767661525 | 2.416373016 | 3.580972932 |
| ENSMUSG00000100876 | 14.85648888 | 18.08604834 | 15.53532305 | 12.08186508 | 18.62105924 |
| ENSMUSG00000100877 | 3.537259256 | 6.260555194 | 2.824604191 | 2.416373016 | 4.297167518 |
| ENSMUSG00000100878 | 5.65961481  | 5.56493795  | 4.236906287 | 2.416373016 | 4.297167518 |
| ENSMUSG00000100879 | 4.952162959 | 6.260555194 | 6.35535943  | 4.832746033 | 3.580972932 |
| ENSMUSG00000100880 | 36.78749627 | 41.73703463 | 43.07521391 | 62.02024075 | 52.99839939 |
| ENSMUSG00000100881 | 2.829807405 | 2.086851731 | 7.061510478 | 1.610915344 | 2.864778345 |

|                    |             |             |             |             |             |
|--------------------|-------------|-------------|-------------|-------------|-------------|
| ENSMUSG00000100882 | 8.489422215 | 6.260555194 | 6.35535943  | 4.02728836  | 7.161945863 |
| ENSMUSG00000100883 | 6.367066661 | 2.086851731 | 6.35535943  | 2.416373016 | 5.729556691 |
| ENSMUSG00000100884 | 12.73413332 | 9.738641413 | 9.886114669 | 8.860034393 | 5.013362104 |
| ENSMUSG00000100885 | 6.367066661 | 6.956172438 | 5.649208382 | 3.221830688 | 4.297167518 |
| ENSMUSG00000100886 | 9.904325918 | 10.43425866 | 9.179963621 | 4.832746033 | 5.729556691 |
| ENSMUSG00000100887 | 1.414903703 | 6.260555194 | 1.412302096 | 3.221830688 | 3.580972932 |
| ENSMUSG00000100888 | 5.65961481  | 4.173703463 | 3.530755239 | 0.805457672 | 3.580972932 |
| ENSMUSG00000100889 | 6.367066661 | 3.478086219 | 4.236906287 | 4.02728836  | 5.013362104 |
| ENSMUSG00000100890 | 10.61177777 | 5.56493795  | 8.473812573 | 8.054576721 | 6.445751277 |
| ENSMUSG00000100891 | 14.14903703 | 9.738641413 | 8.473812573 | 6.443661377 | 2.864778345 |
| ENSMUSG00000100893 | 8.489422215 | 4.869320706 | 7.061510478 | 11.27640741 | 10.7429188  |
| ENSMUSG00000100894 | 7.781970364 | 6.260555194 | 5.649208382 | 8.054576721 | 4.297167518 |
| ENSMUSG00000100895 | 6.367066661 | 10.43425866 | 11.29841676 | 8.054576721 | 7.161945863 |
| ENSMUSG00000100896 | 7.781970364 | 8.347406925 | 9.179963621 | 3.221830688 | 1.432389173 |
| ENSMUSG00000100897 | 3.537259256 | 9.738641413 | 7.061510478 | 4.02728836  | 2.864778345 |
| ENSMUSG00000100898 | 9.196874066 | 5.56493795  | 3.530755239 | 3.221830688 | 5.729556691 |
| ENSMUSG00000100899 | 2.829807405 | 6.260555194 | 12.00456781 | 2.416373016 | 4.297167518 |
| ENSMUSG00000100900 | 4.952162959 | 5.56493795  | 9.179963621 | 3.221830688 | 3.580972932 |
| ENSMUSG00000100901 | 15.56394073 | 41.04141738 | 33.89525029 | 12.08186508 | 28.64778345 |
| ENSMUSG00000100903 | 6.367066661 | 9.043024169 | 6.35535943  | 5.638203705 | 7.161945863 |
| ENSMUSG00000100904 | 6.367066661 | 6.260555194 | 12.00456781 | 4.02728836  | 5.013362104 |
| ENSMUSG00000100905 | 7.074518513 | 3.478086219 | 7.061510478 | 3.221830688 | 5.729556691 |
| ENSMUSG00000100906 | 7.781970364 | 4.869320706 | 6.35535943  | 4.832746033 | 2.148583759 |
| ENSMUSG00000100907 | 4.244711108 | 4.173703463 | 7.767661525 | 3.221830688 | 2.864778345 |
| ENSMUSG00000100908 | 4.244711108 | 6.956172438 | 7.061510478 | 8.054576721 | 7.87814045  |
| ENSMUSG00000100909 | 0           | 0           | 0           | 0           | 0           |
| ENSMUSG00000100910 | 11.31922962 | 9.043024169 | 8.473812573 | 4.832746033 | 7.161945863 |
| ENSMUSG00000100911 | 6.367066661 | 4.869320706 | 4.943057334 | 7.249119049 | 5.729556691 |
| ENSMUSG00000100912 | 9.904325918 | 5.56493795  | 6.35535943  | 8.860034393 | 9.310529622 |
| ENSMUSG00000100913 | 9.904325918 | 9.738641413 | 7.061510478 | 4.02728836  | 5.729556691 |
| ENSMUSG00000100914 | 5.65961481  | 4.869320706 | 4.943057334 | 7.249119049 | 5.013362104 |
| ENSMUSG00000100915 | 4.244711108 | 7.651789682 | 4.943057334 | 4.832746033 | 5.013362104 |
| ENSMUSG00000100917 | 7.074518513 | 9.043024169 | 10.59226572 | 7.249119049 | 5.729556691 |
| ENSMUSG00000100918 | 4.952162959 | 11.1298759  | 8.473812573 | 5.638203705 | 5.729556691 |
| ENSMUSG00000100919 | 2.122355554 | 1.391234488 | 2.824604191 | 3.221830688 | 5.729556691 |
| ENSMUSG00000100920 | 11.31922962 | 4.869320706 | 11.29841676 | 8.054576721 | 2.864778345 |
| ENSMUSG00000100922 | 12.73413332 | 6.260555194 | 16.2414741  | 7.249119049 | 10.7429188  |
| ENSMUSG00000100923 | 10.61177777 | 5.56493795  | 6.35535943  | 10.47094974 | 9.310529622 |
| ENSMUSG00000100924 | 13.44158517 | 24.34660353 | 18.35992724 | 19.33098413 | 23.63442135 |
| ENSMUSG00000100925 | 4.952162959 | 4.869320706 | 7.061510478 | 3.221830688 | 3.580972932 |
| ENSMUSG00000100926 | 8.489422215 | 13.21672763 | 7.061510478 | 7.249119049 | 5.013362104 |
| ENSMUSG00000100927 | 45.98437033 | 64.69240367 | 69.90895373 | 64.43661377 | 62.30892901 |
| ENSMUSG00000100928 | 4.952162959 | 4.173703463 | 5.649208382 | 2.416373016 | 3.580972932 |

|                    |             |             |             |             |             |
|--------------------|-------------|-------------|-------------|-------------|-------------|
| ENSMUSG00000100929 | 6.367066661 | 9.043024169 | 9.886114669 | 8.054576721 | 6.445751277 |
| ENSMUSG00000100930 | 5.65961481  | 1.391234488 | 6.35535943  | 2.416373016 | 2.864778345 |
| ENSMUSG00000100931 | 7.074518513 | 9.738641413 | 15.53532305 | 8.054576721 | 7.87814045  |
| ENSMUSG00000100932 | 4.952162959 | 5.56493795  | 2.118453143 | 3.221830688 | 4.297167518 |
| ENSMUSG00000100933 | 7.074518513 | 6.260555194 | 7.061510478 | 2.416373016 | 0           |
| ENSMUSG00000100934 | 10.61177777 | 9.738641413 | 5.649208382 | 6.443661377 | 6.445751277 |
| ENSMUSG00000100935 | 7.781970364 | 5.56493795  | 7.767661525 | 7.249119049 | 6.445751277 |
| ENSMUSG00000100936 | 7.074518513 | 11.82549314 | 4.943057334 | 4.832746033 | 3.580972932 |
| ENSMUSG00000100938 | 9.904325918 | 4.173703463 | 3.530755239 | 3.221830688 | 1.432389173 |
| ENSMUSG00000100940 | 9.196874066 | 7.651789682 | 7.767661525 | 4.832746033 | 10.7429188  |
| ENSMUSG00000100941 | 0           | 0           | 0           | 0           | 0           |
| ENSMUSG00000100942 | 4.244711108 | 4.173703463 | 2.824604191 | 3.221830688 | 2.864778345 |
| ENSMUSG00000100943 | 8.489422215 | 9.738641413 | 12.71071886 | 4.02728836  | 7.87814045  |
| ENSMUSG00000100944 | 7.074518513 | 9.738641413 | 7.767661525 | 7.249119049 | 7.161945863 |
| ENSMUSG00000100945 | 12.02668147 | 11.82549314 | 11.29841676 | 10.47094974 | 7.87814045  |
| ENSMUSG00000100946 | 4.952162959 | 8.347406925 | 2.118453143 | 5.638203705 | 1.432389173 |
| ENSMUSG00000100947 | 6.367066661 | 2.782468975 | 8.473812573 | 4.832746033 | 7.161945863 |
| ENSMUSG00000100948 | 4.952162959 | 6.956172438 | 7.061510478 | 1.610915344 | 7.87814045  |
| ENSMUSG00000100949 | 9.196874066 | 9.043024169 | 5.649208382 | 4.02728836  | 7.87814045  |
| ENSMUSG00000100950 | 9.904325918 | 6.260555194 | 12.00456781 | 6.443661377 | 7.161945863 |
| ENSMUSG00000100951 | 9.904325918 | 7.651789682 | 6.35535943  | 2.416373016 | 4.297167518 |
| ENSMUSG00000100952 | 5.65961481  | 4.869320706 | 7.061510478 | 2.416373016 | 6.445751277 |
| ENSMUSG00000100953 | 5.65961481  | 3.478086219 | 7.061510478 | 4.832746033 | 6.445751277 |
| ENSMUSG00000100954 | 22.63845924 | 18.08604834 | 14.829172   | 44.30017197 | 27.93158887 |
| ENSMUSG00000100955 | 9.196874066 | 7.651789682 | 7.767661525 | 6.443661377 | 5.013362104 |
| ENSMUSG00000100956 | 4.244711108 | 3.478086219 | 5.649208382 | 1.610915344 | 5.729556691 |
| ENSMUSG00000100957 | 7.781970364 | 4.173703463 | 4.943057334 | 3.221830688 | 5.729556691 |
| ENSMUSG00000100958 | 7.074518513 | 3.478086219 | 5.649208382 | 4.832746033 | 3.580972932 |
| ENSMUSG00000100959 | 29.0055259  | 41.04141738 | 38.13215658 | 32.21830688 | 37.95831308 |
| ENSMUSG00000100960 | 10.61177777 | 10.43425866 | 8.473812573 | 5.638203705 | 6.445751277 |
| ENSMUSG00000100961 | 9.196874066 | 1.391234488 | 6.35535943  | 4.02728836  | 2.864778345 |
| ENSMUSG00000100962 | 9.196874066 | 10.43425866 | 6.35535943  | 8.054576721 | 5.013362104 |
| ENSMUSG00000100964 | 9.904325918 | 2.782468975 | 7.061510478 | 5.638203705 | 4.297167518 |
| ENSMUSG00000100965 | 9.196874066 | 8.347406925 | 4.236906287 | 2.416373016 | 10.02672421 |
| ENSMUSG00000100966 | 7.074518513 | 7.651789682 | 7.061510478 | 7.249119049 | 5.013362104 |
| ENSMUSG00000100968 | 7.781970364 | 4.869320706 | 4.236906287 | 4.02728836  | 4.297167518 |
| ENSMUSG00000100969 | 13.44158517 | 4.869320706 | 7.767661525 | 11.27640741 | 10.7429188  |
| ENSMUSG00000100970 | 7.781970364 | 1.391234488 | 8.473812573 | 1.610915344 | 6.445751277 |
| ENSMUSG00000100971 | 3.537259256 | 4.869320706 | 2.118453143 | 3.221830688 | 2.864778345 |
| ENSMUSG00000100973 | 5.65961481  | 4.869320706 | 2.824604191 | 2.416373016 | 6.445751277 |
| ENSMUSG00000100974 | 4.952162959 | 7.651789682 | 6.35535943  | 4.832746033 | 4.297167518 |
| ENSMUSG00000100975 | 9.904325918 | 7.651789682 | 5.649208382 | 6.443661377 | 3.580972932 |
| ENSMUSG00000100976 | 11.31922962 | 6.260555194 | 3.530755239 | 1.610915344 | 7.161945863 |

|                    |             |             |             |             |             |
|--------------------|-------------|-------------|-------------|-------------|-------------|
| ENSMUSG00000100977 | 9.904325918 | 7.651789682 | 9.179963621 | 8.054576721 | 8.594335036 |
| ENSMUSG00000100978 | 9.904325918 | 7.651789682 | 5.649208382 | 4.832746033 | 6.445751277 |
| ENSMUSG00000100979 | 9.196874066 | 2.782468975 | 8.473812573 | 5.638203705 | 5.729556691 |
| ENSMUSG00000100980 | 7.781970364 | 4.173703463 | 6.35535943  | 7.249119049 | 9.310529622 |
| ENSMUSG00000100981 | 5.65961481  | 9.738641413 | 20.47838039 | 8.054576721 | 5.729556691 |
| ENSMUSG00000100982 | 9.904325918 | 5.56493795  | 7.061510478 | 0.805457672 | 5.013362104 |
| ENSMUSG00000100983 | 5.65961481  | 6.956172438 | 9.179963621 | 1.610915344 | 3.580972932 |
| ENSMUSG00000100984 | 5.65961481  | 3.478086219 | 5.649208382 | 3.221830688 | 3.580972932 |
| ENSMUSG00000100985 | 23.34591109 | 25.04222078 | 15.53532305 | 18.52552646 | 15.7562809  |
| ENSMUSG00000100986 | 7.781970364 | 7.651789682 | 6.35535943  | 5.638203705 | 2.864778345 |
| ENSMUSG00000100987 | 6.367066661 | 4.869320706 | 4.943057334 | 10.47094974 | 6.445751277 |
| ENSMUSG00000100988 | 6.367066661 | 4.173703463 | 6.35535943  | 3.221830688 | 2.864778345 |
| ENSMUSG00000100989 | 11.31922962 | 6.956172438 | 4.943057334 | 3.221830688 | 3.580972932 |
| ENSMUSG00000100990 | 10.61177777 | 9.738641413 | 9.886114669 | 6.443661377 | 11.45911338 |
| ENSMUSG00000100991 | 5.65961481  | 3.478086219 | 6.35535943  | 4.02728836  | 3.580972932 |
| ENSMUSG00000100992 | 0           | 0           | 0           | 0           | 0           |
| ENSMUSG00000100993 | 8.489422215 | 5.56493795  | 6.35535943  | 2.416373016 | 2.148583759 |
| ENSMUSG00000100994 | 4.952162959 | 6.260555194 | 6.35535943  | 4.832746033 | 5.013362104 |
| ENSMUSG00000100995 | 4.244711108 | 4.869320706 | 7.061510478 | 3.221830688 | 2.864778345 |
| ENSMUSG00000100996 | 7.781970364 | 9.043024169 | 5.649208382 | 3.221830688 | 3.580972932 |
| ENSMUSG00000100997 | 14.14903703 | 6.260555194 | 5.649208382 | 8.054576721 | 7.87814045  |
| ENSMUSG00000100998 | 4.952162959 | 5.56493795  | 4.943057334 | 8.860034393 | 6.445751277 |
| ENSMUSG00000100999 | 7.074518513 | 7.651789682 | 9.886114669 | 3.221830688 | 5.013362104 |
| ENSMUSG00000101000 | 9.904325918 | 5.56493795  | 9.179963621 | 4.02728836  | 7.161945863 |
| ENSMUSG00000101001 | 7.781970364 | 4.869320706 | 4.943057334 | 3.221830688 | 7.161945863 |
| ENSMUSG00000101002 | 6.367066661 | 4.173703463 | 2.824604191 | 0.805457672 | 5.729556691 |
| ENSMUSG00000101003 | 6.367066661 | 7.651789682 | 7.767661525 | 5.638203705 | 5.013362104 |
| ENSMUSG00000101004 | 9.904325918 | 7.651789682 | 7.767661525 | 7.249119049 | 5.013362104 |
| ENSMUSG00000101005 | 7.074518513 | 2.086851731 | 8.473812573 | 4.02728836  | 4.297167518 |
| ENSMUSG00000101006 | 12.02668147 | 13.21672763 | 4.943057334 | 5.638203705 | 7.161945863 |
| ENSMUSG00000101007 | 1.414903703 | 0           | 3.530755239 | 1.610915344 | 1.432389173 |
| ENSMUSG00000101008 | 4.952162959 | 7.651789682 | 8.473812573 | 7.249119049 | 2.864778345 |
| ENSMUSG00000101009 | 7.781970364 | 8.347406925 | 4.236906287 | 4.02728836  | 4.297167518 |
| ENSMUSG00000101010 | 0           | 0           | 0           | 0           | 0           |
| ENSMUSG00000101011 | 9.904325918 | 9.738641413 | 7.061510478 | 6.443661377 | 5.729556691 |
| ENSMUSG00000101012 | 13.44158517 | 6.260555194 | 8.473812573 | 4.832746033 | 5.013362104 |
| ENSMUSG00000101013 | 194.5492591 | 235.1186284 | 209.7268612 | 332.6540186 | 246.3709377 |
| ENSMUSG00000101014 | 7.781970364 | 8.347406925 | 7.061510478 | 6.443661377 | 6.445751277 |
| ENSMUSG00000101015 | 9.196874066 | 4.869320706 | 7.061510478 | 1.610915344 | 6.445751277 |
| ENSMUSG00000101016 | 4.244711108 | 2.782468975 | 9.179963621 | 2.416373016 | 3.580972932 |
| ENSMUSG00000101017 | 4.952162959 | 6.260555194 | 3.530755239 | 2.416373016 | 7.161945863 |
| ENSMUSG00000101018 | 2.829807405 | 4.869320706 | 5.649208382 | 3.221830688 | 9.310529622 |
| ENSMUSG00000101019 | 9.196874066 | 6.260555194 | 6.35535943  | 0.805457672 | 1.432389173 |



|                    |             |             |             |             |             |
|--------------------|-------------|-------------|-------------|-------------|-------------|
| ENSMUSG00000101020 | 2.122355554 | 3.478086219 | 4.943057334 | 1.610915344 | 2.148583759 |
| ENSMUSG00000101021 | 3.537259256 | 8.347406925 | 10.59226572 | 2.416373016 | 2.864778345 |
| ENSMUSG00000101022 | 7.074518513 | 6.260555194 | 4.236906287 | 3.221830688 | 0.716194586 |
| ENSMUSG00000101023 | 7.781970364 | 7.651789682 | 12.71071886 | 4.832746033 | 7.161945863 |
| ENSMUSG00000101024 | 43.86201478 | 52.17129328 | 54.37363068 | 35.44013757 | 35.80972932 |
| ENSMUSG00000101025 | 6.367066661 | 6.260555194 | 3.530755239 | 7.249119049 | 7.87814045  |
| ENSMUSG00000101027 | 8.489422215 | 7.651789682 | 5.649208382 | 2.416373016 | 5.729556691 |
| ENSMUSG00000101028 | 7.074518513 | 8.347406925 | 8.473812573 | 4.02728836  | 6.445751277 |
| ENSMUSG00000101029 | 77.81970364 | 148.8620902 | 139.1117564 | 161.0915344 | 135.3607768 |
| ENSMUSG00000101030 | 3.537259256 | 3.478086219 | 2.824604191 | 1.610915344 | 2.148583759 |
| ENSMUSG00000101031 | 6.367066661 | 7.651789682 | 8.473812573 | 8.054576721 | 7.87814045  |
| ENSMUSG00000101032 | 7.074518513 | 4.869320706 | 3.530755239 | 4.02728836  | 3.580972932 |
| ENSMUSG00000101033 | 8.489422215 | 12.52111039 | 7.061510478 | 7.249119049 | 8.594335036 |
| ENSMUSG00000101034 | 9.196874066 | 4.173703463 | 9.179963621 | 4.832746033 | 3.580972932 |
| ENSMUSG00000101035 | 20.51610369 | 5.56493795  | 10.59226572 | 7.249119049 | 9.310529622 |
| ENSMUSG00000101036 | 4.244711108 | 2.086851731 | 4.943057334 | 1.610915344 | 2.148583759 |
| ENSMUSG00000101037 | 91.96874066 | 114.7768452 | 104.5103551 | 178.0061455 | 145.387501  |
| ENSMUSG00000101038 | 5.65961481  | 2.086851731 | 9.179963621 | 5.638203705 | 2.148583759 |
| ENSMUSG00000101039 | 7.781970364 | 6.260555194 | 10.59226572 | 4.832746033 | 7.87814045  |
| ENSMUSG00000101040 | 8.489422215 | 4.173703463 | 6.35535943  | 2.416373016 | 6.445751277 |
| ENSMUSG00000101041 | 7.781970364 | 4.869320706 | 2.118453143 | 3.221830688 | 5.729556691 |
| ENSMUSG00000101042 | 14.85648888 | 4.869320706 | 10.59226572 | 8.860034393 | 4.297167518 |
| ENSMUSG00000101043 | 8.489422215 | 4.173703463 | 4.236906287 | 3.221830688 | 3.580972932 |
| ENSMUSG00000101044 | 4.244711108 | 4.173703463 | 4.943057334 | 3.221830688 | 2.148583759 |
| ENSMUSG00000101045 | 7.074518513 | 5.56493795  | 7.767661525 | 3.221830688 | 5.013362104 |
| ENSMUSG00000101046 | 8.489422215 | 5.56493795  | 6.35535943  | 8.054576721 | 7.161945863 |
| ENSMUSG00000101047 | 0           | 0           | 0           | 0           | 0           |
| ENSMUSG00000101048 | 6.367066661 | 7.651789682 | 5.649208382 | 4.832746033 | 5.013362104 |
| ENSMUSG00000101049 | 8.489422215 | 6.956172438 | 9.179963621 | 3.221830688 | 10.02672421 |
| ENSMUSG00000101050 | 5.65961481  | 2.782468975 | 2.824604191 | 2.416373016 | 3.580972932 |
| ENSMUSG00000101051 | 5.65961481  | 4.869320706 | 7.061510478 | 5.638203705 | 4.297167518 |
| ENSMUSG00000101052 | 7.781970364 | 2.782468975 | 2.824604191 | 4.832746033 | 6.445751277 |
| ENSMUSG00000101054 | 5.65961481  | 9.738641413 | 9.179963621 | 4.02728836  | 4.297167518 |
| ENSMUSG00000101055 | 2.829807405 | 2.086851731 | 4.943057334 | 3.221830688 | 3.580972932 |
| ENSMUSG00000101056 | 4.952162959 | 4.869320706 | 8.473812573 | 3.221830688 | 4.297167518 |
| ENSMUSG00000101057 | 3.537259256 | 2.086851731 | 9.179963621 | 1.610915344 | 4.297167518 |
| ENSMUSG00000101058 | 2.829807405 | 4.173703463 | 6.35535943  | 2.416373016 | 5.729556691 |
| ENSMUSG00000101059 | 18.39374813 | 36.86771392 | 25.42143772 | 47.52200265 | 40.10689684 |
| ENSMUSG00000101060 | 5.65961481  | 2.782468975 | 8.473812573 | 1.610915344 | 5.013362104 |
| ENSMUSG00000101061 | 15.56394073 | 18.08604834 | 17.65377619 | 14.4982381  | 16.47247549 |
| ENSMUSG00000101062 | 11.31922962 | 6.260555194 | 9.179963621 | 8.054576721 | 3.580972932 |
| ENSMUSG00000101063 | 11.31922962 | 7.651789682 | 7.061510478 | 6.443661377 | 7.161945863 |
| ENSMUSG00000101064 | 4.244711108 | 3.478086219 | 0.706151048 | 2.416373016 | 3.580972932 |

|                    |             |             |             |             |             |
|--------------------|-------------|-------------|-------------|-------------|-------------|
| ENSMUSG00000101065 | 10.61177777 | 6.260555194 | 7.767661525 | 4.832746033 | 7.87814045  |
| ENSMUSG00000101066 | 7.074518513 | 7.651789682 | 9.886114669 | 6.443661377 | 7.87814045  |
| ENSMUSG00000101067 | 11.31922962 | 6.260555194 | 6.35535943  | 7.249119049 | 5.013362104 |
| ENSMUSG00000101068 | 7.074518513 | 4.869320706 | 4.943057334 | 0           | 2.148583759 |
| ENSMUSG00000101069 | 8.489422215 | 6.956172438 | 2.118453143 | 3.221830688 | 2.148583759 |
| ENSMUSG00000101070 | 4.952162959 | 4.869320706 | 4.943057334 | 4.02728836  | 4.297167518 |
| ENSMUSG00000101071 | 7.781970364 | 6.260555194 | 3.530755239 | 2.416373016 | 3.580972932 |
| ENSMUSG00000101072 | 4.952162959 | 5.56493795  | 4.943057334 | 3.221830688 | 2.864778345 |
| ENSMUSG00000101073 | 12.02668147 | 6.260555194 | 9.179963621 | 5.638203705 | 5.729556691 |
| ENSMUSG00000101074 | 11.31922962 | 3.478086219 | 6.35535943  | 4.02728836  | 2.148583759 |
| ENSMUSG00000101075 | 12.02668147 | 6.956172438 | 5.649208382 | 5.638203705 | 5.729556691 |
| ENSMUSG00000101076 | 7.781970364 | 4.869320706 | 5.649208382 | 3.221830688 | 2.148583759 |
| ENSMUSG00000101077 | 14.14903703 | 9.043024169 | 11.29841676 | 5.638203705 | 2.864778345 |
| ENSMUSG00000101078 | 9.904325918 | 6.956172438 | 7.767661525 | 4.832746033 | 6.445751277 |
| ENSMUSG00000101079 | 8.489422215 | 4.869320706 | 7.767661525 | 6.443661377 | 7.87814045  |
| ENSMUSG00000101080 | 9.904325918 | 3.478086219 | 4.943057334 | 4.832746033 | 0.716194586 |
| ENSMUSG00000101081 | 7.074518513 | 2.086851731 | 7.767661525 | 4.02728836  | 3.580972932 |
| ENSMUSG00000101082 | 4.952162959 | 4.869320706 | 9.886114669 | 6.443661377 | 6.445751277 |
| ENSMUSG00000101083 | 9.196874066 | 5.56493795  | 4.236906287 | 1.610915344 | 1.432389173 |
| ENSMUSG00000101084 | 10.61177777 | 7.651789682 | 8.473812573 | 7.249119049 | 7.161945863 |
| ENSMUSG00000101085 | 10.61177777 | 6.956172438 | 7.767661525 | 8.054576721 | 9.310529622 |
| ENSMUSG00000101086 | 8.489422215 | 0.695617244 | 5.649208382 | 7.249119049 | 12.17530797 |
| ENSMUSG00000101087 | 13.44158517 | 9.043024169 | 5.649208382 | 7.249119049 | 7.87814045  |
| ENSMUSG00000101088 | 8.489422215 | 9.738641413 | 3.530755239 | 7.249119049 | 4.297167518 |
| ENSMUSG00000101089 | 10.61177777 | 4.869320706 | 3.530755239 | 4.832746033 | 7.161945863 |
| ENSMUSG00000101090 | 3.537259256 | 6.956172438 | 2.824604191 | 5.638203705 | 2.864778345 |
| ENSMUSG00000101091 | 5.65961481  | 4.173703463 | 4.236906287 | 3.221830688 | 5.729556691 |
| ENSMUSG00000101092 | 7.781970364 | 1.391234488 | 9.179963621 | 4.02728836  | 4.297167518 |
| ENSMUSG00000101093 | 9.904325918 | 7.651789682 | 4.943057334 | 4.02728836  | 9.310529622 |
| ENSMUSG00000101094 | 5.65961481  | 6.260555194 | 6.35535943  | 1.610915344 | 5.013362104 |
| ENSMUSG00000101095 | 5.65961481  | 5.56493795  | 4.236906287 | 6.443661377 | 7.161945863 |
| ENSMUSG00000101096 | 11.31922962 | 4.869320706 | 1.412302096 | 4.02728836  | 5.013362104 |
| ENSMUSG00000101097 | 11.31922962 | 7.651789682 | 6.35535943  | 6.443661377 | 7.87814045  |
| ENSMUSG00000101098 | 9.196874066 | 4.869320706 | 5.649208382 | 1.610915344 | 4.297167518 |
| ENSMUSG00000101099 | 5.65961481  | 6.956172438 | 4.943057334 | 4.832746033 | 3.580972932 |
| ENSMUSG00000101100 | 4.244711108 | 4.173703463 | 5.649208382 | 4.02728836  | 5.013362104 |
| ENSMUSG00000101101 | 12.73413332 | 9.043024169 | 9.886114669 | 7.249119049 | 4.297167518 |
| ENSMUSG00000101102 | 85.601674   | 107.1250555 | 101.6857509 | 45.91108731 | 52.99839939 |
| ENSMUSG00000101103 | 5.65961481  | 7.651789682 | 7.767661525 | 2.416373016 | 5.729556691 |
| ENSMUSG00000101104 | 10.61177777 | 5.56493795  | 7.767661525 | 8.054576721 | 11.45911338 |
| ENSMUSG00000101105 | 9.196874066 | 7.651789682 | 7.767661525 | 4.02728836  | 5.013362104 |
| ENSMUSG00000101106 | 6.367066661 | 3.478086219 | 4.943057334 | 6.443661377 | 1.432389173 |
| ENSMUSG00000101107 | 1.414903703 | 4.869320706 | 3.530755239 | 4.02728836  | 2.864778345 |

|                    |             |             |             |             |             |
|--------------------|-------------|-------------|-------------|-------------|-------------|
| ENSMUSG00000101108 | 6.367066661 | 3.478086219 | 3.530755239 | 1.610915344 | 3.580972932 |
| ENSMUSG00000101109 | 4.244711108 | 4.869320706 | 6.35535943  | 5.638203705 | 4.297167518 |
| ENSMUSG00000101110 | 5.65961481  | 4.173703463 | 5.649208382 | 4.02728836  | 4.297167518 |
| ENSMUSG00000101111 | 0           | 0           | 0           | 0           | 0           |
| ENSMUSG00000101112 | 9.904325918 | 6.956172438 | 7.061510478 | 4.832746033 | 6.445751277 |
| ENSMUSG00000101114 | 1.414903703 | 2.782468975 | 0.706151048 | 3.221830688 | 0           |
| ENSMUSG00000101115 | 4.952162959 | 6.260555194 | 9.179963621 | 4.832746033 | 3.580972932 |
| ENSMUSG00000101116 | 5.65961481  | 6.956172438 | 7.061510478 | 8.860034393 | 11.45911338 |
| ENSMUSG00000101117 | 7.074518513 | 7.651789682 | 12.71071886 | 6.443661377 | 6.445751277 |
| ENSMUSG00000101118 | 4.244711108 | 2.782468975 | 4.236906287 | 3.221830688 | 2.864778345 |
| ENSMUSG00000101119 | 4.244711108 | 6.956172438 | 6.35535943  | 0.805457672 | 1.432389173 |
| ENSMUSG00000101120 | 4.244711108 | 3.478086219 | 4.943057334 | 3.221830688 | 5.013362104 |
| ENSMUSG00000101121 | 15.56394073 | 13.21672763 | 12.00456781 | 4.832746033 | 11.45911338 |
| ENSMUSG00000101122 | 15.56394073 | 20.86851731 | 25.42143772 | 14.4982381  | 15.04008631 |
| ENSMUSG00000101123 | 3.537259256 | 4.173703463 | 6.35535943  | 2.416373016 | 3.580972932 |
| ENSMUSG00000101124 | 4.244711108 | 6.956172438 | 7.061510478 | 1.610915344 | 1.432389173 |
| ENSMUSG00000101125 | 4.952162959 | 6.956172438 | 6.35535943  | 2.416373016 | 2.864778345 |
| ENSMUSG00000101126 | 9.196874066 | 2.086851731 | 7.061510478 | 7.249119049 | 5.013362104 |
| ENSMUSG00000101127 | 2.829807405 | 6.956172438 | 4.236906287 | 1.610915344 | 2.148583759 |
| ENSMUSG00000101128 | 6.367066661 | 9.043024169 | 6.35535943  | 6.443661377 | 4.297167518 |
| ENSMUSG00000101129 | 4.952162959 | 4.173703463 | 7.767661525 | 8.054576721 | 5.729556691 |
| ENSMUSG00000101130 | 7.781970364 | 9.043024169 | 10.59226572 | 4.02728836  | 6.445751277 |
| ENSMUSG00000101131 | 5.65961481  | 4.173703463 | 2.824604191 | 6.443661377 | 6.445751277 |
| ENSMUSG00000101132 | 12.73413332 | 17.39043109 | 12.00456781 | 27.38556085 | 23.63442135 |
| ENSMUSG00000101133 | 8.489422215 | 5.56493795  | 9.179963621 | 4.832746033 | 10.02672421 |
| ENSMUSG00000101134 | 6.367066661 | 5.56493795  | 7.061510478 | 1.610915344 | 4.297167518 |
| ENSMUSG00000101135 | 14.85648888 | 15.99919661 | 10.59226572 | 23.35827249 | 14.32389173 |
| ENSMUSG00000101136 | 7.074518513 | 13.21672763 | 7.767661525 | 5.638203705 | 8.594335036 |
| ENSMUSG00000101137 | 7.074518513 | 7.651789682 | 6.35535943  | 2.416373016 | 10.02672421 |
| ENSMUSG00000101138 | 8.489422215 | 4.869320706 | 5.649208382 | 4.832746033 | 8.594335036 |
| ENSMUSG00000101139 | 6.367066661 | 4.869320706 | 8.473812573 | 2.416373016 | 2.148583759 |
| ENSMUSG00000101140 | 4.952162959 | 7.651789682 | 4.943057334 | 2.416373016 | 5.729556691 |
| ENSMUSG00000101141 | 8.489422215 | 10.43425866 | 12.00456781 | 4.832746033 | 2.148583759 |
| ENSMUSG00000101142 | 5.65961481  | 2.782468975 | 3.530755239 | 3.221830688 | 2.864778345 |
| ENSMUSG00000101143 | 6.367066661 | 4.173703463 | 4.943057334 | 4.832746033 | 6.445751277 |
| ENSMUSG00000101144 | 7.781970364 | 5.56493795  | 8.473812573 | 72.49119049 | 57.29556691 |
| ENSMUSG00000101145 | 4.244711108 | 0.695617244 | 1.412302096 | 0.805457672 | 6.445751277 |
| ENSMUSG00000101147 | 6.367066661 | 8.347406925 | 2.118453143 | 3.221830688 | 3.580972932 |
| ENSMUSG00000101148 | 7.074518513 | 8.347406925 | 4.236906287 | 4.02728836  | 5.013362104 |
| ENSMUSG00000101149 | 6.367066661 | 4.173703463 | 4.943057334 | 4.832746033 | 7.87814045  |
| ENSMUSG00000101150 | 4.952162959 | 4.869320706 | 7.061510478 | 3.221830688 | 4.297167518 |
| ENSMUSG00000101151 | 11.31922962 | 6.956172438 | 4.236906287 | 8.054576721 | 7.87814045  |
| ENSMUSG00000101152 | 7.074518513 | 8.347406925 | 7.767661525 | 4.832746033 | 7.161945863 |

|                    |             |             |             |             |             |
|--------------------|-------------|-------------|-------------|-------------|-------------|
| ENSMUSG00000101153 | 12.73413332 | 7.651789682 | 7.061510478 | 5.638203705 | 5.013362104 |
| ENSMUSG00000101154 | 7.781970364 | 6.956172438 | 12.71071886 | 4.02728836  | 5.013362104 |
| ENSMUSG00000101156 | 9.904325918 | 9.043024169 | 5.649208382 | 4.02728836  | 5.729556691 |
| ENSMUSG00000101159 | 13.44158517 | 8.347406925 | 5.649208382 | 4.832746033 | 7.87814045  |
| ENSMUSG00000101160 | 5.65961481  | 4.869320706 | 7.061510478 | 1.610915344 | 5.013362104 |
| ENSMUSG00000101161 | 7.781970364 | 4.869320706 | 5.649208382 | 5.638203705 | 2.148583759 |
| ENSMUSG00000101162 | 24.05336294 | 28.52030699 | 21.89068248 | 16.91461111 | 17.18867007 |
| ENSMUSG00000101163 | 2.122355554 | 0.695617244 | 4.236906287 | 0.805457672 | 1.432389173 |
| ENSMUSG00000101164 | 7.074518513 | 6.260555194 | 4.943057334 | 3.221830688 | 3.580972932 |
| ENSMUSG00000101166 | 0           | 0           | 0           | 0           | 0           |
| ENSMUSG00000101167 | 0           | 0           | 0           | 0           | 0.716194586 |
| ENSMUSG00000101168 | 7.074518513 | 5.56493795  | 4.236906287 | 5.638203705 | 9.310529622 |
| ENSMUSG00000101169 | 3.537259256 | 0.695617244 | 2.118453143 | 2.416373016 | 3.580972932 |
| ENSMUSG00000101170 | 9.904325918 | 6.260555194 | 7.767661525 | 4.832746033 | 7.161945863 |
| ENSMUSG00000101171 | 10.61177777 | 10.43425866 | 9.179963621 | 12.88732275 | 10.7429188  |
| ENSMUSG00000101172 | 16.97884443 | 38.25894841 | 21.89068248 | 35.44013757 | 43.68786977 |
| ENSMUSG00000101173 | 9.196874066 | 4.869320706 | 2.824604191 | 0           | 2.148583759 |
| ENSMUSG00000101175 | 10.61177777 | 9.043024169 | 9.886114669 | 7.249119049 | 10.02672421 |
| ENSMUSG00000101176 | 3.537259256 | 10.43425866 | 10.59226572 | 6.443661377 | 8.594335036 |
| ENSMUSG00000101177 | 7.074518513 | 4.869320706 | 7.767661525 | 4.02728836  | 3.580972932 |
| ENSMUSG00000101178 | 7.074518513 | 8.347406925 | 4.943057334 | 6.443661377 | 2.148583759 |
| ENSMUSG00000101179 | 7.781970364 | 9.043024169 | 7.061510478 | 4.832746033 | 7.87814045  |
| ENSMUSG00000101180 | 9.196874066 | 13.21672763 | 5.649208382 | 4.832746033 | 4.297167518 |
| ENSMUSG00000101181 | 0.707451851 | 3.478086219 | 2.118453143 | 0.805457672 | 2.148583759 |
| ENSMUSG00000101182 | 7.074518513 | 2.782468975 | 6.35535943  | 5.638203705 | 3.580972932 |
| ENSMUSG00000101183 | 14.14903703 | 4.869320706 | 6.35535943  | 7.249119049 | 2.148583759 |
| ENSMUSG00000101184 | 7.781970364 | 4.869320706 | 3.530755239 | 0.805457672 | 4.297167518 |
| ENSMUSG00000101185 | 9.904325918 | 7.651789682 | 5.649208382 | 8.054576721 | 7.87814045  |
| ENSMUSG00000101186 | 7.781970364 | 6.956172438 | 11.29841676 | 1.610915344 | 2.148583759 |
| ENSMUSG00000101187 | 9.196874066 | 6.956172438 | 9.886114669 | 7.249119049 | 7.87814045  |
| ENSMUSG00000101188 | 0           | 0           | 0           | 0           | 0           |
| ENSMUSG00000101189 | 9.196874066 | 4.869320706 | 5.649208382 | 6.443661377 | 4.297167518 |
| ENSMUSG00000101190 | 4.952162959 | 3.478086219 | 3.530755239 | 3.221830688 | 7.161945863 |
| ENSMUSG00000101191 | 17.68629628 | 27.12907251 | 21.18453143 | 25.77464551 | 22.91822676 |
| ENSMUSG00000101192 | 4.952162959 | 2.086851731 | 4.943057334 | 3.221830688 | 3.580972932 |
| ENSMUSG00000101193 | 2.829807405 | 4.173703463 | 5.649208382 | 4.02728836  | 5.013362104 |
| ENSMUSG00000101194 | 3.537259256 | 4.869320706 | 3.530755239 | 3.221830688 | 2.864778345 |
| ENSMUSG00000101195 | 7.781970364 | 10.43425866 | 4.236906287 | 5.638203705 | 5.013362104 |
| ENSMUSG00000101196 | 7.781970364 | 6.260555194 | 4.943057334 | 3.221830688 | 7.87814045  |
| ENSMUSG00000101197 | 4.952162959 | 3.478086219 | 4.236906287 | 3.221830688 | 6.445751277 |
| ENSMUSG00000101198 | 7.781970364 | 4.173703463 | 3.530755239 | 3.221830688 | 3.580972932 |
| ENSMUSG00000101199 | 9.904325918 | 4.869320706 | 4.236906287 | 11.27640741 | 2.864778345 |
| ENSMUSG00000101200 | 8.489422215 | 4.869320706 | 4.236906287 | 5.638203705 | 0.716194586 |

|                    |             |             |             |             |             |
|--------------------|-------------|-------------|-------------|-------------|-------------|
| ENSMUSG00000101201 | 4.952162959 | 3.478086219 | 6.35535943  | 3.221830688 | 3.580972932 |
| ENSMUSG00000101202 | 7.074518513 | 9.043024169 | 7.767661525 | 2.416373016 | 5.729556691 |
| ENSMUSG00000101203 | 4.244711108 | 4.869320706 | 4.236906287 | 1.610915344 | 4.297167518 |
| ENSMUSG00000101204 | 3.537259256 | 4.869320706 | 6.35535943  | 4.02728836  | 5.013362104 |
| ENSMUSG00000101205 | 4.244711108 | 7.651789682 | 3.530755239 | 1.610915344 | 5.013362104 |
| ENSMUSG00000101206 | 12.02668147 | 8.347406925 | 7.767661525 | 5.638203705 | 7.87814045  |
| ENSMUSG00000101207 | 8.489422215 | 2.782468975 | 4.236906287 | 1.610915344 | 6.445751277 |
| ENSMUSG00000101208 | 7.781970364 | 6.260555194 | 2.824604191 | 7.249119049 | 7.161945863 |
| ENSMUSG00000101209 | 12.02668147 | 8.347406925 | 4.236906287 | 8.860034393 | 7.87814045  |
| ENSMUSG00000101210 | 5.65961481  | 9.738641413 | 12.71071886 | 9.665492065 | 5.729556691 |
| ENSMUSG00000101211 | 8.489422215 | 6.956172438 | 11.29841676 | 6.443661377 | 7.161945863 |
| ENSMUSG00000101212 | 4.244711108 | 6.260555194 | 2.824604191 | 0.805457672 | 4.297167518 |
| ENSMUSG00000101213 | 11.31922962 | 6.956172438 | 4.236906287 | 4.02728836  | 5.013362104 |
| ENSMUSG00000101214 | 8.489422215 | 9.043024169 | 7.767661525 | 4.832746033 | 7.161945863 |
| ENSMUSG00000101215 | 4.952162959 | 5.56493795  | 1.412302096 | 2.416373016 | 5.013362104 |
| ENSMUSG00000101216 | 6.367066661 | 2.782468975 | 9.179963621 | 3.221830688 | 4.297167518 |
| ENSMUSG00000101217 | 7.074518513 | 9.043024169 | 4.236906287 | 8.054576721 | 6.445751277 |
| ENSMUSG00000101218 | 12.02668147 | 4.869320706 | 3.530755239 | 0.805457672 | 5.013362104 |
| ENSMUSG00000101219 | 0           | 0.695617244 | 0           | 0           | 0           |
| ENSMUSG00000101220 | 12.73413332 | 5.56493795  | 4.236906287 | 4.02728836  | 6.445751277 |
| ENSMUSG00000101221 | 8.489422215 | 6.260555194 | 4.236906287 | 6.443661377 | 3.580972932 |
| ENSMUSG00000101222 | 6.367066661 | 6.260555194 | 7.061510478 | 1.610915344 | 0.716194586 |
| ENSMUSG00000101223 | 9.904325918 | 17.39043109 | 9.886114669 | 6.443661377 | 12.89150255 |
| ENSMUSG00000101224 | 7.781970364 | 10.43425866 | 10.59226572 | 5.638203705 | 7.161945863 |
| ENSMUSG00000101225 | 36.78749627 | 54.95376226 | 62.1412922  | 215.0571984 | 179.0486466 |
| ENSMUSG00000101226 | 14.85648888 | 6.260555194 | 12.71071886 | 7.249119049 | 6.445751277 |
| ENSMUSG00000101227 | 8.489422215 | 3.478086219 | 6.35535943  | 8.054576721 | 5.729556691 |
| ENSMUSG00000101228 | 7.781970364 | 6.260555194 | 9.179963621 | 6.443661377 | 5.729556691 |
| ENSMUSG00000101229 | 5.65961481  | 6.956172438 | 6.35535943  | 1.610915344 | 2.148583759 |
| ENSMUSG00000101230 | 6.367066661 | 11.1298759  | 2.824604191 | 2.416373016 | 2.148583759 |
| ENSMUSG00000101231 | 6.367066661 | 6.956172438 | 7.767661525 | 5.638203705 | 4.297167518 |
| ENSMUSG00000101233 | 6.367066661 | 4.173703463 | 3.530755239 | 3.221830688 | 5.013362104 |
| ENSMUSG00000101234 | 12.73413332 | 11.82549314 | 16.2414741  | 17.72006879 | 10.02672421 |
| ENSMUSG00000101235 | 3.537259256 | 6.260555194 | 5.649208382 | 5.638203705 | 3.580972932 |
| ENSMUSG00000101236 | 14.85648888 | 9.738641413 | 7.767661525 | 6.443661377 | 9.310529622 |
| ENSMUSG00000101237 | 5.65961481  | 10.43425866 | 8.473812573 | 6.443661377 | 2.148583759 |
| ENSMUSG00000101238 | 7.074518513 | 4.869320706 | 4.236906287 | 4.832746033 | 4.297167518 |
| ENSMUSG00000101239 | 6.367066661 | 1.391234488 | 4.943057334 | 4.02728836  | 2.864778345 |
| ENSMUSG00000101240 | 8.489422215 | 8.347406925 | 8.473812573 | 13.69278043 | 5.729556691 |
| ENSMUSG00000101241 | 2.829807405 | 5.56493795  | 5.649208382 | 2.416373016 | 2.148583759 |
| ENSMUSG00000101242 | 12.73413332 | 4.173703463 | 7.767661525 | 8.054576721 | 4.297167518 |
| ENSMUSG00000101244 | 4.244711108 | 5.56493795  | 7.767661525 | 4.02728836  | 1.432389173 |
| ENSMUSG00000101245 | 6.367066661 | 5.56493795  | 4.943057334 | 2.416373016 | 5.013362104 |

|                    |             |             |             |             |             |
|--------------------|-------------|-------------|-------------|-------------|-------------|
| ENSMUSG00000101246 | 6.367066661 | 6.956172438 | 7.767661525 | 4.832746033 | 3.580972932 |
| ENSMUSG00000101247 | 11.31922962 | 4.173703463 | 4.236906287 | 7.249119049 | 2.148583759 |
| ENSMUSG00000101248 | 9.904325918 | 6.956172438 | 5.649208382 | 6.443661377 | 7.161945863 |
| ENSMUSG00000101249 | 2.122355554 | 1.391234488 | 0           | 1.610915344 | 0.716194586 |
| ENSMUSG00000101250 | 9.196874066 | 5.56493795  | 7.061510478 | 4.832746033 | 8.594335036 |
| ENSMUSG00000101251 | 7.074518513 | 9.738641413 | 9.179963621 | 4.832746033 | 1.432389173 |
| ENSMUSG00000101252 | 9.904325918 | 9.043024169 | 9.179963621 | 8.054576721 | 11.45911338 |
| ENSMUSG00000101253 | 7.781970364 | 6.956172438 | 9.179963621 | 4.02728836  | 2.864778345 |
| ENSMUSG00000101254 | 7.074518513 | 3.478086219 | 5.649208382 | 6.443661377 | 4.297167518 |
| ENSMUSG00000101255 | 4.952162959 | 2.782468975 | 5.649208382 | 4.832746033 | 4.297167518 |
| ENSMUSG00000101256 | 8.489422215 | 3.478086219 | 4.943057334 | 3.221830688 | 3.580972932 |
| ENSMUSG00000101257 | 9.196874066 | 8.347406925 | 7.061510478 | 10.47094974 | 10.7429188  |
| ENSMUSG00000101258 | 31.12788146 | 42.43265187 | 32.4829482  | 91.82217462 | 82.36237743 |
| ENSMUSG00000101259 | 4.244711108 | 5.56493795  | 4.236906287 | 5.638203705 | 4.297167518 |
| ENSMUSG00000101260 | 7.781970364 | 5.56493795  | 9.886114669 | 4.832746033 | 5.013362104 |
| ENSMUSG00000101261 | 7.781970364 | 6.260555194 | 11.29841676 | 11.27640741 | 7.161945863 |
| ENSMUSG00000101262 | 8.489422215 | 6.260555194 | 4.943057334 | 7.249119049 | 7.87814045  |
| ENSMUSG00000101263 | 7.781970364 | 6.260555194 | 5.649208382 | 4.02728836  | 3.580972932 |
| ENSMUSG00000101264 | 4.952162959 | 4.173703463 | 9.886114669 | 10.47094974 | 10.7429188  |
| ENSMUSG00000101265 | 13.44158517 | 3.478086219 | 7.061510478 | 9.665492065 | 5.013362104 |
| ENSMUSG00000101266 | 8.489422215 | 4.869320706 | 10.59226572 | 3.221830688 | 7.87814045  |
| ENSMUSG00000101267 | 7.074518513 | 4.173703463 | 3.530755239 | 0.805457672 | 7.161945863 |
| ENSMUSG00000101268 | 9.904325918 | 6.260555194 | 5.649208382 | 4.832746033 | 8.594335036 |
| ENSMUSG00000101269 | 10.61177777 | 6.956172438 | 2.824604191 | 8.054576721 | 4.297167518 |
| ENSMUSG00000101270 | 9.904325918 | 4.173703463 | 5.649208382 | 10.47094974 | 5.729556691 |
| ENSMUSG00000101271 | 2.829807405 | 4.869320706 | 3.530755239 | 7.249119049 | 5.013362104 |
| ENSMUSG00000101272 | 7.074518513 | 4.173703463 | 4.236906287 | 4.832746033 | 1.432389173 |
| ENSMUSG00000101273 | 7.781970364 | 4.869320706 | 4.236906287 | 1.610915344 | 2.148583759 |
| ENSMUSG00000101275 | 10.61177777 | 1.391234488 | 5.649208382 | 7.249119049 | 9.310529622 |
| ENSMUSG00000101276 | 4.244711108 | 4.869320706 | 5.649208382 | 1.610915344 | 4.297167518 |
| ENSMUSG00000101277 | 8.489422215 | 6.956172438 | 6.35535943  | 4.02728836  | 2.148583759 |
| ENSMUSG00000101278 | 4.244711108 | 4.173703463 | 9.179963621 | 4.02728836  | 5.013362104 |
| ENSMUSG00000101279 | 27.5906222  | 34.08524495 | 26.83373982 | 21.74735715 | 23.63442135 |
| ENSMUSG00000101280 | 9.904325918 | 4.869320706 | 2.824604191 | 6.443661377 | 2.148583759 |
| ENSMUSG00000101281 | 7.074518513 | 7.651789682 | 3.530755239 | 6.443661377 | 5.729556691 |
| ENSMUSG00000101282 | 7.781970364 | 4.869320706 | 4.236906287 | 4.832746033 | 2.148583759 |
| ENSMUSG00000101283 | 8.489422215 | 6.956172438 | 7.767661525 | 4.832746033 | 4.297167518 |
| ENSMUSG00000101284 | 4.952162959 | 8.347406925 | 2.824604191 | 2.416373016 | 2.864778345 |
| ENSMUSG00000101285 | 5.65961481  | 2.782468975 | 5.649208382 | 3.221830688 | 2.148583759 |
| ENSMUSG00000101287 | 4.244711108 | 6.956172438 | 6.35535943  | 8.054576721 | 9.310529622 |
| ENSMUSG00000101288 | 9.196874066 | 7.651789682 | 5.649208382 | 5.638203705 | 7.87814045  |
| ENSMUSG00000101289 | 9.196874066 | 8.347406925 | 10.59226572 | 7.249119049 | 15.7562809  |
| ENSMUSG00000101290 | 4.244711108 | 2.782468975 | 5.649208382 | 3.221830688 | 1.432389173 |

|                    |             |             |             |             |             |
|--------------------|-------------|-------------|-------------|-------------|-------------|
| ENSMUSG00000101291 | 7.074518513 | 2.086851731 | 2.118453143 | 4.832746033 | 4.297167518 |
| ENSMUSG00000101292 | 3.537259256 | 5.56493795  | 7.767661525 | 7.249119049 | 6.445751277 |
| ENSMUSG00000101293 | 11.31922962 | 13.91234488 | 10.59226572 | 6.443661377 | 6.445751277 |
| ENSMUSG00000101295 | 14.85648888 | 22.2597518  | 14.12302096 | 16.91461111 | 12.17530797 |
| ENSMUSG00000101296 | 14.14903703 | 5.56493795  | 9.179963621 | 6.443661377 | 6.445751277 |
| ENSMUSG00000101297 | 7.781970364 | 7.651789682 | 7.767661525 | 3.221830688 | 6.445751277 |
| ENSMUSG00000101299 | 7.074518513 | 4.869320706 | 4.943057334 | 6.443661377 | 9.310529622 |
| ENSMUSG00000101300 | 3.537259256 | 4.173703463 | 7.767661525 | 3.221830688 | 3.580972932 |
| ENSMUSG00000101301 | 8.489422215 | 12.52111039 | 4.943057334 | 6.443661377 | 6.445751277 |
| ENSMUSG00000101302 | 7.781970364 | 2.782468975 | 4.943057334 | 4.832746033 | 5.013362104 |
| ENSMUSG00000101304 | 11.31922962 | 8.347406925 | 9.179963621 | 8.054576721 | 9.310529622 |
| ENSMUSG00000101305 | 3.537259256 | 5.56493795  | 3.530755239 | 1.610915344 | 2.864778345 |
| ENSMUSG00000101306 | 4.952162959 | 6.260555194 | 12.71071886 | 4.02728836  | 6.445751277 |
| ENSMUSG00000101307 | 12.02668147 | 11.1298759  | 7.767661525 | 5.638203705 | 2.864778345 |
| ENSMUSG00000101308 | 14.14903703 | 7.651789682 | 9.886114669 | 9.665492065 | 9.310529622 |
| ENSMUSG00000101309 | 9.904325918 | 5.56493795  | 6.35535943  | 3.221830688 | 8.594335036 |
| ENSMUSG00000101310 | 5.65961481  | 2.782468975 | 2.824604191 | 2.416373016 | 2.864778345 |
| ENSMUSG00000101311 | 4.952162959 | 6.956172438 | 4.236906287 | 2.416373016 | 5.013362104 |
| ENSMUSG00000101312 | 7.781970364 | 9.043024169 | 7.767661525 | 5.638203705 | 7.161945863 |
| ENSMUSG00000101313 | 3.537259256 | 3.478086219 | 11.29841676 | 8.054576721 | 4.297167518 |
| ENSMUSG00000101314 | 7.781970364 | 9.043024169 | 14.829172   | 5.638203705 | 4.297167518 |
| ENSMUSG00000101316 | 0           | 0           | 0           | 0           | 0           |
| ENSMUSG00000101317 | 6.367066661 | 6.260555194 | 6.35535943  | 0.805457672 | 5.729556691 |
| ENSMUSG00000101318 | 5.65961481  | 6.260555194 | 8.473812573 | 4.02728836  | 4.297167518 |
| ENSMUSG00000101319 | 4.952162959 | 3.478086219 | 8.473812573 | 5.638203705 | 5.729556691 |
| ENSMUSG00000101320 | 111.0699406 | 134.9497453 | 133.462548  | 175.5897725 | 159.7113928 |
| ENSMUSG00000101321 | 5.65961481  | 6.260555194 | 7.767661525 | 1.610915344 | 4.297167518 |
| ENSMUSG00000101322 | 9.196874066 | 11.1298759  | 8.473812573 | 1.610915344 | 5.729556691 |
| ENSMUSG00000101323 | 6.367066661 | 6.260555194 | 4.943057334 | 4.02728836  | 4.297167518 |
| ENSMUSG00000101324 | 9.196874066 | 6.956172438 | 6.35535943  | 8.054576721 | 11.45911338 |
| ENSMUSG00000101325 | 14.85648888 | 9.043024169 | 10.59226572 | 4.02728836  | 5.729556691 |
| ENSMUSG00000101326 | 7.781970364 | 5.56493795  | 5.649208382 | 1.610915344 | 3.580972932 |
| ENSMUSG00000101327 | 11.31922962 | 6.956172438 | 9.179963621 | 3.221830688 | 6.445751277 |
| ENSMUSG00000101328 | 5.65961481  | 4.173703463 | 6.35535943  | 5.638203705 | 6.445751277 |
| ENSMUSG00000101329 | 4.952162959 | 9.043024169 | 5.649208382 | 1.610915344 | 1.432389173 |
| ENSMUSG00000101330 | 14.85648888 | 13.21672763 | 10.59226572 | 15.30369577 | 14.32389173 |
| ENSMUSG00000101331 | 2.122355554 | 4.173703463 | 3.530755239 | 4.02728836  | 2.864778345 |
| ENSMUSG00000101332 | 14.14903703 | 6.956172438 | 14.12302096 | 8.054576721 | 7.161945863 |
| ENSMUSG00000101333 | 10.61177777 | 8.347406925 | 7.061510478 | 7.249119049 | 10.02672421 |
| ENSMUSG00000101334 | 8.489422215 | 6.956172438 | 3.530755239 | 4.02728836  | 7.161945863 |
| ENSMUSG00000101335 | 13.44158517 | 22.95536904 | 13.41686991 | 12.88732275 | 22.91822676 |
| ENSMUSG00000101336 | 7.781970364 | 8.347406925 | 10.59226572 | 3.221830688 | 5.729556691 |
| ENSMUSG00000101338 | 7.781970364 | 4.173703463 | 5.649208382 | 9.665492065 | 7.161945863 |

|                    |             |             |             |             |             |
|--------------------|-------------|-------------|-------------|-------------|-------------|
| ENSMUSG00000101339 | 5.65961481  | 5.56493795  | 3.530755239 | 3.221830688 | 3.580972932 |
| ENSMUSG00000101340 | 3.537259256 | 7.651789682 | 7.061510478 | 4.02728836  | 5.013362104 |
| ENSMUSG00000101341 | 3.537259256 | 3.478086219 | 7.061510478 | 2.416373016 | 3.580972932 |
| ENSMUSG00000101342 | 11.31922962 | 8.347406925 | 3.530755239 | 4.832746033 | 7.161945863 |
| ENSMUSG00000101343 | 3.537259256 | 6.956172438 | 4.236906287 | 2.416373016 | 3.580972932 |
| ENSMUSG00000101344 | 6.367066661 | 4.173703463 | 10.59226572 | 2.416373016 | 6.445751277 |
| ENSMUSG00000101345 | 10.61177777 | 9.043024169 | 8.473812573 | 8.054576721 | 8.594335036 |
| ENSMUSG00000101346 | 4.952162959 | 5.56493795  | 4.236906287 | 4.02728836  | 1.432389173 |
| ENSMUSG00000101347 | 10.61177777 | 3.478086219 | 2.824604191 | 3.221830688 | 2.148583759 |
| ENSMUSG00000101348 | 14.14903703 | 7.651789682 | 5.649208382 | 7.249119049 | 8.594335036 |
| ENSMUSG00000101349 | 7.074518513 | 2.782468975 | 5.649208382 | 4.832746033 | 2.864778345 |
| ENSMUSG00000101350 | 6.367066661 | 4.173703463 | 3.530755239 | 5.638203705 | 11.45911338 |
| ENSMUSG00000101351 | 4.952162959 | 2.782468975 | 3.530755239 | 3.221830688 | 5.729556691 |
| ENSMUSG00000101352 | 11.31922962 | 13.21672763 | 7.767661525 | 7.249119049 | 3.580972932 |
| ENSMUSG00000101353 | 5.65961481  | 5.56493795  | 4.943057334 | 4.02728836  | 2.864778345 |
| ENSMUSG00000101354 | 9.196874066 | 9.738641413 | 4.943057334 | 5.638203705 | 6.445751277 |
| ENSMUSG00000101355 | 3.537259256 | 5.56493795  | 3.530755239 | 1.610915344 | 2.864778345 |
| ENSMUSG00000101356 | 4.952162959 | 4.173703463 | 2.824604191 | 6.443661377 | 3.580972932 |
| ENSMUSG00000101357 | 6.367066661 | 6.956172438 | 9.179963621 | 2.416373016 | 9.310529622 |
| ENSMUSG00000101358 | 6.367066661 | 4.869320706 | 6.35535943  | 4.02728836  | 4.297167518 |
| ENSMUSG00000101359 | 4.952162959 | 5.56493795  | 4.236906287 | 2.416373016 | 4.297167518 |
| ENSMUSG00000101360 | 9.196874066 | 3.478086219 | 4.943057334 | 5.638203705 | 7.87814045  |
| ENSMUSG00000101361 | 12.73413332 | 3.478086219 | 9.179963621 | 8.860034393 | 6.445751277 |
| ENSMUSG00000101362 | 12.02668147 | 12.52111039 | 7.061510478 | 8.860034393 | 9.310529622 |
| ENSMUSG00000101363 | 7.781970364 | 9.738641413 | 8.473812573 | 5.638203705 | 7.161945863 |
| ENSMUSG00000101364 | 6.367066661 | 4.173703463 | 5.649208382 | 3.221830688 | 2.864778345 |
| ENSMUSG00000101365 | 9.904325918 | 4.869320706 | 9.886114669 | 4.02728836  | 7.87814045  |
| ENSMUSG00000101366 | 4.952162959 | 6.956172438 | 4.943057334 | 4.832746033 | 0.716194586 |
| ENSMUSG00000101367 | 7.781970364 | 3.478086219 | 6.35535943  | 3.221830688 | 5.013362104 |
| ENSMUSG00000101368 | 8.489422215 | 4.173703463 | 2.824604191 | 4.02728836  | 4.297167518 |
| ENSMUSG00000101369 | 7.074518513 | 3.478086219 | 4.236906287 | 7.249119049 | 4.297167518 |
| ENSMUSG00000101370 | 11.31922962 | 9.738641413 | 4.943057334 | 6.443661377 | 5.013362104 |
| ENSMUSG00000101371 | 9.904325918 | 8.347406925 | 12.00456781 | 4.832746033 | 7.161945863 |
| ENSMUSG00000101372 | 7.781970364 | 7.651789682 | 7.767661525 | 9.665492065 | 10.02672421 |
| ENSMUSG00000101374 | 9.196874066 | 4.869320706 | 2.824604191 | 2.416373016 | 2.148583759 |
| ENSMUSG00000101375 | 9.904325918 | 6.260555194 | 9.886114669 | 3.221830688 | 7.87814045  |
| ENSMUSG00000101376 | 10.61177777 | 4.869320706 | 11.29841676 | 5.638203705 | 6.445751277 |
| ENSMUSG00000101377 | 4.952162959 | 4.869320706 | 4.943057334 | 4.832746033 | 5.013362104 |
| ENSMUSG00000101378 | 8.489422215 | 5.56493795  | 6.35535943  | 4.832746033 | 8.594335036 |
| ENSMUSG00000101379 | 4.244711108 | 6.260555194 | 5.649208382 | 1.610915344 | 1.432389173 |
| ENSMUSG00000101380 | 7.074518513 | 4.173703463 | 3.530755239 | 5.638203705 | 4.297167518 |
| ENSMUSG00000101382 | 3.537259256 | 3.478086219 | 4.943057334 | 1.610915344 | 6.445751277 |
| ENSMUSG00000101383 | 7.781970364 | 8.347406925 | 4.236906287 | 3.221830688 | 4.297167518 |



|                    |             |             |             |             |             |
|--------------------|-------------|-------------|-------------|-------------|-------------|
| ENSMUSG00000101385 | 9.196874066 | 6.956172438 | 8.473812573 | 4.832746033 | 5.729556691 |
| ENSMUSG00000101386 | 10.61177777 | 7.651789682 | 7.061510478 | 1.610915344 | 3.580972932 |
| ENSMUSG00000101387 | 7.074518513 | 8.347406925 | 5.649208382 | 4.832746033 | 14.32389173 |
| ENSMUSG00000101388 | 2.122355554 | 6.260555194 | 4.236906287 | 2.416373016 | 2.148583759 |
| ENSMUSG00000101390 | 7.074518513 | 7.651789682 | 7.061510478 | 1.610915344 | 5.013362104 |
| ENSMUSG00000101391 | 6.367066661 | 5.56493795  | 6.35535943  | 2.416373016 | 4.297167518 |
| ENSMUSG00000101392 | 0           | 0           | 0           | 0           | 0           |
| ENSMUSG00000101393 | 1.414903703 | 4.173703463 | 3.530755239 | 4.02728836  | 0.716194586 |
| ENSMUSG00000101394 | 5.65961481  | 4.869320706 | 5.649208382 | 8.054576721 | 9.310529622 |
| ENSMUSG00000101395 | 7.781970364 | 7.651789682 | 9.179963621 | 4.832746033 | 7.87814045  |
| ENSMUSG00000101397 | 8.489422215 | 9.738641413 | 8.473812573 | 6.443661377 | 4.297167518 |
| ENSMUSG00000101398 | 4.952162959 | 7.651789682 | 5.649208382 | 7.249119049 | 5.729556691 |
| ENSMUSG00000101400 | 29.0055259  | 45.91073809 | 37.42600553 | 49.132918   | 45.83645353 |
| ENSMUSG00000101401 | 9.904325918 | 8.347406925 | 6.35535943  | 7.249119049 | 6.445751277 |
| ENSMUSG00000101402 | 4.952162959 | 4.869320706 | 7.767661525 | 2.416373016 | 6.445751277 |
| ENSMUSG00000101403 | 2.829807405 | 4.869320706 | 5.649208382 | 4.832746033 | 3.580972932 |
| ENSMUSG00000101404 | 10.61177777 | 6.260555194 | 8.473812573 | 8.054576721 | 7.87814045  |
| ENSMUSG00000101405 | 5.65961481  | 2.782468975 | 9.179963621 | 4.02728836  | 4.297167518 |
| ENSMUSG00000101406 | 5.65961481  | 6.956172438 | 3.530755239 | 8.054576721 | 5.013362104 |
| ENSMUSG00000101407 | 10.61177777 | 4.173703463 | 5.649208382 | 1.610915344 | 7.87814045  |
| ENSMUSG00000101408 | 7.074518513 | 5.56493795  | 4.943057334 | 4.02728836  | 7.87814045  |
| ENSMUSG00000101409 | 8.489422215 | 6.956172438 | 9.886114669 | 4.832746033 | 4.297167518 |
| ENSMUSG00000101410 | 10.61177777 | 6.260555194 | 9.179963621 | 3.221830688 | 5.013362104 |
| ENSMUSG00000101411 | 8.489422215 | 4.869320706 | 8.473812573 | 2.416373016 | 5.729556691 |
| ENSMUSG00000101412 | 5.65961481  | 6.260555194 | 6.35535943  | 3.221830688 | 4.297167518 |
| ENSMUSG00000101413 | 7.074518513 | 7.651789682 | 6.35535943  | 8.860034393 | 9.310529622 |
| ENSMUSG00000101414 | 15.56394073 | 4.869320706 | 8.473812573 | 7.249119049 | 7.87814045  |
| ENSMUSG00000101416 | 5.65961481  | 9.738641413 | 6.35535943  | 5.638203705 | 7.161945863 |
| ENSMUSG00000101417 | 5.65961481  | 2.086851731 | 3.530755239 | 1.610915344 | 2.864778345 |
| ENSMUSG00000101418 | 4.244711108 | 2.086851731 | 4.943057334 | 3.221830688 | 4.297167518 |
| ENSMUSG00000101419 | 10.61177777 | 9.738641413 | 8.473812573 | 7.249119049 | 6.445751277 |
| ENSMUSG00000101420 | 7.074518513 | 2.782468975 | 4.943057334 | 2.416373016 | 4.297167518 |
| ENSMUSG00000101421 | 7.074518513 | 6.956172438 | 7.061510478 | 2.416373016 | 5.013362104 |
| ENSMUSG00000101422 | 4.952162959 | 5.56493795  | 7.767661525 | 3.221830688 | 5.013362104 |
| ENSMUSG00000101423 | 8.489422215 | 1.391234488 | 5.649208382 | 3.221830688 | 3.580972932 |
| ENSMUSG00000101424 | 5.65961481  | 4.173703463 | 8.473812573 | 0.805457672 | 3.580972932 |
| ENSMUSG00000101425 | 2.829807405 | 2.782468975 | 4.236906287 | 4.02728836  | 1.432389173 |
| ENSMUSG00000101426 | 6.367066661 | 5.56493795  | 8.473812573 | 4.832746033 | 6.445751277 |
| ENSMUSG00000101427 | 9.196874066 | 13.21672763 | 11.29841676 | 5.638203705 | 5.013362104 |
| ENSMUSG00000101428 | 6.367066661 | 3.478086219 | 1.412302096 | 5.638203705 | 4.297167518 |
| ENSMUSG00000101429 | 9.904325918 | 3.478086219 | 12.71071886 | 8.054576721 | 5.729556691 |
| ENSMUSG00000101430 | 4.244711108 | 6.260555194 | 4.943057334 | 8.054576721 | 13.60769714 |
| ENSMUSG00000101431 | 2.122355554 | 0           | 0           | 0           | 0           |

|                    |             |             |             |             |             |
|--------------------|-------------|-------------|-------------|-------------|-------------|
| ENSMUSG00000101432 | 9.904325918 | 4.869320706 | 5.649208382 | 1.610915344 | 5.729556691 |
| ENSMUSG00000101433 | 7.781970364 | 13.91234488 | 12.71071886 | 8.054576721 | 5.729556691 |
| ENSMUSG00000101434 | 2.829807405 | 7.651789682 | 3.530755239 | 0.805457672 | 2.148583759 |
| ENSMUSG00000101435 | 5.65961481  | 5.56493795  | 5.649208382 | 1.610915344 | 2.864778345 |
| ENSMUSG00000101437 | 19.10119998 | 29.91154148 | 28.24604191 | 28.19101852 | 25.78300511 |
| ENSMUSG00000101438 | 74.28244438 | 111.298759  | 94.6242404  | 290.7702196 | 232.7632406 |
| ENSMUSG00000101439 | 16.97884443 | 23.65098629 | 17.65377619 | 33.02376456 | 24.35061594 |
| ENSMUSG00000101440 | 9.904325918 | 4.869320706 | 3.530755239 | 1.610915344 | 5.729556691 |
| ENSMUSG00000101441 | 7.781970364 | 5.56493795  | 6.35535943  | 3.221830688 | 3.580972932 |
| ENSMUSG00000101442 | 7.074518513 | 3.478086219 | 6.35535943  | 2.416373016 | 8.594335036 |
| ENSMUSG00000101443 | 4.952162959 | 4.173703463 | 2.824604191 | 2.416373016 | 2.864778345 |
| ENSMUSG00000101444 | 11.31922962 | 4.869320706 | 6.35535943  | 2.416373016 | 6.445751277 |
| ENSMUSG00000101445 | 8.489422215 | 4.869320706 | 6.35535943  | 7.249119049 | 6.445751277 |
| ENSMUSG00000101446 | 7.781970364 | 5.56493795  | 9.179963621 | 4.832746033 | 7.87814045  |
| ENSMUSG00000101447 | 12.02668147 | 12.52111039 | 8.473812573 | 4.832746033 | 4.297167518 |
| ENSMUSG00000101448 | 6.367066661 | 4.869320706 | 3.530755239 | 4.02728836  | 4.297167518 |
| ENSMUSG00000101449 | 7.781970364 | 7.651789682 | 15.53532305 | 11.27640741 | 7.161945863 |
| ENSMUSG00000101450 | 16.97884443 | 37.56333116 | 36.71985448 | 18.52552646 | 19.33725383 |
| ENSMUSG00000101451 | 10.61177777 | 7.651789682 | 3.530755239 | 7.249119049 | 3.580972932 |
| ENSMUSG00000101452 | 16.97884443 | 29.21592424 | 31.0706461  | 24.16373016 | 31.5125618  |
| ENSMUSG00000101453 | 7.074518513 | 6.260555194 | 9.179963621 | 8.860034393 | 2.148583759 |
| ENSMUSG00000101454 | 9.196874066 | 11.82549314 | 10.59226572 | 9.665492065 | 14.32389173 |
| ENSMUSG00000101455 | 7.781970364 | 6.956172438 | 1.412302096 | 0.805457672 | 5.013362104 |
| ENSMUSG00000101456 | 8.489422215 | 4.869320706 | 7.061510478 | 6.443661377 | 3.580972932 |
| ENSMUSG00000101457 | 8.489422215 | 4.173703463 | 8.473812573 | 0.805457672 | 7.87814045  |
| ENSMUSG00000101458 | 9.904325918 | 7.651789682 | 11.29841676 | 4.832746033 | 7.161945863 |
| ENSMUSG00000101459 | 26.88317035 | 11.1298759  | 21.18453143 | 24.16373016 | 25.06681052 |
| ENSMUSG00000101460 | 7.074518513 | 6.956172438 | 7.061510478 | 5.638203705 | 4.297167518 |
| ENSMUSG00000101461 | 8.489422215 | 0.695617244 | 8.473812573 | 4.02728836  | 8.594335036 |
| ENSMUSG00000101462 | 10.61177777 | 9.738641413 | 7.767661525 | 8.054576721 | 5.013362104 |
| ENSMUSG00000101463 | 5.65961481  | 7.651789682 | 7.061510478 | 1.610915344 | 3.580972932 |
| ENSMUSG00000101464 | 8.489422215 | 9.043024169 | 4.943057334 | 5.638203705 | 5.013362104 |
| ENSMUSG00000101465 | 4.952162959 | 4.173703463 | 6.35535943  | 3.221830688 | 5.729556691 |
| ENSMUSG00000101466 | 8.489422215 | 4.869320706 | 4.943057334 | 2.416373016 | 2.864778345 |
| ENSMUSG00000101467 | 8.489422215 | 6.956172438 | 8.473812573 | 4.02728836  | 2.148583759 |
| ENSMUSG00000101468 | 8.489422215 | 5.56493795  | 9.886114669 | 8.054576721 | 5.729556691 |
| ENSMUSG00000101469 | 4.244711108 | 4.173703463 | 4.943057334 | 3.221830688 | 5.013362104 |
| ENSMUSG00000101470 | 10.61177777 | 11.82549314 | 7.061510478 | 4.832746033 | 10.7429188  |
| ENSMUSG00000101472 | 2.122355554 | 2.086851731 | 7.061510478 | 1.610915344 | 4.297167518 |
| ENSMUSG00000101473 | 8.489422215 | 8.347406925 | 4.236906287 | 2.416373016 | 5.729556691 |
| ENSMUSG00000101474 | 6.367066661 | 6.260555194 | 4.943057334 | 2.416373016 | 2.148583759 |
| ENSMUSG00000101475 | 3.537259256 | 4.173703463 | 7.061510478 | 2.416373016 | 3.580972932 |
| ENSMUSG00000101476 | 13.44158517 | 20.17290007 | 14.12302096 | 15.30369577 | 12.89150255 |

|                    |              |             |             |             |             |
|--------------------|--------------|-------------|-------------|-------------|-------------|
| ENSMUSG00000101477 | 14.14903703  | 9.738641413 | 7.061510478 | 5.638203705 | 5.729556691 |
| ENSMUSG00000101478 | 2.829807405  | 2.782468975 | 2.824604191 | 6.443661377 | 5.013362104 |
| ENSMUSG00000101479 | 4.2447111108 | 3.478086219 | 4.943057334 | 0.805457672 | 2.864778345 |
| ENSMUSG00000101480 | 7.781970364  | 2.782468975 | 9.179963621 | 4.832746033 | 3.580972932 |
| ENSMUSG00000101481 | 8.489422215  | 4.869320706 | 6.35535943  | 7.249119049 | 5.013362104 |
| ENSMUSG00000101482 | 9.904325918  | 5.56493795  | 6.35535943  | 9.665492065 | 8.594335036 |
| ENSMUSG00000101483 | 8.489422215  | 5.56493795  | 6.35535943  | 5.638203705 | 2.148583759 |
| ENSMUSG00000101484 | 8.489422215  | 4.173703463 | 5.649208382 | 4.02728836  | 4.297167518 |
| ENSMUSG00000101485 | 13.44158517  | 6.956172438 | 7.061510478 | 2.416373016 | 8.594335036 |
| ENSMUSG00000101486 | 10.61177777  | 7.651789682 | 4.943057334 | 4.832746033 | 5.729556691 |
| ENSMUSG00000101487 | 8.489422215  | 8.347406925 | 9.886114669 | 4.02728836  | 9.310529622 |
| ENSMUSG00000101488 | 9.196874066  | 8.347406925 | 9.886114669 | 4.832746033 | 5.013362104 |
| ENSMUSG00000101489 | 7.781970364  | 4.869320706 | 7.061510478 | 2.416373016 | 2.864778345 |
| ENSMUSG00000101490 | 10.61177777  | 6.956172438 | 8.473812573 | 6.443661377 | 0.716194586 |
| ENSMUSG00000101491 | 4.2447111108 | 5.56493795  | 7.061510478 | 3.221830688 | 3.580972932 |
| ENSMUSG00000101492 | 10.61177777  | 10.43425866 | 4.236906287 | 4.02728836  | 9.310529622 |
| ENSMUSG00000101493 | 62.25576291  | 69.56172438 | 60.02283906 | 58.79841006 | 67.32229112 |
| ENSMUSG00000101494 | 9.904325918  | 6.260555194 | 6.35535943  | 6.443661377 | 2.864778345 |
| ENSMUSG00000101495 | 10.61177777  | 9.043024169 | 7.061510478 | 3.221830688 | 2.148583759 |
| ENSMUSG00000101496 | 15.56394073  | 12.52111039 | 16.94762515 | 13.69278043 | 5.729556691 |
| ENSMUSG00000101497 | 7.781970364  | 6.956172438 | 4.236906287 | 2.416373016 | 8.594335036 |
| ENSMUSG00000101498 | 12.73413332  | 6.260555194 | 12.71071886 | 4.832746033 | 10.7429188  |
| ENSMUSG00000101499 | 10.61177777  | 7.651789682 | 4.236906287 | 2.416373016 | 7.87814045  |
| ENSMUSG00000101501 | 3.537259256  | 3.478086219 | 0.706151048 | 0.805457672 | 0           |
| ENSMUSG00000101502 | 11.31922962  | 5.56493795  | 13.41686991 | 12.08186508 | 8.594335036 |
| ENSMUSG00000101503 | 16.27139258  | 15.99919661 | 20.47838039 | 22.55281482 | 24.35061594 |
| ENSMUSG00000101504 | 8.489422215  | 7.651789682 | 7.061510478 | 2.416373016 | 2.148583759 |
| ENSMUSG00000101505 | 11.31922962  | 7.651789682 | 7.061510478 | 6.443661377 | 8.594335036 |
| ENSMUSG00000101506 | 12.02668147  | 3.478086219 | 7.767661525 | 2.416373016 | 8.594335036 |
| ENSMUSG00000101507 | 4.952162959  | 6.260555194 | 7.767661525 | 1.610915344 | 0.716194586 |
| ENSMUSG00000101508 | 6.367066661  | 4.869320706 | 3.530755239 | 4.832746033 | 3.580972932 |
| ENSMUSG00000101509 | 6.367066661  | 10.43425866 | 6.35535943  | 6.443661377 | 5.729556691 |
| ENSMUSG00000101510 | 7.074518513  | 6.956172438 | 6.35535943  | 0.805457672 | 2.864778345 |
| ENSMUSG00000101511 | 9.196874066  | 6.956172438 | 2.118453143 | 4.02728836  | 7.161945863 |
| ENSMUSG00000101512 | 7.074518513  | 4.173703463 | 6.35535943  | 2.416373016 | 5.013362104 |
| ENSMUSG00000101513 | 6.367066661  | 3.478086219 | 4.943057334 | 3.221830688 | 2.148583759 |
| ENSMUSG00000101514 | 12.73413332  | 5.56493795  | 3.530755239 | 5.638203705 | 4.297167518 |
| ENSMUSG00000101515 | 4.952162959  | 6.260555194 | 4.236906287 | 2.416373016 | 5.013362104 |
| ENSMUSG00000101516 | 10.61177777  | 4.869320706 | 6.35535943  | 2.416373016 | 0.716194586 |
| ENSMUSG00000101517 | 8.489422215  | 6.260555194 | 9.179963621 | 4.832746033 | 7.161945863 |
| ENSMUSG00000101518 | 9.904325918  | 4.869320706 | 6.35535943  | 0.805457672 | 5.013362104 |
| ENSMUSG00000101519 | 6.367066661  | 9.043024169 | 6.35535943  | 3.221830688 | 4.297167518 |
| ENSMUSG00000101521 | 4.952162959  | 4.869320706 | 4.236906287 | 2.416373016 | 2.148583759 |

|                    |             |             |             |             |             |
|--------------------|-------------|-------------|-------------|-------------|-------------|
| ENSMUSG00000101522 | 14.85648888 | 4.869320706 | 7.767661525 | 9.665492065 | 4.297167518 |
| ENSMUSG00000101524 | 13.44158517 | 7.651789682 | 11.29841676 | 4.832746033 | 1.432389173 |
| ENSMUSG00000101525 | 7.074518513 | 3.478086219 | 5.649208382 | 4.832746033 | 2.864778345 |
| ENSMUSG00000101526 | 12.73413332 | 8.347406925 | 5.649208382 | 2.416373016 | 3.580972932 |
| ENSMUSG00000101527 | 4.952162959 | 7.651789682 | 6.35535943  | 5.638203705 | 3.580972932 |
| ENSMUSG00000101529 | 6.367066661 | 4.869320706 | 3.530755239 | 4.832746033 | 1.432389173 |
| ENSMUSG00000101530 | 6.367066661 | 4.869320706 | 12.00456781 | 0.805457672 | 4.297167518 |
| ENSMUSG00000101531 | 7.074518513 | 9.738641413 | 8.473812573 | 3.221830688 | 2.864778345 |
| ENSMUSG00000101532 | 4.244711108 | 7.651789682 | 9.179963621 | 8.054576721 | 5.013362104 |
| ENSMUSG00000101533 | 5.65961481  | 2.782468975 | 4.943057334 | 4.02728836  | 5.729556691 |
| ENSMUSG00000101534 | 5.65961481  | 4.173703463 | 4.943057334 | 4.02728836  | 5.013362104 |
| ENSMUSG00000101535 | 123.804074  | 181.5561006 | 162.414741  | 154.647873  | 147.5360848 |
| ENSMUSG00000101536 | 4.244711108 | 4.173703463 | 2.824604191 | 4.02728836  | 0.716194586 |
| ENSMUSG00000101537 | 9.196874066 | 9.738641413 | 7.767661525 | 5.638203705 | 6.445751277 |
| ENSMUSG00000101538 | 6.367066661 | 4.869320706 | 6.35535943  | 4.832746033 | 2.148583759 |
| ENSMUSG00000101539 | 5.65961481  | 3.478086219 | 8.473812573 | 2.416373016 | 5.729556691 |
| ENSMUSG00000101540 | 7.074518513 | 4.869320706 | 7.767661525 | 3.221830688 | 5.729556691 |
| ENSMUSG00000101541 | 2.829807405 | 6.260555194 | 6.35535943  | 6.443661377 | 3.580972932 |
| ENSMUSG00000101542 | 4.244711108 | 2.086851731 | 8.473812573 | 4.02728836  | 3.580972932 |
| ENSMUSG00000101543 | 10.61177777 | 4.173703463 | 12.71071886 | 5.638203705 | 7.87814045  |
| ENSMUSG00000101544 | 6.367066661 | 6.956172438 | 9.886114669 | 2.416373016 | 4.297167518 |
| ENSMUSG00000101545 | 12.73413332 | 8.347406925 | 7.767661525 | 4.02728836  | 4.297167518 |
| ENSMUSG00000101546 | 8.489422215 | 8.347406925 | 5.649208382 | 5.638203705 | 5.013362104 |
| ENSMUSG00000101547 | 9.196874066 | 3.478086219 | 3.530755239 | 2.416373016 | 7.87814045  |
| ENSMUSG00000101548 | 8.489422215 | 3.478086219 | 5.649208382 | 7.249119049 | 7.161945863 |
| ENSMUSG00000101549 | 7.781970364 | 6.956172438 | 9.179963621 | 8.860034393 | 6.445751277 |
| ENSMUSG00000101550 | 4.244711108 | 9.738641413 | 11.29841676 | 6.443661377 | 7.161945863 |
| ENSMUSG00000101551 | 4.952162959 | 4.869320706 | 2.824604191 | 4.832746033 | 7.161945863 |
| ENSMUSG00000101552 | 7.781970364 | 6.956172438 | 5.649208382 | 0.805457672 | 5.013362104 |
| ENSMUSG00000101553 | 7.074518513 | 2.086851731 | 8.473812573 | 5.638203705 | 6.445751277 |
| ENSMUSG00000101555 | 68.62282957 | 86.25653823 | 74.85201106 | 97.46037832 | 77.34901533 |
| ENSMUSG00000101556 | 5.65961481  | 9.738641413 | 12.71071886 | 12.88732275 | 7.161945863 |
| ENSMUSG00000101557 | 7.074518513 | 6.956172438 | 4.943057334 | 1.610915344 | 4.297167518 |
| ENSMUSG00000101558 | 4.952162959 | 2.086851731 | 5.649208382 | 0.805457672 | 2.864778345 |
| ENSMUSG00000101559 | 14.14903703 | 4.869320706 | 6.35535943  | 3.221830688 | 2.864778345 |
| ENSMUSG00000101560 | 4.244711108 | 4.869320706 | 3.530755239 | 4.02728836  | 6.445751277 |
| ENSMUSG00000101561 | 13.44158517 | 10.43425866 | 11.29841676 | 4.02728836  | 12.89150255 |
| ENSMUSG00000101562 | 3.537259256 | 2.782468975 | 4.236906287 | 2.416373016 | 3.580972932 |
| ENSMUSG00000101563 | 6.367066661 | 4.173703463 | 4.943057334 | 2.416373016 | 7.161945863 |
| ENSMUSG00000101564 | 9.904325918 | 7.651789682 | 7.767661525 | 6.443661377 | 3.580972932 |
| ENSMUSG00000101565 | 8.489422215 | 7.651789682 | 6.35535943  | 5.638203705 | 7.161945863 |
| ENSMUSG00000101566 | 4.952162959 | 6.260555194 | 8.473812573 | 4.02728836  | 3.580972932 |
| ENSMUSG00000101567 | 11.31922962 | 6.956172438 | 9.886114669 | 3.221830688 | 7.161945863 |

|                    |             |             |             |             |             |
|--------------------|-------------|-------------|-------------|-------------|-------------|
| ENSMUSG00000101568 | 11.31922962 | 8.347406925 | 8.473812573 | 3.221830688 | 7.161945863 |
| ENSMUSG00000101569 | 7.781970364 | 6.260555194 | 7.767661525 | 4.832746033 | 5.729556691 |
| ENSMUSG00000101570 | 4.244711108 | 3.478086219 | 10.59226572 | 4.832746033 | 1.432389173 |
| ENSMUSG00000101571 | 0           | 0           | 0           | 0           | 0           |
| ENSMUSG00000101572 | 7.074518513 | 7.651789682 | 9.179963621 | 3.221830688 | 5.729556691 |
| ENSMUSG00000101573 | 9.196874066 | 9.738641413 | 6.35535943  | 6.443661377 | 7.87814045  |
| ENSMUSG00000101574 | 9.904325918 | 3.478086219 | 6.35535943  | 11.27640741 | 7.87814045  |
| ENSMUSG00000101575 | 2.829807405 | 4.173703463 | 5.649208382 | 4.02728836  | 0           |
| ENSMUSG00000101576 | 5.65961481  | 4.173703463 | 6.35535943  | 8.054576721 | 3.580972932 |
| ENSMUSG00000101577 | 0.707451851 | 0           | 0           | 1.610915344 | 0           |
| ENSMUSG00000101578 | 8.489422215 | 5.56493795  | 12.71071886 | 4.832746033 | 5.013362104 |
| ENSMUSG00000101579 | 2.829807405 | 4.869320706 | 7.061510478 | 6.443661377 | 3.580972932 |
| ENSMUSG00000101580 | 7.074518513 | 3.478086219 | 2.824604191 | 2.416373016 | 2.148583759 |
| ENSMUSG00000101581 | 7.074518513 | 14.60796212 | 8.473812573 | 29.80193387 | 20.05344842 |
| ENSMUSG00000101582 | 6.367066661 | 3.478086219 | 7.767661525 | 4.832746033 | 2.148583759 |
| ENSMUSG00000101583 | 20.51610369 | 34.78086219 | 38.13215658 | 82.96214023 | 87.37573953 |
| ENSMUSG00000101584 | 8.489422215 | 8.347406925 | 4.943057334 | 4.832746033 | 2.148583759 |
| ENSMUSG00000101585 | 14.14903703 | 9.043024169 | 9.886114669 | 13.69278043 | 12.89150255 |
| ENSMUSG00000101586 | 8.489422215 | 8.347406925 | 11.29841676 | 4.02728836  | 7.161945863 |
| ENSMUSG00000101587 | 10.61177777 | 18.78166558 | 22.59683353 | 13.69278043 | 21.48583759 |
| ENSMUSG00000101588 | 4.952162959 | 1.391234488 | 5.649208382 | 4.02728836  | 3.580972932 |
| ENSMUSG00000101589 | 9.904325918 | 9.043024169 | 7.061510478 | 8.860034393 | 9.310529622 |
| ENSMUSG00000101590 | 8.489422215 | 6.956172438 | 8.473812573 | 6.443661377 | 5.729556691 |
| ENSMUSG00000101591 | 13.44158517 | 7.651789682 | 7.061510478 | 4.832746033 | 11.45911338 |
| ENSMUSG00000101592 | 3.537259256 | 4.173703463 | 4.943057334 | 1.610915344 | 0.716194586 |
| ENSMUSG00000101593 | 2.829807405 | 2.086851731 | 8.473812573 | 4.832746033 | 1.432389173 |
| ENSMUSG00000101594 | 2.829807405 | 4.869320706 | 4.943057334 | 2.416373016 | 2.864778345 |
| ENSMUSG00000101595 | 11.31922962 | 9.043024169 | 5.649208382 | 4.832746033 | 10.02672421 |
| ENSMUSG00000101596 | 4.952162959 | 11.1298759  | 5.649208382 | 8.860034393 | 5.729556691 |
| ENSMUSG00000101597 | 8.489422215 | 8.347406925 | 6.35535943  | 8.860034393 | 6.445751277 |
| ENSMUSG00000101598 | 4.244711108 | 5.56493795  | 4.236906287 | 4.02728836  | 3.580972932 |
| ENSMUSG00000101599 | 127.3413332 | 161.3832006 | 166.6516473 | 161.8969921 | 135.3607768 |
| ENSMUSG00000101600 | 7.781970364 | 8.347406925 | 8.473812573 | 10.47094974 | 4.297167518 |
| ENSMUSG00000101601 | 3.537259256 | 6.260555194 | 6.35535943  | 3.221830688 | 5.013362104 |
| ENSMUSG00000101602 | 6.367066661 | 6.260555194 | 6.35535943  | 3.221830688 | 1.432389173 |
| ENSMUSG00000101603 | 0           | 0           | 0           | 0           | 0           |
| ENSMUSG00000101605 | 7.781970364 | 8.347406925 | 7.061510478 | 12.88732275 | 4.297167518 |
| ENSMUSG00000101606 | 10.61177777 | 9.043024169 | 4.236906287 | 3.221830688 | 7.161945863 |
| ENSMUSG00000101607 | 7.781970364 | 4.173703463 | 6.35535943  | 4.02728836  | 3.580972932 |
| ENSMUSG00000101608 | 9.196874066 | 6.260555194 | 6.35535943  | 4.832746033 | 2.864778345 |
| ENSMUSG00000101609 | 60.84085921 | 83.47406925 | 59.31668801 | 92.62763229 | 86.65954495 |
| ENSMUSG00000101610 | 7.781970364 | 6.956172438 | 12.71071886 | 4.02728836  | 7.87814045  |
| ENSMUSG00000101611 | 2.122355554 | 6.956172438 | 2.824604191 | 3.221830688 | 2.148583759 |

|                    |             |             |             |             |             |
|--------------------|-------------|-------------|-------------|-------------|-------------|
| ENSMUSG00000101612 | 10.61177777 | 7.651789682 | 9.179963621 | 7.249119049 | 9.310529622 |
| ENSMUSG00000101613 | 9.196874066 | 6.260555194 | 2.824604191 | 4.02728836  | 6.445751277 |
| ENSMUSG00000101614 | 10.61177777 | 3.478086219 | 3.530755239 | 2.416373016 | 1.432389173 |
| ENSMUSG00000101615 | 9.904325918 | 6.956172438 | 9.179963621 | 8.860034393 | 7.87814045  |
| ENSMUSG00000101616 | 16.27139258 | 10.43425866 | 15.53532305 | 14.4982381  | 12.17530797 |
| ENSMUSG00000101617 | 12.73413332 | 6.956172438 | 12.00456781 | 5.638203705 | 6.445751277 |
| ENSMUSG00000101618 | 7.781970364 | 6.260555194 | 9.179963621 | 4.02728836  | 4.297167518 |
| ENSMUSG00000101619 | 4.952162959 | 3.478086219 | 4.236906287 | 2.416373016 | 4.297167518 |
| ENSMUSG00000101620 | 0           | 0           | 0           | 0           | 0           |
| ENSMUSG00000101621 | 9.904325918 | 7.651789682 | 5.649208382 | 3.221830688 | 7.87814045  |
| ENSMUSG00000101622 | 14.85648888 | 6.956172438 | 9.179963621 | 8.054576721 | 7.87814045  |
| ENSMUSG00000101623 | 7.074518513 | 5.56493795  | 7.061510478 | 2.416373016 | 4.297167518 |
| ENSMUSG00000101624 | 10.61177777 | 6.956172438 | 4.943057334 | 4.02728836  | 5.729556691 |
| ENSMUSG00000101625 | 16.97884443 | 13.91234488 | 12.00456781 | 4.02728836  | 13.60769714 |
| ENSMUSG00000101626 | 3.537259256 | 4.869320706 | 7.767661525 | 0.805457672 | 3.580972932 |
| ENSMUSG00000101627 | 2.829807405 | 6.260555194 | 2.824604191 | 1.610915344 | 2.864778345 |
| ENSMUSG00000101628 | 7.074518513 | 8.347406925 | 10.59226572 | 6.443661377 | 6.445751277 |
| ENSMUSG00000101629 | 8.489422215 | 9.738641413 | 9.179963621 | 5.638203705 | 4.297167518 |
| ENSMUSG00000101630 | 9.196874066 | 6.260555194 | 16.2414741  | 4.02728836  | 8.594335036 |
| ENSMUSG00000101631 | 5.65961481  | 4.869320706 | 6.35535943  | 6.443661377 | 2.148583759 |
| ENSMUSG00000101632 | 7.781970364 | 2.782468975 | 4.236906287 | 0.805457672 | 5.013362104 |
| ENSMUSG00000101633 | 4.952162959 | 2.782468975 | 1.412302096 | 2.416373016 | 7.161945863 |
| ENSMUSG00000101634 | 7.074518513 | 6.260555194 | 8.473812573 | 3.221830688 | 10.7429188  |
| ENSMUSG00000101635 | 0           | 0           | 0           | 0.805457672 | 0           |
| ENSMUSG00000101636 | 5.65961481  | 6.260555194 | 11.29841676 | 6.443661377 | 7.87814045  |
| ENSMUSG00000101637 | 6.367066661 | 2.782468975 | 7.767661525 | 4.832746033 | 2.864778345 |
| ENSMUSG00000101639 | 24.76081479 | 6.956172438 | 14.829172   | 8.054576721 | 11.45911338 |
| ENSMUSG00000101640 | 14.85648888 | 9.043024169 | 11.29841676 | 9.665492065 | 10.02672421 |
| ENSMUSG00000101642 | 9.904325918 | 4.173703463 | 6.35535943  | 0.805457672 | 4.297167518 |
| ENSMUSG00000101643 | 9.196874066 | 4.173703463 | 4.236906287 | 4.832746033 | 4.297167518 |
| ENSMUSG00000101644 | 9.196874066 | 6.956172438 | 9.179963621 | 5.638203705 | 7.161945863 |
| ENSMUSG00000101646 | 3.537259256 | 4.869320706 | 6.35535943  | 4.02728836  | 0           |
| ENSMUSG00000101647 | 4.952162959 | 2.086851731 | 6.35535943  | 1.610915344 | 4.297167518 |
| ENSMUSG00000101648 | 10.61177777 | 4.173703463 | 10.59226572 | 7.249119049 | 8.594335036 |
| ENSMUSG00000101649 | 2.829807405 | 1.391234488 | 4.236906287 | 2.416373016 | 1.432389173 |
| ENSMUSG00000101650 | 9.904325918 | 6.260555194 | 7.061510478 | 10.47094974 | 5.729556691 |
| ENSMUSG00000101651 | 11.31922962 | 18.78166558 | 19.77222934 | 6.443661377 | 12.89150255 |
| ENSMUSG00000101652 | 5.65961481  | 7.651789682 | 9.179963621 | 8.054576721 | 7.161945863 |
| ENSMUSG00000101654 | 4.952162959 | 6.956172438 | 3.530755239 | 3.221830688 | 2.864778345 |
| ENSMUSG00000101655 | 6.367066661 | 10.43425866 | 8.473812573 | 10.47094974 | 8.594335036 |
| ENSMUSG00000101656 | 9.904325918 | 7.651789682 | 12.71071886 | 8.054576721 | 8.594335036 |
| ENSMUSG00000101657 | 4.244711108 | 7.651789682 | 7.061510478 | 3.221830688 | 2.864778345 |
| ENSMUSG00000101658 | 10.61177777 | 4.869320706 | 7.767661525 | 4.832746033 | 7.161945863 |

|                    |             |             |             |             |             |
|--------------------|-------------|-------------|-------------|-------------|-------------|
| ENSMUSG00000101659 | 5.65961481  | 9.043024169 | 5.649208382 | 5.638203705 | 6.445751277 |
| ENSMUSG00000101660 | 12.02668147 | 3.478086219 | 8.473812573 | 7.249119049 | 9.310529622 |
| ENSMUSG00000101661 | 8.489422215 | 6.956172438 | 5.649208382 | 4.832746033 | 5.013362104 |
| ENSMUSG00000101662 | 9.904325918 | 6.260555194 | 7.767661525 | 3.221830688 | 5.729556691 |
| ENSMUSG00000101663 | 9.904325918 | 6.956172438 | 9.179963621 | 5.638203705 | 5.729556691 |
| ENSMUSG00000101664 | 7.074518513 | 9.043024169 | 7.767661525 | 9.665492065 | 9.310529622 |
| ENSMUSG00000101665 | 0           | 0           | 0           | 0           | 0           |
| ENSMUSG00000101666 | 4.952162959 | 6.260555194 | 9.179963621 | 0.805457672 | 0.716194586 |
| ENSMUSG00000101668 | 5.65961481  | 6.260555194 | 4.236906287 | 4.02728836  | 1.432389173 |
| ENSMUSG00000101669 | 3.537259256 | 4.869320706 | 5.649208382 | 3.221830688 | 3.580972932 |
| ENSMUSG00000101670 | 6.367066661 | 9.738641413 | 4.236906287 | 5.638203705 | 3.580972932 |
| ENSMUSG00000101671 | 9.904325918 | 3.478086219 | 6.35535943  | 3.221830688 | 4.297167518 |
| ENSMUSG00000101672 | 4.952162959 | 3.478086219 | 3.530755239 | 4.832746033 | 5.013362104 |
| ENSMUSG00000101673 | 8.489422215 | 9.043024169 | 12.71071886 | 4.02728836  | 5.013362104 |
| ENSMUSG00000101674 | 24.05336294 | 42.43265187 | 35.30755239 | 6.443661377 | 22.91822676 |
| ENSMUSG00000101675 | 4.952162959 | 2.782468975 | 4.943057334 | 2.416373016 | 5.729556691 |
| ENSMUSG00000101676 | 7.781970364 | 3.478086219 | 4.943057334 | 2.416373016 | 6.445751277 |
| ENSMUSG00000101677 | 6.367066661 | 14.60796212 | 6.35535943  | 5.638203705 | 6.445751277 |
| ENSMUSG00000101679 | 5.65961481  | 6.260555194 | 2.824604191 | 4.832746033 | 0.716194586 |
| ENSMUSG00000101680 | 8.489422215 | 5.56493795  | 8.473812573 | 8.054576721 | 10.02672421 |
| ENSMUSG00000101681 | 7.781970364 | 9.738641413 | 7.767661525 | 1.610915344 | 4.297167518 |
| ENSMUSG00000101682 | 7.781970364 | 13.91234488 | 11.29841676 | 5.638203705 | 5.013362104 |
| ENSMUSG00000101683 | 12.02668147 | 6.956172438 | 7.061510478 | 4.02728836  | 4.297167518 |
| ENSMUSG00000101684 | 4.952162959 | 2.782468975 | 2.824604191 | 3.221830688 | 2.148583759 |
| ENSMUSG00000101685 | 4.952162959 | 5.56493795  | 4.236906287 | 2.416373016 | 2.864778345 |
| ENSMUSG00000101686 | 5.65961481  | 2.086851731 | 4.236906287 | 2.416373016 | 5.013362104 |
| ENSMUSG00000101687 | 4.952162959 | 5.56493795  | 8.473812573 | 3.221830688 | 3.580972932 |
| ENSMUSG00000101688 | 6.367066661 | 9.738641413 | 4.236906287 | 4.832746033 | 4.297167518 |
| ENSMUSG00000101689 | 4.952162959 | 1.391234488 | 7.061510478 | 3.221830688 | 2.864778345 |
| ENSMUSG00000101690 | 8.489422215 | 11.1298759  | 4.236906287 | 0.805457672 | 5.013362104 |
| ENSMUSG00000101691 | 3.537259256 | 10.43425866 | 7.767661525 | 3.221830688 | 0.716194586 |
| ENSMUSG00000101692 | 3.537259256 | 3.478086219 | 7.061510478 | 2.416373016 | 4.297167518 |
| ENSMUSG00000101693 | 6.367066661 | 2.086851731 | 9.179963621 | 5.638203705 | 4.297167518 |
| ENSMUSG00000101694 | 3.537259256 | 6.260555194 | 4.236906287 | 1.610915344 | 5.013362104 |
| ENSMUSG00000101695 | 19.80865184 | 19.47728283 | 19.77222934 | 16.10915344 | 21.48583759 |
| ENSMUSG00000101696 | 9.196874066 | 6.956172438 | 6.35535943  | 9.665492065 | 8.594335036 |
| ENSMUSG00000101697 | 9.196874066 | 5.56493795  | 8.473812573 | 5.638203705 | 8.594335036 |
| ENSMUSG00000101698 | 14.85648888 | 12.52111039 | 17.65377619 | 7.249119049 | 7.87814045  |
| ENSMUSG00000101699 | 2.122355554 | 1.391234488 | 2.824604191 | 0.805457672 | 6.445751277 |
| ENSMUSG00000101700 | 10.61177777 | 4.869320706 | 8.473812573 | 6.443661377 | 5.729556691 |
| ENSMUSG00000101701 | 5.65961481  | 8.347406925 | 8.473812573 | 5.638203705 | 7.161945863 |
| ENSMUSG00000101702 | 9.196874066 | 7.651789682 | 9.886114669 | 4.832746033 | 10.7429188  |
| ENSMUSG00000101703 | 15.56394073 | 8.347406925 | 16.94762515 | 9.665492065 | 7.161945863 |

|                    |             |             |             |             |             |
|--------------------|-------------|-------------|-------------|-------------|-------------|
| ENSMUSG00000101704 | 8.489422215 | 6.956172438 | 6.35535943  | 5.638203705 | 2.864778345 |
| ENSMUSG00000101705 | 7.074518513 | 6.260555194 | 7.767661525 | 10.47094974 | 7.87814045  |
| ENSMUSG00000101706 | 4.952162959 | 4.173703463 | 5.649208382 | 0           | 5.729556691 |
| ENSMUSG00000101707 | 3.537259256 | 5.56493795  | 2.824604191 | 3.221830688 | 1.432389173 |
| ENSMUSG00000101708 | 0.707451851 | 0.695617244 | 2.118453143 | 0.805457672 | 1.432389173 |
| ENSMUSG00000101709 | 4.244711108 | 4.869320706 | 4.236906287 | 2.416373016 | 3.580972932 |
| ENSMUSG00000101710 | 4.952162959 | 6.956172438 | 4.943057334 | 3.221830688 | 2.864778345 |
| ENSMUSG00000101711 | 19.10119998 | 19.47728283 | 16.2414741  | 33.02376456 | 23.63442135 |
| ENSMUSG00000101712 | 5.65961481  | 4.869320706 | 2.118453143 | 3.221830688 | 5.013362104 |
| ENSMUSG00000101713 | 4.952162959 | 4.869320706 | 5.649208382 | 3.221830688 | 3.580972932 |
| ENSMUSG00000101714 | 7.781970364 | 4.173703463 | 12.00456781 | 9.665492065 | 6.445751277 |
| ENSMUSG00000101715 | 7.074518513 | 5.56493795  | 4.236906287 | 4.832746033 | 4.297167518 |
| ENSMUSG00000101716 | 77.81970364 | 80.69160028 | 79.08891735 | 178.0061455 | 118.1721067 |
| ENSMUSG00000101717 | 7.781970364 | 6.956172438 | 7.061510478 | 5.638203705 | 3.580972932 |
| ENSMUSG00000101718 | 5.65961481  | 4.173703463 | 3.530755239 | 2.416373016 | 2.864778345 |
| ENSMUSG00000101719 | 5.65961481  | 4.869320706 | 2.824604191 | 1.610915344 | 4.297167518 |
| ENSMUSG00000101720 | 8.489422215 | 9.738641413 | 8.473812573 | 4.832746033 | 7.161945863 |
| ENSMUSG00000101721 | 15.56394073 | 8.347406925 | 6.35535943  | 3.221830688 | 8.594335036 |
| ENSMUSG00000101722 | 13.44158517 | 9.738641413 | 11.29841676 | 6.443661377 | 12.17530797 |
| ENSMUSG00000101723 | 7.781970364 | 5.56493795  | 4.943057334 | 8.054576721 | 2.148583759 |
| ENSMUSG00000101724 | 10.61177777 | 9.043024169 | 8.473812573 | 3.221830688 | 10.02672421 |
| ENSMUSG00000101726 | 10.61177777 | 11.1298759  | 7.061510478 | 4.02728836  | 4.297167518 |
| ENSMUSG00000101727 | 7.781970364 | 11.82549314 | 3.530755239 | 3.221830688 | 2.148583759 |
| ENSMUSG00000101728 | 5.65961481  | 4.869320706 | 4.943057334 | 4.02728836  | 2.864778345 |
| ENSMUSG00000101729 | 7.074518513 | 4.173703463 | 7.767661525 | 11.27640741 | 6.445751277 |
| ENSMUSG00000101730 | 8.489422215 | 6.956172438 | 9.179963621 | 2.416373016 | 6.445751277 |
| ENSMUSG00000101731 | 7.781970364 | 2.782468975 | 7.061510478 | 9.665492065 | 10.7429188  |
| ENSMUSG00000101732 | 7.074518513 | 5.56493795  | 6.35535943  | 0.805457672 | 4.297167518 |
| ENSMUSG00000101733 | 7.781970364 | 6.260555194 | 6.35535943  | 4.02728836  | 5.729556691 |
| ENSMUSG00000101734 | 7.074518513 | 9.043024169 | 6.35535943  | 10.47094974 | 6.445751277 |
| ENSMUSG00000101735 | 7.074518513 | 9.738641413 | 7.061510478 | 5.638203705 | 5.729556691 |
| ENSMUSG00000101736 | 3.537259256 | 4.173703463 | 6.35535943  | 7.249119049 | 7.161945863 |
| ENSMUSG00000101737 | 7.074518513 | 5.56493795  | 6.35535943  | 4.02728836  | 5.013362104 |
| ENSMUSG00000101738 | 9.904325918 | 5.56493795  | 12.71071886 | 6.443661377 | 6.445751277 |
| ENSMUSG00000101739 | 9.196874066 | 2.086851731 | 4.236906287 | 4.02728836  | 6.445751277 |
| ENSMUSG00000101740 | 6.367066661 | 5.56493795  | 9.179963621 | 4.832746033 | 5.729556691 |
| ENSMUSG00000101741 | 12.02668147 | 4.869320706 | 11.29841676 | 6.443661377 | 5.013362104 |
| ENSMUSG00000101742 | 7.074518513 | 4.173703463 | 7.767661525 | 3.221830688 | 2.148583759 |
| ENSMUSG00000101743 | 4.952162959 | 5.56493795  | 3.530755239 | 4.02728836  | 6.445751277 |
| ENSMUSG00000101744 | 5.65961481  | 6.260555194 | 2.118453143 | 5.638203705 | 4.297167518 |
| ENSMUSG00000101745 | 6.367066661 | 6.260555194 | 5.649208382 | 2.416373016 | 7.87814045  |
| ENSMUSG00000101746 | 8.489422215 | 9.738641413 | 7.767661525 | 8.054576721 | 7.87814045  |
| ENSMUSG00000101747 | 5.65961481  | 5.56493795  | 7.767661525 | 4.832746033 | 2.148583759 |



|                    |             |             |             |             |             |
|--------------------|-------------|-------------|-------------|-------------|-------------|
| ENSMUSG00000101748 | 4.952162959 | 4.173703463 | 7.061510478 | 4.02728836  | 4.297167518 |
| ENSMUSG00000101749 | 5.65961481  | 9.738641413 | 7.061510478 | 2.416373016 | 6.445751277 |
| ENSMUSG00000101750 | 3.537259256 | 6.956172438 | 7.061510478 | 5.638203705 | 5.729556691 |
| ENSMUSG00000101751 | 28.29807405 | 41.73703463 | 48.01827125 | 37.85651059 | 46.55264811 |
| ENSMUSG00000101752 | 6.367066661 | 6.260555194 | 5.649208382 | 3.221830688 | 2.148583759 |
| ENSMUSG00000101753 | 4.952162959 | 2.782468975 | 4.236906287 | 2.416373016 | 5.013362104 |
| ENSMUSG00000101754 | 9.196874066 | 4.173703463 | 10.59226572 | 7.249119049 | 7.161945863 |
| ENSMUSG00000101755 | 9.904325918 | 3.478086219 | 7.061510478 | 8.054576721 | 5.013362104 |
| ENSMUSG00000101756 | 0           | 0           | 0           | 0           | 0           |
| ENSMUSG00000101757 | 12.02668147 | 6.260555194 | 11.29841676 | 3.221830688 | 5.729556691 |
| ENSMUSG00000101758 | 2.829807405 | 4.173703463 | 6.35535943  | 4.02728836  | 5.013362104 |
| ENSMUSG00000101759 | 13.44158517 | 6.260555194 | 8.473812573 | 5.638203705 | 5.013362104 |
| ENSMUSG00000101760 | 9.904325918 | 6.956172438 | 7.767661525 | 1.610915344 | 9.310529622 |
| ENSMUSG00000101761 | 7.074518513 | 2.782468975 | 4.943057334 | 2.416373016 | 2.864778345 |
| ENSMUSG00000101762 | 12.73413332 | 9.043024169 | 8.473812573 | 7.249119049 | 6.445751277 |
| ENSMUSG00000101763 | 9.196874066 | 4.869320706 | 5.649208382 | 5.638203705 | 7.161945863 |
| ENSMUSG00000101764 | 8.489422215 | 11.1298759  | 5.649208382 | 5.638203705 | 8.594335036 |
| ENSMUSG00000101765 | 9.904325918 | 6.260555194 | 7.061510478 | 4.832746033 | 7.161945863 |
| ENSMUSG00000101767 | 9.904325918 | 6.260555194 | 7.061510478 | 4.832746033 | 6.445751277 |
| ENSMUSG00000101768 | 21.22355554 | 29.91154148 | 26.83373982 | 14.4982381  | 15.7562809  |
| ENSMUSG00000101769 | 4.244711108 | 2.086851731 | 2.824604191 | 4.02728836  | 2.864778345 |
| ENSMUSG00000101770 | 5.65961481  | 2.782468975 | 6.35535943  | 4.832746033 | 3.580972932 |
| ENSMUSG00000101771 | 5.65961481  | 2.782468975 | 7.061510478 | 1.610915344 | 4.297167518 |
| ENSMUSG00000101772 | 7.074518513 | 6.260555194 | 9.886114669 | 0.805457672 | 7.87814045  |
| ENSMUSG00000101773 | 5.65961481  | 6.956172438 | 7.061510478 | 7.249119049 | 10.7429188  |
| ENSMUSG00000101774 | 7.074518513 | 6.260555194 | 4.943057334 | 3.221830688 | 1.432389173 |
| ENSMUSG00000101775 | 7.074518513 | 7.651789682 | 3.530755239 | 2.416373016 | 4.297167518 |
| ENSMUSG00000101776 | 2.122355554 | 4.869320706 | 6.35535943  | 0.805457672 | 4.297167518 |
| ENSMUSG00000101777 | 10.61177777 | 3.478086219 | 4.943057334 | 10.47094974 | 7.87814045  |
| ENSMUSG00000101778 | 9.196874066 | 15.30357936 | 4.236906287 | 16.91461111 | 11.45911338 |
| ENSMUSG00000101779 | 1.414903703 | 4.869320706 | 6.35535943  | 2.416373016 | 3.580972932 |
| ENSMUSG00000101780 | 11.31922962 | 4.869320706 | 11.29841676 | 5.638203705 | 7.161945863 |
| ENSMUSG00000101781 | 2.122355554 | 6.260555194 | 2.118453143 | 3.221830688 | 1.432389173 |
| ENSMUSG00000101782 | 7.074518513 | 2.782468975 | 4.943057334 | 3.221830688 | 5.013362104 |
| ENSMUSG00000101783 | 7.074518513 | 6.956172438 | 5.649208382 | 4.832746033 | 2.148583759 |
| ENSMUSG00000101784 | 9.904325918 | 6.260555194 | 9.179963621 | 7.249119049 | 6.445751277 |
| ENSMUSG00000101785 | 8.489422215 | 6.260555194 | 3.530755239 | 5.638203705 | 5.729556691 |
| ENSMUSG00000101786 | 5.65961481  | 4.173703463 | 7.061510478 | 4.832746033 | 2.864778345 |
| ENSMUSG00000101787 | 4.952162959 | 7.651789682 | 4.943057334 | 4.832746033 | 5.729556691 |
| ENSMUSG00000101788 | 9.196874066 | 6.956172438 | 2.824604191 | 4.832746033 | 5.729556691 |
| ENSMUSG00000101789 | 6.367066661 | 4.173703463 | 4.943057334 | 1.610915344 | 2.864778345 |
| ENSMUSG00000101790 | 4.244711108 | 7.651789682 | 1.412302096 | 3.221830688 | 3.580972932 |
| ENSMUSG00000101791 | 7.074518513 | 4.173703463 | 7.767661525 | 9.665492065 | 7.87814045  |

|                    |             |             |             |             |             |
|--------------------|-------------|-------------|-------------|-------------|-------------|
| ENSMUSG00000101792 | 6.367066661 | 11.82549314 | 4.943057334 | 4.02728836  | 5.729556691 |
| ENSMUSG00000101793 | 7.074518513 | 8.347406925 | 7.767661525 | 2.416373016 | 7.161945863 |
| ENSMUSG00000101794 | 4.244711108 | 6.956172438 | 4.236906287 | 2.416373016 | 3.580972932 |
| ENSMUSG00000101795 | 7.781970364 | 6.260555194 | 6.35535943  | 16.91461111 | 4.297167518 |
| ENSMUSG00000101796 | 4.952162959 | 9.738641413 | 7.767661525 | 7.249119049 | 5.013362104 |
| ENSMUSG00000101797 | 9.904325918 | 4.869320706 | 4.236906287 | 4.02728836  | 10.02672421 |
| ENSMUSG00000101798 | 36.78749627 | 61.9099347  | 58.61053696 | 66.85298678 | 54.43078856 |
| ENSMUSG00000101799 | 10.61177777 | 5.56493795  | 10.59226572 | 4.832746033 | 7.87814045  |
| ENSMUSG00000101800 | 2.122355554 | 0.695617244 | 0.706151048 | 0           | 3.580972932 |
| ENSMUSG00000101801 | 7.074518513 | 7.651789682 | 4.943057334 | 8.860034393 | 10.02672421 |
| ENSMUSG00000101802 | 5.65961481  | 4.869320706 | 2.824604191 | 5.638203705 | 5.729556691 |
| ENSMUSG00000101803 | 8.489422215 | 5.56493795  | 7.061510478 | 7.249119049 | 7.161945863 |
| ENSMUSG00000101804 | 7.781970364 | 3.478086219 | 4.236906287 | 4.02728836  | 5.729556691 |
| ENSMUSG00000101805 | 5.65961481  | 3.478086219 | 6.35535943  | 1.610915344 | 4.297167518 |
| ENSMUSG00000101806 | 7.074518513 | 4.869320706 | 8.473812573 | 4.02728836  | 4.297167518 |
| ENSMUSG00000101807 | 11.31922962 | 6.260555194 | 12.00456781 | 8.054576721 | 5.729556691 |
| ENSMUSG00000101808 | 5.65961481  | 5.56493795  | 4.943057334 | 6.443661377 | 7.161945863 |
| ENSMUSG00000101809 | 4.244711108 | 3.478086219 | 2.824604191 | 4.832746033 | 3.580972932 |
| ENSMUSG00000101810 | 4.952162959 | 6.956172438 | 8.473812573 | 5.638203705 | 7.161945863 |
| ENSMUSG00000101811 | 3.537259256 | 4.869320706 | 3.530755239 | 3.221830688 | 7.161945863 |
| ENSMUSG00000101812 | 6.367066661 | 6.956172438 | 5.649208382 | 2.416373016 | 2.864778345 |
| ENSMUSG00000101813 | 9.196874066 | 8.347406925 | 9.886114669 | 7.249119049 | 4.297167518 |
| ENSMUSG00000101814 | 3.537259256 | 6.956172438 | 6.35535943  | 9.665492065 | 6.445751277 |
| ENSMUSG00000101815 | 4.952162959 | 4.173703463 | 7.061510478 | 5.638203705 | 1.432389173 |
| ENSMUSG00000101816 | 4.244711108 | 9.043024169 | 5.649208382 | 3.221830688 | 2.148583759 |
| ENSMUSG00000101817 | 7.781970364 | 6.260555194 | 7.061510478 | 3.221830688 | 3.580972932 |
| ENSMUSG00000101820 | 6.367066661 | 6.956172438 | 9.179963621 | 2.416373016 | 6.445751277 |
| ENSMUSG00000101821 | 2.829807405 | 2.782468975 | 4.943057334 | 6.443661377 | 5.013362104 |
| ENSMUSG00000101822 | 7.781970364 | 7.651789682 | 11.29841676 | 4.832746033 | 5.013362104 |
| ENSMUSG00000101823 | 21.93100739 | 36.17209668 | 36.01370344 | 45.10562964 | 24.35061594 |
| ENSMUSG00000101824 | 8.489422215 | 6.956172438 | 7.767661525 | 6.443661377 | 8.594335036 |
| ENSMUSG00000101825 | 4.952162959 | 5.56493795  | 9.179963621 | 3.221830688 | 4.297167518 |
| ENSMUSG00000101826 | 11.31922962 | 4.869320706 | 9.179963621 | 3.221830688 | 11.45911338 |
| ENSMUSG00000101827 | 12.73413332 | 9.738641413 | 9.886114669 | 8.054576721 | 4.297167518 |
| ENSMUSG00000101828 | 7.074518513 | 4.869320706 | 8.473812573 | 8.054576721 | 4.297167518 |
| ENSMUSG00000101829 | 8.489422215 | 5.56493795  | 5.649208382 | 4.832746033 | 5.013362104 |
| ENSMUSG00000101830 | 8.489422215 | 5.56493795  | 7.061510478 | 2.416373016 | 3.580972932 |
| ENSMUSG00000101831 | 7.781970364 | 3.478086219 | 7.061510478 | 1.610915344 | 3.580972932 |
| ENSMUSG00000101832 | 4.244711108 | 7.651789682 | 7.767661525 | 9.665492065 | 7.87814045  |
| ENSMUSG00000101833 | 6.367066661 | 4.869320706 | 4.236906287 | 6.443661377 | 5.729556691 |
| ENSMUSG00000101834 | 7.781970364 | 5.56493795  | 5.649208382 | 10.47094974 | 4.297167518 |
| ENSMUSG00000101835 | 7.074518513 | 5.56493795  | 5.649208382 | 4.832746033 | 1.432389173 |
| ENSMUSG00000101836 | 6.367066661 | 0.695617244 | 4.236906287 | 2.416373016 | 4.297167518 |

|                    |             |             |             |             |             |
|--------------------|-------------|-------------|-------------|-------------|-------------|
| ENSMUSG00000101837 | 7.074518513 | 6.260555194 | 4.236906287 | 2.416373016 | 2.864778345 |
| ENSMUSG00000101838 | 7.781970364 | 11.82549314 | 12.00456781 | 5.638203705 | 12.17530797 |
| ENSMUSG00000101839 | 2.829807405 | 4.173703463 | 5.649208382 | 1.610915344 | 5.729556691 |
| ENSMUSG00000101840 | 7.781970364 | 6.260555194 | 12.00456781 | 4.02728836  | 5.013362104 |
| ENSMUSG00000101841 | 0           | 0           | 0           | 0           | 0           |
| ENSMUSG00000101842 | 2.829807405 | 4.173703463 | 4.236906287 | 3.221830688 | 4.297167518 |
| ENSMUSG00000101843 | 9.196874066 | 10.43425866 | 4.943057334 | 7.249119049 | 2.864778345 |
| ENSMUSG00000101844 | 4.952162959 | 6.956172438 | 6.35535943  | 1.610915344 | 5.013362104 |
| ENSMUSG00000101845 | 24.05336294 | 41.73703463 | 40.25060972 | 72.49119049 | 68.75468029 |
| ENSMUSG00000101846 | 6.367066661 | 4.869320706 | 7.767661525 | 3.221830688 | 6.445751277 |
| ENSMUSG00000101847 | 8.489422215 | 10.43425866 | 12.71071886 | 8.054576721 | 4.297167518 |
| ENSMUSG00000101848 | 7.074518513 | 7.651789682 | 4.943057334 | 4.832746033 | 8.594335036 |
| ENSMUSG00000101849 | 5.65961481  | 3.478086219 | 13.41686991 | 2.416373016 | 5.729556691 |
| ENSMUSG00000101850 | 4.244711108 | 5.56493795  | 2.118453143 | 3.221830688 | 2.148583759 |
| ENSMUSG00000101851 | 8.489422215 | 5.56493795  | 4.236906287 | 4.832746033 | 3.580972932 |
| ENSMUSG00000101852 | 5.65961481  | 4.173703463 | 2.824604191 | 3.221830688 | 5.013362104 |
| ENSMUSG00000101853 | 6.367066661 | 10.43425866 | 7.767661525 | 12.88732275 | 7.161945863 |
| ENSMUSG00000101854 | 5.65961481  | 9.043024169 | 12.00456781 | 4.02728836  | 5.013362104 |
| ENSMUSG00000101855 | 2.122355554 | 0           | 4.943057334 | 3.221830688 | 2.864778345 |
| ENSMUSG00000101856 | 16.27139258 | 19.47728283 | 9.179963621 | 12.08186508 | 10.7429188  |
| ENSMUSG00000101857 | 3.537259256 | 2.782468975 | 4.236906287 | 4.02728836  | 4.297167518 |
| ENSMUSG00000101858 | 2.829807405 | 2.782468975 | 6.35535943  | 1.610915344 | 2.148583759 |
| ENSMUSG00000101859 | 7.781970364 | 6.956172438 | 4.943057334 | 11.27640741 | 8.594335036 |
| ENSMUSG00000101860 | 6.367066661 | 5.56493795  | 7.767661525 | 1.610915344 | 7.87814045  |
| ENSMUSG00000101861 | 8.489422215 | 4.869320706 | 3.530755239 | 4.02728836  | 3.580972932 |
| ENSMUSG00000101862 | 5.65961481  | 8.347406925 | 10.59226572 | 5.638203705 | 4.297167518 |
| ENSMUSG00000101863 | 5.65961481  | 4.173703463 | 6.35535943  | 4.832746033 | 5.729556691 |
| ENSMUSG00000101864 | 4.244711108 | 2.782468975 | 4.943057334 | 3.221830688 | 2.864778345 |
| ENSMUSG00000101865 | 7.074518513 | 1.391234488 | 6.35535943  | 4.832746033 | 7.161945863 |
| ENSMUSG00000101866 | 8.489422215 | 4.173703463 | 4.236906287 | 0           | 3.580972932 |
| ENSMUSG00000101867 | 8.489422215 | 13.91234488 | 7.061510478 | 7.249119049 | 10.7429188  |
| ENSMUSG00000101868 | 4.952162959 | 4.869320706 | 6.35535943  | 3.221830688 | 4.297167518 |
| ENSMUSG00000101869 | 7.781970364 | 5.56493795  | 9.886114669 | 4.832746033 | 5.729556691 |
| ENSMUSG00000101870 | 6.367066661 | 6.956172438 | 4.236906287 | 4.02728836  | 6.445751277 |
| ENSMUSG00000101871 | 3.537259256 | 2.782468975 | 3.530755239 | 0.805457672 | 2.148583759 |
| ENSMUSG00000101872 | 11.31922962 | 13.21672763 | 18.35992724 | 8.054576721 | 10.02672421 |
| ENSMUSG00000101873 | 5.65961481  | 3.478086219 | 8.473812573 | 1.610915344 | 3.580972932 |
| ENSMUSG00000101874 | 16.27139258 | 6.260555194 | 5.649208382 | 8.054576721 | 9.310529622 |
| ENSMUSG00000101875 | 7.074518513 | 9.738641413 | 9.886114669 | 4.832746033 | 6.445751277 |
| ENSMUSG00000101877 | 4.952162959 | 3.478086219 | 6.35535943  | 1.610915344 | 11.45911338 |
| ENSMUSG00000101878 | 0           | 2.086851731 | 1.412302096 | 3.221830688 | 0.716194586 |
| ENSMUSG00000101879 | 3.537259256 | 3.478086219 | 3.530755239 | 1.610915344 | 2.864778345 |
| ENSMUSG00000101880 | 53.05888884 | 57.73623123 | 53.66747963 | 26.58010318 | 27.21539428 |

|                    |             |             |             |             |             |
|--------------------|-------------|-------------|-------------|-------------|-------------|
| ENSMUSG00000101881 | 6.367066661 | 4.173703463 | 4.943057334 | 4.02728836  | 5.729556691 |
| ENSMUSG00000101882 | 7.074518513 | 4.173703463 | 7.061510478 | 3.221830688 | 2.864778345 |
| ENSMUSG00000101883 | 9.904325918 | 3.478086219 | 3.530755239 | 2.416373016 | 4.297167518 |
| ENSMUSG00000101884 | 7.074518513 | 1.391234488 | 7.061510478 | 5.638203705 | 1.432389173 |
| ENSMUSG00000101885 | 4.244711108 | 2.782468975 | 4.943057334 | 4.832746033 | 3.580972932 |
| ENSMUSG00000101886 | 7.074518513 | 6.956172438 | 4.236906287 | 5.638203705 | 6.445751277 |
| ENSMUSG00000101887 | 5.65961481  | 5.56493795  | 7.767661525 | 3.221830688 | 3.580972932 |
| ENSMUSG00000101888 | 12.02668147 | 4.869320706 | 9.886114669 | 4.832746033 | 5.013362104 |
| ENSMUSG00000101889 | 0           | 0           | 0           | 0           | 0           |
| ENSMUSG00000101890 | 7.781970364 | 3.478086219 | 9.886114669 | 4.02728836  | 8.594335036 |
| ENSMUSG00000101891 | 6.367066661 | 6.956172438 | 6.35535943  | 5.638203705 | 5.013362104 |
| ENSMUSG00000101893 | 6.367066661 | 5.56493795  | 7.767661525 | 4.02728836  | 12.17530797 |
| ENSMUSG00000101895 | 7.781970364 | 7.651789682 | 8.473812573 | 7.249119049 | 6.445751277 |
| ENSMUSG00000101896 | 9.196874066 | 9.738641413 | 9.886114669 | 6.443661377 | 11.45911338 |
| ENSMUSG00000101897 | 7.781970364 | 7.651789682 | 7.061510478 | 5.638203705 | 7.161945863 |
| ENSMUSG00000101898 | 6.367066661 | 5.56493795  | 4.943057334 | 4.02728836  | 5.013362104 |
| ENSMUSG00000101899 | 7.781970364 | 4.173703463 | 3.530755239 | 6.443661377 | 6.445751277 |
| ENSMUSG00000101900 | 4.244711108 | 9.738641413 | 4.943057334 | 4.02728836  | 5.729556691 |
| ENSMUSG00000101901 | 7.074518513 | 3.478086219 | 7.061510478 | 2.416373016 | 7.161945863 |
| ENSMUSG00000101902 | 6.367066661 | 9.043024169 | 3.530755239 | 1.610915344 | 4.297167518 |
| ENSMUSG00000101903 | 9.904325918 | 6.956172438 | 7.767661525 | 4.02728836  | 6.445751277 |
| ENSMUSG00000101905 | 172.6182517 | 193.3815938 | 168.7701004 | 171.5624842 | 156.8466144 |
| ENSMUSG00000101906 | 10.61177777 | 4.173703463 | 9.886114669 | 4.02728836  | 4.297167518 |
| ENSMUSG00000101907 | 3.537259256 | 6.956172438 | 7.767661525 | 4.832746033 | 5.013362104 |
| ENSMUSG00000101908 | 7.781970364 | 7.651789682 | 7.061510478 | 4.02728836  | 3.580972932 |
| ENSMUSG00000101909 | 6.367066661 | 9.043024169 | 11.29841676 | 5.638203705 | 4.297167518 |
| ENSMUSG00000101910 | 7.074518513 | 8.347406925 | 4.943057334 | 4.02728836  | 6.445751277 |
| ENSMUSG00000101911 | 10.61177777 | 6.260555194 | 7.767661525 | 9.665492065 | 7.87814045  |
| ENSMUSG00000101912 | 10.61177777 | 13.21672763 | 7.061510478 | 9.665492065 | 9.310529622 |
| ENSMUSG00000101913 | 2.829807405 | 1.391234488 | 2.118453143 | 4.02728836  | 2.864778345 |
| ENSMUSG00000101914 | 8.489422215 | 6.956172438 | 4.236906287 | 0.805457672 | 4.297167518 |
| ENSMUSG00000101916 | 6.367066661 | 4.173703463 | 9.179963621 | 4.02728836  | 8.594335036 |
| ENSMUSG00000101917 | 2.122355554 | 5.56493795  | 4.236906287 | 5.638203705 | 5.729556691 |
| ENSMUSG00000101918 | 14.14903703 | 10.43425866 | 6.35535943  | 1.610915344 | 5.729556691 |
| ENSMUSG00000101919 | 7.074518513 | 5.56493795  | 9.179963621 | 4.832746033 | 5.729556691 |
| ENSMUSG00000101920 | 6.367066661 | 5.56493795  | 3.530755239 | 3.221830688 | 3.580972932 |
| ENSMUSG00000101921 | 6.367066661 | 9.738641413 | 5.649208382 | 6.443661377 | 8.594335036 |
| ENSMUSG00000101922 | 10.61177777 | 9.043024169 | 3.530755239 | 1.610915344 | 8.594335036 |
| ENSMUSG00000101923 | 7.074518513 | 4.869320706 | 9.179963621 | 4.02728836  | 5.013362104 |
| ENSMUSG00000101924 | 10.61177777 | 5.56493795  | 8.473812573 | 6.443661377 | 10.02672421 |
| ENSMUSG00000101925 | 7.781970364 | 9.738641413 | 9.179963621 | 11.27640741 | 12.17530797 |
| ENSMUSG00000101926 | 12.02668147 | 4.869320706 | 7.767661525 | 6.443661377 | 6.445751277 |
| ENSMUSG00000101927 | 10.61177777 | 9.043024169 | 7.061510478 | 2.416373016 | 5.013362104 |

|                    |             |             |             |             |             |
|--------------------|-------------|-------------|-------------|-------------|-------------|
| ENSMUSG00000101929 | 5.65961481  | 9.738641413 | 7.767661525 | 2.416373016 | 4.297167518 |
| ENSMUSG00000101930 | 9.196874066 | 3.478086219 | 4.943057334 | 5.638203705 | 5.013362104 |
| ENSMUSG00000101931 | 6.367066661 | 3.478086219 | 7.061510478 | 0.805457672 | 7.161945863 |
| ENSMUSG00000101932 | 0           | 0           | 0           | 0           | 0           |
| ENSMUSG00000101934 | 9.196874066 | 12.52111039 | 12.71071886 | 6.443661377 | 7.161945863 |
| ENSMUSG00000101935 | 9.196874066 | 6.260555194 | 9.886114669 | 7.249119049 | 4.297167518 |
| ENSMUSG00000101936 | 14.14903703 | 5.56493795  | 7.767661525 | 1.610915344 | 8.594335036 |
| ENSMUSG00000101937 | 7.074518513 | 8.347406925 | 11.29841676 | 10.47094974 | 10.02672421 |
| ENSMUSG00000101938 | 0.707451851 | 3.478086219 | 0           | 1.610915344 | 1.432389173 |
| ENSMUSG00000101939 | 0           | 0           | 0           | 0           | 0           |
| ENSMUSG00000101940 | 7.781970364 | 9.043024169 | 7.061510478 | 8.860034393 | 4.297167518 |
| ENSMUSG00000101941 | 11.31922962 | 6.260555194 | 7.767661525 | 4.832746033 | 6.445751277 |
| ENSMUSG00000101942 | 218.602622  | 243.4660353 | 235.1482989 | 343.1249683 | 214.1421813 |
| ENSMUSG00000101943 | 10.61177777 | 5.56493795  | 11.29841676 | 6.443661377 | 2.864778345 |
| ENSMUSG00000101944 | 12.73413332 | 9.738641413 | 7.767661525 | 4.02728836  | 5.013362104 |
| ENSMUSG00000101945 | 5.65961481  | 9.043024169 | 3.530755239 | 7.249119049 | 10.02672421 |
| ENSMUSG00000101946 | 11.31922962 | 8.347406925 | 5.649208382 | 4.02728836  | 9.310529622 |
| ENSMUSG00000101947 | 6.367066661 | 2.782468975 | 8.473812573 | 4.832746033 | 2.148583759 |
| ENSMUSG00000101948 | 12.73413332 | 3.478086219 | 4.236906287 | 4.02728836  | 3.580972932 |
| ENSMUSG00000101949 | 4.952162959 | 6.260555194 | 10.59226572 | 11.27640741 | 8.594335036 |
| ENSMUSG00000101950 | 2.122355554 | 3.478086219 | 4.943057334 | 0.805457672 | 1.432389173 |
| ENSMUSG00000101951 | 3.537259256 | 9.738641413 | 7.061510478 | 8.860034393 | 7.87814045  |
| ENSMUSG00000101952 | 24.76081479 | 42.43265187 | 29.65834401 | 33.02376456 | 27.21539428 |
| ENSMUSG00000101953 | 5.65961481  | 6.260555194 | 4.943057334 | 5.638203705 | 9.310529622 |
| ENSMUSG00000101954 | 4.244711108 | 2.782468975 | 2.824604191 | 2.416373016 | 3.580972932 |
| ENSMUSG00000101955 | 6.367066661 | 2.086851731 | 4.943057334 | 3.221830688 | 4.297167518 |
| ENSMUSG00000101956 | 4.952162959 | 6.956172438 | 6.35535943  | 0.805457672 | 1.432389173 |
| ENSMUSG00000101957 | 11.31922962 | 9.043024169 | 7.061510478 | 4.832746033 | 8.594335036 |
| ENSMUSG00000101958 | 6.367066661 | 9.043024169 | 4.943057334 | 5.638203705 | 3.580972932 |
| ENSMUSG00000101960 | 5.65961481  | 2.782468975 | 2.118453143 | 4.02728836  | 2.864778345 |
| ENSMUSG00000101961 | 8.489422215 | 2.782468975 | 7.767661525 | 4.832746033 | 3.580972932 |
| ENSMUSG00000101962 | 3.537259256 | 4.869320706 | 4.236906287 | 5.638203705 | 5.729556691 |
| ENSMUSG00000101963 | 8.489422215 | 6.956172438 | 7.061510478 | 4.832746033 | 7.161945863 |
| ENSMUSG00000101964 | 101.1656147 | 109.9075245 | 120.0456781 | 70.88027514 | 62.30892901 |
| ENSMUSG00000101965 | 7.074518513 | 7.651789682 | 9.179963621 | 8.860034393 | 7.161945863 |
| ENSMUSG00000101966 | 5.65961481  | 6.956172438 | 8.473812573 | 4.832746033 | 7.161945863 |
| ENSMUSG00000101967 | 4.952162959 | 9.738641413 | 9.886114669 | 4.832746033 | 4.297167518 |
| ENSMUSG00000101968 | 7.074518513 | 11.1298759  | 7.767661525 | 4.02728836  | 2.148583759 |
| ENSMUSG00000101969 | 7.074518513 | 6.956172438 | 3.530755239 | 5.638203705 | 10.02672421 |
| ENSMUSG00000101970 | 0           | 1.391234488 | 0.706151048 | 0.805457672 | 0           |
| ENSMUSG00000101971 | 5.65961481  | 5.56493795  | 7.767661525 | 3.221830688 | 2.864778345 |
| ENSMUSG00000101972 | 3.537259256 | 8.347406925 | 9.179963621 | 2.416373016 | 5.013362104 |
| ENSMUSG00000101973 | 11.31922962 | 12.52111039 | 12.71071886 | 7.249119049 | 5.729556691 |

|                    |             |             |             |             |             |
|--------------------|-------------|-------------|-------------|-------------|-------------|
| ENSMUSG00000101974 | 9.196874066 | 6.956172438 | 9.179963621 | 4.02728836  | 7.87814045  |
| ENSMUSG00000101975 | 9.196874066 | 7.651789682 | 7.061510478 | 5.638203705 | 5.013362104 |
| ENSMUSG00000101976 | 11.31922962 | 6.260555194 | 11.29841676 | 4.02728836  | 6.445751277 |
| ENSMUSG00000101977 | 3.537259256 | 8.347406925 | 6.35535943  | 0           | 2.864778345 |
| ENSMUSG00000101978 | 1.414903703 | 0.695617244 | 1.412302096 | 0           | 1.432389173 |
| ENSMUSG00000101979 | 10.61177777 | 9.043024169 | 6.35535943  | 1.610915344 | 5.729556691 |
| ENSMUSG00000101980 | 4.952162959 | 3.478086219 | 3.530755239 | 3.221830688 | 4.297167518 |
| ENSMUSG00000101981 | 7.074518513 | 4.173703463 | 5.649208382 | 1.610915344 | 9.310529622 |
| ENSMUSG00000101982 | 6.367066661 | 2.782468975 | 7.767661525 | 4.02728836  | 5.729556691 |
| ENSMUSG00000101983 | 2.122355554 | 1.391234488 | 4.236906287 | 8.054576721 | 5.013362104 |
| ENSMUSG00000101984 | 4.952162959 | 8.347406925 | 4.943057334 | 2.416373016 | 2.148583759 |
| ENSMUSG00000101985 | 6.367066661 | 6.260555194 | 7.061510478 | 4.02728836  | 8.594335036 |
| ENSMUSG00000101986 | 9.904325918 | 8.347406925 | 6.35535943  | 4.832746033 | 2.148583759 |
| ENSMUSG00000101987 | 4.244711108 | 5.56493795  | 7.767661525 | 3.221830688 | 5.013362104 |
| ENSMUSG00000101988 | 3.537259256 | 1.391234488 | 5.649208382 | 4.02728836  | 1.432389173 |
| ENSMUSG00000101989 | 6.367066661 | 6.956172438 | 10.59226572 | 0.805457672 | 5.729556691 |
| ENSMUSG00000101990 | 8.489422215 | 5.56493795  | 6.35535943  | 1.610915344 | 2.864778345 |
| ENSMUSG00000101991 | 10.61177777 | 4.173703463 | 5.649208382 | 9.665492065 | 8.594335036 |
| ENSMUSG00000101992 | 6.367066661 | 5.56493795  | 7.061510478 | 0.805457672 | 2.864778345 |
| ENSMUSG00000101993 | 6.367066661 | 2.782468975 | 5.649208382 | 3.221830688 | 5.013362104 |
| ENSMUSG00000101994 | 7.781970364 | 5.56493795  | 7.767661525 | 4.02728836  | 5.729556691 |
| ENSMUSG00000101995 | 8.489422215 | 2.086851731 | 4.236906287 | 3.221830688 | 7.87814045  |
| ENSMUSG00000101996 | 7.781970364 | 7.651789682 | 8.473812573 | 5.638203705 | 4.297167518 |
| ENSMUSG00000101997 | 7.781970364 | 9.738641413 | 12.71071886 | 8.860034393 | 7.87814045  |
| ENSMUSG00000101998 | 7.074518513 | 9.043024169 | 7.061510478 | 1.610915344 | 4.297167518 |
| ENSMUSG00000102000 | 7.781970364 | 5.56493795  | 5.649208382 | 5.638203705 | 5.729556691 |
| ENSMUSG00000102001 | 11.31922962 | 9.738641413 | 5.649208382 | 4.02728836  | 9.310529622 |
| ENSMUSG00000102002 | 6.367066661 | 6.260555194 | 4.943057334 | 5.638203705 | 12.17530797 |
| ENSMUSG00000102003 | 7.781970364 | 6.956172438 | 7.061510478 | 4.832746033 | 5.013362104 |
| ENSMUSG00000102004 | 13.44158517 | 10.43425866 | 4.943057334 | 4.832746033 | 8.594335036 |
| ENSMUSG00000102005 | 5.65961481  | 5.56493795  | 5.649208382 | 0.805457672 | 5.729556691 |
| ENSMUSG00000102006 | 7.074518513 | 6.956172438 | 9.179963621 | 7.249119049 | 5.729556691 |
| ENSMUSG00000102007 | 12.73413332 | 2.782468975 | 7.767661525 | 4.02728836  | 5.013362104 |
| ENSMUSG00000102008 | 6.367066661 | 6.956172438 | 2.118453143 | 1.610915344 | 5.013362104 |
| ENSMUSG00000102009 | 12.73413332 | 4.173703463 | 4.236906287 | 4.832746033 | 5.013362104 |
| ENSMUSG00000102010 | 8.489422215 | 3.478086219 | 4.943057334 | 0.805457672 | 2.864778345 |
| ENSMUSG00000102011 | 7.781970364 | 6.260555194 | 5.649208382 | 4.832746033 | 3.580972932 |
| ENSMUSG00000102012 | 12.73413332 | 10.43425866 | 8.473812573 | 7.249119049 | 4.297167518 |
| ENSMUSG00000102013 | 11.31922962 | 4.173703463 | 7.061510478 | 7.249119049 | 7.161945863 |
| ENSMUSG00000102014 | 110.3624888 | 149.5577074 | 124.2825844 | 235.9990979 | 177.6162574 |
| ENSMUSG00000102015 | 5.65961481  | 5.56493795  | 4.943057334 | 3.221830688 | 4.297167518 |
| ENSMUSG00000102016 | 4.952162959 | 3.478086219 | 7.767661525 | 2.416373016 | 4.297167518 |
| ENSMUSG00000102017 | 12.02668147 | 6.956172438 | 6.35535943  | 2.416373016 | 6.445751277 |

|                    |             |             |             |             |             |
|--------------------|-------------|-------------|-------------|-------------|-------------|
| ENSMUSG00000102019 | 5.65961481  | 5.56493795  | 4.943057334 | 1.610915344 | 3.580972932 |
| ENSMUSG00000102020 | 12.02668147 | 6.260555194 | 7.061510478 | 4.832746033 | 5.729556691 |
| ENSMUSG00000102021 | 0           | 0           | 0           | 0           | 0           |
| ENSMUSG00000102022 | 3.537259256 | 6.260555194 | 3.530755239 | 5.638203705 | 3.580972932 |
| ENSMUSG00000102023 | 7.781970364 | 3.478086219 | 7.767661525 | 5.638203705 | 4.297167518 |
| ENSMUSG00000102024 | 9.196874066 | 6.260555194 | 7.767661525 | 4.832746033 | 9.310529622 |
| ENSMUSG00000102025 | 2.829807405 | 4.173703463 | 2.824604191 | 0.805457672 | 5.013362104 |
| ENSMUSG00000102026 | 4.244711108 | 4.869320706 | 7.061510478 | 2.416373016 | 2.148583759 |
| ENSMUSG00000102027 | 7.781970364 | 4.173703463 | 11.29841676 | 7.249119049 | 6.445751277 |
| ENSMUSG00000102028 | 10.61177777 | 7.651789682 | 10.59226572 | 9.665492065 | 2.864778345 |
| ENSMUSG00000102029 | 7.781970364 | 4.173703463 | 5.649208382 | 4.02728836  | 7.87814045  |
| ENSMUSG00000102031 | 9.904325918 | 1.391234488 | 4.236906287 | 3.221830688 | 2.864778345 |
| ENSMUSG00000102032 | 4.952162959 | 2.782468975 | 4.943057334 | 4.02728836  | 2.148583759 |
| ENSMUSG00000102033 | 12.02668147 | 12.52111039 | 4.943057334 | 2.416373016 | 7.161945863 |
| ENSMUSG00000102034 | 0           | 0           | 0           | 0           | 0           |
| ENSMUSG00000102035 | 8.489422215 | 5.56493795  | 5.649208382 | 3.221830688 | 7.161945863 |
| ENSMUSG00000102036 | 7.781970364 | 4.869320706 | 6.35535943  | 4.832746033 | 5.013362104 |
| ENSMUSG00000102038 | 0           | 0           | 0           | 0           | 0           |
| ENSMUSG00000102039 | 3.537259256 | 4.869320706 | 6.35535943  | 2.416373016 | 2.148583759 |
| ENSMUSG00000102040 | 0           | 0           | 0           | 0.805457672 | 0           |
| ENSMUSG00000102041 | 9.904325918 | 7.651789682 | 4.943057334 | 7.249119049 | 3.580972932 |
| ENSMUSG00000102042 | 4.244711108 | 4.869320706 | 2.824604191 | 4.832746033 | 4.297167518 |
| ENSMUSG00000102043 | 8.489422215 | 2.782468975 | 7.767661525 | 4.02728836  | 10.02672421 |
| ENSMUSG00000102044 | 3.537259256 | 5.56493795  | 7.767661525 | 1.610915344 | 3.580972932 |
| ENSMUSG00000102046 | 7.781970364 | 8.347406925 | 11.29841676 | 0.805457672 | 6.445751277 |
| ENSMUSG00000102047 | 9.904325918 | 9.738641413 | 6.35535943  | 3.221830688 | 6.445751277 |
| ENSMUSG00000102048 | 7.074518513 | 7.651789682 | 2.118453143 | 4.02728836  | 6.445751277 |
| ENSMUSG00000102050 | 1.414903703 | 3.478086219 | 7.767661525 | 3.221830688 | 4.297167518 |
| ENSMUSG00000102051 | 9.196874066 | 10.43425866 | 7.061510478 | 8.860034393 | 7.161945863 |
| ENSMUSG00000102052 | 6.367066661 | 9.738641413 | 7.061510478 | 6.443661377 | 7.161945863 |
| ENSMUSG00000102054 | 5.65961481  | 3.478086219 | 3.530755239 | 4.02728836  | 2.148583759 |
| ENSMUSG00000102055 | 7.781970364 | 8.347406925 | 7.061510478 | 8.860034393 | 8.594335036 |
| ENSMUSG00000102056 | 9.904325918 | 6.260555194 | 7.767661525 | 2.416373016 | 4.297167518 |
| ENSMUSG00000102057 | 6.367066661 | 4.869320706 | 7.767661525 | 8.054576721 | 7.87814045  |
| ENSMUSG00000102058 | 5.65961481  | 1.391234488 | 7.061510478 | 4.02728836  | 1.432389173 |
| ENSMUSG00000102059 | 19.10119998 | 27.82468975 | 30.36449505 | 55.57657937 | 42.97167518 |
| ENSMUSG00000102060 | 6.367066661 | 4.869320706 | 7.061510478 | 8.054576721 | 8.594335036 |
| ENSMUSG00000102061 | 3.537259256 | 3.478086219 | 2.118453143 | 4.832746033 | 2.148583759 |
| ENSMUSG00000102062 | 2.122355554 | 1.391234488 | 3.530755239 | 1.610915344 | 2.148583759 |
| ENSMUSG00000102063 | 13.44158517 | 15.30357936 | 19.06607829 | 10.47094974 | 10.7429188  |
| ENSMUSG00000102064 | 3.537259256 | 4.173703463 | 5.649208382 | 4.832746033 | 8.594335036 |
| ENSMUSG00000102065 | 6.367066661 | 3.478086219 | 9.886114669 | 3.221830688 | 3.580972932 |
| ENSMUSG00000102066 | 1.414903703 | 1.391234488 | 0           | 0.805457672 | 1.432389173 |

|                    |             |             |             |             |             |
|--------------------|-------------|-------------|-------------|-------------|-------------|
| ENSMUSG00000102067 | 7.074518513 | 7.651789682 | 9.179963621 | 5.638203705 | 7.161945863 |
| ENSMUSG00000102068 | 6.367066661 | 7.651789682 | 8.473812573 | 0.805457672 | 6.445751277 |
| ENSMUSG00000102069 | 6.367066661 | 4.869320706 | 3.530755239 | 2.416373016 | 6.445751277 |
| ENSMUSG00000102070 | 0           | 0           | 0           | 0           | 0           |
| ENSMUSG00000102071 | 4.244711108 | 4.869320706 | 4.236906287 | 4.02728836  | 5.729556691 |
| ENSMUSG00000102072 | 4.244711108 | 6.956172438 | 5.649208382 | 1.610915344 | 5.013362104 |
| ENSMUSG00000102073 | 10.61177777 | 11.1298759  | 9.179963621 | 7.249119049 | 7.161945863 |
| ENSMUSG00000102074 | 12.73413332 | 7.651789682 | 7.767661525 | 6.443661377 | 2.148583759 |
| ENSMUSG00000102075 | 7.781970364 | 8.347406925 | 8.473812573 | 12.88732275 | 5.729556691 |
| ENSMUSG00000102076 | 10.61177777 | 9.043024169 | 5.649208382 | 6.443661377 | 3.580972932 |
| ENSMUSG00000102077 | 7.781970364 | 7.651789682 | 6.35535943  | 2.416373016 | 1.432389173 |
| ENSMUSG00000102078 | 7.781970364 | 5.56493795  | 4.943057334 | 7.249119049 | 7.161945863 |
| ENSMUSG00000102079 | 4.952162959 | 3.478086219 | 4.943057334 | 6.443661377 | 4.297167518 |
| ENSMUSG00000102080 | 6.367066661 | 0           | 1.412302096 | 2.416373016 | 1.432389173 |
| ENSMUSG00000102081 | 4.952162959 | 4.869320706 | 4.236906287 | 4.832746033 | 4.297167518 |
| ENSMUSG00000102082 | 6.367066661 | 9.738641413 | 10.59226572 | 5.638203705 | 8.594335036 |
| ENSMUSG00000102083 | 9.196874066 | 5.56493795  | 5.649208382 | 11.27640741 | 3.580972932 |
| ENSMUSG00000102084 | 6.367066661 | 10.43425866 | 15.53532305 | 12.88732275 | 13.60769714 |
| ENSMUSG00000102085 | 9.904325918 | 4.173703463 | 9.179963621 | 4.832746033 | 4.297167518 |
| ENSMUSG00000102086 | 6.367066661 | 11.1298759  | 9.179963621 | 8.054576721 | 12.17530797 |
| ENSMUSG00000102087 | 6.367066661 | 4.869320706 | 4.943057334 | 3.221830688 | 7.161945863 |
| ENSMUSG00000102088 | 9.904325918 | 3.478086219 | 7.767661525 | 2.416373016 | 2.864778345 |
| ENSMUSG00000102089 | 12.02668147 | 7.651789682 | 14.12302096 | 5.638203705 | 5.013362104 |
| ENSMUSG00000102090 | 8.489422215 | 5.56493795  | 11.29841676 | 2.416373016 | 2.148583759 |
| ENSMUSG00000102091 | 9.196874066 | 10.43425866 | 4.943057334 | 4.02728836  | 5.729556691 |
| ENSMUSG00000102092 | 8.489422215 | 4.173703463 | 2.824604191 | 0.805457672 | 7.87814045  |
| ENSMUSG00000102093 | 9.904325918 | 12.52111039 | 17.65377619 | 12.08186508 | 10.7429188  |
| ENSMUSG00000102094 | 2.829807405 | 0.695617244 | 2.118453143 | 1.610915344 | 2.148583759 |
| ENSMUSG00000102095 | 1.414903703 | 2.782468975 | 2.118453143 | 4.02728836  | 3.580972932 |
| ENSMUSG00000102096 | 12.02668147 | 6.956172438 | 10.59226572 | 4.02728836  | 4.297167518 |
| ENSMUSG00000102097 | 55.88869625 | 100.8645003 | 89.68118307 | 124.8459392 | 115.3073284 |
| ENSMUSG00000102098 | 12.02668147 | 4.173703463 | 8.473812573 | 3.221830688 | 7.87814045  |
| ENSMUSG00000102099 | 10.61177777 | 9.738641413 | 4.943057334 | 4.02728836  | 5.729556691 |
| ENSMUSG00000102100 | 9.196874066 | 4.173703463 | 4.943057334 | 5.638203705 | 8.594335036 |
| ENSMUSG00000102101 | 114.6071999 | 143.9927695 | 98.86114669 | 265.8010318 | 201.9668733 |
| ENSMUSG00000102102 | 9.196874066 | 4.869320706 | 2.824604191 | 4.02728836  | 3.580972932 |
| ENSMUSG00000102103 | 4.952162959 | 3.478086219 | 12.00456781 | 3.221830688 | 7.87814045  |
| ENSMUSG00000102104 | 4.952162959 | 5.56493795  | 9.179963621 | 2.416373016 | 5.013362104 |
| ENSMUSG00000102105 | 11.31922962 | 6.260555194 | 7.767661525 | 5.638203705 | 7.161945863 |
| ENSMUSG00000102106 | 7.781970364 | 9.043024169 | 7.061510478 | 4.02728836  | 6.445751277 |
| ENSMUSG00000102107 | 5.65961481  | 4.869320706 | 2.824604191 | 2.416373016 | 5.729556691 |
| ENSMUSG00000102108 | 4.244711108 | 4.869320706 | 7.061510478 | 0.805457672 | 1.432389173 |
| ENSMUSG00000102109 | 9.196874066 | 6.260555194 | 5.649208382 | 4.832746033 | 7.161945863 |



|                    |             |             |             |             |             |
|--------------------|-------------|-------------|-------------|-------------|-------------|
| ENSMUSG00000102110 | 8.489422215 | 4.869320706 | 3.530755239 | 3.221830688 | 2.148583759 |
| ENSMUSG00000102111 | 7.781970364 | 5.56493795  | 7.061510478 | 3.221830688 | 4.297167518 |
| ENSMUSG00000102112 | 98.33580733 | 140.5146832 | 117.927225  | 121.6241085 | 103.848215  |
| ENSMUSG00000102113 | 9.904325918 | 6.260555194 | 7.767661525 | 8.054576721 | 9.310529622 |
| ENSMUSG00000102114 | 14.14903703 | 25.73783802 | 24.71528667 | 9.665492065 | 10.02672421 |
| ENSMUSG00000102115 | 2.829807405 | 8.347406925 | 5.649208382 | 5.638203705 | 4.297167518 |
| ENSMUSG00000102116 | 4.952162959 | 6.956172438 | 3.530755239 | 0.805457672 | 4.297167518 |
| ENSMUSG00000102117 | 12.73413332 | 2.086851731 | 6.35535943  | 8.860034393 | 7.161945863 |
| ENSMUSG00000102118 | 4.244711108 | 5.56493795  | 5.649208382 | 3.221830688 | 2.864778345 |
| ENSMUSG00000102119 | 7.074518513 | 3.478086219 | 4.236906287 | 3.221830688 | 2.148583759 |
| ENSMUSG00000102120 | 5.65961481  | 1.391234488 | 8.473812573 | 1.610915344 | 3.580972932 |
| ENSMUSG00000102121 | 12.02668147 | 6.260555194 | 8.473812573 | 2.416373016 | 8.594335036 |
| ENSMUSG00000102123 | 10.61177777 | 10.43425866 | 8.473812573 | 3.221830688 | 9.310529622 |
| ENSMUSG00000102124 | 8.489422215 | 5.56493795  | 7.767661525 | 6.443661377 | 2.864778345 |
| ENSMUSG00000102125 | 10.61177777 | 2.086851731 | 1.412302096 | 3.221830688 | 6.445751277 |
| ENSMUSG00000102126 | 9.904325918 | 4.173703463 | 7.767661525 | 5.638203705 | 3.580972932 |
| ENSMUSG00000102127 | 2.829807405 | 6.956172438 | 2.118453143 | 4.02728836  | 5.729556691 |
| ENSMUSG00000102128 | 6.367066661 | 7.651789682 | 5.649208382 | 4.02728836  | 7.161945863 |
| ENSMUSG00000102129 | 5.65961481  | 5.56493795  | 2.824604191 | 1.610915344 | 1.432389173 |
| ENSMUSG00000102130 | 12.02668147 | 6.956172438 | 2.824604191 | 4.02728836  | 11.45911338 |
| ENSMUSG00000102131 | 7.074518513 | 2.782468975 | 9.886114669 | 3.221830688 | 5.013362104 |
| ENSMUSG00000102132 | 7.074518513 | 4.869320706 | 4.943057334 | 2.416373016 | 5.729556691 |

|             |
|-------------|
| Activated_3 |
| 35.11542615 |
| 146.0801728 |
| 150.9963324 |
| 109.5601296 |
| 62.50545855 |
| 114.4762893 |
| 28.09234092 |
| 2.809234092 |
| 130.6293853 |
| 150.9963324 |
| 7.725393753 |
| 4.916159661 |
| 3.511542615 |
| 35.81773467 |
| 208.5856313 |
| 9.832319322 |
| 8.427702276 |
| 7.02308523  |
| 14.04617046 |
| 3.511542615 |
| 9.130010799 |
| 91.30010799 |
| 9.130010799 |
| 8.427702276 |
| 69.52854378 |
| 5.618468184 |
| 8.427702276 |
| 8.427702276 |
| 6.320776707 |
| 42.13851138 |
| 4.213851138 |
| 7.02308523  |
| 8.427702276 |
| 12.64155341 |
| 5.618468184 |
| 9.832319322 |
| 6.320776707 |
| 61.1008415  |
| 70.2308523  |
| 12.64155341 |
| 82.87240572 |

|             |
|-------------|
| 251.4264512 |
| 2.106925569 |
| 7.725393753 |
| 70.2308523  |
| 42.8408199  |
| 71.63546935 |
| 127.8201512 |
| 6.320776707 |
| 4.916159661 |
| 4.916159661 |
| 16.85540455 |
| 21.77156421 |
| 4.916159661 |
| 13.34386194 |
| 81.46778867 |
| 4.916159661 |
| 9.832319322 |
| 8.427702276 |
| 13.34386194 |
| 40.03158581 |
| 115.1785978 |
| 10.53462785 |
| 6.320776707 |
| 8.427702276 |
| 7.725393753 |
| 37.92466024 |
| 36.5200432  |
| 73.04008639 |
| 25.98541535 |
| 42.13851138 |
| 2.106925569 |
| 20.36694717 |
| 99.02550175 |
| 8.427702276 |
| 4.213851138 |
| 7.725393753 |
| 150.9963324 |
| 49.86390513 |
| 12.64155341 |
| 157.3171092 |
| 37.22235172 |
| 93.40703356 |
| 9.832319322 |

|             |
|-------------|
| 4.916159661 |
| 3.511542615 |
| 7.02308523  |
| 65.31469264 |
| 23.87848978 |
| 3.511542615 |
| 8.427702276 |
| 7.02308523  |
| 9.130010799 |
| 7.725393753 |
| 40.73389434 |
| 18.96233012 |
| 141.1640131 |
| 20.36694717 |
| 5.618468184 |
| 42.8408199  |
| 128.5224597 |
| 152.4009495 |
| 4.916159661 |
| 9.832319322 |
| 7.725393753 |
| 193.8371524 |
| 7.725393753 |
| 10.53462785 |
| 28.09234092 |
| 42.13851138 |
| 6.320776707 |
| 12.64155341 |
| 13.34386194 |
| 17.55771308 |
| 70.93316082 |
| 68.12392673 |
| 193.8371524 |
| 32.30619206 |
| 9.832319322 |
| 140.4617046 |
| 104.6439699 |
| 11.23693637 |
| 87.08625685 |
| 7.725393753 |
| 156.6148006 |
| 27.3900324  |
| 8.427702276 |

|             |
|-------------|
| 134.8432364 |
| 187.5163756 |
| 84.97933129 |
| 7.02308523  |
| 18.96233012 |
| 164.3401944 |
| 11.93924489 |
| 10.53462785 |
| 85.68163981 |
| 51.26852218 |
| 10.53462785 |
| 61.1008415  |
| 83.57471424 |
| 18.2600216  |
| 77.95624606 |
| 6.320776707 |
| 5.618468184 |
| 115.1785978 |
| 132.7363109 |
| 152.4009495 |
| 97.6208847  |
| 12.64155341 |
| 25.98541535 |
| 7.02308523  |
| 14.04617046 |
| 4.213851138 |
| 35.81773467 |
| 57.58929889 |
| 46.35236252 |
| 96.21626765 |
| 54.07775627 |
| 84.97933129 |
| 5.618468184 |
| 109.5601296 |
| 140.4617046 |
| 6.320776707 |
| 61.1008415  |
| 0           |
| 4.213851138 |
| 95.51395913 |
| 7.725393753 |
| 146.7824813 |
| 141.1640131 |

|             |
|-------------|
| 66.01700116 |
| 66.71930969 |
| 160.8286518 |
| 6.320776707 |
| 9.832319322 |
| 17.55771308 |
| 4.916159661 |
| 9.130010799 |
| 4.916159661 |
| 8.427702276 |
| 160.1263432 |
| 8.427702276 |
| 14.74847898 |
| 187.5163756 |
| 127.8201512 |
| 10.53462785 |
| 6.320776707 |
| 22.47387274 |
| 63.91007559 |
| 4.213851138 |
| 2.106925569 |
| 29.49695797 |
| 20.36694717 |
| 5.618468184 |
| 17.55771308 |
| 0           |
| 4.916159661 |
| 9.130010799 |
| 59.69622446 |
| 169.9586626 |
| 9.832319322 |
| 9.832319322 |
| 16.15309603 |
| 10.53462785 |
| 105.3462785 |
| 160.1263432 |
| 4.916159661 |
| 23.87848978 |
| 9.832319322 |
| 9.832319322 |
| 124.3086086 |
| 72.33777787 |
| 10.53462785 |

|             |
|-------------|
| 9.832319322 |
| 8.427702276 |
| 63.91007559 |
| 4.213851138 |
| 9.130010799 |
| 157.3171092 |
| 41.43620286 |
| 5.618468184 |
| 7.02308523  |
| 38.62696877 |
| 8.427702276 |
| 4.916159661 |
| 6.320776707 |
| 9.832319322 |
| 11.93924489 |
| 10.53462785 |
| 5.618468184 |
| 3.511542615 |
| 325.1688462 |
| 48.45928809 |
| 5.618468184 |
| 111.6670552 |
| 10.53462785 |
| 144.6755557 |
| 119.3924489 |
| 9.832319322 |
| 5.618468184 |
| 2.106925569 |
| 44.24543695 |
| 16.85540455 |
| 8.427702276 |
| 8.427702276 |
| 1.404617046 |
| 5.618468184 |
| 60.39853298 |
| 7.02308523  |
| 7.725393753 |
| 10.53462785 |
| 98.32319322 |
| 9.130010799 |
| 114.4762893 |
| 15.45078751 |
| 21.06925569 |

|             |
|-------------|
| 54.07775627 |
| 9.130010799 |
| 6.320776707 |
| 113.7739807 |
| 58.29160741 |
| 127.1178427 |
| 11.93924489 |
| 28.09234092 |
| 154.5078751 |
| 30.19926649 |
| 6.320776707 |
| 18.2600216  |
| 9.832319322 |
| 4.213851138 |
| 4.916159661 |
| 44.24543695 |
| 3.511542615 |
| 8.427702276 |
| 9.832319322 |
| 28.09234092 |
| 16.15309603 |
| 40.73389434 |
| 136.950162  |
| 7.02308523  |
| 3.511542615 |
| 6.320776707 |
| 12.64155341 |
| 13.34386194 |
| 7.02308523  |
| 9.832319322 |
| 7.725393753 |
| 31.60388354 |
| 65.31469264 |
| 7.02308523  |
| 10.53462785 |
| 53.37544775 |
| 5.618468184 |
| 15.45078751 |
| 31.60388354 |
| 7.725393753 |
| 4.213851138 |
| 68.82623526 |
| 6.320776707 |



|             |
|-------------|
| 9.130010799 |
| 93.40703356 |
| 9.130010799 |
| 83.57471424 |
| 10.53462785 |
| 4.213851138 |
| 54.07775627 |
| 136.2478535 |
| 28.09234092 |
| 7.725393753 |
| 5.618468184 |
| 42.13851138 |
| 26.68772387 |
| 41.43620286 |
| 5.618468184 |
| 7.02308523  |
| 18.2600216  |
| 7.02308523  |
| 39.32927729 |
| 22.47387274 |
| 7.725393753 |
| 7.725393753 |
| 15.45078751 |
| 294.2672711 |
| 9.832319322 |
| 38.62696877 |
| 41.43620286 |
| 242.2964404 |
| 4.213851138 |
| 36.5200432  |
| 32.30619206 |
| 3.511542615 |
| 141.8663216 |
| 9.832319322 |
| 36.5200432  |
| 4.916159661 |
| 101.1324273 |
| 4.213851138 |
| 11.23693637 |
| 15.45078751 |
| 6.320776707 |
| 386.9719962 |
| 33.00850058 |

|             |
|-------------|
| 49.86390513 |
| 51.9708307  |
| 6.320776707 |
| 147.4847898 |
| 10.53462785 |
| 8.427702276 |
| 2.809234092 |
| 4.213851138 |
| 9.832319322 |
| 7.725393753 |
| 39.32927729 |
| 7.02308523  |
| 7.02308523  |
| 125.7132256 |
| 5.618468184 |
| 30.19926649 |
| 5.618468184 |
| 7.02308523  |
| 63.20776707 |
| 5.618468184 |
| 23.87848978 |
| 3.511542615 |
| 9.832319322 |
| 9.130010799 |
| 10.53462785 |
| 7.725393753 |
| 5.618468184 |
| 4.916159661 |
| 43.54312843 |
| 9.832319322 |
| 1.404617046 |
| 6.320776707 |
| 9.832319322 |
| 3.511542615 |
| 27.3900324  |
| 8.427702276 |
| 21.77156421 |
| 218.4179507 |
| 118.6901404 |
| 36.5200432  |
| 29.49695797 |
| 7.725393753 |
| 60.39853298 |

|             |
|-------------|
| 43.54312843 |
| 4.916159661 |
| 0           |
| 63.20776707 |
| 6.320776707 |
| 74.44470344 |
| 4.916159661 |
| 5.618468184 |
| 20.36694717 |
| 8.427702276 |
| 3.511542615 |
| 34.41311763 |
| 4.916159661 |
| 4.916159661 |
| 4.916159661 |
| 8.427702276 |
| 7.02308523  |
| 73.74239492 |
| 2.106925569 |
| 85.68163981 |
| 238.7848978 |
| 10.53462785 |
| 15.45078751 |
| 8.427702276 |
| 9.130010799 |
| 28.79464944 |
| 217.0133336 |
| 20.36694717 |
| 4.916159661 |
| 8.427702276 |
| 33.00850058 |
| 9.130010799 |
| 7.02308523  |
| 128.5224597 |
| 190.3256097 |
| 93.40703356 |
| 15.45078751 |
| 6.320776707 |
| 18.2600216  |
| 35.81773467 |
| 33.00850058 |
| 7.02308523  |
| 4.213851138 |

|             |
|-------------|
| 6.320776707 |
| 4.916159661 |
| 4.916159661 |
| 7.725393753 |
| 137.6524705 |
| 146.0801728 |
| 7.725393753 |
| 39.32927729 |
| 44.94774547 |
| 13.34386194 |
| 14.74847898 |
| 20.36694717 |
| 112.3693637 |
| 152.4009495 |
| 5.618468184 |
| 52.67313923 |
| 103.9416614 |
| 91.30010799 |
| 60.39853298 |
| 65.31469264 |
| 8.427702276 |
| 5.618468184 |
| 35.81773467 |
| 7.02308523  |
| 11.93924489 |
| 11.23693637 |
| 84.27702276 |
| 175.5771308 |
| 5.618468184 |
| 30.19926649 |
| 9.130010799 |
| 142.5686302 |
| 82.87240572 |
| 100.4301188 |
| 48.45928809 |
| 28.09234092 |
| 115.1785978 |
| 6.320776707 |
| 141.1640131 |
| 100.4301188 |
| 26.68772387 |
| 16.15309603 |
| 8.427702276 |

|             |
|-------------|
| 108.1555125 |
| 13.34386194 |
| 25.28310683 |
| 7.725393753 |
| 32.30619206 |
| 204.3717802 |
| 9.832319322 |
| 10.53462785 |
| 5.618468184 |
| 7.725393753 |
| 8.427702276 |
| 2.809234092 |
| 9.130010799 |
| 9.130010799 |
| 77.95624606 |
| 4.213851138 |
| 7.725393753 |
| 5.618468184 |
| 2.106925569 |
| 160.1263432 |
| 6.320776707 |
| 31.60388354 |
| 94.81165061 |
| 26.68772387 |
| 7.725393753 |
| 110.2624381 |
| 7.725393753 |
| 7.725393753 |
| 40.03158581 |
| 6.320776707 |
| 26.68772387 |
| 71.63546935 |
| 10.53462785 |
| 118.6901404 |
| 7.725393753 |
| 30.90157501 |
| 182.600216  |
| 7.725393753 |
| 6.320776707 |
| 94.10934208 |
| 113.7739807 |
| 101.1324273 |
| 10.53462785 |

|             |
|-------------|
| 58.29160741 |
| 4.916159661 |
| 49.86390513 |
| 49.86390513 |
| 9.130010799 |
| 195.9440779 |
| 9.130010799 |
| 183.3025245 |
| 19.66463864 |
| 24.58079831 |
| 64.61238412 |
| 242.998749  |
| 150.9963324 |
| 19.66463864 |
| 6.320776707 |
| 8.427702276 |
| 99.72781027 |
| 5.618468184 |
| 64.61238412 |
| 3.511542615 |
| 6.320776707 |
| 8.427702276 |
| 4.213851138 |
| 11.23693637 |
| 124.3086086 |
| 8.427702276 |
| 5.618468184 |
| 5.618468184 |
| 11.23693637 |
| 7.02308523  |
| 4.916159661 |
| 30.90157501 |
| 8.427702276 |
| 4.213851138 |
| 10.53462785 |
| 9.832319322 |
| 7.02308523  |
| 5.618468184 |
| 7.725393753 |
| 12.64155341 |
| 7.02308523  |
| 7.02308523  |
| 4.213851138 |

|             |
|-------------|
| 28.09234092 |
| 121.4993745 |
| 13.34386194 |
| 8.427702276 |
| 7.725393753 |
| 9.832319322 |
| 4.213851138 |
| 23.87848978 |
| 19.66463864 |
| 100.4301188 |
| 27.3900324  |
| 80.06317162 |
| 82.87240572 |
| 5.618468184 |
| 11.93924489 |
| 193.1348438 |
| 176.2794393 |
| 80.06317162 |
| 11.23693637 |
| 82.17009719 |
| 61.80315003 |
| 144.6755557 |
| 146.7824813 |
| 32.30619206 |
| 23.17618126 |
| 158.7217262 |
| 5.618468184 |
| 8.427702276 |
| 162.2332688 |
| 6.320776707 |
| 6.320776707 |
| 21.77156421 |
| 15.45078751 |
| 79.3608631  |
| 221.2271848 |
| 24.58079831 |
| 2.809234092 |
| 3.511542615 |
| 7.725393753 |
| 7.02308523  |
| 11.93924489 |
| 8.427702276 |
| 22.47387274 |

|             |
|-------------|
| 77.95624606 |
| 92.70472504 |
| 8.427702276 |
| 101.1324273 |
| 9.130010799 |
| 7.725393753 |
| 11.23693637 |
| 11.23693637 |
| 130.6293853 |
| 141.8663216 |
| 9.130010799 |
| 21.77156421 |
| 8.427702276 |
| 8.427702276 |
| 15.45078751 |
| 5.618468184 |
| 5.618468184 |
| 4.213851138 |
| 4.916159661 |
| 15.45078751 |
| 5.618468184 |
| 25.98541535 |
| 54.7800648  |
| 7.725393753 |
| 228.25027   |
| 125.0109171 |
| 8.427702276 |
| 17.55771308 |
| 4.213851138 |
| 7.02308523  |
| 28.09234092 |
| 6.320776707 |
| 87.08625685 |
| 4.213851138 |
| 116.5832148 |
| 109.5601296 |
| 7.725393753 |
| 86.38394833 |
| 9.832319322 |
| 19.66463864 |
| 7.725393753 |
| 6.320776707 |
| 152.4009495 |



|             |
|-------------|
| 4.916159661 |
| 71.63546935 |
| 28.79464944 |
| 18.2600216  |
| 6.320776707 |
| 7.725393753 |
| 129.2247682 |
| 69.52854378 |
| 5.618468184 |
| 4.213851138 |
| 63.20776707 |
| 49.16159661 |
| 54.07775627 |
| 9.832319322 |
| 7.725393753 |
| 25.98541535 |
| 118.6901404 |
| 14.74847898 |
| 5.618468184 |
| 4.916159661 |
| 4.916159661 |
| 97.6208847  |
| 92.00241652 |
| 6.320776707 |
| 3.511542615 |
| 134.1409279 |
| 30.90157501 |
| 6.320776707 |
| 97.6208847  |
| 6.320776707 |
| 14.04617046 |
| 2.106925569 |
| 53.37544775 |
| 2.809234092 |
| 45.650054   |
| 39.32927729 |
| 3.511542615 |
| 27.3900324  |
| 7.725393753 |
| 25.98541535 |
| 77.95624606 |
| 7.725393753 |
| 8.427702276 |

|             |
|-------------|
| 8.427702276 |
| 134.8432364 |
| 2.809234092 |
| 2.809234092 |
| 37.22235172 |
| 70.93316082 |
| 61.80315003 |
| 45.650054   |
| 6.320776707 |
| 4.916159661 |
| 6.320776707 |
| 4.916159661 |
| 100.4301188 |
| 9.832319322 |
| 107.453204  |
| 213.501791  |
| 134.8432364 |
| 12.64155341 |
| 11.93924489 |
| 7.02308523  |
| 47.05467104 |
| 73.74239492 |
| 5.618468184 |
| 5.618468184 |
| 4.213851138 |
| 5.618468184 |
| 114.4762893 |
| 147.4847898 |
| 96.21626765 |
| 5.618468184 |
| 11.23693637 |
| 108.8578211 |
| 77.95624606 |
| 158.0194177 |
| 166.44712   |
| 7.02308523  |
| 9.130010799 |
| 5.618468184 |
| 99.72781027 |
| 143.9732472 |
| 25.28310683 |
| 7.725393753 |
| 20.36694717 |

|             |
|-------------|
| 146.0801728 |
| 17.55771308 |
| 11.23693637 |
| 88.4908739  |
| 10.53462785 |
| 8.427702276 |
| 108.8578211 |
| 25.98541535 |
| 11.93924489 |
| 131.3316938 |
| 8.427702276 |
| 77.25393753 |
| 84.27702276 |
| 98.32319322 |
| 6.320776707 |
| 6.320776707 |
| 7.02308523  |
| 51.26852218 |
| 7.02308523  |
| 56.88699036 |
| 80.76548015 |
| 9.130010799 |
| 7.02308523  |
| 5.618468184 |
| 204.3717802 |
| 3.511542615 |
| 4.916159661 |
| 34.41311763 |
| 4.916159661 |
| 89.19318242 |
| 61.80315003 |
| 7.725393753 |
| 7.725393753 |
| 7.02308523  |
| 6.320776707 |
| 141.1640131 |
| 9.832319322 |
| 6.320776707 |
| 5.618468184 |
| 7.02308523  |
| 54.07775627 |
| 8.427702276 |
| 9.130010799 |

|             |
|-------------|
| 10.53462785 |
| 101.8347358 |
| 89.89549095 |
| 58.29160741 |
| 44.94774547 |
| 48.45928809 |
| 35.81773467 |
| 110.2624381 |
| 104.6439699 |
| 12.64155341 |
| 118.6901404 |
| 6.320776707 |
| 3.511542615 |
| 9.130010799 |
| 119.3924489 |
| 18.96233012 |
| 13.34386194 |
| 9.130010799 |
| 113.7739807 |
| 45.650054   |
| 68.12392673 |
| 12.64155341 |
| 40.03158581 |
| 11.93924489 |
| 86.38394833 |
| 9.130010799 |
| 7.02308523  |
| 109.5601296 |
| 7.725393753 |
| 63.20776707 |
| 25.98541535 |
| 4.916159661 |
| 262.6633876 |
| 33.00850058 |
| 21.77156421 |
| 42.13851138 |
| 7.02308523  |
| 8.427702276 |
| 81.46778867 |
| 166.44712   |
| 30.19926649 |
| 6.320776707 |
| 5.618468184 |

|             |
|-------------|
| 23.17618126 |
| 58.99391593 |
| 53.37544775 |
| 22.47387274 |
| 5.618468184 |
| 6.320776707 |
| 11.93924489 |
| 9.832319322 |
| 2.106925569 |
| 15.45078751 |
| 47.75697957 |
| 11.23693637 |
| 174.1725137 |
| 10.53462785 |
| 15.45078751 |
| 6.320776707 |
| 94.81165061 |
| 2.809234092 |
| 8.427702276 |
| 9.130010799 |
| 6.320776707 |
| 11.93924489 |
| 82.17009719 |
| 52.67313923 |
| 153.8055665 |
| 10.53462785 |
| 139.7593961 |
| 54.07775627 |
| 160.8286518 |
| 112.3693637 |
| 54.7800648  |
| 98.32319322 |
| 42.13851138 |
| 11.23693637 |
| 144.6755557 |
| 156.6148006 |
| 28.09234092 |
| 47.05467104 |
| 147.4847898 |
| 77.95624606 |
| 148.8894069 |
| 101.1324273 |
| 6.320776707 |

|             |
|-------------|
| 77.25393753 |
| 59.69622446 |
| 8.427702276 |
| 47.75697957 |
| 75.14701196 |
| 7.02308523  |
| 75.84932049 |
| 6.320776707 |
| 7.725393753 |
| 8.427702276 |
| 2.809234092 |
| 3.511542615 |
| 175.5771308 |
| 40.73389434 |
| 52.67313923 |
| 186.1117586 |
| 9.832319322 |
| 11.93924489 |
| 230.3571956 |
| 4.916159661 |
| 40.03158581 |
| 4.916159661 |
| 41.43620286 |
| 191.0279183 |
| 54.7800648  |
| 33.7108091  |
| 149.5917154 |
| 52.67313923 |
| 35.81773467 |
| 9.130010799 |
| 6.320776707 |
| 1.404617046 |
| 11.93924489 |
| 1.404617046 |
| 10.53462785 |
| 7.725393753 |
| 26.68772387 |
| 27.3900324  |
| 56.18468184 |
| 17.55771308 |
| 98.32319322 |
| 112.3693637 |
| 123.6063001 |

|             |
|-------------|
| 4.916159661 |
| 54.07775627 |
| 6.320776707 |
| 2.106925569 |
| 5.618468184 |
| 25.28310683 |
| 27.3900324  |
| 5.618468184 |
| 16.85540455 |
| 9.130010799 |
| 44.24543695 |
| 103.2393529 |
| 2.809234092 |
| 193.8371524 |
| 4.916159661 |
| 38.62696877 |
| 6.320776707 |
| 3.511542615 |
| 4.213851138 |
| 46.35236252 |
| 2.809234092 |
| 8.427702276 |
| 82.17009719 |
| 13.34386194 |
| 65.31469264 |
| 4.916159661 |
| 47.05467104 |
| 5.618468184 |
| 7.02308523  |
| 9.130010799 |
| 61.1008415  |
| 7.725393753 |
| 63.20776707 |
| 5.618468184 |
| 146.0801728 |
| 4.916159661 |
| 114.4762893 |
| 134.1409279 |
| 8.427702276 |
| 7.725393753 |
| 7.02308523  |
| 79.3608631  |
| 5.618468184 |

|             |
|-------------|
| 75.14701196 |
| 4.213851138 |
| 77.95624606 |
| 20.36694717 |
| 7.02308523  |
| 8.427702276 |
| 7.725393753 |
| 179.0886734 |
| 175.5771308 |
| 9.832319322 |
| 88.4908739  |
| 65.31469264 |
| 51.26852218 |
| 8.427702276 |
| 8.427702276 |
| 95.51395913 |
| 79.3608631  |
| 7.02308523  |
| 4.916159661 |
| 35.11542615 |
| 9.130010799 |
| 7.02308523  |
| 10.53462785 |
| 24.58079831 |
| 7.725393753 |
| 16.85540455 |
| 51.26852218 |
| 11.23693637 |
| 52.67313923 |
| 25.28310683 |
| 2.809234092 |
| 6.320776707 |
| 61.1008415  |
| 73.74239492 |
| 8.427702276 |
| 66.71930969 |
| 37.22235172 |
| 9.832319322 |
| 92.00241652 |
| 11.93924489 |
| 7.02308523  |
| 9.130010799 |
| 6.320776707 |



|             |
|-------------|
| 7.02308523  |
| 171.3632796 |
| 8.427702276 |
| 19.66463864 |
| 8.427702276 |
| 130.6293853 |
| 37.92466024 |
| 68.12392673 |
| 2.809234092 |
| 2.106925569 |
| 4.213851138 |
| 8.427702276 |
| 149.5917154 |
| 80.76548015 |
| 102.5370444 |
| 5.618468184 |
| 7.02308523  |
| 7.02308523  |
| 23.17618126 |
| 50.56621366 |
| 111.6670552 |
| 4.916159661 |
| 7.725393753 |
| 4.916159661 |
| 37.92466024 |
| 15.45078751 |
| 3.511542615 |
| 72.33777787 |
| 34.41311763 |
| 3.511542615 |
| 59.69622446 |
| 3.511542615 |
| 7.725393753 |
| 89.89549095 |
| 6.320776707 |
| 42.13851138 |
| 7.725393753 |
| 4.916159661 |
| 7.02308523  |
| 6.320776707 |
| 5.618468184 |
| 80.06317162 |
| 94.10934208 |

|             |
|-------------|
| 133.4386194 |
| 14.74847898 |
| 9.832319322 |
| 84.27702276 |
| 105.3462785 |
| 3.511542615 |
| 42.8408199  |
| 9.832319322 |
| 63.20776707 |
| 47.75697957 |
| 208.5856313 |
| 192.4325353 |
| 115.8809063 |
| 11.93924489 |
| 4.916159661 |
| 9.832319322 |
| 1.404617046 |
| 9.130010799 |
| 103.2393529 |
| 35.11542615 |
| 5.618468184 |
| 4.916159661 |
| 85.68163981 |
| 20.36694717 |
| 141.1640131 |
| 68.82623526 |
| 7.02308523  |
| 99.72781027 |
| 125.0109171 |
| 9.832319322 |
| 120.0947574 |
| 56.18468184 |
| 35.11542615 |
| 95.51395913 |
| 61.80315003 |
| 8.427702276 |
| 47.75697957 |
| 5.618468184 |
| 16.85540455 |
| 10.53462785 |
| 7.725393753 |
| 16.85540455 |
| 146.0801728 |

|             |
|-------------|
| 150.9963324 |
| 7.02308523  |
| 33.7108091  |
| 9.832319322 |
| 9.130010799 |
| 18.2600216  |
| 106.7508955 |
| 95.51395913 |
| 7.02308523  |
| 59.69622446 |
| 129.2247682 |
| 89.19318242 |
| 9.130010799 |
| 7.725393753 |
| 40.03158581 |
| 193.1348438 |
| 6.320776707 |
| 8.427702276 |
| 6.320776707 |
| 5.618468184 |
| 124.3086086 |
| 128.5224597 |
| 26.68772387 |
| 94.10934208 |
| 5.618468184 |
| 7.725393753 |
| 65.31469264 |
| 3.511542615 |
| 36.5200432  |
| 4.213851138 |
| 8.427702276 |
| 7.725393753 |
| 14.74847898 |
| 49.86390513 |
| 124.3086086 |
| 92.70472504 |
| 70.93316082 |
| 4.916159661 |
| 7.725393753 |
| 65.31469264 |
| 7.725393753 |
| 47.75697957 |
| 20.36694717 |

|             |
|-------------|
| 9.832319322 |
| 35.11542615 |
| 19.66463864 |
| 109.5601296 |
| 116.5832148 |
| 117.9878319 |
| 3.511542615 |
| 9.832319322 |
| 10.53462785 |
| 4.213851138 |
| 74.44470344 |
| 78.65855458 |
| 23.87848978 |
| 16.85540455 |
| 4.916159661 |
| 30.19926649 |
| 3.511542615 |
| 72.33777787 |
| 145.3778643 |
| 9.130010799 |
| 68.12392673 |
| 7.725393753 |
| 12.64155341 |
| 4.213851138 |
| 8.427702276 |
| 11.93924489 |
| 28.09234092 |
| 7.725393753 |
| 4.213851138 |
| 4.213851138 |
| 6.320776707 |
| 7.02308523  |
| 7.02308523  |
| 4.213851138 |
| 132.7363109 |
| 7.725393753 |
| 6.320776707 |
| 5.618468184 |
| 7.725393753 |
| 14.74847898 |
| 6.320776707 |
| 47.75697957 |
| 9.130010799 |

|             |
|-------------|
| 101.8347358 |
| 140.4617046 |
| 169.256354  |
| 6.320776707 |
| 3.511542615 |
| 4.916159661 |
| 151.698641  |
| 4.213851138 |
| 79.3608631  |
| 2.809234092 |
| 7.725393753 |
| 127.1178427 |
| 43.54312843 |
| 115.1785978 |
| 35.11542615 |
| 6.320776707 |
| 7.02308523  |
| 107.453204  |
| 65.31469264 |
| 144.6755557 |
| 14.74847898 |
| 12.64155341 |
| 69.52854378 |
| 110.2624381 |
| 158.7217262 |
| 7.02308523  |
| 4.213851138 |
| 6.320776707 |
| 141.8663216 |
| 51.9708307  |
| 143.2709387 |
| 7.725393753 |
| 74.44470344 |
| 73.04008639 |
| 87.78856538 |
| 10.53462785 |
| 3.511542615 |
| 8.427702276 |
| 35.81773467 |
| 5.618468184 |
| 85.68163981 |
| 7.02308523  |
| 86.38394833 |

|             |
|-------------|
| 5.618468184 |
| 8.427702276 |
| 74.44470344 |
| 11.23693637 |
| 7.02308523  |
| 104.6439699 |
| 166.44712   |
| 60.39853298 |
| 82.87240572 |
| 3.511542615 |
| 2.106925569 |
| 104.6439699 |
| 7.725393753 |
| 11.23693637 |
| 9.832319322 |
| 7.02308523  |
| 12.64155341 |
| 135.5455449 |
| 7.02308523  |
| 147.4847898 |
| 110.9647466 |
| 7.02308523  |
| 94.10934208 |
| 40.73389434 |
| 7.02308523  |
| 28.79464944 |
| 15.45078751 |
| 11.93924489 |
| 9.130010799 |
| 117.2855233 |
| 80.06317162 |
| 228.9525785 |
| 49.86390513 |
| 50.56621366 |
| 7.725393753 |
| 31.60388354 |
| 35.11542615 |
| 12.64155341 |
| 25.98541535 |
| 6.320776707 |
| 9.832319322 |
| 7.02308523  |
| 4.916159661 |

|             |
|-------------|
| 11.93924489 |
| 8.427702276 |
| 5.618468184 |
| 7.725393753 |
| 115.8809063 |
| 2.809234092 |
| 9.832319322 |
| 6.320776707 |
| 39.32927729 |
| 200.1579291 |
| 6.320776707 |
| 4.916159661 |
| 4.916159661 |
| 4.916159661 |
| 82.87240572 |
| 85.68163981 |
| 4.213851138 |
| 69.52854378 |
| 27.3900324  |
| 5.618468184 |
| 8.427702276 |
| 11.93924489 |
| 130.6293853 |
| 47.05467104 |
| 63.20776707 |
| 23.17618126 |
| 174.8748222 |
| 6.320776707 |
| 2.106925569 |
| 108.8578211 |
| 92.00241652 |
| 7.725393753 |
| 122.9039915 |
| 7.02308523  |
| 7.725393753 |
| 15.45078751 |
| 35.11542615 |
| 76.55162901 |
| 3.511542615 |
| 112.3693637 |
| 61.80315003 |
| 21.77156421 |
| 5.618468184 |

|             |
|-------------|
| 8.427702276 |
| 44.24543695 |
| 59.69622446 |
| 9.832319322 |
| 91.30010799 |
| 14.04617046 |
| 108.8578211 |
| 4.916159661 |
| 4.916159661 |
| 5.618468184 |
| 4.916159661 |
| 6.320776707 |
| 44.24543695 |
| 2.809234092 |
| 9.130010799 |
| 3.511542615 |
| 6.320776707 |
| 5.618468184 |
| 4.213851138 |
| 2.106925569 |
| 18.96233012 |
| 11.23693637 |
| 9.832319322 |
| 219.1202592 |
| 15.45078751 |
| 97.6208847  |
| 9.130010799 |
| 9.832319322 |
| 15.45078751 |
| 8.427702276 |
| 6.320776707 |
| 10.53462785 |
| 153.103258  |
| 7.725393753 |
| 9.832319322 |
| 8.427702276 |
| 42.13851138 |
| 65.31469264 |
| 7.02308523  |
| 23.87848978 |
| 7.725393753 |
| 5.618468184 |
| 10.53462785 |



|             |
|-------------|
| 15.45078751 |
| 5.618468184 |
| 14.74847898 |
| 16.85540455 |
| 11.23693637 |
| 9.130010799 |
| 9.130010799 |
| 0.702308523 |
| 6.320776707 |
| 5.618468184 |
| 131.3316938 |
| 8.427702276 |
| 11.23693637 |
| 106.7508955 |
| 10.53462785 |
| 7.725393753 |
| 7.725393753 |
| 4.916159661 |
| 4.213851138 |
| 7.02308523  |
| 96.91857618 |
| 6.320776707 |
| 5.618468184 |
| 7.725393753 |
| 7.725393753 |
| 7.725393753 |
| 14.04617046 |
| 79.3608631  |
| 7.02308523  |
| 2.106925569 |
| 6.320776707 |
| 88.4908739  |
| 4.916159661 |
| 10.53462785 |
| 12.64155341 |
| 7.725393753 |
| 4.916159661 |
| 11.93924489 |
| 16.15309603 |
| 27.3900324  |
| 2.106925569 |
| 4.213851138 |
| 24.58079831 |

|             |
|-------------|
| 4.916159661 |
| 32.30619206 |
| 3.511542615 |
| 9.832319322 |
| 180.4932904 |
| 8.427702276 |
| 5.618468184 |
| 68.82623526 |
| 6.320776707 |
| 7.02308523  |
| 33.00850058 |
| 9.832319322 |
| 11.23693637 |
| 7.725393753 |
| 29.49695797 |
| 37.22235172 |
| 2.106925569 |
| 9.832319322 |
| 116.5832148 |
| 6.320776707 |
| 8.427702276 |
| 77.95624606 |
| 6.320776707 |
| 6.320776707 |
| 202.9671632 |
| 9.832319322 |
| 181.8979075 |
| 4.916159661 |
| 9.832319322 |
| 18.96233012 |
| 66.01700116 |
| 94.81165061 |
| 7.725393753 |
| 9.832319322 |
| 69.52854378 |
| 9.832319322 |
| 250.0218342 |
| 7.725393753 |
| 211.3948654 |
| 7.02308523  |
| 4.916159661 |
| 11.93924489 |
| 5.618468184 |

|             |
|-------------|
| 6.320776707 |
| 4.916159661 |
| 4.213851138 |
| 233.8687382 |
| 190.3256097 |
| 85.68163981 |
| 5.618468184 |
| 12.64155341 |
| 13.34386194 |
| 56.88699036 |
| 51.9708307  |
| 21.06925569 |
| 9.832319322 |
| 41.43620286 |
| 134.8432364 |
| 102.5370444 |
| 108.1555125 |
| 6.320776707 |
| 5.618468184 |
| 3.511542615 |
| 139.7593961 |
| 81.46778867 |
| 7.02308523  |
| 7.02308523  |
| 7.02308523  |
| 8.427702276 |
| 9.130010799 |
| 8.427702276 |
| 56.18468184 |
| 34.41311763 |
| 60.39853298 |
| 2.106925569 |
| 84.27702276 |
| 76.55162901 |
| 7.02308523  |
| 84.27702276 |
| 10.53462785 |
| 3.511542615 |
| 9.832319322 |
| 11.23693637 |
| 9.832319322 |
| 83.57471424 |
| 28.09234092 |

|             |
|-------------|
| 14.04617046 |
| 21.06925569 |
| 10.53462785 |
| 6.320776707 |
| 8.427702276 |
| 98.32319322 |
| 75.14701196 |
| 7.725393753 |
| 16.15309603 |
| 2.809234092 |
| 3.511542615 |
| 162.2332688 |
| 85.68163981 |
| 7.725393753 |
| 19.66463864 |
| 48.45928809 |
| 4.916159661 |
| 4.916159661 |
| 133.4386194 |
| 54.7800648  |
| 6.320776707 |
| 9.130010799 |
| 104.6439699 |
| 25.98541535 |
| 102.5370444 |
| 74.44470344 |
| 49.86390513 |
| 117.2855233 |
| 54.7800648  |
| 93.40703356 |
| 7.02308523  |
| 2.809234092 |
| 63.20776707 |
| 54.7800648  |
| 89.19318242 |
| 29.49695797 |
| 147.4847898 |
| 25.28310683 |
| 193.1348438 |
| 292.1603456 |
| 8.427702276 |
| 4.213851138 |
| 5.618468184 |

|             |
|-------------|
| 82.87240572 |
| 7.02308523  |
| 77.25393753 |
| 118.6901404 |
| 5.618468184 |
| 20.36694717 |
| 5.618468184 |
| 2.106925569 |
| 6.320776707 |
| 177.6840563 |
| 7.02308523  |
| 4.916159661 |
| 4.213851138 |
| 16.15309603 |
| 102.5370444 |
| 13.34386194 |
| 94.10934208 |
| 41.43620286 |
| 13.34386194 |
| 132.0340023 |
| 135.5455449 |
| 132.7363109 |
| 6.320776707 |
| 79.3608631  |
| 4.213851138 |
| 5.618468184 |
| 61.1008415  |
| 94.10934208 |
| 7.725393753 |
| 7.02308523  |
| 4.916159661 |
| 18.96233012 |
| 7.725393753 |
| 6.320776707 |
| 4.213851138 |
| 8.427702276 |
| 125.0109171 |
| 32.30619206 |
| 3.511542615 |
| 92.70472504 |
| 115.8809063 |
| 2.809234092 |
| 95.51395913 |

|             |
|-------------|
| 7.02308523  |
| 92.70472504 |
| 5.618468184 |
| 6.320776707 |
| 77.95624606 |
| 47.05467104 |
| 110.2624381 |
| 2.106925569 |
| 73.04008639 |
| 56.18468184 |
| 10.53462785 |
| 35.11542615 |
| 216.3110251 |
| 148.1870984 |
| 121.4993745 |
| 19.66463864 |
| 117.9878319 |
| 43.54312843 |
| 4.213851138 |
| 5.618468184 |
| 21.77156421 |
| 115.1785978 |
| 90.59779947 |
| 56.18468184 |
| 5.618468184 |
| 120.797066  |
| 58.29160741 |
| 102.5370444 |
| 23.87848978 |
| 5.618468184 |
| 9.130010799 |
| 21.77156421 |
| 217.7156421 |
| 132.7363109 |
| 9.832319322 |
| 33.7108091  |
| 158.7217262 |
| 181.1955989 |
| 6.320776707 |
| 212.097174  |
| 9.130010799 |
| 2.809234092 |
| 48.45928809 |

|             |
|-------------|
| 5.618468184 |
| 160.8286518 |
| 4.213851138 |
| 34.41311763 |
| 62.50545855 |
| 9.130010799 |
| 9.130010799 |
| 6.320776707 |
| 169.9586626 |
| 4.916159661 |
| 146.7824813 |
| 3.511542615 |
| 155.2101836 |
| 3.511542615 |
| 10.53462785 |
| 11.93924489 |
| 75.84932049 |
| 8.427702276 |
| 7.725393753 |
| 6.320776707 |
| 87.78856538 |
| 10.53462785 |
| 61.80315003 |
| 29.49695797 |
| 86.38394833 |
| 8.427702276 |
| 59.69622446 |
| 70.2308523  |
| 7.02308523  |
| 5.618468184 |
| 9.130010799 |
| 3.511542615 |
| 117.2855233 |
| 9.832319322 |
| 227.5479615 |
| 13.34386194 |
| 5.618468184 |
| 109.5601296 |
| 55.48237332 |
| 40.03158581 |
| 3.511542615 |
| 12.64155341 |
| 3.511542615 |

|             |
|-------------|
| 11.23693637 |
| 42.8408199  |
| 7.02308523  |
| 23.17618126 |
| 42.13851138 |
| 7.725393753 |
| 46.35236252 |
| 9.832319322 |
| 12.64155341 |
| 92.00241652 |
| 4.213851138 |
| 7.725393753 |
| 11.23693637 |
| 22.47387274 |
| 28.09234092 |
| 11.93924489 |
| 9.130010799 |
| 32.30619206 |
| 6.320776707 |
| 7.725393753 |
| 40.73389434 |
| 91.30010799 |
| 9.832319322 |
| 20.36694717 |
| 53.37544775 |
| 53.37544775 |
| 13.34386194 |
| 6.320776707 |
| 13.34386194 |
| 140.4617046 |
| 192.4325353 |
| 28.79464944 |
| 58.99391593 |
| 5.618468184 |
| 213.501791  |
| 61.80315003 |
| 72.33777787 |
| 13.34386194 |
| 5.618468184 |
| 88.4908739  |
| 179.0886734 |
| 131.3316938 |
| 36.5200432  |



|             |
|-------------|
| 28.79464944 |
| 1.404617046 |
| 2.106925569 |
| 3.511542615 |
| 221.2271848 |
| 82.17009719 |
| 51.26852218 |
| 2.809234092 |
| 1.404617046 |
| 67.42161821 |
| 39.32927729 |
| 7.725393753 |
| 15.45078751 |
| 66.01700116 |
| 2.809234092 |
| 7.725393753 |
| 9.130010799 |
| 12.64155341 |
| 8.427702276 |
| 103.2393529 |
| 6.320776707 |
| 2.809234092 |
| 5.618468184 |
| 84.27702276 |
| 181.1955989 |
| 6.320776707 |
| 68.82623526 |
| 212.7994825 |
| 152.4009495 |
| 61.80315003 |
| 69.52854378 |
| 10.53462785 |
| 11.93924489 |
| 56.88699036 |
| 7.725393753 |
| 68.12392673 |
| 8.427702276 |
| 9.130010799 |
| 10.53462785 |
| 8.427702276 |
| 4.213851138 |
| 57.58929889 |
| 9.130010799 |

|             |
|-------------|
| 147.4847898 |
| 73.74239492 |
| 76.55162901 |
| 4.916159661 |
| 27.3900324  |
| 172.0655881 |
| 129.2247682 |
| 51.26852218 |
| 11.93924489 |
| 160.8286518 |
| 68.12392673 |
| 62.50545855 |
| 60.39853298 |
| 33.7108091  |
| 37.92466024 |
| 99.02550175 |
| 2.106925569 |
| 9.832319322 |
| 25.28310683 |
| 9.130010799 |
| 9.130010799 |
| 7.725393753 |
| 9.130010799 |
| 7.725393753 |
| 21.06925569 |
| 166.44712   |
| 87.08625685 |
| 10.53462785 |
| 64.61238412 |
| 174.1725137 |
| 53.37544775 |
| 7.725393753 |
| 47.05467104 |
| 2.106925569 |
| 8.427702276 |
| 11.23693637 |
| 10.53462785 |
| 7.725393753 |
| 115.8809063 |
| 6.320776707 |
| 7.02308523  |
| 51.26852218 |
| 11.93924489 |

|             |
|-------------|
| 117.9878319 |
| 9.832319322 |
| 4.916159661 |
| 7.725393753 |
| 92.70472504 |
| 9.832319322 |
| 75.84932049 |
| 4.916159661 |
| 9.832319322 |
| 118.6901404 |
| 9.832319322 |
| 9.832319322 |
| 15.45078751 |
| 9.832319322 |
| 8.427702276 |
| 85.68163981 |
| 3.511542615 |
| 2.106925569 |
| 11.23693637 |
| 5.618468184 |
| 28.79464944 |
| 4.916159661 |
| 15.45078751 |
| 7.02308523  |
| 7.02308523  |
| 126.4155341 |
| 4.916159661 |
| 12.64155341 |
| 53.37544775 |
| 63.91007559 |
| 123.6063001 |
| 108.8578211 |
| 5.618468184 |
| 7.725393753 |
| 16.15309603 |
| 46.35236252 |
| 4.916159661 |
| 31.60388354 |
| 7.02308523  |
| 7.725393753 |
| 7.725393753 |
| 133.4386194 |
| 9.130010799 |

|             |
|-------------|
| 7.725393753 |
| 36.5200432  |
| 157.3171092 |
| 95.51395913 |
| 9.130010799 |
| 0           |
| 27.3900324  |
| 160.8286518 |
| 8.427702276 |
| 107.453204  |
| 115.8809063 |
| 44.24543695 |
| 75.14701196 |
| 49.86390513 |
| 137.6524705 |
| 48.45928809 |
| 5.618468184 |
| 6.320776707 |
| 71.63546935 |
| 91.30010799 |
| 6.320776707 |
| 33.00850058 |
| 97.6208847  |
| 23.87848978 |
| 4.213851138 |
| 48.45928809 |
| 3.511542615 |
| 245.1056745 |
| 90.59779947 |
| 48.45928809 |
| 4.916159661 |
| 3.511542615 |
| 7.725393753 |
| 0           |
| 4.916159661 |
| 11.93924489 |
| 125.7132256 |
| 3.511542615 |
| 11.23693637 |
| 4.916159661 |
| 14.74847898 |
| 7.02308523  |
| 5.618468184 |

|             |
|-------------|
| 191.0279183 |
| 6.320776707 |
| 5.618468184 |
| 5.618468184 |
| 15.45078751 |
| 54.07775627 |
| 7.02308523  |
| 11.93924489 |
| 7.725393753 |
| 21.06925569 |
| 7.02308523  |
| 7.725393753 |
| 74.44470344 |
| 9.832319322 |
| 14.74847898 |
| 205.0740887 |
| 11.93924489 |
| 9.832319322 |
| 4.916159661 |
| 7.02308523  |
| 4.916159661 |
| 6.320776707 |
| 7.725393753 |
| 9.130010799 |
| 2.106925569 |
| 8.427702276 |
| 70.2308523  |
| 12.64155341 |
| 10.53462785 |
| 7.725393753 |
| 87.78856538 |
| 3.511542615 |
| 4.916159661 |
| 10.53462785 |
| 10.53462785 |
| 36.5200432  |
| 10.53462785 |
| 7.02308523  |
| 9.130010799 |
| 5.618468184 |
| 11.23693637 |
| 8.427702276 |
| 111.6670552 |

|             |
|-------------|
| 77.25393753 |
| 114.4762893 |
| 181.1955989 |
| 84.27702276 |
| 24.58079831 |
| 4.213851138 |
| 7.02308523  |
| 11.93924489 |
| 57.58929889 |
| 6.320776707 |
| 4.916159661 |
| 8.427702276 |
| 4.916159661 |
| 40.03158581 |
| 2.106925569 |
| 7.02308523  |
| 7.725393753 |
| 9.832319322 |
| 9.130010799 |
| 2.809234092 |
| 38.62696877 |
| 11.23693637 |
| 21.77156421 |
| 3.511542615 |
| 148.1870984 |
| 13.34386194 |
| 8.427702276 |
| 5.618468184 |
| 4.916159661 |
| 6.320776707 |
| 31.60388354 |
| 6.320776707 |
| 4.213851138 |
| 21.77156421 |
| 6.320776707 |
| 4.916159661 |
| 54.7800648  |
| 87.08625685 |
| 103.9416614 |
| 94.10934208 |
| 133.4386194 |
| 120.797066  |
| 3.511542615 |

|             |
|-------------|
| 3.511542615 |
| 16.85540455 |
| 7.02308523  |
| 7.02308523  |
| 4.916159661 |
| 47.05467104 |
| 108.1555125 |
| 23.87848978 |
| 7.725393753 |
| 89.89549095 |
| 10.53462785 |
| 67.42161821 |
| 57.58929889 |
| 7.02308523  |
| 7.725393753 |
| 12.64155341 |
| 38.62696877 |
| 155.9124921 |
| 0           |
| 2.106925569 |
| 79.3608631  |
| 6.320776707 |
| 6.320776707 |
| 7.02308523  |
| 8.427702276 |
| 3.511542615 |
| 7.725393753 |
| 5.618468184 |
| 7.02308523  |
| 7.02308523  |
| 9.130010799 |
| 120.0947574 |
| 35.11542615 |
| 4.916159661 |
| 5.618468184 |
| 2.809234092 |
| 68.82623526 |
| 82.87240572 |
| 93.40703356 |
| 11.23693637 |
| 91.30010799 |
| 99.02550175 |
| 7.02308523  |

|             |
|-------------|
| 162.9355773 |
| 6.320776707 |
| 5.618468184 |
| 4.213851138 |
| 7.02308523  |
| 6.320776707 |
| 5.618468184 |
| 7.02308523  |
| 7.725393753 |
| 156.6148006 |
| 72.33777787 |
| 6.320776707 |
| 83.57471424 |
| 2.106925569 |
| 9.130010799 |
| 0           |
| 7.725393753 |
| 49.86390513 |
| 66.01700116 |
| 8.427702276 |
| 11.93924489 |
| 44.94774547 |
| 61.1008415  |
| 5.618468184 |
| 64.61238412 |
| 4.916159661 |
| 6.320776707 |
| 5.618468184 |
| 11.23693637 |
| 36.5200432  |
| 17.55771308 |
| 141.8663216 |
| 7.02308523  |
| 9.832319322 |
| 4.916159661 |
| 5.618468184 |
| 0           |
| 12.64155341 |
| 5.618468184 |
| 9.832319322 |
| 9.832319322 |
| 161.5309603 |
| 21.06925569 |



|             |
|-------------|
| 25.28310683 |
| 11.23693637 |
| 8.427702276 |
| 4.916159661 |
| 37.22235172 |
| 7.725393753 |
| 7.02308523  |
| 5.618468184 |
| 9.832319322 |
| 37.92466024 |
| 9.832319322 |
| 10.53462785 |
| 11.23693637 |
| 20.36694717 |
| 6.320776707 |
| 14.04617046 |
| 9.130010799 |
| 4.213851138 |
| 27.3900324  |
| 4.916159661 |
| 11.23693637 |
| 4.916159661 |
| 9.130010799 |
| 7.725393753 |
| 84.97933129 |
| 7.02308523  |
| 7.725393753 |
| 146.7824813 |
| 10.53462785 |
| 83.57471424 |
| 10.53462785 |
| 5.618468184 |
| 11.93924489 |
| 5.618468184 |
| 75.14701196 |
| 16.85540455 |
| 9.832319322 |
| 80.06317162 |
| 7.725393753 |
| 2.809234092 |
| 42.8408199  |
| 7.725393753 |
| 3.511542615 |

|             |
|-------------|
| 6.320776707 |
| 6.320776707 |
| 90.59779947 |
| 31.60388354 |
| 9.130010799 |
| 6.320776707 |
| 4.213851138 |
| 4.916159661 |
| 4.916159661 |
| 8.427702276 |
| 267.5795473 |
| 30.90157501 |
| 122.9039915 |
| 4.213851138 |
| 4.213851138 |
| 6.320776707 |
| 54.07775627 |
| 6.320776707 |
| 7.02308523  |
| 9.130010799 |
| 143.2709387 |
| 8.427702276 |
| 4.916159661 |
| 6.320776707 |
| 4.213851138 |
| 25.98541535 |
| 5.618468184 |
| 6.320776707 |
| 7.02308523  |
| 11.93924489 |
| 9.130010799 |
| 7.02308523  |
| 7.725393753 |
| 6.320776707 |
| 7.02308523  |
| 14.04617046 |
| 6.320776707 |
| 7.725393753 |
| 11.93924489 |
| 14.74847898 |
| 5.618468184 |
| 37.22235172 |
| 92.00241652 |

|             |
|-------------|
| 4.213851138 |
| 5.618468184 |
| 5.618468184 |
| 5.618468184 |
| 4.213851138 |
| 143.2709387 |
| 17.55771308 |
| 6.320776707 |
| 33.00850058 |
| 56.18468184 |
| 159.4240347 |
| 7.02308523  |
| 230.3571956 |
| 2.809234092 |
| 36.5200432  |
| 9.130010799 |
| 9.130010799 |
| 141.1640131 |
| 9.130010799 |
| 7.02308523  |
| 7.02308523  |
| 15.45078751 |
| 6.320776707 |
| 10.53462785 |
| 24.58079831 |
| 157.3171092 |
| 0.702308523 |
| 7.725393753 |
| 7.725393753 |
| 4.213851138 |
| 33.00850058 |
| 14.04617046 |
| 17.55771308 |
| 9.130010799 |
| 109.5601296 |
| 5.618468184 |
| 5.618468184 |
| 155.9124921 |
| 7.725393753 |
| 7.02308523  |
| 7.02308523  |
| 160.1263432 |
| 11.93924489 |

|             |
|-------------|
| 1.404617046 |
| 7.02308523  |
| 9.130010799 |
| 8.427702276 |
| 5.618468184 |
| 11.23693637 |
| 130.6293853 |
| 7.02308523  |
| 8.427702276 |
| 170.6609711 |
| 6.320776707 |
| 38.62696877 |
| 7.02308523  |
| 38.62696877 |
| 20.36694717 |
| 10.53462785 |
| 4.916159661 |
| 73.04008639 |
| 13.34386194 |
| 18.2600216  |
| 37.92466024 |
| 7.02308523  |
| 140.4617046 |
| 9.130010799 |
| 12.64155341 |
| 2.809234092 |
| 50.56621366 |
| 88.4908739  |
| 47.75697957 |
| 5.618468184 |
| 4.213851138 |
| 9.130010799 |
| 85.68163981 |
| 9.130010799 |
| 61.1008415  |
| 86.38394833 |
| 7.725393753 |
| 87.08625685 |
| 9.130010799 |
| 8.427702276 |
| 2.809234092 |
| 108.1555125 |
| 18.2600216  |

|             |
|-------------|
| 9.130010799 |
| 14.04617046 |
| 23.17618126 |
| 4.916159661 |
| 59.69622446 |
| 23.87848978 |
| 14.74847898 |
| 7.725393753 |
| 120.797066  |
| 6.320776707 |
| 4.213851138 |
| 7.725393753 |
| 9.130010799 |
| 84.97933129 |
| 9.832319322 |
| 174.8748222 |
| 132.7363109 |
| 33.7108091  |
| 36.5200432  |
| 181.1955989 |
| 0           |
| 7.02308523  |
| 8.427702276 |
| 4.916159661 |
| 11.23693637 |
| 73.04008639 |
| 8.427702276 |
| 4.916159661 |
| 79.3608631  |
| 111.6670552 |
| 106.048587  |
| 5.618468184 |
| 131.3316938 |
| 13.34386194 |
| 11.23693637 |
| 115.8809063 |
| 9.832319322 |
| 103.9416614 |
| 44.24543695 |
| 11.93924489 |
| 36.5200432  |
| 5.618468184 |
| 51.26852218 |

|             |
|-------------|
| 16.15309603 |
| 9.130010799 |
| 84.97933129 |
| 3.511542615 |
| 22.47387274 |
| 6.320776707 |
| 8.427702276 |
| 91.30010799 |
| 131.3316938 |
| 143.2709387 |
| 141.8663216 |
| 5.618468184 |
| 5.618468184 |
| 9.130010799 |
| 8.427702276 |
| 14.04617046 |
| 94.10934208 |
| 16.85540455 |
| 140.4617046 |
| 44.24543695 |
| 7.725393753 |
| 113.7739807 |
| 21.06925569 |
| 14.74847898 |
| 7.02308523  |
| 53.37544775 |
| 7.02308523  |
| 6.320776707 |
| 7.02308523  |
| 10.53462785 |
| 118.6901404 |
| 4.916159661 |
| 67.42161821 |
| 158.7217262 |
| 183.3025245 |
| 83.57471424 |
| 4.916159661 |
| 194.5394609 |
| 4.916159661 |
| 82.87240572 |
| 9.130010799 |
| 7.02308523  |
| 4.916159661 |

|             |
|-------------|
| 4.213851138 |
| 4.213851138 |
| 7.02308523  |
| 63.91007559 |
| 16.15309603 |
| 3.511542615 |
| 9.130010799 |
| 7.02308523  |
| 4.213851138 |
| 4.213851138 |
| 5.618468184 |
| 4.213851138 |
| 14.04617046 |
| 12.64155341 |
| 6.320776707 |
| 97.6208847  |
| 209.9902484 |
| 54.7800648  |
| 7.725393753 |
| 148.1870984 |
| 4.213851138 |
| 9.130010799 |
| 32.30619206 |
| 5.618468184 |
| 0           |
| 54.07775627 |
| 76.55162901 |
| 78.65855458 |
| 113.7739807 |
| 9.832319322 |
| 9.832319322 |
| 147.4847898 |
| 34.41311763 |
| 5.618468184 |
| 93.40703356 |
| 110.9647466 |
| 23.17618126 |
| 92.70472504 |
| 80.76548015 |
| 23.17618126 |
| 5.618468184 |
| 77.25393753 |
| 9.832319322 |

|             |
|-------------|
| 125.0109171 |
| 5.618468184 |
| 7.02308523  |
| 7.725393753 |
| 5.618468184 |
| 4.213851138 |
| 6.320776707 |
| 7.725393753 |
| 5.618468184 |
| 4.213851138 |
| 6.320776707 |
| 10.53462785 |
| 51.9708307  |
| 6.320776707 |
| 7.02308523  |
| 7.02308523  |
| 9.832319322 |
| 7.725393753 |
| 9.832319322 |
| 7.02308523  |
| 1.404617046 |
| 8.427702276 |
| 7.02308523  |
| 129.2247682 |
| 9.130010799 |
| 6.320776707 |
| 12.64155341 |
| 4.916159661 |
| 7.725393753 |
| 3.511542615 |
| 6.320776707 |
| 4.916159661 |
| 7.02308523  |
| 4.916159661 |
| 7.02308523  |
| 44.24543695 |
| 16.85540455 |
| 45.650054   |
| 17.55771308 |
| 4.916159661 |
| 5.618468184 |
| 164.3401944 |
| 136.950162  |



|             |
|-------------|
| 7.02308523  |
| 105.3462785 |
| 7.725393753 |
| 77.25393753 |
| 64.61238412 |
| 8.427702276 |
| 3.511542615 |
| 10.53462785 |
| 7.725393753 |
| 6.320776707 |
| 4.916159661 |
| 89.89549095 |
| 152.4009495 |
| 7.725393753 |
| 5.618468184 |
| 101.8347358 |
| 90.59779947 |
| 184.004833  |
| 150.2940239 |
| 8.427702276 |
| 8.427702276 |
| 5.618468184 |
| 10.53462785 |
| 7.02308523  |
| 7.02308523  |
| 74.44470344 |
| 2.106925569 |
| 6.320776707 |
| 7.725393753 |
| 163.6378859 |
| 100.4301188 |
| 10.53462785 |
| 20.36694717 |
| 33.7108091  |
| 11.23693637 |
| 7.02308523  |
| 4.916159661 |
| 2.106925569 |
| 192.4325353 |
| 7.02308523  |
| 81.46778867 |
| 10.53462785 |
| 7.02308523  |

|             |
|-------------|
| 1.404617046 |
| 5.618468184 |
| 120.797066  |
| 118.6901404 |
| 7.725393753 |
| 12.64155341 |
| 63.20776707 |
| 6.320776707 |
| 11.93924489 |
| 4.213851138 |
| 5.618468184 |
| 9.130010799 |
| 7.02308523  |
| 15.45078751 |
| 11.93924489 |
| 4.213851138 |
| 75.84932049 |
| 7.725393753 |
| 80.76548015 |
| 14.74847898 |
| 53.37544775 |
| 69.52854378 |
| 22.47387274 |
| 5.618468184 |
| 8.427702276 |
| 6.320776707 |
| 9.832319322 |
| 8.427702276 |
| 4.916159661 |
| 6.320776707 |
| 7.02308523  |
| 4.213851138 |
| 10.53462785 |
| 7.02308523  |
| 9.832319322 |
| 7.02308523  |
| 6.320776707 |
| 6.320776707 |
| 9.832319322 |
| 68.12392673 |
| 2.809234092 |
| 5.618468184 |
| 82.87240572 |

|             |
|-------------|
| 42.13851138 |
| 123.6063001 |
| 96.91857618 |
| 9.832319322 |
| 180.4932904 |
| 74.44470344 |
| 96.21626765 |
| 95.51395913 |
| 7.725393753 |
| 87.08625685 |
| 136.2478535 |
| 2.809234092 |
| 72.33777787 |
| 38.62696877 |
| 143.2709387 |
| 9.832319322 |
| 4.916159661 |
| 17.55771308 |
| 92.70472504 |
| 44.94774547 |
| 331.4896229 |
| 14.04617046 |
| 6.320776707 |
| 255.6403024 |
| 6.320776707 |
| 287.2441859 |
| 43.54312843 |
| 63.91007559 |
| 48.45928809 |
| 9.130010799 |
| 8.427702276 |
| 7.02308523  |
| 5.618468184 |
| 5.618468184 |
| 10.53462785 |
| 28.79464944 |
| 9.832319322 |
| 49.16159661 |
| 34.41311763 |
| 9.832319322 |
| 6.320776707 |
| 111.6670552 |
| 11.93924489 |

|             |
|-------------|
| 7.02308523  |
| 7.02308523  |
| 7.02308523  |
| 108.8578211 |
| 46.35236252 |
| 11.23693637 |
| 51.9708307  |
| 5.618468184 |
| 28.09234092 |
| 6.320776707 |
| 8.427702276 |
| 3.511542615 |
| 6.320776707 |
| 7.02308523  |
| 73.74239492 |
| 73.04008639 |
| 4.916159661 |
| 6.320776707 |
| 9.130010799 |
| 7.02308523  |
| 7.02308523  |
| 70.2308523  |
| 61.1008415  |
| 3.511542615 |
| 184.004833  |
| 47.05467104 |
| 202.9671632 |
| 7.725393753 |
| 139.0570876 |
| 121.4993745 |
| 81.46778867 |
| 3.511542615 |
| 27.3900324  |
| 0           |
| 103.2393529 |
| 5.618468184 |
| 25.98541535 |
| 2.106925569 |
| 4.213851138 |
| 3.511542615 |
| 9.130010799 |
| 2.809234092 |
| 1.404617046 |

|             |
|-------------|
| 8.427702276 |
| 42.8408199  |
| 4.916159661 |
| 11.93924489 |
| 1.404617046 |
| 2.809234092 |
| 63.91007559 |
| 16.15309603 |
| 2.106925569 |
| 1.404617046 |
| 23.87848978 |
| 1.404617046 |
| 0.702308523 |
| 2.809234092 |
| 3.511542615 |
| 31.60388354 |
| 5.618468184 |
| 6.320776707 |
| 4.916159661 |
| 85.68163981 |
| 9.832319322 |
| 1.404617046 |
| 9.130010799 |
| 9.832319322 |
| 2.106925569 |
| 22.47387274 |
| 87.08625685 |
| 3.511542615 |
| 12.64155341 |
| 7.02308523  |
| 70.93316082 |
| 2.809234092 |
| 3.511542615 |
| 3.511542615 |
| 3.511542615 |
| 42.13851138 |
| 4.213851138 |
| 39.32927729 |
| 21.06925569 |
| 3.511542615 |
| 4.916159661 |
| 2.106925569 |
| 2.809234092 |

|             |
|-------------|
| 2.809234092 |
| 4.916159661 |
| 5.618468184 |
| 2.106925569 |
| 45.650054   |
| 8.427702276 |
| 5.618468184 |
| 99.72781027 |
| 7.725393753 |
| 4.213851138 |
| 7.725393753 |
| 3.511542615 |
| 9.832319322 |
| 6.320776707 |
| 54.7800648  |
| 7.725393753 |
| 20.36694717 |
| 15.45078751 |
| 36.5200432  |
| 80.06317162 |
| 7.02308523  |
| 8.427702276 |
| 42.13851138 |
| 21.77156421 |
| 7.02308523  |
| 4.916159661 |
| 8.427702276 |
| 4.916159661 |
| 13.34386194 |
| 115.1785978 |
| 75.84932049 |
| 134.8432364 |
| 11.93924489 |
| 56.18468184 |
| 9.130010799 |
| 54.07775627 |
| 3.511542615 |
| 19.66463864 |
| 105.3462785 |
| 30.19926649 |
| 4.916159661 |
| 75.84932049 |
| 4.213851138 |

|             |
|-------------|
| 7.725393753 |
| 179.7909819 |
| 92.00241652 |
| 9.130010799 |
| 2.809234092 |
| 52.67313923 |
| 40.73389434 |
| 9.832319322 |
| 10.53462785 |
| 8.427702276 |
| 7.02308523  |
| 305.5042075 |
| 117.2855233 |
| 44.94774547 |
| 7.725393753 |
| 16.15309603 |
| 9.130010799 |
| 5.618468184 |
| 240.8918234 |
| 5.618468184 |
| 96.91857618 |
| 7.725393753 |
| 4.916159661 |
| 8.427702276 |
| 194.5394609 |
| 165.0425029 |
| 51.26852218 |
| 75.14701196 |
| 6.320776707 |
| 94.81165061 |
| 3.511542615 |
| 68.12392673 |
| 8.427702276 |
| 4.916159661 |
| 158.7217262 |
| 7.725393753 |
| 28.79464944 |
| 30.90157501 |
| 9.832319322 |
| 6.320776707 |
| 7.02308523  |
| 15.45078751 |
| 7.725393753 |

|             |
|-------------|
| 117.9878319 |
| 5.618468184 |
| 8.427702276 |
| 7.725393753 |
| 7.725393753 |
| 17.55771308 |
| 5.618468184 |
| 26.68772387 |
| 52.67313923 |
| 77.95624606 |
| 9.130010799 |
| 6.320776707 |
| 41.43620286 |
| 44.94774547 |
| 10.53462785 |
| 50.56621366 |
| 50.56621366 |
| 94.81165061 |
| 7.725393753 |
| 4.916159661 |
| 8.427702276 |
| 7.02308523  |
| 5.618468184 |
| 6.320776707 |
| 4.916159661 |
| 3.511542615 |
| 25.28310683 |
| 5.618468184 |
| 54.7800648  |
| 10.53462785 |
| 46.35236252 |
| 16.15309603 |
| 32.30619206 |
| 8.427702276 |
| 34.41311763 |
| 78.65855458 |
| 5.618468184 |
| 14.04617046 |
| 31.60388354 |
| 14.04617046 |
| 169.256354  |
| 6.320776707 |
| 70.2308523  |



|             |
|-------------|
| 126.4155341 |
| 7.725393753 |
| 4.916159661 |
| 40.73389434 |
| 4.916159661 |
| 11.93924489 |
| 9.832319322 |
| 66.71930969 |
| 4.213851138 |
| 14.74847898 |
| 4.916159661 |
| 6.320776707 |
| 11.93924489 |
| 30.19926649 |
| 8.427702276 |
| 7.725393753 |
| 89.89549095 |
| 16.15309603 |
| 146.0801728 |
| 143.9732472 |
| 141.8663216 |
| 51.26852218 |
| 56.18468184 |
| 23.17618126 |
| 7.02308523  |
| 7.725393753 |
| 70.2308523  |
| 8.427702276 |
| 8.427702276 |
| 10.53462785 |
| 9.832319322 |
| 9.832319322 |
| 46.35236252 |
| 6.320776707 |
| 14.74847898 |
| 70.93316082 |
| 37.22235172 |
| 18.2600216  |
| 207.1810143 |
| 2.106925569 |
| 10.53462785 |
| 12.64155341 |
| 12.64155341 |

|             |
|-------------|
| 54.07775627 |
| 78.65855458 |
| 7.02308523  |
| 4.213851138 |
| 11.23693637 |
| 5.618468184 |
| 3.511542615 |
| 8.427702276 |
| 6.320776707 |
| 42.8408199  |
| 4.916159661 |
| 0           |
| 9.130010799 |
| 11.93924489 |
| 65.31469264 |
| 7.725393753 |
| 38.62696877 |
| 54.07775627 |
| 4.916159661 |
| 127.8201512 |
| 11.23693637 |
| 5.618468184 |
| 3.511542615 |
| 4.916159661 |
| 17.55771308 |
| 13.34386194 |
| 155.9124921 |
| 5.618468184 |
| 9.130010799 |
| 20.36694717 |
| 6.320776707 |
| 6.320776707 |
| 158.0194177 |
| 3.511542615 |
| 7.02308523  |
| 42.13851138 |
| 47.75697957 |
| 4.916159661 |
| 8.427702276 |
| 131.3316938 |
| 40.03158581 |
| 4.916159661 |
| 9.130010799 |

|             |
|-------------|
| 120.797066  |
| 182.600216  |
| 6.320776707 |
| 26.68772387 |
| 9.130010799 |
| 176.2794393 |
| 4.916159661 |
| 148.8894069 |
| 25.98541535 |
| 48.45928809 |
| 125.0109171 |
| 84.27702276 |
| 6.320776707 |
| 10.53462785 |
| 3.511542615 |
| 39.32927729 |
| 22.47387274 |
| 12.64155341 |
| 4.916159661 |
| 9.130010799 |
| 87.78856538 |
| 97.6208847  |
| 37.92466024 |
| 5.618468184 |
| 122.201683  |
| 17.55771308 |
| 82.17009719 |
| 65.31469264 |
| 87.78856538 |
| 4.916159661 |
| 4.916159661 |
| 33.00850058 |
| 122.201683  |
| 48.45928809 |
| 8.427702276 |
| 3.511542615 |
| 129.2247682 |
| 54.7800648  |
| 9.130010799 |
| 7.725393753 |
| 10.53462785 |
| 11.23693637 |
| 7.725393753 |

|             |
|-------------|
| 2.809234092 |
| 134.8432364 |
| 21.06925569 |
| 7.725393753 |
| 59.69622446 |
| 94.81165061 |
| 49.16159661 |
| 243.7010575 |
| 2.809234092 |
| 5.618468184 |
| 8.427702276 |
| 6.320776707 |
| 142.5686302 |
| 44.24543695 |
| 7.725393753 |
| 9.832319322 |
| 137.6524705 |
| 25.98541535 |
| 71.63546935 |
| 7.725393753 |
| 17.55771308 |
| 21.06925569 |
| 12.64155341 |
| 10.53462785 |
| 37.92466024 |
| 11.23693637 |
| 79.3608631  |
| 9.130010799 |
| 37.22235172 |
| 127.1178427 |
| 26.68772387 |
| 4.213851138 |
| 20.36694717 |
| 4.213851138 |
| 3.511542615 |
| 54.7800648  |
| 10.53462785 |
| 11.23693637 |
| 9.832319322 |
| 27.3900324  |
| 9.832319322 |
| 4.213851138 |
| 10.53462785 |

|             |
|-------------|
| 4.213851138 |
| 35.11542615 |
| 89.89549095 |
| 37.22235172 |
| 9.130010799 |
| 6.320776707 |
| 11.23693637 |
| 7.02308523  |
| 46.35236252 |
| 9.130010799 |
| 39.32927729 |
| 7.02308523  |
| 12.64155341 |
| 50.56621366 |
| 193.8371524 |
| 11.93924489 |
| 27.3900324  |
| 129.9270768 |
| 89.89549095 |
| 7.02308523  |
| 5.618468184 |
| 4.213851138 |
| 6.320776707 |
| 128.5224597 |
| 7.02308523  |
| 3.511542615 |
| 84.97933129 |
| 10.53462785 |
| 26.68772387 |
| 101.1324273 |
| 6.320776707 |
| 163.6378859 |
| 47.05467104 |
| 3.511542615 |
| 4.213851138 |
| 45.650054   |
| 71.63546935 |
| 134.1409279 |
| 9.130010799 |
| 64.61238412 |
| 22.47387274 |
| 9.832319322 |
| 127.8201512 |

|             |
|-------------|
| 8.427702276 |
| 7.02308523  |
| 8.427702276 |
| 11.23693637 |
| 5.618468184 |
| 47.75697957 |
| 9.832319322 |
| 194.5394609 |
| 6.320776707 |
| 151.698641  |
| 14.74847898 |
| 9.130010799 |
| 110.2624381 |
| 84.27702276 |
| 94.10934208 |
| 2.106925569 |
| 130.6293853 |
| 44.24543695 |
| 16.15309603 |
| 4.213851138 |
| 4.213851138 |
| 68.12392673 |
| 110.9647466 |
| 7.725393753 |
| 179.0886734 |
| 129.9270768 |
| 7.02308523  |
| 9.130010799 |
| 24.58079831 |
| 56.88699036 |
| 5.618468184 |
| 6.320776707 |
| 45.650054   |
| 8.427702276 |
| 8.427702276 |
| 136.2478535 |
| 9.130010799 |
| 9.832319322 |
| 80.76548015 |
| 6.320776707 |
| 0           |
| 32.30619206 |
| 16.15309603 |

|             |
|-------------|
| 9.832319322 |
| 58.99391593 |
| 6.320776707 |
| 7.02308523  |
| 11.23693637 |
| 7.02308523  |
| 4.213851138 |
| 101.8347358 |
| 17.55771308 |
| 56.18468184 |
| 7.02308523  |
| 5.618468184 |
| 6.320776707 |
| 56.18468184 |
| 2.809234092 |
| 6.320776707 |
| 11.93924489 |
| 6.320776707 |
| 7.02308523  |
| 9.832319322 |
| 44.94774547 |
| 16.15309603 |
| 14.74847898 |
| 4.213851138 |
| 53.37544775 |
| 79.3608631  |
| 76.55162901 |
| 143.9732472 |
| 3.511542615 |
| 4.213851138 |
| 66.71930969 |
| 16.85540455 |
| 67.42161821 |
| 52.67313923 |
| 5.618468184 |
| 89.89549095 |
| 113.0716722 |
| 4.213851138 |
| 6.320776707 |
| 87.78856538 |
| 9.130010799 |
| 16.85540455 |
| 8.427702276 |

|             |
|-------------|
| 13.34386194 |
| 107.453204  |
| 7.725393753 |
| 4.916159661 |
| 40.73389434 |
| 4.213851138 |
| 46.35236252 |
| 103.2393529 |
| 78.65855458 |
| 59.69622446 |
| 54.7800648  |
| 61.1008415  |
| 87.78856538 |
| 120.797066  |
| 4.213851138 |
| 8.427702276 |
| 6.320776707 |
| 7.02308523  |
| 138.354779  |
| 68.82623526 |
| 5.618468184 |
| 63.91007559 |
| 29.49695797 |
| 148.8894069 |
| 47.05467104 |
| 4.213851138 |
| 61.1008415  |
| 7.725393753 |
| 22.47387274 |
| 7.02308523  |
| 42.13851138 |
| 4.213851138 |
| 3.511542615 |
| 119.3924489 |
| 4.213851138 |
| 55.48237332 |
| 42.13851138 |
| 8.427702276 |
| 23.87848978 |
| 6.320776707 |
| 176.9817478 |
| 30.90157501 |
| 7.725393753 |



|             |
|-------------|
| 7.02308523  |
| 66.71930969 |
| 81.46778867 |
| 4.916159661 |
| 7.02308523  |
| 9.130010799 |
| 7.02308523  |
| 6.320776707 |
| 143.9732472 |
| 6.320776707 |
| 8.427702276 |
| 25.28310683 |
| 61.1008415  |
| 106.048587  |
| 4.213851138 |
| 9.832319322 |
| 4.916159661 |
| 120.797066  |
| 4.213851138 |
| 4.213851138 |
| 16.85540455 |
| 4.213851138 |
| 25.28310683 |
| 114.4762893 |
| 68.82623526 |
| 66.71930969 |
| 9.130010799 |
| 142.5686302 |
| 7.725393753 |
| 5.618468184 |
| 7.02308523  |
| 126.4155341 |
| 4.213851138 |
| 11.23693637 |
| 4.916159661 |
| 8.427702276 |
| 0           |
| 105.3462785 |
| 41.43620286 |
| 12.64155341 |
| 2.106925569 |
| 4.916159661 |
| 1.404617046 |

|             |
|-------------|
| 51.26852218 |
| 13.34386194 |
| 9.832319322 |
| 0           |
| 4.213851138 |
| 103.9416614 |
| 4.916159661 |
| 167.851737  |
| 31.60388354 |
| 69.52854378 |
| 4.213851138 |
| 185.4094501 |
| 13.34386194 |
| 7.02308523  |
| 9.130010799 |
| 36.5200432  |
| 12.64155341 |
| 76.55162901 |
| 6.320776707 |
| 5.618468184 |
| 21.06925569 |
| 21.06925569 |
| 23.87848978 |
| 47.75697957 |
| 113.7739807 |
| 135.5455449 |
| 126.4155341 |
| 7.02308523  |
| 27.3900324  |
| 9.130010799 |
| 15.45078751 |
| 4.916159661 |
| 10.53462785 |
| 11.93924489 |
| 61.1008415  |
| 71.63546935 |
| 11.23693637 |
| 89.19318242 |
| 11.23693637 |
| 7.725393753 |
| 72.33777787 |
| 7.02308523  |
| 6.320776707 |

|             |
|-------------|
| 25.98541535 |
| 13.34386194 |
| 58.29160741 |
| 10.53462785 |
| 5.618468184 |
| 109.5601296 |
| 65.31469264 |
| 4.916159661 |
| 4.916159661 |
| 19.66463864 |
| 37.22235172 |
| 11.93924489 |
| 10.53462785 |
| 9.130010799 |
| 12.64155341 |
| 4.213851138 |
| 71.63546935 |
| 245.1056745 |
| 8.427702276 |
| 9.130010799 |
| 21.06925569 |
| 4.916159661 |
| 144.6755557 |
| 84.27702276 |
| 9.130010799 |
| 28.09234092 |
| 120.797066  |
| 113.7739807 |
| 141.1640131 |
| 38.62696877 |
| 3.511542615 |
| 6.320776707 |
| 10.53462785 |
| 68.82623526 |
| 278.8164836 |
| 6.320776707 |
| 12.64155341 |
| 6.320776707 |
| 4.916159661 |
| 132.0340023 |
| 117.2855233 |
| 6.320776707 |
| 165.0425029 |

|             |
|-------------|
| 210.6925569 |
| 2.106925569 |
| 4.916159661 |
| 17.55771308 |
| 9.130010799 |
| 24.58079831 |
| 100.4301188 |
| 7.02308523  |
| 4.213851138 |
| 2.106925569 |
| 91.30010799 |
| 80.06317162 |
| 2.809234092 |
| 4.213851138 |
| 6.320776707 |
| 6.320776707 |
| 11.23693637 |
| 4.213851138 |
| 2.106925569 |
| 3.511542615 |
| 18.96233012 |
| 3.511542615 |
| 2.809234092 |
| 7.725393753 |
| 5.618468184 |
| 5.618468184 |
| 4.916159661 |
| 36.5200432  |
| 3.511542615 |
| 9.832319322 |
| 3.511542615 |
| 8.427702276 |
| 28.09234092 |
| 16.85540455 |
| 4.916159661 |
| 7.725393753 |
| 2.809234092 |
| 33.7108091  |
| 40.73389434 |
| 8.427702276 |
| 9.832319322 |
| 110.9647466 |
| 8.427702276 |

|             |
|-------------|
| 42.13851138 |
| 175.5771308 |
| 6.320776707 |
| 71.63546935 |
| 23.17618126 |
| 87.78856538 |
| 40.73389434 |
| 11.93924489 |
| 64.61238412 |
| 56.18468184 |
| 9.130010799 |
| 7.02308523  |
| 7.725393753 |
| 0.702308523 |
| 7.725393753 |
| 5.618468184 |
| 25.98541535 |
| 4.916159661 |
| 1.404617046 |
| 41.43620286 |
| 7.725393753 |
| 7.725393753 |
| 6.320776707 |
| 183.3025245 |
| 174.8748222 |
| 9.130010799 |
| 4.916159661 |
| 4.916159661 |
| 6.320776707 |
| 9.130010799 |
| 85.68163981 |
| 4.213851138 |
| 4.916159661 |
| 7.725393753 |
| 151.698641  |
| 10.53462785 |
| 5.618468184 |
| 5.618468184 |
| 35.11542615 |
| 5.618468184 |
| 23.17618126 |
| 9.832319322 |
| 107.453204  |

|             |
|-------------|
| 94.10934208 |
| 6.320776707 |
| 3.511542615 |
| 39.32927729 |
| 11.93924489 |
| 8.427702276 |
| 7.02308523  |
| 4.213851138 |
| 12.64155341 |
| 5.618468184 |
| 19.66463864 |
| 8.427702276 |
| 89.19318242 |
| 5.618468184 |
| 7.02308523  |
| 12.64155341 |
| 6.320776707 |
| 93.40703356 |
| 10.53462785 |
| 7.02308523  |
| 4.916159661 |
| 128.5224597 |
| 10.53462785 |
| 106.7508955 |
| 2.809234092 |
| 16.85540455 |
| 15.45078751 |
| 174.1725137 |
| 65.31469264 |
| 18.96233012 |
| 7.725393753 |
| 9.832319322 |
| 121.4993745 |
| 84.97933129 |
| 179.7909819 |
| 4.213851138 |
| 43.54312843 |
| 4.213851138 |
| 9.832319322 |
| 75.84932049 |
| 11.23693637 |
| 139.7593961 |
| 7.725393753 |

|             |
|-------------|
| 41.43620286 |
| 82.17009719 |
| 22.47387274 |
| 10.53462785 |
| 136.2478535 |
| 17.55771308 |
| 10.53462785 |
| 44.94774547 |
| 6.320776707 |
| 11.23693637 |
| 14.04617046 |
| 40.03158581 |
| 42.13851138 |
| 9.832319322 |
| 5.618468184 |
| 5.618468184 |
| 7.02308523  |
| 9.832319322 |
| 4.213851138 |
| 73.04008639 |
| 40.73389434 |
| 122.201683  |
| 75.14701196 |
| 9.832319322 |
| 9.130010799 |
| 23.17618126 |
| 37.22235172 |
| 2.106925569 |
| 4.916159661 |
| 112.3693637 |
| 158.0194177 |
| 148.1870984 |
| 69.52854378 |
| 6.320776707 |
| 1.404617046 |
| 128.5224597 |
| 7.725393753 |
| 51.26852218 |
| 87.08625685 |
| 58.99391593 |
| 9.832319322 |
| 2.809234092 |
| 2.809234092 |

|             |
|-------------|
| 13.34386194 |
| 5.618468184 |
| 25.28310683 |
| 7.02308523  |
| 21.77156421 |
| 7.02308523  |
| 2.809234092 |
| 9.130010799 |
| 7.02308523  |
| 8.427702276 |
| 7.725393753 |
| 9.130010799 |
| 111.6670552 |
| 18.2600216  |
| 116.5832148 |
| 18.2600216  |
| 7.02308523  |
| 5.618468184 |
| 7.02308523  |
| 9.832319322 |
| 21.06925569 |
| 160.1263432 |
| 9.832319322 |
| 3.511542615 |
| 9.832319322 |
| 40.73389434 |
| 148.8894069 |
| 3.511542615 |
| 6.320776707 |
| 18.96233012 |
| 8.427702276 |
| 7.725393753 |
| 193.8371524 |
| 239.4872063 |
| 112.3693637 |
| 49.86390513 |
| 3.511542615 |
| 7.02308523  |
| 90.59779947 |
| 21.77156421 |
| 7.02308523  |
| 60.39853298 |
| 115.1785978 |



|             |
|-------------|
| 7.725393753 |
| 7.725393753 |
| 5.618468184 |
| 18.2600216  |
| 28.79464944 |
| 7.02308523  |
| 6.320776707 |
| 2.106925569 |
| 5.618468184 |
| 5.618468184 |
| 9.130010799 |
| 5.618468184 |
| 10.53462785 |
| 45.650054   |
| 21.77156421 |
| 5.618468184 |
| 171.3632796 |
| 21.06925569 |
| 89.19318242 |
| 18.2600216  |
| 208.5856313 |
| 81.46778867 |
| 37.22235172 |
| 108.8578211 |
| 103.2393529 |
| 7.725393753 |
| 30.90157501 |
| 8.427702276 |
| 4.916159661 |
| 8.427702276 |
| 85.68163981 |
| 33.7108091  |
| 2.106925569 |
| 110.9647466 |
| 8.427702276 |
| 11.23693637 |
| 4.916159661 |
| 7.02308523  |
| 155.2101836 |
| 11.23693637 |
| 54.7800648  |
| 4.916159661 |
| 15.45078751 |

|             |
|-------------|
| 37.22235172 |
| 3.511542615 |
| 7.02308523  |
| 12.64155341 |
| 4.916159661 |
| 7.02308523  |
| 13.34386194 |
| 167.851737  |
| 6.320776707 |
| 6.320776707 |
| 10.53462785 |
| 18.96233012 |
| 34.41311763 |
| 101.1324273 |
| 19.66463864 |
| 11.23693637 |
| 44.94774547 |
| 9.130010799 |
| 7.725393753 |
| 4.916159661 |
| 30.19926649 |
| 8.427702276 |
| 8.427702276 |
| 58.29160741 |
| 136.950162  |
| 4.213851138 |
| 35.81773467 |
| 4.916159661 |
| 155.2101836 |
| 6.320776707 |
| 11.23693637 |
| 77.25393753 |
| 44.94774547 |
| 32.30619206 |
| 4.213851138 |
| 159.4240347 |
| 4.916159661 |
| 96.91857618 |
| 4.916159661 |
| 14.04617046 |
| 9.832319322 |
| 7.02308523  |
| 3.511542615 |

|             |
|-------------|
| 2.809234092 |
| 7.725393753 |
| 23.87848978 |
| 103.9416614 |
| 91.30010799 |
| 3.511542615 |
| 108.8578211 |
| 6.320776707 |
| 5.618468184 |
| 4.916159661 |
| 25.98541535 |
| 9.832319322 |
| 200.1579291 |
| 36.5200432  |
| 10.53462785 |
| 5.618468184 |
| 254.2356853 |
| 9.832319322 |
| 18.2600216  |
| 2.809234092 |
| 144.6755557 |
| 122.201683  |
| 122.9039915 |
| 4.213851138 |
| 206.4787058 |
| 4.916159661 |
| 9.130010799 |
| 103.9416614 |
| 46.35236252 |
| 165.0425029 |
| 7.725393753 |
| 79.3608631  |
| 71.63546935 |
| 16.85540455 |
| 3.511542615 |
| 5.618468184 |
| 50.56621366 |
| 7.725393753 |
| 6.320776707 |
| 8.427702276 |
| 3.511542615 |
| 117.2855233 |
| 7.725393753 |

|             |
|-------------|
| 4.916159661 |
| 4.916159661 |
| 9.130010799 |
| 14.74847898 |
| 3.511542615 |
| 57.58929889 |
| 70.2308523  |
| 7.725393753 |
| 8.427702276 |
| 16.85540455 |
| 9.130010799 |
| 14.04617046 |
| 80.76548015 |
| 1.404617046 |
| 9.832319322 |
| 6.320776707 |
| 4.213851138 |
| 10.53462785 |
| 4.213851138 |
| 191.7302268 |
| 11.93924489 |
| 11.23693637 |
| 4.916159661 |
| 8.427702276 |
| 146.7824813 |
| 44.24543695 |
| 6.320776707 |
| 28.09234092 |
| 4.213851138 |
| 24.58079831 |
| 9.832319322 |
| 15.45078751 |
| 27.3900324  |
| 3.511542615 |
| 65.31469264 |
| 30.90157501 |
| 9.832319322 |
| 4.916159661 |
| 73.04008639 |
| 7.725393753 |
| 122.201683  |
| 4.213851138 |
| 10.53462785 |

|             |
|-------------|
| 61.80315003 |
| 10.53462785 |
| 90.59779947 |
| 40.03158581 |
| 15.45078751 |
| 7.02308523  |
| 5.618468184 |
| 5.618468184 |
| 8.427702276 |
| 5.618468184 |
| 128.5224597 |
| 15.45078751 |
| 10.53462785 |
| 7.02308523  |
| 7.725393753 |
| 21.06925569 |
| 6.320776707 |
| 31.60388354 |
| 2.809234092 |
| 3.511542615 |
| 18.96233012 |
| 54.07775627 |
| 17.55771308 |
| 38.62696877 |
| 13.34386194 |
| 79.3608631  |
| 25.28310683 |
| 9.832319322 |
| 7.02308523  |
| 4.916159661 |
| 8.427702276 |
| 3.511542615 |
| 4.916159661 |
| 5.618468184 |
| 153.8055665 |
| 8.427702276 |
| 110.9647466 |
| 7.725393753 |
| 7.725393753 |
| 2.809234092 |
| 9.832319322 |
| 4.916159661 |
| 74.44470344 |

|             |
|-------------|
| 13.34386194 |
| 2.809234092 |
| 5.618468184 |
| 7.02308523  |
| 92.70472504 |
| 130.6293853 |
| 10.53462785 |
| 19.66463864 |
| 4.213851138 |
| 20.36694717 |
| 6.320776707 |
| 5.618468184 |
| 39.32927729 |
| 7.02308523  |
| 41.43620286 |
| 125.0109171 |
| 10.53462785 |
| 107.453204  |
| 5.618468184 |
| 80.06317162 |
| 7.725393753 |
| 7.725393753 |
| 7.02308523  |
| 9.130010799 |
| 4.213851138 |
| 9.130010799 |
| 80.06317162 |
| 4.916159661 |
| 2.106925569 |
| 202.2648546 |
| 6.320776707 |
| 6.320776707 |
| 6.320776707 |
| 32.30619206 |
| 75.14701196 |
| 8.427702276 |
| 159.4240347 |
| 7.725393753 |
| 8.427702276 |
| 13.34386194 |
| 167.1494285 |
| 7.02308523  |
| 4.213851138 |

|             |
|-------------|
| 7.725393753 |
| 7.02308523  |
| 4.916159661 |
| 115.8809063 |
| 95.51395913 |
| 7.02308523  |
| 5.618468184 |
| 186.1117586 |
| 4.213851138 |
| 100.4301188 |
| 11.23693637 |
| 34.41311763 |
| 107.453204  |
| 23.17618126 |
| 12.64155341 |
| 9.832319322 |
| 7.02308523  |
| 6.320776707 |
| 8.427702276 |
| 7.02308523  |
| 5.618468184 |
| 20.36694717 |
| 11.23693637 |
| 17.55771308 |
| 7.02308523  |
| 8.427702276 |
| 188.9209927 |
| 14.04617046 |
| 10.53462785 |
| 3.511542615 |
| 5.618468184 |
| 3.511542615 |
| 5.618468184 |
| 9.130010799 |
| 9.130010799 |
| 74.44470344 |
| 7.02308523  |
| 6.320776707 |
| 17.55771308 |
| 101.8347358 |
| 6.320776707 |
| 45.650054   |
| 6.320776707 |

|             |
|-------------|
| 53.37544775 |
| 8.427702276 |
| 11.23693637 |
| 115.1785978 |
| 9.832319322 |
| 9.130010799 |
| 163.6378859 |
| 9.130010799 |
| 17.55771308 |
| 3.511542615 |
| 93.40703356 |
| 5.618468184 |
| 9.832319322 |
| 84.27702276 |
| 9.130010799 |
| 5.618468184 |
| 6.320776707 |
| 116.5832148 |
| 6.320776707 |
| 3.511542615 |
| 7.725393753 |
| 99.02550175 |
| 8.427702276 |
| 3.511542615 |
| 21.77156421 |
| 6.320776707 |
| 8.427702276 |
| 28.09234092 |
| 8.427702276 |
| 133.4386194 |
| 23.87848978 |
| 5.618468184 |
| 114.4762893 |
| 9.130010799 |
| 0           |
| 45.650054   |
| 4.213851138 |
| 16.15309603 |
| 6.320776707 |
| 73.04008639 |
| 127.1178427 |
| 20.36694717 |
| 7.02308523  |



|             |
|-------------|
| 14.74847898 |
| 21.06925569 |
| 7.725393753 |
| 7.725393753 |
| 59.69622446 |
| 12.64155341 |
| 21.06925569 |
| 70.2308523  |
| 0.702308523 |
| 64.61238412 |
| 125.0109171 |
| 5.618468184 |
| 58.29160741 |
| 54.7800648  |
| 6.320776707 |
| 7.725393753 |
| 7.02308523  |
| 84.27702276 |
| 28.79464944 |
| 2.809234092 |
| 17.55771308 |
| 9.130010799 |
| 6.320776707 |
| 8.427702276 |
| 235.2733552 |
| 5.618468184 |
| 64.61238412 |
| 16.15309603 |
| 125.0109171 |
| 68.12392673 |
| 7.02308523  |
| 5.618468184 |
| 51.9708307  |
| 7.02308523  |
| 7.02308523  |
| 7.725393753 |
| 70.2308523  |
| 19.66463864 |
| 57.58929889 |
| 4.916159661 |
| 60.39853298 |
| 9.832319322 |
| 60.39853298 |

|             |
|-------------|
| 3.511542615 |
| 3.511542615 |
| 8.427702276 |
| 5.618468184 |
| 6.320776707 |
| 6.320776707 |
| 97.6208847  |
| 6.320776707 |
| 2.809234092 |
| 9.130010799 |
| 110.2624381 |
| 4.213851138 |
| 9.130010799 |
| 123.6063001 |
| 219.8225677 |
| 6.320776707 |
| 2.809234092 |
| 138.354779  |
| 57.58929889 |
| 7.02308523  |
| 10.53462785 |
| 3.511542615 |
| 7.725393753 |
| 5.618468184 |
| 66.71930969 |
| 7.725393753 |
| 8.427702276 |
| 9.130010799 |
| 239.4872063 |
| 126.4155341 |
| 30.19926649 |
| 8.427702276 |
| 75.84932049 |
| 7.02308523  |
| 2.106925569 |
| 8.427702276 |
| 3.511542615 |
| 5.618468184 |
| 9.130010799 |
| 9.832319322 |
| 4.916159661 |
| 54.7800648  |
| 5.618468184 |

|             |
|-------------|
| 25.98541535 |
| 14.74847898 |
| 8.427702276 |
| 5.618468184 |
| 42.13851138 |
| 161.5309603 |
| 6.320776707 |
| 4.916159661 |
| 9.130010799 |
| 30.90157501 |
| 9.130010799 |
| 6.320776707 |
| 5.618468184 |
| 7.725393753 |
| 56.88699036 |
| 6.320776707 |
| 5.618468184 |
| 6.320776707 |
| 65.31469264 |
| 5.618468184 |
| 5.618468184 |
| 79.3608631  |
| 13.34386194 |
| 74.44470344 |
| 61.1008415  |
| 6.320776707 |
| 5.618468184 |
| 8.427702276 |
| 7.02308523  |
| 7.725393753 |
| 7.02308523  |
| 21.77156421 |
| 11.23693637 |
| 7.02308523  |
| 3.511542615 |
| 7.02308523  |
| 114.4762893 |
| 5.618468184 |
| 7.02308523  |
| 9.130010799 |
| 9.130010799 |
| 179.7909819 |
| 80.76548015 |

|             |
|-------------|
| 31.60388354 |
| 6.320776707 |
| 5.618468184 |
| 23.87848978 |
| 48.45928809 |
| 9.832319322 |
| 9.832319322 |
| 8.427702276 |
| 7.725393753 |
| 7.02308523  |
| 8.427702276 |
| 5.618468184 |
| 21.06925569 |
| 31.60388354 |
| 8.427702276 |
| 10.53462785 |
| 7.725393753 |
| 214.906408  |
| 11.23693637 |
| 4.916159661 |
| 6.320776707 |
| 7.725393753 |
| 117.2855233 |
| 8.427702276 |
| 9.130010799 |
| 99.72781027 |
| 7.02308523  |
| 4.916159661 |
| 14.04617046 |
| 5.618468184 |
| 92.00241652 |
| 7.02308523  |
| 25.28310683 |
| 200.1579291 |
| 5.618468184 |
| 40.73389434 |
| 7.02308523  |
| 2.809234092 |
| 8.427702276 |
| 5.618468184 |
| 18.96233012 |
| 5.618468184 |
| 140.4617046 |

|             |
|-------------|
| 39.32927729 |
| 9.130010799 |
| 10.53462785 |
| 5.618468184 |
| 14.74847898 |
| 3.511542615 |
| 147.4847898 |
| 10.53462785 |
| 2.106925569 |
| 14.74847898 |
| 212.097174  |
| 9.130010799 |
| 11.93924489 |
| 71.63546935 |
| 28.79464944 |
| 261.9610791 |
| 14.74847898 |
| 7.02308523  |
| 5.618468184 |
| 2.809234092 |
| 5.618468184 |
| 8.427702276 |
| 11.93924489 |
| 6.320776707 |
| 4.213851138 |
| 205.7763972 |
| 4.916159661 |
| 11.93924489 |
| 14.74847898 |
| 9.832319322 |
| 7.725393753 |
| 7.725393753 |
| 202.9671632 |
| 116.5832148 |
| 2.106925569 |
| 7.02308523  |
| 77.25393753 |
| 5.618468184 |
| 2.809234092 |
| 104.6439699 |
| 4.213851138 |
| 78.65855458 |
| 2.106925569 |

|             |
|-------------|
| 6.320776707 |
| 2.809234092 |
| 192.4325353 |
| 35.81773467 |
| 7.725393753 |
| 27.3900324  |
| 7.02308523  |
| 131.3316938 |
| 7.02308523  |
| 93.40703356 |
| 12.64155341 |
| 81.46778867 |
| 45.650054   |
| 211.3948654 |
| 7.02308523  |
| 11.23693637 |
| 42.8408199  |
| 3.511542615 |
| 3.511542615 |
| 107.453204  |
| 22.47387274 |
| 20.36694717 |
| 68.82623526 |
| 7.02308523  |
| 7.725393753 |
| 9.832319322 |
| 8.427702276 |
| 61.80315003 |
| 13.34386194 |
| 72.33777787 |
| 23.17618126 |
| 21.06925569 |
| 9.832319322 |
| 4.213851138 |
| 61.1008415  |
| 75.14701196 |
| 6.320776707 |
| 9.130010799 |
| 53.37544775 |
| 7.02308523  |
| 6.320776707 |
| 9.832319322 |
| 7.02308523  |

|             |
|-------------|
| 1.404617046 |
| 61.1008415  |
| 14.74847898 |
| 134.1409279 |
| 7.02308523  |
| 6.320776707 |
| 8.427702276 |
| 7.725393753 |
| 21.06925569 |
| 65.31469264 |
| 75.14701196 |
| 4.213851138 |
| 7.02308523  |
| 149.5917154 |
| 44.94774547 |
| 8.427702276 |
| 9.130010799 |
| 29.49695797 |
| 4.916159661 |
| 0           |
| 171.3632796 |
| 7.02308523  |
| 11.23693637 |
| 50.56621366 |
| 82.87240572 |
| 5.618468184 |
| 4.213851138 |
| 7.725393753 |
| 6.320776707 |
| 11.23693637 |
| 34.41311763 |
| 4.916159661 |
| 103.9416614 |
| 16.15309603 |
| 10.53462785 |
| 45.650054   |
| 143.9732472 |
| 4.213851138 |
| 94.81165061 |
| 3.511542615 |
| 23.17618126 |
| 7.725393753 |
| 47.75697957 |

|             |
|-------------|
| 4.213851138 |
| 81.46778867 |
| 6.320776707 |
| 150.9963324 |
| 3.511542615 |
| 4.213851138 |
| 73.74239492 |
| 82.17009719 |
| 149.5917154 |
| 9.130010799 |
| 4.916159661 |
| 3.511542615 |
| 3.511542615 |
| 7.02308523  |
| 64.61238412 |
| 30.19926649 |
| 14.74847898 |
| 42.8408199  |
| 11.23693637 |
| 9.832319322 |
| 77.25393753 |
| 15.45078751 |
| 9.130010799 |
| 1.404617046 |
| 4.213851138 |
| 19.66463864 |
| 4.213851138 |
| 23.17618126 |
| 6.320776707 |
| 112.3693637 |
| 37.22235172 |
| 19.66463864 |
| 29.49695797 |
| 7.02308523  |
| 73.74239492 |
| 174.1725137 |
| 6.320776707 |
| 80.06317162 |
| 45.650054   |
| 155.9124921 |
| 2.809234092 |
| 90.59779947 |
| 4.916159661 |



|             |
|-------------|
| 7.02308523  |
| 14.74847898 |
| 71.63546935 |
| 9.130010799 |
| 12.64155341 |
| 7.725393753 |
| 42.8408199  |
| 126.4155341 |
| 5.618468184 |
| 6.320776707 |
| 9.130010799 |
| 7.02308523  |
| 7.02308523  |
| 13.34386194 |
| 3.511542615 |
| 4.916159661 |
| 4.213851138 |
| 6.320776707 |
| 5.618468184 |
| 26.68772387 |
| 15.45078751 |
| 28.09234092 |
| 7.02308523  |
| 7.725393753 |
| 54.07775627 |
| 11.93924489 |
| 3.511542615 |
| 15.45078751 |
| 5.618468184 |
| 6.320776707 |
| 30.90157501 |
| 66.71930969 |
| 16.85540455 |
| 9.130010799 |
| 16.15309603 |
| 3.511542615 |
| 8.427702276 |
| 4.916159661 |
| 9.832319322 |
| 81.46778867 |
| 7.725393753 |
| 5.618468184 |
| 9.832319322 |

|             |
|-------------|
| 167.1494285 |
| 7.725393753 |
| 11.93924489 |
| 11.23693637 |
| 2.106925569 |
| 7.02308523  |
| 9.130010799 |
| 3.511542615 |
| 7.02308523  |
| 6.320776707 |
| 38.62696877 |
| 48.45928809 |
| 133.4386194 |
| 7.02308523  |
| 13.34386194 |
| 28.09234092 |
| 5.618468184 |
| 68.12392673 |
| 5.618468184 |
| 2.809234092 |
| 6.320776707 |
| 2.809234092 |
| 6.320776707 |
| 10.53462785 |
| 94.81165061 |
| 11.23693637 |
| 42.13851138 |
| 9.130010799 |
| 9.832319322 |
| 21.77156421 |
| 12.64155341 |
| 6.320776707 |
| 73.04008639 |
| 3.511542615 |
| 5.618468184 |
| 8.427702276 |
| 7.02308523  |
| 7.725393753 |
| 4.916159661 |
| 3.511542615 |
| 8.427702276 |
| 7.725393753 |
| 120.0947574 |

|             |
|-------------|
| 2.809234092 |
| 9.130010799 |
| 4.916159661 |
| 29.49695797 |
| 9.130010799 |
| 18.2600216  |
| 4.213851138 |
| 5.618468184 |
| 8.427702276 |
| 4.916159661 |
| 4.213851138 |
| 8.427702276 |
| 7.02308523  |
| 6.320776707 |
| 157.3171092 |
| 3.511542615 |
| 8.427702276 |
| 9.130010799 |
| 9.832319322 |
| 3.511542615 |
| 7.725393753 |
| 8.427702276 |
| 19.66463864 |
| 7.725393753 |
| 2.809234092 |
| 5.618468184 |
| 25.28310683 |
| 5.618468184 |
| 7.02308523  |
| 37.92466024 |
| 11.93924489 |
| 3.511542615 |
| 4.213851138 |
| 4.916159661 |
| 5.618468184 |
| 6.320776707 |
| 7.02308523  |
| 46.35236252 |
| 4.916159661 |
| 9.832319322 |
| 10.53462785 |
| 111.6670552 |
| 4.213851138 |

|             |
|-------------|
| 7.02308523  |
| 17.55771308 |
| 53.37544775 |
| 6.320776707 |
| 5.618468184 |
| 7.725393753 |
| 7.02308523  |
| 13.34386194 |
| 5.618468184 |
| 24.58079831 |
| 122.9039915 |
| 6.320776707 |
| 21.06925569 |
| 9.130010799 |
| 7.725393753 |
| 17.55771308 |
| 7.725393753 |
| 2.106925569 |
| 14.74847898 |
| 92.70472504 |
| 204.3717802 |
| 28.79464944 |
| 67.42161821 |
| 4.213851138 |
| 138.354779  |
| 10.53462785 |
| 6.320776707 |
| 24.58079831 |
| 99.72781027 |
| 33.7108091  |
| 9.130010799 |
| 2.106925569 |
| 6.320776707 |
| 7.725393753 |
| 3.511542615 |
| 11.93924489 |
| 5.618468184 |
| 6.320776707 |
| 4.916159661 |
| 7.725393753 |
| 65.31469264 |
| 6.320776707 |
| 9.130010799 |

|             |
|-------------|
| 9.130010799 |
| 4.916159661 |
| 7.02308523  |
| 7.02308523  |
| 12.64155341 |
| 7.725393753 |
| 8.427702276 |
| 3.511542615 |
| 14.04617046 |
| 6.320776707 |
| 108.1555125 |
| 7.02308523  |
| 6.320776707 |
| 2.106925569 |
| 5.618468184 |
| 7.02308523  |
| 25.28310683 |
| 9.130010799 |
| 12.64155341 |
| 1.404617046 |
| 7.02308523  |
| 24.58079831 |
| 4.916159661 |
| 4.916159661 |
| 7.725393753 |
| 18.2600216  |
| 6.320776707 |
| 9.832319322 |
| 7.02308523  |
| 117.9878319 |
| 6.320776707 |
| 5.618468184 |
| 7.725393753 |
| 6.320776707 |
| 14.74847898 |
| 7.725393753 |
| 9.832319322 |
| 7.725393753 |
| 4.213851138 |
| 5.618468184 |
| 29.49695797 |
| 8.427702276 |
| 7.725393753 |

|             |
|-------------|
| 14.04617046 |
| 10.53462785 |
| 14.04617046 |
| 10.53462785 |
| 11.93924489 |
| 10.53462785 |
| 7.725393753 |
| 11.93924489 |
| 53.37544775 |
| 7.02308523  |
| 6.320776707 |
| 119.3924489 |
| 101.1324273 |
| 7.725393753 |
| 16.15309603 |
| 6.320776707 |
| 4.916159661 |
| 4.213851138 |
| 12.64155341 |
| 4.213851138 |
| 8.427702276 |
| 198.753312  |
| 11.23693637 |
| 79.3608631  |
| 6.320776707 |
| 10.53462785 |
| 8.427702276 |
| 97.6208847  |
| 99.72781027 |
| 38.62696877 |
| 4.916159661 |
| 8.427702276 |
| 23.87848978 |
| 9.130010799 |
| 23.87848978 |
| 10.53462785 |
| 14.04617046 |
| 9.130010799 |
| 6.320776707 |
| 22.47387274 |
| 90.59779947 |
| 12.64155341 |
| 10.53462785 |

|             |
|-------------|
| 42.8408199  |
| 43.54312843 |
| 7.02308523  |
| 12.64155341 |
| 5.618468184 |
| 5.618468184 |
| 11.23693637 |
| 14.04617046 |
| 1.404617046 |
| 8.427702276 |
| 6.320776707 |
| 9.130010799 |
| 2.809234092 |
| 4.916159661 |
| 6.320776707 |
| 7.02308523  |
| 7.02308523  |
| 7.02308523  |
| 7.02308523  |
| 6.320776707 |
| 0           |
| 10.53462785 |
| 6.320776707 |
| 37.92466024 |
| 4.916159661 |
| 18.96233012 |
| 6.320776707 |
| 5.618468184 |
| 11.93924489 |
| 10.53462785 |
| 87.78856538 |
| 143.2709387 |
| 48.45928809 |
| 7.02308523  |
| 4.213851138 |
| 156.6148006 |
| 9.832319322 |
| 54.7800648  |
| 4.916159661 |
| 4.916159661 |
| 13.34386194 |
| 143.2709387 |
| 82.87240572 |

|             |
|-------------|
| 13.34386194 |
| 3.511542615 |
| 45.650054   |
| 12.64155341 |
| 15.45078751 |
| 2.809234092 |
| 9.130010799 |
| 6.320776707 |
| 5.618468184 |
| 25.98541535 |
| 5.618468184 |
| 4.213851138 |
| 7.02308523  |
| 2.106925569 |
| 10.53462785 |
| 68.82623526 |
| 7.725393753 |
| 13.34386194 |
| 8.427702276 |
| 4.213851138 |
| 35.11542615 |
| 3.511542615 |
| 7.02308523  |
| 8.427702276 |
| 158.0194177 |
| 7.02308523  |
| 5.618468184 |
| 7.725393753 |
| 5.618468184 |
| 8.427702276 |
| 7.725393753 |
| 4.916159661 |
| 6.320776707 |
| 9.130010799 |
| 5.618468184 |
| 4.213851138 |
| 2.809234092 |
| 6.320776707 |
| 16.15309603 |
| 12.64155341 |
| 4.213851138 |
| 62.50545855 |
| 4.916159661 |



|             |
|-------------|
| 11.93924489 |
| 4.916159661 |
| 6.320776707 |
| 4.916159661 |
| 7.725393753 |
| 6.320776707 |
| 7.02308523  |
| 5.618468184 |
| 4.213851138 |
| 2.106925569 |
| 10.53462785 |
| 2.809234092 |
| 8.427702276 |
| 5.618468184 |
| 4.916159661 |
| 7.725393753 |
| 7.725393753 |
| 5.618468184 |
| 7.02308523  |
| 72.33777787 |
| 3.511542615 |
| 9.130010799 |
| 105.3462785 |
| 9.130010799 |
| 7.02308523  |
| 57.58929889 |
| 9.130010799 |
| 7.02308523  |
| 26.68772387 |
| 11.93924489 |
| 182.600216  |
| 5.618468184 |
| 12.64155341 |
| 4.916159661 |
| 91.30010799 |
| 84.27702276 |
| 148.8894069 |
| 4.916159661 |
| 9.130010799 |
| 16.85540455 |
| 4.213851138 |
| 9.130010799 |
| 5.618468184 |

|             |
|-------------|
| 9.832319322 |
| 30.90157501 |
| 7.02308523  |
| 14.04617046 |
| 61.1008415  |
| 12.64155341 |
| 5.618468184 |
| 9.832319322 |
| 21.06925569 |
| 6.320776707 |
| 90.59779947 |
| 9.130010799 |
| 184.7071416 |
| 9.130010799 |
| 7.02308523  |
| 209.9902484 |
| 12.64155341 |
| 7.02308523  |
| 6.320776707 |
| 103.2393529 |
| 28.09234092 |
| 4.213851138 |
| 82.17009719 |
| 6.320776707 |
| 4.916159661 |
| 5.618468184 |
| 2.809234092 |
| 3.511542615 |
| 9.832319322 |
| 4.916159661 |
| 5.618468184 |
| 7.02308523  |
| 173.4702052 |
| 167.851737  |
| 9.130010799 |
| 5.618468184 |
| 100.4301188 |
| 9.130010799 |
| 6.320776707 |
| 8.427702276 |
| 4.916159661 |
| 2.809234092 |
| 4.213851138 |

|             |
|-------------|
| 7.02308523  |
| 6.320776707 |
| 2.106925569 |
| 5.618468184 |
| 8.427702276 |
| 5.618468184 |
| 4.916159661 |
| 3.511542615 |
| 7.725393753 |
| 7.02308523  |
| 38.62696877 |
| 7.725393753 |
| 69.52854378 |
| 5.618468184 |
| 9.832319322 |
| 56.88699036 |
| 18.96233012 |
| 8.427702276 |
| 5.618468184 |
| 7.725393753 |
| 8.427702276 |
| 7.725393753 |
| 7.02308523  |
| 4.916159661 |
| 9.832319322 |
| 7.725393753 |
| 55.48237332 |
| 2.809234092 |
| 74.44470344 |
| 106.7508955 |
| 2.106925569 |
| 54.7800648  |
| 4.916159661 |
| 49.86390513 |
| 34.41311763 |
| 5.618468184 |
| 6.320776707 |
| 6.320776707 |
| 6.320776707 |
| 6.320776707 |
| 7.02308523  |
| 7.725393753 |
| 7.725393753 |

|             |
|-------------|
| 25.28310683 |
| 100.4301188 |
| 7.02308523  |
| 9.832319322 |
| 5.618468184 |
| 9.130010799 |
| 99.72781027 |
| 4.916159661 |
| 4.916159661 |
| 125.7132256 |
| 9.832319322 |
| 9.130010799 |
| 13.34386194 |
| 4.916159661 |
| 5.618468184 |
| 7.02308523  |
| 7.02308523  |
| 168.5540455 |
| 99.02550175 |
| 99.02550175 |
| 8.427702276 |
| 5.618468184 |
| 180.4932904 |
| 9.130010799 |
| 8.427702276 |
| 3.511542615 |
| 11.23693637 |
| 8.427702276 |
| 5.618468184 |
| 44.24543695 |
| 5.618468184 |
| 7.02308523  |
| 5.618468184 |
| 14.74847898 |
| 214.2040995 |
| 289.3511115 |
| 4.916159661 |
| 3.511542615 |
| 5.618468184 |
| 55.48237332 |
| 6.320776707 |
| 7.725393753 |
| 7.02308523  |

|             |
|-------------|
| 10.53462785 |
| 5.618468184 |
| 8.427702276 |
| 5.618468184 |
| 82.17009719 |
| 7.725393753 |
| 165.7448114 |
| 4.916159661 |
| 9.832319322 |
| 8.427702276 |
| 13.34386194 |
| 5.618468184 |
| 6.320776707 |
| 9.832319322 |
| 119.3924489 |
| 7.02308523  |
| 25.28310683 |
| 1.404617046 |
| 94.10934208 |
| 8.427702276 |
| 45.650054   |
| 137.6524705 |
| 73.74239492 |
| 9.130010799 |
| 3.511542615 |
| 5.618468184 |
| 28.09234092 |
| 3.511542615 |
| 56.88699036 |
| 10.53462785 |
| 96.91857618 |
| 2.809234092 |
| 4.213851138 |
| 2.106925569 |
| 61.1008415  |
| 5.618468184 |
| 4.916159661 |
| 6.320776707 |
| 7.725393753 |
| 4.213851138 |
| 0           |
| 2.809234092 |
| 3.511542615 |

|             |
|-------------|
| 144.6755557 |
| 6.320776707 |
| 11.23693637 |
| 16.15309603 |
| 6.320776707 |
| 7.725393753 |
| 10.53462785 |
| 7.725393753 |
| 4.213851138 |
| 2.809234092 |
| 7.725393753 |
| 6.320776707 |
| 9.130010799 |
| 226.8456529 |
| 9.832319322 |
| 4.213851138 |
| 9.832319322 |
| 4.213851138 |
| 9.130010799 |
| 11.93924489 |
| 7.725393753 |
| 89.89549095 |
| 9.130010799 |
| 99.02550175 |
| 4.916159661 |
| 5.618468184 |
| 7.02308523  |
| 4.213851138 |
| 7.725393753 |
| 22.47387274 |
| 117.2855233 |
| 86.38394833 |
| 5.618468184 |
| 8.427702276 |
| 69.52854378 |
| 18.2600216  |
| 7.725393753 |
| 12.64155341 |
| 2.809234092 |
| 11.93924489 |
| 7.725393753 |
| 18.96233012 |
| 12.64155341 |

|             |
|-------------|
| 5.618468184 |
| 4.916159661 |
| 9.130010799 |
| 61.1008415  |
| 10.53462785 |
| 8.427702276 |
| 33.00850058 |
| 55.48237332 |
| 8.427702276 |
| 9.832319322 |
| 4.916159661 |
| 2.106925569 |
| 16.15309603 |
| 4.213851138 |
| 3.511542615 |
| 2.106925569 |
| 96.91857618 |
| 4.213851138 |
| 8.427702276 |
| 14.04617046 |
| 99.72781027 |
| 11.23693637 |
| 9.832319322 |
| 7.02308523  |
| 26.68772387 |
| 6.320776707 |
| 35.11542615 |
| 7.725393753 |
| 40.73389434 |
| 7.02308523  |
| 5.618468184 |
| 224.7387274 |
| 7.725393753 |
| 13.34386194 |
| 2.809234092 |
| 7.725393753 |
| 9.130010799 |
| 22.47387274 |
| 6.320776707 |
| 46.35236252 |
| 12.64155341 |
| 11.93924489 |
| 3.511542615 |

|             |
|-------------|
| 4.916159661 |
| 30.90157501 |
| 63.91007559 |
| 9.130010799 |
| 44.94774547 |
| 9.832319322 |
| 3.511542615 |
| 5.618468184 |
| 7.02308523  |
| 5.618468184 |
| 8.427702276 |
| 9.130010799 |
| 7.02308523  |
| 30.19926649 |
| 58.29160741 |
| 7.02308523  |
| 7.725393753 |
| 18.96233012 |
| 6.320776707 |
| 223.3341103 |
| 2.106925569 |
| 86.38394833 |
| 7.02308523  |
| 4.213851138 |
| 10.53462785 |
| 7.02308523  |
| 9.130010799 |
| 9.832319322 |
| 5.618468184 |
| 4.916159661 |
| 7.02308523  |
| 5.618468184 |
| 1.404617046 |
| 12.64155341 |
| 11.23693637 |
| 68.82623526 |
| 94.10934208 |
| 4.213851138 |
| 7.02308523  |
| 3.511542615 |
| 12.64155341 |
| 4.916159661 |
| 5.618468184 |



|             |
|-------------|
| 6.320776707 |
| 24.58079831 |
| 51.9708307  |
| 7.725393753 |
| 57.58929889 |
| 9.832319322 |
| 7.725393753 |
| 7.02308523  |
| 2.106925569 |
| 3.511542615 |
| 7.02308523  |
| 9.130010799 |
| 65.31469264 |
| 11.23693637 |
| 6.320776707 |
| 5.618468184 |
| 181.8979075 |
| 9.130010799 |
| 9.130010799 |
| 8.427702276 |
| 6.320776707 |
| 8.427702276 |
| 7.02308523  |
| 6.320776707 |
| 10.53462785 |
| 11.23693637 |
| 4.916159661 |
| 21.06925569 |
| 66.01700116 |
| 7.02308523  |
| 21.77156421 |
| 7.02308523  |
| 7.02308523  |
| 3.511542615 |
| 5.618468184 |
| 6.320776707 |
| 14.74847898 |
| 4.213851138 |
| 12.64155341 |
| 7.02308523  |
| 23.87848978 |
| 8.427702276 |
| 6.320776707 |

|             |
|-------------|
| 3.511542615 |
| 4.213851138 |
| 10.53462785 |
| 6.320776707 |
| 13.34386194 |
| 8.427702276 |
| 7.02308523  |
| 15.45078751 |
| 35.11542615 |
| 30.90157501 |
| 7.725393753 |
| 3.511542615 |
| 13.34386194 |
| 4.213851138 |
| 41.43620286 |
| 23.87848978 |
| 18.2600216  |
| 117.9878319 |
| 6.320776707 |
| 4.213851138 |
| 21.77156421 |
| 3.511542615 |
| 8.427702276 |
| 9.130010799 |
| 32.30619206 |
| 83.57471424 |
| 9.130010799 |
| 5.618468184 |
| 4.916159661 |
| 63.91007559 |
| 187.5163756 |
| 8.427702276 |
| 5.618468184 |
| 56.18468184 |
| 8.427702276 |
| 9.832319322 |
| 5.618468184 |
| 176.2794393 |
| 4.213851138 |
| 21.77156421 |
| 25.98541535 |
| 6.320776707 |
| 8.427702276 |

|             |
|-------------|
| 6.320776707 |
| 9.832319322 |
| 1.404617046 |
| 4.213851138 |
| 6.320776707 |
| 8.427702276 |
| 6.320776707 |
| 7.725393753 |
| 7.02308523  |
| 30.90157501 |
| 9.832319322 |
| 3.511542615 |
| 11.23693637 |
| 6.320776707 |
| 63.20776707 |
| 19.66463864 |
| 43.54312843 |
| 7.02308523  |
| 12.64155341 |
| 6.320776707 |
| 48.45928809 |
| 2.106925569 |
| 9.832319322 |
| 7.02308523  |
| 7.02308523  |
| 5.618468184 |
| 0           |
| 5.618468184 |
| 14.74847898 |
| 32.30619206 |
| 35.81773467 |
| 3.511542615 |
| 12.64155341 |
| 8.427702276 |
| 7.725393753 |
| 7.02308523  |
| 19.66463864 |
| 7.02308523  |
| 6.320776707 |
| 92.00241652 |
| 9.832319322 |
| 77.95624606 |
| 9.130010799 |

|             |
|-------------|
| 209.2879399 |
| 6.320776707 |
| 5.618468184 |
| 11.93924489 |
| 158.0194177 |
| 8.427702276 |
| 5.618468184 |
| 49.16159661 |
| 9.832319322 |
| 5.618468184 |
| 35.81773467 |
| 7.02308523  |
| 5.618468184 |
| 42.13851138 |
| 3.511542615 |
| 11.93924489 |
| 9.832319322 |
| 110.9647466 |
| 102.5370444 |
| 7.02308523  |
| 9.832319322 |
| 4.213851138 |
| 6.320776707 |
| 0.702308523 |
| 7.725393753 |
| 7.725393753 |
| 7.725393753 |
| 11.23693637 |
| 6.320776707 |
| 36.5200432  |
| 8.427702276 |
| 7.725393753 |
| 9.832319322 |
| 22.47387274 |
| 6.320776707 |
| 3.511542615 |
| 21.77156421 |
| 9.130010799 |
| 8.427702276 |
| 9.832319322 |
| 5.618468184 |
| 11.23693637 |
| 8.427702276 |

|             |
|-------------|
| 6.320776707 |
| 90.59779947 |
| 7.02308523  |
| 0.702308523 |
| 5.618468184 |
| 4.213851138 |
| 7.02308523  |
| 9.130010799 |
| 50.56621366 |
| 115.1785978 |
| 217.7156421 |
| 66.71930969 |
| 202.2648546 |
| 4.916159661 |
| 122.9039915 |
| 2.106925569 |
| 4.916159661 |
| 7.725393753 |
| 1.404617046 |
| 23.87848978 |
| 9.130010799 |
| 8.427702276 |
| 5.618468184 |
| 75.84932049 |
| 14.04617046 |
| 13.34386194 |
| 8.427702276 |
| 8.427702276 |
| 6.320776707 |
| 38.62696877 |
| 6.320776707 |
| 82.87240572 |
| 21.06925569 |
| 75.14701196 |
| 9.130010799 |
| 59.69622446 |
| 54.07775627 |
| 99.02550175 |
| 9.832319322 |
| 18.2600216  |
| 7.725393753 |
| 2.809234092 |
| 6.320776707 |

|             |
|-------------|
| 6.320776707 |
| 55.48237332 |
| 48.45928809 |
| 0           |
| 7.725393753 |
| 1.404617046 |
| 103.2393529 |
| 30.19926649 |
| 9.130010799 |
| 8.427702276 |
| 9.832319322 |
| 11.23693637 |
| 95.51395913 |
| 5.618468184 |
| 5.618468184 |
| 7.02308523  |
| 2.809234092 |
| 37.22235172 |
| 7.725393753 |
| 39.32927729 |
| 4.916159661 |
| 5.618468184 |
| 6.320776707 |
| 1.404617046 |
| 9.130010799 |
| 0.702308523 |
| 129.2247682 |
| 7.02308523  |
| 3.511542615 |
| 134.8432364 |
| 8.427702276 |
| 9.832319322 |
| 4.213851138 |
| 9.130010799 |
| 77.25393753 |
| 4.916159661 |
| 7.02308523  |
| 3.511542615 |
| 9.130010799 |
| 2.809234092 |
| 7.725393753 |
| 6.320776707 |
| 55.48237332 |

|             |
|-------------|
| 94.81165061 |
| 4.916159661 |
| 4.916159661 |
| 8.427702276 |
| 4.916159661 |
| 185.4094501 |
| 26.68772387 |
| 8.427702276 |
| 5.618468184 |
| 7.02308523  |
| 4.213851138 |
| 2.809234092 |
| 5.618468184 |
| 7.02308523  |
| 4.213851138 |
| 2.106925569 |
| 6.320776707 |
| 74.44470344 |
| 1.404617046 |
| 7.02308523  |
| 7.02308523  |
| 9.130010799 |
| 8.427702276 |
| 6.320776707 |
| 10.53462785 |
| 14.04617046 |
| 16.85540455 |
| 7.725393753 |
| 3.511542615 |
| 4.213851138 |
| 11.23693637 |
| 4.213851138 |
| 30.19926649 |
| 21.06925569 |
| 6.320776707 |
| 46.35236252 |
| 7.02308523  |
| 75.84932049 |
| 11.93924489 |
| 7.02308523  |
| 16.15309603 |
| 5.618468184 |
| 9.130010799 |

|             |
|-------------|
| 170.6609711 |
| 2.809234092 |
| 7.725393753 |
| 8.427702276 |
| 7.725393753 |
| 5.618468184 |
| 7.02308523  |
| 41.43620286 |
| 11.93924489 |
| 66.71930969 |
| 7.725393753 |
| 60.39853298 |
| 4.916159661 |
| 6.320776707 |
| 5.618468184 |
| 113.7739807 |
| 175.5771308 |
| 31.60388354 |
| 9.130010799 |
| 4.916159661 |
| 8.427702276 |
| 8.427702276 |
| 12.64155341 |
| 9.832319322 |
| 15.45078751 |
| 6.320776707 |
| 140.4617046 |
| 2.106925569 |
| 7.725393753 |
| 7.02308523  |
| 7.725393753 |
| 5.618468184 |
| 7.02308523  |
| 15.45078751 |
| 10.53462785 |
| 8.427702276 |
| 4.916159661 |
| 4.213851138 |
| 12.64155341 |
| 125.7132256 |
| 6.320776707 |
| 3.511542615 |
| 6.320776707 |



|             |
|-------------|
| 7.02308523  |
| 3.511542615 |
| 13.34386194 |
| 5.618468184 |
| 12.64155341 |
| 12.64155341 |
| 11.23693637 |
| 11.23693637 |
| 5.618468184 |
| 2.809234092 |
| 7.02308523  |
| 4.916159661 |
| 62.50545855 |
| 6.320776707 |
| 16.85540455 |
| 4.916159661 |
| 6.320776707 |
| 2.809234092 |
| 14.74847898 |
| 12.64155341 |
| 9.832319322 |
| 8.427702276 |
| 4.213851138 |
| 11.23693637 |
| 9.130010799 |
| 5.618468184 |
| 7.02308523  |
| 9.130010799 |
| 59.69622446 |
| 60.39853298 |
| 2.809234092 |
| 124.3086086 |
| 8.427702276 |
| 8.427702276 |
| 0           |
| 8.427702276 |
| 8.427702276 |
| 33.7108091  |
| 40.73389434 |
| 11.23693637 |
| 3.511542615 |
| 172.7678967 |
| 55.48237332 |

|             |
|-------------|
| 7.725393753 |
| 5.618468184 |
| 150.2940239 |
| 13.34386194 |
| 2.809234092 |
| 7.02308523  |
| 9.832319322 |
| 6.320776707 |
| 9.130010799 |
| 4.916159661 |
| 4.916159661 |
| 54.7800648  |
| 101.8347358 |
| 21.77156421 |
| 15.45078751 |
| 54.07775627 |
| 3.511542615 |
| 9.130010799 |
| 7.725393753 |
| 9.832319322 |
| 152.4009495 |
| 13.34386194 |
| 90.59779947 |
| 9.130010799 |
| 8.427702276 |
| 21.06925569 |
| 179.0886734 |
| 5.618468184 |
| 6.320776707 |
| 20.36694717 |
| 6.320776707 |
| 7.02308523  |
| 4.916159661 |
| 3.511542615 |
| 4.213851138 |
| 148.1870984 |
| 23.87848978 |
| 4.213851138 |
| 7.02308523  |
| 16.15309603 |
| 63.20776707 |
| 7.02308523  |
| 6.320776707 |

|             |
|-------------|
| 4.916159661 |
| 8.427702276 |
| 4.213851138 |
| 8.427702276 |
| 8.427702276 |
| 2.106925569 |
| 7.02308523  |
| 9.130010799 |
| 49.16159661 |
| 7.02308523  |
| 5.618468184 |
| 217.0133336 |
| 11.93924489 |
| 44.24543695 |
| 10.53462785 |
| 7.725393753 |
| 9.130010799 |
| 12.64155341 |
| 16.15309603 |
| 13.34386194 |
| 71.63546935 |
| 7.02308523  |
| 4.213851138 |
| 8.427702276 |
| 4.213851138 |
| 4.916159661 |
| 9.130010799 |
| 3.511542615 |
| 0.702308523 |
| 86.38394833 |
| 139.7593961 |
| 7.725393753 |
| 13.34386194 |
| 9.832319322 |
| 6.320776707 |
| 5.618468184 |
| 16.15309603 |
| 4.916159661 |
| 4.916159661 |
| 7.02308523  |
| 8.427702276 |
| 14.74847898 |
| 8.427702276 |

|             |
|-------------|
| 9.832319322 |
| 97.6208847  |
| 9.130010799 |
| 15.45078751 |
| 6.320776707 |
| 7.02308523  |
| 4.916159661 |
| 97.6208847  |
| 5.618468184 |
| 46.35236252 |
| 7.725393753 |
| 8.427702276 |
| 69.52854378 |
| 7.02308523  |
| 4.916159661 |
| 9.832319322 |
| 7.02308523  |
| 186.1117586 |
| 6.320776707 |
| 23.87848978 |
| 11.23693637 |
| 195.2417694 |
| 112.3693637 |
| 19.66463864 |
| 7.02308523  |
| 9.832319322 |
| 89.19318242 |
| 7.02308523  |
| 6.320776707 |
| 9.832319322 |
| 2.809234092 |
| 11.23693637 |
| 2.809234092 |
| 5.618468184 |
| 4.916159661 |
| 157.3171092 |
| 5.618468184 |
| 5.618468184 |
| 89.89549095 |
| 5.618468184 |
| 19.66463864 |
| 8.427702276 |
| 8.427702276 |

|             |
|-------------|
| 137.6524705 |
| 6.320776707 |
| 7.725393753 |
| 6.320776707 |
| 2.809234092 |
| 4.916159661 |
| 17.55771308 |
| 7.02308523  |
| 9.130010799 |
| 25.98541535 |
| 9.130010799 |
| 182.600216  |
| 120.797066  |
| 81.46778867 |
| 144.6755557 |
| 6.320776707 |
| 2.809234092 |
| 23.17618126 |
| 74.44470344 |
| 58.29160741 |
| 4.916159661 |
| 5.618468184 |
| 184.7071416 |
| 158.7217262 |
| 11.23693637 |
| 24.58079831 |
| 9.130010799 |
| 5.618468184 |
| 8.427702276 |
| 7.02308523  |
| 2.106925569 |
| 2.809234092 |
| 48.45928809 |
| 11.23693637 |
| 2.809234092 |
| 4.916159661 |
| 4.213851138 |
| 4.916159661 |
| 4.916159661 |
| 4.916159661 |
| 148.8894069 |
| 6.320776707 |
| 18.96233012 |

|             |
|-------------|
| 11.93924489 |
| 36.5200432  |
| 49.86390513 |
| 194.5394609 |
| 7.725393753 |
| 16.85540455 |
| 9.832319322 |
| 3.511542615 |
| 5.618468184 |
| 85.68163981 |
| 103.2393529 |
| 3.511542615 |
| 33.00850058 |
| 28.79464944 |
| 8.427702276 |
| 4.213851138 |
| 3.511542615 |
| 4.213851138 |
| 7.02308523  |
| 4.916159661 |
| 92.00241652 |
| 31.60388354 |
| 9.130010799 |
| 4.213851138 |
| 0           |
| 10.53462785 |
| 92.00241652 |
| 110.9647466 |
| 139.7593961 |
| 85.68163981 |
| 8.427702276 |
| 7.02308523  |
| 164.3401944 |
| 15.45078751 |
| 7.02308523  |
| 4.213851138 |
| 47.75697957 |
| 5.618468184 |
| 80.06317162 |
| 8.427702276 |
| 7.02308523  |
| 9.130010799 |
| 8.427702276 |

|             |
|-------------|
| 9.130010799 |
| 7.02308523  |
| 51.26852218 |
| 112.3693637 |
| 6.320776707 |
| 7.02308523  |
| 60.39853298 |
| 4.916159661 |
| 6.320776707 |
| 9.832319322 |
| 7.02308523  |
| 9.832319322 |
| 10.53462785 |
| 9.130010799 |
| 11.93924489 |
| 4.916159661 |
| 6.320776707 |
| 1.404617046 |
| 66.71930969 |
| 0           |
| 4.213851138 |
| 4.213851138 |
| 6.320776707 |
| 7.02308523  |
| 66.01700116 |
| 9.130010799 |
| 7.725393753 |
| 65.31469264 |
| 6.320776707 |
| 7.725393753 |
| 40.73389434 |
| 4.916159661 |
| 5.618468184 |
| 11.23693637 |
| 7.02308523  |
| 7.02308523  |
| 8.427702276 |
| 35.11542615 |
| 9.832319322 |
| 8.427702276 |
| 7.02308523  |
| 6.320776707 |
| 6.320776707 |

|             |
|-------------|
| 9.832319322 |
| 5.618468184 |
| 15.45078751 |
| 3.511542615 |
| 7.725393753 |
| 4.916159661 |
| 6.320776707 |
| 4.213851138 |
| 23.17618126 |
| 7.02308523  |
| 21.06925569 |
| 7.725393753 |
| 4.916159661 |
| 23.87848978 |
| 30.19926649 |
| 129.9270768 |
| 55.48237332 |
| 5.618468184 |
| 65.31469264 |
| 7.02308523  |
| 9.832319322 |
| 25.28310683 |
| 35.11542615 |
| 10.53462785 |
| 77.95624606 |
| 5.618468184 |
| 61.1008415  |
| 7.725393753 |
| 4.213851138 |
| 7.02308523  |
| 93.40703356 |
| 4.916159661 |
| 7.02308523  |
| 2.106925569 |
| 22.47387274 |
| 68.82623526 |
| 53.37544775 |
| 12.64155341 |
| 6.320776707 |
| 2.809234092 |
| 6.320776707 |
| 6.320776707 |
| 45.650054   |



|             |
|-------------|
| 189.6233012 |
| 11.23693637 |
| 18.96233012 |
| 4.213851138 |
| 9.130010799 |
| 2.809234092 |
| 3.511542615 |
| 5.618468184 |
| 6.320776707 |
| 47.05467104 |
| 87.08625685 |
| 47.75697957 |
| 4.916159661 |
| 8.427702276 |
| 7.02308523  |
| 4.213851138 |
| 7.02308523  |
| 8.427702276 |
| 9.130010799 |
| 6.320776707 |
| 0.702308523 |
| 7.02308523  |
| 3.511542615 |
| 38.62696877 |
| 10.53462785 |
| 10.53462785 |
| 2.106925569 |
| 7.02308523  |
| 7.02308523  |
| 7.725393753 |
| 4.916159661 |
| 100.4301188 |
| 6.320776707 |
| 4.916159661 |
| 7.02308523  |
| 4.916159661 |
| 9.832319322 |
| 18.96233012 |
| 8.427702276 |
| 4.213851138 |
| 42.8408199  |
| 132.0340023 |
| 13.34386194 |

|             |
|-------------|
| 6.320776707 |
| 7.02308523  |
| 33.7108091  |
| 9.130010799 |
| 114.4762893 |
| 5.618468184 |
| 91.30010799 |
| 10.53462785 |
| 11.23693637 |
| 23.87848978 |
| 12.64155341 |
| 4.213851138 |
| 7.02308523  |
| 82.17009719 |
| 6.320776707 |
| 109.5601296 |
| 34.41311763 |
| 5.618468184 |
| 4.916159661 |
| 8.427702276 |
| 4.916159661 |
| 1.404617046 |
| 35.11542615 |
| 10.53462785 |
| 7.02308523  |
| 7.02308523  |
| 7.02308523  |
| 10.53462785 |
| 8.427702276 |
| 7.02308523  |
| 3.511542615 |
| 12.64155341 |
| 4.213851138 |
| 4.916159661 |
| 6.320776707 |
| 5.618468184 |
| 9.130010799 |
| 9.130010799 |
| 79.3608631  |
| 4.213851138 |
| 5.618468184 |
| 10.53462785 |
| 89.19318242 |

|             |
|-------------|
| 2.809234092 |
| 29.49695797 |
| 5.618468184 |
| 4.916159661 |
| 4.916159661 |
| 7.725393753 |
| 7.02308523  |
| 1.404617046 |
| 70.93316082 |
| 71.63546935 |
| 5.618468184 |
| 14.04617046 |
| 6.320776707 |
| 16.15309603 |
| 70.2308523  |
| 8.427702276 |
| 7.02308523  |
| 14.74847898 |
| 12.64155341 |
| 9.832319322 |
| 101.1324273 |
| 5.618468184 |
| 7.02308523  |
| 11.23693637 |
| 12.64155341 |
| 10.53462785 |
| 7.725393753 |
| 27.3900324  |
| 9.130010799 |
| 18.96233012 |
| 9.130010799 |
| 5.618468184 |
| 36.5200432  |
| 10.53462785 |
| 13.34386194 |
| 2.809234092 |
| 85.68163981 |
| 7.725393753 |
| 9.832319322 |
| 43.54312843 |
| 4.916159661 |
| 187.5163756 |
| 8.427702276 |

|             |
|-------------|
| 40.73389434 |
| 48.45928809 |
| 14.04617046 |
| 158.0194177 |
| 8.427702276 |
| 4.213851138 |
| 150.9963324 |
| 4.916159661 |
| 7.02308523  |
| 9.832319322 |
| 7.02308523  |
| 5.618468184 |
| 4.213851138 |
| 7.02308523  |
| 115.8809063 |
| 6.320776707 |
| 16.15309603 |
| 4.213851138 |
| 9.832319322 |
| 0           |
| 6.320776707 |
| 173.4702052 |
| 10.53462785 |
| 11.23693637 |
| 9.832319322 |
| 14.74847898 |
| 12.64155341 |
| 6.320776707 |
| 9.832319322 |
| 8.427702276 |
| 7.02308523  |
| 109.5601296 |
| 4.916159661 |
| 7.02308523  |
| 3.511542615 |
| 8.427702276 |
| 29.49695797 |
| 9.832319322 |
| 2.809234092 |
| 161.5309603 |
| 5.618468184 |
| 160.8286518 |
| 5.618468184 |

|             |
|-------------|
| 40.03158581 |
| 5.618468184 |
| 6.320776707 |
| 3.511542615 |
| 4.213851138 |
| 6.320776707 |
| 7.02308523  |
| 2.106925569 |
| 16.85540455 |
| 9.130010799 |
| 5.618468184 |
| 9.832319322 |
| 4.916159661 |
| 3.511542615 |
| 9.130010799 |
| 4.213851138 |
| 8.427702276 |
| 5.618468184 |
| 7.02308523  |
| 182.600216  |
| 2.809234092 |
| 75.84932049 |
| 139.0570876 |
| 58.99391593 |
| 5.618468184 |
| 2.809234092 |
| 7.02308523  |
| 7.725393753 |
| 52.67313923 |
| 12.64155341 |
| 89.19318242 |
| 4.916159661 |
| 4.916159661 |
| 16.15309603 |
| 7.725393753 |
| 147.4847898 |
| 205.0740887 |
| 20.36694717 |
| 2.809234092 |
| 42.8408199  |
| 2.809234092 |
| 8.427702276 |
| 28.79464944 |

|             |
|-------------|
| 9.832319322 |
| 7.725393753 |
| 7.725393753 |
| 58.99391593 |
| 58.29160741 |
| 7.725393753 |
| 47.05467104 |
| 4.916159661 |
| 245.1056745 |
| 2.809234092 |
| 2.809234092 |
| 5.618468184 |
| 0.702308523 |
| 55.48237332 |
| 5.618468184 |
| 7.725393753 |
| 47.05467104 |
| 7.02308523  |
| 68.12392673 |
| 4.916159661 |
| 6.320776707 |
| 5.618468184 |
| 4.213851138 |
| 7.725393753 |
| 6.320776707 |
| 9.130010799 |
| 4.213851138 |
| 3.511542615 |
| 7.02308523  |
| 7.02308523  |
| 53.37544775 |
| 3.511542615 |
| 66.01700116 |
| 187.5163756 |
| 7.02308523  |
| 39.32927729 |
| 72.33777787 |
| 8.427702276 |
| 7.725393753 |
| 3.511542615 |
| 11.23693637 |
| 29.49695797 |
| 4.916159661 |

|             |
|-------------|
| 9.130010799 |
| 2.809234092 |
| 6.320776707 |
| 7.725393753 |
| 2.106925569 |
| 4.213851138 |
| 5.618468184 |
| 7.725393753 |
| 0           |
| 0.702308523 |
| 12.64155341 |
| 4.213851138 |
| 8.427702276 |
| 4.213851138 |
| 7.725393753 |
| 39.32927729 |
| 3.511542615 |
| 208.5856313 |
| 8.427702276 |
| 2.809234092 |
| 4.916159661 |
| 160.1263432 |
| 5.618468184 |
| 2.809234092 |
| 8.427702276 |
| 10.53462785 |
| 4.916159661 |
| 9.832319322 |
| 9.130010799 |
| 9.832319322 |
| 3.511542615 |
| 5.618468184 |
| 5.618468184 |
| 9.130010799 |
| 101.8347358 |
| 3.511542615 |
| 4.916159661 |
| 89.19318242 |
| 7.725393753 |
| 92.70472504 |
| 5.618468184 |
| 0.702308523 |
| 6.320776707 |

|             |
|-------------|
| 11.23693637 |
| 4.213851138 |
| 7.02308523  |
| 180.4932904 |
| 6.320776707 |
| 8.427702276 |
| 0           |
| 8.427702276 |
| 5.618468184 |
| 106.048587  |
| 70.2308523  |
| 8.427702276 |
| 46.35236252 |
| 19.66463864 |
| 80.06317162 |
| 2.809234092 |
| 9.130010799 |
| 4.916159661 |
| 1.404617046 |
| 51.9708307  |
| 62.50545855 |
| 4.916159661 |
| 3.511542615 |
| 6.320776707 |
| 7.725393753 |
| 1.404617046 |
| 46.35236252 |
| 4.213851138 |
| 17.55771308 |
| 4.916159661 |
| 14.74847898 |
| 13.34386194 |
| 8.427702276 |
| 7.725393753 |
| 7.725393753 |
| 7.02308523  |
| 4.916159661 |
| 5.618468184 |
| 4.916159661 |
| 9.130010799 |
| 119.3924489 |
| 11.93924489 |
| 19.66463864 |



|             |
|-------------|
| 5.618468184 |
| 4.916159661 |
| 10.53462785 |
| 7.725393753 |
| 7.02308523  |
| 3.511542615 |
| 7.725393753 |
| 98.32319322 |
| 141.8663216 |
| 61.80315003 |
| 5.618468184 |
| 6.320776707 |
| 7.725393753 |
| 7.02308523  |
| 4.213851138 |
| 3.511542615 |
| 2.809234092 |
| 5.618468184 |
| 8.427702276 |
| 8.427702276 |
| 8.427702276 |
| 4.213851138 |
| 10.53462785 |
| 6.320776707 |
| 77.25393753 |
| 5.618468184 |
| 7.725393753 |
| 5.618468184 |
| 10.53462785 |
| 9.832319322 |
| 3.511542615 |
| 62.50545855 |
| 7.725393753 |
| 6.320776707 |
| 7.725393753 |
| 141.1640131 |
| 14.04617046 |
| 44.24543695 |
| 98.32319322 |
| 5.618468184 |
| 4.916159661 |
| 6.320776707 |
| 11.23693637 |

|             |
|-------------|
| 6.320776707 |
| 5.618468184 |
| 4.916159661 |
| 7.02308523  |
| 3.511542615 |
| 9.130010799 |
| 29.49695797 |
| 14.74847898 |
| 4.213851138 |
| 2.106925569 |
| 80.76548015 |
| 10.53462785 |
| 9.130010799 |
| 4.916159661 |
| 37.22235172 |
| 5.618468184 |
| 6.320776707 |
| 10.53462785 |
| 4.213851138 |
| 5.618468184 |
| 4.916159661 |
| 9.832319322 |
| 46.35236252 |
| 9.130010799 |
| 16.15309603 |
| 1.404617046 |
| 34.41311763 |
| 7.02308523  |
| 145.3778643 |
| 9.832319322 |
| 23.87848978 |
| 7.02308523  |
| 6.320776707 |
| 10.53462785 |
| 200.1579291 |
| 0.702308523 |
| 7.725393753 |
| 44.94774547 |
| 8.427702276 |
| 47.75697957 |
| 6.320776707 |
| 9.130010799 |
| 3.511542615 |

|             |
|-------------|
| 9.130010799 |
| 1.404617046 |
| 4.916159661 |
| 6.320776707 |
| 11.23693637 |
| 4.916159661 |
| 7.02308523  |
| 8.427702276 |
| 25.98541535 |
| 4.916159661 |
| 4.916159661 |
| 9.130010799 |
| 20.36694717 |
| 63.20776707 |
| 13.34386194 |
| 7.725393753 |
| 6.320776707 |
| 11.23693637 |
| 7.725393753 |
| 7.02308523  |
| 6.320776707 |
| 7.02308523  |
| 5.618468184 |
| 5.618468184 |
| 3.511542615 |
| 4.916159661 |
| 9.832319322 |
| 11.23693637 |
| 4.213851138 |
| 19.66463864 |
| 7.725393753 |
| 11.93924489 |
| 6.320776707 |
| 0.702308523 |
| 128.5224597 |
| 4.213851138 |
| 2.106925569 |
| 2.809234092 |
| 4.916159661 |
| 4.213851138 |
| 4.213851138 |
| 63.91007559 |
| 5.618468184 |

|             |
|-------------|
| 4.213851138 |
| 5.618468184 |
| 6.320776707 |
| 120.0947574 |
| 5.618468184 |
| 7.02308523  |
| 11.93924489 |
| 4.213851138 |
| 257.0449194 |
| 31.60388354 |
| 6.320776707 |
| 209.2879399 |
| 9.832319322 |
| 3.511542615 |
| 8.427702276 |
| 4.916159661 |
| 42.8408199  |
| 2.106925569 |
| 4.213851138 |
| 7.02308523  |
| 2.809234092 |
| 72.33777787 |
| 4.213851138 |
| 42.13851138 |
| 16.85540455 |
| 7.725393753 |
| 9.832319322 |
| 7.02308523  |
| 3.511542615 |
| 9.832319322 |
| 5.618468184 |
| 20.36694717 |
| 39.32927729 |
| 64.61238412 |
| 54.7800648  |
| 7.725393753 |
| 3.511542615 |
| 10.53462785 |
| 4.916159661 |
| 40.03158581 |
| 83.57471424 |
| 7.725393753 |
| 0           |

|             |
|-------------|
| 35.81773467 |
| 179.0886734 |
| 4.213851138 |
| 5.618468184 |
| 9.130010799 |
| 8.427702276 |
| 2.809234092 |
| 162.2332688 |
| 7.725393753 |
| 9.832319322 |
| 2.809234092 |
| 6.320776707 |
| 7.725393753 |
| 9.130010799 |
| 6.320776707 |
| 9.130010799 |
| 4.916159661 |
| 12.64155341 |
| 9.832319322 |
| 3.511542615 |
| 10.53462785 |
| 0           |
| 6.320776707 |
| 3.511542615 |
| 42.13851138 |
| 102.5370444 |
| 5.618468184 |
| 6.320776707 |
| 22.47387274 |
| 7.02308523  |
| 4.213851138 |
| 7.725393753 |
| 5.618468184 |
| 12.64155341 |
| 7.725393753 |
| 33.7108091  |
| 7.02308523  |
| 2.809234092 |
| 6.320776707 |
| 5.618468184 |
| 3.511542615 |
| 4.916159661 |
| 84.27702276 |

|             |
|-------------|
| 2.809234092 |
| 4.213851138 |
| 1.404617046 |
| 5.618468184 |
| 17.55771308 |
| 7.02308523  |
| 4.916159661 |
| 10.53462785 |
| 5.618468184 |
| 4.213851138 |
| 6.320776707 |
| 4.916159661 |
| 7.02308523  |
| 4.213851138 |
| 3.511542615 |
| 139.7593961 |
| 9.130010799 |
| 2.106925569 |
| 66.01700116 |
| 6.320776707 |
| 7.02308523  |
| 4.213851138 |
| 7.725393753 |
| 5.618468184 |
| 4.916159661 |
| 7.725393753 |
| 9.130010799 |
| 2.106925569 |
| 3.511542615 |
| 4.916159661 |
| 9.130010799 |
| 29.49695797 |
| 35.11542615 |
| 3.511542615 |
| 170.6609711 |
| 2.106925569 |
| 9.130010799 |
| 6.320776707 |
| 7.725393753 |
| 9.832319322 |
| 5.618468184 |
| 14.74847898 |
| 9.130010799 |

|             |
|-------------|
| 6.320776707 |
| 7.02308523  |
| 10.53462785 |
| 8.427702276 |
| 43.54312843 |
| 7.02308523  |
| 17.55771308 |
| 11.23693637 |
| 5.618468184 |
| 136.950162  |
| 12.64155341 |
| 9.130010799 |
| 39.32927729 |
| 6.320776707 |
| 3.511542615 |
| 94.81165061 |
| 5.618468184 |
| 6.320776707 |
| 3.511542615 |
| 7.02308523  |
| 7.725393753 |
| 5.618468184 |
| 6.320776707 |
| 1.404617046 |
| 6.320776707 |
| 21.77156421 |
| 4.916159661 |
| 44.94774547 |
| 9.130010799 |
| 7.725393753 |
| 2.106925569 |
| 25.28310683 |
| 11.93924489 |
| 67.42161821 |
| 4.916159661 |
| 9.832319322 |
| 7.725393753 |
| 26.68772387 |
| 5.618468184 |
| 70.93316082 |
| 85.68163981 |
| 44.94774547 |
| 4.916159661 |

|             |
|-------------|
| 36.5200432  |
| 248.6172171 |
| 8.427702276 |
| 65.31469264 |
| 56.18468184 |
| 80.06317162 |
| 214.2040995 |
| 3.511542615 |
| 4.916159661 |
| 4.916159661 |
| 4.916159661 |
| 7.725393753 |
| 11.93924489 |
| 4.213851138 |
| 6.320776707 |
| 6.320776707 |
| 7.02308523  |
| 5.618468184 |
| 11.93924489 |
| 62.50545855 |
| 9.130010799 |
| 10.53462785 |
| 6.320776707 |
| 5.618468184 |
| 7.02308523  |
| 45.650054   |
| 7.725393753 |
| 15.45078751 |
| 6.320776707 |
| 7.02308523  |
| 3.511542615 |
| 67.42161821 |
| 9.832319322 |
| 119.3924489 |
| 11.23693637 |
| 2.106925569 |
| 9.832319322 |
| 26.68772387 |
| 5.618468184 |
| 21.06925569 |
| 7.02308523  |
| 230.3571956 |
| 8.427702276 |



|             |
|-------------|
| 5.618468184 |
| 9.832319322 |
| 4.916159661 |
| 11.23693637 |
| 143.9732472 |
| 7.725393753 |
| 7.725393753 |
| 9.130010799 |
| 5.618468184 |
| 6.320776707 |
| 4.916159661 |
| 11.93924489 |
| 7.725393753 |
| 8.427702276 |
| 2.809234092 |
| 94.10934208 |
| 10.53462785 |
| 7.02308523  |
| 2.809234092 |
| 5.618468184 |
| 14.04617046 |
| 5.618468184 |
| 37.92466024 |
| 4.213851138 |
| 172.7678967 |
| 58.99391593 |
| 37.22235172 |
| 0           |
| 32.30619206 |
| 6.320776707 |
| 9.130010799 |
| 5.618468184 |
| 21.77156421 |
| 107.453204  |
| 213.501791  |
| 157.3171092 |
| 141.1640131 |
| 7.02308523  |
| 3.511542615 |
| 72.33777787 |
| 4.916159661 |
| 7.02308523  |
| 16.85540455 |

|             |
|-------------|
| 4.213851138 |
| 11.23693637 |
| 8.427702276 |
| 2.106925569 |
| 10.53462785 |
| 9.130010799 |
| 7.02308523  |
| 37.92466024 |
| 3.511542615 |
| 54.07775627 |
| 2.809234092 |
| 4.916159661 |
| 7.725393753 |
| 6.320776707 |
| 36.5200432  |
| 6.320776707 |
| 6.320776707 |
| 25.28310683 |
| 66.71930969 |
| 3.511542615 |
| 29.49695797 |
| 10.53462785 |
| 0           |
| 7.725393753 |
| 9.130010799 |
| 240.8918234 |
| 6.320776707 |
| 4.916159661 |
| 9.130010799 |
| 2.809234092 |
| 8.427702276 |
| 7.02308523  |
| 14.04617046 |
| 9.832319322 |
| 6.320776707 |
| 121.4993745 |
| 8.427702276 |
| 8.427702276 |
| 5.618468184 |
| 8.427702276 |
| 6.320776707 |
| 7.02308523  |
| 8.427702276 |

|             |
|-------------|
| 10.53462785 |
| 164.3401944 |
| 8.427702276 |
| 7.725393753 |
| 33.7108091  |
| 7.725393753 |
| 7.725393753 |
| 2.809234092 |
| 11.23693637 |
| 159.4240347 |
| 11.23693637 |
| 89.89549095 |
| 36.5200432  |
| 2.809234092 |
| 9.130010799 |
| 7.725393753 |
| 11.23693637 |
| 14.04617046 |
| 8.427702276 |
| 170.6609711 |
| 7.725393753 |
| 69.52854378 |
| 7.725393753 |
| 7.02308523  |
| 9.130010799 |
| 10.53462785 |
| 4.213851138 |
| 8.427702276 |
| 26.68772387 |
| 4.213851138 |
| 17.55771308 |
| 125.0109171 |
| 9.130010799 |
| 6.320776707 |
| 7.725393753 |
| 7.725393753 |
| 9.832319322 |
| 10.53462785 |
| 51.26852218 |
| 7.725393753 |
| 10.53462785 |
| 6.320776707 |
| 9.832319322 |

|             |
|-------------|
| 7.02308523  |
| 6.320776707 |
| 87.08625685 |
| 6.320776707 |
| 7.725393753 |
| 15.45078751 |
| 11.93924489 |
| 6.320776707 |
| 6.320776707 |
| 5.618468184 |
| 7.725393753 |
| 4.213851138 |
| 7.725393753 |
| 72.33777787 |
| 9.130010799 |
| 9.832319322 |
| 11.93924489 |
| 0           |
| 15.45078751 |
| 179.7909819 |
| 6.320776707 |
| 4.916159661 |
| 65.31469264 |
| 6.320776707 |
| 150.2940239 |
| 2.106925569 |
| 11.93924489 |
| 7.725393753 |
| 4.213851138 |
| 1.404617046 |
| 2.106925569 |
| 7.725393753 |
| 70.93316082 |
| 9.832319322 |
| 11.23693637 |
| 83.57471424 |
| 136.950162  |
| 82.17009719 |
| 19.66463864 |
| 7.725393753 |
| 6.320776707 |
| 7.02308523  |
| 4.916159661 |

|             |
|-------------|
| 7.02308523  |
| 4.916159661 |
| 7.02308523  |
| 8.427702276 |
| 7.02308523  |
| 80.76548015 |
| 7.725393753 |
| 3.511542615 |
| 3.511542615 |
| 9.130010799 |
| 7.02308523  |
| 9.832319322 |
| 10.53462785 |
| 10.53462785 |
| 1.404617046 |
| 2.106925569 |
| 4.213851138 |
| 3.511542615 |
| 10.53462785 |
| 5.618468184 |
| 8.427702276 |
| 66.71930969 |
| 78.65855458 |
| 4.916159661 |
| 12.64155341 |
| 4.916159661 |
| 4.916159661 |
| 1.404617046 |
| 4.213851138 |
| 4.213851138 |
| 9.130010799 |
| 4.213851138 |
| 17.55771308 |
| 8.427702276 |
| 5.618468184 |
| 4.213851138 |
| 42.8408199  |
| 16.15309603 |
| 5.618468184 |
| 2.809234092 |
| 14.74847898 |
| 23.17618126 |
| 88.4908739  |

|             |
|-------------|
| 113.0716722 |
| 14.04617046 |
| 11.93924489 |
| 10.53462785 |
| 114.4762893 |
| 1.404617046 |
| 4.213851138 |
| 3.511542615 |
| 6.320776707 |
| 6.320776707 |
| 9.130010799 |
| 5.618468184 |
| 4.916159661 |
| 4.916159661 |
| 0.702308523 |
| 0           |
| 6.320776707 |
| 4.916159661 |
| 84.27702276 |
| 8.427702276 |
| 8.427702276 |
| 2.106925569 |
| 47.75697957 |
| 7.725393753 |
| 75.84932049 |
| 6.320776707 |
| 4.213851138 |
| 1.404617046 |
| 14.04617046 |
| 18.2600216  |
| 5.618468184 |
| 5.618468184 |
| 18.96233012 |
| 4.213851138 |
| 4.213851138 |
| 108.8578211 |
| 7.02308523  |
| 9.832319322 |
| 6.320776707 |
| 153.8055665 |
| 50.56621366 |
| 6.320776707 |
| 45.650054   |

|             |
|-------------|
| 6.320776707 |
| 87.08625685 |
| 6.320776707 |
| 16.15309603 |
| 5.618468184 |
| 7.725393753 |
| 10.53462785 |
| 3.511542615 |
| 160.8286518 |
| 4.916159661 |
| 7.725393753 |
| 7.725393753 |
| 6.320776707 |
| 11.23693637 |
| 8.427702276 |
| 7.02308523  |
| 5.618468184 |
| 4.916159661 |
| 2.809234092 |
| 43.54312843 |
| 9.130010799 |
| 7.725393753 |
| 161.5309603 |
| 11.93924489 |
| 5.618468184 |
| 7.725393753 |
| 6.320776707 |
| 142.5686302 |
| 6.320776707 |
| 7.725393753 |
| 9.832319322 |
| 7.725393753 |
| 8.427702276 |
| 4.213851138 |
| 6.320776707 |
| 20.36694717 |
| 11.93924489 |
| 14.74847898 |
| 101.1324273 |
| 9.832319322 |
| 2.106925569 |
| 10.53462785 |
| 9.832319322 |

|             |
|-------------|
| 6.320776707 |
| 114.4762893 |
| 44.94774547 |
| 8.427702276 |
| 7.02308523  |
| 6.320776707 |
| 4.213851138 |
| 10.53462785 |
| 37.22235172 |
| 0.702308523 |
| 4.213851138 |
| 4.213851138 |
| 3.511542615 |
| 1.404617046 |
| 3.511542615 |
| 6.320776707 |
| 3.511542615 |
| 2.809234092 |
| 0.702308523 |
| 7.02308523  |
| 6.320776707 |
| 0.702308523 |
| 4.213851138 |
| 3.511542615 |
| 4.916159661 |
| 7.02308523  |
| 5.618468184 |
| 4.213851138 |
| 5.618468184 |
| 6.320776707 |
| 7.02308523  |
| 9.130010799 |
| 8.427702276 |
| 25.98541535 |
| 11.23693637 |
| 9.130010799 |
| 7.725393753 |
| 6.320776707 |
| 9.832319322 |
| 73.74239492 |
| 2.809234092 |
| 2.809234092 |
| 3.511542615 |



|             |
|-------------|
| 5.618468184 |
| 16.15309603 |
| 5.618468184 |
| 9.832319322 |
| 23.17618126 |
| 11.23693637 |
| 115.1785978 |
| 4.916159661 |
| 4.916159661 |
| 4.916159661 |
| 11.93924489 |
| 6.320776707 |
| 4.916159661 |
| 0           |
| 7.02308523  |
| 1.404617046 |
| 115.8809063 |
| 79.3608631  |
| 124.3086086 |
| 9.832319322 |
| 4.213851138 |
| 6.320776707 |
| 11.93924489 |
| 90.59779947 |
| 59.69622446 |
| 16.85540455 |
| 6.320776707 |
| 9.832319322 |
| 11.93924489 |
| 9.832319322 |
| 4.213851138 |
| 4.916159661 |
| 163.6378859 |
| 7.725393753 |
| 5.618468184 |
| 8.427702276 |
| 5.618468184 |
| 19.66463864 |
| 19.66463864 |
| 3.511542615 |
| 9.130010799 |
| 9.130010799 |
| 5.618468184 |

|             |
|-------------|
| 2.809234092 |
| 10.53462785 |
| 9.832319322 |
| 5.618468184 |
| 6.320776707 |
| 4.213851138 |
| 207.1810143 |
| 7.725393753 |
| 9.832319322 |
| 15.45078751 |
| 80.76548015 |
| 11.23693637 |
| 8.427702276 |
| 160.1263432 |
| 4.213851138 |
| 14.04617046 |
| 54.07775627 |
| 7.02308523  |
| 6.320776707 |
| 5.618468184 |
| 4.916159661 |
| 5.618468184 |
| 8.427702276 |
| 80.76548015 |
| 6.320776707 |
| 9.130010799 |
| 7.725393753 |
| 4.213851138 |
| 7.02308523  |
| 28.79464944 |
| 6.320776707 |
| 7.725393753 |
| 7.02308523  |
| 3.511542615 |
| 32.30619206 |
| 5.618468184 |
| 7.725393753 |
| 9.130010799 |
| 9.832319322 |
| 6.320776707 |
| 7.02308523  |
| 10.53462785 |
| 10.53462785 |

|             |
|-------------|
| 9.832319322 |
| 4.916159661 |
| 176.9817478 |
| 40.73389434 |
| 4.213851138 |
| 14.04617046 |
| 7.02308523  |
| 8.427702276 |
| 7.02308523  |
| 7.725393753 |
| 9.832319322 |
| 4.916159661 |
| 11.23693637 |
| 8.427702276 |
| 7.02308523  |
| 19.66463864 |
| 100.4301188 |
| 8.427702276 |
| 7.725393753 |
| 7.02308523  |
| 2.809234092 |
| 9.832319322 |
| 7.02308523  |
| 4.213851138 |
| 7.725393753 |
| 7.725393753 |
| 10.53462785 |
| 33.00850058 |
| 4.213851138 |
| 2.106925569 |
| 85.68163981 |
| 116.5832148 |
| 40.03158581 |
| 8.427702276 |
| 9.832319322 |
| 11.23693637 |
| 7.02308523  |
| 3.511542615 |
| 5.618468184 |
| 9.832319322 |
| 2.809234092 |
| 3.511542615 |
| 4.213851138 |

|             |
|-------------|
| 8.427702276 |
| 131.3316938 |
| 4.916159661 |
| 109.5601296 |
| 80.06317162 |
| 87.78856538 |
| 8.427702276 |
| 21.06925569 |
| 6.320776707 |
| 10.53462785 |
| 4.213851138 |
| 5.618468184 |
| 4.916159661 |
| 7.725393753 |
| 9.832319322 |
| 7.02308523  |
| 78.65855458 |
| 6.320776707 |
| 12.64155341 |
| 16.15309603 |
| 11.23693637 |
| 10.53462785 |
| 7.725393753 |
| 6.320776707 |
| 66.01700116 |
| 22.47387274 |
| 51.26852218 |
| 9.130010799 |
| 9.130010799 |
| 6.320776707 |
| 11.23693637 |
| 5.618468184 |
| 7.02308523  |
| 4.916159661 |
| 3.511542615 |
| 9.130010799 |
| 17.55771308 |
| 6.320776707 |
| 4.916159661 |
| 3.511542615 |
| 14.04617046 |
| 5.618468184 |
| 6.320776707 |

|             |
|-------------|
| 0           |
| 7.725393753 |
| 8.427702276 |
| 8.427702276 |
| 3.511542615 |
| 7.02308523  |
| 4.916159661 |
| 3.511542615 |
| 7.02308523  |
| 4.213851138 |
| 209.2879399 |
| 9.130010799 |
| 4.916159661 |
| 7.02308523  |
| 8.427702276 |
| 42.8408199  |
| 5.618468184 |
| 4.213851138 |
| 7.02308523  |
| 4.213851138 |
| 10.53462785 |
| 143.9732472 |
| 166.44712   |
| 35.11542615 |
| 44.24543695 |
| 77.95624606 |
| 148.8894069 |
| 124.3086086 |
| 102.5370444 |
| 27.3900324  |
| 10.53462785 |
| 14.04617046 |
| 200.1579291 |
| 42.13851138 |
| 116.5832148 |
| 2.809234092 |
| 2.106925569 |
| 26.68772387 |
| 7.02308523  |
| 9.130010799 |
| 2.809234092 |
| 2.106925569 |
| 3.511542615 |

|             |
|-------------|
| 2.809234092 |
| 7.02308523  |
| 4.916159661 |
| 7.725393753 |
| 5.618468184 |
| 4.916159661 |
| 2.809234092 |
| 5.618468184 |
| 4.916159661 |
| 4.213851138 |
| 2.809234092 |
| 18.96233012 |
| 9.130010799 |
| 2.106925569 |
| 10.53462785 |
| 4.916159661 |
| 7.02308523  |
| 5.618468184 |
| 4.916159661 |
| 7.02308523  |
| 69.52854378 |
| 6.320776707 |
| 7.02308523  |
| 15.45078751 |
| 7.725393753 |
| 50.56621366 |
| 3.511542615 |
| 6.320776707 |
| 4.916159661 |
| 7.725393753 |
| 12.64155341 |
| 11.93924489 |
| 7.02308523  |
| 10.53462785 |
| 80.76548015 |
| 6.320776707 |
| 44.94774547 |
| 23.17618126 |
| 6.320776707 |
| 5.618468184 |
| 175.5771308 |
| 6.320776707 |
| 6.320776707 |

|             |
|-------------|
| 5.618468184 |
| 7.02308523  |
| 7.725393753 |
| 189.6233012 |
| 9.130010799 |
| 7.02308523  |
| 5.618468184 |
| 9.130010799 |
| 4.916159661 |
| 74.44470344 |
| 33.00850058 |
| 11.93924489 |
| 9.130010799 |
| 4.213851138 |
| 7.02308523  |
| 12.64155341 |
| 7.725393753 |
| 4.213851138 |
| 43.54312843 |
| 17.55771308 |
| 1.404617046 |
| 7.725393753 |
| 5.618468184 |
| 5.618468184 |
| 7.725393753 |
| 42.13851138 |
| 4.916159661 |
| 2.809234092 |
| 23.17618126 |
| 9.832319322 |
| 8.427702276 |
| 2.106925569 |
| 4.916159661 |
| 2.809234092 |
| 13.34386194 |
| 4.213851138 |
| 4.916159661 |
| 8.427702276 |
| 0           |
| 7.725393753 |
| 7.725393753 |
| 73.04008639 |
| 9.130010799 |

|             |
|-------------|
| 2.106925569 |
| 11.23693637 |
| 4.213851138 |
| 4.213851138 |
| 3.511542615 |
| 27.3900324  |
| 7.725393753 |
| 38.62696877 |
| 4.916159661 |
| 2.809234092 |
| 4.213851138 |
| 10.53462785 |
| 5.618468184 |
| 9.832319322 |
| 16.15309603 |
| 9.130010799 |
| 1.404617046 |
| 13.34386194 |
| 4.213851138 |
| 4.916159661 |
| 4.916159661 |
| 2.106925569 |
| 4.916159661 |
| 2.106925569 |
| 2.809234092 |
| 2.809234092 |
| 6.320776707 |
| 3.511542615 |
| 2.106925569 |
| 4.213851138 |
| 3.511542615 |
| 8.427702276 |
| 7.725393753 |
| 5.618468184 |
| 4.916159661 |
| 7.725393753 |
| 270.3887814 |
| 8.427702276 |
| 16.15309603 |
| 6.320776707 |
| 2.809234092 |
| 10.53462785 |
| 210.6925569 |



|             |
|-------------|
| 3.511542615 |
| 7.725393753 |
| 14.74847898 |
| 17.55771308 |
| 29.49695797 |
| 47.75697957 |
| 42.8408199  |
| 20.36694717 |
| 7.725393753 |
| 4.213851138 |
| 5.618468184 |
| 3.511542615 |
| 77.25393753 |
| 4.916159661 |
| 34.41311763 |
| 139.0570876 |
| 3.511542615 |
| 6.320776707 |
| 6.320776707 |
| 7.02308523  |
| 7.725393753 |
| 11.93924489 |
| 13.34386194 |
| 0           |
| 10.53462785 |
| 17.55771308 |
| 102.5370444 |
| 71.63546935 |
| 13.34386194 |
| 6.320776707 |
| 9.130010799 |
| 299.1834308 |
| 44.24543695 |
| 7.725393753 |
| 68.82623526 |
| 35.81773467 |
| 133.4386194 |
| 5.618468184 |
| 13.34386194 |
| 4.916159661 |
| 6.320776707 |
| 5.618468184 |
| 10.53462785 |

|             |
|-------------|
| 7.725393753 |
| 8.427702276 |
| 106.7508955 |
| 5.618468184 |
| 23.17618126 |
| 10.53462785 |
| 11.93924489 |
| 5.618468184 |
| 1.404617046 |
| 4.916159661 |
| 4.916159661 |
| 8.427702276 |
| 4.213851138 |
| 10.53462785 |
| 8.427702276 |
| 7.725393753 |
| 9.130010799 |
| 5.618468184 |
| 4.213851138 |
| 10.53462785 |
| 3.511542615 |
| 11.93924489 |
| 5.618468184 |
| 7.725393753 |
| 6.320776707 |
| 7.725393753 |
| 6.320776707 |
| 5.618468184 |
| 7.02308523  |
| 9.832319322 |
| 8.427702276 |
| 136.950162  |
| 8.427702276 |
| 10.53462785 |
| 7.725393753 |
| 8.427702276 |
| 38.62696877 |
| 177.6840563 |
| 5.618468184 |
| 147.4847898 |
| 2.106925569 |
| 3.511542615 |
| 11.93924489 |

|             |
|-------------|
| 10.53462785 |
| 6.320776707 |
| 4.916159661 |
| 7.725393753 |
| 7.725393753 |
| 6.320776707 |
| 7.725393753 |
| 0           |
| 9.130010799 |
| 58.29160741 |
| 9.832319322 |
| 4.213851138 |
| 6.320776707 |
| 19.66463864 |
| 25.28310683 |
| 0.702308523 |
| 9.832319322 |
| 11.93924489 |
| 66.01700116 |
| 1.404617046 |
| 9.130010799 |
| 12.64155341 |
| 8.427702276 |
| 23.17618126 |
| 44.94774547 |
| 3.511542615 |
| 0           |
| 12.64155341 |
| 8.427702276 |
| 9.832319322 |
| 6.320776707 |
| 28.09234092 |
| 10.53462785 |
| 11.93924489 |
| 9.832319322 |
| 4.916159661 |
| 7.02308523  |
| 5.618468184 |
| 10.53462785 |
| 4.213851138 |
| 7.02308523  |
| 4.916159661 |
| 98.32319322 |

|             |
|-------------|
| 52.67313923 |
| 7.02308523  |
| 11.23693637 |
| 4.213851138 |
| 0.702308523 |
| 4.213851138 |
| 4.213851138 |
| 9.832319322 |
| 7.725393753 |
| 15.45078751 |
| 9.130010799 |
| 7.725393753 |
| 9.130010799 |
| 28.09234092 |
| 6.320776707 |
| 35.11542615 |
| 11.23693637 |
| 12.64155341 |
| 8.427702276 |
| 8.427702276 |
| 44.24543695 |
| 7.02308523  |
| 2.809234092 |
| 64.61238412 |
| 23.87848978 |
| 13.34386194 |
| 154.5078751 |
| 9.832319322 |
| 4.916159661 |
| 6.320776707 |
| 7.725393753 |
| 14.04617046 |
| 10.53462785 |
| 15.45078751 |
| 4.916159661 |
| 7.02308523  |
| 11.93924489 |
| 19.66463864 |
| 49.86390513 |
| 7.725393753 |
| 8.427702276 |
| 5.618468184 |
| 8.427702276 |

|             |
|-------------|
| 6.320776707 |
| 8.427702276 |
| 45.650054   |
| 10.53462785 |
| 4.916159661 |
| 9.130010799 |
| 5.618468184 |
| 17.55771308 |
| 9.130010799 |
| 7.02308523  |
| 9.832319322 |
| 6.320776707 |
| 11.93924489 |
| 12.64155341 |
| 129.2247682 |
| 95.51395913 |
| 21.06925569 |
| 4.916159661 |
| 173.4702052 |
| 76.55162901 |
| 7.725393753 |
| 9.832319322 |
| 37.92466024 |
| 7.725393753 |
| 23.87848978 |
| 4.916159661 |
| 5.618468184 |
| 6.320776707 |
| 103.2393529 |
| 7.02308523  |
| 113.7739807 |
| 12.64155341 |
| 20.36694717 |
| 39.32927729 |
| 6.320776707 |
| 21.06925569 |
| 50.56621366 |
| 7.725393753 |
| 8.427702276 |
| 7.725393753 |
| 8.427702276 |
| 40.03158581 |
| 5.618468184 |

|             |
|-------------|
| 11.93924489 |
| 5.618468184 |
| 7.02308523  |
| 6.320776707 |
| 146.0801728 |
| 118.6901404 |
| 23.87848978 |
| 38.62696877 |
| 10.53462785 |
| 4.916159661 |
| 6.320776707 |
| 4.213851138 |
| 4.916159661 |
| 9.130010799 |
| 3.511542615 |
| 7.725393753 |
| 65.31469264 |
| 7.02308523  |
| 5.618468184 |
| 9.832319322 |
| 5.618468184 |
| 4.213851138 |
| 11.23693637 |
| 13.34386194 |
| 5.618468184 |
| 7.02308523  |
| 80.06317162 |
| 158.0194177 |
| 67.42161821 |
| 2.809234092 |
| 12.64155341 |
| 8.427702276 |
| 6.320776707 |
| 10.53462785 |
| 14.74847898 |
| 7.02308523  |
| 3.511542615 |
| 10.53462785 |
| 7.02308523  |
| 5.618468184 |
| 7.725393753 |
| 116.5832148 |
| 9.130010799 |

|             |
|-------------|
| 37.92466024 |
| 0           |
| 7.725393753 |
| 37.22235172 |
| 27.3900324  |
| 4.916159661 |
| 7.725393753 |
| 5.618468184 |
| 11.23693637 |
| 9.832319322 |
| 31.60388354 |
| 4.213851138 |
| 2.809234092 |
| 5.618468184 |
| 6.320776707 |
| 7.02308523  |
| 4.213851138 |
| 4.916159661 |
| 7.02308523  |
| 10.53462785 |
| 36.5200432  |
| 92.00241652 |
| 3.511542615 |
| 0           |
| 40.73389434 |
| 4.916159661 |
| 11.93924489 |
| 4.916159661 |
| 131.3316938 |
| 103.2393529 |
| 9.832319322 |
| 4.213851138 |
| 60.39853298 |
| 9.130010799 |
| 8.427702276 |
| 11.93924489 |
| 54.07775627 |
| 16.15309603 |
| 5.618468184 |
| 4.213851138 |
| 4.916159661 |
| 10.53462785 |
| 2.106925569 |

|             |
|-------------|
| 8.427702276 |
| 7.02308523  |
| 3.511542615 |
| 5.618468184 |
| 44.94774547 |
| 16.15309603 |
| 18.2600216  |
| 5.618468184 |
| 88.4908739  |
| 10.53462785 |
| 2.106925569 |
| 1.404617046 |
| 1.404617046 |
| 0.702308523 |
| 9.130010799 |
| 15.45078751 |
| 9.130010799 |
| 4.213851138 |
| 5.618468184 |
| 6.320776707 |
| 5.618468184 |
| 7.02308523  |
| 7.725393753 |
| 7.02308523  |
| 7.02308523  |
| 2.106925569 |
| 8.427702276 |
| 1.404617046 |
| 24.58079831 |
| 2.809234092 |
| 2.106925569 |
| 4.213851138 |
| 9.832319322 |
| 6.320776707 |
| 9.130010799 |
| 4.213851138 |
| 178.3863648 |
| 0           |
| 13.34386194 |
| 29.49695797 |
| 5.618468184 |
| 13.34386194 |
| 76.55162901 |



|             |
|-------------|
| 77.95624606 |
| 15.45078751 |
| 5.618468184 |
| 7.725393753 |
| 7.02308523  |
| 22.47387274 |
| 11.23693637 |
| 5.618468184 |
| 4.213851138 |
| 4.213851138 |
| 7.02308523  |
| 6.320776707 |
| 165.7448114 |
| 4.213851138 |
| 9.130010799 |
| 62.50545855 |
| 7.02308523  |
| 4.916159661 |
| 15.45078751 |
| 7.02308523  |
| 25.28310683 |
| 37.22235172 |
| 5.618468184 |
| 6.320776707 |
| 110.9647466 |
| 25.98541535 |
| 26.68772387 |
| 6.320776707 |
| 4.916159661 |
| 6.320776707 |
| 4.916159661 |
| 7.02308523  |
| 151.698641  |
| 10.53462785 |
| 235.9756637 |
| 4.916159661 |
| 2.106925569 |
| 6.320776707 |
| 5.618468184 |
| 7.02308523  |
| 50.56621366 |
| 11.93924489 |
| 12.64155341 |

|             |
|-------------|
| 191.7302268 |
| 28.09234092 |
| 9.130010799 |
| 30.19926649 |
| 8.427702276 |
| 12.64155341 |
| 5.618468184 |
| 8.427702276 |
| 4.916159661 |
| 119.3924489 |
| 7.725393753 |
| 9.130010799 |
| 8.427702276 |
| 9.832319322 |
| 19.66463864 |
| 6.320776707 |
| 157.3171092 |
| 5.618468184 |
| 8.427702276 |
| 5.618468184 |
| 2.809234092 |
| 2.106925569 |
| 9.130010799 |
| 6.320776707 |
| 40.73389434 |
| 0           |
| 9.832319322 |
| 5.618468184 |
| 7.725393753 |
| 101.8347358 |
| 130.6293853 |
| 11.23693637 |
| 40.03158581 |
| 8.427702276 |
| 7.02308523  |
| 11.23693637 |
| 5.618468184 |
| 1.404617046 |
| 2.809234092 |
| 7.02308523  |
| 7.725393753 |
| 37.22235172 |
| 4.213851138 |

|             |
|-------------|
| 11.93924489 |
| 0           |
| 0           |
| 26.68772387 |
| 22.47387274 |
| 17.55771308 |
| 18.2600216  |
| 24.58079831 |
| 20.36694717 |
| 7.02308523  |
| 6.320776707 |
| 212.7994825 |
| 184.004833  |
| 0           |
| 7.725393753 |
| 113.7739807 |
| 11.23693637 |
| 10.53462785 |
| 9.130010799 |
| 4.213851138 |
| 8.427702276 |
| 5.618468184 |
| 8.427702276 |
| 5.618468184 |
| 4.213851138 |
| 8.427702276 |
| 106.048587  |
| 59.69622446 |
| 10.53462785 |
| 7.02308523  |
| 6.320776707 |
| 5.618468184 |
| 9.832319322 |
| 5.618468184 |
| 6.320776707 |
| 14.04617046 |
| 7.725393753 |
| 171.3632796 |
| 13.34386194 |
| 19.66463864 |
| 4.916159661 |
| 7.02308523  |
| 11.93924489 |

|             |
|-------------|
| 9.130010799 |
| 94.10934208 |
| 7.02308523  |
| 0           |
| 2.106925569 |
| 18.2600216  |
| 5.618468184 |
| 30.19926649 |
| 22.47387274 |
| 16.15309603 |
| 55.48237332 |
| 7.02308523  |
| 7.725393753 |
| 10.53462785 |
| 0           |
| 4.213851138 |
| 126.4155341 |
| 146.7824813 |
| 4.916159661 |
| 0           |
| 0.702308523 |
| 7.02308523  |
| 7.02308523  |
| 57.58929889 |
| 3.511542615 |
| 4.916159661 |
| 9.832319322 |
| 5.618468184 |
| 7.725393753 |
| 7.725393753 |
| 51.9708307  |
| 9.832319322 |
| 10.53462785 |
| 4.213851138 |
| 0.702308523 |
| 6.320776707 |
| 7.02308523  |
| 4.213851138 |
| 4.916159661 |
| 22.47387274 |
| 10.53462785 |
| 15.45078751 |
| 8.427702276 |

|             |
|-------------|
| 0.702308523 |
| 24.58079831 |
| 5.618468184 |
| 7.02308523  |
| 6.320776707 |
| 4.916159661 |
| 3.511542615 |
| 50.56621366 |
| 0.702308523 |
| 8.427702276 |
| 6.320776707 |
| 11.23693637 |
| 10.53462785 |
| 2.809234092 |
| 6.320776707 |
| 9.832319322 |
| 6.320776707 |
| 40.03158581 |
| 28.79464944 |
| 32.30619206 |
| 47.05467104 |
| 9.130010799 |
| 7.02308523  |
| 9.832319322 |
| 2.106925569 |
| 47.75697957 |
| 6.320776707 |
| 11.23693637 |
| 88.4908739  |
| 14.74847898 |
| 10.53462785 |
| 79.3608631  |
| 7.02308523  |
| 11.23693637 |
| 11.23693637 |
| 21.77156421 |
| 7.02308523  |
| 4.213851138 |
| 198.0510035 |
| 6.320776707 |
| 2.809234092 |
| 51.9708307  |
| 226.1433444 |

|             |
|-------------|
| 24.58079831 |
| 6.320776707 |
| 9.832319322 |
| 5.618468184 |
| 23.17618126 |
| 11.93924489 |
| 4.916159661 |
| 3.511542615 |
| 3.511542615 |
| 2.809234092 |
| 2.809234092 |
| 4.213851138 |
| 123.6063001 |
| 4.213851138 |
| 7.725393753 |
| 3.511542615 |
| 4.916159661 |
| 174.8748222 |
| 4.213851138 |
| 2.106925569 |
| 0           |
| 12.64155341 |
| 122.9039915 |
| 18.2600216  |
| 6.320776707 |
| 4.213851138 |
| 51.26852218 |
| 2.809234092 |
| 3.511542615 |
| 9.130010799 |
| 122.201683  |
| 3.511542615 |
| 16.85540455 |
| 9.832319322 |
| 7.02308523  |
| 4.916159661 |
| 0           |
| 2.809234092 |
| 134.1409279 |
| 6.320776707 |
| 4.916159661 |
| 1.404617046 |
| 1.404617046 |

|             |
|-------------|
| 2.106925569 |
| 5.618468184 |
| 2.809234092 |
| 2.106925569 |
| 2.106925569 |
| 2.809234092 |
| 12.64155341 |
| 9.130010799 |
| 5.618468184 |
| 4.213851138 |
| 2.106925569 |
| 140.4617046 |
| 136.950162  |
| 5.618468184 |
| 71.63546935 |
| 7.02308523  |
| 21.06925569 |
| 4.213851138 |
| 3.511542615 |
| 4.213851138 |
| 2.106925569 |
| 33.7108091  |
| 34.41311763 |
| 4.213851138 |
| 11.23693637 |
| 5.618468184 |
| 6.320776707 |
| 5.618468184 |
| 31.60388354 |
| 59.69622446 |
| 2.106925569 |
| 8.427702276 |
| 1.404617046 |
| 1.404617046 |
| 3.511542615 |
| 2.106925569 |
| 3.511542615 |
| 32.30619206 |
| 8.427702276 |
| 24.58079831 |
| 5.618468184 |
| 4.213851138 |
| 9.832319322 |

|             |
|-------------|
| 2.106925569 |
| 4.916159661 |
| 3.511542615 |
| 25.98541535 |
| 217.0133336 |
| 2.106925569 |
| 2.809234092 |
| 2.809234092 |
| 4.916159661 |
| 4.916159661 |
| 2.809234092 |
| 11.23693637 |
| 4.916159661 |
| 200.1579291 |
| 10.53462785 |
| 6.320776707 |
| 11.23693637 |
| 10.53462785 |
| 5.618468184 |
| 77.25393753 |
| 9.832319322 |
| 7.02308523  |
| 11.23693637 |
| 3.511542615 |
| 30.19926649 |
| 58.29160741 |
| 27.3900324  |
| 7.725393753 |
| 9.832319322 |
| 7.02308523  |
| 4.916159661 |
| 25.28310683 |
| 6.320776707 |
| 12.64155341 |
| 7.02308523  |
| 9.130010799 |
| 7.02308523  |
| 13.34386194 |
| 4.916159661 |
| 6.320776707 |
| 9.130010799 |
| 58.29160741 |
| 6.320776707 |



|             |
|-------------|
| 8.427702276 |
| 15.45078751 |
| 70.93316082 |
| 7.725393753 |
| 50.56621366 |
| 14.04617046 |
| 8.427702276 |
| 165.7448114 |
| 0           |
| 11.23693637 |
| 0           |
| 6.320776707 |
| 0           |
| 6.320776707 |
| 9.832319322 |
| 33.7108091  |
| 10.53462785 |
| 2.809234092 |
| 7.725393753 |
| 12.64155341 |
| 19.66463864 |
| 7.02308523  |
| 0           |
| 1.404617046 |
| 1.404617046 |
| 0           |
| 9.130010799 |
| 9.130010799 |
| 7.02308523  |
| 5.618468184 |
| 155.2101836 |
| 96.91857618 |
| 0           |
| 47.05467104 |
| 7.725393753 |
| 7.725393753 |
| 124.3086086 |
| 59.69622446 |
| 4.213851138 |
| 0.702308523 |
| 2.106925569 |
| 2.106925569 |
| 42.13851138 |

|             |
|-------------|
| 61.80315003 |
| 0           |
| 9.130010799 |
| 56.88699036 |
| 50.56621366 |
| 270.3887814 |
| 36.5200432  |
| 0           |
| 7.725393753 |
| 7.02308523  |
| 26.68772387 |
| 2.809234092 |
| 26.68772387 |
| 2.809234092 |
| 16.85540455 |
| 13.34386194 |
| 69.52854378 |
| 2.106925569 |
| 12.64155341 |
| 4.916159661 |
| 7.02308523  |
| 5.618468184 |
| 7.02308523  |
| 1.404617046 |
| 58.99391593 |
| 3.511542615 |
| 185.4094501 |
| 5.618468184 |
| 4.916159661 |
| 11.93924489 |
| 4.213851138 |
| 9.130010799 |
| 7.725393753 |
| 9.832319322 |
| 2.809234092 |
| 6.320776707 |
| 0           |
| 35.11542615 |
| 4.213851138 |
| 10.53462785 |
| 4.213851138 |
| 7.725393753 |
| 0.702308523 |

|             |
|-------------|
| 0           |
| 27.3900324  |
| 14.74847898 |
| 17.55771308 |
| 15.45078751 |
| 7.02308523  |
| 7.02308523  |
| 4.916159661 |
| 8.427702276 |
| 7.02308523  |
| 6.320776707 |
| 8.427702276 |
| 7.725393753 |
| 4.916159661 |
| 12.64155341 |
| 82.17009719 |
| 7.725393753 |
| 9.130010799 |
| 8.427702276 |
| 2.106925569 |
| 4.213851138 |
| 8.427702276 |
| 6.320776707 |
| 108.8578211 |
| 4.213851138 |
| 6.320776707 |
| 129.2247682 |
| 7.725393753 |
| 9.130010799 |
| 16.85540455 |
| 28.79464944 |
| 5.618468184 |
| 8.427702276 |
| 33.00850058 |
| 3.511542615 |
| 7.725393753 |
| 4.213851138 |
| 10.53462785 |
| 21.06925569 |
| 9.130010799 |
| 5.618468184 |
| 6.320776707 |
| 7.725393753 |

|             |
|-------------|
| 4.916159661 |
| 7.02308523  |
| 8.427702276 |
| 5.618468184 |
| 7.725393753 |
| 10.53462785 |
| 128.5224597 |
| 4.213851138 |
| 15.45078751 |
| 7.725393753 |
| 11.23693637 |
| 16.85540455 |
| 6.320776707 |
| 10.53462785 |
| 0           |
| 3.511542615 |
| 10.53462785 |
| 30.19926649 |
| 6.320776707 |
| 7.725393753 |
| 7.725393753 |
| 9.832319322 |
| 5.618468184 |
| 5.618468184 |
| 5.618468184 |
| 12.64155341 |
| 8.427702276 |
| 12.64155341 |
| 3.511542615 |
| 4.916159661 |
| 3.511542615 |
| 4.916159661 |
| 7.725393753 |
| 36.5200432  |
| 7.02308523  |
| 7.02308523  |
| 10.53462785 |
| 4.916159661 |
| 7.725393753 |
| 12.64155341 |
| 16.15309603 |
| 7.02308523  |
| 9.130010799 |

|             |
|-------------|
| 6.320776707 |
| 29.49695797 |
| 5.618468184 |
| 11.93924489 |
| 5.618468184 |
| 3.511542615 |
| 7.725393753 |
| 3.511542615 |
| 13.34386194 |
| 9.130010799 |
| 7.725393753 |
| 2.106925569 |
| 44.94774547 |
| 8.427702276 |
| 11.23693637 |
| 4.916159661 |
| 79.3608631  |
| 2.809234092 |
| 4.916159661 |
| 141.1640131 |
| 6.320776707 |
| 2.809234092 |
| 5.618468184 |
| 7.02308523  |
| 7.02308523  |
| 6.320776707 |
| 55.48237332 |
| 7.02308523  |
| 9.130010799 |
| 89.19318242 |
| 13.34386194 |
| 4.916159661 |
| 10.53462785 |
| 4.213851138 |
| 9.130010799 |
| 8.427702276 |
| 3.511542615 |
| 10.53462785 |
| 7.725393753 |
| 6.320776707 |
| 8.427702276 |
| 6.320776707 |
| 9.130010799 |

|             |
|-------------|
| 10.53462785 |
| 10.53462785 |
| 4.213851138 |
| 7.725393753 |
| 42.13851138 |
| 9.130010799 |
| 47.75697957 |
| 16.15309603 |
| 7.725393753 |
| 6.320776707 |
| 9.130010799 |
| 7.725393753 |
| 4.916159661 |
| 7.725393753 |
| 6.320776707 |
| 115.1785978 |
| 14.04617046 |
| 31.60388354 |
| 6.320776707 |
| 7.725393753 |
| 5.618468184 |
| 0           |
| 6.320776707 |
| 4.916159661 |
| 10.53462785 |
| 3.511542615 |
| 10.53462785 |
| 4.916159661 |
| 7.725393753 |
| 3.511542615 |
| 4.916159661 |
| 4.916159661 |
| 7.725393753 |
| 7.725393753 |
| 0           |
| 8.427702276 |
| 12.64155341 |
| 31.60388354 |
| 6.320776707 |
| 7.02308523  |
| 40.73389434 |
| 43.54312843 |
| 4.213851138 |

|             |
|-------------|
| 11.23693637 |
| 0           |
| 7.02308523  |
| 8.427702276 |
| 12.64155341 |
| 58.29160741 |
| 5.618468184 |
| 23.17618126 |
| 9.832319322 |
| 4.916159661 |
| 7.02308523  |
| 4.916159661 |
| 42.13851138 |
| 110.9647466 |
| 7.02308523  |
| 5.618468184 |
| 0           |
| 4.213851138 |
| 6.320776707 |
| 5.618468184 |
| 2.106925569 |
| 5.618468184 |
| 2.809234092 |
| 8.427702276 |
| 54.7800648  |
| 1.404617046 |
| 7.02308523  |
| 7.02308523  |
| 4.916159661 |
| 41.43620286 |
| 4.213851138 |
| 8.427702276 |
| 7.02308523  |
| 7.02308523  |
| 4.916159661 |
| 6.320776707 |
| 6.320776707 |
| 0.702308523 |
| 5.618468184 |
| 5.618468184 |
| 4.213851138 |
| 3.511542615 |
| 4.916159661 |

|             |
|-------------|
| 5.618468184 |
| 4.916159661 |
| 4.916159661 |
| 10.53462785 |
| 0           |
| 2.106925569 |
| 7.725393753 |
| 63.91007559 |
| 6.320776707 |
| 4.213851138 |
| 4.213851138 |
| 1.404617046 |
| 2.106925569 |
| 4.213851138 |
| 5.618468184 |
| 6.320776707 |
| 2.809234092 |
| 3.511542615 |
| 191.0279183 |
| 1.404617046 |
| 163.6378859 |
| 3.511542615 |
| 7.02308523  |
| 4.916159661 |
| 6.320776707 |
| 9.130010799 |
| 8.427702276 |
| 0           |
| 0           |
| 2.809234092 |
| 2.809234092 |
| 6.320776707 |
| 6.320776707 |
| 3.511542615 |
| 8.427702276 |
| 2.106925569 |
| 15.45078751 |
| 0           |
| 6.320776707 |
| 24.58079831 |
| 0           |
| 5.618468184 |
| 6.320776707 |



|             |
|-------------|
| 9.130010799 |
| 6.320776707 |
| 9.130010799 |
| 5.618468184 |
| 8.427702276 |
| 5.618468184 |
| 4.213851138 |
| 2.106925569 |
| 6.320776707 |
| 2.106925569 |
| 3.511542615 |
| 4.916159661 |
| 7.02308523  |
| 1.404617046 |
| 4.213851138 |
| 8.427702276 |
| 3.511542615 |
| 6.320776707 |
| 9.130010799 |
| 3.511542615 |
| 4.916159661 |
| 2.809234092 |
| 4.213851138 |
| 8.427702276 |
| 5.618468184 |
| 9.130010799 |
| 6.320776707 |
| 158.0194177 |
| 1.404617046 |
| 44.24543695 |
| 4.916159661 |
| 4.916159661 |
| 4.916159661 |
| 8.427702276 |
| 6.320776707 |
| 5.618468184 |
| 2.809234092 |
| 4.213851138 |
| 9.130010799 |
| 2.809234092 |
| 39.32927729 |
| 4.916159661 |
| 8.427702276 |

|             |
|-------------|
| 4.916159661 |
| 1.404617046 |
| 4.213851138 |
| 4.916159661 |
| 15.45078751 |
| 3.511542615 |
| 0           |
| 3.511542615 |
| 4.213851138 |
| 2.809234092 |
| 8.427702276 |
| 1.404617046 |
| 7.02308523  |
| 74.44470344 |
| 1.404617046 |
| 6.320776707 |
| 2.809234092 |
| 4.213851138 |
| 2.106925569 |
| 0.702308523 |
| 5.618468184 |
| 2.809234092 |
| 0           |
| 6.320776707 |
| 5.618468184 |
| 1.404617046 |
| 2.106925569 |
| 6.320776707 |
| 9.130010799 |
| 4.213851138 |
| 7.725393753 |
| 4.213851138 |
| 2.809234092 |
| 86.38394833 |
| 3.511542615 |
| 2.809234092 |
| 11.23693637 |
| 9.130010799 |
| 6.320776707 |
| 7.02308523  |
| 198.0510035 |
| 3.511542615 |
| 27.3900324  |

|             |
|-------------|
| 2.809234092 |
| 1.404617046 |
| 5.618468184 |
| 9.130010799 |
| 9.130010799 |
| 4.916159661 |
| 6.320776707 |
| 9.130010799 |
| 11.93924489 |
| 0.702308523 |
| 9.832319322 |
| 7.02308523  |
| 6.320776707 |
| 126.4155341 |
| 4.916159661 |
| 7.725393753 |
| 11.23693637 |
| 7.725393753 |
| 2.106925569 |
| 1.404617046 |
| 37.22235172 |
| 7.02308523  |
| 7.02308523  |
| 5.618468184 |
| 4.213851138 |
| 6.320776707 |
| 2.106925569 |
| 1.404617046 |
| 8.427702276 |
| 6.320776707 |
| 6.320776707 |
| 5.618468184 |
| 5.618468184 |
| 9.832319322 |
| 4.916159661 |
| 10.53462785 |
| 4.916159661 |
| 5.618468184 |
| 3.511542615 |
| 2.809234092 |
| 2.809234092 |
| 7.02308523  |
| 2.809234092 |

|             |
|-------------|
| 5.618468184 |
| 42.13851138 |
| 4.916159661 |
| 2.809234092 |
| 14.74847898 |
| 9.130010799 |
| 3.511542615 |
| 5.618468184 |
| 0.702308523 |
| 93.40703356 |
| 2.809234092 |
| 21.06925569 |
| 11.93924489 |
| 0.702308523 |
| 3.511542615 |
| 2.809234092 |
| 12.64155341 |
| 9.130010799 |
| 1.404617046 |
| 155.9124921 |
| 6.320776707 |
| 37.22235172 |
| 2.809234092 |
| 2.809234092 |
| 13.34386194 |
| 2.106925569 |
| 2.106925569 |
| 2.809234092 |
| 7.02308523  |
| 2.106925569 |
| 5.618468184 |
| 41.43620286 |
| 4.213851138 |
| 58.29160741 |
| 2.106925569 |
| 0           |
| 4.213851138 |
| 2.809234092 |
| 7.725393753 |
| 5.618468184 |
| 5.618468184 |
| 8.427702276 |
| 8.427702276 |

|             |
|-------------|
| 10.53462785 |
| 9.130010799 |
| 4.213851138 |
| 2.809234092 |
| 9.832319322 |
| 14.04617046 |
| 0           |
| 3.511542615 |
| 4.916159661 |
| 2.106925569 |
| 4.916159661 |
| 2.809234092 |
| 7.02308523  |
| 1.404617046 |
| 10.53462785 |
| 0           |
| 2.106925569 |
| 9.130010799 |
| 7.02308523  |
| 1.404617046 |
| 62.50545855 |
| 3.511542615 |
| 6.320776707 |
| 9.130010799 |
| 5.618468184 |
| 4.213851138 |
| 1.404617046 |
| 2.106925569 |
| 8.427702276 |
| 6.320776707 |
| 5.618468184 |
| 11.23693637 |
| 3.511542615 |
| 8.427702276 |
| 3.511542615 |
| 3.511542615 |
| 6.320776707 |
| 0           |
| 0           |
| 4.916159661 |
| 5.618468184 |
| 13.34386194 |
| 4.916159661 |

|             |
|-------------|
| 9.130010799 |
| 4.213851138 |
| 8.427702276 |
| 6.320776707 |
| 4.213851138 |
| 7.02308523  |
| 32.30619206 |
| 8.427702276 |
| 1.404617046 |
| 7.725393753 |
| 7.02308523  |
| 9.130010799 |
| 5.618468184 |
| 4.213851138 |
| 5.618468184 |
| 9.130010799 |
| 3.511542615 |
| 4.213851138 |
| 3.511542615 |
| 6.320776707 |
| 7.725393753 |
| 24.58079831 |
| 13.34386194 |
| 9.832319322 |
| 78.65855458 |
| 9.130010799 |
| 3.511542615 |
| 47.75697957 |
| 5.618468184 |
| 1.404617046 |
| 8.427702276 |
| 6.320776707 |
| 7.02308523  |
| 7.725393753 |
| 5.618468184 |
| 7.725393753 |
| 7.02308523  |
| 4.916159661 |
| 11.23693637 |
| 9.130010799 |
| 10.53462785 |
| 4.213851138 |
| 7.725393753 |

|             |
|-------------|
| 3.511542615 |
| 10.53462785 |
| 1.404617046 |
| 2.106925569 |
| 3.511542615 |
| 4.916159661 |
| 4.213851138 |
| 8.427702276 |
| 9.130010799 |
| 2.809234092 |
| 7.02308523  |
| 18.96233012 |
| 3.511542615 |
| 7.02308523  |
| 9.832319322 |
| 360.2842723 |
| 13.34386194 |
| 9.832319322 |
| 4.213851138 |
| 7.02308523  |
| 11.23693637 |
| 15.45078751 |
| 228.9525785 |
| 2.809234092 |
| 9.832319322 |
| 4.916159661 |
| 2.809234092 |
| 5.618468184 |
| 7.02308523  |
| 3.511542615 |
| 4.213851138 |
| 2.809234092 |
| 9.130010799 |
| 0           |
| 4.213851138 |
| 66.01700116 |
| 3.511542615 |
| 9.130010799 |
| 3.511542615 |
| 69.52854378 |
| 7.02308523  |
| 4.916159661 |
| 3.511542615 |

|             |
|-------------|
| 4.213851138 |
| 7.02308523  |
| 6.320776707 |
| 134.1409279 |
| 35.81773467 |
| 1.404617046 |
| 0.702308523 |
| 6.320776707 |
| 8.427702276 |
| 0           |
| 13.34386194 |
| 2.106925569 |
| 8.427702276 |
| 25.28310683 |
| 8.427702276 |
| 7.725393753 |
| 24.58079831 |
| 8.427702276 |
| 90.59779947 |
| 9.832319322 |
| 22.47387274 |
| 16.15309603 |
| 68.82623526 |
| 9.832319322 |
| 0           |
| 4.916159661 |
| 3.511542615 |
| 0.702308523 |
| 0           |
| 9.130010799 |
| 10.53462785 |
| 4.916159661 |
| 0           |
| 11.23693637 |
| 0           |
| 0           |
| 0           |
| 23.17618126 |
| 5.618468184 |
| 0           |
| 7.725393753 |
| 10.53462785 |
| 9.832319322 |



|             |
|-------------|
| 0.702308523 |
| 3.511542615 |
| 4.916159661 |
| 7.02308523  |
| 7.02308523  |
| 1.404617046 |
| 23.17618126 |
| 5.618468184 |
| 4.916159661 |
| 4.213851138 |
| 4.213851138 |
| 1.404617046 |
| 4.213851138 |
| 5.618468184 |
| 7.725393753 |
| 133.4386194 |
| 4.916159661 |
| 0.702308523 |
| 11.23693637 |
| 7.725393753 |
| 2.106925569 |
| 7.725393753 |
| 8.427702276 |
| 6.320776707 |
| 4.916159661 |
| 2.809234092 |
| 2.809234092 |
| 9.832319322 |
| 2.809234092 |
| 4.916159661 |
| 2.106925569 |
| 9.832319322 |
| 2.809234092 |
| 4.213851138 |
| 4.213851138 |
| 1.404617046 |
| 4.213851138 |
| 5.618468184 |
| 3.511542615 |
| 3.511542615 |
| 37.92466024 |
| 3.511542615 |
| 7.02308523  |

|             |
|-------------|
| 10.53462785 |
| 0.702308523 |
| 9.832319322 |
| 3.511542615 |
| 2.809234092 |
| 2.106925569 |
| 2.809234092 |
| 4.213851138 |
| 10.53462785 |
| 0.702308523 |
| 2.809234092 |
| 9.130010799 |
| 9.832319322 |
| 1.404617046 |
| 9.832319322 |
| 4.916159661 |
| 2.809234092 |
| 9.832319322 |
| 28.09234092 |
| 2.809234092 |
| 1.404617046 |
| 6.320776707 |
| 36.5200432  |
| 2.809234092 |
| 2.809234092 |
| 17.55771308 |
| 7.02308523  |
| 44.94774547 |
| 28.09234092 |
| 6.320776707 |
| 5.618468184 |
| 7.02308523  |
| 129.9270768 |
| 2.809234092 |
| 64.61238412 |
| 21.06925569 |
| 7.02308523  |
| 4.213851138 |
| 6.320776707 |
| 4.213851138 |
| 173.4702052 |
| 28.79464944 |
| 4.916159661 |

|             |
|-------------|
| 35.81773467 |
| 24.58079831 |
| 8.427702276 |
| 6.320776707 |
| 4.916159661 |
| 100.4301188 |
| 172.7678967 |
| 107.453204  |
| 8.427702276 |
| 9.130010799 |
| 9.832319322 |
| 4.213851138 |
| 117.2855233 |
| 7.725393753 |
| 8.427702276 |
| 9.130010799 |
| 4.213851138 |
| 3.511542615 |
| 264.0680047 |
| 7.725393753 |
| 96.91857618 |
| 36.5200432  |
| 90.59779947 |
| 12.64155341 |
| 9.130010799 |
| 5.618468184 |
| 9.130010799 |
| 10.53462785 |
| 8.427702276 |
| 9.130010799 |
| 2.809234092 |
| 7.02308523  |
| 51.26852218 |
| 82.87240572 |
| 37.22235172 |
| 42.13851138 |
| 165.0425029 |
| 9.130010799 |
| 218.4179507 |
| 119.3924489 |
| 7.725393753 |
| 5.618468184 |
| 85.68163981 |

|             |
|-------------|
| 22.47387274 |
| 5.618468184 |
| 60.39853298 |
| 9.130010799 |
| 66.71930969 |
| 103.2393529 |
| 8.427702276 |
| 35.11542615 |
| 17.55771308 |
| 3.511542615 |
| 223.3341103 |
| 190.3256097 |
| 175.5771308 |
| 40.73389434 |
| 171.3632796 |
| 16.15309603 |
| 3.511542615 |
| 68.82623526 |
| 5.618468184 |
| 5.618468184 |
| 7.725393753 |
| 41.43620286 |
| 3.511542615 |
| 54.7800648  |
| 11.93924489 |
| 8.427702276 |
| 9.130010799 |
| 32.30619206 |
| 10.53462785 |
| 0.702308523 |
| 126.4155341 |
| 2.809234092 |
| 73.74239492 |
| 4.916159661 |
| 38.62696877 |
| 4.213851138 |
| 93.40703356 |
| 51.26852218 |
| 6.320776707 |
| 9.130010799 |
| 12.64155341 |
| 26.68772387 |
| 167.1494285 |

|             |
|-------------|
| 92.00241652 |
| 0.702308523 |
| 109.5601296 |
| 8.427702276 |
| 30.90157501 |
| 4.213851138 |
| 0.702308523 |
| 11.93924489 |
| 127.8201512 |
| 84.97933129 |
| 50.56621366 |
| 7.02308523  |
| 2.106925569 |
| 9.832319322 |
| 63.20776707 |
| 12.64155341 |
| 87.08625685 |
| 125.7132256 |
| 14.04617046 |
| 7.02308523  |
| 11.23693637 |
| 85.68163981 |
| 18.96233012 |
| 7.02308523  |
| 5.618468184 |
| 101.1324273 |
| 40.73389434 |
| 35.11542615 |
| 40.73389434 |
| 44.24543695 |
| 14.74847898 |
| 114.4762893 |
| 61.80315003 |
| 122.9039915 |
| 7.725393753 |
| 160.1263432 |
| 2.106925569 |
| 2.809234092 |
| 32.30619206 |
| 22.47387274 |
| 80.06317162 |
| 6.320776707 |
| 58.29160741 |

|             |
|-------------|
| 54.7800648  |
| 125.0109171 |
| 4.213851138 |
| 3.511542615 |
| 130.6293853 |
| 42.8408199  |
| 1.404617046 |
| 4.213851138 |
| 87.78856538 |
| 7.02308523  |
| 4.916159661 |
| 16.85540455 |
| 11.23693637 |
| 3.511542615 |
| 73.74239492 |
| 73.04008639 |
| 7.02308523  |
| 34.41311763 |
| 10.53462785 |
| 3.511542615 |
| 113.0716722 |
| 8.427702276 |
| 33.00850058 |
| 60.39853298 |
| 54.7800648  |
| 143.2709387 |
| 170.6609711 |
| 66.01700116 |
| 207.1810143 |
| 37.92466024 |
| 5.618468184 |
| 4.916159661 |
| 25.28310683 |
| 93.40703356 |
| 99.72781027 |
| 125.7132256 |
| 22.47387274 |
| 5.618468184 |
| 8.427702276 |
| 5.618468184 |
| 1.404617046 |
| 3.511542615 |
| 10.53462785 |

|             |
|-------------|
| 85.68163981 |
| 54.7800648  |
| 12.64155341 |
| 27.3900324  |
| 20.36694717 |
| 146.0801728 |
| 9.832319322 |
| 7.02308523  |
| 107.453204  |
| 61.80315003 |
| 11.23693637 |
| 86.38394833 |
| 7.725393753 |
| 6.320776707 |
| 9.130010799 |
| 32.30619206 |
| 132.7363109 |
| 68.82623526 |
| 9.130010799 |
| 0.702308523 |
| 7.725393753 |
| 3.511542615 |
| 101.8347358 |
| 75.14701196 |
| 69.52854378 |
| 13.34386194 |
| 9.130010799 |
| 62.50545855 |
| 47.75697957 |
| 9.832319322 |
| 8.427702276 |
| 2.809234092 |
| 89.19318242 |
| 51.9708307  |
| 54.7800648  |
| 2.106925569 |
| 2.809234092 |
| 8.427702276 |
| 21.77156421 |
| 178.3863648 |
| 67.42161821 |
| 149.5917154 |
| 115.8809063 |

|             |
|-------------|
| 9.832319322 |
| 4.213851138 |
| 33.00850058 |
| 9.130010799 |
| 263.3656961 |
| 12.64155341 |
| 179.0886734 |
| 9.130010799 |
| 5.618468184 |
| 4.213851138 |
| 4.213851138 |
| 45.650054   |
| 4.213851138 |
| 58.99391593 |
| 23.87848978 |
| 7.02308523  |
| 166.44712   |
| 5.618468184 |
| 153.8055665 |
| 7.725393753 |
| 155.9124921 |
| 20.36694717 |
| 9.130010799 |
| 7.02308523  |
| 67.42161821 |
| 23.17618126 |
| 7.02308523  |
| 174.8748222 |
| 43.54312843 |
| 18.2600216  |
| 53.37544775 |
| 7.725393753 |
| 85.68163981 |
| 11.23693637 |
| 7.02308523  |
| 15.45078751 |
| 5.618468184 |
| 7.02308523  |
| 39.32927729 |
| 98.32319322 |
| 97.6208847  |
| 7.02308523  |
| 40.73389434 |



|             |
|-------------|
| 51.9708307  |
| 88.4908739  |
| 54.07775627 |
| 37.22235172 |
| 5.618468184 |
| 2.809234092 |
| 8.427702276 |
| 61.80315003 |
| 7.725393753 |
| 4.916159661 |
| 26.68772387 |
| 29.49695797 |
| 28.09234092 |
| 8.427702276 |
| 59.69622446 |
| 143.2709387 |
| 13.34386194 |
| 40.73389434 |
| 165.0425029 |
| 149.5917154 |
| 97.6208847  |
| 53.37544775 |
| 69.52854378 |
| 96.21626765 |
| 17.55771308 |
| 6.320776707 |
| 28.79464944 |
| 47.75697957 |
| 37.22235172 |
| 45.650054   |
| 41.43620286 |
| 35.81773467 |
| 113.7739807 |
| 4.916159661 |
| 6.320776707 |
| 18.96233012 |
| 8.427702276 |
| 5.618468184 |
| 4.916159661 |
| 198.753312  |
| 92.00241652 |
| 77.95624606 |
| 4.916159661 |

|             |
|-------------|
| 11.23693637 |
| 4.213851138 |
| 9.832319322 |
| 122.9039915 |
| 17.55771308 |
| 51.26852218 |
| 22.47387274 |
| 66.71930969 |
| 13.34386194 |
| 196.6463864 |
| 71.63546935 |
| 14.74847898 |
| 107.453204  |
| 36.5200432  |
| 6.320776707 |
| 70.2308523  |
| 10.53462785 |
| 24.58079831 |
| 216.3110251 |
| 11.23693637 |
| 60.39853298 |
| 6.320776707 |
| 32.30619206 |
| 68.12392673 |
| 45.650054   |
| 7.725393753 |
| 7.725393753 |
| 15.45078751 |
| 5.618468184 |
| 101.1324273 |
| 66.71930969 |
| 59.69622446 |
| 65.31469264 |
| 7.725393753 |
| 131.3316938 |
| 42.13851138 |
| 121.4993745 |
| 10.53462785 |
| 32.30619206 |
| 4.213851138 |
| 172.7678967 |
| 85.68163981 |
| 246.5102916 |

|             |
|-------------|
| 49.16159661 |
| 6.320776707 |
| 7.725393753 |
| 24.58079831 |
| 167.851737  |
| 58.29160741 |
| 120.797066  |
| 178.3863648 |
| 11.93924489 |
| 2.809234092 |
| 42.8408199  |
| 16.15309603 |
| 66.01700116 |
| 6.320776707 |
| 0           |
| 29.49695797 |
| 117.2855233 |
| 107.453204  |
| 56.18468184 |
| 10.53462785 |
| 44.24543695 |
| 61.1008415  |
| 68.12392673 |
| 42.8408199  |
| 10.53462785 |
| 10.53462785 |
| 7.02308523  |
| 24.58079831 |
| 32.30619206 |
| 78.65855458 |
| 11.93924489 |
| 84.27702276 |
| 37.22235172 |
| 119.3924489 |
| 2.106925569 |
| 121.4993745 |
| 7.725393753 |
| 111.6670552 |
| 70.93316082 |
| 3.511542615 |
| 148.1870984 |
| 37.92466024 |
| 9.130010799 |

|             |
|-------------|
| 23.17618126 |
| 88.4908739  |
| 19.66463864 |
| 0           |
| 7.725393753 |
| 129.9270768 |
| 81.46778867 |
| 5.618468184 |
| 180.4932904 |
| 38.62696877 |
| 5.618468184 |
| 6.320776707 |
| 7.02308523  |
| 6.320776707 |
| 6.320776707 |
| 33.7108091  |
| 3.511542615 |
| 4.213851138 |
| 9.130010799 |
| 31.60388354 |
| 36.5200432  |
| 8.427702276 |
| 49.16159661 |
| 14.74847898 |
| 16.85540455 |
| 86.38394833 |
| 89.19318242 |
| 37.22235172 |
| 6.320776707 |
| 89.19318242 |
| 222.6318018 |
| 24.58079831 |
| 154.5078751 |
| 158.0194177 |
| 163.6378859 |
| 15.45078751 |
| 42.13851138 |
| 30.19926649 |
| 56.18468184 |
| 11.23693637 |
| 81.46778867 |
| 114.4762893 |
| 10.53462785 |

|             |
|-------------|
| 119.3924489 |
| 25.98541535 |
| 115.8809063 |
| 133.4386194 |
| 59.69622446 |
| 42.13851138 |
| 7.725393753 |
| 14.74847898 |
| 9.832319322 |
| 4.916159661 |
| 6.320776707 |
| 192.4325353 |
| 50.56621366 |
| 79.3608631  |
| 97.6208847  |
| 65.31469264 |
| 57.58929889 |
| 23.87848978 |
| 14.74847898 |
| 4.213851138 |
| 11.93924489 |
| 6.320776707 |
| 23.87848978 |
| 3.511542615 |
| 11.93924489 |
| 144.6755557 |
| 16.85540455 |
| 3.511542615 |
| 16.15309603 |
| 51.26852218 |
| 228.25027   |
| 29.49695797 |
| 12.64155341 |
| 326.5734632 |
| 69.52854378 |
| 70.2308523  |
| 4.916159661 |
| 16.85540455 |
| 127.1178427 |
| 4.916159661 |
| 6.320776707 |
| 5.618468184 |
| 6.320776707 |

|             |
|-------------|
| 173.4702052 |
| 6.320776707 |
| 6.320776707 |
| 114.4762893 |
| 29.49695797 |
| 10.53462785 |
| 73.04008639 |
| 18.2600216  |
| 245.8079831 |
| 159.4240347 |
| 11.93924489 |
| 70.93316082 |
| 102.5370444 |
| 6.320776707 |
| 37.92466024 |
| 2.106925569 |
| 37.22235172 |
| 6.320776707 |
| 11.23693637 |
| 39.32927729 |
| 22.47387274 |
| 99.72781027 |
| 7.725393753 |
| 70.93316082 |
| 11.93924489 |
| 3.511542615 |
| 3.511542615 |
| 14.04617046 |
| 146.7824813 |
| 106.7508955 |
| 81.46778867 |
| 126.4155341 |
| 6.320776707 |
| 87.78856538 |
| 50.56621366 |
| 67.42161821 |
| 4.916159661 |
| 4.916159661 |
| 25.98541535 |
| 81.46778867 |
| 63.20776707 |
| 148.8894069 |
| 20.36694717 |

|             |
|-------------|
| 2.809234092 |
| 23.17618126 |
| 4.213851138 |
| 23.17618126 |
| 20.36694717 |
| 10.53462785 |
| 110.9647466 |
| 7.725393753 |
| 11.93924489 |
| 9.832319322 |
| 6.320776707 |
| 11.23693637 |
| 209.2879399 |
| 196.6463864 |
| 49.16159661 |
| 58.29160741 |
| 9.832319322 |
| 126.4155341 |
| 48.45928809 |
| 44.24543695 |
| 7.02308523  |
| 11.23693637 |
| 23.87848978 |
| 183.3025245 |
| 28.09234092 |
| 28.09234092 |
| 17.55771308 |
| 6.320776707 |
| 15.45078751 |
| 22.47387274 |
| 20.36694717 |
| 154.5078751 |
| 4.916159661 |
| 40.03158581 |
| 103.2393529 |
| 6.320776707 |
| 8.427702276 |
| 52.67313923 |
| 65.31469264 |
| 40.03158581 |
| 134.1409279 |
| 115.8809063 |
| 10.53462785 |

|             |
|-------------|
| 6.320776707 |
| 4.916159661 |
| 23.17618126 |
| 7.725393753 |
| 4.916159661 |
| 120.0947574 |
| 10.53462785 |
| 3.511542615 |
| 158.7217262 |
| 4.916159661 |
| 4.916159661 |
| 91.30010799 |
| 6.320776707 |
| 76.55162901 |
| 48.45928809 |
| 213.501791  |
| 7.02308523  |
| 44.24543695 |
| 53.37544775 |
| 42.8408199  |
| 38.62696877 |
| 11.23693637 |
| 37.22235172 |
| 194.5394609 |
| 139.7593961 |
| 37.92466024 |
| 19.66463864 |
| 112.3693637 |
| 134.1409279 |
| 8.427702276 |
| 28.79464944 |
| 122.9039915 |
| 8.427702276 |
| 5.618468184 |
| 134.8432364 |
| 84.97933129 |
| 11.23693637 |
| 9.130010799 |
| 34.41311763 |
| 172.0655881 |
| 8.427702276 |
| 27.3900324  |
| 174.8748222 |



|             |
|-------------|
| 119.3924489 |
| 11.93924489 |
| 5.618468184 |
| 6.320776707 |
| 2.106925569 |
| 7.725393753 |
| 8.427702276 |
| 8.427702276 |
| 51.26852218 |
| 2.106925569 |
| 195.2417694 |
| 41.43620286 |
| 7.725393753 |
| 5.618468184 |
| 285.1372603 |
| 9.130010799 |
| 84.97933129 |
| 122.9039915 |
| 40.03158581 |
| 5.618468184 |
| 56.18468184 |
| 123.6063001 |
| 171.3632796 |
| 73.04008639 |
| 22.47387274 |
| 66.01700116 |
| 10.53462785 |
| 52.67313923 |
| 77.95624606 |
| 25.28310683 |
| 40.03158581 |
| 68.82623526 |
| 6.320776707 |
| 80.76548015 |
| 4.213851138 |
| 9.130010799 |
| 17.55771308 |
| 6.320776707 |
| 7.725393753 |
| 4.916159661 |
| 11.23693637 |
| 108.1555125 |
| 44.94774547 |

|             |
|-------------|
| 45.650054   |
| 21.06925569 |
| 6.320776707 |
| 126.4155341 |
| 6.320776707 |
| 129.2247682 |
| 7.725393753 |
| 33.7108091  |
| 132.7363109 |
| 106.048587  |
| 10.53462785 |
| 56.18468184 |
| 52.67313923 |
| 37.22235172 |
| 7.02308523  |
| 16.15309603 |
| 111.6670552 |
| 54.07775627 |
| 6.320776707 |
| 67.42161821 |
| 11.23693637 |
| 7.725393753 |
| 6.320776707 |
| 124.3086086 |
| 56.18468184 |
| 96.21626765 |
| 106.048587  |
| 61.80315003 |
| 14.04617046 |
| 146.0801728 |
| 228.25027   |
| 1.404617046 |
| 176.2794393 |
| 136.2478535 |
| 8.427702276 |
| 10.53462785 |
| 11.23693637 |
| 7.725393753 |
| 25.98541535 |
| 63.20776707 |
| 8.427702276 |
| 25.98541535 |
| 2.809234092 |

|             |
|-------------|
| 8.427702276 |
| 94.10934208 |
| 107.453204  |
| 8.427702276 |
| 44.94774547 |
| 3.511542615 |
| 11.93924489 |
| 121.4993745 |
| 125.0109171 |
| 35.81773467 |
| 6.320776707 |
| 175.5771308 |
| 0           |
| 33.00850058 |
| 6.320776707 |
| 80.76548015 |
| 17.55771308 |
| 4.213851138 |
| 30.90157501 |
| 237.3802808 |
| 165.0425029 |
| 11.23693637 |
| 64.61238412 |
| 21.77156421 |
| 13.34386194 |
| 3.511542615 |
| 8.427702276 |
| 42.8408199  |
| 11.93924489 |
| 6.320776707 |
| 6.320776707 |
| 5.618468184 |
| 186.8140671 |
| 3.511542615 |
| 33.7108091  |
| 7.02308523  |
| 130.6293853 |
| 9.832319322 |
| 87.78856538 |
| 211.3948654 |
| 66.71930969 |
| 8.427702276 |
| 155.9124921 |

|             |
|-------------|
| 1.404617046 |
| 4.213851138 |
| 109.5601296 |
| 87.08625685 |
| 36.5200432  |
| 193.1348438 |
| 29.49695797 |
| 137.6524705 |
| 13.34386194 |
| 4.213851138 |
| 50.56621366 |
| 27.3900324  |
| 9.832319322 |
| 6.320776707 |
| 4.916159661 |
| 8.427702276 |
| 92.70472504 |
| 169.256354  |
| 14.74847898 |
| 18.2600216  |
| 28.09234092 |
| 23.17618126 |
| 129.2247682 |
| 60.39853298 |
| 5.618468184 |
| 8.427702276 |
| 11.93924489 |
| 4.916159661 |
| 9.832319322 |
| 127.8201512 |
| 42.13851138 |
| 0           |
| 115.8809063 |
| 25.98541535 |
| 123.6063001 |
| 30.19926649 |
| 13.34386194 |
| 8.427702276 |
| 39.32927729 |
| 48.45928809 |
| 28.79464944 |
| 18.96233012 |
| 4.213851138 |

|             |
|-------------|
| 4.213851138 |
| 141.1640131 |
| 73.74239492 |
| 211.3948654 |
| 12.64155341 |
| 127.1178427 |
| 180.4932904 |
| 33.7108091  |
| 23.87848978 |
| 24.58079831 |
| 95.51395913 |
| 69.52854378 |
| 26.68772387 |
| 5.618468184 |
| 42.13851138 |
| 7.725393753 |
| 7.02308523  |
| 18.2600216  |
| 5.618468184 |
| 19.66463864 |
| 96.91857618 |
| 7.02308523  |
| 32.30619206 |
| 9.130010799 |
| 67.42161821 |
| 10.53462785 |
| 6.320776707 |
| 119.3924489 |
| 178.3863648 |
| 40.03158581 |
| 42.8408199  |
| 9.130010799 |
| 5.618468184 |
| 20.36694717 |
| 61.1008415  |
| 58.99391593 |
| 133.4386194 |
| 39.32927729 |
| 12.64155341 |
| 74.44470344 |
| 9.130010799 |
| 200.8602376 |
| 7.02308523  |

|             |
|-------------|
| 6.320776707 |
| 11.93924489 |
| 52.67313923 |
| 10.53462785 |
| 266.1749302 |
| 2.106925569 |
| 209.2879399 |
| 137.6524705 |
| 128.5224597 |
| 106.048587  |
| 5.618468184 |
| 4.213851138 |
| 4.213851138 |
| 0           |
| 85.68163981 |
| 42.13851138 |
| 180.4932904 |
| 35.81773467 |
| 84.97933129 |
| 7.02308523  |
| 44.24543695 |
| 116.5832148 |
| 244.403366  |
| 65.31469264 |
| 7.02308523  |
| 17.55771308 |
| 70.93316082 |
| 11.23693637 |
| 7.725393753 |
| 42.13851138 |
| 7.02308523  |
| 113.0716722 |
| 11.93924489 |
| 10.53462785 |
| 5.618468184 |
| 3.511542615 |
| 24.58079831 |
| 7.02308523  |
| 102.5370444 |
| 11.93924489 |
| 115.1785978 |
| 7.725393753 |
| 77.95624606 |

|             |
|-------------|
| 0.702308523 |
| 25.98541535 |
| 20.36694717 |
| 23.87848978 |
| 215.6087166 |
| 6.320776707 |
| 215.6087166 |
| 7.02308523  |
| 197.348695  |
| 7.02308523  |
| 98.32319322 |
| 27.3900324  |
| 11.93924489 |
| 27.3900324  |
| 4.213851138 |
| 42.8408199  |
| 9.832319322 |
| 5.618468184 |
| 8.427702276 |
| 92.70472504 |
| 114.4762893 |
| 29.49695797 |
| 108.8578211 |
| 8.427702276 |
| 37.92466024 |
| 116.5832148 |
| 0.702308523 |
| 49.86390513 |
| 4.916159661 |
| 31.60388354 |
| 7.02308523  |
| 18.2600216  |
| 97.6208847  |
| 4.916159661 |
| 9.832319322 |
| 8.427702276 |
| 14.04617046 |
| 4.916159661 |
| 9.832319322 |
| 154.5078751 |
| 206.4787058 |
| 0           |
| 8.427702276 |

|             |
|-------------|
| 18.2600216  |
| 113.7739807 |
| 7.725393753 |
| 181.1955989 |
| 4.213851138 |
| 18.2600216  |
| 112.3693637 |
| 161.5309603 |
| 17.55771308 |
| 112.3693637 |
| 4.916159661 |
| 1.404617046 |
| 7.02308523  |
| 174.8748222 |
| 123.6063001 |
| 7.725393753 |
| 80.06317162 |
| 9.130010799 |
| 4.916159661 |
| 14.74847898 |
| 148.8894069 |
| 7.02308523  |
| 5.618468184 |
| 11.23693637 |
| 14.04617046 |
| 76.55162901 |
| 76.55162901 |
| 84.97933129 |
| 20.36694717 |
| 10.53462785 |
| 33.00850058 |
| 13.34386194 |
| 8.427702276 |
| 4.916159661 |
| 23.17618126 |
| 46.35236252 |
| 162.9355773 |
| 9.832319322 |
| 7.02308523  |
| 30.90157501 |
| 6.320776707 |
| 18.2600216  |
| 17.55771308 |



|             |
|-------------|
| 6.320776707 |
| 14.04617046 |
| 61.1008415  |
| 50.56621366 |
| 69.52854378 |
| 28.09234092 |
| 155.2101836 |
| 40.03158581 |
| 9.832319322 |
| 51.26852218 |
| 5.618468184 |
| 6.320776707 |
| 75.84932049 |
| 5.618468184 |
| 9.130010799 |
| 122.9039915 |
| 117.2855233 |
| 63.20776707 |
| 5.618468184 |
| 134.8432364 |
| 100.4301188 |
| 60.39853298 |
| 9.130010799 |
| 3.511542615 |
| 6.320776707 |
| 138.354779  |
| 5.618468184 |
| 5.618468184 |
| 11.23693637 |
| 24.58079831 |
| 21.77156421 |
| 7.02308523  |
| 9.832319322 |
| 85.68163981 |
| 10.53462785 |
| 138.354779  |
| 9.130010799 |
| 10.53462785 |
| 14.74847898 |
| 63.20776707 |
| 9.832319322 |
| 25.98541535 |
| 64.61238412 |

|             |
|-------------|
| 13.34386194 |
| 108.1555125 |
| 18.2600216  |
| 238.0825893 |
| 126.4155341 |
| 9.130010799 |
| 93.40703356 |
| 23.17618126 |
| 162.2332688 |
| 56.88699036 |
| 14.04617046 |
| 37.22235172 |
| 8.427702276 |
| 136.2478535 |
| 122.9039915 |
| 268.9841643 |
| 44.24543695 |
| 147.4847898 |
| 10.53462785 |
| 47.05467104 |
| 4.916159661 |
| 5.618468184 |
| 6.320776707 |
| 54.07775627 |
| 136.2478535 |
| 6.320776707 |
| 176.2794393 |
| 46.35236252 |
| 80.76548015 |
| 5.618468184 |
| 104.6439699 |
| 6.320776707 |
| 8.427702276 |
| 37.92466024 |
| 68.12392673 |
| 80.06317162 |
| 188.9209927 |
| 108.8578211 |
| 7.725393753 |
| 97.6208847  |
| 7.02308523  |
| 0           |
| 81.46778867 |

|             |
|-------------|
| 33.7108091  |
| 46.35236252 |
| 37.92466024 |
| 31.60388354 |
| 6.320776707 |
| 143.2709387 |
| 7.02308523  |
| 30.90157501 |
| 51.9708307  |
| 7.02308523  |
| 7.02308523  |
| 70.93316082 |
| 112.3693637 |
| 99.02550175 |
| 4.213851138 |
| 22.47387274 |
| 7.725393753 |
| 20.36694717 |
| 15.45078751 |
| 6.320776707 |
| 55.48237332 |
| 7.725393753 |
| 98.32319322 |
| 142.5686302 |
| 70.93316082 |
| 7.725393753 |
| 131.3316938 |
| 130.6293853 |
| 40.73389434 |
| 7.725393753 |
| 51.26852218 |
| 60.39853298 |
| 7.725393753 |
| 61.1008415  |
| 69.52854378 |
| 8.427702276 |
| 16.15309603 |
| 5.618468184 |
| 56.88699036 |
| 18.2600216  |
| 94.81165061 |
| 63.20776707 |
| 44.94774547 |

|             |
|-------------|
| 6.320776707 |
| 7.725393753 |
| 129.9270768 |
| 18.2600216  |
| 205.0740887 |
| 30.19926649 |
| 8.427702276 |
| 16.15309603 |
| 8.427702276 |
| 4.916159661 |
| 4.916159661 |
| 5.618468184 |
| 22.47387274 |
| 0.702308523 |
| 75.84932049 |
| 109.5601296 |
| 66.71930969 |
| 68.82623526 |
| 7.02308523  |
| 122.9039915 |
| 127.1178427 |
| 66.01700116 |
| 54.07775627 |
| 9.130010799 |
| 4.916159661 |
| 5.618468184 |
| 7.725393753 |
| 58.29160741 |
| 10.53462785 |
| 9.130010799 |
| 2.106925569 |
| 47.05467104 |
| 50.56621366 |
| 39.32927729 |
| 4.916159661 |
| 56.18468184 |
| 33.7108091  |
| 30.90157501 |
| 5.618468184 |
| 93.40703356 |
| 68.12392673 |
| 4.916159661 |
| 3.511542615 |

|             |
|-------------|
| 48.45928809 |
| 57.58929889 |
| 57.58929889 |
| 143.9732472 |
| 62.50545855 |
| 12.64155341 |
| 104.6439699 |
| 7.725393753 |
| 143.2709387 |
| 115.1785978 |
| 139.0570876 |
| 67.42161821 |
| 196.6463864 |
| 217.0133336 |
| 99.72781027 |
| 6.320776707 |
| 232.4641211 |
| 10.53462785 |
| 148.8894069 |
| 138.354779  |
| 30.90157501 |
| 8.427702276 |
| 138.354779  |
| 9.832319322 |
| 6.320776707 |
| 9.130010799 |
| 4.916159661 |
| 10.53462785 |
| 37.92466024 |
| 61.80315003 |
| 87.08625685 |
| 1.404617046 |
| 8.427702276 |
| 143.9732472 |
| 7.725393753 |
| 5.618468184 |
| 35.11542615 |
| 6.320776707 |
| 4.916159661 |
| 3.511542615 |
| 28.09234092 |
| 109.5601296 |
| 4.916159661 |

|             |
|-------------|
| 4.213851138 |
| 7.725393753 |
| 15.45078751 |
| 8.427702276 |
| 0.702308523 |
| 63.20776707 |
| 137.6524705 |
| 141.8663216 |
| 4.213851138 |
| 5.618468184 |
| 47.05467104 |
| 44.24543695 |
| 7.725393753 |
| 8.427702276 |
| 5.618468184 |
| 4.916159661 |
| 2.809234092 |
| 191.0279183 |
| 49.86390513 |
| 7.725393753 |
| 9.832319322 |
| 178.3863648 |
| 79.3608631  |
| 32.30619206 |
| 8.427702276 |
| 99.72781027 |
| 54.07775627 |
| 15.45078751 |
| 14.04617046 |
| 5.618468184 |
| 7.725393753 |
| 80.76548015 |
| 10.53462785 |
| 49.16159661 |
| 5.618468184 |
| 92.70472504 |
| 68.12392673 |
| 4.916159661 |
| 156.6148006 |
| 17.55771308 |
| 82.87240572 |
| 9.130010799 |
| 4.213851138 |

|             |
|-------------|
| 84.97933129 |
| 238.0825893 |
| 101.8347358 |
| 7.02308523  |
| 21.77156421 |
| 20.36694717 |
| 7.02308523  |
| 136.950162  |
| 58.29160741 |
| 87.08625685 |
| 105.3462785 |
| 132.7363109 |
| 49.16159661 |
| 97.6208847  |
| 2.106925569 |
| 9.832319322 |
| 6.320776707 |
| 12.64155341 |
| 33.7108091  |
| 107.453204  |
| 14.74847898 |
| 12.64155341 |
| 70.93316082 |
| 15.45078751 |
| 4.916159661 |
| 7.02308523  |
| 23.87848978 |
| 224.0364188 |
| 172.7678967 |
| 11.93924489 |
| 108.8578211 |
| 97.6208847  |
| 8.427702276 |
| 65.31469264 |
| 159.4240347 |
| 106.048587  |
| 146.7824813 |
| 133.4386194 |
| 11.93924489 |
| 7.725393753 |
| 126.4155341 |
| 34.41311763 |
| 63.91007559 |

|             |
|-------------|
| 135.5455449 |
| 150.2940239 |
| 82.17009719 |
| 7.725393753 |
| 105.3462785 |
| 186.1117586 |
| 173.4702052 |
| 58.99391593 |
| 8.427702276 |
| 8.427702276 |
| 8.427702276 |
| 0           |
| 14.74847898 |
| 9.832319322 |
| 48.45928809 |
| 22.47387274 |
| 76.55162901 |
| 190.3256097 |
| 3.511542615 |
| 141.8663216 |
| 25.28310683 |
| 119.3924489 |
| 7.725393753 |
| 68.82623526 |
| 205.0740887 |
| 162.9355773 |
| 46.35236252 |
| 134.1409279 |
| 4.213851138 |
| 5.618468184 |
| 6.320776707 |
| 200.1579291 |
| 6.320776707 |
| 6.320776707 |
| 7.725393753 |
| 3.511542615 |
| 200.1579291 |
| 13.34386194 |
| 4.916159661 |
| 77.25393753 |
| 31.60388354 |
| 83.57471424 |
| 10.53462785 |



|             |
|-------------|
| 152.4009495 |
| 172.0655881 |
| 49.16159661 |
| 110.2624381 |
| 0           |
| 21.06925569 |
| 191.7302268 |
| 5.618468184 |
| 6.320776707 |
| 5.618468184 |
| 7.725393753 |
| 68.12392673 |
| 161.5309603 |
| 54.7800648  |
| 7.02308523  |
| 47.75697957 |
| 5.618468184 |
| 64.61238412 |
| 209.9902484 |
| 2.106925569 |
| 150.9963324 |
| 101.1324273 |
| 9.832319322 |
| 213.501791  |
| 104.6439699 |
| 8.427702276 |
| 9.130010799 |
| 7.725393753 |
| 77.25393753 |
| 4.916159661 |
| 40.73389434 |
| 109.5601296 |
| 6.320776707 |
| 43.54312843 |
| 21.06925569 |
| 122.201683  |
| 199.4556205 |
| 115.8809063 |
| 7.02308523  |
| 40.03158581 |
| 5.618468184 |
| 162.2332688 |
| 41.43620286 |

|             |
|-------------|
| 7.725393753 |
| 95.51395913 |
| 53.37544775 |
| 7.725393753 |
| 143.2709387 |
| 176.2794393 |
| 8.427702276 |
| 66.71930969 |
| 9.130010799 |
| 31.60388354 |
| 136.2478535 |
| 9.832319322 |
| 4.213851138 |
| 7.725393753 |
| 7.02308523  |
| 5.618468184 |
| 8.427702276 |
| 24.58079831 |
| 45.650054   |
| 42.8408199  |
| 32.30619206 |
| 109.5601296 |
| 37.92466024 |
| 0.702308523 |
| 9.832319322 |
| 50.56621366 |
| 2.809234092 |
| 89.19318242 |
| 9.130010799 |
| 97.6208847  |
| 7.02308523  |
| 9.130010799 |
| 35.11542615 |
| 0           |
| 76.55162901 |
| 14.04617046 |
| 11.93924489 |
| 9.130010799 |
| 95.51395913 |
| 66.71930969 |
| 33.7108091  |
| 9.832319322 |
| 30.19926649 |

|             |
|-------------|
| 6.320776707 |
| 32.30619206 |
| 10.53462785 |
| 278.1141751 |
| 9.130010799 |
| 7.02308523  |
| 4.916159661 |
| 8.427702276 |
| 7.02308523  |
| 150.9963324 |
| 50.56621366 |
| 119.3924489 |
| 43.54312843 |
| 49.16159661 |
| 35.81773467 |
| 13.34386194 |
| 8.427702276 |
| 13.34386194 |
| 4.213851138 |
| 89.19318242 |
| 40.73389434 |
| 41.43620286 |
| 11.23693637 |
| 3.511542615 |
| 207.8833228 |
| 25.28310683 |
| 126.4155341 |
| 173.4702052 |
| 120.797066  |
| 135.5455449 |
| 110.9647466 |
| 181.1955989 |
| 7.725393753 |
| 132.0340023 |
| 25.28310683 |
| 5.618468184 |
| 4.213851138 |
| 115.8809063 |
| 16.15309603 |
| 71.63546935 |
| 31.60388354 |
| 9.130010799 |
| 25.98541535 |

|             |
|-------------|
| 10.53462785 |
| 65.31469264 |
| 2.809234092 |
| 8.427702276 |
| 113.7739807 |
| 102.5370444 |
| 87.08625685 |
| 5.618468184 |
| 9.832319322 |
| 10.53462785 |
| 3.511542615 |
| 163.6378859 |
| 150.9963324 |
| 5.618468184 |
| 14.04617046 |
| 56.18468184 |
| 113.0716722 |
| 35.11542615 |
| 11.93924489 |
| 4.916159661 |
| 97.6208847  |
| 17.55771308 |
| 76.55162901 |
| 11.93924489 |
| 4.213851138 |
| 43.54312843 |
| 42.8408199  |
| 44.94774547 |
| 89.89549095 |
| 171.3632796 |
| 36.5200432  |
| 9.832319322 |
| 7.02308523  |
| 32.30619206 |
| 2.809234092 |
| 7.725393753 |
| 110.2624381 |
| 0           |
| 8.427702276 |
| 8.427702276 |
| 67.42161821 |
| 7.02308523  |
| 95.51395913 |

|             |
|-------------|
| 7.02308523  |
| 51.9708307  |
| 19.66463864 |
| 99.72781027 |
| 233.1664296 |
| 11.23693637 |
| 25.28310683 |
| 113.0716722 |
| 4.916159661 |
| 92.70472504 |
| 21.06925569 |
| 52.67313923 |
| 4.916159661 |
| 35.11542615 |
| 11.23693637 |
| 144.6755557 |
| 10.53462785 |
| 14.74847898 |
| 37.22235172 |
| 61.80315003 |
| 4.916159661 |
| 58.99391593 |
| 6.320776707 |
| 10.53462785 |
| 63.91007559 |
| 20.36694717 |
| 9.130010799 |
| 8.427702276 |
| 87.78856538 |
| 155.9124921 |
| 85.68163981 |
| 102.5370444 |
| 74.44470344 |
| 15.45078751 |
| 93.40703356 |
| 12.64155341 |
| 4.213851138 |
| 110.9647466 |
| 90.59779947 |
| 6.320776707 |
| 47.75697957 |
| 7.02308523  |
| 4.916159661 |

|             |
|-------------|
| 24.58079831 |
| 6.320776707 |
| 7.725393753 |
| 4.916159661 |
| 4.916159661 |
| 7.725393753 |
| 6.320776707 |
| 35.11542615 |
| 68.12392673 |
| 47.05467104 |
| 53.37544775 |
| 4.916159661 |
| 8.427702276 |
| 5.618468184 |
| 133.4386194 |
| 122.9039915 |
| 4.916159661 |
| 4.916159661 |
| 63.91007559 |
| 50.56621366 |
| 4.916159661 |
| 124.3086086 |
| 4.213851138 |
| 103.9416614 |
| 9.130010799 |
| 9.130010799 |
| 33.7108091  |
| 122.9039915 |
| 58.29160741 |
| 45.650054   |
| 8.427702276 |
| 34.41311763 |
| 9.130010799 |
| 16.15309603 |
| 4.916159661 |
| 8.427702276 |
| 18.2600216  |
| 45.650054   |
| 6.320776707 |
| 3.511542615 |
| 9.130010799 |
| 89.19318242 |
| 11.93924489 |

|             |
|-------------|
| 11.93924489 |
| 7.725393753 |
| 10.53462785 |
| 21.06925569 |
| 9.130010799 |
| 4.916159661 |
| 0           |
| 8.427702276 |
| 7.725393753 |
| 20.36694717 |
| 5.618468184 |
| 7.725393753 |
| 101.1324273 |
| 44.94774547 |
| 87.08625685 |
| 11.23693637 |
| 109.5601296 |
| 121.4993745 |
| 2.106925569 |
| 7.725393753 |
| 191.0279183 |
| 153.103258  |
| 4.213851138 |
| 49.86390513 |
| 61.80315003 |
| 11.93924489 |
| 7.725393753 |
| 112.3693637 |
| 106.048587  |
| 20.36694717 |
| 138.354779  |
| 9.832319322 |
| 4.213851138 |
| 7.02308523  |
| 2.809234092 |
| 200.1579291 |
| 6.320776707 |
| 106.048587  |
| 147.4847898 |
| 16.15309603 |
| 4.213851138 |
| 35.11542615 |
| 165.0425029 |

|             |
|-------------|
| 175.5771308 |
| 23.87848978 |
| 7.725393753 |
| 85.68163981 |
| 9.130010799 |
| 31.60388354 |
| 3.511542615 |
| 99.72781027 |
| 160.1263432 |
| 117.9878319 |
| 6.320776707 |
| 5.618468184 |
| 9.832319322 |
| 6.320776707 |
| 176.9817478 |
| 9.130010799 |
| 19.66463864 |
| 113.0716722 |
| 18.2600216  |
| 89.19318242 |
| 206.4787058 |
| 7.02308523  |
| 96.91857618 |
| 259.8541535 |
| 8.427702276 |
| 6.320776707 |
| 6.320776707 |
| 4.213851138 |
| 73.04008639 |
| 141.1640131 |
| 34.41311763 |
| 36.5200432  |
| 22.47387274 |
| 9.130010799 |
| 14.04617046 |
| 22.47387274 |
| 16.85540455 |
| 89.89549095 |
| 160.1263432 |
| 8.427702276 |
| 44.24543695 |
| 62.50545855 |
| 56.18468184 |



|             |
|-------------|
| 5.618468184 |
| 44.24543695 |
| 3.511542615 |
| 145.3778643 |
| 15.45078751 |
| 26.68772387 |
| 7.02308523  |
| 10.53462785 |
| 77.25393753 |
| 28.79464944 |
| 136.2478535 |
| 52.67313923 |
| 80.76548015 |
| 8.427702276 |
| 103.9416614 |
| 13.34386194 |
| 10.53462785 |
| 7.02308523  |
| 13.34386194 |
| 46.35236252 |
| 58.99391593 |
| 127.8201512 |
| 7.02308523  |
| 103.2393529 |
| 58.99391593 |
| 221.9294933 |
| 55.48237332 |
| 7.02308523  |
| 4.916159661 |
| 8.427702276 |
| 56.88699036 |
| 9.130010799 |
| 8.427702276 |
| 155.9124921 |
| 35.81773467 |
| 149.5917154 |
| 5.618468184 |
| 1.404617046 |
| 136.2478535 |
| 48.45928809 |
| 5.618468184 |
| 231.0595041 |
| 35.11542615 |

|             |
|-------------|
| 220.5248762 |
| 122.201683  |
| 6.320776707 |
| 58.29160741 |
| 254.9379939 |
| 8.427702276 |
| 7.725393753 |
| 45.650054   |
| 11.93924489 |
| 57.58929889 |
| 18.2600216  |
| 49.86390513 |
| 74.44470344 |
| 7.02308523  |
| 42.8408199  |
| 130.6293853 |
| 20.36694717 |
| 9.130010799 |
| 106.048587  |
| 6.320776707 |
| 37.92466024 |
| 80.06317162 |
| 3.511542615 |
| 115.1785978 |
| 63.20776707 |
| 39.32927729 |
| 21.77156421 |
| 9.130010799 |
| 20.36694717 |
| 2.106925569 |
| 5.618468184 |
| 164.3401944 |
| 15.45078751 |
| 7.02308523  |
| 9.130010799 |
| 201.5625461 |
| 7.725393753 |
| 40.73389434 |
| 20.36694717 |
| 84.97933129 |
| 92.00241652 |
| 59.69622446 |
| 181.8979075 |

|             |
|-------------|
| 222.6318018 |
| 92.00241652 |
| 127.8201512 |
| 58.29160741 |
| 41.43620286 |
| 117.9878319 |
| 109.5601296 |
| 15.45078751 |
| 160.1263432 |
| 94.81165061 |
| 6.320776707 |
| 63.91007559 |
| 19.66463864 |
| 8.427702276 |
| 31.60388354 |
| 107.453204  |
| 61.1008415  |
| 7.725393753 |
| 75.84932049 |
| 144.6755557 |
| 129.9270768 |
| 2.809234092 |
| 9.832319322 |
| 5.618468184 |
| 101.1324273 |
| 92.70472504 |
| 130.6293853 |
| 107.453204  |
| 150.2940239 |
| 31.60388354 |
| 136.950162  |
| 122.201683  |
| 4.916159661 |
| 103.9416614 |
| 55.48237332 |
| 77.95624606 |
| 46.35236252 |
| 131.3316938 |
| 23.87848978 |
| 80.06317162 |
| 30.90157501 |
| 146.7824813 |
| 3.511542615 |

|             |
|-------------|
| 7.725393753 |
| 94.81165061 |
| 7.02308523  |
| 89.19318242 |
| 7.725393753 |
| 39.32927729 |
| 29.49695797 |
| 2.809234092 |
| 90.59779947 |
| 150.2940239 |
| 32.30619206 |
| 55.48237332 |
| 53.37544775 |
| 132.0340023 |
| 8.427702276 |
| 19.66463864 |
| 93.40703356 |
| 5.618468184 |
| 7.02308523  |
| 32.30619206 |
| 164.3401944 |
| 7.725393753 |
| 4.213851138 |
| 13.34386194 |
| 87.08625685 |
| 11.93924489 |
| 15.45078751 |
| 139.0570876 |
| 30.19926649 |
| 3.511542615 |
| 7.725393753 |
| 7.02308523  |
| 7.02308523  |
| 9.130010799 |
| 4.916159661 |
| 77.95624606 |
| 32.30619206 |
| 7.02308523  |
| 48.45928809 |
| 10.53462785 |
| 3.511542615 |
| 148.8894069 |
| 24.58079831 |

|             |
|-------------|
| 0           |
| 3.511542615 |
| 46.35236252 |
| 110.2624381 |
| 37.92466024 |
| 73.04008639 |
| 15.45078751 |
| 16.15309603 |
| 13.34386194 |
| 42.8408199  |
| 7.725393753 |
| 70.93316082 |
| 63.20776707 |
| 94.81165061 |
| 10.53462785 |
| 47.05467104 |
| 9.130010799 |
| 3.511542615 |
| 5.618468184 |
| 8.427702276 |
| 173.4702052 |
| 9.832319322 |
| 10.53462785 |
| 7.725393753 |
| 11.23693637 |
| 147.4847898 |
| 5.618468184 |
| 96.91857618 |
| 60.39853298 |
| 30.90157501 |
| 6.320776707 |
| 21.77156421 |
| 82.17009719 |
| 75.84932049 |
| 91.30010799 |
| 5.618468184 |
| 9.130010799 |
| 3.511542615 |
| 199.4556205 |
| 188.9209927 |
| 7.02308523  |
| 11.23693637 |
| 37.92466024 |

|             |
|-------------|
| 66.01700116 |
| 58.29160741 |
| 173.4702052 |
| 36.5200432  |
| 68.12392673 |
| 2.809234092 |
| 6.320776707 |
| 4.916159661 |
| 47.75697957 |
| 176.9817478 |
| 165.7448114 |
| 112.3693637 |
| 258.4495365 |
| 142.5686302 |
| 92.00241652 |
| 192.4325353 |
| 162.9355773 |
| 24.58079831 |
| 139.7593961 |
| 7.725393753 |
| 96.21626765 |
| 8.427702276 |
| 59.69622446 |
| 21.06925569 |
| 51.9708307  |
| 40.03158581 |
| 100.4301188 |
| 36.5200432  |
| 24.58079831 |
| 53.37544775 |
| 7.02308523  |
| 6.320776707 |
| 77.25393753 |
| 137.6524705 |
| 23.87848978 |
| 71.63546935 |
| 30.90157501 |
| 4.916159661 |
| 15.45078751 |
| 9.130010799 |
| 12.64155341 |
| 64.61238412 |
| 4.916159661 |

|             |
|-------------|
| 0           |
| 7.02308523  |
| 97.6208847  |
| 212.097174  |
| 37.22235172 |
| 32.30619206 |
| 36.5200432  |
| 6.320776707 |
| 7.02308523  |
| 44.94774547 |
| 13.34386194 |
| 9.130010799 |
| 4.916159661 |
| 9.832319322 |
| 6.320776707 |
| 50.56621366 |
| 11.23693637 |
| 188.9209927 |
| 191.0279183 |
| 108.8578211 |
| 124.3086086 |
| 212.7994825 |
| 49.16159661 |
| 4.916159661 |
| 9.130010799 |
| 13.34386194 |
| 27.3900324  |
| 11.93924489 |
| 91.30010799 |
| 46.35236252 |
| 17.55771308 |
| 12.64155341 |
| 22.47387274 |
| 9.832319322 |
| 6.320776707 |
| 11.23693637 |
| 84.27702276 |
| 4.213851138 |
| 4.213851138 |
| 4.213851138 |
| 9.130010799 |
| 18.2600216  |
| 128.5224597 |

|             |
|-------------|
| 10.53462785 |
| 99.72781027 |
| 69.52854378 |
| 108.8578211 |
| 2.809234092 |
| 30.19926649 |
| 8.427702276 |
| 47.05467104 |
| 38.62696877 |
| 7.725393753 |
| 7.02308523  |
| 232.4641211 |
| 6.320776707 |
| 153.8055665 |
| 109.5601296 |
| 61.80315003 |
| 86.38394833 |
| 160.8286518 |
| 110.2624381 |
| 40.73389434 |
| 7.02308523  |
| 8.427702276 |
| 112.3693637 |
| 9.130010799 |
| 23.17618126 |
| 6.320776707 |
| 6.320776707 |
| 75.14701196 |
| 2.809234092 |
| 97.6208847  |
| 6.320776707 |
| 143.2709387 |
| 15.45078751 |
| 3.511542615 |
| 49.16159661 |
| 3.511542615 |
| 93.40703356 |
| 85.68163981 |
| 30.90157501 |
| 23.87848978 |
| 14.74847898 |
| 11.93924489 |
| 5.618468184 |



|             |
|-------------|
| 69.52854378 |
| 6.320776707 |
| 38.62696877 |
| 8.427702276 |
| 0           |
| 6.320776707 |
| 41.43620286 |
| 60.39853298 |
| 162.9355773 |
| 212.097174  |
| 15.45078751 |
| 80.06317162 |
| 4.916159661 |
| 5.618468184 |
| 2.809234092 |
| 8.427702276 |
| 21.06925569 |
| 39.32927729 |
| 7.02308523  |
| 4.213851138 |
| 84.97933129 |
| 122.201683  |
| 8.427702276 |
| 9.130010799 |
| 9.130010799 |
| 14.74847898 |
| 84.97933129 |
| 6.320776707 |
| 7.02308523  |
| 42.8408199  |
| 7.725393753 |
| 6.320776707 |
| 155.2101836 |
| 89.89549095 |
| 209.9902484 |
| 26.68772387 |
| 16.85540455 |
| 81.46778867 |
| 191.0279183 |
| 142.5686302 |
| 4.213851138 |
| 0           |
| 33.00850058 |

|             |
|-------------|
| 79.3608631  |
| 52.67313923 |
| 2.809234092 |
| 95.51395913 |
| 22.47387274 |
| 45.650054   |
| 104.6439699 |
| 18.96233012 |
| 3.511542615 |
| 64.61238412 |
| 61.1008415  |
| 132.7363109 |
| 40.03158581 |
| 61.1008415  |
| 99.02550175 |
| 4.916159661 |
| 6.320776707 |
| 34.41311763 |
| 6.320776707 |
| 9.130010799 |
| 6.320776707 |
| 7.725393753 |
| 50.56621366 |
| 172.7678967 |
| 7.725393753 |
| 0.702308523 |
| 7.725393753 |
| 38.62696877 |
| 6.320776707 |
| 59.69622446 |
| 14.74847898 |
| 40.73389434 |
| 5.618468184 |
| 171.3632796 |
| 108.1555125 |
| 10.53462785 |
| 10.53462785 |
| 120.0947574 |
| 9.832319322 |
| 8.427702276 |
| 163.6378859 |
| 5.618468184 |
| 12.64155341 |

|             |
|-------------|
| 207.8833228 |
| 123.6063001 |
| 11.93924489 |
| 134.1409279 |
| 89.89549095 |
| 103.9416614 |
| 129.2247682 |
| 6.320776707 |
| 77.25393753 |
| 41.43620286 |
| 34.41311763 |
| 138.354779  |
| 199.4556205 |
| 2.106925569 |
| 17.55771308 |
| 9.832319322 |
| 6.320776707 |
| 5.618468184 |
| 139.0570876 |
| 48.45928809 |
| 8.427702276 |
| 3.511542615 |
| 44.94774547 |
| 7.725393753 |
| 3.511542615 |
| 2.809234092 |
| 7.725393753 |
| 48.45928809 |
| 7.725393753 |
| 7.02308523  |
| 3.511542615 |
| 4.916159661 |
| 186.1117586 |
| 9.130010799 |
| 9.130010799 |
| 162.2332688 |
| 8.427702276 |
| 33.7108091  |
| 120.0947574 |
| 47.05467104 |
| 83.57471424 |
| 6.320776707 |
| 63.20776707 |

|             |
|-------------|
| 81.46778867 |
| 4.916159661 |
| 89.19318242 |
| 47.05467104 |
| 9.832319322 |
| 10.53462785 |
| 11.93924489 |
| 9.130010799 |
| 43.54312843 |
| 152.4009495 |
| 117.9878319 |
| 92.00241652 |
| 92.00241652 |
| 57.58929889 |
| 11.93924489 |
| 167.1494285 |
| 5.618468184 |
| 2.809234092 |
| 114.4762893 |
| 94.81165061 |
| 17.55771308 |
| 15.45078751 |
| 5.618468184 |
| 8.427702276 |
| 24.58079831 |
| 14.04617046 |
| 27.3900324  |
| 2.809234092 |
| 154.5078751 |
| 37.22235172 |
| 7.725393753 |
| 58.99391593 |
| 42.13851138 |
| 121.4993745 |
| 113.0716722 |
| 0           |
| 6.320776707 |
| 188.9209927 |
| 49.86390513 |
| 68.82623526 |
| 3.511542615 |
| 26.68772387 |
| 12.64155341 |

|             |
|-------------|
| 31.60388354 |
| 4.916159661 |
| 8.427702276 |
| 7.725393753 |
| 57.58929889 |
| 4.916159661 |
| 9.130010799 |
| 188.2186842 |
| 191.0279183 |
| 4.213851138 |
| 47.05467104 |
| 53.37544775 |
| 136.2478535 |
| 7.02308523  |
| 56.88699036 |
| 5.618468184 |
| 176.9817478 |
| 9.832319322 |
| 4.213851138 |
| 106.7508955 |
| 63.91007559 |
| 143.9732472 |
| 188.2186842 |
| 21.06925569 |
| 1.404617046 |
| 66.71930969 |
| 4.916159661 |
| 98.32319322 |
| 196.6463864 |
| 135.5455449 |
| 4.213851138 |
| 129.9270768 |
| 102.5370444 |
| 111.6670552 |
| 179.0886734 |
| 10.53462785 |
| 1.404617046 |
| 8.427702276 |
| 25.28310683 |
| 84.27702276 |
| 62.50545855 |
| 14.74847898 |
| 4.916159661 |

|             |
|-------------|
| 9.130010799 |
| 24.58079831 |
| 6.320776707 |
| 78.65855458 |
| 19.66463864 |
| 130.6293853 |
| 127.8201512 |
| 92.00241652 |
| 47.75697957 |
| 55.48237332 |
| 95.51395913 |
| 9.130010799 |
| 110.9647466 |
| 7.02308523  |
| 9.130010799 |
| 8.427702276 |
| 7.02308523  |
| 20.36694717 |
| 135.5455449 |
| 52.67313923 |
| 4.916159661 |
| 42.13851138 |
| 7.725393753 |
| 5.618468184 |
| 7.725393753 |
| 57.58929889 |
| 125.7132256 |
| 116.5832148 |
| 25.98541535 |
| 28.79464944 |
| 9.130010799 |
| 4.213851138 |
| 6.320776707 |
| 54.7800648  |
| 7.02308523  |
| 13.34386194 |
| 15.45078751 |
| 82.17009719 |
| 7.02308523  |
| 5.618468184 |
| 11.23693637 |
| 5.618468184 |
| 20.36694717 |

|             |
|-------------|
| 40.03158581 |
| 115.8809063 |
| 65.31469264 |
| 22.47387274 |
| 17.55771308 |
| 71.63546935 |
| 58.29160741 |
| 5.618468184 |
| 5.618468184 |
| 193.8371524 |
| 60.39853298 |
| 7.02308523  |
| 7.02308523  |
| 4.916159661 |
| 49.16159661 |
| 10.53462785 |
| 102.5370444 |
| 54.07775627 |
| 0           |
| 158.7217262 |
| 7.02308523  |
| 25.28310683 |
| 180.4932904 |
| 80.06317162 |
| 27.3900324  |
| 8.427702276 |
| 26.68772387 |
| 129.2247682 |
| 6.320776707 |
| 70.2308523  |
| 61.80315003 |
| 10.53462785 |
| 16.15309603 |
| 119.3924489 |
| 223.3341103 |
| 67.42161821 |
| 54.07775627 |
| 6.320776707 |
| 21.06925569 |
| 2.106925569 |
| 5.618468184 |
| 49.16159661 |
| 151.698641  |

|             |
|-------------|
| 6.320776707 |
| 9.130010799 |
| 160.1263432 |
| 9.832319322 |
| 154.5078751 |
| 10.53462785 |
| 7.725393753 |
| 0           |
| 88.4908739  |
| 4.916159661 |
| 7.725393753 |
| 160.8286518 |
| 3.511542615 |
| 8.427702276 |
| 23.17618126 |
| 4.916159661 |
| 49.16159661 |
| 15.45078751 |
| 96.91857618 |
| 7.725393753 |
| 33.7108091  |
| 56.88699036 |
| 42.13851138 |
| 98.32319322 |
| 30.19926649 |
| 6.320776707 |
| 2.809234092 |
| 38.62696877 |
| 9.130010799 |
| 3.511542615 |
| 111.6670552 |
| 7.725393753 |
| 41.43620286 |
| 4.916159661 |
| 5.618468184 |
| 18.96233012 |
| 12.64155341 |
| 169.256354  |
| 35.81773467 |
| 6.320776707 |
| 6.320776707 |
| 94.10934208 |
| 7.02308523  |



|             |
|-------------|
| 9.130010799 |
| 14.04617046 |
| 6.320776707 |
| 155.9124921 |
| 11.23693637 |
| 85.68163981 |
| 11.23693637 |
| 89.89549095 |
| 3.511542615 |
| 7.725393753 |
| 9.130010799 |
| 7.02308523  |
| 35.81773467 |
| 95.51395913 |
| 80.76548015 |
| 6.320776707 |
| 6.320776707 |
| 5.618468184 |
| 184.7071416 |
| 24.58079831 |
| 65.31469264 |
| 35.81773467 |
| 3.511542615 |
| 5.618468184 |
| 129.2247682 |
| 117.9878319 |
| 7.02308523  |
| 7.02308523  |
| 7.725393753 |
| 59.69622446 |
| 134.1409279 |
| 28.79464944 |
| 5.618468184 |
| 6.320776707 |
| 4.916159661 |
| 48.45928809 |
| 240.8918234 |
| 8.427702276 |
| 122.9039915 |
| 2.809234092 |
| 2.809234092 |
| 2.106925569 |
| 197.348695  |

|             |
|-------------|
| 160.1263432 |
| 5.618468184 |
| 27.3900324  |
| 276.0072495 |
| 4.213851138 |
| 62.50545855 |
| 7.02308523  |
| 193.1348438 |
| 80.06317162 |
| 5.618468184 |
| 29.49695797 |
| 7.725393753 |
| 6.320776707 |
| 7.02308523  |
| 4.916159661 |
| 11.23693637 |
| 6.320776707 |
| 157.3171092 |
| 53.37544775 |
| 7.02308523  |
| 112.3693637 |
| 7.725393753 |
| 119.3924489 |
| 10.53462785 |
| 20.36694717 |
| 6.320776707 |
| 159.4240347 |
| 0           |
| 1.404617046 |
| 33.7108091  |
| 8.427702276 |
| 112.3693637 |
| 97.6208847  |
| 6.320776707 |
| 9.832319322 |
| 9.832319322 |
| 141.8663216 |
| 10.53462785 |
| 6.320776707 |
| 77.25393753 |
| 35.81773467 |
| 157.3171092 |
| 8.427702276 |

|             |
|-------------|
| 13.34386194 |
| 53.37544775 |
| 233.1664296 |
| 66.71930969 |
| 165.7448114 |
| 179.7909819 |
| 111.6670552 |
| 6.320776707 |
| 8.427702276 |
| 4.213851138 |
| 17.55771308 |
| 7.02308523  |
| 21.77156421 |
| 7.725393753 |
| 6.320776707 |
| 10.53462785 |
| 26.68772387 |
| 6.320776707 |
| 13.34386194 |
| 9.130010799 |
| 5.618468184 |
| 92.70472504 |
| 51.9708307  |
| 4.213851138 |
| 7.725393753 |
| 6.320776707 |
| 7.02308523  |
| 8.427702276 |
| 7.02308523  |
| 99.02550175 |
| 16.15309603 |
| 8.427702276 |
| 202.2648546 |
| 7.725393753 |
| 4.213851138 |
| 7.725393753 |
| 127.1178427 |
| 281.6257177 |
| 105.3462785 |
| 7.02308523  |
| 15.45078751 |
| 97.6208847  |
| 6.320776707 |

|             |
|-------------|
| 11.23693637 |
| 120.797066  |
| 11.23693637 |
| 167.1494285 |
| 139.7593961 |
| 5.618468184 |
| 162.9355773 |
| 6.320776707 |
| 148.8894069 |
| 18.96233012 |
| 10.53462785 |
| 18.96233012 |
| 28.09234092 |
| 7.725393753 |
| 28.79464944 |
| 127.1178427 |
| 124.3086086 |
| 14.74847898 |
| 229.654887  |
| 16.85540455 |
| 44.94774547 |
| 77.25393753 |
| 11.23693637 |
| 63.91007559 |
| 9.130010799 |
| 7.725393753 |
| 3.511542615 |
| 9.130010799 |
| 11.93924489 |
| 10.53462785 |
| 198.0510035 |
| 2.809234092 |
| 38.62696877 |
| 153.8055665 |
| 9.832319322 |
| 23.17618126 |
| 22.47387274 |
| 37.22235172 |
| 11.23693637 |
| 6.320776707 |
| 6.320776707 |
| 5.618468184 |
| 25.98541535 |

|             |
|-------------|
| 49.16159661 |
| 51.26852218 |
| 5.618468184 |
| 4.916159661 |
| 4.213851138 |
| 48.45928809 |
| 77.25393753 |
| 9.832319322 |
| 4.916159661 |
| 37.92466024 |
| 10.53462785 |
| 72.33777787 |
| 0.702308523 |
| 94.10934208 |
| 79.3608631  |
| 80.06317162 |
| 0.702308523 |
| 7.02308523  |
| 0           |
| 115.8809063 |
| 1.404617046 |
| 7.02308523  |
| 152.4009495 |
| 92.00241652 |
| 120.797066  |
| 47.75697957 |
| 96.91857618 |
| 7.725393753 |
| 24.58079831 |
| 9.130010799 |
| 158.7217262 |
| 185.4094501 |
| 256.3426109 |
| 12.64155341 |
| 8.427702276 |
| 101.1324273 |
| 153.103258  |
| 29.49695797 |
| 13.34386194 |
| 7.725393753 |
| 7.02308523  |
| 67.42161821 |
| 9.130010799 |

|             |
|-------------|
| 7.02308523  |
| 53.37544775 |
| 28.79464944 |
| 3.511542615 |
| 9.832319322 |
| 20.36694717 |
| 30.90157501 |
| 32.30619206 |
| 68.82623526 |
| 163.6378859 |
| 9.832319322 |
| 153.103258  |
| 43.54312843 |
| 6.320776707 |
| 100.4301188 |
| 4.213851138 |
| 120.797066  |
| 9.130010799 |
| 25.98541535 |
| 91.30010799 |
| 7.725393753 |
| 125.0109171 |
| 87.78856538 |
| 92.00241652 |
| 9.832319322 |
| 6.320776707 |
| 155.2101836 |
| 62.50545855 |
| 7.02308523  |
| 6.320776707 |
| 7.725393753 |
| 5.618468184 |
| 20.36694717 |
| 9.832319322 |
| 66.01700116 |
| 52.67313923 |
| 4.916159661 |
| 131.3316938 |
| 9.130010799 |
| 5.618468184 |
| 80.76548015 |
| 88.4908739  |
| 103.2393529 |

|             |
|-------------|
| 73.04008639 |
| 27.3900324  |
| 5.618468184 |
| 0.702308523 |
| 195.2417694 |
| 5.618468184 |
| 11.23693637 |
| 50.56621366 |
| 81.46778867 |
| 6.320776707 |
| 4.916159661 |
| 6.320776707 |
| 6.320776707 |
| 122.9039915 |
| 2.809234092 |
| 6.320776707 |
| 47.05467104 |
| 179.0886734 |
| 5.618468184 |
| 4.916159661 |
| 38.62696877 |
| 167.1494285 |
| 58.29160741 |
| 6.320776707 |
| 53.37544775 |
| 120.797066  |
| 248.6172171 |
| 13.34386194 |
| 36.5200432  |
| 28.09234092 |
| 4.916159661 |
| 33.00850058 |
| 30.90157501 |
| 21.06925569 |
| 18.2600216  |
| 117.2855233 |
| 114.4762893 |
| 35.81773467 |
| 73.04008639 |
| 187.5163756 |
| 140.4617046 |
| 94.81165061 |
| 101.8347358 |

|             |
|-------------|
| 58.99391593 |
| 112.3693637 |
| 18.96233012 |
| 87.08625685 |
| 30.19926649 |
| 152.4009495 |
| 12.64155341 |
| 137.6524705 |
| 3.511542615 |
| 12.64155341 |
| 66.01700116 |
| 9.130010799 |
| 24.58079831 |
| 13.34386194 |
| 162.9355773 |
| 97.6208847  |
| 6.320776707 |
| 42.13851138 |
| 4.916159661 |
| 8.427702276 |
| 96.91857618 |
| 113.7739807 |
| 7.725393753 |
| 9.832319322 |
| 12.64155341 |
| 9.130010799 |
| 8.427702276 |
| 9.832319322 |
| 25.28310683 |
| 66.71930969 |
| 15.45078751 |
| 133.4386194 |
| 75.84932049 |
| 14.04617046 |
| 7.02308523  |
| 6.320776707 |
| 30.90157501 |
| 73.04008639 |
| 50.56621366 |
| 2.809234092 |
| 5.618468184 |
| 108.1555125 |
| 57.58929889 |



|             |
|-------------|
| 77.25393753 |
| 44.94774547 |
| 25.28310683 |
| 136.950162  |
| 1.404617046 |
| 108.1555125 |
| 76.55162901 |
| 150.9963324 |
| 19.66463864 |
| 4.213851138 |
| 38.62696877 |
| 9.832319322 |
| 8.427702276 |
| 13.34386194 |
| 183.3025245 |
| 99.72781027 |
| 8.427702276 |
| 18.2600216  |
| 3.511542615 |
| 7.02308523  |
| 8.427702276 |
| 73.04008639 |
| 14.04617046 |
| 182.600216  |
| 7.725393753 |
| 93.40703356 |
| 5.618468184 |
| 21.06925569 |
| 93.40703356 |
| 25.98541535 |
| 9.130010799 |
| 8.427702276 |
| 61.1008415  |
| 16.15309603 |
| 101.8347358 |
| 6.320776707 |
| 14.74847898 |
| 8.427702276 |
| 3.511542615 |
| 61.1008415  |
| 87.78856538 |
| 97.6208847  |
| 10.53462785 |

|             |
|-------------|
| 9.130010799 |
| 11.93924489 |
| 93.40703356 |
| 19.66463864 |
| 8.427702276 |
| 23.17618126 |
| 54.07775627 |
| 76.55162901 |
| 55.48237332 |
| 7.725393753 |
| 8.427702276 |
| 4.916159661 |
| 30.90157501 |
| 48.45928809 |
| 121.4993745 |
| 47.05467104 |
| 7.02308523  |
| 8.427702276 |
| 21.06925569 |
| 45.650054   |
| 7.02308523  |
| 29.49695797 |
| 11.93924489 |
| 7.725393753 |
| 7.725393753 |
| 4.916159661 |
| 9.130010799 |
| 44.24543695 |
| 140.4617046 |
| 4.916159661 |
| 51.9708307  |
| 6.320776707 |
| 221.9294933 |
| 38.62696877 |
| 54.7800648  |
| 4.916159661 |
| 6.320776707 |
| 5.618468184 |
| 52.67313923 |
| 9.832319322 |
| 105.3462785 |
| 132.0340023 |
| 7.725393753 |

|             |
|-------------|
| 3.511542615 |
| 11.23693637 |
| 28.09234092 |
| 69.52854378 |
| 5.618468184 |
| 141.8663216 |
| 9.130010799 |
| 5.618468184 |
| 161.5309603 |
| 102.5370444 |
| 125.7132256 |
| 7.725393753 |
| 9.832319322 |
| 122.9039915 |
| 103.2393529 |
| 49.86390513 |
| 111.6670552 |
| 28.09234092 |
| 5.618468184 |
| 29.49695797 |
| 28.79464944 |
| 28.79464944 |
| 3.511542615 |
| 9.130010799 |
| 7.725393753 |
| 80.06317162 |
| 8.427702276 |
| 14.04617046 |
| 42.8408199  |
| 2.809234092 |
| 219.8225677 |
| 35.11542615 |
| 66.71930969 |
| 4.213851138 |
| 8.427702276 |
| 63.91007559 |
| 47.05467104 |
| 188.9209927 |
| 35.11542615 |
| 38.62696877 |
| 58.99391593 |
| 9.130010799 |
| 40.03158581 |

|             |
|-------------|
| 187.5163756 |
| 106.7508955 |
| 49.86390513 |
| 42.13851138 |
| 8.427702276 |
| 7.02308523  |
| 16.15309603 |
| 33.7108091  |
| 169.256354  |
| 141.1640131 |
| 8.427702276 |
| 23.17618126 |
| 7.02308523  |
| 40.03158581 |
| 6.320776707 |
| 11.23693637 |
| 33.7108091  |
| 50.56621366 |
| 40.73389434 |
| 41.43620286 |
| 14.04617046 |
| 7.725393753 |
| 101.1324273 |
| 106.7508955 |
| 7.02308523  |
| 78.65855458 |
| 23.87848978 |
| 9.130010799 |
| 8.427702276 |
| 7.725393753 |
| 7.725393753 |
| 115.1785978 |
| 7.02308523  |
| 7.02308523  |
| 11.23693637 |
| 174.8748222 |
| 24.58079831 |
| 35.81773467 |
| 59.69622446 |
| 14.74847898 |
| 43.54312843 |
| 2.809234092 |
| 92.00241652 |

|             |
|-------------|
| 8.427702276 |
| 38.62696877 |
| 40.73389434 |
| 14.04617046 |
| 10.53462785 |
| 7.725393753 |
| 4.213851138 |
| 92.70472504 |
| 9.832319322 |
| 178.3863648 |
| 5.618468184 |
| 97.6208847  |
| 39.32927729 |
| 11.93924489 |
| 6.320776707 |
| 121.4993745 |
| 6.320776707 |
| 50.56621366 |
| 4.213851138 |
| 16.15309603 |
| 109.5601296 |
| 9.832319322 |
| 4.916159661 |
| 122.201683  |
| 7.02308523  |
| 86.38394833 |
| 33.7108091  |
| 149.5917154 |
| 38.62696877 |
| 13.34386194 |
| 9.130010799 |
| 4.213851138 |
| 4.213851138 |
| 18.96233012 |
| 115.1785978 |
| 55.48237332 |
| 237.3802808 |
| 5.618468184 |
| 7.02308523  |
| 8.427702276 |
| 171.3632796 |
| 254.2356853 |
| 146.0801728 |

|             |
|-------------|
| 18.96233012 |
| 7.725393753 |
| 27.3900324  |
| 11.23693637 |
| 73.74239492 |
| 110.9647466 |
| 41.43620286 |
| 5.618468184 |
| 57.58929889 |
| 156.6148006 |
| 9.130010799 |
| 153.8055665 |
| 31.60388354 |
| 14.04617046 |
| 176.9817478 |
| 99.02550175 |
| 106.048587  |
| 10.53462785 |
| 43.54312843 |
| 32.30619206 |
| 69.52854378 |
| 7.02308523  |
| 97.6208847  |
| 4.213851138 |
| 33.7108091  |
| 5.618468184 |
| 22.47387274 |
| 200.1579291 |
| 8.427702276 |
| 21.06925569 |
| 5.618468184 |
| 51.26852218 |
| 109.5601296 |
| 64.61238412 |
| 9.832319322 |
| 7.02308523  |
| 191.0279183 |
| 7.725393753 |
| 159.4240347 |
| 171.3632796 |
| 7.02308523  |
| 2.809234092 |
| 28.79464944 |

|             |
|-------------|
| 9.832319322 |
| 120.0947574 |
| 99.72781027 |
| 84.27702276 |
| 6.320776707 |
| 4.916159661 |
| 9.832319322 |
| 5.618468184 |
| 4.213851138 |
| 6.320776707 |
| 4.213851138 |
| 143.9732472 |
| 42.8408199  |
| 9.130010799 |
| 6.320776707 |
| 95.51395913 |
| 0           |
| 6.320776707 |
| 186.1117586 |
| 51.9708307  |
| 36.5200432  |
| 15.45078751 |
| 9.130010799 |
| 19.66463864 |
| 235.9756637 |
| 167.1494285 |
| 184.004833  |
| 8.427702276 |
| 9.832319322 |
| 10.53462785 |
| 74.44470344 |
| 19.66463864 |
| 34.41311763 |
| 8.427702276 |
| 4.213851138 |
| 6.320776707 |
| 16.15309603 |
| 7.725393753 |
| 7.725393753 |
| 37.22235172 |
| 11.23693637 |
| 4.213851138 |
| 5.618468184 |

|             |
|-------------|
| 5.618468184 |
| 90.59779947 |
| 135.5455449 |
| 82.87240572 |
| 4.916159661 |
| 87.08625685 |
| 7.02308523  |
| 11.23693637 |
| 170.6609711 |
| 11.93924489 |
| 163.6378859 |
| 11.23693637 |
| 132.0340023 |
| 29.49695797 |
| 95.51395913 |
| 53.37544775 |
| 8.427702276 |
| 115.1785978 |
| 0           |
| 49.16159661 |
| 7.725393753 |
| 80.76548015 |
| 42.13851138 |
| 27.3900324  |
| 9.832319322 |
| 14.74847898 |
| 60.39853298 |
| 116.5832148 |
| 10.53462785 |
| 103.9416614 |
| 7.02308523  |
| 11.93924489 |
| 14.74847898 |
| 66.71930969 |
| 174.1725137 |
| 6.320776707 |
| 165.7448114 |
| 35.81773467 |
| 103.9416614 |
| 40.03158581 |
| 155.9124921 |
| 70.93316082 |
| 63.20776707 |



|             |
|-------------|
| 79.3608631  |
| 96.21626765 |
| 94.10934208 |
| 7.02308523  |
| 39.32927729 |
| 203.6694717 |
| 95.51395913 |
| 40.03158581 |
| 20.36694717 |
| 13.34386194 |
| 115.8809063 |
| 23.17618126 |
| 10.53462785 |
| 14.04617046 |
| 9.130010799 |
| 11.93924489 |
| 3.511542615 |
| 7.02308523  |
| 139.0570876 |
| 7.725393753 |
| 8.427702276 |
| 91.30010799 |
| 7.725393753 |
| 4.213851138 |
| 35.81773467 |
| 8.427702276 |
| 80.76548015 |
| 7.02308523  |
| 32.30619206 |
| 63.20776707 |
| 87.08625685 |
| 185.4094501 |
| 14.74847898 |
| 97.6208847  |
| 58.99391593 |
| 18.96233012 |
| 14.74847898 |
| 30.90157501 |
| 13.34386194 |
| 7.725393753 |
| 113.7739807 |
| 4.916159661 |
| 7.02308523  |

|             |
|-------------|
| 119.3924489 |
| 7.02308523  |
| 78.65855458 |
| 17.55771308 |
| 6.320776707 |
| 114.4762893 |
| 95.51395913 |
| 5.618468184 |
| 48.45928809 |
| 59.69622446 |
| 6.320776707 |
| 6.320776707 |
| 47.05467104 |
| 7.02308523  |
| 106.7508955 |
| 9.130010799 |
| 75.84932049 |
| 9.130010799 |
| 86.38394833 |
| 7.02308523  |
| 9.130010799 |
| 119.3924489 |
| 108.8578211 |
| 9.130010799 |
| 14.74847898 |
| 11.23693637 |
| 11.23693637 |
| 8.427702276 |
| 7.02308523  |
| 4.213851138 |
| 18.2600216  |
| 30.19926649 |
| 7.725393753 |
| 4.916159661 |
| 9.832319322 |
| 70.93316082 |
| 4.213851138 |
| 9.832319322 |
| 10.53462785 |
| 31.60388354 |
| 2.809234092 |
| 33.00850058 |
| 4.916159661 |

|             |
|-------------|
| 11.23693637 |
| 140.4617046 |
| 158.7217262 |
| 147.4847898 |
| 127.8201512 |
| 7.02308523  |
| 4.213851138 |
| 12.64155341 |
| 25.28310683 |
| 16.15309603 |
| 19.66463864 |
| 7.02308523  |
| 2.106925569 |
| 36.5200432  |
| 120.797066  |
| 49.86390513 |
| 7.02308523  |
| 172.7678967 |
| 9.130010799 |
| 2.809234092 |
| 126.4155341 |
| 5.618468184 |
| 13.34386194 |
| 71.63546935 |
| 8.427702276 |
| 9.130010799 |
| 127.8201512 |
| 18.2600216  |
| 42.13851138 |
| 23.87848978 |
| 119.3924489 |
| 30.90157501 |
| 2.809234092 |
| 14.04617046 |
| 8.427702276 |
| 4.213851138 |
| 25.28310683 |
| 6.320776707 |
| 5.618468184 |
| 125.0109171 |
| 70.2308523  |
| 103.2393529 |
| 6.320776707 |

|             |
|-------------|
| 2.809234092 |
| 9.130010799 |
| 72.33777787 |
| 181.8979075 |
| 68.82623526 |
| 28.09234092 |
| 44.94774547 |
| 8.427702276 |
| 17.55771308 |
| 60.39853298 |
| 3.511542615 |
| 5.618468184 |
| 94.81165061 |
| 45.650054   |
| 3.511542615 |
| 41.43620286 |
| 1.404617046 |
| 10.53462785 |
| 4.213851138 |
| 33.7108091  |
| 4.213851138 |
| 16.85540455 |
| 25.28310683 |
| 43.54312843 |
| 1.404617046 |
| 178.3863648 |
| 68.82623526 |
| 67.42161821 |
| 6.320776707 |
| 3.511542615 |
| 21.06925569 |
| 128.5224597 |
| 117.9878319 |
| 2.809234092 |
| 128.5224597 |
| 105.3462785 |
| 3.511542615 |
| 6.320776707 |
| 66.71930969 |
| 35.11542615 |
| 244.403366  |
| 13.34386194 |
| 40.73389434 |

|             |
|-------------|
| 21.77156421 |
| 84.97933129 |
| 87.78856538 |
| 7.725393753 |
| 41.43620286 |
| 16.15309603 |
| 5.618468184 |
| 47.75697957 |
| 4.213851138 |
| 15.45078751 |
| 35.81773467 |
| 114.4762893 |
| 39.32927729 |
| 49.16159661 |
| 33.7108091  |
| 4.916159661 |
| 61.80315003 |
| 63.20776707 |
| 5.618468184 |
| 4.916159661 |
| 198.753312  |
| 3.511542615 |
| 27.3900324  |
| 47.75697957 |
| 80.76548015 |
| 23.17618126 |
| 3.511542615 |
| 10.53462785 |
| 26.68772387 |
| 7.725393753 |
| 7.02308523  |
| 1.404617046 |
| 67.42161821 |
| 8.427702276 |
| 7.02308523  |
| 28.09234092 |
| 6.320776707 |
| 6.320776707 |
| 4.916159661 |
| 138.354779  |
| 117.9878319 |
| 114.4762893 |
| 9.832319322 |

|             |
|-------------|
| 10.53462785 |
| 4.916159661 |
| 20.36694717 |
| 42.13851138 |
| 7.725393753 |
| 5.618468184 |
| 47.05467104 |
| 47.75697957 |
| 6.320776707 |
| 51.9708307  |
| 21.06925569 |
| 102.5370444 |
| 69.52854378 |
| 8.427702276 |
| 40.03158581 |
| 18.2600216  |
| 2.106925569 |
| 0.702308523 |
| 28.79464944 |
| 83.57471424 |
| 16.15309603 |
| 47.05467104 |
| 27.3900324  |
| 47.05467104 |
| 207.1810143 |
| 8.427702276 |
| 4.213851138 |
| 35.11542615 |
| 73.74239492 |
| 46.35236252 |
| 172.7678967 |
| 70.2308523  |
| 9.130010799 |
| 23.17618126 |
| 210.6925569 |
| 75.84932049 |
| 15.45078751 |
| 6.320776707 |
| 4.213851138 |
| 0.702308523 |
| 22.47387274 |
| 17.55771308 |
| 98.32319322 |

|             |
|-------------|
| 206.4787058 |
| 125.7132256 |
| 67.42161821 |
| 40.03158581 |
| 17.55771308 |
| 6.320776707 |
| 81.46778867 |
| 2.106925569 |
| 3.511542615 |
| 3.511542615 |
| 3.511542615 |
| 13.34386194 |
| 5.618468184 |
| 3.511542615 |
| 53.37544775 |
| 14.74847898 |
| 113.7739807 |
| 6.320776707 |
| 4.213851138 |
| 57.58929889 |
| 30.90157501 |
| 15.45078751 |
| 18.2600216  |
| 33.7108091  |
| 7.725393753 |
| 21.06925569 |
| 110.2624381 |
| 70.2308523  |
| 87.78856538 |
| 0.702308523 |
| 11.23693637 |
| 54.07775627 |
| 29.49695797 |
| 4.916159661 |
| 5.618468184 |
| 18.2600216  |
| 5.618468184 |
| 6.320776707 |
| 31.60388354 |
| 233.8687382 |
| 73.04008639 |
| 4.213851138 |
| 149.5917154 |

|             |
|-------------|
| 31.60388354 |
| 29.49695797 |
| 92.70472504 |
| 11.23693637 |
| 73.74239492 |
| 9.130010799 |
| 10.53462785 |
| 4.213851138 |
| 33.00850058 |
| 110.9647466 |
| 137.6524705 |
| 8.427702276 |
| 5.618468184 |
| 4.916159661 |
| 9.832319322 |
| 28.09234092 |
| 130.6293853 |
| 51.26852218 |
| 26.68772387 |
| 106.048587  |
| 7.725393753 |
| 61.1008415  |
| 125.0109171 |
| 8.427702276 |
| 3.511542615 |
| 10.53462785 |
| 47.75697957 |
| 85.68163981 |
| 3.511542615 |
| 7.725393753 |
| 4.213851138 |
| 5.618468184 |
| 75.14701196 |
| 35.81773467 |
| 7.725393753 |
| 4.916159661 |
| 35.81773467 |
| 7.02308523  |
| 18.96233012 |
| 4.213851138 |
| 103.2393529 |
| 16.15309603 |
| 102.5370444 |



|             |
|-------------|
| 0           |
| 19.66463864 |
| 94.81165061 |
| 4.916159661 |
| 12.64155341 |
| 5.618468184 |
| 7.02308523  |
| 6.320776707 |
| 110.9647466 |
| 7.725393753 |
| 121.4993745 |
| 6.320776707 |
| 5.618468184 |
| 77.25393753 |
| 70.2308523  |
| 8.427702276 |
| 4.916159661 |
| 15.45078751 |
| 88.4908739  |
| 18.2600216  |
| 36.5200432  |
| 3.511542615 |
| 70.2308523  |
| 204.3717802 |
| 15.45078751 |
| 8.427702276 |
| 8.427702276 |
| 172.0655881 |
| 322.3596121 |
| 30.19926649 |
| 193.8371524 |
| 4.916159661 |
| 4.916159661 |
| 110.9647466 |
| 2.106925569 |
| 13.34386194 |
| 34.41311763 |
| 71.63546935 |
| 6.320776707 |
| 37.92466024 |
| 4.916159661 |
| 66.71930969 |
| 4.213851138 |

|             |
|-------------|
| 46.35236252 |
| 167.1494285 |
| 16.15309603 |
| 29.49695797 |
| 120.797066  |
| 136.2478535 |
| 136.950162  |
| 78.65855458 |
| 191.0279183 |
| 62.50545855 |
| 66.01700116 |
| 135.5455449 |
| 2.809234092 |
| 3.511542615 |
| 11.23693637 |
| 23.87848978 |
| 87.78856538 |
| 7.02308523  |
| 7.725393753 |
| 93.40703356 |
| 7.725393753 |
| 5.618468184 |
| 3.511542615 |
| 5.618468184 |
| 11.93924489 |
| 73.74239492 |
| 6.320776707 |
| 38.62696877 |
| 21.77156421 |
| 83.57471424 |
| 188.9209927 |
| 2.106925569 |
| 143.2709387 |
| 143.9732472 |
| 4.916159661 |
| 169.256354  |
| 0           |
| 20.36694717 |
| 47.75697957 |
| 139.7593961 |
| 186.1117586 |
| 115.8809063 |
| 0.702308523 |

|             |
|-------------|
| 43.54312843 |
| 103.2393529 |
| 25.98541535 |
| 8.427702276 |
| 4.213851138 |
| 172.7678967 |
| 10.53462785 |
| 4.916159661 |
| 47.05467104 |
| 4.916159661 |
| 147.4847898 |
| 7.02308523  |
| 25.98541535 |
| 12.64155341 |
| 8.427702276 |
| 40.73389434 |
| 10.53462785 |
| 71.63546935 |
| 3.511542615 |
| 44.94774547 |
| 8.427702276 |
| 1.404617046 |
| 4.916159661 |
| 7.02308523  |
| 7.02308523  |
| 58.29160741 |
| 72.33777787 |
| 5.618468184 |
| 6.320776707 |
| 23.87848978 |
| 7.02308523  |
| 63.91007559 |
| 30.90157501 |
| 10.53462785 |
| 7.725393753 |
| 92.70472504 |
| 5.618468184 |
| 11.93924489 |
| 15.45078751 |
| 35.81773467 |
| 25.98541535 |
| 66.71930969 |
| 42.13851138 |

|             |
|-------------|
| 14.04617046 |
| 7.02308523  |
| 4.916159661 |
| 17.55771308 |
| 4.213851138 |
| 29.49695797 |
| 83.57471424 |
| 169.9586626 |
| 15.45078751 |
| 4.213851138 |
| 7.725393753 |
| 6.320776707 |
| 144.6755557 |
| 162.2332688 |
| 9.130010799 |
| 220.5248762 |
| 51.9708307  |
| 34.41311763 |
| 120.797066  |
| 9.832319322 |
| 6.320776707 |
| 6.320776707 |
| 4.916159661 |
| 6.320776707 |
| 140.4617046 |
| 5.618468184 |
| 5.618468184 |
| 61.1008415  |
| 87.78856538 |
| 33.7108091  |
| 4.213851138 |
| 16.85540455 |
| 83.57471424 |
| 76.55162901 |
| 9.832319322 |
| 4.213851138 |
| 96.91857618 |
| 61.1008415  |
| 91.30010799 |
| 70.93316082 |
| 146.0801728 |
| 127.1178427 |
| 7.725393753 |

|             |
|-------------|
| 6.320776707 |
| 4.916159661 |
| 4.916159661 |
| 25.98541535 |
| 119.3924489 |
| 37.22235172 |
| 3.511542615 |
| 45.650054   |
| 5.618468184 |
| 166.44712   |
| 7.725393753 |
| 85.68163981 |
| 3.511542615 |
| 6.320776707 |
| 40.73389434 |
| 155.2101836 |
| 15.45078751 |
| 9.130010799 |
| 178.3863648 |
| 122.201683  |
| 58.29160741 |
| 7.02308523  |
| 4.213851138 |
| 68.12392673 |
| 156.6148006 |
| 4.916159661 |
| 6.320776707 |
| 42.8408199  |
| 72.33777787 |
| 9.130010799 |
| 69.52854378 |
| 7.725393753 |
| 40.73389434 |
| 164.3401944 |
| 6.320776707 |
| 33.7108091  |
| 20.36694717 |
| 11.93924489 |
| 9.130010799 |
| 6.320776707 |
| 9.130010799 |
| 4.916159661 |
| 6.320776707 |

|             |
|-------------|
| 9.832319322 |
| 4.916159661 |
| 7.725393753 |
| 10.53462785 |
| 9.130010799 |
| 11.23693637 |
| 7.02308523  |
| 71.63546935 |
| 70.2308523  |
| 42.8408199  |
| 5.618468184 |
| 20.36694717 |
| 151.698641  |
| 0           |
| 101.8347358 |
| 6.320776707 |
| 146.7824813 |
| 4.213851138 |
| 37.22235172 |
| 4.916159661 |
| 6.320776707 |
| 35.11542615 |
| 23.17618126 |
| 84.27702276 |
| 6.320776707 |
| 4.916159661 |
| 106.048587  |
| 7.02308523  |
| 41.43620286 |
| 54.7800648  |
| 11.93924489 |
| 0           |
| 32.30619206 |
| 7.02308523  |
| 10.53462785 |
| 84.27702276 |
| 43.54312843 |
| 61.1008415  |
| 19.66463864 |
| 10.53462785 |
| 150.2940239 |
| 96.21626765 |
| 3.511542615 |

|             |
|-------------|
| 136.950162  |
| 28.09234092 |
| 97.6208847  |
| 15.45078751 |
| 41.43620286 |
| 3.511542615 |
| 25.98541535 |
| 6.320776707 |
| 91.30010799 |
| 5.618468184 |
| 100.4301188 |
| 181.1955989 |
| 61.80315003 |
| 9.832319322 |
| 56.88699036 |
| 8.427702276 |
| 46.35236252 |
| 73.04008639 |
| 7.725393753 |
| 9.130010799 |
| 35.11542615 |
| 4.213851138 |
| 14.74847898 |
| 56.18468184 |
| 4.916159661 |
| 66.71930969 |
| 54.07775627 |
| 5.618468184 |
| 4.916159661 |
| 4.916159661 |
| 9.130010799 |
| 5.618468184 |
| 160.1263432 |
| 87.08625685 |
| 40.03158581 |
| 7.725393753 |
| 35.11542615 |
| 14.04617046 |
| 49.86390513 |
| 75.14701196 |
| 3.511542615 |
| 54.07775627 |
| 150.9963324 |

|             |
|-------------|
| 48.45928809 |
| 40.73389434 |
| 29.49695797 |
| 9.130010799 |
| 5.618468184 |
| 45.650054   |
| 154.5078751 |
| 109.5601296 |
| 122.9039915 |
| 80.76548015 |
| 4.916159661 |
| 87.78856538 |
| 2.106925569 |
| 9.130010799 |
| 3.511542615 |
| 33.7108091  |
| 7.725393753 |
| 42.8408199  |
| 42.8408199  |
| 9.832319322 |
| 16.85540455 |
| 8.427702276 |
| 110.2624381 |
| 9.130010799 |
| 86.38394833 |
| 59.69622446 |
| 123.6063001 |
| 9.130010799 |
| 57.58929889 |
| 63.91007559 |
| 29.49695797 |
| 47.75697957 |
| 7.725393753 |
| 94.10934208 |
| 8.427702276 |
| 7.725393753 |
| 4.916159661 |
| 14.74847898 |
| 59.69622446 |
| 50.56621366 |
| 6.320776707 |
| 72.33777787 |
| 38.62696877 |



|             |
|-------------|
| 55.48237332 |
| 75.84932049 |
| 73.04008639 |
| 8.427702276 |
| 58.29160741 |
| 81.46778867 |
| 17.55771308 |
| 7.02308523  |
| 3.511542615 |
| 18.2600216  |
| 13.34386194 |
| 4.916159661 |
| 61.80315003 |
| 29.49695797 |
| 38.62696877 |
| 3.511542615 |
| 5.618468184 |
| 16.85540455 |
| 4.916159661 |
| 46.35236252 |
| 181.8979075 |
| 138.354779  |
| 9.832319322 |
| 6.320776707 |
| 69.52854378 |
| 99.02550175 |
| 4.213851138 |
| 91.30010799 |
| 33.00850058 |
| 9.832319322 |
| 5.618468184 |
| 25.28310683 |
| 5.618468184 |
| 87.08625685 |
| 11.93924489 |
| 58.99391593 |
| 76.55162901 |
| 40.73389434 |
| 13.34386194 |
| 205.7763972 |
| 12.64155341 |
| 10.53462785 |
| 73.74239492 |

|             |
|-------------|
| 37.22235172 |
| 66.01700116 |
| 2.809234092 |
| 165.0425029 |
| 2.809234092 |
| 67.42161821 |
| 16.15309603 |
| 60.39853298 |
| 9.130010799 |
| 6.320776707 |
| 44.24543695 |
| 10.53462785 |
| 82.17009719 |
| 13.34386194 |
| 9.832319322 |
| 6.320776707 |
| 6.320776707 |
| 8.427702276 |
| 32.30619206 |
| 9.832319322 |
| 11.93924489 |
| 127.8201512 |
| 5.618468184 |
| 4.213851138 |
| 13.34386194 |
| 7.02308523  |
| 8.427702276 |
| 7.02308523  |
| 7.725393753 |
| 37.22235172 |
| 38.62696877 |
| 78.65855458 |
| 64.61238412 |
| 92.00241652 |
| 51.26852218 |
| 41.43620286 |
| 44.24543695 |
| 25.98541535 |
| 258.4495365 |
| 44.24543695 |
| 70.93316082 |
| 91.30010799 |
| 11.23693637 |

|             |
|-------------|
| 9.130010799 |
| 9.130010799 |
| 115.8809063 |
| 193.8371524 |
| 9.832319322 |
| 9.130010799 |
| 9.832319322 |
| 32.30619206 |
| 3.511542615 |
| 21.77156421 |
| 4.916159661 |
| 42.13851138 |
| 4.916159661 |
| 156.6148006 |
| 66.01700116 |
| 139.7593961 |
| 10.53462785 |
| 13.34386194 |
| 12.64155341 |
| 7.02308523  |
| 108.8578211 |
| 41.43620286 |
| 151.698641  |
| 159.4240347 |
| 6.320776707 |
| 11.23693637 |
| 9.130010799 |
| 4.213851138 |
| 35.11542615 |
| 7.725393753 |
| 9.130010799 |
| 8.427702276 |
| 6.320776707 |
| 19.66463864 |
| 186.8140671 |
| 8.427702276 |
| 7.725393753 |
| 4.213851138 |
| 31.60388354 |
| 14.04617046 |
| 29.49695797 |
| 9.832319322 |
| 87.78856538 |

|             |
|-------------|
| 5.618468184 |
| 5.618468184 |
| 60.39853298 |
| 82.87240572 |
| 47.05467104 |
| 4.916159661 |
| 182.600216  |
| 7.02308523  |
| 70.2308523  |
| 9.832319322 |
| 4.213851138 |
| 9.130010799 |
| 62.50545855 |
| 14.04617046 |
| 11.23693637 |
| 58.99391593 |
| 21.06925569 |
| 2.809234092 |
| 33.00850058 |
| 39.32927729 |
| 67.42161821 |
| 27.3900324  |
| 9.832319322 |
| 44.24543695 |
| 86.38394833 |
| 8.427702276 |
| 49.16159661 |
| 7.725393753 |
| 7.02308523  |
| 20.36694717 |
| 2.809234092 |
| 125.0109171 |
| 6.320776707 |
| 117.2855233 |
| 7.725393753 |
| 94.81165061 |
| 9.130010799 |
| 84.97933129 |
| 25.98541535 |
| 101.8347358 |
| 7.725393753 |
| 25.98541535 |
| 77.95624606 |

|             |
|-------------|
| 33.7108091  |
| 173.4702052 |
| 129.9270768 |
| 50.56621366 |
| 91.30010799 |
| 9.832319322 |
| 64.61238412 |
| 95.51395913 |
| 11.23693637 |
| 2.809234092 |
| 16.85540455 |
| 35.81773467 |
| 0           |
| 33.7108091  |
| 42.8408199  |
| 4.213851138 |
| 129.2247682 |
| 7.725393753 |
| 8.427702276 |
| 66.01700116 |
| 49.16159661 |
| 115.1785978 |
| 85.68163981 |
| 7.725393753 |
| 49.16159661 |
| 9.832319322 |
| 133.4386194 |
| 73.04008639 |
| 94.81165061 |
| 25.28310683 |
| 7.02308523  |
| 8.427702276 |
| 110.9647466 |
| 8.427702276 |
| 80.06317162 |
| 8.427702276 |
| 149.5917154 |
| 129.2247682 |
| 4.916159661 |
| 24.58079831 |
| 4.213851138 |
| 54.07775627 |
| 5.618468184 |

|             |
|-------------|
| 2.106925569 |
| 51.26852218 |
| 7.02308523  |
| 7.725393753 |
| 5.618468184 |
| 11.93924489 |
| 152.4009495 |
| 71.63546935 |
| 51.26852218 |
| 11.23693637 |
| 118.6901404 |
| 207.1810143 |
| 8.427702276 |
| 4.213851138 |
| 4.916159661 |
| 58.29160741 |
| 5.618468184 |
| 113.7739807 |
| 88.4908739  |
| 4.916159661 |
| 2.809234092 |
| 50.56621366 |
| 54.7800648  |
| 82.17009719 |
| 49.86390513 |
| 86.38394833 |
| 88.4908739  |
| 47.75697957 |
| 128.5224597 |
| 73.04008639 |
| 27.3900324  |
| 7.725393753 |
| 4.916159661 |
| 66.01700116 |
| 73.04008639 |
| 0.702308523 |
| 47.05467104 |
| 4.916159661 |
| 9.832319322 |
| 11.93924489 |
| 87.08625685 |
| 70.93316082 |
| 12.64155341 |

|             |
|-------------|
| 51.9708307  |
| 21.77156421 |
| 23.17618126 |
| 4.916159661 |
| 9.130010799 |
| 106.7508955 |
| 49.86390513 |
| 55.48237332 |
| 152.4009495 |
| 7.725393753 |
| 7.02308523  |
| 43.54312843 |
| 51.26852218 |
| 101.1324273 |
| 7.725393753 |
| 61.1008415  |
| 5.618468184 |
| 200.1579291 |
| 70.93316082 |
| 9.832319322 |
| 80.06317162 |
| 45.650054   |
| 106.7508955 |
| 16.15309603 |
| 68.82623526 |
| 8.427702276 |
| 10.53462785 |
| 7.725393753 |
| 63.91007559 |
| 11.93924489 |
| 82.87240572 |
| 26.68772387 |
| 9.130010799 |
| 90.59779947 |
| 50.56621366 |
| 7.02308523  |
| 4.916159661 |
| 8.427702276 |
| 161.5309603 |
| 18.2600216  |
| 96.91857618 |
| 113.7739807 |
| 2.106925569 |

|             |
|-------------|
| 8.427702276 |
| 78.65855458 |
| 233.8687382 |
| 243.7010575 |
| 0           |
| 62.50545855 |
| 66.71930969 |
| 18.96233012 |
| 7.725393753 |
| 8.427702276 |
| 4.916159661 |
| 7.02308523  |
| 16.15309603 |
| 42.13851138 |
| 97.6208847  |
| 8.427702276 |
| 26.68772387 |
| 6.320776707 |
| 95.51395913 |
| 106.7508955 |
| 115.1785978 |
| 79.3608631  |
| 7.02308523  |
| 9.832319322 |
| 127.1178427 |
| 5.618468184 |
| 7.725393753 |
| 7.725393753 |
| 19.66463864 |
| 4.916159661 |
| 13.34386194 |
| 73.74239492 |
| 163.6378859 |
| 178.3863648 |
| 9.130010799 |
| 4.916159661 |
| 146.0801728 |
| 51.26852218 |
| 94.10934208 |
| 146.7824813 |
| 56.18468184 |
| 7.02308523  |
| 186.8140671 |



|             |
|-------------|
| 7.725393753 |
| 103.9416614 |
| 4.213851138 |
| 72.33777787 |
| 11.23693637 |
| 8.427702276 |
| 4.916159661 |
| 7.02308523  |
| 48.45928809 |
| 22.47387274 |
| 15.45078751 |
| 179.0886734 |
| 7.725393753 |
| 7.02308523  |
| 4.916159661 |
| 32.30619206 |
| 63.20776707 |
| 36.5200432  |
| 7.725393753 |
| 12.64155341 |
| 187.5163756 |
| 45.650054   |
| 7.725393753 |
| 202.9671632 |
| 5.618468184 |
| 115.8809063 |
| 12.64155341 |
| 261.2587706 |
| 9.130010799 |
| 194.5394609 |
| 14.04617046 |
| 10.53462785 |
| 27.3900324  |
| 1.404617046 |
| 18.96233012 |
| 94.81165061 |
| 93.40703356 |
| 28.79464944 |
| 7.02308523  |
| 6.320776707 |
| 9.832319322 |
| 5.618468184 |
| 4.213851138 |

|             |
|-------------|
| 108.8578211 |
| 76.55162901 |
| 72.33777787 |
| 192.4325353 |
| 5.618468184 |
| 110.9647466 |
| 122.201683  |
| 33.00850058 |
| 21.77156421 |
| 13.34386194 |
| 126.4155341 |
| 84.27702276 |
| 125.7132256 |
| 7.02308523  |
| 57.58929889 |
| 145.3778643 |
| 134.1409279 |
| 61.1008415  |
| 47.75697957 |
| 79.3608631  |
| 41.43620286 |
| 145.3778643 |
| 27.3900324  |
| 16.15309603 |
| 91.30010799 |
| 99.02550175 |
| 4.213851138 |
| 4.916159661 |
| 89.89549095 |
| 193.1348438 |
| 28.79464944 |
| 139.7593961 |
| 10.53462785 |
| 7.02308523  |
| 12.64155341 |
| 9.130010799 |
| 40.03158581 |
| 86.38394833 |
| 2.809234092 |
| 49.86390513 |
| 80.06317162 |
| 0           |
| 36.5200432  |

|             |
|-------------|
| 4.213851138 |
| 6.320776707 |
| 108.8578211 |
| 8.427702276 |
| 15.45078751 |
| 75.14701196 |
| 9.832319322 |
| 5.618468184 |
| 4.916159661 |
| 120.0947574 |
| 245.8079831 |
| 83.57471424 |
| 24.58079831 |
| 164.3401944 |
| 141.8663216 |
| 34.41311763 |
| 162.2332688 |
| 7.725393753 |
| 5.618468184 |
| 7.725393753 |
| 6.320776707 |
| 7.02308523  |
| 9.130010799 |
| 136.950162  |
| 4.213851138 |
| 35.11542615 |
| 290.7557285 |
| 3.511542615 |
| 76.55162901 |
| 4.916159661 |
| 113.0716722 |
| 162.9355773 |
| 4.916159661 |
| 109.5601296 |
| 150.2940239 |
| 35.81773467 |
| 96.21626765 |
| 14.04617046 |
| 5.618468184 |
| 66.71930969 |
| 42.8408199  |
| 4.213851138 |
| 9.130010799 |

|             |
|-------------|
| 32.30619206 |
| 9.130010799 |
| 7.02308523  |
| 9.832319322 |
| 119.3924489 |
| 8.427702276 |
| 6.320776707 |
| 4.916159661 |
| 6.320776707 |
| 7.02308523  |
| 119.3924489 |
| 181.1955989 |
| 72.33777787 |
| 7.725393753 |
| 36.5200432  |
| 4.213851138 |
| 70.93316082 |
| 5.618468184 |
| 74.44470344 |
| 7.725393753 |
| 8.427702276 |
| 130.6293853 |
| 14.74847898 |
| 63.91007559 |
| 7.02308523  |
| 7.725393753 |
| 40.73389434 |
| 167.851737  |
| 169.9586626 |
| 103.2393529 |
| 16.15309603 |
| 16.85540455 |
| 5.618468184 |
| 261.2587706 |
| 90.59779947 |
| 12.64155341 |
| 43.54312843 |
| 53.37544775 |
| 38.62696877 |
| 7.02308523  |
| 4.213851138 |
| 42.8408199  |
| 108.1555125 |

|             |
|-------------|
| 5.618468184 |
| 66.71930969 |
| 9.130010799 |
| 7.725393753 |
| 95.51395913 |
| 4.213851138 |
| 7.02308523  |
| 6.320776707 |
| 48.45928809 |
| 7.725393753 |
| 11.23693637 |
| 4.916159661 |
| 10.53462785 |
| 7.725393753 |
| 6.320776707 |
| 68.12392673 |
| 42.13851138 |
| 3.511542615 |
| 5.618468184 |
| 9.832319322 |
| 4.213851138 |
| 4.916159661 |
| 103.9416614 |
| 9.832319322 |
| 12.64155341 |
| 19.66463864 |
| 96.21626765 |
| 4.213851138 |
| 2.809234092 |
| 6.320776707 |
| 7.02308523  |
| 97.6208847  |
| 95.51395913 |
| 23.17618126 |
| 30.19926649 |
| 242.2964404 |
| 198.0510035 |
| 13.34386194 |
| 7.02308523  |
| 9.832319322 |
| 45.650054   |
| 23.87848978 |
| 32.30619206 |

|             |
|-------------|
| 47.05467104 |
| 11.23693637 |
| 176.9817478 |
| 23.17618126 |
| 10.53462785 |
| 184.004833  |
| 40.73389434 |
| 7.02308523  |
| 9.130010799 |
| 56.88699036 |
| 25.98541535 |
| 105.3462785 |
| 14.04617046 |
| 7.725393753 |
| 8.427702276 |
| 29.49695797 |
| 47.75697957 |
| 3.511542615 |
| 21.06925569 |
| 165.0425029 |
| 9.130010799 |
| 25.28310683 |
| 33.7108091  |
| 186.1117586 |
| 9.130010799 |
| 15.45078751 |
| 26.68772387 |
| 25.98541535 |
| 139.7593961 |
| 38.62696877 |
| 13.34386194 |
| 6.320776707 |
| 43.54312843 |
| 10.53462785 |
| 7.02308523  |
| 35.81773467 |
| 8.427702276 |
| 129.9270768 |
| 14.04617046 |
| 2.809234092 |
| 4.916159661 |
| 11.93924489 |
| 53.37544775 |

|             |
|-------------|
| 69.52854378 |
| 66.01700116 |
| 7.02308523  |
| 5.618468184 |
| 97.6208847  |
| 10.53462785 |
| 33.7108091  |
| 0.702308523 |
| 25.28310683 |
| 96.21626765 |
| 89.19318242 |
| 138.354779  |
| 33.00850058 |
| 5.618468184 |
| 13.34386194 |
| 28.09234092 |
| 7.725393753 |
| 16.85540455 |
| 90.59779947 |
| 3.511542615 |
| 7.02308523  |
| 9.130010799 |
| 6.320776707 |
| 63.91007559 |
| 119.3924489 |
| 21.77156421 |
| 153.8055665 |
| 10.53462785 |
| 9.130010799 |
| 9.130010799 |
| 52.67313923 |
| 42.8408199  |
| 61.1008415  |
| 16.15309603 |
| 8.427702276 |
| 48.45928809 |
| 11.23693637 |
| 17.55771308 |
| 136.2478535 |
| 52.67313923 |
| 5.618468184 |
| 101.1324273 |
| 89.19318242 |

|             |
|-------------|
| 58.29160741 |
| 13.34386194 |
| 3.511542615 |
| 64.61238412 |
| 8.427702276 |
| 9.832319322 |
| 54.07775627 |
| 82.17009719 |
| 108.8578211 |
| 23.87848978 |
| 83.57471424 |
| 89.19318242 |
| 5.618468184 |
| 135.5455449 |
| 108.1555125 |
| 4.213851138 |
| 122.9039915 |
| 19.66463864 |
| 6.320776707 |
| 25.98541535 |
| 7.725393753 |
| 61.80315003 |
| 81.46778867 |
| 78.65855458 |
| 82.87240572 |
| 74.44470344 |
| 7.02308523  |
| 4.213851138 |
| 1.404617046 |
| 39.32927729 |
| 8.427702276 |
| 113.7739807 |
| 80.76548015 |
| 224.0364188 |
| 9.130010799 |
| 172.0655881 |
| 162.2332688 |
| 108.1555125 |
| 7.02308523  |
| 7.02308523  |
| 7.725393753 |
| 3.511542615 |
| 7.725393753 |



|             |
|-------------|
| 7.725393753 |
| 4.213851138 |
| 150.2940239 |
| 35.81773467 |
| 134.1409279 |
| 5.618468184 |
| 8.427702276 |
| 6.320776707 |
| 37.92466024 |
| 9.832319322 |
| 3.511542615 |
| 4.213851138 |
| 53.37544775 |
| 113.7739807 |
| 1.404617046 |
| 50.56621366 |
| 12.64155341 |
| 144.6755557 |
| 18.2600216  |
| 68.82623526 |
| 12.64155341 |
| 148.8894069 |
| 189.6233012 |
| 5.618468184 |
| 40.03158581 |
| 141.1640131 |
| 165.0425029 |
| 9.832319322 |
| 82.87240572 |
| 65.31469264 |
| 16.15309603 |
| 8.427702276 |
| 2.809234092 |
| 37.92466024 |
| 9.130010799 |
| 17.55771308 |
| 32.30619206 |
| 53.37544775 |
| 5.618468184 |
| 6.320776707 |
| 14.04617046 |
| 73.74239492 |
| 20.36694717 |

|             |
|-------------|
| 9.130010799 |
| 7.02308523  |
| 121.4993745 |
| 119.3924489 |
| 56.88699036 |
| 53.37544775 |
| 0.702308523 |
| 6.320776707 |
| 3.511542615 |
| 7.02308523  |
| 3.511542615 |
| 30.90157501 |
| 105.3462785 |
| 69.52854378 |
| 6.320776707 |
| 8.427702276 |
| 6.320776707 |
| 13.34386194 |
| 139.0570876 |
| 23.87848978 |
| 5.618468184 |
| 154.5078751 |
| 7.02308523  |
| 6.320776707 |
| 35.81773467 |
| 54.07775627 |
| 6.320776707 |
| 7.02308523  |
| 7.02308523  |
| 7.725393753 |
| 3.511542615 |
| 131.3316938 |
| 11.93924489 |
| 3.511542615 |
| 7.725393753 |
| 28.79464944 |
| 9.832319322 |
| 7.725393753 |
| 10.53462785 |
| 9.130010799 |
| 77.25393753 |
| 4.213851138 |
| 35.11542615 |

|             |
|-------------|
| 21.77156421 |
| 51.9708307  |
| 65.31469264 |
| 4.916159661 |
| 11.23693637 |
| 2.809234092 |
| 9.832319322 |
| 8.427702276 |
| 17.55771308 |
| 129.9270768 |
| 2.809234092 |
| 7.02308523  |
| 85.68163981 |
| 7.02308523  |
| 15.45078751 |
| 9.832319322 |
| 9.130010799 |
| 11.93924489 |
| 110.2624381 |
| 188.9209927 |
| 203.6694717 |
| 61.80315003 |
| 8.427702276 |
| 156.6148006 |
| 7.02308523  |
| 10.53462785 |
| 95.51395913 |
| 7.725393753 |
| 6.320776707 |
| 44.94774547 |
| 8.427702276 |
| 18.2600216  |
| 27.3900324  |
| 7.02308523  |
| 10.53462785 |
| 64.61238412 |
| 44.24543695 |
| 115.1785978 |
| 151.698641  |
| 56.88699036 |
| 52.67313923 |
| 5.618468184 |
| 21.77156421 |

|             |
|-------------|
| 4.213851138 |
| 186.8140671 |
| 7.725393753 |
| 22.47387274 |
| 13.34386194 |
| 4.916159661 |
| 117.9878319 |
| 143.9732472 |
| 39.32927729 |
| 66.71930969 |
| 9.130010799 |
| 54.7800648  |
| 122.9039915 |
| 8.427702276 |
| 116.5832148 |
| 165.7448114 |
| 39.32927729 |
| 7.02308523  |
| 101.8347358 |
| 70.2308523  |
| 32.30619206 |
| 50.56621366 |
| 88.4908739  |
| 134.8432364 |
| 167.1494285 |
| 10.53462785 |
| 44.94774547 |
| 66.01700116 |
| 9.130010799 |
| 46.35236252 |
| 14.74847898 |
| 75.84932049 |
| 74.44470344 |
| 17.55771308 |
| 167.851737  |
| 185.4094501 |
| 88.4908739  |
| 28.79464944 |
| 9.130010799 |
| 13.34386194 |
| 49.86390513 |
| 147.4847898 |
| 30.90157501 |

|             |
|-------------|
| 7.725393753 |
| 60.39853298 |
| 37.22235172 |
| 7.725393753 |
| 7.02308523  |
| 9.130010799 |
| 4.213851138 |
| 80.06317162 |
| 99.02550175 |
| 80.76548015 |
| 5.618468184 |
| 22.47387274 |
| 10.53462785 |
| 188.2186842 |
| 33.00850058 |
| 227.5479615 |
| 7.725393753 |
| 4.213851138 |
| 13.34386194 |
| 7.02308523  |
| 1.404617046 |
| 0           |
| 37.92466024 |
| 86.38394833 |
| 9.832319322 |
| 50.56621366 |
| 40.03158581 |
| 167.1494285 |
| 4.213851138 |
| 7.02308523  |
| 5.618468184 |
| 7.725393753 |
| 5.618468184 |
| 10.53462785 |
| 7.725393753 |
| 7.725393753 |
| 181.8979075 |
| 20.36694717 |
| 193.1348438 |
| 234.5710467 |
| 235.2733552 |
| 14.04617046 |
| 23.17618126 |

|             |
|-------------|
| 12.64155341 |
| 233.8687382 |
| 240.8918234 |
| 66.71930969 |
| 136.2478535 |
| 7.02308523  |
| 20.36694717 |
| 202.9671632 |
| 190.3256097 |
| 201.5625461 |
| 77.95624606 |
| 42.8408199  |
| 73.04008639 |
| 0.702308523 |
| 70.2308523  |
| 10.53462785 |
| 8.427702276 |
| 6.320776707 |
| 46.35236252 |
| 9.130010799 |
| 47.05467104 |
| 8.427702276 |
| 93.40703356 |
| 66.71930969 |
| 99.72781027 |
| 7.02308523  |
| 8.427702276 |
| 35.81773467 |
| 52.67313923 |
| 9.832319322 |
| 132.0340023 |
| 4.916159661 |
| 40.03158581 |
| 16.15309603 |
| 27.3900324  |
| 122.9039915 |
| 4.213851138 |
| 110.2624381 |
| 101.8347358 |
| 218.4179507 |
| 96.91857618 |
| 7.02308523  |
| 0           |

|             |
|-------------|
| 58.29160741 |
| 72.33777787 |
| 125.0109171 |
| 39.32927729 |
| 7.02308523  |
| 52.67313923 |
| 180.4932904 |
| 28.79464944 |
| 33.7108091  |
| 7.725393753 |
| 91.30010799 |
| 8.427702276 |
| 22.47387274 |
| 42.13851138 |
| 212.7994825 |
| 49.86390513 |
| 11.23693637 |
| 7.02308523  |
| 181.8979075 |
| 5.618468184 |
| 89.19318242 |
| 55.48237332 |
| 92.70472504 |
| 10.53462785 |
| 3.511542615 |
| 58.99391593 |
| 66.71930969 |
| 69.52854378 |
| 21.06925569 |
| 37.22235172 |
| 21.77156421 |
| 5.618468184 |
| 21.06925569 |
| 5.618468184 |
| 18.2600216  |
| 28.79464944 |
| 74.44470344 |
| 7.725393753 |
| 5.618468184 |
| 10.53462785 |
| 9.832319322 |
| 17.55771308 |
| 22.47387274 |

|             |
|-------------|
| 4.916159661 |
| 63.91007559 |
| 85.68163981 |
| 53.37544775 |
| 39.32927729 |
| 63.20776707 |
| 10.53462785 |
| 8.427702276 |
| 209.9902484 |
| 75.84932049 |
| 47.05467104 |
| 136.950162  |
| 73.74239492 |
| 34.41311763 |
| 33.7108091  |
| 63.20776707 |
| 10.53462785 |
| 165.0425029 |
| 27.3900324  |
| 33.7108091  |
| 7.02308523  |
| 51.9708307  |
| 160.1263432 |
| 6.320776707 |
| 19.66463864 |
| 132.7363109 |
| 28.79464944 |
| 9.130010799 |
| 14.74847898 |
| 134.8432364 |
| 16.85540455 |
| 106.048587  |
| 25.28310683 |
| 206.4787058 |
| 123.6063001 |
| 221.9294933 |
| 70.2308523  |
| 0           |
| 172.0655881 |
| 5.618468184 |
| 4.916159661 |
| 4.213851138 |
| 5.618468184 |



|             |
|-------------|
| 9.130010799 |
| 9.130010799 |
| 4.213851138 |
| 6.320776707 |
| 52.67313923 |
| 27.3900324  |
| 7.725393753 |
| 36.5200432  |
| 81.46778867 |
| 2.106925569 |
| 4.213851138 |
| 227.5479615 |
| 9.130010799 |
| 6.320776707 |
| 11.23693637 |
| 40.73389434 |
| 147.4847898 |
| 34.41311763 |
| 9.130010799 |
| 165.7448114 |
| 5.618468184 |
| 9.832319322 |
| 125.0109171 |
| 49.86390513 |
| 2.809234092 |
| 107.453204  |
| 119.3924489 |
| 146.0801728 |
| 60.39853298 |
| 19.66463864 |
| 12.64155341 |
| 104.6439699 |
| 7.725393753 |
| 10.53462785 |
| 4.916159661 |
| 8.427702276 |
| 7.02308523  |
| 9.832319322 |
| 2.809234092 |
| 10.53462785 |
| 175.5771308 |
| 28.09234092 |
| 36.5200432  |

|             |
|-------------|
| 68.12392673 |
| 0           |
| 45.650054   |
| 99.72781027 |
| 4.916159661 |
| 7.02308523  |
| 0.702308523 |
| 15.45078751 |
| 8.427702276 |
| 9.130010799 |
| 64.61238412 |
| 109.5601296 |
| 8.427702276 |
| 8.427702276 |
| 189.6233012 |
| 21.06925569 |
| 155.9124921 |
| 164.3401944 |
| 10.53462785 |
| 9.832319322 |
| 5.618468184 |
| 19.66463864 |
| 20.36694717 |
| 7.02308523  |
| 8.427702276 |
| 86.38394833 |
| 77.95624606 |
| 4.213851138 |
| 70.2308523  |
| 8.427702276 |
| 106.048587  |
| 7.02308523  |
| 3.511542615 |
| 28.09234092 |
| 82.17009719 |
| 10.53462785 |
| 36.5200432  |
| 5.618468184 |
| 210.6925569 |
| 207.8833228 |
| 10.53462785 |
| 54.07775627 |
| 111.6670552 |

|             |
|-------------|
| 86.38394833 |
| 4.213851138 |
| 49.86390513 |
| 146.0801728 |
| 7.02308523  |
| 71.63546935 |
| 5.618468184 |
| 17.55771308 |
| 49.86390513 |
| 12.64155341 |
| 5.618468184 |
| 2.809234092 |
| 39.32927729 |
| 5.618468184 |
| 9.832319322 |
| 5.618468184 |
| 73.04008639 |
| 37.22235172 |
| 0           |
| 7.02308523  |
| 6.320776707 |
| 9.130010799 |
| 11.23693637 |
| 4.213851138 |
| 85.68163981 |
| 14.04617046 |
| 6.320776707 |
| 99.02550175 |
| 159.4240347 |
| 178.3863648 |
| 64.61238412 |
| 8.427702276 |
| 14.04617046 |
| 5.618468184 |
| 99.72781027 |
| 74.44470344 |
| 40.03158581 |
| 7.725393753 |
| 7.725393753 |
| 4.213851138 |
| 9.130010799 |
| 6.320776707 |
| 35.11542615 |

|             |
|-------------|
| 24.58079831 |
| 67.42161821 |
| 7.02308523  |
| 7.725393753 |
| 5.618468184 |
| 7.02308523  |
| 4.213851138 |
| 4.213851138 |
| 33.7108091  |
| 138.354779  |
| 117.9878319 |
| 57.58929889 |
| 158.0194177 |
| 13.34386194 |
| 133.4386194 |
| 40.03158581 |
| 10.53462785 |
| 68.12392673 |
| 129.9270768 |
| 52.67313923 |
| 96.21626765 |
| 8.427702276 |
| 21.06925569 |
| 206.4787058 |
| 7.725393753 |
| 6.320776707 |
| 250.0218342 |
| 7.02308523  |
| 89.19318242 |
| 13.34386194 |
| 166.44712   |
| 12.64155341 |
| 4.213851138 |
| 63.20776707 |
| 10.53462785 |
| 139.7593961 |
| 54.7800648  |
| 7.725393753 |
| 13.34386194 |
| 141.8663216 |
| 174.8748222 |
| 4.916159661 |
| 65.31469264 |

|             |
|-------------|
| 111.6670552 |
| 28.79464944 |
| 68.82623526 |
| 73.74239492 |
| 17.55771308 |
| 69.52854378 |
| 77.25393753 |
| 116.5832148 |
| 67.42161821 |
| 113.0716722 |
| 4.213851138 |
| 6.320776707 |
| 30.19926649 |
| 38.62696877 |
| 92.70472504 |
| 7.725393753 |
| 10.53462785 |
| 81.46778867 |
| 77.25393753 |
| 8.427702276 |
| 86.38394833 |
| 56.88699036 |
| 154.5078751 |
| 97.6208847  |
| 54.07775627 |
| 7.02308523  |
| 197.348695  |
| 114.4762893 |
| 11.93924489 |
| 26.68772387 |
| 54.07775627 |
| 44.94774547 |
| 6.320776707 |
| 238.7848978 |
| 9.130010799 |
| 13.34386194 |
| 129.2247682 |
| 0           |
| 0           |
| 174.1725137 |
| 8.427702276 |
| 4.916159661 |
| 18.96233012 |

|             |
|-------------|
| 3.511542615 |
| 57.58929889 |
| 117.9878319 |
| 3.511542615 |
| 45.650054   |
| 8.427702276 |
| 110.2624381 |
| 11.93924489 |
| 54.7800648  |
| 157.3171092 |
| 61.1008415  |
| 5.618468184 |
| 2.106925569 |
| 32.30619206 |
| 40.73389434 |
| 7.725393753 |
| 106.7508955 |
| 80.76548015 |
| 249.3195257 |
| 7.02308523  |
| 29.49695797 |
| 28.09234092 |
| 48.45928809 |
| 51.26852218 |
| 11.93924489 |
| 8.427702276 |
| 54.07775627 |
| 136.2478535 |
| 101.1324273 |
| 10.53462785 |
| 9.130010799 |
| 69.52854378 |
| 127.8201512 |
| 19.66463864 |
| 5.618468184 |
| 169.256354  |
| 63.91007559 |
| 2.106925569 |
| 63.91007559 |
| 9.832319322 |
| 99.02550175 |
| 128.5224597 |
| 222.6318018 |

|             |
|-------------|
| 141.8663216 |
| 143.2709387 |
| 66.71930969 |
| 49.16159661 |
| 7.02308523  |
| 68.82623526 |
| 89.89549095 |
| 7.02308523  |
| 130.6293853 |
| 73.74239492 |
| 198.0510035 |
| 176.2794393 |
| 3.511542615 |
| 139.0570876 |
| 14.74847898 |
| 5.618468184 |
| 141.8663216 |
| 6.320776707 |
| 99.02550175 |
| 8.427702276 |
| 8.427702276 |
| 6.320776707 |
| 6.320776707 |
| 7.02308523  |
| 3.511542615 |
| 7.02308523  |
| 25.98541535 |
| 5.618468184 |
| 120.0947574 |
| 5.618468184 |
| 4.916159661 |
| 41.43620286 |
| 63.20776707 |
| 96.21626765 |
| 37.92466024 |
| 61.1008415  |
| 9.832319322 |
| 14.04617046 |
| 9.832319322 |
| 49.16159661 |
| 64.61238412 |
| 60.39853298 |
| 13.34386194 |

|             |
|-------------|
| 1.404617046 |
| 0           |
| 7.725393753 |
| 0           |
| 69.52854378 |
| 9.130010799 |
| 7.02308523  |
| 3.511542615 |
| 43.54312843 |
| 103.2393529 |
| 40.03158581 |
| 107.453204  |
| 117.9878319 |
| 99.72781027 |
| 4.916159661 |
| 4.916159661 |
| 40.03158581 |
| 4.916159661 |
| 4.213851138 |
| 2.809234092 |
| 7.725393753 |
| 66.71930969 |
| 6.320776707 |
| 75.14701196 |
| 0           |
| 86.38394833 |
| 24.58079831 |
| 46.35236252 |
| 1.404617046 |
| 133.4386194 |
| 5.618468184 |
| 55.48237332 |
| 48.45928809 |
| 46.35236252 |
| 88.4908739  |
| 7.725393753 |
| 9.832319322 |
| 63.20776707 |
| 7.725393753 |
| 21.06925569 |
| 17.55771308 |
| 7.02308523  |
| 8.427702276 |



|             |
|-------------|
| 94.10934208 |
| 10.53462785 |
| 148.8894069 |
| 8.427702276 |
| 4.213851138 |
| 108.1555125 |
| 207.1810143 |
| 3.511542615 |
| 7.02308523  |
| 89.19318242 |
| 207.8833228 |
| 4.916159661 |
| 9.130010799 |
| 7.02308523  |
| 5.618468184 |
| 5.618468184 |
| 5.618468184 |
| 96.21626765 |
| 7.725393753 |
| 8.427702276 |
| 8.427702276 |
| 9.130010799 |
| 59.69622446 |
| 47.75697957 |
| 9.832319322 |
| 7.02308523  |
| 33.00850058 |
| 4.213851138 |
| 33.00850058 |
| 63.20776707 |
| 87.08625685 |
| 70.93316082 |
| 41.43620286 |
| 10.53462785 |
| 14.74847898 |
| 7.725393753 |
| 11.23693637 |
| 158.7217262 |
| 124.3086086 |
| 6.320776707 |
| 6.320776707 |
| 4.213851138 |
| 24.58079831 |

|             |
|-------------|
| 4.916159661 |
| 20.36694717 |
| 25.28310683 |
| 39.32927729 |
| 4.916159661 |
| 45.650054   |
| 152.4009495 |
| 25.28310683 |
| 93.40703356 |
| 222.6318018 |
| 122.201683  |
| 114.4762893 |
| 14.74847898 |
| 92.00241652 |
| 5.618468184 |
| 11.93924489 |
| 0           |
| 6.320776707 |
| 4.916159661 |
| 7.02308523  |
| 94.10934208 |
| 161.5309603 |
| 16.85540455 |
| 21.77156421 |
| 11.23693637 |
| 8.427702276 |
| 4.916159661 |
| 4.213851138 |
| 142.5686302 |
| 5.618468184 |
| 116.5832148 |
| 9.832319322 |
| 49.86390513 |
| 81.46778867 |
| 73.74239492 |
| 158.0194177 |
| 6.320776707 |
| 7.725393753 |
| 4.213851138 |
| 5.618468184 |
| 38.62696877 |
| 15.45078751 |
| 55.48237332 |

|             |
|-------------|
| 8.427702276 |
| 48.45928809 |
| 80.06317162 |
| 5.618468184 |
| 5.618468184 |
| 7.02308523  |
| 6.320776707 |
| 4.213851138 |
| 5.618468184 |
| 10.53462785 |
| 9.130010799 |
| 9.130010799 |
| 4.916159661 |
| 0           |
| 44.24543695 |
| 6.320776707 |
| 8.427702276 |
| 8.427702276 |
| 16.15309603 |
| 3.511542615 |
| 182.600216  |
| 167.1494285 |
| 4.213851138 |
| 27.3900324  |
| 124.3086086 |
| 100.4301188 |
| 3.511542615 |
| 94.81165061 |
| 48.45928809 |
| 91.30010799 |
| 8.427702276 |
| 4.916159661 |
| 4.916159661 |
| 7.02308523  |
| 7.725393753 |
| 56.88699036 |
| 141.1640131 |
| 12.64155341 |
| 147.4847898 |
| 2.106925569 |
| 5.618468184 |
| 146.0801728 |
| 25.98541535 |

|             |
|-------------|
| 5.618468184 |
| 4.213851138 |
| 6.320776707 |
| 12.64155341 |
| 74.44470344 |
| 7.725393753 |
| 6.320776707 |
| 5.618468184 |
| 143.2709387 |
| 128.5224597 |
| 5.618468184 |
| 10.53462785 |
| 76.55162901 |
| 16.15309603 |
| 18.96233012 |
| 5.618468184 |
| 1.404617046 |
| 18.96233012 |
| 98.32319322 |
| 80.76548015 |
| 49.16159661 |
| 114.4762893 |
| 8.427702276 |
| 35.81773467 |
| 11.23693637 |
| 17.55771308 |
| 12.64155341 |
| 46.35236252 |
| 16.15309603 |
| 49.16159661 |
| 13.34386194 |
| 37.92466024 |
| 43.54312843 |
| 11.93924489 |
| 120.0947574 |
| 14.04617046 |
| 7.02308523  |
| 9.130010799 |
| 95.51395913 |
| 7.725393753 |
| 7.725393753 |
| 7.02308523  |
| 56.18468184 |

|             |
|-------------|
| 25.98541535 |
| 6.320776707 |
| 54.7800648  |
| 9.832319322 |
| 42.8408199  |
| 44.94774547 |
| 10.53462785 |
| 7.02308523  |
| 42.13851138 |
| 4.213851138 |
| 36.5200432  |
| 11.23693637 |
| 11.23693637 |
| 5.618468184 |
| 4.916159661 |
| 86.38394833 |
| 9.832319322 |
| 9.832319322 |
| 95.51395913 |
| 4.916159661 |
| 9.130010799 |
| 376.4373683 |
| 7.725393753 |
| 10.53462785 |
| 150.2940239 |
| 6.320776707 |
| 10.53462785 |
| 11.23693637 |
| 32.30619206 |
| 70.2308523  |
| 9.130010799 |
| 4.213851138 |
| 9.130010799 |
| 4.213851138 |
| 41.43620286 |
| 11.93924489 |
| 2.106925569 |
| 127.8201512 |
| 7.725393753 |
| 136.950162  |
| 10.53462785 |
| 14.04617046 |
| 20.36694717 |

|             |
|-------------|
| 4.213851138 |
| 60.39853298 |
| 110.9647466 |
| 7.725393753 |
| 70.2308523  |
| 59.69622446 |
| 10.53462785 |
| 71.63546935 |
| 4.213851138 |
| 9.130010799 |
| 7.725393753 |
| 73.74239492 |
| 5.618468184 |
| 4.916159661 |
| 33.7108091  |
| 44.94774547 |
| 33.7108091  |
| 3.511542615 |
| 153.8055665 |
| 4.213851138 |
| 4.916159661 |
| 4.916159661 |
| 7.02308523  |
| 163.6378859 |
| 8.427702276 |
| 7.02308523  |
| 32.30619206 |
| 94.10934208 |
| 12.64155341 |
| 26.68772387 |
| 66.71930969 |
| 141.1640131 |
| 59.69622446 |
| 9.130010799 |
| 28.09234092 |
| 5.618468184 |
| 8.427702276 |
| 6.320776707 |
| 4.916159661 |
| 21.06925569 |
| 23.17618126 |
| 113.0716722 |
| 120.0947574 |

|             |
|-------------|
| 6.320776707 |
| 212.097174  |
| 11.23693637 |
| 28.09234092 |
| 7.02308523  |
| 30.19926649 |
| 9.130010799 |
| 7.725393753 |
| 122.201683  |
| 7.02308523  |
| 89.89549095 |
| 4.916159661 |
| 8.427702276 |
| 97.6208847  |
| 7.725393753 |
| 204.3717802 |
| 38.62696877 |
| 78.65855458 |
| 11.23693637 |
| 30.90157501 |
| 8.427702276 |
| 6.320776707 |
| 4.213851138 |
| 129.9270768 |
| 7.02308523  |
| 6.320776707 |
| 5.618468184 |
| 58.29160741 |
| 69.52854378 |
| 0           |
| 5.618468184 |
| 9.130010799 |
| 162.2332688 |
| 69.52854378 |
| 16.85540455 |
| 105.3462785 |
| 9.832319322 |
| 7.725393753 |
| 13.34386194 |
| 17.55771308 |
| 80.06317162 |
| 6.320776707 |
| 7.02308523  |

|             |
|-------------|
| 90.59779947 |
| 160.8286518 |
| 7.725393753 |
| 44.94774547 |
| 14.74847898 |
| 10.53462785 |
| 84.27702276 |
| 13.34386194 |
| 16.85540455 |
| 9.832319322 |
| 11.93924489 |
| 58.29160741 |
| 6.320776707 |
| 73.74239492 |
| 113.0716722 |
| 22.47387274 |
| 9.832319322 |
| 7.02308523  |
| 10.53462785 |
| 75.84932049 |
| 21.77156421 |
| 9.130010799 |
| 0           |
| 9.130010799 |
| 21.06925569 |
| 2.106925569 |
| 129.2247682 |
| 132.0340023 |
| 111.6670552 |
| 9.832319322 |
| 143.9732472 |
| 5.618468184 |
| 7.02308523  |
| 5.618468184 |
| 101.1324273 |
| 27.3900324  |
| 11.93924489 |
| 9.832319322 |
| 5.618468184 |
| 4.916159661 |
| 10.53462785 |
| 14.04617046 |
| 10.53462785 |



|             |
|-------------|
| 6.320776707 |
| 10.53462785 |
| 34.41311763 |
| 16.85540455 |
| 174.1725137 |
| 7.02308523  |
| 137.6524705 |
| 12.64155341 |
| 35.81773467 |
| 30.19926649 |
| 27.3900324  |
| 9.130010799 |
| 20.36694717 |
| 67.42161821 |
| 44.94774547 |
| 25.28310683 |
| 9.130010799 |
| 38.62696877 |
| 165.7448114 |
| 8.427702276 |
| 28.79464944 |
| 89.89549095 |
| 10.53462785 |
| 113.0716722 |
| 0.702308523 |
| 62.50545855 |
| 11.93924489 |
| 6.320776707 |
| 4.916159661 |
| 6.320776707 |
| 60.39853298 |
| 5.618468184 |
| 103.2393529 |
| 134.8432364 |
| 117.9878319 |
| 66.01700116 |
| 25.98541535 |
| 33.00850058 |
| 60.39853298 |
| 74.44470344 |
| 29.49695797 |
| 11.93924489 |
| 108.8578211 |

|             |
|-------------|
| 77.95624606 |
| 12.64155341 |
| 97.6208847  |
| 6.320776707 |
| 6.320776707 |
| 193.1348438 |
| 33.7108091  |
| 28.79464944 |
| 21.06925569 |
| 49.16159661 |
| 8.427702276 |
| 4.916159661 |
| 7.725393753 |
| 4.916159661 |
| 63.20776707 |
| 35.11542615 |
| 103.9416614 |
| 70.2308523  |
| 98.32319322 |
| 0.702308523 |
| 110.2624381 |
| 70.93316082 |
| 82.87240572 |
| 30.19926649 |
| 5.618468184 |
| 122.9039915 |
| 6.320776707 |
| 48.45928809 |
| 4.916159661 |
| 47.75697957 |
| 11.23693637 |
| 7.02308523  |
| 9.130010799 |
| 4.916159661 |
| 6.320776707 |
| 139.0570876 |
| 59.69622446 |
| 13.34386194 |
| 9.832319322 |
| 35.81773467 |
| 4.916159661 |
| 9.832319322 |
| 0.702308523 |

|             |
|-------------|
| 2.809234092 |
| 28.09234092 |
| 68.82623526 |
| 6.320776707 |
| 9.130010799 |
| 6.320776707 |
| 2.106925569 |
| 5.618468184 |
| 7.02308523  |
| 16.85540455 |
| 4.213851138 |
| 15.45078751 |
| 2.106925569 |
| 25.28310683 |
| 1.404617046 |
| 2.809234092 |
| 2.809234092 |
| 6.320776707 |
| 3.511542615 |
| 8.427702276 |
| 63.91007559 |
| 3.511542615 |
| 49.86390513 |
| 69.52854378 |
| 90.59779947 |
| 44.24543695 |
| 45.650054   |
| 42.13851138 |
| 4.916159661 |
| 5.618468184 |
| 9.130010799 |
| 83.57471424 |
| 28.79464944 |
| 3.511542615 |
| 6.320776707 |
| 23.17618126 |
| 5.618468184 |
| 4.213851138 |
| 3.511542615 |
| 3.511542615 |
| 1.404617046 |
| 20.36694717 |
| 58.99391593 |

|             |
|-------------|
| 55.48237332 |
| 64.61238412 |
| 76.55162901 |
| 2.809234092 |
| 2.106925569 |
| 4.213851138 |
| 0.702308523 |
| 10.53462785 |
| 40.73389434 |
| 82.17009719 |
| 66.01700116 |
| 2.809234092 |
| 46.35236252 |
| 4.916159661 |
| 3.511542615 |
| 43.54312843 |
| 3.511542615 |
| 16.85540455 |
| 87.08625685 |
| 2.106925569 |
| 0.702308523 |
| 1.404617046 |
| 52.67313923 |
| 3.511542615 |
| 2.809234092 |
| 3.511542615 |
| 3.511542615 |
| 4.213851138 |
| 1.404617046 |
| 10.53462785 |
| 4.916159661 |
| 3.511542615 |
| 40.73389434 |
| 1.404617046 |
| 21.77156421 |
| 1.404617046 |
| 14.74847898 |
| 72.33777787 |
| 32.30619206 |
| 5.618468184 |
| 7.725393753 |
| 3.511542615 |
| 0.702308523 |

|             |
|-------------|
| 5.618468184 |
| 3.511542615 |
| 33.7108091  |
| 2.809234092 |
| 24.58079831 |
| 82.17009719 |
| 1.404617046 |
| 3.511542615 |
| 12.64155341 |
| 12.64155341 |
| 7.02308523  |
| 62.50545855 |
| 7.725393753 |
| 47.75697957 |
| 7.725393753 |
| 2.809234092 |
| 2.809234092 |
| 6.320776707 |
| 3.511542615 |
| 68.12392673 |
| 2.106925569 |
| 3.511542615 |
| 20.36694717 |
| 2.809234092 |
| 6.320776707 |
| 141.1640131 |
| 15.45078751 |
| 62.50545855 |
| 46.35236252 |
| 1.404617046 |
| 0           |
| 0.702308523 |
| 1.404617046 |
| 4.916159661 |
| 5.618468184 |
| 10.53462785 |
| 35.81773467 |
| 24.58079831 |
| 54.7800648  |
| 4.916159661 |
| 4.916159661 |
| 20.36694717 |
| 7.02308523  |

|             |
|-------------|
| 6.320776707 |
| 120.797066  |
| 43.54312843 |
| 4.916159661 |
| 37.92466024 |
| 3.511542615 |
| 2.809234092 |
| 6.320776707 |
| 9.130010799 |
| 6.320776707 |
| 103.2393529 |
| 7.725393753 |
| 7.02308523  |
| 8.427702276 |
| 111.6670552 |
| 92.00241652 |
| 11.93924489 |
| 8.427702276 |
| 63.91007559 |
| 8.427702276 |
| 23.87848978 |
| 7.02308523  |
| 9.130010799 |
| 7.02308523  |
| 7.02308523  |
| 7.725393753 |
| 5.618468184 |
| 86.38394833 |
| 58.99391593 |
| 123.6063001 |
| 11.93924489 |
| 3.511542615 |
| 5.618468184 |
| 23.17618126 |
| 5.618468184 |
| 44.24543695 |
| 78.65855458 |
| 117.2855233 |
| 8.427702276 |
| 7.02308523  |
| 19.66463864 |
| 4.213851138 |
| 9.130010799 |

|             |
|-------------|
| 9.130010799 |
| 84.27702276 |
| 176.9817478 |
| 9.832319322 |
| 4.213851138 |
| 7.725393753 |
| 10.53462785 |
| 5.618468184 |
| 100.4301188 |
| 18.2600216  |
| 6.320776707 |
| 9.130010799 |
| 97.6208847  |
| 51.9708307  |
| 7.725393753 |
| 63.20776707 |
| 7.725393753 |
| 56.18468184 |
| 105.3462785 |
| 4.916159661 |
| 115.8809063 |
| 84.97933129 |
| 4.916159661 |
| 147.4847898 |
| 34.41311763 |
| 35.81773467 |
| 7.02308523  |
| 8.427702276 |
| 43.54312843 |
| 11.23693637 |
| 20.36694717 |
| 25.28310683 |
| 32.30619206 |
| 5.618468184 |
| 18.2600216  |
| 3.511542615 |
| 9.130010799 |
| 15.45078751 |
| 19.66463864 |
| 4.916159661 |
| 111.6670552 |
| 2.809234092 |
| 0           |

|             |
|-------------|
| 2.809234092 |
| 96.91857618 |
| 7.725393753 |
| 47.75697957 |
| 14.74847898 |
| 92.00241652 |
| 40.03158581 |
| 33.00850058 |
| 16.15309603 |
| 49.16159661 |
| 173.4702052 |
| 108.8578211 |
| 206.4787058 |
| 12.64155341 |
| 12.64155341 |
| 106.048587  |
| 18.96233012 |
| 14.74847898 |
| 155.9124921 |
| 4.916159661 |
| 40.03158581 |
| 23.87848978 |
| 104.6439699 |
| 32.30619206 |
| 5.618468184 |
| 4.916159661 |
| 9.130010799 |
| 5.618468184 |
| 20.36694717 |
| 7.725393753 |
| 73.04008639 |
| 285.1372603 |
| 127.1178427 |
| 29.49695797 |
| 16.85540455 |
| 195.2417694 |
| 5.618468184 |
| 28.79464944 |
| 7.02308523  |
| 123.6063001 |
| 27.3900324  |
| 94.81165061 |
| 9.130010799 |



|             |
|-------------|
| 4.213851138 |
| 8.427702276 |
| 42.8408199  |
| 35.11542615 |
| 42.8408199  |
| 116.5832148 |
| 4.916159661 |
| 76.55162901 |
| 44.24543695 |
| 184.004833  |
| 25.98541535 |
| 23.17618126 |
| 7.725393753 |
| 102.5370444 |
| 9.130010799 |
| 9.832319322 |
| 2.106925569 |
| 99.02550175 |
| 16.85540455 |
| 79.3608631  |
| 30.90157501 |
| 114.4762893 |
| 7.02308523  |
| 144.6755557 |
| 22.47387274 |
| 5.618468184 |
| 7.725393753 |
| 9.832319322 |
| 82.17009719 |
| 4.916159661 |
| 237.3802808 |
| 11.93924489 |
| 33.7108091  |
| 148.8894069 |
| 20.36694717 |
| 36.5200432  |
| 4.213851138 |
| 7.725393753 |
| 61.80315003 |
| 58.99391593 |
| 50.56621366 |
| 8.427702276 |
| 7.725393753 |

|             |
|-------------|
| 32.30619206 |
| 10.53462785 |
| 178.3863648 |
| 14.04617046 |
| 224.0364188 |
| 206.4787058 |
| 76.55162901 |
| 1.404617046 |
| 125.0109171 |
| 2.809234092 |
| 94.81165061 |
| 47.05467104 |
| 7.02308523  |
| 10.53462785 |
| 68.82623526 |
| 185.4094501 |
| 205.7763972 |
| 199.4556205 |
| 23.17618126 |
| 6.320776707 |
| 6.320776707 |
| 94.81165061 |
| 112.3693637 |
| 4.916159661 |
| 80.06317162 |
| 11.93924489 |
| 6.320776707 |
| 16.85540455 |
| 54.07775627 |
| 89.19318242 |
| 35.81773467 |
| 3.511542615 |
| 9.832319322 |
| 4.916159661 |
| 19.66463864 |
| 120.0947574 |
| 148.8894069 |
| 5.618468184 |
| 7.02308523  |
| 13.34386194 |
| 8.427702276 |
| 127.1178427 |
| 8.427702276 |

|             |
|-------------|
| 5.618468184 |
| 8.427702276 |
| 4.213851138 |
| 16.15309603 |
| 7.725393753 |
| 147.4847898 |
| 3.511542615 |
| 47.05467104 |
| 26.68772387 |
| 103.9416614 |
| 40.73389434 |
| 39.32927729 |
| 5.618468184 |
| 37.22235172 |
| 58.99391593 |
| 5.618468184 |
| 7.725393753 |
| 9.130010799 |
| 7.02308523  |
| 97.6208847  |
| 12.64155341 |
| 7.02308523  |
| 7.725393753 |
| 42.8408199  |
| 9.130010799 |
| 165.7448114 |
| 240.8918234 |
| 10.53462785 |
| 84.27702276 |
| 8.427702276 |
| 183.3025245 |
| 49.16159661 |
| 145.3778643 |
| 164.3401944 |
| 7.725393753 |
| 25.98541535 |
| 23.87848978 |
| 7.725393753 |
| 41.43620286 |
| 2.809234092 |
| 7.725393753 |
| 13.34386194 |
| 14.74847898 |

|             |
|-------------|
| 7.725393753 |
| 145.3778643 |
| 25.98541535 |
| 66.01700116 |
| 58.29160741 |
| 7.02308523  |
| 152.4009495 |
| 150.9963324 |
| 33.00850058 |
| 14.74847898 |
| 7.725393753 |
| 150.9963324 |
| 42.8408199  |
| 113.7739807 |
| 104.6439699 |
| 19.66463864 |
| 5.618468184 |
| 51.9708307  |
| 9.130010799 |
| 3.511542615 |
| 38.62696877 |
| 7.02308523  |
| 51.9708307  |
| 11.23693637 |
| 6.320776707 |
| 139.7593961 |
| 22.47387274 |
| 0           |
| 148.1870984 |
| 48.45928809 |
| 21.06925569 |
| 6.320776707 |
| 4.213851138 |
| 14.74847898 |
| 39.32927729 |
| 5.618468184 |
| 9.130010799 |
| 4.916159661 |
| 62.50545855 |
| 84.97933129 |
| 2.809234092 |
| 4.916159661 |
| 7.02308523  |

|             |
|-------------|
| 152.4009495 |
| 56.88699036 |
| 7.02308523  |
| 19.66463864 |
| 25.98541535 |
| 105.3462785 |
| 47.05467104 |
| 11.93924489 |
| 33.00850058 |
| 51.26852218 |
| 6.320776707 |
| 9.130010799 |
| 49.16159661 |
| 4.916159661 |
| 107.453204  |
| 13.34386194 |
| 37.22235172 |
| 5.618468184 |
| 92.00241652 |
| 5.618468184 |
| 4.213851138 |
| 119.3924489 |
| 37.22235172 |
| 4.916159661 |
| 4.916159661 |
| 76.55162901 |
| 42.13851138 |
| 8.427702276 |
| 7.725393753 |
| 9.130010799 |
| 8.427702276 |
| 84.97933129 |
| 7.02308523  |
| 7.02308523  |
| 8.427702276 |
| 9.130010799 |
| 63.20776707 |
| 6.320776707 |
| 7.02308523  |
| 5.618468184 |
| 2.809234092 |
| 120.797066  |
| 92.00241652 |

|             |
|-------------|
| 74.44470344 |
| 70.93316082 |
| 4.916159661 |
| 10.53462785 |
| 86.38394833 |
| 23.17618126 |
| 269.6864728 |
| 8.427702276 |
| 39.32927729 |
| 114.4762893 |
| 176.2794393 |
| 51.26852218 |
| 96.91857618 |
| 7.02308523  |
| 91.30010799 |
| 9.832319322 |
| 24.58079831 |
| 7.02308523  |
| 14.74847898 |
| 169.256354  |
| 34.41311763 |
| 73.04008639 |
| 137.6524705 |
| 178.3863648 |
| 2.106925569 |
| 63.20776707 |
| 2.809234092 |
| 5.618468184 |
| 9.832319322 |
| 42.13851138 |
| 103.9416614 |
| 122.9039915 |
| 4.213851138 |
| 7.725393753 |
| 87.08625685 |
| 155.2101836 |
| 44.24543695 |
| 61.1008415  |
| 83.57471424 |
| 104.6439699 |
| 74.44470344 |
| 44.24543695 |
| 11.23693637 |

|             |
|-------------|
| 4.916159661 |
| 4.916159661 |
| 21.06925569 |
| 7.02308523  |
| 9.832319322 |
| 121.4993745 |
| 9.832319322 |
| 7.02308523  |
| 54.07775627 |
| 8.427702276 |
| 53.37544775 |
| 7.02308523  |
| 106.7508955 |
| 54.07775627 |
| 15.45078751 |
| 12.64155341 |
| 2.809234092 |
| 63.20776707 |
| 68.12392673 |
| 8.427702276 |
| 8.427702276 |
| 4.916159661 |
| 4.916159661 |
| 49.16159661 |
| 0.702308523 |
| 104.6439699 |
| 9.130010799 |
| 80.06317162 |
| 5.618468184 |
| 90.59779947 |
| 4.916159661 |
| 162.2332688 |
| 81.46778867 |
| 4.916159661 |
| 37.22235172 |
| 3.511542615 |
| 48.45928809 |
| 173.4702052 |
| 43.54312843 |
| 36.5200432  |
| 166.44712   |
| 144.6755557 |
| 2.809234092 |

|             |
|-------------|
| 9.130010799 |
| 44.94774547 |
| 14.74847898 |
| 105.3462785 |
| 8.427702276 |
| 115.1785978 |
| 115.1785978 |
| 17.55771308 |
| 48.45928809 |
| 11.93924489 |
| 9.832319322 |
| 138.354779  |
| 58.29160741 |
| 155.2101836 |
| 4.916159661 |
| 60.39853298 |
| 92.70472504 |
| 74.44470344 |
| 11.93924489 |
| 90.59779947 |
| 13.34386194 |
| 12.64155341 |
| 14.74847898 |
| 37.92466024 |
| 17.55771308 |
| 6.320776707 |
| 52.67313923 |
| 4.213851138 |
| 14.74847898 |
| 25.28310683 |
| 9.832319322 |
| 13.34386194 |
| 6.320776707 |
| 106.7508955 |
| 5.618468184 |
| 7.725393753 |
| 7.02308523  |
| 33.7108091  |
| 4.916159661 |
| 13.34386194 |
| 11.23693637 |
| 9.832319322 |
| 85.68163981 |



|             |
|-------------|
| 169.256354  |
| 4.213851138 |
| 15.45078751 |
| 13.34386194 |
| 19.66463864 |
| 40.03158581 |
| 27.3900324  |
| 162.2332688 |
| 0           |
| 123.6063001 |
| 10.53462785 |
| 3.511542615 |
| 9.832319322 |
| 5.618468184 |
| 1.404617046 |
| 78.65855458 |
| 8.427702276 |
| 4.213851138 |
| 12.64155341 |
| 8.427702276 |
| 33.00850058 |
| 40.03158581 |
| 46.35236252 |
| 4.916159661 |
| 18.2600216  |
| 47.05467104 |
| 7.725393753 |
| 1.404617046 |
| 9.130010799 |
| 7.725393753 |
| 17.55771308 |
| 6.320776707 |
| 14.04617046 |
| 5.618468184 |
| 9.130010799 |
| 56.88699036 |
| 7.02308523  |
| 8.427702276 |
| 31.60388354 |
| 6.320776707 |
| 56.18468184 |
| 11.23693637 |
| 7.725393753 |

|             |
|-------------|
| 19.66463864 |
| 4.213851138 |
| 99.02550175 |
| 71.63546935 |
| 19.66463864 |
| 87.78856538 |
| 6.320776707 |
| 5.618468184 |
| 9.130010799 |
| 15.45078751 |
| 4.916159661 |
| 120.0947574 |
| 5.618468184 |
| 123.6063001 |
| 112.3693637 |
| 33.00850058 |
| 23.87848978 |
| 6.320776707 |
| 12.64155341 |
| 78.65855458 |
| 132.0340023 |
| 9.832319322 |
| 30.19926649 |
| 9.130010799 |
| 51.26852218 |
| 9.130010799 |
| 4.213851138 |
| 30.90157501 |
| 9.130010799 |
| 42.8408199  |
| 77.25393753 |
| 7.02308523  |
| 7.725393753 |
| 4.213851138 |
| 4.213851138 |
| 56.88699036 |
| 17.55771308 |
| 13.34386194 |
| 7.725393753 |
| 46.35236252 |
| 6.320776707 |
| 2.106925569 |
| 2.809234092 |

|             |
|-------------|
| 68.82623526 |
| 59.69622446 |
| 68.82623526 |
| 103.2393529 |
| 4.916159661 |
| 7.725393753 |
| 2.809234092 |
| 5.618468184 |
| 208.5856313 |
| 7.02308523  |
| 9.832319322 |
| 2.106925569 |
| 9.130010799 |
| 6.320776707 |
| 8.427702276 |
| 31.60388354 |
| 8.427702276 |
| 84.27702276 |
| 11.23693637 |
| 104.6439699 |
| 11.93924489 |
| 32.30619206 |
| 115.8809063 |
| 45.650054   |
| 4.213851138 |
| 72.33777787 |
| 118.6901404 |
| 4.916159661 |
| 117.9878319 |
| 7.02308523  |
| 63.91007559 |
| 3.511542615 |
| 30.90157501 |
| 9.832319322 |
| 126.4155341 |
| 52.67313923 |
| 159.4240347 |
| 7.02308523  |
| 80.06317162 |
| 6.320776707 |
| 7.725393753 |
| 60.39853298 |
| 0           |

|             |
|-------------|
| 9.832319322 |
| 40.03158581 |
| 101.1324273 |
| 10.53462785 |
| 4.213851138 |
| 24.58079831 |
| 56.18468184 |
| 8.427702276 |
| 8.427702276 |
| 114.4762893 |
| 209.9902484 |
| 101.8347358 |
| 4.916159661 |
| 7.02308523  |
| 48.45928809 |
| 9.832319322 |
| 112.3693637 |
| 185.4094501 |
| 117.2855233 |
| 9.832319322 |
| 16.85540455 |
| 70.2308523  |
| 5.618468184 |
| 4.916159661 |
| 2.809234092 |
| 6.320776707 |
| 52.67313923 |
| 186.8140671 |
| 76.55162901 |
| 5.618468184 |
| 5.618468184 |
| 11.23693637 |
| 130.6293853 |
| 34.41311763 |
| 3.511542615 |
| 16.15309603 |
| 8.427702276 |
| 117.9878319 |
| 24.58079831 |
| 4.916159661 |
| 120.0947574 |
| 37.92466024 |
| 96.21626765 |

|             |
|-------------|
| 34.41311763 |
| 9.130010799 |
| 6.320776707 |
| 5.618468184 |
| 5.618468184 |
| 4.213851138 |
| 3.511542615 |
| 9.832319322 |
| 29.49695797 |
| 99.72781027 |
| 39.32927729 |
| 47.05467104 |
| 21.77156421 |
| 6.320776707 |
| 15.45078751 |
| 28.79464944 |
| 111.6670552 |
| 4.916159661 |
| 12.64155341 |
| 186.8140671 |
| 86.38394833 |
| 16.85540455 |
| 80.06317162 |
| 8.427702276 |
| 117.9878319 |
| 46.35236252 |
| 3.511542615 |
| 13.34386194 |
| 14.74847898 |
| 63.20776707 |
| 271.0910899 |
| 2.809234092 |
| 7.725393753 |
| 64.61238412 |
| 4.916159661 |
| 100.4301188 |
| 12.64155341 |
| 11.23693637 |
| 7.725393753 |
| 46.35236252 |
| 7.02308523  |
| 68.82623526 |
| 20.36694717 |

|             |
|-------------|
| 55.48237332 |
| 122.201683  |
| 0.702308523 |
| 136.2478535 |
| 73.74239492 |
| 119.3924489 |
| 24.58079831 |
| 105.3462785 |
| 4.213851138 |
| 0           |
| 11.23693637 |
| 6.320776707 |
| 9.130010799 |
| 9.130010799 |
| 40.03158581 |
| 102.5370444 |
| 5.618468184 |
| 136.950162  |
| 7.725393753 |
| 6.320776707 |
| 18.96233012 |
| 21.06925569 |
| 141.8663216 |
| 4.916159661 |
| 62.50545855 |
| 115.1785978 |
| 67.42161821 |
| 93.40703356 |
| 7.725393753 |
| 27.3900324  |
| 106.7508955 |
| 24.58079831 |
| 14.04617046 |
| 9.832319322 |
| 42.8408199  |
| 1.404617046 |
| 34.41311763 |
| 5.618468184 |
| 36.5200432  |
| 17.55771308 |
| 13.34386194 |
| 4.916159661 |
| 7.725393753 |

|             |
|-------------|
| 10.53462785 |
| 7.725393753 |
| 82.17009719 |
| 125.7132256 |
| 7.725393753 |
| 36.5200432  |
| 37.22235172 |
| 7.725393753 |
| 9.130010799 |
| 114.4762893 |
| 7.02308523  |
| 7.02308523  |
| 33.00850058 |
| 14.04617046 |
| 6.320776707 |
| 90.59779947 |
| 67.42161821 |
| 11.23693637 |
| 181.1955989 |
| 2.809234092 |
| 4.213851138 |
| 7.725393753 |
| 14.04617046 |
| 5.618468184 |
| 129.9270768 |
| 4.916159661 |
| 172.7678967 |
| 10.53462785 |
| 4.916159661 |
| 91.30010799 |
| 11.93924489 |
| 7.725393753 |
| 134.8432364 |
| 30.19926649 |
| 86.38394833 |
| 9.130010799 |
| 97.6208847  |
| 176.2794393 |
| 9.130010799 |
| 61.1008415  |
| 7.725393753 |
| 9.130010799 |
| 273.900324  |

|             |
|-------------|
| 14.74847898 |
| 63.91007559 |
| 12.64155341 |
| 9.130010799 |
| 11.93924489 |
| 58.29160741 |
| 74.44470344 |
| 30.90157501 |
| 7.725393753 |
| 68.12392673 |
| 176.9817478 |
| 9.832319322 |
| 9.130010799 |
| 11.93924489 |
| 4.916159661 |
| 89.89549095 |
| 11.23693637 |
| 113.0716722 |
| 31.60388354 |
| 9.832319322 |
| 40.73389434 |
| 233.1664296 |
| 11.23693637 |
| 62.50545855 |
| 8.427702276 |
| 23.17618126 |
| 22.47387274 |
| 205.7763972 |
| 54.7800648  |
| 5.618468184 |
| 9.130010799 |
| 99.72781027 |
| 16.15309603 |
| 154.5078751 |
| 4.213851138 |
| 84.27702276 |
| 116.5832148 |
| 89.19318242 |
| 63.91007559 |
| 73.74239492 |
| 96.91857618 |
| 64.61238412 |
| 192.4325353 |



|             |
|-------------|
| 4.916159661 |
| 125.0109171 |
| 6.320776707 |
| 6.320776707 |
| 28.09234092 |
| 7.02308523  |
| 3.511542615 |
| 7.02308523  |
| 143.2709387 |
| 5.618468184 |
| 22.47387274 |
| 21.06925569 |
| 49.86390513 |
| 7.725393753 |
| 231.0595041 |
| 13.34386194 |
| 33.00850058 |
| 42.13851138 |
| 61.80315003 |
| 0           |
| 46.35236252 |
| 9.832319322 |
| 4.213851138 |
| 32.30619206 |
| 7.02308523  |
| 18.96233012 |
| 21.06925569 |
| 4.916159661 |
| 7.02308523  |
| 17.55771308 |
| 33.7108091  |
| 5.618468184 |
| 25.28310683 |
| 7.02308523  |
| 4.916159661 |
| 146.0801728 |
| 3.511542615 |
| 0.702308523 |
| 4.213851138 |
| 4.916159661 |
| 16.15309603 |
| 101.8347358 |
| 4.213851138 |

|             |
|-------------|
| 7.02308523  |
| 7.02308523  |
| 120.797066  |
| 4.916159661 |
| 13.34386194 |
| 60.39853298 |
| 81.46778867 |
| 99.02550175 |
| 80.06317162 |
| 103.9416614 |
| 0.702308523 |
| 21.06925569 |
| 16.15309603 |
| 7.02308523  |
| 99.72781027 |
| 3.511542615 |
| 7.725393753 |
| 99.02550175 |
| 9.832319322 |
| 42.13851138 |
| 7.02308523  |
| 22.47387274 |
| 216.3110251 |
| 4.213851138 |
| 10.53462785 |
| 140.4617046 |
| 6.320776707 |
| 225.4410359 |
| 4.916159661 |
| 9.130010799 |
| 8.427702276 |
| 7.725393753 |
| 45.650054   |
| 16.15309603 |
| 35.11542615 |
| 44.24543695 |
| 7.02308523  |
| 18.2600216  |
| 12.64155341 |
| 21.77156421 |
| 6.320776707 |
| 4.213851138 |
| 29.49695797 |

|             |
|-------------|
| 6.320776707 |
| 44.94774547 |
| 5.618468184 |
| 36.5200432  |
| 9.832319322 |
| 17.55771308 |
| 19.66463864 |
| 33.00850058 |
| 9.130010799 |
| 9.130010799 |
| 41.43620286 |
| 61.1008415  |
| 7.02308523  |
| 7.02308523  |
| 4.916159661 |
| 96.21626765 |
| 8.427702276 |
| 52.67313923 |
| 7.725393753 |
| 4.916159661 |
| 9.832319322 |
| 103.9416614 |
| 7.02308523  |
| 13.34386194 |
| 23.17618126 |
| 35.81773467 |
| 4.916159661 |
| 5.618468184 |
| 179.0886734 |
| 33.00850058 |
| 86.38394833 |
| 58.99391593 |
| 4.213851138 |
| 101.1324273 |
| 6.320776707 |
| 94.10934208 |
| 32.30619206 |
| 18.2600216  |
| 10.53462785 |
| 28.09234092 |
| 4.213851138 |
| 6.320776707 |
| 44.24543695 |

|             |
|-------------|
| 78.65855458 |
| 7.725393753 |
| 35.11542615 |
| 55.48237332 |
| 38.62696877 |
| 4.213851138 |
| 11.23693637 |
| 25.28310683 |
| 132.0340023 |
| 2.106925569 |
| 48.45928809 |
| 9.130010799 |
| 4.916159661 |
| 51.9708307  |
| 70.93316082 |
| 7.02308523  |
| 13.34386194 |
| 116.5832148 |
| 54.7800648  |
| 31.60388354 |
| 4.916159661 |
| 12.64155341 |
| 6.320776707 |
| 9.832319322 |
| 21.77156421 |
| 65.31469264 |
| 6.320776707 |
| 135.5455449 |
| 7.02308523  |
| 82.87240572 |
| 11.93924489 |
| 47.75697957 |
| 4.916159661 |
| 10.53462785 |
| 7.725393753 |
| 10.53462785 |
| 42.13851138 |
| 7.02308523  |
| 5.618468184 |
| 2.809234092 |
| 4.916159661 |
| 8.427702276 |
| 7.725393753 |

|             |
|-------------|
| 146.7824813 |
| 107.453204  |
| 125.7132256 |
| 25.98541535 |
| 10.53462785 |
| 42.8408199  |
| 9.832319322 |
| 28.09234092 |
| 14.04617046 |
| 9.832319322 |
| 2.106925569 |
| 150.2940239 |
| 4.916159661 |
| 86.38394833 |
| 145.3778643 |
| 4.916159661 |
| 22.47387274 |
| 4.916159661 |
| 6.320776707 |
| 2.106925569 |
| 22.47387274 |
| 57.58929889 |
| 16.15309603 |
| 5.618468184 |
| 92.00241652 |
| 2.106925569 |
| 0.702308523 |
| 73.04008639 |
| 2.809234092 |
| 105.3462785 |
| 9.130010799 |
| 6.320776707 |
| 62.50545855 |
| 8.427702276 |
| 60.39853298 |
| 5.618468184 |
| 68.12392673 |
| 29.49695797 |
| 6.320776707 |
| 42.13851138 |
| 5.618468184 |
| 7.02308523  |
| 11.93924489 |

|             |
|-------------|
| 7.725393753 |
| 2.809234092 |
| 9.832319322 |
| 18.2600216  |
| 132.0340023 |
| 102.5370444 |
| 4.916159661 |
| 14.74847898 |
| 91.30010799 |
| 7.02308523  |
| 11.93924489 |
| 35.81773467 |
| 4.916159661 |
| 10.53462785 |
| 78.65855458 |
| 8.427702276 |
| 10.53462785 |
| 148.1870984 |
| 8.427702276 |
| 10.53462785 |
| 75.14701196 |
| 7.02308523  |
| 7.02308523  |
| 0           |
| 7.725393753 |
| 95.51395913 |
| 76.55162901 |
| 119.3924489 |
| 2.809234092 |
| 9.130010799 |
| 193.8371524 |
| 16.15309603 |
| 191.0279183 |
| 76.55162901 |
| 61.1008415  |
| 11.93924489 |
| 122.9039915 |
| 4.213851138 |
| 8.427702276 |
| 36.5200432  |
| 4.213851138 |
| 30.19926649 |
| 130.6293853 |

|             |
|-------------|
| 137.6524705 |
| 4.213851138 |
| 56.88699036 |
| 87.08625685 |
| 110.2624381 |
| 89.19318242 |
| 157.3171092 |
| 53.37544775 |
| 6.320776707 |
| 30.90157501 |
| 75.14701196 |
| 89.19318242 |
| 6.320776707 |
| 179.7909819 |
| 129.2247682 |
| 30.19926649 |
| 25.28310683 |
| 4.916159661 |
| 33.7108091  |
| 87.08625685 |
| 39.32927729 |
| 16.15309603 |
| 19.66463864 |
| 25.28310683 |
| 5.618468184 |
| 40.73389434 |
| 77.95624606 |
| 46.35236252 |
| 9.130010799 |
| 146.0801728 |
| 42.13851138 |
| 45.650054   |
| 57.58929889 |
| 4.916159661 |
| 4.213851138 |
| 3.511542615 |
| 68.82623526 |
| 5.618468184 |
| 56.18468184 |
| 15.45078751 |
| 44.24543695 |
| 97.6208847  |
| 4.213851138 |

|             |
|-------------|
| 11.93924489 |
| 136.950162  |
| 11.23693637 |
| 14.04617046 |
| 10.53462785 |
| 4.916159661 |
| 13.34386194 |
| 7.02308523  |
| 99.02550175 |
| 44.24543695 |
| 42.8408199  |
| 52.67313923 |
| 7.02308523  |
| 9.130010799 |
| 11.93924489 |
| 160.1263432 |
| 7.725393753 |
| 99.72781027 |
| 14.04617046 |
| 7.725393753 |
| 91.30010799 |
| 96.21626765 |
| 33.7108091  |
| 116.5832148 |
| 15.45078751 |
| 11.93924489 |
| 169.256354  |
| 2.106925569 |
| 82.87240572 |
| 11.23693637 |
| 35.11542615 |
| 82.87240572 |
| 4.213851138 |
| 7.725393753 |
| 77.25393753 |
| 5.618468184 |
| 9.130010799 |
| 7.02308523  |
| 25.28310683 |
| 9.130010799 |
| 19.66463864 |
| 62.50545855 |
| 84.97933129 |



|             |
|-------------|
| 11.23693637 |
| 162.9355773 |
| 8.427702276 |
| 43.54312843 |
| 10.53462785 |
| 93.40703356 |
| 90.59779947 |
| 5.618468184 |
| 9.832319322 |
| 47.05467104 |
| 61.80315003 |
| 9.130010799 |
| 8.427702276 |
| 9.130010799 |
| 69.52854378 |
| 68.12392673 |
| 63.20776707 |
| 13.34386194 |
| 63.91007559 |
| 4.213851138 |
| 189.6233012 |
| 208.5856313 |
| 3.511542615 |
| 6.320776707 |
| 80.76548015 |
| 5.618468184 |
| 26.68772387 |
| 85.68163981 |
| 1.404617046 |
| 75.14701196 |
| 6.320776707 |
| 77.25393753 |
| 35.81773467 |
| 7.02308523  |
| 20.36694717 |
| 5.618468184 |
| 8.427702276 |
| 61.80315003 |
| 40.03158581 |
| 44.94774547 |
| 10.53462785 |
| 7.02308523  |
| 92.00241652 |

|             |
|-------------|
| 30.90157501 |
| 70.2308523  |
| 68.12392673 |
| 83.57471424 |
| 168.5540455 |
| 7.725393753 |
| 7.725393753 |
| 6.320776707 |
| 9.832319322 |
| 4.916159661 |
| 35.11542615 |
| 103.9416614 |
| 23.17618126 |
| 83.57471424 |
| 69.52854378 |
| 5.618468184 |
| 31.60388354 |
| 37.22235172 |
| 11.23693637 |
| 4.916159661 |
| 188.9209927 |
| 4.916159661 |
| 8.427702276 |
| 84.97933129 |
| 5.618468184 |
| 65.31469264 |
| 54.7800648  |
| 30.90157501 |
| 2.106925569 |
| 4.213851138 |
| 49.16159661 |
| 113.7739807 |
| 11.93924489 |
| 5.618468184 |
| 99.02550175 |
| 9.130010799 |
| 4.916159661 |
| 11.23693637 |
| 9.130010799 |
| 2.809234092 |
| 37.22235172 |
| 5.618468184 |
| 45.650054   |

|             |
|-------------|
| 7.725393753 |
| 28.79464944 |
| 118.6901404 |
| 200.8602376 |
| 37.22235172 |
| 37.22235172 |
| 15.45078751 |
| 11.23693637 |
| 7.02308523  |
| 7.725393753 |
| 21.77156421 |
| 42.13851138 |
| 8.427702276 |
| 7.725393753 |
| 38.62696877 |
| 200.1579291 |
| 54.7800648  |
| 0           |
| 35.11542615 |
| 7.02308523  |
| 153.8055665 |
| 60.39853298 |
| 9.130010799 |
| 29.49695797 |
| 37.22235172 |
| 68.12392673 |
| 38.62696877 |
| 7.02308523  |
| 7.02308523  |
| 34.41311763 |
| 7.02308523  |
| 132.0340023 |
| 155.2101836 |
| 2.106925569 |
| 139.7593961 |
| 91.30010799 |
| 8.427702276 |
| 10.53462785 |
| 66.71930969 |
| 87.08625685 |
| 4.916159661 |
| 10.53462785 |
| 26.68772387 |

|             |
|-------------|
| 4.916159661 |
| 10.53462785 |
| 4.213851138 |
| 37.22235172 |
| 9.130010799 |
| 9.130010799 |
| 89.19318242 |
| 77.25393753 |
| 0           |
| 167.851737  |
| 8.427702276 |
| 68.82623526 |
| 11.23693637 |
| 10.53462785 |
| 9.130010799 |
| 59.69622446 |
| 25.28310683 |
| 40.03158581 |
| 9.832319322 |
| 7.02308523  |
| 44.24543695 |
| 6.320776707 |
| 58.99391593 |
| 18.2600216  |
| 45.650054   |
| 7.02308523  |
| 7.02308523  |
| 17.55771308 |
| 7.725393753 |
| 93.40703356 |
| 13.34386194 |
| 47.75697957 |
| 4.213851138 |
| 18.2600216  |
| 5.618468184 |
| 89.19318242 |
| 54.7800648  |
| 5.618468184 |
| 77.95624606 |
| 5.618468184 |
| 4.213851138 |
| 4.916159661 |
| 33.7108091  |

|             |
|-------------|
| 58.29160741 |
| 8.427702276 |
| 4.916159661 |
| 143.9732472 |
| 28.79464944 |
| 2.809234092 |
| 103.2393529 |
| 0           |
| 3.511542615 |
| 42.13851138 |
| 7.02308523  |
| 8.427702276 |
| 3.511542615 |
| 0           |
| 67.42161821 |
| 51.26852218 |
| 9.130010799 |
| 50.56621366 |
| 28.09234092 |
| 183.3025245 |
| 14.04617046 |
| 173.4702052 |
| 92.00241652 |
| 54.07775627 |
| 9.832319322 |
| 5.618468184 |
| 40.73389434 |
| 7.725393753 |
| 102.5370444 |
| 3.511542615 |
| 21.06925569 |
| 24.58079831 |
| 5.618468184 |
| 5.618468184 |
| 8.427702276 |
| 6.320776707 |
| 59.69622446 |
| 103.9416614 |
| 95.51395913 |
| 70.2308523  |
| 22.47387274 |
| 3.511542615 |
| 23.87848978 |

|             |
|-------------|
| 31.60388354 |
| 33.7108091  |
| 9.130010799 |
| 56.88699036 |
| 120.0947574 |
| 9.832319322 |
| 58.29160741 |
| 7.725393753 |
| 86.38394833 |
| 31.60388354 |
| 4.916159661 |
| 9.130010799 |
| 2.809234092 |
| 42.8408199  |
| 85.68163981 |
| 30.19926649 |
| 91.30010799 |
| 4.213851138 |
| 67.42161821 |
| 3.511542615 |
| 82.87240572 |
| 2.809234092 |
| 40.73389434 |
| 8.427702276 |
| 4.916159661 |
| 65.31469264 |
| 43.54312843 |
| 160.1263432 |
| 9.130010799 |
| 7.02308523  |
| 63.91007559 |
| 9.130010799 |
| 215.6087166 |
| 39.32927729 |
| 84.27702276 |
| 3.511542615 |
| 11.23693637 |
| 9.832319322 |
| 5.618468184 |
| 108.1555125 |
| 4.213851138 |
| 10.53462785 |
| 127.1178427 |

|             |
|-------------|
| 20.36694717 |
| 167.1494285 |
| 397.506624  |
| 11.23693637 |
| 74.44470344 |
| 189.6233012 |
| 9.130010799 |
| 9.130010799 |
| 238.0825893 |
| 89.19318242 |
| 96.21626765 |
| 45.650054   |
| 5.618468184 |
| 11.93924489 |
| 152.4009495 |
| 5.618468184 |
| 66.71930969 |
| 12.64155341 |
| 106.7508955 |
| 10.53462785 |
| 106.048587  |
| 7.02308523  |
| 19.66463864 |
| 128.5224597 |
| 33.7108091  |
| 6.320776707 |
| 5.618468184 |
| 125.0109171 |
| 28.09234092 |
| 8.427702276 |
| 4.916159661 |
| 94.10934208 |
| 5.618468184 |
| 148.1870984 |
| 6.320776707 |
| 142.5686302 |
| 198.753312  |
| 5.618468184 |
| 18.2600216  |
| 126.4155341 |
| 176.2794393 |
| 1.404617046 |
| 148.1870984 |

|             |
|-------------|
| 6.320776707 |
| 136.2478535 |
| 8.427702276 |
| 83.57471424 |
| 60.39853298 |
| 37.22235172 |
| 7.02308523  |
| 122.201683  |
| 59.69622446 |
| 5.618468184 |
| 7.02308523  |
| 42.8408199  |
| 257.0449194 |
| 51.9708307  |
| 213.501791  |
| 4.916159661 |
| 7.725393753 |
| 47.05467104 |
| 196.6463864 |
| 8.427702276 |
| 20.36694717 |
| 14.04617046 |
| 9.130010799 |
| 0           |
| 4.213851138 |
| 10.53462785 |
| 147.4847898 |
| 9.832319322 |
| 11.93924489 |
| 12.64155341 |
| 25.28310683 |
| 5.618468184 |
| 7.02308523  |
| 61.1008415  |
| 29.49695797 |
| 87.78856538 |
| 7.725393753 |
| 4.213851138 |
| 44.24543695 |
| 117.2855233 |
| 7.02308523  |
| 3.511542615 |
| 66.01700116 |



|             |
|-------------|
| 27.3900324  |
| 0.702308523 |
| 5.618468184 |
| 7.725393753 |
| 97.6208847  |
| 6.320776707 |
| 5.618468184 |
| 4.916159661 |
| 11.23693637 |
| 63.20776707 |
| 58.99391593 |
| 8.427702276 |
| 4.916159661 |
| 9.130010799 |
| 89.89549095 |
| 51.9708307  |
| 57.58929889 |
| 9.130010799 |
| 37.92466024 |
| 136.950162  |
| 8.427702276 |
| 136.2478535 |
| 11.93924489 |
| 146.7824813 |
| 26.68772387 |
| 9.832319322 |
| 82.87240572 |
| 132.0340023 |
| 122.201683  |
| 4.213851138 |
| 27.3900324  |
| 16.85540455 |
| 31.60388354 |
| 7.725393753 |
| 144.6755557 |
| 8.427702276 |
| 6.320776707 |
| 29.49695797 |
| 5.618468184 |
| 67.42161821 |
| 25.98541535 |
| 4.916159661 |
| 199.4556205 |

|             |
|-------------|
| 4.213851138 |
| 6.320776707 |
| 116.5832148 |
| 42.8408199  |
| 9.130010799 |
| 8.427702276 |
| 6.320776707 |
| 57.58929889 |
| 70.2308523  |
| 13.34386194 |
| 14.04617046 |
| 62.50545855 |
| 13.34386194 |
| 6.320776707 |
| 75.84932049 |
| 37.22235172 |
| 24.58079831 |
| 92.70472504 |
| 75.84932049 |
| 96.21626765 |
| 125.0109171 |
| 51.9708307  |
| 39.32927729 |
| 5.618468184 |
| 105.3462785 |
| 0.702308523 |
| 15.45078751 |
| 93.40703356 |
| 16.15309603 |
| 25.98541535 |
| 4.213851138 |
| 35.11542615 |
| 4.213851138 |
| 4.916159661 |
| 17.55771308 |
| 4.916159661 |
| 8.427702276 |
| 8.427702276 |
| 102.5370444 |
| 102.5370444 |
| 44.94774547 |
| 77.95624606 |
| 2.809234092 |

|             |
|-------------|
| 10.53462785 |
| 89.19318242 |
| 9.130010799 |
| 40.03158581 |
| 21.77156421 |
| 9.130010799 |
| 8.427702276 |
| 14.74847898 |
| 6.320776707 |
| 5.618468184 |
| 137.6524705 |
| 79.3608631  |
| 68.12392673 |
| 16.15309603 |
| 4.213851138 |
| 4.213851138 |
| 8.427702276 |
| 8.427702276 |
| 39.32927729 |
| 11.23693637 |
| 11.93924489 |
| 23.87848978 |
| 103.2393529 |
| 101.1324273 |
| 2.809234092 |
| 0.702308523 |
| 103.2393529 |
| 3.511542615 |
| 7.725393753 |
| 98.32319322 |
| 15.45078751 |
| 78.65855458 |
| 185.4094501 |
| 2.809234092 |
| 41.43620286 |
| 38.62696877 |
| 9.130010799 |
| 14.74847898 |
| 4.916159661 |
| 9.130010799 |
| 58.99391593 |
| 11.93924489 |
| 87.78856538 |

|             |
|-------------|
| 103.2393529 |
| 38.62696877 |
| 122.201683  |
| 9.130010799 |
| 103.2393529 |
| 40.73389434 |
| 9.130010799 |
| 9.130010799 |
| 7.02308523  |
| 7.725393753 |
| 7.02308523  |
| 24.58079831 |
| 79.3608631  |
| 11.93924489 |
| 7.02308523  |
| 4.916159661 |
| 54.07775627 |
| 42.13851138 |
| 73.04008639 |
| 14.74847898 |
| 7.02308523  |
| 110.9647466 |
| 7.725393753 |
| 8.427702276 |
| 51.26852218 |
| 26.68772387 |
| 4.916159661 |
| 4.916159661 |
| 125.0109171 |
| 42.13851138 |
| 8.427702276 |
| 7.725393753 |
| 44.24543695 |
| 254.9379939 |
| 6.320776707 |
| 139.0570876 |
| 5.618468184 |
| 13.34386194 |
| 92.70472504 |
| 51.26852218 |
| 4.916159661 |
| 4.916159661 |
| 7.725393753 |

|             |
|-------------|
| 8.427702276 |
| 100.4301188 |
| 8.427702276 |
| 42.13851138 |
| 7.02308523  |
| 4.213851138 |
| 35.11542615 |
| 8.427702276 |
| 90.59779947 |
| 7.02308523  |
| 5.618468184 |
| 41.43620286 |
| 153.8055665 |
| 220.5248762 |
| 49.16159661 |
| 105.3462785 |
| 2.106925569 |
| 7.02308523  |
| 89.89549095 |
| 14.04617046 |
| 6.320776707 |
| 6.320776707 |
| 23.17618126 |
| 39.32927729 |
| 80.06317162 |
| 11.93924489 |
| 25.28310683 |
| 89.19318242 |
| 7.725393753 |
| 44.94774547 |
| 79.3608631  |
| 149.5917154 |
| 31.60388354 |
| 8.427702276 |
| 145.3778643 |
| 118.6901404 |
| 8.427702276 |
| 68.12392673 |
| 3.511542615 |
| 110.2624381 |
| 7.02308523  |
| 47.05467104 |
| 82.87240572 |

|             |
|-------------|
| 142.5686302 |
| 14.04617046 |
| 7.02308523  |
| 11.93924489 |
| 59.69622446 |
| 155.9124921 |
| 44.24543695 |
| 158.7217262 |
| 47.05467104 |
| 7.725393753 |
| 89.89549095 |
| 12.64155341 |
| 61.80315003 |
| 41.43620286 |
| 108.8578211 |
| 6.320776707 |
| 9.832319322 |
| 25.98541535 |
| 55.48237332 |
| 7.725393753 |
| 5.618468184 |
| 9.130010799 |
| 31.60388354 |
| 7.02308523  |
| 9.832319322 |
| 4.916159661 |
| 56.88699036 |
| 54.7800648  |
| 99.02550175 |
| 73.04008639 |
| 256.3426109 |
| 8.427702276 |
| 106.7508955 |
| 37.22235172 |
| 13.34386194 |
| 15.45078751 |
| 21.06925569 |
| 4.213851138 |
| 150.2940239 |
| 10.53462785 |
| 51.9708307  |
| 153.103258  |
| 6.320776707 |

|             |
|-------------|
| 26.68772387 |
| 4.916159661 |
| 186.8140671 |
| 12.64155341 |
| 47.75697957 |
| 5.618468184 |
| 9.832319322 |
| 20.36694717 |
| 26.68772387 |
| 66.01700116 |
| 193.1348438 |
| 236.6779723 |
| 96.21626765 |
| 16.85540455 |
| 129.9270768 |
| 4.916159661 |
| 38.62696877 |
| 8.427702276 |
| 117.2855233 |
| 81.46778867 |
| 89.89549095 |
| 29.49695797 |
| 7.725393753 |
| 127.8201512 |
| 101.8347358 |
| 4.916159661 |
| 9.130010799 |
| 14.74847898 |
| 172.7678967 |
| 7.02308523  |
| 2.809234092 |
| 135.5455449 |
| 33.7108091  |
| 135.5455449 |
| 2.106925569 |
| 58.99391593 |
| 155.9124921 |
| 7.02308523  |
| 133.4386194 |
| 113.0716722 |
| 8.427702276 |
| 23.87848978 |
| 7.02308523  |

|             |
|-------------|
| 195.9440779 |
| 7.725393753 |
| 9.130010799 |
| 302.6949734 |
| 12.64155341 |
| 9.832319322 |
| 9.130010799 |
| 7.725393753 |
| 86.38394833 |
| 4.916159661 |
| 143.9732472 |
| 2.809234092 |
| 5.618468184 |
| 87.78856538 |
| 100.4301188 |
| 114.4762893 |
| 6.320776707 |
| 2.809234092 |
| 7.725393753 |
| 14.74847898 |
| 107.453204  |
| 4.916159661 |
| 16.85540455 |
| 0           |
| 5.618468184 |
| 58.29160741 |
| 94.81165061 |
| 8.427702276 |
| 22.47387274 |
| 139.0570876 |
| 59.69622446 |
| 15.45078751 |
| 15.45078751 |
| 26.68772387 |
| 67.42161821 |
| 42.8408199  |
| 150.9963324 |
| 84.97933129 |
| 2.809234092 |
| 82.17009719 |
| 158.7217262 |
| 5.618468184 |
| 66.71930969 |



|             |
|-------------|
| 37.92466024 |
| 25.98541535 |
| 16.85540455 |
| 60.39853298 |
| 28.79464944 |
| 8.427702276 |
| 59.69622446 |
| 8.427702276 |
| 167.851737  |
| 218.4179507 |
| 10.53462785 |
| 39.32927729 |
| 4.916159661 |
| 5.618468184 |
| 95.51395913 |
| 18.2600216  |
| 80.76548015 |
| 56.18468184 |
| 79.3608631  |
| 7.02308523  |
| 0.702308523 |
| 37.22235172 |
| 11.93924489 |
| 60.39853298 |
| 83.57471424 |
| 2.106925569 |
| 56.18468184 |
| 7.725393753 |
| 15.45078751 |
| 12.64155341 |
| 4.213851138 |
| 38.62696877 |
| 200.8602376 |
| 66.71930969 |
| 47.75697957 |
| 120.797066  |
| 11.93924489 |
| 5.618468184 |
| 7.02308523  |
| 174.8748222 |
| 58.29160741 |
| 18.2600216  |
| 4.213851138 |

|             |
|-------------|
| 9.130010799 |
| 15.45078751 |
| 9.130010799 |
| 6.320776707 |
| 42.13851138 |
| 7.02308523  |
| 7.02308523  |
| 6.320776707 |
| 4.213851138 |
| 8.427702276 |
| 103.9416614 |
| 54.07775627 |
| 7.02308523  |
| 9.832319322 |
| 21.77156421 |
| 23.87848978 |
| 19.66463864 |
| 8.427702276 |
| 62.50545855 |
| 43.54312843 |
| 200.1579291 |
| 92.00241652 |
| 14.74847898 |
| 7.02308523  |
| 7.02308523  |
| 14.04617046 |
| 6.320776707 |
| 42.13851138 |
| 8.427702276 |
| 18.2600216  |
| 5.618468184 |
| 8.427702276 |
| 60.39853298 |
| 3.511542615 |
| 68.12392673 |
| 6.320776707 |
| 37.92466024 |
| 8.427702276 |
| 9.130010799 |
| 55.48237332 |
| 0           |
| 169.9586626 |
| 93.40703356 |

|             |
|-------------|
| 69.52854378 |
| 25.98541535 |
| 57.58929889 |
| 37.22235172 |
| 100.4301188 |
| 14.74847898 |
| 116.5832148 |
| 7.725393753 |
| 39.32927729 |
| 68.12392673 |
| 8.427702276 |
| 26.68772387 |
| 7.725393753 |
| 126.4155341 |
| 41.43620286 |
| 2.106925569 |
| 49.86390513 |
| 24.58079831 |
| 92.70472504 |
| 12.64155341 |
| 29.49695797 |
| 8.427702276 |
| 14.74847898 |
| 9.130010799 |
| 10.53462785 |
| 189.6233012 |
| 82.17009719 |
| 4.916159661 |
| 44.24543695 |
| 7.725393753 |
| 23.17618126 |
| 45.650054   |
| 108.1555125 |
| 188.2186842 |
| 6.320776707 |
| 127.8201512 |
| 7.725393753 |
| 7.02308523  |
| 21.77156421 |
| 8.427702276 |
| 26.68772387 |
| 4.916159661 |
| 4.916159661 |

|             |
|-------------|
| 35.81773467 |
| 49.16159661 |
| 11.93924489 |
| 127.1178427 |
| 4.916159661 |
| 70.93316082 |
| 134.1409279 |
| 129.9270768 |
| 4.213851138 |
| 33.7108091  |
| 42.8408199  |
| 11.23693637 |
| 24.58079831 |
| 42.13851138 |
| 9.832319322 |
| 2.809234092 |
| 271.0910899 |
| 37.92466024 |
| 104.6439699 |
| 7.02308523  |
| 77.25393753 |
| 25.28310683 |
| 102.5370444 |
| 2.106925569 |
| 7.02308523  |
| 4.916159661 |
| 4.916159661 |
| 8.427702276 |
| 18.96233012 |
| 14.04617046 |
| 4.916159661 |
| 6.320776707 |
| 25.28310683 |
| 101.1324273 |
| 4.916159661 |
| 4.916159661 |
| 7.725393753 |
| 59.69622446 |
| 40.73389434 |
| 7.725393753 |
| 0           |
| 32.30619206 |
| 99.72781027 |

|             |
|-------------|
| 95.51395913 |
| 11.23693637 |
| 133.4386194 |
| 219.1202592 |
| 33.7108091  |
| 7.02308523  |
| 54.7800648  |
| 9.130010799 |
| 9.832319322 |
| 42.13851138 |
| 49.16159661 |
| 4.213851138 |
| 5.618468184 |
| 36.5200432  |
| 10.53462785 |
| 4.213851138 |
| 17.55771308 |
| 7.725393753 |
| 25.98541535 |
| 129.2247682 |
| 4.213851138 |
| 6.320776707 |
| 13.34386194 |
| 2.106925569 |
| 4.213851138 |
| 6.320776707 |
| 9.130010799 |
| 81.46778867 |
| 52.67313923 |
| 4.916159661 |
| 9.832319322 |
| 35.81773467 |
| 35.81773467 |
| 9.832319322 |
| 65.31469264 |
| 136.2478535 |
| 46.35236252 |
| 4.213851138 |
| 207.8833228 |
| 110.9647466 |
| 19.66463864 |
| 6.320776707 |
| 44.94774547 |

|             |
|-------------|
| 80.06317162 |
| 7.02308523  |
| 14.74847898 |
| 122.9039915 |
| 8.427702276 |
| 33.00850058 |
| 13.34386194 |
| 5.618468184 |
| 67.42161821 |
| 6.320776707 |
| 110.2624381 |
| 6.320776707 |
| 9.832319322 |
| 4.916159661 |
| 45.650054   |
| 189.6233012 |
| 45.650054   |
| 4.916159661 |
| 45.650054   |
| 94.81165061 |
| 9.832319322 |
| 9.832319322 |
| 21.06925569 |
| 9.130010799 |
| 19.66463864 |
| 102.5370444 |
| 14.74847898 |
| 6.320776707 |
| 25.98541535 |
| 73.04008639 |
| 18.2600216  |
| 108.1555125 |
| 58.29160741 |
| 4.916159661 |
| 30.90157501 |
| 8.427702276 |
| 8.427702276 |
| 13.34386194 |
| 4.916159661 |
| 162.2332688 |
| 8.427702276 |
| 31.60388354 |
| 107.453204  |

|             |
|-------------|
| 139.7593961 |
| 122.201683  |
| 91.30010799 |
| 56.18468184 |
| 0           |
| 9.832319322 |
| 16.15309603 |
| 224.7387274 |
| 6.320776707 |
| 246.5102916 |
| 18.96233012 |
| 176.2794393 |
| 207.8833228 |
| 58.99391593 |
| 174.1725137 |
| 50.56621366 |
| 11.23693637 |
| 5.618468184 |
| 9.832319322 |
| 4.213851138 |
| 133.4386194 |
| 9.832319322 |
| 62.50545855 |
| 38.62696877 |
| 16.85540455 |
| 5.618468184 |
| 9.832319322 |
| 27.3900324  |
| 99.02550175 |
| 7.725393753 |
| 9.130010799 |
| 4.916159661 |
| 59.69622446 |
| 6.320776707 |
| 4.213851138 |
| 9.130010799 |
| 4.213851138 |
| 3.511542615 |
| 7.02308523  |
| 139.0570876 |
| 7.02308523  |
| 11.93924489 |
| 70.93316082 |

|             |
|-------------|
| 11.23693637 |
| 44.24543695 |
| 27.3900324  |
| 5.618468184 |
| 5.618468184 |
| 9.130010799 |
| 61.80315003 |
| 5.618468184 |
| 30.90157501 |
| 4.916159661 |
| 30.90157501 |
| 12.64155341 |
| 7.725393753 |
| 185.4094501 |
| 4.916159661 |
| 11.93924489 |
| 10.53462785 |
| 129.2247682 |
| 4.213851138 |
| 151.698641  |
| 97.6208847  |
| 4.213851138 |
| 212.097174  |
| 6.320776707 |
| 21.06925569 |
| 5.618468184 |
| 66.01700116 |
| 19.66463864 |
| 11.23693637 |
| 17.55771308 |
| 9.130010799 |
| 87.78856538 |
| 146.7824813 |
| 56.18468184 |
| 5.618468184 |
| 19.66463864 |
| 16.15309603 |
| 68.82623526 |
| 16.15309603 |
| 132.7363109 |
| 7.02308523  |
| 5.618468184 |
| 12.64155341 |



|             |
|-------------|
| 9.130010799 |
| 20.36694717 |
| 18.2600216  |
| 174.8748222 |
| 71.63546935 |
| 73.04008639 |
| 30.19926649 |
| 2.106925569 |
| 61.80315003 |
| 19.66463864 |
| 8.427702276 |
| 33.00850058 |
| 12.64155341 |
| 107.453204  |
| 6.320776707 |
| 14.04617046 |
| 23.17618126 |
| 115.1785978 |
| 9.832319322 |
| 64.61238412 |
| 29.49695797 |
| 6.320776707 |
| 6.320776707 |
| 14.74847898 |
| 3.511542615 |
| 136.950162  |
| 9.130010799 |
| 146.7824813 |
| 19.66463864 |
| 17.55771308 |
| 49.16159661 |
| 159.4240347 |
| 5.618468184 |
| 13.34386194 |
| 9.130010799 |
| 28.09234092 |
| 0           |
| 37.92466024 |
| 206.4787058 |
| 21.06925569 |
| 19.66463864 |
| 23.87848978 |
| 8.427702276 |

|             |
|-------------|
| 17.55771308 |
| 3.511542615 |
| 0.702308523 |
| 4.916159661 |
| 114.4762893 |
| 69.52854378 |
| 168.5540455 |
| 7.725393753 |
| 7.02308523  |
| 108.8578211 |
| 35.81773467 |
| 28.09234092 |
| 9.130010799 |
| 63.91007559 |
| 8.427702276 |
| 4.213851138 |
| 5.618468184 |
| 6.320776707 |
| 14.74847898 |
| 106.048587  |
| 56.88699036 |
| 4.213851138 |
| 3.511542615 |
| 7.02308523  |
| 10.53462785 |
| 9.832319322 |
| 4.213851138 |
| 10.53462785 |
| 11.93924489 |
| 238.7848978 |
| 4.916159661 |
| 7.02308523  |
| 209.2879399 |
| 7.725393753 |
| 2.106925569 |
| 8.427702276 |
| 108.1555125 |
| 4.916159661 |
| 99.02550175 |
| 10.53462785 |
| 4.213851138 |
| 26.68772387 |
| 5.618468184 |

|             |
|-------------|
| 8.427702276 |
| 88.4908739  |
| 8.427702276 |
| 25.28310683 |
| 8.427702276 |
| 8.427702276 |
| 113.0716722 |
| 9.130010799 |
| 74.44470344 |
| 67.42161821 |
| 41.43620286 |
| 69.52854378 |
| 8.427702276 |
| 29.49695797 |
| 66.01700116 |
| 11.23693637 |
| 9.130010799 |
| 5.618468184 |
| 106.048587  |
| 30.19926649 |
| 23.17618126 |
| 6.320776707 |
| 94.81165061 |
| 161.5309603 |
| 217.0133336 |
| 8.427702276 |
| 4.916159661 |
| 238.7848978 |
| 7.02308523  |
| 25.98541535 |
| 91.30010799 |
| 125.7132256 |
| 30.19926649 |
| 198.0510035 |
| 11.93924489 |
| 41.43620286 |
| 85.68163981 |
| 29.49695797 |
| 112.3693637 |
| 122.9039915 |
| 124.3086086 |
| 34.41311763 |
| 25.28310683 |

|             |
|-------------|
| 7.02308523  |
| 11.93924489 |
| 6.320776707 |
| 9.832319322 |
| 11.93924489 |
| 92.00241652 |
| 8.427702276 |
| 9.130010799 |
| 5.618468184 |
| 9.130010799 |
| 122.201683  |
| 106.048587  |
| 58.29160741 |
| 108.8578211 |
| 3.511542615 |
| 6.320776707 |
| 32.30619206 |
| 68.12392673 |
| 9.832319322 |
| 158.0194177 |
| 11.93924489 |
| 9.832319322 |
| 7.02308523  |
| 100.4301188 |
| 5.618468184 |
| 4.916159661 |
| 14.74847898 |
| 0           |
| 5.618468184 |
| 55.48237332 |
| 42.13851138 |
| 7.725393753 |
| 190.3256097 |
| 30.19926649 |
| 4.213851138 |
| 7.02308523  |
| 13.34386194 |
| 127.8201512 |
| 97.6208847  |
| 54.07775627 |
| 4.916159661 |
| 221.9294933 |
| 9.130010799 |

|             |
|-------------|
| 7.725393753 |
| 5.618468184 |
| 5.618468184 |
| 7.02308523  |
| 7.725393753 |
| 40.03158581 |
| 77.95624606 |
| 5.618468184 |
| 6.320776707 |
| 2.106925569 |
| 6.320776707 |
| 127.1178427 |
| 47.75697957 |
| 24.58079831 |
| 25.98541535 |
| 9.832319322 |
| 26.68772387 |
| 25.98541535 |
| 39.32927729 |
| 7.02308523  |
| 8.427702276 |
| 25.28310683 |
| 45.650054   |
| 117.9878319 |
| 86.38394833 |
| 7.725393753 |
| 110.9647466 |
| 8.427702276 |
| 52.67313923 |
| 16.85540455 |
| 155.2101836 |
| 4.916159661 |
| 155.2101836 |
| 8.427702276 |
| 6.320776707 |
| 47.05467104 |
| 9.832319322 |
| 139.0570876 |
| 16.85540455 |
| 61.1008415  |
| 23.17618126 |
| 47.75697957 |
| 64.61238412 |

|             |
|-------------|
| 7.02308523  |
| 2.809234092 |
| 84.27702276 |
| 4.213851138 |
| 72.33777787 |
| 16.15309603 |
| 131.3316938 |
| 5.618468184 |
| 3.511542615 |
| 60.39853298 |
| 3.511542615 |
| 8.427702276 |
| 2.809234092 |
| 153.103258  |
| 30.90157501 |
| 2.106925569 |
| 176.2794393 |
| 9.130010799 |
| 116.5832148 |
| 42.8408199  |
| 152.4009495 |
| 7.725393753 |
| 14.74847898 |
| 51.26852218 |
| 75.14701196 |
| 7.725393753 |
| 1.404617046 |
| 7.02308523  |
| 46.35236252 |
| 9.130010799 |
| 3.511542615 |
| 44.94774547 |
| 43.54312843 |
| 49.86390513 |
| 90.59779947 |
| 106.048587  |
| 71.63546935 |
| 9.832319322 |
| 10.53462785 |
| 16.85540455 |
| 58.99391593 |
| 16.15309603 |
| 11.93924489 |

|             |
|-------------|
| 7.725393753 |
| 6.320776707 |
| 148.8894069 |
| 7.02308523  |
| 2.809234092 |
| 23.87848978 |
| 9.130010799 |
| 157.3171092 |
| 5.618468184 |
| 120.797066  |
| 4.916159661 |
| 49.86390513 |
| 119.3924489 |
| 6.320776707 |
| 13.34386194 |
| 37.92466024 |
| 9.130010799 |
| 73.04008639 |
| 6.320776707 |
| 5.618468184 |
| 125.0109171 |
| 7.02308523  |
| 51.9708307  |
| 7.725393753 |
| 7.02308523  |
| 18.2600216  |
| 4.213851138 |
| 49.16159661 |
| 7.725393753 |
| 8.427702276 |
| 174.8748222 |
| 9.130010799 |
| 24.58079831 |
| 2.809234092 |
| 143.9732472 |
| 90.59779947 |
| 6.320776707 |
| 217.7156421 |
| 3.511542615 |
| 27.3900324  |
| 38.62696877 |
| 9.832319322 |
| 7.725393753 |

|             |
|-------------|
| 9.832319322 |
| 11.93924489 |
| 23.87848978 |
| 9.832319322 |
| 33.00850058 |
| 2.809234092 |
| 7.725393753 |
| 4.213851138 |
| 10.53462785 |
| 18.96233012 |
| 114.4762893 |
| 8.427702276 |
| 6.320776707 |
| 9.832319322 |
| 72.33777787 |
| 4.213851138 |
| 143.2709387 |
| 5.618468184 |
| 9.832319322 |
| 6.320776707 |
| 23.87848978 |
| 159.4240347 |
| 76.55162901 |
| 10.53462785 |
| 10.53462785 |
| 40.73389434 |
| 58.29160741 |
| 3.511542615 |
| 9.832319322 |
| 168.5540455 |
| 4.213851138 |
| 202.2648546 |
| 7.02308523  |
| 25.28310683 |
| 4.213851138 |
| 4.213851138 |
| 10.53462785 |
| 198.0510035 |
| 7.725393753 |
| 6.320776707 |
| 156.6148006 |
| 132.7363109 |
| 73.74239492 |



|             |
|-------------|
| 202.2648546 |
| 24.58079831 |
| 6.320776707 |
| 11.23693637 |
| 7.725393753 |
| 100.4301188 |
| 15.45078751 |
| 8.427702276 |
| 37.22235172 |
| 29.49695797 |
| 18.2600216  |
| 10.53462785 |
| 14.04617046 |
| 5.618468184 |
| 47.05467104 |
| 45.650054   |
| 27.3900324  |
| 38.62696877 |
| 28.09234092 |
| 1.404617046 |
| 5.618468184 |
| 5.618468184 |
| 83.57471424 |
| 5.618468184 |
| 8.427702276 |
| 15.45078751 |
| 13.34386194 |
| 7.725393753 |
| 18.2600216  |
| 16.85540455 |
| 26.68772387 |
| 54.07775627 |
| 0           |
| 6.320776707 |
| 9.130010799 |
| 10.53462785 |
| 44.94774547 |
| 14.74847898 |
| 27.3900324  |
| 8.427702276 |
| 5.618468184 |
| 35.11542615 |
| 13.34386194 |

|             |
|-------------|
| 133.4386194 |
| 6.320776707 |
| 23.17618126 |
| 0.702308523 |
| 7.02308523  |
| 139.0570876 |
| 4.213851138 |
| 73.74239492 |
| 27.3900324  |
| 70.2308523  |
| 41.43620286 |
| 18.96233012 |
| 15.45078751 |
| 8.427702276 |
| 5.618468184 |
| 150.2940239 |
| 5.618468184 |
| 7.02308523  |
| 4.916159661 |
| 4.213851138 |
| 6.320776707 |
| 7.02308523  |
| 4.213851138 |
| 7.02308523  |
| 9.130010799 |
| 7.02308523  |
| 2.106925569 |
| 2.106925569 |
| 9.832319322 |
| 7.02308523  |
| 10.53462785 |
| 9.130010799 |
| 39.32927729 |
| 21.06925569 |
| 4.916159661 |
| 14.74847898 |
| 73.74239492 |
| 4.213851138 |
| 77.95624606 |
| 15.45078751 |
| 245.8079831 |
| 47.75697957 |
| 7.02308523  |

|             |
|-------------|
| 109.5601296 |
| 12.64155341 |
| 23.17618126 |
| 55.48237332 |
| 166.44712   |
| 2.809234092 |
| 1.404617046 |
| 66.71930969 |
| 8.427702276 |
| 9.130010799 |
| 8.427702276 |
| 10.53462785 |
| 19.66463864 |
| 131.3316938 |
| 90.59779947 |
| 25.28310683 |
| 82.17009719 |
| 3.511542615 |
| 8.427702276 |
| 7.02308523  |
| 86.38394833 |
| 55.48237332 |
| 42.8408199  |
| 7.02308523  |
| 2.106925569 |
| 92.70472504 |
| 5.618468184 |
| 29.49695797 |
| 136.950162  |
| 30.19926649 |
| 3.511542615 |
| 2.106925569 |
| 10.53462785 |
| 7.725393753 |
| 115.1785978 |
| 100.4301188 |
| 99.72781027 |
| 119.3924489 |
| 20.36694717 |
| 2.809234092 |
| 254.2356853 |
| 7.725393753 |
| 50.56621366 |

|             |
|-------------|
| 7.725393753 |
| 5.618468184 |
| 12.64155341 |
| 108.1555125 |
| 123.6063001 |
| 4.916159661 |
| 13.34386194 |
| 56.88699036 |
| 15.45078751 |
| 7.02308523  |
| 60.39853298 |
| 39.32927729 |
| 194.5394609 |
| 167.1494285 |
| 4.916159661 |
| 7.725393753 |
| 89.89549095 |
| 148.1870984 |
| 57.58929889 |
| 4.213851138 |
| 84.97933129 |
| 14.74847898 |
| 328.6803888 |
| 143.9732472 |
| 16.85540455 |
| 4.213851138 |
| 6.320776707 |
| 41.43620286 |
| 24.58079831 |
| 8.427702276 |
| 8.427702276 |
| 8.427702276 |
| 8.427702276 |
| 32.30619206 |
| 12.64155341 |
| 150.9963324 |
| 11.23693637 |
| 261.2587706 |
| 32.30619206 |
| 8.427702276 |
| 103.2393529 |
| 16.15309603 |
| 231.7618126 |

|             |
|-------------|
| 65.31469264 |
| 99.72781027 |
| 10.53462785 |
| 54.07775627 |
| 44.24543695 |
| 9.832319322 |
| 8.427702276 |
| 4.213851138 |
| 7.725393753 |
| 57.58929889 |
| 194.5394609 |
| 45.650054   |
| 9.130010799 |
| 106.048587  |
| 8.427702276 |
| 14.04617046 |
| 7.02308523  |
| 14.74847898 |
| 30.19926649 |
| 7.02308523  |
| 11.23693637 |
| 22.47387274 |
| 4.916159661 |
| 54.7800648  |
| 9.130010799 |
| 42.8408199  |
| 65.31469264 |
| 14.74847898 |
| 8.427702276 |
| 10.53462785 |
| 6.320776707 |
| 181.1955989 |
| 7.02308523  |
| 8.427702276 |
| 7.725393753 |
| 9.130010799 |
| 75.14701196 |
| 7.725393753 |
| 13.34386194 |
| 127.8201512 |
| 4.916159661 |
| 32.30619206 |
| 2.809234092 |

|             |
|-------------|
| 74.44470344 |
| 94.10934208 |
| 4.916159661 |
| 11.23693637 |
| 7.02308523  |
| 96.91857618 |
| 20.36694717 |
| 11.93924489 |
| 53.37544775 |
| 6.320776707 |
| 9.832319322 |
| 8.427702276 |
| 141.8663216 |
| 26.68772387 |
| 191.0279183 |
| 9.832319322 |
| 40.03158581 |
| 49.86390513 |
| 53.37544775 |
| 104.6439699 |
| 60.39853298 |
| 35.81773467 |
| 7.725393753 |
| 21.77156421 |
| 155.2101836 |
| 160.1263432 |
| 5.618468184 |
| 3.511542615 |
| 8.427702276 |
| 79.3608631  |
| 9.130010799 |
| 8.427702276 |
| 14.74847898 |
| 11.93924489 |
| 7.02308523  |
| 3.511542615 |
| 96.91857618 |
| 0           |
| 7.02308523  |
| 111.6670552 |
| 0           |
| 7.725393753 |
| 9.130010799 |

|             |
|-------------|
| 4.916159661 |
| 125.7132256 |
| 9.832319322 |
| 54.07775627 |
| 8.427702276 |
| 35.81773467 |
| 22.47387274 |
| 4.916159661 |
| 19.66463864 |
| 5.618468184 |
| 7.02308523  |
| 4.916159661 |
| 5.618468184 |
| 5.618468184 |
| 6.320776707 |
| 4.213851138 |
| 4.213851138 |
| 4.213851138 |
| 7.725393753 |
| 15.45078751 |
| 2.106925569 |
| 8.427702276 |
| 124.3086086 |
| 8.427702276 |
| 94.10934208 |
| 11.23693637 |
| 5.618468184 |
| 23.17618126 |
| 14.04617046 |
| 8.427702276 |
| 18.96233012 |
| 3.511542615 |
| 9.832319322 |
| 10.53462785 |
| 2.809234092 |
| 5.618468184 |
| 93.40703356 |
| 68.12392673 |
| 4.916159661 |
| 7.725393753 |
| 7.725393753 |
| 21.06925569 |
| 6.320776707 |

|             |
|-------------|
| 9.130010799 |
| 29.49695797 |
| 0           |
| 10.53462785 |
| 5.618468184 |
| 4.916159661 |
| 42.8408199  |
| 7.725393753 |
| 38.62696877 |
| 14.04617046 |
| 216.3110251 |
| 4.916159661 |
| 7.725393753 |
| 0.702308523 |
| 48.45928809 |
| 6.320776707 |
| 15.45078751 |
| 5.618468184 |
| 3.511542615 |
| 82.17009719 |
| 2.106925569 |
| 7.02308523  |
| 101.8347358 |
| 7.725393753 |
| 5.618468184 |
| 10.53462785 |
| 5.618468184 |
| 3.511542615 |
| 61.80315003 |
| 56.88699036 |
| 6.320776707 |
| 7.725393753 |
| 162.2332688 |
| 5.618468184 |
| 4.213851138 |
| 87.08625685 |
| 66.01700116 |
| 25.28310683 |
| 4.916159661 |
| 7.02308523  |
| 5.618468184 |
| 7.02308523  |
| 5.618468184 |



|             |
|-------------|
| 106.048587  |
| 4.213851138 |
| 7.725393753 |
| 11.93924489 |
| 22.47387274 |
| 28.09234092 |
| 4.916159661 |
| 45.650054   |
| 8.427702276 |
| 4.916159661 |
| 8.427702276 |
| 10.53462785 |
| 7.725393753 |
| 6.320776707 |
| 18.96233012 |
| 61.80315003 |
| 35.81773467 |
| 15.45078751 |
| 108.1555125 |
| 116.5832148 |
| 75.14701196 |
| 4.213851138 |
| 91.30010799 |
| 54.07775627 |
| 9.130010799 |
| 30.19926649 |
| 9.130010799 |
| 4.213851138 |
| 2.809234092 |
| 9.832319322 |
| 6.320776707 |
| 146.0801728 |
| 61.80315003 |
| 61.80315003 |
| 7.725393753 |
| 21.77156421 |
| 63.20776707 |
| 5.618468184 |
| 104.6439699 |
| 6.320776707 |
| 9.130010799 |
| 7.725393753 |
| 6.320776707 |

|             |
|-------------|
| 9.130010799 |
| 9.832319322 |
| 59.69622446 |
| 132.0340023 |
| 47.05467104 |
| 8.427702276 |
| 33.7108091  |
| 4.916159661 |
| 65.31469264 |
| 8.427702276 |
| 238.7848978 |
| 4.916159661 |
| 165.7448114 |
| 29.49695797 |
| 14.74847898 |
| 7.02308523  |
| 9.130010799 |
| 4.213851138 |
| 103.9416614 |
| 8.427702276 |
| 41.43620286 |
| 11.93924489 |
| 24.58079831 |
| 87.78856538 |
| 4.916159661 |
| 5.618468184 |
| 11.93924489 |
| 122.9039915 |
| 135.5455449 |
| 0           |
| 7.02308523  |
| 12.64155341 |
| 5.618468184 |
| 9.832319322 |
| 4.916159661 |
| 33.00850058 |
| 4.213851138 |
| 4.916159661 |
| 85.68163981 |
| 11.23693637 |
| 45.650054   |
| 106.7508955 |
| 8.427702276 |

|             |
|-------------|
| 4.916159661 |
| 31.60388354 |
| 21.77156421 |
| 0           |
| 2.106925569 |
| 6.320776707 |
| 15.45078751 |
| 39.32927729 |
| 9.832319322 |
| 2.809234092 |
| 9.832319322 |
| 28.09234092 |
| 10.53462785 |
| 63.20776707 |
| 7.02308523  |
| 38.62696877 |
| 129.2247682 |
| 20.36694717 |
| 7.725393753 |
| 7.02308523  |
| 176.9817478 |
| 63.91007559 |
| 5.618468184 |
| 4.916159661 |
| 134.1409279 |
| 7.725393753 |
| 49.16159661 |
| 4.916159661 |
| 10.53462785 |
| 0.702308523 |
| 8.427702276 |
| 51.9708307  |
| 11.93924489 |
| 177.6840563 |
| 8.427702276 |
| 0           |
| 82.87240572 |
| 52.67313923 |
| 11.23693637 |
| 5.618468184 |
| 28.09234092 |
| 7.725393753 |
| 87.08625685 |

|             |
|-------------|
| 23.17618126 |
| 30.90157501 |
| 12.64155341 |
| 165.7448114 |
| 0           |
| 137.6524705 |
| 141.1640131 |
| 5.618468184 |
| 9.130010799 |
| 8.427702276 |
| 6.320776707 |
| 5.618468184 |
| 7.02308523  |
| 11.93924489 |
| 23.87848978 |
| 4.213851138 |
| 22.47387274 |
| 7.725393753 |
| 0           |
| 13.34386194 |
| 23.87848978 |
| 75.14701196 |
| 84.27702276 |
| 7.02308523  |
| 4.916159661 |
| 7.725393753 |
| 3.511542615 |
| 81.46778867 |
| 2.809234092 |
| 41.43620286 |
| 11.23693637 |
| 147.4847898 |
| 5.618468184 |
| 5.618468184 |
| 12.64155341 |
| 35.81773467 |
| 11.93924489 |
| 38.62696877 |
| 6.320776707 |
| 6.320776707 |
| 25.28310683 |
| 11.93924489 |
| 145.3778643 |

|             |
|-------------|
| 12.64155341 |
| 9.130010799 |
| 75.14701196 |
| 21.77156421 |
| 211.3948654 |
| 3.511542615 |
| 3.511542615 |
| 44.24543695 |
| 194.5394609 |
| 52.67313923 |
| 30.90157501 |
| 10.53462785 |
| 63.20776707 |
| 7.725393753 |
| 48.45928809 |
| 7.725393753 |
| 8.427702276 |
| 38.62696877 |
| 73.74239492 |
| 65.31469264 |
| 5.618468184 |
| 11.93924489 |
| 7.02308523  |
| 35.81773467 |
| 35.81773467 |
| 5.618468184 |
| 119.3924489 |
| 8.427702276 |
| 3.511542615 |
| 9.130010799 |
| 40.03158581 |
| 84.27702276 |
| 5.618468184 |
| 9.130010799 |
| 3.511542615 |
| 32.30619206 |
| 119.3924489 |
| 4.916159661 |
| 7.02308523  |
| 8.427702276 |
| 37.22235172 |
| 4.213851138 |
| 111.6670552 |

|             |
|-------------|
| 8.427702276 |
| 50.56621366 |
| 4.213851138 |
| 8.427702276 |
| 5.618468184 |
| 4.916159661 |
| 14.74847898 |
| 10.53462785 |
| 27.3900324  |
| 6.320776707 |
| 195.2417694 |
| 1.404617046 |
| 6.320776707 |
| 2.809234092 |
| 8.427702276 |
| 0           |
| 58.29160741 |
| 10.53462785 |
| 14.04617046 |
| 7.725393753 |
| 110.2624381 |
| 3.511542615 |
| 15.45078751 |
| 16.85540455 |
| 7.725393753 |
| 4.213851138 |
| 18.2600216  |
| 60.39853298 |
| 20.36694717 |
| 34.41311763 |
| 11.93924489 |
| 224.7387274 |
| 8.427702276 |
| 2.106925569 |
| 9.832319322 |
| 162.2332688 |
| 184.004833  |
| 3.511542615 |
| 7.725393753 |
| 24.58079831 |
| 144.6755557 |
| 11.23693637 |
| 6.320776707 |

|             |
|-------------|
| 4.916159661 |
| 3.511542615 |
| 7.725393753 |
| 7.02308523  |
| 6.320776707 |
| 31.60388354 |
| 9.832319322 |
| 14.74847898 |
| 205.7763972 |
| 9.832319322 |
| 6.320776707 |
| 21.06925569 |
| 48.45928809 |
| 49.86390513 |
| 9.130010799 |
| 32.30619206 |
| 1.404617046 |
| 16.15309603 |
| 15.45078751 |
| 11.23693637 |
| 51.9708307  |
| 31.60388354 |
| 103.9416614 |
| 12.64155341 |
| 4.916159661 |
| 3.511542615 |
| 0.702308523 |
| 127.8201512 |
| 22.47387274 |
| 11.93924489 |
| 6.320776707 |
| 32.30619206 |
| 166.44712   |
| 6.320776707 |
| 9.130010799 |
| 7.02308523  |
| 226.1433444 |
| 6.320776707 |
| 11.93924489 |
| 7.02308523  |
| 8.427702276 |
| 10.53462785 |
| 160.8286518 |

|             |
|-------------|
| 7.02308523  |
| 110.9647466 |
| 220.5248762 |
| 9.130010799 |
| 4.213851138 |
| 88.4908739  |
| 9.832319322 |
| 7.02308523  |
| 33.7108091  |
| 0           |
| 6.320776707 |
| 11.23693637 |
| 15.45078751 |
| 25.28310683 |
| 9.832319322 |
| 41.43620286 |
| 95.51395913 |
| 5.618468184 |
| 58.99391593 |
| 9.130010799 |
| 167.1494285 |
| 9.130010799 |
| 49.16159661 |
| 3.511542615 |
| 41.43620286 |
| 94.10934208 |
| 103.2393529 |
| 11.93924489 |
| 7.02308523  |
| 7.725393753 |
| 6.320776707 |
| 9.832319322 |
| 9.832319322 |
| 5.618468184 |
| 9.130010799 |
| 94.81165061 |
| 16.85540455 |
| 45.650054   |
| 5.618468184 |
| 16.85540455 |
| 46.35236252 |
| 68.82623526 |
| 9.832319322 |



|             |
|-------------|
| 2.106925569 |
| 30.90157501 |
| 7.02308523  |
| 0           |
| 17.55771308 |
| 10.53462785 |
| 7.02308523  |
| 7.725393753 |
| 115.8809063 |
| 6.320776707 |
| 9.832319322 |
| 106.048587  |
| 15.45078751 |
| 127.8201512 |
| 5.618468184 |
| 5.618468184 |
| 37.22235172 |
| 6.320776707 |
| 66.01700116 |
| 9.130010799 |
| 4.916159661 |
| 4.213851138 |
| 11.23693637 |
| 4.916159661 |
| 108.1555125 |
| 8.427702276 |
| 63.91007559 |
| 4.916159661 |
| 10.53462785 |
| 66.71930969 |
| 189.6233012 |
| 7.725393753 |
| 109.5601296 |
| 14.04617046 |
| 16.85540455 |
| 7.02308523  |
| 11.23693637 |
| 70.93316082 |
| 21.77156421 |
| 11.23693637 |
| 9.832319322 |
| 51.26852218 |
| 4.916159661 |

|             |
|-------------|
| 3.511542615 |
| 82.87240572 |
| 9.832319322 |
| 6.320776707 |
| 49.86390513 |
| 7.02308523  |
| 9.130010799 |
| 13.34386194 |
| 214.2040995 |
| 4.213851138 |
| 23.17618126 |
| 45.650054   |
| 9.130010799 |
| 193.8371524 |
| 178.3863648 |
| 7.02308523  |
| 8.427702276 |
| 7.725393753 |
| 285.8395689 |
| 148.8894069 |
| 155.2101836 |
| 5.618468184 |
| 5.618468184 |
| 11.23693637 |
| 10.53462785 |
| 4.916159661 |
| 8.427702276 |
| 8.427702276 |
| 8.427702276 |
| 37.22235172 |
| 7.725393753 |
| 35.81773467 |
| 9.130010799 |
| 9.832319322 |
| 133.4386194 |
| 0           |
| 5.618468184 |
| 7.02308523  |
| 11.23693637 |
| 5.618468184 |
| 51.26852218 |
| 4.213851138 |
| 3.511542615 |

|             |
|-------------|
| 62.50545855 |
| 9.832319322 |
| 70.93316082 |
| 35.81773467 |
| 16.15309603 |
| 11.23693637 |
| 3.511542615 |
| 6.320776707 |
| 7.725393753 |
| 1.404617046 |
| 7.725393753 |
| 7.02308523  |
| 11.23693637 |
| 30.90157501 |
| 107.453204  |
| 32.30619206 |
| 9.832319322 |
| 23.17618126 |
| 2.106925569 |
| 10.53462785 |
| 4.916159661 |
| 109.5601296 |
| 6.320776707 |
| 7.02308523  |
| 9.832319322 |
| 9.832319322 |
| 7.725393753 |
| 7.725393753 |
| 98.32319322 |
| 93.40703356 |
| 23.87848978 |
| 126.4155341 |
| 5.618468184 |
| 0.702308523 |
| 7.02308523  |
| 40.73389434 |
| 134.8432364 |
| 2.809234092 |
| 6.320776707 |
| 8.427702276 |
| 6.320776707 |
| 7.725393753 |
| 35.11542615 |

|             |
|-------------|
| 5.618468184 |
| 5.618468184 |
| 7.02308523  |
| 1.404617046 |
| 0.702308523 |
| 73.04008639 |
| 157.3171092 |
| 25.28310683 |
| 30.90157501 |
| 2.809234092 |
| 89.89549095 |
| 80.06317162 |
| 20.36694717 |
| 144.6755557 |
| 4.916159661 |
| 6.320776707 |
| 4.213851138 |
| 7.02308523  |
| 30.19926649 |
| 9.130010799 |
| 0.702308523 |
| 2.809234092 |
| 4.213851138 |
| 6.320776707 |
| 5.618468184 |
| 4.213851138 |
| 4.213851138 |
| 6.320776707 |
| 14.04617046 |
| 10.53462785 |
| 2.809234092 |
| 5.618468184 |
| 11.93924489 |
| 4.213851138 |
| 2.106925569 |
| 9.832319322 |
| 18.96233012 |
| 4.916159661 |
| 4.916159661 |
| 27.3900324  |
| 17.55771308 |
| 79.3608631  |
| 6.320776707 |

|             |
|-------------|
| 11.23693637 |
| 6.320776707 |
| 55.48237332 |
| 2.809234092 |
| 63.20776707 |
| 9.130010799 |
| 11.23693637 |
| 4.916159661 |
| 164.3401944 |
| 3.511542615 |
| 8.427702276 |
| 36.5200432  |
| 42.13851138 |
| 5.618468184 |
| 27.3900324  |
| 92.70472504 |
| 97.6208847  |
| 115.1785978 |
| 5.618468184 |
| 8.427702276 |
| 226.1433444 |
| 147.4847898 |
| 9.832319322 |
| 5.618468184 |
| 7.725393753 |
| 5.618468184 |
| 37.22235172 |
| 209.2879399 |
| 7.725393753 |
| 7.02308523  |
| 9.130010799 |
| 40.03158581 |
| 9.130010799 |
| 29.49695797 |
| 0.702308523 |
| 11.23693637 |
| 23.17618126 |
| 6.320776707 |
| 84.27702276 |
| 127.8201512 |
| 135.5455449 |
| 30.90157501 |
| 8.427702276 |

|             |
|-------------|
| 70.2308523  |
| 80.76548015 |
| 9.832319322 |
| 4.916159661 |
| 4.213851138 |
| 7.725393753 |
| 9.832319322 |
| 7.02308523  |
| 108.1555125 |
| 128.5224597 |
| 24.58079831 |
| 81.46778867 |
| 109.5601296 |
| 62.50545855 |
| 4.916159661 |
| 23.17618126 |
| 6.320776707 |
| 4.213851138 |
| 22.47387274 |
| 21.06925569 |
| 165.0425029 |
| 65.31469264 |
| 0.702308523 |
| 7.02308523  |
| 4.213851138 |
| 98.32319322 |
| 7.02308523  |
| 7.02308523  |
| 43.54312843 |
| 162.9355773 |
| 12.64155341 |
| 23.87848978 |
| 6.320776707 |
| 5.618468184 |
| 5.618468184 |
| 8.427702276 |
| 10.53462785 |
| 122.9039915 |
| 6.320776707 |
| 7.02308523  |
| 6.320776707 |
| 4.213851138 |
| 68.12392673 |

|             |
|-------------|
| 5.618468184 |
| 7.02308523  |
| 7.725393753 |
| 7.02308523  |
| 66.01700116 |
| 12.64155341 |
| 7.02308523  |
| 103.9416614 |
| 4.916159661 |
| 0           |
| 6.320776707 |
| 4.916159661 |
| 29.49695797 |
| 6.320776707 |
| 10.53462785 |
| 128.5224597 |
| 4.213851138 |
| 20.36694717 |
| 64.61238412 |
| 7.725393753 |
| 66.01700116 |
| 9.832319322 |
| 5.618468184 |
| 5.618468184 |
| 7.725393753 |
| 8.427702276 |
| 2.809234092 |
| 24.58079831 |
| 6.320776707 |
| 5.618468184 |
| 40.03158581 |
| 68.12392673 |
| 9.832319322 |
| 7.02308523  |
| 48.45928809 |
| 5.618468184 |
| 9.130010799 |
| 8.427702276 |
| 156.6148006 |
| 95.51395913 |
| 5.618468184 |
| 11.23693637 |
| 18.96233012 |

|             |
|-------------|
| 13.34386194 |
| 127.8201512 |
| 89.19318242 |
| 47.05467104 |
| 6.320776707 |
| 3.511542615 |
| 6.320776707 |
| 48.45928809 |
| 14.04617046 |
| 7.02308523  |
| 5.618468184 |
| 7.02308523  |
| 5.618468184 |
| 4.213851138 |
| 8.427702276 |
| 129.2247682 |
| 11.93924489 |
| 7.02308523  |
| 7.02308523  |
| 6.320776707 |
| 16.15309603 |
| 68.82623526 |
| 6.320776707 |
| 51.26852218 |
| 6.320776707 |
| 162.9355773 |
| 25.28310683 |
| 48.45928809 |
| 2.106925569 |
| 10.53462785 |
| 9.832319322 |
| 74.44470344 |
| 42.13851138 |
| 92.70472504 |
| 7.725393753 |
| 8.427702276 |
| 4.916159661 |
| 36.5200432  |
| 6.320776707 |
| 26.68772387 |
| 2.106925569 |
| 7.725393753 |
| 6.320776707 |



|             |
|-------------|
| 11.23693637 |
| 6.320776707 |
| 14.74847898 |
| 143.2709387 |
| 32.30619206 |
| 0.702308523 |
| 9.832319322 |
| 14.04617046 |
| 7.725393753 |
| 8.427702276 |
| 146.0801728 |
| 4.916159661 |
| 74.44470344 |
| 127.8201512 |
| 7.725393753 |
| 4.916159661 |
| 5.618468184 |
| 5.618468184 |
| 92.70472504 |
| 85.68163981 |
| 64.61238412 |
| 6.320776707 |
| 9.130010799 |
| 14.04617046 |
| 3.511542615 |
| 13.34386194 |
| 12.64155341 |
| 4.916159661 |
| 6.320776707 |
| 39.32927729 |
| 23.17618126 |
| 6.320776707 |
| 0.702308523 |
| 6.320776707 |
| 1.404617046 |
| 71.63546935 |
| 9.130010799 |
| 120.0947574 |
| 196.6463864 |
| 92.70472504 |
| 7.02308523  |
| 8.427702276 |
| 75.84932049 |

|             |
|-------------|
| 5.618468184 |
| 9.130010799 |
| 142.5686302 |
| 60.39853298 |
| 10.53462785 |
| 10.53462785 |
| 58.99391593 |
| 1.404617046 |
| 7.725393753 |
| 0.702308523 |
| 7.02308523  |
| 9.832319322 |
| 10.53462785 |
| 11.93924489 |
| 9.832319322 |
| 28.79464944 |
| 7.02308523  |
| 7.725393753 |
| 23.87848978 |
| 40.03158581 |
| 5.618468184 |
| 34.41311763 |
| 6.320776707 |
| 94.10934208 |
| 11.93924489 |
| 7.725393753 |
| 2.106925569 |
| 4.213851138 |
| 7.02308523  |
| 25.28310683 |
| 4.916159661 |
| 7.725393753 |
| 6.320776707 |
| 6.320776707 |
| 11.93924489 |
| 6.320776707 |
| 10.53462785 |
| 23.87848978 |
| 89.19318242 |
| 125.0109171 |
| 4.916159661 |
| 77.95624606 |
| 10.53462785 |

|             |
|-------------|
| 10.53462785 |
| 56.88699036 |
| 7.02308523  |
| 30.90157501 |
| 6.320776707 |
| 6.320776707 |
| 97.6208847  |
| 54.07775627 |
| 114.4762893 |
| 83.57471424 |
| 6.320776707 |
| 9.130010799 |
| 17.55771308 |
| 125.0109171 |
| 7.725393753 |
| 92.00241652 |
| 3.511542615 |
| 111.6670552 |
| 5.618468184 |
| 2.809234092 |
| 4.916159661 |
| 7.725393753 |
| 7.725393753 |
| 160.8286518 |
| 7.02308523  |
| 7.725393753 |
| 44.24543695 |
| 132.0340023 |
| 16.85540455 |
| 11.93924489 |
| 22.47387274 |
| 29.49695797 |
| 54.07775627 |
| 172.0655881 |
| 6.320776707 |
| 80.76548015 |
| 155.2101836 |
| 56.88699036 |
| 8.427702276 |
| 9.832319322 |
| 6.320776707 |
| 4.916159661 |
| 10.53462785 |

|             |
|-------------|
| 143.9732472 |
| 4.213851138 |
| 11.93924489 |
| 2.809234092 |
| 7.725393753 |
| 4.213851138 |
| 26.68772387 |
| 3.511542615 |
| 4.916159661 |
| 135.5455449 |
| 13.34386194 |
| 2.809234092 |
| 7.02308523  |
| 12.64155341 |
| 7.02308523  |
| 23.17618126 |
| 20.36694717 |
| 9.832319322 |
| 12.64155341 |
| 7.02308523  |
| 7.725393753 |
| 77.25393753 |
| 7.725393753 |
| 4.213851138 |
| 80.76548015 |
| 123.6063001 |
| 44.24543695 |
| 201.5625461 |
| 11.23693637 |
| 51.26852218 |
| 112.3693637 |
| 37.22235172 |
| 149.5917154 |
| 6.320776707 |
| 2.809234092 |
| 1.404617046 |
| 68.12392673 |
| 137.6524705 |
| 58.29160741 |
| 9.832319322 |
| 6.320776707 |
| 42.13851138 |
| 39.32927729 |

|             |
|-------------|
| 2.106925569 |
| 174.8748222 |
| 82.17009719 |
| 2.106925569 |
| 3.511542615 |
| 2.809234092 |
| 9.130010799 |
| 5.618468184 |
| 7.725393753 |
| 8.427702276 |
| 9.130010799 |
| 7.02308523  |
| 21.06925569 |
| 40.03158581 |
| 8.427702276 |
| 16.15309603 |
| 10.53462785 |
| 23.87848978 |
| 56.88699036 |
| 64.61238412 |
| 129.9270768 |
| 8.427702276 |
| 4.916159661 |
| 8.427702276 |
| 2.809234092 |
| 7.02308523  |
| 164.3401944 |
| 4.213851138 |
| 4.916159661 |
| 9.130010799 |
| 8.427702276 |
| 3.511542615 |
| 4.916159661 |
| 0           |
| 6.320776707 |
| 41.43620286 |
| 134.1409279 |
| 8.427702276 |
| 7.02308523  |
| 9.832319322 |
| 158.0194177 |
| 32.30619206 |
| 107.453204  |

|             |
|-------------|
| 80.76548015 |
| 7.725393753 |
| 7.02308523  |
| 8.427702276 |
| 52.67313923 |
| 3.511542615 |
| 126.4155341 |
| 11.23693637 |
| 76.55162901 |
| 48.45928809 |
| 5.618468184 |
| 35.81773467 |
| 7.02308523  |
| 35.11542615 |
| 9.130010799 |
| 128.5224597 |
| 4.916159661 |
| 7.02308523  |
| 0           |
| 9.130010799 |
| 33.7108091  |
| 36.5200432  |
| 167.1494285 |
| 9.130010799 |
| 75.84932049 |
| 1.404617046 |
| 63.91007559 |
| 6.320776707 |
| 15.45078751 |
| 108.1555125 |
| 9.130010799 |
| 8.427702276 |
| 4.916159661 |
| 4.916159661 |
| 31.60388354 |
| 7.02308523  |
| 47.75697957 |
| 6.320776707 |
| 81.46778867 |
| 13.34386194 |
| 77.95624606 |
| 112.3693637 |
| 5.618468184 |

|             |
|-------------|
| 16.15309603 |
| 181.1955989 |
| 133.4386194 |
| 100.4301188 |
| 2.809234092 |
| 110.2624381 |
| 11.93924489 |
| 7.02308523  |
| 23.17618126 |
| 214.906408  |
| 9.832319322 |
| 66.71930969 |
| 62.50545855 |
| 7.725393753 |
| 4.916159661 |
| 2.809234092 |
| 7.02308523  |
| 3.511542615 |
| 5.618468184 |
| 4.916159661 |
| 8.427702276 |
| 108.8578211 |
| 165.0425029 |
| 67.42161821 |
| 5.618468184 |
| 9.130010799 |
| 7.02308523  |
| 8.427702276 |
| 50.56621366 |
| 125.7132256 |
| 6.320776707 |
| 7.725393753 |
| 85.68163981 |
| 54.07775627 |
| 4.213851138 |
| 9.832319322 |
| 4.916159661 |
| 18.96233012 |
| 136.2478535 |
| 9.832319322 |
| 64.61238412 |
| 0           |
| 9.130010799 |

|             |
|-------------|
| 8.427702276 |
| 16.85540455 |
| 30.90157501 |
| 17.55771308 |
| 194.5394609 |
| 4.916159661 |
| 47.05467104 |
| 33.7108091  |
| 228.25027   |
| 7.725393753 |
| 72.33777787 |
| 4.213851138 |
| 37.92466024 |
| 6.320776707 |
| 7.725393753 |
| 25.98541535 |
| 162.9355773 |
| 10.53462785 |
| 5.618468184 |
| 1.404617046 |
| 5.618468184 |
| 22.47387274 |
| 6.320776707 |
| 28.79464944 |
| 4.213851138 |
| 1.404617046 |
| 4.213851138 |
| 7.02308523  |
| 31.60388354 |
| 4.916159661 |
| 97.6208847  |
| 106.048587  |
| 16.85540455 |
| 47.75697957 |
| 68.82623526 |
| 9.130010799 |
| 16.15309603 |
| 7.725393753 |
| 9.130010799 |
| 5.618468184 |
| 9.130010799 |
| 6.320776707 |
| 14.04617046 |



|             |
|-------------|
| 57.58929889 |
| 160.1263432 |
| 26.68772387 |
| 142.5686302 |
| 7.02308523  |
| 35.11542615 |
| 4.213851138 |
| 134.8432364 |
| 2.106925569 |
| 5.618468184 |
| 11.93924489 |
| 18.2600216  |
| 21.06925569 |
| 7.725393753 |
| 45.650054   |
| 5.618468184 |
| 8.427702276 |
| 9.130010799 |
| 7.725393753 |
| 58.29160741 |
| 3.511542615 |
| 4.916159661 |
| 8.427702276 |
| 2.809234092 |
| 9.832319322 |
| 16.85540455 |
| 5.618468184 |
| 30.19926649 |
| 9.832319322 |
| 4.213851138 |
| 11.23693637 |
| 20.36694717 |
| 2.106925569 |
| 3.511542615 |
| 41.43620286 |
| 4.916159661 |
| 9.832319322 |
| 176.2794393 |
| 6.320776707 |
| 10.53462785 |
| 153.103258  |
| 81.46778867 |
| 3.511542615 |

|             |
|-------------|
| 25.28310683 |
| 58.29160741 |
| 12.64155341 |
| 8.427702276 |
| 7.02308523  |
| 8.427702276 |
| 28.79464944 |
| 7.02308523  |
| 9.832319322 |
| 9.832319322 |
| 4.916159661 |
| 28.79464944 |
| 8.427702276 |
| 9.130010799 |
| 4.916159661 |
| 8.427702276 |
| 203.6694717 |
| 6.320776707 |
| 146.0801728 |
| 6.320776707 |
| 158.7217262 |
| 9.832319322 |
| 7.725393753 |
| 7.02308523  |
| 87.78856538 |
| 7.02308523  |
| 11.93924489 |
| 96.91857618 |
| 7.725393753 |
| 55.48237332 |
| 4.213851138 |
| 85.68163981 |
| 85.68163981 |
| 174.1725137 |
| 9.130010799 |
| 12.64155341 |
| 10.53462785 |
| 52.67313923 |
| 25.98541535 |
| 45.650054   |
| 8.427702276 |
| 11.23693637 |
| 7.02308523  |

|             |
|-------------|
| 4.916159661 |
| 8.427702276 |
| 41.43620286 |
| 7.02308523  |
| 140.4617046 |
| 6.320776707 |
| 2.809234092 |
| 4.916159661 |
| 146.0801728 |
| 64.61238412 |
| 21.77156421 |
| 13.34386194 |
| 6.320776707 |
| 40.73389434 |
| 72.33777787 |
| 44.94774547 |
| 29.49695797 |
| 22.47387274 |
| 71.63546935 |
| 4.213851138 |
| 7.725393753 |
| 6.320776707 |
| 5.618468184 |
| 4.916159661 |
| 9.130010799 |
| 22.47387274 |
| 14.74847898 |
| 8.427702276 |
| 47.75697957 |
| 9.832319322 |
| 27.3900324  |
| 4.213851138 |
| 4.213851138 |
| 11.93924489 |
| 4.916159661 |
| 8.427702276 |
| 227.5479615 |
| 8.427702276 |
| 27.3900324  |
| 11.93924489 |
| 260.556462  |
| 27.3900324  |
| 18.2600216  |

|             |
|-------------|
| 143.2709387 |
| 2.106925569 |
| 4.213851138 |
| 7.725393753 |
| 103.2393529 |
| 7.02308523  |
| 2.809234092 |
| 7.02308523  |
| 33.00850058 |
| 104.6439699 |
| 27.3900324  |
| 10.53462785 |
| 14.04617046 |
| 60.39853298 |
| 9.832319322 |
| 19.66463864 |
| 6.320776707 |
| 7.02308523  |
| 17.55771308 |
| 116.5832148 |
| 7.02308523  |
| 3.511542615 |
| 150.2940239 |
| 8.427702276 |
| 11.23693637 |
| 7.02308523  |
| 5.618468184 |
| 59.69622446 |
| 36.5200432  |
| 56.88699036 |
| 11.23693637 |
| 4.916159661 |
| 136.950162  |
| 4.213851138 |
| 5.618468184 |
| 87.78856538 |
| 103.9416614 |
| 183.3025245 |
| 77.25393753 |
| 7.02308523  |
| 42.13851138 |
| 7.725393753 |
| 13.34386194 |

|             |
|-------------|
| 8.427702276 |
| 3.511542615 |
| 20.36694717 |
| 9.130010799 |
| 78.65855458 |
| 18.2600216  |
| 24.58079831 |
| 2.809234092 |
| 184.7071416 |
| 17.55771308 |
| 12.64155341 |
| 25.98541535 |
| 38.62696877 |
| 8.427702276 |
| 59.69622446 |
| 7.02308523  |
| 6.320776707 |
| 122.9039915 |
| 152.4009495 |
| 4.213851138 |
| 9.130010799 |
| 9.832319322 |
| 168.5540455 |
| 9.130010799 |
| 8.427702276 |
| 5.618468184 |
| 29.49695797 |
| 7.725393753 |
| 5.618468184 |
| 80.06317162 |
| 14.74847898 |
| 60.39853298 |
| 164.3401944 |
| 164.3401944 |
| 1.404617046 |
| 5.618468184 |
| 14.74847898 |
| 40.73389434 |
| 4.916159661 |
| 2.809234092 |
| 9.130010799 |
| 7.725393753 |
| 14.04617046 |

|             |
|-------------|
| 162.9355773 |
| 48.45928809 |
| 54.7800648  |
| 143.9732472 |
| 6.320776707 |
| 0           |
| 10.53462785 |
| 59.69622446 |
| 16.85540455 |
| 61.1008415  |
| 19.66463864 |
| 2.809234092 |
| 91.30010799 |
| 31.60388354 |
| 9.130010799 |
| 31.60388354 |
| 2.809234092 |
| 40.03158581 |
| 23.87848978 |
| 62.50545855 |
| 141.8663216 |
| 6.320776707 |
| 11.23693637 |
| 18.2600216  |
| 9.832319322 |
| 22.47387274 |
| 181.1955989 |
| 103.9416614 |
| 306.9088246 |
| 206.4787058 |
| 7.02308523  |
| 55.48237332 |
| 73.74239492 |
| 27.3900324  |
| 6.320776707 |
| 7.725393753 |
| 94.10934208 |
| 50.56621366 |
| 4.916159661 |
| 5.618468184 |
| 8.427702276 |
| 7.02308523  |
| 4.213851138 |

|             |
|-------------|
| 32.30619206 |
| 29.49695797 |
| 71.63546935 |
| 26.68772387 |
| 82.87240572 |
| 7.02308523  |
| 4.213851138 |
| 146.7824813 |
| 85.68163981 |
| 171.3632796 |
| 8.427702276 |
| 54.7800648  |
| 140.4617046 |
| 156.6148006 |
| 11.23693637 |
| 5.618468184 |
| 7.02308523  |
| 10.53462785 |
| 9.832319322 |
| 65.31469264 |
| 3.511542615 |
| 7.02308523  |
| 4.916159661 |
| 60.39853298 |
| 155.2101836 |
| 85.68163981 |
| 6.320776707 |
| 27.3900324  |
| 7.725393753 |
| 5.618468184 |
| 47.75697957 |
| 9.130010799 |
| 7.725393753 |
| 8.427702276 |
| 5.618468184 |
| 4.916159661 |
| 58.99391593 |
| 4.916159661 |
| 7.725393753 |
| 4.213851138 |
| 125.7132256 |
| 104.6439699 |
| 7.725393753 |

|             |
|-------------|
| 4.213851138 |
| 9.130010799 |
| 3.511542615 |
| 4.213851138 |
| 47.75697957 |
| 43.54312843 |
| 21.77156421 |
| 22.47387274 |
| 4.916159661 |
| 7.725393753 |
| 9.130010799 |
| 56.18468184 |
| 19.66463864 |
| 7.02308523  |
| 17.55771308 |
| 16.85540455 |
| 9.130010799 |
| 51.26852218 |
| 74.44470344 |
| 44.94774547 |
| 3.511542615 |
| 93.40703356 |
| 69.52854378 |
| 72.33777787 |
| 6.320776707 |
| 3.511542615 |
| 9.130010799 |
| 0           |
| 26.68772387 |
| 55.48237332 |
| 66.01700116 |
| 162.9355773 |
| 6.320776707 |
| 12.64155341 |
| 174.1725137 |
| 7.725393753 |
| 121.4993745 |
| 46.35236252 |
| 66.71930969 |
| 2.106925569 |
| 23.17618126 |
| 176.2794393 |
| 21.06925569 |



|             |
|-------------|
| 5.618468184 |
| 143.9732472 |
| 10.53462785 |
| 187.5163756 |
| 6.320776707 |
| 7.02308523  |
| 4.213851138 |
| 66.71930969 |
| 21.77156421 |
| 7.02308523  |
| 7.725393753 |
| 62.50545855 |
| 7.725393753 |
| 8.427702276 |
| 73.74239492 |
| 107.453204  |
| 18.2600216  |
| 71.63546935 |
| 7.725393753 |
| 13.34386194 |
| 110.2624381 |
| 8.427702276 |
| 184.004833  |
| 2.809234092 |
| 5.618468184 |
| 4.916159661 |
| 61.1008415  |
| 146.0801728 |
| 9.130010799 |
| 19.66463864 |
| 6.320776707 |
| 7.02308523  |
| 4.213851138 |
| 5.618468184 |
| 20.36694717 |
| 4.916159661 |
| 11.23693637 |
| 6.320776707 |
| 9.130010799 |
| 1.404617046 |
| 72.33777787 |
| 7.725393753 |
| 5.618468184 |

|             |
|-------------|
| 35.11542615 |
| 129.9270768 |
| 21.77156421 |
| 5.618468184 |
| 4.213851138 |
| 4.916159661 |
| 75.14701196 |
| 11.23693637 |
| 9.130010799 |
| 1.404617046 |
| 45.650054   |
| 8.427702276 |
| 4.916159661 |
| 5.618468184 |
| 230.3571956 |
| 21.06925569 |
| 25.98541535 |
| 2.809234092 |
| 89.89549095 |
| 30.90157501 |
| 30.19926649 |
| 4.213851138 |
| 4.916159661 |
| 68.82623526 |
| 7.02308523  |
| 141.1640131 |
| 18.96233012 |
| 125.0109171 |
| 129.9270768 |
| 174.1725137 |
| 51.26852218 |
| 14.04617046 |
| 115.1785978 |
| 2.809234092 |
| 10.53462785 |
| 0.702308523 |
| 21.77156421 |
| 11.93924489 |
| 164.3401944 |
| 9.130010799 |
| 11.23693637 |
| 16.15309603 |
| 5.618468184 |

|             |
|-------------|
| 4.213851138 |
| 8.427702276 |
| 21.77156421 |
| 9.130010799 |
| 12.64155341 |
| 9.130010799 |
| 9.130010799 |
| 1.404617046 |
| 111.6670552 |
| 103.2393529 |
| 79.3608631  |
| 25.98541535 |
| 63.20776707 |
| 2.809234092 |
| 103.9416614 |
| 99.02550175 |
| 14.74847898 |
| 18.2600216  |
| 11.23693637 |
| 8.427702276 |
| 9.130010799 |
| 60.39853298 |
| 29.49695797 |
| 37.92466024 |
| 79.3608631  |
| 11.93924489 |
| 16.15309603 |
| 6.320776707 |
| 9.130010799 |
| 11.23693637 |
| 263.3656961 |
| 4.213851138 |
| 47.05467104 |
| 6.320776707 |
| 9.130010799 |
| 21.77156421 |
| 97.6208847  |
| 108.8578211 |
| 80.06317162 |
| 1.404617046 |
| 14.04617046 |
| 9.130010799 |
| 2.106925569 |

|             |
|-------------|
| 99.02550175 |
| 32.30619206 |
| 124.3086086 |
| 28.79464944 |
| 35.11542615 |
| 7.02308523  |
| 5.618468184 |
| 108.1555125 |
| 11.93924489 |
| 8.427702276 |
| 8.427702276 |
| 8.427702276 |
| 26.68772387 |
| 13.34386194 |
| 9.130010799 |
| 7.725393753 |
| 77.25393753 |
| 4.213851138 |
| 7.02308523  |
| 72.33777787 |
| 33.7108091  |
| 6.320776707 |
| 6.320776707 |
| 220.5248762 |
| 10.53462785 |
| 5.618468184 |
| 71.63546935 |
| 5.618468184 |
| 42.13851138 |
| 5.618468184 |
| 2.809234092 |
| 5.618468184 |
| 113.0716722 |
| 115.8809063 |
| 5.618468184 |
| 3.511542615 |
| 58.99391593 |
| 141.1640131 |
| 7.02308523  |
| 5.618468184 |
| 11.93924489 |
| 219.1202592 |
| 5.618468184 |

|             |
|-------------|
| 9.832319322 |
| 6.320776707 |
| 194.5394609 |
| 28.09234092 |
| 48.45928809 |
| 7.02308523  |
| 163.6378859 |
| 66.71930969 |
| 39.32927729 |
| 76.55162901 |
| 16.15309603 |
| 4.213851138 |
| 4.916159661 |
| 70.2308523  |
| 113.0716722 |
| 9.130010799 |
| 30.90157501 |
| 7.02308523  |
| 33.7108091  |
| 11.23693637 |
| 7.725393753 |
| 60.39853298 |
| 2.809234092 |
| 139.0570876 |
| 105.3462785 |
| 7.725393753 |
| 9.130010799 |
| 8.427702276 |
| 7.02308523  |
| 167.851737  |
| 10.53462785 |
| 74.44470344 |
| 7.02308523  |
| 4.213851138 |
| 126.4155341 |
| 8.427702276 |
| 42.13851138 |
| 209.9902484 |
| 169.256354  |
| 14.74847898 |
| 0           |
| 4.213851138 |
| 5.618468184 |

|             |
|-------------|
| 65.31469264 |
| 171.3632796 |
| 123.6063001 |
| 2.106925569 |
| 21.77156421 |
| 8.427702276 |
| 7.02308523  |
| 66.01700116 |
| 169.9586626 |
| 10.53462785 |
| 5.618468184 |
| 7.02308523  |
| 56.88699036 |
| 5.618468184 |
| 6.320776707 |
| 4.213851138 |
| 55.48237332 |
| 7.02308523  |
| 25.98541535 |
| 103.2393529 |
| 46.35236252 |
| 6.320776707 |
| 66.01700116 |
| 106.7508955 |
| 76.55162901 |
| 23.87848978 |
| 7.725393753 |
| 14.04617046 |
| 10.53462785 |
| 70.93316082 |
| 4.916159661 |
| 9.130010799 |
| 207.8833228 |
| 2.809234092 |
| 44.24543695 |
| 212.7994825 |
| 6.320776707 |
| 10.53462785 |
| 9.832319322 |
| 9.130010799 |
| 8.427702276 |
| 3.511542615 |
| 4.213851138 |

|             |
|-------------|
| 21.06925569 |
| 89.89549095 |
| 7.725393753 |
| 39.32927729 |
| 183.3025245 |
| 8.427702276 |
| 4.213851138 |
| 7.02308523  |
| 4.916159661 |
| 8.427702276 |
| 8.427702276 |
| 20.36694717 |
| 38.62696877 |
| 30.19926649 |
| 14.74847898 |
| 146.7824813 |
| 5.618468184 |
| 4.213851138 |
| 68.12392673 |
| 5.618468184 |
| 6.320776707 |
| 20.36694717 |
| 150.9963324 |
| 110.9647466 |
| 6.320776707 |
| 115.8809063 |
| 4.213851138 |
| 11.93924489 |
| 21.06925569 |
| 4.916159661 |
| 8.427702276 |
| 117.2855233 |
| 49.86390513 |
| 6.320776707 |
| 40.03158581 |
| 3.511542615 |
| 5.618468184 |
| 13.34386194 |
| 37.22235172 |
| 109.5601296 |
| 35.11542615 |
| 7.02308523  |
| 7.02308523  |

|             |
|-------------|
| 11.93924489 |
| 2.809234092 |
| 84.97933129 |
| 3.511542615 |
| 40.03158581 |
| 9.130010799 |
| 6.320776707 |
| 37.92466024 |
| 0           |
| 49.86390513 |
| 18.96233012 |
| 1.404617046 |
| 89.19318242 |
| 3.511542615 |
| 11.93924489 |
| 137.6524705 |
| 9.832319322 |
| 150.9963324 |
| 7.02308523  |
| 0.702308523 |
| 4.916159661 |
| 4.916159661 |
| 80.76548015 |
| 7.02308523  |
| 0           |
| 4.213851138 |
| 7.725393753 |
| 26.68772387 |
| 2.809234092 |
| 11.23693637 |
| 7.725393753 |
| 22.47387274 |
| 78.65855458 |
| 42.13851138 |
| 9.130010799 |
| 6.320776707 |
| 3.511542615 |
| 6.320776707 |
| 6.320776707 |
| 144.6755557 |
| 73.04008639 |
| 16.15309603 |
| 0           |



|             |
|-------------|
| 27.3900324  |
| 5.618468184 |
| 16.15309603 |
| 79.3608631  |
| 16.15309603 |
| 1.404617046 |
| 17.55771308 |
| 15.45078751 |
| 5.618468184 |
| 3.511542615 |
| 52.67313923 |
| 7.725393753 |
| 63.20776707 |
| 5.618468184 |
| 16.85540455 |
| 82.17009719 |
| 4.916159661 |
| 13.34386194 |
| 4.916159661 |
| 12.64155341 |
| 38.62696877 |
| 35.81773467 |
| 45.650054   |
| 8.427702276 |
| 1.404617046 |
| 11.23693637 |
| 42.13851138 |
| 3.511542615 |
| 4.213851138 |
| 105.3462785 |
| 5.618468184 |
| 16.15309603 |
| 18.96233012 |
| 66.01700116 |
| 7.725393753 |
| 6.320776707 |
| 12.64155341 |
| 6.320776707 |
| 5.618468184 |
| 29.49695797 |
| 18.2600216  |
| 7.725393753 |
| 6.320776707 |

|             |
|-------------|
| 12.64155341 |
| 39.32927729 |
| 7.725393753 |
| 4.916159661 |
| 58.99391593 |
| 82.87240572 |
| 229.654887  |
| 9.832319322 |
| 9.832319322 |
| 188.2186842 |
| 41.43620286 |
| 14.74847898 |
| 124.3086086 |
| 139.7593961 |
| 49.86390513 |
| 44.24543695 |
| 134.1409279 |
| 10.53462785 |
| 9.130010799 |
| 33.7108091  |
| 4.916159661 |
| 12.64155341 |
| 122.201683  |
| 5.618468184 |
| 6.320776707 |
| 221.2271848 |
| 141.8663216 |
| 8.427702276 |
| 5.618468184 |
| 92.70472504 |
| 4.213851138 |
| 19.66463864 |
| 10.53462785 |
| 6.320776707 |
| 6.320776707 |
| 143.9732472 |
| 23.87848978 |
| 7.02308523  |
| 7.725393753 |
| 6.320776707 |
| 7.02308523  |
| 4.916159661 |
| 7.725393753 |

|             |
|-------------|
| 11.93924489 |
| 7.725393753 |
| 36.5200432  |
| 44.94774547 |
| 9.832319322 |
| 2.809234092 |
| 3.511542615 |
| 9.130010799 |
| 178.3863648 |
| 43.54312843 |
| 28.79464944 |
| 9.832319322 |
| 26.68772387 |
| 37.22235172 |
| 10.53462785 |
| 6.320776707 |
| 8.427702276 |
| 135.5455449 |
| 9.832319322 |
| 34.41311763 |
| 11.23693637 |
| 122.9039915 |
| 7.02308523  |
| 0.702308523 |
| 8.427702276 |
| 43.54312843 |
| 6.320776707 |
| 5.618468184 |
| 29.49695797 |
| 7.725393753 |
| 47.75697957 |
| 65.31469264 |
| 18.96233012 |
| 89.19318242 |
| 7.725393753 |
| 14.74847898 |
| 32.30619206 |
| 12.64155341 |
| 9.832319322 |
| 6.320776707 |
| 30.90157501 |
| 47.05467104 |
| 46.35236252 |

|             |
|-------------|
| 9.832319322 |
| 96.21626765 |
| 5.618468184 |
| 9.832319322 |
| 9.832319322 |
| 136.2478535 |
| 109.5601296 |
| 7.02308523  |
| 7.02308523  |
| 11.93924489 |
| 50.56621366 |
| 2.106925569 |
| 5.618468184 |
| 6.320776707 |
| 94.10934208 |
| 15.45078751 |
| 5.618468184 |
| 89.19318242 |
| 17.55771308 |
| 28.79464944 |
| 24.58079831 |
| 33.7108091  |
| 7.02308523  |
| 0           |
| 127.1178427 |
| 40.03158581 |
| 5.618468184 |
| 11.23693637 |
| 7.02308523  |
| 5.618468184 |
| 5.618468184 |
| 168.5540455 |
| 169.256354  |
| 194.5394609 |
| 1.404617046 |
| 6.320776707 |
| 7.725393753 |
| 4.916159661 |
| 4.916159661 |
| 5.618468184 |
| 61.1008415  |
| 84.27702276 |
| 88.4908739  |

|             |
|-------------|
| 12.64155341 |
| 4.916159661 |
| 64.61238412 |
| 11.93924489 |
| 69.52854378 |
| 101.8347358 |
| 30.90157501 |
| 7.725393753 |
| 96.21626765 |
| 191.7302268 |
| 35.81773467 |
| 4.213851138 |
| 81.46778867 |
| 24.58079831 |
| 8.427702276 |
| 11.23693637 |
| 50.56621366 |
| 4.916159661 |
| 27.3900324  |
| 7.02308523  |
| 9.130010799 |
| 7.725393753 |
| 5.618468184 |
| 7.02308523  |
| 3.511542615 |
| 37.22235172 |
| 19.66463864 |
| 11.93924489 |
| 14.04617046 |
| 0           |
| 180.4932904 |
| 3.511542615 |
| 72.33777787 |
| 4.916159661 |
| 11.23693637 |
| 6.320776707 |
| 9.130010799 |
| 7.725393753 |
| 70.93316082 |
| 7.02308523  |
| 123.6063001 |
| 5.618468184 |
| 7.02308523  |

|             |
|-------------|
| 43.54312843 |
| 7.02308523  |
| 217.0133336 |
| 204.3717802 |
| 9.832319322 |
| 9.130010799 |
| 4.213851138 |
| 61.80315003 |
| 24.58079831 |
| 2.106925569 |
| 4.213851138 |
| 8.427702276 |
| 0.702308523 |
| 0.702308523 |
| 10.53462785 |
| 9.832319322 |
| 2.809234092 |
| 4.916159661 |
| 14.04617046 |
| 8.427702276 |
| 9.130010799 |
| 7.02308523  |
| 5.618468184 |
| 11.23693637 |
| 15.45078751 |
| 0           |
| 9.832319322 |
| 47.75697957 |
| 9.130010799 |
| 5.618468184 |
| 11.23693637 |
| 73.74239492 |
| 8.427702276 |
| 142.5686302 |
| 2.809234092 |
| 14.04617046 |
| 4.213851138 |
| 11.93924489 |
| 4.916159661 |
| 6.320776707 |
| 5.618468184 |
| 7.02308523  |
| 7.02308523  |

|             |
|-------------|
| 144.6755557 |
| 96.91857618 |
| 5.618468184 |
| 37.92466024 |
| 191.0279183 |
| 0           |
| 4.916159661 |
| 23.17618126 |
| 73.04008639 |
| 2.809234092 |
| 5.618468184 |
| 13.34386194 |
| 11.23693637 |
| 86.38394833 |
| 6.320776707 |
| 7.725393753 |
| 3.511542615 |
| 66.71930969 |
| 30.19926649 |
| 10.53462785 |
| 53.37544775 |
| 10.53462785 |
| 191.7302268 |
| 6.320776707 |
| 3.511542615 |
| 4.916159661 |
| 26.68772387 |
| 130.6293853 |
| 5.618468184 |
| 4.916159661 |
| 9.832319322 |
| 51.26852218 |
| 9.130010799 |
| 35.11542615 |
| 53.37544775 |
| 8.427702276 |
| 9.130010799 |
| 73.74239492 |
| 51.26852218 |
| 143.9732472 |
| 9.130010799 |
| 42.13851138 |
| 21.77156421 |

|             |
|-------------|
| 3.511542615 |
| 7.02308523  |
| 152.4009495 |
| 164.3401944 |
| 9.832319322 |
| 6.320776707 |
| 10.53462785 |
| 7.02308523  |
| 165.0425029 |
| 95.51395913 |
| 187.5163756 |
| 51.9708307  |
| 76.55162901 |
| 4.213851138 |
| 41.43620286 |
| 3.511542615 |
| 25.98541535 |
| 60.39853298 |
| 37.22235172 |
| 3.511542615 |
| 106.048587  |
| 101.1324273 |
| 3.511542615 |
| 3.511542615 |
| 18.2600216  |
| 4.916159661 |
| 38.62696877 |
| 1.404617046 |
| 2.106925569 |
| 5.618468184 |
| 4.213851138 |
| 2.809234092 |
| 2.106925569 |
| 65.31469264 |
| 67.42161821 |
| 18.96233012 |
| 7.02308523  |
| 2.106925569 |
| 14.74847898 |
| 45.650054   |
| 10.53462785 |
| 18.2600216  |
| 149.5917154 |



|             |
|-------------|
| 108.1555125 |
| 9.130010799 |
| 40.03158581 |
| 19.66463864 |
| 7.725393753 |
| 10.53462785 |
| 87.78856538 |
| 9.130010799 |
| 6.320776707 |
| 9.832319322 |
| 11.23693637 |
| 8.427702276 |
| 233.1664296 |
| 104.6439699 |
| 14.74847898 |
| 16.85540455 |
| 8.427702276 |
| 2.809234092 |
| 42.13851138 |
| 47.05467104 |
| 67.42161821 |
| 220.5248762 |
| 9.130010799 |
| 2.809234092 |
| 7.725393753 |
| 26.68772387 |
| 4.916159661 |
| 12.64155341 |
| 0           |
| 14.04617046 |
| 10.53462785 |
| 0           |
| 6.320776707 |
| 4.213851138 |
| 9.130010799 |
| 198.753312  |
| 4.916159661 |
| 4.916159661 |
| 11.93924489 |
| 6.320776707 |
| 13.34386194 |
| 2.106925569 |
| 110.9647466 |

|             |
|-------------|
| 10.53462785 |
| 6.320776707 |
| 6.320776707 |
| 4.213851138 |
| 1.404617046 |
| 8.427702276 |
| 89.19318242 |
| 2.809234092 |
| 8.427702276 |
| 5.618468184 |
| 9.832319322 |
| 9.832319322 |
| 9.130010799 |
| 10.53462785 |
| 6.320776707 |
| 7.02308523  |
| 4.213851138 |
| 0           |
| 6.320776707 |
| 5.618468184 |
| 7.725393753 |
| 8.427702276 |
| 13.34386194 |
| 5.618468184 |
| 21.77156421 |
| 15.45078751 |
| 68.12392673 |
| 92.70472504 |
| 5.618468184 |
| 201.5625461 |
| 8.427702276 |
| 7.02308523  |
| 9.130010799 |
| 56.88699036 |
| 6.320776707 |
| 5.618468184 |
| 9.130010799 |
| 4.213851138 |
| 16.15309603 |
| 11.23693637 |
| 7.725393753 |
| 10.53462785 |
| 50.56621366 |

|             |
|-------------|
| 7.725393753 |
| 64.61238412 |
| 9.130010799 |
| 5.618468184 |
| 13.34386194 |
| 9.130010799 |
| 301.9926649 |
| 16.85540455 |
| 184.004833  |
| 7.725393753 |
| 2.809234092 |
| 242.2964404 |
| 8.427702276 |
| 10.53462785 |
| 7.725393753 |
| 28.79464944 |
| 5.618468184 |
| 9.832319322 |
| 54.7800648  |
| 21.06925569 |
| 37.92466024 |
| 31.60388354 |
| 8.427702276 |
| 3.511542615 |
| 110.2624381 |
| 175.5771308 |
| 8.427702276 |
| 7.725393753 |
| 74.44470344 |
| 6.320776707 |
| 7.725393753 |
| 54.7800648  |
| 11.93924489 |
| 154.5078751 |
| 40.03158581 |
| 167.1494285 |
| 7.02308523  |
| 5.618468184 |
| 5.618468184 |
| 23.87848978 |
| 4.916159661 |
| 4.213851138 |
| 0           |

|             |
|-------------|
| 7.725393753 |
| 7.725393753 |
| 214.2040995 |
| 68.82623526 |
| 13.34386194 |
| 176.9817478 |
| 4.213851138 |
| 93.40703356 |
| 7.02308523  |
| 39.32927729 |
| 16.85540455 |
| 88.4908739  |
| 2.809234092 |
| 7.725393753 |
| 27.3900324  |
| 5.618468184 |
| 1.404617046 |
| 7.725393753 |
| 8.427702276 |
| 4.916159661 |
| 165.0425029 |
| 7.725393753 |
| 4.916159661 |
| 0           |
| 11.93924489 |
| 96.91857618 |
| 5.618468184 |
| 10.53462785 |
| 8.427702276 |
| 17.55771308 |
| 7.02308523  |
| 9.832319322 |
| 14.74847898 |
| 4.916159661 |
| 11.23693637 |
| 6.320776707 |
| 14.04617046 |
| 8.427702276 |
| 5.618468184 |
| 11.23693637 |
| 9.130010799 |
| 20.36694717 |
| 10.53462785 |

|             |
|-------------|
| 5.618468184 |
| 29.49695797 |
| 5.618468184 |
| 33.00850058 |
| 7.02308523  |
| 7.725393753 |
| 6.320776707 |
| 10.53462785 |
| 7.725393753 |
| 0.702308523 |
| 49.16159661 |
| 0           |
| 9.832319322 |
| 5.618468184 |
| 9.130010799 |
| 5.618468184 |
| 14.04617046 |
| 11.23693637 |
| 3.511542615 |
| 51.9708307  |
| 7.02308523  |
| 4.916159661 |
| 9.832319322 |
| 7.725393753 |
| 13.34386194 |
| 1.404617046 |
| 37.22235172 |
| 9.832319322 |
| 1.404617046 |
| 1.404617046 |
| 7.02308523  |
| 87.78856538 |
| 5.618468184 |
| 12.64155341 |
| 20.36694717 |
| 325.8711547 |
| 192.4325353 |
| 44.94774547 |
| 2.106925569 |
| 9.130010799 |
| 21.77156421 |
| 112.3693637 |
| 1.404617046 |

|             |
|-------------|
| 129.9270768 |
| 173.4702052 |
| 27.3900324  |
| 82.87240572 |
| 7.725393753 |
| 9.130010799 |
| 7.725393753 |
| 20.36694717 |
| 7.02308523  |
| 6.320776707 |
| 0           |
| 77.25393753 |
| 77.25393753 |
| 23.87848978 |
| 19.66463864 |
| 169.9586626 |
| 42.13851138 |
| 7.725393753 |
| 11.23693637 |
| 10.53462785 |
| 15.45078751 |
| 8.427702276 |
| 21.77156421 |
| 13.34386194 |
| 3.511542615 |
| 3.511542615 |
| 7.02308523  |
| 7.725393753 |
| 84.27702276 |
| 7.02308523  |
| 69.52854378 |
| 2.106925569 |
| 4.916159661 |
| 3.511542615 |
| 5.618468184 |
| 25.28310683 |
| 154.5078751 |
| 8.427702276 |
| 4.916159661 |
| 7.02308523  |
| 10.53462785 |
| 77.25393753 |
| 8.427702276 |

|             |
|-------------|
| 6.320776707 |
| 106.048587  |
| 1.404617046 |
| 12.64155341 |
| 16.15309603 |
| 11.23693637 |
| 28.09234092 |
| 77.25393753 |
| 12.64155341 |
| 6.320776707 |
| 9.130010799 |
| 4.916159661 |
| 31.60388354 |
| 99.02550175 |
| 11.23693637 |
| 33.7108091  |
| 33.7108091  |
| 36.5200432  |
| 11.93924489 |
| 17.55771308 |
| 4.916159661 |
| 9.832319322 |
| 127.8201512 |
| 12.64155341 |
| 7.725393753 |
| 9.130010799 |
| 5.618468184 |
| 23.17618126 |
| 28.79464944 |
| 11.93924489 |
| 81.46778867 |
| 10.53462785 |
| 7.725393753 |
| 0           |
| 7.725393753 |
| 11.93924489 |
| 1.404617046 |
| 6.320776707 |
| 46.35236252 |
| 10.53462785 |
| 11.23693637 |
| 8.427702276 |
| 9.832319322 |

|             |
|-------------|
| 8.427702276 |
| 2.106925569 |
| 14.04617046 |
| 46.35236252 |
| 28.79464944 |
| 16.15309603 |
| 14.04617046 |
| 9.130010799 |
| 5.618468184 |
| 14.74847898 |
| 214.906408  |
| 94.81165061 |
| 7.725393753 |
| 8.427702276 |
| 3.511542615 |
| 11.23693637 |
| 162.2332688 |
| 107.453204  |
| 20.36694717 |
| 0           |
| 27.3900324  |
| 7.02308523  |
| 3.511542615 |
| 193.8371524 |
| 4.213851138 |
| 7.02308523  |
| 11.93924489 |
| 9.832319322 |
| 7.725393753 |
| 9.832319322 |
| 160.1263432 |
| 7.02308523  |
| 7.02308523  |
| 17.55771308 |
| 7.725393753 |
| 7.02308523  |
| 7.725393753 |
| 9.130010799 |
| 28.79464944 |
| 4.916159661 |
| 101.1324273 |
| 21.77156421 |
| 26.68772387 |



|             |
|-------------|
| 7.725393753 |
| 9.130010799 |
| 94.10934208 |
| 39.32927729 |
| 5.618468184 |
| 8.427702276 |
| 14.04617046 |
| 11.23693637 |
| 7.725393753 |
| 87.08625685 |
| 162.2332688 |
| 7.725393753 |
| 7.725393753 |
| 7.02308523  |
| 7.725393753 |
| 12.64155341 |
| 121.4993745 |
| 31.60388354 |
| 7.02308523  |
| 8.427702276 |
| 20.36694717 |
| 6.320776707 |
| 7.725393753 |
| 2.106925569 |
| 4.213851138 |
| 4.916159661 |
| 5.618468184 |
| 7.02308523  |
| 5.618468184 |
| 9.130010799 |
| 121.4993745 |
| 5.618468184 |
| 136.2478535 |
| 9.832319322 |
| 7.02308523  |
| 0           |
| 7.725393753 |
| 5.618468184 |
| 5.618468184 |
| 8.427702276 |
| 176.9817478 |
| 0           |
| 6.320776707 |

|             |
|-------------|
| 94.10934208 |
| 3.511542615 |
| 13.34386194 |
| 5.618468184 |
| 225.4410359 |
| 5.618468184 |
| 11.93924489 |
| 7.02308523  |
| 11.93924489 |
| 30.19926649 |
| 10.53462785 |
| 6.320776707 |
| 12.64155341 |
| 10.53462785 |
| 262.6633876 |
| 104.6439699 |
| 61.1008415  |
| 28.79464944 |
| 34.41311763 |
| 127.8201512 |
| 60.39853298 |
| 11.93924489 |
| 6.320776707 |
| 6.320776707 |
| 4.916159661 |
| 5.618468184 |
| 6.320776707 |
| 9.130010799 |
| 8.427702276 |
| 4.916159661 |
| 7.02308523  |
| 6.320776707 |
| 4.213851138 |
| 4.213851138 |
| 189.6233012 |
| 92.70472504 |
| 13.34386194 |
| 7.725393753 |
| 11.23693637 |
| 0           |
| 11.23693637 |
| 14.74847898 |
| 7.02308523  |

|             |
|-------------|
| 7.02308523  |
| 9.130010799 |
| 18.96233012 |
| 11.93924489 |
| 6.320776707 |
| 70.93316082 |
| 8.427702276 |
| 9.130010799 |
| 5.618468184 |
| 41.43620286 |
| 7.725393753 |
| 3.511542615 |
| 3.511542615 |
| 24.58079831 |
| 20.36694717 |
| 22.47387274 |
| 61.1008415  |
| 6.320776707 |
| 0.702308523 |
| 221.2271848 |
| 9.832319322 |
| 5.618468184 |
| 143.2709387 |
| 7.725393753 |
| 16.85540455 |
| 28.79464944 |
| 194.5394609 |
| 8.427702276 |
| 11.93924489 |
| 8.427702276 |
| 11.93924489 |
| 7.02308523  |
| 2.106925569 |
| 0           |
| 51.26852218 |
| 0           |
| 5.618468184 |
| 53.37544775 |
| 146.0801728 |
| 4.916159661 |
| 38.62696877 |
| 4.916159661 |
| 13.34386194 |

|             |
|-------------|
| 11.23693637 |
| 27.3900324  |
| 7.725393753 |
| 16.85540455 |
| 33.7108091  |
| 25.98541535 |
| 16.15309603 |
| 20.36694717 |
| 15.45078751 |
| 27.3900324  |
| 14.04617046 |
| 16.85540455 |
| 20.36694717 |
| 4.213851138 |
| 21.77156421 |
| 7.02308523  |
| 56.88699036 |
| 6.320776707 |
| 192.4325353 |
| 3.511542615 |
| 8.427702276 |
| 16.85540455 |
| 11.23693637 |
| 2.106925569 |
| 7.02308523  |
| 113.7739807 |
| 0           |
| 5.618468184 |
| 0           |
| 29.49695797 |
| 239.4872063 |
| 0           |
| 6.320776707 |
| 5.618468184 |
| 7.02308523  |
| 4.213851138 |
| 42.13851138 |
| 159.4240347 |
| 5.618468184 |
| 0           |
| 17.55771308 |
| 7.725393753 |
| 7.725393753 |

|             |
|-------------|
| 92.70472504 |
| 210.6925569 |
| 11.93924489 |
| 7.725393753 |
| 39.32927729 |
| 10.53462785 |
| 5.618468184 |
| 7.02308523  |
| 5.618468184 |
| 0.702308523 |
| 56.88699036 |
| 34.41311763 |
| 4.213851138 |
| 5.618468184 |
| 4.213851138 |
| 5.618468184 |
| 8.427702276 |
| 178.3863648 |
| 94.81165061 |
| 157.3171092 |
| 2.106925569 |
| 3.511542615 |
| 4.916159661 |
| 2.809234092 |
| 77.25393753 |
| 2.809234092 |
| 9.832319322 |
| 31.60388354 |
| 11.23693637 |
| 39.32927729 |
| 74.44470344 |
| 21.77156421 |
| 0           |
| 6.320776707 |
| 29.49695797 |
| 34.41311763 |
| 8.427702276 |
| 2.809234092 |
| 5.618468184 |
| 7.725393753 |
| 2.809234092 |
| 11.23693637 |
| 9.130010799 |

|             |
|-------------|
| 126.4155341 |
| 1.404617046 |
| 3.511542615 |
| 6.320776707 |
| 2.809234092 |
| 1.404617046 |
| 124.3086086 |
| 139.7593961 |
| 49.86390513 |
| 29.49695797 |
| 4.213851138 |
| 4.213851138 |
| 9.832319322 |
| 10.53462785 |
| 0.702308523 |
| 4.916159661 |
| 5.618468184 |
| 11.93924489 |
| 5.618468184 |
| 17.55771308 |
| 6.320776707 |
| 23.17618126 |
| 4.213851138 |
| 108.1555125 |
| 4.916159661 |
| 7.02308523  |
| 7.02308523  |
| 61.1008415  |
| 6.320776707 |
| 18.2600216  |
| 6.320776707 |
| 8.427702276 |
| 5.618468184 |
| 1.404617046 |
| 8.427702276 |
| 0           |
| 10.53462785 |
| 4.213851138 |
| 0           |
| 23.17618126 |
| 7.02308523  |
| 3.511542615 |
| 0           |

|             |
|-------------|
| 15.45078751 |
| 2.106925569 |
| 0           |
| 5.618468184 |
| 6.320776707 |
| 250.7241427 |
| 79.3608631  |
| 8.427702276 |
| 7.725393753 |
| 175.5771308 |
| 7.725393753 |
| 7.02308523  |
| 42.13851138 |
| 7.725393753 |
| 7.725393753 |
| 7.02308523  |
| 9.130010799 |
| 9.130010799 |
| 9.130010799 |
| 122.201683  |
| 37.22235172 |
| 11.23693637 |
| 0           |
| 11.93924489 |
| 9.832319322 |
| 7.725393753 |
| 6.320776707 |
| 11.23693637 |
| 9.832319322 |
| 3.511542615 |
| 5.618468184 |
| 153.8055665 |
| 2.809234092 |
| 5.618468184 |
| 11.23693637 |
| 0           |
| 63.91007559 |
| 3.511542615 |
| 5.618468184 |
| 10.53462785 |
| 4.213851138 |
| 438.2405184 |
| 16.85540455 |

|             |
|-------------|
| 167.1494285 |
| 4.916159661 |
| 4.213851138 |
| 8.427702276 |
| 4.213851138 |
| 4.916159661 |
| 27.3900324  |
| 3.511542615 |
| 5.618468184 |
| 13.34386194 |
| 7.02308523  |
| 3.511542615 |
| 41.43620286 |
| 100.4301188 |
| 5.618468184 |
| 9.130010799 |
| 9.130010799 |
| 3.511542615 |
| 9.130010799 |
| 23.87848978 |
| 9.130010799 |
| 5.618468184 |
| 5.618468184 |
| 11.23693637 |
| 167.1494285 |
| 7.725393753 |
| 15.45078751 |
| 10.53462785 |
| 7.02308523  |
| 5.618468184 |
| 0           |
| 0           |
| 7.02308523  |
| 7.725393753 |
| 8.427702276 |
| 8.427702276 |
| 56.88699036 |
| 5.618468184 |
| 1.404617046 |
| 1.404617046 |
| 2.809234092 |
| 0           |
| 233.8687382 |



|             |
|-------------|
| 1.404617046 |
| 36.5200432  |
| 4.213851138 |
| 69.52854378 |
| 8.427702276 |
| 2.809234092 |
| 11.23693637 |
| 2.106925569 |
| 6.320776707 |
| 101.8347358 |
| 8.427702276 |
| 5.618468184 |
| 100.4301188 |
| 0           |
| 109.5601296 |
| 0           |
| 18.96233012 |
| 10.53462785 |
| 6.320776707 |
| 7.02308523  |
| 4.916159661 |
| 59.69622446 |
| 8.427702276 |
| 5.618468184 |
| 6.320776707 |
| 4.213851138 |
| 3.511542615 |
| 4.213851138 |
| 2.106925569 |
| 7.02308523  |
| 9.832319322 |
| 10.53462785 |
| 1.404617046 |
| 37.22235172 |
| 4.213851138 |
| 12.64155341 |
| 4.916159661 |
| 18.2600216  |
| 3.511542615 |
| 9.832319322 |
| 7.725393753 |
| 4.916159661 |
| 1.404617046 |

|             |
|-------------|
| 12.64155341 |
| 5.618468184 |
| 3.511542615 |
| 7.725393753 |
| 4.916159661 |
| 2.106925569 |
| 4.213851138 |
| 4.916159661 |
| 4.213851138 |
| 7.725393753 |
| 9.832319322 |
| 7.02308523  |
| 3.511542615 |
| 28.79464944 |
| 7.02308523  |
| 10.53462785 |
| 0.702308523 |
| 8.427702276 |
| 3.511542615 |
| 4.213851138 |
| 4.916159661 |
| 5.618468184 |
| 2.809234092 |
| 11.93924489 |
| 8.427702276 |
| 2.106925569 |
| 1.404617046 |
| 4.213851138 |
| 89.89549095 |
| 5.618468184 |
| 7.725393753 |
| 240.1895149 |
| 5.618468184 |
| 6.320776707 |
| 2.106925569 |
| 6.320776707 |
| 2.106925569 |
| 0           |
| 5.618468184 |
| 4.916159661 |
| 6.320776707 |
| 2.809234092 |
| 7.725393753 |

|             |
|-------------|
| 6.320776707 |
| 8.427702276 |
| 7.02308523  |
| 0.702308523 |
| 7.725393753 |
| 5.618468184 |
| 6.320776707 |
| 5.618468184 |
| 6.320776707 |
| 7.725393753 |
| 8.427702276 |
| 8.427702276 |
| 5.618468184 |
| 4.213851138 |
| 11.93924489 |
| 13.34386194 |
| 6.320776707 |
| 4.213851138 |
| 4.916159661 |
| 11.93924489 |
| 6.320776707 |
| 4.213851138 |
| 3.511542615 |
| 4.213851138 |
| 1.404617046 |
| 1.404617046 |
| 7.02308523  |
| 6.320776707 |
| 7.02308523  |
| 5.618468184 |
| 5.618468184 |
| 1.404617046 |
| 13.34386194 |
| 7.725393753 |
| 7.02308523  |
| 11.23693637 |
| 3.511542615 |
| 5.618468184 |
| 4.916159661 |
| 4.916159661 |
| 14.74847898 |
| 10.53462785 |
| 4.213851138 |

|             |
|-------------|
| 7.725393753 |
| 10.53462785 |
| 6.320776707 |
| 102.5370444 |
| 139.0570876 |
| 77.95624606 |
| 4.916159661 |
| 80.06317162 |
| 3.511542615 |
| 7.725393753 |
| 0.702308523 |
| 11.93924489 |
| 8.427702276 |
| 6.320776707 |
| 140.4617046 |
| 75.84932049 |
| 7.725393753 |
| 11.23693637 |
| 0           |
| 4.916159661 |
| 43.54312843 |
| 59.69622446 |
| 8.427702276 |
| 6.320776707 |
| 4.916159661 |
| 25.28310683 |
| 1.404617046 |
| 2.106925569 |
| 0           |
| 0           |
| 6.320776707 |
| 0           |
| 0           |
| 2.106925569 |
| 0           |
| 28.09234092 |
| 5.618468184 |
| 79.3608631  |
| 0           |
| 3.511542615 |
| 0           |
| 3.511542615 |
| 5.618468184 |

|             |
|-------------|
| 2.106925569 |
| 0           |
| 1.404617046 |
| 2.809234092 |
| 8.427702276 |
| 6.320776707 |
| 2.809234092 |
| 14.04617046 |
| 7.725393753 |
| 4.916159661 |
| 2.106925569 |
| 4.916159661 |
| 4.213851138 |
| 8.427702276 |
| 7.725393753 |
| 1.404617046 |
| 3.511542615 |
| 0           |
| 0           |
| 4.916159661 |
| 7.02308523  |
| 3.511542615 |
| 0.702308523 |
| 38.62696877 |
| 4.213851138 |
| 0.702308523 |
| 9.130010799 |
| 4.916159661 |
| 9.832319322 |
| 2.106925569 |
| 4.916159661 |
| 2.809234092 |
| 2.809234092 |
| 0           |
| 3.511542615 |
| 7.725393753 |
| 3.511542615 |
| 5.618468184 |
| 7.02308523  |
| 11.23693637 |
| 20.36694717 |
| 0           |
| 6.320776707 |

|             |
|-------------|
| 23.17618126 |
| 3.511542615 |
| 9.130010799 |
| 4.916159661 |
| 0.702308523 |
| 12.64155341 |
| 9.130010799 |
| 3.511542615 |
| 5.618468184 |
| 7.725393753 |
| 60.39853298 |
| 17.55771308 |
| 6.320776707 |
| 2.809234092 |
| 9.130010799 |
| 82.87240572 |
| 82.87240572 |
| 11.93924489 |
| 10.53462785 |
| 9.130010799 |
| 155.2101836 |
| 7.02308523  |
| 9.832319322 |
| 9.832319322 |
| 14.74847898 |
| 4.916159661 |
| 144.6755557 |
| 9.130010799 |
| 7.02308523  |
| 6.320776707 |
| 10.53462785 |
| 9.832319322 |
| 4.213851138 |
| 47.05467104 |
| 11.93924489 |
| 47.05467104 |
| 13.34386194 |
| 9.832319322 |
| 1.404617046 |
| 5.618468184 |
| 0           |
| 7.725393753 |
| 169.9586626 |

|             |
|-------------|
| 9.130010799 |
| 2.809234092 |
| 7.02308523  |
| 18.2600216  |
| 5.618468184 |
| 5.618468184 |
| 7.02308523  |
| 11.93924489 |
| 49.86390513 |
| 7.725393753 |
| 6.320776707 |
| 6.320776707 |
| 21.06925569 |
| 85.68163981 |
| 27.3900324  |
| 5.618468184 |
| 6.320776707 |
| 3.511542615 |
| 65.31469264 |
| 30.19926649 |
| 15.45078751 |
| 4.916159661 |
| 13.34386194 |
| 8.427702276 |
| 4.916159661 |
| 28.09234092 |
| 2.809234092 |
| 66.71930969 |
| 110.9647466 |
| 9.130010799 |
| 6.320776707 |
| 10.53462785 |
| 10.53462785 |
| 10.53462785 |
| 8.427702276 |
| 11.93924489 |
| 5.618468184 |
| 7.725393753 |
| 9.130010799 |
| 9.130010799 |
| 7.725393753 |
| 8.427702276 |
| 5.618468184 |

|             |
|-------------|
| 5.618468184 |
| 8.427702276 |
| 82.87240572 |
| 7.02308523  |
| 11.93924489 |
| 75.84932049 |
| 7.725393753 |
| 205.7763972 |
| 4.213851138 |
| 2.809234092 |
| 2.809234092 |
| 15.45078751 |
| 3.511542615 |
| 122.201683  |
| 4.213851138 |
| 8.427702276 |
| 16.15309603 |
| 6.320776707 |
| 9.130010799 |
| 8.427702276 |
| 24.58079831 |
| 5.618468184 |
| 1.404617046 |
| 9.832319322 |
| 7.725393753 |
| 22.47387274 |
| 8.427702276 |
| 9.832319322 |
| 3.511542615 |
| 7.725393753 |
| 4.213851138 |
| 4.916159661 |
| 3.511542615 |
| 7.725393753 |
| 9.130010799 |
| 47.75697957 |
| 16.15309603 |
| 10.53462785 |
| 16.85540455 |
| 5.618468184 |
| 7.02308523  |
| 3.511542615 |
| 0           |



|             |
|-------------|
| 139.7593961 |
| 7.02308523  |
| 2.809234092 |
| 2.809234092 |
| 4.916159661 |
| 4.916159661 |
| 5.618468184 |
| 4.916159661 |
| 2.809234092 |
| 4.916159661 |
| 9.832319322 |
| 9.832319322 |
| 5.618468184 |
| 2.809234092 |
| 84.97933129 |
| 4.916159661 |
| 42.13851138 |
| 7.725393753 |
| 7.725393753 |
| 9.130010799 |
| 10.53462785 |
| 9.130010799 |
| 4.213851138 |
| 12.64155341 |
| 3.511542615 |
| 75.14701196 |
| 75.14701196 |
| 6.320776707 |
| 8.427702276 |
| 22.47387274 |
| 8.427702276 |
| 5.618468184 |
| 8.427702276 |
| 9.832319322 |
| 4.916159661 |
| 10.53462785 |
| 21.77156421 |
| 79.3608631  |
| 10.53462785 |
| 9.130010799 |
| 8.427702276 |
| 6.320776707 |
| 53.37544775 |

|             |
|-------------|
| 7.725393753 |
| 16.85540455 |
| 6.320776707 |
| 9.130010799 |
| 12.64155341 |
| 5.618468184 |
| 9.130010799 |
| 0.702308523 |
| 5.618468184 |
| 9.832319322 |
| 16.85540455 |
| 14.04617046 |
| 13.34386194 |
| 7.02308523  |
| 7.02308523  |
| 4.916159661 |
| 8.427702276 |
| 11.23693637 |
| 8.427702276 |
| 7.02308523  |
| 5.618468184 |
| 7.02308523  |
| 11.93924489 |
| 3.511542615 |
| 2.809234092 |
| 7.725393753 |
| 103.9416614 |
| 6.320776707 |
| 7.725393753 |
| 6.320776707 |
| 7.02308523  |
| 5.618468184 |
| 7.725393753 |
| 2.106925569 |
| 12.64155341 |
| 6.320776707 |
| 4.916159661 |
| 266.1749302 |
| 16.15309603 |
| 7.02308523  |
| 35.81773467 |
| 10.53462785 |
| 4.916159661 |

|             |
|-------------|
| 5.618468184 |
| 9.832319322 |
| 5.618468184 |
| 44.94774547 |
| 8.427702276 |
| 4.213851138 |
| 7.02308523  |
| 8.427702276 |
| 10.53462785 |
| 5.618468184 |
| 53.37544775 |
| 8.427702276 |
| 9.130010799 |
| 9.832319322 |
| 128.5224597 |
| 14.74847898 |
| 28.79464944 |
| 129.2247682 |
| 15.45078751 |
| 9.130010799 |
| 4.213851138 |
| 9.832319322 |
| 14.74847898 |
| 4.213851138 |
| 21.77156421 |
| 11.93924489 |
| 10.53462785 |
| 29.49695797 |
| 7.725393753 |
| 206.4787058 |
| 6.320776707 |
| 8.427702276 |
| 10.53462785 |
| 9.130010799 |
| 3.511542615 |
| 4.916159661 |
| 10.53462785 |
| 3.511542615 |
| 40.73389434 |
| 6.320776707 |
| 7.725393753 |
| 292.8626541 |
| 7.02308523  |

|             |
|-------------|
| 7.02308523  |
| 6.320776707 |
| 3.511542615 |
| 58.99391593 |
| 2.809234092 |
| 6.320776707 |
| 4.916159661 |
| 5.618468184 |
| 84.27702276 |
| 4.213851138 |
| 10.53462785 |
| 7.725393753 |
| 11.23693637 |
| 19.66463864 |
| 4.916159661 |
| 9.130010799 |
| 14.04617046 |
| 9.130010799 |
| 2.809234092 |
| 40.03158581 |
| 7.02308523  |
| 9.832319322 |
| 2.809234092 |
| 6.320776707 |
| 7.02308523  |
| 2.809234092 |
| 7.02308523  |
| 8.427702276 |
| 9.130010799 |
| 8.427702276 |
| 7.02308523  |
| 7.02308523  |
| 3.511542615 |
| 6.320776707 |
| 7.725393753 |
| 6.320776707 |
| 4.916159661 |
| 3.511542615 |
| 162.2332688 |
| 7.02308523  |
| 7.02308523  |
| 4.916159661 |
| 3.511542615 |

|             |
|-------------|
| 9.832319322 |
| 81.46778867 |
| 134.8432364 |
| 1.404617046 |
| 4.213851138 |
| 8.427702276 |
| 5.618468184 |
| 9.130010799 |
| 15.45078751 |
| 21.06925569 |
| 0.702308523 |
| 33.7108091  |
| 7.02308523  |
| 6.320776707 |
| 8.427702276 |
| 8.427702276 |
| 7.725393753 |
| 2.106925569 |
| 6.320776707 |
| 11.23693637 |
| 7.725393753 |
| 3.511542615 |
| 8.427702276 |
| 2.106925569 |
| 5.618468184 |
| 3.511542615 |
| 2.809234092 |
| 6.320776707 |
| 6.320776707 |
| 9.832319322 |
| 9.832319322 |
| 8.427702276 |
| 25.98541535 |
| 9.832319322 |
| 10.53462785 |
| 8.427702276 |
| 17.55771308 |
| 4.916159661 |
| 5.618468184 |
| 54.07775627 |
| 51.9708307  |
| 6.320776707 |
| 4.213851138 |

|             |
|-------------|
| 161.5309603 |
| 7.02308523  |
| 0           |
| 7.02308523  |
| 5.618468184 |
| 8.427702276 |
| 7.725393753 |
| 7.725393753 |
| 11.23693637 |
| 4.213851138 |
| 9.130010799 |
| 47.75697957 |
| 4.916159661 |
| 9.130010799 |
| 5.618468184 |
| 8.427702276 |
| 12.64155341 |
| 5.618468184 |
| 5.618468184 |
| 7.725393753 |
| 4.916159661 |
| 6.320776707 |
| 7.02308523  |
| 16.85540455 |
| 9.832319322 |
| 8.427702276 |
| 105.3462785 |
| 9.130010799 |
| 18.96233012 |
| 3.511542615 |
| 11.23693637 |
| 275.304941  |
| 5.618468184 |
| 7.725393753 |
| 67.42161821 |
| 5.618468184 |
| 5.618468184 |
| 12.64155341 |
| 7.725393753 |
| 7.725393753 |
| 4.213851138 |
| 5.618468184 |
| 5.618468184 |

|             |
|-------------|
| 1.404617046 |
| 4.916159661 |
| 3.511542615 |
| 2.809234092 |
| 5.618468184 |
| 3.511542615 |
| 4.213851138 |
| 1.404617046 |
| 8.427702276 |
| 79.3608631  |
| 7.725393753 |
| 4.213851138 |
| 4.916159661 |
| 16.15309603 |
| 110.9647466 |
| 0.702308523 |
| 2.809234092 |
| 9.832319322 |
| 90.59779947 |
| 4.213851138 |
| 6.320776707 |
| 4.213851138 |
| 4.916159661 |
| 7.02308523  |
| 4.916159661 |
| 6.320776707 |
| 5.618468184 |
| 6.320776707 |
| 3.511542615 |
| 6.320776707 |
| 3.511542615 |
| 4.213851138 |
| 116.5832148 |
| 4.213851138 |
| 4.916159661 |
| 27.3900324  |
| 5.618468184 |
| 9.832319322 |
| 5.618468184 |
| 10.53462785 |
| 11.23693637 |
| 6.320776707 |
| 2.106925569 |

|             |
|-------------|
| 4.213851138 |
| 7.725393753 |
| 162.2332688 |
| 7.725393753 |
| 8.427702276 |
| 6.320776707 |
| 6.320776707 |
| 2.809234092 |
| 9.130010799 |
| 4.916159661 |
| 6.320776707 |
| 133.4386194 |
| 7.725393753 |
| 8.427702276 |
| 9.832319322 |
| 9.832319322 |
| 173.4702052 |
| 9.130010799 |
| 8.427702276 |
| 9.832319322 |
| 87.08625685 |
| 6.320776707 |
| 4.916159661 |
| 4.916159661 |
| 3.511542615 |
| 4.916159661 |
| 16.15309603 |
| 54.07775627 |
| 4.213851138 |
| 7.725393753 |
| 37.22235172 |
| 7.725393753 |
| 7.725393753 |
| 6.320776707 |
| 7.02308523  |
| 14.74847898 |
| 9.130010799 |
| 6.320776707 |
| 5.618468184 |
| 7.725393753 |
| 5.618468184 |
| 12.64155341 |
| 66.71930969 |



|             |
|-------------|
| 12.64155341 |
| 82.17009719 |
| 9.832319322 |
| 7.02308523  |
| 9.832319322 |
| 9.130010799 |
| 10.53462785 |
| 4.916159661 |
| 5.618468184 |
| 11.23693637 |
| 6.320776707 |
| 7.02308523  |
| 3.511542615 |
| 6.320776707 |
| 113.7739807 |
| 2.809234092 |
| 5.618468184 |
| 7.02308523  |
| 3.511542615 |
| 3.511542615 |
| 7.725393753 |
| 0           |
| 5.618468184 |
| 127.8201512 |
| 6.320776707 |
| 4.916159661 |
| 7.02308523  |
| 7.725393753 |
| 8.427702276 |
| 36.5200432  |
| 4.213851138 |
| 9.832319322 |
| 11.23693637 |
| 6.320776707 |
| 4.213851138 |
| 3.511542615 |
| 4.213851138 |
| 5.618468184 |
| 3.511542615 |
| 7.02308523  |
| 4.916159661 |
| 1.404617046 |
| 2.809234092 |

|             |
|-------------|
| 5.618468184 |
| 5.618468184 |
| 7.725393753 |
| 7.02308523  |
| 5.618468184 |
| 5.618468184 |
| 28.79464944 |
| 7.02308523  |
| 12.64155341 |
| 9.130010799 |
| 4.916159661 |
| 35.11542615 |
| 5.618468184 |
| 5.618468184 |
| 125.7132256 |
| 4.213851138 |
| 6.320776707 |
| 0           |
| 7.725393753 |
| 1.404617046 |
| 7.02308523  |
| 5.618468184 |
| 2.809234092 |
| 9.130010799 |
| 7.02308523  |
| 30.19926649 |
| 0           |
| 7.725393753 |
| 9.130010799 |
| 18.2600216  |
| 7.02308523  |
| 9.832319322 |
| 17.55771308 |
| 8.427702276 |
| 6.320776707 |
| 3.511542615 |
| 3.511542615 |
| 10.53462785 |
| 10.53462785 |
| 0           |
| 3.511542615 |
| 2.809234092 |
| 220.5248762 |

|             |
|-------------|
| 4.916159661 |
| 5.618468184 |
| 3.511542615 |
| 6.320776707 |
| 3.511542615 |
| 6.320776707 |
| 4.916159661 |
| 5.618468184 |
| 3.511542615 |
| 4.916159661 |
| 19.66463864 |
| 82.17009719 |
| 5.618468184 |
| 15.45078751 |
| 0.702308523 |
| 9.832319322 |
| 7.725393753 |
| 9.130010799 |
| 4.916159661 |
| 10.53462785 |
| 8.427702276 |
| 132.0340023 |
| 58.99391593 |
| 7.725393753 |
| 8.427702276 |
| 6.320776707 |
| 7.02308523  |
| 5.618468184 |
| 7.02308523  |
| 8.427702276 |
| 9.832319322 |
| 1.404617046 |
| 7.02308523  |
| 9.832319322 |
| 3.511542615 |
| 69.52854378 |
| 2.809234092 |
| 54.7800648  |
| 9.832319322 |
| 0           |
| 4.916159661 |
| 11.93924489 |
| 7.725393753 |

|             |
|-------------|
| 3.511542615 |
| 4.916159661 |
| 5.618468184 |
| 8.427702276 |
| 10.53462785 |
| 3.511542615 |
| 5.618468184 |
| 6.320776707 |
| 2.809234092 |
| 7.725393753 |
| 2.809234092 |
| 1.404617046 |
| 5.618468184 |
| 7.725393753 |
| 6.320776707 |
| 5.618468184 |
| 4.213851138 |
| 4.916159661 |
| 0.702308523 |
| 3.511542615 |
| 3.511542615 |
| 6.320776707 |
| 25.28310683 |
| 7.02308523  |
| 6.320776707 |
| 11.23693637 |
| 23.87848978 |
| 7.725393753 |
| 7.02308523  |
| 0.702308523 |
| 7.02308523  |
| 4.213851138 |
| 13.34386194 |
| 4.213851138 |
| 3.511542615 |
| 21.06925569 |
| 4.213851138 |
| 0           |
| 6.320776707 |
| 7.02308523  |
| 10.53462785 |
| 7.02308523  |
| 2.809234092 |

|             |
|-------------|
| 5.618468184 |
| 6.320776707 |
| 7.02308523  |
| 7.725393753 |
| 7.02308523  |
| 7.02308523  |
| 7.725393753 |
| 7.725393753 |
| 9.832319322 |
| 6.320776707 |
| 6.320776707 |
| 11.23693637 |
| 7.725393753 |
| 83.57471424 |
| 8.427702276 |
| 102.5370444 |
| 7.725393753 |
| 12.64155341 |
| 6.320776707 |
| 2.106925569 |
| 5.618468184 |
| 7.02308523  |
| 6.320776707 |
| 4.916159661 |
| 2.106925569 |
| 7.725393753 |
| 6.320776707 |
| 5.618468184 |
| 36.5200432  |
| 4.916159661 |
| 7.725393753 |
| 4.916159661 |
| 4.916159661 |
| 2.106925569 |
| 5.618468184 |
| 5.618468184 |
| 7.02308523  |
| 4.213851138 |
| 7.02308523  |
| 2.809234092 |
| 9.832319322 |
| 3.511542615 |
| 7.725393753 |

|             |
|-------------|
| 2.809234092 |
| 2.809234092 |
| 25.98541535 |
| 8.427702276 |
| 2.809234092 |
| 3.511542615 |
| 8.427702276 |
| 9.832319322 |
| 5.618468184 |
| 8.427702276 |
| 8.427702276 |
| 66.71930969 |
| 3.511542615 |
| 7.02308523  |
| 9.832319322 |
| 8.427702276 |
| 3.511542615 |
| 7.725393753 |
| 6.320776707 |
| 4.916159661 |
| 3.511542615 |
| 2.809234092 |
| 26.68772387 |
| 10.53462785 |
| 106.048587  |
| 2.809234092 |
| 3.511542615 |
| 6.320776707 |
| 4.916159661 |
| 0           |
| 3.511542615 |
| 110.2624381 |
| 0.702308523 |
| 7.725393753 |
| 132.7363109 |
| 156.6148006 |
| 5.618468184 |
| 6.320776707 |
| 4.916159661 |
| 92.00241652 |
| 6.320776707 |
| 6.320776707 |
| 4.213851138 |

|             |
|-------------|
| 4.916159661 |
| 14.04617046 |
| 6.320776707 |
| 76.55162901 |
| 2.106925569 |
| 7.725393753 |
| 209.9902484 |
| 128.5224597 |
| 11.23693637 |
| 47.75697957 |
| 42.13851138 |
| 5.618468184 |
| 8.427702276 |
| 7.725393753 |
| 6.320776707 |
| 11.23693637 |
| 3.511542615 |
| 3.511542615 |
| 5.618468184 |
| 12.64155341 |
| 5.618468184 |
| 21.06925569 |
| 4.213851138 |
| 64.61238412 |
| 11.93924489 |
| 161.5309603 |
| 2.809234092 |
| 5.618468184 |
| 12.64155341 |
| 7.02308523  |
| 62.50545855 |
| 9.130010799 |
| 5.618468184 |
| 4.213851138 |
| 23.17618126 |
| 4.213851138 |
| 7.725393753 |
| 5.618468184 |
| 4.213851138 |
| 27.3900324  |
| 4.213851138 |
| 7.725393753 |
| 8.427702276 |

|             |
|-------------|
| 8.427702276 |
| 7.02308523  |
| 42.8408199  |
| 4.916159661 |
| 24.58079831 |
| 61.80315003 |
| 5.618468184 |
| 6.320776707 |
| 4.916159661 |
| 0           |
| 12.64155341 |
| 14.04617046 |
| 11.23693637 |
| 110.2624381 |
| 8.427702276 |
| 10.53462785 |
| 9.832319322 |
| 8.427702276 |
| 95.51395913 |
| 7.725393753 |
| 73.74239492 |
| 8.427702276 |
| 21.77156421 |
| 6.320776707 |
| 8.427702276 |
| 11.93924489 |
| 7.02308523  |
| 44.24543695 |
| 18.2600216  |
| 5.618468184 |
| 34.41311763 |
| 5.618468184 |
| 101.8347358 |
| 2.809234092 |
| 10.53462785 |
| 7.02308523  |
| 15.45078751 |
| 7.725393753 |
| 5.618468184 |
| 4.916159661 |
| 104.6439699 |
| 4.916159661 |
| 6.320776707 |



|             |
|-------------|
| 9.832319322 |
| 7.02308523  |
| 7.02308523  |
| 153.8055665 |
| 8.427702276 |
| 5.618468184 |
| 8.427702276 |
| 7.725393753 |
| 82.87240572 |
| 5.618468184 |
| 7.02308523  |
| 6.320776707 |
| 18.2600216  |
| 6.320776707 |
| 9.832319322 |
| 88.4908739  |
| 7.02308523  |
| 9.130010799 |
| 9.832319322 |
| 9.130010799 |
| 6.320776707 |
| 6.320776707 |
| 36.5200432  |
| 2.106925569 |
| 8.427702276 |
| 5.618468184 |
| 4.916159661 |
| 7.02308523  |
| 85.68163981 |
| 12.64155341 |
| 134.1409279 |
| 105.3462785 |
| 10.53462785 |
| 8.427702276 |
| 0           |
| 8.427702276 |
| 50.56621366 |
| 8.427702276 |
| 9.130010799 |
| 0           |
| 207.1810143 |
| 7.02308523  |
| 7.02308523  |

|             |
|-------------|
| 75.14701196 |
| 15.45078751 |
| 4.916159661 |
| 9.130010799 |
| 11.93924489 |
| 8.427702276 |
| 4.916159661 |
| 7.725393753 |
| 11.23693637 |
| 4.916159661 |
| 3.511542615 |
| 7.725393753 |
| 6.320776707 |
| 7.725393753 |
| 2.809234092 |
| 42.8408199  |
| 5.618468184 |
| 7.02308523  |
| 92.00241652 |
| 6.320776707 |
| 9.130010799 |
| 69.52854378 |
| 10.53462785 |
| 7.02308523  |
| 10.53462785 |
| 56.88699036 |
| 5.618468184 |
| 9.130010799 |
| 6.320776707 |
| 115.8809063 |
| 11.23693637 |
| 7.725393753 |
| 2.809234092 |
| 9.832319322 |
| 7.02308523  |
| 7.725393753 |
| 8.427702276 |
| 99.02550175 |
| 11.23693637 |
| 8.427702276 |
| 5.618468184 |
| 7.725393753 |
| 6.320776707 |

|             |
|-------------|
| 40.73389434 |
| 0.702308523 |
| 8.427702276 |
| 86.38394833 |
| 177.6840563 |
| 5.618468184 |
| 14.74847898 |
| 9.130010799 |
| 27.3900324  |
| 9.130010799 |
| 2.106925569 |
| 9.832319322 |
| 9.130010799 |
| 5.618468184 |
| 12.64155341 |
| 7.02308523  |
| 5.618468184 |
| 9.832319322 |
| 4.213851138 |
| 6.320776707 |
| 11.93924489 |
| 12.64155341 |
| 4.916159661 |
| 7.725393753 |
| 11.93924489 |
| 3.511542615 |
| 4.916159661 |
| 5.618468184 |
| 3.511542615 |
| 8.427702276 |
| 7.02308523  |
| 4.213851138 |
| 96.21626765 |
| 11.93924489 |
| 9.832319322 |
| 8.427702276 |
| 5.618468184 |
| 4.213851138 |
| 6.320776707 |
| 4.916159661 |
| 4.213851138 |
| 9.130010799 |
| 4.916159661 |

|             |
|-------------|
| 3.511542615 |
| 54.07775627 |
| 7.725393753 |
| 11.93924489 |
| 4.916159661 |
| 184.004833  |
| 10.53462785 |
| 9.130010799 |
| 2.809234092 |
| 5.618468184 |
| 0           |
| 8.427702276 |
| 3.511542615 |
| 125.7132256 |
| 7.02308523  |
| 2.809234092 |
| 7.02308523  |
| 8.427702276 |
| 7.02308523  |
| 6.320776707 |
| 14.04617046 |
| 7.725393753 |
| 61.1008415  |
| 11.93924489 |
| 25.28310683 |
| 5.618468184 |
| 7.02308523  |
| 11.93924489 |
| 11.23693637 |
| 3.511542615 |
| 7.725393753 |
| 4.916159661 |
| 4.213851138 |
| 3.511542615 |
| 4.213851138 |
| 6.320776707 |
| 7.725393753 |
| 4.916159661 |
| 3.511542615 |
| 1.404617046 |
| 7.725393753 |
| 9.832319322 |
| 4.916159661 |

|             |
|-------------|
| 0.702308523 |
| 247.9149086 |
| 7.02308523  |
| 31.60388354 |
| 10.53462785 |
| 7.02308523  |
| 8.427702276 |
| 9.832319322 |
| 2.809234092 |
| 7.725393753 |
| 7.02308523  |
| 4.213851138 |
| 5.618468184 |
| 8.427702276 |
| 5.618468184 |
| 8.427702276 |
| 4.213851138 |
| 5.618468184 |
| 3.511542615 |
| 6.320776707 |
| 3.511542615 |
| 3.511542615 |
| 6.320776707 |
| 5.618468184 |
| 49.16159661 |
| 135.5455449 |
| 10.53462785 |
| 4.213851138 |
| 9.832319322 |
| 7.02308523  |
| 2.809234092 |
| 7.725393753 |
| 6.320776707 |
| 5.618468184 |
| 6.320776707 |
| 2.809234092 |
| 30.19926649 |
| 14.74847898 |
| 2.809234092 |
| 11.23693637 |
| 9.832319322 |
| 0           |
| 4.916159661 |

|             |
|-------------|
| 18.2600216  |
| 9.832319322 |
| 7.725393753 |
| 3.511542615 |
| 7.725393753 |
| 7.725393753 |
| 6.320776707 |
| 10.53462785 |
| 2.106925569 |
| 9.832319322 |
| 58.99391593 |
| 7.725393753 |
| 12.64155341 |
| 136.950162  |
| 3.511542615 |
| 11.93924489 |
| 7.725393753 |
| 11.93924489 |
| 3.511542615 |
| 14.74847898 |
| 0           |
| 4.213851138 |
| 11.23693637 |
| 8.427702276 |
| 5.618468184 |
| 9.130010799 |
| 4.916159661 |
| 14.74847898 |
| 6.320776707 |
| 14.04617046 |
| 7.725393753 |
| 7.725393753 |
| 8.427702276 |
| 10.53462785 |
| 10.53462785 |
| 4.916159661 |
| 5.618468184 |
| 7.02308523  |
| 9.832319322 |
| 186.1117586 |
| 9.130010799 |
| 4.916159661 |
| 14.04617046 |

|             |
|-------------|
| 37.92466024 |
| 4.213851138 |
| 5.618468184 |
| 3.511542615 |
| 6.320776707 |
| 4.213851138 |
| 9.832319322 |
| 150.9963324 |
| 7.02308523  |
| 2.809234092 |
| 10.53462785 |
| 11.23693637 |
| 7.725393753 |
| 2.809234092 |
| 7.02308523  |
| 5.618468184 |
| 10.53462785 |
| 6.320776707 |
| 8.427702276 |
| 9.130010799 |
| 2.809234092 |
| 7.02308523  |
| 11.23693637 |
| 7.02308523  |
| 5.618468184 |
| 14.04617046 |
| 77.95624606 |
| 4.916159661 |
| 3.511542615 |
| 9.832319322 |
| 7.02308523  |
| 7.725393753 |
| 8.427702276 |
| 107.453204  |
| 4.916159661 |
| 74.44470344 |
| 11.93924489 |
| 4.213851138 |
| 7.02308523  |
| 6.320776707 |
| 9.832319322 |
| 18.2600216  |
| 6.320776707 |

|             |
|-------------|
| 3.511542615 |
| 10.53462785 |
| 11.93924489 |
| 4.916159661 |
| 7.725393753 |
| 6.320776707 |
| 3.511542615 |
| 2.106925569 |
| 40.73389434 |
| 6.320776707 |
| 4.213851138 |
| 2.106925569 |
| 7.02308523  |
| 77.95624606 |
| 7.02308523  |
| 8.427702276 |
| 5.618468184 |
| 7.02308523  |
| 4.916159661 |
| 15.45078751 |
| 6.320776707 |
| 2.106925569 |
| 0           |
| 74.44470344 |
| 9.130010799 |
| 4.213851138 |
| 7.02308523  |
| 10.53462785 |
| 4.916159661 |
| 16.85540455 |
| 0           |
| 9.832319322 |
| 6.320776707 |
| 11.23693637 |
| 7.02308523  |
| 9.832319322 |
| 7.02308523  |
| 7.02308523  |
| 9.832319322 |
| 9.130010799 |
| 1.404617046 |
| 2.106925569 |
| 7.725393753 |



|             |
|-------------|
| 9.130010799 |
| 16.85540455 |
| 12.64155341 |
| 6.320776707 |
| 9.130010799 |
| 4.213851138 |
| 6.320776707 |
| 6.320776707 |
| 7.02308523  |
| 7.02308523  |
| 7.725393753 |
| 6.320776707 |
| 3.511542615 |
| 6.320776707 |
| 11.93924489 |
| 16.85540455 |
| 4.213851138 |
| 2.809234092 |
| 7.725393753 |
| 4.916159661 |
| 9.832319322 |
| 5.618468184 |
| 12.64155341 |
| 12.64155341 |
| 6.320776707 |
| 27.3900324  |
| 5.618468184 |
| 5.618468184 |
| 3.511542615 |
| 4.213851138 |
| 7.725393753 |
| 9.130010799 |
| 10.53462785 |
| 23.17618126 |
| 4.213851138 |
| 9.832319322 |
| 9.130010799 |
| 7.725393753 |
| 4.916159661 |
| 4.916159661 |
| 7.725393753 |
| 14.04617046 |
| 4.916159661 |

|             |
|-------------|
| 4.916159661 |
| 4.916159661 |
| 0           |
| 7.02308523  |
| 4.213851138 |
| 8.427702276 |
| 5.618468184 |
| 1.404617046 |
| 7.725393753 |
| 7.02308523  |
| 5.618468184 |
| 22.47387274 |
| 8.427702276 |
| 2.106925569 |
| 9.130010799 |
| 7.02308523  |
| 9.832319322 |
| 7.725393753 |
| 12.64155341 |
| 4.213851138 |
| 42.8408199  |
| 6.320776707 |
| 13.34386194 |
| 4.213851138 |
| 6.320776707 |
| 9.130010799 |
| 10.53462785 |
| 4.213851138 |
| 9.832319322 |
| 18.96233012 |
| 12.64155341 |
| 9.832319322 |
| 84.97933129 |
| 3.511542615 |
| 7.725393753 |
| 1.404617046 |
| 11.23693637 |
| 9.832319322 |
| 7.02308523  |
| 18.96233012 |
| 37.22235172 |
| 7.725393753 |
| 1.404617046 |

|             |
|-------------|
| 12.64155341 |
| 4.213851138 |
| 1.404617046 |
| 7.725393753 |
| 8.427702276 |
| 6.320776707 |
| 5.618468184 |
| 1.404617046 |
| 7.02308523  |
| 7.725393753 |
| 7.02308523  |
| 2.809234092 |
| 11.93924489 |
| 4.916159661 |
| 9.130010799 |
| 4.213851138 |
| 5.618468184 |
| 33.00850058 |
| 7.725393753 |
| 10.53462785 |
| 7.02308523  |
| 7.02308523  |
| 3.511542615 |
| 2.106925569 |
| 3.511542615 |
| 12.64155341 |
| 2.809234092 |
| 6.320776707 |
| 3.511542615 |
| 10.53462785 |
| 4.213851138 |
| 8.427702276 |
| 0           |
| 13.34386194 |
| 9.832319322 |
| 8.427702276 |
| 7.725393753 |
| 7.725393753 |
| 14.74847898 |
| 122.9039915 |
| 18.2600216  |
| 3.511542615 |
| 11.93924489 |

|             |
|-------------|
| 7.02308523  |
| 7.725393753 |
| 5.618468184 |
| 7.02308523  |
| 11.23693637 |
| 10.53462785 |
| 4.213851138 |
| 11.23693637 |
| 11.93924489 |
| 9.832319322 |
| 6.320776707 |
| 2.809234092 |
| 10.53462785 |
| 4.916159661 |
| 4.916159661 |
| 7.725393753 |
| 6.320776707 |
| 119.3924489 |
| 2.809234092 |
| 7.725393753 |
| 3.511542615 |
| 6.320776707 |
| 5.618468184 |
| 4.213851138 |
| 6.320776707 |
| 4.213851138 |
| 5.618468184 |
| 7.02308523  |
| 7.725393753 |
| 0           |
| 4.916159661 |
| 8.427702276 |
| 7.02308523  |
| 149.5917154 |
| 4.213851138 |
| 7.725393753 |
| 2.809234092 |
| 4.916159661 |
| 6.320776707 |
| 1.404617046 |
| 6.320776707 |
| 7.725393753 |
| 8.427702276 |

|             |
|-------------|
| 4.916159661 |
| 4.213851138 |
| 6.320776707 |
| 45.650054   |
| 43.54312843 |
| 5.618468184 |
| 0           |
| 9.130010799 |
| 202.9671632 |
| 60.39853298 |
| 7.02308523  |
| 4.213851138 |
| 8.427702276 |
| 4.916159661 |
| 8.427702276 |
| 3.511542615 |
| 4.916159661 |
| 5.618468184 |
| 11.23693637 |
| 11.23693637 |
| 4.916159661 |
| 6.320776707 |
| 14.04617046 |
| 4.213851138 |
| 5.618468184 |
| 14.04617046 |
| 10.53462785 |
| 4.213851138 |
| 7.725393753 |
| 5.618468184 |
| 4.213851138 |
| 9.832319322 |
| 135.5455449 |
| 4.213851138 |
| 3.511542615 |
| 8.427702276 |
| 4.916159661 |
| 47.75697957 |
| 4.916159661 |
| 6.320776707 |
| 4.213851138 |
| 7.02308523  |
| 3.511542615 |

|             |
|-------------|
| 10.53462785 |
| 7.02308523  |
| 3.511542615 |
| 5.618468184 |
| 6.320776707 |
| 3.511542615 |
| 9.832319322 |
| 9.832319322 |
| 4.213851138 |
| 4.213851138 |
| 7.02308523  |
| 14.74847898 |
| 7.02308523  |
| 16.15309603 |
| 9.130010799 |
| 4.916159661 |
| 4.213851138 |
| 33.7108091  |
| 9.130010799 |
| 2.809234092 |
| 8.427702276 |
| 11.23693637 |
| 7.02308523  |
| 8.427702276 |
| 5.618468184 |
| 10.53462785 |
| 14.74847898 |
| 6.320776707 |
| 9.130010799 |
| 9.130010799 |
| 9.130010799 |
| 8.427702276 |
| 7.02308523  |
| 5.618468184 |
| 1.404617046 |
| 13.34386194 |
| 3.511542615 |
| 0           |
| 0           |
| 0           |
| 0           |
| 0           |
| 0           |

|             |
|-------------|
| 0           |
| 16.85540455 |
| 0           |
| 0           |
| 0           |
| 0           |
| 0           |
| 0           |
| 0           |
| 0           |
| 0           |
| 14.04617046 |
| 0           |
| 0           |
| 0           |
| 0           |
| 0           |
| 0           |
| 0           |
| 0           |
| 0           |
| 0           |
| 0           |
| 0           |
| 0           |
| 0           |
| 0           |
| 0           |
| 0           |
| 2.106925569 |
| 0           |
| 0           |
| 2.106925569 |
| 2.809234092 |
| 1.404617046 |
| 0           |
| 0           |
| 2.106925569 |
| 0           |
| 14.04617046 |
| 0           |
| 7.725393753 |
| 7.02308523  |
| 4.916159661 |
| 7.02308523  |
| 7.725393753 |
| 9.130010799 |

|             |
|-------------|
| 8.427702276 |
| 4.916159661 |
| 9.130010799 |
| 2.106925569 |
| 0           |
| 6.320776707 |
| 6.320776707 |
| 53.37544775 |
| 32.30619206 |
| 4.916159661 |
| 14.04617046 |
| 28.09234092 |
| 5.618468184 |
| 0           |
| 47.75697957 |
| 390.4835388 |
| 4.916159661 |
| 36.5200432  |
| 1.404617046 |
| 9.832319322 |
| 5.618468184 |
| 10.53462785 |
| 9.130010799 |
| 6.320776707 |
| 0           |
| 0           |
| 143.9732472 |
| 9.130010799 |
| 9.130010799 |
| 5.618468184 |
| 10.53462785 |
| 0           |
| 31.60388354 |
| 5.618468184 |
| 49.16159661 |
| 3.511542615 |
| 2.106925569 |
| 7.725393753 |
| 6.320776707 |
| 4.213851138 |
| 9.832319322 |
| 8.427702276 |
| 7.02308523  |



|             |
|-------------|
| 3.511542615 |
| 0           |
| 9.130010799 |
| 5.618468184 |
| 13.34386194 |
| 0           |
| 4.213851138 |
| 4.916159661 |
| 162.9355773 |
| 37.92466024 |
| 102.5370444 |
| 103.9416614 |
| 4.213851138 |
| 0           |
| 3.511542615 |
| 0           |
| 4.213851138 |
| 7.02308523  |
| 2.106925569 |
| 4.213851138 |
| 6.320776707 |
| 37.22235172 |
| 0           |
| 2.809234092 |
| 5.618468184 |
| 6.320776707 |
| 4.213851138 |
| 2.809234092 |
| 0.702308523 |
| 11.23693637 |
| 7.725393753 |
| 0           |
| 5.618468184 |
| 3.511542615 |
| 3.511542615 |
| 9.130010799 |
| 5.618468184 |
| 16.15309603 |
| 7.02308523  |
| 0           |
| 7.725393753 |
| 6.320776707 |
| 4.916159661 |

|             |
|-------------|
| 11.23693637 |
| 3.511542615 |
| 3.511542615 |
| 3.511542615 |
| 9.130010799 |
| 6.320776707 |
| 7.725393753 |
| 54.7800648  |
| 282.3280263 |
| 7.725393753 |
| 184.004833  |
| 11.93924489 |
| 9.130010799 |
| 9.130010799 |
| 4.916159661 |
| 1.404617046 |
| 7.02308523  |
| 8.427702276 |
| 4.213851138 |
| 85.68163981 |
| 5.618468184 |
| 9.832319322 |
| 7.725393753 |
| 7.725393753 |
| 7.02308523  |
| 119.3924489 |
| 7.02308523  |
| 116.5832148 |
| 8.427702276 |
| 16.15309603 |
| 4.916159661 |
| 14.04617046 |
| 367.3073575 |
| 8.427702276 |
| 0           |
| 0           |
| 6.320776707 |
| 28.09234092 |
| 9.130010799 |
| 0           |
| 8.427702276 |
| 6.320776707 |
| 7.02308523  |

|             |
|-------------|
| 4.213851138 |
| 7.02308523  |
| 44.94774547 |
| 0           |
| 10.53462785 |
| 13.34386194 |
| 7.02308523  |
| 7.725393753 |
| 2.106925569 |
| 22.47387274 |
| 0           |
| 40.73389434 |
| 5.618468184 |
| 7.02308523  |
| 11.23693637 |
| 0           |
| 33.00850058 |
| 9.832319322 |
| 148.8894069 |
| 33.7108091  |
| 7.02308523  |
| 2.809234092 |
| 4.916159661 |
| 2.106925569 |
| 27.3900324  |
| 50.56621366 |
| 8.427702276 |
| 5.618468184 |
| 0           |
| 185.4094501 |
| 8.427702276 |
| 4.916159661 |
| 9.130010799 |
| 0           |
| 7.725393753 |
| 4.916159661 |
| 7.02308523  |
| 2.106925569 |
| 4.213851138 |
| 9.832319322 |
| 7.725393753 |
| 9.130010799 |
| 16.85540455 |

|             |
|-------------|
| 9.832319322 |
| 22.47387274 |
| 0.702308523 |
| 9.130010799 |
| 5.618468184 |
| 14.04617046 |
| 3.511542615 |
| 3.511542615 |
| 2.809234092 |
| 4.213851138 |
| 69.52854378 |
| 9.832319322 |
| 9.832319322 |
| 40.03158581 |
| 0           |
| 0           |
| 9.130010799 |
| 9.832319322 |
| 0           |
| 0           |
| 6.320776707 |
| 3.511542615 |
| 51.26852218 |
| 6.320776707 |
| 7.02308523  |
| 5.618468184 |
| 9.832319322 |
| 18.2600216  |
| 7.725393753 |
| 0           |
| 21.06925569 |
| 13.34386194 |
| 6.320776707 |
| 4.916159661 |
| 6.320776707 |
| 9.130010799 |
| 0           |
| 6.320776707 |
| 7.02308523  |
| 6.320776707 |
| 3.511542615 |
| 6.320776707 |
| 2.809234092 |

|             |
|-------------|
| 79.3608631  |
| 2.809234092 |
| 13.34386194 |
| 37.92466024 |
| 8.427702276 |
| 6.320776707 |
| 18.96233012 |
| 4.916159661 |
| 4.213851138 |
| 5.618468184 |
| 7.725393753 |
| 0           |
| 6.320776707 |
| 33.00850058 |
| 1.404617046 |
| 6.320776707 |
| 8.427702276 |
| 7.725393753 |
| 3.511542615 |
| 16.85540455 |
| 15.45078751 |
| 5.618468184 |
| 3.511542615 |
| 0           |
| 7.02308523  |
| 6.320776707 |
| 5.618468184 |
| 4.916159661 |
| 3.511542615 |
| 7.02308523  |
| 59.69622446 |
| 14.74847898 |
| 0           |
| 2.809234092 |
| 8.427702276 |
| 181.1955989 |
| 9.130010799 |
| 0           |
| 2.809234092 |
| 6.320776707 |
| 8.427702276 |
| 4.213851138 |
| 13.34386194 |

|             |
|-------------|
| 4.213851138 |
| 10.53462785 |
| 45.650054   |
| 8.427702276 |
| 5.618468184 |
| 7.725393753 |
| 24.58079831 |
| 5.618468184 |
| 14.04617046 |
| 173.4702052 |
| 9.130010799 |
| 6.320776707 |
| 3.511542615 |
| 122.9039915 |
| 13.34386194 |
| 70.93316082 |
| 7.02308523  |
| 6.320776707 |
| 3.511542615 |
| 0           |
| 7.02308523  |
| 0           |
| 28.09234092 |
| 0           |
| 2.809234092 |
| 11.23693637 |
| 6.320776707 |
| 6.320776707 |
| 7.725393753 |
| 4.916159661 |
| 16.15309603 |
| 0           |
| 2.106925569 |
| 0           |
| 6.320776707 |
| 5.618468184 |
| 21.77156421 |
| 51.9708307  |
| 9.832319322 |
| 5.618468184 |
| 26.68772387 |
| 13.34386194 |
| 0           |

|             |
|-------------|
| 143.2709387 |
| 6.320776707 |
| 6.320776707 |
| 6.320776707 |
| 3.511542615 |
| 4.916159661 |
| 8.427702276 |
| 12.64155341 |
| 2.106925569 |
| 69.52854378 |
| 0           |
| 10.53462785 |
| 10.53462785 |
| 9.130010799 |
| 6.320776707 |
| 11.23693637 |
| 5.618468184 |
| 0           |
| 54.07775627 |
| 9.832319322 |
| 9.130010799 |
| 6.320776707 |
| 3.511542615 |
| 89.89549095 |
| 9.130010799 |
| 31.60388354 |
| 148.8894069 |
| 4.916159661 |
| 0           |
| 10.53462785 |
| 9.832319322 |
| 5.618468184 |
| 0           |
| 7.725393753 |
| 10.53462785 |
| 4.916159661 |
| 19.66463864 |
| 4.916159661 |
| 7.02308523  |
| 105.3462785 |
| 0           |
| 5.618468184 |
| 3.511542615 |

|             |
|-------------|
| 6.320776707 |
| 5.618468184 |
| 2.106925569 |
| 7.725393753 |
| 2.106925569 |
| 0           |
| 6.320776707 |
| 0           |
| 7.725393753 |
| 4.916159661 |
| 0           |
| 3.511542615 |
| 8.427702276 |
| 8.427702276 |
| 6.320776707 |
| 4.916159661 |
| 6.320776707 |
| 100.4301188 |
| 8.427702276 |
| 8.427702276 |
| 0           |
| 7.02308523  |
| 17.55771308 |
| 14.04617046 |
| 30.90157501 |
| 5.618468184 |
| 51.26852218 |
| 6.320776707 |
| 6.320776707 |
| 8.427702276 |
| 5.618468184 |
| 1.404617046 |
| 4.213851138 |
| 6.320776707 |
| 9.832319322 |
| 1.404617046 |
| 0           |
| 4.916159661 |
| 84.27702276 |
| 8.427702276 |
| 6.320776707 |
| 4.916159661 |
| 2.106925569 |



|             |
|-------------|
| 8.427702276 |
| 21.06925569 |
| 8.427702276 |
| 1.404617046 |
| 9.832319322 |
| 7.725393753 |
| 5.618468184 |
| 0           |
| 32.30619206 |
| 7.02308523  |
| 4.916159661 |
| 103.9416614 |
| 7.02308523  |
| 20.36694717 |
| 7.02308523  |
| 4.213851138 |
| 49.86390513 |
| 7.725393753 |
| 73.04008639 |
| 0.702308523 |
| 18.96233012 |
| 98.32319322 |
| 3.511542615 |
| 9.130010799 |
| 5.618468184 |
| 4.213851138 |
| 4.213851138 |
| 54.7800648  |
| 11.93924489 |
| 1.404617046 |
| 33.7108091  |
| 67.42161821 |
| 0           |
| 113.0716722 |
| 7.02308523  |
| 5.618468184 |
| 6.320776707 |
| 150.2940239 |
| 2.106925569 |
| 7.725393753 |
| 3.511542615 |
| 11.93924489 |
| 9.130010799 |

|             |
|-------------|
| 7.725393753 |
| 16.15309603 |
| 7.02308523  |
| 9.130010799 |
| 7.02308523  |
| 54.7800648  |
| 17.55771308 |
| 8.427702276 |
| 4.213851138 |
| 8.427702276 |
| 121.4993745 |
| 6.320776707 |
| 14.04617046 |
| 6.320776707 |
| 4.213851138 |
| 33.7108091  |
| 5.618468184 |
| 8.427702276 |
| 5.618468184 |
| 82.17009719 |
| 3.511542615 |
| 8.427702276 |
| 0           |
| 7.02308523  |
| 2.106925569 |
| 9.130010799 |
| 12.64155341 |
| 7.02308523  |
| 5.618468184 |
| 15.45078751 |
| 4.916159661 |
| 6.320776707 |
| 6.320776707 |
| 5.618468184 |
| 7.725393753 |
| 6.320776707 |
| 21.06925569 |
| 9.130010799 |
| 4.213851138 |
| 4.213851138 |
| 7.725393753 |
| 5.618468184 |
| 5.618468184 |

|             |
|-------------|
| 0           |
| 54.7800648  |
| 7.725393753 |
| 5.618468184 |
| 66.71930969 |
| 0           |
| 7.725393753 |
| 5.618468184 |
| 9.130010799 |
| 5.618468184 |
| 166.44712   |
| 4.916159661 |
| 3.511542615 |
| 4.916159661 |
| 9.832319322 |
| 0           |
| 0           |
| 0           |
| 6.320776707 |
| 0           |
| 0           |
| 9.130010799 |
| 10.53462785 |
| 2.809234092 |
| 13.34386194 |
| 9.832319322 |
| 7.725393753 |
| 30.19926649 |
| 51.26852218 |
| 4.213851138 |
| 63.91007559 |
| 0           |
| 5.618468184 |
| 11.23693637 |
| 9.130010799 |
| 7.725393753 |
| 9.130010799 |
| 3.511542615 |
| 35.81773467 |
| 5.618468184 |
| 7.02308523  |
| 2.106925569 |
| 3.511542615 |

|             |
|-------------|
| 16.15309603 |
| 9.130010799 |
| 11.93924489 |
| 7.02308523  |
| 10.53462785 |
| 2.809234092 |
| 30.19926649 |
| 3.511542615 |
| 7.02308523  |
| 1.404617046 |
| 11.93924489 |
| 2.809234092 |
| 5.618468184 |
| 9.832319322 |
| 9.130010799 |
| 3.511542615 |
| 16.85540455 |
| 6.320776707 |
| 10.53462785 |
| 7.02308523  |
| 0           |
| 2.809234092 |
| 9.130010799 |
| 10.53462785 |
| 16.85540455 |
| 0           |
| 7.725393753 |
| 5.618468184 |
| 7.725393753 |
| 6.320776707 |
| 5.618468184 |
| 4.916159661 |
| 3.511542615 |
| 5.618468184 |
| 11.23693637 |
| 0           |
| 1.404617046 |
| 9.832319322 |
| 2.106925569 |
| 129.9270768 |
| 0           |
| 6.320776707 |
| 0           |

|             |
|-------------|
| 0           |
| 11.23693637 |
| 0           |
| 0           |
| 4.213851138 |
| 97.6208847  |
| 2.809234092 |
| 5.618468184 |
| 11.23693637 |
| 0.702308523 |
| 20.36694717 |
| 0.702308523 |
| 2.106925569 |
| 7.02308523  |
| 7.02308523  |
| 0           |
| 24.58079831 |
| 0           |
| 145.3778643 |
| 35.81773467 |
| 1.404617046 |
| 6.320776707 |
| 3.511542615 |
| 4.213851138 |
| 0           |
| 2.106925569 |
| 0           |
| 23.17618126 |
| 0.702308523 |
| 14.04617046 |
| 13.34386194 |
| 0           |
| 54.7800648  |
| 8.427702276 |
| 106.048587  |
| 21.77156421 |
| 0           |
| 14.74847898 |
| 155.2101836 |
| 11.23693637 |
| 0           |
| 1.404617046 |
| 0           |

|             |
|-------------|
| 1.404617046 |
| 10.53462785 |
| 0           |
| 0           |
| 9.130010799 |
| 3.511542615 |
| 23.87848978 |
| 42.13851138 |
| 22.47387274 |
| 0           |
| 169.256354  |
| 0           |
| 3.511542615 |
| 0           |
| 5.618468184 |
| 0           |
| 0           |
| 25.98541535 |
| 37.92466024 |
| 4.213851138 |
| 31.60388354 |
| 7.725393753 |
| 4.916159661 |
| 2.106925569 |
| 7.02308523  |
| 0           |
| 0           |
| 1.404617046 |
| 0           |
| 0           |
| 0           |
| 7.02308523  |
| 11.23693637 |
| 0           |
| 0.702308523 |
| 2.106925569 |
| 11.23693637 |
| 0           |
| 8.427702276 |
| 11.23693637 |
| 9.130010799 |
| 10.53462785 |
| 0.702308523 |

|             |
|-------------|
| 48.45928809 |
| 15.45078751 |
| 163.6378859 |
| 0.702308523 |
| 1.404617046 |
| 3.511542615 |
| 3.511542615 |
| 7.02308523  |
| 0.702308523 |
| 0           |
| 15.45078751 |
| 7.02308523  |
| 0           |
| 1.404617046 |
| 4.213851138 |
| 1.404617046 |
| 9.832319322 |
| 9.832319322 |
| 2.809234092 |
| 0.702308523 |
| 5.618468184 |
| 4.213851138 |
| 0.702308523 |
| 6.320776707 |
| 1.404617046 |
| 0           |
| 0           |
| 1.404617046 |
| 0           |
| 40.03158581 |
| 11.93924489 |
| 1.404617046 |
| 7.725393753 |
| 4.213851138 |
| 15.45078751 |
| 1.404617046 |
| 2.809234092 |
| 9.130010799 |
| 7.02308523  |
| 11.93924489 |
| 0           |
| 0.702308523 |
| 13.34386194 |

|             |
|-------------|
| 7.02308523  |
| 5.618468184 |
| 16.15309603 |
| 0.702308523 |
| 0.702308523 |
| 18.2600216  |
| 0           |
| 56.18468184 |
| 0           |
| 13.34386194 |
| 0.702308523 |
| 0           |
| 87.78856538 |
| 0           |
| 3.511542615 |
| 21.77156421 |
| 1.404617046 |
| 0.702308523 |
| 0           |
| 4.916159661 |
| 0           |
| 0           |
| 11.93924489 |
| 1.404617046 |
| 10.53462785 |
| 6.320776707 |
| 0           |
| 0           |
| 3.511542615 |
| 18.96233012 |
| 4.916159661 |
| 1.404617046 |
| 0.702308523 |
| 7.02308523  |
| 7.725393753 |
| 0           |
| 0           |
| 85.68163981 |
| 0           |
| 11.93924489 |
| 1.404617046 |
| 37.22235172 |
| 8.427702276 |



|             |
|-------------|
| 7.725393753 |
| 0           |
| 1.404617046 |
| 6.320776707 |
| 79.3608631  |
| 4.916159661 |
| 6.320776707 |
| 0           |
| 12.64155341 |
| 4.916159661 |
| 2.106925569 |
| 11.93924489 |
| 0.702308523 |
| 1.404617046 |
| 2.809234092 |
| 0           |
| 9.832319322 |
| 0           |
| 0           |
| 7.02308523  |
| 4.213851138 |
| 35.81773467 |
| 7.725393753 |
| 9.130010799 |
| 0           |
| 5.618468184 |
| 4.213851138 |
| 12.64155341 |
| 0.702308523 |
| 6.320776707 |
| 90.59779947 |
| 0           |
| 41.43620286 |
| 6.320776707 |
| 5.618468184 |
| 4.916159661 |
| 22.47387274 |
| 1.404617046 |
| 56.88699036 |
| 81.46778867 |
| 6.320776707 |
| 8.427702276 |
| 167.1494285 |

|             |
|-------------|
| 53.37544775 |
| 7.725393753 |
| 6.320776707 |
| 2.106925569 |
| 14.04617046 |
| 1.404617046 |
| 21.77156421 |
| 4.213851138 |
| 4.916159661 |
| 40.03158581 |
| 7.725393753 |
| 9.130010799 |
| 4.916159661 |
| 0           |
| 11.23693637 |
| 0           |
| 321.6573035 |
| 8.427702276 |
| 9.130010799 |
| 18.96233012 |
| 14.04617046 |
| 1.404617046 |
| 17.55771308 |
| 11.23693637 |
| 4.916159661 |
| 8.427702276 |
| 9.130010799 |
| 2.106925569 |
| 5.618468184 |
| 6.320776707 |
| 7.725393753 |
| 9.832319322 |
| 5.618468184 |
| 6.320776707 |
| 73.04008639 |
| 2.106925569 |
| 2.106925569 |
| 2.106925569 |
| 4.213851138 |
| 7.02308523  |
| 18.2600216  |
| 5.618468184 |
| 3.511542615 |

|             |
|-------------|
| 33.7108091  |
| 9.130010799 |
| 14.04617046 |
| 2.809234092 |
| 0           |
| 0           |
| 4.213851138 |
| 0           |
| 4.213851138 |
| 4.916159661 |
| 9.130010799 |
| 9.832319322 |
| 10.53462785 |
| 4.213851138 |
| 0.702308523 |
| 167.851737  |
| 7.725393753 |
| 0           |
| 4.213851138 |
| 2.106925569 |
| 6.320776707 |
| 9.130010799 |
| 12.64155341 |
| 73.04008639 |
| 2.106925569 |
| 5.618468184 |
| 3.511542615 |
| 10.53462785 |
| 65.31469264 |
| 6.320776707 |
| 20.36694717 |
| 0           |
| 4.916159661 |
| 9.832319322 |
| 7.02308523  |
| 5.618468184 |
| 11.23693637 |
| 11.23693637 |
| 4.916159661 |
| 8.427702276 |
| 7.725393753 |
| 49.86390513 |
| 132.0340023 |

|             |
|-------------|
| 4.916159661 |
| 6.320776707 |
| 4.213851138 |
| 8.427702276 |
| 4.916159661 |
| 23.17618126 |
| 11.93924489 |
| 9.832319322 |
| 4.916159661 |
| 4.916159661 |
| 102.5370444 |
| 0           |
| 5.618468184 |
| 7.725393753 |
| 0           |
| 4.916159661 |
| 9.832319322 |
| 2.809234092 |
| 7.02308523  |
| 6.320776707 |
| 7.725393753 |
| 0           |
| 4.916159661 |
| 3.511542615 |
| 7.725393753 |
| 26.68772387 |
| 186.1117586 |
| 11.93924489 |
| 7.725393753 |
| 0           |
| 0           |
| 79.3608631  |
| 9.832319322 |
| 8.427702276 |
| 13.34386194 |
| 18.2600216  |
| 11.93924489 |
| 45.650054   |
| 20.36694717 |
| 5.618468184 |
| 1.404617046 |
| 0           |
| 4.916159661 |

|             |
|-------------|
| 4.916159661 |
| 4.916159661 |
| 1.404617046 |
| 5.618468184 |
| 8.427702276 |
| 7.725393753 |
| 7.02308523  |
| 3.511542615 |
| 3.511542615 |
| 99.72781027 |
| 2.106925569 |
| 31.60388354 |
| 5.618468184 |
| 4.916159661 |
| 2.809234092 |
| 7.02308523  |
| 0           |
| 261.2587706 |
| 5.618468184 |
| 9.130010799 |
| 11.23693637 |
| 4.916159661 |
| 5.618468184 |
| 11.93924489 |
| 2.106925569 |
| 197.348695  |
| 7.02308523  |
| 89.89549095 |
| 6.320776707 |
| 3.511542615 |
| 5.618468184 |
| 4.213851138 |
| 0           |
| 9.130010799 |
| 61.80315003 |
| 10.53462785 |
| 10.53462785 |
| 3.511542615 |
| 8.427702276 |
| 9.130010799 |
| 14.04617046 |
| 27.3900324  |
| 57.58929889 |

|             |
|-------------|
| 7.725393753 |
| 7.02308523  |
| 9.130010799 |
| 217.0133336 |
| 7.725393753 |
| 4.213851138 |
| 4.213851138 |
| 12.64155341 |
| 9.130010799 |
| 7.725393753 |
| 4.213851138 |
| 6.320776707 |
| 9.832319322 |
| 6.320776707 |
| 21.06925569 |
| 10.53462785 |
| 13.34386194 |
| 3.511542615 |
| 14.04617046 |
| 7.725393753 |
| 9.832319322 |
| 10.53462785 |
| 27.3900324  |
| 0.702308523 |
| 5.618468184 |
| 16.85540455 |
| 7.02308523  |
| 6.320776707 |
| 4.916159661 |
| 11.93924489 |
| 3.511542615 |
| 202.9671632 |
| 12.64155341 |
| 10.53462785 |
| 13.34386194 |
| 11.93924489 |
| 8.427702276 |
| 9.832319322 |
| 5.618468184 |
| 4.213851138 |
| 6.320776707 |
| 7.725393753 |
| 6.320776707 |

|             |
|-------------|
| 7.725393753 |
| 5.618468184 |
| 7.02308523  |
| 13.34386194 |
| 5.618468184 |
| 2.809234092 |
| 9.130010799 |
| 4.916159661 |
| 11.93924489 |
| 9.832319322 |
| 9.832319322 |
| 7.725393753 |
| 4.213851138 |
| 9.832319322 |
| 9.832319322 |
| 5.618468184 |
| 6.320776707 |
| 6.320776707 |
| 7.02308523  |
| 2.106925569 |
| 3.511542615 |
| 7.725393753 |
| 9.832319322 |
| 5.618468184 |
| 2.106925569 |
| 63.91007559 |
| 4.213851138 |
| 7.725393753 |
| 6.320776707 |
| 6.320776707 |
| 10.53462785 |
| 6.320776707 |
| 7.02308523  |
| 7.02308523  |
| 7.725393753 |
| 7.02308523  |
| 10.53462785 |
| 8.427702276 |
| 8.427702276 |
| 50.56621366 |
| 66.71930969 |
| 3.511542615 |
| 6.320776707 |

|             |
|-------------|
| 5.618468184 |
| 5.618468184 |
| 9.130010799 |
| 7.725393753 |
| 7.725393753 |
| 9.130010799 |
| 4.916159661 |
| 4.213851138 |
| 11.93924489 |
| 4.213851138 |
| 4.916159661 |
| 7.02308523  |
| 4.213851138 |
| 4.213851138 |
| 9.130010799 |
| 8.427702276 |
| 4.213851138 |
| 9.130010799 |
| 9.130010799 |
| 12.64155341 |
| 15.45078751 |
| 4.916159661 |
| 10.53462785 |
| 6.320776707 |
| 0           |
| 12.64155341 |
| 6.320776707 |
| 4.213851138 |
| 7.725393753 |
| 4.213851138 |
| 3.511542615 |
| 10.53462785 |
| 0           |
| 0           |
| 3.511542615 |
| 2.809234092 |
| 6.320776707 |
| 4.916159661 |
| 9.832319322 |
| 9.832319322 |
| 4.916159661 |
| 7.725393753 |
| 5.618468184 |



|             |
|-------------|
| 5.618468184 |
| 5.618468184 |
| 7.02308523  |
| 12.64155341 |
| 5.618468184 |
| 8.427702276 |
| 6.320776707 |
| 12.64155341 |
| 6.320776707 |
| 6.320776707 |
| 7.02308523  |
| 9.130010799 |
| 4.213851138 |
| 3.511542615 |
| 6.320776707 |
| 10.53462785 |
| 16.15309603 |
| 9.832319322 |
| 4.916159661 |
| 14.04617046 |
| 5.618468184 |
| 13.34386194 |
| 13.34386194 |
| 7.02308523  |
| 6.320776707 |
| 7.725393753 |
| 4.916159661 |
| 2.809234092 |
| 6.320776707 |
| 7.02308523  |
| 6.320776707 |
| 2.106925569 |
| 3.511542615 |
| 7.02308523  |
| 3.511542615 |
| 4.213851138 |
| 2.106925569 |
| 4.916159661 |
| 7.725393753 |
| 4.916159661 |
| 6.320776707 |
| 4.213851138 |
| 4.916159661 |

|             |
|-------------|
| 4.916159661 |
| 0.702308523 |
| 4.213851138 |
| 7.02308523  |
| 5.618468184 |
| 9.832319322 |
| 7.725393753 |
| 19.66463864 |
| 5.618468184 |
| 4.213851138 |
| 7.02308523  |
| 9.130010799 |
| 9.130010799 |
| 3.511542615 |
| 98.32319322 |
| 7.725393753 |
| 5.618468184 |
| 18.96233012 |
| 9.130010799 |
| 9.832319322 |
| 3.511542615 |
| 8.427702276 |
| 8.427702276 |
| 6.320776707 |
| 5.618468184 |
| 4.916159661 |
| 4.213851138 |
| 7.725393753 |
| 7.725393753 |
| 7.725393753 |
| 9.130010799 |
| 11.23693637 |
| 7.02308523  |
| 5.618468184 |
| 7.725393753 |
| 8.427702276 |
| 10.53462785 |
| 9.130010799 |
| 92.00241652 |
| 47.75697957 |
| 6.320776707 |
| 4.916159661 |
| 11.93924489 |

|             |
|-------------|
| 6.320776707 |
| 7.02308523  |
| 2.809234092 |
| 8.427702276 |
| 7.02308523  |
| 7.02308523  |
| 9.130010799 |
| 8.427702276 |
| 7.02308523  |
| 9.130010799 |
| 5.618468184 |
| 7.02308523  |
| 3.511542615 |
| 7.725393753 |
| 9.832319322 |
| 10.53462785 |
| 9.832319322 |
| 9.130010799 |
| 5.618468184 |
| 2.809234092 |
| 7.02308523  |
| 0           |
| 0.702308523 |
| 0           |
| 2.809234092 |
| 84.27702276 |
| 10.53462785 |
| 0           |
| 18.96233012 |
| 0           |
| 0           |
| 41.43620286 |
| 9.130010799 |
| 0           |
| 2.106925569 |
| 0.702308523 |
| 6.320776707 |
| 8.427702276 |
| 0.702308523 |
| 0           |
| 1.404617046 |
| 0           |
| 9.832319322 |

|             |
|-------------|
| 7.725393753 |
| 2.809234092 |
| 7.02308523  |
| 0           |
| 1.404617046 |
| 0           |
| 0           |
| 2.106925569 |
| 0           |
| 0           |
| 0.702308523 |
| 2.106925569 |
| 4.916159661 |
| 0           |
| 10.53462785 |
| 10.53462785 |
| 39.32927729 |
| 0           |
| 8.427702276 |
| 7.725393753 |
| 0           |
| 2.809234092 |
| 7.02308523  |
| 7.725393753 |
| 4.916159661 |
| 7.725393753 |
| 47.75697957 |
| 4.916159661 |
| 9.832319322 |
| 3.511542615 |
| 11.93924489 |
| 4.213851138 |
| 4.916159661 |
| 6.320776707 |
| 1.404617046 |
| 28.09234092 |
| 16.15309603 |
| 29.49695797 |
| 10.53462785 |
| 9.130010799 |
| 5.618468184 |
| 2.809234092 |
| 10.53462785 |

|             |
|-------------|
| 7.02308523  |
| 6.320776707 |
| 9.832319322 |
| 8.427702276 |
| 6.320776707 |
| 0           |
| 7.02308523  |
| 8.427702276 |
| 7.02308523  |
| 8.427702276 |
| 4.916159661 |
| 3.511542615 |
| 7.02308523  |
| 2.809234092 |
| 2.106925569 |
| 7.02308523  |
| 8.427702276 |
| 10.53462785 |
| 9.130010799 |
| 76.55162901 |
| 4.213851138 |
| 4.916159661 |
| 7.725393753 |
| 14.04617046 |
| 7.725393753 |
| 9.832319322 |
| 8.427702276 |
| 14.04617046 |
| 8.427702276 |
| 28.09234092 |
| 8.427702276 |
| 14.74847898 |
| 10.53462785 |
| 10.53462785 |
| 9.130010799 |
| 2.106925569 |
| 7.725393753 |
| 5.618468184 |
| 6.320776707 |
| 15.45078751 |
| 9.130010799 |
| 7.02308523  |
| 4.213851138 |

|             |
|-------------|
| 2.809234092 |
| 9.130010799 |
| 4.916159661 |
| 2.809234092 |
| 9.832319322 |
| 4.213851138 |
| 58.29160741 |
| 3.511542615 |
| 5.618468184 |
| 11.93924489 |
| 3.511542615 |
| 9.832319322 |
| 6.320776707 |
| 7.725393753 |
| 128.5224597 |
| 9.832319322 |
| 27.3900324  |
| 9.832319322 |
| 14.04617046 |
| 9.130010799 |
| 4.916159661 |
| 2.106925569 |
| 9.130010799 |
| 7.725393753 |
| 9.130010799 |
| 11.93924489 |
| 4.916159661 |
| 8.427702276 |
| 6.320776707 |
| 10.53462785 |
| 9.130010799 |
| 13.34386194 |
| 9.832319322 |
| 4.213851138 |
| 11.93924489 |
| 6.320776707 |
| 5.618468184 |
| 4.916159661 |
| 57.58929889 |
| 7.02308523  |
| 3.511542615 |
| 9.832319322 |
| 11.23693637 |

|             |
|-------------|
| 21.77156421 |
| 7.725393753 |
| 7.725393753 |
| 3.511542615 |
| 5.618468184 |
| 4.916159661 |
| 7.725393753 |
| 8.427702276 |
| 9.130010799 |
| 7.02308523  |
| 9.832319322 |
| 0.702308523 |
| 9.130010799 |
| 5.618468184 |
| 9.832319322 |
| 14.74847898 |
| 7.02308523  |
| 11.93924489 |
| 2.809234092 |
| 9.130010799 |
| 3.511542615 |
| 8.427702276 |
| 3.511542615 |
| 1.404617046 |
| 3.511542615 |
| 259.151845  |
| 11.93924489 |
| 6.320776707 |
| 22.47387274 |
| 8.427702276 |
| 4.916159661 |
| 185.4094501 |
| 13.34386194 |
| 5.618468184 |
| 1.404617046 |
| 9.130010799 |
| 4.916159661 |
| 7.02308523  |
| 12.64155341 |
| 9.832319322 |
| 9.832319322 |
| 26.68772387 |
| 7.725393753 |

|             |
|-------------|
| 2.809234092 |
| 6.320776707 |
| 7.725393753 |
| 10.53462785 |
| 7.725393753 |
| 2.809234092 |
| 43.54312843 |
| 6.320776707 |
| 4.213851138 |
| 4.213851138 |
| 320.954995  |
| 4.213851138 |
| 7.725393753 |
| 28.79464944 |
| 19.66463864 |
| 14.74847898 |
| 10.53462785 |
| 4.213851138 |
| 4.916159661 |
| 9.832319322 |
| 8.427702276 |
| 12.64155341 |
| 5.618468184 |
| 7.725393753 |
| 6.320776707 |
| 3.511542615 |
| 6.320776707 |
| 4.916159661 |
| 4.916159661 |
| 81.46778867 |
| 7.725393753 |
| 5.618468184 |
| 3.511542615 |
| 10.53462785 |
| 52.67313923 |
| 14.04617046 |
| 2.106925569 |
| 81.46778867 |
| 12.64155341 |
| 114.4762893 |
| 6.320776707 |
| 9.130010799 |
| 12.64155341 |



|             |
|-------------|
| 14.74847898 |
| 0           |
| 61.80315003 |
| 0           |
| 12.64155341 |
| 33.00850058 |
| 11.93924489 |
| 2.106925569 |
| 2.809234092 |
| 11.23693637 |
| 7.725393753 |
| 10.53462785 |
| 5.618468184 |
| 9.832319322 |
| 4.213851138 |
| 5.618468184 |
| 5.618468184 |
| 4.916159661 |
| 44.24543695 |
| 7.02308523  |
| 2.809234092 |
| 7.02308523  |
| 3.511542615 |
| 80.76548015 |
| 9.130010799 |
| 7.02308523  |
| 4.916159661 |
| 16.15309603 |
| 429.1105076 |
| 193.8371524 |
| 4.916159661 |
| 4.213851138 |
| 62.50545855 |
| 8.427702276 |
| 9.130010799 |
| 3.511542615 |
| 8.427702276 |
| 7.02308523  |
| 4.213851138 |
| 5.618468184 |
| 7.725393753 |
| 5.618468184 |
| 5.618468184 |

|             |
|-------------|
| 146.7824813 |
| 28.79464944 |
| 25.98541535 |
| 9.130010799 |
| 11.93924489 |
| 6.320776707 |
| 4.213851138 |
| 56.18468184 |
| 2.809234092 |
| 10.53462785 |
| 28.79464944 |
| 125.0109171 |
| 11.93924489 |
| 4.916159661 |
| 17.55771308 |
| 232.4641211 |
| 64.61238412 |
| 42.13851138 |
| 121.4993745 |
| 7.02308523  |
| 9.832319322 |
| 9.130010799 |
| 111.6670552 |
| 6.320776707 |
| 5.618468184 |
| 4.213851138 |
| 5.618468184 |
| 7.02308523  |
| 7.02308523  |
| 84.97933129 |
| 5.618468184 |
| 224.7387274 |
| 109.5601296 |
| 101.1324273 |
| 39.32927729 |
| 7.725393753 |
| 3.511542615 |
| 9.130010799 |
| 0           |
| 7.02308523  |
| 23.17618126 |
| 7.725393753 |
| 7.02308523  |

|             |
|-------------|
| 33.00850058 |
| 9.832319322 |
| 5.618468184 |
| 9.832319322 |
| 8.427702276 |
| 8.427702276 |
| 9.130010799 |
| 6.320776707 |
| 23.17618126 |
| 4.916159661 |
| 14.04617046 |
| 4.916159661 |
| 5.618468184 |
| 3.511542615 |
| 6.320776707 |
| 20.36694717 |
| 6.320776707 |
| 19.66463864 |
| 4.916159661 |
| 7.725393753 |
| 7.725393753 |
| 5.618468184 |
| 4.916159661 |
| 14.74847898 |
| 9.130010799 |
| 6.320776707 |
| 11.23693637 |
| 17.55771308 |
| 4.916159661 |
| 7.725393753 |
| 99.72781027 |
| 4.916159661 |
| 7.02308523  |
| 4.916159661 |
| 7.725393753 |
| 7.02308523  |
| 9.832319322 |
| 12.64155341 |
| 7.02308523  |
| 29.49695797 |
| 6.320776707 |
| 5.618468184 |
| 4.213851138 |

|             |
|-------------|
| 5.618468184 |
| 7.725393753 |
| 2.809234092 |
| 7.725393753 |
| 5.618468184 |
| 5.618468184 |
| 6.320776707 |
| 4.916159661 |
| 7.02308523  |
| 5.618468184 |
| 4.213851138 |
| 7.02308523  |
| 4.213851138 |
| 2.809234092 |
| 7.725393753 |
| 6.320776707 |
| 7.725393753 |
| 4.916159661 |
| 1.404617046 |
| 7.725393753 |
| 6.320776707 |
| 5.618468184 |
| 4.213851138 |
| 8.427702276 |
| 4.916159661 |
| 4.916159661 |
| 3.511542615 |
| 7.725393753 |
| 5.618468184 |
| 8.427702276 |
| 8.427702276 |
| 2.809234092 |
| 2.106925569 |
| 7.725393753 |
| 4.213851138 |
| 6.320776707 |
| 7.02308523  |
| 9.832319322 |
| 8.427702276 |
| 5.618468184 |
| 9.130010799 |
| 7.02308523  |
| 13.34386194 |

|             |
|-------------|
| 14.04617046 |
| 7.02308523  |
| 4.213851138 |
| 3.511542615 |
| 7.02308523  |
| 89.19318242 |
| 2.106925569 |
| 7.725393753 |
| 4.213851138 |
| 195.9440779 |
| 82.17009719 |
| 4.916159661 |
| 25.28310683 |
| 7.725393753 |
| 7.02308523  |
| 9.130010799 |
| 9.832319322 |
| 6.320776707 |
| 282.3280263 |
| 14.04617046 |
| 96.91857618 |
| 9.130010799 |
| 40.73389434 |
| 9.130010799 |
| 9.832319322 |
| 5.618468184 |
| 7.725393753 |
| 6.320776707 |
| 10.53462785 |
| 9.832319322 |
| 7.02308523  |
| 74.44470344 |
| 13.34386194 |
| 11.23693637 |
| 15.45078751 |
| 10.53462785 |
| 16.15309603 |
| 3.511542615 |
| 6.320776707 |
| 4.916159661 |
| 8.427702276 |
| 9.832319322 |
| 4.213851138 |

|             |
|-------------|
| 5.618468184 |
| 7.02308523  |
| 5.618468184 |
| 9.130010799 |
| 16.15309603 |
| 14.04617046 |
| 5.618468184 |
| 8.427702276 |
| 3.511542615 |
| 4.916159661 |
| 0           |
| 3.511542615 |
| 4.213851138 |
| 5.618468184 |
| 9.130010799 |
| 7.725393753 |
| 7.725393753 |
| 56.88699036 |
| 4.916159661 |
| 8.427702276 |
| 7.725393753 |
| 13.34386194 |
| 11.23693637 |
| 7.725393753 |
| 14.74847898 |
| 9.832319322 |
| 4.916159661 |
| 9.130010799 |
| 11.23693637 |
| 9.832319322 |
| 7.02308523  |
| 78.65855458 |
| 4.916159661 |
| 7.02308523  |
| 11.93924489 |
| 73.04008639 |
| 7.02308523  |
| 7.02308523  |
| 61.1008415  |
| 2.809234092 |
| 3.511542615 |
| 4.916159661 |
| 9.832319322 |

|             |
|-------------|
| 7.725393753 |
| 10.53462785 |
| 11.93924489 |
| 5.618468184 |
| 6.320776707 |
| 44.94774547 |
| 0           |
| 7.725393753 |
| 10.53462785 |
| 35.81773467 |
| 4.916159661 |
| 5.618468184 |
| 9.130010799 |
| 143.2709387 |
| 9.130010799 |
| 11.23693637 |
| 11.23693637 |
| 18.96233012 |
| 91.30010799 |
| 6.320776707 |
| 8.427702276 |
| 6.320776707 |
| 5.618468184 |
| 9.130010799 |
| 8.427702276 |
| 18.96233012 |
| 57.58929889 |
| 8.427702276 |
| 8.427702276 |
| 4.916159661 |
| 7.725393753 |
| 9.130010799 |
| 8.427702276 |
| 9.130010799 |
| 4.916159661 |
| 9.130010799 |
| 7.725393753 |
| 9.832319322 |
| 2.106925569 |
| 4.916159661 |
| 10.53462785 |
| 1.404617046 |
| 25.98541535 |

|             |
|-------------|
| 7.725393753 |
| 0           |
| 5.618468184 |
| 6.320776707 |
| 664.3838628 |
| 645.4215327 |
| 3.511542615 |
| 200.8602376 |
| 31.60388354 |
| 4.213851138 |
| 12.64155341 |
| 6.320776707 |
| 80.76548015 |
| 10.53462785 |
| 10.53462785 |
| 7.725393753 |
| 9.832319322 |
| 8.427702276 |
| 4.213851138 |
| 3.511542615 |
| 7.02308523  |
| 4.916159661 |
| 5.618468184 |
| 7.725393753 |
| 7.02308523  |
| 5.618468184 |
| 6.320776707 |
| 4.916159661 |
| 0.702308523 |
| 3.511542615 |
| 6.320776707 |
| 6.320776707 |
| 5.618468184 |
| 9.130010799 |
| 5.618468184 |
| 4.916159661 |
| 4.213851138 |
| 2.809234092 |
| 6.320776707 |
| 7.725393753 |
| 3.511542615 |
| 2.809234092 |
| 4.916159661 |



|             |
|-------------|
| 7.02308523  |
| 6.320776707 |
| 4.213851138 |
| 3.511542615 |
| 9.832319322 |
| 4.213851138 |
| 2.106925569 |
| 6.320776707 |
| 5.618468184 |
| 4.213851138 |
| 7.725393753 |
| 7.725393753 |
| 3.511542615 |
| 7.725393753 |
| 4.213851138 |
| 7.02308523  |
| 2.809234092 |
| 5.618468184 |
| 5.618468184 |
| 8.427702276 |
| 4.916159661 |
| 6.320776707 |
| 1.404617046 |
| 1.404617046 |
| 5.618468184 |
| 2.809234092 |
| 6.320776707 |
| 1.404617046 |
| 1.404617046 |
| 2.106925569 |
| 4.213851138 |
| 9.130010799 |
| 4.213851138 |
| 4.213851138 |
| 26.68772387 |
| 4.213851138 |
| 4.916159661 |
| 2.106925569 |
| 7.725393753 |
| 5.618468184 |
| 1.404617046 |
| 7.02308523  |
| 4.916159661 |

|             |
|-------------|
| 4.213851138 |
| 6.320776707 |
| 4.213851138 |
| 7.725393753 |
| 5.618468184 |
| 3.511542615 |
| 5.618468184 |
| 4.916159661 |
| 6.320776707 |
| 4.916159661 |
| 5.618468184 |
| 4.916159661 |
| 7.02308523  |
| 2.809234092 |
| 4.916159661 |
| 8.427702276 |
| 4.916159661 |
| 4.916159661 |
| 3.511542615 |
| 2.106925569 |
| 3.511542615 |
| 7.725393753 |
| 4.916159661 |
| 2.809234092 |
| 2.809234092 |
| 2.809234092 |
| 2.809234092 |
| 7.725393753 |
| 3.511542615 |
| 7.02308523  |
| 2.809234092 |
| 9.130010799 |
| 5.618468184 |
| 2.809234092 |
| 7.725393753 |
| 4.213851138 |
| 5.618468184 |
| 6.320776707 |
| 9.832319322 |
| 7.02308523  |
| 0           |
| 17.55771308 |
| 25.28310683 |

|             |
|-------------|
| 21.06925569 |
| 8.427702276 |
| 7.725393753 |
| 8.427702276 |
| 7.725393753 |
| 7.02308523  |
| 7.02308523  |
| 5.618468184 |
| 4.213851138 |
| 15.45078751 |
| 0.702308523 |
| 4.916159661 |
| 2.809234092 |
| 2.106925569 |
| 5.618468184 |
| 9.832319322 |
| 4.213851138 |
| 7.02308523  |
| 7.725393753 |
| 8.427702276 |
| 7.725393753 |
| 14.04617046 |
| 8.427702276 |
| 7.02308523  |
| 7.02308523  |
| 25.98541535 |
| 6.320776707 |
| 49.16159661 |
| 9.832319322 |
| 13.34386194 |
| 6.320776707 |
| 31.60388354 |
| 3.511542615 |
| 4.916159661 |
| 2.809234092 |
| 2.809234092 |
| 9.130010799 |
| 5.618468184 |
| 31.60388354 |
| 6.320776707 |
| 132.7363109 |
| 9.130010799 |
| 7.725393753 |

|             |
|-------------|
| 6.320776707 |
| 8.427702276 |
| 9.832319322 |
| 27.3900324  |
| 9.832319322 |
| 6.320776707 |
| 0           |
| 9.832319322 |
| 0           |
| 4.213851138 |
| 5.618468184 |
| 5.618468184 |
| 5.618468184 |
| 67.42161821 |
| 10.53462785 |
| 3.511542615 |
| 7.725393753 |
| 5.618468184 |
| 5.618468184 |
| 18.2600216  |
| 6.320776707 |
| 8.427702276 |
| 7.02308523  |
| 4.916159661 |
| 0           |
| 6.320776707 |
| 5.618468184 |
| 0           |
| 0           |
| 21.06925569 |
| 1.404617046 |
| 5.618468184 |
| 7.725393753 |
| 0           |
| 0           |
| 7.02308523  |
| 4.213851138 |
| 0           |
| 10.53462785 |
| 0           |
| 1.404617046 |
| 0           |
| 0           |

|             |
|-------------|
| 7.02308523  |
| 4.916159661 |
| 0           |
| 35.81773467 |
| 0           |
| 160.8286518 |
| 2.106925569 |
| 0           |
| 7.725393753 |
| 7.725393753 |
| 1.404617046 |
| 4.916159661 |
| 6.320776707 |
| 2.106925569 |
| 0           |
| 6.320776707 |
| 5.618468184 |
| 12.64155341 |
| 0           |
| 7.02308523  |
| 0           |
| 0           |
| 19.66463864 |
| 1.404617046 |
| 7.725393753 |
| 9.130010799 |
| 14.04617046 |
| 136.950162  |
| 0.702308523 |
| 24.58079831 |
| 6.320776707 |
| 4.213851138 |
| 15.45078751 |
| 0           |
| 0           |
| 7.02308523  |
| 15.45078751 |
| 6.320776707 |
| 10.53462785 |
| 5.618468184 |
| 2.809234092 |
| 4.916159661 |
| 75.14701196 |

|             |
|-------------|
| 160.1263432 |
| 9.832319322 |
| 0           |
| 0           |
| 0.702308523 |
| 1.404617046 |
| 6.320776707 |
| 0           |
| 0           |
| 0.702308523 |
| 0.702308523 |
| 0           |
| 0           |
| 1.404617046 |
| 7.02308523  |
| 9.130010799 |
| 0           |
| 44.94774547 |
| 0           |
| 0           |
| 5.618468184 |
| 0           |
| 0           |
| 42.13851138 |
| 0.702308523 |
| 26.68772387 |
| 10.53462785 |
| 0           |
| 4.213851138 |
| 4.916159661 |
| 16.85540455 |
| 3.511542615 |
| 1.404617046 |
| 3.511542615 |
| 35.11542615 |
| 0           |
| 3.511542615 |
| 4.916159661 |
| 11.93924489 |
| 9.832319322 |
| 8.427702276 |
| 7.725393753 |
| 4.916159661 |

|             |
|-------------|
| 0           |
| 31.60388354 |
| 7.725393753 |
| 7.02308523  |
| 7.725393753 |
| 9.130010799 |
| 7.725393753 |
| 7.725393753 |
| 0           |
| 9.130010799 |
| 4.213851138 |
| 0           |
| 9.130010799 |
| 4.916159661 |
| 2.106925569 |
| 10.53462785 |
| 6.320776707 |
| 278.8164836 |
| 4.916159661 |
| 8.427702276 |
| 0           |
| 11.93924489 |
| 7.725393753 |
| 4.916159661 |
| 11.23693637 |
| 13.34386194 |
| 7.02308523  |
| 20.36694717 |
| 0           |
| 89.19318242 |
| 5.618468184 |
| 6.320776707 |
| 0           |
| 4.213851138 |
| 0           |
| 5.618468184 |
| 9.130010799 |
| 35.11542615 |
| 0           |
| 9.130010799 |
| 11.93924489 |
| 7.02308523  |
| 7.725393753 |

|             |
|-------------|
| 16.15309603 |
| 5.618468184 |
| 0           |
| 6.320776707 |
| 1.404617046 |
| 0           |
| 23.87848978 |
| 6.320776707 |
| 1.404617046 |
| 4.213851138 |
| 8.427702276 |
| 2.809234092 |
| 3.511542615 |
| 4.213851138 |
| 2.809234092 |
| 7.02308523  |
| 7.02308523  |
| 6.320776707 |
| 4.916159661 |
| 6.320776707 |
| 4.916159661 |
| 11.93924489 |
| 4.213851138 |
| 4.213851138 |
| 4.213851138 |
| 6.320776707 |
| 0           |
| 0           |
| 0           |
| 0           |
| 0           |
| 0           |
| 0           |
| 0           |
| 0           |
| 6.320776707 |
| 0           |
| 0           |
| 0           |
| 0           |
| 0           |
| 0           |
| 6.320776707 |
| 4.916159661 |
| 4.213851138 |



|             |
|-------------|
| 9.130010799 |
| 2.106925569 |
| 7.725393753 |
| 4.916159661 |
| 7.725393753 |
| 5.618468184 |
| 8.427702276 |
| 4.916159661 |
| 4.916159661 |
| 7.02308523  |
| 0           |
| 2.106925569 |
| 6.320776707 |
| 6.320776707 |
| 9.130010799 |
| 2.106925569 |
| 7.02308523  |
| 10.53462785 |
| 7.02308523  |
| 7.725393753 |
| 4.213851138 |
| 3.511542615 |
| 5.618468184 |
| 7.725393753 |
| 7.02308523  |
| 6.320776707 |
| 4.213851138 |
| 5.618468184 |
| 2.809234092 |
| 5.618468184 |
| 5.618468184 |
| 2.809234092 |
| 7.02308523  |
| 6.320776707 |
| 6.320776707 |
| 4.916159661 |
| 2.106925569 |
| 7.02308523  |
| 9.832319322 |
| 7.02308523  |
| 4.213851138 |
| 4.213851138 |
| 7.02308523  |

|             |
|-------------|
| 6.320776707 |
| 7.02308523  |
| 6.320776707 |
| 6.320776707 |
| 5.618468184 |
| 5.618468184 |
| 7.02308523  |
| 9.130010799 |
| 7.725393753 |
| 5.618468184 |
| 4.213851138 |
| 0           |
| 0           |
| 0           |
| 0           |
| 91.30010799 |
| 11.23693637 |
| 16.15309603 |
| 56.18468184 |
| 29.49695797 |
| 99.02550175 |
| 0           |
| 0           |
| 0           |
| 0           |
| 30.19926649 |
| 0           |
| 2.106925569 |
| 2.106925569 |
| 2.106925569 |
| 4.213851138 |
| 3.511542615 |
| 3.511542615 |
| 4.916159661 |
| 1.404617046 |
| 3.511542615 |
| 3.511542615 |
| 4.213851138 |
| 3.511542615 |
| 4.916159661 |
| 4.213851138 |
| 4.916159661 |
| 5.618468184 |

|             |
|-------------|
| 4.213851138 |
| 3.511542615 |
| 6.320776707 |
| 5.618468184 |
| 4.213851138 |
| 5.618468184 |
| 7.725393753 |
| 7.02308523  |
| 6.320776707 |
| 3.511542615 |
| 2.106925569 |
| 5.618468184 |
| 4.213851138 |
| 6.320776707 |
| 10.53462785 |
| 5.618468184 |
| 0           |
| 4.213851138 |
| 2.809234092 |
| 5.618468184 |
| 4.916159661 |
| 6.320776707 |
| 6.320776707 |
| 6.320776707 |
| 3.511542615 |
| 4.916159661 |
| 9.832319322 |
| 7.02308523  |
| 11.93924489 |
| 11.93924489 |
| 5.618468184 |
| 3.511542615 |
| 4.213851138 |
| 6.320776707 |
| 7.02308523  |
| 4.916159661 |
| 11.23693637 |
| 1.404617046 |
| 11.93924489 |
| 10.53462785 |
| 0           |
| 0           |
| 0           |



|             |
|-------------|
| 0           |
| 0           |
| 0           |
| 0           |
| 0           |
| 0           |
| 0           |
| 0           |
| 0           |
| 3.511542615 |
| 58.29160741 |
| 110.9647466 |
| 23.87848978 |
| 5.618468184 |
| 10.53462785 |
| 8.427702276 |
| 0           |
| 9.130010799 |
| 4.916159661 |
| 6.320776707 |
| 9.130010799 |
| 0           |
| 7.725393753 |
| 0           |
| 7.725393753 |
| 7.02308523  |
| 0           |
| 12.64155341 |
| 0           |
| 4.213851138 |
| 0           |
| 4.916159661 |
| 0           |
| 0           |
| 0           |
| 7.725393753 |
| 7.02308523  |
| 8.427702276 |
| 3.511542615 |
| 0           |
| 15.45078751 |
| 10.53462785 |
| 0           |
| 3.511542615 |

|             |
|-------------|
| 4.916159661 |
| 0           |
| 0           |
| 6.320776707 |
| 10.53462785 |
| 9.130010799 |
| 4.916159661 |
| 7.02308523  |
| 9.832319322 |
| 15.45078751 |
| 3.511542615 |
| 0           |
| 191.7302268 |
| 0           |
| 0           |
| 4.213851138 |
| 0           |
| 6.320776707 |
| 7.725393753 |
| 0           |
| 0           |
| 1.404617046 |
| 5.618468184 |
| 1.404617046 |
| 0           |
| 7.02308523  |
| 7.725393753 |
| 9.130010799 |
| 7.02308523  |
| 6.320776707 |
| 72.33777787 |
| 14.04617046 |
| 6.320776707 |
| 4.916159661 |
| 9.130010799 |
| 13.34386194 |
| 8.427702276 |
| 3.511542615 |
| 6.320776707 |
| 4.916159661 |
| 5.618468184 |
| 9.130010799 |
| 58.99391593 |

|             |
|-------------|
| 9.130010799 |
| 8.427702276 |
| 7.02308523  |
| 8.427702276 |
| 7.02308523  |
| 9.130010799 |
| 4.213851138 |
| 7.725393753 |
| 8.427702276 |
| 4.213851138 |
| 9.832319322 |
| 0           |
| 6.320776707 |
| 6.320776707 |
| 0           |
| 0           |
| 7.02308523  |
| 4.916159661 |
| 9.832319322 |
| 2.809234092 |
| 20.36694717 |
| 7.725393753 |
| 52.67313923 |
| 8.427702276 |
| 6.320776707 |
| 9.130010799 |
| 5.618468184 |
| 8.427702276 |
| 9.130010799 |
| 8.427702276 |
| 8.427702276 |
| 18.96233012 |
| 8.427702276 |
| 0           |
| 14.04617046 |
| 0           |
| 6.320776707 |
| 6.320776707 |
| 15.45078751 |
| 14.04617046 |
| 4.213851138 |
| 5.618468184 |
| 5.618468184 |

|             |
|-------------|
| 9.130010799 |
| 8.427702276 |
| 39.32927729 |
| 5.618468184 |
| 9.130010799 |
| 8.427702276 |
| 8.427702276 |
| 7.02308523  |
| 7.02308523  |
| 13.34386194 |
| 8.427702276 |
| 7.02308523  |
| 3.511542615 |
| 22.47387274 |
| 4.916159661 |
| 7.02308523  |
| 153.103258  |
| 6.320776707 |
| 5.618468184 |
| 2.106925569 |
| 17.55771308 |
| 6.320776707 |
| 10.53462785 |
| 8.427702276 |
| 16.85540455 |
| 4.916159661 |
| 6.320776707 |
| 9.130010799 |
| 15.45078751 |
| 11.23693637 |
| 9.832319322 |
| 16.15309603 |
| 5.618468184 |
| 4.213851138 |
| 1.404617046 |
| 5.618468184 |
| 7.725393753 |
| 7.725393753 |
| 4.213851138 |
| 9.832319322 |
| 9.130010799 |
| 30.19926649 |
| 28.79464944 |



|             |
|-------------|
| 4.213851138 |
| 7.725393753 |
| 11.93924489 |
| 5.618468184 |
| 7.725393753 |
| 9.832319322 |
| 5.618468184 |
| 10.53462785 |
| 5.618468184 |
| 7.02308523  |
| 9.130010799 |
| 4.916159661 |
| 7.02308523  |
| 4.213851138 |
| 6.320776707 |
| 3.511542615 |
| 6.320776707 |
| 4.213851138 |
| 4.916159661 |
| 10.53462785 |
| 3.511542615 |
| 6.320776707 |
| 7.02308523  |
| 10.53462785 |
| 4.916159661 |
| 9.832319322 |
| 6.320776707 |
| 6.320776707 |
| 7.725393753 |
| 5.618468184 |
| 11.93924489 |
| 4.916159661 |
| 0           |
| 8.427702276 |
| 7.02308523  |
| 3.511542615 |
| 52.67313923 |
| 7.02308523  |
| 2.809234092 |
| 9.832319322 |
| 6.320776707 |
| 9.832319322 |
| 7.725393753 |

|             |
|-------------|
| 3.511542615 |
| 14.04617046 |
| 20.36694717 |
| 4.213851138 |
| 22.47387274 |
| 10.53462785 |
| 11.93924489 |
| 47.05467104 |
| 4.916159661 |
| 7.725393753 |
| 3.511542615 |
| 4.213851138 |
| 4.213851138 |
| 2.106925569 |
| 54.07775627 |
| 7.02308523  |
| 40.03158581 |
| 6.320776707 |
| 3.511542615 |
| 30.90157501 |
| 2.809234092 |
| 12.64155341 |
| 9.130010799 |
| 4.916159661 |
| 1.404617046 |
| 7.02308523  |
| 5.618468184 |
| 3.511542615 |
| 7.725393753 |
| 8.427702276 |
| 9.130010799 |
| 9.832319322 |
| 4.916159661 |
| 10.53462785 |
| 0           |
| 4.916159661 |
| 4.213851138 |
| 8.427702276 |
| 7.02308523  |
| 7.02308523  |
| 5.618468184 |
| 5.618468184 |
| 5.618468184 |

|             |
|-------------|
| 2.106925569 |
| 8.427702276 |
| 18.2600216  |
| 25.28310683 |
| 119.3924489 |
| 0.702308523 |
| 7.725393753 |
| 7.725393753 |
| 20.36694717 |
| 9.130010799 |
| 7.725393753 |
| 3.511542615 |
| 47.75697957 |
| 7.02308523  |
| 4.213851138 |
| 14.04617046 |
| 6.320776707 |
| 11.23693637 |
| 0           |
| 2.809234092 |
| 6.320776707 |
| 9.130010799 |
| 8.427702276 |
| 4.213851138 |
| 38.62696877 |
| 22.47387274 |
| 4.213851138 |
| 2.809234092 |
| 70.93316082 |
| 4.916159661 |
| 8.427702276 |
| 0           |
| 2.809234092 |
| 281.6257177 |
| 7.02308523  |
| 3.511542615 |
| 8.427702276 |
| 7.02308523  |
| 7.02308523  |
| 10.53462785 |
| 7.725393753 |
| 4.213851138 |
| 9.130010799 |

|             |
|-------------|
| 5.618468184 |
| 5.618468184 |
| 7.02308523  |
| 9.130010799 |
| 40.73389434 |
| 2.809234092 |
| 9.130010799 |
| 6.320776707 |
| 5.618468184 |
| 6.320776707 |
| 8.427702276 |
| 5.618468184 |
| 9.130010799 |
| 5.618468184 |
| 9.832319322 |
| 5.618468184 |
| 9.130010799 |
| 9.130010799 |
| 9.832319322 |
| 5.618468184 |
| 3.511542615 |
| 9.130010799 |
| 6.320776707 |
| 259.151845  |
| 0           |
| 11.93924489 |
| 9.832319322 |
| 9.130010799 |
| 0           |
| 4.916159661 |
| 4.916159661 |
| 9.130010799 |
| 11.23693637 |
| 9.130010799 |
| 4.916159661 |
| 47.05467104 |
| 2.106925569 |
| 30.90157501 |
| 6.320776707 |
| 4.916159661 |
| 7.725393753 |
| 10.53462785 |
| 2.809234092 |

|             |
|-------------|
| 8.427702276 |
| 3.511542615 |
| 9.832319322 |
| 11.23693637 |
| 6.320776707 |
| 9.130010799 |
| 19.66463864 |
| 4.916159661 |
| 6.320776707 |
| 7.725393753 |
| 6.320776707 |
| 10.53462785 |
| 3.511542615 |
| 7.02308523  |
| 18.2600216  |
| 2.809234092 |
| 0           |
| 0.702308523 |
| 0           |
| 5.618468184 |
| 2.106925569 |
| 11.93924489 |
| 9.130010799 |
| 7.02308523  |
| 19.66463864 |
| 6.320776707 |
| 0.702308523 |
| 4.213851138 |
| 9.832319322 |
| 7.02308523  |
| 7.725393753 |
| 6.320776707 |
| 5.618468184 |
| 7.02308523  |
| 4.213851138 |
| 6.320776707 |
| 8.427702276 |
| 110.9647466 |
| 110.9647466 |
| 7.02308523  |
| 5.618468184 |
| 7.02308523  |
| 0.702308523 |

|             |
|-------------|
| 10.53462785 |
| 7.725393753 |
| 10.53462785 |
| 9.832319322 |
| 0           |
| 9.130010799 |
| 5.618468184 |
| 5.618468184 |
| 83.57471424 |
| 14.74847898 |
| 8.427702276 |
| 42.13851138 |
| 3.511542615 |
| 8.427702276 |
| 7.02308523  |
| 4.213851138 |
| 4.916159661 |
| 0.702308523 |
| 279.5187922 |
| 4.916159661 |
| 50.56621366 |
| 0           |
| 7.02308523  |
| 1.404617046 |
| 11.23693637 |
| 14.04617046 |
| 9.130010799 |
| 8.427702276 |
| 0.702308523 |
| 32.30619206 |
| 7.725393753 |
| 3.511542615 |
| 4.916159661 |
| 9.130010799 |
| 9.130010799 |
| 5.618468184 |
| 6.320776707 |
| 7.725393753 |
| 69.52854378 |
| 3.511542615 |
| 10.53462785 |
| 3.511542615 |
| 8.427702276 |

|             |
|-------------|
| 8.427702276 |
| 9.832319322 |
| 7.02308523  |
| 6.320776707 |
| 7.725393753 |
| 9.832319322 |
| 7.02308523  |
| 5.618468184 |
| 6.320776707 |
| 7.02308523  |
| 9.832319322 |
| 7.02308523  |
| 1.404617046 |
| 5.618468184 |
| 46.35236252 |
| 9.130010799 |
| 3.511542615 |
| 0           |
| 4.916159661 |
| 6.320776707 |
| 11.23693637 |
| 11.93924489 |
| 12.64155341 |
| 8.427702276 |
| 8.427702276 |
| 7.725393753 |
| 7.725393753 |
| 1.404617046 |
| 9.130010799 |
| 7.02308523  |
| 0           |
| 10.53462785 |
| 7.725393753 |
| 16.15309603 |
| 11.93924489 |
| 11.23693637 |
| 6.320776707 |
| 168.5540455 |
| 4.213851138 |
| 23.87848978 |
| 1.404617046 |
| 388.3766132 |
| 9.832319322 |

|             |
|-------------|
| 14.04617046 |
| 11.23693637 |
| 8.427702276 |
| 2.809234092 |
| 11.93924489 |
| 11.23693637 |
| 320.2526865 |
| 6.320776707 |
| 10.53462785 |
| 10.53462785 |
| 61.1008415  |
| 9.130010799 |
| 6.320776707 |
| 1.404617046 |
| 49.86390513 |
| 6.320776707 |
| 12.64155341 |
| 5.618468184 |
| 11.93924489 |
| 2.106925569 |
| 16.85540455 |
| 7.725393753 |
| 9.130010799 |
| 11.93924489 |
| 5.618468184 |
| 4.213851138 |
| 9.832319322 |
| 7.02308523  |
| 5.618468184 |
| 10.53462785 |
| 7.725393753 |
| 82.17009719 |
| 12.64155341 |
| 4.916159661 |
| 1.404617046 |
| 10.53462785 |
| 33.7108091  |
| 9.130010799 |
| 6.320776707 |
| 14.74847898 |
| 5.618468184 |
| 6.320776707 |
| 6.320776707 |



|             |
|-------------|
| 10.53462785 |
| 14.74847898 |
| 6.320776707 |
| 0           |
| 7.725393753 |
| 101.8347358 |
| 18.96233012 |
| 7.02308523  |
| 4.916159661 |
| 0           |
| 8.427702276 |
| 9.832319322 |
| 2.106925569 |
| 8.427702276 |
| 7.02308523  |
| 0           |
| 7.725393753 |
| 11.23693637 |
| 9.832319322 |
| 7.725393753 |
| 7.02308523  |
| 1.404617046 |
| 5.618468184 |
| 7.725393753 |
| 2.809234092 |
| 1.404617046 |
| 8.427702276 |
| 7.725393753 |
| 2.809234092 |
| 17.55771308 |
| 0           |
| 9.130010799 |
| 0           |
| 0           |
| 4.213851138 |
| 0           |
| 0           |
| 14.04617046 |
| 8.427702276 |
| 2.809234092 |
| 7.02308523  |
| 0           |
| 9.832319322 |

|             |
|-------------|
| 9.832319322 |
| 0           |
| 5.618468184 |
| 16.85540455 |
| 11.23693637 |
| 7.02308523  |
| 0           |
| 5.618468184 |
| 0           |
| 4.213851138 |
| 10.53462785 |
| 9.832319322 |
| 6.320776707 |
| 83.57471424 |
| 4.916159661 |
| 0           |
| 7.02308523  |
| 25.98541535 |
| 0           |
| 0           |
| 59.69622446 |
| 0           |
| 4.916159661 |
| 3.511542615 |
| 0           |
| 311.8249842 |
| 0           |
| 7.02308523  |
| 0           |
| 20.36694717 |
| 7.725393753 |
| 0           |
| 1.404617046 |
| 2.106925569 |
| 0           |
| 0           |
| 0           |
| 0           |
| 0           |
| 0.702308523 |
| 0           |
| 8.427702276 |
| 0           |

|             |
|-------------|
| 0           |
| 5.618468184 |
| 4.213851138 |
| 0           |
| 7.725393753 |
| 214.906408  |
| 7.02308523  |
| 11.93924489 |
| 4.213851138 |
| 5.618468184 |
| 2.809234092 |
| 4.213851138 |
| 16.15309603 |
| 7.725393753 |
| 108.1555125 |
| 2.809234092 |
| 8.427702276 |
| 40.03158581 |
| 9.130010799 |
| 12.64155341 |
| 4.916159661 |
| 7.02308523  |
| 35.81773467 |
| 8.427702276 |
| 14.04617046 |
| 25.28310683 |
| 14.74847898 |
| 0           |
| 8.427702276 |
| 21.06925569 |
| 10.53462785 |
| 5.618468184 |
| 5.618468184 |
| 4.916159661 |
| 2.106925569 |
| 22.47387274 |
| 11.93924489 |
| 6.320776707 |
| 5.618468184 |
| 9.130010799 |
| 4.916159661 |
| 7.725393753 |
| 10.53462785 |

|             |
|-------------|
| 10.53462785 |
| 4.213851138 |
| 6.320776707 |
| 12.64155341 |
| 11.93924489 |
| 1.404617046 |
| 6.320776707 |
| 21.06925569 |
| 9.832319322 |
| 7.725393753 |
| 3.511542615 |
| 45.650054   |
| 7.725393753 |
| 7.725393753 |
| 4.916159661 |
| 5.618468184 |
| 3.511542615 |
| 4.916159661 |
| 9.130010799 |
| 5.618468184 |
| 8.427702276 |
| 7.02308523  |
| 0.702308523 |
| 0           |
| 36.5200432  |
| 5.618468184 |
| 14.04617046 |
| 6.320776707 |
| 9.832319322 |
| 8.427702276 |
| 2.809234092 |
| 5.618468184 |
| 6.320776707 |
| 42.13851138 |
| 6.320776707 |
| 4.916159661 |
| 10.53462785 |
| 11.93924489 |
| 26.68772387 |
| 2.809234092 |
| 5.618468184 |
| 2.809234092 |
| 7.02308523  |

|             |
|-------------|
| 7.725393753 |
| 46.35236252 |
| 73.74239492 |
| 11.23693637 |
| 5.618468184 |
| 32.30619206 |
| 5.618468184 |
| 10.53462785 |
| 2.809234092 |
| 6.320776707 |
| 7.02308523  |
| 5.618468184 |
| 23.87848978 |
| 9.130010799 |
| 30.19926649 |
| 7.725393753 |
| 7.02308523  |
| 5.618468184 |
| 18.2600216  |
| 7.02308523  |
| 5.618468184 |
| 5.618468184 |
| 7.725393753 |
| 2.106925569 |
| 6.320776707 |
| 2.809234092 |
| 5.618468184 |
| 10.53462785 |
| 1.404617046 |
| 6.320776707 |
| 7.02308523  |
| 0           |
| 5.618468184 |
| 4.916159661 |
| 7.02308523  |
| 11.93924489 |
| 7.02308523  |
| 5.618468184 |
| 9.130010799 |
| 2.106925569 |
| 14.04617046 |
| 22.47387274 |
| 7.02308523  |

|             |
|-------------|
| 6.320776707 |
| 2.809234092 |
| 8.427702276 |
| 6.320776707 |
| 3.511542615 |
| 7.725393753 |
| 2.809234092 |
| 8.427702276 |
| 5.618468184 |
| 59.69622446 |
| 6.320776707 |
| 7.02308523  |
| 6.320776707 |
| 6.320776707 |
| 8.427702276 |
| 4.916159661 |
| 13.34386194 |
| 58.29160741 |
| 7.725393753 |
| 5.618468184 |
| 16.85540455 |
| 9.130010799 |
| 4.916159661 |
| 7.02308523  |
| 4.916159661 |
| 1.404617046 |
| 4.916159661 |
| 4.916159661 |
| 9.130010799 |
| 33.00850058 |
| 15.45078751 |
| 14.04617046 |
| 16.85540455 |
| 4.213851138 |
| 3.511542615 |
| 10.53462785 |
| 7.02308523  |
| 9.130010799 |
| 10.53462785 |
| 11.93924489 |
| 11.93924489 |
| 9.130010799 |
| 2.809234092 |

|             |
|-------------|
| 9.832319322 |
| 7.02308523  |
| 7.725393753 |
| 6.320776707 |
| 9.130010799 |
| 99.72781027 |
| 7.02308523  |
| 4.213851138 |
| 5.618468184 |
| 3.511542615 |
| 5.618468184 |
| 84.27702276 |
| 8.427702276 |
| 6.320776707 |
| 11.93924489 |
| 6.320776707 |
| 4.916159661 |
| 4.213851138 |
| 2.106925569 |
| 4.213851138 |
| 11.93924489 |
| 9.832319322 |
| 8.427702276 |
| 4.916159661 |
| 6.320776707 |
| 4.916159661 |
| 5.618468184 |
| 35.11542615 |
| 73.04008639 |
| 191.0279183 |
| 49.16159661 |
| 9.832319322 |
| 0           |
| 10.53462785 |
| 167.851737  |
| 5.618468184 |
| 5.618468184 |
| 2.809234092 |
| 3.511542615 |
| 8.427702276 |
| 2.106925569 |
| 7.02308523  |
| 4.916159661 |

|             |
|-------------|
| 6.320776707 |
| 6.320776707 |
| 4.916159661 |
| 0.702308523 |
| 5.618468184 |
| 4.213851138 |
| 8.427702276 |
| 4.213851138 |
| 11.23693637 |
| 2.809234092 |
| 3.511542615 |
| 4.916159661 |
| 7.725393753 |
| 4.213851138 |
| 5.618468184 |
| 3.511542615 |
| 3.511542615 |
| 7.02308523  |
| 4.916159661 |
| 13.34386194 |
| 7.02308523  |
| 0           |
| 7.02308523  |
| 5.618468184 |
| 25.28310683 |
| 7.02308523  |
| 3.511542615 |
| 4.916159661 |
| 3.511542615 |
| 20.36694717 |
| 6.320776707 |
| 7.02308523  |
| 8.427702276 |
| 7.725393753 |
| 4.213851138 |
| 13.34386194 |
| 7.725393753 |
| 15.45078751 |
| 6.320776707 |
| 14.04617046 |
| 3.511542615 |
| 9.832319322 |
| 167.1494285 |



|             |
|-------------|
| 1.404617046 |
| 2.106925569 |
| 2.809234092 |
| 4.916159661 |
| 9.130010799 |
| 207.1810143 |
| 8.427702276 |
| 4.916159661 |
| 4.916159661 |
| 2.106925569 |
| 4.916159661 |
| 2.106925569 |
| 7.725393753 |
| 13.34386194 |
| 9.832319322 |
| 5.618468184 |
| 0.702308523 |
| 9.130010799 |
| 9.832319322 |
| 4.916159661 |
| 6.320776707 |
| 4.916159661 |
| 9.130010799 |
| 8.427702276 |
| 4.916159661 |
| 6.320776707 |
| 12.64155341 |
| 66.01700116 |
| 0.702308523 |
| 11.23693637 |
| 1.404617046 |
| 0           |
| 2.106925569 |
| 1.404617046 |
| 4.916159661 |
| 2.106925569 |
| 2.106925569 |
| 12.64155341 |
| 7.02308523  |
| 4.916159661 |
| 4.916159661 |
| 5.618468184 |
| 4.916159661 |

|             |
|-------------|
| 11.23693637 |
| 10.53462785 |
| 7.725393753 |
| 4.213851138 |
| 7.725393753 |
| 6.320776707 |
| 6.320776707 |
| 4.213851138 |
| 6.320776707 |
| 0           |
| 0           |
| 7.725393753 |
| 7.02308523  |
| 11.93924489 |
| 8.427702276 |
| 38.62696877 |
| 43.54312843 |
| 7.02308523  |
| 2.106925569 |
| 11.23693637 |
| 14.04617046 |
| 106.7508955 |
| 7.02308523  |
| 6.320776707 |
| 6.320776707 |
| 56.88699036 |
| 2.106925569 |
| 4.213851138 |
| 7.725393753 |
| 5.618468184 |
| 106.7508955 |
| 10.53462785 |
| 4.916159661 |
| 0           |
| 0.702308523 |
| 6.320776707 |
| 0           |
| 15.45078751 |
| 0           |
| 4.916159661 |
| 7.725393753 |
| 9.832319322 |
| 2.106925569 |

|             |
|-------------|
| 11.23693637 |
| 7.02308523  |
| 11.93924489 |
| 2.106925569 |
| 4.213851138 |
| 5.618468184 |
| 5.618468184 |
| 10.53462785 |
| 4.916159661 |
| 108.1555125 |
| 10.53462785 |
| 6.320776707 |
| 4.213851138 |
| 13.34386194 |
| 3.511542615 |
| 9.832319322 |
| 28.09234092 |
| 0           |
| 70.93316082 |
| 0           |
| 21.77156421 |
| 2.106925569 |
| 30.90157501 |
| 30.19926649 |
| 72.33777787 |
| 13.34386194 |
| 0           |
| 20.36694717 |
| 4.916159661 |
| 0           |
| 0           |
| 5.618468184 |
| 0           |
| 2.809234092 |
| 3.511542615 |
| 0.702308523 |
| 0           |
| 10.53462785 |
| 7.725393753 |
| 7.02308523  |
| 9.130010799 |
| 3.511542615 |
| 6.320776707 |

|             |
|-------------|
| 7.02308523  |
| 208.5856313 |
| 14.74847898 |
| 7.725393753 |
| 4.916159661 |
| 8.427702276 |
| 0.702308523 |
| 11.93924489 |
| 101.8347358 |
| 11.93924489 |
| 4.916159661 |
| 11.23693637 |
| 13.34386194 |
| 0.702308523 |
| 104.6439699 |
| 131.3316938 |
| 10.53462785 |
| 4.916159661 |
| 6.320776707 |
| 6.320776707 |
| 8.427702276 |
| 10.53462785 |
| 7.02308523  |
| 0           |
| 7.725393753 |
| 7.725393753 |
| 2.809234092 |
| 125.0109171 |
| 21.77156421 |
| 194.5394609 |
| 7.02308523  |
| 7.725393753 |
| 1.404617046 |
| 9.130010799 |
| 4.916159661 |
| 7.02308523  |
| 0.702308523 |
| 5.618468184 |
| 3.511542615 |
| 6.320776707 |
| 4.213851138 |
| 6.320776707 |
| 6.320776707 |

|             |
|-------------|
| 7.02308523  |
| 5.618468184 |
| 0           |
| 9.130010799 |
| 1.404617046 |
| 4.213851138 |
| 44.24543695 |
| 0           |
| 5.618468184 |
| 25.28310683 |
| 0           |
| 8.427702276 |
| 17.55771308 |
| 7.02308523  |
| 0           |
| 14.04617046 |
| 0           |
| 8.427702276 |
| 0           |
| 6.320776707 |
| 0           |
| 10.53462785 |
| 7.725393753 |
| 12.64155341 |
| 9.832319322 |
| 2.809234092 |
| 4.213851138 |
| 7.725393753 |
| 11.23693637 |
| 9.130010799 |
| 7.725393753 |
| 7.725393753 |
| 2.106925569 |
| 5.618468184 |
| 18.2600216  |
| 1.404617046 |
| 0           |
| 0           |
| 0           |
| 2.106925569 |
| 5.618468184 |
| 4.916159661 |
| 6.320776707 |

|             |
|-------------|
| 5.618468184 |
| 7.02308523  |
| 9.130010799 |
| 28.79464944 |
| 11.23693637 |
| 7.02308523  |
| 7.725393753 |
| 9.832319322 |
| 11.23693637 |
| 23.17618126 |
| 2.809234092 |
| 2.106925569 |
| 4.916159661 |
| 45.650054   |
| 4.916159661 |
| 2.809234092 |
| 6.320776707 |
| 7.725393753 |
| 0.702308523 |
| 5.618468184 |
| 10.53462785 |
| 4.213851138 |
| 5.618468184 |
| 16.15309603 |
| 5.618468184 |
| 4.916159661 |
| 5.618468184 |
| 4.916159661 |
| 57.58929889 |
| 19.66463864 |
| 1.404617046 |
| 6.320776707 |
| 9.130010799 |
| 9.832319322 |
| 0           |
| 9.832319322 |
| 6.320776707 |
| 0           |
| 6.320776707 |
| 4.916159661 |
| 7.02308523  |
| 11.93924489 |
| 10.53462785 |

|             |
|-------------|
| 4.916159661 |
| 5.618468184 |
| 7.725393753 |
| 7.725393753 |
| 4.213851138 |
| 66.71930969 |
| 5.618468184 |
| 4.213851138 |
| 7.725393753 |
| 3.511542615 |
| 6.320776707 |
| 7.725393753 |
| 5.618468184 |
| 7.725393753 |
| 7.02308523  |
| 2.106925569 |
| 4.916159661 |
| 4.213851138 |
| 4.213851138 |
| 3.511542615 |
| 4.213851138 |
| 4.916159661 |
| 107.453204  |
| 9.832319322 |
| 4.916159661 |
| 4.916159661 |
| 8.427702276 |
| 0.702308523 |
| 1.404617046 |
| 90.59779947 |
| 9.832319322 |
| 9.130010799 |
| 11.23693637 |
| 15.45078751 |
| 7.02308523  |
| 4.916159661 |
| 1.404617046 |
| 5.618468184 |
| 14.74847898 |
| 98.32319322 |
| 4.213851138 |
| 7.725393753 |
| 7.02308523  |

|             |
|-------------|
| 3.511542615 |
| 10.53462785 |
| 19.66463864 |
| 2.106925569 |
| 2.809234092 |
| 6.320776707 |
| 8.427702276 |
| 5.618468184 |
| 7.725393753 |
| 5.618468184 |
| 5.618468184 |
| 3.511542615 |
| 8.427702276 |
| 5.618468184 |
| 304.0995905 |
| 16.15309603 |
| 11.93924489 |
| 2.809234092 |
| 9.832319322 |
| 9.832319322 |
| 11.23693637 |
| 6.320776707 |
| 4.916159661 |
| 3.511542615 |
| 4.916159661 |
| 5.618468184 |
| 14.04617046 |
| 4.916159661 |
| 0           |
| 6.320776707 |
| 8.427702276 |
| 1.404617046 |
| 4.213851138 |
| 231.0595041 |
| 7.02308523  |
| 0.702308523 |
| 2.809234092 |
| 9.832319322 |
| 9.832319322 |
| 6.320776707 |
| 4.916159661 |
| 4.213851138 |
| 9.832319322 |



|             |
|-------------|
| 4.916159661 |
| 9.130010799 |
| 5.618468184 |
| 7.725393753 |
| 3.511542615 |
| 16.15309603 |
| 5.618468184 |
| 6.320776707 |
| 8.427702276 |
| 3.511542615 |
| 5.618468184 |
| 9.130010799 |
| 8.427702276 |
| 5.618468184 |
| 1.404617046 |
| 0           |
| 1.404617046 |
| 6.320776707 |
| 7.02308523  |
| 8.427702276 |
| 9.832319322 |
| 7.02308523  |
| 11.23693637 |
| 7.725393753 |
| 7.02308523  |
| 360.9865808 |
| 3.511542615 |
| 21.77156421 |
| 4.916159661 |
| 3.511542615 |
| 3.511542615 |
| 8.427702276 |
| 9.832319322 |
| 18.96233012 |
| 6.320776707 |
| 3.511542615 |
| 7.725393753 |
| 2.809234092 |
| 0.702308523 |
| 2.106925569 |
| 5.618468184 |
| 51.9708307  |
| 7.725393753 |

|             |
|-------------|
| 4.213851138 |
| 4.916159661 |
| 7.725393753 |
| 7.02308523  |
| 4.916159661 |
| 11.93924489 |
| 4.916159661 |
| 9.832319322 |
| 4.213851138 |
| 9.832319322 |
| 11.23693637 |
| 4.213851138 |
| 5.618468184 |
| 165.7448114 |
| 2.106925569 |
| 2.809234092 |
| 2.809234092 |
| 12.64155341 |
| 2.106925569 |
| 5.618468184 |
| 3.511542615 |
| 8.427702276 |
| 13.34386194 |
| 3.511542615 |
| 6.320776707 |
| 4.213851138 |
| 9.130010799 |
| 50.56621366 |
| 11.93924489 |
| 7.02308523  |
| 17.55771308 |
| 6.320776707 |
| 11.23693637 |
| 6.320776707 |
| 10.53462785 |
| 3.511542615 |
| 54.07775627 |
| 7.725393753 |
| 5.618468184 |
| 12.64155341 |
| 5.618468184 |
| 1.404617046 |
| 2.809234092 |

|             |
|-------------|
| 9.130010799 |
| 8.427702276 |
| 7.725393753 |
| 11.93924489 |
| 36.5200432  |
| 1.404617046 |
| 2.106925569 |
| 1.404617046 |
| 7.725393753 |
| 8.427702276 |
| 96.91857618 |
| 3.511542615 |
| 0.702308523 |
| 3.511542615 |
| 5.618468184 |
| 11.93924489 |
| 9.832319322 |
| 0.702308523 |
| 5.618468184 |
| 6.320776707 |
| 4.213851138 |
| 12.64155341 |
| 2.809234092 |
| 9.832319322 |
| 42.8408199  |
| 2.809234092 |
| 14.04617046 |
| 12.64155341 |
| 8.427702276 |
| 3.511542615 |
| 7.725393753 |
| 2.809234092 |
| 7.02308523  |
| 6.320776707 |
| 9.832319322 |
| 10.53462785 |
| 5.618468184 |
| 9.832319322 |
| 10.53462785 |
| 7.725393753 |
| 0           |
| 3.511542615 |
| 9.832319322 |

|             |
|-------------|
| 3.511542615 |
| 3.511542615 |
| 7.02308523  |
| 6.320776707 |
| 0.702308523 |
| 11.23693637 |
| 2.809234092 |
| 8.427702276 |
| 4.916159661 |
| 3.511542615 |
| 5.618468184 |
| 6.320776707 |
| 6.320776707 |
| 0.702308523 |
| 8.427702276 |
| 7.725393753 |
| 6.320776707 |
| 4.213851138 |
| 8.427702276 |
| 4.916159661 |
| 4.213851138 |
| 6.320776707 |
| 1.404617046 |
| 1.404617046 |
| 1.404617046 |
| 9.832319322 |
| 9.832319322 |
| 6.320776707 |
| 3.511542615 |
| 6.320776707 |
| 5.618468184 |
| 4.213851138 |
| 2.809234092 |
| 8.427702276 |
| 2.106925569 |
| 7.725393753 |
| 0.702308523 |
| 2.106925569 |
| 7.02308523  |
| 5.618468184 |
| 6.320776707 |
| 2.809234092 |
| 10.53462785 |

|             |
|-------------|
| 8.427702276 |
| 4.213851138 |
| 4.213851138 |
| 6.320776707 |
| 4.213851138 |
| 4.916159661 |
| 11.93924489 |
| 12.64155341 |
| 0.702308523 |
| 3.511542615 |
| 3.511542615 |
| 72.33777787 |
| 7.725393753 |
| 3.511542615 |
| 9.130010799 |
| 2.106925569 |
| 5.618468184 |
| 6.320776707 |
| 2.809234092 |
| 6.320776707 |
| 1.404617046 |
| 5.618468184 |
| 7.02308523  |
| 10.53462785 |
| 9.130010799 |
| 12.64155341 |
| 2.809234092 |
| 2.106925569 |
| 7.725393753 |
| 19.66463864 |
| 18.2600216  |
| 4.916159661 |
| 3.511542615 |
| 2.809234092 |
| 4.213851138 |
| 3.511542615 |
| 4.213851138 |
| 4.916159661 |
| 121.4993745 |
| 9.130010799 |
| 4.213851138 |
| 4.916159661 |
| 6.320776707 |

|             |
|-------------|
| 5.618468184 |
| 0.702308523 |
| 3.511542615 |
| 7.725393753 |
| 7.725393753 |
| 11.23693637 |
| 8.427702276 |
| 4.213851138 |
| 9.130010799 |
| 20.36694717 |
| 4.916159661 |
| 28.79464944 |
| 4.213851138 |
| 9.832319322 |
| 4.916159661 |
| 8.427702276 |
| 16.85540455 |
| 5.618468184 |
| 7.02308523  |
| 5.618468184 |
| 9.832319322 |
| 4.213851138 |
| 9.832319322 |
| 0.702308523 |
| 0           |
| 7.02308523  |
| 13.34386194 |
| 4.213851138 |
| 8.427702276 |
| 3.511542615 |
| 5.618468184 |
| 9.130010799 |
| 13.34386194 |
| 4.916159661 |
| 3.511542615 |
| 6.320776707 |
| 2.809234092 |
| 6.320776707 |
| 3.511542615 |
| 2.106925569 |
| 8.427702276 |
| 9.832319322 |
| 3.511542615 |

|             |
|-------------|
| 4.916159661 |
| 10.53462785 |
| 8.427702276 |
| 14.74847898 |
| 105.3462785 |
| 10.53462785 |
| 2.106925569 |
| 3.511542615 |
| 2.809234092 |
| 6.320776707 |
| 11.23693637 |
| 7.725393753 |
| 5.618468184 |
| 5.618468184 |
| 4.916159661 |
| 8.427702276 |
| 23.87848978 |
| 12.64155341 |
| 10.53462785 |
| 2.106925569 |
| 2.106925569 |
| 2.809234092 |
| 6.320776707 |
| 8.427702276 |
| 4.213851138 |
| 9.832319322 |
| 6.320776707 |
| 7.02308523  |
| 7.02308523  |
| 9.130010799 |
| 10.53462785 |
| 1.404617046 |
| 8.427702276 |
| 8.427702276 |
| 5.618468184 |
| 3.511542615 |
| 12.64155341 |
| 5.618468184 |
| 16.85540455 |
| 7.02308523  |
| 7.725393753 |
| 2.106925569 |
| 8.427702276 |

|             |
|-------------|
| 4.213851138 |
| 6.320776707 |
| 4.916159661 |
| 2.106925569 |
| 1.404617046 |
| 5.618468184 |
| 7.725393753 |
| 4.213851138 |
| 4.213851138 |
| 0.702308523 |
| 3.511542615 |
| 1.404617046 |
| 6.320776707 |
| 9.832319322 |
| 2.809234092 |
| 21.77156421 |
| 9.832319322 |
| 7.725393753 |
| 61.80315003 |
| 7.02308523  |
| 7.02308523  |
| 1.404617046 |
| 5.618468184 |
| 11.93924489 |
| 5.618468184 |
| 2.809234092 |
| 2.809234092 |
| 5.618468184 |
| 3.511542615 |
| 7.02308523  |
| 1.404617046 |
| 11.23693637 |
| 2.809234092 |
| 5.618468184 |
| 0.702308523 |
| 9.832319322 |
| 7.725393753 |
| 5.618468184 |
| 4.916159661 |
| 4.916159661 |
| 7.725393753 |
| 4.213851138 |
| 1.404617046 |



|             |
|-------------|
| 19.66463864 |
| 1.404617046 |
| 9.130010799 |
| 9.130010799 |
| 4.213851138 |
| 7.02308523  |
| 16.85540455 |
| 4.213851138 |
| 11.93924489 |
| 4.916159661 |
| 2.809234092 |
| 162.9355773 |
| 7.02308523  |
| 0.702308523 |
| 9.832319322 |
| 5.618468184 |
| 7.02308523  |
| 4.916159661 |
| 0.702308523 |
| 9.130010799 |
| 7.02308523  |
| 7.02308523  |
| 10.53462785 |
| 4.916159661 |
| 5.618468184 |
| 2.106925569 |
| 9.130010799 |
| 7.725393753 |
| 24.58079831 |
| 2.809234092 |
| 2.809234092 |
| 9.832319322 |
| 2.809234092 |
| 14.04617046 |
| 7.02308523  |
| 10.53462785 |
| 0.702308523 |
| 9.832319322 |
| 9.130010799 |
| 5.618468184 |
| 8.427702276 |
| 2.809234092 |
| 4.213851138 |

|             |
|-------------|
| 4.213851138 |
| 4.916159661 |
| 9.130010799 |
| 10.53462785 |
| 4.916159661 |
| 6.320776707 |
| 3.511542615 |
| 2.809234092 |
| 6.320776707 |
| 2.809234092 |
| 1.404617046 |
| 6.320776707 |
| 2.809234092 |
| 6.320776707 |
| 2.809234092 |
| 2.809234092 |
| 4.213851138 |
| 3.511542615 |
| 34.41311763 |
| 7.725393753 |
| 4.213851138 |
| 6.320776707 |
| 9.130010799 |
| 2.809234092 |
| 7.02308523  |
| 1.404617046 |
| 12.64155341 |
| 6.320776707 |
| 9.130010799 |
| 2.106925569 |
| 8.427702276 |
| 6.320776707 |
| 8.427702276 |
| 7.725393753 |
| 7.725393753 |
| 9.832319322 |
| 12.64155341 |
| 4.213851138 |
| 7.02308523  |
| 0.702308523 |
| 0.702308523 |
| 13.34386194 |
| 5.618468184 |

|             |
|-------------|
| 9.130010799 |
| 4.916159661 |
| 8.427702276 |
| 11.93924489 |
| 3.511542615 |
| 3.511542615 |
| 9.832319322 |
| 5.618468184 |
| 9.832319322 |
| 0.702308523 |
| 9.832319322 |
| 8.427702276 |
| 4.916159661 |
| 7.725393753 |
| 17.55771308 |
| 14.04617046 |
| 4.916159661 |
| 6.320776707 |
| 7.02308523  |
| 1.404617046 |
| 6.320776707 |
| 0.702308523 |
| 6.320776707 |
| 7.02308523  |
| 3.511542615 |
| 11.93924489 |
| 6.320776707 |
| 4.916159661 |
| 26.68772387 |
| 8.427702276 |
| 7.725393753 |
| 7.725393753 |
| 4.213851138 |
| 2.106925569 |
| 3.511542615 |
| 5.618468184 |
| 6.320776707 |
| 11.23693637 |
| 14.04617046 |
| 1.404617046 |
| 0.702308523 |
| 14.04617046 |
| 28.09234092 |

|             |
|-------------|
| 5.618468184 |
| 17.55771308 |
| 2.809234092 |
| 7.725393753 |
| 9.832319322 |
| 5.618468184 |
| 10.53462785 |
| 0.702308523 |
| 5.618468184 |
| 2.106925569 |
| 2.809234092 |
| 4.916159661 |
| 8.427702276 |
| 10.53462785 |
| 2.106925569 |
| 3.511542615 |
| 4.213851138 |
| 6.320776707 |
| 2.809234092 |
| 8.427702276 |
| 7.02308523  |
| 5.618468184 |
| 0.702308523 |
| 51.9708307  |
| 5.618468184 |
| 15.45078751 |
| 3.511542615 |
| 2.809234092 |
| 4.916159661 |
| 3.511542615 |
| 6.320776707 |
| 13.34386194 |
| 3.511542615 |
| 4.916159661 |
| 7.725393753 |
| 2.809234092 |
| 1.404617046 |
| 11.93924489 |
| 9.130010799 |
| 2.809234092 |
| 3.511542615 |
| 0.702308523 |
| 4.916159661 |

|             |
|-------------|
| 3.511542615 |
| 7.02308523  |
| 35.11542615 |
| 7.725393753 |
| 9.832319322 |
| 6.320776707 |
| 4.916159661 |
| 8.427702276 |
| 9.832319322 |
| 7.725393753 |
| 4.916159661 |
| 2.106925569 |
| 8.427702276 |
| 24.58079831 |
| 2.106925569 |
| 3.511542615 |
| 6.320776707 |
| 4.916159661 |
| 15.45078751 |
| 7.725393753 |
| 8.427702276 |
| 9.832319322 |
| 7.725393753 |
| 15.45078751 |
| 4.213851138 |
| 11.93924489 |
| 8.427702276 |
| 4.213851138 |
| 1.404617046 |
| 2.809234092 |
| 12.64155341 |
| 7.02308523  |
| 3.511542615 |
| 2.106925569 |
| 7.725393753 |
| 1.404617046 |
| 2.809234092 |
| 7.725393753 |
| 7.725393753 |
| 5.618468184 |
| 2.809234092 |
| 3.511542615 |
| 4.213851138 |

|             |
|-------------|
| 4.213851138 |
| 16.15309603 |
| 3.511542615 |
| 9.832319322 |
| 37.22235172 |
| 11.23693637 |
| 7.02308523  |
| 9.832319322 |
| 51.9708307  |
| 2.106925569 |
| 4.916159661 |
| 6.320776707 |
| 4.213851138 |
| 9.130010799 |
| 2.106925569 |
| 11.23693637 |
| 5.618468184 |
| 10.53462785 |
| 9.130010799 |
| 38.62696877 |
| 10.53462785 |
| 20.36694717 |
| 4.213851138 |
| 0           |
| 2.106925569 |
| 9.832319322 |
| 6.320776707 |
| 10.53462785 |
| 4.213851138 |
| 3.511542615 |
| 7.02308523  |
| 8.427702276 |
| 9.130010799 |
| 1.404617046 |
| 6.320776707 |
| 6.320776707 |
| 8.427702276 |
| 7.02308523  |
| 7.725393753 |
| 8.427702276 |
| 18.96233012 |
| 5.618468184 |
| 7.725393753 |

|             |
|-------------|
| 5.618468184 |
| 5.618468184 |
| 16.15309603 |
| 10.53462785 |
| 11.93924489 |
| 9.130010799 |
| 24.58079831 |
| 3.511542615 |
| 0           |
| 2.106925569 |
| 11.93924489 |
| 4.916159661 |
| 6.320776707 |
| 14.74847898 |
| 165.7448114 |
| 7.725393753 |
| 5.618468184 |
| 8.427702276 |
| 4.213851138 |
| 9.130010799 |
| 7.725393753 |
| 9.130010799 |
| 9.832319322 |
| 8.427702276 |
| 5.618468184 |
| 6.320776707 |
| 5.618468184 |
| 6.320776707 |
| 4.213851138 |
| 4.916159661 |
| 7.02308523  |
| 7.725393753 |
| 3.511542615 |
| 33.7108091  |
| 8.427702276 |
| 4.213851138 |
| 2.106925569 |
| 2.809234092 |
| 7.02308523  |
| 114.4762893 |
| 9.832319322 |
| 30.19926649 |
| 2.809234092 |

|             |
|-------------|
| 4.213851138 |
| 7.02308523  |
| 12.64155341 |
| 9.130010799 |
| 7.725393753 |
| 6.320776707 |
| 8.427702276 |
| 9.130010799 |
| 5.618468184 |
| 9.832319322 |
| 12.64155341 |
| 14.04617046 |
| 1.404617046 |
| 2.106925569 |
| 5.618468184 |
| 7.725393753 |
| 4.213851138 |
| 52.67313923 |
| 13.34386194 |
| 31.60388354 |
| 16.15309603 |
| 6.320776707 |
| 3.511542615 |
| 2.106925569 |
| 8.427702276 |
| 10.53462785 |
| 8.427702276 |
| 9.832319322 |
| 0           |
| 56.88699036 |
| 16.15309603 |
| 4.916159661 |
| 4.916159661 |
| 74.44470344 |
| 8.427702276 |
| 6.320776707 |
| 7.725393753 |
| 4.213851138 |
| 4.916159661 |
| 4.213851138 |
| 7.725393753 |
| 7.02308523  |
| 5.618468184 |



|             |
|-------------|
| 4.916159661 |
| 12.64155341 |
| 4.916159661 |
| 14.04617046 |
| 8.427702276 |
| 2.809234092 |
| 5.618468184 |
| 1.404617046 |
| 2.809234092 |
| 18.2600216  |
| 3.511542615 |
| 7.02308523  |
| 2.106925569 |
| 4.916159661 |
| 7.725393753 |
| 2.106925569 |
| 7.725393753 |
| 3.511542615 |
| 5.618468184 |
| 1.404617046 |
| 0           |
| 10.53462785 |
| 5.618468184 |
| 36.5200432  |
| 11.23693637 |
| 2.106925569 |
| 14.74847898 |
| 8.427702276 |
| 9.130010799 |
| 8.427702276 |
| 7.02308523  |
| 5.618468184 |
| 1.404617046 |
| 4.916159661 |
| 35.11542615 |
| 6.320776707 |
| 0.702308523 |
| 22.47387274 |
| 2.809234092 |
| 7.725393753 |
| 7.02308523  |
| 7.02308523  |
| 2.809234092 |

|             |
|-------------|
| 7.725393753 |
| 9.130010799 |
| 8.427702276 |
| 8.427702276 |
| 13.34386194 |
| 14.74847898 |
| 8.427702276 |
| 2.106925569 |
| 1.404617046 |
| 13.34386194 |
| 11.93924489 |
| 158.7217262 |
| 179.0886734 |
| 7.725393753 |
| 3.511542615 |
| 5.618468184 |
| 11.23693637 |
| 7.02308523  |
| 5.618468184 |
| 3.511542615 |
| 7.725393753 |
| 3.511542615 |
| 3.511542615 |
| 11.23693637 |
| 154.5078751 |
| 5.618468184 |
| 9.832319322 |
| 9.832319322 |
| 4.916159661 |
| 4.213851138 |
| 11.23693637 |
| 3.511542615 |
| 7.725393753 |
| 7.725393753 |
| 7.725393753 |
| 2.809234092 |
| 6.320776707 |
| 5.618468184 |
| 56.18468184 |
| 1.404617046 |
| 6.320776707 |
| 8.427702276 |
| 8.427702276 |

|             |
|-------------|
| 7.02308523  |
| 8.427702276 |
| 4.213851138 |
| 9.130010799 |
| 4.213851138 |
| 2.809234092 |
| 5.618468184 |
| 3.511542615 |
| 9.130010799 |
| 7.02308523  |
| 3.511542615 |
| 2.809234092 |
| 14.74847898 |
| 6.320776707 |
| 13.34386194 |
| 1.404617046 |
| 12.64155341 |
| 0.702308523 |
| 2.809234092 |
| 4.916159661 |
| 6.320776707 |
| 1.404617046 |
| 13.34386194 |
| 6.320776707 |
| 5.618468184 |
| 5.618468184 |
| 7.725393753 |
| 5.618468184 |
| 5.618468184 |
| 6.320776707 |
| 2.809234092 |
| 7.02308523  |
| 4.916159661 |
| 2.106925569 |
| 4.916159661 |
| 2.809234092 |
| 11.23693637 |
| 6.320776707 |
| 7.02308523  |
| 4.916159661 |
| 4.916159661 |
| 2.106925569 |
| 4.213851138 |

|             |
|-------------|
| 14.74847898 |
| 0           |
| 1.404617046 |
| 6.320776707 |
| 4.213851138 |
| 3.511542615 |
| 10.53462785 |
| 5.618468184 |
| 7.02308523  |
| 7.02308523  |
| 2.106925569 |
| 6.320776707 |
| 4.213851138 |
| 25.28310683 |
| 66.71930969 |
| 6.320776707 |
| 4.213851138 |
| 4.213851138 |
| 11.23693637 |
| 7.725393753 |
| 11.93924489 |
| 14.04617046 |
| 6.320776707 |
| 3.511542615 |
| 1.404617046 |
| 9.832319322 |
| 9.130010799 |
| 8.427702276 |
| 49.16159661 |
| 4.213851138 |
| 2.809234092 |
| 37.22235172 |
| 2.106925569 |
| 3.511542615 |
| 2.106925569 |
| 14.04617046 |
| 9.130010799 |
| 2.809234092 |
| 9.130010799 |
| 3.511542615 |
| 6.320776707 |
| 10.53462785 |
| 13.34386194 |

|             |
|-------------|
| 4.916159661 |
| 2.809234092 |
| 3.511542615 |
| 4.213851138 |
| 7.725393753 |
| 10.53462785 |
| 4.916159661 |
| 5.618468184 |
| 12.64155341 |
| 8.427702276 |
| 2.809234092 |
| 2.106925569 |
| 14.74847898 |
| 11.93924489 |
| 11.23693637 |
| 4.916159661 |
| 4.916159661 |
| 274.6026325 |
| 8.427702276 |
| 10.53462785 |
| 6.320776707 |
| 8.427702276 |
| 4.916159661 |
| 3.511542615 |
| 2.106925569 |
| 5.618468184 |
| 4.213851138 |
| 6.320776707 |
| 4.916159661 |
| 7.725393753 |
| 5.618468184 |
| 7.725393753 |
| 11.23693637 |
| 9.832319322 |
| 1.404617046 |
| 11.93924489 |
| 2.809234092 |
| 12.64155341 |
| 11.23693637 |
| 14.74847898 |
| 9.832319322 |
| 7.02308523  |
| 6.320776707 |

|             |
|-------------|
| 18.2600216  |
| 135.5455449 |
| 47.75697957 |
| 4.213851138 |
| 1.404617046 |
| 2.809234092 |
| 6.320776707 |
| 8.427702276 |
| 4.213851138 |
| 2.809234092 |
| 7.02308523  |
| 3.511542615 |
| 9.130010799 |
| 7.725393753 |
| 3.511542615 |
| 1.404617046 |
| 9.130010799 |
| 11.93924489 |
| 9.130010799 |
| 14.04617046 |
| 2.809234092 |
| 5.618468184 |
| 8.427702276 |
| 8.427702276 |
| 7.725393753 |
| 2.809234092 |
| 2.809234092 |
| 7.725393753 |
| 129.2247682 |
| 9.832319322 |
| 6.320776707 |
| 5.618468184 |
| 3.511542615 |
| 8.427702276 |
| 0.702308523 |
| 7.02308523  |
| 7.02308523  |
| 10.53462785 |
| 7.02308523  |
| 7.02308523  |
| 6.320776707 |
| 6.320776707 |
| 11.23693637 |

|             |
|-------------|
| 7.725393753 |
| 10.53462785 |
| 0           |
| 5.618468184 |
| 7.02308523  |
| 4.213851138 |
| 2.106925569 |
| 8.427702276 |
| 6.320776707 |
| 7.725393753 |
| 6.320776707 |
| 4.916159661 |
| 4.916159661 |
| 3.511542615 |
| 8.427702276 |
| 11.93924489 |
| 13.34386194 |
| 5.618468184 |
| 28.79464944 |
| 3.511542615 |
| 4.916159661 |
| 3.511542615 |
| 9.130010799 |
| 11.93924489 |
| 4.916159661 |
| 2.809234092 |
| 2.106925569 |
| 5.618468184 |
| 7.725393753 |
| 6.320776707 |
| 4.916159661 |
| 2.809234092 |
| 15.45078751 |
| 6.320776707 |
| 7.02308523  |
| 2.809234092 |
| 4.213851138 |
| 10.53462785 |
| 4.916159661 |
| 8.427702276 |
| 4.213851138 |
| 22.47387274 |
| 9.130010799 |

|             |
|-------------|
| 4.213851138 |
| 3.511542615 |
| 33.00850058 |
| 5.618468184 |
| 2.809234092 |
| 3.511542615 |
| 0.702308523 |
| 7.02308523  |
| 6.320776707 |
| 4.916159661 |
| 14.74847898 |
| 30.90157501 |
| 3.511542615 |
| 3.511542615 |
| 7.02308523  |
| 6.320776707 |
| 9.130010799 |
| 154.5078751 |
| 5.618468184 |
| 4.213851138 |
| 4.916159661 |
| 3.511542615 |
| 13.34386194 |
| 9.130010799 |
| 4.916159661 |
| 9.130010799 |
| 5.618468184 |
| 4.213851138 |
| 7.725393753 |
| 6.320776707 |
| 0.702308523 |
| 8.427702276 |
| 2.106925569 |
| 2.106925569 |
| 9.130010799 |
| 8.427702276 |
| 7.725393753 |
| 33.7108091  |
| 22.47387274 |
| 9.832319322 |
| 14.74847898 |
| 4.213851138 |
| 8.427702276 |



|             |
|-------------|
| 4.213851138 |
| 5.618468184 |
| 3.511542615 |
| 12.64155341 |
| 13.34386194 |
| 4.916159661 |
| 0           |
| 2.106925569 |
| 30.19926649 |
| 4.916159661 |
| 9.832319322 |
| 18.96233012 |
| 7.02308523  |
| 4.213851138 |
| 0.702308523 |
| 2.106925569 |
| 2.809234092 |
| 8.427702276 |
| 8.427702276 |
| 7.02308523  |
| 8.427702276 |
| 4.916159661 |
| 4.213851138 |
| 9.832319322 |
| 11.93924489 |
| 4.916159661 |
| 2.809234092 |
| 6.320776707 |
| 3.511542615 |
| 7.02308523  |
| 4.916159661 |
| 10.53462785 |
| 13.34386194 |
| 7.725393753 |
| 5.618468184 |
| 2.106925569 |
| 9.130010799 |
| 13.34386194 |
| 6.320776707 |
| 10.53462785 |
| 8.427702276 |
| 0           |
| 7.02308523  |

|             |
|-------------|
| 0.702308523 |
| 5.618468184 |
| 7.725393753 |
| 9.130010799 |
| 1.404617046 |
| 10.53462785 |
| 6.320776707 |
| 21.06925569 |
| 4.916159661 |
| 6.320776707 |
| 4.916159661 |
| 8.427702276 |
| 0.702308523 |
| 6.320776707 |
| 9.130010799 |
| 4.213851138 |
| 11.93924489 |
| 10.53462785 |
| 3.511542615 |
| 1.404617046 |
| 4.213851138 |
| 5.618468184 |
| 4.213851138 |
| 8.427702276 |
| 7.725393753 |
| 10.53462785 |
| 4.916159661 |
| 7.725393753 |
| 3.511542615 |
| 3.511542615 |
| 8.427702276 |
| 2.106925569 |
| 7.02308523  |
| 2.106925569 |
| 7.725393753 |
| 18.2600216  |
| 3.511542615 |
| 3.511542615 |
| 7.02308523  |
| 1.404617046 |
| 10.53462785 |
| 12.64155341 |
| 2.809234092 |

|             |
|-------------|
| 11.23693637 |
| 12.64155341 |
| 12.64155341 |
| 13.34386194 |
| 4.213851138 |
| 8.427702276 |
| 9.832319322 |
| 2.106925569 |
| 14.74847898 |
| 10.53462785 |
| 0           |
| 8.427702276 |
| 5.618468184 |
| 4.916159661 |
| 2.106925569 |
| 4.213851138 |
| 8.427702276 |
| 320.2526865 |
| 1.404617046 |
| 4.916159661 |
| 6.320776707 |
| 34.41311763 |
| 2.809234092 |
| 4.916159661 |
| 2.809234092 |
| 0.702308523 |
| 7.02308523  |
| 8.427702276 |
| 9.130010799 |
| 1.404617046 |
| 14.74847898 |
| 4.916159661 |
| 4.916159661 |
| 4.916159661 |
| 7.725393753 |
| 2.106925569 |
| 4.916159661 |
| 6.320776707 |
| 9.832319322 |
| 7.725393753 |
| 9.130010799 |
| 8.427702276 |
| 7.725393753 |

|             |
|-------------|
| 5.618468184 |
| 5.618468184 |
| 30.19926649 |
| 8.427702276 |
| 9.130010799 |
| 7.02308523  |
| 87.78856538 |
| 4.213851138 |
| 9.130010799 |
| 0           |
| 9.130010799 |
| 6.320776707 |
| 5.618468184 |
| 4.916159661 |
| 3.511542615 |
| 7.725393753 |
| 9.832319322 |
| 2.809234092 |
| 3.511542615 |
| 1.404617046 |
| 4.916159661 |
| 9.130010799 |
| 6.320776707 |
| 2.106925569 |
| 9.832319322 |
| 0           |
| 4.916159661 |
| 26.68772387 |
| 5.618468184 |
| 5.618468184 |
| 4.213851138 |
| 146.0801728 |
| 4.213851138 |
| 11.23693637 |
| 10.53462785 |
| 65.31469264 |
| 11.23693637 |
| 2.106925569 |
| 1.404617046 |
| 16.15309603 |
| 3.511542615 |
| 7.02308523  |
| 14.74847898 |

|             |
|-------------|
| 7.02308523  |
| 17.55771308 |
| 11.93924489 |
| 6.320776707 |
| 2.809234092 |
| 7.725393753 |
| 1.404617046 |
| 4.916159661 |
| 7.725393753 |
| 4.213851138 |
| 2.106925569 |
| 5.618468184 |
| 1.404617046 |
| 0           |
| 76.55162901 |
| 6.320776707 |
| 16.15309603 |
| 3.511542615 |
| 8.427702276 |
| 6.320776707 |
| 41.43620286 |
| 6.320776707 |
| 9.832319322 |
| 1.404617046 |
| 2.809234092 |
| 4.916159661 |
| 2.106925569 |
| 0.702308523 |
| 1.404617046 |
| 7.725393753 |
| 5.618468184 |
| 8.427702276 |
| 7.725393753 |
| 4.916159661 |
| 4.213851138 |
| 8.427702276 |
| 3.511542615 |
| 7.725393753 |
| 5.618468184 |
| 3.511542615 |
| 6.320776707 |
| 3.511542615 |
| 7.725393753 |

|             |
|-------------|
| 28.79464944 |
| 2.809234092 |
| 5.618468184 |
| 7.725393753 |
| 7.725393753 |
| 9.130010799 |
| 2.106925569 |
| 6.320776707 |
| 2.106925569 |
| 5.618468184 |
| 7.725393753 |
| 11.93924489 |
| 10.53462785 |
| 4.916159661 |
| 5.618468184 |
| 11.23693637 |
| 14.74847898 |
| 9.130010799 |
| 16.15309603 |
| 11.23693637 |
| 1.404617046 |
| 9.130010799 |
| 4.213851138 |
| 2.106925569 |
| 8.427702276 |
| 7.725393753 |
| 11.23693637 |
| 4.916159661 |
| 4.916159661 |
| 14.74847898 |
| 4.213851138 |
| 8.427702276 |
| 20.36694717 |
| 0           |
| 5.618468184 |
| 7.725393753 |
| 9.832319322 |
| 5.618468184 |
| 86.38394833 |
| 13.34386194 |
| 2.809234092 |
| 7.02308523  |
| 2.106925569 |

|             |
|-------------|
| 254.2356853 |
| 14.04617046 |
| 8.427702276 |
| 9.832319322 |
| 2.809234092 |
| 9.130010799 |
| 3.511542615 |
| 12.64155341 |
| 28.09234092 |
| 11.23693637 |
| 3.511542615 |
| 7.725393753 |
| 7.02308523  |
| 7.02308523  |
| 7.725393753 |
| 3.511542615 |
| 4.916159661 |
| 11.23693637 |
| 6.320776707 |
| 21.06925569 |
| 7.725393753 |
| 5.618468184 |
| 7.725393753 |
| 7.02308523  |
| 4.916159661 |
| 11.93924489 |
| 1.404617046 |
| 11.93924489 |
| 6.320776707 |
| 7.725393753 |
| 4.916159661 |
| 2.809234092 |
| 13.34386194 |
| 11.23693637 |
| 8.427702276 |
| 11.23693637 |
| 9.130010799 |
| 6.320776707 |
| 13.34386194 |
| 7.02308523  |
| 4.213851138 |
| 3.511542615 |
| 2.106925569 |

|             |
|-------------|
| 4.916159661 |
| 9.130010799 |
| 5.618468184 |
| 7.02308523  |
| 6.320776707 |
| 19.66463864 |
| 1.404617046 |
| 3.511542615 |
| 6.320776707 |
| 9.130010799 |
| 7.725393753 |
| 4.213851138 |
| 8.427702276 |
| 9.130010799 |
| 7.725393753 |
| 13.34386194 |
| 11.23693637 |
| 5.618468184 |
| 7.02308523  |
| 0           |
| 7.725393753 |
| 7.02308523  |
| 12.64155341 |
| 7.725393753 |
| 214.906408  |
| 5.618468184 |
| 17.55771308 |
| 8.427702276 |
| 4.213851138 |
| 4.916159661 |
| 4.916159661 |
| 7.725393753 |
| 9.832319322 |
| 3.511542615 |
| 6.320776707 |
| 8.427702276 |
| 7.725393753 |
| 9.832319322 |
| 0.702308523 |
| 4.213851138 |
| 11.23693637 |
| 6.320776707 |
| 7.02308523  |



|             |
|-------------|
| 7.02308523  |
| 6.320776707 |
| 6.320776707 |
| 2.106925569 |
| 4.213851138 |
| 11.93924489 |
| 35.81773467 |
| 3.511542615 |
| 2.809234092 |
| 6.320776707 |
| 7.02308523  |
| 7.02308523  |
| 317.4434524 |
| 0           |
| 7.02308523  |
| 9.832319322 |
| 4.213851138 |
| 8.427702276 |
| 5.618468184 |
| 5.618468184 |
| 9.832319322 |
| 3.511542615 |
| 11.93924489 |
| 2.106925569 |
| 5.618468184 |
| 8.427702276 |
| 1.404617046 |
| 7.02308523  |
| 7.725393753 |
| 7.725393753 |
| 4.213851138 |
| 4.213851138 |
| 7.02308523  |
| 7.725393753 |
| 3.511542615 |
| 1.404617046 |
| 5.618468184 |
| 294.9695797 |
| 8.427702276 |
| 6.320776707 |
| 8.427702276 |
| 11.23693637 |
| 2.106925569 |

|             |
|-------------|
| 12.64155341 |
| 9.130010799 |
| 2.106925569 |
| 4.916159661 |
| 11.23693637 |
| 4.916159661 |
| 6.320776707 |
| 2.809234092 |
| 4.213851138 |
| 9.130010799 |
| 1.404617046 |
| 7.725393753 |
| 4.916159661 |
| 26.68772387 |
| 11.93924489 |
| 7.02308523  |
| 16.15309603 |
| 4.213851138 |
| 3.511542615 |
| 6.320776707 |
| 4.916159661 |
| 3.511542615 |
| 75.84932049 |
| 4.213851138 |
| 20.36694717 |
| 10.53462785 |
| 6.320776707 |
| 7.02308523  |
| 4.213851138 |
| 7.02308523  |
| 5.618468184 |
| 2.106925569 |
| 6.320776707 |
| 13.34386194 |
| 0           |
| 3.511542615 |
| 9.130010799 |
| 16.15309603 |
| 6.320776707 |
| 7.02308523  |
| 16.85540455 |
| 9.832319322 |
| 6.320776707 |

|             |
|-------------|
| 25.28310683 |
| 6.320776707 |
| 4.213851138 |
| 7.725393753 |
| 6.320776707 |
| 9.130010799 |
| 7.02308523  |
| 7.725393753 |
| 4.213851138 |
| 4.213851138 |
| 15.45078751 |
| 4.916159661 |
| 4.213851138 |
| 2.106925569 |
| 7.02308523  |
| 101.8347358 |
| 1.404617046 |
| 5.618468184 |
| 37.22235172 |
| 11.23693637 |
| 56.18468184 |
| 8.427702276 |
| 3.511542615 |
| 6.320776707 |
| 3.511542615 |
| 5.618468184 |
| 28.09234092 |
| 9.832319322 |
| 1.404617046 |
| 8.427702276 |
| 22.47387274 |
| 9.130010799 |
| 6.320776707 |
| 8.427702276 |
| 9.130010799 |
| 9.130010799 |
| 11.23693637 |
| 9.832319322 |
| 2.809234092 |
| 9.130010799 |
| 7.725393753 |
| 5.618468184 |
| 16.15309603 |

|             |
|-------------|
| 21.06925569 |
| 2.106925569 |
| 6.320776707 |
| 7.725393753 |
| 5.618468184 |
| 3.511542615 |
| 3.511542615 |
| 9.832319322 |
| 1.404617046 |
| 6.320776707 |
| 0.702308523 |
| 4.213851138 |
| 7.02308523  |
| 2.809234092 |
| 9.130010799 |
| 4.916159661 |
| 3.511542615 |
| 3.511542615 |
| 10.53462785 |
| 3.511542615 |
| 2.106925569 |
| 7.02308523  |
| 8.427702276 |
| 6.320776707 |
| 0           |
| 178.3863648 |
| 6.320776707 |
| 4.213851138 |
| 7.02308523  |
| 7.02308523  |
| 6.320776707 |
| 5.618468184 |
| 3.511542615 |
| 6.320776707 |
| 8.427702276 |
| 3.511542615 |
| 6.320776707 |
| 10.53462785 |
| 7.725393753 |
| 12.64155341 |
| 3.511542615 |
| 9.130010799 |
| 8.427702276 |

|             |
|-------------|
| 12.64155341 |
| 5.618468184 |
| 6.320776707 |
| 4.213851138 |
| 13.34386194 |
| 2.809234092 |
| 3.511542615 |
| 5.618468184 |
| 7.725393753 |
| 3.511542615 |
| 4.916159661 |
| 35.81773467 |
| 5.618468184 |
| 4.213851138 |
| 2.809234092 |
| 12.64155341 |
| 6.320776707 |
| 3.511542615 |
| 19.66463864 |
| 7.02308523  |
| 11.23693637 |
| 1.404617046 |
| 11.23693637 |
| 7.02308523  |
| 3.511542615 |
| 7.725393753 |
| 5.618468184 |
| 13.34386194 |
| 17.55771308 |
| 4.916159661 |
| 4.916159661 |
| 6.320776707 |
| 8.427702276 |
| 23.87848978 |
| 4.916159661 |
| 1.404617046 |
| 3.511542615 |
| 12.64155341 |
| 0.702308523 |
| 6.320776707 |
| 6.320776707 |
| 4.213851138 |
| 8.427702276 |

|             |
|-------------|
| 4.213851138 |
| 14.04617046 |
| 5.618468184 |
| 2.809234092 |
| 10.53462785 |
| 8.427702276 |
| 16.15309603 |
| 5.618468184 |
| 4.213851138 |
| 2.106925569 |
| 7.725393753 |
| 6.320776707 |
| 0.702308523 |
| 8.427702276 |
| 3.511542615 |
| 12.64155341 |
| 7.02308523  |
| 5.618468184 |
| 4.213851138 |
| 4.916159661 |
| 7.02308523  |
| 9.130010799 |
| 2.809234092 |
| 48.45928809 |
| 2.809234092 |
| 7.725393753 |
| 1.404617046 |
| 220.5248762 |
| 4.916159661 |
| 7.02308523  |
| 7.725393753 |
| 7.725393753 |
| 2.809234092 |
| 14.04617046 |
| 7.02308523  |
| 7.725393753 |
| 9.130010799 |
| 4.213851138 |
| 9.832319322 |
| 5.618468184 |
| 7.02308523  |
| 8.427702276 |
| 7.725393753 |

|             |
|-------------|
| 2.809234092 |
| 7.02308523  |
| 5.618468184 |
| 6.320776707 |
| 2.809234092 |
| 3.511542615 |
| 3.511542615 |
| 4.916159661 |
| 6.320776707 |
| 334.298857  |
| 9.130010799 |
| 9.130010799 |
| 11.93924489 |
| 13.34386194 |
| 6.320776707 |
| 4.213851138 |
| 9.130010799 |
| 11.93924489 |
| 14.04617046 |
| 17.55771308 |
| 0.702308523 |
| 7.725393753 |
| 7.725393753 |
| 5.618468184 |
| 7.725393753 |
| 7.725393753 |
| 6.320776707 |
| 4.213851138 |
| 7.02308523  |
| 5.618468184 |
| 7.02308523  |
| 9.832319322 |
| 12.64155341 |
| 12.64155341 |
| 125.0109171 |
| 4.916159661 |
| 6.320776707 |
| 0.702308523 |
| 7.725393753 |
| 28.09234092 |
| 6.320776707 |
| 0.702308523 |
| 9.130010799 |

|             |
|-------------|
| 6.320776707 |
| 7.725393753 |
| 0.702308523 |
| 11.93924489 |
| 10.53462785 |
| 11.23693637 |
| 8.427702276 |
| 4.916159661 |
| 6.320776707 |
| 8.427702276 |
| 7.02308523  |
| 7.02308523  |
| 3.511542615 |
| 8.427702276 |
| 2.809234092 |
| 4.213851138 |
| 4.916159661 |
| 8.427702276 |
| 11.23693637 |
| 10.53462785 |
| 11.93924489 |
| 2.809234092 |
| 10.53462785 |
| 4.916159661 |
| 10.53462785 |
| 4.916159661 |
| 12.64155341 |
| 4.213851138 |
| 9.130010799 |
| 1.404617046 |
| 4.213851138 |
| 7.725393753 |
| 3.511542615 |
| 8.427702276 |
| 4.213851138 |
| 9.130010799 |
| 5.618468184 |
| 11.93924489 |
| 19.66463864 |
| 4.213851138 |
| 4.916159661 |
| 5.618468184 |
| 4.916159661 |



|             |
|-------------|
| 11.93924489 |
| 5.618468184 |
| 6.320776707 |
| 0           |
| 0.702308523 |
| 4.213851138 |
| 3.511542615 |
| 2.106925569 |
| 8.427702276 |
| 4.916159661 |
| 7.725393753 |
| 4.916159661 |
| 6.320776707 |
| 8.427702276 |
| 3.511542615 |
| 8.427702276 |
| 2.106925569 |
| 12.64155341 |
| 9.130010799 |
| 6.320776707 |
| 10.53462785 |
| 6.320776707 |
| 4.916159661 |
| 7.02308523  |
| 4.213851138 |
| 10.53462785 |
| 9.130010799 |
| 4.916159661 |
| 5.618468184 |
| 2.809234092 |
| 6.320776707 |
| 4.916159661 |
| 14.74847898 |
| 7.02308523  |
| 32.30619206 |
| 6.320776707 |
| 18.96233012 |
| 5.618468184 |
| 7.02308523  |
| 7.02308523  |
| 5.618468184 |
| 5.618468184 |
| 3.511542615 |

|             |
|-------------|
| 7.02308523  |
| 8.427702276 |
| 7.725393753 |
| 8.427702276 |
| 2.106925569 |
| 2.809234092 |
| 3.511542615 |
| 4.916159661 |
| 2.106925569 |
| 6.320776707 |
| 1.404617046 |
| 21.06925569 |
| 4.916159661 |
| 0.702308523 |
| 16.15309603 |
| 5.618468184 |
| 4.916159661 |
| 10.53462785 |
| 21.06925569 |
| 3.511542615 |
| 0.702308523 |
| 4.916159661 |
| 2.106925569 |
| 8.427702276 |
| 3.511542615 |
| 0           |
| 3.511542615 |
| 6.320776707 |
| 49.16159661 |
| 7.725393753 |
| 7.02308523  |
| 4.916159661 |
| 5.618468184 |
| 2.106925569 |
| 14.74847898 |
| 4.213851138 |
| 4.213851138 |
| 9.130010799 |
| 8.427702276 |
| 27.3900324  |
| 9.130010799 |
| 4.213851138 |
| 0.702308523 |

|             |
|-------------|
| 10.53462785 |
| 6.320776707 |
| 30.90157501 |
| 10.53462785 |
| 4.916159661 |
| 9.832319322 |
| 7.02308523  |
| 7.725393753 |
| 5.618468184 |
| 10.53462785 |
| 6.320776707 |
| 12.64155341 |
| 9.832319322 |
| 6.320776707 |
| 11.93924489 |
| 5.618468184 |
| 6.320776707 |
| 9.130010799 |
| 0.702308523 |
| 6.320776707 |
| 2.809234092 |
| 0           |
| 14.74847898 |
| 9.832319322 |
| 4.916159661 |
| 5.618468184 |
| 9.832319322 |
| 9.130010799 |
| 3.511542615 |
| 14.74847898 |
| 20.36694717 |
| 2.809234092 |
| 9.832319322 |
| 4.916159661 |
| 4.916159661 |
| 11.23693637 |
| 4.213851138 |
| 3.511542615 |
| 4.213851138 |
| 1.404617046 |
| 2.106925569 |
| 7.02308523  |
| 6.320776707 |

|             |
|-------------|
| 5.618468184 |
| 4.916159661 |
| 4.916159661 |
| 4.213851138 |
| 2.809234092 |
| 11.23693637 |
| 0           |
| 9.130010799 |
| 9.130010799 |
| 14.74847898 |
| 7.02308523  |
| 17.55771308 |
| 7.725393753 |
| 4.916159661 |
| 124.3086086 |
| 2.809234092 |
| 5.618468184 |
| 117.9878319 |
| 5.618468184 |
| 8.427702276 |
| 9.832319322 |
| 8.427702276 |
| 30.90157501 |
| 4.213851138 |
| 6.320776707 |
| 0.702308523 |
| 7.725393753 |
| 11.23693637 |
| 9.130010799 |
| 7.725393753 |
| 7.02308523  |
| 3.511542615 |
| 1.404617046 |
| 2.106925569 |
| 8.427702276 |
| 5.618468184 |
| 9.130010799 |
| 40.73389434 |
| 9.130010799 |
| 4.916159661 |
| 9.130010799 |
| 7.725393753 |
| 11.23693637 |

|             |
|-------------|
| 7.725393753 |
| 3.511542615 |
| 7.02308523  |
| 5.618468184 |
| 14.74847898 |
| 2.809234092 |
| 4.213851138 |
| 7.725393753 |
| 4.213851138 |
| 7.02308523  |
| 4.213851138 |
| 6.320776707 |
| 5.618468184 |
| 10.53462785 |
| 4.213851138 |
| 7.725393753 |
| 2.809234092 |
| 7.02308523  |
| 17.55771308 |
| 7.02308523  |
| 0           |
| 7.725393753 |
| 11.23693637 |
| 9.832319322 |
| 23.17618126 |
| 8.427702276 |
| 49.86390513 |
| 7.725393753 |
| 6.320776707 |
| 5.618468184 |
| 2.809234092 |
| 37.92466024 |
| 12.64155341 |
| 7.02308523  |
| 6.320776707 |
| 9.130010799 |
| 8.427702276 |
| 6.320776707 |
| 16.85540455 |
| 10.53462785 |
| 2.809234092 |
| 6.320776707 |
| 4.916159661 |

|             |
|-------------|
| 9.832319322 |
| 20.36694717 |
| 6.320776707 |
| 9.832319322 |
| 12.64155341 |
| 5.618468184 |
| 2.106925569 |
| 8.427702276 |
| 6.320776707 |
| 178.3863648 |
| 10.53462785 |
| 5.618468184 |
| 9.832319322 |
| 2.809234092 |
| 11.23693637 |
| 8.427702276 |
| 9.130010799 |
| 4.213851138 |
| 4.916159661 |
| 9.832319322 |
| 57.58929889 |
| 6.320776707 |
| 21.06925569 |
| 3.511542615 |
| 8.427702276 |
| 7.02308523  |
| 4.916159661 |
| 9.130010799 |
| 332.8942399 |
| 4.916159661 |
| 19.66463864 |
| 3.511542615 |
| 6.320776707 |
| 2.809234092 |
| 4.916159661 |
| 9.832319322 |
| 0.702308523 |
| 0           |
| 7.02308523  |
| 7.02308523  |
| 2.809234092 |
| 9.130010799 |
| 5.618468184 |

|             |
|-------------|
| 25.98541535 |
| 2.106925569 |
| 1.404617046 |
| 4.916159661 |
| 7.725393753 |
| 10.53462785 |
| 4.213851138 |
| 9.832319322 |
| 2.106925569 |
| 5.618468184 |
| 6.320776707 |
| 8.427702276 |
| 4.213851138 |
| 6.320776707 |
| 7.02308523  |
| 5.618468184 |
| 8.427702276 |
| 4.916159661 |
| 6.320776707 |
| 7.725393753 |
| 5.618468184 |
| 4.916159661 |
| 8.427702276 |
| 5.618468184 |
| 13.34386194 |
| 9.832319322 |
| 3.511542615 |
| 5.618468184 |
| 8.427702276 |
| 0           |
| 3.511542615 |
| 4.213851138 |
| 5.618468184 |
| 16.15309603 |
| 2.809234092 |
| 2.809234092 |
| 21.77156421 |
| 4.916159661 |
| 4.916159661 |
| 37.22235172 |
| 6.320776707 |
| 14.04617046 |
| 9.130010799 |

|             |
|-------------|
| 8.427702276 |
| 9.130010799 |
| 7.725393753 |
| 15.45078751 |
| 0           |
| 2.809234092 |
| 9.832319322 |
| 12.64155341 |
| 3.511542615 |
| 7.725393753 |
| 2.106925569 |
| 6.320776707 |
| 157.3171092 |
| 2.809234092 |
| 2.106925569 |
| 7.725393753 |
| 6.320776707 |
| 10.53462785 |
| 2.809234092 |
| 7.02308523  |
| 11.93924489 |
| 0.702308523 |
| 8.427702276 |
| 2.106925569 |
| 10.53462785 |
| 2.106925569 |
| 5.618468184 |
| 16.85540455 |
| 9.832319322 |
| 4.213851138 |
| 11.23693637 |
| 9.130010799 |
| 8.427702276 |
| 5.618468184 |
| 7.02308523  |
| 5.618468184 |
| 14.04617046 |
| 6.320776707 |
| 4.213851138 |
| 72.33777787 |
| 5.618468184 |
| 6.320776707 |
| 11.23693637 |



|             |
|-------------|
| 5.618468184 |
| 150.9963324 |
| 2.106925569 |
| 5.618468184 |
| 9.832319322 |
| 29.49695797 |
| 4.213851138 |
| 4.916159661 |
| 42.13851138 |
| 4.213851138 |
| 7.725393753 |
| 11.93924489 |
| 6.320776707 |
| 7.725393753 |
| 4.916159661 |
| 9.130010799 |
| 10.53462785 |
| 4.213851138 |
| 5.618468184 |
| 0           |
| 4.213851138 |
| 20.36694717 |
| 9.130010799 |
| 2.106925569 |
| 9.832319322 |
| 9.130010799 |
| 7.725393753 |
| 15.45078751 |
| 2.809234092 |
| 158.0194177 |
| 4.916159661 |
| 9.130010799 |
| 10.53462785 |
| 6.320776707 |
| 8.427702276 |
| 4.916159661 |
| 6.320776707 |
| 5.618468184 |
| 2.106925569 |
| 4.213851138 |
| 6.320776707 |
| 5.618468184 |
| 4.916159661 |

|             |
|-------------|
| 4.213851138 |
| 7.725393753 |
| 11.23693637 |
| 88.4908739  |
| 188.9209927 |
| 30.19926649 |
| 6.320776707 |
| 6.320776707 |
| 2.106925569 |
| 4.213851138 |
| 0           |
| 5.618468184 |
| 11.23693637 |
| 2.809234092 |
| 7.02308523  |
| 3.511542615 |
| 14.04617046 |
| 3.511542615 |
| 4.213851138 |
| 4.213851138 |
| 7.725393753 |
| 5.618468184 |
| 7.02308523  |
| 2.809234092 |
| 9.832319322 |
| 6.320776707 |
| 4.916159661 |
| 8.427702276 |
| 5.618468184 |
| 19.66463864 |
| 4.916159661 |
| 8.427702276 |
| 7.725393753 |
| 4.213851138 |
| 5.618468184 |
| 7.02308523  |
| 5.618468184 |
| 1.404617046 |
| 4.916159661 |
| 7.725393753 |
| 9.130010799 |
| 8.427702276 |
| 6.320776707 |

|             |
|-------------|
| 1.404617046 |
| 5.618468184 |
| 5.618468184 |
| 2.809234092 |
| 4.916159661 |
| 9.130010799 |
| 2.106925569 |
| 9.130010799 |
| 4.916159661 |
| 4.213851138 |
| 15.45078751 |
| 2.106925569 |
| 4.213851138 |
| 14.74847898 |
| 18.2600216  |
| 4.213851138 |
| 8.427702276 |
| 7.725393753 |
| 5.618468184 |
| 7.02308523  |
| 8.427702276 |
| 6.320776707 |
| 7.02308523  |
| 3.511542615 |
| 10.53462785 |
| 3.511542615 |
| 1.404617046 |
| 4.213851138 |
| 4.916159661 |
| 8.427702276 |
| 6.320776707 |
| 7.725393753 |
| 20.36694717 |
| 2.809234092 |
| 9.130010799 |
| 3.511542615 |
| 4.916159661 |
| 7.02308523  |
| 7.725393753 |
| 0           |
| 7.725393753 |
| 7.02308523  |
| 5.618468184 |

|             |
|-------------|
| 2.106925569 |
| 7.725393753 |
| 6.320776707 |
| 9.130010799 |
| 7.02308523  |
| 48.45928809 |
| 4.916159661 |
| 9.130010799 |
| 4.916159661 |
| 18.96233012 |
| 7.02308523  |
| 58.99391593 |
| 6.320776707 |
| 5.618468184 |
| 3.511542615 |
| 2.106925569 |
| 9.832319322 |
| 7.02308523  |
| 3.511542615 |
| 0           |
| 7.725393753 |
| 9.130010799 |
| 43.54312843 |
| 2.809234092 |
| 4.916159661 |
| 7.02308523  |
| 5.618468184 |
| 4.916159661 |
| 4.916159661 |
| 9.130010799 |
| 4.916159661 |
| 5.618468184 |
| 6.320776707 |
| 4.213851138 |
| 176.9817478 |
| 31.60388354 |
| 9.130010799 |
| 5.618468184 |
| 1.404617046 |
| 9.832319322 |
| 2.106925569 |
| 4.213851138 |
| 6.320776707 |

|             |
|-------------|
| 2.809234092 |
| 2.809234092 |
| 3.511542615 |
| 6.320776707 |
| 6.320776707 |
| 10.53462785 |
| 9.832319322 |
| 4.916159661 |
| 12.64155341 |
| 4.916159661 |
| 4.916159661 |
| 9.832319322 |
| 6.320776707 |
| 7.02308523  |
| 4.213851138 |
| 6.320776707 |
| 7.725393753 |
| 6.320776707 |
| 5.618468184 |
| 9.130010799 |
| 6.320776707 |
| 9.130010799 |
| 2.106925569 |
| 7.02308523  |
| 3.511542615 |
| 8.427702276 |
| 5.618468184 |
| 5.618468184 |
| 7.02308523  |
| 4.916159661 |
| 4.916159661 |
| 7.725393753 |
| 8.427702276 |
| 6.320776707 |
| 6.320776707 |
| 6.320776707 |
| 6.320776707 |
| 4.916159661 |
| 7.725393753 |
| 5.618468184 |
| 4.916159661 |
| 13.34386194 |
| 7.725393753 |

|             |
|-------------|
| 33.7108091  |
| 9.832319322 |
| 6.320776707 |
| 3.511542615 |
| 8.427702276 |
| 7.02308523  |
| 0.702308523 |
| 7.02308523  |
| 4.213851138 |
| 30.90157501 |
| 5.618468184 |
| 5.618468184 |
| 11.23693637 |
| 13.34386194 |
| 5.618468184 |
| 4.213851138 |
| 4.213851138 |
| 3.511542615 |
| 3.511542615 |
| 0           |
| 6.320776707 |
| 7.725393753 |
| 4.213851138 |
| 7.725393753 |
| 2.106925569 |
| 0           |
| 7.02308523  |
| 7.02308523  |
| 5.618468184 |
| 4.213851138 |
| 2.106925569 |
| 14.74847898 |
| 16.15309603 |
| 7.02308523  |
| 1.404617046 |
| 4.213851138 |
| 16.85540455 |
| 73.74239492 |
| 9.832319322 |
| 4.213851138 |
| 4.213851138 |
| 2.809234092 |
| 0           |

|             |
|-------------|
| 9.832319322 |
| 7.725393753 |
| 12.64155341 |
| 4.916159661 |
| 12.64155341 |
| 6.320776707 |
| 4.213851138 |
| 4.916159661 |
| 2.106925569 |
| 2.106925569 |
| 6.320776707 |
| 0.702308523 |
| 6.320776707 |
| 10.53462785 |
| 5.618468184 |
| 4.213851138 |
| 8.427702276 |
| 11.23693637 |
| 9.130010799 |
| 7.725393753 |
| 4.916159661 |
| 3.511542615 |
| 7.725393753 |
| 4.916159661 |
| 8.427702276 |
| 4.213851138 |
| 4.213851138 |
| 4.213851138 |
| 5.618468184 |
| 7.02308523  |
| 47.75697957 |
| 14.74847898 |
| 4.213851138 |
| 7.02308523  |
| 5.618468184 |
| 8.427702276 |
| 6.320776707 |
| 3.511542615 |
| 12.64155341 |
| 1.404617046 |
| 0           |
| 7.725393753 |
| 7.725393753 |

|             |
|-------------|
| 7.02308523  |
| 6.320776707 |
| 2.809234092 |
| 4.916159661 |
| 6.320776707 |
| 1.404617046 |
| 7.02308523  |
| 10.53462785 |
| 7.02308523  |
| 9.130010799 |
| 3.511542615 |
| 16.85540455 |
| 7.02308523  |
| 1.404617046 |
| 49.16159661 |
| 7.725393753 |
| 1.404617046 |
| 7.02308523  |
| 4.213851138 |
| 7.725393753 |
| 5.618468184 |
| 5.618468184 |
| 4.916159661 |
| 8.427702276 |
| 4.213851138 |
| 2.809234092 |
| 0.702308523 |
| 7.02308523  |
| 2.809234092 |
| 6.320776707 |
| 5.618468184 |
| 5.618468184 |
| 9.832319322 |
| 5.618468184 |
| 13.34386194 |
| 9.832319322 |
| 4.213851138 |
| 57.58929889 |
| 6.320776707 |
| 1.404617046 |
| 14.04617046 |
| 6.320776707 |
| 7.725393753 |



|             |
|-------------|
| 2.106925569 |
| 6.320776707 |
| 7.02308523  |
| 6.320776707 |
| 3.511542615 |
| 9.130010799 |
| 12.64155341 |
| 3.511542615 |
| 10.53462785 |
| 5.618468184 |
| 4.213851138 |
| 2.106925569 |
| 10.53462785 |
| 9.130010799 |
| 3.511542615 |
| 22.47387274 |
| 3.511542615 |
| 14.04617046 |
| 9.130010799 |
| 3.511542615 |
| 9.130010799 |
| 13.34386194 |
| 0           |
| 11.23693637 |
| 2.809234092 |
| 4.213851138 |
| 5.618468184 |
| 6.320776707 |
| 9.832319322 |
| 0           |
| 5.618468184 |
| 4.213851138 |
| 8.427702276 |
| 7.02308523  |
| 4.916159661 |
| 7.725393753 |
| 0           |
| 4.213851138 |
| 7.02308523  |
| 4.213851138 |
| 9.130010799 |
| 13.34386194 |
| 5.618468184 |

|             |
|-------------|
| 4.916159661 |
| 4.916159661 |
| 11.23693637 |
| 7.02308523  |
| 8.427702276 |
| 8.427702276 |
| 4.916159661 |
| 4.213851138 |
| 2.106925569 |
| 2.106925569 |
| 2.809234092 |
| 9.832319322 |
| 1.404617046 |
| 7.02308523  |
| 2.106925569 |
| 2.106925569 |
| 0.702308523 |
| 4.916159661 |
| 22.47387274 |
| 16.85540455 |
| 2.106925569 |
| 4.213851138 |
| 14.04617046 |
| 10.53462785 |
| 2.809234092 |
| 2.809234092 |
| 3.511542615 |
| 7.725393753 |
| 3.511542615 |
| 5.618468184 |
| 7.02308523  |
| 12.64155341 |
| 7.725393753 |
| 2.106925569 |
| 7.725393753 |
| 4.213851138 |
| 6.320776707 |
| 12.64155341 |
| 6.320776707 |
| 5.618468184 |
| 2.106925569 |
| 0.702308523 |
| 2.106925569 |

|             |
|-------------|
| 3.511542615 |
| 2.106925569 |
| 2.106925569 |
| 14.74847898 |
| 11.93924489 |
| 7.02308523  |
| 2.106925569 |
| 5.618468184 |
| 9.130010799 |
| 204.3717802 |
| 7.02308523  |
| 7.725393753 |
| 9.130010799 |
| 7.02308523  |
| 16.85540455 |
| 14.74847898 |
| 6.320776707 |
| 5.618468184 |
| 11.23693637 |
| 8.427702276 |
| 6.320776707 |
| 8.427702276 |
| 6.320776707 |
| 9.130010799 |
| 6.320776707 |
| 4.213851138 |
| 12.64155341 |
| 12.64155341 |
| 9.130010799 |
| 47.05467104 |
| 0           |
| 7.725393753 |
| 6.320776707 |
| 8.427702276 |
| 9.130010799 |
| 13.34386194 |
| 4.213851138 |
| 5.618468184 |
| 3.511542615 |
| 0           |
| 7.02308523  |
| 9.832319322 |
| 11.23693637 |

|             |
|-------------|
| 18.96233012 |
| 2.809234092 |
| 7.02308523  |
| 9.130010799 |
| 6.320776707 |
| 12.64155341 |
| 7.02308523  |
| 7.02308523  |
| 0.702308523 |
| 73.04008639 |
| 3.511542615 |
| 8.427702276 |
| 19.66463864 |
| 4.213851138 |
| 4.916159661 |
| 7.725393753 |
| 7.725393753 |
| 2.106925569 |
| 1.404617046 |
| 3.511542615 |
| 4.916159661 |
| 5.618468184 |
| 7.725393753 |
| 12.64155341 |
| 9.130010799 |
| 9.832319322 |
| 50.56621366 |
| 6.320776707 |
| 6.320776707 |
| 0           |
| 5.618468184 |
| 7.02308523  |
| 4.213851138 |
| 14.04617046 |
| 7.02308523  |
| 6.320776707 |
| 5.618468184 |
| 15.45078751 |
| 11.93924489 |
| 7.725393753 |
| 9.130010799 |
| 7.725393753 |
| 2.809234092 |

|             |
|-------------|
| 6.320776707 |
| 7.02308523  |
| 4.213851138 |
| 4.213851138 |
| 4.213851138 |
| 3.511542615 |
| 56.88699036 |
| 4.213851138 |
| 7.725393753 |
| 4.213851138 |
| 7.02308523  |
| 2.106925569 |
| 6.320776707 |
| 4.916159661 |
| 13.34386194 |
| 1.404617046 |
| 6.320776707 |
| 18.96233012 |
| 4.213851138 |
| 12.64155341 |
| 7.02308523  |
| 5.618468184 |
| 4.916159661 |
| 9.130010799 |
| 2.809234092 |
| 9.832319322 |
| 10.53462785 |
| 8.427702276 |
| 9.832319322 |
| 25.98541535 |
| 3.511542615 |
| 11.23693637 |
| 6.320776707 |
| 6.320776707 |
| 0           |
| 7.02308523  |
| 2.809234092 |
| 5.618468184 |
| 115.1785978 |
| 2.106925569 |
| 7.725393753 |
| 10.53462785 |
| 7.725393753 |

|             |
|-------------|
| 9.130010799 |
| 6.320776707 |
| 4.213851138 |
| 4.213851138 |
| 9.130010799 |
| 5.618468184 |
| 10.53462785 |
| 11.23693637 |
| 11.23693637 |
| 8.427702276 |
| 8.427702276 |
| 9.832319322 |
| 5.618468184 |
| 4.916159661 |
| 3.511542615 |
| 5.618468184 |
| 4.213851138 |
| 2.106925569 |
| 4.213851138 |
| 9.832319322 |
| 8.427702276 |
| 11.23693637 |
| 6.320776707 |
| 7.725393753 |
| 67.42161821 |
| 7.02308523  |
| 7.02308523  |
| 8.427702276 |
| 4.213851138 |
| 6.320776707 |
| 132.7363109 |
| 4.916159661 |
| 13.34386194 |
| 28.79464944 |
| 7.725393753 |
| 2.106925569 |
| 6.320776707 |
| 6.320776707 |
| 7.02308523  |
| 9.130010799 |
| 11.93924489 |
| 6.320776707 |
| 4.213851138 |

|             |
|-------------|
| 6.320776707 |
| 4.213851138 |
| 7.02308523  |
| 4.213851138 |
| 2.106925569 |
| 208.5856313 |
| 2.106925569 |
| 73.74239492 |
| 2.106925569 |
| 4.916159661 |
| 4.213851138 |
| 8.427702276 |
| 11.23693637 |
| 6.320776707 |
| 7.725393753 |
| 11.93924489 |
| 0.702308523 |
| 4.916159661 |
| 11.23693637 |
| 9.130010799 |
| 1.404617046 |
| 2.106925569 |
| 7.725393753 |
| 6.320776707 |
| 4.916159661 |
| 6.320776707 |
| 7.725393753 |
| 7.725393753 |
| 7.725393753 |
| 6.320776707 |
| 66.01700116 |
| 2.809234092 |
| 16.85540455 |
| 7.02308523  |
| 5.618468184 |
| 164.3401944 |
| 18.96233012 |
| 4.213851138 |
| 10.53462785 |
| 5.618468184 |
| 7.02308523  |
| 13.34386194 |
| 7.725393753 |

|             |
|-------------|
| 9.832319322 |
| 4.213851138 |
| 7.725393753 |
| 9.832319322 |
| 4.916159661 |
| 7.725393753 |
| 2.809234092 |
| 7.725393753 |
| 7.725393753 |
| 7.02308523  |
| 3.511542615 |
| 8.427702276 |
| 4.213851138 |
| 6.320776707 |
| 3.511542615 |
| 40.03158581 |
| 5.618468184 |
| 0           |
| 7.02308523  |
| 9.130010799 |
| 7.725393753 |
| 10.53462785 |
| 5.618468184 |
| 11.23693637 |
| 2.809234092 |
| 225.4410359 |
| 7.725393753 |
| 49.86390513 |
| 5.618468184 |
| 7.02308523  |
| 8.427702276 |
| 6.320776707 |
| 10.53462785 |
| 7.725393753 |
| 3.511542615 |
| 8.427702276 |
| 4.213851138 |
| 7.725393753 |
| 10.53462785 |
| 0           |
| 12.64155341 |
| 8.427702276 |
| 4.213851138 |



|             |
|-------------|
| 7.02308523  |
| 4.213851138 |
| 7.02308523  |
| 1.404617046 |
| 9.130010799 |
| 8.427702276 |
| 6.320776707 |
| 2.809234092 |
| 2.809234092 |
| 4.916159661 |
| 6.320776707 |
| 2.106925569 |
| 7.725393753 |
| 0.702308523 |
| 6.320776707 |
| 0           |
| 4.213851138 |
| 6.320776707 |
| 5.618468184 |
| 4.916159661 |
| 7.725393753 |
| 3.511542615 |
| 10.53462785 |
| 10.53462785 |
| 9.130010799 |
| 4.916159661 |
| 8.427702276 |
| 11.93924489 |
| 9.832319322 |
| 4.213851138 |
| 0           |
| 11.23693637 |
| 5.618468184 |
| 3.511542615 |
| 7.725393753 |
| 3.511542615 |
| 1.404617046 |
| 5.618468184 |
| 4.916159661 |
| 2.809234092 |
| 9.130010799 |
| 83.57471424 |
| 7.725393753 |

|             |
|-------------|
| 44.94774547 |
| 4.916159661 |
| 6.320776707 |
| 15.45078751 |
| 3.511542615 |
| 0.702308523 |
| 4.213851138 |
| 9.832319322 |
| 9.130010799 |
| 4.916159661 |
| 51.9708307  |
| 56.88699036 |
| 4.916159661 |
| 9.130010799 |
| 18.96233012 |
| 14.74847898 |
| 2.106925569 |
| 16.85540455 |
| 7.725393753 |
| 4.213851138 |
| 6.320776707 |
| 0           |
| 2.809234092 |
| 2.106925569 |
| 2.809234092 |
| 7.725393753 |
| 7.02308523  |
| 7.725393753 |
| 3.511542615 |
| 2.106925569 |
| 4.213851138 |
| 13.34386194 |
| 9.832319322 |
| 11.23693637 |
| 4.213851138 |
| 6.320776707 |
| 0.702308523 |
| 5.618468184 |
| 8.427702276 |
| 6.320776707 |
| 9.832319322 |
| 4.213851138 |
| 5.618468184 |

|             |
|-------------|
| 21.06925569 |
| 5.618468184 |
| 5.618468184 |
| 7.725393753 |
| 7.725393753 |
| 6.320776707 |
| 1.404617046 |
| 2.106925569 |
| 10.53462785 |
| 116.5832148 |
| 7.725393753 |
| 7.725393753 |
| 1.404617046 |
| 11.23693637 |
| 4.916159661 |
| 5.618468184 |
| 1.404617046 |
| 8.427702276 |
| 6.320776707 |
| 1.404617046 |
| 38.62696877 |
| 8.427702276 |
| 7.02308523  |
| 11.93924489 |
| 3.511542615 |
| 3.511542615 |
| 4.916159661 |
| 3.511542615 |
| 0.702308523 |
| 4.213851138 |
| 7.725393753 |
| 3.511542615 |
| 4.213851138 |
| 5.618468184 |
| 9.130010799 |
| 2.809234092 |
| 2.809234092 |
| 7.02308523  |
| 13.34386194 |
| 0           |
| 2.106925569 |
| 5.618468184 |
| 0           |

|             |
|-------------|
| 7.725393753 |
| 5.618468184 |
| 8.427702276 |
| 4.213851138 |
| 9.832319322 |
| 3.511542615 |
| 11.23693637 |
| 2.106925569 |
| 8.427702276 |
| 8.427702276 |
| 4.916159661 |
| 6.320776707 |
| 2.809234092 |
| 7.725393753 |
| 18.96233012 |
| 9.130010799 |
| 6.320776707 |
| 9.130010799 |
| 4.916159661 |
| 7.02308523  |
| 3.511542615 |
| 1.404617046 |
| 1.404617046 |
| 6.320776707 |
| 14.04617046 |
| 0           |
| 7.02308523  |
| 8.427702276 |
| 3.511542615 |
| 7.02308523  |
| 15.45078751 |
| 23.87848978 |
| 4.916159661 |
| 6.320776707 |
| 2.809234092 |
| 180.4932904 |
| 7.725393753 |
| 14.04617046 |
| 2.106925569 |
| 8.427702276 |
| 8.427702276 |
| 2.809234092 |
| 6.320776707 |

|             |
|-------------|
| 3.511542615 |
| 7.02308523  |
| 8.427702276 |
| 11.93924489 |
| 2.106925569 |
| 8.427702276 |
| 10.53462785 |
| 7.725393753 |
| 5.618468184 |
| 9.130010799 |
| 3.511542615 |
| 12.64155341 |
| 7.02308523  |
| 4.213851138 |
| 5.618468184 |
| 18.2600216  |
| 1.404617046 |
| 21.06925569 |
| 10.53462785 |
| 11.23693637 |
| 7.02308523  |
| 7.02308523  |
| 7.02308523  |
| 9.130010799 |
| 9.130010799 |
| 4.213851138 |
| 4.213851138 |
| 73.04008639 |
| 4.916159661 |
| 4.213851138 |
| 4.916159661 |
| 18.2600216  |
| 33.7108091  |
| 4.916159661 |
| 8.427702276 |
| 4.213851138 |
| 2.106925569 |
| 33.7108091  |
| 10.53462785 |
| 2.106925569 |
| 3.511542615 |
| 6.320776707 |
| 11.23693637 |

|             |
|-------------|
| 5.618468184 |
| 10.53462785 |
| 38.62696877 |
| 0           |
| 5.618468184 |
| 13.34386194 |
| 2.106925569 |
| 7.02308523  |
| 5.618468184 |
| 9.130010799 |
| 11.93924489 |
| 5.618468184 |
| 2.809234092 |
| 8.427702276 |
| 7.02308523  |
| 7.725393753 |
| 9.130010799 |
| 4.213851138 |
| 7.725393753 |
| 2.809234092 |
| 9.130010799 |
| 11.93924489 |
| 4.213851138 |
| 6.320776707 |
| 11.23693637 |
| 5.618468184 |
| 8.427702276 |
| 9.130010799 |
| 2.106925569 |
| 6.320776707 |
| 7.02308523  |
| 6.320776707 |
| 2.106925569 |
| 8.427702276 |
| 4.916159661 |
| 3.511542615 |
| 4.916159661 |
| 7.725393753 |
| 9.130010799 |
| 11.93924489 |
| 4.213851138 |
| 9.832319322 |
| 7.02308523  |

|             |
|-------------|
| 214.906408  |
| 6.320776707 |
| 6.320776707 |
| 1.404617046 |
| 8.427702276 |
| 9.130010799 |
| 5.618468184 |
| 7.02308523  |
| 10.53462785 |
| 6.320776707 |
| 12.64155341 |
| 4.916159661 |
| 15.45078751 |
| 6.320776707 |
| 16.85540455 |
| 211.3948654 |
| 18.2600216  |
| 4.213851138 |
| 2.809234092 |
| 5.618468184 |
| 6.320776707 |
| 4.916159661 |
| 7.725393753 |
| 7.02308523  |
| 7.02308523  |
| 5.618468184 |
| 2.809234092 |
| 3.511542615 |
| 7.02308523  |
| 9.832319322 |
| 7.02308523  |
| 5.618468184 |
| 124.3086086 |
| 7.02308523  |
| 9.832319322 |
| 0.702308523 |
| 2.106925569 |
| 9.832319322 |
| 6.320776707 |
| 16.15309603 |
| 9.832319322 |
| 4.916159661 |
| 4.916159661 |

|             |
|-------------|
| 9.130010799 |
| 7.02308523  |
| 2.106925569 |
| 2.106925569 |
| 0.702308523 |
| 10.53462785 |
| 12.64155341 |
| 7.725393753 |
| 7.02308523  |
| 3.511542615 |
| 8.427702276 |
| 316.0388354 |
| 9.832319322 |
| 15.45078751 |
| 4.916159661 |
| 3.511542615 |
| 6.320776707 |
| 2.106925569 |
| 4.916159661 |
| 4.213851138 |
| 4.916159661 |
| 1.404617046 |
| 11.23693637 |
| 3.511542615 |
| 69.52854378 |
| 28.79464944 |
| 5.618468184 |
| 7.02308523  |
| 10.53462785 |
| 9.130010799 |
| 11.93924489 |
| 7.725393753 |
| 8.427702276 |
| 0           |
| 12.64155341 |
| 8.427702276 |
| 2.809234092 |
| 9.130010799 |
| 4.916159661 |
| 7.725393753 |
| 7.725393753 |
| 4.916159661 |
| 9.832319322 |



|             |
|-------------|
| 7.725393753 |
| 4.916159661 |
| 7.725393753 |
| 5.618468184 |
| 11.23693637 |
| 10.53462785 |
| 12.64155341 |
| 9.130010799 |
| 12.64155341 |
| 6.320776707 |
| 3.511542615 |
| 11.93924489 |
| 0           |
| 3.511542615 |
| 9.130010799 |
| 1.404617046 |
| 9.832319322 |
| 14.74847898 |
| 2.809234092 |
| 2.809234092 |
| 6.320776707 |
| 7.725393753 |
| 9.130010799 |
| 9.832319322 |
| 13.34386194 |
| 4.213851138 |
| 7.725393753 |
| 2.809234092 |
| 3.511542615 |
| 4.916159661 |
| 4.213851138 |
| 8.427702276 |
| 9.832319322 |
| 7.02308523  |
| 7.02308523  |
| 9.832319322 |
| 8.427702276 |
| 14.74847898 |
| 21.77156421 |
| 7.725393753 |
| 4.916159661 |
| 9.130010799 |
| 6.320776707 |

|             |
|-------------|
| 2.106925569 |
| 4.213851138 |
| 8.427702276 |
| 7.02308523  |
| 4.213851138 |
| 7.725393753 |
| 3.511542615 |
| 283.0303348 |
| 6.320776707 |
| 9.832319322 |
| 3.511542615 |
| 4.213851138 |
| 2.106925569 |
| 7.02308523  |
| 6.320776707 |
| 1.404617046 |
| 7.725393753 |
| 5.618468184 |
| 8.427702276 |
| 7.725393753 |
| 4.213851138 |
| 2.106925569 |
| 4.916159661 |
| 35.11542615 |
| 14.04617046 |
| 9.130010799 |
| 16.15309603 |
| 3.511542615 |
| 7.725393753 |
| 4.213851138 |
| 7.725393753 |
| 3.511542615 |
| 7.725393753 |
| 2.106925569 |
| 6.320776707 |
| 3.511542615 |
| 4.916159661 |
| 0.702308523 |
| 6.320776707 |
| 2.106925569 |
| 11.93924489 |
| 4.213851138 |
| 6.320776707 |

|             |
|-------------|
| 7.02308523  |
| 8.427702276 |
| 2.809234092 |
| 12.64155341 |
| 44.94774547 |
| 25.98541535 |
| 8.427702276 |
| 7.725393753 |
| 4.213851138 |
| 9.130010799 |
| 9.130010799 |
| 9.832319322 |
| 11.93924489 |
| 26.68772387 |
| 2.809234092 |
| 27.3900324  |
| 15.45078751 |
| 9.130010799 |
| 4.916159661 |
| 3.511542615 |
| 7.725393753 |
| 14.04617046 |
| 58.99391593 |
| 4.213851138 |
| 150.2940239 |
| 4.213851138 |
| 14.04617046 |
| 4.916159661 |
| 11.23693637 |
| 9.130010799 |
| 6.320776707 |
| 3.511542615 |
| 16.15309603 |
| 3.511542615 |
| 8.427702276 |
| 4.213851138 |
| 0.702308523 |
| 8.427702276 |
| 7.02308523  |
| 68.12392673 |
| 44.24543695 |
| 6.320776707 |
| 10.53462785 |

|             |
|-------------|
| 7.02308523  |
| 7.02308523  |
| 4.213851138 |
| 11.23693637 |
| 2.106925569 |
| 5.618468184 |
| 61.80315003 |
| 9.832319322 |
| 7.02308523  |
| 5.618468184 |
| 4.916159661 |
| 9.832319322 |
| 5.618468184 |
| 7.02308523  |
| 8.427702276 |
| 8.427702276 |
| 6.320776707 |
| 7.725393753 |
| 4.916159661 |
| 7.725393753 |
| 8.427702276 |
| 8.427702276 |
| 0           |
| 6.320776707 |
| 96.91857618 |
| 7.02308523  |
| 148.1870984 |
| 6.320776707 |
| 7.02308523  |
| 7.725393753 |
| 6.320776707 |
| 7.02308523  |
| 167.1494285 |
| 14.04617046 |
| 7.725393753 |
| 25.28310683 |
| 5.618468184 |
| 6.320776707 |
| 7.02308523  |
| 7.02308523  |
| 103.2393529 |
| 7.02308523  |
| 9.832319322 |

|             |
|-------------|
| 4.213851138 |
| 8.427702276 |
| 88.4908739  |
| 7.02308523  |
| 17.55771308 |
| 0           |
| 4.916159661 |
| 56.18468184 |
| 6.320776707 |
| 9.832319322 |
| 9.832319322 |
| 7.02308523  |
| 0           |
| 7.02308523  |
| 11.23693637 |
| 7.02308523  |
| 9.130010799 |
| 11.23693637 |
| 249.3195257 |
| 6.320776707 |
| 10.53462785 |
| 3.511542615 |
| 4.213851138 |
| 11.23693637 |
| 0           |
| 6.320776707 |
| 7.02308523  |
| 7.725393753 |
| 8.427702276 |
| 8.427702276 |
| 11.93924489 |
| 0           |
| 8.427702276 |
| 7.725393753 |
| 0           |
| 0.702308523 |
| 5.618468184 |
| 6.320776707 |
| 7.02308523  |
| 21.06925569 |
| 28.79464944 |
| 58.29160741 |
| 8.427702276 |

|             |
|-------------|
| 4.916159661 |
| 21.77156421 |
| 4.916159661 |
| 9.130010799 |
| 5.618468184 |
| 32.30619206 |
| 7.725393753 |
| 9.130010799 |
| 25.28310683 |
| 4.916159661 |
| 2.809234092 |
| 16.15309603 |
| 16.15309603 |
| 14.04617046 |
| 43.54312843 |
| 5.618468184 |
| 5.618468184 |
| 17.55771308 |
| 4.916159661 |
| 4.916159661 |
| 8.427702276 |
| 39.32927729 |
| 7.725393753 |
| 25.98541535 |
| 0           |
| 3.511542615 |
| 5.618468184 |
| 10.53462785 |
| 5.618468184 |
| 8.427702276 |
| 9.130010799 |
| 94.81165061 |
| 4.916159661 |
| 7.02308523  |
| 1.404617046 |
| 7.02308523  |
| 7.725393753 |
| 7.02308523  |
| 198.0510035 |
| 10.53462785 |
| 11.93924489 |
| 39.32927729 |
| 5.618468184 |

|             |
|-------------|
| 8.427702276 |
| 2.106925569 |
| 13.34386194 |
| 2.809234092 |
| 14.74847898 |
| 4.916159661 |
| 7.725393753 |
| 6.320776707 |
| 6.320776707 |
| 6.320776707 |
| 8.427702276 |
| 9.130010799 |
| 30.90157501 |
| 6.320776707 |
| 4.916159661 |
| 11.93924489 |
| 6.320776707 |
| 4.916159661 |
| 9.130010799 |
| 24.58079831 |
| 7.725393753 |
| 4.213851138 |
| 14.74847898 |
| 4.916159661 |
| 7.02308523  |
| 7.725393753 |
| 16.15309603 |
| 15.45078751 |
| 9.130010799 |
| 4.916159661 |
| 0           |
| 4.213851138 |
| 7.02308523  |
| 5.618468184 |
| 0           |
| 8.427702276 |
| 4.916159661 |
| 3.511542615 |
| 111.6670552 |
| 16.85540455 |
| 8.427702276 |
| 9.832319322 |
| 11.93924489 |

|             |
|-------------|
| 3.511542615 |
| 7.725393753 |
| 80.76548015 |
| 7.725393753 |
| 4.213851138 |
| 5.618468184 |
| 2.106925569 |
| 4.213851138 |
| 6.320776707 |
| 11.23693637 |
| 7.02308523  |
| 12.64155341 |
| 6.320776707 |
| 6.320776707 |
| 6.320776707 |
| 4.916159661 |
| 7.02308523  |
| 0           |
| 7.725393753 |
| 40.73389434 |
| 2.809234092 |
| 4.916159661 |
| 96.91857618 |
| 9.832319322 |
| 4.213851138 |
| 8.427702276 |
| 10.53462785 |
| 12.64155341 |
| 10.53462785 |
| 2.809234092 |
| 4.916159661 |
| 6.320776707 |
| 11.23693637 |
| 8.427702276 |
| 8.427702276 |
| 182.600216  |
| 8.427702276 |
| 5.618468184 |
| 8.427702276 |
| 8.427702276 |
| 66.01700116 |
| 11.23693637 |
| 30.19926649 |



|             |
|-------------|
| 9.130010799 |
| 4.916159661 |
| 49.16159661 |
| 11.23693637 |
| 43.54312843 |
| 5.618468184 |
| 5.618468184 |
| 7.02308523  |
| 25.98541535 |
| 11.23693637 |
| 7.02308523  |
| 10.53462785 |
| 54.7800648  |
| 4.213851138 |
| 0.702308523 |
| 4.213851138 |
| 10.53462785 |
| 9.832319322 |
| 68.12392673 |
| 63.20776707 |
| 47.75697957 |
| 7.02308523  |
| 4.213851138 |
| 3.511542615 |
| 7.02308523  |
| 7.725393753 |
| 6.320776707 |
| 3.511542615 |
| 9.130010799 |
| 35.11542615 |
| 0.702308523 |
| 8.427702276 |
| 14.04617046 |
| 14.74847898 |
| 7.02308523  |
| 14.04617046 |
| 2.106925569 |
| 4.213851138 |
| 7.02308523  |
| 172.0655881 |
| 35.11542615 |
| 5.618468184 |
| 175.5771308 |

|             |
|-------------|
| 7.02308523  |
| 9.832319322 |
| 18.96233012 |
| 56.18468184 |
| 6.320776707 |
| 30.90157501 |
| 5.618468184 |
| 34.41311763 |
| 24.58079831 |
| 7.02308523  |
| 0           |
| 18.2600216  |
| 8.427702276 |
| 6.320776707 |
| 9.832319322 |
| 36.5200432  |
| 13.34386194 |
| 23.87848978 |
| 4.213851138 |
| 5.618468184 |
| 6.320776707 |
| 69.52854378 |
| 6.320776707 |
| 7.02308523  |
| 4.213851138 |
| 10.53462785 |
| 8.427702276 |
| 14.04617046 |
| 112.3693637 |
| 7.725393753 |
| 16.15309603 |
| 12.64155341 |
| 9.832319322 |
| 5.618468184 |
| 8.427702276 |
| 8.427702276 |
| 18.96233012 |
| 6.320776707 |
| 7.725393753 |
| 8.427702276 |
| 6.320776707 |
| 4.916159661 |
| 3.511542615 |

|             |
|-------------|
| 4.213851138 |
| 44.94774547 |
| 10.53462785 |
| 10.53462785 |
| 2.809234092 |
| 5.618468184 |
| 6.320776707 |
| 75.84932049 |
| 96.91857618 |
| 5.618468184 |
| 14.74847898 |
| 7.725393753 |
| 44.24543695 |
| 49.16159661 |
| 3.511542615 |
| 7.725393753 |
| 7.02308523  |
| 13.34386194 |
| 3.511542615 |
| 6.320776707 |
| 14.04617046 |
| 25.98541535 |
| 9.832319322 |
| 9.832319322 |
| 28.79464944 |
| 8.427702276 |
| 7.02308523  |
| 159.4240347 |
| 4.916159661 |
| 5.618468184 |
| 14.74847898 |
| 14.74847898 |
| 105.3462785 |
| 9.130010799 |
| 8.427702276 |
| 4.916159661 |
| 47.75697957 |
| 4.213851138 |
| 5.618468184 |
| 9.832319322 |
| 9.130010799 |
| 2.106925569 |
| 7.02308523  |

|             |
|-------------|
| 7.725393753 |
| 5.618468184 |
| 16.15309603 |
| 9.832319322 |
| 11.93924489 |
| 16.85540455 |
| 4.916159661 |
| 22.47387274 |
| 9.130010799 |
| 7.02308523  |
| 0.702308523 |
| 7.725393753 |
| 4.213851138 |
| 8.427702276 |
| 150.9963324 |
| 9.832319322 |
| 15.45078751 |
| 1.404617046 |
| 4.213851138 |
| 7.02308523  |
| 4.213851138 |
| 25.28310683 |
| 5.618468184 |
| 4.916159661 |
| 3.511542615 |
| 7.725393753 |
| 16.15309603 |
| 10.53462785 |
| 2.809234092 |
| 4.916159661 |
| 4.213851138 |
| 6.320776707 |
| 6.320776707 |
| 9.130010799 |
| 24.58079831 |
| 11.93924489 |
| 5.618468184 |
| 11.93924489 |
| 4.213851138 |
| 10.53462785 |
| 4.916159661 |
| 3.511542615 |
| 14.04617046 |

|             |
|-------------|
| 8.427702276 |
| 4.916159661 |
| 8.427702276 |
| 56.18468184 |
| 30.19926649 |
| 6.320776707 |
| 4.213851138 |
| 6.320776707 |
| 8.427702276 |
| 17.55771308 |
| 3.511542615 |
| 9.832319322 |
| 6.320776707 |
| 3.511542615 |
| 4.916159661 |
| 11.93924489 |
| 9.832319322 |
| 11.23693637 |
| 7.725393753 |
| 9.130010799 |
| 2.809234092 |
| 9.130010799 |
| 9.130010799 |
| 13.34386194 |
| 4.916159661 |
| 4.916159661 |
| 9.832319322 |
| 42.13851138 |
| 50.56621366 |
| 4.213851138 |
| 2.106925569 |
| 4.916159661 |
| 11.93924489 |
| 8.427702276 |
| 3.511542615 |
| 4.213851138 |
| 6.320776707 |
| 6.320776707 |
| 70.2308523  |
| 5.618468184 |
| 37.92466024 |
| 7.725393753 |
| 4.213851138 |

|             |
|-------------|
| 5.618468184 |
| 9.832319322 |
| 8.427702276 |
| 4.916159661 |
| 9.130010799 |
| 10.53462785 |
| 14.74847898 |
| 4.213851138 |
| 5.618468184 |
| 10.53462785 |
| 7.725393753 |
| 6.320776707 |
| 9.832319322 |
| 8.427702276 |
| 4.213851138 |
| 18.96233012 |
| 6.320776707 |
| 9.832319322 |
| 5.618468184 |
| 84.97933129 |
| 120.797066  |
| 6.320776707 |
| 18.96233012 |
| 42.13851138 |
| 7.02308523  |
| 6.320776707 |
| 7.02308523  |
| 5.618468184 |
| 11.93924489 |
| 4.213851138 |
| 24.58079831 |
| 4.213851138 |
| 123.6063001 |
| 3.511542615 |
| 4.213851138 |
| 11.23693637 |
| 5.618468184 |
| 0.702308523 |
| 25.28310683 |
| 4.213851138 |
| 7.725393753 |
| 12.64155341 |
| 4.213851138 |

|             |
|-------------|
| 7.725393753 |
| 7.02308523  |
| 25.98541535 |
| 1.404617046 |
| 9.130010799 |
| 6.320776707 |
| 8.427702276 |
| 66.01700116 |
| 23.17618126 |
| 8.427702276 |
| 4.916159661 |
| 7.725393753 |
| 9.832319322 |
| 197.348695  |
| 8.427702276 |
| 68.82623526 |
| 8.427702276 |
| 10.53462785 |
| 4.213851138 |
| 45.650054   |
| 5.618468184 |
| 7.02308523  |
| 7.725393753 |
| 152.4009495 |
| 9.130010799 |
| 11.23693637 |
| 174.1725137 |
| 3.511542615 |
| 7.02308523  |
| 16.15309603 |
| 5.618468184 |
| 1.404617046 |
| 10.53462785 |
| 30.19926649 |
| 5.618468184 |
| 92.70472504 |
| 5.618468184 |
| 2.809234092 |
| 10.53462785 |
| 3.511542615 |
| 15.45078751 |
| 8.427702276 |
| 8.427702276 |

|             |
|-------------|
| 9.832319322 |
| 5.618468184 |
| 6.320776707 |
| 8.427702276 |
| 4.213851138 |
| 10.53462785 |
| 4.916159661 |
| 4.916159661 |
| 9.832319322 |
| 7.02308523  |
| 6.320776707 |
| 8.427702276 |
| 1.404617046 |
| 8.427702276 |
| 2.809234092 |
| 125.7132256 |
| 18.96233012 |
| 4.916159661 |
| 9.832319322 |
| 7.02308523  |
| 7.02308523  |
| 13.34386194 |
| 10.53462785 |
| 65.31469264 |
| 5.618468184 |
| 1.404617046 |
| 6.320776707 |
| 7.725393753 |
| 9.832319322 |
| 15.45078751 |
| 10.53462785 |
| 30.90157501 |
| 27.3900324  |
| 22.47387274 |
| 7.02308523  |
| 61.80315003 |
| 14.04617046 |
| 4.213851138 |
| 20.36694717 |
| 4.213851138 |
| 7.725393753 |
| 63.91007559 |
| 8.427702276 |



|             |
|-------------|
| 15.45078751 |
| 22.47387274 |
| 5.618468184 |
| 14.74847898 |
| 10.53462785 |
| 4.916159661 |
| 4.916159661 |
| 8.427702276 |
| 9.130010799 |
| 9.832319322 |
| 7.725393753 |
| 9.130010799 |
| 13.34386194 |
| 21.77156421 |
| 8.427702276 |
| 5.618468184 |
| 70.2308523  |
| 5.618468184 |
| 4.916159661 |
| 27.3900324  |
| 4.916159661 |
| 4.916159661 |
| 10.53462785 |
| 140.4617046 |
| 167.851737  |
| 43.54312843 |
| 21.06925569 |
| 129.2247682 |
| 2.106925569 |
| 25.98541535 |
| 172.0655881 |
| 35.11542615 |
| 9.130010799 |
| 8.427702276 |
| 4.213851138 |
| 7.02308523  |
| 3.511542615 |
| 8.427702276 |
| 4.213851138 |
| 5.618468184 |
| 2.809234092 |
| 58.99391593 |
| 4.213851138 |

|             |
|-------------|
| 40.03158581 |
| 7.02308523  |
| 9.832319322 |
| 11.23693637 |
| 8.427702276 |
| 58.29160741 |
| 5.618468184 |
| 7.02308523  |
| 13.34386194 |
| 9.832319322 |
| 0           |
| 14.04617046 |
| 6.320776707 |
| 18.2600216  |
| 9.832319322 |
| 7.02308523  |
| 7.725393753 |
| 7.725393753 |
| 4.916159661 |
| 9.130010799 |
| 8.427702276 |
| 10.53462785 |
| 4.213851138 |
| 35.81773467 |
| 2.106925569 |
| 7.725393753 |
| 54.07775627 |
| 5.618468184 |
| 59.69622446 |
| 10.53462785 |
| 8.427702276 |
| 4.213851138 |
| 2.106925569 |
| 113.7739807 |
| 7.02308523  |
| 213.501791  |
| 9.130010799 |
| 5.618468184 |
| 4.213851138 |
| 14.74847898 |
| 11.23693637 |
| 18.96233012 |
| 7.725393753 |

|             |
|-------------|
| 4.213851138 |
| 1.404617046 |
| 7.725393753 |
| 5.618468184 |
| 47.75697957 |
| 4.916159661 |
| 9.130010799 |
| 7.02308523  |
| 7.02308523  |
| 7.725393753 |
| 4.213851138 |
| 7.725393753 |
| 4.916159661 |
| 5.618468184 |
| 4.213851138 |
| 4.916159661 |
| 2.809234092 |
| 8.427702276 |
| 7.02308523  |
| 7.02308523  |
| 37.22235172 |
| 43.54312843 |
| 8.427702276 |
| 3.511542615 |
| 96.21626765 |
| 3.511542615 |
| 3.511542615 |
| 3.511542615 |
| 6.320776707 |
| 9.832319322 |
| 16.15309603 |
| 9.130010799 |
| 3.511542615 |
| 7.725393753 |
| 3.511542615 |
| 12.64155341 |
| 9.832319322 |
| 1.404617046 |
| 6.320776707 |
| 6.320776707 |
| 6.320776707 |
| 7.02308523  |
| 157.3171092 |

|             |
|-------------|
| 26.68772387 |
| 7.02308523  |
| 6.320776707 |
| 7.02308523  |
| 11.93924489 |
| 7.725393753 |
| 8.427702276 |
| 9.130010799 |
| 46.35236252 |
| 5.618468184 |
| 5.618468184 |
| 6.320776707 |
| 4.916159661 |
| 7.725393753 |
| 0           |
| 189.6233012 |
| 7.02308523  |
| 4.213851138 |
| 0.702308523 |
| 11.93924489 |
| 130.6293853 |
| 7.02308523  |
| 3.511542615 |
| 9.130010799 |
| 10.53462785 |
| 7.02308523  |
| 6.320776707 |
| 7.725393753 |
| 7.02308523  |
| 9.130010799 |
| 5.618468184 |
| 195.9440779 |
| 7.02308523  |
| 9.832319322 |
| 9.130010799 |
| 4.916159661 |
| 11.23693637 |
| 5.618468184 |
| 8.427702276 |
| 6.320776707 |
| 4.916159661 |
| 14.04617046 |
| 10.53462785 |

|             |
|-------------|
| 25.98541535 |
| 8.427702276 |
| 4.213851138 |
| 9.832319322 |
| 82.87240572 |
| 7.725393753 |
| 3.511542615 |
| 11.93924489 |
| 8.427702276 |
| 13.34386194 |
| 10.53462785 |
| 11.93924489 |
| 3.511542615 |
| 31.60388354 |
| 13.34386194 |
| 4.916159661 |
| 8.427702276 |
| 18.96233012 |
| 9.832319322 |
| 7.725393753 |
| 2.809234092 |
| 16.15309603 |
| 4.916159661 |
| 7.02308523  |
| 7.02308523  |
| 7.725393753 |
| 5.618468184 |
| 10.53462785 |
| 24.58079831 |
| 7.02308523  |
| 4.916159661 |
| 5.618468184 |
| 5.618468184 |
| 5.618468184 |
| 5.618468184 |
| 28.09234092 |
| 16.15309603 |
| 9.130010799 |
| 91.30010799 |
| 10.53462785 |
| 115.1785978 |
| 11.23693637 |
| 7.02308523  |

|             |
|-------------|
| 1.404617046 |
| 23.17618126 |
| 5.618468184 |
| 3.511542615 |
| 7.02308523  |
| 5.618468184 |
| 0           |
| 8.427702276 |
| 7.725393753 |
| 2.106925569 |
| 7.725393753 |
| 7.725393753 |
| 10.53462785 |
| 4.916159661 |
| 2.809234092 |
| 8.427702276 |
| 9.130010799 |
| 4.916159661 |
| 46.35236252 |
| 7.02308523  |
| 4.916159661 |
| 3.511542615 |
| 8.427702276 |
| 7.725393753 |
| 6.320776707 |
| 108.8578211 |
| 6.320776707 |
| 5.618468184 |
| 6.320776707 |
| 9.130010799 |
| 8.427702276 |
| 8.427702276 |
| 16.15309603 |
| 64.61238412 |
| 9.130010799 |
| 9.832319322 |
| 9.832319322 |
| 7.725393753 |
| 9.832319322 |
| 11.93924489 |
| 6.320776707 |
| 12.64155341 |
| 90.59779947 |

|             |
|-------------|
| 3.511542615 |
| 96.91857618 |
| 2.809234092 |
| 6.320776707 |
| 40.73389434 |
| 6.320776707 |
| 10.53462785 |
| 2.106925569 |
| 6.320776707 |
| 7.725393753 |
| 10.53462785 |
| 6.320776707 |
| 7.02308523  |
| 75.84932049 |
| 2.809234092 |
| 15.45078751 |
| 9.832319322 |
| 12.64155341 |
| 7.02308523  |
| 4.213851138 |
| 38.62696877 |
| 9.832319322 |
| 2.809234092 |
| 7.725393753 |
| 7.02308523  |
| 7.725393753 |
| 9.130010799 |
| 12.64155341 |
| 39.32927729 |
| 14.04617046 |
| 7.725393753 |
| 10.53462785 |
| 8.427702276 |
| 9.130010799 |
| 7.725393753 |
| 11.23693637 |
| 3.511542615 |
| 4.213851138 |
| 83.57471424 |
| 9.832319322 |
| 8.427702276 |
| 6.320776707 |
| 2.809234092 |

|             |
|-------------|
| 11.23693637 |
| 11.23693637 |
| 10.53462785 |
| 2.106925569 |
| 6.320776707 |
| 1.404617046 |
| 6.320776707 |
| 7.02308523  |
| 2.106925569 |
| 3.511542615 |
| 11.23693637 |
| 2.809234092 |
| 4.213851138 |
| 9.832319322 |
| 35.81773467 |
| 4.213851138 |
| 6.320776707 |
| 8.427702276 |
| 7.725393753 |
| 9.130010799 |
| 0           |
| 1.404617046 |
| 4.213851138 |
| 12.64155341 |
| 8.427702276 |
| 9.130010799 |
| 10.53462785 |
| 2.106925569 |
| 14.04617046 |
| 80.76548015 |
| 2.809234092 |
| 18.2600216  |
| 4.916159661 |
| 8.427702276 |
| 5.618468184 |
| 8.427702276 |
| 0           |
| 28.09234092 |
| 2.809234092 |
| 9.130010799 |
| 13.34386194 |
| 7.02308523  |
| 3.511542615 |



|             |
|-------------|
| 7.725393753 |
| 7.725393753 |
| 7.725393753 |
| 10.53462785 |
| 0.702308523 |
| 3.511542615 |
| 6.320776707 |
| 46.35236252 |
| 11.23693637 |
| 8.427702276 |
| 9.130010799 |
| 0           |
| 2.809234092 |
| 4.213851138 |
| 36.5200432  |
| 15.45078751 |
| 175.5771308 |
| 7.02308523  |
| 4.213851138 |
| 2.106925569 |
| 5.618468184 |
| 193.1348438 |
| 11.23693637 |
| 9.832319322 |
| 44.24543695 |
| 6.320776707 |
| 6.320776707 |
| 0.702308523 |
| 10.53462785 |
| 5.618468184 |
| 8.427702276 |
| 7.02308523  |
| 51.26852218 |
| 7.02308523  |
| 4.213851138 |
| 99.02550175 |
| 9.832319322 |
| 4.213851138 |
| 6.320776707 |
| 5.618468184 |
| 9.832319322 |
| 50.56621366 |
| 6.320776707 |

|             |
|-------------|
| 8.427702276 |
| 7.02308523  |
| 7.02308523  |
| 10.53462785 |
| 9.130010799 |
| 54.07775627 |
| 2.809234092 |
| 5.618468184 |
| 136.950162  |
| 10.53462785 |
| 7.725393753 |
| 5.618468184 |
| 6.320776707 |
| 6.320776707 |
| 7.725393753 |
| 15.45078751 |
| 7.02308523  |
| 7.725393753 |
| 10.53462785 |
| 7.725393753 |
| 11.23693637 |
| 5.618468184 |
| 5.618468184 |
| 13.34386194 |
| 9.832319322 |
| 4.916159661 |
| 6.320776707 |
| 7.725393753 |
| 9.832319322 |
| 5.618468184 |
| 10.53462785 |
| 6.320776707 |
| 5.618468184 |
| 7.725393753 |
| 10.53462785 |
| 4.916159661 |
| 2.106925569 |
| 7.02308523  |
| 4.213851138 |
| 6.320776707 |
| 6.320776707 |
| 7.02308523  |
| 10.53462785 |

|             |
|-------------|
| 2.106925569 |
| 7.02308523  |
| 1.404617046 |
| 4.916159661 |
| 4.916159661 |
| 4.213851138 |
| 14.04617046 |
| 4.916159661 |
| 63.20776707 |
| 21.77156421 |
| 2.106925569 |
| 7.725393753 |
| 6.320776707 |
| 8.427702276 |
| 4.916159661 |
| 7.02308523  |
| 0           |
| 9.130010799 |
| 18.2600216  |
| 3.511542615 |
| 24.58079831 |
| 11.23693637 |
| 4.213851138 |
| 30.90157501 |
| 79.3608631  |
| 8.427702276 |
| 3.511542615 |
| 12.64155341 |
| 40.73389434 |
| 8.427702276 |
| 5.618468184 |
| 1.404617046 |
| 42.13851138 |
| 16.15309603 |
| 5.618468184 |
| 11.93924489 |
| 35.11542615 |
| 9.130010799 |
| 16.15309603 |
| 8.427702276 |
| 7.725393753 |
| 225.4410359 |
| 13.34386194 |

|             |
|-------------|
| 5.618468184 |
| 1.404617046 |
| 4.916159661 |
| 14.04617046 |
| 5.618468184 |
| 7.02308523  |
| 9.130010799 |
| 6.320776707 |
| 9.832319322 |
| 154.5078751 |
| 13.34386194 |
| 5.618468184 |
| 0.702308523 |
| 7.02308523  |
| 73.04008639 |
| 4.916159661 |
| 8.427702276 |
| 76.55162901 |
| 13.34386194 |
| 6.320776707 |
| 49.86390513 |
| 12.64155341 |
| 5.618468184 |
| 25.28310683 |
| 7.02308523  |
| 9.832319322 |
| 9.832319322 |
| 2.809234092 |
| 76.55162901 |
| 7.02308523  |
| 6.320776707 |
| 44.94774547 |
| 16.15309603 |
| 141.8663216 |
| 11.23693637 |
| 0           |
| 47.75697957 |
| 8.427702276 |
| 7.02308523  |
| 4.916159661 |
| 6.320776707 |
| 3.511542615 |
| 4.916159661 |

|             |
|-------------|
| 4.916159661 |
| 4.916159661 |
| 25.98541535 |
| 9.130010799 |
| 3.511542615 |
| 13.34386194 |
| 11.23693637 |
| 6.320776707 |
| 7.725393753 |
| 7.02308523  |
| 12.64155341 |
| 7.725393753 |
| 5.618468184 |
| 4.213851138 |
| 8.427702276 |
| 5.618468184 |
| 71.63546935 |
| 4.213851138 |
| 4.916159661 |
| 32.30619206 |
| 7.02308523  |
| 5.618468184 |
| 4.213851138 |
| 55.48237332 |
| 8.427702276 |
| 5.618468184 |
| 3.511542615 |
| 9.832319322 |
| 70.93316082 |
| 0           |
| 7.02308523  |
| 7.02308523  |
| 4.213851138 |
| 4.213851138 |
| 2.106925569 |
| 4.213851138 |
| 7.02308523  |
| 7.725393753 |
| 4.916159661 |
| 8.427702276 |
| 7.725393753 |
| 6.320776707 |
| 7.725393753 |

|             |
|-------------|
| 5.618468184 |
| 40.73389434 |
| 30.90157501 |
| 5.618468184 |
| 7.02308523  |
| 6.320776707 |
| 9.832319322 |
| 9.130010799 |
| 8.427702276 |
| 11.23693637 |
| 81.46778867 |
| 9.130010799 |
| 10.53462785 |
| 7.02308523  |
| 14.04617046 |
| 3.511542615 |
| 7.02308523  |
| 9.832319322 |
| 10.53462785 |
| 7.02308523  |
| 9.832319322 |
| 7.02308523  |
| 16.85540455 |
| 13.34386194 |
| 5.618468184 |
| 5.618468184 |
| 7.02308523  |
| 8.427702276 |
| 42.8408199  |
| 4.916159661 |
| 17.55771308 |
| 4.213851138 |
| 149.5917154 |
| 193.8371524 |
| 11.23693637 |
| 9.130010799 |
| 128.5224597 |
| 44.94774547 |
| 2.106925569 |
| 11.23693637 |
| 11.23693637 |
| 11.23693637 |
| 9.832319322 |

|             |
|-------------|
| 129.9270768 |
| 8.427702276 |
| 5.618468184 |
| 10.53462785 |
| 8.427702276 |
| 4.213851138 |
| 9.130010799 |
| 5.618468184 |
| 5.618468184 |
| 0.702308523 |
| 7.02308523  |
| 19.66463864 |
| 4.916159661 |
| 102.5370444 |
| 7.725393753 |
| 41.43620286 |
| 9.130010799 |
| 5.618468184 |
| 6.320776707 |
| 7.725393753 |
| 6.320776707 |
| 4.213851138 |
| 5.618468184 |
| 8.427702276 |
| 6.320776707 |
| 10.53462785 |
| 12.64155341 |
| 5.618468184 |
| 111.6670552 |
| 8.427702276 |
| 6.320776707 |
| 7.725393753 |
| 4.916159661 |
| 3.511542615 |
| 16.85540455 |
| 9.832319322 |
| 16.15309603 |
| 3.511542615 |
| 35.81773467 |
| 2.809234092 |
| 4.213851138 |
| 11.93924489 |
| 5.618468184 |

|             |
|-------------|
| 5.618468184 |
| 8.427702276 |
| 9.832319322 |
| 187.5163756 |
| 47.75697957 |
| 11.23693637 |
| 6.320776707 |
| 9.130010799 |
| 2.809234092 |
| 7.725393753 |
| 7.02308523  |
| 7.725393753 |
| 11.93924489 |
| 7.725393753 |
| 5.618468184 |
| 24.58079831 |
| 10.53462785 |
| 4.213851138 |
| 39.32927729 |
| 5.618468184 |
| 16.85540455 |
| 1.404617046 |
| 9.130010799 |
| 9.130010799 |
| 5.618468184 |
| 2.106925569 |
| 104.6439699 |
| 8.427702276 |
| 4.213851138 |
| 4.916159661 |
| 107.453204  |
| 0.702308523 |
| 5.618468184 |
| 11.93924489 |
| 34.41311763 |
| 6.320776707 |
| 2.106925569 |
| 7.02308523  |
| 137.6524705 |
| 23.87848978 |
| 8.427702276 |
| 37.92466024 |
| 8.427702276 |



|             |
|-------------|
| 7.02308523  |
| 5.618468184 |
| 6.320776707 |
| 11.93924489 |
| 7.725393753 |
| 8.427702276 |
| 67.42161821 |
| 9.832319322 |
| 14.74847898 |
| 209.9902484 |
| 4.916159661 |
| 6.320776707 |
| 8.427702276 |
| 7.725393753 |
| 9.130010799 |
| 6.320776707 |
| 5.618468184 |
| 4.213851138 |
| 8.427702276 |
| 5.618468184 |
| 7.725393753 |
| 9.832319322 |
| 12.64155341 |
| 37.92466024 |
| 3.511542615 |
| 8.427702276 |
| 8.427702276 |
| 7.725393753 |
| 96.21626765 |
| 7.02308523  |
| 2.809234092 |
| 9.130010799 |
| 5.618468184 |
| 18.2600216  |
| 94.10934208 |
| 7.02308523  |
| 0           |
| 10.53462785 |
| 4.213851138 |
| 6.320776707 |
| 0           |
| 7.02308523  |
| 12.64155341 |

|             |
|-------------|
| 6.320776707 |
| 6.320776707 |
| 9.130010799 |
| 51.26852218 |
| 24.58079831 |
| 18.2600216  |
| 6.320776707 |
| 6.320776707 |
| 6.320776707 |
| 105.3462785 |
| 2.809234092 |
| 7.02308523  |
| 6.320776707 |
| 4.213851138 |
| 46.35236252 |
| 20.36694717 |
| 2.809234092 |
| 7.725393753 |
| 8.427702276 |
| 4.916159661 |
| 148.8894069 |
| 7.725393753 |
| 4.213851138 |
| 5.618468184 |
| 6.320776707 |
| 6.320776707 |
| 8.427702276 |
| 2.106925569 |
| 7.725393753 |
| 7.725393753 |
| 11.93924489 |
| 3.511542615 |
| 9.130010799 |
| 11.23693637 |
| 24.58079831 |
| 4.916159661 |
| 21.06925569 |
| 171.3632796 |
| 8.427702276 |
| 12.64155341 |
| 62.50545855 |
| 4.213851138 |
| 4.213851138 |

|             |
|-------------|
| 7.725393753 |
| 3.511542615 |
| 25.28310683 |
| 7.02308523  |
| 3.511542615 |
| 6.320776707 |
| 83.57471424 |
| 4.213851138 |
| 7.02308523  |
| 13.34386194 |
| 0           |
| 7.725393753 |
| 11.23693637 |
| 5.618468184 |
| 7.725393753 |
| 9.832319322 |
| 5.618468184 |
| 10.53462785 |
| 0           |
| 2.106925569 |
| 4.916159661 |
| 3.511542615 |
| 3.511542615 |
| 19.66463864 |
| 2.106925569 |
| 13.34386194 |
| 110.2624381 |
| 6.320776707 |
| 5.618468184 |
| 6.320776707 |
| 11.93924489 |
| 1.404617046 |
| 75.14701196 |
| 3.511542615 |
| 7.725393753 |
| 4.916159661 |
| 5.618468184 |
| 10.53462785 |
| 7.02308523  |
| 9.832319322 |
| 11.23693637 |
| 6.320776707 |
| 124.3086086 |

|             |
|-------------|
| 5.618468184 |
| 2.809234092 |
| 8.427702276 |
| 5.618468184 |
| 3.511542615 |
| 3.511542615 |
| 9.832319322 |
| 10.53462785 |
| 6.320776707 |
| 8.427702276 |
| 7.02308523  |
| 252.8310683 |
| 4.213851138 |
| 7.02308523  |
| 8.427702276 |
| 4.916159661 |
| 7.02308523  |
| 9.832319322 |
| 47.05467104 |
| 11.93924489 |
| 41.43620286 |
| 5.618468184 |
| 7.725393753 |
| 11.23693637 |
| 4.916159661 |
| 7.725393753 |
| 5.618468184 |
| 5.618468184 |
| 7.725393753 |
| 9.130010799 |
| 10.53462785 |
| 23.87848978 |
| 4.916159661 |
| 8.427702276 |
| 220.5248762 |
| 101.8347358 |
| 11.23693637 |
| 4.213851138 |
| 30.19926649 |
| 10.53462785 |
| 14.04617046 |
| 8.427702276 |
| 9.130010799 |

|             |
|-------------|
| 11.93924489 |
| 7.02308523  |
| 15.45078751 |
| 6.320776707 |
| 4.213851138 |
| 4.916159661 |
| 7.725393753 |
| 11.23693637 |
| 14.04617046 |
| 8.427702276 |
| 9.130010799 |
| 12.64155341 |
| 33.7108091  |
| 6.320776707 |
| 4.213851138 |
| 7.02308523  |
| 4.213851138 |
| 4.916159661 |
| 0.702308523 |
| 3.511542615 |
| 2.809234092 |
| 53.37544775 |
| 2.809234092 |
| 8.427702276 |
| 3.511542615 |
| 98.32319322 |
| 4.916159661 |
| 9.130010799 |
| 5.618468184 |
| 7.725393753 |
| 9.832319322 |
| 6.320776707 |
| 9.130010799 |
| 8.427702276 |
| 9.130010799 |
| 5.618468184 |
| 8.427702276 |
| 77.95624606 |
| 7.725393753 |
| 7.725393753 |
| 11.23693637 |
| 7.02308523  |
| 12.64155341 |

|             |
|-------------|
| 9.130010799 |
| 4.916159661 |
| 7.02308523  |
| 5.618468184 |
| 3.511542615 |
| 9.832319322 |
| 11.23693637 |
| 6.320776707 |
| 5.618468184 |
| 7.725393753 |
| 17.55771308 |
| 16.15309603 |
| 0.702308523 |
| 7.02308523  |
| 0           |
| 10.53462785 |
| 9.130010799 |
| 11.23693637 |
| 16.15309603 |
| 10.53462785 |
| 12.64155341 |
| 4.916159661 |
| 18.96233012 |
| 9.130010799 |
| 16.15309603 |
| 9.832319322 |
| 23.17618126 |
| 4.213851138 |
| 8.427702276 |
| 9.832319322 |
| 7.725393753 |
| 48.45928809 |
| 106.7508955 |
| 8.427702276 |
| 9.832319322 |
| 2.809234092 |
| 12.64155341 |
| 9.130010799 |
| 18.2600216  |
| 4.213851138 |
| 8.427702276 |
| 4.916159661 |
| 9.832319322 |

|             |
|-------------|
| 2.809234092 |
| 1.404617046 |
| 4.213851138 |
| 19.66463864 |
| 11.93924489 |
| 47.75697957 |
| 9.130010799 |
| 5.618468184 |
| 56.88699036 |
| 4.916159661 |
| 7.02308523  |
| 50.56621366 |
| 6.320776707 |
| 5.618468184 |
| 4.916159661 |
| 7.725393753 |
| 9.130010799 |
| 25.28310683 |
| 5.618468184 |
| 15.45078751 |
| 4.916159661 |
| 9.832319322 |
| 7.02308523  |
| 8.427702276 |
| 4.213851138 |
| 115.8809063 |
| 7.725393753 |
| 11.23693637 |
| 4.213851138 |
| 11.23693637 |
| 7.725393753 |
| 9.832319322 |
| 61.1008415  |
| 7.725393753 |
| 4.916159661 |
| 8.427702276 |
| 7.02308523  |
| 4.916159661 |
| 7.02308523  |
| 7.02308523  |
| 6.320776707 |
| 7.725393753 |
| 101.1324273 |

|             |
|-------------|
| 8.427702276 |
| 7.02308523  |
| 4.916159661 |
| 20.36694717 |
| 10.53462785 |
| 14.04617046 |
| 4.213851138 |
| 6.320776707 |
| 162.2332688 |
| 6.320776707 |
| 7.725393753 |
| 10.53462785 |
| 72.33777787 |
| 4.916159661 |
| 35.11542615 |
| 16.85540455 |
| 7.725393753 |
| 4.916159661 |
| 7.725393753 |
| 4.916159661 |
| 5.618468184 |
| 9.130010799 |
| 7.725393753 |
| 6.320776707 |
| 15.45078751 |
| 9.832319322 |
| 9.130010799 |
| 99.02550175 |
| 10.53462785 |
| 1.404617046 |
| 2.809234092 |
| 7.725393753 |
| 228.9525785 |
| 9.130010799 |
| 4.213851138 |
| 10.53462785 |
| 44.24543695 |
| 6.320776707 |
| 9.130010799 |
| 11.23693637 |
| 10.53462785 |
| 7.725393753 |
| 0.702308523 |



|             |
|-------------|
| 217.0133336 |
| 89.89549095 |
| 9.130010799 |
| 5.618468184 |
| 21.77156421 |
| 7.02308523  |
| 4.916159661 |
| 7.02308523  |
| 6.320776707 |
| 33.00850058 |
| 0.702308523 |
| 61.80315003 |
| 6.320776707 |
| 8.427702276 |
| 7.02308523  |
| 49.86390513 |
| 6.320776707 |
| 9.130010799 |
| 89.89549095 |
| 0           |
| 7.02308523  |
| 69.52854378 |
| 9.130010799 |
| 9.832319322 |
| 27.3900324  |
| 7.725393753 |
| 9.130010799 |
| 101.1324273 |
| 7.725393753 |
| 89.89549095 |
| 7.02308523  |
| 9.130010799 |
| 7.02308523  |
| 10.53462785 |
| 5.618468184 |
| 4.916159661 |
| 9.832319322 |
| 7.725393753 |
| 4.916159661 |
| 5.618468184 |
| 7.725393753 |
| 120.0947574 |
| 4.916159661 |

|             |
|-------------|
| 92.00241652 |
| 2.106925569 |
| 2.106925569 |
| 7.725393753 |
| 11.23693637 |
| 10.53462785 |
| 7.725393753 |
| 92.00241652 |
| 1.404617046 |
| 7.725393753 |
| 10.53462785 |
| 40.03158581 |
| 14.74847898 |
| 4.213851138 |
| 5.618468184 |
| 5.618468184 |
| 4.916159661 |
| 9.130010799 |
| 7.02308523  |
| 11.93924489 |
| 3.511542615 |
| 7.02308523  |
| 9.832319322 |
| 6.320776707 |
| 6.320776707 |
| 4.916159661 |
| 4.213851138 |
| 20.36694717 |
| 22.47387274 |
| 8.427702276 |
| 9.832319322 |
| 5.618468184 |
| 5.618468184 |
| 54.7800648  |
| 9.832319322 |
| 6.320776707 |
| 33.00850058 |
| 66.71930969 |
| 1.404617046 |
| 4.916159661 |
| 7.725393753 |
| 7.02308523  |
| 8.427702276 |

|             |
|-------------|
| 14.04617046 |
| 8.427702276 |
| 14.74847898 |
| 0           |
| 5.618468184 |
| 5.618468184 |
| 7.02308523  |
| 8.427702276 |
| 0           |
| 139.0570876 |
| 7.725393753 |
| 3.511542615 |
| 4.213851138 |
| 7.725393753 |
| 1.404617046 |
| 7.725393753 |
| 8.427702276 |
| 4.213851138 |
| 18.2600216  |
| 7.725393753 |
| 7.725393753 |
| 67.42161821 |
| 5.618468184 |
| 4.213851138 |
| 8.427702276 |
| 2.809234092 |
| 60.39853298 |
| 20.36694717 |
| 4.916159661 |
| 8.427702276 |
| 26.68772387 |
| 4.213851138 |
| 7.02308523  |
| 23.87848978 |
| 9.832319322 |
| 9.832319322 |
| 10.53462785 |
| 7.02308523  |
| 14.74847898 |
| 7.02308523  |
| 141.1640131 |
| 9.130010799 |
| 6.320776707 |

|             |
|-------------|
| 97.6208847  |
| 7.02308523  |
| 21.77156421 |
| 8.427702276 |
| 3.511542615 |
| 6.320776707 |
| 11.23693637 |
| 254.2356853 |
| 9.130010799 |
| 4.213851138 |
| 7.725393753 |
| 7.02308523  |
| 10.53462785 |
| 5.618468184 |
| 4.213851138 |
| 14.04617046 |
| 162.2332688 |
| 35.81773467 |
| 8.427702276 |
| 6.320776707 |
| 5.618468184 |
| 6.320776707 |
| 10.53462785 |
| 2.106925569 |
| 28.79464944 |
| 2.106925569 |
| 49.86390513 |
| 4.916159661 |
| 23.17618126 |
| 7.725393753 |
| 7.02308523  |
| 9.130010799 |
| 7.02308523  |
| 5.618468184 |
| 8.427702276 |
| 18.96233012 |
| 6.320776707 |
| 16.85540455 |
| 62.50545855 |
| 9.130010799 |
| 3.511542615 |
| 2.106925569 |
| 5.618468184 |

|             |
|-------------|
| 157.3171092 |
| 10.53462785 |
| 8.427702276 |
| 2.106925569 |
| 153.8055665 |
| 6.320776707 |
| 2.809234092 |
| 9.832319322 |
| 7.02308523  |
| 2.809234092 |
| 9.832319322 |
| 129.9270768 |
| 113.7739807 |
| 6.320776707 |
| 107.453204  |
| 67.42161821 |
| 6.320776707 |
| 4.213851138 |
| 6.320776707 |
| 2.809234092 |
| 8.427702276 |
| 11.93924489 |
| 2.106925569 |
| 5.618468184 |
| 141.8663216 |
| 5.618468184 |
| 24.58079831 |
| 9.832319322 |
| 16.15309603 |
| 6.320776707 |
| 4.213851138 |
| 303.3972819 |
| 7.725393753 |
| 7.725393753 |
| 4.916159661 |
| 3.511542615 |
| 10.53462785 |
| 10.53462785 |
| 7.725393753 |
| 4.213851138 |
| 8.427702276 |
| 0.702308523 |
| 7.02308523  |

|             |
|-------------|
| 5.618468184 |
| 71.63546935 |
| 8.427702276 |
| 13.34386194 |
| 7.02308523  |
| 12.64155341 |
| 30.19926649 |
| 7.725393753 |
| 5.618468184 |
| 8.427702276 |
| 7.02308523  |
| 186.1117586 |
| 5.618468184 |
| 51.26852218 |
| 9.832319322 |
| 2.809234092 |
| 2.106925569 |
| 7.02308523  |
| 6.320776707 |
| 16.85540455 |
| 4.213851138 |
| 6.320776707 |
| 7.02308523  |
| 7.725393753 |
| 11.23693637 |
| 3.511542615 |
| 14.74847898 |
| 5.618468184 |
| 7.725393753 |
| 38.62696877 |
| 4.916159661 |
| 3.511542615 |
| 0.702308523 |
| 7.725393753 |
| 7.02308523  |
| 3.511542615 |
| 99.72781027 |
| 5.618468184 |
| 56.18468184 |
| 4.213851138 |
| 6.320776707 |
| 6.320776707 |
| 3.511542615 |

|             |
|-------------|
| 11.93924489 |
| 10.53462785 |
| 7.02308523  |
| 4.916159661 |
| 57.58929889 |
| 20.36694717 |
| 7.02308523  |
| 6.320776707 |
| 7.02308523  |
| 7.02308523  |
| 4.916159661 |
| 2.809234092 |
| 95.51395913 |
| 4.213851138 |
| 35.81773467 |
| 6.320776707 |
| 51.9708307  |
| 7.725393753 |
| 8.427702276 |
| 33.7108091  |
| 7.725393753 |
| 13.34386194 |
| 4.916159661 |
| 11.23693637 |
| 11.23693637 |
| 5.618468184 |
| 7.725393753 |
| 3.511542615 |
| 5.618468184 |
| 9.832319322 |
| 36.5200432  |
| 6.320776707 |
| 14.04617046 |
| 8.427702276 |
| 10.53462785 |
| 11.93924489 |
| 5.618468184 |
| 2.106925569 |
| 7.725393753 |
| 7.02308523  |
| 9.130010799 |
| 6.320776707 |
| 5.618468184 |

|             |
|-------------|
| 7.725393753 |
| 9.130010799 |
| 6.320776707 |
| 7.725393753 |
| 169.256354  |
| 9.832319322 |
| 3.511542615 |
| 10.53462785 |
| 8.427702276 |
| 14.04617046 |
| 4.213851138 |
| 12.64155341 |
| 115.1785978 |
| 6.320776707 |
| 6.320776707 |
| 9.130010799 |
| 4.213851138 |
| 1.404617046 |
| 25.28310683 |
| 50.56621366 |
| 7.02308523  |
| 220.5248762 |
| 6.320776707 |
| 0.702308523 |
| 4.916159661 |
| 4.213851138 |
| 9.130010799 |
| 11.93924489 |
| 30.90157501 |
| 7.02308523  |
| 132.7363109 |
| 9.130010799 |
| 9.832319322 |
| 8.427702276 |
| 8.427702276 |
| 7.02308523  |
| 8.427702276 |
| 10.53462785 |
| 7.02308523  |
| 2.809234092 |
| 4.916159661 |
| 11.93924489 |
| 11.93924489 |



|             |
|-------------|
| 10.53462785 |
| 9.130010799 |
| 4.916159661 |
| 7.725393753 |
| 8.427702276 |
| 2.106925569 |
| 5.618468184 |
| 7.02308523  |
| 6.320776707 |
| 4.916159661 |
| 4.213851138 |
| 2.809234092 |
| 30.19926649 |
| 10.53462785 |
| 35.81773467 |
| 11.23693637 |
| 4.213851138 |
| 14.04617046 |
| 2.809234092 |
| 15.45078751 |
| 2.809234092 |
| 95.51395913 |
| 10.53462785 |
| 4.916159661 |
| 11.23693637 |
| 108.8578211 |
| 9.130010799 |
| 10.53462785 |
| 18.96233012 |
| 5.618468184 |
| 10.53462785 |
| 9.130010799 |
| 4.213851138 |
| 7.02308523  |
| 9.832319322 |
| 2.809234092 |
| 6.320776707 |
| 8.427702276 |
| 3.511542615 |
| 6.320776707 |
| 8.427702276 |
| 10.53462785 |
| 13.34386194 |

|             |
|-------------|
| 90.59779947 |
| 126.4155341 |
| 9.832319322 |
| 24.58079831 |
| 105.3462785 |
| 9.832319322 |
| 105.3462785 |
| 7.02308523  |
| 47.05467104 |
| 7.02308523  |
| 5.618468184 |
| 9.130010799 |
| 8.427702276 |
| 5.618468184 |
| 9.130010799 |
| 29.49695797 |
| 6.320776707 |
| 5.618468184 |
| 3.511542615 |
| 29.49695797 |
| 7.725393753 |
| 2.106925569 |
| 4.213851138 |
| 7.725393753 |
| 4.213851138 |
| 2.809234092 |
| 84.97933129 |
| 9.130010799 |
| 156.6148006 |
| 7.02308523  |
| 9.832319322 |
| 1.404617046 |
| 5.618468184 |
| 9.130010799 |
| 4.916159661 |
| 7.02308523  |
| 62.50545855 |
| 7.725393753 |
| 13.34386194 |
| 10.53462785 |
| 2.809234092 |
| 10.53462785 |
| 2.106925569 |

|             |
|-------------|
| 9.832319322 |
| 4.213851138 |
| 5.618468184 |
| 42.13851138 |
| 6.320776707 |
| 9.130010799 |
| 8.427702276 |
| 4.213851138 |
| 4.213851138 |
| 8.427702276 |
| 7.02308523  |
| 2.809234092 |
| 4.916159661 |
| 4.916159661 |
| 11.23693637 |
| 10.53462785 |
| 7.02308523  |
| 4.916159661 |
| 102.5370444 |
| 9.832319322 |
| 127.8201512 |
| 47.75697957 |
| 4.916159661 |
| 3.511542615 |
| 34.41311763 |
| 4.213851138 |
| 6.320776707 |
| 9.832319322 |
| 7.02308523  |
| 9.130010799 |
| 5.618468184 |
| 4.213851138 |
| 5.618468184 |
| 7.725393753 |
| 9.130010799 |
| 7.725393753 |
| 9.832319322 |
| 3.511542615 |
| 13.34386194 |
| 4.916159661 |
| 11.23693637 |
| 51.26852218 |
| 5.618468184 |

|             |
|-------------|
| 34.41311763 |
| 4.916159661 |
| 7.725393753 |
| 2.809234092 |
| 11.93924489 |
| 5.618468184 |
| 9.832319322 |
| 6.320776707 |
| 13.34386194 |
| 4.916159661 |
| 10.53462785 |
| 9.832319322 |
| 10.53462785 |
| 4.916159661 |
| 19.66463864 |
| 7.725393753 |
| 7.725393753 |
| 6.320776707 |
| 2.809234092 |
| 3.511542615 |
| 10.53462785 |
| 4.213851138 |
| 8.427702276 |
| 6.320776707 |
| 9.130010799 |
| 113.0716722 |
| 14.74847898 |
| 5.618468184 |
| 4.213851138 |
| 7.725393753 |
| 5.618468184 |
| 11.93924489 |
| 8.427702276 |
| 9.130010799 |
| 10.53462785 |
| 9.832319322 |
| 32.30619206 |
| 8.427702276 |
| 3.511542615 |
| 9.130010799 |
| 33.7108091  |
| 13.34386194 |
| 2.106925569 |

|             |
|-------------|
| 3.511542615 |
| 16.15309603 |
| 9.832319322 |
| 41.43620286 |
| 9.130010799 |
| 9.832319322 |
| 10.53462785 |
| 5.618468184 |
| 7.725393753 |
| 4.213851138 |
| 7.02308523  |
| 11.93924489 |
| 9.130010799 |
| 2.809234092 |
| 56.88699036 |
| 9.832319322 |
| 8.427702276 |
| 6.320776707 |
| 7.725393753 |
| 3.511542615 |
| 6.320776707 |
| 8.427702276 |
| 3.511542615 |
| 4.916159661 |
| 11.23693637 |
| 4.213851138 |
| 7.725393753 |
| 8.427702276 |
| 148.8894069 |
| 23.17618126 |
| 6.320776707 |
| 6.320776707 |
| 104.6439699 |
| 9.130010799 |
| 22.47387274 |
| 4.916159661 |
| 9.130010799 |
| 11.23693637 |
| 6.320776707 |
| 9.832319322 |
| 129.9270768 |
| 8.427702276 |
| 11.93924489 |

|             |
|-------------|
| 4.916159661 |
| 5.618468184 |
| 11.93924489 |
| 9.832319322 |
| 9.832319322 |
| 174.8748222 |
| 46.35236252 |
| 6.320776707 |
| 1.404617046 |
| 4.916159661 |
| 11.23693637 |
| 7.725393753 |
| 125.7132256 |
| 4.213851138 |
| 4.213851138 |
| 10.53462785 |
| 0.702308523 |
| 8.427702276 |
| 4.916159661 |
| 3.511542615 |
| 4.916159661 |
| 9.832319322 |
| 6.320776707 |
| 25.98541535 |
| 13.34386194 |
| 3.511542615 |
| 4.213851138 |
| 5.618468184 |
| 7.02308523  |
| 30.19926649 |
| 7.725393753 |
| 4.213851138 |
| 31.60388354 |
| 9.130010799 |
| 52.67313923 |
| 5.618468184 |
| 24.58079831 |
| 4.916159661 |
| 9.130010799 |
| 8.427702276 |
| 4.213851138 |
| 28.09234092 |
| 77.25393753 |

|             |
|-------------|
| 15.45078751 |
| 67.42161821 |
| 128.5224597 |
| 35.11542615 |
| 5.618468184 |
| 80.06317162 |
| 3.511542615 |
| 11.93924489 |
| 6.320776707 |
| 117.9878319 |
| 6.320776707 |
| 4.916159661 |
| 10.53462785 |
| 6.320776707 |
| 9.130010799 |
| 17.55771308 |
| 10.53462785 |
| 8.427702276 |
| 4.916159661 |
| 6.320776707 |
| 7.02308523  |
| 11.23693637 |
| 61.1008415  |
| 41.43620286 |
| 21.06925569 |
| 6.320776707 |
| 5.618468184 |
| 5.618468184 |
| 21.06925569 |
| 11.23693637 |
| 2.809234092 |
| 7.02308523  |
| 9.832319322 |
| 3.511542615 |
| 7.02308523  |
| 47.05467104 |
| 102.5370444 |
| 5.618468184 |
| 10.53462785 |
| 5.618468184 |
| 3.511542615 |
| 4.916159661 |
| 19.66463864 |

|             |
|-------------|
| 6.320776707 |
| 21.77156421 |
| 6.320776707 |
| 3.511542615 |
| 6.320776707 |
| 20.36694717 |
| 9.832319322 |
| 6.320776707 |
| 8.427702276 |
| 7.725393753 |
| 11.23693637 |
| 9.130010799 |
| 8.427702276 |
| 16.85540455 |
| 56.18468184 |
| 7.725393753 |
| 0.702308523 |
| 41.43620286 |
| 10.53462785 |
| 3.511542615 |
| 9.832319322 |
| 4.916159661 |
| 24.58079831 |
| 58.29160741 |
| 7.02308523  |
| 30.19926649 |
| 13.34386194 |
| 14.04617046 |
| 17.55771308 |
| 9.130010799 |
| 7.02308523  |
| 116.5832148 |
| 11.23693637 |
| 14.04617046 |
| 9.130010799 |
| 7.02308523  |
| 7.02308523  |
| 8.427702276 |
| 10.53462785 |
| 44.94774547 |
| 7.02308523  |
| 7.725393753 |
| 9.130010799 |



|             |
|-------------|
| 5.618468184 |
| 7.02308523  |
| 9.130010799 |
| 7.02308523  |
| 6.320776707 |
| 63.20776707 |
| 9.832319322 |
| 7.02308523  |
| 0           |
| 11.93924489 |
| 17.55771308 |
| 14.04617046 |
| 4.213851138 |
| 8.427702276 |
| 14.04617046 |
| 140.4617046 |
| 5.618468184 |
| 11.23693637 |
| 16.15309603 |
| 8.427702276 |
| 189.6233012 |
| 9.832319322 |
| 4.213851138 |
| 5.618468184 |
| 10.53462785 |
| 12.64155341 |
| 6.320776707 |
| 9.832319322 |
| 5.618468184 |
| 1.404617046 |
| 4.213851138 |
| 10.53462785 |
| 2.809234092 |
| 9.130010799 |
| 8.427702276 |
| 8.427702276 |
| 117.2855233 |
| 7.02308523  |
| 7.02308523  |
| 4.916159661 |
| 10.53462785 |
| 42.13851138 |
| 6.320776707 |

|             |
|-------------|
| 2.106925569 |
| 6.320776707 |
| 2.809234092 |
| 66.71930969 |
| 3.511542615 |
| 7.02308523  |
| 11.93924489 |
| 8.427702276 |
| 6.320776707 |
| 39.32927729 |
| 11.93924489 |
| 5.618468184 |
| 9.130010799 |
| 184.004833  |
| 37.22235172 |
| 6.320776707 |
| 22.47387274 |
| 5.618468184 |
| 5.618468184 |
| 8.427702276 |
| 3.511542615 |
| 2.106925569 |
| 42.8408199  |
| 9.130010799 |
| 12.64155341 |
| 7.02308523  |
| 0.702308523 |
| 155.9124921 |
| 54.7800648  |
| 51.9708307  |
| 4.916159661 |
| 68.82623526 |
| 6.320776707 |
| 10.53462785 |
| 7.02308523  |
| 7.725393753 |
| 159.4240347 |
| 9.130010799 |
| 10.53462785 |
| 16.85540455 |
| 12.64155341 |
| 10.53462785 |
| 5.618468184 |

|             |
|-------------|
| 7.725393753 |
| 6.320776707 |
| 229.654887  |
| 3.511542615 |
| 6.320776707 |
| 7.02308523  |
| 5.618468184 |
| 9.832319322 |
| 7.02308523  |
| 28.79464944 |
| 10.53462785 |
| 5.618468184 |
| 5.618468184 |
| 7.02308523  |
| 4.213851138 |
| 6.320776707 |
| 17.55771308 |
| 7.725393753 |
| 20.36694717 |
| 21.77156421 |
| 9.130010799 |
| 6.320776707 |
| 7.725393753 |
| 7.725393753 |
| 15.45078751 |
| 8.427702276 |
| 4.213851138 |
| 2.106925569 |
| 2.106925569 |
| 7.725393753 |
| 7.725393753 |
| 7.725393753 |
| 2.106925569 |
| 8.427702276 |
| 9.130010799 |
| 3.511542615 |
| 0           |
| 77.95624606 |
| 23.87848978 |
| 9.130010799 |
| 17.55771308 |
| 7.725393753 |
| 24.58079831 |

|             |
|-------------|
| 72.33777787 |
| 4.916159661 |
| 54.07775627 |
| 14.04617046 |
| 7.725393753 |
| 77.25393753 |
| 7.02308523  |
| 30.90157501 |
| 75.14701196 |
| 7.725393753 |
| 7.02308523  |
| 6.320776707 |
| 7.02308523  |
| 14.74847898 |
| 8.427702276 |
| 4.213851138 |
| 4.916159661 |
| 3.511542615 |
| 3.511542615 |
| 6.320776707 |
| 2.106925569 |
| 4.916159661 |
| 2.106925569 |
| 7.02308523  |
| 7.02308523  |
| 5.618468184 |
| 4.916159661 |
| 87.08625685 |
| 9.130010799 |
| 193.8371524 |
| 146.0801728 |
| 8.427702276 |
| 7.725393753 |
| 8.427702276 |
| 6.320776707 |
| 87.78856538 |
| 8.427702276 |
| 49.86390513 |
| 7.02308523  |
| 2.809234092 |
| 5.618468184 |
| 9.130010799 |
| 6.320776707 |

|             |
|-------------|
| 14.04617046 |
| 72.33777787 |
| 5.618468184 |
| 2.809234092 |
| 229.654887  |
| 0           |
| 8.427702276 |
| 2.809234092 |
| 3.511542615 |
| 6.320776707 |
| 9.130010799 |
| 5.618468184 |
| 9.130010799 |
| 2.106925569 |
| 5.618468184 |
| 4.916159661 |
| 3.511542615 |
| 7.02308523  |
| 10.53462785 |
| 25.98541535 |
| 4.916159661 |
| 2.809234092 |
| 16.15309603 |
| 10.53462785 |
| 11.23693637 |
| 6.320776707 |
| 11.23693637 |
| 8.427702276 |
| 4.916159661 |
| 6.320776707 |
| 40.03158581 |
| 9.832319322 |
| 61.1008415  |
| 6.320776707 |
| 6.320776707 |
| 80.76548015 |
| 10.53462785 |
| 4.213851138 |
| 16.85540455 |
| 9.130010799 |
| 28.09234092 |
| 6.320776707 |
| 4.213851138 |

|             |
|-------------|
| 7.02308523  |
| 30.90157501 |
| 2.809234092 |
| 8.427702276 |
| 6.320776707 |
| 8.427702276 |
| 0.702308523 |
| 24.58079831 |
| 0           |
| 8.427702276 |
| 9.832319322 |
| 0.702308523 |
| 2.106925569 |
| 12.64155341 |
| 2.106925569 |
| 7.02308523  |
| 4.916159661 |
| 6.320776707 |
| 4.916159661 |
| 37.22235172 |
| 7.02308523  |
| 2.106925569 |
| 56.18468184 |
| 9.130010799 |
| 9.130010799 |
| 9.130010799 |
| 6.320776707 |
| 9.130010799 |
| 3.511542615 |
| 2.809234092 |
| 4.916159661 |
| 4.916159661 |
| 0.702308523 |
| 3.511542615 |
| 8.427702276 |
| 99.02550175 |
| 7.02308523  |
| 33.00850058 |
| 11.93924489 |
| 5.618468184 |
| 115.1785978 |
| 9.130010799 |
| 7.725393753 |

|             |
|-------------|
| 3.511542615 |
| 12.64155341 |
| 16.85540455 |
| 6.320776707 |
| 9.130010799 |
| 6.320776707 |
| 0.702308523 |
| 11.93924489 |
| 24.58079831 |
| 7.725393753 |
| 3.511542615 |
| 12.64155341 |
| 4.916159661 |
| 10.53462785 |
| 6.320776707 |
| 1.404617046 |
| 78.65855458 |
| 2.809234092 |
| 6.320776707 |
| 18.2600216  |
| 4.213851138 |
| 2.106925569 |
| 6.320776707 |
| 4.213851138 |
| 20.36694717 |
| 8.427702276 |
| 6.320776707 |
| 146.0801728 |
| 9.832319322 |
| 6.320776707 |
| 4.213851138 |
| 11.23693637 |
| 6.320776707 |
| 4.916159661 |
| 9.130010799 |
| 9.130010799 |
| 4.916159661 |
| 12.64155341 |
| 5.618468184 |
| 9.130010799 |
| 4.213851138 |
| 4.916159661 |
| 7.725393753 |

|             |
|-------------|
| 14.04617046 |
| 3.511542615 |
| 4.916159661 |
| 2.106925569 |
| 9.130010799 |
| 17.55771308 |
| 5.618468184 |
| 5.618468184 |
| 4.213851138 |
| 8.427702276 |
| 35.81773467 |
| 8.427702276 |
| 33.7108091  |
| 4.213851138 |
| 9.832319322 |
| 6.320776707 |
| 4.916159661 |
| 19.66463864 |
| 7.02308523  |
| 4.916159661 |
| 18.2600216  |
| 9.130010799 |
| 129.2247682 |
| 3.511542615 |
| 9.832319322 |
| 10.53462785 |
| 23.17618126 |
| 7.02308523  |
| 8.427702276 |
| 0           |
| 4.916159661 |
| 7.725393753 |
| 10.53462785 |
| 13.34386194 |
| 7.02308523  |
| 11.93924489 |
| 9.130010799 |
| 6.320776707 |
| 6.320776707 |
| 5.618468184 |
| 2.809234092 |
| 25.98541535 |
| 5.618468184 |



|             |
|-------------|
| 5.618468184 |
| 9.130010799 |
| 7.725393753 |
| 15.45078751 |
| 9.130010799 |
| 60.39853298 |
| 1.404617046 |
| 4.916159661 |
| 3.511542615 |
| 8.427702276 |
| 5.618468184 |
| 42.13851138 |
| 4.916159661 |
| 6.320776707 |
| 11.23693637 |
| 7.725393753 |
| 5.618468184 |
| 35.11542615 |
| 17.55771308 |
| 20.36694717 |
| 276.0072495 |
| 7.02308523  |
| 5.618468184 |
| 11.93924489 |
| 32.30619206 |
| 7.725393753 |
| 4.916159661 |
| 4.213851138 |
| 3.511542615 |
| 6.320776707 |
| 11.23693637 |
| 3.511542615 |
| 8.427702276 |
| 6.320776707 |
| 4.213851138 |
| 7.02308523  |
| 17.55771308 |
| 4.916159661 |
| 6.320776707 |
| 11.93924489 |
| 8.427702276 |
| 9.832319322 |
| 9.832319322 |

|             |
|-------------|
| 7.725393753 |
| 5.618468184 |
| 15.45078751 |
| 4.213851138 |
| 112.3693637 |
| 49.16159661 |
| 14.04617046 |
| 9.130010799 |
| 38.62696877 |
| 7.02308523  |
| 23.17618126 |
| 9.130010799 |
| 7.725393753 |
| 8.427702276 |
| 14.04617046 |
| 13.34386194 |
| 6.320776707 |
| 7.02308523  |
| 11.23693637 |
| 8.427702276 |
| 2.809234092 |
| 6.320776707 |
| 3.511542615 |
| 7.02308523  |
| 3.511542615 |
| 22.47387274 |
| 9.130010799 |
| 7.02308523  |
| 6.320776707 |
| 3.511542615 |
| 2.809234092 |
| 11.23693637 |
| 3.511542615 |
| 247.2126001 |
| 9.130010799 |
| 6.320776707 |
| 13.34386194 |
| 7.02308523  |
| 6.320776707 |
| 5.618468184 |
| 3.511542615 |
| 9.832319322 |
| 54.7800648  |

|             |
|-------------|
| 10.53462785 |
| 3.511542615 |
| 9.832319322 |
| 6.320776707 |
| 7.725393753 |
| 3.511542615 |
| 4.213851138 |
| 35.81773467 |
| 10.53462785 |
| 8.427702276 |
| 3.511542615 |
| 5.618468184 |
| 3.511542615 |
| 4.213851138 |
| 6.320776707 |
| 12.64155341 |
| 0           |
| 12.64155341 |
| 4.213851138 |
| 7.725393753 |
| 13.34386194 |
| 42.13851138 |
| 4.213851138 |
| 6.320776707 |
| 6.320776707 |
| 9.130010799 |
| 11.23693637 |
| 10.53462785 |
| 7.725393753 |
| 5.618468184 |
| 5.618468184 |
| 75.14701196 |
| 8.427702276 |
| 7.725393753 |
| 6.320776707 |
| 7.02308523  |
| 13.34386194 |
| 8.427702276 |
| 7.02308523  |
| 2.106925569 |
| 7.725393753 |
| 54.07775627 |
| 8.427702276 |

|             |
|-------------|
| 8.427702276 |
| 4.213851138 |
| 6.320776707 |
| 5.618468184 |
| 4.916159661 |
| 30.90157501 |
| 23.87848978 |
| 7.02308523  |
| 9.832319322 |
| 4.916159661 |
| 150.9963324 |
| 2.809234092 |
| 7.02308523  |
| 4.916159661 |
| 7.725393753 |
| 5.618468184 |
| 9.832319322 |
| 0           |
| 13.34386194 |
| 3.511542615 |
| 2.809234092 |
| 2.809234092 |
| 4.213851138 |
| 7.725393753 |
| 9.130010799 |
| 17.55771308 |
| 8.427702276 |
| 6.320776707 |
| 15.45078751 |
| 11.93924489 |
| 6.320776707 |
| 7.02308523  |
| 3.511542615 |
| 4.916159661 |
| 0           |
| 4.213851138 |
| 5.618468184 |
| 29.49695797 |
| 5.618468184 |
| 3.511542615 |
| 0           |
| 7.02308523  |
| 0           |

|             |
|-------------|
| 6.320776707 |
| 4.213851138 |
| 6.320776707 |
| 14.04617046 |
| 4.916159661 |
| 184.004833  |
| 7.02308523  |
| 5.618468184 |
| 1.404617046 |
| 4.916159661 |
| 5.618468184 |
| 5.618468184 |
| 2.809234092 |
| 179.7909819 |
| 5.618468184 |
| 11.23693637 |
| 7.02308523  |
| 0           |
| 20.36694717 |
| 4.916159661 |
| 1.404617046 |
| 9.130010799 |
| 5.618468184 |
| 6.320776707 |
| 11.93924489 |
| 3.511542615 |
| 4.916159661 |
| 11.23693637 |
| 4.916159661 |
| 7.02308523  |
| 7.02308523  |
| 16.15309603 |
| 44.24543695 |
| 7.02308523  |
| 9.832319322 |
| 6.320776707 |
| 8.427702276 |
| 6.320776707 |
| 20.36694717 |
| 7.02308523  |
| 167.851737  |
| 6.320776707 |
| 12.64155341 |

|             |
|-------------|
| 3.511542615 |
| 9.130010799 |
| 12.64155341 |
| 18.2600216  |
| 8.427702276 |
| 2.106925569 |
| 4.213851138 |
| 4.916159661 |
| 5.618468184 |
| 9.130010799 |
| 44.24543695 |
| 5.618468184 |
| 4.916159661 |
| 7.02308523  |
| 9.832319322 |
| 2.106925569 |
| 12.64155341 |
| 2.106925569 |
| 157.3171092 |
| 4.916159661 |
| 4.916159661 |
| 6.320776707 |
| 6.320776707 |
| 9.832319322 |
| 0           |
| 2.809234092 |
| 0           |
| 16.85540455 |
| 6.320776707 |
| 4.213851138 |
| 8.427702276 |
| 0.702308523 |
| 5.618468184 |
| 10.53462785 |
| 22.47387274 |
| 8.427702276 |
| 6.320776707 |
| 0           |
| 7.02308523  |
| 7.02308523  |
| 7.02308523  |
| 7.02308523  |
| 15.45078751 |

|             |
|-------------|
| 11.23693637 |
| 7.02308523  |
| 10.53462785 |
| 4.916159661 |
| 123.6063001 |
| 3.511542615 |
| 5.618468184 |
| 6.320776707 |
| 5.618468184 |
| 6.320776707 |
| 8.427702276 |
| 6.320776707 |
| 28.09234092 |
| 11.93924489 |
| 12.64155341 |
| 8.427702276 |
| 5.618468184 |
| 6.320776707 |
| 4.916159661 |
| 3.511542615 |
| 4.916159661 |
| 3.511542615 |
| 2.106925569 |
| 4.916159661 |
| 4.916159661 |
| 6.320776707 |
| 2.809234092 |
| 8.427702276 |
| 20.36694717 |
| 59.69622446 |
| 4.213851138 |
| 7.725393753 |
| 16.85540455 |
| 1.404617046 |
| 7.725393753 |
| 10.53462785 |
| 7.725393753 |
| 60.39853298 |
| 7.02308523  |
| 6.320776707 |
| 4.213851138 |
| 6.320776707 |
| 4.916159661 |

|             |
|-------------|
| 7.02308523  |
| 2.809234092 |
| 8.427702276 |
| 5.618468184 |
| 5.618468184 |
| 8.427702276 |
| 5.618468184 |
| 16.15309603 |
| 4.213851138 |
| 3.511542615 |
| 5.618468184 |
| 6.320776707 |
| 18.2600216  |
| 8.427702276 |
| 68.12392673 |
| 10.53462785 |
| 6.320776707 |
| 6.320776707 |
| 7.725393753 |
| 26.68772387 |
| 8.427702276 |
| 9.832319322 |
| 5.618468184 |
| 6.320776707 |
| 4.916159661 |
| 2.809234092 |
| 16.85540455 |
| 5.618468184 |
| 11.23693637 |
| 4.213851138 |
| 9.130010799 |
| 8.427702276 |
| 10.53462785 |
| 5.618468184 |
| 6.320776707 |
| 11.93924489 |
| 7.725393753 |
| 29.49695797 |
| 23.87848978 |
| 6.320776707 |
| 6.320776707 |
| 16.85540455 |
| 8.427702276 |



|             |
|-------------|
| 11.23693637 |
| 0           |
| 5.618468184 |
| 11.23693637 |
| 10.53462785 |
| 7.725393753 |
| 11.23693637 |
| 5.618468184 |
| 7.725393753 |
| 68.12392673 |
| 10.53462785 |
| 7.02308523  |
| 11.23693637 |
| 3.511542615 |
| 1.404617046 |
| 9.130010799 |
| 4.916159661 |
| 4.916159661 |
| 7.02308523  |
| 7.725393753 |
| 5.618468184 |
| 4.213851138 |
| 6.320776707 |
| 20.36694717 |
| 24.58079831 |
| 3.511542615 |
| 2.809234092 |
| 11.93924489 |
| 10.53462785 |
| 5.618468184 |
| 2.106925569 |
| 14.74847898 |
| 7.02308523  |
| 123.6063001 |
| 9.130010799 |
| 7.725393753 |
| 8.427702276 |
| 4.916159661 |
| 11.23693637 |
| 7.02308523  |
| 12.64155341 |
| 4.916159661 |
| 11.93924489 |

|             |
|-------------|
| 0.702308523 |
| 157.3171092 |
| 11.23693637 |
| 2.809234092 |
| 12.64155341 |
| 4.916159661 |
| 6.320776707 |
| 4.213851138 |
| 2.809234092 |
| 9.130010799 |
| 4.916159661 |
| 10.53462785 |
| 9.130010799 |
| 9.130010799 |
| 5.618468184 |
| 11.23693637 |
| 11.23693637 |
| 4.916159661 |
| 47.75697957 |
| 76.55162901 |
| 9.130010799 |
| 35.11542615 |
| 6.320776707 |
| 6.320776707 |
| 8.427702276 |
| 7.725393753 |
| 3.511542615 |
| 10.53462785 |
| 0.702308523 |
| 4.213851138 |
| 4.213851138 |
| 11.23693637 |
| 5.618468184 |
| 8.427702276 |
| 8.427702276 |
| 4.213851138 |
| 7.02308523  |
| 49.16159661 |
| 7.02308523  |
| 12.64155341 |
| 10.53462785 |
| 0.702308523 |
| 3.511542615 |

|             |
|-------------|
| 10.53462785 |
| 4.916159661 |
| 11.23693637 |
| 6.320776707 |
| 11.23693637 |
| 1.404617046 |
| 81.46778867 |
| 0.702308523 |
| 7.02308523  |
| 8.427702276 |
| 8.427702276 |
| 54.07775627 |
| 32.30619206 |
| 2.809234092 |
| 11.93924489 |
| 31.60388354 |
| 9.130010799 |
| 7.02308523  |
| 50.56621366 |
| 0.702308523 |
| 6.320776707 |
| 4.916159661 |
| 4.916159661 |
| 11.23693637 |
| 10.53462785 |
| 4.916159661 |
| 8.427702276 |
| 4.213851138 |
| 56.88699036 |
| 3.511542615 |
| 52.67313923 |
| 2.809234092 |
| 4.213851138 |
| 7.02308523  |
| 4.916159661 |
| 212.097174  |
| 5.618468184 |
| 7.02308523  |
| 4.916159661 |
| 4.213851138 |
| 19.66463864 |
| 7.725393753 |
| 6.320776707 |

|             |
|-------------|
| 10.53462785 |
| 4.213851138 |
| 4.213851138 |
| 9.130010799 |
| 8.427702276 |
| 37.92466024 |
| 2.106925569 |
| 28.09234092 |
| 8.427702276 |
| 5.618468184 |
| 2.809234092 |
| 8.427702276 |
| 25.98541535 |
| 9.130010799 |
| 14.04617046 |
| 7.725393753 |
| 5.618468184 |
| 9.130010799 |
| 6.320776707 |
| 10.53462785 |
| 3.511542615 |
| 4.213851138 |
| 6.320776707 |
| 4.213851138 |
| 3.511542615 |
| 2.809234092 |
| 7.725393753 |
| 10.53462785 |
| 19.66463864 |
| 7.02308523  |
| 7.02308523  |
| 21.77156421 |
| 4.916159661 |
| 4.213851138 |
| 4.213851138 |
| 10.53462785 |
| 16.15309603 |
| 8.427702276 |
| 4.213851138 |
| 7.02308523  |
| 11.93924489 |
| 3.511542615 |
| 60.39853298 |

|             |
|-------------|
| 2.106925569 |
| 14.04617046 |
| 7.725393753 |
| 9.832319322 |
| 40.73389434 |
| 3.511542615 |
| 13.34386194 |
| 0.702308523 |
| 2.809234092 |
| 7.02308523  |
| 9.832319322 |
| 7.02308523  |
| 7.725393753 |
| 15.45078751 |
| 7.02308523  |
| 25.98541535 |
| 6.320776707 |
| 17.55771308 |
| 9.130010799 |
| 7.02308523  |
| 3.511542615 |
| 7.02308523  |
| 2.809234092 |
| 4.213851138 |
| 11.23693637 |
| 3.511542615 |
| 6.320776707 |
| 11.93924489 |
| 5.618468184 |
| 1.404617046 |
| 10.53462785 |
| 12.64155341 |
| 4.916159661 |
| 121.4993745 |
| 4.916159661 |
| 5.618468184 |
| 2.809234092 |
| 4.916159661 |
| 151.698641  |
| 7.02308523  |
| 9.832319322 |
| 7.02308523  |
| 2.106925569 |

|             |
|-------------|
| 5.618468184 |
| 6.320776707 |
| 47.75697957 |
| 7.725393753 |
| 13.34386194 |
| 12.64155341 |
| 7.02308523  |
| 5.618468184 |
| 3.511542615 |
| 9.832319322 |
| 9.832319322 |
| 7.725393753 |
| 6.320776707 |
| 1.404617046 |
| 6.320776707 |
| 7.725393753 |
| 3.511542615 |
| 17.55771308 |
| 7.725393753 |
| 9.832319322 |
| 1.404617046 |
| 5.618468184 |
| 18.2600216  |
| 4.916159661 |
| 0           |
| 24.58079831 |
| 14.74847898 |
| 6.320776707 |
| 9.832319322 |
| 7.02308523  |
| 2.809234092 |
| 7.02308523  |
| 91.30010799 |
| 16.15309603 |
| 10.53462785 |
| 23.87848978 |
| 7.02308523  |
| 92.00241652 |
| 7.02308523  |
| 8.427702276 |
| 3.511542615 |
| 7.02308523  |
| 5.618468184 |

|             |
|-------------|
| 3.511542615 |
| 0.702308523 |
| 8.427702276 |
| 7.02308523  |
| 2.809234092 |
| 4.916159661 |
| 7.02308523  |
| 4.213851138 |
| 4.916159661 |
| 8.427702276 |
| 4.916159661 |
| 22.47387274 |
| 4.916159661 |
| 0.702308523 |
| 8.427702276 |
| 5.618468184 |
| 7.725393753 |
| 6.320776707 |
| 0           |
| 7.02308523  |
| 7.725393753 |
| 7.02308523  |
| 16.15309603 |
| 13.34386194 |
| 2.809234092 |
| 7.725393753 |
| 5.618468184 |
| 6.320776707 |
| 5.618468184 |
| 9.130010799 |
| 5.618468184 |
| 0.702308523 |
| 10.53462785 |
| 7.725393753 |
| 18.96233012 |
| 0.702308523 |
| 10.53462785 |
| 5.618468184 |
| 4.916159661 |
| 0           |
| 9.130010799 |
| 4.213851138 |
| 11.23693637 |

|             |
|-------------|
| 87.78856538 |
| 7.725393753 |
| 5.618468184 |
| 61.80315003 |
| 9.832319322 |
| 23.87848978 |
| 7.725393753 |
| 6.320776707 |
| 8.427702276 |
| 2.809234092 |
| 299.8857393 |
| 9.130010799 |
| 8.427702276 |
| 6.320776707 |
| 7.02308523  |
| 7.02308523  |
| 3.511542615 |
| 7.02308523  |
| 2.809234092 |
| 11.23693637 |
| 2.106925569 |
| 7.02308523  |
| 7.725393753 |
| 7.02308523  |
| 8.427702276 |
| 6.320776707 |
| 9.832319322 |
| 9.130010799 |
| 6.320776707 |
| 4.213851138 |
| 9.130010799 |
| 7.725393753 |
| 9.832319322 |
| 2.809234092 |
| 7.02308523  |
| 8.427702276 |
| 108.8578211 |
| 4.916159661 |
| 50.56621366 |
| 3.511542615 |
| 6.320776707 |
| 40.73389434 |
| 8.427702276 |



|             |
|-------------|
| 5.618468184 |
| 11.23693637 |
| 9.130010799 |
| 4.213851138 |
| 6.320776707 |
| 8.427702276 |
| 4.916159661 |
| 4.916159661 |
| 15.45078751 |
| 22.47387274 |
| 4.916159661 |
| 6.320776707 |
| 135.5455449 |
| 7.02308523  |
| 4.916159661 |
| 11.93924489 |
| 9.130010799 |
| 14.74847898 |
| 6.320776707 |
| 4.916159661 |
| 11.23693637 |
| 3.511542615 |
| 2.106925569 |
| 4.916159661 |
| 47.75697957 |
| 13.34386194 |
| 149.5917154 |
| 9.130010799 |
| 4.916159661 |
| 11.23693637 |
| 1.404617046 |
| 8.427702276 |
| 12.64155341 |
| 13.34386194 |
| 4.213851138 |
| 9.832319322 |
| 9.130010799 |
| 4.213851138 |
| 11.23693637 |
| 10.53462785 |
| 8.427702276 |
| 5.618468184 |
| 4.213851138 |

|             |
|-------------|
| 7.02308523  |
| 7.725393753 |
| 6.320776707 |
| 18.96233012 |
| 11.23693637 |
| 9.130010799 |
| 4.213851138 |
| 6.320776707 |
| 11.93924489 |
| 2.809234092 |
| 4.213851138 |
| 11.93924489 |
| 6.320776707 |
| 6.320776707 |
| 7.725393753 |
| 40.73389434 |
| 6.320776707 |
| 11.23693637 |
| 107.453204  |
| 0.702308523 |
| 4.213851138 |
| 2.809234092 |
| 7.02308523  |
| 15.45078751 |
| 9.130010799 |
| 4.213851138 |
| 9.130010799 |
| 3.511542615 |
| 1.404617046 |
| 30.90157501 |
| 9.832319322 |
| 10.53462785 |
| 143.2709387 |
| 2.809234092 |
| 24.58079831 |
| 7.725393753 |
| 2.809234092 |
| 6.320776707 |
| 4.916159661 |
| 20.36694717 |
| 109.5601296 |
| 7.02308523  |
| 5.618468184 |

|             |
|-------------|
| 4.916159661 |
| 10.53462785 |
| 7.725393753 |
| 14.04617046 |
| 5.618468184 |
| 11.23693637 |
| 7.02308523  |
| 15.45078751 |
| 4.916159661 |
| 4.213851138 |
| 4.213851138 |
| 4.916159661 |
| 5.618468184 |
| 4.213851138 |
| 5.618468184 |
| 0           |
| 3.511542615 |
| 10.53462785 |
| 17.55771308 |
| 7.02308523  |
| 8.427702276 |
| 4.213851138 |
| 7.02308523  |
| 4.916159661 |
| 5.618468184 |
| 5.618468184 |
| 2.809234092 |
| 69.52854378 |
| 3.511542615 |
| 7.02308523  |
| 5.618468184 |
| 6.320776707 |
| 6.320776707 |
| 2.809234092 |
| 56.18468184 |
| 7.725393753 |
| 6.320776707 |
| 2.809234092 |
| 4.213851138 |
| 8.427702276 |
| 5.618468184 |
| 2.809234092 |
| 12.64155341 |

|             |
|-------------|
| 6.320776707 |
| 6.320776707 |
| 103.9416614 |
| 11.23693637 |
| 6.320776707 |
| 4.916159661 |
| 8.427702276 |
| 11.23693637 |
| 5.618468184 |
| 0           |
| 114.4762893 |
| 11.23693637 |
| 7.725393753 |
| 3.511542615 |
| 5.618468184 |
| 5.618468184 |
| 3.511542615 |
| 10.53462785 |
| 7.725393753 |
| 14.74847898 |
| 7.02308523  |
| 7.725393753 |
| 0.702308523 |
| 5.618468184 |
| 2.809234092 |
| 8.427702276 |
| 5.618468184 |
| 5.618468184 |
| 9.130010799 |
| 7.02308523  |
| 4.213851138 |
| 6.320776707 |
| 4.916159661 |
| 7.02308523  |
| 11.23693637 |
| 2.106925569 |
| 40.73389434 |
| 1.404617046 |
| 9.130010799 |
| 5.618468184 |
| 5.618468184 |
| 7.02308523  |
| 5.618468184 |

|             |
|-------------|
| 0           |
| 42.8408199  |
| 6.320776707 |
| 0           |
| 4.213851138 |
| 11.93924489 |
| 16.15309603 |
| 7.725393753 |
| 8.427702276 |
| 7.725393753 |
| 12.64155341 |
| 8.427702276 |
| 7.02308523  |
| 6.320776707 |
| 7.725393753 |
| 5.618468184 |
| 76.55162901 |
| 8.427702276 |
| 145.3778643 |
| 6.320776707 |
| 3.511542615 |
| 9.130010799 |
| 9.130010799 |
| 5.618468184 |
| 4.916159661 |
| 7.725393753 |
| 25.98541535 |
| 5.618468184 |
| 4.213851138 |
| 4.916159661 |
| 7.725393753 |
| 7.02308523  |
| 64.61238412 |
| 7.02308523  |
| 7.725393753 |
| 3.511542615 |
| 8.427702276 |
| 6.320776707 |
| 5.618468184 |
| 9.130010799 |
| 4.916159661 |
| 8.427702276 |
| 9.832319322 |

|             |
|-------------|
| 6.320776707 |
| 8.427702276 |
| 7.02308523  |
| 6.320776707 |
| 16.85540455 |
| 1.404617046 |
| 6.320776707 |
| 2.809234092 |
| 8.427702276 |
| 16.15309603 |
| 9.130010799 |
| 5.618468184 |
| 5.618468184 |
| 7.725393753 |
| 7.725393753 |
| 7.725393753 |
| 6.320776707 |
| 15.45078751 |
| 9.832319322 |
| 4.916159661 |
| 7.725393753 |
| 19.66463864 |
| 2.106925569 |
| 7.725393753 |
| 58.29160741 |
| 4.213851138 |
| 11.23693637 |
| 15.45078751 |
| 10.53462785 |
| 10.53462785 |
| 5.618468184 |
| 3.511542615 |
| 7.725393753 |
| 0           |
| 6.320776707 |
| 9.832319322 |
| 9.832319322 |
| 17.55771308 |
| 7.725393753 |
| 7.725393753 |
| 7.725393753 |
| 8.427702276 |
| 4.213851138 |

|             |
|-------------|
| 4.213851138 |
| 5.618468184 |
| 2.106925569 |
| 5.618468184 |
| 61.1008415  |
| 13.34386194 |
| 9.130010799 |
| 112.3693637 |
| 7.725393753 |
| 7.725393753 |
| 15.45078751 |
| 54.7800648  |
| 4.916159661 |
| 28.09234092 |
| 7.02308523  |
| 5.618468184 |
| 37.22235172 |
| 4.916159661 |
| 4.213851138 |
| 5.618468184 |
| 7.02308523  |
| 2.809234092 |
| 7.725393753 |
| 6.320776707 |
| 7.02308523  |
| 3.511542615 |
| 42.8408199  |
| 11.93924489 |
| 0           |
| 7.02308523  |
| 10.53462785 |
| 4.213851138 |
| 9.832319322 |
| 9.130010799 |
| 7.02308523  |
| 8.427702276 |
| 2.809234092 |
| 10.53462785 |
| 136.950162  |
| 7.02308523  |
| 2.106925569 |
| 77.95624606 |
| 8.427702276 |

|             |
|-------------|
| 6.320776707 |
| 5.618468184 |
| 38.62696877 |
| 4.916159661 |
| 11.93924489 |
| 4.213851138 |
| 3.511542615 |
| 2.809234092 |
| 9.130010799 |
| 3.511542615 |
| 8.427702276 |
| 5.618468184 |
| 11.23693637 |
| 51.9708307  |
| 58.29160741 |
| 155.9124921 |
| 6.320776707 |
| 7.02308523  |
| 5.618468184 |
| 2.106925569 |
| 4.916159661 |
| 4.916159661 |
| 10.53462785 |
| 2.809234092 |
| 65.31469264 |
| 6.320776707 |
| 11.23693637 |
| 4.916159661 |
| 3.511542615 |
| 2.809234092 |
| 5.618468184 |
| 10.53462785 |
| 7.02308523  |
| 4.213851138 |
| 4.213851138 |
| 9.832319322 |
| 4.916159661 |
| 5.618468184 |
| 5.618468184 |
| 6.320776707 |
| 7.02308523  |
| 11.93924489 |
| 6.320776707 |



|             |
|-------------|
| 10.53462785 |
| 8.427702276 |
| 11.93924489 |
| 4.916159661 |
| 3.511542615 |
| 7.02308523  |
| 5.618468184 |
| 8.427702276 |
| 9.832319322 |
| 4.916159661 |
| 4.916159661 |
| 7.725393753 |
| 5.618468184 |
| 11.23693637 |
| 0           |
| 4.916159661 |
| 6.320776707 |
| 9.832319322 |
| 33.00850058 |
| 7.725393753 |
| 6.320776707 |
| 7.725393753 |
| 0           |
| 7.725393753 |
| 9.130010799 |
| 5.618468184 |
| 7.725393753 |
| 10.53462785 |
| 0           |
| 4.213851138 |
| 9.130010799 |
| 4.213851138 |
| 5.618468184 |
| 7.725393753 |
| 4.213851138 |
| 12.64155341 |
| 9.130010799 |
| 9.130010799 |
| 5.618468184 |
| 10.53462785 |
| 7.725393753 |
| 5.618468184 |
| 127.1178427 |

|             |
|-------------|
| 5.618468184 |
| 11.23693637 |
| 105.3462785 |
| 8.427702276 |
| 3.511542615 |
| 6.320776707 |
| 0           |
| 3.511542615 |
| 6.320776707 |
| 4.916159661 |
| 9.832319322 |
| 7.02308523  |
| 5.618468184 |
| 3.511542615 |
| 7.725393753 |
| 3.511542615 |
| 22.47387274 |
| 11.23693637 |
| 2.809234092 |
| 22.47387274 |
| 6.320776707 |
| 6.320776707 |
| 3.511542615 |
| 16.15309603 |
| 9.832319322 |
| 14.74847898 |
| 7.725393753 |
| 11.23693637 |
| 57.58929889 |
| 8.427702276 |
| 7.725393753 |
| 7.02308523  |
| 91.30010799 |
| 7.725393753 |
| 7.725393753 |
| 7.02308523  |
| 7.725393753 |
| 12.64155341 |
| 9.130010799 |
| 7.725393753 |
| 250.7241427 |
| 1.404617046 |
| 7.725393753 |

|             |
|-------------|
| 5.618468184 |
| 7.725393753 |
| 4.916159661 |
| 3.511542615 |
| 3.511542615 |
| 6.320776707 |
| 9.130010799 |
| 2.106925569 |
| 5.618468184 |
| 8.427702276 |
| 102.5370444 |
| 4.916159661 |
| 5.618468184 |
| 4.213851138 |
| 6.320776707 |
| 0           |
| 11.23693637 |
| 139.7593961 |
| 5.618468184 |
| 304.801899  |
| 4.213851138 |
| 6.320776707 |
| 7.02308523  |
| 4.213851138 |
| 7.02308523  |
| 28.79464944 |
| 93.40703356 |
| 7.02308523  |
| 23.17618126 |
| 0           |
| 7.02308523  |
| 4.916159661 |
| 5.618468184 |
| 5.618468184 |
| 9.130010799 |
| 9.130010799 |
| 7.02308523  |
| 101.1324273 |
| 4.916159661 |
| 6.320776707 |
| 6.320776707 |
| 7.02308523  |
| 10.53462785 |

|             |
|-------------|
| 4.916159661 |
| 105.3462785 |
| 3.511542615 |
| 4.916159661 |
| 9.832319322 |
| 6.320776707 |
| 8.427702276 |
| 6.320776707 |
| 7.02308523  |
| 4.916159661 |
| 0.702308523 |
| 20.36694717 |
| 17.55771308 |
| 4.916159661 |
| 5.618468184 |
| 6.320776707 |
| 35.81773467 |
| 5.618468184 |
| 6.320776707 |
| 22.47387274 |
| 4.213851138 |
| 7.725393753 |
| 11.23693637 |
| 0           |
| 9.832319322 |
| 4.916159661 |
| 3.511542615 |
| 4.916159661 |
| 24.58079831 |
| 16.15309603 |
| 5.618468184 |
| 3.511542615 |
| 11.23693637 |
| 20.36694717 |
| 7.725393753 |
| 34.41311763 |
| 9.130010799 |
| 6.320776707 |
| 6.320776707 |
| 7.725393753 |
| 4.213851138 |
| 11.23693637 |
| 9.130010799 |

|             |
|-------------|
| 7.02308523  |
| 7.725393753 |
| 4.916159661 |
| 6.320776707 |
| 0           |
| 14.04617046 |
| 31.60388354 |
| 9.130010799 |
| 2.809234092 |
| 6.320776707 |
| 4.916159661 |
| 5.618468184 |
| 6.320776707 |
| 10.53462785 |
| 164.3401944 |
| 7.725393753 |
| 35.81773467 |
| 12.64155341 |
| 1.404617046 |
| 49.16159661 |
| 6.320776707 |
| 220.5248762 |
| 35.81773467 |
| 7.02308523  |
| 6.320776707 |
| 9.130010799 |
| 9.130010799 |
| 9.832319322 |
| 7.02308523  |
| 9.130010799 |
| 4.213851138 |
| 4.213851138 |
| 9.130010799 |
| 4.916159661 |
| 158.7217262 |
| 5.618468184 |
| 5.618468184 |
| 7.725393753 |
| 8.427702276 |
| 4.916159661 |
| 6.320776707 |
| 9.130010799 |
| 4.213851138 |

|             |
|-------------|
| 61.80315003 |
| 5.618468184 |
| 7.725393753 |
| 4.213851138 |
| 2.106925569 |
| 12.64155341 |
| 4.916159661 |
| 30.90157501 |
| 21.77156421 |
| 5.618468184 |
| 7.725393753 |
| 1.404617046 |
| 11.23693637 |
| 8.427702276 |
| 3.511542615 |
| 13.34386194 |
| 7.02308523  |
| 6.320776707 |
| 7.725393753 |
| 7.02308523  |
| 7.725393753 |
| 5.618468184 |
| 2.809234092 |
| 9.130010799 |
| 9.832319322 |
| 7.725393753 |
| 2.809234092 |
| 8.427702276 |
| 7.725393753 |
| 39.32927729 |
| 2.809234092 |
| 150.9963324 |
| 1.404617046 |
| 7.725393753 |
| 0           |
| 13.34386194 |
| 5.618468184 |
| 5.618468184 |
| 7.02308523  |
| 4.916159661 |
| 9.130010799 |
| 9.130010799 |
| 9.130010799 |

|             |
|-------------|
| 7.725393753 |
| 19.66463864 |
| 9.130010799 |
| 7.02308523  |
| 7.02308523  |
| 4.213851138 |
| 6.320776707 |
| 7.02308523  |
| 6.320776707 |
| 9.130010799 |
| 5.618468184 |
| 6.320776707 |
| 4.213851138 |
| 9.130010799 |
| 44.24543695 |
| 4.213851138 |
| 11.23693637 |
| 4.916159661 |
| 4.213851138 |
| 8.427702276 |
| 9.832319322 |
| 9.130010799 |
| 8.427702276 |
| 5.618468184 |
| 22.47387274 |
| 7.725393753 |
| 37.92466024 |
| 8.427702276 |
| 4.213851138 |
| 82.87240572 |
| 7.725393753 |
| 6.320776707 |
| 179.7909819 |
| 7.725393753 |
| 28.09234092 |
| 3.511542615 |
| 9.130010799 |
| 1.404617046 |
| 7.02308523  |
| 4.916159661 |
| 5.618468184 |
| 5.618468184 |
| 2.106925569 |

|             |
|-------------|
| 4.916159661 |
| 6.320776707 |
| 4.916159661 |
| 6.320776707 |
| 5.618468184 |
| 7.725393753 |
| 8.427702276 |
| 13.34386194 |
| 7.02308523  |
| 4.213851138 |
| 7.725393753 |
| 4.213851138 |
| 11.93924489 |
| 8.427702276 |
| 9.832319322 |
| 6.320776707 |
| 8.427702276 |
| 7.725393753 |
| 3.511542615 |
| 6.320776707 |
| 3.511542615 |
| 4.213851138 |
| 7.02308523  |
| 16.15309603 |
| 185.4094501 |
| 108.1555125 |
| 5.618468184 |
| 5.618468184 |
| 8.427702276 |
| 7.02308523  |
| 75.14701196 |
| 9.130010799 |
| 11.23693637 |
| 6.320776707 |
| 7.725393753 |
| 12.64155341 |
| 3.511542615 |
| 6.320776707 |
| 64.61238412 |
| 116.5832148 |
| 10.53462785 |
| 28.79464944 |
| 8.427702276 |



|             |
|-------------|
| 21.77156421 |
| 120.0947574 |
| 7.02308523  |
| 7.725393753 |
| 7.02308523  |
| 0.702308523 |
| 9.130010799 |
| 7.725393753 |
| 11.23693637 |
| 5.618468184 |
| 2.809234092 |
| 0           |
| 10.53462785 |
| 10.53462785 |
| 9.130010799 |
| 12.64155341 |
| 5.618468184 |
| 4.213851138 |
| 5.618468184 |
| 8.427702276 |
| 12.64155341 |
| 6.320776707 |
| 12.64155341 |
| 6.320776707 |
| 2.106925569 |
| 10.53462785 |
| 0           |
| 4.213851138 |
| 6.320776707 |
| 7.02308523  |
| 6.320776707 |
| 4.916159661 |
| 4.916159661 |
| 9.832319322 |
| 6.320776707 |
| 6.320776707 |
| 9.130010799 |
| 16.85540455 |
| 6.320776707 |
| 9.130010799 |
| 6.320776707 |
| 2.106925569 |
| 8.427702276 |

|             |
|-------------|
| 4.916159661 |
| 4.213851138 |
| 0           |
| 19.66463864 |
| 4.213851138 |
| 9.130010799 |
| 4.213851138 |
| 3.511542615 |
| 14.74847898 |
| 7.02308523  |
| 4.213851138 |
| 7.725393753 |
| 11.93924489 |
| 11.23693637 |
| 13.34386194 |
| 4.916159661 |
| 10.53462785 |
| 5.618468184 |
| 6.320776707 |
| 9.832319322 |
| 18.2600216  |
| 32.30619206 |
| 13.34386194 |
| 7.725393753 |
| 3.511542615 |
| 9.832319322 |
| 4.916159661 |
| 6.320776707 |
| 6.320776707 |
| 7.725393753 |
| 6.320776707 |
| 19.66463864 |
| 16.15309603 |
| 9.130010799 |
| 9.130010799 |
| 4.916159661 |
| 2.106925569 |
| 4.213851138 |
| 8.427702276 |
| 13.34386194 |
| 4.213851138 |
| 18.2600216  |
| 0           |

|             |
|-------------|
| 6.320776707 |
| 11.23693637 |
| 9.130010799 |
| 18.96233012 |
| 9.130010799 |
| 7.725393753 |
| 10.53462785 |
| 18.96233012 |
| 9.130010799 |
| 28.79464944 |
| 7.725393753 |
| 19.66463864 |
| 12.64155341 |
| 9.130010799 |
| 9.130010799 |
| 8.427702276 |
| 18.2600216  |
| 58.99391593 |
| 3.511542615 |
| 4.916159661 |
| 4.213851138 |
| 8.427702276 |
| 221.9294933 |
| 4.916159661 |
| 6.320776707 |
| 2.809234092 |
| 7.02308523  |
| 11.23693637 |
| 4.916159661 |
| 4.213851138 |
| 10.53462785 |
| 23.17618126 |
| 23.87848978 |
| 10.53462785 |
| 101.1324273 |
| 34.41311763 |
| 9.130010799 |
| 7.725393753 |
| 4.916159661 |
| 58.99391593 |
| 6.320776707 |
| 6.320776707 |
| 11.93924489 |

|             |
|-------------|
| 10.53462785 |
| 3.511542615 |
| 4.916159661 |
| 9.130010799 |
| 15.45078751 |
| 15.45078751 |
| 4.916159661 |
| 8.427702276 |
| 6.320776707 |
| 11.23693637 |
| 4.916159661 |
| 9.832319322 |
| 2.106925569 |
| 11.23693637 |
| 16.15309603 |
| 11.23693637 |
| 69.52854378 |
| 16.15309603 |
| 4.213851138 |
| 4.213851138 |
| 11.93924489 |
| 4.213851138 |
| 6.320776707 |
| 25.98541535 |
| 10.53462785 |
| 60.39853298 |
| 6.320776707 |
| 7.02308523  |
| 4.916159661 |
| 20.36694717 |
| 6.320776707 |
| 11.23693637 |
| 7.02308523  |
| 2.809234092 |
| 70.93316082 |
| 0.702308523 |
| 47.75697957 |
| 16.85540455 |
| 6.320776707 |
| 6.320776707 |
| 0.702308523 |
| 6.320776707 |
| 11.23693637 |

|             |
|-------------|
| 6.320776707 |
| 9.130010799 |
| 28.09234092 |
| 2.106925569 |
| 4.916159661 |
| 4.916159661 |
| 14.74847898 |
| 50.56621366 |
| 67.42161821 |
| 9.130010799 |
| 10.53462785 |
| 7.02308523  |
| 2.809234092 |
| 8.427702276 |
| 12.64155341 |
| 11.23693637 |
| 11.23693637 |
| 13.34386194 |
| 7.02308523  |
| 2.809234092 |
| 82.17009719 |
| 8.427702276 |
| 5.618468184 |
| 7.02308523  |
| 9.832319322 |
| 77.95624606 |
| 5.618468184 |
| 49.86390513 |
| 4.916159661 |
| 4.213851138 |
| 9.832319322 |
| 11.93924489 |
| 4.916159661 |
| 24.58079831 |
| 7.725393753 |
| 7.02308523  |
| 10.53462785 |
| 7.725393753 |
| 7.725393753 |
| 3.511542615 |
| 6.320776707 |
| 4.213851138 |
| 9.130010799 |

|             |
|-------------|
| 11.23693637 |
| 4.916159661 |
| 7.725393753 |
| 4.213851138 |
| 9.130010799 |
| 7.725393753 |
| 51.26852218 |
| 4.916159661 |
| 5.618468184 |
| 0.702308523 |
| 11.93924489 |
| 10.53462785 |
| 8.427702276 |
| 6.320776707 |
| 5.618468184 |
| 23.87848978 |
| 12.64155341 |
| 28.09234092 |
| 9.130010799 |
| 9.130010799 |
| 56.88699036 |
| 8.427702276 |
| 4.916159661 |
| 9.832319322 |
| 8.427702276 |
| 5.618468184 |
| 2.809234092 |
| 20.36694717 |
| 7.725393753 |
| 74.44470344 |
| 7.725393753 |
| 9.832319322 |
| 0           |
| 5.618468184 |
| 4.213851138 |
| 4.213851138 |
| 12.64155341 |
| 3.511542615 |
| 9.832319322 |
| 63.91007559 |
| 20.36694717 |
| 11.93924489 |
| 4.916159661 |

|             |
|-------------|
| 7.725393753 |
| 6.320776707 |
| 11.93924489 |
| 11.93924489 |
| 49.86390513 |
| 6.320776707 |
| 8.427702276 |
| 9.130010799 |
| 2.809234092 |
| 9.130010799 |
| 14.74847898 |
| 7.725393753 |
| 7.725393753 |
| 6.320776707 |
| 4.916159661 |
| 7.725393753 |
| 7.725393753 |
| 5.618468184 |
| 6.320776707 |
| 10.53462785 |
| 5.618468184 |
| 85.68163981 |
| 164.3401944 |
| 21.06925569 |
| 8.427702276 |
| 2.809234092 |
| 9.130010799 |
| 0           |
| 7.02308523  |
| 4.916159661 |
| 8.427702276 |
| 6.320776707 |
| 7.725393753 |
| 10.53462785 |
| 7.725393753 |
| 11.93924489 |
| 7.02308523  |
| 7.725393753 |
| 11.93924489 |
| 2.809234092 |
| 7.725393753 |
| 9.832319322 |
| 6.320776707 |

|             |
|-------------|
| 11.93924489 |
| 9.832319322 |
| 5.618468184 |
| 7.02308523  |
| 6.320776707 |
| 14.74847898 |
| 11.93924489 |
| 8.427702276 |
| 6.320776707 |
| 7.02308523  |
| 4.916159661 |
| 2.809234092 |
| 8.427702276 |
| 4.916159661 |
| 4.916159661 |
| 9.130010799 |
| 9.832319322 |
| 5.618468184 |
| 11.93924489 |
| 65.31469264 |
| 11.93924489 |
| 85.68163981 |
| 61.80315003 |
| 10.53462785 |
| 14.74847898 |
| 67.42161821 |
| 6.320776707 |
| 8.427702276 |
| 7.02308523  |
| 7.725393753 |
| 9.832319322 |
| 8.427702276 |
| 19.66463864 |
| 7.02308523  |
| 9.832319322 |
| 7.02308523  |
| 5.618468184 |
| 11.23693637 |
| 9.832319322 |
| 7.02308523  |
| 30.90157501 |
| 18.96233012 |
| 9.832319322 |



|             |
|-------------|
| 7.02308523  |
| 6.320776707 |
| 11.93924489 |
| 7.02308523  |
| 9.130010799 |
| 6.320776707 |
| 7.725393753 |
| 16.85540455 |
| 10.53462785 |
| 7.02308523  |
| 9.130010799 |
| 7.02308523  |
| 7.725393753 |
| 124.3086086 |
| 19.66463864 |
| 4.916159661 |
| 9.832319322 |
| 1.404617046 |
| 4.213851138 |
| 15.45078751 |
| 54.7800648  |
| 8.427702276 |
| 3.511542615 |
| 3.511542615 |
| 28.79464944 |
| 110.2624381 |
| 7.725393753 |
| 57.58929889 |
| 7.725393753 |
| 148.8894069 |
| 3.511542615 |
| 12.64155341 |
| 3.511542615 |
| 10.53462785 |
| 16.15309603 |
| 4.916159661 |
| 4.916159661 |
| 1.404617046 |
| 4.916159661 |
| 57.58929889 |
| 4.916159661 |
| 251.4264512 |
| 0.702308523 |

|             |
|-------------|
| 11.23693637 |
| 10.53462785 |
| 9.130010799 |
| 7.725393753 |
| 6.320776707 |
| 38.62696877 |
| 7.725393753 |
| 7.725393753 |
| 7.02308523  |
| 4.916159661 |
| 74.44470344 |
| 9.130010799 |
| 4.916159661 |
| 37.22235172 |
| 7.725393753 |
| 0           |
| 7.725393753 |
| 9.130010799 |
| 8.427702276 |
| 2.809234092 |
| 12.64155341 |
| 9.130010799 |
| 5.618468184 |
| 5.618468184 |
| 8.427702276 |
| 9.130010799 |
| 114.4762893 |
| 6.320776707 |
| 6.320776707 |
| 28.79464944 |
| 68.82623526 |
| 0           |
| 127.1178427 |
| 10.53462785 |
| 5.618468184 |
| 16.15309603 |
| 18.2600216  |
| 7.02308523  |
| 4.213851138 |
| 9.130010799 |
| 7.02308523  |
| 169.9586626 |
| 10.53462785 |

|             |
|-------------|
| 11.23693637 |
| 9.130010799 |
| 7.02308523  |
| 40.03158581 |
| 4.213851138 |
| 44.24543695 |
| 24.58079831 |
| 8.427702276 |
| 8.427702276 |
| 4.213851138 |
| 11.23693637 |
| 250.7241427 |
| 15.45078751 |
| 0           |
| 17.55771308 |
| 9.832319322 |
| 6.320776707 |
| 16.85540455 |
| 13.34386194 |
| 184.004833  |
| 4.916159661 |
| 2.809234092 |
| 30.90157501 |
| 7.02308523  |
| 9.832319322 |
| 11.23693637 |
| 6.320776707 |
| 4.916159661 |
| 10.53462785 |
| 9.130010799 |
| 4.916159661 |
| 61.1008415  |
| 4.213851138 |
| 22.47387274 |
| 2.809234092 |
| 176.9817478 |
| 4.213851138 |
| 4.916159661 |
| 6.320776707 |
| 4.213851138 |
| 32.30619206 |
| 7.02308523  |
| 7.725393753 |

|             |
|-------------|
| 4.916159661 |
| 6.320776707 |
| 11.23693637 |
| 7.02308523  |
| 4.213851138 |
| 14.04617046 |
| 5.618468184 |
| 7.02308523  |
| 50.56621366 |
| 3.511542615 |
| 8.427702276 |
| 9.832319322 |
| 7.725393753 |
| 0           |
| 8.427702276 |
| 2.809234092 |
| 42.13851138 |
| 7.02308523  |
| 4.916159661 |
| 11.93924489 |
| 8.427702276 |
| 22.47387274 |
| 19.66463864 |
| 9.832319322 |
| 2.106925569 |
| 9.130010799 |
| 2.106925569 |
| 9.130010799 |
| 9.832319322 |
| 6.320776707 |
| 11.93924489 |
| 6.320776707 |
| 7.02308523  |
| 23.17618126 |
| 2.106925569 |
| 7.02308523  |
| 35.81773467 |
| 5.618468184 |
| 99.72781027 |
| 0           |
| 3.511542615 |
| 6.320776707 |
| 6.320776707 |

|             |
|-------------|
| 8.427702276 |
| 15.45078751 |
| 2.809234092 |
| 18.96233012 |
| 6.320776707 |
| 5.618468184 |
| 4.213851138 |
| 7.02308523  |
| 21.77156421 |
| 8.427702276 |
| 9.130010799 |
| 9.130010799 |
| 13.34386194 |
| 4.916159661 |
| 5.618468184 |
| 0           |
| 5.618468184 |
| 4.916159661 |
| 4.916159661 |
| 7.725393753 |
| 9.832319322 |
| 7.725393753 |
| 7.02308523  |
| 7.02308523  |
| 7.02308523  |
| 17.55771308 |
| 0           |
| 4.916159661 |
| 6.320776707 |
| 9.832319322 |
| 193.8371524 |
| 7.02308523  |
| 5.618468184 |
| 3.511542615 |
| 0.702308523 |
| 9.832319322 |
| 8.427702276 |
| 0.702308523 |
| 7.02308523  |
| 11.93924489 |
| 8.427702276 |
| 10.53462785 |
| 9.832319322 |

|             |
|-------------|
| 6.320776707 |
| 11.93924489 |
| 58.29160741 |
| 38.62696877 |
| 43.54312843 |
| 13.34386194 |
| 228.9525785 |
| 3.511542615 |
| 2.106925569 |
| 13.34386194 |
| 6.320776707 |
| 4.916159661 |
| 48.45928809 |
| 5.618468184 |
| 9.130010799 |
| 13.34386194 |
| 20.36694717 |
| 10.53462785 |
| 7.02308523  |
| 9.130010799 |
| 7.02308523  |
| 3.511542615 |
| 0.702308523 |
| 4.916159661 |
| 6.320776707 |
| 3.511542615 |
| 6.320776707 |
| 3.511542615 |
| 75.84932049 |
| 9.832319322 |
| 4.916159661 |
| 9.130010799 |
| 9.832319322 |
| 2.809234092 |
| 7.725393753 |
| 5.618468184 |
| 11.93924489 |
| 8.427702276 |
| 3.511542615 |
| 9.130010799 |
| 12.64155341 |
| 18.2600216  |
| 216.3110251 |

|             |
|-------------|
| 9.832319322 |
| 5.618468184 |
| 4.213851138 |
| 5.618468184 |
| 7.725393753 |
| 4.916159661 |
| 4.916159661 |
| 7.02308523  |
| 4.213851138 |
| 7.02308523  |
| 11.93924489 |
| 7.725393753 |
| 7.725393753 |
| 4.916159661 |
| 6.320776707 |
| 6.320776707 |
| 9.130010799 |
| 7.02308523  |
| 80.06317162 |
| 4.213851138 |
| 11.23693637 |
| 8.427702276 |
| 11.93924489 |
| 189.6233012 |
| 9.832319322 |
| 9.832319322 |
| 10.53462785 |
| 6.320776707 |
| 14.74847898 |
| 9.832319322 |
| 5.618468184 |
| 5.618468184 |
| 11.23693637 |
| 11.93924489 |
| 5.618468184 |
| 2.809234092 |
| 4.916159661 |
| 7.02308523  |
| 2.809234092 |
| 6.320776707 |
| 7.725393753 |
| 2.809234092 |
| 4.916159661 |

|             |
|-------------|
| 0           |
| 11.93924489 |
| 17.55771308 |
| 2.809234092 |
| 7.02308523  |
| 7.725393753 |
| 7.02308523  |
| 10.53462785 |
| 7.725393753 |
| 9.130010799 |
| 5.618468184 |
| 5.618468184 |
| 2.809234092 |
| 11.23693637 |
| 136.950162  |
| 8.427702276 |
| 0           |
| 5.618468184 |
| 9.130010799 |
| 5.618468184 |
| 9.832319322 |
| 6.320776707 |
| 9.130010799 |
| 33.7108091  |
| 6.320776707 |
| 5.618468184 |
| 159.4240347 |
| 3.511542615 |
| 9.130010799 |
| 6.320776707 |
| 5.618468184 |
| 4.916159661 |
| 4.916159661 |
| 7.725393753 |
| 219.8225677 |
| 4.916159661 |
| 22.47387274 |
| 10.53462785 |
| 6.320776707 |
| 106.7508955 |
| 8.427702276 |
| 7.02308523  |
| 39.32927729 |



|             |
|-------------|
| 8.427702276 |
| 5.618468184 |
| 10.53462785 |
| 13.34386194 |
| 6.320776707 |
| 7.725393753 |
| 4.213851138 |
| 9.832319322 |
| 7.02308523  |
| 10.53462785 |
| 4.916159661 |
| 7.02308523  |
| 7.02308523  |
| 8.427702276 |
| 11.23693637 |
| 4.916159661 |
| 0.702308523 |
| 0           |
| 2.106925569 |
| 5.618468184 |
| 7.725393753 |
| 11.23693637 |
| 8.427702276 |
| 2.809234092 |
| 18.2600216  |
| 4.916159661 |
| 8.427702276 |
| 184.004833  |
| 6.320776707 |
| 636.2915219 |
| 7.725393753 |
| 54.7800648  |
| 8.427702276 |
| 7.02308523  |
| 4.916159661 |
| 4.916159661 |
| 7.725393753 |
| 7.725393753 |
| 240.8918234 |
| 8.427702276 |
| 5.618468184 |
| 7.02308523  |
| 8.427702276 |

|             |
|-------------|
| 0           |
| 8.427702276 |
| 6.320776707 |
| 4.916159661 |
| 14.04617046 |
| 10.53462785 |
| 14.04617046 |
| 4.916159661 |
| 10.53462785 |
| 23.87848978 |
| 27.3900324  |
| 6.320776707 |
| 10.53462785 |
| 10.53462785 |
| 10.53462785 |
| 6.320776707 |
| 7.725393753 |
| 12.64155341 |
| 11.23693637 |
| 11.23693637 |
| 6.320776707 |
| 14.04617046 |
| 7.02308523  |
| 89.19318242 |
| 4.916159661 |
| 5.618468184 |
| 8.427702276 |
| 2.809234092 |
| 17.55771308 |
| 4.213851138 |
| 56.88699036 |
| 4.213851138 |
| 19.66463864 |
| 7.725393753 |
| 4.916159661 |
| 25.28310683 |
| 9.832319322 |
| 9.130010799 |
| 0           |
| 21.77156421 |
| 7.725393753 |
| 7.02308523  |
| 9.832319322 |

|             |
|-------------|
| 8.427702276 |
| 3.511542615 |
| 1.404617046 |
| 9.832319322 |
| 61.80315003 |
| 7.725393753 |
| 7.02308523  |
| 4.213851138 |
| 7.02308523  |
| 1.404617046 |
| 9.130010799 |
| 12.64155341 |
| 7.725393753 |
| 4.916159661 |
| 12.64155341 |
| 8.427702276 |
| 45.650054   |
| 4.213851138 |
| 3.511542615 |
| 4.916159661 |
| 5.618468184 |
| 5.618468184 |
| 9.130010799 |
| 18.96233012 |
| 9.832319322 |
| 6.320776707 |
| 9.832319322 |
| 9.130010799 |
| 3.511542615 |
| 4.213851138 |
| 10.53462785 |
| 2.809234092 |
| 5.618468184 |
| 11.23693637 |
| 7.02308523  |
| 11.23693637 |
| 5.618468184 |
| 7.725393753 |
| 13.34386194 |
| 5.618468184 |
| 7.725393753 |
| 8.427702276 |
| 40.73389434 |

|             |
|-------------|
| 4.916159661 |
| 0           |
| 4.213851138 |
| 4.916159661 |
| 9.832319322 |
| 7.02308523  |
| 7.725393753 |
| 4.916159661 |
| 9.130010799 |
| 7.02308523  |
| 16.85540455 |
| 217.0133336 |
| 14.74847898 |
| 8.427702276 |
| 4.213851138 |
| 11.93924489 |
| 4.916159661 |
| 19.66463864 |
| 9.130010799 |
| 10.53462785 |
| 6.320776707 |
| 4.916159661 |
| 4.213851138 |
| 2.809234092 |
| 8.427702276 |
| 13.34386194 |
| 21.77156421 |
| 10.53462785 |
| 5.618468184 |
| 3.511542615 |
| 16.85540455 |
| 16.15309603 |
| 4.916159661 |
| 13.34386194 |
| 7.725393753 |
| 9.130010799 |
| 4.213851138 |
| 51.26852218 |
| 11.93924489 |
| 7.02308523  |
| 8.427702276 |
| 8.427702276 |
| 4.213851138 |

|             |
|-------------|
| 4.916159661 |
| 4.213851138 |
| 3.511542615 |
| 9.130010799 |
| 9.832319322 |
| 6.320776707 |
| 4.916159661 |
| 15.45078751 |
| 7.725393753 |
| 9.832319322 |
| 7.725393753 |
| 13.34386194 |
| 9.832319322 |
| 8.427702276 |
| 5.618468184 |
| 2.809234092 |
| 25.28310683 |
| 9.130010799 |
| 4.213851138 |
| 20.36694717 |
| 3.511542615 |
| 128.5224597 |
| 7.725393753 |
| 4.213851138 |
| 6.320776707 |
| 6.320776707 |
| 5.618468184 |
| 7.02308523  |
| 5.618468184 |
| 6.320776707 |
| 25.98541535 |
| 12.64155341 |
| 2.809234092 |
| 9.130010799 |
| 11.23693637 |
| 2.106925569 |
| 9.130010799 |
| 10.53462785 |
| 0.702308523 |
| 7.02308523  |
| 219.1202592 |
| 44.24543695 |
| 7.02308523  |

|             |
|-------------|
| 11.23693637 |
| 7.02308523  |
| 19.66463864 |
| 5.618468184 |
| 11.23693637 |
| 8.427702276 |
| 1.404617046 |
| 2.809234092 |
| 25.98541535 |
| 9.130010799 |
| 1.404617046 |
| 3.511542615 |
| 11.93924489 |
| 6.320776707 |
| 6.320776707 |
| 155.2101836 |
| 2.106925569 |
| 110.9647466 |
| 7.725393753 |
| 7.02308523  |
| 7.02308523  |
| 4.213851138 |
| 4.213851138 |
| 16.85540455 |
| 22.47387274 |
| 6.320776707 |
| 9.130010799 |
| 14.04617046 |
| 4.213851138 |
| 7.02308523  |
| 7.02308523  |
| 9.832319322 |
| 7.725393753 |
| 7.02308523  |
| 5.618468184 |
| 2.809234092 |
| 7.725393753 |
| 10.53462785 |
| 7.725393753 |
| 6.320776707 |
| 10.53462785 |
| 13.34386194 |
| 11.93924489 |

|             |
|-------------|
| 7.02308523  |
| 4.213851138 |
| 9.130010799 |
| 7.02308523  |
| 4.916159661 |
| 8.427702276 |
| 7.02308523  |
| 11.23693637 |
| 12.64155341 |
| 19.66463864 |
| 8.427702276 |
| 7.725393753 |
| 7.02308523  |
| 10.53462785 |
| 7.02308523  |
| 5.618468184 |
| 7.725393753 |
| 9.832319322 |
| 8.427702276 |
| 8.427702276 |
| 9.832319322 |
| 4.916159661 |
| 4.213851138 |
| 5.618468184 |
| 16.85540455 |
| 5.618468184 |
| 10.53462785 |
| 4.213851138 |
| 9.832319322 |
| 4.916159661 |
| 12.64155341 |
| 6.320776707 |
| 6.320776707 |
| 3.511542615 |
| 9.130010799 |
| 20.36694717 |
| 6.320776707 |
| 4.916159661 |
| 0.702308523 |
| 4.916159661 |
| 5.618468184 |
| 17.55771308 |
| 9.130010799 |

|             |
|-------------|
| 3.511542615 |
| 7.02308523  |
| 14.04617046 |
| 9.832319322 |
| 5.618468184 |
| 7.02308523  |
| 3.511542615 |
| 35.11542615 |
| 6.320776707 |
| 23.87848978 |
| 3.511542615 |
| 25.98541535 |
| 7.725393753 |
| 8.427702276 |
| 7.02308523  |
| 6.320776707 |
| 6.320776707 |
| 10.53462785 |
| 7.725393753 |
| 9.130010799 |
| 2.809234092 |
| 0           |
| 7.02308523  |
| 16.15309603 |
| 7.725393753 |
| 8.427702276 |
| 54.07775627 |
| 56.18468184 |
| 6.320776707 |
| 15.45078751 |
| 7.725393753 |
| 14.04617046 |
| 2.809234092 |
| 132.7363109 |
| 4.213851138 |
| 2.809234092 |
| 6.320776707 |
| 9.832319322 |
| 19.66463864 |
| 7.02308523  |
| 4.213851138 |
| 295.6718882 |
| 9.832319322 |



|             |
|-------------|
| 63.20776707 |
| 7.02308523  |
| 2.106925569 |
| 21.77156421 |
| 4.916159661 |
| 9.130010799 |
| 4.916159661 |
| 8.427702276 |
| 10.53462785 |
| 12.64155341 |
| 2.106925569 |
| 5.618468184 |
| 7.725393753 |
| 9.832319322 |
| 10.53462785 |
| 7.725393753 |
| 8.427702276 |
| 7.02308523  |
| 0.702308523 |
| 4.213851138 |
| 4.213851138 |
| 7.02308523  |
| 16.15309603 |
| 5.618468184 |
| 8.427702276 |
| 18.96233012 |
| 4.916159661 |
| 9.832319322 |
| 6.320776707 |
| 4.916159661 |
| 13.34386194 |
| 8.427702276 |
| 5.618468184 |
| 42.13851138 |
| 10.53462785 |
| 4.213851138 |
| 5.618468184 |
| 9.130010799 |
| 6.320776707 |
| 4.213851138 |
| 9.832319322 |
| 3.511542615 |
| 35.11542615 |

|             |
|-------------|
| 11.93924489 |
| 9.130010799 |
| 8.427702276 |
| 9.832319322 |
| 11.23693637 |
| 4.916159661 |
| 6.320776707 |
| 7.02308523  |
| 5.618468184 |
| 4.916159661 |
| 7.725393753 |
| 9.832319322 |
| 8.427702276 |
| 9.130010799 |
| 7.02308523  |
| 3.511542615 |
| 7.725393753 |
| 4.213851138 |
| 6.320776707 |
| 38.62696877 |
| 28.09234092 |
| 28.09234092 |
| 6.320776707 |
| 5.618468184 |
| 2.809234092 |
| 23.87848978 |
| 4.916159661 |
| 9.130010799 |
| 11.23693637 |
| 12.64155341 |
| 7.02308523  |
| 9.832319322 |
| 5.618468184 |
| 0           |
| 3.511542615 |
| 9.130010799 |
| 0           |
| 4.213851138 |
| 0           |
| 7.725393753 |
| 7.725393753 |
| 7.725393753 |
| 4.916159661 |

|             |
|-------------|
| 8.427702276 |
| 7.725393753 |
| 4.916159661 |
| 0           |
| 7.725393753 |
| 36.5200432  |
| 4.916159661 |
| 28.79464944 |
| 9.130010799 |
| 11.23693637 |
| 5.618468184 |
| 4.916159661 |
| 5.618468184 |
| 10.53462785 |
| 5.618468184 |
| 169.9586626 |
| 4.916159661 |
| 6.320776707 |
| 11.23693637 |
| 9.130010799 |
| 77.95624606 |
| 7.02308523  |
| 7.725393753 |
| 25.28310683 |
| 10.53462785 |
| 9.130010799 |
| 7.02308523  |
| 3.511542615 |
| 13.34386194 |
| 3.511542615 |
| 5.618468184 |
| 8.427702276 |
| 129.2247682 |
| 9.130010799 |
| 15.45078751 |
| 6.320776707 |
| 1.404617046 |
| 7.02308523  |
| 5.618468184 |
| 12.64155341 |
| 208.5856313 |
| 24.58079831 |
| 3.511542615 |

|             |
|-------------|
| 3.511542615 |
| 7.725393753 |
| 3.511542615 |
| 4.916159661 |
| 7.02308523  |
| 9.832319322 |
| 16.15309603 |
| 7.725393753 |
| 7.725393753 |
| 6.320776707 |
| 9.130010799 |
| 7.02308523  |
| 15.45078751 |
| 6.320776707 |
| 4.916159661 |
| 7.02308523  |
| 7.725393753 |
| 3.511542615 |
| 5.618468184 |
| 7.725393753 |
| 4.916159661 |
| 6.320776707 |
| 4.916159661 |
| 8.427702276 |
| 5.618468184 |
| 9.832319322 |
| 13.34386194 |
| 4.916159661 |
| 4.213851138 |
| 6.320776707 |
| 6.320776707 |
| 6.320776707 |
| 10.53462785 |
| 4.916159661 |
| 4.213851138 |
| 4.916159661 |
| 2.809234092 |
| 4.213851138 |
| 5.618468184 |
| 12.64155341 |
| 2.809234092 |
| 2.106925569 |
| 7.02308523  |

|             |
|-------------|
| 4.213851138 |
| 6.320776707 |
| 5.618468184 |
| 7.725393753 |
| 0           |
| 9.130010799 |
| 4.213851138 |
| 120.0947574 |
| 0           |
| 18.96233012 |
| 8.427702276 |
| 15.45078751 |
| 4.916159661 |
| 7.02308523  |
| 7.02308523  |
| 7.02308523  |
| 7.725393753 |
| 4.916159661 |
| 8.427702276 |
| 1.404617046 |
| 6.320776707 |
| 0.702308523 |
| 5.618468184 |
| 3.511542615 |
| 4.213851138 |
| 10.53462785 |
| 32.30619206 |
| 7.02308523  |
| 2.809234092 |
| 117.2855233 |
| 9.832319322 |
| 4.916159661 |
| 14.74847898 |
| 4.213851138 |
| 8.427702276 |
| 9.130010799 |
| 7.02308523  |
| 6.320776707 |
| 9.832319322 |
| 115.1785978 |
| 4.916159661 |
| 7.02308523  |
| 107.453204  |

|             |
|-------------|
| 4.213851138 |
| 30.90157501 |
| 11.23693637 |
| 4.916159661 |
| 4.213851138 |
| 2.106925569 |
| 9.130010799 |
| 2.106925569 |
| 8.427702276 |
| 14.04617046 |
| 7.02308523  |
| 4.916159661 |
| 4.916159661 |
| 31.60388354 |
| 4.213851138 |
| 5.618468184 |
| 5.618468184 |
| 5.618468184 |
| 5.618468184 |
| 199.4556205 |
| 9.832319322 |
| 8.427702276 |
| 2.106925569 |
| 7.02308523  |
| 4.213851138 |
| 4.213851138 |
| 7.725393753 |
| 205.0740887 |
| 24.58079831 |
| 4.213851138 |
| 5.618468184 |
| 5.618468184 |
| 7.02308523  |
| 5.618468184 |
| 7.02308523  |
| 5.618468184 |
| 4.916159661 |
| 6.320776707 |
| 1.404617046 |
| 4.916159661 |
| 10.53462785 |
| 7.02308523  |
| 1.404617046 |

|             |
|-------------|
| 10.53462785 |
| 7.02308523  |
| 14.04617046 |
| 4.916159661 |
| 6.320776707 |
| 4.213851138 |
| 3.511542615 |
| 7.02308523  |
| 283.0303348 |
| 9.832319322 |
| 5.618468184 |
| 4.213851138 |
| 9.130010799 |
| 4.916159661 |
| 4.213851138 |
| 2.106925569 |
| 5.618468184 |
| 6.320776707 |
| 2.809234092 |
| 4.916159661 |
| 4.916159661 |
| 2.809234092 |
| 7.725393753 |
| 5.618468184 |
| 14.04617046 |
| 4.213851138 |
| 7.02308523  |
| 7.725393753 |
| 254.9379939 |
| 53.37544775 |
| 12.64155341 |
| 7.725393753 |
| 7.02308523  |
| 4.916159661 |
| 10.53462785 |
| 4.916159661 |
| 7.725393753 |
| 16.85540455 |
| 4.916159661 |
| 5.618468184 |
| 7.02308523  |
| 9.130010799 |
| 6.320776707 |

|             |
|-------------|
| 7.02308523  |
| 8.427702276 |
| 14.04617046 |
| 1.404617046 |
| 4.916159661 |
| 7.02308523  |
| 9.832319322 |
| 99.02550175 |
| 8.427702276 |
| 4.213851138 |
| 6.320776707 |
| 3.511542615 |
| 4.916159661 |
| 5.618468184 |
| 13.34386194 |
| 5.618468184 |
| 3.511542615 |
| 5.618468184 |
| 7.725393753 |
| 7.725393753 |
| 4.916159661 |
| 5.618468184 |
| 7.02308523  |
| 7.725393753 |
| 3.511542615 |
| 11.93924489 |
| 2.809234092 |
| 8.427702276 |
| 7.725393753 |
| 4.213851138 |
| 11.23693637 |
| 89.19318242 |
| 8.427702276 |
| 1.404617046 |
| 6.320776707 |
| 5.618468184 |
| 2.809234092 |
| 7.725393753 |
| 194.5394609 |
| 7.02308523  |
| 5.618468184 |
| 9.130010799 |
| 5.618468184 |



|             |
|-------------|
| 11.93924489 |
| 41.43620286 |
| 3.511542615 |
| 4.213851138 |
| 20.36694717 |
| 4.916159661 |
| 7.02308523  |
| 8.427702276 |
| 130.6293853 |
| 3.511542615 |
| 4.213851138 |
| 9.832319322 |
| 8.427702276 |
| 54.7800648  |
| 4.916159661 |
| 7.725393753 |
| 8.427702276 |
| 12.64155341 |
| 4.213851138 |
| 9.130010799 |
| 11.93924489 |
| 9.832319322 |
| 2.106925569 |
| 4.916159661 |
| 8.427702276 |
| 5.618468184 |
| 4.916159661 |
| 3.511542615 |
| 7.02308523  |
| 54.7800648  |
| 0           |
| 264.0680047 |
| 6.320776707 |
| 3.511542615 |
| 7.725393753 |
| 5.618468184 |
| 5.618468184 |
| 2.809234092 |
| 7.725393753 |
| 5.618468184 |
| 8.427702276 |
| 9.832319322 |
| 5.618468184 |

|             |
|-------------|
| 13.34386194 |
| 7.02308523  |
| 4.213851138 |
| 4.916159661 |
| 13.34386194 |
| 8.427702276 |
| 4.213851138 |
| 7.02308523  |
| 4.213851138 |
| 6.320776707 |
| 10.53462785 |
| 25.98541535 |
| 226.1433444 |
| 4.916159661 |
| 2.809234092 |
| 5.618468184 |
| 7.725393753 |
| 9.130010799 |
| 9.832319322 |
| 5.618468184 |
| 5.618468184 |
| 9.832319322 |
| 4.213851138 |
| 11.93924489 |
| 2.106925569 |
| 100.4301188 |
| 2.106925569 |
| 7.02308523  |
| 4.916159661 |
| 128.5224597 |
| 0.702308523 |
| 4.916159661 |
| 4.916159661 |
| 49.16159661 |
| 3.511542615 |
| 5.618468184 |
| 6.320776707 |
| 6.320776707 |
| 45.650054   |
| 7.725393753 |
| 0           |
| 0           |
| 5.618468184 |

|             |
|-------------|
| 20.36694717 |
| 69.52854378 |
| 0           |
| 0           |
| 4.916159661 |
| 4.916159661 |
| 0           |
| 58.99391593 |
| 9.130010799 |
| 2.809234092 |
| 0           |
| 9.832319322 |
| 6.320776707 |
| 9.832319322 |
| 9.130010799 |
| 0.702308523 |
| 6.320776707 |
| 4.213851138 |
| 14.74847898 |
| 6.320776707 |
| 5.618468184 |
| 6.320776707 |
| 10.53462785 |
| 6.320776707 |
| 0           |
| 9.832319322 |
| 98.32319322 |
| 16.85540455 |
| 83.57471424 |
| 7.02308523  |
| 7.02308523  |
| 2.106925569 |
| 0           |
| 13.34386194 |
| 12.64155341 |
| 4.916159661 |
| 4.213851138 |
| 22.47387274 |
| 0           |
| 0           |
| 9.130010799 |
| 7.02308523  |
| 10.53462785 |

|             |
|-------------|
| 8.427702276 |
| 7.725393753 |
| 87.78856538 |
| 114.4762893 |
| 11.23693637 |
| 0           |
| 7.725393753 |
| 1.404617046 |
| 3.511542615 |
| 9.130010799 |
| 2.809234092 |
| 4.916159661 |
| 4.213851138 |
| 9.130010799 |
| 21.77156421 |
| 6.320776707 |
| 16.85540455 |
| 7.02308523  |
| 7.725393753 |
| 0           |
| 6.320776707 |
| 12.64155341 |
| 9.130010799 |
| 9.130010799 |
| 9.832319322 |
| 70.2308523  |
| 5.618468184 |
| 0.702308523 |
| 7.725393753 |
| 0.702308523 |
| 9.832319322 |
| 43.54312843 |
| 7.02308523  |
| 8.427702276 |
| 129.9270768 |
| 2.809234092 |
| 4.916159661 |
| 5.618468184 |
| 8.427702276 |
| 9.832319322 |
| 1.404617046 |
| 2.106925569 |
| 5.618468184 |

|             |
|-------------|
| 5.618468184 |
| 14.04617046 |
| 2.106925569 |
| 3.511542615 |
| 40.73389434 |
| 2.106925569 |
| 7.02308523  |
| 31.60388354 |
| 11.93924489 |
| 8.427702276 |
| 15.45078751 |
| 0           |
| 0           |
| 6.320776707 |
| 0           |
| 199.4556205 |
| 7.725393753 |
| 8.427702276 |
| 7.725393753 |
| 2.809234092 |
| 32.30619206 |
| 9.130010799 |
| 80.06317162 |
| 16.15309603 |
| 14.04617046 |
| 7.725393753 |
| 4.213851138 |
| 8.427702276 |
| 0.702308523 |
| 2.106925569 |
| 4.916159661 |
| 289.3511115 |
| 10.53462785 |
| 2.809234092 |
| 35.81773467 |
| 7.725393753 |
| 4.213851138 |
| 11.93924489 |
| 0           |
| 1.404617046 |
| 0           |
| 37.92466024 |
| 8.427702276 |

|             |
|-------------|
| 44.24543695 |
| 6.320776707 |
| 2.106925569 |
| 4.213851138 |
| 1.404617046 |
| 4.213851138 |
| 8.427702276 |
| 7.02308523  |
| 11.93924489 |
| 4.916159661 |
| 3.511542615 |
| 16.15309603 |
| 7.02308523  |
| 9.832319322 |
| 7.725393753 |
| 4.916159661 |
| 20.36694717 |
| 8.427702276 |
| 30.90157501 |
| 5.618468184 |
| 6.320776707 |
| 0           |
| 3.511542615 |
| 28.09234092 |
| 9.130010799 |
| 9.832319322 |
| 0           |
| 7.725393753 |
| 2.809234092 |
| 0           |
| 9.832319322 |
| 87.08625685 |
| 0           |
| 0.702308523 |
| 7.02308523  |
| 2.106925569 |
| 0.702308523 |
| 80.06317162 |
| 17.55771308 |
| 15.45078751 |
| 11.23693637 |
| 66.01700116 |
| 7.02308523  |

|             |
|-------------|
| 4.916159661 |
| 2.106925569 |
| 4.916159661 |
| 11.93924489 |
| 0.702308523 |
| 1.404617046 |
| 5.618468184 |
| 15.45078751 |
| 1.404617046 |
| 11.23693637 |
| 15.45078751 |
| 0.702308523 |
| 7.725393753 |
| 215.6087166 |
| 0           |
| 11.93924489 |
| 8.427702276 |
| 6.320776707 |
| 7.725393753 |
| 4.213851138 |
| 6.320776707 |
| 9.130010799 |
| 3.511542615 |
| 14.04617046 |
| 5.618468184 |
| 2.809234092 |
| 4.916159661 |
| 127.1178427 |
| 7.02308523  |
| 191.7302268 |
| 16.85540455 |
| 6.320776707 |
| 9.832319322 |
| 55.48237332 |
| 9.832319322 |
| 27.3900324  |
| 2.106925569 |
| 158.7217262 |
| 9.832319322 |
| 3.511542615 |
| 13.34386194 |
| 0           |
| 224.7387274 |

|             |
|-------------|
| 10.53462785 |
| 63.91007559 |
| 7.725393753 |
| 6.320776707 |
| 15.45078751 |
| 7.02308523  |
| 4.916159661 |
| 134.8432364 |
| 171.3632796 |
| 56.18468184 |
| 17.55771308 |
| 5.618468184 |
| 5.618468184 |
| 4.916159661 |
| 79.3608631  |
| 4.213851138 |
| 9.130010799 |
| 4.916159661 |
| 9.832319322 |
| 23.87848978 |
| 6.320776707 |
| 20.36694717 |
| 19.66463864 |
| 4.916159661 |
| 10.53462785 |
| 5.618468184 |
| 7.725393753 |
| 7.02308523  |
| 6.320776707 |
| 7.725393753 |
| 0.702308523 |
| 5.618468184 |
| 5.618468184 |
| 6.320776707 |
| 33.00850058 |
| 7.725393753 |
| 4.213851138 |
| 5.618468184 |
| 8.427702276 |
| 38.62696877 |
| 6.320776707 |
| 14.04617046 |
| 6.320776707 |



|             |
|-------------|
| 7.02308523  |
| 8.427702276 |
| 4.916159661 |
| 2.106925569 |
| 9.130010799 |
| 12.64155341 |
| 14.74847898 |
| 1.404617046 |
| 39.32927729 |
| 9.832319322 |
| 6.320776707 |
| 7.02308523  |
| 12.64155341 |
| 33.00850058 |
| 7.725393753 |
| 13.34386194 |
| 6.320776707 |
| 24.58079831 |
| 11.23693637 |
| 8.427702276 |
| 7.725393753 |
| 14.74847898 |
| 56.88699036 |
| 8.427702276 |
| 8.427702276 |
| 10.53462785 |
| 9.130010799 |
| 41.43620286 |
| 16.15309603 |
| 18.2600216  |
| 7.02308523  |
| 6.320776707 |
| 9.832319322 |
| 6.320776707 |
| 6.320776707 |
| 11.23693637 |
| 6.320776707 |
| 5.618468184 |
| 2.106925569 |
| 33.7108091  |
| 9.130010799 |
| 7.725393753 |
| 21.77156421 |

|             |
|-------------|
| 3.511542615 |
| 10.53462785 |
| 7.725393753 |
| 40.73389434 |
| 2.106925569 |
| 4.213851138 |
| 7.02308523  |
| 41.43620286 |
| 4.916159661 |
| 5.618468184 |
| 11.23693637 |
| 14.04617046 |
| 39.32927729 |
| 9.130010799 |
| 5.618468184 |
| 2.809234092 |
| 8.427702276 |
| 0           |
| 8.427702276 |
| 10.53462785 |
| 5.618468184 |
| 6.320776707 |
| 7.02308523  |
| 3.511542615 |
| 2.106925569 |
| 22.47387274 |
| 7.725393753 |
| 7.02308523  |
| 3.511542615 |
| 7.02308523  |
| 2.106925569 |
| 5.618468184 |
| 0.702308523 |
| 2.106925569 |
| 214.906408  |
| 8.427702276 |
| 6.320776707 |
| 6.320776707 |
| 122.201683  |
| 5.618468184 |
| 10.53462785 |
| 0           |
| 9.130010799 |

|             |
|-------------|
| 28.79464944 |
| 28.79464944 |
| 116.5832148 |
| 5.618468184 |
| 0           |
| 7.02308523  |
| 7.02308523  |
| 5.618468184 |
| 4.916159661 |
| 9.130010799 |
| 10.53462785 |
| 7.02308523  |
| 0           |
| 9.130010799 |
| 16.15309603 |
| 3.511542615 |
| 0           |
| 4.916159661 |
| 8.427702276 |
| 10.53462785 |
| 13.34386194 |
| 2.809234092 |
| 10.53462785 |
| 9.130010799 |
| 10.53462785 |
| 42.8408199  |
| 9.130010799 |
| 176.2794393 |
| 34.41311763 |
| 2.106925569 |
| 2.809234092 |
| 6.320776707 |
| 0           |
| 9.130010799 |
| 4.916159661 |
| 5.618468184 |
| 7.02308523  |
| 7.02308523  |
| 8.427702276 |
| 12.64155341 |
| 4.916159661 |
| 1.404617046 |
| 141.1640131 |

|             |
|-------------|
| 5.618468184 |
| 7.02308523  |
| 7.725393753 |
| 75.14701196 |
| 8.427702276 |
| 7.02308523  |
| 44.24543695 |
| 2.809234092 |
| 9.832319322 |
| 37.92466024 |
| 4.916159661 |
| 16.15309603 |
| 9.130010799 |
| 10.53462785 |
| 15.45078751 |
| 7.725393753 |
| 4.213851138 |
| 280.9234092 |
| 125.7132256 |
| 25.98541535 |
| 6.320776707 |
| 6.320776707 |
| 7.02308523  |
| 0           |
| 4.213851138 |
| 7.02308523  |
| 7.725393753 |
| 11.23693637 |
| 6.320776707 |
| 43.54312843 |
| 1.404617046 |
| 12.64155341 |
| 3.511542615 |
| 23.17618126 |
| 5.618468184 |
| 7.02308523  |
| 4.916159661 |
| 4.916159661 |
| 2.809234092 |
| 8.427702276 |
| 6.320776707 |
| 42.8408199  |
| 0.702308523 |

|             |
|-------------|
| 21.06925569 |
| 7.02308523  |
| 4.916159661 |
| 14.74847898 |
| 4.213851138 |
| 4.213851138 |
| 4.916159661 |
| 0           |
| 4.916159661 |
| 110.9647466 |
| 7.725393753 |
| 8.427702276 |
| 2.106925569 |
| 28.79464944 |
| 3.511542615 |
| 37.22235172 |
| 5.618468184 |
| 7.725393753 |
| 2.809234092 |
| 75.84932049 |
| 7.02308523  |
| 7.02308523  |
| 132.0340023 |
| 3.511542615 |
| 5.618468184 |
| 1.404617046 |
| 10.53462785 |
| 7.725393753 |
| 8.427702276 |
| 1.404617046 |
| 58.99391593 |
| 9.130010799 |
| 1.404617046 |
| 7.725393753 |
| 5.618468184 |
| 4.213851138 |
| 7.725393753 |
| 11.93924489 |
| 7.725393753 |
| 3.511542615 |
| 6.320776707 |
| 7.725393753 |
| 4.213851138 |

|             |
|-------------|
| 4.916159661 |
| 2.809234092 |
| 58.99391593 |
| 5.618468184 |
| 7.725393753 |
| 44.24543695 |
| 4.213851138 |
| 11.93924489 |
| 7.02308523  |
| 20.36694717 |
| 9.130010799 |
| 5.618468184 |
| 6.320776707 |
| 47.05467104 |
| 5.618468184 |
| 2.809234092 |
| 9.130010799 |
| 6.320776707 |
| 5.618468184 |
| 9.130010799 |
| 45.650054   |
| 4.213851138 |
| 6.320776707 |
| 5.618468184 |
| 6.320776707 |
| 8.427702276 |
| 7.02308523  |
| 3.511542615 |
| 9.130010799 |
| 4.916159661 |
| 4.213851138 |
| 7.02308523  |
| 9.832319322 |
| 5.618468184 |
| 89.19318242 |
| 7.02308523  |
| 8.427702276 |
| 7.02308523  |
| 5.618468184 |
| 5.618468184 |
| 5.618468184 |
| 34.41311763 |
| 3.511542615 |

|             |
|-------------|
| 14.74847898 |
| 6.320776707 |
| 4.213851138 |
| 5.618468184 |
| 5.618468184 |
| 5.618468184 |
| 10.53462785 |
| 9.832319322 |
| 11.93924489 |
| 6.320776707 |
| 4.916159661 |
| 10.53462785 |
| 3.511542615 |
| 10.53462785 |
| 10.53462785 |
| 3.511542615 |
| 7.725393753 |
| 11.23693637 |
| 10.53462785 |
| 4.213851138 |
| 4.916159661 |
| 7.02308523  |
| 12.64155341 |
| 3.511542615 |
| 6.320776707 |
| 13.34386194 |
| 4.213851138 |
| 4.916159661 |
| 16.15309603 |
| 6.320776707 |
| 7.02308523  |
| 9.130010799 |
| 1.404617046 |
| 8.427702276 |
| 8.427702276 |
| 7.725393753 |
| 7.725393753 |
| 9.832319322 |
| 55.48237332 |
| 12.64155341 |
| 8.427702276 |
| 61.80315003 |
| 2.809234092 |

|             |
|-------------|
| 6.320776707 |
| 7.02308523  |
| 8.427702276 |
| 4.916159661 |
| 7.725393753 |
| 6.320776707 |
| 5.618468184 |
| 3.511542615 |
| 12.64155341 |
| 0.702308523 |
| 5.618468184 |
| 6.320776707 |
| 17.55771308 |
| 30.90157501 |
| 2.106925569 |
| 198.753312  |
| 5.618468184 |
| 7.02308523  |
| 7.725393753 |
| 125.7132256 |
| 10.53462785 |
| 9.832319322 |
| 82.17009719 |
| 97.6208847  |
| 7.725393753 |
| 14.74847898 |
| 9.832319322 |
| 6.320776707 |
| 4.916159661 |
| 8.427702276 |
| 2.809234092 |
| 8.427702276 |
| 9.130010799 |
| 4.916159661 |
| 7.725393753 |
| 4.916159661 |
| 9.130010799 |
| 0           |
| 2.106925569 |
| 9.832319322 |
| 6.320776707 |
| 7.725393753 |
| 7.02308523  |



|             |
|-------------|
| 11.23693637 |
| 3.511542615 |
| 3.511542615 |
| 1.404617046 |
| 3.511542615 |
| 0           |
| 9.832319322 |
| 5.618468184 |
| 11.23693637 |
| 6.320776707 |
| 3.511542615 |
| 9.130010799 |
| 8.427702276 |
| 4.916159661 |
| 9.130010799 |
| 5.618468184 |
| 4.916159661 |
| 9.832319322 |
| 167.1494285 |
| 6.320776707 |
| 11.93924489 |
| 10.53462785 |
| 7.725393753 |
| 4.916159661 |
| 23.17618126 |
| 4.213851138 |
| 23.17618126 |
| 2.106925569 |
| 4.213851138 |
| 20.36694717 |
| 6.320776707 |
| 11.23693637 |
| 4.916159661 |
| 7.725393753 |
| 3.511542615 |
| 0           |
| 4.213851138 |
| 4.213851138 |
| 7.725393753 |
| 4.916159661 |
| 134.8432364 |
| 6.320776707 |
| 47.05467104 |

|             |
|-------------|
| 8.427702276 |
| 6.320776707 |
| 9.832319322 |
| 14.04617046 |
| 2.106925569 |
| 7.02308523  |
| 11.93924489 |
| 2.809234092 |
| 4.916159661 |
| 149.5917154 |
| 7.725393753 |
| 7.725393753 |
| 10.53462785 |
| 7.725393753 |
| 7.02308523  |
| 6.320776707 |
| 6.320776707 |
| 7.725393753 |
| 61.80315003 |
| 3.511542615 |
| 3.511542615 |
| 9.130010799 |
| 9.130010799 |
| 7.725393753 |
| 5.618468184 |
| 3.511542615 |
| 21.77156421 |
| 10.53462785 |
| 3.511542615 |
| 5.618468184 |
| 7.02308523  |
| 13.34386194 |
| 10.53462785 |
| 6.320776707 |
| 7.02308523  |
| 12.64155341 |
| 9.832319322 |
| 7.02308523  |
| 7.02308523  |
| 6.320776707 |
| 11.23693637 |
| 2.809234092 |
| 7.725393753 |

|             |
|-------------|
| 314.6342183 |
| 7.725393753 |
| 5.618468184 |
| 0.702308523 |
| 1.404617046 |
| 6.320776707 |
| 6.320776707 |
| 9.130010799 |
| 47.05467104 |
| 2.809234092 |
| 4.916159661 |
| 26.68772387 |
| 10.53462785 |
| 4.916159661 |
| 4.916159661 |
| 2.809234092 |
| 4.213851138 |
| 12.64155341 |
| 4.916159661 |
| 9.832319322 |
| 8.427702276 |
| 4.916159661 |
| 2.809234092 |
| 7.02308523  |
| 0.702308523 |
| 9.130010799 |
| 7.725393753 |
| 7.02308523  |
| 0           |
| 4.916159661 |
| 6.320776707 |
| 4.213851138 |
| 0           |
| 4.916159661 |
| 8.427702276 |
| 7.02308523  |
| 7.725393753 |
| 5.618468184 |
| 7.725393753 |
| 9.130010799 |
| 7.02308523  |
| 7.725393753 |
| 7.02308523  |

|             |
|-------------|
| 7.02308523  |
| 9.130010799 |
| 4.213851138 |
| 0           |
| 6.320776707 |
| 0           |
| 97.6208847  |
| 4.916159661 |
| 134.1409279 |
| 7.725393753 |
| 0           |
| 3.511542615 |
| 9.130010799 |
| 8.427702276 |
| 6.320776707 |
| 3.511542615 |
| 4.213851138 |
| 5.618468184 |
| 2.809234092 |
| 0           |
| 2.106925569 |
| 7.02308523  |
| 0.702308523 |
| 5.618468184 |
| 0           |
| 8.427702276 |
| 2.106925569 |
| 9.130010799 |
| 11.23693637 |
| 2.809234092 |
| 13.34386194 |
| 4.916159661 |
| 10.53462785 |
| 6.320776707 |
| 3.511542615 |
| 2.106925569 |
| 4.916159661 |
| 5.618468184 |
| 0           |
| 7.02308523  |
| 4.916159661 |
| 21.06925569 |
| 3.511542615 |

|             |
|-------------|
| 0           |
| 6.320776707 |
| 0.702308523 |
| 8.427702276 |
| 0           |
| 3.511542615 |
| 7.02308523  |
| 12.64155341 |
| 10.53462785 |
| 0           |
| 1.404617046 |
| 6.320776707 |
| 2.809234092 |
| 6.320776707 |
| 9.130010799 |
| 5.618468184 |
| 5.618468184 |
| 5.618468184 |
| 4.916159661 |
| 11.23693637 |
| 4.916159661 |
| 4.916159661 |
| 7.02308523  |
| 10.53462785 |
| 5.618468184 |
| 1.404617046 |
| 2.809234092 |
| 8.427702276 |
| 16.15309603 |
| 4.916159661 |
| 7.725393753 |
| 0           |
| 9.832319322 |
| 4.213851138 |
| 1.404617046 |
| 4.213851138 |
| 6.320776707 |
| 0           |
| 5.618468184 |
| 5.618468184 |
| 8.427702276 |
| 9.832319322 |
| 2.106925569 |

|             |
|-------------|
| 4.916159661 |
| 0           |
| 14.04617046 |
| 8.427702276 |
| 7.02308523  |
| 13.34386194 |
| 4.213851138 |
| 6.320776707 |
| 6.320776707 |
| 7.725393753 |
| 5.618468184 |
| 3.511542615 |
| 4.916159661 |
| 6.320776707 |
| 11.23693637 |
| 4.916159661 |
| 11.93924489 |
| 9.130010799 |
| 0           |
| 3.511542615 |
| 0           |
| 3.511542615 |
| 4.213851138 |
| 2.809234092 |
| 7.02308523  |
| 4.916159661 |
| 0           |
| 4.916159661 |
| 0           |
| 14.74847898 |
| 5.618468184 |
| 4.213851138 |
| 3.511542615 |
| 0           |
| 7.02308523  |
| 3.511542615 |
| 5.618468184 |
| 4.213851138 |
| 0           |
| 4.213851138 |
| 3.511542615 |
| 6.320776707 |
| 9.130010799 |

|             |
|-------------|
| 7.725393753 |
| 0.702308523 |
| 6.320776707 |
| 14.74847898 |
| 4.916159661 |
| 0           |
| 4.916159661 |
| 2.809234092 |
| 10.53462785 |
| 5.618468184 |
| 1.404617046 |
| 5.618468184 |
| 7.02308523  |
| 3.511542615 |
| 0           |
| 3.511542615 |
| 0           |
| 14.04617046 |
| 7.02308523  |
| 0           |
| 0           |
| 7.725393753 |
| 206.4787058 |
| 7.02308523  |
| 2.809234092 |
| 3.511542615 |
| 0           |
| 0           |
| 1.404617046 |
| 4.916159661 |
| 5.618468184 |
| 0.702308523 |
| 0           |
| 7.02308523  |
| 2.809234092 |
| 5.618468184 |
| 3.511542615 |
| 2.106925569 |
| 0           |
| 0           |
| 1.404617046 |
| 0           |
| 3.511542615 |

|             |
|-------------|
| 10.53462785 |
| 4.916159661 |
| 9.832319322 |
| 4.916159661 |
| 7.725393753 |
| 4.916159661 |
| 8.427702276 |
| 7.725393753 |
| 5.618468184 |
| 5.618468184 |
| 7.02308523  |
| 5.618468184 |
| 7.02308523  |
| 12.64155341 |
| 18.2600216  |
| 0           |
| 4.213851138 |
| 0           |
| 4.213851138 |
| 0           |
| 4.213851138 |
| 0           |
| 0           |
| 2.809234092 |
| 5.618468184 |
| 4.916159661 |
| 5.618468184 |
| 3.511542615 |
| 1.404617046 |
| 9.130010799 |
| 7.725393753 |
| 18.2600216  |
| 5.618468184 |
| 4.213851138 |
| 2.106925569 |
| 6.320776707 |
| 9.130010799 |
| 15.45078751 |
| 2.809234092 |
| 8.427702276 |
| 9.832319322 |
| 11.93924489 |
| 20.36694717 |



|             |
|-------------|
| 16.85540455 |
| 0           |
| 20.36694717 |
| 6.320776707 |
| 3.511542615 |
| 2.809234092 |
| 9.130010799 |
| 12.64155341 |
| 5.618468184 |
| 5.618468184 |
| 5.618468184 |
| 3.511542615 |
| 0           |
| 0           |
| 2.809234092 |
| 7.02308523  |
| 11.23693637 |
| 4.213851138 |
| 7.02308523  |
| 3.511542615 |
| 7.02308523  |
| 8.427702276 |
| 32.30619206 |
| 0           |
| 8.427702276 |
| 3.511542615 |
| 2.106925569 |
| 4.916159661 |
| 4.916159661 |
| 0           |
| 9.130010799 |
| 4.916159661 |
| 5.618468184 |
| 6.320776707 |
| 5.618468184 |
| 4.213851138 |
| 10.53462785 |
| 7.725393753 |
| 0           |
| 0           |
| 5.618468184 |
| 7.02308523  |
| 4.213851138 |

|             |
|-------------|
| 0           |
| 7.02308523  |
| 5.618468184 |
| 10.53462785 |
| 7.725393753 |
| 0           |
| 7.02308523  |
| 1.404617046 |
| 9.832319322 |
| 3.511542615 |
| 4.916159661 |
| 8.427702276 |
| 9.832319322 |
| 6.320776707 |
| 7.02308523  |
| 2.809234092 |
| 8.427702276 |
| 11.23693637 |
| 6.320776707 |
| 3.511542615 |
| 1.404617046 |
| 0           |
| 11.23693637 |
| 9.130010799 |
| 4.916159661 |
| 5.618468184 |
| 11.93924489 |
| 4.916159661 |
| 8.427702276 |
| 6.320776707 |
| 6.320776707 |
| 4.916159661 |
| 2.809234092 |
| 2.106925569 |
| 7.725393753 |
| 12.64155341 |
| 7.725393753 |
| 3.511542615 |
| 7.725393753 |
| 18.96233012 |
| 9.832319322 |
| 2.106925569 |
| 0           |

|             |
|-------------|
| 4.213851138 |
| 4.213851138 |
| 6.320776707 |
| 9.130010799 |
| 15.45078751 |
| 10.53462785 |
| 11.93924489 |
| 7.725393753 |
| 9.832319322 |
| 7.02308523  |
| 25.28310683 |
| 1.404617046 |
| 8.427702276 |
| 4.916159661 |
| 9.832319322 |
| 7.725393753 |
| 7.02308523  |
| 3.511542615 |
| 0           |
| 7.725393753 |
| 1.404617046 |
| 9.130010799 |
| 0           |
| 6.320776707 |
| 11.23693637 |
| 0           |
| 7.02308523  |
| 0           |
| 2.106925569 |
| 4.213851138 |
| 3.511542615 |
| 5.618468184 |
| 7.725393753 |
| 7.725393753 |
| 70.93316082 |
| 11.93924489 |
| 0           |
| 0.702308523 |
| 7.02308523  |
| 14.74847898 |
| 16.85540455 |
| 2.809234092 |
| 5.618468184 |

|             |
|-------------|
| 4.213851138 |
| 5.618468184 |
| 2.106925569 |
| 7.725393753 |
| 8.427702276 |
| 0           |
| 5.618468184 |
| 2.809234092 |
| 7.725393753 |
| 5.618468184 |
| 6.320776707 |
| 2.809234092 |
| 40.73389434 |
| 0           |
| 4.213851138 |
| 7.725393753 |
| 4.213851138 |
| 4.213851138 |
| 5.618468184 |
| 2.809234092 |
| 14.74847898 |
| 2.809234092 |
| 39.32927729 |
| 2.106925569 |
| 4.916159661 |
| 6.320776707 |
| 12.64155341 |
| 11.93924489 |
| 0           |
| 2.809234092 |
| 0           |
| 7.02308523  |
| 8.427702276 |
| 9.832319322 |
| 6.320776707 |
| 1.404617046 |
| 2.809234092 |
| 8.427702276 |
| 5.618468184 |
| 2.809234092 |
| 5.618468184 |
| 10.53462785 |
| 7.02308523  |

|             |
|-------------|
| 7.02308523  |
| 2.106925569 |
| 2.809234092 |
| 11.23693637 |
| 4.213851138 |
| 11.23693637 |
| 1.404617046 |
| 4.916159661 |
| 0           |
| 0           |
| 0           |
| 5.618468184 |
| 5.618468184 |
| 7.725393753 |
| 5.618468184 |
| 11.23693637 |
| 4.213851138 |
| 0           |
| 3.511542615 |
| 6.320776707 |
| 2.809234092 |
| 21.77156421 |
| 6.320776707 |
| 2.809234092 |
| 7.02308523  |
| 11.93924489 |
| 2.809234092 |
| 6.320776707 |
| 4.916159661 |
| 12.64155341 |
| 10.53462785 |
| 7.725393753 |
| 3.511542615 |
| 8.427702276 |
| 7.725393753 |
| 6.320776707 |
| 7.02308523  |
| 0           |
| 2.809234092 |
| 7.02308523  |
| 7.02308523  |
| 2.106925569 |
| 7.725393753 |

|             |
|-------------|
| 5.618468184 |
| 0           |
| 14.74847898 |
| 9.130010799 |
| 5.618468184 |
| 7.725393753 |
| 4.916159661 |
| 0.702308523 |
| 9.832319322 |
| 3.511542615 |
| 2.809234092 |
| 2.106925569 |
| 4.213851138 |
| 7.02308523  |
| 7.02308523  |
| 3.511542615 |
| 5.618468184 |
| 9.130010799 |
| 7.725393753 |
| 11.93924489 |
| 0           |
| 4.916159661 |
| 74.44470344 |
| 0           |
| 4.916159661 |
| 25.98541535 |
| 7.725393753 |
| 7.02308523  |
| 7.725393753 |
| 4.213851138 |
| 0           |
| 7.725393753 |
| 0           |
| 0           |
| 5.618468184 |
| 6.320776707 |
| 10.53462785 |
| 8.427702276 |
| 0           |
| 4.213851138 |
| 10.53462785 |
| 4.213851138 |
| 4.916159661 |

|             |
|-------------|
| 11.93924489 |
| 7.02308523  |
| 16.85540455 |
| 0           |
| 14.74847898 |
| 9.832319322 |
| 7.02308523  |
| 8.427702276 |
| 4.916159661 |
| 5.618468184 |
| 12.64155341 |
| 10.53462785 |
| 10.53462785 |
| 7.02308523  |
| 2.809234092 |
| 9.832319322 |
| 5.618468184 |
| 7.725393753 |
| 9.130010799 |
| 7.725393753 |
| 5.618468184 |
| 0.702308523 |
| 6.320776707 |
| 6.320776707 |
| 6.320776707 |
| 4.213851138 |
| 0           |
| 4.213851138 |
| 0           |
| 3.511542615 |
| 4.213851138 |
| 0           |
| 6.320776707 |
| 0.702308523 |
| 9.832319322 |
| 9.130010799 |
| 3.511542615 |
| 6.320776707 |
| 5.618468184 |
| 0           |
| 8.427702276 |
| 0           |
| 2.809234092 |

|             |
|-------------|
| 14.04617046 |
| 4.916159661 |
| 9.832319322 |
| 4.916159661 |
| 4.916159661 |
| 5.618468184 |
| 3.511542615 |
| 0.702308523 |
| 6.320776707 |
| 7.02308523  |
| 0           |
| 0           |
| 4.916159661 |
| 1.404617046 |
| 0           |
| 6.320776707 |
| 9.130010799 |
| 9.832319322 |
| 5.618468184 |
| 7.725393753 |
| 0           |
| 0           |
| 0           |
| 33.7108091  |
| 1.404617046 |
| 11.93924489 |
| 0           |
| 8.427702276 |
| 10.53462785 |
| 5.618468184 |
| 8.427702276 |
| 7.02308523  |
| 0           |
| 14.04617046 |
| 0           |
| 3.511542615 |
| 1.404617046 |
| 9.832319322 |
| 4.916159661 |
| 4.916159661 |
| 2.106925569 |
| 2.106925569 |
| 6.320776707 |



|             |
|-------------|
| 1.404617046 |
| 10.53462785 |
| 9.130010799 |
| 2.809234092 |
| 0           |
| 8.427702276 |
| 4.916159661 |
| 5.618468184 |
| 11.23693637 |
| 3.511542615 |
| 9.832319322 |
| 2.106925569 |
| 7.02308523  |
| 4.916159661 |
| 5.618468184 |
| 8.427702276 |
| 0           |
| 12.64155341 |
| 4.213851138 |
| 3.511542615 |
| 4.916159661 |
| 2.106925569 |
| 0           |
| 7.725393753 |
| 3.511542615 |
| 272.4957069 |
| 5.618468184 |
| 5.618468184 |
| 8.427702276 |
| 6.320776707 |
| 0.702308523 |
| 14.04617046 |
| 6.320776707 |
| 0           |
| 9.130010799 |
| 8.427702276 |
| 0           |
| 8.427702276 |
| 7.725393753 |
| 0           |
| 6.320776707 |
| 11.93924489 |
| 3.511542615 |

|             |
|-------------|
| 7.02308523  |
| 3.511542615 |
| 0.702308523 |
| 3.511542615 |
| 16.85540455 |
| 6.320776707 |
| 7.725393753 |
| 5.618468184 |
| 0           |
| 0           |
| 0           |
| 7.725393753 |
| 7.02308523  |
| 11.23693637 |
| 3.511542615 |
| 0           |
| 2.809234092 |
| 4.916159661 |
| 2.809234092 |
| 6.320776707 |
| 7.02308523  |
| 4.213851138 |
| 2.809234092 |
| 7.725393753 |
| 4.916159661 |
| 7.725393753 |
| 1.404617046 |
| 8.427702276 |
| 8.427702276 |
| 4.213851138 |
| 6.320776707 |
| 0           |
| 3.511542615 |
| 5.618468184 |
| 3.511542615 |
| 2.106925569 |
| 6.320776707 |
| 2.809234092 |
| 5.618468184 |
| 5.618468184 |
| 2.106925569 |
| 4.916159661 |
| 5.618468184 |

|             |
|-------------|
| 6.320776707 |
| 2.809234092 |
| 9.130010799 |
| 6.320776707 |
| 5.618468184 |
| 14.74847898 |
| 0           |
| 7.725393753 |
| 2.809234092 |
| 5.618468184 |
| 7.02308523  |
| 3.511542615 |
| 4.213851138 |
| 5.618468184 |
| 0           |
| 3.511542615 |
| 7.725393753 |
| 6.320776707 |
| 7.02308523  |
| 1.404617046 |
| 4.213851138 |
| 9.832319322 |
| 8.427702276 |
| 4.916159661 |
| 7.02308523  |
| 0           |
| 7.725393753 |
| 6.320776707 |
| 7.02308523  |
| 2.106925569 |
| 7.725393753 |
| 7.02308523  |
| 0           |
| 6.320776707 |
| 0           |
| 6.320776707 |
| 4.916159661 |
| 5.618468184 |
| 12.64155341 |
| 0           |
| 4.213851138 |
| 8.427702276 |
| 0           |

|             |
|-------------|
| 5.618468184 |
| 10.53462785 |
| 4.916159661 |
| 4.213851138 |
| 7.02308523  |
| 9.832319322 |
| 0           |
| 5.618468184 |
| 3.511542615 |
| 8.427702276 |
| 16.15309603 |
| 14.74847898 |
| 9.832319322 |
| 18.2600216  |
| 7.02308523  |
| 7.02308523  |
| 6.320776707 |
| 11.93924489 |
| 4.916159661 |
| 12.64155341 |
| 4.916159661 |
| 0           |
| 5.618468184 |
| 9.832319322 |
| 8.427702276 |
| 21.77156421 |
| 6.320776707 |
| 7.02308523  |
| 5.618468184 |
| 8.427702276 |
| 2.106925569 |
| 13.34386194 |
| 7.02308523  |
| 4.213851138 |
| 12.64155341 |
| 6.320776707 |
| 7.725393753 |
| 2.809234092 |
| 6.320776707 |
| 2.106925569 |
| 7.02308523  |
| 7.725393753 |
| 7.02308523  |

|             |
|-------------|
| 3.511542615 |
| 4.916159661 |
| 58.99391593 |
| 9.130010799 |
| 1.404617046 |
| 4.916159661 |
| 9.130010799 |
| 0           |
| 2.106925569 |
| 3.511542615 |
| 5.618468184 |
| 9.832319322 |
| 10.53462785 |
| 6.320776707 |
| 5.618468184 |
| 2.809234092 |
| 4.916159661 |
| 3.511542615 |
| 5.618468184 |
| 4.916159661 |
| 3.511542615 |
| 4.916159661 |
| 8.427702276 |
| 7.02308523  |
| 9.832319322 |
| 8.427702276 |
| 6.320776707 |
| 4.916159661 |
| 3.511542615 |
| 10.53462785 |
| 2.106925569 |
| 0           |
| 7.02308523  |
| 7.725393753 |
| 0           |
| 6.320776707 |
| 2.809234092 |
| 8.427702276 |
| 2.809234092 |
| 7.02308523  |
| 0           |
| 7.02308523  |
| 3.511542615 |

|             |
|-------------|
| 4.916159661 |
| 2.809234092 |
| 0           |
| 2.106925569 |
| 10.53462785 |
| 4.213851138 |
| 0           |
| 1.404617046 |
| 4.916159661 |
| 9.832319322 |
| 5.618468184 |
| 0           |
| 10.53462785 |
| 0           |
| 0           |
| 0           |
| 11.23693637 |
| 2.809234092 |
| 0           |
| 2.106925569 |
| 44.94774547 |
| 4.916159661 |
| 0           |
| 5.618468184 |
| 4.213851138 |
| 19.66463864 |
| 7.02308523  |
| 5.618468184 |
| 6.320776707 |
| 9.832319322 |
| 4.213851138 |
| 6.320776707 |
| 0           |
| 9.130010799 |
| 9.832319322 |
| 7.02308523  |
| 2.106925569 |
| 2.809234092 |
| 2.106925569 |
| 0           |
| 10.53462785 |
| 4.916159661 |
| 0           |

|             |
|-------------|
| 1.404617046 |
| 0           |
| 2.809234092 |
| 7.02308523  |
| 4.916159661 |
| 4.916159661 |
| 10.53462785 |
| 7.725393753 |
| 17.55771308 |
| 4.916159661 |
| 51.9708307  |
| 7.02308523  |
| 7.725393753 |
| 9.832319322 |
| 12.64155341 |
| 2.809234092 |
| 4.213851138 |
| 9.832319322 |
| 0           |
| 9.130010799 |
| 7.725393753 |
| 4.916159661 |
| 7.725393753 |
| 9.130010799 |
| 2.106925569 |
| 4.916159661 |
| 2.809234092 |
| 7.02308523  |
| 8.427702276 |
| 8.427702276 |
| 7.725393753 |
| 7.725393753 |
| 2.809234092 |
| 0           |
| 1.404617046 |
| 8.427702276 |
| 7.725393753 |
| 4.213851138 |
| 0           |
| 5.618468184 |
| 2.106925569 |
| 5.618468184 |
| 2.106925569 |

|             |
|-------------|
| 0           |
| 2.809234092 |
| 12.64155341 |
| 0           |
| 38.62696877 |
| 1.404617046 |
| 14.74847898 |
| 0           |
| 14.74847898 |
| 13.34386194 |
| 6.320776707 |
| 3.511542615 |
| 10.53462785 |
| 3.511542615 |
| 4.916159661 |
| 1.404617046 |
| 5.618468184 |
| 0           |
| 23.17618126 |
| 9.130010799 |
| 3.511542615 |
| 4.213851138 |
| 7.02308523  |
| 3.511542615 |
| 2.809234092 |
| 0           |
| 6.320776707 |
| 4.916159661 |
| 19.66463864 |
| 4.213851138 |
| 11.93924489 |
| 2.809234092 |
| 7.02308523  |
| 3.511542615 |
| 9.130010799 |
| 4.213851138 |
| 4.213851138 |
| 4.916159661 |
| 0           |
| 10.53462785 |
| 4.916159661 |
| 13.34386194 |
| 16.15309603 |



|             |
|-------------|
| 5.618468184 |
| 9.130010799 |
| 12.64155341 |
| 84.97933129 |
| 3.511542615 |
| 0           |
| 6.320776707 |
| 7.725393753 |
| 7.725393753 |
| 7.02308523  |
| 11.93924489 |
| 35.81773467 |
| 9.832319322 |
| 2.809234092 |
| 2.106925569 |
| 6.320776707 |
| 3.511542615 |
| 1.404617046 |
| 4.916159661 |
| 5.618468184 |
| 2.809234092 |
| 6.320776707 |
| 0           |
| 47.75697957 |
| 2.106925569 |
| 4.916159661 |
| 17.55771308 |
| 242.998749  |
| 5.618468184 |
| 8.427702276 |
| 8.427702276 |
| 7.725393753 |
| 5.618468184 |
| 6.320776707 |
| 0           |
| 7.02308523  |
| 10.53462785 |
| 48.45928809 |
| 9.832319322 |
| 2.809234092 |
| 6.320776707 |
| 5.618468184 |
| 9.130010799 |

|             |
|-------------|
| 6.320776707 |
| 3.511542615 |
| 0           |
| 11.23693637 |
| 6.320776707 |
| 0           |
| 2.809234092 |
| 2.106925569 |
| 8.427702276 |
| 4.916159661 |
| 18.96233012 |
| 10.53462785 |
| 4.916159661 |
| 5.618468184 |
| 4.213851138 |
| 0           |
| 6.320776707 |
| 5.618468184 |
| 11.93924489 |
| 3.511542615 |
| 11.93924489 |
| 21.06925569 |
| 9.130010799 |
| 5.618468184 |
| 12.64155341 |
| 3.511542615 |
| 2.809234092 |
| 0           |
| 0           |
| 7.725393753 |
| 4.916159661 |
| 509.1736792 |
| 8.427702276 |
| 3.511542615 |
| 3.511542615 |
| 4.213851138 |
| 5.618468184 |
| 18.2600216  |
| 3.511542615 |
| 7.725393753 |
| 0           |
| 24.58079831 |
| 4.916159661 |

|             |
|-------------|
| 2.809234092 |
| 9.130010799 |
| 8.427702276 |
| 4.916159661 |
| 37.92466024 |
| 0.702308523 |
| 9.832319322 |
| 2.809234092 |
| 10.53462785 |
| 3.511542615 |
| 7.725393753 |
| 8.427702276 |
| 6.320776707 |
| 5.618468184 |
| 8.427702276 |
| 0           |
| 0           |
| 0           |
| 0           |
| 1.404617046 |
| 2.809234092 |
| 0.702308523 |
| 3.511542615 |
| 3.511542615 |
| 9.832319322 |
| 3.511542615 |
| 7.02308523  |
| 7.02308523  |
| 5.618468184 |
| 8.427702276 |
| 3.511542615 |
| 5.618468184 |
| 0           |
| 5.618468184 |
| 23.17618126 |
| 7.725393753 |
| 9.832319322 |
| 2.809234092 |
| 4.916159661 |
| 0.702308523 |
| 4.916159661 |
| 11.23693637 |
| 7.02308523  |

|             |
|-------------|
| 3.511542615 |
| 6.320776707 |
| 9.832319322 |
| 0           |
| 7.02308523  |
| 1.404617046 |
| 2.809234092 |
| 4.213851138 |
| 14.74847898 |
| 4.916159661 |
| 7.02308523  |
| 72.33777787 |
| 9.832319322 |
| 954.4372828 |
| 97.6208847  |
| 2.809234092 |
| 2.809234092 |
| 5.618468184 |
| 2.106925569 |
| 5.618468184 |
| 4.916159661 |
| 11.93924489 |
| 3.511542615 |
| 4.916159661 |
| 10.53462785 |
| 3.511542615 |
| 32.30619206 |
| 11.23693637 |
| 7.02308523  |
| 2.809234092 |
| 9.130010799 |
| 7.02308523  |
| 7.725393753 |
| 5.618468184 |
| 11.23693637 |
| 4.213851138 |
| 0           |
| 7.725393753 |
| 4.916159661 |
| 10.53462785 |
| 2.106925569 |
| 84.97933129 |
| 5.618468184 |

|             |
|-------------|
| 7.02308523  |
| 5.618468184 |
| 8.427702276 |
| 6.320776707 |
| 15.45078751 |
| 2.809234092 |
| 7.725393753 |
| 8.427702276 |
| 5.618468184 |
| 7.02308523  |
| 7.02308523  |
| 7.725393753 |
| 0.702308523 |
| 0           |
| 3.511542615 |
| 0           |
| 0           |
| 7.725393753 |
| 8.427702276 |
| 2.809234092 |
| 6.320776707 |
| 8.427702276 |
| 4.916159661 |
| 5.618468184 |
| 0           |
| 7.725393753 |
| 2.809234092 |
| 7.02308523  |
| 4.213851138 |
| 0           |
| 4.213851138 |
| 260.556462  |
| 43.54312843 |
| 9.832319322 |
| 4.916159661 |
| 7.725393753 |
| 4.916159661 |
| 7.725393753 |
| 0           |
| 9.130010799 |
| 2.106925569 |
| 0           |
| 7.725393753 |

|             |
|-------------|
| 9.130010799 |
| 7.02308523  |
| 9.832319322 |
| 3.511542615 |
| 6.320776707 |
| 7.02308523  |
| 4.213851138 |
| 2.809234092 |
| 3.511542615 |
| 6.320776707 |
| 89.89549095 |
| 28.79464944 |
| 0.702308523 |
| 3.511542615 |
| 7.02308523  |
| 0           |
| 7.725393753 |
| 0.702308523 |
| 0           |
| 2.809234092 |
| 9.832319322 |
| 4.213851138 |
| 0           |
| 6.320776707 |
| 1.404617046 |
| 4.213851138 |
| 4.916159661 |
| 5.618468184 |
| 2.809234092 |
| 0           |
| 13.34386194 |
| 0           |
| 4.916159661 |
| 8.427702276 |
| 7.725393753 |
| 3.511542615 |
| 6.320776707 |
| 3.511542615 |
| 9.130010799 |
| 6.320776707 |
| 5.618468184 |
| 2.106925569 |
| 2.106925569 |

|             |
|-------------|
| 0.702308523 |
| 14.74847898 |
| 5.618468184 |
| 5.618468184 |
| 0           |
| 0           |
| 0           |
| 7.02308523  |
| 7.725393753 |
| 4.213851138 |
| 2.809234092 |
| 2.106925569 |
| 6.320776707 |
| 5.618468184 |
| 8.427702276 |
| 0           |
| 2.809234092 |
| 11.23693637 |
| 0           |
| 1.404617046 |
| 0           |
| 6.320776707 |
| 13.34386194 |
| 5.618468184 |
| 8.427702276 |
| 5.618468184 |
| 7.725393753 |
| 7.725393753 |
| 2.106925569 |
| 6.320776707 |
| 8.427702276 |
| 5.618468184 |
| 3.511542615 |
| 9.832319322 |
| 0           |
| 4.213851138 |
| 4.916159661 |
| 6.320776707 |
| 5.618468184 |
| 8.427702276 |
| 1.404617046 |
| 0           |
| 8.427702276 |

|             |
|-------------|
| 7.02308523  |
| 38.62696877 |
| 6.320776707 |
| 0           |
| 0           |
| 0           |
| 6.320776707 |
| 8.427702276 |
| 7.02308523  |
| 10.53462785 |
| 15.45078751 |
| 7.725393753 |
| 5.618468184 |
| 4.916159661 |
| 6.320776707 |
| 138.354779  |
| 7.725393753 |
| 16.85540455 |
| 6.320776707 |
| 4.916159661 |
| 18.2600216  |
| 8.427702276 |
| 5.618468184 |
| 11.93924489 |
| 7.02308523  |
| 0           |
| 9.832319322 |
| 3.511542615 |
| 5.618468184 |
| 4.213851138 |
| 4.213851138 |
| 7.725393753 |
| 16.85540455 |
| 606.0922554 |
| 0           |
| 7.02308523  |
| 7.725393753 |
| 5.618468184 |
| 3.511542615 |
| 7.725393753 |
| 13.34386194 |
| 3.511542615 |
| 5.618468184 |



|             |
|-------------|
| 10.53462785 |
| 1.404617046 |
| 124.3086086 |
| 2.809234092 |
| 9.832319322 |
| 3.511542615 |
| 8.427702276 |
| 4.916159661 |
| 6.320776707 |
| 0.702308523 |
| 1.404617046 |
| 0           |
| 0           |
| 6.320776707 |
| 4.213851138 |
| 0           |
| 5.618468184 |
| 9.832319322 |
| 4.916159661 |
| 0           |
| 7.725393753 |
| 9.130010799 |
| 4.916159661 |
| 0           |
| 0           |
| 6.320776707 |
| 8.427702276 |
| 9.832319322 |
| 0           |
| 3.511542615 |
| 6.320776707 |
| 2.809234092 |
| 6.320776707 |
| 6.320776707 |
| 5.618468184 |
| 7.725393753 |
| 7.725393753 |
| 4.213851138 |
| 5.618468184 |
| 6.320776707 |
| 4.213851138 |
| 56.18468184 |
| 75.84932049 |

|             |
|-------------|
| 2.809234092 |
| 2.809234092 |
| 3.511542615 |
| 6.320776707 |
| 5.618468184 |
| 1.404617046 |
| 0.702308523 |
| 0           |
| 6.320776707 |
| 11.23693637 |
| 2.809234092 |
| 3.511542615 |
| 5.618468184 |
| 112.3693637 |
| 2.809234092 |
| 7.02308523  |
| 6.320776707 |
| 6.320776707 |
| 3.511542615 |
| 5.618468184 |
| 0           |
| 6.320776707 |
| 10.53462785 |
| 15.45078751 |
| 4.916159661 |
| 7.02308523  |
| 0           |
| 6.320776707 |
| 2.809234092 |
| 0.702308523 |
| 2.809234092 |
| 8.427702276 |
| 4.213851138 |
| 0           |
| 7.725393753 |
| 4.916159661 |
| 7.725393753 |
| 5.618468184 |
| 1.404617046 |
| 0           |
| 11.93924489 |
| 6.320776707 |
| 11.93924489 |

|             |
|-------------|
| 11.23693637 |
| 9.832319322 |
| 7.725393753 |
| 7.725393753 |
| 6.320776707 |
| 18.2600216  |
| 3.511542615 |
| 8.427702276 |
| 4.213851138 |
| 6.320776707 |
| 5.618468184 |
| 0           |
| 2.106925569 |
| 4.916159661 |
| 3.511542615 |
| 0.702308523 |
| 7.02308523  |
| 4.916159661 |
| 4.213851138 |
| 9.130010799 |
| 171.3632796 |
| 0           |
| 0           |
| 9.130010799 |
| 10.53462785 |
| 7.02308523  |
| 9.130010799 |
| 4.916159661 |
| 3.511542615 |
| 2.809234092 |
| 4.213851138 |
| 4.916159661 |
| 5.618468184 |
| 6.320776707 |
| 9.130010799 |
| 3.511542615 |
| 2.106925569 |
| 4.213851138 |
| 5.618468184 |
| 5.618468184 |
| 0           |
| 27.3900324  |
| 10.53462785 |

|             |
|-------------|
| 7.02308523  |
| 2.106925569 |
| 19.66463864 |
| 0           |
| 0.702308523 |
| 2.106925569 |
| 7.02308523  |
| 9.130010799 |
| 6.320776707 |
| 7.725393753 |
| 5.618468184 |
| 4.213851138 |
| 12.64155341 |
| 0           |
| 7.725393753 |
| 226.8456529 |
| 3.511542615 |
| 3.511542615 |
| 14.74847898 |
| 1.404617046 |
| 8.427702276 |
| 6.320776707 |
| 7.02308523  |
| 6.320776707 |
| 2.106925569 |
| 1.404617046 |
| 1.404617046 |
| 0           |
| 4.916159661 |
| 6.320776707 |
| 3.511542615 |
| 9.130010799 |
| 7.02308523  |
| 9.130010799 |
| 8.427702276 |
| 2.809234092 |
| 0.702308523 |
| 7.02308523  |
| 12.64155341 |
| 5.618468184 |
| 1.404617046 |
| 7.02308523  |
| 7.02308523  |

|             |
|-------------|
| 6.320776707 |
| 5.618468184 |
| 9.832319322 |
| 7.02308523  |
| 1.404617046 |
| 8.427702276 |
| 10.53462785 |
| 12.64155341 |
| 10.53462785 |
| 6.320776707 |
| 2.809234092 |
| 0           |
| 5.618468184 |
| 11.93924489 |
| 2.809234092 |
| 1.404617046 |
| 9.130010799 |
| 7.02308523  |
| 9.832319322 |
| 0           |
| 4.916159661 |
| 12.64155341 |
| 7.02308523  |
| 2.106925569 |
| 7.02308523  |
| 6.320776707 |
| 27.3900324  |
| 5.618468184 |
| 12.64155341 |
| 7.725393753 |
| 0.702308523 |
| 0.702308523 |
| 5.618468184 |
| 3.511542615 |
| 14.74847898 |
| 4.213851138 |
| 0           |
| 7.725393753 |
| 0           |
| 7.725393753 |
| 2.809234092 |
| 14.04617046 |
| 8.427702276 |

|             |
|-------------|
| 0.702308523 |
| 4.916159661 |
| 7.02308523  |
| 0           |
| 0           |
| 6.320776707 |
| 5.618468184 |
| 2.106925569 |
| 584.3206912 |
| 6.320776707 |
| 6.320776707 |
| 3.511542615 |
| 7.725393753 |
| 0.702308523 |
| 2.106925569 |
| 4.213851138 |
| 5.618468184 |
| 7.02308523  |
| 1.404617046 |
| 8.427702276 |
| 7.02308523  |
| 2.106925569 |
| 5.618468184 |
| 8.427702276 |
| 5.618468184 |
| 7.02308523  |
| 0           |
| 6.320776707 |
| 205.0740887 |
| 8.427702276 |
| 0           |
| 8.427702276 |
| 5.618468184 |
| 6.320776707 |
| 3.511542615 |
| 12.64155341 |
| 4.916159661 |
| 0           |
| 6.320776707 |
| 8.427702276 |
| 7.02308523  |
| 7.725393753 |
| 7.02308523  |

|             |
|-------------|
| 7.02308523  |
| 4.213851138 |
| 1.404617046 |
| 7.725393753 |
| 0           |
| 2.809234092 |
| 1.404617046 |
| 7.02308523  |
| 7.02308523  |
| 10.53462785 |
| 6.320776707 |
| 0           |
| 11.93924489 |
| 11.23693637 |
| 2.809234092 |
| 9.832319322 |
| 5.618468184 |
| 4.213851138 |
| 13.34386194 |
| 4.213851138 |
| 4.916159661 |
| 9.130010799 |
| 4.213851138 |
| 9.832319322 |
| 5.618468184 |
| 4.916159661 |
| 1.404617046 |
| 1.404617046 |
| 0           |
| 3.511542615 |
| 2.106925569 |
| 4.916159661 |
| 3.511542615 |
| 8.427702276 |
| 7.725393753 |
| 7.725393753 |
| 49.86390513 |
| 9.130010799 |
| 11.23693637 |
| 6.320776707 |
| 11.23693637 |
| 3.511542615 |
| 3.511542615 |

|             |
|-------------|
| 3.511542615 |
| 169.256354  |
| 7.02308523  |
| 0           |
| 9.130010799 |
| 7.02308523  |
| 7.02308523  |
| 5.618468184 |
| 0           |
| 4.916159661 |
| 7.02308523  |
| 5.618468184 |
| 5.618468184 |
| 10.53462785 |
| 0           |
| 2.106925569 |
| 7.725393753 |
| 4.916159661 |
| 0           |
| 4.916159661 |
| 7.02308523  |
| 2.809234092 |
| 2.106925569 |
| 8.427702276 |
| 2.809234092 |
| 3.511542615 |
| 0           |
| 0           |
| 7.725393753 |
| 4.213851138 |
| 0.702308523 |
| 0           |
| 8.427702276 |
| 6.320776707 |
| 0           |
| 7.02308523  |
| 5.618468184 |
| 9.130010799 |
| 0           |
| 6.320776707 |
| 4.213851138 |
| 4.213851138 |
| 8.427702276 |



|             |
|-------------|
| 108.8578211 |
| 0           |
| 9.832319322 |
| 6.320776707 |
| 4.213851138 |
| 13.34386194 |
| 18.2600216  |
| 9.832319322 |
| 0           |
| 3.511542615 |
| 4.916159661 |
| 2.809234092 |
| 7.02308523  |
| 3.511542615 |
| 4.916159661 |
| 6.320776707 |
| 9.130010799 |
| 3.511542615 |
| 0           |
| 5.618468184 |
| 11.93924489 |
| 7.02308523  |
| 4.916159661 |
| 2.809234092 |
| 4.916159661 |
| 7.725393753 |
| 11.23693637 |
| 2.809234092 |
| 6.320776707 |
| 7.725393753 |
| 0           |
| 7.725393753 |
| 0           |
| 7.02308523  |
| 4.213851138 |
| 6.320776707 |
| 9.832319322 |
| 6.320776707 |
| 6.320776707 |
| 4.916159661 |
| 4.916159661 |
| 2.809234092 |
| 3.511542615 |

|             |
|-------------|
| 4.916159661 |
| 4.213851138 |
| 8.427702276 |
| 28.09234092 |
| 0           |
| 6.320776707 |
| 2.106925569 |
| 5.618468184 |
| 3.511542615 |
| 7.725393753 |
| 7.725393753 |
| 6.320776707 |
| 2.809234092 |
| 0           |
| 5.618468184 |
| 9.130010799 |
| 7.02308523  |
| 0           |
| 4.916159661 |
| 0           |
| 2.809234092 |
| 0           |
| 3.511542615 |
| 7.725393753 |
| 5.618468184 |
| 6.320776707 |
| 7.02308523  |
| 9.130010799 |
| 1.404617046 |
| 5.618468184 |
| 5.618468184 |
| 4.916159661 |
| 27.3900324  |
| 3.511542615 |
| 7.02308523  |
| 5.618468184 |
| 10.53462785 |
| 0           |
| 11.23693637 |
| 2.809234092 |
| 8.427702276 |
| 3.511542615 |
| 3.511542615 |

|             |
|-------------|
| 5.618468184 |
| 0           |
| 7.02308523  |
| 14.04617046 |
| 9.130010799 |
| 12.64155341 |
| 2.106925569 |
| 11.93924489 |
| 5.618468184 |
| 7.02308523  |
| 7.725393753 |
| 4.213851138 |
| 8.427702276 |
| 0           |
| 12.64155341 |
| 0.702308523 |
| 4.213851138 |
| 2.809234092 |
| 54.07775627 |
| 3.511542615 |
| 29.49695797 |
| 6.320776707 |
| 2.809234092 |
| 68.12392673 |
| 4.916159661 |
| 501.4482854 |
| 9.832319322 |
| 8.427702276 |
| 7.725393753 |
| 7.725393753 |
| 4.213851138 |
| 7.02308523  |
| 16.15309603 |
| 2.106925569 |
| 8.427702276 |
| 5.618468184 |
| 7.02308523  |
| 7.02308523  |
| 8.427702276 |
| 2.809234092 |
| 5.618468184 |
| 6.320776707 |
| 1.404617046 |

|             |
|-------------|
| 164.3401944 |
| 30.90157501 |
| 3.511542615 |
| 298.4811223 |
| 0           |
| 3.511542615 |
| 2.809234092 |
| 2.106925569 |
| 7.725393753 |
| 1.404617046 |
| 1.404617046 |
| 14.04617046 |
| 2.106925569 |
| 9.130010799 |
| 4.916159661 |
| 7.02308523  |
| 7.02308523  |
| 0           |
| 0           |
| 26.68772387 |
| 3.511542615 |
| 8.427702276 |
| 2.106925569 |
| 4.916159661 |
| 7.725393753 |
| 2.106925569 |
| 5.618468184 |
| 7.02308523  |
| 4.213851138 |
| 0           |
| 5.618468184 |
| 3.511542615 |
| 0           |
| 4.916159661 |
| 0           |
| 4.916159661 |
| 4.213851138 |
| 7.725393753 |
| 0           |
| 28.79464944 |
| 4.916159661 |
| 5.618468184 |
| 0           |

|             |
|-------------|
| 4.213851138 |
| 4.213851138 |
| 3.511542615 |
| 0           |
| 0           |
| 7.725393753 |
| 8.427702276 |
| 6.320776707 |
| 11.93924489 |
| 0           |
| 0           |
| 0.702308523 |
| 11.23693637 |
| 40.03158581 |
| 2.106925569 |
| 7.02308523  |
| 2.106925569 |
| 7.02308523  |
| 2.809234092 |
| 5.618468184 |
| 9.130010799 |
| 6.320776707 |
| 0           |
| 4.916159661 |
| 2.809234092 |
| 0           |
| 10.53462785 |
| 8.427702276 |
| 2.809234092 |
| 0           |
| 8.427702276 |
| 7.02308523  |
| 4.916159661 |
| 3.511542615 |
| 7.725393753 |
| 8.427702276 |
| 7.02308523  |
| 0           |
| 17.55771308 |
| 5.618468184 |
| 7.02308523  |
| 42.8408199  |
| 54.07775627 |

|             |
|-------------|
| 8.427702276 |
| 9.130010799 |
| 18.96233012 |
| 6.320776707 |
| 8.427702276 |
| 23.87848978 |
| 0           |
| 0           |
| 0           |
| 18.2600216  |
| 4.213851138 |
| 9.832319322 |
| 4.916159661 |
| 4.916159661 |
| 0           |
| 8.427702276 |
| 6.320776707 |
| 12.64155341 |
| 9.832319322 |
| 2.809234092 |
| 7.725393753 |
| 5.618468184 |
| 2.809234092 |
| 3.511542615 |
| 4.916159661 |
| 4.916159661 |
| 9.832319322 |
| 5.618468184 |
| 799.2270992 |
| 3.511542615 |
| 0           |
| 6.320776707 |
| 0           |
| 4.916159661 |
| 0           |
| 0           |
| 7.02308523  |
| 2.809234092 |
| 2.106925569 |
| 136.2478535 |
| 9.130010799 |
| 0           |
| 4.213851138 |

|             |
|-------------|
| 4.916159661 |
| 10.53462785 |
| 4.213851138 |
| 7.725393753 |
| 4.916159661 |
| 2.809234092 |
| 11.93924489 |
| 12.64155341 |
| 0           |
| 9.130010799 |
| 6.320776707 |
| 9.130010799 |
| 8.427702276 |
| 4.916159661 |
| 2.809234092 |
| 7.02308523  |
| 0           |
| 2.809234092 |
| 9.130010799 |
| 11.23693637 |
| 5.618468184 |
| 3.511542615 |
| 0.702308523 |
| 7.725393753 |
| 14.04617046 |
| 30.90157501 |
| 6.320776707 |
| 1.404617046 |
| 4.213851138 |
| 4.916159661 |
| 0           |
| 7.02308523  |
| 3.511542615 |
| 6.320776707 |
| 6.320776707 |
| 8.427702276 |
| 4.213851138 |
| 0           |
| 5.618468184 |
| 2.106925569 |
| 7.725393753 |
| 4.916159661 |
| 3.511542615 |

|             |
|-------------|
| 5.618468184 |
| 4.213851138 |
| 4.916159661 |
| 11.23693637 |
| 5.618468184 |
| 7.725393753 |
| 3.511542615 |
| 4.916159661 |
| 11.23693637 |
| 9.130010799 |
| 9.832319322 |
| 6.320776707 |
| 7.02308523  |
| 15.45078751 |
| 8.427702276 |
| 4.916159661 |
| 6.320776707 |
| 5.618468184 |
| 4.213851138 |
| 0           |
| 0           |
| 3.511542615 |
| 4.916159661 |
| 4.213851138 |
| 0           |
| 3.511542615 |
| 4.213851138 |
| 0           |
| 7.725393753 |
| 5.618468184 |
| 8.427702276 |
| 0           |
| 7.725393753 |
| 10.53462785 |
| 4.213851138 |
| 4.916159661 |
| 35.11542615 |
| 2.809234092 |
| 705.1177571 |
| 15.45078751 |
| 6.320776707 |
| 2.106925569 |
| 2.106925569 |



|             |
|-------------|
| 12.64155341 |
| 7.02308523  |
| 2.809234092 |
| 4.213851138 |
| 2.809234092 |
| 9.832319322 |
| 1.404617046 |
| 7.02308523  |
| 9.832319322 |
| 21.06925569 |
| 6.320776707 |
| 82.17009719 |
| 0.702308523 |
| 4.213851138 |
| 4.916159661 |
| 2.809234092 |
| 4.213851138 |
| 0.702308523 |
| 7.725393753 |
| 4.916159661 |
| 9.130010799 |
| 2.809234092 |
| 4.916159661 |
| 0           |
| 4.213851138 |
| 7.725393753 |
| 1.404617046 |
| 7.02308523  |
| 16.85540455 |
| 4.916159661 |
| 6.320776707 |
| 0.702308523 |
| 0           |
| 4.916159661 |
| 7.02308523  |
| 6.320776707 |
| 0           |
| 4.213851138 |
| 0           |
| 21.77156421 |
| 7.725393753 |
| 8.427702276 |
| 0           |

|             |
|-------------|
| 4.916159661 |
| 10.53462785 |
| 9.130010799 |
| 0           |
| 4.916159661 |
| 0           |
| 2.809234092 |
| 0           |
| 5.618468184 |
| 3.511542615 |
| 0           |
| 6.320776707 |
| 2.106925569 |
| 0           |
| 4.213851138 |
| 9.832319322 |
| 9.130010799 |
| 10.53462785 |
| 0           |
| 4.213851138 |
| 3.511542615 |
| 7.02308523  |
| 14.74847898 |
| 7.02308523  |
| 9.130010799 |
| 7.02308523  |
| 8.427702276 |
| 5.618468184 |
| 4.916159661 |
| 7.02308523  |
| 4.916159661 |
| 10.53462785 |
| 0           |
| 2.809234092 |
| 0           |
| 4.213851138 |
| 7.02308523  |
| 44.24543695 |
| 1.404617046 |
| 6.320776707 |
| 4.916159661 |
| 2.809234092 |
| 10.53462785 |

|             |
|-------------|
| 7.02308523  |
| 21.77156421 |
| 9.130010799 |
| 2.809234092 |
| 5.618468184 |
| 7.02308523  |
| 13.34386194 |
| 6.320776707 |
| 2.106925569 |
| 3.511542615 |
| 7.02308523  |
| 6.320776707 |
| 0           |
| 95.51395913 |
| 10.53462785 |
| 9.130010799 |
| 6.320776707 |
| 7.725393753 |
| 9.832319322 |
| 9.130010799 |
| 2.106925569 |
| 60.39853298 |
| 9.130010799 |
| 6.320776707 |
| 5.618468184 |
| 9.832319322 |
| 11.93924489 |
| 2.106925569 |
| 9.130010799 |
| 4.916159661 |
| 0           |
| 1.404617046 |
| 3.511542615 |
| 2.106925569 |
| 6.320776707 |
| 4.213851138 |
| 4.213851138 |
| 4.213851138 |
| 16.15309603 |
| 2.809234092 |
| 12.64155341 |
| 5.618468184 |
| 9.130010799 |

|             |
|-------------|
| 11.93924489 |
| 4.916159661 |
| 6.320776707 |
| 3.511542615 |
| 8.427702276 |
| 6.320776707 |
| 658.7653946 |
| 7.02308523  |
| 7.02308523  |
| 7.02308523  |
| 9.130010799 |
| 10.53462785 |
| 7.725393753 |
| 0           |
| 4.916159661 |
| 0           |
| 5.618468184 |
| 5.618468184 |
| 10.53462785 |
| 7.02308523  |
| 3.511542615 |
| 4.916159661 |
| 2.106925569 |
| 0           |
| 52.67313923 |
| 7.02308523  |
| 0           |
| 9.130010799 |
| 5.618468184 |
| 10.53462785 |
| 2.809234092 |
| 8.427702276 |
| 23.87848978 |
| 0           |
| 9.130010799 |
| 0           |
| 7.02308523  |
| 11.93924489 |
| 6.320776707 |
| 4.916159661 |
| 8.427702276 |
| 13.34386194 |
| 8.427702276 |

|             |
|-------------|
| 0           |
| 4.213851138 |
| 34.41311763 |
| 27.3900324  |
| 9.130010799 |
| 6.320776707 |
| 4.916159661 |
| 4.213851138 |
| 2.809234092 |
| 16.15309603 |
| 8.427702276 |
| 0           |
| 0           |
| 4.916159661 |
| 0           |
| 9.130010799 |
| 11.93924489 |
| 6.320776707 |
| 3.511542615 |
| 0           |
| 4.916159661 |
| 7.02308523  |
| 2.106925569 |
| 6.320776707 |
| 9.130010799 |
| 6.320776707 |
| 3.511542615 |
| 8.427702276 |
| 1.404617046 |
| 96.21626765 |
| 7.02308523  |
| 0           |
| 7.725393753 |
| 4.916159661 |
| 6.320776707 |
| 38.62696877 |
| 7.725393753 |
| 11.23693637 |
| 6.320776707 |
| 8.427702276 |
| 7.02308523  |
| 43.54312843 |
| 7.02308523  |

|             |
|-------------|
| 7.02308523  |
| 0           |
| 9.130010799 |
| 6.320776707 |
| 5.618468184 |
| 9.130010799 |
| 4.916159661 |
| 3.511542615 |
| 5.618468184 |
| 21.77156421 |
| 2.106925569 |
| 4.916159661 |
| 7.02308523  |
| 4.916159661 |
| 6.320776707 |
| 4.916159661 |
| 1.404617046 |
| 8.427702276 |
| 2.106925569 |
| 8.427702276 |
| 4.213851138 |
| 0           |
| 4.916159661 |
| 8.427702276 |
| 0           |
| 3.511542615 |
| 0           |
| 6.320776707 |
| 11.23693637 |
| 2.809234092 |
| 0           |
| 7.725393753 |
| 8.427702276 |
| 2.809234092 |
| 2.809234092 |
| 7.02308523  |
| 9.130010799 |
| 5.618468184 |
| 3.511542615 |
| 68.82623526 |
| 4.213851138 |
| 7.725393753 |
| 4.213851138 |

|             |
|-------------|
| 9.130010799 |
| 4.213851138 |
| 33.7108091  |
| 7.725393753 |
| 3.511542615 |
| 3.511542615 |
| 10.53462785 |
| 2.809234092 |
| 147.4847898 |
| 6.320776707 |
| 16.15309603 |
| 7.02308523  |
| 22.47387274 |
| 11.93924489 |
| 74.44470344 |
| 2.809234092 |
| 23.17618126 |
| 4.916159661 |
| 9.832319322 |
| 46.35236252 |
| 4.916159661 |
| 9.832319322 |
| 6.320776707 |
| 21.06925569 |
| 8.427702276 |
| 14.74847898 |
| 177.6840563 |
| 30.19926649 |
| 14.04617046 |
| 143.9732472 |
| 9.130010799 |
| 9.130010799 |
| 5.618468184 |
| 115.1785978 |
| 119.3924489 |
| 7.02308523  |
| 1.404617046 |
| 61.1008415  |
| 23.17618126 |
| 19.66463864 |
| 6.320776707 |
| 21.06925569 |
| 6.320776707 |

|             |
|-------------|
| 14.04617046 |
| 47.75697957 |
| 6.320776707 |
| 0.702308523 |
| 16.85540455 |
| 9.130010799 |
| 5.618468184 |
| 7.02308523  |
| 4.213851138 |
| 7.725393753 |
| 9.832319322 |
| 36.5200432  |
| 11.23693637 |
| 2.106925569 |
| 18.96233012 |
| 7.02308523  |
| 20.36694717 |
| 6.320776707 |
| 29.49695797 |
| 9.130010799 |
| 109.5601296 |
| 2.809234092 |
| 3.511542615 |
| 10.53462785 |
| 16.85540455 |
| 6.320776707 |
| 136.950162  |
| 117.9878319 |
| 17.55771308 |
| 5.618468184 |
| 4.916159661 |
| 152.4009495 |
| 10.53462785 |
| 5.618468184 |
| 6.320776707 |
| 6.320776707 |
| 9.832319322 |
| 9.832319322 |
| 23.87848978 |
| 247.9149086 |
| 4.213851138 |
| 5.618468184 |
| 28.09234092 |



|             |
|-------------|
| 9.130010799 |
| 24.58079831 |
| 113.7739807 |
| 4.916159661 |
| 35.11542615 |
| 7.02308523  |
| 9.832319322 |
| 29.49695797 |
| 61.1008415  |
| 124.3086086 |
| 9.130010799 |
| 6.320776707 |
| 4.916159661 |
| 138.354779  |
| 5.618468184 |
| 11.93924489 |
| 7.725393753 |
| 8.427702276 |
| 7.02308523  |
| 9.130010799 |
| 137.6524705 |
| 11.93924489 |
| 9.130010799 |
| 0.702308523 |
| 3.511542615 |
| 4.916159661 |
| 0           |
| 5.618468184 |
| 9.832319322 |
| 110.2624381 |
| 9.130010799 |
| 9.130010799 |
| 8.427702276 |
| 84.27702276 |
| 193.1348438 |
| 8.427702276 |
| 5.618468184 |
| 240.1895149 |
| 1.404617046 |
| 11.93924489 |
| 8.427702276 |
| 89.89549095 |
| 7.725393753 |

|             |
|-------------|
| 37.92466024 |
| 3.511542615 |
| 185.4094501 |
| 8.427702276 |
| 59.69622446 |
| 7.02308523  |
| 7.02308523  |
| 9.832319322 |
| 7.725393753 |
| 11.23693637 |
| 195.2417694 |
| 6.320776707 |
| 3.511542615 |
| 0.702308523 |
| 6.320776707 |
| 77.25393753 |
| 14.74847898 |
| 64.61238412 |
| 5.618468184 |
| 49.16159661 |
| 8.427702276 |
| 9.832319322 |
| 7.02308523  |
| 5.618468184 |
| 3.511542615 |
| 9.130010799 |
| 14.74847898 |
| 87.78856538 |
| 40.03158581 |
| 10.53462785 |
| 12.64155341 |
| 59.69622446 |
| 2.809234092 |
| 4.213851138 |
| 7.02308523  |
| 5.618468184 |
| 18.96233012 |
| 93.40703356 |
| 10.53462785 |
| 6.320776707 |
| 16.15309603 |
| 9.130010799 |
| 7.725393753 |

|             |
|-------------|
| 6.320776707 |
| 8.427702276 |
| 74.44470344 |
| 4.213851138 |
| 11.23693637 |
| 7.02308523  |
| 11.93924489 |
| 7.02308523  |
| 34.41311763 |
| 20.36694717 |
| 7.725393753 |
| 105.3462785 |
| 2.809234092 |
| 306.206516  |
| 39.32927729 |
| 153.103258  |
| 6.320776707 |
| 282.3280263 |
| 6.320776707 |
| 118.6901404 |
| 6.320776707 |
| 0.702308523 |
| 13.34386194 |
| 9.130010799 |
| 4.213851138 |
| 12.64155341 |
| 3.511542615 |
| 40.03158581 |
| 22.47387274 |
| 5.618468184 |
| 70.2308523  |
| 30.90157501 |
| 12.64155341 |
| 165.7448114 |
| 4.916159661 |
| 7.725393753 |
| 210.6925569 |
| 4.213851138 |
| 25.28310683 |
| 133.4386194 |
| 103.9416614 |
| 132.0340023 |
| 7.725393753 |

|             |
|-------------|
| 4.916159661 |
| 23.17618126 |
| 15.45078751 |
| 20.36694717 |
| 121.4993745 |
| 9.130010799 |
| 79.3608631  |
| 13.34386194 |
| 204.3717802 |
| 93.40703356 |
| 12.64155341 |
| 4.916159661 |
| 11.93924489 |
| 6.320776707 |
| 12.64155341 |
| 7.725393753 |
| 24.58079831 |
| 0.702308523 |
| 42.13851138 |
| 0.702308523 |
| 6.320776707 |
| 10.53462785 |
| 7.725393753 |
| 9.832319322 |
| 7.02308523  |
| 7.725393753 |
| 11.23693637 |
| 4.916159661 |
| 80.06317162 |
| 7.725393753 |
| 113.7739807 |
| 59.69622446 |
| 304.0995905 |
| 1.404617046 |
| 61.80315003 |
| 2.809234092 |
| 7.02308523  |
| 4.916159661 |
| 8.427702276 |
| 6.320776707 |
| 169.256354  |
| 8.427702276 |
| 299.8857393 |

|             |
|-------------|
| 40.03158581 |
| 6.320776707 |
| 6.320776707 |
| 8.427702276 |
| 8.427702276 |
| 75.84932049 |
| 5.618468184 |
| 9.130010799 |
| 4.213851138 |
| 168.5540455 |
| 6.320776707 |
| 8.427702276 |
| 7.725393753 |
| 146.7824813 |
| 2.809234092 |
| 73.04008639 |
| 7.725393753 |
| 0           |
| 7.02308523  |
| 12.64155341 |
| 27.3900324  |
| 94.10934208 |
| 297.0765052 |
| 19.66463864 |
| 21.06925569 |
| 18.96233012 |
| 117.9878319 |
| 6.320776707 |
| 47.75697957 |
| 7.02308523  |
| 7.725393753 |
| 4.916159661 |
| 14.04617046 |
| 9.130010799 |
| 4.916159661 |
| 13.34386194 |
| 49.16159661 |
| 6.320776707 |
| 2.809234092 |
| 5.618468184 |
| 5.618468184 |
| 84.97933129 |
| 8.427702276 |

|             |
|-------------|
| 28.09234092 |
| 8.427702276 |
| 3.511542615 |
| 11.23693637 |
| 11.93924489 |
| 14.04617046 |
| 131.3316938 |
| 8.427702276 |
| 115.8809063 |
| 6.320776707 |
| 323.7642291 |
| 19.66463864 |
| 2.106925569 |
| 8.427702276 |
| 7.725393753 |
| 9.130010799 |
| 51.26852218 |
| 8.427702276 |
| 22.47387274 |
| 25.28310683 |
| 7.02308523  |
| 57.58929889 |
| 7.725393753 |
| 37.22235172 |
| 11.23693637 |
| 4.916159661 |
| 6.320776707 |
| 9.832319322 |
| 58.99391593 |
| 11.93924489 |
| 7.725393753 |
| 9.832319322 |
| 4.213851138 |
| 8.427702276 |
| 31.60388354 |
| 9.130010799 |
| 68.12392673 |
| 11.93924489 |
| 26.68772387 |
| 0           |
| 73.04008639 |
| 1.404617046 |
| 29.49695797 |

|             |
|-------------|
| 6.320776707 |
| 6.320776707 |
| 35.81773467 |
| 7.725393753 |
| 6.320776707 |
| 10.53462785 |
| 8.427702276 |
| 66.01700116 |
| 7.02308523  |
| 9.832319322 |
| 562.5491269 |
| 7.725393753 |
| 4.916159661 |
| 9.130010799 |
| 12.64155341 |
| 9.130010799 |
| 144.6755557 |
| 54.7800648  |
| 20.36694717 |
| 5.618468184 |
| 10.53462785 |
| 11.23693637 |
| 37.22235172 |
| 7.02308523  |
| 12.64155341 |
| 7.02308523  |
| 14.74847898 |
| 11.23693637 |
| 73.04008639 |
| 31.60388354 |
| 3.511542615 |
| 21.77156421 |
| 5.618468184 |
| 6.320776707 |
| 39.32927729 |
| 1.404617046 |
| 87.08625685 |
| 9.832319322 |
| 74.44470344 |
| 10.53462785 |
| 35.81773467 |
| 3.511542615 |
| 7.725393753 |

|             |
|-------------|
| 38.62696877 |
| 80.76548015 |
| 11.23693637 |
| 58.29160741 |
| 8.427702276 |
| 15.45078751 |
| 75.14701196 |
| 7.02308523  |
| 84.97933129 |
| 4.213851138 |
| 7.02308523  |
| 4.916159661 |
| 9.130010799 |
| 1.404617046 |
| 7.725393753 |
| 18.2600216  |
| 23.87848978 |
| 2.809234092 |
| 18.96233012 |
| 4.916159661 |
| 12.64155341 |
| 93.40703356 |
| 28.79464944 |
| 0           |
| 3.511542615 |
| 106.048587  |
| 4.916159661 |
| 7.02308523  |
| 20.36694717 |
| 10.53462785 |
| 9.130010799 |
| 73.04008639 |
| 3.511542615 |
| 4.213851138 |
| 4.916159661 |
| 14.04617046 |
| 56.18468184 |
| 0.702308523 |
| 9.832319322 |
| 2.809234092 |
| 6.320776707 |
| 40.03158581 |
| 4.916159661 |



|             |
|-------------|
| 7.02308523  |
| 7.02308523  |
| 9.832319322 |
| 22.47387274 |
| 36.5200432  |
| 9.130010799 |
| 7.02308523  |
| 8.427702276 |
| 21.77156421 |
| 28.09234092 |
| 8.427702276 |
| 12.64155341 |
| 182.600216  |
| 12.64155341 |
| 102.5370444 |
| 230.3571956 |
| 54.07775627 |
| 6.320776707 |
| 5.618468184 |
| 111.6670552 |
| 2.809234092 |
| 3.511542615 |
| 3.511542615 |
| 28.09234092 |
| 4.213851138 |
| 30.90157501 |
| 0           |
| 9.832319322 |
| 11.23693637 |
| 2.809234092 |
| 3.511542615 |
| 13.34386194 |
| 1.404617046 |
| 5.618468184 |
| 9.832319322 |
| 7.725393753 |
| 14.74847898 |
| 44.94774547 |
| 2.106925569 |
| 7.725393753 |
| 1.404617046 |
| 5.618468184 |
| 0           |

|             |
|-------------|
| 7.725393753 |
| 7.02308523  |
| 23.17618126 |
| 23.17618126 |
| 4.916159661 |
| 18.2600216  |
| 4.213851138 |
| 9.832319322 |
| 51.9708307  |
| 6.320776707 |
| 4.916159661 |
| 7.725393753 |
| 10.53462785 |
| 14.74847898 |
| 7.02308523  |
| 57.58929889 |
| 3.511542615 |
| 7.02308523  |
| 10.53462785 |
| 23.87848978 |
| 134.1409279 |
| 8.427702276 |
| 4.916159661 |
| 9.832319322 |
| 5.618468184 |
| 10.53462785 |
| 6.320776707 |
| 7.02308523  |
| 9.130010799 |
| 8.427702276 |
| 7.02308523  |
| 56.18468184 |
| 11.23693637 |
| 79.3608631  |
| 76.55162901 |
| 7.725393753 |
| 7.725393753 |
| 2.809234092 |
| 11.93924489 |
| 39.32927729 |
| 8.427702276 |
| 37.22235172 |
| 38.62696877 |

|             |
|-------------|
| 15.45078751 |
| 21.77156421 |
| 38.62696877 |
| 22.47387274 |
| 9.832319322 |
| 10.53462785 |
| 11.23693637 |
| 5.618468184 |
| 24.58079831 |
| 28.79464944 |
| 21.06925569 |
| 3.511542615 |
| 7.02308523  |
| 57.58929889 |
| 5.618468184 |
| 70.2308523  |
| 51.9708307  |
| 12.64155341 |
| 4.213851138 |
| 27.3900324  |
| 32.30619206 |
| 37.22235172 |
| 156.6148006 |
| 318.1457609 |
| 7.725393753 |
| 153.103258  |
| 180.4932904 |
| 0           |
| 6.320776707 |
| 9.832319322 |
| 3.511542615 |
| 8.427702276 |
| 4.916159661 |
| 12.64155341 |
| 1.404617046 |
| 20.36694717 |
| 8.427702276 |
| 4.213851138 |
| 6.320776707 |
| 7.02308523  |
| 101.1324273 |
| 53.37544775 |
| 18.2600216  |

|             |
|-------------|
| 5.618468184 |
| 21.77156421 |
| 9.832319322 |
| 7.725393753 |
| 4.916159661 |
| 4.916159661 |
| 77.95624606 |
| 7.02308523  |
| 183.3025245 |
| 11.93924489 |
| 0           |
| 6.320776707 |
| 7.725393753 |
| 5.618468184 |
| 9.832319322 |
| 62.50545855 |
| 164.3401944 |
| 52.67313923 |
| 77.25393753 |
| 15.45078751 |
| 4.916159661 |
| 28.09234092 |
| 82.17009719 |
| 117.9878319 |
| 54.07775627 |
| 9.832319322 |
| 9.130010799 |
| 58.29160741 |
| 28.79464944 |
| 14.04617046 |
| 34.41311763 |
| 5.618468184 |
| 6.320776707 |
| 89.19318242 |
| 9.832319322 |
| 4.213851138 |
| 7.725393753 |
| 6.320776707 |
| 12.64155341 |
| 11.23693637 |
| 8.427702276 |
| 12.64155341 |
| 10.53462785 |

|             |
|-------------|
| 4.213851138 |
| 7.02308523  |
| 2.809234092 |
| 5.618468184 |
| 9.832319322 |
| 34.41311763 |
| 8.427702276 |
| 25.28310683 |
| 9.130010799 |
| 3.511542615 |
| 9.130010799 |
| 68.82623526 |
| 9.130010799 |
| 7.725393753 |
| 4.213851138 |
| 7.02308523  |
| 5.618468184 |
| 5.618468184 |
| 9.130010799 |
| 4.916159661 |
| 8.427702276 |
| 55.48237332 |
| 4.213851138 |
| 3.511542615 |
| 40.03158581 |
| 63.91007559 |
| 37.92466024 |
| 11.23693637 |
| 4.916159661 |
| 10.53462785 |
| 125.7132256 |
| 144.6755557 |
| 14.04617046 |
| 12.64155341 |
| 7.725393753 |
| 6.320776707 |
| 2.809234092 |
| 10.53462785 |
| 1.404617046 |
| 6.320776707 |
| 6.320776707 |
| 4.916159661 |
| 7.02308523  |

|             |
|-------------|
| 6.320776707 |
| 7.02308523  |
| 3.511542615 |
| 48.45928809 |
| 7.02308523  |
| 96.21626765 |
| 21.06925569 |
| 63.91007559 |
| 41.43620286 |
| 37.92466024 |
| 8.427702276 |
| 15.45078751 |
| 6.320776707 |
| 0           |
| 5.618468184 |
| 14.04617046 |
| 203.6694717 |
| 142.5686302 |
| 59.69622446 |
| 23.17618126 |
| 12.64155341 |
| 2.106925569 |
| 8.427702276 |
| 6.320776707 |
| 51.9708307  |
| 9.130010799 |
| 8.427702276 |
| 4.916159661 |
| 42.8408199  |
| 10.53462785 |
| 8.427702276 |
| 33.00850058 |
| 4.916159661 |
| 60.39853298 |
| 11.23693637 |
| 9.832319322 |
| 5.618468184 |
| 4.916159661 |
| 6.320776707 |
| 49.86390513 |
| 21.06925569 |
| 8.427702276 |
| 8.427702276 |

|             |
|-------------|
| 8.427702276 |
| 28.79464944 |
| 49.86390513 |
| 252.1287598 |
| 9.130010799 |
| 5.618468184 |
| 4.213851138 |
| 10.53462785 |
| 6.320776707 |
| 18.96233012 |
| 24.58079831 |
| 7.725393753 |
| 4.213851138 |
| 5.618468184 |
| 2.809234092 |
| 7.02308523  |
| 37.22235172 |
| 37.92466024 |
| 92.00241652 |
| 4.916159661 |
| 6.320776707 |
| 7.02308523  |
| 8.427702276 |
| 45.650054   |
| 4.213851138 |
| 160.8286518 |
| 0           |
| 2.809234092 |
| 2.809234092 |
| 4.213851138 |
| 14.74847898 |
| 4.213851138 |
| 9.832319322 |
| 9.832319322 |
| 14.74847898 |
| 16.15309603 |
| 102.5370444 |
| 6.320776707 |
| 37.92466024 |
| 165.7448114 |
| 115.1785978 |
| 11.23693637 |
| 30.19926649 |

|             |
|-------------|
| 39.32927729 |
| 5.618468184 |
| 8.427702276 |
| 7.725393753 |
| 21.06925569 |
| 7.02308523  |
| 28.79464944 |
| 0           |
| 73.74239492 |
| 132.0340023 |
| 7.725393753 |
| 6.320776707 |
| 18.96233012 |
| 13.34386194 |
| 10.53462785 |
| 4.213851138 |
| 9.832319322 |
| 0           |
| 11.23693637 |
| 186.1117586 |
| 21.77156421 |
| 7.725393753 |
| 68.82623526 |
| 4.916159661 |
| 95.51395913 |
| 37.22235172 |
| 9.832319322 |
| 47.75697957 |
| 9.832319322 |
| 95.51395913 |
| 140.4617046 |
| 101.1324273 |
| 14.74847898 |
| 7.02308523  |
| 5.618468184 |
| 7.02308523  |
| 16.15309603 |
| 46.35236252 |
| 42.13851138 |
| 6.320776707 |
| 6.320776707 |
| 10.53462785 |
| 7.02308523  |



|             |
|-------------|
| 4.916159661 |
| 47.75697957 |
| 14.04617046 |
| 5.618468184 |
| 9.130010799 |
| 3.511542615 |
| 2.809234092 |
| 2.106925569 |
| 7.725393753 |
| 9.130010799 |
| 158.0194177 |
| 12.64155341 |
| 9.130010799 |
| 3.511542615 |
| 9.130010799 |
| 7.02308523  |
| 13.34386194 |
| 63.91007559 |
| 7.02308523  |
| 6.320776707 |
| 2.809234092 |
| 5.618468184 |
| 4.213851138 |
| 4.213851138 |
| 32.30619206 |
| 9.130010799 |
| 51.9708307  |
| 4.916159661 |
| 6.320776707 |
| 4.916159661 |
| 132.7363109 |
| 5.618468184 |
| 8.427702276 |
| 120.0947574 |
| 25.28310683 |
| 11.23693637 |
| 5.618468184 |
| 9.832319322 |
| 4.916159661 |
| 48.45928809 |
| 5.618468184 |
| 9.832319322 |
| 4.916159661 |

|             |
|-------------|
| 4.213851138 |
| 7.02308523  |
| 30.90157501 |
| 3.511542615 |
| 4.213851138 |
| 181.1955989 |
| 11.93924489 |
| 75.14701196 |
| 9.832319322 |
| 254.9379939 |
| 21.77156421 |
| 5.618468184 |
| 78.65855458 |
| 7.02308523  |
| 51.26852218 |
| 40.73389434 |
| 4.213851138 |
| 4.916159661 |
| 25.98541535 |
| 3.511542615 |
| 123.6063001 |
| 6.320776707 |
| 18.96233012 |
| 6.320776707 |
| 42.8408199  |
| 6.320776707 |
| 24.58079831 |
| 9.130010799 |
| 4.916159661 |
| 83.57471424 |
| 8.427702276 |
| 9.130010799 |
| 4.916159661 |
| 27.3900324  |
| 9.832319322 |
| 12.64155341 |
| 92.70472504 |
| 219.1202592 |
| 23.87848978 |
| 6.320776707 |
| 4.916159661 |
| 7.02308523  |
| 9.832319322 |

|             |
|-------------|
| 11.23693637 |
| 7.02308523  |
| 19.66463864 |
| 16.15309603 |
| 12.64155341 |
| 12.64155341 |
| 4.916159661 |
| 11.23693637 |
| 8.427702276 |
| 0           |
| 172.7678967 |
| 7.02308523  |
| 10.53462785 |
| 11.93924489 |
| 97.6208847  |
| 3.511542615 |
| 9.130010799 |
| 9.130010799 |
| 9.130010799 |
| 16.15309603 |
| 6.320776707 |
| 8.427702276 |
| 9.832319322 |
| 11.23693637 |
| 7.725393753 |
| 8.427702276 |
| 9.130010799 |
| 9.130010799 |
| 11.23693637 |
| 18.96233012 |
| 9.130010799 |
| 5.618468184 |
| 7.02308523  |
| 3.511542615 |
| 8.427702276 |
| 4.916159661 |
| 4.916159661 |
| 3.511542615 |
| 4.213851138 |
| 10.53462785 |
| 106.7508955 |
| 12.64155341 |
| 4.213851138 |

|             |
|-------------|
| 7.02308523  |
| 11.23693637 |
| 7.02308523  |
| 8.427702276 |
| 7.02308523  |
| 2.106925569 |
| 7.02308523  |
| 7.725393753 |
| 7.02308523  |
| 5.618468184 |
| 3.511542615 |
| 3.511542615 |
| 4.213851138 |
| 3.511542615 |
| 1.404617046 |
| 7.725393753 |
| 4.916159661 |
| 7.725393753 |
| 5.618468184 |
| 6.320776707 |
| 4.213851138 |
| 8.427702276 |
| 5.618468184 |
| 0.702308523 |
| 111.6670552 |
| 4.213851138 |
| 8.427702276 |
| 7.02308523  |
| 3.511542615 |
| 2.809234092 |
| 8.427702276 |
| 4.916159661 |
| 7.02308523  |
| 6.320776707 |
| 80.76548015 |
| 8.427702276 |
| 6.320776707 |
| 7.725393753 |
| 7.725393753 |
| 9.130010799 |
| 8.427702276 |
| 7.02308523  |
| 5.618468184 |

|             |
|-------------|
| 6.320776707 |
| 42.13851138 |
| 48.45928809 |
| 266.8772387 |
| 5.618468184 |
| 2.106925569 |
| 3.511542615 |
| 10.53462785 |
| 189.6233012 |
| 9.832319322 |
| 4.916159661 |
| 6.320776707 |
| 9.130010799 |
| 9.832319322 |
| 7.725393753 |
| 7.02308523  |
| 6.320776707 |
| 8.427702276 |
| 6.320776707 |
| 4.916159661 |
| 9.832319322 |
| 7.02308523  |
| 11.23693637 |
| 10.53462785 |
| 9.832319322 |
| 13.34386194 |
| 9.130010799 |
| 2.106925569 |
| 8.427702276 |
| 2.809234092 |
| 234.5710467 |
| 8.427702276 |
| 279.5187922 |
| 9.130010799 |
| 11.23693637 |
| 4.916159661 |
| 5.618468184 |
| 5.618468184 |
| 3.511542615 |
| 10.53462785 |
| 2.809234092 |
| 4.213851138 |
| 4.916159661 |

|             |
|-------------|
| 102.5370444 |
| 5.618468184 |
| 8.427702276 |
| 8.427702276 |
| 10.53462785 |
| 3.511542615 |
| 16.85540455 |
| 9.832319322 |
| 7.725393753 |
| 7.725393753 |
| 7.02308523  |
| 0           |
| 5.618468184 |
| 9.130010799 |
| 6.320776707 |
| 6.320776707 |
| 9.130010799 |
| 22.47387274 |
| 6.320776707 |
| 3.511542615 |
| 9.832319322 |
| 1.404617046 |
| 9.832319322 |
| 4.213851138 |
| 3.511542615 |
| 48.45928809 |
| 17.55771308 |
| 8.427702276 |
| 9.130010799 |
| 2.809234092 |
| 4.213851138 |
| 3.511542615 |
| 6.320776707 |
| 11.93924489 |
| 7.725393753 |
| 5.618468184 |
| 4.213851138 |
| 6.320776707 |
| 8.427702276 |
| 8.427702276 |
| 4.213851138 |
| 5.618468184 |
| 7.725393753 |

|             |
|-------------|
| 4.916159661 |
| 4.916159661 |
| 5.618468184 |
| 7.725393753 |
| 5.618468184 |
| 7.02308523  |
| 84.27702276 |
| 5.618468184 |
| 9.130010799 |
| 9.130010799 |
| 4.916159661 |
| 5.618468184 |
| 11.23693637 |
| 7.725393753 |
| 4.213851138 |
| 4.916159661 |
| 70.93316082 |
| 7.02308523  |
| 5.618468184 |
| 4.213851138 |
| 10.53462785 |
| 9.130010799 |
| 9.832319322 |
| 4.916159661 |
| 6.320776707 |
| 8.427702276 |
| 14.74847898 |
| 7.02308523  |
| 13.34386194 |
| 6.320776707 |
| 5.618468184 |
| 5.618468184 |
| 10.53462785 |
| 210.6925569 |
| 25.98541535 |
| 4.916159661 |
| 2.809234092 |
| 6.320776707 |
| 10.53462785 |
| 4.916159661 |
| 4.916159661 |
| 5.618468184 |
| 5.618468184 |

|             |
|-------------|
| 9.832319322 |
| 10.53462785 |
| 7.02308523  |
| 9.832319322 |
| 4.213851138 |
| 8.427702276 |
| 2.809234092 |
| 7.02308523  |
| 4.916159661 |
| 2.809234092 |
| 8.427702276 |
| 7.02308523  |
| 6.320776707 |
| 11.23693637 |
| 9.130010799 |
| 7.02308523  |
| 7.725393753 |
| 6.320776707 |
| 7.725393753 |
| 7.725393753 |
| 4.916159661 |
| 9.130010799 |
| 6.320776707 |
| 11.23693637 |
| 7.02308523  |
| 7.725393753 |
| 4.916159661 |
| 7.02308523  |
| 9.832319322 |
| 8.427702276 |
| 9.130010799 |
| 9.832319322 |
| 10.53462785 |
| 5.618468184 |
| 6.320776707 |
| 7.725393753 |
| 5.618468184 |
| 9.130010799 |
| 8.427702276 |
| 14.74847898 |
| 8.427702276 |
| 112.3693637 |
| 7.02308523  |



|             |
|-------------|
| 15.45078751 |
| 7.02308523  |
| 14.04617046 |
| 133.4386194 |
| 5.618468184 |
| 8.427702276 |
| 9.832319322 |
| 7.02308523  |
| 12.64155341 |
| 4.916159661 |
| 8.427702276 |
| 11.93924489 |
| 8.427702276 |
| 6.320776707 |
| 11.93924489 |
| 59.69622446 |
| 10.53462785 |
| 8.427702276 |
| 7.02308523  |
| 32.30619206 |
| 4.916159661 |
| 9.832319322 |
| 5.618468184 |
| 7.02308523  |
| 0           |
| 8.427702276 |
| 7.725393753 |
| 40.03158581 |
| 3.511542615 |
| 6.320776707 |
| 7.725393753 |
| 4.213851138 |
| 6.320776707 |
| 9.130010799 |
| 9.130010799 |
| 4.213851138 |
| 5.618468184 |
| 4.916159661 |
| 5.618468184 |
| 7.02308523  |
| 7.02308523  |
| 16.15309603 |
| 8.427702276 |

|             |
|-------------|
| 7.725393753 |
| 8.427702276 |
| 3.511542615 |
| 5.618468184 |
| 7.02308523  |
| 7.02308523  |
| 7.725393753 |
| 8.427702276 |
| 7.725393753 |
| 4.916159661 |
| 11.23693637 |
| 9.832319322 |
| 6.320776707 |
| 7.725393753 |
| 9.130010799 |
| 16.15309603 |
| 5.618468184 |
| 27.3900324  |
| 8.427702276 |
| 5.618468184 |
| 7.725393753 |
| 9.130010799 |
| 63.20776707 |
| 7.02308523  |
| 4.213851138 |
| 5.618468184 |
| 7.02308523  |
| 5.618468184 |
| 70.93316082 |
| 7.725393753 |
| 9.130010799 |
| 15.45078751 |
| 3.511542615 |
| 0           |
| 4.213851138 |
| 9.130010799 |
| 8.427702276 |
| 0           |
| 2.809234092 |
| 32.30619206 |
| 45.650054   |
| 75.84932049 |
| 9.130010799 |

|             |
|-------------|
| 4.916159661 |
| 10.53462785 |
| 7.725393753 |
| 20.36694717 |
| 11.23693637 |
| 9.832319322 |
| 9.832319322 |
| 68.82623526 |
| 10.53462785 |
| 0           |
| 11.23693637 |
| 7.02308523  |
| 9.832319322 |
| 6.320776707 |
| 9.832319322 |
| 8.427702276 |
| 5.618468184 |
| 7.725393753 |
| 5.618468184 |
| 12.64155341 |
| 9.130010799 |
| 1.404617046 |
| 9.832319322 |
| 5.618468184 |
| 5.618468184 |
| 4.213851138 |
| 7.02308523  |
| 6.320776707 |
| 8.427702276 |
| 11.93924489 |
| 60.39853298 |
| 14.74847898 |
| 134.1409279 |
| 4.213851138 |
| 11.93924489 |
| 2.809234092 |
| 7.02308523  |
| 4.916159661 |
| 11.23693637 |
| 6.320776707 |
| 122.9039915 |
| 7.02308523  |
| 90.59779947 |

|             |
|-------------|
| 135.5455449 |
| 4.916159661 |
| 10.53462785 |
| 0           |
| 16.85540455 |
| 2.106925569 |
| 10.53462785 |
| 8.427702276 |
| 18.2600216  |
| 9.130010799 |
| 16.85540455 |
| 70.2308523  |
| 7.725393753 |
| 9.130010799 |
| 7.02308523  |
| 5.618468184 |
| 6.320776707 |
| 9.130010799 |
| 81.46778867 |
| 7.02308523  |
| 0.702308523 |
| 4.916159661 |
| 54.7800648  |
| 6.320776707 |
| 8.427702276 |
| 6.320776707 |
| 14.74847898 |
| 202.2648546 |
| 6.320776707 |
| 77.95624606 |
| 7.02308523  |
| 138.354779  |
| 11.93924489 |
| 0           |
| 4.916159661 |
| 6.320776707 |
| 4.916159661 |
| 70.93316082 |
| 6.320776707 |
| 9.130010799 |
| 1.404617046 |
| 7.725393753 |
| 4.916159661 |

|             |
|-------------|
| 0.702308523 |
| 5.618468184 |
| 7.02308523  |
| 7.725393753 |
| 4.213851138 |
| 4.916159661 |
| 84.27702276 |
| 4.916159661 |
| 9.832319322 |
| 25.98541535 |
| 5.618468184 |
| 3.511542615 |
| 7.02308523  |
| 52.67313923 |
| 7.02308523  |
| 5.618468184 |
| 11.23693637 |
| 5.618468184 |
| 11.23693637 |
| 10.53462785 |
| 9.832319322 |
| 0           |
| 2.106925569 |
| 137.6524705 |
| 3.511542615 |
| 13.34386194 |
| 7.02308523  |
| 8.427702276 |
| 3.511542615 |
| 33.00850058 |
| 13.34386194 |
| 2.106925569 |
| 9.130010799 |
| 6.320776707 |
| 7.725393753 |
| 4.916159661 |
| 12.64155341 |
| 6.320776707 |
| 68.82623526 |
| 2.809234092 |
| 11.93924489 |
| 11.23693637 |
| 3.511542615 |

|             |
|-------------|
| 11.23693637 |
| 13.34386194 |
| 5.618468184 |
| 8.427702276 |
| 10.53462785 |
| 7.725393753 |
| 9.832319322 |
| 2.809234092 |
| 10.53462785 |
| 6.320776707 |
| 11.23693637 |
| 0           |
| 0           |
| 9.832319322 |
| 4.916159661 |
| 70.2308523  |
| 0           |
| 3.511542615 |
| 7.725393753 |
| 8.427702276 |
| 7.725393753 |
| 28.09234092 |
| 74.44470344 |
| 20.36694717 |
| 0           |
| 12.64155341 |
| 2.809234092 |
| 35.11542615 |
| 8.427702276 |
| 31.60388354 |
| 23.17618126 |
| 3.511542615 |
| 9.130010799 |
| 16.15309603 |
| 2.809234092 |
| 11.93924489 |
| 9.832319322 |
| 14.74847898 |
| 0           |
| 18.2600216  |
| 10.53462785 |
| 233.8687382 |
| 5.618468184 |

|             |
|-------------|
| 40.73389434 |
| 0           |
| 7.725393753 |
| 25.28310683 |
| 7.02308523  |
| 7.725393753 |
| 6.320776707 |
| 10.53462785 |
| 9.832319322 |
| 7.02308523  |
| 10.53462785 |
| 6.320776707 |
| 5.618468184 |
| 7.02308523  |
| 29.49695797 |
| 9.832319322 |
| 14.74847898 |
| 11.93924489 |
| 2.106925569 |
| 2.809234092 |
| 4.213851138 |
| 20.36694717 |
| 6.320776707 |
| 24.58079831 |
| 30.90157501 |
| 184.004833  |
| 4.916159661 |
| 2.809234092 |
| 0           |
| 12.64155341 |
| 42.13851138 |
| 32.30619206 |
| 0.702308523 |
| 11.93924489 |
| 7.02308523  |
| 0           |
| 11.93924489 |
| 3.511542615 |
| 9.832319322 |
| 6.320776707 |
| 0.702308523 |
| 23.17618126 |
| 13.34386194 |

|             |
|-------------|
| 21.77156421 |
| 4.916159661 |
| 7.725393753 |
| 24.58079831 |
| 7.725393753 |
| 4.916159661 |
| 10.53462785 |
| 7.725393753 |
| 10.53462785 |
| 4.916159661 |
| 0           |
| 0           |
| 17.55771308 |
| 11.23693637 |
| 9.130010799 |
| 7.02308523  |
| 14.04617046 |
| 4.916159661 |
| 11.23693637 |
| 6.320776707 |
| 0           |
| 1.404617046 |
| 5.618468184 |
| 16.15309603 |
| 11.93924489 |
| 0.702308523 |
| 7.02308523  |
| 14.74847898 |
| 9.832319322 |
| 7.02308523  |
| 15.45078751 |
| 2.809234092 |
| 7.02308523  |
| 4.916159661 |
| 212.097174  |
| 4.916159661 |
| 6.320776707 |
| 2.106925569 |
| 2.106925569 |
| 6.320776707 |
| 94.10934208 |
| 3.511542615 |
| 6.320776707 |



|             |
|-------------|
| 4.213851138 |
| 0           |
| 0           |
| 19.66463864 |
| 7.02308523  |
| 5.618468184 |
| 0           |
| 8.427702276 |
| 8.427702276 |
| 10.53462785 |
| 9.832319322 |
| 7.02308523  |
| 21.06925569 |
| 52.67313923 |
| 7.725393753 |
| 6.320776707 |
| 0           |
| 47.05467104 |
| 13.34386194 |
| 11.23693637 |
| 9.832319322 |
| 2.809234092 |
| 9.130010799 |
| 15.45078751 |
| 8.427702276 |
| 107.453204  |
| 6.320776707 |
| 82.17009719 |
| 7.725393753 |
| 0.702308523 |
| 2.106925569 |
| 9.130010799 |
| 37.92466024 |
| 16.15309603 |
| 18.2600216  |
| 0           |
| 11.93924489 |
| 9.832319322 |
| 9.832319322 |
| 19.66463864 |
| 7.725393753 |
| 7.725393753 |
| 21.06925569 |

|             |
|-------------|
| 0           |
| 0           |
| 9.832319322 |
| 7.725393753 |
| 10.53462785 |
| 75.84932049 |
| 4.916159661 |
| 0           |
| 34.41311763 |
| 2.809234092 |
| 23.17618126 |
| 7.02308523  |
| 7.725393753 |
| 10.53462785 |
| 9.130010799 |
| 11.93924489 |
| 10.53462785 |
| 13.34386194 |
| 6.320776707 |
| 7.725393753 |
| 2.106925569 |
| 13.34386194 |
| 6.320776707 |
| 6.320776707 |
| 4.213851138 |
| 233.8687382 |
| 21.06925569 |
| 11.23693637 |
| 4.213851138 |
| 11.93924489 |
| 80.06317162 |
| 16.15309603 |
| 4.213851138 |
| 0           |
| 8.427702276 |
| 15.45078751 |
| 6.320776707 |
| 4.916159661 |
| 2.106925569 |
| 4.213851138 |
| 9.832319322 |
| 2.809234092 |
| 11.93924489 |

|             |
|-------------|
| 0.702308523 |
| 6.320776707 |
| 9.832319322 |
| 3.511542615 |
| 4.213851138 |
| 7.02308523  |
| 89.89549095 |
| 22.47387274 |
| 40.03158581 |
| 19.66463864 |
| 14.04617046 |
| 1.404617046 |
| 0.702308523 |
| 8.427702276 |
| 17.55771308 |
| 6.320776707 |
| 0           |
| 6.320776707 |
| 10.53462785 |
| 4.916159661 |
| 7.725393753 |
| 7.02308523  |
| 15.45078751 |
| 106.048587  |
| 7.02308523  |
| 55.48237332 |
| 0.702308523 |
| 0           |
| 7.725393753 |
| 5.618468184 |
| 13.34386194 |
| 6.320776707 |
| 10.53462785 |
| 18.2600216  |
| 216.3110251 |
| 12.64155341 |
| 7.02308523  |
| 6.320776707 |
| 9.130010799 |
| 4.916159661 |
| 127.1178427 |
| 4.213851138 |
| 0           |

|             |
|-------------|
| 0           |
| 7.02308523  |
| 12.64155341 |
| 119.3924489 |
| 103.9416614 |
| 0           |
| 31.60388354 |
| 73.74239492 |
| 2.809234092 |
| 7.725393753 |
| 0           |
| 2.106925569 |
| 0           |
| 11.23693637 |
| 8.427702276 |
| 16.85540455 |
| 11.93924489 |
| 11.23693637 |
| 11.93924489 |
| 0           |
| 16.15309603 |
| 3.511542615 |
| 11.93924489 |
| 0           |
| 8.427702276 |
| 6.320776707 |
| 9.130010799 |
| 5.618468184 |
| 13.34386194 |
| 1.404617046 |
| 6.320776707 |
| 7.725393753 |
| 3.511542615 |
| 11.23693637 |
| 0           |
| 15.45078751 |
| 20.36694717 |
| 11.23693637 |
| 98.32319322 |
| 8.427702276 |
| 7.725393753 |
| 5.618468184 |
| 10.53462785 |

|             |
|-------------|
| 9.130010799 |
| 14.04617046 |
| 95.51395913 |
| 7.02308523  |
| 11.23693637 |
| 7.725393753 |
| 23.87848978 |
| 3.511542615 |
| 7.725393753 |
| 9.832319322 |
| 5.618468184 |
| 6.320776707 |
| 7.02308523  |
| 9.130010799 |
| 1.404617046 |
| 6.320776707 |
| 2.809234092 |
| 22.47387274 |
| 4.213851138 |
| 3.511542615 |
| 8.427702276 |
| 11.93924489 |
| 20.36694717 |
| 13.34386194 |
| 10.53462785 |
| 3.511542615 |
| 6.320776707 |
| 18.2600216  |
| 3.511542615 |
| 126.4155341 |
| 1.404617046 |
| 15.45078751 |
| 0           |
| 9.832319322 |
| 4.213851138 |
| 0           |
| 0           |
| 16.15309603 |
| 6.320776707 |
| 9.130010799 |
| 19.66463864 |
| 4.213851138 |
| 0           |

|             |
|-------------|
| 0           |
| 2.106925569 |
| 24.58079831 |
| 19.66463864 |
| 66.01700116 |
| 0           |
| 9.130010799 |
| 1.404617046 |
| 8.427702276 |
| 9.832319322 |
| 5.618468184 |
| 4.916159661 |
| 8.427702276 |
| 7.725393753 |
| 10.53462785 |
| 12.64155341 |
| 1.404617046 |
| 13.34386194 |
| 33.00850058 |
| 0           |
| 5.618468184 |
| 18.96233012 |
| 25.98541535 |
| 8.427702276 |
| 9.130010799 |
| 6.320776707 |
| 0.702308523 |
| 20.36694717 |
| 0           |
| 58.29160741 |
| 11.93924489 |
| 0.702308523 |
| 220.5248762 |
| 21.06925569 |
| 3.511542615 |
| 0           |
| 0           |
| 0           |
| 0           |
| 10.53462785 |
| 6.320776707 |
| 4.213851138 |
| 10.53462785 |

|             |
|-------------|
| 7.725393753 |
| 8.427702276 |
| 41.43620286 |
| 55.48237332 |
| 13.34386194 |
| 8.427702276 |
| 10.53462785 |
| 5.618468184 |
| 0           |
| 5.618468184 |
| 17.55771308 |
| 8.427702276 |
| 12.64155341 |
| 5.618468184 |
| 2.809234092 |
| 5.618468184 |
| 174.1725137 |
| 21.77156421 |
| 0           |
| 4.916159661 |
| 9.832319322 |
| 9.832319322 |
| 0           |
| 13.34386194 |
| 1.404617046 |
| 30.19926649 |
| 1.404617046 |
| 8.427702276 |
| 11.23693637 |
| 36.5200432  |
| 28.79464944 |
| 7.725393753 |
| 8.427702276 |
| 10.53462785 |
| 4.916159661 |
| 0.702308523 |
| 126.4155341 |
| 8.427702276 |
| 5.618468184 |
| 9.832319322 |
| 9.130010799 |
| 35.11542615 |
| 0           |

|             |
|-------------|
| 8.427702276 |
| 5.618468184 |
| 10.53462785 |
| 9.832319322 |
| 35.11542615 |
| 14.04617046 |
| 14.74847898 |
| 7.02308523  |
| 8.427702276 |
| 4.916159661 |
| 17.55771308 |
| 150.2940239 |
| 77.25393753 |
| 6.320776707 |
| 28.79464944 |
| 9.832319322 |
| 72.33777787 |
| 0.702308523 |
| 9.832319322 |
| 9.832319322 |
| 2.809234092 |
| 25.98541535 |
| 252.1287598 |
| 7.02308523  |
| 23.17618126 |
| 11.23693637 |
| 193.1348438 |
| 6.320776707 |
| 6.320776707 |
| 2.809234092 |
| 9.130010799 |
| 2.106925569 |
| 8.427702276 |
| 9.130010799 |
| 23.17618126 |
| 7.725393753 |
| 9.130010799 |
| 8.427702276 |
| 0           |
| 3.511542615 |
| 0           |
| 7.725393753 |
| 18.2600216  |



|             |
|-------------|
| 2.106925569 |
| 1.404617046 |
| 3.511542615 |
| 0           |
| 18.2600216  |
| 1.404617046 |
| 47.05467104 |
| 14.04617046 |
| 5.618468184 |
| 5.618468184 |
| 5.618468184 |
| 0.702308523 |
| 6.320776707 |
| 12.64155341 |
| 1.404617046 |
| 0.702308523 |
| 3.511542615 |
| 0           |
| 7.02308523  |
| 16.15309603 |
| 17.55771308 |
| 0           |
| 36.5200432  |
| 7.725393753 |
| 9.832319322 |
| 2.106925569 |
| 1.404617046 |
| 4.916159661 |
| 0           |
| 16.15309603 |
| 2.809234092 |
| 8.427702276 |
| 7.02308523  |
| 0           |
| 5.618468184 |
| 90.59779947 |
| 4.916159661 |
| 0           |
| 8.427702276 |
| 39.32927729 |
| 7.02308523  |
| 7.02308523  |
| 29.49695797 |

|             |
|-------------|
| 8.427702276 |
| 7.725393753 |
| 5.618468184 |
| 9.832319322 |
| 4.213851138 |
| 7.02308523  |
| 11.23693637 |
| 13.34386194 |
| 7.725393753 |
| 8.427702276 |
| 0           |
| 54.7800648  |
| 2.809234092 |
| 7.02308523  |
| 3.511542615 |
| 4.916159661 |
| 7.725393753 |
| 11.93924489 |
| 3.511542615 |
| 2.809234092 |
| 0           |
| 11.93924489 |
| 9.130010799 |
| 125.0109171 |
| 0           |
| 30.90157501 |
| 14.74847898 |
| 9.130010799 |
| 10.53462785 |
| 4.916159661 |
| 18.2600216  |
| 18.96233012 |
| 5.618468184 |
| 14.04617046 |
| 7.725393753 |
| 2.809234092 |
| 51.26852218 |
| 9.130010799 |
| 10.53462785 |
| 50.56621366 |
| 25.28310683 |
| 4.213851138 |
| 16.15309603 |

|             |
|-------------|
| 9.832319322 |
| 6.320776707 |
| 7.02308523  |
| 7.725393753 |
| 7.725393753 |
| 10.53462785 |
| 7.725393753 |
| 69.52854378 |
| 7.725393753 |
| 2.809234092 |
| 5.618468184 |
| 10.53462785 |
| 113.0716722 |
| 5.618468184 |
| 25.28310683 |
| 11.93924489 |
| 0           |
| 9.832319322 |
| 11.93924489 |
| 9.832319322 |
| 0.702308523 |
| 2.106925569 |
| 1.404617046 |
| 10.53462785 |
| 6.320776707 |
| 5.618468184 |
| 56.88699036 |
| 6.320776707 |
| 10.53462785 |
| 11.23693637 |
| 5.618468184 |
| 0           |
| 7.02308523  |
| 0           |
| 7.02308523  |
| 30.19926649 |
| 3.511542615 |
| 4.916159661 |
| 36.5200432  |
| 14.74847898 |
| 15.45078751 |
| 5.618468184 |
| 0           |

|             |
|-------------|
| 4.213851138 |
| 53.37544775 |
| 7.02308523  |
| 7.725393753 |
| 4.916159661 |
| 6.320776707 |
| 28.09234092 |
| 0           |
| 1.404617046 |
| 8.427702276 |
| 14.74847898 |
| 1.404617046 |
| 89.89549095 |
| 8.427702276 |
| 7.02308523  |
| 0           |
| 0           |
| 0           |
| 8.427702276 |
| 16.85540455 |
| 2.809234092 |
| 0           |
| 12.64155341 |
| 0           |
| 4.213851138 |
| 1.404617046 |
| 8.427702276 |
| 11.93924489 |
| 1.404617046 |
| 0.702308523 |
| 8.427702276 |
| 0           |
| 1.404617046 |
| 9.130010799 |
| 8.427702276 |
| 6.320776707 |
| 20.36694717 |
| 3.511542615 |
| 16.15309603 |
| 2.809234092 |
| 19.66463864 |
| 0.702308523 |
| 7.02308523  |

|             |
|-------------|
| 27.3900324  |
| 4.916159661 |
| 6.320776707 |
| 2.106925569 |
| 10.53462785 |
| 5.618468184 |
| 40.73389434 |
| 7.725393753 |
| 240.1895149 |
| 0.702308523 |
| 6.320776707 |
| 0           |
| 9.130010799 |
| 10.53462785 |
| 7.725393753 |
| 8.427702276 |
| 9.832319322 |
| 0           |
| 9.832319322 |
| 2.809234092 |
| 6.320776707 |
| 5.618468184 |
| 0           |
| 7.02308523  |
| 4.916159661 |
| 80.06317162 |
| 6.320776707 |
| 2.106925569 |
| 9.130010799 |
| 8.427702276 |
| 6.320776707 |
| 30.90157501 |
| 0           |
| 7.02308523  |
| 42.13851138 |
| 10.53462785 |
| 9.130010799 |
| 0           |
| 6.320776707 |
| 7.725393753 |
| 28.09234092 |
| 2.809234092 |
| 7.725393753 |

|             |
|-------------|
| 11.23693637 |
| 4.916159661 |
| 134.1409279 |
| 17.55771308 |
| 2.106925569 |
| 25.98541535 |
| 5.618468184 |
| 4.916159661 |
| 8.427702276 |
| 77.95624606 |
| 6.320776707 |
| 18.96233012 |
| 0           |
| 11.23693637 |
| 6.320776707 |
| 20.36694717 |
| 9.832319322 |
| 12.64155341 |
| 8.427702276 |
| 7.725393753 |
| 141.8663216 |
| 7.02308523  |
| 5.618468184 |
| 9.832319322 |
| 2.106925569 |
| 0           |
| 2.106925569 |
| 40.73389434 |
| 0.702308523 |
| 8.427702276 |
| 0           |
| 62.50545855 |
| 11.23693637 |
| 0           |
| 0           |
| 0           |
| 6.320776707 |
| 27.3900324  |
| 6.320776707 |
| 163.6378859 |
| 195.9440779 |
| 8.427702276 |
| 0           |

|             |
|-------------|
| 44.24543695 |
| 0           |
| 10.53462785 |
| 4.916159661 |
| 1.404617046 |
| 55.48237332 |
| 2.809234092 |
| 7.02308523  |
| 8.427702276 |
| 45.650054   |
| 3.511542615 |
| 4.916159661 |
| 7.02308523  |
| 7.725393753 |
| 9.130010799 |
| 2.106925569 |
| 9.130010799 |
| 1.404617046 |
| 9.832319322 |
| 191.0279183 |
| 7.725393753 |
| 16.15309603 |
| 9.832319322 |
| 0           |
| 2.809234092 |
| 8.427702276 |
| 4.916159661 |
| 12.64155341 |
| 10.53462785 |
| 8.427702276 |
| 130.6293853 |
| 99.02550175 |
| 18.96233012 |
| 6.320776707 |
| 11.93924489 |
| 16.15309603 |
| 7.725393753 |
| 8.427702276 |
| 11.23693637 |
| 17.55771308 |
| 10.53462785 |
| 7.725393753 |
| 118.6901404 |

|             |
|-------------|
| 10.53462785 |
| 3.511542615 |
| 4.916159661 |
| 4.213851138 |
| 7.02308523  |
| 4.916159661 |
| 7.02308523  |
| 4.916159661 |
| 0           |
| 12.64155341 |
| 11.93924489 |
| 97.6208847  |
| 10.53462785 |
| 4.916159661 |
| 42.13851138 |
| 0.702308523 |
| 73.74239492 |
| 5.618468184 |
| 0           |
| 9.832319322 |
| 0.702308523 |
| 11.23693637 |
| 6.320776707 |
| 2.106925569 |
| 1.404617046 |
| 4.213851138 |
| 5.618468184 |
| 3.511542615 |
| 0           |
| 0           |
| 32.30619206 |
| 5.618468184 |
| 0           |
| 10.53462785 |
| 4.916159661 |
| 5.618468184 |
| 11.23693637 |
| 3.511542615 |
| 6.320776707 |
| 5.618468184 |
| 4.213851138 |
| 6.320776707 |
| 9.130010799 |



|             |
|-------------|
| 7.02308523  |
| 2.106925569 |
| 4.213851138 |
| 4.213851138 |
| 4.213851138 |
| 2.106925569 |
| 2.809234092 |
| 7.02308523  |
| 3.511542615 |
| 9.130010799 |
| 5.618468184 |
| 4.213851138 |
| 7.725393753 |
| 12.64155341 |
| 2.809234092 |
| 4.916159661 |
| 5.618468184 |
| 4.916159661 |
| 1.404617046 |
| 5.618468184 |
| 0           |
| 0.702308523 |
| 9.832319322 |
| 5.618468184 |
| 9.130010799 |
| 6.320776707 |
| 6.320776707 |
| 1.404617046 |
| 25.98541535 |
| 5.618468184 |
| 9.832319322 |
| 1.404617046 |
| 9.130010799 |
| 2.809234092 |
| 3.511542615 |
| 5.618468184 |
| 12.64155341 |
| 6.320776707 |
| 0.702308523 |
| 19.66463864 |
| 9.130010799 |
| 3.511542615 |
| 7.725393753 |

|             |
|-------------|
| 7.725393753 |
| 0.702308523 |
| 2.809234092 |
| 6.320776707 |
| 7.02308523  |
| 4.916159661 |
| 6.320776707 |
| 2.106925569 |
| 7.725393753 |
| 0           |
| 3.511542615 |
| 9.130010799 |
| 6.320776707 |
| 7.02308523  |
| 2.809234092 |
| 7.02308523  |
| 13.34386194 |
| 7.02308523  |
| 2.809234092 |
| 4.916159661 |
| 1.404617046 |
| 3.511542615 |
| 4.213851138 |
| 9.130010799 |
| 4.916159661 |
| 6.320776707 |
| 3.511542615 |
| 5.618468184 |
| 3.511542615 |
| 16.15309603 |
| 1.404617046 |
| 4.213851138 |
| 6.320776707 |
| 11.93924489 |
| 4.213851138 |
| 4.916159661 |
| 2.106925569 |
| 5.618468184 |
| 40.73389434 |
| 4.213851138 |
| 5.618468184 |
| 7.725393753 |
| 6.320776707 |

|             |
|-------------|
| 4.213851138 |
| 5.618468184 |
| 7.02308523  |
| 2.809234092 |
| 7.725393753 |
| 4.916159661 |
| 1.404617046 |
| 3.511542615 |
| 4.916159661 |
| 4.916159661 |
| 1.404617046 |
| 10.53462785 |
| 2.809234092 |
| 7.02308523  |
| 4.213851138 |
| 5.618468184 |
| 5.618468184 |
| 11.23693637 |
| 4.916159661 |
| 5.618468184 |
| 9.832319322 |
| 4.213851138 |
| 4.916159661 |
| 2.809234092 |
| 2.809234092 |
| 4.213851138 |
| 16.15309603 |
| 5.618468184 |
| 4.916159661 |
| 3.511542615 |
| 2.106925569 |
| 7.725393753 |
| 9.832319322 |
| 4.916159661 |
| 5.618468184 |
| 0.702308523 |
| 6.320776707 |
| 4.916159661 |
| 30.90157501 |
| 9.832319322 |
| 2.106925569 |
| 9.130010799 |
| 4.916159661 |

|             |
|-------------|
| 11.23693637 |
| 1.404617046 |
| 11.93924489 |
| 0           |
| 6.320776707 |
| 4.213851138 |
| 4.213851138 |
| 4.916159661 |
| 4.213851138 |
| 5.618468184 |
| 3.511542615 |
| 6.320776707 |
| 3.511542615 |
| 7.02308523  |
| 5.618468184 |
| 15.45078751 |
| 7.725393753 |
| 5.618468184 |
| 5.618468184 |
| 6.320776707 |
| 4.213851138 |
| 5.618468184 |
| 4.213851138 |
| 7.725393753 |
| 7.725393753 |
| 9.832319322 |
| 7.02308523  |
| 3.511542615 |
| 4.213851138 |
| 4.916159661 |
| 6.320776707 |
| 7.02308523  |
| 4.213851138 |
| 25.98541535 |
| 3.511542615 |
| 2.809234092 |
| 4.916159661 |
| 4.916159661 |
| 4.916159661 |
| 4.213851138 |
| 12.64155341 |
| 6.320776707 |
| 2.106925569 |

|             |
|-------------|
| 1.404617046 |
| 4.213851138 |
| 4.916159661 |
| 6.320776707 |
| 4.916159661 |
| 2.809234092 |
| 4.916159661 |
| 4.213851138 |
| 3.511542615 |
| 4.213851138 |
| 4.213851138 |
| 5.618468184 |
| 3.511542615 |
| 2.809234092 |
| 8.427702276 |
| 9.832319322 |
| 4.916159661 |
| 8.427702276 |
| 3.511542615 |
| 4.213851138 |
| 2.106925569 |
| 4.213851138 |
| 2.809234092 |
| 8.427702276 |
| 2.809234092 |
| 3.511542615 |
| 6.320776707 |
| 5.618468184 |
| 6.320776707 |
| 9.130010799 |
| 10.53462785 |
| 4.213851138 |
| 7.725393753 |
| 7.725393753 |
| 5.618468184 |
| 7.725393753 |
| 8.427702276 |
| 5.618468184 |
| 2.106925569 |
| 6.320776707 |
| 104.6439699 |
| 4.916159661 |
| 6.320776707 |

|             |
|-------------|
| 2.809234092 |
| 4.916159661 |
| 5.618468184 |
| 2.106925569 |
| 9.832319322 |
| 7.725393753 |
| 7.02308523  |
| 9.130010799 |
| 0           |
| 5.618468184 |
| 9.130010799 |
| 6.320776707 |
| 2.106925569 |
| 1.404617046 |
| 2.809234092 |
| 1.404617046 |
| 10.53462785 |
| 5.618468184 |
| 8.427702276 |
| 5.618468184 |
| 7.02308523  |
| 5.618468184 |
| 7.02308523  |
| 12.64155341 |
| 9.832319322 |
| 11.93924489 |
| 77.95624606 |
| 2.106925569 |
| 7.02308523  |
| 4.213851138 |
| 4.916159661 |
| 4.916159661 |
| 3.511542615 |
| 4.916159661 |
| 7.725393753 |
| 0.702308523 |
| 7.02308523  |
| 7.725393753 |
| 7.02308523  |
| 4.916159661 |
| 3.511542615 |
| 4.916159661 |
| 9.130010799 |

|             |
|-------------|
| 4.916159661 |
| 5.618468184 |
| 2.106925569 |
| 5.618468184 |
| 4.213851138 |
| 7.02308523  |
| 4.916159661 |
| 7.725393753 |
| 5.618468184 |
| 7.02308523  |
| 8.427702276 |
| 3.511542615 |
| 6.320776707 |
| 4.916159661 |
| 6.320776707 |
| 150.9963324 |
| 4.213851138 |
| 10.53462785 |
| 4.916159661 |
| 4.213851138 |
| 0.702308523 |
| 4.213851138 |
| 6.320776707 |
| 7.725393753 |
| 5.618468184 |
| 4.916159661 |
| 3.511542615 |
| 63.91007559 |
| 2.809234092 |
| 3.511542615 |
| 0           |
| 11.23693637 |
| 9.130010799 |
| 4.213851138 |
| 4.916159661 |
| 2.809234092 |
| 2.809234092 |
| 3.511542615 |
| 15.45078751 |
| 10.53462785 |
| 7.02308523  |
| 7.725393753 |
| 8.427702276 |

|             |
|-------------|
| 6.320776707 |
| 7.02308523  |
| 0           |
| 7.725393753 |
| 4.916159661 |
| 9.130010799 |
| 4.916159661 |
| 5.618468184 |
| 3.511542615 |
| 8.427702276 |
| 3.511542615 |
| 9.130010799 |
| 7.725393753 |
| 4.916159661 |
| 7.725393753 |
| 3.511542615 |
| 2.809234092 |
| 3.511542615 |
| 4.916159661 |
| 5.618468184 |
| 10.53462785 |
| 136.2478535 |
| 5.618468184 |
| 1.404617046 |
| 1.404617046 |
| 4.916159661 |
| 9.130010799 |
| 7.02308523  |
| 4.916159661 |
| 7.725393753 |
| 7.02308523  |
| 5.618468184 |
| 37.92466024 |
| 9.832319322 |
| 6.320776707 |
| 4.916159661 |
| 29.49695797 |
| 7.725393753 |
| 4.213851138 |
| 4.916159661 |
| 6.320776707 |
| 4.213851138 |
| 2.106925569 |



|             |
|-------------|
| 2.106925569 |
| 6.320776707 |
| 4.916159661 |
| 299.8857393 |
| 4.213851138 |
| 4.213851138 |
| 2.106925569 |
| 4.916159661 |
| 56.18468184 |
| 4.213851138 |
| 5.618468184 |
| 4.916159661 |
| 25.98541535 |
| 11.23693637 |
| 0           |
| 1.404617046 |
| 6.320776707 |
| 4.916159661 |
| 4.916159661 |
| 3.511542615 |
| 2.809234092 |
| 4.213851138 |
| 6.320776707 |
| 3.511542615 |
| 2.106925569 |
| 7.725393753 |
| 5.618468184 |
| 4.916159661 |
| 11.23693637 |
| 2.809234092 |
| 7.725393753 |
| 1.404617046 |
| 2.106925569 |
| 9.130010799 |
| 3.511542615 |
| 7.02308523  |
| 2.809234092 |
| 2.809234092 |
| 7.02308523  |
| 8.427702276 |
| 4.213851138 |
| 4.916159661 |
| 7.725393753 |

|             |
|-------------|
| 7.725393753 |
| 3.511542615 |
| 4.916159661 |
| 0           |
| 4.916159661 |
| 4.213851138 |
| 132.7363109 |
| 4.213851138 |
| 0           |
| 5.618468184 |
| 2.809234092 |
| 9.832319322 |
| 7.02308523  |
| 0           |
| 1.404617046 |
| 4.213851138 |
| 13.34386194 |
| 7.02308523  |
| 0           |
| 2.809234092 |
| 4.916159661 |
| 7.725393753 |
| 11.23693637 |
| 2.106925569 |
| 8.427702276 |
| 3.511542615 |
| 5.618468184 |
| 7.02308523  |
| 11.93924489 |
| 7.02308523  |
| 11.93924489 |
| 2.809234092 |
| 3.511542615 |
| 1.404617046 |
| 2.106925569 |
| 7.02308523  |
| 9.832319322 |
| 6.320776707 |
| 4.213851138 |
| 4.213851138 |
| 5.618468184 |
| 2.809234092 |
| 7.725393753 |

|             |
|-------------|
| 4.213851138 |
| 3.511542615 |
| 7.02308523  |
| 3.511542615 |
| 4.916159661 |
| 4.916159661 |
| 7.02308523  |
| 7.725393753 |
| 4.916159661 |
| 3.511542615 |
| 4.213851138 |
| 2.809234092 |
| 3.511542615 |
| 41.43620286 |
| 1.404617046 |
| 4.916159661 |
| 7.725393753 |
| 4.916159661 |
| 2.809234092 |
| 2.809234092 |
| 4.213851138 |
| 2.106925569 |
| 4.916159661 |
| 6.320776707 |
| 3.511542615 |
| 9.130010799 |
| 4.213851138 |
| 4.213851138 |
| 2.809234092 |
| 23.17618126 |
| 4.213851138 |
| 2.809234092 |
| 4.213851138 |
| 4.213851138 |
| 0           |
| 4.213851138 |
| 3.511542615 |
| 5.618468184 |
| 0           |
| 11.23693637 |
| 4.213851138 |
| 2.106925569 |
| 14.04617046 |

|             |
|-------------|
| 6.320776707 |
| 1.404617046 |
| 149.5917154 |
| 6.320776707 |
| 7.725393753 |
| 7.02308523  |
| 4.213851138 |
| 8.427702276 |
| 2.809234092 |
| 4.213851138 |
| 16.15309603 |
| 4.916159661 |
| 3.511542615 |
| 5.618468184 |
| 4.916159661 |
| 0           |
| 7.725393753 |
| 0           |
| 9.130010799 |
| 3.511542615 |
| 6.320776707 |
| 4.916159661 |
| 5.618468184 |
| 2.106925569 |
| 4.916159661 |
| 4.916159661 |
| 11.93924489 |
| 7.02308523  |
| 42.13851138 |
| 9.130010799 |
| 5.618468184 |
| 7.725393753 |
| 0.702308523 |
| 4.916159661 |
| 5.618468184 |
| 11.93924489 |
| 9.130010799 |
| 4.213851138 |
| 213.501791  |
| 6.320776707 |
| 0           |
| 4.213851138 |
| 4.213851138 |

|             |
|-------------|
| 1.404617046 |
| 2.106925569 |
| 5.618468184 |
| 2.809234092 |
| 9.832319322 |
| 7.725393753 |
| 7.02308523  |
| 4.916159661 |
| 5.618468184 |
| 3.511542615 |
| 4.213851138 |
| 7.02308523  |
| 0           |
| 1.404617046 |
| 3.511542615 |
| 9.130010799 |
| 0           |
| 3.511542615 |
| 7.02308523  |
| 7.02308523  |
| 3.511542615 |
| 1.404617046 |
| 3.511542615 |
| 5.618468184 |
| 7.02308523  |
| 7.725393753 |
| 4.916159661 |
| 9.832319322 |
| 4.916159661 |
| 6.320776707 |
| 34.41311763 |
| 6.320776707 |
| 9.130010799 |
| 12.64155341 |
| 7.02308523  |
| 2.809234092 |
| 9.832319322 |
| 30.19926649 |
| 9.130010799 |
| 7.725393753 |
| 9.130010799 |
| 5.618468184 |
| 6.320776707 |

|             |
|-------------|
| 18.96233012 |
| 7.02308523  |
| 2.809234092 |
| 0.702308523 |
| 4.213851138 |
| 2.106925569 |
| 3.511542615 |
| 5.618468184 |
| 5.618468184 |
| 8.427702276 |
| 8.427702276 |
| 4.213851138 |
| 6.320776707 |
| 7.02308523  |
| 9.130010799 |
| 7.02308523  |
| 3.511542615 |
| 9.130010799 |
| 3.511542615 |
| 3.511542615 |
| 9.832319322 |
| 18.96233012 |
| 33.7108091  |
| 5.618468184 |
| 7.725393753 |
| 4.213851138 |
| 2.106925569 |
| 9.832319322 |
| 2.106925569 |
| 42.13851138 |
| 5.618468184 |
| 6.320776707 |
| 12.64155341 |
| 4.213851138 |
| 33.00850058 |
| 2.106925569 |
| 2.809234092 |
| 3.511542615 |
| 2.809234092 |
| 2.106925569 |
| 4.213851138 |
| 2.809234092 |
| 13.34386194 |

|             |
|-------------|
| 9.832319322 |
| 2.106925569 |
| 10.53462785 |
| 5.618468184 |
| 3.511542615 |
| 4.916159661 |
| 0           |
| 9.832319322 |
| 3.511542615 |
| 2.106925569 |
| 4.213851138 |
| 2.809234092 |
| 9.130010799 |
| 7.02308523  |
| 6.320776707 |
| 3.511542615 |
| 7.02308523  |
| 28.09234092 |
| 2.809234092 |
| 5.618468184 |
| 7.02308523  |
| 51.26852218 |
| 2.809234092 |
| 4.213851138 |
| 2.809234092 |
| 0           |
| 9.832319322 |
| 3.511542615 |
| 17.55771308 |
| 4.213851138 |
| 3.511542615 |
| 7.02308523  |
| 7.02308523  |
| 2.106925569 |
| 4.916159661 |
| 57.58929889 |
| 7.02308523  |
| 7.02308523  |
| 4.213851138 |
| 9.832319322 |
| 9.832319322 |
| 4.916159661 |
| 3.511542615 |

|             |
|-------------|
| 7.02308523  |
| 2.106925569 |
| 9.130010799 |
| 3.511542615 |
| 35.81773467 |
| 10.53462785 |
| 4.916159661 |
| 8.427702276 |
| 5.618468184 |
| 4.916159661 |
| 2.106925569 |
| 0           |
| 3.511542615 |
| 13.34386194 |
| 9.832319322 |
| 9.832319322 |
| 7.725393753 |
| 2.809234092 |
| 7.725393753 |
| 7.02308523  |
| 2.809234092 |
| 4.213851138 |
| 2.106925569 |
| 4.916159661 |
| 5.618468184 |
| 3.511542615 |
| 6.320776707 |
| 3.511542615 |
| 4.213851138 |
| 3.511542615 |
| 4.213851138 |
| 0.702308523 |
| 4.213851138 |
| 7.02308523  |
| 1.404617046 |
| 1.404617046 |
| 4.213851138 |
| 4.916159661 |
| 3.511542615 |
| 8.427702276 |
| 5.618468184 |
| 1.404617046 |
| 6.320776707 |



|             |
|-------------|
| 2.809234092 |
| 5.618468184 |
| 3.511542615 |
| 40.03158581 |
| 2.809234092 |
| 1.404617046 |
| 12.64155341 |
| 4.916159661 |
| 8.427702276 |
| 0           |
| 2.809234092 |
| 174.8748222 |
| 1.404617046 |
| 5.618468184 |
| 4.213851138 |
| 5.618468184 |
| 5.618468184 |
| 4.213851138 |
| 4.213851138 |
| 6.320776707 |
| 5.618468184 |
| 10.53462785 |
| 4.213851138 |
| 8.427702276 |
| 2.106925569 |
| 2.809234092 |
| 4.213851138 |
| 4.916159661 |
| 7.725393753 |
| 4.916159661 |
| 0           |
| 4.213851138 |
| 6.320776707 |
| 2.809234092 |
| 16.85540455 |
| 3.511542615 |
| 9.832319322 |
| 11.93924489 |
| 15.45078751 |
| 19.66463864 |
| 0           |
| 4.916159661 |
| 4.213851138 |

|             |
|-------------|
| 3.511542615 |
| 4.916159661 |
| 7.725393753 |
| 0           |
| 10.53462785 |
| 4.213851138 |
| 4.916159661 |
| 3.511542615 |
| 2.809234092 |
| 7.725393753 |
| 9.130010799 |
| 0           |
| 9.130010799 |
| 7.725393753 |
| 0           |
| 0.702308523 |
| 9.832319322 |
| 5.618468184 |
| 2.809234092 |
| 2.809234092 |
| 5.618468184 |
| 0           |
| 9.832319322 |
| 2.106925569 |
| 6.320776707 |
| 4.213851138 |
| 4.916159661 |
| 7.02308523  |
| 7.725393753 |
| 4.213851138 |
| 2.809234092 |
| 2.106925569 |
| 22.47387274 |
| 10.53462785 |
| 7.02308523  |
| 0           |
| 7.02308523  |
| 3.511542615 |
| 6.320776707 |
| 6.320776707 |
| 0           |
| 3.511542615 |
| 5.618468184 |

|             |
|-------------|
| 2.106925569 |
| 0           |
| 63.20776707 |
| 2.106925569 |
| 10.53462785 |
| 2.809234092 |
| 6.320776707 |
| 13.34386194 |
| 3.511542615 |
| 4.213851138 |
| 7.725393753 |
| 0           |
| 7.02308523  |
| 9.832319322 |
| 122.201683  |
| 4.213851138 |
| 10.53462785 |
| 7.725393753 |
| 10.53462785 |
| 6.320776707 |
| 8.427702276 |
| 4.213851138 |
| 3.511542615 |
| 3.511542615 |
| 5.618468184 |
| 1.404617046 |
| 9.832319322 |
| 4.916159661 |
| 7.02308523  |
| 6.320776707 |
| 5.618468184 |
| 5.618468184 |
| 2.809234092 |
| 3.511542615 |
| 9.832319322 |
| 7.725393753 |
| 170.6609711 |
| 29.49695797 |
| 9.832319322 |
| 2.106925569 |
| 7.725393753 |
| 4.213851138 |
| 5.618468184 |

|             |
|-------------|
| 7.02308523  |
| 2.809234092 |
| 7.02308523  |
| 4.916159661 |
| 9.130010799 |
| 37.92466024 |
| 5.618468184 |
| 0           |
| 3.511542615 |
| 7.02308523  |
| 9.130010799 |
| 2.809234092 |
| 7.725393753 |
| 9.130010799 |
| 7.725393753 |
| 4.213851138 |
| 2.809234092 |
| 9.832319322 |
| 2.809234092 |
| 7.02308523  |
| 167.851737  |
| 2.809234092 |
| 7.02308523  |
| 6.320776707 |
| 4.213851138 |
| 4.916159661 |
| 14.74847898 |
| 2.809234092 |
| 6.320776707 |
| 2.106925569 |
| 3.511542615 |
| 1.404617046 |
| 4.213851138 |
| 2.106925569 |
| 3.511542615 |
| 8.427702276 |
| 3.511542615 |
| 4.213851138 |
| 7.725393753 |
| 8.427702276 |
| 8.427702276 |
| 7.725393753 |
| 3.511542615 |

|             |
|-------------|
| 6.320776707 |
| 3.511542615 |
| 12.64155341 |
| 2.809234092 |
| 9.130010799 |
| 2.809234092 |
| 5.618468184 |
| 7.02308523  |
| 8.427702276 |
| 9.130010799 |
| 1.404617046 |
| 7.725393753 |
| 1.404617046 |
| 0           |
| 4.916159661 |
| 2.106925569 |
| 7.02308523  |
| 3.511542615 |
| 4.213851138 |
| 7.02308523  |
| 4.916159661 |
| 9.130010799 |
| 72.33777787 |
| 9.832319322 |
| 6.320776707 |
| 5.618468184 |
| 2.106925569 |
| 4.213851138 |
| 2.106925569 |
| 7.725393753 |
| 4.916159661 |
| 2.809234092 |
| 4.213851138 |
| 6.320776707 |
| 2.809234092 |
| 0           |
| 11.93924489 |
| 4.213851138 |
| 6.320776707 |
| 11.23693637 |
| 2.106925569 |
| 4.916159661 |
| 7.02308523  |

|             |
|-------------|
| 2.809234092 |
| 11.93924489 |
| 9.832319322 |
| 4.213851138 |
| 0           |
| 6.320776707 |
| 6.320776707 |
| 0           |
| 2.106925569 |
| 4.916159661 |
| 4.916159661 |
| 7.725393753 |
| 4.916159661 |
| 4.916159661 |
| 4.916159661 |
| 4.213851138 |
| 2.809234092 |
| 7.725393753 |
| 44.24543695 |
| 4.916159661 |
| 4.213851138 |
| 4.916159661 |
| 6.320776707 |
| 2.809234092 |
| 2.106925569 |
| 4.213851138 |
| 2.106925569 |
| 4.916159661 |
| 4.213851138 |
| 3.511542615 |
| 4.213851138 |
| 9.130010799 |
| 6.320776707 |
| 9.130010799 |
| 8.427702276 |
| 3.511542615 |
| 6.320776707 |
| 9.832319322 |
| 4.213851138 |
| 4.916159661 |
| 4.213851138 |
| 5.618468184 |
| 9.130010799 |

|             |
|-------------|
| 4.916159661 |
| 9.832319322 |
| 8.427702276 |
| 5.618468184 |
| 5.618468184 |
| 0.702308523 |
| 7.02308523  |
| 3.511542615 |
| 7.725393753 |
| 4.916159661 |
| 1.404617046 |
| 5.618468184 |
| 8.427702276 |
| 4.213851138 |
| 4.213851138 |
| 6.320776707 |
| 2.809234092 |
| 3.511542615 |
| 0.702308523 |
| 4.213851138 |
| 2.106925569 |
| 11.93924489 |
| 4.213851138 |
| 2.106925569 |
| 8.427702276 |
| 8.427702276 |
| 8.427702276 |
| 3.511542615 |
| 9.130010799 |
| 7.725393753 |
| 5.618468184 |
| 2.809234092 |
| 9.832319322 |
| 2.809234092 |
| 9.832319322 |
| 4.916159661 |
| 7.725393753 |
| 10.53462785 |
| 2.106925569 |
| 2.106925569 |
| 9.832319322 |
| 2.106925569 |
| 5.618468184 |

|             |
|-------------|
| 7.02308523  |
| 7.02308523  |
| 1.404617046 |
| 16.85540455 |
| 9.130010799 |
| 203.6694717 |
| 5.618468184 |
| 56.18468184 |
| 7.02308523  |
| 3.511542615 |
| 6.320776707 |
| 4.916159661 |
| 5.618468184 |
| 3.511542615 |
| 3.511542615 |
| 1.404617046 |
| 6.320776707 |
| 4.213851138 |
| 2.809234092 |
| 3.511542615 |
| 7.02308523  |
| 6.320776707 |
| 3.511542615 |
| 8.427702276 |
| 5.618468184 |
| 0.702308523 |
| 5.618468184 |
| 5.618468184 |
| 8.427702276 |
| 4.213851138 |
| 3.511542615 |
| 2.809234092 |
| 4.213851138 |
| 3.511542615 |
| 3.511542615 |
| 6.320776707 |
| 7.02308523  |
| 4.916159661 |
| 6.320776707 |
| 5.618468184 |
| 13.34386194 |
| 4.916159661 |
| 4.916159661 |



|             |
|-------------|
| 9.130010799 |
| 1.404617046 |
| 2.809234092 |
| 9.832319322 |
| 35.11542615 |
| 8.427702276 |
| 4.213851138 |
| 6.320776707 |
| 7.02308523  |
| 4.213851138 |
| 7.02308523  |
| 5.618468184 |
| 11.93924489 |
| 3.511542615 |
| 2.106925569 |
| 5.618468184 |
| 4.916159661 |
| 5.618468184 |
| 6.320776707 |
| 2.106925569 |
| 2.809234092 |
| 19.66463864 |
| 0           |
| 8.427702276 |
| 3.511542615 |
| 0           |
| 7.02308523  |
| 6.320776707 |
| 4.916159661 |
| 4.213851138 |
| 2.809234092 |
| 6.320776707 |
| 2.106925569 |
| 5.618468184 |
| 4.916159661 |
| 4.213851138 |
| 7.725393753 |
| 8.427702276 |
| 4.213851138 |
| 2.106925569 |
| 4.213851138 |
| 7.02308523  |
| 4.916159661 |

|             |
|-------------|
| 2.809234092 |
| 2.106925569 |
| 2.809234092 |
| 8.427702276 |
| 4.916159661 |
| 4.916159661 |
| 9.832319322 |
| 9.130010799 |
| 9.130010799 |
| 8.427702276 |
| 4.213851138 |
| 1.404617046 |
| 7.725393753 |
| 1.404617046 |
| 2.809234092 |
| 9.832319322 |
| 6.320776707 |
| 5.618468184 |
| 5.618468184 |
| 9.130010799 |
| 0           |
| 5.618468184 |
| 2.809234092 |
| 3.511542615 |
| 10.53462785 |
| 2.106925569 |
| 0           |
| 9.832319322 |
| 2.809234092 |
| 2.106925569 |
| 3.511542615 |
| 4.213851138 |
| 5.618468184 |
| 7.02308523  |
| 0           |
| 4.916159661 |
| 4.916159661 |
| 10.53462785 |
| 4.213851138 |
| 4.213851138 |
| 1.404617046 |
| 7.725393753 |
| 36.5200432  |

|             |
|-------------|
| 5.618468184 |
| 9.832319322 |
| 5.618468184 |
| 3.511542615 |
| 7.02308523  |
| 6.320776707 |
| 9.130010799 |
| 7.725393753 |
| 4.213851138 |
| 4.916159661 |
| 2.106925569 |
| 6.320776707 |
| 7.725393753 |
| 6.320776707 |
| 8.427702276 |
| 3.511542615 |
| 4.916159661 |
| 7.725393753 |
| 3.511542615 |
| 7.02308523  |
| 4.213851138 |
| 0           |
| 4.916159661 |
| 2.809234092 |
| 42.13851138 |
| 9.832319322 |
| 6.320776707 |
| 8.427702276 |
| 13.34386194 |
| 6.320776707 |
| 6.320776707 |
| 9.130010799 |
| 9.130010799 |
| 8.427702276 |
| 9.130010799 |
| 4.213851138 |
| 4.916159661 |
| 4.213851138 |
| 6.320776707 |
| 7.02308523  |
| 4.213851138 |
| 2.809234092 |
| 2.106925569 |

|             |
|-------------|
| 2.106925569 |
| 7.02308523  |
| 4.916159661 |
| 4.916159661 |
| 4.213851138 |
| 11.93924489 |
| 7.02308523  |
| 2.809234092 |
| 3.511542615 |
| 1.404617046 |
| 9.130010799 |
| 5.618468184 |
| 4.213851138 |
| 6.320776707 |
| 3.511542615 |
| 3.511542615 |
| 82.87240572 |
| 4.213851138 |
| 7.725393753 |
| 3.511542615 |
| 3.511542615 |
| 4.916159661 |
| 6.320776707 |
| 2.809234092 |
| 4.213851138 |
| 13.34386194 |
| 61.80315003 |
| 9.832319322 |
| 8.427702276 |
| 2.106925569 |
| 7.02308523  |
| 55.48237332 |
| 9.832319322 |
| 7.725393753 |
| 11.23693637 |
| 5.618468184 |
| 7.02308523  |
| 7.02308523  |
| 3.511542615 |
| 4.916159661 |
| 0.702308523 |
| 2.106925569 |
| 2.106925569 |

|             |
|-------------|
| 2.106925569 |
| 9.832319322 |
| 5.618468184 |
| 9.130010799 |
| 9.832319322 |
| 3.511542615 |
| 2.809234092 |
| 22.47387274 |
| 7.02308523  |
| 0.702308523 |
| 7.02308523  |
| 2.809234092 |
| 7.725393753 |
| 7.02308523  |
| 8.427702276 |
| 33.00850058 |
| 11.23693637 |
| 5.618468184 |
| 7.02308523  |
| 1.404617046 |
| 4.213851138 |
| 9.832319322 |
| 2.106925569 |
| 7.725393753 |
| 14.04617046 |
| 2.809234092 |
| 4.916159661 |
| 4.916159661 |
| 0.702308523 |
| 4.213851138 |
| 5.618468184 |
| 7.725393753 |
| 3.511542615 |
| 6.320776707 |
| 3.511542615 |
| 5.618468184 |
| 8.427702276 |
| 0           |
| 3.511542615 |
| 0           |
| 4.916159661 |
| 45.650054   |
| 2.106925569 |

|             |
|-------------|
| 2.809234092 |
| 5.618468184 |
| 4.916159661 |
| 3.511542615 |
| 4.213851138 |
| 7.725393753 |
| 4.213851138 |
| 7.725393753 |
| 2.809234092 |
| 6.320776707 |
| 8.427702276 |
| 6.320776707 |
| 3.511542615 |
| 4.213851138 |
| 4.916159661 |
| 3.511542615 |
| 2.106925569 |
| 2.106925569 |
| 9.832319322 |
| 7.02308523  |
| 3.511542615 |
| 2.106925569 |
| 4.916159661 |
| 5.618468184 |
| 0           |
| 7.02308523  |
| 7.02308523  |
| 5.618468184 |
| 4.213851138 |
| 41.43620286 |
| 4.213851138 |
| 4.213851138 |
| 3.511542615 |
| 7.725393753 |
| 0           |
| 9.832319322 |
| 4.213851138 |
| 4.916159661 |
| 4.916159661 |
| 9.832319322 |
| 7.02308523  |
| 5.618468184 |
| 2.809234092 |

|             |
|-------------|
| 2.809234092 |
| 0           |
| 3.511542615 |
| 4.916159661 |
| 6.320776707 |
| 4.213851138 |
| 8.427702276 |
| 7.02308523  |
| 4.916159661 |
| 6.320776707 |
| 6.320776707 |
| 2.809234092 |
| 2.106925569 |
| 0           |
| 7.725393753 |
| 4.916159661 |
| 2.809234092 |
| 5.618468184 |
| 7.725393753 |
| 9.832319322 |
| 7.725393753 |
| 4.213851138 |
| 2.809234092 |
| 7.02308523  |
| 4.916159661 |
| 4.213851138 |
| 5.618468184 |
| 10.53462785 |
| 4.213851138 |
| 42.13851138 |
| 5.618468184 |
| 2.809234092 |
| 2.809234092 |
| 2.809234092 |
| 6.320776707 |
| 11.23693637 |
| 7.02308523  |
| 3.511542615 |
| 0           |
| 5.618468184 |
| 3.511542615 |
| 15.45078751 |
| 2.809234092 |

|             |
|-------------|
| 3.511542615 |
| 0           |
| 11.23693637 |
| 0           |
| 3.511542615 |
| 4.213851138 |
| 6.320776707 |
| 8.427702276 |
| 9.130010799 |
| 4.916159661 |
| 4.916159661 |
| 3.511542615 |
| 4.916159661 |
| 2.106925569 |
| 5.618468184 |
| 7.02308523  |
| 5.618468184 |
| 7.725393753 |
| 37.92466024 |
| 2.106925569 |
| 2.809234092 |
| 3.511542615 |
| 9.130010799 |
| 3.511542615 |
| 9.832319322 |
| 7.725393753 |
| 4.213851138 |
| 9.130010799 |
| 7.02308523  |
| 4.213851138 |
| 6.320776707 |
| 7.725393753 |
| 2.809234092 |
| 1.404617046 |
| 11.93924489 |
| 5.618468184 |
| 4.213851138 |
| 7.725393753 |
| 2.106925569 |
| 6.320776707 |
| 2.809234092 |
| 3.511542615 |
| 9.832319322 |



|             |
|-------------|
| 10.53462785 |
| 2.809234092 |
| 2.106925569 |
| 4.916159661 |
| 1.404617046 |
| 0.702308523 |
| 0           |
| 4.213851138 |
| 2.809234092 |
| 4.213851138 |
| 3.511542615 |
| 2.809234092 |
| 5.618468184 |
| 8.427702276 |
| 2.106925569 |
| 8.427702276 |
| 25.98541535 |
| 9.130010799 |
| 17.55771308 |
| 2.809234092 |
| 3.511542615 |
| 6.320776707 |
| 6.320776707 |
| 6.320776707 |
| 4.916159661 |
| 5.618468184 |
| 3.511542615 |
| 3.511542615 |
| 3.511542615 |
| 7.02308523  |
| 8.427702276 |
| 1.404617046 |
| 3.511542615 |
| 6.320776707 |
| 5.618468184 |
| 11.23693637 |
| 7.02308523  |
| 7.725393753 |
| 9.832319322 |
| 7.725393753 |
| 2.809234092 |
| 3.511542615 |
| 2.809234092 |

|             |
|-------------|
| 12.64155341 |
| 13.34386194 |
| 3.511542615 |
| 8.427702276 |
| 4.916159661 |
| 9.130010799 |
| 4.213851138 |
| 2.809234092 |
| 2.106925569 |
| 7.725393753 |
| 2.106925569 |
| 4.213851138 |
| 9.130010799 |
| 4.916159661 |
| 2.106925569 |
| 2.106925569 |
| 4.916159661 |
| 7.02308523  |
| 6.320776707 |
| 5.618468184 |
| 2.106925569 |
| 6.320776707 |
| 10.53462785 |
| 0           |
| 0           |
| 4.916159661 |
| 8.427702276 |
| 4.916159661 |
| 6.320776707 |
| 7.725393753 |
| 3.511542615 |
| 4.916159661 |
| 2.106925569 |
| 3.511542615 |
| 5.618468184 |
| 2.106925569 |
| 4.916159661 |
| 15.45078751 |
| 4.213851138 |
| 2.809234092 |
| 2.106925569 |
| 94.10934208 |
| 5.618468184 |

|             |
|-------------|
| 4.916159661 |
| 3.511542615 |
| 7.02308523  |
| 4.213851138 |
| 6.320776707 |
| 3.511542615 |
| 7.02308523  |
| 4.916159661 |
| 9.130010799 |
| 8.427702276 |
| 9.130010799 |
| 4.916159661 |
| 8.427702276 |
| 0.702308523 |
| 4.916159661 |
| 3.511542615 |
| 7.02308523  |
| 2.809234092 |
| 11.93924489 |
| 5.618468184 |
| 7.725393753 |
| 7.725393753 |
| 4.213851138 |
| 9.832319322 |
| 8.427702276 |
| 0           |
| 6.320776707 |
| 9.130010799 |
| 4.213851138 |
| 6.320776707 |
| 6.320776707 |
| 1.404617046 |
| 4.916159661 |
| 4.213851138 |
| 4.213851138 |
| 2.809234092 |
| 7.02308523  |
| 5.618468184 |
| 19.66463864 |
| 4.213851138 |
| 8.427702276 |
| 57.58929889 |
| 4.916159661 |

|             |
|-------------|
| 4.916159661 |
| 2.106925569 |
| 11.23693637 |
| 2.106925569 |
| 2.809234092 |
| 5.618468184 |
| 2.106925569 |
| 5.618468184 |
| 4.213851138 |
| 4.916159661 |
| 0           |
| 3.511542615 |
| 4.916159661 |
| 7.02308523  |
| 10.53462785 |
| 4.213851138 |
| 2.809234092 |
| 3.511542615 |
| 9.832319322 |
| 5.618468184 |
| 3.511542615 |
| 4.213851138 |
| 6.320776707 |
| 28.79464944 |
| 6.320776707 |
| 0.702308523 |
| 2.809234092 |
| 4.213851138 |
| 34.41311763 |
| 2.809234092 |
| 4.916159661 |
| 4.213851138 |
| 2.809234092 |
| 4.916159661 |
| 7.725393753 |
| 5.618468184 |
| 7.725393753 |
| 2.809234092 |
| 7.02308523  |
| 2.106925569 |
| 7.725393753 |
| 10.53462785 |
| 6.320776707 |

|             |
|-------------|
| 7.02308523  |
| 5.618468184 |
| 10.53462785 |
| 9.832319322 |
| 4.916159661 |
| 4.213851138 |
| 2.809234092 |
| 3.511542615 |
| 9.832319322 |
| 2.809234092 |
| 11.23693637 |
| 3.511542615 |
| 4.916159661 |
| 4.213851138 |
| 3.511542615 |
| 0           |
| 4.213851138 |
| 4.213851138 |
| 3.511542615 |
| 2.809234092 |
| 4.916159661 |
| 3.511542615 |
| 8.427702276 |
| 9.130010799 |
| 8.427702276 |
| 2.106925569 |
| 5.618468184 |
| 7.725393753 |
| 6.320776707 |
| 4.916159661 |
| 2.106925569 |
| 6.320776707 |
| 6.320776707 |
| 0           |
| 4.916159661 |
| 4.916159661 |
| 238.0825893 |
| 5.618468184 |
| 4.213851138 |
| 9.130010799 |
| 3.511542615 |
| 7.02308523  |
| 2.809234092 |

|             |
|-------------|
| 4.916159661 |
| 3.511542615 |
| 4.213851138 |
| 7.725393753 |
| 36.5200432  |
| 4.213851138 |
| 5.618468184 |
| 4.213851138 |
| 167.851737  |
| 2.106925569 |
| 9.130010799 |
| 4.213851138 |
| 5.618468184 |
| 7.725393753 |
| 14.74847898 |
| 3.511542615 |
| 146.0801728 |
| 3.511542615 |
| 4.916159661 |
| 5.618468184 |
| 2.106925569 |
| 10.53462785 |
| 4.213851138 |
| 5.618468184 |
| 4.916159661 |
| 8.427702276 |
| 0           |
| 9.832319322 |
| 10.53462785 |
| 6.320776707 |
| 3.511542615 |
| 2.809234092 |
| 4.213851138 |
| 4.213851138 |
| 2.809234092 |
| 6.320776707 |
| 2.809234092 |
| 44.24543695 |
| 4.916159661 |
| 14.04617046 |
| 9.130010799 |
| 9.130010799 |
| 2.106925569 |

|             |
|-------------|
| 9.130010799 |
| 3.511542615 |
| 2.809234092 |
| 3.511542615 |
| 2.106925569 |
| 6.320776707 |
| 5.618468184 |
| 2.809234092 |
| 7.725393753 |
| 5.618468184 |
| 6.320776707 |
| 7.02308523  |
| 5.618468184 |
| 2.106925569 |
| 8.427702276 |
| 5.618468184 |
| 5.618468184 |
| 9.130010799 |
| 2.809234092 |
| 9.130010799 |
| 4.916159661 |
| 5.618468184 |
| 2.809234092 |
| 4.213851138 |
| 4.916159661 |
| 3.511542615 |
| 2.809234092 |
| 4.916159661 |
| 5.618468184 |
| 5.618468184 |
| 6.320776707 |
| 2.106925569 |
| 4.916159661 |
| 2.809234092 |
| 1.404617046 |
| 6.320776707 |
| 4.213851138 |
| 42.13851138 |
| 4.916159661 |
| 11.23693637 |
| 2.106925569 |
| 6.320776707 |
| 3.511542615 |

|             |
|-------------|
| 4.916159661 |
| 3.511542615 |
| 5.618468184 |
| 0           |
| 2.106925569 |
| 0           |
| 5.618468184 |
| 11.23693637 |
| 7.725393753 |
| 5.618468184 |
| 8.427702276 |
| 2.106925569 |
| 9.832319322 |
| 14.04617046 |
| 3.511542615 |
| 4.213851138 |
| 2.809234092 |
| 8.427702276 |
| 4.213851138 |
| 4.213851138 |
| 2.809234092 |
| 12.64155341 |
| 6.320776707 |
| 25.98541535 |
| 9.832319322 |
| 2.809234092 |
| 16.15309603 |
| 10.53462785 |
| 7.02308523  |
| 2.106925569 |
| 4.213851138 |
| 6.320776707 |
| 7.725393753 |
| 2.106925569 |
| 2.106925569 |
| 44.24543695 |
| 2.106925569 |
| 4.213851138 |
| 3.511542615 |
| 6.320776707 |
| 3.511542615 |
| 7.02308523  |
| 8.427702276 |



|             |
|-------------|
| 9.130010799 |
| 5.618468184 |
| 9.130010799 |
| 5.618468184 |
| 3.511542615 |
| 3.511542615 |
| 14.04617046 |
| 2.106925569 |
| 0           |
| 0           |
| 0.702308523 |
| 9.130010799 |
| 0.702308523 |
| 3.511542615 |
| 5.618468184 |
| 34.41311763 |
| 3.511542615 |
| 6.320776707 |
| 8.427702276 |
| 2.106925569 |
| 6.320776707 |
| 6.320776707 |
| 3.511542615 |
| 4.213851138 |
| 7.725393753 |
| 4.916159661 |
| 7.02308523  |
| 13.34386194 |
| 9.130010799 |
| 3.511542615 |
| 0           |
| 7.02308523  |
| 7.725393753 |
| 16.85540455 |
| 3.511542615 |
| 7.02308523  |
| 2.106925569 |
| 5.618468184 |
| 1.404617046 |
| 3.511542615 |
| 4.916159661 |
| 9.832319322 |
| 9.832319322 |

|             |
|-------------|
| 2.809234092 |
| 4.916159661 |
| 7.02308523  |
| 2.106925569 |
| 3.511542615 |
| 4.916159661 |
| 6.320776707 |
| 4.213851138 |
| 8.427702276 |
| 7.725393753 |
| 8.427702276 |
| 3.511542615 |
| 4.213851138 |
| 4.916159661 |
| 3.511542615 |
| 2.106925569 |
| 11.23693637 |
| 4.213851138 |
| 0.702308523 |
| 5.618468184 |
| 3.511542615 |
| 3.511542615 |
| 10.53462785 |
| 12.64155341 |
| 158.0194177 |
| 3.511542615 |
| 6.320776707 |
| 4.213851138 |
| 2.106925569 |
| 2.809234092 |
| 4.213851138 |
| 2.106925569 |
| 11.23693637 |
| 4.213851138 |
| 10.53462785 |
| 4.916159661 |
| 5.618468184 |
| 2.809234092 |
| 10.53462785 |
| 4.916159661 |
| 7.725393753 |
| 3.511542615 |
| 7.02308523  |

|             |
|-------------|
| 3.511542615 |
| 4.916159661 |
| 6.320776707 |
| 0           |
| 4.213851138 |
| 5.618468184 |
| 9.130010799 |
| 4.916159661 |
| 2.809234092 |
| 5.618468184 |
| 3.511542615 |
| 4.916159661 |
| 89.89549095 |
| 2.809234092 |
| 4.213851138 |
| 4.916159661 |
| 6.320776707 |
| 5.618468184 |
| 7.725393753 |
| 11.23693637 |
| 4.916159661 |
| 4.916159661 |
| 4.916159661 |
| 9.832319322 |
| 7.02308523  |
| 4.213851138 |
| 2.809234092 |
| 3.511542615 |
| 4.916159661 |
| 2.809234092 |
| 4.213851138 |
| 2.106925569 |
| 33.00850058 |
| 4.213851138 |
| 5.618468184 |
| 2.809234092 |
| 0.702308523 |
| 4.213851138 |
| 2.809234092 |
| 7.725393753 |
| 6.320776707 |
| 9.130010799 |
| 4.213851138 |

|             |
|-------------|
| 2.809234092 |
| 2.106925569 |
| 3.511542615 |
| 13.34386194 |
| 7.02308523  |
| 3.511542615 |
| 7.02308523  |
| 6.320776707 |
| 4.916159661 |
| 2.809234092 |
| 7.725393753 |
| 2.106925569 |
| 5.618468184 |
| 10.53462785 |
| 9.832319322 |
| 3.511542615 |
| 6.320776707 |
| 0.702308523 |
| 7.02308523  |
| 4.213851138 |
| 4.213851138 |
| 0           |
| 4.213851138 |
| 4.916159661 |
| 5.618468184 |
| 124.3086086 |
| 2.809234092 |
| 6.320776707 |
| 3.511542615 |
| 11.23693637 |
| 2.106925569 |
| 2.809234092 |
| 8.427702276 |
| 8.427702276 |
| 3.511542615 |
| 13.34386194 |
| 2.106925569 |
| 4.213851138 |
| 6.320776707 |
| 8.427702276 |
| 23.17618126 |
| 4.916159661 |
| 8.427702276 |

|             |
|-------------|
| 7.02308523  |
| 8.427702276 |
| 7.02308523  |
| 4.916159661 |
| 2.809234092 |
| 4.213851138 |
| 8.427702276 |
| 7.02308523  |
| 2.106925569 |
| 8.427702276 |
| 4.213851138 |
| 2.809234092 |
| 3.511542615 |
| 4.213851138 |
| 4.916159661 |
| 4.213851138 |
| 1.404617046 |
| 3.511542615 |
| 4.916159661 |
| 5.618468184 |
| 5.618468184 |
| 9.832319322 |
| 8.427702276 |
| 4.916159661 |
| 5.618468184 |
| 6.320776707 |
| 7.725393753 |
| 4.213851138 |
| 3.511542615 |
| 6.320776707 |
| 4.213851138 |
| 6.320776707 |
| 5.618468184 |
| 7.725393753 |
| 2.809234092 |
| 11.23693637 |
| 8.427702276 |
| 2.809234092 |
| 4.916159661 |
| 4.916159661 |
| 3.511542615 |
| 4.916159661 |
| 3.511542615 |

|             |
|-------------|
| 9.130010799 |
| 4.916159661 |
| 7.725393753 |
| 4.213851138 |
| 2.809234092 |
| 4.213851138 |
| 0           |
| 4.213851138 |
| 6.320776707 |
| 5.618468184 |
| 5.618468184 |
| 9.130010799 |
| 56.18468184 |
| 6.320776707 |
| 4.213851138 |
| 4.213851138 |
| 7.02308523  |
| 2.809234092 |
| 7.725393753 |
| 1.404617046 |
| 1.404617046 |
| 4.213851138 |
| 8.427702276 |
| 7.725393753 |
| 7.02308523  |
| 9.130010799 |
| 7.725393753 |
| 8.427702276 |
| 6.320776707 |
| 3.511542615 |
| 8.427702276 |
| 7.02308523  |
| 2.106925569 |
| 4.213851138 |
| 7.02308523  |
| 3.511542615 |
| 4.213851138 |
| 2.809234092 |
| 4.213851138 |
| 5.618468184 |
| 3.511542615 |
| 7.725393753 |
| 0           |

|             |
|-------------|
| 6.320776707 |
| 13.34386194 |
| 4.213851138 |
| 7.02308523  |
| 41.43620286 |
| 238.7848978 |
| 24.58079831 |
| 4.213851138 |
| 2.106925569 |
| 7.02308523  |
| 5.618468184 |
| 2.809234092 |
| 6.320776707 |
| 4.916159661 |
| 6.320776707 |
| 4.213851138 |
| 8.427702276 |
| 20.36694717 |
| 7.725393753 |
| 29.49695797 |
| 4.916159661 |
| 5.618468184 |
| 6.320776707 |
| 4.213851138 |
| 7.725393753 |
| 6.320776707 |
| 17.55771308 |
| 4.213851138 |
| 7.02308523  |
| 7.725393753 |
| 7.725393753 |
| 4.213851138 |
| 2.106925569 |
| 3.511542615 |
| 0.702308523 |
| 5.618468184 |
| 2.809234092 |
| 11.23693637 |
| 3.511542615 |
| 2.106925569 |
| 2.809234092 |
| 2.809234092 |
| 16.85540455 |

|             |
|-------------|
| 7.02308523  |
| 2.809234092 |
| 4.916159661 |
| 1.404617046 |
| 9.130010799 |
| 12.64155341 |
| 6.320776707 |
| 5.618468184 |
| 5.618468184 |
| 7.725393753 |
| 6.320776707 |
| 4.213851138 |
| 3.511542615 |
| 5.618468184 |
| 5.618468184 |
| 5.618468184 |
| 67.42161821 |
| 2.809234092 |
| 7.02308523  |
| 11.23693637 |
| 4.213851138 |
| 8.427702276 |
| 3.511542615 |
| 2.106925569 |
| 6.320776707 |
| 29.49695797 |
| 4.916159661 |
| 7.02308523  |
| 4.916159661 |
| 4.916159661 |
| 4.916159661 |
| 7.725393753 |
| 5.618468184 |
| 4.916159661 |
| 4.916159661 |
| 3.511542615 |
| 4.213851138 |
| 4.213851138 |
| 2.106925569 |
| 9.832319322 |
| 4.213851138 |
| 4.916159661 |
| 1.404617046 |



|             |
|-------------|
| 8.427702276 |
| 8.427702276 |
| 2.809234092 |
| 7.725393753 |
| 4.916159661 |
| 2.809234092 |
| 2.106925569 |
| 4.213851138 |
| 4.213851138 |
| 8.427702276 |
| 5.618468184 |
| 110.2624381 |
| 2.106925569 |
| 9.832319322 |
| 7.725393753 |
| 5.618468184 |
| 5.618468184 |
| 4.916159661 |
| 4.916159661 |
| 7.725393753 |
| 2.809234092 |
| 8.427702276 |
| 7.725393753 |
| 4.916159661 |
| 5.618468184 |
| 7.725393753 |
| 9.130010799 |
| 7.02308523  |
| 4.213851138 |
| 8.427702276 |
| 88.4908739  |
| 8.427702276 |
| 2.809234092 |
| 4.916159661 |
| 7.725393753 |
| 3.511542615 |
| 4.213851138 |
| 2.809234092 |
| 9.832319322 |
| 7.725393753 |
| 7.02308523  |
| 2.809234092 |
| 9.130010799 |

|             |
|-------------|
| 4.213851138 |
| 5.618468184 |
| 6.320776707 |
| 0           |
| 6.320776707 |
| 5.618468184 |
| 7.725393753 |
| 5.618468184 |
| 3.511542615 |
| 0           |
| 4.916159661 |
| 7.02308523  |
| 4.213851138 |
| 39.32927729 |
| 1.404617046 |
| 93.40703356 |
| 6.320776707 |
| 9.832319322 |
| 9.832319322 |
| 14.74847898 |
| 2.809234092 |
| 7.725393753 |
| 6.320776707 |
| 8.427702276 |
| 3.511542615 |
| 3.511542615 |
| 4.213851138 |
| 4.213851138 |
| 7.02308523  |
| 5.618468184 |
| 4.213851138 |
| 108.1555125 |
| 9.832319322 |
| 4.213851138 |
| 2.106925569 |
| 0           |
| 5.618468184 |
| 5.618468184 |
| 3.511542615 |
| 3.511542615 |
| 88.4908739  |
| 3.511542615 |
| 5.618468184 |

|             |
|-------------|
| 4.213851138 |
| 7.725393753 |
| 6.320776707 |
| 9.130010799 |
| 11.93924489 |
| 6.320776707 |
| 3.511542615 |
| 1.404617046 |
| 0           |
| 3.511542615 |
| 7.725393753 |
| 2.106925569 |
| 8.427702276 |
| 8.427702276 |
| 2.809234092 |
| 4.916159661 |
| 10.53462785 |
| 5.618468184 |
| 5.618468184 |
| 5.618468184 |
| 4.916159661 |
| 5.618468184 |
| 8.427702276 |
| 0           |
| 5.618468184 |
| 2.106925569 |
| 17.55771308 |
| 9.130010799 |
| 1.404617046 |
| 9.130010799 |
| 3.511542615 |
| 4.916159661 |
| 4.916159661 |
| 4.916159661 |
| 2.106925569 |
| 6.320776707 |
| 6.320776707 |
| 5.618468184 |
| 0.702308523 |
| 6.320776707 |
| 14.74847898 |
| 2.809234092 |
| 7.02308523  |

|             |
|-------------|
| 3.511542615 |
| 9.832319322 |
| 3.511542615 |
| 7.725393753 |
| 7.725393753 |
| 5.618468184 |
| 0           |
| 2.809234092 |
| 3.511542615 |
| 4.213851138 |
| 3.511542615 |
| 7.725393753 |
| 1.404617046 |
| 4.916159661 |
| 17.55771308 |
| 6.320776707 |
| 4.916159661 |
| 7.02308523  |
| 5.618468184 |
| 9.832319322 |
| 4.916159661 |
| 7.725393753 |
| 11.93924489 |
| 2.809234092 |
| 2.106925569 |
| 4.916159661 |
| 9.130010799 |
| 4.916159661 |
| 4.213851138 |
| 3.511542615 |
| 5.618468184 |
| 6.320776707 |
| 10.53462785 |
| 4.213851138 |
| 15.45078751 |
| 9.130010799 |
| 2.809234092 |
| 7.725393753 |
| 2.809234092 |
| 12.64155341 |
| 4.916159661 |
| 5.618468184 |
| 9.832319322 |

|             |
|-------------|
| 5.618468184 |
| 4.916159661 |
| 2.809234092 |
| 2.809234092 |
| 3.511542615 |
| 4.213851138 |
| 5.618468184 |
| 35.81773467 |
| 2.106925569 |
| 8.427702276 |
| 11.23693637 |
| 2.809234092 |
| 120.0947574 |
| 4.213851138 |
| 4.213851138 |
| 4.213851138 |
| 2.106925569 |
| 6.320776707 |
| 12.64155341 |
| 7.02308523  |
| 5.618468184 |
| 4.213851138 |
| 4.213851138 |
| 2.809234092 |
| 7.02308523  |
| 7.02308523  |
| 11.23693637 |
| 2.809234092 |
| 4.916159661 |
| 10.53462785 |
| 2.809234092 |
| 7.725393753 |
| 4.213851138 |
| 2.809234092 |
| 4.213851138 |
| 1.404617046 |
| 9.832319322 |
| 2.809234092 |
| 2.809234092 |
| 2.809234092 |
| 2.809234092 |
| 3.511542615 |
| 2.809234092 |

|             |
|-------------|
| 4.213851138 |
| 9.832319322 |
| 10.53462785 |
| 64.61238412 |
| 4.916159661 |
| 2.809234092 |
| 4.916159661 |
| 6.320776707 |
| 0           |
| 3.511542615 |
| 4.916159661 |
| 8.427702276 |
| 6.320776707 |
| 1.404617046 |
| 4.916159661 |
| 7.02308523  |
| 5.618468184 |
| 7.725393753 |
| 7.02308523  |
| 8.427702276 |
| 2.809234092 |
| 3.511542615 |
| 6.320776707 |
| 4.213851138 |
| 9.832319322 |
| 7.725393753 |
| 7.02308523  |
| 2.809234092 |
| 6.320776707 |
| 9.832319322 |
| 5.618468184 |
| 4.213851138 |
| 4.213851138 |
| 7.02308523  |
| 7.02308523  |
| 7.02308523  |
| 2.809234092 |
| 2.106925569 |
| 2.809234092 |
| 4.916159661 |
| 2.106925569 |
| 3.511542615 |
| 9.130010799 |

|             |
|-------------|
| 4.916159661 |
| 4.213851138 |
| 2.809234092 |
| 9.130010799 |
| 4.213851138 |
| 6.320776707 |
| 65.31469264 |
| 4.916159661 |
| 0.702308523 |
| 9.832319322 |
| 2.809234092 |
| 9.832319322 |
| 5.618468184 |
| 4.916159661 |
| 4.916159661 |
| 5.618468184 |
| 3.511542615 |
| 3.511542615 |
| 8.427702276 |
| 5.618468184 |
| 9.832319322 |
| 5.618468184 |
| 3.511542615 |
| 5.618468184 |
| 4.213851138 |
| 6.320776707 |
| 3.511542615 |
| 7.02308523  |
| 7.02308523  |
| 39.32927729 |
| 5.618468184 |
| 3.511542615 |
| 5.618468184 |
| 8.427702276 |
| 6.320776707 |
| 6.320776707 |
| 4.213851138 |
| 2.106925569 |
| 19.66463864 |
| 5.618468184 |
| 9.130010799 |
| 2.106925569 |
| 2.106925569 |

|             |
|-------------|
| 4.213851138 |
| 7.725393753 |
| 5.618468184 |
| 8.427702276 |
| 0           |
| 3.511542615 |
| 12.64155341 |
| 6.320776707 |
| 54.07775627 |
| 9.130010799 |
| 4.213851138 |
| 13.34386194 |
| 4.213851138 |
| 5.618468184 |
| 4.916159661 |
| 6.320776707 |
| 4.916159661 |
| 6.320776707 |
| 2.106925569 |
| 11.23693637 |
| 4.916159661 |
| 3.511542615 |
| 5.618468184 |
| 7.725393753 |
| 7.02308523  |
| 9.130010799 |
| 3.511542615 |
| 2.809234092 |
| 6.320776707 |
| 6.320776707 |
| 4.916159661 |
| 3.511542615 |
| 4.916159661 |
| 4.213851138 |
| 4.213851138 |
| 14.04617046 |
| 4.213851138 |
| 4.916159661 |
| 7.02308523  |
| 4.916159661 |
| 0.702308523 |
| 4.213851138 |
| 25.98541535 |



|             |
|-------------|
| 5.618468184 |
| 5.618468184 |
| 3.511542615 |
| 3.511542615 |
| 3.511542615 |
| 6.320776707 |
| 2.809234092 |
| 7.02308523  |
| 0           |
| 2.809234092 |
| 6.320776707 |
| 5.618468184 |
| 15.45078751 |
| 11.93924489 |
| 6.320776707 |
| 2.809234092 |
| 5.618468184 |
| 3.511542615 |
| 7.02308523  |
| 1.404617046 |
| 3.511542615 |
| 151.698641  |
| 4.916159661 |
| 5.618468184 |
| 6.320776707 |
| 7.02308523  |
| 7.02308523  |
| 7.725393753 |
| 9.130010799 |
| 0           |
| 6.320776707 |
| 3.511542615 |
| 4.916159661 |
| 4.213851138 |
| 4.916159661 |
| 2.106925569 |
| 7.02308523  |
| 7.02308523  |
| 4.213851138 |
| 6.320776707 |
| 11.23693637 |
| 3.511542615 |
| 2.809234092 |

|             |
|-------------|
| 3.511542615 |
| 4.916159661 |
| 3.511542615 |
| 0           |
| 14.04617046 |
| 7.725393753 |
| 7.725393753 |
| 7.02308523  |
| 1.404617046 |
| 0           |
| 7.725393753 |
| 7.725393753 |
| 278.8164836 |
| 4.916159661 |
| 4.916159661 |
| 2.106925569 |
| 8.427702276 |
| 3.511542615 |
| 6.320776707 |
| 6.320776707 |
| 0.702308523 |
| 7.725393753 |
| 37.92466024 |
| 5.618468184 |
| 3.511542615 |
| 4.916159661 |
| 2.809234092 |
| 6.320776707 |
| 7.725393753 |
| 6.320776707 |
| 0.702308523 |
| 4.213851138 |
| 4.213851138 |
| 62.50545855 |
| 8.427702276 |
| 9.130010799 |
| 5.618468184 |
| 6.320776707 |
| 3.511542615 |
| 1.404617046 |
| 2.106925569 |
| 1.404617046 |
| 5.618468184 |

|             |
|-------------|
| 6.320776707 |
| 7.725393753 |
| 3.511542615 |
| 0           |
| 0.702308523 |
| 4.916159661 |
| 1.404617046 |
| 3.511542615 |
| 3.511542615 |
| 4.916159661 |
| 1.404617046 |
| 5.618468184 |
| 8.427702276 |
| 5.618468184 |
| 4.916159661 |
| 4.213851138 |
| 2.106925569 |
| 7.725393753 |
| 3.511542615 |
| 2.809234092 |
| 3.511542615 |
| 7.02308523  |
| 7.725393753 |
| 4.916159661 |
| 4.213851138 |
| 7.02308523  |
| 8.427702276 |
| 9.832319322 |
| 4.213851138 |
| 4.213851138 |
| 6.320776707 |
| 7.725393753 |
| 4.213851138 |
| 2.809234092 |
| 7.02308523  |
| 4.213851138 |
| 3.511542615 |
| 6.320776707 |
| 8.427702276 |
| 182.600216  |
| 4.916159661 |
| 3.511542615 |
| 5.618468184 |

|             |
|-------------|
| 2.106925569 |
| 7.02308523  |
| 0           |
| 4.916159661 |
| 5.618468184 |
| 10.53462785 |
| 1.404617046 |
| 4.213851138 |
| 11.93924489 |
| 4.916159661 |
| 5.618468184 |
| 4.213851138 |
| 2.106925569 |
| 4.916159661 |
| 0           |
| 4.916159661 |
| 7.02308523  |
| 0           |
| 2.106925569 |
| 1.404617046 |
| 6.320776707 |
| 3.511542615 |
| 7.02308523  |
| 4.916159661 |
| 4.916159661 |
| 8.427702276 |
| 3.511542615 |
| 2.106925569 |
| 7.02308523  |
| 7.725393753 |
| 5.618468184 |
| 9.130010799 |
| 7.725393753 |
| 3.511542615 |
| 4.916159661 |
| 54.07775627 |
| 7.725393753 |
| 2.809234092 |
| 5.618468184 |
| 9.832319322 |
| 9.130010799 |
| 3.511542615 |
| 1.404617046 |

|             |
|-------------|
| 7.725393753 |
| 8.427702276 |
| 6.320776707 |
| 0           |
| 4.916159661 |
| 2.106925569 |
| 9.832319322 |
| 8.427702276 |
| 9.832319322 |
| 10.53462785 |
| 3.511542615 |
| 6.320776707 |
| 4.916159661 |
| 4.916159661 |
| 2.809234092 |
| 4.916159661 |
| 8.427702276 |
| 11.93924489 |
| 9.130010799 |
| 5.618468184 |
| 4.213851138 |
| 2.106925569 |
| 9.832319322 |
| 8.427702276 |
| 3.511542615 |
| 3.511542615 |
| 9.130010799 |
| 1.404617046 |
| 2.106925569 |
| 4.916159661 |
| 134.8432364 |
| 4.213851138 |
| 4.916159661 |
| 4.916159661 |
| 221.9294933 |
| 5.618468184 |
| 8.427702276 |
| 2.106925569 |
| 12.64155341 |
| 7.02308523  |
| 5.618468184 |
| 3.511542615 |
| 8.427702276 |

|             |
|-------------|
| 2.809234092 |
| 4.213851138 |
| 97.6208847  |
| 9.130010799 |
| 19.66463864 |
| 5.618468184 |
| 2.809234092 |
| 5.618468184 |
| 1.404617046 |
| 6.320776707 |
| 3.511542615 |
| 7.02308523  |
| 7.725393753 |
| 4.213851138 |
| 5.618468184 |
| 2.809234092 |
| 4.213851138 |
| 4.213851138 |
| 4.213851138 |
| 7.725393753 |
| 4.213851138 |
| 5.618468184 |

Activated B cells

TMM normalized RNA-seq counts for selected genes

| ID                 | KO1        | KO2         | KO3         | WT1         | WT2         | WT3         | mgc_symbol | FDR         |
|--------------------|------------|-------------|-------------|-------------|-------------|-------------|------------|-------------|
| ENSMUSG00000020592 | 6.99867486 | 10.3522085  | 15.67906325 | 4.643876153 | 3.897033692 | 2.659788762 | Sdc1       | 5.42E-05    |
| ENSMUSG00000022346 | 59.6637032 | 62.41952937 | 85.99987553 | 126.9326148 | 125.5092279 | 130.2346569 | Myc        | 0.027259834 |
| ENSMUSG00000023067 | 85.0338996 | 89.12700219 | 98.68838175 | 44.25340805 | 35.50630697 | 25.83794798 | Cdkn1a     | 0.000159158 |
| ENSMUSG00000029687 | 417.995856 | 387.0745889 | 306.8311505 | 556.9919692 | 695.4040121 | 746.6407025 | Ezh2       | 0.034311075 |
| ENSMUSG00000038151 | 185.639851 | 211.3933227 | 175.1184748 | 38.97213713 | 89.26062884 | 49.87103929 | Prdm1      | 1.80E-06    |
| ENSMUSG00000040270 | 58.5264185 | 44.83915162 | 54.08635987 | 198.411885  | 225.4093773 | 186.945153  | Bach2      | 2.29E-08    |
| ENSMUSG00000021356 | 528.224985 | 652.8016924 | 532.2337056 | 384.5311567 | 553.1932112 | 444.754678  | Irf4       | 0.536623641 |

Transcript per million

| Population            | Dot1l      | Ezh2       |
|-----------------------|------------|------------|
| FoB_rep1              | 55.1988811 | 34.708492  |
| FoB_rep2              | 35.908004  | 24.9233565 |
| B1_rep1               | 40.0595626 | 28.1292185 |
| B1_rep2               | 45.2716187 | 27.7230899 |
| MZB_rep1              | 50.5221821 | 35.8015073 |
| MZB_rep2              | 53.3578887 | 45.3479775 |
| GCB_rep1              | 89.4455145 | 289.330742 |
| GCB_rep2              | 83.5624949 | 279.829604 |
| SplPB                 | 42.1353754 | 56.5465927 |
| SplPC_rep1            | 18.2586333 | 23.4225853 |
| SplPC_rep2            | 25.6910087 | 24.9232573 |
| SplPC_rep3            | 24.9270755 | 22.9043305 |
| BMPC                  | 16.8471645 | 22.2557949 |
| LPS_blasts            | 43.6413242 | 123.102549 |
| LPS_Syn.PB_rep1       | 37.1303541 | 332.511544 |
| LPS_Syn.PB_rep2       | 32.1400938 | 306.696051 |
| LPS_PB_rep1           | 35.139789  | 162.928426 |
| LPS_PB_rep2           | 35.5816086 | 167.506191 |
| CD40L_IL4_blasts_rep1 | 52.8603601 | 190.446784 |
| CD40L_IL4_blasts_rep2 | 51.0133558 | 167.895577 |
| Unstim                | 49.527968  | 32.6996435 |
| Div0                  | 89.6076842 | 218.199407 |
| Div1                  | 72.3843514 | 370.767292 |
| Div3                  | 47.8146612 | 146.953208 |
| Div5                  | 55.6266022 | 103.27118  |
| Div7                  | 55.6319456 | 97.1190692 |
| CD40L_IL4_PB          | 58.1147973 | 128.414461 |
| A20                   | 100.559707 | 332.77154  |
| MPC11                 | 95.0582333 | 151.803968 |
| CD40L_IL4_IL5_PB_rep1 | 59.1118743 | 160.201599 |
| CD40L_IL4_IL5_PB_rep2 | 55.3449201 | 147.951922 |
